# Supplementary material for: Transcriptome sequencing of three Pseudo-nitzschia species reveals comparable gene sets and the presence of Nitric Oxide Synthase genes in diatoms
Source: PubMed Central journal article supplement (PMC4648414; doi:10.1038/srep12329), 2015-07-20
Supplement: srep12329-s15.pdf [file srep12329-s15.pdf]

***Pseudo-nitzschia multistriata* peptides.**

>comp162\_c0\_seq1; 44 1 433 LEN=527; translated  
XMWPWELWIFALALIVSAALLLILHALKAWNERILFVKLTEMGLCILFFIAPMITSNFFH  
MHHWYAGWLMGMHFNYDVVWSRLAMAWCWGMVYVNGVAVYGRDPVMTCEYSYFLSLDNRCF  
YISCYLEGLADENNTTEVVEMVPVDW

>comp235\_c0\_seq1; 438 1 1332 LEN=1332; minus strand; translated  
XGPSGEAYGPSFPFNLMFKTSIGPEGTSVGYLRPETAQGLFVNFRRLLDLNAQKMPFAAA  
QIGLGFNRGMLYFEGSGNRLKERKIVFDSQNEFADLFCSHSNSTEIAPRSGLLRVREFCM  
GEIEHFVNPDDKSHPNFSSVAEKELVLFGRDDQLGTGKTKTLKIGEAVKGGLVNNETLGY  
FMARTQLYMEKIGMDPERLRFQHLATEMAHYAADCWDLKSSYGWVECVGHADRACYD  
LDVHAKATNTSMVATVKYDTPKEIEVAKLKFDRKKIGMVFKKDARTVSGALDKLAEWKD  
FEP IAKALEADGKVTVDGFEVTKDMVSWEQSTKKVHELKFTPSVIEPSFGMGRILYSLE  
HSFYIRENDEQRCVMKFKPQVAPQKCAVLPISSSPEFNAIVDGAASLMEYDLATRVDKS  
TAALGRRYARSDEVGVPFAVTVDF

>comp236\_c0\_seq1; 20 1 209 LEN=209; minus strand; translated  
VPTVSNFFPIERYYEASDKVFESFEMVFNRRQLDNAYVYGRRYCTFYVKGISKHDYYSRQ  
NSEARRNQAX

>comp292\_c0\_seq1; 18 1 248 LEN=248; minus strand; translated  
XGDINSTEVFLLRDAVHKLHKDLDMPLVGVYFSFDVEESFREARKDHLVEVERYKAENK  
TNNPYVPERFPEQTMVNILKMW

>comp406\_c0\_seq1; 52 1 156 LEN=298; minus strand; translated  
AGAGACLLLPPPLVIHERPRQEQTVTYTQGPDKVQETHVAVVKGTPVEP

>comp436\_c0\_seq1; 55 1 237 LEN=237; minus strand; translated  
GGVSVVDGHDESDSSSPLAKVSRWRYLLSSQQRVLLVLFVASAAYWAGNCFVNRQREI  
QRTWEERLRLEELQMAKVL

>comp645\_c0\_seq1; 89 1 752 LEN=752; minus strand; translated  
XALTTCTRVVTDQITIDSSFCVMPNTCQQDPTVEYKTDIEEPMSSRALLRPRVLTRDPP  
SDPPGTPSNISPKKQIPGHHRRQRFVAFKNSVKELMYRVILFFPYVAIMIMCKVLVSNI  
TEHETSVVSLHGATQERAEATTMTAPTGSRPWMVHVHVPKATATTTIKKGLLEVAEKLAL  
DDNVYFVGGIQSSRVDVNVGVDTEFKVYRNADTFPSNHESAMQSNFEFESQALEGHLRNG  
HNVVISNDMYTX

>comp689\_c0\_seq1; 25 1 210 LEN=210; minus strand; translated  
RKRKVKAGRQKRKHTGYTLFMQETYPKAKIENPDLPPKALISIMAKLWRNLAAGGKREWK  
ERAETVNSDD

>comp778\_c0\_seq1; 94 1 265 LEN=265; minus strand; translated  
XGGAPGGDQNYNLDYRDSNRRMDRGGGLMNYRPNYNQRGGNEYDNQRGDEYYYDDPYDS  
SGSFYNHEGKRVRFRDPVYDRPDGYYNPX

>comp882\_c0\_seq1; 125 1 247 LEN=247; minus strand; translated  
REGTGASGKRFSRYIGSMVGDVHRTLLYGGVFGYPGDTKNPNGKLRLLYEGAPMSFIME  
QAGGISSTGKERVMEITPEYVHX

>comp889\_c0\_seq1; 90 1 174 LEN=266; minus strand; translated  
RECVLRGATSREELVHATVSKMRSVGTGAEDVCIAILKRHRVDVTEAVEAYLDGQTR

>comp936\_c0\_seq1; 82 1 289 LEN=289; minus strand; translated  
XEKIYSLSKLEELYLFSNSFEDQLSNGSFGKLLNLKVIDVKNLLSGPLPDALFSTLTNL  
EVIDFHQNALNGHINDVVAKGHSLRYMDVSSNLLSGG

>comp1141\_c0\_seq1; 125 626 771 LEN=771; minus strand; translated  
MSHTDEEWEQIRIPIPLSVEEDYEIVIPPSIVPSSMDAHDSSPRTARSG

>comp1194\_c0\_seq1; 8 1 218 LEN=218; minus strand; translated  
GGGWDSIFENDQSSKVLNIDTAAKLFDTSTKITDAEWPTLKQIASPCPTLKVIGAVTQGM  
VKREELKRMRELG

>comp1198\_c0\_seq1; 33 1 268 LEN=268; minus strand; translated  
XALLFYHVAPNVYRTQDLFCNGPNRYVRMLRLGTSRTRCEGNRRTAQLGTCNGRGNIPYF  
TQRDILASNGIIHVISNVMIASPDGTLQGX

>comp1252\_c0\_seq1; 69 1 337 LEN=337; minus strand; translated  
XGSQNEATAQKSSGRFSDEKKMELEDNDDDDVVDVVKRKSSEDGSLKHANVSRCDTSLMCGE  
VVGEDGSIRCXTINKRNQARQPRFGWIAMNEANAAQNTKGHVARENPVESAA

>comp1480\_c0\_seq1; 35 1 406 LEN=406; minus strand; translated  
DGQLWRVDEKGNKIKRVRKSTANATNTYENCAETTTGHSVVEEKVEGRLGRKIRGGRRRN  
VPSDWSLTEDSGASSVLSYKSNDSRVRTRGRPFREALDRLDNSTHGSDNGSLSHDEIPS

KPRRSQSNEKNSDAKX

>comp1578\_c0\_seq1; 49 1 213 LEN=213; minus strand; translated  
XEVANGLIDYICIVEMVMFAIAHSFTFTTYKEYLPSTVENAIGDYEQVQHNQPIDDAEDN  
SRNDNNDGDQGX

>comp1614\_c0\_seq1; 128 1 327 LEN=327; minus strand; translated  
XTGETEGDKSGAVGGDDQNEYELDPEKRREARKMRRIMANRRSARESRRERKKLLTDLQD  
SVENLTTDNAVLTKENFSLRRELITLVEQSGGVASLSMIPNIQASLESAR

>comp1664\_c0\_seq1; 350 91 1335 LEN=1503; translated  
MKSKLISRFSPIGVIIAGLFCIEVDLCYSFALVGGQFELKNHNQLLMAADKNPVTVSNE  
NNGSGSENSKGGKVFDEASYEKERLAKDAQAMDAMKVVAEKELSKVDTGSVVGELRSPWKW  
VLRKRIWDFMEENDIARFPRPVHHRIPNFVADQAARRLSELPEFRSASTIKVNPDPQPQR  
PVRHFVLEQKKVLLTPQPRLRGTGFFSTIEMKELPSLVEIKECTNSKGVVKYGTPTVTLNEE  
YTVDLVVVGSTAVCPRTGARVKGEGFAELEWGIILSAQGNLEAKTCLVVTTVHDCQVIED  
ENDMPEGWALTKHDVPVDIIIVTPTRVIHVFDRAKPSGILWDLSPQKLAAIRVLRQLKQ  
ETEDKLGVTLPSPGDELPPVASRNNKNRKKKNNRRRKRPRQQQRKQSETPPAKK

>comp1667\_c0\_seq1; 476 1 1481 LEN=1481; minus strand; translated  
XFEKHTDFMNAMESSNDKMSATKSIGSNNTIYQKEPNLESKDEGRHGSKKEVLTISNETKI  
EGRIAILNIQSEKERTTEEMEQFRTEIDEIDTIELLSPIQSEKEMISENYEQTGTKAEIYS  
SFKKEEENISGITEQTVIEEISEKTEIRAEIPRSPLQSEKKMIDEMLGKFLKTMESMDDD  
KFTDDDAQVLNSSRTGYIDSSSVLDDSEPRNHYS SSPDNTSLKSSPRFGYDESGFSSPAR  
SLLEQSNFYKPSKSEIASQSNYWSNLSEADSNGEASLLKTKSISIMPSFRPLDESRSRIA  
SPDLNLSFVRSSSENDFLAATWIDSSGSHGALSRIILSKDEPGIRTASKEDCSMQDNSLCIM  
DNAKGTNYVTDTPRPLNPIAAVLSRGGFSKDVVAQVENNGQDMSREGNKKSIKVIDATDSS  
KARNPFAAVSYQAFSGNTVTQVDDNGQDLLSKVIDVLAEAMNKSEKMIDITESSRPYNLN  
AVVLQGTSEDEIASX

>comp1667\_c0\_seq2; 469 1 1543 LEN=1543; minus strand; translated  
ELSSDNTNLDTNSIKVDVHMEHIVPPAFMNAMESSNDKMSATKSIGSNNTIYQKEPNLESK  
DEGRHGSKKEVLTISNETKIEGRIAILNIQSEKERTTEEMEQFRTEIDEIDTIELLSPIQS  
EKEMISENYEQTGTKAEIYSSFKKEEENISGITEQTVIEEISEKTEIRAEIPRSPLQSEK  
KMIDEMLGKFLKTMESMDDDKFTDDDAQVLNSSRTGYIDSSSVLDDSEPRNHYS SSPDNT  
SLKSSPRFGYDESGFSSPARSLLEQSNFYKPSKSEIASQSNYWSNLSEADSNGEASLLKT  
KSISIMPSFRPLDESRSRIASPDNLNLSFVRSSSENDFLAATWIDSSGSHGALSRIILSKDEP  
GIRTASKEDCSMQDNSLCIMDNAKGTNYVTDTPRPLNPIAAVLSRGGFSKDVVAQVENNGQ  
DMSREGNKKSIKVIDATDSSKARNPFAAVSYQAFSGNTVTQVDDNGQDLLSKVIDVLAEAM  
MNKSEKMIDITESSRPYNLNNAVVLQGTSEDEIASX

>comp1682\_c0\_seq1; 324 1 1492 LEN=1748; translated  
XGQQPIDRLVQYKACASAWATTRSNGARNDDSNAAAPTQSKQKKRPSMPPKTTILPYDP  
LFGEQGILSSSDEEGDDDAKEELNLDKPVVNSIWGSSIGTNTNRYLLLDIPKKKKKKGKD  
KKNKGKPIQNVPKKRKGEKSPNDCAKLFVQSVSSPQEGYAIAVRYLVWGGVGGAPAERGV  
LIPGSEVAFPATPQGVSNCWQRYSPLIHVITRTWPGFACILTHLVDFVLSIEDSSAVCE  
NESLDAGSIRKLYFLYAWIRLILSQRFMAALDRNFSVKTTTTKNSNPLDLPLAHLHDHLES  
LGYPLNSLLDRRCRCNSEKHDNSGENGDASGRS FVNNSDSMGTSRDIVRDLESILGAKV  
SPNFGYSNTFVPSNTNNTVEPNPLSRSTENDDSINIQVEHAKTSGEMSLDEMEAMLLSE  
DNNNNGQEGAKAEHPPTASHLEDAMKATYMTSGTSAGACMEMAEQQRQVDLNMRRP  
AWIR  
CQRWDECAIGTLPGYPT

>comp1697\_c0\_seq1; 146 17 505 LEN=505; translated  
MKVIEGASRVAFLAFLSHIPITLTFVDAQGLFGPHYPKLLTDLIAWYCGLFGDVLKKNAP  
SGEYAWFSSLIGCEILFQLPFFIVAARTIMTAGKCNGSSTTNPSDGGSTPQESYPEWFRI  
ACIVYGSHVSTTLVPILSCFVWSEEMTTGQKCATTASKYRIES

>comp1697\_c0\_seq2; 219 17 592 LEN=718; translated  
MKVIEGASRVAFLAFLSHIPITLTFVDAQGLFGPHYPKLLTDLIAWYCGLFGDVLKKNAP  
SGEYAWFSSLIGCEILFQLPFFIVAARTIMTAGKCNGSSTTNPSDGGSTPQESYPEWFRI  
ACIVYGSHVSTTLVPILSCFVWSEEMTTGQKCATTAIYSPYLIFPLWLLWLAVKETFVDA  
MDEKRSSGKRD

>comp1702\_c0\_seq1; 234 287 934 LEN=1251; minus strand; translated  
MSDASATAPTGTQVVRAMALIAVLAGCTWFSPAPNPAGGGHGLVLLHLLAFSSWFGCSV  
WVSFVAGIVMFKTLPRHTFGRQLQSRFPAYFVFSAVSILVAIATSGALASPGGEEAAAPY  
SLVVVLVCILANLFCFEPATTRVYQRHAVEKRLGTGHEIGKIRPDDPKKANDPELRLALS  
KTFGMLHGVTLLNLLALGFGCAWLSRCAEQIVVA

>comp1708\_c0\_seq1; 43 640 983 LEN=983; minus strand; translated

MAYAMLNAFGKHQRSLAAAAVLRGYNVSRPIGPEERRYLPPLLIACRLSCSATLGAYSYA  
QNPNGNEYLLLHATPAWNALELIWGTDPERRSSVLETVQEVFDLACSSCETDKKTR  
>comp1718\_c0\_seq1; 219 609 1324 LEN=1324; minus strand; translated  
MMSKATGTLYSILVSLVVLVCCSKCHAFLPQQTAKPNTINTQIGWFGQKTSAPGHPLSM  
GLVDDFVASTDEKTRKSRNEKYLAKLQERVTRINGLEETIEELGDELQAKTESFKERLK  
NGEDINGPLLVLVSAFFFDLYLTGXVLELRHYDVQILGGLVLHDGRLAEMATGEGKTLVST  
LPVYLNALTGETSFVVTVNDYLAKRDMEIMGQVHRFLGLTVGLIQSEMKEEERRVAYEN  
>comp1733\_c0\_seq1; 215 1 514 LEN=600; minus strand; translated  
XGSEADNVCDADAKEPEPETEIEVGT'TNGDDDHGQEAEMQAEPEKSEKPAYIPGMFVINN  
TETAEEEEKSETSPDDVGGEAKSPAEEGGEAKTDSGVETPNVRKVITYMKNKSKFAAMD  
DNSCTTDEVKSNKKVKGMPRKANKTHSVSQLHYNILFCNTTCQYTYLDHK  
>comp1812\_c0\_seq1; 525 1 827 LEN=881; minus strand; translated  
XGGGDVFSPLVPAAAAPTQVTQGALKNAIPPPPKSAPQATTPATLAEELMKNPAPVAT  
KTTTNSDDILALFGSPKPKQNQPQSGFGMAMNQMGPGGFFNANSMTSMNGMMPQQHVN  
NAFGNRQNMMTQQQHQQMMMMQNNNNVNNMMPNSNQAMANQMMQQQMMMQRQMMM  
KQQQMQNQFQMNAGAMNNTNMFNSPNGINNSMGRMANNNNHNSAIKGMQNMNMGNNIASSQ  
SSDDGGFGTPMGSSQQQTMKDDAFSSLGGMNAFR  
>comp1818\_c0\_seq1; 718 1 1765 LEN=1814; translated  
KEYCGAFSANGGNSLGLTIAHQVQVKEQTKQAVGFRRRSSLALGAERDCRVAISTNSSDS  
VAGEPYNENDTSHNDLEAVKSLTRTAMYRCGTEEGLDALKSLRELCDNRLPFDFDSVHRR  
QTYGGRFSSPDPRNAIDQGEETISLLPGFLPTQAVGDFLESVRCMEEQGWMSTNPDSVD  
GLPSLHLNLVLSQGKPLFDETPPSCDDSRESPSEYCEDESFESQIFRLYDIVRPYVYEELL  
PKVDQLLNNANKSTPRKRKLRSVDFLRRYQDIDCGDVTRNGISIHVDVYSRVTAVALD  
EVAAEGDNGFLTLDVENTGETSNHKALRRFFPLRTGDCVVHTWDVLHGVDVQPLDRTS  
LIVWFDEVAEGEGQNEAESVSPWLSLESQNAAPPVTTLQNGNDVQRQFVLASALSSLEGDE  
DTELEELLYLRSASRGNTFALTRMGSI CDEGALSSPELQKEAVQLLDRLRPFKNLPEIL  
QGLLEGNDQAQNLACRFWFEASLSGNPLAQKALANEIMFRASQSERPDQRLLAAVLFALA  
SQQEDEDGSPDSLRSVIEHDLAARNVQSQEEFLASPVVQTAKAAFGAA  
>comp1834\_c0\_seq1; 519 608 2302 LEN=2504; minus strand; translated  
MEEDRIIIDSHIRFGNRWAEISKMLNGRDTDNAIKNHWNSSMKKKIEKYLERKRVDP  
TAPVDESGRFLLRREDIEGCLQALQQSGSNSKSIKNQAKSYAGRPLGSTRLNHMHPNRMVPLA  
TPMSAAQNPAAYNSMMKRQYDAMMVGAYPGMGYTPKSVKRVKSSSEYNKNSKLAEMSPVN  
KKILEEFLSELKGGYIKGVYHSALERRRIVEKAVKSGSIGELNALGLSQSEYSRLQKAVP  
MNQSRRLDGPKWATPQQQLYPHHRYSNGYVMPVPPHMPHWGHPSPLYPMAQLFPGYPPVR  
PPPTTPLPTNNLPTPSSTKDSTQLQQASSKIETLSNLSLKHSPILRTKDNTVQKDTKSK  
DNFELGESSDLGYTLDEYALLGSPCAKGSKNCFSPFLIPTPNKSSTPGMCTSWGGDDAK  
LLHDTFSKGYVSSSKSSSANTPRVFFKDDLTEQSILLDSGTVKVKHTNEETPFQSDFTMT  
PGRPKSRIGVVTGSGRERIRGAMVDERDNLLSTAILATPKSPKSGNVQEIDHSLHHIDAYS  
VIKSPHFGSPIVKAAARSPMRL  
>comp1834\_c0\_seq2; 567 246 2183 LEN=2385; minus strand; translated  
MERDGEKCKERYDFLRQSQGGRGPVWTRQEDEQILALVAHQGAKKWSSIANIAGRSGK  
QCRERWHNHLNPNINKSKTWTMEEDRIIIDSHIRFGNRWAEISKMLNGRDTDNAIKNHWN  
SMKKKIEKYLERKRVDP  
TAPVDESGRFLLRREDIEGCLQALQQSGSNSKSIKNQAKSYAGRPLGSTRLNHMHPNRMVPLA  
TPMSAAQNPAAYNSMMKRQYDAMMVGAYPGMGYTPKSVKRVKSSSEYNKNSKLAEMSPVN  
KKILEEFLSELKGGYIKGVYHSALERRRIVEKAVKSGSIGELNALGLSQSEYSRLQKAVP  
MNQSRRLDGPKWATPQQQLYPHHRYSNGYVMPVPPHMPHWGHPSPLYPMAQLFPGYPPVR  
PPPTTPLPTNNLPTPSSTKDSTQLQQASSKIETLSNLSLKHSPILRTKDNTVQKDTKSK  
DNFELGESSDLGYTLDEYALLGSPCAKGSKNCFSPFLIPTPNKSSTPGMCTSWGGDDAK  
LLHDTFSKGYVSSSKSSSANTPRVFFKDDLTEQSILLDSGTVKVKHTNEETPFQSDFTMT  
PGRPKSRIGVVTGSGRERIRGAMVDERDNLLSTAILATPKSPKSGNVQEIDHSLHHIDAYS  
VIKSPHFGSPIVKAAARSPMRL  
>comp1835\_c0\_seq1; 518 1 1561 LEN=1578; translated  
RGAEYAVNFVPKIKLEIAVSAAMADQVETITKTARTGKIGDGKIFVLDIQAVRVRTGE  
TNDDAFERAGERINTMNSMLKLGLAATLIALPQMGLTQEAAA  
EAVPSFDEIGPYIMTTLLFCMAGFLVFFMAAGFAMLEGLVRSKNVTMQMTKNIVLYSFATIMYWL  
VGFNLMPGDGWLVAWVGPFAMTELDPVGVAAADAALDYASIGSDFFFQLVFVAATASIVSGALA  
ERIKLWPFVLFVIVLTGFMYPISGSWQWGGWLESEAGSDFAGSTVVHVSVGGWAALAGAIILGPR  
LGKYGKDGKVTMPGNSLALATLGTFILWLGWGFNGGSQLAMGTVDVSDVSRIFANTN  
MAAAA  
GSIAALILTQVLYKPKDLTMVLN  
GALAGLVSITA  
EPLAPSLFGALWIGAVGGVIV  
VLA  
VPM  
LDKFKIDDVVGAI  
PVHLLAGI  
WGT  
LAVV  
FYGEASLGTQLL  
GIFAYGAFTFTVSI

VIWLI IKGTMGLRVDQETE INGLDMAEMGMEAYPEFSKS  
>comp1840\_c0\_seq1; 308 1 1408 LEN=1408; translated  
GKSMSPVAISQFNHSRRARSPSSGRNESITSSATTAATEPERMVWRGRAQD TVVSSGTN  
PNTLTRPKPTINRDNRDSNNNSRVQKDNANTNDGDSISR IKNNNNTICGNRRRQCCPGST  
AWIVAWIVLVLCRQLMTETGLLR TALASYGAPCHYFDRGGWTEQGDECGYGRGNRNRPS  
RSAHGSSVDASSNQT LGSNDKNSSSINITVPSLPSALDLLNPPFKKNY TIRVLGGDSIG  
DIYNSNCNGSDTAVTTT SRKNKNSNNRNI IVTAYYKIPSKHTPERYRDWMKNFLGRFRDP  
VVAFTSPDMVDSL AALRCPLSNSSSSNSTSDKDLNRSLSQSPACFP TVLVALPLEELPLA  
ELYPKSFWVDQLDRDPEGKI HAPLRGDRVGGRFESGELYWIWLSKAWFVHEAVGLLMQE  
QHOGANEKKSV EEEVAATTRLTSTATAAEEGEKEHCPERDKRGDVF AWIX  
>comp1841\_c0\_seq1; 292 1 897 LEN=1482; translated  
NDNDDNDETNAAPSSPRVKFRGIDASTTGGGSSGGDSFVGGNPLDRFLAVVASDSFSIA  
SGAIGLLAVVHRWNLVLAASDGSTAASIAAAEALTYQTRTDLLGVFAAGSVLLNGVTKL  
DVTTALAESV VLEGGALPSPESVGGASGERPGPEVAWGLESVLGATPARSAVLLGSDKDG  
GWVVLHRAGVVPVPAPVPGKTPILDRVGS PGNTRETYLPTLQALPGRTELNYLPPNAQM  
AVMLPIAAGGEAQSENESESESGSGNSVLVLGGNAAKSFTPRDIAWSRIVAERIGESL  
>comp1843\_c0\_seq1; 300 1 835 LEN=1110; translated  
XRKVEVAEEEA EDETEALEEELEALPDGVFVEAPEEGDMAAVHGSSWGLDGRHKRNP GP  
PGSKNGGRASKDQDGDVEMEPATKKT KLGTEQDGAQGA KPGGPKGSGEGEENDDALSDE  
FVYVPSFYPRPPSTKV VVDDRRTVVDETDDEEQRL LQQTRTQLRQEQQVSYASSLAARAF  
PGAALRDTIDIDSSRGVRTSLVQLGSGHSHYWGSGWDEAAPK GQRPASASAI AVPMGRKP  
AASGNTVPLGEPILPMSRASGSRVSRVLEGSMDAAAMQ  
>comp1844\_c0\_seq1; 505 104 1830 LEN=2015; translated  
MKTPRSLLAALFATVHLQLPPPCHSFS AKLTTNPKAAPGTNNVNFEDWITDAPEEVREWK  
DLTVRGDIPDYVRGTWIRNGGGIWSGGDNGDGGESFSHIFDGF AKVSAYRFGNGRLRHQA  
RFLEGGKWKYKFKQSDGSLPPSIGTGPI LDASGTPKVGAARTVGAILNVATAFDNAXGKHLG  
FRSALEDSRSQKGGGLTDAPPRVNLDYDTMDT LSSSTINPLAKGIRGFELLITAHPLYSL  
ESDDTYNIAVEIGLGLPNARVNLIKETPLGDRSVVGS FATDDGIPYFHSFGLSRNYAVVV  
VQPLRIDPGNLSGLLEKGFMRSMKSVEKTRVVVLDLKTGECVLDQSVPEPLYFYH AVSTA  
EVDHGRSLSLRLCAYKSSDQLTGENQFMRLERCRRGKEWRNKLDKGGRFCDVVC DLEKGT  
FSLRWDDRIRQGFELPVTRY SRAHGGSVEERRAAADAPIDGHPRYVYSFGAFALGAE EYD  
AWGLFKFDTERREVAAS YRCDSVYVSEPVFVPDP SGRREDDGVLLTQAYFGAERETRLLV  
LDARTMEVVAEAGTGMRTPMDFHGGWIPEGGGGRP  
>comp1847\_c0\_seq1; 323 1 1191 LEN=1251; translated  
XLSHGDIGPTGSAGNFC AVGTFGPGIEIWNLDVMNALEPSCVLGGEDTSMADDIMRLNMM  
GASEKKHSNTLSPQGRSLKPGSHTDAVMALS WNKVHRQVIASGSADCTVKLWDVTQAQSD  
KANAATLKH HEDKVQSVLWHPKEGTL LATGSYDRTVGLVDARSTENVKTVKIPGDCE SLA  
WDPFNPQYLSAASEDGTVTCWDVRKFSTKTPLWSIVASEFGGVSDLAYNTHVPGMMATSS  
VDKTVTIWDTATQSPTAKMKNKDMKVGKLF TLKFYPSLPWLMGCAGGSKEMAIWMSQDDT  
IQKCFGDRIDHSSLVQTDERDRKPQNEISFD SLMNSTSVEKTNGKSKGKSSISNKKKKKK  
KAHEPADDYCLKKTDEMIVNEFFRDDNFQYMWN NQM  
>comp1848\_c0\_seq1; 483 317 1621 LEN=1621; translated  
MAAANATLVFHSNAEEGECNND SKRLVTENNILVNTGANHTIRM TTTTTRIRTRARKQHI  
LLSPSLFVLVLTIALFQTVDP LLVRAFPCSPGIESISYSRWKQSIGRPRFLSTSF LK LST  
VTPPKTVLPSRAELES MKVVDLKELIKDSGLNERGLFSRLKRKQDLVDFLVQAGSREQQT  
TTAAAKEKSQIISDQPK EQQTQPKTRRKPLGMP SKKSGARQDAATTTTTTANKQ QDTGTAS  
HNAVADEESLPLPKSPLQVIYDRVHEQY PPLKYLSEGNNTLLGEQDIRQKYHPMLQHA AK  
AITSKRDKNKNDQNDQD GKSDDGESETDDDTYTKPALS GDMDLIFVGTASCTPSITRGV  
SCTALRLHSLAKQQTQSANVRVDARKPSKGNTKQSGKNFDVAQNSQSNLGTWLFDCGEST  
QVRKGKELRRSEKVS  
>comp1848\_c0\_seq2; 478 317 1600 LEN=1600; translated  
MAAANATLVFHSNAEEGECNND SKRLVTENNILVNTGANHTIRM TTTTTRIRTRARKQHI  
LLSPSLFVLVLTIALFQTVDP LLVRAFPCSPGIESISYSRWKQSIGRPRFLSTSF LK LST  
VTPPKTVLPSRAELES MKVVDLKELIKDSGLNERGLFSRLKRKQDLVDFLVQAGSREQQT  
TTAAAKEKSQIISDQPK EQQTQPKTRRKPLGMP SKKSGARQDAATTTTTTANKQ QDTGTAS  
HNAVADEESLPLPKSPLQVIYDRVHEQY PPLKYLSEGNNTLLGEQDIRQKYHPMLQHA AK  
AITSKRDKNKNDQNDQD GKSDDGESETDDDTYTKPALS GDMDLIFVGTASCTPSITRGV  
SCTALRLHSLAKQQTQSANVRVDARKPSKGNTKQSGKNFDVAQNSQSNLGTWLFDCGEST  
QLQIQKTS  
>comp1851\_c0\_seq1; 155 1 608 LEN=608; minus strand; translated

XRLEYLEGGISSGFVKVEPTKEKPLFFRYGPRENRKEGELVQVPM DVSSMDSRSGFILLADKATVWVWHGKEVGTTRKDL CGRGLCVVCVYVCVARSVDWESAVDAFLDRRMLVCLFLLSILFWC PGKPELTRLSSKHEMPFAQMKIMDKI ACTQRGEELCTLTGTVTVLDQGD CDDDEEFWNYLYHGGSDKAVGSR SIGTCX

>comp1852\_c0\_seq1; 250 105 2116 LEN=2116; minus strand; translated  
MHHHRVATAALLAWNFAAVTSFAVRGGSRNVRWEFTGSDHRRSNCRIWEQERLSATHRGE  
SHTECSQGPLRVGIAGAGAVAFGTASILSKNGHESILWSPSGKGTADLVSRDNGSGDEGP  
STVSSTGALRHEFDPEIASSAEELVKKSDVLI IALPANGHKQIFDALAPHLSSSSSDSSP  
AAAGAPPKKKHII VSSHASFGALYLSQFLHQ LGNHHTITSWGTTVCTARRTSGTSVDIK  
TIRKSVDS SCLPEGDSASSLELCERLFPDTEFRPREGLLAITLSNLNPQNHLAIAMGNIS  
RMDKGEEWYQFNITPKIGGFLEALDKERLEIASALGLDVKT VYDHFSLSFHVPI PASGSL  
SEM CQNIYEKGN DVHGPTAADSRYVTEDVPYGLAPVVALGKLVGRPAVLHESGMRICDA  
MYGRNFAENDLLGAI GLETIGLDELGEAARTGKLPGQRLLAGSRPLSPAHTHDVQXVGL  
PAAGLGLARKIDSHPAPTIEGSLRLAPNPAAPDANENAEQTP IHRTAHRDKIRFGCGSFL  
APGDESLQGHPLGDP AQVQRLLLGQRLLFLPRELHTAGARKELGSEPGRRRHPAVDGGV  
HHARRQVGPVGARVVQVFSEQPVPERNVFLPEDKECVSHGRDPRPLAGREL PSEDP RVVL  
VALRQAFRKGX

>comp1855\_c0\_seq1; 682 220 1986 LEN=2064; translated  
MRYDLAFLCCRSF LGGDGENDDGEASGFYGLLGVESDATPDQIKRAYKRRSLQMHPDKL  
AQRGKPVTD EDRARFTRMKDAYECLSDPHKRETYDAI GEKGMKWLDEPF SVDPQELAGNF  
ARSSVLDRSKIFAIFVGLAVALLALPVAVCLHLDGDLGDDASWSVTLVPLWIWNAMALFY  
HSRVLTMPTVSAPDGPPEEWIDPFPMKDRIRSLFRFLLLVSAEILLALKLDEVLECAWG  
LVFLPVYLWEAANVHEQWPLSRLR TLTVEDLEAALGKPLGECTADETEAIRRAYVVVPSA  
ESPEFAEAEERKARAARELAKSARAIVLSALAVRLDTRADWNWLVFLPVWILSLGACL  
TDYLSFAEASASAAEKDPGLFGGDRDDPEAAATTRASFGASGSAAA AETTSAVQSGESGG  
PGSGGTATNYGSVGADGAATPSAAAAGSDLSEEEKDRLEHVMNQSECCTRCCWRGCFLL  
LLMGLVAAKLQGAAFSAFWIISPFLFAAGIILLCLGF AIFGVSETTDGEERGAEFYSHPA  
ASDIT TNAQPSTNIVLPVAPGTPDTRG LLATAGGSSASENEMEIRGLD

>comp1856\_c0\_seq1; 237 49 624 LEN=767; translated  
MTTDKDH TKSNEIYHFPTHASYLVPVVIKETPHHGEGQRGVFAKEPIAKGTKLWVWTHR  
V KSIHRDDLEDYIQKTFGN DLEETR VFLRQGFVLP PKHSSETMSPPQKQGETTPRNASND  
D NFFHSNPTDAGRLTNHSSDPNTGPDGALR DIDPGEEMTMDYSFHGNPEWYQAI CARFGVM  
TEAQIAALHHT

>comp1858\_c0\_seq1; 410 103 1974 LEN=2391; translated  
MGPLPTTSF LSKSKREEEKDQDEVDEFKNKILRNQSCRQWL VSESIKIAFLLSFGVLLQ  
WKIMKQVDVTE DLSFQPFVSGHRALKTLNAPLGEKNDNPKYRNC PFRDSPIVESIYVYPH  
PGSPEWKGDILSNYTRIQTNSSSEDFIVYPWIDNDLRCKAAGVGPYDGTSQLVQYNT ELL  
VRDIITHPDSCLRTNDPEKATL FVYPYLP SAEYKNGTLFGK DMSQSKYGKAIQNIITKQE  
YESWEKEFGLTSEYWKRRNGSDHILV FSEPMHGLWHPKSRRGNFHLHSQFQTHSP IVIS  
NELSKTFIDMYPLCARKNILVPY PNTNGRWFNGALDNEAVAMMTEHSGIRKLSSESPGAIQ  
SEIDLAKQSELKETSNGSNSTPP RLLGYYYSGGNHGTCVDLRKSMKDEFRCSPSGKMVKK  
YKKALNNYAHGYRQSTFCPCPGGDS PSAKRNFDSVFAGCIPVILSEDFVWPFTSEFDRSS  
NSGSESGIVALNYPYDFSIRLNAKDHWSKFDSPKNCNPKINTGEGHNETDHRSLQSVLEA  
VP SKELARLRQGLARAAEVYSYRKR PDLDPDEPLREGLLPDGGAAHMLV RALAEERASGAL  
WNACRQEMK GKDISKDSVKKFKC

>comp1864\_c0\_seq1; 288 32 1608 LEN=1608; minus strand; translated  
MKFLQITVATISSFSFLVEEVHGHGYMFEPISRNYYSNQFGLTWGTEPNIPMKEYCFHCL  
NTKGVGSVCGTSEQGVNYDSWLD SLQQPISWNSNGNVYQEGGIITVETFLTAHHTGHMEL  
RACPMGRASTQECFDQHVLEFVEDVNNFDVKMPKGKYAFNSADRAKLDKNVPSTDVIGCY  
RFPFLDENYPERGYYYGSQAFN NNRFAMNRLPQGLTGEEVLLQWLYDVLFELIYDLFXM  
IYDPPNISDNMXNFYDLLVTANSCSPEGYAEYSLNSHL PQEFWNRQLSTCTPEQFPPEF  
YTGDSPERFVNCAEISILPN DNNIHIDEPAPTPTPTPEISTQSPVQVISVPDVSPPTPIA  
TPTITNESESRVIA YVGNWQACPTDEQIAQYTHVVI AFAVSYQWSPGKNICSETCEIAMP  
PVCENVNRPDLIAKWKGMGKKVILSFGGAGMGGSWAGDNND CWDYCFGRETKVIDRLTIV  
NEMNLDGIDIDYEFYSDNQNGSGFSKGA EARNFLTEVTVGLRNSX

>comp1865\_c0\_seq1; 428 81 1556 LEN=1570; translated  
MDFSLPHVHEDSLATLSKIRHIDLPAKDERGGSTGNGEPSLDELLIEEANNAASLFLGK  
WNNDNKENNSGEDAMDCGDNSSKSNNSLTVNERRMLMNSASYPERSTPQTEKITEDSLV  
VIFESFDNLKFCYPKKGAIFSNRNGHFH HEDFIGKPF GCKIRSRNNQGWGFVYLLKPTPE  
LWSRSLNHR TQIIHFLDASMIVFYLNIRPNMVVCESGTSGGALS HCIMRSIAPRGLHTF

EFNQKRAEDAKREFASNGVGHLSKVHVKDVCCKHGAGGFDQPQSSVDAVVLDLPEPWLAV  
PHAAAYCIKRNARLVSYSPCIEQAQKTIETLKKNGFHSIKTMEFRLKENYVDEVEYSMPPT  
EKQRVEDNRVYPREDKEIASGIAADAAASNQSEKPVVETKEESGICKDSPTEESTEQLK  
TGDATAKIGETQPAPKGAEKNPPESSSEATAPAAAKRKAPKTKLVARPFVIMRGHTAFLTF  
ATSGNGLRPKP

>comp1867\_c0\_seq1; 831 91 2352 LEN=2468; minus strand; translated  
MNSSLSSWNHEYSIVAHDDHGIRLRLDPRQFTCPNIEEAILTSIEGRQWRLLDRPIFVF  
FDTESEQPQHRQGPALEREHKLXASTPIKASMSTSTSTIAPWPTKMVESHGDRDEA  
WLEELAHNKDTTYKNQSSLPQLPVPALIEDTLRFLPTALPLAESEEEKRALENVQKFP  
QAQKLQERLLERAASVQKNSWLQHWNTLGYLQVRDVCINVSYFQFADDRTLGKGS  
KGNLQVQRAASILYATGQYRNIVASGRLAPETLGRKNIPLCMTAYKMFHACRIPLPQQ  
DSYRIYDPHHYKHAVVARKGRFYKIPLIDESTNEVLSVESLEGHLSQILELADEEDSKTE  
APGLGYLTGDHRDAWATARAALLELPGMAEAMEVLESVCVNLDDASPSSRAQCGKQLL  
CGNGDASNRWFDKSVQLMVCNPKAGLLGEHSMMDGMPVGLANHIVSTTYQQARDESTT  
GNSGLETFGGVADIFGSIEMTPKVLEMIETSKGNFREWTTGKHDLEVQSFVWYGGSGFMKK  
SGFSPDAYVQAMQVATARLFGKQVGTYEASQTRVFRHGRTEETTRTVSPASAAFVQSLLG  
RNGGGQPLSATDKIALLNKACKSHARYIGNAAKGLGVDRHFLGLSMLVRDGEAAPDLYSD  
PVFVRSKKWRVSTSNLTHPKLDNWGYGEVVPDGVGLSYSVHKDRVIFGITALKEHGGWPE  
RLSQYLEDALVEMRLLVVEEAAAASDAAPPTRSKM

>comp1868\_c0\_seq1; 468 87 2348 LEN=2954; translated  
MQCGANGIWDGTCFVYIEITAPHRICVRNSPCSSPKPRQIQDFYFECGELVSIIDLIRHN  
REDYTDPIGSNHSVGLHPGAHASITRRRRRRSDDGPFRLRLSDGSGWILARSDGQDLAKRV  
YVEDANHDSDEKRSRTPFWNFRADNLPLGIELRRHPNEELRNPNDTNRFSPPGSGGIRYL  
PMQRIVCDRKITTASGVSFFRVQGTGCVWFDRRSSNGSNHTGQEPYREMMIRDDLVDVDTGL  
FAFRVTSTEPVAVRRSCHVGDGPNLGPVTVVQHGDVLLVDDVRRSPLQDANGNPFRLRV  
DGSGLWFQHRRGVPGSLLEEVPIENGVFRRLILQVPDHTATNHGQPFLLDRYQHRGLSSKV  
TNMNSNNNLSPLKQGEIVSCDRKVVVPSPTSSAGICWCRQVGTQWIMVKQQTNEDDD  
EDMHDGGHIVAEIVPEPEHPASFLRERTAGDVRKRETYASSNGAKRLQQQPWSPRLVRSY  
ACMVPGLEEIGFDRQHQLSFKSSNGVIFNIYCNRVIGILSVRENTIQGCVQRYHRNCS  
DLELREILQDTKTCRGEVHRCDKRARSFMPPSPITRTRFLADEEDCNNSEELSLRENQNI  
ITPDTSSSSSAIGTGFEMHQDYNDKDDTIDTELECRMDLVDCQRKIQNLLYRQGNILRAI  
KVYEEERMRDAEAMRAKSERIRIEHRENQRQVEQLQHQRVEEDDRQARWRRTCRQLVSE  
NVFVGAFFVGGVGLVLSPLYCGPLLQKLGLQHL

>comp1872\_c0\_seq1; 421 439 1410 LEN=1616; translated  
MITRTRTTSTLFAAAIKATALCWAVALCSSSSHSDSHSMAFVQSFSPPTPLANGAEPRGTTIA  
SSNSGLSSKTALSMAGGVRRRGLEQRREGATPTEGGMTLYLKAEDGTSVGDGCPFAHYIR  
MILEEKNLPTVQPCASNDKPGWLLYYEGKMPCLRHKKEAYVESNVIAAYLDYFFPSG  
ESDADHKAALKDAEDAMDGFPAVAGYLDKESDAEAEALSCEPLAALREKLGALAEHLGN  
AGGEDCNLDGTSTSFGLDCRLVPLQYHLKVGIDTFKEHGKPDLESEFPTVHAYLSRSM  
RESFVNTMYPPEETIEWGWTNARQ

>comp1875\_c0\_seq1; 566 203 1372 LEN=1612; translated  
MKTTRDMAVFFLSLLSLNSAAGFTSSAIRTSTNRVSSPLAPFPPSANKQERQTPILIRCNE  
KPGWLDAMDGIPSGDFDEESYRNRIDLRGGIAGFSVDPELGFVCILVAGGEDSNQQHNC  
HWMPVVVSPVDTRPKSAEALTCVQLAGGLDLGTAILPPDSLARLVAEHDAEEQSGEGTA  
RDKGAPKRLSLTKITAAPNPDAENAKAGIEEEAQELVATSPEREKAI SDALPKVETAVK  
TLPGLQETTTESVREAMQRFADKGAVDRAFDASSILDSLRLNTPAISLAPPLFRLDVSV  
IDNGNISQVTVDTTNSMIALGLAMRYKVTVDMEEKYRHRPRGGKGVDELLERFPVFRPIQE  
LNEDSRIVDGFIPSMFEKARSIDNDMKGE

>comp1876\_c0\_seq1; 698 44 2179 LEN=2474; translated  
MSQVEETPASLKDTKDAASTVQKSPKADSILTNLDATIAGFGDGHIFPDTDTSPASSCCS  
SSSDKTDHRANALGDGIVERFSPPGLEEFPKQLHSILFPALHRGHAKGDIDPGRAGPATL  
PLSSPSPKFNPISSSSAAILMGVKGSGKTLLELRLVLAACREQLQYNPGGRRRLLYRMV  
EINGIVCRGEDVASVYIEIRQLSDIAYRSIQTTKAEESPLKATRKIRRTSGDDSDTTGK  
RGFSSDSILRHNDGKTEEGNETGRLGGNEKDDSGDESIFVHDDDDANTRKRKARRQRKQ  
RKIDKHMLRRLRRATFNSNLSLLESILEFAAADDIPIILNLELDSFTDEGERQMLLYHLL  
DRVATPGSNLVLGTTSSFSALTLLEKRIRSRAEGTSKIYLRTPPTYHGLLELLDYKLLK  
GCVARKDILDRLAHPKDIEAKAREIVSKKGLGARNGHANHTTEESTDEIVKLSVAMERFR  
VGRDTRWFSRVIATSLSLYRHDCIMAMSFNDSVSSGSPSLSDGAPPNFCAYIRDAMAM  
GASVLETMAGSQQPDLCIVDVAASPRQLQALLDLSTPQVALMLSARRILKREEQRELVV  
LAPLTLERMLKEYESFRRGSKSMGNSKLLKRAASHLMEQGLLVPSMDHSGGGPLQYDYSK

MYRTL DNYTLLRRLPLHIPYDINREL GKALEQNLL ECPTALK EWARFIS KAA  
>comp1881\_c0\_seq1; 109 1 733 LEN=1320; translated  
XSLHRPPEQIAPHRITGTCTRTQETERPKRPWLSETGPAAVPPASRPGRNGSVRADSAPPQ  
TAPPSTAREPPARRLSRTAGSSPASDTXISASVTERVPWGFVCGYPVKTGSGDLYGGGHY  
LEAASSNETPQGRAVLEAALRFGTGGTLFPFCPCCKRGYKPVSEGGPPRRMVACSFHEAARR  
KRLARDKGLRGGEADPSELFWSPKLSSEESRAELPPPPGSSREKAREKSSEKGDGQHD  
KTAT  
>comp1884\_c0\_seq1; 92 308 653 LEN=653; minus strand; translated  
MAAYTTPRGPHIIFLLSPFALRAMSEAQYVSTGQIGGEQGLSHYGLGLGKYTHFTSPIRR  
YADV VVHHQLLQTLTLKADDFPLRAPPGFGRKALKSLPESKTISI IQGEGIEDAKX  
>comp1885\_c0\_seq1; 349 109 1066 LEN=1066; translated  
MASSRWKRFAFFEKNAISLPSEVLEDLLPAGEYEYSNSGGRGRRSEEGPSNSKDKVRMVV  
TTAALPLDSKPGHGATAGMPNQSGGNANASGGGEYTV ALNEMWVSGLAACNPMENIPGGY  
AGGTNQTTITLPSQAQLFEDDSNVVSSSSGAAVDGLVLAFTSRDTNRVHCFD ISVRCNHR  
SSGGAPGIEPSADGDTQASGKKASDPEDLDGWRGYLAPIQMGTRATSDSRAAAGRSSDGR  
ASADTDAARPQEEPREGIVGIATCRGTSGHRPMHMACITATNLVVCVDPHLYLSCRRLS  
TPENNEAPSFTLGSNWNEAX  
>comp1886\_c0\_seq1; 382 150 1481 LEN=1481; translated  
MRPPI SKTKVLVLLAVFV FVVVSTPSASGFCFVHPHRKSPSAQPRQLVSSLSQSRPVDVNH  
KLEKEGDDVDSL NQREKPSNNTTKQ QREAAKNKTPVHLLAGFLGSGKTTTLKHVLENKED  
VRVGVVNDVASVNIDAKLIAQKDASSADAFSSEATATKPP IKASRNDVVELQNGCACCS  
LAGELFDSIESLLRPRIGSGDSEATSPYEAI VVELSGVADPLAIRNHWREAVATD SHPGV  
TNQAE LGRILTIVDATTFGTDYMTYDVLDRDRDGLGGSSTTINTSERQRLQPNMNC SGN  
KQVAYLLVEQVEAADLVVVKQDLAGETKTDVARRMVEGLNEEAEILTTNHGKISATKLL  
GLPWP SDLEESDSREQEESADGSHSHSHTHQHSSRKDADSPSLDAYSHDHAACDDADC  
TDP SHSHSHTSHSHTSHSHTSHS  
>comp1888\_c0\_seq1; 225 1 544 LEN=1140; translated  
XHQGTSPHSLHHHDPAESAAAF AASIALAGSVVGVNGIGIGAHGDLASHQVTD SAAVEEA  
VAAALAATDAKS NAYHHHHHAGDLVGPNIHLHGTGDPMEAGASAANGSMPV GAGLPPAAV  
GSPRASAPAAA PARGDVGLGLALDAAAKLAAAAAAGGDVLAATTAVSTGGPVG STAKQGA  
A  
>comp1890\_c0\_seq1; 127 1 305 LEN=305; translated  
KGSKGGYYSIAKPSYGPSYPTYPSYPSYGEVSYSYGGKGSKGGKGSKGGYTPSYKPSY  
PSYPSYGGNCYEV CYGYGGKGGKGSKGYGGYKYGYG SVGYG  
>comp1891\_c0\_seq1; 438 297 1286 LEN=1741; translated  
MTPSASASPNGHSTSSLLLAASSFPEKEAKKLEVEEKF SFSDRSKLEERLKMEGFALCQ  
EVIMVDWYYDRLVANSECLASVLP LVRNDHWLR YRQITSRNCIECVDGEAEWQLKRGT SI  
GGDG GATVYEEIEGTEALKIACSLANRELSKRDEANPTKNETALLL LFEGESFPVPPVD  
SCDLQPF AKIVTHRAKWEQRQGGQPTSGTKTTNASLFSKLVVDLDTTPDGF AVGEVEALV  
EAYGKTEGTSTAVYQEEAVAMARTDIRELLERILKGDNDNDRSTPTRSPSMGKLEQFLF  
LRQPLIHKVCVESGVIPQPPFSAEEEPSS  
>comp1892\_c0\_seq1; 281 133 1359 LEN=1433; translated  
MARRFSRPLVPHILLALVSCAFLGSTRVKLTIDALVVHSSATSFIGRGDDGNLVQLRGIR  
FDCEGDFENEQQATVVSNI DKITPIMSTSSTRNL FANTCF LAAVATTLELPASAAEPVR  
AKD TDSVLAI AKRKL RP KPPKILRRKLSQDFAVLLMRSSYNALDEMDCVAMDQFQRDFFL  
IRVAEYETYTKNLGAGMVTQGD LTPFYDFDISFAQYKTINREVTQDPPYVFEEQQVPPE  
GSSEPSMNPNGTIRFVPVIVQRDPTLTNKMLIPTFDK KVGSKILDKLEENFANTESKI PN  
IGYK PDSVALLSGIRQIVNLFLIGGYAFKGDVKTIAPE SNGVLATYVLSLAPATLWSGK  
VLQVEGDPLDNNFLLKTLAEYIRRSYINIKSSIKYEGTGEEITITVQ  
>comp1897\_c0\_seq1; 235 1 1708 LEN=1742; translated  
XLALRQQQQHVL FQAQEEQSI AVT LSPAQWFESKLCRKN GSN SYWRGSLFNERD HRRH  
QIIANKKLSNLNGRFFQRHCLEFVKLSLSSLDRIARKRRSIFHIALAREYGLCGREQFE  
RGVSRFFYVKQLLDQPDIVSPHRKSISSLSVDLTGRFLLAGSADATIT IYDVSKWGRSES  
ISKDDANSQRYSYSPVAKSIKPAVPDVLQLPAGHSASITYTQWYPTDPGVFLSGSSDGT  
ILVWDTHKMKPVLRVHPFRDNSTGWVSAHLRTGGDHSMIAAGSWYESEIKLVDIRSGACS  
HQLVGHGKGISALKWSSSNPNVVASGSRDSTVRLWDIRKSGSRACVTVLDREQVSSSANS  
FGLSSSESTSVGYASDYSHLRREPTWARKQRQQIPGIAPNNYDHVQHNGAKSHRAGHVS  
GLSFFSSGHYLCVSVGLDGELLLWDLRSGCLLP SKFVAPGKSSAGSPNQRRTAI I AEGSG  
YTDSCNKSS TIWISRRGVLHGFSTEGGTPKQTLKGHLTNI TSLEAMEPGGKLLSGSADGM  
ILAWGQPQGALEVG DATMKEIVQQDIDDW

>comp1898\_c0\_seq1; 466 1 1067 LEN=1256; translated  
XAAAATTTAAPTSPHRRRHPTGSLSKRPRSGVLLLLIAILLGSTTHTMLPASARAAASAA  
GRTALRRSSSSSAGGDKVTTIVFDVDDTLYDVASGFTAHRNGEVVWRFMVDRLGFPDTAT  
ARAVRDEYFAVYHSTAKALTVARAEGRFPEGAPAFDPKDLSSYWVDHLDYGKLFGTRAHP  
TEEAACKKAAAFGAALAECPCELVAFSNGPRSYVLKVLDRLSLLELFGTGRSSRDGALVW  
GVDDVLPCHKPEAAAFSAVFGELENAKRRDAGHHDEVVPEECVMVEDSMKNLRAAKALGMK  
TVLITGTGEEGRILPGDAPSSSEDPVDAAFATVEEMVDGLPGLWRDPPVFEPKPG  
>comp1899\_c0\_seq1; 401 111 1598 LEN=1718; translated  
MTRCSTKRKRSAAFCTNGNSNHGKEGRAIVGNISFPPPIATTKIASDSPLDEIKFSDWQSA  
RVCSIREDNPKHCQSSLLSFFAKAKRMKAAQSSPQKRLQKNDNDNSKSNRSGFWCSKEN  
RASLVSSLPTAPSCSSSFRQRNPSIGKTATEKRSQKSSKPKAKSLTQVYIDCGQSSFGQ  
ILCDKCGMLYMPGIAEDELQHKQFCQAYTHGIPCVRGNVKGKGYVPDTGSVNALAAAREKG  
RKRNGAATVWLWRPGTKCHNRARSKQRQHPGFAVTTTKDAEISKSNHNKLNLSQWPLL  
AQMISKDLGTNEETTLNHIANQMVFYIESDNSKYLSTSQIHRASAPGRSRILGVATVQV  
LSRRIPAYEMISLHERSLTSVEAKLGIGLLWTHPVARQRGIATRLVDAARGHAIIFGMKVT  
KTEVAYSSPTQAGYDFAIRYSCCRNEKNGIVSSRSDENDDCKGCDGEHVAIHPKEQSEAS  
LCRAVKGPLVYEIDL  
>comp1900\_c0\_seq1; 762 81 1637 LEN=1788; translated  
MKFSVAATALALSSATTVSCFSIAPNGRSSLASLRVATSSEEAVDSSVNGDDDIVRKSDE  
EVFSKHKRPTSFATKASLYHPNPGAERGLAPPVYFGSTFLLDDAAHGARLHAKREPYT  
DDDGFFVYSRWGAPTNEAAAVQIAALEGVDDPNKGALGKCLLFNSGMSAITSALMAVLRAG  
DHAIFPYTVYGGTHEFAENFCKEWGIEVYIDASGVDGPENYKKAFFRENTKVVYVYETPAN  
PTMRLTDLEGVGRVVTHEYGAAEDTPGSDPNARKRPWVMVDGTFATPYHQRVLDIPGVDV  
SIHSATKYLGGHSDILAGSVTSRSEPFHGCAGVQKLIITVPLNPMDSFLLARGLRTLDR  
MQRHGENAIAKARMLEEHPDVESVFYPLDSDHPDRSMSGIYSSGRDEDEDGDFNQTYGG  
MVTFIMAGEGDIALQRARNVCEHLRVINLAVSLGGVESLVEHPASMTGMIHQPREQRLAGG  
LADGLIRLSVGLKAKDLIDDLKSALDRCDDEEGCDLID  
>comp1905\_c0\_seq1; 238 235 805 LEN=1759; translated  
MEFAAARELASTWAETGVIDPREERLLALLAGIPEDLRQTMMEVSIKCMPSKMDLADGVA  
LVSALAAIGIINLRDNLRIDFEKHSKHTAPVWFYQMDDEGRVKRLRIGGSMIYFDGRNDE  
DNFDLPSEIAHLQLEELSVVNCRSLPIDIQHLTNLEILVFLRCDFNQPPFWQHGRVDEY  
GLLELNSST  
>comp1906\_c0\_seq1; 174 1 1067 LEN=1067; translated  
XESSRRRTEHDDAALHKVASRKMRLITLFIICMRVVDFAFTRSSLCHYAVPSKCSATP  
KESSAFPKVRSIPSSFLSSENNENALYVPGKITLKIADFDSQGGVADLSSEKSERFTC  
GESLDMVHRLRRVSDAVLVGRSTVEIDDCITLTVRRVPLLPDKEPSNGTAPKAKKKQPF  
VVLDPNLDLELDQKIFQDGLLETIVIHALSDDLVDAGSKSTSADMGNSYFVKSTKKEF  
PAVTFGLQPIIDQDKLRLCTRQVRDILAEFGIHHIMVEGGPNTALQFLRDKTVDRAIL  
VYAPISFKDPLLSNISTSVLEQAGLEPIEGYKLGVDLSKCYSRPELSPSTPIKSWX  
>comp1908\_c0\_seq2; 200 155 595 LEN=985; translated  
MIGDRTTAFQSIVLVSRPGRNRGKFRITNQNHNFIHNCRDASLFASPSGKEDIDFNDE  
LDDEKFNVEVSEQPIEFEWVRLQQLGINIFTVILAALIVFFLSMNIILGPGWLGSTIGI  
PGTGNIQEVSPPLPGSLDLNRPEYRL  
>comp1913\_c0\_seq1; 196 1 506 LEN=550; translated  
XPSSGPGSSGPGSSGHLVSEDEDEEDSDCEDDSAFVFRGREGKNCNWVKKKARKFR  
RFCKRSNGISVADFCPMACGMCNEDDNDSDCKDDSAFLFRGREGKNCNWVKKKVRFCN  
KKQMASKSKSRVQLLAMHASFSSTMPMLKKMIQLTPNFFIYNLDLSHI  
>comp1914\_c0\_seq1; 448 404 1810 LEN=2138; translated  
MANQLNRHRGNNYRVHQFQTEQHKPRNRGSLFLFFILITLGLYSTLSIVYIHRITLYSR  
PENAISEKTTHESSVASLKRKENDVSKSKEGEGEKIESSSQKFSFKSRDRDHDKVLRLSLQ  
ELTRSPPPGSIVCPSPHMTPYDRILFSTSPRESENTTAVSLGGADRKIPIVHFSFNRC  
VPNDLATSIRLWSDALPDHSIFFHDDEAVKRLMEGDDRSNQSPLWHSSEHFPNLRDRMPC  
VTSTGAMLIDVWRMLVVWYTYGGIYTDIDNWPGPKNFSQTIREDSSFFSLSDGKNRCSQWL  
FGMAPQHPAIAFTLQDLTRRLVLIKVARPRVVRITGPMTLKTAFAQKFKQLKENATIFG  
ESSYFTQIQKVDLATSQYARGSLGGTFDEIVDHYDEIHNTTYINITKRERAELISGIE  
HWTQVNRTSKVSANKTEGESLNTVDKNLPLPPYAGVSCSDYLDALNK  
>comp1914\_c0\_seq2; 453 404 1828 LEN=2064; translated  
MANQLNRHRGNNYRVHQFQTEQHKPRNRGSLFLFFILITLGLYSTLSIVYIHRITLYSR  
PENAISEKTTHESSVASLKRKENDVSKSKEGEGEKIESSSQKFSFKSRDRDHDKVLRLSLQ  
ELTRSPPPGSIVCPSPHMTPYDRILFSTSPRESENTTAVSLGGADRKIPIVHFSFNRC



VPNDLATSIRLWSDALPDHSIFFHDDEAVKRLMEGDDRSNQSPWLWHSSEHFPNLRDRMPC  
VTSTGAMLIDVWRMLVVWTYGGIYTDIDNWPQPKFNSQTI REEDSFFSLSDGKNRCSQWL  
FGMAPQHPIAIFTLQDLTRRLVLIKNVARPRVVRITGPMTLKTAFOKFKQLLKENATIFG  
ESSYFTQIQKVDLATSQYARGSLGGTFDEIVDHYYDEIHNTTYINITKRERAELISGIE  
HWTKQVNRTSKVSANKTEGESLNTVDKNLPLPPYAGVSCSDYLDALNNFLSFHV  
>comp1915\_c0\_seq1; 432 486 1489 LEN=1931; translated  
MKAMYPKIMKKKLRLLQGKTLREAPRNASDRQHQQPYRSLLDDEETTISNTWKSSGSNT  
SEVDANVEGGTEDIQEDCEEENEKPVSEQMPETERETKEIESVNNIVFTSDSIGQIEVSS  
AQVAEEEEHETKVEECTDNRKSASWTPFLKKKIQATVKKSYTIVAGQYCEKNHTRAIAMT  
KHRSKMWTEAMSGIRVGIKVDESSMTTLTAVEGSDSSTASNGNTASYNFFLLEESAAA  
SQIENWLADHKEGNVSVSHVSKNTTGFVQRLRAGHIIITPDEATDPMNIIKQPYPVSDT  
SETILTNDGTNLLKTVECGATTIPIQSFAKLIIV  
>comp1917\_c0\_seq1; 188 1135 1678 LEN=1678; minus strand; translated  
MQASVGVLIIGLLQKVGVPDKILMRIQKCTVKPTDFLVLTTTLSAAISIGNVLRNDLLASM  
NHTTAPPQQGPNFSFCDHQYSFFSELCIECNVEVMIDLREIRITNTIDSELTLLEEKASVV  
IRHGFHEQLDQWKEQYECLEETLAEAAKLDLYHKYQQLDGLTVIFIPQVGYLVGLNETLV  
LX  
>comp1918\_c0\_seq1; 479 91 1362 LEN=1362; translated  
MKPFGISCTRRSQQLLVILSTLFTLAGAFHTESLLRHPKLAASRQEKIIQSTTSVRPHVR  
SNGTCDICKSFDTLALRAGGDDGALEKKPNKVSQIIQYCNKNYFLVGMFVAVSLAKALPA  
LGKNGGILRPEVLIGNYGVALLIFLLSGFSLQTSDLAKAISNVKLNGLVNLFFFQWPF  
GIVPLRFLFTDIFPTLIPPALADGILITTTLPPTVNMCIMLTSTAGGNAASAICNAVISNL  
AGIFLTPLLLMMFFGASIHLPFGQMVLLKCKVLLPVTIGQLLRTNGQAKAFYKTHSKKF  
KRLQETVLLGIVWNAFCNAFSDGLGIQLKHSVLLALLPTLHIVTLGAFFKFFSLPFLGF  
SKGETIAGMFCSSQKTLAFLGPLINTIFQGNPNLASFCAPLMFIHPLQMAIGSFLLEPTIQ  
KYTG  
>comp1919\_c0\_seq1; 145 1 589 LEN=970; translated  
XQQQQARYSNGSSTAGSSSAENHRASESTDCVCLGHTRNNSCQKSSSNNNHNDHNHNHY  
NENYSDEAIEELFHTEKDADGDSRPLVIWPELDIMCRHDKGKAFFSDSRNTEFESIADCG  
HLFHS DGRIILEIAXGEAERMPARFFAVLADERARNGWNGSCSSLAQTNDSPKPSLRNDK  
SMEQNQQSAGYVRVLN  
>comp1920\_c0\_seq1; 120 144 923 LEN=923; minus strand; translated  
MSVEGFAPFPAGHRSEPPPRFLPERAPGAVVLAALVPPLPRFGSRGRWQGPATPKKLF  
MVLRSVIAHAIVRGQTGAXVLVVKAPADTLPGPSQGIELGPQRPRGLVVRGKPDPPA  
PDPGPDDLQGPLWLGPHDRLLLEGRQHVEDGAVHQRHLLAAGGEALAVAKAVRFPKGGPP  
GGFHGLDAGQVALLRFGGRCHVAVTEVPAGQDEPVRLLVEVPRALVGEARPRVRPDDLHQ  
SQGIQGGGLVFRLEDGPVKLX  
>comp1923\_c0\_seq1; 286 40 798 LEN=946; translated  
MRRGTVKRVKGLVKAACHNGKIGIVTKATAPGEGQRVGVKLQDGGVLAVKIENLEEIKS  
SPRTTATVSKPKSASASTPASTLPKERTLKRDNALLREVDGSPDPNVLALYYHFADRAF  
CFNASEYNVQMLRYYEKGLSVRLICPRMIGGNEYFLVGLQHAHQHDKNSLCEVAFNCGRSF  
TGISMLVKKRCFVCHKPLPGNSQCPSCLCACFCTDSSCINRNSTIRSDHERLCKKIDLT  
VVVEKESLQLLQ  
>comp1924\_c0\_seq1; 615 492 2292 LEN=2292; translated  
MVNKMPGSNLNSRSTGGAAAILSRKRLPASGAGEESNGVVRTTNESRTTTIGRGDGN  
RDANTGIENNNSSARSSTASSTNSNGSTRKMRRGSFRRTLMLQRNKRSNNGSSSSHSK  
REGNAVGGATPATAVTNQLPVSKRNSTYHDQSSAPVPLKGSVGVASVAFALEREETGACS  
PTLTSSNVTTTPVRGSQLRHERLPRGHIETIRKHYGSNREGVLDIYEDVLKISPDASDREI  
RIAYFRRGREILGDNASSIKINKKNQKAIKQLDPAIKSRFQAVSMAYEILSTPAWKEAYR  
KQGGILNTPGARASPLVPKVVVEQDGVGLSHPRITVGGKKQEQEPDFPFVSYPLASRAS  
FWENTNANTGNPSAMFPTTFSSDPVLPAPSTASRSPKRLVGLALRKSFLGNSGDVNDNS  
SRSRQRPSASVRWKDHVEELIFVNHPDEHGSSDEESSEADYSSDDENLRGDDSTGN  
DAGNSRASSR PALPVAVDLYSEPADPGYNAQENNSNLSYSSRSGSTRRRKKNKARIV  
IDSEELSHLKLMDSEAEKHVQDFWDFEESMDGILTLVDSIGGGGGAADISKASNSN  
X  
>comp1926\_c0\_seq1; 298 1 1328 LEN=1450; translated  
XHNECCLNTLLTNTDENKSLIMPIDTRILSAFGLVQMLLLGNSNGWTHPGTNTANISSC  
YCGAIRRRWGQSNKMYSSAENLQSIQSYTHQKQQRSLRASTIAAAATVQNQPLAPGLPK  
ELEKLNLFEPKPLEYNNDGDEVHGQTVVERVSMDDPPIFIFRKALTPKQCRGIRQTAFSMVE  
MEQGKTNTCKDDNDEIHEEVSTASDQERKKEQHRKHPRRFSNVGWLSNEMPMVEQVARNG

HGVFLNGMPFHSTRGIEPLQVVHYVDVGG EYINH HDSNNRLLTLLYYLNGVGETWFWPLAD  
NHDVVVRDSREADLACRDKSPDRDGLVLTCCRKSSII ERGGDCGDLQLDSKGC SGFPVVAH  
VEEGDAVAFYNYNLDGSMNWKA FHSGLPITETDLESPDGENSASKDEDGVHKNDGGKWIA  
NHFFHFVPSHVPETPPPTPVEK

>comp1927\_c0\_seq1; 383 106 2154 LEN=2332; translated  
MEEDGIVVREISTIARDDISGEIDHEGSVTKSS FQQKPN SNP TTEAENTRKKKPSIRHAEK  
RRTSTCRFADRVAQLSVDHYKRTVPADRRPAQTCIATIVAHCRKHNGGRDAGEEHEDGVD  
VNGTGTGEADVLWV LAMGIGTKFLPESRLQRERENEGQEGYGS RVRDMHAEVLARRAFRR  
QLTLEIQEDLRLPAEEHERQKERPSNRVLVRS EDNSSTVCYRIRPGVTVHMYSSSAPCGN  
ATLKRFCCKMSKEKFRDDLGPDEWPSDAHDPPSGHSIKLGEFSLLVKQDSSSSSNPQTNEA  
TSNSTNSEEKNKNTSSKMDANMDY GSKPKRTRLAGDRPPALRTNISKASATSQGRKTVS  
RAKWPATLSDDWTPPGTTIVGFRHKGSIH TCSDKICRWNYLGMQGSLLASLMEEPIYM  
STLTVGRKLSGPVCCRRAVCCRLDTRC RQPNLAIPLNNSIPLTGR TNSNKIQYRVNHPAIM  
GTSVYLDTGVVDTSNVEERGQDVRFHSS FVWAWWAGSSQCGVNSNKIPNTDCYGILECIE  
SSSGLLADLSAEVTAENDIDKIRSTTSV PQQVSTKSLTSAFLQVFQEASNGSYTKNTAG  
YASSAASYENSNDTKLTPEGVTPESWENDTNTL NTLRSVKKRFSPIHEEVKDRLFAEHRV  
LSQWRRRCYQDICTEAINTMSS

>comp1934\_c0\_seq1; 288 1 1324 LEN=1397; translated  
XTTTAMRSSTGTGGAGDEPPVTHVVVAGAGVIGVSTAYYLAKNFGVATTLVDPGTIAPA  
ASGKAGGFLALDWN DNSPALGPLARRSFALHEELADDLGADTISYRRLECVSVPVGENGG  
RRPAGRKLEGIEWAEGANAMGDASVLGGTRTIAQVHPK LCDAMWERVLELAPESKLVRG  
RVVAPEDKDGADADA AAVARLEDGSLLEGDALLYSCGPWTATNMYGTYHSLVVPTRV  
LHQCVFFSGLGDP EYVVRGDSTAYCTGFDP PVRVAEHPGEEV RPEAIDRIRESVRAAS  
SFADGASTSYLVLGDDGDGRQAPLEQAC YLPGTADGIPMMGRVPGKERTYVCAGHTCWG  
ILLGPASGEAMAHEIAAAXGERKLPALRG PGDVFPRAVRKAARAGPGFRSGAVTAERARR  
RTTKRERGGFAGSPVRTSFTS

>comp1942\_c0\_seq2; 273 533 1342 LEN=1342; translated  
MRQPQQI WGGSSQ GKRRMKTDTSLPYSSLSLWHPLDFTQSTVPIGITLERHCHNNPHE  
PIIGNAFHNLF EVNVHGIHLASPGERLHMHLRCAKRAAETFHNVFLSNSKLLDDGM  
DLIAGYYGASLQRQSNRDFPQTNFSESIHTAKKEGNHFSGM LLLQILYLLKDGALLRP  
YYDRQEIDGRIYDLELILGMEEFLKWSGTPCKIFHLQQNINGRN LNNAFKFKPGRTGANN  
LDMVVFHINNINHLGRNEGNSKNLIK NH

>comp1945\_c0\_seq1; 216 106 618 LEN=996; translated  
MTTPIHGKPT EGMCCCTMEDITEENGN YVEYQTYPSL TWHPCGYERSTVEHLLKTQFGA  
YLERVKT TNCQAE LRLLRDGPPVWLTDPHALKLP GAGEDKETTITTEATTTTPATDTHV  
CSLWYAGDNTVVS AKLNGAVEGGDREN LWNELKEFLVEEGKEPGDDDDNN

>comp1946\_c0\_seq1; 116 139 642 LEN=714; translated  
MGKKS KRPNRRQPP PATAGAVSPAATAPATATASPPVYFYP SDGSPDV ELLQTT SRS  
LQAKLDL LTRLGGENDRAGFVREFVPLDLP GPDAAGYLEDLTTAPEAEGQWRNLVAEIAA  
IRCGRGVEKIGGDQVSRAV FHFHEHPLLEKCDREVAFC CVGGEWRAEG

>comp1950\_c0\_seq1; 68 1 319 LEN=765; translated  
XMYWSHAGKHV GIEPAGPFWASVPRPSMEEFFARTQNP SECARILREDFCTEEFGDRRQE  
VVF IGVLRRSEIEEALDGC LLTDGEMDDYRGHLEEKNRLLAKPAA

>comp1951\_c0\_seq1; 502 1 1189 LEN=1282; translated  
XTMQATVTRFVFATAVIAAGCN A FVPITTTLS SARQGTTKDGDDVLLRASEEDSSWSSTS  
TDVSGNAVIERTILPDGVILNEKLVLRDITPEER GKGGVEVGQGGKIKALEVLARIPRDL  
IISTLDVPDRAIEAASGARNLTWATDLTAASLSALHP IEEELAASASVQARKEWVQSWQA  
GGWATDGADLGP PDANFGSKDVTGSLSTGTDNDHNIYAKFRMPCHPVLLRASLGLQVLT  
KCTEEKAREALTARGFTYRSMRDALEPLVLESTERAKGSKREKRCWDVADTL SRVLSRAT  
TLQLEETNDSEELSLAYAI VPLHEQLEHSVKENSKLVSNNGDEILLVATRDIGEGEAIT  
RDYNSSPKLLNDKSEGALHLLLQFGLPPKAWPNSPN

>comp1952\_c0\_seq1; 406 1 1829 LEN=2187; translated  
XDATIPSLAVKKRPHNADVEISTSPSGSSLEYSMSSSFSSGEDLGDLEDV PMLSEFDTLQ  
SNDRSNRNSRD LVQRRRASFA PRYRPAIAFIALAFSSYIYIAITSQSVKDPVKTAVSESV  
VDRHKDNKI HGNATTKEEESSSLRKFHSHSTSPVLVSTPRRSPNPSALPAPEPTLKPSPN  
PSVPSVPEPTQKPSNPSEPPVPEPTQKPSNP SLGLPTEPPSSHPI SKPNVASPLNNRG  
GKNVEAQRRKKNLVLHVGPQKTGSTT LQDAWAPYGILGQPLKNDNYLYAFVHRNSGYFNC  
DQNKWGLENCKSSPRLKRL LQTAKNNGRNLLS DENLGD RFPALRDVIDDNDWDVTVI  
VVYRRIHQWLVS WYNQINKTTNKDSNGN I LFDKNGNAYRKEHTVWPDKGGSHIPAFSTWY  
KEFTQNWD PSEFVEKHRTIEFINAYNSSFSNVVVHNMHEDGDMVKNFMCNSVPDAHHC CN

RLKYDSNRSPRDKNMSVNLNIDILAVKAREIGAMKKSISRKRAVSEIERYTKVFNKRIPL  
KCDNDVISEIKNWLLESEKAVFHETWSDQQTSDLEDTFDAYLPSGKLCDVDFENIFNDEQ  
WVGFFKSLG

>comp1956\_c0\_seq1; 227 304 1083 LEN=1261; translated  
MLVTIAILDSDLSDPESVLFMLYIIYSILGSFLNSRAVPEASAPHLLDQVRAAETGIAG  
LPIEGVPVPPSPCGRTLGETAATCGWAVAWGAYKNNHYHINYHHHHHHHGDRPFSSPRTT  
LRRYLGTTVRRAAFLAWSSAYGRWVDLREEAAAFHRSAYEKAAGEGGLFGHWGAAGKGRFC  
ESLCQGIPLAATQRYALSQAQTAATAATLAASLGAAGIEHCLRVGAGAGAGENQNEREN  
QNQDERGSTPRSETQTADL

>comp1957\_c0\_seq1; 299 1 985 LEN=985; translated  
XDSDDGGKPSAVPATAAAAPARGLSLPPAASPAATTATTTATATATTAACKKGSTRADRTK  
RVIGRKVLKLSAVLPEHILNQLQLAGGGGSSGRKRNKSGDGTNSDSDSDSDSDSDSDSDSDSD  
DDEDGTGAQSRKTPGSRKKGANPGANPGSTNAPPRDFSIDKGLMGLLKLKELSKSGSSSQPK  
NKKILGGGAEESGSSATTGDENPTPETEPKPTQPKPKSEPLGAAFLATTVETTTTRKRRO  
PVAVRNHDAEDSAVKPDASVHASASASASPRTPSVSVPRPSVAPPPPQPRARAASSMGR  
SAAPQVRGSSSTSYNSGSHYPASHYRIQQX

>comp1960\_c0\_seq1; 288 118 1070 LEN=1070; translated  
MSRRNQDQGGSKPSIAFHMRHAESNNKVVYGDARLYRYGSDDYDSEGFRRYVDAHRRRA  
DPHLSPLGVEQADALASEYLNPAFLDCQASSPVRLCSPMLRLLTIRPALQRLVVSSSQ  
TAGSGGSGFRQKVMVVVAHYHEIEGCHDKGVAQPGMSPNEIRDCLFRDLLCSSGGKSSS  
ESNDTMPISQSDIDEIVTLEFVGFDFHPHEGWYGGTGHEARVDAEARAAYCLWLTDYLDL  
LMYGNLGDGDPDETGDSDNNNGDLFDVGFLLPGEELQDHRDFARPLRRRRRTVLAIGHGDFM  
SVVLKRLVGGYVGCGRGG

>comp1964\_c0\_seq1; 427 138 1799 LEN=1992; translated  
METSCEWNGRVKNVRRSGCDGVLNKLKGYEDHLSVAMSIERHENSRRNASQNKQNESE  
GSGNWTERFISKNTNTPTTTSTIISQLNDYHRHGALAVIDARRDTNWNNGRNKVTTPPSGAL  
KSPWEKQTCESLSDTNLQRKHPGDPPLQLSGSNPAFTGTISRSSMSVATTQNSLLSLPG  
KKGVPPIHYHDYSNPDTIGVVRKKTGGVTQPFPEKLHMLDNDDDPSIVSWLPHGRAFLV  
RKPAEFTAQIMPKYFRQTKLTSFQRQLNLYGFRRLTQADAGAYYHELFLRGRPQLCLRM  
QRQKIKGTGHKQPADVQTEPNFYTMPLPKRYEQTKKKEKEQTDEVSKVAKVRTVSHSGNS  
MLKDSFSGNSSFAHLSPGSRGVHGAHLLNGMKSTICSMKGRSLVDLKSLLGKSAISSTV  
SVSEMNVQQSNRTSSPTSSLSTQSSHTTSSPILTANYELYVPTQRSMSLLGRVQQFQSKP  
KERKRSSDMAEAPGEYLWPATRSTIGSSGHTIATFGSSSITYSSSPPTYLHLDFEDSS  
KQGGIDQPEKHQV

>comp1969\_c0\_seq1; 850 64 1461 LEN=1803; translated  
MAMKKQKAGKGGKTKHEEIVEEDEDESDDQSEADESDSNDDDDSDSESGSDGDEDVAASL  
FKGANEEEESENDDEDDTDEDDQPASALPSEPYTFDLRNMLAINTDQLEVGSLHKSSKK  
KKSDAGNEEIPLANAAFEVNEEYLLSKATDGTQLIEALWKLPTASDAGPLVTLPTYD  
EVRLPRAMPPPPPKQETKWEKFAKAKGIPLNKEKRSRKVWDEGTGTWMFRHGYQKANAKE  
GEWPIMEVGANDDPFDDPWEKQREEKRARLDRNMERRLKNEERAGNLTKGATNRTMKARE  
QAYKAGKEAGRKDSRSTPVGLPIDLKNNDPRKAADNKLKRGKSSTLAALSAVQRSTASLG  
KFDKMREGEPERKKVLSKTKKRKYENPTDKKVLQSEGDSMKILNAVMMNGGGAAKAKAIR  
KGQLAKGETAYDYEFNDGLGASSFRKKKGRAGVGMKMKMTKKRAK

>comp1972\_c0\_seq1; 211 181 1014 LEN=1014; minus strand; translated  
MSPITPSPLSGLGSLTRCSKCKHVRPIQNAPFLDIPLVPTSVPNYLSKHMDPQQNLFLP  
ISHTSLLARWKIASRILHVSNGSKMLNAGPVRFDXEIANLEEEALMLQGAVGTTERRRNK  
RMGGSNKRTSELEPFQTKCLRDDLKVEKRLFRLKTMDDDDSDVPSLAPFVSEVDNMI  
LFDSSDHENISIQRFQAKCLLLTRSPSILCCHVQRRYYPFTNRMEKCVQFVEFPLIL  
DLSPYCAYGQKSITPWAAGSCMKDVRTNERRPPWNKRNX

>comp1974\_c0\_seq1; 294 96 1197 LEN=1436; translated  
MGRLSRDKRDVFYRRAKEKGYRARSFAKLLQLDSEFNLFVTRAVDLCAAPGSWSQVLS  
DKLVVSKRNSAPDETTEETSNAIVAVDLQPMAPIDGVLCIQGDITSYETAQAILKPFQ  
CGSEGKTKDGGETRAELVICDGAPDVTGLHDLDEYLQAQLLISAVKITTHVLVDGGTFVA  
KIFRGRHASQLYSQLRLLFDRVSIKPTSSRNSLESFVVCQQFNKRGADLRLNSLDRD  
TVLDVVEGSPSLPKCIPFPLTCGLSGWGEAPGTIMDADKSYPMEEEDYVQPIHPPIAPP  
HMQAIEEKRYNARNRDEDFIIQFFVRDLTDWYERCSAASSNGSGATREMLHGTATTTHEI  
WYKRSE

>comp1975\_c0\_seq1; 418 1 1169 LEN=1360; translated  
XLLCTVQYLARKGKSSVPTDCKETTQVPTENCRRARHWQEANRRTQLYGVNDTDIEYA  
ETLSEHNNNSNNDKADDGNDYDEDDDNFAMAKAKTLVRMVSIVLALGIATAPRGVRSLS

SPGSTDPLPLGSTGTASEPTAVSPEPIPTRRRLLRAAAMAAAAGLSGTRSADAACL TGDT  
RPVCIGIYKVPQDAAFSNIYSTPEQLKEFAPDLTYVPPTPAPSSYKQALEILEGQRVVAE  
GIRRNVAAGRLEDAGVGVGLLIPQVTASGRFVVDLSARVYRKQQAACKLAAAPPPADG  
EEPEAVREYDENGKLPPTADELAVDMASNQMDYVAGYFGECDICIGQGIRGELGVSVA  
QLTILASLKDATIALDDFVATAASLGARM  
>comp1976\_c0\_seq1; 475 1 971 LEN=1137; translated  
XNEQDRTSIHEAMEQQSISVSKAGIVTSLQARCSVIAAANPIGGRYDSSNTLSDNVELTA  
PILQRFDILCVLQDTPVLDERLAKFVTSSHMSAVATRDLNNGEATLPPSTSVAAQQQEG  
IIDQELLRKYIQYARTNVKPTLRGNAFDQEKIASLYVALRRESKNSGGVPIAVRHVESIM  
RMSEAHAKMHLRDYVRDDVDAAIKMMLESFIVAQKFSIRRSRSLRRSFAKYITSGEDRAHL  
LLHILGDMMRKEQMYQVIRLRQKQSEDLLGRLEVPVDELEARARERRIYNVTFDFCKGPS  
FQEAGYFLDEKRGLISRSAVIST  
>comp1978\_c0\_seq1; 306 234 854 LEN=873; translated  
MEEVGTARGQFFLWFFGSSGGGIALSSFPMEYQVAYIQSLKGVGPSLGGDTLGISPLC  
GYPQDIAVKDVEKVANSKLTIDQMVEKFPQEGNYLASKGYITFSAFEQANEGCNPLAIRA  
VFDTFSQSTNISDPRAQEKLDLYKQDPFAINGALFKAKVTGFSAVFTLLVLLGLAESIA  
FGHAKDGFHDWTWSDGILNIPDFWI  
>comp1981\_c0\_seq1; 139 1 937 LEN=1497; minus strand; translated  
XEKLMFSEDGGHLPWSNSTANAKSTPTEPAMHLISRFVDDFLFISPDKAAFQGFDRTHE  
GITELGARVNSKKTLVNVRFSVQRNADDGRTQSI SLSVSSKLNRSVLFVPCGFLFDTE  
TGEVFCDYERFQGGKLRDGITIDYDGNRGRKMEFRVTRTFVYPRCLPILYDSSINTFETSV  
GNFYQMLFAACKTAEYLRGHI THNVHDHVRCIRGLPQYAVWSIRCRFEKSPGTTQDFGA  
VFAINGHLASVLSWKAFCDVFSYLQGFVITRELREEASSSSRTMTVRKRQVQRIVSRA  
FEDFQIRHMIK  
>comp1985\_c0\_seq2; 383 1 1031 LEN=1066; translated  
XLVKIDRAILRIPTLAIHLETAERKAFKINKENHLSPI LAQAAQKALSGDTDDSESGDN  
GKVSSKDDDEDGWTEYQEPLLLQLLSSELGIPIDDIVDFELSLFDIQKASLGGIHFVH  
SARLDNLASCFAIVQALMDCAQDGFLENDEDVSMVVLVDHEEIGSTSAVGAASPILGEA  
VKRISSVLNEEQAVAPHDLYEATVRHSFVLSDDQAHALHPNYASKHEKNHQPMNAGMV  
IKRNSNQRYATTAATGILMREIARRSNLPPVQEFIVRQDCGCGSTIGPLISSSTGIRAID  
MGCPQLSMHSIRETMGVCDLSNGLELFKAFFMKFREVDKSLEK  
>comp1993\_c0\_seq2; 112 612 819 LEN=819; minus strand; translated  
MLLSQMPPIVVRVELFLPNRTNKKKKKPPNGAVRANKDDRGLVDRIRLFEHGHITSFNIVN  
KDKTDKDSVX  
>comp1995\_c0\_seq1; 608 178 1205 LEN=1205; translated  
MCGPTNRLPPVQDGPVAVDARSSSGKPLPNPATPTTGHQAPPGSSKRSSAVPSGILHVSP  
AVAAAAAFAFVSVAPSYLYVNRGFTVWFHWASLACVLTRSHFLAQALVLCGTSICLWYA  
CLVHEYAVHGRVFDALHKNMPGALVDRMLLPGGGGGESSGSPNGVLDFFESTGSLAMAVS  
HVLDFLXPSVPDLLFLEKAPPAPKPIQCWRQQQKQQQQEEEEVDPEEEEEESDDGDDDEL  
NGSYDDDDYNEEFEEKDEDGSHEEDEERYKSEEGGDENVEQTIQNQESPKTEPLEEDEET  
EIEEDEDDDDDYLEDEDEPDNPWGIKPIDDKHEELRLQQQQQQQ  
>comp2005\_c0\_seq1; 422 1 691 LEN=850; translated  
XMHDVLDQAQYVYDTTKDESYLRRVVMPLVLLTKYKRIVVKDSAVNAICYGAKFMIPGLL  
RFADGIELNDEVVLMTTKGEAIAVAIAQMTTSVMATVDHGVVAKIKRVIMERDVYPRRWG  
LGPMAQRKKS MIKEGKLDKHGKPNDRTPSDFLTSYKDYSKSKPPQLSGEGSTPAAAGVPS  
SPSGDVSMDDGGAGKRAKESDGNSSDEQPAKKKEKKEKKEKKEKKEKKEKKEKKEKKE  
>comp2006\_c0\_seq1; 229 90 882 LEN=882; minus strand; translated  
MNSEFVPIYQSVSGCLSLNSL LLLSVGGAIFFSPRKALSVLLDYKNSYNNHSYRLESHV  
IDLSDLELIRGSLNHEDSIGSACDMMAAVILAQGLGCIMMLYPLISRGSSSALAIWNLRT  
SITIQLITGLLWIVSALYDDRNEAVLVNKKKYVGFYSQAHGDPVIGAVQRRTTFGLFLI  
GFVMFITACLGMMSIFWPVATAENTRLHSERSEMSRERTRHQESVDGNEDLTAPLLPTAQ  
NFENTSQTSLQYEEDNSDQLQASNX  
>comp2007\_c0\_seq1; 175 310 697 LEN=697; minus strand; translated  
MRAVPVHRNTATAAIRIPRVVTASETAFGPFGATAESVPLAAHRHFGRLVQSDGPNHF  
VDGHVDAFREARPAIALPGRQEVVLEEEPLPEQPLADGQPVFLLLLKARPDPDVLRVVV  
VVVVVVAVV  
>comp2008\_c0\_seq1; 429 160 1212 LEN=1263; translated  
MIRHTLFLLLLGI PAICYAFVSPVPQSHRSIASGLVGLNVAAPLEQDTREDEQQLREREE  
KRQKRKLKREKQERNSPVGKLFKLLKQLKAVAKDYEMLQDGDHIMVCVSGGKDSAVL  
LVLLMHLQEQLKPIGVDFKLTAVHVDQKQPGYDGEPLVKWFDELGV DYEILEEDTYSVVV

DKTAAGKSFCMCSRLRRGILYSKALELGCNKLVLGHHADDSLETLVLNMLHAGELKAMP  
ARYTSRRGKLAVMRPLITCMEDDIEEYAMLSKFFILPCNLCKNQNGLHRPQVKLLLLSTLD  
SFTPDAKKNWLTSLSNVQPSHLLDQNLRKAVGMDPITGEEEEETEEQNP  
>comp2009\_c0\_seq1; 1614 335 4291 LEN=4361; translated  
MAQYSKPSVSVRRRTRQNRIMPTVRGFFLFTIALISRFGYCSSKDDDLQPYHQLVPRVHA  
GVEQDFHELMSEMHAEDSGSSVERMMQSKEDLAFICYDALYLADMNNNDNMVNRDEFVTF  
QIMGPTGFLPNANVFQDLPLILQSNFIILSCLCLQMPFTFDGGNVVDPQCCAVNPHIDVDG  
SQPGEIPTSQQSQYLYQVCFLTETSIERLLLLSETPTTEPTKKI IPTSPPSMAPTNTPTNE  
PSDEPTNTPTVEPTAEPTEPMTDTPSAHPTAEPGTPTAEPSTKPTDEPSPELSDQPTDT  
PTKEPTEKPSGEPGEPKTLTDEPTISPTVSPTLFPPTSEPSMRPTTSPTEKVEPTVSP  
TVQDINVTPVPTQSPTVTSVPTPSSVVEVAIAKYGIAIADGKTEEIPQSSYESDLIESMN  
IVAEDVADDLNSLNEGDRLLQEQRSGTALRRSLQONHRKLESSLAVKLPVIDDIAGS  
ECPSPVPPNDECKAVTASVELDIAAVGINSSTDIKNLFEERLNSAIENGALQAALVEVNP  
NSVVSIIINGAAPGPPTPTASPVTLTPTTVATVEPVPI SPGGIAGLVLAGIGGLIIGFLII  
TYLRRRGATDGGVNAVAYAVPAEESADVEEALLKNTEAQEIDLGSREDSSFDKDEKYET  
LHSQMPTIVDSGPPMVDGTGTAVATAAFIGTGGALAAAAALESNDNQASLDTSPGKKKRASG  
NLYGSDEASSAGESGWSSNQDGSSANTSMDASLDSIPQSAISGVSPVVLGDIAAVGRDSE  
TVDQASPPASPERLQVSTEEEQVNYVSQSLSPNTISPENSRSQAQSTNSQENQSYTGT  
TGTEGSIQSTYSELDEAIQKGDWAAVGVTAALLASQAYGEESTQGSSKNSSVRFIRKDA  
LDPERAAELDLLVESGDWEGVVAATAAKFDAQEALRGDPQSPQNSAGSAVSVSSAAGSNNS  
SALSGSVDGSSNGTIPSNMGSQTIDTTTSPSTYTATGLTATSDTASTRASKARKLNEIRD  
EVEALVNAVPEEAENIDEMMTQFRGREELVETLRSMQERLVAQKARKESQKQAKRQAK  
EYVQDKKQESAGD TDVATDAADMIKEIEGSSGAADALAGTSVARGEALETPFEVDED  
AEAKAMKTQLKEAISNEDWENVAEAAAGLSSHAFFKPGSSQDSRSEASNRSVDINALVDE  
GDWDGVVAAASKYREAASTPGSSSNAETDIPDDSTIERRRKRREERLKEEEEAQAQI  
DAIADQTKVDNKAEGSAAGLAADWAIDQSLAALKKAEEDSDESDQNDNESL  
>comp2010\_c0\_seq1; 200 1 1091 LEN=1603; translated  
RVRVRIHPNPIPHCCTTAEQSNNAASDREHREKRHRKRNLEASIMTGLAAAAPSVVLGG  
AITGSGSSFAAAGASLALAVFRGHRDRGGDDPFLHGPPHRRGRQGWRSENTEPRARDA  
GSNGNNHRNPLVGVYHAWLHLPQVFRFFVAGNLGNLGFFFYLEKVFFQCLSHILIASTE  
VY SFLLDGIEKYQDGLSFFSAYLVQIVTTHLLYAFLVYGMDDTIDTYEKYCLTLWGQF  
KVYGF GLVGATGLNSFLIGRGEKFAAFWITTAFAVINYVLSRVVSGVVEASEAAPPGD  
AGAS PGPWGKRRKQKQRKSLGFAERVGRGGGRHPQPPVAASAPLATASGXAGMPGGV  
QLLL FEL  
>comp2011\_c0\_seq1; 468 336 1946 LEN=2097; translated  
MTETTKTLLLAGQTKLTKNGEQVLRVLESRSKGLPMFVCEEIQNSIVALMIANGFLDK  
WKTAFMSVSTRTNSAIQDEDVLSLLSSILEDEPECRDSEIAATMTRLLISRETVIQE  
GIN DIAESFLANLENTVHQLLDEFNPERADRGFYLDWFDEAKITAAIRLVPSVLSTK  
WNGAY PIHWQTKLQETSDEDATSYSLKSLSLVPMMLAKLGAELGCRFRDEIEENND  
SYNDSYL AMRGGLLSKDLGLNLVQLNCLYPWVCFSHDEEHQKLCDETTSTRTLQTLKE  
QQLTKEDI RDHDLVWNLFCSTTRGETDRRNHSYFPEQRFRFFSDWDPTTLATPIGGS  
VPLFGACTKS YDATKPRLP IHWSMGFSNESMRAFSIVLKAGMKHYPEKIGFVFANED  
GYPYSCGYRNSDNG TKMNRRAKRRKRHNVPYFEACETYGAHRVKTEVLDRLT  
TTAATDTNRSNDKQLSPEGFLLSAMTDETMDRSGLHLLQHFSGALSQILTKNERISKRAA  
LETISNTKVGQVQSK  
>comp2012\_c0\_seq1; 580 242 2623 LEN=2873; translated  
MDEEVVCPCCCEELDISDRQFFPCKCGYQVCMWCWHRIRESESGLCPACRTPYGD  
DPHEF SAVDVEDVLKANKEKEAAKKERDRQRHQSNEGYISEVEGLAGGRQVQMEIPK  
DRITQLA NMRVIRNVLVYAVGLPPNISTEEQLRKPEYFGQYKIAKIVINRSQTTSGG  
DARRASASA YVTLVHKEDTLACILALDGFYMDGRNVRSSYGTSKYCSAFIKNVR  
CNNPECTYLHNMGLEDTFTKQEIQAGYVTSGRDVLARQQQIVQQALSAASGAAGTTP  
SYDEAVKNPTTSLVPTPTIITHVRSAAAAASVQTIGSGFPSISAAGAGSSSSASS  
NHMNAASRVASSSVISASKNIGPAGALSSASKSAVASLPMSTARKNMPG  
SINGTNSGMSLAPAGATAASVVAGVHSVSS HSEPPAPHTTLTPLTPLKRST  
TASKGAPKTNSASDVQKYSNSRTSTKKTSGLKSASSQPA ASNPEVGISSIRN  
VPGQLEIGGDVISA PVSVPPIINRELASTNGIPRGPQLKFGGDGL GGLGGEV  
FDGPLLSSNTRSAIGSGKGDWLSLNDAGFPNTKAQSWGNGSQNALPGANRD  
SIGGGVIGGGPIGNFHGSGSSALASMLGINLPTGSGSLRETSSQLWSSEPGRQ  
SSMSSFN NDSLPLQGVIGGATKASNNPIGGVPIGMNSQIPANPNVSNSSDIAL  
LQSLLPVHITSG GNYQSGFGSIGSSNNPGRGPPSHHKNGGSASLASGDTHQGF  
GLQQSLGGQPIGTIGQNG GHGKQRQAPGSIW  
>comp2012\_c0\_seq2; 624 242 2695 LEN=2945; translated

MDEEVVCP LCCEELDISDRQFFPCKCGYQVCMWCWHR IRESESGLC PACRTPYGDDPHEF  
SAVDVEDVLKANKEKEAAKKERDRQRHQSN EGYI SEVEGLAGGRQVGQMEIPKDR TQLA  
NMRVIRRNLVYAVGLPPNISTEEQLRKPEYFGQYKIAKIVINRSQT TSGGDARRASASA  
YVTLVHKEDTLACILALDGFYMDGRNVRSSYGT SKYCSAF IKNVRCNNPECTYLHNMGLI  
EDFTFKQEIQAGYVTSGRDVLARQQQIVQQALSAASGAAGTTPRRRTGGGGPSGTGKASS  
NPIFP PPSYDEAVKNPTTSLVPTPPTITHVRSAAAAAASVQTIGSGFPSISAAGAGSSSS  
ASSNHMNAASRVASSSVISASKNIGPAGALSSASKSAVASLPMSQTARKNMPGSINGTNS  
GSMSLAPAGATAASVVAGVHSVSSHSEPPAPHTTTLTPLTPLKRSTTASKGAPKTNSASDV  
QKYSNSRTSTKKT SGLKSASSQPAASNPEVGISSIRNNVPGQLEGIGGDVISAPVSVPPP  
INRELASTNGIPRGPQLKFGGDGLGGLGGEVFDGPLLSSSNTRSAIGSGKGKWD SLNDAG  
FPGNTKAQSWGNGSQNALPGANRDSIGGGVIGGGPIGNFHGSGSSALASMLGINLPTGSG  
SLRETSSQLWSSEPGRQSSMSSFNNDSLPLQGVIGGATKASNNPIGGVPIGGMNSQIPAN  
PNVSNSSDIALQLSLLPGVHITSGGNYQSGFGSIGSSNNNPGRGPSHHKNGGSASLASG  
DTHQGFGLQQSLGGQPIGTIGQNQGHGKQRQAPGSIW

>comp2013\_c0\_seq1; 345 81 965 LEN=1415; translated  
MSTSTKTKTNTFPWVLHEMLETAHEKGF DGI VSWLKD GKSFKVHDPASFVEKIMR KFFQO  
SKYKSFQRQLNLWGFQRIAYGPNKGGYHPEGFFIREKRCKIHMMQRQRIKGCVLKDKSN  
KNAKIDDDHVEKGNITEIDNTVIEASGAASIIISQGS LVDINNDALNVGRDSAEPFLPPLK  
SLQSSISDEESSLLQLELKDEFSIDPEVGDCIGFAGRSFFFT EEEAVENTPCTVSSSMT  
LARRLHPQQRVALPPVSVLLPNTYLCTANMMSQISRRRVSIGIFGAACKPTTGC

>comp2013\_c0\_seq2; 277 493 1068 LEN=1518; translated  
MMQRQRIKGCVLKDKSNKNAKIDDDHVEKGNITEIDNTVIEASGAASIIISQGS LVDINND  
ALNVGRDSAEPFLPPLKSLQSSISDEESSLLQLELKDEFSIDPEVGDCIGFAGRSFFFT  
EEEAVENTPCTVSSSMTLARRLHPQQRVALPPVSVLLPNTYLCTANMMSQISRRRVSIGI  
FGAACKPTTGC

>comp2014\_c0\_seq1; 996 212 2227 LEN=2407; translated  
MGLFGK KSKASKEQASSYSPDPVSSSTEVEAVVPGEDGVMVSGNGSVTSLGSDDSKKE  
YLIDGEEIESENTTDQIMEFVNKT KATAISYKDKGMEQITVISATVLA WFSLSKVTQVA  
LLAGAAIGAVTIVVAAAAGGRSPA F PSHINVAFAGNSYFYANDLPRFVESIGNGHVTQDS  
VVHNSASILELVMTGNMWNK WSTQNGMINGAKFD TYRGTEYLYDMGACSV PQLLTGSD  
QMITPGNQLGAFVNDGQNPCFQQDAYREYKDSVTLKHGWDFV VITDQPKAMAFDES RHA  
LMAFN YTYGPI LKKKHISPIIVQPHAYSSSGVNSASTNDLATFTALIMEGAQIYRKYLNK  
RIGLFAKAHVAPVGNAYLAIYEE SPNDLWPKLFLDDGVHPSAYGTFVYGCVIYATMTGYM  
PKYKRVVDDMENSALFASARRVQSANSAAGFP TKDEAATLYKIVKKVAISGYKPKALRG  
FKIQEDAADFLDSTSSNVYDGSYASGNSYASN NVYNEYDSYNQYNGYQNNAVNNDYNVN  
NQYDNYQYDNYQENNGYN NNANGNYQENNGYDNNENYNGDYNNGN NYQVNNNYEDYQENA  
NGNYNNANQQNMDADADANENNNNGQY EAAQQYYNARSYQNHNSNNVNGQYGGGNQNKQF  
YYNDLKDNDGN

>comp2015\_c0\_seq1; 365 285 1217 LEN=1362; translated  
MAISTELKSDVKITGKAPYKKRLEGINASPALYDLWKSAYSTHVTTKKDSSVEDSFRASA  
TPSTKTEAIDVLRNAGDPSKIKRKKNKPAVVP IRVLQSI RLLLPLAGEESSLSLDSALSS  
ASLQLAFTPPPPAPEL TEERKKYLARMEKLR LKAEETKYTRIT TNIKDQRQDDDKTAKSM  
TYAASVGINMIVAPISFGAFIYFFS GGVFDYLFPREEGDDEFDKNPTGVDIKRVILAVIS  
GVGMMIIE MVLFVIR SHEFETH TTKKKKRGVQPF GSYNSANSAMTYTDGNLDRKINKTID  
REDPAVKKNK

>comp2017\_c0\_seq1; 556 259 1539 LEN=1630; translated  
MSGKGAYRSMGTGNDGGRVTKKVGLRLRLMGLFRKKGVS SDEKLIH HESASIDDSTAC  
ESPSKESDDSCSEQFDVYFASSFLPHVD TNGKKKAPIGTKKKS VHWKAFEDAKEMAIPPS  
PPKLVTRTRKQPLPNGYATNKAHKTESTPTSPRNSSQNEVQVPCVPLENDYNNLT TDVQAP  
PEEIVAEKANESPSNALNTTAE LLSFDDDLIDTVDKSQADFNKMLDRMSSES KIRMMNP  
FSDETVLMSLPEAGTAESESMISKPMGGIVKYF SKLKA AVGETSNP SHDGEDTCTYGT  
ATSVYPELLKTKMDSIAKAFCSVELESTAKNSELPTNHLCTFIECTDPTNDIPMGTLP EHL  
LHAPLNLNSPLNRSWFS LNE DSDSISKLSMPIGTNDMDLSVTSEMSPTPLMEKEPIAGFS  
HGETHL

>comp2018\_c0\_seq1; 382 151 1407 LEN=1527; translated  
MTVTCNSFACFLFLCLVATAKVSSSSQRATDADSHDTMDVPTGALHNGKKIPLVGLGCAS  
GVRREHVSRALSIGYRFLDTAQSYN WGYHEDEVGTA AKKFMDDNIDEEIFIQTKVHPEDL  
GYEATKRAVYQSLERLQVRTIDSVL IHKPHCWTGACTKEPEGTWQESWKALEELYDDGII  
AHSIGICDVSDDLDEL LSQR IKPHIIQN WMDPFHQDKRMRDRIQSHGILYQAYSSSLGTQ  
WHHHKGHSKNPVMNHPVLQEI AEAHGDV GADVGQVVVNWATTRHGISVLPASTNPGREQE

NLRNSFRFSLTDEELDRIDALDGRVPAKSSNEVSITFTSDGDTASGTVDVYWIGNDGIE  
EVPVGSVESGRSLFLNSYHGHVFRFKDKENNVYSDHTIERQAGIQQVHVITPIDDEEL  
>comp2019\_c0\_seq1; 301 118 1569 LEN=1614; translated  
MATAPRTTQQYPIAGPTAAGGTNEVATAIPALKVMRLQKPELDMTKAGTLKPSGCLLSS  
LCLPDSFGIIHVGETFTAYLGALNVSKRLPVTNLTITAQQLQTPSQRWHMASHKTLDECNAAG  
GCELLPGQIDSISSHAEAGQHILRVEVGYGGNGGPMKSLRKFYRFQVSNPVVMSEL  
TYRTGDSSCFVSIQLQNGHESKGLTVSSAEFEAAPGLVVEKAIACAPKTDDTNKIGAP  
TNHLGEGLDLDFNSGRLEPGDSKRYIFKVGVSADKASGASVKGIAAGDQLGKAIFTWRK  
ACGEMGRMASSPVVCPMLHPNLDPNDPGTTMGTGTDFVHVQSSLSIDVATHAAGRIT  
NSPRDGTTLDLLLPLTVEPVNPCKQLRVGVPVDFAFVNVNHSPEFVTPQLQFRLEHMKGI  
AVCGPSPFNLEEIIPNGGGSTTVLVRFIALSTGLAQLTGCCVLNLATGHVIAQPPLMNI  
MVEE  
>comp2020\_c0\_seq1; 612 90 1589 LEN=1936; translated  
MIATKQKRGLASPLKATACILFLAIAAQPFSATRFVLESPLRTRKQAFLSKKIADAPS  
WKTIPRGGDIQEDVSSPTATDDDCAFVAVASAIKGLASFMKGPADTMLLLSTTALNTPL  
SKMIGLSPILGYLALGVLFPGNLSLVKDIHTTELLADIGIVFFLFEMGIHLDFKTLMSM  
KRDVFGGLGQCFLVTGAVVAACKFCFGLSSAAQIVLGGGLLSSSAFVLQLLKDKDQMG  
TKFGRSSFGVLLQLDLAVVPLLVTPILAGGGGLAEAFGAAGVKAIALGTIAVVGKFF  
LKPFFDSVAKTKNQEAFVGAILTTLVGMSTLGLSNTLGAFLAGMLLSETDYRHQIE  
QEIAPFRGILVGLFFFTVGFIDLELIGSNPGRIVSIVLGIASIKCVIASVLSMFGLDK  
GTALRLGLILSQGGEFAFVAFRLARSCGILSPELTKLMLTCVSLTMGLTPFLDDVGAKMA  
IALDDAPSTGKGGKKNR  
>comp2021\_c0\_seq1; 70 1 1411 LEN=1674; translated  
XWAKELYEINHEREVINDELHGVSVSFHPNPEQNWTEKQYDYMMRFQAEIDTNIPTED  
KEAYKLGDLGSSYIVSLEFRFRFIRAEQYDIQNAAIRYCNCLSFLEVFGEKSLLRPLL  
INDLTKNEMKFLKEGYIQILPSRDRIGRIRLAQLGSYGGSRYTEFEKFRVSIYLCFSVLS  
EDVTSQHRGVVSLGSFTIEAESFMWKELRVISKLIKRFFAAVPLRWSATHLCIPDDPVYH  
LVKSCTLFFLGKNGRIRLRIHVGTPEMCDYKLRFCGIPTEDIPTCTHKIKLKNHNLIV  
VRKAIDQFREQSMRPNVNMSPFPGVECEINCVLFGKCAYSYPGNIEFRGFLREIHTKH  
RKVDLENQGMIIYDITQRVIEELPSQNFRRMMYDRNTLFFYNEVTNYEEIWKLVLSVRDYR  
KRSRARAMTNEARLSISKIIDKSGSEDETGMNVTHRSSCACLKGEYRSTAW  
>comp2022\_c0\_seq1; 415 1 1653 LEN=2079; translated  
GEKMMMTILCGKVPLAQLPTLSVVVLSLLIIQNFTTRCEANLKLPTFVASHMVLQREPLS  
SRIWGWADPGSLVRVSLDSKIYTDNAQPDGSIWIELPPQAGSDHKILADGETSITLQ  
DVAFGDVYLCSGQSNMELSLPAVFNASAEIEDSSNYPNLRRLATVDKVTSDTPQKDAPSKS  
PDYAWARSGPDAMNLDNDFKYYSATCYFFGRELYKALDSEIPIGLVTSWGGQTVETFSS  
PDALADKSCGTRPVHGTGDDGGGRNGTTVVTSVSGPGRPTQLWNAMIHPLVNMRFAGSVWY  
QGESNAFDPEYACRFPAIRDWRKFGLSLDSFFVQLAGFHGTKDDWPLRAAQMAAT  
QLPRVGYAAIDLDGDPSSPSSAIHPRRKLEVGRRLSLSARTIQYGERGGLVSTGPILAGV  
QQLPTFTTHTIRLSFSPGTADGLHVHGSPECSLCCCKLPFRVLDANGTWSRVDGAEVRD  
SEIDLSSNVGPVFGVRYAWELYPECLVYNGEGGPDHAGIAGAPWEWCSEPSGDPAWTGT  
ACKVPASAKG  
>comp2023\_c0\_seq1; 482 34 1101 LEN=1384; translated  
MLLGVKLFIIIGFICCSLSGVSAAVVPSTNRLCSTRRTQSRATATVPYQLQKKGSPSTRR  
GNTRLYNKLEFLSPYDSKIPEELRDEIYKAEANTPAKDRGTRVAIYATMALFGIILAS  
FNGFLTDMRDRETAMNAATVVASAADPGTPNSLYVLEANGFGWVLSNPIFKFLFTNKIGG  
IITLLFGGGSLMAEAEELDSQRINAEKIYEELERRREQKQTKKTGGGGMSKSKKKRRSGK  
EKKRLAAISEVVMDDTTEATSVLKSTPAEETSSTNDVETTMGGGESDDKKGVFVKMKD  
LYEKADSAASQALILNKNLEEAGVVEKITDETGLKVIIGREEGKKIEEKKASDDN  
>comp2024\_c0\_seq1; 302 349 942 LEN=1060; translated  
MSFQHLTQIFLLSCAILCATSFVSVDAFSPKAPTSSSVPESSRREWLEQASFGGVAIVG  
AVATTTASFPQAARADSGEYVAELQSSLAQLQPIPKMLEQKWDEVRTILKTPPVNKLWN  
LGDSONTVLKLKVKETGNVELFEIKDDLAYHLQMCQDLTYDNNFIYYQPGNGKLIKKEPID  
AINKALVSLKSIIDESS  
>comp2025\_c0\_seq1; 216 311 1369 LEN=1745; translated  
MASPRCSSFAFETGFGSPHSITSNHGNSGPSEITARSLARSCGLLSATLWIGYTLGASK  
APPTAPVLSDDLNVLASRLVADRFEEWIQWIVVPLYLLGTVTYLSVRTYNDTDWTLVLS  
STKTSEKFRYSLLPSLRMASTETIPEEPEEEGLKEETTTPLSVTPLPSQKYDKPAPIDM  
NGTFKVVENHNFAEFLNAQGLPWFLLCKAASKARPHTFSLPTYSDLTITIKGIESETHY  
TIDGPCTETTIRGRVFRDSVNYLYEESDEGENDGVCVGLRRTTKVSVGEGYAVHVQRRIVP

AGATYAPPKGQHAYDLGTPADVDRLLMTNTLVYDEPAKGGSGVVASQLFHRQ  
>comp2026\_c0\_seq1; 550 315 1882 LEN=2105; translated  
MVVVNSXEFEHKQOEHHFFSTKSKIPSPVSENASPSSTTKTEEDQPPSIATTGNIASHLAP  
IPTERDLAIVGGVFALTSKRDKLGEELRNALGEGDLTLDDKATDEELMDLYLADGLKLIT  
KCTDAALDLSGKTKDEMKLLSDFSAWLDSQHDPSEDELSTAMEIKLELISAKLDNLLGE  
VPADTCLRHVRDFLDPETIPEELGEAGEDENLLCSLGAESDALDVGSPFFRNAVARYRL  
LLTKATVDKVSASWDVLTTVSDGDIDRAASEGIALVPELETVSISGVLGFLQKTATGSCS  
ERITAAWNLMDRDRDGSLEAEMNHVVHLCLGIETDALQVLFREAVDAFPVRAPLSAIGA  
GNEKDGGDVDNAGAVGRQGWKARRREKKTRKTLAKMFERACQRHFDRELEIDHRLRCV  
YAWANKADQGNQLKSVLVDEQAGWSGRKRYVELSPKISEAEFREVQEIHFRLDKLGTTEL  
VTSFREDLWVLQKGGRERKDLVKNSFLFLGAVSAIDTAILLL  
>comp2027\_c0\_seq1; 149 147 619 LEN=619; translated  
MAIRYEAPPYAPQPGGGGSLITVKPERWRLFAYGFFWSLMIFAKLVCATLVEPIIEAGA  
PPDTPAERLGCQPFNREGGPFDFLEYGMGFTLDESHLTQIFGYANSCVWWDYTPAREMMAM  
YFPFFFEYSLVIYLFLLDYTSTMLS YRRGELPEWYWKLMX  
>comp2028\_c0\_seq1; 82 231 989 LEN=1269; translated  
MATRCAFENSPEVGVFSALTNSYALAGIGGSENFYSTLEAELIEHIPVVIHATIGGGRYVG  
RTTAGNVRGLLVNPTTTDQELQHLRNSLPDKVVVQRVEERLSALGNVIC TNDHVALIHPD  
TDRETEEIIISDVLGVEVFRQTVGGQALVGT YMNISNQGMVHPRTTVQDMEELSSLLQIP  
LVAGTVNRGSDVLGGGLVVNDWSAF CGLDTTGTEISVVESIFKLRNRGQDQSMQPMDIV  
QDMRSSLIDQLS  
>comp2029\_c0\_seq1; 463 74 1171 LEN=3199; translated  
MMINIKGSMVSAFVLLLLLDRAKESSALSIRDKSRGGSGRRDFIEGIATATATALILPE  
QAHATRAVGGAEIECREAGNCLEKFELDGALGWNWGA KDRCDATDPNCGSNGKLRD SPLV  
GDSVPDRMGYEITHVVQMSLAIGRSEDECTVRMGLYGNDVAVSVEEFLNIVSPSGLRTTS  
ELMFENGMGVAIIPVSLTRGGILGQIVPGQRLDFGIPLQSAAYARSKGMANAGDNFVQP  
RPRELKDVPVLRKHDVPLVSIIPAKGIGYGGTGF ESEDECFESA FQIIASANPAMDKENR  
RVIGQIVDDESMQSLARLASLPTKKGFRGVI PGQNSGPPLIKVVLTDIQVAKVQSQPSQ  
SPVES  
>comp2030\_c0\_seq1; 154 248 562 LEN=562; translated  
MFSHGLPMQVTINQRQSECLYETLNEGEAVTASVFI LAGSQLMATYSLEGPVTDLSTDSG  
IALYESALAFERTGGSEGSEL RISGEVDFEHLNDEINDDDDDDDD  
>comp2031\_c0\_seq1; 504 283 1416 LEN=1783; translated  
MGSSGSKHTTTTNTTMPISPSQFSFFQTLTARCDSDSNPPPPPPPGSDSAPPPPPSSA  
NDANDDSIAKAAAMASQMMNPGPLEQAPADMKRLVQLDTHDGFRC DINKQISPYLAVVHS  
FWLGTNMLPDGQKRTYT WMAQVADESSFCFSRLDPSQSSVDGRI IKTLGGIATAKLQLG  
LSAEGQADQCLLEVDV NAMS WNGNLKYGSMGGGAVYGC SFHQGITPNLSMGGDGMFVAAN  
GNMMSNYLLKYSFGASGESTSANEPSSAVCLQFAPS GSPMPLTLNKRVTVPKRVTLG  
AELSCDPLSMQSHCVLGGEFKFSRSLKLVAVDGNLKMQS LLETPLGKEPGQPRLSLSAEL  
DHLRDEMKGFGYGLAIDG  
>comp2032\_c0\_seq1; 270 119 957 LEN=1003; translated  
MKLVIAATRLHLGRASSPPT EESLH SVLANLRGV CDDNGLRQDYETEVLIAVDATPRLEGY  
DYVEAVRSALHSNSANEANGSNHIHILPVT PWGKFVPALNSLVIHAKTQOEADLIMFVSA  
EVNLSCKTVRTL CQQVSDNKNVIVAGAVLNGHQYHEIESSSDERGRVVPLTGR TTPWNTL  
CVWDLHKL SMTGFSIISDLGKSAGVEECAIALLQNLFP EAEARLVNVDGTKWEEEFQDE  
ERRKWHEEKMKSKVERPRRQLELLGLSGTXSPLLTAHVE  
>comp2033\_c0\_seq1; 528 216 1640 LEN=2082; translated  
MRFP RNESMSATPMLLILVLLAAVIEVDAGAVMGKIRSGNSNPNSRSLNIENQSGRKVDL  
YVWNMF EKPEKFVPQFVEDGVSVGCSY GADKSISSYVGHTFEIRELH SKKTEACIFDECR  
KVR YTVSNRQEQKIVINKDFTLTVIDERQKAYQKADEMYSRCKEKADAVVDPLGSI ELLT  
NCMQEEMTQKIDVNKEERSFQSKIQRKMVADLV PFECGDV NK TDSREIMNTTWSY YDSND  
ESNKDYTVRTLHELPTS KIVVVDDFIAEGTCN ILSLRQEISDGKIGIPTMIATNESKES  
KRMLEEFYKIYDLIKTIFPDWDELEFLSDTLFDFFKDS DGFQTPSQLCVGP EEVAGAHDE  
INAGKHPKCKIPGGE PVRASSKR FVVEEKGSKGPKRQVAQFFLFCDEPEQKLGCVHFPY  
AGVYVAPKAGKVVGAIHRHANDPSDEL DGYVDEYHFCPNHDLYTHTINHNI PAE  
>comp2034\_c0\_seq1; 985 214 2400 LEN=2611; translated  
MASTVATNPMLEQSGLPKFETIEPKHLTPAVEELLEKLEND FVEMEDT LSKKDGA VEFD  
EVL PVVERMQYPIGIVWGLASHLNGVKN GDELREAYE SNQGVIESMTKFSQSKALYDAL  
SAIEKQWAEDGDQCD SFLSKQKRRAVENSLLEMKLG GVGLEGADKERFNEIKLQLGKLSN  
KFSNNVLD DTKTFSYTVEDPAIMEGVPE SAKALWANSHAQFIKSEAKEGEDVPEVDLDA



TKSGPWITLDIPSYIPAMSHLADRGIREKVYKAYISKASEKSDGKNNVPLIYEILTTLKQ  
EMAKLLGFSNYAELSLAKKMSSVDEVTELTNLMADKAVPAKKELEEVTTALAREKGGDE  
YSTENLEKLEPWDVTFWSERLKESKFDMTQEELRPYFALPAVL DGMFGLLNRLFDVDVKA  
ADGEAEVWNEDVRFKIFDSKTDKHIAFFLDPYSRPENKRGGAWMADCIGKSEATNNDI  
PVAYLTCNGSPVVDGDKPSLMTFQEVETLFHETGHGLQHMLTDAQVGDVAGINGIEWDAVE  
LPSQFMENWCYDRPTVFGFAKHWEETGEPLPEEKFEKLCQKIFNSGMQTCRQLYFGQLDL  
ALHSDFDASAGEEGKIFELQREIASKYTPHSMPLEEDRFLCSFGHIFAGGYAAGYYSYK  
WAEVMSADAFGAFEDVGLDNEEAVRTVVGKFRFRETVLSLGGVPPADVFKEFRGRGPSPEA  
FMRHNGLE

>comp2035\_c0\_seq1; 585 1 2659 LEN=2708; translated  
XDDDDDDDSIEDEIWDHEHGKAIYQQKQLGRRRRRFAPAYNIWEKPALRPIPKKVAKRAG  
QQAVRSMKXGSMIPQILSDATMEDLREFIVDKNERVLGTPDQYPMSASHHRIISYGIES  
TEHPVSVRALKEIHDHGVFAELIQNLVGDENPALSEITAITAWGGAEMQSWHPDVKPDGN  
GVMFGRYSHSYSLFLPLQDTVGEEMGPTDLCPTGTHMCADEDLWDMCEENKIGLHEIRKAK  
PRHLYDPSVEGTKEYLEDLSKEGTWRAGDGALLNQGWHRGTAHTDEDMDRVRVIVSFL  
KRPSAADPRQLARGTYFHQKWLNWGSTWQDMADAAESLKRPNILRCLHLYKASDRSWG  
DLFTATTLRIANEQMGGEAGDLEGLIDNMIPLRYPEWLQGTIDYDSEEAWQMYLRETIQ  
KTHGFLYRVNAIGLTGFMVAMFIIAILAHLYNRFSGQKNRERSVIIPVLKASARRLVWTH  
GSIFAFGLYVWHVLRSSQWAIDIDSGTTLMRPFPPDPYRDVDPGVQGGNTTLPRRSDV  
LIGTRYHTNAIGAYRTWLDYHPGNSVFNDVDYTYGGNGNFYHSLQLLNKESHAVSQLPLS  
LADQLASVALNTIQSRHDGRFLMQDYRSGDWKVLSEAESKYYIHKRLFVGSKDTLLGALN  
DETEMLNRYRFGVERKTFMSMAWNSQLFVADLSESLFSPANCKYLKENLNQEMVRDSSTS  
SLAFRSILPHSSFRLRKRKKVHENANISHNNSRIRRYMVGDSLPSLFPGMEIYYSIDNSR  
DGSSDEIFFATLIGISSKKTIDGRARYHIAFDGSEVPEIETTELGRVQRQSIRTRPPITE  
GSRVMVGDVAGTILLVLADGSDVDFDEDEIDTDIPYTDYELFVE

>comp2036\_c0\_seq1; 578 383 2491 LEN=2674; translated  
MVQVVQVVLKWSKEVIEFEIEVPTTPNSFTGRSFKDRVHSLTKVPVDRQKIVVAKTKSKP  
TPSGTGKTKNPIKWWKILKDDDFDASAIASINTDNSTRIELRLTLMGTAEVLESNSNR  
EKTKFIEDMSLSEKKEAEQREWMNSMESVAAMIPALQVPPLDRQPPGNTNGDGNSSGD  
PMQSSPTIVSEFTESRAYDRLVHGYSQLRIDALLREQTRGDLPGADAEPEGSLSTPRLH  
GRPVMTMGLELQRAYVNDLAVLKDGTLLSALDDGHVQLWKHCRRICDIVHKPGQFQGSQF  
FSGVDSVLALDDSNSSPFAFCTAGMGTVRVWSDGDALLGLVPSPLPNTSPTGLVRIP  
TNSPDALCLAAFRIAWPASRRPRLVQDEAGRRLIEIERSEAEMNDALTGMSKTVQVF  
FSDGGSKTQGVKNFFLTAPAPVTALASWKQGDSDILAVGDTQGGITLQKIATSEPGSNGS  
QANISNNKNNSTLRIQEVRRIQFASSENASETCSIVYLQYMAETKQLLVSTKEIQLTAL  
TNPSSNIPILTLIPSAGPQAVHSIDMEAVLSDATPRPLSSNPLFLSLAGHKDEVHCIM  
SLPNGDLLTAGGKHATTQIWSRSQLQSATTRTETPASVPIAKAATVNLCKDAGYIFAA  
EVLEDFKSKGDSGDEPNKKEQKSSPFAIAVARYNVVKIIV

>comp2037\_c0\_seq1; 523 221 1903 LEN=2044; translated  
MRQNKSKKKTSLPSRISAEHCSKNDKTSSARRRSPERRSAKESRRQTGRGSSRRSKAM  
SPSGGGPRLPLSPRSSTAASPTSISQTSFSSRRSKIEPLLSDELRIAVTTSSKIEKS  
TENYTPPVAGNRSVAVETENPKSLASGASSPRKLPPEITARVAQTKQYKQPVAETASI  
EDSAENDRYELAESKLAAASQGMFEVKNITINETSPTGQHRGSSALEAGLFTDGSFTFGT  
DTYASDTFADEMSFSFESHQRPKKSYRKYRFSRSWVTTDASSFDDVSVIVKQVAVGCI  
FLSAVQFAILTQVLMCGIAKLNINPTIGYPDAFSEWGGKNAYLLVEGHQYFRLVTPTF  
LHVGYLHFLMNAFFQLETCAYLEREWGFNVWIFIYLASGLGSCLAASAIDPNVIGVCSG  
ALMGLFGARIAQAIWVYSFEPREHYIGQGALLFERLGGIVCSAAVVFLLTFLTYIDWSGH  
LGLLATGFLVGLVVFPALEGRSTKAVLRFTGVLLIGGVVLGVLLFHYAELDEELANA  
CNYFRSLYTEGYNCECQAFD

>comp2038\_c0\_seq1; 649 72 1937 LEN=2032; translated  
MTSQTNFGTNEENSGAVLAPLMSRGPAMGAIKYVKQPGPAPALQNNGGQSTANATVVQ  
MPALAPQP IAPPAPVNAAGVSQPPPPMVINMQQQQMHNMQQQLHTMQAQLQQKMQPKLI  
PMNTRPKVPAAAAAATTVNHVPSHAAPNGTSSASVVGTDPGTLRTGGGGGQLLQFPWKL  
HEMLHLAEKNGKTDIISWLPGGNGFKVHNKELFCSEEIMPGYFASQYKTFQRSLNLWGF  
SVAKGPDGACYHQYFVKGHPXVVPQHVSSRFVLSFLFSFAFVRCCLHSEGLKCFSSIDL  
FXELISMFPYSYLDIPGLXVKIKGQSNRPTPAAAQAAAAAAAKRAALSSFANQQHQQQAV  
TAPVPHQQQQHQQP INMMAINQFMPTMPGVVTP IVGIPNFGMQMNGATAASATTNPYAF  
AAMNQFVTMNALQOMNPTLAAAAMQNPAAMNMLTAQVAAAAAIIQAQATQLQQQQALGADM  
AAGQQVAPSIAPPTTFFSPVGPQYPPPMSSAPTSTA AVHPEPAPTATVPTSTSTTSKNS  
NGLLTLNANGNDHSSSEAKNKTQSNADANFAEYLARKSAMDRHIEQLSDPSAPVPTVAAS

NNNNKKTGSTNSAGSDGAPVAV

>comp2038\_c0\_seq2; 764 72 1790 LEN=1885; translated  
MTSQTNFGTNEENSGAVLAPLMSRGPAMGAIKYVKQPGPAPAPALQNNGGQSTANATVVQ  
MPALAPQPIAPPAPVNAAGVVSQPPPPMVINMQQQQQMHNMQQLHTMQAQLQQKMQPCLI  
PMNTRPKVPAAAAAAATTVNHVPSHAAPNGTSSASVVGTDPGTLRTGGGGGQLLQFPWKL  
HEMLHLAEKNGKTDIISWLPGGNGFKVHNKELFCEEIMPGYFASQKYKTFQRSLNLWGF  
E SVAKGPDRGACYHQYFVKGHPELCHSMTRVKIKGQSNPRTPAAAQAAAAAAAKRAALSSF  
ANQQHQQQAVTAPVPHQQQQQHQQP INMMAINQFMPTMPGVVTP IVGIPNFGMQMNGATA  
ASATTNPYAFAAMNQFVTMNALQQMNPTLAAAAMQNPAMNAMLTAQVAAAAAIQAQATQL  
QQQQALGADMAAGQQVAPSIAPPTTTFSPVGPQYPPPMSSAPTSTA AVHPEPAPTATVPT  
STSTTSKSNENGLLTLNANGNDHSSEAKNKTQSNADANFAEYLARKSAMDRIEQLSDP  
SAPVPTVAASNNNNKKTGSTNSAGSDGAPVAV

>comp2040\_c0\_seq1; 292 127 1008 LEN=1230; translated  
MSAVFLPQSRIKEVHIEGLAMMKIVKHCQESLPNMVQGALLGLAVDGDILEVTHAFPNPA  
GKTDDDIDEEYQVEMMRMLREVNVDNNCVGGWYQSMYLG VYSTASVLENQFSYQTEVSPNA  
VVILYDPLQTANGNFCLKAFRLSDECEVEMKKS GSNDFLKP SNIFEELPVRCTNPSLATAM  
LQDWTPKSGIALDRLDMSTQPYLEKHLES LCGWVDELAGEQQKFQYYTRHLARGNNKSKA  
SWAAPEAPKRMESLLVTNQIENYCEQMDKYVGGGLGKLF LAGGLHKGERSTSA

>comp2041\_c0\_seq1; 587 42 932 LEN=1039; translated  
MKFTAFAALALASSTEAFSPVTRSNGASATALEAVRQPI MAGNWKMNPA TEDDAISLSTG  
LTKLLGDETCPLDDENPLCTEVVLFPPFPFISKVKDAVEEVGITVGAQSIF FEDKGAFTG  
SVSASMVDSIGCEYVLCGHSE RRTIFSDDDDAINRKVLKVLTSGMKPILCIGETKNEYDL  
NIKNEVCAMQLSRDLAGVTKEQMADVVIAYEPVWAIGTGLVCGSQEANDTHAFVRTILAR  
MYDDEVAQATRIQYGGSVTPDSVDEL MAMPEIDGCLVGGASLDAEKFGRIVNFESK

>comp2042\_c0\_seq1; 270 1 456 LEN=551; translated  
QQQQQQQH HHHHQHQPPATKKQKKPLSRKRQMEQMLRAGKLEVVRGDHEVRGVAVHYQQ  
QGDYAAVAASSASSTVRVVP TSAYDAATGTTATSTSVTSRQKNSNQLNSLLANAASLE  
SQRAQNPRYAGGSLGAGQGSHRATAKRRYGW

>comp2043\_c0\_seq1; 143 385 978 LEN=1322; translated  
MQCTSSSVAQHRIAPCPTRPLGAPTGVVGP EAAHRCGEKRDGRAAPSFQIPVRWNGMVWF  
GMGWF PDNTTQRSTPGGGSTEQSPREAGEASDRTHPAGGEGEQTSTL FAGRTPVLPRTKG  
GRGSSAAQRNGREGNGGGINDSKETQRPTRCRHRTKAEAQKAMCFRHKGRCGHQKRC SI  
RGREAIRYGTIEQGKTE

>comp2044\_c0\_seq1; 476 1 1689 LEN=1721; translated  
PVSFEHNLHSFPYQGRAMIDHIVQNADILQNLNFLANDGDSVARFALSSKELYDKILRS  
ETIINPTLWKELLRQRWKR TMRRPMVASSNADDNQNVTVAELSYRELYVAKRQADAEAIR  
LLEEMTSDLLVLR LNEPKSVLTKKNPHIGKASNHN CWYHLLRDRADFDVMKATAMRYA  
RPTAASSAHDRLMGFCAARCFQSMHFADCLWEWRRLAEKEEEERLDRQQQRELSQP SLS  
QMRACQLSASFLEQFALLVCEIQKSPLQHLEEPNGCACTEY NANDEITGIGFRNTMRY S  
HQATKSMDAIAKVCRERIKEKSEANASTSTKLAVINDVLMNDYGFAGNSGDYYNFRNVLL  
DEVVESKTGMPLTLCVLYSCICRRLGIPVHLI GLPGHVVLGFHTDDESIDFDEIHSFIDV  
FHGGRILSRDDCRRIVENYRMPWHDEF LNPIPTTMI IQRIFNNLRNCHERAMMNP NPPMF  
CSDLMFQQHILGMIHRSPPELG TILLERLTEDLPNVLSP ELLHAYHLLSPEELGNGP VVN  
ATHARMLLELSSYAGLSYNNYA

>comp2045\_c0\_seq1; 658 29 1429 LEN=1662; translated  
MKFSIAALTTFATATSAFTHTSSFTGKTSLNAA SNGSNMDMYKVA VVGGGPGACAAEI  
FAQEKGIDTVL FERKMDNAKPCGGAIPLCMVGEFDIPETVVD RKVRRMNLVSPTGAEVSI  
GDTLQPD EYIGMCRREIMDTYLRDRAIEYGAEAINGLVTRIDVPADHKTSESQYTLHYQK  
FEPGKSSGTAAEMKVD MVI GADGANSRVAKAMDAGEYNFAIAFQERIKI PDDKMVFYEEM  
AEMYVGDVSPDFYGWVFPKYDHVGVGTGT VVNRP AIKQYQKAIRDRA GDKIAGGKI IKV  
EAHP IPEHYRPRRVQGRMVLVGDAAAGYVTKCSGEGIYFAAKSGRMAAEEIVACMDGGKKL  
PTQEEIENYTLKKYDKAYGPTYAVLDILQKV FYSNNGAREAFVELCDSKYVQQVTFDSYL  
YKKVQGNPLDDLKLLGETIGCLIKGYSNAK PDAVFSNPVESQKRL

>comp2046\_c0\_seq1; 700 1 1805 LEN=2032; translated  
XVQLLFRMQSLRTQRRGRPF SRIAAVAVAAIVSIVATALAPVFGFAPQAFVSSNKPTRFF  
EKYVDEPICYRTERYSRLISFSSKSGSLDVKLL EIRSMRVKELKAELTERRISTADVFE  
KEELVQRLYEAKLSPDPTETASASTKRTSSDTSSSSGTSTGVLCADLFFTSVDSGRSMS  
GMDGNSQSVTIKVEDVSDPYPTIAIDVYDSSGSSSGSFP LKLLVDTACSGLVLRPSV VQR  
HSSCLKSYSTPVTMTGGAGAAAANTGLTQIQSYSLRDSAGTQPKRLGPLPAAVQDIGALPL  
ELDGILGLSLLSQFACTELDLENARLNLYETEYRPLANENKEIVVAEAEELSPTKLG IWT

VDVSFAVGGRTGRPIKMLVDTGAMATFLTWKGLDDMGLGLSRSSPSVRELTQPMGAMGSD  
NVAMSLSHRIELDADAPISFGRKSGRLQQEQGLGLSIAASKRKDGKEPSLPIDIGNIGILEN  
QLASDNVVGILGMDVFSKASRIRMTFRGPVPRITFYQKKEETLSKDEMKDATAAADVEPE  
KHTAKTEDAAPVDPVEPAAAPPTKGLEARGEETKNAVPTMVEAPTRKKKKKKKKRRYD  
D

>comp2047\_c0\_seq1; 282 85 1179 LEN=3159; translated  
MSRCILASNKSLRLARHLAAPLQLLPDAVGATAGVDSPSTVNSEGNLYNKSYFHFRRRF  
SSVVRDQATSTAPMKTENIQNQGLARTDKSIVRRLFEKYSMSKQKDRILMAESLFAQAATT  
QASDPRWYGPGRIGRDFRAYQALLTMHIWFLHRRRLVTDEADPHTAALIQEELFDILWIDT  
SNRMRAHGVNEMLINKNLKVKVQYQYFMHMFHYDHCYTGDLLENAADRLEALKMTVKTHVL  
LLPSLTDKDAADGSGGDAAVNEEALQKHVEHDDHAERIAWYIETQFQNILHDLPESEFFQK  
ARIAWVDLPSFEHMVDGNTGKELTMQPINQDILLPTNWTKSIANDGTYYFWNIEETREVQW  
ERPE

>comp2047\_c0\_seq2; 282 85 1179 LEN=3032; translated  
MSRCILASNKSLRLARHLAAPLQLLPDAVGATAGVDSPSTVNSEGNLYNKSYFHFRRRF  
SSVVRDQATSTAPMKTENIQNQGLARTDKSIVRRLFEKYSMSKQKDRILMAESLFAQAATT  
QASDPRWYGPGRIGRDFRAYQALLTMHIWFLHRRRLVTDEADPHTAALIQEELFDILWIDT  
SNRMRAHGVNEMLINKNLKVKVQYQYFMHMFHYDHCYTGDLLENAADRLEALKMTVKTHVL  
LLPSLTDKDAADGSGGDAAVNEEALQKHVEHDDHAERIAWYIETQFQNILHDLPESEFFQK  
ARIAWVDLPSFEHMVDGNTGKELTMQPINQDILLPTNWTKSIANDGTYYFWNIEETREVQW  
ERPE

>comp2048\_c0\_seq1; 517 1 1746 LEN=1983; translated  
SPTNSEKKDSWDDTDGFGKQASFSPTNSEKNNQKNHTSFSGDNAWNVSVSSPVGQSPSK  
LNSSNEQFSRNRDTPFRNSSAIGGSSVVSAGSSSTGLPAENRSLTELEAAKSKRKDSR  
RSYGNSATRLTQHNQSTSSRMSSASVNSAPAITASYLRQHHLGGNNVAGDDPLSPRDGT  
SVSDIIQSLEDTDRMKRAEQITSSHRSMGDAGVVATARAAKERLRERRRRERESAGIYTT  
AGRSANSLRHSSSRDHGSDSDESENGNEASESWLFDQVTGAMGPVGIADLESLSGRSNR  
SKNSHGGKSHKSSGTSNRRRSSRKTSSSTRRHRSDRSVDSHGSRTSRYSHRSTKSFLSQMS  
EQSRSVANDLLRLEMQLAMVGNVNVGGGKEATMREIDSLPQVQARTGMSSASLGGTS  
RASGRSRRSVTSSHNSSSSSSVLRRTKTTIVAPPGLGILANKADSKGTVVSGVRTSS  
VLVHKISPGDRIVAIDGEDVSRMTVSEITTIMSRKAEYERRLTVMTIPRIGSPSNGNTNS  
GYADQQKMRSPNRRVSSPRVASISDSKFDASGSGSNYHSVR

>comp2048\_c0\_seq2; 1045 490 3705 LEN=3942; translated  
MGILKKIFRGNKKKTREFQDGGSRPISDPSFSPQTSYSQTSQATTRGGEWRGTMVGDST  
IPNGMKIVGSASTSTASSYPNNMLNNTNNNNINNTSSHPQQQLMGGYRSPRSTGPVDTD  
DEGIIVPENETEAFYDNARNQTQEQLRLAYEMSKANKSNNSANISSDSSNSSFALTSNQ  
LQQWDHQQRHSSTHQFSSSPTTNNNNPKPVYTMSSDLPSMNPQQPSGLDDTMRSVSSASS  
FNLSTDAEDSEYENLKRYYPPGQLTSLNLGIGLSALTALDTSAIDAAGSIASYYTDEDRS  
KIFPNLPTDDMTLGTDAASSKRSEPPSLDFPQSRLYASTNVGSSPYGAQVTVPMHAAL  
AINTNQNSENNTNTNSRNPGGTTPRDFTPRSPKASKLEHKLKLNHSSSPKKNMSRNRN  
NDSSGDDGFGNISTNRSHESSNGSGNHRQNKSPATAAISHSVVEDSGFADFGNFADFADFP  
RGEVDDSGWTTVKEEKKDSWDDTDGFGKQASFSPTNSEKNNQKNHTSFSGDNAWNVSV  
SSPVGQSPSKLNSSNEQFSRNRDTPFRNSSAIGGSSVVSAGSSSTGLPAENRSLTELE  
AAKSKRKDSRRSYGNSATRLTQHNQSTSSRMSSASVNSAPAITASYLRQHHLGGNNVAG  
DDPLSPRDGTSVSDIIQSLEDTDRMKRAEQITSSHRSMGDAGVVATARAAKERLRERRRR  
ERESAGIYTTAGRSANSLRHSSSRDHGSDSDESENGNEASESWLFDQVTGAMGPVGIAD  
LESLSGRSNRKNNSHGGKSHKSSGTSNRRRSSRKTSSSTRRHRSDRSVDSHGSRTSRYSHR  
STKSFLSQMSQSRVANDLLRLEMQLAMVGNVNVGGGKEATMREIDSLPQVQARTGM  
SSASLGGTSRASGRSRRSVTSSHNSSSSSSVLRRTKTTIVAPPGLGILANKADSKG  
TVVSGVRTSSVLVHKISPGDRIVAIDGEDVSRMTVSEITTIMSRKAEYERRLTVMTIPRI  
GSPSNGNTNSGYADQQKMRSPNRRVSSPRVASISDSKFDASGSGSNYHSVR

>comp2049\_c0\_seq1; 190 1 365 LEN=588; translated  
XRIYTPIDSTKMGKKKGANEKKGAKIFKTKCSQCHTVEEGGAHKQGPPLYGFFGKQSGGQ  
DGYSYSAANKKSGVIWEDQSLFDYLENPKKYMKGTKMVFAGIKKPADRKDLIAYLKKCT  
A

>comp2050\_c0\_seq1; 260 163 962 LEN=1253; translated  
MIGSLIGQEVNTNEXLQNNNDKINPLLLWIDGNNVVRGIGKFEWNAVELQHRVVRFCHKYRV  
PNAIVVWDHGSHQLSCKQYHFNDGKEIASSEADVPYKDDKSFVNLITLFSGIRQRA  
DDVLVKESNHLVLSFRNTVESDYNTKLNWSSNAFVTNDTELNYKLRRQAVPNSPSIRLS  
RRRRRDAGKIYNSDSSSNNEVKDTSNPLFCSTGFVDLLCEISREYDMAMNDVDQEASML

IEKAKDSLRECSKGQRRGYNPREKTW

>comp2050\_c0\_seq2; 321 163 1262 LEN=1347; translated  
MIGSLIGQEVNTNEXLQNNNDKINPLLLWIDGNNVVRGIGKFEWNAVELQHRVVRVRFCHKYRV  
PNAIVVWDHGSHQLSCKSKQYHFNDSDGKEIASSEADVPYSKDDKSFCVNLITLFSGIRQRA  
DDVLVKESNHLVLSLFRNTVESDYNTKLNWSSNAFVTNDTELNYKLRRQAVPNPSPSIRLS  
RRRRRDAGKIYNSDSSSNNEVKDTSNPLFCSTGFVDLLCEISREYDMAMNDVDQEQASML  
IEKAKDSLRECSKGQRRGYNPREKTWERCVQAETLRRFIIDQEERVTKEKVNETSPTSDT  
NDAVVFVANYLNELQTKRGYISPLHEENREDSYETFLPFLAPSRLDKRQRLLDRYNALVK  
NGEITS

>comp2051\_c0\_seq1; 916 126 2603 LEN=2762; translated  
MSMHVVIKRDGRMESVHFDKITSRIDKLAFLGLDTKHVEPPLVAQKVIQGVYPGVTTCELDE  
LAAQTAASFATQHPDYSILAAARISVSNLQKSTCEVFSSELTEALYNIHPTTGKAGPLVSK  
EYYETVMKHKDVLDNAINHNDNDFEYDYFGFKTLEKSYLLKLNKIAERPQCMLMRVAVGI  
HGDDIERVLETYKGLSERYFTHATPTLNFAGTNNPQMSSCFLLTMKEDSIDGIYDTLTKSC  
AVISKYAGGIGLATHNIRASKSYIRGTNGTSNGIIVPMLRVFNNTARYVDQGGGKRKGSIA  
IYLEPWHADIFAFDLRKNHGNADRARDLDFYSLWIPDLFMERVKANGTWTLMCPDECPG  
LPDCHGQEFKELYEKEYEKEGKGRQTIQAQQLWFAILDSQVETGTPYMVYKDHCCNKNQ  
NLGTIRCNSNLCTEIVQYTSPEETAVCNLAISLSKLVRLTNNGPLIFDFEKLQRVAMIL  
TRNLNRVIDRNFYPIPEAKYSNMKHRPIGLGVQGLADAFAMKLPFDSPEAAQLNRDIFE  
TIYFGACTASCDLAKTEGHYESYPGSPVSQKQLQFDLWGVTPSDRWNAKLLKAEIAEHGM  
RNSLLVAMPPTASTAQILGNNESTEPFTSNIYNRRVLAGEFTIVNKHLLRDLTSLGIWNE  
SLRNRLIADRGSVQKIEEIPKCLRVDYKTVWEVPQRIILDLAADRSPFICQSQSLNVHIA  
DPSSKKLTSMHFYAWKKGKLTGMYLRSRPAKADAIQFTVDQEKLAADTKKKANISSDKEN  
KKKVSNIIPMESLKKKKPMVEAKPLVDSATLGQAEVEEVCLNCGA

>comp2052\_c0\_seq1; 275 110 1912 LEN=2461; translated  
MAIKEELLFSLSITGTLSLVGSCLLIATILRSRKKLSLPYRRIIFGTSVFDVVFQSLGLT  
SSIFLSPKDVEPPVPYAIIGNTSTCTIQGFLTTIGAIGVPIYLCSLSIYYFCTIPLNMKAR  
TFKKIEPFLHAAPLVYSLVGFYALANQYNNAGSVCYVAPSPLTCEILPGVECNRGEGA  
SKFRVRFLSFPMSIIFVIVCTTMAVITYSVKQERRQRRLFLPHGGGEVSDASSPVWRR  
LKRIGSVFLDVLFCVLSRKNENENENDTGIDLDTASRGENECPSEPKAESARTEMSPG  
PSQRISSSRRRSSTRIRETQTQALLYVGCYVLSYGFVWAQSIYSLATNLPPPKAFTLLS  
SIFFPLOQFLNVFIYCRPHIVSLRRNFPDDYSWFQAFVKVLKSGGDDPLTVQERRMIRRI  
SSSITVSHPSTRRPSMSAGMGDYEADSQMTVTMTSRTEIFERRSSITSRTTADLEEVPDN  
IQDSEKAEMGFSKITIPQGDAEQRSXNHDCNRIESSGENRQQSESSEPEVDDSDHYRRPS  
ARDEPGNKTSVTPENNLSDVEIIPESLEDFIHEAEEALDDALHEVLELAREANEANGEV

>comp2053\_c0\_seq1; 508 235 1926 LEN=2116; translated  
MTASDLFFPLVATSAASAVAGLVLLQTDMSVRKILDPDQLNTRRSESRYSWKKSVDRAK  
LLMDYSLAGGQRIILTDPEIVMKHTEYISKEDSLIKKIIVDRKDSERFYALKIDKDP  
LDASEEFYLYIIEKEQEKNVKTLYQIPLVKFGLKLAQAFEDQLTTTALCFVADASSGKAT  
SMLESVTEKSGVAVVSEPLWMIQIARLAEASIVAKSKIQKLI FALCRLDAWSVRHKVG  
DAKTVMFTLPGQAVVGTLLPLVQSAFPEDRHFVFAVDGCVESVVRGIYAERMYKHNLIPD  
LKSIIQGMGKDPLRITTPLSNSPLSHDASLGGRGAMERAFSQQVPVKQARIVEAWLSSI  
DAYFKLKNEETTNGYVPCFKLGLTSPVGFDFEYGTDSYWSLNSFLQYVTGCQGRKVQEH  
VIDAAREWMKDYNSEQKAEDGSFETSIVLSEHERKMIENCCFQHKQILIGNKTLQDTVLP  
KEHWTMKQASRNGCSCCGPDPYDQMEEEESDVMEEAKSNAMTGNFGAGKPNMTIGMNAN  
SSRQTGYVDATQVFAFDPTFRFTT

>comp2056\_c0\_seq1; 170 917 1585 LEN=1695; translated  
MNRMLPVDIRAWNLERASPEEVAETGSNFTLPGVYNWNAMRSSTSKLYSYRICVGDAMP  
SERFHRWQLPWRGLDAARLQRIILKKFEGQHDFVCFAGALEQQQKKTGIALGTIRTIHEIR  
LVKEVDIDRNRFDINLSDMGDPSEHYRIDIYLDGALYKMVRNIVGTAIDVCRESVSEE  
VLSDLLDRPKELKYSRKNNPCVPAPPNGLTLERVFYSDHEHF

>comp2057\_c0\_seq1; 176 520 660 LEN=1313; translated  
MEKSTAYFLHQKKTETKDPNMDMFINNQFELYVKAMPWDQHSSL

>comp2058\_c0\_seq1; 395 197 1195 LEN=1277; translated  
MAGNTGISPFLTLILGLVEIVKPELLNMGKTIEIILASWWSIAVLGVLTIIVEMVKGKCI  
AVDEIIDSVEFVIVPVISILASMATMGLLPDAGTPQSDAGLGQDINVISILDTEYSGDGY  
RNLQDQVGKANLAGIEDIPSNELGEGFLTFMKCSLVAFGMLLALLIHFFKMLIRLSSMVC  
TAGCCQPCITVVEFLIVISGVILAILIPTFAVMACIAFLVAAGYVVVVKCKTKDGKNHT  
TTSGVEVEVGNPEINDIECQPSACRTSNATIPHTHVLYPAETKVEFVRPVSPPTPTTIT  
PKEMIRNSSIGELVVVPLSPIQAKKDFQATTY

>comp2059\_c0\_seq1; 877 64 1842 LEN=2011; translated  
MATPFSVPFVVSNDPDSWGGPPPPGADEGNPNPSSSTKFPDLPYSPFGRSDRLGRAADFTN  
ISRGDERSRFRNRHGRYDKNDRNDRRSKNDNDSEDEGEDFQLVDTSKATTQKRFPVPAKR  
QHTARLRQVNARRQNQGGSFSLSKQEGFGGRGRGAGGRGGRGGRGGRGGRGGRGGRGGRG  
RIDRQPSVAVQPDWVKVEELDLAKVTKNLSGTSSSDSKKSKKALEESIPTPQDVLWCGFL  
DQYNDAYDKVTARQPAPLKRMTKEFYVPTTTDDPVLEKLAVDGIGGAGEGDKRSIFVTD  
NILAHLMTCSRVSYPWDLVIQKTAGLLFLDKRDNSQLDYLTWETAYNAPQPAKEGEDA  
SANINTPERLGLLEATTINQNFSSQILKKSGRKNMDLNPFFDEDDADGMEPASVAYRYRK  
FALDENTTLVCRTELHGLVKKTYMTAFALNEYIPPPQNGMPSAAQTKTWRDTIDSSRGS  
VLANELKNNSFKLAKWTAQSLLAGADQMKIGFCSRGNPKSAYEHVILATQFYRPFKDFAOQ  
ITLNESQMWAMLRMFVAMFAKQEEGKYVLMRDPNKAVLTMYPQETFEED  
>comp2060\_c0\_seq1; 430 148 1390 LEN=1721; translated  
MKAESVETFEMILVHCSYLIAIAALSHLADYAKGFPSFLQTRGSSNHGRTLTFVSGCAPLA  
LIKDDNGHLDDEEGTANWTMEEDWALVDNLPLFTVSTTTETKTFWTQLWSANSAFFSGKE  
PEDLYQRTLELQQRQATVAIMEKSENRRRGRSLLVFGDSPPVLENWKIDVEQQDNRAVG  
QIGNGNSEGRRTIWFHYHSIGRLEGDPFADGSSRVVSLFPGGYIEAVGGRIYELGQPMF  
DKWHTKDGKLRPNTQEISRDSVREDGEKPSIPRWLLPGGTAAMSALVSATILSACIGYG  
AGLSMIRDQSPYSAPVPMMLTVETVLAGPSNSNGVKMLPPSSSSTEAAVTKSSAIKTS  
NLNQAPSTEELRARAQYRVLREERLLEKISQRLEIDKQTLKQLDDQSSGLHP  
>comp2061\_c0\_seq1; 195 221 661 LEN=915; translated  
MTVLSKSSGEEYKQNYTERMQKTGRPVSPHVTIYALPVPFAFASITTRVTGIMLSFGAFG  
VGAIDLMMGGPGASLSLMESIGSSGFLVASPAKFAVAFPLVYHYLGAVRHFVWDYFPDKYL  
NNEDVQKSSIALIGSAGLISLGFV  
>comp2061\_c0\_seq2; 150 221 316 LEN=579; translated  
MTVLSKSSGEEYKQVRLSVDLGRLSFYRAG  
>comp2062\_c0\_seq1; 172 202 1432 LEN=2008; translated  
MRLPKASQSTSEVSDRSSLRFHLNGNIYPALVITCLVLRFAVLNFESGLSEYSRAASN  
KFDDRNTTHGPPVSSRHIIYRSANDTAYTWQGNIIWIPPLGVPHYTGAAVRCLFRSENTI  
GDSTIRQEYHTLRSFLEAANPGNIEASEFVDGAFNPNLGHKIPFLFTARHGVSGSDRCL  
RVRPKGPSEDPNATLAIATYNQDPSKHSEDCISTGRNDLYRLNCRYRDIQWIDQDLRPH  
YKHGLRSWFLSIAIISLGVWDTDPGNRDKCASLDRLEELLGKIEKEVSGPDLFVIWQAHAP  
ASYEGPTNGAEALSLGNRARAWFLEHQPEHMDFIDLGSILVGGNRSFWPNRITGDHTAHY  
GFEARALGGQLVADALHGGNMGMSIALRTPNADGSTRMPAGGAKRNNP  
>comp2063\_c0\_seq1; 344 63 905 LEN=1401; translated  
MLSSNFRRTVLSSRNLWARSFATGPASGGSVSDLEMLQKLGSLSTQALVDGLWVMGWPPAQ  
IDGARPLTSGMKCVGRAVTLNFPARPDVAQDKPPGGESPEYEFELCGPNEVLVMSSVG  
PAESVGGDIKFLRLKQREIGGLVTDGSRVDTDEIINYGFPCFSDSTTARQGPAAQWPEC  
NGVISVSGVTVRPGDAIVGDQDGVVVVPAKVADTVYSIAHGREVIEEIIKEELIKNPGPP  
GKFYPMMSGKIKVDSPLGELLASKGITPENSNOFEGTADW  
>comp2063\_c0\_seq2; 134 63 589 LEN=589; translated  
MLSSNFRRTVLSSRNLWARSFATGPASGGSVSDLEMLQKLGSLSTQALVDGLWVMGWPPAQ  
IDGARPLTSGMKCVGRAVTLNFPARPDVAQDKPPGGESPEYEFELCGPNEVLVMSSVG  
PAESVGGDIKFLRLKQREIGGLVTDGSRVDTDEIINYGFVVKFFVDTPDLLMIVGY  
>comp2064\_c0\_seq1; 144 384 1101 LEN=1101; translated  
MCLDRRSHSQGHFLSTGFRGKRVRWGGPHVAYTGFEETELVYRVRSSIRSEDPLVPLVS  
ASAFRGACTVYEEATIQGGGSVGIAAADDGLHAFVRRHRHRYGFLSRSRPVGSLPVSYG  
GGDRIHFHEGSAGATGSLAFDEPFGAASDATTLVGCGYDAARGLLFFTRNGRLLGVCPR  
GIRCLGYCAAVSLTHPGGSATFNFGSAPFAFDLELFCARARFLQNCENNKNENNNDENX  
>comp2065\_c0\_seq1; 615 156 1815 LEN=2023; translated  
MLLTPAIFTTGFFLSIFVSLGLLTDVVRADLKYYLYIEDEGALHDTINKDGAAGEVVVLE  
SVGSLPFKSSYSAVGGSCPTVTKAGGMNSRYLCIGSHEKSNENNVFFPIAPAPGHSTT  
ASILPLRFGSLEESHGTSSGLLLFRNALAVDWLVPTTTLNEGTVSLNAISYGRDNSRDGF  
NMEWLRSAASGYKDGQIVAEWNLLTEAGGDPILDGGSIQFIKPKPLPAIEQKQLSDGKNK  
TLAAANISNSSQPETSAVTCQSITQNLCDKNDKFCSTICSLMQVGLDDVLSPPSSNSY  
TLYAPTNEAFSRAFGKNASPALLSGHDLTKLLLSHLFVGDNIKSSQTQISISGQNPLRYED  
MVCQAKQIMASQVTKIGCDANAESVYVTGAGNQNMYPKPSFLAVDQETCNGIIHTLDYVI  
LPASTEIGDEQIQHHHDHVVVDIDTTGGPGEGKSSSTRKNLDESALISFFNDNIGQVDDA  
EDNMKTTSSAATIEANNEGPTFGNNDVHPVRRKDVNPVNTPTQNEQPRKIGDGELGRD  
PVNKIWAQDSEG  
>comp2066\_c0\_seq1; 356 1 1953 LEN=2225; translated

RGHWCLHRSDPRGIGSIPPPGDHPSLIGSSNPFHSMCVDPVLSNNAPOHDGNNNDNDNIN  
HNHQHEDSQAPCARTIRNQRQAAGSGRRRTNGDRGVLLPKRGGTGHRKRPCRVMPTL  
REGGLETLRNGGLAPSNSSSGHGVFDLLFRETADGPVQQVMDGIRDWKNSSGRGIVLGA  
SFLGVGVGPEESGGRAPKTVYRLMENLSLRSGDVTLLVLYGTPIREWASVWLGRSSPGT  
YEDFLCGDAWADQRLEHSETTMNPFVVAEAYLSRGWNVFLDEAAARASGLDPAHVLA  
ALEGVSCGEGWIAGLEGETSGIPPSYEIDGLDRSEESDLEKFLFLARDCCYRAGLASTKGS  
GTLRTSIGASAWKDCRSLSCGAGAGENLTDPSFFLRALRSQKGCGEALDLSGLLTGGKR  
PPDAAAPLLPVAPVVVVATATALSTLAGLLVWVVRHRWRSKPGPLRGASDGLFSGETLG  
RPGGPAPPASAFSGRLCNACRFVRADPACVFCGEGTVASPPGGMGREIERRTRECLGRAK  
GRTDRGGRCVPDASHFDNLKTRHQSRSHKRKQMLQQLQVHRQRDEEAEEGAARESRVV  
RKPKEILLVTKTETGEKIYEVAERESSALWSPCEGNPQAIVFENDERTLL  
>comp2067\_c0\_seq1; 291 1 961 LEN=1203; translated  
XRPTPTTGDGNRDLGTDTSFHRQLNTTIEEGVVPTQPRIARSTHPPKMPRMTRIRSLVA  
FLLLGACALLSNGVCHAFVSHRTAARPVNNRFHRGRSPAGSTDTRLCAIPPEILVDVEG  
SRVQFFGWFFGASGGMGIAGVAFPRMYEQFRALRALRGCEPSLGGERVGLSPLCGYPEDL  
CVRDLEKVVNNKLSIEQIVEKFPNIENFLSRNGYITFLAYERANKGNPLVVRVAFDSFA  
QSTDACDPNVAQDKIDSYKEDVYQINGTLLQSKLVGYSAGITLLFLLGLALSVMVGQLKN  
GWFPSWTLADGIFNIPDFWI  
>comp2068\_c0\_seq1; 590 103 891 LEN=1651; translated  
MSTKRKFVADGVFYAELNELLIAELAEDGYAGVEVRTTPHRTEIIRATRTQNVLGENGR  
RIRELTSVVQKRFQFADGAVELYAERVQNRGLCAQAQAEKFKLLGGLAVRRACYGVVR  
FVMEASAKGCEVIVTGKLRGQRAKGMKFGDGYMIKTGHAGQVYTDTAVRHVMMRQGVIGI  
RVSIFLPHDPKQGLGPKIPLDDVVTIMEPKKEEVDPAALLAAQEAQQQAAALAAAQAQAAA  
ELAAQQQAQVEVAAVGDAGMAM  
>comp2068\_c1\_seq1; 806 145 1353 LEN=1666; translated  
MILVSFKSFPRWLAATAAISAFALPTTEAFHPVSLQSTTGVSLSLGVTPAPSVMVAGGAR  
QHAAHNRPLTVMYRIRCENKYYQLEELEDADNCTTELFKEDGTMDIMETDGP IFFKAVGH  
WEIKENQFAMTITKTFVTGTDNKSDPTGMGEFSFDVERVFEGEMTVVGGTEVAINGKILA  
EDVVTSKMEKEVGFNMDIGTDQRLERRPDARPKNIGVIPSPIDSNDVKGHDGIPKEWLE  
PQAPQVPQMDAFGGGSFGQDAQGYGGGGAGYQOQQQQASDWGSGSAGYEQQQQQSPGIS  
EYGNPQTFGQESQGYGGGGYGQGDNGTNDPQPSFADYYGQQQQQEQQQEGYGDGSGQQQ  
QTEYEQTNGDGNTEGGSWDDYYSQGGAGVSPMGGGGGPNPWP  
>comp2069\_c0\_seq1; 385 1 1374 LEN=1586; translated  
FSIMVASAVFITDLQKAIISRNRYRQDVMNKVIERFATYLVLDVEEAKKPVFHVVDVNGD  
VQSGENVGETGTGGEHYVYVSHQNVYLCAVTTKNSNVFLIFTFLYRLAQVFKDYFGSLEE  
ESIRDNFVVIYELLDDETMDHGMPQSLDSNILRSFITQDANRMAEDSKSKPPVALTNAVSW  
RAEGIKHKKNEIFLDVVEKLNLLVAANGTVLHSEINAAVKMRSFLSGMPELKLGLNDKLM  
FEATGRANQAKGKSVELEDIKFHQCVRLARFENDRTISFIPPDGEFDLMTYRLNTHVKPL  
IWVEAVVEPHKGSRIEYMIKTRSQFKSRSVANNVEIVIPVPPDVSFSPFKSSIGNVTYLP  
DKDAIVWNIKQFHGGREYLMRAHFGLPISAAADVPDQKKGKGENSWKKPISVNF EIPYFT  
VSGIQVRYLKIIEKSGYQALPWVRYITANGDYQLRMS  
>comp2070\_c0\_seq1; 403 87 980 LEN=1129; translated  
MMFGAKLPNSRENGSLSSLLFLQTSALLKKAPIFVLLICLPLATSFVSPRASF SINNHLC  
HYRKVGRKLYAADS AISADDP IPPARARLLPSVLRFRGAVDEGYGRGGKLGVP TANLPS  
SLFQNALEDVGTGVYFGWVALERNYDNDIEFHKA VVNVGFSPTFEGEENKEKIEAHLIM  
EDGDEKDTGDNTNNAEKNETTSDKAFIEDFYGVPMRLQLVGFLEEKKFDSFPPELIAQIH  
ADVKDAKLSLECEPYKACQADQFLCIKTSPAWIGSGGGDKTASWENAPLEEFDLTLK  
>comp2071\_c0\_seq1; 198 48 446 LEN=640; translated  
MGVLTVKVVKASHLADKDLMGKTDYVVKLELEQDNLIRDKDYGYQKTSVKQGDVNPVWNE  
SFNFNIPTLDNMVLTLRVYSDIGSKDDKAGWCKIKLEHEGISSSPKRIEKTIDRNLLRA  
NGTITVDISYEE  
>comp2072\_c0\_seq1; 386 1 1006 LEN=1244; translated  
XQTKPNQTTSPKAKQSKPNAKPNQSDRTATTAAMMLLQRAILGASLLLAPALAFSARKGS  
ELVRSAASSPTSSSSSPLSRSAHSVAVWTEDEDDYGGDSFLLGRAGACADSESCSLEEA  
RACLDGVLRSQADCVGDALGSSPLCGNADKVAEVVAGLRQKIAREERRLAPLRAAFHLAN  
LSVGAWVMWTVLHGVAAPVNPVVDGLSMVGTLP EGQAPETWGVATILPQEWYWSVRDGYF  
PSLLAEWAKHGGLSVDLSAFDEKVVPFSPQEWVWAAQNGSLGTMLGEHLRYGGYLVD SGY  
DTEGLSPLTPQEWAVSVRGGYFGDALRHFYRNGGI  
>comp2073\_c0\_seq1; 301 148 576 LEN=673; translated  
MIKPDGVQRGLIGEIIKRFEQKGYKLVAMKLTSPKHEHMENHYADLKEKKFFPGLIEYMT

SGPVCAMVWEGKNVVLEGRKMLGATMPSESAMGTIRGDFCIEVGRNICHGSDAVESAKHE  
IAMWFPEGVISYAATEAQWIYE  
>comp2074\_c0\_seq1; 285 1 1787 LEN=1872; translated  
XTMLDIAKHAATDEVRLNQLDPDFAALSFYKLFHGHTGLGALLVRRPSVEVLLLEASTVGG  
GHYQGGGSVDLVLVFRGYTVPKPGLASLASGTCHFRGIADLSHGFDALERLGGMPAVHRH  
AVSLAGELARRLSEMRHANGRMVVR IYGAWAGRGGEHRQNNIGIPTVALNVVRSVSDGSPVG  
YSEVSKLASLHRPPIQLRTGFCFNPNGACQRALGVGEETALEHYRTTGHVCGDHIDLDGGT  
PTGAVRVSFGKDSLWEDMDVVFVRFLETTFRNHNPEPSPVVTGGNAPGHCEPKSGPEESKV  
SVSELYLFP I KSCAAQRAPKWPLVLP S GKLRYDREFALVDRSGTVLRLQKHPKLGLVSPV  
VDLEAGTMTVSAPGCEDLVVGLSETLYHGGENAVRVCGDTCGGRVWGDASVSDWFASFLG  
IECWLAR YDSSLATDRVIKDRPGFSNEQPILLVSESAVATLNGVLSEQDQPPCTAKRFRA  
NIVVKGHTTRGGHPASDRCHGHAEDWKTVRLSRNHRLEFSVEGDPCRCAMVDYDPETGQ  
KGKTLRALASYRRRNNGRIVFGIFLRASEGILPDTSSLGAGNGDRGEEGSDAGTIW  
>comp2075\_c0\_seq1; 222 1 948 LEN=948; translated  
XKTANKHVYFHRISHRLIIHSGTTIPEALPQENRNKLFRRSDNHGQRNIRTEETPLSSAR  
EAKVEHFRDDEKPDHLRGI FGLGCIDLGLQNNYLNLQLSQQGQNFQQEPTYYQPAPEP  
GSYAADSYEAEVVPTEENKSNEFNPAYYQPPRIRLGYGYDHQDNRKGGMAPLKPVDTT  
PNGASATMGRGKMEMLSQLLNAKASAEVASMGREKMQMLSQLLNASPSGESATMGRDKMQ  
MLNQLLSSKASAEVASMGREKMQMLSQLLNASPSGESATMGREKMDMLNQLLNSKPSDEY  
ASMGTEKMEMLNQLLN  
>comp2076\_c0\_seq1; 299 283 951 LEN=1032; translated  
MECEREKIESSETSSENDAFDDDKKYKSSTKRKKENRKSERKSEDRARKKERLGNSRGGK  
NNEDDYSRSDSSRESASEDNRRRDRKRKRHAKKQRGSSSRKASRSYFSDSSDDDESSIS  
NSSETDSYRNEARRKQKKDGRQRRRKRKEKRNRYDYSSSSSSDDESSNHKKRKHKKGKK  
KKKKKSSKSEERRSVISGKKIKLHIEKTDEDLLEKKPERIIW  
>comp2077\_c0\_seq1; 396 122 1351 LEN=1449; translated  
MSNRLGRATGTVVNASQLRLILMGAIGALFLNNLMISTSHTNRIIHENLDGSDMIPPEFY  
SSSQRQTKEETEEKFPLEVGRKLLTDDDETIRRLRNSRTLMI G I FSSDNMFDASHRKWHR  
NLFNNVWKKDRVCTLNQFRNSDDIDFQKKCELIYTFVTGANEDPNAPTERLEEFDTVDP  
IELPGGYKSPMKEDINWDDVTHLNIRENMNDGKSPTWFWYFGSKMAKHFEKTETPIDYIVK  
FSDSMLKLHDFLEFAHNRLPPAPYKNIFAGALRDKRPWYFKDSKLGHNQADMPRYESH  
WGTEYDGVHLYLAGQCYLMSADLA AFVAEEAPFSKIRVAKGGYLEGHEDHDVAAMVYHNP  
SPISLITIGKSQRFWEHPVKGAPRYNKIVARETARVNKKPFEGKILKLY  
>comp2078\_c0\_seq1; 446 239 1396 LEN=1396; translated  
MNRSSQYLPNIGVPCHRGASSSSSSKQFSDQKKTTHYIRPEDLRPYDILCGRDKATFN  
NIGNRRFRVSI GINI PRYEAAKSKAQKADVIKSVCNVLQKDVGVRFLLKTKSPSTKVSGD  
DECEDYYYIELDETEARKKVGHALRDM SVARQQLRQKREVAKRQGSQKNIENIHNKRYK  
LTTDKQNDGVINFPMTENFQAESYTAQNNIEDTLLEPLPIIDNLYNDPLLP SQIQLESRE  
GPEEPRRLSLQLPQQRPEESRRLSLQLPQQLRLEEPRRLSLQISQQLQPMQTSDDAFSQ  
IEQQRIQFQQRQQQFREQIQMQLQQQRNRQRNQKQHRQFDQQHHQPHAI SMQDIPQLEQQ  
QYDRHRMLLLLQQEQEQQRHQQQQQQ  
>comp2080\_c0\_seq1; 314 240 1187 LEN=1299; translated  
MIKNSVTVSDHNHDGDNDD EYFMRKSLEVAKRALDIGEVPVGCVIVLDRHHPAVVKKKDK  
IICKNETNESCSIGEERRGVVISHGANQVNATRDRHAEVVAIDRLLTDGVSSDKMRLP  
PDLARKGQSSHAGDRVPYSVQKARNDQWEDRWINEP SNSGHWTNSFGWRNNFDCNGASLG  
QDEDKEHISIEREIRSEDI FRHCDLYVTCEPCIMCAAALATVGIRKVI FGCKNDRFGGCG  
SILHLHQVEKEDTATLQKIGRGGCDNNPTTMTNKS VGYEIKSGVLEEEAITLLRSFYDRE  
NFHAPDDKRRRKDQA  
>comp2080\_c0\_seq2; 228 240 695 LEN=973; translated  
MIKNSVTVSDHNHDGDNDD EYFMRKSLEVAKRALDIGEVPVGCVIVLDRHHPAVVKKKDK  
IICKNETNESCSIGEERRGVVISHGANQVNATRDRHAEVVAIDRLLTDGVSSDKMRLP  
PDLARKGQSSHAGDRVPYSVQKARNDQWEDRW  
>comp2081\_c0\_seq1; 449 95 838 LEN=937; translated  
MKFTLSILCLVAVYVFSAEATSLRGKSI PRKETLMQAFLSAAQSGDRRLDQYNYNQYATD  
DNQNGDDQVDDSYGDDYVFYDDYALQNC EGEDCETVAKYTA YDDTYLANCEEAEDEC  
NAAAAYMTAKKAKEEEELNSNEWSLSNLTDKYNSMSRS SKTWTIVLAVWFTALLVTTSYF  
CCCRQSLSQREKSRGRRLRESFLGNNRRGDSGAKTSDERKRGRSKFKFFGRKGNKSKRG  
NSRGPVY  
>comp2082\_c0\_seq1; 478 336 2807 LEN=3227; translated  
MRITNGTLRCSSRRGNFILLFFAFLVQSSSDALFCNAEVPVGSYGTASESSDRNSGIDG

GLWKVPTLNSESGPQANEIYLNRYRCPVGDLSPVMLEEDTGTYYVLFQRSPHSNETEENLVL  
IDGGEKLNRSRGNIIYSGDNIDSKEKFGADDNSVLDHIRAGTRRYLRGAKMSRETEENRIL  
VSTPIFVASGFVEEAPTSENSMRFLSTYRKNLSLVADRRDLRDAKNSNDETSADLESYSTS  
ELLMLRPCGCFDEFGTFFGGVSEGSDDINQIGDPLLTFCPASSDWCAYTTSYDTDASSRS  
PKLECFMAKDERVALNAWPLLWIMYAVVLCSCFCSFQGRILLDFVRGTILYYVCGCGDR  
YRNRQMRNINRYNQFVVQEIILDEERVDRENVVRRHRTRNQNGNWMNFDPPRIPTITSTH  
HEGLSQDNDNTEGSPITEGRGDHPDVSIGNNRLVTWWRGVVWPWQTSWNRYIKYNLLLR  
VEWMAIRDEIAFIESRQERGLPHAIYEMKTRRWSSTEEDTSRSSCCRTGNEYDHSIDAPH  
CTICFTELEDGDRVGLGCIHVHVFDCLMWWIQKRNSCPLCNIPIANRRRLSSEELLVKN  
NNNDNRGAQNESPQEGHRNNHGRTIEEGSLEAQGSSLSPTIRNTDHGSPSNHQRRLSHLP  
VTPSTIADDVDAYSTFSEEIESVVQLDDDDDESTFGRRTLEIGEESGNGEAEQTTVAVES  
SLLAATRLSASSAVTEENEDKNSIMSIEDEYCNIDDFLLSKDNQGRSVASDHSEAASFA  
SSARAENSVDDEVDLPSPRHVRLSSEAPSSSVMLPNHQRY  
>comp2083\_c0\_seq1; 191 228 599 LEN=1280; translated  
MIQAVFRYMLVLSMEREVTTSYIRNRKRQRKASTKMSYFQTSTVDETPDLGFGCCAM  
GFDLCGNDYDAADLAAYRTFQRRQYEERKKAQKEREFFLSRSYMEQKIDTSIMLRGQSL  
IDA  
>comp2083\_c0\_seq2; 369 253 1086 LEN=1767; translated  
MGLFRKKNRGADAFDIDFDDYDNSSIPREVNTKGARHSRSLGKIFGGSSSKKTDKKG  
KRKSGKGNNSGSMKINYSSSTSTSSNRDARDDRPTFRASTSKAKSETKSRRHNEDYG  
QVNSLCSIPPTAADAFAHGPFRFDWIDIEFNAATMIQAVFRYMLVLSMEREVTTSYIR  
NRKRQRKASTKMSYFQTSTVDETPDLGFGCCAMGFDLCGNDYDAADLAAYRTFQRRQYE  
ERKKAQKEREFFLSRSYMEQKIDTSIMLRGQSLIDA  
>comp2084\_c0\_seq1; 369 308 1306 LEN=1566; translated  
MTRPTGPLGIDPLAFTFSLFGLLLLFLVLYLILPRGLRKYFGAYPKRHAWARSRRMRNR  
GYGDHSLGGGSITGASSVATGTTFGTHGHPGSHRQLQGMGLGASHSVAGSTIGGTTAYSN  
MTGRRGFDEEQVVFVGGGAAGAGTNQMLDIQQNEEIVISAAMQQLRDPGVLIVAHGSRGK  
PKTVRLQLTESAVTWRTETRKKGVAKDAKPKMGKHLQVPLSHIMYVDVGKQTTALRRVEN  
ASVNDALCFSLLTKEGSLDLEANSRERDALVSCFSLVLDEVHAQNWRDIYRGPSSDMPS  
SFDEIDQQQQQQPQGTQGRQHDPTAGRHP  
>comp2085\_c0\_seq1; 558 230 2389 LEN=2504; translated  
MGFKRIGRGNLSGIFHLSVATVVVAILRSNSNGTSPVFCSAWVSTSSSSTNGGTCSSST  
FSALNNGATARSPSGRISDKIGDRRYWMILNAVVDSDRQGGNDTLSTSTTTKSQGRKSS  
TISTSKIKTNRRIYINVDRWNSMFERLKEYKKTYGNTNVPKKNYNDGGTPALGNWVSKQRF  
EALVYQNTKGEQGITPERISKLESIGFVWELGRQDEWEEKWLSMFSELEEFQKKYWSTK  
VPILNKELNFKSGSGLDEPMSLGRWVKTRIQRNKLLRNEAAPAMTKERLEMLESIDF  
AWSGKQASDYDKWLNMYFKLMFYQRHGTTVVSDSQGSSRLLKWTEEQRRFYRDLMTTNS  
TMSASKTGAATILNLTTEHRINLLNDINFDWSHCHEDRWDDMFNELVEYYVNFNSTLI  
STSINERLWKWTLQRDKYNAGSKDLDRQKITKLNINFDWNATEDVNWNNAMMYRLEAYK  
RKYDTTIVPNHDGDRPLANWVNNQRVKLGKYVINEDGEFYDDHDLVERIALDLGCSPET  
EFEPKGFIQKLSPTKATRIRRLNEVGFVWDAREASWQDMYQRLVYKEQNNGSTMVFPV  
PQDHRSNKSSGSTEQQSESLGVVVKVQRHKKQLGEMSEKRLVLLNEIEFVWDPQEAQWA  
EMFDRCLKYQKENNGCTRVPRAYSPELGAWLNTNRRAYKRKTLPQERIDRLDSIGFVW  
>comp2086\_c0\_seq1; 517 128 1516 LEN=1773; translated  
MTTGSMLRGRMLGAELAHSDALRYLTYNNSTVADSESDTSNMVNTAKDYASRIKTATSD  
LTSTHPRDWDHLYLGVVTFVVAIWTLTLLCTCRKCCDRRRIQRKSVDDSYMNSFAD  
NKQALLNQHRSGPYKYDMVRPRVVRGTATDAGGIASVESPSGYDYDAMPNRLPMGARLH  
GANKLRSDGLSGRGVVAIIDSVDHTHPGLHDKVTRKRWFRHGTSLLEDDHGTHVAGTI  
HYVAPEAELEFDYRVFGKDGDFTDGVAIAKSIRSAVDIDKCHVINLSLRCSYPVLPATKA  
VQYAKRKGVMVCAAGNDGDGNGNTDELYTFPAQFDETSVAAVRKEAGLPPANFSESNA  
KVSFSGIGKDVISLKPGGGHQIMSGTSMAAPHVTGLIACLLSDEPTKYTDYQLRKLLEK  
HTVDIAEKGFQGTGAGFVTVLVAEQGEDEESNSLFDLLALV  
>comp2087\_c0\_seq1; 222 64 393 LEN=606; translated  
MASMQFNFDFAFEDAEDKGGGASEEKVHVRVQQRNGRKCITTVAGLADDLDIKRICKAFK  
KNFNCNGAVQKDEDAGEVIQLSGDQRTNVKQFLVDQEICHALSIVLHGF  
>comp2088\_c0\_seq1; 1147 1 3439 LEN=3503; translated  
XQQQQQDGHRRPGEKTRRSTTRVESEAMSPSSRRSSRRSSRTNIGVPETLEVVRKPK  
SRHGSNSSNHCGDDNSIVSAITMDVHLFHPYSSRDDNFANFTNYSEEEEEEEQRIPARPT  
HQRRRPRPEKSGRSKQKGTGNNGSKSIDNNMNNIGIGQFHTALRRRGSHSDESSHRSDSSQ  
HSRHRKSHSMRGDSERNLYPWDYGEQEMSGAMHQQLNPSTNITPVLECDALMRSVSSN



EDTYFFDRKSVSNTKTKKIGSEVGIDFQPDENANHSRRSRQTGMQQSIDFATGSTANNRN  
TENSAHAVRSEYPPKPHDKTAIEDDNDGFPSFIMDDYDYNDDYDHNQNILRQKQQQH  
FQQLLKNDTNPIPHPPITSVSSSSSSSGRIHNGTNARQNSLFTPI TKQDITDIQGI LHLCL  
NLEECNPVREDALCKLFDMIQNM SRAGDRHTREFILEHNVIEAATKAIWADMQIVEVQE  
AAMQLLLLISATTTLIGGRDGDHEHGKSSGSGSND SNLLSKNESVCD SILFAMQNHATE  
PGIQLKGCLIFASLAGSLPDESAAGTNSDGSLSGAMTMVLKAMS NHGNSRSIRKAGLQAL  
HHQCLLSIHVENNKRS LASGKLENGMAAVDVL IYAMEELQQDLVAMDWACQLCWCLTARK  
DLLQELEESSLHEAILSVCQH YMTSPAGISVVEASIGTIGNLAYLDKRRKELLNIGAVEL  
VLDGLRYHSNHFGISYEAASAIENFALPPDIRGSSSMVSKADAVQMLVHGLKMFKSEHEY  
VVQVFRALACIATQSQSSKETICTEEILVLVLESIRKHKTP EIIATCSTLVATLATGDSN  
TQSELMINNGIVDILIQCMELTNGEKAQDAACLALRNLS CQIHDSEPLLKNAKTL SLIIS  
AMESHRSSLSIQSSACCIWNLLSKTEEKQLVFNSKI VPSIT SAMQSHFESGD LLELACG  
ALWVFDTFNDQKLFVKG EVIDMVACAMVMHPTKTPTLE NACGLLSHLSSEESLAE AISK  
AQGVNIVAEAMCNGSSISLLEAGCLTLKNTTIACPSFARDG SVAISTVINALKENVNHT  
SFVVEACDLLWVLASEDDNARSKILALDGISILMHCL EENSNI PQVETSALGAFNQLAKS  
NTVNVA

>comp2089\_c0\_seq1; 243 101 508 LEN=824; translated  
MKSHLFSAPSLLLATALFLAKAASVSGMGFFNSLMAHIQENAVEEIDRMTDSSGKGIYFS  
SGGASTGGVNRYA QPERFTA FPGSSSKNDEERIHQRKQLLAKERRTKGYLPPMGVTQSYS  
SHDEELIERLVELQN

>comp2089\_c0\_seq2; 243 73 480 LEN=796; translated  
MKSHLFSAPSLLLATALFLAKAASVSGMGFFNSLMAHIQENAVEEIDRMTDSSGKGIYFS  
SGGASTGGVNRYA QPERFTA FPGSSSKNDEERIHQRKQLLAKERRTKGYLPPMGVTQSYS  
SHDEELIERLVELQN

>comp2090\_c0\_seq1; 278 24 677 LEN=826; translated  
MIAINNLMLTKQTVLKNKGIMMNVNSCKKSRNEINPNDVLCGRGGLTNSNIGNKRFRSVV  
AKYQQEYLHARKNDK KLIARRIITEIKENDGRFLQRSSDPSIWSEISMKKALEKTSQALR  
EGLDVRHKTVRPEKLVHKIDIDSNRWRTPKKTEARVVEGVVIESPSKNEIVSGEDVPNFV  
QESETHFDPIFTFSHAMISEQKEHIQESESTNIEAI

>comp2091\_c0\_seq1; 607 288 1679 LEN=1724; translated  
MGQDEKTQEEMDKQIEIFKVKKLIK NLEAARGNGTSMISLIIPPGDQISRVNKM LSDEYG  
TASNIKSRVNRLSVLSAITSTQQR LKLYNKCPNGLVMYCGTVITEDGKERKVNIDFEPF  
RSINTSLYLCDNKFHTEDLNELLIDDEAFGFIIMDGNGLYGT VQGSREILHKFSVDLP  
KKHGRGGQSALRFARLRLEKRHNYVRKVAELATQLFVPDGQKPNVQGIVLAGSADFKSEL  
MRSDLFDQRLHKIVVKMVDVSYGGENGFNQAI ELSADSLANVKLMKEKKLLQKYFDQIAQ  
DTGQYCFMVDTLRGLMGAVEDLI IWDNLEIQRYKVRNIQTQEEKVLHLTKEQEGDDKF  
FRDAETGAELETIDKEPLVEWFAENYKDYGCNLEF ITDRSAEGTQFVKGFGGIGGTLRWK  
VDLAE LNSLEEANMDHGVGGDDSDDDSDDGSEYGFDDGDFGF

>comp2092\_c0\_seq1; 427 88 1152 LEN=1374; translated  
MKLTKAQNGNKTRTYAYSTIFLLCASMLYFREGMSLGEYNLYDDAAKMYNSAVVGVGSD  
SSSAAVAEKSHMLSLEPSKSSLHAEWKLWEEMNPSEQDEAIQKVGAYMTKYGKLIYPNAK  
RRQTIKQGTCELVEFASGHALCGPKPPNGCSFFSFGINDDP SFDQKLAELWGCRGFAGDP  
TVPHPSKLHPLVTFHNVGASMLQDNEERLAN KGGAEWWST SMPKLR YWLGLERVEI IKM  
DCEGCEFALARDILREDPTFLYNVDQISIETHVSKAWMTT REHFYFALHFALLEEAGFK  
MEWSSIFGC SKRHEVPGCIPELEQFGFPCGYDPWPGRPNVVLGRSCHDFLWKRY

>comp2093\_c0\_seq1; 424 159 1022 LEN=1132; translated  
MAVQATNVVLKENERIPGKGRYIYSYDDD VANKCGVVVMIGVGTAMPASAYRILSKK TSA  
GASIVTVFFDHNSGSLDKTDDK YADFYNAFTENLSEYVPVCEGKSPKIIAGGHSAGGRA  
GLQAMHRGIEPDGFIGLDPYQASKDRIRGIGAKAAPATEIASDLPVLSWGFERRTCAVD  
PKIAGKSQYNLSGENNRVFFRANNGSARGVGHCDFTDSGCGPLPFCPNPQNDDVKDVVAE  
SIKVFAAGVVAGSISKSNFGFDTTNPSVPIDVFVNSEDFVAPSEAE L

>comp2094\_c0\_seq1; 386 1 924 LEN=1159; translated  
IINDQQLEATLVEPIGHRTDIPCPRH LKGFEMIAICQTRSL LASSLLLSVAVCLSQAFF  
LPSATHGSHRQTHNERGLSNFNLPRESDFLALS AKKKRRRRRRKDNTATPSNEQTEDVED  
LSSFDETLGPGE LPEFDLGE EEEEEKEKPKKKVNPDEITANMMGSGSSGSKTVDELISDRA  
LESKLEFDDNGDASIPDFVDLAQASSTTP TYS PDDPSMTAGVGKKKQRRARVANAI AAR  
EAEEEEKSFLKFPQFLNEKGEVSAIKILEQGAWIGIFLLIGWELYINSPFFERAA PMAP  
IVYEILM

>comp2095\_c0\_seq1; 350 169 1491 LEN=1940; translated  
MSSRVCFTTRGLSSLQIGIQGRRNLLFATEACSSRRYTNADDTFVSAACIGRDAQRVSATE

VELPLADGMVVRGQRWIHLDRQLQKNQAATTAPTVAVGGENPVTRILALHGWLDNCRSF  
YCLAPRLVEKLGTRAEVAIDLPGHGRSSHRPIDGPTAVLSEGAYYIAEILDALWGWQDA  
NANSSSKCNGAKEDQTKVTLGLHSMGGMAVTYAGVFPEQIGNIVSLDMFGPEPGEPEDA  
AAHIRSHVVQRRGLGPLGRPHVLYPSLERVIERRMKSARMAPGGHQYLSIEAATELVTRS  
TVPVYASDDDEAAEESFPKGYRFRHDTRMMWPSLQYLTAEQIASILGRVDCRVCLLAAED  
GYPFRQDRVDRALACLEPEVYKVLPGSHHFHADPDTAEAVADAICEFLRGGKNRESTNTT  
RGARKNASPSQEATATYGMQ  
>comp2096\_c0\_seq1; 300 275 1144 LEN=1247; translated  
MPIHTARHRTPI SVVAFALLLSIGSTRSNRQVLAAPAPTCQSFGESWYFPNSCVADCTAQ  
SDGSSMTDTRSRNVNGDLKCYCTGRESPLCADDPMCSDLEILPGSAKESCEAVCGSSGG  
SSDVVVVDDVEYAGDASAANKNQTHFRVGCSCDGGATQVCGTDYVLFSDLTYLKWCTRKA  
DNNSLQIKSAEACDAYCTKTNP LFDGGIWNDSAKSCACKEDSMEVSAVACDDSSANTNDG  
SGLGNPCYENGVSTADCSSSSNANGEQPSTTQTLVSSAAIMGIWLLPW  
>comp2097\_c0\_seq1; 118 116 364 LEN=752; translated  
MPFVHITWLPKTCR NAKVRKEVAAAVMKAMTSHPEADVAPENLVVRFSEAVDGFPLPKGH  
SENPELSAPQTPAGEAFLKDRE  
>comp2098\_c0\_seq1; 337 188 898 LEN=1024; translated  
MKPRISLSNTAIRAEVDGMPEADIAAGVPDTPAQAADAVSEAVGAATSPAAPATVDTAA  
NIITPNQFAPPVAPKIIDPDAPMPLPVAPLTDLDTIALVAGQENYGLAIVLLGEAIWSFS  
KAPSVDHGLKTLVPAVLAALFVASGPMITSGDAGSISTGLFIATGVSVMGACYAARL  
SAPFSPSPKEIPALGLVVAFAFFSFSQNLVVDGFVTLPSLPHVDLPSLPSISLPP  
>comp2099\_c0\_seq1; 501 1 1210 LEN=1351; translated  
XVFPVPRYNRALISIVRFQTKSGMIGHKIMQNDDGNRQVVDKIPTDIAADSGAVTVPST  
QTATSEDRIVESLYRHVIESMCQDVASNHELIKTGAGDVVPSSWKLFMGTKIPTRRELY  
PELYNGSDFNAASEGNKNEEDTREGGDEAGENMDPKTLNRIRMTDEEIQGLLDKYAVDLP  
TSSSYSNVSP TVSRKRRTPRDMAEEEEERLLSKIKKGKESNYKDDSEDIEDDVTNGDDD  
DDDDDFKMDDAEGDDDDDDDLGGAQKKKRTLSSSSATPSTDSIAEPAITDLPSSSSNS  
ISNINSHHPKTDIWKTPSKEPKNRLCLCQLCGRLVSTSRFASHLDKCMGLSTSRGGPSS  
ISSSTASXEKYVIVVRNAHEKSKKGLTYEEVMQKAQITSKEI  
>comp2100\_c0\_seq1; 315 474 1490 LEN=2059; translated  
MTAPEAPT TTAIGDDTKFPFPASSLKDEETSLRSNASSCTSLNSSCSHDTDTSCARALP  
PSLDPSTKKRKRVSFSLQQTAYFSPEQMLSKQERKSQCWYSEVELSLSREEARAAIAALH  
HQLQLDAASAGTHGKRQPSPAQPTELSNEYGSWVLRCPHDETKIVCLRGIEKYAD  
AAKYAGQKRLVDSVLQQQLNSEDIHVALVSR TLSQPFTEVARYYAVKSAEELDLCRKH  
EQEKERNQTEERKQEEVATVLLLIMGQENREGTLHEPPHPPGTPSPSPSSSKLQEDS  
PIVTPRGSASGKRSSSFSNSPLCEQRNVKPCIRAVSDR  
>comp2101\_c0\_seq1; 273 118 960 LEN=1016; translated  
MITNSQRHSDERTRRLNRLG YFKTPGGGTAGLSSSELSSVISQSTISCTNFSFPLANH  
HPDNSQNL TLLGDAAPVMVNLNDNLNEGDCRHHDDVPYFKSSSPTSCMIDISSTIRSSST  
SHQSYNKSQRNRNRPPEPPPTDITAITATYNSTSVQFNEKAAVLLIPSRYQYSDRIKCC  
MWSSKQEMTEMTKR NATEFAAEGWDWKNVVMERDMHFVKVTGTLVHPCHLNDKRLYMLYD  
EIDRDAYDKDDYQAYDCEQEYCFQPLERKSHVMARGNMTR  
>comp2102\_c0\_seq1; 944 220 3063 LEN=3249; translated  
MSSIMVRSSTTDITETGHDRY TIAETMDDSFDDDDDEYESQYNSSRHERTII SESTYSGT  
YGTTSYMSEMSEVLDEDASFIDDDDDYLSLGSEAMVGDGWVDTACGLDRPVSTYQNMCS  
RKQTSLLRHSRGKPRPNFNQRS AVIPTSKLTMSAKKRRNFRLKDRSVCEHGERDIEDVED  
SDIKTDARRSDEIKMMRIQPRESYQLEDDFDVRKVRDTEKTRNKNSSKSMKVKREEAAS  
HNDEDEPNVKQEDRPEKASEKKMPATE SKTEDDPVIKNEAPPMMERGIEAEGIEISAQ  
MSGISTRDRSVKRDPPTESEAVATREDQPADYYPENYSNLEAPASQVEGEERSKDEDASE  
EDVTLPSPPSFGDKKTSGLE TNRNGNVSPIPVEEISRNP SDMVLSSTSQNEDFARTPSN  
ENQKEVGDGASTSNNIEI IDVLNLSIDDEDSWTPVARHDVEKGTATGKNSNEFSRRSMNS  
NRALHPMNSPMEERWIEEAKLMKKV KALGLTNSRPQNHTVME SAEDVWNEERMKLQKP  
SDDIFDDPKAREAF LDRRGLRDAVMI SRNKMLSKNGT SITDSL DGVGKQVFP RSQSTG  
RNPPSPPEMRTKIMQSRSSSRDRITRNRSM DPGSASLLPSRSKDLVAVRSIEEGQMRSS  
NRASNKQRTFSNSHDPIV VHSYVGD TLRGYPDELQGRNQHSRTTDRNRNPSTPSRSRST  
SIRSEPIVAADLTNVDYPMNSHRFSDERDDQESLTTANPNSIESSQTNVFSASEKLLKLE  
QKIERQLRQVRGGVQEDLERSREIRRIESKLSQKLKSFRTDGADLQTLSSRDIKRLEKQL  
AQKLSGDNEKRASRLKKIKRRGVSSARSHAHSSGMLTDDQQQLSLASSAGRDRAGSAE VV  
TTPSGKSLRRSSRSQESRSEKSKYQTLQGLRSRYVRRGYSRMPETD  
>comp2103\_c0\_seq1; 1093 61 2055 LEN=2436; translated

MKFVAAAVACIAGSTAMTLATAELRGMRLNEQDHHKMLRRVPPGFDINQFTQPPEVADDS  
SGTVVEVTSPPSAAPVLPDCTPVDGAPSRTEEYVVVQYDSSANDKVINFDKKEDQIVLDV  
LYEFAYKNATGPCTQKGAVNEVFDAEFLAFNEDDSTFLLRIGRITNSIGEMFSGTSESCG  
PIVYNSTDPGSVDLSVRRLEEQCECPLPTAAQLVAGYSAALANEYKDEGLGENFIVGTQQ  
LCAELEGCKADKKGITTYSSAGVCLGDMEALTNVPSSSPTDFPTDFPTKFPPTDKPSRKPTA  
KPSKSPTEGPTKEPTFEPTSPSPAEGDTPSPTAEDTSSPTADDTPSPTITNTTSSRFLVE  
EELVVSQNQDAYAYLTEAQAKQDVCSQIDWKLVNNEANRRMCKDYLELPHYAKTDAKKCAE  
QSSETKVPKFFSVARTSHESLVHTGVSASNPDFERYHFSDSEALEFIEENCGADVARAY  
QCLAPPAFRADLFRFCALYSNGGVYLDSDILPLVRLLEDLYDPCAVATVGHDPQGRPQKQ  
MKILASQKNAPIFGCMLQKIVGNVANEFYSDNALAITGPIALQECYELHSEGVAITYHDT  
RQAAFPTGMRDVHGHSVLALETPTPTVERENYKTDVDSHEVYRPNCPHTNIAKKVAATV  
VDNM

>comp2104\_c0\_seq1; 430 115 1134 LEN=1341; translated  
MKFSAISLHTCLAATALFASNCNAYTPGVKVPVPTQSNALDNNADIAMSQYEAALKAAF  
EQASSTAAPDAPEAESSTASATFAEQVEEQEQQAIDQYEAALKAALSTSAAGAPSSISF  
GEADQNGPNWESISENISSQIEKAESKIGAPLSAAAKGEIVGTVLAGSAVLGTAAINSPL  
LMGAALGYASTHVLSGKRGEDLARVSKDAFLSAVTFTQTQLDQEEGDISKASARIMQHLQ  
HEAQNKAMEVGKVAQTQAHQVTRDITNAPTHLVEEGKKI IASEDFKKMPNRTFKAVQAF  
LSDEVKRAKESVVKSIKDGLESDELKAVKDRATRSLKEI

>comp2104\_c0\_seq2; 437 115 1155 LEN=1362; translated  
MKFSAISLHTCLAATALFASNCNAYTPGVKVPVPTQSNALDNNADIAMSQYEAALKAAF  
EQASSTAAPDAPEAESSTASATFAEQVEEQEQQAIDQYEAALKAALSTSAAGAPSSISF  
GEAEPVANQDDQNGPNWESISENISSQIEKAESKIGAPLSAAAKGEIVGTVLAGSAVLGT  
AAINSPLLMGAALGYASTHVLSGKRGEDLARVSKDAFLSAVTFTQTQLDQEEGDISKASA  
RIMQHLQHEAQNKAMEVGKVAQTQAHQVTRDITNAPTHLVEEGKKI IASEDFKKMPNRT  
KAVQAFVLSDEVKRAKESVVKSIKDGLESDELKAVKDRATRSLKEI

>comp2105\_c0\_seq1; 432 129 1704 LEN=2050; translated  
MARKLFAPLVVISPPVLLCRSGISLGTSSNNIAPSSKSTTRLLLLNIPKLSHLSLTTTARTT  
TQSRRLPRTNHFYTAKKWFNIHSISGEPIIKSTDYKSSRVEQAFDDGSLETTRAPSLK  
TNSIPMIRKAGSQRLRNKDCFAASASQQLGEMSPNIKTKDENRYSVVIDNGFMKISMIPT  
LTLSDGKTKRMDGDFCENNCDSPNNFEKVMQSPSNRDENEFKKQKIEIPETVLQYQRQLRK  
TQAAKRASTPLLSQLQVVYNDKHI VVVKNSPSGVLTPVPGINSNP SMLTLLHKKYEHMDP  
QMKPEHMIVHRLDMDTSGIVMYAKTKKALLSLQALFRERDGMKYEAVVCGHLNPDVER  
GSIDLPLQRDRHFPPFMRVATPKSEHEAQVVKDLKNAGWKKIVKKPKPSKTLFEVIER  
EYVYCDGYAEVDENLCGAKEKQREVKRYPVTRLKLTPTITGRTHQLRVHCASIGHPILGDP  
AYGIYGEASANGGFEEDELMDELIRDRASINLQSLSLNEYAKAKAK

>comp2107\_c0\_seq1; 227 1 1006 LEN=1075; translated  
XKIDTRTYVSTRSSPPP IGFRAVPYRIVTVYKEISLRSIGHISYIDSFQPFPMRRGWK  
VPALYLATCTSSHFALGFVSHQLSTAASAWKPASSLIYGSPPSGSTFTRRNMSSEVV  
PAKDYGPTDQSWRSLLEVSMARSRKIRGSNYVQI STATKDGEPRCRTCRTVFRGFLNNKNLP  
EDHPMSASGNVDGKPCVMKMCCTDLRSNKVAEVAHQPISEMWWFPKTSEQYRVRGSLLLV  
GDDSGDRDLQIARKELWGNLSDPARESFLLDKLPVPVGGRDDEGKVPVPENFLMLLDP  
IHVDFLRLTGAQYRQIDERQSGPDGSTWSAKSVKP

>comp2108\_c0\_seq1; 362 87 1670 LEN=1778; translated  
MNGETFNVDPDFSVIFGCRSSLSLVGLTTAVVGYWLMERKWDNEGTALEKPDQRVENE  
GNGIYIHMYDPNRVVAQGFHPSGERDLVRVRTDDSEDKRYHPGQAASNSTEP IQSLEAAK  
YYSSPDILYAKLAHALPVPRTMLVGFGLWLSFFLDPSLGGFRFYANFWNSCCFIFSGLL  
GAILGFPMRTATLERDAEQKKKAMAFAVACSVLLWIVAIVDPEVDGPWFYFNVFGVLFILL  
SYPAFMASRKMGYTWFTEGKPRSTASITIQNMGPLLLIFGVFLLWVGTNAIYMVDLNQSY  
IPFWTTAVRGWVVFIAGMFLIVPAHMALDRAFDQGSQPVVPGFRDITYYKMDGTTFAALA  
RENITRFDLAWMARLLETPLLGSIWILMGLCSFMPFGIMDPTIQKFFTMFLCFVPPVQ  
FVLLTPAFWRSRADFLKWMRVYCALMVALVVAIGHSSGIAFLFSFIGMGLIYGKRRKDF  
HDERKRGNLWLTESPPSANPSPQVYGLGQPLHVLGWILFCTAMSVPM

>comp2108\_c0\_seq2; 221 87 770 LEN=911; translated  
MNGETFNVDPDFSVIFGCRSSLSLVGLTTAVVGYWLMERKWDNEGTALEKPDQRVENE  
GNGIYIHMYDPNRVVAQGFHPSGERDLVRVRTDDSEDKRYHPGQAASNSTEP IQSLEAAK  
YYSSPDILYAKLAHALPVPRTMLVGFGLWLSFFLDPSLGGFRFYANFWNSCCFIFSGLL  
GAILGFPMRTATLERDAEQKKKAMAFAVACSVLLWIVAIVDPEVDGPW

>comp2109\_c0\_seq1; 277 128 847 LEN=1448; translated  
MISEIANSFLTYLASEYILSSPSAASSSSKSLSTSRTLKSANANSYENHCKKASLEKDN

CVVLGFLLSMVGIANLLDHHYYLSVVWESATELFPNIPSYIYIPIAKLLTAATSIVLALY  
VDIHRMRKSDNSRRSKHRIKKIPFRTVFLPRVWAFKILPAYPFLAVLISFGFLFVVDL  
WDFVVFHLPDLWLNPIYYGTLYGPFAYTYVYVKREIVHRNNDCTGTGGESTTESSFV  
>comp2110\_c0\_seq1; 647 83 1963 LEN=2062; translated  
MPSKSRNARSTDGSSDVDRERTGQSSITITSLILVILSLVFFVIFGGSLIGGILSGDPS  
NVFFITIVAASAFASVALGVSVRYVLTQRSKRQRAEHGDDYFAKDNHVRETFSGSSDEE  
NHLCANRPSDYDPRDGHYPPIESEIKEIEAKSVFGEMSALSPTTYDGGSLSTYRHHIIR  
DNHHRGFDFSSITSAKHGDNASGRQDPPEGTGLATIQAAWNTRAVSREPSAPKFSTEGET  
IVDNDYSKDANDDCDEKSSRSRKSARSRGDLEEKSVRTERSKYSQRTKSSSKRSRSP  
SNLRNGKSPANSEANSFFSSGRKEKEATVHPVPPMSTRPGATSSVKPSAVPSTPAASEAG  
SFASSFMGLFAKGGKTASEAGSTSMSSDKSKTEPKKDPDGKKKDRKPPMVRPPMMPN  
KKGGLQSVGLTGPSVSTPSNNSTFTIPPRVVPRTFAGGDFSEFQSVVESTYSNGVA  
SSTFFDQARERALQKLRRNQAAIGAAPIGAAPLGATPVDAGDMPYYTDDDDKASSVGGN  
SAAQLNSYDVFAAPPALGIVVDTTDKGCIVYSLKSSPMLGLMHKGLIIGLDNFDVRNM  
TASSLTKLMAKSDQOERKFTLVNN  
>comp2111\_c0\_seq1; 380 280 2107 LEN=2851; translated  
MTEESGISSSVKRCLEGFPAIFGVSAVFLFLWRGTTVALCDAFFFLPVATREFGAHPCN  
INFDESEHRLRIQRVKEPTKKHDQNTCSGRIYSCHSSITSHHNEGGDDEEEDKNEDNINT  
SRDYSFLMVRSSSRKMLRSTPGTIAAAVFGTTSLAGVPSITFGEESDSENISTTYTSQ  
NADSSIRDRNKINDIATGRKNESSLHRVLESSSVYRVKTAPTIVRLTGRRTPVVPALDAKP  
PSVHRMASQNLLRDLQSKRALVLGEHHPDPRDHLQAALVRDLHKARRHSGSGSSEMVA  
LEAVQQQFQPFLLDAYVEGILDNDELKVATEWESRWYWSFDAYLPVLRTRCDLGIPLLLD  
LSSEDRTTVERGGLESLSLDRLNYPDPDAFCFSFGSTAAAYRAYLDYTLRPPYELLQMA  
KQGPASSNSSGIPFSTFVENAERRGDGLGLHTVAPPPRRIAGGIVGTNHAASFQCGVPR  
IARTLASNSGEKRGRAAVASVLINPEPLNTGTELRI CNKDGTLATNDYDDEESPTRIGFL  
PNSGNQVCIENSTDLQNYALQFQFASFSLSPSQOQIGILQEATLAQQTAEGENVLGLADYL  
VFSPKEKT  
>comp2112\_c0\_seq1; 285 274 1155 LEN=1554; translated  
MAASIAGENCSEFKVQSTKNIKEIKAILFDMGTLDDTESLADKAILMALFGCSNDNDDSD  
QPRLPESLRSKPPTSEWRLPWELKKKILGLRGKEWAPICLDFARQHCERSLPTAEDLINL  
WEQNLNGMCSEIEACEGAKALVKSIISSCNSSNSKIPLAIATSSRMMSGVDKTRRHEKDL  
FECIDEIVTGDPAVKNGKPAPDIYLEAARRLGVDPTECLVFEDALSGVKSGKAAGCQVV  
AVPDPFRFSNKERTLFLNEGGADVLTSLWEFDGREFGMDFMNEIAQSRGQQ  
>comp2113\_c0\_seq1; 393 319 1239 LEN=1736; translated  
MKFMENEKLNQISSELSEAVLKDSHRMIQGRIEAYTMKRAGNDKKFAHALGQKYIAEIED  
LQEEAATVERKRRRRNSSESLFTTTKSKLSLPSTPESTKAPSKRERAKSFDCTLDST  
SKTTLGDFSEISTRKLMTDLILTLNASFPDYDFSTVKPNQFQKVKMADVRSIHNLSF  
ASQRSSPNFLEELWDALNDVIDLQEANVYSFDYEFADDDSGNNSLWNFHYLFFVNSVRR  
IVFFTCSERISDDMTGAQGSADDEVDDTSERVEYYARENVTYPVDDVDWDPGDNIAGGMSV  
EVTIGG  
>comp2113\_c0\_seq2; 393 535 1455 LEN=1952; translated  
MKFMENEKLNQISSELSEAVLKDSHRMIQGRIEAYTMKRAGNDKKFAHALGQKYIAEIED  
LQEEAATVERKRRRRNSSESLFTTTKSKLSLPSTPESTKAPSKRERAKSFDCTLDST  
SKTTLGDFSEISTRKLMTDLILTLNASFPDYDFSTVKPNQFQKVKMADVRSIHNLSF  
ASQRSSPNFLEELWDALNDVIDLQEANVYSFDYEFADDDSGNNSLWNFHYLFFVNSVRR  
IVFFTCSERISDDMTGAQGSADDEVDDTSERVEYYARENVTYPVDDVDWDPGDNIAGGMSV  
EVTIGG  
>comp2114\_c0\_seq1; 1039 17 1900 LEN=2004; translated  
MKLRIASFVAAATHAFVVDTKTSQRHNGHVLYSTTAATLGSAPTEAAETFGTVVGD  
RGAALRLENVAISRATPLLNINWSIQPNERWGWINGAGKSTLLGAIITGTVRMDEGK  
ALVHSNVRVGYLRQSAVSGSTKVAEEARSEMTHIEEAKIELEAATKVVEDGDYSEEALD  
KLATAQEHFETIGGYQQEQMVDSVLKGLGFEPEDSDRLCSDFGSGWQMRIALARLLLSKP  
SLLLLDEPSNHLDSAKDWLGKYIASYDGSVVLVSHDVSLLDVSVNSIAEIAAGNTVVEYR  
SCSYNKYLEEKEFRAASAQAEYERNLEEAARLQAFVDKFGASATKAKSAQSRVKMLEKMK  
KEGKLDPPPVAVARERDPELVLPKPKNGEYLMKMKDATIGYDPSEPPLLKNINLKIP  
RGMKLLLRGPNAGKSTLLKALRGNVPEMIQSGERVENDRLFLGTFTQDLAQELDPDSRA  
VDLVTDYARSGSDGNIRVTDAAARGVLGRGLGGEKPLRKVSALSGGEKARVALGMFALK  
ASNLLMLDEPSNHLDVGCISGLAKALSEWGGKDGAIVVISHDRKFCEKVGFTHVGTVMG  
KLVLEQRSLRSDWDQYDINAASRSPA  
>comp2115\_c0\_seq1; 141 184 429 LEN=778; translated

MAPGGVMLIPFVRVVISILLVLTICGFVADVARIHMVVLGCLSGGLLFSLSMFEREFNK  
VKNRGPPSTTTTTKLANSNKTD  
>comp2116\_c0\_seq1; 476 124 1374 LEN=1866; translated  
MWLTHAGLGVAIAVAFAVWTRGSSSPLSLPWQGGFVTVIDPCPSFETERVDLPSPADEN  
DPLLVDAAEHVLLGLEAPEDGFRLDGTGNGDEWIWSMGNGDLLRVNLRTMVALPFAHTGEI  
HEECGAMHMESRCGRPLGLLKLPPEDYDRYQRYDSDPVATKQDKGNGSEPAEAETPLCLV  
ADAYKGLMLVFSRGTIVPLLEAVAGQPLFFANALARAGDGTIFLSDSSSRFRSDVLEET  
LESRPTGRVSWNPDETVSRLVASDLPFPNGLVLRDNDKSLLVALTTRHQIIRIDLSNHG  
ESGWVAPEPVLFAALPGIPDNLHVFHSNEWNRSVLWVGTSTKSSPVVRFNRWPQIRKLV  
ATLPRGMMLKCFKKYGLLLALDPDTGELLRAYQDPTGTTGYIAGIHFDSDSYAYLGSW  
>comp2117\_c0\_seq1; 371 115 855 LEN=1518; translated  
MYLTRSEYDRGVNTFSPEGRLFQVEYAIEAIKLGSTAVGIQTKDGSVLAVEKRLTSPLLD  
PDSVEKIAEIDSHIGAAMSGLVADAKTLVDHARVEAQNHFTTYDEPIGVEPLTQAVCDLA  
LSFGEGSDGDSSKRMSRPFVALLLAGYDDLEGSQLYFSDPSGTFVRYKAKAIGAGSEGA  
QSNLEESYSDSMTLKEAEELALGTLKQVMEEKISTDNIELARVTPEGFQIVKHEEVAAIL  
ERLTTG  
>comp2118\_c0\_seq1; 281 90 1010 LEN=1550; translated  
MSFEKTSPGTTAASCSPKPLPEYVSDELEYLQPSQVDEAARLLADCFLDDSNPSPQYSW  
IFEELLLTEEEERAPRAAGNHKEDPRIGSKRRSRQDALRWIFRKNLEIELEHDAQNR  
TTACRCSFRKPNQPPEMVCFFILKDVQSPTTNSGSTDKKDGESGDGTKISTWTMLRNG  
ILWFPILFGWRVVFYRLLVVKNYFDATLELLSNHVVRSCRALERVVVHPSLQKGVGTF  
FLRKALFGDGTDDGSAGNGNSGGGSVILHTQEERNVAFYSRLGFVVVKDRPFSGGTNWA  
MVMTSS  
>comp2119\_c0\_seq1; 267 1 904 LEN=1022; translated  
XMGSGASSALTQKNHRRRIRFQTKYENIFDMLKSTIQSKRSSTEKLSMFIGSTTMPRRR  
NPIILWYMAFLLVLSTANCVESFSVCFGLGALLTQPKGLITTSTKGDIPALLEASDFFVD  
AFWVGKVGGGANELSEKQRRTLSASQFYEFRSRYAGAGRGQSELVTCRLPSGDLTGACAGI  
EVSPIPDKGLKGLNTKSGPLMSNLAVGRDFRRKGIAEKLVEVERIVRYEWGYDDCYLYV  
EERNKPAVRLYQKLGKYLWVDKEASTLLPSSNGKLTNSATNIVCMKKRLDLGIIGRLLP  
F  
>comp2120\_c0\_seq1; 366 110 1159 LEN=1233; translated  
MGRFFKKFRQRIESRIDAAVAEATGGGGFGIANQTAAQLSFEEQKPDMSRQKDVRMISGC  
EDSQTSAVSNVAHFSLPDPAGRAGGACTSTLLNILYKDETVPEDTSLFTQVLELMRSDL  
RRGGYSQIPQLTSLNKIDVETDFQLVPSTATGVHRAVMVGINYVGHSPGELRGCHNDVLN  
MKKYIMEVHGFEENIVILMDDGIHTSPTKENMIAAYEQIVADSEEGDAIFLHYSGHGK  
LVDQSGDEDDGYDEALVPLDFRESGMILDDDLDFDILIARLSDGVHVMVSLMDCCHSGTILD  
LPYIFKPMQDGSMPQEMQLDDSVNLDGILQQFGGQALGMLTNFLNSKLE  
>comp2120\_c0\_seq2; 361 110 1334 LEN=1408; translated  
MGRFFKKFRQRIESRIDAAVAEATGGGGFGIANQTAAQLSFEEQKPDMSRQKDVRMISGC  
EDSQTSAVSNVAHFSLPDPAGRAGGACTSTLLNILYKDETVPEDTSLFTQVLELMRSDL  
RRGGYSQIPQLTSLNKIDVETDFQLVPSTATGVHRAVMVGINYVGHSPGELRGCHNDVLN  
MKKYIMEVHGFEENIVILMDDGIHTSPTKENMIAAYEQIVADSEEGDAIFLHYSGKSRN  
VMQELYFIQELVIATVQGNAILASCFLILSLGCIDMLTNFCAFLSCTGWQPAGHGKLV  
DQSGDEDDGYDEALVPLDFRESGMILDDDLDFDILIARLSDGVHVMVSLMDCCHSGTILDLP  
YIFKPMQDGSMPQEMQLDDSVNLDGILQQFGGQALGMLTNFLNSKLE  
>comp2121\_c0\_seq1; 348 148 1259 LEN=1393; translated  
MANVTDPLIKSIQSDPQNLMEYITRQKIYDSRFWKEQCFGLTVADVMERAVETLTCVGG  
TYSGMGKPTKFLSLVLKLLQLQPDYELIRTFLEQTHFKYLRLALGAFYLRLTGRPQDIYEL  
LDPLYADYSKLYRGVNEWKLVHLDEFVDELNTNSFCCGIAMPRLPARETLQEAGYLEEG  
PRRTALHDALTRAGGIKEYLRIVDEEASARKSGINDAVNDSAFGGAISLXGKRYGKLP  
IERGEDDENGNTAGENLESTRDNEVVGGDNHETESERGTGQNNSEGRLGKRKAADTDADSV  
EAKKKKKKSSKYGSLFKSSAVDSSKNSNSMLPKDEEGTQSSKSVQNSDEYWNELR  
SSLGMNPLKK  
>comp2122\_c0\_seq1; 265 27 803 LEN=1601; translated  
MVPPLARTSIQTLQILCQKHGWYLFGADEATGDWFLDIFYGLGEWKRFMVPIPKQALHG  
KTLVSEAAVLGLREIIEERESKRILSFKDVFPNPVIVYDSHKSSTWERFWNDSPTVEGVD  
CEGNSISPPVLVQISTENYTIETPLDGHLENLQRLGKMSIVKIFCDNYSHRDKICLG  
LNVYGDYNERDQVSKKTHIVDIEILSNRVIGPSKTPRGLSKLVCLCFPELNVRIKSGKS  
MKQRFNRNIGKFVEIEQK  
>comp2122\_c0\_seq2; 290 27 938 LEN=1460; translated

MVPPLARTSIQTLQILCQKHGWYLFGADEATGDWFLDIFYGLGEWKRFMVPIPKQALHG  
KTLVSEAAVLGLREIIEERESKRILSFKDVFPNPVIYDHSKSTWERFWNDSPTVEGVD  
CEGNSISPPVLVQISTENYTIETPLDGHLSENLQRLGKMSIVKIFCDNYSHRDKICLG  
LNVYGDYNERDQVSKKTHIVDIEILSNRVIGPSKTPRGLSKLVCLCFPELNVRIKSGKS  
MKQRFRNIGKFVEIEQGAEPKLGICDLNDTQRQYAALDSWCTLKIYQRMVSIKKEIAG  
QVN

>comp2123\_c0\_seq1; 357 188 1231 LEN=1490; translated  
MSVLSRSRPIRWGILSAGKISSDYAKAVAVTEGSKVAAVAARSLANAESFAEKHGISKAY  
GTYEELLRDDSIDVVIYIGSIANQHYPLAMQSLAKKPTVVEKPLTLSYQDTNSLVSLAKQ  
QNTFLMEGLWTRCFPAMRKVQSLIQQGTIGQISTIQADFGWSTKDCGPEDRIWAPESGGM  
ILDIGMYMVQLGQVGFSGSPSRVQAMGNFRNGVDHTVLTNIQYGSSGFLQFIVTGDANT  
EERVVVQGTGRIILEPPAHVPTVVKLQADAGRGVIEEEVFEFPLPDDSYTTWNYPGSIG  
FTHQIQSVTDSLINGEKECYFTHQDSLEVASVVDQILQQVHNQQKE

>comp2124\_c0\_seq1; 271 266 535 LEN=535; translated  
MGQSASTGGGAEGPPDLSSTIVIAETDEEDDERSGSDRDAFFSDAKAGGGVEGIGGKNAD  
ETDSGSTWSSSSSDSSSTHSGSSSSSSSS

>comp2125\_c0\_seq1; 338 349 1535 LEN=2128; translated  
MMFRLMFRLDKAVLTTLLLSWTMSYFLCGKDAAVLVEASTSFSMESMMENGSTTISQECL  
PWWQRQIDVAEVFLVCDHQSGDGEDGDDQYYTNRASCRTGDLGKVALGFTVKNQLPYDS  
TLFVSIKTHYYGRSATIRNRTDVCFSFNLGYINADGAFYSSGSNDDNGDADDGGEGGDG  
SGNPLCPIQAGMHYMLMESFTLQDSSASRTSNWQEFKPDLSVSFYLSDESPPIGCVLT  
GTRAKHALDQRRSRDGVIALIVSVFSFVIVFGLCLHNQKQRKKAVALLENRNVAXDDSAV  
QLSKEQQRWILYGADDGFVEPRAQATAGGRPVSARGALRQSPREPATGSAPRSSAAVAITTT  
ESLLATARIVFPETHSCPDGVTARAQALTSKALE

>comp2126\_c0\_seq1; 560 170 1762 LEN=2649; translated  
MRTAAQAGGTIRRRTRIATNDGGSDNNDGFGLPNPSRVRRQRTRNRRSNGALGFAGAIIVV  
AIAIAGGWTLPGVVPSAAEALAVSGTGLPPAAALRSSGRSERGGHPREQAQEQQPSPPL  
LGSCRQGFPGSRIHQNRLARTRLHLFFNQRDENGNLVQKPAKRAKPSDDLDELRSPLGIS  
FPPKPIRLTGSSSPKEPSAGTDSPLVLRMTTEDLRALVPMCINEFGSISQPPPEDTHA  
KKGLRGLVPRWIQDPKRIPELWEGKSFELLIYTLRLKLMQGGGNSGKNSGSISSGNSSGS  
NGNPVANSNGNPGSIPNDMVMLVLCENEKPKQEQSKSLWRKPKPAAIAAATTATTVEAT  
QSQPLSPLSPQQRVVGMIELSLQPPDADRNPALPLPRWFKAALARQTTIDGRLQGWITN  
LLVDDDRRGRGYSKLLVAACEGIAKHSWGCSSVYLHADADISSGRIPQSLYEGMGYEAUV  
GSTQKNPNGARSDGDGGEYAWAGVAGKELERFTAIRMVDGVALLCYSKKL

>comp2127\_c0\_seq1; 222 699 1115 LEN=1410; translated  
MSKFTFCLLTVLVAACSAFAPTSQLSSATRQASMTSSPFALNAVEDYDSEYWEDEYPPS  
KVLGPIMSKMPSGLLAALSVMVFLTSLVLSISGSAALQQEPGAFENGSWVKWYVVLGSGFG  
PLAWGTHVAAWIQRKNGM

>comp2128\_c0\_seq1; 696 123 2252 LEN=2876; translated  
MPMLTLQQARSDAVANEAEQRTTSPEHKRLLSERGEHDTTIGESKRRKRLSESLDTELVV  
TGSSDDKTSKKIQNKETIDGVTMLKPSDKKKVDPTELASAFALASLASLSPGGSSVGS  
SGISTPPRESREANVIRKTDKLDDEVKAASFESETRSPKASEHPLSPEQLSLREQEDH  
SASSTVNSPAGNANRRVFSAPNTKSAEESKVPSTPTTSASSSGELATSTSHRSLAMPQE  
SPGKNGRSGRSSNSNTTINTSPNSMMQMSRPHRMYGGRGLPPFVRTPPQVNMNHRLD  
YGTPPPPHAPHYHRLPPPVTNGSMPPGSRHGGPVLHHRQQFGYPGAPPGHRFSPHQY  
FPPRYLMQPPLLHRTNSYGVGMVPSAPTTPNQGAPATTKCNQWVCDYCNVASFSSYEEA  
CAHEEICKKAGPKAAAQLLSVRSYSSASMDSDSVSSNMSMMVGGHLLPANNPHLHPAF  
GNAMEAARRHHHSLALKMGHQHRMQIDGNNSMISGSNNGSSSSNNNRPGKATPVSAGK  
GNSREEQQPMTEEERRRQEMHLHSLGGYIVYPNDVEMIPPYVHFLMRQVEPCLFTEADRF  
VARSKGPVGYPGFQCRHCHGAGLGKYPVSSKSLSTNSTSQNIHAHMLKCRKCPDNVKE  
QLVQLKIEKSRAARLEPGWRKVFFDKVWKRHLHREAGDNDEQATCKTQSN

>comp2129\_c0\_seq1; 564 1 1383 LEN=1653; translated  
QNTTQHNTIQQRHKMSRKALSVDTGDDHQVEGTMSGVDTNANTPVADNKSGSSFLFRS  
PQSKTQALRPPSPKTSLAAENERLRNELRVLRRQIQEMEEFQDWKQDSNEQHRHTQQY  
QQHLLQSSFSHDYHGRASKNTSNKVIVELPEMFQSSLPPPTSESEICNHRDGTVKEK  
HSISTADDQETVEPILDIEAHHQSAAGLHHRNTTMITSNHTKKKKEVLTEETASSASSC  
GNSLGETDVEAIALIEGIDSHGNKTNTHHNTFWSSLLDRAGWLIGLLIFQSLSSFILAR  
NESLLTHHSVIVQFLTMLVGAGGNAGNQASVGVVVGIAVGTIRRSNARRVLLREFAMGTC  
LSIILGLAGFVRAKVFVWPWLETMAITTSFLIVFISVVVGATLPLCMEAVAIDPAHSSST  
TIQVMDITGVIITVKVSSFLDSSGGDWLGAVALSMDGETR

>comp2130\_c0\_seq1; 1130 40 1479 LEN=1578; translated  
MKIVSSLAFAAFLATTEAFGPAQPLKGVVSNGAANGMTMRYGIKDQALRGRVCAIVDANP  
TKEIVVEEELLSDSMSEAIKGANWKLRLKALIRKVTNQAARYDVAVDPAFGKADTQAEERAK  
EAVAGAANKAAKVAAIKAAADEFANQAARKERRAAHKARAAEALAARKSGAPAPAAEEA  
AAPAPAAGGEITPKTIKALRDLTGAGMMDCKKALTESGGDQEAFAAEFLRKKGLAQADKKA  
TRVAAEGKIAVSTGSDGKAVMVEVNCETDFVVGKSTFLAYCDRVAGAASASGTVVVDDLM  
NEEVDGESLEATRQALVSKIGENIQVRRLESRGDSTTVGGYVHMGTIGVLVEIEGGSEQ  
LCTDIAMHVAAMNPPFATADDVPQEVLDNEKRILTEQAIESGKPEAIVEKMMVEGRIRKFL  
EEKCLVSNQNYVKDSLTVQQLLDKNDKAMIGFSRLVVGEGIEKKVDDFAAEVASMAAGN  
>comp2131\_c0\_seq1; 249 536 1735 LEN=2057; translated  
MASEDDTDNMAAGLELNQLHPKAVMWIPRIVGVITLVCGASMISMAWKRSDRLFHRLVL  
AMAIHLAILGIALIIGAAAIPELSNSDEPSESILGYHGTEATCTAQGFVVFYVCFMASMM  
YYCSFSAYSYLGVPRNFVSRGFVAGKYIHAFVNFALVTAVAIVLLDGFNNTGLGFCGP  
ARSDISTYKFLMLVPLMLEIVFSSVVMVLLYGKVKRNQAMIFINARSVARQATIYLAFLY  
WVVVPLLSQCISWATNGGHGRSFMFVSVNFSLFGLWSMLSYWYFSVEQRHHKRRRGD  
DDTADPTNTFFATERTQMDSMRGRSSNCIFSSKEFNMSRAKGESEAPNSQTRTQRFNFNI  
FDGTNASGRFASFVFSGDDEDEEADKIESDKWKDIQDHV  
>comp2132\_c0\_seq1; 540 1 869 LEN=869; translated  
XKNNEEEGTSKEDEKKNNGNEDNEDQDISKEKDQKNNDGNKDNEQGISNEDENVNGIV  
DEENNGGNKENEDEDISNEDEIFHDIIDMENDDGNKDKDTISDEEEMKDNKEEEMINNG  
NKDNKNKDITSDEEDKKNKNKNKDNKNKDKNKNKKESEDKTDPTTAPSASPSHAWSK  
TPSIEPSSFVYGEREAPITSPDIISSTDSPTFFLVNQLLEPTTYPTMIYKNTIPSFVAVNI  
GVTPVPSSFPSPDKPSIHFSNSPSDGPTRPESLNPSPDAPSVSPSGGPSQAP  
>comp2133\_c0\_seq1; 388 590 2107 LEN=2248; translated  
MIVIDSTHTESSPLLIKDKGNDQISIGTDKTYNSSEDFSAVGSDFRDPDPSSVVILLHRG  
NDNESERKDHNDGDHTKLKSNCEEPLQKSLIEGLAEFFHDITEALNEVYVPPDENYM  
IEMGLTRNLSILHDDVVEASVLLQGSLLLTSEDNYDTEAGDDNCAERFVPGAVAAAIVP  
LGAYLLLFSIAIVAMSTIGPLLELQGDTTATMKVLWRMIGTSLLLAPRALIDIYRQAGVLR  
LTPPQWITFFLSTFWFVMAIGFCLSLDYTSIGNAVILSNSQALMLLSGRMCTGAPVTML  
EFTGAIVAFGGAVLCSRDAADTMDDKDESIGFGTTITGDLLALASAIGGVGYVTLAKTS  
RAQMSLFVFMFLTMALGAVIVVLFQVAVLKEIVTWDRDVHGVWGFVWDRFDRLELV  
VVLICNLVGTMGYVRAMPHFDAIVICSVQLEPTIAEFLSYFAGVGVLPGLLGWIGNAAV  
AGGTLVVVSESQKFHDASKKTSVH  
>comp2134\_c0\_seq1; 387 269 1548 LEN=1806; translated  
MATPTEVLSQGVSEKNEKNSDGESENTPKPGSVHLMPSNNAIPFPWKLHRILGDAETQNF  
SDIISWVPTNNGFKVHKPKSFDTDIMPTYFNNTKYKSFQRQLNMWGFDRVGSFPFKGAYL  
HQYFVRGNPDLCEMRHRTKIKGIHKKLRKNRFQASHGSDVRSSSHSSMMTMDSGMPCFPS  
PLDPHESFKAAAQKVADLERKKEEIQRKLEMVSNRANAASVSNALANMSGMIPRVSINSE  
MQIQASTNNYRRNDFFPLPGAGEGDSLMFGGQTFVFDANNQNNQQQHHQSPRHRVAR  
RYSLEPKGPESDEYVLELEQGMHGNNIGMKTSEEDFLMPTPLPPNMDVIKVTTKFPNST  
PAPLVIGLDKPKRRFSFLSTPVENPLDXALRDTASPKSCDEQQHDEQVDYEQFRQPEWHD  
DDELEL  
>comp2135\_c0\_seq1; 325 1 650 LEN=891; translated  
XFTQDTINKFKTTTSMKVISPSIVSYGAADGIGTMMTEGVRTLASQPAPWLLQSHLETIM  
LGSVILDAMAGGIIFIFSNTIMKTFAEFDDEIGINVMVLLNKIIINPLFAFVFFGGLISA  
YPAIVMMTRPDEFKPARYYALASTLVFFFGEFLVTVTQNVPRNDALMAADPTSDEGVEY  
WRKDFLGDWVAWNTARCIASVVASILGGLSLMAMRS  
>comp2136\_c0\_seq1; 192 1 566 LEN=1658; translated  
XEMPEQIYDTQKSKISQANYVTIGMVSASLGFACKENMQYVFQSQYVGDDELLTLFLRSL  
ALHPLCAAISLQSLGVIKRDILGDPSSSLGRILLPAVILHGAFDFAEMLLAYFLYINDLEEQ  
GTFAPSSAQDTGSPSSGIGIVSPVGVGGIFMIVGLMYFFFRARLQQNQLALAHMSESTS  
ALELSSFV  
>comp2137\_c0\_seq1; 156 60 303 LEN=303; translated  
MGQSASKGLSKAAEKAARQAPAKLKRPPIPSRVLRTOEASAQNPEFSLRGQGIGAQLDRD  
RQEMYLQHAQQQRQQQQQQX  
>comp2138\_c0\_seq1; 390 1 1118 LEN=1240; translated  
XRTAAAANSLRRMSVRARLSGSDGALFMSKYERLNQVIDSPRHKHRRARGSRHERGQP  
YTGNDNTQGHNHDLFLDEETVEDEVGNADSSSSYREHIPSPTNNVMDPTLFRANRSGQ  
RVQVRSSMFFEQDGRMLMRLPRDQVRLVMDYNLEPGILSVEQWRSKEEADRTIERMAVSA  
DAATPRTKGGPNHGSQTERRRRDREKRRLREKERERRRQRKRKEKKQKKKLLREKAA

AATAKNDTDGSATEDRDASGHDPGDSSSSSSSSSSWSSSDSDASSSCDYLDDYDLEEGRPGL  
AELPELKYVITVPDDLRYRRMVGEMSAKIFPPAWGFFKCHQESERADIKLALVILAVVMA  
LLFVGSLEWRTT

>comp2139\_c0\_seq1; 421 179 1099 LEN=1240; translated  
MLGENFTGATKVVSSLATSLFNESLSDYIDYHKPDPIARRQLESWKMSWSEDTNDSRKSND  
NANDKKKHLWDKPTNAIEGKLEICGEYVAATIKMECFWTDWNPVNDKIEDGRLCFSCK  
LISGRLLIDKKDGEERTERKVRKKMLTRLRGDSYISKMLAMTEGGKSDTKDIQTHHQLCLA  
QASIYVNATKFEMEERVDVSESVAE TLRRSLWPSIHSSLDVVEVILALPSPCRTPGSKT  
RATTRLANRAKLRMLEDAMLDECEKEGDDQIIEDLNISNEQASSKEDIIEHESADSSSRK  
KKKSKR

>comp2140\_c0\_seq1; 443 347 1354 LEN=1399; translated  
MIAAKGFGAASAEKKTEPPRNAADSNTQNDNNSGEIYSKPSMYDMAFGYRNFEEVDFLM  
DQHRQLNPDNALPKRVLELAAGPARHCIEALGASYIESATAIDNSADMIKYAREIAAEEL  
KSSDYTFEEINGADDVTKDSAYEHRVNSLNYVQADMTNFSFPGDDEAQLFDSAWILLGSL  
QHLTTNEQVISCFKCINRVLRPNGTFILELPHPRETF SMVECTRNGWEI PLEDESGGTCG  
ELKIVWGDDDDDFDPIQVQRQFTVSMELTGENPNDAPIQSVREVVP MRHFTSQEIDMLAR  
IAGFEVMSMHGALQFDVDVNDQAFRLVCVLQKK

>comp2141\_c0\_seq1; 296 77 628 LEN=1906; translated  
MTVAGIMRQYQVVGRKAPTDDVPNPEAYRMIIFAPNAVIAKSKFWYFMHQFRKMKKTGE  
ILDCVEIVEKNNRIVKKNYGIWLRYSRSGTHNMYREFRDVSLTGAVSQLYDEMAGRHRAR  
PRSIQIIRTAVVGAKDLKRVNGMQFAQANVKFPLPHRVASGKRGQKALSSSTFTTTRPTT  
FLG

>comp2141\_c0\_seq2; 258 77 628 LEN=2054; translated  
MTVAGIMRQYQVVGRKAPTDDVPNPEAYRMIIFAPNAVIAKSKFWYFMHQFRKMKKTGE  
ILDCVEIVEKNNRIVKKNYGIWLRYSRSGTHNMYREFRDVSLTGAVSQLYDEMAGRHRAR  
PRSIQIIRTAVVGAKDLKRVNGMQFAQANVKFPLPHRVASGKRGQKALSSSTFTTTRPTT  
FLG

>comp2142\_c0\_seq1; 512 519 1763 LEN=1959; translated  
MPKRKAGPKFYAVASGRIPGIYTTWAECQTQVKGFSNAKFKSFGTVEEAESFVKKENPNA  
GEKTHRKPQGSVGVSEKATS VKKQKHNLGKPSSSFAGYVARNMERSEVRADPTLKRFBV  
EAEIDKILFSEQHTDAAGTDSIVPLVPLPATDPPATEFEKGSRTVGSNSDPDSDGDN  
LARTPPPHKLSFHV MFDDGSRGNPHGHAGAGTYVVTRSYSRSGPQSEEPD NAAAKGARKT  
PKTTRPKESLAEERANIRTYLGMGELTNNQAEYQGLLTGLE YVSEALKRVDRLASVELLV  
QGSDSLILKQVRGEYACKSPKLRPYHSRAVALIEDLSRDCRRRLGCAPEIALEHVYRNHN  
EVADALANDAMDARRSWTTTTTKKTGATAPGEKTTNDQTV DGRGPGNDDGAIEV

>comp2143\_c0\_seq1; 568 45 1523 LEN=2864; translated  
MRNSNDNNKHNGNSHSTSTLEDRHFLSDPRPVRDLKLP TWEVDIHREGVDMPIMTLRVDS  
TVLPPRKNKKKVLWKLDPNIDTAPKFGEQDKRRVLELFR EKKKELKKLKNKQRAYRRAS  
SMESMNSSGAGSIDLSTHAGGGGKDDLNSNAEGLPPEANGKDKQHENQKQCQOPTGTNEKN  
NGNNSNPDAIVASDGLNPSSSKTIEERGGRRGALSPPPGF GNPPTSPPLKLAPPGLPSK  
NNEHLAENCKAANGHSSSLSPATSNSTSSQPPLPSQNGHHPQ QHLHHGAQHSLTPPPPP  
PPGLQNIHDLNQDGIRAPKAIPPQQPPMAIGPCFVLP PNPAPPGMSIGKFVTETYYLSLRN  
GLVRELDAYYYQNGGERSGADVAKVCKAVTVGGAHAFCTNQQDR LMQLNNTFSGTEMRIKQ  
VQEQLTVGNGLVVLITGV SIRFSAPNGSSPQQLPFCHTLILAPVSTRPTADSSTIGYQI  
LNDNLVILTADE

>comp2144\_c0\_seq1; 310 176 604 LEN=1063; translated  
MAYLLPHLHSGWEVDQAIVTAEDRVVIRFGHDNDATCMVQDEILMSIADKVKNFAVIYL  
VDITEVPDFNNMYELFDDCTTMFFYRNKHIMVDLGTGN NNKINWALADKQEMIDIEMVY  
RGARKGRGLVVSPKDYSTKYQY

>comp2144\_c0\_seq2; 165 360 518 LEN=977; translated  
MVDLGTGN NNKINWALADKQEMIDIEMVYRGARKGRGLVVSPKDYSTKYQY

>comp2145\_c0\_seq1; 834 537 3572 LEN=3846; translated  
MGSDSDNDPNLLGDAAEKDASNGRKRKTRSLSPCPSFLPFDVEDKKCAVYVGDIPFNGR  
NRCR ICFNGDRSIDRGSIQDCDNDTVDSNIASDDDILVSSDRSNPKNKDGACACETELK  
AYIRGRIFAAYKTPIRYIGIRSCRFFALPARSTSSSTSSSTSTEKNDAEDEDTTKPCDT  
NSNLHRRSDRRLRIAACIEFENPRLAEYSLGLKYTTFSFRSHPTVRAALKFRPWAIESRL  
PQQLTPRMPKHKQNSKEQQLDPKVNLP RPPISSPPHRRNLVCDIDCNSSDEQSPSLSISF  
SPSPPTSSCLVLITNIPSDVTCDELVAFLVERMNRAFRGKPSPTILRLAIRKPKAMDADR  
SDHATDRNDQSRPIRNHACVEFQDARAAFRATTLKHRRWHAKPQECETENNVGNFGGAGG  
CSDTKGSDKTRDSARAPCLGIEIWDPTKHDVNDFFIGNESSIPEAINTDDGTEDDI SESS



NLVAEKDEKSDGVRTASELTENEIEPKLKTFLFEELKEDGFLVCKHASINQKLDHLFAIPG  
SGKKASMCQGYAFRGRICRAYRRSLGIDNNNNKRGSSASSNHSCPYPVHIDSLEDLEDPLDV  
LAILYFVHNNDDINFVPGHGWTPEYLLQQQFQKLSALPPSQHQPTQSKSMEEVVEKLQN  
DLSEVRTQLAITQOELLKSENANEYLLEKQSKAALIEPSNTSSKQEVQEKDTIRSLQDEI  
ARLKIHLDEKQNLKASERDAAEIRRECFALIEQSRNSTKQVANNHISDDNLKSDIMKLE  
EELQQTRSDIQKLDQTRYFNPNSHVGHVWAQGMDFIQTSVPALMELAGGTQNEQQQQD  
AMYHSLNSSLSTRNGTNEKTESVKSVALQAEIAAVQSLYGREAVVTSSGSSTTVTR  
YIILPVLNSQAGDITVTLIITLPGYPSQGVVEIDANALPHSFPRIKECISLILLVCQWE  
AEACTGSPAVIRIMKKVEQWVQNDWEILQRKLTSMGHGMNEETRKTFFHSM

>comp2146\_c0\_seq1; 668 232 1731 LEN=1957; translated  
MGKFVRRSYKTAGKRSSGGFGRFNPHTAFVLLGLAMILLRHNQSKEIFSRFSDLDVGT  
LANPLNTATATATAPHQGSIRATTGAPPQAAASNATPTECTREELLTIRKHLNPEFC  
PTAREFAYFQFCSLTQATKCVASNWLEDYRDLRKEGSLPDAFLGLSVGCNKGFDALNT  
LRMGTHDTAFTTKKAWKQSMELDGAKLSESVCNQDIVDEFQVSLEDNSNPADAAAADAFATG  
EMHCFEPMPPTVKKLQHAQKQGYDQKGFVVHAGVSKTPGTAWFATVGSSESGVENVGM  
NCEAMGPIRKAKYCTQVPVSLKDYVKQHIDGNDNDNANGKKRTIHHLSIDVEGFDAV  
LSGTGSDVLKRVEYLEFEYNWMGSWKDQHLVDVVTALDQISMTCYWAGTRRLWRITGCWM  
RYDYIHTWSNVACVNRNLVPKLAAKMEDVFRATLGDSAITAHTFRNPVWRRANHWMRGLK  
NDPMLATEPHEAMVSTEYL

>comp2147\_c0\_seq1; 382 249 2115 LEN=2115; translated  
MLSGAARKMAGLSATNPALVRIRTNTSGMCNRTFNSTCNSMLRRLRSILDLEGRGKGPCVR  
RFSTAPAIVGDDDSLGRHQHSHSHSNNSPIQVKAKQPSYKDAIRGGPKEILHPTEQTT  
KHNHQPPTTKAGDDCKQEQQKHPGQNSRKARTNTTPDRLVDFGDISRAMVAIRSGIRRT  
KCTQSFFLSELCRANIFLKPVEHQFTGFSFKERGARNAILSLLEKQESPRVIAASAGNH  
ALAYHGKQLGVPVTVVMPVAPLLKVDRCRQFGATVLEGLHIGESKTVAEELAAREGLT  
YVNGYDDPPIVAGAGTIGMEIVEDVPDADVVVVVPGGAGLIAGVSCAVKTLKPCTRVGV  
EPERCASYTEALRKGHFVDSASGRSRHKNQNTTADGLAVPEVGSFAFALARQHVDEC  
VLVDERAISLAVLRLIENEKIVVEGGGATGLAALLPGGPLSGRPEIVGKNVVVPLCGGNI  
DTAVLGRVLERGLASDARLCSFTAEVSDRPGGIEGLTKVLRGQGASIKDLYHERAXAAQ  
RRPGEGLRGGAPREGPRPAPPVPRGGRAFDRVEPADALLASACGRGCGCVGLTWEYVY  
VSSARILVELETGRDTRMRTIVA

>comp2148\_c0\_seq1; 567 406 1521 LEN=1735; translated  
MSTEDDFTVPSSEEEEEAGLADMKKVFETEMTDDQTGKKKSYWSFAMETMGMASGKDGED  
LWLETVEQGVPIKYYIREKDAKLAEQEQAQKLPFTSYMDLVPLDEFHTTQTNFLKSF  
LKWSIKDKEDIVEGSEGANLVVNASKARRRLDSYFEWMKDNMAEDMAENPLTFESVKEVH  
KAWGLEATHSKDDQLIWWFDLGTMTKSIKSLAPQDQMRIYVWFSLMMFDHRGQDNGLL  
LVEALDNLGFWSMTLLPMELGAKMDRFTIGVLPKMKGIYMFGCARWVHLMVGLMKPFM  
SKKMRSRMIVTEKMAPEPQKYCDDNFGQGSIPDGFMSLNGGSKDALIHRNLKKGKQKE  
KKAATKAKEEE

>comp2149\_c0\_seq1; 714 224 2545 LEN=2647; translated  
MPNNGDDNDSSEELTAKKMDSVLNRVSFFEKSQEI MQSKIARTPPRKKETKKKEDPSPT  
PEPEKVPEKSRRESSTMSRVQQWESRASGNNETKKSFSFGTETSSSANRDISLGFSGTSAS  
SSEEDTDEQEVLMHSMTNDDDIPELELFSNAASLNRVLETANSANSPPQKLFKDGEEIV  
ENTKKQDENKESPIAEP TAVRTVLYDSDDDDEMDVESGQGLARYMPAAGFMAIPYSNGKRK  
KDADGMSVSDDISIAANVGLNFKFEMLRVTVPKPDYKEYPPDNSTERKYKVIIMLCCV  
LLIGVISVIGLLASRRPEILPSPVVTAPMTAPSSPITQKPSLAPVDMVLVEEGPSLPP  
VSVIPVAKEPSLAPVGMIPVAKEPPVEIGLPPIKYKFKNTATIVGQADGDRLGSVISMSS  
DGTFLAALSNTPNAPVQTFQRDENS GDWVPTMATPVDNATISTNTSLAFGSDISSATIPE  
DGTFLAALISSQTQVQVYQLVGRSWVNRGQPILWDVDTVAYSAMTSSDASTLAMGCVDDN  
GVIMSVQIYRYDLSSKEWTPIGGNPLLYDAQNRHVGGNQRRTLLSISLALSRNGSVLSVK  
EWAVADPQVVVQTFGKDLSSGRDDHSGSWEAMGGQLMHQFGPASVALSEDGYTLAVVAT  
HPGEAVVYRWIEGYWKKISGDANHGYPSPGGSSVSLARNGSRILIGNLQKDEARIYDYSN  
NETWLRTTTTLWGS GSSGFTSVAMDES GSTLGIGAPSLSSRNGNNLGQVRIYS

>comp2150\_c0\_seq1; 197 1902 2760 LEN=2858; translated  
MKIYRRANTELSTETTFQVESEEDDHQLFFVTSYSDFEKL AHGPRGSEAKHSVHVYRFS  
PSDGLVLLNIQGDANVIKNPAF SRHHPRLNVVYTCTEDCHENGQI IAYKLLQDGSLEQF  
GEAVDAGGTSTCYLTIDKAHRNLLAVNYWNSTLVTIPMDPETGALVGGVKNVYDPNMGKS  
MVACAKKDG VNHSCNDASTISARQADPHSHALVLDPFVGRVAYVPDLGKDLIREFYDA  
ADGKIAIELNVMP SGLCTGKPDGPRYDFHFPEYNIGYVVNELAPP

>comp2150\_c0\_seq2; 371 1902 3458 LEN=3758; translated

MKIYRRANTELSTETTFQQVESEEDDHQLFFVTSYSDFEKL AHGPRGSEAKHSVHVYRFS  
PSDGLVLLNIQGDANVIKNPAFSRHHPRLNVVYTCTEDCHENGQIIAYK LKQDGSLEQF  
GEAVDAGGTSTCYLTIDKAHRNLLAVNYWNSTLV TIPMDPETGALVGGVKNVYDPNMGKS  
MVACAKKGGVNHSCNDASTISARQADPHSHALVLDPFVGRVAYVPDLGKDLIREFYDA  
ADGKIAIELNVMP SGLCTGKPDGPRYFDHFPEYNIGYV VNELSSTVAVFEINRQLLNEIY  
AASKNGEDMNRFRGQSTLRLVQSIKTIPOAFPTMNTCGRMCVHKSGRFVIVSNRGHQS I  
TVFRVKRKGSKRGE LQTVGCFHTRGETPRHFQFDNSGQYLLVANQD TDSIAVFNFNLSNG  
ELKYSGNEYRVSPNFVCCCPTYAEDSDLYHENMGSSISAVTSIQADENSSPACSDSED  
STLPTWTDKSSDD DVKAELAKAREEIEALKKLLMERTQ  
>comp2151\_c0\_seq1; 606 71 1438 LEN=1486; translated  
MRRPTSKPPVTRLRSPSRSSSTYKTSSKQNNGAALEDERFKQFLKNADEIESIEHFMYWK  
DEFFTTFRPYLDPLGTATAREADEELYFELEKLANACVHTNELVKEGKISPEKSSVKGQK  
SINEMIASTCTCEQHIDRYFPKTQEEELTCGYSKFELAAVLVRDGRVYGMVATRNYVQ  
GLVIEGGALQKILKSNQMSILQYYFRCLDTFAQTMADLGMFKLMVRCEELYSVRPRRKN  
KTKKFNKHGAKDALSDTSCEGEAINGGRMFQKSKLNYRAIMDKGWSNGLCLGQEILGPLK  
FSKKNDKKKKGGK KKRLIKENKNDANCKSGEDNEVASNDET NF SPEAGSSSSIEDDSV  
DETAETVDELM SMASSEDEEEDEEDVIYYFDPVRKIVGKVS RKKCLAEITIVSV DSETG  
TERAEGVVEEWD SRDEIGKQDLILNLKEILRSKA  
>comp2152\_c0\_seq1; 390 251 1015 LEN=1206; translated  
MSKHADTHVDVDNDQEKSDDDTDIGNSPNARRSLSQRYNDRCL SCKMLLGIVPFVLAIV  
SPVDEELSVWLALALSLSLNLRLLYRGCDPKYPK WYMEMALCLSL LGIGIFNGITGVA  
VSL LQIIPSTAMFLAIPISM MFEDPFLYRELAPT VTPDVSSSPGFMQLCQYLSAYWMFVM  
FLQSVSMWVSL LFLTSLTSGEPSEPIPYLILSAVLP IGF IILGFLT TTKPLADY LKSKGEE  
KDGDEENG DVTCDV  
>comp2152\_c0\_seq2; 311 376 840 LEN=1031; translated  
MALCLSL LGIGIFNGITGVA VSL LQIIPSTAMFLAIPISM MFEDPFLYRELAPT VTPDVS  
SSPGFMQLCQYLSAYWMFVMFLQSVSMWVSL LFLTSLTSGEPSEPIPYLILSAVLP IGF I  
ILGFLT TTKPLADY LKSKGEEKDGDEENG DVTCDV  
>comp2153\_c0\_seq1; 579 257 2047 LEN=2235; translated  
MATPVSTEAPLNGLVRS GSDQERDLQAKMQHMIRLQYAEQTISNTNANANQDL AGGDGTK  
GHQTGAPLENDREDDGSRGGRGLTMTKRKGT KTHANLENLGN DTD TNSVDNNAE VVGKGTI  
VFSGSLRGSMLPPGIVDDRLDQ NATATKGLEREHQRYQMP SHSTTLESQQORLLSSAPPQ  
QIYSGYGSVHEQNHEFH YGNPDYNNIDDEDYFDEHGGFRDRDGDHRTTYCGQLFGCLVSP  
IANLVGQENLRRSFCYGAIDGLLTGSGIASALWGLGLLSVR TKTEL RVAFVVVTLA ACTA  
DALCMAMGHVWTTYIVTSNHAWERSHERLLEHDKADSKGR LVDMLLERGMLKIDAMSLA  
DTLEGYPDLFVSALVGDSLSSGIQDALLDERTDDGRNYPREHYSPGTYS DPATDFDGGG  
AFFGSFGSWKFPMHYDS DERGEFRNIEDRHARVVYSESQKEATFMMVGF AFFALIPSLW  
LFLPRWFNNPANNGDFGQTHAYSSLSSQEAYSGVGDGETVNVPSLI IILILSSI IWCLGVW  
KSSFVDSNWVVFLETVAVLILCISSAYWIAVLLVHFLGLEYLILSGETS LGS PDL  
>comp2154\_c0\_seq1; 436 28 1251 LEN=1468; translated  
MKVLSTLYLASVASAFTTQSSHRSP LAVASRKVKQSTVAR SLLPNKQQQSDASPF AIDVE  
SSTVLDKAGT SKTAEDGSAGVRQLLGV RGADKSDDIWKIRLQLTKPVTWIPLLWGV MCGA  
AASGN YHWIWNPFDPNDRNVLLGLEDTAKAITAMVLAGPFLTGYTQTINDWYDREIDAIN  
EPDRP IP SGAI AEGDVIAQIWI LLLGGLGLSYGLDVWCGHEYPINLYLAIFGSFISYIYS  
APPLK LKQNGWAGNFALGASYISLPW WCGQAVFGELDRPVFWILPVLYSIAGLGIAIVND  
FKSIEGDRAMGLNSLPVAFVGDGA AKICAGSVTITQFGVAAYLYSINEPIYAAVLLALVL  
PQAYFQATLLLPDPIENDVQYQASAQPFLVFGILATCLCLGHHEFPV  
>comp2155\_c0\_seq1; 139 155 499 LEN=834; translated  
MKSTILFCLLSVILGMFFAPQSASAFAPVSVAPVALTPTTSTQLFFF GKPKDDGSPGDYV  
CKDCGYVFTKGPKAWAALDDSKYKCPPCGAPKFRFKKVPK GSESGKVEVKKSWF  
>comp2156\_c0\_seq1; 304 311 1108 LEN=1608; translated  
MSRSPLAAPIAPRPARANWRTATKRQILGNFQQGSPSMSLSSAKIDGSNTDHIQMLIGG  
LQEKHDQMIAFLKSDLDDCKLEQEEVLSTGLIKLPKAVRNMSVRDFNRQHGC DLLALLKS  
KDGVILSKNSVNGINNI PKHPNNTTACMIDANKKRCYETPAPRMRRPGAPMGTILRTARR  
GEELYSQNGSPVAATEPGTVIATVCKKRRGNESANVEINIGEGQYISLNDPSGIS ELDAQ  
MKQTAASQLKVLQDQMASLMAQLQH  
>comp2157\_c0\_seq1; 139 281 841 LEN=1119; minus strand; translated  
MCDPRPTVLHSKAIATDTRVPCRFLAGNGFAWIRRSFFHRNSASLSSQHEQGD AKQSDRK  
KVRLRHRSVPSDASAKHPSPPRS GKAGRPTPPRLPPGSAPGAASVLSQGRGVVHAHPAL  
AVGHGDRRPVLLQAQSGLAGFPQPDRLRGQQPQLPQPRGSLLVSR AAPGIDRLLFFPPV

LVAGGV

>comp2158\_c0\_seq1; 580 84 2252 LEN=2401; translated  
MLRQRAQFLISRASTSVSGRNGSQNSARSLFSRRSTGSSERFKLSTRATSTLSSSAHSED  
AGSSLWNTASAAALIAAAAATTTFVSSDSTTDCCGIVGVIGTDKNADAREFLLDGLTILK  
NRGYDSAGIATVPSDGSALSITKYASDGDNADSIELVAKHSQNHGHFTGIAHTRWATHGG  
KTDENAHPHLDSSGKIALCHNGILNNANDLRRELQSEGHTFTSQTDEIVIVKLVGKYYAE  
GRSENI TLKDATQKALDRCDGTWGLAIVCTDTPDEM VVACNGSPLVIGLGADRFTFIASET  
SAFNRYTKNFISMKDGEIGVLHADGRNLDLSRKQIAPDQQVKLSPDPYPHWTLKELNEQP  
EAI AQALNFGGRMSTDRVTLAGLDRNEEKMSKVKHMTLSACGTSLNAAKYGERIMKHLGS  
FDSVASIDAAETESKDFPCMDRPE TTGLIVVSQSGETKDVHRVVKNAMEK GIVSMSV VNA  
VGS LIARTTKLGVYCNAGRENAVASTKAFTTQVTVLAL IACWFRECRDRLSGR PANMEAR  
LVKDSLMLRPITIGMTMKTCQE QCKKVAERLMDKEHCFVLGKGYAEPVAYEGALKIKEMC  
YLHAE GYSGGALKHGP FALIEGEGKGFATPIIMFILD DQHAHMRSAAEV KARGAELI  
IITDKPSLARDLDDNPIVIPQNGPMTALTGVIP LQLIAYELALLRGINPDTPRNLAKAVT  
VD

>comp2158\_c0\_seq2; 569 84 2201 LEN=2506; translated  
MLRQRAQFLISRASTSVSGRNGSQNSARSLFSRRSTGSSERFKLSTRATSTLSSSAHSED  
AGSSLWNTASAAALIAAAAATTTFVSSDSTTDCCGIVGVIGTDKNADAREFLLDGLTILK  
NRGYDSAGIATVPSDGSALSITKYASDGDNADSIELVAKHSQNHGHFTGIAHTRWATHGG  
KTDENAHPHLDSSGKIALCHNGILNNANDLRRELQSEGHTFTSQTDEIVIVKLVGKYYAE  
GRSENI TLKDATQKALDRCDGTWGLAIVCTDTPDEM VVACNGSPLVIGLGADRFTFIASET  
SAFNRYTKNFISMKDGEIGVLHADGRNLDLSRKQIAPDQQVKLSPDPYPHWTLKELNEQP  
EAI AQALNFGGRMSTDRVTLAGLDRNEEKMSKVKHMTLSACGTSLNAAKYGERIMKHLGS  
FDSVASIDAAETESKDFPCMDRPE TTGLIVVSQSGETKDVHRVVKNAMEK GIVSMSV VNA  
VGS LIARTTKLGVYCNAGRENAVASTKAFTTQVTVLAL IACWFRECRDRLSGR PANMEAR  
LVKDSLMLRPITIGMTMKTCQE QCKKVAERLMDKEHCFVLGKGYAEPVAYEGALKIKEMC  
YLHAE GYSGGALKHGP FALIEGEGKGFATPIIMFILD DQHAHMRSAAEV KARGAELI  
IITDKPSLARDLDDNPIVIPQNGPMTALTGVIP LQLIAYELALLR

>comp2159\_c0\_seq1; 357 150 1214 LEN=1430; translated  
MATFDTKHCWVRDLKTGTFLANSRESVRVMGVVTHISDFSMEDKALLHPLMKCPNWSSPI  
ERPITSVNNRGEALSQTQNSGTDGGNEAVFLSVTIDDGTD SIVVCAPRQMIESPSS EIVI  
DIGTTYDWVLKLRQNSSTKQWFADTLIKIENPIDEHYRWELSHHDQMSCSQSSPSSSL  
RVQYSNLCHRAGFPTRRKNAPFVYRLIRLNAQLQREQQQQEQTGKPIAKRFRNSIPQKRS  
CLRFNSDRLPLRLQNRPKGLQRSFVNTNRIIPARRSLNSKLQPTKLHTGTYCLQTQSSAK  
TKEQPPQVQSLNGLLLKDLAAVLQKTQRDIQEMTEDLQMEGKIYQNERGEYLP L

>comp2160\_c0\_seq1; 261 73 1167 LEN=1373; translated  
MSSPATQSAIIPGSRSDENRLASCLVLLNEVDEWISGPMFRLGLPKWFEFWYSIPACFF  
GTTFTSVAGPVWIALLALVWGQHDEKETCGAELEDNIFLLK IITFSVTVG YVVMWGLWQI  
GGHEYLAGIAFWNGNVYVLGVPFNIAVLAYILNGFPYSSYQGETNCSAEYKKNIFSMAI  
YPLFLWPILITLLNWMKSTSKRSRPALKDIERKNAEGCGRGTSENWTQKKKFPAMTQLLA  
KYNGDASFPSGDVLCATMVALSIFNISSDVSHAYRPSHLASTIVILAGTGRMYVLAHFF  
DVMVGAILPFLAHLRATKLGCGMFDMEWWHPLLVLGIFFFVINSITRKSDEKKSTKNPLA  
EKEA

>comp2161\_c0\_seq1; 281 357 1648 LEN=2577; translated  
MRASSSVSTPSSVSRLPCASFCDFEASFKDMFRCQGEFAIGDGN DILAGRSDTISAT  
SSASTVSQRSILVIGSDDAIEVDVDVDVADCESARDYLERVSNNRSKNTDTSASQQEE  
QRDETSSSGSSPRPSPRGKSKGNKHKHLYHIIRSRSSSNSNSEVPSSPRRRRRRPSFGS  
YLKRNDSDSTDRSLSEDESERQPREQEKQPHDLEPKDSDDTRDSCEPDSGREERQAQA  
QPKPTASPLPRNGALDXPSGLDSPAQGTVCGPDDCRQRQDPHLCPVHGLCGPGRAPP GPP  
ENPPAAEAEGEHPGGGNDRSLLEAGGSPEPAPVLVEFESAFALLGVVLLLLFRFRIDRS  
LQRPRKEAALAEGPAKGAADRAIGQORAIAPGLKRVLRLSVRNETAAIRYDTIQHHIAR  
HRTTKEHTQH

>comp2162\_c0\_seq1; 411 250 1062 LEN=1229; translated  
MCQSFRSLRLLNRGMILKSDLLGRQIFDEAMSGQQIKSRLLASTGACSMRSYAMTPTRLF  
GSKKGVGNPLGTVSIYNDQEALKEIDEDALQRTVHRISKIIGYETYDVTL LLLVDDDEM R  
ETNLETRGINSPTDILSFPFHSREDNKAGLLKEPEFDIPDY YTLGDMVVCVPYVIRRCKE  
DILFRKEQAEGATNDEKKSEYGDSDLDIDDDRGVSGAMANIDDPEKIRIMLLVHGMLH  
LVGYDHIEDDDYVEMVEREEELKELGDLL

>comp2163\_c0\_seq1; 1301 523 4603 LEN=4793; translated  
MITEVPTSSFPETEGSSTRKPRAAQQQQHSINITSIGHLNSYRSPSPFGSALKTPLKSGS

IMRTRSLDDHHQEQQKQINCNPPLSQDIEMTGNSFCEGGSASSCCNDDKDEGTTVATALH  
SSFDISLLRGGGASCSSGDLTLFENGLDEEEGDSQVI I HTRNSCFDPGDLTPSAKSDSIH  
HHYQKLRQPKLSSAKEVSYIDLKPPATVRKPKISAKSRKDRRRSSDTATTVGTHLSTGSF  
AFPMSKTPARTPGRPLRHGKNTNARTPGKPAGLHRSPAPSSSTAKRRRDPLAHPARLSPMR  
RYGTLSPSSCAATPAANTPTKSQPPPPFSLSHPAALAGKGGADKIRSLSTQTP IHQNLSS  
DPHGAFLLKLPYHTGTAAGATPLETTFEVDGDSVDTNSPARFRFTSFPASLPRVHHANHY  
PRSTPPVCPGSRKRMSFDTEENANTEDAKNTATEHIDDEIENDPVGLNYSIHDAVNQS  
KDDDGTHNTSLSSLVSDGGHHQHLPHLPHQHPPHFASVPMKNLLLFPGEQDDENRQNELG  
TNMFGYSDDEEDDVSSKVFVGEDIRTSASPDQEGTVRRRTRLNFNVFLSPSSDKKNLENSQE  
NGFGGDRQIQLMNADLSRYPDPQNP IHSFHSSLSSTQINASAHTNEENLMVGTSSSSM  
SPPASVVKVNSNANSLPSTPREVHLHFPPPESECSPI LGVPKHDFVEPPSCSRALMLNRQ  
QLETISSVRKNGTSSPIHSASKHLSHQKEDSTSSISSSESTTTTQKRRLRPMPDMSAFE  
NVKASSTRPADRSIDNNTATDSRGAGSLTRRERACPPPTPQRTPAWANDGGGRPIFPTRK  
QNSLIMTKVLLSCPSQVLEGRSSLETSVLDEDSKHSGSRNSFSNSCDSINYPNGEDNQN  
PEKSTNEDGTTNMDVEKCEQPLGLSTLSTGNAHEERKVTHDQIAAPPKLMRRLPSNPDI  
AVISFSDDFEILGSLGSGTFADVYKVRQKSDHLYAVKRNRRQFRGKRDRDVALAEVQSM  
QRLQSVFATSNASGERNHSENSNNSSSDSKRNCYSLYLLFFYRAWQEDGYFYSQTELCR  
DTCRELLDSLRLWNSAKKKYPRLVKTLPPPSGVEAGSSMDAFGRLLVPNLTVWKICHDIS  
AGLSHIHSHGIVHQDIKPSNIFVTNARFGAMCKIGDFGLAGSIGSSGEGQEGDTRYMP  
ELLASATRHSSSDIFSLGLTLYEIAMDDHVEMPSEGRWHQLRSSDEPKLPACRGDNLQR  
LLQCMTNPDERKRPTADTILENTNVKIAGHEVDTFLONYIRDVESFDRQEEERLAMERSD  
DQTPRNDHRSAAVRSPSLSMMLPVAPCMFSPSSKVIHS

>comp2164\_c0\_seq1; 946 110 2167 LEN=2715; translated  
MSAPNKDDMETTVRSIDGYSDENDGNSSSTNGINRDYDGVVYGDSDDDPAALLLALD  
EAERNESSFDILADHGFEFSYSEHDQRMYPALDIDALLPPDNMLPISEEEGEVGGGTAS  
SSLYEIPSGYRNNRSLAETQGEDELDDVVDEDMSSQTSSLSGSEPSRSIQEKVVEINTF  
LDDAMQQQPSNKANRGFAKTGSGANLWNRFSAKGSSFDENASAVSDASFLLKKGTVSLVQE  
LVAADASYLNSKRKSGSPTEDPEALATALLPSAPVGEEVDAGADTIQKRYFVRRAIWC  
AILIIVLISAAGTTAGLLIAKNRRNNNETTEVVVSPGETTEKKNETSFDSTNNSALDE  
VNSSIGFSNSSSSNDANDQNGPSSSLLNPSMRPSTAPWITSTNFPSTMTPTNTISLSP  
VQTASVEPSVRDDNDTNEPSKEDNAEITGDDVIDKSDRPWDDDDFQPIEIQGDDDFYKNG  
EEEDNDGIKGGGFEDDKPVDQPSGDDDFQPIEMLGEDDFYTGIEPQDPLHDNTMGVPSAV  
VHDKKQKQTKESKINSTKKKKSKSTKTRTKKPKSTRTKEQKNEIPHSEDSVDGSLLYGSA  
EAVNIKQRSFFSKGRNIDPQPSRYRTRYDRYPQPQLHNQYYGKRPQKFWYHKYDSNPYLS  
VKTRKQPHKWRQQKQWRRIPRGY

>comp2165\_c0\_seq1; 361 213 1061 LEN=1564; translated  
MMENLVFPVAGASYGLTTVVVGQPLDTVKVRMQGLPSAANSSGVAVAGDLFAKEGVRLY  
RGGLPLFVGGAFMRSAQFGVSGAAKVVLEENTNGGKPAPRLFGILDWQVMIAGAAGVSR  
GLVEIPTDFFKTRRQVEHGWSIREVMDGTGVTLARNTVLYTAFMFYLDMAKLLCRQGYVP  
SLLMADDRENLSFPVKGAVCANLAWLTCWPADVVKTRQSGNYASRSNTELLMENLRNGR  
LFRGIVPGLVRSTIANGSSMVVYEVLTTLTKKFDLERRDLA

>comp2166\_c0\_seq1; 260 445 1080 LEN=1487; translated  
MIRMNSILFVLASTILVFGCESHAFIPLLRASASTLRPAPTSEISYGRKTVVVSYSFYFV  
EAVEHIGYAAKVLIEHDVGKPLGSIQRIICVVDPDVEARFLVDITHLLLDFTVIFNFDGA  
LLNFAQVVGRIAFIAIDFLPGHEFHYEEMAVQLVLLGVS IKRMAFAETKdstpsalekfd  
QLDHVGQETQCATDtdfstvdesmlveacee

>comp2167\_c0\_seq1; 133 399 653 LEN=928; minus strand; translated  
MPRSISESSPHWSDSAVVSPARRCVYTMLRRTSTSSPSRSTLLKAEFTGAKSVTLPPSFP  
DKKFDRSTSLTSSQNLLKLFIEQM

>comp2168\_c0\_seq1; 274 556 918 LEN=918; minus strand; translated  
MVGLKLGEEGLLDGASDGASDGAADGSEDGATDGADGASDGAADGSEDGAADGDADGA  
ADGAADGAEEGAKDTVGPDGDSEGAEGAAEGDAEGVAVGDAEGAADGAAEGEAEGIAD  
G

>comp2169\_c0\_seq1; 373 1 1895 LEN=1972; translated  
XKLSADRLDDFLPTVVLNRLRELTTLNFEGLTDTHVHVLVLLSTTTMLLGAAGANCKPGR  
NLPLGSPNQNRQPHSTGRQGNQWTRLVLDGCHGLTSHALTSIAKLCSQDHLRELSLRDC  
PGIDTIAPLSELLVTKLGAKKATTATTMATTAAATTATNTNTNTHSHRDELLRPSVPLSA  
LVPAEALGRKLRDFSDGECSTRAARVPAPMARLFETPPAASVETTHRRGRGSPPLSSSTL  
ASLFDLPGTSPTRRKAESLVLPPPPVVALGESGAITSAGSSPLRLRPPPRLPDPLS  
HRRSSPGLTQPLLLSCADGVTPKPSPPRKHQLVPEKETAAAAAPSMAHASRRYHRHKQS

LSKEAALPFPGLLPSKNRDEWERVCRLLHSFAPTFECRDHRSDNRANGNPGPSTALNDVR  
PPSFFGEGTTTTVGSLEALDLRGTAVRPREIVGVLSLTHHRPRKKPLMSVGARTCFPNQS  
DSNTASAWCRVWFEELHLNGGLDYSCRNRNEIRVNLRTGAGEDATHATIDAAGACFLPA  
TRWWDGAMAESDSCPGGTGWGTGEDRRDLEASLAMDEMELRIGGEKAKKKKKHAIATNYEC  
NATQYNNANRAKRKEPSTCGKSIVLRFVHYT  
>comp2170\_c0\_seq1; 220 274 531 LEN=610; translated  
MQNEAGENVDLYVPRKCNWTNRLVEAKDHSSVQVNVANVDPVTGLATGDATPYCLVGYIR  
KISEGDMALTALVEKNDAAMFASEE  
>comp2170\_c0\_seq2; 220 42 299 LEN=378; translated  
MQNEAGENVDLYVPRKCNWTNRLVEAKDHSSVQVNVANVDPVTGLATGDATPYCLVGYIR  
KISEGDMALTALVEKNDAAMFASEE  
>comp2171\_c0\_seq1; 740 181 2136 LEN=2196; translated  
MSDALPPCRLFLRSKEGIEIFSVRSERDAEPLPPATDRKFLLKGASSFQTMLPDGSAVLV  
HRPDKGIVKIDLDGNDTQNSDQPPFPNTSKVQIMDVSPKGSYLLTWERGSANESENNLLKV  
WNTSTGECVTGFRRKMINRNCWPYLQWTHDEKFAFLLTTNEVRIYPGTFFPQKAETRFVVK  
IRIPQITQMSLPSSTATDSVGKILFAAFIGKDKNKPARAALYEYPPANESASPYPAIASK  
SLFNAEEMTVHWSPRGDVALIALQSSVDNTGESYYGSSSLFLMSQQTSNDAIAVPLPQEG  
PVLVDVGWMPNAEKPPCFAVAAGRMPSMASLHNGRDGKATFLFGNRHQNTVSWAPHGRFVN  
LAGFGNLAGGMTFWDKNKGKQIPPGTPVTASETTQFGWSPDSRLFFVATTSPRMNVSNGV  
NLYRYNGEKINNNVLPWNNENYLPDRLLQATFVPAAPEVVYPDRPQSPSLKDLGTGPDA  
AASAAAAPKAGRYIPPSQRNRAGRGGNSLADRMRAEKEGKMLGAQKVTKTTPGMKRGV  
VGATGKVVVGMAPPEQKEGKSKSALRREKQQKKKEEAARKALEEKLAAEQKAQEEANKP  
VDPVKRAKKINKVLRQIDELKQKDPSELNEDQAKKVAASEPSLREELAKLSV  
>comp2172\_c0\_seq1; 191 599 1132 LEN=1875; translated  
MGAVLAKLLQVFWTKKLDIVVIGLENSGKTTLLSVLAHGEPVETVPTIGLNVKVFKKGQV  
NMKCDWIGGQEQYRSEWSRYTKGCDVVLVVDAAAPQKLGAAKELHKLDDGDSIGSTPM  
LVCANKIDLSPHVGEAELIDKLQLNYVMETPMMVLPISALKCTNIEQVVEWLTSQ GK  
>comp2173\_c0\_seq1; 621 52 1245 LEN=1645; translated  
MDILQREMRRKKEALLKAKKEADASSETSSAGDGRKKRKYLVSDLRRIEDEEQEKEKM  
RWRDRNTNSNRKAVSISSASKETDDDDAISQARMKFKNAKKGKSSTTSSPSSSPAATVRDK  
IDSSPASITQKLREMGLIVRYFGEANTARLERLKNALYQSKTLEGLSELEEFRLGKGHG  
IRNPFLENEKQFKNNQHOMP G M G I N D K G S L E N S R L E R K K Q G K G H A T K S D V D G E N E E D Q S  
DPPKFIYKYLKGLLKEWEVELAERAESVARSVAGRNESKTLKQCKDYIRPLFKLLKSRKL  
EEGLQLHLLKIVKFAKQGEFVKAHDSYIDVAIGRAAWPIGVTMVGIIHARSGRAKIESANV  
AHVMNSELQRKYLTSVKRLTLTFDQNRRTDVPDPSKKVR  
>comp2174\_c0\_seq1; 681 287 1615 LEN=1706; translated  
MAKTKTKAATKGGSKREKPPALDQYKMP L I A L C L S M L G Y H M F R G M M A K E I K R V D M T A T A N  
ELELREVFVFGEDVNTGSTNYAVLCYPENAVFPVSSVFQDAANDGSAPCQFRLMDCDAAMP  
FSEEGKS V V K R F G L N K K T R P V V F V S G A V G Q P K Q V P A K Y L K T G A M L T K A L K N L L E P R A E K I  
ETTQDLRSKCLDKDICGLMLKGGKVSPTYAKEAMQKLVVEYPKVTFAAVDSSVLYVKGIE  
AEFLPELTPGLPRFIVFQKTSGGVKSDSSRLKSTAIPLDVDVAYGPM SNL V A S V V S G K A E  
MTKIPASPTIKTRTKKLEKSENEKRQRKNKTNGSGDSSSDSGTPHSGANDGSREGRAE  
RERRRAEHRKNNPNYREKTP EE I K E M E R K R R I R M E E E A K K W N M D A E D P S E D S S S G E Y M V E  
DEGFDEDEENLDEEDEDVMDLD  
>comp2175\_c0\_seq1; 658 577 2031 LEN=2504; translated  
MGLFGRKSNIGRDEKQQQLKPPSMYEQGGPNNDADDVDLSESMNDDYDDFHEYNHDDDDA  
SVASHMEEMTTDPHDDYDFDFMDPEAMANAASASASGPQQQLQEVSRSFFPQRHTNGDKYY  
KNASPSFHSSHDALKRSN S S S S K N C A A D H E N D T N A I P E R T N S A T A L V H N S N E R S N G H S R K  
REDPLVPVTSSLSPAATARSVSSXEHGHRQSLPVPQLAFDQDALEVPVVPDPTLALALA  
LEEILPVRRRWVEEQDETRREA EKWRGPEKPTFGNGKASSTTALEKQEQVAPSPAAKARA  
SAKSSPSGDLVEQQQHEILAMQIQQLSLLQQQREQEQQHPSAHPIDESETTRDLVKTFI  
GEIWNRGEISSISKVCSPLRLRFNSESGLEKVGHEGFSQMVLSVRSLEEDYHCEIHSMVVE  
GRKCFRLKFTGKHVGTLLGCPATHKLVSWSGASEFTVCPKRHQILKVWELGDIKTLEKQ  
LKID  
>comp2176\_c0\_seq1; 391 1 1229 LEN=1431; translated  
XKAQQQHSQSLSPRHPTILLFKTSLIVPLLA AVFFAMSLNPTPADAAAKRDAFAATHTT  
TTGEAKEGDDSYGASHTSFYTTTEKKDSYSTLSKTLTKCSDKLVRQVILDMMGVCADIT  
DALRVNLVTVEGSANTFGDSQLSVDVISDKLMWDACKKSSVIREGASEEDPIVHNVDIEG  
ESGGEFTVCWDPLDGSSIIDNNWAVGTMIGIWPKKTGLIGATGRDQVTSIALYGPRTTV  
LVALDDGVYEFTYGADVPDEATTDGGDPTWICTRSRIRLKDDSKIFSPANLRS AQDLPGY

ARLVNHFMTNRYTTLRYTGGLVDPVYQQFTKNMGVFCNPTSEKSPAKLRLAFEAAPFGLIV  
EKAGGLTSDGVTGGSILDVKITAVDQRTALCCGSKNEVLRNFNEFLELSK  
>comp2176\_c0\_seq2; 391 1 1202 LEN=1633; translated  
XKAQQQHSQSLSPRHHPTILLFKTSLIVPLLAAVFFAMSLNPTPADAAAKRDAFAATHTT  
TTGEAKEGDDSYGASHTSFYTTTEEKDSYSTLSKLTETKCSDKLVRQVILDMMGVCADIT  
DALRVNLVTVEGSANTFGDSQLSVDVSDKLMWDACKKSSVIREGASEEDPIVHNVDIEG  
ESGGEFTVCWDPLDGSSIIDNNWAVGTMIGIWPKKTGLIGATGRDQVTSIALYGPRTTV  
LVALDDGVYEFTYGADVPDEATTDGGDPTWICTRSRIRLKDSSKIFSPANLRSAQDLPGY  
ARLVNHFMTNRYTTLRYTGGLVDPVYQQFTKNMGVFCNPTSEKSPAKLRLAFEAAPFGLIV  
EKAGGLTSDGVTGGSILDVKITAVDQRTALCCGSKNEVLR  
>comp2177\_c0\_seq1; 195 1 771 LEN=951; translated  
AQHNTSPDVLRYHNSLLPHDTQENDCKARHIAPHRTAPVQRATMVRTGLLRQGTLCRNS  
FAAKAAHSLPGTGTTPSASSFGGARRSFLCQHRPGRP IAIKASASASATIHPNPLCAS  
YRRSFAEGFASESDYHTAADETLEDLLDALEAAIEDHCDDMVAAGGGSEENENDEPEATL  
ASGVLTVGLPPHGTWVINKQTPNRQIWWSSPLSGPRRYEHDGEDWVCTRAEGEGPKTLAE  
ALEGEFEELYGISLGL  
>comp2178\_c0\_seq1; 76 350 769 LEN=1230; translated  
MTRILSLARMIQSRTAAATRSVPAALSEPLKVLFGTTPCEDAAEDNEANHADREHEEP  
AAEQAPGLFAALVRGPAAAGPAAAANTPWNAREERKASIRDYYHRAIAEGREAAAANNDRV  
LRNPDLSPDGEQYLYIAQ  
>comp2179\_c0\_seq1; 877 187 2451 LEN=2757; translated  
MPVQKILSTVGCILLLACSGSNAAAPAPKRTKKGVKAVSPRGALAHKDQLRKKTVKEKI  
EAAKRLNRREKKEVADAEMQTYKTLRREGADEVTNSAEAQMLRNYRLRNKKRKGLLRKKQ  
TSLAQILFPVGSPEEYNFQEQVWIYSDLVESKKTQVPYEEYDLPGCPYQVESGIKRRRRE  
RKNL GARLQGHDTKPAFKLFAKQDKECTPMCLVTLEGGKLRWMRNLIQRQYRVQLQLDG  
LPVLMRSSELNYAVRGYP IGFVSAAGGTVAKSKRNADVLYNHLKFAITYRTGEDFDGI  
RITGFDVHPVSIADHIPENKAVTETASSLSTCKGMGVENDPSSYLSLSDKGNVSDVIYS  
YDVTWIENDSLLWADRWDVYLVGAPDDDIHYYSI INSLMIVLFMTGAVATIVIRTLRKDI  
AGYNELQTLLEAEQEEETGWKLVHGDVFRPPQFSPMLLSAMVGTGAQIGCAFGLLAI FN  
VTNSMRKGQILTSMILLYVLCGS IAGFVSSRIYKFCEATNWKMNSIATATGLPAVFVGMF  
TLLNIFLSFAGAATAVSFLTILVLFLLWVTISAPMVVFGAF IGLKAPTIEVPTKTKQIAR  
VIPEAPIHMNSGVMMLMGVLPFGSVCIELAFIMSALWLHQIYYVMGFLLAVLGILAATC  
AQVSI VCYLQLCAEDHRWWKSFNNCAMAGIYLFYLSLWFLSSRLDLVGMLPVIVYLT  
MSMISICFGLFCGAVGFMSSFWFTRTIYGQVKVD  
>comp2180\_c0\_seq1; 471 294 2054 LEN=2339; translated  
MEMKDIERSSQLEGSRNNAQKLLDQECPIVWRWVPFHANHGDSGISSLSQPRVIYATSK  
KVGKPEPSPLLTGGELREARELLIRSKVNSLIEATSATEPSPLSLRIPHVPRNIPPHVNL  
VRHTQHQVLLSQGASGNASNGMNSSSKRAETAGGELEVANLLLNMGGS SPKSGETAQK  
KKQTTKKTALPSRPGQTKGSAADKKPSLLEDTYLDNWWAGSISLHTPEDDDVLSPLHCF  
MRRYCVEAFSATPEDVATPRYKSHGFKVEVGQV GIRCLHCKDLPPSKRAERAVCYPSSL  
RNIYHSIETWQRRHSLVCKCINPWVRKSILELMESSKTRAGRRQYWEDSARRLGMVDT  
QGVRF CRKPGDLGPI P SPGSRLPGE PDVPQHEPEKIVRKEDKDLVTDYLFLLMDQMOTC  
QFTEEDRTGGRSKIKDNEVGFP GMECRHCQGRAGFGRYFPSSVAALSLANS DRNVYHNLQ  
KCRKCPESVKTELIRLQKTQAQSKNRRGLRKLFFNRIWKRMHKVDKDDSEN SRPSESGLV  
GRQQLPQGRPGEFVQYSFSQLPPAIMNHSYQHTMHPQVAVHNFRRY  
>comp2180\_c0\_seq2; 368 294 1364 LEN=2457; translated  
MEMKDIERSSQLEGSRNNAQKLLDQECPIVWRWVPFHANHGDSGISSLSQPRVIYATSK  
KVGKPEPSPLLTGGELREARELLIRSKVNSLIEATSATEPSPLSLRIPHVPRNIPPHVNL  
VRHTQHQVLLSQGASGNASNGMNSSSKRAETAGGELEVANLLLNMGGS SPKSGETAQK  
KKQTTKKTALPSRPGQTKGSAADKKPSLLEDTYLDNWWAGSISLHTPEDDDVLSPLHCF  
MRRYCVEAFSATPEDVATPRYKSHGFKVEVGQV GIRCLHCKDLPPSKRAERAVCYPSSL  
RNIYHSIETWQRRHSLVCKCINPWVRKSILELMESSKTRAGRRQYWEDSARYVTV  
>comp2181\_c0\_seq1; 301 58 672 LEN=1392; translated  
MSDLSLQSKETACVFIEYQNEFTTEGGKLYPATKEVMEKTNMLENSTELLKFCREKGI  
LVHVPISFRPGHNEIAKDPY GILAGIKDGSFESGDSGSEIYEPMKPIEGELIVQKSGLC  
SFASTNLEFLLRQHNKVVVLGGFLTNCCESTMR TAYEKGFKVYTLNDCTAATSLAAHE  
ASF EHNFGMFSVPTSSEDIKKAIQ  
>comp2182\_c0\_seq1; 284 158 730 LEN=969; translated  
MPTNAIHRNYRKTFTTTPRRPYEKETLDAELKLVGEYGLRCKREIWRVQYALAKLRKSART  
LLTLDPKDPKRIFEGQALLRRMSRYGLLADDELELDAVLQLTTQKLLERRLQTKVYKQGL

AKSIHHARVLIRQRHIRVGSQSLVTVPSFNVRTSSEKHIDFSVNSPYGQGGPPGRVAKKRAA  
SRAAAGDDEE  
>comp2183\_c0\_seq1; 414 98 1277 LEN=1371; translated  
MSTDPEDRMNTQEDREARDGLLQLNTYLGGHADGLVSDDSSEEDFHQEEAVVPPPPAAQ  
PPVPPAPPTLPAASHPLFKTAQATLAKRKFVPLKEKQDLLLRIREKLSHDLIKAVFPGGD  
ALSLEMQGVYHNITATGNTHHKRIGMESGLYSHNACQILYRNGDQEGEERPTTKKGEQKE  
AAVAELETVSRVKKAMKAEETSRLKSGSKHKKGKVYVWQQGAASRLQDQCSYDPAKLDR  
FGCPCDHHSIMPVDDLKIQKHNQGRKEHDIAVAHEHDAANRDKKGHPKLGMLDVRMA  
CYCKFNCKLDPRGGTCPECSKPGVDYLEYENGVPVACNCPNCQCSIYFYLTDRFNIN  
KNEERLRSGPQPEEEQYSGNPIFARSSTCRP  
>comp2184\_c0\_seq1; 316 448 1719 LEN=1956; translated  
MASQYNNNGNNNMSTMDATRSYVTARTAASQSVANHTTSGDTCSLAPPPGAMAQPQPAP  
YPSFVKVCGCVEIYKPGREVLEYDYTYDDVSGKKPPQSYPRIRERGEFYIDSYNGEPWSC  
SFGTAEKNGTWFNSSDQAGSIMSCLVWVLMYSSVTVTLTITTEGIPVTCGMVYNVLCFM  
ALACHAKTSLTDPGSVPLAAIPSERQRLMKDSSHSMCGQCQTFKPPMSHHCRCINRCISRM  
DHHCPWMNNCVGGNNLKHFLFLIYTWTCAYALALFGWNYFFCADEDCTFHPVVVHLVR  
VMTMLCVGAFLFTSSMLMNVCYGLMTGIGTIDRLKKKATNTMNQSDEEPIPLKDVFGIQG  
WITWPFVDPFIFEDFDQVMGYCLPQRLDRERQFMEYKRP IPEIQQVTSHEMELPKCINDL  
LPV  
>comp2185\_c0\_seq1; 564 97 1557 LEN=2106; translated  
MKPSGSKGRNVSLFTTWLLIVGNQCTGLIGGEAFVITSHVKISAYCSGLGRRLENTFLCG  
STGDNDDFSFRRTDGDARYWNLPNDFTMFLTQRAIQSFI FLTSQLRDPETCYWVEQFTEP  
NLVRLDTKQSFSLGDTLPNLSDISSGKSDWRPNADGDDPKDDEDEEERTLLLLLKYHGLA  
AMDTVRFPTWESYFEEMLEQPTDKWIIASDQSHIPDYTWEIDPSSLCSRILSVREQLSRE  
FASDLQAVSNMGGQTLDWYWRDLRQSREDERREEGQQTEGKNSGENEDNPFVDPTSLSRGS  
RQNLLFLEINVDRPELDHKPSPLRRGNFDLLVLLATEEAIQRVLNRWQSKKSVGDLDGSE  
FVSYEFLEDFYKERQHLFQGPLPSYKADDILEELLSSALSFKGDGEVINPTKIAEVVLR  
ERERVALDWKDIALDSPQDHMKIQKRLRLSRMMMGNNDNNGGQQGESSRGESSNVGYHDP  
GPGAFE  
>comp2186\_c0\_seq1; 576 191 2422 LEN=2890; translated  
MEQINKKNLRRRSVDYGTKTNRSKLADDSKRLRLFNQSNPNKTQLTGDSRFVVAAKIATL  
NNSAVDLYIKRDFENASGFFFEATLLRLISDSLFPKVLFDLSRPPNNKMTWDKGTDAK  
TYTMGDSAVPLTSNMYQRTEFDEGISLYCDTKVIHGDHHLSSAKATLLFNAGQARRELG  
DLVGAVAFYGDALSVLLPNLETDEATHFSPHRIVVPVLHNLGQIAYRMGAASKAIWLYE  
ALVHCRVNLNGERSLSVASTLNCLGVMHYHSPANDSDQAIRYFLRALDVLHEVMGSASEY  
EATILNNLGRAYVHYNEFDLAFESYDQSLAIRKHLYLGPDHVDYAATAFNAGQSLHHKAL  
YFDRAMELYGDFLRVALVRFSSKHRDVAVVLSGMAQIHQERKEYPKALKLYEEALEVAKE  
ALGNFHLEVAVICNRIGNFHFERGHCDKALEAYKEGLHIELRLEFERTHPNIIVTMSNIGG  
ILRQKGSLECAIRIYKDVVKLQTMRYGKNSAEVATTLVIGMIYDQNGNSDKALVTLQRA  
LAIRRSATGVNDVDICTTLTIGTILYRKSVMVSTAIIEFFSELSIRRIKLGKNHRSIAYT  
LYNIGLCHQSLGNLNQAVDCYKETLRIEKMVLGEDHKDISMTLLKLGEACKAKGDLDEAL  
DVLNYALAIERSTKGQDNPAAVVRIINEIGTIHLEKGFVPMMEAFCEASTLFQQAGLTA  
ESIAMPGALYHIGIIFPSGAPAA  
>comp2187\_c0\_seq1; 71 252 1079 LEN=2093; translated  
MSYSSAARTNLSSQDVRISNYKLGEGAFRCHEGTYVGGNRNGQYAACKRFKQPFRSMET  
EYFEKEFMIADTAIHAEQWNDICDPEDKILITKGHI IYSNSGIPYMAEPVIRDFKKFTS  
NSGWIDESDIYTEAMEAFSHMTYHNSGGNHLVCDLQGRYRNNYRKSRLFELTDVAICSVAR  
EFGPADLGEKGIENFFANHQCNFCFPHWRRPNLARRWFPSQPGTSMFPAGDVRLQRPSP  
GTHFQLEGISVRPGAYQLTTTEDGLIRGLFPVPQT  
>comp2188\_c0\_seq1; 338 52 732 LEN=927; translated  
MVSLSSALYSHYTLAIAIALLVLPFPLQAGGASARRKLTKKATQEP IPTPDPTPAPGP  
KTLKLAFDALRLVSEDVASIGFESSLSTGNPQPTFVGATTVSFLNLFPPDPTVAENVES  
LHADPSSGGAIGTIEFPCIIITNNGFSKGLCQGVVDFLLDGEPA GAMVSYGGHLINQEHYQ  
GMIIGGTGALGNAIGGTYQSVKTNIPADGTSVYVIENFVATFVLA  
>comp2189\_c0\_seq1; 274 1 1195 LEN=1742; translated  
XSSKKKPKQTTDIEMDQDTKKNTSKGEKKNMKS KSKSNQKNKTKKDKKNDRKRDDVADA  
IPNVLDVTPIVAVAPIAAVAIPLPDDIHPDQHYTPPVSAQSN TTDHQFPNEGSINPVIYP  
VVSEIAAVAVPLPDDIHPNQHYIPPVSNQPSAMFPNQEGRNQPNIGSPI SGNVNLKLDQ  
GYSSGLIYSIGLNNVICPLRIWVDNSGSMKKRDGHR ISENKRTKQPFLLECTRWAEMQD  
TVEYHARMAAQLESPTVFRLLNKASTGQQQFSIGERGHQFIQEDLNIALETIWRTPVNGK





VLNGGLGLTNPLFWVSAISAAAALEFVATKNGDSREPGDFGFDPLSLAGTNGQQSVFVRE  
AEIFNGLRLAMLAITGFVAQEFYTNNTAVVNQTPIFFKPFSDVVAHFLGAGGGSI  
>comp2198\_c0\_seq1; 705 83 2107 LEN=2232; translated  
MRRVSSRQRLVSWDAFDATAVSDSGSGNDSSVGGFEEDDRSCASGYETAYSRSYHSSMAL  
NMLCEGNLYISNSIDNTNSMEEITGIDATTELRRRKRDRKSSRSPTERANSSKMVETPK  
TFVFTTLSTSKSPKLVPSHSWETGKPPPPSSVGFDDMISDLHLKIFSFLDLSSLRSAMYS  
SRHYRNLIISNDARNLWMDHCEKIWHISEFMEEESGQNQYHFQPHPKFTDNFHLPIAHT  
STVTNSTGFETDPVDTTNISLSSLTPKDFPTCVDKDALKSRMQLSGTIRQTIPVDRQDD  
EDQQVQYYKEQSTGRSLIRYTYGVGQDRCIRSNRPIPRPSQRARLNETFESAKDINEIN  
SSRSLMNSIGPSFLHIDDSHHPLLYSLLQKCSSKAMKGDGMKSSKSSSSSSNSVLSPPSP  
SLAWTPFVVPFVDKSSDDNSTFLNVTPRFISYYEVSILKQDGGENQADFP AERMVPPPL  
HRRSNMDCVAVGLGTFKDFNNRTRMPGWDRQSFYHGDDGGIFHASGGMLKQYGPKFGPGD  
TVGCGVDYISKGIFFTYNGKFLGYAWNNVSDILNNDLYPVVGLDTNFVHLNWGTSGPF  
EFDLSKFIKKHEVAVMATYSLDGCSCLCPRDTTVTGATAAETDSSTKKVARSFSGRSTSR  
RHRKGFIGKRNQSR  
>comp2199\_c0\_seq1; 559 64 897 LEN=1164; translated  
MRIISAALLSLASVNAFTPAVLRTHTGQSTALSMSTVSQDELKKQVGYKAVDDYVKSGM  
VVGLGTGSTAYFAVERVGNLLKSGELKDIVAIPTSERTKEQALSLDIPLVTLDTHSKLDV  
AIDGADEVPDLNLVKGGGALLREKMVEVMADKFIVIVDESKLCDGLGPGFPVPEITP  
FCHEHTMRQVAALDSCAGCKPVLRMGSSSSSNQPDGDEIAVTDNGNYIVDLHFEEP IKDAR  
KMAADIKNVCVVDHGLFCDMSTAVIIAGADGISVKE  
>comp2200\_c0\_seq1; 319 1 908 LEN=1235; translated  
XLFHSIAPIHITPLESIMSSPSSSSSTCHGRLAYGVRRLRPGAEPFQKDFEAWLATHNE  
SRLAAALAFDPDSDAHLHLVWDDNTTEEGADDVLLGPESDAFEEEDADGVLHVYGS  
ATGGASNSTSTNRKLPVHMOTPLAGYMRRRLRTTAASKDTGSLLLIGVFKRAIHSGKRD  
DLAQAFQVRVCDIWKYKTPGILAAAMVFPDPTDTGFVHDIRIFDDKASYDAHVDKSNPELTR  
AMEEWFSHYDTSIPHKGIMVAEDTSDPAMHTSSIKKRPVKVDFNVFHYGQGGCMGRCLHV  
TF  
>comp2201\_c0\_seq1; 1199 1 3307 LEN=3391; translated  
XGSFFSQNTTLKLFNLEGNFVHDEGVQTIADGLQANPGGKLEELYLGWNGIGDEGCLHL  
ARMIEITNSTVTMGLGENDITSIGARALLNALAQNTLQRITGLYHNMIDRKFVIECINR  
ILYSHLETLPAELEQVRRAEFERLKLASMSATDTLLEPLGSHLPIDDEISEGELDWADRL  
YNDETDLVESGVTIGEVPREETPSALGQVDTEEGDIDEAAEPKTIAMMSQFGKMPPEKSL  
LDRLVVFQAAPLVYLHRETAFRQAIPLHDFDQETAIIQNSLNGCSRLDATIDMDVQPATA  
ESFASFLASGRGRVLHFTGYGHPNHLLEDEAGYLDLTFSLDTPDLIKSANPPDLV  
VNSFHSGRIGKAFLDAGVPHVVCCHHPETFRDKAANSFLKNFYRALATNKSILKQAFYHSQ  
EAVRVEEISKVDVRYVLLPRKPEDDPYHDVPIFYTQVPANTLDQDTDNLLLEDGRKLLP  
KLPRHFTGREVDMCKVLDALRNQKLVRIIGGIRGIGKSSSLAAVCRYVQKRSGFFFDNVF  
WLPAARGVVPDEDTLADLVEYTSMLVKADHNISEDEDALECRERIEIELEGQSTLLAID  
SRKFDSEVSAECLETFLELNTDLEVKVILINSNEEDEEATLRLAPIDFKSTSLFLGMV  
SRFITANGCPCAAQSPDEYADLIVPPSIAIGEPKSAISVRQERLLSVMGDGIPLQVIRSA  
KSMQANIFIRLISMANTPEVHVDSLDSLEVISKWTSRMEHAIENKNFFRALDLQHVLE  
LEGQRSKFPSVDDLVAAREKELHRKHTLCFKTRRYEEGNRIKREILVLKKEILRQKRRLAT  
NRHITDAALTQSQTNKIADIQAQMKSIMKLANSSFSLLDQESDPKNEAVFRLGSAYHS  
CQVRIYPGNVEDFDPGDDL GASICWTNECCDINLDEQGASLLSYGGQNLADDAETLPAIA  
ETPWGTTKCGTGNVIVGPGNYDDL RVHCVILAVGPI SPTRDEVLDESDSLHYITVMM  
RSCLRSSFILAKHSQVQSI AVPTLTTKVGSPTYESTLLTNLKL VDEAKFSDLNTLHIVA  
RSDEESTKLIDMALTMGLTMS  
>comp2202\_c0\_seq1; 350 139 888 LEN=1193; translated  
MDDSRISLVSTEEVLRSEAYMLFYRVVDHPYSKLANQVKALNDSYDVSDSLKAKEEKEA  
AVASRKRKEKETKASIEIEKNSADASSKNSSRLSDRSIGSGPAASVKRNHRKRKAPEFF  
CGEEWARSKTVIAEKNIARFRDVEGKVS RHITFTPEFEKLLSEHALKTNAKIDQIPSSGS  
SLLDNCGDSSSTEDINITLLRCFLAVSKNDGIVDFAPTPTPTMTTRSSAASRGKLQSSAIH  
VVDPTDDLL  
>comp2202\_c0\_seq2; 843 496 2787 LEN=3092; translated  
MPQLMEDKNDGIGNDNDLMLPPRPPQRAVARAVSNLGNTCYMN AVLQALAHAPELCMAM  
DVHGHMRCP IYKENAEKMAALSAASSAPSSRSSPDNTLNQNFDSNGELKSVYTYSSTG  
GAGTRKSTRRSARTNSPTSNENSEDKSVDDPNVTKFCALCETEHHMDRVHRNTHGSNMTS  
NSKAVSPTNFVHGFIDHVAPASFRVGGQEDSHEFLRLLIEAMQKSKQARRRKVTTIDQG  
NPQDTPTESLPSEAESANSVLKQEEESPDEYPPQLFSGKVESKVTTCGYCHTTSSTLD

PIEDLGLEVTPLAGTSLNAVGRRNAPSPVPTSSLADVSHALQRFACAEDLDAGYKCEKCG  
KVGKATKQMRLASIPPILTLHLKFRFRYSSSDPSMANAGGGAGLLGNGGSGYLPTRRSQRT  
SEVSQLIASSGGVTSSSGVDWFSGGKSGSAKIEGPSEFKAVMDLKPYLTEELQKKHGNM  
LCRLFVAVVHVHGKNSHSGHYLAYVRNISKNEWWKDDSRISLVSTEEVLRSEAYMLFYRV  
VDHPYSKKLANQVKALNDSYDVSDSLKAKEEKEAAVASRKRKEKETKDASIEIEKNSADA  
SSKNSRSLDRSIGSGPAASVKRNHRKRKAPEFFCGEEWARSKTVIAEKNIARFRDVEGK  
VSRHITFTPEFEKLLSEHALKTNAKIDQIPSSGSSLLDNCGDSSTEDINITLLRCFLAVS  
KNDGI VDFAPTPTPTMTTRSSAASRGKQLQSSAIHVVDPTDDL

>comp2203\_c0\_seq1; 400 139 1056 LEN=1420; translated  
MIAPIDVAEQIEGRPKIDVDLLTEASVSGEVFSRRKSKVQFHAVEVREYARSIGDNPTAM  
DGPPLGLGWTYQNLKRSSFSEKSQRTESNIVTTGSETDTTVDDHDESITIPIDEYETAT  
NERRRRRIMKLLKLRENATFQLKKQRSRATQRQASTGNYYYKSKEKDDKLDPNELTDEQI  
NQLSATWLKIQPVPGKTRRKILLEATDMSQNQIEDTVRELAKLRNQRSTQAMAETGLDD  
FQAAVEFCVRRRLRIRLGMSSKREQELLWEKAEYWKSIETPHFNRRDSAPRSALKVCEVD  
DKTED

>comp2204\_c0\_seq1; 369 72 1657 LEN=1667; translated  
MADKGQRRLVLEEDYTSKLSLIVARDYFPEISRLERENSLLDCLAGDAIGAVAVRRAT  
RNSLEEEEEAAARREGDRDVLSESESNENTLARRNPPGANIQIRKMRPLEEETVTGFVM  
RATNEDDDEFDSNLKQNIENRQRLEAIYQTKSNPTSKTNERPPGAI SNLCLEMASDD  
FAPESNRTAWKHKPLMRNGLFFNPTPMRNSSETDSDAIGNVREQALLKNSTALMVLSDGS  
DDMPPPSKQHTSGLLSNRNAGKDKLTQNLKSQLVEYIPKHKLEKKIEPSATRFPSNP  
SLIPIPGSALHGSLDEETSDSHTDYMSSTDASTDLDAPLRSLSEERRRFKRKESYRQSY  
YVAMSSPRAKQQLPISTHGAIDGPPLVLSHQEEQLEKPESTSSFRMPKNEREFAASNAE  
KLMARRARLASPSSLRRSSLKSGKHSSMCQALGPGSLTPAALSMLKAKSIKLRNRDAFGS  
ALRRSYTPQVXPPLVLVQEFSEKEKRKSTRGSCLQCDAPKIEIRKTLG

>comp2205\_c0\_seq1; 565 95 1318 LEN=1505; translated  
MKFTVAATLLATSVTATSGSDQSVANDAASASHRGLAVSLEDREFEVTSVLKERRASKNKG  
KVIRNLQRKLQQRQLGNEVEEDSQVHEEDLDLGI FSRGLQANATEPEEELSVMEQLIELC  
GDTEETDESFSCTCADLNVEAYTASVTCAYAENCLSPTE DICGGNTTFCFLETYNLEVT  
A PGTGSSAICYELTSPLSFNYCYGLTYTDESTTPSGCVLEVEGNQCNSCEFYFYDSQP  
NVT CNMFDCSNADETIGSGIICGDDTIVSAKIEDHLTYAPLPCEGGCNICPSNGEMSLV  
DNNV TMITGDVYQCWQLNLAQAGYLQDMPGDL CNSLLEV VNEPCGCVVPATEVPEV  
TPTSDE DTNPEAAPT DAPMSSTEPNEASDGATVKS RFSFAVTALAAATFSWMI

>comp2206\_c0\_seq1; 251 200 664 LEN=1211; translated  
MMKHSTAMNSGKKTIVACLWMAVLSIAWSSNNAGVFVQGMGEKTS SLP L TANTP  
ISCDEM IILHRWEGSCCSLNV TNGGGCILNVFDGYCNVKGQEWTLKYNSTYDEKPCPP  
SEFSNTQL GMKGEP TLP P SGSSSRFTTKAMVVLGASIFAALL

>comp2207\_c0\_seq1; 374 105 1253 LEN=1582; translated  
MNNETLATIARENTSLALSTLAI AAGA AVVFASTAIS RKP DNS QNDKPIPLPVAP  
IGSK FAILPKSGVT LRYTDTQEEQVTEKDSGESSEQVTFVLLHGFAGCVETWELLTP  
YLKSN STTNESEVAVRVVAIDMVGSGFSDKPIGDDFDYAYRNQGVVSEFISVLSL  
SNVVIVGHS SGTVVGAATASQQQSNESGKTAVVGAVFMACALFRPKSDFFSKSWL  
KPLFRWMTKKMMAN RKQSLERMHLPAHAERVLTD D FVEKFAAPTRLPNFHDALVET  
VMAKEAPYEELVDELINT PSAPFPMLFVWGKQD TYTPLPAEQKDSIQKLD TMNK  
TSEQERQPIVETTELDECHHPQ HEQPEALANEILTFVQKNVKLH

>comp2208\_c0\_seq1; 1180 105 1916 LEN=2256; translated  
MTQSMRAIALLLVFGIVATIVQGYRAPSSLLSQAATNANANAVVGGASP KLSPL  
MRSVM NIRGGDEEEESDGE EEEEE SDDDEETGLSSSGSIDYVAVLEKALDVT  
TKTKIVPTVIDYS KKGFLAAKTSIVVYGALHRAIQAGLEGESEESDDEDDSDS  
DDEGEEATLVEKILMTK KTVKTVQRMVKAALTVPEGDETS EDEDEETIDLEEGE  
DDAIDTTEEGTEEGAATGPEETP AAKDGNDEAAVNDNDFGSYLSEAYEVDL  
RNSGKSPGTVILDGSLQDALETARKQARML LVFIPSEKPKSEQGGLSLFGGRK  
GTEESEQNNLVAIESLLSKEVAKASNRKARKMQAED FGSFAIWGTKAGSSEA  
VAIKRLKVKEISAKGEKRAILCVVYPASSGGVIAPKVL AQHHC NPPLKAES  
MASWMNALRKRHGKQYEV MQTEFTTELQLYKERKEGYIDSVQSDNQRKAKEAQ  
EEAERKAKEVKEARQAEIDARRQELEQSLPEDIKSGSNVKKIALRFPDGR  
TGQRFASD QPLTVL FNWVDAMFEIERETVVLTTLN GKQTF SWEGDENTTTLE  
DAGLNKMTAFRVSQAA KAD

>comp2208\_c0\_seq2; 230 1 765 LEN=1105; translated  
XASSGGVVSIDSVRARWCRENDAKVSLFV FHSFFARLQPHVRRFRMYRLLTE  
FCGSFLFQ IAPKVL AQHHCNPPLKAESMASWMNALRKRHGKQYEV MQTEFT  
TELQLYKERKEGYIDSVQ

SDNQRKAKEAQEEAERKAKEVKEAARQAEIDARRQEQLEQSLPEDIKSGSNVKKIALRFPD  
GRTGQRGFASDQPLTVLFWVDAMFEIERETVVLTTLNGKQTFWEGDENTTTLEDAGLN  
KMTAFRVSQAAKAD

>comp2209\_c0\_seq1; 149 220 600 LEN=982; translated  
MPDYREASNFCARYSIVGMI F MVLI SMMLTYQPFYIGGIEDLDQARSNAYGGAGTFLFVF  
ILSVVYLVFDALRGGGNNRNRRESRISRNEYDAVSLSGLDGTEQMMENMANLELPPSVQ  
EARFT

>comp2210\_c0\_seq1; 161 143 901 LEN=1228; translated  
MRQSTLYCCSVLLSAVGTGPAMVDAFAPALQEQSNPIRLQATTKDSDSIDIDRRGVFRTA  
ATAVAIAIAGTSSISLPANANQAEGVNLQQYEDFTKAPEGFSYRDVNVGTGVSPSIGDRVV  
YEWGYTIGYFGRPFPEAKGGPQGGAFDKNQDYRSTVLGKGEVVKGLELAMQSMKVGIRQ  
IIVPYGELGYPSTKEDASHDKIGPKPTTFSGERALNFVLDNPRVDRTLLFNVKMIRVDKA  
DGKGGFTRGEKA

>comp2212\_c0\_seq1; 489 240 2921 LEN=3195; translated  
MKSTREDSGRDKNDRGGRGKNGRQSGNQGRGGGGGSKGGSRRSKNKGQNNNGNRSSNRSN  
RSSFSSSSSPLVYPQYATLEECLTRYNRGDRNLIRGTIRCLPVRDGPACTCDRGSQSKD  
VVLGDPLERNRALDGDVVFVEIISKPPKEKEGTAPSDRTPREEPGSETKEQESEDEWWQ  
DDIDQVNLWDPVPIAHKKLIPKSDSSSPVAFDKEQKHGRVVFVHPKEWSSEIKSKQN  
SHSRDRSAPTKRIVGTLKRLKGGTALLTSSNNRSMQQFRLSNADAKEYKDAPEGSIFAGK  
YTYGTWQETHKWPACSNLEQFGATGNIETAALLIEFGVDHGEFPSHVLEESQTVVASG  
QYSNGTESGWRPTEDMYEGRRDYRNQRIFTIDPTTAKDLDDALHITDLGNGQIEIGVHIA  
DVSFFVTPDCAIDVEAQRCTTVYLVDRVIPMLPRPLCEVACSLNENVERLAFSCVWRMN  
RDGSLVKGQDVWYGRVTIKSCARLDYSTAQNIIENKVAYPGENEIDEELWPVSRRTGGH  
TIGQVAADVRLMNEIAQARRRLRFRNGAVALDAVKLTFQLDDRETPLLCEPYKIRDSNK  
LVEEYMLLANFLVAQRLITNTGPRACLNRNHEPPDYEGLEKAAALAMEAIGFRIDIESSEA  
VQKSLNRLSQEQDPILLKCITELLKNPMKPATYIAAGTLSQPEWAHFALHIPYYTHFTS  
PIRRYADVIVHRLQLASIDGEDAVEDFPMEVKEISAICGTCNEKKEGSRKAQERSDAVFL  
ALYLKRFPKKRQLAVVTSIGMKAFTVFLPHLGISAMVYLDEHKHWIEAEAYEDPKFGRRI  
KLKRTQTHKGERWKELLVKNFLRLRVTCGSDKPLNVNLKLEGPWEGDDETR

>comp2214\_c0\_seq1; 726 1 1651 LEN=1877; translated  
XQQQRYNPSFEDDVFNERYYSIENGYAISCYELAMALYQDLILTENEERKANDKAMEL  
AESQLGLNEDATEDEIMDALLSQTTSGGMGAGATSSFVSIPLDIGDDELQDLFGAGTGR  
FSEAKEASLLEIEGFLDTAILTFLQHADYPPSGDGARSGGFFHGQTPPKKKKIVVNGKR  
KKSQEEELRAEERLFHWASLATAYQNSARIATVRNHHIRARELTNKALELYTKVVVPPYE  
ETERGSGKSKARENARQFVSSSMASMTMKEYAKTISIGELKKSALAATALYLGNYSESMGQ  
YNKAMTYFQRNHLTPSPDGMYNLQGDVGMHQYREIVATYQKELEDYRGNVRAMYVYKD  
DSYEGVLLALASMTMAMGDLPVTIRSYEEAIEIYDRIQSNPDRKTRLGLASAHSGLSSA  
LFFSRRFAHSGHHYKALGHFRSVYEGTTPQEEAELAIEDMKDELIQAYGEEYYESLYA  
QYTAMGGGKGGGPGSGSGADGPGVSGNFVVGYHNATFAAEEESAATAGGDDSDDDDD  
HAHRAHSGEL

>comp2215\_c0\_seq1; 387 117 710 LEN=922; translated  
MKYSVGLVLAASLIPAAASLTREGIGRRDAISAAASGVVGGFLSQVQPSFAAGTPPTKEELG  
RIVLGYKQITALLENFEESTTVCRENGGECKRDAEPIRRVLGLRSTTDPLFQIEKVFNKV  
KYMDDDIDLEVFFEATEDWNSAMTLSNSMAFISQFGEYNPGGGVEEVLYLNESSKAVLV  
AQSAKRIIDTLHLEGV

>comp2216\_c0\_seq1; 177 732 998 LEN=1278; translated  
MALVPDFNPLAPIQSLQLVLLTLTGTAQAGFCSSISPDNSCSSVTGRSLFQQPIRRTRGMR  
RRVSDTEDADAGRWCMLTQIADTEDVH

>comp2217\_c0\_seq1; 539 62 1498 LEN=1571; translated  
MGKHALVLTVVLAALQTECCLGFQLARETHLPLSLASGLSKNDEPSNDNGCVSGLCNSEL  
SRRDACRSVVGTAALTMSSALLGGADPVFATKEDENGFAPAVRPTAYRVDSTIPPTLLPLS  
SARKEKATLALGGSGTDEKEIKIDTLNLNFMNKL VFGSIDFVSQTVS QSKDESKVGP  
GYASFVCMGMPKSTTSNDIDLATSLMGSILQSRREELATGLGLSFCPMSSQPALDAFTKS  
GDESTLQSALKGAGVGSETIDL YMPLIRYAKSKSVDFLALSPEFQDIEAARTKGLASVDF  
ERRKSYVLDPEGFISMTQDPYKLYTDRSLLKDFEPTNSEDNIKGFFAERIFVHEAGASA  
VAKYTVNKPESMVVMI SPISDVRYLQINGRIPRVFVGS LVEKNNANGVNSQTVTNKVS DN  
AVTTILLNPTALD TLSAGEKLRLEIGTGPDTIDYQSKIADYIWFSSSPKVSLIPRLMN

>comp2218\_c0\_seq1; 428 103 807 LEN=1589; translated  
MKFKLFDKLLKALKPKKEYAAAVKLQTFFRGILARARVSRMVNKLITDILIRRGELPPDFY  
EQEEKRKEEKKKEEKKKSATKGRGAMLEIQKGSVKDLTLKFDKNPPKPRETASSEACP

VEEPPSEPKNSIYKSFRCHEHNATKHVISEDILNEQARRLNEEIEHLLLDIKRIGEKGK  
KSVKFGELFDDDDVANYEALVGTAKAAKKKGLISYEGQILLKGVHDDHEICIL  
>comp2219\_c0\_seq1; 124 1226 1624 LEN=1729; translated  
MILKQVPYTVTKNVSFDVFTKFFYSCLRNSGVATVSHAMKFTIPLVSAAIASVLSLTSQ  
PGDTILSLSCAHGGDYRTRDISRNILRSDRGIAGFFVGTTRRLLHVGMIVTIQLLIYDYV  
KRICGIGATGLA  
>comp2219\_c0\_seq2; 314 199 1518 LEN=1623; translated  
MVRHLGDTYGVKLVATLIVCCFQESSFNHNNRLTHCHSTVTNINQNPSTELSNPIRQQ  
RLLATSSGVGNFEEALQHSQNHASSLNAAGGATWDDVLIPLSLELPVNDHTKITAMDKLG  
IAIFGGCSIGVFLSIVSKSAGSWRFFLAGGLCAAISHTIPTPVDVIKTRKQVDTRFVDS  
FVEAGRVIKEDGFSALWAGLGPTTFGYLLEGAVKFGVYEVLPKAIKSWLSVIASMSSFS  
FLNSHFFSFVLSGIASGLAASFILCPMEVIRIRLVAEPNYTSGNWIRGGYKILKKEGVQG  
FSKGLNPMILKQVPYTVTKNVSFDVFTKFFYSCLRNSGVATVSHAMKFTIPLVSAAIASV  
LSSLTSQPGDTILSLSCAHGGDYRTRDISRNILRSDRGIAGFFVGTTRRLLHVGMIVTIQ  
LLIYDYVKRICGIGATGLA  
>comp2220\_c0\_seq1; 792 341 2995 LEN=3106; translated  
MTPHHIFRHRGFHSTLRTLSTLGGSLLAGCQIASSPLLFENEDTCHCSLKVNNNADDTIC  
TVRNRLEIHSVFSRFSRLLLEANRSSLLEPASKPASRIASENNTILATSVRQRKTCLEPGK  
AIGSVGNTALYDFVIVGYGNAGQSALRTLQEQCPGARVALVDPLRSPNKGTKGKGVDTDY  
FRDTRVVEFDPSKTLRLLAADPSRRAIRYKHGVLIAFGARGAPPPLELFQEEESLPRVLEL  
RPTELFRNTRKRPAMAPEKVRNAVAEAAKAKIAVLGSGWEALDLLLLVAERACKSTKRRP  
TMCFASSGIAWHTLPPYLSAELRKKLGKREVDVQDRSFVRYVADYQQSNRQQIELHTAKT  
YDLMDTRRTALDLLLLVAPDSFGDKGTAALPTMDVPESMKESSDGRPWYKTSQMARRRNA  
EPSALVCFEDDGRISVNAELHVASRIYAAGGCAKYPNSSTGHSCIAGEGSIDGSEAGRLA  
ALNMSRDYRLATRASSSYGFSSSGDDIEEAHSFATNSLP IWRSDITSFPACNGDRISSLS  
SIGVQALCVGKCDSEQRSTRAFWWTNSARRKMNRF IKDESESSQDDDDGDDGKDEDVDEG  
SIRRRKSLVISRHKTRGVNSRGLVKPVYGVGVVYLDHYGRIQGIMTWGLPFADRPGGKI  
NPELLEHMKHMIASNAGVSALDAEDNHQLVNLALGKASQKLVALSVKDQVSHTRTRWHGL  
DGP IQGFATPLYRYTEVSNSRNKTVNVLKRKDGSGGLVLEGLYVRDDFVLEEVDNPGP  
DHLSEENEDASPANIPTTMYPI TVAPASHHDDAYGKKEISLETMKELNRYLAVQLRWEA  
NENRARPGEKEDPLWLRPGDERKNTSGKQNVIDAYRRIMFPHQSS  
>comp2221\_c0\_seq1; 379 56 1435 LEN=1483; translated  
MKYSFVGFLLAFPRYRGLNSTTSLVAGFSPSPVTRRNYRNAIGYLTGCRSYVEKTARSR  
RSSLSAQSGRDSRDNYGSNPDSIENKAGTNNNTKNCNWL VVGDDLSYSASIAEYLANKG  
IRLFATVLEEEVHDSVYKRSSQNKAAILSYHNLHDSLVRSDTTGGDDTAATNLQSQHIV  
LFGVDATHLIDYFPRTKFSTIVFNFPHWRGKTNAKRNRILLDSFMGSAEVLAEEGKIII  
SLCEGQGGFPASTAEWKRSWLVPQYAAGHGLLLHKLKQYDPMYQQTSHRGKDRPWIKDG  
TDQRYIFGFPNEGCIDEDLQISCRHEL RVLPKDFVEGSAVGRQEIIEGDAVFQLTKGFV  
PDGIRMEVVTREILYPYFFDNEEVTLAI FLLNYSGEKAPLTRESADTIRSKVEASVQQDW  
NLKVAKSGRLVSRPYPTHLLPALIRESSERNLTLTNSSP  
>comp2222\_c0\_seq1; 504 129 917 LEN=1047; translated  
MAELHPSVREKTDALDAAGNTTAAIGKGFAGSAAVSLALFGAFVTRIRDSSGQTLFTD  
GVNMLEPVTFSFLIIGGMIPFAFAALTMKSVGMAAMEMVMEVQRQFDEKPHLLDENPSE  
PDYDACCIAISTQASLKEMVAPGAMVIFTPLVTGILFGVTAVSGLLVGALVASIQLAISMS  
NSGGAWDNAKKYIEKQSADSELKKGKSDIHKAAVVGDTVGDVDPFKDTS GPALNIVMKLMAV  
LSLVFADTFYAINNGTGLLQLS  
>comp2222\_c0\_seq2; 1075 35 2278 LEN=2408; translated  
MSLLTGASGLIFGSAVVALLWGYLQFKIIAAIPVKSSSGSGEEGLADQTDHVTATQRLN  
EIEYAIYEGAESFLKAEYSVCFWFVVSFVLIIFILVSWGTGWDMSRGSFTAISFLGAF  
SMASGYLGMKVAVFNSVRTTVAQKAGWTECFNTAFRAGAVMGFALCGMGIFMLYGTALL  
FKSHYPDAKEWILLTSLRTGYGLGGSVIAMFGRVGGGIYTKAADVGADLVGKVVHGIPED  
DPRNPATIADNVGDNVGDVAGMGSDFGSAESTCAALVIGSSIGLSSGWDAMVFP IIVS  
AVGIFVCLVCSFIATHIWTVKQESDVERALKVQLISTTIVMVPVYAAAMNYLPASFELH  
ATVGDVAVLTLPLDATICVAMGAVGGLTIGLITEYYTSHSYAPVRELANSCKTGAATNMI  
YGIALGFKSAIIPVVVVALLVVYFSFDICDMYGVALAAIGFLSNLATGLTIDVYGPVCDNA  
GGIAEMAELHPSVREKTDALDAAGNTTAAIGKGFAGSAAVSLALFGAFVTRIRDSSGQ  
TLFTDGVNMLEPVTFSFLIIGGMIPFAFAALTMKSVGMAAMEMVMEVQRQFDEKPHLLDE  
NPSERPDYDACCIAISTQASLKEMVAPGAMVIFTPLVTGILFGVTAVSGLLVGALVASIQ  
LAISMSNSGGAWDNAKKYIEKQSADSELKKGKSDIHKAAVVGDTVGDVDPFKDTS GPALNIVM  
KLMAVLSLVFADTFYAINNGTGLLQLS

>comp2223\_c0\_seq1; 307 1 1788 LEN=1788; translated  
RAMKKQLLYLILSLALVIFYGSCDNGNADPVIIVDGPPIESLTVNAGTIENTDFMATAVV  
NDGIAGSTISTLATANWTITNGGTTVASGTELSGDLATINIIVAGGGFVGDYNLDLVVS  
DSNGNSSTENVSFTVELPLPDFDISGDWLEPVPAGALKVGPAGQDGSWSSGAGDVAGRA  
CLFDDVYFTFTGNATGTFGVNVGDMTWLEPWQGMDEGCGTPVAPFVSSTDFTYTYQNNQL  
TLEGVGAALGLVKAHNGVELGNPADAPDQVTYEIASQTQEGSVRRMTLQIFSGGETWWEF  
LLISGEPDAVPIDVVGDMTWLEPVPAGALGVGPGQGNVSWWASGDGDVTGRACLFDDVYTFD  
ANGNFSMTLGSETWLEPWQGTDEACGTPPLAPHDGMGSYTYTSLSGTDLQIVGTGHHVGLA  
KVTNGSELGNPADAPGDITYIVSDFVSDGTTKRMRTLQIFAGGETLVAVPADLAIIPLVHS  
FYGXAPMRDGGGLIKPQLLKSMMKINSIFAAILVVCFYACGSDDGGETPGGGNTETITIP  
TTGFTSPTSYPNMTLAWEDDFDGAVLNSAHWTHETGTGSNGWNAELQYYRSENTTL

>comp2224\_c0\_seq1; 494 1 1279 LEN=1554; translated  
XAFVLVLFPPMKDQNRFTKTKLTKPKLKMSAAAARRKKQLLARKKQQEAAAAAGHDALDP  
VSAQLQKLLLEDPEKLAEEATAYEALQLAQSQIRKVKHAGSYAEAIELACSASLIILEQGR  
VSVASQLTALLANVLRHTEETPALLEKLLKGLHAAQEKAMDGKTGAEAVRLNRLQRDWL  
RKCVQWSSELGKTRYGNLELQKLLAQSWKLSQQLVAEGADENVDEEDNEVMELKADAVT  
HMALEPEPMGIVEMKTPKPTAAETKSGHTCPPADRALLTRAVLCLCAVENLRDASAL  
CRAFLEQVEDRDADALTASYVSKDDGKAPSHIFCCMLIRICEKDPRTGPLFSWLLRSFK  
RELDGFYKVVQIIQSYTSKIGKIYFNIQPPPSMMNMLENMMGSMGGGGMGGLNPMQAM  
MQNMQM

>comp2225\_c0\_seq1; 653 262 3198 LEN=3496; translated  
MTCSSAIHKALTGMTGINNVTVSLATNIASVEYVESETLTAEEIAEEIEDIGYDVT  
IIRKVPAYRRTRVLKSVEYAVGGMTCSSAVTKALTGMPGVQTVDVSLSTNTARISYY  
DDDQVENDTNEPLDYPGDFQEMIEDIGYDVNGVVDDCGEESLCEENDDNDVDELVPSEAE  
NRLEIRLQQNSELKARRNAFLWSFVGTFPILIIITMVMRVLHKDNFVCQFMRRHVDVFG  
CKLLIEAILWMLATPVQFLCGHSFYKTAFHGIRRGVVGMDVLVSI GTTSSYVYAF LAMW  
KNDSGYRFFETSAVLISFVLLGKWMNAMAVRKTQSALTQLMKLQAKTAIKITIPPSTNSS  
TWNPLTDPYSEEIVPIQIKPGNIVKILRGANIPADGTVIHGELTVDQSMITGESIPVLK  
SPDDAVIGGTICSETGTVEGDNNALTAAFVVRVTGVDGADSALS KIVQMVDQAQSRQVPIQ  
KLADGIASIFVPPVVVFSILTFLTWVCCSTGRVPTGWYDKENPIAFSLMFGIAALVISC  
PCALGLATPTAVMVGTVGASHGILMKGGAELEVASKVNAVIFDKTGTLTRGKPAVTDFT  
RVVSDEYLRSLMSNDVAQISADYFLLWLLGSLERNSEHVLATAIVKYAELNIESLLRSLP  
FAQPSDFVPVTGRGASGVINGKTVAIGNRAFAELHTGSMKISSEAECEMQLKLEGDKTAI  
LAAVNGVCAVLGIADIEKTESPDAIRYLHDRGMDVVMVTGDSWRTAKAIANELQIPRAR  
VIAEALPDSKINQVRKLQKEGKIVCMVGDGVNDAPALAEANVGISMGTGSDIAAEASDMV  
LVGGNISGTCTALHLSRAIFRRIQWNFVFSMGYNIICIPLAAGIFYPATHVRLPPTMAAI  
AMALSSVSVCCSSLALRLYKPPDIVARSSSSLCKPLGQLRLLGRRTTEQEYEMIAQQPL  
AWSDENSVGSDLFGDEMVA

>comp2226\_c0\_seq1; 303 1 808 LEN=1088; translated  
XKNFVKQSSERDSNYLCYLIKMKQKDGDPDFRSCGLDRSCPRSVTTPQGQGVRLDQYQS  
SITGNQNKRRQRQSRQSYSGPTVAIVAQTCTTFCPASTRTSLAVIPDHDFEWYDLEAIR  
KVDNKENTIIIVGHHDYNAGLLFTTERQVLGKGAEMNMFNTSITIE SDDSEGKSKDGKNSR  
GKKGKNNKGNENKRNQRFFWEKNDNDII EETPAEKEEREFRVQMQELEQEMSIDLSSQS  
SGSKHNRNKNDSDNAFFATWRVGD PVIRY

>comp2227\_c0\_seq1; 366 249 881 LEN=1204; translated  
MKMEDFGFLKGTGIGFEDLWEGEEVISESALEARLNKDGLRFRMNRTPEEAEDEVGRLEGL  
PGVTVNLPIIGETFLGPPKVESIWEAIGFTATSNNEARQLEKKAIEKCKIAKEGVSENQ  
TMFGPGGGGADTRKDWLDKYGYPRLVGTGGIFYADQLSSDKEPSGGFNMGKSGSIWVVPD  
VVKEGQYGGSMGWMKKGPAVDGLAKEKL

>comp2228\_c0\_seq1; 941 133 2442 LEN=2489; translated  
MASEESKEIPTKKMGDLKIDAGGKSKSGGGGKKEAKPQREWTPEMQADYDRILSVGEEC  
QNPDELRLGLILAKGRGSEHPTGFNLVDGFEPSSGRMHIAQGVFKAMNVNKCTFPGTNSTFI  
FWWADWFALMNDKMGDLDKIKTVGKYLLEVWKAAGMDLSNVKFKWCSEEFTHADKYWP  
NMLDIARRFNVTRIKKCCQIMGRMEGSLTSAQVLYPLMQCTDIFFLKADICQLGVDQRKV  
NMLARDYCVAAKIKNKPIILSHHMLFGLKAGQEKMSKSDPDSAVFMEDTAEDVERKIMS  
YCPTEDEKTETDTGGEEDAGKASMQKEIKIKNPCLDYIENIIFSPPGATFTAGTNYT  
DFETVRDKFLAGDIS EELKRGLIDELNKLLEPVRHHFTDENAKDLLSKVRQYKKEAPP  
KVTNVRRLNLVELSKVPAGSHLVFAPMPTATPTLQEAIDVLTLLRRAEEGQPCVLMPLPDW  
SARVTNACDGDTKSITAYFTILATALKALCAETMSKVQIILQSEAILSDPSNYWISVINA  
GRHFTLKDVMGEMSDSDPVGWVIARLMLVGDVAGVEPKSVALLEGGNNIHADGASIGSKM

ITEFFQEKLVSLSVQPSVTTGAGPNMLLQRRELEAHKTENDEYLLDDPKVNGKSKMKKAF  
CEPKNIEFCPPINVAFAAFGLPDSNGEMI I SRTPENGGDAVFKNRSELEAAFADES LH  
PGDLKAFASSTMVATLTKLSTAIKADGDSAKAGKTLKAMAKKLAKQKKK  
>comp2229\_c0\_seq1; 207 1 815 LEN=1179; translated  
XSSSSYSGSGAHSFQTKSALKVWTTTATEEEEEADRQPDPSFDRRSLLLAGASSVATGFVL  
NENKDALRRAPAIMTSIEAPSEAGGVVAPATTSVSSVEEALTI IESLGDKRFLHAVVASD  
YKFLYEQTTPRQNRSGAPKSVLSDIDAEAI FSKKKNVSSSPRSIVLAASGNLAPGKAPSLW  
PLETARCSVAGSCDSIHYAWPEQGGAI PRRNNDFAARSAMIVDGIDCGKMSLEDALEGD  
MQVLVQAPTYLLVPSYMESNLRRGLQGAFLI  
>comp2230\_c0\_seq1; 278 185 1003 LEN=1263; translated  
MPYLSRACGAKIFYETKGP IHGIPVLLLAPGGMRS SIGKWEMSPYNPMMRLSSKNEKHGK  
FL LIGMDQRFAGRSTGTVNKDDGWH TFLGDQLALLDHLRVKCHILGSCIGPSYALQLMK  
MAPERFGRCVMLQPIGLAHHTTEPGEAWEGLNSDASWDWVNSWADEMIGTKKSSDRSILN  
DLYYNMFVAQPHREFVFSITRQDAARIQQPLLIFMGKDIYHPSETSRQISRIVKNTTELVE  
VWRDAGPEKINAAASKISSFLLTDFSSSTPPR  
>comp2231\_c0\_seq1; 326 139 1323 LEN=1347; translated  
MRTARNGPEQRTSGSCCLAVVPRLLVAVCLPLSNGLVPSTSPATGRPPQRSSAAALREK  
SGSGGFLEGLFGSTAPAKSPPRVRTPEGFVTPEPKPLQISESADPARFARNTLAFVIRLG  
VGAFVLGWKIDTVFYKQPEDDNDNDKDNGEPSGDGRKTRYSLDLGPF SIRDSSSVLPK  
PEQPLVLYEYEASPFCKRVRETINLLDLTVEYRPCPGARQGKFSDEL FEMTGRRTVPYLY  
DPNTGEGLFESSDQIEYLLANYGPADASTYDRKALWPVTLEPFSVATSTLCAILLGMPGK  
ARRPDARPDNEEMLPLELWGNEASPFVRNVRET LGGLCLPHAMVSCPRGSSNRDRMVERT  
GRFQVPYLVDPNTGIEMFESE EIVKYLEEVYTVS  
>comp2231\_c0\_seq2; 293 139 1393 LEN=1417; translated  
MRTARNGPEQRTSGSCCLAVVPRLLVAVCLPLSNGLVPSTSPATGRPPQRSSAAALREK  
SGSGGFLEGLFGSTAPAKSPPRVRTPEGFVTPEPKPLQISESADPARFARNTLAFVIRLG  
VGAFVLGWKIDTVFYKQPEDDNDNDKDNGEPSGDGRKTRYSLDLGPF SIRDSSSVLPK  
PEQPLVLYEYEASPFCKRVRETINLLDLTVEYRPCPGARQGKFSDEL FEMTGRRTVGG LR  
VPSFVPDGLPVFIVLPLAVPYLYDPNTGEGLFESSDQIEYLLANYGPADASTYDRKALWP  
VTLEPFSVATSTLCAILLGMPGKARRPDARPDNEEMLPLELWGNEASPFVRNVRET LGGL  
CLPHAMVSCPRGSSNRDRMVERTGRFQVPYLVDPNTGIEMFESE EIVKYLEEVYTVS  
>comp2232\_c0\_seq1; 117 1 321 LEN=495; translated  
VCSSDLEKSQSKIHDTSKVNSSNSTSNISLSSLSVIEDAAQTHLTGRKRYRTVVPRR  
VYLD SIAQQCDEEQDSFYVVQSDPETSRTGKRLLLESFEEATTLNTF  
>comp2232\_c0\_seq2; 528 179 1996 LEN=2170; translated  
MSKDAPPCFSDGRKFPLISIPKPADRGVTNSNINDRAPPKSTSKRIRIRRRNPFSDGRRN  
NFPDLNDFKSTSESPSPGRLRVGHDSFHSHSRHDAYDDEDECYHLSDVGETSVLNMSIG  
ARAALNEHARHVAKY GIDGEVAEKQESDESENQKNNSYEISSNAGTNVFLDHQWERLFDL  
SQVNYSSSEGS DSGGI PPTPNFGTINSKFDVNVASTDRSGYEESI EVLTDVSYDYFNSSR  
INLLVTPERNKNFRTAMIVTRDGN GVEDDLFGNHQNF LFDGAEADGLPYHDEI ETSRVGS  
CRFTHSSQEGAFVQDPWVSSFNIGDVSRI SAHSVSNANCTPNTSFQNYHSHGKKGNKSN  
NFNGPLSAHFADSPSMILNDSSSFSSIGMGPSQLPFDNNGYTSPEIPFSPSNDQKSGIR  
TKEKPSPDRSANS SSSI QSTVSSFIAEARTMAKQVVS DVEK SIGAMESLPVDFLRAL EIG  
RADTLSPISRALSTPPSSRRDGSKKEKSQSKIHDTSKVNSSNSTSNISLSSLSVIED  
AAQTHLTGRKRYRTVVPRRVYLD SIAQQCDEEQDSFYVVQSDPETSRTGKRLLLESFEEAT  
TLNTF  
>comp2233\_c0\_seq1; 901 183 1925 LEN=2028; translated  
MNRGGMQPGII IILREGTDT SQGLPQLVSNINACQAVADAVRTTLGPRGMDKLVAAAGSKAT  
ISNDGATIMKLEI SHPAARTLV DI SMSQDASVGDGTT SVVLLAAE I LTKL KALVEEGIS  
PTRMIQTIRKTRFAVEQV GALAVETDREEMLLK CAGTALNSKLISSHRLDFAPMVVSAV  
TKLHEAGNVDEIMD VWSIKQIPGGDVRQSFLVEGVAFKKTFSYAGFEQMTKKFENPKILL  
LNVELELKSEKENAEVRISSPKDYQSIVEAEWQVIYDKLDACIDCGANIVLSKLP IGD LA  
TQYFADRGLFCAGR VADGDMKR VAKATNGSIQTTTNGLTESVLGTCGCFEETQVGDERFN  
LFTFCPSSLTCTIVLRGGTEQFIAESERSVHDALMVVKRITITSGSVVAGGGAVEMCVANS  
LRRRALEIEGKEQMI VAAAYAKALEVI PRQLCENAGLDATDVL AALRRKH FVEEGDENACW  
YGVNIEEGGITNTFDLGVWEP SDNKMNSFQAATEAACVILS IDETVI SPRSQDPAAQATG  
QMGGGAGAMMG NAMDIANS GGPR TGQMGPVSYMKGRGGG  
>comp2234\_c0\_seq1; 716 74 1887 LEN=1944; translated  
MKFVAACLLASAACPGVSAFAFHSTPSSNVAASTEVS MKRASLKP SFQLNAETVDSDTVA  
GLPDTIET EYELLGLPARPGRPLKVAIAGGGVGG LTAAYMLKKGF DVTVYEKTSEFARF

GGPIQFASNALSVLKEIDDRFLFDRVMEKFTFTGIRTCGIKDGLRSDGSFRMTDDSLDYLV  
NPDAPADWFVKFPLKECADLFGLPYTGVIDRDLQEILLDECRQIKPDFIQNGNPVVGYE  
NLPKSGSVSINLDDGSTAEADVLVGCDCGIWSAVRNQMYNEGGVKSLSKNKKKRQGCDSYG  
YTVFAGETVLKTPDYETGYKVYIGPQRYFVTSVDVGDGRIQWYAFFALPPGTTKAPSGWG  
GTEREDQADPEENLVEYIKSLHEGWSDEIMTVLDATPPDSVSNXDLYDRAPEFFRSWADG  
NVVLMGDAIHAMMPNLGQGGCQAIEDAYVLTENLANTKSTDKIEASLQDFYKKRILRVSA  
VQFLSRLASDLIVNAFDTPWSPHDNLGKSWKSYLTFFWKPILOQYAIFFPAQFAFLYSYPS  
GRLDDVAEKLSDEWKSRRHFEASEEAFKKAEEGFVRESGPSFFQKAEVEESKPLVAGLKS  
FSIF

>comp2235\_c0\_seq1; 517 382 2172 LEN=2816; translated  
MTKQILLKTPRGNTAVIPVDHFVSKAKAGATATSGAKPTLAFSSPGERRTASVLSSSNYC  
DYPHGHAPATTEAEAAAAIAAALDTSRIFEDHEHYDVDRESKEELLFHLIGASKRRDVGR  
KRNLRSLYNLEVEGEDDGMEIETEHYAHQHPHQNECQTHNNGWSSSDDEKEQTVVATRLHE  
MDINRDDYYSYGAGNRRLFKSPRRFYSHSGVRSSAALVPTSPTPAVRRRQREDPGLAR  
QADRP SQQSSPPLMVAFYHQGRKVS LDRIWDWITGSSAAKSESGTTDDVGVAGRSNSET  
ASSSSSTPLFPLYLTLST SARLLGGIDRQNRVSGKFGGGVSSSQNSERERKERLQKQAL  
ESIDLAKDPYLMRNHLGTYECKLCLTLHTNEANYLAHTQGKKHQAGLAKRAHMEKLRKER  
EEQLADRNNLKRPPPGRFVCPATTRKVPRI GRPAYQVFKSKDPDTSQRCLTFELTYKD  
IETDLQPRHRFMSAFEQRVDLPRDKRYQYVLF AAEPYETIAFKIPNEPLDRDPGRLVTHW  
DEDDKKFTVTLYFADGKDGGPSNENV TGGSHKEAASMEIDGSAAGTSVFAPALGSH

>comp2236\_c0\_seq1; 164 332 1441 LEN=1994; translated  
MTPPQCSTNDDGGGFR LRIPLLDDDSYHDDSGNRVLSQKTIDKFRSDGFVFPNVLSPDA  
VDALNDRLEDVLRGVYDRGQKPKDTPRLLKSHKPQSLPRDESTYPSNVETENPEIAAAAE  
IEPKGSGKHKHRKKGSPSVGP IGFSGNLENVKVLQI INIHKADSLFRRLETSASLAKI  
VAELAGWEEGARLAQDQVWAKPPGAPPLVFHRDSPYFMFDPDPVVTVWLALDDMDGALGP  
LEYVKGSHLWGDGRVGS AKQFFQADTRSLLRSAAREG IPEADLEFVSMEGLERGGLSVH  
HGR IWHGSAGNSSTSLPRRGLGLHFVPSTVRFTADTAKSKLWKSYPVEDLEGDPSEVELPE  
EDFPLSTAL

>comp2237\_c0\_seq1; 679 96 1412 LEN=1541; translated  
MTEQTS GASQPPALSDL SSETLLSLGDSHFVDENYEEAADAYAAAALSLFRETEVSSQVRA  
LSHRSSAFFKLGREDALEDSQKALELLSNNKPSGLRMGEGEICHRRAGLAAL ELKQYQE  
AKEALQAAKLASLNQKKTNKELYEDLLQRCDAGLSASKKKTATSAAPLPDFPKNEDVPE  
ATSMPSRVSSPSKAKTTTRPALAGVKGKTPKYQYYQSDKVMTISVLEAGVKEQDLTVRFQ  
PKHLVILRKDNTDFTVIAGNLYSEIDVEKSKAVFKDEKVLVLRKVEHYEWPPELLGKGD  
DNSSKATKKKASEEDSSSDTATNPKMIPSV PQDSKKNRPYASHRDWDAIEKAI EEEDEKN  
EKPEGDEAMNKLFKQIYGNAD ETRRAMVKS FQTSGGTVLSTNWNEVKDKDYEKERTAPK  
GVEWKTWDGEEKVPMKEDD

>comp2239\_c0\_seq1; 107 1 318 LEN=667; translated  
NQSNSAFARACSLGT MADQKNAVWLHYLRSFLRSDQTDASA EKKR KSEAGLEEATKTNP  
SSDFYCEPNGPGRIPVAVHHPFVAMDQSSSSSPQPSNKRVCRSRS

>comp2240\_c0\_seq1; 688 60 1616 LEN=1803; translated  
MDIEKQFSDLLQSVESLKADSVNEIRKLRVENEKLEQLKVFSGGRKQKRMTTANAGFAE  
WAQADFVRMAKNTDALHGMDNVEVADGEDGMVLTDSVAFDPEKSSYASGYDYKYL SAKV  
LITLHDVGDNNVNIDAGPGMWANYILSKERNSTLKCVDKAKLLKEGKYHYHKSIREGLDI  
DTLVAYCKERNIKAICPTSVSDEIYLATHNKVLRGQGIYPFCCEDPQSYKTL DHKWL SYL  
FCEENGIPQAKTLPLRVDTVDACRELVAETCAAGKPVFVKECFDTCAGDGVIKVDKIEEY  
DDAVERITKGRGPQPADTSGIDQHIIVQAGHPGRIACCHNVFYKGNLVS LYITKENMKIM  
DKLGE LRWDMTIGTWSKTTDDLSTSLKLELDDPCDRLIRDQAITIMKKV GKALNYTGMCE  
VEFICEHSPDAILNVLEFNPRFSGACHSFV GAGMVQDYMHVIGLMVNTNDDTDK VIAEKA  
GTFHARS DTHLPKSNFRDYNTLKFYMPQLATI AKLGKI

>comp2241\_c0\_seq1; 635 31 1083 LEN=1120; translated  
MNLFVTLVALSVLAVTPSTSANASFSRGV GAPLFGISRGGGLFGGKDDSKNNEASVAAS  
GEKVMYPAMTQOEVEDWLEHIPVFAVTD SNGAGVVLKPEDESSVFYFFLNPLAANATLTQ  
LKS VNEDMDLKVSAFSLGKIWFKLLQSDADREVLLKKGDDDDMTQATK GVEYRLVPDTK  
DLLGARMLLTMNPEDEGALKNGQEMTPEMAQKAVEKAMNESPKFKETFNEIPVFTIAQMR  
MQKQPAEGESSAEPVTL LPMYFSLQNMVGTWQQFMAQSAPELQGTEPAINLMALHDLIVEM  
MQKESEIDFRSVVLVPSIPEGPGGAAPQGPVVASAADPMASMGGATLGDI

>comp2242\_c0\_seq1; 389 90 1085 LEN=1271; translated  
MSETNPEEGDPSAVSSKVEPTQAGDEQKVKKDDGNTNKDKGKKNPVQMTYVSATQIERMV  
TVSLYMHNL SWKHLSCRQFYWFTMPQAVLTAVASVLA FVATSDALS DDEASKVILNLIVG

STASLVVFLQTMSGLKNYGTRAAMHQGAAVDLKDLLCDLHILKMKMSQVENIDQEYLDMM  
RGIQPKDPEADAEADKEALKYSETFGTIQSRLTQTLNACKSNIPEI SAAFNGLRRTAHL  
AMTKANFESFEKIYGHENFLNTYYSKADDILQGEILGSRFFPMKLPYSKVMVKKTMEILY  
TQFKDYDRHDFGDFSSTDDATNDVEKQGESK

>comp2243\_c0\_seq1; 418 113 1052 LEN=1052; translated  
MSAAKTMAALAAAVIASSMPAMAFNSVAAPRSAARRAAATATATTTTRLYDSYDDQYAKFQ  
NRGPPPSQQPAEAGAVEEEEAPSAPVPSAYGSYLDNLGSAPVAEETEVEVFEATNSYEAPP  
VFEAEPEPEPEPLPEPVFAAAPAVPQPVVAAAPPAAAKPPPAVSSRPPPIEYQSSPTLSA  
ESSTLSVTLPVGLRPPKLGKSKDISYGEGRKFRRTVYSHDDWVRHRDPDRFFRYIASVP  
TSGIYRNLAREVWAVVAVTMLVLVYNGLITGYQDVSGALHEPVLSSPFLPPLTLPATPFT  
LASPSLGLLLVFRX

>comp2244\_c0\_seq1; 121 646 765 LEN=2763; minus strand; translated  
MTESVADPTHESSHVREQGNHCFNMENYLVASRSKNERQ

>comp2244\_c0\_seq2; 197 1 1643 LEN=2681; translated  
XFMSGPQLPAKSTIRKRSVAALLESASNRKATSNERGISNIPRKGSPMAMTARPVRSNKE  
DNATANEAKESSSDAMASKSPKRQHYGFQPSANWMIRSPLLWAVAVVLPLFYWVYSKQGHG  
TSLADATKTSDIPTGDRDTTTTTILEEYRTLIELSIPPGALTPGEHRKGRYGVHATFCA  
IDWDLQSANPSTVPMFKDLKGRSSSCKATKTVVTFDYKLARAARDYDAEQSDRNETDEAP  
YPSGVVFHETRCGSTLVANLLAGSSPTMGTSRVYSESPPIAALQACARNGGNACDPDLH  
SSLIRDVFYVMGRRRPASPKAEQHRVFYKIQSIGSMSIDKFTAAPFTVPWIFVYRDTVEI  
LQSHLQQGRTNPTNSQGGQKSTVIPKVCTRNYNLGLNRQPATTLEAMKDAGVAIDKPPSA  
SLDP I EYCA AHLAGLSLAALHEHDRWQSNHKQAASGGGRFVEYSQLPDRWLNEILPDHFG  
LGRPLPEQAI SNMETIAGVYSKGRGKANQEWASDSEAKQETASKQVTEAAKRFASGAYE  
RMKALSS

>comp2245\_c0\_seq1; 192 127 870 LEN=1372; translated  
MTVSSAYQKSPMSWTERPI PGLTITTAFAVWLGITTVLVPALIQNSYYRTESGKSPLLPP  
ITILGWSIMFFNNLNLVIAFCEIALGNHIAFIQNHYQKLLKEYRDAKTGKPKKAEYLAGF  
AYLNMPLSLRDLYDGGQKWSQMWSTYSLWDPSYSNPESFGFFIDVGNWGSTIVPCWTWNF  
AILFPHYFARSNTDGTAVVLLGFIGACSYWQVLYGTIIYFLSFLWNKRYQYKPLVEVLGF  
VGFANGIW

>comp2246\_c0\_seq1; 1070 225 2509 LEN=2509; translated  
MTNESESVVKFIFPSSSTVESPFVWRYCHLKLETIRLNEDPIDIRASYGAAAAATSAATGG  
TNR IQCQESGLLLPGADDAGGHDAARESPIPNDRVACAGVLLGYNTKESFQKVVDKNLLK  
DVFCDRFFGASSSSLAAPSLVLLTFPDLKQHKVLYWFGFPTIMARAPILASTGGSPGQSW  
WAGLAEGLYAYRVREDALPPYFAVRAGGFTAGDDPGPLDIAAPLDRDRHREALDLSEGQEA  
VFGFVDP TAIGVASSSSSGSGTKTNDILMMGWPMRNLVAYLVLHLGLGGKVRILSLRPG  
GCPGLRGRIDATDSNEFGSMLS AVDGERLAENSVLMTVTLPHSRDYDYGKSDGKEDTKEP  
TYKVVGWELNARQKPGPRWVNLKPLLDQNH LAIQAADLNLKLMKWRMIPELDVDLLQKNC  
KVL LLGAGTLGCSVARTLLGWGIRHFTFVDYGTVSYSNPVRQVLFNLEDCHFHDHGQKPK  
AEAAAAALKEIAADV VSEGIRLSIPMPGHASDNDESLAETVDRLDALVKNADVVFLLTDT  
RESRWLPTVMAAHHDKILINAALGLDSWLVMRHGGADLGDDNSSQSNRLGCYFCNDV  
VAPENSTKNRTL DQOCTVTRPGLAPIASSMAVELLVSLLHHPKQRAHAPAPGGNNSGNF  
APTERSGSDSSPLGLIPHQIRGSIVTYTMMTPSVPAFRCTGCSAPVLAAYDVDRFGLVS  
RACASMDGSYLENLSGLTAFRAEAAEKLADLDELWD DDDDDX

>comp2247\_c0\_seq1; 366 56 1234 LEN=1313; translated  
MVFGITIVTRVPLALIIYMGVVSLLLRSILTNYKTAFDAIYRDQTPGIQALDYRTSVRA  
NAFSQYLYRDLNATAYTWQGNIWIPPIGVPHYSVATRCLFQSENTVMVGDSTIRQQYHT  
LRSFLESENPDNIPVAQFGEGRDFYPNLGSKNAFETTMERKVLGSKGNCFRVRSSTGTDGN  
STSYSHHKEKHGPDSTSNSTPGRNYGYHSEECLETGKYDLFRLNCFKEAIDWLQRNSTIP  
DIRHRYSFVVL SLGVWELDEYQKASCASLDRLEELLGLVARELSGPDLFVVWQAHAPDSS  
HIGDVGADTLALGDRASAWFVENRPRYMDFIDVGNMLVRANRAFADQRI GGDHHAHWGFE  
ARALQGQLVAQALHRKQOREGMDCVVPYTHSA

>comp2248\_c0\_seq1; 414 139 1284 LEN=1784; translated  
MKSARGHTGSSSSPILIRGAMLLHRVAEFAIFAVLAIATTTIFSNVVAGRGGVGPVAAES  
STAGPFADAFPTYIAPAI SRHARHYVSIHTNTRPESPGSSLAALAAASDVPRLGPDLL  
ETLKSQGYVVVEDFLPSDSEWKNLSRSDVLQLREKNKFKIARIGQDSTNTLNEEIRVAET  
CFLGRNKAELRDVPSADRERLYDVL DALRQDLEDHGAKGNKLEGLSEFLYAYYPTGGFY  
RRHRDAIKGSASFLREYSLLLYLNDSDYAETDGGRLRIHMDSGGDFLPAGEAPLFQDVD  
ACGGTLVLFESDRFPHEVLDTVRERFAVVGWYNRPM SIGDLASINSESGGVGDSASDPIR  
LAGLAVAAGLVTVGLINLLGS



>comp2249\_c0\_seq1; 244 309 1412 LEN=1438; translated  
MTAGLNSIRSSCRGSLVIDVFGNPSAKGGGDNGNCTSRNRAINCHCRGCRRYHTGAYAS  
FLETDWSNIFVRQGRDKIGKFSSDCNEFGPVERWFCKNCSSKLLLVPQHLSSEETAHGD  
GGDKVDDDDDKEEKKYAERK IAPDTKCLLNLGPVIDDTIHPDTANCWKEQLDRSENNLHF  
DKTKSVWARALPENEDRDYIYDDHQCQTLPTPLKWFGGCAGACRYEFILTHPTMCHCY  
CRLCRELSGSPFMTWIPVEKRNFRWIVCTKGVETETLTSSSALQLVVRTTTPFGSRHVCNMC  
QSVMTIVYDEQPDITWPCAGSLDDSDALPKSTEEMGETLSRVCHICCRYKPTWLRIRRDGM  
ERIEEAC

>comp2250\_c0\_seq2; 495 146 1549 LEN=1734; translated  
MEGGEIYRDNQPETDPSTVTNPNYTKTKHQLEPSHRPKGKCDPDIEEGLLYSYSRNGSRNS  
VFFGNNGVNPVPSRNLGPIPAAPVSVSVEKSVEKPEPNDTATS IHGCNNFDNGIQACT  
ASTIINGSNSKSNIKSNSNNDTISFREILPRDRTRIQELFEWFVVDYKDEFYDDLQCNQ  
SMGSQRLYTLVATTTTTAAKAPLSPAPEPQRERLIACLLGCKLTASKLNRTSRRLIIPGY  
ESRKTDRPAGRGAGGDTDPASDDENENDYHCDGEEDRRFLDRTEVFYIMTLGVVGEYRKR  
GLASYLVERALEQIGAAAATEHSDGKQPDGTALSNGTKGTDPTTEATRPPCETAYLHVIV  
DNEAAIKFYEKLGFRVRLREIAGYYTIRDEKHASFLYAKFFDRASLEKRRARRARAAWKRW  
VLAVPGRLLLEALAVGPWLWSIWSSVLVRHGPPEHRQGGGGGGMKHD

>comp2251\_c0\_seq1; 164 202 687 LEN=1079; translated  
MAFVGHATSRRQSTTSLDALGRREAFFGITSALVAGTTLVYNPEAASAKYSDYARREKDW  
HDRGEAGQIKVSTAKDLRRQLAEIVPQNSEGSKIIFCPNGASAAVSPLMENKCSDTLMALP  
SVYGRTOQSMGNSIPGFQKGYDWSASQSSSMSAAVGGFPKY

>comp2251\_c0\_seq2; 164 340 825 LEN=1217; translated  
MAFVGHATSRRQSTTSLDALGRREAFFGITSALVAGTTLVYNPEAASAKYSDYARREKDW  
HDRGEAGQIKVSTAKDLRRQLAEIVPQNSEGSKIIFCPNGASAAVSPLMENKCSDTLMALP  
SVYGRTOQSMGNSIPGFQKGYDWSASQSSSMSAAVGGFPKY

>comp2252\_c0\_seq1; 176 50 553 LEN=1020; translated  
MKLRSHSIPSSSSTLSMQEVLSPTKIGESFLRTSRNLFVAAETSERTLFVVPAGSIPET  
ESRKEQIIQVVGMTVFFVVLPPFVITILFCCVAYKHFVNTVERDDIRNATPRVPQRRSTTR  
RELPTVELSLGDNDGDGEESCTCTVMSQDMDLKSIDAKQPDQSVR

>comp2254\_c0\_seq1; 90 1 661 LEN=684; translated  
XGFSKPLSPSEFAALRAYLREEDGAEIGEDEIPVEPANEASVLGGYADTEELNXEVEVLE  
RDEVHGRHPGRRSLLGPPVVRPQDPDPGQPPGGQADPEAPPPPQQPGAPPEVHHPVGPDPH  
EPGPVPLGREGPAEDRQAHAQAGVPVPGPHPQQRAVRGGGPRERPRGRPPGRGQGVGGRAEAE  
GPGGREGAAAHKHERAAPVSGTTLERGHRRGAMAQRDELD

>comp2255\_c0\_seq1; 138 143 725 LEN=992; minus strand; translated  
MLCWSLAIKWPALSIVQEYLARRIRGVGKEFDRQHPAVPNAVQQHAVVAPEEVDPAFL  
RAFLGVHVDVHRRGLAHARHHAACLRWEARSKVDVRPVHLPEAAVPQDGLPRPRVRPVHDA  
GERPQGFGRDPGQQLRVDGNAVALVRPYAEDRLPLPFAGGRVQVPRPVLEPEALLVAV  
FDHPSDGFQRGPP

>comp2256\_c0\_seq1; 434 170 1714 LEN=1970; translated  
MARKWAAKLDMYRKVPLDLAEGTRRGNIIVSLVAIFVMSYLFYKETRDIYFTTKLVPSLYLD  
RRHSEQEQINVTFKITMMDLRCDFVEVDVSVLGINQNATKFKVKKVPLDANGVLNTMAER  
NLDQKDIQDIALHDAAVTKSIEDLHVNGEDAIRLDSKTLGYALHENDLVFVDFFASWCSH  
CRVLAPTWETLAKVMLDANEESSEEGGDEYGEQELRTAEALDVPVVIKAVDCVEHDKLCR  
EQNIQAYPTLRLRFVNGKPFDSGDYEGHRTVLDVMVQYLKLAENKLGKEKLSADGLHSALE  
RHLEMSVEERHWAEAFQRLQKRQDVSWNPMEHPCQISGSLLLNRVPGNFYIEAHSPFH  
NLAPHMTNCSHEIHYSFEPTGVLDLKEGDPLPPNFYKSN SPLNGNVYVTQKLHESYHHYI  
KLISTNGNKFQVLQSSQLASYPHDDTPEAKFILDLSP IAVSYEKISRKYDYITSLMAII  
GGFTTVVGFLLDSGIRVATRKRKIKLSHNNKPRTIY

>comp2256\_c0\_seq2; 264 170 913 LEN=2056; translated  
MARKWAAKLDMYRKVPLDLAEGTRRGNIIVSLVAIFVMSYLFYKETRDIYFTTKLVPSLYLD  
RRHSEQEQINVTFKITMMDLRCDFVEVDVSVLGINQNATKFKVKKVPLDANGVLNTMAER  
NLDQKDIQDIALHDAAVTKSIEDLHVNGEDAIRLDSKTLGYALHENDLVFVDFFASWCSH  
CRVLAPTWETLAKVMLDANEESSEEGGDEYGEQELRTAEALDVPVVIKAVRDI STL SHNE  
RQVVPFS

>comp2257\_c0\_seq1; 215 84 836 LEN=1652; translated  
MPLLGVGFSMGSSGDGDSPAFGKSLDEIISDRRKEQAKASSGKSVAACKNGKIEAKNKKT  
AMADRSIATGRAKRAAAIKARRGLAGNGAGNGASNTAGNGAAKNNASSGKKKKAKASAME  
IEKEVYRQSRKTSESKRAEQKKTGGRLPPNSSLRKNNNTNKKSVESISPEAPAVVTIKQP  
RKTQLMAAIKGMEOAGCPVPDGFQVAMQFIPSPVTKATKGMGKKSQAGSNKNNNSTNKRN

TSGRGRGGKK

>comp2258\_c0\_seq1; 610 68 2334 LEN=2686; translated  
MSANENNNMMMGKIDDEVVELRFSNINVDTEELISGIISDEFEDIVEEYADATAERNTNR  
GTKTANRLSAISFSKGTDRGPSILSVRPSLMSLGMSDRLLEKVMEDLSDPSLDPCDLPPQ  
EQNSSDNASDTSWAMNVAAPETNGDLYNDDRHDSFGASPSVSAPTLDSPSSNPFVTGVA  
MESHSEQFHAGGNYAKGRISMTADPLVFGAGGIPIDAHNGENHYESTQPFADPAISQN  
IGDQTYNDSISPPPLKRPFAMRFSVSRRTLNLMLDDDDFFHDFSPHSSGHENDEHPKPVNVV  
SSEMQQTYLNETEEVFKAQELALTRMEKIAVHDQDKVNFVHGI PHMGTLNVEPVNTDW  
YLHQLEMELQSTIQDNSAFQEAQRMNPSYVNSKTFRLMFLRTFWQESTFDVKQAAAKIAL  
YFSTKKLIFGGGEILGRDVRSLDLSVDDRAAMDCGALQTMPDRDAAGRVVILYAPGQRVF  
NTVENWLRAMWYMLSVTAKDEDNQKSGMVMVYLRGFTNRRDTEFAQAKKITMVRDSIPLK  
IVGLHYCYNDXVDESFGDGPKGAFDPKPTKSYPRTFGKTRDICFRLETYGIHVDKCILL  
ENGHLGMAWYNQWIRLRGVAEVMVASSGTATTPTIDTTIVPKKFDVLFGRGRNTREHC  
GNLRCAHLVEMHQLEYENCSKPQKTALALKIVDMVKECGGKFLKKDRKYGWQEVDPDAAAR  
EKVSHFFRHLRSTKSSADDDKQPGVTESQKRSAPC

>comp2259\_c0\_seq1; 575 19 1014 LEN=1061; translated  
MSGINETLTLRGTLKGHDWVTSLATTPEDPNLLLSSSSRDKSVVVWQLFNGSTPTTVNVE  
DHEYGFARRALRGHSHFVSDVVISSDGAFALSASWDSSELRLWDIATGKTTRRFVVGHEKDV  
LSVAFSVDNRQIVSGSRDGTIRLWNTLGECKFSISGNNGEQQGGHTEWVSCVRFSPSQS  
VPLIVSSGWDRLVKVNWNLNNCQLRNDLFGHTGYLNTVCVSPDGS LAASGGKDG TAMLWDL  
NEGKRLYSLDAGTIINGLVFSPNRYWLCAATEDSIKIWDLESKVVVDTLRPTIEGAKIP  
ACTCLAWSADGSTL FAGYSDNVIRVYTVTPS

>comp2260\_c0\_seq1; 269 206 988 LEN=1325; translated  
MPSSSNGLSNESKEKTHYEVLGIEDPDRCELSDIKKAYRKLALKYHPDRVPVGEKESATV  
KFREVSEAYEVLSDKKSRAEYDDSLRYGANGNRNTGQGRPNYHGGYNTNHRHRYRDPFA  
QFDDLFRNDPFFSEFRGMDDLFSKTFQRRNGGHPNTKSKGWGEWMLDKLGVQMTTSST  
STRTNRDGTFSSSSSTYSNSRSSYTSKSTRITIIENGRRITIQSMEKDG NRIEEKYEGNKL  
VQRLINGRPQDIGRIAGGDL

>comp2261\_c0\_seq1; 754 303 2312 LEN=2429; translated  
MLRRVTSTATASRTASSLLRRSNPMAIGGNTRAKHPSSRAFAAATSAEKRALNAQQKLG  
SSGKSSSTAAKESATGAAPTAESGGGGIGPVLALLVATGGAGAAYNGLLDDFLGADSSP  
LPQKLEDVKKPKKKKAAEATDSPTPITNIEKKNANAAAAADESLSTKELLEVEI IADV  
IGEVEEVAAVTEAIESIAKENEAAALASVVATPVDITAKIEERPPVPAEAVPKEVKKKTP  
EPEPVPEPQPEPEPAPVLMAYSTPASTLDEAKIMSEIAELKKALHEKSDKALTEAHSELA  
KISSMDVMSLDDLQMTSSQLKVRLVQMAKDLEERTKWEAVRLQEFLSMKEKEVEDRYVLL  
IKKLR IEAEHLQEEKLSEQRKALVAQAEALKEQQARSEAFLENSMQIEAKAHAEDKAAF  
EQKTEAMSAKYEELYGKELAKIKDDFATKMNQRVQOMERLTKKLSDLETSLKDSQDFQV  
GSLEAHRITAAAIALMEKLESGEPAGAAVNALEAVASENAVVSAVKSLPNSVTRSGIMT  
VQELQAGFEENIYPQCRRAANIPEGQDGLLEGQLLGSIFATLRPAPGPEDVAPSEKNSSE  
YVLARIRRYVRLGDLEKAIGETKKLSGQVAYTAKDWNHARDRVAVEKALKVIRMECALA  
NDNLSKAAA

>comp2262\_c0\_seq1; 309 86 1207 LEN=1580; translated  
MYSANNFEDEPGLEGIDKFEDIPVPSEKVRFDGLDEAAAKAERRRKRNRNRTGMIAA  
CIIILVCILIGVII SATVVEETEHLMYQDAYVPETEMPSTSPPTAKPTMHTTPSPTVARKP  
TFSVKTPSPTIRHTPSPNLDLQTDSPTEPTGPTSIMTDVYTFEPVGDITYMYLDGNHKVQA  
YGHEDSLWVQRGNKESTLPGHEVTIPTIVGLLEFDTTQETPTNMALPKRSRWPAAEENNV  
VVTLRLHHVAKSDSDELAVEDILPVNIEVYRLPNNHDWVVEESLTGDDFQNSPKAAREGIL  
VAQHVI EATDTLVDINVESAI FLPEDINARMYKDDQVLLLLLVYWEAPNEGDSFETRES  
DGRSPQLIFSNMM

>comp2262\_c0\_seq2; 267 197 853 LEN=1226; translated  
MTDVYTFEPVGDITYMYLDGNHKVQAYGHEDSLWVQRGNKESTLPGHEVTIPTIVGLLEFD  
TTQETPTNMALPKRSRWPAAEENNVVTLRLHHVAKSDSDELAVEDILPVNIEVYRLPNN  
HDWVVEESLTGDDFQNSPKAAREGILVAQHVI EATDTLVDINVESAI FLPEDINARMYKDD  
QVLLLLLVYWEAPNEGDSFETRES DGRSPQLIFSNMM

>comp2263\_c0\_seq1; 256 528 1064 LEN=1846; translated  
MRLIQSLACCLAFLLSSGPPHTLLWTVSLAVSASFASSTPHLWTSEHRRHASSSKMVPGG  
QGA STRAIDALRTRKRCLRDINDNDNDCECECEPVWDRDDGNYDGDGISIGINTNDEDN  
FDASSSCWYPINRFALEKDHERRSVRAAEYAHGTADAKIGGESTDQIPSSTTGEGIFV

>comp2264\_c0\_seq1; 446 94 1743 LEN=1855; translated  
MEFGTLHETKDVIDHNGKSI EVNHVDVRDKSRWDVGLDCINSLLRPGSATLEAMTDYQRL

GLKNLKAMIMLSGDMEDDTKNHIPQALLESSESASSDFLLAEYAGYDRRSQAKTLTNSIH  
KVLSAKKCAIKMKKIASSNVNARESASLFLSVDFESKERTNLPPhWFDLNTSKLKLRL  
DLLSWENLSRWDFNVFVDDTLKGKNTLIFVAWAIIGSPHSQYAMDMACSKIEGDTNTEV  
EGLAERKGYDFVSALKIREKTLNLFLEIENYRDVYHNKVHAADVTQNLNLFQMGGE  
FFSDGKLETFSMLIAAVVHVDVGHVGNNAFLIHSKSDLAIVYNDVSVLENMHLSTMFRII  
TGNSRDPKIDVFENFLEEETEVARCLIKAVLSTDMTKHFKLNLTIRGVILSQEDGEVET  
ESLPMDICFTSEILSFMLHAADISNPSRDTATAIKWADKVLSESFHQGDLEQSMGLPITP  
LSDRNSTHREKSQIDFIKFIILPTFELLGQLIPRVTSEVIPKIFENLKYWQEQLDRENE  
VRSRRRSKT

>comp2266\_c0\_seq1; 599 369 2153 LEN=2823; translated  
MTDTPQLAEIAIISPELGLKTDDVSDRRARQAAAEILASDHNNNGDETAGLSSQPQQSS  
VLEQDQGLLMDVLKELDRERQKRAELEARVRVLEQEVQFHRKKSTTKSNKSSKSSEASVR  
DYTIVKTERDGYKEILEAITQDRPAFSTYAPDDNIQKRRFGRNRKQPPSLPIHIVRLL  
VMPWDSRAQQYVFGEEHVYEQFYASAGKKWQKELRYFPTFFKTLPIVVPSPGKIVSDDAA  
TKKHRRFSGSANIAPPKQCVLTDLEGKTIILNIDKGYPLPEDGGWAWVGAWKVEKNNDTDE  
DGWYSNETSIMSDPSTYYGEFRVPEQGTPIAKRRRKRWSRSLVTDYPYASQMTREYLK  
LITEKSIMDSNIVKLSGQLVDTKMNLTTLEAEKEQTDERIRTLERDLEDKNKILGLVEVG  
AGLQLTKATSAAADTSDASIKSTDSANKVDEIRSAVTQVSNVTVQKADGDNNTVVSNGSG  
EEAALITKLVQQQQQLRLHDPKQQLFDSIRDKGTGLFEILKQKGEQLDKIKQGGGAGGV  
GLPWQKKEEDADTDSKETEDPESSTSSAASAPTKSNVYTPSARMRFLSSGSSKD

>comp2267\_c0\_seq1; 603 198 1751 LEN=2035; translated  
MVIRASSVVRLSRHRATSARISSGASSRRLASAAAGSSCTGDSSTVNNLLLAAGAASIL  
AAGVALGSANATATNTTDCQDQWGNLPAFGSSSDSIPGSEYSEKANGSNNTIILSKIKR  
KRTQQEIDDLEKERQKFEELGQNILSTSAALPGGSDSKSTESVTTKKMYFYRTSQIETE  
KKSKEILLAGPSSDQLGSDIAHLLGKELNNMDVGAFAADGETKVELEDSVRGKHVYLVCS  
SSNDAMVELTFMLSALRRASAKSITAVIPYFGYSRQDQFGREPVAASDVAIMYEEMGVD  
HVMCLDLHNSDLRGGFFSPKIPVENLVPVVAAYFNEELVGDGEKITVVASHEGQVSRAT  
IFRNVLQRLSGEDIELAFITKARQRGEKKYTPQVVGNVKGRKCVIVDDLNTGTTLSEN  
VEKLAEMGAKSIHAWATHGVFGPKELCQAREKIGSLKDLEYLLISNSVKYD GALPKIRQ  
LNVAPLLAEAIARSFHHSVSGIILNINETIQERYDSR

>comp2268\_c0\_seq1; 458 1 2130 LEN=2344; translated  
XAEGSRLLMLRLHTVSDRFNEPVAYXMEFSRKRIALRTVAVLFLGFLTvkQWRYIVLF  
HTSSHPNDWQAQGRTEIDEAYLIQGNQSLEYKTTIRSENEELRHRPGVVVVNEI IHRA  
FFGLGHRLHRSAAASYHLARSLSSPGASRSPAGELDPVNTDHYNQOPTITHLRFHWESCLA  
DGDQGNSSLHDEAGEKKEYNVFRFLFGEDLWELKDQPENSLMASTDSEGSDSKNVGVQNI  
RNMIVLRNDIPGYIAGQLYKDLKLPVKMKPKEAPSRNNKADALSSATVALTDKLYEYDTI  
LDKVMHSDVHFYRRLVDNRYFERELQDFQVQHKWGQRPLVGLHLRAGNGEDAHFVKSGR  
GASIEYNEMITRMLMLINEVAAREILKAEHNEQDDALSPLLFVATDTAHLIPLVEKVA  
KLNANDADSMHGLEGLRSLNATATNTRTKTLPLQIITWPQSYLPKNAGVGFDAKKGKD  
RCLEGWKSAMSDILLKSKVDVLAARRSTFTQSLPISLGFDRSRKYTEIARASDISSGIS  
NDPESDRRRFSFCEVSESDTARITCFGSMQKWLFRGKDDSMSTSKTYQEEDGKGTQASVD  
PEIWTLSIPATTSSASDQPEKREQVEHKVTVLLPDVVPVPPNEMKEARDFLRREGSHGRKEA  
VNEGKSREAI FRYGRSKIYKRYAAHKTNDKTTSGWNLVLSHVGNKRIEK

>comp2269\_c0\_seq1; 411 116 1912 LEN=2085; translated  
MAYHQTRRHCTISICGDRYRIYALFLVVATVTLSCSGFTSTAFIVNNAPKLTMLGHTSSF  
TKTIQPKRFRSPSEKSNLVLPTTTSVASASSSFEPLFRGVKRDENRCPEFKSDIVDGLN  
AQSLATVFFLFFACLAPAVGFGSVLGGTLGNQMGVIEMVASTLSGILYATFSAQPVQLI  
GPQGPVAVFVAALFGLASSLGLDFLSLYAATGSVAAVCLAIFAFTSASNLVQKLSRWTE  
TFSVLVSVLFLAQAVGDVGATFALPASVVPVLTAMATAMTLVTCTSTFGTAVALKGL  
PKTRYGTAAIRKQLSNFAPAGVVAASILLYLDQNI TARLVNHPRFKQTKGNRTSITDGMHGD  
LSTLASNSCKLWLAAPVAGVAASILLYLDQNI TARLVNHPRFKQTKGNRTSITDGMHGD  
MLVLAGLTALSSFLGLPWC GAPTRSAHVRAALATSDEDGTISGTLENRVSGFSIHALIG  
LCAVAAAAPRNLLATVPKAALSGIFLYLGF TSLQGLEFWDRIRGLFQDDVVLDKFD SVKRS  
AITVFTMAQILCLWMMQVTQSKYGVVSPLLIALLPFARWGLLRMGAVTKNDMKILDD

>comp2270\_c0\_seq1; 317 153 1166 LEN=1279; translated  
METAKRLQGYQKRGYQWPVLEFVNP TPGWKLMEDRLEQISNIEDPAERFKGYTATMYSG  
IVIQNYTEHG FARTRISESLKELQQGIRDGFEDRVNEGYTPSITGNQAWHIQRDDL TQK  
VEDELHDKLEEWGRVDLDTYVYGLRFRNTTTIKMHLDKKGSMSMGYVLHVDSDDYDS  
DGDWPFLIEDFHGRTHEITMVPGLDILFEAAKL VHGRPHQLNATWYCNVVGHYYPREDT  
WASMNHVAAEYAVPPKWANEPGSSKADDAMVREIQFRGGLREPGCMDGWCRSTSLERI

QWKGPSGPSTHWIDANGESHEFMGRLLKQKEEQKAVEL  
>comp2271\_c0\_seq1; 485 1 1323 LEN=1400; translated  
TGSNRNGKKVFSQQQLRANALLSSSGYLKDKTGISLITENMASITASSALVNVVDGAEELC  
LVRLLEDESAAPGSIRPTFVQDCEACIAHSDASQLLKTIVSDQGAIAALVSLDEEAI SAIS  
LLAACLDRVEDSSAVILNNLADSI IAISTATGASSKAISLLATLYNMRSDPTEKVGLLVK  
MIRLAVESGDVLESENSVLGKWM DPAQVETMLNEWNVEPTGRRELYQVAAQSSQKSPAAT  
QQFTLLVVETYSKSDVDAAGLEAAKQAAIGAIRDPVTLFAQQRKILSLPAIQALEKSDAP  
LFALLKVLQEGKLEDYNSYIKSNGGDSVLAQWQLSAEDCSRNMRI LSLCSLAADHEEIPY  
SVVAETLQADAGDVEKQWVIAAVSSGLLSAKMDQLQQKVMVERS SVVRKFDMDQWKALQSRL  
HLWKQNVGGILEAYKQSLNK  
>comp2272\_c0\_seq1; 808 121 1263 LEN=1508; translated  
MAPSTEDTTPEATVAETTPAAPAEETA AKRPSEEEAENSAKAKVDDSAAPAVDADAERL  
AKTHAYGKLI LFGHEHFVYKVPALVGAVAAYTDCS IKLEDPADSKDESPTGIVEVIDNR  
PAVFNKTKKAEEGKAIDLVLNHFKIFGKGGKATLTFGGNLT CASGIGASAAQVVALAR  
AVKETLPEFAKLT DDEVNAAGYEGEKGYHGTPSGIDNTAATFGGLLKFQRTDADPIFEKK  
TIKEPIRIVYASTGITSSTTEVVG DVKAKKEADPAWFDDLK KYCEVATKGEKALEDGDT  
ALLGSLNENHKL LQDLTVSCKELDTLVDAARAAGAVGAKMSGTGRGGLMLALTPTEEIQ  
NAVAEAELEKIAPQVWKTSFQ  
>comp2273\_c0\_seq1; 518 44 748 LEN=1007; translated  
MPLL TATVVKEETSSKLGIAFERLAEDKAMTIK LIRDDSLFAGSDLCEGLIVASAVGKDM  
EGMSPKDCADALREAPGGEEISLVCKGSKATIKKEKKLLKKEPKIGISFKSTTSAPGKI  
FISNIKEDSKFAGTDLTVGHQVLTINGQKCPGRVTEAVEMLTKKGVSEITLVTIDPEDEI  
VVPKVKEEPVEEVVEEKEDTEAAAAE EPKEAEEDLTPEGNKTILD TMFGVCMC  
>comp2275\_c0\_seq1; 606 1 2033 LEN=2102; translated  
RYRMTLKGTRQQIPQHRATASATNRDIEHQQAEOCTQSAEDXNKNNNHQSVVQQFERRLA  
IMLFLLSRSRSTTIPVFLSFLLVGSCIFGVGSASETEHAPYLRRDSGSKEGSPISVVGDD  
DPDIKEMYITQQLDHFDR TNEATYQQR YFVDYSRHGSKQSGSQETLPIISLLCVGGEGPG  
FDESVLIDSVHCSGDMLELAKRIAQTKSHRVHLYALEHRYYGKSYPAFVDSKTGNKTSPL  
TVQNLRFLLSSHQALEDLAHFVHTMNKETSTGDGPSANTWVTFGGSYPLMSMYARYKYPH  
LVFASVSSSAPLQLRVDFPGYKAKQGWGLKYDKVGGSEECHRIVQAGHEQAVAVLHQGN  
KTNATEAGPVVLAKKFGVCDPGKALSMRRNQELLLGDGLVVIP SQGNDPKCTGGELCNIA  
GLCRFMIQETEKMRNATAHNSTGKSNI ELEVLA KVSQQORSERTRGNEKTYKHNRQQMM  
QRMRLPRLLAGGGDNDDCVDVDFEGMVKYYS DLEVRPFGDRSWLWQTCTEFGFYQTCGDD  
CPYAAHFHQVDMLEICARLFN ISSDRVYENVQSSLDAYGGKSFLESGATSRILTVNGNV  
DPWSALGLEENDSTSFLLPVKMVDGASHHFWTHAVKDTDALEI IKIREYIYSCVMSWLGI  
TVPHNPLLSLHASNVAR  
>comp2276\_c0\_seq1; 481 399 1724 LEN=2592; translated  
MASNRSRNRTOGRSHTIKVHDHDVLSGRGVNIAQH PGENERFRSLINASRDEKYCSDFTTE  
EKKALAEVIDHIESLDPPGRFLKREGVSQSSRGLEGPWEELTKKEASKKATQALRDCNR  
PDRGTGAAQVKAPPDVKVTAEEERRRSGISLKD HAAKVEERSKQPKRNKNSSSSDNRKNP  
PSSVTAASRKSTKRSIRGSSPANNYK KHRLEETPLSFLQEGPFGAQPELSDSVPFNEATS  
STAF AETS VGATPGPPHETSVPVTE TPVQYRPTFNQREPQDYGFHHQSHYQNOQQQHLHP  
YSRSLPVPIMPNSSASYLPVDTGHHQFQSQESNEGDSVPYRAPYSPLVRNSPPRHGNGHS  
EDVLR LRPMDFRQTLFDGEEDDFESMAANAAAGLPHGHNEGGFDMMHDAHHLDET NENIS  
NGNVANASNQLILPWPSPEQK  
>comp2277\_c0\_seq1; 141 119 454 LEN=682; translated  
MLSPRSTIAAALLVLLAVDPSHGLAGVVNRFRRSAPWGRAVARQRTSTSTTSVGLPV  
RAAVAKQGLL TEPEPELSPHPPGSTPF DADAYRQOMTDLVYQRSMERIFRD  
>comp2278\_c0\_seq1; 273 129 1121 LEN=1121; translated  
MSPRSTLKLASILLALSSSCAGVRSGAPYRAERSQRRGLNKRTRGIGGVSGRAEYGSKS  
KSGKSGSKSGSKAGKAGASASASTGSSSSSPNTGGDAVPASISPPTAAPGASEPEARAP  
TPVYRPVPAPTERRPSFWYPGSDREPT EGRIDPSGGKLPNQNEVVAVVDEEDGGSPFGPG  
SGEGKQDGSPSDAFQDLFDLVTGDGGSGTSIGTETGDDQAQGGGSPGGSGNDTDGSPGD  
NSDGRDPSTGGNDRSGSLDGDQAGDSSQGTQTGISTGVSTGGSKEDSKESSTGSSTGDS  
TGSSTGGSTEVSTGSSTGGATGGSTEGSTEG  
>comp2279\_c0\_seq1; 216 62 539 LEN=539; translated  
MNL SFVAILSVIALQSTQAMISPAVSCCEDNGGKYEIVDGS DGQSGVCRKDG VNTAEFYF  
MDQNCPPPPTVSPSNAPTMYKSVYAVNNCDATVTANFVLRSSRRLGGNRNSQVEVQOQC  
TYVGP TNL DVVYTSQGSYVSSGND SCLNIGDSNNSDCNX  
>comp2281\_c0\_seq1; 224 423 1225 LEN=1609; translated

MCSNGCVCPTASWRGELSRLPPLRRATNRPGDEXALVGVMGVAVTIDYNNRTSTGVLS  
LGALS CDHCECEAVRRRSNGIPTSGDVFSVGKITHEPATKISFPALCNGMSLGGVGVRIK  
YVFKVYAVGAYFDPIAMA AVKKG TQADIEGALVDPTYPR TIRIVMNRGLSVDFK FIAALN  
EAI EPRLNGKNLETLDEFKELFKIDLIEGDEIELTIRGDTLLLKTGLGVGTIRS QPFTE  
AMCDVYFGKESVSPTLKEDVLKGIPAL

>comp2281\_c0\_seq2; 197 423 1368 LEN=1752; translated  
MCSNGCVCPTASWRGELSRLPPLRRATNRPGDEXALVGVMGVAVTIDYNNRTSTGVLS  
LGALS CDHCECEAVRRRSNGIPTSGDVFSVGKITHEPATKISFPALCNGMSLGGVGVRIK  
YVFKVYAVGAYFDPIAMA AVKKG TQADIEGALVDPTYPR TIRIVMNRGLSGEFLFFSSV  
DLHVLFSDFPKL TEACPSXPPAPLVDVFM TIVFVEYCAVDFK FIAALNEAIEPRLNGKNL  
ETLDEFKELFKIDLIEGDEIELTIRGDTLLLKTGLGVGTIRS QPFTEAMCDVYFGKESV  
SPTLKEDVLKGIPAL

>comp2283\_c0\_seq1; 158 232 450 LEN=1457; translated  
MASYSSALALLLVLSNASFFANALDIEFDRIQCDETL SAYSSFSEIEVTCNDGKDSRCSF  
GNDVNIKGMCKC

>comp2283\_c0\_seq2; 235 232 990 LEN=1295; translated  
MASYSSALALLLVLSNASFFANALDIEFDRIQCDETL SAYSSFSEIEVTCNDGKDSRCSF  
GNDVNIKGM LHYHNL PYLTNNTGYASANRLLSVEYNLFDLFPVDFCGDWAVPYNSTYG  
HDCPDWDSYAFDIDYKLPWDDDDITWFATGWQGVSNLAIYSNQTVDSELITYCTMHHW  
TYVTPSEDEDFR TLPSAAVTGIALASFLVALFCCCCYVNCRRRQKHVTDRDYDDEVSR  
KSRYERYEEHAC

>comp2284\_c0\_seq1; 594 86 1564 LEN=1672; translated  
MNEICGFSSRRRRQRKNLLWNSIAVLISVSGSMGSTYAEDFATQYPTTESTRFDDDDNSY  
DDILFFDLPSMAITLDVDTEDNVLIPFEDKLTESI EHHLEHFYQKLLTSEIGNPKFIHV  
DLESNLLWTEVSMAPNMRQTDDVTFVKKYQVQGIFNSKIKLQVEPIVTEEGEKEKLSLLN  
QVLMDLFFLEAFEDDYQWDL LHGF LLEPLLHDI INVEINIMDSGFVHPHDANGNLVFEQG  
GDDFYSKSIFSLQTKDVHWMVGVILATSFLVGLIALWICLCIATKGGKRHYCFRWLRGK  
TTTTYYDDKSLEGSSVTGSTSSHDSVSAESEATSLSYNLDAWANAIT SITLRNPARRKRG  
AKVVKRPFYFRPSDEHSSDLSCIAEGDNESCTSTVKSAGTSRSERSRRKRNRNSKSSWKSST  
AYDLPSLDSSSVSSALSSVIYEEPEKETADSDENANGITEDDDGTKQSAPLLSERGLIR  
LMPSDDEDDFKM

>comp2285\_c0\_seq1; 873 903 3017 LEN=3178; translated  
MKTHEFDIRVALVGYVSVGKSTVLNALLGDRFSEVSLKRRTAGVNLFRISQPSQVEGKKD  
LEGSATQEWSTLDDCKVMKGANATHEEISEDNKKLRSSDVVEKTFDIQVDYQICEMRPD  
TNLILIDIPGINEAEASKKYDYVESNWDTFDCVVVMDA IKGVNTEEQVELLK FVQQNN  
QNTKDIPTIILGNKIDDPDEDAIALMHETHTKTMEIFGHVDSKYMPHERKTKDNENNYF  
GSNETDTAFIPISAKNAFTYRKAGR IDTDHLKDAKHRDLLNKIGNDELGRKWSKMDMDKK  
VEAVTEILRDPaelDERLADTNFN TFLAVLSSFVGS DERQQDILRKQTELELARISHGVL  
GEKAI AASILEVFKRMKPIGWVDTGILHTAFWGAFENFKCGALIDAFETDVSPKAFGRAF  
TELEKYHDVASKLGTKESERAIFEMKMLRSQVLVLLQKVNWSFHSFCMEAGVRLHSD  
WGEHGCGLCSGYCNTVYRYPQSSRYAQSSTERSYGVCRRSKFASWPDTLTIP SATTW  
ANLSPQDWITILASLSLVWNQSWFIEDFGHEKLELEAALLRYRSFFYSSPVGTLSSDKFT  
GNQDDDTALNEFILSHSYKDAIINIYGTKSKSKSESQSKNRFDLLSDVIDTNGTDNAAI  
TKVRMPMSLADPSHWGNLAWKYIKFCNKQEDMIDSREKKKPRLL

>comp2286\_c0\_seq1; 192 185 757 LEN=984; translated  
MAMTNERWSAPGGTNENDALGAFVSNSTTQTDRSNKSDSLRQMLCQDIGTRTLVLTGKPS  
SKARSLIRSMPIPSNNSLGSMTISSTESLWLYGESQKLGSVTNI SKNSLLRYGNMDSRN  
SLLSLNRRWRATPPNAVNSNPQKIFSSSFNAPISTGNQQSRWKATQGGDQPIGMVTRKTS  
ATYLFPAKSA

>comp2287\_c0\_seq1; 287 208 733 LEN=1234; translated  
MSLLGFASHHALVNLQQSQKTL SIFEKNGGFSPTWKRRKRS DKTKVALLGGTSIATSNGD  
PTFGGLATGILFII LCTAVGTFVFANQVYTP EIIEGAQMIRKSNRENEIRKLL EAVRSHQ  
EDGKELIELRLPLETALGSTLEEYVA AVEGSEQKSDTIFTMADKDLVKILKQNV

>comp2288\_c0\_seq1; 210 1 836 LEN=1174; translated  
XFTKPAPGSRERMRFDVYYSTGTVGTRLP LVLPPGEEPPRDKIGRVKMMTHLIRR DVSSP  
EILEAIFSDPYAHGGARPREGTSNRARNDLRLAQQNDRFHRAFHDALHGIIDTTGDHPRS  
HFLNWGTSRFLQLARSVFSFRRIKSGSNQINVP PPHGGDEGEPPREGTEYIDMENGILE  
VVQKMIQKSPRLSERWELKEKKQAASKSSGSSSKTERHAGDHLACGGGRHGESSDEHDG  
NEHEHEHDDGEGERMDLADEHEHDDNDDEEFGRMLGL

>comp2289\_c0\_seq1; 663 1 1690 LEN=1708; translated

XDNPEVTQDYSEQPSSVLEXNLFLEDKIGGHYFNQIEKRTRRQQQRKRHRSIMSTLRQV  
RISQFALILLSVWIPRIVVDGFSSTTQHRICGRKAPLFSVVEDKQPOTSSVNEDEEDGPA  
GIGGAEFFGGNKQKEELYDPVAEREAGKGIELKATSYNRFSLVGAFDSVEVASMAQSLQ  
AQINEVLYSDNKKLNRLKRNQKDESDQQLDFPDVNFGRSLSWDTPMTVSSTNPFEEI  
RAAKNFYQONIDLAIVGGRRVSEGVSELSWELSVVWPTFWSPRVVLSGSSTVTTASDKVTI  
TKQVDRIFGADNNAALLSLLGGQITPRFWDWYHIGMTPSAEQVPRKVISQKGGMAVYQIP  
PQLVTAPSLIETGTRDNRNAQMVPNHSFTCVIRTMGPKDDRDIYVPTTPIEVKIGRNDRS  
QNDNAEDGKESDDRLLLSWSIPLSTQFQALNKNLLPAEDEDEAEEGAFPECNYVWQPLR  
QVATIKYGGNVQDEEISGIRKKLYEQVMKEGLKPKLDEAGKPKFFFQNDVKACYIEDGL  
GMVVYDWRPEFANSNEVGIELMV

>comp2290\_c0\_seq1; 254 494 1270 LEN=1693; translated  
MFIFPPRSLVSSLYSKTKREWEKLAASVKGMVTIAYWDTEGGSRPPRLLEGEYKGTPTIKL  
FKPKRRQRKKGSSAEKDVVEYQHGERNAKDMRKFLYQLPSFIERVKFGPDDLAKARSKA  
DKYGLPVAVLFTSKASTSTTVKWLSEVFRRRMLLVEVPPTEKNKGIREALLEEFSAGTSA  
DDSNSLPALYVIPPQEGPLSSETDKGTLQIYEGESFNRRKLQSFFDKTVLKKPVLEPLVK  
PEEDPQPKKESVGGDEF

>comp2290\_c0\_seq2; 209 1 1075 LEN=1498; translated  
KCSHIQFLHTKVTTPLSKYDKNEAGNLRFLTVALWQQRCPNRSNGRRTGMDGSFRVLSF  
DNHYDEPIRVGLNSQSVVFLQCRDARFLELERNRGGQSAPCVGQHLPGGGYCQLLQPEW  
EKLAASVKGMVTIAYWDTEGGSRPPRLLEGEYKGTPTIKLFKPKRRQRKKGSSAEKDVVEY  
QHGERNAKDMRKFLYQLPSFIERVKFGPDDLAKARSKADKYGLPVAVLFTSKASTSTTV  
KWLSEVFRRRMLLVEVPPTEKNKGIREALLEEFSAGTSADDNSLPALYVIPPQEGPLSS  
ETDKGTLQIYEGESFNRRKLQSFFDKTVLKKPVLEPLVKPEEDPQPKKESVGGDEF

>comp2291\_c0\_seq1; 656 56 1765 LEN=2040; translated  
MATINGLYELARRPIKNGNGWFDSLPSLPDFSDEYELVRDTAGTLISNTYDEIEQRLPDD  
LKNNYFVFEDQVGESLAVIGLGDVRPRTVIKWAAYLLVLSIVVLKYVSKMKRRRRHKMLY  
GNNAFPFPFTKASMAKTVSALVTNSQSPWFFKKCESEDINSSVFRRLRPFVKAPMVAVGDL  
VTAKEILQDPLTMKSESHFSSVSSIAGGPNIITSEGPQWKKSRKAVSPAFAFMKKHLDRMH  
VCREETEDWINNKLKRYIDKDKDFDIGKEMMRLTSLILCKAAFYDTEVDERAAIASELE  
IVTKEFGYDDMNRPLRVRFGILRSSTRARLARTRIQDFAKKILHSHRKKKQTENSTAVD  
GNETILSCIVKSRKYEDDSRRISDIVMFLFSGVENTAYSLAWTLFELARNPRVASELNSA  
LNGNNDKRAQEMLKDVLRGMRRLRPLPSIGLRTVGRDFYMEDRSIVIPKGSQIIVPSLV  
TTRFDVEDAESFRPSRWRDHPDKSFLFSTGRRNCVQSLALAEITWVLSRLCAKFEFHV  
VDDGAI EYCGATMKCLGTRLKAKVVPKHL

>comp2292\_c0\_seq1; 492 254 1603 LEN=1663; translated  
MATSSDNQTDLSRNHLFKIRTITAFVSLKSDSFHDDAVALKSKLETTSRALEMARQQLEG  
KSSGSGYEIQTLRVATNPFPEYLLGSDSSSKTACDEAVVRERLKVLDCCFEKHGIAFVSL  
GPACSQETVEVCTRIVDFSGRFSCSVQLASNDVALARVSAETILRNSKLGNPEDGGLANF  
RFCVANVKPYIPFFPAAKARTEDEFTTIRFAIGLENGALLKDLLEKDAGRTIANILPPK  
TLSPASGSSFAAGFAESVRPIQSICDNLVREWDGSSAALEYIGLDASFNPSLDEEGSVAS  
AVEALDEVSRGFGVGTIAATAAMTTAIQTKLPSEEEGFGIKITGYNGLMLPLCEDKRLA  
QLATEGKLRMTDLLNVSSVCGVGIDTVPIPGDASVEELTSLLLDVAGLAERWNKPLSCRV  
FPVPNKTVGEMTTFDSPFLVNSKILPVSS

>comp2293\_c0\_seq1; 392 1 1717 LEN=1752; translated  
XQNF EINTAPNXMPPQRGTSNDRGVDSLSEPLVSESIDDTLGAAAESPEIASIANSKDIV  
VRKCKRGGENENNVVIRVNHVFLNLLLSVLYGISNSLWSGTAYLAFLKMGHGNGPV  
GNI EAVSGLASLVCALPIGYFADKMGKSI VIRSGGMLLFTT SILQIGILQWVGTDFDKNE  
DDEDSNSNRNNTALWLMGAIMVLWGLGDGVVNGPCQALYADSTPEGQRSTYFTYQFACYL  
SASAVGPLVSI VLFQVLGDEWDLYHLRLVIYITGLGMEVFNSWLMMLFDDSKALDEDQDTV  
ESTDENDGDASFDWSNEGIEQRLP SERDTTPTTLQKRQEWIPYLVFFSGLVSSLGSGMT  
VKFFPLFFKDEIGMSPSQVQVTVLVPLVMIVMGS LCTKIANAGVGRVQTTALYEVGGIS  
LLLAMVVFKNYLDVHPFLVPIYVMRTSLMNATYPLQQSILMDFVPKDKRARWKSLSVA  
SFGWCGSAAF GGWLADKYDYHTFLLTAVFQSVSLGIWCCLLPLVPRVEGSELEEDGEEG  
PLPDQAEAADDHSPGFSTTEENGLTESEPLL

>comp2295\_c0\_seq1; 443 129 1382 LEN=1622; translated  
MKHRNFPPSSMLVFFAPLIANLANSNYHHA VEGFSSPLLKNASKPRIATP IFAAKGF  
GGGGFGGGGTTKTKKQSGKKGNRLADSLADRP SKPVAKKGQTYVKSEQDAMLEELAA  
KSSRTPIGKAVNEAKRALHAAGIDTDVDPFDLMP SLISSKFP SLQDSQLERVAGMVKHA  
LHPDRQSLLDQSIVADEWRPHEEIHAYMPDLGETKPFWDSS ELSICQKLSENYDTICSEY  
QALLQDQKDRFQSVTSMNYESGWKTLVLFYNGHRIPDFPYHLCPKTTELMESLPLAGRIA

GFNRQQPQSGIPLHSDGNMWWLTLQMGIKVPEGEKAWIRVGPETKRWKEGECMLYDTTYE  
HETFNESETEERVVLHIDFFNTLKMTTPVEIEVMRYIYSMREEFMKAEGVSKVGNQIL  
>comp2296\_c0\_seq1; 576 332 2497 LEN=2692; translated  
MLRSGGKKFKAALTSGPCRRYLSSSPVAAAAAASPGDHASSSSSSIRYAMPLSMLSLA  
VGFAAGRLSFRSPEEEERLQQLPKGNPLACCGDNHTTDDGSQAHSHSHSHSHTHSSNFWK  
TTSCDAPQLSEEHQQLVKTLRRLVGKDCFLDGREINTETTAYLKGARMGKTALAIVRPT  
KLKQIQDIVQASVDAGCAVLVQGSNTGLTGASVPRPQSDGRPTVVISMKNFDTIFPIDGG  
EKVVCLAGVGLASLKHVADNFPDRESHSILGSTFLNPTTAAGVAFVSGSGGTQSRKGPFT  
DRALYLKVVDPKYGKHIVKVVNTLGIEDLDSEEGEFVANKALDGVIPPTLDSYIDVVKNEQ  
DNTMKSNNYTGKDQCHDKKYKEKLCSLDNKMSRFNADTSGRDCNRSEGKVLILATVHDT  
FKAPTAKSLWISFDSLELATKFKTEVCLDSPEDLPVSCFYMDRDSFDVIDEAGRFGHL  
IKFFGSASPVVSAGWAIKLIKIEALDIRGASTFPDVTQYLLNFLPAVLPKEIMKMGYARD  
HHIATTVGDFNGSLGRFEERFEKFKENEGKIDVYECKTNSEKNGVTAFRFIAAAAFKTY  
CVGTGLQGYSVDYALPKKDS SSPKLPESNQPVKRMRYSHFLCNVHEDLAYEQGVDTHAA  
KMELKHVVDETYHGRLPAEHGHGTEYHAPKDTQKRWMKMDPLNVMNPGVGGGLSTKYRYEK  
E  
>comp2297\_c0\_seq1; 371 256 1416 LEN=1648; translated  
MKLTTIATNAFLVAAGSFQGSQAFAPTSHTQHKTSSQLSMAQSGTLPCRPIGVGHAAPK  
TVVTNKDLEAVVETDDEWIRTRTGIAQRLLVSGESLRELGVKASKDALEMAGVSAEDID  
IVICATSSPEDMFGDATAIAAEIGCSKATMAFDLTAACSGFLFGTGTAGMYLSSPNTKLN  
NALVIGADALSRVVDWEDRNQCILFGDGAGAMVVTNQNDSDDESDEITPGLLGAAHSNG  
EGYEDLNCVYKGTPEVSTPDPITLENSEYNNLAMTGQNVYKFATREVPRVVTEALEEAN  
MTADDIDWLLLHQANIRIMEVVAKRLKIPKEIITNLADYGNTSAGSIPIALSEAVQSGQ  
VKKGDVIACAGFGAGLSWGSAILKWG  
>comp2298\_c0\_seq1; 449 1 996 LEN=1152; translated  
QEPSRTRQINEDKQNEQEDVASKRENLWKHRLPSNAPATQNP TARHTEPKYNTTQHNTSTN  
EEGQRDMTETDEPMGESEGMSNPTRRKKPVKPAKSSSSSRSSGNNGTTDQDYDHHHTTD  
DDSETDSRKTSSSTGKFAKRTKKANRTLKWEAMIQEHDQLRGTRMKIEEANTPFAYYDS  
GSETDGSFSGSARGMSVASNDSGGSHRERGKGGPPNRRAGGICWDALTNKLEAHAAVAASS  
SAASARFAPGSGGESEGDGDGHLRRRDEQRAELKRLEFQEHKRHYNEMEVLRFRREHP  
DGEPTANGHGEDEGEDEDDYDEQNDGDDEND  
>comp2299\_c0\_seq1; 431 190 975 LEN=1032; translated  
MARPAEKARAMLNKWKMRREEGNATPSVRGARPKLASECEHLGDAEFYRTQINKEITGMI  
AKIQNPALGEHTIRDLNDEINRKFREKHHWNKRIQFQLSNGTIDYNKRERSARIEEGDVQF  
LAVTNNGRKHGPTYRYFGAAKDLPGVKELLEQQQEKMRAMNRKKRGPHEIYKHVGVGYFG  
WRDEEDGVLELEEDAFRNHKNKQKQKTDANGTGGPAVQVTEVDLDRLLEKDYLDVPSQ  
EEMKQIILAEMKALLARFSV  
>comp2300\_c0\_seq1; 245 95 952 LEN=1498; translated  
MIHPAKRINQINLQIANEEYDEAIVSLVGLRTIKLVLSGDARISIESERVEIDRDNDQR  
DDTTPSSGTSLEYDFDFSTPKSPSILETADVGNECCHSSYYQPNPQRTRSDLALASHNKSD  
ESTTYCSAQKHHQPFRDPMVVRGNFFRASLDNKVCQQLSYVALYNLALSHHLKSMQLSR  
KKSEKQTEYLQKALSLEYHFHEALMAQTASNSIPITHGMALLGNLGHIHRELGNQRSSET  
CLQCLLSRTMYLVVVTGQVDKMGDLMDTTFDIVFPCLSIGSPAPAA  
>comp2301\_c0\_seq1; 411 116 944 LEN=1063; translated  
MATYVVANDTNSRRRQSSQVILLSPEEILGLVDAVDEDEDNETEAKVAIIELAATSTTMS  
VRVTSQQRHRRSGPSPTDLHESPPQPRRVSWNGEAMISSDDQGIISDNIGLYDDGIVDSK  
DDKYGDDVSDDSMTTNPAPNPPSRETKNLDRSHYWNSLNDQPRDILQATRKNNTNTNTY  
HSTDYPMNARALPPAGI IDNPVFRPIDADREAGNNTKKLRIAAAKTANATTTTQIAALF  
LILPAQVHDTAIATPTITNSELHHRGLKFFSKLQD  
>comp2302\_c0\_seq1; 320 1 1175 LEN=2061; minus strand; translated  
XCACQFLTLIYNDGFSTRCLEFDKNCVDAIRLKYLLSKRIIEVDDLKLGAPVAMPILTEE  
QRDYGRFTFQWLGDPQRGLDPIELEREFHTKSKILLDEEKIFLALRSVSHIFLCTNLRVMA  
ILVSGLSNMRFLYTSLPYRSIRYYSVYLGPAVGMKSSVCIYTRNRWNLASIGFSFLAGT  
ADVLQLEILSSFIVGCHTDPKVVFRPKTCIGYEKNPFGLNRFPLMAIEINPEQLNVQFH  
HVYPLLLLEETVLKALEQGTKFFLYTNLRLIIVTGRMDVSVVPYKSIHGFFFFETAARFDP  
KASISLYTTSARCTQTDKPRVCNLLISSVNISPQKTDIYKMAHFILDHTIIHPPTNVGAA  
PPRVIMATEAVQAQDSDEGIIVASEAVLIRK  
>comp2303\_c0\_seq1; 298 404 1423 LEN=1684; translated  
MIVENSWLHADDPVRSVTSKKTILSSRNQTSANEGRRRESAPGRTLFRKTTSSILWIESAR  
DMSDEEIDACYQNRDYESFRSREKMRSGFSAWSFMNGTKSEDLLGVETRMQRFRHRQR

SKNAVFAVIFEQELRQENGRDAHSSTGDDDIILAQVYQQYTMESTRLAKERAVLNASQVE  
RLTLRRTNGSLMNDVETEEMNKETKSDRTANVGGSPWQIPVSNRNKTDNRNRYSEKVRVYVSCS  
RPILPQQYSGMSTPDMKLLDDQKESQDFRYEMQTEMQGRGSNYGSRRQEAPVQQQINRAEE  
KFHYRRPTGVLRLKAQDECQSMPLYATAKNNYAGTLAQKW

>comp2304\_c0\_seq1; 623 194 2017 LEN=2063; translated  
MRSVKYLVPCYLTASIVSIVAGFQQQQPNQQFRLQRRVVDPSTLSRQKMPAKTTLSKKS  
DAYSRTFGRTPGSTATQLNALSSSPLGALAVLAGIVVVHESGHYLAARAFNITVEEFSI  
GFGPKLAGFEALGNEFNLRALPLGGFVRFPENYDSEAVFENEELKRKAKRTLRRREEKRN  
EDGNNWNWKDEALDAASLGYWGEKKFEEARIEKRIERENKVASTKPFWAGLFGASNVA  
TNGGENNSKEDGELVDIDKIYEDLDELEEFVEVEYFEDPQLLQNRPWQERAVVLSGGVIF  
NLILALSIFYAAIGPLPVGSSEGLPRAIFDNGVVVSQVPRSDGPSSGLLQRGDVITEING  
RPVQVLGSKKTSVAAGQQQVTDVISAIRATPEGESVSVISVLRGATKPVATTEASSLDAVA  
TKQTTTETKTSKTTTTVRIKPSTADGSNVQSIGVMLSPRIERLERLKSNDPIVAFQLAWG  
YLSDFITQTLGLTSLVLTSSLSPPGPPGQKISGPIGLISQGSNVVATKDWTAVLLFAAG  
LSVNLGVINALPLPALDGGQLVFVVAEAITGKKVDQKLQEKVTSVAVLFLLLWLSFSA  
AIGDVGGLFQ

>comp2305\_c0\_seq1; 336 162 1115 LEN=1667; translated  
MTPPLQNDKTFDVPKRLRGMFSPKRQVLKMGAGAISSLPVLVWVKWAIDQRNKRAED  
VRTRVRVNVQTIDDLMIERCRPGDILLFDRRWEHCAAGPLAAFVLCALGRTVLCFADNSK  
AIGEGKFDHCGIVVPGYVKHESDRYDPTNLLLLLEATAAEGIVARPLLTRLEMSESRSV  
LPLALPGERNDQFYESSSSVIATEQIVNKKLEEFRDNWVLSKTMNYSTAHSTLGLIGA  
IAYLLGYHTANPGPTSPSAWFVTKALVDAKVAQNVSESAKEAKVEDFLRDYRFQDQDVI  
RLRPGWRFLAPVSFRET

>comp2306\_c0\_seq1; 301 269 784 LEN=792; minus strand; translated  
MMGMNMSRSGSSPEDEEFVVACDLLDACVWRDRSSLSFRSVSSDVGVPDPSPVSVGLV  
PHPSSSSSLEENRVVENPDCMGEMFPEPEHLIAATPIVLHMVIDSAGDFNTATNASDVHA  
DVNDSRSAISIAVEPWQRMMLLVLSFPISPLVIVFLLCSILRARIVPDSIL

>comp2307\_c0\_seq1; 332 150 1136 LEN=1369; translated  
MEADNDKDDPSVETTTTRSQDEQQLDHELKDVVEGNKNIMPRSKDIISGNYGHRKLAPENHG  
SIFWDCFVRSLSPLHAGGQLTKYEKSLLDMMMACVKKMGMRVFKRIRDESQSTGKEKLO  
SQEGHRSVWCELRTFNARSKTLNDLRRYPDYKWKTLHLERGDSSNIVASAKATASIVAET  
ILSSKAKRINEAISVHEKKDFRKSVDLDEKKEYYQYRFAMNAVEKHIPENGIFFDAFDEK  
SNLRSNNCTNYVRAESDNETDIFVAPGIATDMVLGQSLIMTQDHRCQQRWLREEHAKARR  
EKLQHDNDLYCALFKNVFAVPNQELKPYW

>comp2308\_c0\_seq1; 398 279 1519 LEN=2141; translated  
MKIVKKNISAKDGSVTMLPPETPEDLWHSYNLLKKEDLVRCTTVRKVIKESSTGSTTSS  
KKRLMLTILLGKIDFPDALQVRLSGQVRNQNELVRLGAHHTLMLELHQNFTEIKXLLGP  
DLPDPRGSLQPDRAKLAIVMHSGLAHLCLVTGSLTITKARIKTNISKKRTGSSQNSK  
AITKFFEAIIYQAILRHVDFTKVKALLIGSPGYTKDDFFAYLKETCVKRDDKPLRDAVHQD  
KFVLVRASNGHKYALEEVFSDPVIAKKIEDTKVVVEVAIILGKFMRRMDTDPDKAYYGYSH  
VKSAADQCAIDSLITDELFRAPTQVRCMYVDLVENVRNNGGTVYIFSALHISGQQLGQ  
VSGVAAILRYPLPDLEELELEYEAAMMGNNDSEDEDEDEGIDEVQEDLDDMHF

>comp2309\_c0\_seq1; 443 482 1327 LEN=1525; translated  
MPPLSESGHGGDDVDGFGQNGIERKSGATDLGFTSSLMESISAFESKIEAWAEHEKSKTDL  
RAKSYNNTLMQQQAAIDAQVTELASVQRERGANLISGVKEGKGDNSSESNKENIASRRIS  
LEEEESTKVQVEILRLKTERDNRKRVKDIELEESKQSIASDAVLRRAEEAKNTTIDD  
LTRGVVNYKGLDFEQTGDELEFKFDQLDPHDP SRLFSFTLF INDEDNYDISGCNPNI  
IAENLTEILEETNASSDRDNMSTLARRMRRAFKIDICEPERY

>comp2310\_c0\_seq1; 493 167 1627 LEN=1726; translated  
MSDAISVLRGWSNSGKLESEVAFSDEGLRLGETASLTASETVEVAVGGGKTCRYTVGSIF  
LQLVDVNQSLLAYRACKKHKVKDAVKAIDKAELIAFFKGGAGPKPAVPEHAREGAAPVS  
SSKPAPPPRPEGDRGRDRHSNREDKKRHRSSSERERERDRHRSSKKRELSSSRSSSRQP  
ERKEKAHKPIDPEMLFSNLSVVVGKREIKAKRDAEQAKLHAALSTEGFGTVAKELIAEFR  
SKHSMHEIPVGDASILKAGAGKDLRIILKLYSETMEKKSAPGRKPTSGSSRAKGFSDG  
QKRSWRPYLVDKKPIIVLPKGMTAPITLVNAHKFFAESQFVSRTVMQKELRTKRQAPKTH  
FERQVNARFGGGTVQYELMDNPRSKLHRPEDWERVVAVLALGQSWQMKDWPGPYSNPVQL  
FHRVFGFYVMEGDNPVKELQGWSVTQTRVSRDKRGLDSVTYASFWNALDEWMAIHKPEL  
LPQPNE

>comp2311\_c0\_seq1; 421 1 1069 LEN=1605; translated  
XSNWRFERVPSSKKTQDFVVDSDVQVKKTKSSKIFDSSPSESQEGGIFYFQRICSRNESH



KTKTAHDSYTRVSESSSDCAVTTNGDQQLPNFFFEVNVGDGDLFADLEAVADSKDDSEISF  
DDLMDIDVEDGASTEHIQNYNGHPYSDSIYDVDGFLNATVDNLRNASLEDDDEDINMMSCD  
DTASNMMNTYLSPVTSKASLSSSTLPFGSLDSPTCVAQDMALSPIFSSSLSMPSASTRPAF  
QQMRKIMTKQLMDINNGSMRSLHKDSLPCAEGMDQMYLDTLQKLSISMARSNRTRKSL  
SIPLQTMQDGNDSHGLQRQQDYNNREYTRVNQVLKSVQTSRSHVDTCLQSVRMMSR  
>comp2312\_c0\_seq1; 428 160 1911 LEN=2183; translated  
MENNFGMICRNDGIGTQRAMLAFNRGRVYDCGRVPPIPRRSSDTTSAGAITLIRFLMTSH  
TNHQHRHFSESGWRRRIEKGQILMDGIVVNDAEEMELTKANVKQRYEYVRGPWREPIVAVV  
VHDDTIDTGPEPSCQLKILYIDHLMVVKPSRLPTMPSQTYFEFVSVLNALRQLHCMEKE  
LSKDKEDEDNCEVESYSNTNANTDSISKNHCVVATSTVRRLIRSHCSALPQPVHRLGVT  
SGILLIATSLGRQLTDAMRLKSHNVNNKLRKTYRALVYAYRRDERLSIATDDGSPEV  
DGSSKERSTREGPKMLIPDFMMIDCPIGPVFPPIGGDSIHAACPISGDSNDKIDPLYSHV  
HLHNQVSDVQENQPQERSTTASNKKIKHALSLVKVIRRNIPRHERNVDKENGGETDSD  
TYSGHNFDTTATAVVEIEIPTGRPHQIRIHMAYAGYPLVDDPLYLPGGIPDVRPRPFKTR  
KREEDLDQSDATEDGGIDCDEEDNGTHSTTMRVALPRDCGYHLHAYQITLHPCSSRHSS  
VATISTANADVSDAAPSAYAECAVSSSSAMMTFTATPPRILR  
>comp2313\_c0\_seq1; 382 191 1252 LEN=1341; translated  
MEREARTKCKHHRQHQPQRKLADALRCAGFDIFHGPFSPKKYNDLLECEGLEGLSRLPEE  
RRCTGSSGNSNSGNSDYEAYLIGNTKHLWPVFLDWLQLRRQSAASTATATATTTASSIE  
AHLPLDYERTAIERVVRESLGPDEEKGGKGDANCNTNCDTNACRCYELFFSSDLGTGLVS  
MARVASCSGFSYLDPHTHLSIHPRYGTWHSYRAVLLLASEGLPPGLFETGKTETPILTP  
IQNPLSPIDARKSRKAFDRALAITTGTTTDELMDEAMEELCEMLGAGLYRDVDERQEEN  
DNDNNKTKSKNETVAAAIALRDSISIGREDYRFGTNQLLYHYTKDPRHLLP  
>comp2314\_c0\_seq1; 405 157 1317 LEN=1454; translated  
MPSSPDHDDSCITVKTQGRNYSVERYMLSEIEQHSIHPVYLNHHSSSEVHDSNDISH  
GVNENENSSCSRGSKKGHDISRKNNIKFPFVILYLLWNAHIDEKTTATTASFQKGPFRE  
AIQKLKCLEMKRTSTVLNQSEDPDTPRVYVVVDMVLVQPSVAKRSNALRSDEFQKHVS  
NAEELARCILLSESVGNKQDGDCLGDTTPYMLSAIDLAVTVGLTDHPRAAPGLESC  
DAILIGSRDRRKYSDKTGSHRDGVDLKKSCIGIVCNSIQDLIGFDEERETDAVQGMQSR  
TDGVRMDCHKETDGEERKEEALESPLSSFAHESHRYWRVHNAGLPPEPTLEKKKFAEY  
GPIENNRITWILGTVIALAAAYCWKAS  
>comp2315\_c0\_seq1; 159 1 215 LEN=622; translated  
XNNNNNTKKGQGGNSNSNNSNGGNGGAGSSGAGNNNNKKKPRTKPKSDNRVNRQRDR  
KMNKQGAFGVQ  
>comp2316\_c0\_seq1; 477 160 1818 LEN=1818; translated  
MMISRLAPATLQLLSAFWALAPVISTQSRDLQNGMGLGWNENPGSCHGTLFYFQSEVFD  
FGGFDTDNDLTRIRWHEELERSFRMSYNALSEDLCDNSYRRVVDVINEQPDGDILIKRG  
GNQYLSYTVAVCRGCDPSSVTLFSPNPDPYFRKLISSDGATIDSMENPLNAVLQKRR  
RNSEKSSKSEKSGKSKSKAEEKSKSHYRSRGTGSVDEGTINGSSENGKGTAVAGKVEAGK  
GNDAGKGDGEGDAVDGREDEYDCGCKSQYPKYRAPTEEEFATAYGFSIREIEEKPRQR  
HAGVIVDNVLKVTEIQDVSCSIVTETFEFSTVAIEFFGNYEAVTDQERSILEQNFVWAYNG  
LQDHRCDSPFRKATSADIFFMIDPIAKGETTFVYLLNVKGTCTRGEGCSKSDLLLFAS  
ETGGFFRNLQFVDGAECTCPLWGTAFGPPSTSEMEVRYFQVIQDLRFLDGPFFTRLSIDA  
SGFVKEIGEGASTPFPTFRPTLPPAEVPAIPGVPTLKPVTLSPTREGETRSPTRPTDFP  
TRKPVTLSPTRREG  
>comp2317\_c0\_seq1; 120 1 409 LEN=865; translated  
XKISRSNKSVKTFDICVRRRESVSSILPKAIEXPKGWQIFLGASVAIFWGF SRLGAGNKK  
RAEQQLFERQERYTLVSLQNEADREYLMREKKLQKQEATIMSEVPGWEVVGKSQYYNASR  
WTPDHIMDSMKSNMCK  
>comp2317\_c0\_seq2; 221 95 511 LEN=967; translated  
MSVRPDPNFIKQESGPLGGWAHTKVFHLTKGNRGPKGWQIFLGASVAIFWGF SRLGAGN  
KKRAEQQLFERQERYTLVSLQNEADREYLMREKKLQKQEATIMSEVPGWEVVGKSQYYNA  
SRWTPDHIMDSMKSNMCK  
>comp2318\_c0\_seq1; 233 29 484 LEN=927; translated  
MKIAAVLALVSSVAFAFPNGQVRQTTELAEREFMSSAAAALGVAGLTAFAPAKADR  
DYAGVGLLGGNVVDVNNANVRVYLKMPGLYPGVAGKIASNGPYKTVGDLYGIPGLSGAE  
KDLIKKYESRFTVTPPSADYVIDRINNGLYR  
>comp2319\_c0\_seq1; 338 229 1638 LEN=1840; translated  
MEGITHRQSSSAIDVTTTDTIEESVFSPLIEESSAISDIDGYDDDGVSPLLGNNDGNG  
TSRTSSNTNGKELADHSHGAGPPGSAGTPQVIINIIISFVGAGLLGVPNAFSGWLLGS

ITLVLVSTLNVYAMLCLPRVQRVVQAKYPNEIVQSYGDVGRLLILGKGEKVIIFLCLGISQ  
AGFATAYIIFIAANLNSIYGWSRGLICATCVPGLLGLVQFRELASLSPFSLANTANFCA  
LSAVLFQDYEHYTPHNDAIHKADFGGVIYVMAVTIYSMEGVGLILSLKASCKQPQQFSYL  
LIATLAAITTFMAIFGSAGYWAFGDATLAPITLNLANHWSATFVKCSLCLGLYLTYPIIMM  
FPIWAIIEDANTTQLSRISVRSAILVLSALVAYSVPNFGKFLSLVGSISICTLLGFVFPSPY  
FHLHTFGKELPVWQRGLDTFLLVGGFSFGCMGTYQSVVAMMEGELEGGH  
>comp2320\_c0\_seq1; 434 488 1492 LEN=1564; translated  
MNRPSNREKRNRNRIKSVRRALSFDLGA PSGNSSHQFVERILHDCFSPPRYHRVAGDG  
GSESNKNNTNKNIYATVAGRESERSNRNDIFRPRTNRHHPGFRRGAHERVSHSFPSPRFT  
LLSLQEEREQALRDYKVTIEYKHLKSHAPGGVYLIPSMNSLRDFHGIIFVRRGPFPTNGIF  
KFRLNLPKYNNTNMWPRITFSSHVFNPNYVNEATGELDVQSAYPTWDP SRHYLVTVLTYL  
KKIFYAKNFADARANTA AKELAESDPQAYKKKVEECVHESQKNVYVNEEGSTAKFTEEAV  
AHRVLRDLLKHHIKNENQVSKQAVMTQIEKARKV  
>comp2320\_c0\_seq2; 226 89 775 LEN=847; translated  
MSTPSKTPTRIPISPIASEEEREQALRDYKVTIEYKHLKSHAPGGVYLIPSMNSLRDFHG  
IIFVRRGPFPTNGIFKFRLNLPKYNNTNMWPRITFSSHVFNPNYVNEATGELDVQSAYPTW  
DPSRHYLVTVLTYLKKIFYAKNFADARANTA AKELAESDPQAYKKKVEECVHESQKNVYV  
NEEGSTAKFTEEAV AHRVLRDLLKHHIKNENQVSKQAVMTQIEKARKV  
>comp2321\_c0\_seq1; 418 1 1632 LEN=1915; translated  
LESNPVKPNPIYLTNTPFHLNMPQLQAQQPRILAASSSSWMTKGNASWLATAVGGTAFVA  
ASTASAWMVYTHRTKRLGGSIVSGLLSPLFRRSRSLRSSSSSSKQIATAPKSYLDYNG  
TTP IYPEVFDAMEPYLKEHFGNPSSSHLFGEPRIAIENARRQILTQLLGVKDTAESNPG  
KNGLDLSAVWFTGCGTESDNLAVRLALMSAPSRSSASGGRQKHIVTCNVEHPAIENYLRW  
LEEDQSDEIDGAVRSSGSIRVTRVPVNNEGRVS AEDVLKAITPDTVLVTLMLANNESGAL  
QPVKEVAEECRRRGVLCHTDAAQAAGKVS IHLSDMGNPDMVTIVGHKIGAPKGIAALYVR  
PGCLNEHGRAFRANQSGVLLIGGGQEFGRGGTENTPYIVGLGRAAE LAQEHLERNA AHT  
EELRGRLLDNLERLGAARVRANGPGDPCQRLPNTLSVGLDGIRSSDLLSSVGHVVAASA  
GAACHSSGGSISSVLVAMEVPE SFARGTLRLSVGPGTTLGDVDEASEI IARAALSQWGEE  
GRA  
>comp2322\_c0\_seq1; 380 1 1159 LEN=1159; translated  
XEAAARLQRAAEAEAAARIKLAEEAEATRLKKAEEAEAAARLRQEAQEAEAAQQRQAAEEA  
RIAREERAERIRELEEQA KDKARQEAIAREQRAVEILRQREEEEAQLKAEELRLASGG  
KATVAGVNILRDYVAKFGEAFNPAQQLEQNP NLEQLRTSLNQLGISPGVAGGLAAATLIV  
GGGATAIKVLADQAESNIDDAREEDGAMGKGD ESNSSGKDLLDSRIADLENKKEEKTQ  
APT VRRTLRIVDDDINGNSPNGQSETSRPNADPPASIKFGDSPSQPKVSPPPVKSSN  
PMNTQGPLSSSSSSQKFDTQSDKNGNKVSPVKANVSDSSLNSSSPTSTSSSGFVPPQKT  
VGPSTLSPPPDTFGSPPSKTSSPFGVP  
>comp2323\_c0\_seq1; 202 323 889 LEN=1214; translated  
MKTAVRTTSSSSDDPNHRSNMRSEATT SNNTHTTPTIWRSTYRYVWLSGIIIGVVGLQSI  
TLFRLTSGFTLDETGTL SNATNNAWSDLGIPEAVFLTGAALDRNRSNAESKAF AEALDKK  
RWDFQRRQKLRKRLAFPGSNRTARFKERSRKFP I ISSRSDATNESLSLHPVAAVYNNEST  
KTSKAKET  
>comp2325\_c0\_seq1; 322 87 1145 LEN=1409; translated  
MSAAPSPLLGLRMSNFPRTPAAVSDRCGNTDRVKAMLNQSESTYRCNDYIRRRSRKDKSG  
CHATVGEASDSGCPELSVEQEQLD TVCREKMCEWSYRVCDHFQGTGREIVAVSFSLLDRF  
VDKCSERSAFKLAAMTTLYMANKIYGGPQAISIGALAE LSRGEFEP SHISEMEVIILKT  
LEWRLHPPTVQCFIDAFFHYLSLPSHGAWSV AIYERATFFAELAVYDYAFVPPKRKSLIAL  
GCLMNAMEGMDNSLSAEQQRGFVD AVNATFDLEFTTDSIESVRNRLWYVYSMSAQYKEDD  
AVAGAEPGDVVKKSVSQRTYGVSS TAATDLSSSPSTSPVSVA AASGPHHIAS  
>comp2326\_c0\_seq1; 729 178 1833 LEN=2083; translated  
MKSLSLVLAVFFLAILAVFVMNFVFLV FFFVPVESASRPSSAF AAAGGGWFRTPGESTE  
QQKHRKKQQRPLRPSNKRHPLHHQTEQATEPPI IKPPDPTE SATSDPIPAKNDNSTRKP  
SVGECRSFGCPIYPPELTNPLQNATIRDALESSR LGGSPGSKSLLPDREKAASIGFAAAS  
FATLSQKGESHTVNQDRAVYVPSFSLDLLVSSARKPSGAAAELPAPESFLVGLFDGHGEL  
GHDVAEEVV EKL PVL LAEKLTKGLGGGSSSNGEFDDFKRAVATDSYRDNSNNSTNTVNN  
EAIVVHAKEYDKTDFIIRKALNETFLEV NKKGTSPTFYLG GCTASVALRWGSKLYVANAG  
DSTTILVSAAEKKAPKKKETPSLDVKVEYQTRRDKANQP GERERIEKLGKVVHNAQGF  
PRVIVYSHVAKDTIGLAMSRS LGDWEWKVAGVTAEPTIDVIDLSELSEPPAQERSLFLLA  
ASDGFWD MRQQHFLATLSASSFV VPSRDTGNESEEEKLLRPLFHLYDI IRRITPKEQTGY  
RDDITATIVRL

>comp2327\_c0\_seq1; 406 73 1251 LEN=2403; translated  
MTFHSCSRPRTKIPTKMVPCARELLFLVCATLVILLGCLGSTDALAGPSQPRNNGPVTIK  
DERIVLPNGVRAQVVSALPEGWPRQQNQDEILSKKGVDEEKPKPPILFLHGSFHGAWCWQ  
EHYIPFFVERGHPCVAFSWKGTGGTPAGEGVTKVRVVEDHCADLEALLDCLPSILGDTGS  
VGDESLRP IVVSHSMGGVVVMKFLEKMARSKDLQPSSEIFRGIVSMCSVPPSGNSKTTMRY  
LRRSLVDTYKITVGFVLKKVITDDAICRECFGGTGKGPPEGVSEDEDLARYQGYFERDTR  
AILDVTDLNQIVPSRSADSGRAPFVADLPPCLVVGARDDFIVDAVANAETATYYGTSAP  
VYVDSPHDVMLGGQWRNGADALHDWIQETFLA

>comp2328\_c0\_seq1; 215 177 395 LEN=395; translated  
MASDGPPQPMPMNPVPTASLSNPMAQQQQAPPQAMAMAMPPPSMMVQPTPMAMNVSMTQ  
GMVQVQQQQQQQQ

>comp2329\_c0\_seq1; 434 279 1718 LEN=2244; translated  
MVQQVTPLRSPGVEKDGQEFGLVPRYVLRKKKAVNKEGRGPTGDSNHVKNNQNGHHMMK  
DCDEEDTPQKTPQEVDKLLHETNSLLARRWRLSSLIDSERDKKVLATEAYLPSKAADRI  
EKNCKTKMELFGSELMDKKITLFEFLSSEKSEVGVVEGGYVQLLPTRDLGRAVLFQYDQ  
DLYSEQPINFRKILFYMMASALEVDVTARKGISMVVWNGAPTKWFDPFWRVFEEKISAPFK  
ISKLHYCQVSQYESSYQVLEKREGETDVR IHKGS LQECMHGLV TYGVPSHF IPI LNPLDG  
SINLKEHLKWIELRRRIESFPESQQACIVLVPQGDDVLLGKRKMSMNGNVLYHQMIMKNI  
KAYHEATSEDARDDILMAVWDSIQCRGGRFLLQVEDGQLWERLELQSALYKISQAFDFLC  
MQLYAPKPTSSKSSKNSKDDDEDIFFGWNDLLDGKKCYECFDLIHCKGDGFGKPAACW

>comp2331\_c0\_seq1; 214 178 457 LEN=457; translated  
MNNSNNKMNNDNETNDNDTVSTSTSNNDNDNEKGHGFARHHQWLPSGPAVLPLAQAAGVFL  
AAGPRTGGAAPAGPGGSGVRLSDRGDAALGAPEX

>comp2332\_c0\_seq1; 315 311 2140 LEN=2322; translated  
MVSFLRSTASKFTVLAVVFLGSGAAPIHAMEPELEDETEIGNDAPLDTICKDKPNWRYNDK  
ERKTCEWIGKNPDKRARLCEKKRVKTNCPETCGVDCNDLINRNGPTDPMPPLEQTPPRDP  
CKNDPSWRWNDERKSKCDWISRKPQNKERLCVKRRVREACPETCGVVEDVSRNVPTDPI  
PPPSSPITKCPKFLGAKVDSAVPAFDRIPSAESYFEEPTMDCSEYLDGLTCYTDYRYNGC  
SDDTMQCTPSKASVCSNNVWQTSVAVNPALCGSDFGEMPYLSVFGYCDPKECPVSPQKN  
GSDCSSYEGEFSCMNYKTFGCDGFDDSHGCFPTTSLKCTDDNKWQMSIFSIACPDGSP  
QGQVACDPEECPLKEPMHGTDCSSYEGKDECHYDYKTIGCDADSLTCAPTKEYTCMEEPD  
GKSDRWQLQYTMRPACYYEGADKSCDPSGCPLSAPIPGTDCSSYNGGKQDCMYNFKFDGC  
SFDDLRCSPTSYFSCNSDFNTWEVAETKPLDCEV I IQDFEGISEDLPVGETCKLCPTVEP  
ADLCPAKQPRAGTSTSDKYDYEVGLVCSYDFKYEGCSTNKLKCKPHEFFECTEQDGVV  
KMTEPEPCN

>comp2333\_c0\_seq1; 178 1 732 LEN=1604; translated  
RSTNDVHRHLFHFLPEDQIFAYIMFSALARKSTSKSAAALTSTVRRTVGVRTFASEDSH  
QPPVSVYGTAAARYANATYVAASKAGALSQVEGELNGLAQAASDSPAFAGFLDNPLISRDE  
KSAQIEALLKEKNVSEITTNLCTTMAGNARLNELPKVADTFATLMKAKRGEVEATIISAD  
PLTKKETADVAAA KATSQ GASEVVISSKVDPSI IGGIQVQIGDQFLDLSIKSRIE EISR  
TSI

>comp2335\_c0\_seq1; 38 1 809 LEN=932; minus strand; translated  
XMANSLGVDLEQKIMEGQMTFDTLGDVVLACTGCVNPETCEKWLQONKTATATPDFCRNT  
DVFSLLMAGKHAERARSGPDPKRPCAPSEAGREGRCDAKEKAPAGKGHEEVPDGI GEPQA  
LPPVKHHPKRIKQPSRQQQRKAMCRKNRRKRDKQRHADPSQRHIGQPSRWHLPALGPDIG  
RGPNDGQHPDQRKHIIAKGSAQKHAERREGARDFHIDRSMIQTAQNGPRGGMGIKVI GRR  
GPQHHQKRTGIDDGRGQRHPVHAQRPHGE

>comp2336\_c0\_seq1; 262 125 776 LEN=1000; translated  
MNVEQRTMRWTNEPEKWKRKEDGIKVTCPMETDFWRGTMHGYNKDDGPFYWMIAENNF EA  
RLSLKVKLKELYDQAGMMIRIDSENWIKLGCYRDQPHVSCCFTRGVSDWSTHRLSQT  
VDHFHVWVKRKEEVIECFYSLDNENWTRIRQGYFSDRPRLKVGMMCAAPESAGFKVTFSD  
LLIKNLDDDGSDSDSNKVWTTTRGLEDEGLRGTED

>comp2337\_c1\_seq1; 752 1 2558 LEN=2870; translated  
XATSERERQSTVPGNYRAEAGYGAGRMLPGDPHERTENRKRRAHQRQEARHGRRPKATPAT  
TVRNEAEAERVLEEFWSVLGSAASGEDPTEASEGTGKPKRGSSKGTNLEATSKSHKPHPS  
AAATKTTPTAN EKTT EMVDTTTITDPKPTTSTEVSSALGGLKTIHRSNDPGETNHSLSL  
PSLP IVGN EVSVFAEEMPQICRFQLTMTLRQPSSPPHERSSGGLDADSIVVSTTPLGR  
AASRTIVI IRRREANKPGDVRASQPATDHTAALFVGEFFPRKIEASDVTWRVYPSNTPGNE  
SSAAVPIFSAVKIVFRLPYPYDPSVAPGSLGSAIGNASSSSTLDEINSVLCGSCHTPLI  
LRRRHDCGAHDNDVEASSNNGRSNSHNKTAIHSSSSDTEPSQSDVGTIRRVPPLPVGHWD

EIAEYLICYDGPVVDFVSAGSECAEPSMALQDASLLCFHRRDVEHAVCALAVDGYGEPTE  
RRKNDANRGEIDGFGDLGTFGTKEPSSFLVQLQEPQDSGGPNRNDPQGAPGDAKEEHRPN  
SEDEVLPSSAVVRGNRSWQDAADGDSVSLCCGRCCAPIGFASLGSPETWRFWKHRLCLPM  
PKLPQENEQTRESEYRIGENPVEANHIPFQNASLLQPTKPFASCSSFLARELVRYAESKA  
IFTFIVRCEETEDDDDDAEGGESTKSNSEIKCLLLRLLSWETAIATSFEINDSSLSRRR  
LRFQRVAKIVFEETIDPTASEAAAGASAGHNGNGSSATTQFWGGVDLCCPPPAAATKT  
SAPKASSGERGNEGDDPVSTVRLQLPRLEYDRVLDLVSGRSLFQKEVADATIMLKMGM  
SEGLGLTAVALE

>comp2338\_c0\_seq1; 161 497 1300 LEN=1927; translated  
MRHAAKLARRVLDLACSVAKPGVTTDEVDTVVHEALLEAGAYPSPLNYVGFPKSLCSSIN  
EVICHGIPDTRPLEFGDIVSFDVSCFINGVHGDNCATIIVGDEQENDEIGTDWRGVPLYG  
SEYFENRPEADEQMIRSARRLVHAARESLEYEAINRIGPGSCLTDIGAAVQDVADSYGYST  
VAKYRGHGIGTDFHRPPFVKHYRNYDKLELLPGMVFTIEPMIVEGASDCFEWSDHWTVAT  
SDGMSAQFEHTVLIKEDGVEILTVP

>comp2339\_c0\_seq1; 592 1 1401 LEN=1672; translated  
TTTTNNNNEKNRPSDMVAREQESLLQEVWESCDSSIAAKLGDGTVFFLAASLLIGAAAFAP  
HPQTTIPSRPLFAPAIASVSTNSLLLPLHATTTDASDNGRDDDEEEFFDASFSFSTERL  
VSKSGLPVCRYALGGAARSTQPKSIVNEYRERLENAIVGANATPAAPFLFYNNPHRYPDF  
MRGIRELANKDSGNPIRREDLFLASGGTDRSQKGMQRLRDALAYSGGDYLDLFLVLEYV  
CPEEAGDDSGDLVKALELARSWVRDGSVRYVGAsthshsvGAWLGSldRGEERDNDNDND  
GASSPLPLLDAMMLRYNMGHKAAAEALSLPVCAERGIPVLAFTTTRWNRLQDGHDPDWQR  
APTTPPECLSFALSASSDERGASAGPDAPTTTEDGAGRPIEIVLHSARDAEELGEGMSCLD  
SSFPPTIDAGNRAAVAIWRDYGDLEWNDMDGFDEYPEEQGTSIL

>comp2340\_c0\_seq1; 412 1 1437 LEN=1461; translated  
SVSFLRTGHAENAIDFPIRRHLTIMSSSESILKLDGRNDASKSDCGDSSVLNyletPLNA  
CSLESFCNTIHSELCEGQQFIPLCLGQYQNEITGNREGLLELYASTTESFGTGMHPPLT  
ILGDGDGAPGVLDGKWSRLPSSSTSIDFHNYYATAHANGEIWHNITNKAVEIANDGVE  
KNTNPFRAFATLAGKSRSPSENEGLCLALAWEDPLYRNGDSNCSTAVDTRIISSYSdGRTAI  
HRVREHPPTSAEDATQTVELSLHHWDSHTIFKCPAEVWCANFIDSNTVVTGGDEGSWKV  
WDLRQPLIKPVYHGKNDFEAGVTVLSPHPRHKNLLAIGSYDETIALFDLRRMTTDTSTAN  
KCPEELYHSEPLGGIWRCKWHPRDSDRILVAAMHGGCVSGKFGGLDSANFEGQEAIVPT  
SISFSIQKQFNLHQSMAYGIDWLVPYEGTTEDTSTEEAAASCSFYDKAMYLWKTGPENI

>comp2341\_c0\_seq2; 132 1 294 LEN=779; translated  
PVATRTHQSNFTSFVTMNRQSTSNDYAHDTTCRLSAEDKGMMAQVSMTSCNRIAGHSEET  
AMKTNSNSPKLSTTPQDTSFMTEEKMKSIYMPKRIDF

>comp2343\_c0\_seq1; 251 90 734 LEN=1316; translated  
MTFLDTPVCKCCGGNKTITGDVFKLIIPVAWSTVAFMACLAYLISPLSRGDTPRWGSAA  
LVALSGAAGTGLSIAIYSFHRTTSSFAIDENYVSSNDGDGEREQDEDQGGTTKLEPPMK  
KIQRQKMLQIHAVLALGLSILSIIILAIFFGVFASNLNKAHETCGADVSWSCITLVVSVL  
WMGITYLGFKHLRQQLLPEKDATNNENDQGLEIP

>comp2343\_c0\_seq2; 251 90 734 LEN=1437; translated  
MTFLDTPVCKCCGGNKTITGDVFKLIIPVAWSTVAFMACLAYLISPLSRGDTPRWGSAA  
LVALSGAAGTGLSIAIYSFHRTTSSFAIDENYVSSNDGDGEREQDEDQGGTTKLEPPMK  
KIQRQKMLQIHAVLALGLSILSIIILAIFFGVFASNLNKAHETCGADVSWSCITLVVSVL  
WMGITYLGFKHLRQQLLPEKDATNNENDQGLEIP

>comp2344\_c0\_seq1; 228 117 758 LEN=1785; translated  
MNRLRPLVARGLPAAATATATTTTRMAAWRRQRLARSHRSFQLRLGSSSHKHKDKHKPSS  
SSAPRPGGTWIYLGWTVLGLVGVQALQHKQASADAKARKALSVLQKDAEASAKADWERS  
VDQRANTAPVGSARIARVDPCLDGTKMLTRHRGVQRGDAVDVLETGVGPAGRYHLCRWTK  
GGANENAGDGSVVVVGWYPIDYLEPLERKHA

>comp2345\_c0\_seq1; 592 42 1277 LEN=1489; translated  
MSFVSRWMQRISQSRDGLALSAMYLAVPRAAPANTTIPERIKAVLLEESRQPSNNSVA  
ISLLKIDKEMGLVKYWGGLAEYMRQKQDSFVLPSSILSSNSNSLPPENPDSKVSVTDSPTGTG  
AAISTHSASSGAKVAFMITSMPKHDLINNLGYETNIKGMTPQQASLVLHHRVLPESYDD  
CISKLEEQFQEEQKLQEQKTCLEKEQFEMEKEQPREVDVEDNLTAEIAAIPSDNASNS  
LYVASHDRDEGYDRDNRVNIQKQLILSSQNEELSSLSDSRLPNDLATESPTLPSTED  
RFIPESSVPKENSTDTIVRKEEEDMNLWYEVVEIKGEKASSAASDAGVYSNEVRHGLYRN  
RDEAMLSLETRQMIKNRRELDTNDNGAKNSTETSSSFVLRPISDEDLRVQS

>comp2347\_c0\_seq1; 366 31 684 LEN=818; translated  
MGRRPARCYRYQKNKPYIKSRYCRGVPEKIKIFDVGAKKAPVDLFPFVAHLVCDEKQQI

SSEALEACRVAINKHLVKTIGKEGYHIRMRAHPFHVLRANKMLSCAGADRLSSGMRHSYG  
KPIGVAARVDIGQILLSVRSKDASEAHVIEAIRRGKFKFAGRQKILKSAKWGFTKYPREE  
YVEKRRSGELSCDGNIVKVHNRGLLVNSALYQAGQE

>comp2348\_c0\_seq1; 556 247 1881 LEN=2075; translated  
MFSLIIWLSFAGATRCTAFVPSSTLSSLHGAHDLNLLNVATDDSDADTITGENVIREVFP  
VHLPKDNVPLALNNDGVEAKTKKFVFKAAPLLFALNGKPKADGLLPLQAYLEETLDDYT  
IPDDPNYDFFPNNCNAKTLRYLLKVDPPFFASALTKTRWGFELRSFDRRDPDCKNPKSLYR  
EMTRTLTGVRNVNFFFDKRMKLTGYKVYDSDSKGSKIFEFKSQQDEDEDYWASAAIYNLFFY  
ASSIHATIHVLHYLITSAFQYVSKDFEPMHQWAKFYANNIQQKYSQVGTLLILPAPEILD  
TDQSKITALITGKLGFGSTAAITPILSRLNLTWQNPSSASSWIDSMVGISSKDMDRAGIL  
TEFRKHVNLI SPFAKEASDAFRNINPEKAAAVEERLKQYLKECGSFTSEINSLEDWIELM  
SITADVHGSTLGYTRLATSSDVMRWRDIRDPNWDLSGLNMITVLLGTVCGMEEGRHTMTS  
TVDAPYDPALQAVLDKYDEKATRLKEEYQENIQKDPDFSDYGWILSGFCTDGFDDGKQLTS  
ATYI

>comp2349\_c0\_seq1; 255 1 474 LEN=787; translated  
KVSVARIPRITDTTLIHSTFKHPKMKFTILASLGFLATASAFQAQQSCNRPSFTALNMASP  
AEFVDSEIESNDVVVFSKSYCPFCTKTKELFDSL NVEYAVHELDQMGDEGPELQMALFKK  
TEQKSVPNVFKQQHIGGNDTQAAAAAGKLQELGL

>comp2350\_c0\_seq1; 1320 117 5179 LEN=5357; translated  
MSPRRSLSKKSTVTVHPKSGRSMDSLGEELDEFRCRGLCRRCARVITHKRVFKLFGTN  
HPKWEPLTVLKPPTAADEWNNNGDNKGGNQGNGHNGVEQYKKNDEIDNDEDDSYLVYKGY  
CLGEGCYTMKEARRLLGETGDKNSRYNKENSGWRSRMTKSTRFKKKNPKRPGKRRTRTNP  
ETGSSVVTNAASLSSLRSSSSSSIVTTSASTRHSIIISGMSGLSGFSGMSGSVKSTRRSGR  
SRRSTQRSSSRSSSDDDDEHNRKEFSSEKNAVSHIVVERLEKLVSYDYFTVLDLSNIDM  
SNSSKSTKNESNANLDALVKAIGIAKTLKAVVLEKCGLGDEGLEKLAGGLEQQIVTTSLH  
KSKSADAGDVLLPSILRLRGNRIGNRGVQALEFLFRSSSTLKEVDLSDNHIGSKGACSLF  
ESLAQNPNGIPLSVLNLSONEIWELSSPMENNNASTFLYTNSTLKELNLDGNLLHDGGAE  
FIAQSIRSNRRCALKRLHLGWNAIGDDGVRALGKALESNTSLEVLGLAENDITNTGARAL  
LAALAVNTSVKEISGLYHNP IERKFIIVAIAIKRLLHRKSSVRGDKNNTD PARSLANSEHSA  
AAAASTRTGATTAADNEDYEDSEEMIVPLKPAASNKAVVVVDDGFSRLQRSYEETARSSQ  
GGDHHTHASTASHSGGSLALEAIENWDWGTFGIEEIERKISGDLDDNIEVQVDGYTDPSS  
AKDSALSNSNTKRGLSADTKKLVD RMFVFQSAPLAYFDRKKMQHVGVPLLDLDFLEARSLR  
DVLPEKNDIVVFNATQNNFKLYFSKSLSPVMHFSCHGNDSDCLILENGFGYMQALPLD  
SLKKMVAASKIKLVVSSCNSRHLGEVFLNAGVPHVVALQRETTYSDGPIDFARAFYGA  
LGQRKTLREAFDIGINECKKFSKPPRLDAYKLLPEHCSNHDEIFFQQSPPPI TESVLA  
KDLSEDT SILPEVPKQFVGREVDLYEILESLRVDDVVRVGGAPGSGKKSILAVLSRYILE  
RSRSL EIDSVYWFPTPPGVTPDPDSLYGDL CNVMKWI VEAEDDVWDEEDYAESRERIVIE  
MEGKNSILVIDGRIFANEIAGEMLERFLTHILNEVNVKILLITATDES RVKSKRSKSEEA  
TIHLGPLDYTSTVRVFGSACPLLSLNEKDCSCTVDTVEEFESCLLPNSKAAGPTVFVDPK  
QDVVRSPHQSELYNLMSGNPRDIARKAASCQOEDLYRLLRLAQRPVVSVASSTELERQV  
AKWMARKEQAVQNHYYLRASDIDKTLQELEDLRKTYP SLTDMKTKERDLKEKFRALLKAK  
RYDEANSVQRQLLTLKRSMVKEQSSSSSISSQSTAAQESILEIQERMKTMIALAETLGQS  
MSSVGSPTSHLVQESPPAEAEFC LSDTCTLKI SPGCLWTFPCSKTGGTSGKDNSTVSAM  
IVFTNEACDLT SNSKAI SE SGTDRK LK LSEK IHDL ETLTETQWGT VKCATGESVALDDI  
GAGGNRNL CIVLAVPPLVTNVNEDAKDFDSDQH YVATQLRS AIRSSFRTRVRRTNKVTAI  
GISTSPSLNKGKGNRYRTNDELSDENTSSFVTLKAI VDEICRGGGGKNNELRTVHLF  
PSTGIVESKMLIRTA FEMGLKADSKAIRVVTAREFEFLFLSCGMNNENDSNKSLKIITAT  
IIFLPE

>comp2351\_c0\_seq1; 363 454 1296 LEN=1407; translated  
MTLAPKLMPTGNNLVPITSKVPAQQPRVHTKAKPKTNKATTSIAMQTPSDSSAATVKP  
KVTKRKPLDVLQTI LSSADAVNGSSSENSA AVQQQMTTPKSTSLTTPKALTFQKPSEVD  
IAAYDLETVKAIRSNNDLLRQLWQSGKSMDACNQFGESVLHMACRRGYRKYVVEFLIVEV  
KVRTDRCCDFGRNPFHDALWTSTPNFVDVLLIDHADPALLLTEDVRGNTPFAYARNDHR  
DQWNEFLEKRKGLINRMGVSVDNSDGGVDAAKKVEVVG

>comp2352\_c0\_seq1; 356 20 808 LEN=1486; translated  
MSLSNLKCI VTGASSGIGKATSISLSAAGAKVVGVRNEESLKEKLNNGQIHDYVVADLV  
EPGACERIVQEAVSMLDGELTTLINNAGVLKGGAGAPGTDLSNYKYNM TLNTQIPFELM  
HYSVPYLEKHPNVSSIINVSSVNGKQAFAGCLSYCMSKAALDMMARCASVDLAPK GIRVN  
NVNPGVVTTNIHTAGGRMDETQYAAF IKR SVETTHPFAQSLGRIG EATEVAELIVFLAGE  
KAKFLTGE CIAIDGARQNLGSR

>comp2353\_c0\_seq1; 410 47 1216 LEN=1373; translated  
MKDKILAAVYILGWALATGDCFSNPATPISARRRQAEASVVVRSSNEDGDSDEPLVIPT  
SDVVKKVAVTGATGKTGKLVVEELLSRNVQVVLVVRNETKAEELYGGSPSDMLDIQVCNL  
SDPSSIEEAELEGCDATIWCATGFSAPGGPPTTTVMSSSEQSIDVVGVPVVAKTMLRNSGS  
EEREQAFPNVVMLSSAGTTRPGWDEEKKDRLRGCADIPIVRLNPFGLGLKAESEAKLRD  
TGADYCIVRPCGLNDNWPPEGARPVVSQGDVAVGRINRRDVSRIICDVLSLPEALHKTFEV  
LGLGGYPPSSIGPALERLRTDSEPPSEAEVEATYLALQQLLPGERQDAAALAMGQTYEQ  
LDRGETGRLGERGTENVDAAGIKPTTAAA

>comp2354\_c0\_seq1; 318 64 882 LEN=961; translated  
MPIRNTSTGSSSSGKKRPPVFPKRLYDMLQSAERDGYAHLISWMPDGNSFKIHVDGSPDP  
EDEKAIVRLLKQVFNQTRFKSFVRQLQLYGFERTYKGPRRGECRHPLFIRGRRDLLDKKS  
IDNFQQKSNDKTSRRSKHVRQLLQKSPSRAEVISFMRKNDSRIETYSMQSLENTASSPCQ  
YLNTSVIPTKLHNLVLSDDCSTKGSDESCNENYDDEDLSVIVSNPLLDPPPLNNYQQTV  
NLYGGDLISIHDSSESVFPDWTGIELEILRSAL

>comp2355\_c0\_seq1; 579 1 3006 LEN=3407; translated  
XATGNNEVLQNPLLLPLTPDSVYEFYVHELFPAAVSSLPILFYRIWINDALSWAWLAGHKL  
YVFVQPTWMTNGGTIEANNETTANILMHLHLAEKDLGGMIONIWEQAVQSSKQHVNFATFF  
FELLREHSLHSNSTTGPLELLARLPATANIIIQEAAAVEKSFWTWFSREWPLMDWKIGV  
FLWQTFGGVLLVVALLSIMPGRLLHTWSGKLLRWPILGLTYLLINVELVVYVCIRLGIRLI  
EAIVATPKHRALRAKMANESSTYEEWYGYASELDASQKRTLWQSTTTDETSYQYNWPLIQ  
QLIADMRVARCDKKDPIALAVLQQCTRKNVGGIMNEDLFTKTYTGEPKFIVMEFIGEVT  
KTLYWVTEQTLTLEEREELRNKTAGRSSTRGGPKTYEQNLQQKSKAEHHLWRNLVAF  
TLDFSTRTMSQNEQEKEPLPSESEANDPGSPKSTGSGPQQPPVNRAQLLKFLKRAKHAY  
GKTALCLSGGSMGLYHLGHLKGLMETDCLPEIVSGCSAGSAIGAVLCTRTRNDELHRDL  
PTIIGPRLKCFDRTWSECLRSVWKTGNLFDGDDXARDDQVGRYMRWLCXHPFACKQICF  
LDAVHGILTLWVLYTFLYSSMIARFGSCFCFCFFLGLARFQTLSMAPSPSTQPKQQVTL  
GDTTFEEAYQKTGRVLCIALAATAKKTPIILLTYISSPNVTIASAVVASAAVPGFVSPRR  
LQIKDPVDGTERSAGPETYFDGSIKHDIPTAGLSEMLNCHFVACQCNPHIVPFFFNAKG  
GVGRPTRWSGGEKETSRRGGFLLAALEMYIKNDMRAKFVFLRDLDAAVSFTGTMMTQSF  
GTTTIVPQVELRDFFTLFRDPSVHRLYHYLKVGSVAAAYQHAAMIRCHYRIADALEECIER  
LEAGGEKGGQQHHDHAARREAFGQYESPLKRRASRRACFETGSMRFEPGRCDLHTESQSH  
SHRSQRSVPEIVSQRTDSDSVSTASETGTLPGGGMVHLAR

>comp2355\_c0\_seq2; 656 1 2776 LEN=3177; translated  
XATGNNEVLQNPLLLPLTPDSVYEFYVHELFPAAVSSLPILFYRIWINDALSWAWLAGHKL  
YVFVQPTWMTNGGTIEANNETTANILMHLHLAEKDLGGMIONIWEQAVQSSKQHVNFATFF  
FELLREHSLHSNSTTGPLELLARLPATANIIIQEAAAVEKSFWTWFSREWPLMDWKIGV  
FLWQTFGGVLLVVALLSIMPGRLLHTWSGKLLRWPILGLTYLLINVELVVYVCIRLGIRLI  
EAIVATPKHRALRAKMANESSTYEEWYGYASELDASQKRTLWQSTTTDETSYQYNWPLIQ  
QLIADMRVARCDKKDPIALAVLQQCTRKNVGGIMNEDLFTKTYTGEPKFIVMEFIGEVT  
KTLYWVTEQTLTLEEREELRNKTAGRSSTRGGPKTYEQNLQQKSKAEHHLWRNLVAF  
TLDFSTRTMSQNEQEKEPLPSESEANDPGSPKSTGSGPQQPPVNRAQLLKFLKRAKHAY  
GKTALCLSGGSMGLYHLGHLKGLMETDCLPEIVSGCSAGSAIGAVLCTRTRNDELHRDL  
PTIIGPRLKCFDRTWSECLRSVWKTGNLFDGDDWLEMIKWFTLGDTTFEEAYQKTGRVLC  
IALAATAKKTPIILLTYISSPNVTIASAVVASAAVPGFVSPRRLQIKDPVDGTERSAGPE  
TYFDGSIKHDIPTAGLSEMLNCHFVACQCNPHIVPFFFNAKGGVGRPTRWSGGEKETS  
RGGFLLAALEMYIKNDMRAKFVFLRDLDAAVSFTGTMMTQSFEGTTTIVPQVELRDFFTL  
FRDPSVHRLYHYLKVGSVAAAYQHAAMIRCHYRIADALEECIERLEAGGEKGGQQHHDHA  
ARREAFGQYESPLKRRASRRACFETGSMRFEPGRCDLHTESQSHSHRSQRSVPEIVSQRT  
DSDSVSTASETGTLPGGGMVHLAR

>comp2356\_c0\_seq1; 925 173 1484 LEN=1484; translated  
MKQDPMDAYRRERARDRSNSFDRHNNNNRRSRNQNGPGGGVSHYGPSYGNNSNNQ  
NKNHQYPPNSKYAPSSSGSGPPPPPHNGMGLMGNNGNLPPPPPPPPRQAAHGGGPPP  
PSQYGAPPQQQQQQQQQLPPPHHTQHYGSQQPQQQQQPANNMYGGQQQPSYAAQSQQQP  
HHQMMTPGSASVGVPPATGVPNSNSYGAQNPQQQQQYGNVAASYSNPPATNAMAQK  
QPYMQHQQAARVPPATNGYAPQHQQSQQQQQQTGWQQQTQNSVAGAAGLVDILGIADKA  
ASAVQALQNQNRLKQPQQQQPYQQQQQQHQQPQQGTQQQPAQQHAPPVQHHQQQSYQAQ  
QHQQYQQQPQIQQPQQYQQAQVQQPAANNQYGAYGPPAQTSTPYSTGAPPYQQQAQQQQQ  
QYPPQQGHYGNHMQQQQX

>comp2357\_c0\_seq1; 296 500 1873 LEN=2013; translated  
MVEQLQLLPPDSVLSPTPEPQVRVSPRSPKNGVEGTRWADHRFRPVHLNPEDWIALGST

LSMAELVDPNMSYDFSGNIGAKFSGRWHLEEDDEDGRVVKLFINPFGWGGIYNDVFASIDD  
VVGHIHRNDPFFHLSEDI SRLTKLTFGLWNCRSLPSRGLSSLPCLQKLHLDNYMCPPELLS  
NFPSSMKLKHLELTVDFNLTEPPAQFLEWITNKDMVPMLEIEFVQTKEEHLPLLLDAL  
LGAEIAFRGQLTSSIFLESQFNGDKLETLLDFDLPRFPNVATLNVEHLKIESFRPILERI  
EQGEAKSPVSGSLRDLSDIVSHILERIKTVAEEKEAVLRFLKLFGRLSRLGNHPRWSD  
IRYALMKNAAGRRLLEYGTIGAPAGLPLALWANAIERASREWEERNAPATKVFYLVQN  
AREIAMEASERYTKEGKAREREQAEGEAHAKRSRLFY  
>comp2358\_c0\_seq1; 493 89 1333 LEN=1438; translated  
MKFSLVALLAAAPRASAFAPQGAPSHLLSPSLASASAAPVEDYVDAKLTEHSHCTEPGDRD  
ILVRAARGEVTERTPVWLCRQAGRYMEAFRAYSTRYPFRERSETPEMAVELSLQCHRYG  
MDGIIMFSDILTPLPTLGIDFVVPGIGPVI STEVASESDVEALGSVEGVEAFDEKLPFI  
REILGDL SREAEEKNTALIGFVGSPTFLAAYTIEGKSSKHCLATKKLMMEAAARGETATMD  
LFLDKIATMIGHYACHQIECGAQVIQFFESWAHQLSPKHFNDFAKPAQAIAIVKEKHP  
DVPVIYFANGGSSYLELQRDMGADMIAVDWSVDMAEARRILGPDVAVSGNIDPTVLFSGK  
EQIEQAVRDCIDKAGGPGNRHLLNLGHGVMQGTPEEAVGWLVDKRYTGKQAE  
>comp2359\_c0\_seq1; 464 318 1433 LEN=1548; translated  
MPLRASVGSVIERDRRHGMREHFLALSAHDEAFQDWSSDSRIDVRNLLTQRAIQSFMFL  
CEECDRPHSGKWIEDFLKTQNLNLYHGTGASFMADVPWDGPLELMDQPEDVMIVSAKRR  
GRGHGGWSKNNPYLQDRYVEFKITIDPASLTDRILAVREQLAAEWVNDLEILGRANQQIL  
DSYFQLAKDERNQDPAMSPAVAFERTAVDALNSHTSFGASGSPFRMGSDLLYNLCTQAS  
IHRLLRSLGDKGDDANLELLRDFYVDRLEDFDGDLPFGKADDFIEELLLSPSIIHRDN  
GNVALTDPFGISEQIIEFRNDIFSEWIEAMKLVPTAHQDGVKRLNKRMEAWNEYTRKS  
KSGSNTGAGFQ  
>comp2360\_c0\_seq1; 179 187 630 LEN=718; translated  
MFRNPNPETIRRVLLNAKTIAVVGASPKPERPSNFVMKFLLDHGYEVVVPVNPGLAGKQIHG  
QTVYASLSEIPVSGNKGIDIVDFRNSAAVPPIVDEAISVGAGCVWMQSGIVNEEAAATA  
TEAGLDVMDACPKIELPRLPTGSEL  
>comp2361\_c0\_seq1; 401 156 1121 LEN=1121; translated  
MSNGSGGVQCHYDVLGCSQDADTSAIKKCHRKLVLKYHPDKNAGDEDAAEKFI L VQRAYE  
VLTDQPQERKWDHRDAI LAGWSASEAANSNTADIMLFNVAPYMHPCYSSYTDSTGGFY  
QVYRGVFEHIVACERKQSETIVELPTTFGNSETSWSELSFFYKSWECFSSALNFAWEDTY  
NAREDAPSRVRRLMEEENKARRTAKKAYKNDILQLVAFVKKRDPYKAHTEEQERLKK  
EREERQKQEKIDRKKEQKAKEEWREASLREMEKAEEDRLRGRIRLADLEDDYDYGGGK  
KKKRGKKNRKSMIKEEEEEEE  
>comp2362\_c0\_seq1; 478 1 1769 LEN=1848; translated  
XKKSEASRTYETSITQOMTMLPTTFFSIDNKYKSTKNTKNKNTRRPHDGPSTSGSV  
GRPPMRAAKTGRWQHQRHYTQVQAFRQKVVSANQNSICNTTNRVGRRTLRLQLLPV  
DASRTHGSANEDDSEAYIVP IFQRRYCWTTTQWETLWMDVWKRKSVKHS LGRLTCTTVE  
VEPMTTGTQIRYAHQQTNSNGSNVGFNDNIGASPHDDDVPVPRSVIIDGQQRFTTVTL  
LLAAIRDELLSTGAITEDCGCNDSPGPSTFELKPEEAALVQSIHQMLFLDVPAMREWET  
ESTNHRALEDGTVLDFCRLVPTFCDRSAYLAAI LPPSAPQVQRF LAKSYNPTWHRPLLAK  
KYFETKIRDQLLENVSNQQNETTKAAFLGQLTRSLLDGIDMLYFPVDVSGGYKDGTEDTQ  
VIYERLAIRDATWCKPKRHSEYHSMGDTMIRNLF LGSMDTSQSKVDFYQNYWLP LERKC  
YPNLGEDEDGDESKSI STFFRAFLDHQASILDGVHQKRLTEAVASPNPGLIGRIYRDFE  
LWMGLDLELWQQKQGATKPEPATTEHDTRDVGRRLLEFARDSITEDSLG  
>comp2363\_c0\_seq1; 477 171 1548 LEN=1629; translated  
MIYQNVFLATLALASTASNFGLVSAVRGERKYLRSDNQPLEQE QDERSLLFKRGRMGKNK  
KDKDKNNKPGSSVNLNPQFQIIANPPTAAPAKTTTDL EDWKKACQGTPINNIDLCTLP  
MITADATPENCMKCLFAFGSLSTSTAQGSASSCRNNEACGTRCSTDLLKPFECGKRVDK  
AYVDAGRPAVWDASTLNTSQAEDAPGAQEPQEPQGGPASEVVIDTVNCPATLPES  
GTNCTFVGDANIKSCPYYEYNPVP ICTCVRGEDTWVCTNQSGTLDVEKEDLTTIVVTN  
PLAPPLAPVADVIGVLDL SVNNLAINPNFCGAEAPMSGDACNPSGFEEFTAATTTTPSGP  
SSARARVPPTPSRAPGGPSPAPRCVPPQGLRMRMRIP IPWRATT PAANNREALRSAS  
SRSFLVLGTEPMTTHDHGAGVLLDIEPNRIDPSTEEMI  
>comp2364\_c0\_seq1; 458 1 1924 LEN=2866; translated  
XDNSHPSQHNQVXSNSFDRTEINLKIHQNTSAMEGANRDGSFFEDVISSDLALRIQWL  
NVADSGRLACTSQRYYYLVHQYRRWRGPEIAITD LLLTAGIEQPTKTERVLSYSSDEIS  
SAMAKDWKKKLQSKPNLILGFSTPSNLVDAIKKDTCFVSPRTCEAISLNVVAHQRIQVY  
QPELGQSGVQSRQPKLDYKSRA SLMAMSPGATIMPYLRGQPQVEDLEFMEHRLRFH NK  
SNDENFWKAMILYAVGSGVQASDQITTRI QALMPSAVIVGGACREGFVSMPTYTKEELSS

MSIKNIKYVLSHCCSNAIHEGVVDRDAAKNFLEKSELVDCIYAALEKERAVTSDRYSSVY  
TISGAGILGVFLGGNVPKSVVSRGVHVSVLNNNGPPQPFSDLVVHETALSRPGDDDYLF  
GHDQPPHILIRKIRDKATGVLYSPIELMVKYFPAAESQIDFLGLKRKGWDGFLSSLNEM  
TQALNAFALITDGEPELETLEEAEMDFCLNGEACMEDMDRMLKLKEQTKGEEILGAL  
MYTCNGRGPEIGYLIPEEMSDAKRFARSFPAVPCLGFYAAGEYGPIALAGNENVFQKGRA  
SLQGFTAVFALFIVPVRDLPSTYDWDSDIQNVEQFVVRHRLH  
>comp2366\_c0\_seq1; 149 1 495 LEN=700; translated  
DILKAKPNRFQSPTKYFAMTSFKILFSFLLLAASARAAAADTIIRDQLKELKPQKFI  
RRCMKTGVSEDECEELVEECIKDTETFRMCKAKFKECKTSTDKKGCRKSLVEEFPECEREK  
KDKCKQKIKQCKEQGIPKKDCLANLPDCKPSTVKNACKALFPKVK  
>comp2367\_c0\_seq1; 161 1 387 LEN=387; translated  
XKAEKSDKASKAEKKEGKSDKKEKGGDESAAPTSSASPTSSASPTSPTVQPSGISPT  
KAPVVTTKPPPTSPTTSPTRPTTSPVTSSSGGTSSTSDGSGGGTAGNSDENTSETSD  
SGNAAIAEMP  
>comp2368\_c0\_seq1; 447 475 1695 LEN=2217; translated  
MYQVLDVLPGMATYRHCTEPLGVGCVGAFAYNVEQDGNNEGTSSDNTIVENRCPVEA  
RQDGGSSCDERLLETTLLEESGIRDGNARWDLCTFACTRVGEVAGIHDENGASNGPSNSNDE  
HSLLVQTIKVRENDISAGSTPSQNSANRSGDNPRSDAIGDNSSDSSSTTKNKKEKIKREID  
SNDKEQTIVVETIKIRTADFLDREPFSTTPDHGDAKNTTIHGKTGTKQNLWPIDPPGHV  
GDKKEKQNGFHKLFLFHHKLNINLQNHMRQHKERQIRTRGRIRKDKESWTRNERDQAE  
EQLMLLTPRARTEPSCRLSSNQTHPCRLESTAADVDLHMATEPPLKRSHSSPQPTLQSF  
RGSKSHKLSPPFRVARSLFSVMTSPFGKSKSHKTGKTPRFEYLKDE  
>comp2369\_c0\_seq1; 408 432 1249 LEN=1249; minus strand; translated  
MEEGTVVAALSIAPSSMSPDSSPVGAFVFFELSDFDAFVSVGALDFFTPDFDALEETA  
SVGTAVGDWVTVPPRAPSSTAPSSSTAPSGTWSVDESAVLDDLDFDNFSTAGTFDFLSGR  
DFSALDLLNFSPPFDLSDLGTFDLSDLSLDLDAYDLPALESVFSIDLLDLPSLDLSDLP  
ALLSRDPITPNVFSGLLPPRNPRLRSCHSLSAFTHEARTTRIKMDNDVRRQLRQMLL  
GVEVFI FVLIVSDNVQMEFMKSVLELFDVCFVLDG  
>comp2370\_c0\_seq1; 330 191 1033 LEN=1216; translated  
MAPKTDTPVPTLLALLVACTVVALAAVRTADAFAPALRTAVSSRSALPARPRSKWDD  
LVDEDEKGGSGYEGGTFFESGIPVPPDMTYVERNVRCHENFLNLRKVGKDLCHDVYAKS  
PLKKEEVWYVGKVKAITDVSLEDCIARQWNI IETHAANLRPIELYPQRGNLEIWTAPGDT  
ELDVAYNRPELVMARMEKYEVLAKDLRNNLIGFQGEVYQEGEEGFRTRWKEDGSPARPEI  
NPGGETRPTEEMEQLKAEARQNI SFQDVYKESQKRM  
>comp2371\_c0\_seq1; 284 258 1079 LEN=1381; translated  
MTLAIQVSTKTETPGDSYDESKLFNSSCPSKSGQEENNEVCKYTKAESSISRLRNTTAS  
VADALLKLGGSQDDVEPTLSNPLKRRKSLFVLGERKFTTYVKDAASTVSETDTESTDHFS  
KRFRNDGCEQRRAPSDFKLNLPLSLSIPRTNGTGNEVDDALTFSTSEFQLPLQDFNERKC  
PGELGPISSTLQDFRPLRAPHMPTFIVPEHPPPPQNYYSPLLSDSPMMTSVVAADE  
GCFVLHSYTI VPRQNLHPTPLPLMTNAPYPCYR  
>comp2372\_c0\_seq1; 433 74 1123 LEN=1348; translated  
MTKILFPLALIGSLVASLPQLAMAQSDLPEESTGSFSDIDQFHESYDQELQSIQKFLSEY  
VPPESANELSPCQEEGAKTIADYCGEITEDSHPIYVWCKAAFETGLMNKYANPLRKYTIF  
APSKAGFVNYYTELARTQNVPHETLMPILEYMELEGN IYGNQLWCKKKYITTTDR IAGH  
VKPPKIICLNDINGDPVTFRLRGS DKESQKVFTFPQFENPGDP IKVCNANIYPMNMMVLYKI  
KGSNEGKGRKRRNRNKNNGVTTAPVSTPIVGVAEVAAPAPLAPAAPVPAPVAVVAPI  
PSPIAIVAPVPAPVAVEAPVPAPVAVVAPVPSPIAVEEAPVAATDPIQV  
>comp2373\_c0\_seq1; 407 1 1423 LEN=1557; translated  
XRSSKVYINVQQTQKETILLTTSEGIFSIPIVSHHYRKKLSQPTGINDMKGLYHPITAI  
GVCIAAYCCVAKVHEILTFLDFFEKPSVHDEACVKVMSIGASEDQTQFNNSIVMTEWR  
ATGYHPGEEKPPGALYVSSGFKQGTAKSAQEFVENNLKIQELPIFNYPENIDFHPHGM  
YIRKEDSTLYVINHAYENGERIDVFGVGTADDGDDDTENDIPNRLDYQYSITSDWMNNDM  
HGILNSLIVVEKNKFYVTQYLP IPERHDGWL SFERNIDIERFKTLVFGKRGTYVWYCEYD  
DESGSLDCRKVADQFIGANGITHNEDYSKIFVGDYFTINVFDRDASSNELQNRTTIDV  
PNFVDNLKFDKVSNGVYGGTINNLWYTVFVHPFPAESEQSTSGIMELAFDPQTSSWQAREII  
SSSKLNAISNGLKMGFEYVMGAGGLGYPGLLVCPVIKEAGQSN TGGGKAYDSEL  
>comp2374\_c0\_seq1; 225 262 704 LEN=798; minus strand; translated  
MAMGANSFRILSKAGQEGGAAATTTLWALDEQVGADAF LHVFAAGETLHRVTAQALG  
STGAKSFGFDDSAVAAKAGNLAALSFLLVGCHAAAPRLGVHRKAACMADTKAIARFFVAK  
LHVLAITGRVGTTKATI HASSTVSHDD



>comp2375\_c0\_seq1; 333 361 1277 LEN=1828; translated  
MSXAETAAKHGGEVLLLNRPSESVSSLEKLRAAVPDGKFVPI DCDLQDFSSVRAAAQTI  
KDKGYKSIYCLSNAGIMAVPDEITKADGFDKQMOTNHLSHFLLTKELFPLIVAASKEHG  
DARIVQHSSGARHMT PNNGLEEKYFLKQEKDGM LGGDTENGFMKGGKWRYHQTKLANSV  
FTQCLHDKIQASENADCKNILSLCAHPGGSRTNLADHLPIDGIFMKALLNVVAYTFMQSA  
EDGSMGLLKGMMSRESVVRGGTLYGPERFAGWAEPNPPKPYEVDPKAKEMLWSTSEKATG  
VTFEI

>comp2375\_c0\_seq2; 328 1 1064 LEN=1615; translated  
XNDNATTSIPNKTSNQNRIMGSKFTKFDAAALPSVDGKVFVFAITGTTSGTGYVAAETAAKHG  
GEVLLLNRPSESVSSLEKLRAAVPDGKFVPI DCDLQDFSSVRAAAQTIKDKGYKSIYCL  
SNAGIMAVPDEITKADGFDKQMOTNHLSHFLLTKELFPLIVAASKEHGDARIVQHSSGA  
RHMT PNNGLEEKYFLKQEKDGM LGGDTENGFMKGGKWRYHQTKLANSVFTQCLHDKIQ  
ASENADCKNILSLCAHPGGSRTNLADHLPIDGIFMKALLNVVAYTFMQSAEDGSMGLLKGM  
MDSRESVVRGGTLYGPERFAGWAEPNPPKPYEVDPKAKEMLWSTSEKATGVTFEI

>comp2376\_c0\_seq1; 320 142 1247 LEN=1282; translated  
MDESEPPTPKKTRVFLVLLGQSNMVMGVTQVQADTEGTLQHAVQQKKLYRYLVDAATGEW  
KEVVDPSVRNIFTMGSNDPRDGVQRNELLTVKHSRMIGPEIGIGCVLGRWRSEAAAART  
PTPNGSSSSSNRSSHNDIEITVLLKSCIGNRSLGWDLLPPGSPSFEHTEPSSGKKWTYA  
GYGQSPSRWEAGTDPVPDP SWHAGEQYDGDVRRARRVLEGLSGDGENDGAVSVAGFFFWQ  
GDKDRYDLAYAGRYKENLARLVRALRKDFGAPGAPFVLATLGQTARDQAGTGADGLIFE  
QTGLQELPEFSGNAFCVYSKPFCHGGASNGHYNHNAETYMDVGLAMGRAMVXPPADDATQ  
SPGPTGIL

>comp2378\_c0\_seq2; 351 1 552 LEN=1267; translated  
NNDDGNNAYGGDYGYAENQENSYEGSYGNNDDGNYQDDGGYNNGDDAATYDGDYGNSSNS  
AYSNDNTYNSNSAYQANVYNGRDQYWDGQSVQMYTDDDEEPIEEEEGGGIKIFGKYAG  
LSIASTFSLVFLLLMAAISTYVFLLLARGFNLDIFYHKYLCKRRPANEPKDDSFVKLEDP  
VLS

>comp2380\_c0\_seq1; 209 114 746 LEN=746; translated  
MNNFNRLWTLWLLGAASIP TCTARISHEKQAERAD FVRAMDRALGQKKDDLFRSRLA  
QLAVPASSNPRYVRSQDFNAEPRRLEEYQDYAIDLSEYALKYIGCSNIRTWSDDLAAEN  
DGGSDSVLKMNFVVLRLCPRDSCSNYNQYGCLEQFGDYLI PMETYMQTMAETFFSQQYE  
YCQTCYECMNTNYNNDDGGNYNNDDGNNYNN

>comp2381\_c0\_seq1; 191 452 1286 LEN=1286; translated  
MTTRIFL FALAAVATTL PSSVATPIVDFDSSRIVNGVDAEPCQFPYFAQFESGCGSLIA  
PDIVLTSATCKPVNDEGVVVGAYRRGRDNEFGAKKRFCKEFV VHPNSMQRLKYDFALCKL  
NKPVFIDESFVRLELSKNVSAPVGGTRTISIGMGWTNNKVDVLRNVTI PTRSNGDCKRDY  
SWFDRRTQLCMEYYPTITLPPCNGVSGAPVVERVYQDGFVVDVQHGLTSDGTYCTHGFN  
ARISGEIEWIRSTSCLTLHSIGSMCDTITSPSTSPSISX

>comp2382\_c0\_seq1; 438 1 2455 LEN=2637; translated  
XREECSSRLNSEYTRTQYTRSSTSDDSKSMKAWRASPN SNR LPMKSSCHSSRDSL VFEFL  
PEATREL FHRNSIDAMDEDIMSSDGVHLAHVYLSQATSETEDAKNKSEPDQCSEGESKQR  
QTQTPDAAKPIDGKIASNHLDENLLQVYRNKLTILTEANTEKERRLEELEKEHNDHNVQH  
KEGIYWLRLQLDTRRQKNAEKRLAEMKKEFRKL GAGDASTSDEDDLTIGSDWDEKDIL  
IAELRERLRKSEAGFGVMERQMATIESSALVIKSLKEEIANIMEDRTRVELDLLNKLSD  
LDTERQRRLQLEFALELQDRDETIDALRRGQQASLCTADATSFSGTYS DASWCVHGVSSKS  
RSESHADESF SNHQHHRPGGAELHRILEVASHDSEGACAGYGGGNDSGRSGELVWKERHR  
IDSSICKMKTVLESTNASISNMEGIVKSFDPNDDAGGENKERETMMSILQSASLISEQVK  
LSISLIELKLRNKSESLKSGVTVNEGHQECSSVDEKTI DTIEEIEDNALIELGKVEETLT  
NQLKELEERAKQELMNQNPDIKNGSLPSLGDHCHKDTRSN TDDTLVIRGVLHRLEELV  
QFAECMQSKNDKIDELTAEIRKQKKRERDLK KELKAASRTSSERSSGSKSTREHYRSRS  
KSGDTKSTRSKRMPEDRTKDQKVEPKNLTRTRTF SHQPIELPAELQSKKEVLQITSIKLA  
PDLVPPGPIR DDETKGHAGSFSPGGHG CALSVQADFP EAQQEPVGI FLGHQPEARDRRR  
NALGHPRGTIEAPLARRDRVMVCGEGGRSRLCQSPRD

>comp2383\_c0\_seq1; 127 1 1135 LEN=1371; translated  
SNQRKPRVALCASEVFTRPQFLSSGRLISNTAKTKQRDEDEDQRRFPILHHGFFAALAF  
VALTTKILPGGVSVCGFLLSGDRVKN DSSSNLSSRHYPVVDNQQCRMHAVHSSSEFNG  
NDKQKQEYPPQSPQLQSREAFFGTLRLASLGAIVLSP IENAFDFDGGVGG LGKTKPETGV  
ELFDETSAPIQNEKIVSSEIKGKDGSPILVAFQTPWPLLPTSGALEARDIRSTESAFVQ  
VTGLSAAARSSDQKWKSKKEFEKVLME SVFAAQGKFGAYGQPYDIQAKKVARADGDESDAK  
PTLFSVGF TTTLPAMRESERRALVAATQVGADTLVILVVT TTTSAQYASNEKTFKAIASSF

EAIAPESGLKNKRSSK

>comp2384\_c0\_seq1; 163 201 317 LEN=1885; translated

MRNEVPDDGATTSTIASDVFRKETKRMTQATTASMSKP

>comp2385\_c0\_seq1; 445 538 1277 LEN=1277; translated

MAKPVRTSTQRRRPVVETSADGAPSI PNKKS NKVRSKRKQK KALKPMYVVSYS DGGDDEA  
NEAKRELYAPFRREFPDTAVRSSPKQKPKHKKDATASDHNRSHKNKGSKHSSLLCKHRNG  
VVSSHARMSFAGEVLEGEDRHGDNYFASKQGKTSSSAHPRQLGLPLMPTESSSSETISILS  
DTVFCVQGONSADANAATAAAAATASPEEIQAFA SAILDHMMKEGGAEDAKKKKNNNNKKK  
KDKKKKX

>comp2386\_c0\_seq1; 241 443 976 LEN=1389; translated

MANALCCVYTHVVS GSGITDVNSAFFEIIDGSTIEIAGCGTSKTSIQLMQDVMSICDMS  
MGSEDCYSQRVCIENAKRTSVPSTVPTPVPSAVPTPPRNNESECEDEAFLFRGKAGRNC  
TWIKKKRETHCSKTSRGRVSESCPLACDQCSNNDNNSGCKNDSTFLFKGKAKKDCNW

>comp2387\_c0\_seq1; 475 231 1520 LEN=3255; minus strand; translated

MTVTSSQTRS FYGQRKILSFLQICLTVLLLVLFIAPRNHVQAFSTTSQAFATKPDQSVTF  
SRHFVAWASIGESFVDETSNDDTSSSATASSLDWSFLDSVCLIHCPNGDV DGNRIQSTRN  
ILNTINLLDSTTIKEFETDDEDVRGCVTSHVSVFRDVLGANSRGSSVSPGGFDFFNVFQ  
KVNARSIDSKN DGKDLNVLIFEDNLSLGNRILTQDTIDAVSDFIENKNSKWDVIHLAYIP  
YVPDLKVKSTNEERIVKLSTSNSQSALGTTAYIINKRAMERIEEDDQNGYTLSIPDKMA  
VLFGDSRYALNPTAFVRAPATKSLVNPQLDDLR SILFRPTVVSIVQQILVVTGLSTTVLL  
PLVILLVLTSSISSATSSVRAAIEFANYGTVDGPLLFPIMNSIISLFSLGLIIQGVLLAP  
KPEEENDDE

>comp2388\_c0\_seq1; 414 1 1041 LEN=1203; translated

ARNVQGPVKSLLAMALLCVLLLFRTFSDPFPETQE QPMLRVPVANRLSHDYAITVSKTDP  
SIAVSVYKQGDIVSNINIVKHGYWDGGLTEVVSAILDARRQHHPSTGNTQPQTIVDFGANV  
GWFSLAASKGHRSI AVEPMSSNRGALLQSVALNSFDDLIQVVAALGDGSSDSPSSLCI  
QPRVAGHNIGNGQTTTKVDDCGEVVQVRTLSIIIGNRKVDFVKADCEGCEANAIMGMDI  
IAGKSPPCSFAIEWRVETMKELGGNPTEVTKLLFQSGYLFRRQQCDLVTGEGLKLTEIPS  
SLVLEKLP TGSM DLVLLHNSKRCFERD GKAFRYVM DRVASFQPVLL

>comp2389\_c0\_seq1; 331 189 1558 LEN=1643; translated

MSAEKVGKRAGIGFTYLVILVIPLLFSLRDHAIISDWTRTLELNSNVLPSGVSPWNRHGR  
PQTQATALLEFDKFSRNSSCVYETE VVDEFCKNTTCDEHEFCAEGEDPGPCDEHEWDTED  
EDGEEGCKMLWFAAIYDGGDEVACNEKGTGYKNFY SVALNXATVNAGESLQPVLLLRLE  
LEDDSETTTTTTTSTTTTATKTASLSKVGRWAEQKGAWVFNVPRLSFQEI VNRHYPEMPPS  
HRQGPWLRLEIPRLIKEHGLMDKAPNMCKRRFLYTDTDV MFPNKLKKANLKR LSDT LSN  
DAAIMYGRESSKEAEAVNTGIMLIDVEKFGKEIPGMLAYFNETGQHVAFDQGLVNDYFNA  
TDLGRSLLPIHYNWKS YWKLHPSTFEVKI IHTHGPKPGKGLAEIGSCDISGLPNIPYYF  
GFFRTGICCDRGKTA AWFMSY EKLLAPSE DICGSA

>comp2391\_c0\_seq1; 1614 1 2334 LEN=2529; translated

EEEEKEEDRS DSNETPLLET VATATKPSNDDAARSFLEEFDVASKTDEISALLEENVALK  
TTF SMVATDQSEVTYSDFWTRYFR IADPDRVAETYGVYRKELEAFEQRREEAEAAARD  
AAANDNLARGISNVTNFFGGVVNRLTQEDDEGGADEAGVDESMDVDDDESAPQTSGLGGFF  
NSVTGGGVGRPPFVLNTAVSDDEYDDYQAP EEEEDDDSEVELGWDDDDLESDDDDEQN  
TSATMQFKDGD LSETVDFKDAEKEGLLDQLEQARAERDALQKTVMQTEELK KARTADI  
AAISPPAAVLEGGDKDEEVQKLSIQLF EKDSELAALRAKLEDDKNEAKDQQQQQETLEKL  
LQSI AEKDAEALRRSTDERI EMLQNTVDQKTTEQERLRTEWDSEKEALLLEKEANRQD  
TSVVTAEKADDAEMLALRSKIAEQEQKIEELVASKDAAEKANSVEIVALRSKVAEQEQKI  
EELVESTTAQEA DGVEMASLRSKVAEQEQKIEDLVMSKATAQEA DGAEMAALRSKVAEQEQ  
KKIEELAASKAAATEELQHQTEQSAEQEQEALRTTLQLKIEGLEQRLLVATNQEESDVAAM  
EALISEKEATNVKLQ TALAECSKLAKVTERN SQDQAALRADLEAQIDTLIDQSSKRDE  
YKQTKKHQHTLEVSELGEQLASSRAVL DLLKVSNI AEATNLLASLEANRSELSKAELSA  
ALTAPASPGSSSTGVQVRLPSGDDGEPVSMPSASPNEPGNNADADDDDDDDGWGDDW

>comp2392\_c0\_seq1; 305 1 1183 LEN=1390; translated

XEELRRKRESEDNLQKLLKDAQSRFSTLHDQNEDISARNRELEGQIRKQAGSDHGQQSDA  
DTTRTTQLTETISLQDEEIRRLRSELDRARPLSSPSSHAGSSRAASSLERELEAARGDLA  
QKEHANTV LNKSLKEALGLLQPLQMHLEAAEMEKNETSKELRNLRKRFRQLQM GEMVDDQ  
SRSTVGGRAIDGGVELAKIKEELEETVRQLELEENSELHDALDDLTEGGNKQNN EAKTRHR  
LVELNSLYEVTQNQLEDARVENHALLKALRQKEAEEIERRAEVVRLGEQLHKTESELTNA  
KKIAQSALVKVEELTMSNXRAALDPPGLARECTPDRPLEPARGVLLLAAGPGFPGNQFAT  
HERQAEKARHTGTGKNANFFGWNSLVVVCHANQT

>comp2393\_c0\_seq1; 590 58 2134 LEN=2322; translated  
MEKATATKINTISVAEDGENKEIEVFSNLNRGATGRIELADGSGIFRSEGTELFDSXEDY  
SKCNVPDSTFITTVHLSLGLGASIVNFLSNADENDEVVDIVAGYKDAKTFHDTGNPPFFGG  
IVGRVANRIGGGKFSLGKKSYSIFPNNPPNALHGGKVGTSRKIWAPEIIREGSALQFSLQ  
SPDGDQGFPGDITIKATYILRPSFSPSGVLLQLDMHAELNPNPGEETVKETPINLANHSYF  
NLGDQENGILDHYLQVESDSYTPVDKNFIP TREVRSLDDGVMDFRQKRLRDALEKYAI  
EKMDLSAQQSQEHLAARNYSSLP I PYGFDHNYVVRKQRGTS L PK I GFLTYGLRRLTIYSD  
APGVQIYTANNLGDSDQSSSV DVCKAEYGPWSAVCLETQHFPDSSISSAKTASSSTRDFWA  
GKCPILTNAEPTYNQTMVMHLEMDHSNAEASYFGSDTNGKKYSSIEEMWRNQDSSTWYTR  
AKGWYEDNCPSTIDGVLGGIGHISCKDLEGSREFLKQLKLP SRADGKASVACECGAGIGR  
VTKGLLLDFADRCDLV E S S R L L F S A P D H L G D S S N K C R F F C A E L Q D W K P G A N K Y S I V W I  
QWALCYLTFDFDIVQFLRRCSSLSLVEGGWIVLKENTCEDQAFVVDMDASITRSLEYWLDL  
IAKSGLQVKRLTWQNNFPDEIFPVP MIALQK

>comp2393\_c0\_seq2; 685 58 2016 LEN=2204; translated  
MEKATATKINTISVAEDGENKEIEVFSNLNRGATVHLSLGLGASIVNFLSNADENDEVVDI  
VAGYKDAKTFHDTGNPPFFGGIVGRVANRIGGGKFSLGKKSYSIFPNNPPNALHGGKVGT  
SRKIWAPEIIREGSALQFSLQSPDGDQGFPGDITIKATYILRPSFSPSGVLLQLDMHAEL  
NPNPGEETVKETPINLANHSYFNLGDQENGILDHYLQVESDSYTPVDKNFIP TREVRSLDD  
DGVMDFRQKRLRDALEKYAIEKMDLSAQQSQEHLAARNYSSLP I PYGFDHNYVVRKQRG  
TSLPKIGFLTYGLRRLTIYSDAPGVQIYTANNLGDSDQSSSV DVCKAEYGPWSAVCLETQ  
HFPDSSISSAKTASSSTRDFWAGKCPILTNAEPTYNQTMVMHLEMDHSNAEASYFGSDTNG  
KKYSSIEEMWRNQDSSTWYTRAKGWYEDNCPSTIDGVLGGIGHISCKDLEGSREFLKQLK  
LPSRADGKASVACECGAGIGRVTKGLLLDFADRCDLV E S S R L L F S A P D H L G D S S N K C R  
FFCAELQDWKPGANKYSIVWIQWALCYLTFDFDIVQFLRRCSSLSLVEGGWIVLKENTCEDQ  
AFVVDMDASITRSLEYWLDLIAKSGLQVKRLTWQNNFPDEIFPVP MIALQK

>comp2394\_c0\_seq1; 211 677 1300 LEN=1522; translated  
MSGVDVGKAADEKHDATNVLNNAIEGLAFEETASVNTHGALAKSDSVTVGNTGEIRYENV  
WQKMDGKARIGAKKLWDDTFGDAMPCKVKNERLGALCVVAFSGDEVVAVSTVVIEMNSSL  
YCKVGWLRCLVKEEFRRRRGI FTEIMSRCKIALEEWAIENPLAGLLAMGVMLELKF DGKNL  
NNKDPVWPKTGLTLVGYTQRGVQIRIAW

>comp2395\_c0\_seq1; 479 402 2234 LEN=2464; translated  
MNQGRLTINMFSNSVELSPELERTSKKIASNCLPPKSPASMNGKLLSVVTNASSSSS  
RRRGP SRRR S S R R R S R S K S R N C R G N S S D A S C S S E N S S S S D T D S L K L L P L S P R I T D P S P  
IHLTVDTDSDDFSNAEQFSLLSFEKSMKSNSTFSYLDKNSELADRRNSGCQDNHTQNR  
RQHRRSHRREHSWNSSTPINLNTVDTGTSSKSCLTVPKILRRQRVIVADVAVSGNASDTL  
VSIVETSNGNGRGRITGRELHETAKVFMNEGEYQEALQMFEAILRAQLARFGCEEHSSVG  
AALHNVGVVRLRIGEPLKAEAF LRAL T I R R N V L K S D H L D L A A T L A K L G S A R T S L G K F D E  
GLFDLREALRISRKVLGRNHRNVAQILCHIACLYFEAGELFSAQATFQDALEIYRGVFQT  
ESDRDACMAQLTETLCNIGSIQNKRNKNSGAI ESFREALYLQRGILGHDHPKVIATLDNL  
AYSFSKSKSYNQALICYREMLSAEISRYGSFTLECCDTLAKQVLILGKLKVVDDALQVVN  
KYLESIQAKSEQEVSAANDEVAAEEVNQMLLDLKTAKKKSSKPKTRRRRERSLDCFDRI LFE  
KGKDKRASEL

>comp2396\_c0\_seq1; 209 148 1170 LEN=1250; translated  
MEGPEANHGGRPKTPQEFLGCVPIGHPDSMMSVESVRKAVEEFRTKPTDVIVATFPKGTGT  
TLVTWICHLLRTGACPKKSLGFETLYEVVPWPTLSWDIGYDPNVQGFSEFNPRVFKSHLRM  
ASIYPSCKYVVTIRDPAKTALSFYNF IAKKVPFLVSPEDGKLLMDVSTFLLDTPFVKGN  
HPKRASIWYDYSEYHALMECPSVLMIIYEDFVQEMSSQTRILAKFMDIPEMNKDDADNEN  
LIARTVSMSSKEYMAQHMSKFDEPYERAKSLRAADISQLAPGAKI AVKKHVQKFDERAN  
SFLEDQWKATMGTGLGYDDYDSFCSTVRTRNKR LFGNRNIQ

>comp2397\_c0\_seq1; 431 1 820 LEN=1035; translated  
XCRHCPDDDAMGGAASATSVEVKT PVGFLCRHCPDDDAMGTD SLLMTAISQDCAGLCQK  
EAAAELEVDFCNKIRSAQNSKYLSSAKSCAIRFDIEEKSSNNKRVSSATNKVATVDSTII  
LKGVGTGDATKEEQAILAKAFVSAYNDVHWGANHYLTDAEIPFTAATGSPEGFLCRHCPD  
DDSMGGAQQTNTLVLDIVSPVEAF LCRHCPDDDAMGSQFDIQSLNSNPFDKKAI E V A F C K  
KIQNSVSDKLAATKSCSIAVESVIAAASNTKKW

>comp2398\_c0\_seq1; 656 73 2015 LEN=2326; translated  
MEAHGNYKPGYDSEYDTAKNETTSDDHHHGSVEKEGKNDDYKISSYTKMNCPPSKQMR  
QPLSSSSSRSTRRLPSYNNKIVQESANNCINSRFDHDTFSTAKSMALKFANPCGLDMNQ  
YNNNYCPPRTPSTVGSSFSDDSVETSSSLAQHSSHPKRNNLKSRCSDDNRS GHPFLRR  
TVIQRRSSRSSEAYSQFSTEKDEGGYPLTRGIAPNFDKNDGEDVVIVVG DQEYPLPRTN

EKFVVKYLLSRQERVDDHFSYVDLSTHSPNEFEVMEFFENNRNTETWDEIHWKNIHIIL  
PWFVEFQSLPLMTAVDSFLCHNGLGGGQFGCNDNGNTKRKHIISLNLILITQIAFR  
GLESTKSHARRLLKQCLLEPRKEYGGSVDLDDSNHTNRPPMEAATEDIELEWTLHDLQIL  
AQTLQAYSIDLREYLWDTSVIVYLPDLDI SNSTELVSNALFPYLLREGMMQMMIVEGIRI  
DSSADLSYSQANESSFNSSVSI GFSYSESTSCSDTTIPTNPAQRKNLTQEEMRVHLNEI  
VMYLDKFRAEKVARIEMHKEQLENSLLANESSFDDIGELSDVGVNTSRSSQDYGSRSDKY  
DSSSSGKKIFNVLSGESEGLNVCMLKNILKAHTTIWDDFVQKELRR

>comp2399\_c0\_seq1; 125 164 697 LEN=1097; translated  
MAGYVTKPAAAVNKALVEFLPELDSYATYPMKHDRWYEPDETGPKGEPFCIAKGGTSLA  
TGSPPIKKDYVYCTTGGNGEGYYSLMCRYSYINLYYKLLKSCAPQGTCTACPCFASKATRD  
ALDRYDDCKRVVYMRQKCFPKPDDKLASDIVMGIKDTANMVYHGTQNEQLIVNAVF

>comp2400\_c0\_seq1; 478 153 1673 LEN=2038; translated  
MQTKGDDLDKINIRMKDDGTSKSGICTCGGMSSSDMMTTVAMDEKLTANSSSGS  
GIGENNE ELGAIHFEGAKKSPVWLESFFVNLMTTRRNIRTSKDYKERHHQQLSQHGFLERHQHLLKLL  
EVAYNANSDDIDHHKNENHGKCDAMVELCVEC IDRVEAALEADTQRMYAIEIEVYQKAVHV  
AKNKTSLQKTTEGVVAGIATMGEDPTEDQAHGKNNIAIEEAYRHEISMLEQEAQTR  
CDELLHYKNIHKEQTTITRELDLFEEAIQLEQNSLELQSQA FDNRRQILTCTLSEVQNEV  
DRLTCVSLPRVLFDLQVDQVRGLHYPLINQLRLA FRPKGDVPAQEIQVAWSQATQLLLVL  
GNLLDYPSSDWKLVPLADCAKLIYRKEIFNLEPGDCRSLMAWNALLDQIVKHALSITVGG  
GNKVNLSVSTDIYDQDSTSTSTNAKPPYISSPTMIGNTELARLDPIDHVSWSQVIHRMA  
SNLLWLSNRASALAAATQVGSIVHCVV

>comp2400\_c0\_seq2; 482 153 1483 LEN=1592; translated  
MQTKGDDLDKINIRMKDDGTSKSGICTCGGMSSSDMMTTVAMDEKLTANSSSGS  
GIGENNE ELGAIHFEGAKKSPVWLESFFVNLMTTRRNIRTSKDYKERHHQQLSQHGFLERHQHLLKLL  
EVAYNANSDDIDHHKNENHGKCDAMVELCVEC IDRVEAALEADTQRMYAIEIEVYQKAVHV  
AKNKTSLQKTTEGVVAGIATMGEDPTEDQAHGKNNIAIEEAYRHEISMLEQEAQTR  
CDELLHYKNIHKEQTTITRELDLFEEAIQLEQNSLELQSQA FDNRRQILTCTLSEVQNEV  
DRLTCVSLPRVLFDLQVDQVRGLHYPLINQLRLA FRPKGDVPAQEIQVAWSQATQLLLVL  
GNLLDYPSSDWKLVPLADCAKLIYRKEIFNLEPGDCRSLMAWNALLDQIVKHALSITVGG  
GNXVYPLPWNLINYEYSIFLREG

>comp2401\_c0\_seq1; 440 1 1643 LEN=1972; translated  
XQKVSQVSYSNKLTATRMDLQFQEDWPKEADKMYERIEVLGKGSFGLVWMCERKTKADDE  
FDDKYVAVKNIEIKEEKGVYAQREISILSELKHPNVIRLIREFPYINNISRLVALQLAR  
GPNLQRVVS KR GALGLPLCRLISRELVA AVSYLHGRGVLHRDIKPTNLILENTEIRPVDY  
YDYSRDSSI WSDGRDAEEMVERNKWKVMLVDFGFARALTANEIDFYRSEADDKTPDLAKK  
SRRHMRNSITLESKGPPTQTKPPSA AVNVDDSEELALITMAANS MRTNMMDNAAHQPSK  
RRTSNVSNLEEIKEATNATNGTPTPTEDRVAPIKSKNRRESITQKQVRSMSALGTKAYAA  
PEIKHDLRNKTIEDINKTNAALTECVADYGMIVDAYS VGWTLRVVLTGVPPNSTISKYMR  
KYNGQKASAEFTDEVVCCSFLGSPTDIEEENKTQTKPDRVDRDTDEIPRAATIFISQLT  
KKDPEERMSIRQAQLHPWIKGDEQKGEPLYKVPQGDYPSHHGDPVPLKCAANLTNIVEI  
HNINKDQ

>comp2402\_c0\_seq1; 343 37 681 LEN=946; translated  
MSEVQVNAV LSTQSADTV DSTQSRDANGNP IVSKSKARSLRRKRAKQRKKAAMQNGGQGV  
EEKKTEPQDKENSGAQPKGQAGAKKKRHRKKNKAQAGDGAKPDAIKNNNGNKVRSSS  
AATSKNVEPKVTASTKLS EAKPKVTASTSEITKGTEETSPAKIDDLPVREETIAPVATS  
VEIKSDTTQATIYDDDNENNIGEKEDCACACTLM

>comp2403\_c0\_seq1; 537 73 1578 LEN=1821; translated  
MAYFAVAARRIATASSRRAVQSTANRSFSSNGADVLASGVYGGQLDQDRIFTNLYGEQD  
WRLKDALKRGDYHMTKEIMTMGPDWIVQEI KDSGLRGRGAGFP SGLKWSFMPKETDGRP  
SFLVVNADESEPGTCKDREIMRKDPHKLVEGCLLAGYAMRARAAYIYIRGEYFNAAVLD  
EAIHEAYSAGLIGNACSGYDFDI FLHRGAGAYICGEETALIESLEGRQGKPRKPPFP  
AGVGVFGCPSTVTNVEETIAVSPTILRRGASWFAFGNENNRGTCLFGISGHVKNPTVVEE  
SMSIPLQELIEKHCGMNRNGWDSLQACIPGSSSTPAMNKELCDEALMEFDHLKSLGTSLG  
TAAITMFDDSVDMVAAIRRLAHFYKHESCGQCTPCREGT SWLEDV LIRMEKGDADKREIP  
MLEE IARQIEGQTICALGDAAWPIQGLLRHFKE DIEKRIDDPASFDHDAAFQTSWSGDP  
FANDEWVDEFGDGLTYKKATA

>comp2404\_c0\_seq1; 354 1 714 LEN=839; translated  
HRVSTVTAPGTIGTTTTSLFHLTSDFLVKTMMADGEEPITSDDVANGTAGDSNASPNETEA  
SALEDNIATKGRNSYF AHKHKAKGPKWDGKAEPKSLSKEDMKALSLEDPTKLLLEQSGKA  
SSFAYHKS NITSY AFLNEEKQVKLYITLEGIGE QCKDEDIQLDWDESSL SLLIKNYS GTD

STGTEDRTLSFGRLTAKISNAKFKLKPDKIILTLKKEKAGMEWHTINDKGSPDHELIV  
>comp2405\_c0\_seq1; 821 113 1990 LEN=2244; translated  
MLFRSIALFAALASPAFGFAPVSTPRPSVMALRVATDPIKSDDLVSKEANVKSVRRTKPT  
KNPMSPEFEQIRSVPYNEAFPNSTKEHKTVTHEETGHVNLNVPFRRVHLEDPDQKYLPLYD  
TSGPQGHDPKIGIPKLRKDWVAAREGKFERYTQMHFARQGMITEEMLFVAEREGVEPEFV  
RSEIARGRAIICSNKKHLELEPQIIIGRMFKVKINANIGNSAITSSIEEEVEKLQWSTLWG  
GDTLMDLSTGKHIHETREWIMRNSPIPVGTVPYIYQALEKVDGIAEDLNWEVVFRETLEQA  
EQGVDFYTIHAGVLLPYVPMTVKRMTGIVSRGGSIHAKWNI FHHKQNFAYEHWDDILDIC  
AEYDIALSIGDGLRPGSIYDANDEAQAELKTQGDLTRRAWEKDVQVMNEGPGHVPLHKI  
PENMRNQLDWCNEAPFYTLGPLTTDIAPGYDHITSAIGAANIGALGTAML CYVTPKEHLG  
LPNRDDVKAGIIAYKIAAHAADLAKGLPGAQDRDDALSKARFEFRWNDQFNISLDPVTAR  
AFHDETLDSASKSSHFCMCGPKFCSMKITDDVQRQYAAENGYGVEEEAIAKGMEEEMSDM  
YKEMGNKLYLEDMDNVVNPLEDLTP  
>comp2406\_c0\_seq1; 140 1 296 LEN=350; translated  
XDNDNDNDVGRHTVSFSVSFSSSLLAGAVDVLHPGGAFGSSPVSGAGVLC SARHNLGVA  
ESKNKTMADRQCHAQSRNGNNEPEPEPATASTIQESKE  
>comp2407\_c0\_seq1; 422 54 965 LEN=1137; translated  
MVFGRKKKETTTPAEGENDLALAAGAPDDASSTGDSVPPPPPEAFAGGKQNTESIEADQYV  
VTMPQASGLADEAKEGKDDPDFYKKLGVILLICISTFFVLLGVS IKYGVSRNQRAENSIGD  
PLLVESGPAEEGTSEPPRTVDQQSVPWEDTPSDPTGTNTTGVGVDAETAPGAGEKTVVPS  
QVGTGGTLPAPNPFAGCTADGIVLEATCVDGASLVSMDFCLANGGATDEFWAWVETPD  
AYARFVETDWGWL RDEASREVEGLPGGTYVIGLFS DGRQLLPEYPLLVSQEF TVSCPELE  
VRN  
>comp2407\_c0\_seq2; 470 54 1004 LEN=1176; translated  
MVFGRKKKETTTPAEGENDLALAAGAPDDASSTGDSVPPPPPEAFAGGKQNTESIAVADDD  
DGDGESIEADQYVVTMPQASGLADEAKEGKDDPDFYKKLGVILLICISTFFVLLGVS IKY  
VSRNQRAENSIGDPLLVESGPAEEGTSEPPRTVDQQSVPWEDTPSDPTGTNTTGVGVDAE  
TAPGAGEKTVVPSQVGTGGTLPAPNPFAGCTADGIVLEATCVDGASLVSMDFCLANGG  
ATDEFWAWVETPDAYARFVETDWGWL RDEASREVEGLPGGTYVIGLFS DGRQLLPEYPLL  
VSQEF TVSCPELEVRN  
>comp2408\_c0\_seq1; 174 209 664 LEN=1018; translated  
MATKRLRQLLSIQISRSIVCRRAAEFQPAEFANQTFSLSHRAFSDDRSGSSSEKPPPRPQ  
SLGNEWRKQQLDKLENRFQKLLLETRTIESEEDLQPMWKEMEGRVTRRKARTLADTGGKS  
GRRNIKKTDEDVWLQEGMYGTTDDNKDASKKQ  
>comp2409\_c0\_seq1; 427 106 1098 LEN=1418; translated  
MAPSRKGRVSAPLLTAGLFLAFVAGAFSFPVQRRAWQGTSTRSSLCMSAESNASSNTKGG  
LLVLGGTGFGLQTCRRALLEGYQVTSVSRRLPPATKDNKSEQQAGPIGSNSIDYRAG  
DARKENTISSILREGGYVGVVHCIGLLDDASGLGTYNRFVSGSGSVPDENSSYDSITRV  
TAFNAIDSTIQYLNDQEGGPPGGRLPFVFTSAAEAGWPDVAGGSQIEKFLAPEWLQRYLV  
AKRAVESKLLGTDQKLLRPIIVRPSLIYSLDKPASVYPVGAFFVGNRLGLPFVDRPVTV  
QSLANAVVKSMSKSDSTVEGVLRYPEIDALN  
>comp2410\_c0\_seq1; 461 202 1487 LEN=1559; translated  
MSTRSRTRARASISMAVTLFLSLETSSVAMIRSVESASPLISKAPTTKNIDVDVDVD  
VDSDGINDIEVNNSNCKQRGKMLKERFDEHLLRAYQEIKA EYQEKAFGGSCDATDGSQS  
IGKGQEEPQWRVLA TVNPNKGKNTNTEHDELIVVSMLEHPDPLCPYVKMETVIVPVV  
EKCWNFLSLDRWDETMPRMDPFYEGLDVYGEYAVASGSGGEGDKSDHDAARCQLVRMILA  
RKRTKRILAFGKREFVFSVEDTPLQDGTWVSGTVSVQVDESSLKSP LKRNKSYTRAFQD  
SIAFYKPLPSRAATEGKAGGDADHRSGRTGLTIVCRIDLND SNGRGGCIPMXALRENDR  
GDGGEIRLEHAQVPAGRVCLMLQQSVEAIAVHLTRAAERQSNPPTVCIEEYTTWKMCVRH  
NRTNAKKL  
>comp2411\_c0\_seq1; 305 681 1214 LEN=1566; translated  
MASKLGLEKPERVAVAVEGICYQNTGIATSVAASMFTGTQLATAIGVPLYGLVEMIVLAI  
FCLGCWKS GWTKAPPDENFFTMIGKSYEVEQARLES PNAIEVVHNNNPKDDGDI EDLVFN  
QTIEGYQVDERSLQEKTNAGLMEQRQMNGSPLRARSSAESRRIDDDTLKAEQGEFT  
>comp2411\_c0\_seq2; 322 130 1317 LEN=1669; translated  
MSRATEIGAHFLFLVFGMSATVDIGHMRKQLRNWKALMIGLCLQFVILPFVGF CIVKI  
LNMDPAIGVSLLVVTSPPGSSYNWCSL FNAELALSVM TGTISTLLSVVMLPLNLVIYT  
TGSYSDEVVKS LDWFALFLSLIVVLGGITSGVLMSAWYNSTRFNL MANKLGNLAGVSLVI  
FSAIVSSTGQDTSIWNQSAVFYIGCAI PAIVGVILATY MASKLGLEKPERVAVAVEGICYQ  
NTGIATSVAASMFTGTQLATAIGVPLYGLVEMIVLAI FCLGCWKS GWTKAPPDENFFTM

IGKSYEVEQARLESPNAIEVVHNNPKDDGDIEDLVFNQTI EGYQVDERSLQEKTNAGLM  
EQRQMNGSPLRARSSAESSRRIDDDTLKAEQGEFT  
>comp2412\_c0\_seq1; 438 162 1511 LEN=1745; translated  
MLRKCLAGPCLLLIAVAACAISTGSSSFPATEALSSSGKPKRPVSLTGSQDVSKFLYGK  
LQRATSLYGSGLVGPATAVVHGDKDTRELLPKPVVASSSRDQRKDLDDMLWKQFGMATCE  
GIVEREDLLTKMSYLKPRDLADLQDTVLFLLDATTSGMGKNSAGSGETGLGGLLSGFLGGGS  
KPKPNSTPKNKPRSNKKKSMQSDCWVDVLDLVRSSMRGSRVFFVCESSDTTRCAKALNK  
CISAMGDNSIVTLVSPEDGTILGGNEGEDTAWKSLRPQDLEGELLQAVSVRRDPVAERR  
GGGPSGDNGSRARLAAASADYIATDSAKGLPLSRQDLAEVCVQCALRLPTTPPAPTEEPG  
TDVDADTGSAPTGTPTLRVVRVIPRGTERRAARDGIDWTERPNKNYFAMMGKKAKAREGT  
VASADWARTLEPLVDGGSIRVFPKRPSEM  
>comp2413\_c0\_seq1; 241 114 1136 LEN=1309; translated  
MDQDNDDNEKESKINRQSRGFLQNALILVATLTVVGLIMGYIHTHDPQLSKNIQHIVEK  
WEDNLVAHESAAQQLRTPPIATKETPPEKTSKQTEFDLTFQVEELDQKVRARKSTEGVL  
METDPEGLRLTKKLQAATLKLKHYGYGTHKHERFRVRVDLVYPEVIVGEGESKKAFFVI  
EMAPPSLIPCSVFFYFMEMVRTYKSGSFHRNADHVLQINAQTEATAGHKSMFPQEYSPEHP  
HKKYTTGYAGRPSGPGWYVSIKDNNTKNHGPGSQQKHNPYEADANFGRVVEGIKEGVIDKM  
HSPVQKGLWLDKDDCIIIPKMTILVQAPDDELEWIEWTPDL  
>comp2414\_c0\_seq1; 322 214 996 LEN=1093; translated  
MKIPFQKLPEEREPIRESVHVSKIRIVHKRPSTTSRRNSDTGPKRASHRSYARTKDTEVT  
TTPKRASHLLCERTKDVEAASVETKSTLHRSQGNTKTIQPPSPTCVKEFARQRIVVEEEK  
QGEIFEEKHDEICEEEEEANVSDGWASSHCTRYACVESFPDFSDTEFLSSVQGNRSMKG  
FKDFARVVMKVEGFQEQYHVNHHALEKIFTLRHFCHNLPCDNLNACSPSAVDDATDAKD  
ISMTVEFRSKNTPPTIERIEI  
>comp2414\_c0\_seq2; 343 94 945 LEN=1042; translated  
MRFSFRQATDRAKEFCNEMQLRRMKIPFQKLPEEREPIRESVHVSKIRIVHKRPSTTSRR  
NSDTGPKRASHRSYARTKDTEVTTPKRASHLLCERTKDVEAASVETKSTLHRSQGNTKTI  
QPPSPTCVKEFARQRIVVEEEKQGEIFEEKHDEICEEEEEANVSDGWASSHCTRYACVE  
SFPDFSDTEFLSSVQGNRSMKGFKDFARVVMKVEGFQEQYHVNHHALEKIFTLRHFCH  
NLPCDNLNACSPSAVDDATDAKDISMTVEFRSKNTPPTIERIEI  
>comp2416\_c0\_seq1; 607 254 1639 LEN=2000; translated  
MVQTIYSNAKVSRCPHRRDPRNTNAAMEPNKIGSRRISKRRRSAMARRAFSLSEYANG  
IGTAVANLSVAFFLVILLAAAPSFVRATLPLFGRITKNAPQQASQSPLSSLKQPAFHMRA  
GSTAAAAGFVTPTLELMLPSYLRIALAGGLAGATGSAVLYPIDSAKTLRQSNPTAYSSV  
RDALWTMLKSKNALRRVYRGILPAALGAISSALYFGAYESSKVTTLKRLVLFQKNHKNVDS  
DDYRARLRFVHGLAAASGNVISSFVFPKEVIKQQLQIRASEATTGTVQAIGSIVRQNGIS  
GLYAGYGATLLRNIPSATIRFVLYEELKRKWATAPSGESGSSPQTQKLRAAGTFLAGAVA  
GATSSFAMTPIDVVKTRMATGSCPLGVRSCMLHVVEGVGWKGLYAGAGSRVLWSGAFSAI  
GFGTFELVKGYLGVSSSTSSKLSPSTSTKPTPFTTAKTSSSL  
>comp2417\_c0\_seq1; 688 1 1917 LEN=2240; translated  
ATTRSEFPNDTEREIQORYGKVMGSAVNPVLRGNSDRRVAPPVKAYAQKNPHRMGIWS  
KASRTHVAHMTQGDFYQSEQSTIIGDKPTSVRIEFIPKNGSASRILKEDIPLEASEVIDA  
SCMSAEALTAFLADEIEDAKDSDILFSIHLKATMMKVSDPIMFGHCIKVFFKDVFDKHGD  
ILKEIGADPKQGLASILEAVENKVDKDKKKEIMLDFKGSYGTEDRPWLAMVNSDKGITN  
LHAPNDI IIDASMPVVIRDSGMMWNEDGELEDCKCVIPDRCYATLYQEVINYVKTHGQFD  
VATMGNVSNVGLMARKAEYGSHTKTFELEGHVAVTDNNTGEVYFQHIIVGDGDIWRMCQ  
TKDEPVRDWRVLAIERGRATNDRVIFWLDKRAHDRSLIDKVNNTYLDKHDLSGLDISIMK  
PVDAIRVTMERATLGKNTISVTGNVLRDYLTDLFPILLELGTSAKMLSIVPLLAGGGLYET  
GAGSAPKHVQFVEEGHLRWDSLGEYLALAVAFEQLGSTTDNGKAVLLGECLNKAVGRI  
LNNRKSRSRKNVQIDNDRATNFYVALYWADYLAQEDPTYQPMFDALSARATIVEEKFECQ  
GDPVELGGYYLVDPKKVKAMNPSPTLNKILASIGETL  
>comp2417\_c0\_seq2; 901 374 2821 LEN=3144; translated  
MMHRAARAARSLSLANTRRPHTFAAASKTAALSRMATKSFSTTRFAASDAASASDLIDIPSA  
PTSNHSHTALPGAQASIIYETDEAPALATYSLFPVVNKIGALADIDIVPCDISLSGRVL  
ALFPEKLEPNQRVPDNLAYLGELAKVPEANI IKLPNISAPLNQLEDCISELSKGYDVPI  
YPREPSNDTEREIQORYGKVMGSAVNPVLRGNSDRRVAPPVKAYAQKNPHRMGIWSKAS  
RTHVAHMTQGDFYQSEQSTIIGDKPTSVRIEFIPKNGSASRILKEDIPLEASEVIDASC  
SAEALTAFLADEIEDAKDSDILFSIHLKATMMKVSDPIMFGHCIKVFFKDVFDKHGDILK  
EIGADPKQGLASILEAVENKVDKDKKKEIMLDFKGSYGTEDRPWLAMVNSDKGITNLHA  
PNDI IIDASMPVVIRDSGMMWNEDGELEDCKCVIPDRCYATLYQEVINYVKTHGQFDVAT

MGNVSNVGLMARKAEEYGSHTKTFELEGHVAVTDNNTGEVYFQHI VGDGDIWRMCQTKD  
EPVRDWRVLAIERGRATNDRVIFWLDKRAHDRSLIDKVNTYLKDHDL SGLDISIMKPDV  
AIRVTMERATLGKNTISVTGNVLRDYLTDLFP ILELGTSAKMLSIVPLLAGGGLYETGAG  
GSAPKHVQQFVEEGHLRWDSLGEYLALAVAFEQLGSTTDNGKAVLLGECLNKAVGRILNN  
RKSPSRKVNQIDNRATNFYVALYWADYLAQEDPTYQPMFDALSNARATIVEEFKECQGDP  
VELGGYYLVDPKVKVSKAMNPSPTLNKILASIGETL  
>comp2418\_c0\_seq1; 350 203 883 LEN=980; translated  
MTILYALVSRQQTVLAENTNASTTGNFPTVTRVLLLEKIPPDGRMITYVYDEYVFHYVVEN  
GICYLCMSDEPSKHRIPFAFLEDVKQRFLQQFGLQQAQAI AF SMNEGFKAVLGERMDFY  
GTEEADRSIDNIGTVKSQIDEVRDTMVQNIERVLERGEKIELLVDKTDRLNQQAFRFESN  
SRSLRRTLYWRQMRTRAFLGAAVLAVLCLATVSACGFGLQRCRSS  
>comp2420\_c0\_seq1; 316 255 1073 LEN=1378; translated  
MASNNGQTPGTTFPVMP LSI PKDIAQNEAALSSSLPSSSSSTTTISKPGVPGTPKSIYEM  
IMSNPPPTSANYTPQAAMHRPVEYYSETNRVDRGRGYNKYALDKLTRKSLPYFMPWKTS  
GGPTEIPPNYAWLMDGCAGKAAIGVFGGGVMGLLMGVFLGALSDSQPPIQVAGGKDVPQA  
PFKEQARYTMRATAEKSMYWC RNFAFITGVFGGSECLVEKFRGKHD MNPVVSGCITGAA  
LQAHAGPQAAAVGCGGFAAFSIVIDKIMGNYD  
>comp2421\_c0\_seq1; 535 62 1186 LEN=1309; translated  
MDSEAVSSHEDNPPSRVKNHNKYRKDKPWDNDQIDHWKNQPWNEEDGDQLVGGRRLLLEESC  
FATLFPKYRENYLRQVWPVVT KALDGYRIACELNLVEGSM TVRTTSKTSDPYIILKARDL  
LKLRSRIPVAQALKILNDEWVCDIVKIGGLVRNKERFVKRRQRLGQEGSTLKALELVT  
GCFILVQGN TVSIMGQTYHGLKQARNVVVDCMNNIHP IYHIKRLMIMKELAKDEKLKNE  
WERFLPKFAKKNVKKKPTKKT PKAYTPFPQAQPRKVDLQLETGEYFVSEEQRKSQKL  
AAKKEQAKLISLEKRKRMEEDEIAPARKTDNKRKKMASTENANVDVQAFKSKIKSRKE  
VNPKDSKISDFVKD  
>comp2422\_c0\_seq1; 1482 215 3532 LEN=3709; translated  
MEDSDDARDMAIKEARLEQMLSEKLMQGYVLMESTCPKCSTPLVKNHQMVP RSLQCPSSD  
QNDTRRVDKCVLLPQESFDPFKPVEGVPVCVQCNSHVITQETEVSILEQCDSMKDKGSI  
YVALEEITDDKPEI IHLDGAFEVSVSPSKERSNNTFRDGDNVTEQKHESPTRQMVDIETT  
FDDGTNYEITLSPREGGEGKPIVLDGDETKPIDLVEEDPLG SYAERRELATKVLGAKML  
QGYTLQETTCEKCSMPVMSYKGVVCKVCPALAKRAKKKLRQKQKHQEAALGGQQHEHEE  
PSDVSEDLQHRDEQLDRIKTVRKEIEEKTHREEEADAKRAEEQQKAINHEKARILDNME  
DSKDHAVSQSGPTEDPQIPMSDEQAELARLGAIAKEEQRKRKLAKERQKEEEAVELEA  
QKKALQEIETKALAEELQRIEGMDKNTLQNDKALAMK KDLMV EYRKRMLGKAALDNEVA  
RLEEEERLNEEMEARLAD EQRAESES RMIAALEADAAMKALAAEDAIRKAKEALAEVQST  
KKQIISQTIEIAEKEVIAEAEQTIMANREDYTEPVILPTDSEIESERWETLRMEGRAIMT  
RRILQGW EILPEACKGSECFMSPLIGRLGRKECCVCGNGSGTDGAYSKQEVAEQQQSEA  
ELAPPPSVKLETS DDECKGKDWYDMMDFEKKRAIYSKEIGKRMLLGWVLVDATCPKCGMP  
MMMDDLGN TDCV VHGEMNKHFDASTIATKDMAALETAGEVSVEEVPEETGEQKKHVESG  
SDGTSPELVV KRTSDSLCSTIQKQAKKQTKRKPVTTS DPPAFKPPQARVSVETARQISQA  
SALVESARQIAGQPSQKVNVDVIPIDTND FADSSAFEKVTGAQGREETKPIDIS IEMVA  
NMF LKSPHGYDFQDFGHSMNVDEIKELVDIFLVTNVDNSVSDDFKLSVAQRILSKMNLDT  
AKSRDDSLPLRIEVDEQQFNFNDI ESDYTATKSTGKFGKRAKRPEDQARGLPPVSPTR  
TTPRGGLNYVGSPTYRRSRSDDM SVASRASTVASDALESYDRIDACKEKLLDPNNTLDE  
QIATASLLERLAQA AAVKEMEYVE  
>comp2423\_c0\_seq1; 651 198 2411 LEN=2450; translated  
MTIAGRFVFPVVRSTKAFKSLSSSVTSR FNSTGGRNRLF GTVARKSGTSVFHQLVFSFRR  
ALSSSATVIHPLDPLLPEITRASDAVRKHLGLTPDNAVQNLRFVSI SLLEPPKADYIQG  
VKTPRKAECITLNPQTGIASFNTV TLENNEAKIVEST EYPKGTQPLLTPEDCDLAEAIQ  
SSPEVARALRD RYGIIDSSRVACDPWSVHLASPADQLVNWRDDGVPGRVLVQTFLYHRQY  
GDGLEDNHYAHPIDI VVVLDL NARKVVTIHGMERSPAPEIPTSSVQYHRDLVSINSYLET  
EWRKDKLAPLDVLQPEGFSFTV TGNQVEWSKWKFRVGFNSREGLVLHEVEYDGRPIMHRG  
SLVEMAVPYADPNEHFARKCAFV DVG DYGLGFCANSLSLGCDCLGHIHYFDAILNDSQGNP  
VELKNAVCMHEEDTGV LWKHVEYRNGHNE SRRSRELI ISSIATVVNYEYLFYWHLRQDGC  
IDFKIKLSGELSTNLLSDGESVPSHGVMVAPNVNAQIHQHMFCARLDMSVDSHKNSISEV  
DMYSEPLSDTNPYGNCFNVKETILEDEESAKRVYDANKARSWKIFNAEGKTNGMTGKPV  
YKLLPF SMGSPQILLTDPSCAVTKKGEFATKHLWVTPHSDKERYPAGECTVLGDGSDGL  
PDWTKANRN LQGEDLVLWHAFGVAHVPRTEDFPVMPCETTGF TLKPDGFFDGNPGIDLEP  
TVNKASELAEGCCPNTK  
>comp2424\_c0\_seq1; 363 164 814 LEN=1033; translated

MDRIFGKKKQAAAAPSLSDTSTNLGGRVDEMCKKIAGLEQELRVYKDKIKKARTPAKNA  
VQKRAMEVLKRKKMYEQORDMVAGQQFNIDQASFGIESAKANVQTIAAMKGANQELKRTM  
KKDLNIDDVDDLADDMAEMMDEFNEINEALGRNFATPEDIDEADLDAELEMLEDEMFEED  
AEAAEATPAYLQTNEMPDTPTTELPQAEGLPAVFN  
>comp2425\_c0\_seq1; 207 112 725 LEN=774; translated  
MIDAIHAGLDYLIANKDYLLFCFSVDAVNTLISFPLIVWKGPKWLLSSTEPGAKEKLED  
GDAGTEVVLDSDTDRKSFRVLWEIFTICYEGYFGFTASTLACLYTAPETRPLFAYPLFAL  
YVYKAKAYMTTLSTDSAQARAKLGSILFFYWPCYGGYCLLHSIEWARGRAXRAGSGARAP  
RRFGNTTTYNSDGAKQGMHKRARG  
>comp2426\_c0\_seq1; 320 1 1619 LEN=2132; translated  
XPNEVANDQATCCHPCLYDIASWPFNRKSPIAHQRNEMSLSATIGTVSSSASPRKVAII  
GGGAAGLVATARVLKRNIGESTIFEKDSNDTGVGGVWSYKQNSDTRPMYRGLRNLPRELM  
AYREFPWGGDGKTRSFVTHREVVDYLSRYSKVMGVEDTIRYDSIVTQLEILEIDEKKNEN  
DEGNEQYSWPQIKVRWESVLDGINAGDRNSQSEVFDVAVCVNGHYSAPANPIISGMENFE  
GNI IHSITYDDPSVFKDQTVLVCVGRASGSDLAREISHFAKHVYLSDTTTPALVDGKPII  
EENVSWVPRTTAVLPNSRISFGPTCGETPKVDTIILCSGYDYEFPFINDNSNLDLSVVP  
ERRVKPLYEQLWHAQYPSLAFIQLQHSVVPFPFFELQAEAIASQLVGDSSSRSWTLPPMK  
ERMECAEKDATSGGPKAPGRVQDTHYLSYQWEECLKYARFAGVCDEDLKKYIMTNKAIY  
DHSGEARKNLPFGGPDYRYSYVRDDNNETFTAVSLHHEMDLEENLHPAHSDDSSVKAS  
>comp2427\_c0\_seq1; 372 98 966 LEN=1014; translated  
MDDDADSFAGDGCWQLFTNYGHTTSDADLSDNSGGGLYPHSRSPSQDDSSVFSGDTTST  
TKSSHDIISTSSKNSLSLGTSLSDDALYYNNAFNDKIQLLELLDLSDSSDLEQDELE  
HLLHDSVLMSPSTSTSSKILPAGTHMSLDGDEKAHNSNDHEEECNNTVQHQSFCVRN  
FVQFFEQVQDTSPPKRRGDQLCIGVLLILLEVSFMIISNNEELFGGFHLRMSRLEQSNT  
VNKACISGVMVTWNGKKSGLDAAEWSPPPLSSIIHLEEVQPQVPPML  
>comp2428\_c0\_seq1; 549 1 1224 LEN=1240; translated  
PKVDEATKEPNPDDDDNAVKLDKVGKNSTEDDDQYTKNDTDNNKTDDDETKPQILVETYG  
SSSRNKNETLPFAARNTTNGAEVSNVTDVAIENSTMTSLYSLNGTDSILSLSAGTNNSI  
GNTSTLDSGILPTNTTKPSTDSDDKIPTNSSAVANTTAPSTFAGENVAI LAEDFNATAS  
NASFLANDTVTTEGTTETIDANANTTLKRMNAPVIVIPDSGDNDGHSLSNNTNTSKTVSG  
SFESSNVTIGGGSSGSFSNSTVPLEIPTNDIRTVATEGKMATEKKKKKKSRRARESSTS  
DTSAMTSSTEGGGASEAKETSESESESKGETTGQTNLSGKTTSSSKKKKKSKSGTMKND  
GSESRANPVTSAVGTGGGDKKKKSKSRKGSKTQSIKAEELGGSIKK  
>comp2429\_c0\_seq1; 312 275 757 LEN=1168; translated  
MRIVVQVKKSASVTVNGSIVSSIGPGAMALVGIHENDTDEDLEYCAKLLGCKLWENDAG  
ALWRHGVKQRNLELLCVSQFTLYGKLTKNQPDYKASKAIPAKAMYEDFLGKLGKSSYEP  
EKIQDGVFGAMMDVELVNDGPVTIVIDS DAVSSSKTTPPSD  
>comp2430\_c0\_seq1; 514 1 1298 LEN=1711; translated  
XHQRNSTDQHRIESMKNRSLPLFLSTATAYAFGFLLWMTATTIKECGGTVLALALATP  
PTTIPVAVLGATGRLGKETVGALLERGI PVRALVRPSSVEKLGKQQNQNELPGDGIGILD  
HPQVEIEGELLDTPASGTYSDDTVLPSEELVECLTGCSVCIACYGATRKTTPSELLSWV  
LSTKSNDEPDSEDTP IHPKQINYSMLALGKACERINSNNNNKDTTRIEHIVRITG  
KGEDPTGIFSVLLNGLGSFCKLWNYQGETVLRSKAFGGPNSGTNENEGSVGYTIVRPGVM  
VEDLKEDDLKPGQRRYLELKGNGGNDLPVTPVTRPQIAGLLAELAVGEAAGARRRRVTL  
AAMNVVAEDEAGASGDLRDRIRGLASDRSFPDSL VHEHKSATKRFFRRLAAVAVVV  
AAVSLLGKVVLG  
>comp2431\_c0\_seq1; 395 166 1188 LEN=1235; translated  
MNESSPDPSPDTTDDAVLLERAEEFYGEERLLKAAEVLKQVKDKDNCLTDRHKRILRWAD  
LIESGIDNLLQDPERDGPWIKQREQHGRDFLVFYQLTDNNKLIARIDCAFESSLLVPL  
LSVFNESELFSSWMPWCWERPVRLGISRSEKLDDEGRGKQIIRVTTSLAWPFADREVFRV  
MAADAIEEDRSCIAIQAVSQTSDDDPVI PKATREAVRVDFSNFM LIQACPPDHPCVARSK  
HHSNDKDHEPLILMNL TLEVDPHLGVVPQSVQNFVTRTVIGRLWLALLHVAEDVRDGRP  
RHKEAIDAKPELYDWIKERVGM IENLGKEKEKLGCEPSM  
>comp2432\_c0\_seq1; 256 33 948 LEN=1292; translated  
MDRRRQQKIQSVLLDSCAAGAVAMLYHKQPEFFNPWNLS PAHWVLGGLAIRLAINFYDHL  
VYVAVDSLFGHKYLPTRTTGTPVRYVELDAKSVVFLSINAVHEWIFVQRLCHYLWHSQEV  
SLDPADLGLLNTVGALWVMFVLDLCYAPCHLLHTPALYPLVHKHHRQHYPTRGYLD  
GNEHP IEHVIGVLTWTAVLAAVRLCGAHSVVFVFFNVHAALAMLNHS PYDVEFDIIPF  
GILTYSVANHEMHRKFTVNYAQYSMWYDHLVKTTFAGYEGPAVAKAVTKQLYTAGTEAGQ  
RVRV



>comp2433\_c0\_seq1; 692 77 1189 LEN=1455; translated  
MAVAMACSTEAFIGKGGVASNMMLGKKSGGKIATAPKGAVKKSARGVKLSASKAADSEGK  
SGLGETLQVGTYFALWYLFNIAAYNIYNKQALNVLDYPWTIATIQTATGIFYFVPMWLTGL  
RKAPKLSFSELKTLFPALCHTGVHVGAVIALGAGAVSFAHIVKASEPVVTCMLMNYLFLG  
QVLPLPVYMTLLPIIGGVAIASMKELSFTVLALASAMLSNVSSSARGVLSKKTMSGKSIG  
ENLDAQNLYAVLTAMSTLVLIIPMMLAIEGTGFFSAFKNVVSAGDFTNKSLAALMALGGAS  
YYAYNEVAFLALGKVNVPVTHAVGNTIKRVVIIVASVVAFKTPMSTGSIIGSSIAIAGTLL  
YSLAMNASKK

>comp2434\_c0\_seq1; 505 76 1289 LEN=1289; translated  
MSPKDETTIPVVIVESHQHVLEHVHDVLRKKKLFDPQWMSVHFDHAPDLACTKSAPAIAC  
FAPRQYYGMGNRNNKEPGDNATGNDLDGEADGEEERNLYELLDLTPSGIAEWIMPLVLAA  
NLNRIEWIKPFFSKQIAEGFYRFEVGAEYQRNNNVVVDGNDVDDGGTGGDDSSHRDEINSFLD  
LPRDAKLKVNFDHPYLLDDLSVVPSEDLVLKQTLLELKVSELQRRLP I EQQNDTSVFCGSD  
KSGTRSSSTNGSATKDDPRLWILDICLDYFACQNPFLSDLETKNESATRAFLDVMESGIFN  
HCTDEDKDGNVSVVEISNNQPATNASFVYQTELVCFYKLLKELLLDLCGQECTERKYQEIS  
HSKSGNSLVFDQISKYFYGKERAKVLIGTLVDEINANDDGRDDGR

>comp2435\_c0\_seq1; 133 79 1016 LEN=1664; translated  
MLLSSNSVYVDGAILTFGMQFTGFVVAAVLQTTETFYDVLGGINFLALAVLAFVSGQGTID  
AGRNNVFFVLFVAVSRGWLLFLAWRAHHRKGDSTRFDGVRNVPSTFFVYWMVQAIWVYCIS  
LPLLAVAEHAHDHPDAAADTGGVDGYSLLLVAMAMSIVAEIHSVAKAXMGEGPARRI  
LSGGPLETLEAPELCRRDPDVGVCGGVRNLCWLVLLEGGHRCIGLAALYGADPAEYLGDG  
RLERRGEKPAALLRRRNRDRRELRGVPKDDTPTVSDTVRPLRESPAGVPAPDLLRMESLRV  
QETVERGKRAMR

>comp2436\_c0\_seq1; 695 187 1869 LEN=1996; translated  
MSSNRSLSENNGGAIPITRDDDPEAQGRVIDTMEEGRMSASLELEPRRESLLREDSVDRS  
SSNRSSANSRRDDEGRARAVTMIGSVANLCSATLGAGILALPFAFYQAGIICGVLLLLIS  
ALATSSSIGLLVEACDRYNLSTYEKIVEKGLGRNARKLVEISILVFCGTAAGYVIAVGD  
IMERVVPSLTTSQKQLSMSLVWCVAMPLSCLKTMRSLCASSVGILSIGTLLAAA VVHL  
VRGDGSGGRGNDYGYSDDETLLSFSEPASIASLLGPAGGSWVSVLQACPIFFYAFSCQ  
VNVAQIFDELPAVRGGEKLPMTNRVTSTGVLVCGLLYASVSLVTLVDFGASVEPNVLSNY  
DLGRGAQPLLHAAFLGMALAVVMAFPLNIFPARVSLIQMWEETTKENNNASLSSSLPPEF  
EAVRQPLLSEHRANGGLDYNSDGESSGAAGSGEDPLHDETGSHDDVDEPGGFRPVRHA  
FVTLLLASLALGLALVVPNISVVFGLLGGSTSSLLGFVVPGLLGLKLDHTRVGAWVLVVC  
GSMIGILTGTVTIYSMVHAS

>comp2437\_c0\_seq1; 396 213 1414 LEN=1673; translated  
MGLMVSLMAKAVATGAAAGFASHKLVEGLSPGLPPPARAALALLSSLAGTAGYLRAWIQD  
YWVDRSYRGDKDLTGTTAVVTGGTVGGLGFAAAELLYELGATVVVTVRTAEKGRAAVEGL  
QGKACDTETEGRAFYVLCDFLSEDSVRACAAELRAKCGGGIDFLVLNAGISGGGTGGSP  
QAKPEAERDADAARVWMTNHVGPVVFANELMPLLVAARKDPARHSPRAVWVSSGAHKRA  
SIDWEDPFHPSFAASGMRVYAQSKLANILHAREYQKRVRECLNEGSKKEGGPDVRCFALT  
PGAVWTGILGATNRPLLYPLLWATMRTPRTGAQVIKMACLDXGPGGGEYLSNCYAKETEG  
KNGCSNDEAQWKKLWELTEGQVAAKAYADPSFFGAREKSE

>comp2438\_c0\_seq1; 112 174 398 LEN=398; translated  
MKFSSSQTFIATATTFMSIATRRTAGFVHKNAVAKTATRAYSAGSAANLAKDGQAEVILVG  
CGAPNRGMGWYHAVQ

>comp2439\_c0\_seq1; 536 1 1340 LEN=1340; translated  
XGNGNGNGSVGLPNDQAQTHQKARRRSSFSSVMSALGSETKRLSCMKRREKQAKHHQEGK  
DEDRGICNGNVNDNDKKEKKKTPTKDKDKDKDKRKKKREKKTEENKPRISENEGVCSS  
SCSSSSTAELPQDARVNPQQPTFVVS DPHGLVFHDKDRDKEKDRDDHETKNKSKKKKKEK  
KKKKKTPKKKDGKRTQQGTNEKTGPPEEASACESHKHSCSHSCSHSCSHSQRRLP SDPSS  
LGLDGAVSPADLVRRLRSIRS IHSTMSGSLALHSHHEGSLSVSR TDSRTGHSYNYGYNHS  
GTESRSSCSSCDSSCDSSSTQSTTSHHSLNRENHNLFPVATKEGISQGTSEGTSSLS SF  
RSHQQPLQMSQSSLFSSPPPLRFRRATRRSSSLGSKSSATRMTVCSTIEETF SHGQEERLP  
RPGSRRSLTPRRRRRFSHPQQQQQQQ

>comp2440\_c0\_seq1; 215 1041 2404 LEN=2666; translated  
MSSHSAGSSSSGGGDPRQAQSTSSNNGNGNPNRDP SGFLNTDEYGRPSESSAPT VVKI  
VGTARDDLNGLLGFCTAFNRDRERYMVRMASVDPGNSPNATVMALKPANLTKASGLETYR  
AMFQQKTDPRVKRKLSEYYQQADTLCRGLPLPAGTKPEHAAGALLCVVVGLVYLLGLTR  
VIMLSACLVMVGCILADDVLRHRKPWRVVLQNLPSRSNAVLSRQFPFLRGR LSDPVAAGL  
VGLLVLTQLSVLSRSPAPAPRS GTTGGVGSRSGRDLSASYSVNRDVLEEFYNLGFKDS

AEGRERGHSAEEVEQLLGSSSSSSNIGDDGDIPIYXVFGNTAPAADSTVRPGVPSKNLFP  
ETGEHAHDGVFVLSVPHGHADRSRLDGDFFRCPALFEHSALDATVAKGDASFFVLQPGQ  
QPSVLEGSMEKMEFLQMVLLRCMESICDSRDDPK

>comp2441\_c0\_seq1; 590 100 1311 LEN=1494; translated  
MSDDEYSAASEEVEEEEEVTDLNSDVCTKYQEASKIVNLTLEGLVAQTVVGAKVLDLCKF  
GTTVMETAASKLYTKKVNVAIDRGVAFPVCSVNDIVCNCSPNDPEPESIAMTPLKAG  
DVVKFDLGLDGYIAVAHAHTVVVKETADSPAPPEDEELAKCAVATYNAMLVAAATIAAG  
KTNADVTKAVDKVAKAYGVTPISSVRMHQMKRYVLDGVKEVALKEPLPDDPEEEKVPDCT  
FEQAEVYAVDVAMSTGDGKARPGMTRTTVFKRNVEQQYLLKVKAAARQTLAEVDKKYPTMP  
FTMRDLTDVRAAKLGINECVAHGLLTPYPSLHDYSGKVCHFKCTVLLLPSTARVTGLKL  
PEYFKTDVQADEETQKILAEIAEAEAKKAAKKAACKRNNKKKK

>comp2442\_c0\_seq1; 288 199 1047 LEN=1194; translated  
MLPKISFLLATAAFLRFAADRLGTADAYNVVRVCSNKHCSKRARGDVLQTIHNLGTTGG  
ETETRUVVEASGCLSHCDKGNLEVKTKDGTILQGMIDAMCAYQLGEISSASPSFPPV  
PKLLVAASKVIEQSERFASEGNHREQIRYLGSVIDKVGASPLSPLTAANAHAAHALRARA  
HLKLACSEGEGLPPRSESFSAASVRDARRVQDFSEVSTPSSLSIAYRTWADALLEQQKET  
EDEPSKQRDLGQVAVLQWHRVQPVYRTKLQGEIRGLLANT

>comp2443\_c0\_seq1; 528 387 2201 LEN=3158; translated  
MSVKQKAQPQRVTLTSGSHRVDADPQEQNHVTAVAKQKQQQQPPSRKIRRFASTSTS  
SLVRVVFVSVLMPMVYKYHSELLPTFAVMIVPEPKQPNVSVSPLLNTSTRVSTPGAY  
AAATGSQQKVNWSIGVGKNDSTQTEIHSHTTTTAEISIEVSKVALLPDNRGGNAKRNNKND  
DGKQKRKRSTNLFKLESKSVSELLENDQGRAIVVLSMGKNKTHEEIIAGQQPQPQKGH  
PAIGNQTQLSPLERFVFSARNIAKFRGIWVVTDAPSLDDLEESINAALDENDANTLLVR  
PRPGDLLEDRFHDEQMAFYRLKTFALDYIDMDPRLDGVRIVYVMDEAVLFGSMIHETMQE  
LEFMYGIGRPTTEATKSDKTIGTAALQSSGDGTEALEDAVTKVQASSARGKMWMFRANHN  
SSDHDHAMESGHIVLDRNISRPCLDRWRREFDEKAAGERIVMDQRLLSFLLEEEEEYKTT  
TVHKTSKPLECSIQLMEQAPYADYPSVDSIRNQTALIEHKKVRHPPMVHTGNVMRMEAR  
SPEFIRPYLQDLLRLRGNEKDEKDEGLIGTDTFARPDTQEGIEETISSPTARVVAVLRTT  
QQNT

>comp2445\_c0\_seq1; 276 224 895 LEN=967; translated  
MSVLAMTRNGLKGRILVDGFALSQRARFQRSAAADKVSSTSSSLSSSDTINGGSSKVE  
SDASVSTRLFSEEINVLVYDSCNVCKLEMDWLVSRLDIRLNGPDNRKRLRLTDLEDNFDET  
PANGGIDYDTGMAAIYAIKHDGTIYKGVVFEIISYDQVGLGWIWKINKVPAVNRFLNWGY  
EIFARNRTRKITRGTPLEELLRLNAEKKKAKAMEDCESCNKII

>comp2446\_c0\_seq1; 426 78 899 LEN=961; translated  
MKAAIFLWQLIVSAGAFSSSPVTGVGRTHSTPLRSTETDLSPTGTSYTLGDGEEIRGPIT  
PLRNFILVKVKTTLTATSGGILLPDQSKERPTEGLVVAAGKGIHPFTGIRITNPIKEGM  
SVLYGKYDGKAIYNDSDCQMIRDDCLLYSGVTMKLDAVFPVRDYVLIALDENPESLS  
TSSGVVIASQVAVDDVPCGIVVKVGEGRNLSSGELSPSPVEEGERVKFKDYAGNDVTIE  
GKQYSVVKMVDILCSLSKEVQSIRETGGDEEAP

>comp2447\_c0\_seq1; 628 320 1729 LEN=1939; translated  
MAKDKDKDAAAVKIQAIRGRDRKVDGLLOGLIESLMASKEGKKKSGKSKSKPKTKK  
KEKKEKKSAAWCKGDVSAVEEIIIEVVEIVTVVDSKPEPTPKESTAKTSVPAKGAAPK  
ARTPKVSEFDRYNQQQKQEQAAARAMARPPGLKPTKSWREPPSGGKAARPEWMEKAKSFRD  
ASEKSAASSTAASKGPDPRKPPPKPQKHKKSALVNRYLEAAARQNEGEKKNENEASK  
IIEITRNLEEKAKKEEEDAKREEEKAKAAEIEADRKNAGKKKWKGNNTAYQNHPNPV  
KPWEKSKQPPGSEVPSGSSDADVAAPPREVPVEGGDAKDKVASLNDNLMNKTSETTTGK  
MTMSTLSPPSGYDESQGLPLWWMQLVPHNTNHKGNTGSAKGKVKVIYKIDKNHPPAKRAK  
LQAISEGDEPEAPKTTSNRSAPASSRKKKSGIFAKWFSRPRRRSMGEF

>comp2448\_c0\_seq1; 244 148 1305 LEN=1379; translated  
MKKDGLAIEPPGRSGYAHVSQRPHAKHCREARGAVWKDLLAGGIAGTVGIGHPFDTIK  
VRFQGGHTPPEAKRAGIPTARTPQSPYRGLYRGLGAPLATAALVNASVFCVYGATARQW  
DELFGTTTTWEESSTASAIGREAFCGGVTGFATSLICPIELVKVQLQTLRPPRQGSFQP  
SPPGTLVARQILGSEHGLRGLYRGLLATALRQTPSLAIYFPVYRSLKDRLLGGTGGTPTR  
EPSWYSSALAGGLAGCVSWAVVYPIDVLKSRIQSLPMEAPARERSLRRVARQTLRNEGLV  
RLMCSGGLAVTLLRAFPVNGAIFVYELASERLAPLGNPLGSNGKSVIGAETSLAAAGIG  
GASSRLRGRITSQVECSEFNATADV

>comp2449\_c0\_seq1; 286 227 646 LEN=983; translated  
MKAMRSNFKYTTVLCCFKAKKQTKVSSLEFKILQLKCKFGVDYLLVSENAPVEDLKDCL  
KTALAEELSNLQEEIDDTLDEIDEKEHKVNEKISRKSADELFGPNKNTVRSKPKQKKS

RVDNSEKESDWRDDDGSEFK

>comp2450\_c0\_seq1; 709 233 1876 LEN=2085; translated  
MRALSVFRYALSWSLRFLVAASASASASAPALSRRFLRSLQQEQDAAPPVVRTDLLR  
LVFPFIQIAIRDETTGEEAEVLVSEILYEGGARTLLTDTITDWLVSFFASKSTGAAGELLG  
IGNATSFDSIALEMVGDASASTGTIDGQELSLVQVSFEGVSLWERTGTGTAPMEAENVELI  
QRATFLEDKRLRDDLQAAIASLLYDLGLETTESITILDVRAIYITPPGSILDGSGGSDAQ  
PTDSAGTQAQAGDSGADQNNLEIIIIIVAIIVVACLAFALLIFAVVWAWRADRNRDGRSSKS  
SSASGGRKRKTKKNAYDSVRDDAEAAAAAPAAGGKGRRRGKKSTQQTAKQQQREREQP  
PPQTRGSRGIFSKKNRESPEPASSPSRGGMVIIGDITGGRGVSDISDNETDDDDTAGNAT  
NDSYPILQPNDSVSSDISSSLTAYYKSGMGYGGGSGSKNSGRSGARDFNDAASMSMDS  
YGYSLDGYAPSLGPAQGGYPVGPMPQAAANAPIPIGTSQDEELANHDDFEAIRQLQEDESI  
VDYQAEA

>comp2451\_c0\_seq1; 226 77 1432 LEN=1674; translated  
MIAYRKHLLARNRGTGEKITLQPPTPGDAKGKHTRTAGLSSCVRRLLAMKFRFYSNKTMF  
SIKTIALVVLALVCVGIWDRFFYRTGCVRLGGDQPWLPSLSSPLLPPHPSTFAVVINTY  
RRPERLRKTVRHYAETCGRRYGVGRVFWVWADQHIIEPPTDDFFWGTGGPPLRALQGYNNG  
DDTATGSDANRVPVEVLKHKNSLNVRFEPIQQLQTRAGTTSVFMVDDVVRVACPSLVEA  
FSVWRENPDVMGFYPRALALPPIRKHDTPYDAPAGHGDLHYHLWPKVYLAQKFNIILTK  
ASFLHSRYLELYTSDDSFPREIKDYVDEHMNCEDIAMSVLVANYTNQYRTTSKDHTDGGST  
QNPSRPVLYVEGVSVDVGMFGGISSGPHFATRNTCLNEITSIVRARGWGSPLERDFDLV  
ENSCGQHSPGFWWQSAPSNSLEWLGLVNVLS

>comp2452\_c0\_seq1; 392 175 1065 LEN=1481; translated  
MKDVKELADNVEDLKNMGMMMDLAFDGMWSFSGYCGMMVQLAHFFVESKQGREENKGF  
ENDEDEDEFLFVGSMDISAEETIIRCQENLEERNLHMADGVLRRRLVEGCCPPKIRITRL  
DEDTLKKLIDYKVGQGNHFFGRHEFREAIDFYDLALSSIPETQRRLYIAPRNQIQEIVNVL  
SNKAECLLRKVYEEAAETATDALIFMADHEKSRIIRAKAGLEIGKYDRYEATSRRGDGSM  
TGVAFLVQSKYDLEEVNAPDATLVGRQTAEIILHQVDKLLKGAKKKVLSKDPNPEW

>comp2453\_c0\_seq1; 413 1 1026 LEN=1079; translated  
AIALDSNIDDNDNDGEANDDGEGTSSSPEGGRNVTTMLQKILSLGGSEEEGENGQAEAE  
APTPTPTPPVEPEEAETDPEYVDAVVSGASSRIPSVQHNGRLVCNLPDHP IHAGATAVV  
AVLTGRILT VSNAGDSRAVL CRRRAGANPEANAGSDCYAYPLSYDHKPSQMHERNRI  
LRS GGF INHFGRINGNLNLSRSIGDLKYKQVPGIPPAHQMITAEPDIMQIALDPSVDEFFVLG  
CDGIWDCLTNQAVDFVAKRIDTMSPTIEIGREMLDEIISDDPRVVSQGGIGDNMTVMIVDL  
QSKKRSRKSAAPEAPQOGEPPSAGEPAGAEADQAEAAE

>comp2454\_c0\_seq1; 463 125 1195 LEN=1495; translated  
MNHTDGQPHRRNKGYRGEKTNNTKNNDDEIGINRKQHDRGTHCHTHQFHFRMKNILYS  
SATALLFIVLTIYQFQDYFDERLQDKYWRAMLLPLRYLRVKFMDQRPTRPKFTFLKATR  
SFVINLDADKKRWRFFQESNQQLQSITRFPATSLQTIHDDEREHYFLEKYQFLRNLIKN  
EGKGSAAACAI SHLKLLEFVSNANTANDDDYIFVFEDDALLTSHLLQYGFVVGPDNADFILL  
SEYSSAHIYVFPDKTDVNTNVNDLSKKSLEENLLQNYAEKINTATRVVSGYTAIGYIVTR  
RGAKVVLDGMKKEEELPVLYFFANPQIKAYLPLLGWPLVQHHQPSQSVRRDKNKE

>comp2455\_c0\_seq1; 298 128 1067 LEN=1067; translated  
MEHQEGDDVSSTAELILADLCKKETEAAELKEALKNLLDSHVRTKRRHAKELSEVHKQYS  
KRLVQLEIDLETHDIHFTNYAKDQMGLETKAILEDKKECAWKKPKSDILAQQNLIKLI  
ENADLEHRYKRDCTGHNDRIELEENENRWLRRLRRRVDSSSSTGDAESAGGQALLETDS  
NCSLVVEKEYEKQNTPELLRSVDELKEKIRSLLELKHVLAGGPTNTKEENGKELSCNDKDEKL  
KDCKIALLLSKAIAYQARNIWPDPTECSAPPELSSSSSTAIDLKEQIQELENILIRKDK  
QLRSQSKRYRKRTRX

>comp2456\_c0\_seq1; 330 196 1176 LEN=1235; translated  
MTPLNPRRTLAILAILLQGAESYFNPVYALPRSLSGELFAKSAICYNNAYGSFRIRQSS  
PITSTCTKHTGSDFMKFPQPTTSTSSSLAVMNPVRRRSETGNGGRGTSPAFNLNFTLNNVG  
TLTESLVSATMKSRLKHWWSFPMIMALIPPYCVLFRGSYASMPHWWGVNMDYVAAAKNA  
NLI IAHFLGSNIAYAASGAYVLHKFHFFGRSKSGGLEFRLSRFSMLGIWILMAGMVSTIF  
HSVQALGSYALAESMCYLDHAVAGSATFYFADTCGAPSKTTSIIGALALMSLVMSSPAYA  
WIHSCWHYLSALVATRWAIDGSARMH

>comp2458\_c0\_seq1; 200 1 640 LEN=919; translated  
XNNNNNSRFAPERIRRVSSAGVTDRFVPGRENTDHHKHDARHTVVPRTGLALAVAPTAS  
PLPSVRDVLGRGRPLQKHPGNLRLRLMISDRLDEYESSTKPEKTWLAEDIVKEVRAGG  
RFLQKRKPTENAKAKEAGPGICVGVGVGISGERKNAAADDDTVNDGTVECGWEEVDDHTA  
RLKVA YTFRTLRKTKTKAKTREPRQQQSTRAKP

>comp2459\_c0\_seq1; 390 113 1255 LEN=1963; translated  
MVAAILTRGAFLLKAAALASSLTISPSSPAVDFDLASGTQTGGVVGTAQPGPFPSVSSSTVVG  
TIPSPLEDRQYAAAAAFVRRREITRIVREENPSMAGSILRLSFHDATVRSVASDPSIGGAD  
GSIRYELEWEPENRGLAKPLAVVTSVYEEQLVRFVSVPGSSPIEEENAPLPSCLPSFADTLA  
LSGAAAVEAAEGPQIPVRLGRRDKEVADNRFLDRPIPGFTTMDQGPGRASITSSSLPSAG  
LDSLGLRNYFRRLGLTESELVALSGAHDLRHVTTLLGMRKDCLRDLTRACLEDAPVLWPF  
VTKDPDTLSNRYFATLLRWKREIERGEASFIPTDVALVDDGLKRHVVAFAKDEKLFRR  
RFRTAYQKLV DSTASSQSRF

>comp2461\_c0\_seq1; 212 224 823 LEN=1482; translated  
MSETTSTEPKPTAAMAKRGTKSEEKVKPDTDQNLCTATNNTNDQPSLNKKSVRFGSVFVR  
LYGITIGCNPATSLGASVCLTWDYDELLPEPLDTRREGKKPKRKNTPSTFYLSYRREG  
ILKRAGFSKEDFDRHEKLIQRDRLKRKISTYQCYPILFAKSFGLSRARRKSRTFVKKYRK  
EKRNKKKQTINKPKEQARQ

>comp2462\_c0\_seq1; 397 273 1074 LEN=1333; translated  
MSTEETNGGSGASDLPRIDGSETIGSTRWLKLETLSYTDATGSQRKWDYATRRTTKASKSS  
TDAVVIIPLLKRPYKKEGETGNEKDEEDKDDVLDLTLLEQFRPPVGRATLEFPAGLIDAG  
ETPEQAALRELREETGYVGEACRIPPVVSQVCMSPGLCDETVQCVVVVVDLNDPNYNDPS  
GALFEATPDEGEHITVHRVSLKDGFTLLDKGSSPMAIMGLYLFAMGLEVGKTMGKESTT  
ASVNGAHESLDMALVDHGIVVVRIEM

>comp2463\_c0\_seq1; 301 1 1066 LEN=1085; translated  
XSKLSIDLIVPLISQEKDEYYYSMKKKSKSKTNRKESSEVDTMDSPPVAEESTPIEDKLER  
GNPNVEDGNAETSIFSTSDGKYRNKQRCLVLCRGATARYRHLLLEDLRTLPHHKKESKL  
DSGKGGAAATAVNDAIQIRGCNTVLFMECRKRQDAYLWLGRGTDNMGPSAKFHLLTNVHTMD  
ELRLTGNCMKGSRPILTFDESFEKHGHLKLLKSLFTDVFGTGPRGHPKSKPFVDRVMAFY  
ADKKIWRNYQIVVEEQPTNALEAHQAKKLSGQEEESTSLVEIGPRFVLNPIRIFRGSFGGQ  
TLFQNPDFVSPNEIRAVEKKRKRGRSYELRKESQKMRKSRQEDYVLPEDPLNSVFR

>comp2464\_c0\_seq1; 475 67 1827 LEN=2194; translated  
MRYDAATPSTVFGADDEEKENPDTVDLTKELLGLSFKERNAFQEEIHGVVCLAREETP  
SLLKKSLERLQOEIDVMPDCRKEAYLKSQTLANVIKNNSPCTTYVNTDGFRLRFLRFEL  
FDATKAAVRMTKFLDVIDIFGEYALQRPRLSDFSKMELRNLRKGRYQFLPYRDRAATC  
GRRVLCVFPDQEWEAIPPRVRNKILYLVWVAGEDVNTQKEGFVVVCWIDHTFKVSKSIK  
VHTKDHQTLTVRISALHICSSDTPHRFRRAI IAMRIGHNRSRLKQHVGESMELRYALQS  
YGI PVDQIPITYTGKVKVYFRQWLRLRDFVEGNRCDKINHSELRTNQVDDNNQMIFC  
CDWNSCEDKSNNGNSCICYTAIESPYLNDIIFRKGANTSSHGNAVMSRLIADKTRQELY  
AQHEQQLVGENNKRKMKLKFVSEIIQEIREKNSTERRMCRFLVWDERGWWTEILNEYDIQ  
TRVEYIARGIRNTVTKNYRSSTPLMQSPINMGYKAYIVKEDERMMLGAFATQRQLKDDA  
MFRYQDFCGLDKRKRQKRFKAMTNSSGDGDGIMMASETFRFCGSYCF

>comp2466\_c0\_seq1; 177 114 914 LEN=1153; translated  
MATATLLSIVLPDGDVTDKIVPTSLKKSIPKLGTLRIERDGEDGHERVFATCAGRLVH  
RSNTYYIKQNVQRYPLOEDRIGIVEDRVASDGAGGDIYRVNIGGPHPAMLNLRFEGA  
TKRNKPNFTAGKLVYARIDTMPSPMDPTLSCQLGPHDAGVPRKDWMTNEGTYGELKGGTC  
RKIPLGLARELLYPKNLVNELSKSIAFEVCIGVNGFLWVHSPRPEYTIILNAINMSQV  
LTEAQVRGMVKSIVDVTNVRQIEDEED

>comp2467\_c0\_seq1; 272 1 1175 LEN=2330; minus strand; translated  
XYDLENRRNNGDEFDLFHKEGVDFLAPSVNFMEGPYPSTDSYQKIPARTGILIHQISHSA  
PSMSFSVNLMLNELSSAFLGGNGASGTMFDILPVKDINIRKIYLNLAVIDETVNVELWTRTG  
THISFENKPLWLRQSVVSVVDGNGRGGKSCMDIENLPLNANTRYGFYLVLTGGRFRYTN  
IAAGSVSVSNEDLTVYEGVGLTRPFGKVYQNR IWNNGIFVDVLSSEGGERSGRRLETTFD  
GGSGQDGVMFVLPKHDLMDGFDLHLIDSDTVCVHVYTKEGPFTGSENKRDDWILLAKM  
NVGKGINVATKVLLDHSDVITLKKDKLQAFYIFIENGRGLRYTEGHGTGNPVRSDDNLT  
IFEGVGVASQFGSIFQSRVWNGALHYRIKKN

>comp2468\_c0\_seq1; 171 1 720 LEN=1572; translated  
DTFKESRYNTVLPYELHNEEVAHNGVRVSSTVTDKFRCDLFAVKIMGIPIPGDKFPGDQR  
PLIRGGDIDVRHAASRILSSVSHTTTIKLEKSNKDENDYHHYCCYTAQEQYWLLALIVA  
SMVCIIVHLRNGALYGD SHVQIMSCKYARIRYVLLGMSTIAAPILPFEHGVLVIAMLGNG  
FHLFEVIRSHDTTTTVYQKLETTKRHEKRMPLIDTSKYVDDCSGDLKIELAVKWDSTA

>comp2469\_c0\_seq1; 224 77 1258 LEN=1436; translated  
MSQHESTIDERKSDYKVTTEQPKNDQVLSVEDWNDAYLAHQYRLSLPSSPTQSNFRVLAL  
LFYEEKYDGNNGSPMATSHLPWVKQMVGDNRNFI VGTNDEPGYIGGAICAERAAMVQLRFV  
PAFRITKLV IATDCETVPI SPGMLCREFLAGHGESVPWDLKVIISTGSQCTRCKRKDEDII

RPLKGLQSAKEDGDKSYCCIEGHEGHSPLTLRTTIAELYPPSPYTRLTASQSVALGTKF  
GESSHRNRHLDYLDSTAKRLLLELAISEAQSVLNEAGRENHP IHFGAAVAFEDQSI STSN  
QRSAL EYGC SLDAVSQ LVPY IEDSDCPPVLIVQVDQYGVVAHSPFAPARAYLSEHGYEDCR  
IIVHSTDINDVTCLDKWDLIKVRVANLAPTPPAW

>comp2470\_c0\_seq1; 230 71 613 LEN=613; translated  
MSDTEVKTGEPTEWKAYSEYAI EVDPDQDDKAKTIKLC SLARPHMRAFHFSSWWGFFVAFV  
IWF A IAPLLSEIKVDLGLTKQE IWTSSIVGVGGTILMRFILGPACDKWGARIPMAVVLCA  
AS IPTACTGLVKDATGLAILRLFIGSAGGT FVMCQYWSTSMFCKEVVGTSNALCGGWGNL  
G

>comp2471\_c0\_seq1; 352 1 1614 LEN=2008; translated  
TTPKPSFAQSHETKR DHCQSIARES VRETMVDSGNQD SPVMAKTERKRRKITV VQKAVFA  
AATVTTMVTAGRLCSSSSSAWSSLFQRYSRNNSMDSA HGQTHTYLQTNERRRRLGE I EAN  
MENDDFVAESQKKHHPMFVSDTFTILGPTVFPKPTYVYGDDVP SDKDLVTYLQPTSGSH  
RPRDRSVFVFAAEYKFDTYVLF LMSLYDTGFRGDVVF GISKMDWENKEVRKFLEHWQNA  
GKDEMTVVVYVVPYHCYNLEGEVVP SHRGGMRVCKCNDMFGLRAKGGDPDAPTIP IADKR  
HGRTAQTIRYELYWIWSEHYDPDSWILLIDARDTIFQQT PFGRVPRRENHGDDGGVLIFF  
GENADATSLGQSKYNRKWLTLAYGESVADAFYDKPTICSGSTMGEQKAIETYLR AEVAES  
DESKTVIFGADQGFHNLYYSNKMANAE AISQILVQDQGLGLVNNMGALRDKPLSEWNG  
RMLQEEASEAHPQNTVFNWDGTVSPIVHQYDRHKVLSKWWCKTKYKEYKNRWNEMKK

>comp2472\_c0\_seq1; 456 350 1549 LEN=1687; translated  
MVLYGQVVAGPPGSGKTTYCTGMQEYLRLLGRNAWVINLDPANEVPSATK KSTVEKNGAD  
VEGDEKDQDEFENDLPYECLLDVCKSVVNLSSVMKQLGLGPNGGLVYCM EYLEAHVDEVV  
DMIEEQIREQGDNNAYLIFDLPGQIELYTHGTAVPRL LAKLVKVF DLRLVAIQ LIDAHYC  
TEPANFLSAALLGTTVMLKLELPTVNVLSKIDLLANYGPLPFSLEFF TDCQDLERLVPYL  
QQQGFDFLNENEDDFTISTQQYFDEDNYADDPEYQRARKIKSSSPFFRKHTRLHKVMAEI  
VEEFGLISFLPLDISSAESVGRVVAIDKCNGYIFTQQVRGGSGSSSSSANGSNTTTAAE  
DLFQCALESEPSNYEAIADIQERLSIGRAKGGQSGRRDT

>comp2474\_c0\_seq1; 485 320 1525 LEN=1600; translated  
MNTSNITKNQSVGDMSDVTTVASSLGGSFPPSPASSVASESVRSWMDTELVEPHVGYKKV  
LVTGGAGFIGSHVSEYLLARGDDVVIIDEMNHYYDVNIKESNLKLLKESYPEEGRVTIYR  
GDICDRDLLERIFETENIKWVCHMAARAGVRPSIQDPFVYIHSNINATTHLMELSHKHGI  
QNFVFASSSVYGGSKSTFFSEDEVVDHPVSPYAATKKACELLGYTYHHLYNLKV TGLRF  
FTVYGPRGRPDMAPFKFTDRIYRGVEMQQFGDGSSSRDYTYISDIVDGVVRAIDRPYDYQ  
IFNLGKGDGTSLKKF IGLVQKYVGKKA I KVLDPDQPGDVPYTCADVAKAKHLLGYKSKVS  
FEDGIKRTVDWYKRSYATQNEQKNECQQTIPVVQMAQLAV

>comp2475\_c0\_seq1; 323 135 1111 LEN=1155; translated  
MPPKKRPAGSSII VXPNEEEKSGSFRENKGGIKYAFRRKEEISEGWCHAALPGFTGPTEAQ  
ARGIEQNNTRCIPKAEKPLL VQVINELSKASKL KMEKSGVDNDLYYTLVSDEVAQKYIG  
LDVSAKMVLQCI EKAGNNGIWTKEIRMQTGLQLQGLNKT FQLEQRCLIKPVKSVNAKAK  
KLYMLYDLTPSKEITGGVWYSGLEFDHEFISELRTFVMHCVRKLN GGKGVTLSEIKKKTE  
QAKVSRVELGVDDIKQLVQTLVFDNYIEEGYRNDSD EVCYVYARPVSTT CDFKWWDALSP  
DFHFRAIKFEDGVTL LPHPHHHTA

>comp2476\_c0\_seq1; 409 142 756 LEN=1022; translated  
MTTQSDGLALSGKIITSENGKSTVNSDNENISEKDASAASGKGS AVKKRNDNICNQNAVQ  
DDEDDQMMDIEVPSGMVFL EDSAGDDGRINLIQQKHHTKNLPQKPAVNLQVDDRAILDC  
WNLTVASHEAAMVVTATNPTNTSASFSSPSTTTTSLTSPFVTLLENEYRWN AKDKASTA  
PDATDVFGSWEPKPLALPIWAI V P

>comp2477\_c0\_seq1; 516 71 1384 LEN=1443; translated  
MLKLS TTVLRRKQREILRRLQSTSAKSASECMELEDKYGAHNYHPLPVVLSK GAGTKVWD  
TDGKEYFDLFSAYS AVNQGHCHKPI GALVDQAQNLTLTSRAFHN DALGEYCEFVTDYFG  
MDRVLP MNTGVEGETA IKLARKWGYQVKG IAPDKARCLFANNFWGRTLAAVSSSNDPT  
AYNEFGPYMPGFS LIPIYNDVESLEKEFEKDAENIAAFMVEPIQGEAGVMVPDDGYMRKVK  
ELCEKYNVLLIADEVQ TGLCRTGYRLAVDHDGILPDILVLGKALSGGVLPVSAVLAKEEV  
MLTLKPGEHGSTYGGNPLACKVAMTALEVL RDEKLAENSQVRGEQLRSGLEGLIGNSSVE  
HVRGRGLLNAVIINQPKGGYD TGKAWDL CVKMQN HGLLAKPTHGNI IRLAPPLTIT EEE  
IDQCLDIFERSVRE LDA

>comp2478\_c0\_seq1; 864 100 1791 LEN=1886; translated  
MSETKTPVKEEPKGA AFTEEDIPEDATWGEVLQSCCVHSPKEWGLIFIGVCVVVFFLYFF  
LLGLDLLGSGAKVMGGCAAGSLFGDDTNPVAGLMIGILATVFLQSSSTTT SIVVSLVGAG  
SVSVNQGIYMIMGANIGTSVTNTIVAMGQMGDQQLERAFAGATVHDMFNFLTVAIFFPV

ELITGYLNWLTGLCVRNFTARDGEKWWGPIKKFVGPLTKKII IANKNVIKDVAKGGNCEE  
YYPIECEDMSAPTKKTC SRVGI IACDKGTGKCPAFFDANATLADDQVSGIAAFVGLIIL  
FVCLFGMVTMLQKMLLGISSRI IYKATNINGYLAMI IGVGVITILVQSSSITTSTFTPLVG  
LGVIRLEQMPITLGANIGTTITALLAALLSTTEALQVALAHLFFNISGII VWPVPFMR  
NIPLNAAARHLGKATRMWRGVPIVYIILVAFFLIPLALLGISLLFTQGSTGLTTLGSLVTIF  
LLGGIIYFIYWFQFTGGKNSIAECMAKRQTRRIAIEDLPSDMEALKAKIQSLEEHTGLLT  
EEPEDEKEAPEEAPNSVSAEEQV  
>comp2479\_c0\_seq1; 109 330 551 LEN=551; minus strand; translated  
MTARGWFKMTGKSNSGCHPLNGGNTENIIGSCLRFRFRWLSSTTDSTTACFTCIYFPISS  
SFHMTGDGMSYLFM  
>comp2481\_c0\_seq1; 435 156 1370 LEN=1431; translated  
MPAATNSGGGGGEQAWLGLLKWTLAHTDGRPSSSEPTMMSDEDKAFLEKVM AEGIIIDE  
SERMKFVLQEF SKAMEYYKSQSQSDGQEAPTTSTTTEEKEQEPLQPPAPPNEDDLEELL  
QELRDIVEQVDYARGFVN LKGC RYLLGAI APEVPTTIRDA CLGILSTLAQNNPPVQKEL  
VELGSIKVLSDLFLSETQTDADADTATESGTRAVPLSTKTRTMQALSAIVRCYDLTEGVF  
EGLPQAPAMMVQGLSTDPNVSSLSLRTKTLFFLRAFLTSDLSTPARAQAFRYAIAAVADT  
DSL YLKASDESGNDWASIQLRESAVSLLGQLLERRLAVG LLLQRKQHLASRGVQRIRELR  
ACTGEDAEATRTELQQWEAFL LLLLARTEPEAPEEGASEAPK LLL  
>comp2482\_c0\_seq1; 245 1 1537 LEN=1537; translated  
XNSHNN TVPDQEKVREQQKDNKNDSS TSPGPLDYLVAPPVILLCFHF PYLLTLSASTGG  
FMVSW SRLGSLRTAATNKIVQKYESEIGPVVLNVLD FGAIGNGIDDDTD AVRRALQ IASN  
LAGGIVATILLPENHTFSTG PLNLTSHVTLQVDGTLRALNWTET TWPQIPPLVNYGRAED  
GGFHLQYQAFLYAVNAHDIR IIGKGMIDGQGPWWDA AQNHSSLLKAGRP NLIQLVRCRN  
VEVTGVM LKDSPFWCLHPVLCKNVHIH HIKIRSHMYAFNSD GIDPDSK NVLI EDNDISC  
GDDHIAIKAGLCGKTAALDCGKTK EFNDGTYETVNV TIRRMFRIGMGISLGSECSGGIR  
NVRVEDNVIGFCHPGHCEVGC CGWSPALHLKTTGTRGGHMKNILFANNTI HNTTSVILVE  
TDYQDDGKDRNDRPTLIQNL SFQNSGVGTAKGIRFACSKYMP CRNVTF LNNKFD PETS V  
ECENVEIDQNQNNICSIKTLDDFLTVNNK L  
>comp2486\_c0\_seq1; 460 129 1526 LEN=1779; translated  
MLSKATGDKASRAVIFLSRLHPTRRAAAFATFGYGYDRESRLSFSSPPSSIRRQDENDSR  
NLPASPAQNDVPIDFAVSSKIEGEESQIATVTVRPGERLRAESGSMIYMTQGVEMATTLE  
GSSSAFKRMMTGQNI FLTDFTYRDTN NENEGEGKGTVALGTD FPSKIIRFSLEEHGGS LIA  
QRGAFLASNTTVDIQMEFTKTMTAGFFGGQGFILQRLV GAGDVLIKAGGTLIERELEEGE  
VLRATSGSIVAFEPTVSYDIQMMQGVKNVVF GGEGFLVTTLTGPGR CWLQGMPPDRMIAE  
IASRIPSGGGFGPVI PVGGMGGTGGGAEGAEGGAGAPIDVPGTTD VDSGEEIVAAANEGL  
PIDQEATTTMDDASTTFSNAVSSEIDDAFQETTFQDDGTD FSGPSFSDDTSFSTGNTFRD  
ENFEQQEGEFFGGDDAEIFDSGATEEAAEAGSSILTTLWDIFNGD  
>comp2486\_c0\_seq2; 460 129 1526 LEN=1938; translated  
MLSKATGDKASRAVIFLSRLHPTRRAAAFATFGYGYDRESRLSFSSPPSSIRRQDENDSR  
NLPASPAQNDVPIDFAVSSKIEGEESQIATVTVRPGERLRAESGSMIYMTQGVEMATTLE  
GSSSAFKRMMTGQNI FLTDFTYRDTN NENEGEGKGTVALGTD FPSKIIRFSLEEHGGS LIA  
QRGAFLASNTTVDIQMEFTKTMTAGFFGGQGFILQRLV GAGDVLIKAGGTLIERELEEGE  
VLRATSGSIVAFEPTVSYDIQMMQGVKNVVF GGEGFLVTTLTGPGR CWLQGMPPDRMIAE  
IASRIPSGGGFGPVI PVGGMGGTGGGAEGAEGGAGAPIDVPGTTD VDSGEEIVAAANEGL  
PIDQEATTTMDDASTTFSNAVSSEIDDAFQETTFQDDGTD FSGPSFSDDTSFSTGNTFRD  
ENFEQQEGEFFGGDDAEIFDSGATEEAAEAGSSILTTLWDIFNGD  
>comp2487\_c0\_seq1; 346 1 948 LEN=989; translated  
AVGAAVGATAGSVRSHSLRWMVAGTSEKTTENNAALRDQTTEQKRGHGSNSTGRHRSM PA  
SPDRHNRWNEMYRRLFRYKDRVGHANVPQHYRTSEKDHHQKLGKWL DKQRQLKAQGT LDA  
GREELLEDLGVAWDVQSWKWDKMFRL LARYQAEHGHANVPQNYTVEVRTDKADGGD GDD  
RHGEASPSSANLGGW LKDLRQLKLEGR LD PTRQEKLEGLGVVWDMHSWRWNHMFRL LVRY  
RERRGPSSVNTMKQSHKENGENLGRWC SRQRESFKKGDMDPERIAALEEIGFAWTVAASN  
KARKKKNSAKRTRK  
>comp2488\_c0\_seq1; 227 139 1002 LEN=1345; translated  
MRSTSRIFYITVAVICLVTTTVDGFAALRPGVTSTTKITSQLKSESSTTANNLAIVRQTQ  
LFAGSNAGVVPGIGEECNLPSVSGINTKDDL TQAFVVKVFLSLALGTFLFSSGLEQCS  
GFLDSNFPSQYEFFRNTWPI SFGLIFSLAGVTHFTLKEEYENIYPTRGAWGVWYLP GSRA  
FHVAWTGAAELAGGLGLLAAGVSSFAGNP NLAPLTSAGLES DSAAALFLLVLAVTPANIF  
MFTHGAKLPMDSEPLPVSFHGVWRWIMQVVLLGFLYQMGQETFQALLS  
>comp2489\_c0\_seq1; 505 114 1469 LEN=1748; translated

MIQQHRQLSQRLVSMPAALMVAASYFLLLLTPPI SAFLVGGTSTVLSRGSLSVATSSSLQMT  
ATNGARIDQHEETKDDNDYDVVKVDLTDGRDYPYIYIGTSFTDEQISETLTSHIHGKQALI  
ITNDKIAPMGFLEKEYEKLLAPHKEVHTLVLPDGESNKNLEILQLILDKALEEKLDKCTL  
IALGGGVI GDMVGF AAAIYQRGVDFVQIPTTVMAMT DSSVGGKTGVNHPLGKNMVGAFHQ  
PQCVFIDTDSLSTLPDRELQSGIAEIIKYGLIRDRDLFEWLEVNMEKLLNRDPEATRHAV  
KRSCENKA EVVKADEKEAGVRATLNLGHTFGHAI ESGSGYGTWLHG EAVAIGTAMATTMS  
AQMGWIDNELVKRTYKLLLEKAKLPTDLPLDSPMNREIFLKYMAADKKVANGQLRLILLKG  
ALGNCVFTGDFDQ EAMIDTIDEFVAEC SGAQ  
>comp2490\_c0\_seq1; 160 179 505 LEN=766; translated  
MSSTSNNYTPPPRDTAAMKDTGREGRLSFRNFAENQLKKEFKAEAMKKCDLQIGALAECI  
KDEGLFAPFNCRPIQKDVDECMVYNSAERFKLYVKEHEDELQSKPFV  
>comp2491\_c0\_seq1; 424 1 1025 LEN=1082; translated  
XGNNGNGNGESESESGPPGECKLAYRKFLSSSDSLSQGWKDLYIDDYSLFAPVTSRED  
DQMADYFNRPDVRSALHVTDTEQSWPNPDVGF SYTK EYNACNWKPAEFIRYPNTTMDV  
YREIIPMLDRVWIYNGDTPCVSYEGTREA VKQILVDEL DGGSYRPFYQQEAAASLDVLA  
EKSVLFGPDLVAQTLEQNQFAGEVTSYQNGLSFVTFHGS GHMVPQFRPQSSSLHFLK RFLY  
AADNGSALSPLLPTNATLLAMSDDDFEQAMDDWTESARDELSSGTSRAGHG ANRAAGTPE  
GRKERTNPDRGNELAAIGGADSLES LPASTNDSSTINVCVG  
>comp2492\_c0\_seq1; 991 171 2657 LEN=2935; translated  
MNDD ETETIALAIK TLEKGVSRILKRRGETFNDNSRHR IQMLIEHARHV LLELFKRRSL  
KAFLRWFHKEWVRIEIDLAKHPVQILQHSMQHFLRCQDAFILLTSGECRHEYDMKLAKKT  
KFRSRLSTLQERDDGYTALYKGTGVYSYGFDEFNNEIVGIRALLVKELKKYHKAPWDYL  
ERQGGTELLENLLDQHEREQKELQHALQSLKRLMIENMTKRLKPKNLKFATQDKLERLSL  
STKGQTIDLERRGDAFQIDGPLL P NENKNPDDWHSFSLEIKEEMDQSSIPP SKIQRRRV  
IIDSDDGSDNDDEREDAPKKKGRQNNKTSQASGLVVRVDS SRTNAEKEDSLAAIKSQVG  
ISTQDLEQAREILEEENASTKKVFEDEKVLRL EKI LRRV LARDEIDENEVWDARECLRYA  
CMEAGNKYLWDSSVGCVEKAIENFEKAKEIVELQOKSQQKVTSS EASL FVQLNLFYLHGQ  
ALVNI G ISLVDTSHRSLIPRVKVMRAIEEFEGAKKQMAKLRSLAGHTSQSTS RASVKEA  
NSYILKSKQLES LACRWMGRGLWLI SEEMKAVTSFEEASQFLNDDILRKWQRDVYFEIDV  
FDITAEAIYATCDLADRCYSMM EALDHKSPSSRKKGHDLLEIITRALNRHIGIIESIELC  
SSPVRTKHFRDEYDISSIEDVLLYRKNVMKWKWEQCENEMNDVKPNQNCNSRLPESRSDS  
SSLKTKKILTSDGSRRKRYEKRRKASSHMHGNSNNSQDFGQENDAVYALSGHYQPRPPV  
KFRRWGDEYLIAQQQLAKSECD DPHEETNSSFLTYP SIAPPKPV E FQV  
>comp2493\_c0\_seq1; 228 61 816 LEN=1209; translated  
MSTILNESTQTRMLEWALALFSLTVLGCVMYKKS RFGAESE DIDESIHPNPTANTTTANR  
KNVPKWEQKRRAVIFKLFQTEHIQERVTC SRIRRSRSVSMGSATT KDSESLDGEEDRED  
VCSLDGEEDHGIVMVGADGVHSDGGTEPDDTDIETGGDPGGTGGKPVANLCAICLEEYH  
EGDTIVWSSNKNCRHAFHRDCLTSYLVKINAKDTYESYPCCCRQNF FYEDRGDGGKQNA  
SASTGSEEEEEV  
>comp2493\_c0\_seq2; 181 483 938 LEN=1331; translated  
MGSATT KDSESLDGEEDREDVC SLDGEEDHGIVMVGADGVHSDGGTEPDDTDIETGGDP  
GGTGGKPVANLCAICLEEYHEGDTIVWSSNKNCRHAFHRDCLTSYLVKINAKDTYESYPC  
PCCRQNF FYEDRGDGGKQNASASTGSEEEEEV  
>comp2494\_c0\_seq1; 825 117 2087 LEN=2570; translated  
MAVKNIDSSSGIGDYRPHEGTGR LMMFMGFVAIMGLTFVSQLRDYHRTDHGGGGRSNAV  
HLSQPSFPAADSKIAAGAEQMVEHLQRQAEQIAAETAMLLVPKGLSGAAEAKPEAKPEVK  
PEAEPEAKPEVKPEAKPEDPPKPAEQKKPRRLNVALFYADDWTMKVLGKLDKNVKT PNID  
RMADNGMI FTNNCVTTSVCWSSRSTLATGTYS AVHKHTFPFQEADFETEHWTE TLYPLMK  
RRERGNYYTGLFGKWHKLEKENELNEAFDESIRYYGSHWEERNGKMRHVTELNAADSLWF  
LDKWDSRRRQVPATPEEGD LTKPFFLTTSFFATHARDGEFPSYQPLNATREIEYPDSVI  
IPKPKTATKQHWNDLPHFLRH DGN EGRTRWKKRFDPE SFQANIKDIYAMATDVDAAI GTI  
VDKITQLGVLGETVLI FTTDNGNMHGEHGLAEKWYPFEESLRVPLVIQDPRMPKERRGTI  
SEAWTLNVDLTPTILGVANLPPSDFMQGRDISDLYLYKDEDKEKALSNT EVADKVAWRKD  
WYEFNLGMKDDASDHPTNFIDASFALVTDEWKYVWVPQHDDYEQLFHRSVDPFDEWDL  
LNKVLRGKNEEVEVEGNGD TVNGPFKDTVQTT RKM YEEMKQRYAELKKAQAGERI  
>comp2495\_c0\_seq1; 391 295 1854 LEN=2052; translated  
MAFSSAGEAIVNAGEYI LSPLKES SPSSRRNRVNF FKEEDDTEKEPPQVDIRPRVDGTGI  
ELVANNDHCAARKENTNNKLGTSYLRGSMLMFDPIAAEAENGELEAMNLRVLRGESLPID  
RTRVRIGVLNREGAAVDQIIGSTPSSEGT RDP IWGSRTCSWTLNAKESTKLLFTLVAADS  
EKGSKVETKTNGAIKFCAEISVADLLSKRNP NFWINLKNEDDPCSSNNNGRIQIRLTRPT

QAKLHEQETCLRISP GPGLPRVQSYAIRKMALYSCSPVMLNVYDVSNNPRIQTVNNTTKA  
LGYGGVFHAAIEIQGKEYSFGGTVDKSKVSGVFQCAPKQCPMHSYRESVFLGDSEVNGQ  
QIQSILAE LRPKWLARSYNLFRKNCAFFSREFAIELGVGDIPEWVFLATTAETIEPYLQ  
KLNAYLKSRTNAASPKRITKSTTTTSTKQKSSKRVSIDTDEDIKAHEVAKNTQEALLDH  
AMAARIQRRVRASNRRASMYRAQTQLKIEPVGFASASA  
>comp2496\_c0\_seq1; 257 150 1211 LEN=1596; translated  
MPNQFFITSPEIATVQSGQAYLQRTVVIVLAVACIGINIFNLRADCRLVLFWTVDLNA  
YELERTANVTNTVSDVLGVVGIQLDNSNRNFDILDYVEGDDGLYFGLNGFAFVNSKSSE  
YWNKKYKCVPDFSLPETKITMTEEDVKFFDSIKTVAILSSYFGFAGVLCAFVEFLFCV FY  
PSVIAGSVFLALAAF MNVCVYLLLYLGSVECFTAGMCKPDLNFFSYLFTTGGFFFFASCLL  
VFGFRTPWF LKRNRPANCKVVEADIVDEEGYDRSEHQEEQGGVPIEAYRELEEEELAE  
TKRRMLRAERELQDYLAQKAGKTS PHTGRGHTE SNASNDKRIAFRHYGSQP AE  
>comp2497\_c0\_seq1; 497 574 2205 LEN=2441; translated  
MLGEE SAKPTDGT P SSKGIFMWFKEIYSTCLLIFCSIIVLTVIFEKNTKISEATAWGA F  
FLFWIALYWLSMVEGGQASLVGLP PVDMELYKESHPTTHKIMAI INKGETLDRYLMGRQF  
MVLALVFVENLCVHPIDASLSILGMP IAINKIFLDTGLAVFFMTAMIGKISAQVNASRCM  
LDYVNNFFAYFTMQTARLIEVSGLLHCCYPVQIFFAWAAGQPLESKEPPRSLVQNIFFWA  
RVLVSTAILCF AFAVTLYAILNGQT TMWEGVPSWLTILLFFLFMSVVMLEGMQIAFFAV  
ARMTEAERARSTWAKRTCDVLFEGDGRNLP GFMIGRQMCVTLCFFI IARVTTVQLQAGDE  
NIFGVSDATQAFFATGLL GALIT TIVASIAWQLVASAFPMAFLSTPITYVLLRFCLALEW  
TGICQGSWVARIHRKIVKFKRDEVYIGTAEERAARAKANPSKFEEDKGEKYDVVPGHMY  
PGVPTLPPDFKGVHRSLEEIEDLERD LLSRQOEIEGR LAELKAQKAILIGNGVESTRSVD  
VEC  
>comp2498\_c0\_seq1; 346 1 1744 LEN=1988; translated  
XRF P SSKISDLGYPESISFGVIFDATTMKYFRPQQVLVGLSTILAF LASTCRASFPANET  
TYLNFHIPTSLRHNTWPHAASMFGRMGHGPEGLVLPVKMYVDSRYLCNDNFDFTEVNK  
QLKIPSDGGAPFILLVESGICTFVKVRNAQHLGAAAVLIADMEHEHLPDNL ELSGDI LH  
RAHPHHDTSNHT EHRNAFRMADDGSGRDISIPSMIAKNEYDELKKVIDSKPNSTGIVVA  
EMSWHVPKFVNKVIDLDLW HSPADMHSKQFLASNFSVIARTFDLNEMHGKTHDNDSYENM  
NLLQFREWPVLLDGKALGCVGNTDAPDEPCYLLCTNGGRYCHASHHLDGKYIVKEALRR  
MCIDKHYKSPKFHWDYIDHFSKFCWDSDYFANEKCI EDAYKHSKIDKKVIESCFDDSGDP  
ESDHSNALLQHALDMQLKWGVHKS SVTINHEI SPLVEFQGLTPATILSGLCDAFAYGDK  
PHVCYACQHCGDPVKCAQRSPMKCLSTDGVEKEDTSAHKEVNGGGKHKHKKR SFFWRHFF  
IGVFVLGGLAGGYVYYQKMEENGSGGLGSYTLQDAFLSDSM  
>comp2499\_c0\_seq1; 157 353 877 LEN=1001; minus strand; translated  
MTNSPCCPSKISLMNVKIASQNTGVISTPKAGGILPFASLNKGS DGQATTAQGN SFRLVS  
GYHDATTRHNI AKDIKFKNGPNTVAVGFTQASVSANNIPLPDEIATPTLSATEEAIVGST  
IDRVLEDDLAAADATGDVGT TKAETPLMAVAIIAQQITKEKRYILFYCLEYRR  
>comp2500\_c0\_seq1; 81 1 549 LEN=1017; translated  
PTPRDKHTGII EPTHGLKRKPLRSPVEDTTMVRANEKSAGFYFVFLFCFLLGAVCIYHD  
LGVI AFVLA VFGVIFGFG LREKFSNETTASAYSVF NEDGRAIVGGFTSSQFERQLRGSVA  
SQMASGAGGNPDASAASGPIARARTEGPARRTNVALSDAERTARRRAAAEAAERRFQAAK  
EE  
>comp2501\_c0\_seq1; 713 523 2553 LEN=2806; translated  
MSTPGYRSIKARKCSRRVLFESSNGSVQPSVDDSDSDWEDDASSSSSDSEMSRRHRWSR  
QVTSRSLSAKNLKS SSWGIVGVYDSSRQMNYDGLDGSNSMSNSNKRSDDSNKLDDDDID  
IEIEGSDSDESFLEQKQDEKVKLKMVAI LSTVVCLLLMLTAVGLGIALSKKKRRPPAI  
PLNGLSDNNSVFDPFAPSSTPSSSLAPSVMNTSSNTTTIGTMNVTLDDFDPIFLNETD  
DNVGANETSSPTSTTI FTTDSPTLSPTTASPTKSPNSPTQSPTRDPEMIIPDAVDLTP  
AGDTYV VILPDGEVYKESATPTLLVRSRNSAGNNGASLITQQVNEDEILAGDGLPLDAL  
SYALLHFDMADYKWEDEGNAELLSTKANAYLCLEHVPNTRENDAWGNPNQKIF SACRVE  
NP ILEEDWLANPAFQAELTGYKMPEDCFGGEVKKTFVSPDTGNVCIDVSMFVDNYPPFAE  
VDP SDDFTLPDPDEDLVETLGVRRHLLRPNI FKNMESTNETEAFSESATPRVGGNYKNM  
LFMVAHIEPGVDASAEFYSRQDTDNAPKLYVTLETLEAPT VAPTGSEYPSQHPTADATN  
DVTLGSSGGVGTIGAVDGNATMVPTLVRPPPPARALRXDEIGAVAPTSRATTETGNGKAG  
DETAALAAAKDAIAV  
>comp2502\_c0\_seq1; 402 227 1219 LEN=1240; translated  
MIMVKPRRRLERVIHVPALLSLSFSLPLVCGFALTTMTTGMNNLSSVEDFLLRSR  
LEGIKKGIKKDYANSPGVKLLSGEVDEKSTMP TFIFFGAGGLDELVLELQATIPNSEVID  
WKEYRG TLLTAGYDSEAVGEAIAELVLEQIGGDGEEINNGGYENEELSPSISSDSCSGV



RFVGISVGGFAANAATIVHRQITERSQPKNVEKNKENDILNVHLVLLDPFCGRGVFGQN  
YGRNNGFYKATSAIQILNTDDPVTNTDPLSNICYCLDVTEAPEKQDFVVLPGDSMHSWPV  
AYFARYYYYKCCQDPSLTPMLFPRGVVEEVS

>comp2503\_c0\_seq1; 655 96 1169 LEN=1346; translated  
MSGRCCLKLLRQGRGGRQIRSAAISSSFSTFSSSPVATATTSSGNDGGFRRLCSLPLPYGGN  
LRGHPQYTHQPPLPLCQKRWRSGKMGHQVESLKEMAHRRPEREAAQERRKKKKDRKAAKKA  
GGKKQQASETDGPGGGADTAGGDEDEDEDDIFFGDEDEDEEAGDGDGEPTLPDPVAVRSK  
MDAVVDRFSESLRSVRGAEP TADMFDVVMVQAYGAP TPLNAVAQVVIVSPTLAQVTCFDP  
SVARDVVKAVQLTLELNPQLEEGGAGNIKVPLPRISKEVREKLSRSVKKRAESCKKRLRG  
VRRKAMDVKKGKDGKLAGVSKDDAFASGKEIEAASEAATERLKAVVAEKMDSIMAV

>comp2504\_c0\_seq1; 302 28 1110 LEN=1128; translated  
MTATLERRESVSVWERFSAWITSTENRLYIGWFGCLMFP TLLTATSCYIIAFIAAPPVDI  
DGIREPVAGSLLYGNNIITG SVIPSSNAIGMHFYPIWEAASIDEWLYNGGPYQLVVMHFL  
LGVASYMGREWELSYRLGMRPWIFVAFSAPVAAASAVFLVYPIGQGSFSDGMPLGISGTF  
NFMLVFAQEHNILMHPFHMAGVAGVFGGSLFSAMHGSLVTSSLI RETTENESTNNGYKFG  
QEEETYNI VAAHGYFGRLIFQYASFNNSRALHFFLALWPVLGIWLTAMGISTMAFNLNGF  
NFNQSVVDSQGRVINTWADI INRADLGMEVMHERNAHNFPLDLASGEVLPVALTAPAVNG

>comp2505\_c0\_seq1; 148 1 370 LEN=420; translated  
XPYHRWNRVQPSIGLPSPTNPEDGQKMEHAASPGTGAAGNEPSACEKECSKQQDAL TACM  
NAIRDAREVVASGAGAGETNDDGDVSRVDT SCLAPAVASWTECCALANNGAVESNEGHI  
GIG

>comp2507\_c0\_seq1; 619 372 2621 LEN=2893; translated  
MDDLTSIPWWQKNGNDEDLMRGDYDDAGDDDILSTEQPVYAREGDFHRERRKQONQNEYEY  
DYEYKNQRHSKAGAIHTTAETNPRRTTGS RNERFVSEDP SANRRSDANASSTKNASTRRK  
QSVSRTKSGNALRGGNASPEQAPEPERPPP AKRTSSSSSARRHSGDKSDKRSSNGDKIRK  
QVRWICSSCTFVNARNCRV SCKSTILTCEVCSVPYVLPAAAARSSGDVHDARSITEQQA  
PQHAEDRTRRNSSSSLPQANTKNDTARRQKDSQSRHSGKDNSDSTSSTGASTSKSNGNRR  
TYSISELVRC LGATGEDGSSSVSNLPPSLERRVQDFRFAQQKRREKHGDQKAWGIYGLYA  
HLSDIRADLEWAEDA AWRRRRSKPYLSWKDFDAARDKGAHSRPFYFTYGVMLCTVMMLVT  
LGVNGWKFELTVNPLIGPSSETLIACGARDTNLIVNENQWFR LFTPMVLHAGLVHYFVN  
MLAMYFIGGAVEKAHGA AFTSVLFVIPAVGGNILSAICLPGFISVGASGGIFGLIGGMA  
DICLNWNLLFLKTTTDEDSRLRHL CVLLWLAVDIIVNCILGFTPFVDNFTHLGGFLYGFC  
IGYASIERLATGFFGIRIGDSHWSRLKSVGLRYFGLVLSVVTIFATTIVLAQSDGLTSPC  
HRCRYISCVFPFPGAERDKWWHCDDCDIVTADLFVATDGSGLYQQVDIHC PNGETVEVPI  
WDEGIYDTEVLRRLKPSYCRGFCAEVFAH

>comp2508\_c0\_seq1; 461 89 1177 LEN=1372; translated  
MLSRKVLKPKFLAKRLLDV ASPSTAGAKSIRLVSTSQTKKGFPPPI LFDYETIRNNLTV A  
DAIPSVKEAFCALAAAGKVDVPM PHIGIEESLAAGPGDCHIKGGYVYGEKTF TVKLACVS  
FYKNVTERNLPAGSGV FVVVDAQTGAPLAF FQENRIMTDLRTGAAGAVAI EYTTPNDDSN  
VIGFIGTGAIARNMARA AAVRPNFTGVAYGLDFPGA EAFAKEMSSELGLNFSVASSEE  
LCHRSNVIF TQT TGSEHVLELEHLRKGTTIIASGSDQPTKQELPNDV LASADKYIADLIN  
QTSRVGELRGAIEANVM TTEEVYAE LGEIVNGSKPGREDHEELIVVDLTGTGAQDAAIGQ  
VAW

>comp2509\_c0\_seq1; 563 83 988 LEN=1192; translated  
MVSSVLSILALLSAVQLSPVEVLA AEDVGLSWTIYHSWDANQQFVRRGSLTWGPAPVDES  
KDDDGKKEFQILNDDASANL TAGDIRSMLEYGWYHIKIQSKDDENSFVFQTV PACNLRR A  
NFKDQFDVTLPRSSLD DRQDPMTSFAYTPLV SPLAPKNCDDYDDES DGTTRSFSRVSQ  
LDTPAMTIKNILPQSKPPPGIA FVKQPPGGSGEQRGGTDDGESYQDPEAP TTPPGPF GFF  
SKYWYIILPMMILQVLQVPEEPPKEQQGQQQQQQGGGGGTIAPQAGASPQKVRRGKTSK K  
N

>comp2510\_c0\_seq1; 513 14 1810 LEN=1957; translated  
MSNWVRKKNQHTSDIEPESTET FESDDEEEYDEDEDIEDISFWREHGLAILVAFAASII  
VHFHNQNLISLSGFLNRLPFGTNSERHSHLDGFSRMANV SFCRQRIQPPASERLNSMDFY  
IPRDHFESLLTFYVADLDEDDY YANTDIAVSSSRKEDLGARL KDNKEFECLSEQHHINPT  
DKKLGKTTYFYKDP TLEEIYPELMKENTTPNL SMVKKSSNERKRQLEQPPLRFTGF AAKF  
VNLD TDPVLLYWDGKGGHESSRKL VGEIPPMESIGTATMPGHSFHVTP IYDPSTVLNHWV  
VTLD TALVFYEPKSA TEMKHTL KAKDPKSYAMYQRQMVNKAFSRDY TIIISGRTWLGHFPR  
PFPLHYMHEASFIGQE HQVGM TLKVASVRPRVFTIENFLTSEECEEVRLSLEQGLTES  
TLHSSPQATQNRDVSTRSSSN AWLSRETSSLTKMIFEKTAELTKIDRHLFQKFHESNAKR  
HSIAESLQVVRYKKGEEYTPH HDFVSPSINSRHQPSRFATLLIYLN DVDEGGETRFPRAV

NNYNAEGLEIVPKTGKAVLFYNTLEDGNLDDLSQLHGGNKVLAGNKWLANLWIWDPVIG  
>comp2511\_c0\_seq1; 146 683 1111 LEN=1111; translated  
MDRHIVTEFLRKVRTISDGHNAIGAPHSWSSMNNPRGIPRNKSNCNSNDCHSHTQNVNAT  
QREQSSQDSHILHGRPQERMHHQPFFMEERLQSDLAVNLSLSSNGSNGSKNTTSSKTSF  
SNHIHMQLTLHRGRQQQQQQQ  
>comp2512\_c0\_seq1; 471 65 799 LEN=1253; translated  
MDRDSLVIYKAKLAEQAERFDEMVDMEKQVQPELTVVEERNLLSVAYKNVIGSRRASWR  
VVTSIEQKGDSDKMEIKDYKAKIESELVEICNDILGII EESLIPNSTSEEAKVFYKMK  
GDYHRYLSEFQTDTRKESAGAALDAYQAASGIAQSDLPPTHPIRLGLALNFSVYFYEIL  
NAPDKACSIKQAFDDAIAELDTLNEESYKDISTLIMQLLRDNLTLWTSDQADSEVVDKGD  
AEGE  
>comp2513\_c0\_seq1; 374 180 1253 LEN=1772; translated  
MEGAEGGEAVSRKVIIVGMNRPRLKII SMVDEDEVAGGNAPTGVEYVPCLAAMSSYEAE  
GDAVRYMSDFVFRDGPMSFFDDEAFRESLDTVVMVGYEWQENDKQLVEKYFESNLLSV  
TIVCVSPNPGFSSLGEEEMSHFKNLSDDERHTTNTMGPCKMKRFILDTTTTPLQTTTEK  
KDSAEKDNVESLDGEEENEIEIDSPPDKPKEEEEVPPKKKIPVAIDHNATSFACRMCRV  
LFGESHLADDHKKALHSLKRTPNRASGTVASCQSFFCDESVLEWLAPDGADVEGKLACPH  
CNFKLGHWNWSGAQCSCGTWVPAIQIPMGKVDVILPPSERAKVSPIMIVAPKASYA  
>comp2514\_c0\_seq1; 522 120 2084 LEN=2123; translated  
MATNGLSRRRGTTRRRKRNWGPLLLGGAVLFLFGIIGGSILCFVMLDVGHTGDSTVAVDAT  
ADVTGDAKADAKADATADATADAGRSSFQRKRHVRKRNILEYDPPDSKKIPPKSLDDFM  
KEAKKKFMDHLVQEGTSGSFPYPRDEVAKDHDFTTWTAPGGKRFEEYKHGDSPTYAPN  
ESDALARSRRYHVKKAMEHAWRGYKYAFGMDELAPVSEKIRWGGLGTTLVDSLDLTLW  
LMNMTDEFYRARDWCKTSLSHNKDVQVSVFETTIRSLGGLLSAYDWSQDEVFLDQAKDLG  
ARLFKAFDTEGLPASQVNLRTGNAQKARWMSTGAVILSEFTTLQIENRALARFSGIRDY  
KLKSEEVFQRMNRVENVKDGLYPWSIHGTKDGATIYNQKITFGAMSDSFYEMKLIWIQG  
GQTEPIYREMYDKSIOGMHDLRLLSVSRPSELVFIADENNGRMDHKMDHLVCFMGGLLALG  
AYTDPQGLDSKRAQRDLKTAKALTYTCYQSYARMPTGISPEFIQFHMADDDFGPGRGAPH  
YLLRPETVESFFVLYHLTGDPVYREWGWVQAIERYCKTKVGYGELSDVQNLKIKPRDT  
MESFFLAETLKYLYLLFDPEPTIDLLHKHVFNTEAHPMRFVMDSDGIMDLIK  
>comp2515\_c0\_seq1; 360 93 953 LEN=1275; translated  
MRIVCVAFVLLHPAAIGHALLLPPPATRKLAVIGSIEPATRPSRSHTRNRFGPSSTCDTA  
LSSKAPPEEYDDGIGDLQONNRNDGDDNNWQERSDDAATNYAEGESLSAEFFQNLDRQ  
EGGAVDANSSLSLRSRSPVSREQFDSGLFEPSEYDDNYTDARANAPPTPGTKKFTGRRSE  
GSLDYFGASSGNNQRSGGSNNNNNAVRQMMRREYDLVSGATGRTALGLQAGLALTM  
LVFFLYVGFSGGIVSGEAVDADFDDLIQFEQIIPLRSDKSVW  
>comp2517\_c0\_seq1; 694 155 1681 LEN=2291; translated  
MSLTFDICFIHAIADLQNPGLALCTTIDDIDAVGGDLHCLGWNGSRTFEDIDEKASRNP  
GLDFLPADLDDKDEPLPNWRYENGLLRAPFQGSSEGGSRDLCLGPSDVALFEAPCKPY  
ELKLQECPESENVRNSIVLDEGYDNAVPADSAASSEEMAASRHRMFLVTGQGRVQSLAPV  
LERRTGRDVIETKPFCLTMLNGNDDGLGKKPYLVPCQPENKDGKDTNHDGRHGLASPVQV  
FGVYGTYSDFSVMVLQTVWGYNEVVKLAYQVGIPTGSMSSFTSSATIVIEQQVGSNSHV  
DNSTPMLVKEIPLVEDHHVANSISGILSFSSCQYEMVGPMTATLHSIRDDVNASNFEAST  
ASTAASRAFFVDDPQKESLNGFFEMFVIIFCSIAGCFTLMSVADWCLKDKIRAFGTLWG  
ENSDGKTVCLDDDLDDNFLEKDEGTEITSEPEKENERTADEDNNTHEASADDSSRNIDG  
SDDYSMCSNENHGKADNEETPPLFPNDV  
>comp2517\_c0\_seq2; 697 376 1881 LEN=2491; translated  
MPVPTSLEEMNPGNLALCTTIDDIDAVGGDLHCLGWNGSRTFEDIDEKASRNPGLDFLPA  
DLDDKDEPLPNWRYENGLLRAPFQGSSEGGSRDLCLGPSDVALFEAPCKPYELKLQEC  
PSESNVRNSIVLDEGYDNAVPADSAASSEEMAASRHRMFLVTGQGRVQSLAPVLERRTGR  
DVIETKPFCLTMLNGNDDGLGKKPYLVPCQPENKDGKDTNHDGRHGLASPVQVFGVYGT  
SDFSVMVLQTVWGYNEVVKLAYQVGIPTGSMSSFTSSATIVIEQQVGSNSHVDNSTPML  
VKEIPLVEDHHVANSISGILSFSSCQYEMVGPMTATLHSIRDDVNASNFEASTASTAASR  
AFFVDDPQKESLNGFFEMFVIIFCSIAGCFTLMSVADWCLKDKIRAFGTLWGENSDGKT  
VCLDDDLDDNFLEKDEGTEITSEPEKENERTADEDNNTHEASADDSSRNIDGSDDYSMC  
SNENHGKADNEETPPLFPNDV  
>comp2518\_c0\_seq1; 626 113 1369 LEN=1414; translated  
MAESKPKLVLAYSGGLDTSVILKWLCEKGFVDVIAFCANVGQFEEDFSAVEAKALAVGASK  
CVITDLRKEFVTDYVFDICISNAIYEGRYLLGTSIARPCISKEMIRIANEEGATYIAHGA  
TGKGNQVRFEMCAQALSPTIKCIAPWRDAEFIESFKGRKDLLAYCEKHSIPVDAKPKSN

YSIDENLFHTSYESGCLEDAACGPEESMFKMTVSPQAAPETGEIVVIEFDKGI PVKITNK  
SDGTVKTDPLDIFLYCNMIAGKHGIGRIDIVENRFVGIKSRGVYETPGGTL LRAAHMDLE  
GICMDREVKRITEGMSNEFARLCYNGFWFAPEMELIRHSLDYSQRDVVGEVEIELYKGN  
TIKGRTPNALYNADLASMDIEGGDAFDYNPADAQGFIRINAVRLKTYAALRAKDSA  
>comp2519\_c0\_seq1; 375 287 905 LEN=905; translated  
MAGRKLIDTARSRAFRTLWMLLEEIGIPYQHVAALPQSEQARRYNPLGKIPVLVEDDGFSL  
YESGAILSYLGDYRSNSGGGLVPRAGTRERAIYEQTMSVLLTELDAQGLWIHRKHEVMG  
KFFTYVPDAVEHARKYFHKTNRVLIQQLKDNNNNSNKNKNKNNKGNVKNMNERIGQRKK  
KPGRKPKKVGGKVGKKNRNEDEEDEX  
>comp2520\_c0\_seq1; 297 1 843 LEN=1000; translated  
QRLSQITIWKSSGFGASHRYKQMLFNSSPVGLFLLATAWSQPCYGFHVRQEQPRLPCSAI  
SLFQESSCGFMEEKTDSFASVSSRRDLFRNSAAVAFALLLNEGCSNQPAFAFDGSGASA  
SAGYSPATKAEKKKKQFERVAADVDFKALGKAIDKGETDGPWVNFILFQRREPDEVG  
RTYAALADLRGLPGKKKGEYEGGDGLLLANTFTKPGKPPDNTPAVKSFLLKSKTFFDAIEA  
AGKAKDAKAKKEWQKTSELSQYLSDELPGDLNDSLYK  
>comp2521\_c0\_seq1; 666 287 2485 LEN=2956; translated  
MKVLCFPSFFFVFAAIAPVAFVNSEDRSALSGLKEEVPVSSPWIDLSQLNSNPPQDNG  
QEGSVQGRKAPKSKSKSSKSGSKSPTDSPMSSPTSPVSSPIDLACVDVFTGNRTYIPS  
CAGAVNEIIVQCNSEGNYNQYVIEFSDGNVILDNDTCLLLAEFSYNKVMVKSSQCEL  
QLEPIQLSHVGT CNFPNGLNYGAPNMLKANIRPDGTMDFYSKDDGETFFDDVRVATMK  
NEEGIRKVDPAIFRSAAQCE TLNPAPYQIDELSSGYGPCRNDADCKQVNTDTWCSLDTGD  
NFPTAYCYDCLNNHCIGGQTCETNRNSRSCVNPDIQVRGIAGITTYDVFDADPLFT  
AYASGLADQAEDAGAVNRRRFFELWSSDPKYKVDLPSNKTYEPIGFVTAELVMTSQT  
SVKAFASLDQFSEEQNKALGLGASGTIKGVQLGGSVGIKSKKRIAEDA HKNLVTVTAKSA  
KQIYRFQIASNKKLKLTL SAEADLKKASSSKDWNDFFRMYGTHLTLGGKVGAWQRQIYSF  
DENQRSQLTTTERTFSQSVNIGIPGIFGFDQDSESSESKEIGKKIQQLQVKQKTYSKGNV  
DNVYDEAAIIQRRL EPICDHVGEVEGVTKDECQEALIEYCVERIKDTGQITTTKCELSGD  
EFNFTCLYDNQCPRQETCNRGICTPRCKEDSDCGKFEECIDVDNVPSKECHPMKGESQLH  
KHQCSYENNDTLW  
>comp2522\_c0\_seq1; 1411 223 3357 LEN=3474; translated  
MSQPYKASAEDVLKEYGVSLDQGLSEAQVLELRKKYGTNELEHEEKTPLWQLVLEQFDDK  
LVQILLGAALLSFVLAFFEEVDHWVEAFVEPAVILLILI INAVGVWQESNAENALEALK  
KMQSLHTPCLRDGVWQDELPT EELVPGDIVKISVGDRAPADVRLCKLLTATLRSDEGALT  
GESETVLKTTDSISSGEKISDQKNMVFAGTTISGGKAI GVVTSTGMTTEIGKIQSAVTEA  
SEDAEKTPLNQKLDEFGLLTQVITGICVLVWIMNFNQFFDPVFGGVFKGCIYYLKI AVA  
LGVAAIPEGLPAVITLCLALGT KKMVKRNAIVRKLPSVETLGCCTVICSDKTGTLTTNQM  
VVEALVVPDAQEGDLQEF SVTGTGYAPT DGVVQNYTSTTGNLEQMANVCSLCNEAVIRYS  
EGKYVRVGEPTAALKCLVEKMGLPGQSAPSNEVEVADYFGKSFQGFQDKEATLEFSRDR  
KSMSVLCNKATGDRVLFVKGAGELLERCTS IMRPDGSVQPM SAKDRQTLADRVTDMSK  
RPLRVLGMAIKTNMPPKEQLPSQLLNLDEYAQIESGLTFVGLTG I KDPPRPEVRS AIQRC  
QDAGIRVIMITGDNKTAEAIAREVGI FEHDEKVTGKSFTGAEFFHGSISDDQRAHLIMH  
GGGSRVFSRTEPRDKQLLVKLLRSCGEVPAMTGDGVNDAPALKQASIGIAMGIAGTEVAK  
EASDMILADDNFATIVSAVEEGRS IYSNMKAFIRYMISSNIGEVSIFLTSTIGCPEGLI  
PVQLLWVNLVTDGPPATALGFNPPDPDVMLKPPRGKDDSLITNWVFFRYMVI GLYVGFAT  
VGI FVFWYTEYEGFVNWLGPS IMELLGSSYDGHSMVSYDQLTRWGH CRTGEEAVGTIFEG  
FSVNDFDNTGNGLIEDFSTDP CSYFTKGKMKASTLSLSVLVTIEMFNALNAVSE DGSLLT  
IPPWVNPYLLLAMASSFILHF MILYVPWMATVFSISPHDAVDWILVFLFSFPV I IIDEIL  
KYVGRQMNETERKERERLRKEKEA  
>comp2523\_c0\_seq1; 1645 218 3895 LEN=3954; translated  
MALGSEPEGGPPRSPEATIRVAGGDEAIKSTVKSLRKL MGGICDPRKNNADGSGEEEEEDNQ  
YDLYLHEQYQHYLHDQRHQDRHQDQHQQDQLQDQLQDQHRPTHDP TWSPPVRPSSPSA  
TDGATTVVASSTSKNDDSNNPPPLVDGNGATATPSEEKDSLDSMDSAKKVLFPNEENDEP  
LVDETTPIFEESCDNSI ISNNSNTNLEIDPIPEQRHPRDHLHVWTRTLLSIAALVFLALG  
TTILCMQTTDTEGLNINEVLDRIK YRRTTHLQERSTIHPASVTNDVDSTIREASLPKKT  
RRTTEEINDHAKEPNSWLD TMYDDAEEILRLTYDRTQLYLREAVGEILETLGHQKNK VLE  
KIYEHKTIQSEQFNEPELSLNGITKYSELVDIRNVTVALELFLKYFSGNSTWEQMGIN  
VISKEYFTQYIPKTL ELVRGEANLEHVHKI WTSDLTKRIRNM RVFDEDDIYNKLN EIGDT  
IARFYHESGLHQYVERLEQKLADAVGETNMTIVDAMRAEILDR LAEYYQNNPLSDYLQLR  
PLLSSDIAGVDEATASGASSDECATTGADSTPERETDEL DQAETGLD TDERGAE EEEVQI  
VDRDPSGSDEESELLVDTVQDNPIETNDSSSIEEEEGGEGEESPTTESNPSISD VDVVD

AELDDTLEPEDSDATTTTEDETIGKHADEAADLIESDQEPKLPADPTIADSSSGTDNSLL  
TEMEGSIPKMESKPSLSDVGVDAEFHATLEPDMNIEGSETNDKNSDETVNLNIADQEPD  
VPAETATTDSDVTEQSLRTEIEEYNTTTTESNPMDFDEGVIGVELDETIEQEKDPKISIPA  
EYDI INKKKPLVYDEVDLQNPNSDQDMLVPKKALDGDSDGLSSGEEHSIKSDVKESLG  
KTTTKEQAGEEHDDQPEGTDILDEASIASENPELTTDESTPDDSLADESSQGDERIPSEL  
HNSIPMGTFFSENKEKGGAEKADADSDIQTVSSEDHGTGDEIGEDLEASSSQSIPPSDVS  
ADIKEIAVESPIQKPAELGAHDSKDEEDGTDGENLLVVS AETLDSQHSIIEEATPDSKE  
RNSVQGHDETDVHDQKDSGNPEILNEGNLISSDNERDSTNQSPQTPTSAQPARDVDPNIP  
DMIKGI EYHMTKMEQSVAPDLDKKCSSVECMIEEIEAIVDRTRTESYAARKYDAADNFEE  
RNPVVS KPLSVRRRWNLSLQGWQR

>comp2524\_c0\_seq1; 376 531 1577 LEN=2336; translated  
METSDGDDGCKIGSCLSEIETKPIKAPSTVFPVAVVACGYRRVGIKSGNYFFPAFLVAF  
PNHRDSSNPETVQRKSAICFAWRSKRDFMLLARSSDSLVLPAALKKVVDNSVWPWRRFD  
MNLVGNNTPYFLSDPKLPNHF SVRMKKSLWLLDHFLHRAETSATETAKAAWETFCRPSD  
TEDLITPREFTPGADSTTNQRDGNIAKPKGEDTQAHSTETKINDPNTSFSSSHNENVTTL  
ADSSRLGQYFASEENSRMVVECALEKILPLFHDGKNSDILFLEPSCGHGDIVASLVEALE  
EHEISPRSVFIQGYDIDPCVIKTCQQSTTFHNSRSANSCKDSNDYRVLW

>comp2525\_c0\_seq1; 150 324 695 LEN=722; translated  
MRAIVLNATKMGVYDVAKGQVVKSTGWTRKDPRTAFCSFLAGFFMTCTVAPFDRVRTKL  
MSQPTNEKLYTGLSDCFVKTVSQEGPLSLWRGFVPIWARFAPMATLQLLTIESLYAFFGF  
DSI

>comp2525\_c0\_seq2; 199 209 937 LEN=964; translated  
MGVIQTISDTAKNEGIVAFWKGLPWAYCREGSYTAIRLGAYAPVRDAIGAGAPDSPVYMK  
FLAGAMTGAIGSIAGNPFVLTLSQTNKGKSVPLSTLVGQMYKDQGVAGFYRGVGVNVM  
RAIVLNATKMGVYDVAKGQVVKSTGWTRKDPRTAFCSFLAGFFMTCTVAPFDRVRTKLM  
SQPTNEKLYTGLSDCFVKTVSQEGPLSLWRGFVPIWARFAPMATLQLLTIESLYAFFGF  
SI

>comp2526\_c0\_seq1; 601 125 1636 LEN=1711; translated  
MTTKRAASVEKPLSPVASVSRPISWWTICCSLLLLLPAVLEANKIDDDEQWGANLEDHP  
DPNDEHYEGMIYVGKHDANGKRIGFDQDNGIRYIFGTSFDETHKDIEEKDLLHHPLRPVQ  
DIPDHEREAVLRERRHGLSKQDGESEGRYEMPKAFGHVDEHPLDGGVVPKVVHVDPFFLD  
ETLVTNKEFGKFVRATYYETEAEKYGWSFVLESMDKAAALMQHRRDQQQDEDELELNDPE  
AEDWMAVDGAYWRRPEGPKSSYKYREDHPVVHVSHRDAAEYCKWVGKRLPGEWEEYAAVR  
GKNTGPSNRMTFAWGDDSDWELASKHANLWGPAGFPNENGALDGYRATSPVKHYPPNDL  
GFYDITGNVWEMRGGKHKARIVRGASFVDSL DGSVNHAATLGARSTVHATTTTTNVGFR  
CAKAPKRRTEYHFVTHDEATHGHLAVEDQFGKRD MIPQKGWEDQYHHVDEEENENDEDPD  
NQYNNQLKRRVIKRRERYSNEL

>comp2527\_c0\_seq1; 251 19 525 LEN=704; translated  
MAFFLSCFQQTIVFGILNLISSVWGVVLAIGLLTGALIGSDGVEEWEDEAGSASLYILG  
GILMFVSVCGVGFYSFQIHAACKFNVCGLKLVIAWDIFTICFRIAELIIQQQHSGDVGVM  
INNLFWTVAIYGLSLYPIVGLVFEIQKGIMSEETYPREAYS CCCEPKV

>comp2527\_c0\_seq2; 271 247 843 LEN=1022; translated  
MSSEEVKEVPVATPEAEVPMKDQEKIGAKCCGCCDYRRATIVFGILNLISSVWGVVLA  
GLLTGGALIGSDGVEEWEDEAGSASLYILGGILMFVSVCGVGFYSFQIHAACKFNVCGLK  
LVIAWDIFTICFRIAELIIQQQHSGDVGVMINNLFWTVAIYGLSLYPIVGLVFEIQKGIM  
SEETYPREAYS CCCEPKV

>comp2528\_c0\_seq1; 831 1 2000 LEN=2156; translated  
XDNNYTDSYKDCVFTMAIMFNHSFPRLLVWVAVLATLHGTAGEDATKAEAEPKVVASIE  
VQLDPNRPMDGVDKEFGDDGKFECKQWASEGECEKNPGFMLQNC AASCKAANTVIVSVY  
DGEDVGVA AFRFGEHSSAFGSPSETQESVLKVAQELQGVLDKGSYEPKELTHCGKRQC  
SAGLWKRAEEMRKADMHDDAGADLIRALLKTGIEVDFVERCKRSLQWAFGSIQRERERE  
KRDAIEEAKLEARQAEERVAMEEALQRKKEYEADVFVKVQEMVADGSKVSSASVGD  
GTVETETNGLILEIMKSFVAEGPEGGNWSNVLQLIKKVRPSEKTTEILLIEARCHEMMG  
DHKNALSAAGRLIQKAASYTPWVDDSPRMIAVTLGANAAMQLGLSENAISFYQTVLKFDP  
EQKTRKQYRGLKVVKLMAKADEQIEKGYNKAASFVDDCLSAMRGLDVDSPLFRSKIQ  
LKQCTILSGMGKHEEALANCDSAVEQRAGNESVSDSKKEYLVRAEALLLDMDYDEAVG  
DFRMAFDLVPETQETMQEKHELNQRLKQTRQOELWNGGVKDYQFNENTGYPDGRPPQRD  
HAKILQLPIDLDQOSKEVKCAWLKQFKTLVRKYHPDKYKGNKKRAARKFKEVKEAKEII  
SKAWQC

>comp2529\_c0\_seq1; 592 104 2008 LEN=2218; translated



MASVTYSSTRGGQSNLDFRTVVMVTGLAHRGLFVDPDTFFPTVEAEELSWRGLDYPSVAVN  
VISKFKEDQVPADKLEDIVRRSCAAFRHEEVTVPINVAGHKVLELFGHPTFAFKDVALQ  
MLGNFFEYFLETGSNDGRLAVLGATSGDTGSAAIYGLRGKKGVCVILFPKGRVSAIQER  
QMTTVQDDNIHCVAIEGTFDDCQDIVKASFNSPEFRDRVKLGAVNSINWCRVLAQITYYF  
WSYLRVTDEDEHKDAKVGYSVPTGNFGDILAGFYAKQIGLPVGKLIIVATNENDILHRFFT  
KGEYHREAINKTISPSMDCVSSNFERYLFFLAGNDSAKLAEWMTTFFETKKLTIIEGELL  
AKAQSDFSSARADTSMTLDIIREYNNHNHYVMCPHTAVGVSAIHQTNDVVETMVCLATAH  
EGKFPAAVNQAIDPLPTPPEQLACLDDLPTLRLSECPNDVQHVHDFMEKKIAXENGESLKK  
PNAFRVKDSQTEYEMEDKLCNFSSIEASNNVKAFLSRYNMNY

>comp2536\_c0\_seq2; 404 134 1818 LEN=1891; translated  
MASVTYSSTRGGQSNLDFRTVVMVTGLAHRGLFVDPDTFFPTVEAEELSWRGLDYPSVAVN  
VISKFKEDQVPADKLEDIVRRSCAAFRHEEVTVPINVAGHKVLEVANLLQNIKXNKSEW  
SASPEKADTRPLLMLRLCDTFFSLQELFHGPTFAFKDVALQMLGNFFEYFLETGSNDGRLAV  
LGATSGDTGSAAIYGLRGKKGVCVILFPKGRVSAIQERQMTTVQDDNIHCVAIEGTFDD  
CQDIVKASFNSPEFRDRVKLGAVNSINWCRVLAQITYYFWSYLRVTDEDEHKDAKVGYSV  
PTGNFGDILAGFYAKQIGLPVGKLIIVATNENDILHRFFTCKGEYHREAINKTISPSMDCV  
SSNFERYLFFLAGNDSAKLAEWMTTFFETKKLTIIEGELLAKAQSDFSSARADTSMTLDI  
REYNNHNHYVMCPHTAVGVSAIHQTNDVVETMVCLATAHEGKFPAAVNQAIDPLPTPPEQ  
LACLDDLPTLRLSECPNDVQHVHDFMEKKIAXENGESLKKPNAFRVKDSQTEYEMEDKLCN  
FSSIEASNNVKAFLSRYNMNY

>comp2537\_c0\_seq1; 540 1 844 LEN=844; translated  
XEKEAKEKAEREAKEKAKKEAKEKAEREAKEKAKEANEKAEIEATAEAGEEENENTEGN  
AAASATTISSPTKSTTEPATTSTVDESKAVAESGNNDGFLKQVQEDGFVNAFLKLDVTTQ  
ATAAAGVLASGAAAALSIVKRDDDNGDDNGSGFGGNSFFGNQGRQNNQGGPSSFGNQGGN  
PSFGNQRNQAGPQSFQGNRNQGGTTPFGSAPADASQNNKDGKSLFSSFSFGNPPSAKNS  
NSNNAGGLGGPPKNGGFGGAFGSSQTSSKKQGGFGGGGGFG

>comp2538\_c0\_seq1; 432 38 1528 LEN=1528; translated  
MVSATLKKYLKFLLFQCLILSVLGDFFDNAISAKIKSLAIRGASIAYYDSNMKMPSPVTRG  
YGQISSDSSASVTPDTAFMIASVSKPFTASAVAVLVDKGIISLDDDICDVIIPAGYSMTM  
CRNQNHVNVKITWRMMITHRSSMKGNIPDAKDRWGDPIPSYGPSSGGYTSAPAVGNPTC  
PLGEIGDFYHALLTDDPNATTDVGAGVILQGGKELDWFDLAINSGSMWSRSKPGQRRDYS  
NAAYGVSALIEFATGQSFQDFCREHLFEPLGMSHTEWFLDDLDPDGSQVAVPVEKKRNGG  
YMDVGHYCFIDYASGLRSTANDIARWSNAMLDYGSPMLWSTAVGKEIVKCQEKVNGEP  
IGNNCDYFYGWILLNNSMKQSTQEKWLKQGFSEYDWTGVDGWHHDGSEAGSQTNIVILPKA  
GIFVAVLTNTDLNSETAAQQLTQAVVEAPLPSLPPTPTPLSNPTLAPQPTRAPASPTRAP  
TNPTKAPTNPTRAPTNP

>comp2539\_c0\_seq1; 744 370 2724 LEN=3009; translated  
MIQHVLFFYPFRVLFSPYFSDQLTSFLTGAFTVGLLWLLDGLYHSVPDHFTKDRTRSDGS  
IDDDDDDDDLTFIDPWNPLAYVSTQQRMMRTSISTMVDIQKNIGELPKRLKREHWPWE  
TIRRKVMGEESDRDEGKTEEERDSQTTENQGEKRMKNLMSGSEEEEASYQENKKEEKPL  
CIGSIFGLDVGGTLAKLVYFEKKALDVPDLYTRSLREKHYAKALSAQTVLMARMDDNTDG  
RAKRSASMSMRKIPAPLGNRFRSSTAEEYEFKEEDSFKEKRLIPPSNEIPGVMRRSQTM  
TGHIAHPVKIKESQNYPTKIESSLFVEEDGEETNIMPEHATKERNSTNDLQSLYAIRQES  
LPDDVRQFRHVVDSDDENDSVFKQTTSLSSSSGLPPSLNLKRSLSMLDMTTAHDQEK  
VEALNRFYDFARRLDTNEDSISDIQLSFYCRELGGEFHFISFETRKMKNAMDLIRFNKLH  
MNIRNMGATGGGAHKFADKWERELAIGMIKQDELDSLAVAGMQFVFLSTVVGECYTFRQKQ  
RTAETTGDKNETADGGKNPKLEWWTRKVRDRTISYSSAYPYMLVTIGTGVSVLRVDGPR  
KHERVSGSTIGGGTFWGLMRLTLDVENFEDAMKLAEKGDPTKVDMMVGDYIGEDSDALEK  
LGLTADIVASSFGKLVSKEDPAKGLTQEDLARALLSLVTNIGQVAYLNAKLHKTPIYF  
VGSFLRHNMSQRRLSYAIDYWSKGEMEALFLEHEGYFGALGAFLMTQNIKKSQGGFFQW  
ENNP

>comp2539\_c0\_seq2; 669 370 2848 LEN=3133; translated  
MIQHVLFFYPFRVLFSPYFSDQLTSFLTGAFTVGLLWLLDGLYHSVPDHFTKDRTRSDGS  
IDDDDDDDDLTFIDPWNPLAYVSTQQRMMRTSISTMVDIQKNIGELPKRLKREHWPWE  
TIRRKVMGEESDRDEGKTEEERDSQTTENQGEKRMKNLMSGSEEEEASYQENKKEEKPL  
CIGSIFGLDVGGTLAKLVYFEKKALDVPDLYTRSLREKHYAKALSAQTVLMARMDDNTDG  
RAKRSASMSMRKIPAPLGNRFRSSTAEEYEFKEEDSFKEKRLIPPSNEIPGVMRRSQTM  
TGHIAHPVKIKESQNYPTKIESSLFVEEDGEETNIMPEHATKERNSTNDLQSLYAIRQES  
LPDDVRQFRHVVDSDDENDSVFKQTTSLSSSSGLPPSLNLKRSLSMLDMTTAHDQEK  
VEALNRFYDFARRLDTNEDSISDIQLSFYCRELGGEFHFISFETRKMKNAMDLIRFNKLH

MNIRNMXVSSTEVLVFFVLVRVSRFSCAMLEISDRNRLMLITSNVSDAAATGGGAHKFAD  
KWERELAIGMIKQDELDLSLVAGMQFVLSTVVGECYTFRQNRRTAETTGDGKNETADGGK  
NPKLEWWTRKVVQRTDISYSSAYPYMLVTIGTGVSVLRVDGPRKHERVSGSTIGGGTFWGL  
MRLTLDVENFEDAMKLAEKGDPTKVDMMVVDIYGEDSDALEKLGLTADIVASSFGKLVSK  
EDPAKGLTQEDLARALLSLVTNNIGQVAYLNAKLHKTPIYFVGSFLRHNMISQRRLSYA  
IDYWSKGEMEALFLEHEGYFGALGAFMTQNIKKSQGGFFQWENNP  
>comp2540\_c0\_seq1; 430 73 1101 LEN=1261; translated  
MKYCQAAVLMLAAASGPVPGSSQLRMRTKTQPKRDEELQNRINDEEEVFWTSALLNNLD  
SMVAPTPTQAPPAGASIHPSLGDTFLETGFPTPTPTIIPGSISETDPSSTPKSINIVDI  
DNSSFFFSDILNVASYSTFCRAGEYTNVQIVSAREDVVYCI TNFEGGEVEFGYEQDYPDR  
PIMKLDITPPLVCGDDEVEVEDSISIDTPYKNYCGFFGKANFQPMAITVTDIDGENIGFI  
DANITETASYTTYCVDEEYSNVEIVDINGDIYCVTVAPGNPTIEFVDNSGFMALIDVEPT  
MSCNGIDGSI SVPCGFEGVALTVWPNFISSDSNITDSNSTVF  
>comp2541\_c0\_seq1; 207 1 538 LEN=787; translated  
XTTQHDKLRYDTARPKHCCFPTEHEPRPENATHRNPTPAMDKFSPAHVGANELPDGFTQV  
NPNGGGGPGGSEADFKKAAIQEQKQMIQAMDLQALARLGRIRLVKPEKAAEIENTIVS  
MAMQKLPKLINEAKLVEILERKNRQDARSSEGASHGIQIQRKRYALDSDEDEDDDDDDI  
>comp2542\_c0\_seq1; 774 67 3386 LEN=3686; translated  
MIHSVFCLGASEPKSISLHRGELGKNKANYISAELNGRQWSDXNFYDEESSPTAGAITTA  
SLPIPGRSFTLLKASTSASSLNVSSSSASSRKAESAHSVHTNQSGGNKFEGSMIAPSSHC  
TPPRKKWERSFNFLKGNPNLSPTMSSSPGSSINSMLPAEDMSTGTNGSGASQSTTGGG  
MRGSKKKSSFSIIKGSKRLVSRNLGKSGGLPSMFSGKASSGRIQRGHQSM DALDVQLR  
KGQQIAKNDSTTLARRSLPSTSL LAVVAPSATTHTRMHFPSSVAEYTRTGPLHSSGLQKE  
VDCHGDNRSANTETTSTTPPTFTSALDEQLRGSTSYNNMNATSTACHSPSFQINPVVSE  
GEEQPNSASSAPQLTQLHRTRSNRTHIYSSSSNSNSRTNTPVRQYNHNYHDELDFRNVP  
EMPTLKGRLIQNKHPSSSEFHDVGLNLDSDNSLVPENNGDTNLMSQNNSSHYSFSNTTP  
TII TDGRITEPPENLDGALETIGGMVTVHTSSSSHLLHKLQGTERTVFPASPETKKAFTK  
IHNSSTDSESPFLGGNKASNVDLAGMYNSQERPSSSNLLSKSLPTTTFAKDNI IHSNSS  
RLLKPIQSADSWARGRRYL IAPAALAACPSSTIQGLSGLCTESVKEAATSTCPSKASGAI  
ELGDVAMTYIGEKYHLSFGKFSCKLVLRQNYLFEYDLSAPLTNLPRGIAHLQHATAH  
KDFEDGLELHFYASPCAKVDHRVLLIRVKNKDERDHWITCLNKAARLQIEDLWEIDEDHP  
LGSGRYASIFAARRKNSKTANNSDEEDRCDKERSPIDDGKYNKALKVINKNEFWRMVIK  
RERPDIVRELAVQSTLTAKFGTKQNFLOIQGFETSDKVVIELELLDGRDLFEYISSKG  
VLEEGEAGCIIRDILVALDAMNRAGIAHRDIK PANILMTTSNESKYGVSVKICDFGMSTL  
VGADGFVRGRCSPGYVAPEIFKAGPGEGRNKVDVFSAGVTFYLMMLCGYEPFYGETEKA  
LIEANKTAELDFPESEWGKISQDVKDLVELMLDKNPTDRLTAKAEALYEPWIOGLEKNEKH  
NTNRCPGGTNDDTNNPRLQGGICALM  
>comp2543\_c0\_seq1; 279 376 1024 LEN=1024; translated  
MSSSEKADGGWSISATGKRAASFISGLFFGAPGGKDGDENPQPSNKRKTTTTTSSAEMD  
LVLETVREHTARAEAREKAAAAAETIEALLEAVLERLEQRKRPAARETFSTPRKPARPL  
PLNPNPPSASGQKLWTOQERSIVVKGLAAYGMGSAKRVAELLKHRNYSQTRGFMRRNADS  
IRREIEATTGYATTEAEKQEILDSIAAENEEDGEDDX  
>comp2544\_c0\_seq1; 86 1 639 LEN=639; minus strand; translated  
EVDANKDKDLDEKPGAPMLFEKDAPAI AVVVHARLSNTRLDAETAAXQHPEERSAVDADA  
GADARARARAFARAGCPTEQWLLLQRHLCSSECFQKEEWMGASFASVPCTDLWIYGTIGKAI  
VWGDLESELLLGI PREWGFCSATDRWPVVFVLGVFGFSFLTSSVVGTVQVQVPSTGLYGN  
RIVLLAPNTHTYATFQSTYVHSVLLLVPGSCLWX  
>comp2545\_c0\_seq1; 233 1 801 LEN=915; translated  
AQTSTGNLDQYSTVLTDPARPKRHTQTEPTQTKRKRNPSTRMADEGTKIESVGLAPEVFV  
LVAHAHAVHPASPVHGVLVGSREGGRISVHGAYPVCHETPTGVLVETALSLVQSSLEEDT  
SNETTTEIVGWFTAPELLHEKAPGPVALRIVASLAAATSGGGTDPVLLVVDNEALLALAG  
GGGAVLASEAVRAFGKDLGRQWKEPVGSLAVESDAGAAEAAAASAIREATGAAAGPFVRDL  
VDHWKAGAASEWTTAASLAAFTKKHT  
>comp2546\_c0\_seq1; 472 134 1738 LEN=2213; translated  
MLPRFQFLTSSKLFGLSSSLASSVRSFSTPTTASELLRSSLKDPSLWEPEDPSSPTD  
EPRFPVFDPSPTLLAEISTRDPKAAIEKCSDALPAWRDETTAPHRASLLTKWSSLMTE  
NADDLATIMTLESGKPLAESHGEGINYAKGFLDYAAEAIRPTGAGGGFLVPSPPFGPSGG  
PKGQVMVAVQAVGVAAMVAPWNFPLAMITRKVGPALAAAGCTTVAKPSELTPLSAIALKHL  
ADRAGIPEGVFEIVTASTEGTPAVGTEFCTNP IVKKISFTGSTRVGKILMAQSSDTPVSRV  
SMELGGNACFVVFADANVDDAVNGAMTAKFRNAGQTCVSADRFLIHSSIHDEFVSKFSER

VKTLKVGPGMHPGTEMGPLINASGVQTITEKVKA AVKEGATIYEEVALPEKGS GPQFYPP  
TVLTVNSADSEIWKTTETFGPVAAIRSFETEEELAIANDCNVGLASYMYTNDLSRAFNF  
SKMEVGMVGVNEGMISSATPFGGVKESGIGTEGSPLGIKEYLETKYIFMKTAN  
>comp2547\_c0\_seq1; 197 185 631 LEN=798; translated  
MSCSAIRKSPDSMHAAAAPVRVAAPPPHSHYFEESGPP IGAGSEKLHTRQVKGA AVAG  
GVTGLVLLGPAAGLLAAGGAALATTKGRGKLGRAARATGDSVSDLGRSAKKFDQKHGVRE  
KTSRGIAGCDWISKKLDKGKEATRKY  
>comp2548\_c0\_seq2; 171 383 916 LEN=1369; translated  
MTFPLLLSDDGHSIQSLITTTTKQRSSVLTRVWGKITESMKFDRKEIAKMGIDFGLTYN  
MISNINGSITLSTAWYIASMKSGLSPLAPGNWRSLLAAYASLYVVAALARPFRIFA LGV  
THKMEHFVQHVQKRIGCTRTNAIGLIFGFGVVMWITCCAAGVTLASTLAGVPVWKYD  
>comp2549\_c0\_seq1; 189 199 766 LEN=881; translated  
MSYRRGLLRRVGNLRISYNSWGNPRFFGNVGFDDFYNDY YGNSWNVNFWNWNIGAI CVYN  
DPFFYGNFRNSYRRVREDANYIYYRANDGTVNSRDRMIRRRKASSNNVANGQTVKKVEE  
EIHREQINEDLFKTSLLTLEEEELSLVQITIEREDRFKMNLTGTGENPSSIQIITGKKERL  
ETLLPKEK  
>comp2550\_c0\_seq1; 403 216 1373 LEN=2362; translated  
MVDTSAASECLELIYLSIFAYIESVLISFGIQHDTAIEKNPREELECRNKTD CIDRCLG  
TKRPVDLWELRELALSEGGLLRAGYRQKAWPKLVGLTEEDIPELELSSTYSESPSSVRS  
RNESALWSPSTTATTSTSCLIIEEEKKSEIEANVDLIRRDAGRSVIFRYHLGTS DANPIV  
PPCASERLAQVLENTIRQGNSSLHYYQGLHDIAGVVLHNMDYQVDITSQILQRISHSHLR  
DAMRENFSNINWFLNVLLPPLVERVDPSVHYSLQMANVELSTVCLPWMITWFTHDIHDPE  
TAGRLVDAFLSGHPLMPMYFAMAIITHPLLKQELLNADPEDTSSIFMAIKSMPSRLKTKV  
EEDEQLSEQQHVSLQEVLEDCITIM  
>comp2550\_c0\_seq2; 450 216 1730 LEN=2250; translated  
MVDTSAASECLELIYLSIFAYIESVLISFGIQHDTAIEKNPREELECRNKTD CIDRCLG  
TKRPVDLWELRELALSEGGLLRAGYRQKAWPKLVGLTEEDIPELELSSTYSESPSSVRS  
RNESALWSPSTTATTSTSCLIIEEEKKSEIEANVDLIRRDAGRSVIFRYHLGTS DANPIV  
PPCASERLAQVLENTIRQGNSSLHYYQGLHDIAGVVLHNMDYQVDITSQILQRISHSHLR  
DAMRENFSNINWFLNVLLPPLVERVDPSVHYSLQMANVELSTVCLPWMITWFTHDIHDPE  
TAGRLVDAFLSGHPLMPMYFAMAIITHPLLKQELLNADPEDTSSIFMAIKSMPSRLKTKV  
EEDEQLSEQQHVSLQEVLEDCITIMNRMPPRSLDLIDSNIYRSELLQRMSSISL FKAP  
ASWSMASGGLPRSRNELNDIEGTTYCVRAKLASGVPMLMNTVSESTVIRRKSWGSRKYLR  
KKKTQRMKKLTRIILGNTTNTKMS  
>comp2551\_c0\_seq1; 433 62 1003 LEN=1286; translated  
MIALKPFVALLAGTSSAFAVIQPASSIAKATTTSTILKLSGGAVGAGTAPELKPPPSL  
YQGAVAAGVGKASKTWGDI FKLGI VSGCHIAFGAYLAITVGGACSGIAAENPGLQKIIFG  
SFGLPFGLIMTLVTGGELFTGNTALVTAAYKEGKISGKD LIKNWVSSYTG NLVGSLLLAY  
LAYKSGTLAASPASAAIATAKCSLPWDVAFVVRGILCNWLVCMAVYMASGCAS MAGKMTAV  
YFPISAFVALGLDHSVANMFIIPLGMLRGADITIKAF LMKNLIPVTLGNIVGGALCVMAP  
FGSVFSGWGKSD  
>comp2551\_c0\_seq2; 390 62 1242 LEN=1525; translated  
MIALKPFVALLAGTSSAFAVIQPASSIAKATTTSTILKLSGGAVGAGTAPELKPPPSL  
YQGAVAAGVGKASKTWGDI FKLGI VSGCHIAFGAYLAITVGGACSGIAAENPGLQKVRIG  
VENMEQIIFSSGLLRNDQSFHRS LNEFDYRIQSVFQDLLKRHSSVSIYNQELFRVLT VVN  
NLSSRLTFAFTFHKKIIFGSFGLPFGLIMTLVTGGELFTGNTALVTAAYKEGKISGKD LI  
KNWVSSYTG NLVGSLLLAYLAYKSGTLAASPASAAIATAKCSLPWDVAFVVRGILCNWLVC  
MAVYMASGCAS MAGKMTAVYFPISAFVALGLDHSVANMFIIPLGMLRGADITIKAF LMKN  
LIPVTLGNIVGGALCVMAPFGSVFSGWGKSD  
>comp2552\_c0\_seq1; 927 455 3430 LEN=4711; minus strand; translated  
MEGSASKSVTHRKPVIKIEDDDVALDEKRDAGCNKPTDETPGKPTVPVKASSTTMKSLN  
TAGAKNVSKAPASVVAKAETNATESKDKATIKQKGMGHRDGNETTCSDAFDAIADIASKA  
HVRSKRRKRARFDKGTDAFIKDCSRSQVTSNASASTLMAMSCHPPTVVTASISNHVPPR  
LISGTGLAKQNGSTKNKDYSRRLDSHSSGNKNKVSVHMLNSVGLECGDDGVLQLEHFDD  
EEIPSTHADDDGDKAAAIKAENNAGGDENCDTSSNMLAVTKNKPPQWSLEQHKAFAAAI  
FEIGLKNCSPSVIMENMRKQPRYITRERTKSHLQKYRQTKERGRAEFLKEYDVFFKSIEQ  
AKAHLNRKNCISPSSEKEPSACSDTKGNVNVNHKEPIPKAVLTTALEGKPKNLLGGKAA  
ALLSYSVLNNFSTSHGPDQLQYKAAKLMEFPI MSEEEKRSSVGASLLQVKS LIDNMTDAL  
LKQRHGISP IPAHKTGNGDEESDSSSSCSSEDEEDNVEGNAANNKQQINKSLSKD  
QDPATAAVPTQQTGPFATATAAPGHPFYRGPTTAYPPYPAPVAPASVGTGFALPYPHAP



PSFYGGAPPPPHLQAAAAPPPAFGAPVAFAAHPMHYTQDARINPYQQAPPGQVQVAYPGVP  
PIQPNYYPGVAGYPAYYGNTGEGGMAPTUNGSNPSTEYNRPPPQPSYPQQTGSSQQHQQQ  
RVYDQSPSHSNEGRGERRTFDLSGDSPTDASNRSSERRSKRRRTRDHHSENRSVDTRNM  
PRKSRDDFRDFLDRLSRMPSDPKAPQRTSSSPVQRSSRGHEKFKSSPSSMHPDDALPKTS  
ERQSRHHGQQYERQHYDRQFESSGQSKSYAKDFESPAGDPFSESEASRFASPYEASPIDN  
ALNERQSQGHVSQDQQQQQLKQNDINGQFWESSNFMGTEYNDQQQQNAGGGDFHQQPAQP  
DVFVPVTHNRRYGNLSLSSPEGEATGNFFFGE

>comp2553\_c0\_seq1; 493 269 1789 LEN=1973; translated  
MSDDDYSYEYSEEDYEIGDDDDMDWNSSATCTIASENPNAAPTGLAGVLNGIRISPA  
DDLRPENKRRLEKEVTEILDIPAAAASVLLREHKWSKEQLFEVIFYADSEKLLKCGVSNRC  
DPKDPKTPDDDDNCCPICYDDMEDGQKMSMPCGHEFCMSCWHDFCANAIEQEGPSCVYV  
TCPEATCTEVVTEVEFQKAAPDYLQKFQTYQLRNFVESNRLTRWCPCGKGCDRACAPTAS  
AMEQDGNVANCDSCYTSFCMVCGEPPHAPSECKDLAKWNEKCRNESETANWILANTKSCP  
KASRIEKNQGCNHITCQRCKHEFCWICSGDASHGANTGGYYKCNRYDPKSTETNDNSA  
AAKAKRELDLYLHYKRYHAHSEAQKFAKKQLKETESRMVMLQESSDNSKWTDVEFLKTA  
NEQLVECRKVLKYTYVYAYMNPNDTLQKERFEYHQEMLEKFTENLSEQSEKPLDKMDRT  
DVVNQTRVDRFMKNILKYVDEGMEG

>comp2553\_c0\_seq2; 493 153 1673 LEN=1857; translated  
MSDDDYSYEYSEEDYEIGDDDDMDWNSSATCTIASENPNAAPTGLAGVLNGIRISPA  
DDLRPENKRRLEKEVTEILDIPAAAASVLLREHKWSKEQLFEVIFYADSEKLLKCGVSNRC  
DPKDPKTPDDDDNCCPICYDDMEDGQKMSMPCGHEFCMSCWHDFCANAIEQEGPSCVYV  
TCPEATCTEVVTEVEFQKAAPDYLQKFQTYQLRNFVESNRLTRWCPCGKGCDRACAPTAS  
AMEQDGNVANCDSCYTSFCMVCGEPPHAPSECKDLAKWNEKCRNESETANWILANTKSCP  
KASRIEKNQGCNHITCQRCKHEFCWICSGDASHGANTGGYYKCNRYDPKSTETNDNSA  
AAKAKRELDLYLHYKRYHAHSEAQKFAKKQLKETESRMVMLQESSDNSKWTDVEFLKTA  
NEQLVECRKVLKYTYVYAYMNPNDTLQKERFEYHQEMLEKFTENLSEQSEKPLDKMDRT  
DVVNQTRVDRFMKNILKYVDEGMEG

>comp2554\_c0\_seq1; 648 106 1794 LEN=1922; translated  
MSEGTDCCTENPTGLGADNFLSRITFRKASPTDILRCVEMVKKESRSKGLMFVSKNELEYR  
QHAAANYRCAVYEDDEGNNDEDTIVGFITGIRVGAIEEADKVVGHALTHVVPHPDNGEV  
LIIRSVIVGEEYRKQGVGKAMIQDYIGAVRELPKQSSSKPKSSKKKPIQKIVGLCWDHVL  
LPFYLACGFSLQQAHKVTGACTETEKSDELRRAYFFESSLAATFDYGIFFGDGNNDDGCNY  
YIVDSFASVPGTGNPASVLLREEFDPMVKHKWQKVAEEFNLAETAFCWPKGSNTGNDH  
ADAIAFFKNESHWNIRYFTPTTEMGLCGHATLASAAVLYQTLPEVLPSGTAVVFHASED  
ILTMNLENNGEKEGISAVSSSRQVSKVSMNFPKPTKDISTREKATVRNMLKSAFIDL  
EPLYVGLSDIGDLLVELSPKTFSEIGYDSLNFKAFFEWGYYRGIVICCAAPESAVKDKT  
DKSIEIDFLSRFFAPKAGIDEDPVTGSAHCSLGPYFAKKLGKRRVGRQMSVRSVVECL  
VAPDRVTLTGTAITTMRGQLFM

>comp2555\_c0\_seq1; 553 261 2141 LEN=2388; translated  
MIRSRAVNGNNTVGKSAGTSAKRGTRPGIRKAPRKESANPFAAILYAVLFIMICATVGGF  
YETSSMSASDKVPPPRQLKTNPRILDKIRKEFNARYNVSGKIDGQKMLEKGLHSFGSID  
HTARRIMEAARAQRPFVMAFSGYSITVGRGNFYKQSFPPVAEEILKGPMQELFNIPLVVR  
NAAIGGIPSFYGFCEMHFLGSDPDVSWDYSMNEKSKDASVFEAFRQATKQLPKRPMV  
IMMDTNANRMKTLDTYTQNGWLKDAIAIGNKDILKQANIFEGDAQDLPTGFQDWNEFGAP  
ANCPGRGSHWPKKQEHSMGMWMIAMHFIEAMDRALKLSSEEPSQTSRMLSVEMPKLGAP  
ISKSLPANDPEVTELLFGHGDNHMMKDLSCRTSFLPATDHDKTLKSVVVSGLAEGDLDIM  
IDRTDEHYKEGWVLDVSKVERDTRKVEKCGGLGYVDMKIAMYGIPESGKLRLLWLPFEGA  
LHDHAHHGHGDNHVLDTNAKHWFDDFIICEANDKRDDKACKLDRDLEIIVGGVPTVTSI  
HIVKDAAEYLKRPTCVNVGVPETAKITTLGDLRTTKGKALSDEKFKFRSYGDDTFGMV  
VDVTAKSrvTRKNGACCLSHIVWEQH

>comp2555\_c0\_seq2; 491 261 2380 LEN=2627; translated  
MIRSRAVNGNNTVGKSAGTSAKRGTRPGIRKAPRKESANPFAAILYAVLFIMICATVGGF  
YETSSMSASDKVPPPRQLKTNPRILDKIRKEFNARYNVSGKIDGQKMLEKGLHSFGSID  
HTARRIMEAARAQRPFVMAFSGYSITVGRGNFYKQSFPPVAEEILKGPMQELFNIPLVVR  
NAAIGGIPSFYGFCEMHFLGSDPDVSWDYSMNEKSKDASVFEAFRQATKQLPKRPMV  
IMMDTNANRMKTLDTYTQNGWLKDAIAIGNKDILKQANIFEGDAQDLPTGFQDWNEFGAV  
SRFFLRCLFFIGSTEHDXMRSSGKFCVAMDAFTKMLQHIVLARTSTREELFSHVSARSL  
FFYCILKLSFCDETPLIYSPIVQDEVAGIQXKQEHSMGMWMIAMHFIEAMDRALKLSSE  
EEPSQTSRMLSVEMPKLGAPISKSLPANDPEVTELLFGHGDNHMMKDLSCRTSFLPATDH  
DKTLKSVVVSGLAEGDLDIMIDRTDEHYKEGWVLDVSKVERDTRKVEKCGGLGYVDMKI

AMYGIPESGKLRLLWLPFEGALHDHAHHGHGDNHVLDTNAKHWFDFFIICEANDKRDDKAC  
KLDRLDLEIIVGGVPTVTSSEIHIIVKDAAEYLKRPTCVNVGVPETAKITTLGDLRRTTKGKAL  
SGDEKFKFRSYGDDTFGMVVDVTAKSrvTRKNGACCLSHIVWEQH  
>comp2556\_c0\_seq1; 211 301 1208 LEN=1733; translated  
MSDGDPNGEPESSXSRPVLPSDLDRRGGPGRRRRGGAGHEAPPEDVPVVPVGVVRRHRGR  
KRPKGQDDQGFPFADLPRVVRVPPGGPGLCVQAGDWERFDGTGGSSPLYGRNWADEGSAIA  
TNQPGFLRHDKEGILSMANTGKPGTNGSQFFLTLKPAPHLDDGGHAAFGRVVAGTESLRKI  
ASVERGERDKPVSLQRVVIEDCGRLFESGGGELGGKRDRKKKKKKKESKQRDRKRRRGGC  
RGSDSENSDEDRRRTSRKSRKKRRRRRGYESSDDSSDCDGSVVGSSSSSDSDRGXPETV  
SG  
>comp2557\_c0\_seq1; 449 131 2156 LEN=2278; translated  
MPQNPFRHLNDNGDEAYECRRRQFYHLFGVFLILGFLSSEASAFCSSSIPVIGIPRGNHEN  
FHQRSTVIKNRKFSTGTSTTIPTRTNNRVKLRSTESEGEQRSLLEQIRYRRKTRSEIRR  
DRRRKKRKLSETNPSLSTTVPHSGRHFVPSHPSYRRPLVQRLFSLKLRFRKRFMEGWYRLL  
TLKEYDIDDCNIKGKSETNAVSFAIIISIEDPGIKSSNLRLACLQAIGPNDQYLQVQSTKD  
DTKFWASKKSQSLGCTFNEHDNNNNTAHPKSRLDPDVWKEVTKSGFQITDDSSFRATSTP  
KHLKPRWVGRIHGHGDSHGGVLEGGVGGTLEFDFELDPDSVCGYGGYTTTTIGDANATF  
GHTANTTKSNQGIPIPDFSTTNGSAGKRRRQSRDANRQKSTGGWLSFPVFEPHWQVTIADA  
LATGKINWNGTEYRFKQSFYAEKNWGDALPSKQWYWTQCNSFDNIEEELSVTAGGGVRKL  
PFGKEEELGMIAIHHKQGFYEAVPWKGNVENVSTWGEWSLYGDRLEETIDHDTGRITPA  
FAVEIQYRCDPDKLPLGLVFRAPTPKQGMVPCFRDTFEADTVLTLWELKRNENTNEFEKIE  
PPIIDRARSKEGGAEIGGGPWETWSGKSQKPLIKTLLNIPNAFSATDRYLVSREKTLR  
QPVSEGLVKVTKFV  
>comp2558\_c0\_seq1; 206 53 319 LEN=644; translated  
MQRQQSFVGLERSLMVKAKTCDRLVTEVMQAKKKMKEVDSAKQTFCLKIQIPKMEKQIAEL  
KVELEGLLDEDEIDPCGEYYELAKKLLA  
>comp2558\_c0\_seq2; 203 340 522 LEN=847; translated  
MQAKKKMKEVDSAKQTFCLKIQIPKMEKQIAELKVELEGLLDEDEIDPCGEYYELAKKLLA  
>comp2559\_c0\_seq1; 348 609 1547 LEN=1601; minus strand; translated  
MATLKASIAASESEIAASEAEIAASKAKIAASVAEIAASGQHLKDLTQELEKLRAESNAA  
EENHEAAKSMVMDLTEETYTDDEDSGESTKKVGSSEKSRSRALSTTSNGGIVSQDERRS  
SVKKNVDATTRGFLPFPSSDGGSRSKKSKTPAARIVYLPQQRSNCSIGRTRKQLNKIK  
GMVKYMGPSKFRPDVCKKDGKIYTLVLSERWHNLVERNCEKQICLVRRGPKTTPAEKV  
GEWKESIPIFHVPKQPENSEKKLYYAGHWKVEKMDKLNHPMEFKRSPRNMKLTFAFDRFD  
SKLNSIIQNNQE  
>comp2560\_c0\_seq1; 483 96 1622 LEN=1662; translated  
MDTSEQRAQSTSFKFPFTDNEDADLNLSKSFHEFRAPKTPVGAPSYNEFADVNFIAVPSD  
MNLGLSPIAVLRDSDASVDSVCKSSGEECEPQIPISVENTNDATKSDLSTTGLEIDKLIP  
PDDHSSPSKTDLLHSAMKKVGERSSNFIDKIRNAAHKRKVAVTRSRDSLVAKEQEQLRSI  
AESKTRLLSLNEELQIVEKENEETTKESVSNTGKSKPKHSYKNNKGGFGGVPKVEKRP  
TTTPLSPMLGSRKGGGRAPRLVENSRRGSGRGLKNGPTAKAIDRSNFSTKGLKKSIRD  
HKDAASGTTNGRFAKRGTDSSKLEGPNEEISIRNFTVVQANVRRWNAGQIGIPKVSRAV  
TVPVSPCLGPKRQSRRIAGSHDEENSNSNGRIILKVEVDASKRANGSISSQNEVMTSPSTR  
MSPLLGLNLIDSVQKVRYACSESDRELALKSSFPVPRSTTRAKMRSRYDILRKEKQEI  
RRSEERERLQAQIKVIHRELRLVGLKDLT  
>comp2561\_c0\_seq1; 302 439 1110 LEN=1482; translated  
MTENFNYSHFSPGKSRVGYVGNLYDDVVCRIADDGEIQVKTPGKMMGYFKNPEATAETI  
TEDGYVRTGDKGELDEQGRKLGITGRKEIFKTSKGKYVAPAPIENLLISNQYVELACVGG  
KSQPQPFQAIQVSESPKAKAIGSEGEREVLGKALEEHFINSVNSKIDGHEKLQFVVIVKD  
DWLPENGFLTPTQIKRATIEDTYDPKVEGWYAAKKKVIWDGF  
>comp2561\_c0\_seq2; 639 81 1772 LEN=2144; translated  
MSDDTKTILDFFFDNVKKLGAKTFLTQPMGGDVVKTFSYQEVLDKAKKAVAGYIESKGYPP  
KSQIAICSKNCAHWLIADIGIMLAGHVSVPVYPTLTAETTYILEHSESKMVFIGKLEDEK  
PWQEMKGGIPSSIDAVSFPLCPKDTLHAKKWDDAIASSSPIASVSRKDEMATIITYTSG  
STGKPKGVMTSFGAMTDTTKGICKELSVTSDDRYLSYLP IAHGMRWLGMCVPLYSGEQV  
WYAEALTTFIADLNRCEPTLFLSVPRLWTKFQAGVFSKLEPKKVNLLLSIPLINILIKK  
LLKTLGLSKVRFAGSGSAPLPQDLLNWRSLGLELLEGYGMTENFNYSHFSPGKSRVGY  
VGNLYDDVVCRIADDGEIQVKTPGKMMGYFKNPEATAETITEDGYVRTGDKGELDEQGRK  
KITGRKEIFKTSKGKYVAPAPIENLLISNQYVELACVGGKSQPQPFQAIQVSESPKAKA  
IGSEGEREVLGKALEEHFINSVNSKIDGHEKLQFVVIVKDDWLPENGFLTPTQIKRATI

EDTYDPKVEGWYAAKKKVIWDGF

>comp2562\_c0\_seq1; 457 505 2854 LEN=3098; translated  
MSKRSGMNLGGLMAKKSKLDDKTAASAEASRIGIGGKGPSNPYLTKPVPPEQMIQILLT  
QFRNAARKRHGSNGSKPYASPFCEIEARIGILKVHNRRTSSGPKRVNGTVVRAFDGGST  
PSGVEPPSMVSGISRSHFVGTWLAGLSEASPLSSALGEMSENSKEIKKKLDEHEYVETVF  
AGYEGDRRVSPFGYVDVEHPPSAPVPTRSMSMEYKEKIDQRDLIIPAAKYDLRIGLATEK  
IVDPNVTTIIPPGWSLHRVKRRRSYKRKDKNMGWQIDVTEVTSTPRHDL SKKTVVYEIEME  
LQADVLLNLINMEDKDQIRTEETHKLSQQLWWILSHLNPLEETVDVEEYLIDHPDKKAVQL  
ALATCGALKKFMMDGRPSHAHQPIEVGSLPLANPGTIPPPSLANTKFCGCMPIGFSRHNI  
EDVQRGSKYFLSEKTDGVRHFMIFTGETVVLVDRAMRGKQCIPIAKHQQEKSAEPMASVI  
PLIKAGTVFDGEVVMHRGNGKKGPRPLFIVFDVLTIGPSAVVMHLPFEKRLEHLKRATF  
RTPANRDMFADSAIADLSIPLPLVRKNFVQRTDIAELLNVIIEKGFRRSRRPLIHNHL  
TDGIIFQPNLPYKCGTDVNLKWKYLDCTIDVQLLLEGGYRPRGGVEEDDDPLKGVGGP  
DNTSVDMSTRYVKLPASERYRLEADKMEVSKSIHIAEVGFDP LSGEWYYLTMRPKIAPNH  
ISTVLGTLLESESLTTEELQYRMSVPPGQRDTYRKDLKGMKQLLSYQKQSIFKQQQAG  
RR

>comp2563\_c0\_seq1; 256 1 1230 LEN=1838; translated  
QHQQEQHQQETQEQNLEASIEETPLNMEPYVSFNSDSNCNDTSTSTTAANHTEKLCRRFERL  
EPYVEQPTPLNSNPRYRIRETRQEHEYEYAHECPPKLLSKQEKMPVHGLADTNSDPDP  
PNQRKISFSERLPEVSSACPRAFRNMIPPTSCLEVEELQKDP SYAHALAAGTIWQSLVQGH  
VRFPKLWYDGAEPARPF LGCYDPNRRNKWSYVGRHRIEGDPLLNRRYVRSKSSGKILLH  
IVCRDVLNLTGGVDLEDEAATEDLVGVGFHPNAEGIH SRLGNPSNHGSIGIDCCRDVWIA  
HKSRRIAHNKKTATRIE SLLRNLNKNRVDETPLGGDFMHSEPAQTKRIRRTIDNTNVN  
IFGRGPPKHTVVFPEHKLYRMLAPLAETENKRNKNIPASVLLMRTFLR

>comp2564\_c0\_seq1; 162 429 645 LEN=645; minus strand; translated  
MGREARRAFPALDFFVALDFFDGEVDGEVDLDFMTGGDVASLIRDGKMDGELGGEMDVKM  
DGGEVDGEMDVEX

>comp2565\_c0\_seq1; 1056 330 3013 LEN=3284; translated  
MSNASRDVMAEQQEQQRVFPPTMSNASRDAVAEQKQOREGEPNAQPPSYRSYEP LSL  
LEFVTAVERDSSSSNDPGENEEACELDTSFKVVEDWKEHKMDATCRSNTTSQQSPVVK  
YVLDREWEPEVIFRYENATARIPSGPPRHSDIPSTALCFV DNAESYPAGLATTGSSANG  
TNTTYIDV DATLIRTLVDFPNAYERFHAYANAAMIML MFDVRNPQIVMLGKPESKFIYD  
EGDRDFWRLFSDLEPIYIPWGKDVGIPENANANVT AHDKNTIYRFREIIEAPNAGLSMVN  
TKSKASGIRGRATEHHCMS S LFRGVMAWIETKTFLATNAKATKAIDGNRGKQNGIGNKKV  
EVFSRRAGNHSGESDRSTPTEGSTETAFATAAAVAATARTTEPEGAPLSKQPPRLVKIL  
WSSRRPYCCRDGGIWFPKRVL MRETEFLEALLEALYDNDKTTTRANEYEITSVEFGSLST  
TESIRMAESTVMVGLHGAGLIWSAFMSGERGDDGDDDDGNFDYDDEAKVEEMILKAQL  
RRNGGKSRRSTSSVGSNSNSNSIPKPGQSRVSNALSAAIRRSKRDNEDMLAAITSKIYP  
VADILCVQGNQRNSRAVDLDPFLKEDSVVEGM DRDFAAAFFPPSQMRCLALVSHNEMKSTM  
RKFFVANKNLLKKFRLTGTNSTMTMLREVFSD EPAGTVMFGPACASGPLGGDAELVSLMV  
GGRIGGILFFRDPM SAHPHRADIDCLVRQALVHNTMMAETPTSALMMCHCLRAALKGEGK  
PEMIP SFFFSLQCP SVEAYKAEQKR VVEMQKKMARESM TTRSSVTSSALAGAKDYXVLP  
VRVKPRRPDAEAEAEAAPELEAEAEAAAGTDARWC SRVAGLHFLQTICTVEEY

>comp2566\_c0\_seq1; 322 225 1133 LEN=1669; translated  
MGYHRSDSEKTYAIKCVNRKLTNEDEVALLDEVSILKEMKHN IIRLFDFFKEPTSYYL  
VMEEMDGGELFDRIVAKAYYNEKEARDTCKILVDAVGYLHENQVAHRDLKPENLLL VSKN  
DDSQVKIADFGFAKKVLKPKSLTTQCGTPGYVAPEILEGHPYDERADMWSVGVILYILLG  
GYPPFIENTQRELFRKIKRGDYEFHEEYWGTVSKEARNLIKSLLTVDPELRLSAQQSLEN  
PWICGDGKTLAKRGLDKNLES LRAFNARFKFAAVSTVAVNKLNSLGNAFKNLDMAD E  
SP

>comp2566\_c0\_seq2; 350 407 1432 LEN=1968; translated  
MAFEEHDDTPVPSSKSGKHFEELYRLKGVLTGAFSTVRMGYHRSDSEKTYAIKCVNRK  
LTNEDEVALLDEVSILKEMKHN IIRLFDFFKEPTSYYLVMEEMDGGELFDRIVAKAYN  
EKEARDTCKILVDAVGYLHENQVAHRDLKPENLLL VSKNDDSQVKIADFGFAKKVLKPKS  
LTTQCGTPGYVAPEILEGHPYDERADMWSVGVILYILLGGYPPFIENTQRELFRKIKRGD  
YEFHEEYWGTVSKEARNLIKSLLTVDPELRLSAQQSLENPWICGDGKTLAKRGLDKNLES  
LRAFNARFKFAAVSTVAVNKLNSLGNAFKNLDMAD EES P

>comp2567\_c0\_seq1; 591 92 1822 LEN=1952; translated  
MEAA SQNQVGANN TREGRGN NNRNRRRGGRRGRRGRRGRRGRRGRRNRNSEN  
G  
ENSQNRNYPKKHKEENMDSNTNKRPKKIKNTPPARNENGSTHGG SASESKKLAHITNN

RFADLKISAESRRAMAIEVFQYEFMTAVQSETLPLILKENKDCLAKAKTGTGKTLAFMIPT  
IEKITASLSKNGKQRSDICCLVISPTRELAQQIGSETEKLLSFHKSYLKRVVVCVGGTNK  
NKDIKSLVGTTPPIVVATPGRLLDHLQNGGLAERMNRDLTLIFDEADQLLDMGFRPDIERI  
LRLQLQPSQETRQTLFSATIPDSVSEIAGIAMRGDYNFVDTVGEDSEQTHLHVQQQLMVT  
PQALSVQALANVLERETKSNKDYKIVFFTTARLTGFMAELFNSVQKETGYDVLEIHSRK  
SQKQERERASEEFRRRKNAVMSFSSDVTARGMDYPDVSVFLQVGLTDRSQYIHLRGR TARAG  
KDGKGGLLLADYERDYMVKKELADMPLEVTVPVNLQDATAAISKAIQNVSKKNDLRNSAE  
QAYRAWLGYNGHLKVKVRWDKTLVQHANMWGIEVV

>comp2568\_c0\_seq1; 841 134 2575 LEN=2910; translated  
MLALQRIARTRPSATSLFPSRGVSIIPSAHSSSPFSSVALRFDERLGPQDRRIPHDRARP  
SPRCVSSLSPPVPTSLPPLPGKVLIANRGEIACRVIRTCLLDIPTVALYSLADGPESL  
HAKSADEAYQIGFGSSPSESYLLQEEVLEIALRSGAEAIHPGYGFLSENAEFCQRVQVQET  
NGGVKFGVPPHSAITAMGSKSKSKAIMEKAGVTTVPFGFYGDSDEEQEPLHLLERAVQDVG  
FPLLIKAVMGGGGKGMRLVWSESEFLEKLEACKRESLNAFGDSRVLLERYLLQPRHVEVQ  
VVADDYGNVSLHERDCSLQRRHQKIIIEAPASDLSENLRQLGEMGCRAAKAVGYVNAG  
TVEFLLESNKTKEDPEFYFCENMTRLQVEHPITELITGIDLVEWQLRIAAGESLPITDPA  
AIPCRGHAFEARIIYAENPGTGNFLPTAGTVWHHEPPAPPNAVGVGEDNLRASNGVRVDTG  
IQAGQEVGVYDPMICKLVVHDESREKALEKLTDAKRYQLSGVPTNIDFLIRCAEHRTF  
RKAGATSTGFLDDHMAEVLPPVENEPPELAIAIAVFAASLLQSEGRIGVSDFEAERRIQTS  
PWNSLSGSRNNGGHSCQKLETADGTSVETTAFRDGSFEIRITKTTEESNNGNGLTFHIGG  
TLSSDQYMQIVVDGSKTMALTVALREMDGQYQVCMWPQSLLLRNEGHYFWEVSVPNPRI  
TMAQNETGFSSGQGVVSAPMPGKISKINASVGDVREGDVLVMEAMKMEHTVPSQPQSGI  
VSSIPFQVGDVVDGTVLAVVGSEEMKDEAEAV

>comp2568\_c0\_seq2; 780 134 2724 LEN=3059; translated  
MLALQRIARTRPSATSLFPSRGVSIIPSAHSSSPFSSVALRFDERLGPQDRRIPHDRARP  
SPRCVSSLSPPVPTSLPPLPGKVLIANRGEIACRVIRTCLLDIPTVALYSLADGPESL  
HAKSADEAYQIGFGSSPSESYLLQEEVLEIALRSGAEAIHPGYGGVFFQLCAELSNFKVR  
LSRFSNRQVTPNAVLLNSIGFVPSVLDLRLVFDENAEFCQRVQVQETNGGVKFGVPPH  
SAITAMGSKSKSKAIMEKAGVTTVPFGFYGDSDEEQEPLHLLERAVQDVGFPLLIKAVMGG  
GGKGMRLVWSESEFLEKLEACKRESLNAFGDSRVLLERYLLQPRHVEVQVVADDYGNVVS  
LHERDCSLQRRHQKIIIEAPASDLSENLRQLGEMGCRAAKAVGYVNAGTVEFLLESNKT  
KEDPEFYFCENMTRLQVEHPITELITGIDLVEWQLRIAAGESLPITDPAIIPCRGHAFEA  
RIYAENPGTGNFLPTAGTVWHHEPPAPPNAVGVGEDNLRASNGVRVDTGIQAGQEVGVYD  
DPMICKLVVHDESREKALEKLTDAKRYQLSGVPTNIDFLIRCAEHRTFRKAGATSTGFL  
DDHMAEVLPPVENEPPELAIAIAVFAASLLQSEGRIGVSDFEAERRIQTS PWNSLSGSRN  
GGHSCQKLETADGTSVETTAFRDGSFEIRITKTTEESNNGNGLTFHIGGTLSSDQYMQIV  
VDGSKTMALTVALREMDGQYQVCMWPQSLLLRNEGHYFWEVSVPNPRIPTMAQNETGFSS  
GQGVVSAPMPGKISKINASVGDVREGDVLVMEAMKMEHTVPSQPQSGIVSSIPFQVGDV  
VGDGTVLAVVGSEEMKDEAEAV

>comp2569\_c0\_seq1; 777 342 1912 LEN=2192; translated  
MSVNDLLVDGSIIEGDLMAAMNAALAESGDDNNSNSNSNHGSAFFSETDTASMRSIDVMG  
EAMGLMSGENDYENDYSEPTNGNMNMDGKEIRIDSGNNNYGGVGGDIDDEEINFDDF  
MAGSKGSGDNDGKSMQDIYAIDGGDQPQGGESKDDAGAPGAESSNATTETAASKEPP  
PAGLAADVPLKQFENALALIQDLENRIQVLETDHQCLTEENMVLREQTLTSLQATVLADLE  
AKLAAFPKLLEETAREEAQVAAAKAEIETKFIWKKDMDRQEQELEEEKLRTRKHYSAT  
TDSLKQSDFLKDVVERKEQENDDGHHQEKPNGPLAFLRGWGNRNNKHSNSKANGDKNDA  
VPSGESDASTGGGASANGGSSGSKDHGSESTIETSKGDFNINITLSTSRSGDDLDPDMEQ  
RNGKIRPSLPSNEEDDETEVNSNAIKGNHGHDEXTAGPADVTQPQQRGKIPFPLIAPS  
FVQPLTTAKPIRKVPEDYDAELFSFRGLSKLPPFAGKFGRNGMV

>comp2570\_c0\_seq1; 366 176 1402 LEN=1639; translated  
MAWSSPKNSGRRTTRTPAGPIYYDSKHSVAILLQCNGSAWLRVIPCILNAAFTAALT  
ALETRYDLPLALPGESSLSLGHDFGLVLSFLLVHRIGWALRRYSRYQESLGTVLRDVRGL  
TQKAIVFSRRKNNDTSAKEWRSEIAYRSLLMARMTTANAEPVAQIPAHEVAELDGPPEL  
QFCTPDRDFLYHAEIPYSKGIHSLLRMPWKIAELIRETICGQEERLVKPMSTDHEMNLLA  
TVDSILAGYHGIQNLMLTPVPPFLVQMTLTLTMVYVFTLPLVFLKDDAQRSLGDCSRVF  
FATYCFGLGLAFVAQDLDDPFPCGPNDFDAAGCFGFALDDVVTMIHDADGLEWADALRYKC  
NPNPSRAVHDEMVGAMTGEREGLLPKHKHGGDDNRPWKHAPVPDWMA

>comp2570\_c0\_seq2; 330 176 1543 LEN=1780; translated  
MAWSSPKNSGRRTTRTPAGPIYYDSKHSVAILLQCNGSAWLRVIPCILNAAFTAALT  
ALETRYDLPLALPGESSLSLGHDFGLVLSFLLVHRIGWALRRYSRYQESLGTVLRDVRGL

TQKAI VFSRRNKNNDTSAKEWRSEIAYRSLLMARMTTANA EFPVAQIPAEVAELDGP EL  
QFCTPDRDFLYHAEIPYSKGIHSLLRMPWKIAELIRETIVGKSAIRLPAFSVQIAN SVQQ  
ASLTLNFARILPRNPMLSFALPPWFATAKNDXVKPMSTDHEMNL LATVDSILAGYHGIQ  
NLMLTPVPFPLVQMTLTLTMVYVFTLPLVFLKDDAQRSLLGDCSRVFFATYCF LGLAFVA  
QDLDDPFGCGPNDFDAAGCFGFALDDVVTMIHDADGLEWADALRYKCNPNPSRAVHDEM V  
GAMTGEREGLLPKHKHGGGDDNRPWKHAPVPDWMA

>comp2571\_c0\_seq1; 575 477 3236 LEN=3767; translated  
MASPTPSPSKSWMTDSQGNHLSKTGMTSTPPGFVAQSGLWSENGGIAATGSQNADAVSTG  
DKTRPERRRNERTSSFN NIAAALGSGLAESMEDATRGDHISASHHGDNANHNQSNISNGP  
ATLTD SFNFPIENNGMAYERHKKRHSASRLVGVPGASTSSATSSHKT PETGPLFVASLNSG  
EARSKSFNSRNGGSHLVGDQSNMSSSIDKGHC PGAIINDSSIAAS PFSQDKNASAFHTSY  
DEVQSNSTMQTNRGQLN NVGDTQGN GHIKSRLPVTKDIGLTVNEPSDYSFADSGGVSNIP  
NRNF SNFGMNRV GKPDVNFTYGIQQDMQNLWSDAGGSRGGG NLSPTGK PQSSNRTIESM  
DGGGVGIIDGNRHRGSSPQGIDAENDLRPFTWDTNQHETSRTLAI FNAAAIPCNQIEELC  
DNFGAIENFRSEFWERVGVIFISYFDMRSVQFAAMQLPRRLQGLHPTGGNIHIKYCIPIN  
SSSQNDESLVVINDLPQGIGQSNLGSYLSQFGAIRSLRSGSYGSFIAEFNDLHDARQV VY  
ELETRQPWGPDVSI EVGIRSPADRKKGRELLALLGRWR TKGGAGQGAPPNRGRQLVNTPD  
TYRSR PDSRGMGGHRDGRYERGMHNE DHP SQLGYGPGPQDARYNHGGNTYV VHHNQHQHP  
SYSSYRGS HHPNDHIGHGHHGHTYMNRPVSHQPSPHQQYYQQPHINHG NFPGGSSVI  
SAGSSRHTGTSGYYTDDRSIGSHTSHGSMNRSINSLVDSMAGSSRDGQS QNLILDLLELVE  
NELDKRSSLMVRNIPNKYTQQMLLNEFTENGHPGII DFFYLPIDFKNRCNRGYAFIN FV  
DYRDIVK FHRQYYGQHWRTFNSDKICDITYARIQTKASMLKRFENSALMEKDEEYKPLVF  
VSDGPEKGRLLPFPVSSRG

>comp2572\_c0\_seq1; 566 421 1728 LEN=2303; translated  
MWADEDGKISGQQQPERSLQAYTNMTAQYEDGPAVNQDREVD FEYCYGALQRADSNNDGR  
LETADYLSFVQDYGSNAECLGNIMSLPVMPIELTACWNQLSCECRNRGGAPDCCEKENAH  
LPLNGVNAVDPAPSGQTTQPPKEEYIQTEQDFLRQACVRTDQCII SF CGYPPPPPLPIPP  
PVPPTPPPTIPVPVEKNLEVE TNYLWLLFLLLLLCCRRR WILCPVAKDDDEENQERAP  
DDPAAMGSLPADIENRPDGFEGDYNDPDANKMSMKSTAATEV GEGGGIRYYRVVQEPEYE  
EPPPPPEPKILDQYDKGVPEGDGMK LKHIEKDGPPPEDDPYALEHYEPDGGVVEHKRKG  
KWSFLAGGGYKKEERAKKEKSDWKRPGYNRAAKKEEDDPNRRDRNLNKYEGGAI FDHLD  
ETDEPAKRGAGNSLEW

>comp2573\_c0\_seq1; 90 1 129 LEN=217; translated  
NDEELNKLLGNVTIASGGVLPNIHAVLLPKKTKMNSKASQDF

>comp2574\_c0\_seq1; 963 101 2680 LEN=3009; translated  
MPSLKKKKSSYESTGFVRRMLKKGSSFRSLNNGSGDSVMSSSSGNQPFGR LAGNEGSKWR  
PRKNQFERLDGDDDESITAGLELKKSFSSSWGVEHISTFPSTES ESGEYKRDIMFDK KAT  
ALINRTPSKDRDNKGSKKREFSPIKSPGKDTSVIRGPSSTKKIQSKI QEEEEIKWGNNDNA  
DVVGF GDNKTTDANQHSFFPVASSAATNSASNSFGFQINPIGGH SKQNVTKKCHTIP SRE  
EQSSANPQSSYSSVADPTDFFSKEQT TTKLTMSNLAKMDSSLDNTHSISAGEKEPAMGGI  
ERMVKERKFYQFTIDEDKASTVVESTFQLPADYPYGD RNYSIDDETOFSCSETSQETRI  
QQRSKTNEIVSKTSEIVTDDKLNPIHSGQNADDVNEFDAFFPGTEGDEKDGQKEFDAFFP  
LSTKKDSFFDECSSNQQESRQKLAATESDISSSWGDAYFERSYKSSTEFEGRCRAQRGRC  
DERRVQKASTKSLASQQVSI TSLSYSPSPVHKAKSTDIPQNGRQPLTHKNTQSGAENNNI  
VPSGKKVVQGNDFRSENSQRKSSEFQFDDFVARPPSF KKRNSSIASSNIQLPPSDPFES  
LPNGASAKENFAVRSNRPEDFGGDW RAYQKNQYPIHRRKSFEEEDKDDDDNDSFDDVGPW  
EKQSSFNGI SRAQLRNSGNRSRLSRHNYSPANRPSRNQYID DGYVDDDNRSTGGFSFEK  
PSRSSAGAGSYAKPLALPSNAIVASMLFRTHYDIDQNDVEEKINKFEEENSKQREIRHLH  
GDIPDDVHADTENMTTVSSSDATSAYFQESWRRPSRDLVNHLSSARALDMDYPSARRFP  
TRQVTQAEQQQLPPGLYEA

>comp2575\_c0\_seq1; 256 1 872 LEN=1620; translated  
XLLKFKKSDAKQPPSPPTPLEPTPTNAEAGKVKGKGLLRFLDSKKEEPPSEPQEPAPKTG  
VNHSEASKSKGLLRFL EPRKEESPLKPEEIPTKKGSNHSEPSKGKSLGQFLESGNNEAPL  
KPIITTNSTHRSTQSRSNYSIGSKSSSGGTKE SVEELPSKSYPPP KLGSKNPNSGAGA  
PNSPWKPKSRDSDAERPHASFLANAGKPRKRSTGTVPVLETIQADKQKTNFVKFAAETNF  
AKFAAATISESDGGTKQPNSK KVRNSENKIIKSITLDDGAEMHCVC AIM

>comp2576\_c0\_seq1; 892 54 2120 LEN=2175; translated  
MLFKQATTLGLFLAAVGT TTTAFTPSFGVSPRTVSSLRSTTEDIEKKNVEQTEDTSREKV  
MTFSYDMSTETKYEKPTYKGTGNGLSGDSGEYDVIVIGSGMGGLTCGALS AKYGSKVLVL  
ESHIKVGGSAHTFTRVHNGEKYSFEVGP SIFEGLDKPSLNPLRMVFDILEESMPVETYKG

LGFWTPEGYWRFPIGDKKAFEELLMEQCGEDGPKAIAEWNALRERLRTLGGSTTAVALLN  
LRQDAGFLATTAGALPFVATHPDVFADLPLTFDDLSTVDEIVTVPFVVRNFIDLMCIFCG  
FPAKGAMTAHILYILERFFFEEDAASFVPVGGTSQLGETIQRGLEKFGGKQLQNAHVDEIL  
IEDGRAVGVRLKNGNVVKARKAVVSNATPFDTVKLMPEKEDEPKKLTWRNDLGTLPRHG  
AISHLFLGIDAKDLDSFIDDPAHLVVQDWRSMQDSQNLCSEFFIPSLLDKSVCPGKHV  
IHVYSSGGEPYEPWEKLSGSPYEYAYKEERVEVLFRAVERCIPDIRDRLEFSIIGSPLA  
HEAFLRRDRGTYGMAWAAGSSAPQAGLLGKVLPPFPNLKTPVDGLLRGDCSFCFGIGTP  
SAAASGAIANTMTHVDNHIQLLKEASQKDPMYKFLDPGFMAEVYKPLVQGFTPSAELRN  
ERFAAGAGVAPVNHTANNKARDAAAAEK

>comp2576\_c0\_seq2; 637 171 1610 LEN=1665; translated  
MKQTQQPQEWNALRERLRTLGGSTTAVALLNLRQDAGFLATTAGALPFVATHPDVFADLP  
LTFDDLSTVDEIVTVPFVVRNFIDLMCIFCGFPAKGAMTAHILYILERFFFEEDAASFVPV  
GGTSQLGETIQRGLEKFGGKQLQNAHVDEILIEDGRAVGVRLKNGNVVKARKAVVSNATP  
FDTVKLMPEKEDEPKKLTWRNDLGTLPRHGAISHLFLGIDAKDLDSFIDDPAHLVVQD  
WRSMQDSQNLCSEFFIPSLLDKSVCPGKHV IHVYSSGGEPYEPWEKLSGSPYEYAYKE  
ERVEVLFRAVERCIPDIRDRLEFSIIGSPLAHEAFLRRDRGTYGMAWAAGSSAPQAGLLG  
KVLPPFPNLKTPVDGLLRGDCSFCFGIGTPSAAASGAIANTMTHVDNHIQLLKEASQK  
DPMYKFLDPGFMAEVYKPLVQGFTPSAELRNERFAAGAGVAPVNHTANNKARDAAAAEK

>comp2577\_c0\_seq1; 643 387 2324 LEN=2597; translated  
MSLFPMSFREIDEARKNSQSLANANRGKNRKRKGAPGQISDIDTVNGVYVSDRRTRGRWTT  
EEMAYCDKLIAKFESGELPISSGLKLNFLGNMLKSKQSRLTKKMKNKLSRRTFQRCAP  
GIMDNNEVREFSELEDLFFQSIQCQQERAEIKFHMQREWREQFSLYCSSVSQPLDADSWL  
SSVEEMDRSSSHAKDAARMAKRKLMMGFALRTDSMNPCNGVIEKTPSDQRIALGTHGIE  
NDIDEQKEILQLLTHEANQIGTTDINGKSSLLHSAPFLAKAVVYLKRHDVPPFEHVELWVP  
SFVPPQANGQTADGAASNCRLCFAGSATVDEVVEEGSKTKKPLSQSQSFLQAFGDYSQKF  
SFDVGCGLPGRVYESGRPTWEQSVQNAHHHFERCGGALQWGIKTVLGIPIASPNVGRIV  
VTLYSLHDRPKDQDLVGRVLSSEFTRLLPSPKWKLVVDIGEPQQPQQVVGSTGTGSSADMN  
GVDKGSETVKDDTGRDPRIDDVVSLGELMPSDPNSPLAPYLSGFMSLRLLLLRSSRSPE  
EEDRARTMLDSYTSYSQGARSKADIGIMLARDYMFLSQSNGATNNTIQQPQQQHP IQLQQ  
QQANFFNLGQGSSATLSGNSLEFDVHNSPMLGPI SANDTLSIISN

>comp2578\_c0\_seq1; 476 141 1775 LEN=1832; translated  
MLSTQKTCILWGILLSLNSLPATVGGFDLPKTAGRSNGSVPGHRIRTPSSTSLES GDTNI  
STKQTGKMSPRSRQIDEDLLSQLKDVESGTAARRLLERLFLDADGNNAKRPLFGSSQIP  
PGLSDRSISDGDLAIQTKVRNMKYGIFDLIDTNGDRDADRASA AVFGTFVASSLSAIVAN  
ENLPGPEIFRFAVVWILSFAPLALVGF GIGSTDKLQAFVLSVQRQIFPVYRKR MVQHEAG  
HFLIAHLLGYPIAGYSTNAVKNAVEFYPLSDKDVGKDKARMLGFDRNISRGDESQTERAR  
PRVNDAPFFSPEGSGAMDLETQSVFRNKKDYRNNPFLKIATEDQPRNSWPYRGFDHGTVD  
KLAVVSCAGVCAEIIISYGYAEGGLADINQLQQILANAEP ELTERDKENRIRFAMGYTMTQ  
LRLHLGCLDALADVMDRGGSAIECVSAIESCTNVSGNNGIIGEDYEVRRRKELKSSALGI  
FEKILLNPKNVDAEEDRLVQGAGGGY LKEKPRFLQISGDDPLYIAGGIACFLAYATSGG  
LSLH

>comp2578\_c0\_seq2; 369 141 1877 LEN=1934; translated  
MLSTQKTCILWGILLSLNSLPATVGGFDLPKTAGRSNGSVPGHRIRTPSSTSLES GDTNI  
STKQTGKMSPRSRQIDEDLLSQLKDVESGTAARRLLERLFLDADGNNAKRPLFGSSQIP  
PGLSDRSISDGDLAIQTKVRNMKYGIFDLIDTNGDRDADRASA AVFGTFVASSLSAIVAN  
XESAWAGDFPIRSCMDTIFRTTVSFDNSIVAXYIDDTLSLCLIKMPVKQPFSGCNVXALV  
GFGIGSTDKLQAFVLSVQRQIFPVYRKR MVQHEAGHFLIAHLLGYPIAGYSTNAVKNAVE  
FYPLSDKDVGKDKARMLGFDRNISRGDESQTERARPRVNDAPFFSPEGSGAMDLETQSVF  
RNKKDYRNNPFLKIATEDQPRNSWPYRGFDHGTVDKLAVVSCAGVCAEIIISYGYAEGGLA  
DINQLQQILANAEP ELTERDKENRIRFAMGYTMTQLRLHLGCLDALADVMDRGGSAIECV  
SAIESCTNVSGNNGIIGEDYEVRRRKELKSSALGIFEKILLNPKNVDAEEDRLVQGAGGG  
YLKEKPRFLQISGDDPLYIAGGIACFLAYATSGGLSLH

>comp2579\_c0\_seq1; 1086 300 3806 LEN=4116; translated  
MYLQRIIHPALPGFFFLIARCGVATAQKLA VVFGPHETHGTGTTTFLSKHAASDGTGDPE  
FNGWSWPTVHENDIDSSPQHAFDFLVEQDDEGIQNVLIDAIRSARKTSQKGTFIGSLDF  
DKVGTNPYSGYDAVEALKRVVDELGVSTDDVIVVVYRTPRVDQWADVWKNHFEAESYQD  
FICSDSEQSKRWEWLDTSMNPFKIAKAYHDRDWNVLVVDKESTVRSKDVANVVACWAME  
DENCQDQWINGFDRSVQNI TSTGHLIDELEHTDHRNLERLFLLRDCYNGQLSGSSRFVL  
LDDGNEGFS SLAKECKNWSANSYKMLSNTSFLMNAIQSQKYCEQDDIDVPSLLAEIYESD  
VLETLASLGSSTEEDRSSNSVSEDDTEKEPWPVSPADDNPNKRLVVVFGPHETDAVGVTK

FFVDYASTSGDSERSSSFDGWIWPSVNNDLIKKPPHRVFDLLVQYPSDEDIQRAVIEAIV  
DSWKIATNGV IIGSLDFDKTGENPYSYDYP I KALKRVVEALGISSSQVIVSVTYSSPRID  
QWSAVWNNHFD TNGYENFVCS DGVESKRWEWLD T VMNPFK I AKTYRDQGWVVIDQEG  
TINDGLEVAHV IACEVMKSVKCDGGWVTGLKSAVSNQLITYPMDSLAEEDRWDL EQIFRE  
RDCFFKYQLKHESNFSI IHQHTAWSSCSNQHQSFYRK FANTDFVLDLLRSQKQCGENIVD  
VSKMLRKKMTPNEQKELLI FVGP HETS AVPVTKFFVDHASDKGGTNHSPSFDGWAWPVID  
SEILGDIQSHRTFDLLS DASKRPVQNI I L N G I R D S W N N A L D G V I I G S L N L D R V G E N P Y S  
GYDALGAIQRVVEKLGISDDVTIALNYSRNL D H L S A V W W N H F E A E S F E E F V C S N A Q A E  
KRWEWIDTVLNPLKLANAYHEEGWKVAMIDQEGTANAGGDVAHALACNLMIGVDCGTGRV  
RGLNETIDVPSTYKIEDLDELQRTEFETLLQMRDCYRYTLEQDGKFLIVNKDALWGSC  
SRKNYALYEKLANTDVLLYEMRSLQCGDIEPSIFSGNLFDRDTLASSKSSRTVVIGSVV  
FSTAVFALGAAFVWQLLRKGREAKRNGTEGIFRDGTHDASQEPAFHDRKENDVEDTKYQD  
GFDDENEGSKPEATHEKVL E E Y D V D V H V

>comp2580\_c0\_seq1; 901 1065 4019 LEN=4490; translated  
MAELSATPAAIPAASTIPVEAEAE TETQVPNGKETKDP TNGTCDADADTEASANANENVN  
GTTMNTNARLRPELKEKIQSWILSFYHLDPRYKILTFNVLVASEGADNLTDDQIEEHSYA  
MMTTTSTTGAAGSLGNSVTSQQRQASPT E E P T P V S A N Q S S P A S G K I P P A N S T S K D K N N  
GNNRDVYKVN AHLMSRPSARNIRPSTLSLLSRIFNATSILTVWRPCSNDAMRKMMEGAGV  
GKGLDIKGS AKKGTLSGFVPMQIFDNDHKNEIQPIPVKALMRVYKDEKLRDHLVGLV  
QTYLEEGPPLKKNNGNVPPLSPVGKLMDEPIITDEVVAFRQARTAMRCSTIDEITEDDDL  
HNEQE QEEGTGKEKKPSLPDHKNPNSSKYVPPKPLKLLKKYTKVGFYGI ECTQRLFWLAT  
VQDADISRSGTGTETGRPSLPGFQDANLTKLVAHTQLPKPNMPVVLQYKSYEEVVASS  
DDEDENQNTNHPLDDCLDPRFLVMAYEEQGTIKPVVSDFDGFLGWRREALWFGCCLPY  
QENLMMWCVERIEEILDDQKKNPTNSDTWTQRWLDVQKKAQQGKVFDIPEYGFDPKST  
SIMEHAALKLSTGAVRHGSECFNYHFQ E I D E T F L L I S D T L K P V P W K Y V N V K E L Q D I L S  
QKIAEGFVFP LNPKWILCDPGWKKVYDDLMSDALYSKDIWFPPYSGIRERIEKIHK  
LHPNGFQRCTNFSKAKGLDKMKS H S S T G R R Q S A S N I L R D T L D E G L G S Q L T G N A Y A D L A Q L  
ELDDF IGRTSAMPGRGMELDSAMGKNIRDAIKDLSIEELDDDYAEQPRSSKGVGGVPLSQ  
RSRQEKRP SGVSHTSS I A S S V G S S G T S Q S N S K T G P S S S N N Q S P G L S L T S S I S S G S G T T P T  
TFRKLFKVRRRPN S M E F T N E S S N N D Q H T T S S E P Y T R S K T T S S P D L R L G Q Q A R A V S N P K D  
SSSANPKKKTSSKDTNKPRRHFSKW

>comp2581\_c0\_seq1; 286 263 1600 LEN=1848; translated  
MSDPSFLFD S G S D S G S L L S S S S T C E M C G W L A A F A A L L A F G S F G V P V K S K V A R S I D I D P L V  
MQSYKTAMCFLT SWLFLLRGEEVTFTPWGIVSGLFWVPGGVATIYAIKTAGLAIGIGVG  
SSFIVLVSFSWGIFFNEHVHSRIQACSAVGCMLFGLAGMAYYSAPTVAHASHPRAPEEN  
PRSGDFDDAFDDAYYHAVSPENLNF L P P S E A F E T E Y T S M D V E A D A A E E H G A S S D N C N N C L  
EDNDHIDESMERLDVPMIQTVDYSEEETPHVVF CWGFLRLQERTLGILAALVVTGIWGG  
IMVPMQFAPNVDKGLPFLTSFAIGATLVTL SFWLLRYLCLCHKHSYSFSTAYRALPSFHF  
KKMWPYGCGLLWSIGNFFSIVAVENLGEVGVYSACQASMLV SGLWGI F Y F K E I E G T D A  
ILKWYASASITALGIILLSYEHHEL

>comp2582\_c0\_seq1; 653 66 1070 LEN=1232; translated  
MSTKLGINGFGRIGRLVCRAAIENKDATVVAVNDPFLSVDYAAAYQFKYDSVHGRFPGSVE  
VDGDCLIVDGTRIKFFAQRDPTEIPWAEAGAEIVCESTGIFTTIEKASMHLKGGAKKVI  
SAPSADAPMFVMGVNNSYAGQNI FSNASCTTNCLAPLAKVLNDKFGIVEGLMTTIHAGT  
ANQLVVDGPAKGGKDWRAGRSALNNSIPASTGAAKAVGKVLPELNGKLTGMAIRIPTADV  
SIVDLTFRTEKAATKEEILGALKEASEGDMKGILGYTEEKLVSSDFIHDSASSTVDAGAC  
IFLNDNFHKVISWYDNEWGYSNRLVDLAVYTTNA

>comp2582\_c0\_seq2; 471 66 1182 LEN=1344; translated  
MSTKLGINGFGRIGRLVCRAAIENKDATVVAVNDPFLSVDYAAAYQFKYDSVHGRFPGSVE  
VDGDCLIVDGTRIKFFAQRDPTEIPWAEAGAEIVCESTGIFTTIEKASMHLKGGAKKVI  
SAPSADAPMFVMGVNNSYAGQNI FSNASCTTNCLAPLAKVLNDKFGIVEGLMTTIHAGT  
ANQLVVDGPAKGGKDWRAGRSALNNSIPASTGAAKAVGKVLPELNGKLTGMAIRVKYRGA  
CLYFEVNTNIEQNHI SPXIAALSQTYCSILPQIPTADV SIVDLTFRTEKAATKEEILGAL  
KEASEGDMKGILGYTEEKLVSSDFIHDSASSTVDAGACIFLNDNFHKVISWYDNEWGYSN  
RLVDLAVYTTNA

>comp2583\_c0\_seq1; 261 359 604 LEN=739; translated  
MGGDPFFMDEEYKDTIPEKVDAAKLFENSQ LSELLAKASSRSATDGLGPTPSQRSTVSN  
NNDSDWEWDGTVDEDAHLGLD

>comp2585\_c0\_seq1; 124 1 315 LEN=644; translated  
KFTSVPYAKGFDCWDTTSALIAISFYTLFLLSFDWTGMVGVVENEAVDHGIDSPLAGLGY

GLPISRSYCRYFGGDLSIMSMEGYGTDAFVYLARLGNTKEPVPI  
>comp2585\_c0\_seq2; 383 369 1851 LEN=2180; translated  
MEFSFWETSERNSNGDHRGGPIILLTLNEDINIDYDDKDPDKKHKRKKSKPFSDRIFCSVRAN  
STNHQHVAKQNLRSVRFNSSSIQVSTPKVDRDLEYDGVPNDAKLINDHAKQPPTSVSLSQ  
ALMRTGRGEYLDHRFENVAIKEHTATELVLMQVASFLRRELPIRLAHRIQDLEKVPMLKD  
MSSVKEVKQLYIQSFLELIDFDKKIVSADQEEGFSRLVEGIYERHSRVLVQMARGAYEFR  
HHIHTNSTSKSKSSRRPKDVFAQMEDTHAFLDRFYLCRIGIRVLIGQYLALRQPPVDHYV  
GIICSVTSPYEIVKRAIDDAAFMCTRKYGDAPEVIMSGRLDLTFPYVPTHLHYIMLELLK  
NSMRATVEWHGSDADFPPIKVIADGSDNEDVVIKVSDEGGGIPRSNVEKIWSYLF'TTAD  
PSIQEGMVGVVENEAVDHGIDSPLAGLGYGLPISRSYCRYFGGDLSIMSMEGYGTDAFVY  
LARLGNTKEPVPI  
>comp2586\_c0\_seq1; 129 23 277 LEN=551; translated  
MLRTGLQAGLRAVSRKANNNAGALRFMSKEIKFGVDGRNGMLEGVNTLADAVQVGVGDVL  
HRVVLACFVSKPICRVTLVFPGNR  
>comp2586\_c0\_seq2; 1096 23 1753 LEN=2037; translated  
MLRTGLQAGLRAVSRKANNNAGALRFMSKEIKFGVDGRNGMLEGVNTLADAVQVTLGPKG  
RNAIIAQPYGAPKITKDGVTVAKSIDFEDPFEDMGAQLIKSVASKTNDVAGDGT'TTATV  
ARAIYSEGCKAVAAGLNPQDLRRGINMAVDSVVQTLTDISRPIITSKEEIAQVGTISANS  
EEVGGLIADAMERVGKEGVIITVQDGKTLDDLEVEIEGKFERGYISPYFITDAKTQKCVL  
EDPHILLVEKKVSSLQQLVPILESVIKSQGSLLIIAEDVESEALATLVVNKLKLAGIKVCA  
VKAPFGDNKATMQDLALLTGTVVSEETGMKLENTTPEMLGRCKKVEVDKNNAILGG  
VGDSEGLKERCDLIKHSIETTKSDYEREKLQERLAKLSGGVAVIRVGGASEVEVGEKKDR  
VVDALNATRAAVEEGIVPGGGKALLYCSTKLEAVKEEKAKNMDQKIGVDIVLKALQAPM  
QIATNAGAEGAVVGHLTESETPIETGFDAQNGVYTDMYAAGIIDPTKVTRTGIVDAASV  
AGLLTTSEAMIVDKPMEGGAAAAPPMMGGMGMGMGM  
>comp2588\_c0\_seq1; 1088 333 3215 LEN=3595; translated  
MKKKELDFERARQAREFREQEERIASEKEDEARRIAAEKEAERERIAQAHEETLLNAE  
HSSIGSSHSYESRAPKPSPGTVKRTEWLRNLAKDAAEHRHLEEEFNLSMLVARLKRHPNE  
AAKDAEAAVKAALTSSSPRDDFDRDIEKLRDQTAHIAKEVANAERRLRKGSSEDLIEEFNQ  
IEADLEMEIAEYQTPSSDANSSDLIDIEGHEVNGVKPRDLMEEYSHSDAPDLTTVESMTME  
TIEENIDAPEGNLEPQGDSDIEKLETSPGQQIHSGGPEYGAEADPAHTTAKTVSVVSKSI  
IAEPSTMETTEENVDAPEEILEPQRDEDAREIQPLPKKKSYSNNLEFGAEADPTDITDGT  
FPIASKSTIAESTSIETLEENFDVPEANSELQDGMGVGIQMLPKQQMHS DGLEYGAQAD  
PRTQALLAEDDLVPTGKKYHADENLRIDRNKKSIVLDGSI PVDRKIFRRNKSSSKNYED  
EDGEFGSEFVHKEATFELPMELTENGLKLSNNTAEVNMITTIPPSRLDGRISGILEGRST  
LGPHSNTASGSLALEYKSSKQSRLTLGMIRGCEPHHPLITIGRLLRQGT SVGVIFYHNA  
QFLHQMLLEHSLWAI SFRHSFPNSRWTLSSQLSRRKDL SLSLVNGNKL SGLIGWNLLKPK  
QFHARFDARPKL TEYRRAHLYCQWKASPGPGLWNVGLSLVQSLHSQIATVGLGCRLFSTK  
GLEWVISWSRGNSTISIPILLSKSMAPSTTIGQTFYFSLISFMMQEYIAETWGWIGNDSE  
DDEDCKVEDASIALRAQNLAKARQDAVIQKELMARQARRKTKEEKEKDGLIIDAIYKVE  
NGEESVTVPLQFWVTNSTLTLPARPKSELLGFYDVAAPLKNSRVSSIAGNQSTSTSSSS  
GRCFPTLSELWHDLDRTPEDSQSKKSEISSPTLTVSYEFRGKPHVVTIKDRDELRLPQV  
>comp2589\_c0\_seq1; 125 48 840 LEN=1016; translated  
MNLITFISATLLIITSEKLANVAAAGPQLRGRSNTGQLQRRILNDDSGWCPTYFFPGTNTD  
CPLTGMFRGTCCYSSSAKEGETPNTDSQACSCNAEMAGKFWCEPSPFPGGAPT PPPSPRA  
LPEGSWCPELFPDSDTECPLTGMVRGTCTFYTSSAPAGEPPNNDHQACVCNGDGT SRFVCE  
PRPFPGLRPPATAKDPAEPTTGNPTQWCPPDVPNTGDS CALPAGKTTDRAPLSAETPS  
LSAAARRTRKHLCAIETRPDPTA  
>comp2590\_c0\_seq1; 406 53 739 LEN=924; translated  
MKIFAALSMLLASASAFAPSATQKRGTAMNALVDDAFGVSIETGNKVPPLGRKILEDAGP  
DGIKWFQNAEIKHGRIAMVATIGFWVQKLG VHFPLYLGP SGSNAPSPDSTASNWLLSSTT  
GVTFQDIAQAAPLDAINMVPVQGWFI FLAAGWFECIAYNRQWAEGREIPGDYGYDPLGF  
TKKEGGIAGKDFESLRMKEIKNGRVAMMTIAAWVANEAI PGALPVVHP  
>comp2591\_c0\_seq1; 546 148 1647 LEN=2018; translated  
MELTPSITGPVDGFIDFIYSFGPLAEKTVVLVPDFIKAQVGGVADAAGMDIETVSYV LGM  
FLCYPLGMLMAQIPFGTSRHIFSFLLGAFLLQFTLVGVQWIHHLISSLIAYGLILVLPKRT  
LKTALPVFAMTYMTLGH LHRQYINYLGWDLDFGTGTQMVLTQKLYMIGYNLYDGELLAKGK  
EDRAAKKCAPFALKNTPSLIEFLGYTFCFANLLAGPATEYATYLHAVDGSIFKTPDGKTK  
LPSNILPTLKPFLTCLLNLGIFLTL SAKFPLLDTS DPQHNTPYILTEEFLKPKPIFYRYFH  
TWMGLFALRQKYYFGWKNAEGAQNIWYAGFDGYDEK GNEKGWETSNNIDIITFETAPGVS



IMSRVWNKKTSLWLSRYVVMRTGGNLI AVYSMSAFWHGFYPGYYLFFLSVPIPSFCERLA  
KKKLSPYFSPNYFSPYGI VCVLVT SITMNYLIVSFTMLASGWSFAAYKSFYFFGHIGCVA  
FYIILTMLPSPKKEKKKEA

>comp2592\_c0\_seq1; 441 101 1294 LEN=1660; translated  
MKEPWSKKHKKDFKGRQFSLSNSFAQPLSQPELVALTKARNDQALLDDYEHHDLVYTPNG  
GSDDLKQAISELYGPKISKENILVFPGGQVAIQVAAQAFARDCHSIVFVPGYQSTVESPE  
WALGSKGVTQLQRRASNRWQIEIEQVKASIQETTKYMVINEPYNPGGIVMSHESQNELVE  
LCREHGITILSDEVYRLLLEHDPKDRIPAMADAYERGLSCVSMKPGWACGISVGWLACQD  
REMISKLWNCQYFGTACIGRACEIQAIMVVRASETILKDRVSIIRANKALLTEVIEEKYP  
DFFEWEPNAGAI AFVKFKGPLTSLLELGDLLGARGISIKPAYCFVSSDNGGKGPPEVDY  
FRLGFGERKMPEALDAFCSVVEEFKDAWRQEMEGMKK

>comp2593\_c0\_seq1; 282 938 1591 LEN=1930; translated  
MAARVDEEYDYLFKIVLIGDSGVGKSNLLSRFTRNEFNLESKSTIGVEFATKSIQAEGKT  
IKAQIWDTAGQERYRAITSAYYRGAVGALLVYDISKHGTFENVERWLKELRDHAEANIVV  
MLVGNKSDLRHLRAVETDEAMSFSEQHNLAFIETSALDASGVDTAFQRILTEIYRLMSRR  
NVAAEADAAGGPPSL SAGQSSISLSGGNNNAGQGEKKGCC

>comp2593\_c0\_seq2; 237 256 909 LEN=1248; translated  
MAARVDEEYDYLFKIVLIGDSGVGKSNLLSRFTRNEFNLESKSTIGVEFATKSIQAEGKT  
IKAQIWDTAGQERYRAITSAYYRGAVGALLVYDISKHGTFENVERWLKELRDHAEANIVV  
MLVGNKSDLRHLRAVETDEAMSFSEQHNLAFIETSALDASGVDTAFQRILTEIYRLMSRR  
NVAAEADAAGGPPSL SAGQSSISLSGGNNNAGQGEKKGCC

>comp2594\_c0\_seq1; 424 215 2356 LEN=2746; translated  
MIDTCHPSTYGFFASTSEQRNLAPPRYVRSEEIHEAAFAP IPTNKWWGNLIHQDMNPDGP  
IEPIWSNPYAIRVVPKGKLVVSGIHRHYGPCLEINPKVKALKYYAHAFIDDIILSAVDLP  
AGLDVYGWDDFGVRIQLGKRMNSSLVRGMAFVSATYGLGTRPRIETIHAISSINGEAPSP  
DAYYAVSPGSKLVLEFNNGQFWTVYADQDIRFSKEGSALTATDAVDATTVRIARVENPE  
NRLDVLDEYAKCVVLGGRVQFLSHKRYNLEWETVGEFSFLHFALHHLHSFLEPPTNVS I  
LAESTTHGRMHGICSSRSRDNGRIRVWELAEPKSMP IRFEPQHGIDPAYVKEFRIDERLK  
EEIESSWVISREGSYFNGKLMQKFASLCLMAHDDAINRDDKIKRICLEKLASLWDSFSL  
NGDGEWPHPLVFDEIYGGIVSSEGFKNQNDQNVDFGNTVYNDHHYHYGYWLV SASIFLHLH  
PGYPRAKELRGKIDVLRDVANPNASDHWFRFRHFDWFLGHSYSHGVTMPADGKDQESI  
SEEFNFHYGLMLWGMATDRLDVEQLGELLLKINARTARTYFFMADDNVIHPKEFVFNKVT  
GIFFDNKADCTTWFSPERHC IHGIQMLPFPSPVTPFRPQKFVKEEWESILSNLPVVLDPK  
SNLNSWQSILFVNSARVVS NRARDAMKHLEYVPMDNGLSRSWALYMAATLCDA

>comp2595\_c0\_seq1; 278 183 890 LEN=1075; translated  
MTPSSNDPAEARKRRKEIIQSQRSENELIANGSVVASSSHPPAISSAMDGIQVNSAVDHV  
EGQPTNISNNDPSSNGADKPKPKRKLGS GDPNGRKNKNDKSGKSKKTQIRYDPDVP MNK  
DQLAAWRREARRVRNRESAAA SRQIRNRRISELEEEVGEWKS KY SIALQRLEALEQHIAA  
NGNGESSIGVQGEQEPKEEPQEQNPPSDQPT EQHPQEPGQQPTEQPLASSDNANV

>comp2596\_c0\_seq1; 577 1 1176 LEN=1485; translated  
NQMMKLYTNTFVILLTLALLGISSVSGNAGRENDRVRALKANKANNY EYYGAKNTNND F  
EVIDQRSVNTNSNHKVGKNSGKNSNTGRNEVNSDFDVI RSHDKKHKEGRNKKKDKPKNK P  
LPRNMPSPPTPVPSTKSPSSPTPSGKGRGKGGKGGKGRKAGKKGKGGKGGKGGK GAK  
YRKPDTAAPITAAPSGAPSFAPSDAPSPAPSASPSVAPPD TLMPTPLGSTASSLVSSVF  
VSSESSEFTSVSSTESSSDAAATNGEGVGAAGDGVGHKRKNKRKNTRKNNRNPNRHKK  
GRWVLVKT KDGEWRRKTKNHRKR NENKGVTVSKNENEELGDEEVSI FQDEGEDNEEE EVD  
EVEVEEEVEEEVEEEMEVEDEGE EAPLQL

>comp2597\_c0\_seq1; 1015 35 2053 LEN=2406; translated  
MTSFYFNRSNRTRHLLVLGLSIVVFAVLGNFVESINLVARVDEDSKLF SNIKTGDNIGRI  
RGRSVRRALSSDDDEGK GAKGSKGSKNGDDDDDDRGTKGGKGSKSGKGSKKSYYGDDDD D  
GKGSKSGKTSKSAKSGKGGKASKSAKSGKSYFNGDDDDDDDGKSKRKKRSKTSKRSK K  
SHSSTTESRIDVESSVDKPKNSM TSQEKDHKEHIADIGEQQRGIFAGMRPDLWGELNEE  
DQSDKIVVDTTQSQQQDLSPKEDSNSAANDRIVESTQSQSQSQY SKEDIGGTGEVTIEDT  
TQSQKQILEDDIDGTSETTVVETTHS QSPNEDIGVADAVTDMDTTHSKDNILEDDIDGNS  
ATAVVDTTQSQGLKEEIEGGTVEENTEDTTHSKEQILEDDIDGNSQTSIVDIIQSKEENIS  
PEENIPEGTGDTIDADTAPLEEEENNIRTVQLFHPEALDECVTYDKELEEMTIFMSE CSTL  
NNDTRHDDYWEILQARVSINNTGNTFHLRHKATQLCIPMNTENPDASFNCQRYFGMNEA  
IADSFNGLIDCSGVA AVFGMGGVANSLYLKNAGCSDMAISDNKSDLDIVFITYQNPVEE  
KRVVVLGQSILLELGGAVASYDFRTEWAF LDVKDIDREKKAVAPQPHSDLFDHIFHLNDG  
KSKNGSSPAKRT

>comp2598\_c0\_seq1; 1033 187 3168 LEN=3315; translated  
MTTAARTTAKSSSPGPAPSLWTALVRSPLLPATFWGAGLAVRVSFPAALKWLAYDSIST  
HLLTVSYPLCATVSLIHRDLQQRHKQHQANNDHDPANVRANSLLOVERQYWIEYWSVGFA  
GVQFLQQAELFPLSLHRAGLQEQYSNLPVLLAQLKLMFFVWIFCMQSVLAGHQRFLLGGQQQ  
NEKWKKFVPLTFLTKAIGPKLMGLQMAISERISKETWQRLIHSKVQRVLEVLVMLQFLKE  
TSRDYLLQLEEGRSLLLLSVFAVLPSSVTQVGILYAKYVFPAAARSLVARGDDLEVLVSLK  
YWVLNNLFSLSLSTWVWLCVFPSTQVLLGLWCFATFPSTITYYYSLEIEMELITFGILS  
GEPKLSVNKTMTVQALRHFVKRLPRDKQAQSFQFEIDDDSDINQKSSGDNGDDSSIGSQDT  
TDSEERRRRQRRRERRARRKREAESKSKKATPPPPLLSEDCITQYANDEQKDDGKYSSFV  
NEKRQSESDERNQYRHCSTVTEERDTRNATQLQPQQVEIRHPTSMVSLVDVDYDHSLSRP  
NKVEEEMSSDSLASMSDDINNLIAPATLSMNNEMEDSAMVSIQADDFDDKDGDDSDRALL  
PSLTIGSNYSASQVHTDAKSMGLNIATPTENVTGEVEVQMRTRGQARSTTTSTRPTSSI  
FPATYPRSSSRNLLLLPSASIERFSFLVNSMSIPEDKLAPKPEKSKAHSNDNDDGDC  
NDGLNISDVDSTSSSLVDDTESFEISNPLDGNEKQSSKAIKQDYVCKKKPTKTVDVDEGV  
STPPRRSSRLEKLEWQEEKKKMSPSKASKRLEANGGSKPSKKTSSSTAEEKKGGKPKTHS  
SSSPEKKKKSKDKCPSKSVRGSEATNGVNGNSSRRSTSKASSERTSVFDKPTAASLTRR  
VEKKSTKTPRDKSRTRATTTSTAKAASPGKTRSSKSKGEAPIPECTEVGRDKNNSFDSP  
NQKAAGGKPRKIPNSRRKKKDISSVFGGVLRSK

>comp2599\_c0\_seq1; 245 1 598 LEN=1493; translated  
XTTRNYIQQHMKMYAAVFAALLVSATAFNAPQFATRAVGKAPATKAVKKASTKAPPESK  
GYPSFAEKAQNFKLGGGKISGGGAGRTITPVFVHPTVNTDPIPDFDYKEAAKARVTPQSR  
TDYVFDDGLTELERKQKSTIPAFLTGSARSRVEAEAPRDDIEEQEYPFGLSGDRFQLLFI  
SVFSLFALVGSLSGSISFD

>comp2600\_c0\_seq1; 123 1 290 LEN=303; translated  
XLLLCLCLQIPKAQPSQLNGPQPASFNNGRSSTTFFGKELPSGLYVCGDHMATATLNGAA  
ESGVKAGDDVSKAMFSTGAPSPSASESDPEPAAVAQ

>comp2600\_c0\_seq2; 1038 59 1813 LEN=1826; translated  
MVKISSAALLLCLQMOPGTVSGFLPASKNLNANGNGAVTSTTLAFDWFGLRKNNGNSEVA  
SIFDSSNTMIVNTQKDYVTDGDWLSKNLNRKNKNNDNAESADVVIIGGGISGLAAAITA  
AEAAKSANDPKKIVLVEANNKCGGRVSSVETDDGFVLDEGFVAFVIEEYPPVVKLLDYDAL  
ELKRFLPGALVKLKGNDDELARVADPLRNPEDIFASVLSPIGSLIDKIKVLPLVLSVRLGS  
VESIFAEAETDKTALVERWGFSDAFIDSFLKPFLEGIYLAPLEEQSSRMFSFVFKMFS  
GSATLPKGGMVAVTNQLVEKAESLGVITLTGTPVASVAPKDDDAGYVIECVDGNSRSDT  
PSVVVATDGKIAKKIIGNIEGFESLRDEPDQVQRSVGCAYYGFEGPAPVEDPILVLNGMK  
GENDDPVNNVCFPSVVNDGYAPEGYNLCSVTVLSDAMDKYMGKPELDQAIRKQLATWV  
DQESDILENWDLKQIFYPKAQPSQLNGPQPASFNNGRSSTTFFGKELPSGLYVCGDHMA  
TATLNGAAESGVKAGDDVSKAMFSTGAPSPSASESDPEPAAVAQ

>comp2601\_c0\_seq1; 594 30 1832 LEN=1919; translated  
MSKVVGIDLGTNSVVAIEGGQPSVIINSEGLRTPSIVAYTKKQELLVGGQIAKRQAVI  
NPENTFFSVKRFIGSKETEVSAREARQLPYTITNDSKDNKIKCPALGKEFSPEEISAQVL  
RKLINDASEYLKQDVKQAVITVPAYFNDSQRQATMDAGK IAGVEVLRILNEPTAASLAYG  
LDKKQNETILVFDLGGGTFDVSILEVGDGIFEVLSTAGDTKLGDDDFDKVLVNWLIQNFK  
DKEGIDLSTDIQALQRLTEAAEKAKMELSTVQETKISLFPFITADASGPKHIDEELTRDKF  
EVLCEDLIERCRIPVEKAINDARLDKSDIDEIVLVGGSTRIPAIQNLVESLTGKKPNQSV  
NPDEVVAIGA AVQAGILAGEIKDILLDVTPLSLGVETLGGVMTKI IARNTTIPVKKSEM  
FSTAVDNQTNVEIHILQGERELVSANKSLGNFRLDGIPAGNRGVPQIEVTFDIDVDGILS  
VTAKEKETGVEQFVTIQGASTLSESEVEAMLEEA EKNAADKIMRENIDLKNQADLLCSE  
VEKELPNATVSEDEKQAITTLVGEIKDSIQNDNIDTLKVLI EDLKEKLNMGKSQEVNPEM

>comp2602\_c0\_seq1; 640 1 1687 LEN=1701; translated  
XKKKKKKKKKKKKKNGKDAESRAGGNNTSNQHNSALDHSNAATVEEKEDPLVTALLGGMG  
FAESQIMAAVKACGGTHRATADDLVTWILGQGETEESANEATRIPDGTDLQEQENAAAYDR  
TRTEDSLPTNEKEQKQQLAEAVRKQEEAARRLA AKREEARRRNREWNREARQKQKEAKA  
KVAQKFFNVPRPAVPLPVPKPMATPDLVPPNVSKLKGPPRQPKLTTGTSGLP IGGNKWGV  
PPI SANPKFPV SANQSKSIGSKPTSSAAPTPTATEQHALPVSSFLASLDDDKTVSSFG  
SSRTMSVSSKEFVPIASQPSVPPPGFLSTSAAPI SAATRSLVPPLESEGPMGAPFSPESRQ  
GEIRATAKEFVPSFTIPGSVNPSASLQKDFAPLNDLVGEPQPSESHGVGFPPGILPQHGA  
SKVGH TSSLLGPSLQSSFDNVRPMNSGAADTILSGASFVDGPKSEPPMSIPFGFGQADS  
NESNDIGGSRLNLSISRNRSTGSASIWGDGQQISSL ETTLQPSFFGDGTTNESDDNQKSM  
LWNVSTGGNSSLPNGGGQGSIW

>comp2603\_c0\_seq1; 393 284 1198 LEN=1270; translated

MANPFINSSFTLRPSMNNRDIPELTLRQTEVSRIIPMERTETKEGRSFKRQRLFMDFRMST  
AFPFGYRYSCNDVDYSYDDQYLSDEENGVPLTTRRRVSSRLTSCRRI SDISIGSSSNGMN  
ISEADYWKTRCLDVQDTFENAQARLREAEEDQRQLRQRVRELEEQLLLQSSSGNSNSNGG  
IGNEDYEAGNTEETFETRDRDASSNIEGKNNRIAPKHLGKDDGQCAEDTGRKNKKERPLP  
ALVVEIKENHQAVSSCFYLT DGEGLNESYDQEMEDVSM DVYCGDQMLGDI DDDRNDINFN  
QQRG

>comp2604\_c0\_seq1; 473 329 1795 LEN=2229; translated  
MRLSFVAWMAFLASTTFVDAFTSQSGNTNRRITQSPGKSGANKALYSLSTKSEDEKVVAG  
KILEGGKVIDFESTRGP SRAENALKLAKKEEIANGLTKNTHLSKILGINSVDVIAEVGHDL  
GLFASDDEIQKCAAYLRSKAASGFFEKRPGSVAVTYDEIHSSPSIGSEQKAGVASILEKA  
FVESGEVTSFAKTFYLTQLMPEAQREAIWAIYVWCRRTDEIVDAPRDNDDEMLSDLGI  
WETRLLENLWKYGEVEDVFDLCLLDVLVKYPSLPITPFADMIRGMLMDVPELGTDTYDVFD  
DLHLYCYRVAGTVGLMCLPVFGCSEGYDEIIAKEPALSLGVAFQLTNILRDVGEDATTRG  
RVYLP IEDMERFVTKELFEQRVDENYINMMKFQIARARMYERARRGVFMLSEESRLP  
VQSALDAYGKILDKIEDNGYDTLTTRAYVDKWEKLSIIPFSWYRTQDISRTVPLPGDKQI  
PSLEEPTP

>comp2604\_c0\_seq2; 352 329 1330 LEN=1453; translated  
MRLSFVAWMAFLASTTFVDAFTSQSGNTNRRITQSPGKSGANKALYSLSTKSEDEKVVAG  
KILEGGKVIDFESTRGP SRAENALKLAKKEEIANGLTKNTHLSKILGINSVDVIAEVGHDL  
GLFASDDEIQKCAAYLRSKAASGFFEKRPGSVAVTYDEIHSSPSIGSEQKAGVASILEKA  
FVESGEVTSFAKTFYLTQLMPEAQREAIWAIYVWCRRTDEIVDAPRDNDDEMLSDLGI  
WETRLLENLWKYGEVEDVFDLCLLDVLVKYPSLPITPFADMIRGMLMDVPELGTDTYDVFD  
DLHLYCYRVAGTVGLMCLPVFGCSEGYDEIIAK

>comp2605\_c0\_seq1; 499 324 1583 LEN=2200; translated  
MPPSAVINDDQSQYSLCCGAFDIGEIEIEVQAVGGDCNSVKETQIVVSPGSATTKNENVT  
NRCDPSQYDFVRDGRNPLDGSQAGSFDSTDEIIIEGSNEMKLMRRVVEKQRLGMKGP RHR  
FIQQPISMERQDSMSDTNSVNAVDFVSIEDSKEMEYLDVLDQHLNQTNPKALDYEHLED  
ETEDSHPNKQRFQADLDDIIIEHLCAVPCAGYLPVVDGTCLGDSTEAGHPRSVLRRPRYSS  
PGMYPPASAPLNRAADGTGTTFDQPIILIRSSSNYDATGASRDTQQRHSVRFQNVDIRHL  
KMTLGNHPSATTGPPVMLDGE LAEPRHSARQIILLEKYEQTRPPRRKRRQLKLTQQRH  
ILVKERGFTFDEKSAWQESLRIRKQRKETLERGLAMMKWDEVWESTCRKFNRLVDGTL

>comp2607\_c0\_seq1; 53 103 435 LEN=677; translated  
MTASGGSVRLLAQN SAVLRRGAEHARQQIFGHVPILEGAAAGNKTAKKTFTGPYLEKYY  
PTSINHHARKVHDGWETEQQEYRRVKLTQRRRKGKGP PPKGAGARS GKKR

>comp2609\_c0\_seq1; 267 343 942 LEN=1132; translated  
MMIYQQTMLGSTIKPTPYTPGHPREGPSNKKGVMFSSCTKDTSSSHRRRRPSSSSVPIPH  
AMFRSPSELQLSMDEQMA DERDFVFYARLIRGIRERTLRVNTSKNGDDNQPOLYQQYNEE  
TERCLTHIMQTRYQE QDREPKEIYDSTSNENCLENLDGCYESSCSSSSTSSFAYQRDFEG  
DGDDFDSGEDEFIFDLEL

>comp2611\_c0\_seq1; 358 147 1529 LEN=1692; translated  
MTSGIRPSVARTILGGQNTLR TWHTRRITFSESFPPASVPLCLCRRRKRGRSDSWVSAFS  
SSPFASSGQDHGYAKLRDASSLVDQASFKIRGSKHHSKLLRRHV AIFCEAVRAGLLHNK  
GELYGSDRYSNNSCEATRKL TASLGGIGADRGIMPDFS NPRALRGYTLGHFGRVRLLSQL  
VAQTEPDWLATRVSQIFSDEVSNRADDPHCSSSLKGGSEIALASLGGGCGYDFVAMSALS  
EFLKGPKIAATVFEYEP AWKDVLDGDES SVVQDVVASKDNRAVSHAHRCGFESC DITRPLD  
SSSNEALASVVGSTHMFSCSYVVAENAVGLRTNKYEFFRQLFSEASDGLS LFFFTE TTHRL  
WPDLDIVAMDHNDHLSTIKISIPHIRCGKSGWQLALLKDSAGNDHGGSKTCSLEEHQRVI  
YERFRSDNLAHLSRLDRGWKRDKKARGAKQLSHKDQRNQ

>comp2612\_c0\_seq1; 450 148 1509 LEN=1991; translated  
MPLHRRHAAGTTKAESSSSPPSPSPDKGREGSMKTGDGHLGSGFLPNPPRSIVFLGLAV  
LEVTVQLAVIRKSGIRSVGHLLTVIVSAFVATL PMLLTLAVGMGISGNPTKDLPHQRYIP  
LTVAATVFASQLPIFISYAMAATGIVLFGLASRPIEEEKAKNKSDTGTDTKGNQSQPKK  
EMSGQLKAVFSVFLVIAVLLTENFFIWVVSATYKPSQNLSTLPTPLQDNGQISLQYLFHE  
LLNITKRDVVKVRNIINVEAILVSGLALSVAIELQGPSMQRNLWSMAMRGVLT LAAARS  
IRTF SFLITVLP SQNPQCFSSHFPMPKDWYSWLKVGLIPQIDGGCNDLII SGHATVTST  
IACVITSIVGKPLFTIAIWMSVTLDYFVEIYEGFHYSVDMFLGAMLVNFWSSLSFLEDV  
KKGHAAVEERRFLPVQDATP SDVLR YAIPAVGLW

>comp2614\_c0\_seq1; 578 152 1861 LEN=2434; translated  
MAPHEKCNEEDMKDITEPRESVLCGRGGAALRHVGNQTYRRLVNLNKPLYITCLKTEK  
LKISRSIVAAIREQNGRFLERDAQKGVWTDIGDKKAI EKTSQALREGQPKLKKKLAAMGQ

LPAEQANGGVDATRNSSTQQQAVQHYNGIYNPRGVHPSISNVMMNNNINDGMDMNFNMGR  
GMRMNSGTNMNANMNMNMNYDRAGSGNFSSTMFASMQQQVQQQQYDRFNQMGGNHMGR  
DTTGNMRHGMMQNPAPHRDENPARPQRNDFDDNDLTMIRHLSLDSTPQSIPSWTPSVR  
STDSFAMSIGEDIPQMVTNRKGSRTLRNPFASAPYPCNENRNSNGSDFASAYGNMGMRDGS  
QTRSSSFDIEDVGPFDRSNEPHRRQQQQFVRTHDYGQNTLNEASNQMKTNDNQSPPTTSIK  
DRRRNFARLKDVRASSLRSGSSRSIDDMPIHMOVDSQFSLLSNLSAHGSKHQGQNAIDMA  
ISTHRGGRKDSMGSYIGVASRRSVMSGLSKMSAHSVDLNVFSGLSRKFSGGTNHTASSR  
SMISEFSGIDEDFAEDDFDFDIPTKPNP

>comp2614\_c0\_seq2; 578 152 1861 LEN=2344; translated  
MAPHEKCNEEDMKDITEPRESVLCGRGGAALRHVGNQTYRRLVNLNKPLYITCLKTEK  
LKI SR SIVAAIREQNGRFLERDAQKGVWTDIGDKKAI EKTSQALREGQPKLKKKLAAMGQ  
LPAEQANGGVDATRNSSTQQQAVQHYNGIYNPRGVHPSISNVMMNNNINDGMDMNFNMGR  
GMRMNSGTNMNANMNMNMNYDRAGSGNFSSTMFASMQQQVQQQQYDRFNQMGGNHMGR  
DTTGNMRHGMMQNPAPHRDENPARPQRNDFDDNDLTMIRHLSLDSTPQSIPSWTPSVR  
STDSFAMSIGEDIPQMVTNRKGSRTLRNPFASAPYPCNENRNSNGSDFASAYGNMGMRDGS  
QTRSSSFDIEDVGPFDRSNEPHRRQQQQFVRTHDYGQNTLNEASNQMKTNDNQSPPTTSIK  
DRRRNFARLKDVRASSLRSGSSRSIDDMPIHMOVDSQFSLLSNLSAHGSKHQGQNAIDMA  
ISTHRGGRKDSMGSYIGVASRRSVMSGLSKMSAHSVDLNVFSGLSRKFSGGTNHTASSR  
SMISEFSGIDEDFAEDDFDFDIPTKPNP

>comp2615\_c0\_seq1; 589 278 1564 LEN=1705; translated  
MFARIYGADGTVVNDDEFENTDYGSDNKNDEIILESLTNAVDDQAVWTRIIACAFAPPPHD  
RLNPELVRRRAELVRVGGKSIDVAVAVPASVGPASADQLAQVLTGYPQSWVDSKDL  
NMLTQQIRVLDGHAKDRLSERDVGEVGVGDDSQYERIVIEKRWMERLQDEPKNESLPQ  
WWTTIAPQSSPLELVDECKLLKLLNEDEFEDELRALFMTHYEDIGASIDFSAGAVALRV  
AVASIGSSGLYLKARIIDTAHVDGSEKLSAVSIPYEEDNSDKTRVEVKTAGELREAVLLL  
VESVVPPIVPKTETVKSVAIPIPTNDDKGFPTPFNEQVVQVVTNLEENAKPKATTTDND  
PAEIANKVEEDVLPKAQSSSRNSSLADRRTYYQRKSPEDAEKLSAKYAAIEDLGERAYT  
ILCDLEMI

>comp2616\_c0\_seq1; 1359 132 4646 LEN=4690; translated  
MIEMPSAILGTIFYRGMTMGLFSLAFCAFALAPPALAKDEFSPYDISEYNLDRSISRI  
LQSSNDFDRVNELLGTVTINIEDMTISEKVGFINLNLVVDLSVCRDISIGNMNVNHVT  
EDNVIDVDISLDEIDVACDIEYQYEGFLKGTGLAEIVTDGNMADTSMRFVTSNKGGDIS  
VTSSVTKCVVDVEIIDVNFIDADFASNIIGLFEQYLRDLIEEIEGYACSQLSSTGVTML  
NDEVFTMIDETLSLSDSATEDTGSSLQPNDYDTTALNFKDIAETQIGELFETALGEIDQL  
FGSNEDSGSELGINALLKSYVLNENGALVVNVDELGQDALNFELHDKLTKTSIAVKEVR  
IYGLDSMIKFNPLVVVGNHLSLNEFVWDYLNMEIDIALDIQPSSEKALLKLETDSPSKG  
INEEITIRFGVEDVAVIARIFLLIDVNALSGFTIGSVLALTNTADYSWLLPCLMSAIQDL  
VFTELTVSSKQISSPTLEGFVDDGLDRILSDLAIEAFEMYHDVIVEDLLPNMFHNTVKTF  
VNDQISLILEDSSSNCPKYESVSDIGSEEVDFREFFDSSSFSTESKSKQYGEFPSLLMDAV  
NKGLLENDLTTGMPKINEVLVDPLTKRQSGTEGTLFGGDGEDIFNIVQRINLGGFNANV  
RLRASDIKIENLNTLSAPLVMLQVPNEPYMLNNNLTIGVKDHPLRVSANVAFAVIDEVQ  
GTEIANELDISFDMYSANAMATIMLKILKSNLLEFPLIDVFDLNCWIATIPAPSLNAQGV  
TTGEDEVASVVDVQASVANLNLNVSCVECSSPGIVEFTEFETLMLSGEAQNVDVFLANTLL  
LSAADVIKGNLLQVQIDRLLNDASKQCRHSPTYDPNFSNISA KRKYKDFDTIQIEDS  
ATFLILIGVIFLSLILVVAAVVFSIRCVTRRRHRRLSTLPIEQVEVLKNIQRNEDSMEF  
NLNSTTRSMFQSAEDIPCVLRWGMPIIILGNIALFLSGHLSLGATVKIVATIAGETIEVD  
DFFEFVAKSTIDIWNSGGKALAILILIFSGIWPYTKQMATLVLVFTPTPSWVPI SRGSI  
LVWLDRLAKWSMIDIFVLIVCLAARVTVNSPANFAILPNDFYSLDLLVPLWGLYANLI  
AQLISQISSHFIHYHRKIAEKARISYLKSTNLSLEKIEDDCQKVLRLRTHKFSRPRRG  
EDEKLIVRPWTSSMLIFLVLSLIACIIAGCTLPSFSIEVFGLLGI AVEVMGQEFREANTNH  
SAFTVIQLIFEEAQFLDVTVKDVVGLGSFVIFVATILLVPIAQSIFLLGHWFVPM TMKRR  
RKMIVLNEIFQAWQYAEVYIISIFVASWQLAPISSFMVNSYCGSLDGGFSELVFGILKN  
EDAQCFSVKSSIEDGFFVLATGAVILALVNTFVVKATMQYFQDQDESNKRIQIETYTTRL  
ESGEKGQEAANEDSQVTIRPVPVLFDTDFRWLLRQDEEANKVLNSREPSCDNSNSMHCSS  
AKVQ

>comp2617\_c0\_seq1; 537 111 1421 LEN=1561; translated  
MSASGVARRSLSTAMRTAGASRVWSTARSAPAKYPLAFGVVLSGFKTSFSDLLVQKVVER  
KEKIDWRRNAFAAFGFVYLGGIQYTYLVPVIFGRFLFPNAAKFAAKPLRQVKDIRGLCNL  
GLQTFLDQC VHHPLMYFPAYITKELVMGGKGN DGKPDISRVLSDYRTNMKEDLIALWKI  
WVPATLVNF AFMPMHLRIPFVAGVSLWTA VLSAMRGGDAIHADDMAGGVVTNASYQIFM

EGLDAFNTPVEMDRNLDHVSISAAGKDRPGMVAQLASHVASQGGNVTHSKMVRLGDEFI  
IQMHVALPKESSSFFKSLNNGNLEELNIQPTRLTRRDTDEKKKAVMGMKIHCVGDDRPG  
ILADVTRNIARKGMSLEDVATSIRLSTTGKREFVIDVLASSPNVEDKENIDEYVADISSM  
EEDLNLSKMDIRVHTA

>comp2618\_c0\_seq1; 703 246 2438 LEN=3101; translated  
MVWKAGSLRRGRSDSDCSSYSSLPEKSPAETEVRRIASKIGLPEDSDLLATVCHKMRKE  
YVVEAWQLPSLDSRQWEKMNAPIGLAVAVQHLSSQRLREQLLQCREEQQIQEDIDADIER  
QICLTLFPRGRNEQMGRSHVSERCNPNGDILASLSSTSDSSVVSERGKSKETINIFTEA  
ETKTESDLTGPVLLPNADETSKEIPRLAPPMPKPSCTGIDTPREDIDEDPKEDQQKEIN  
QGLFSDHGSETAEFSEFPFKWLNLSSTVASGQHDEKPKLLSDEDYGEKPDGRFNAIASP  
TETEETKNGSTHDISSGSELETKASPRKQLSVVTHREPSKDDVESVQETLALNASSKPV  
GDETNAAESQIIPGDTIETPNETTVPALPRPVETQPNPEPEHAETEPESENTETDSTVDN  
TRLASDENQEPKIIACPRSSGSPQAKDKTGERTLEKTDSDSESEDATNIFSGLGSCVVSFSE  
EEEDDVLAFVVEREAAQQKSLGPIAEESTNTTPAAGRYETNENAASPVSGSDDDEITVA  
VSNVSAAKKSGSRRRAKETSCKYPYDNRGDQKIDTSALQVILVRLPDVDHRSILSQLLIM  
ANAKDKASRITLAFQIQDLLLLDLMEKHKMEEGSEKAVQLIFHLARLKKQYRVIIFGKSLFK  
AMSALYKESEKRKEKNSITSDKKEKKKVIDPEHLPETESRALEQNSPKPTMEQAKIGHAA  
DVLSAIQSPT

>comp2619\_c0\_seq1; 274 314 1177 LEN=1535; translated  
MSPIAIMRKTLLRRRSRAPPKLLKSLIEDHYNVEKNIVGKRLALPGVVPNYEDDWARDSDH  
FFNLIVLIPPIVNLVMNWNWDRLEFTLGKHYHLADAWTGEWFDMMFFWATVITYFVTDFFWVL  
IVPKCVKSPMVIIQHIIHTVMTLYLLLPHYRPKYRWCMSVEINTWFLIARRVFNKQGF  
PPWIIDLSFVSIRLKIISICFYVTFWFSIRVFLYPMMLVYLVKEHHKESKRVGTYINVGLI  
PPILQSFICILNLKWTFDLIMSKVRYFRKKANKVVGKRLDYVDKGL

>comp2620\_c0\_seq1; 558 68 2470 LEN=2695; translated  
MSDETQNSNPAMSDHRANNQTNNDTDRNRRRQEQPQARQIFGGLPAQGFQFARRHMNPNN  
VARIQTSGLPMNLDRIHGNPLQNAALNGNNGNHNHADRDMNGNLSFQRLRWGGRGQMA  
RQLQLQQLQRQRQNLQPGSMPPNGENQAGSTTSVPVHLGMVRVQLEPLTPQPVAASVAT  
NATETANPSGSGTRVQDPPQYERFKCGICYEYMDDPVGCCKSSRFCRAQLRVIDSDRE  
NQQVTKCPVCRCECDAAVPDYDLYGKMSDENVPRLPCRYVSVGCRERNLPLSEIAKHEQE  
CEHALVKCRYAAYGCKWIGKRGVPMHEEYEGCKLAPAGPFIQHFRQTMADQKVKLDLLAQ  
QTSGAVRMSHVLRHAYLRDNQRKSLSDVLRFLFYCHKVTSLTPHFFLTkdLWVSYWRNHE  
TRAAVVNFCVCFPFLSAAIGVVGHGHTNSFFDIFEEISPEKTLWALTRAFEGAKTNIITMA  
APETMAVTIKSLQNSHTIELWENAFGLGCVGSLGMLVLMNFVDTKSSISWDKISIPILG  
GRFPLIGDAMALCIFTLLAMMEYHQSNIRAWIMWMAIVPASTIFPATILSISHNTARLV  
TGTPTPAAFDMMKMARLVEPCMFGLRFSMLVTFYFGMPALDASVLLALVPQSSKIYLNKNS  
LLIHTPQSVFFFFAAAKSSYWIKIKIHLFDSGLDLSPLKSAAITFESAQNFFASSPDAI  
ALSGVFDISTSLAVATLMVTSYIINSFFDLGITVGEYISLTSQKEVENLSRGTFFKEYS  
SVGIFVFLWAMINTLLVYI

>comp2621\_c0\_seq1; 578 138 2417 LEN=2520; translated  
MGPKEYLIVYNLSCCAGWSLILLAAIRSLANGVVPQDGLKESLANVYQNTDMPFQVSSA  
EPVGDLLFYTQSAALLEIFHAAVGLVRSPVVVTAMQVMSRIVALVAVTYSPEAQSQWGAG  
VMIISWSLVEIFRYLFYAFGLVTGDSNKKTPYPLFWLRYSLFAVLYPTGITGELTCFFSA  
AYDPAFQSTFSADIAIWIYARILPLVYVFGSPFMIMNMVGNRKSFAKRFARPPPPPRGI  
VFPVEEGKKSRSSTPVNKEILASAVGAVNPSKAEKIRSAKGYRFTYVKHLTGLVEEQCKS  
PEACLKIAQAGLDKAYDIFEFVAPDGSASVREAMSMKNTEKFTGFIKGEKADTTMME  
VPYKGTILKQSLKDQVKKWVDYGTIEPSAGEAIGCVDNPNWCDLSDKYFVLLGAGSAM  
GPLLVLLALGANVIAVDLDRPNIWKRLIGLAKKSPGTITFPLKQEQSSLDSDDALYAAAG  
CNLFTHTPMIRDWLDLPGKSFVTGYSAYLNGALHVQVSLAMDAITRDLSEKRPGTSLA  
YLCTPTDLHLVPKEAWDASVSNFKEYGSRLLCMFVRLLSGRLLKKNAPVAGEGGDFY  
MINGVSVAGPNYILAKRMQHWRRAVVARSKGCISSNIAPATSTVSVTQNRTFAWAYEGM  
PYFEPYEIFAPETSNAMVSAIFSDLNPKSVGNPKTSLNPNQLFSQGSFHGGNWRCA  
EVDSIGETSVLIYFARIGAPYIAGSAVVLAAYAYKVLGY

>comp2622\_c0\_seq1; 284 231 1043 LEN=1152; translated  
MTNVVDTCFAFPMLSTQSVPSDLRWSCFRKPVRLHLQKGFWAEDGEDRDEDMLVTREDL  
NRDLLGMEPKVKKRKNKGQGYRPLDNRDHLFPVTRTKTPDDPYKTEFQRRKEQQMIDK  
SNGDKVKGTDLDRHMLASTRGNFFSKRKNKINGKSKKLSDDSTTPSKLIQRQSRKSK  
SQNGKSTTTVVGEFQLDKSTTSGDIIVIGDKEYLVETARCQYKYAGGQRFVMVRKILEVK  
ELARAKKEDDLLRQYESSPSAFTSLSNDFE

>comp2623\_c0\_seq1; 819 307 3969 LEN=4226; translated

MDGETMRKEMMNGGNGAQEYKHTGYQNSQHIQRSPSMDTTRHHHRHNQQQFAKPLH  
PTQRHPEQQYHGKAPSHYPRRYDNRGGYPAYPPPAQMMNQNHMHYHPHYSRPSRSHTPR  
VQTVVSHSFSMEEEQREDGSSRYCGHHHRSPNQRTSSYPGDEYRSPSGEFSADRSSHQ  
HQQRDAQDHSFQPPPLPPHHYGSRRDYQYVNDRELPPVLEESRIQMSPGGMISRTGDQV  
VSKREPPSPVVEGQAPGIERSLSSVSTGGPLKRSFWHHSRPVDAMNGNDVSMPPASSP  
PSEFLPPKRSKTGESKSPGSPKREKEYTMTPRSQASPNSDREHQEHEHEQQIMDIPGGN  
GGLGSLGGGIPTSTSDIGLSPSGDWYTNRARSMSWEAREDYRRDPRSAPSWSRSRSPSGR  
DGPAPVNSGSGSHWMEAPYMPSPRGRHTRDGSYDMHLQPWEASPRDWGHHAHHLPHHPH  
QPPHLQYLAWPGRSNGNGREESEEGKKFRGHEHGAFDSEKQSHLHFPVRGAPPLLPQPH  
GMGHIMGPPMQTGS GGVDPSIMMEGQSGDMMNSDRRGVDKSGPIKLLALPEDRISLSETL  
CIVRENVEVFTATIEDVEAPAPGRKHAVTVGQVGLRCIHCRHTTRSSSERVKRAVCYPSI  
KRIYRTVIDMKLDHFLHCKFVFPQPLKDTLQALKANTRSTGTTMQYFIRAATSLGMVDGP  
MGVRIADSSIPTVPMSLQSSGKNLKPSSLPKKEHVPSKINSKNPGEQSESSSGRDI  
RINRTSSSMSTEGTPQTSVSTDDLPELFTGKVALSVPEDKMSLSPLRCFLREQVCAFSA  
TEEDIAVRTPTTFVAVSVGQVIGICIHCLGQPAKLRLNRAVCFPFSITRIYQSVADIQRFH  
LGECKMVPKDVKEKFLLELQSQSSKGSKGLATRQYWVTSAKKIGLVDTTKGIRFCRDP  
ENKPVSLDILAQVANSVTTVNKPLVLPEDKQIAEFLFVVMGQLQPCRFTADRNRRLK  
DVGCI GVECKHCAGQVDGRKFFWSSVNAVESNFVSVHTHMMECRMVPEETKEELARLKKL  
RKEQTAALKTGSQKSFFARVWKRLHEEPKKDEPKDEQKDGEQQDSTTKEGCSERAAEAPI  
EKTAASEKATATTDSTAKASFVSLSQDTLTLAMTTPPTSPASVEKPFTEISVGLKSPG  
SPDSTQKIEAVSDKMAVVRV

>comp2624\_c0\_seq1; 671 177 1733 LEN=1931; translated  
MQDNTTQEIEDKLSERLLGSPSGDGMHHDADTSSFRIDGSHNEDFSATAIMEGGEIIVGSG  
AGFGGQQPLQPEYRDAPFALAFLAHLGFVFFVSMANGISAMRSSEPSGDDASSSGDSGSV  
FFSGLLWIAFFTCAASIGISAVSLQVMMHHAETLIQCSLIGSCVFMGMAIVFFFVDDVWV  
MAFVWMLSLFLTAWYARNVWHTIPFAASNLRALSIAIQTNNGVCALAYGIAILACVWTVV  
WVLAVVGVSFKEASCVAGVCKPDINAFSVFFLILSFYWTIQVFQNVLHVTVSGVVGTTWWF  
APQDALSVFSPAILDSTRATTYSFGSICMGSLLVAVIQSLESLARNARRNNRGGILLCI  
IECILRMVSRIAEYFNWAYCYIGLYGFDYISSGKKAIELFKARGWTTIIMDNLIYRSLR  
LVAIIVGAVSGVIGMLLAKATGWVATTLGEDSDGQVFLCFVGVFMSFILMKVVLSAVD  
TVIVAFAEAPNEFNTHHPALYNMVKWRLVFPPEECGF

>comp2625\_c0\_seq1; 409 66 980 LEN=1537; translated  
MAAVDTGLWGPETRTAKTGKESKIEAWWEVRRAGPAEPAPTRGATPLVERCMRVHSFSED  
FARRVLKGYRQFMELKSVMNWQELKLAPSNP INQMWELHLLDNLNLYTEDCLLLFGRVIG  
HNPDAVLDGAAMRERIMTTQIAFQARYGDDLQDVWDFGDDWNKDSMAQPSLNKKFDSLE  
VSSRGRLPVAGRGDDMSASRGRASSKGPVSPRRVNAAKTPTSASPGNEPITIFLRDQST  
GEETYFSLRYKSTLRIVFTVFAERRGLNQDSLKFNYNGQQLNQYETPHSLALEDRARIDV  
SITR

>comp2626\_c0\_seq1; 352 38 694 LEN=969; translated  
MFKATILATLLASASAFAPSQFSGRASTVVRSEEAEEVEAPPAYVASTALPFLEYPPNL  
AGYVGDAGDFPFRFSDFVPMDFLREAELKHGRICQLAVLGFAAVDMGFRIYPLPEAYKGL  
TSVTAHDALVEQGAMSQFLWLWIGLAEVLGTVALMQTLQSGRAAGDFGLDPVGFVLAGKSE  
SEINEMKEKEITHCRLAMMAFSGMVTQAVLTQGFPPYV

>comp2627\_c0\_seq1; 569 469 1658 LEN=1658; translated  
MENTGNGCRRSHDNPS SSPMHIGMQVGLNPFSADEIQELMGLIPGSDQHSHPGTAAHAH  
SHSSL SHAHAPSPLPHANSLGNDMSVGVHNPLQLGNNNTNQGSNMRAAASHAAEMGLASL  
PPHPGHGMVQPTSSLSSMPTIGNGNHATSNNRRHSSGSNTSTAIDEGSKSQARSERKRSRE  
KQRRTDVKNQFGELTEVLKRIEAEQQMQQERAAEEAGVDGAVNNGNGSQSSSLSSRM  
ILPPFSPTNRVDLIARTIAHLERLSHLTKKQVHEIKALDDQLKSAQKAGEDTAQKLKEAV  
FHHQQQATVHMGNNNTGGMMMAPGMMGQPMNSMFNPMAMANGTNGMMSIQPQKQMMMMV  
MMMPQGGAGPTPMMPTGNQPFMMMPQVFLPSQQQQX

>comp2628\_c0\_seq1; 363 76 495 LEN=711; translated  
MKVNTILAAATLLPLASARIRGFDASDTIEINDLEERLLAFSLPGEAMNVTDPADDDFDA  
DFELETGPKKPKPGAACKVIEKGGKPKKADKSKKSKLAKPKKAKSAKEAKSAKVAKEG  
KAEKSAKSAKEGSAKESK

>comp2629\_c0\_seq1; 434 222 1988 LEN=2107; translated  
MANDEDLGTFGVSRGMNEKAANKRLNELQQKKRSTSDKDIISKYNADRQKDRRLRHLEKD  
ITVPTGRMNGYQKRSIQKRMNRKDKSVHSLKLIYKAKRYEAAVAADAQIILNTEQAGFL  
EAEHEMEFTSSLSQVELKRNHLIDENTARHIYDVTLPSGPYGCKFDRSGRYSILYGHRGQL  
AMMDAHLHLSLHKEFDVRRERVRDACFLHNFSLFAVAQTNHVYIYDDTGAEVHKLSDHDDPM

AMDFLPYHWLLASVGRGTGHLVYQDTSTGGLVSSQRTKLGPCNVLRQNQSNVAVMHLGHSNG  
TVTLWSPASNNYLAKMCHKGAPITSMADISGNMATGGADRQIKIWDLRKFQCTHSYF  
SIAGIPTSLDISQRRVLGVGHAGHATFWSPEALLKKVKEPYMRHSVPACGPVETLRFPRF  
EDVCTIGHTKGMASIVIPSGEPNLDTTEYNLNPFFQDKKQRREAEVRALLDKLDHNMITL  
DPHEIGMEESTPEVRNERLKDAAELANAHKKPKRQATKKRGRSKIQTQLRRKQRNVIDE  
QVTKLREAREKEKEMAALSSGSEGTNRKPSSESHTANNAVPSALKRFF  
>comp2630\_c0\_seq1; 158 481 915 LEN=1169; translated  
MKNPTYRQVCSGSTGHVEVLNIELSESASATPEIFEELMKFFYMFHDPTTLNQQGNDRT  
QYGSVVFVSSSEDQKEIAERVKRELQSHVDNRTIKTYQRKKIETAIVDYTTFFYEAAEHQE  
YLEKNPSGYCNHRYRFKDWPKAEL  
>comp2630\_c0\_seq2; 190 155 733 LEN=987; translated  
MAPIASTLALGAGCYWGTEKYIVKDFQKRHPGCIANASVGFMPNPNPKGMKNPTYRQVCSG  
STGHVEVLNIELSESASATPEIFEELMKFFYMFHDPTTLNQQGNDRTQYGSVVFVSSSED  
QKEIAERVKRELQSHVDNRTIKTYQRKKIETAIVDYTTFFYEAAEHQEYLEKNPSGYCNH  
RYRFKDWPKAEL  
>comp2631\_c0\_seq1; 191 590 1045 LEN=1722; translated  
MADCKVYSERRSRCYNVYGNNGEECVHEALTEKRCLSMCLKCPRQALEYYGGAGIGGGEQ  
NDSGFFATHNELPRREFGAGEATKNGYPKALCASWAESFFYVDKALEYGEVASHHREAR  
RIVSSDSKLRKECRMAMELADCLRAATATK  
>comp2634\_c0\_seq1; 521 94 1359 LEN=2682; translated  
MSNDVMSSVDGCLLSSNLSIESRGS DIPESVLSVSEADAEAEDEPLPNNMTRLDPDEAS  
NEGSDADESINEEKKPYPKAHFKSDASTSSKSEKLGESDPPDVRLVVKRDRVSTSSATNDG  
CSSQECTSSSLPQAHSASEINSNQIPSMGAFAIENPLFESLERRRSASFGSYSDSIATY  
GHNTDDR IAISEATPPLQEQMDRDTEEGMVVRAVRVEEHVFEAKLVDQNSTANPLKRLKK  
CWWLIAIAVTLIVVITLAILLTKESEVDETNEVINETT IHSTESSRVKELRAILAPLNGD  
GVFDKNSTEFSPDRLTALNWLVTDDYFSRYSFDEFKIRQRYIVTLLYFSTNGQEWINQLS  
FLSDRDVCDWSAVKTVDRGNQLESFVITGVICNKLQVETIKIGKYQSLVSSFWRDLPGS  
R  
>comp2634\_c0\_seq2; 578 94 1539 LEN=2562; translated  
MSNDVMSSVDGCLLSSNLSIESRGS DIPESVLSVSEADAEAEDEPLPNNMTRLDPDEAS  
NEGSDADESINEEKKPYPKAHFKSDASTSSKSEKLGESDPPDVRLVVKRDRVSTSSATNDG  
CSSQECTSSSLPQAHSASEINSNQIPSMGAFAIENPLFESLERRRSASFGSYSDSIATY  
GHNTDDR IAISEATPPLQEQMDRDTEEGMVVRAVRVEEHVFEAKLVDQNSTANPLKRLKK  
CWWLIAIAVTLIVVITLAILLTKESEVDETNEVINETT IHSTESSRVKELRAILAPLNGD  
GVFDKNSTEFSPDRLTALNWLVTDDYFSRYSFDEFKIRQRYIVTLLYFSTNGQEWINQLS  
FLSDRDVCDWSAVKTVDRGNQLESFVITGVICNKLQVETIKIEGNNLSGTIPPEIRHFS  
DTIMEISLGEGLSGTIPSSFEEFKALEIFDVNSNCLSGPIPNSLRIPSIRRLSLENNLR  
LW  
>comp2635\_c0\_seq1; 263 97 1035 LEN=1184; translated  
MPTIINSPVETIVTNDAPQIKMIEIGGPETETEQKRRRRRRRRRPRSKMSSATPVEGCEK  
SLSCDDSTCATASLSSDDMSTATPQSPQQQTQKQRRRNQKNKSKKQQKQKNKNNADHEV  
SPEEQSRYLAMDCCEMVGVGFGGKRSSVARVTLVDWDGRIVYDEFVQRQEEVTDYRTFVSG  
ITPLDVEDATLTLEECRLEVQSMIADKILVGHALKNDMRALGLTHHWMATRDTAKYEPFM  
QTRFEDNILWPRKLELALAKLERKIQRDGEPHSAYEDAAAAMDLYRLVRRKWEKVM DYK  
IKKTREIEN TRN  
>comp2636\_c0\_seq1; 422 190 816 LEN=901; translated  
MNRLAARTLILSMLFASNDAFSPVRSSQRQSIALFDTTSTPTVEAPTEEASVPDVSSTA  
PALEKKKVNKNAEGIFAPAVLLTKDIVGETELNKLRAK IIGLHSDVIGKFTETAQSEFG  
NQVLKVLFTLADKNGDGTIDEEELAEALQSLGFDFLKEKQIAGIFARADADKNGQLDFEE  
WKAAPKTLKTSLIKLAKKNGHDLGFLA  
>comp2637\_c0\_seq1; 1249 1 3215 LEN=3670; translated  
XQQQQREQRAVDLPMESVTPASPDRDFDEISEISRASNLSGLWSRGRNSLNTITSNLNT  
IAENQTNKGKALLSPELIGRATHVSGKVSGLLNKFRGVPEDSEDVDEIDEQHEHFVNSQD  
SIQLQKQNIIDLSTPLKLVHSPSADSHEALRAYRMNRASMSPEETDKMSDASSFHALPDQI  
RMVVQNSGEKPPKSLRTSTTAPTTSQTQPLHNDQYESPIRSTITQSTLSQSELSNEQYK  
RAHGRFINNSALLGGEFQHETI IDTDGTQSDASGTADVNPQTLASLMMSDMLQKRLKQA  
IASVEKRKWDQVFLINANPWLAEKELTTNQFLLHKLAFFGKGTSPAPMSLSEQLVEKF  
PAAVYKFDQDGNVPLHLAAAAGNVQMIQMLGEKFESGASIRNEDGMLPLHYAIASFAEFD  
SEQVDGVHSQPLSVLKTLLKLFKAVAIADNDGNLPLHVASECLEGGIGVDVIFLLMDEA  
ERQLQDPYGARFRNKVKIEDLMDDMSARTMSTARDTDVSAMDSEMPCTVVLLNFFNETPL

LVAIRSHKGWEMIEALVSGPGGRKAALCQDTDKNNALHLLVGEFQDATAAMSILKVVPE  
ALQRNAAGILPIEIAQMQLMPEEVLAIALVDLPVNIIDDRDGLKVIKDRGESWIFLTCD  
DDHMVNVVEEIVSICSFQQLQELCFMTEQGSENAIIDRATPKREALNRALRFLGRFEFV  
GDGPLFSDMQGTGFAKFDALDFGDSEAGKRVLLECYKNEFDENRCYTMFEVELESNFVEE  
VNVYVEHLDDDSASKTTSEEIQQRQCVAIERPRLTLDKVVEGISKNGAYENKHLRLKYS  
AKLCSVLRRLIGKALRHLHSAGVVHGNVSLCTCGKFDDSMWKLSERLDVQAIKPFDPTRF  
RKSFPPELESLELPINDGEQRDGMVFDSDGPTVTFVTDMLADPSIDIWAFGKICYECLVGK  
PLIEFDASNSDSDVIALQLTSEWNEENMETVFDDLVESEGIGESGADMVTSCLFPQPE  
QRPADMDEILDNPFWQEIIRRHRSRPRKGRGGRKEGSIESTVSLFTDVEKEYEV  
>comp2638\_c0\_seq1; 319 180 1517 LEN=1842; translated  
MLASSANSRLPAAAGTARQVYAWGGLLKQKRTSSKAMGTVMSAKKQHRRVNAGGVVHNEF  
RSCSNDNKGFFYNLNGMAIRRESFRMNTNSGDESKESTRITATVRLYRMLRRSCKGLAP  
TDQGTILIQNEILASDWGKHSFRDNDIMDNDGDEVDTLVTENQTNELIRLFLRWNGIDP  
DAGFSKVNEWYDELMGARGFRDAKNTVEGACWTTTPHQLRETVRF AFLSSSKLSTQTPTEL  
QGLAVRAIQMMQEONTLWKKSSVSTTLDG LVRVTATSRC LGTVSPVSFAAPSSPLDPKYR  
FAYRIRVENISPETTQQLLGRYWHITEEGDGSDEESLEPIEVDAPYTGAVGQLPVLRPGQ  
AFEYVSGTDLATPVGMTKGFYMATVPEKTKSAKSGDDVVAVSYYQSGKSGCTSSSSSKE  
SGTGGNDTRLFHA AVKPFRLLESFEK  
>comp2640\_c0\_seq1; 72 926 1704 LEN=1778; minus strand; translated  
MLGXVPSVGVVQLVGFNRDAALAGALGELDAGRPAVSVEEDLHAVLQOGTGLSLAQVGP  
PLFPQQRHGQVGPVKPRHQVFLEGCSPVYGSQKRFRGLLVEARYHDVVPEGIHSRPLL  
HDGPPQVIPEGPRRELAVDVAFHRRRGLFSQGLYLGHDLQVRVFSGGSQQDAVFDVAV  
QAGGVEGLRHAPVGEQRVGGQQDAIVYDADHAGACGYGTGGVLDGHAGGAAGLQCGGRC  
DRRSTGTACDECKENKEW  
>comp2642\_c0\_seq1; 222 329 748 LEN=1274; translated  
MDTNMKNKIYTKDYPQHKRDSKGQRVKKKKEVNNCRESFENSVSELDNYAVVVANPQQR  
QTKGNRRFPRPLSKRRKVGGDQRVAHWPLPGNLGMPVRSEMNDETPQHKQQRPEILVLD  
DNTDDDADDHHEERDDLVF  
>comp2646\_c0\_seq1; 171 71 679 LEN=689; translated  
MSRASQSAVAGRS DGRNDGRNYGKNNGRNNGSHDGASFRGVGAFCGALWTP IAFGASVRR  
PFLSRSLVSGDCSSSDCSDSDCRDNTSNHDGDETEAETACASPFSPSASSFFASSADAA  
AADAHAHARACARACRTQNRQRQTAGLLQWYCGNADVSDRIGRTMSLLLVTFRLLSVL  
AVVAVEGEGADHGAYANTYANA  
>comp2647\_c0\_seq1; 97 557 909 LEN=909; minus strand; translated  
MAGRRLRRTPDVDQAEATADTANDGATSRPLTIDKGRKRS DNRGSSTCFLFCVPSISW  
MGPSVVVGDAMFIVITGEDAVVVIIGAREGARS LGARFVGARILGARFVGARFEGAX  
>comp2649\_c0\_seq1; 258 91 630 LEN=1513; translated  
MSSPFI LRLAGSTAARRSLAASSVHAGSSFQLQASTLEFPCR PETNTAAATSSPIAEQRR  
SFWMDVVR IKKQSPRRSFKDKNDGSSSSNQKMAHEDPEMVVRRHTDEV RADGENLLDLMF  
YNDRHEKAWMKRKRMLNRRYEFDKKHVTDLAKYIAFVQDYGDENDDKDGDSKSKSKK  
>comp2650\_c0\_seq1; 345 81 767 LEN=767; translated  
MTKSIPLSSFAVLALAKLADAYDSGWHRQT TNCSTIMEIICD VDNLSTDTFCEAVEM  
AGLDDLDTETWTVFAPVND AFHLLPDTIVEDMLDGD DPRGLIDL LAYHTAEKKIMSTD LK  
CDTRIFMSNEEFTVTICEGDKTFQVGLANPTS DYPQIITADIEACNGVIHTLSEIMLYKE  
YDVSNSTFVQAAVDFTSGPSSSPSDGPSMEPSVSRPSSSPSDGPSMEPSV  
>comp2651\_c0\_seq1; 642 139 1593 LEN=1848; translated  
MSTILFSFCMLCISNHALVAAQLELSIDSNDRDYDCDVGP DALTN AHGKDI PRTCIDVPV  
GEGSTATTVERCYTYVPE SCVGDENGENPLDL PVVFDI HGLTSCALYSSLYTGWKEKAE  
EECFVVVWPSGNVNDLLINGCWNLP AFLRDEGYGTEGGNNVTTAPCCCFKSDDEMGLPS  
KEPNDPLFLRMAIDSVAESFDMENSSNYYSISIDRSRVYMAGHSNGCMTSLSMAALHSD  
VVAAVCCHAGTLLTPFPEQYTPVPIWMAHGLKDDVVRADGVVAFDLGPLFGKLGWSWSTND  
VLDYIGRRNDCEGAETADIGESGATYRRNTNCTNSADVELVMLYESGHWPYAPLPNSIFSS  
SVDAPVDTTAMAWEFCSYSNPQQQGYPSGDDSLENEIDDEIDDEIDDDAGEPVENEKEH  
KKPETGAVPVNDQDANNAKAVEDNEEAMDPLLSSSAPRWRSMHEDGTILSATVMTLV LVL  
GCLV  
>comp2652\_c0\_seq1; 452 1 928 LEN=1474; translated  
XSNNNNNHNSRNNHGAFGGLLGSFRNRD GASSRDSTSETPKKQAFGGMFDSFRVRRGE  
VLDGDGDGDGKDDDKSNDKDKHDNDND DSDSDKDNKDNKDDNKDNDSDDKDNDNG  
DGDSGLDGDSCIDGSSLGTTNESQSLHEHQPTGFPEVIFVMIQSMTNDGRDLSIDYKLS  
GPFFRDVPTVSSTYDEIIFFPAPLAPDPHTGRGDIVVPKTACSAFCTTNLDVLLRRLFVEQ



LVVCGQLTDQCVESAVRDAADLGYLVTVAEDACAAHSEKEHYKGLFGMNGFCRILTTTRDV  
VRELERGDG  
>comp2653\_c0\_seq1; 186 1 378 LEN=378; translated  
XIPAAPAAITKEEVQGLFYKWNALATLDPDQVAARYSSKTAPCLLPTVSDVPRTDYDSI  
KAYFVDFCKKKPQGEILESYVTVGHNWAMDDGIYEFTMGATGDKVKARYSFVYTFEDGEW  
KIAHHHX  
>comp2653\_c0\_seq2; 224 1 396 LEN=396; translated  
XIPAAPAAITKEEVQGLFYKWNALATLDPDQVAARYSSKTAPCLLPTVSDVPRTDYDSI  
KAYFVDFCKKKPQGEILESYVTVGHNWAMDDGIYEFTMGATGDKVKARYSFVYVYEDGQW  
KIAHHHSSQMPEX  
>comp2654\_c0\_seq1; 388 1 1213 LEN=1288; translated  
XSSTSRAKTKWDSKAHKSEKSAKAGKSSKKEKYEHYQHEYPYTKSAKSGKSKKAKSD  
KKHNVPSMAPSVSMHPSASHTPTATTERVEVVANAPDTPDIDTQNSSATPPPSPPPTSP  
TISPTISPTTLPPTSQPTGVATTAATTAATQOETSEETWMDTWETTFWTTLDGEEDGDGE  
GDGEGGETADASMLSPSSGDFGDFYITLPDSFHITLSPAFPTASPGAGAGHPSPGGRSE  
EAHSPTSPPTIDAEGFQTLNPTVFPAESDADADEYPNAYPEFHAYADAYAANLSPGEDTS  
EETHSPTKLPPTPHPTGFPTGAPSESPTKAPTDSPTADTENPTYFPTFFPTFYPTYPTD  
FPTLSPEGVAAKEERLRMLRKRRLRRLRRLREEQRAAEKTITI  
>comp2655\_c0\_seq1; 263 1 727 LEN=882; translated  
XDQFRIVTDKNQVMKFQTASNVLAITALASKASAFAPTSNNVKSTALLMGTPGMDSLGN  
WKPDSEKMGSTDTGDYFPEGYNPEEEIAFSSGMMGSQSGNAGSRDGPQLPGLNGLGADAV  
VAGGISLDPNIPEGMEFVPASVPDGNFEFQVASTGSGSLQVMISSPCMTFEDYAAAFAP  
GSHPSLSVGPSAGRLDRRSGDPTPLEITCEPNGVGGVLTGDLVINLPDDNSKLSYKVTVN  
SV  
>comp2655\_c0\_seq2; 233 343 870 LEN=1025; translated  
MXSTDGTGDYFPEGYNPEEEIAFSSGMMGSQSGNAGSRDGPQLPGLNGLGADAVVAGGISL  
DPNIPEGMEFVPASVPDGNFEFQVASTGSGSLQVMISSPCMTFEDYAAAFAPGSHPSLS  
VGPSAGRLDRRSGDPTPLEITCEPNGVGGVLTGDLVINLPDDNSKLSYKVTVNSV  
>comp2656\_c0\_seq1; 474 95 1036 LEN=1135; translated  
MSAMAKAQKAKAEVFIKEAEALLSKKGFSSSKERNAEEAAETFEKAANAYKVGGLNQE  
ADAYVKAGEIYRDKLSNFNASKSFNNAGTCYKRSNPADAVTAFQQAVSLYTDNARIMQA  
AKLMKEIAELYETEEIDEEDKSHVLAIEAYEQASELFAMEDSKSSTSQCLSKIAELCSA  
ALDPPDFRRASKMYDDLGRRCSSNLLKFNAGYFLQAVLCHLASGDDVGAEQAVAKYES  
LDYTFADSREGKFAQSLIESVQGFVVEEFSNSCYEYDRISKLNPWQTSILVKVKNRIDDG  
GDGDDDDSDVDLT  
>comp2659\_c0\_seq1; 236 152 547 LEN=1300; translated  
MVSATRLKKNGSASRSNANFFQLSLGMFLGALGMNLWIGSDVDPTALWLDQDRNSISEK  
VVTSLSKSIPEVKETKGWHSIHVFYGEKEGLFNDAPKSIQSQESFAQVQDSIILDLLGS  
NGYFIDLAAASK  
>comp2659\_c0\_seq2; 317 152 1012 LEN=1203; translated  
MVSATRLKKNGSASRSNANFFQLSLGMFLGALGMNLWIGSDVDPTALWLDQDRNSISEK  
VVTSLSKSIPEVKETKGWHSIHVFYGEKEGLFNDAPKSIQSQESFAQVQDSIILDLLGS  
NGYFIDLAAANDALDLTNTLALERKGTGLCVEPNHAYWYGLSHRCKTVVVALVSGTKPEP  
VKVKFRGVYGGIVGKLSAKLANRKKEPDAPKVTRYTAPILEVLQKFDVPEIIDYLSLDVE  
GSEYDIMKYFPFDSYITIRIMTVERPNKELKALLEEKGYVFLAELAPW  
>comp2660\_c0\_seq1; 193 1 480 LEN=669; translated  
PTNPTKAPTNPTRAPTNPTRAPTNPTKAPTNPTRAPTNPTAPQPDGKCPGEV  
EFVFSLETDDFPEETKWLKRNNRVKKRKYENPLSFYEESICVPLTGNYKQFVIVDR  
YGDGVCCDKGDGSYEISFNGEVKKRRGGDFRRRQRTKWSA  
>comp2661\_c0\_seq1; 417 1 980 LEN=1117; translated  
XPPADGPGLEENDEKDLLELEGI FVDEPIVPPATDGPVENKNEEKVETPKQIVEV  
DEPIIPPATEPPKEINVPLDQPLTPPTYAPRLDDEKEDQDVPTPPVIPPPIAEQKLEEDEN  
LDEIGTEPPIYTRPPYEEKRVEDEINQEEDNLVSLLELVSEPRVGCAGDVKILRQKSGSL  
VSEEDPMQNAVNIVRQDISTVTVSLNQVWSREDQVLDVYQFYAPGKNFWGNAKCYEQ  
QVPPFSRSDPFETFELACNVLPYAEQLICLVNVDNSILLPPRVVEDPLSLVPKCCSPDT  
SIPREQAATCYIMEVKCTPPTANSC  
>comp2666\_c0\_seq2; 201 468 995 LEN=1240; translated  
MMHESYPDRGEAPGNMAARTRRSMVKREGLLASVVRAASAVNNALLEHCGVCTVYCDKQ  
VQYEDYVQQQYEVGVGAMEHLYAQLHTAAGEPGADAGLDAGVDANAETGPSRQRALAPSP  
QGGAGSEPSRGPHRAMAPSDPRTAEAEERYRGVLFDEESVVRVSVGSRGAVDDGE

>comp2668\_c0\_seq1; 104 263 815 LEN=815; minus strand; translated  
MVCPHLFIHAPISTAGRSVYDLDRRKNSSGGKRGIIHERLFI DASQASGYVLHPSTELGVAC  
EGDGAEAVSPPPCRPGTRTVFSATTDGTRWDNPGRDNGPAGLTDLQKRKRSVVFVGFVDTAC  
WTFITYEAYCPFELLEAVPKQHCSWYGRSNFFFAWDTPQLVKEGVCVPTAPTRNPTGPPE  
EPTX  
>comp2669\_c0\_seq1; 763 1 2179 LEN=2472; translated  
XDDDDDDDDDAQKDDDLNFDLDDDDDDDAVELDDDSALGKNSLPGSTMTYQGVGEWEFSGI  
QSDWGP AHAGSMVYDFTRNSVYLVGSYFPDSENDWVRSGCFLGEIPMSDIKDWKTVESPL  
PPSAKNRLPSNHYDGVVFSLPDSDLPREVLSCHSIMYDDRDDSNHYLFIGAVDEPDAQI  
RSGTINGFVNAFQRSSTNPDWELKINPTALDTAKAEDFRDTSPPVRYPIAMTTGFYQNG  
EHLMVSVSSNDPLLTEEYVESGDANNAQNFKNTMVPPGLRPYNSFAKRGSNFYFVSHQFF  
TYDKRKNMELTF SFDAILDSETYPTGVVNLV PNNMIAVMVGHKGRGPRVFRFPKPLM  
NGVERLDDFDGDFVQNFLFANGVQPQFRDSL RVSSVEMNPPLDDFIHGICLGPKNEIGNHD  
SYFIVGSTYGTMPAGTLQDEITTNILSGKSKKSM DGNRIDKLSAFVSKVESNEI VWTQ  
YAVPE SKTTLNGGKTEAFGCHLIESDPTTMYVGGNVYEGGVMSKFE SAGGDDVWVAQID  
TANGEPRWIKQVGSAGTDRISHTNGVQAALNGDCILYGETTGELYREKRKNEEDKYTS DV  
FVTTFGKNDGFTGPTIGSQDSTSKKSGTIIGVGTALVVVSLLMCAGVFYKFRRPTRRGAS  
KNAKAGSDGIFSGNLAPEYHDEDEA QVTDAA SNGASNGSTSGFSDNAPPHV FQDDPKIA  
PEKSFV  
>comp2670\_c0\_seq1; 16 1 647 LEN=647; translated  
XYDNEDDYRTRKMEAQRKQNAIGGIGK LKPHIREKPTLLLPTPIIVMGFPKAGTSSIF  
RFFRKQGLRSQHWCCEEQSTRIQGGPLMADCLLHNLKRG NRTSIFSGCGHFDVYSEING  
PRRLKYHPKFHDRKGYLLDDGT YDFDGGPQRIFFPQRFRIREIHDSYPNATWILNWRDYD  
PWIDSVLKWTGDNLHYQFLNEYI IQGVIPSVPPPE  
>comp2670\_c0\_seq2; 147 317 852 LEN=852; translated  
MIPSLQCFVDSNGDGDGMGFDAYLITIVTRASTSLFLNKS NPLGFKEXPLMADCLLHNL  
KRG NRTSIFSGCGHFDVYSEINGPRRLKYHPKFHDRKGYLLDDGT YDFDGGPQRIFFPQR  
FRIREIHDSYPNATWILNWRDYDPWIDSVLKWTGDNLHYQFLNEYI IQGVIPSVPPPE  
>comp2671\_c0\_seq1; 2 1 216 LEN=216; minus strand; translated  
XTLDWLDCMQKSANKLDWVGCMQAKLANRPDWLG YKRAK WASMPDLWDCTQAKWASMLD  
LLGCKQVTLASMP  
>comp2672\_c0\_seq1; 299 55 441 LEN=1122; minus strand; translated  
MHR IASHYITPVSYLLPPAFFLRPRVPAIVVAVAVAAAAAAVEDTVGSWLHDAQREIVL  
LLKIEIVDGVV GALDVNDNEDEEASVRS GREQE QEHQM QIEPMRLATNRVAYFGLASSQQ  
RFCEKSGD  
>comp2673\_c0\_seq1; 531 165 1861 LEN=1861; translated  
MGKAI VRVTSGNKPLSKRRARQPPTTSSRRNKS IENSNYEFFPVL PRLS FNHREQGRGN  
ETVEVARENTEPKCSYRSKDLGLMVLNPREAAE IDDPGNP I GNSVNFVCDNIF SINTATI  
DISTLLQSCYRIDVGDVMVNFFLCDYSGGASPKTVKSKGPPAINTMRADENDRLDALALS  
CNKKEKAGWKKTLKTIQGNLLRSM SMKRWPAHGDCENRLEVAISSDSDDTIFSNLEDEPE  
KWDIKTSSKSKTINTRKAHKSLSASPATKEEC DKKYDFFHEDTDKSLDTFDSFWNYSMFT  
WNEEVCAENEVHRNDGENKKVTCKDGTQNP NPIA ANHGAREDNESQE QENGVKFGL ETTR  
DES NVRHRKWK NITSWKKFEPFRVSSKFNNATGKDSTPSSGQKLG TNPIQKGSYSEREDI  
SGQALENPENSVDKMDVIERSNHQNKNETQDQGSTKFALDDARSKSLVSQRTVRNLRKRR  
LQKALGLTRSNRSISSMSKPKRPSWKKMLMVSIPSTRRISSREVAIPADI IHVIDKSQEV  
HEVKEEDIPTPGPIISEETT DKS GFX  
>comp2674\_c0\_seq1; 378 117 1887 LEN=2603; translated  
MPSSMGDVTAMGNAGSGMGVPGSGFPPQ QHHHHPHQISQFLPPMDRCAGCGAVDTPLLAC  
DDLDRASGKKKDIVIDPSQRLRFCANCMIGKVRVFWPVDNSWYIGTVQQFNAV TGEHLL  
KYEDDDTEWHIGESNTT MNPSDFTPQQPLSAQVGI VAPQPNFVPRSEAGSSPADK KSA  
MVPASRIKDGNTTPTIANADPKNRV GSSASGGPTTTKGTDTQSAAGPGL ETENPSNALH  
TTYRTFGSAQIQGNSYPPNSSSGQRHL PPHLAHQPHHIPQGYGHGPGGPPQPTPYGSFS  
SSSLGHGPQLGYGYPGHPGMGIPQRHGAVGALPPH YGGMQGHPPHPHRIENPAQISNA  
PGSGGNV GANGGKKTGPKAWTKEEDALLLSIVQSMRVPMKWSLVAQSLPERTGKQCRERY  
VNHLNPR LKVADWSPTEDATIFHLYNTIGSHWAKMSKIIPGR TDNGIKNRFHNLRRQLER  
EDEHRLRLNASRDFPEEIRLELIREFPEELRGKAAELWDIKSGLSVLAAKVYVWVGI EPEQ  
QGVSDLSVRQYPERISASGVVFAFLVFKRGA KSVQKRVGVKAAHEFHRT  
>comp2675\_c0\_seq1; 674 41 1807 LEN=1807; translated  
MSKIALVDDDRNILTSVSM TLEAEGFEVETYNDGQQAFDAFSK KLPDMAVLDIKMPRMDG  
MDLLQRLRQKSQMPVIFLTSKDEIDEV LGLRMGADDYVKKPFSQRLLVERIRALLRRQD

AANGHVVEETEETKVIERNLLMDPLRHSVSWKGDVSLTVTEFLLLQALAKRPGFVKSR  
DQLMDVAYDDQVYVDDRTIDSHIKRLRKKLRMVDPEFSAIETLYGIGYRYNEEXMALVER  
IGVRSVEPRKDNLDLVLGDDFVAPDRLEGELNARRAKRGWFSFRDSSLTRKIIITFNLI  
NLVVGILYLNSSRDNLAMQRANSLMVQTALIAADVVEARLPVGAPVSFATGDGVDMATTL  
DNLDIQTGTVEVFLFDRTGMLVGRKQGD TMGQDR TATLPSTPMTDFLSRVWDRISSPFSGV  
DQVSASRVVEDVARDMVDLAVGGGVEVRTAETAQGVVLTVAAPVMQGNTPVAVVALANAS  
GEIDKLARVERERVLMFLIATLVS VGLSLILASTISNPLADLAAAAEIGRDRNKKGAK  
GRIRIPDLTARPDEIGRLSGALRGMVSALYHRIDSNEQFAADVAHEIKNX  
>comp2676\_c0\_seq1; 909 94 2394 LEN=2487; translated  
MSDEKAVEELAKKVDRWTLQDDSTIDYGYLAQTYGAGIKEAKEGDKTFYLT TAINYTN  
AHMGHAYEGASSDVI SRFQRLK GDRPCYFVTGADEHGQKVAAAAEKEGKDAQLYCDKYVD  
GFKNLNQRLLSNDDYVRTTSARHKRVAQELWKRCAAKGDIYLDAYS GWYNVKEETFVTD  
MEAEKNDFKDPSSGIPLKRVEEESYLFKMSAYADRLIEHIKNNPDFIRPEQHKNVLSRL  
TSDPLRDLISRTTFSWGISVPEGFDDKHVMYVWIDALS NYLTGIDYFGTNGDGKEGIEK  
FWPCDVHIGKDILWFHTVIWPCLLMSADIPLPTSVYLVHGFVNDREGKKMSKTVGNVVD  
HDVLDQSHVDSFRWYLCKEAPYGGELS YNIDNMREMHNADL CDTLGNLLNRATNLCKKFC  
GGVIPDVPGPANPVVDLASI IDNYTAKMDQFDLQGGAAIAIAGFRDVNGYLQTEAPWLKK  
GDEHAEFRQIVVRATLEAIYALAHLLMPFLPVGCKFIFNKLGKEPVSLTELNRDCRSLDT  
GVKIEVGRVLYEKMLS DAERDKKAGGKKKESYEEAQKRKKEMKAAA IASSEKGRGKGDAN  
QSDFTKMEIRVGKIIIEVWNHESADKLFCEKIDCGEETGPREIASGLRDFYSIEDMKDKLV  
LVVCNLKASKILGFNSNGMVLAAKEEDGKTELVEPPEGSQVGERVYIEGLSGDPFSSSQV  
KKKKIWSNVSKELKTGEGGVATWQGKTIQTASGPKVASLVGAPIS  
>comp2677\_c0\_seq1; 288 114 977 LEN=1196; translated  
MRIYNGGTF TNSYRSDAMENRKLKIAPSQKLPCSSFLPATSKRSIVLPEDQENSAPNKNF  
EASSNARVPKPLSMDQENSSNF SNTSVTAAPMVPSKALSEK PAMQKGLSERTLGEPIPE  
GGVCNLVYEPDSSGRLVEHF TKTELHGMAVVGRW TAGTGKKIAGFKFKRNAGRNVLIGNC  
AAGVLGRKNYCNGFCQFVKQAYLMNGEVTLYDIPKGFKAMPVDVYLYDDNRPGHQTVKL  
VPGKSLPTENLLAVSCLPKNTPFYETETVDL FKWLHDAEVQGYSSKC  
>comp2679\_c0\_seq1; 252 1 366 LEN=850; minus strand; translated  
AELKSLVLLARLDPEDAKVVEAGSDDAKAANDESQQLVVQDGVVFLPLSGLIDPEKER  
ARLTKQQGKLEIEIQKLAGRLSSKGFVDKAPAAVVDKAKAE LAELESQAKMVQSSLDALP  
Q  
>comp2680\_c0\_seq1; 727 101 1927 LEN=2897; translated  
MFREQLLRELYEQPKGKTLFFTT SASSNLKLTGKAF TGLYRCTL ET PEDLFD DFTHYGE  
DEEICNAATKVG DGHNF GGADQSE LLLRN LQFDLSSLRESPLDRKKKKNYLYANTHKAHY  
LKGEDSDWEIVRAQVPDAIDFDK KIVNHDGSLKFESVFKTQSVIDWNECDFDCCTKADYE  
DLGFHSNAKEFDSNNEYHHTYANTIVRSFVIDEHTGDTFVSWE GFYKDCGDTFSSSKKLM  
WTLGVSRLKTEESDCVFLDTVQANDHF SRSSNFPRCTEPVSIVYQSARGREAVLPYGGLA  
IIPASQTGSRRTFLMSVLFSPGIDTGELTSRVWAFPEGANS IKDGLKRQDLTGTGTVIDG  
AHFDASVWDGGSRLRNYNPR TQKPDYFCRTVYEAGIECIPIDISTDEQGLPVVKAASQTK  
DVFLGKEQVKNFCRLNVADKSFARQFTLV TGLDVQWDPVTGEPHRIFFGCWGGEDGTGNF  
GSVQKDLHLKQVMQAYADAVL FMPDELQITVRSSTGRVATAAAKASGIPLQNP LSSQ  
PFAAVCLLSILCAVMATIYKRSQKAKQYSSPSVLQQQTGFGAPYIELQSMYSNMESSPPL  
PQSPTPIV  
>comp2681\_c0\_seq1; 328 210 857 LEN=1006; translated  
MKS FATATLLVALSGSASAFSPVRGI AKPSSL SAASVDSL VGAL EPVGFWDPLGF AAKA  
DDNTLRRYREAELTHGRVAMLATV GFLAGEAVEGSSFLFDAQVSGPAITHLSQVPVGFWL  
ALTIAIGCAEQKRATIGWVEPENVPVDQPGLLREGYTPGDIGFDPLGLKPTDPEELKIMQ  
TKELQNGRLAMLAAAGFMAQELADGKGILEHLFSS  
>comp2683\_c0\_seq1; 259 1 1082 LEN=1500; translated  
TGM D TGM DTEEDGTANNPLVVSSEEPWRSDPGEKASSHRCRTTTVTATATATAPPTKTT  
HQTIRHSERNQRREQQKQYQQQLQPPTISIFSNPIVRRSDGSAWKEGEGVTCCSSCNTN  
TTTGKNLPVSLDVRTCEELS YAVIYNLALSHHLRSEELALGAEPPSSQPPSGRARAYLQK  
AWSLYEYSHEIFRRQRTIDL LFPALHSMALANNVAQIHHVLGNADQIGLCMHHIISIVL  
YMVDRGELVLGEGTAGSSTQGPSHGDP LPGGTDHRSEIEHFFDTAAAAHVQGPARGVVA  
RMCCVALHARM DRAAQA AKNQPHGARHKRRTAKAQHSTAQQSKANEQ GKPAARQAKHDL  
>comp2684\_c0\_seq1; 448 294 1772 LEN=1935; translated  
MKGKPDWGAEAGTKRKTNRYNRGSFYHREHSLSSRYTFVSNVAVLSLSSGSHSRESGISR  
NNVSTEEKENKRSNIIT IETVDSSGQELPLRTREYRRRKHEWAERYTSQEGLEAFGRN  
RNRWGDLD AQTARRLYKRL LFPAALSELVLELGD EIVRPEELAPLAYEAR KAAKMYVRE

RCRVPSRVGAYLIDGFRQLYKYGKFQPNGASYEQIWIRYYEYGGSSNHTEEELIVLLTQN  
DNQDTSDDVIDNDDIVLVEDIIDDIDDAVTEDEI IKRTCQKILEKSCTTNGAIDRFYLR  
NFDQNSLREECNSLQAESISSCDANQNDCKKVRKSRGSRWRNRKRRKDRYNDLFLFKIT  
NTLERDVRKLLLEPPPLLLHSPTEQEEEGTLFGQFMKERAKCNAEIDRVGECETNKKEGDW  
SSRRMTRQEYHSLKLFKAMKRSQQQYSESNANDATKRISIDDIALTERSENIDIVTVSK  
AAEPERTRNKDR

>comp2685\_c0\_seq1; 736 275 2221 LEN=3194; translated  
MATTIQHRSKRRGERTPPLVGVRSAAALAVSSALLLALSATPSVAFQSKATSANFRST  
ASFSPSVRLFAESFEKDSKGNNDNITPKQQPYVRMTEDNQSSATRGKSALLPSIGDVVR  
YTDLDGGDLGSLGQVLVGIKISYVFGSKTSGYSVELNELEDVGDGYFAEYSSALRNRKGRKTE  
RRLDQVSPLAASVFGSEQAYKVPLDRDTGLPSRQATYDIDRYEGPAFYQTVQDVLERD  
AEDYSALKSKLFRNVALTGLVGTILANASYGSELAVIYFFGGSVASLLYLFLLSVKTDIVA  
VNQEDNTQNLVGTPIANLRFGAPALVLIGVSLWNSQKMSGLGGADDFQMRLFDTVSRDQ  
FAAAVLGFLTYRLPLFVQGIRDAFQKLEAETDNTTSSGIQLPGSAGVAAKLLGRGTTAG  
TSSSSVGGDDSLVTVLLVSGPQATGRSELVGRLLLEDSSNPDPDSSNPPLVPPERVVK  
RDDGATFERLARRGEFLDATTIDNDIAASDSASGLTVGGIFDAARGLVDGREVPKNVNV  
VDASVELAKALATAKSLPGKTRLIGIIVVGLSVADFRKRLEEDIDTGVLVVPPDETKESE  
LRAKIKEIVGEIDFGLGAGIFEFITLNDASDPEKSLAELKEAASYAFK

>comp2686\_c0\_seq1; 264 82 966 LEN=1233; translated  
MARLSVIRRNQTNGWSLLPFLCWSLSLWKMLLLSPVVEFSFDALLLGRQRSGGGSSGAFS  
SSALSSSEDCCTGTMTNVVDEGAINSHNTNSRRAAIGRLVGSTAVAACAGIGLSPSLAAAAS  
SDTDSVTKQTNLSEELLAIIVVEKDLVANQFLVSGRLTRSIYDEACVFTDEIDTYTLDKW  
ITGTSRFLFDANRSRVTLVPGSATISKSDGSLSFREFYELCFNIPFVKPITYLSGKLVLER  
SPSTGLITSYKEIWDQDVNTVVSQNSKLFTSGLSNDSLDADLETFGAKMESLFD

>comp2687\_c0\_seq1; 368 183 1508 LEN=1886; translated  
MAKRSHNYFLEQHPPPPPPPLPSSNPSSRDAGISNVRDPPGTYYLDHQPYAYNYSYV  
NERGHSVRGDSLLSTIASPSTTQNMPIPIFKGHINNSHSAASSNIANIQNKNLQTCPLV  
QISQSSSGKDFAEETTKSAKAPMVWTKACNVTLSEKAFKSHRKS HVRCSDCSFEGAPK  
IVKAHYQATHGKFGSGGFKTITVGVPGCRPQKFNICVGNRPEDIERWIAERKKRFRKSA  
SATEHKQEGTKQKVHGAEVRTAAQTGLSLLLAGYGGSSDDDDSENEKKVEADGKEGSVSS  
HVVENAVGSDHTELNNREQTNSGPIPPPEKTKTRRPCRFFFNGSCRHGSNCRFSHDVEE  
GQPLQSHSKQKNRSQPSNTSNRNNHNSRKRKRGGHTSSDTLLRKLFFENDMERESSMTMQ  
LLKFIVDNNFFLDKDT SARPK

>comp2688\_c0\_seq1; 293 202 1749 LEN=1891; translated  
MKAAADYDPKAVTSMLEELMKNSEDRNQITEEMHGVRNMSLQETPDVQTRALGMLQNG  
LDRMPPSKAAAYDKAQGLEKTYVNDDKFRRLRFLRAELFDVDRAAERMTSHLDLILELFGD  
EVLARPLRTTDFKGLVKRILRGGLVQLLQPYRDRSGRRVMVILSDVMSYSHIARVKIFLY  
VLTAAAECEETQKKGVIFVMWPGTDRITIRIPETEERAI CRKSFAAFPLRVVSVHFCWPD  
HFFHMVKYFFVLVMPGSLRVRVNFHSGERQELTYKLMGFGIPVQLLPTTESGAIKTKNHT  
QWLKTRCFEKNAGKNPTTTPGELIGAI ECPALHDVLYERSKPCTFHGNSFFKELIEN  
KEEHAVLSQTGKRNF SWSIVDKVEKNNGRFLTWDRRGFWIKLDDRSEIRLKVATSLRDFN  
KHARALAKCQTVSSVCKVSFDDGQYLKRRIVVTDESSNVSLCERASNCESFYGTCLPD  
LP IFRSKGYDETRNRLTSGFPIDDISLLSYTPRSA

>comp2688\_c0\_seq2; 225 202 1869 LEN=2011; translated  
MKAAADYDPKAVTSMLEELMKNSEDRNQITEEMHGVRNMSLQETPDVQTRALGMLQNG  
LDRMPPSKAAAYDKAQGLEKTYVNDDKFRRLRFLRAELFDVDRAAERMTSHLDLILELFGD  
EVLARPLRTTDFKGLVKRILRGGLVQLLQPYRDRSGRRVMVILSDVPIPIVTSRGYVVRSG  
VSXKA EFGLP SDFHQISNIVLLPYRAAFQITSQVKIFLYVLTA AACEETQKKGVIFVM  
WPGTDRITIRIPETEERAI CRKSFAAFPLRVVSVHFCWPDTHFFHMVKYFFVLVMPGSLRV  
RVNFHSGERQELTYKLMGFGIPVQLLPTTESGAIKTKNHTQWLKTRCFEKNAGKNPTT  
PGELIGAI ECPALHDVLYERSKPCTFHGNSFFKELIENKEEHAVLSQTGKRNF SWSIV  
DKVEKNNGRFLTWDRRGFWIKLDDRSEIRLKVATSLRDFNKHARALAKCQTVSSVCKVSF  
DDGQYLKRRIVVTDESSNVSLCERASNCESFYGTCLPDLPIFRSKGYDETRNRLTSGF  
PIDDISLLSYTPRSA

>comp2691\_c0\_seq1; 634 1 2346 LEN=2538; translated  
SSSPDIRNARTQCKNLSRFLSSPTTPTPGKQVFNPSMANTAYHRSTGTMNALSSVPC  
RRSCVLFCLLLLGLIATSEGSTDPI D GARFHAKRMSR KERMALRQKEAERYAELRASGQD  
EVGHTPEAAAMRQYQLRKKMRRGVFGKRKTDLASILFPGATPEPYIAGEEVLMYTDNVNS  
RKTQVPYDFYKLP GCAMPKMTVSRRRRERKNLGARLQGLELKPAPYTMKVKEDYGTPLC  
QKMITPRRVGFLRQLIERQYRVHMTFDGLPVL MRSENHN YAIRGFPVGFKAPPSYTG LKV

EQFYLYNHLKFTITYQQMDTGELHITGFDVDPVSIRHEIQQEDSFVAMSQEVSTCNTDDA  
PPVKNDELETYLALDKKAGAEGFLPVIYSYEVWKESTLPWTDWRDIYILIGSPDDDIHSFA  
IINSLMIVLFLTGAIAAIMIRTLRRDIAGYNMQQFEEESGEETGWKLVHGDVFRPPASCP  
MLFSILVGTGAQIGFACFLTMMFSIVGLISPMKKGQMLTAIVLLYVSSGAVAGYISARVF  
KYCDAKAWKQNTFLTAAGLPGVLIGIFTVLNVFLHVAGAATAIHFFTLAILGLWIAIAT  
PMVFGVSYFGFRAEKMPVPVKVNSIARYIQPPWYANPPMSYMLGGVLPFGSVCIELFFI  
MSALWLHQVYYMMGFLLAVLLILGATCAQVSVVMTYLQLCAEDYHWWWKSFFNCASAGCY  
LFLYSLWFLVSRDLFVIGILPVVVVYTYMGMISLFCGLFCGSGVGLCSFLFIRSIYGALKV  
D

>comp2692\_c0\_seq1; 169 38 358 LEN=811; translated  
MADEDSKEQQHVYVYKLVSAEGHETFVDRAIAMGASATIRTMLEGQFREAQDNVIRFPNIT  
TAILEQVVRMQFKAKYTNSSSRIPEFTIEPEYALELLIASKYLDC

>comp2693\_c0\_seq1; 735 204 1658 LEN=1765; translated  
MPSANDYNDERHKKEEMARREKRKSAKSHKSDAQREKERKRKEHIEKTLRKHGGGERKKQK  
TEPEATSSAFQSLFKQRAQGFIEAFKFRNAPRPPVGPFCFIGTNLDEKLREISQYKPLNA  
VEVNYRWKLVHSEPD LGVPLAPSAMDPTS YKQNTQTEEAQLHPDDLKLEWNGSMADTAAEQ  
LKKRRDNARAIARLALMGKSPAKFLMEKTKTTRSGPASTKKAFSRVLDEGMQSWMKKTTY  
ITNDYGRKVHDFKSLAKTKQELERELEVRQOTIMQRRSAPVVSRTFEEVKATVQNHPNKK  
GVTPVAEMSFLPNIEKWGNAYTYVVVDKSPGDNSTFLNSSIVANVQKKDATARMTCLEFG  
QSENDSGSYLGMQNYELDVVPLKEGDAPHANFCIWVDPENNTALYTPISSRVQLSNGRPI  
RGKNYKLVNTRRAMNDEDMAEINERLAEVDADVEEKINGSNSANNKSGNNISINDDDDDS  
DEDM

>comp2694\_c0\_seq1; 550 447 2294 LEN=2569; translated  
MKSSFTILLVSLIFQALTNTCASLEQSLSSLSRSMSK GKRLKGVPRQEHRKILHNVCIL  
FRKETRYLSTKSTDPQATMVASEETWTCELENASGHDFVPATVELKGINNQFLESQGAKS  
GFSALVATEGIVEGGDGTMMAMTIPPAALVKVLEQPTTLGNKLRQSGRKRRLAATSGTL  
KTLVVRVIAKNGIGPIANTVQLRSDVFEDKVCLKSQYEACSHGRKIEPFTGYTETNRYI  
KDGVS SVGVDAPIEGNKDNFEVAANKRATEIYGDLSQFDLVMFCIPPGTGPWLAYAYI  
NRFDSFFNDEWCSSVSTQVHEVGHNLGLAHSGKDTDVYGDQSGMMGF SYKDDDFPLMCFN  
PAKSYQLGWYREQQDFVNPLTDILPMKYSREYILNGVDDFDRGESGVKEDLII LRKQQN  
SREDYYIGFNRKKGRNAETVKDANCVTIVKKTSGPNEYGQSWQVSTLCEIQDSYTINNYD  
ESSFDVTVKLISIIIGKDAKVDIIASNSALCDTVRDSTSLRYKNKKRRNCNWWSKRKSRRC  
SKTWTNRPLSEWCPLTCGSCSGQLNIYSSGFGMNDSLPSTLCVDAQNVSFQNNFAKNCGW  
VGKEEEKKDERCAKEW

>comp2695\_c0\_seq1; 737 27 1175 LEN=1213; translated  
MAARPLVSVFSLSGDKSGETTLPAVMTAPLRPDIVQFVHTNVNKNKRQAYAVSIRAGKQV  
SASSWGTGRAVARIPRVGGGTSRSGQGAFGNMCRGGRMFAPTKTWRKWHKKVNIQKQY  
AVASALAASAVPALVMARGHVVDVPEVPLVLDTSVESTKKTSAKDILSAVGALDDVEK  
AGDSKKIRAGKGMRRRYVMRRGPLVVAENDGIEQAFRNLPGVELCCVDRLNILQLAP  
GGHMGRFCVWSQAALDKLDTIYGESGKRIPAAAMTNADLARINSDEIQSVLNPADGSA  
TFEPKANPLRSIVALEKLDHAANKRRMAQQAQAEKDREANKAALLSKKRAARTAKKAYNAQ  
GKAFAEASKQGDVDCADGFTIE

>comp2696\_c0\_seq1; 388 14 1116 LEN=1116; translated  
MKFGVATKLLLAALAAGTMPAITAQNCTIVLPEITEVMELAFPTWNVDKKGKRV EGGGKW  
NPNYLTKRWGLDPALGGYPTPIDTRYPFEEFAAAFKGQPGAGSPHHCPEGTDPLTPVQSC  
PKIITDNDGPGYIGHVPPPIALAVVRNLLDCENDADIENWFDSEFSETAPCDIKPSVLA  
SMIRTKYPRDPETGAVDYPPPVEIEGEYEEYELEFPSPQGP PHWCTDEFLATGQWVDYCPY  
IFEGPNAGQYRPHLALSAVMQFVANKINPEVCGPEWDDRGNYPANPPTSIAWSMESED  
GDAQPALPYLWPENDDPLIKDVPGLVLFDPAAEPPAPPTPEPPSEDEVTPVPEPPATEA  
PEPPVTEA

>comp2698\_c0\_seq1; 310 1 918 LEN=1264; translated  
QLGCCFCFFLIRHNPLDLLRHQKEMHFFQNRNRPRSSFELKVGKSHLLEVTVHLVTRRR  
DVAVRRKVNRNPEWDWYNTNKDDIHREFLELLEASVLSRMFGDEIEGYHRKKNPSVMEGN  
NGEMGFVKVSKNRVIRSKNGMASGTRKRKGTTPSNSKHKHVLETNNDGENNSKPEK  
DIYFSFGELIQLAYKKEPIKDDRSSRTIIFESLPSKSNRKIADGHNGNSETITRAAGGT  
FLDRQKLSHRLLVWIGKSEAAAASAGGGHSHATAAEGMYRNEMVPISSLFRKPPEFVSLSD  
DDDGD

>comp2701\_c0\_seq1; 304 293 2032 LEN=2670; translated  
MAALILAAAATAIVEIFLVSSTSLRPRSPTVSVSRLVAKSMASISISFVNGRGVRRPRGH  
RYYDYWRDEHEDHDFEPYPWKFMRPFSSSGSKNADVNNLGIALLDDETYVPEQTLDKNSNA

NIERKLTSSKEDVIFNDRSSFYAKLRQSYESFFPPPYLSSSSRNDANAKRALQAVEDLQ  
TYTNLQTYLSASNPVNPDNSDSSGNSSGHNLYYDIHNCTEEPLPGYPKEWNLHHDVGLGQW  
PADDPPELPASGTLYQGLCVFDLQANPDDLKAIAYRNAEVPFVVRGDPVAQAQTVRWNA  
HYLEALLGDLPHGTETSASGSFTYWTANGVDSRKYPMDAASYKAPTDLTEMFFAKWMALA  
NVTDPQLLGPESPHYFRVVCAPARPPTHHNNHGADSFEDNTCSILPGKARHVPYLAD  
ELPFYTQTKASLYVKEPLAEKIALQGPAGAGSKALNCRFGMKGVMTTNHFDGERNFVTVL  
SGERRYILAHPRQCGNMALFPYGHPSARHSSVDWARPDLLAHPRFEAAEGNEVVLLQAGDS  
LFLPSLWFHYIVSMSTNIQCNTSGMDGRHVSDDLDESCGW

>comp2702\_c0\_seq1; 888 274 2694 LEN=2949; translated  
MAKFPSTSSAAEEDSDHNDEQYSREASEEENIDTSVWSPRNKIMLRCLTAGVLLYGALVA  
YTDHQNATVGIHTNANIGFNKVENEPRELHPRRRLMAVMGDVVPSYMETLMRDLDKDRKLL  
FEDTPPEEIKYWFYETGPLQKYFYRFSKSRGKADYFEGRDDS SVTSSRFTEEFLLGGSEHN  
RMFNGGAAGEAHKSKTGSNQHRMQYRLLENCLAMGSPSRPDTNTPVWKEWYGNKDGVEHD  
TYGMDRCRVLFTLNTVAGAGRTTMIWETSPPALPHAQGPDRWMSEQETSATHIQRQLEEI  
DAMCATNQVAARVQVLVCEPISARWTEWMDSLLPHCGGKVS DLSQVDKKTAKVEDRASPI  
QVVVVATAESAGVCHDLKSGFMERRTQDLILAPPFLGDGAKTNGDVSIDNAAIKTTHPDL  
VSSDDHDMYVGLKWTSLVTMRALSSFLQASADIAAGATSPVNKVQSLEDTSVINGPSSPF  
LIPSFVRVSYVSEENAKVAKWRMHGDFHFAAWEVCKDSFELTWIDHSLSGSGGINGLCD  
DPSTKTAMKRRLEAAGDDNKVDCGQWVYMTLQMP TSPDVYANEVTPPIVQGGSNFVW  
MVTERQRREIVSRQVCMKKASSSPEKDKLEAECPAPPQAVMPLGDLESFLINYSPTALG  
KKHVKERPPGYSRQTEREAERELVREKQKLGQEDIEKALFDYTVYPAALFRKDATLSAA  
RARDAVLVDQKKKKGDDNEEVIGPQFIKSAYYDVTVTKPRSPVLGWCQAIARKGLCTLY  
ADYFRTSSDVRCLEACGMKKNFSKIE

>comp2703\_c0\_seq1; 490 60 1353 LEN=1353; translated  
MRMNDNSTPEKRSRKFYSGALLLVVLAASSAVVGYFIFKKNDDTLSVSSMSEPCHL  
AVKDAHQP ILEITLSAEQSKTMLTDTQAKEFETALLEAYNDASGGCSDEFKRWMYGTSIV  
DQSLKEHVLENEGDSSISHTFDESEYSLVLQVETMISCDGCPDDLAFASQYPETFGDVAS  
SNRNLGVGLPLGRFYNALEDIVHTTLKKTITSVKVTPNAGSKIQHMSYYTKTAKANSGGN  
YYTSGRASSGNYYGSKGSKGIASAVAFGMKGGKSGKGFKNKSGKSGKGFKSGKSGKDAY  
VPPTPAPQEEASTPSPTRFVYTPQPTTEKPTRPTPLPTPRPTPDPTPQPTLPIEDTVIP  
PSPRPTPLPTPEPTPAPTPTPAPVALPTEPPTRFVYTPQPTALPTNPPTPIPTPRPT  
DPTPQPTAQPTX

>comp2704\_c0\_seq1; 663 463 2478 LEN=2565; translated  
MVYRSPYETEKQRLEKDLKEVEEKGFPDVIITLYLSQFIYHMGDIRTRTKELGYGSGAE  
ARTELINEVLRDAEAFQKLRDGGKSMAKLMRGKHLNDINHGLPDI PDINMDLVEHVLN  
NEKYKEVSESCADELDVMAIHSFKKNKVLYKFD AISDKTDLVHAIAGREKEKKDGTKFS  
DLFLIFRGSVTLKDWIQNLKAPLVNIDIQKEKNSGKWFVLEQCTYSRIEIEKELASLLED  
AIGDTPIKVHRGFLSYLFGKTNSSTPKKDKTDESGR TKRASTNGTVSFRNVNVSKYQSI  
KNDLLLLFQTRSSLYITGHSLGGALSTLAAFFLACDVEVHDNRSFEGFKCITFASPLV  
GNISFQRAFVDVLQNYRQDKSSRKYAAGVVRLRHLRFTNDRDLVPLSPPLSRYRHTACINV  
HLNLYSPPLSPSWCIRKEEPRHDI FHRWNSDKSDKQNKRLGLLPPTSTLSGLCSTTFP  
FLWVVFNTAPIILVILYLLVRPVASSLFSVSI FKEFFHAMP IQIQKSFIEFSVRVSETLS  
SKAI IWMWAGWLTMAGSPNADFKRTVAVMVGAPLLGVGTLYLANEQYFDYFTENVEALF  
VVGMLLWQIVILPFRRADEVVSASTHGLAQYYLHIKKRGEPLSSLK KIVENNLAMKGDKA  
YGEDSSSKKV

>comp2704\_c0\_seq2; 663 484 2499 LEN=2586; translated  
MVYRSPYETEKQRLEKDLKEVEEKGFPDVIITLYLSQFIYHMGDIRTRTKELGYGSGAE  
ARTELINEVLRDAEAFQKLRDGGKSMAKLMRGKHLNDINHGLPDI PDINMDLVEHVLN  
NEKYKEVSESCADELDVMAIHSFKKNKVLYKFD AISDKTDLVHAIAGREKEKKDGTKFS  
DLFLIFRGSVTLKDWIQNLKAPLVNIDIQKEKNSGKWFVLEQCTYSRIEIEKELASLLED  
AIGDTPIKVHRGFLSYLFGKTNSSTPKKDKTDESGR TKRASTNGTVSFRNVNVSKYQSI  
KNDLLLLFQTRSSLYITGHSLGGALSTLAAFFLACDVEVHDNRSFEGFKCITFASPLV  
GNISFQRAFVDVLQNYRQDKSSRKYAAGVVRLRHLRFTNDRDLVPLSPPLSRYRHTACINV  
HLNLYSPPLSPSWCIRKEEPRHDI FHRWNSDKSDKQNKRLGLLPPTSTLSGLCSTTFP  
FLWVVFNTAPIILVILYLLVRPVASSLFSVSI FKEFFHAMP IQIQKSFIEFSVRVSETLS  
SKAI IWMWAGWLTMAGSPNADFKRTVAVMVGAPLLGVGTLYLANEQYFDYFTENVEALF  
VVGMLLWQIVILPFRRADEVVSASTHGLAQYYLHIKKRGEPLSSLK KIVENNLAMKGDKA  
YGEDSSSKKV

>comp2705\_c0\_seq1; 147 1 244 LEN=373; minus strand; translated  
XPEGTEEGTSETDGIPEGIPEGTVEGIMEGIPESGIEPEGIPEGIPEGTVEGTMEG

IPEREGIPDGIPDGVEDGSCA

>comp2705\_c0\_seq2; 89 1 138 LEN=267; minus strand; translated  
EREGIPEGIPEGIPEGTVEGTMEGIPEREGIPDGIPDGVEDGSCA

>comp2706\_c0\_seq1; 483 428 1288 LEN=1523; translated  
MKIASRNSALAAALCLAASALGGALAFAPHAARRAPTQSSSSSTLSVKIPRVELPEA  
VASQLGEFDLKNPNAMNDDDYRSYSGAAIAGTLAFSLLPALVSGIYSDLGPVAIATLID  
FLFSAIVGGGLAIYLSLRKQDQIGETVRSYGNQLLSAAKDATGIGTLRYDLPVAATDVLTG  
ELGLLDPNKMEDDDYDGYSGAAVAGTLLFFLLPGALATGAAGILGDFASSAAVDFVLSAL  
VGGGACIYLSLRDEVGATVSQLGGQFLDVVDGVLGAEEDTKLLEE

>comp2707\_c0\_seq1; 734 338 2566 LEN=2566; translated  
MPNTTNATTSTTKKLPFRHCSEKNHKHQSTVDAPSATTGSQRSIAVPQSLANLRSQNLNYS  
SSSSVTSSSSSSSSLEGGNVIALHTNNDANDFAVQDRRNNNNSRNNNNNTMPRRRLHTNS  
FSPSVTQRQTQKHPKEQPQHYQEQQYHAQQGIFRRRAVPLHYEQRPFKQQRSMSSQSPHRP  
RDTLRISPEQRGQQQRNTKEPSNSSTANIAMLMLPNFQDPSSSTEQVSDAPPPPPLWTEG  
FAKGLADSIARTPQPLGANRARRKFW SRLKPQDI IRVSSLSSEDSCEDTSNTGSAYFEDED  
KHEDDNGVLGCGSFSVTRICVRGKGTQYALKHLKQDLLPRLSEDCLTNGSTAAFERA  
ARELAREANLLSRFGNEPHI INIVGWTGGAASYAAYMRHDAFFLVLELLQEETLDDRI  
ERWNHDDAQLRQKQTVVTPNDNPRLHF IRRKIEQLTICKQIADALSYIHSKNIVYRDLKP  
QNI GFAIPTKSSSVANDGDSNNVVVKLMDFLARELPTSGTILPKQQQQQPARSQPPR  
SPNKNKDPFSTPFNGFLDMTGTVGLTRYMPEVCMHRPYGLECDIYSWSIVAHEILSQ  
TRPYEDMTPDMYQTLVCLQGVPRQNGSNGRGMPEYTVLLTQAWRTDPSKRLRLDRIMRQ  
LDLFLQKEKLMLEAQELLLGMPESNESPLSLSLSFAERSSTSSRSHHRHTRGIHCGYRV  
RSPHYQGGKAKYGNSSSSSSNGNK

>comp2708\_c0\_seq1; 479 757 2076 LEN=2322; translated  
MKFTIGCMLLLLALSDVNDAFAPSKLVNTAVKSSSTARAFSPMDPTSFQELPHHVQSIQD  
FMSTLSVADVDVAGIEQVATQVATTVDPATAEVATEAAKSNGWFGFLTGPTEAFLEIIH  
SVLVGVGLNSNAWGISI IALTSLIKLLTFPLTKKQLESTQKMQUALQPSLKEVQAKYQSNP  
EVMNQKIAELYQTNNVNPLDGCIPSLVQIPVFI GLYRAVLDLATDNVLDPEPFLWLSSLEG  
PTYGTDPTKGSAWLFDNWVNGAPSLGWDETVSFLVLPVFLVVSQFASMEMLTPKEQKDQQ  
PSFLKVLPLMIGYFSLNVPSALCVYVWVNNIVTTASSLI IRNSLKMPEAAVVASEATAAA  
PANPNVFTPPTIREKPAGFGEAAPSASVDGVTPITGSGDVVDVEVSEISSNVEAAGEGM  
SAPKSKKRGKGGKKKKRRKN

>comp2709\_c0\_seq1; 182 361 1617 LEN=2522; translated  
MPSNSNTQLLAIAGAVLAISAPASGFVPSQRLPAATKSSSNLFQSSRSAPVDCAPIGEVI  
SAVGSGLVDEEFTPAKEKI IKEPGLWEYNFGLQDPGLAMPHGIVKDVTEPETFAITEEQ  
IATLERDGVVHIKGVFDEQWVDYLRKATAYQVDEPHFWAFAGTASLYDYIQRNWQVNS  
AFARFYYHSAMGHVLAQCGRTEIRVSTDLLMVNPNKGFKWHQDNQNGPISWEEGLRFWI  
TMDETPKEYGAPVYLQGSKNDVVDEQAVFVDIEQDGLDYNTKMLEFRTPMGDMLIWHP  
RTIHKVDGPADGIWTSYRRVLGGTVAKAGSVYHDKRGS GGVLSDLGRHGLEDGKALKSSF  
FPVVYPKFDSEAAADRDSGNVGRNPMDIVSKLGLATKASGERFNSFFQVLGSQSNK

>comp2710\_c0\_seq1; 245 133 1047 LEN=1047; translated  
MKFSTTTVTCCLFAVAVRRSNYKFASASAVVESDNTGNENERDLISLNGSFFGIPAPTPA  
TLAPVSTEEQDKKDEISGRYKVKPKMPSYPAPPEPNPPRNDEPTPNPTPRPTPVPTPRPT  
PRRTPEPTPYPTKPPVEYKPYPTYKRPTIQTRQPTPEPTPAPTHKPTSHPTARPTSRPT  
DHPTYNPTPGPTPMPTSQPTRPPSASPTSLPPTHNPTRNPTHSPTPRPTLSPTASPSAKP  
TGKPSPLPSPAPTPKPSAPPTISQEP TTLIPSMEPSENPTQSEEPSDNPTASEEPSDNPT  
ASEEP

>comp2711\_c0\_seq1; 179 335 844 LEN=1165; translated  
MNTTEATPLSRTKKRVRFLVEDVEVIEIGGASQNKDKENDSEAHLEGNNRTALEEQDRDIS  
TDNSQPVSNSRAQRGHFLVFPSCPITTFPLQGVNEVLLTSLAPTSARLFDRWACGASHQ  
QLDPRSFVLPPTLPVRRVDDTKAQCTRDI IQSALDCVTADCPVLLVTD

>comp2712\_c0\_seq1; 473 732 2717 LEN=2831; translated  
MRKPI SQEAEEDCGDQQRCKKGWEPILCKKLAAGHASFNHMKRFSEKSRDLDRFDDEVH  
SVPWSAIRKKNVLGQGAYSMVYKQVSMNVNDASKATTLDNQKYALKHIKPDITDESKD  
FDVAAVDLAIEGEMLSRLRHDNI IKLHGVS GPKTSYVDFKHGYFLLIDVLGDTLTRRL  
AKMRKLVKRRRGTAPSVLDLIQNV AIGIAKGLEYLHENNVILRDLKPDNVGFDEKNAPI  
IFDLGFARELHTVHKSEVAGSIRYMAPEIGLRQGAKLASDVYSFGVLLYELCTLEKPYKQ  
YRGRTEFIQDVFVHNYRPDLTSSKTRMDLISSCWDGDHTKRPTMKRVVNILRVETALL  
QRERMSTKS AKVSTQRRSDNSVSSSTHSSLSFNAGSVNSFRSSTKNLVKPKSTGSTTVPS  
LLTSSSTDIKNSFARRSSI IRRMGSKNFDWNNNPSATPENSTVNDKNMVF GIAQRRNSF

TSSLLDRRKRSTNSIASST SANDVKESRSAERIAADYTREL P APNTRL SNRYPTRRSYGR  
GLARGISYESETSLASTSGDSCATSYSTDLSTSNFTLGEFRARVLGRSRRNRTFSSGSS  
SSKDLFRIDVCHGSNTDDENISGDSDFGDDCI EDMSLLTKKEVNNEGKQEERASLPKLVH  
P

>comp2713\_c0\_seq1; 587 1 1387 LEN=1551; translated  
XKYVQPSASLMENAPDWDVAHNAATSFNPSVNVNDITETKPEPNDESIVEEPQRKKYVQP  
SVSLMENAPDWDVAVKPSLSTSNPSVSVVSSPDANSKTNVGKNKEIDNVTGQPKKRRY  
VKPSVSLMDSAPDWNVAQPSLSTSNPSVNVVDGINRISGGKRLVRSVVKPDSETDQKTR  
AAPADKPFYKQVQSIPKENPAGAKPVRDEEAKTKLPASIAHAAGSTSEGWTPSAHFPTD  
DKTSSPGDQDSNTKESRTRSAQSSTMENYDPDALPRPTGVIPLTVSSSTREKTQLFREEY  
SLEAVEEDAENDGEEEEENPSSSRSEPSLSEPGKKFLYDGGNPQPKELWEFSIDGSDT  
RLDQRSEQEMNTTKKLVTYDGNNGSEAIRSAVVDNKDKNISGNGNGRESENGSKLKEKT  
VSPFTREVSNDQAAGSSATKPKVKSSTNDGISIDAESDVEET

>comp2714\_c0\_seq1; 742 365 2896 LEN=3167; translated  
MEAAPKNTRVFSFRPSEPATNYTATNINDHRTSTDAPHKQQQRNEAIEDAAEGATGQQEQ  
TNQTRQLSQVEQNQRSMVQRRKASQSTPNLQKMELNERNRDHHPKRRHSVATSANLGTTA  
TTRSTMRRCTSVSNMKRSRSELILLSPEFRTRLMNEQKERDPLFYRVQKTIGNGSMGSV  
ALVKKRSQTVGGSARKVVREAVQTHKRKQKCFQLPFGIGGLFRLCIEDELRVQEDKAPTH  
SKTRKQNRHHRVGGTKNALLSVETWLGSSSEGSDVSSCDSTSTAGNPAKQRRRSSILFP  
ADDSTTAASTASVRSALDVEYAMKSIHLSRITDDTFVQELENEIAILKLDHPPHIVRPLE  
TFHYRNQIFIVMEHCSGGDLYSRDPYTEEEAARHISSILSAVGYLHANNVAHRDLKYENI  
LFVNDSPKAEIKLIDFGLSKVYGGVNGKSQTLTEGVGTIYTMapeVLKGSYTKQADVWS  
VGVIAYMLLSSQMPFYGRKRQHIVEQILAGKYDFRGRWRVSTPAKDFVRDLLVLDPDE  
RLDAERASSCVWLNKRFSASVRGPRECEILQARNMRYVGYTKLKKMALMVVAHRSTCE  
EIGILRKVFQKYASIDKGGCISYEGFNSAWKESGLPPEDTRAIFDSVDLDGSGLIQYTEF  
LAATIEAQGAISEERLAEAFDRFSDSGHISVDNLAELLGKDFSRQEIIDIIGDAVDPD  
NGGDGTSNQMISYSAFLSLWEKNHEKEVRANKLRMLGSQLCQLGDDGFDDVEDTDVDS  
PHYSMENCEEAAKARATFLMDKHGTLRNSNAQEQQKLIIVVEQPILEDGADFDDSFYVDDG  
IQI

>comp2715\_c0\_seq1; 199 168 598 LEN=1019; translated  
MTDTVARRSMNLARSENGEFVESINAYRCDPVALCDLTNRLSPALFVSKIQEAPCPSVTA  
XILLQKHVPADFEFPTTECSKFDSEFRAGLVRRDSKQKEEIAFAGMDPGSAVKAMTAREQG  
HPSEAQLIRRMSSRRNSKESW

>comp2715\_c0\_seq2; 199 168 503 LEN=924; translated  
MTDTVARRSMNLARSENDSRSPVSRHCSILLQKHVPADFEFPTTECSKFDSEFRAGLVRRD  
SKQKEEIAFAGMDPGSAVKAMTAREQGHPSQAQLIRRMSSRRNSKESW

>comp2716\_c0\_seq1; 756 52 1422 LEN=1891; translated  
MSDKHEHLSLVVCGHVDAGKSTTCGHILFKQGGIPEREMAKLNELAAEKGKSSFGFAYYLD  
TCKEERDRGVTIQCNTKEFFTEKYHYTIVDAPGHKDYIKNMITGSATADVGMILLVPAEK  
GFEEAIAKADAKLVDEGQTRQHARLLYLLGVEQILVGINKMDSCNWSSEDRFNEIKEEFV  
KMLQMIGFKPKKVPFIPYSGFHGDNLVDAVDPKAPWYKGTANKTPKVKITGKSIVDAL  
NNYITPPKREPDAALRLPVSNIYNIKGVGQIICGTVEQGTLRPGDQVGFVPSNLKGGKIF  
SIEQHKKVLESAGPGNSVGLSIKGIKDEKVNPGDIYNEKDGELKPIKSFTALVAVQEH  
PGVLKPGYCPVVFSTRAKVACKMTKILWKMGGKTTGGAKVDNPPPELSQFENAEIEFEPTAP  
LFVEPFAQCAALGRFAVMSNRKMLGKVS AVVHKD

>comp2717\_c0\_seq1; 143 233 664 LEN=826; translated  
MDSYFGHQRDDCWYSDEDEGLSSRSTDEVLSSETWLDCLANRYGYSKIDASSATPMASY  
RRGACRLNFWLTGTGTVGSYLEHPRQKTQLFRRGIDRDEAENIFENPRMHTGRGYHTRNG  
NGGSRGPCRYGQDCHRADCFWDH

>comp2718\_c0\_seq1; 112 1 226 LEN=537; translated  
XGKGKGYGPKNYGYYGPGYYSKGGKSGHDGKHYGKTKGKARNLGQPYGKAGKSG  
GYYQYKCEIVCDGDW

>comp2721\_c0\_seq1; 356 326 1456 LEN=2572; translated  
MAHLEQLTPQEREWALALDEAIYGEVNOGVGWSLSPRGNSNDPKTPTTTNSRAATELY  
GKPSDFEIVAHAIRAKGDVQRGLRRLKRMKMFKDEYSVPDFDLSSNDPLEPILRVMKK  
FHLAYPHFIQKIGMDKFRVAVQLQLDGLRWSLSPPFNHTETERFQAFCLLHATQPTLE  
SIRRGTVWIGDLRGISQRPSSMFRGARMFLRDSYPKVEDIPVVDCCPKFSVAYATYP  
FLSSHVDFKFRVTPPEVLRQHFPPELLSDRLRGINNTKNDNINKRRFRSKKASKNNATDQ  
NTNAVDIASMDGDESEASWENLDDDDDDVVSYGNGNGNSGNGSVGNGETDESEVLTRIE  
RLLRMRFETEKNFRLA



>comp2722\_c0\_seq1; 324 125 841 LEN=1067; translated  
MPLGGRLRREGRRARREHREERKEHIPPAVKTAVVMTGAGLGIAVARRAKAKRSGSPD  
SSSSSDEDDNAPKTFAMKEKLLAFGDSFTINRVSRRHQRGRPAYYANNKVMRLRETFLQ  
ASRSGPTLYCIQDRKLRIRDSMAIEDADGRKVAEIKKKVIGIVRENFVVKIKDETNWQIH  
GSILEHDFTIKENGREIVKVHKNWIAPIRDCYFIDIHGTDDVPLALTVVIGLEAMSED  
>comp2723\_c0\_seq1; 447 222 2267 LEN=2899; translated  
MSDHSEVEETHRRPSVIEVEGARDDVIDDVIDDGTESRASITTVPS PSSQDEHGDSRTTA  
SSQTRLANDAADCSIAPPRDHSYLEESHPLLPDEDRYLRMASGRALHRDSTGLKPTAKRT  
LEVAVLELHGVLFPGCTIPVKLQNRSMIRYLGRQIRLCRNDPVAQPVVQLGILPYEYQS  
PEQTLPPQHRRRRTNEPQEEPQRASQRRGSWMRRGFSFGNREIRATESSHALRRSLTRL  
QDEFQFDENMDLEDSESSGDDSDGDVGF DENNDEHLSRPPLSPEQSHPLVGRIGTIAT  
VRHTHERASSVGGHGGSDPSHGRSQSSSTLWGRYEEAPELVFTAVGTSRFRILSCLNDDE  
NLFEVEDMRDEPLLLPPVPFRLLPFRGQC VHFVKVNDDESDDGNNDEHLGKGSIKTGR  
IRTSESDVVETRSTRMQAPIERMAWNLSRLTPVPYFVYLLQMPWSLVWKIAEALQTNNGR  
GNLPSLGDDSVVTNRENLEPTKFSYWMANNAPFSEAERKLLKTSSVLERLLFIWKKVCR  
WTAENAETRICCEL CETNL TGVSNI FTVGGAEGTTSTYVNGHGF IHQITTLRNVD DSKLS  
FQGLPSTENSIFYPGYSWLITSCYRCGSILGWKFQKVGNSGIDANGGYENGNIVDRDTP  
QRPPHFYGFMSNVKIKRSR  
>comp2723\_c0\_seq2; 393 222 1727 LEN=3042; translated  
MSDHSEVEETHRRPSVIEVEGARDDVIDDVIDDGTESRASITTVPS PSSQDEHGDSRTTA  
SSQTRLANDAADCSIAPPRDHSYLEESHPLLPDEDRYLRMASGRALHRDSTGLKPTAKRT  
LEVAVLELHGVLFPGCTIPVKLQNRSMIRYLGRQIRLCRNDPVAQPVVQLGILPYEYQS  
PEQTLPPQHRRRRTNEPQEEPQRASQRRGSWMRRGFSFGNREIRATESSHALRRSLTRL  
QDEFQFDENMDLEDSESSGDDSDGDVGF DENNDEHLSRPPLSPEQSHPLVGRIGTIAT  
VRHTHERASSVGGHGGSDPSHGRSQSSSTLWGRYEEAPELVFTAVGTSRFRILSCLNDDE  
NLFEVEDMRDEPLLLPPVPFRLLPFRGQC VHFVKVNDDESDDGNNDEHLGKGSIKTGR  
IRTSESDVVETRSTRMQAPIERMAWNLSRLTPVPYFVYLLQMPWSLVWKIAEALQTNNGR  
GNLPSLGDDSVVTNRENLERK  
>comp2724\_c0\_seq1; 154 1 1360 LEN=1623; translated  
XQKSQAMSVRLDTIQSLGRNLKDWCRHTLPLICLARYSSDRPIDWFFFWIGYKCCRCWG  
LGKGFRTNRNSNASASANKNVLSVDGVELDSPTGKLLKKGQTLQERDTSDTFMHNSIESI  
QLTDLPSVVISNVACCLHVKDMTALDVAIRSGCSAAF IASDEQQESQTTTITQSRRDASV  
ILHDVWKRLWYRDYGDVLLRWRISREALQRSLASLGTKVSRSCDRNQWLEEELSRLFDN  
KSTKDFYFIFGECYMDYILAGNNKADGCYLGLHGHVDFDTTFADYHPGLVEPILKECGGD  
ATFFFEDLPHSEGARRIAERLCVVVHHGSMDRSRDGEPSGGHRCGLELVKSGAEDASELE  
RVLRSSNTRPPPLADQKGSXPESKPPMEGAPRPPSPPHAYAARDARKDPDQVPRRTVVAI  
GIAAAAATNATKPVLEASRQ RIVENPHLLRSVS  
>comp2725\_c0\_seq1; 590 277 1617 LEN=1671; translated  
MENTFIPQAI EIVGKAI EADNAGEYEKALGLYRDSLGRFTMGLKYEKNEARKKLVLERVE  
GYMKRAEELRDYVTKQNELDKNGGGGSATAKKGDKEDMDAEKAKMRGALAGAIVEKPD I  
TWDDVIGLDNAKDSLKETVILPTRFPQLFTGKRKPFKGILLFGPPGTGKSYLAKAVATEA  
DSTFFSVSSADLISKWQGESEKLVNLFEMARESEGGRAIIFIDEVDSL CGSRSEGESDS  
MRRVKTEFLVQMDGVGKSDSRVLVLGATNIPWELDAAIRRRFEKRVYIPLPEAEARTAMV  
KLNLDGTPNELTEEEFERVGEITDGSSGADIKILVKEALMQPLRKCQKAKQFYVDKEGNY  
HPCDRYPNCSACPPKLS TDKPGKDYTCNR CGAKRMSLWDVPTEK LKAPMVLYDDFKKVMK  
SSVTSVSPEELERFKEWTKLFGQDGA  
>comp2727\_c0\_seq1; 444 1 1353 LEN=1430; translated  
TRSKLHSVLDLNFIMCKPEISNEKAI EAMGGQFCVKDLAEEDKWLATFDFFPAFSKEIKELG  
KKLEKEQGPDDVAHLNKMIGWSNRFAAIGLLTMGFGVNPITVICLSLYTFSRWTMIAHV  
CHGYEKCHPNKSRWSRFKFGITFWRRFNDWFDWMMPEAWNVEHNTRHHYNLSEIHDPD  
LVEENAAML RNP NLP IVVKYGVVFLALFWKWFYAPNTYKELKLAKMRREGKKIPDDVD  
PAGAVTIRSCLMGTNFFYSFAELLAVVLLPYLVFHHFFITPLPYLFLGKHFGYEDTLYWNA  
VKNLFLAELLTNAHGFLAVVTNHAGDDMYRFRKGCRPFSGSFFLRQVLASVNF SMGTDAV  
DFFHGWLNYQIEHHMWP NLSMLS YQKSAPLVEEICRRHNVPYIKQNVFWRLKKTVDIIVG  
NTSMRWFPEDFEDKFLD TDLKVEKAAYKSE  
>comp2727\_c0\_seq2; 366 222 1013 LEN=1090; translated  
MLRNP NLP IVVKYGVVFLALFWKWFYAPNTYKELKLAKMRREGKKIPDDVD PAVGTI  
RSCLMGTNFFYSFAELLAVVLLPYLVFHHFFITPLPYLFLGKHFGYEDTLYWNAVKNLFLA  
ELLTNAHGFLAVVTNHAGDDMYRFRKGCRPFSGSFFLRQVLASVNF SMGTDAV DFFHGWL  
NYQIEHHMWP NLSMLS YQKSAPLVEEICRRHNVPYIKQNVFWRLKKTVDIIVGNTSMRWF

PEDFEDKFLDSDLKVEKAAYKSE

>comp2728\_c0\_seq1; 409 52 1548 LEN=1857; translated  
MTGQLKVQSILTLFWLMGYLSFTRSFVCMGKNLFPSTRASTIAFSKTTSSQSQTGGVNSRVNH  
SVSFSKVSISDAYDGGNIELANIEDGPTKVVSLRIKPDYTELEKKSHMQYFSFRSSIH  
TNAEDDKRDVPVTYELLNAGEASYAKAWNGSTVFYKSLSDPDSWKRAQSTRFVEGKLV  
WDHIHSESESVYFGYFPPFSYDRHLELVEKCSSELATVFSLGQTLEGREIECIQVGTGKS  
IGWIIHRQHPGEHMAEFFAEGFLKRLGLDSSGDTGLVLRQLLSKYTFYIIPSMNPDGAV  
AGNLRVNAAGANLNREWCSSGDDYEAPTLERSPEVYHVLEKMKETGCDVFCDIHGDEEIP  
YNFLAQPVVWNWGPRLALHGAFNAAYRRANPDMQQEFAYEPTTEYAEGDILNIANDQIAH  
RFDCLSVTLEMPFKDCRSNSDPERGWSPARSRALGASLCEPLLYIQPYLRAEALDEKSFA  
DSFPEIDRYVLPSTSEYNK

>comp2729\_c0\_seq1; 655 77 2152 LEN=2790; translated  
MDVENDDIFGGVCWAKPQSSSCASDEHKATAFRGDSVGSKNKSTNVSELFAPDGI SLR  
RKS AVSTPVNGDEFVVKVEIKTGWLNDSKSRLLSLLPTLDSQFADRLERLRTRRESGPNEE  
DEGKENMKTNKENNDESDVKDGKEYPEQQRNEEEDCSSIFKKGTTGQILQPQHEGATICD  
HESYLNEKVDIIETIPKIPAILIMDHIAFVNDRMVWNSLAALSKETYAITVTPSHSKQN  
SIYRPPWRVRWRLAATTASMDAKTYSQNRRLTSTSQVSHRRWSRMPARGSVQTSARP  
WTVCFGTNYLGCCTDRGGVLRVAVHNGSTMSAQGHFGRINSVQLFAESWFLSGGDDKVV  
IWNIRKNKISCEAVLKGHIGSITSIAVVSYRNTHCVGNGGGGENSMGCMMLVATAALDGN  
HLHVNYKDDRVI STQHMHVFEFDSQEP IHTAKQPIYSIVMFEKDGHTSLVSGGEDGCLRV  
WDVDEAMDNALGNHEGILGQYPNRASDKTDELSIRAAPKRIVRNACIFRDDGEIKSIAIS  
RDKQQAAYGRTICHALSVEITLSKFNDSSHYYQAHHQRRRLRTNQNHFERENSFEAEH  
QNRHNGNDGWRLKGHYSGDIRCISFSSDGNISASACSDGSIRLWDLEKGCWNRKWKAHN  
GFMVCSIAVSPDQSLLSAGSDGTIAIEGLL

>comp2730\_c0\_seq1; 282 443 1303 LEN=1682; translated  
MCSKDQTSKNNTDQYRDAVRS LGPYDVVCGRGSVAFNINRRFR I IIGMNVDKYSAID  
GRFQKGFIFIGNLVDALVCEMGARFFKQKKTGRLVELTEAEIRKKVGHALRDMFAFQESQ  
QQQQQDVKQNMAGDTATLAIPSLLSLARSPAHKKSNMNCCLPHERTQQSLPQSL  
PHFPLPTSLLFQESI ESIDVPRNYRADTNNGFQGTNNFEIQNRSTEIRQHGFPPVSNRDK  
RQRQKELQRRLLQQQSGHFSMRELEERLSATTNISNSERERQGTI

>comp2731\_c0\_seq1; 790 1 1748 LEN=1956; translated  
XKAAALQNIRNQTNRNQSQSQPQSQSNQTSGLNSLKASAQISTFVATDPAQTRPETKR  
KPKTQTHPHKHYNLRQTYDSSKMFATKSAVRSVFSRTRPTALRSFNSTSATLADQYDVV  
IGGGPGGYVAAIKSAQLGLKTACVEMRGLGGTCLNVGCIPSKALLTSTHHYHDAKHHFA  
DHGVVIDGNI SMDVDMQDTKAKSVEGLTGGIEYLLKKGVEYHKGKRITGPNGVEVAL  
NEGGSESLDTKNIL IATGSEVTPLPPVPVDNEGGKIVDSTGALEIRKIPEKMAVVG GVI  
GLEMGSVWARLGA EVT VIEFLDRILP SNDHEIGKKFQTTLKKQGFKFNLKTKVKSVED  
DGVVLTTEPAKGGDAKEEKYDVVLVSTGRRPYTEGLGLELDVGIQTDQLGRIEVD SHFKTA  
VPSIYAIGDCISGPMLAHKAE EEGIAAVETIAGFAGHVCYDAIPGVVYTYPEVANVGKSE  
EELKEAGIAYNVGNFPFSANSRARANGSSEGFVKVLADKETDQILGVHII GPNAGEMIAE  
AVIAIEYGASSED MARTCHAHTLSEAFKEACMDTYDKPIHF

>comp2732\_c0\_seq1; 290 22 1365 LEN=1662; translated  
MERNKQHDSEKMKMEEKRTINAVF IGHANVGKSTIFGHLIRECGGTDNASIEK CENDAAE  
KGE GSKMYTWLLDQSAERERGT MISGNLRRLESTKYHINLIDTPGHCDFIENTTTRISQ  
ADVALLCIDSSTSGYGRGMDENGQTRQHPLLAYALGVKQMI VIVNKMDGDSVNFSEDRWK  
TIRTEVSNYLRIVGYRPMKIPFIPISGWLGDNLISKSIHMPWYDGPTLLEALEDVNV PNR  
FSTKPLRVPIQDIQNAGPSGT VLI GRVETGELRPEMEVQFAPSGIIGTVQSLEVECREVS  
EAIGGDIVTINMQDKSKLSKHL CRGHILSDSSNHPAQGVSSFQAQLIIMKNYQGEISIGY  
TPIIDVHTSHTPCKFVDIKTKMNSRTGQVVEKNPRSLKAGDACIAELQPQTPLCV EEFKK  
FPPLGRFLVRGDSGQTVAFVGVKSVIY

>comp2732\_c0\_seq2; 188 373 1467 LEN=1764; translated  
MISGNLRRLESTKYHINLIDTPGHCDFIENTTTRISQADVALLCIDSSTSGYGRGMDENG  
QTRQHPLLAYALGVKQMI VIVNKMDGDSVNFSEDRWKTIRTEVSNYLRIVGYRPMKIPFI  
PISGWLGDNLISKSIHMPWYDGPTLLEALEDVNV PNR FSTKPLRVPIQDIQNAGPSGT VLI  
IGRVETGELRPEMEVQFAPSGIIGTVQSLEVECREVSEAIGGDIVTINMQDKSKLSKHL C  
RGHILSDSSNHPAQGVSSFQAQLIIMKNYQGEISIGYTPIIDVHTSHTPCKFVDIKTKM N  
SRTGQVVEKNPRSLKAGDACIAELQPQTPLCV EEFKKFPPLGRFLVRGDSGQTVAFVGVK  
SVIY

>comp2733\_c0\_seq1; 507 265 1749 LEN=1959; translated  
MKFSICFFLAFAKLATAQRSDIHVLMYETDSSMEDNPTSPLHFFMEQSNFAHLATTVYG

GGLEYRFGDKYQVLREILDVIDPRKLVVVADARDVALNIPHEYELANEAIDRFVRYFEK  
LAKNNPHAVVMSAESQCCVSAMTHAHPGDYFDPITKKRNKRACSSGSPGCVWSQENIHA  
WVDFQRQAFNQTGIERSGEDVGEVYLNAGLMAGYPEDIMNILDLLDIESYEDDQAVLSG  
LMYQFPDKIILDYDQAMFGNNQWPRGLSEGCIFEKGENNALIHRQTKAQPLIVHTPGKFY  
GCLDMLIEELGGVSQQRYSLSDSPEGNPRVLEREGISAESTSFSAFPRLSLQSTENCECIC  
ESRRHLLSGLWGMKTYFTDEIHQRTEEEKPKIEDEKELSRVIEDSFVEFTTESTNYGN  
YGQYGQYGNYGQYGYGQYGYGNYGAAADICVDFCIDKCEDDETNYGSYGN  
GSYGNYSVRRRFV

>comp2734\_c0\_seq1; 204 1 358 LEN=1543; minus strand; translated  
XLTSIGEILGFLMLFFVLAFFAPVSFVTQLLYFILAGFLGYLIWAVEPALFSPLMS  
ISNSLSGVVILGGILMVSGERGPSNILGCLAISVATINVFGGFAVSYRMLLMFKKEKQ

>comp2735\_c0\_seq1; 268 1 1010 LEN=1010; translated  
XENPTQSEEPSEFPTQSEEPSEPTIVFRFPTLFSLYEIVCSEANANIFSDFCDLINAVP  
GLGRLLGQSLFGRKLQSGAKRYTLFAPTNNAFEFYDIPLPDLTNLTIDDKRLVKFLATYH  
IVEDLYDYDELDCNQKLTMYNGLESQTRCSIKTGGINIGVQQKFQVGTDSQAFGDDNEDV  
VLSKADARITNKNVAASNGILHAVNRFILPNLTIYETDVPTSEPSDSSSYPTSSTTFST  
TSLEPSGVIKPPSPGPVQPPTEAPTKSPSKAPSKPPSKPPSKPPPTVNPSPKAPSAEP  
SPAASDDPTVGGSEVPSEAPSEALSVAPSVAPSEAPSX

>comp2736\_c0\_seq1; 344 282 1766 LEN=1940; translated  
MGVPNDLVEAGKSSDELHSPRSLRRQIPYVETFEEKTVRDLWEKDPFDGHKYVNAVI  
IRSRNNENRRSPILNCCDREPMHPLSLSGYEDSFDRYQPFSTENESDSTRDNISGGGK  
NSLIEGATTASIAASPFWTPPKNQKEEEKMNFYLVQVAYEGNAFCGWQTQLKNLVKPSV  
QRTLEEWLTVLQNNGHLEADIIVDAVKNADRKRERRLKKQKRETKNVTKKDSRSENSF  
STAPRIRWADLPVAGRTDAGVSAIGQVCRFRTHRKDLTAEMISDYLTNRITTAPEISQSL  
GITKIVKVSRSFHTFSTSCRAYAYLIDVDTEHNSDCDGVLELFKGGRAKHQISLLDGM  
QKLEKALDYIGLSYGRVKTNTICTLHHARAKLVRYETSAGAKSRARTAVCIELVGD  
LRRMVRLLEASVRLVSTA EKNAETEPPVIGGIADCGATTDALLQLVEKRDRTIVGRPAP  
PDGLVFGARLPLA

>comp2737\_c0\_seq1; 96 207 650 LEN=1761; translated  
MGSAQSATGVGISSGSDPSLPLSAVGEFGRGTRAGGASEADRENDKPKKPAGTAPAGTTG  
VGVDVDRRCRKHKRAWGRCVADHYEKKFLPGKSLEPEQDCDDFFEKFRDCYMRGMLVQRR  
QKGLPPPCKDSALHEYMVDEGMTDDGE

>comp2738\_c0\_seq1; 312 72 1442 LEN=1546; translated  
MTERCRSSVPKRAFLCSRSDQKETSAAVLPSKVP IIGLCSSFSFFWTNEELAAETND  
GQTKTAITAEALTRDHPKVQEWIETIRYAILDCGISLLDTPWYGHGTSEIVVGWALKES  
LSGSDADSSNSKLIDREDLCVNTKVGRYEADPTHQFDFSRATLESVQRSLQRMNCGYID  
VLQLHDPEFSPTEILLKETIPAMVECRSNGWCKALGLTGYPLEVQYQILQHSLETYGG  
ESVRIWDQALTYGHFNLDASLVRRI SPSCESFAECCHQSGMGLLAAAPLSMGLLTNNI  
PPDWHPANGSELAKACLEAARICRDLVDVIAILALLFSMSHPSVPCTILGMKDVEQVEKA  
SAVARRFAMVDWTIPDLSQELVLSFVLTVPESKAYRILSDREAGPFAEVWKRETAEDYD  
NGIFAPKFWQDGVREAEHFWRRTTGQSFEDWQDKSFQ

>comp2739\_c0\_seq1; 868 247 3336 LEN=3615; translated  
MSAVLRFWSCVWFVFCFLLCESIEFNEKKLHDLKSSDIDNGIGKNKDPVAFQEI EVNSL  
LTYLESPLGVDKDVPVRSWQIQTKTSDQKHGFTADAVATGNVRRQVFQDSYQLHVST  
SASSRWKDCGWASNETSLVPLECKGLTPISTSDMNVSWKVSRLDDGSVIESAVAFFRT  
GIFGPWDAQWISGGGWDNTDEKERTLFRKEFSAGASNAGAVPTKNQPARPHATL FVAGL  
YNHVYLVNGVRVGDHELDPGWTNYTKRVWYSTYDVTDLVRFADAE EGASNDFFNDTNNV  
VAVMLGNGWWSGCGPPPGTQDYCTSDPPQF ILQLHIDGQPVLVSDETWLASADSPILYNS  
LYNGE IYDSRIAKRIRGWNTLHYDDSDWEVATLATNDATMATLASQLFEP IRHISSRRI  
SIVVAGKGDNLTQVVDFGQNAAVVRLKHVFCPAGTTIALRHAELIMHPPYGEYDNATIY  
VENLRTAKPNDYIICNGDPKGESYIP SFTQHGFRYVEITGLNYTLDPDVEAVELHTDVK  
QTSFIQFADPLLNIQHMMWGLKSNFMSVQTD CNQRDERKGWMGDAALTAEEAVLTSYGM  
GAFYTHWLMQMVENQSPDDGSMNPNI VPPMGRIEGAPNWQTAYPMILWVMTTYGDRQLIF  
QHHNSLVRYDFLEASYNKNGLNFRGTGFDWVPPWPHPKTDLHFMGAF AFLGDLKLGID  
IFQYSDHPDSDTQVERLTKLRAQSSPDFHAVFFNFATGAYMSGLQTEQALALYLGVVPE  
LQDSVLSYLIDDIEITNHGHTTSGIIGIKYAMEVLSKLD RGDVALDLALQTTYP SWGYM  
KSQFEPATTVWELWESDFAAPDMNSRNHMFSGITGWFKYVAGIQPLDPGFSRVQIKPN  
LLRHENFTASVSTPRGKIYLSYLKKTASDKKNSVVF IYEIILPPCTSGTVYFPMATDDKE  
LALSGENNYDFLIRESENPIWLDQMFLPGHDGVLHAEMVGKYLKVEISNGRFTFSITVSE  
TASISKLLN

>comp2739\_c0\_seq2; 583 247 2386 LEN=2386; translated  
MSAVLRFWSCVWFVFCFLLCESIEFNEKKLHDLKSSDIDGNGIGKNKDPVAFQEIIEVNSL  
LTEYLESPGLGVDKDVPRVSWQIQTKTSDDQKHGFTADAVATGNVRRQVFQDSYQLHVSTS  
SASSRWKDCGWWASNETSLVPLECKGLTPISTSDMNVSWKVSRLDDGSVIESAVAFFRT  
GIFGPWDAQWISGGGDWNTDEKERTLFRKEFSAGASNAGAVPTKNQPARPHATLFFVAGLG  
YNHVYLNQVVRVGDHELDPGWTNYTKRVWYSTYDVTDLVRFADAEEGASNDDFNDDDTNNV  
VAVMLGNGWWSGCPPPGTGQDYCTSDPPQFILQLHIDGQPVLVSDETWLASADSPILYNS  
LYNGEYDSRIAKRIRGWNTLHYDDSDWEVATLATNDATMATLASQLFEPIRHISSRRPI  
SIVVAGKGDNLTQVVDFGQQAQAAVRLKHFVCPAGTTIALRHAELIMHPPYGEYDNATIY  
VENLRTAKPNDYIICNGDPKGESYIIPSFTQHGFYVEITGLNYTLDPDVEAVELHTDVK  
QTSFIQFADPLLNIQHMMVWGLKSNFMSVQTDNQRDERKGMWMDAALTAEEAVLSYGM  
GAFYTHWLMQMVENQSPDDGSMPIVPPMGRIEGAPNWQTAYPMILWVMMTYGDRQLIF  
QHHNSLVRYFDFLEASYNKNGLNFRFTGFGDWGTLIYI IQPQTSKNQIALCSQX  
>comp2740\_c0\_seq1; 554 523 2472 LEN=2697; translated  
MTKPDPLDDVFADAEDDVYGRVRAPNFHDWEHNGRRRFLSRLRYLGRDKSRSGNGNGGG  
GECLGVGGYDGLSEYDAQAEVTCFRPILPSPLRELSYKPRTGWRYNPSARNAPFLDRLGT  
GIAEQTGRRNKKQTRTNHPLQNKHRETTTTINSSGNQNAVSNTKAQFNNTDVRPMPSTSMI  
VPVAWTSGLPIEKNTCKKFTDQTFTTANNDSDADISTALERKRGRDVTDTGNLPPRKMQR  
FSDSSTVVTNSTGGDSLSSSTIASNKTKPTGAAPLGSYIPKAALYQWYGKPKRKMVQVSCD  
QYLWECGDGTALHQPNTTTFVICPMTKEAFLAGPLRIAIGDPNSSQAITPDKDGLYWYPR  
KVLAEHAAAARAWDSLWRDTGGCDETLVRFVGGAEYWPSPQRPVWPFHRIPAAVLERLPP  
DQRPDAAANGAKKEEDEAMACVASGADPASAKHGATNSTVQCANNAGSNRNLIPGGRGQG  
RGGRRHSRSNKREEDFAMRKRERDQYARRRQNNRSPYKPNNHVVRPQQQQQWPPQAPGH  
NSQPYSSGRSHASMLGDMQRQDRYDYFPRERHQSRNLTQLQPYHNQFQHVGSMMQQHQQQ  
PHQIYNQQQPQQYNRQPLIPPPPPPLPPGLPPRVIPPPPPPPPSNRLRP  
>comp2741\_c0\_seq1; 184 640 1212 LEN=1460; translated  
MDDYGSVDNGFYDDRIDKVAEPERRAFAYLMLTTVRFAYASAAARLLVVKLVASLSISASA  
AALATADFDLSAVEYGETLTVKWRGKPIFIRKRTAEVAVRAVPMGSLRDPETDEDRVL  
TDEWVVVLAICPHLGCVPVSNAGEFNGWFCPCCHGSHYDISGRIRKGPAPLNLEVPPYKFT  
DGENTQLLIG  
>comp2741\_c0\_seq2; 211 27 794 LEN=1042; translated  
MNALRLSSRRLAPQAFKSIQSVARPNKLSSAYSFSGLRRAFTSTSSSWKASSGSGPSVPVP  
SGVETMDDYGSVDNGFYDDRIDKVAEPERRAFAYLMLTTVRFAYASAAARLLVVKLVASLS  
ISASAAALATADFDLSAVEYGETLTVKWRGKPIFIRKRTAEVAVRAVPMGSLRDPETD  
EDRVL TDEWVVVLAICPHLGCVPVSNAGEFNGWFCPCCHGSHYDISGRIRKGPAPLNLEVP  
PYKFTDGENTQLLIG  
>comp2742\_c0\_seq1; 193 688 1290 LEN=1490; translated  
MTEVVAGYDVCPSYATVFGYLGASGCMILSSWGSAGTWRAGLGVCQMGIDHPKGIKNI  
VPIVMAGVLGIYGLIVSVIITQSISSPAGGGYNTYSIFNGYVHLAAGMCCGLSCLAAGGT  
IGIIGDAGVRGFLKAEGGRKWFWEEDQGGDDGDFGSSNAEASNKLYVGMIMLIFSEAL  
ALYGLIVALILSQNTYVCAA  
>comp2743\_c0\_seq1; 691 93 1055 LEN=1167; translated  
MPLSPERKAEYFDTFKNLLSTYSKCFVVEIDNVGSKQLQDTRKTLRGKAEVMMGKNTMMR  
KVIKEYCEENPESEAIKLVDECRGNVGFVFTNGDLGGIKEILEANTRPAPAKVGAVAPVD  
VVVPKGTGCDPGQTAFQTLQIATKITRQIEMVADTHLIQAGEKVTASQAALLQKLDI  
CPFSYGMMLKSVYDNGSLFDKVL EITDDVLT AQFCEALGILASISLAAGFPTQASVPHS  
LVNAFKMVL SVTIELDTYSFDVADQYEEYLKDP SKFAGSGGGGGGGEAAAEEVVVEEEEE  
EEEAPQGGGLFGDDDGDDY  
>comp2744\_c0\_seq1; 331 186 1349 LEN=1638; translated  
MSNSKDISVDENQWMIDDSNIDNDGYSGGDRESSDYDAVDNPDYFNDEQNSSNRDLGAY  
DDSQKFKEGGRMEISDEWWE GREKLIAIVAVCWCLCFIIIGVVV GILVGGKKNKTRGP  
GATPRPTLHPTLAPQPLPPSLISIKPTERTVQLTLTDSPTFEPTLFTPTISPTVSPAPTIS  
IPETLGVIANQDTFVILNGHHDIMGEEHGKMDTFVVQNGPVKDETVPDTVALITFPFDAV  
PAFSRLTNLPVSAALRLYHVVP EESRGATYTVRIPETRMAIEYFHGFSFRPPEDDADG  
VLVGPSTVTKPDDEVDIDVTEVLF EYEFEEPEEENQMMMLIQNRGPEQLQGGDVVYSRE  
SNTPELLIDFVGGDPSDITIVNLPGR  
>comp2744\_c0\_seq2; 331 119 1282 LEN=1571; translated  
MSNSKDISVDENQWMIDDSNIDNDGYSGGDRESSDYDAVDNPDYFNDEQNSSNRDLGAY  
DDSQKFKEGGRMEISDEWWE GREKLIAIVAVCWCLCFIIIGVVV GILVGGKKNKTRGP  
GATPRPTLHPTLAPQPLPPSLISIKPTERTVQLTLTDSPTFEPTLFTPTISPTVSPAPTIS

IPETLGVIANQDTFVILNGHHDIMGEEHGKMDTFVVQNGPVKDETVPDTVALITFPFDDAV  
PAFSRLTNLPVSAALRLYHVVPPEESRGTATYTVRIPETRMAIEYFHGFSFRPPEDDADG  
VLVGPSTVTKPDDEVVDIDVTEVLFYEFEPPEEPNQMLMIQNRGPEQLQGGDVFYSRE  
SNTPELLIDFVGGDPSDITIVNLPGR

>comp2745\_c0\_seq1; 433 51 1523 LEN=1633; translated  
MSVSTDGLRQRKTATGQETKAVENKKTATLTEDDGTNFVEGGIEQNAFFFGLLVAAPFLS  
LLLAYLTSEEMATEFPGYATHPVTVMLGVCVSDPAGCASSVVKSGLSVVPATQFVLS  
FMGVALVLERFLPGKIECGPETLTGHI PKYVDNAVLHCVIY TALFYLGSNIGYGDLYDFG  
IIYDLFPGSVAFLNLFGLAFCVFLTLKGIYFPSTQDSGSSGSLFKDFVWGTELYPRVFG  
DLKRFVNCRF SMTFWQLAGLSFCYRSYTLHGHTMDWGLFFSALSQYLYLKFLLWEMGYM  
RSIDIIVDRAGFEIQWGCLVWVPAVYTLHSRFLVQYPSGLSF AAAAGLFI LSMTGVVLNY  
MADRE RDVFRATNGEALVWGKKPSFIKATYTTIDRKTGESSQKTSLLLASGFVGVARHFQ  
YFFELTAAWSWCLLANPLQNGVLVLSYAAFLTYLLIDRAERDSKKCHLKYGYEYEEYCLL  
VPYKILPGVY

>comp2746\_c0\_seq1; 272 286 1470 LEN=1669; translated  
MNP RKR SKRMRAAQFGKLYYSGQPNGPSRMEIEQKAVEHCELSDSLAVLQKQEI AATYK  
CKDYLAMTEFRLNIYDLLPNGRMNSDITAQN PQQSQPQCPVDSQIDEYCREQIV EWSFR  
VVDYFHIDREVVVFSLSMLDRFLALCKCDRATFKLAATTTLHLAVKILHPCKLAE LGILS  
DLSRGEFDMKDVAS METHILAE LQWQLHPPSPIAFCTVLLDLFFSSQKMG MVHTDVNDLY  
DISSFFTELALCDYFVGVTPSIVAITSI VNALEGMFGPENKVAPRILKLARETNIYQNO  
DLSQISHRLWELYERSEECALHNNVDAMEVEKTPETATVPPASAAEVFVRKGD CGAQVVS  
DTGSPVSVSKHGKTLSSNELMCAMRSQTLRNGSW

>comp2747\_c0\_seq1; 744 51 2144 LEN=2358; translated  
MAEATTTT NALSARELEWAKNSPELQAKHAEINGPI IIRTRFPPEPNGYLHMGHAKSINMN  
FSLAFEKLG VAPENRRCIFRYDDTNPDAESKEYIDSFVHDLEWLGWTPERTTYSSDNFQK  
LYELAIKLIKDGLAYCCDMTKAEMEAQRELAMQRVLARNKGEDPDEVAPI SEDILPGRN  
RDTSVERNLDIFERMKMG LYDEGTWTLRLKMD FESSNPNMYDLVAYRIRYTSHPHAGNGW  
CIYPNYDYTHGICDSLEDIDYSICTLEFETRREPYFWILWALDMYRPNVYEMSRLNLQYT  
VLSKRRLKLVNNGI VRGWNDPRMPTLSGYRRRGFTA EI INK FCTDLGATRAS NVIEME K  
LYTTARVALSEKTQRAMAAL EP IKVVVTN WEDAKNGGEGMVF EVQNSPTDPSMG SHTIE  
LTQTLYIDSSDFRLVDESSY YGLAPNKAVGLKYYGGN LICDEVVFKEGANGKEKSQIVEL  
KCHLDGSDRRVKPKT WISWVPAQTAIPCEIRVYNHLFTVPEPSDLWEEE INPKSEIVYEN  
GFIDPSVLPVLDKDISLVKSNQALQFERMGYFVVDV DSTFDSSTRTGKLVFNRTVTLKE  
EVSKK KATLSKREEEANEARKAKQKADLAAKEARLKIDP INFFKEAE EFKGKYSKFDDNG  
VPTHDAEGNELTKS AMKKL KKEQDKHV KQLKKASMKK

>comp2748\_c0\_seq1; 482 120 1034 LEN=1077; translated  
MTTINSTTSLSPALVMEEGADTITQVVVHPLVLLHVL DHHTRRQEASGRVIGTLLGRRD  
GKKIEVTNCF AVPHAERGDEVAIGKDFNKQMLALHLRANRKETVVGWYASAA LADGDNEA  
PDLIANTSSLIHEFYAEESDEGDPVHLVVDTRLIEDAITARAYRSTPVVVQGEPMANMFH  
ELRLTLQNSEPETLALHRMVADSK EKSTEESS EEP LLSMETLYN LLETASNYVDSVVEG  
KTS PD AE IGRKVADTLATVPRIRPEVFDKLFNDSLQDMLMVTYLSNITQTQLSIAEKLNA  
SLGV

>comp2750\_c0\_seq1; 352 1 1294 LEN=1404; translated  
XTERTPR TMHRSSRSLVLLGSLYILTKIDPILSLLHPSVVEKHLIMVSLYGQSSISFRRS  
TSRLAKAADNSANGRRPD AIVTNCN FNANKNPLHRP SDPRS VVG NPSQLDEKASELAEWL  
SSKRNVFCLTGAGLSTDSGIPDYRGHKGSYHVGHKPI IHHQFMEHPHQRRRYWGRSMVGW  
KTFDQAKPNVGHYLSALERMGR LGVN MEDREDFYDEQDRDEF LFTSGQRRLTVLTQNV D  
SLHVRAGSKDVLAIHGENKIVRCMNCGRMCRNDYQE QLEEMNLAWLMKHLKLL EEGKES  
SRQQS QLRPDGDAQLVKANYDDVVL PSCPCE DGF FKP DVVFFGDTVPKHRVRI CEQAVE  
NCDGILVIGSSSLAVHSAFRHVRAASRKGTSVAVLNVGETRAEAEKLEGLVKIESPISDTL  
QRCVEMMGAL

>comp2751\_c0\_seq1; 538 403 1110 LEN=1295; translated  
MSRWADSTDEDDYLHDGDHEDYVEHAVSADQLREPMPLPEHNVHLPDKNIAEGADDEDA  
EAEAE EEEEEEEEEETEE EKADRQRRL EEA KAAAKAKKEAE EAAAKEKAQKNDLNDLDD  
ILNEMGIEAAPAAEEQTVAADDNEEPEAGGNTSRRRKKKKKGGPAAAEAPAAESEEQP  
TTVDVAAVMKAKAGKKKSTTSAKAAAQAASSESKS AKGKKKLSKKDKALQYGR

>comp2753\_c0\_seq1; 317 431 979 LEN=1392; translated  
MTVQNPSPKYNLNTRANNLISRSSTSDDEVEQTATAPTAPKNLMDDDED TMVEQLQOKNT  
AVLSTKEIDSKTTSQRDQQLDLVDAIFKGDSPSRNDVKKVEDDRSVLEKIDSFLDKPFF  
DPDAYDDDDNSFFGKFARLVKTDYEFFEAVFVACFFLLLITITKDV LRAQMAASSVPSGR

LF

>comp2754\_c0\_seq1; 209 94 291 LEN=1233; translated  
MYRRESPWAVDEPPAEHPAETNPATNAGAIATNDAAPTAPDAAVKTAAPAAVCINSCTND  
DDDDL

>comp2755\_c0\_seq1; 425 155 1525 LEN=1792; translated  
MISVSSRSLGVIARRIRGSSSNRLFSTRPIAGGRDVVIVGGARLPFAQASTIYQDEMAV  
DLQRLAIKGLIDQTALSKDAIDYVVCGNVIQEVKTSNIAREAAINAGLPYDIPSHVAQA  
CISANAAIATGASAIQAGHADVVIAGGVETFSVPIRLTRPIRQKLITLPKAMKGGPIG  
ALKHMLKGLKAKDLGLETPAIANYTTGEVMGVSSDKLSAKFGVSRQEQDEFTVRSHTLAQ  
KAHDDGFYKEEIIIPYRGSTAENGIKGDSSIESVSKLKPFAVKPNGHTHTAANSSYLTDGAA  
ASLIMSEEKAKELGFRPLAYLRDWSFRSCDPWEELLLGPTYCSHDIMQRNKMSMSDIGVF  
EIHFAFAGQILSNLVAMDSAKFAQEKLGGNKVGAVDVDMNTKGGSLSIGHPFGATGSRL  
VTTASRRLQOGERFALIAACADGGLGHACLLERYD

>comp2756\_c0\_seq1; 1347 252 3875 LEN=4412; translated  
MIHPPPVAADACPKKRNKVGSGKRCHVQATADSSARIFSCVAFLLLLSAASLPTVDAQ  
KTTE TLASPIATQILPPTPIPSFFPGSNENVEDTLCTLDLDERANDSQLNVI FHELEQTN  
FFQH FVVDLEVKNMFKDEEAKSKPAAPKAPPKPAFGTGQTSQTSSFSMDSFPWGNDEDD  
GDDFLCTGGADELDEDAVPLCSVDTGSDSDDMLAGGGFSAWEEKTDEIVMDEDPPCDSDEE  
EQDSGIFDIPDSFWMIDCSNIRKGEGETKVVNLELNPERNTYYNGSHVWDIYKENRITTD  
DTCLEERVLYRLLSGMHTSTTSLIAKNYPPSKRKNRENWEANPQYFMERFADHPEYIRN  
LHFSYIVMLRAIKKARDYLYNYDISSTMPLEDTASTNILLRLLD'TTILRSCSDVFSAFD  
ESVMFQEDDNKELRESFKEVFHKISGILDCVQCQCKLHGKLTMLGYGTALKILFVKS PK  
NLVLERNEVVALINTAARLSKNLVEVRELT'TMYWEEERTKIANLEIKTEVSKGASVVPDK  
LPSQVSSTPFDSLVDLDTVGVISNAGRLELISMEREKELVNMALARHPELMILGKHYSK  
DPERFVAMATDLGELESGGRAATK'TSLPALPPDAIVVGSGLSGLAASLNILDRGGTVVIL  
EKEHLVGGNSNKASSGINGYCPHNDTCSDSMDAFRNDTIKSAGTVADLIDLVDLVTKSSQ  
AVSWLRDRANVDSLQAQLGGHRYKR'THRPSNGMAGAEI IYNIQKTVRSFEKTGRVKILV  
DTQVKELLEDGGDRVVGVAESTKDGTVQEI LADNVILATGGFASDRSSGSYLDQHRPE  
LMSFPATAGAFSTGDGITMATTLGAATRDMDKVQIHPTGWVDPKDPGNPSKILAAELMRG  
VGGMLIDHSGRRFANELGTRAYVTDQMLKHDEEFVKTGKWNPSTEVPTFFLVLSSSAAAD  
GKKHVDLYSHKGLLTKVEGDALSNHMGMSTEKITKTISQYQLAAKKGIDFEGKQSFGRV  
PAENLKTET'FVYGTVPVLHYCMGGIKINPECSVMREDGKIEGLHAAGEVTGGVHGANR  
LGGNSLLECTVFGTVVQKVP'IKKEGT'YRMVIGDEEISTEQLDPGTVGSDEL'PNIQ'MDEL  
ARHNT'EDLWVAIHGT'VYDFTEFAHEHPAGFKSIFDLAGTDGTAAFDAVHNLGMLDDFEQ  
DRRGILV

>comp2757\_c0\_seq1; 737 353 2236 LEN=2302; translated  
MALAADPTGAFSFTAPAVGKTVANSSSSSSSRLSMVLEKPKAPIKKISKLEILKSESANL  
LHPLKEELTTESIGISKDAYQIMKYHGSYQSNREKSKVKDYQFMLRLKQPAGELPPDL  
YRLVDDL SANHGQDLRATTRQCFQIHGIMKGLSKTVISSIMNIGSSTVGACGDVNRNVM  
TTPAPFVSKDYEYAREYSKVFAHLFRPMTPAFSELWLDGEKVATAELWGKEVEKHNI  
IDEA  
MTYDSGRGIILDHPVEPLYGDRYLPRKFKIGVTVPGDNSLDIYTNDIGCVVITNDEGELE  
GFNVMMVGGMGRTHNKETT'FARAADHM'GFVPKEDIMECLKAILAAQRDHGNRDVRANARM  
KYL'VHTL'GIDNFTL'VESYFGKKIQPWKEIQEWKYNDWMGWWEQGDGKLFYGLHVDNGRV  
KDEGDFKLKSCMRAIVDKYNLPMIMSPTQSIIFKDIKPEDKAGFEAILAEHGIKPLEEID  
PLARLSMACPALPLCGLAQTEAERIMP'SYIERIRAVL'GKLGIDDEEILMRMTGCPNGCAR  
PYMAEMAFVGDGPKSYQIWLGGSPVLR'TAWP'FKAKVKND'DLEVIVEPILAMFKEQRQEF  
EAFGDFCHRVGADAIEKFSETYEPIAA

>comp2758\_c0\_seq1; 945 379 4107 LEN=4201; translated  
MNFGDETGMEGHGMMAEQQQQYGNDEMMDAEGGGGGYEGEDGMIDIDEVVPVTQEDS  
WAVISAYFEEKGLVRQQLDSFDEFIQNTMQELVDSSGDIRVSPELQHMVGYNDDDEDADDV  
QFGETKPVFEIKFGQVYLSKPTTVEKDGTVTNMFPHEARLRNLTYSAPLYVDMMNQYRV  
PRDINITDPAEDMGEAESTEHAKEFLGYVPIMLRSLFCVLSKDDTDLSDLGECIYDQG  
GYFVINGSEKVI'IAQERLSNNH'VYAFRKKQPSKFSWVIE'TRSQVENSTRPVSTLYLQMYQ  
KGGRAIEGNQIRSTL'PYIRT'DVPVVIIFRALGYVADRDIIEHVYDLDTDGEMMDLFRPS  
LEEAFVIQRQ'EVALDFIGRRGSARDVTKDDRIRYASAILQKEVLP'PHVGI'EEHCETKKGFF  
IGYAVHKLLSCKLGRAEEDDRDHFGKRLDLAGPLL'GGLFRLLFRKLTLDVRRHLQRCLD  
EGKHFNIGAAIKSNHITDGLKYSLATGNWGDKGASAPKAGVSQVLNRLTYASSLSHLRRC  
NTPLARTGKQAKPRLHNT'HWGMVCPAETPEGQAVGLVKNLALMAYITTGTAQVPVMEFL  
EEFSTENLTDILPSVADPNTCKIFVNGNWGIHRDPRALVD'TFRSLRRMVDIDAEVSI  
VDIAAKEVRIYTDAGRICRPLYV'VQEQQLVIKKQHIMQLQGLS'GEKKLTWTDLLMEGIVE

YIDTEEEETTMMVAMDPLDLDTDDSYSSSTYTHCEIHPSMILGVCASII PFPDHNQSPRNTY  
QSAMGKQAMGIYASNYQVRMDTMAHVLHYPQKPLCTTRAMEFLHFRELPSGVNCCVAIMI  
YTGYNQEDSLIMNQSAIDRGLFRSSYYRCYIDQEKASSVGTMGSLNSEIFEKPSHDKTRG  
MKHGHEYGLDEDGLVAPGTRVSGDDILIGKTAPLDSTANMPSRYTKRDCSTSMKANENGI  
VDNVLISTTKEGYRFTKVRIRNVVRVQVGDKFASRHGQKGTIGMTYRQEDMPFTVEGMVP  
DII VNPHAIPSRMTIAQLIECLLGKVVVFQCEGDATPFTDVTVEDI STRLHAMGYQKFG  
NEHLFQGHGTGRPMCARVFFGPTFYQRLKHLVDDKVHSRARGPVAMLTRQPLEGRSRDGGL  
RMGEMERDCLITHGCANFIRDRFFCNSDQYRIHICERCGLTAQVNLKKMTYECRTPSCHD  
KPTAICQIEIPYACKLLLQEMMSMCISTRIYTDTRVTRDNSY

>comp2759\_c0\_seq1; 870 79 2215 LEN=2539; translated  
MFATSAAVKAIARREATLKA AVNIRAMS NLSAYDDFGKNVFTGKVADEY LKKHGASGETL  
KDP SWVNNADK VANAVFDWALDRGANV FCHWFQPMASSGVRHGLTGQVQNMMLKFNGDG  
EVEQDFKGTTLVKGETD GSSFPNGGLRGTHCAGGYLAVDTSSPILCRGDTIFIPSAFVSY  
YGAALDEKTPLLRANSALDKHGTRLF SLLGGDASSGVQSNIGLEQEIFLIPREEYYRRPD  
LQLTGRTIMGKNAPRGQEMCDHYMAPLSSATAALACMQEIQDECWKMGIP LKTRHREVAP  
NQDFDFPLYGTNTTQIDQNVFVMQI I EETAPKHGLAALLQE KPFNEVNGSGKHNNWSIAT  
RSGVNF LDVEDVWEATGNPEAFPI IMAAIVAAVDENGDLMRAAIASPGNDFRLGACEAPP  
AIVSTYLGEDLTSYLENSLPEKPP EYKPGKMLDLGTREVL PFEVPAEDRNRTSPFPYGG  
SRFEFRAVGS SQNVSLVNTV LNTIAAEKFALFADRIEAGEAPADVAREALKKHVKVIFNG  
DNYDEANQQMLTDSGVWRIDSGVEAIATLSSDKNVALFEKMGVFNGEELSARQDVLHDHY  
TGTVEMEALCMVDMINQHVIP SVKAAGVGPLDEL SAAVTTITAAVAEIHAAESSMDKAQL  
ARVLRLETMIDIRATCDAAEEV VPAENWTLATYKELMFLD SHVDPEPDFFGE

>comp2760\_c0\_seq1; 957 310 2511 LEN=2867; translated  
MSAAAKPSDII VFKLQEI VESWKS KRYQKVSQQCVALLKRKKT IENLGMTVPLQRILLQA  
YMQEDKYEKVLEWDKASASATKGCEDLILYARYRTEDYANASKQAATAAAGTNDGQDHSC  
AVAFKNLQAQSD FHLNRTEEGLAGYLDLLSNEINENDPE SKMEILTNALALIASSACTPG  
VAIHMDENNETTKFLLEEA EAALSNDDDAVDEEMLADLASNLGCIRFLTDPTTTENNWLE  
QASAAIEAGDGSSEQTNLQWSKHFWYRDI EDITYENVPSSKASNQVSVVQSI AKINQSL  
DENLSRLPPQPHPKWNLQVRMYWYDRA ILQLKAGKYVECHDSCQSLKKTLSNKGASDKK  
KKNKTGSGGAEATGGAQNASSPAALWWETRADVV LAYAQQNQSKRKDASVRLSNCIHNLQ  
AAASSSSSSSMVLDHAMAHALLHQFVMEQKGNKKDRQRQKRELLSLLKSLPDSIQSRPAV  
QLTMDLLETV VNNDSSENNKANKANSTPKSPLEADILFGGQYEEACKLYEGALSNGSDDS  
ILDSQLRYVQALAMSGQHEASQELWQSLESSVLGESTPVTASLPSGDVLETKTLPRGTSS  
NRSSI SKKLAAASNPLEEEETDKPSREKILRRRARKREVYLKQLESK GKYNPDRPTKPD  
ERWIPKNERSRSGRNRRGGKSNKGLNSAQGGGSR LDAQRLDAAARRAGKVPVSAGPSSANL  
KVSSGGRKGGRRR

>comp2761\_c0\_seq1; 463 273 950 LEN=1558; translated  
MMNFFGKKKKEVNTTVSSTSTSKPSDAQTTIVKLR ESIANQDKREDHIQKKIDMMVKEAK  
AKMAKGDKKGA VYAMKRKKLYEQEQAKIQNVRFTLETQVINLESAQQNAQTYQALKQGNT  
AMKGI RENVGIDQVDDVMDEIKEEMEMAQEINDAIAQPVDPLMTDEDELLEELNMLETAD  
LEAELLKPPPTAVQAMP AAPNSKLPAL EKKEEDDLRALEAELAGL

>comp2762\_c0\_seq1; 845 418 3075 LEN=3209; translated  
MLDATRTEKGGKIDTTP LNTREILKQLVAHFQNIHVKIFAESYSSSDERSQTDIQVLS  
EDADDVEQQQLD DSAASPIVQFWLDRLLTLDKAPCNDEGIAGVILEWIRGYEESVRPIV  
HSTGSDASPAFHPDC TYVLENYELIFSKILSRLATLPDDPKGIGLSLTLPLTPVIPSFSL  
QQQTLQRAIKIFSTDV TLLTVSARYDVEGRNANDDKTNDLRRNVALPTLLKILANTLETM  
RLLFATKTVANKAVGNPKTRDEKSSLSDCYECLRRCSVTLLAFEVPEIDDDDES VVRSASI  
MLSPHQ LAPSLSSSTSSDDCQSTDLVIRRMFQHVGYNCPCSIDVDDVDFVSKSKNSSSD  
FTDVRRIYIDGPLGNDS SAYDDVDDQYWNELQSSLKKS VSLAGWVDPTLNKMTFPVVRSTW  
HTIANLLREVSREAKIPFREQDEE IACADISVPKCHRRQVDFVLRRTLGGAGPMLRDTRAH  
FFGRDMHSMETLVKLRAD EIAAGNDSFAPSVLVRMGRRVTKAPKSGFDEAPYEQIPSR I  
AAALNAFYFLLLPGMSGVDKHC EEQILNDVFPICAALVDSHSSFCCV LGAAGFIRVIEV  
LQPRKRGP GSTCTNEKAWINFSDNALSVL DKASKASSDSGVLVAIGRAQAILLDMVVLQE  
NEKKEEVRKQAITGETGNHFR LKRRATTRQWLANLERSLHRSTGTRHSLDLLLGGVIPS  
LSQHALDEENGADG MEMGRLGLAALLPLTTNSMGFTEQPGDVVGRKTQM ASMVALINLM  
FAAHPVMP SHGGKIMSHLLATAADSAPGADRSDDESQNSTGNLPTKDSIRNMAILTAAIA  
LVICGQRFAGEVLES IENHREQYQHELVA AVSEVRKLAHCLTASS

>comp2763\_c0\_seq1; 551 168 2162 LEN=2424; translated  
MSSTKEQPESLVENATQVIPAKPDISLDQYKTLHKQSIENPTDFWGKAGR DHIDWFRPF  
KVLDGGFEHG DVRWFEGGKLNLSYNALDRHVNSDSSNDLALI WEGDEPTDVRKLT YDEVL

RKTCQIANAMVRLGVQKGDIVTIYMPMIPELSMTMLACTRIGAVHSVVFAGFSAEALGQR  
ISAASKHLITADVGRRGKTIALKEIVNNALTKLDCDSIVEHVMVWERFYDGAESSAPY  
EMKKKDIRMDLLVSAQRPYCPPAHMDAEDNLFILYTSGSTGNPKGLVHTTGGYALYAKMT  
TQITFDLAPGDIFACVADCGWITGHTYVVYGPPLLNGSTSFMFESTPVYPDEGRYWDMVQR  
HKITQFYTAPTAIRLLMRSGDEPVKKYDLSSLKVLGSGVGEPIPEAWRWYEVVVKSNCT  
VVDTYWQTEETGGHIIITNLPGITPMKPGSCTLPFYGIDTAVLCPTTGKELTEPDENGNFHG  
VMALKQPWPGMARTCLGDHGRFLTIVYKPYPGYYFTGDTVSRSDGYHFIIGRMDDVMNV  
SGHRIGTAEVESALVAHPAVAQA AVVGKPHDIKQOSICAFVMLTAGFEESQELIKELRAS  
VRSEIGGFCSPDMIIVSPSLPMTRSGKIMRRILRKIVCGETDSLGDSTLADPSIVNLLI  
EKVA

>comp2763\_c0\_seq2; 329 326 1648 LEN=1910; translated  
MVWERFYDGAESSAPYEMKKKDIRMDLLVSAQRPYCPPAHMDAEDNLFILYTSGSTGNPK  
GLVHTTGGYALYAKMTTQITFDLAPGDIFACVADCGWITGHTYVVYGPPLLNGSTSFMFES  
TPVYPDEGRYWDMVQRHKITQFYTAPTAIRLLMRSGDEPVKKYDLSSLKVLGSGVGEPIPE  
EAWRWYEVVVKSNCTVVDTYWQTEETGGHIIITNLPGITPMKPGSCTLPFYGIDTAVLCPT  
TGKELTEPDENGNFHGVMALKQPWPGMARTCLGDHGRFLTIVYKPYPGYYFTGDTVSRDS  
DGYHFIIGRMDDVMNVSGHRIGTAEVESALVAHPAVAQA AVVGKPHDIKQOSICAFVMLT  
AGFEESQELIKELRASVRSEIGGFCSPDMIIVSPSLPMTRSGKIMRRILRKIVCGETDSL  
GDTSTLADPSIVNLLIEKVA

>comp2764\_c0\_seq1; 112 119 364 LEN=652; translated  
MGGRRNPAAEPKTTQDVDAMAAARIPLAYRDKCGHLLIDLNKCRRENKFKMWECCGHERHT  
YEECEYYAWMDRCAQKKNGSA

>comp2765\_c0\_seq1; 1003 247 2472 LEN=2549; translated  
MKFESGVLSSLALASLVAPTEAFQPSTRSFHTARAQDQIVRQSTTPEVVESAKTAGDDSEL  
EALTADIVSKLRFREVQRELERREVDTTGTFTTMRTRLMELADDANNGEQNTSEGSNDVHV  
ISNDALNTAFKDTGISFEDNSDPDFDFNLLTEISSLSEKVVHWKTAARRFKQLIKRFGQN  
GPESREIPESVFTEVLTAQMOSRLHGARAAEPARRAMEEMISHGYMVPSEIANSCIKDCL  
GFEEKDGSHEGFAGIDTALAMLA AVELSEENPTPIFVDTYEKLITTLANEGSIDHALQMLR  
TTVVDKADTPSLKV FADVASACVEGSDEPEKLM TGLAYVKATGYELDNI ASTVDGRSILA  
AGVIAAEKMNNIGLGLRFLTAASQAEGCEPDRGDTLVANLSPASQRACTIIHRRAILKAV  
ENGSWKLAVKLELMLERGLTPSPSVWRNVVILCTKEEKSRKATALLLDWIDLYNQERAE  
KPPLRVFN SVVNACEVCGEEELTVRVL D AMKETHDTEGNLITFNIALKRLAKQGNMACE  
GIIIGMLQGGIEPSVVTYTTA IASCVADPKKSDVAIEWIKRMKSRLVQPNVITYNTAFAS  
CLDGTIEGTRKRASELAVGMINDIKS QLDAGILSKDDYTNII PN FYTRTLAKSLVEQADAQ  
MKGGELEDDEDAESTIRGPFLELVDFLNSDLAQLAEKQKQYVKDQLDDKEADIETT IENAE  
EEVDEELEY SVAISTHRAAMV

>comp2766\_c0\_seq1; 243 28 708 LEN=918; minus strand; translated  
MFILLYVLLVFGFCPPRKNRTG SVPTANPWLERIGVCIHPASIPPNALPRLASSCRRRLF  
FPVPRSLPCGVALRCAAAGTEPQQAGPSTLRTGWLAVVPVLQMPQAHCDAPRRWVRGAEV  
GFGPPACRRCRAGGNRRPLAGVGLAARGGDCDRRGARSGGVVQHRVELDECELCVCGQGL  
DCLSRQQQVRNFVDGLVHGRAGSLDRSFVGLFCVREGYGTVRVVRW

>comp2767\_c0\_seq2; 169 102 833 LEN=1043; translated  
MQIYLF LIACYLGFVASFRTSSAPLRSSFSRLYANTGQSYQASLPSPLIDAQGNVIESAE  
AIAGLVEGQRVALYFGASWCKDCTNLEFM LAQYRSALADSNQPIQLIYVPCDQSQEDQLS  
QMQLGLLEVGVPLGETADALKQQYGVWPDVDIERFGGISREIAIEGTETIVAVKGSSEGE  
VATERVEIMGKVEDTRDEYGRRS GIPSFVVL DNTGA EFCFLNAERDSISVLADWPLDDPQ  
NIW

>comp2768\_c0\_seq1; 271 1 1100 LEN=1100; translated  
TASNTASNTASTTASTTANRTATNTQSSQSWSPSPVKAAPESNRSKASFPTPTLGI EVQN  
AVHGRSEATASGTEIVLTRDRDSVGD KKTPTHYRHQPPQLETD DNTCATSSAYTATSSDE  
SIRTHGGRSTHEMTMIRTQSIRRDQSHVPGHSSQRPEQAPRTIFYALPSSLVQQPQLV  
SQLPNQRLQPPNHRPRRHVRSHSFGSTLSLSSFGASSYNSSSSSEDSNIIANTTSTSSSR  
GNSICQNSSHLSDSDQVQEQPQMTFYLRPSVTTVKHVLKEDHQSQQMHENRRRTPIQTST  
WDSTRDQTALPAVTANATAYRENY SASKILQRI PGRSTAKIADEMTDETSTSAASTSIS  
TSTSTST

>comp2769\_c0\_seq1; 525 101 1513 LEN=1695; translated  
MCNNTVHPPAVGAGSTHSASSTSSQQSHSHSYSHSTGKLV SITVRKENPNDKAGIQLEQ  
DKYGTVHV TNIAKNGLFGNSQLEIGDTILSVNRRRLSKGEGPKEILRAVHKYKTISISIR  
KAPPKGAPLVGRKKDKKKNQEKDNNRAKIDTYRGC SKYKEDGSINVQYDEDSADDEKKM  
PTITISAQKGCPSNCTNEESKPGNRR TSSSSRSTTPKRRSLPSEVGLVGLLELAAEGKNR



LVVREIQPKSIFRGTGLRVGDRILSINDMSFRQYIDA EYAQSVMDNAPFMVTLVIEKPEL  
RRGSRKKEELDHSEGSDEDEFGRDTPLSKYELKIETDFLIETYR PATITAPKSRRSQDS  
GLTFKLVRTTRPFGKDKKSSAMRKKKATWVYVDKIDPDSLFAKTSLEVGDKIISINNID  
LRHTPDPNLA YLTC SRSTESIALVVLKDEKVFKEKKLCF DKSITNLEWKV  
>comp2770\_c0\_seq1; 398 76 1206 LEN=1784; translated  
MTVDNSHAATATADDPLARMTSKNNRQQSASNDEIDAMVPSKTNNDAVGNKGFHNKENN  
ENQSAFVLNGPETSASAAKINSTISQTDRTHTASIVDAPPILARPRATLAREISRQVLRH  
KLQKLRHLVLEGVVSEEYLEQHIMHPKLLDMFDPQTVTYNGGI AKIKEWKISCYLEVMEG  
GVPCTNPHELLEVFRLNLTCCDDLFLAWYKQQHACNNHRTNRGHSARRT CERLMTFVTR  
YTPAPGEQALLKHVDGAGKVDGSCVLALPVD RWTGPDNSFYGHGGGLTFWDGREPVEDD  
GGDRPDRSDGHPKRTRPRTRPREIH YDTRPGDIAFIDRAVWHQADPITKGTRWALVIFYK  
VTEQEDDENDCEQERK  
>comp2771\_c0\_seq1; 560 109 1944 LEN=2186; translated  
MGSGAKRLLQRWLLARPLPYLKQGSTISIRSKLKTDLRIRSHWRDDGELSFLQHCHLPSG  
SATIDNDNQSARIFLSRNEDKMTSLGREDPHLSIDILEKIEVEDSVSNGHIGSEPIVTSL  
SLPPPTTIETSEEEVGNLLTIDVDPKINIDCNLTEGGSIFVENKIEGDVRLKTAQGNISV  
KKLRGHHELDTTSIQSQQKGEENSTITPSTIFVSDVLESQSLRLAVDRSSVDRIRAK  
RIHANTMEIQAGGVGEKDEGDVPLNLTTFRESLLDEDDSGAICDIGSLYLVDATVNVQQS  
AASDNRNHGQRQAVRIKSHHGHVHVQVSAPKPNIDNELTGEARPMVDLGGVNGSCEVFVS  
RSDSDSKSADDEWTSCHVHFDSIAPDSVSLIDAKGGNVHVTVDRKVESDVRLFSSPSDAH  
VDTEILLLEDNEDGSLADEVTHMIQEIEDNATSVNSKALPKADKGFDIETNRIKIETQA  
FTSRDRDESGQLQHCQLVDGWENTTSEPDSRFDRKIRGNSGGGKINLGG AQNALHGFV  
SDRSGAAEAAGEDFARPLLA VSSSTGKIVLETLSWLGNIARRYGLDENRSEDDLGRQATRR  
KGLGRVVPKED  
>comp2772\_c0\_seq1; 286 1 1379 LEN=1575; translated  
XTD TD TD TTNXELQLQLQ LNSNSNSNANSNSTPTPKMASTEPELRQAPDSAAPGEEPPV  
VEADADLLERGICRVELPPGLDPERWAAELSRPTPLNFGFEGDGEAFLYRNIMDEPGFPF  
DLVLLGSGGDGDGDSLSEIGRAVLEHFPVLPKSGDGGIRDPRKVLSEELRLDDAFVHY  
HEDQH DTRGKKHRDPSDITVNLCLHKSENAEGLVMFHGARTLRNAGNSDSNSDSGRALA  
GGDRHRRFLVPQKQGHATLHFGDHPHETTALTRGSRTNVILTYVYTDPTGATRPPGCATE  
QCFSAERTVPESQHAPLSLVGRRTTKLCIDSRFSFGARNPCFPFQWTWAASLSAAGEERR  
RDKHSSPPLPTDPRDAKHPADRTRCEDAGSRSDPRQNDGSARDRGRWHTDRADPSGGDD  
PFAASDDGRELPSRSPGHCFSSRQNERLEFTKEIILAW  
>comp2773\_c0\_seq1; 486 102 884 LEN=1135; translated  
MTASKRKNENVYVTHELTKMVI VVNSNHQENENENEQPPNQGVHPTARTPMERMKLLR  
ERWGAAGGPFVAVGASEGGRDDEIALAIGSFLEGGAAEEERESEMLGRAEEV RAGLAHQIQ  
RARELYREESSDLSDL SRELGLKEEKALLREIDELESRQRASQENI AVYQAEAAQELD  
EIMDVEEQRKQHVPR LKMTISLFASTTGIKWDFCDPDL LSGQVAVPSQNSFKLFSIDPRD  
YSPVETANILWGLMDGVEPQ  
>comp2774\_c0\_seq1; 167 208 549 LEN=1127; translated  
MLSLASLGRSLAQTSKTPAVQRCLSRRAASGLCGLPDERDSHWRLRSGSEAASSQEDGTA  
QGSPGLANPGDSLADHPFYDQTAAAEQMIYTMENSYYFASYKAGSGKEGLGSC  
>comp2775\_c0\_seq1; 115 346 1342 LEN=1342; translated  
MFSSSLDGDGDDLNNNENSPDN AFHLITEYPKRSILFSVLMTTTCGATLGPFLDSYHSAFG  
VLAYDEPIRFILWGSETYPALTTAWWVPELFGLAGFLIGWLYILFDATLLNASNDERLRP  
TPSKTLVGISFFTLQYWLSGILLQSN TLDRTGILNLM SLLAASGFLVLDGTF SGLTVSLI  
TCIGGPLIEAGLITATSSGLMSGGYHYTDLGETGFFPLWIVPIYFLGGPANGNLARGFWN  
ALSGKRGGGEMVAVNEPCEVCHSTRRTPCPNCDGVGT YVAMGNRIVQCTSCNSR GYVICR  
ACFDQFDDDPHDIDGIRDIMNRMPDYEF RNNX  
>comp2776\_c0\_seq1; 581 338 1936 LEN=2424; translated  
MPIIAVEEDDQDEVIRLLSGAEIPDIKSNATIS IETPPCTDDEEQKHNEAIDIKGQDPDWD  
DNQSGSTFELCSISSCTNLSEYNNNESLNKSVGRSTHSIGRSGHSIGRSGHSIGRSGRS  
IGNSTSSHRYTIVRRGPSTSQIQMNR SIGSSNSSGRKIGGPRKSSLSKIIDDVIVIPN  
TEERIDTKYFVDHSREIGRGTKTIVRKC IERSTGNRYAVKSVRRTDKTEYEHMRNEVNLL  
TVLDHPSIIKIYDTYEDDKFLHIVVDICKGGELYDYVVKPTSTNKKNQOQEA VPNC PSEE  
VAAVIVRQVVDVAVYLHDHDIVHRDLKLENLLFKLKPNAKNKQSLTEIRVIDFGLSRKYN  
THHRFCSLKKLTSFVGT KLYVAPEVLNHSYTHAVDLWSVGLAYALLSARAPFTGRNDQE  
LFDKIQC HCGEQLKFPSPDFDAVSEEAKHFIRSL LVKDESNRPTACELL DHPMVKADQWK  
EEIDAAAADGNASLFFKILGRFGKGGKKSRAKGNERN DHGPKSNDLDGRVQ  
>comp2777\_c0\_seq1; 886 1 3159 LEN=3499; translated

VPSAVVIEFTEVAKENQKTNVDTVTPFGRQYSSMRFSAAIGALLVLQKSASSGAASVNP  
AGDTFSHQSHHNSKHANQLPKVEGTGARSSRVLRNLPNSHKETESRQKQPEISSSPLAI  
SSALVDLGEDKNYEENFGSIFLGLVGTIPNPSADDTIIRSLQEDASQFDHVMGICNEPN  
TKGVCSKCQYSSINNAEDGLLCSADVDCNSYVFPNEDSEYFLVAYFQYLYHVCRSENLCV  
ESPCEVDVTTKRLSWKDCLYIYDPSDFYTYDPSIYGGYTIQNPEELLQDISFEDLENEIH  
DGEAVDEVSVAYLVSNNPSPFESLCDIFSSIEDDAGNSICPTCMSSTIVGEKGLLLYNM  
EVDCEDESASINEDLGNLTLQIFEGYSAFCDFSKYSDYFVCETGCEVNVDKSMIAEGCY  
FKESAFNYIYATHVVAATTDTFCSYAGGDDGHCRCGITYVDEGEQTNNAVYDVTINSCG  
SFEEAMKGEYSRHALLSFYWICYAGTYCTGACEVDVDSMTISMRHCSNNYSVSFTND  
ETDSLGGIPSTVGSIVPGESEMTTDESEDMGDEPENKTDGTSLVTISLIVRVPVDLEAI  
EEKVIAVAQSILDESMSRRGRQRRLYKVTYHRYLKPDPQRPNLTA VATIVPASSCEPYDS  
FDLSAGSQCIVVSLLEVGKGGKIRKYTKSIEDSVENGVFENELQEVGLDITVVMQTNNE  
AGNLSDNTLIDPSTATPSTGGPSSLAPSAAPTVMRTKELTVTPTIHTVIDTAMDTAMDTT  
MDTTIAPTMAPTMAPTKAITKPTKDPVPTIVPTATPTKARSTKTPTTTTAPSANMISV  
KDTSTTSPSTNTPDISDSLTSNLDLVATDPCPGFADDCSRVANPACSWCLETSVCFNAN  
VEIEAAPVQNGDGSSIIARKFENQCFGTMTQLVSACPIS SQNP SLGETEGGNYKATNLDA  
DVDAEGNVGPD TNADDTLKGTHETTTTSSSTAMNLDAAANDENVDT DANARASFEGINETTD  
IAQSSSSSINTAGMLLASGVCC IATV LAMRHM

>comp2779\_c0\_seq1; 362 143 1012 LEN=1100; translated  
MGNSHPQNK'TGRKVVEQKLENAKKTGVLSLCEHKLETCPNQVFEISKLTTLDL SKNKLVK  
LNPKLSTLKVLSLNVNNDKMPGSMTPISSLTKLKLTSASNNLLGRPVTNKNSKAPAAP  
STAKNTDILPTPLPKGLRTIILLSNNSLTTIPRSIVNNSNPLKLEKLDLSFN NLATVPES  
IANLVALNDLNLDSNVIVSLPPAIGKLRKALSLRNHISSATTPQPLPEELWNTLLI  
DMNLHGPNMTSTQLNSMDGYDAFLSRREVKNKDILGGALTDLDGCGLK

>comp2780\_c0\_seq1; 592 106 2070 LEN=4278; translated  
MPRWNSLFLLAVAIAATAVDAFYVPGVRPLELKEGEPVEMKVNALTSVHTQIPKDYRRLP  
FCVPSSGGPKMASENLGFEFLTGNKIQSSPYSINMLTDAYCTKLCQKTLSPVQAMTLRKH  
YGYHNNWIIDNLP SAAVGLNSQT KKKQLHYAGGFPIGFLDANTGHPYIFNHVNIMIKYHQ  
YDETKSEYRVVGFVAVPMSIKHSFAGGYEWDGDDPEGWSKTLSSCTDASQHLHTSRESIA  
ASQIIAPNESIIIFTYDVIWEQSDIAWSSRWDIYLSDDLVP AEVHWF SITNSILVVLFLS  
LLVVSMLVRNLRDIAAYNALAALADEERDEDMDESGWKL VHADVFRPPDNHPMMFCVCC  
GGGVQLAL TIFLSICFSAIGFLNPARRGSLMNGILSFYVLSGILAGYVSSRLYKAFKGR  
WQLCTVVTALLFPGVAF CIFCFNIILFFLHSSASAPLLDIIIVAAMWCGVSVPLVFGA  
YFGYKQESISFPTVTSTIARAIPEPQLIMHPMV GALVAGVVPFAAAYVELFFIMTSLWMD  
QYYYVFGFTLIVFFILMVTCAEVTLLL VYNQLCIENHRWWWFSFFAPGSTALYTFIYSIF  
WFKALEASKMIMTYLLYFGYMG LICSAMFLVTGTV GALSSSLWFVKTIFGTIKVD

>comp2780\_c0\_seq2; 737 106 4118 LEN=4178; translated  
MPRWNSLFLLAVAIAATAVDAFYVPGVRPLELKEGEPVEMKVNALTSVHTQIPKDYRRLP  
FCVPSSGGPKMASENLGFEFLTGNKIQSSPYSINMLTDAYCTKLCQKTLSPVQAMTLRKH  
YGYHNNWIIDNLP SAAVGLNSQT KKKQLHYAGGFPIGFLDANTGHPYIFNHVNIMIKYHQ  
YDETKSEYRVVGFVAVPMSIKHSFAGGYEWDGDDPEGWSKTLSSCTDASQHLHTSRESIA  
ASQIIAPNESIIIFTYDVIWEQSDIAWSSRWDIYLSDDLVP AEVHWF SITNSILVVLFLS  
LLVVSMLVRNLRDIAAYNALAALADEERDEDMDESGWKL VHADVFRPPDNHPMMFCVCC  
GGGVQLAL TIFLSICFSAIGFLNPARRGSLMNGILSFYVLSGILAGYVSSRLYKAFKGR  
WQLCTVVTALLFPGVAF CIFCFNIILFFLHSSASAPLLDIIIVAAMWCGVSVPLVFGA  
YFGYKQESISFPTVTSTIARAIPEPQLIMHPMV GALVAGVVPFAAAYVELFFIMTSLWMD  
QYYYVFGFTLIVFFILMVTCAEVTLLL VYNQLCIENHRWWWFSFFAPGSTALYTFIYSIF  
WFKALEASKMIMTYLLYFGYMG LICSAMFLVTGTV GALSSSLWFVKTIFGTIKVDKRI  
GGPGRSKTVFVSRGAAEFSPNQPKHVAAASLIRHKNTPRSKRTNTNTFELSIFKTHFIAF  
KIIIFRGAFLASCQPDSSDGASRVLLNLA FVRFC TFSFSGFSVEIVLVGEVRILYRSNSY  
RTVIRDATSIQAKVKNVLANVRYQSDLENSLXRVYEDARGNVRTFLRGSVCTPGTSTSTY  
SYEKNVKNRDFRENEGKMLLLVFP ECKCVSSPVVWRRSMIARERHTMTLILKFQAVVSTLL  
ILSLLPETTRAMASSAAASTISSSVRAIIGGGVSGSASARRLAQLAPSARITLYEMGRG  
LGGRSTRKTRSVPHIYINH GAPYADVRSKLGRSLISSLGPSTAPFSGVRGFLDSKTGT  
FAPGDGEKEGVYVTGAKGEMSIASAMISGIPSIDTKFKTMIRGLSRSPSGEWQLL DKS  
EEVIGSADWLIVAGSGVAHLRWSKTFGGEPPLIAAEKARPD PKLREALDAIASHEASVPL  
AVFFSCSGPTARKWLSLDFDVADVNGSSILSRIMI QGKQKDNSSQSDGGDEWCSVVLH  
STEEFALQNSGVYGSSSSATRIGDAASDASRENSLISDMMVAMNEIPGMPEINTKLQDES  
YSSRYDYGPVIHRWGNAPFKGDALAEFLPSSRIAF CGDYVDTSNPARFGSFESALLS  
GTWAGEQVSQFCQKD

>comp2781\_c0\_seq1; 296 1 1400 LEN=2069; translated  
XSCSSTLPFSSHRAENDRSASYKILSQIASVFWDLMSGENDVSSELYSRNDTFITSSPC  
I I I SWTEELPAEQAENAHIEKYDSETFCCSIAVRPGTEPSGTVKVFMGSDSGDETNNDDR  
TLKEDLLHPDDFGPIPHPKHLS PSSAMTFKECPQSFLFQYLYKIKQPTNKILAKGSMCHS  
ALEHVFDLDPKDRTLENLQNLMRVEWAENRLEEEYRFLFEEEEEDAETGSTNVRRDINAE  
REWGQSALQLENNYYQSEDPRTILRPNPHKREVWVSADLTVDSSLGVTTPAGRAATKTQP  
NPETFVKVIRGIIDRLDIVREAQRKVALKVIDYKTGKAPNLKYSPAMNQKIFEEKFYQLKIY  
ALLMREKTHAAANDKDSMDLRYLKLHFLTSEEPAKWPWMDLGENQEIRDDELQKVHKDL  
SQIWM DIGALVDKQDPKAFQHCDRPF CFC HVCRDRFVPGTVWERPE  
>comp2782\_c0\_seq1; 626 103 1905 LEN=1975; translated  
MTTMMVTPIATVFVLVLAHQGWTESFRGHHGVSFPFRMGYHLDVLPKPTALFSKQHH  
NHFFQQQFP IPAMP SDNFRKMAQS QLELLASSLSRADDPSISKVQSMILYLPQENSFTGQL  
EFTPAILYPDPSTERVFIASDAASGQAPTLPKSLSKLPGFSSAPDLLPGYPMLAGNDPG  
VGTVEEVLCDIRLKTSAISIPLLSGSETVGVLLVSPTVTLDNKSSVENGTSWTKREREQV  
SLAAQSLSMALRMDNERNLLREQNSVFRENLSDSLHQMKNPIQALRTYKILQRQVADTT  
SDGSGTPELLELAERLMVQSDRVVDM LGPMDSLVETLDQPN SVVMLPPAISNNTENVQSM  
VLWNDHPSNNSAMVPRSNPEATIDENDPQPLAPEKITIENRKETEIDGLQATVIGDFETE  
MVFITDVLESVFDTFEAIASENDIKFEVSIEDIDDLPGV FVAPKSFQEATSNVLDNAFKY  
VVLPKDDALFTRNPNPEVRVRIYPNDHVERPGVTVLVEDNGPGIAEDDLDLIFERGFERSD  
KTSSDVGGRGIGLGLARALMKRMGGYLG PASDDMSHFTDILDGAKMKLEVS RKPYPASHR  
>comp2783\_c0\_seq1; 205 389 712 LEN=1247; translated  
MPDMLKDFSVDHICYSGEVIDEAASTTKSHLRKTAESARELPKQKQFADSQAEILHSHS  
KVLKTQLSENWNSSIASIASMPSAISESWDYHANIYHEQQKQLKQQQ  
>comp2784\_c0\_seq1; 270 142 774 LEN=1022; translated  
MKFHLSLPLLSIAFIESTSPAAGA QVDLMPEGEDIYYFKPSETAAAATPPECNKEYESIL  
DICEAGAYDLTEFCRLLA FVNYLDLSDSNKSFTIFAPTDEAVSRLFDDVLD SNGIGSTLM  
REIIQSNYIDGQVETRDLECN SKPNVSSAGKDPPIKCKVDITGNTVPYIKGRGNARGYI  
PRFTDPQNPILTCNSNIYKIDEVLLTNYV  
>comp2786\_c0\_seq1; 355 1 853 LEN=1082; translated  
XPPQAEKGPLVTTERS RHQTYQSAKMKFTSTIILSSLLSGVSAFVVPVARPTVATSSLAAT  
GVDDKTEVREYFNTEGFNRWNKIYSDSDEVNSVQLDIRTGHQDTIQKILNWVQDDGDISG  
KSVCD CGCGVGLAIPLAQMGAKISASDISDSMANEAARRAKEMGLEAKFYTS DLESVSG  
KYDVTVCVDVAIHYPTDKMAEMVGHLC SLAEDRVIISFAPK TWYYSFLK KVGELFPGPSK  
TTRAYLHEEEVVRNALKKAGFEVAREEMTGTNFYFSRLLEAKRV  
>comp2787\_c0\_seq1; 161 136 501 LEN=783; translated  
MASLQLSRHARNLGVINSPAVLYKRILKELPRVLMYDIDMPIEKAKATIRDRFYDNKDV  
KDHRVQEMLIETGYFALETSMLQHKQKNHLMHFLEGYTTPLEGDRKRLDQDSTILDQFAR  
N  
>comp2788\_c0\_seq1; 309 57 1268 LEN=1553; translated  
MQTFYSLLLFSKPRPVVVLFLAASVVVDSFAPATIRSGVLQHHRTKNASAKTERGTL LFA  
ESPQYQKQEGILKRSECVGKGSYLLYIDCVDDDTNGYKPGHVLAL EIQPPAVDGCDDDEV  
SETMTMNEKTRKDMEANEGWMRGPYTVSRGYGTSSEINGKAKNDGFQVLVKEVGYKSHVF  
STCPEGTPVRYGGKFKVPIAEGILEAAETS DSED RGATKRVIMVSTGVGVGPGCLGASEIL  
VNMLTSSDAKECAIDSIDLVT SFRTREEIAMASDLDKLQQQQQGRNPEFHWESIITGETG  
RLSASGPEFLLDQYVSPATSTGSAIRNTHYHIIGNGQLVNEWTAGLEQAGVPS SRVTTEA  
YFNHKGEADPVAVNAICQAILRLDRDAESKEVETAVEQAARDA  
>comp2789\_c0\_seq1; 173 1 400 LEN=882; translated  
XDKSKSTRSNNNTSALSLSLQKNIRCYSNPNHVLTPTFYSIMPPKRVKVM TLPINV  
IFGHLQKKTRVRIWLYEDTKTQIEGQIIGFDEYMNMTLDDAVEIGKTRIEVGRILLKGDA  
ITAIQEANPVKKE  
>comp2790\_c0\_seq1; 181 319 663 LEN=751; translated  
MPIKFSKETSSRLFRYVKSVDIRFNPFDNRRTSAREFWRQM QATRYRKMNPRL EINTHVL  
GSASPPEIVLKLIDDTEKRYDSRNYTASEIFFDVHLSLDNLDNEFELS GKS LDD  
>comp2790\_c0\_seq2; 153 311 511 LEN=599; translated  
MNPRL EINTHVLGSASPPEIVLKLIDDTEKRYDSRNYTASEIFFDVHLSLDNLDNEFELS  
GKS LDD  
>comp2791\_c0\_seq1; 541 185 1786 LEN=2000; translated  
MKLTSMMGQTAAIALMLVKTCL SFRHCTFPALPSLGLRVEDRGS LNPLFYSNQNGDDPQE  
DWRDIRAKLV MQYDKGNDHTTTNRSNTTCMPPIPGMNRWAYDSGDVIEVGS LIVSHPYQD  
WGGLKKQHFKCIIILVIEHSQDGTKGIILNRKLQDEQHKNWICHFGGDTEGIGSSDGS LG

CLFRLNDLSRVKIGMALSILNDIAIMPLDIAOQLVDEEEAKKEDFRLYHGYSAWGPGQLE  
KQIKRGDWMFVATDTESLWDIIVQESTFSTGTDKWVQMMKRIGKESLMISSPNQKFEDDM  
LKQYMLRLLKSSNELQRSSRQQMHARKKSACNLSPGTLVRSSTTILFDEQVVFHQSL  
VLILQDNPEMTIGVVLNRPSTSVSIGGTSPLRYGGRFELDDEGIPELWFHCNNEILQE  
ARIGEPVSQEGKARSIFWKCTRKAETAIKTGLGRAEDFLVVSGLSVWEKEELTKHAGET  
SCIKLDDCFSKVDENSIDTIWKLMLVQEPLNKRNAENLEAANTAWMLSGDAGW  
>comp2792\_c0\_seq1; 370 75 1187 LEN=1322; translated  
MKTLLIGSDRNIRLGQRWQGGDPSTCMSSKIPIHFLKTLFAVFAMTLSKASGITVNGVLF  
SAPSGAVSNIGVATQTSPLPSTTCRSRVVFIHGRLEADPASDDLTIIPRPAELYSDFCCKGL  
AASMSDVFLVDYHEHYRDWRREPRDLELGPVSSAVGETIRKHIKSYSDPMNATATSISV  
KITLVSFSGMAAIVLKLKNSPMFESASVSPSSILKNGIKIERAILVEPVWRCWLPAFAV  
SRAAEARYSANAKKVEISKVPSLVLVGTNDLEVRHDINGMGMSNGTRNLGQSVARCLQPF  
LPNLSTIDIAGGNHFLGCSGPPKFMVFASEGLSSGKSSERLRKEMIDHISEFSAQSPESD  
DDSDSDSTAI  
>comp2793\_c0\_seq1; 562 143 1555 LEN=1681; translated  
MKFSHATLLAIASVSTASAFSTRSASVTRSTKASVKTPQYAVSVDLDPDSTNTAVPEVKK  
VPEATEEPFDMTGVALSGLEKALQWKESDFPKAKDLRAVIPKDCFEPETKTSMKYLSVS  
VIGTTLCSLFGARMLNVFNPGSVANLPFWAAYSTVTGTVMGLWVLAHECGHGAFSKNKK  
IQDTVGYILHSLFLVPYYSWQRSHAVHHQYTNHMELGETHVPETASGHSLGLRNSLVAKV  
GKSAGIKIWGSLQAFHLHLIIGWPAYLLIGATGGPDRGMTNHYWPNPLTTPKQPRRELFPG  
NWKAKVMKSDIGVAVGAAGALGWFKGLPLMMAMYGGPLIVVNAWLVLTYTLQHTDQV  
PHFSSDKHSFVKALHTIDRPYDKLDPFGFIDFLHHKIGTTHVAHHFDSSIPHYKAQVAT  
DAIKKAYPKMHLYDPTPIPKALWRIAKGCTAVEKRGDKWIWKNSSGLEPLL  
>comp2794\_c0\_seq1; 246 48 536 LEN=1045; translated  
MKLSFSLLSLALVALSASSVSAAGLSTRKLQEQFEGTDNSQYNAPDAPSYCKKDQQPNNG  
DKCPSVGLQCAFNNIQCICGEGGWSCGNPSPTPLTPMPTPSPISKPTCNGSDPCVTI  
LKENEEDVTENIAVTDEESSAAGAASAAVMVAAGAATALVL  
>comp2795\_c0\_seq1; 567 164 1852 LEN=2068; translated  
MQMQDSQLRNCLRQAFFAPRLLLLVLLICGIVSSTNAKPGPNSMLLRVRLADGSMERVQV  
EEGKEDTLTLEDVLKPFVGSDDASITIGTSKETAIRDSFLANLGVNRNGSMITVMAPKEKE  
SGNGTTPKTSRFAFRKASASKVGGWNPYPDLAKDYDSVVIEAQKRRASRQSMSYDAISKL  
QSSLHVVDPOKEGPLLRVYMCRVSAERFYNSGVVTTASKSKKKQQGPTYNCRAGLLGLTIQ  
KERVDQRPKARTSLSSQTADSEYCKVAKIQAIWEPPGQKPSDKLYDAKLAASLLDSSK  
KRMKTIANHLGLVPVGIWIFSYQDDRLKEENSFSTEGPQALFGLDVTIGAKLKIQNEMDRR  
AIKEDDVLQGDRFVTLAMDATSGATEAFQLSDVCVQMVHEDMFQKLTETDGTSEITNPP  
IVPVRHAVLVDGRETLLDSVLCVNTALLSHVGSYSGHVTGSSVSVKINGSLTNKTKK  
LLLKALESSDANDFLQEICDFNIMALDQLLSQSQVKSSNNDHEADMEILCGLVRKWAR  
GQKKGTAIDPKFKRKLQTYLST  
>comp2796\_c0\_seq1; 326 101 559 LEN=619; translated  
MNAERTYIMIKPDGVQRGIVGNIISRFEKGYKLSAMKTKQATKELLDEHYKDLVDKPF  
FPGLRDYMMSGPVVCMVWEGKEAVVTGRKMLGETNPLASSPGTIRGDFCIEVGRNICHS  
DCVENAEKEIALWFDDEVIDWTSHSKDWIYE  
>comp2797\_c0\_seq1; 355 134 1081 LEN=1373; translated  
MSRPELTGHASNFYNEKEARKYNSSSRMINVQREITLRAIELLLLPPDETSLVLDIGCGS  
GLSGEVLEEQGHVWVGCDVSRDMLQVAHERMEDSYKVKDDGDSGMSDSDDEDDDGLPST  
GDLMHDMGTGLPFRPATFDACVSISALQWLCYSNSASQIPKRRLVRFSSLYSILKKS  
RAVLQFYFETAQAVLISECATAVGFGGGIVVDYPNSAKAKKHVYLVSCDRCTCRKQLPTG  
MTGDERVENSNRHVQVSSSSSGRTQREGRGKEKPIRKKKGVKTKEWILHKKETQRKKGKNV  
RPDTKYTARRRRGKF  
>comp2798\_c0\_seq1; 353 1 1233 LEN=1407; translated  
RSILLDELRLVEMETGNSTHWNDETVVGDVDFGLPDDEESQSQPREAPDYESSASNRPASG  
ESTDVSIPSDPRKSIHVHRQNLTMATDSAKSLQSSIDFAELQLQEVIGGGGFGQVWKAT  
WRGTPVAVKVLTGSAQNTHIAKAILIEFKAEINLLKGMRHPNICLYMGACMTPPNRAIIT  
ELAANGSVWDSLRLPLMPPYTASDGTPNGSWPLSLYLPSSHGVPPTSSGSVLRATTEISA  
PIPPRGTWPELVKRVSCGAARGMAYLHSGHPPVLRDLKLANLLDESYTTKVCDFGLS  
RLKAQARSMTANCGTVQWMAPEVLANRSYDERADVYSFGIIVWELLSRECPYEGMTAIQC  
ALAVLNDRKRPEIPKWCPPGLHALIKSCTKKDPSEPSFAEIIAALDAMG  
>comp2799\_c0\_seq1; 354 206 1651 LEN=2196; translated  
MIGAALLAVSFALTLFPVFRASNDWMWIETHHYTGERRGLPSNDSYLSRRRLEKETSIGRD  
KTISDTSYDFPFQADIGSSSSSRDIGSKQHQRQAFPSSETESGRRNFFFPIDFRRQKGRLL

NVGFSGDDDGARKRGQRNRPPRRKSLTNGIKDRSFPMSIVSGNSTTIPPAMASGGDPS  
EGTTATTALVEKTNHALEKRRATSATLQHGDFAFRARSNYNDSNVELSLSLDPFSLASLVR  
NLVASSVGAGSVYVGTLLKLLGPMILAKQCLASVGYAFYDYSGRYLPQKQQRVRCVQEY  
ELIAAGRAALRSLQLFLCMGLVGQVRLVLDPHRSCTLGPPWPCHLWYGVVWLASVCAA  
GCACEEWGDFLAKKTGNRFAPSSLSVLSTATDAGPRADFFFSSKHHVREDCLRGRKRKN  
VVGPPQRRFVKGPSRDPENWLKSIMCILPDREDPIRPRQSGTNSGICRKVSGDVEDVLLFPS  
VW

>comp2800\_c0\_seq1; 558 204 1547 LEN=1894; translated  
MASAGDTPETLPEFANAEDYLKYLGTVSQPLPLGFATGTADGTFISVEAPGLGNLKIRATV  
IQLTEGPTENWAACFTSNKFPGAPIKVGRKRLEAGGPIEALVINNKVSNVCSGGDGEADA  
EMVCEAVAKALNLESKDLVLPSSGTGVIWRLPAKELATEVVPEAIKNMQTDSVLNAAEAI  
MTTDRFPKVRISITLSNGARVVGIAKGAGMIEPNMATMLS YILTDATVPKETLQSMGLSVV  
NDTFNCMSVDGESTSDTVVCLASNKISEDIDLKEFESALKTVSEGLAADIVRNGEGTSH  
VMRVVISNFPGTKKDARFLGRHIVNSPLFKCAVAGNDPNTGRLAGAIGSYMGKYMADDT  
TKMSLTLGGRSIFTKGKFVLEGDKVEKELSNHMKNAEYGDTHFPHPHQRVFEIGVDFGIE  
NTDFEDVSVLGSDDLTKKEYVVINADYRS

>comp2800\_c0\_seq2; 159 204 467 LEN=595; translated  
MASAGDTPETLPEFANAEDYLKYLGTVSQPLPLGFATGTADGTFISVEAPGLGNLKIRATV  
IQLTEGPTENWAACFTSNKVGLKHQYA

>comp2801\_c0\_seq1; 480 213 1673 LEN=1868; translated  
MNVVKSRSNNLPRASTSPDKKFSKAVTNINLYQEIPTEVSLDDFEFALDRLKVLKKIE  
QLKIRHVHPDNYKKHLDPLLSKLNDPKDTISHFVLRLAYCRSEDLRRWILAQEVALLKH  
RLHHSRVGNAI PNALRSVLPNAHVMTRESELEPLPKILAATPSLNKNPLSVASGGEASAI  
GQAIYRVPFAQALDLVQHRQVFKAGKAYIPESKLLNLVTARFRTNLSRQLALLSAVPST  
PSLQRTTGFLKNVATVHTQQEDYSRTNKDGNMNAHNVP SHLKHMPCLMAQLQMALGTEK  
HLKHWGRLQYGLFLKGAGLSLDDALTYFERMFVVGKDFNKEYSYNFRHMYGKEGKRQSYPP  
YTCSKIINSNAPNANEHHGCPYKHSSVQDLSRMLSRLGVAPSQQKSIVAQKQSHNYQLAC  
VEHFKAVHPGVTPSESNFGNHPNAWFASSVKA AAVSGGGTTSSEPGSPSSPGDATMKDAD  
PVSVS P

>comp2802\_c0\_seq1; 353 111 2171 LEN=2759; translated  
MSMANAKEASSTGTSDDPIALLDDDDDDGTVASIGAVRNTNERKRSASPGRECSL  
ESVPRKRSVRGNRAVSPQERAILPHDDGCM LNPRHP IKIFATDRDKTTRNLRRRLKKGE  
VDSDKDGYHYTNTEDAYRTHWSVFHCWTFREMLGFDRFSGIRYQTQADLIGSDTFPGAKT  
NKISHGNPVGIDWIFITTYILDVDYLLHELPELLDIPLVVIYQYKDFSSREEAWIKEVS  
SKKEHNALALVERNPRDPPRTE SNPLKVRMPYGC HHTKMTLVGYSSGRLRVHIHTSNLRQG  
DVHDKCQGAFLQDFLPKTEDQLCNFVTSDFEESLVTYLESYHFVLPVWVWKA EIGRGE  
EATTLVSNIQTYDFSSSVGLVLPVSPGYHNASLDARPSHRGNREIYG LKVVHKAIREHCN  
CDSSSAGPIVCQFSSMGALWEPYLDKVA AAWNAGAANCGSKTVATSRPPKKGELAA SWLR  
FVWPPTLEVKESEVEGPMGGNSVPGTAKNLHKT FVRSL LHKWRFLSSNNGGSTTGM YENL  
DSTDSNQRRWKEEDPLDKGCHVPHIKSYYQIHELGD RYGRDSMLWFVLS SHNMSVA AWGQ  
IQNRQKDLGRKVLTVQHWELGIFLAPSTLGVRS MGPTLEGSRRHRQAYNCKTANDDP INEA  
TRAVIPLPFKFRPIKYQDSDKPWVVG

>comp2803\_c0\_seq1; 724 1 2003 LEN=2106; translated  
XAPSAPSAPPTPNHRTTPTKEYFHGLFPLTTDCEHNHDVDKCKQSVREVFAAERVASIVP  
TKAPSAFTRVFLSLEYAPGAERSDVARNRGLGLGYSFYSTTRHLAGKKRIEKEFEYEP LF  
QSNVYDTSLEANAETEFVQILPPEGHVETVVVDGEEYLRLVDPKRTLSEL SERAFGDIAH  
LLRPKHLGQLRSILEDP EASKNDKFVALELLRNADIASGRILPGCQDTGT AIVSAKRGRH  
VLTDGDDEEYLSLGAYQAYKNLNLRYSQVAPLDMFKEKNTGTNLPAQIDVAAAKGDEYKF  
LFMAKGGGSANKTFLYQQTKALLNPGSLEEF LDNTIKSIGTSACPPYHLAIVVGGLSAEL  
NLKAVKMASTK FYDDLPTTGSEGGRAYRDVEWEKHILKMTRNMGIGAQFGGKYFCHDVRV  
IRLPRHGASCVPVIGVSCSADRQILAKINKDGVFVERLET DVAKYIPDVTE SDLANDDDN  
DTEAVSIDLDSMSMTELRETLAKYPTKTRLSLTGTIVVARDIAHAKMLTKIESGGLPDY  
AKNNIIYYAGPAKTPEGYASGSFGPTTAGRMDAYVKKFMENGGSFVTLAKGNRSKAVTNA  
CKKYGGFYLSIGGPAAILAKNCIKNVEVLDNEEDGMEAVWKIDVVDFFPAFIVVDDKGD  
FFKEWLG

>comp2804\_c0\_seq1; 165 190 1288 LEN=1714; translated  
MFAVLPLCVINCLLLALVSYSREKFR LGFSPNGHLLTLLVSVFLVSKVNLAYDRYRAVR  
EYAGRGSTLLRELIQMAMAISIAHSNNNIENSEREKELRQWRLECV EKVKELLNSSVCVL  
QDRSLAKHFAYNKPVTKSGPSILTSSSSYDSRTVDLNGGSRDEDAXDNASGSPAADPITA  
TASLLHPGHGVRASRTGPPDEQAPGIRNMLHLAAHAGIDSASF SAGANGEGLSVDM DILD

AXLLEGPFSMWSAQTFLLFFLTGFIGLELVSIKLSDPFGSGRDDVPI SGIRDAAIQI  
DNDLREIAGMQATISERRLKFSRQTIRQRHQSASHAQETEAGDCQDHHDDQNYGYHAMAG  
ADNDIA

>comp2805\_c0\_seq1; 393 234 1334 LEN=1480; translated  
MARWHSTSGRRTTSLFESVANGYYRNTNSDEI PLEKLLQKASGIVRDYSRKNRNSDSDSP  
AVFSLEALGTQAVYENTLFFPSFYNAGVGANKKSSPSSSTTGMTERGFSNWILPGKIMVG  
QYPGRVPEKNTPTETEVEVRAHLGEVLEASRRSDATTTNGGVCFVSLQSELPPQDDYDSWKAS  
GGEIYLEGDARSEWPNPFSHYAPTVEWVRSRMDTDGDGDSAVEVQYLHHPIRDLSVPSNS  
KHLRLLLWKILEVLNRESDGNSDSMVYIHCWGGRRGRAGLTACCLLALLHFASEGTDG  
GGNHDDNLSAIFDIVQTGYDSRLGSEHMLLALSRSPQTSQRAVAGFYGEVRAAAAEAG  
KNGNAK

>comp2806\_c0\_seq1; 85 212 439 LEN=816; translated  
MLEEGARSHLDASEHYREAREFARWSAEDRASRRADLPPLTPEQREQMRNYLRIMQEYHA  
FNPDSDLDPATGKPR

>comp2806\_c0\_seq2; 143 360 704 LEN=1081; translated  
MFQNFGRLSANQRVWGAIGGVIVVGTAFKITYFRYCRDAMLEEGARSHLDASEHYREARE  
FARWSAEDRASRRADLPPLTPEQREQMRNYLRIMQEYHAFNPDSDLDPATGKPR

>comp2807\_c0\_seq1; 321 70 780 LEN=1754; translated  
MATTMGEACDSSLIGSFYFIGINAWPTVLDDLTNSTTQRRGEVLMFGFQDIPGGDLTYLT  
DRAWTDEGFVPNFVVGKEGILKFTTPPQGVPSGVAFGIGNNTQIYKYAEEMDEDVDGTQA  
EVGGNETHYFDLGLDGDQVFLYCVGGDGKDRPIAGISYNGDFAYQDTYGTNKSSAPGSFQ  
EHDTESGANRTLLVMPTVATEDETSKIFLDWQYVGPMSLNFELQDAIRDTEENNW

>comp2808\_c0\_seq1; 879 391 3246 LEN=3502; translated  
MSPAMTDADEILSYATGTSSLSGKFATHDVYDEHLEDIHANLSKRESIRTSLSISNRNN  
RVSNGKQDPYDELEQDIRETVRSSTKQSRNLPSHNGRRNSNNSNKEQRDKKTKSSDQKS  
SHSGRTRSKMRSSGNECASTVASSMSMLSKDDSENKDTGHRNRNKMERTSSGRRIRSNS  
DINRLLQYDETDGYSTEKSRGSSSTRGGKNISSSRSGHRSLAGSVRNRTQSCERRVGR  
STSESVPKVVLDSDNRDDLDPKRRSSSQHFQSNLKNRRRSDERRNDDRYGKSSSSLSRS  
IRSIQRRQSDQENKEKRREREGKSLDALDKLQDRSFEKAWADDRPILGQRSRSEREISNKS  
FSRIEGVKGDCSTRSGTFPADKGGKTKLEKIHELQKCDLYKAELRKLTDQRYYRRLD  
NSREEVISLKKIVDEYEGDITALQTKLADVQDTLQMTSAQRSELTELSVAKELARVNI  
DYAKSVEEARSTKTELEGVKQKLADREKKIAELEELRKSVENVKQFEADVLYADEHIDK  
LESEVKRLEIDLTTYKDAERDSVLNSDGNQNGDHLRRAKEEAERKRFEEQENRIKERNR  
ILEEQKQEFEAERKRCYEEQRKKERDFEEQRAREDDRLKIAEADQQRKEEKMNKILKTL  
DENAALKGRLKGEQLDSTIKLQKKDNAIGELQKEVARLTKEQKHDSAPNNSPALLQEI  
RLKAAA AVKEVDFEDAHIKNMELTNEVSDLQIASKEMVALLSLENEVVEQKLEVDNQKK  
KTMEWQKKSGEWSDKAFKWKEMSEYWEKKAKESNNHSDSCSSF DENVVQTDPOALFLAAV  
EKKVMNTSTANGNGSWHLRRLFGQAPENGDEAHDIVEKLESENSMKQTEINKLKSELVKL  
QTNFKGEAYSRSQYEYELRKEKNDLEVTNANLLKELELARKLNQTI SDYVD

>comp2809\_c0\_seq1; 260 36 322 LEN=322; translated  
MITSFTIAVTAVALTEWKKLEGNGKNTTHHQKDKVKDKDTGKRYGSMQRKASKAKKKASR  
PVAVASSYFVAGDILFDPTKTRASTANNNGNGNG

>comp2809\_c0\_seq2; 147 1 370 LEN=370; translated  
XSHRIASHPIPSHQDEPRTLGRGEFWKQTDKQTGGTVGAVALTEWKKLEGNGKNTTHHQK  
DKVKDKDTGKRYGSMQRKASKAKKKASRPVAVASSYFVAGDILFDPTKTRASTANNNGN  
GNG

>comp2810\_c0\_seq1; 595 426 2948 LEN=4823; translated  
MKTHPPFGSAPGPRAVGFPPAIAFRRQDALHDQORRRFFSSPPPGAGQSLGSIFGTDPSGG  
SYLEDFTIDLTEIARGGKKQGGADSPGGNGSGGNTKMDPIIGRHEEIGRCLQILARRTKS  
NPILIGQAGVGKTAVAEGLAQRIVGGQVPESMKHKRVLSLDVTGLVSGAYMRGQFEERLR  
GILKEVTESDGSVILFVDEIHLIGTAGKGEVSDMGNMLKPALARGDLQLIGATTLD EYR  
ILEKDPALARRFQAVYVDEPSVEDTSLIRGLKPHYELHHAGIRIKDEALVAAAEMSDRY  
ITDRFQPKSIDLVDEACSQLRLEQESKPEVLWKVERDLMTKQIEMSALQGEDDKNSIKR  
RETVASEVEELKQRAQKLTQEMWQEERNLSTRVKDLKQELAEAQQEMEIARSKGDFARAGE  
LLHSKIPHLKHELEETEKEEDDASATQGSRLNDSVDASIAAIVARSTGIPVSKITGTE  
SRKLLDMEDKLRQRVIGQDHALQAVSNVRLSRTGLQARDRTLGNFLFAGPSGVGKTELC  
KALAEFLFDDQAMTRIDMSEFGKHTVSRILIGSPPGYVGYEKGGVLTEAVRRRYPYQILL  
LDEFEKSHPDVWNLLLQLFDDGRLTDSHGREVDFSNVIVVMTSNMGAHVISELPSHLKGN  
EPEVKESIMNVVRNTLSPELLNRIDETVIFNRLQREQMGQIAGIHLEDIATRLEENHGMA  
LKVSKSAQACIEEHGFDIRYGARPLKRAITKDILNPLSKAILGGEIRDADLVRVVTRGEA

INLQNEERHLGWVTGADPRSTDRNDVLLKNHEAYTDDDISGSGKVSGEDDDYYSDREWRA  
>comp2811\_c0\_seq1; 230 126 665 LEN=1172; translated  
MASIWARYNKLLDTQPLLTCLTSLTGFTVGDILAQKFI EPSDKPYDIMRTIRLGSFGFL  
FHGSTGHYFYGMLDSKMPGKTPVTVASKVLIDQTIWNPIFGCCFFGFLNFAEGKTWDDYT  
KKLNSDLKTAVMGSWAVVPAHTINFAPFIPPSQRLLYINTIQIGYNIFLSFLGNKKADE  
>comp2812\_c0\_seq1; 226 101 787 LEN=877; translated  
MLGTRKHLILEVVVVVVALVWNHSL EATRFQGQVDAFLATAVFPKFPARGCTAPRQPQFPS  
MGPLFSLGDSRAPPDRETNRAGNGSDAVEKKNRRKRSLYSFSEARKIARGHGFSTREEF  
IEYDCAGAYQVPKNADEVWSEDTWSEDFLGLRLAEFEQARDVARSRVGPNSTTSWKVST  
EEEYLELFRSKQIDDDDIASRLPYRPDLFYKNKGWTSWEDFLSPGSDE  
>comp2813\_c0\_seq1; 180 87 717 LEN=717; translated  
MGKKRNNRRRQNYQSGSSNTPRLGSKGCSLCYDSSIPENLNAHVNDSQTCADIHLQLAM  
LRYDNAMCSVQEKYQELCCTKVDTGNGGSTLGFMLGAI VAGFFLKNMFTLRKR RVEEMK  
SMDGGMELPRTVSLGARSRNSNSRENQDIPSTWYVRMDDSKSKSKSSSRSRGKPMAYIT  
NSKRLEKKEARRDPKH YFLPDDL GAGVDQE  
>comp2814\_c0\_seq1; 413 344 1789 LEN=1805; translated  
MTTSVCYPDQCCIDTDESCGMEGTHFSTISSVFPRLKQLLRKSVNSLSPSTPFEENDE  
TAIATLIFESMYTPGRVYHSMQHVFNISDNCDIETDPMLLLSTLFHDVIYYTVDKSFLKS  
QLELLDNVLA FEDAGDEPKRLKEPLLLSPDAQEDPLLD MIFRLDFDKPGTPLPSFGSNEF  
LSAVIGVRVLSKWL SVQVTQLTAAIEATVPFRPPSPDGKTAMDRLYDRLITVAPNQSED  
WFEETIHLSALMANCDLCSFDSNFDFFLDSNWSLVP EFRPALLKENCPLQEYYDEF LAM  
EGRTKFLISAIPNIFQVFRNVPSESE LADKRASTRANLV LGDDYAQVRRQLQMLVMEFVT  
MVGEIPESIPGRQFLSLELKKSSCSGEE SPVRKRLDPGRRQGF PWDPARCSLGAFLYDHL  
GKEGIDTAVEVGKTQKPGSGHLLDHL PNDVVAVVAASLEEILPDHSEALKNISDKLGF SQ  
T  
>comp2815\_c0\_seq1; 336 1 1594 LEN=2098; translated  
XLQPTYHPPVPSSTKQRKERAIMGSSNRRKRRKGINIERVLFPLVILMAIGLLFVN  
ISVMVEHSNKGKRRGSDEADSSIRKSRGMSESEKQKRGNGSDSHSKDVQKDRLPPPETK  
PHDEPKPSKQETPQTAA PGENSGGDI DEHMLRILRHVGIHNSQLTDQELSALPTWSQV  
VEKFGNKGPVMLGRETCSEYRSSVDRKHRKLG VAGPFSSGTHYLHTILSNCKSLEDKGR  
VMFQVPWGKHQSANFRLVHNVAVSSTLKN DHKKNETT GKLDHPPLDPKHLKENKSVLP IV  
VVRDPYSWWQSMCRVRYSAHWFHVVPDHC PNFV PNEVEREFWFKTKKEIRKHYNNDPWKV  
DNVVDKANFTLDKTVVPLWVRYHSEN RQHKS LAHMWADWYNDY YEANFPRLMIRLEDLVF  
YPHETLKMVCECANDDDDGDEQKASFEYVGDENLELSLESAIKGKGDKVDNIHGKDR TGL  
LGAMKKHAGKYSDEHRLTGMPSDMEFAEAVL KESDVFKDLGYQRPVRPSA  
>comp2816\_c0\_seq1; 335 428 1477 LEN=1579; minus strand; translated  
MRLLFVALSVDVVRAKGLLSGTDGILEHEFVGVVLD TLLGGVVELFRPRQYLVL LFPFRWH  
VDLAQVPADAAQR PDLKGARPRQKEHPRKGLVQRGGRHQRAVVLQH QDLVGRSQAFYQPL  
PLVDGIRRALEGVVGQAALGRQSRFLADGQQAEPRLTHGRRIQGVYVPHGVGVRPAPVDR  
RVDHKARLEDPASPVA VHHVPVQVDLED RRGPHFVEARTKFVDEKVR AIQDIVRVNLE  
RDVVENVLVPALHEGYPVTSRQLAALLPLDFFLGNAASRIAFFCRVLRNRREL PSSFWN  
RTPDLRVVRAMLSSYGGWTKPPQVANGCSESVH VYDDDDAISDFYRVPW  
>comp2817\_c0\_seq1; 281 294 1094 LEN=1516; translated  
MTAATNRDNSVKVKASSTTKVAGPKTASSGIMHQVIMP KTLPTAPPTSQPSKPVSLPAN  
RTVATVTTTHRSNYAKKTNGRVSKRNGVWYLG GNHVVKLLTSVDGDL DHSILSKLAAVPT  
VVGELALSVELVSDDITVGGFENDLLAKIASNTLTAKRE IMAAKAAAAPKATP ICTTPT  
PLGSTSMGAAAAASTHKKAKGAPSSGSEQV PNPLLANYQPVPNPLAIRITPPASPHTSAA  
TEQSSAGSPKTTKTLQTKGLPLIHAR  
>comp2818\_c0\_seq1; 125 402 829 LEN=885; translated  
MAEXHDL SAE LAQREASLPGSQKETKGF LPVPLRSRRPRNKDPALSPLQAAGGGPPAGVE  
EPPGSHGDAPELDEEGPPAPPGRSDRADRTG STPVARKVTAQAGTGSRAKAKRKRQ ILEA  
YPRIQADGGTRRSNRCLLVPRF  
>comp2819\_c0\_seq1; 886 1 2587 LEN=2842; translated  
XSPGPSPAPSPFPTLAPNSGQTPAPSPGSPAPSAEPS SPPSPAPTGACSISSCLNCTA  
IVEGIELDCADIPEEKQPVCFCECVRELQFTYTGR SCPENQLSCTDNSPSPFVAGYRIT  
DANDPTLVLATGQAQQQDTIVVTSPTGCI PDTLSVTISVPTGAVTQTFLIDARCDGGRGL  
TLLGNYGAFESVGYTCDATDVHNCVQT VTYGKVCNDGPEPQKIYEFDLTTKETNTAFDE  
SCDLLQDGSIPMLGPGECYENKPF EVNRCVQSNYCVDVVANATDVL TGIPSPCPASDEI  
KFGWPGMPLPPPTFPPTVMPSPPPSPAPTSACVIDVKIDGCPAPNISLDNNCEGRPQTIT  
FKYTGDC EQSRNFQSRQKFMCTPAEGPSAPTTKGT VNYIEAVPRGGGDLYYAGNVAVG D

NYILNENKQFDKLSADMTITIFESQGGPVLQTVDVHLSQALFLFDKFGANQVVRWVET  
DGRVVEAQAFVTTDDFVLNLETSEVTGSGGPITLTEMVLTNAQDLPIDYTPQVAGKQLI  
PGQPINLPGFQLDIDLQRTQTEYTFFTTIIIGQTSDBGTPCNGSDFHSCVVGFNLSFSFPTDV  
PTPRPTITPFPTGSPNSTACEIASNIECTVTRPANPKLPLSCSDLGSGVSATCSSELLAA  
FLEYDGSGLGPRVFNPTCGKNEFFGQFVNANEVVELNTRAADFCDGAVTIGIYDADPLQG  
GSQLGSADVELSCPGPWTIGNTIAPGLTLAYVSTVNNGLTFTYNFLDAEVQIDYVGINA  
GAGPLTVSGGDYSGTSPFTSGAITGGSTITGRGRQVLATETQTISLPGTGGTALDFSMSV  
DGATANQFALPCTTASNYRLNL

>comp2820\_c0\_seq1; 463 128 1036 LEN=1279; translated  
MTSGVPVGDSPFGPTEMPTEEQRHMSGLCCFNWLGLTSLAAFICGVYSFAYCNFLSRYV  
TLSDNYSFGDFAAACSDLGYEDGDSFDAQTCQSIMEDHAIGFSYWQATIPVDQRVCFSYT  
QLTPWGYASPDFDSSFFTSRTFAIIGYVFGGMAWFTLACSSCCMIDQORLKGIGCYFIIA  
SFSQGLSLVMFRSNI CEKGFFEPYFVPPSQRDNETYLESFNSVVADVECELSFGSKMAIS  
ASVLYFICALMVPFSVVPPLYEQRYRRDFDGDQQQRGQDEASPSPLPEGEGPVVRGHVTG  
KV

>comp2821\_c0\_seq1; 327 451 1662 LEN=2405; translated  
MTSLNNDGIMRRGSYNQGLSNSKIESARRFLYDEDESFSGSVNFKSVRRNTNLSGFPTVT  
SVPYGNENTRGRDYSSKRCLCAIVLIGILAVCVWTSFVVASGRESPEHVDEKRIQEFQSK  
IVELGLSLEGDIETTGTTPQYHALQWLANDDGAKLDVADAHAMQRYALAVLFYSTAGTEDH  
IDPNANGQWVNQTNWMTGAGFCSWHGKCIADSTEHRNEDGDVLALDLSQNGLDGVLPS  
ELSAFSLQRLDFSHNGLTGNLPKNFETLTGLRSLILRNKLSGTIPKGFGIKLTNMVWL  
NLGENQLHGPIPSEMEHMVDLRSGLDRNQLSGKIPDLEDLSKLLKLYLKENNLEGPFP  
SLSKLTSLVEINLSGNHLTGLLPSEIEKLTCLGELVHDQAFSE

>comp2821\_c0\_seq2; 365 451 2208 LEN=2278; translated  
MTSLNNDGIMRRGSYNQGLSNSKIESARRFLYDEDESFSGSVNFKSVRRNTNLSGFPTVT  
SVPYGNENTRGRDYSSKRCLCAIVLIGILAVCVWTSFVVASGRESPEHVDEKRIQEFQSK  
IVELGLSLEGDIETTGTTPQYHALQWLANDDGAKLDVADAHAMQRYALAVLFYSTAGTEDH  
IDPNANGQWVNQTNWMTGAGFCSWHGKCIADSTEHRNEDGDVLALDLSQNGLDGVLPS  
ELSAFSLQRLDFSHNGLTGNLPKNFETLTGLRSLILRNKLSGTIPKGFGIKLTNMVWL  
NLGENQLHGPIPSEMEHMVDLRSGLDRNQLSGKIPDLEDLSKLLKLYLKENNLEGPFP  
SLSKLTSLVEINLSGNHLTGLLPSEIEKLTCLLELLILNKMNLRGTIPEIFKKVTRTEL  
NLSNHFQGIPTSIGHLKDIQGFFLGENKLTGTIPRQVGLMVDLKRFEIDGNNIGGTIP  
NLISALNSLEGFKLSRNSITGTIPPDIGNLHRLVELEFESNKLEKVPPEIGNLVNLKQA  
RLYDNNLTGDVPKEVCALTKDEDLAYLGVDKASDKVNCDCCTKCF

>comp2822\_c0\_seq1; 1075 150 3365 LEN=3600; translated  
MTWFRANRALWACPNTLPPDTARTISTTTRRKNVEHLIEEYLGQRTEDDGCSESSDV  
LEKEEWMHNDYPLEEKNDTPAATHTTDEDNYGYFEISLTTNAIQDMVDEGTIWVAEQAT  
KNCECENGEGLLSAAPLAAGPLVLWLRDLRQPQAPDPDRDDAQMDHKRIGEIESGMF  
SASISDGTNWCSGAIWQTKEGQLEDLSECVLSISGFVLGVHCAASLECPSPDTARGDR  
KDCDDNCTVASGGKRPKPVSCCSLNSLDGNKRQTSPIYITRYEVLYEKRSKNQSHDD  
DDSINDIQFTEQIRSQTCELQKEGILAGLLASRKLGTDLVIGEDKGKLI CHSYHNRHDHL  
CQEAAMLKINENALEVRNFMEQHFAITTLKSRKEDASLMASSFSLMLGSQKCFQNYYS  
ALNEFDQGQRENLFSLNDTTEESFVDGSDPEETASDTRREQKRIQNKETMEYALQCTE  
ERLSPPELLLRWHAWLLGDGLEQEAGAFRSEKISVRVGAF CASMEDHWLPRVRQDPTNAVR  
IATFAAAVKLGFLDMRPF EAGNQLLARILFCWSLRRAGLPFSVITYSNEKQKLDYYSLIE  
STRRNLVPLGLVDADIMTRILLSTGGLAPLVGFLVNCIASSAIDLRLVEKKNMASE  
ETNARLRLAREKAAKGTICICFDENPNIVTMCCGKPVHFNMAEWLTSNSSCPQCRSDI  
PSLSTRRFSQARENPPVEYQDRSYLRNLFSEEFLYAHSSSSSSSSSSSSSSSSSSSS  
TESAFFYSGLDYGVNDTSSANSPVENESTNSIRNLLPYRIDSPVPSQIQTGLNYVTSD  
ESQHNYVTDDTDDSDAISQSGNDDGDGQYSFDSNHSANYSTHFELTRGNSADNDSGWES  
ESTALSFARSGRLEL CDDSAANSEPELSDDGTENSEHYSCSDDEQSSLGDQEHLHRFRMS  
FLDPELLGNAQALESRRSRRTYLHRESSDSMVGQERLRF LRDGEGNGSLEFALPADPRYL  
RVGDGSSHDANQLVSSII EGSLTNAFADMRCDVTPAQPNPVPDNDVSVTI

>comp2824\_c0\_seq1; 213 247 945 LEN=1438; translated  
MMLRIGISLLAFLAAWAPLSSALSCPPQKTSAAHQSSSLASTRRSFVGGAAAAAGLVT  
SGPSFASEPPSSTGLPSKGARAPSFELPNSRGTGLVTL DGLVKNSKWTVLYFYPGAFTSG  
CTLEARGFQKDL EYRKLNAQIVGVSVDPEKNAQFCTEEKLDFFMLSDKGGIVSKKYGS  
ALSIPGFGTFSNRQTYIIDPSGELRWIFTDVESKIARHSSEVLEKLAELERA

>comp2825\_c0\_seq1; 371 203 1609 LEN=1929; translated  
MRLVKTISRKSLLAFGYPKLETYHPELSVYDVGAVKVRMSPELPACQIFYPVEKDKSEKDH



VDDVVPYYRPEAVEALVDYLNFGDGMQMLNEKSHPLQNTYAIAPLMVDSNNGDSMKFP  
LVLFSHGLSGNMEMYSQICAQLASTGCVVALEHEHEDGSASYSTKLLKDGTVVEAIPYKQPL  
PNAEVPYSRKKVLDFRTPMLEQRVNELRRIYNYFRDEKTSVDETIITTCYDSNSRLVRKI  
LAIADPTKLHLVGHSGGATQLLAAQKWIMEGHDEKVQTEATTEAHPMSMRLSDSENPAT  
TSTMTIDTSTSSSSPPIQSVMVFDANFSLSDVLRNRSISIPSSPTGSTTAAPTIVSVL  
SEQWERTNPEKEQTLQFLRNCPPSTTYSYLARDSVHQSI SDTECYLPSIVARKLENLGPS  
EERHQTVRAVVEEFVRRTKSSGNDCCSSKKRGSDDNTLIELPLRNIHIG  
>comp2826\_c0\_seq1; 428 99 1355 LEN=2092; translated  
MFGNKKRQSAPGDVTGTRLNAKRRRLSPSRTTAPGDESPSVRLTDKEVSHAMLLRA  
AEVGLDSAINEAKMEKSRKSMVITPQSVIQTKKISSVSDDDSKAGRTGTTVTERKPDQA  
IQQLDPKLAATNICDFRNDVDLSPDDDDQSCSSSSSSSSSSSSSSSEESSGLLSYRSNSSR  
EDGEQKLPPLNVGEEYEGIQRLEKKLSLRKERLKKLCAGRPAAYARYLEANEEAAGDIRI  
AEYKESYPDEDKPLSCGLPRSKLIRTCSSRLGLLQFEAMHTLPCFYTILVVMVAVHSTFCA  
CTETVSNILYGSIFENIVSKNVYNAFVIGFGLALLRINGHCFWYTGTSNDYTLIQMEMGN  
RLKLLKFDARVLKIKESVACSACNMFYGLICVIGIGHFHFHFDNLMDQFDLWLDISIW  
>comp2827\_c0\_seq1; 324 1 787 LEN=1350; translated  
NEFYLHNPQKTI FAQAKRRKINGPEHQKYFFNDNQLQETLSPLLTPRDHMDSSGFSTV  
TSSSHRVATTSISVATEASNDFGSAMPEDVDPHDIIGVKPELLAIGINATEFLEWIGTKE  
DLMEKQLQADFKSYNSERVEEADKFMMDAENVNMYIKYLKDRKANPAKYANEALEAELSL  
SNPKTAATYA AWLIGGVSGVLRREKYIDPKLASGEWKGITL DLPFLHKADAAAEEAASLT  
SKANIIVEGIANINDSVDLLG  
>comp2828\_c0\_seq1; 303 44 721 LEN=1265; translated  
MSFASGARKTLHRRSTLLQANVSVLRQKLG LITALRKT LGPNQANKGYAQSCP IVGASIG  
QHFRHSMDHMERVADIIIEVQKKNNGDGGFSREIHYDVRVRGGSDEYDMDEAEARIRRV  
QPF RDGIDAIVSFCPTDDGGDDTEVCNDSNSVLACFLLSGDPKEDEFMLSSTVERELGFV  
AHHA IHHLAMVKIITMHTLKLPPDSIPEGFGMAPSTIVYDHSQR  
>comp2829\_c0\_seq1; 398 1 822 LEN=863; translated  
QKYRNMKLSLSVCLAATAAAFCQGFPTASSTRQSTAIRNTPAMGPWTMMPDEPTPEVDP  
RRRNPEQPPSNPVRMPVIDTDNGQMDVLSRLKDRILLGQGV DDEVANVLVAQLLYLA  
NEDPEKDITLYINSPGGSVSAGMAIYDTMQYVPCDVSTVCFGMAASMGAFLLGAGAKGR  
RALPNSRIMI HQPLGGAQGQAADIEIQAKEILFIREVLNTYIAEYCDQPKDKIEEDCDRD  
FFMTPEEA VEYGIIDEVVKTKTSHISKPAMPAL  
>comp2830\_c0\_seq1; 333 437 1549 LEN=1844; translated  
MAITFSALDPAWAAGSGRAGGSFGRSDRFRHPPVSKVHRPSGDNRIQSRQHRPAPIRVV  
YPPGRSNTNRIRNHSYRTHRPTGEKVTGEDVAVVTNTDGTTFNVRKVNPHPFHDSRASD  
ITVAVLSTALVTRGVLRKRRSDREKFGDDDL SHPLGPGLSVWSLTACLNVDPDIGAPTSVVQ  
KIQR LAETTSTVTREGLQSLIAETALELARQVGKTVASVESQYHHYRSSDQSVVRAERH  
YNRISARERSKFERESWSNYNGKIRLDDV SERDALSPSSAGDSIASLALVQIHLVIEGNT  
MEPFGTRQVETRKSLREALVQLSGDVTAVEDCVVAGEVLWAPQLQEQQEVMTEEYVYANY  
PRLWPLDYTK  
>comp2831\_c0\_seq1; 702 254 2596 LEN=3098; translated  
MSAAFLVESRGT PKRMSAEFSREVEEDGLKFSVENAAEDIVSTL FCTYEPPTSKKMQYKA  
AKAFRKH PERYKRNPHVPKSILKFKVPTPKILRKKHKQKLEPEPAQDEGRDDIDGAVLSTT  
TDGGKKSVRWRDQKPYEDREDRDI ENTVAGLASKYCGGAFNHGDDIADILSSPQGRAA  
QTFFGGPETPGSVANMTSSLFGGTPAAANTNANSSSTGSVHTDTKIFYDDSGNP IREDDV  
PEDEEQGSYFPSTPKDAAASVATENPASPQTATRP GGNEGQPNLFCSNIPFMDTVITGIG  
IAGVMAASA AVKAGVPENYCNRVYTTKSQRSASQEQISEELRQAQETLGVYEPESYDKEP  
DLSSGSGLKRQSTPRNVRRKGT PRHMDPEDELREDVEDNETVEDQSQQGNNNSNPYSSRR  
SYVNSDITMGNTTVKHFNGNASLFDMEEDGAKSPSISGRSGRSQFASMVEELKHVQKE  
RRLGSSVKSHDLKKQTTKEIDHLGVCVSSIKNDYQK SCKSPKHSVVTSSYLNSINKSPVG  
SQFNGAGLPATPNQNRQLSDPDLFEKRTG SVASLAKQFESPRSNRLPITGRKSVDPSES  
FFDGKVDLLPPTPRRKSPEPTGYSMVGNKLVHDWDTSPSPHFNNKGTSPRFSNRYTV  
KDMMSPKSGTTYNTEAEVREAPSSILDNVATQDRPNFGGQRPASLVTGPETVDDDTVEEK  
KVSKKSKKKNKGSKEQPGRSKSFTEKLLKSVEKAQIRVKNATRKVEASRIPDKEQDTL  
>comp2832\_c0\_seq1; 697 194 2851 LEN=3032; translated  
MSAGKGATSPKVKGLIKRYSGAPIQEAIASPSVYSSSTTAGSPAPKTALHDQLHVSVD  
EDFDTRITTPTRLFRKPSLLSRLSSTISDNGTTPSRQKQRKELKLLKQRRRDERRRKS  
DSQYYATTGSVSNEKPTKALNGNQVCSPTASVQTSNSTSRKSRSSILFLKRVLSPPIL  
RQRLRSSSHLYGNKFKERDTS DGSCQDNSNNDNISSSSRSSVELNPKTNNDTEMPERIS  
IVAKSVSPTASKNRRRRELEEE SVGKPADAMIRSVSCNATSIFHHSFSMESICGVSMGE

LHNSDMSNLVFEESNRKLMASATNYGSESRQGNLMNDTLGQQSNLDYSYCDSDMGP I SEDPT  
VQESI ECI FASQLEDGLNLWDDHGDSDENCTTEI I LQRHNPSFGTLNRPQNPSSSSSPR  
GNLNELIS PAGFQQSRMNRKDRKNSSRSLYANMSQNKRRYEQASLVYVGTDFPSCPSPTH  
TISQDNVRNISTNDNSLDSATIYDTINPLPCRCATNFLPAIEPKDWPQAPIALRPTPGSG  
TKVKAIRLCNSDEPLWVPGSHLWWSQLAKRWGRKCEDQSPHFASCEECVMLP INNGNEA  
PGE SLVTD FESELFEGTLLLRRLRHS DGTTP EPEYDDSKGYFAGVNRRYQVCIRGRFKKTL S  
FTELNNGFRLRRKFGKLP SKWVLKSALKVVSFFAPQLDIKLEGVDQPYSLTPLGSTPQCI  
TIDDADVLYNEKNKEMSGCSGLSDGLNSINKNPLDGTNEEPIEAHRSLIGAALKADTSL  
QRAKMRKKA FDKL FVQKSPCKTDP SKIYTFEFLQHMLNFQDFTVELGSVMGSLELGDIL  
DGQPLQVMAEHGPSKIRLWSFVWNECLWNRAKEHDKAVAI AASK  
>comp2833\_c0\_seq1; 207 1 465 LEN=1065; translated  
NNSNNNNKPKPKPKRKANRAGKRQDKVVKQSPKKTSGNKPGRTPNHKQGVVGRKRKRNK  
NKNKNNQSNNDNTNGLDRGGGESSFLLGSGFSAVDIVYVQCLDWSKDIGWNDKWKDNDA  
LASVVAACKSRAAYARTLAVAKNEGKHDRSGSKL  
>comp2834\_c0\_seq1; 332 403 1736 LEN=2334; translated  
MTGIQSSSSSVLILFVLGFASLDCTIVSSFVLPSTNTRSTIIRQTASVGTTRSVSTSRVRS  
NNLLL RME DDDDDMSWLQGPPEGIPEMETIECDVAIIGGGPAGCTCALYTSRADLSTV  
ILDKNEAVGALAITSHIANYPGVDRSMSGIELLRQMKKQAVEYGTTRICDRAQVFMIEIQD  
DGGDDENGSKSNPYNKIVYTPDYTVKARSLVLATGAMGRSMPYLPGE EKYLQGVSYCAT  
CDGAFYRGSEVAVFGSTGEAMEEAMFLTKFASTVHWITPTD VVG YLDRLDAGGFQNVEMN  
SMFDEAILRELLSKPNVKHKNKARLREVEGDVSGVTGVNVQLIGSGEEFTIPVEGAFIYG  
AGGGSKPITDFLSGSGVALDEAXGVVTEDTMESTSHKGI FAIGDIRNTPYKQVVVAASDG  
CVAAMSIEKFLKGRKIIKVDWVHK  
>comp2835\_c0\_seq1; 287 55 720 LEN=1398; translated  
MTNTDNDTVTEKRENGVMKRIASISGANGEKQGDAFKLAPFNPSSDQIQEKATSMFDLGE  
HDVLFDIGCGDGRLLCFAATKIPGLKCVGIEILEEFVSRARERVKECNLESRIDIRLEDA  
TKLVETSTAEIGKGIKANDEGEKCLSDLTLLDDATALYLFILPKGIVKIMPILQSLKEKR  
NDEGKRLKVL SYMFKIHDWEATKTDVSGKGGCPVYYYDFQP  
>comp2836\_c0\_seq1; 214 163 1056 LEN=1503; translated  
MIAQLFRSPVSSLSRARLWSPSLALLLGVMMASMQFSPGWIGAGIGGPCSM DGAGLGV L  
AFRPS PQQTWGLRVR RPSGPCRATAGRFPGGFV L APAGDRLRPGWQSPGSGRVRHPG  
TADAYGH CRRRGLFDPLFGGRSSEEDGGSGADTHGSDDARNRRKRSFSMKRIGGRQRRG  
RRFP E EASKPLPPTTTDSGDKRRFPGGFLISALLAL TLLKNLLLGSGGGDAGY Y YSYSS  
SSSSVYETTIDPDGSRRTTETSRRVTS DLKSNIPGLTKDSIPGANQNLGIVIYDDGF  
>comp2838\_c0\_seq1; 519 158 1960 LEN=2197; translated  
MAESMEMVDQCQSVTPPEVLNTKYKPI SDP SLLPKKRSQIPGACSNLVNSIVGAGIIGIP  
FALQQSGLVSGI I LLLLVGYFTDKSLRMLVNLATSSSSSLRGKGVWTYDDLMLR LFP GPPGR  
TFVLVSMFVTAYGAMVAYLLI IKDTLPVVLGLVDDGDSSVGGFLERELIMIVTSLVVVVP  
LSMQRDFSSLAFTSSISVTADMILVVFVA AFAPIQETVSAAGGFGEVIKNSIIDKGFFIG  
FGVLTVAMCCQHSAFIAASSLDNPTPKRWSVVTAVSLTISVCCCLVLGVSGYLGFLDDTQ  
GDILNNGFVDTVVANTARALLAL TMFFTYPMEAFVARHVLVQLLWNGDMDGYIVDTVANE  
QTGEETTSQRKSKCCYVLRNRHQVTFLIYLLT LMPALIVDDLGPVLSITGAIGGCCLAYI  
GPGLVYLG IHGDDFINRLANRILALNTNKASSNASEVDLPLEGDATAQMSPGGRAVDPR  
QVFSTEYLSGYRKPWFYVVLGMPLFVKIALKGSNGLSERLAALDGEHHRPNSPTT L S ADN  
LGTNDSPPATINDNNECIVEPSLVDYGFAMFFIVFGAIALVAGVASNVYVQINGIFNIPA  
>comp2839\_c0\_seq1; 454 80 1561 LEN=2009; translated  
MVATKRNLRTSNYRDPDGSNLSSENSGGNCPENRFDKLIHDVSDHGIYDSKGEKSMAQSAG  
LFLKIGVGS AVFIMVLHFQTSWIQIYHDHQFVIGGDETPKLN GGGGFDSRQKIIGLENHD  
RKDQGYELFPFLVDAEKVASSLSSTAE LNSVLSTPTMPDFPLVPRLERCLLKWKPPHP  
RSQEDKRLMFWMP SYPSSGGSCPTKKGDIVRQVIDGLFLGERIDATAYGNPTKDFHASSN  
NLKRCIGVSETIACTSSHPLVSTTPHLRHHVFRGAVIVP IRNPATVIPQHYTSKDMAYRQ  
ASQISVESWRQMRDSYFEGSLADWMRIIRFWRGTKSRLGEPASYYQTELYVPYEDLITT  
DVVKASAIIEKVS NLLGGAGSTEIVNASNATSSDLTKHGFFETS KSKADYECLWYRVAHK  
EWERLQNVIGHYI PAYTVRQKNMMIQNLTIYADEIEAEILNDKSDLALASLLRRYAFQIK  
HYVVVEDVIYTPQ  
>comp2840\_c0\_seq1; 193 1 707 LEN=1003; translated  
XNTYTTTMDALLAGYSSDSE DGPSPASGNRDGETGEPGPQKEQPKPKPAGLALLL G  
GGADDGSCSSSSEGA AHRGQAGRGGSPAEPASKKPRRGNEGNHDTNGGGSSRLFLARH  
RLFPFRLASLRSGSTSPSSSSSMVHRSRDSLSREAPRHREKGS PETITASIGSKQHHQRF  
RFKQLAALVAPCGGSHKSWAEAIKSEQGFHNPGVVFQSVMERSGITEPLGSRADPA

>comp2841\_c0\_seq1; 164 90 362 LEN=593; translated  
MTYRARGRSLIEVVLAVCFVVFVGVFITVLCIGNYFRAKRAQERQRRLAKLAASNAA  
AAQGMATDANYSASYEAPAHVAGGGVQA  
>comp2842\_c0\_seq1; 412 29 856 LEN=995; translated  
MATQTDWGNAMSQEDMMMKTIVLVLDDDDNVIIGSASKRKSHEFTPEQPRAILHRAF'SVFI  
FDESTGELLQQRASSKITFPNVWTNTCCSHPLHGMEPPEVDGPKDVADGTVMGVKNAAI  
RKLDELGIPGSELDINKFKFLTRLHYWAADTITHGPDSPWGEHEIDYVLFYTVSSKSDL  
TIKHPDEVDVVKWVTRDVLIEEMMEDKSLFSPWFRLICKKWLDDHWWKDLKRTMTTDDH  
VDLKS IHCFDPPKEHLGGGGKAGPLFGAEVEGDER  
>comp2842\_c0\_seq2; 831 29 2308 LEN=2355; translated  
MATQTDWGNAMSQEDMMMKTIVLVLDDDDNVIIGSASKRKSHEFTPEQPRAILHRAF'SVFI  
FDESTGELLQQRASSKITFPNVWTNTCCSHPLHGMEPPEVDGPKDVADGTVMGVKNAAI  
RKLDELGIPGSELDINKFKFLTRLHYWAADTITHGPDSPWGEHEIDYVLFYTVSSKSDL  
TIKHPDEVDVVKWVTRDVLIEEMMEDKSLFSPWFRLICKKWLDDHWWKDLKRTMTTDDH  
VDLKS IHCFDPPKEHLGGGGKAGPLFGAEVEGDESCKQGAYGKIKTHKEPLVKQLSHLDE  
VFAAVTFLYVKPLKSNLDTPIRETFDADDLAFCDIEILVKVSRSFAAVIRQLPATMLVDI  
LIFYLVLRALDVTEDDMTSFSPNDVVIKHLNLFHKTALADPTWTMDGVGEADEKRLQOF  
DKHRVFAKLSDKSRRVIVDITQRMATGMAEFVVGKDLGQGTDDIDQYNRYCHFVAGLVGE  
GLSRLFAASGLEKASFASEVFLSDQMGLFLQKTNIIRDYLEDYVDGRAFWPQSIWKKHSK  
TGELGYFTEQNDPEVRMRSLECLNELVTDALAPDCLLYLSKLECAEIFRFCAIPQVMA  
IATLNYCYNNDVFTGVVKIRKGTSCKLILRTNSLDEVHDTFYQFARGVLRKADANRSQG  
VLDPSYARTIKICKTMDITADGHNREKARQLPWMAASLLVPAAGVAASMLLKIDVTKDM  
PKFQRLALLGLSAFTLTPFFQKPSDLTDSKFLENKGGK  
>comp2843\_c0\_seq1; 486 251 1847 LEN=2227; translated  
MPRKDSSWIEASGLYGTWTFSTETMTDVGYYKGTAYVVMHLMPPDPMQVKSCALGNGGSTE  
GKSCREADNKACSHGGASGDERECEVDTESSLEWSDVTAFFQFGFRLREGIVKKS YHTI  
NTSDWLGPNLILAPIEKNHFQLTSAENVQHVHTTKELFVSRYVNTPTWTSTQLQRPFTT  
ASIFNFDETVLETVAGTIAINATIHEQIKWRGGTNDDPYDRYSKTCAGDLNPLLPRIQI  
EKTVTQKSAEAPSKTSYSMAVDYSMLSVPVHGIIDLYKKWPSFKRHLGDKFPLNGRVRNT  
MQFMLVIDNCFVGRPVIRILTTLVFSPPFLSLHYDSLRLPLSNFLDCYKDPNRAFAIRLS  
YDSTESNTTSIWKGTGKCRASFPCWEGDASGTAAPSARIPTDNNSPGAYVLDPMGLEFAL  
LYGMGFLLVVSLLFNCQLANRLRSRQVLPPEPSRQPRPAWSGPGDPAASGSGSRRRNSTG  
NNPSRNELEELLDNTDASAGDEELLATSFDNPPSASQVEHGVGEGSTE  
>comp2843\_c0\_seq2; 521 251 1702 LEN=2082; translated  
MPRKDSSWIEASGLYGTWTFSTETMTDVGYYKGTAYVVMHLMPPDPMQVKSCALGNGGSTE  
GKSCREADNKACSHGGASGDERECEVDTESSLEWSDVTAFFQFGFRLREGIVKKS YHTI  
NTSDWLGPNLILAPIEKNHFQLTSAENVQHVHTTKELFVSRYVNTPTWTSTQLQRPFTT  
ASIFNFDETVLETVAGTIAINATIHEQIKWRGGTNDDPYDRYSKTCAGDLNPLLPRIQI  
EKTVTQKSAEAPSKTSYSMAVDYSMLSVPVHGIIDLYKKWPSFKRHLGDKFPLNGPYCYG  
KDPNRAFAIRLSYDSTESNTTSIWKGTGKCRASFPCWEGDASGTAAPSARIPTDNNSPGA  
YVLDPMGLEFALLYGMGFLLVVSLLFNCQLANRLRSRQVLPPEPSRQPRPAWSGPGDPAAS  
GSGSRRRNSTGNPPSRNELEELLDNTDASAGDEELLATSFDNPPSASQVEHGVGEGSTE  
EGV  
>comp2844\_c0\_seq1; 421 104 955 LEN=955; translated  
MASSGEYVELHELAKGWKAAIGRAMDPATKHEAQIRNDRGNLPLHSATSFRAPI DVAEAL  
LQAYPEAASITNNYGNLPLHFTAWKKGPLEVERLLK IYPEGAAQKNNHGNLPLHYAAHY  
NAPLEVEALYNAYPQATQKNNDNNTPLDLAIADGASPNVVSLLQGKKVPPTTEDEALEK  
AKRRYEAAERELARHMSESTGTTEEMEEVLALLLDIYEAHPHALYSAGINPENAGTMDSM  
MEEVSFVLSRKCLPLNDHVKSSIMELNLILMLHPNDLGSKSSCR  
>comp2844\_c0\_seq2; 789 104 1840 LEN=1952; translated  
MASSGEYVELHELAKGWKAAIGRAMDPATKHEAQIRNDRGNLPLHSATSFRAPI DVAEAL  
LQAYPEAASITNNYGNLPLHFTAWKKGPLEVERLLK IYPEGAAQKNNHGNLPLHYAAHY  
NAPLEVEALYNAYPQATQKNNDNNTPLDLAIADGASPNVVSLLQGKKVPPTTEDEALEK  
AKRRYEAAERELARHMSESTGTTEEMEEVLALLLDIYEAHPHALYSAGINPENAGTMDSM  
MEEVRKAAAADNSHANGIGGIEDYAGRNEEEEEAQLI EDALCPPDDTVEIALSKLVGLEA  
VKNQIRGMRTMELVKTEQNGKLAHPSHIVLEGNPGVGKTSVATILADVLYEIGVTKTLN  
FMSVGRDELIDRKESRTIAKTRKVLERAKGGVVLVNEGYTLLPSTARPRSRDHGGAALR  
EIARTLPSGNPLIILTGSSELELQRISSIEGFKSHFLTRIEFSDPTPSQVARIFIGKMSE  
KGLVPGDGVTVDYLAELISTNTDEDWRLERNRIADLLLNGVRAELRKRMHFSDDSSKVS  
FSPIKMMSPTAASRMPAATPDEIFVTVEDVQNAIVNGM

>comp2845\_c0\_seq1; 275 86 1216 LEN=1686; translated  
MKDHAVVVTPNRETLRHQVNVAFAASQASKTPLSSRPLTPGRSRRGGGGVFRSKSPGKR  
HAAGYRDLAQEVYDRMGVNYVRGQNSIDLVDSTSSISISSTKRHFQSPDRGSPVSSITSR  
TSGLSGVSRASVTSEHPKERAIGGPGVASQRNAYSSVRNRYSPSADTRSDQDERNWNRNPN  
GSEDEERESFRSARSVKSMVSVFSGGKSTGSYGRSVASNKSSYSAFKAPPNFVNAAFNQG  
QKRISDNDNDVNTSLSFGLDEGRWVNKQQNQYPQEQPQRQVYRSRFSRSSRSSFQNSK  
AFSSSSMSSSHPNNTSCDKMIEKLVKEKVEEKLTELDAFEDRLRRIDTDINSRLNDIET  
KLNMILKVESSPALRKKW

>comp2846\_c0\_seq1; 1067 73 1707 LEN=1850; translated  
MVSFRKKKKEEGKEKSGKAPTPEEKPSKNAPAKPPTLDDIPDLIDTMLNAKGEKSAAA  
TKRVYELCDVGHKQNRVPMVCSGKYDVLTPLAQCLTQESGDGRHLACLALNNLSIPTENK  
RVMALGPASKDVIIGGLCKVIAEDKQESYLCCICLMNLSFLEASITTTILQHSPSADGKEIP  
PLENPNLSLLRVLEKLLTNSPAAPKASSGKSEGVWACGLIKNLAKSEENAALIGLTEIPK  
CVVENIRAATAPPSRWTSNSLEDFSLFVILNLAQWPQSRESLISAGAVDVIKSIMAEGDL  
QGLKATMACAFDLAAWTDFPESGNPAKAVSELMTNIVEKKGKDGQYAYGVFKLYTATKA  
YADLSKAAGKADSEAGGEANTKVLAVPSAVALNFQIVSDLVLSAMDDTEGGSKYVPDAMS  
AEHAVTAIEAMPLPAIQAGDPPRKSQSDKACGEVSMQLLTYADISGTSPEAKASARAAA  
DQISKASGSARPILEISHDLWVQYRKREGQPLDQFMSEKGVVEDESGLDFLPCASGDSG  
CVIA

>comp2847\_c0\_seq1; 351 197 1045 LEN=1265; translated  
MKGRWKEERMESSPLYSTTPASDSFFQVWIRAQKALAAFFVREYSVRALPCASRTDLFLV  
SVSQLINSRECAEYREGWFGNEILWHTSTSHNFQLFPQKDPPTTENITSPPLTLKMKVEFH  
LKQKFKLVSNDYRITQNGGAVYQVKGNAFKWGNQASQFQTIIGGEELCCLKQTNATTVTPWN  
NYEWFKDGELWATAKQEDWGMASKKEIDIDIPGDNDYKIKGDRMSWNFTILKGDVKVGEI  
SKKWGILDSYGVREDDANEVDILMCAILVDATYHHKDGNNN

>comp2848\_c0\_seq1; 305 102 989 LEN=1167; translated  
MVADGLVSGISQWIDNLIGVHGSSGYVFIFLLAYIGYRFMNSSEPFKKSSQVEEDEEEEE  
PDPFRNFTSLQLVHFNGEPEDETGEDKPVYLSINGIVFDVVSQGRNFYGPDPYAAAFAGKE  
CGVALAKMSFDEHLNLAGCKDLNYGEKDELENWINKFTYYRKYPKGRLLVDDILDPL  
KSRTLTKEDLAKHMGDAEEIPEGYAAVPIYIGAGNKVFDASFGGVEFYGPAGGYNKFAGR  
DISRALAKMSFSPEDLENTNTDDLEEKQKVLDDWIKTFEVKKGYPVGNLKGSS

>comp2849\_c0\_seq1; 940 110 2494 LEN=2649; translated  
MVLDFGLTKSSSVAHISISSTKLRLSKSKKKREKKRQASSSDYCGSSSSSSDEDEGEYSSSS  
SCDEEDILYKENVQRSRRGKVKNSSESDRSSKRHHLDPVSLVERMSSFNIDEQGSASMA  
LASMLNLEYCEDEIANDHNLNVKLAADLEAELVQKQOHATVNDAGEYENYDDEEEDLESS  
DFLDALDEVHTRFLLNVPPEELSSSERIFFQLEQAWWYEDLICDKLEDEGQCLLPRHS  
NLKDFAEERLDFDFPLGGLDFDKLWNEFTIYKRKISTYGCILLNEDCTHVVMCKVYESNV  
WTFPAGKINENEIGIEAAARETYEETGFDPHCNYGLTGQWNSREEDREKHITWMHPLQDP  
DNMLTYVEQKSGKRRTFYVCCGVPEDYFPQVCRKEVDKIEWVLDLRDIREYETFVAVLPFV  
GKLKWKIKRKNKSGKNNKVKVKKIKKKKERKANKSRTKSRPKSREKSSSTRDKQSSSRQRSS  
RKKDREQLVDAGLIASMGDSARWTEREMFEANSKLQGGRVVEYDGNPHLFVEKGFIDDS  
ATGQKRVDPHSFRVVGGSFMNSKHGDKLAEVNDAGANYQPLVRNSNEDSGLQPFSEHGA  
TPWGEVVEAKSEDEGSDSTRFSGSDGPAGIENSRRASQDLLTMLQKQAPDKSKKSRK  
SKKSKHQHQHQPISGDYDYDNSNHDELMI FATDKEITAKRQRDHELKKGKNEYSSSL  
VSPLRSSINTATRDDARRQLLAQYEEDMKFVHKWVANSLPNPINFKIRNVDGIIDQHC  
GGPGTKTKRGSIKN

>comp2850\_c0\_seq1; 223 1 682 LEN=973; translated  
XFVLLHLKPNQIIIEQRAQATGFCGNHFLFFASDRKSTNTQAMISESLNDITDVVDLSKS  
KRNTIAEYSSAPCSRNGMVDLLLPRKEKRHTKHAGADTDSSRHLHNFHLSETQRCSSATQ  
KTQATTDTTDDDDDDYGYDEEERWLRNENRYHQLRDSEPIFRSTVLNNDVSTSSIQP  
LRERRRSSMGRETPTVPPLGYENQANNSRSCCMRLPKKFRLYDPDF

>comp2850\_c0\_seq2; 244 286 846 LEN=1137; translated  
MISESLNDITDVVDLSKSKRNTIAEYSSAPCSRNGMVDLLLPRKEKRHTKHAGADTDSS  
RHLHNFHLSETQRCSSATQKTQATTDTTDDDDDDYGYDEEERWLRNENRYHQLRDSE  
PIFRSTVLNNDVSTSSIQPLRERRRSSMGRETPTVPPLGYENQANNSRSCCMRLPKKFRL  
YDPDF

>comp2851\_c0\_seq1; 372 239 1342 LEN=1342; translated  
MNRSSPGALLLLLAVASFHTSEAFAPVARTLSPALPVSSLRTATAVFAAAGDGEAPGET  
RAAPKRKRKRKKAQVVAETAPEETEPEGAPPLVPDLRPREDAPVVLEVRNIVAPEGDPE  
PSAVAKAGAVLSSVSSMLGSSKGEPEGAGSERAVSPPPPGLGGPGRSLDDSLDQLEEDARS

MSEEGGASPGGSGLLSDEEGTGVKQAIGNALSTVVTADFFLVCGFLAWFLLGIFCSYVL  
KDDTVQIAFNNNFERLVQPALGVLMIAAIGGNFFKEEEEEYDXVGD LGNADAEGTGRLLA  
MPPAAPDAPQARSEVSAQGIASLYSYREHATDFSKTLKHLWMACCDARTVVEPQDFNSR  
VESKSKWPX

>comp2852\_c0\_seq1; 579 121 2565 LEN=3050; translated  
MTGQQUERELYWYDDATYDIGFYNYQRTVDPSPWAFIVCLLFCIIMALLLPYRLAYYRSI  
HTSNLKKAYSSNNIIQLWSQAFRANDAVPNGNDETIRTQNKRNIIYPSLNEENESGENS  
EKDEEANGSFRRKVMRERALQSLCHFVRAPKSEIDNCINSQSKTEETRVPTTDYTSMEDR  
ACDDDAKNDIDSSGYGEFVTTEAEIPPSQDLTEPNANDPLPPEYLYDDLTRDAESCVSS  
VLSENTNPFHIIKNDFRDFTRNRHPDES SVSVASGWEEFDPSTQNTIYFHPATGARTTEK  
PLEPHSENF RPWYLFYTSFSFRKMRKCSKWDDDEMOKIIGLALPYTAHTIAVDIFGLLEV  
GVIGRLLGTTELSAYFATEFAISFATMFFHGILASLKVLSQAHGADNIRLAGTYVQIGV  
WTHHLFSLPLVLYGWNHFDVVLRLGLDEGTAESADQYARFALIYEAIGIYDGALHCVLV  
VTGHEKYSAISNGFRASLSFLAVLIVSVMLNKGAELWMVGAHLVAKVFFFFFNMSVILY  
QKWLNDNYWSEMVGNPF SHMAPIKTLWKASLRLSSGRVIENCEWNI LFVFSAIQGP AEVA  
IWGLV GELWDFADDIVIAVSDASKVRCAHLLGSGLP EQAKYCSEKSLF IGVVTSI IMSVS  
LGILRSNIPRWLTNDFTLQRL LGDMIPMVCLAVATLSFGSLCSSILCAQGRAHLATAVTG  
FGSLAIALPLALMSNFCFNLN LQGLIASLIIGYATSGFCNSILMLTSNWT HISRKVRKRT  
SRIEVKLEKDKMLYNATTD TAVVDGKVEASGDLT

>comp2853\_c0\_seq1; 947 242 3074 LEN=3661; translated  
MSIFHII FELLFLFALLSDCWAKNHESNCDAISDGSNPNKSCVIDRSGFGPIKVI VHG  
T KNDPFWQQVKAGMEQTARMDKVDL D LLLYDDEDPTLDASTLANAMVNDIRKYDYLYNGAE  
PDNDRRQRRRRNSFADFTNRGDGKNQENENENVEPRCGFGGCKSRIEGGQISTNDALSPRP  
AAMIVSLPGNSKVEDALRSIQKDSNNDMPIFGINALASNRENS SIEKEGSSSFFLGTVSM  
NETQAGVMAGNHIRELLSREDKIDGAVTGLYVNRSDVHALKERFDALSSTSSDIVQTW  
EVAYLEKNTTEEDFMAFFEGCRHTVIQLAGGSGIVESILEALVANGCNIEDNHIVGTFTD  
SSPFIYDAITEGTIDFAIAQQPYLQGS HAVLMAALYATTGQKLVGGAEAA NIETGPILVT  
EESDDFPGKRHQICESEGY PVCWPGTGSSEKSECPCTDRSNISIAVVTHDESSDFWNTVF  
SGISQAATDFGISVERNRYKRVGPNHGRQRQHGKQTNLRLKHTFDINQACQSKKIDGLIV  
SLPDASMMSSLVGCKSRGIPYLALNALADTNQNDI VEKLSPTRPSVPYVQKDFESGFE  
AGKRLIEAGVVQGWCLMHDNFDTLNDRC DGMKEAFL ENEKTEFMGIIYV PNNNDALTYKT  
LVETA FNQDGRGDDWSGYGILSTGREQIPSLLSLEDHPKILAGTYDVESTLYKENNDSA  
LRDQIFGIDQNA YMEGYLSVATMVWKTSTSETHTIPILETGPNFVSQTDSSSSQVIEKE  
EHWHQQRDNGFRFCESRKSEPPPIEERPLTFTGKCSQLDRKCGVCEGDCDDDT HC GEGL  
VCFVRDSLTS GVS DPVPGCSGNPIEWSAKDFCVDARLYECKD VDVFEDEWGI FPSNGRAP  
LWNWTS D GARNTGGFAEPHAGIAVKKHAKTTQPHT EAINRPTN

>comp2854\_c0\_seq1; 240 124 921 LEN=1748; translated  
MAIYNTSSNNN HASNASVLSIVIGTTFVVGTLSSV G W Y Y Y F T R A T I S K D S G D D N G S N K S S  
LSPAKPSSSLIKPPFPQTLRDMLSVCR LAYLSTVDNAAGSSHL SLMRFTYLHDES DGEVV  
IMSTNRKTKKFDMLCRQNGVALLVHDFDGITKQQ LAAAAAANEINDDDKADPEHPKILRSI  
TLNGNCRILDGSSDEERYRAHLAHPDYPQFIVGDDIAVLCIDVTSARICDLNDRV VHW  
NVEDAALAAATTAMPSPPLAETARV

>comp2855\_c0\_seq1; 599 51 1817 LEN=2346; translated  
MDTDEDMDGIKAI RTYIDRMVEGDGKCRGMKVL LLDASTTQIVSAVYSQTEILSSDVYLV  
SRLDDTKQQKQQSSGKSSHLKAVCFVRPTEASV GMLVRELKEPRFSEYHFFFSGILTQ  
LLRLLAESDMTERVKQVQEFYGFVPINDDLTLQCRNTLSMSMAAGT SWAPQYAHLYER  
NLRGLQGMLLALKRQPLAGIRYAGQSACAEELAKDIFDAISTDEIFHFRKRRRSAGALL  
LVLDRDDPVTPLLSQWTYQAMVHELLGLNNHRVVLK GAPNIAKDLEEVV LSSCQDDFR  
ENRHKNFGELGENIQKLLQDYQKQTAQHNTSILNTI EDMQAFMEKFP ELRSRSHNVSKHV  
AIMGELARLV DVC SLMLDKVQFEQELACADDHTAHWRELMEKLDSPSVKIPDKLRLGLLYA  
LRYETSGNINMVQSHLKGVPVPPDMVNLLPVILRYGGSKSRGPGLY GDNPNIMSNTKSF  
MTSVQGVQNVYAQHVPVLMDTIQSITKGLRKETHPFVPGSIKTVPGVSPETLVPDEIIV  
FMVGGITYEEGNKIAEFNQVHRGKFQVLLGGSTVHNSTSFLEELRMTK

>comp2856\_c0\_seq1; 452 79 987 LEN=1314; translated  
MSNEKKPLVGVLSIQGA FEEHQACLEASGCR TKQIRTVADMTEGGEALDGMVLP GGESTA  
MGLIGTATKESGKSVWDALRDFIEVDK KPTWGTCAGMILLAERC VGASAVIQDQ QALIG  
GMDILVCRNYFGSQVSSFEMATPPPPTSGGEDGGMASPYPGV FIRAPAILSAGQEVTVLG  
KVVATPCRQA AVVLEELERKIEKGETTVVQMGVVDALERDGSQLRHREVVKASPCETGEEK  
KELEQDASIELPGAADGSNAREVICAVRKS NLLCTAFHPELTNDHRWHQYFAQMVKESVA  
SA

>comp2857\_c0\_seq1; 205 415 1137 LEN=1302; translated  
MLSQTPNASSSYLPTQYRRKLPASRNATADNNATTINTLPLDQKAPSKSNQAPSPTTYRI  
LVATFVLYSVFLGWYASTRPKGKWKSPFSWHPFLMTVGMTGSMGIAAVTKKLGGYTNTKL  
HGILASLGGFFVSLGGVYAIYHNKNLYQRPHTSVHGKVGIAVVAMMALPMLAGAVFLHPD  
FGIDKTNKLYRKIHKLASRVLMVAWAGNSLYGLYGMRSSEHPMELILYGVPLVVLMPMTLL  
>comp2857\_c0\_seq2; 304 1 675 LEN=840; translated  
QRTRMVVKLRSPSTRSCFSSIRSVMQMAPSKSNQAPSPTTYRILVATFVLYSVFLGWYA  
STRPKGKWKSPFSWHPFLMTVGMTGSMGIAAVTKKLGGYTNTKLHGILASLGGFFVSLGGV  
YAIYHNKNLYQRPHTSVHGKVGIAVVAMMALPMLAGAVFLHPDFGIDKTNKLYRKIHKL  
ASRVLMVAWAGNSLYGLYGMRSSEHPMELILYGVPLVVLMPMTLL  
>comp2859\_c0\_seq1; 690 518 2062 LEN=2371; translated  
MSNSPPAKHASTPMMMATTAAHTTTLPNQQGLTLNGSPQFLRPNVVLGVTQLPQHQQQPPP  
QQQHMRVVSPPGVSPIAQLPLQHYQHNTNPSPLPQYLPVSTGVPNHGHNPAWAWQQQPPH  
SMLPLQQQQAPHTGFTQQQQQHVSMQVPLRLMPRPNLDDIENSNRDDVSSVPWGSIRPDP  
KYNPAKDPLNPNIDKPFVPPLEITITIVPSRRRKSINRHSSPPPQACVASDRYPSITPT  
NQESASTEWLQLQVPLSTGLPGGEVHRI PVLGLANSMSMDVSNNTNPNDRKNSSFETID  
DENDETANANDLLEQFSDLATYTAVDARGNQYYLTNETDDDEEYLELRGDLLELQKLQE  
LQHPSYDGIQVTRSGDAEAEVKNHGNIAHNAGNTPMEVIAEGASQRRGMVRREFN  
RRVWRFKKKASPSDSEELAPGGELAPDVADHAVAAAHEMPSIVADAEADGNPGKQTLV  
SKKSMHFYSPSFVTHNYNKSMMTMVSGQENG  
>comp2860\_c0\_seq1; 345 1 769 LEN=812; translated  
XFIQEEYEVRSCTMSLSFVSSAVQIGTSDGGFEEKPIENKETEAVNRRNAHKPLFEQLRS  
NQEQDQEKKEEQERLLMRSTCALDEDDVAHLNAIERQRSDREKIQERTENELKEFRAAR  
ALKKQAALSGEDKDDENDESNAEDQAAKIFIMNGNASEALAEKRETNPGQAGCSLPVIKV  
RKRKRRTNPLDTQSKQTNIKGEASKLEKGYTSDLNEVNPSSSEKRVEMSSADVKRDESAG  
GLGSLLSGYGSSSDED  
>comp2861\_c0\_seq1; 420 210 1229 LEN=1676; translated  
MKIRSPMALDAGNSSPKRTIWFILPAACAMVYICIMINLNEQLYELLSNREPAQQVLRRA  
TTATTI IKKEEESHSTYELARRESLGGFTDIPEETWKRHKRFQLTQPNYDDSNQRAFERQ  
SRYSNHFVAGHFEPEFTCPHEFRLGKLGDKGKWCDFPHRITQTNKDGKCLIIYSIGSNGNY  
QFEKEAFNHVSKTCEIHTFDINKFGQRKDFAAALQELGVNFHHWGLGEKTKVYQNMKTFK  
EIILELNHQDRVIDVAKIDCERCEYAQFEQWFKDWKELNMVVRQIMIEIHNSDLPGVUNI  
FKAFQSAGYVMFHKEANYINEGKAIEAAFILLSPDFQKI  
>comp2862\_c0\_seq1; 255 137 904 LEN=1379; translated  
MNI TVKKRNARDIGVGCCTSQEDMPLKQRRNLNPKSPSSSTSSISSVKAFRFMMIPRMIT  
SQESSIPVLSPTYSIALKNKKIKTRVDSFSLEQALYFEPYQEAIEHVDLLKALRGADL  
EKLRTLKDEKEKNYDLARNQFGENLVHLACRMALSLDVLKFLVEETKIPVNVDRDRFGR  
PLHNACMSALPNFDNIDFLIKTAPKLAVFEDDKNKIPFELIPQRVFERWIRYFSEMNVLK  
KLTTTELAKHEGLSNK  
>comp2863\_c0\_seq1; 1036 34 1467 LEN=1616; translated  
MKTFSQQLLVTFALLSVASAASEAGSEAAVALTPPEPRDLTQSRKLDQEPWDTGTVK  
YNEFPNQGWWSGTITAYDPVAEMYTVTWEDGSTDYDDGDKIDEMVAYAQNPDQNNPAGG  
STDQSGSYPTGTAVSMFEDGEWYDGVIIKYGSGTYTVEWDEDEGEIEEIAAGSIMDQMVQD  
ALGDDDEAPEGFDGGSDDSGSSSGDIAVGTVPVSFEDGEWWDGTVSDYSDNTYTI EWKDG  
STNEYDDFDGDDLEELKQAVEDYMADDDEVPEVSGSGPKFPLGTPVSDYEDGEWVEGEVVD  
FDDGSYVVEWEDEDELEYYESSNAEDMQALGNMASYSNKDDDAPPDSYFEEEDLWKVGT  
VAITEDDNLWYGEISGFNNGEYSIDWENGEREWLDNFDLVNEMVSNAALAPKKGMSAVGK  
TFLSLFLIGVCAAGAVFGYRFYENQKQRTREGDLSLEDGGARSFRDNDAPKII  
>comp2864\_c0\_seq1; 426 76 906 LEN=1372; translated  
MEGLGTEVTLMYRGMFLRGFDNDIRNHLYEEMERNTSIDIQLNTDPTEIIKNEGDSFTV  
VTGDKKVDCCDQVLYATGRKGK IENLNLESAGVKTEGSFIPVDEYSRTNVEGVYAVGDVT  
DRIALTPVALMEGHSADTVFGGMDRPCDHEFVASTVFTTPEIGTVGYSEEEAAKYGDI  
TVYKTRFRPMAHSFPKSEMF'TMMKI IVDTATDKVVGCHIA TDGAGEMMVGVAIAVKMGAT  
KADFDKTIGIHPTSAEELVTMRTPSYHYKDGKKVEE  
>comp2864\_c0\_seq2; 647 125 1711 LEN=2177; translated  
MKIPAASLSALFATLTASTAAFAPTSTASRSSTVAFRRAYSLAMADKPYEPDPDFDYDMV  
VIGGGSGGVRASRIASGYGAKVLLLEGQNQHPPNYSAGGTCVNVGCVPKKLMVFASRY  
PGAIGEMTGYGWDGATPGIFSWDKFMEAKNEEITRLNNVYSKFVLGNAGVETIEGLGKLN  
GKNSVEISLTGGGKTIVSAKNILIAVGGWPFKNIPGIEHTITSNEIFYLEEQPKRMVVV  
GGGFIALEFAQIMEGLGTEVTLMYRGMFLRGFDNDIRNHLYEEMERNTSIDIQLNTDP

E I I K N E D G S F T V V T G D G K K V D C D Q V L Y A T G R K G K I E N L N L E S A G V K T E G S F I P V D E Y S R T  
N V E G V Y A V G D V T D R I A L T P V A L M E G H S L A D T V F G G M D R P C D H E F V A S T V F T T P E I G T V G Y  
S E E E A A A K Y G D I T V Y K T R F R P M A H S F P K S E M F T M M K I I V D T A T D K V V G C H I A T D G A G E M M  
Q G V A I A V K M G A T K A D F D K T I G I H P T S A E E L V T M R T P S Y H Y K D G K K V E E  
>comp2865\_c0\_seq1; 354 126 824 LEN=1277; translated  
M S V K V Y Y F N A T G R A N Q I R L A L A A G G I A F T D D F A S F P P S D E N K A K W K A L T N G N S T F S V P I M  
T I D E G T D S Q K V Y I Q S S A V L R K A A R M G G L E L T L D D A D D A A Y L Q D K L I A D A D D L R T A S Y R A F  
K M F G A S D G A V Q K F V K E V L P K H V D N L E R Q F V A A G G D Y F G G S T L S I A D V A L Y D A I V F F G T R  
L I D G A E G V D N P C G P A L T K W I E R V E S N E K I A A Y L A G E Q F K A V A M V F D K S A L G F  
>comp2866\_c0\_seq1; 737 1 1874 LEN=2107; translated  
X L A R P L N N S Q I P S E Q K Y K L S K K W N S M Q E A C K R H H N R A L A L R C W N A A E L L R G K K Q Q T V E Y N  
R S W R K D S L R Y V R L N T L R D E G S A D V T G G N V I Q E R A G R E L T K P N G V I D H G K Y F Y T A K V V D V D  
P Y V Y A P D D E L L D R T M T T Q Q T E N Q E Q D R G S T R N R L L N V Q A F E T I S T S A P I A S L S T D D D E D R  
I P P P I E V V G A K T C T S R A D N H P D F A S W K R D V F G T L P S S S S S F S P N S R R E L I D W K T A Q I S K R  
L E K Q L R L Q E Q L L R T V K S D I S N D D S N E S S Y I N V L N K E L K D N N T F E T R N S S Y M L G D E C K E S N  
N E N Q N T Q P M S E Q T T I T H S I C K I K K F H P E S T V T N V Y V R Q E K E G K A R R C H Q Q D Q Q Y L T M A V P  
P N S P K M K N H T I S S L S L K R T G I P E K K N N S T Q L A A I M M E L A E L K D W V A K D I D N A I A D N V A D S  
P T S L P S I A T R L R Q S T P P S S P T S P A P P A S R D K P E L Q I P S L D V P N L V S P P L S P E A D H S T K N E  
N N E M I K T E S P L K V E T N M D A M E A T M K S K E K K S V R F A S P E I T D T I Y R P F T P Q E E I N T L F F Q E  
D E L L D W E N D E E T T V R D R F E V I V T E I E T S H C S E V E S K Q H N D N R L V T G S F L N I G T P I I S F H N  
S Y S S S F Q E S S D D D S S H Y E N N M Y E L  
>comp2867\_c0\_seq1; 750 360 3821 LEN=3821; translated  
M E S S M A S S M A S S P P K P P P E G S V A S E T A A G K S N P R T S T T G P P F L N R A P R K V S T E N N A A A G A  
A S G T L E S T A T T S P M E T T G G C G S P G G C V L S D S P R S G R P A S G F R A K P F P S T W K R T V T S A C S P  
L A K Y K P P T K N P L A W S S P F G R K M E A R F G R I G D P L S P A Y R H S L Y V K E R L K R L R Q R K K E L L S T  
L S S S H S C S S R P C T D S N P K E R T E E I A K P V I D L C N E D D D C K E S P K E S L R D A P S S S V K S A Q T  
G G T P Q K N A V L T G T A T L K P N T E T N P T E D G I G N P N S R S W R K F P L E R V T V E G P D I G S K T Y C R R  
E N Q P I I K Y N N D L G F R I V L S E S K E K V R I I V S H V L S F S H H C R R D L I S R I E I P G V G S C V L V H C  
Y A N I N P A D I K N K M R G K R C M V T L E F Q D H G D F Q N M V D I A L E Y C S P G V V S E A E W F H K G L I L A N  
L G Y K P S S P T S L R S R L A L K K D E A H G G P L L R R L A T R A S T L T A T W E R V Q K Q S K R P Y E T S K D R T  
I A S R I N T T F T F D K T P S D F G Q P D P K K Q R I A T E D V T T G T D I D K H S Q A T D K M S V D S E S K N P S D  
P H P E E I A R Y T S A D N L V G D S V S G L L S P Q L S P S P S P S D T R A S K K F E S H P L P D A T S A K G G Y  
A S E D N K S I G A K E T A G S Q S H T N G K A T S N K E C S F E W D G T F Q L L Q Q D S S K P E D D S K P T G S D V D  
A D V K D V A N E K E A D D V R Q D Q G S S L C D E S S N G E Y Q S S N N S D L D R A P R S S V D H S G I Q T T H K E  
D A Q T Q T T V E K E A I E Y H N V A E N E A T S A Q R Y N D N N E E R L P I V R Q V L T L F K G I A S S I A E N V G D  
V R S A Q Q E D E A E D K D E E D D K R P V G G D S I P Q E C V L M P P E S N S E S D A D S E D L T V N S N Q D S E Q Q  
N H N P L I S I S V G N L L V L A L P L V G L A G I F W R L R L F D V S N S I L E G C F R T F V Q L H I L G W L L S P I  
F K W G T R N P L L I A C Y A L F M I L L A S H E A S S R T K Y T Y D D Q F F V I A L S L V V N V G W A L G A F G L V  
L K P K P L W D P R Y V L P I V G M L L G N S I N G I S I A L D T V T T S L V E R Q A E I D L Y L S F G A S Q F E A V S  
G I V A H A I Q K G S T P A L N M M C V V G I V S I P G M M T G Q I L G G A S P M V A A R Y Q A M I I F L I A L S T L S  
T I L V S S Y Q T I T S M F C S H Q I L R P E R L V R N H K R S L A R L I M W L W G S I F G A T D Q I P S G A N M L S H  
G T E Y V G Q P S L M N L P  
>comp2868\_c0\_seq1; 347 88 747 LEN=1176; translated  
M T S N S D P F D C A F N S D L S D V Q S T F D E V V L G G E V S A I E E G R V L G K E E G L L T G F R E G G V L G H K  
T G I D Y G M E I G F A L G L L Q A V R E S V L L E G S D L T S S S S S L D R I R K S V D E L E K A I N D F P S S E E D  
I R R R L F Q S S D K E K N V H F R D R D C D E E D G K N H N Q Q T Q A E E D V R A Q L Q R I R A R S K V L T A R L G I  
P R H S L K N S M S E A A K K M A L S T R Q E E T G H A F D G S G E N T Q E W  
>comp2869\_c0\_seq1; 339 1 891 LEN=1332; translated  
S E V E P P E I D E E Q P E S A D D A S E Q S P E V E Q P P E I D V K Q P R D E E E S K S I E Q N R S D I K S L M K S  
K K E S D T Y S L A E D V Y A F I F V A P V S S Y P F I F S S Y V V L T K I I C Y A I L V E D I S W E S T V R Y S T N S  
T A V K F F L V P V A V A M Q E D L I Q C F S S F A N I V Y D P Q I L E T H K S A T K V K Y M L S S L L R L I D G I L S  
L V V N F Y V M L T T T E V L S V F L N F A A L Q F L Q S I D D I F Y E L V T L G F F G D E M E H W A T Q C E E V E L R  
R R V G P N D K Q I F K R L K M S H L D S L L F G F T L L V C L I T Y A I T M A G V K S Y F K Y S P P E E S F  
>comp2870\_c0\_seq1; 625 192 2203 LEN=2203; translated  
M T V A P A I F P T H S G D R D A T N P T I V R P T E A Q L R Y A Q F H H K R R A Q A V K H R I D R L H R T P L Q V T V  
V L A Q E L E E D N D N Y S S R S D F S G T D T S D V D L R A V R L L R P K I T S G R R A L L K K S K R K Y R R R K R D  
I A K H G Y R G C F L D D N E D D Q L E R G E A S E G D E F I D K D W N D I D K E E N D A M Q E I F M T R P K H Q R R R  
A R R H R T P S G G N A Q S Y K R F Q A A C H A M M R N I Q T S Q T K A A L P A I E V P S K R W T R S E E H V A A A A A  
Q T T D F Y R Y R T G L N A R R I K S G R S A A L L L N Y A Y Y Q Q N Q K D H D M D R G A T W L T H L P A K Q S K R G S  
S S Y Y F H N L D G L P P L I S S A N D E G E D E Q Y Y D G D G N E S S I T L S M R Q P G P A K F H R L M A Y V Q Q R L

IEKEKKEKEHDENNHOQKILMFEGIQNKSSSPEKSRTREII ESLEPKSENTNRSTRIRQM  
AESIEGKSSRGTPTITLRSRSTPFGSGFSSQGSQRNRRGKSRVYVPRVLRDFVVEGTDDEDDN  
GEKPTPLPPRKLSERFQOEDDDGSSDKNELFSPPKIRLRDSFIGNEEKDTETNNRTREIA  
LAFEADQDNGVGGSKVNLRESLEPKTTPKIKLKKDFFGNDTDEKKITEREPHISRSNV  
DRLSRQFQGGQERLEGLDSPSTEVLNEFSSHIDPRIFEQFQDEGSSKRQSAETNVTEFFA  
RLRGEQQQQXX

>comp2871\_c0\_seq1; 460 647 2128 LEN=2265; translated  
MDIDNQNRSKYGSASHQQHYQHSAPGSSSSSKPAYDSRGRSRSNRGTRDDMVENEGPRGG  
RSSQGYSSRQGGSSRSSRYNVQQHQEQSSGGSSYPHSSSSQYNHHQSSRQGPPTNAPP  
SSMITPSANQHFPTPPGNNPYGGQQRHNSHHHVAPHTPDQSVQPTFPPPAVTSESPPPAEQ  
TQRRPAYLLHRDLVIGKGSYGQVCIASRGEAEGHMSGSGRSGKRKKFACKCVMLRNDPKY  
ISKLQEEVNVLERELGRHNDVIRLYDVFVCDNELFIITELGRGGDLFHLTTTHPKHGVT  
YAAKTVSEMLS AVAFVLSRSICHRDLKLENWVLES GKD VWSPLKLI DFGLSTHYRQGERL  
TRVVGSSYYVAPEVLKKSYTEACDLWLSLVIVYMLLSGAPPFYKGNDEAIKASIVQGEYT  
FPHELFRDVSDEAMAFVSTLLSYNIEYRYTAAQALHPWLSANCDSEALSRAKDGARGVG  
I I IDGSKPEPMQL

>comp2872\_c0\_seq1; 532 166 1311 LEN=1439; translated  
MVWRSSVFARRILRSRGIAGIRTGASASSNRFHNEPSLNPSTVSLAVLATATATFGFCG  
AATI QNSGDHSHGFGDGLVRFQQSMAPTALCESSYKSENDRGEPHKKKAKLKRKTA  
LKVATNLKMTREEIISKLRLIKDEMLRRWERDEDGWRDLPARAWPEYQPNSEQLGAI  
V A EI QKLG CNDK LATR NYASGT NQADDEQAEGAAHCYKLLFDMATGLV FYNVDPEAGFALYE  
KLAKQGH T PSMVACGI ILIEGLGVPPQELQGFSWLEKAMASSEDGDGSAQA MYELGT  
VY YTGIDGVVEEDPEKAFALFERAARLDHTAALYMVADCLVEGEGTERSVAKAVPLFYKAAE  
RGHRSRQRIRELLARVDYPL

>comp2873\_c0\_seq1; 608 92 2795 LEN=2830; translated  
MTYMPMAFLKSSFLFLFLYAESFSHNLAFLSNYNPSLSRSRRWSTNEVASQDVTDP  
S KDE I TTKVMDENNS E DLEASVIKNGYPMNNNFNGYSMTSGYSPFLDQEPSKWLRLK  
LIG KDSESISSRQDMEEDGYAEMQRRKQSLLKRIAKFPLRTAKRLVSTNSIEPGTLILVRH  
GE SSWNKNKTF TGWSDPDLTDQ GKREMEHAARLLMEGGYHYDINVVFTSRLKRAIRSSW  
ILL QEFNRVYLPVFKSWRLNERFYGALTGLNKTQTAERLGEDLVQGWSSLRIRPPALTEN  
DP FYPGRDRKYADLTKDQLPLTESLLDCMERTKPLWNDKILFELKQGRNVLVVAHANTIR  
GL VKTIDDIGEEEI QNVAIPTGIPIVYKFEMQTNGQLISIPPKSEENSVSQ LHMKGKFL  
EKP GLLKEALKLEGNWREQVPGYDATMSRHSRPM TGLERSLYKLN AVRELGEWATDFIDL  
DPE EDDGNDGNGIFFTADKNESSTVAGLKENS SNEDI PANDQDAIPTFFAQPCITSAP  
TSAVS KRQDSVIVIRHGKTQHNLGLFTGWEDAPLADEGIEEAKLAGQNLKKGFEFDV  
VYTSW LSRALETAWLVLDLDSLWLP IVKTWRLNERVYVWKRVL CYVNCTLATIMVLF  
PQPTILYTFICFNFTFGHVHVSCPFOQTRMYGELTGLSKQMVKQRHGEKQFKAWRRGF  
EVQPPAVSSFSQNYPGNDQR YRYIRDVRYSVKESAIRSIEKGLRLARKLPKTESLKDC  
MDRTIPYFLERIAKDAVDQNKRVLISSSENAIRGLLMHLCDIPESEITGLEIPNGLPL  
IYDVKSKCVKLLDDGTGRDPLEVYVNFGPSAKYLFRPCQNE DGS LDEECTINFD  
SLITTTADQDTLNYIKSKTGR

>comp2873\_c0\_seq2; 659 92 2647 LEN=2682; translated  
MTYMPMAFLKSSFLFLFLYAESFSHNLAFLSNYNPSLSRSRRWSTNEVASQDVTDP  
S KDE I TTKVMDENNS E DLEASVIKNGYPMNNNFNGYSMTSGYSPFLDQEPSKWLRLK  
LIG KDSESISSRQDMEEDGYAEMQRRKQSLLKRIAKFPLRTAKRLVSTNSIEPGTLILVRH  
GE SSWNKNKTF TGWSDPDLTDQ GKREMEHAARLLMEGGYHYDINVVFTSRLKRAIRSSW  
ILL QEFNRVYLPVFKSWRLNERFYGALTGLNKTQTAERLGEDLVQGWSSLRIRPPALTEN  
DP FYPGRDRKYADLTKDQLPLTESLLDCMERTKPLWNDKILFELKQGRNVLVVAHANTIR  
GL VKTIDDIGEEEI QNVAIPTGIPIVYKFEMQTNGQLISIPPKSEENSVSQ LHMKGKFL  
EKP GLLKEALKLEGNWREQVPGYDATMSRHSRPM TGLERSLYKLN AVRELGEWATDFIDL  
DPE EDDGNDGNGIFFTADKNESSTVAGLKENS SNEDI PANDQDAIPTFFAQPCITSAP  
TSAVS KRQDSVIVIRHGKTQHNLGLFTGWEDAPLADEGIEEAKLAGQNLKKGFEFDV  
VYTSW LSRALETAWLVLDLDSLWLP IVKTWRLNERMYGELTGLSKQMVKQRHGEKQFK  
AWRRGF EVQPPAVSSFSQNYPGNDQR YRYIRDVRYSVKESAIRSIEKGLRLARKLPK  
TESLKDCMDRTIPYFLERIAKDAVDQNKRVLISSSENAIRGLLMHLCDIPESEITGLEI  
PNGLPLIYDVKSKCVKLLDDGTGRDPLEVYVNFGPSAKYLFRPCQNE DGS LDEECTIN  
FD SLITTTADQDTLNYIKSKTGR

>comp2874\_c0\_seq1; 253 1 851 LEN=1268; translated  
FDLDIPKVCFNKSI L YCNPSFEKRKYFPTSFKNRNSDFLPFLQNNIXDITPITTKTLEAV  
TEKTKLLFICSPGNPTCKAIPLSDVEKIASETEKYPGLIVVDEAYIDFAGEGASAVSLLK  
KYNIVVVLQTLKAFGLAGIRCGFCIGPPDVIQLMNNVKAPYVNSLTSEVAINAMNSMD



TLRKNVQSTLDERAKVRAALEALTSIVVSVYPSDSNFLLFRVKDDLKANDVYKRMADTGV  
VTRFRGNEMHCNQCIQRTVIGTPEENQKFLASLQATWKELLEAK  
>comp2874\_c0\_seq2; 435 517 1659 LEN=2076; translated  
MTTSTGIAAKLARPNIILELQPYRCARDYSNGVLLDANENAFGPTSLPTKSLDPYDNSNT  
LERYPDPYQSKLKELEFCRERGNLQPSNVFVGVGSDEAIDLMLRIFCTPGTGGDNILITP  
PTYGMYKCAKVNVDVQIVSAPLTPDFDLIDPKTLEAVTEKTKLLFICSPGNPTCKAIPLS  
DVEKIASSETEKYPGLIVVDEAYIDFAGEGASAVSLLKKNYNNIVVLQTLKAFGLAGIRCG  
FCIGPPDVIQLMNNVKAPYNVNSLTSEVAINAMNSMDTLRKNVQSTLDERAKVRAALEAL  
TSIVVSVYPSDSNFLLFRVKDDLKANDVYKRMADTGVVTRFRGNEMHCNQCIQRTVIGTPE  
ENQKFLASLQATWKELLEAK  
>comp2875\_c0\_seq1; 400 129 1163 LEN=1361; translated  
MASRMAIKTIAAALDATAALRIPDRVALVSASPEALMQTVTTTDSRGMNESLNDRYTYGD  
FRDKTNRLAGFLRAYGYEKNDVMMSDLPNVAENLMLQIACNRIGVSYATAKGLEMAKLT  
KVKGAVSATGTGFLAETSLSLPLGDFLLDLIHGTTNSSEISGLFGLDEFDLEDNEQD  
FACGDEEDENTKKLPPHAYNSTKPFTEEEALELGADAAWEVAMVEEDSVICIAITLCHAFG  
MGSAVCSALKEGATIVLPAVGGIRGCGVPSQRAEATLQVLESEQCTLLFADHTLTKAFPD  
EESIGYNLALKGGVCKVSGSQFLEETVKCFGASLRTLGSKGNNW  
>comp2876\_c0\_seq1; 325 161 931 LEN=1187; translated  
MATASMTMASQSVDHYSSDMSSSIDPFVESRDVLEKMKSNLIRYARSNDRRMVLRCLKD  
ARFLSYVPMDAADEQLRIPISELEKEISKEEFLLNGISLKPYPDQAQAKNVCNREGTSSGS  
LKMIGTLAQILCEGTTMDGNLYERVINRVAKTSAEPEVYHINAMMGNTTSLVKQLSPE  
QISKEEEANVTDLKLYETGGQIQMVLETTHSYGLFREKDAIINRPWIIVHCKVHERANLS  
NNEFRSMNIKTPSLY  
>comp2877\_c0\_seq1; 919 81 2030 LEN=2640; translated  
MSTNEDSPSAKRRKALKDADSANQLRVLESCPLSKYADIAERLLGHFQNAVDGRRRLDEAY  
VFGLRFANLCISGLPQHPEWRREIGSKTRKRLTSQVGDVLSMMDVIKQRMDAEELMKIKA  
EMMARKAEELRKKEEEDRRNHEFEAAQRRKQQRDALEKERAFLAEQRAQRQKQIEERK  
EIEKRNAAINKKKEIEQSAMAKLKAMQARVPLAETKEEQSVAVSETNVEKPSNTKAKPNR  
LKNWFGGKDKSSKKKNEEKSKLSAPSGAKDSDEMVSSTKPTVTDNRNVATAEDRSVTTQE  
YPPTEAIQLQQPEQETSSSSTAHTGRKKGAKPVEVSTGGPTISRRSNKSQSVDSSTILN  
PLRSMKIKPRKNTDSKNTKNKNDNEQEESANSNEVCSKHKVHHSSEKPIGSTLPSSS  
SPECNEGVTSTSDVSSTAVTMI PSHLTPLSRKEQATIHKLQRAITVQEDRLEEIEGKQIP  
QLLERAKVLLKEKNQEQALKCLVHKKRLERQVDAIKAAVFNMETQMFMLESAFEDRHVKK  
ALDEAASAIAGYQQIIIGDPKAAMVDLTNMSESLPELDVGESTDEELMEELTEWLTPEEKK  
RAKANENTYADKEDLLLLSMPEFLPAAPADAPEPLSAGRAPNAVETNN  
>comp2878\_c0\_seq1; 901 156 3116 LEN=3404; translated  
MPFGSQSSLSSSSDESVEYGSINANNDVEMAPSDPIFTGEARSGKNSNVCGEKVLSPRTRL  
VILGAVLGVLLMLGRRTAMPASHQLKHGKGARIKLYNKDDSGIGSLSNGAGNDPFQLSP  
VENLGMLSIDRADDALPSPIWGNHLKGLPLPTNSWYLNLVSHRAAFRPDDSTRVYTPY  
IIDTASPYPGMEGLRVHWPVVQASDGNVQMVNDFKNALCIGSDGFSSDGDGIDGTYRV  
KDGALSPLVGLEWAGSDTNSNIMSTNIVRGMPYATMVYSDSSNMVPTIYSYNGLASD  
VQIDRTSTFDPVTSKFPKLVCGIEGTSKKGISATVHSHLHLMINSDFTWIVFFNKPKV  
SCVTNNEQDPKVRDFKMTFLDNEDDTEAGDTLVVRIALLNQCTTGHASIKEHCKERNAL  
ADKDGYEELLLKNNHLVLPQSPTIDFEYASKSKNDDVAKINIDWDVTNTKNASNDADLL  
MFALPHHQDSLSSADREVKNQC VHSFHGKTCLVSSSNWTLEEDLGSPLSFDAPRPPSAEF  
IPTIAKYLKEDIKFEIPKNTMRGASDTYFSGKILGRLARIVAIASELRSLASASSVEDIQ  
GRYDMKLDSSIDMLQESMKAASANLPSSEKFKDALDQLKSAVQAWLKSADAPYIYDKS  
WGLVNCGCSYVGKMDRGCNNTFPECPALLSVNEDFGNGYNDHHYHYGYHVYAAAVAA  
KFDPAWGRKHFEVVMYIRDVANPKGDDEFFPQYRQKDWFLGSSWASGII SAENSPHGRN  
EESSEAI SAYEGVTLYGSAMVDAFEVKTGDEEITTKLETAKLIRDSGQLLTASEIS  
ATNRYWHVWSSDTHNTYPAEYTKPVVGMLYDTMAMFQTFWAPWAVVSYGIQLIPLTPVA  
ETRDDPDWAAELYPLYDEACDDAGKDFCEANGWSILQAGLLATAGNQTEALNQAKAVPRE  
VFATEGGVGNMSNTIWIYIATRKKIV  
>comp2878\_c0\_seq2; 873 156 3247 LEN=3535; translated  
MPFGSQSSLSSSSDESVEYGSINANNDVEMAPSDPIFTGEARSGKNSNVCGEKVLSPRTRL  
VILGAVLGVLLMLGRRTAMPASHQLKHGKGARIKLYNKDDSGIGSLSNGAGNDPFQLSP  
VENLGMLSIDRADDALPSPIWGNHLKGLPLPTNSWYLNLVSHRAAFRPDDSTRVYTPY  
IIDTASPYPGMEGLRVHWPVVQASDGNVQMVNDFKNALCIGSDGFSSDGDGIDGTYRV  
KDGALSPLVGLEWAGSDTNSNIMSTNIVRGMPYATMVYSDSSNMVPTIYSYNGLASD  
VQIDRTSTFDPVTSKFPKLVCGIEGTSKKGISATVHSHLHLMINSDFTWIVFFNKPKV

SCVTNNEQDPKVRDFKMTFLDNEDDTEAGDTDLVVRIALLNQCTTGHASIKEHCKERNAL  
ADKDGYELELLKNNNAHLVPSPTIDFEYASKSKNDDDDVAKINIDWDVTNTKNASNDADLL  
MFALPHHQDSLSSADREVKNQCVHSHGKTCLVSSSNWTLEEDLGSPLSFDAPRPPSAEF  
IPTIAKYLKEDIKFEIPKNTMRGASDTYFSGKILGRLARIVAIASELRSASASSVEDIQ  
GRYDMKLDSSIDMLQESMKAASANLPSKFEFKDALDQLKSAVQAWLKSADADAPYIYDKS  
WGGXRELRFVLRREDGQGLLQQYFPGVPGFVECKRRFWKRYVYIALQIHVCCNYNSIIGW  
DRLGSTLPADLVPSRFLLFNNLGYNDHHYHYGYHVYAAVAAKFDPAWGRKHFEEVML  
YIRDFANPKGDDEFFPQYRQKDWFLGSSWASGIIISAENSPHGRNEESSSEAISAYEGVTL  
YGSAMVDAFEEVKTGDDDEEITTKLETAKLIRDSGQLLTASEISATNRYWHVWSSDTHNN  
TYPAEYTKPVVGMLYDTMAMFQTFWAPWAVVSYGIQLIPLTPVAETRDDPDWAAELYPLY  
DEACDDAGKDFCEANGWSILQAGLLATAGNQTEALNQAKAVPREVFATEGGVGNMSMNTI  
WYIATRKKIV

>comp2879\_c0\_seq1; 278 163 736 LEN=1181; translated  
MIRGVGIQVPEKNILASLAFGLAIASLRQYFYDFNFFPRDNGCQASTMNGGSREEETDDG  
TPEGGAADVNIIDGNVANDLVEDNKKNICFPWEPHYSPKCRDTENLNPRKFPLKKWHEV  
SALHKIDYSAHEDDHGTISTETCKTELDFLSSMTFAMEDCDLPLVLAVFDAQRTAYLSF  
TNFFANIGQW

>comp2880\_c0\_seq1; 599 120 1190 LEN=1267; translated  
MDNKNNDADTDHKIMMESTSTANIESASSSAEAHPSEPVAATSNIGIVTKSNDDTHNTIRS  
GDENDDDEVLQEEEDDEEQNDTVPTSRASCYKKTAVGLVLLGLIIFVIADSLTNQHIKTGL  
LAFLEWIEDHLVVGVLVFLVYFLATVFFIPGSILTLGAGFVFSAMDSLWIGVLLGTAA  
VFGASLGAIVAFLLGRYLFREAVAVKLTQKYKIFEADRALEQNGLKIMVLLRLSPIFP  
FNALNYSMGITAIRFWDYVLAACLGMPLGTIVYVFLGASAGSLAELGGDEDETEEDDDNKT  
VTIVVIVVGVVFGFLAVGLTSYAKQELNKVLEEEAEQNDESNNGVDENAEIIIISV

>comp2882\_c0\_seq1; 443 209 1051 LEN=2356; translated  
MSFSTTTSITQKDVLSSEWAPSEWAETDTQMIPGNVDGEMLPASAFQAAGKVLKQWLS  
GQQEPDQCYQNHLNNSAIIVIPCDSSASSTEHDATADLASLMEVDEEIGENLLGDEV  
FGGPEITEDSQLHFGYLSAVSHEDKTLMNSISAMNMEMDMSEEDRRFLAPLLVENTST  
SMDYDAGYIVTDDEVLHQPCASSPSAIVDQQRQYQEIIMKKLEASMNRSQETRKSLTMKTPK  
TEKYNRRRSITGVLSSIESSSRQLQNFLQTVKQRKQRTPV

>comp2883\_c0\_seq1; 820 218 3175 LEN=3345; translated  
MSTPWNPNNHGFTSGPPGKNSPPGSAVALRNGNSSTTFDARNNIDSTASSEATRNPAG  
PTKEEKGGQGEKSQRATPMIPTQQQMRDQQRPISSSTTSATSFSHAGSSNGIPHPHHP  
QPSSGMGGNNYHMAPQYRHAPSHHHP SHGQPNHFYNGDQMMGAVRGQGRPHDPDHAMQN  
NNFHHLNLRPTGRYPIQHTVPEFGFHHPHGHGHGHGFRPGPARNYHQHQHQPPQFHS  
FPQVPHTKGGTITQGMGQQVGSRGPSPTHPPQYLSQGRKSVSPPPGVAVAIQSQPLR  
RLSQNSSANNSTDSSSGPVVPHEDTGNPSSNRVPTGSYQSKPVTSSQQNQQQQTSVGHSA  
PLRPPSQQEMADISSQDQYRHRGGPPDMHQYQNPYQNPQPTDHIHYGGQPPMHNGGH  
PNSMQSDMQNYNYHHTSHGPPSTSGPPLAHNHYRGYPDNGMPTGYPHGPGGHEMYPHP  
SNQHYHQHQHQPHSYGKPLPPPPAPQRI PGHGFQLPKYNSNLTTSDPATSDNKNESRKS  
STNRSPSPPPSPPPAPSAQALLRARLRQQEGAKTTDEMSTSSPTTGDMINSSTNENPSR  
RNSSGSHSSMVGKPTALGDRGNVAVTSRGSTLGKKQTNQPVSKPAKQEDVTADAASILLQ  
LQGSMMNRSTGGTENQNPCSHPSPIIPSSVQHSSSMDDVSDAGTMLTMQTDVPLDTS  
GSPSSDI DTEMSGVSASRPMDTPTKSNLTTKVTTKQEPDTDFPCVPDRYPTRLALPY  
DNAKLNNLH CFLRSELLEIFVVS KSNKSPCHSPSSSVGRVGLRCVHCAMNRMSCADAP  
MSVFPKSI AEIYRLVTSWQRCHLRKCKKIPPGARAEWQKLRDTRKSRGKTHYVVTSA  
KQLGLMDCQSRA GGIRFKPDFDPSTLPPNTPLTPSAKEAKEAAERAAAIAAKAQKIVSL  
ATAVTTTSTIAAAS AKLEESTVMTDAPSTEVLASAAVHT

>comp2884\_c0\_seq1; 591 1 1244 LEN=1818; translated  
XTTDKSGFSEETTDKSKDTLDYSESDDDSKSDNEDSTSPSTSNRSNVITMADLSSTS  
VMGLQHWAWNMGGKNCDSDEKVNLAVSTLKEVDDKASSIGTKDNHDAWIMNEDQLDSFA  
EDD DKEDENTNEGKEQRDVEGDTHDLINIE TNSPKSNLESETDVTKDNTSPPQAQDN  
RIASPK REHFLAAQKALS KSKFRKSLSSIKKKKPHSSADIASNVLVNATVTMDET  
PDPIETVLMNS AVEDRNPSSNTNRI PKRFGANRANKRNSLANSGVAFSKARKFWREKT  
QEKTRKPTGIGRN DTVRTRDVETVHKSSDDSHSKDLVTIENNTIAETIISSHYDPV  
ISPSRENSFLDDIRDI AMHGLLGAEYDDYDADSLGTTNTSFSWVRDDDETVESLRDDG  
SLHNQSHQVIRE

>comp2885\_c0\_seq1; 245 420 944 LEN=1236; translated  
MFFQHKTAAFLLLSSSPFADAQCYESSVCLDVMGKPGECTSSEGRTPICCPDDATQ  
TWNPTDVCTMGGDPTPTDAGEAAPTGAEAEPEKLCYEIGTAICWELGVKMSSCVTGD  
GREFN ACCPKDVTESSTWNSTCIYGDGGHEKSAAHARSLETVVVALGLAVATTAVAFAGF

>comp2886\_c0\_seq1; 464 329 2263 LEN=3258; translated  
MGILDESLVSTASTLIDSCSISLDPPLDNRSDHPSAEKENNGLNVNPIHGRNTKSGTSS  
KRFVRAISHASQIVEKRNARLLSPSATKTHRFLQSENHSVSESTTTTNNKLDILRARTK  
LLRKQGSQKISESRASLRKNRTVQVGLSPHLPCPMNQPEALLGNTPRPAKTNSASIMRGK  
ILGASKNMDLPVLLRRSNSVIDQLTLEMETAGDI INQTYVSENSDSRMILDTSSIYDTHV  
LVPPSPIMQTSHDQDIEDDTSSIHNISVDDYWDQSTISASARDASSISEQLSPTRSNLEE  
PPPSQSVNCSGLPPPEVVVKITPTPTSAKLSRSRELAESRHRMSPPSISPIKGCASMYN  
TDQKCEKLSFENDCLRRQLELLESRHRDFQKLDKQMLSPEKVP GALRTPGSPSTATSTS  
SGASSPNSYKYHKRKRRRSDRRRLALVLFAPFLISTSLFFYRAVRNVSDARRRNRDNA  
LRNSGLGSI PPFADTNSRGPQATLSKPALSGLASLMREGVLRQTS LGPILFRDKSNGRIQ  
RDNINFSGDWIGERHETFS AEGQNESFDYADSLPVMALPKYRRIEGSVGGDNP DSTQSGR  
KGRSVKRWFQKRLSKMKIATHNDPAGVWLKRAQQIKTRELHAE L

>comp2887\_c0\_seq1; 487 172 1446 LEN=1775; translated  
MSAASSTSKAGAKSIVVVGGGIQGT SVAYQLAQKATAE EPLEITILEAKEPASAASGKGG  
GFMARSWGDGSP TQGLHHLAFDMYEDLAKELGCSSYRKL PVLSVAPEGGGGIRGSKGNPL  
IPSWLDGDSIGRISPMGYGDDTAQITPKEFVEKMLEAA SENVS VVLGTCTGV DVCESSDE  
DDEQSVTGVRYQPRGSEDGTEKVL PADAVVVSAGPWSCQAEDWFE GSGVQLPMEGVKSTS  
IVWKQPEGTSEVDATALFCGEDYRFNTHLEVYPRPDGTIYICGIGGSDYITTQELKQGAY  
REVIEANDSRVKAASDSFRELSSLYREK GELDRTQACMRPCPPDALPYMGAIPSYTNAFV  
NAGHNCWGIAWAPASGRAMAELVLDGASESVDLRPFDPARFTPSAGKRGGGRKKK GASV  
GEQW

>comp2888\_c0\_seq1; 493 1 1518 LEN=1559; translated  
XLASVGD CRRLMRAADDAFGRLDVLVNAAGTTDRGSLWDTTPEDYDRIMAVNARAPFFLM  
QDAARIMERESTEGSIVNVSSTASYGSMPLAAYGMSKAALNASTKNAAYSLAWSRIRVN  
ALAI GWMDTPGEEAAQKGMCPNGHKGGGQGWRETAGRGLPFGRLLRPEEVARCI AF CAS  
DESGMMTGCVIDFDQSVWGAGNPPVPPRKEEWD RASGMTFSFEGRDRFVVPVAAEQKAVK  
KAAEKA AVAVAVAAEKSPAPPTPAPAPAPAPASKPAGRRAGSKSPGRLRWPPPPPVAKD  
VEPESYRRASEVF AAAATPATQD SNSNSKSENYGYDNNGVDTSSQASIKEPTAASETAS  
DASTGASPTPTPTPPPPEEDAEDAADDAADAAKEAYFSMRTQRMGDVYRPDEYLPGETEP  
SGYFVPTSXGLEAQEEGRQEVGGKGPLPREVEGGRVAGLRGGPQAHLQAGLAVGRGGQ  
VHRHECDTNQRRRFHHTSAMYSTSKQ

>comp2889\_c0\_seq1; 702 1 2901 LEN=2996; translated  
VASCRICSI TTEPKVAGLDWSTIHEIGRHTTMRWSFISPQANGEGGEEAAADRDEANDGK  
KLHHYLQDPEENGVD CYQSCDYWTHEDPLSPV PSSSSSISLPNGPGSGLSRRGQKAATIS  
ACFLKDYERGHPTLSSDFSGITRRQ LLLYRVKHSFHWNI FGLWLATALLFVPSFRARAA  
TLFLHAYAILAFSADLYMVDQFR CEDTERESNRWPLGAADRPGRLLFGCMEGFLFLMGLQ  
TIANAI VPNNTVVHAFTLAVSVLKPLVFFYQSRRARDALEALIRISKLLRVIL IEMFLI  
LTFAAVACRLYYNYDSFQTL PQA WLSL FALSTTVVNPSIWMPAYNESPWNAVFFVIFIV  
SIFYLHSLVLSVVFQVFIQSATEVHRQSATDKENSLKLAFLALTSARGNASKTLGDKNFS  
PDKNALVDVRLICEAFRLLRPHYGQQKLNVLTDIILPPNSEGGNEATQHNGRNGEEKDRS  
NKHNIDFTEFRSRI LQALNSSVRTRTRHSTEGMAVELLSITVSI VNFVLMIFASRM RPR  
EESTDSEFIIGSVITLLTLCEVSLRYNPWQFSNRINPITRLNAVLDGMGCLGGIVSFCGI  
VVFLCGNEIGLEYLLVGRAIGMIQSMRFSIWFREVLQRSLYVLPFLAGPILLILTAMHVF  
VICIGMALWEGAVDTEEQASNENVEYLYLNNFN SYAEGCITVFNVLVNDWHQIANVFLY  
GNRCSSPFVYLYFVMLVIVAVCILLNVIVAFFVETFTVQLNLVDVESDSVNSDVKVRID  
ESTPAMQP TDMSTHIAPIAKSWIFDSSDLKKT SVRSLSCPNTGVKTDYDVIRREGFDDIM  
QSVGNDEDKQFEDFARDLLGALELVRALTPDRNIGHLLCCHQKGIQFQSSGFSLLT KDYI  
PGNKGIESIVAETKDALLNANSSGRVGRYIPNPNNDSKVLQIDGALLPQNNEVLM LTAI  
EKKLEN

>comp2889\_c0\_seq2; 576 1 2664 LEN=3112; translated  
VASCRICSI TTEPKVAGLDWSTIHEIGRHTTMRWSFISPQANGEGGEEAAADRDEANDGK  
KLHHYLQDPEENGVD CYQSCDYWTHEDPLSPV PSSSSSISLPNGPGSGLSRRGQKAATIS  
ACFLKDYERGHPTLSSDFSGITRRQ LLLYRVKHSFHWNI FGLWLATALLFVPSFRARAA  
TLFLHAYAILAFSADLYMVDQFR CEDTERESNRWPLGAADRPGRLLFGCMEGFLFLMGLQ  
TIANAI VPNNTVVHAFTLAVSVLKPLVFFYQSRRARDALEALIRISKLLRVIL IEMFLI  
LTFAAVACRLYYNYDSFQTL PQA WLSL FALSTTVVNPSIWMPAYNESPWNAVFFVIFIV  
SIFYLHSLVLSVVFQVFIQSATEVHRQSATDKENSLKLAFLALTSARGNASKTLGDKNFS  
PDKNALVDVRLICEAFRLLRPHYGQQKLNVLTDIILPPNSEGGNEATQHNGRNGEEKDRS  
NKHNIDFTEFRSRI LQALNSSVRTRTRHSTEGMAVELLSITVSI VNFVLMIFASRM RPR  
EESTDSEFIIGSVITLLTLCEVSLRYNPWQFSNRINPITRLNAVLDGMGCLGGIVSFCGI

VVFLCGNEIGLEYLLVGRAIGMIQSMRFSIWFREVLQRSLYVLPFLAGPILLILTAMHVF  
VCIGMALWEGAVDTEEQASNENVEYLYLNNFNNSYAEGCITVFNVLVVNDWHQIANVFLY  
GNRCSSPFVVYLYFVMLVIVAVCILLNVIVAFFVETFTVQLNLVDVESDSVNSDVKVRID  
ESTPAMQPTDMSTHIAPIAKSWIFDSSDLKKTSVRSLSCPNTGVKTDYDVIRREGFDDIM  
QSVGNDEDKQFEDFARDLLGALELVRALTPDRCVRFVSSVTPGIVLR  
>comp2890\_c0\_seq1; 229 1 490 LEN=490; translated  
SHTTPETPPENKSKTKSLVVSSASVATILSRNQDNKNNDNDNNNNNRNLILDAFYQQQQQ  
MYAVNNGNQNSSGNYSNPDSNFVYTNQSHGANNSHLNGNAAAASVSETFHSYSLDTQGQ  
LSNFMSEFFGRNHNHNSNHANIRAIQSFPLPHPYHLHQQQQQQX  
>comp2891\_c0\_seq1; 524 289 1500 LEN=1562; translated  
MTDKVLPWRDTNRSPLSGTELRLVVRAALLEEIEDNEDDDSSSFLDIPGVAWLEHINLI  
VGKVAEDRSVAESFYLDVMGMTADKSKSFHVNLGRQQFHLATPKRDDEVAHRIHGSIGLA  
VPDLEALLDRLRDARKDAEGNNDYGFRETLDYEEHDEDDDKIVHVRCPWGNVFRFC  
YSVKSRGTPPTPFAKPEESPQKMTNLHAPQLGIHGADKMGVLGVGLPGIRFVELILPKGV  
SSHQLYGFYKRMRLRCPAQLVLTSCDGGKRDCCVSVGAGVHLVFEVGSIGSENEEEAIAQ  
RLMKGVHICIAHADFYGLYKRLSDKSLIWSNPRFFHLDTCDTWEEAKNSRTLRFRIHVDV  
EREETSNNNGENNGNSNILIELEHETRPLRHGQFMKVPHYVVK  
>comp2892\_c0\_seq1; 205 197 943 LEN=1203; translated  
MTDGFGRNFVSSKRGLLASVWSIVTILTAISFLTAFVYALSTSDDENDENYNNNEGEGS  
QDQREGHDAEVAVTSRALAFSALWTGVLAAALLSIFGTVILGWQSPGTQYYTCCSSSVHRT  
TPLGIGSFIGALLMFANLTLCSVLFGEFQVRDNREGEDRAGGAGNQIDGQRETRSMAFS  
IMCAVLTVLYGGFAALTAYAPDVINEYAVDERDEVLMTSTRNKKGHFNAAAYDGYIGERF  
GVGRTTLA  
>comp2893\_c0\_seq1; 485 1 1714 LEN=2055; translated  
FWLEAVVIDIXNTVMSLKKTSSEFEVAKNTYDTEKMDSTEKSFSKNGEIEVSINLSVDDKT  
RHWVYFRSNPRTDEERFNSIHKDDFGSASVQCKQTILNGRTNRDSLTLDDASFELVDDFD  
VSKLFSNQDFYEMQSGEKNFNGYHKAVEDFVKTKLGC DKVICFHSQVRNAQRTSSDGVG  
YAGGSPHTDSSPVSADQLALQMLQANNDTGTQRYCYLNLWKNISDTPIONDHLAMMDER  
TAVKPDDYITKDLFGDGYSVVQYGLNARHAHLHKWYHFPHMTSKEAILFKQMSDPTKTG  
RICFHMSVHDISADKDNAQQQSPRESIETRMCFWKDVAASNGSSNGNAGSSMPTPTNI  
HEDMIKDPEVFATELAAGGATLEGATVWRLLALFKKIPLLGSLLFSSDISSSRPSKYSG  
NPEDYLPFFVEAMKYYSWPAFGKTYVENQFKNSADYDAGVKQLTRLLVNDAYGNLKTRS  
LRPLEKDAVVLCLLSYEPYLAEVKKCFGDXXNVTDEKEYSRSHWRILSSRVIRGEKIFPSAM  
QNMDRSSIIYKPNGSTVVGVFRKMLSPQKNE  
>comp2894\_c0\_seq1; 458 275 1585 LEN=2074; translated  
MRRLPSEPLSQYRRCGLFWTILLVLLLPLGLTLGQSCIDDFEAIYKREAVVTDTSVPRLY  
ILCPRHVEYIGKLDGDLVQPPGGKAVMPPLPLRPNMTIRCGDQGLRENVCVWKGDDLH  
LDGTKILGITDSDLENVRIEGLVFIGAGEYSFWGNKPGSVTFQDCEFREFTNSSAPIMLD  
FYDASAPSAELVTTFLDCEFRNRYFGRGSQSALIYGNQNRINVTSSLFENNDMIWNN  
TRPDTHSYIVESLGPVGVSTTCFSDNLVGSNNVVVFGNSFQNEFNRYVRNSSGGLCPFFSV  
FENMQQFEDFDPTCVAASQSVCSRVTLSPTPAPSPSPTVSPAPTASSSGSPTRTPQPTI  
TPVPTGEP SARPSGRPSPYGATNEP SMAPTEP LLEFFWPTIMEEDPFASSATRVGAGATN  
LAMLWAWSTALVCWSL  
>comp2895\_c0\_seq1; 585 633 2174 LEN=2679; translated  
MSSSTSASDTSVDTETITKSNIDDIVESLYNNQDELIGYSCKQIMEKNTVEEMDLVIFYMD  
VLSPKDDESGNSDNTNYQLAAIDATQSVVLEEVALEYQIDPDISRGVRCFDLPVDGSTWL  
QMSIEKKDFVEVTIFGGCRKLEWDDATQDCNFYEARLKGSYIGAVPVADDGTEFSDVVG  
LKSLLNGPTIVDNLNNNGDGGNGLDNI FGQNAASDAYKMAFLGVPRAE TNPNFQAE EGRN  
DLKPPVNIKTGIDASQSTAQPNRNTITVVGGMVLVACFSIAFLMVAYILVKRRQSYRNERN  
EDEEERSAEISMAMASGASAGNFHLDTVDRIDRND EYNHADDG YGYDRNDYDDDNDGD  
DDDDIREDQAGGGREMDPE SFRDDDAGPEMQQNH LQHE SLRSAQR PQEYGDHPMSAEAI  
QMDLGNLTKGQMI GLHGNTSKKVLPMCGPSTRGGNGGNQHKVQRLGNRNAGSFFHQLSDD  
GDHDSFDDSDSWAQT DGTIGSLELQLEPITAEV  
>comp2896\_c0\_seq1; 570 1 1485 LEN=2010; translated  
EQPESPLAPILANPVL PARRSVLRIAPTPLRNSMTAMLLSPPCSHELKTTSDACGTENDG  
SRRHALGIEIERTNNEFAEERCREILSHYEEESH RPEHEDARWL VGQLDREEQEIAARCS  
YAYWYLSRRSLEEPSAQAVKDPARFASAMQEARRHLDCADHRSEVLKVFRETLD FHRSHK  
TALYRTC MVDAPGADKGLSDSEKELSKRRERIGDEM KDLQTNVVRGHDRDRAIFFAFP  
RRKAGTSEDAFVDSL VYTVERRAASSEFQSIGRQDQIVVVLDTKGSSCPPFKTLQAAVGI  
LQNFYPGRLKTCVILNPHYVVTGIFRMIKPFMHPLTF SKFVLVKAKRQSGIAEEDSVLSR

LIDESQAMPEMMPGRGKGLASKVDVDRFLYKVPFYRLYDCTDPEHDPKLLDRETHSTTSTT  
LSLSSSSSSLSLSSDAADEDEHECDEATEPLANLERGTTKAKPTRVALRSLAVGQLSVRA  
SPGSPMVVDLRIVG  
>comp2897\_c0\_seq1; 209 262 603 LEN=1014; translated  
MTTFQVASRRFFLPALRRSSVTLNTGRRTMMAFEDHARLRGKFEEDRYLKQQEEQWRQNL  
QALRAQEESKREKRHQEEVVEPVKKHLEEILAASGDKISDEGLENLAKFRLSL  
>comp2899\_c0\_seq1; 343 1 1073 LEN=1668; translated  
XEERQRKEQQRKEVEERQRKKHQKVAEELQRKEKERKEAEERQRKEKERKKTEELQRKE  
NERKKTEGLQREENEKKISAELSRKENEQKKTEESQREENEKKAAAKLQRKKNERDKTEE  
LQGTEKMSVMNEITKDVSEKSPATTSPKLQSIKIRKIVAMDKTVSDAQAMLAQGMIRVSSV  
ENNVPSPIMNSDVQNSTKTNGKASSDITISAVRKGCLSAKTVPVSNKVQNAVVEGSYADA  
TRTNASTNPVSSEPAEKISDIDRDDPKLTKGTVMMSDSSSNDPRLPENRASGSSESEFYI  
PKGMGSKIMGRTTSTLNPNSILAGVSKGLQSLVTGRLAQGSSSDEKTLSSASEKIS  
>comp2900\_c0\_seq1; 278 348 1115 LEN=1496; translated  
MESQRGRNFTIPQPIAEEDQQQQSEKTSVRKNLEKASFMDSVKFFFEPCVGAVIDAASFYI  
GECRPSDYEACDPNQDQKVAEDVIMKLRENGGLKRRNETLEIPTNGMLFEDDDVSAISS  
HTLEEMERLRLAQNSGITNFQIAPGKHQPGNILHPRPTDDPTSPQDAADRSDAVKFRNWS  
TQKTPSTAKPQERGTNEGNIITLCVSVSDSSSNEDGEKASPKASSPKFESPKTFTTSPPSWS  
KKSNGKRAFKTHPVG  
>comp2901\_c0\_seq1; 766 150 2756 LEN=2817; translated  
MSKPNDETYSNNHGAPAEALPALGQHQQPPSSSSGMRRGAAPGSGGVLVSKAGGSSNNSNQ  
SIMPTASNVSIGTSTSQHQHLSVERSPPMILRSLGDRSNEKRKNAALEIEALVKTQ  
EANNLSMIQNVIEILSKDFCTSMNSNYRKGLVGLAATGIGLMGHSRTFLPVLLPPVLHC  
FDDPESRVRYACESLYNIAKVSQRQILQYFNQIFEGLTQVIADVDVDVKNQAQLLDRLI  
KDIVTEADEAFQVDQFLPLLQKYIQRTPYIRQLIVGWVTLTLDSPDISMLDYLPDFLDG  
LFNMLSDSNREIRQAADSALSEFLKELTSSTVMEFGPIISILVLQCQSKERLNRLTATTW  
LSELIHHPYSGGDALLPYNSEILGAILCCISDGEVEIRIVAERTNDDLLSLVKGTSPPFE  
LRSLLETTLSELLNKEDVPTKMAALGWINMLMEKRKGMNAFIEELLPVLIIRTLSDPSDA  
VVLLNLQVLSRISLAQRDEKGDAAEESAEEQFELVLNAILSLFAKDRQLLETRGSLIRKL  
CVLLNAKSVYIRLANALMQYEVNEKIADAGTLEFVSTMVQTLNLIILLTASELHDLRSIL  
SKSFTIPPENDSKKNNPEHDQRKRQKQKQKQWSRQKKNFIEDSLKVVFVILFRCWSHNPV  
ATFSLCCLAQAYDLSFALVKRFKSKMEDVSVGFLMQIDKLVYLLESPIFVHLRLKLLDVES  
ESHAQLLKSIIYGILLCLPQGDFAFRLLNRLTTVCNLRDNLGLTPMPDAPKQDDLSLPSTS  
TVFVGCFLSLDALLIRYDEILEMHRVAQEYQYDNFVYDEQQRLQMQLAPGSQQIGLSGSS  
QGGRSHQAVLAHGPLSPQYQQHERRLWD  
>comp2903\_c0\_seq1; 434 192 2000 LEN=2692; translated  
MFVTKKFALFIVSAAFLASSVSAGGVRGVPTEDSAPANHGWRGRELKDKQNKPNKNQNNPA  
VVTRPALPPPPTSPVPNPIDVLVKGCSNPTLTSCVLRSGANERVCFCTCLYSISRLSSAG  
DSAVVNCGRSQCGGCVNEARDTFGCATGGSAPAPVTTTPGVPAPVSVSSPVPAPVPAPVLE  
EIEETFDFTTQGPCALKPVGGAVCSVPAPFQFQOCDYPTGSGVGVRCMAYGQFICNPAPI  
SPTPAPVPAPTAPTPTPPVAAPPVCSPTLPNSGDTCTSTGGAPFATCCYTGISNKPANY  
AHICNCLSGENRYICNGGVSSQCTSVINNVASSPVPAPVPAPVATMPTPSLVNAPAPTGS  
SSSIPEFCLALPGVPKDGESGAGVLPAGMASGGCGGEIIEETDNMNVTTVTNAACTCTATD  
PAPAWSCVKISAVAPSSGCPPQASPPNTGDSATVLPADSFLLTSVECKYSKTVTDSSQL  
STTTEKFCTCEKATQIFCTDATSQLIIPVSIIEAPADPAPADPAPADPAPADPAPADPAA  
PAASPTIVQDGCPTITSGTPCKAFIPAGANEQSCMTSLTTQCDCPGQESADPVWTCRT  
VP  
>comp2904\_c0\_seq1; 527 207 1775 LEN=1841; translated  
MIDQTDVVKKFASLIGTKQSSTESQVSSSLLRAEPKASNSREMLMCISKSVTIDEVVCTL  
PSLDMRKLDEEPDSNPLPEVGEHFPMRMEASVLNNAADASAKAAQVEQKAAQTLGSLTAW  
TRSSVIYASKQISENAAESFSSSLVSRVRAWTLTLLLRHSLTTGDDASRSRLLSMLASTIK  
VNSAETSFKPQPLPPNLANMAKNENDPDVILPLIFEIDLKISVRNNDCTVTLRAPGTISA  
DFDRLENKMGMLKRVQVQLNTGTLLESVMNEARLVVFNAVEAAAKSNSATKNEHNRV  
NPSSQLSSGSSFKLSAPSTKSSGGLPPPSPQGGKHQPSHRALKAQSSSLRGLSVLSSS  
TSTFQKTRSVQFNSSDLKPKSNMIPTPKRQKLATAARLTSIKSFRPHGGDFGAEGGPKN  
ATFQDFGGGSRFWGRDGLASKPKPMLPSETTDMMTSQTRRNANASFDIQKPPIHLSG  
SDVRMGLGGKKKPPAENQVPPSIPRTATALEAMYIKKFGGKF  
>comp2905\_c0\_seq1; 226 79 591 LEN=807; translated  
MGTTSTKLATSAPKKGMKSFYLSAVTGDGSIQKMEEFRGKVYATNVASNEVRPAXEYA  
QFESLNERWGKKLIIFGFPSREYGWQEFDNDEEINEFAKSKNFPGIMMKLGKIKGDTAPE

VWRFFKDETGAGDPMWNFKGKFLVSKNGEVSVPDLEADIERLINEDSKE  
>comp2906\_c0\_seq1; 423 226 969 LEN=1119; translated  
MSKSVLTISSASTILVGDPIVGYSLTPKEAEIAYDSYAANYDELDDGGKAADIFGLDEARS  
ALFRQARGSVLEIGVGTGLNLEKYDPSKLESLLVDSIRGMLGEAQKRFEAIPALQRPVP  
RFIQADATSGLTVRFVGDGSDTVDVDFSFVCMVMSKGAQSCLEQVKNVVKSKENNGQILLL  
ENTRSSNPLLGLYQDATAEAAAASAGGKGLYNQDVSKMIQATNGIEIMKETSFAGGVFRS  
YFCQVVT  
>comp2906\_c0\_seq2; 423 226 969 LEN=1087; translated  
MSKSVLTISSASTILVGDPIVGYSLTPKEAEIAYDSYAANYDELDDGGKAADIFGLDEARS  
ALFRQARGSVLEIGVGTGLNLEKYDPSKLESLLVDSIRGMLGEAQKRFEAIPALQRPVP  
RFIQADATSGLTVRFVGDGSDTVDVDFSFVCMVMSKGAQSCLEQVKNVVKSKENNGQILLL  
ENTRSSNPLLGLYQDATAEAAAASAGGKGLYNQDVSKMIQATNGIEIMKETSFAGGVFRS  
YFCQVVT  
>comp2907\_c0\_seq1; 1257 61 2343 LEN=2388; translated  
MAFSSFFKAAFLAVIVPNEAFAPASLVGKTSLSMSSQAQDVKKEASSAAQREVDLDDL  
YRNIGIMAHIDAGKTTTTTERILYYTGKSYKIGEVHEGGATMDWMEQEGERGITITSAATT  
CQWKDYRINIIDTPGHVDFTLLEVERSLRVLDGAVAVFDGAVGVEPQTETVWRQADKYKVP  
RMCFLNKMDRGTANFYFCVDTIVDLLGATPAVLQLPIGSEGDFLGVIDLVTKEAIVWRGE  
DLGASFVDIPLAECDDIPLVDELKAKAEYHEKLVELAVEQDEDVLMEYLEGEMPSVDT  
LKRLRLKGTNLNLDLVPVLTGTAFKNKGVQPLLDVAVDYMPSPLDVLAIAAGVTEDGEETER  
KSSDAEPMSALAFKVANPFPVGTTLTFTRVYSGVMEAGTSVYNSVKGKNERIGRMLQMHAN  
DRTEIKSAVAGDI IALVGLKDTTGTETLCKDKNVILEKMEFPEPVIKVAVEPKTKGDQQ  
KMSEALIRLAAEDPSFRFARDEETGQTIIEGMGELHLEIIVDRMKREFNVECTVGAPQVS  
YREAITTTAEVDYTHKKQSGSGQYARIKLVFEPKEFSEEEGAMDFEFVSDIKGGAVPKE  
YVPGVQKGIESVLGTGVVAGFPVLGMKATLIDGAYHDVDSVMAFEIAGRAATREGLRKA  
KARLMEPLMQVDVSTPEEYMGDVLGDINSRRGMVGEELGERGNVKTISAQVPLANMFQYVS  
TLRSMKGRANYSMKLANDYFVPPNIEEDLKKGFTGVEEEE  
>comp2908\_c0\_seq1; 224 158 919 LEN=1072; translated  
MTTSRSHFFAPTKFFVLSVLVLAFLADASTLAKTYVSKQPGTQPRGTEYVSSFCSD  
ETNDEPEEPVAVFAKRRHTSPLKAAQWYLKSCETETPFRAKGLTSATIAALGDVIAQLIE  
KKATAKALNAARVATFFFVNMLFTGPF IHLWYTFNLTVGKKMDERFYNVSALKKTVTQVF  
LDQTLGTAVFFPLYIYVYGAFESVIQMHRLPNLSHATEKCRNHLWGIIMTQFRVFPPLSNM  
INFGLVPFELRVLW  
>comp2909\_c0\_seq1; 190 121 1074 LEN=1875; translated  
MPQQHYIFGYGLICAKSRAATASALGVVGEVEADEAGDRNKHNTGGIPVRLNWNMRLWN  
LQGPNTYLVGQKSNNTNTNSSSPRVSCVGVLVPLPSSKQNETGGSKNDEDEVLEALDRRER  
GYRHSVDLSSIERVDDLLLTNIAESERCDQAIEDRYKHTFLRRKNDTSTNGNDNTIRS  
PTQNDVVKVWIYVPQDCYSGMACPQKPILOSYVDICLRGCLSISESFAREFIASYGW  
YPGHGHLTGHVGEKCFESKRSVDESNAVVSICKHCWINDRERPIYVRADRNF SIGN  
SELLDALFDPQLLERRR  
>comp2910\_c0\_seq1; 295 63 779 LEN=802; translated  
MGRRRKRLQSEDYDDSLERSFSAKRKSPENDDSGKGGASKQDVGASPAKSGETQNHNDNN  
SKKNDKDNIERLREKKRLKKQRQKEKLLAAQKEQEKLIKILQEKQNKEREKRKQKQKLLKE  
LEKKVSSDTNTFIKTSMGVRYMDVVVGTGPLLVDRKKIVCQYVLRANKYKGVLDSEGERF  
SFKFGKGEVIPGWEI GLKGMKQGGKRHIIVPPNAGYGFKDIGGGKAMLYFEVTLKEC  
>comp2911\_c0\_seq1; 492 196 1671 LEN=2038; minus strand; translated  
MMFIVIIFGFGIKFLEEYCSILPPPTRLDDKEGKKARRPAVYLLKIPFGLFTSCLLLPNL  
VAVYIPNYIRAANTMLMSNANFEGEDLRVILPPDEF SRVCYREEMGFLIQCTLTAAEILA  
FHFDLPNVVWAHHIVAMSLALGRLYAWCYPITLMSDWLWLAVVVHLLTIYSLNFVRSYF  
LRHFLLTREDNLSGIPTMKHLFHCTNVGSKWIIIVSAYAFSSVAVLSDGGKTEQALLCLAF  
VAPLFYGSFQEMRRWRSSSISDGFPTRMFVQVTVVEIMVGLFLGPILLFLDFLFPHAMKKF  
SKKTSHKNTAGGVVALRALCNASSDRLHIDDPYAIRFVQRGVLHIVVKSAVLRYLMTLK  
LEVQHPGALGHLITRKTIDEIILDLSRKNKPVRQLVILGAGYDTRAYRLKSLKDVLLV  
EVDQPFMSSEKQEKCADLKPLCKELVHLSTDFNKESVADVMNGCDKFDPKKPTLFLWEGV  
QVYLSDDSVDK  
>comp2912\_c0\_seq1; 645 94 2616 LEN=3240; translated  
MEWPSLEFQSDLLNCIENDEILSHSSQVLSDRFLSDLASSIVTKEIYARAASAALASDTS  
RIVARKSNTGENELSEKMVVAFLDKLRTSASDSDEWHAYQYRETARDVTELMASLDPLAT  
LKFCKGGLDAVHDLKYLRLPSSSSSDSPTDGSAAALLNAKDAYVLSQSFPKLDADSVTGTR  
APDLEFRFGLLHNSKVNNSNVDCDVNSLYGMEACDIVNALHQDGMTETSAAASLAKNTL

ANPNLVAQLSASKTTNSTGENQTETIFVVLGCDHPMSPAKPLLRIPGVKVLGIPSSSEGL  
EDILDYVRYNPDDTTFFVHP IWNQKDKKGNHRKRNRGTNNLILSRGPQVAQWLIDHAIL  
AKKDGDEITTTDSKASANCRKKLKLVLVPMAMPSPATTSRNSDSPFAFVPEASVRWAAS  
SDLIVQRVVMAEEAASSTSRQIQCSLWSYQSSSTCMVVPPTSTTLSTELLHKRPSHEQWL  
HTLSMGTVLTPTIEEDNNRNKLHKHTEQQDDHSRSTAVPSGSSESDIEANTVRNRFVGA  
VSNTNHNYSIVNGIVTSEPHHMLSEHIRLWRAMITHYSADLENNSSQNYIGDYSDSDDD  
DDDGIQRKNSVHVAFHPVIVSRGLLTEAIEKASPSTPKISAARPNKITAPLQILNSGTM  
ASLMAAIALAGFTDPLINQPMGLIDEKDANTAETIITTPFCLFWNGSVHSGVWNCPY  
TLDSIFGTVGYFLEKVYGYCDSALAAASSAIAIANANAASVGLWNKNSNDTQNI EQRITT  
NTKSTEAAKSGRDNKFNYANNDHCNTSIVDMVPSIMRDEERQDQQLMPNLVKDRLEILA  
>comp2913\_c0\_seq1; 309 80 751 LEN=1012; translated  
MSTTIVFLLQAALLVGACVAFQQVLPKGVSSRQTIQSVPLMMAERNEDTENAFGRRNFL  
ATSTAAVATGLLSFQQSAMAIPMATVDEFDITLSDSPLSVNVVEFSGPRSENVVVKLVDG  
TVFVVKDIVESPTDPRSPLKLAADCREANVTKKFVDFEAMLSGSPKKKKLYTNERVQKAY  
ELQAAQKERIRQDELELRQVALMEEQEKAASAAAAAPPVSE  
>comp2915\_c0\_seq1; 383 108 1133 LEN=1407; translated  
MTKLVSRRGSNLLLHNLEENDVVFGTKGNRNEIFLKVLESHSEQYMQLSKFKMGLIQ  
QIIREWNGNFYILNSKTNDLHLAKRKDHLSTTDPSSKKLYTSVRRMMNYVNSKVQRKPQ  
HLTRPTTNLAGTAIIDRTTQIMKVIPTIAIGALNPQVQKQRMNNEQHCSAPTTAAAAA  
APDRPPTAMTAMDYVRKEHITLPLPGDISSYPTFVPKTINISPLQRSVIMVTPEPSRSA  
FLRPPPISPLPLSKPDIPYNNTACTAPLSPEASFSSETIPAQTNNGSLLSKKQVTTTPV  
PTTRMQAIEEQGPNAKTTDVPGNLEHSAILALISLGASPS  
>comp2916\_c0\_seq1; 1276 1 3220 LEN=3296; translated  
XEEELQETKKKKNKMERWLTKIVEESTKRENLLKQKLRDLEANVGDTTDQERLLQEQVNG  
LETTKKELEEKCSRALLESFMESALEKEIKQERLTKRFVQLKAKAEKTTQIHEKEVKH  
LNSRVSDLETQLASSVKDDEQRKQLDNRITERIAELEAKAEQMRDGNRKKHFESRIADL  
EAELALSQNDSKEEGREGQYNPSSFYQDLIKERNNLADRVSLEEELEAERTVREEFK  
QTVDELNIEIETHAQKYKAI EAENLELEKELELGKSEHIRLKNVDELDEFETITEDYN  
SVTAINLDLGQKLVSANTERNRLEERLSELQDVLDSNTNERGIEEIPKSIPTGMQNELET  
LVDENKKKQEQNSRIFTLENDLESSYQERSRLEDRIVEMRKEIDLEKSAQVQISGDVAA  
LKI ELERVNITQTRIAELETELASGAEHDRLLQVVRELEDERKVRGEKHSAAKVV  
KHSKANSKLEARNLKEEELDSYKRKQEHLDQAILELQKELEMATERSRKAQEIRDENDL  
KFKYELEAEKTEQKRLNKLVEHELEDKVEKAAGKYEFELEAKRAEQERLNDI IETMONEVE  
MNTEENDKII ESLNGRIGDFKNEALNAKIAELEQELTILEEPPKDATNNGAQI IDQNL  
TDRILELETNLESTLDREKKEQEQLIVRTLELEKELESTIEKTLKNEQHLYFQILEMEKE  
LASSRDEARNQEERLSAQIRELEMDIDTTKEEGHEKEVWSELGKESEKMESLINMIDRER  
KENGVLNEKYSGLKHDFELYKKNKLLSSQYVNITLEGNRHLKLLRRVAELEQEILHIT  
KSNATEKKLTTTRHDEELDRDLRERAQKNEAERKDLNELEPEKNEKNRVRPSSGGEVDVRR  
QKEDGHHSDKTEASTSFATTIEHQVANDKLSAHLRNSSPSNRETDSPESSIAEEELKAPR  
NQKFTKMSSESKADLMEEYLHPLLTETEQLGDEIPSNIGRIHDAFLDNFTNGKYDLRW  
EEFEEILEEACQGHDEETWFNIQEAFFTVWETAMKNNPDRDREVITKWESFTD  
>comp2917\_c0\_seq1; 322 271 1400 LEN=1553; translated  
MPAMTTRRTAIGICWVSLVLAPWGCVEGWVAPKSTAQKTPKSTAPTSSNTLFYKTCGSDE  
TFSRVAKPVLPGIHETVHEERQPRKDETEDPVSRAASIPWIGDEHDCTGDVFLPHWNWQL  
DFFRTHLTNLRFNPPGDASDEDLYCMDDGTKRVYTI SLSSDEYRDIRMTYMDFP SCKTVR  
CLAYPSDERLPILGMGIMKFGKHQHMAVLDYQPLSTKEEDHDVNDAYTSELLRMRAENPT  
MSQPHTYRHFVTEERKYFTDFPLIGKFNDKEDPASPEQGTSAWMREMRGQREFVETHVK  
LTQRHTEADPGTTDDASVREVHSEFDTHVSKKEPAGPMLTATYGD EIAAQAGPPGDLSA  
FKELSERAPSLATSPG  
>comp2918\_c0\_seq1; 506 1 1986 LEN=2113; translated  
SQTNSPNFKSNPRKFTSMPTQDSANRLTPQOREAVERRSRMTQRRQELTSRIRKQKKS  
YIQKRRGLQCGVDVNSARPLNLCVAEFRNLLIAYCQTPSAPERLLPSVDNFVAKKIT  
STAVRSAEDPLVLEANDEDLALRFLDCLRQQAIDIFPNQSNPISFQSILKILVHLTISIS  
SGDAMESSMTPSVEYYGRHPSTWSELIVSSTSSPTITAAQSIEKAPSWLDIFVQGLASSR  
EPELVSLVLGNLVGDDGAAQNVFQAISKDFKSSMVAGLVQSVSPATPTAAWTLTNMIRND  
PLSYARTYCSENLLSASLLASWLREPCLVSTAWMIASLTAREEDAVQYLSAQHSTPEHS  
PFLSAIVESVQNPLQTDQILPLVQALGNI SCHLTLVAPLLTKTAPALVPLLQHILTTTPS  
RNPILAKAAWVAGCLLDVVGTEAHPSTTVAAPALIPALINRLGDVNEEIGGSMGMTLEE  
EREFASSLWNALDVPPGPGQPQLPQNSLWSNHPTQSSPVQLPFALNLPSTLRSLVRLI  
NSNDSDAVLAGVHVISLLFQRENDHQNLQRILEEEELPCALEQVCD SQMEEAADVAADCL

DDYFYNENYDNDELVETPSPWAGPPVPTTFHFGIGAEAHATNRGGRGRGRGSTIPAWMT  
K

>comp2919\_c0\_seq1; 412 526 2373 LEN=2760; translated  
MLPLNITDTEKHSTAFPQPPMTILSIEEGQQQQQPHYNRIHQSQHSYNSKESFRSSSHT  
ESTVCESIDVLTSEDFIMPSNSQDESAIYYFGYGPVNPVLRRCRRGCKISPHNVRPAILY  
DHRLRFVEGGTANVVPMMGWVKGVLLRFDSVNEWENFRNFDAGYDIKEVSVSIIDETNL  
DPKNKNSRTFPTFVNRGSDEHLIEEEDHKDESYNGERRNGSDLIRNRHLCKSCAFSTADS  
GLVGDEDEDEGSCSSEEEYSCPFTIGAKRSRQKEDPATVRCLTFAMSDQGSQHQNARISLS  
GNNGDSCSVDSVFCCKPQERYLRLMMDGLRALKVDETYIRDEVLRVNYIPSERDRVADQSY  
SYKKFPVATKSNKMPKISFAKYKSKLCSNSKRGENATATYFICNRKVLKVNLLSDKLSSD  
NDLSMYTNNACVKWLRALGHGKGDITLLVHQTFVDPDCLHIPLVNDDDLTPMHYEWAEH  
TILLYLERGGVTATTVYELTDSGCNSNAKTRRRSLSTSLTRVGKSVPSLTASMGRRFQKN  
RFSVDVSGHSESSNALPKITSRFSAPTILTTKSSTAEAPTEDFSTTSIKAKSKLCGITTR  
LKNLRLSKSENEV

>comp2921\_c0\_seq1; 1118 199 1992 LEN=2299; translated  
MSSQAPSVAQEVASASLSDGPSTETRNAEIWSTRLQRELLALTTDNASEEAKTEMVAVLPP  
FCSIKEHALDIEAGNCTVTCLLDLPKAASTGDGKAEGSETTTEETDKADAPIVVTFDVSL  
QKKADGSVDTSAVSYFPLKPLACLASGCGNFPEGSTIRDGDAIDIEMDWTPSLHLSAIL  
NVSLKIKECLSQGEAFHAAEVSSKASKAEQAVNEAVNKAKTLGANLGASLRNLAHNATTD  
KDGEKKKIRLPMGRKKKQRPKATAKEIRIGDEINMLEAPWVDCQGVYSCKAIRRPFKFAEE  
AIALADSKDKITKEEETE QVASAGFAGAGLMLQKFTNSTRGLLEESFLMITESHIIEMRS  
NKLNLSTGTVSFAIPIDMMAKLFRRQESISLFFKPAPEDPLIYMCPDSADCVHQIQTVL  
KRHGVKGKHTNAATHRAINEALQLVQEIQTKELALKHDPNIERNVQIMDLRQAAERFEV  
AGDVRHEEVVTHMRKFLALPLTVSVLDGSYVTPTRNADNEPIPSPVTKGGAYDSNMDSLL  
SKAETDLSNMKGNDKELDDLFADGTDDALGSTADTIAEFENMLKEADKELAEELMAS

>comp2921\_c0\_seq2; 1148 199 2097 LEN=2404; translated  
MSSQAPSVAQEVASASLSDGPSTETRNAEIWSTRLQRELLALTTDNASEEAKTEMVAVLPP  
FCSIKEHALDIEAGNCTVTCLLDLPKAASTGDGKAEGSETTTEETDKADAPIVVTFDVSL  
QKKADGSVDTSAVSYFPLKPLACLASGCGNFPEGSTIRDGDAIDIEMDWTPSLHLSAIL  
NVSLKIKECLSQGEAFHAAEVSSKASKAEQAVNEAVNKAKTLGANLGASLRNLAHNATTD  
KDGEKKKIRLPMGRKKKQRPKATAKEIRIGDEINMLEAPWVDCQGVYSCKAIRRPFKFAEE  
AIALADSKDKITKEEETE QVRRRTASLLDQSDQGPVDAFGDYMRQQAGGVTVASAGF  
AGAGLMLQKFTNSTRGLLEESFLMITESHIIEMRSNKLNLSTGTVSFAIPIDMMAKLFRR  
RQESISLFFKPAPEDPLIYMCPDSADCVHQIQTVLKRHGVKGKHTNAATHRAINEALQLV  
QEIQTKELALKHDPNIERNVQIMDLRQAAERFEVAGDVRHEEVVTHMRKFLALPLTVSV  
LDGSYVTPTRNADNEPIPSPVTKGGAYDSNMDSLLSKAETDLSNMKGNDKELDDLFADG  
TDDALGSTADTIAEFENMLKEADKELAEELMAS

>comp2922\_c0\_seq1; 389 91 690 LEN=843; translated  
MSESPSWLDAPAPAPAAAAPAVEPMSIEGTGAAPTAAADEKDLPSIILMMRLNLAAAAA  
LIVVSSLQIVGIPALSSIVLAVYTICGGLLICLETQLKFLRVMIAVNFGFLFNSFWRFL  
FYLILGSVCWAFGGIMGRTMACVMGGVALFNTYVLCRYPSYRKIREQIAEEEDKRIEARV  
SKEVKTQALKQMAKSATGK

>comp2923\_c0\_seq1; 598 327 2496 LEN=2778; translated  
MSRRRGEFEHRTSIFEGAFRAWSHLGGLEPQELDSKASTDLPLSHPIENDVRLQNKDGD  
KAGSNADPNGSKRRQFPYEPPLPRSGLAHPYVQAILSPWLGSADSDAIQLGLTTLRTWWQ  
HRRKGESGSAIAALGTEKMKGVVEGYTRHFFTLAYCLVINDKEQPRTLHGKMKKELEKVR  
DKKKKRSRDTTEKGDNANAMGMNSMGRRGVDL SAEIMNPNLSPLERLHMAQQNQLNGAG  
GIKSSLTEPGQMINVKNKCVPGVVDLPGIVDKVSRRAATQLAHSGGGRLLSNPSAVASMG  
MNGDNGEHSDTVPIIFVTENREIMIAMAVEGITCAHCVKIVETVLRGCNGNKSPIIDGLID  
AAADRITLNAILIRIDRVNRARRISLEATRNLAMVGYVQVQVKTMRKIVEKNGNSTKVPQDE  
MYMAFERMGAIDPRDIFDWSAPCSCPNDNGVARDDCLXVRKWGESLLFHXSLISFVLRP  
TKFSNLVDKFFYLDCIRHGQMNNSLLDAFETRAAGVRRFLSGDMPQPIQKNHIPQRMMMN  
NHFPQQRQQQGMDDIQPLNDTTGMGLDMFGSSGMNMMVANMNPNSGGDIRGSNMGS  
NNMNNNQMMSEFGNHRMSLMGRMSQNPNNRMSLMGRMSEISYGRAMSGLSAISIDWENMED  
FDVNVVDHSEHINNNMGAGAAGAMGRARGPRVAPRWSMAQHMMNNNNAGGQNIITDSDAHVQ  
FKI

>comp2923\_c0\_seq2; 675 327 2378 LEN=2660; translated  
MSRRRGEFEHRTSIFEGAFRAWSHLGGLEPQELDSKASTDLPLSHPIENDVRLQNKDGD  
KAGSNADPNGSKRRQFPYEPPLPRSGLAHPYVQAILSPWLGSADSDAIQLGLTTLRTWWQ  
HRRKGESGSAIAALGTEKMKGVVEGYTRHFFTLAYCLVINDKEQPRTLHGKMKKELEKVR



DKKKKKRSRDTEKGDNANAMGMNSMGRRGVDLSAEIMNPNLSPLERLHMAQQNQLNGAG  
GIKSSLTEPGQMINVKNKCVPGVVDLPGIVDKVSRAATQLAHSGGGRLLSNPSAVASMG  
MNGDNGEHSDTVPIIFVTENREIMIAMAVEGITCAHCVKIVETVLRGCNGNKSPIDGLID  
AADRTLNAILIRIDRVNRARRISLEATRNLAMVGYQVQVKTRKIVEKNGNSTKVPQDE  
MYMAFERMGAIDPRDIFDWSAPCSCPDPNGVARDDCLRHGQMNNSLLDAFETRAAGVRRFL  
SGDMPQPIQKNHIPQRMNNHFPQQRQQQGMDDIQPLNDTGMGLDMFGGSSGMNNMV  
ANMNA PNSGGDIRGSNMGSGNNMNNNQMMSFGNHRMSLMGRMSQNPNNRMSLMGRMSEIS  
YGRAMSGLSAISIDWENMEDFDVNVVDHSEHINNMGAGAAGAMGRARGPRVAPRWSMAQH  
MNMNNNAGGQONITDSDAHVQFKI

>comp2924\_c0\_seq1; 275 1 1236 LEN=1264; translated  
SILLFLMTILVWEQLPVLKVNPLDSMVNALATTNNKQLRMQTSSTSPVSSPRIAPPPR  
LPLKPPFPNGLCGGTMVDIVPEETFGVDVNLANFNFMGDMVLLPRTIRIWLPPGYDENDK  
DGGHPVLYAHDGQNAMEDEESWTGASWRLIGAITRLADHKLICTSSSPATNSTSSRNNGN  
ESRQPTSSSCTSDGKLPVIVLLPSAQGDWLPGIRRRHLEYGDMNFPFAQAHADFVANTVK  
PLVDNRFRTPNSAERTFCIGSSLGGQASLHLLLRHPDKFGGAACLSPAFGPAILNFVDSS  
KGGKILREGKKKVYLDIGGDMDDSKSSDFVVRVSPIDVLDHLTPVHGWNPGYFWLDTQLQG  
QVTAMRKALDRSGADYEYRQYPGGRHNERAWALRIDKPLLHLFSDKRRKKE

>comp2925\_c0\_seq1; 442 172 1741 LEN=1955; translated  
MNEESSSSSSSKRRGPTTYPDPDASAATDDATEASLTRRSKNDRIPLSLGKASLRIRLEAY  
YSLISPAILSDRTAWLRKYDQIYEKYSTGTQKQESKRAVLSEPHSFRCLLSYQPGKSPLA  
FNALLDRFLRHTLCDQIEPNQYGGTHSGERKLATKLAKKYGTAVRLLLVSDSSSLVPRFP  
TDSNRSNLANTRKSNLPRDESQYQLRKEEAGSGIVDFLSSRFDPVEALTGASGRGSVAR  
ANPWMEELLPKTILDNIGKCAALLPTDDPLRKENHLQLQLRKSAAARNSSSQONQLALGT  
AAAAESVQIRPTTLRKQTNHDLHPFEAIAASHLDTGPHSLLFRLRRDRKRARVVVRYVMV  
RGTITGSLVAFDKHMNLIIRDVEEIIYSPRINDKECRLSNLELELERRRRLSLDAEDLGT  
LEAAAAATATSNQSGSSIDYRVGKGCSAIQEQHQHQSGNWKVRRRQMKQLLVRGDMVVS  
YEAAQERTNVQKSRYRKRATSALVRAGAFGTSKRLTEKEAK

>comp2925\_c0\_seq2; 481 172 1572 LEN=1786; translated  
MNEESSSSSSSKRRGPTTYPDPDASAATDDATEASLTRRSKNDRIPLSLGKASLRIRLEAY  
YSLISPAILSDRTAWLRKYDQIYEKYGTHSGERKLATKLAKKYGTAVRLLLVSDSSSLV  
PRFPTDSNRSNLANTRKSNLPRDESQYQLRKEEAGSGIVDFLSSRFDPVEALTGASGRG  
SVARANPWMEELLPKTILDNIGKCAALLPTDDPLRKENHLQLQLRKSAAARNSSSQONQL  
ALGTAAAAESVQIRPTTLRKQTNHDLHPFEAIAASHLDTGPHSLLFRLRRDRKRARVVVRY  
VMVVRGTITGSLVAFDKHMNLIIRDVEEIIYSPRINDKECRLSNLELELERRRRLSLDAED  
LGTSLLEAAAAATATSNQSGSSIDYRVGKGCSAIQEQHQHQSGNWKVRRRQMKQLLVRGDM  
VVSIEAAQERTNVQKSRYRKRATSALVRAGAFGTSKRLTEKEAK

>comp2926\_c0\_seq1; 220 42 452 LEN=574; translated  
MVRSSLFSAIVSLLL VGPSHGFSPSTPSTTTTTRLNGFGDAFKNAFANDDDLGARKNEG  
LSGGPNYNE SVTMNGKAVPGCVVGQKLTVVGGKARVKIPVNCQAGDCGTCVVKMNGRKKV  
ACQTQVPKGCNIQTL

>comp2928\_c0\_seq1; 1010 596 3958 LEN=4142; translated  
MNFQRPRSSRRYAGDRAIGTEAVANLSSMKQRRSADGTYLRRRYATIAVGLVVVIGVII  
FAVTSTKAKDEL PVSVAEITEKVI SEITHSHTDSYELLTSQSYSDANSTIGVNSTLAVYE  
HKKSGIDIVTMIPIDPYQDATFGINFRTPSERDDGAQYVVKNAVLAGESENYPVKDPLNQ  
KRGSLQTYSDSWIERDRTSFMASRNLA DFRNNLKVTVDAVFNPLFIKDEHKWIYRQEGW  
RLESPDNVLLISGNAYVEAKAAQMNPEEVMIKHIYSNLFPGHVYGNPKGEASEVVTMT  
YQEVIAYYETYYHPSNAQAFCYGSQEFIDVCLNELDVQLSEYENNTSVGNHSQIPWQELT  
EVEEQIKNITYPDYQEQVDYRSVIAWILNDEPMDLRTQIAWQLIYELLAGSNTALVPKII  
FDSNLGTDIVTHFQHSLLQQWVLA LGVSGIESYEDVATADRKIMQELAKVVSKGFSDAME  
AAMHKMEFKFREQSPDDVPLGVKYFRDILRNWNYGQAPLEPLNSATEFLNLKAEIQNEGQ  
EFLLTLMTQRMMDNKHTVSLSLHPDTNYA IQYERLEQNWLDNLDTYLNKEEGLKVMSETQ  
KFKEMQDENGSEELAKIPRLEVSELNQTMYIPPSDLIKNLVETDVTAIKHKLPFTNGIA  
YVDFSIDMSNMFDDVLIPLFCQLLEGGTEVHDDVEMQRQIDKYTGVTITPIIEEIV  
QTDDHDYLVDPDGKHFVTKLIISGSCIASDTCLPMLILFRQFVWDSNVRNKEKAEILEA  
RINEME QDVQINGHKYTTSRVESRYSLSGFVREQWYGITQLMQMRRALA QIKDNFTLEGL  
RLVKMQDELKRGHHNGMHMSITGDHEALTDIKGPLSNFMKNGLPLATQKTPFPNFAEEEEH  
PWVPKGMHRVKEEFSSETS NQAFVTPTRVNHVAKGGILYDVGERIPGADMVVTQYLGYY  
LFNELRFGQAQEAWSFLDLDSGVC IYQSDRDPGIFSTLETYEHGATWLWEQVHNGELPL  
EAKSAIVGAIGRMDAKIMTEPKKLGRQALISHLKEDRHEFRQHWRNQILNANADDFMAMV  
ERLGSWGHPSVCVVTSPPEVYDTIDQEDFAISKCDYSGYQC

>comp2929\_c0\_seq1; 1127 128 2032 LEN=2128; translated  
MKLFSRIAAILGLIAQMRDTEAFGLVSKPNAPIFTGSSTSLNAGSEVFPALSSSTMKEGKV  
VSWLKSEGDEIEAGEAIMVVE SDKADMDVEAFEDGYLAK IIVDEGEMAPVGAVALIAET  
EGE IDEVASAGGSAPVAAAEEA PAEAASAGAPDCEFSQIDMPALSSSTMKEGKVSWWLK  
AEGDSIESGEAIMVVE SDKADMDVEAFDDGFLAAIITDEGETSSVGPVALIAAEEADIP  
ALKAYAASLSGAPAAAAAPA VAPAAPAAPKASAAPVARAPGARVVASPLAKKKAEEIGL  
DLSTVAGTGPDRITAADVENAAKGGAPAAAKPAAAPAKPVWTPAAGVIAATPMARVAAK  
KAKIDLATITGTGSLGRVTVDDVKMATGEKKAERKKAPSGEAAVELPDGFVFPFSGMQKAV  
SGNMVATLTVPSFQVSTDIEMTAFEAMYQKVKPDGISVSAMLA KACALAI EKHPIINSAY  
SDQDGGGILYKGDINIAMA VAIDGGLITPTLMYANERP I KEIAENWRELVGKAKTGLTSP  
AEYTTGFTTISNMGMFVTSFSGSLLPVGQGGILAVGATQDKVVPDSQAIMGMKKARLMTV  
TLTADHRQIYGSDAALFLKTLK SIMENDVAKLAK

>comp2930\_c0\_seq1; 353 110 1672 LEN=1764; translated  
MEDTVAKQSSAATSSSTSSSETWNVAVKNRGPFFDRRGS LREGGWWIDLDEAKKLG MDEEW  
WTETEPTKSPVALPKASPTIYHSWGNV KYRPKGPIW LSESGTMYLGPWAEVRQGPGRRT  
VRVAKGIGIS CQKNGQCHIGEYRDGLFHGWGRSFWLKNLSLVWKR NINEEEKQIMETRVVV  
TGDGQKTEELVGLPYEYHGTFRSGSKHGIAGKVVLKDLTTRVGSWVDDIAVLRKWKYRIRQ  
DLDPVLEEQADWWKHVKLDCVPI DSPQSRYIASKTRKNAKHELPSPSVLSRRKRSCRA  
PNRKKHKSSKTRKCGEESHIGTETDHRGEDETDNHPRSEYNQDAEFKQENSLGAGTEVID  
VDALDPDGLVPDEPPSSLMPERIISAVGNSNRHLSSQVFPDAYLSEAEESNFPLHTAVKF  
GDEDFVDEELEKIATGTGPEGSPIGSDRSYDSARLNAVDSKGR TALDLAAL TGQVGLIKK  
LRRAKGISFSFKPGPRMMILAKKR SKDVAKYLEQVHETVE

>comp2931\_c0\_seq1; 577 557 1585 LEN=1679; translated  
MANSKDTNGSQFFITFRPTPHLDNKHVVFHGV DLSSTSSKDSLRI LENVRTGRSDRPVT  
PVQIVDCGIISDDEGNDESEKGA KGLVSGENTTKHPTAKDDIEVELPVEEEEEVPPKTK  
AEALKRRMRK LKMKMNQARQLNKQEV LREGERLGSVEGAAKARKRQQIMDKKAKELEWKK  
RNSKALEVAAAAGLDGKHLVEQADASLRKAYKKEQKAVSQQFAVNDYYNPEGQHRNYERN  
LKSLSRAAGPLPEDAVTNGHATFDPTTDESDEKREREGARNLANELKRRIEKQKEKRNRL  
EFEGEDVTWINQRNKR FNQKISRNF DKHTAEIRQNLERGTAL

>comp2931\_c0\_seq2; 723 1 1448 LEN=1542; translated  
PNLTELSDENRSDKLQOTPRKYFLTESKTLCTHKGQSVKSXTMVQKAF LKIRVGERQVLS  
FDLVLYDDDVPNTVNRNFVHYLEERGSTGYLNSRFHRIKGFMAQGGDFVNGDGTGTASIY  
GGTFADENFLRRHDRPGILSMANSKDTNGSQFFITFRPTPHLDNKHVVFHGV DLSSTSS  
KDSLRI LENVRTGRSDRPVTPVQIVDCGIISDDEGNDESEKGA KGLVSGENTTKHPTAK  
DDIEVELPVEEEEEVPPKTKAEALKRRMRK LKMKMNQARQLNKQEV LREGERLGSVEGAA  
KARKRQQIMDKKAKELEWKKRN SKALEVAAAAGLDGKHLVEQADASLRKAYKKEQKAVSQ  
QFAVNDYYNPEGQHRNYERNLKSLSRAAGPLPEDAVTNGHATFDPTTDESDEKREREGAR  
NLANELKRRIEKQKEKRNRLFEGEDVTWINQRNKR FNQKISRNF DKHTAEIRQNLERGT  
AL

>comp2932\_c0\_seq1; 758 78 1355 LEN=1840; translated  
MKFSIAFTALTA AVVSANPFAPAKSPNSSKTKYMSKLMRNARPTPNSQLGRKLD EEEAEA  
EEYEVDISGYSLKFEQCQFVKAYDDELAGEDSDSVLATRRFVIFRLCPSDACDSCNYNFG  
EYIVDLEEYLEATVNYQQEMQEEMCNACEENCQWEDEEEEEEDNGRRRRKLEDYGSNCN  
TCYEECMKIENMEDNGYIDATQFLDCQM VYDPEDDGLSALYAGPMCASNGSKIKIGIFTD  
EECNVPDSDKD VDDYLM DGDGVSMKLSHALLKTVYSSECVSCLAPQEEEEEDDENG DENDN  
GDEEEVEVLEMCEQLYQASAKCEKTNGFDNGYASYDGYENQLAQESVVCDFVESL KAGSY  
DESGEIVVNGKSSSVGGGSQT TGGQKFAL TFFILGTAGLAGYAAMLH SKLTKGTMGLAET  
GGLA

>comp2933\_c0\_seq1; 73 1 379 LEN=869; translated  
XDDDDSN EEEASGGGDESESAK PAMPKRNTG SWSVEEQEAAAXGPRDPRDDKHKGDRA  
DGRNPQHRSGPPLHRSPLPQAPCDGNEFRGIVVRQLLSR DENETRGRNRAREPIAKAIAR  
FLACAS

>comp2934\_c0\_seq2; 125 194 991 LEN=2586; translated  
MSPDIHIRLSLPTRPVPLINENLDDEILVPSERACPNRMSSPHYFSPNDHFRKSIMKW  
KTLDES LKSTDETEETREGRGMKKNLQFTIINIREYSRTVGDNPSCSSGPPLSISWEYM  
NIG EIDVDEYENMRPPRRVQREMILPRNMREDILRYECNASRQEITESIRQNVRIKNQR  
TTINN LGKAEKLEEVME SASRKLRRFVTRKKS VHKQVEDLEKEIDVCNRRARKLNYLEKT  
MSQGREESFPGESTLDCADSVSVNS

>comp2935\_c0\_seq1; 565 229 1731 LEN=1986; translated  
MTRQLLLPI LVGAIASMPATGMVLR EPPKVSSPAGSAVEY GKWSPSSWRTKESKQIPEY

PDQDALKAVEDQLSKCAPLVFAGEVRNLSQDLALASQGKSFVLFGGDCAESFDEFVSVDHV  
RDTFRILQMALILTHGGSKPVVKIGRMAGQFAKPRSSPTETIDGVTLPSTYQGDNINREH  
PFTAERQADPKRMVEAYDQCSQTLNILRAFSSGGYANLSRLHAWTLDFVEATPVGSKYR  
KLASVVEESLRFMNAIGVDLESPAMQQVDFFTAHECLLLPYEEAMTRIDSTSGKYYDTSA  
HLLWVGERTROPGFHFVVRGLENPLGVKISDKASPEDVLEILNTFNPDPNIPGRVTLIT  
RMTAEGIRTKLPAIIKAVQAEDKHVVVWSDPVHNGGFAENGFKTRSFDAIREEVVAFD  
VHRECGSHPGGIHLEMTGKDVTECLGGDTNGVTMDGERGLASKYETHCDPRLNAMQSLEL  
AFCVAEKMREAEAAKEEASN

>comp2936\_c0\_seq1; 186 335 778 LEN=827; translated  
METSAKVTLFEDIFEVTALNPDGYKFDVRNRIQAVGTTFECDLLLDINCEIYSLREHDKV  
TLMLASTLHLDGSPADHFSYTPSSEPTLADNYEYVMHGRVFDISYKKDGTAVLALSFGGL  
LMRLTGDQRHLANVLPDMRLYLLKKD

>comp2937\_c0\_seq1; 174 90 671 LEN=761; translated  
MSSVTCSSFEFCNSGWGEVLTHMSPYGFANFGVAFGLGLSIIGAAWGIWLTGSSSLVGASVK  
APRIISKNLVSVIFCEATAIYGLIMAILGNKIKEPETVSYYLEEGWDYNGYYYAGYGMF  
SAGLSVGLTNVAGSVSVGLAGSSCAIADAQDASLFFVKILIVEIFASALGIFGIIVGIIQS  
NACTFPPTYALGQE

>comp2938\_c0\_seq1; 836 154 2362 LEN=2576; translated  
MKFILTTAFLASLALGQNNHASNKDAEDFAYWRDLVDAVDSMPPTSAPTSPVTPDAPV  
TPTDTPVAAVTDAPTDAPVTPTDAPVAPTDPVAVVTDAPVAPTEAPVTSTVA  
PTVAPTIAPSVSCKTIAEVITTTPEFATLTTLVEGAGILDNFEQGTTLTFAPTNDIAIAL  
PSELVDTILEDKELLELVLLGHVRRQQIMVENLECEGGPISSSLTMANGAETTITCGMSL  
DPEGNEVIDTFIEDNGVPGKIVGPDGMACNGVIQAIDAVIIPDIQTTEAPVAPIPKPTPA  
PVTLPPIAPIAPTIAPVAPTDPVSGTQAKLSTFALSNGAEFEDTTSYQYKALKQTESQI  
GVDSFTDAKLVQYYALYCIFFATNGVNPVITDADPRFEGIPFPNWLITTGWEATDIDPCD  
WYGIICDAESRVSIIDLFENLLTGSFPPEVLLSLDGGPFSTGAGNLFRIIDLFRNEFLYNN  
ADSSWMTDLGNSMNTTIIAEETAFAFGDIPRLPENLVNFDISFSYFTGGLIDTNFESLQELA  
FIDLDGNAFNSTIPAVFGRPLSLEFLYLSDSFVSGDISYMQGMPISIREHWIDTNPLKGP  
IPAYIGDLTTLESWSMAFNLSLTGTIPSELGNLVNMQMWLYANELTGTIPSELGNLDMR  
ILELEGNFVGSMPAEVCANTVFPTQIIIEKLGADCEDENLNLVLAHAVVYWNAAALNSRNQ  
VTTRRKPKEFNCLSY

>comp2938\_c0\_seq2; 523 154 1761 LEN=1761; translated  
MKFILTTAFLASLALGQNNHASNKDAEDFAYWRDLVDAVDSMPPTSAPTSPVTPDAPV  
TPTDTPVAAVTDAPTDAPVTPTDAPVAPTDPVAVVTDAPVAPTEAPVTSTVA  
PTVAPTIAPSVSCKTIAEVITTTPEFATLTTLVEGAGILDNFEQGTTLTFAPTNDIAIAL  
PSELVDTILEDKELLELVLLGHVRRQQIMVENLECEGGPISSSLTMANGAETTITCGMSL  
DPEGNEVIDTFIEDNGVPGKIVGPDGMACNGVIQAIDAVIIPDIQTTEAPVAPIPKPTPA  
PVTLPPIAPIAPTIAPVAPTDPVSGTQAKLSTFALSNGAEFEDTTSYQYKALKQTESQI  
GVDSFTDAKLVQYYALYCIFFATNGVNPVITDADPRFEGIPFPNWLITTGWEATDIDPCD  
WYGIICDAESRVSIIDLFENLLTGSFPPEVLLSLDGGPFSTGAGNLFRIIDLFRNEFLYNN  
ADSSWMTDLGNSMNSKCGHEQFRYSRNLNCLCTVNLTQSSHLQNSRNLNFSATIIAE

>comp2939\_c0\_seq1; 160 261 1034 LEN=1495; translated  
MNTTTRVGGIGSWRKKTSQEEPDEGESGVVNASSSPEANGSSNHNHMSNSEHQYHKTYLD  
LFGETAKDFLTRVAPERISRIVPPEEPGCRWDWRYLRCEPYCACTLSPKFPWDLHLGRAC  
RKRGAEGTDGGTEAGFEEGADYRGLCEGGDSRPGSTLLSVLRSPAPFLAKTSGAAWRIL  
RTRADPVVARAAGELERVGAGVSAVVCGLSDRCKDGGDGAEGPPVLAWQERLVCREIA  
RDCGLVPPSRGPDPAEA

>comp2940\_c0\_seq1; 484 123 1037 LEN=1341; translated  
MGAGREDEEITDLLTKLYTIQEDIGAKPKTSEDEKRAKANNTAKMGSSKKAIEKKGSKFLE  
LKSTIVDRLKTIIHQLLKDTKKLEGAGYGGDNAKDIKMQAETRENIRQATDEWRELEAIY  
KKEARKKKSFTPEELEVQSELTKRLYAEIEKVKDAQMKGYARSRTPDAAAALNTKALAY  
NPSGSYGGKPSWGGTGGGVALTGDQQQQIMQIEERDADFDLQQLDEIGEGIQDLAEIAQQ  
QGEEVRLQNQMLDKVDKLLDKNLERMTTVNARMKETLEQVGRSGDKIMVDIMCIVLAIGF  
AAVIW

>comp2940\_c0\_seq2; 511 123 1055 LEN=1236; translated  
MGAGREDEEITDLLTKLYTIQEDIGAKPKTSEDEKRAKANNTAKMGSSKKAIEKKGSKFLE  
LKSTIVDRLKTIIHQLLKDTKKLEGAGYGGDNAKDIKMQAETRENIRQATDEWRELEAIY  
KKEARKKKSFTPEELEVQSELTKRLYAEIEKVKDAQMKGYARSRTPDAAAALNTKALAY  
NPSGSYGGKPSWGGTGGGVALTGDQQQQIMQIEERDADFDLQQLDEIGEGIQDLAEIAQQ  
QGEEVRLQNQMLDKVDKLLDKNLERMTTVNARMKETLEQVGRSGDKIMVDIMCIVLAIGF

AAVIWNFSKK

>comp2941\_c0\_seq1; 480 174 983 LEN=1694; translated  
MDFTLNLTILGSDCATLLARSLFFVSRGNQKRLALGGTCGDRGTANGMERKTDTDACVVVSF  
HERTSKRRGNKLLGSGLFSVVKHRDSLVLLENQNRQQHLKHIDDDDETASTVDMDEDEF  
VAASSSNHREKKERRSVQFEEELVTAVYTRPRTTKEDKYLYHYDEYDYMDFKLEYRDQL  
LQQRDRERNKGRISNQQQQLPCYRRSPRKSFSKREVVEVHPVMDRSQRKKIQKDLFYT  
EEEMRTFLDEFVVSLLQKQQQQQQVVVTS

>comp2942\_c0\_seq1; 232 1 705 LEN=999; translated  
NQPIGDWDTSSVTDMSGMFSNNTSFDQPIGTWNTSSVEGMGRMFYSSHFNQPLDEWDVSA  
VAHMFMLFDGATNFNQCLGSWAECTPDYVSVFVGMFDNSACPNTSDPKTKGPWCQTSNDS  
CGHLVSSDCANEKGFITIKRYIECNELSELSDRERNALCRKKVVKQACPGVCDRRCICKD  
KKRFSIKKRNKHIKFGSYKCRNVGKQNPSCDTKAKKRLLVKDLCPKKCDSCLT

>comp2943\_c0\_seq1; 639 199 2009 LEN=2009; translated  
MPSGKPRLNTPCYRWDFSAKECLCLHSNLMKTTSNHKKDDENAFLSDKSLSVLLHGSWN  
HDLSPALSDEDEVSEHAGKEEIEGQNRRETTKQIVMQQIAFAFSAARDWAVKLSREQAGTD  
ASIARDILEYADCRTIGGSMMLVDSDDDETIDIAVDQFLAPEDLPALVVVANGDVGSPAL  
LHPVRGLDSRTLGAFLSTPSSEPTYNEASFTVLNLRDTRLNIFEGRPADAGGGEAGKTK  
TGPSLEGETEALRIFVSGDRSQVGKSSVCMGLIGTLVHDLGYPPSSLAYIKPATQCEATQ  
LVALYCEELGVSHRAIGPIVYKGFTRAFLAGDTAPSEVLLEQAGEAVDAIAEGKRIVIV  
DVGYPVAVGSICGTDNASVAAAACGPIQSQTSQGGRRPPVPLLVGKKGVDGAVDSFNLN  
ATYFESRGVPLGVSFVNRPLLEGYYSLDNCKQAVGSYFEQKTDKIAFGFIPEVASISSSR  
EEGAALLESASKEFVKTFADHVDVNAIVEAAKATAVVRKIMAPPLSHKNLXPKNAPT  
HAGGIGGKPDETAQHRSQGSAAEDPTDEGAGRGRQDSRSRGRWRRKVAAPWLRRAESNPP  
FESA

>comp2944\_c0\_seq1; 293 128 1078 LEN=1118; translated  
MSETESIDVAFKMAVILGSMMLAVIVSLVAMQTKIKGGDSRWLPNPTSEPSKRAYEIIYALC  
YTPIWIFAFGCIVAFGLYEDFDKWSYMKVCVGLSLPFLLPVIFASAGTPDSPDEKRPLI  
ERYSFKANVWIAVYSFIGNYWYTHYFYSVLRKYTMPAHLNPLALYFATHFYFSTYH  
VFSNLLLRKVVTYVPGMVRSILYVTVVFTFAYFTAFTMETLTISAYPDYSFEDRNMAYTV  
GSAFYGIYFIVSFPAFFVFDKIDIDNAEAKRKTTSVWDTIVSSCGYGMIIIMILLDIVRLHLG  
IPLVIGSSDDICSSINK

>comp2945\_c0\_seq1; 1339 109 4128 LEN=4735; translated  
MDMSEACYAAVPHESSPLIRKKTLLPVLLWVGLAYAVFQETSSSHVRKSVSVAEEVRS  
STKNRGNHYNNDPVHFDDTDLIDDDLHEPVHRSFGSDVDIDVDIDSEGIDWDNDEKDE  
NIERKNSARTGPNIILVATVDGTIAGISKEGTVLWRQSEDISSVPSSSSSSSSSYLMMES  
TKNDSCSPILKPLVSTTTTKSASDASYKVVPSVDGTIYTTTNDMTIATPVKDLVAKSPF  
LDQQGRFYVGSQYASTAALDGTTEVLRVVSSTATTIPDDEDDNESSLPTLDDPNIVWIG  
RVDHEVSIQDAKTGFTDAQFSVGQVMSVEDMRGMMRESVSNPEQTIRPNGSSLLSKAVAT  
TVNEAMDLPNSLVATPNGAALWSFENKFAWVASELSNSPIVYAMDAETGVTLRVDIIP  
DVPDPKANIRDLTREMERQSRMASVTNTPVVGAMSNGLYALPLRSSDQSTSSATIDQLP  
TQPGGKLIKSPPIGDGENDFPDSSLVIQKEEGFFHPKYGYISPKDLGGFVHPVYGYVS  
PRDLFGAPKRSSKTSLSLFRVLGSLPPTIALLFVIFSELGRRKRLKDEKKGARNSLHP  
QKDQINGVISFNEDSGGKYGALQKSHHQEVI SVSEDLVGYGGHGTVVYKGVLDGRDVAVK  
RMLKAYHASADREISLLIESDGDPNVRYFLKEVRGDFVYLALCLDLSELHELIGVLREK  
QQEKSSSILPNADKEACVLSNESVGATTRILLQIASGVKHLHSLRIVHRDLKPANILLAV  
SKKGGKKVKEEDPIFATFTRNYDAKISDMGLGKQLIGQSSIGASFIGDSSFRGNKSGVH  
SIGVGPGTVGVQAPEVMAMRLTSDTSARSTDSASNIGESKEGQGNLILPSIRTSRSDIF  
SLGCIFYSLIPGSHPFGEWFEREANIMHNRPNLKPLTSSSEAYRLIRSMMLDRNPLRP  
TAKEVCEHPFFWNAEKKLTFLCDFSDRLETDTIAPGSSNVFGSFAIERGALEVVGTSWEE  
KLDVSSLVDNVQKFRTYDYSCVRDLLRLIRNKHHEEELPEAFRLNEAPNQNALCKYFTKI  
FPALIMHCYTFCGQNLTDLDDPLVLKRVIPPAKFQTRFSTAPISVSVEETIPTNHNEAV  
ISSEELKNDSTDTQCLEIAQVVTCDNDEVEDDIIVWEGSIAAKTFNNRGWSRSQDEWSR  
HIEPFYKRRDPASKRCEMEDPKFRTRLCNHWDMSLGAFCPMKKKNKCVFAHGPAELRVKEG  
KKNRWGKLVKNGNNSNPWHCGGEDTYGAANSIELVRKEEGKWNASKDRKKNQGTTLRKK  
KPGSNSNQVKQKTNPKAPA

>comp2946\_c0\_seq1; 738 61 1683 LEN=1835; translated  
MMKADIETKRIQNSNENDATMDSNTDTSKRRRRCFGLIRHYQVTGILIFAVIGIGAGIG  
ISSWQPENEDAKDIAVKWIGLVGDLFLRALQCFVLPVFNVIVAVVEMVSVGKASSVGY  
TVIGLYFATTLAAALFGIVSTLAFMGLYNTEEDIHEEEISPLYIQLGCNDADSVLAEAKN  
GTITCISKALADGIDSTFILHDLNNTLVETNSAVTQVVISDVTYEGIFEKIVPNNIIGAF

ADSNFTAI IFFAVLFGAALSPVILKEKNGGESSLMTMLKETDLVFQRIIRWIIDLTPFAV  
CSLIASAVGEQEDLFSMFSSIGLLMASTIVGWGLQVVVIYIGLFALLTKSNPFGYLKQLI  
PAQMMAFATSSSAATIPASLAAVKSTGRAPDTISRFRVIFPGATVNMDGGAVYFVCACIWL  
AVLNGEDVTVSSFFMLII IATIGSMGTAPVPSAGLVLMITAYNTVFGTADVPHGFGYIVA  
IDWFMDCQAACNITGDCIVTAIVAHRCPVDETPVIMVQTNDDDRDRLTTEEEDEQCSEV  
>comp2947\_c0\_seq1; 263 1 1012 LEN=1183; minus strand; translated  
ALMDALMDTLLGLRGPVVGQRQVKKDEAEDGSRFRFFVGVSHSYRSGVYKVKGGNL  
GVAVAMDVAAAMAVAVVLGRSEASSLAADSTHAFQLPFLGADRMDELVASEKAMQSSSVV  
LVEVDVVVLAVLGLIVLGLIVAVVVLVVLVLPVAVLGLIVAVGVSVSVSVSVVLEREKPR  
GPRTLPSGSSASPAQASVGGSRRTLASLEXFPGTFPGTFAGSQASARALAQQERPVRP  
NGPVVPADLDAQGGAVVQLLGEELAGGTGDVPPNGLVFLVLLMVLVLMVLLIILMLLLV  
APAAAEEATGDATSVLGSWFMSVGMDCLLDCLLA  
>comp2948\_c0\_seq1; 558 87 1322 LEN=1450; translated  
MADEPSEPPADTTTPDASDDAPGGLTDADISSNWDEVIESFDGMELPEALLRGIYSYGFEK  
PSAIQQRAIRPAISGRDLIAQAQSGTGKTATFAIGCLAVIDQSVQQCALILAPTRRELAC  
QIQKVVLLALGDYMDIKVHACVGGTAVRDDIRTLQNGVHVVGTPGRVNDMITRRALRLDS  
MRQFFLDEADEMLSRGFKQIYDIFKFLPEQVQVCLFSATMPLDVLEVNTNRFMRPVRIL  
VKKDELTLLEGIKQFYIAVDREEWKLETCLDLYETLTITQAI IYCNTRRKVDWLQEEQKR  
DFTVSCMHGDMQDQRRERDIIMREFRTGSSRVLITDILLARGIDVQQVSLVINFDLPTNREN  
YIHRIGRSGRFRGKGVAINFLTEGDVRYLRDIEQFYTTEITEMPMADVADLI  
>comp2949\_c0\_seq1; 343 616 1367 LEN=1880; translated  
MTPSTDTTNNDSVLLALPSARTDSEGRNTNTVREEFEHHQLDNHTCICIFDNDLVVETIF  
SFLDARSLLSLCSTAKATHHRSRLRYDHVLRARSARYGADSPGSASPRPPTVSKTRADHHA  
LVVEKLVSVFGLGGENENENGXKQKHQEHQESTATTVGPTTHHTDAAAAIGERQEVRTVQ  
PQAVPLLRNGGKHGAGPHHPPEPVTRGILLHGVHISTDTNKGFDKNDDDDDKPSRNSKSY  
HHHHDDDPID  
>comp2950\_c0\_seq1; 249 122 850 LEN=952; translated  
MSRGLFTILYFASVIPSVLGSAKLVPKTSTASCTGHLSDLILTSITCDHSNSGCTYGE  
VFVTGQVTSNADLRPLKISVSRTFPSIYIGITQVSSSEVYDLCSSDAISLVDDNSGSSC  
PGAGVYNFNFLFDNFGTSKSWYAGWHGFSMGMAVHLKHEGGGSDFATCTLNVSVEGSD  
SYATNATLVSFATLGLAGLCVGMFSSKRRKERLFCGENIEDERTKELATNFELVRDSTGA  
MV  
>comp2951\_c0\_seq1; 375 100 1001 LEN=1079; translated  
MARCTAAFALLFLCLGTTSWAF'TTTNSPLAAVSIARTRRSQTPPVVVLGAGGFWEDEPTD  
EQYDQGVENPFKNPELLKAMKKGDDDESGDDENAKTIDPARLLGPRLQGSNLYLVGMMGSG  
KSSVGDKLARRMGSYKFLDTDEIIEKATKLTINEIFESEGEEGFRDVESQVLDTVHAYVR  
CVVSTGGGLVCKPKNWGLQGTGIVVWLDVAPEVILKRVEGNEDRPLLKTKDPLQTLKDLL  
EERTPKYNQADLRVEITEDMDEDAVASRIVLDLHNFIDDNXAGVEAREAKAQEEGLDWVQ  
>comp2952\_c0\_seq1; 249 553 1293 LEN=2355; translated  
MYHPLPLRFLCSVFIVLVAVNQCCDAQQONPLTMNGGSLAMAGDGCVALAVDKRFGSG  
PQMVNIAPRHVWAAHPNMLLAFSGLEGDVQSLSEELQLEVAAKRNRALGFSVGGKIGNE  
KGSNDEMERRFRISPPALACLTSHVLYQKRGYYVEPLVVGLMEGTWAPFLCAMDMIGAQ  
SFSQSFICSGAASTSLYGTAEALWKPNNMKPKDLLECCGKVFQSGTFTNCSFIKHVFLYYC  
CVIDFH  
>comp2952\_c0\_seq2; 256 553 1320 LEN=2224; translated  
MYHPLPLRFLCSVFIVLVAVNQCCDAQQONPLTMNGGSLAMAGDGCVALAVDKRFGSG  
PQMVNIAPRHVWAAHPNMLLAFSGLEGDVQSLSEELQLEVAAKRNRALGFSVGGKIGNE  
KGSNDEMERRFRISPPALACLTSHVLYQKRGYYVEPLVVGLMEGTWAPFLCAMDMIGAQ  
SFSQSFICSGAASTSLYGTAEALWKPNNMKPKDLLECCGKVFQSALERDCLSGYGILYLI  
TKDGI AEYDFASRND  
>comp2953\_c0\_seq1; 1158 61 2976 LEN=3010; translated  
MPLRLDIKKKLSASSERVKSVDLHPTPEPWVLAALYSGNMIWDYESGSLVKSFEVSELPV  
RCAKRVARKQWFVAASDDMRFRIFNYNTMEKIKEFEAHADYIRCLEVHPSLPYVLSSSDD  
MCIKLWDWDRGFCTQIFEGHAHYVMQVKFNPKDTNTFASASLDRSIKVWGLGSHAPHYT  
LEGHERGVNCIDYPSGDKPYILSGADDQTVKIWDYQTKSIVHSLDGHTNNVCAVMFHPK  
LPIIASASEDGTVRIWQSTTYRAETTLNYGMERAWALAASPQTNKLAIGFDEGCVCIELG  
SDDPVASMDATGKVWATNNDIQTTSVKGLVGSGEDALPDGERLPVPRDLGSCELYPQM  
LKHNCNGRFVAVCGDGEFIIYTAQALRNKAFQALDFVWSGNGTGDYCIRESSNSIQTYK  
NFKESQTIVPATASADGLFGGTAIGVKGSDGVLFYEWDSGEFIQKIEAIPKDVYWSDSGN  
MVLLETEDSAYVLSYNSQQVSQAIAMGQVNPEAGIEGSFELLYEINDTITSGKWVGDCFI

FINGVGRNLNYCVGGQIETLVHLETSAGGQSQHTILGYLAKEDRVYLVDKSLNIVAYKVML  
SVLQYQTAVMRGDFDAANQLLPNVPSEYTKVARFLESQGFKEEAFVTTDPDHKFELAL  
ELGQTETAHALLLETPTDEDKSTETESKWKRLSDAALKENNELVEAASVASHDYSDLLL  
LYSAIGNLAGMETLADAASKDGKTNVAVFVAYLLTGNVEACAELLVATKRLPEAAMFVRTY  
LPSKIDEIVALWKQDLSTISETAAEALATPSSNPEQFPDLSIGLQVEQMFLQQREATKLT  
GMPGVNYLSAKDDLELNLIELIKARQGAGETKEPEPADVVPAPPQDQAEVGEAEVEQAI  
VEDAAAVEAARVSAELAQAEEAERLAAEAAAAEAAAAEAAAAEAAAAEAAAAEAAAAE  
DDMADDFGDDW

>comp2954\_c0\_seq1; 182 77 652 LEN=1186; translated  
MGWFDWMYSALASLGLYHKNKILFLGLDNAGKTTLLHMLKENRVQVHVPTLHPNTDELI  
IGNIKFKTFDLGGHETARRLWQDYFTTVDGVVYIVDAIDRGRFPEAKQELDALLTTEELQ  
DVPFVLVGNKIDMPSSAASEEELKYELGLMDTYGKDKGPDGSGARPIELYMCSVVRMGYA  
DGFKWLSQFLS

>comp2954\_c0\_seq2; 155 616 1077 LEN=1611; translated  
MLKENRVQVHVPTLHPNTDELIIGNIKFKTFDLGGHETARRLWQDYFTTVDGVVYIVDAI  
DRGRFPEAKQELDALLTTEELQDVPFVLVGNKIDMPSSAASEEELKYELGLMDTYGKDKGP  
DGSGARPIELYMCSVVRMGYADGFKWLSQFLS

>comp2955\_c0\_seq1; 465 329 2124 LEN=2509; translated  
MSSKSSSSKSSSSKSSSSPKVYLTPQIEKQAKRRESLCPSSLLEHDHVRLSQSKKGNGL  
AAITKSYQTNTKLLNSEVSDLENDQELQFIVDSVQKYLKIVDEKKQKSDLISMFKPKPK  
GCTWVLEMPNDVGGATDYMITVVCYAKGEGNGITTFVVDTKLVGKQNDSTTSTTLPGFREA  
KGVLEFTALMVRKGVVRCFVPVPEGLKDKSFREIYQLNAREGKNLFFIDCLHANMNGGI  
ISEFVSHVFMDSIXLIVAVLMIISPFDLYRNLLVAVASSCDGTSSDCIAAQIWFVLRDG  
LPRNTSGNWEKGGDKMVLKDLPPNDAAIYEEVSIMSSLSHPHVPLIDFFEEKDCYFL  
VMELMSGGDLFDRIGKKSYSSEEDARDLSLMLKAMAYCHAHKVAHCDMKPKNLLMS  
EDNHSYIKVADFGFAAHCHTEKCLTKQCGTFFVVSPEILMRQSYDQQTDMWSVGCIMFLLLS  
GNLFPNGRSQKELFRKIVSGKYEYFKEEGWDGVEDAKDLVKLLVLDLDPDERITASQALRH  
RWMKASRDRLARITLQGTSQRLKTFNARMKLRSAMIAVEWVAQLKKTSWGSKKVVRD

>comp2955\_c0\_seq2; 551 329 1912 LEN=2297; translated  
MSSKSSSSKSSSSKSSSSPKVYLTPQIEKQAKRRESLCPSSLLEHDHVRLSQSKKGNGL  
AAITKSYQTNTKLLNSEVSDLENDQELQFIVDSVQKYLKIVDEKKQKSDLISMFKPKPK  
GCTWVLEMPNDVGGATDYMITVVCYAKGEGNGITTFVVDTKLVGKQNDSTTSTTLPGFREA  
KGVLEFTALMVRKGVVRCFVPVPEGLKDKSFREIYQLNARLKSFSFATVCRGTHRATGK  
KVAIKCVLRKDLPPNDAAIYEEVSIMSSLSHPHVPLIDFFEEKDCYFLVMELMSGGDL  
FDRIGKKSYSSEEDARDLSLMLKAMAYCHAHKVAHCDMKPKNLLMS  
EDNHSYIKVADFGFAAHCHTEKCLTKQCGTFFVVSPEILMRQSYDQQTDMWSVGCIMFLLLS  
GNLFPNGRSQKELFRKIVSGKYEYFKEEGWDGVEDAKDLVKLLVLDLDPDERITASQALRH  
RWMKASRDRLARITLQGTSQRLKTFNARMKLRSAMIAVEWVAQLKKTSWGSKKVVRD

>comp2956\_c0\_seq1; 259 310 1647 LEN=1899; translated  
MTVTMTSRFSVSKIVSLAYRTTTLVILLTISCHETFFVTADPEPESRVVGGQNAEVNEYPF  
FTSWGASCGATLIHDDILLTAAHCNPVETNQVVVHAYHKGRPSVNSQLRWVERRIHPQY  
NVDTWNYDVMLLKLTPVNSVRKVKLNDRDTPPAVLDTVTPPLGLGRIAEVDGAFPEVLQE  
VNVRVIQSSKCNQAPMPYQWIEQSMICAGVSGGGQDQACFGDSGGPLLYRDNATDEIQVG  
VVSFGTGCARPDKPGVYHRISSSYDWIQEKICEFSSNKPSTCPGVIDPISANPRDTAI  
DGNSTQLEESDQPELLQOPEDGEQEQQVNLFTHPENPPPLPLGLCEGDQDSDCAEGLF  
CFFKTNGIVQNVPGCEGNDNTSTDFCVDIKYRPEGTTSNPVQRQSIFFSNQKNLRGVSQSG  
KLDKQLQPTSRMSGLLKGAFKESIP

>comp2957\_c0\_seq1; 485 393 1880 LEN=1984; translated  
MSVQDIVIRRQQQLLLGRENKLTEDQQRFLQHGASDGIVQSSSSGDNAHAVAPGYCGD  
SSP IGLSPNISPPTVITRKALATRPPPPTWPLAATQQQQHQEHRHRDQQWHQHQQEQE  
QKRHQLLLQQQYNNHYELHYQLQQQHQQQLQQQKEQRQRQTEHEGDFICLHPRDDTRSR  
VRFSTALSVYDHFEDDDNDSNDGSDRATRENHQGGSPLGIINEQTANATASTAAARTLPH  
DLFLRRRARRCWYSREELAAIKAERKAIIVRAIRGNARGSDAPGHELRLGLEASLSVGICR  
TILLCCATMPLFSSPRMPTGMHKYTKDQCXVAHVPIFFVVFPHRSARNQGGDLPKTQASP  
GGGARRATPAANTNASYQFQYEEYQEQHRQPLAPDDEKLRRLASREATEWFRNRALESA  
RQDASDAREFYESGANNHDATSMLYESMSSLHGSFALMDIDDGAAGVIFGNENENDNSTL  
RYWADSSWTRNLMEE

>comp2957\_c0\_seq2; 548 393 1730 LEN=1834; translated  
MSVQDIVIRRQQQLLLGRENKLTEDQQRFLQHGASDGIVQSSSSGDNAHAVAPGYCGD  
SSP IGLSPNISPPTVITRKALATRPPPPTWPLAATQQQQHQEHRHRDQQWHQHQQEQE

QKRHQLLLQQYNNHHYELHYQQLOQQHQQQLQQQKEQQRQRQTEHEGDFICLHPRDDTRSR  
 VRFSTALSVYDHFEDDDNDSNDGSDRATRENHQGGSPLGI INEQTANATATAAARTLPH  
 DFLRRLRRRARCWYSREELAAIKAERKAIVRAIRGNARGSDAPGHELRGLEASLSPAIKE  
 ATYRKRRQVLEVVLEGEQHRQRTQTHPTNSNTTNTTIRSSSTGQPLAPDDEKLRLASREATE  
 WFRNRALESARQDASDAREFYESGANNHDATSMLYESMSSLHG SFALMDIDDGAAGVIFG  
 NENENDNSTLRYWADSSWTRNLMEE  
 >comp2958\_c0\_seq1; 573 175 1098 LEN=1149; translated  
 MHRVLSASALVLAATASAFAPSAQQQQRQAQHAVSTMPLQATKLAALPTIPNPFKSLPWNV  
 EKAQKSQERKIKLERSKMHRELGIAQDATYEEIVEVTQRMIEDAPDRKRQIQIEVMKDKI  
 LQARLNERLAGLVSDIVSDDAKAQDDESNLEEQAIAEMKDKKAPKEWNA PAWTQGLIVKP  
 DQAHIKSQVQI WGVMTLMGVVALPFIQYANRFSWMVCVAQLSFRGMAKQEGGGGGFGVMR  
 MGNAFGDKKHLKVAWLLGITITIVGAVATYGLMPAWAKGHRMTPAIAFGMRNFIYGVACS  
 YLQPYKG  
 >comp2959\_c0\_seq1; 364 1 328 LEN=555; translated  
 XSDDGSDDGSDNGSDNGSNDGNDGSDNGSDDGSDSDSNSDSNSSGNSDDGSDGSDGSD  
 GTNDGTNDGSDGSDGSDGSDGSDNSKSGGADASNSDSDSDDDDDASTEP  
 >comp2960\_c0\_seq1; 349 609 1367 LEN=1605; translated  
 MXPNGYIGKHLNSAINEVLQNPIDAPKPLAFSILRIPFFLEPGYDEDEKVFVETNRERL  
 VKKWGKAGWDNQKRSHDLKGRGLEAGIPYFNLDKASSTMASHRLIQHIGKKYGLATSE  
 AVYDKLNVYFVDGHSNDRPRLAQVHVHKLRELILDNAPIEDELLEFLNGDEGKKEISY  
 ATHALQQLGIHGIPKFIIEGTTMVDGAARPDTFVHIFREIEKRGTVQSGPIFNDVLGVSD  
 ETIQVPSHSLSS  
 >comp2961\_c0\_seq1; 222 79 474 LEN=588; translated  
 MGASFSTAGNSSVVSRCDEERRAVDNGANNPPMRRVMTVEERMWQKCKDEPLVPIGCAAT  
 AYFLASGIKSFQNDPRRGQKMMRLRVGAQFATLAMFVFYVGLDNINFEIAPQYQRAKKE  
 EEERLREQQQ  
 >comp2962\_c0\_seq1; 538 110 1510 LEN=1784; translated  
 MPETNPYVDDGEGFSTTMLHHGHKLDTDNRARAPPFQSTSFEFKSSEHGASLFSLSELG  
 PIYTRLMNPPTHVLEYKMAKLEGAPCPAHGDCDNATTLPSALAVASGMSAQMHALMTFMQ  
 AGDNFVTASELYGGSFTQFAYSFKHIGIEARFANVSDLDQVKS LIDDKTKAIYIETLANP  
 SGTIPDFDAIKEIATEAKIPIVCDNTFGMGGYACRPLKLGADIVVESATKWIGGHGTSIG  
 GIIVDGSSFDWCVNADGSLKFLIGGPQESYHGGVFAEHPIFGVKATNTVFILLARVKT  
 LRDMGGCISPFNAWQLIQGIETLSLRAKAHCENANELALWLSTHPKVKEG SVLHPSLPSH  
 PSHEKAKKYFRPGCFGSVFCFELKGEDPDDEKAKGSSFVTNLKMC AHLANVGD SRTLVIQ  
 PSATTHQQLNADQAAAAGIKPASIRVSVGYEDLEDIKADFEQAFNA  
 >comp2963\_c0\_seq1; 284 1 1020 LEN=1020; translated  
 PFRSSIASIAHG VANHLPNANSSRASGILLTDTWKTASDGQATNADQQELPALASPDDLK  
 DIRNHAVKRALMALKTALKLFAENGT KPDDLALQSARLSFAYMSLEDNDFKTALKYSMLV  
 LTHSKPDEPGTKGDGEEDPSESARRILIKRQAATARMYASEANASLGDPMAMKVLVGDG  
 KDDAFDRLSSDLGGVTLGMASANHNAKARLAKAQTMVRC SASAATAALGNLTASKQLAMS  
 AQAMENSYSSSREGTSQARKALIYCM LREGNHGAALNXAAVGPLRAANPSVYPSIHP SVH  
 SSKGRVRRTPGELVNLATEWDPRTAWLHLGNKRRKKKAKAX  
 >comp2964\_c0\_seq1; 336 121 978 LEN=1307; translated  
 MLAQHS SHSPTTSMSSLLLT EFFLTCEVSTATASESTSTMPIHAQYGLRHQPWTS AVDS  
 SSTSFWSDFPLIVHDEEYNSDVNGLFHASKTVTPMDCPGFPLHMTSTTSSTSSSTSI  
 PTKNMKKKRSVRFAFPVEIRTHSQILGDHPCCEGLALELGWEYNSSSALLPEQIVRNVE  
 KKDCQQSQFKIIGRSSSGESMTGTRIPHRRSYSERKRLLIEVGGYTSDELNMKDPKEYC  
 LVGRNCSDQKKNSTNGMTAVLQRQTHLSRVGSITESLCSVVAAGA  
 >comp2965\_c0\_seq1; 283 748 1308 LEN=1449; translated  
 MDPKYQPEYQAIVD RYPGRLEFANPGEERQGSVENGLNKL VEMSEGKCKYVAVHDSARPL  
 VTIGEICDVVRDAKEHGAAVLGVPCKATIKESEDGSFVQRTIERSRLWEVHTPQVIL IEN  
 LLKGFKKVAEENLEVTDDVSIEQLGEAVKLRGEYTNLKITTPEDMDVAEAILED RKSK  
 PVNMLA  
 >comp2965\_c0\_seq2; 364 227 1123 LEN=1264; translated  
 MKFLFHLSTLVLLKSCVSSAFVCNPQRIASATTRL SAANGDVDFDTPEMGDVGFVLLAGG  
 TGSRMKASMPKQYLPLRGVPVLHHS LDFLEKLVHDCKSSGDSSPPENVVLVMDPKYQPE  
 YQAIVD RYPGRLEFANPGEERQGSVENGLNKL VEMSEGKCKYVAVHDSARPLVTIGEICD  
 VVRDAKEHGAAVLGVPCKATIKESEDGSFVQRTIERSRLWEVHTPQVIL IENLLKGFKKV  
 AEENLEVTDDVSIEQLGEAVKLRGEYTNLKITTPEDMDVAEAILED RKSKPVNMLA  
 >comp2966\_c0\_seq1; 250 273 1344 LEN=1643; translated

MGQHPHGS DGIRIRNGPATKSKINVCSNVLVPMQVFPFLNRTRKKMASRRELINCFELVP  
PRKP E E I D A P E T P F E S N Q V M P N T G G C N A K V R S T Q K K I E N V L V E F R S V G I S Q I P K D R L C E L  
T G Y K C T S T K T W A T A F K V A K E E G S I Q V F R S N R E V M V Q I S D C P K S L M L N P N N I E A L L R R Y S K  
E L K I Q Q T T F D V F D V L L G L G I G R Y I D K S R L A D A V N R N I A T K S F V N S C K L F Q S L G M L E T R R V  
G Q R G N S T S Y R L V Q S L L S R D G A T A D A S V A I G T K P Q G N I F T N S T T F K E V S S P P M K C E I P S V T  
V N G T R L R G D K N P L L C H R D R D Q G T E D L V E P N S N S P S Q R T D G I A D D E T S N Y E R I V T F  
>comp2967\_c0\_seq1; 204 1 926 LEN=1321; translated  
X I S T M Q T Q I S K E T D N L I D T Q D G W Y G R N D P R P L T R G K R I F I R T I L I V L S P I V L A L F L L Y V A  
F T A A L L C V V T V N D Y Q I K S S K V L S Y E N W W R A P G K M L R V K E T G D S S S D I V I S A D M V N D D G E L  
D T G K N T S L R K S I E C T L G E H L R K G P H G P G I A A D E D R D R P H Y L L H G W P E P F D P A G D E L W C T H  
A R T A T W A A I Y S W S V R L R P G G F L K N W N Q A I D L E T A P E V F G Y V Y L F E I G N P D F Y D K D R I A R V  
G A L A A N A P D H T P E T E N K V F A R Y N Y G H V K Y M G D F P E G D P D A Y V F K G E K V M S E A R L R L L H T Y  
R V I N P N Y A  
>comp2968\_c0\_seq1; 650 112 2019 LEN=2558; translated  
M D K D L E V Q I L A T K R L D D P A S P R S Y G A M S D T N D F G H G V P N A T G D R K Q A T R M T T G A I N S E G P  
Q F L S D E V L R P P T N K K C R H Y V Q I D D A I E Q I G I G A F Q Y Q V L L A A G L C F M S D A M E V L L L S F L S  
T V L K Y E W A L S E R E V D S I V A V V F A G S L L G T L V L G L A A D K W G R R P I F A V T S F I I A L S G I A T A  
F C R N Y L E V V T A R F F V G F G V G G L T V P F D T L S E C L P T A S R G K N L L Y I E F F W T I G T L S V P M L A  
Y L T L D T S T K N D D E T N W Q L F V I L C S I P C F A S T I L G M V L V P E S P R W L L E Q C S D R P E D E S G S E  
K A L K I L K D A A R K N G I S Q N V I D E G L F P P T S R L V I S W D D V A S I E K V L S P I Q A G N G D N K S Y P T  
S E T P V Q S S A G A G D I S T L F S T P S Q T R L T L L L W A T W F G N G F L Y Y G V I I A V S I A F T N E R I E E Q  
D D F Y V V N D D T G G N G N D D T N S S M S T S Y S F D F A A I F I T A S S E I F G L V A V L S T V D R F G R I P S Q  
T M S Y R I G G I A T F V M G L Y G A I A F A A N D N Q Y H R S L L I S L A F V A R M A M M G G S C T T W V S T S E I L  
T T D I R T T G H G T A N A M G R L G G F T C P Y F I T E G N S L A L I G V F V L F I S V V T A E C A K R L P E T A G K  
A M G D I K I E S T I E S P V S K D N V D C Q Q R A A T T Y Y R D L S  
>comp2968\_c0\_seq2; 226 112 709 LEN=877; translated  
M D K D L E V Q I L A T K R L D D P A S P R S Y G A M S D T N D F G H G V P N A T G D R K Q A T R M T T G A I N S E G P  
Q F L S D E V L R P P T N K K C R H Y V Q I D D A I E Q I G I G A F Q Y Q V L L A A G L C F M S D A M E V L L L S F L S  
T V L K Y E W A L S E R E V D S I V A V V F A G S L L G T L V L G L A A D K W G R R P I F A V T S F I I A L S G I A T A  
F C R N Y L E V V T D D S S L D L V  
>comp2969\_c0\_seq1; 485 45 1418 LEN=1705; translated  
M V R T R S D D N T V S Y N S D G A G G A A C R P P R G K T Y L T I G Q D F F S V E E Y V L S Q Y N A S L H R P D G H N  
V Y S E V G N S R R Q A P I L P L P Y F Y P A A T M V Y T D I H E L K G L D Q P A D Y G S G I E Y V K G L A D A F P E S  
G L Q I G L W L N G S A G C R D I V S G V L D D Q T Y R L F D F I R S E L P E S L P R V F L R V G Y E F D N P W F G Y S  
D D P A A Y Q E A F R K I V H A C E R Q M T T K Q C H E K V D F V W H S W A A P R E D T L S L D Q F Y P G D Y F V D W V  
G V S I F Q Q V Y P W A N D E K Q N E K G N F A G G D M K E V K E V L E F A T S K G I P I M I A E S T P F G G M D V A E  
S D V A R Q Y I K D D A N K D D V W N M W F Q K T I D L I E E F D I S M W S Y I N C D W G S Q P M W H G V G F G D T R I  
S S S K V M K R W W E Q V L S N D S R F L V R I E D C N E N S R P R G H I R E E D E M A V A R S A T T A I D G L F H S  
D G S V N Y M T S N P R C L Q L L C I G G V L L V T V A F L F L L Q I R L W  
>comp2970\_c0\_seq1; 134 1 1163 LEN=1611; translated  
X L D T A S S E Y R A S E T L L L C V A F L N K I W L E L H R V L I A I T Y S P L F T H P A S K I M R N K T P P T T T A  
V P F P G V G W I D R M S K N D P D A S I T L A D G R T Y Q N A Y A A I L D N D P L G N P C R N F N A W V N S I F F S S  
N V A A W F V H L L N D N V E Y A H Y L L C Y L R N F I A G M F V Y Y G T A G S F H Y F C Y V H P M S K K T F E E Q G R  
T R P S W E T I K G Q I K L S Q A S L T I Y T M L P V F D E W M I E S G L T K V Y F T V D E I G G W L P H V G I M A F Y  
F A C V E I G I Y W M H R T L H T N K F L Y K H I H L K H H D Y N K P E T L T P W A S I A F H P L D G I L Q A S P Y V Y  
L L P F I P C H Y M T H I C M V F F T A I W A T Y I H D A M D W N V D P I M G S K Y H T V H H T H Y I Y N Y G Q I F T F  
C D R F W G T L K L P D G P T G M Q K P R T A K K V D  
>comp2970\_c0\_seq2; 236 246 1376 LEN=1824; translated  
M V F S V S R Q T A E L S L L V S F A A F T V C C A G L F E R N N E T L M A D E T S G G L D T A S I P F P G V G W I D R  
M S K N D P D A S I T L A D G R T Y Q N A Y A A I L D N D P L G N P C R N F N A W V N S I F F S S N V A A W F V H L L N  
D N V E Y A H Y L L C Y L R N F I A G M F V Y Y G T A G S F H Y F C Y V H P M S K K T F E E Q G R T R P S W E T I K G Q  
I K L S Q A S L T I Y T M L P V F D E W M I E S G L T K V Y F T V D E I G G W L P H V G I M A F Y F A C V E I G I Y W M  
H R T L H T N K F L Y K H I H L K H H D Y N K P E T L T P W A S I A F H P L D G I L Q A S P Y V Y L L P F I P C H Y M T  
H I C M V F F T A I W A T Y I H D A M D W N V D P I M G S K Y H T V H H T H Y I Y N Y G Q I F T F C D R F W G T L K L P  
D G P T G M Q K P R T A K K V D  
>comp2971\_c0\_seq1; 341 59 1165 LEN=1833; translated  
M T K T L P I I V G A G P C G L V T A L T L K K Y N V P F V M I E K A S R S K I C S N A G S G F E L A P T A V D I L Q  
N R L G I D V T K I M S Y Y Q G M A I V N N G K L I R H S R I P D G Y T G G S A N R A D M Q I H L L D Q L F P S P K D  
E E G V L F C G S G L E T Y R E L H N D D P D G G R V V A T L S S G E E I S G C V L L A C D G I R S R V R A V M H G G Y  
D S T K D W K T N T E T A N T K D P L H F C N T I V Y W G K T K V P R G S A L E L E F T K T Q M A K K A K D N E K T K Y



CTSFAFTITTPSAPASFFIIPSONGTELNWAVSVQSETDKRSKNNDGTDLTRRGGGPLTE  
AEKKRLFDFTSKDNSESVVRGITNFPLIQELFKMTPASDITEAGLFDRENLDLPYASESK  
RVALLGGK

>comp2971\_c0\_seq2; 451 59 1543 LEN=1732; translated  
MTKTLPIIIVGAGPCGLVTALTLKKNVFPVMIKASRSKICSNAGSGFELAPTAVDILQ  
NRLGIDVTKIMSYYQGMIVNNGKLIHRSRIPDGYTGGSANRADMQIHLLDQLFPPSPKD  
EEGVLFCGSGLETYRELHNDPDGGRVVATLSSGEEISGCVLLACDGIRSRVRAVMHGGY  
DSTKDWKTNTETANTKDPHFHCNTIVYWGKTKVPRGSALELEFTKTQMAKKAKDNEKTKY  
CTSFAFTITTPSAPASFFIIPSONGTELNWAVSVQSETDKRSKNNDGTDLTRRGGGPLTE  
AEKKRLFDFTSKDNSESVVRGITNFPLIQELFKMTPASDITEAGLFDRENLDLPYASESK  
RVALLGDSAHQPPTFLGQGVNMAIVDAYVYATNLAVALKTKKKSLEQSI SDCTTGNRHGE  
AKKLVEDARIGCTMMTSQNIFLYWFMFLFIRLASTSSFMNQIISQDKSNSDFLKLLEDEEH  
CSPKEQESMSQMSA

>comp2972\_c0\_seq1; 89 1 263 LEN=263; translated  
XEDNTNYVANQEILRQSEVGLAAKSGEDLAAPITFTPYKSEDHTNYVANQGKLRSEVGD  
AVKSGEDLAAPITFTPYKNEDHSNYVAN

>comp2973\_c0\_seq1; 909 81 2192 LEN=2231; translated  
MVFVPMNASDAKAI RHLTLATQRSVAPPRSETPRANANNAPYRYRDEFDDYDDSDDER  
DFRDLSHYCSIDPKTGRVTELWLGIGSQNANHPQHTTAQGAAAAGNYWTLSEADWQWL  
ARLDQLRHLKVTRCGALPYRQLKELPHLEHISCSECGTNLDPLGAGDTDEDGEDGDGGDD  
DEGETIADDDTPPCRSRWNPPQTD SHRNTGIDL PNIKSLSLRCAFQPTAQGIRSLGVSFV  
WIKHHLPGLERLTIWRLDQPPNRWSP TPLSAYQRTTNKRLMVEALLDGLSPLSPGATKDA  
DACTKSNAWSNRVTLELNRCLTSSDFRRLVLDILPGSF PFLQRLSLASNDIDELPPLK  
HPNACPNYHQEPERNCFHKY EYECETE CDDPTFSRTKQKLCRLRRSLQQIHLSNNPIMEF  
LGKHGDEDPLPLSREQMEGTSWSFPEERTPGRESGTQPRKHTLEQRRKRLHLRLLLESVDE  
NHTTATEPSLPAVLERRVRLVELEHLRDLLELFPRLSHLGYASCVHKLRLSVVGDVVVD  
HNNDGNGNGNDETENRWCVLLPFGLYAMD LQRQIEFYLRFNRRGRRRLVEGIGCEPRAQRN  
EERRDDGDDDDKNHGNAGRRLLEFLALWPNILEWSYRTSSGGCFLMPLPPLSSSSSHAGSA  
AQAAQHAVSTPTHHSAAFSNKNATALYRLLREGPVLFSSSERH

>comp2976\_c0\_seq1; 416 243 1136 LEN=1547; translated  
MIRNSGMDLIIDGWFHERGVLWPGQAMSLKVKKVLVDHYRTDFQDLLVFESENHGNVLDG  
GVIQVTERDEHAYQEMIAHIPLFAHPNPKKVLVIGGGDGGVLEVARHPGV E EIVECEID  
EGV I IASKKHLPSLAVGYDDPRVTVKIMDGAKFMDENQDAFDV IITDSSDPVGPASVLF E  
TPFYNAMYKSLREGGIVCTQGE CMWLHLDLIKPLVDSISQTFSSVEYAYTTIPTYPSGQI  
GFILATKGRKTCKVPEREADMTPELQKCLKYYTPALHRASFVLP AFTQRAIFGEDTV

>comp2976\_c0\_seq2; 421 37 927 LEN=1338; translated  
MGLNGMDLIIDGWFHERGVLWPGQAMSLKVKKVLVDHYRTDFQDLLVFESENHGNVLDG  
VIQVTERDEHAYQEMIAHIPLFAHPNPKKVLVIGGGDGGVLEVARHPGV E EIVECEIDE  
GV I IASKKHLPSLAVGYDDPRVTVKIMDGAKFMDENQDAFDV IITDSSDPVGPASVLF E T  
PFY NAMYKSLREGGIVCTQGE CMWLHLDLIKPLVDSISQTFSSVEYAYTTIPTYPSGQIG  
FILATKGRKTCKVPEREADMTPELQKCLKYYTPALHRASFVLP AFTQRAIFGEDTV

>comp2977\_c0\_seq1; 127 1 1075 LEN=1144; translated  
XDREMERLEVAHNRRAVAILDRGVFALEMACHVLTVAHFCHIWSLNGVQFTLIDGVLALHL  
HSAISSACTKLARRRN VHN IARDLQGRFPNATDEELDKASAAGDVCCICLGSMTTGGSVK  
KLRCGHLYHTHCLREVI ERAQNLSARCPLCREPLLD RPQPQGDPPPADAETDNARATA  
TATANPEPPRAGGADPARRPAAEAGGGGDPARGEGERALFRFSTEGILPVWVPVPAFSF  
EVVRRPPNGTQGAGPLRN E PAAAE PRAQAPGTGAGDLANALGRQQQHEHEPSFLQRVLAL  
AGLVPMSP EEEARALEQLVDMFPQYDRQDLLGELRDRGSI EAVTESILMGI FRGVPRS

>comp2978\_c0\_seq1; 641 1 1408 LEN=1408; translated  
XILERRAEEERLRKAREAEDDR LRAVREAAAERDRAEQERAAVLERETEKEQAATRDR  
EARAAETERRRREREAAAKKATEYIDKAKKLVGQLVQVRASVEPFEKNKTVGKRRRLGMKK  
MANGKVNTLNDNPSKIREVATQISTAI AAYEQEDGQIKTQLQQGAPGLTSDMAVGRRYFV  
DLLASTAMKRVAESFGGTKGDGFPLAAMLAMVSVESKQIISVLA AHIYTVCPVAIPTLP  
APRDNASEDDLMI GLGMQRNQKTGEFETFP RFLARTENIVSFVAALQSSLPSSHQLMGGH  
AGAMLWLRKFIDLPLPPTSPLPLTTAPVLGAF LTVAGHMMANAHADDFRTMLATI QNDV  
MNRLEDEGELGKPSAIRLKGKVV EGGFDSFRKNLPPKAVPELYYGASEHSHKKEGVVSGGT  
IGGEEDVQPKK PQMQQPPQNPFGGGVSFGG P SSTGGNPNTFSGGGG

>comp2980\_c0\_seq1; 175 91 579 LEN=634; translated  
MKFVVL LLSLTVNAFSGSGSKKASPAATSPLPTFDKNTGKWS PAPANAE EPYGIGRTLL  
GNGPVP AFTRLTQSEDIYMQAVYKFQASEKCTVRYAQGNM DAYFENPN DWAYQRKVEESGG

YKKKYGEP I P Q K Q V I L T V V W G V G I T G L L G K G L L T F V S Y K L G N  
>comp2980\_c0\_seq2; 203 91 624 LEN=860; translated  
MKFVVLLLSTLSLVNAFGSFGSKKASPAATSPLPTFDKNTGKWSPAPNAEPEPYGIGRTLL  
GNPVPFAFTRLTQSEDMQAVYKFQASEKCTVRYAQGNMDAYFENPNDDWAYQRKVEESGG  
YKKKYGEP I P Q K Q V I L T V V W G V G I T G L L G K G L L T F T S G D F C L S E A N A A T N Y C K V F F S  
>comp2981\_c0\_seq1; 545 57 1052 LEN=1718; translated  
MPVVGSMALGAALIFTI AVGI AVL P I P N Y A F T P A V Y Q Y K S D R T L M Q I N F K N D K L V T G K N F  
ELSARDTIFSLVEEDDGNDDNIENPDIDDIADLLADKEFLENNVKTDDGKDSKSKKIGDPL  
REDNGVRPSIHPTAINAIVDALKARAEQSKQEMDDDDDDTMHFRATETVEPLMVMVTAGQ  
FASDAIQKRQESSEADGMLMTQDEEQTLAGRIMGVIMRLDALEEEEAERVSGVEWIGKYD  
EWGNFGVLSDEHQNNLARDSDSGDDGLADVHAKILDDPLFCMNRAECLLAI FLQEVEI P Q  
LEK L K E T V P D G S K I D F L D Q D R L E V V V G S D K S  
>comp2984\_c0\_seq1; 232 1 1875 LEN=1968; translated  
XMMADYEQIATFPSLPPHAITVEQQRVLEPLSYPKSIDTRTSHSRQVVALLQDLHQSIPT  
PERWQSLQRALNLVSHDVTTELHDYEISLGLDKALCLKLGYVVVTTKSNCASKEVTLICSC  
LLQIFKCSSKNRLRSFHHIGATELLPILIQFCIGI IKCKIDMEDQSPEHDDGLVSVIRVL  
RVF SK L I P A K S F L I N Y L Q G A Y L G H L L R D M L I W I D D P A S S I I Y S S T E V L W E A I G V L K D L T F  
RSQTNDKETLLHLEGGVLLKILSICCGGIKASHPRIQEWCTAVIWNLALDPQICRKL VFG  
NDTHESGGNVILDGLLEVLTHYSADSKISGYSLKIKRNAMSAIGNSFGFPELFD S F Q K K M  
QDKSSEILQRLMSLVQNDSDSVRRRAMRTIRCLASSGVNDTILLRDLSSLLVDIISQKG  
SENDEDEDMHVQVCQTIIILKETIDAKIWPRLQKSLVCRIETTTSIKIIISAAIVCLSNC  
FSDEHSIQNWDGFSDFWTSLERTTTANLEAHESVSKLLLGIANNEGNIRDAGDRGIRNP  
SILTKTAVVNTLTITILLESECNREEPRNQALQTVQILAGNEINKRPLAENDRLLSGLVTL  
CLTQPDPGIKDSAKGVILQLVPEL  
>comp2985\_c0\_seq1; 333 171 986 LEN=1007; translated  
MTTKNWL L L A C A L R I Q G G N G F T Q T K L V H V N S G V D N F V L R A S L T N D Y G K S C S R R S W L A D A C  
RTIGVATASVAIGTSVKPEKAQATEEQFNPDPEFKEIYNNPATPPAPEERSGLVVLVA  
EVSQFQEKILRAIVSGELKDVMSPMQFAFGTQILLRNSNL DGNMRLMIQEEV PKQKRDS  
ARKNAANVMNTLQDI AKYSASIQRDFEPELMEVELADMYKVVRI NLNELYEYLPEKEREKY  
YGYFVAVTEYEKKVANGTYNPDIDGV L K F D N  
>comp2986\_c0\_seq1; 22 1 276 LEN=276; translated  
XSSNNNSNSNNTLRVLFSGAGPSSPEEIQRALVEGPRTESGNALARL F Q H L G G N P V A A L  
AEV P D A T E E A E R E V L A A S R N I T K R I R S N R I E S  
>comp2987\_c0\_seq1; 268 1 669 LEN=1176; translated  
NLCSVISDYNNLYGQFLAEIGETLSLPTSVEMYRPTSRPLETPLETSQPTSRPSETPLEA  
SRPTSRR A E T L T E T L S E T P X V D E V S T D V S T N V S T N V L T N V L T N V L T D V Y Q N V D T A T A T L S  
DDLMTFRPTL K P T L E P Q L R L Q L Q L Q L Q P P P Q P Q L Q P Q Q Q S L D D V W T V V G P M S V E  
NFKPTDESTVELIDLGTDEPNQQLIEEPTDPGTEEPTNQTR  
>comp2988\_c0\_seq1; 300 163 564 LEN=1226; translated  
MKTSFLAVAMLCVSYIHASVVI E G D S V R S V G K P Y Y R F E A S S H E D R N L K E R N L K K S K G D K  
SKKKGKSKSNKGAKSDKSKKSKKGVTEEPSAAPS A A P S A P S A P S A P T A A P T G A P T G S T T  
VSSTATSSQEGST  
>comp2989\_c0\_seq1; 323 80 1390 LEN=1872; translated  
MDCNQGIYLERLLQQQLCQRKNGNNINSTVNKNISDGNS SFGNCSAPSGFIATNTTSIGV  
SNTGIGLGMHQQH F Q N R M I A F L K E R Q Q R Q L V A N G I I C A P C D M T S N P S I P G L S N I A G L G  
HQLVGRDCGGIGQTIPTISALIDGISSGGRGARNVRGLGNRGFLYPSTEQDFLSSSNPYTA  
VGEITGEHNTKLR SN G S V G A G S L N S S M G G L S Q F S I Q H Q A L T Q A A L N S Y Q K A N E K R L T D V I  
LAKQAQVAFLEAAQVHPRTIRLPCGARGMKADHNSSTAFFDI PENARHGQHLLCSHSVC  
RAAGVKFRYCFYCKKPVTKQNFRRHLHANLDPNNKEAERKPIDKLKEENKSKTEICQSK  
ESNANMPSTYKATTKPQIAVSESNVSKSLGDKNSIDSSPALPSIKRKKKEENS R S T E A  
ERAQKIPKLLLSELGP  
>comp2991\_c1\_seq1; 148 10 705 LEN=1774; translated  
MVSSEGIAEAFSRTGMAPLGDPSGPCSDLRRNLVLSGISAEALNAMVGHEVAIGREGRVF  
VHRRCPCRYREAACKRSGLTNNLWGVSGISCEVLPPRSKTAPGGTTIQVGDEVAVVPGT  
HAPDRIDVGRTKPGSFVRPADRSAEDVKKSITPPYIAALASLWDPEGFARVEAAHNSVGL  
RFWTP E A Y Q V G L L A A A L R V P L M L L L A L V A G S A L A G L G V L L L R S G G R E A G E L  
>comp2992\_c0\_seq1; 133 1 473 LEN=473; translated  
XKRKDYKGRGEGKGYKAKVEGKGYGVKGRKDSNGTKGNNKGSKAKTDLTEEGSDHS  
KGNANKSTKRSDKNKNDKDRHLYQYDSGMNSRKTITITEEGEKGNIDEMIDQIIQAYFRA  
SCEPTQSPTQATLPPSETINPQPDFPTKSSIPSVAPT V

>comp2993\_c0\_seq1; 376 1 1999 LEN=2066; translated  
XLINKIKVLVGLKAYSTALHQELDLGTSLNVAIDCSSNFATKVLPHRYFENAAIMLSDTY  
LLLNNVATTSTRILSLKTVRLLLVFATHLLLLLTDAAASRHGQRPHRNHHNLRNNYRSTPQ  
EKLLDSDISNPPILEALRAKGTVTSWGAAGPGVIATIMCRGGS IATKMPRSSKQGGKNISVS  
TDMDGDSPSLLLILIRVMFFSYASLGSLLPYLPVYYHSLGHGGQVIGMLGAIKPF TTFVLV  
APLWGIISDQTGSPFTVLYFTFLVSLVGQLAVSWRHDPFWIMSMVFITAFFNAPVKSLID  
SMVMSNIKNGKLYGRLRLWGQLGFGVGSVVGLLILSKSQQAQQQREVIGDGTITTAAILG  
GSGTMMEKIDQIWQKITGYKLLFFTHALLSIPTLICIRAFHRMTTKDTAAAVEKPPKGAS  
KKKGRASKSENKPNVLEGIRVLFHNSDALLFFFLVLVVGVS SVGIENFAYVRLREVGGT  
GKEMGLSRLVSSMAGAPMFWFSGPLTELLGADRVLALSLGNYVLRVFNAYAFMQSPLQGLP  
AEALRGATFAAFWSTCTIYASRIAPPGMATMLMLLNAMYGGLGQSLGAIIGGKLQSKLG  
TVRTFIYAGAFDACFVLLLIGYQVLEKVVASRTPKPS SPCKERVLGRLTGRDFEDDRDAR  
KYIVT

>comp2994\_c0\_seq1; 477 173 900 LEN=900; translated  
MASIAGVLICTVGF TDAFSAKQQSPLLSSTR LGLIPPPGSGYAGPEEEIDVMPD TYEPM  
EYPGTM RGPRTPENMPFHDLPIGDDDPDPVPWPHFQQIEWHHRWAPPHPHPTMEEFIEQ  
QGRWATPEMEAEMRTGSRRASRTRREMEEEQKRDTLIMDDDEDDDDFVDDFPQELGEGMF  
GQLGSTDDAKITADAVSPDRMNDK KSKDDDDDDADDDAGLDDFLLDLGLDSLGD DDD  
DDX

>comp2996\_c0\_seq1; 393 1 1575 LEN=1686; translated  
AFLYTGTTNMVASAQESDRGTTDKPRTAEMMMGAMRMSTYVIGIGLSLLFAFARPLLRAI  
IGNDAIGPAVFASAMRYVRIRALGMPAAA ILGSTQAACLGMQDVRSPLYVLA AAAAVNLF  
GDALFVGHSHPLIGGTAGAAWATVLSQYAAVALFVRWLCGRAPEEREADVDSGPEVMNLS  
SAILEITNPGERDSNSNARGGHR TDRRQRFRAALESFKLAARRKKT PVPGRSEARRSPLR  
RLLPGRTAEKTSSGSGNESGLSFSTRGFLRNRFSAADLLRPPGAETRREFAPYVVPVTTT  
QVGRVSGYIAMAHVVASSLGTVMGAAQVVVVSIFYCLCP IADSLSLTAQSFVPAVSE  
RDPGPEKASAMGTVLANFLKAGLVFGAAMVA AVGAIPLLAGWFTSDPSVVALVRSV  
VPLLLVFGVHGLVCGSEGVLGRKDLGFLGKMYAAFFVAVPYFMMGVKRRALAGAAGL  
SSVWTVFVGYQLARCGI WVARACALQARTRRSAAATAVRPFASEPESNKLAP

>comp3000\_c0\_seq1; 267 345 764 LEN=1057; translated  
MKFSAIVALTTLATASAFAPTSSPKTSV VSLNAEAEQSRKAFFSVAGAALFGAAVAPGVA  
GAMDQDNVSTPTEVWEVKGPKADVNERFARYQNARNQNN SNFPPIKRLTLERKSPVTRL  
DLNAPNFEGYKKSYPGLFK

>comp3000\_c0\_seq2; 223 1 443 LEN=736; translated  
XAFEI IDKMFSAIVALTTLATASAFAPTSSPKTSV VSLNAEAEQSRKAFFSVAGAALFG  
AAVAPGVAGAMDQDNVSTPTEVWEVKGPKADVNERFARYQNARNQNN SNFPPIKRLTLE  
RKSPVTRLDLNAPNFEGYKKSYPGLFK

>comp3002\_c0\_seq1; 385 1 1500 LEN=1518; translated  
KTTAEDSAVSRILRLVEEAQSNRSPT EMMVDSFARSYTPFVVGAAAIMCTIPWYFGTETG  
RMWTLRGLIIVVIACPCALTI STPVTYAAGLAATAKRGVIVKGGAKLEAMGSVDRV VFDK  
TGTLTRGQFSVTHLEVVRSRTRRQMLELLSLVQDRASHPIAASLVRAAKSEGVRTPKQT  
AVSDHKILKGEGITARVDGKLQVYVGNQRLFERLGMRLGLSSEDKDAIEEWDDTGGTVGF  
IGIENDGIIGMFCAKDSVREEAGDALDELKEAL IETYMCTGSDTTARAVSKEVGI PGHR  
VQSRLLPEDKLR FVEGLRRPEP SKFGLCRKKKYVLF CGDGVNDAPALAAVDIGVSMGEGA  
AMALEMSDVTLMDSNLTKLPYVIKMGQRVLKTVKENIVISFAAKFAVVS LTLAGKMTLLY  
AIASDVGIMLLVTLNGMKLLPNDRFDLVPPKQSRRRGGT IASRLAKLKLGLGKNAGFELVS  
MNNTDDEPPEDLRVAGIV

>comp3003\_c0\_seq1; 460 1 1416 LEN=1508; translated  
YALDGDHVVKALAGV FYDVI GWNPSDDGDGDENGSESAHGNSNGADGNENGGDEENSSGA  
ENDDEPRFSPREAWKGLTRRGRWRERFCRASLGRGNLPAESARCLEAVLTILRNLSFVS  
ANLRL LAYSNDILSILVGCLYEPNQGDAGDDGSNGIVLSALGILINLSPHLDVTRGRKLF  
CDKLF LRSTAQGAPPEDGAKLPDPSTFGQVVNGSWGFGSLLLAKKLDTKEDYVQDIDKEM  
LLQVTKEYLVRVWAI FPAALGSVLVDTRTPRAVVTMALELLQEFINQARVGVIGSVEDQDP  
DEIPNTRAILVYIPDDLARLSDFLYI PRLGSDAIEYVDPRTIVTRVNP IKLTVGYDGS  
VDTDVRDRALEVLVPLLELDSPIAGRFGTKPGG SGLPNNKVFD AIFPILSTQSGRNEAP  
LLATQLLRELSKARENRLGCLYLQERIVALASKEPRVAHLAFNHLYASEED

>comp3006\_c0\_seq1; 395 116 964 LEN=1159; translated  
MMASRLPTMFRKNGLPAAAAFAAASAASASV TLLDEEDVHAPHYPWRHQGYFSSFDHA  
ALRRGYQVYREVCASCHSLHYIRFREL VGVTHTKEEVKQAMMDVDVLDGPN DQGEMFERP  
GKPYDVIPSPYPNKEAGRAANGGAYPPDLSLMVKARHNGADYV FALLTG YCDPPAGKEMM

PGLHYNPYFPGGAISMPPPLNDGGVEYEDGTEATISQQARDIAQFLSWTAEPESEERKKN  
ACKYMVVLAFMALSVGYKRWKWAFLKTRQIAYVKGVGGAH  
>comp3006\_c0\_seq2; 314 1 1330 LEN=1525; translated  
AAAPIPIPTPTRHQHCNNPNPRTETRTKPHGEEDQIQDDGLSITNNGELGKSFRPTESA  
ERERRTRDWRQGEVPMPTPSDDARRTESRGILESLWNLTLGMDWLRFSVCLRNLSRSLR  
VPLCVSVSPFTKLGCI RFPVCLCLGPLESESPFRSVPCCPVLRCIAPLRQFRKNGLPAAAA  
AFAAASAASASVTLLDEEDVVHAPHYPWRHQGYFSSFDHAALRRGYQVYREVCASCHSLH  
YIRFRELVGVTHTKEEVKQMAMVDVLDGPNQDQEMFERPGKPYDVIPSPYPNKEAGRAA  
NGGAYPPDL SLMVKARHNGADYVFALLTGYCDPPAGKEMMPGLHYNPYFPGGAISMPPPL  
NDGGVEYEDGTEATISQQARDIAQFLSWTAEPESEERKKNACKYMVVLAFMALSVGYKRWKWAFLKTRQIAYVKGVGGAH  
>comp3008\_c0\_seq1; 128 1 742 LEN=990; translated  
XKRIDYVLALVNNCVSILNSYPHSFSTFATVPYFDTNKKQQMQDHTARITTLTALCAFWA  
ALFAPSHVTSLQFGHNRI RSDFHGKDSSATQSAAIPKSECAISSRRNILTAAASGLAWMA  
CVGGALPAKAATATETTSIETNEITATKSNFNFDLGSSDCETSCVLNCELQKNGKNGGK  
SSEGCLDSCVRSQRYCHQVASTSDSPSASEAPTSRYTTTTTKEPRIQSAKPIPLKYNNSN  
RGGAWRD  
>comp3011\_c0\_seq1; 357 438 1823 LEN=2306; translated  
MIADSHRVMEGWSTTGFKTSSKENAVAIENLVKRLVDEAEAGNSNANPTTKDYNCMLESW  
ARSGEGVHAAERCEEILVQMQA EYESGASSAQIRPNLSSFKIVLQAWKHAGGKLLSSFRA  
QRILDWMSLHESGKNSLAQPDQMCFTVLSWSRNNHEEAPVYAERLLAKMETMKLEST  
AIVPLVQPRTLSFNAVLGAWNRASLTSPLESFAFASQPSSTSWQRSCDILEFMKLYYV  
EGNSMVEPDRVSYSLVLRTLARHKNDRAAPKADKILRFIEKSRNGELSWRPDTLLFNT  
VMGCWSSHLSKGSYRKTGRGILDRQIHLFTSFDGKVGSDDCRPDVYGFTTVLSSCALERAN  
GEEKAKAFNVARSTYQQLITNKDEY GAPNHVTYGTMLKCVSNLLPADHPQRKKWTKKVFN  
QAVANGCVGGMVLSRLSEAASSAKEYKALMRGHSSKKKLPAGW  
>comp3012\_c0\_seq2; 90 1 523 LEN=1028; translated  
XRSASHSPGSGAALTPVPARGLARGLALDSTGPAPVPPSRVSGATAAVPLPLXVRVCVQ  
PDVGLPPPQLREGGPGAPAGPEGTRREAKGLHGSGQHARQRREDPAQRGANGDADA AVG  
GGGSGSLVKGCRHGGSVSRGLRVCLFVCLCVWFCVVCVCLQRVVPVAVSDVLEP  
>comp3013\_c0\_seq1; 372 1 1611 LEN=1629; translated  
AASGLASGLFGDESMPTTCMAVTVTADPLRSXGVGEGWTGALTRQHIFKSI PGQFDEEG  
AGFDGERDPEERPHRTGSDDGTSLEWLSPPASPRPVLIYEHDDVQRAAAGWGVSAFLDTR  
GALRVVGRPHDLVSLRLNRMPGLLQRWINRNHDTSATTPVGTMVSSLIGWATGSLGGVP  
GDNERWKVAEQFSLDDWTRVEVNHSGGTKIGKTAGEFDTRIKQLACGPGFLAMI SECG  
SLYTMGVNRRGQCGTGAISNNVWTPQAVRGLSMTSLNIGGGDKISDKMASEQDQPMVQVC  
LGFQHGYSRDRGQVYSWGKASRGQLGRTVDSQDPWARPIQFDNADGNPRVVAIGAGFH  
HGALLTEDNEVFVWGNMVRNAGEEDDANSDDGDEQPVDPDARTPQKVLGLPDSAHDNQ  
SPMKVERISCGSHHTAMLMEGDSIFGIGIASDEPVPI LDPELIPPGVLELPLRHFEAHH  
DRTSVIDNSGAVYQVHLWNDETLE YAYFTPSYVDALLDEGHDIQSITAAGAIRS  
>comp3014\_c0\_seq1; 176 69 353 LEN=388; translated  
MMRSVFFLLAI IACASAFAPVYNTVRVADTCLSAKHVNDKAAKWAKSKRPRKSRPSDINR  
APIDYAIHSYQKPAEYDISSEPAAPMAKPAATEN  
>comp3016\_c0\_seq1; 435 162 1658 LEN=1811; translated  
MVSDKASNMEA EKFSRCSGKAMMLCDSEFLDACCPI CYEPFLPVDVDP IRPVA AKVGSSES  
TFCRQEDS QSSTDERNGIYKKADGDCRKEGTSSKDIDILIIHQDDRHSHTDTEKEHCQP  
CHGNCRLDPRQVRTIPECGHEYCRGC IKKHCSYAILIRDMPIQCPGCTSGTSNPCSSLLP  
EDIIEESLLLKEKSVEEDGGDCPINTLSSARKEGSTVNQDLIKFQRLQRMLKDP SLISC  
TRCDELIPPSNIQMI GCVDPNRIECPACHHVFCRIHGDAHLGMDCYTASAKKTDERNER  
KSESAIRKCKPCSHCQSLIERVSGCDHICPVCHNDFCFRCGTHIYLQEGGMVRDCSKC  
KQSYIDHRHIGKYRLCIGLWVPLLLPFYISYITMTIGFAIVTCGFFCCLGCGIRKDKKTD  
SII FMPVMAAREILNFVFLPFVDLSRSCGIPCCFCNNAPGLGKGQYADNDDDEEDYDDS  
VESEDYDEENQM QENSLR  
>comp3018\_c0\_seq1; 200 75 656 LEN=896; translated  
MMKGTIRSLPYYGSTKNLFLHALVFLGLISTTHAFQYPRNHQNHQSSGSSSQYNKINSIH  
YEGWSSAVRPIRYDRSIRLSGGFMDDLQGFKRFTTRASASHILIKGGAEAEENKLEDLK  
VEIGDSPVAFAKAAQYSACPSGSSGGDLGSFGPGAMVKEFDVAVFNEPIGVVHGP IKTQ  
FGYHLIYIRDRT  
>comp3020\_c0\_seq1; 711 1 1727 LEN=2065; translated  
XEKEMEVMQYKDHFPKAREIKMHASSSSAAKKLASPRRPLTKPESFHFHSPSSHRPVK

EDGEKKELFKPFKALPMPKFSRKRKVLGGTKTPGSSRPLTTPPEPFKLHKSTAIHKSNEK  
HPEADKEAKSGTFKALPMPDFASAKGSKLKSPPSRPLTTPPEPFRFHKTRSKRSNEKAKE  
EKQSAGFKARSMPKFAARNATPSTGTHPKAPGALTKSEKKRTKSTRSKTIPTGASGLLFH  
RSTSATNRLSRPKVVQETKQPQSKPFKAKAMPNFI PDVIVTRTPVDEEKRQPSRSPELYA  
DEKYN SAYHHCDNSTISSCFNKASLGPKSLTEEPVVFVREEHPTNVTSPDSVKESAEPAL  
PREDPVEPAVLNTVQAMEPPSEPPAVVRQRDPNPPSPVASPQLNKSTLSMEDAKARLRERL  
SKRKS NASKPQQHNGGAAASSASMAFSTLQVQSRLTVQAEKNVKLEEKLRKMTLKKTKQER  
SSNGASYL VNDNPTPVKSNNTAPKSTRLQGT VAGSDDKCTIPEQHEVQQPAGDDNTTS  
SILQLAQEVQRAAEDEL SFYGLDTRDRLERELGL  
>comp3021\_c0\_seq1; 151 168 1178 LEN=1415; translated  
MLAGMVATRGGIALPLARKLCSQEHGRQLVSRFSGQAGGGGARRRYS LAIARRVPRSFP  
EALGTSQGS GGEIDRERAEAEHERYLAALRKHVPVLC L PALDDL PDSV FVEDTVVAVGNR  
AVVTLPGHPSRRNEVGP IRELLAGGLGMDVTD MGSVGGGRALCDGGDVLYTGRHLLVGM S  
GR TNRAALEVLEEGLGMEALPIPLARENGRASLHLKSVLTHLDDRTLVPENDEGRRVFS  
AIRDATGGAYTSSDAVWLP AHAGLSCNAVSVGDRGILAQLV RGGDAPTRERLEAAAARER G  
RAIEFVAQGEAAKCDGAL TCCSVLLDLRPAGGLVRY  
>comp3025\_c0\_seq1; 167 1 458 LEN=576; translated  
XNDNDNKTPHYLWEDLSPDLQREIQALRGILRSSNRKKVYFSSYHEYLALLAEQHQQYYRE  
RLDDARHGLKMRLEEDATLRKELELLEQERRYLGGRSSRMDLR IKETTNRLEGLSRGTEY  
AISKIEPQARRVDTLKALLVEQKKIFGGGELL  
>comp3026\_c0\_seq1; 371 1 1249 LEN=1316; minus strand; translated  
PIQSKPNQPKQORSANERNNPPSSMFSSLSTAGGLRLASRRILDASRSVAPRSRATPQLH  
LPQRQAVSTAAFRAGVARARTAGHRYLSKDTAKTAAEPAKVGWWSPEFWGFAGSIAAWG  
MSGAAIYDSALQGPEVISLTMTPVLMVYSGLFARWAWVKPRNLSLMYCHVANVLAQTNQ  
LRRALEYKMENGEQVKEMAQQVGM LGGVAGAAVLGGPAARSALSANL GIVSTIAAAD  
AGPFTATFGE L HARDGCGTFCPVRAVLSVVLASRAFDPF LFTQH DAPVSLRTNATLRMK  
LVSCNSRTNAIGANDRSIERTNERTPHAVTNRAPMSKVFISGASMLELDRPTDKISLPQY  
AAL TATGFFFTRYALLVTPVNYTLC AVNIALFLSSFWHFGRKVKADFVDAKPDAQ  
>comp3026\_c0\_seq2; 355 1 999 LEN=1066; minus strand; translated  
PIQSKPNQPKQORSANERNNPPSSMFSSLSTAGGLRLASRRILDASRSVAPRSRATPQLH  
LPQRQAVSTAAFRAGVARARTAGHRYLSKDTAKTAAEPAKVGWWSPEFWGFAGSIAAWG  
MSGAAIYDSALQGPEVISLTMTPVLMVYSGLFARWAWVKPRNLSLMYCHVANVLAQTNQ  
LRRALEYKMENGEQVKEMAQQVGM LGGVAGAAVLGGPAARSALSANL GIVSTIAAAD  
AGPFTVHFVAPMSKVFISGASMLELDRPTDKISLPQY AAL TATGFFFTRYALLVTPVNYT  
LCAVNIALFLSSFWHFGRKVKADFVDAKPDAQ  
>comp3027\_c1\_seq1; 192 1 680 LEN=709; translated  
QPRRTTGGGRNERTGVYVTD DMVLSLVRATVRASRLRSRRKRATGDPPPTPEEEEREAL  
RKIPLDSALEILSRLKEDHGLPLAAYVNPLAAYQSLGYTAHSKEILETMLSNRTAGED  
DLPNVHDLCAKDKXELQPPGPG LGGEGGLGGGGLAGGNDGRRPLPQPAALQHV ERDLGA  
ADEAEGRRLQEEEEAGRL LDRQHPTARTMVQLAQEHKQCICLLES  
>comp3028\_c0\_seq1; 426 1 1382 LEN=1400; translated  
KAFGFCARNGLEM RVVXMITAAKGKAEISGLQOSSSLPMISIQLPETVDFDACEISFNV  
YYKHMPFR L DSIRAKQAFNDLAILGSSRARMKILRLVPIDSINASLLFGIPVGIKAAILL  
AEDEGEHREKVL MVQSL LKTLADRDCALLLR FVDDGGLCHDTVDP SGE GILDSSREVQHF  
FLMPDLVFSKEGPASPR TGVLHRVASADHILEETTASDI FMASNLESASTTQILENSFSE  
YVKASLDCLGCS PWNPLLQDVLQKNKISPNPAEIVKKNRIPKYNSDFRTTLLGRRQKS  
PIDQGCTAESAEVWMNEYGVGSLVRQKSLSEHSNEMKGAATWEDSKV SANVANVDGDATS  
TDISKGTGYVDENSTNADEEKI IYSFGTSGAGVKTNHAKHKSNAVK SVGSDL DSSDNTSV  
GISFDDSDGYSSSSTTSTCSSSATSGATTFGTFHYGRTR  
>comp3029\_c0\_seq1; 73 521 709 LEN=709; minus strand; translated  
MCSRRKARELFDQESVQAWERVWEGVWEVWVWERVWEKQRPVEGQRPVEGLVEGLV  
EQL  
>comp3030\_c0\_seq1; 130 1 978 LEN=1340; translated  
PKLKSMTSVALTHNITPEYGNRNSLVERNNGAAAAATMLPVVCGGLSGMLAKTATNPFE  
RIKVL SQTGDHLMKSSSIIDLYTGIIRNEGVI GLWAGNGANLVRIFPAKGILFSTNDVYQ  
EFFRKVAKTSKSEKLPLFYTFISGGVAGMTACALTYPLDFAQGRISGKLASHGNRKEYRG  
IIRTVLTTVKDEGLVALYKGVPTTGMALPYEGIKFGTVGFLEQCFPVEQTTPLRKMMFG  
GIGGVIAGLVTFPNDTVRRLQLQGSRGSKTNYCGFLDCIRQTYKSEGITRFYRGFTINI  
VRMPNAAVQFGSYEVLKNLTKNYF  
>comp3031\_c0\_seq1; 280 434 1477 LEN=1477; minus strand; translated

MSSSSPTKNFSNPAASFESQPHSPRSIFENSVV RTEEDAGVIAEDEVNCQTKSKSLV PKV  
IIPCGHDGYEKSRSSVGEKDIVLGRRYAVXNVEDALKTDWCMILTRNSLISFPLIFPPIV  
VDSDSVQNRSEDRFRFRIVNLYRDEYISSNSVERATIVSKVIALLEKDSYSFLRSGSLRT  
PFSNRNSSYPSSLCDGYGINEGDSNGGLESGMFMGQIRQMVSTSF SRLGRRRSRNDSS E  
FKDAIRQQQRQ MIDATLNRTPNTLKNPAPLATKDKVSYLKASTL GANQSIAPQQQDGPQD  
ELVPPLRASRAPAHSETKLAADKVQKVRPFSSAHESCLLQECQPKVPAX  
>comp3032\_c0\_seq1; 325 1 717 LEN=751; translated  
XAKEMVVTGNRPMRKAIEEHGKNLDDAYLAELVRYLGAPAPAASAPVAGATEDVEMGTG  
ADPKEEDAGARAPASSYQSALEAAFLYRYASTLQEQLLADAYHKHTCAWCLDPSSGASS  
AAEDLPRAAAPSSAPTAEAHVPPVVEAPVPDGGEEAAA AVAAA AVDVAVVAAVEDQGAFA  
TEXIARRTAREGIEKKSIEQEKQSETNVLDKXHPFLKRRKQPDGTIDSDNTSNNSHSG  
>comp3035\_c0\_seq1; 137 1 920 LEN=1431; translated  
IDQELGAIQHPQRILQNEKVCFCRDHFSYTAASPRSLAVALYMDSICGEKTRRRPTALPF  
GSVHARWGSRVGALLGEAVDGGELENVGEPLDPKLVAAA SEKLAWELTEDRRQKPIILNLS  
SRDASPEETQKKEDECENISEWDRGQRWKISLGYLSDLGVDV DATRAAHNGHEEILGAAM  
LENCPQLVRLKPEAIRDTAEWIATEFGLGYLKDSVLPQHSVLLSFRSSDASYGLEFMGLM  
MMGDAR PACSASP AFLVTAIEGGLQERTV GKALGAAGEATSKASRSIASDTMESFRQLRG  
ATRHHK  
>comp3036\_c0\_seq2; 141 203 322 LEN=980; translated  
MSELAAGKMKRYIMLQIQWFDANILTRLVSHNAGRIQTM  
>comp3037\_c0\_seq1; 375 1 931 LEN=1018; translated  
XGTTTTASGPSHSGDQLSWARDTLSEWGEASKSNSVIYTYAFVTF LTLAKTEDGGEGQDD  
SELVDRYHKNRGYQGSKLGLAGTALLLVLVGVAIVIQT VTPIAIVATMELPEGGACPNE  
ADGLTKFIGLTLCLYFVFLTISMCQNKLRAMGYLRLF CGHHDAGLGGRMGISCGVFLDA  
GILANMLSMGAAGAAQYLLFVRNANRDVLLLLLLQSLAMQFVLTADQKLMTGAWNALTKK  
QIEILLQKDTAGNKPGGAGGAEESGLGTEAIEID DARLSRILLMHKAETAFLMSVVLIGG  
GWSIALTYCM  
>comp3038\_c0\_seq1; 755 299 2575 LEN=2902; translated  
MSYHVRLPNRRALRKEDQHQRMRKENEALNPD LQWTFIGTKRVSNSESMDEEDD SGLHE  
NGDYVSVVQKDEAAFMYLPRLNEPLV TYSTRAPNYP IGYSCAHTLVHSSNGIKGIDSSPH  
DPMNLSHSEGEDGESMVLSETFVPIPLEFFIPASLSGDYDKIYSNVEALQWSILNEVAKRSG  
LAKGCKVNVQFDDRPLLTALTSLNELHSSATPETTLRHNSDQHTT LSVSSNARSSSQNQG  
KNQNGQRNRRRARTIGTNRRLSRLPYPM SVYSIESTRPQWTECSSEMIHSDESESQC  
FTAETILEVFRGTTGESNLIEEYIQSIVHNQIALDASQLFVEDIFGLK WSSVQEASSLT  
QPPSNSSQESNGPISFGPENVEDSSDSIGTTAKDKSNSL FASIIPIIATACIVFVWYCT  
RRYYNRDRKRARGARDHQEKSQAVVRGMKQSTDIEIGIVRTETTQSSH DQLSKSSSNSNG  
NPEDVISATASSDTISSSSSSTSLKSI SATSDFSDRSITGLPPRPNVVKREGSKQLKPR  
KKKRRKKKVMQLRINSRDNISEMPMISESESECDSESGGEDEDYSQDDDGSSYDASGG  
CLTPSRRSRTSSRASSASSVSSPPKSPRDDFFQPE SATGDQSSYEFVMEAPEFSEDLFAG  
LKTKNMFNINANN SNPHTSIE TPQSKMTVPETDKMDKH NQQTNI LD SVSIGDDIDNDNFE  
IETGAELDTSF TNEHGSVMERMMLPWL TGSGRNQRMK  
>comp3039\_c0\_seq1; 221 1 1103 LEN=1116; translated  
XSSSLSESQKGLVATTEPISP I RHAGEGASEGESSWEGASPDTPSSWSVHSGSNDSRDSS  
GSYTEDGSQGGPGPSYGEADGILRCLLDLRDRGVLYKGVKPIVSTIFTSQFVFFFLHAYA  
KRWLARVTNSGVSNSP SLSLSSCLAGVGNVLLTNPLWVTNMAIVSGTTETQNL FREV L  
RLSRDHGLGHLWKGTGASLLVSNPILQFVCYEQFKRKILEGRGKTGPGGKARTTLGAAE  
AFAVAALAKTIATVGTYP LQLAQTLRLADGDRSGERAARYEGTIDCLARLYRTNGAGCA  
AWFKGMRAKLLQTVLTA AFTFLTYEQILGAVRRVVE SHALRVRTSRRRVGTTGGSSGNG  
LDQLE  
>comp3044\_c0\_seq1; 718 89 1642 LEN=2177; translated  
MSPKVNDDDNDGTADDSPYISRIETS FQPM DVAFHPRDNLVAAALVDGSLEVHDFRKD  
EDIDPTDSDDEYESLSSLSLHAPS NYTERS P SKKTP TASCCKVAFSPDGRKLYTGGSPY  
GDMCAIDAERACFSLSNKNPLWRIQSATASTDSVVTNND EYNINKNKNKNPLVALYP  
FCKDGEAGTPLLATGDDNGGLR I WDERLCGSSGASFSSSRPKGCVLEWNEQQDYISGIE  
YYPHNSGKNHDGNNILLATSADGSLGVYDLRMNKGTVADTTRTSDHL DDELLSLCVLKS  
RKIVCGTQTGALSIFSWGTWGDISDRFP GHPSVETLLKVDENTILTGSSDGLIRVVQIH  
PDKLLGVLNDDIEGHEGYPEKIAFNSNRDVVGSVTHDNFVRLWDARILKDDDDHSDND  
SGGDDDDDDVEDSKKPAGVAKSTGSSQVYMSTSTRRADEKHNSDDEWEDMDDNKKSGSG  
SDDSDSDSDSEPEQETANDRRKRLKTENEKFFDDL  
>comp3044\_c0\_seq2; 691 214 2640 LEN=3175; translated

MSNRNVSQVKNRAPAPIQISAEQLLRESADRQEVVKVDPVVQIHDAEEYQSYLRDRRKHY  
EDNIRYRREHIGNWVKYAKLEEDHKEFERARSIYERALEVEPRSAELWLRQAQFEMRNEF  
LNHARNVLDRAVQLLPRTFDLWYKYVYMEELVRDIPKCRSVFERWMKWMPDDNAWMAYAR  
FETRCGSSGGLDRAEAVMRRYVNAVYSPKSFMKFAKWAEEYEAKNVDLARTIWEASLSEL  
EPEESKQARVFAFAAFEEERQGEYVRRARVIYKHAIVLLRLEELEKIKAEQSSRTMEQDDD  
IPDWELDQRKDLYKAYLTFEKKHGDRQGIERVLLTKQRREYNERVEKDPYDYDAWFEFAK  
LEEDSTLLDAGTDNHHHRAGDPAAVREYERAVAQVPPGNTGEKEHWKRYIYLWIYYATYE  
ELTNRDLERASEIYQTCLDHVIIPHKQFSFSKVWIYAAKLQIRRNLTAAARKLLGRAIGMC  
KGKERIFKEYIAIEMSLGEIDRCRTLYNNYLKAMPQNCCEAWSKYAELEKSLGESERCRAI  
LSLAISQPSLDMPEVLWKSFIIDFEIEEGEAGNARKLYERLLEKTSHVKVWISYAQFEAGE  
IGGMPKVRTILEKAYNELKEDGLKEERVLLLDLDSWRALEQQKGDADSLSAVEKRLPRRVK  
RKRMRKDGNDLWEEYFYDQFPDDDDQGASNLKILEMAAKWKRKHDDSDDDSDDDDDSD  
DVEDSKKPAGVAKSTGSSQVYMSTSTRRADEKHNSDDEWEDMDDNKKSGSGSDDDSDSDSD  
DSEPEQETANDRRKRLKTENEKFFDDL  
>comp3045\_c0\_seq1; 435 1 951 LEN=1137; translated  
DVDEDVDEDGLLVLDNPCSLEEEELDLDSFEQQQFPHTQLDIIQEGSAEESAEEASVRHDH  
RVVSEEEEFATAAGAVVEAEDSAAVWRTLYGLVRLLFVSTVVFHCGATVGFVDRVADHLGS  
IEGGPLVLEKAEAVVSDLRAAGTSLVSGTREVVSdTVEVTVQQRIGSIDDPLARLEEAFFPG  
LEATASHWLEEAASFYHRLEQAASDLAREAASFDIESFETAEEGPPPELFGGEDAPMSDLE  
VFHQVVEEALSDDEREAATATASSASARAPPEDA AVAPLQGGVVSEVVVPATAGPGVE  
RGSEEAIEVVAAGQE  
>comp3046\_c0\_seq1; 176 134 340 LEN=970; translated  
MPDDIAIEMTPAPGDVIDDVEDEISFEWTVATIAQSIALFLLAGVAEILGGWVWMSIRG  
NGKDEKKPW  
>comp3046\_c0\_seq2; 182 134 301 LEN=1070; translated  
MPDDIAIEMTPAPGDVIDDVEDEISFEWTVATIAQSIALFLLAGVAEILGGWVWV  
>comp3048\_c0\_seq1; 120 184 396 LEN=396; translated  
MSGELSAPTTNYKTNSFPPTPRIKKTQNWREAAEKSKKFRDETTTPAQKKVAIIGGGLS  
GLACAKYLSDA  
>comp3049\_c0\_seq1; 113 975 1091 LEN=1183; minus strand; translated  
MVEMGKKSRSRLYVMICHVVHAMEYDIKVSLSLHAEENQY  
>comp3050\_c0\_seq1; 328 30 1345 LEN=1493; translated  
MEGLPTEPPPETGKGDSGRREVARDGQEPSPQRKASKPAPPAPFWPLLALALEPLLSRWKER  
AVSWTEAFASGPRNDLIGILADRALEAAGHHLDPGEPVVRGLLERFLPGGLEPGGDKGGD  
NDKHKDKHKDRQRRERRESPAKQDLLQKFPFYQALDAVKYQRDSYLMGPDYANRKLQQQE  
QELRQHPKDPREPPEPPWREPQQLEHQPPPKRLLPLRFGGATAPGTTGGLPLPPLGGST  
GTSTAYPLLVDTGGRFLESRGARDRLLPIVVSPLSTEPPLGSAICSTVSNAIPLAAPPLDE  
AVKQAVLGMGDPFTRELIKSRTQQILRVDDDXALIFASARAGGSRRTRSGAKSRHENNE  
CLPLGVDDPSETDGRATGAIDANANIEERKRTKTPQRRGSAAWFFPDGIESNRDLSTRIDW  
NPSGIDPTEQRKNMVGNR  
>comp3053\_c0\_seq1; 474 117 958 LEN=958; translated  
MAGDQSPILFLQEDNRESEVRQDHILSASVFGHRALQSNKLSFGKFLIATLREENGKVFL  
CMKTVERAHS PKNLWEKVLLSRNYAKALAQIDEHLQYFPKALLHRNKQRLTKIHQYLLRM  
RKLKLEKELSGHKAKIVQAPTRKIKQREERREQKALVAAKITNKIEQELVDRLANGTYGDI  
YNFEQTSFNKALGQVESDEEEMETEDESEEEESIVEYVEDLDSDEEESMEEDMEDFEYLG  
DGQWGRAESDSDESDDYDDDDDDDAESEDGDSKSEKKENRX  
>comp3054\_c0\_seq1; 207 767 1024 LEN=1161; translated  
MANDGRGKPNTRNSQWFINTAKTQWLDGRNEIFGMVLDGVDVITAMEEKGTGGTPTARI  
AINDSGSLPLEREDAVPYLVVSQKLR  
>comp3054\_c0\_seq2; 299 185 895 LEN=1032; translated  
MLFLRSIEILLIGLLRIAPVWSEYDVPTTKAMPKMDPIPTLPLVTERVFFDILIDDEPI  
GRIIFGLFGDVAPKAIVENFSALCKCDRGKAPITGKDMCYKHSIHRVIPNFIIQGGDYTH  
GDGTGGESIFEGNTFEDESFAVKHNRKYM LSMANDGRGKPNTRNSQWFINTAKTQWLDGR  
NEIFGMVLDGVDVITAMEEKGTGGTPTARIAINDSGSLPLEREDAVPYLVVSQKLR  
>comp3057\_c0\_seq1; 405 166 750 LEN=839; translated  
MAEPTPEPTDAVAGDRSDRDVEDKYEYDNDEYDDDDFGDDEAPPALFRMSGVDTSLGDAF  
LEECLAVLLRGQEAAGERGSDEPKLTVTLMKDFDEKGTLLFLVSDEGGGAGGTAPPTT  
PCDVEGAIRDYLEASQPGDGEAHPWVGDPGAASIELVDWELDDAPGAGVDLAEGLISEEE  
AYRLLVDGQAGDGE  
>comp3059\_c0\_seq1; 210 402 989 LEN=1367; translated

MARDYVENPSPDWWSDEEFVFRGPVIGPLVKKDLVATLTANEDLRTAFPDLLQONAFGFTA  
DDPIEPNRVWYFVRPRGTFAGFPMPGTGKMIQPTNAPYIGPPECRSVIFNREGKIKYQS  
VGYVVDRFTGDTTGGRGAI FGQYAVMGQDIDANPGAVSTIFLQKLSEYLPQFPKSYSKRE  
DLPKWWTDERMGAEI

>comp3060\_c0\_seq1; 317 70 1749 LEN=1777; translated  
MTKRTKSQSPTRAPQHNGGNIAQPTRARSRSRSPSSGSRAAQSNQPQLKRGRRPGGSVQ  
PSTGNNKNENADRKAEEAEQADPAQGVQIRPKEIEIEAVREAWIRHRGTRNRTDIEAEAV  
RKARTHQHRGTGLEAEAXSESM DPASRNKRYAHFDDTQATKEYPSQNRKGLRRGFTARKL  
SRGISVGRREMSWCKLAQYIVPGLIIIAATVGAI FATGNGSIIITDTLGGLIPILDNSDIE  
DPFGNGNAPSWPSNGKGLEITIIINALNDDWQNTFAIAVANWNGDPSAVQITQEPGTYDP  
DCEAPEGKIIVCNGDYGETKWRGVTESLSGNDGKLVLATAKLN EYLLNMKGAWQYTM  
HELGH SIGLGHTDEVFGNEDLGDCMDYTDNLERNKQPTELNYDMLMSLYGPLGGQRQRRE  
RLQLRMLERNEQNF IPEAYTNSSGHHQDLSVQRLRKKVSFRNNIRIHDVSAEGSDDVNAH  
VFRTVPDDIKKEKDKAVQVLFDRVRNEDPDDYEIAAGYTHKDGWKL LHRKLYGEEHEMEL  
GMGYKVRIQLLLDHKQTIR

>comp3060\_c0\_seq2; 338 70 1872 LEN=1900; translated  
MTKRTKSQSPTRAPQHNGGNIAQPTRARSRSRSPSSGSRAAQSNQPQLKRGRRPGGSVQ  
PSTGNNKNENADRKAEEAEQADPAQGVQIRPKEIEIEAVREAWIRHRGTRNRTDIEAEAV  
RKARTHQHRGTGLEAEAXSESM DPASRNKRYAHFDDTQATKEYPSQNRKGLRRGFTARKL  
SRGISVGRREMSWCKLAQYIVPGLIIIAATVGAI FATGNGSIIITDTLGGLIPILDNSDIE  
DPFGNGNAPSWPSNGKGLEITIIINALNDDWQNTFAIAVANWNGDPSAVQITQEPGTYDP  
DCEAPEGKIIVCNGDYGETKWRGVTESLSGNDGKLVLATAKLN EYLLNMKGAWQYTM  
HELGMSFSFVSFSAVQLVVLKFDLTF TQPTLREFFCVFLTF TLAGHSIGLGHTDEVFGNE  
DLGDCMDYTDNLERNKQPTELNYDMLMSLYGPLGGQRQRRERLQLRMLERNEQNF IPEAY  
TNSSGHHQDLSVQRLRKKVSFRNNIRIHDVSAEGSDDVNAHVFRTVPDDIKKEKDKAVQV  
LFDRVRNEDPDDYEIAAGYTHKDGWKL LHRKLYGEEHEMELGMGYKVRIQLLLDHKQTIR

>comp3061\_c0\_seq1; 50 1 1107 LEN=1230; translated  
RLVLELTGEVVERAEPHIGLLHRGTEKLI EYKNYLQALPYFDRLDYVSM LCEHTYCLAV  
ENLVHCKVPKRAQYIRVLF AEITRVLNHL LAVGCHAMDVGAMTPMLWGF EEREKLMEFYE  
RVSGARMHAAYFRPGGVHTDLPKGLLTDIFIFKEQFRLRLLEIEEMLTENRIWKQLVDI  
GVVSL EQAQDWGFSGVMLRSGGLEWDLRKNQPYE IYDELEFD TLAGTNGDCYDRYLIRIF  
EMKQSLQIEEQCLDNIPLGP IKTSDNKVTPPSRFDIKQSMEAL IHHFKFYTS GVIIPANE  
TYIGTEAPKGEFGVYLVSN DTKPYRCKIKAPGFAHLQGLDMMSQGHMIADVVTI IGTQD  
IVFGEVDR

>comp3062\_c0\_seq1; 366 1 935 LEN=935; translated  
PQPQQPQSPTTEPRGSPTTPSIQAGAAATGTDPTDPGKT TAGPAAGTGAKEDAKEDAGA  
NAGTDANANANASVSP I STNSSRRTRSVEVDLEEPKRASVSRGKSARKPSAATKASPSKK  
KKASRSKKEDRTPARGRGAGKNAPGKRKDPGSSGGESTVTAETVDVAAVEDTDEEPASVG  
RTDAESARAGRAKRRKKKKKKKSKGSGASKKKKKKRVYSIVVEGDE DAYKSF DNRLREVE  
VFEEKLVRDKLL LQKEREAMAFELESMEIRMDEELGYSEELLRVKELEQLLRSQKISQA  
GHRVETEDKVRR

>comp3063\_c0\_seq1; 234 1 484 LEN=649; translated  
NDDDDNNNDGDPVQKNSEVPQRQEGLPGARNHP EMQEQMENQWREVERRER EAAANT  
RENILLRRQEEEARAP IRREVMAYRKMMEGMGKGEKLAPLDSKEAAQEYDDR LALGKTLE  
EQERKMRMNETL LRKMDMEDRKVNADEQSESMCARCCVIS

>comp3064\_c0\_seq1; 179 1 1009 LEN=1009; translated  
XNNNNNNNAFDAHRSIVLVHQYGSRMFGAGASWFLWDV SFYGNKLFQSTILEALV GKD  
AGVVGITEAALLNASVALAGYFCAALVIDRVERKRLQSAGFLGTGALFVACGR LVSALDD  
RGRSFSVVVVVLYLLSSFVGVGNCTTFLVPAEIVPTAQRTYCHGVCAAAGKAGALVAS  
VLFHALGSRGAGASLFYVSGAASLLAALVTQGFVPETHGLDLLDWTAGGAGSCASAGTSG  
EREPEGRRDPTKRAIAIWSASRGGPAATDRPSEMPTRVRTSGTGPGGQRERGFRCGGPPP  
GGSPSGTSGGPPQPQNKTKRNSVDAVVLIDTITAFX

>comp3065\_c0\_seq1; 521 1343 2230 LEN=2298; minus strand; translated  
MTIQGILLSSVLGSVA TTYPVGISNCGVRSWIEDAPKRAV TMNQGTTEVMLALGLADS  
MVGTA YLDDEIWP ELAADYARVPLSEGYPDIDTLMATDPDFLYASYKSAFQAKTEEDSK  
RIDYFQVVEDGCDLTLPETNATY CRAELHVEGIQTYLQTPYCELADHRPAEVDLKHLYEE  
IWDVALIFDAFEAQV LVSNI DDHFRRATNLVETHGSSDVQVFWLDGWD DTTPFVGS CCG  
SVNKII EYAGAQNIFSDLGIEEQKSWADANWTDVIERDPDVI VIVDASWDQAGA

>comp3066\_c0\_seq1; 566 256 1094 LEN=1094; translated  
MMEFSRNNLSDEEWM AKMSSSMNQSV DQEFRLRLKASSSAGSSGGAGSNAPSGMGT DGSS



SMMQQNQQRNLSQQNGGNTGNGGNDAAEEELLLQLLYQRRRRQQMKEGMGGGAGGAP  
GDDGRFGSGVDSSGASGNPTTHLMRSDEEQLKCLRDRQQATVVSRRNSLMSATGGGNDRRA  
TMINGFSDASGNLNGANPLGGNRSPNQTRGSGSISPFNASNGMVGGPGSSLDGVRSS  
MMGAMGNMGAPAGGMFGGMGGLGGIGAMGAMGGMGAMNGX  
>comp3066\_c0\_seq2; 492 201 1039 LEN=1039; translated  
MMEFSRNNLSDEEWMKMSSSMNQSVQDFLRLKASSSAGSSGGAGSNAPSGMGTGSS  
SMMQQNQQRNLSQQNGGNTGNGGNDAAEEELLLQLLYQRRRRQQMKEGMGGGAGGAP  
GDDGRFGSGVDSSGASGNPTTHLMRSDEEQLKCLRDRQQATVVSRRNSLMSATGGGNDRRA  
TMINGFSDASGNLNGANPLGGNRSPNQTRGSGSISPFNASNGMVGGPGSSLDGVRSS  
MMGAMGNMGAPAGGMFGGMGGLGGIGAMGAMGGMGAMNGX  
>comp3067\_c0\_seq1; 191 150 833 LEN=833; translated  
MFHRRGGGGFHHNKTVSCSAVKRNISSARKALVCPPTATPKNRAGRETNGSDVGKQK  
GEKGFLLFFQRHKQRNGSVNSVEETLTNNSSNGIRSIPASSPARTKSAMRSRWRSPRAQ  
QQQEEREQEPPLSEQLAAHRRRVTFATATTRVYVKNKDRRRTQQRTRRQAPSETTATEK  
NAKTKKNKRNLKSSSNGPRPTIEGLPPPFLHRNNSEGSKQKQQQX  
>comp3068\_c0\_seq1; 379 92 823 LEN=967; translated  
MVLVSVKNVQAALKYRGGWKGLFQAMYTNGDYPFKFGTYKGCDAAGNRYENKVDPYFGQ  
HRWVEPGDIHNFDSQVPPGWHGWLTSMYDATPEEDEEYIDELKKRIRPSAPSDAPYDHN  
IGYQNELFNFNHMQQQTQIRSRGYGIGNSIVGLPAFKPEAYYTQPGSPYNPAFQRKLEYE  
GDLDEATGGGRPYKNAMWKERLMTAEKKAMEPVDDAEFAAEATKLTPREEAILARGGTL  
PTK  
>comp3069\_c0\_seq1; 293 160 1083 LEN=1629; translated  
MTTVPAATQQSEEKNGNANDDVTSRDRRLCEEENEEALYQCPGCLIRTCCLKCCQAHKK  
RTKCSGKRPRGAYLPLCRMNDSTLRSYDFMEEVLDSSIPRARKISKLAEEGKSCMNRSMH  
GKSSNLQKSIASINKKAKRLVQQAQRGIVTVQVMPPILERHKNNTSWYCGPRDLIMWKVE  
VVLVPTTESTVFSNLSEKEESILDHIAKHITFHKNDPNMPTKLSQPQNYQLLIKRLPSAAN  
SPRYARIENKSLREVLEGFVVEHPTIYCVNEKMTDFPIGTKEI IERSCDTHSETVSD  
NYLPTSD  
>comp3069\_c0\_seq2; 293 160 1083 LEN=1453; translated  
MTTVPAATQQSEEKNGNANDDVTSRDRRLCEEENEEALYQCPGCLIRTCCLKCCQAHKK  
RTKCSGKRPRGAYLPLCRMNDSTLRSYDFMEEVLDSSIPRARKISKLAEEGKSCMNRSMH  
GKSSNLQKSIASINKKAKRLVQQAQRGIVTVQVMPPILERHKNNTSWYCGPRDLIMWKVE  
VVLVPTTESTVFSNLSEKEESILDHIAKHITFHKNDPNMPTKLSQPQNYQLLIKRLPSAAN  
SPRYARIENKSLREVLEGFVVEHPTIYCVNEKMTDFPIGTKEI IERSCDTHSETVSD  
NYLPTSD  
>comp3070\_c0\_seq1; 223 146 1084 LEN=1084; translated  
MALHESLTVLIQTSPISHPSTALLEALFRSFEKADGLLESRIVILADGCEALGHDGSSA  
TPTESGKQATENIKHGRCSRTAENYLRLHLELLERAVREGTPPFCPRAGGSIELVRLSR  
HGSAPAIEAAMARCVSTPLVMICQHDFVNEAPLRGVVAALLEEPRGLGIDANCVHFLS  
TATLNYREKIQRRYKLDIGEPKRVKALEPLVPLVFWYGRSHVAYS DYVRSHCLNRELAR  
GSHLEELLGEKQLHDIVEVGMEAHKKYGTVYLDQGFVLYHMSGRVRRAADPSDATENFG  
QKDSSEIENKQQQQ  
>comp3070\_c0\_seq2; 74 1 804 LEN=1282; minus strand; translated  
LLLLLVLDLDRGILLAKVLCGIARIGRPHSPRHVVQYLKPLVQNIRPVLVGLHPLYLDNVV  
QLLLSEQFFEVAAPPCEFPQAVRPNI IAVCNVGSVPVEDERDQGILQGFYPPGLSDVQFV  
PPLDLFPVIQRRRRQEMDAVCIDPEALGSSRAATTTPRSGASLTKKLSWCQIITSQVETH  
RAIAASMAGAXPVPRQLQPDQLDAAPGAGTKGRGSLPNGSLQQLQVPQVVLGRPRVAPAVL  
DVLGSLFAGFGRGRASPVVTRQLASVR  
>comp3071\_c0\_seq1; 413 83 1471 LEN=1717; translated  
MSFCGLANGIIADGFCAVELPLSVSRPRSVRVHGDSDIEFVLERETQSI VHLFDSGDGI  
PDSKAIVASASNLNHGLAIYDGYIYASSDSTVYRWPLYEGDIAGSVSMNYNAFPLVNEEV  
VVSININEDGMGGAPLGHKTRTLEFDKSGMLYISVGSNKNVDGDSYRSRIRRFNISDPSVT  
FPQDFQTMVEVFADGLRNEVGLAFDKHGILWGVENSADNLVREDLGGDIHEDNPAEELNRF  
RPEDAGKHGWYPYCWEYNLPAPTGIGRMVWAWPSFFEDGTITDEECRN DYIAPVVPMQ  
AHSAPLGITFFNWLPAQEVVSEACNGVKSFPPEMNGFAFIAYHGSWNRDVPTGYKVVYVQ  
MDESGDAIGEPIDLLAHSPPNAKWEDGFRPVDVAFDSCGRLIVTSDGTRGRGAKVIRIEY  
IGREINGSTEASNPDISSAAEFSSTQIYAFLLFAFLMVAICS  
>comp3072\_c0\_seq1; 186 172 606 LEN=694; translated  
MDHSLSDGSGDEDLPLSHPARIGFEGSKNDKNRGGWGESMELAHQREAGRRTAGAPETV  
VAVDLSQFRNTEVGRGYQARHVVRQRSAAIETTKTTTTVNDRVHLPRARDSERPVKQEPLD

KEDLLRNEGLRLFRKEIESILASP

>comp3073\_c0\_seq1; 233 1 999 LEN=999; translated  
LIRTIIDTLDI IHKMKVTSQPQLPTIRDQLPGRRLSFFYYYCSLFLFLSIASAPKTIVVVDA  
SPIVKHQERNSSNNNSQSPYRFEPYSGDQSWIFETINLPGAWKLGYTGRGVKIRINDEWES  
GHKEWKPKRLIKDNKNALDDYSCGATNNTLAEGKFRSDNKNKFLNHGAAVTSILAADGS  
NDFCGVGIAPETELSFYFRKTDASVLKYDAVDNMMFFYISVNAFAQEGCKPRTSMFGE  
AVNEQTIATGNGDRNRQRRRTKNRHGRQHRQQDQSDRILNEQEIGGCPFVNFYDEYNP  
GDDPCKVCTTSDFKSVRDSNNENARNNFGSLQD

>comp3074\_c0\_seq1; 191 373 847 LEN=847; translated  
MSSNSKNVLANIKTEPLPESPPPPLVLPKPLWNLAKGDNVWVTQGKTDHMTFVGDPRM  
VCIYDSDDDHNTSPGEPMQKKQRTDRGTQOLEVRIRWATTGNKGYVQASSVRPVVSGER  
RRRQLVSHYDAAPSKRPVYTRKSRGKTGGTTGSTSTSTX

>comp3075\_c0\_seq1; 161 1 409 LEN=1054; translated  
XSSSSSSSAMPTAQGRSSGRWVTKPSRLSRGSIQLSPRWKVRLLPKESGGGTVIYKGFIDA  
QKMIGRGGKSVSAEMTGVIITGEEVNKEKVIGRFTADDFVRQLDDEEVDALKIGGGGGKEI  
TATGSSNNGPITLSPK

>comp3076\_c0\_seq1; 278 1 887 LEN=947; translated  
XSSSPCYRARGDAANAFLLVGLGYAFLVLCFARPGSEGVDHKKAGFCIHNKEVPYR  
SSFDAclyLDVVL SAVLGAMYL SWSKLP GMEAPSKLVPSLVASTVGHGVAHGVMKELRE  
RIAGGMAEASAAADSNGGGESGPKPWQLAGFCVGFWFP LLGAALPGLRHGTLFLCAVAA  
TCGNVAVRKElafgyvqtvvnvafaasqlllppdqkneroyalplagvlpivvswaeal  
CCDSLVRSLGGHALYDASIIIVSVIVFYSESYLHCTAKRAAPKKTGDALGDKEKTR

>comp3077\_c0\_seq1; 205 1 289 LEN=702; translated  
XQHQQHQQQQQQHHLQQQQRSLNFNRRNANNFLPGRNSTFGTHEPILSSGLNAGEVN  
NWRNGNTDPNNSYAMGGNNINMGSNPFDTRHHHAN

>comp3078\_c0\_seq1; 389 1 1455 LEN=1668; translated  
APGKVLLAGGYLVLEAPNAGFVIAADKRFYTTVDAGSDKGDDHETKHLMRIRVESPOFHS  
TWNYYEYKSKCQLVPSPENQSVNPFVEKSLRVCLIIYLLQSSKSAGSAIPSSLNIIIRADN  
DFYSVLPPLPADSKKTPAEVAALPKFLPCVPDPTGKAI VHK TGLGSSAALTTSLVGLV  
HYFSRQSPDETDQLSPMIHNLAQICHCHAQKVGSGFDVSAACHGTHVYRRFPKCLLPDL  
LQLLDQFEKQPDGNEQHVLGETITKLVELVPWKEDMVTP IKLPNDLQLILADVRGGSE  
SPSMARTV LKWKAGNKSENDEVP HWSALSRLNPKIVESMQLLATDDTKNVNYS LAKAP  
SSEWSSDADSTLISLRDFTVQIRNELRSMGEAADVPIEPPPQELCDATSKLPGVVTALV  
PGAGGYDAVACLYINRPEVVKSIGELWSSWTSPPVVCPLAVRAGDEGLRVENESDFNEKKR  
KQIE

>comp3079\_c0\_seq1; 256 1 1460 LEN=1782; translated  
DATMRILD TMKTALLWLAIGRLGPSLAF LPPQAVPPATARSRAFVAEAE PGNSSDRERPR  
HPCAGQENPGTEAAAGLETWDRRGFLAGAAV LASSAAEGSSPARAVVTDETDFADNYW  
SKSPAQQGTTAPGTASEGAF AAPSDEVT VGVSGADLRSEGGIGLELGEVEFR TNRRVYV  
KSVSPGSPADRLGIKKDWIVVSVNGASAERTDVEGVA IMIYKAAREPGRSAKDTVDLRF  
NPVVFRNQLRDLSSSPGSTVVTQVAPEGDTTQRNPDG SVRQYGGPTDQADQLT VTQL  
VPPKICRRGATEDDLLEISYVGKVAETGAI FDGSAVRINGEG IAGRGNDVSIFFVLGKQP  
FGQFP PGWDAGLEGICVGERRRLLVPPV LAYGSKGLPRRGI PPDATLQYDVTLVSLNGLX  
DAAVAGGGGDGTHRKEGNGPQSNATQRKAVLVRVRVLADTGRYARTTHTRTGRNAFAPAS  
CNAAGW

>comp3080\_c0\_seq1; 370 1 1288 LEN=1332; translated  
XEAAGIVQKLAEACGDDFELHRYQRFS DLKVS KSLGKNPTKTGSYRNVQKGD CVVAFSR  
NDIFAIKREIESLTDHRCCVIYKLP PQT RADQARRFNDPDSGYDVLV ASDAIGMGLNLN  
IKRIVFNSIFKFNGEKIVRLGHSDVKQIAGRAGRNSPYPNGEVT CRDVRDLGYLRKCLS  
TEIEPLRKAALLPTESHIELFAEAVSAASAGEDPGDQ NATDPANHPDLHEILRQFSAMAT  
VRGDYFLGRQATEMAMI AKRLRNIP IRLRDAYAMCLSP TTESSARLLEM FATKVSQNEVFG  
LPSRSVPRKARSFDDL SYLCNIYSDVDL FMWLQYKFP PGN AVELATAMARKERTMEFIND  
ALSATERLRLDH CYLKTAQRHRSVWEQRSGGIGSTANTDES DSDGEDYDDD IVFAFDYSY  
DDNIRRRID

>comp3081\_c0\_seq1; 266 1 943 LEN=1015; translated  
XPGGDLRSEIFWLEDAAVEVARRHYEEVVEREEGVLP PNQRTGFRPPTVGFTHDTPDEF  
LLRRSEEIDRFREATAEVTIENQTRIVPAYFPWKARTYTN TSLDNIVGQWHSIQSVFKLM  
DYTARAKGFAYGRVGMFRSDALYVTP IDIARLGGTD RYDTTNRCFVTPSFALQP VNDRMV  
YGPYGA VKI WATKRFDLLED RASKQTD PGWILHHERFLNASVFPAMEAAGYEHSLE TNGI  
CSLRTRADRS AVLSDCCTDGLLP THRATFWNDPGEAAERARLA AVE SIVGRKCSLEDRGS

KWRFVAVCGEERPAY

>comp3084\_c0\_seq1; 138 398 1345 LEN=1364; translated  
MPPHVWIPKATAHAASRYASHRREALSLYREILRTARAFHWCDEEGRPWNERLRREARRE  
FEARHETDPLVLARLLVTGRDCVQQVQNKFNADRAAPGPDPPGFRGPGVMRSGGDRSV  
AFRFVAHNAPGPVSTVWHALVWWWFASFRVGVCRSRAHRWPGEDATQSPPRDAVSRTLGG  
VDGTARHGTAPDSXGSDGSGGPFGGGRAADPAPGKAFPDRAPERIPPEEAPGGLRFGGLHPW  
ALNNAERVAVPGGRAARSVGAALPPCTALWAVLVDHGPADTDGWTLTLDSEPKSRHTPFIFG  
GVPVVFVEVPYDKKK

>comp3085\_c0\_seq2; 135 1 980 LEN=1062; translated  
XFPEPIGAPGECHRIAAPVTCASCRFEAPRSLGLHGPVPPFAHRQRARTTAPPDAPARCP  
WRNAMFHAGRIAGRSRISPTVVKLDITVTTPLASFLPGQWVDLVAEGQPWVGGSFIASS  
PRDLPTLTLAVKRSGDPPAAWVHDADRSVAVGSPVRVVRVGGSVLTGPGPLRPSVFCAGGI  
GIAPVLSQYREFLFLRGAAAEGSPAAPAMLLYTASRAEELVFGGELADLSREGCTAGGGS  
DRVVFALTREPTGWGSERNGDSDSDRTFPPHVELRTGRVLKEFLDEGPADADYYLCPGS  
MIDEAVAHLRGVRSIPHEQIKYEKWW

>comp3086\_c0\_seq1; 135 1 273 LEN=711; translated  
SIPFHSIVTKVVRRLLLEAGVDATANDNAAIQIASENGHIEVVDSSLRAGADATANDNAA  
IRLASQNGHPKVVDLLRAHIDAVIDRKRKR

>comp3087\_c0\_seq1; 445 365 1391 LEN=1391; translated  
MGDNGGHRTKKRPLSAASEASEATGDNDSEPPPLYLEEGLFAVTKPLGWTSDQDVVGKI  
RFVLEKDARERGAAPDRRTKKRRPVMKVGHGGTLDPLATGVLVCGVSGTKDLQKYLVGSK  
QYRAEVTLYGQTTTLDADPKGEVVEEKSFDHVVSYDEIDAMLQSKFTGTIQQVPIFSAL  
KRDGKLYELGRKGQTAEEIKIEAREVVIHDLKLRPDRSGSDSDAASEPPRIEKFEIE  
VECGGGTYIRSLVRDIGIELGTVATMTALERTKQGRFLPEHCIPYQLLGDPEKQKQGS  
DEKTGTVFIDKKEDCNWTVETITEGIRVCRSNVLGSSDDDDDDX

>comp3090\_c0\_seq1; 271 1 542 LEN=542; translated  
QHQQHEHQHEHQHQREHEHKKFKHDNERHRSYMLYTQKAGLALFQONATPSFANHTKEHN  
GIIGNNTNTNTNNHTIDRSTNGGNEEDNNDWKEFFDSAESPLFGKHRELRIHKERLSSA  
SGSVDDATEAEGAEANTDTDTEPSVDSYPIIRLSEPDSSSTISTSLSEAVYDNSSSSSN  
X

>comp3091\_c0\_seq1; 271 236 658 LEN=863; translated  
MAADAYAEELSEEDEPADFSSTLAETTSFPAPPATDVAIKVAAPSEITANTE  
WKKVRLYQDEMGNSSTEPKPIQDTRKNWKYFTPVCGCYDIDETWSMLTTSTTTGPKKSP  
QGKIMWDFVFLNAGCDG

>comp3093\_c0\_seq1; 266 1 1001 LEN=1414; translated  
GAAVAPALIHGAMEFFAVAPDYLGPLAAPAGALPGTASPSFVELATLPDGSQIVAGGFSW  
XTPGLWAGVAPSVVTASFATGYVSSLGVGMAVGRFGWNALSDSLGRKNTYSLFGLGIPLV  
GLAPHLAHAHAETASVGGMESEQLVVPYLWAFYGGSVLAITFYGGIFALSALPAYIADLFGQ  
KHAGAIHGKLLTAWAASAVVGPMLGLYLRSRSDVNAVGDLLAIGNGGQEADEARKSVFE  
ETFGCGLDDTETIEKLIDAKTISIGRLMELVPEGTVDPTPFYDITTCYASAGFMGIALLA  
NLAIRPLEFVKIGARAREPNDENGPRQETESKS

>comp3094\_c0\_seq1; 211 328 1170 LEN=1516; translated  
MLTDYSKWRLEVVSSSDGSDGSEDDAHPAAPRVTRLEAPSRITFGGGSPTIAASPPAPGP  
RASPAAPLAPREAPAPEGTGAAGAPPGNASAPSAWTERGGLVFDAAAHGHRARNLYW  
SQDRYSVVLRLLELEGAEKVGSVTVGGILPYRDRCAAAGTARPVLSAGSRDGTVLLEGELP  
HPVHLDEDEEVVDWSVEAAPSEATGRYLCVALRKAVPMQGLSVWRRPLTEFPEADLGAI  
RGAELSKGGSDEFLLRAWEEAHKVFREGKPKRLPRNGPGGP

>comp3094\_c0\_seq2; 211 328 1170 LEN=2157; translated  
MLTDYSKWRLEVVSSSDGSDGSEDDAHPAAPRVTRLEAPSRITFGGGSPTIAASPPAPGP  
RASPAAPLAPREAPAPEGTGAAGAPPGNASAPSAWTERGGLVFDAAAHGHRARNLYW  
SQDRYSVVLRLLELEGAEKVGSVTVGGILPYRDRCAAAGTARPVLSAGSRDGTVLLEGELP  
HPVHLDEDEEVVDWSVEAAPSEATGRYLCVALRKAVPMQGLSVWRRPLTEFPEADLGAI  
RGAELSKGGSDEFLLRAWEEAHKVFREGKPKRLPRNGPGGP

>comp3095\_c0\_seq1; 151 458 553 LEN=553; translated  
MKDSEIEDDAALVDSFFSPGGLFADENNNNNN

>comp3096\_c0\_seq1; 110 56 1232 LEN=1647; translated  
MASRFLKRRFTTNLLGWPTDVTSDPNPASCHNATVHTIIVWIPGNPGQYDWNDFLEI  
LSALGHGYAIRSLSHAGHGLMVSIGENCGADHSSSTMDIEGHCHRCRADNEETNGPSPRI  
PWTVKGQVLHKIAFVDSLREITGGDRYSEHERKQTCRFTPNPRFIFIGHSFGCHI IQRM  
CVLRPDILERTTGFLFLMPYIRTKPLFVTEKKKLDVGGSYPEHLILVATKLSQLLKFPE

PIVRGLIRKGLQGDSSGNDDGGIDGESIANVTTKLLCNPLYPRNFFELGTEEIRDIPNEI  
DTTALRLLSSRLLLLPQNKTSMTGTSQRDVAQKRRIFILYAGDNDQWCPSFHGEEINALQ  
SVKVLPAASIERTKMSGLNMTTFAKIQRRDPG  
>comp3097\_c1\_seq1; 158 1 313 LEN=569; translated  
GGALRPAPPGLLPLDLQAHEEQAARGLARGEYRAIATTTYGDASFDNAFSENFSDDEEED  
GYEEDSSWSNSGNGRVLLEMSGLGKHKQGGHDDGLSLEEMNG  
>comp3098\_c0\_seq1; 187 672 1361 LEN=1361; minus strand; translated  
MKTIVFLILFASLSPPAFVESDPELPCPEVIGDEGHCAPACYCIPDDPGRCNACPGVGNR  
QFAYLSGSSEVFFAGLEVEEASVFRLLDPAGCNPFPAVASVLNQTLC SGVTTAGKGGTET  
KTKAVGDDGNGDIANGPVRCVFEYKRSKKGKSEGDRRRYSILEEPAPFKTTKKKSKKNPK  
AAKRDAVLTHVSGCVCSAQLAVNLSPTLDVDALSCTTKASELLADT  
>comp3099\_c0\_seq1; 407 1 963 LEN=1136; translated  
KEAGEGQGKEAVDSFVLDAEVVAYDHEKQQLVFPQVLSTRKKTVDEGETSKVQVIVQAFD  
LMYLNKGSLLGKTLKERRELLKTHFAPVEGRFQFAKYLDAREGDTTVLEQFLDAAVKGQ  
CEGLMVKTMVDIYEPSRRSLNWLKLLKDYLDGVGDSFDLVPLGAYYGRGKRTGVYGYLL  
ACYDPDTEEFQSVCKIGTGFSDDELQSLSKALGEHELEGGKSSQYVVSESLPEPDVWFDAV  
QVWEVKAADLSKSSSTHKGALGKLEEGRGIGLRFPRFERVRDDKRPDQATSSDQVLDMYYN  
QDSVKGQLGGDGYDDGYDGI  
>comp3100\_c0\_seq1; 450 1 1605 LEN=1765; translated  
AVSNQSLPAAGAGEETPWIVPDDYEEEEEEKPPPAPRPQKKPRPERKSIHVAMDLPKLLV  
EENAEAWDEESAPVFDLSKQPDRIRRHRYRNRLYQRLWKKRKLARLGKTKQAYKLNRYR  
VSAGGDGDDSDDDSDDDTDDDNHDDHDETTGGERSKDTIPKRRRTWLPRPIRGARSRLG  
DVHRI LAVVVMACKLVPNWDENHRYVFSRGGDKSHHNSGGKPSGITTAEENSKNHSARA  
MDRFVFPNRDHFYIGNGKTETDYLNFLEEFIFRGKSYALPKLVESLKEASSEGDGDANV  
PDVDDDKASSDRCLVEESDDEEPEDQNDRTCSDITVVVPNDTVVEWRSRRKENNTGCLVG  
SKRKFQCWTRPKVDSVPYRLTTVTDTKSLRSLDPLGSLIEYIAYKTETQPDILQLLIL  
LDKEMSVKYRRSMKKCDRVAPSQIYKFVMGRKKKKKSKVLAVDNECQGTPAKANLLTDDA  
NDDKTVDCSNHARLETISLLSPLQFNDVLAQESPEIGEGPMDDDVWSVGERACV  
>comp3102\_c0\_seq1; 152 1448 1654 LEN=1968; translated  
MGVIKAIVDSYPEAVLMRTNKGSSAKQCLSLTNAPNKAQMLQATFARVEQKYRPAQA  
PKSERVLV  
>comp3102\_c0\_seq2; 188 647 1324 LEN=1638; translated  
MITSEDWHKVVQLCQGSPSEAKKWTTTRQGFEGMKDANVLP IHEALVGGAPFQIIEALLN  
AYPDSVYCKESSYQRLPLHCACRKNAPPEVVDLLRRYADAALTPDSLGRPLPHYALSNG  
ASPAIVDCILTKRPNASRGFDKRGWTPHLVACGVGAKMGVIKAIVDSYPEAVLMRTNKG  
SAKQCLSLTNAPNKAQMLQATFARVEQKYRPAQAPKSERVLV  
>comp3103\_c0\_seq1; 982 59 2567 LEN=2567; translated  
MRYLSSRVLFYWISSLAFEKKSAAFVSPFFRRAAIQRAATAATTSGTRSSMVAATSASA  
SSSAFSSRSIPKEETRIIDLQGPADGRGVKIAVLDTGCDLAAAGLQETSTGLPKYL  
DFLDCTGDGIDITATATIPEVSNDDADGPIVIKKGSGRDLTLGAWAPPAGCTVRLGSI  
LYDVI PRSVKRRLVREKAEAFVDEHRLIAQTQOTLDDLQSKISGFTAGNGDDDDAKEK  
ADEKKQLIRQRKDAETLLGQYQAMMESYDDAGPYMDVVLFRDESDGDEYKAVIDLKADGN  
LTVSVPFSAFAKHRQMGEFGFGSSVTFCIQIYDGGNTLSIVTDAGSHGTHVAGIAAANFG  
EEDIKNGVAPGAQVLACKIGDGRGSAETGTGLIRALIAAKKYGCDLVNLSYGEPSWQPD  
SGRVSEVFADATKKWGITVFTSAGNDGPALSSLGSPGALSSCITVGAYVSSDMMVDQYST  
LPDGDGLRDASYFFSSRGPTPDGLLPDLCAPGGAI SPIPRHALQGKAQYHGTSMSSPNA  
CGVAACVLSAVKQRLGIDRVSPALRKLGLSNTAVPVDVADPFAQGYGLVSATTAVDYILE  
NRGKLAQDLTLDVSVPERNNARGLYIRDALELEGPMTFGVKVMPDFQHASTRTPDEMDEV  
LSMELDLNLVPSASVWKCPERM TLMSAIERNQQQFSIRLAVEDLPAGVHYATVDGIDSND  
EARGSLFRPLPVTVVKPHSAIVDATNPSASLNEHETITLGDNGIDYSMSYKLEAGAPNRRF  
LEVPSIAEWATIKIKSTDPNPSPTSPGRVLIHAVPFVVRGDI PNTEIQLKKLIQITEX  
>comp3104\_c0\_seq1; 532 1 1675 LEN=1844; translated  
XHTCPQPTSIGWNRSKKVI IANGSTASMERSENENMNDQSRPMEGAARAXETDYETKVED  
GPYLTVMARQSSIVSDLSSSTSDSKYSQNSFFMDTSNSEDKELKPARATTEENPRSLK  
EVFDRMNCLALQDSTLIEKQALKMSCVDEKADAPRELSTPGEVIVLGSQRQNVYP IVTNL  
GGRVKPHIVPTATKQEASRAGSYQTLFVSYDSGFSNSDAAATNAPKRIRIVDFFKCGQPR  
FDSAAKSTDGYRGPF SYLVP I I SPSKVVASTSPRFLSVSMSMDELSCSMNSIAVEGEGKM  
PEKGLGKTKMKQGMFQVPTAKESMFTKETTIEDMPFDLQSSTASTPKQGNKKGARNDSEK  
QDIVGEEDGVLENSAPIAASSLALQSVQSDDFIGANIEAIEVNETGTIVNEDINTCETPA  
EGHSPQLPFPKNVYLSHKIDAGQSEVQDETSLSSPMKDSYEENAKTVSKHFSLLTSFSTPK

LKRRLRALAGSRDKKENG FVSKKPKATDCDSPGANTTATILMDGSSFG EEDFSNSNGNQPFQLRPRPGGEQQSCFRLF

>comp3106\_c0\_seq1; 50 1 746 LEN=1468; minus strand; translated  
XGQYPGRVPEKNTPTETEVRAHLGEVLEASRRSDATTNGGVCFVSLQSELPPQDDYDSWK  
ASGGEIYLEGDARSEWPNPF SHYAPTVEWVRSR METDGDGDSAVEVQYLHHP I RDL SVPS  
NSKHLRLLLWKILEVLNRESDGSNSDSMVYIHCWGGRRAGLTACLLALLHFASEGGT  
DGGGNHDDNLSAIFDIVQTGYDSRLGSEHMPLALSRSPQ TDSQRA FVAGFYGEVRAAAAE  
AGKNGNAK

>comp3107\_c0\_seq1; 397 258 1348 LEN=1704; translated  
MEPRLSSAREACGAKDLRKASETTTTISLMLNSTSDPKSSQGNQKRTHPHS ISSAMEEIF  
DYKKNKSEGINAHNHK RANPKSRLQLLHDHNI IENVMFLDEIALFQLENTHMNMIGQLL  
FARQWY YLSICDEKNMGFAHKRWRSLNAEDITVALDETESPINLERGNVTNENDHGKNAM  
LPDSLSSRELLARKVGRFFAEAEI FVQEREK DASRIYDFDRMPVKDSEIPLSMAHSSATD  
IDSSLATSCSSSSQENFWNEWYDYRMNSVNDRYV FVRLSLRDGTGRFWHGFRRLTTEHNR  
TFFRMHFGMKELIQDMQWTELESYVQAQDTGYTSAXKSFEDRKIFDAYDAVDSIFGRKII  
DGDW

>comp3108\_c0\_seq1; 250 1 635 LEN=674; translated  
XFINDFYHHHYHLGTHSNHYQQHYHHHDEHERESTHQTSATEGFRPWFDRSGLSTGPSSS  
AFGGGAESP YHSHHHPPDGPAGLHQQAEDMPFAVEGIGNERSSPRKPQGSV SASASASL  
QASMGVAPRRRLAMFGGGSAGGQPGSPSSAPKAPTKTQARASSPGADPVVSLADQLSEF  
RSFGAGLSSVSGT PCGTAAAL TASVSGG

>comp3109\_c0\_seq1; 469 146 2098 LEN=2597; translated  
MSNILRRSVKHGIGRLTASADGIPKQA AKNPSSRRLTQVAHKAPTRLIPVKKTSVQKQG  
AAVCALSNYGAGMLQGD SAELSVHENS AKLALISQ GASRIYTRVPGEVK ARMYAKVEK  
DGVLVF TPDPCVMFASSYSQTQEF EIHPEASVALIDWFASGRFKNQERWDFDKLTRTT  
LKW MEDAENKNSAKEETNQIPFLQDSISIDLRLNSNSDKNNRSVHDTHGVADFNCFASL  
IIYGSEMEAVKDKCQVLADLFAAQHTRIRERDNGEGDTMLRSVKTIDDLKLSGRIVMGV  
SKISLPGKPSNAHVIRLAGETNEDLYRVFHECLIPLAPSF GFGFYKDRILAQRSEIPVQG  
VTNEKQKIFETPTKKHQTKAAKSYPSRKPLESFNDFSQTSRSFWSVVMLADSGLPTGSF  
AHSAGLEAATQLGMIRNEEDVCSFIHAATR SSIQLLTPFLVRGLRITQCETSNGSDKKT  
EDLWEKLHRQCHAIMVTNEPACSASIDQ GKSLIRVA AHWLN GANESHEPTLPNKYILDCL  
KSGSAPHIAPALGAI GLLGLDEVQVCRLFAYCMARDLVSSAVRLSLVGPLASVPMLDSV  
QEAAEDAICSAYHDFRSNPEDPLLVA SSSAPVIEAVHPSHEVLQVRLFRS

>comp3110\_c0\_seq1; 321 68 598 LEN=701; translated  
MTATPRYYP AEDLPASKPTYRVKQNP PRIRKSITPGTVLILLAGRFRGKR VVCLKALES  
LILVSGPYKINGVPLRRVNQAYVIATSSKVDVSGVDVSSINDEYFARSKDASTEGEEFF  
MGDAPKAAIVSDQRKEDQKKVDAALLKAVASVDMMEAYLAAQFTLNPNDKPHLMKF

>comp3112\_c0\_seq1; 286 82 972 LEN=1013; translated  
MAISSAESNFILDGCQDDCRADGRSRRDFRLYSSVVGDFALS YGSARIFLATKENHVLVS  
IKAEMAVPASSAPTEGAVEVHVDCVKGTNTQDDDESTISNLLVPHLV DKNRNCIAPGYF  
AWKLNIDL FVVNSGGGLIDACSQGIHAALQOTLLPRISVIPATQGGENKPTLQIDSDIK  
AAGKILGVGNAPIIVTVTVLKHKRTHLLIVDATTEEEICAF AKVHVVLDRGEPLSSSCRK  
RKPTICALHKAGGALPFEILQDVTSFVLEASGSSCAVESESLPHLLQDNFSIQQ

>comp3114\_c0\_seq1; 148 1 232 LEN=232; minus strand; translated  
XLLVVVVVVDLALDRIGSGGIEGYFCLEEFVAVDEVEEFSE DVDEGDEDGYSFWLSRSLD  
RLDRLDVGRWLLLLLLLLL

>comp3115\_c0\_seq1; 348 83 556 LEN=705; translated  
MARGRRGGMGARRPAARSPPPSRPASTKATPAPAPAASAPAPMQQSRGGGMLSGIGS  
TIAQGM AFGTGSAIAHQAVGAAVGAMSGGSSSGSDHAAAPAAQPQQAAPADNGVCSNDK  
QLFFDCLKSSNGDAQACSF LYEQLQNCQQQSATQTFY

>comp3115\_c0\_seq2; 372 57 799 LEN=948; translated  
MTRTSRLNRSEEPKPLGSSHETS VSGXILVTAHQVFL EETSRLRNDFVAASRLVLILSCF  
FVVDAVANTTAPCTR CGYGTNTCAAFHPFD PQRGRGGMGARRPAARSPPPSRPASTK  
ATPAPAPAASAPAPMQQSRGGGMLSGIGSTIAQGM AFGTGSAIAHQAVGAAVGAMSGGS  
SSGSDHAAAPAAQPQQAAPADNGVCSNDKQLFFDCLKSSNGDAQACSF LYEQLQNCQQQ  
SATQTFY

>comp3116\_c0\_seq1; 477 78 1607 LEN=1723; translated  
MGGGISKHGGDEAAVRAASAVGDQPGQPPQS QPPPQPPGSEPDAGDEPPASKCPMHKADG  
SGYSYDWKQLFRAAVHGP GSKPLSEKERA EATGATGGGSACPVVHDPAAAGGCPVRA  
PHPEYDVYSQPIDKTNNMPRGASVQLPNASQRIELSTERVSS TIPKGGADGSSAATWTYP

SPQQFYNALARKGKFDANGGESEVASEEDMASVVALHNNMNEKTWAKVVEWERQTYSEAS  
APKLLRFCGRPHDLSPKAALKHYLLGHPLPYDRHDWTVLRDDGSTVRYVIDYYYYDESRAG  
LTDDSAMPDLHRSATPSLLVDVRPALDGPGLSLLARGVRMPYRMATGQTGYEMLPLRGT  
ELADQVKESVEVWKS IQQTRARQEDEKARKEAAADDDGTAEGFDVSEDRAREIALGFARA  
LEDCSGVRERMANCSSEDECSRASMDLTLFCGKHLCSVQHKSLLGALKEKDGDDAKAEAL  
ETLTQCVMLKSAERRFAREQHPGLFEERE

>comp3117\_c0\_seq1; 267 1 940 LEN=1067; translated  
XSVPTIVAVQFAVQTTAMQLEMVTTSSLIDGPSTNSGRSVTLANSHPFSQSQPPSLRRLY  
ESMVRESSSTDYNELYEERTTLQREWTQFLESVDVGDHNLDPDIAPQTSSRDRNGRNEW  
PSPETPTAGLSASSCTLEEATQISLMTVVTTTTAEDAHLVCSDESSGHCSACQARSQTKT  
DPRCAAAGTQLDLEPEDTEEAMVTFRCLNEQVDXIAWDPGVIVADGGRLLPNNNNNNKLT  
PSTTDRSSNTKRF SVETASFGSFHGLSMVGGPPVTTQQRSDVQMPLGDTVRRCLYTSDDD  
PSPFEKII VFALD

>comp3118\_c0\_seq1; 177 1 439 LEN=1134; translated  
XAMESMQWKDATIRTEENDVFEDPGTSHPGQAPGCVETKPPPHCRFLFRLAAVSAGASSV  
LAACVCLEPNSTARADRNHGWFALTAAKQPTRTLQSAAFPVGNKCSSTLVQTF SVGGLPT  
GDPWLPSLDPWLFSLGPGPKPSQV

>comp3119\_c0\_seq1; 405 58 1229 LEN=1229; translated  
MADLYNLLDELEENEAFDDDAKRDPRRLTVETAATDGLSDDDDDDNDYEEFDAPT  
PRVPA ALLDRDEDEDESGDPFYPAPKPRADAFSKAGLDLHDDLDETHKQEQHGVPNELYEK  
LHRHW LQERHCPELLGYDEAMVGE LRRERFEDRQQADDLVDSQDPVEVLMANLAQQDL  
DRARFVL SDWLTHRLHKIESHPLHMREKIERMSQNEIDYLAAYGAMVHHHLEQAVTRS  
IPHAWNQLD DPGMIDQPDYEGYHFWLVREAIVDRDENEHEPGSCLVAKYLD MKENMN  
XEQGGTARLRAG GQRAIGRATTKGTGRSVRFLSMEGAVRCVWSFRTRVRAMVCSAWL  
VRHARAAMFGEPEH ATAGGATDGSFGLLGRGESNR CALGGWRV

>comp3121\_c0\_seq1; 489 474 1847 LEN=2037; translated  
MTKPSSLCVLLILSATCSSVWARSRFSPPGSIAVLQQQRRRMQTNGDDNDGIPSPG  
SALV FDPPILTTSYVGGDCTGGGGPDTIFPGQLASIKNTAYGEFCIGDLVDGQIEY  
SLLDEITC TPWGI FERY SACTDETCNCTPEAISYFQLEEILNEPNGYCYDLTYSR  
NPTS FDSDELFR VGYMFDDNADMSAASDYWSLIGLNSCISTMVVEEAIDDDAALAD  
DKLVNRSVSYNMYCFL LRS LQHGN DVYWR RAXNELLWYNTNISFEGMVL SFLIEI  
ILTACDRLCATSCHFCPSLWPP LTYLLMYRTADLICNTAGYTVLCDLFTKWAPEV  
YEAAS TDY YTLFAPS DVAF EKISG PLT DGSL SDEEIGAIFFYHATEGFVMMKDL  
VCGEKIE MAMAGNSR TKCTDGGATMFQMG GGNR SNNLFPVIDDADIMACNGI  
IHLVSEVMLPNFVPEGFV

>comp3121\_c0\_seq2; 513 474 1613 LEN=1803; translated  
MTKPSSLCVLLILSATCSSVWARSRFSPPGSIAVLQQQRRRMQTNGDDNDGIPSPG  
SALV FDPPILTTSYVGGDCTGGGGPDTIFPGQLASIKNTAYGEFCIGDLVDGQIEY  
SLLDEITC TPWGI FERY SACTDETCNCTPEAISYFQLEEILNEPNGYCYDLTYSR  
NPTS FDSDELFR VGYMFDDNADMSAASDYWSLIGLNSCISTMVVEEAIDDDAALAD  
DITCQSI PDLICNTAG YTVLCDLFTKWAPEVYEAAS TDY YTLFAPS DVAF EKISG  
PLTDGSL SDEEIGAIFFYHAT EGFVMMKDLVCGEKIE MAMAGNSR TKCTDGGAT  
MFQMG GGNR SNNLFPVIDDADIMACNGI IHLVSEVMLPNFVPEGFV

>comp3123\_c0\_seq1; 950 1 2272 LEN=2363; translated  
XFPPCVCGCCLHLHRARFYRTHHRATFVFTFTRYDGP TVKTDGAEGTADGKHA  
AIENEGG GREEKDAVDSTTDRSLTTETRLQDGLEAVDGDSSHPTIAGASILSKNH  
SLLTTTESTAQK PPIKIAEEGADPVI EDVQSTGAEQE QDKEQGDVSSSKRESQ  
SMEARSEETTEDDPTNRL QTSTNQDDQTDLPDEVTGDKSTPDPDIEDASTNNS  
IDIDIDIDITAGETKKADLEATN PEALDEVKAQRPI NDGEIGTPKDGEDDGADSV  
LESTKKEGAATSAATEDV LIDAENSSE VETDQETS PETKDATGNGAETVFP  
IKDNLEDKPKDKEKEHEGVNDNVFEGSEITATPGDA RNIHNNDLPIQNLQSD  
SKNPDDGKPPDAARDEVTE SLGDDAGDDADY SKSKTVSSGGPNQ HNVSSK  
TATDQSDLEETIENSKDKTTAGMNGIEDAQSGTIDIDEKNTESHTDNVMDEEL  
LSWMTTSTETNIDDQLGNAGSPPGKSDGDKVSVIDEELMSWMTTPNQDKVEDK  
SASVPV TPFSGSNGDKSSAVDDEQLMSWMTTPNQEKEIEDDDADRNGGNLLGEQ  
IVSALDTAEID VVGAEGDEVIAPETLADIMLENIEKDAIKTNKVGRSLFGAN  
SLYSIGGETSISNTELEPP DDAFTDILLRDIANSKHLEAEDDSVEQTIGEEMV  
LVADSILNILLPDGEGEPEAIPEDAP SESTGSAEKGDNGSDGPSTSHRFELK  
PDGSGGSGLFY

>comp3125\_c0\_seq1; 213 120 939 LEN=1003; minus strand; translated  
MATASGRNLAVGGDSAEPAGACHLLRLLRVTNGGSRKPAKARRKRGNF TAGEHRP  
GRRD RQAKTRARNPTIVGWKINAEAA SNVRRMERFDIESNRLV PPHAGPHSRQ  
SSTFNNSLHS LWKELSVYAVSMLC IFSTNGAXDFRGLAAGTSLPEKGS  
GAADRPAAGPGXTKEDSADRWQ

AAAGDGNTRVACKVRGPFVWVGCRVAAWRRSMAVCCLGLFRWRSVAFVRLLESRS DPRGT  
RPN SGVVGWCSEKWIGAESSHRGISLISWIAVT  
>comp3126\_c0\_seq1; 303 122 1033 LEN=1174; translated  
MIADENKEVLEKALGKLLGFEEGEAEDLLDHLFSIESEEDLSEYLAQLLGGNTPEVSHFV  
DSVSRHRKGECLSSRDGGDDKKEAPSKPPAGEDTAALDSFRMMALGKNTVETPKRGTNSG  
RKKEAKSRVPPPKKYSKGQTQEPAKTTTTSVAQTSIRSKPQSYNTQPEEKKEEETT VVKK  
FHP SRGKAKVVC GFCFGSKHKALTNCLYCGRICCEAEGYGF CFCGFMIEAPVAGGSGKAF  
QOKERLLRFDRDFARRTEVFDDQADYQGPATWMTEEEQKEAEANEQKHLET LKRPKQKLS  
LVL  
>comp3126\_c0\_seq2; 226 122 803 LEN=1367; translated  
MIADENKEVLEKALGKLLGFEEGEAEDLLDHLFSIESEEDLSEYLAQLLGGNTPEVSHFV  
DSVSRHRKGECLSSRDGGDDKKEAPSKPPAGEDTAALDSFRMMALGKNTVETPKRGTNSG  
RKKEAKSRVPPPKKYSKGQTQEPAKTTTTSVAQTSIRSKPQSYNTQPEEKKEEETT VVKK  
FHP SRGKAKVVC GFCFGSKHKALQIAFTA AEYVAKPKGM AFVRFADL  
>comp3130\_c0\_seq1; 476 127 1086 LEN=1228; translated  
MIRFTPALLSLALMMAMMGPLVKAFVLVLPKIGNSHQHCFQELSLSLSLASDAGSELEMG  
MTP ELKRVTD AFASIEQE QVRYKQLLYMAQTTEQVNNMP ESSKI QENKVP GCLSTVFVDG  
EAVYDDEIGDYVIN FQGDSDGLMTKGLVALLVRCLSGNTAEAIQKVDPQFIKIARIDQSL  
TPGRNNGFLNMLQTMKNKATSLDEAVRTSGASPDGDGAGEDGAAAVVDGDEANGSSTNH  
AAILAALGALKPSSLT VTDNSPDGEADTRFVVEIVAPAFEG LNVIKRQQLIFMILADVMP  
EIQDLRIASMFTPEEAENQ  
>comp3132\_c0\_seq1; 429 112 1449 LEN=1535; translated  
MEVNKEQAEKCKTIGANALKQGQYDRAIKFFKSLHLYPLPGVDTLLETAERMARGESS  
NNYNSGSNANSYSQRSSTNGASYSASSSTARPAPAPAPAPSSAPAPAPASNGRSYTPQM  
ETVERIMKAKEGGRGAHYRVLGITQ NATENEIKKAYRKTAIKVHPDKNSAPQADEAFKAV  
GLAYATLSDPQKRTIYDRYGEEDPDNRGGGMGMRGPGGMHFRPGQEVN PEDIFNMFFG  
GGMGMHRGPGGVH FSTNFGMPGGFRQQRRQAGGQRQPEPEAPGLANLIQ LLLPFLVIM  
MLSFFNQSNDYAASGGSNSGKSRSPGLNKYFTLHQEVPF INPLHTKLT KVKDIPYFVDDK  
FMRTL YRDRYQLAQVERMVQTAYENYLVDACNDQRRHKKNL LKEAETKATEEEME IARRT  
AERFELFRCELNNFFPLRNTGRRY  
>comp3132\_c0\_seq2; 367 112 1161 LEN=1748; translated  
MEVNKEQAEKCKTIGANALKQGQYDRAIKFFKSLHLYPLPGVDTLLETAERMARGESS  
NNYNSGSNANSYSQRSSTNGASYSASSSTARPAPAPAPAPSSAPAPAPASNGRSYTPQM  
ETVERIMKAKEGGRGAHYRVLGITQ NATENEIKKAYRKTAIKVHPDKNSAPQADEAFKAV  
GLAYATLSDPQKRTIYDRYGEEDPDNRGGGMGMRGPGGMHFRPGQEVN PEDIFNMFFG  
GGMGMHRGPGGVH FSTNFGMPGGFRQQRRQAGGQRQPEPEAPGLANLIQ LLLPFLVIM  
MLSFFNQSNDYAASGGSNSGKSRSPGLNKYFTLHVSGWSVLMFRGLFHC  
>comp3133\_c0\_seq1; 262 1 938 LEN=1385; translated  
XGPQAKSLAVALTARESLVENGFGGANWPGGT VTKGDLIAVIATYRAWKKHRSDQKRRSFC  
YQH ALDHATLRDM DRLRGQFRELLADAGFVAGSSSRGASGEEQEENRSNAASEDALLTSC  
CLVAGLYPNVCSLMRPRRGPRGGGRLLTNDGDECRPQSSSFQRRVRQASETGRDAYAV  
YHSKHSRIGTSSGTAKERPPEVFLTEVNFVSRFALLLFGDLEIAGNAIVVDGWLKFKVG  
DEKEEGKASSKSGRDTT DNAVLL LALREKLD RMVLEHV VSESGACGPDERAAMEERHSV  
VAVVRKLLAEEG  
>comp3134\_c0\_seq1; -16 526 985 LEN=1042; minus strand; translated  
MPSPFPESGPPRTICXTSASTSTSVASDSQLPPPPGEPASGPKSDTGRLRRSYSSASNQS  
KTSSSSSVM PDXEALHAVLVAGVLDGGKDPARHRVPGVSPGEIGRPVFDGRDPSDQGA  
EDLRGHERPIDEA AVTGGDGKQHSVAGGLCIVR  
>comp3136\_c0\_seq1; 333 1 1557 LEN=1909; minus strand; translated  
GDDRDEMPDDYYDEDDQFYDEQDEEDRRKRARLRRRAWICCFVMLCCLLLAI IAFVIFL  
ITRSK DRAPEPTPMPTMEPWVPDTDDDYMYDDDI ILNPGVVTAPMAPFN RDCEESEGIEY  
SGEFRNIMDQACLGEIVDVPDDVAEMRNLI IERVAPK FYGPNFTI PLNSCDPANMAATW  
LATGDNRDGGEARQRFAMALNFYQLNGTVWDFMDGWL GPFNECLWMGIQCNNKGI VNSLA  
LDANNLFGPV RITESTVQSDAMLELVISFFKSLQDALYSSHPADTNFYFVTIVGLNNRQI  
ICVLF PTEIAKLTGLASIAITRTHLTGTI PTELF SMPK LKELRLYANRMTGSIPPEIVKA  
TKLESRLLETNFFHGELISEIGAVSTLTDLNIGFNDVQTIPT EIGKLNKLYLRVSNNA  
LSGR LPSEIGRIDALEVLAMTNNLFFGSI PSYFGLLWNL RDFRITGSGVGGFLPTELALL  
SNLERLDIAISNFHGTLMT ELGQLTNLCKSLLEIRMRW  
>comp3137\_c0\_seq1; 297 1 1157 LEN=1314; translated  
NENDNDNDNHENQNDVDYDCDSSEHHQRGAIEASASSRSPPGSPSQLHKTIE NEFG RYS

TDSNDTPVTCNKSLVVLPTPPSPHGNGGDGEFLGNSNGSLSGSGTAAHAGDPNGLFGKPPK  
TILHRSLSLGDALSPTEDDDGSPIRWHRPSGGVEEHKDDVANHPGRPSARQQQIELLQLP  
VMEEGPRQGLPAGFVGESGPGGQGSGLHTNAPAHHGLAATRIRDENDDVSAALTSSTVSSF  
VFXEGEPAERDHVVSPPAAAPAGGKGRPGSRPPRVFLEDQALCHRKVVPVPAKAPTPAH  
AAGAGGCRHGGRGLVPPREAAAALSVHPRPAPGRPAKNDGGEPAFSGGGDQPGGEPSIT  
ADSPPSRLFLSHARWYLVAKLVAA  
>comp3138\_c0\_seq1; 660 323 1936 LEN=2071; translated  
MNDPGPAPDGNIGNDTAVFTGVPTTPEDLYGIMLFFLALVLMGDCVCQRLKIVPSLVGY  
ILVGIAFGPEGFGVLGSNTEETLAVLGNLGLVLLIAQAGLEMDYATLRLVGLRGVAVAVV  
GTILPVSIGTAVASRYLGSWRSALSAGCSFGPTSAGIAMNVLGQCTVRPARSGGGLSSPG  
GGSNEDGGSDNGDTSGLSVLRPLVQGLIVAAIVDDILALVVLSQLQALTTTTTTDAAG  
SDGGTNNNIAMDIALPIASAVLWLVVGGGIALWVFPVRLSTIFDRVAKGRPSVEGARESG  
GLSLGVLFGLLYTLLPATYLTGASHLLGAFSLGAFRCRDPDTPGASLFRSRFGRLVEWLMK  
LFFAASIGFQVPVRSFGDTEVVSRCFFSLALLGKLAVALMTPTNLDPSGERTSSSDSND  
GNDDNGHPDTASPNARSFCRKGHARDCFVVGFSMMGEAEFAFVAVFVTEGLVPPDIYA  
SIVFAILLSTVISPLLLKTTLAFPPYDYDYEQHDSQSVQREDSEPAIKGAKAAIEAE  
>comp3140\_c0\_seq1; 367 1 1133 LEN=1183; translated  
SSRDSIHVHMKTLRIITASTRSKIPSSLSPPSPASFPFGRRRSTRFFSLYTAATSL  
LLFPSSLGVTALANSNSNQQRAMSCRKTHVTDRDGSMTITVSPRNEAEQSGLLVISHG  
LGDTAEGFADVAEQFASEMPWLKIVLPTAPTQKVTMNMGMAMPSPWYDIVGLDERSNENCH  
GIDESRARIAGILQKEHDATGLPYSRMVLGAFSQQGALSFLTGLQLESSLAGILVMSGYL  
PAASKLKLSTQDTPVWHGHSADPLVQYQMAEKTKSILTERGVKNYSLNSYPIPHTVSPS  
ELGDALAFKTVLPFDESIVKVTLKDPKMSVKELKAAIRKAGLSAVGLMEKSEFIKMOVQD  
HRDGKLTSTNFDTFTTV  
>comp3140\_c0\_seq2; 170 259 741 LEN=823; translated  
MVLGAFSQQGALSFLTGLQLESSLAGILVMSGYLPAAASKLKLSTQDTPVWHGHSADPLV  
QYQMAEKTKSILTERGVKNYSLNSYPIPHTVSPSELGDALAFKTVLPFDESIVKVTLKDP  
KMSVKELKAAIRKAGLSAVGLMEKSEFIKMOVQDHRDGKLTSTNFDTFTTV  
>comp3141\_c0\_seq1; 319 134 1195 LEN=1241; translated  
MKLLQRIRALDASRRLDVMNKYIPAVLVENQKDFGESSSGVCVDNTIIIGHIHSIDLIDLM  
RINLDEGRDDNSFCDSFLFPPLDDASTSSLTKRFFGLRVNEIPQGESPIARTDARNAIL  
EQFTSLLLECKVISKHTDMYPVKDLRNDCEGEILAEINRSAAPFLGISSVGVHLLCYVR  
GDGTSRDDDVTCLWLAQRAANKSHNALRWDPTVAGGQPASLSLFDNLVKEAGEEAGIDPC  
VVARNAVSTGCLSQMTCKPNGACMKPSLYTWDQVGSNFPVHPADGEVAKFQLFSAKEL  
EHEVRNGDRLRPAMILVVTFDLIRHGVITPDNEPDYAQILAAMHRERLILDYQ  
>comp3142\_c1\_seq1; 206 560 1093 LEN=1143; translated  
MKTGLFLASLCSLNASTSAWTPASSTSTSSRRGFLDQAAKIVPLVVVAAPAFADDEEVAAV  
APEAAAAVEAEPETPADPAPATDENEFARLKAQSEANKDKYLAQSRMNDKLSKRQFNSQ  
YDRPSYVGVHTADNSSVKMLLKADFEQMLKEGKIEQKYESKVVKKTGEISDDFSKPIW  
>comp3143\_c0\_seq1; 283 126 853 LEN=1811; translated  
MTASGSGKSLLFVTNKMCPFAQKXELKRYNHPCSFPYHWIRLGSNDTNRNTYIHSFLK  
AWIALEAAKVPFKFEEISLYGGGGKQWFRKLNPKGTVPVLVNDGGRKGTENAIVLADS  
DLILDDEMKLVDVSVGESSASPLTIAPVDDAVRTKIDAFRSSLTEFLPIGKSAVLGGDKER  
MWTKLRELDTLIDTANEGQPCFLAGTDKPSVADCAGFPFLWRIDDEFGAGSWESHGCSNI  
PVW  
>comp3143\_c0\_seq2; 313 126 743 LEN=1701; translated  
MTASGSGKSLLFVTNKMCPFAQKAWIALEAAKVPFKFEEISLYGGGGKQWFRKLNPKGT  
VPVLVNDGGRKGTENAIVLADSDLILDDEMKLVDVSVGESSASPLTIAPVDDAVRTKIDA  
FRSSLTEFLPIGKSAVLGGDKERMWTKLRELDTLIDTANEGQPCFLAGTDKPSVADCAGF  
PFLWRIDDEFGAGSWESHGCSNIPVW  
>comp3145\_c0\_seq1; 230 982 1485 LEN=1509; minus strand; translated  
MPTSSRMIDSTIEDQSMGGGSSSSTNNSKCPDTPKHNEPQQKGTGKLSNITETSAHISGG  
PSVNDADTSSKVKEEPLNEVSNTLESEKLGNDHDFSGDTSLQEGDSSKVAATRSSPSRA  
PVISRNYLFSPLVSLLSVSYKIERNTMKMTPWVSRSLSTKPYIFPCE  
>comp3146\_c0\_seq1; 309 136 1284 LEN=1323; translated  
MATSHPTRKPRNRWVYAIAGFAGIAVVDVAVSSQQRGVMGKPGDGGFSKAAETGAHS  
TRITVSRHGGRTNQHAPALQSTAQAKETPFFAEFKEPSVARPSATASATPKASSPPASA  
MFRGPDPAKPDYANIHGPLGKAVDDVFLWIFRTRLAEFVGVDSLPLKTDYDGLIELTA  
ALNARYSDREEIQTIAQKTLRSLFSPWLPQGFALFARPFPEFSSRMNAWATYMAGTWLM  
GECEINDIEIDGTTYKDQGLLVKRCRFLEESGCASVCVNSCKIPTQNFFAEDMGLPLTMT



PDYETHECQFAFGRAPDERDEFDAKNTPCLSRCPTAGSMRSWHSGGNVASVEGPTSFDAT  
AGTAGGEPGGKCAF MENAPSER  
>comp3147\_c0\_seq1; 402 1 1272 LEN=1319; translated  
VIVTTSMATMGK FALLSRVQYATRGAQAQNRVCCA EKASILATQILGRQRKHFTSSTTTT  
MEKETTTTEVKDRHLTLLEVEAICSKALSSSGLNPDATAAITEVVTV AERDGC HSHGLFRV  
PGYCQALLSGKVDG SVKPKVHDVAPGVVRVDAGGGYAPPAILAGRDLAIQKVRKNGISCL  
AIHNSVHFAALWWEVEALANEGLVSLAFVNSRSFVAHHPGGKRKLYGTNPMAFGFPRPIG  
TSSENEARGPLVWDQASAAMARGEIQLCERDGH TLSEGVAIDRHGQPTTSPEAALDGAQL  
PFGGHKGLSIAMMVELMAAGMTGSQFSFEAHDNDDDPENSNGPTNHGELIILIDPVVTS  
GNDYLQHCEMLFERILEEEGTRLPSTRRYANRLKTPSEGISIPLELYEKIISLGLLEDGGP  
TPK  
>comp3148\_c0\_seq1; 204 83 1027 LEN=1340; translated  
MLARGDMELCAANSSRLTAVYHRTILGITEDFRHEVAWCVSQKILDRLWDEDGATSAGE  
CEKASQNARPAFINASAENSPVRILLCCQCGFRLHPGWGGTTLRIQRPKIPCSSSAKKT  
LRRREQRRRRKATRAEESRSKDHNRRLAVAPSSTVESTGLEIGVILRDDSSISRLDRN  
HLVLTGCNQC HKTYL KGLRRELENAHAGFAKSALQSSVATQSQKGP GKAPAAACVRPHDL  
GQSFELV PKLERNPSACIASASKTSRISANATSSTLSLLEQKGGRRKKRKKSGSNPTNQK  
SGNLLSFLSSLNDH  
>comp3149\_c0\_seq1; 344 1 788 LEN=1078; translated  
XSSSSSSLN VFNPF AKKEAAPAVVEVREEPVPGPLETQNYVAGAVWITLIAFAFGAAPG  
ELNSAADQEMVTTLV TQPSRPEQINELWF AIWNCFAVVPALLAAL EAPVGRGQRLPAAP  
FLWGSAAF GYFSLG PYFATRMRTEPADTEDLGWASRNIFENR LFGVALSALALSIPFSS  
DLLGCDVSATIGGFIELASTSRFVSVASADIVIMSLLA AVLVS EDAKRRGWEDRSVPLLA  
ASILLPVITPCLYLAARPSLEE  
>comp3150\_c0\_seq1; 237 1 1169 LEN=1277; translated  
XHRHRHRPGAGIGSTALV LPLLLLPLLP LLLALAPHR SVSAFAFRQPAVPF SASPAAAG  
RQGS LPRGTALRLASEPNSSGDSSSGDGK HGPPLFRFR RATPADVAPCFEIESASYPPDE  
AASLRALADRQSLAGDYFLVCTEETTGAVAGFVCATRCHAFTEASMSEPHDPAGRLLAVH  
SVVVREDHRRKGLATEMLGRYFEGIASSE DGADASEQPP IESVVCIAKEHLLG FVYRCGF  
RVNRPSPIVHGRELWYDLERELRTPNKEESSSSSAAAAA PRTRPGPGESWFC KTERFKP  
SLSFPEIKPHLEAHSEWVRSLSRSGEACIVSGYRVDADGRPGGGGLMFLAAASHEEAELEL  
VRKDPLVANGCVDWELNGWIGQVGGIRAE  
>comp3152\_c0\_seq1; 149 1 778 LEN=831; translated  
XRAQEPLYHMTGFCGSPRYMAPEVGLRHPYNAKCDVYSFGVLAW EILTLEVPYGD CNLRD  
MTSTIWPGSIGPAEWNRGDRRQPGTGSFRGRNPRWR SKPPCRETPLPAVLGDTWNREVSM  
RPTMEEVGRCFRAECERFETRFPSEANSPTEARAALRRWFRDPTLQKLLRQOPESTVVK  
PMAALGTPPPQHPERRRSSWMPRRSSAFSLEPMVLR SVTMIRRGSGADRWQSSSVATL  
DSTSSRSEEQQEAQG PLRV  
>comp3157\_c0\_seq1; 515 1 1455 LEN=1583; translated  
QKITKMKIKSKANQLPCSIISMTFLLLCAIAQIVIIPTNGEMAVESNIGVGGKANDANKD  
NMVVL RGGGTNNF SERNF GFVPQTSMTSQLRIRNLKPKEPASSTKKT KKTAPKSKKISKK  
NTKKS GNSCAMKNF IGQYDSVRGEC ELKFRSVITCANENECTFKENEIKDGEMLCTKAGT  
FNPSEMI VGSSSCELDYIPLDEGT CEDNSFGVKIRMDGKDELNLFFSINQGEVYYNEFF  
PDKAVRVSEKNDRVFQHADEEGGIAQAYSILRGLYKQSIATGVNMCAEENRPDMEYEVKVL  
APIVKQHNQGREHKINHEFILDKWCPKHPEGMLQPF SRAARTPCSEKVIDFLASAI GLVL  
AMIGFPGIVKGALLDIIGFFINGLSGGINEIVKLFEGGQNP INLVERSLQVFILLLNTIGL  
LGAISDVIWESMAWWEVCLSIAGIGVTLLGIVASGGLAYVAYGLSLLVANVAFV PALIGM  
LEAC  
>comp3157\_c0\_seq2; 530 807 2078 LEN=2206; translated  
MVVLRGGGTNNF SERNF GFVPQTSMTSQLRIRNLKPKEPASSTKKT KKTAPKSKKISKKN  
TKKSGNSCAMKNF IGQYDSVRGEC ELKFRSVITCANENECTFKENEIKDGEMLCTKAGTF  
NPSEMI VGSSSCELDYIPLDEGT CEDNSFGVKIRMDGKDELNLFFSINQGEVYYNEFFP  
DKAVRVSEKNDRVFQHADEEGGIAQAYSILRGLYKQSIATGVNMCAEENRPDMEYEVKVL  
PIVKQHNQGREHKINHEFILDKWCPKHPEGMLQPF SRAARTPCSEKVIDFLASAI GLVLA  
MIGFPGIVKGALLDIIGFFINGLSGGINEIVKLFEGGQNP INLVERSLQVFILLLNTIGL  
GAISDVIWESMAWWEVCLSIAGIGVTLLGIVASGGLAYVAYGLSLLVANVAFV PALIGM  
EAC  
>comp3161\_c0\_seq1; 276 1 1008 LEN=1008; translated  
XRELVLVLTQTTDEPPIHGPGALGESEGEDRGNNDNDNENGEAEAFRQLTEQE QEDYASNA  
MLLLSGIALRYHRPRAPSLRLCFGAPGKGPLPPPKHPPTGKRAERLPTDTEREAARV LRE

ETGYDALLPDPGSDAERLLAHSGRREDYLSWEDYFMSVALLTAQRSKDPSTQVGACIVDG  
QNRIVGLGYNGMPTGLDDDLMPWGRANAQAI FNKYVYVTHAEVNAILNSKEGYGSPRVRG  
GTLYVTLFPCEHCTKKVVVQSGIRAVVYLEDKYHDTDGCKASRAMLR CAGIEVREHVRTVE  
AVTVDFGRGGEEEDQEEEDGGEGDXVLIGLEIGLDWIG

>comp3162\_c0\_seq1; 579 1 1902 LEN=1925; translated  
RELYGKGICNRTLVPVHRSPPTTEYRRLFSRSLSDHKNSNDPTYQPTNQLTDQASKEAS  
KQATPSSTAQNRNTNLKXAMKNLGPALLFGALAATASAFSPGAHRAREAGAASRTAPGA  
PLFVSTSSRPSRASVEEDEALEIFQKAQDFAFSDDEAVQGSSSLTDEEALLAESRYWLRE  
MIRVQSGCATGTIAEKGVCCENQLGAAEIVGRLRFRIEKHEKRLEKRSKGSQSDSVVPTIATE  
LALGALLVVVAIFWATLDLQQRHDDLPSLNNFQDFLSVVEEKEYSFLVGVWANDGGAPPHL  
ASRRTKPNQTKPNPIRIKTTMARPKRTVGRATAGFIAAVFLSGAGSLRHASAFVGPTRHP  
VAATPRHMFDFFKKDDPEPSDPSGASPESEDEEPPDDFSDDPVDKIFSVFFGKKEATPMGM  
KRFGRERFPEQYPAVLDEWAEFVASDDKDMAVLRPMLKNTNLETRGLKLTYSANRDGWD  
VSFHRKVDKLGGLLVVCTTEDGLVCGGYNPKGWVGYGEARGSI AAFVLYVFTKGTSELPTK  
LRKVGGPSLAQQDLPETGPSFGADSLVIPLEKSSPRVARSKLGSYYERFPGGGNTLFGKR  
GSSVRLKDLKVYHGVAEGEYIPFTDAEPFALY

>comp3162\_c0\_seq2; 538 1 2089 LEN=2112; translated  
RELYGKGICNRTLVPVHRSPPTTEYRRLFSRSLSDHKNSNDPTYQPTNQLTDQASKEAS  
KQATPSSTAQNRNTNLKXAMKNLGPALLFGALAATASAFSPGAHRAREAGAASRTAPGA  
PLFVSTSSRPSRASVEEDEALEIFQKAQDFAFSDDEAVQGSSSLTDEEALLAESRYWLRE  
MIRVQSGCATGTIAEKGVCCENQLGAAEIVGRLRFRIEKHEKRLEKRSKGSQSDSVVPTIATE  
LALGALLVVVAIFWATLDLQQRHDDLPSLNNFQDFLSVVEEKEYSFLVGVWANDGGAPPHL  
ASRRTKPNQTKPNPIRIKTTMARPKRTVGRATAGFIAAVFLSGAGSLRHASAFVGPTRHP  
VAATPRHMFDFFKKDDPEPSDPSGASPESEDEEPPDDFSDDPVDKIFSVFFGKKEATPMGM  
KRFGRERFPEQYPAVLDEWAEFVASDDKDMAVLRPMLKNTNLETRGLKLTYSANRDGWD  
VSFHRKVDKLGGLLVVCTTEDGLVCGGYNPKGWVGYGEARGSI AAFVLYVFTKGTSELPTK  
LRKVGGPSLAQQDLPGTNEESEQVHERAGCARGGEARAKNRRVCCCLPTVPCFLFVRLCF  
CYWHCCAARSPNTLFAETGPSFGADSLVIPLEKSSPRVARSKLGSYYERFPGGGNTLFG  
KRGSSVRLKDLKVYHGVAEGEYIPFTDAEPFALY

>comp3166\_c0\_seq1; 383 1 1248 LEN=1311; translated  
SSFLPIWQREANARLEEHTDESVRFL LARGYTLQEIQGLEELETGEQVQPSVLLSRLWKR  
LASGTDQPGSSDGEDEETDLWCRIYESRNEEKDVLEAIYGEDDLARFGWRNDNDESGND  
DSDDSDDECDPTRPFSFDCVLPVQGYEPPERDYDFPPPLLEVVDRSLSYYPYGRSP  
SALDPPVLALVGGGLPQSYLREATDRLRASVEEDLGGSDADEGGTPRLFDWLQLAGELAA  
EVLEKEEADLAEKARLERVARAKRDREAAKQLREERAREQKEQKEKLAFRSEADRRAYAQ  
GVLARGLATEGHRRPGESEGGKAGKSKTRNYDAGADNLSLVNDPLDDAASGASGGNGWVR  
PRLATIVHDEHAQRTDEQQTQGTMRVFLVAGIVAXALVEAATVARKMLRVAVL

>comp3167\_c0\_seq1; 501 1 2487 LEN=2758; translated  
LRSFEKKIGRDLKLRGLLDQHGLRTRSRISPREAVSVYKDSCLGGDDEPANSFLKDGT  
DFLLVTFGLHPQQEELEKYFRRSIQNTYCLLLFCKKMREEYHSLGLSSSESASAKSQH  
VSEPTNAIDNEINKQIEMLI GEIEKTTSGLFRESLSSTKIGTTKEHHGGVSSRF AEQVT  
ALIELASAVKGRRYRAE EWKKEYQRICVANSTISNAYLFLQLTHEMCIQDILFKYNPK  
EPKYERITIIYLYDPAIDYRKPLGFSFLPGLRVLTRGPHELVS DMIESFWSQVLRNGYFP  
TAAIQEVLEPQLRSFFLSGLVAADARGTTYLPLPLKASFVPSAPLSIYLHGKAGAGKSSL  
AKVLPMALQSTLEEHIDPECMARFVKQNLNKRLETLELEFQLRPNNNDMSVMSIIQGRM  
AMSQSKPGLVVLNLEELPMDSSSLGNDPNQEAVAQLISQRFGGRKGYQSQEKQRNIENK  
RNGHGNAAPRNSDKRSIGRDFSLVTIFTSNYPLAENSKTALAQLELYKSLAPIEIFSIT  
GSDRRQFAQSYLSQCLTDLLEENCDELSPRNMILDIAISSDGDTRPLVRQLRMFSYYV  
GKLLKNACVAKEGPIIVEEIKIKQSDKNCTISVQTKTEGNQNQSSQKLTMGNLSNWYPS  
GEFVFDNRINRVIDKLTKIAGDKKAI ELAVILEFWFSSILAPAVILSQDKKII EHIIMDAI  
DRMGSGVNCIRRIDTQTYKMIKSLYDPKEMPNLRDDILKFGRAFVATELSCPTSDSQC  
IREMIEDSPSMTAFSSTKSALHKSGLLFAIHVEGEVTPEVLSRVSFIL

>comp3168\_c0\_seq1; 234 1581 1955 LEN=1955; minus strand; translated  
MAKIRKANESQEDGKPRKKFKKESPHKKKDRKQKQKDGKTDSPAESTE KWSKSKKKR  
MRKILGKLLKKEQAEGKTSQSAPSATSSTDASSTNSLAASATTETGTKKNSIQEAFKARL  
AGSRF

>comp3173\_c0\_seq1; 325 71 862 LEN=954; translated  
MPSASNRGKLLLLGDSL TQQSFEGWASDLANVYQRRADV LNRGMSGYNTRWYLYAEDNG  
IWTEPGNVVLTIFFGANDAAILEHDPKHPV IPEYQTNLETIVDKAKEAYPGAKILLIA  
PPPVHREQRLAYQKKRYGNKATGIPERTSEHTAKYAAAACRQVAETKQVPCLDLFSLMRND

KENEDADDIGRFFWDGLHFNKTGQKYVYDALANAIHTHFPSLEVRPCPITGQFNNSGSAC  
DDVVNSGPYHEKLGKDWKAFD  
>comp3174\_c0\_seq1; 81 1 793 LEN=793; minus strand; translated  
CNQNTFTFFKGLMRRSETDRSKQRTDFQRVPQNGLPGLSVVRRRPVVRPMHACVALGDAVF  
GEQAGIDRSIDPVRRCIAPDPSVDPGPCRETTPTGTHRCPSAGSVPGVSRCCGAFLPWI  
LFRSGWEHSRRSPPAVALHRGTNRPTRPAGTRRDDAVVWSVVVRFSGEQAFSRGRDITYS  
YLLGGSFGNPCEVRCGIAVSALYRTRMYVLVRTCSSFRFRIDGFLGSVQKNFFKIDITQ  
PADASSATEAAESSAAIELCRVLP  
>comp3175\_c0\_seq1; 438 756 1745 LEN=2918; minus strand; translated  
MTPSASASPNGHSTSSLLLAASSFPEKEAKKLEVEEKFSFSDRSKLEERLKMEGFALCQ  
EVIMVDWYYDRLVANSECLASVLPVLRNDHWLRYRQITSRNCIECVDGEAEWQLKRGTSI  
GGGDGGATVYEEIEGTEALKIACSLANRELSKRDEANPTKNETALLLLFEGESFPVPPVD  
SCDLQPFKIVTHRAKWEQRQGGQPTSGTKTTNASLFSKLVVDLDTTPDGFAVGEVEALV  
EAYGKTEGTSTAVYQEEAVAMARTDIRELLERILKGDNDNDRSTPTRSPSMGKLEQFLF  
LRQPLIHKVCVESGVIPQPPFSAEEEPSS  
>comp3176\_c0\_seq1; 390 225 1337 LEN=1337; translated  
MLPPSMIRNVNNGAIGSMNGASRRIRNGERNNGNSKNGALQRSIAAGGSDRQQPAVSPT  
DKNRLLLEQLRLVTAQLQARSSSLSQPAASITQRTTPPSTTAPTTPPIQLEAQPKPSNQQT  
MLHPEVPRSNVGIPTPATVIRGGNTGSSISTAINIDSCGSAPS AVATSNSNPASQASPI  
GNDAQEELFPYILHGMLDDVERMGHTNIVSWNADGRSFRIHDPDSFVSLLEKYLKRYVG  
GIASRFTQFRSRLMDWGFEDAVIDGNRMGETFTHHCFQRGQANLCRYMRCGRKSEESPAK  
QALVTPNTIPRRQPVVSVQSQPRVVNAQPTTAAVSAVQATNPVTLGSTAQLLLQVQV  
AQAKQQQQQQQ  
>comp3177\_c0\_seq1; 761 95 1828 LEN=1897; translated  
MCSIRGPLVTSIAIAMLALCQKTSHALVTSARRPGLQCRPSRSTLVALRGGSSSTMAEVPT  
ETESSPATASDVYQELLAKLETITHLERASSVLSYDQLVFMPSAAADRGAQISALAGVI  
HEQKTDPAKAVLDRVLELEKKAPELDADAMRLVDLERKDFVENERVPAALAAKAAAGLSA  
SAYS DWVAAREAKDYEAFAPTLQECFDTAMETARAKRGETDEEATKTLYDQMLDQFEVGM  
GQARIDEIFGEVQSKLVPLIARVLS SPSKPSAEPLSGSFDIAKQQQLSEKLVKAI GYDNE  
QGRIDVSVHPFSSSMSAKDVRITSRFREDEWYQGLAGSIHEGGHAIYEQNLVPSAISIDK  
ALSMGTHESQSLFWERHIGLSKSFWKFAHPSLPDLDTSFETYTPDEVYGA VNSVRNSFIR  
VEADELTYPLHVILRYNIEKDVIGGKQDVAGLSERWKNMKTLDDVDVPSDDLGLVLDVH  
WSAMAFGYFPTYLIGAIAAAQLYHYCEKDLDPDIESKIENGEFQPIKEWLTAKVHKHGRRY  
PSLDSMFQDQLGEPLNAKYIIDYLTSKYEDLYQLDQK  
>comp3178\_c0\_seq1; 70 1 816 LEN=1839; translated  
XQRPVGPGRKIVRDDPDKLLGLALAGERIRVAERGPVAVPFLADGPHKTDRAAGPTVD  
VRQPGASQAAKGVLVVVVQPPYTKDETPTWVSVRLPVASSTGPLCRRGPPESPQMPFFS  
SLAIAFDETKTRETDPVAVRWLGVAQRIDQRTRSQLTSTNVIRGIIIVTVDLVHGNGNLLK  
KLGRTGETGRSGEVASKADRNYFFFRRKHWLWFSEPKCYGGVVDIDRGIKLALWRRKEN  
KGPPIVLKSGVDSFTSGTIATHTHALGTTVR  
>comp3179\_c0\_seq1; 211 464 853 LEN=1295; translated  
MPANEDYGSFQHVGDGRVSN TSMWKARIDELAERALEAAAALLSDNIVVTMSSNEDVNVD  
ARWTSRQDLLVERLIKGGASAERITVERLATDAIVPVGMSNNSNMHSHSGSYRTQYCTWR  
PKQESVGCT  
>comp3179\_c0\_seq2; 211 312 701 LEN=1143; translated  
MPANEDYGSFQHVGDGRVSN TSMWKARIDELAERALEAAAALLSDNIVVTMSSNEDVNVD  
ARWTSRQDLLVERLIKGGASAERITVERLATDAIVPVGMSNNSNMHSHSGSYRTQYCTWR  
PKQESVGCT  
>comp3180\_c0\_seq1; 462 175 1152 LEN=1267; translated  
MARSSPTGVSKRFLAALVVALAAAIRPASSLLQASLAEARAKAKAPAQRRSPLPLPLPS  
LAAAAAAPPRLPTLALSASPNGSGGGSGRREVLRRAF LAAAAATASFPSGLAFPNVAVP  
DARKFADKTKRRGTPPKDLGILPRTTEGIDASVTSRPLRTCDGNPNCFSTTG DALLEDRQ  
QYGVDFLVAPWVPPAGETDPIGGIAAVVASYEYEPGGIDGGGFALVKQTDNYLYYQFEAL  
KKGFI DDVEFAVVGNDTTAVQVRSASRVGVTD FGVNAVRLNYISRKLRAGGWTIAEITPE  
THRDIWITANEAREATFDADRRSMD  
>comp3181\_c0\_seq1; 263 381 1376 LEN=1444; minus strand; translated  
MACFLRWGRRASHHHEHTTKVRGADQRFVAVFFLSGPI SRIQQRASVFLGLCIGAXMHLCD  
APAAAFEMMHGTEGGGNHCCRVTHSGETARTNRLGQGA VCPVRSQKQGSAMAI SMAIQSN  
RVQSVAVRSERVSIPLD SRSIAEQSVNDRRGVWVIGLVLRSLGWSWEAASTGVHVS GGFD  
RSKAKRDRAGRDEMLRPSPPGLVPSRLAPGVPGGALPTAPRQVFPDLPEKGHDETRNPAE

GPLGSPEPASFRGGRTTAGGGRTGRTRLALGQVLDGPGDLFGPLLVEFLVLLVGPDKPL  
EGPGIGEALDDDLVGDVVDDALDELLAHGCSW  
>comp3182\_c0\_seq1; 180 106 505 LEN=676; minus strand; translated  
MSLFDREPFDSKECAQKRHHGLLDVILLFGQSSTSQILALHISIKVVAVGGAVSDCL  
TKITGPFDPKPFEEPIDVGEQTAQRLQRHEENPEWSDNGSDWPRNEKKKNDPTERIANISS  
PHGFRYYQYNLF  
>comp3183\_c0\_seq1; 495 325 1947 LEN=1947; translated  
MDTPAREPEASRLSVLSVQSPPECVLNVDVNLFCPSATPGSGRDNSHLVDDYEPPIPYNAN  
GNFNGNTNGNTKGNINGKNP SDYNYVSRYNSSRPPPLPDVREAIQELLAIQEEMAHLT  
LHQQESARRSVLGRSSMQLQAHTTPNSVDNPNRTPLECPAFLGRKLETMKRELENLETR  
FCHTNTCGSDDDSMVSAYRMASMKENNSINRSNSDKENS YVDDPDFRLGFLRAERYDARR  
AASRMWRYLSEKRD LFGIECLRSSGHIFLSDLGHDGLSVLSMGAIQVLPQRDAAGRVI  
FGCPLPGNSHAIHGTYTIRGAAKAHFYVYSSLLEDDTDVGR IKGVVGVLRVHHP EIHDPDI  
IAATVRVRECAPIKFSAYHMGHGVYNNHAAAPASDQSRHNTNRNYEAMYDYARRIVTFL  
LPNLQRIGQMRYRAHYGTALECRYSLYSRYGCPSDCFPLLHGSGGDGLVNPRC VEEWMA  
YRKRIDDDQEEKQKWRAIATNIGMIQPLAPTQREVTIERDRNSDGWPSTAGDCDGNNGD  
G  
>comp3184\_c0\_seq1; 338 108 1475 LEN=1661; translated  
MCRLDSGLKSCDIHAVCQDRNC SVKTIQKFVSKYGVKILKKQDVYGRVSLFYALRKQSSL  
SVVKSLFDLCPALLQKDFCGELPLYMLFRPNADYRILEYVLD RDP SLALYEEKRFSGSQ  
SLLQRLCNQWASTIKGQRSASSVRSNSDGNNGNSVVL SHEEIRSDNALCNQWAKLVLTVR  
AVHRIAHTATKVFTEFDEEVSNAMKSEDELQRFPPRQLSFEIPELHMAMQLPFLPPGIVC  
QFIELYPEQASLPIENVIQSTNNLLDNEDPGEGRSHLVGTPSAKRIAGKMLPLHFFLSD  
YSAMKPTPNRPVEGTGAHKLLSQCKRAGILRGLVGTFFPRAATLRQKHQCCDRGVLRSR  
CFPIHVAIARGIPWECGLREL VYANPSGLSIRDECGTKLLPFLQQALAAATCYKPLYEPT  
EDGDRYRFVCKEESNLSVFNTIYCLLENPSVLTP  
>comp3185\_c0\_seq1; 247 194 934 LEN=1268; translated  
MNIENEEPREVVASRAMCYYSFDILIHALQRRNTSLPESNRGNELAAEFVSELDPDSIQ  
PLFVTWEKSAHNGSGWRLRGCIGCLNPRPLATDVGEYALISAFRRRNFPI SREEVQSLR  
VSVSLLVDYEDCEHVYDWTIGVHGIMIKFAVDGKLFSGTFLPEVAKQQRWDHAETISSLI  
RKAGYTKAIDQSLLDGIHCRRYQSSKCLV TYADYVNEKCGGIDPVFTPLGQEKESKQPWY  
KHFPG L  
>comp3186\_c0\_seq1; 847 172 2790 LEN=3033; translated  
MTYAKELSENFSSIPLSTYRDRD VPLRAFYPYGM LISAI SVLFFRTTIQFPETTSKEPMFL  
RWWFGALLAFLTYSNRSYELICAVEIFS YLATFLLFSDCIPSLFSKFADDKNKTNVLRIV  
LISISAILCLMVCMAATGLLFEILKSVTPAFLSKGLMAMFPIEEIQASYDIMNEFVVED  
GLLQDQVARLFFITFH IQVIGYLGIDFLKQEQHRRNELVKMDIDIEGAVDKDGDGAKKA  
PLHDAKGGGTAKNKLQRGIEEKKMKRSQKFQRTAAPF IFFTAVPYMVRVIGYGNINAF  
ACMRDDIHRAVRLYDLFDHNDHLVALADHSAKAPADFAGFMDTIVSTTYDLFNRKFLSLP  
KVMLLPVVMKQPKMIAQIFPIIFISDWMKGRAVS YMTSRIEELEKDVQELNAIRSKVES  
YDLKNSSELLHRSGPGAMNFTKERWLEMTVKVQMKMAVSNLTSRTKGFFSFIQRNFVSVL  
VDCALAQLMVAVGKIVAADIFVFSRAIEDAVDMILMRSRSEAE LARMMTQISNLKELSTVW  
KSAKERNLLPCSLRSRHVDDSSSTPLVVFKNIA YARGTAAVQIVDMELPAGIYALTGANGS  
GKSTLFRVIMSCSTNDRPIDIPPSISLSISSESLTPSLDGRRNESHGDISDESHLQPSIT  
MPSSHVVEISQTFYWP LYSKPIEWILQSSAEKLTNKEKENRSRVAELLHSLEFTQSLD  
IEEVSEKDNETRNLTENESNSDSIVASSPTGDAITRIMEDLEEVKEDW FNDLSSGGQRSKV  
ELVRKVFLMDECPKTL LIDETMAPLDRSKALVMEQIKSFCIGSVVIVIYHTDVGREQEK  
DGGDLVECVPSNNFFDGNIHVQNKTMILRPVC  
>comp3186\_c0\_seq2; 788 172 2863 LEN=3106; translated  
MTYAKELSENFSSIPLSTYRDRD VPLRAFYPYGM LISAI SVLFFRTTIQFPETTSKEPMFL  
RWWFGALLAFLTYSNRSYELICAVEIFS YLATFLLFSDCIPSLFSKFADDKNKTNVLRIV  
LISISAILCLMVCMAATGLLFEILKSVTPAFLSKGLMAMFPIEEIQASYDIMNEFVVED  
GLLQDQVARLFFITFH IQVIGYLGIDFLKQEQHRRNELVKMDIDIEGAVDKDGDGAKKA  
PLHDAKGGGTAKNKLQRGIEEKKMKRSQKFQRTAAPF IFFTAVPYMVRVIGYGNINAF  
ACMRDDIHRAVRLYDLFDHNDHLVALADHSAKAPADFAGFMDTIVSTTYDLFNRKFLSLP  
KVMLLPVVMKQPKMIAQIFPIIFISDWMKGRAVS YMTSRIEELEKDVQELNAIRSKVES  
YDLKNSSELLHRSGPGAMNFTKERWLEMTVKKLIAGTRLS SFYVSSDTLTSCFCRVQMKMA  
VSNLTSRTKGFFSFIQRNFVSVL VDCALAQLMVAVGKIVAADIFVFSRAIEDAVDMILMR  
SRSEAE LARMMTQISNLKELSTVW KSAKERNLLPCSLRSRHVDDSSSTPLVVFKNIA YARG  
TAAVQIVDMELPAGIYALTGANGSGKSTLFRVIMSCSTNDRPIDIPPSISLSISSESLTP

SLDGRRNESHGDISDESHLQPSITMPSSHVVEISQTFYWPLYSKPIEWILQQSSAEKLTN  
KEKENRSRVAELLHSLEFTQSLDIEEVSEKDNETRNLTENESNSDSIVASSPTGDAITR  
IMEDLEEVEDWFDNLSGGQORSKVELVRKVFVLMDECPKTLIDETMAPLPDRSKALVMEQ  
IKSFCIGSVVIVIVYHTDVGREQEKDGGDLVECVPSNNFFDGNIHVQNKTMILRPVC  
>comp3187\_c0\_seq1; 451 1 1615 LEN=1862; translated  
RTALEKTSADTPVLDKQKQKYEYAFGIRGKGEFDSQPIVAAAPFLHHSSTGASAWSTTQT  
PGISLQKDSRRTATARKMTESSAVNAAASKPRLPIPAPLYSDVPGTWAYDTMSRRVDEEI  
LQRTFDDNKGAWETEFEFSDILERFNALRKELQONAGETKLGGLPLPPSPDCSEARRTEWEEW  
KQIMEPFVAKGDTWLTAPWVMAEFYVYRRLVVDVIQYWDEYDRNDPEKKNPGYLYDPFID  
QKHAGLESSVASAEGVLAKINNLLGGNGSSIDQGGRLAASIALWGNKMDLSLWPAKDTAS  
KDIFFSAILDKATEGLLHDDSSLLVEHFELKASGGNIDIIVDNAGFELITDLVLAQYLT  
ESGIAKCVTFQLKSHPTFVSDALEKDLLEHVNHADFDDEAKAYPNVKISGAKWQEYLN  
GRWKCTENNFVWQGFPMWEMTEPLRSDLRDRCDLAFVKGDANYRRLGDCQWDYSTDSFQ  
DVVGHYFPCPVCALRTLKAEIGCGMEANQVDRASKLDPNWQTNGRFGVLQFGTGESQ  
>comp3188\_c0\_seq1; 160 94 441 LEN=803; translated  
MDNWIVSQISFWFTVRKVKPAQIVDQIINFWLDVTIPGRGAGENSLLMRGVRSVQQAER  
AEAELNLRSSLRQWDFPEIHHMIVRWGCGLVASVVFVSSIIYQALKPQPRNRKY  
>comp3189\_c0\_seq1; 350 1 1232 LEN=1262; translated  
XLATKNEKISAQFRRQSNNTMITFIEIMHYMMMPVTATFAFLWVFPYPAWAVLIAERIE  
WDVEDLASPGMNKDSFESPLTLVIPAFNEEDRIPIMIRETFDYLTSSQGGKQLLRKLQSS  
IKPQTTSSLEYEKLEDAASLREESSEQRGAEPKVEWIIIVDDGSTDATCDVVRETYKKLMGN  
KSNVGVKSTPSATNACDWKWKIVSLTKNAGKGGAVKTGMNLAEGMFHLMVDADGATDFGN  
GLENLTRELRAHTQGILASREGHIGSRKGMAGSRIAVFGSRAHLERESTAQRSFVRTLLM  
KAFHFVVSFLVSTKVHDTQCGFKLFSKKASNAIFKTLHLRRWAFDTEIVLLCDKQCIDI  
EVAVRWKEVDGSKLSTSKLALALVSI SMLRDMICVRACYTLGFWRVKMGL  
>comp3190\_c0\_seq1; 437 525 1307 LEN=1626; translated  
MPGRSLQRLSSLRLHGTNKDNEMEGERKKPLGPRRIKSLTDSFRIRRFDNLDGIDNNK  
SRSESVEYQVCTNSVGGKHHKAFDGTSNFYSPRMLIRRRPVIKINDDKRNETETNVAR  
DNEGADATSSSTTTPSLQRETPIRSNSRRRLSKLKQTLFGSSSSSSKNLFGHRTRNTDGS  
NGIQQNKTNELQDTLSLAVGDSHGKANIAHNSNDVKYRNDESDLEDSFSIRDVAKDNL  
VMLLLCREFNLIDTNESSSE  
>comp3191\_c0\_seq1; 434 215 1339 LEN=2516; minus strand; translated  
MPSAADYLVGPTIGEGSFVYAVHKTQQRKVAIKVMEAPVMGATEHKHRQLWKEQKTA  
MILNERRILSLPELKSSKWIWNLWAAFCESSNSRYLYFVMEATGGDLQGLIDRALTSSRA  
KSKRDAWRTDSVPPFYASQLIEAIQFLHSTGILHCDLKPENVLDAATGDLKLADFGCALD  
TNRQQNRNPSSPPIMLPRGTARYSAPELLQAESPLALDAADVWWSMGCILYAMFRGKSP  
FDRGSEALTIRAVFDYLDGAPSDLSPKQKWAEDTNDDESTRYPLYRLSQGLFAMIPGDRT  
TFWATSVIPLFDSKQGESVGGDDAIHGIDNRRSATFATTSNESGVLPSPDPWDKQVESA  
TLRNGDLGWVAFQL  
>comp3193\_c0\_seq1; 377 87 1013 LEN=1335; translated  
MKSTVTFLLFFYAILLTQEANAFSASDGLFRQAKPSTRSNNGYSNIDLLTTTEQRRNAFS  
TLPNKQTSNSNTRLSVAPGAIAGVLTGGVLLGGALHAIAGPDHLAALLPRCIGQRWYKAGR  
IGILWGMGHGISVTMLGVLGFALKSQFAKAPGARAVLNEVSHLMEFAVGLSLIVIGAMGL  
REAKEWGEEMESQPAHSLSSAVSPSEAKNQNRNRRAVVFNGLLHGFSDWGAPSLAPALAVA  
SWSGNLAFLSAYAAGTVAVMAVATSFIEGTRRAGEIFNRPDLPQKLSFFTSLLAMAIGG  
IWCGLALM  
>comp3194\_c0\_seq1; 280 68 1156 LEN=1372; translated  
MKDIQDNPHHPASIDTLERYTLIVSYDGARYSGFQRQSSSSSSSCRNPDSKSDANPLKRR  
RPNNQIKRKIKNRGNVPIVQETLEDALEFYTGMDRFQLKLRFAGRTDGGVHARGQVVAV  
SLPRAIFSDQKVINNIDENENDREKLWTIRKSINSRLPNDISIEDVSVCQDECDFDPRLD  
AKRKQYSYMLRYRQMVTFEIKNVKNEECGKTI SPICLKGGPQLLRTALDSNRVVICPWAL  
DDSKLTHYCELLTGTHDFSAFVHKEARKTRDNKMTVTRLDYERVRFRDDVAPVWEIRFVV  
EAKGFGRSQVRNMGVFLVEACRGSFEDLESNQGWLWEEDPDRDLAKQIP SAPACGLCLEHV  
MY  
>comp3196\_c0\_seq1; 362 79 798 LEN=952; translated  
MSGGKIILDKALRSVNLSSSKLPSEVAKSSAALFSALSGTKFVLPDLAYDYNALEPAIS  
AETMELHHSKHHQTYITNLNATMEKIDSAMVAGNVSETIALQGALKFNGGGHINHTLFEW  
NLGPDSTFPEGGPLEAAVNARFGSLDEMIAEVSAKTIQVQSGWGWLVDFDPKSKMIDVVA  
LPNQDPLEATTGLKPLLGIDVWEHAYYVDYRNV RPSYVSAIWGIINWDVVEERLVAASK  
>comp3197\_c0\_seq1; 204 1 753 LEN=835; translated

XSIRMQNNQKQLQSNNTNDHDSENIFFSALVPPDHQSGVLSPIATDEVILSQGMALNMA  
TTAVTATTILPQANADPSVVSGLQGGIQDKVAPGHWIGQFIGLNSKTEKWEFPNSTPEE  
VSKALVDVLTSLTEDRKAKLYMPEFEIQTADASKLHVLWTWKLEWLDTLDVTFRPKENNG  
CTATASFYATGFLPTNIPGAPLNFVAFFWFFPASPGRGEMLQSFRLRALNGLVTKRLEE  
NKVTPDLYFP

>comp3198\_c0\_seq2; 347 141 1015 LEN=1015; translated  
MGDRHLGIRDRTLVLRLVLPGLRTRLRDKMKEVEEAADTDPDTKSATERSNTGRTSSSSG  
NHNKEILLDLGFACEPTKDSSTLWNFHC DGATYPARLVNLPVLPVHKTTHDHAMYKCC  
DIAQMLIVYEDSMALDDADAYPKKTGYPSYYHSGITLPMKQVVERRFGQRDHQPGIKFPR  
NEVSDVERELHELMCKISKEGKGRKLIKPSLANQNKVLQEVVEEVVIDYEPWMEDGIEF  
EATDQIASLHPEIWLSPKIKKQKKEEKEEERKKRQKEREKKEKKEKX

>comp3199\_c0\_seq1; 319 111 1262 LEN=1828; translated  
MKHRTAFLAVTISVGLTFNQKFFFSVVEFGNQGEKTSMLDKDHPSMGKALECLRLTKP  
KLPNLSYPRDAFEHFHHIHYSLARWIQHPDHNPHRAKGYSGPWIENHWISHFEKELKSNN  
YSLPVDVFGPYVPIIPWTDIWKVNRKYPGELVGVIKRLLREDVMIITVNQNDGDFVGRN  
ADFHDIQNMYHITVLSAGGYGHVPVPLFKQPEALIQKVP LNERKYLVS YVGS D T N A P N D M  
RKKMIAHL D Q A S R Y Y Y K G S E W R D V M A Q S K F S L C P R G F G R T S Y H V I E T L Q M G L V P I Q V Y L D  
QPWLPYGNLLKGISFTVRIEEVSDLLLNLSEIPDSKIEKMEAQIELLREDFYTFEGAINQ  
IGKFMIDPTNSELICQTL PSTPR

>comp3200\_c0\_seq1; 495 90 1322 LEN=1418; translated  
MELTDPWWKYFLIPLIDGAVGYFTNVLALQMTFAPLEFVGIPLVRFPEQPFGLFGWQGII  
PAKARKMATISFDLMTTRLLDLQEIFNQIDPVKFAEAMDEAILLMLDNVISEVAMETMPN  
TWGNIPQAVKDDIIVTADNESGKFLTEFMKDMQAHVYDVVDIKEMCVNACVQNKHLIVKI  
FQECGDKFNFIRQSGFYFGAMFGVVHVMVIYMFYQANWVMPVFGFVVG TATNWLAL K V I F  
SPVRPKKFLGMTFHGIFMRRQEEVSAVFARVVCGEILHIKAIWNAIFQGSNSKNFTAMLR  
AHTLVFTDKLVVEIEPLAVAAMGSEKFLQMKEDIAQKVTKKIPDVIDSSYEY T Q R A L N M E  
NIIREKMSVLPPEEFEGVLHPAFEEDEIQLIILGGALGAI V G A L Q L L I F V

>comp3200\_c0\_seq2; 369 90 1177 LEN=1177; translated  
MELTDPWWKYFLIPLIDGAVGYFTNVLALQMTFAPLEFVGIPLVRFPEQPFGLFGWQGII  
PAKARKMATISFDLMTTRLLDLQEIFNQIDPVKFAEAMDEAILLMLDNVISEVAMETMPN  
TWGNIPQAVKDDIIVTADNESGKFLTEFMKDMQAHVYDVVDIKEMCVNACVQNKHLIVKI  
FQECGDKFNFIRQSGFYFGAMFGVVHVMVIYMFYQANWVMPVFGFVVG TATNWLAL K V I F  
SPVRPKKFLGMTFHGIFMRRQEEVSAVFARVVCGEILHIKAIWNAIFQGSNSKNFTAMLR  
AHTLVFTDKLVVEIEPLAVAAMGSEKFLQMKEDIAQKVTKKIPDVIDSSYEY T Q R V S N I T  
SRX

>comp3202\_c0\_seq1; 582 87 1592 LEN=2007; translated  
MRTTFFCKSHTPLLALAYLCAASHTGAHANGVGI V V G V A Q N P P V N Y V P A R I P F A E L L P S E  
HGTNAGDENDVFWKALREVGLVSI TDV P N L G K Q A M M A D L G E C L A T T A R G A E G L H T E G F A D  
VGIDGFHRRRTLAMHTLAGSGEGLFAERDPSACAALAESSRPFREGVEKVLGAI A E R F A  
LVPSSLAAGEGDGAFLSADRLIHEGEHLEHFHSYYPQPQAGKSGSQT K D K D N A N T K T I  
EWHTDQGMMLVFAPGQRTDGSSTGGFLVRLSDGSTAELDLDPVDDL V V M L G D G V H Q Y I N  
QSGNGSIQGLRSVPHAVSLDRNDGAQRLWYGRMVLPPP G A V H P S S A A A N T F G E L R A A T I R  
GDP S G L G C S S P T A V V S R G L A G D G H E D P G E C D E A T S M F C W M R C M D Y E E Y G A S P E I C G A G N L  
ACANADGEPWAKGVHDP SYKLRCLGSAEADTNATASAGDDGDEPESETMEMDSSGAKDRG  
TTAFGFLVAVVAATAGGWIAW

>comp3203\_c0\_seq1; 414 1 1764 LEN=2592; translated  
XLLQKYEQSHQLLVRAVDSLAPDSSFGSVEGTERGAKEFGPSCCKPQHMKRAIVPSFFI  
DTDETIDADKSI VADESMSQQT SR T T K V V V P S F L G H P E N I L P P L F L I M T C I K V L L F P S Y R  
STDFDVHRNWKALTRQVDISEWYWNDVSGRTVHTLDYPPAF AF FEY I L S N N P I T H L V L P Q  
GDRCLELLPDTNEPSEACVVFQRTSVILGDCILWIGSYFACWAYHYKMPVQLTVSSFLL  
IVLNPALLWLDHIHFQYNGMMIGVLMSSLGCFMMGNNVFDQA AK Q P I E Y D L Y H L A G A A I  
FALLINLKHLYLPLGLPFFCYLLERYCLTTEIPP G K K R K Q F L P G K F L L L A L V T G S V L V L P  
WIPFLKNQKNPKLQVIQIFKRLFPFGRGLVHDYWAGNVWAIYTFANRILLATIRRLVPLL  
MPIMPEIATFLEGLYLPEPSPLVCALLLVLAIPGLQMASLRLTNKKLIEAVVYVSFSSF  
MLAYHVHEKAILTTLMLPTILVEPSSRVEYHNLLFWQSSIWGLLGLFPLLF R P V E L V F K L  
GSFLCYMGLTSYLLKTPPPWMQDRQHDALAVVSFVILLLECVPIQGW

>comp3204\_c0\_seq1; 1129 74 2308 LEN=2339; translated  
MSLLEPPATITRLLQESFPDSVTSTSDGAQWNANEDILSYVAFLAAGMADVKEFSQEAWK  
EQLSPYLEGIKEVGGDEIDAFRILVAKEVLGEDDES Y G D D D D D D E H E E V C N L R F N L A Y G G  
KILLRESKRLRLRRRYAIVGGNGVGKTTLMNAINNGKLEGWPQHLKTAYVDSGNSVDPE

YERQNVMKHLIEDTKQSEETIIAKMKELDFTDQMIRGTIGALS GGWQMKLRLIRAILMDP  
DIFLLDEPTNHLAEGAVNWLTDYLCGLDHQTVLCVSHDITFLENVCTDI IHYEQRSVWGP  
YRRLVHYKTKMSGFVKLQPOAKHYFELATND DGLKFDFFPQGRLDGVKTSTQKFLEMEHV  
DFRYPGAENQLTDVNLKMSLSSRIVILGANGAGKTTLLKMI VGETVPSNSGRFYVHPNL  
RIAYVAQHAFSHVERHMEESPVAYLQWRFRDGF DKEKLESEAYRITPEEQQAIDDFKLEG  
IWSRRMRGGVLEYEVKKNVREKDNKYYSRDEL LGMGF EHLKQTDEKIAAKEAGLDLRP  
VTTSEIQKHLNGFGLPQEFGTYGKIRGLSGGQKV KLVLA AAFWTVPHLVVLEPTNFLDR  
EALGALSAGLNEWGGAVIMISHNREFYSSVCKEEWHVAGGVVQIQGESEEREMKAFARKK  
KFEKELDGNKLEKAGGNMNSNGDKYKEATVNF WGATVSKKEARAYEKAKKKGNVAAMRK  
VLQIPPGKVMPGYEELGDGNDAKQ

>comp3205\_c0\_seq1; 319 1 899 LEN=1041; translated  
XLSLLIAYGSFFTNKNKRMFQFTAATSIGAVLLTMM AAPIGAFLHRDGRSMTAVTTDRG  
GLVSSVPASLSHGAFRLFAETSPESDNEKMRMFESEGWK GIEADLRSFPLFCIATAEDNP  
VAYQITVGEKTFDVPFFYCDVTEAAAALEKAQASSDNATEGV DLKLLPFPLEQAFKLWC  
GDKAVIIPSKASILQAGAPAGTNP IQRVPMWACL DIAEEQGEGLPPKLP IFMGLEDAND  
AVLEAVGGDRAKVDDLEVVCLSLDGAIEQLVTA APEEAPGF AFIPPSKSMKYIEENVQQ

>comp3206\_c0\_seq1; 320 159 707 LEN=891; translated  
MTALRSTKPLLLASFLSVLALLAGPAASFAPG PLRRDTACQESSSTSVGVGNIIDLLNDG  
KKKLVKSLAGDYDAEAVRARTKGLIEANPVLMLSFTTC PFCVKAKGVLDGIGAEYTVVEL  
DVDPDGKAIRAELGDLIGRTSVPVAVWIGQEFVGGCNDGPMGGVVKLSEEGRLEGLLKEAG  
AL

>comp3207\_c0\_seq1; 158 189 1062 LEN=1128; translated  
MAGGGMCLARTTSVSRVLSKRLSFPAAAAAGRLSSSGAAFGLSLQAPAPGAREGKVL SA  
GAPSRQGLPLRLPPSCASHLPLRPGPF SKGTHRAQGRWLS SDAEAGTENNGSYTVPIV  
IKMPPMDDVGGDESHCFVETWHKREGDRVHPEDILCDVSTPDFVFGMQIDDAEPGILGEI  
HVEAGVRVPDHTPLCTIYHRAPPEEAGGERAGRGA AAAAGRTARSHAMRCDAARLGLGSIP  
RSIRPHATSESRVKGKSEKTERHASSPRHKPMREGSMDVFKSWEHPMRLP

>comp3208\_c0\_seq1; 421 120 1538 LEN=1955; translated  
MPKAEKGSVKDIANRMKARGLQKLRFYCQMCQKQCRDANGFKCHI QSDSHMRQMKIFSEN  
AGGFLEQYSKEFEQSFMTNLRMRHGTKKVNANNVYQEVISDKQH IHMNATHWTTLTFVQ  
YLGKTGKCIVEENHSDGTGGWYISYIERDSGILARREAQKQREAADQKAEALLERMKAQ  
RIAAARALDRAGGSVTVQATS IQQNGNTAPA IKLGLGA AKMKTAKKKSTASIGTSAFGDD  
DDEENNDDEKDYSKRKSANTNVEKMMKETTMRKQAAAT TMNENKNSSSKDSSANPKTTKK  
RKLNDGNNRIEIEITKRSRDERSEVSRTPK PSEEQAVKDQNSWLYRDIMVRVVS KRLAGG  
KYFRKKA VVDITVGDGFAAEVEVLGDSE DGVGDILRLDQDDLETVIPKVSSGGKPKKVR  
ILRGEFRGEKATIEHLDKSKYRADLILYKPKRDEDRGRRLR KVPYEDFSQIA

>comp3209\_c0\_seq1; 177 1 1524 LEN=1625; translated  
IQRHERLRKLENSLLEFRDLERSVSDDEEVEKRVAGERARRMARLEEEEAERKERNQR  
GDSGDGYAARNSNRRDRGYSGLASTSGKSNGR TDRGYRGTA YGRGGGPPRDYGRRPQQYR  
RDGHHRRGGDRRPF SNTNSHVEATRKEEENHRLADAFGIDKAKHVEGA AFDRDLQEEKRL  
KTEKKERXEKAAEKAQRKLERDQKRKEKALRKEERNQRK KSKPRVDRDRESAARVIAAA  
VVAAL EATAGPRLRALDHPLRPTAAARRGRPRTAAARRGRPHRGNP IGEQCVGRRMAERI  
AGTQTGASPVKRERGLGAEAQVPTTVGQGA AVAAAAAGAVEHGGDRKDKADAKRSK MDSR  
NEREPAENKNSKGGSEERSTKATEAPSGPGDKKNSEARGGLPERTASPVEAGCGGGR LD  
RNRAPGPPAGRGGARPGERKHQRTAAGSRPRPDLALSRRSARAAA SEPAAGGGPGPDRNRP  
RRQEVHSGRRVARRPAEAPGLGRARPW

>comp3210\_c0\_seq1; 127 512 1109 LEN=1109; minus strand; translated  
MRKPRVSSLAPPWHSVRSRIAPKPVVGLVHPPARQSPTGALV LMLPPPPPLPALPPP  
LPPFLPAGQPAGLRLPGTSGVRNGLPEPVVASHDRQE QGGDSEQSCPGDPAGTPAGRD  
GGGNHLFSCPASFFIVLQGTSTDGTVCCYGFVTLWFVMVCVPRNAWLGVFP RIVKRSIL  
PNAVPHYGTAEKIIIPGLVAX

>comp3211\_c0\_seq1; 227 1 713 LEN=922; translated  
XQLHLCTPVLRAISHANIWPLDYHREHFYDIKRN TASPEQSDGWYSIHRIACFRRQSCG  
FSANNPADRMDQMDVSSISSAIDATSTMPEPATYPRPPPTPAQVAAEASSRQSYLAPPAS  
SSKKS WLD SFLDLVAYSVARILNHPDVRDAVSSAILEGMVKLCYVEDLHEHLRHVDETLT  
EHQVSDAAKKGKDAQKIVRAYLGGMFAGDNDESKTDDADNDSRRNSKHTENNKKVR

>comp3212\_c0\_seq1; 233 139 801 LEN=1083; translated  
MSTSDVRRRLAPT DCTGASTVANNAKATEQAPIFV FVFAHPDDESMFFLPAIRALVAAEA  
TVWFLCLTNGGYDGLGKVRETELEKAGKLIGASKVLIRSDDDNGDERAILDHPTKRYARE  
TVANAIRDSL CASLEPSGSANRFVLVTFDELGVSGHVNHIDTYLGVCHLMDEQEERQREQ

RAQTPKTSRQQSPQELFLEAWHLESERNLFFKYLPLLSW  
>comp3214\_c0\_seq1; 248 70 1202 LEN=1438; translated  
MVNIFGMQTVLFLTLILAIVLVTIVNAEIKQDDRQIFSGDGHETARVLKTIQFGEVDGKTL  
LAQNAPKEINVDPRTTYNEKFMAQMSSPCRPEYDGGFFGATSGDSVQIQYGFQLEVEPLSS  
VMDILDLIEDKIVDSVLQSSFPFEMCGMRRTTRTESHDQYLARSLNDGHPGSGFRFLKFEEV  
GKIYNRSNRKIRSEILFLQDFFLITWCDFAHNVNSPEVNDVNFVCGIFTGIVVYVYVKHQNE  
EEIFQAVMPYIDHVFETTNPRLHSELAMISRVEFSSTASFDISQTPTENQVKHISRGE  
LSGLDTHLLIIVSGLIFLSILYFYIQWDERRRYPDHKVASNSLNVRSRDDYIEDEYGANE  
VEFDQYQDNVQSNIGLS  
>comp3214\_c0\_seq2; 293 70 1110 LEN=1346; translated  
MVNIFGMQTVLFLTLILAIVLVTIVNAEIKQDDRQIFSGDGHETARVLKTIQFGEVDGKTL  
LAQNAPKEINVDPRTTYNEKFMAQMSSPCRPEYDGGFFGATSGDSVQIQYGFQLEVEPLSS  
VMDILDLIEDKIVDSVLQSSFPFEMCGMRRTTRTESHDQYLARSLNDGHPGSGFRFLKFEEV  
AQCIPEVNDVNFVCGIFTGIVVYVYVKHQNEEEIFQAVMPYIDHVFETTNPRLHSELAMIS  
RVDEFSSSTASFDISQTPTENQVKHISRGEGLSGLDTHLLIIVSGLIFLSILYFYIQWDERR  
RYPDHKVASNSLNVRSRDDYIEDEYGANEVVEFDQYQDNVQSNIGLS  
>comp3215\_c0\_seq1; 428 1 1515 LEN=2270; translated  
LVLTMTLVFLGLFLATRSGLLSTSTNVFLPRSDLSPNLTSTSRVYSSRLSSWSKIA  
EPDTEFGSFRVNTEDAALAAASQEGIEFSDSLVFNLASPREWLEFCEARQLYQDQHPND  
IRDRAPGCGAYTVLRCDFLLEEKAWRIWGRDFHWNRLRESYRLLLQKQSIAGQNGSGAN  
HCEQAAIDSSIEAMDCLLAEAESEILSKYQRENDETAVVAMLTLLWDPEPGDATSIRVR  
GHGFSTMKPSSHNDTDTGSMGNPNAPIEAVIGFLPVTLAERVADRINNNHHDVTMLPNRY  
QNIPOAKLSSWCRRLLEKIFKAGENTGDVILTKECGLGKETETNKQESSPEAEVPSIEM  
LEGLTSMNFVLYPGNVLRTAHSSHVLLGGYVRDLIVECASECGYRVKFGPIPLVDSSKWE  
VFLTSSVRLVIPVSRILLPSIASSTRDEECGDSDDLFRDLTVWEMARDELSDGDRPTRP  
ASHVLYEKLMEGRDIPSHTSRSP  
>comp3216\_c0\_seq1; 206 197 712 LEN=1128; translated  
MTDPNAKNPLPSDARDNYTPHRSHHPEELLHDKKKKHHTRAEVEYNVFRDSSLRYLGYAN  
EVGESFRYQYPRFVVPYSVVSFGYCLADAATSGKKAYDYSTSEGSSTAAIDSVVSTVDTL  
LWQSLASVLLPGFAINQIVKFSRFAVTKSPMAAPVALATWLPVAGLGSIPW  
>comp3217\_c0\_seq1; 270 358 921 LEN=967; translated  
MVLTEEQLRIRKNRERLRIQKERREKYEKQKEEHLKESERSIEDNQTPSKKRKTTDST  
LARPTASTTTSQISIPPTNAKQATEDHDYHSSEPLEDFEEGASQWVTKTEAMNTYCLPEG  
TMAVCSYEKQNPKNPSFKPKMLYKRSEIRYRAHKKRHGGVEGLVKEREKRRKRKLEKME  
AARDIFK  
>comp3218\_c0\_seq1; 303 47 697 LEN=2266; translated  
MKSSIAFLALGVSSASAFAPTQSASKSVTQIELTRDEILSTPNTLELGEIYDPLGLSQLG  
GDETISWFRHAEIKHGRVAMAAFGWCATSGAGLRFPGELSHGLNFADVPGQGLAAWDAV  
PGWGKAQMLLLAGLIEFHDELFYARRGTHYMSGVPGKNMVPGLYDPFNFSAGKSEAQLA  
RGRDVEIKNGRLAMVGIAGMYFANVIEGSPVLPQTC  
>comp3221\_c0\_seq1; 364 1 1309 LEN=1385; translated  
XERLMIDESDKSCTVQAI SFVDHSATRMTRPILPSRILKLVVVSVALLKFTDVTVDFAFA  
SFSTRGSIHSSLLHHSRSTLNKLSARLWAQSQQITIRDWRNSNGNEPESIYELLE  
QRREQAQTNDDFDPEGSLELDVLRNRLCQESYSKEDGGCFVAVAGDCNDHNDDEDENG  
KRKSSIVGTLGMITGTQVVYQSSGSSVSEPEVA AAI RRVCSWSSEDEDDGTAKQGLTKQV  
STTTLLEDLIREGEQRAIQSGATRIIGLAYPETTGAAGEKARVAKPSTDLFESLGYRRSD  
QQLPGVKTLYEKKLSRNEALANSNAVLTESSVERWILPAAIVGLVSLGYLVFNLYSNVF  
GIEQLWGSSDNAGIGTSLSTQNLQDLIRDEKLRSGGLDDGISSYASTRQWEDLSPEELRE  
EQALMKVVIQGSIRFK  
>comp3222\_c0\_seq1; 157 243 899 LEN=1072; translated  
MTCLFRNDLTPREKIRTIKLVFEHASNLAAFATYKVFVAVLKGSSRCLRQGVGLNDYP  
NNQPRITTSNAIKSLGRTLIALIVDGPFFSTDTSSVWGSSSSTRRAGEPERPYHSLLAGAA  
GGYIVWGRYSSVNHQIVLYLASRIMVGLAKRGWELVYKEPGHFRNDNRGKSILQHPQTYP  
MVAATVWGIWMLLFEESPHVLRSLKKSMDIYRRGVF  
>comp3223\_c0\_seq1; 229 31 585 LEN=648; translated  
MMPLQQRRLRVRVHFLALATSLIMLSSKLSAFATRSSFITASRAASRSFRSGVVLNMA  
PKPGVATLEELKSHVEAAGDKLVVIDVRNPADKEPGDQKSLAVAPVPDASSGVRPCGLH  
LIWDRESDSMPLPSVEKDTPLITHCGGGGRGQKAKDFLESNGFTNVNLGAGPKETELWDV  
YGEK  
>comp3224\_c0\_seq1; 377 109 712 LEN=1049; translated



MSEEQANTTPPASEEKESQEESTAEFAPVVELEEVVSGEEEEENVEYTQORGKLFYGET  
MLDVGSGNKTEGGGIGDIRILKHKQEQLRVLMRQEKTMKVIYNHALDPRIKLEPNAGSD  
RSWVWSAFDFASGELVETVFAIRFADSDIANFNFKVFEKQAEMQSILDGEDAAPSQAD  
EATEALAGLSTKEEEAAKEE

>comp3226\_c0\_seq1; 462 58 843 LEN=1222; translated  
MSDDKPQDGGRRGGFRGRGRGRGRGRGRGRGRGRGRDENVVWPVTKLGRVLVKEGKIG  
SLEEIFLFSIPVKEAEIIDYFLKDKLQDEVKIMPVQKQSSAGQRTRFKAFVAVGDGNH  
IGLVKCSSEVATAIRGAITAAKLNIVPVRGYYWGRTAGLPHTVPCKVTGKCGSVSVRLI  
PAPRGTGLVSSPAGKMLMSMAGITDCYSSSSGHTRTMGNFIKAIYAALRATYGYLSPELW  
AENALLPLPFQEHTDFLSKKL

>comp3227\_c0\_seq1; 190 125 508 LEN=972; translated  
MNDPKSSSTGNNHNRNHPGVVRVEATAPIKSSPLSTGGIALAIGTFLALHTPSWLVLVFC  
FETDEHKDHHDSLPIRLLSRWLLDFTPWLANALLSFFLVGLCLCLGAAFLSRTERWGAHV  
GVRTEPF

>comp3228\_c0\_seq1; 275 184 1395 LEN=1701; translated  
MPLLFRQRASQNSLPRITPSVAALVAYGLCCTVLVALLAGARSFAPREAFSTAASKRTSP  
VPMSPSSPATESVRWRPLGPELFPSPVSPDDGCRYAKDEAYLGAVLGSWKTNPAGPRAET  
SPWVYRDQDGTALYGHAVRPIERTASTGAPRPGILLFHTAAGPQDVFLFQKAEQLAVSGD  
LGPDGCVVLVCDLLSDPDGAWTPGGDRTRFDQRKELLFRDNARLLRARVEAAVEALSGD  
DRLGVDPDRLAGLWCFGAHPLELSGLRRLPEGGTEEGPTAVALVSYHGVRDRPPGSP  
ATGGDPGDGPRGILPPAPVGDVLICTGGSDPFVSGEDLDAKAAMEEGSYRVAIAEFEGA  
KHGFTNPAQDFNPNPAFGYDEHAATESWKATMELLKRRLGPPG

>comp3229\_c0\_seq1; 239 249 861 LEN=1057; translated  
MYPLLSPTAITHSPNSQNHGAQAVAIAPVQKIQPYGVHVRKSIAAAASAAGRQFVEIFKK  
RWLKLQNTIYVIPKCNVSIVRITASAAVAAGGIVVLSRHQLPSMTREKLYKQVWRNEAAE  
GQDDATNQNDGSIFDDEDEEDFQPLVDKEESPMTTAMIATIGVYKNFISPLLPACRFVP  
TCSQYGVQAIKEFGPSKGVVLT SW

>comp3230\_c0\_seq1; 280 176 673 LEN=828; translated  
MTDAAIQEVEAGDMIPSVVLQEGLPDFGGKNDIDISELIAGKKVIFGVPGAFTPGCSKS  
HLPSFITADELKEKGVDMVICIATNDFVMEAWGNTSGGAEAGIRFLSDGSGELTKALG  
LTMETPMPRTKRFSLIAEDGVVTEYFSSAEASNTWAPAVLAKL

>comp3231\_c0\_seq1; 453 132 1121 LEN=1260; translated  
MVFGWGFNANKLKPQLKMAVHRFQMSNKKAAALKQNMREVAVLLAEDPPKEEKARIKAE  
ALIRDDYMIAYDILSLNCELLSERIKLIQFSKECPPDLISCISTLMYAAPRVDIPELIE  
IRKQFIAKYGKFFDEDAMANTGGILNERVVAKL SVQPPAAYLVQTYLEQICEKFEVDWSP  
NYRLSAEQMGEPMA PPSGFSVP IGQGTGLGHAAHTGMTVTGD DDDTTYDGGQSLPPP  
RAGNNAKVKSNQSEFHIPSAPGTSNAPSLDLPQAPAMTNTSDATNK DDDDEDNQNNGDS  
SGSQSQPSSGKDTASYNDLAARFENLKNL

>comp3231\_c0\_seq2; 369 62 850 LEN=989; translated  
MIEAYDILSLNCELLSERIKLIQFSKECPPDLISCISTLMYAAPRVDIPELIEIRKQFIA  
KYGKFFDEDAMANTGGILNERVVAKL SVQPPAAYLVQTYLEQICEKFEVDWSPNYRLSAE  
QMGEPMAPPSGFSVP IGQGTGLGHAAHTGMTVTGD DDDTTYDGGQSLPPP  
RAGNNAKVKSNQSEFHIPSAPGTSNAPSLDLPQAPAMTNTSDATNK DDDDEDNQNNGDS  
SSGKDTASYNDLAARFENLKNL

>comp3232\_c0\_seq1; 155 1 602 LEN=866; translated  
XRFSSCKSEKIMVVPDPNVLA AVERGSSVVFFDVSLGEGESAADLGRIRMELFTKDCPKT  
CENFRQFCTGEFLRNDQPTGYLNSSFHRVIKGFVLQGGDFINHDGTGKLSIYGTSFPDEN  
LTSKHHDNAGLLSMANSGPNTNGCQFFITCAAQHLDGKHTVFGRVLDDSSMLTVRKCEA  
VPVNGTTPRLPLIITQCGEL

>comp3233\_c0\_seq1; 168 1 364 LEN=559; translated  
XAITTTVSTIGTRYIFGVQNIATSFVASIEMGFSTLFGGGLGFAAQCTSNAIQKIPIS  
RQPWMHVLC TFGGAWAATKWVDAKHALLADVNELRAYKGLPPMVGSKNYMPFVPPVEESK  
E

>comp3234\_c0\_seq1; 266 1 849 LEN=849; translated  
QQQQQQHQQHPHQRHGNSRPVPQRERLRDLRKGRLPPALRPAHARGRLPEGPLCAEDQR  
APAIERPGAPPEAPEFQGAAA AEDA AFGSDEADPIAEAVFASMNTGGRLFHSTGHVFSVL  
ENCGGPSADPMLVLMVLVFDVVIYYSVDANFLEFQLDLLEGLV LALVEDEDGDDRRPSEPLA  
LSETATREDPLVA AVA VFGVEEGAVLPGKATNEFLSAVVATRLLSGWLP LSDLVRLAAG  
IEATIPFRPVGPSGETALGALHDRLSPLVLLPGNGAAAAAAA

>comp3235\_c0\_seq1; 383 589 1479 LEN=1527; translated

MTSSNLQIIRFVLFQLALGSGSIFGEGFQHQQFSILESYAGRRTSRSSLVFSKSKADEG  
SSESTVEEYRNVATKILSNFMQKDKMEISDDENTSSTVDFESPKISPSTSLETLISALDY  
ELSEKEWFVTGNVNPYSYFSEDFTFQDPDVKVESIEDYSKGVKIFNQSTARAEIISTALT  
EEVSSSGNPVVTVTWRLSGGVNIGFGLDIKPYIVYTDVDFVIDPNTSLIISQEDRFDIPSWD  
ILLSALFPFLIGKVTKPPAAAVPKRKLTMKIELIGSESRSSDLSGVFKSIFGDKS  
>comp3236\_c0\_seq1; 186 1 717 LEN=871; translated  
QSNPIQSKPIRCDMRYAICDAMVEGSDARQPSAGQQRSVSPRRSDARCILRIANANAN  
EKRKEMTPTDVLSAANAKKDXKVRSKDGEPTTNAVASCTQWLLARSFVCSGAVARGKKKV  
AGEPQEKDDQQHDCNGWDGVEAADRPPERTDGAFCSPSIAVSGGNAGIVTERRYGTREE  
RFGTNHRDVRSKECPGSFVPTARDRSHGIQLFRIRCDVFQYPYTFLLYFTSLHFTF  
>comp3237\_c0\_seq1; 187 132 764 LEN=924; translated  
MYRDERTSSNHMLSIRSILFLALLVVSTTAFAPPSRTSQLKSPLFALEVVEENDPFEAYQ  
TTPEQTTVVFKDNQIGTGVLVGEAESQQLKIKYTATFLEPNPGAQFDQSESFVCKTGQNK  
ILPGFEEGLKGMKVGGKRTIRIPPNGYGDQWYKGTIPPNAHLQFECELLSIAQTPQEEF  
MEKLNLDYGVGRAIGMTVCIGYLAISPFLTQ  
>comp3239\_c0\_seq1; 838 235 2634 LEN=2704; translated  
MSGATGSATPNVGLSSNRNSSSGTPSAPPRPASYGAAIPAATSGNFPAIGSTLGPYFSVG  
RLGFGTFCSIHKCINLGYHHNKKRKTENDKRKALRLVAAKVEIGEFKNSGVLGGEASIL  
HFLDESLPPNTVPTYMGHYVNSNRDREQNKTVTSAIVMEYLTGQDMHKIREWSTKHQEQQ  
QQEKHERAERGDDEDEAQFSPESYGVGKNGNEHGSPTKGSATNNRNKSGASTRRRIA  
IKDAVYLTAHVLLPLLRKMHSVGIHRDVKPSNVVKNRNDGDEDESNSGSNADMFCIVDF  
GLSKSIVVPHNTADAKQSWKGSTWGMASAPGTAVSSRDPSPGFELLSPDSSGPTGKTN  
NRPCYRAERPTADFRGTSMYASVRVHQLREYSRDDIWSLLYVFCDLASGGLPWMLYAAN  
RDRAACKLLKERIHGLEPHADGRIGTDTKRLLLGDEYHRALFRKRNGRVDPPMDHEEGAL  
IEDEEDPDLKPLALSEDVHKVGLLTKAFEHLKGLGYADIPDYDLIQGCLEGFREDGNKP  
STNGSEAGNGSCETPIPCIDWGLLAEHSRSTENAVHNGHGSVPWGFLDGDKGDNPLD  
ASVFAEAERSILRGNGEEEGGPLYGEAADMARLPLELRFMAQMDYNTAHTTIEPHLA  
LRDWLAACLLLHTPWDSKRYERGGHRSRGDGYKREFFLRLVNKCLGGAARFGGFRARGV  
IYRGGDENENTHNNNNNGSSSERPAKRRKVGMRNVHEPPGNETADLLLLSRVLFELRYTK  
KLEEKLSPPPPSRLSFGS  
>comp3240\_c0\_seq1; 614 39 1328 LEN=1527; translated  
MKFALFTASALYCANFATAFAPATRPAAVRKSVVPAAEQFDQEQFIAESKEMRLKHLEE  
QAMYALKISCENYGNVFPNAMIAGDVVITHLLHRMGYLDSSKCTIMCVDTFHLFPETM  
EFLKEIEEFYGFKAEVFCAEGIPVGDKDAYDKRYGADLWKENIEEYDRVCKVEFPQRGLK  
TLNTDCMINGRTRWQGFERAWIDLFEENAPIGGGLAKCNPLAYWTLEDYCFDYIAKYEVP  
PLHASGYPSIGDAKDTIPIPEDGSVIFKDFKFEQDKTQWLDYASERKGRFVGLANADGST  
KTECGIHVGGAEKTWDRDLWEEGAVKSIESNDAALEITKAGEASVIQVYAPWCQFCQKME  
EDFSTFAEGSDIPVYKFRGDEDEDFVNSANLNTEFPTVNVVKADGSVVKYESEDRSPEAI  
KKFVADTLA  
>comp3241\_c0\_seq1; 514 65 1375 LEN=1400; translated  
MTRFENVRLRSTKKGKTKKAPESSIDLLKAASAAMESLDVERAYETYSHAATRLO  
GADNEKHGVEDLIHVLEKMGELQVSMGDQDLAKDHFVRCGLGLEERGKDSAKDMSYYET  
RSNLFCFYIGQLSLEKEALDAYQNGITSLEKCMQLVADGQEIIVAMQDESDETTNNHEAIL  
KQKLSGAYCNIAELYLTDLCEEETAESDCEQYLEKALQLKSDGEPLVDALQTMASLRLS  
QQRQSEAIIPFVLRAYEKQRVGSEALATLVGLGEKTTDDDAASKGQAQELLEVEAANNLP  
EFEFRCQTAKLLLECAGLDREESGGTDQANECIAAAISVLGSLLAQNDEVIEIWIYLTGCA  
FAAQPPPLVDAAKFYLERAKEMLTDIQKALKDELQYADDSEKQELQEQLLEMNATQMSDVQ  
SKLGALPDAVEDMEEG  
>comp3242\_c0\_seq1; 223 53 625 LEN=625; minus strand; translated  
MPVLWFLQFLRFLPVLLLLVFFSLLAKRRKQVRVLPVPGREPPIPWGGALTVLVLVQFENG  
EGLAEDRANGSGTRFEHGFELSEGFDPGPPSVENSARGSGRSGAVWHTQAGRREEPNGGG  
GCALSLSFPSSSLPLSSFLSLFRFRSLCLCLGLLSVVSIAIVSVFVSVILPGWVGSEAR  
SAFVNDDDDDX  
>comp3243\_c0\_seq1; 201 1 621 LEN=841; translated  
QQQQQQRSEPPQSEDASVLVETLKSQNSILWERILRLQHTVDELEGQAARLVEVNSKLE  
IELREKEKMNQQLVQKMISTRSIAMDYTSAKDAEISLLKEHKLLLATKNSRLQSYLRTTD  
KFIGSIQSQEEMMKIQQQHLESTKRSKRKLTSTIFGDNEEHKTPNKTIVLVESNECKK  
EFNCTENSLGTGSATGKGSVDVIELL  
>comp3244\_c0\_seq1; 388 1 1210 LEN=1272; translated  
XAKQQEKDRSIERLLQTAFSMCDPLPSSDAGPLIRWAQRVWFDLAEGSFYPSSYIPFAL

LHKKVDLPPWPTQDACWKSSELHKDWGVRFHGSREDVNYRISYGDSGISLQVDWDSVTLV  
GNENGYEKQGPSAIEESADVGLLTSVRDAVSIWYNITKDVPCYNISQAAPNARTMRRT  
TGTKLPLLSPPPVEGYARDAYGDPFGLTEAIGSKTVDPERICHEAMVEQGSWGLLCCND  
EMNLVITDAQGTGHDFWPPSHPRSVKTYRDMIRNSTFEPCADPYGIYGSKEPIDPMSM  
RLDAYYGSNTKGHSNIVFSNGLLDPWSAGGVYRDSVRLEEFFDEDKAKVKINENDVVA  
LIIPFGGHHTDLMYSDDSDPNSVTEGRKIEEYIERWIRDWKP  
>comp3245\_c0\_seq2; 203 71 347 LEN=347; translated  
MKAI IAFLLLSAADAAGSLRGEAEPRGPPIACLVKGGTSQSQCATTSEDGSTCVWCSL  
SSYGACVDESIATQMKQMLPALQCDNEDDDDDX  
>comp3246\_c0\_seq1; 343 151 735 LEN=1235; translated  
MSSSRVHHFKLVLLGDTAVGKSCLVVRVRFVREFFEFQEP TIGAAFLTQTVALDDSTVKFE  
IWDTAGQERYRSLAPMYRGA AAAI VVYDITNPDSFTGAKSWVKELQRRGDPNVVIALAG  
NKADLESRRKVEFEEANSYAEENGI LHLETSAKNANNVKALFVEIAKKL PKNPPQPEREA  
FPLAAPQNDNRSCC  
>comp3247\_c0\_seq1; 382 183 1100 LEN=1281; translated  
MVGEAFLAPTATTTSTRSSRSMVDP MSTITTA EISEEFGKSVIIALVLGGGLIPATLSAN  
SAMFSALSGRKGYIPEGKEPPADLET FENYDPNNTFDPTMGNANNIKYREYVLD SGATGP  
ELPSSQLLFASDKIPVADIVAVLGRIEATESIVDWRNLPSATRGT VTPGAEPPMWLPRKA  
FKVLIRKSKFLGWPTDPK TGLPVGGEELKQSEEKRISKKDAIIGDAALDAVFDSWTGGAS  
IATPKVAVKLSKVPAKNEVDLDAFVQA AVLGRANTAF AALS FVVIQIIVFGVLFVQPL  
IEELS  
>comp3248\_c0\_seq1; 277 719 1694 LEN=1716; minus strand; translated  
MAQYSSAVRASALHCIAFH SASVRACKRFRIYGG AIGVRIGASTLSVGQLPVAGPRPHP  
LSPPNQIQELPVVFFLSVELFSEGGRRSPA EPEPVAGPVHQPRGAILPAPGF AAAALLLE  
VRLQPKAMGFRPFLASFGATGSAGGSPYGPALCALVPACRRPRK VAVGVVDAVRDEECVP  
VRPQLQGLAILVALVVGRLFAAASPPDCVHRRVVDLGGPARIGPVRKPRIPVDPVGHEED  
GTACLAPGGFDKVL SRQQRERFFVEALPLV VNPVSVPKVND DGGFPLVVVVARVGSSAA  
PFESRGATDQGRMARSSGVGSNLSW  
>comp3249\_c0\_seq1; 147 324 566 LEN=566; translated  
MSDDGLWEKPSWARGGLK LKKTGRADTMKSSGNLAAPITFTPFKNTDHSNKVANQQMLKR  
SEVGEAVKSGEDLAAPITFTP  
>comp3250\_c0\_seq1; 215 47 295 LEN=295; translated  
MAITNLSEITDAQKEELVASLACL VIGEGELTSES VQAVATASGNSVSDSLAALFATVVG  
NSKDGMKTFTPPPGGGGGGGGGG  
>comp3251\_c0\_seq1; 476 1 1667 LEN=1706; translated  
XPSALIVTKQNCRYKTHSTR TVRYVDQYYAGV GAPQHCHDVPSKACGDALGWLCVLLL  
HRSTLRRICDRACSGAGPPAAIEPTPPLDCCLETGVFPKR FVEQQKLQRILAVETDLEEN  
GVRGEEIEDEESLEEVSILCPPNCYGGANDESVPDERYL PDGIESGGEEEDDEMFLRSL  
PPSGDPFPTAATLAPAENLHGRLLCAAGCAYEIEAPYAQGAGFVAGSKITRLSVGVNSCL  
VGRTE DGI VVAFRGTQAGSPLDWLQNA AVALRRVPQGYAPRGRSRVHEGFY GALRNKLGRA  
VREVLRLRLREDAEAREDGKSGDSRPPPPK VVYLTGH SKGGLASL FALVMHNDEELPD  
PEGVVTFGAARVGNSEFASHFDRLIDQSTYENNDIIPFLPPGENSMQDMMMAAMEDPEKM  
MVMMEGIFWSEEDRKQLKHKSWGWN GRKNKPYAFWRYHPIGNRKYISPDRTVIEPVTS DL  
DASRIRDLERKTL LRFSEFRKAHCSACPD DLKGQEGTCDGGYFSALAPEVCRAWRSIEKK  
AETATKETKTKNDAQ  
>comp3252\_c0\_seq1; 276 1 1135 LEN=1227; translated  
KAKTTGRNNVTIRRQHHWFLSSSRKRARTEHWTSSSSGNNKINSSNNTAIAAGR FETCSI  
RCDKVQYRAIRAMPSSSTGVTRQRSFFLPLLLVLASCLSPALSLLSLPATT TTIASCR TAME  
LAAAEPNTAPGEP PRGTAAPSFKVLGVC GGIGSGKSTACKLLVSSCGCLAHIDADKVAHS  
VYAPGSRAVEDVAARFGEV LKNGGKGDVCEPREIDRKQLGAI VFADR SAMADLEKIVWP  
HVGAAIGDTIGK LREEWERSGGTAD EPGGRLPVV VLEAAVLLDAGWEDLADGVWAVTVPR  
EDALRRLIESRGLSEAEAAKRIDAQASCRGIGNVPEEVAAGAVTGVVANDGSLSDLERVL  
RESLEDPSFWKPAKEPC  
>comp3253\_c0\_seq1; 299 1 787 LEN=808; translated  
XANNKEQMIAMMETTKSSRRVLI AVVLVAITMTNDVGGFNPAVSVQSNAQSRSKLNYVP  
ARVDTFVEADDSAGGVGLAKDSAIKIVGDVKHKPGKAESLPKDLLRYNNLLTVDEATVQS  
ALKNSGSTILCMGQGVELYKDPGQTTNKEVTYGPQEAIKDAFTTAASAMESETLVFNFLG  
GDDLMLGEVTDACSELVVALDIATKAKISFN SVSHKAIPKGTCTVTVVSVGSPAGDSMIA  
QGEVYCRDQTYTTLQESDLNDE  
>comp3254\_c0\_seq1; 372 179 1165 LEN=1628; translated

MAACMPMLMSALLKHMFTAPGQEPWPHGSLRLINCGGIPAQPLNSAERIEALRADFVHKD  
EDVWIVSVFKSGTTWTIGILAAALYDHPAAVYSGNLQKMTRTFPCQPELPLDGLWGDDGFH  
SMEELNSWSSKRRCFKSHWPSQDFVLNPKGSKFIYVMRNAQDQMI SHWNQVWGMGFHYGT  
ANISFEDGWDTFVQDWLEGNVENGKWFHDHVASWYSRSKEIDSDVLLVRYEDLKENTDETI  
RKISNFVDTPMSDDIMARVKDLTSFERMKEADEKDIGLKFMRWLGVLKHHIRQGETGAG  
ELKLSSEEQKKILEEQYESKLLKPLGMPREW  
>comp3256\_c0\_seq1; 170 1 998 LEN=998; translated  
XSPFAAHPLCDRSTRRGHPNSNKQTQQSSRATIAIPNSSSGVPPAAGEGGPGFEPTXQKQ  
AGRQVVAFRFASFRSLAELRRAPSASTQRNARAARREGGMSSHGRSRASGGHRRRHYG  
DHE'TDEHRSETAERYRERNRRADRLHRERERERPGNRESRHRNDDDDDDREAKKRRLAAD  
REERMARLRDQLRKEDETLAELDRKQAETEGGAAGSKTSGPTEAVVEVRPGDLEGLDEEE  
QMRKLLGFDGFGSTKGEAVEDNHSTAARGGAANKARKYRQYMNKSGFNXAAGKDELSR  
PELPVRGSGGARGRHSADAHQSEAALCQYNISAX  
>comp3258\_c0\_seq1; 529 1 1570 LEN=1631; translated  
XDXSETTTATLVAREDRDVLVLEYNASDTRSKKALQFMGDLTGSHGIFSQKTGAGGRPQKP  
SVKKRCIIMDEVDGMGGGDRSGISELIQMIKKSKTPIICICNDRQSQKIKSLLPYCMDLR  
YSRPTKNSLANRAVRIAEMEGLVVERNAEAEIAESCGNDVRQVLNLLQMWAAQKKHVGGEN  
DNSLTYKKLDRGRS IQKDEMLRVSLFDAAKLIVEGPRDLQADDKAKLDSLFKRLDAFF  
VDYSFTGLIVQQNYPKVTNSQYQRIKGDDEAEIQLLERFHKAADSMSDYDMVESQIRGGD  
LNWSLLP'TTSM LAVKTGYHAGGDTGGFLGGFPEFTAWMGKNSSMGKNYRLLSELSHMNY  
KVSANDQELRQAYVPVLRDRILGLLSRADPDANKEAIDLMDYGLSRDDVVDKLNVLILG  
KKDFSFEEDLSKAKAAFTROYNAGSHRSQALIREQGGGAGGAKKKRKRAPITDEDEEAI  
GDSGDDQDSEDELDEEKELARLQAQFKKKGRKKAAPKKKSKK  
>comp3259\_c0\_seq1; 335 228 1073 LEN=1594; translated  
MEFPREFISGDKKEFFVPEIPNHTNRSIAIAALAFLLLLPVPASHAAVPAARDESSYNCP  
KYFESQTLGIQNVVRQPPASSPPAALLSNARGNTSKTSGSLSSYCPASQDGGKEYNRDEE  
EYSVRGLIYLPNNRMGSSMDNGKSRNQNPASSSLIVTVRTSENPSSSIPLMGARIPLA  
QIESFPISFVLSESSNNFLMADRSWERSVLDASNDLYVTAKICLDDGARGDPPLFEGSGI  
SRKILVPSGLSENEEDGFRAVRGAASIRMAGASVPDALYTW  
>comp3260\_c0\_seq1; 279 1 841 LEN=969; translated  
XSYGDPTYEDASGEKCIYTSKAKNHFLNISLHTDTVYMKLNSNATIDIRDDPQIGKFFSH  
PMNFADVWEIRKLNIDHRFRYTDIPEYFIRALENNPEACPNGLSILPSRYIANGTNNNDG  
FVEKYTRKPPFTSNEELMNFKKIWI EQAQS YFDEVAPSPSTNDDEVAPPGSRKKSKEQLC  
CHSSNNIKFICLLFEAIDRDTIERWAIDGDTFLAQVVSRRYDTHPLCRDILLSNTSYGP  
NVEASQKYEESVDCFSDTKPHISSSGGHFRGAIRDSICHW  
>comp3261\_c0\_seq1; 329 143 1645 LEN=1951; translated  
MSSSRVTTLAGNFGRLWKRGHESFSPDSRRILSVQKGATAYLQGLVTSDLLTAPVPPR  
EEKQDQDTGLETADEESEAE'TSGVDFSDHLRATCFLDNKGR IITD SLLWKVDENEYYIDV  
PADTADP LLSHMKQFILRRTKVVKDESARSGMASHVIFGTLNARNTPDGFLAGVDP RHP  
SLGTRVLSLDLPKGKEFTQMMSRQFPKAPGTYNLIRKLAGVAEGSELKGKVAEANQEFM  
NAVSFQKGCYLGQELTARVQFTGAVRKRIMPLMMTNVNMQCPRPWLIASQVQKEQYQQQE  
GIQTDELFTRSDESGNKDEELLPSDVSQLPPLPRLSPS IAGSMIASMSGSP IVAESKGE  
DKENSNNVGGVDDAKKASDELQAQTEALFEELQSYKVGDKIYDSNDGKAIQOIVALPEE  
GTNVLLAQMRLDRVGLLEKPAKPKGDDKATGDADDVPTWKHTNKVSI GEGSSASPLRFL  
PYLPLWWPTIDRGSGKAKEE  
>comp3262\_c0\_seq1; 302 451 1197 LEN=1197; translated  
MLMRLLLAGSLFMGVAESQYTCQFSEEI SIHKGGTTFLSNYVNEDEGTFTMRLRYTGQA  
WVIGVNTGKGMMPAHAVIGDVSRGVKRYSLINDDKKASGVI PLEDVNAHLKAGKFHQ  
TDSESI LEFTQDLVVREPGSSVYHEISLSSVWIFAIGLPGNAWEGKHKVHGAFDGLLELF  
KGCVKDTPPTLPPTDMPANIP TNMPTLPPTTEKLTFEANGVDYAINQEDPYGDEAYTFDG  
YNETFRNET  
>comp3263\_c0\_seq1; 537 178 1581 LEN=1736; translated  
MKVKEEKENMDQRISLISEQNNSDRDEREDEGLKNQRPIQNERQRGRWRKLAFWRRGQTL  
DEGVESEALMPSGFGDDEGLLGGDI STSDLVYQYKTDNEIKCSTSDYNDDGSDEEEDTE  
ENLEAIEEDNLLILTDVPTKNHKVLNAAI SPTSVMASLNGESSLNCDSSSTRSSESSSDC  
SESRS DSSSESSSEDG SVVRKHNHVDLLL GPLECTSFNSNDNSDSSLESEIDDSVPAPI  
STTGRPALDRRCAS'TMSFFDKKDHSSKFSQSSVRSQSMRSGFCNGKEDDYADIDSGR  
KRLNGRIEGFGSSLSPEKSSSRTLRQLQSFRNGSSEMKKMSMERSSSWTTTVE SRMND  
IIDVMFVPPPELRFEEGYMIASRRDRDVIPTSKGVNPTKSN DYIARIERELRQKDLEITC  
WKNRVKELEKEINRLKEVIDEETLLNVCVCGQKTTEIEWQSEEGDLLS

>comp3264\_c0\_seq1; 412 62 1192 LEN=1350; translated  
MTESSAHFYLLHEEHCHCCVTSNASKVDTLPMSSIDESRNDFMRTILDLNNRGSVSLLDG  
DYSVANNLFELAMKRLKDHSESESGVLPSSHLPVQFCDCDCSSSLPLDELDDSTESLPAP  
PSRSPDSDEISTVPVFPNSSRSSNLRIKRMSTSTLPMNPFYQQLNQAPQACQTDH  
KFYQQVYCLPIVLDDEGEWNNASTKDKSFVLLFNALCNHLLGMELLGSRQNLKHQGEHT  
KDDRDKRVLDEMCSRVFITARVLYRLGLENASSFIHGVDKICYLAIFNNMSHVCKTMDGF  
NSIEAFAMDKHLLKAIYWWKDTECRRIQETATWARTSPGTANTSIVEEDGEIIDAFLDNT  
FYLVGVQQNVAPAPVA

>comp3265\_c0\_seq1; 542 286 1170 LEN=1361; translated  
MPIAGIKTRTDLQNDLFLCKEERDFEFESRFLQVSELKALKQELAKSKKEIRRLRMFLMD  
QDTANNPLLLPPDQIDAFPTPKNHKGSFRGSFGTRENALCEDKGGHGHYEGEDEGRNDS  
IHQHIAEKDDASSLTAEIEELDQQDETLEREQERQDQERHREDLQIQSSSSSIRTSPSR  
YESDRGDGEEEEEEEDVRKSAEKLLAWASYRSTMSNRSLNASRTGDLSSVASPSVRTSGS  
ARVSLLGKMIETADSHDRDDNSHCNNDNCNEKNLSLEEEKKDEDCSRGNEVQAN

>comp3266\_c0\_seq1; 613 193 1917 LEN=1972; translated  
MFRPLPTSSVASVSSILLCVSFLSQTTQPFTAKPRVATTKNIPSSPTELFSAAAANPTS  
EIPELMLFNSKTRSKPEFQTLSPRKVAMYTCGPTVYDYAHVGNFRAFLTYDLVKRVLLYF  
GYDVEHICNLTDVDDKIINRANEQGLAVGAINDLTLKFENYFFDDLKALNVMADRYPRA  
TEHIPMEMMILQLAEKDLAYETEDGSWYFATSKKEGYGEQLVQLNKDDMESQQDDTAVG  
TDMKQDPRDFALWKAFKSPDREDASWEHPDGKIKKGRPGWHLECSAMARKYLGDITLHGG  
GGCDLQFPHHENEIAQSEGVTKPYCNYWVHNGFVNINDEKMSKSLGNFLTLRTACPKAV  
DVRAYRFFVMSSQYQKQLGFTAQAMDASKNSLKRIDRVMQQIEDAVGRNKENADGEPQSS  
STLSDAASKALKNFDLALLDDLMPRASASLFLSVKATEKEFEKRVKDEATLTLKGLAE  
VQSALLQMDKVFIFDYVPLTKEEEEALAASGSSDSEGGATEVSDVEMELVVQRTDAKEA  
KDWEADSLRARITELGFAVKDVKGGDPIVTKIE

>comp3267\_c0\_seq1; 337 719 1918 LEN=2045; translated  
MELYSFSLSNYALWPFLLAFFSLLIAVSAQDVSRRYLEEGEEEGEQVRVTISSGLTITSM  
VLGLISSLLCICALIFVISFRKRTIVALGQPPFLCLICIGSLMVGSKNLFESP KAVVRMG  
TLINMNLDTLCIIRLWLLDVGLIIVYMSFFCKLWRTEKVCQFRKNQIIHVSHVIGPFVFI  
LLLQIGLLTAMTILAPPFWTWKVPMPKPHDSSNTDVVEKCYQYQFSNRMNMAFNIA TLAVV  
IICQAITIWMYSYKTRKIREDISDSRRIFQTVVFQILICFPYTLVNGAFTNADVTFFVFLY  
EAMYPFLMSVSSVGFLIFPKIHCILYQRKFGQLPSYARTIGGGVHVSITSSSLPTNSTPI  
TRNATSNKIAESRNNQTPQVPVRDASATNKSILKEGMA

>comp3268\_c0\_seq1; 249 1 428 LEN=428; translated  
DEEDNSSDEDEENDEDEDLIDNFVRNDDGGGEGSVAMPKLECIARAMGFETAPPK  
PRDRDQVEEELTLAPTSAPT KKRKKIGKKRANKGGGGGK KKKKNQKNKKKKRKKKSEE  
FHYEKTDKNETITRHTITSSIGX

>comp3269\_c0\_seq1; 239 174 550 LEN=550; translated  
MFFAKRWLPAVLAVDLVSRSLSLVXQDGGGSLHSRFPQPTQTTPLGASVLDLFRVLEEEE  
EEASKNKKNSRSKAGAALREPKPFRMEFEEEEEYGEDEEVFEMTDEDNEDEDSNEGYQEN  
ENENEN

>comp3270\_c0\_seq1; 253 561 971 LEN=1243; translated  
MIVGSSSCNSACSHRAGIRQDYRRSLRYTRTLDVILEETSTEQNQQEQHFYVTPNNSQ  
HLEQDNRSSCDSPTTTTVLTDFWHSMQSMKKSATSVSLNCLVGANDNSNNA SEELNSGVL  
IEDDEGYDNFLDDWDL

>comp3271\_c0\_seq1; 483 144 1814 LEN=1996; translated  
MDAGEQTKRRILVCCFGSRGDVQPFAALARGLDYQEGSVRFEVLGITNVNDGVSIFRSL  
GVKAEGVHFDMAKMIRENPKMKNAMETGNAVAFGAFMSKQFVRHFPKEFSEQWKIARDFR  
PDMILGTTMMWLQASAIQALKVPVFHADLGPFSFLPISRATQTEMHEPQCLHRFMSFLM  
VCSMSVLMNMKNEEGDSSLGTMHKELVAGGPGAGPNAVPESEERLLGENGAGQFAREWNP  
LAPNLFASISILPKSKFDDLPIYAERSVWTGNWYVSKAIQEELARTGDPNFSNNTKGV  
DVQKTVLEFIEDQRYGTDLLCSQPAYIGWGSMAVAVSPEHMTRLAIESLKLAGLSGIVLG  
GFAKLNPMDLKEQDRDLCDYAEKHVFLFLQSAPHEWLFPRCCVTVHHGGAGTAAAFRS  
VPTIVTPCIADQYDNASLIEDSGCVGFQKPLRKIKAKELADVLVRCSSSSSEAENGNRN  
VDTIRSKCKQVAELGKEDGILNAIRVIEDFVIKRLDSGTWKQEYEARLQORIETPWSFF  
RALYRMLIYKDPFVEE

>comp3272\_c0\_seq1; 164 594 683 LEN=683; minus strand; translated  
MDHDLAAVAGDAAGCVAGAGMDCVGVVVV

>comp3272\_c0\_seq2; 164 766 855 LEN=855; minus strand; translated  
MDHDLAAVAGDAAGCVAGAGMDCVGVVVV

>comp3273\_c0\_seq1; 110 168 710 LEN=853; translated  
MDQHEHRVSPQNAGAERERLGGGPTATSDDADPVRQSHSIPLQDLPCDAFALVVSYP  
LESLTNLGSASHPLGRMVFRQNLNCDRCRIPLFADENLSSRTPHTRAFSCSVCRSTLCG  
YQLFDYDRRNCKPQKCDGCGSIECRACMEAHTSDEHADGYGTENYCKACQGEFEFEGMGGC  
>comp3274\_c0\_seq1; 166 126 461 LEN=1241; translated  
MPEFGDPGYVYDPMDDLPGQKYVEYSKDGEDGETKIKDVDSGLKFEIKGKYIFLKEVKHP  
APTHNLHPGDRVIAVNGKTVEKYKKDLTKIKTAVDDHNVVRLVVDPTTLRK  
>comp3275\_c0\_seq1; 350 305 1147 LEN=1519; translated  
MKGRDTRKFRSFLSSVLLVLAFFLLRSTSNAFITISSKKLVQPQLSRFISPADGRTNLQRT  
TFHEVYAQNARSIKPWYSSSTTSLSMYNLPPGGSGGGGDKNEISEVAKSVGSLLLVVG  
FISPLGGFVLGIFNSFLLLAFLPLLATVGFQVWSSLNTVKGECPNCGAPATVMKTKSSG  
TNVVDVMPAQSI CFCGAVLQANDDNTGINNVSGRTSIDDNLNSPMGGQSI FDLFSTPPQ  
QQQQASTTRTSETRKNNTSDSGVDKGAVIDVDILDDDKPFQ  
>comp3276\_c0\_seq1; 312 1 1646 LEN=2135; translated  
XQKDNEANIDDSKITNETDSGGSNNFQQKDRDRPPLNIVIFFPDDMNHRSLQDVSGTGYV  
KTPFLTELARDGIRFAKNAVTTSCWMSRATLFTGQYTS SHGSMQLKCPRTLPQYWN  
WVATLQRLGGYYVGHVGVKQYMKNAPLPHYFNFSNFFEGSHWYSHQRQPMASD  
KSVMHAI EFLQERPKDTPFALTVAAYYPPKAVGASKEPGGQWFPKESKALYANTTYE  
PPYDVEKAHADLPDFLKKKIMRNRYLERWDTEKYNTGMRNYHALVTEVDLASSQI  
VEELKRQGLYENTMIIFTSDNGLMMGSHGLGGKWIAYEESIRVPLIIYDPRMPSEK  
RGSVDNSMTLNIDLASTILGAANIAPPEAMQGRDIADLYLSSNDGTSKLKEKPWRTE  
YLYEYPIWLSLQNSLIGERYKYIHWMGFQSEQLFDIQEDPFELNDLIKQVSKDEAEV  
DSNHIAQMEKLAVGLFETLHGVKVTISELHDLKKEGIAVQNKSESEATLKELEAL  
ISELKIRYENVRNEVQGGPKPDWCDPSLEYYP  
>comp3277\_c0\_seq1; 326 1 781 LEN=811; translated  
XPASLSPAIPTRPASPGGMALSTPTQKLLGTTTEAATPVTPLDHELEMTSSKNGD  
GTEELVDLLKHTTTAAPATPNKSFDDSTETDVSVLRPIANAEELRLQAKSRTMLG  
AKTKSRRSSILLDRLLRSASKFDPDDANHQSTSTAGGGGTAGCDPERLAGSLMGLD  
VADLDEFQGMFPHTKIAYELVEAHKLHIDQVME TLKVEMDALKDFELVLLLEQGP  
VRPTEEEVVEYFESLGLCLEQRKKAGAILQKKMDRISQG  
>comp3278\_c0\_seq1; 190 1 571 LEN=634; translated  
XKQQQTSSSNSKIQATSPFTFVKMPRYQDKFENVLVPFLGNSKAMKDTARESF  
GQAMKAHKDVKVIQERRARFVTGFSIVGALLGGNVGCMVAGLSVTIVSFLVSLR  
DSPYHEI IETLNALGYKEKEQLINELERLLQCEGCSKDKFSARLYSAEKIPKGR  
EKIWKLCLESLSYYFTQSESESESEWESE  
>comp3279\_c0\_seq1; 384 155 898 LEN=1143; translated  
MTNHSRSIVSQVLLAFTLLAFVLLASPSNAFAQEPKRFQRNNGRESQATATT  
SNVGSSTCLNSTPQSPENQQSQTNKPDVVKQDFVKAIDRVQDEIEAQYRAQLEI  
EPSPEGERWLAERAQAREEDQKYVFLVGKLDVDLPIDTQPELDTESIGPLVLT  
NVWGRTAETGMQSFDTITKVSVKGNDDAGASFYKTKGTPLQETAGALTAQAHA  
ISTGKTIDIQLEVQRLIKGY YAPEDKI  
>comp3280\_c0\_seq1; 473 322 1410 LEN=1680; translated  
MKYSTTAALLAIAMSGGSAFTPSFRRQESTTKTYSSVEVLVEAPLEETVSAE  
VLEADEEDYEGPLTAELINSRLEKQLAKMRLKDQTSKQLEKEDLVI I HEDKN  
ILVVDKPSGVLTVPGKNDNPSLAASVHANVKNSLPTGDHVVHRLGMDTSGLI  
IMAKNKNVRELNGVFRSRKVDRYEALVAGHIEKDDGLINLPVMRDYRCPPFV  
RISTDDHQWALVDLTAEDVGKKILEGPKE SITKYEVVSREFLQGFVTRVTLT  
SITGRYHQINVHLAAFGHPIIGDNVYGINGEALPNGLTPAELNELIPNPNRA  
DDETQLLNESVNAKKLPPCIHAKYIKFTHPITKKEYEFSTDS PF  
>comp3281\_c0\_seq1; 361 54 1235 LEN=1260; translated  
MRKIKRTIIPDWMVVALSAAFVVFVVGASSKNNRPHVPSQPRITIGSVEITAT  
VETRTQVEDSPGNSTIALKKKVTKPKKKRPNGKTSGSNSDKRSYSSGTTST  
SLRRIKREYKDAVDMG IAYDWAKQRLVTRKSKTKRAPSVDGDADGRIPSI  
MCLGPITTNLRQWHFSFRGAGDGAYS KGIYHGQILLPKDYPMSPSVQMWTP  
SGRFVPGRDICLSASNYHPESWTPKWSIQGIVNALRLHMLTAPNEIGGMQ  
STHDEEVEFARLSLAWKQRWRDGGSIITVDHRLLEEGILSDGS SEEPTNIG  
ELLQDLRGETGVREESEDESQGAEVAAEQADHATTEDGLCEYGKESDNRI  
RFGARFSLSMSTVTSLVQLACLVIIVLLFFNR  
>comp3282\_c0\_seq1; 317 1 1068 LEN=1385; translated  
EFVKGGYHRTLANAGKYGATKPIFRDVTTRYVKLQPSTSRMITSFFKPKRVR  
ASAGKENDSGEREETTTAVKKLRTHIDPPSKKNATLSPEAKELVSYLNHTNT  
DSDSSWRDALGKHI

SSPSFDRLATFVAKERNQKTVPVVEDTFAALNLCPLSKVKVVIIVGQDPYHGPQAHGLC  
FSVRRGVPAPPSLRNVYKELLNDASIEENFRSIPGHGNLERWARQGVLMINNVLTVRRGEA  
HSHKKKGWEAVTDEIIRAVIDRANRRKQQAIEGGTKRGGVVFLWGWKATEKATTALAGAA  
SRHTIICTSHPSPLGATKTKSPFLGSRFCFRANEALRKMGEHEIDWRVDGPLAQE  
>comp3283\_c0\_seq1; 691 271 2112 LEN=2766; translated  
MANSSTRTAALLSLFFLWTGTHCCSFFAEAWPVLPVSRTEPSSRLFLSFFEKNIDDDAK  
KDSNRKNSNNNNHNNKHNHNHNQDPQYNPIRKRPPGHIGSKRNSLNAYDYGFNSRIDSSQ  
PPPERKYEPSPSPNRRHEPAEVFYRPGGNRQALERETPDAKAEAAASGAEETKRLEFGM  
EDLRRPGQQWQPPMPQGTIPTPSRGRDGRGSRGRNRYHPGSSRPGRTPASTQSPFSRAYSS  
FSSTTTTTRRAYSSFSSTTTTTRRRTSRQPSGEPFVYFSTTTASSTHRPRSRYQRRPLTEN  
PGMYRSSSRPEMFDVYDALQQRWQQQHEQQRRREQVEQSTSSPVTNADQSGGKNQTA  
ASETANSEFQSVLDQAAIVLRKHLDLGVNEHIAVGPISQSSSFATTASFGVDSFYANN  
ANQRMVRTLRLDGLCHSPWITATLTVDENDELSEIRLRSNDGRSDRVPISQSSRGRSGM  
NSGVANGATDSINRSGSGASNQNSIDRSFIDVEIIDDEDEDEEDYDYDYDCDEDQDDG  
EDESWNDGEGEESCGVDMDDESWNSEHGRSWSDSGYEASWGDDGDNGDAPWNPGEAGAS  
WGEAAWKSIDRE  
>comp3284\_c0\_seq1; 264 259 999 LEN=1111; translated  
MSRGKYDNLCTSSSWGPRQTPFLFAEKQELSVYLDLSDKLDLDERITSLFAWLSRAFAGRDEYN  
NLMLAIAAIFGNLPEDSPPVQMAKAALKDVPPEEKTGDRFSIEERESNSLGAMGAAQWT  
GRWKTRPHALLELEKNITTTIDDWVKTLPRGCKRTIKKALAQNFVTTKHILADEPAPHSSL  
AHFRCVIEHEVRLLRNMYGEDAFFDALAEGVSRYVGTTRMTGDIREYRSEEGKVIAIAHE  
VCRTFH  
>comp3284\_c0\_seq2; 333 259 1260 LEN=1601; translated  
MSRGKYDNLCTSSSWGPRQTPFLFAEKQELSVYLDLSDKLDLDERITSLFAWLSRAFAGRDEYN  
NLMLAIAAIFGNLPEDSPPVQMAKAALKDVPPEEKTGDRFSIEERESNSLGAMGAAQWT  
GRWKTRPHALLELEKNITTTIDDWVKTLPRGCKRTIKKALAQNFVTTKHILADEPAPHSSL  
AHFRCVIEHEVRLLRNMYGEDAFFDALAEGVSRYVGTTRMTGDIREYRSEEGKVIAIAHE  
VRKGSTVRGQWFYATDEAAKNYVWFHSVYSLIERSLEAGDVACVDLGPSPGSDAFSELKAR  
YGFESVDDWTRVADYSGFYFNGKPRRFSGLFL  
>comp3285\_c0\_seq1; 569 65 1303 LEN=1539; translated  
MVPSWILARWILSSILVVAHLGIALAWPPSRPTIRTASTKCSALGGDNNNGHEERESAQK  
GRREILTEWVAGTAMAAAASSTSVGLPFAFAEGGQPLPPVEVTPLSPDAKCLFNEGRALES  
QGNMIAAQRLYGKVVKISPRFIYGSNNGNTEVALGDLSSADDNYSRAIELCQESSAEAA  
AQGFGIKKCNLDLYVLLNRGVSRLNTPGRKVEALQDLRQANLNRERPDVILQNLARAE  
LNGFYTMADKNYNLAISMTANEVNPFWLRSAMVKLQGLDQGGRDLLKRVENRFPDAPEV  
KAASATFLWEMARPQANPASALLGATSSPSNNKNAPDDAPAAKPSPEYKVDARQK  
LEIPDRQRLRFVDPKYLDLTIAWPPIMKEGVTSIARNVGDYKRVAAAPVPQ  
>comp3287\_c0\_seq1; 320 133 1485 LEN=1951; translated  
MPSSTLYLPFKVPVRYDLVQPLANWLDNDDSHVAFHKENIGNSCAGVDAAPAMIVPKPAY  
NSVQCRSELLRIAALRNCMSEALQDSHRTALEEHEMLRDCQDYHATLLEFEKRGFPPTGGG  
GDADEENGIDLTRWGAFFSDDDDHGAQKAGCGGNGVPEHTHTLLWDRACLTWNIAALRSAS  
AALETDDKTKEGLKSAISSLQQAASHLSLCRQILDHSRENEYISTVDLSKAMLQFWEKLL  
LAQAQTCIYKLANLGGSSVRNHTTAYLIQGAAPLYNEALILAQDPRLOSELPTRCREWA  
AHCKARSLVCQARAYFHMSIEGRLTKAHGLEIGRLNQTISALDSVLDVFCRSTQVLKEAIT  
LAGGGKSGKGSAAISPIAEAAATIQPEAEGLLRLASDRRKAAEEDNRTVYMEHIPKPRDL  
QEIRAQTMVKTDLPLPETMVKPRTNLFGWE  
>comp3288\_c0\_seq1; 414 131 772 LEN=953; translated  
MAPPDTLEALGHLQDYADASEKAHDELKSLWQLTKSRRNVRSGILGVDSANAYTAGLLR  
EELRAQFRVFDAAARGDNDGIADLVNEEEGAAPAKDSGAASARSSAPEWKLCNVRLEK  
PKTDDEQSLDPNPSSSWVVEEEDLTDGDERRNEDLDEEERILQTDPLKLFGGYFTARE  
LKVAQRNAQRALDGYIQAASDAARLLAMLPAEK  
>comp3289\_c0\_seq1; 308 74 919 LEN=1186; translated  
MVKEYELLSFVPSVTPASSHSATYSCTLTNQWSAATHPVLYSSISQNAHWSPPALVAHNE  
AYNLWTPNELASPGVENVAETGSTSKLEKEIQKAQKKKKAGDLVVGNGQFNRNDPPQTFE  
SITLTPYFPLFSAITMAAPSPDWFTGFYDVAVDGGETGVVWYKMFELATFPWDGGTEQG  
STYSINNAPEDPHPV IQQLTADTVPDNGILLNPDGDEVLPMAKWTCELVDSSCSNSDNLR  
FKNFKKRNCAWAVAKRKRCAKVFGRGIPLSSWCPETCGKCN  
>comp3290\_c0\_seq1; 320 227 918 LEN=918; translated  
MIRPSLFLMSLVILAWAAPETAFFIPSASQRAPLPATSLSPSSRLSAIYSPGRSASRG  
GNKDESKRQYRVGELVTRTELSRIIHSGVIKGRDATYLDEELRTRISVVSVDVSPDLRQA

RVSVSIRNANPKQRQPSGSDEIMYFEDDPAVDKRRAFSWLVDNTKTLRHTLAQKMSHMKT  
SSPDLTFHQVDVAAATDVMYLIDKVSJKYKRESIGEYEF LGDIDEEDDDDX  
>comp3291\_c0\_seq1; 397 66 1979 LEN=2120; translated  
MELTRMITPWLANTKTEGVTAMSAPTSGEAMNTYSKAKLLVTIFLFRVCYLSGMVVSSH  
LLEHNP GDDVLRFDMLNDVNGCFCLQGQACDNGATDYTASDCAILS NHSSNGSQRWYEF  
LLTPFTKWDAARFLHLATNP SMRDP RYLLSPPSPSEN PWESSEQAHAFLPMFP SILQHF  
SLFLYHILPEQILPPTFESLVVLSGILFNNFFCLTVATLGLYHLTFLVISRNKTLNSGGG  
QREQQYHDKGRHFVASVVCLVFGIWNPALVFFATNYSETFFATTSILGHLCIKLSKNQGN  
IAMWFIGIGCWMVGSYTRSNGSLQSLWLLQDGLSHIILLFRHRNSVCHKGGTNVATNPRT  
TNLSYLFRAIVIGIQSTMGAVLVTLPVRYHDLKGWDRHCVGAAVRPSWCSYGNENPSVLS  
SSFSLYRYIQDKHWNVGFRRYEWKQIPNFLLAAPITLSTIGVYQWIHWSLVTDYGK GK  
FPSSRGMLFVGVPLHALAESASAFDQGASSGTVAHGSRNDTTEPVFAPWSLLENSLLG  
HYAILAILAFVGLFIAHVQISTRMICSASPAITWFIANILMSPPTNDAGTSVSKYNEKEP  
KSGSYVDILQEKRRDIVLFYIALYLLLGSVLHVNF LPW  
>comp3292\_c0\_seq1; 427 254 1432 LEN=1744; translated  
MPVLRNVDFVFKARADIRTSASGGLVTLAASTAFLLFVCQVCVYVFPNATHTLHLS  
THFPMLPSGSGKTNGLSASERRAIDREGRIPLYFKITFLHLPCKHVDVALNGEPIRGDAH  
SEWSSSGSSSKSHGKNHNKPIDRSKLTIKKYPPRSSEIKTIFGSEQSHGARAHRGKGC  
LVGNLRVPLVAGSLTISMTRDSWAEAIQYFMVRSSLPEAEAAARQDELHKNDSTHFIHE  
VRFSGKHGSGGLVEHGYPVPLENKLHSIENDLNGVALQEVHVKLIPTVHSNPGLLEKVF  
GRRGRMYQMSVVDHTLKPETMVAGGVSTLLPGISLGYDVMPLAVHIDELNGEGGFFGFLA  
TLVGI VGGCFVTVGLFAGCAVRSVQAVAKKID  
>comp3293\_c0\_seq1; 85 1 722 LEN=973; minus strand; translated  
XSFRFVSEAAPGGNREAAAVRPVVLARSDFRRVTAGESAGTTASASSKGDPAKPLG  
PDPPEGPPQGRCKEPPPQGPFRVHF GFAPRASGLFPPLRPLPPQPAALFPGLPPQVGPV  
LGTVPCASPAFGLQTQGTGGEAKGKRPASEGCGKRRHRPPLRKGDRRQNGSGEDPGGAE  
PPTHRPRGRKVSVHWNVIGILDWIENAKDSADRTAPSIYGLSPREFLFLSLSLSAERSV  
W  
>comp3294\_c0\_seq1; 234 359 853 LEN=881; minus strand; translated  
MPTTTLTSGTVARLSAALSAVLLL TGAPIIPLASASASGAPFCERVAGGVPLSPPSTWLD  
FGRATVEENDLAGALSGGSLRYGSIGTIRGRPVDLLVRTKDDAPDSVRSGDGAAGLVDPI  
YEGSFGQIALETVRDEPGSGSGTFEFCFVEPGTTNEVVADFFQW  
>comp3295\_c0\_seq1; 507 205 1449 LEN=1599; translated  
MILTAAASAQRSRFARAITAEASHLCRSLSAFGAKLDAPETLAQSPSDSDRRCYSTSP  
FKIHSFGDDGKPLSEREMKEIEAEAEAKILAEAREAKTYPNWKPGERKRPLIKTHSEEF  
MRELMPEKFLDNPIWTLRDKRCGALAIKVGMMPVWDEVWGVVRHPTTVLWLDNRNIVLGH  
KTVKHYSAIRVAAGERKAKNVSKAVLGYQKEDPQLSESPYLVREFRVTDDHEHLLPLNST  
IHARHFVPGQNVDSVSGISKKGFGQAMKRHGFRGMPASHGTSLSHRALGSTGQCQDPGK  
FKGKMGMRMGTDRVTVQNLQILKIDRGRNLIYVKGHVPGQKGFVEIRDAVKKPLWR  
TDKVLGSLERPPLPTFEYDSEIDGTGECYEEFMPLGDEDPLDPDYMDTTIAIKAQA  
>comp3296\_c0\_seq1; 597 314 1945 LEN=1945; translated  
MGVFAHRNVRRGQYLLEDDGDLVVPVYDMTRHVGHAKYHFLWEEYTWRAAGFGGMSE  
EVDVKKVKACSPMGAAINCMLPLVNVVDDFDNRKVGLSGIEAVPGNNATAWSLSSPGAG  
FSPYYNRRWKAKRYIPAGMELYGNYGEGYFKSRSSYGMIPFRENYKHADRLLRTRFQ  
RITRKVATEEVKDLLISLQSMAAIWDES RNMNAI PQTDPKGDHAVVDWLLKKTGGTGM  
LHYNSSIRDLDWLDHEGRCMDNIRDGVSTIPHAGRGAFARRKIRKGAIVAPAPLIQISDR  
DIFTIYGKKPEAEDKKGKETYWLATDHDNPIHHQLLLNYCFGHGESTLLLCPYGLMTSH  
INHDAVAPNTRVAWAADDQMAHPEWREKPIKKWARQDKAGLSFDFVALRDI EPGEEIT  
IDYGDEWEEAWQRHLRSYYREEETNGSESENVLRHHLPAFELNKLVDLKLQTL  
EEGDYELQGLHLFCRKPYVEWYGASATVPGEDDDTLQVRTESGGTTTTIQWNEHYD  
WDDEVVFP CIRQRHTSSNNNS  
>comp3297\_c0\_seq1; 356 140 1513 LEN=1616; translated  
MRKMAGATIKGASRFLRGYRPAASLANSSSLCALQNISGYQISMAPPFWSPSCSVST  
QRFA SSESASPPTRQRQPAPQTKPRQRKLDVAIVGPPNAGKSQLVNVLTQSP  
IAAVSRKRHTT RSDLLGARTIGDTQIVFKDTPGFRLIENAKEERLDRDLIATA  
ASEMQDVDFTLVLVDSAR KLSENYRHALVQLMIGAINSNRIEDSDDLDEEDSDRT  
PKTARN SKDNGSNSNSNVNSN RYNKGKFAIVLNKVDLVKPKKDLISLAMDIG  
SMADVCL EDQFKKNGKPFDFEAQLEHSP I VFYVSALKEDGTD  
DIMELLDLATPSQEWVPEPGRATNMVKEQVQEVIREKIYRSTHRE  
VPHAVQQVNRIFRRI PNKGVVIHQDLVVF TSKSHKLVMGSGGGRTLKRIQ  
ESAQKDLQNM FGCDVALQLHVKFSKSKORRAQSGAEYNLGEVSQSVL



>comp3298\_c0\_seq1; 261 1 753 LEN=1005; translated  
XKVLNDQGKCFFLKGREVAKARQQDNGIYHPISLPAGIASDFFFNPSPCPGFKLGTTCNS  
GIFSRSSIKASCAEDDKVEVSGTVTAPSAFEDA EVTFVPCIRSTGVCFDEYSQRGGNICD  
LISASDGSDCGSAGTYTIDQEFDIPEEVTDHWSFMRLVTIRVLINDEEACTQNATTNASS  
SAFMATGMASLFAVGSLSMYFMRRRQRPVVLVDENGYADRHLGRFVQMNDLSPSVSSIGL  
RGGFSWSGMA

>comp3299\_c0\_seq1; 317 1 822 LEN=859; translated  
GNGNGNNNKDAQGETGTTQNVSRRLPPASSPTYSWGDSATDVA AVAWELAILLETCLSHD  
YVSTICGALEDSSTGASAGAELRALVSEVLGETAAQIRPLVERAWNEIVVGHILDRCSGV  
LGAVKGVVATYRMTNRPPTQASPYVKTI LRPLKEFADDLALRTPEHIGERWKIAVLASI  
ADRYGTAVEELITTVQRTEVALQSRRTKATSSGGARISDGDVKVQLQLFLDYQAFCDARE  
VLGQGGDLVSVVPGIARL GELTKEGAAMLHPK

>comp3300\_c0\_seq1; 134 1 640 LEN=753; translated  
LSELSNVLEGTETTTI IASEIVDASSEKDTKEAREFASAVLTGTVIGRTLQDALRSLSEED  
SDDHATDEYATKSDGTQARADGIDEDTEDGGDGDGVQDEKCAVRMDSQSMNRILKSFQEA  
VVESRLCHKPDNGKAPRGLLKGRCDYFNRYGQNWMLMDEVQIKARPQKFTKRRRDDRPS  
LWDRDDDKTAKTTKKEIVVKEKMQLLAYGDIS

>comp3301\_c0\_seq1; 376 88 501 LEN=618; translated  
MKFNANVSSRRKSRKAHFGAHSEARRKLSANLSKELQARHGVRSMPIRKDDEVLI TRG  
MYKTREGKVTAVYRKKVWHVERISREKVNGATVPVGI PASALVITKLLDKDRKAKLEA  
KAGKKGEKKDET MANVD

>comp3303\_c0\_seq1; 265 688 1527 LEN=1702; translated  
MQSVLLTILVLVLSVFYLD AFLPSEFRTRSQILRARQRGSLVSSPESRS AWPSGRSKHA  
GNALAGSSVPNNDAGGEGAAAALSHKDIVWKL RPPAGTGRRRRLWLRFAANAIRLDCMVF  
RKQLPTALCPKGGQALLEAHTHDENGRLVKIGRFGFTTERGAPAEPIQETIDDLYGVKQL  
AGIGAI IYMFVEPEYRGRNVGTLALEVVR CIHAIQNI DFTVLVDDD GSGKLN DWYRER  
YSEAPKLQNILGSPDAVHGISMIAPTSLTLDEDCRIKWW

>comp3304\_c0\_seq1; 698 86 1729 LEN=1847; translated  
MPNDENEMQTEVWC FREDDIFVNVDDGNGDEDEDADEEEEGNENDATCHDI I VPRNFLCM  
DALGLTNEIDDEVL SFLYDFDTTGLLQDEEEVKEEEGIEQKEEKEQEREEEEPTKALN  
HDKQIISFDASSSLVMKPERDASYTPIPETHTQRTQRRGGLRSRLRLRLGRIGRKNK  
KESTTS AVDCSCSAISSISGASASPNELNPT EEEEEPETTALEEKQSINNSK KIECNA  
THDDTDDDN SKHSPIPLVLSGSSFGGIFDRKENIEYDFDDATEIQSNVSSKNRCSRHT  
TKSEQFSHF TYNEKSDTSYTD SSGYSDDTRDSASF SASNKS HSNRNLI LSSANNAKNDNN  
GELLRTTTKVNSFFRNGVWSKSKSISFSLKSNISGRKSTSSEFKTEGNDDDESSKASTAQ  
ELWQARNEVRRIKQKQKHTKYKRTITPTLVHAGNNSQQFNCDDDPITEASPLEPVNTR  
KEENPVDVAALLLNQHKVKIARWKSEQLMKRAVAKLTDSADEMIETVLLVGFHDHEDSYAI  
QLKSVPL

>comp3305\_c0\_seq1; 197 149 463 LEN=777; translated  
MSSKPF SVIVEAEIQPDRMEDFLKMIQNNAECSRKEPGCIRFDVLRDQSQDNKFWFYEVY  
ENKEAVDFHKTCAHYQSWADFKESGGTISVSHKADGEFIGPKA

>comp3306\_c0\_seq1; 209 53 481 LEN=1010; translated  
MSDPTTTT PASTTAGNSVTGTAATGQSVSSSTAAGTSTRIATAVGS GTTTVTVTDEEPQQ  
VLRLTLVDRPTVTW DENVVDNEGMGRKSSKRCCIFHKEKAFGESSTDSSDYDSGDKNQH  
KRIAHKKHNGKKKTPDHLRFHA

>comp3307\_c0\_seq1; 484 329 2323 LEN=3126; translated  
MSSNNIRRNPNGSRRFLYGDQDEDSFSAHSSRSRNTQRSAGFSTRDYIVDQSVNLM DIGI  
GDSASSVSLPARSSSIAGMFRSSVETEILNRFDEYGD AAPMADAE EYIDNDKRRRGTAMW  
RKCRKALCSMYTLTLVSLTGIFLVVYTLVLT VNTKGREKTD SVTKADNKSGSGSSNKDA  
NHERYALMIRSRIVDAGVTSEGLFDGGSKSPQKLALDWLVLED PANLKDDHPALLDRYGLA  
VFYYSSGNANKTTLVGGWKNSDNWM TGK GICSWHGVECGIREQEATAENKFTPF TKTYDA  
DSQVKGIRLEDNVEGTIPAE LSGLEMELEILNFDDNKLSHTLPSALGSLSKLKD LLIIGN  
ALLGTLPAEYGELTEIHQLHLGKNHFEGPIPN SWLSKLT KLRYSLE RNKITGPF PDL SR  
MTRMKGLFLHDNNFEGTLPEWLGRLTGLL DLRI GKNKFE GNIGLLASLQNL ETLHINKNS  
FTGSI PNMF DHLFRLHELVMNNMFE GSIPLTLTHLQTLR TLNLG FNQLDGEI PAGLGLL  
TDII IISLDHNRFE GTIPTLLGKLDDITDLT LSHNQFSGPI PSELGRCFR LERLHVQHNT  
LLGDIPPELGELIGLIDLRL ESNQFGETTMPPQICALRESEELKVL SVDDNV SCECCTDI  
PDAF

>comp3308\_c0\_seq1; 495 43 1326 LEN=2248; translated  
MATYQNNHRHYSTDQHHHGTPPEEHFSSSYCSSSISNSTHSHNCSQRHDNDVVSRI PVRM

LNNRACVLVAMGCFAKANHLLLEIALSKHKEKMASKLFCPRASSIHAGPGRDTEYHPTNA  
NPNNF'TAFEDDIYGFSDDDSEDEEDDGHCMLIDDSWTVTNFTNDADNACPLTDATQTT  
SLHPLSSPSSSLTYDEDTNI IPPASNQSWGIPRMTRNSQLR'TKSYPGQDQGAERSHKSK  
TKYKYHQVYSLPIVMSQLEWDHASMEERSFVLI'FN'SAVSNQLWGMNITSRVCRQDQQYLP  
TNTNPWDLFQASKTLYKLSLEYIQHNIRCVDKICIPAVFNNLSHLCKSLEGPASQEARCY  
DELLLSVYWLIDSLPSTTINSNNNNSSGIYRDNFYDGDNDDEIIDAFLENSFYLICESPT  
AVLAAAA

>comp3309\_c0\_seq1; 1081 1 1898 LEN=2032; translated  
XQENNNNNNTTTIGSVVDVVP'IKRALVSVSDKTGIVDFCTALQKNYGTCELLSTGGTAKKL  
RESGLEVKDVSEFTGGAEC'DGRVKT'LHPKIHGGLLAVR'GNAQHDADMQAQGMSNIDMTI  
LNLYPFEETMKRENVTFEQCVENIDIGGPSMMRSTAKNHVATTIVTNP'NQYDALLKELAE  
NNGGTT'HKTRKLC'AAKAFALS'AKYDGM'IASYFAEQIKKDESDPEAFTKDVVAPRVYVPEF  
KLKYGCNPHQKPAAILSRMGQKLPFEVLNGT'PGYINLLDAANAWQLVKELKEATGLAAAA  
SFKHVSPAGAAVAVPLTDIECKAYEVTEETRASLTPVSLAYLRARNADPMCSFGDFSAVS  
D'VVDEQ'TALY'LKKEVSDGIVAPGYTPEALAILKSKKGGKFIVLEATKDYDAGINEYREVY  
GMTFCQKRNDTVLTS'DHMSTVVTDSAKCAPVNDAAVRDLIVASICVKYTQSNVGF'SKDG  
MMVGVGAGQQSRVDCV'KL'LAGR'KVQ'TWYLRQHPKVLALPFKEGVKRQARVNARVRYIEGDF  
TDEEKIRWNEQFTEVPEAL'TDEEKQAFLANSTGIAISSDAFFPFRDSIDHASKLGVSYVA  
QPGGSVQDQGVTEACNEYGIAMCHTGVRLFHH

>comp3309\_c0\_seq2; 1115 103 1989 LEN=2123; translated  
MAHVLSAVEGSVVDVVP'IKRALVSVSDKTGIVDFCTALQKNYGTCELLSTGGTAKKLRESG  
LEVKDVSEFTGGAEC'DGRVKT'LHPKIHGGLLAVR'GNAQHDADMQAQGMSNIDMTI LNLY  
PFEETMKRENVTFEQCVENIDIGGPSMMRSTAKNHVATTIVTNP'NQYDALLKELAEENGG  
TTHKTRKLC'AAKAFALS'AKYDGM'IASYFAEQIKKDESDPEAFTKDVVAPRVYVPEFKLY  
GCNPHQKPAAILSRMGQKLPFEVLNGT'PGYINLLDAANAWQLVKELKEATGLAAAAASFKH  
VSPAGAAVAVPLTDIECKAYEVTEETRASLTPVSLAYLRARNADPMCSFGDFSAVSDVVD  
EQTALY'LKKEVSDGIVAPGYTPEALAILKSKKGGKFIVLEATKDYDAGINEYREVYGMTF  
CQKRNDTVLTS'DHMSTVVTDSAKCAPVNDAAVRDLIVASICVKYTQSNVGF'SKDGMMVG  
VGAGQQSRVDCV'KL'LAGR'KVQ'TWYLRQHPKVLALPFKEGVKRQARVNARVRYIEGDF'TDEE  
KIRWNEQFTEVPEAL'TDEEKQAFLANSTGIAISSDAFFPFRDSIDHASKLGVSYVAQPGG  
SVQDQGVTEACNEYGIAMCHTGVRLFHH

>comp3310\_c0\_seq1; 536 214 1203 LEN=1446; translated  
MKLVSPDRNGSRRGFLNNAFFILLILLVALVSGQDEYSQADLEAMTEAELEDICIKRGFQ  
LVNEDSDELTKQDYVEAAQRCLAIEQEMNELLTQYPELADELEEEIKRMERENAEKQAI  
V DGL'ENQISDDAEKGRPAPGTAFHREAI'LEDEENNHAVGSGVGDDELEISEETLVDEVVVD  
SMSGEETTLHDTTLTDEEKSSGSQ'TETNLDEAQDDDFVDTQ'TVTDATPDAGTQIEAPNNS  
AGKEDLTMTNLAI'ESLRLV'LVKNAKDDVRR'IINLAI'PVLP'LLNAGDVAWQQMKSLFLRAR  
EAYEAYQATNTAPIEGSEVADTCDDSI PA

>comp3311\_c0\_seq1; 660 229 1911 LEN=2345; translated  
MSATASSSKSAAEQITKKNKSTLSTLLQSNPKNTDWKRIKAILFTYHPEKKNAPNLEGLL  
HQALNRACLDPSGVSSPTFDLILSKTREL'SLSERVRYTSTAIRCRNRKAVRALIHDDPSV  
LFYCTNEEDDSSMITADNANGT'TLLHIACEEY'GWND'IEAFVLA'EILSNNKHHERDGRCYF  
HNGLFQEMAESEMPLKLSLQAGSDLEKII'CHLKEQHP'SYLER'NL'DCLSQIIAEFCYD'MTL  
LYDLADAYGIRLLTSVHPKDGSSPLGFACYQNEEMVRV'LLELYHNLN'NRTENRESCNNN  
NRNSLLQVQKSLLS'PNNEGMSPLGHLLLSVGD'PDAENAWKCVNTCVRFFTDNDNITNF'DV  
NDDCNNGGNGISRLQQRFPV'LHLFL'LLHTWDALIAKKN'CMKILDRIIQRFRIDFCVVDDE  
TGNTVLSIVVEKLSICSPAYHGK'KRPHAMAMKILDYLT'TGHPVVP'SDVASNHHRPATR  
DGRGR'LPLHSACENS'LPWKTGLRSIVDANVPALESYDPLTRLP'AF'AHAVGPKSDLDSIY  
ELLRLHPGIIDTVIPLANSN

>comp3312\_c0\_seq1; 288 79 796 LEN=920; translated  
MANAAAKKAAAGKLHSSLWRAGFYFLIELCLSKLLNATYFYLLMPENRIISGDLFSALPF  
CNFNLLGTVSKRIAKQDAAKVYMP'LIVIVNIIYALLLLGTSDSIPYDGT'KWGIFGMIVTW  
AMQAYAYIGILESSAIAAAKIKSNKDLAGGANL'DLLAVTVFVQFSSVLHSTRWFAVTFIFG  
VPIIAGYKLYRTIYCGGGGGGGAGTKSQKLSKSENSSDDPAAAKRQRAEKRRQKWG

>comp3312\_c0\_seq2; 309 79 609 LEN=733; translated  
MANAAAKKAAAKQDAAKVYMP'LIVIVNIIYALLLLGTSDSIPYDGT'KWGIFGMIVTWAM  
QAYAYIGILESSAIAAAKIKSNKDLAGGANL'DLLAVTVFVQFSSVLHSTRWFAVTFIFGVP  
IIAGYKLYRTIYCGGGGGGGAGTKSQKLSKSENSSDDPAAAKRQRAEKRRQKWG

>comp3313\_c0\_seq1; 505 149 1186 LEN=1308; translated  
MSDDDQKKIESTEFIFLVAKSGTGKSFSGDYVDLFGDWKHVDGDTPLKNTHGNPHYENLK

NRAFQLEEYEGKDMEWLVTEGLVPYMEELAKLGLEAAKESDKVCISWASYFRPNRLLKK  
LLLDAGAKDFSMVFLHCDLEAHMDALWKRTCRAEQAGCTITEFAALFKLEVEGEEYTK  
QFVAFQKSSDWYKMWQDPDESEQPFQIVNVTAKDATVLDLDAAFGIEDSNRAHLSYDEI  
VAKVRAIDEERDQKNYDAYVETLEGSEESKEELEFAQKEPELCKARRSLLLADKMNSMR  
SLSSVEGEEERQSLAIEALSRRSRKSFITTKGLFTSEELKEIDEE  
>comp3314\_c0\_seq1; 327 60 1262 LEN=1497; translated  
MVEGTAVNHSYDGGNEDYDYIGRGGFLIECGDNQEVLGITKEQAELVKLNCPPFFQKCLHP  
GADSNGEDSDSGGSMKEAKSRIHKPDWSLAIVRHFIEILTKGKTTLNLELVDGVL  
TAGDQSLADLRLSSLVNYIDPCSKENEFMRLVDPSSFFRFYFQAVVTSQWLALLDRGILL  
YREETNFVVQLYKDRAFDRDQSVSRNLDNQRSDFLVHAQRPIEAMFEIQKCLSASGERN  
RSARCIDNVTAEAFSIYFETTESIPKEHHQLIDRLAGGEAYIRTCADAAEYQTEGYTVKA  
SLDVLRAIEPISEESVIHCSIRVDNPTDPTLGRFINACQKVNDYPGTLGIDAPINRYFC  
RKSMGDIHIVLRYMNDYSTSSKVSDFRFLSRSSGSQSF  
>comp3315\_c0\_seq1; 593 371 1780 LEN=2063; translated  
MKPSNQALRQFFSLGSLAIASASMPPTDAADADGRANDNANANANARAHVSEQLRLQDPI  
HGVEVVGANANAHSIADDANQEHKYSNKTTDDNTLNDTSKIILDSGYDDSSPNELTNAK  
IVHKNIHKTEKTPKRCLPDLGLLACGPGESCVCVSGTNDTQQGGDDWHCLPAPAVHGG  
RSLQGRGAMTPSRFNTLPTTRDNQEIYTHCAANFVLDENSSPPTDPAAYDVCICKGYDF  
QLPD AEYAGYGYCDDSI VSNYCQKYFGSEDAVDVMKYDVCLCTLS PDGQHAGKEPN  
FCETVHVL YCAALQADATGSILNCECSL FNVNCPAPTASPTPEVTSSTTSLSTGAPI  
IGGSMAPTMVD TTETT VTTTEIISKIPTAVPVPVTAAPVVPVTAAPVVPVAPVVASA  
PTPDDEVY TASNVR VPTVTLTPPKEPGHSPATSASSSSFRAGCLLVR SATAVAVLAVG  
SLFLP >comp3316\_c0\_seq1; 102 468 770 LEN=897; translated  
MIMRKFHNSMAVGGFFMGGV VAMSQMFFFLMLIYIGY LK DQRNDGLPVVTETVMAFF  
CLLQ CVLLGTFAAILGAHRSEI ILESQDEHAPGQDSFGATPYTRS  
>comp3316\_c0\_seq2; 102 653 955 LEN=1082; translated  
MIMRKFHNSMAVGGFFMGGV VAMSQMFFFLMLIYIGY LK DQRNDGLPVVTETVMAFF  
CLLQ CVLLGTFAAILGAHRSEI ILESQDEHAPGQDSFGATPYTRS  
>comp3317\_c0\_seq1; 242 195 1274 LEN=1730; translated  
MFGKLGKQFAAQVADKVEELALDALNERNPGGRGQTQSAKTTEKLHKISGNRKALFI  
GIN YIGQKGE LRG CINDVKNIKKFFREHYELDDVMVLTDDKRAEPETCFTPTRKNIL  
SAFRWL VKGAKPGDSL LLLHYAGHGKVKNL DGT EASGYDQTLIPVDFQSAGNIID  
DDVHVDL CRKL PKGVRLTAIFDCCHSESIMDLPYVYNVNGNLDI IENDKNQAVAT  
LVAAGTRFLLDGNKKA IGSVLKREITNLVQAGGRGGDSSARARAAEENETSADVIM  
FSGCKDDQTSADAVIKGKA SGAMSYALVHTLKKYHLKRGE LTYTQLLQDMRTILEG  
KYTQVPQLSAGRKLVLNQPFAI >comp3317\_c0\_seq2; 299 195 1694  
LEN=2150; translated MFGKLGKQFAAQVADKVEELALDALNERNPGGRGQTQSA  
KTTEKLHKISGNRKALFIGIN YIGQKGE LGE C FV L VASERLLFRWNGWIVPDC  
DNFDLSMNWLIHLSPCPGSHLDAMRLD ATQGMHVEGTTGFRGFVPGT SVHIHCST  
PLAKRFKSFSCRSEIDSVHLLIAIASDSHPTV IAMDSL PFASTQNNP SQPVPFCV  
QMPRSVAASTTXKNIKKFFREHYELDDVMVLTDDKRA EPETCFTPTRKNILSAFRWL  
VKGAKPGDSL LLLHYAGHGKVKNL DGT EASGYDQTLIPVD FQSAGNIIDDDVH  
VDL CRKL PKGVRLTAIFDCCHSESIMDLPYVYNVNGNLDI IENDKNQ AVATLVA  
AGTRFLLDGNKKA IGSVLKREITNLVQAGGRGGDSSARARAAEENETSADVI M  
FSGCKDDQTSADAVIKGKASGAMSYALVHTLKKYHLKRGE LTYTQLLQDMRTILEG  
KYT QVPQLSAGRKLVLNQPFAI >comp3319\_c0\_seq1; 266 194 994  
LEN=1219; translated MALHLYDQCDNREGRNPSDWYPH SIDRRSSLVSPTSTL  
TTSFR TATSERERE P SSSRIPA TATATKTNEHRFGSVSPTPSSCCSTLSSHSSSI  
ATRSETLSH SYGSEEFAMFNLTNRRS SPKGKAYRHYFARHRDERSESSTDP  
RPHAVPRPDGTGFDLEIPPKHLTNAGGSDYNDV HPGKRRMKKQRKTKTAAGTI  
GGMVGGVALGPIGVLVGALWGGVTAREVARKGEKRAQRREHQKSFRRSAFRKGT  
HWEESEVAVYV >comp3320\_c0\_seq1; 497 1 955 LEN=1076; translated  
XNNSNNNSFKAGLNANSKKKLYPSIDEKLMGNAANANNASANQHQQQLKSQPKQEH  
GLS TAE T P MANN TSAAKNAKNESSDRFDPVYVSKGSDMEKDTFAPGSVDDQ  
SIGQTVASSTY GDDR I KVVNKLLDPYGDKGT YTG VVLRNTGMPHGLGRMIY  
EEDRRVFE GDWRHGRWHGY GRASFNGDSYEGEYKFDQRHGTGVYRWNDGRIYD  
GQFSEDKRHGKGVFTWPDGAIYDGD FVNGQRQGHGKYTFADGGQYEGSWK  
DGRYDGFGTCTWEDGRRYRGEWRNGMAHGRGTETY PNGNVRHEGEWIDDEPIR  
>comp3321\_c0\_seq1; 239 118 672 LEN=867; translated  
MAFILQEALRWPASSFFTEAYKVG DYVDASLSTRSALTIDLLMANQPLFGVPRTV  
HLPRL

PERFSLSFEEGFHSLPYVEGQTLQVLVTFVYSKSGDGR IHSVASKAIRLPKNQAFDKKE  
DIQVVFWDWIEEASLDLEAGAAIMFLAVFVASILFLLQLCTMDNGGEHDTRRKGDHIDQY  
YKGR

>comp3322\_c0\_seq1; 605 114 1067 LEN=1401; translated  
MEETLIPLNDNSAKAAKSPSRNSFSGDKDISLHEDGEDNTLDYRIHAKHGQNAKTLISLW  
HDISLSHIDADTGKQTEYYNFVCEIPKFTRKKYEIATDEEFTPIKQDEKKGKLRREFKKG  
IFFNYGCFPQWTWEDPTFVHPDAEGCRGDNDPLDVCEIGARIVKCGGIRPVKILGILMMID  
EGEADWKLITIDKDDKWAPFMNDINDVDEQMPGMLDAIREWYRTYKIPDGKPPNTFGLDE  
KFMNKAYALEIMAECNHAWKELISGEKVRKMGDNNGHTEEVKKLVRKLSTNSLAALGTNL  
DEHDFPDTGDDDDAPAF

>comp3323\_c0\_seq1; 141 91 408 LEN=1013; translated  
MVKVWYEPGGPRTHLNRGGYVESARTPAIITKMSKARPITVILPAIAAISAMCYVPL  
MGQKGLPSTLNPEHVAAQRAYMRYHNMNPIFGVSSKRARSADPDH

>comp3324\_c0\_seq1; 170 212 643 LEN=1823; translated  
MATKKLFHYPTPTTVTTAASLEERFDRPNVYGNIKTIAMHHRDNTVDFTSKSTATSNS  
ILEEQASVPSLPSRNDNRDDNNVENANANANARSFRKSQAALQKSYQKRREAYRKLPLS  
VRTNTGINLKNLHPLAVRNGEFC

>comp3325\_c0\_seq1; 374 108 1037 LEN=1579; translated  
MAYRSFLRLAIFCVASLHLHQYCVTRAEDPLQQQRRRRRQQQQEEEEERHASQHS  
DAATAAKTTKFHNRKIKVDLYMPQCPGCRQLITSSNEAFHTPGFSNMADVTFIPYSDG  
RIDTGSDDSSTKRIFSHITLESALHFIGIGGADGFETNGTNGLTMHKKHEHQELQFRYIDC  
IDHYPYQYSAATVDVECAKAIGLSEATVTRIESCASSQEGHRLAERYVKQVHSITNPRI  
TYFPWTMVDNVHDKDTEERIWNLSFEHVCSIYSGPLRSLHCQAPGDMNGTDEDDYVYK  
DDEDEDEEL

>comp3326\_c0\_seq1; 638 1 1880 LEN=2884; translated  
XEVQYFVPTVIGTPDSTEATKEVGDHYSTVLSFRSPDSLILYRREQKDDGESHNGEGLG  
ASLQAQAFAPCDGAAAAXAASGREPFVPGPQAGVLGGGPSRLPSPSRAGVALCVLFPAL  
RKGDPRPAPGGPPRLHLGARGPPFQHGVAAGLEQQGQSKEDGNNDERTDDEKAAAAA  
GPRTTDLLVAGDISHDPGKIEEALLLRNHTHEVVFVPGNHEAWLSSDELKAYDEHQT  
EGAEKDAGNPCCGETQTQPKPARYSSIEKLEDIERLCRRLGVFTTGDCVCVGGGALESD  
GKLLPAEELWILPMDGWYDGSLSFVDPNPSSGNSNGTSSSNHHYDLVSDFGRPWVDFL  
RCRWPGLESVGENDENEPPLLRKIPRGLVGHFVKRNQGTIDAFKRATTERESFKRGS  
KPPPTKSAFASVLTVSHFLPNRLCLPDWDLSSADFDSDWLDHGGGLSAKFALVAGSD  
KLDQQIRSIPLPQYNDENSEDDSDANDPSSSPRIHVFGHSHRPKDFVYGGIRYVHNPL  
GKPRERELHMVDPEAAPKLVWEAIPSEGEGEGESEGSFSSKRAPQGCHTASSTTTIIRYWE  
EKGGGLEMLRKRMEGSKRRRRKGPKN

>comp3327\_c0\_seq1; 407 45 872 LEN=1106; translated  
MTETETPTTTSTTKTVALLGATGKVGWVLEACLDKGYNVVALARSKGRFDGFLHEHKDT  
NLTVVEGDATTVVGVRALLDANAPDVVSTLGSPTSNEILVMKKAEEALVGAHQEIESEG  
DFRKIPRIVWMTSTGINKATDQAKSYPLFGAPSRWLFYGFYGFGLQFHLLIPYVIGQELW  
DDMGHSEEVIRSCGSESIASRTVLRPGNMWVSEHPAFSEAWRMEGGDASGYAWVGACD  
PPPGWITRRAIAAALLELLEDDSKDGAAWSLFQS

>comp3328\_c0\_seq1; 199 1 1117 LEN=1287; translated  
KKKKLKENNALALNGVGNDDGKVKSGIPSLCQALWVYLFHFLRCYCDGLQPQLTSAVL  
DENKSSSPLTGFVVDGFDATACTTNRGVLRALFGATFSATSTTLRPSFSWASASAPNSN  
APPSPFVYSDSWTGRLEIKTLSEATTDGAYLINRSSGGSVTYQWPMGKWPDPALRIPA  
TPVPPAMWLEGSAEERRLRALAAAILRDTARAEGAVGLAAQQCGVDARMVYLSSSGRVGS  
DLVLINPRITARSPEPSMRVWTECLVLPSPFRATVLRDDWIDVEYDRSYEYRAPAKSAT  
KHDREPSVRSLSATARFFGEQSRCLQHELDHDRGILITDHVGLDELENETMRTIEAEGH  
DRRQAIAYARE

>comp3329\_c0\_seq1; 112 1 293 LEN=934; translated  
XDESPSGVPSSLDNPTAAPTPLDCPPDKSDPPSEAPIVPAPCKDNAEGSGRRKGRCEDA  
NGLLKEKNATLYTRANLCKGSAESLVGDVVKRQIPGTT

>comp3330\_c0\_seq1; 761 1 2137 LEN=2232; translated  
GREEKPVASASENDAAAPESPGRDENGDTQDTPASDEDVRMDEGSGGGGKEKDPPEAGK  
RSRSPTEKSGSNEGSSEPSQTNKRQAILGVPGVKKATCPSVDAGQAPNEKISVASIAAS  
SQLSSSMGWNLGALLSFLSLLTNSGNSVVTASSSSGERTRGGASKTSSAALAGSAASGSG  
AGNHGSLPSKEQVLQAAIKAVNDAPPFVHLSKTD SAPQLKITDSEVPPAEGTGDRDESGS  
ASDSAAAASSSQAQTAGARTSSNSNSNSNSNSNSNSPSPAPAHLTNDR LACKQGEGERGY  
RMTRGTHGVAPGSGHYEYVVLEPPTACELVNSLPPNVRLGKKLQREMQEALKAEEEDAE

HEAGAANGGGASDAGTTGSKQAFGAHVRLGWSMRTGDLQAPVGYDKWSYGLRDIQGSKIH  
CSRREDNWGGEEFPGDVI GCAISMVSEGPAASQDESSGSAGSGTKSEPQDSQPHPGKGS  
ENHIRFFKNGYPMGEFVITK GKREGGVAFVIPDGVYYPALSLYMGATVKVNF GPHF IHPP  
RKLPTVLSPKYSRKKQGGSNAPVSSLSKPPLTVEEASAKVAKEQKTLFFRKADNSAQQ  
RRFSELVETEVENILQEAYKNHRRKHVLDVMRERQKRNLK CDDLEQDDFFVSE DGSAGGVV  
DSAAEGGSVSSWATPTTPGMGFVAAQKTKGCGEDVLGGGARMRMRMVRFH  
>comp3331\_c0\_seq1; 236 310 627 LEN=1038; translated  
MTAIVVQLPGCEKSYSDAAKAKRMALSATSSGSDGAASTTASEGGRSDCDPPPQEGVAGR  
RRKRDEHHTAAIAAQEWREEEEARNNSSGGQSPLQGARASLPPPL  
>comp3331\_c0\_seq2; 692 1 1241 LEN=1652; translated  
XDDDDDDANQRKDRGKQHSNTDQHHGTNSNTGSSSSAMAGAAMKAASDHVSAIEDEGD  
SGTTS CVVLITPEAIVCANAGDSRAVFARRPPEPVVQKTTEGEGNHDNNPSAVSILGKAI  
PLSFDHKPDDEEEERRVRNAGGYVANGRVEGDLAVSRGLGDFRFKQMAVVLNNTQLY PGD  
DEEDGRFSSSQNNPGKHKDTVMGKTDDDDDEGHDRGVCRSSSSGAPPPLIFPPGDQKVSP  
IPDVT VHARNAERDEYVVVACDGIWDVLSNQQCIAELDAIMYDEGESDLGLVSEEILDTC  
LRYGSKDNMTAIVVQLPGCEKSYSDAAKAKRMALSATSSGSDGAASTTASEGGRSDCDPP  
PQEGVAGRRRKRDEHHTAAIAAQEWREEEEARNNSSGGQSPLQGARASLPPPL  
>comp3332\_c0\_seq1; 822 70 2271 LEN=2429; translated  
MAQP ISSPVSPVFLPLQILLIGIDLLISLLTFGWINVLTTLTKPKPLRTVPVADDFSHRV  
LPENKGNLTTVPNSGATTL YECFNTTLESHGSSLCMRSRKFKGWKS KKVKEFSTEITELT  
YSQVGEKAYKFGAALAAATGCVASDPEASLEKVTKPCR IAFENTCAEWMIAALGAFS QSV  
GVATVYATL GIDSVAEAVVDNSISAIVCNKTNVAYLVNNAKNMPC LKTI IYTNDLVGETM  
EVDMP TDTPAGLTVIAFDDFVETGDT SKYPVVP PAPERAAVIMYTS GSTGKPKGVVVKHS  
SIVAGVAAGESLINLDENVKYLGYLPLAHIFELMYEFCLLSSGASISYADPKSLTATGAY  
PTGALETFAPTHMVAVPKIWDTIKKAIVAKVALSSPVAQALVNTALMWRAF AITIGLDTP  
LFNVLVFKFKFKFVGGNIQHALLSGGGPLNGDVQTFINVAFGFPLVQGYGLTETCAGLTIQ  
HIDDMRTGIAGTPIPCVEVRLDSTPDICDKAGVAYLKTDRKDV DGNVWGRGEIMVKGN  
VTTGYMMPEKTNEVYIDGFATGDIGQFMEDGSIRIVDRKKNLVKLSGEYVALEKMEM  
VYGNSEFVDAVTGGICCYGDGMDRCVALFQIAKPASMQWAQKTGLVGPTEQEGDWEKVK  
NSKELYNHVMCEFKKEHASSDL SHIEKLIAMLDSPWTPENGCLTAANKLQRRKVIEDF  
ATEFEEVKKKGIF  
>comp3334\_c0\_seq1; 232 268 614 LEN=614; translated  
MNDGGMLPLPSQPPNHPGASIPHQNQAVYGYALEQQPQQRAQQYSQQTQQPRQVLQQN  
HQVQQTILGSEGVMMREQQQITQGAPLANSPNPNANLNGAIANPGHFQQQQQQX  
>comp3335\_c0\_seq1; 173 851 1012 LEN=1274; translated  
MNVNTVTKRKEVNAFRASKKRSATS AKFDAHGVITVLF AIDVFCNSIITVCG  
>comp3336\_c0\_seq1; 214 310 546 LEN=878; translated  
MAHATMDF SAYFSPSKSLRL LAVIGRVFAISADYVIDHTIRPEEMVIQLILMSIAIKEL  
VIDKELVETPANSKHIE  
>comp3337\_c0\_seq1; 436 591 2375 LEN=2611; translated  
MSLSTHTDDALGTEGSTQRFHGI VERDKKKVPVASATDLAIKILLVPVMMVLVLP LTI F  
YQVGKSVLNGIGDKQEP EQAAAAAAQSMKATTASGNEPEDTSQSLPTDFVPRPDRSYDV  
VVLGATGFTGGLAVRHLADTYGVGKTVKWAVAGRSASKLDAVLES LADDPVKNFDASDA  
ERVDRIVCDTSDLASLSAMVRNTRSVATTAGPFSLYGGPLVERCARYGTHYADITGETSF  
VKKMKAEHQDMAIATGARILSLCGNDCVPWDL SYNILADEFAERCTNNNRNPNVNDNETM  
VRIEFGNFSSSASGGTLKTMCLGISGKLADPSELDPAASTLLRRSFGSSTEHTSPMENN  
ISFGIKTGVS KPWEMVVAEEDDRRGVTA AATDGTGDKGSKLVEAPFVM SGVNYESV GWS  
HALRRDKKCSYKEQLLPDFITALDGVLG LLLFFTS LMNPITGR LLEDYLVTPGDGPAM  
EQMNNDFFLALTGTAYGSKGSVYQSLLYYDKDPGYLETARMVVECALCLALEEEAVSENI  
AGATLLAKNVD AKPLPEVVGGFFTPGFALRKILLRRLVDTGCHYEFRVLNDASK  
>comp3338\_c0\_seq1; 208 1 862 LEN=1271; translated  
XSNHAI GYGDNDFTADYNRSRFRSAAKYARAVLALASAFVLDLTSAGNTTLVSVAA RVSL  
TLFAYAVVYTSASRMLLMAIAYLMNHGWYLLAASCALILLGCGILLAVCEWMWRWQDRA  
LSVLDRN NIGYDRLRSVNVLDDEMEDGPSLRRAWVRRIGSAVFACLVWVSLFCALSANADA  
WIADAYKGARPSAPSIELRLVGCLEGLFLLAGAALLLYVACPSFYRLHLHL SRPGALGTA  
AVPLAHD ERGLFGGGLD FDFDDNDNYTITVREDEVTVGRGIQNLIL  
>comp3339\_c0\_seq1; 338 554 1878 LEN=2199; translated  
MAPLASASPKKGDGANGANGNKKTRHSPSVASKKEFGEKISIHKPDFQSMEKSSIRRVTL  
AIAGDNESDAEHEHDNSRRKQGHFPPSMLIPVLP SHVPTPQTIGTND EPWAKYKVEDAFH  
HIQTI FSRGGNSEGN TSDGGNANGSNTI SHDGP IKYAPSPITPPQSPVSRKATVTLDLT

PTATTTTRWGADFWNSHKKKNTNSPTSTMTNSLDVSPSSDKHKSNSAGGNEGNTTTND  
NSSNYKNHPNKESIPAENNKIFDQETDDNHFDWAKQDAFLREVMARKRGRPPSCSNGNK  
QQPPARSEEGVATNTALSQPSKRPHSPPGSNTVGTIGGSRXEKDRGLNENEGGQFEAAA  
VIGSALFQPPAATDPPAAPVDARKRSQSTRSLPKKLVRLIEATESNRVRFEESSSQRPGR  
FRFREICARGSDLDPRDCDNR

>comp3340\_c0\_seq1; 489 203 1069 LEN=1457; translated  
MTDFAPIVPVGNLDIGSRKARRQRNADPMAPSAAMLMGAPAQFDVPNVSNPAYYCRNN  
FASVCGTGDENQDVKFMKGTTLAFKFQGGVIVSVDSRSTMGAYISSGTVKKVIEINPFL  
LGTMAGGAADCSFWERNLGMCRLYQLRNGRRISVASASKLLANVMRSYRGGYGLSMGTMI  
AGWDEKGPQLYYVDDDGTRLKGMFVSGSGSTYAYGVLDNYREDLTVEEAIDLKRAIY  
HAAHRDAASGGINNLHYMTKDGFKIHSIDVNDMHYEFEEERANAMSS

>comp3343\_c0\_seq1; 279 207 806 LEN=914; translated  
MTIFDDVADVLEDALSKCTDEPEEKPKIKPEFIKHFPTSAMTNGIEQFYVRLCATISGCM  
YNKLSNISQFNNLDQGYNLSDVGLTEPPKVLVLDNHGMFEVTNPPFSVTVAGKKMILAWR  
GSTTAMDWRDFGFYVASSFRWKNVADVVSQVQAYLALVESCMSKHQDFIIEKIKEHGVT  
EIMLTGHSLAGKFNHTPPFA

>comp3343\_c0\_seq2; 420 207 1481 LEN=1680; translated  
MTIFDDVADVLEDALSKCTDEPEEKPKIKPEFIKHFPTSAMTNGIEQFYVRLCATISGCM  
YNKLSNISQFNNLDQGYNLSDVGLTEPPKVLVLDNHGMFEVTNPPFSVTVAGKKMILAWR  
GSTTAMDWRDFGFYVASSFRWKNVADVVSQVQAYLALVESCMSKHQDFIIEKIKEHGVT  
EIMLTGHSLAGGVAQVAHLWFSGTMDPAIYPEPNPWRELKDEVGLTVRTMSFEGPMTTVF  
IKSGDETLNKKGIDFINKCSANMCTCYHMDAVPRMYGYNDFGLKVLENFKDDIGNSDGW  
IEGSIIEKIVEYLWHKFKASSIKKSIIEQSLKDEVNAASQFQHLGHVLYYESQEAEPKVICI  
DDPNGILTSTSDGKTSTLPQFRDIKYEYVNVKGVLEQEMYDHYIIFGPGLTLNWPYFEHK  
LIIH

>comp3344\_c0\_seq1; 318 174 1730 LEN=1780; translated  
MPEPDNVEPSVASTPLFRAMAMPNRGPQLMMPTEIATAKYVATPQNFSDEIMPRLPEQK  
QERKKQPSELNQQQKQKQFVLDTESQTYYGWNMSQIQVQKFPMYFPRDMIQWFFPTRDL  
PVVLERITKELRESSIQASLIHEPLSAKLQTCQENAEIYLVFFTRNDTVFMSLQRHKGD  
HMVANRWIRHLVDAAGVLSGNDSAGTKPVTASDVLALELIERCAAERAVASINNQDLS  
PEKHHQHPFLSQTAEQMTESAVRDVHACLSPRRLLDLRRLALEHLLAMTDLKRTLRTTAI  
ATSLIVLQGLPSSSFEMNSQARTIQSILLNVLVLTRELPGDRAMLAEEARVDKKNISSTS  
DDMDLEMRPYFPEVDEDVTAADVLDLPQYYSEFMNELFNALRILVQSLEVAACFPESFSS  
TGSNMATQLLTVTSQDVGGKDLYHTLLVCVGHAEKLANGYLACKALRLLASDHPGIKQD  
IKLDDNAKQSIGNAYQVGMHRHTLLKEESYHLWHSVSQ

>comp3345\_c0\_seq1; 296 460 1107 LEN=1823; translated  
MIMNSVMFVFDVTEAKVNNPFVSGIMSGFATAIISTPTDYIKIQMLSSGQRRSTMISI  
LEQEKVNGQYTNVNVKVRKLYRGTLLNLAREGIFTMVYLGIIYHWVITNAKNNSEEFDEL  
KSFNRVLIVAGTSAITGAMAWVASYPFDVAKTMIQSGNTFEQVRELWRRHAVNGRLRGIS  
AFYKGLPSTGRAMLVTSRMIAYDLVIRCFAKTT

>comp3346\_c0\_seq1; 274 234 1439 LEN=1537; translated  
MRTLVLHAHHRRENLPRLSSGLALFPSLLLVLTLVLSFSEANPWSASSSLERTTRPTSHSQ  
TPPQRRLLWRRSLPLTLHVINLDRDTERWETVVTTELVAKGVPKRIRRVSAVSGRDLSPGD  
LRANTTRVARTVCTPGTIGCFLSHRKVWQETEDGPEPYRVVLEDDVVVAPGFLEKVRTV  
REIDEACEETRDNWDVVFLGALGCVHPEGRHGLNRIAAFFAGGGRVPRRTLEGAPHCHV  
PRRPLGAHAFVLSKRGAGKLLKGCSTRASGHVDVVAWGMPDLGVVSVHPMLAHQNNNTGSPS  
TIGAVTGGIETRIPLNVVDPYTGVLVLEWIYNAPVLSLGPVLLTMGRSVLFLVGGYLASAL  
LYNKCPWLIVLHSIVVAILVALTKATTLRHGRGDETSGVEA

>comp3348\_c0\_seq1; 331 1 1004 LEN=1004; translated  
GFGIGPSISVAIAMSAPPEEREATPLHIKTVRNYDTSPNDTNRHHDCGHYEILQKLITSS  
PAGGYETESAIEESCLEQFVGRDGLVLRVVRVSGPSCPQIVHASYMLPQDSSYAPPF  
PDGTAATTDGVSRLSLCWTAFDPDRPDRPLLCLVANPTLLCIWDVYPSNPETEKEEQSQA  
NPSQTEDLEGGEGQNIPLPFEACVIYGVNGEHGLLLQRCESTEDI IAYHNYQQSINIAD  
SMNDLEDQNNDDDGFIKAPPRPKRLRSTGGGSTAMASLNVSTASTPTMMGGVGEAAP  
NASLSSPLMIPSLFSLHHPQGDILPVSTSTAAAAA

>comp3349\_c0\_seq1; 483 51 1406 LEN=1582; translated  
MASSDTEFNHTHEMHPGSEPQSCSGSSGLNINDFIKTHYGAISSGSSNGETAQEDTVTLS  
LLAANAKDHARALGVACSETASLNSGYFSENDSNSGDRNKQQWTLRRLALELSLWLVNFI  
TLTKAVAYFQTLSSVLAALLDSVLDVVSQMVLYTEKHSSLQRSSALYPAGASRLEPIG  
VLTCASLMGMASFVLEKESFETLYTKDSSLQDLDWTEGVRSAAASMGAIIVLKLKLLWLCN

YSSRTSCRNRQGGGAATSKSLRYSDPTLEAVAQDHWNDALSNGVSAVCLLLALYTSDLWW  
CDGVGAILISFYIIYSWYETGKEQIEHLTGKSAPDDFLEELTTLAQHFDRLLVDTTCRAY  
HFGPKFLVELEVMPMDTPLKESHDLGMELQYEIEARGEVERCFVHIDYESREYDEHVVS  
KVPELREHLLRHRSSRNARGTALQTSASSV  
>comp3351\_c0\_seq1; 89 1 236 LEN=236; translated  
XKFRWILKYDTERVMLLNTIFIFSLVIAVVQSFSSNNSELCRNNRTESKLHETMSSLDLK  
YKQDGEEAKEIAKYLDKRSX  
>comp3351\_c0\_seq2; 283 1 817 LEN=993; translated  
XKFRWILKYDTERVMLLNTIFIFSLVIAVVQSFSSNNSELCRNNRTESKLHETMSSLDLK  
YKQDGEEAKEIAKYLPYFPFKGIDRFYDYGFLYEPEVFQKIVDIFVERYQAIGIDSVAG  
LDARGFILGPPIALALKKPFIMMRKKGKMPNTIESEEYKTEYGNRSGLTVQKGIKKGDR  
VLVIDDLVATGGTLSSAISLVKQCEGIVVECACVVELKMFIDPPEESGLPSRTKSFQKLG  
HQDVPVWGLVSEDLLLNEAELPDGYVDDGEEH  
>comp3354\_c0\_seq1; 238 405 1021 LEN=1021; translated  
MQTPQAPPPQMAPAPQAAPQQPMPMPAAPVAAPIPMQHTQYAPQQQNNVQGTTFQFPQQQQQ  
QRYVGAPGTQVGAMPQQQQPVTQQVAAPVAQPQRQQTQIYPHQGLNGGWQSDQDYNER  
KMIKIVHLLKLRKPNAPPDWLKKLPQMAKRLEESLYRSAKSFEEYNDASTLKQRLQQLA  
HNIGMTRKIQQAQMQARAQQQQQQX  
>comp3354\_c0\_seq2; 238 482 1098 LEN=1098; translated  
MQTPQAPPPQMAPAPQAAPQQPMPMPAAPVAAPIPMQHTQYAPQQQNNVQGTTFQFPQQQQQ  
QRYVGAPGTQVGAMPQQQQPVTQQVAAPVAQPQRQQTQIYPHQGLNGGWQSDQDYNER  
KMIKIVHLLKLRKPNAPPDWLKKLPQMAKRLEESLYRSAKSFEEYNDASTLKQRLQQLA  
HNIGMTRKIQQAQMQARAQQQQQQX  
>comp3355\_c0\_seq1; 126 199 843 LEN=1067; translated  
MCRFIHANKGTNHSLSLISLILVLSAMLFTVVPVRGDEATLVAPVPGNGTLLSINASEVP  
SAAPTISYCKGICGEGGNSEGYLVDPDFATEYQWNLRVPCSGASCEKATCAELSMRLR  
TKDLSDFECKERKHQVELQRTALCTCTDPSEDDDFGMGNDDYWDNRTRAFKPAARYTLLGV  
MSALFIACWVGLYIGIQHDDAEKEANGDNDEDVE  
>comp3356\_c0\_seq1; 469 1 1731 LEN=2038; translated  
APSAAPSATPSAAPSATPSATPSAVPSMRPSLNPTESPSVSPTDTPSFSPTDSPSAFSD  
SPSVSPSESPSASPSDRPSVSPSDSPSASPSPSPSGSPSDSPSISVAPSSSVQPSNAPSI  
SANPSSSPSSPSDAPSSSPSASPSEPSAKPSASPSDSVEPSSEPSSEPSTNPSMHPSE  
SPSISTRPSAIPTASPTSSPSSGPTMSSVPSAPPTMIPSSYPSSQPTHKPSKRPSKYPTM  
RPTPDPTPNPTPQPTPRPTPNPTPDPTPQPTPRPSLRPSADPTPQPSHSSDQPSQQPSMK  
PSRNP TGKPSVSPTPEPTPRPSLRPSRDPSSSPTPNPTPEPTPHPTPRPEKPPSSAPSS  
PSIKATTDNAATPEPTNTKKNKYNGVWYEHDTWYAGQSQTCKCHDGGWIGCFLNSDTRD  
PTETPTQASANPTSAPTPPSKMPVSQLATTSSPTGNTTEAPTATTVAPSPIPTLASQSPSD  
RSATDLPSESPITAKTGTPTSSSPTGSPTAATTILTTKGLSYVPSSESPSASPSASPS  
TRPSAAKTGTPTSQ LPTVSTAPTSSLEPTSFFIFKN  
>comp3358\_c0\_seq1; 765 117 1709 LEN=1827; translated  
MTRLRNLVQSRADRFRRKQEKALHQEENRLIGSKYYDDETQLTGECIRPQVEPDGVEP  
DGVSEGDMYLLQAKGTRGTMAETFSSSEENRAFSEYNENERFSRNQKITMYSEQDQYYP  
ENNRQYDNPAYEEVENEYETSNGVEVVNLARGSARSGRAGVDEVENSEQPKTIEFVDS  
GKVF EIPQQEAGCNDGLLQNVRSLLDDTYNDECSKTLNTNDETLQDPYTSNMEGIDHMNSS  
DRFGSLQVQVEDDEREYEEYDQGSAPENIGYEQEHYAHHDNTELYDCDDGQMYDPAQVDS  
NVGQPYQLERDGTFFEQMRSVQSRGHLEMEPENWESTAHDIPLNNPTSAYLNRPNVDPAS  
PQLEDPIYFSDGNSWEEGFSFATGASRTL SRVDTACDDDDDDVRNDDDARTFDGTFDTEY  
YSDDDSYAEKQVDRPFVVRILKKFRDMNVVDEQSDYESGDEGDEEDYEDSKKRSRRRKP  
AFDRLGAIGMNLNETIDYAERQDRAPKLEGGTIINSFADLFSCGAPSGY  
>comp3360\_c0\_seq1; 336 1 825 LEN=1055; translated  
LTKTKAIKDEAKTTRSRKMVLEAVKVLVYCAKCGMPPEYCEYGPDFERLCEPWLKKYH  
HVTLKALRGDTSSDNDEEEEPVPEKPAEPWTTEERLTKFYELYVPEKVSVDVPSLLEKY  
KEEKLFIALS KKYGPEPEDPYMSDNEDEDESEDLAKMDNLQVGGKRRRGVKAKKSVKS  
ETRVLIQKLRSKRKATTVI VGMETVEGIKLDASKAFSKRFAGSSSVKDGVKGKEIIIQ  
GDHMEVVAAMIVDKFKVPGDCVFLDFDGGVVPYQ  
>comp3361\_c0\_seq1; 399 192 1894 LEN=2105; translated  
MVGTAANGGGGSRERPFSGT VRF T ASLLVGLLGI AVSLLLWPETPGSGNPDPSGLLAF  
RPELYHGEGTTRHFFEGWYHKLVRTRTPCPGGNGPSESKNENESGENNISLAVVPGV  
HGGNGKNESHAFVFLVNGEKQHYYRFDLDTFEGFLAPGATGGASGSDIDTPYVRIGNN  
TFSNHGVSLLDLPVPRDGDASVSLRGSVRYGPLAPWPIPSARNLGAMGPVGHFLAPFLECH

HDVLSFDHSLEGRLEVSSRDETQGGGSSSTYAEDFYDSECGSGRETGVAVRSRGYVEKDR  
GRSFP SLWIWMQTN SFPRHPGTSVFFSVARIPILLPAFLRSLLRGLAEPEFPGF TAAVWL  
GGSGETEPRGLVPFATWTGAYFEDLSVEDDRVVAVLDSGGIGGGLAEALWPSESAADAGD  
LLVRLGRYSRAWIGSFFVGYDSRALRYRLELEVDRRVPHALLYAPTARRMEQAVREALAA  
RIRVRLYEYRTGAGEDALPRLLLDDTGEHAXAGPPPERAVPSGQPVREAHGEEQAGLPVS  
EDPHALSHQLDGTMRHAGGAARHSVSA  
>comp3362\_c0\_seq1; 221 72 440 LEN=626; translated  
MTKSSQPSGFVGTLLLLLVVVLCSMASVSAFVGAPRCVVSQSSYNSALAMSSDDENDPNDI  
IARRIVVEGDVQGGYYRSCVRNEAGRFRRLCGTMTPPDDSGTAEIYVEVCSLMDFTNQPI  
AV  
>comp3362\_c0\_seq2; 291 72 539 LEN=1198; translated  
MTKSSQPSGFVGTLLLLLVVVLCSMASVSAFVGAPRCVVSQSSYNSALAMSSDDENDPNDI  
IARRIVVEGDVQGGYYRSCVRNEAGRFRRLCGTMTPPDDSGTAEIYVEGKRKMVDGFMWR  
CKKADVGLSQQIAVSDVTEEDPTGLYDDFYVKVRD  
>comp3363\_c0\_seq1; 110 1 419 LEN=1170; translated  
XSEGETQTIRPGRNTADQHILTATYTTQQENGTESH SKRKMAYIGRDGTVGGQEQTIR  
QKITDFFAGIIGFVALFFSAITNPPTAIGSNGSNYAQRNNNNPYRVSGGGGRTLGRGGAN  
IRVGNLQGAADAKMGGGG  
>comp3364\_c0\_seq1; 153 300 442 LEN=442; translated  
MAAVLSSSRSRNSTAWPVIATLAAVAFALAASVVAASRTRDSSSSSX  
>comp3365\_c0\_seq1; 319 32 829 LEN=1353; translated  
MVSKLFWKEPNGRSAYVLSWVSTIVTAVFAIAGIVLYIATGSMCLVFLGLENCVDLMSSV  
VVLWRFWASGSLTKEREKALKRREL RASMAISFILMILGFGVIATSSYDVAMGPETKHEM  
DFVLGMSAFSLLVCGSLALVKFRYASVLESESLYKDGVC SLIGTILAVALLSNTLI IRT  
PQIWWLDPCVAMICGFAALF IGVHSVFAWKHRRVPICHLSWWLMSRGAHEPKQGDGDGI  
EKSDPDGGGGDGDPSAPTSLSGDVV  
>comp3366\_c0\_seq1; 205 1 1481 LEN=1661; translated  
XTNTRTPSRHFCSLPNAPCFFLAKFKTKDFAPVAGLYLLLLIAGAFEP CRSFQTTSCIHG  
NIIFKYYLAGKDRHSRGTAKKWNIGSREALSSFLVLSRKEQKHSLSHFSTTNGTNDSS  
VGIIEEDCDLFTSRPARLYIGD TDAYGV MYHGNYIRSYERALYELHTQRKRKRQQEDQ  
LQLANNDADGHDTNNQKNPAAASLVLD RSDFR LTRCTNHRFKSSPTLGSRYVIRGTLVP  
SGGDDDGVS DSQEETWSLEMEEYVPKHANNDCCDGRNPSATIYNTALVTIASASECAEKN  
QPHQSL SARVEPFYPSDL DVEKPVKCP SAMYTNRF TIHRDEFDAQGLLPMTTVLDFFERL  
RTDVLGGPDELRLNLQENDNLLFVVTSLNDLEVLHVLDDFENESKTRKIVRPGDDLEVRLY  
GTPKRKGM L FVCEQELWGNLGGIDYEKKDRSILLAKGICTICTIDSLSGRPTSNIPIERV  
RASMETTASLTQS  
>comp3367\_c0\_seq1; 186 488 870 LEN=1031; minus strand; translated  
MNEYLTRRFDCAXPTPIIAKTIEEAKRIGDGRSMGYEVFPSSGVDGLFADKGS SKASNCC  
CWKSSPSGGVEKIFVLF EKGD AIVEDREAAIACSPAKLLL VNAWVPRMKEHATKIMEYRS  
IVVAIVV  
>comp3367\_c0\_seq2; 276 184 672 LEN=833; translated  
MLRYSIIFVACSFILGTHAFTS NSFAGLQAI AASRSSTIASPF SKRTKIFSTPPEGEDFQ  
QQQLDAFDDPLSANKPSTPEEGNTSYPIDL P SPILLASSMVLAIIGVSGGFDIFADEPRF  
PLAVNAVISAGGLAVCLGLFYASILKAQAETEEDDKK YMSGR  
>comp3368\_c0\_seq1; 300 1 412 LEN=412; translated  
QQQQQASGAGQALAGINQIPQHIQAQQILQQQAIQAQHKN TADVTNAVTHLHKKSSQ  
QLPMQPAQNQQQHQPQQQFVIKDG TIQAAPAPSQQKLLVLP TAAGPISATAKPTILWP  
NTANANGGVVQQQQQQX  
>comp3369\_c0\_seq1; 204 247 846 LEN=1404; translated  
MVFVSGKGRPPLGNAKIGHVSWDEEHSCFVGTNGFYWHGRKYGGWKEGPPDALVANRKR  
APCSRGRPRGNDHVGIEVTVSVEYDCYQTEKNYFWHGTYNGGWKHPNGTDFASEKEES  
NDSVSGVGGTKYSSENQKINCEKKQKKGNTKGRRPKARSSGEAIEYDTERLCWKTRDGG  
LYWHGTYNGGWKDHAPKKR  
>comp3370\_c0\_seq1; 355 88 1386 LEN=1470; translated  
MSDPTIRGKLRVLVITLGGERRRQIEELFDDPVMGEHFERPTFSEGVP SRYIRNRNFYK  
VAHDAGLLPEQEWQAILKATEEKTYDHLPTERFFDCLEEEVETKGRHGSQEDIKLHYSVE  
LWRKAKAINRARSELACVFAHLIAMKTFVEDGNFDLILEDNIRTDPKSCAHKVLEFMRAT  
EEWEEDMSEITKSKCHLRFAGWLSVPNIEWIMQTHIPKRKYSRKKACKDDNDEDERATI  
FPLPLLEHLNEDLQTI EESQAKVEPSTNTSTEKDKDEE ESEIGE AQQTQKHTKPGNLLW  
GAYAYWISKEGYKS LLETLSVDGAILWKGRMRNYAVKPIDKMLPRRTVSKFGPSAVQI



LSQPAFFRAPMLTSKIHTQWDPGFCESTEFQLQKGLGWSDLWLTDTERRAIVDHHKTSKG  
WLTIKELELLQL  
>comp3371\_c0\_seq1; 490 35 1129 LEN=1481; translated  
MLSSALNFIRVDSLRSVASQNKIDDRDKINAIHEKGCRSNGEVHPTSVNMHKIEERMDAA  
IEIVAMSPQYFSKNRSPDLVPLTADYEQMRKRLRTLIGVLKTYQKCTRQVQEARFEIAQK  
LTLLESERSPIQDEIGCELDGEAMERLQQLSQRLPSSPSISSPTASTINGENGLSDSESLP  
ISAARVAGDYRKRNGLKFISSLGLYRFSAAEAVVNDLQYQKLVVNFATNWMEIVTHRIDV  
GLKRVGKLASDRLHYERKVEALRNRANDAETKGAIPDSATERLSRNEDKCLKHAFVFHET  
EASKLCALIEAVTQDGYQELYTLVRNYIEWEITRIGRENDMAIQLDATLSSMNEKVNFS  
VIIIE  
>comp3372\_c0\_seq1; 416 1 1111 LEN=1237; translated  
XRNQTKATKPKIKTSLSHTIIAHIFAKNTTKKKDKDQANSTADSEAVVNXIMIQCNESS  
TGRRTLALLLAQKQRQHSSSLSSSLPLKSRDPLCRLYSSSKACRKKDLPPPLPKTGGSS  
KQAKGFPSPAQAKKEYLESQKRTGEFLQDPQANILRLQKEMNETKAKLLTVHDKPIWRRV  
VDRFKAKRHSVINLLCASMAYILAHKLHLKMKANQELQEEIDSEHAKNSELRALLRSLTT  
EEFLRDVLAEATSAGDDNSPESISNANENSSSSWSSTSSQTTSASQSVSDALVDALR  
TKLQARIGDEGLEADRKEKNIQEIWKENEKRIEETEGLAVALAAVAEAGQPGEASATT  
SSSKRVFDM  
>comp3373\_c0\_seq1; 395 1 1144 LEN=1292; translated  
DWKGLPHRDDSSSTILPYFEEKPELPPSHDSTAHLPEEVYIPPIRNKAIVFIIFSASIQ  
TCSSIANSPINNIMSKTEANSSFSKSSWDGSDKDGFAASLDHPGYSMECNADFTGGWHVHR  
KVWEEQEGDKEDKPSDWIKEILDDITKYDYESMDIGRPPRILVLYGSLRPTSFSRKCAYE  
FARLLDLLGCDVRVYNPKGLPVRDPALEDDPKVVELRALTHWSDGHMWVSPEMHGTITGV  
FKNQIDWIPLNTGVRPTQGKTCCVAQVNGGSQSFNAVNALRLLARWMRMPCCNTQSSIA  
KAWQEFDDNGRMKDSFRERVVDAEEFAKFTAVMAPVKDSLTDRYAERKEKAAGRLLT  
QEEKELEKKKTKMVEESRKG  
>comp3373\_c0\_seq2; 211 146 421 LEN=569; translated  
MPCCTNQSSIAKAWQEFDDNGRMKDSFRERVVDAEEFAKFTAVMAPVKDSLTDRYAER  
KEKAAGRLLTQEEKELEKKKTKMVEESRKG  
>comp3374\_c0\_seq1; 465 1 1940 LEN=1992; translated  
XSIPICSLHSTVVRKEAPDMASKVSIQLQSRQGRKVISLASTASTKEFYESASKEFGAPV  
ESIKGGFPPIPSDGSTPISNFVSNQERVQVEFAQNVKICNTNGSNKKNSHIQSKPVS  
DQSSPSSSSGTRRSKRAASKVATESMPAMIKAQEEYLKNSAPIGKKRGRSNKNFNTTSGV  
FPSGKNVKQRPHKTKSTKLSASAGDGRRLVDGATVANPRRAGRQADMRRRRGELGKGEHS  
TDMSTALMGALHDKGMGVIILRKGKMNVLSSYETTRSFRLAAIQARSYQMTNFSGERN  
LSGSGGDLKVIYRGSVNKTKEEIVDRIIPRDVLAQVLEGIHASNKEALRPENLSRLSP  
RVLWSCVKLFPPELSNVPDMYRQLLPDLNWSFLRRRAEQLESEKALENKRQAMDEDEGIDFE  
RASNVAAVEHAMEHLQDHHAEERKARQAQAAEARLRQQGQKSGQNDGGNDKSWTLTTP  
PEPDRDELRECIETSIPEINSNTRGNI SNWISRLMKDCGIHNWRELANASDEKIGILVTK  
LEVPRPNLQSWIDKAQNESVSEIMVEICDDNIQAVEILTERARSGTPKDLAGWKSIPDIL  
LEQLRKKCVDHGYKWMELGTISMWCDRAHDALQDYEWLNWYATPVE  
>comp3375\_c0\_seq1; 168 66 353 LEN=989; translated  
MPLPMSRTAPFAIFGCILSAYALYVEHKVAHLSPDGEEFTALCDIEQIGASCSNVFQLPE  
GRMLSIFYGIVPEGSILDVDPNAALGMYRSFCLMHKI  
>comp3375\_c0\_seq2; 235 66 572 LEN=865; translated  
MPLPMSRTAPFAIFGCILSAYALYVEHKVAHLSPDGEEFTALCDIEQIGASCSNVFQLPE  
GRMLSIFYGIVPEGSILDVDPNAALGLVYYSYLLIGPLLPASSTVFVSSIAMASSVFLAIK  
LVILKELCILCWSTHVINSRLFWSVVAQTISGGSATSTKKKEKVIKRV  
>comp3376\_c0\_seq1; 685 256 2115 LEN=2115; translated  
MARTASVPIGKSSNDGKYSVEILNKKIKKVEKMIANSPPGSKECTKLQKKLVEYRAEL  
RNQTRIDIEKANAETTSRSTEVEVEESSEVQEESTNNSVANSVPTMAKEGTDQRMKEKS  
VKQDEDKGHSLELLNKKLRKVEKMLLACTPGSKEHQKQKRTYERQIENQKHETTRTS  
IGSDKESKQLNKKNEECQNKVEQESQASWRNELREEAKILREKALEKKRERESVESAAR  
AEEELRREEAEKEERQKHADNEADILRKAFFREEAAKLMRKKALEKKQKEKEARELAERT  
KEELKQKEATNQKARSHEGAVNQGDSKVTEIGKSNGTISEANIFLHYANDEKTRKQAF  
EEARKLKQAAAEKKRKEEETNRKEDTKSDTEKQSIDANDRNHESEEWNPQERIYNIDEKK  
RRQAFLEEAQRLKQETMGSKRKENDVTNIYGTSPAESKQDHEACNEDYTRNSERETEKS  
PSNYSDHDHKKLGPVETQSNVNENEKRAETVPPSSSVFNVSKPKLTFLEIRLSANKDE  
DDSDTHKPDFLDEVQLEANKKETCTPGPNTTVHRTKRNFLDEIRSKVEKIEDGAPAPDLE  
CSHRSKPNFLNDIEPKAGKT

>comp3378\_c0\_seq1; 238 1 674 LEN=806; translated  
XENENENGAPQHQHENEHQHEHQHEHEHPQOPEPPEHQLGHQAQQHRSHQQQQDVAQADA  
TNNDLDASDELSDGEDGNGSPGKSPQVPPTTAAVTTVGD SWKDWAPDPTSSLPRTFVGV  
LRIMDDPGVLGIPQRYGLLRSGNDDPSARRSRYSFEHELFFHHRHG NRKGIKTRTYLR  
KLKKRGPRLSWHQSRRSWSPAERQNLKHFVEVLIEIAMAHFMA  
>comp3379\_c0\_seq1; 349 748 1794 LEN=1897; translated  
MNERPICFLLASWMSWVIIGYCDQVFFTLKQQCIETSVPLNVHFCMHRYGEWFMLMFGES  
IMSLLIVEGDNEFSNHSVKFYCGVLSVIFLAHLHFQSEPHHNSDHAVTRSRHSNYLYTVL  
VPIYSMALIATGICYKMFYDYQKGNRRALGDSNQEAGYGDTEYQYIEKKQQFTADLFS  
GSIATVLICTDLNALLHHGTQSILCQLKTIPKTRLALLTISKYSLVFFLATMSAFQNDPH  
FMAFGLGAILFQEYLHRSFKSWQQYPETIHNADDSSTSDGTLR TCFTGYSADEDYQYE  
IESFADAKMALAKFERRLIVETKPTARSRKKDTEKICEKVL PQTYYAC  
>comp3380\_c0\_seq1; 202 181 390 LEN=390; translated  
MTVNPTKSKLLLSAAAVAVALSVSPSPSSLLPCAFAFSPSLFRVAPSHNIASF AASSTEL  
AMAKKKKKKK  
>comp3381\_c0\_seq1; 737 136 1887 LEN=2298; translated  
MGPRPEERAHQPNAIEEDVLETDTDANGREINIINDAIAVGNHRTTGD PETTDSTEAWA  
RAEGYTPLSDLNTDGGFDGADSYQMFSTGPGAADSNDSNSDGDSDNSNSNGDDQIQGGS  
TGTFADASATGGSGGAGQDDFEQVAAGALSAL EEEYKQTLALSQGGVSEAREKDEDLRI  
IGAGFDQRNEELQQIRRQGGFVVHQEWEGPEKKTTPAGIDASGKGTNARSERPGRPQTS  
NVDTDAVRKAIQSLSTKNRNASFQKQFATWQQQQQTNKNTDHSVLI PKASRHEFYRPK  
PTPASRRATANLRSATLAEAMVRLSLLAALPDDCLLIDVGVGDHVECQNASTIRDTFRP  
FVRWVRDYLF FERQRRI IHFRLIGRELMTTTEGVV DLMESAASSISATATCHSGVYHE  
FLDERLKLAREEGDQKPSDGLLLGTKIAPDLAVAFNAGI WGYQEWATTIQYLASFPTASL  
STAEATAAIADDERTRKIGGIPIVITAYTLDECQEDQEVISEAIASMRTEEANEGTGYKT  
TAPFNPCRAEILWESERNPFSGVQVTRKSTQEYRENSCWQAW  
>comp3382\_c0\_seq1; 141 206 421 LEN=421; translated  
MMHPSTKTL LLVIVAVALATTEAKNFRGATSVEEGDMTRRLSAKSMSMKEKSMKEKSMK  
SMKDKSMKSGGK  
>comp3383\_c0\_seq1; 325 469 1584 LEN=2140; translated  
MVSSQALLDFAVITIFARETLEGGIIIEGYRTVIMRSNWENSAITQQVALRAVSVSALLA  
ALVAIIVCAAIAIPLAILSLDFEPSTAKIIIEGVSKIVAAICLLQLSLKMPKFFGLYYSKA  
QLKKIKNNEPLDETMSDQGMSLRSIRFNVAWNIWREVAECGVFLIPSFLTGEGILAIPLS  
AVVGVLVGGIICVSIYANHYFKSTKALTIFTVGLFLLLSTGLFTGGCTNF EKVYGKTKT  
VYELHGDFWSIDRLPMTIFKPF GYS DTRTVLQVCCFWIWMFSLALHYFKYKMCMP SSE  
LSDEAAAARSADIEN TIEEIKEDGANENLSIHEDTREP SDSGCSGECPN DIEGSKKDEIN  
LKGKEFEICEA  
>comp3384\_c0\_seq1; 606 1 1146 LEN=1204; translated  
IRFLGSKGNQQSIHPSTAMSSARNANKSIVFWGAGAAVVVAATAYVLF SRNSSSGSSAEG  
SDDTKPENL KSETTVTKPSKVTK EAVASDAVEEPAGKEKSPPTQAETKLT DATDEQAKE  
HEEPPPETATDTETTAVVDDVEEETKQE QPPLNSPAEEVVVFDEAKENAREEEPPPTPTP  
TAADTEPVADSVKGETEKEDLPSEAPAREVEIGDFELEALANTITTRRNKASAKTKEE  
PPPTPDNATQEETPSDQESNETAIPSTVTRNKNRRKKNKKKKWNTNTTPLTEPDRTPAE  
TTGDENNSKNSNNGAVTAATNGAKDNMEPGGIDTAAAAA IAARRAKDKKRNRRKAAAQ  
SAATREIKEFKTQNGNSGKN  
>comp3385\_c0\_seq1; 438 91 960 LEN=1052; translated  
MTKRTRSRAIGSVCAAATGFLLSACSGPSPSHAFSVVAPSTATTKASSRRWSPPLGMAD  
SSNAAAGDDDADEASPEAPAGSFFHPVAPSGEEAPAPAGGATAPPGEKAPAPAGGDDFD  
DAVSKLMQQRKPLASEPSTIKGVPTKGFQKQ P AGGKKRAAKPISPYVAIGTPDQPVND  
PSKPERDDQGYTLYTDTKTGEKSRVFEALVDYPSVFTMKIVGANEGTFVSDMVALVAEAC  
DTEPLGIQHTTKVMGKWVSVTVKAPVENAEMLYTLYEKVDLDPRVKFKF  
>comp3386\_c0\_seq1; 550 388 1959 LEN=1959; translated  
MMHQRRTVGLDPPSVSSSAASSGTTAANRNSDGT RRRRVRRTVRSRQHRWWKGVRRILS  
DEDALVTLVQIASVIVIIGCMLMLALFFFGPGEIVVGDDDASGIGWTNSILANMNRWIFR  
REIRYRLHRDHENTLHTNKKGDDLPLK PSTIYTI PGSMPHIGDKSDYYAQLRKEYDAMD  
LPRVEQRYKFKTMPMRVNDGD FEEPEHL P APYDIHNCPEHPPENYPYAWNLLQILDHWN  
PDDHEVPEDLRIYQICVFDY EKDYQKALNYRKQEVFPFVSN DPAVQETAKRWMAPGYMD  
RLMSNVKHRTEYSETNHFM YW NAGS QVRRKQHVGMRRGNNQFMGDGHPDGRGVDKDLAHW  
QQPTQMMRMTYAEWLTHANL TEGETV GPHDPHWYR LIGCGEQSPDGKCDKGSSEYLFDE  
LPFFQPKENLYIVDPMEQKGIHCRFGMRGVIAENHFDQSRNAIAVMGGERRYILSHPNQC

GVLSLLPKGHPSARHSAVDWCDPDLESFPEFAQAESNEVVLQAG  
>comp3387\_c0\_seq1; 504 68 1550 LEN=1550; translated  
MDEEKAIAAKKFLKKNESGSMKLDLARLVAEKLGDKENYKNAKKVITKSDKFSLEGKL  
VSLTKKTKIDASELDSAAPAFKRPKTEWGMSSSEKLPSSIEKWRKDNLIVLKHSKDDEEGK  
EETKKINANKPYNPCSSFDECKAIKDSLIRQCTEANGFTKPSPIQAQAWPILMHQKRDI  
VGIAETGSGKTLAFGIPALSCMAKNPVVSKRRLPRMLVLSPTRELAMQVEVVLKEYGAVV  
GMRSLCLYGGVPKYMQTSELRKGNIDIVVATPGRLKDLINEGTCDLSKVDHLVLDDEADM  
LDMGFEEVKYIISTCRSKDDGRQTAMFSATWPAIIQEIAMNYMNDPVRLYVGFEGIVGS  
NGENCIDDSLSANKRVTQTIEVIEDRPRENRLREILRNNRSKKRILVFALYKKEAERMEY  
QLQRDGFVSCSIHGKHKQAARTQALADFKQNSQIMVATDVAARGLDIPDVELVVNYTFP  
LTIEDYVHRIGRTGX  
>comp3388\_c0\_seq1; 282 75 785 LEN=1062; translated  
MKLYFLPFLIAAVAEAFNVSPDVSFRRTGVSAMNESNGTGELSRRITVQSIMLTSVLPVAV  
VSPQMASARLEAVNRPDLLPSEAGLNVIQTEKFLTPGQAKRLDKMMANLEKDTGFRLKLL  
CQNYPNTPGLAIRDYWSLGGKEDQKDDKYIVLVVDQFGGRGNILNFNVDGDKFALPNVFW  
TRLSGKYGNTEFFVKENGIDVAVENAVEAIVSCLRSEDGFCTSPPDQGSRLSLGFN  
>comp3389\_c0\_seq1; 742 188 1414 LEN=1446; translated  
MARFTLAALSLLGASQYVTAFAQPVTSAVRMASSLNAVSKKDSYTVTLLAGDGIGPEISK  
ATKGVLEALCAKQGFSLKDALIGGAIDAVIDPFPQETLDQCQSSDSVLLACIGGYKW  
DNNPRELRPETGLLKMSSMGLFANLRPAKVLDQLIDASTLKREVVVEGVDVMVRELTGD  
VYFGTPKGIDEVDGERIGYNNMIYKESEIDRIARVAGDVASKRNGKLCVSKANVLDVVSQ  
LWREVVTDVISKDFEDVELSHMYVDNAAMQLIRWPKQFDTIIVTGNIFGDILSDEASMLVG  
SLGMLPSASIGESGPGVFEPCHGSAPDIAGEDKANPLAMILSAAMMLKYDLDRPEEAQML  
EDAVESVLEQGFRTPDIKIEGDGCKLVGCVEMGEAVAEAVTAMETISV  
>comp3390\_c0\_seq1; 373 213 938 LEN=1872; translated  
MARLPVGRNGDSRTRLLNSLGLFQEQRDERKCMLGKSSASIRYDRDSSPSNNHFENIVGG  
SDGESGEKKKFRHVRWSWDIPVRSALHNSVAFETRLNDENIMRNHKDDRGNSQRRSSLSR  
KNKEDNSPHSVRFNTVVSQVGIKIPSRNQYSRIKQTLWRDRYELSEMVERNTTEFHAENYD  
WKQVVLDEEMYVDATSGERIHPCHELVNSFDESDDDDYNDLSLVDSESGFAPLSRLDSIASS  
K  
>comp3391\_c0\_seq1; 573 409 1659 LEN=2121; translated  
MLFGSIPDHIWDEAATSLHLKGVATVRLSGRFDEGETFGSTKPSQIHRKAFRSARRVLDQ  
ALHPDRHGAEDETVLDIDHNGNADVGEKLCCLPLMPIAPDADSAHATGFHWAGGMSRYN  
VQREGIVFSDENCVCGDQDQTNPQSFHLHVHEDDCYLRDLSGMFCSLHSIADMVLLAI  
ERKLELPLAEHKIDQSQPI SDDDGWFQRHLGPTTTASQWHMKRFVKEQKTKDDEGNDCTE  
DSTKTSPMLSTSLNENGERITLPMHTDPSLISVVIHDI EEENS DGRPGALGLEYYHPKE  
HCWIEPEAHGHSVATIFVGSVLAYLTSGQFPAAKHRVVEKESKQKQMAATLFRVQP  
SALLQVPLPSPWLLKRIEERREERRRQGEKEPKNSTLSSKLLKSPSSKTPITFDW  
>comp3393\_c0\_seq1; 392 209 1375 LEN=1439; translated  
MAFVSRELAKGHRMATATTRLFSVSNIEADVKSISRATLQSMSSHGAPGSGVCSL  
PDDLEPVYVTTDADAEEPELIANIMGANEFNSLHPLHYPLAKSKSTGNFICGLRRAYAE  
DASYENSSKAPWPIVEAIEGGPGMRLISLNSEHLMRRIACEVDFGDERKELLELYNEDLG  
KGF IQDEGLDRPYEQGSVEKLGYGVDKVVLLRVGPFDPDIYSKLAIGHAERGDESSSLIAA  
EAANGKISGFASFYSSLLNTFPNRSEETRAARMCLRMPLSSVGLSAKDFRDVGIYG  
QLAEETDSDEEIFAQLQIMYEKMRDHENEDPRAGNADMTPEQKALDDANYLLDITSLTGS  
NWSEIRPKLAEIYKSVGRDDMADFVNP  
>comp3394\_c0\_seq1; 460 347 1840 LEN=2266; translated  
MTTMTTRMRYGSSTVSNRSTVAVCSAFVNPVVMGGNHQTKGLFSDSHSRKPTVFASSL  
SASKGFRFPLSATEQAMHTRLRSSGRETTNRCLAVFSSVPSSPPSSSLATVPPNERAEL  
LNLCKLEKLLNHRDDACDQTPSSTEDGDIGSPSIEIMDAALRSLRDPSSGYDQRYGRPALR  
CYRSFVYPKSKTKAKAVADGGDGLIDNESSRHEDRIQLEAAALRTANQIDFLIKRHTSKR  
MDAIRNHDPGSGVRGEESSGLEPEPTPEAFPLVLVLDNLRGFSFNVGSIFRTAEACGVSEIL  
TCGITPHPNGSGAEKVAKSALGADLLVRTRHFATTRKALSALKQPGASSGDEKEIGYLP  
LVVALETTAASELYTRFDYRYPYRKKSGERISQEGANNPSPDNNRQPGHQGIALILGNEV  
TGVDAAELMAHLLDKDLGDNELVTGQNGDKARGLVDAIVELPTYGKKNSLNVAAPVIL  
YEILRQWNEEVEDTGGV  
>comp3395\_c0\_seq1; 299 152 1498 LEN=1594; translated  
MTMEDPMI ERKMVVAQQENENTGFCLQQVSLDKAVAPLLVRPIAPFDRTERKRAHTSAIF  
YSECFLRGIEPKMADTAALQAQGVYDKWVWRSTASSRRFGTFVGDKSESQKGTREEEGTK  
NKAKYKRVADAEFLRNTHDFGTTLVARDPSSLSREISIEVVKKLMIEELRSSGGNVDTPE

FLKYQRILEKEFIQIRGIKNVNQISQEGNWFTISKPTFTFCQGTNDKGENKYSLSGRISFDM  
FKPTGLVCSFRGAFNYVQAVDPSNPGRPLHVPRVLMQDIKKEKCLRTYDIAVAITIEAG  
QDQKGNFIDEAEENSCYIVPKPIRGILTTLGYSIPDPNVANRLSIWLSGGSLLEVQDEERD  
VDEWKKIFDTSTAPNRDIREYANSLAARLLLGAHIHDKMEEDGTLRFDLKRP IGGHGSVF  
CDI IYMDDNLRIMHGHHSVYVSVRVP  
>comp3396\_c0\_seq1; 197 93 902 LEN=1594; translated  
MKLPNTSVTPSTVTVLGLGSLLSERSRSTTFPDLTNFRLGRISNQYRRVFGHPASIFF  
QRGLANVETKEFSSLSAEEIEYCGSNRNDGENLGGFICSVFEVPRDQVYFDETDNDGRIV  
ATKPTGAFLEREEEFDIVEVPPFLDFSESNSDPKTAERATKLGTLCTRFTDQGYVERWGK  
QRFDENYGRFGIDTIWGW EADSGLLPCR VYL RHCYLA AKSMGSECLDSFLDETVLVDRRT  
TIRQYLEEQEPDLIETTIPPPGFQRYSG  
>comp3397\_c0\_seq1; 491 53 1216 LEN=1382; translated  
MKTSQRIALTAIALAYSWSGSSVYAATTSATGNKEGGGEQYLSLIGNAHVQYHPTFFNDV  
ERILHQVGVKKNKKKRASTRKLAKKGKNSKNTSAPTKNPTKAPT KDTTIAPT IAPTDP  
GGRGDDCDPADVKLLDYPQWEAEKGYWIGEYTF LQGDGNPYESSQWNYPYDHYKGFITGE  
VVGNA YQRNVFLYPPQIPSKCNPENENNVI GDGECGVNGNTKVFEADQSATTC SLNPAL  
GGIIEGLYVQGPYELPTKTELIGRENALLYQVFIPGTMVGKEEDVLLQSQLTTITKNEDEK  
VYRTRTAQSFDTFVSPGLTTSASYRERRVSKEEFYESLNSSIADYNIRTEDLCVWDNSG  
FPVEGVTGSIEACEEHLEESFLLGSEE  
>comp3398\_c0\_seq1; 457 484 1880 LEN=1880; translated  
MRLLLATHRSSPPFVVS PRKILDFVVVVTAIASAXLFGANHPGAGRPGWRKRPSGRYTNW  
PTLGSNKRTGATPELLLG VANNYCAAKRWPWPWRSQP HAFHDAFSAAIQLWGGSTDSVFP  
PRPDFENSRRSSKVL RHDEPYQAWDVRFSGSNKGDSNDEKDPKEDREHV SCKDLQDEAT  
FRYGS DPSRDCVWVAEYPIRRCRKIDPIRNQKTRVFCPLTCHKECRVVDKI IDDFVNNNN  
VTGGINGTDVDTHSAAPSGTPTVSFFPSEDASLVPTAIDEGVNDVVEEDVFDPSLS PSTL  
PTTYMPSPLFATAAPTVEDDKRNVSLVTSNNREQTFGTTKWILLGVFMVLVLGILVGTA  
AAQCFRCSSKRTRRRRIQPNSNKERAPNFRRRKKKDRADGRQQQQEQSPPVRTTDRGGG  
SIGSTDS CSCYLQDDYGV EVDYDVHDCWSVSVSVLPPPPVEDVDL  
>comp3399\_c0\_seq1; 367 1 789 LEN=1671; minus strand; translated  
AQNNLLNKATAPKVYQDFTTKKVF TMERLRGVSMLDEETLTKVTKDPEVGQQAIIISALNI  
WTQSVMQMPWFHADVHAGNLLLLDDGRIGFIDFGIVGRVSDKTFKAVNELSTSLALADYK  
GMAQALCNMGATDEEVDVEKFGRDIEVVMKRIASVQPDITITEMQDGAIGGTLDFDETEI  
TNLLELVEITEDNGLKLPREFGLLVKQSLYFDRYLKI LAPELDMNDARVSGLGEEALK  
TTSMPMVNGSGGNTDESIVIDV  
>comp3400\_c0\_seq1; 171 1 542 LEN=732; translated  
XIQNTLLLSFFPISLLPNQOELPRTWCILTFNQKKSISNKVTEYDVYHNPSIVEKFFVGL  
RPTLLQIDRILEIAPIRWKRDDFENHHQOKEGIPKTSQAR IENENKSSAVRNISGVISS  
LRSPLFKGDSKLQ LQAKDMFYKRRKECLRRLQLIFKVMSSAGKGEYETTTFGHVQIRRYK  
>comp3401\_c0\_seq1; 184 269 475 LEN=772; translated  
MGDGARRKLQLFATNFEDRMKGINHNNGAHTGGLQEQARGAAAERRGLLDNDDDDYGEDMI  
EFETRCSR  
>comp3401\_c0\_seq2; 265 1 984 LEN=1281; translated  
KTSSSTERNQRTVIPFWIHTATPRNTPRYIPLQTMGIT YEEALATLEAMFGDPWTRESLD  
AVLRHEKGHMENTCERILEHGEKDPVLLVERLRNGGPEPQVAMDEEYARRLAGQEEGVS  
SGRGSRSRSGGGHRDGGNGRGTPTILPSDFLRLPGFRPPPSSTASSASSSSSGANRAAGA  
GAGRRQPPHDETLARMLQDEL FSEELARNPDFAHLAGRNPRRSSARPSASNARLP AAPA  
GAPLQNPFEGVNVMQKLSMMDGARRKLQLFATNFEDRMKGINHNNGAHTGGLQEQARGAA  
AERRGLLDNDDDDYGEDMIEFETRCSR  
>comp3402\_c0\_seq1; 787 47 1897 LEN=2004; translated  
MRSCGILSLALVAIINNDSRVSSFVPSLLARNSPNYGKLFSTVEAVESESSVETDSASA  
SEKLP ELPALSTSLTKLGFSTPTPIQSVSAKRALDLENLLMIAPTGSKTL SYMLPALE  
KIVAKKQQQEETAGVLQGG EAGTVLVVAPTRELALQLMRD TTSILSNVDAMSDSGDLAVL  
LAVQGVQIPTPEELNSATVLI GTPKELLFVLSEVRGGPEFLAGDVLSSVILDEV DVLLPN  
PPKQLRTSLDKSGNAARERKGGKFNTPQDERRRQEQKRKLMAAKRRGVEFGSDKQIIGP  
TESLLKMIANRRLYTADGSTPTPYHVLGASATASRKTLDRLNKALRDAAMDASQTVDG VV  
NGSVSPCRPEISESDQSDDESKKQDHTIRAVTVPSEVKHQYVRLEKDEATKPAAVLQAVA  
KATEALKPKRALLFLCGEFRKQKSAAPTRKRTTPQKTPPRRGRQKTLKQKAEAAAAAR  
AKAPDTGLSARKACAGLAHFGIEAKPLHVALGLEVNAREEDEDEEEVPPFLVTFEGSAR  
GLHLDDIDTVFVVRPSSAASYLHLAGRVGRSSTSAEGDVVVRPGNVVSFCTAGSSKELN  
KWKTKVGGTELEEIAV

>comp3403\_c0\_seq1; 894 1 1110 LEN=1110; translated  
MDMDGMDGMDLEAGDMDGMEEGWEEIEIEIEEQDFDDISVGDDSVNLQONEDENDLEAE  
EEEDDDDDGGWEEDIEFEEQEELDADGTDADAAGKKGKGSACKNQKKSQAQEQAAKKGGMKGI  
MASIGVAATDLIASQIVGQIFGDGIMPGLMGGGNDVDLGGIEDAADQAGDVVNDVADL  
AEDTVDEVSDEKKDAKAAALAELEERQSGSSSDMYDSTGRKIRAAALPLGAGAAAVGVGAG  
LHAAKKKPSLLGPRTDAAAGADDDSFASIQSGEEDFEDEEVSGDEEEEEEEETKRKTG  
KKTCKLFGAIKNIASATVTAAKETVVSIAIVGDDLCELLVEKQEEAAEGSDSEDGSDDEDK  
EENDDDDDD

>comp3404\_c0\_seq1; 605 1 1165 LEN=1278; translated  
XSDETERIGLKANRSSIAPTPLAPTTLAPSQPHRTAPQHRPLGSLNVTMAPAPLPTAAG  
TQEGTAKAAAAGLPAPAADAASAKPASGITKKTGTGKSSSKTVTKASGAGTKAKKPVK  
KSTKSSSSAGSSQLSASRAAQLDLASQRSAAAARKSDPLWYQLEDYVLPVAEETPMTE  
GTGAKILPEQVQIVEAALEKNGLTRSDVTPQAFACLLAQARRYAIDILTDSDYAFVANR  
TEITKADLALANDFRPDHPTAVTAQLPKLNLLAQTINRVPLPPIPTQCYSVLLPSKRFQ  
LTARTFDVVTSAQTAQKMVQAVPAFPKAKTSSTGSSSGTSSKGTSSSSKSTKAPSY  
GASRGRQIAINLKGDNNSNKDKMDTTK

>comp3407\_c0\_seq1; 470 153 1340 LEN=1386; translated  
MRLAAASCSRRNASQRRFCRCLLVFLFALVAPDSFSGFLPMPFSTTASPSNGRLFGLVPA  
ASAWETDYIAGGENSGANTLTDSEISDLRVRDIKRRRLARSHGYAADELARMLDKKDL  
AALSREETKVRKKHRGQQQRKLFWRGLFVALLCVVAVVWPLWVQLSEVMVNWQVYDR  
KRHEISQCVFRSVKGSFGVLLGLVLDGIRFWLSMTVLLSWVLPSESPYRRYMFPIPSLP  
IRPGQFMGDKIANGPMGRYGINAAPMAITWSMGFVRSKIEYWTGKALSASAKRRRKEARS  
AETSEERKARKAAKKAAREAAEERERKQQAEMERRKEMAQKASEQLYGNRQPA  
KEEPETENEPPTSNGDYDDAKREFESDMDDINDLD

>comp3413\_c0\_seq1; 340 221 655 LEN=1069; translated  
MADDDSDSDEWGLEELVIPPKEKGTGGGNTGQGTADADGADVGDDYWEVKKNTGVAAGK  
ASKEQEDDSNGGNNDKGGPEMIVDMTLLNPDIIHFKFDRNSVNQPEEASALRKAIEK  
DYETYAHSSDYLSEGIIVVPCGSSVW

>comp3416\_c0\_seq1; 199 1 458 LEN=860; translated  
XQTKPNQTLAMGIFKKTRQSLIEDPATVAVDGETIETTLPQKQPQPAQEKQQQPQQSIA  
QWKKARKKERKANAVKQKEQRASRIHQVLVLRHSANRSGGPQNEYCYSPIAVQRQKS  
AKKAASVWGTAQIAMKGVFGGLGRKDKIRKN

>comp3417\_c0\_seq1; 373 76 1389 LEN=1615; translated  
MVMLQRQQAMSMRRQSSCPGMLRNQQSNYSHGGSFMSCAMGDDNGSISVSSRQSSSFSS  
MTSDNTEHERRSPSILPSTFGGNMNSRRTNSQNLVHHQQAQTPRWVLLVMCGTIMLSWFR  
AVQYRTISYGILSSMDTELESIEFQKRQSTRLWKDATDTKNSFAKQHWKLLKKTQKNFQHE  
TRMLEEMAELEAASDNDNIEIPEAAREKFQNRRTGDVAKKWIHRQEALLHKVYSLQAYI  
RENSRQRVIEKYGYGPHHVVDVKSREGRKSGKFTVRMAPLTAVPHAVETFMMDMVSNKVW  
DNTVFYYHHSQAHVVAAPVVYGTFTQKDHELESGLHNGVSFPEYSPSPFKQHTIGFAG  
SGPNFYINSIDNEDHHGPGSQGHHELEGDADPCFGEVINGFDTIREMQYARHRGDVPRVW  
SDYDLTRIIKATLVPLI

>comp3417\_c0\_seq2; 373 94 1407 LEN=1633; translated  
MVMLQRQQAMSMRRQSSCPGMLRNQQSNYSHGGSFMSCAMGDDNGSISVSSRQSSSFSS  
MTSDNTEHERRSPSILPSTFGGNMNSRRTNSQNLVHHQQAQTPRWVLLVMCGTIMLSWFR  
AVQYRTISYGILSSMDTELESIEFQKRQSTRLWKDATDTKNSFAKQHWKLLKKTQKNFQHE  
TRMLEEMAELEAASDNDNIEIPEAAREKFQNRRTGDVAKKWIHRQEALLHKVYSLQAYI  
RENSRQRVIEKYGYGPHHVVDVKSREGRKSGKFTVRMAPLTAVPHAVETFMMDMVSNKVW  
DNTVFYYHHSQAHVVAAPVVYGTFTQKDHELESGLHNGVSFPEYSPSPFKQHTIGFAG  
SGPNFYINSIDNEDHHGPGSQGHHELEGDADPCFGEVINGFDTIREMQYARHRGDVPRVW  
SDYDLTRIIKATLVPLI

>comp3419\_c0\_seq1; 605 123 1274 LEN=1523; translated  
MATQPPPEAKLLDKFPDGISALQYLPSSSNEGKRLASSWDGAVRVHDTSNESASAS  
SSSPLLLSHNMESGPLLSLAVPGATTVVVTGGLDGSIKSFDGTSTVRSIGFHGNKNSGSI  
PGGAGVETGNACSLSSMSNDGASSDVVVSASWNRQLCVWDLRQQNSGNAARSLLPKA  
FAMDVDASRNRIIVATSGRHNCVYDLRMLESPNTFELKSVLERDSSLKFQTRCVRLFPEG  
HGFCIGSIEGRVGEFLDEIGDERMLAVAGKQKQYAFKCHRDSNSGLVYPVNAIAFHPRH  
RNTFFATGGCDGTVVLWDGQNKKLTALPAFPPTSISAMCF'SNDGTELAIASSYTHEEGDRE  
QHPQDELYVRKILDSEATPKTAA

>comp3420\_c0\_seq1; 333 1 1572 LEN=1605; translated  
DDTSLRHFAQICVHNVHARMETSTLVYSWIARGIYNLDSQRFQKASLDTRTEGWTFETW

GNHGEGKSSEESRSEADGIPDGETTNEIDKQSIISLQLATPYPQLEIMLTQHRPAWFEQML  
LRVADIPHIVRNSNHSNEATGQLPYLTDCTPSKLPVLVGRHQPSNLKRSSNICNNSILA  
YLQDCRNVNLDKQAGLATDQEQALSXSQFMIQSELSKILLHARFEDGDAWEQVYRDQYI  
GASTVQCNEGRGPPSSLGKRWNWLLKLGHRFQASMERATERRRRLPGCGCRGQSSISIDQLLER  
ANEAYFAIDRQLLSAAMKQNKTDKSKRYLLGTDEPALVDVLLWAHLAEALCDVHLVLLA  
SYPRLVEYFEDFYRRYFGQCDKAVDEVCSWKDWNNAQNLENAFQKIPTLSKRDPQNTAF  
KNAVDLMQKSSLQKQDLQEVLDAAKEIRTKECIPEPREPPSYLLYRWCMGETSTADQPVT  
GKESENPIRKKLLRDQARNDQMWISGILGISAVAVLVIQGSAT  
>comp3421\_c0\_seq1; 438 536 2021 LEN=2053; translated  
MVLSTPELELQSLRENAYRTRDGSLSVAAGDQWGNLSALAAVSVASQRLGRSTRVGRLLGA  
PVTAMALTFFLASVGVLAQGGTPTSRSLSQTMAIRFATPWILLGAEFGTSGGDELVEASS  
SSSTSVAPLVVGFGLASLTLAGGCIGWNLAGGALVSCALGGHDGLAIASALLAKNIGG  
INYVAVCAALEASPEAIAVGLCIDNIGALVYFPI SNLLASRYPDVTDSDNASQTNSEARN  
SGQNKDSGVASAAVEPMTVSSI SMAFFAATLLWMDYVASSLLKSPSSQIPVVTLLAV  
LAGIVAPRLPTRETDGSISSSTAGGPMSEPKFPLFPSSASKRALRSTCDTLGTFCLYLFF  
TTAGAPGIKVAKSMTSALVPLSILLYAVHGGILSALYQLGHEQSRFRKRQRREGQ  
LRPTRGWLSTVLSQRLLVASSAIGGPPTSVALARSVSWDSLVPALLVGNIGYAVSTF  
IGIAFYCLKSTVL  
>comp3422\_c0\_seq1; 858 140 2020 LEN=2330; translated  
MGSPHRQTHKNARLAVAVAVTVSTLLVLVGLQCSNALAPPPRKDASRATATARALTRTRT  
RANTCLFNNGESAATAAARSEIDRRRLAIISHPDSGKTTMTEKLLLYGGALQQAGAV  
RQKAEQRATQSDFMEMEKERGISISSTVMNFYEGFRLNILDTPGHQDFSEDYRALAAA  
DNAIMLLDAAKGLEPQTRKLFVCRMRGLPLFTFCNKMDRPSLSPEYELMDQIQEEFDLES  
FPILWPIGDGRFKGVLDRLLEDVHLYQKPAKRGAKAEVIEVPLSETDRLEELIDDAELF  
EKLLDRELLDELIEPLDMERVLDGEQTPLFFGSAMTNFGVQLFLDKFLKMGTKPTS  
ISGDKKEESTE QPVSPEHEEFTGFIFKTQANLDPHRDRLAYVRVSVGVYKGMKVGH  
SKAGKKNLAQAQALFGSDRSTVELAYPGDVIGINNPFSFAIGDTLFTGAERVAFP  
GPSFSPEKFAIRSPNPSDYKSFRRKIDQLLAEGAVQALRQRNDGGGGLMLAAVQQLQF  
EVVQARLENEYKVESQMEPLGYTLARWADGGWDAVDKADADGKLFGIMIVQDRWGR  
PVLFRNDWKAASLTHEEKDLQKLPWSQPPDFE  
>comp3423\_c0\_seq1; 238 1 982 LEN=1141; translated  
XSDYPSDYPTAGPSDYPSVGPSASKSSDSPTSLPKPPERRTDPNSLVSSSPTGTPT  
FELPVHCPPSDPILVAVEGETMYPAPPLAITYQNTTHVGFVENTFGNLISSVFTEYH  
SGDFGETECLLEENVETNQEIEFVAQCMVHAKISIVNVWISDCNDASPFLELDNAE  
VPECCHPGDECKTVQYTFKLPCVDPCPIDLSEVGDAVSTSTGSPKLI DSGTSRPT  
SSVSSVSSSPSASPSASPKDATYPQGRKLDEEKLEDEDFCVVEDYPCGPSSDKVYV  
CHYSARDGYKTFVPEPDSALRFYPKDYCGPCVGGYSETI  
>comp3424\_c0\_seq2; 82 281 870 LEN=1416; translated  
MAKMLPSLIVFDLDDCLWTPMHELPGCPEIPVHGDLTPKHGNSKQAHQPPREQV  
GVVGLQVPRYRDTVTLYDGARSVLYELATNPIYKGIQLATASSSLEPSYSYACLGG  
IEILPGLCLGDMMSYNQIGRTGALSPDKTTHFRELHEESGIPYEMLFFDDCNWGD  
XLPESHKGVRSKPENAAWIAMGRIPKGP  
>comp3425\_c0\_seq1; 247 224 1270 LEN=1508; translated  
MPGPPPVVTVFSSIPAIAEALSSCEGLALDVVEDGALTGYGGTVEFDPRNLSPAT  
FKALERAVVLVSEPAVVASLLGHPEPQCLRNLRWCQSTYAGVDPLFAPGIAHLEK  
PWILTRFAGVFGPPIAEWCLARIIGHERSFAASALDQRREWAGSREAVGHYRYS  
SSLTSLVLCGGDIGRCIARAASALGMRTVGFGRIPRAQGDLEGVEKYTLDLGEAL  
RAGDYVVSVPSTPETRGLLGGSALAAAAGASGGKSPVLLNVGRGDVIDEESLLS  
ALESGYISAAILDVFEKEPLPRDSPLWNTPGVVVSPHVSGLTQASDVP  
GVLLANYQRYVEGNDLLYVVDWDKGY  
>comp3426\_c0\_seq1; 352 139 1122 LEN=1585; translated  
MSTSNKSSSKSSSRIARGTALASIALAALSPSASGFSPLASFLRTTGPLRSMS  
MNDNSP SDTPLENDVVTVDVESAESLETVDKALGSETETPGALVSRIVDLLP  
STVGLSPSEENRS AINEALLGLEALNPTPEPAT SALLNGVWELAYAGLYSSA  
GALDSPTRQAALFLYSGGYSPGLFCLQLAKQLPRGLVEVTGPLDISISRAAP  
RVEASVSVKTLGGTSTVRVKS DLGVVSGVRLKETYESAEVLSRGFV  
DLPGVLQYSREIYVTYLDEDLMIVRDGSVPELLVVRKEKSFT  
RVWGDEPTTVDELAPGEEDAASVL  
>comp3427\_c0\_seq1; 254 87 665 LEN=910; translated  
MSNPNHYRHPGHERIVREYEDRQQLVNEAEIADLKRQLERATLNQETLLARR  
NAAKNYEAAPKNKVDHLEDDGGSDEVRSNCIGGSDEVSSNHNRRDASTRRH  
SKRYLRRLMRKTLTTSTTYATSASDEQGRNTCASNGQRMSLVNAEGVLV  
VNNNGISSPRKRSERLRERYQSES

LRIARFSDRRQV

>comp3429\_c0\_seq1; 362 82 1218 LEN=1472; translated  
MRQYETTRIRRRQATCRTTAAHGMLCCLLAFAPFEANGRWVTTVTPWVQSVGAFAPVVIQP  
RIPTSSFP SRDQ NCHNSRAVLPCKGMPFPQGAGSLTKTVHASSLSAMPMELAYTL SGAYG  
TALLEHPLPTKSLTAGILCGIGDVL AQSRGTNEDSTS NYNLQRTLRFASKGCLGGILWTF  
WYDQIDSFLRFQEDIDQIGGDGSYNHNKISLYVLTGSIFSVQANASFLAFCKAHTAAVTT  
LMSILMEQFLWCPLVYGTFEIPISTLMNGG SVGSIRGEVTSKLNGLLV SNAKVWTLANLL  
IYNAPLEWRLFIGNVIDIFWQSIVADVSADCGGLGQE ECGLDGTETTFISAGEEKEIEAA  
MMASSTAPVNDRL LQTIE

>comp3430\_c0\_seq1; 362 134 1388 LEN=1396; translated  
MVSTSAQPTATRPGLLVLVFLLSAPLLAAGFRATTTTGVTSLRG SERTNTSTACFSVRF  
RCGRPGDEPVIALTMARELMNPLGISHRNFVVAEDASTGDRVGWAQIRPLGPAGVDPSEL  
NSPPGSMK PASIGDAVDEQMWEFEEDPSAGFGDGRWQSTLPWTKEYKQAFASAAERRER  
RAELLAREEDARADRPV PRLWELASVYVVPERRSEGIGSGLVRSVLDQHRELGRASEAVY  
ALTLSSSTVEWYRSGFGFVEVEEPREVPKPMALEVAAGSILTKLMGNELVCLRMPLEQMTG  
ERSGKPRINT EEFSEHANRPI RNASCPSWREMGCQNERENRVDKTPPNPQKERRGTEHER  
FENDSSALPFDNYRAGNFSVGIAAIPCRDERIRQAERSFVPPSQIFAPPEVNTAVPY

>comp3431\_c0\_seq1; 175 1 1079 LEN=1352; translated  
XSEENPSKQPKPHSMVDDGAFVSKQPPEALSSTPR SAPARFFRVRPAAGSDDFRAESMHR  
SVRCGGAHPLD VDDPSPSGSV PANGNESGKKIDSGEGSSSSSIEARNRTHPGVACSRPVS  
IREDLTEEQRNPAVGERWMDPPTGGNLHLVCCDTTKG SFRILLHERWAPTGVSHLLEML  
GGGYFDTEIPLFRCTDACQFGLSANQTLTKAFGGTVADDPLWLPTGPEHRYFRAPGGSGE  
IERYPKGVLT YAGGGRNSRGNQFVLTLPNKYMGGGSPWEVPLGEVVEIESERKNAGGES  
SDLSLPDLYTGYGERGPGQGLLHREGASASVRERWPLMDYVLRCSIVDQWISDGGGGRG

>comp3433\_c0\_seq1; 665 1 1029 LEN=1206; translated  
GWYHAVQMLEDKCPSASLDYVVEPWFMGAGADSEAGKEFG EWQA ESEAKYGTGFAVSLDD  
LPPPAAPRLALISGRTADNPRLLSE SIAHGAKCIYLEKPGAPT VVELEAMKDEADAASVE  
VLMGYKNVCKYVRKTREFAETVEGSHVTFVSN NAYENTPESLGE CFERNAEGMLKNMAI  
HELALLVSFYDVTVDNIESVVADKEFSSSLQTLKGPSGDDYTD FDKIKFTITTKTGKEVSV  
AADRCGGTDSYATVTDTSGE E VFRYMPDEEDKVHVKELEAQYPTAMPYFFTQDPDYITV  
KERVAKHTVDGKPAEGVATI QIAIDTLKVAEYLTPI LQEQLK

>comp3434\_c0\_seq1; 228 140 658 LEN=855; translated  
MRSMSYLSNMTSESNLHRSTTKSLGKKRLVASKSSSKSGPATS YKLSSPVRTILSRELQM  
PCFKGSDGPLQPVNSRRRFRQRGSKSASMLRSLSSSHMVAELLKNDSRREERTDTTELLI  
GSMKRISTESNRSSSSSYSESSSMGGSMATLSSRMEDSSNSSLPSREQSSA

>comp3435\_c0\_seq1; 174 117 613 LEN=845; translated  
MSSAPTEEPSTPPEGLR DDELSKR FYYGGLLGLPWLWIVHALHFHGKQRQLEAQRILREE  
QEHNVNVRMKLA EWDDNDNLSVLSSGIFITDVL LFFLASSSHPDTDNQYAEAEKMWVRR  
GRNSAVVVS GAWLAWVLFVQLIFPDTLPSSWYVRDPNSYAATGW

>comp3435\_c0\_seq2; 206 117 515 LEN=747; translated  
MSSAPTEEPSTPPEGLR DDELSKR FYYGGLLGLPWLWIVHALHFHGKQRQLEAQRILREE  
QEHNSESSSSHPDTDNQYAEAEKMWVRRGRNSAVVVS GAWLAWVLFVQLIFPDTLPSSWY  
VRDPNSYAATGW

>comp3436\_c0\_seq1; 299 133 1533 LEN=1768; translated  
MRSILPTTHFVLPFSRQVLEEVPPNQRLARSPPKHTEG SNRPFPSPRDHAPS NRERQTK  
SKLGLVSSRTVVPCLLLLTLAIVAGTMDLRRPLVATLAVVADADGNTDGNTDGREVLSS  
LEHLFHNGGT VGGTTGGATSPGVPFESGLRWNPRPGVPCPHCGQTDDDDGGAVQRFSGS  
ADRDAASLGE GDPPTARTPTGGQTRLATAAVSGSPSWGQ RVLRLWSSGGTAGKASPE SRH  
LRAAPPVATAPGDPLGSSLLPGDSICATIERAFPRAFPERLKRKCRWAAARS RGGGTARR  
TALGSNHRASFETGNGGESGSGKNDVPEDGNNLSEENENNDASEDANDVSKDGNDVPED  
GASPSVPYLGSDRDEHGCI VSAGTPGASWPGPATGPGKAPARAPLARTQSPLPLEPTPAA  
GAATKATSGAGPPGRATTXWETVCGGGAELPARYNP I GARKRHKFL

>comp3439\_c0\_seq1; 401 1 829 LEN=837; translated  
XQQQHQEREQSTRQRRRQRRQDKQQRGAEPTRAEVSVDDILASLQQQQQAPGEPLVSA  
GGPPSASEKDAPGSGFRDDGIATQQIAPQELRIAAASNDL ASLERYLDVAPQHANRQDKR  
GWTALHYASHHG NLGAVRLLLGHGDGESEWEIDAGIKS FDETPQTA FDVALAVHGIDHPV  
ARAFVESGWH DGGESDERVRRVLDEKKRRDEKDKRLADKAERERLAIQQKRDRMFGDL SR  
YRAINKNGDDLDDDDGENESEVELRRKRLDALLGGEL

>comp3440\_c0\_seq1; 281 1 1613 LEN=1790; translated  
RNYREDQILLRFFSVRWNTVTKIPNLEWLIDDFKLMMDNAVEARDQKRTIDPILNLPVNS

LATSLCFVCPAKINAPATKIEPDIETSGNTSYPDEKSAYFCEDDDSESDSDSDDNELLFR  
SSSISITKTDSNTSIRGGRHLHRVLNDRFLASCHQDGEALLWDLNRQKNVARI AAPRGG  
GLCVRRTDDPSQIMVQTRDPKIVSLHSIERCRPIVGSHGIGSDSDTTSNHVRQYETHSQ  
TFCRAAPCYGNKHLALPSDDESTVTVVDNRNSSSVATYSVPGHGMLTSLGLAVTDHERG  
YASHNPILACGMENGTAVFFDITSGSAKPVASESSFSLGKDPILTLDLLPSFSRSIVATH  
ENCPPSPFITSSSNALLVAAGMAGDAEEVSELESEDEAGRAVLFKAFCRGDSTSSPAWTFK  
QRKRFSTCRVDRDGFNGKPGVSSCKFRPGDGRLLAIGGWDRRIRLFRERSTGKPMAILKGN  
VGSVADLDWAPDSMKSGLLQVHAEKKNRYLFGNAMQSVELSLEKYENALYRFLGLV  
>comp3441\_c0\_seq1; 342 1 1890 LEN=1890; translated  
XNNNNNNNTMSSNNPGTAETTGARPMTKEEQEQQLFRDAMLALSALAGAVLFLKALAASIT  
VYLALLPLAFLYGIQTCPASSFPAKQQLRSVLRGDSLPPDHPDNPQKTGFLQQLWADT  
KATLTSELVTLPGYEVTIASLAGAALLARVTMPTADLECVWLGCNHRWYYWGARSLSSEN  
GPGAAVEGVSDNKVGNVYKAPVHDLKIGNANFRLDGKQDEXLPDDGLGRCQLAGT  
PRPAGENGLLDGQKPAKQTKTRWARVLSNSLFPGLFFFLRLDSEPESENRLSTINS  
TQFSLIPRLCLEVENTMQLLNSLQVDFDRELLLSMLYHIHIQRLIYLVFDRVPKPLFILQ  
QWLPWLRREKRAPRTYQLANKLCYAHKLRQNEDEKETEESTHRTALHRKNNSTGQQHRTTTR  
VPAETRSTAIAMCVPMDGLCRVPPHFLPFATERGTGLLYQQHNRPLQPTDLVEAAMAPA  
TESAKETAVATPPLACFVRVAPEEAGGAGGLAPSATAGRKTGDDWLAPPNACSSPQNK  
PISSQVQKSSSRGSLQATVFPVPRHAQFSSSRASSPCQTVPLPSLPSAGSSGPGPSSA  
STSNVVLAVEERSGRLEITSCGGDSGRTIGX  
>comp3442\_c0\_seq1; 614 1 1886 LEN=2369; translated  
XSDDENKPAEGSKWDGAYSPSFFARFANALFGCDDNDTDGRFSMKCGGDHREPNTVEAK  
LKAFTMPSPRKSASEIGSPRRDSGPGPSETSLAGEESSEYQCTETEYTTTEYTSVGV  
TLGDTTETSNYPGSLSIITREGDGARTVGYEGDDNATFFPTYQRGFSATGETQSEPRNGEV  
LEFESDPYHEDETLTTYGEAMGVSTLEDTTTTFTLGDTTTTFTFNDYDDDDDEQREYD  
EDSSYGSNSFRSPLTDSYQTASSRFFGDSQSRFSLSRSMPRFREHFDPTRGNGDRDGAQ  
SVVGNQIAFVSHHHEEQQLAMGESRSVSTRSPSSLRESLMSSGFRNENDVIVGIMAIA  
EDDDNKTGEDSKDLSYTKSENRLNLSINFILLNENEEAPQSELETSQTTRSARLRFTFG  
KKGKTKTAIDRDMAVGSECCSAEDGEKEGCKENEPTKKTTLARKPGEKGPSPSEADVS  
SKAVRITVLTVKKADVDGSRSQGSYRTRSSAFQSIYVGRESTSSGKARDEPRDEPEEPK  
DSHHQRKANHKVLRHRSNGPFLRVDATVPVSTPEKVPVSPGGSMASMTTSHPKCQGP  
SSELLLSGNLSPMARLRNPVSYDVLSDH  
>comp3443\_c0\_seq1; 318 43 777 LEN=1484; translated  
MMEGAFFLLLCLKTLTVPVESFPASSLSHTKISADVTIRRETKIYRAKANDDDDVDQSTD  
SSSLIPTEAVEFEDWKAIANHFVDESVEAETLHSKPIILFDGVCNLCNGGVNYAIDHDKN  
GKFRFASLQSNVAKSLLLRDGDGKDPFTTSDVVLVTAEKNYSSSEAVARIMASLDLPVLKLL  
GNLQGITPSFARNFIYKIVSGNRFVLGENDSCRMDFDGEYTWRFVSDPPESISSLTEEDK  
NAGE  
>comp3444\_c0\_seq1; 162 1 445 LEN=1232; translated  
NNNNTKWKPSLQTI AEEEEERVVAGPNTIEDEDEAEAEQGGDCDEEGKPRKASAMAMAMAK  
PNTQKALPLPHPRQQLDLLVAGSSAPSPSAPPGTSASSGRSEQNGTDQNTTERNGTK  
GNATQKATAKQRPPNPQNHPRATPRK  
>comp3445\_c0\_seq1; 156 1 364 LEN=525; translated  
XRKMIDDVSRPVAMNIATISAGFEKGDFLVREEQGNRVYDFDFEEAFNYISNKG YARMS  
REDEKHWVDLMNVIHDSVKGMKYNTGTLLMVL SRPVNSDGASDKKDKVKAPSKDLKSMN  
P  
>comp3446\_c0\_seq1; 920 1 4209 LEN=4240; translated  
XFFATRLQSGPRFAFESVPPARTEVDWTNLSRMLRQLSATRRKALPSVAPRRGSHKNVRR  
ENYDCGGVVRVSSGNPLCRTVGRFEERQRRYFRHHVQHQQRRQGGGFSFHHNCTDRA  
TRCDLSRRDLPSFHRLRACYFSNA AERTLD DENADDDAAVHAGGDQAPDQAPVHANQSTE  
HEGDPGLNHIGNLKLWYLDHHEIGSVVQDAFETKMVQNP SHSILVRCGGDTDAALSGKG  
QDAIDAIQQIF TASF TCVPTNEREYAGRLSGYFDIGDQNFYSKKKVALQAVSAVVRHMK  
GASDSNHDNPNTKAVLDN GEEYSYRLPSTNDQNSLRQLQALYMAKFKVSPTKSQSRMTK  
QCFVKGEGGSSWTA AFVCPVTSRIYEAGDLPT EYAPDSMKMKNAGQIWIYRKKSDAVHAS  
AYTAIDSIDWDAELSTLEEDKSKTAPAELEQSARSTDVLRALSFWFLEQQGHTDLDSLIE  
ENFVVTAGTDDKGREVWTASF LCP LTGERFDSGTINTNDAVPVAEIDHLN WYTNRDTALR  
AASL RAYDAFHFRDTGVTDRFCREDPTDFTTGNVRVGGEDIDSSENDEDTYTADDLIG  
YEEDEEDFII EVIPQQLNLSRGL ESGSSKTLDIIAQAWIDSTVVPSSSEESPKHEIQKLQ  
NIYSERQRTINRAM EWVSKQKHSVKETNDRTQFDVTGRICNLKIANAILSSLAKNHQRIP  
FDSRPAGVEKCAAAI L ESMWSSESTIPDAQSYALYLKCLEGETAKEVAGRAQEI ISAMES



GDEYNGRFLPKPNEAVHSILAE LNALAGISPPDTIRGCESLDRNVHLCHLSAMAHNPTMF  
DAKLAIECIDQMRTLSETHNCP SLQPDIEAYNAPLRWSGGSLRSRLYSRVIPWDSYSEIF  
EDGFVSESNAALLEQA AKVEEWIEMMKSKTENDDALAPNIETYESLIQAWVRCGSMESL  
LRAETIANNLITGDYPCIRPRLQTFYPIIGAWVYSGCDEG PQSVESWIDRILLQLLEPDI  
DSRLGFP HLSIMSQLSLQRQILKQSGDTPDSMSRIKESAIKSNEILRSIIEEQNNAAEFR  
IGSDMFMLVINAWCNVASTALSQNIMEEVRQCSREIQKVVNLFDEMLISLNMADDSQEEN  
QSKYSRLLNEAPSVYGAQIAALNKLQTD FVSHEGSWSDDGLRQQQIFIEEKIRRL EEFN  
FFFSGDNNVKIADSQNCNSEVNIMSPFPNEVYMTDPSCRWADFIYLSLDSIEKGTNNFS  
HGEADFLRLCTLITRVTSSAMPSVLTSESRDQIFHKVIDLLEIYGSQNQDRMTVVSTLVQ  
SLKKCVGTQQDKETKSLHGCILRCGTNEQLDEEDANDLTVAXCPNKT KNEEEEVSWERIT  
RKLVSFKSTKPLTVKALS FASC

>comp3447\_c0\_seq1; 507 1 2185 LEN=2185; translated  
XTLLLKVAVIYPETTDVADQSYAGLLHHWISSRVDFGKIILTSNRKKS GTSNFTSSDEVRI  
VIVKGSSYDICATADIALFVIPP HWSGPEQKGEILGELASSLIDDDIPRVALVLRDSVGA  
DEIREINNL IATQLAGNMDAIP IHPSELSVKAFESALESF SRIA KLFVHEACVRVSRI  
PAMQLATKTILAVLWQSIPSVAGEDIDEDAIVECSRLTVHTLIEELAKQFERNETEWSLW  
PAPEFSSRDGVVQSYFSGAVGLPLEWGRCLDRRVLHQTYESLLSAFRGHFRDAYQRIVVD  
APITVQDQCASECAQQYRRCLERALQWMQTSSSFSGCFLYLPEGLLEFVKKKVGEKVGGA  
SPLLSSKSGSNSTKAEIPHLAAEDRLF CDDVPTKNTSKRSRAAPDFFGKRSAPTNGNHPS  
LKKQKQEDPPVAAGEGPPCVTPVGTVGSQARNPVQTPSTKRRTSALRKGDAYATKLERLL  
HGDDTIDFVVGQTSLSSEFLRGAPKPKAEGANPSASNGV SIGIKDTMILILQNGKKGTMI  
GGHQYHINITSHHTPHQIIRGRLEILRLLRHFCNKTSQLLNCIILLQQYPYGTVMMSGXG  
MVRQAARDSVGSQ LDRSRLR PCHSVVRSLS TWYDAKSASQRSISDTMARESAFFRCLTRL  
PRTLSTEAPAHSGGATTTASTAAXDLVELVADPRQRALDAEGVPPAGAPSPVGGVVHPD  
RVPEPGGEGX

>comp3448\_c0\_seq2; 301 75 1037 LEN=1184; translated  
MAKSKSKMTLVSSNQNESRNSLVAKPMDRSPNSPTIVNNTKYQIVVFLER GKFFNKCTL  
HPGEAVNMTRKQTGGGSLKFSYKVHAMIGDERSLPTK GDSIRNVLVKVS AVPAFAAGCLI  
SAASAGTMTGPSAALAPLVRGIVVKGVTVSAADIAAGT LMAERTKKVAKILMENHEETVK  
CVTGKYKPKERYLSVEGGLLEGPIVVRDISRRKFKRLSITNTKAPMDPSEVYEKLSAASF  
DDSETDADSSRSMRSGSAANGGKENERGGTNIKSRPQMTDVKNVLVKS YKLLK KVI SESTT  
KQNNASTKAKGKNPMYAAIF

>comp3450\_c0\_seq1; 161 1 700 LEN=1308; translated  
EQEATEQKQDNLEQFSKTASFAPYGNYYEELQLNLVTHQQHYTAMISSSWFMSKTVPLV  
ARSILSKSNRATVTAGATLPTRRGYRGDTGEAVNKLTEKEE KLLKIALPKAEKIMKKHIE  
LPVDDIATRKRRLIYRAKQRGWLEVDLLLGTWASENVPQMEDGDEL DQFEDFVNMETIDI  
YNVITLRLDVPEDMKRDGNGVVERIQEWARSHPLGRGDPDAYKAVKMEHKL T

>comp3451\_c0\_seq1; 666 195 2912 LEN=3153; translated  
MLVQLSPWETASTSIRVPKRRRKRVRGSKGSDKEGDQKEPPSFASHMITMVSKRSLSKMKM  
HSQEFAGCLPLLAITAGHQITVLGKNLSTETEGDSYREFTSLRYSSRPGDAGSFFAGPES  
DLPRIPAI PDKNDRVYALQQGNQRLACWDSWKTGGPDEASAVKVRLENPAVSMSMLPMN  
KGI VYGSCKNGAVYVARMVGGALAVEYLRGKHSKNGKLVGTF AEIDMEQAVRGKKRRTSD  
ADGNSSVRFYQVFCGTTITIVRNSAMLSASGSHSNPDKPLIQ TGLVQNAAFVDLLGEA  
PANDRDNYELTRLELLVSSSGSAPKISVFTVTATHSKTKTNGYSRRESAKDPFCGTF CM  
AISLATGDVSTSPRLRPPGSNQFGLFTESVLSAASDEMICLYDLETSAFLQSVSLEKPLS  
DMDKGGNWILGTNAKHGTL CVFYPRDGLLRVALSTVSGLGSSSERLRSSSKLACSL LANT  
TGAL ELMGNATDETQYKQGLLALTRLDEAVARALATLDEIRRTLVSQGDNAKSSNKPSFR  
EAFYVALSNLTKDTEGSASTGGYPHYHCNGETPTKKMKNGKLN GAVHASLAAKGGKIPPC  
TPQSFIDGAVQIVLSTIIIGKEDRNGSNSSSFDELGLDARFVLKDLLRSGRV SARLHFEG  
LYALQETGKKHPLAIALGCM EYPAAGNPLSPLQIIIEMILNCTDL SERQLVVMLDYMMRH  
AKARDIVKIVREKHTHMVSKDLAALTNGDEKTTVLAGVRV VLEMI VGYSECNEAMLRAAL  
VEELSSSVEAVLLARLLPGLLLSNPNRNSPRYFIRSTCLWIAALSE SFRDDL GWARTSSG  
ETYLAFLLNSVADTTKNSQEIMSLKDSIGVAEMI QKYKKVKAKKVSSEALQTEELVGYSI  
ERIIIF

>comp3452\_c0\_seq1; 248 1 242 LEN=242; translated  
XEEREREEMEKKQLDKKNTKKEEKSDKKKKKKKKEDDDDDGSSGSEK LKSDKSKKKKN  
KSKDESDDDGDDEEEAKKDK

>comp3453\_c0\_seq1; 234 1 925 LEN=925; translated  
XAKPAGAEP AEDREQETDDKDDGDASASDAEPDRAAPGFSVLSADDS DSDQAETGTSLPE  
PEAATGNALLAQLAKERADRQRQREQQAARPSGPGDSKGS SRQAKRKKKPKGQRLGGGR

NPPPGRGPSSKKEKDETLDDDLDDMAFLDAQVARAQNAHGRRVEGSGTAYRTIVHGILNAR  
PEPRHQAPRNARASAAALRAKLGEGAKRQKKPKKKXGPAKCFSSRAARGSSASGSQAKNRYE  
KTAGWPAAADGGGMMTESLSDSPETPSVVSRTTRMVRNSSSSSATTVAGENCDDSLVEMV  
ENQYLDPSWX  
>comp3455\_c0\_seq1; 73 1 395 LEN=395; translated  
EDCAKVGCCHFNEGQCLSSVGRDPCHNVLLLEGYEGWKDGAVVWSDPPSDGKWEACGKVTV  
VFGVAICVQTQGANNNKSKCDHIAHVYQLLDNNADGIPDDEQVLTVMVQNRMYLFFVPENG  
EESEELWSKLPX  
>comp3457\_c0\_seq1; 230 255 713 LEN=770; minus strand; translated  
MLVNGSMKILTRLVEMYLKRALNPFLNVTKQNRIQDLACPTWPAVHTFALTRGAQIVENP  
RFGLGFVLITWPSVLDQPLYGPASSLSSFLLRIRKGMSSVVEALNLEQSCEVLNNFNPRG  
RMFDTATIVSRFRASLPSRGPSSQFYSEQLDR  
>comp3460\_c0\_seq1; 316 26 1018 LEN=1018; minus strand; translated  
MGSKHESKRKNTGTDKHPIDRLMVLVAALFGFRHLLLLAVSFAAFDRAYRTDVLQANERK  
ALLLRGGATGAAPPSSTAQNPAALRPPGLLPDREAWHEMTMAEMDENLGCYDRGLPIHGP  
EIWTGMREAYVSVVGRHRSTLASVGRDAFSTGLLVPFEVRYSDGRGRGIFAKEAVDKGRV  
LYDFSQSAQFETGTDAEFLRILAPELACDVLLWSYAQDLGTETGNQTRSERRETTKGAR  
LRIVTDLDPGSFCNDGGYEGGNTGWMQDQERGGASEGGRHPPHVAVLRREEASSGSGFVRS  
APLVALKDIAGEELSCVYDQFNEGLGLMID  
>comp3462\_c0\_seq1; 601 1 1697 LEN=1722; translated  
NEAHARELQALKEAHAKELRELKEQLDSANTISTASASNNSSNNNSANTASRNEAFRQRW  
KNRMNNNNNTIQNNAHTPTVAFSGDTNHETNDYRATEVASTVVSTMSCRELSVARYRAR  
LLEQMNRGRGTLVATGAGATRREDSGVDGTNGGSAESRDGNDAAEIQRLLELQQAERRQ  
KLEKQLQAGVLAEDIPYQLAKDKVASISKRMNEIGSSGVVHSDPLVQKQLREEYFRL  
EKDMQKYISALMLTDEYAEERRSEEEAWEARNKVANQKALETIRRSMPVDVRRLLTPSQLE  
DDYGLPGDLVKRFRINVLQLLRVDPAIVAKWHPSSVEALRVGTGLTITERRALHCYLSPV  
VCKWNGSETPVVAAGNTGTDAMTQRKLAWFGALRTNFKEALGEYERHLSQRPGPGSCASK  
TCGLMGNRCVVRANAANKYPDLGHPSHGAYEAPFDLVAGGGDQKSPAQVIAAXVPQERTDR  
GRGGTQGGNACARPGEEGVRAEARRTAEASGRAQGGGLGPERPAGGHCRSPDRLSRILDAG  
AEREAAGVAGGRYDAMYKKRYNNIP  
>comp3468\_c0\_seq1; 105 743 1699 LEN=2017; minus strand; translated  
MPLEKYSEGALPSNAPEWAVAASQRIQERMAEKGRAGLYDNPPPEGISKILLHSCCAPC  
SGAMVEEMLSYTEKYGLEVVIFFFYNPNIHPRREYMRKEENKRFAECLGIEFVDCDYDSD  
NWKYKRMKGMFDPERGNRCTECFDMRMERTALYAHENGFDAIATTNATSRWKDAKQVDGS  
GIRAAARYEGLTYWYRDWQTDVMTLRKYQISAENKFYKQYCYGCSYSLRDSNDWRRANGI  
PKIEIGGDRAGLGNRYFSDPIEDAQEESSQDVVDEFFAQAQDIAAAGSDRTERKNALEMYK  
DRKNEKEAGIDFGLNNW  
>comp3469\_c0\_seq1; 146 1 1065 LEN=1065; translated  
NRGDVMTDKTLTRMDLSEAI FREVGLSRNDAAQLVESVLGHMSDALVRGEQVKISSFGTF  
SVRDKTARVGRNPKTGEEVPINPRRVLTFRPSHLMKDRVADGTXLRISPPMGKAADAFR  
TISEVADWLEVPAAVLRWFESKFTQIKPVKRAGRRYRPAADMALLGGIKVLLHDQGMTI  
KGAQKFLRENGIQQVSDMSPPLDEEAQGALSIALDVPSIPARPADVLAFTRPDGDADPA  
ADPEDTAEVAVEPEALEDGAYEADAEAPLSPQTKAPAPKEDLDAPALPPIEDQTPHEAPP  
AAPELSETAPSFHTAPEPEPEGDTAAGAEDETPPLEPDAPPTQTAPHPRAPSDLPX  
>comp3470\_c0\_seq1; 219 1 404 LEN=551; translated  
XMIMMMKNNFLALLVLTIAASALVSGFVQQAQSIASAPESTTTAVNGIWDKVVKSME  
SGYAGGEESPYAKIKAADAKKEEIRRKKALERQKRGFTLKDVKKKSFFVKKLKYPGAEEEE  
EPPAPEKKKLFLGLF  
>comp3471\_c0\_seq1; 1284 93 3638 LEN=3735; translated  
MEGGDLIENHRHKQKKEGRGAKERKDDKAKKEGTRKERHNRHRAFSVANIVRTQRTIQRN  
LDRSQKKEYVPLTDRRSIDPNESPALVVVMGPKGVGKSTLIRSLVKLYTNHNLTTVTGP  
ITVVTSKHKRITLLECCSDDTSAMLDCAKIADLVLLCVDKAFGFEMETFEFLNILQTHGF  
PKVMGVFTHLDQFQTAKNLRKTKKLLKHRFWTEIYDGAKMFYFSGVINGKYLKNECKQLT  
LFI SRVKFRPLTWRNTHPYVLVDRHEDI THPNETDKNPDCDRSVTFYGVWRGSHMKKGTK  
VHLIGVDYNAEISPLPDCPIPDKQKSLKKDALLFAPLSNVGAVSFDKDAIYIDIG  
RANYTQKADLQGNDESGEDEEASEPEYDPEEPAGMLKGLQGVD SAVDERMERSTLRLFK  
GSKAVEAGSDDDDSDSEDDVPEISTDSMVPYRVRGSDSDGNRAEEDNDSQSGNDESDSD  
NSDSEDEDADDGEDDSNSDSSDEDDSEGESDSDSDEEEGDSIERNGISQNSMSWKTGIAD  
RALESFLERKGSIVNLQELIYGVDKAKSVNDDDDGNKSDSDDEFFKIKKSKTVSTSDSN  
SKNILQSKSLLGEEDSSRLISGERENISMEAWLEEGGDSLIESIRDKFVTGNWSKDGEGD

DEEAFDDFADLETGEKYGPNGEVLSSDEDDDDVEEDSDVEDKDPTEEMTDSEIRAYYAEK  
KAKQKGFDDDDYDDDKKSKGMGEMKDDEAENEYLEALKRQKEERMKNHEEFKGDGERSR  
LRHEGFRQGVYCRIRIDGIPAAFIDNYNPEQPLVLGGLTPQETKLGFRVCRFKKHRWHKK  
ILKCNPLVFSIGWRRFQSIPTFSTEDDNGRHRYLKYTPEHMHC FATFYGPQCPPNTGIL  
AIQRMSENISGFRIAATGVVLELDANFPVVKKLKLVGTPTKIYKNTAFVVTGMFNSDLEVS  
RFEGAAIRTVSGIRGQVKKAIREGQPGSFRATFEDKIIRSDIVFCRTWMPVKMKEYYNPV  
TNHLSKGTSGWYGMRNKALMQLETGTPIEVNPD SIYKPIERPERKFRKLRVPKKLESNL  
PFANKPKDDPKRKGGLYERRAVVMEKSEKKKFTFLQAVNTIRNEKVKSRKEKKRLSRIE  
KDKKNAKKEEAIAAARKVNRKRQYRAEGKREKMQEAKRAKM

>comp3472\_c0\_seq1; 386 344 1444 LEN=1540; translated  
MTFRRLARTEATGDESEKREQTNRAIQSLMVKHDPILLFASRLSPQKAEAEASALYAWC  
RRLDEICDSEENSSKPELVQDQLDVWQERFDDLWSEDETKEGARKTTRVEPTATTYYSEDD  
FLMDLALKECIERYQSSGMLTRKPFDDMVQGMKSDAVEKRRIRDMAELELYGYRVAGTVG  
LMLPLLLLPEDDANDSSSTSAAEAVKTAREPATCLGTAIQLVNILRDATQDAVLGRIYL  
PTDMLRAEGVTEEDEAKWLLAAVGEGMSPAPDGYKRVVEKVSNRGYELLAHAEEGRSTL  
PGFPGLLVQVIVELYRDYLEELKRRGYDNLQGGSGSNKGTMDRVKISGLRKAQASLRAI  
AKVLID

>comp3473\_c0\_seq1; 113 1 608 LEN=943; translated  
XTIIDKRSDAERDEGSIFGQTAGSSQSTWVECDKCKKWRRLRGIVDSNKLPPKWCYTMNK  
NDPERARCSAPEEYESPRTPEKADARTRKHLRVVWRRLQCNEQYESRLPTLTRGKKRS  
AGTSPKEPHEWIRCCNPSGKWRILRIMDAKQNVMDLTTDGEWYCVMTWDEKTASCAA  
PQENLPAVGCPSWVMQDLEREN

>comp3474\_c0\_seq1; 235 161 925 LEN=1173; translated  
MPLLHRMPSRPHLMVPRGGDQKVEDLDVDEPLVEEPSTEAEAEAEPAKVAKVASTKVVAAPC  
VISKVMATLTSVGACYSKQLESRPILTKSYTAGLIFGLSDYFAQKIESSNDVNGSSSSMN  
WTRVITSTLVGLLYFGPAAHYWEWIFKLLPGTTLASTLYKAFWQVLFVGFPSFTCVFFAT  
ILMQSGNFSLQSWWQKIRSDLPGAWLAGAGYWPVIVDLSYSIVPVKWIPLFVNMAF IWT  
IYLSLVANKKSSSA

>comp3476\_c0\_seq1; 481 50 1282 LEN=1461; translated  
MGLIQRLKCEKSDGEHTASTATLTNDGEVAKDSGKCKKTKIRSMKVSCKKVEDGDLD  
LTGLDDTNVPEEYWEAEAVVTKIPTEHRDLAENLFCHIWK TQKSVALKLLGDYEQENLS  
KTANERFRNGCQKWRQDDYEGAGWELERSLIIREAQRNHQTLNVRYLKQYKEEGDENQV  
SKQVSREKEIDEIVQNYANADPTDGKALAKEREDAMPPPNGNMFRVNTLSPSPTESTAQ  
LYYALGMVRMSQEDHVDALMEFRRAIQVAALGLGVAHDLTKAATY MIRAALLTMGYRSHE  
IRKYLAQLKSNIYHEIEADVLCESGNFDQALEEYADLNF LHDPSQVQARIQTKIASIFE  
ARGDYIKAIQIWADILVLYDDTPSVGIHHPLARQVVSRIVEGKRL LHTPY

>comp3478\_c0\_seq1; 239 1 721 LEN=765; translated  
XPDIASSKAIMLQLFLQRVVATWLGLFVGGAAVLTSLRYAGGIYAFLEAEKLERPNYSV  
VQRLTDGVEIRRYEPYLIAETTAEDAAGFQKAGKQTFRTL AGYIFGKNKARGGFLSSGKN  
EKMAMTAPVRLDGGQKKTTRVSVFVIGSDYTLKTVPKPMEKKVTLRQVPAHTLAVKKFSGK  
PPSDERVQKQERLQSAKKADIEVQNGDDTTLVYGYHDPFITPNILRRNEVAVVIDGSV

>comp3479\_c0\_seq1; 539 34 1173 LEN=1270; translated  
MAFAPKILSFVLVALNMSQAAAFVGGTFLSAAEKAAL EKTADAVATAGKGITACDEGPA  
TIGGRFEAVGVENSEENRRLYRQMLFEAPGCEDYLSAAI LDPEPLYQRSNDNGVLFDPDLLT  
KKGIVPGVPHLKIYTLPGTNGDTVMQGLDSLAVRCKEY YAAAGARFAKWSPLVIDMEKK  
CPTDLAIKANMHD LARYALICQSEGLMPIVEPDISLSGSHTLEDAIDINIRVQSELFKAM  
IDHGVYMGSTLKPNI VNPGRDCEKSYTVEEIAEANI FVFEQSFVAMKGCNYLSGGQDL  
PTAAARLSAINKANKKGPWNLSFWSQALQLPLLDLCKGK GDLQLEEMSKLYVDELK IAG  
AAAKGEHEWAKEGGDHEAA

>comp3480\_c0\_seq1; 355 1 1335 LEN=1431; translated  
KRNNHWSKRRKETTSSSHNTFHSTISLAEPK KVVVMDSFLLLLLIAGLLGSTS VVEGFDT  
LFGANLNAKSPLVGRVSAGPLEISSMCGTWSWGNRFLFDYDPSQDEEIEAYREVRNAG  
VTLFDTADSYGTLDLNGRAEILLGEFERRYLDDELGISSD GDESGQDTPSSWWEFGSKPPA  
SKNKNYRPQQVATKLAPYPRVTRNNIVRSAEGSVRRLE QPKLSIAQLHWSTANYQPQFQE  
RALRDGICDVYDKGLCDAVGVSNYGPQQLISVAEKFRERE VPLAIAQVQYSLMTYDANGS  
TGKTKMTGKDMNEACDEVGRLISYSPLCLGLLTGKYTLKETNRLPKSKARQQLFRELLP  
GAQGLLDTLEVV AQDYGKSQSQVAINWCMAGKTVPIPGRTLQQAREN LGATGWSLRPDA  
VEELEIAASKVTKPMVQNVFQSRW

>comp3482\_c0\_seq1; 280 1 1130 LEN=1130; translated  
XFCTLLPVPSCGILDGTENTDSTGTTANSRDTAAMTPKTNRAENSFVAISNGEY AIDQLE

RCGKWLASIPRDDITVLRHTIEFQEFASFERLQGAHIRVVVNNQSPNAVGTQISPAGP  
RAFGAHPAEANKKPSGLGNAPIDAPHNQHAEEGNGSAKPNRKRSAAHATAVDAGNPRRS  
NESNDDDDVSMKDPDGAATRGGAGGLHGATPTSGNNFLRF'TDDVLLRIFEFLLRCRCLI  
QASRTCSRFBHQLAGRSFAQRSSDVLQTRQLGSVMQLLRAREQIHYTDEDAAASGTGRTFH  
VPVPLLLPSRRVRVANAGDPEYNGVYYCTECSNGFVFTKPRGSAMVRAENGEANNGNMV  
VPQQYRDLAFHNNNNNNX

>comp3483\_c0\_seq1; 218 271 773 LEN=869; translated  
MGVKKRKAPTPVSQAKQNLVITQHPSHSYSFAADKIAAENNTPIATTQQQSNKSVRFSNRI  
GILSISAHKSYSYNEERQRSWYTTDDYVDFVRRRRGCRCKTQAVRMRAHSFPTDDEGHRN  
RESGIDDIEQXHGIPPRPAVDRKLVVVVVVVRNSKDQEQRPNDRELQ

>comp3484\_c0\_seq1; 402 151 1178 LEN=1973; translated  
MESLFFATGASSGVLEATRQLAVHLSRQQQEEPNRNSNSDGSNNQVVIYLLCRSK  
EKTQAAIEDIYNSIGENSSNAKNNIKLNFLKFDACDDAETIVNNIQFNNATKIAGVLLNA  
GGFGENATGIDKNIKSKTSGSSSNIAKLNIIGHVILVNHLLSVGKTDASTRIVAAGSEAS  
FVTQGLSIHAYNAADLRXLHSSSLGSGKMAIGTEYAWTKGILALYWAAFARHHPVEFVTT  
VSPGAVSDTQLLSNVPFFLRTLARLSQWSCLGGSHTVQEGAKRYVNALINDIPVGS SGSF  
LASRKGFAQDFGDVSSLSKQFVSDIELQDKAWKAVHNSLER

>comp3485\_c0\_seq1; 429 54 1034 LEN=1266; translated  
MRSSIPASILIISSSTATSCAAFSTVSIADQTRRQQHSSCAVLRSSSSEYDSFWNNDIIN  
RRTILSTASAVLASSVAVAGLPLPASALVKGVA PPKKSVGDKPKCTNVEECQAMADKRA  
DEERAKEESGPPPLVTKSGLKYRDLEAGTTILDPEGTGEDISTTAKDGDGVEVYFKVLKLG  
KRSYDGLSGEGTVVFSRGGYLEDDENAAGQKSFQTTVGSFQNI AALNEALVGMKPNGLRR  
FAILPQKGWEKATAACDGGPGGGGAGGEIRTDYVVVPTATMVQQEACFDTNKIPFPSTYA  
QQRMAQRFDQSLIMEVQLVVSINGKQ

>comp3486\_c0\_seq1; 126 1 276 LEN=276; translated  
XKGGKGYKGYGHGDCGGPAYPPAYPPAYPSHGEGCYEVCYGS GGYGGKGGKSGYYGYG  
PGYGKKYYGGKGGKGYGPGPINYGYDGPKYYG

>comp3486\_c0\_seq2; 59 1 221 LEN=221; translated  
GGKGGKSGSYGYEKCEIVCDGGKYGGYPPAYPSEGCYEVCYGYGGDYGGKGGKGYGPG  
PINYGYDGPKYYG

>comp3487\_c0\_seq1; 143 1 574 LEN=574; translated  
XAAGDVGNVFC HQVSPWAEFQHTGTDAAVGDCWSGKPLLPGTLVSVGVPRASTSTNTTRP  
SDDSKQGDRSTLPAPRPDSKPGTVWDNPSLLAAATATSTTTGGYSYLP PPGTEPPVQTQA  
QQMSDAMVLKTMRG TQWRVLEDRSASAFYSGTDSHSPRTCRSLATFAGFAGEFNKGT VSV  
EYSCGSSSSSSX

>comp3489\_c0\_seq1; 567 537 2078 LEN=2251; translated  
MRERIVAGNLTDLTAEVEVSVQTTLLKSKKRGPKKRQERKSHNQISFGDLARTIATKWKA  
IEPDIKAVYTKFAKAEKSRYTKEVLAWKRKKESELHAAASRPRTGNGSSTHSLSTASLSQ  
SWKSLSLQGSFNGTNQADSSSSSLDEV LKRQRDILVEMGFPEKGLRESDAVARQVPDAE  
QDPCLQRRATGFFRTGDP IGCQNSNTNGCNGDDNISQNCDTLPENIMFGDCGSEEQRRR  
RQQRDQKHWHQHQHQSQQEHQHQHDVEDFQGEVAESQLQPQTKGQHILLRLQEQQLQQLWE  
LQKARDETSRMSNITTTNLSHVRQPRISNCDHSNALHLGQQQQRSRIEKLTDSQNQWLS  
MMEQSDLVQLKRLEEITKLLDDLDKQQRRLKQLTKDCHDMDESMFRDAGSNLAKSISKTY  
DRISNNDFSASTSSDSPNSPVFVRCQLSTRQPTGGLLPDDIAEGHLLGGNNNGLAADFNQ  
ACRLNQALQFESAFLSQPCCESMRTEDGRLGSE

>comp3489\_c0\_seq2; 576 1 1930 LEN=2103; translated  
XNSLSDPQAFKNQILKKVFSSTMNATMDVDTVDLLQDCVTTDWCQKEVVTVGGRIEKAV  
EYVDLSDSVHTSMSTSTNSNATISTSTHTSINTSTHSNDSVTFAKTRRSWKRPKDKPMRP  
LSAYNMFFQNMREIRIVAGNLTDLTAEVEVSVQTTLLKSKKRGPKKRQERKSHNQISFGDL  
ARTIATKWKAIEPDIKAVYTKFAKAEKSRYTKEVLAWKRKKESELHAAASRPRTGNGSST  
HSLSTASLSQSWKSLSLQGSFNGTNQADSSSSSLDEV LKRQRDILVEMGFPEKGLRES  
AVARQVPDAEQDPCLQRRATGFFRTGDP IGCQNSNTNGCNGDDNISQNCDTLPENIMFG  
DCGSEEQRRRRQQRDQKHWHQHQHQSQQEHQHQHDVEDFQGEVAESQLQPQTKGQHILLRL  
QEQQLQQLWELQKARDETSRMSNITTTNLSHVRQPRISNCDHSNALHLGQQQQRSRIEK  
LTDSQNQWLSMMEQSDLVQLKRLEEITKLLDDLDKQQRRLKQLTKDCHDMDESMFRDAGS  
NLAKSISKTYDRISNNDFSASTSSDSPNSPVFVRCQLSTRQPTGGLLPDDIAEGHLLGGN  
NNGLAADFNQACRLNQALQFESAFLSQPCCESMRTEDGRLGSE

>comp3490\_c0\_seq1; 371 341 979 LEN=1115; translated  
MEYGSVDLSSSSCPYSVWGQKKYSVGEWTIKARSEYSKGYDYDGD SAGTYITVEGSD  
ADEETFVWGSVVGKKNVKALKVGAKKIINTDGGKFMVAPRHSFETSETHVCLGFTKDDT

KAYLTLSEDEKSFLVQQQLDDDNSASVKAGCSGFVAATMTNESDLGSTTVTVTPDDIDVE  
IKSDGWVAGIKSALSLEAEPVRFKSLTFGV  
>comp3490\_c0\_seq2; 382 94 879 LEN=1015; translated  
MKFSAATLFLLAGYASAGSQYSLTLKGGYDSVRSALSPSLTYSGESNGMEYGVSSVDLSS  
SSCPYSVWGQKKYSVGEWTIKARSEYSKGYDYDGDAGTYITVEGSDADEETFWVWGS  
VVGKKNVKALKVGAKKIINTDGGKFMVAPRHSFETSETHVCLGFTKDDTKAYLTLSEDEK  
SFLVQQQLDDDNSASVKAGCSGFVAATMTNESDLGSTTVTVTPDDIDVEIKSDGWVAGIK  
SALSLEAEPVRFKSLTFGV  
>comp3492\_c0\_seq1; 525 78 1064 LEN=1095; translated  
MRVLNICLSALVLSASAFAPISAPSSRVSSSTELYANGGVVITGSAGGVGWAYAGEFMDR  
GYDVVICDVKDCATAAAALEAKHKGAKVYHTQCDVSDSDSVEKLAEFAKENLGTVTHWIN  
NAGINGGRRALSEVPISQVELVVKVNLMTLLCTKAAIDLMSKQAGVTGHI FNTVGSVVK  
GGGTPGYACYGATKRGLPQLTDSLVELDEGVQGYEKKSTPGTVQVHNLSPGMVFTKLLL  
DNSTPELRFKFPFVGLAAQPEEVAEDLVPKILATTTNGGSVEFLTTDRILTKFFERFILQK  
KSEYIDDDGNVIKTPGAQYDEDGVRALF  
>comp3492\_c0\_seq2; 260 78 548 LEN=641; translated  
MRVLNICLSALVLSASAFAPISAPSSRVSSSTELYANGGVVITGSAGGVGWAYAGEFMDR  
GYDVVICDVKDCATAAAALEAKHKGAKVYHTQCDVSDSDSVEKLAEFAKENLGTVTHWIN  
NAGINGGRRALSEVPISQVELVVKVSLFGTDGVQAK  
>comp3494\_c0\_seq1; 315 98 733 LEN=1105; translated  
MKFAATVLCASAIAGTSAFSPASTAGRRSVSLNANIRDKSEKAEVLANGWDGTTALGGA  
VEDAKPSRMLDEIRAAGETIPSECEVFANVEMDADSLKFEEVMDI IETHYEVGLIEFKN  
GDIVNKPGENEGSAKLLSYAALSEFDKDTTLKLGWQYYREVLADPDGDSSHQNI RNFMTG  
WEGVFPFENGIALTKKCVGSDSDWDWAESWIP  
>comp3495\_c0\_seq1; 191 1 806 LEN=1159; translated  
XFTPHKIYVNNHRSYKTIKSLRLYKTTSIMSAVDAFSSNLSTLSYPRTGKRGVPPQFAR  
RLYEMLQSEAKIASDSNNGNAYISWSESGFAFRILDVDGFTTSVLPKYFRTKKFFSSQFN  
LNLYGFSKVRRGPDMDYAHQSFIRGKPELLLNLRKCSSASRRKMSASSSSSDSCDSSSS  
ATHRENTCQKESPVTSPTITDPFLQASKSSSKLLSYDQNTNQTWLSFHHQHLMPKTYL  
PKLPVKQPQASGAGRLDLLALAVEHASF  
>comp3496\_c0\_seq1; 359 74 1010 LEN=1010; translated  
MRFHSSILLLLVLGLSDAWVTPLTSTNSPLQRSSVTTRTDPTRVAFSSPQQSTTDEYSND  
ITEIPMSSEANTIVGATMAALVCFAMTASPETASAAMTTNSDVASSSIVTAGGSVKSAL  
FAYGHYISLLGVFILATERWTLESGPNLTDEEEDRLAIADTLYGVFGLLLVYTGYNRFS  
DPTLKGIDFYIHEPIFWLKIAMLGVLGAASFFNTTKI IQRVGRYTGDKTVEPMSEELC  
NRMKSICNAELTGLLFIPMAATFMARGIGYNESIPWQAEAGVAALIFAGLSFKYIKEALT  
FESRLAETTSASX  
>comp3497\_c0\_seq1; 240 145 543 LEN=543; translated  
MADAKRSYPTTPRNGRHHSIDPPDYDSPSMRSQRRGRSSQSSSQSFILKAFLGCIILCI  
STTSFLHFHEQASERGLRIHRGLDRYVMDMPDESLEDMMMSARKLQRPRPKAGKPQRKII  
KLGTDDDDDTANT  
>comp3498\_c0\_seq1; 215 1 151 LEN=226; translated  
XGGGGGGGGGAGGAGGAEAEAEAEAEAEAEAPPSSGGGLFGDDGDGDY  
>comp3499\_c0\_seq1; 324 278 987 LEN=987; translated  
MTRKHGWKHDCFEPLTIDDYLDGCGSNLFPSENHGDA SF TG V W Q S S P L F L V L E H N W S K I  
VEAATATTPPTSVPFSILELGS GTGFLGIHLAYNLQQTLAGAACQESNP THRYKVTLSDT  
PRSGAYFWTKANLEKALRGQEREQGDGDGGEKKEAFDCGERRTLAGISSENLCVIFPDW  
ACQEQRRAVSTQMDDWDLVIGTDLIYSEEGCHYLQAMASLLNESPPSPSPAATAA  
>comp3501\_c0\_seq1; 451 84 986 LEN=1446; translated  
MSAACATPQAIAPSEDPGREQSTHDPLSVSSRKSILADDKSSRGEEPPGGGNEP SDVP GAK  
QRRPSKGSEPAAGANES P S S C S S L H A E P P A Q G E S S F L E G G T R D D S C R S G S S R T K P S A A Q T  
QTQHFCEMRLRVGVCQTDFAEQMDIFMRCQHPLDILGMFQEDDDDKTDSINASEHNNEGE  
GKVVVASAPRANKTSGYHAI PRSCEYCGSPDIDL CEDYSHNT CERPKSFFPREMPFFFRK  
SCGTKLPWGGGGGDDDEKENRFGTVFGVAVAVDPAGKTGDAAEDVGGAGPARMACSAWV  
>comp3502\_c0\_seq1; 319 135 863 LEN=888; translated  
MNSSPSPISLSRFLLLILGLVYALKPTAKVDGLRSVDKSMFVVFGRPGSGKTTVANKAFD  
MLSIEAKNRTEKEKCVALDLDV CVTQLMRDNF SKGIYPTLEERKIFAIDACDYVDEQLAT  
ICEPKNEPDKINAIISFSFVNTDLREIFISRFPEAEWILIDTSEEECTKRINEREGHYK  
GEVVTDESDTNVNDEADATENEKDNSDWKFAPVTFPHVILNGLDAVEDNAQKVVDKILEK  
TT

>comp3503\_c0\_seq1; 429 338 1366 LEN=1386; translated  
MVAENDDVFVTDLARYAIKGFSGDLLDSVLIPGGGVQTFPDDRRYALLKQKNKEKFDEKS  
PEWLHKENFLCAFSAPELMASFRSHYEIVVEEQEENKSDDGVAPKVYIRRLTLTYRRSGED  
DNDAASEEKPVLPIDLNTQSGREALASFFSYESNEDLVCVTKETDGKVNTFQFGNTRAG  
VKNNPGDTRTVHIVNRATVREFSNKIGLQLNPMRFRPNIVIDGLGPWEEFDWIGRTLRI  
VPKEEGDNDENASGVQHAHLRLKVLTKTVRCEGIGIDPLDPKTGKLDMPKLLSENYPEH  
GPYLGVIYASIEVIGTEQGGYSGDIDKLLSVGDTLSLLDEDNV  
>comp3504\_c0\_seq1; 168 1 850 LEN=1695; translated  
XINPTYAIGNPLHFPLTRPCYLKVSNIKLEKTKMSCLYSFQIISYLASLLLLISSGV  
IEEVSSHVNDRRCTRRVWVIQISSASIAVAQHPGISYAETRAATNPVEKLMQAQETLNTL  
LENYERATTDCTFADVPRELLETKNKELLEKAATNALFDKSASIIETCKTTNRIVRDYLG  
VTGKGPLVGIKRIQSGLKVFVDGDFLDDYVSELEGFSSQAYSKATSLSYTAGIADLDSVNN  
FSKEDADESKRDNNSNLQQTKEAIEAKRNLDVVILILQKSQL  
>comp3505\_c0\_seq1; 538 110 1711 LEN=1771; translated  
MSFSNLPSPSKRRIASFLDYRSALRLSNISRDFHSDLALSLLVPRYELIYSQIVHGDPIIT  
GDIPIKSVRIPIFGNPHITILLRCRWKQDQWGERKGRLEFIVAHPDKSTDGCVSVRGKAAC  
FESGRVYVESPIASHTFESLSITFSPQQHNEYHLFYLVGGGGHLLIVEDLSIESIVFDD  
AENTMKNAYFSLTKNGIICSDDDDNDRDIVFYTKLLMEILKICASNEMECFVFFFEKYK  
LRPTDLRSLSSIQRVCSFFLEYLEVTDNDADQAPSANESICRDKIVSLSPFTLLQYSTWE  
EEPNTSPSKSRIPFFKRRTKSIRMTCNCHDQCGTSGKGLYLVAERKVLEDEDEPKTQD  
PRTPFVLSGRRLVWESPIIDHESTFLETSPAPDDNETYFLYQDRGVESEDEECILHIDSL  
CIHLTVFDDEIGSLESCYHELLQRGALDSRKSDCASFQTDLLLASISFLQLVEPSQTTTL  
QKFFESTGFGVDANSLRSLKELTQTLPNFQTQTKKSTWLRNGDADLRMFSC  
>comp3506\_c0\_seq1; 434 163 969 LEN=1103; translated  
MKFRPCIDLHNGQVKQIVGSTLKDTEGDEKTKEAASALNTNFETDRPAADYAKMYDRD  
ALTGGHVIKLGPGNEEAASSALGAYPGGLQIGGGINDTNALSWLEAGASHVIVTSHVFSK  
GKIHMERLKKLVEICGKERLVLDLSCRKPNSTDDSYVVTDRWQSFTDYKVNPNENLREL  
AAYCDEFVHGVVDVEGMQCGILTDLVELLGEHSTIPVITYAGGVRSIDLELVLKGLGRDKV  
DATVGSALDCFGGSLSYDEVVAWHKAQN  
>comp3507\_c0\_seq1; 211 147 361 LEN=361; translated  
MDPYVSSSSDKPKKKKKKSKDPYGPVPTEDPYGPPPTGTAGTESGGRSFASTTANFGKQ  
KTSRGKSKKAX  
>comp3508\_c0\_seq1; 462 1 1606 LEN=1606; translated  
XEPHVLHILAPVSYFSKENSPPDRKFLTRFNVDYVDEAHNLKNAKSTRYKMLDKVRTEH  
RLLLTGTTPVQNNPQELNMLSFIIPLFSKAGASFEEKDNYTEQMLKHFVDASVEDEDEQA  
AYRKLKQLFAPFVLRKKDDVIHQMLPKKERKTFFVELSKP IIRSVYDSIIRSHFEKNGTT  
VNPGTGEHLFTNLKCAHHPLLLNRNWNTEERDLIEDLIRFGAFRGEACTKGRVGEI  
KSWNDFDIHLTALNLIDENEHRRPFLQKYVLDQEDLFDSTKFDHLRGLLPRLVKEGHRIL  
IFSSWTSCLDLLGLVEYLGIFLQFLRMDGSCPSKERQRLIDLFNSDPSHVSFLLSTKACGL  
GINLTSADTCILHDLDFNPFNDLQAEDRCHRIGQKPVTVYKLI TRDSVDEDIFKMQEKK  
AKMNAAIMDPASSKKEKNAIILKSVLDRASRASNDGGGGDGA VIGNETDANQPDVLEENA  
NGMLWTPVLSHAFYEKHLRGRFQRCEGSRIFLRAAFWQNTANSLIIQVHKRVTOR  
>comp3510\_c0\_seq1; 279 176 782 LEN=817; translated  
MSENAEENDANQSKFYRVVSTEAITDSNELFDALSNFLMKDKKRQLSAGYLDEKDQIASR  
LTWNNLRKVANSVLDEDCPQREPIPAWKSKKLLLDLDAEKEPPSEYLGGDALSTKQEQP  
ESTTRTVTKIEPCTEFKAHENTLTPKQEAKEKKEAKEAKEAKSARKRERAEKREAKKA  
KKEAKVKKEKRSIESGDE  
>comp3511\_c0\_seq1; 287 1 677 LEN=973; translated  
XKKQANKMKSLSSTKQRTNRRSSLSTPSSSFSRKRRTKRELF SRKSNSTSGLHFLRLRPI  
LDVTFASKISSVTSSVLSVALFSAFIVLLSRQNCFHVHYGLGGSLSNLESGLIEKNGFV  
DYHFTGRGKVVDQEARIDILKANPDINLRDLGLGFVFDADQFGADPMSVEQKEKSTRLAP  
TLTSTKGTTPKWFVGRNDDALFYVTGERIRNALKKMEEQMPRPSN  
>comp3513\_c0\_seq1; 282 127 1272 LEN=1343; translated  
MNQSSILSNSTASLVNSTALKISSSSNSTASFIDETVAPSAQTSPTTIPEPDYVFCRHN  
CHMRFQELLFVTGLFLLPLLIWCYFAEHRSRNEEDVRESETYEEPSLHATLAGMTREEKR  
EYSELQFQRNGNELVLSKDQIVTVEDLDGNHEEGDDPSLYLSLENPSGFASNAASTRTRR  
SSFLVFETSDNCGTDRPSLDGISTTTTTTVDVGTGTCICFEDFEAGDTIVRSMDTRSCXHV  
YHKSCMDVYLSLQKTPKPGMRGSKDEYHPSCPTCRQQFCKLLPPAAKTREQRDNDTGAI  
DAVDLEGGVASAATISTRVSRTRTGMEAQRHESGALTPVPMIAGVREQDLVMSTNAVS  
SPPPATSRSSSAIFYDIEVV

>comp3514\_c0\_seq1; 321 62 841 LEN=2668; translated  
MAEALPFQPSVEAVGPEHQSIQNYGSLKGGCGEGEDYDGNKSTVLCDILEHKEMKDSFNG  
TYEPDSSTEVSDGNGSSGSDNKNNGDDSDHNYDDMSSCTYDSDDIEARFSDISGKSFHLGD  
HTRMSINNILVNQRRTDSFAQYGEDYQLVPTQLKKNVVRVVEDMNMDYGGRRGLYLASYSF  
FDNNHETKYALTIQPNIIYKQLFTEVHDAYNVPCGLFFCCHGGDGAHTGVSHNDFVDIKLA  
WVVFIFVIGCLLGLLELING

>comp3516\_c0\_seq1; 473 346 1335 LEN=1672; translated  
MAKKKGNNPAKTEEEEEEEKEVVEPTDEELRNHIRRLIPLVNLQNTGVKAFTKLLSKECGG  
ADLKSARGKFIKKALSEAINEMDNSSSEEEDEPKKKPPRKTGLSVKKEISLELANFLGVEK  
DQLMARTEVVKGMWDYIYKKNELQNPDNKKEIFLDKMKQKVFVGCKSFTMFTMNKYLGAIH  
PFKPVDLTTSAKKKPAVGSRRKRKKKGDSDVGGKRRKPKKPGQLPPYRLSNELAEIVGT  
QILPRPQVVKAIWAHIKKHDLQNSDKREILCDEKCLKAVMGGEDRVTFMFSNRYITDHL  
EKLDRSEYNHDEIEAELAAREEGSDEESE

>comp3517\_c0\_seq1; 265 1 774 LEN=912; translated  
PSLMNLPNAKQIRELKKGYSYGGDDLQVVELSKHFVDHTAEIDRYRVLFRGLSLSVNE  
GDFYFVSGPNGSGKSQLLRILSGLSPFQDGTLSLRGKEWKDDFDGYKAVEWRKQIRYISQ  
SKVQIPGTTPRFIKKIQSFRSWNTDYDAHSPNSTMKLILQYVFEWGLNVDCLDKDWSFLS  
GGESQRVLMIAAMSSRPKVLLEDESTSALDPESKAAVEASVMDFVGNHRGGVVVWVSHDEQ  
QADRLVHPPAIEECDAN

>comp3518\_c0\_seq1; 376 41 1501 LEN=1717; translated  
MKPKNDNFIKKKIVSVLVLHYVLTWCWSLSLSYQTKLLVLRQIRSQPNVTHTLNVIAQIDT  
KNDAEHVQKPIGPVNFDFKGFSNVIVAALRVCGNANKHELALALELYKKYPSESARAMMISVL  
GGSGQLAKAVDLLEDNFCPTAASFNAIAACGKAKNWELALDIYQNKLPKQHSSTLSTN  
ALLTVLAKCRKGVQALEILHEMVPSPPTNSSAGCDSVTYSLIISALVRSNMLDEATKILES  
LEHPTHNCSAKSIEAMNDMVLAYSQSRSDWSGEMERLERIRQKNNGLVHNQKLENSKLVTP  
IIQSDYRFHKWEGIRKVGKGESEYWMIGTYLDRIDGMNVTIGLRPHRNPSTRNGIQLLFFE  
NAFEDETQSWTQQKIGFLLMKNNANDRTSSLLGMFLKPTKRGRGISKVCLSLWIWLCLKA  
SIVPVTGIIQKPLLALILQHTFGYTGPTESDAHGGVLELVELSKDSEDPDCVVLSPLNKSL  
EGAFGPW

>comp3519\_c0\_seq1; 381 38 733 LEN=990; translated  
MKLTMKSTLFLGALLANSPSMTGAFAPSVRSPFAPSLLKAAESEVSFGDLDGSDVRIGI  
IRTRWNDEHVTNLVDGCKEALKECNVKEENIFETSIAGAYELPLSARFLALSGTVDAIVT  
AGVLIKGETMHFEYISDAVSSGLMNVQLQTS CPVVYGV LNCMNEDQVKARSSGDNNHGYD  
WGKTAVEMALLRNEALNIKAMGGSENKLADVGFSSKKEASEGASEKKAPGFF

>comp3520\_c0\_seq1; 187 97 1149 LEN=1402; translated  
MSLEVLNSPPLVGALTAGCYGLLCAAKNPLVLNSASVPFVALKGINAFSYGLSMYSVSQP  
GRYDGAASVNGEEGDSKSKASSRDKAAQKGMQMGT SRGR TLVPPAPWAFI IWAP IFLG  
ELLMVTVPF LAPGSVPVVERALREIAGPYLLTQIFQSLWAASFRPKYEKGIYRYSVAN  
LAGTAASLSVCHRAFASSIHQHASRSYSAFEYALYFLPLSLHFGWTTAASLVNLNGMFAM  
ATDDNRKNATARAVALLGHVSVALATGVGVGITWTRKAPVYGGVICWALTAVAAGLKQRI  
LASASNSKNDQKIANDDKTVGIYGAERQRTLSLFGAAICASTSAAVMLL

>comp3521\_c0\_seq1; 34 1 747 LEN=1129; translated  
PSTATLKKGARDYAERYAGSAIRFPVLTEAEKSSSLGIAMTFLAGLFLTLSQHLTRERAR  
AETIGLKLPPAPSGAGTPDATTRSATHATQTQAPSGGGPGASVAAPPTGPTREAPSAPMPA  
SGSXAVDRGLARTEEDEQGTETPNTAHRAGAKNETGLLERAADGPXDDLREGLEAPAETNT  
PRLSKQMRTSVFSRQEGRVGWRPSVGDAAADSDATNSTLLCTGMVSIFFAKHSVRRDRVG  
SLPQHGGGLW

>comp3522\_c0\_seq1; 400 134 1093 LEN=1252; translated  
MDSIICCKPVDTRDDGDSNVEESSAIDHNGKILECDYDTNCTKLYKMIIEGKQWEEIYVFL  
ESGKWYFDTTFLTAMIFGAGPDPRFTESRTWVTALDEMGNVRWCQLPLHAAITFQAPFEV  
ITKLVIEIYPE SIRCADQDMLPLHYAFRFGSEDKVLAHILEEFPQAVKKALRDRPLDM  
AHYSSKPERGVIIIECYLDTSIEEAKSDWESDHRSIISSIKTKANASLSDEVSTRNKKLRS  
VERELYEARKKIQEMEEKLDGGRMGPPSGRYSIPRNSNQRSGKGRRDEISLDPSEVSTD  
KKKGF GKMFGRSKKQIVMS

>comp3523\_c0\_seq1; 186 197 1701 LEN=2158; translated  
MRNF TKFLLVFAVLVIVLDLGFVQGFACDKGSALQRDAMTRGKIKVRTVAMSTVTPPK  
VSNCAKKEVRNDGENIGYGGSDNRHYKASDDGIPLQCPSSYPSTFGASNIKVSYQRAEK  
DDINGDSGAQLLPLQRYHARNQNYNGCTADQTIRETNDHPFSSVQNNATNSGSNFSRDN  
YTTKRKTMLVTHDIPDLDFIHDNLSRFRVSKSSQVLLLEEQNEKQSYRKNYPFDNEMMLD  
QDSSE RERQKQALLLKG YRLRSKIRAECRASLALSIEETLKI IYCDSHICVVDKPSGVLS

VPGHRNPSLANLVYDTIDPSSYDTEGRIVNVDQTVVHRLDMATSGIIVYALSKDALQKL  
QGDFRDRRVQKTYQALVEGHGLSSRDRTGDQSQTLRCCGTTEGEIDVALERDPKNPPYM  
RIAQTRAEKQYGGDADEQXTQVLAGGPQTEQDDLVGVPVLRARQRREATDEARAAAPHGPD  
APVAGPHQSGTGDPDRRRDLW

>comp3524\_c0\_seq1; 177 116 391 LEN=755; translated  
MAKKASEKKGAKIFKTKCSQCHTVEQGGAHKQGNLYGFYENTSGSMEGYSYSTANKKAG  
VTWTDENIFKYLKPKQDRHDI IAYLKKTKCA

>comp3524\_c0\_seq2; 222 116 442 LEN=806; translated  
MAKKASEKKGAKIFKTKCSQCHTVEQGGAHKQGNLYGFYENTSGSMEGYSYSTANKKAG  
VTWTDENIFKYLENPKKFMKGNKMFAGLKKPKQDRHDI IAYLKKTKCA

>comp3526\_c0\_seq1; 670 421 2490 LEN=2538; translated  
MPESTPKNPRPATPARGKSDSASDAPVHDLHRRSRQATLTRMRSSPPQSPDAAAGSNHH  
GDGMAPSLFWPSNSNPTKKPAASVPGEETPVDAEYCNNEGEEYDDYDEGSYYHDCDYDE  
VFDSIVKIYATHNFEPDPTMPWQKQKSYNSYSSGFAINGRRILTNAHSVEYAGQVLVRRR  
GSSRKYRATVEVVANECDLAVLTIADETFWTTTRTEYDEDEDEDEYDDYEEDEEEEDGGSEK  
GAVAEASPGDDAIKPLSFGALPELQDEVEVLGYPTGGDSLSVTKGVVSRIEATEYAQCSG  
SHLLAIQIDAAINGGNSGGPVVDAATGRVVGVAFAQLEHAENIGYVVPVTVVLHFLGLELQ  
RHGGTYSVGTCLGVRYSRLENE SMRRYLKLPDAVETAKPNGGKKKSRKKSSNSHAQGGV  
VVRSCYPTCPSRNVLRESVILSIDGIPVASDGNVPFRRNGRERVSFSSYVQTKFSGDTV  
ALDLWRDGGSLKVDVPLAVSRDLVPPHWNQSPPYFIVGGLVFTALSIPYLEDCGAWGEY  
VSDSLSYLMNKVYEPLEKPGDQVVVLINVL AHPANTGYDGLTNLHLRSVNGAPVRSRHL  
KELIEAEQQGTHPGASPNGTDSKDTRDTEPRFLRLGFGSKTNEGDGGILVVLETDSIEDI  
NREVCEEHSIQHPFYFPPLASNESSSESQS

>comp3528\_c0\_seq1; 220 1 1835 LEN=2478; translated  
XQQQQQRIFPPFLPGKPIGPICLFRGKVSNEILADNLEKISFQWALDQDYAGLKQRMAS  
SVTATQIGFVMAEILGRRGPGSLFRLLKKRQWLPEGNRGVPRISFPVDVSGFQIMRLEII  
VSLTGFAKRSSVIAAVFDYLGCLRSNPPGRELIAQYCAVAQLYGHVLA PRPPDAIELAFD  
GQVYGUIDEPNGVGGYDWRMLMPENLLGVQNLQKTIQTVLNWISDPSNAITIMTASQRAI  
LSQHANDLEERFPLFSPASWNISPTTQARYLPQNNVLTGKINEWLITRMSSEGLQPPVLN  
PLIPPSLRPPRLTPSLHRSTISNYESSQKGDIVPPIRSLVEDTIDQEKAPLVRDYWALLK  
VYSHDDPPFPGISLPRAPPEPSSRSLFVMQLSSRPPRATAEMAAHAHVWRISLEYALMD  
LAELGAPAGLAYDISYNYKGMVAFVFLGSLQNIASYARRISRMVDHTNQLLEGPEQVPEP  
IIEAAIRNTNRFRMSPTRKAI V TSTLKTQTTAVDAALEGTRFFQSCSGAVCFSSQGDLLAAE  
TSLLLADLKEIFRKTGTGINVRPAPAVPEVSDLLYRANWIPRAASVCTVTGSSLISYPVGG  
FRADVKEVRNT

>comp3529\_c0\_seq1; 376 1 2020 LEN=2310; translated  
XKTFDVLAVHSSRYMLETLVTFQACSHSSSDFRSTMDRTTPLKRPRTADPSPNTNYNYG  
NSISNDEAIRRHIEILTELQQAISSKQVRALRNLHFLRYDPSTRLCRCPASTLECFV  
HGKCIQLLCLQLGYAIGRHRFDHGNCRCPWGQNHIEILLISTVLDIFYRYCPELVTEHSIQ  
KNGSEVLRLSQEVFINYQREGVGDQDTQEKSGMRGSGDFLSIVSIWHSCSSCSLGTMLLL  
QHPGTLKAINYILSSKMHQSHHDTSR IETIMECLGLLKNLTYFGEDHRQEIVDQTNLLTT  
LTRLTDIPNKKTRERLSAVFRNLALSADLRSRLTKQTNVLA AIVRMANFGLIECNNLNGH  
DSHHENANCKNTLRNISTVANLAIDRSTNHLMVFYGDGILIEELKQFLVQGEDFVLRK  
RASRALRLLAKNPSSAPLLIMQNNQLEILSDLALNDENDSVRVEATEAFAACAELIRAP  
MTQHNNILDALTHMLITSTRRISPSRVNLDIVARTLQEQASHQINKRAMIRRNLLAALA  
NVILSEHATLSAKESVSATFVNLSEEDNQEIISIPIILIALVHILLDRPSVLDANNAVA  
NVRASVDRIITSRIRESSVRTILNLAKTPSNRQAMAKQTALIQSLLRFAAASTTNDLKK  
QVKTVILQLAAEL

>comp3530\_c0\_seq1; 259 230 1330 LEN=1414; translated  
MPSVPPQDPTIVHYHNETSFSSESEQESSNNAKGSSALYLFGDPSSPRMALCCAGFPDDHT  
VFRPFAKLSSEKILVGMCLPGYDDR PADGVPWTEHNPSGYTFDEMVS SIRAAARALRA  
ASKAPGDKPAALTGIFHDWGVVPATMWAQRLEEEEEKDKADKSQPPTLDRIVFFDVLMPPP  
LDRVQGYNPVEGFTALEAAITVLYKVILGLAFWLRANCSEYLAVVFFLCTVFLKGLRL  
DPLYSFDENSPKALYKNNVGHNSERMSLSRIIYMSYPYWNLMRKMGLAGTVHSNWKDT  
PILYLYGPNKRTQFHKKQTLRLLEREAKE SRSISQAVAI SGTGHYLYLQEQERCLELIVFR  
FMTAKK

>comp3532\_c0\_seq1; 519 127 846 LEN=1081; translated  
MKFTAALVSLSVASVAFAPLSTTTTSTTLSAKIDGRTVESGTVVPTNNFILVKVAPAVE  
ETEGGILLTGKAKVQKTEGSVSTGPGKTHPDTGVLFEMPISAGDNVYGYDGTGTEIDID  
GEKHTLIRDDDLVRFEGDELTLDSCTIQDAVLVYVETKEVATEGGILLAASSKTESRP



STGKVVKVGPGRCATNGERMEMEIEEGDFIKFRDYAGNEVEIEGEDYTVVRALDILAKF  
>comp3534\_c0\_seq1; 228 117 881 LEN=1043; translated  
MNKKSRRNTGTLFPFARTFLQHSVLLLAITLSWPRYSHLRADGFASQAVARPHLSSIAT  
TPKTPVSSDSVLFNYNNDNDGDNKNDKSLVDFELLSRRFERADKTLIRDEATLVACYVL  
CRFLVYDISSGAKIEPGWEIQDFIWLGTGFSSATVLVIYYTVAGLLSRSFEEQPDYRSWT  
SIDDGSDSKDPSSSVVKAVVNVVLCPIWLATEHLLGFGPADIGGNTLSVAVATGFLGFG  
SFMALAKILTAGMR  
>comp3535\_c0\_seq1; 1014 1 2687 LEN=2782; translated  
NYHDTHYSNESSSSSHEPTEDTTAPLSTTDSPESSATGPADESSFVSMSSSLASALTTQTFV  
SGFTGFTTTTIRAKPSQATANTGRISGIGNDNDNRYSNNALQQQQQPPTAPPQNSFLGATF  
GPASSGAPPASCTAGERQQRSERILRFASKRLKSHVEDYIEYKCRKRNPHRSHGSSKH  
NNYNHNHNHNDGILDVCHSDIQLDSILGNYSYVVSVKRIRTTSGTSRSHSHLQPRSID  
PNTVVVKTLRSKLLNDVPMPLAACAADLRKEGLVLAALQQQPNEEDNEGARHVIRILAWA  
PTGLEAYSNGCHDAFFIVLEKLEGTLLDTLKEWKALEEFQQRRRRARQRHDKRQQQEQQQ  
IESLTEDI ECCYNPGRQSSISIHNEHNVGYEYEPHGKGHNKHKRRSRLGSKNSFVQKK  
RSISKALSQQLQKQLLKQYHRFEEGKEQGFEQREDRERGFDCHEHIFPSGSNSAHVHRP  
DVDADAAYFWNARLGLLIDLCAVSVFLHSQKIIHRDLKPDNVGFDRNGTLKIFDFDVARI  
LPPQAEDPDRFLKTKKVGSPRYMSPEVARGQPYNEKTDVYGLGLLAYEVLSLKRPFESV  
PSGRSKNQKSRPNPNHNNSTGVYEDCVPVVVREEQHRDSQRFPSKRSEERRKGRVERLFY  
WVRNKDDRANTDGI IQHQKANGNIPKEPINTDDHNSQQPRRLPKYANLRPLLPVATPQE  
LLHEEEEEEQVNSRLMFQSRVDSMLPSTSKNPSLWTRKFHKHGQVFGKFSVAATTVVXS  
SSLNAGNGTKSSSKQQQQQQRQQQHNNINVVDFETRFFWTQSLRTIIDRSWSYDIPTRPS  
ASGLKLSLQAEVDRIINAINILGNTNHSKLSQSAKSCNSGDDYSSSSSLFLDGVSI  
>comp3536\_c0\_seq1; 204 1 552 LEN=849; minus strand; translated  
HKGWSEVLCRLLDKNWFEALS AFGESGLAEQLYGLLKDNVWSSVLKELQKKAPSSNLAKL  
LLTVLQNSGWLVLGLVVLWLSLVRNRKQITANND SKYSSIVEKKIDLERIRFMKTVY  
VITSETSERTYFVALLSHLSLVIVLDAPDVSKQEQQQEQQQQPALAAAFVDSNSNSSSC  
CIF  
>comp3537\_c0\_seq1; 251 182 577 LEN=1430; translated  
MTSKNVEIRTENAPDPLGPYSQAVLAGNTLYCSGNIAIDPKTGDIVGDGDVQKETQQVLK  
NMDAVLSEAGAGPANVVRCTVFLDDLQNFSAVNQVYEEYFKNSPVAPSRSCVQAAALPKG  
VQVEIDCIAVL  
>comp3538\_c0\_seq1; 268 141 677 LEN=1304; translated  
MAEATTFLDIDFTTFLPNGSKDVPTQAGALIQWVKAYQQSGLLRKFPDCSIIENSSSSGV  
FLRVTRVEDDDGGLSGVVENKIRSTMKKIRVEDLGNMQATDLLASIP EEDPQGRGLCDLR  
DMEKKLSIKIVFDDGGGHVYLVGDAKKLDKKAFAIRNLLSHYHWRLSGTDVSSKNLCC  
>comp3539\_c0\_seq1; 469 1 1266 LEN=1681; translated  
RTAFHWDM SGLPRSFHELSDQLVFPVAQQRDQWQDTLAALPSRFDGLSVQVASQTDVLKD  
ELVAKLGSVETSLGEAFISGKAAVAHHTGDWQAASHAKIDQWQNDLAQASGRLOGELAQG  
YANIRYAGQAKIDQMQQGFHQDYSQLQVKGGEAIARAKDVVLMKASEFQETIQQSTDQIK  
DGAVEMNEQARVLANDYSAEMKDLSQQSYGAFREVGEAKMMHAREGLLSEMAKVRETM EI  
VVAQKFTDFQQLSKSTMDGLGKDAIQLTESVRTMFANVGADLEATREIGSTTAPMIQGT  
GEFLRDKTAAFRDTSWIEWDDVQHRMGLQGDAADAIGDNLQKWQENTANGLSALHDSVA  
KQVAPMDTIGDNINKFKESTTNQISSFESSVANQAASIVRRDNSLTTE SAFLKAMLEEMV  
F  
>comp3540\_c0\_seq1; 434 127 1383 LEN=1441; translated  
MKEVMADHEFRSDFASGNPFKIAACLNKFRQEHFPEDLRALWPSLESFNPTVVLGGIST  
PKGLLYSFDKTIPIYSVDLQVVLPLSDKAPVGLPKLPFGTNKLWVSLLLQKATSAMAARK  
KIIKEVLDIDMDGKYEKPAHYTLFTDIPSFPSPHFYGVSTTVITEHPEWPKENFYPCGFF  
TIGEQRQEQLMKDESKGYEFGSETCNELTEFLAAGSPPVYLGWGSIMCNSPQWMVSLALE  
ALQHVARGVLLGGWAGLSEAYIPDHLKNFCKKNVIFVSSAPHEWLFPPQCSCIVHHGGAG  
TTAASIRSGRPTVITPVMGDQDFDAAGVNEVCGIGLRKMSVVRGNTLGD AIKRCL EEEES  
IIARAKETGEKLRNEDGCETFCNVFEEWLVHGFASGEWLRKHENLMKKCKESWEAEQRW  
>comp3542\_c0\_seq1; 362 1 1284 LEN=1284; translated  
VPSTVPSTIPSMKPTHLLSTSQPSSLPSSLPNSQPSASPSTEPTAQSSQPSSLP TFQPS  
DTPSVRPSISEKPSFTGTQTFAPTNPVPSKVPSPDEPSEKPSDEPSSSPSASPTDVPSTSVT  
NSAFNP GTTAAQVEDAYTKVVTS MVIGSLTRKLEQDSSPENLDGVDIDVKCEDQSCSFE  
SQEDISGKVCFCESCTITASPATQINTADSSSVETDIASGGFSAKLEDEGLDGAVVALP  
PSNEPSSQPSGSPSISVKPSLKP SHMPSIVPSSLP SAEPSSEPSVSSSSIPSDVPSVGP S  
KISSTMP SREHSIGPSSMASSMPSRSTSNAPSGVVSSAMP SGIPSMALSSAPSREPSGRP

ISIPSSMPSAEPSTVYSNGPSKLPSPGIPSQNPSTSAVPSSKPSVDISNVPSENPSGIPSH  
NPSASTVP  
>comp3543\_c0\_seq1; 383 864 2112 LEN=2112; minus strand; translated  
MSDVTSPVLRLYSGEHDPLEIMSEICELAKEFDLDWTKFVHVMLEAASTNYSDFGVDTI  
ANSENRIEPMKQTNLLIQTALMPNSRIRENNNSESTAVYVGYDTDEDGMSSPQLFTVALS  
AAWVVGKNSADFWYGTDDKTDQLKTYTAPTPVEHSWDTFESFFLYPGNGGKISINGSDIL  
AKSEGDQNNAFVVGKPLRPPFGPEATTVAQVASASSAAAGGRSPLAPSVYNQNF'SISFY  
IEGSKVRLIWRVLLGISVGLVTTVLVGLVEYCTRCRKKKSDGDSNNDTKDPSNVESENGQ  
DENGQSDVNTSSVRKPKAMASGVCCGILAGCLAGLYFGFGSILLPTVYDVGVGLAYENPH  
FDKFAVCSQWPNPCGTQDAQFNDGYIIDNPAVVVNVGYLQENGVDNQTIKLIVTX  
>comp3544\_c0\_seq1; 234 203 1187 LEN=1187; translated  
MGRSFSFSSPSSGSSKIIISPYFIPLFPDSEKPKTADNEPPPNCDDVVQGPSLLRTPAPRPH  
TLMIMPGRSLPFWTSDSTPTPSSNPGSSAPPRRRIAYNDPSVSRAVEYLEQHADIIRE  
EYLRVAPSLPSDYENLQDHTQGSQGDGKSNNTKLHGDGDWDWHTYLSKGNVQGDVFMKFPET  
SKILNDGFRGEENNYQLFEGTFFGFVFFSNLGGGAKIAPHNAPTNLRLRIHLPPIVND  
VNPETGIPNCGIRVATSIRPYKQNNAIVLDDAYDHEVWNETAENRVLLVDIWHPDVTQA  
EKEAVVEMFQKAKRDGCGNDKTKNQYANX  
>comp3545\_c0\_seq1; 332 743 1459 LEN=1642; translated  
MCTFHLMEFFVTAfYNPTVVASDSFLVNHASKAYTVASIIAGTEFWLGFWCGGGGGEGIDD  
DAPSNATESGWWVTTIVGIVMVVFSQTMRSRAMMKCGESFNHYIQTERKENHVLVTDGI  
YTWFRHPSYTGfYYWSIGTQVVLHNPWSAILFAVAGWKFFSQRIPYEERSLLRFLGDQYY  
DYVGRTYVGIPIFVPSIPNRKEGAVGIGSASHQKEEHRTEEAIEIEVEAEKADREKKN  
>comp3546\_c0\_seq1; 282 890 1726 LEN=2589; minus strand; translated  
MAMTKRLASSALVEAMGDDASVNCNCYNGDDILSRFLGFSVEARDSFFANDFGKNVHIRR  
STSGNDIRDNLPCIDVNEDSNYEKTSKINMKILFDTSEFIALRIRGSMTYLNKAETS  
DFCEYIGNRGSVIPVAEENALMPFRNQIEASMRDQLHMRQRNSQEVHLHQEQNEVQAGIN  
VYHSGPGAVALNRHFDQYDVFLHLDGHKDWIEIGVFDPDHVIDDDAFMDTTSIDKVRRT  
NMTLVPGDVLYIPKGVYHAATTADGYESTTHATIGLEY  
>comp3548\_c0\_seq1; 379 142 1002 LEN=1092; translated  
MPMKSNTSNSNNRGRFLLGRAGASLRRSQNSKNKQKTAAGGKLGRDRPRLSPLKENVP  
SRSMKTNTSLTLREREQHVTFFHSNQSSVPIRSNFFHSTGFSQAEIYDLEESFKLFDIYG  
EGNVQVGLDRSILAVLKQEQQQQSSTAGTKYPYLDRLTYHLSELSDEDTLHMDEYIQLM  
ASTTITNSIVLDNKGEENQSSQHF SRVFELFDTEGKGYITIDDLERIAIELGEHDMTRGE  
LQEMIDRARGGSDSNGNEVVGIEDFTRMMTMSLFPKDDRGEYEA  
>comp3549\_c0\_seq1; 276 1 779 LEN=1371; translated  
XPNFQRYYYRVVLLPSASIIQRSSHCQGMERRRKKKSQPRTIAQFSQKLFLGYLAFTRYE  
YRTTPANPFCHKPKIDPLTKNRDTMKSTARTTQLLLSFLCVMNAANAFVTRGPSQLVGQR  
QLQPEYRVLFQEPPTLEKEAEKSEAVDEVKEPEEEMSETQKLMQVKKDSGTAGFISYAAW  
EMGFWALSVPVCAVGYVQVTGHWPDLGPDQKKGAEAFVNFARFAVPLRIGLALST  
TPWIDENIVKRFLKKDDEN  
>comp3550\_c0\_seq1; 461 94 1879 LEN=1912; translated  
MCGIVALLLADENAVVNQLIFDGLTVLQHRGQDAAGMVTADCKRLHLRKNGLVRDVFQQ  
EHMTQLRGNIGLGHVRYPTAGSSSCAEAQPLYTNYPHGISVAHNGNLTNTDELYKEMLKK  
QRHVNTDSDSEILLNCFEAESLNKYQRISADQDDKENAIVEDIFNTCTDVMKECKGGYATT  
YMINGVGLVGFDPHGIRPLVVGCRSKDPEDKGTWTSESMEQNSGTCKIDFCMASESVA  
IDALGFELVRDIAAGEAFFVDMNTGKCHFRQCLSDESVPACIFEYVYFARPDSIMDGVSV  
YESRLKMGKLANIKKIHPDHGIDVVIPIPETARTSALQTAHFLDVPPFREGFVKRNYIA  
RTFIMPQAKRKKSVRLKLNNTIKAEFSGRNVLLVDDSIVRGTTANEIVQMAREAGAKKVF  
FCSAAPPRIYPNIYGIDIPTRTELIAHEREEEEEIAAKIGCDWVMYQDLDDLEASVTELAR  
PDQPLTKFDTSFCNGVYVYTGQQIGDEYFQRLYSLRNDDAKQNRDASDRGKIQNSDGCESV  
QNDTRKEYMKELVPVKPCIRILSVYEIPDFGLKEQHILITSKERCHATEIDKEIV  
>comp3552\_c0\_seq1; 389 177 878 LEN=980; translated  
MFTNIFLISLLEFVVSLIPATKTLIRHEVFLNNTKKNPDNAQSQHS LAVGTFVEFEKK  
HRAHIGKIEEVEHKSNGGTRYGIKSDGHFNIPDKNVHFSVYPPNSPGPAGELYRELII  
AHEASEEELQSKLEISPEILELAWEEALENEDASGEHAVSPEKLIELVHSHAASAIEKYQ  
AWRLLQSDLAHVFFKDLKDHGRITSFKIKGRKAVETAKIAFCNSHEESDLCLI  
>comp3555\_c0\_seq1; 280 202 1005 LEN=1192; translated  
MACHRSVARRLAASIPLVLVAILRSRSCSAFGVLATGRNGVQRGAVLSSEHTLNVEGIR  
DGDDFLEADGPKARLLAAIGAPAETACPPRFVGGDDSAAKEEIEQLVGDVSGYVLPLEHP  
SEWRLLYTGAPDLLGLEGGPLNRLVSIHQAIIPDREKLEIELEYEPSEGILGLAGSFLDGL

GEDRLVQTVRFGYGVGPMNKVDLELSGTSLSSTRLLSSLLGQGGSSLPPLSLPSPLPFSGF  
SVVFNVDGLRVDRTVQGDFLLIYRREK  
>comp3556\_c0\_seq1; 198 187 354 LEN=354; translated  
MLLAAIVNTNGEAIIESSDIEEAEKICVNNAGGDETCSPFAVEYEEDEDEDYDDDEEE  
>comp3557\_c0\_seq1; 189 610 819 LEN=912; minus strand; translated  
MVQSNLTVPEKQONAGILYGIQIVDERNIETGLVTQKAQKFDSDIDYIVKRSLIPNVVEAAI  
APSVGKED  
>comp3557\_c0\_seq2; 166 57 305 LEN=667; translated  
MSGAASRIVNYNKRLFPGPVARVPASGIRGYARLAPLEGFTHAAVHGTVLGFIAAAVY  
KFGVGDPEAREIAEYEEENPPR  
>comp3558\_c0\_seq1; 196 615 1051 LEN=1094; translated  
MGKSKYSQLSLDDFSDDESVEDGTHHNGNGSANDDHDEYVRNQQVLMQQQDAGLDMLES  
IFRLGEMSNINISEELGQQNKMLDAMETDLDHAGDELIXDEVDQGADRPERGGDLPLNR  
GAFDRSAGAAGPHYIRLNADRGAN  
>comp3561\_c0\_seq1; 131 156 1049 LEN=1440; translated  
MPASGDAASRRRQTRLRREYLYRKSLEGKEKAAYEQKRVIREALASGKPLPTEVRASYDK  
LQKQIDAEDITDTPRSHIDNEYGDAGLLEPRVCVTTSRDPSSRLKQFSKEVKLLIPNST  
RINRGNNRVDIELIESCRQSEFTDVVVVQETRGEPLVCHLPLGPTAYFSINNAVMRHD  
LDPPAAMPSEAYPHIILNNFHSELGKRVGNILKCLFPVPRPDTKRVTFSNDNDFISFRH  
HMYSKPTHDSVTLHEVGPRFELRLYQIRLGTMDQKEADNEYVLRPYQNTAKKRKMLG  
>comp3562\_c0\_seq1; 503 1 750 LEN=786; translated  
KKMDALGLEIPRDTGDYSSVDPGASGIVQPPMDPLDGLEVIIEGTFTVIGILNGIPSRK  
SGRFSNMFDADIEVEGIEESEEPPASVVATPPRTEAPQESYGVTDVDDDEDEESLERI  
ESEMAKAAAEATAAAEAKRKADKMEALKQRAEAAMARRKQKEDETTREAENAAAAEAERK  
AEKMALKQRAEEAMARRKQNKALASEENKEPKEDPAAAEARRKAEMMLKKRAEEAMA  
RRRQKKKEE  
>comp3563\_c0\_seq1; 497 51 1259 LEN=1275; translated  
MKRTFGAWMATIFSSSMNGATAFALKFAAENVHTPVGKDGEAYTAATKGCDFVIDMATP  
LVLQEISEQHINPDRAHFVADYGTADAGTSLGLLTKVVRSVRKRRTSGDDKKEVVIHYEDQ  
LNNEWKSVFNHALGNIKVTDAYNNEIDTPFNLLGGVFVEANGVGFHQCYASGSIDLGVSF  
TAMHWLSSSPSSLKGSKYMHAARCLDGPPEAEKLQAESDWYKILTARSRELSPGGRFICV  
NFCVSKEGYFLGQTDVGVSSMWDSEFAYAWNKLQDGIINEDEQLGVSPNYRRTTEEFLAG  
IERCPDLKLVSAEEKIVRCPYREQYIDSDSKMSAEDYAKTFVPTTRTWSHSTFKTALSDK  
RSDEEKEKILEQFWSNYEELVAQSPETHGMDYVHSYLVIKVV  
>comp3564\_c0\_seq1; 118 578 1016 LEN=1016; minus strand; translated  
MAVVTTRARALESSDRSGMGCCSQRTAGLCVCAALRWFRVPCRTKGWRSVFLPLCFFLG  
PADDFAPVHSDPPVGRQSGSLPRFAPPKHPACVTEQIEIGFFESRFLSKQVSGSGCFDGR  
QRSVIADKGLRLCTIRHEMHRRWKFX  
>comp3566\_c0\_seq1; 324 101 922 LEN=936; translated  
MSRRRLVEIPFLVCGEAAAKRTIGSARSIAFDPCFRFFRRTTERVGVNRNGNTIGTAIGS  
AARFSTGSGGSSYSASGPSQQLKSWESGARMVQNTTVENKYLEHIREVHDPHQIKTIED  
ELKGSIGKALGKQKQKVLMYARLMEEERQRYQDLLELRGQAREAEPTTPSPAVERTDDV  
DRHPELSKIAISHNEYREQCLHARWELIVHRQAVGFIVGNHXYVTDKFPVGDALPVPSD  
GEDERATAAASAESKSKKKKVF'TDQLDWWQRIGR  
>comp3567\_c0\_seq1; 234 1 824 LEN=1315; translated  
XQQQQQQRREQEPTTEETYKLPRTFVLAGASMGALAAAYASQRILEDSAACSKQPRSDR  
PLAQFAAAVAEQHASFVGTLLLSPAVGVDPSVPPALLVAALSVLSWLPAPGVGLEGVTP  
TEDPSHYDCPASTKRNYAGPWPLGTSKLLLDATTVFVPGDVKEGSLNPLAAAAAGPALP  
HATLVVSGVKDPVPIGAVREFVEHTNSHAAKRGCLGPGIGLAEIENGHSLAPQKQKH  
SKGQLGATKKKTLATTTGHVEAFLERCGAEGSS  
>comp3568\_c0\_seq1; 145 1 217 LEN=525; translated  
XLCRHCPDDDAMGSQFDIQSLNSNAFDKKAIEVAFCKKIQNSVSKKFATTKSCSIAVESV  
IATDVAASKAAW  
>comp3569\_c0\_seq1; 279 1 1395 LEN=1878; translated  
LQIGEQETKHNRSVYQDVEGVRGGLLSDNRKMPSYSPSGLRAVCQRLLPINSTYPFLLA  
FLFIHSFWIYYDIAITSHHRPRREPVRVTESSPLTPFYPPSPGVKYNNGYARSFPVWEH  
PFPCGDLEDIGDEKLQRSRKQVNEGFFYVRLLDASPSICSSVTTRIGRNVARRQLHQSHD  
HGGNNRKTVCSTRIGSQRAKQFYARSPQKSFLWSVVREPVDRILISKYYHSRPIEKGGR  
ERAFSEFQHYVLDSEHRYGYFRSLGVKRTLNPYEKQHEADTQELLESYDFLGISERMD  
ESLAVLKLILNLEIEDVLYLATPKAKGTTTPSGSSIDFYQHWQRTCRAIREPDVTMEMKK

WFHSEEFAYIEADVLFYKAVNASLDKTILEIGRERVETTVRQLKWAQKRIEEEECRGARF  
PCSSGGFEFQKETDCFFADVCGYNCIDSLSETFSQDPVFKLAK  
>comp3570\_c0\_seq1; 190 151 810 LEN=810; translated  
MALAIFCVSWMAATAPRSTLALSVPFSGVTKTIGGATQHIQSGRPSGIHRIRGTGTGAW  
SPPERSNNEGEAVWSPGLRKTMAVGAVGLGAVETGYLTYAKVTGGLPFCGSGEASYSTCDA  
VLNGPYAHLPPFFEDLPLASLGFVAYASVAALALSPLAAGDNEGGDATNRVLLAALATSM  
ATFSVFLMTLLFGVLEASCPYCVFSACCSIFLAVALIGG  
>comp3570\_c1\_seq1; 159 1 533 LEN=579; translated  
XLPSGGNASAGGRTVLAGFAGAVAGAVLLFAVGGADAASAGSPPGSTLAATISGSSRGE  
QQLLYAPPEITDSSERALALGRDLASLGGARMYGAWHWCCHCYDQKQILGKQVFDKTSGF  
VEYVECSKDGINSQSKTCKAKEIPGYPTFEIQGQLYPQQDLGELEDLVKGLKEASK  
>comp3571\_c0\_seq1; 394 23 1168 LEN=1989; translated  
MRIGIIGDGIIGTAIAATLAKNRPSLEITLIDDGRPFKTSRAGQGYLWSIHRFDDAVGLE  
TSVMAKNAWRDLGDDGDGDVGGQPLLKKTGSLLIAPNRDASALNDYYQRARNSPHLPNL  
QFLSDASTHNFLLRPGFEHGVYSPDDYTCNPLELIEFLRTRKFRLETDRHTVTDLRSELQT  
RTAAGGGDPDSGDFCVICCCAGPWINDLEDVNLKPIRGLLLEAGVGDALDAMPSTSTYK  
TDGNEEVVKALEQESKLVPMMEFGYGTQGIHFTLSSRDGALLVGASREAVGFSTTDLEIL  
EEAILRHADKFVVS GGIGPVLARRLGFRPACFDQKPKTGRNYWIENSASDDRILLVYGF  
GQGVLYAPLAAMDVLNTFFSF  
>comp3572\_c0\_seq1; 328 1 966 LEN=966; translated  
XSNSNSSNTQVFSIMEKKAIEDAIAMAMSTAVSSPMSSEESSAQSAPASAPIAALRPTPI  
AQSC TEDTARN DATRTFE GSELESELESESKLESESESESAAAASTIQEQQEDFKQRNR  
QQPPSTHATDVHGILRKSSYRKRQTTSNNFAFRSNLPPHVDTRHGGEFVLEDEYCEYGC  
RRRRSPTGNFNGAASSLFRTTLDRTISDKHFRRRNTSTANNESDSSSSGSLNMLFLKSML  
GLVVVLPVLLTFLGLPYLLLGSLVWTLIFVARWFRTFVEEEFLFSSRKNGMDNSASRGG  
GTTPSLLATATRTTDRNRNRNSX  
>comp3573\_c0\_seq1; 658 1 1910 LEN=1978; translated  
XDAGVNDIEALKKMKRELDANRRAMSLASDMEAKRQTEKLMSKIDRMTGDFLRSNEATR  
ASTKMAAAA SRAMEGRGLEMGTWGVLGGRTVVADDDLARSGAAGLLGSVGNVREADKAA  
NTKTTLDDYNDLGSISSTYREEDPPADVRENRI LIVADTQKDKLAKELVPALMAAFEREK  
DSIPDLKFDVLSPTSTMPLGGNDSQCVVVFCTGLSQPDSLKMLDRLLRRTLATGGGKVG  
TPPTQLVGVSTLGTERTFGTFPYNMQNFLLGGKLETRRQIEEVLINTVRNRVVEPPLDYTL  
KVKEGDFLPDES VSGS GSPSFLTPGDVDDATSVETAARVLLQAI AFQPPARNSTIGLAG  
VLPASLLEDPSGSEEVLDQDDFWRETFACLDGP ELWRTVLLLEVETTGEGLPEEELAGT  
CDRLLEYLGEWAGVLARSGKGLTTPVKAETEGGLDPASMVTPSNSRTLLVQDGVRLFLP  
TKTGKNYASKEEEEEELRREQQTS GSGNRVPPPKTAREGGIDVVVEIADLPGE GSSAPR  
RRQLRVRARRTN YSEDAVFKEMSEATILKRLEEALVFKTENNILPPEEKQQA VDWILSI  
AGRTRPAGNKTTQTQNKHDHNRVPS PALPGAVPPSR  
>comp3574\_c0\_seq1; 522 54 1652 LEN=1681; translated  
MRKELSSRSLFLLLLEGTVLFCCSGFRLPEQPTTQRHHRCCQSSVILSVLADTERTAD  
SVSMNTDTSERKFLIHWRGEKDPGYKSFRHLEFESALAAELCSQKLPTSSSLDHARDTT  
SDDSKVIPQVNF TNALNYIGNESMTDMNIEHFNEAMQFVSFSSNDSNLLAVSKATVIRAV  
ERCSLIHG FYEIVASSDKLDDLADLAIKGGFSDLYEGGAN EKATWCFRARMYNSSVIPE  
EHSNKGRGKRYSSRTRSMKIERDGLNALKDLMIRFGGKVNLENPDNKIYIFDGL EEEIDG  
VRVGRKVLARRIASGPKIFS IAPAERICITNTPLEPIAAFVLCNIARIKARDRILD PYAG  
SCTTLAAAMIAPDAETV GIEIAHNGLVNREHIVEDFTTRNLKLP SQIIHG DSTNVTIRE  
TAKEAVGNEAFDAIIADPPYGIRESIGYNENSPLEELFTSIAIDRGATDRERLLKAGGRL  
IAFVPVTDEQTLTEMLPHEDLTEKAGLKFVCREQPLNDKLSRWLVSYVSIK  
>comp3575\_c0\_seq1; 400 1 1486 LEN=1535; translated  
XTSLGKVFMSNMFERAVESYTEALGIEPMYLEAIAARGSSRIILGKYREAGRDLTTVME  
RDESGMFLDVYTG LARILQAREDAVPTGWGPIVERLQRMIP LLEE QHASLHDHQRKGRQN  
NIAHGLNRLFHVL FMYHDTKTKD TDAAWENLTKSYHYKM GALPPWNAGFENQKISATKQI  
FSRSFFPDGVGSQSEVPIFIIGFVRS GSTLLERVLDAHPQIVGTGENSVFNGLDEIRNK  
IVETSLSGDTNQLKRVIASLADGVVDEMRRERWKMVSAGTTGGAGPEEEETPLRFDTKMLT  
NYYNVGF I HMLFPNALILHVIREPMDTIF SAYKHEFPAGTLDYTSDFPSLAELYHGYRDL  
MDHWDREL PGRVTHVRYEDMVHDMPGVARRIVAATGLEWDDSILDFHKKKHAVNTLSTTQ  
VRRGVYKDSLKSWKRYEKHLGPLELIGERTSCGIETTLPGYEKPVEHAASGDGDPGGA  
PVAGGTGAAPSEGEL  
>comp3576\_c0\_seq1; 1194 265 3228 LEN=3381; translated  
MMSKATGTLYSILVSLVVLCCSKCHAFLPQQT KAPNTINTQIGWFGQKTSAPGHPLSM

GLVDDFVASTDEKTRKSRNEKYLAKLQERVTRINGLEETIEELGDDELQAKTESFKERLK  
NGEDINGPLLEEFVAVVREAAWRVLELRHYDVQILGGLVLHDGRLAEMATGEGKTLVSTL  
PVYLNALTGETSFVVTVNDYLAKRDMIMGQVHRFLGLTVGLIQSEMKEEERRVAYENDV  
VYVTNSELGFVDYLRDHLALTPEQTVLPKGAGEFNGFCVVDEADSVLIDEARTPLIISKQV  
ASPATKYQTAFQLAEALKPDVHYTVDLKKNACTLFEVGYRDSERALGIDSLFDIQADGEA  
WVPFVEKAVNAKELFEKDVDYALITDDSGNKVGVGIDSFTGRILDGRRWS DGLHQSIET  
KEGIPVSEQSQVIKVTYQSLFRQFTRLSGMTGTAMSDADELELTYDLKVVPIPTALPIA  
RRDYPDVAFKTRKAADALVKEIKNVGGGQEGGRPCLVGTTSVAQSELIVSKLAEAGIKA  
ELLNASPNNAPRESEIVAQAGRTGAVTVATNIAGRGTDILLGGCPKTMARIKLRSVLVEN  
GVLSTEEADALPPSPPEDYYPCELNDDVQYMMKDAASLRNQFGSEMTSLGLNEILTIAI  
DTTEAEDDPEHILKLRNSAAVIREIFSEITDADRDLVQEAGGLYVMGTNRHESCRIDNQL  
RGRAGRQGDPGTSRFFLSFEDDMFVIFGGDGLQNILKTFRVSDDMPEAPQVSEALDKVQ  
QAVEIKYQEIRGEIFKFDDVLNKQRSIIYARRRILNMSDEESTAMMRKYNTNVITAIK  
GQTNMGKIDAGAIVDKVGQFFPLVASVVKASDIEGMSQAEFLSIAADEVFTTKAEVL  
DQQAIAAGKAPNSIGRSARYIILVTMDNAWS DHLQLENLKEAVVIRKFEKGKDPKEYIA  
EAFETFDGLEDDMQNNAVFSLWQSLGA

>comp3577\_c0\_seq1; 593 1 1929 LEN=1959; translated  
KKAQKQILNLWEENCAIRKTLKQKKREKRVLVREVKQLQNTVRLDLEDDNQRLSRSDSD  
KPSEEDGTVMADTMIGSDEERLIELEEHVASSIRLHNRLVAGSDLDRAEQSISTNPT  
SFAAEGSDLAASVAGWPGLQKGGIEVSQPKLLSLDDSDSDESGSEQEDPKDSRLEL  
GSLGSSVASATDTHARSIGATGTPASASSVGDGSSSQANPLLLKLDHDESTEIRHLD  
PHFRKPPSSPKLVTEHQATSRLVCPLADVDTMGSSSSGNGRARGEGNEELRVHHITFY  
SRKIGLQFQKASPAPQKPRGLLTDVLAADLAGGVDGSDKTAELRSVASIASLAGGTNA  
RGEEVTCPLALPEDIVLVCGFEGFDDSGVNRPRLGARLVAFDGVSVVEVGKWTFFENISKA  
IKSRGRPLTSLFRNDFLTTEQRAILTKAIKDVAKRDPVRSVIQYERPPSATPSLHSALS  
YESGHFLNNEGTOGGHHPNAHGEIDLDISIAATEESNCWHRFPGSSSSSLSSFYKENS  
RSLPRPPSTSSVSTHRSRNSFTSTAKNYMYSFQEAGSPNRVSSLVNNLAEKVASSSERQQ  
RSEIFRGTSPNRKGGSESRRRFGIGINPSGTQQHQDFQSNLL

>comp3578\_c0\_seq1; 139 47 692 LEN=692; translated  
MIRILSAVLWAFLCVVSIPSSSEVRNTAAVTAFAPSLSRHHQKLKVPVDLHVGQLRRTLSP  
KIPSVRVVAQSPASARTTCTSLPSAKVLPFVYTGFSGALLYKATRLSTDCSETIVLVAVS  
ALSFLNLGPSDNARLASAKRAYKTEPASAGKEKQARQAALTWKKAVRIKIIGQVIGLGR  
MVLAKECRGVMKGAAWVMGATLAFMLAGGGSARHDX

>comp3579\_c0\_seq1; 332 327 1151 LEN=1504; translated  
MTLRTSKCSRYNIDQRLTVDAPTEHRPLQHGLNTQGQNGVDCIGHRIVLTNSSNPLPST  
PASPRSIFAAYWKTNRHPSSISPRSSPVGEPERIRRQQQRRQIQPKTYSYFHNQ  
DPFEYFGIAEAQDNSKTQLHDDTDDSSINSYERVLRQEEAASSIAIHERSSTYPCLSAID  
IRSMGTLVSTKKTTSQSDTILFAKASSLQRSCLRKGRFSCNNRKSRENQLQPSKEATP  
RASKVSFESVVEIQWFEIPA EKWAPNGWSSWFGA

>comp3580\_c0\_seq1; 400 1 1708 LEN=1829; translated  
XAGLRQPGRRALSPAPTLPALAARSDDQGASAFSGLALLLLGAVSAATDCEAASGSDIN  
SDINIDDDNDGPEYTSSEVDRANDGMDGRPVWMTYGGRVFDVTSFVRNHPGGDRILLAAG  
GPIEPHWHLYRQHFAASDLPMRLLEPLAIGTLRESQDEVDKMEIEAERERDPYELEPER  
RGIIVTDKGAEDRMKVHSDQPMNAEVPERLLTRS YLTPSYLFYMRHHHPVPYLPSEKQIEN  
YRLEIDLSEYGKGVVRLSLDDLKSLPKKEIVATMQCSGNRRSEYNVFEKTSGTTWGQGAI  
STAKWGGVRLGELLKNAGMGDPVEAREKGGIEHVRFGAIDGMKVSIGIEKATNPYGDVMV  
CYEMNDEELPRDHGYPIRLIVPGYAGVRS LKWLNKISISREEAEGPWQRGLNYKVLPPNV  
HDANEVDVGGMPACNELSVSSGITTVPEVGLGSAPQPGDVVSVRVAGWAFAGGGRNIVRV  
DVTGDVANHDWRAAELGEGRDQRYGRGAWTFWGAEIPARVQADGSVHIFCKGVDMAFNS  
QPESAADQWNVRGLMNNNSWYHRTILFNKQ

>comp3581\_c0\_seq1; 247 345 1333 LEN=1642; translated  
MAAMDRTRGNSGISSNNRRNSAFLVQREALKAVANNQPVSGSFRSFETVSTTVLSMADEG  
SSPVTDDGGQNSLSSASKPTPSSAVVVGTKNRNFFASLNSKEILNGATQORSALLATMIDE  
KKVVPVESGNDALSTATETEPIPTVSYARPGSTQTFMKPGSVRSNAKVAEGTWKVIYAPH  
MTTAMDIFRGRFDVYDLPDQTMVSHAYDFPVFGKGYLSVSGTYGSVEGDDSGTYSRV  
DFDKAWIKRLASEDSNDSNSVPYGSLSSEVPDSFLKTAINEIGKRAFIESVAVFPVSLDD  
DTIVFEFQALGDEDLCPQTIALAATLEHL

>comp3582\_c0\_seq1; 396 1 1021 LEN=1204; translated  
XSTSASTSALAATTTEDPWFSSSSSSSPALATETESAGSVERLKIQLLQLGAALDRGQA  
YNPTSGSYEENMKVARDKIGQLLDAADAGDADKDDDVADDIADGANQPPTLPRSLADM

DGEWELVLSTVPHGIFRSSPFFLAIQESYEYAESKTFEDGTSKAGLFFKLHELQTCSWGVS  
SKVGRIAQHIDAQGGYLYSTFDTSLSLTVVPLVWGFKLLPTFGGCVVTAASCTCSGKEM  
LLEPDTFGRRVSRDLMDVVDYTTSRKIEGLDGLPLLGDFIWRKVPVGAIWKLLPWNKGR  
EATCKVYVNYCDGDFRIVQDADGEFFVYTRPVVPRPLEVF

>comp3583\_c0\_seq1; 213 1 1196 LEN=1279; translated

XCVCAFVGEPTGGTSGRQRLDLDFAAALSNRVHFLSLVAPGSLCTSFLPACCARTLTKNYF  
LSHFHSDHYGGIASSWDAGTIYCSLPTASLVHQQLGVDKKHLHPLMNTPTVIESRGRAV  
TVTLLDANHCPCGAVMFFFFEVGRRTILHVGDFRWSRDAMLGDPSSPLGSIASQKRALDELY  
LDTTYCDEKYHLPEQSVAIKATIEAFETETAKKGRTHLFGAYTIGKEKIWASVALRFGR  
RVCVDRSRHRVLSALDLPEEITSLLTTNKEESNLWVVPMGHLNMKKLPDYLGAANSKPFSS  
PHYDRIVGYRPTGWSLSSKPGSVLTSRTSKDRRLTIHSVPYSEHSSFPPELVDCIACLRP  
EKIVPTVKASASGEQVKLLMGGLRQRQRTSKLFFGKAV

>comp3584\_c0\_seq1; 166 276 1190 LEN=1190; minus strand; translated

MSRHHTPHTGCSVPNDGPEELCKWASLPCVLLCELLSGTAIHDPHLSGLACRGSSVVFCS  
VLRCLPHHRAECAVEHDAQHPVGFNGSAPAHAVPDMPLVVVWHAQRNANHAAPRRV  
VFWTRHRHWIEAPSARSRAVVPSCDEEEARTHPCPNGPFRRGGPFVSRCSLIRARPGR  
AEPGQVLFASHHIIASSGVSAADVSSSTARLLRKKDKPPAALGSRRETNNHHHHHREWIESG  
TAHLALVGNATRNRNATQGIAPAVADRLLVPPHGSSIEHATRWCDASRRVALCTSPTSIII  
IISX

>comp3585\_c0\_seq1; 436 153 1364 LEN=1451; translated

MTNETTTIQRNPLVLNETIIPRLWSDLLHSLKFASTYASSITKIIISVVPPTVIDAGNATI  
RSRPVARRATSCQATAGTTNNSISSTHLGSKLAGDMLVAATVTFGVSPFLTVDKAIIVES  
TAGTNSILQSSINSLRSMARNPVEYVRSPTFLLMWGVYSATYTTANAFKTL EEHATYSRD  
RSSSSNTTQKSSGMFQMGAF LGTTVVNSGASMLKDRAYARMFSGTTSSTSFPKASYALWA  
MRDLSVISSSFLLPDLVSAKLVEHSNGEIDRERALSFCQIGLPVLAQFVAGPFQYLGLDV  
YNRNLGHMTTPQAIIVDRSRQLTRGVAPVIAARVARIIPGYSIGGVANTKLRTAWRKKLLE  
RDVAAMMKSSAANGRQSGGSNEYATRMVALLHGSNQGETKKRS

>comp3586\_c0\_seq1; 542 139 1368 LEN=1658; translated

MRLSFSLLTAFLLAVPSATTTAFSTFAASTGSPNPQHSQRHSQRLSPKTATKMSASLKP  
YIETLIAGERSLTTDETKFAFSEILQGADEVQVGSLLTLLRQKGETPDEIAGMVQAMNDA  
CNAVDLGDRLKLLDIVGTGGDGADTINISTASTVLAACGCTVAKAGNRSVSSACGSADVL  
EALGVKIDLDPSQVVECVDKVGVAFMMAPVNHPAMRFVAPVRKKGVRTCFNILGPMNTNA  
AGAQRVIGVGFHPELLELMAGALQKVGRVDHAVI IHGVLDEISPLGPATILEIKNTAAE  
GEAKVYETNRFEFDPEVTGIPRCELIDLKGGGPKENADKFRDVLLGGDHTDAKRDSIVLN  
AGVGCWVYGLADSI EEGCKLARETLNSGKASDLLQDWIAASQEIASE

>comp3587\_c0\_seq1; 54 1 326 LEN=350; translated

XIPYHTIPIDQSNGTNSGTLRPNDVPGENETKNAARGTVYFVSTDRPGFRTGWRVSMVET  
GHITEEYSPKLRMCSGAHSMPIIPPERYSVFFCACSKNATKTTTTVR

>comp3588\_c0\_seq1; 253 1 572 LEN=572; translated

NNNNNNRNNKNTKLRTRQQPCNRRESRFPCVSEERQRQEQHPEQQEAAADEELWFGYNI  
LDGKQPRNSHGVGEISDALATESPEQAPNPTVPPTTEHISKHSSASIYRNIELIEATYAA  
LDHNETELESILDEAAGETTNETE IADHP IWEDNAIYYPYEETEVEFVDTTNNQYNNNGTV  
AIVEDGLYNDX

>comp3589\_c0\_seq1; 330 74 979 LEN=2544; translated

MGEEAIIRCGTTKGDITLKFIREWSPNGYDKAVELFERHYDHSFFRAVPKFLVQFGIS  
YSEDQELVSFGKLQIKDDPKHDPPIEFHPIISYAGSGPNSRSTSQLFISYGSAKSLGREL  
WETPIGKVI EGMVAEQFYSGDMPPWGGKGPVQGIYNGPKYIEDNFPLIDKFLECEVER  
TNSGEQSPSGSDEKAGSTDDGEKSSADLNEGNDDDAHGMDDPMNGTGAPKEKKNHYS  
DRSEQKIDKFYAVPQGLHEKSLRLRGNFDSNSFAFPAGVIFVMVLLTFILRGRKISAKE  
N

>comp3591\_c0\_seq1; 106 1 144 LEN=1854; minus strand; translated  
VSTGGNSGMPNDCEGCGSLSYTVGDFVGNDDFFYRRQRVAQF DAVVS

>comp3592\_c0\_seq1; 498 385 1764 LEN=1852; translated

MAVIAEMCPKIRVVVDISQKQIDAWKTDELPIYEPGLLECCKTRGKNLFFSTELDKET  
DEADVIFISVNTPTKTGIGAGSAANIKNCEL CARHIAKVATSSKIVVEKSTVPVRTAEA  
INRILSANEQKPDVTFQVLSNPEFLAEGTAMSDLHNPDRVLIGGPQTPEGLAAIETVVS  
YANWIPREQILTTNLWSSELSKLVANAFQAQRVSSINSISALCEVTGADVTEISRAGMD  
DRIGKRFLQPSVGFSGCFQKIDILNLVYLCEYGLQPCADYWRQVIQMNDFQKKRFSEEI  
VSSMFNTVTGKKIAVLGYAFKKTGDVRETPSMFVVRDLLEENAKIHVYDPQVSREDMWT  
EMSYTCGINHENTKNLDELVTSTDPYEACKGAHAVCIMTEWDEFKTYDYQKIYDSMQKP

AFLFDGRLHLNHKELRDI GFVHAIGKPDPIKFPGSTIL  
>comp3592\_c0\_seq2; 414 782 2087 LEN=2175; translated  
MEDDELPIYEPGLLECVKTRGKNLFFSTELDKIDEADVIFISVNTPTKTKGIGAGSAA  
NIKNCEL CARHI AKVATSSKIVVEKSTVPVRTAEAINRILSANEQKPDVTFQVLSNPEFL  
AEGTAMSDLHNPDRVLIGGPQTPEGLAAIETVVSUYANWIPREQILTTNLWSSELSKLV  
NAFLAQRVSSINSISALCEVTGADVTEISRVAVMDDRIGKRFLQPSVGFSGSCFQKDILN  
LVYLCETYGLQPCADYWRQVIQMNDQKRFSEEIVSSMFNTVTGKKIAVLGYAFKKDTG  
DVRETPSMFVVRDLLEENAKIHVYDPQVSREDMWTEMSYTCGINHENTKNLDELVTTST  
PYEACKGAHAVCIMTEWDEFKTYDYQKIYDSMQKPAFLFDGRLHLNHKELRDI GFVHAI  
GKPDPIKFPGSTIL  
>comp3593\_c0\_seq1; 299 1 849 LEN=984; translated  
RNRNIRIMAPAVATRRLRKE LINLKTEPPPGIIAEPDES NILKWHYAIRGPTETPYEGGI  
YIGKIIFFPEYPMAPSVMYMLTPSGRFQISTKICMSMTDFHPESWNPWKVATI IQGIQS  
FMASDELTTGGLRASEKDRKTF AKLSMNYNQKHYPKLFEGDIEAALEAADQACGKAEMEN  
AKTSCSASNDQKASSRRSRMARKAASSGGNF SQDDENASSQDNGDDNNQTDNNDAPS  
TTTEKELTPEEIEKRRKNAKRAKQAKKAAAVTQEKGTPE  
>comp3599\_c0\_seq1; 297 1 1408 LEN=1483; translated  
XGSASNTTNP I PGHQLSQSYTAMAFKVQNLDLLASRVASHVLRYNVAQAAAKRIPLASAS  
ASASTSQPPPPRHELILYDFEGSPWCRLVREYATILDLT LHIRPCPRETL LFGE GAFSAK  
SRFRPEAMEWFKSRCYRCSRETDLCSANSEAI IQSTIEEDEEEV DNRDNLTFPLLVDRT  
NAKISTEENSKFSDHG VVLTESYDILCHLWKHYGASVVQSEPCGGSGNSRRRDPQTVN  
SSSVFPPIRFLSLAGPSYLRPWRPCGLMRFP CSRSTAAVPLSSPEEPGGRPQQPALTY  
QAEGCPESRLVREVLCSLEIPYRSVPVADGSSNRLPNASDSRNHGATDDARDGGKSLRIP  
LLEIAPPNDSVIAATPETAGTSSSIGVIYRVGARECVDYLRDNFYRRSGAPKHHDDHGRD  
GDTPTWLDPLPEENLGRGSDGDGNSLAIGAYTAFLKGSRAFPARAMK  
>comp3602\_c0\_seq1; 270 108 752 LEN=1083; translated  
MAFNNDDEIEEVELYSSSRERQAYDDQAALYAIILATEHLERAYS RDAITQQEYVQECNK  
LISQFRLAEKAALPKLNMTTESFMELYQMD CPRATERLLNMGVPEPIRTATGQTADVAVT  
VAKTVENFITAMDAVKIETR FVDELQPLLSDLMDSLTKLPDIPDDFEPNHKVKKWLQKLN  
GMRAIDEITEEDSRQLSMDLDSAYVEFTRYLKS  
>comp3605\_c0\_seq1; 247 436 1085 LEN=1188; translated  
MRQLLREEKQPGTLPAPNLSTSHDISIISETFDDPSSLLLGSGSFGQSDSRLINSLIGG  
MSRRQKSSGSFSKRGGIRNNTTSAKVASYRNLKASAALRQTQQQVNVHVPDADDGSDS  
GSDDDDTNCEKRLWKLNCFRKPSKVTKRNSIRTLTHETFPMLTSEEEEKRWLAYGMKPIV  
EARSLASGSIISMSEPLLLPEKKDNSMRSRQPFPRPT  
>comp3605\_c0\_seq2; 518 198 2051 LEN=2154; translated  
MPPQSQSTVSPVRRAGGTQRLLPPSGARASSGRYGTNRVRSQGELRMAYKAQSRNIGSPSQ  
NKNIKTIDGDALPYNNGFFDSSNDHLSTDSAGNSVGT PSSVYMPSSVALSRDMSDLSGVS  
GDRHRSSSSHTIPGQIFDSRFLNKPWKQAYTLSNSPPECVNVGTRTTSSNATGKNRGRSD  
GNDKSEGKKNVKGTSIWVQPNDVVEIFDSLESSLGLDRFQSMGGKHSRIPIMVLLMNP PN  
QSYELMQI WDRANDSIRD LVHVLQHKLP SQWKQAYDGLFQVRGHRFTQLINI IRLVKYD  
IQSHEILVAKPWAMTAKVTIAFAGSAIRHLTRVGVI AVDNNDSGSIRSGRYLRTQHKNE  
VPLLLSKRARDRAYFPEGILNHHHALQFVTFSPSFEP THNNNEAATTRRKAARNASAPNL  
STSHDISIISETFDDPSSLLLGSGSFGQSDSRLINSLIGGMSRRQKSSGSFSKRGGIRN  
NTTSAKVASYRNLKASAALRQTQQQVNVHVPDADDGSDSDESGSDDDDTNCEKRLWKLNC  
FRKPSKVTKRNSIRTLTHETFPMLTSEEEEKRWLAYGMKPIVEARSLASGSIISMSEPLLL  
PEKKDNSMRSRQPFPRPT  
>comp3610\_c0\_seq1; 128 105 577 LEN=577; minus strand; translated  
MGKSCPHDVHAKLSSMPIKSDSTRLD A ISFALTQVKKRLKHTPPYFTTTVWPLSDLAAS  
AMVSATSEKFSGAAETDVFETAPGARGARADDGKAKPDATDAVDAATMRTDASDFMFVRL  
VFSSFDLVWFGSVLASGGLALRSSFDRSRLRKASANX  
>comp3610\_c0\_seq2; 505 127 1134 LEN=1392; translated  
MKSLASVLIVAASTASVASGFAPSSALAPRAPGAVSKTSVSAAPENFSEVAETIADAAR  
SLRGQTVVVKYGGNAMTSP ELKAGFCQDVVTLQNLGVRILLVHGGGPQINAMLEQVGVES  
RFEGMVRVSSKEVVDVAEMVLCGSVNKEISS TIC SAGGRAIGLSGRDSSLQCVKKTND  
GYDLGFVGEVESVNTKLLNDLLDMGICPVVSPIGTGIGDEKDIAYNVNADVAAGRIAGEL  
RAARALFLTDIAGVLDKEMKLLPSLSCADVESLIEDETTITGGMI PKVSYATS AIELGVGG  
AFITDGRVPHALLKEVL AGGAEGSGSGEGGTFVSK  
>comp3611\_c0\_seq1; 252 1 354 LEN=354; translated  
ALLKQKITELETSVDRFENQEALLREQIYEEFEAKKEEETIAVNAENTVSSDQYREQEEE

LQETKKKNKEMEQWLTKVVEESTKRETLKKKVTELETSIDKFENQETLLASKVVEES  
>comp3612\_c0\_seq1; 703 1 1639 LEN=1831; minus strand; translated  
XCVLSIASFLGNVGVALTGFGMAIIYLFVYQIIVLAGYDGNLRYAVFIQALALFSAQPLL  
LRKAEITKHASWKILHYFIPITIIISTPLGQLTGDAISTDLIEIVAGFLVTFVAVFEMYQK  
RKLFAKRFRKWCCSVGNEEEKKEPVDEENPKSRDTGEETSTNISRDTSQONVLLMNDHNG  
ETNAENDASLLHTPEGGFFGQYNLGTKTLDNFSFVVKLGTKKKCTRKSFAIKIIDKSHLL  
DDEAEQLQEEITHLQQLNHPNIIYLQDLYDEPQKYFLVFDLMHGGDLLARLSGVRFFSEA  
EARRIAKDVLGAVRYMHDHRIAHRDLKPENILLASGDADCEVKLADFGFSKKEVRPNSFV  
TLCGTPGYVAPEILKGTPTYGCKVDMWSFGVICWVMLVGYQPFRGESEQEVQIAIVRGKYD  
FDEEFWEDINDSPKEFITSLLVSDPETRLSSEEAQCNPWFSEYKCAERIVDETTVPVFFM  
VGSQRSGSNWLRMTLNEREDLGGPHPPHIMREFMPIIDKFGDLSDDSEFRILLDHVCTFV  
ERNQVPW  
>comp3615\_c0\_seq1; 330 1 2203 LEN=2203; translated  
XSPIVKATQIIALLSFVVFPEASLLDISSGVEIYPDLWRRNLDESTLLIAFSCTLRRIQG  
LLAILAVFLLVITSSNATEIILNFTAVNFISLLDDIAFDLAKDGKYGRKLVAAKRVENE  
ALPRYTVSRNSFLRHKVSVCLVSIILFGMLSIVILCQESSQTWITRIVQIRFGNKDFKAL  
SGCYDIIDELTDNGRYNYEISDKLHQTTMRMFGYCKKSRRWVLFSGRHLNGTEFDDPCLA  
DEYEIKARSSKTDSDIMYSLDEPWYSPSGEALDFTLVLDLEDNQQKCNSVVGDLGNEFF  
NNEYHRYDDGDCCFMTCNSTNCGKNGYKFTPLFGVTIAAADGYPRCDLKAPDSAGLKYYF  
IRLDSISISDRESNPFVLECDGKMVFSIPVDQEMQNKTEKAIVPKEGKCTLNLFELKRSQ  
EIREFSWDLNYSIYSAGKDIYRQEMGEKIFKGHSSSEKSKEYFSSYDLGSEDHLSSNIG  
TLLHGNTSLDLYDMQLDGTLPTEIGLLTDLTSINLCGNSFKGGLPSEIGFLTCLTEFDIA  
CKDIDGGNANITDGLRGTLPTEIGSLSDLTSIRFGIRSFTGTLPSEIGLTKLSELDHKS  
SFTGSLPSEIGLLTNLAKLDFNQSSFTGDLPSEIGLLTQLSELRFYNTSFTGVLPTIWS  
LTNVSKIWCGNSTFNGSLPSEIGFLTCLTSLVLFNSGFKGTLPSEIGLLTRLTFLRVDNN  
HFTGSLPTEIGWLAX  
>comp3616\_c0\_seq1; 505 145 1952 LEN=1952; translated  
MTSKEGIDSNPVEREDIEEAIDTAIVKRKDDDDSDCKDEDCDRHEVDETNPPYLDIFIRAKT  
KGWGWIIICSAVIVAYSAAFIILDFRRALFLFVVEVLVVTLVAFQYVTDRCLEQKTRIMD  
SIIDWFVEDLEESKIAAGVLLVAMIAIIGVMTRDPMNLVSASGLVVFLGLSWLTSYKPS  
VRWRPVISGVFLQFLGLVILRVEPIAQAFQWLGDQVAIFLNYTNFGAMFVYGFADSSL  
NETPLATADGGEYYLPPFYFTVLSVIFFFSSVVSILSYIGVIGYLVKKVGLTLAMLMGT  
SGPETFNCVANMFLSMTESPLLIRPLLSEVTESELHAVMTAGFASVAGSVLAAAYISFGAS  
PSDLLAASIMSAPAALGISKLIYPETTVRRDRESLFDLEMAKSVDPNIVAAASSGASLAV  
DMVLQIGGQLISIVALVAMVDGFLSGIGKLDIVSLSFNLICSYIFYPFAFLMGVPMADCL  
QVASLIGTKIVNEFAAYAQLGVMIREGSLARSITATIYALCGFSNIASIGVSVAVLSS  
LTEPRMKPIIVRLVTSAMIAGNTACFMTACVAGLFYTTSSIASDPNNIDPLVDQAGNMTAS  
EHX  
>comp3621\_c0\_seq1; 239 1 988 LEN=1591; translated  
XNSNSNSNTAETDDDRDFVQLDLSSCNVLDVAGGKELAFQLLNLNNAKTCHVIDPRPLSL  
KRFRGRLEKGFYHRSQGILTHDVVRPLTEPERPVDQLRCLFSELWETEPDSNDTNNND  
DNDDGDNDANPQKIKPKRDLRKEFFQNCYRAQGWVWPPVGASNEHAAMGDDDRDEIVRK  
RPSANATAKANGSDPTPTPSGRGTIDNKENESSFTPTFDHASEVVRKADLIVGMHVDQA  
VDAIIDAALAMDISFFVVPCCVYSKEFPFRRVPLVLEGGGCGDGNKQRTKPVTTYEELIRY  
LKAKSPDIRSHVLPFEGRNICLYRVVGC  
>comp3625\_c0\_seq1; 657 401 2454 LEN=2454; minus strand; translated  
MKWTFNSVMLSTILFSTARHALAFVPGVQRAASRQMATAAGSSFASRYSMRPSSTPARLM  
ATVAPEKQAEDKDTDFDELPTNDNDNDLLRIRHSSAHVMAMAVQKLFPEAQVTIGPWI  
DNGFYDFFFPETIDPETGETIEARKLNDQDLKKIKKQMDKIIQKDYPITKEEVTREEAE  
RRIKELNEPFKLEILEGLQEPITIIYHIGDEWDLGAGPHVESTKQIPKKALALQSVAGAY  
WRGDENREMLQRIYATAWKDPTQLKQYKMMEEAKKRDRHMLGKLDLFSIQEDAGGGLV  
FWHPKGSKVRKIIEDFWKTAHEEDGYDIIYTPHIANLDLWKTSGHFDFYGEDMFDQMDVE  
NEQYQIKPMNCFHCLMYADELRSYRDLPIRWGELGTVYRCVLIITCCICCESMLDIIVL  
DSQHKIFTDFLHNRYSRGLHGLFRVRGFTQDDAHVFCLPEQLEDEIVKVCDLIETIL  
TKFGFDKYEIMLSTRPEKAVGSDEIWDAAATIALRGALEKKGWYDIDEGGGAFYGPIDL  
KIRDAIGRQWQCSTVQCFNLPERFGLYTSKEGTERPIMVHRAIFGSLERFFGILTEN  
CAGDFPFWIAPVQLKLLPVTDSVQDYCHEIAAKAKKAGIRVEVDRGTERLAKQIRNAEQQ  
RVPIMAVVGNKEVETNKLAIRSXX  
>comp3626\_c0\_seq1; 220 77 622 LEN=894; translated  
MGKELKVEFGRINQDNIEQLRKVNLCFPVQYQEKYKDVSAVSGEGLCKFAYWNGFVVG



AASSRIEPIINGSNGNTDEPKNDNESNEKRIYIMTLGVLAAYRGRITIGTQLIQSILDYFEE  
NKNESPELKDVIEISLHVQISNDDAIKFYTEKFGFEKGEMVENYYRRIDPPHCYKLYKKV  
R

>comp3626\_c0\_seq2; 203 303 806 LEN=1078; translated  
MVCWQLRKVNLCFPVQYQEKYKDVSAVSGEGLCKFAYWNGFVGAASSRIEPIINGSNG  
NTDEPKNDNESNEKRIYIMTLGVLAAYRGRITIGTQLIQSILDYFEENKNESPELKDVIEI  
SLHVQISNDDAIKFYTEKFGFEKGEMVENYYRRIDPPHCYKLYKKVR

>comp3627\_c0\_seq1; 486 42 1439 LEN=1598; translated  
MVDESQVISRFKDNQSHVLKHLDTLSIEAKSEFLEQLNSIKVDELSDLLGAAMAEQQNQ  
DGNDDINPFSKDVGRTSKDKDESASAYEEGIGAIGRGEVAALVLAGGQGTRLGFSGPKGMY  
DIGLPSGSTLFLQLLAERLKRLLKIAECSTLPFYIMTSPINHEETTIFFKENNYFGLPEND  
VLFFQQGMLPCMNDGKIILERADKVAMAPDGNNGIYPSLKNSGMIDDMVNRGTYIHVF  
SIDNALTKIADPVFIGHCVKTQADCGNKAVWKKGPHEKVGVLAEKGGKPCIVEYSEITTE  
MAEQTDGEGRLVYGAGNICNHFYTLDFLDCKVVPNLGNMYHIARKKISYYDEESKSTVKP  
EANNIKLESFIFDIFPMSERMAVLEAQREEEFAPVKNAPGSASDSPDTARVYLSKQAQK  
WVIEAGGNLTGDLESQCEISPMTSYGGEGLEDLVRGKDIHCPFSL

>comp3627\_c0\_seq2; 407 42 1346 LEN=1441; translated  
MVDESQVISRFKDNQSHVLKHLDTLSIEAKSEFLEQLNSIKVDELSDLLGAAMAEQQNQ  
DGNDDINPFSKDVGRTSKDKDESASAYEEGIGAIGRGEVAALVLAGGQGTRLGFSGPKGMY  
DIGLPSGSTLFLQLLAERLKRLLKIAECSTLPFYIMTSPINHEETTIFFKENNYFGLPEND  
VLFFQQGMLPCMNDGKIILERADKVAMAPDGNNGIYPSLKNSGMIDDMVNRGTYIHVF  
SIDNALTKIADPVFIGHCVKTQADCGNKAVWKKGPHEKVGVLAEKGGKPCIVEYSEITTE  
MAEQTDGEGRLVYGAGNICNHFYTLDFLDCKVVPNLGNMYHIARKKISYYDEESKSTVKP  
EANNIKLESFIFDIFPMSERMAVLEAQREEEFAPVKNAPGSASDRSVVFYTCIASMFFD  
RFKVVVFNILLLCNW

>comp3630\_c0\_seq1; 366 195 1373 LEN=1466; translated  
MTTGTATQQKWNRWGTSSYTVMPHVSPESKAIETYQLRPTDVVLSFPKGTGTTWTQTV  
CEQLRTRAEGYDGFGDITERQPWLEFAHDCGQDLDDGLYDAYKPRIFKSHQLLSAINPGG  
KYLICIVRDPAAATLLSWFSFQKAKGRPGYAEYKDANEYIKHRPELFGGHHIFGTNLWQMYA  
EIWSARNDPVSVKVLVYEALIAADGPNDYMDHLPVIHDFLGLRNTNHTSPEEDEETKTLYQKV  
AFLVSRAEMVRHAEKFKDTFIAEMGKKHGRALRIMEPAAKVRSKSDKRAELDEDTLWLE  
DQWLEKITPHTGHATYDEFATELSDLFFEGVVDEKQVEKAGAEPLPLSHDEIEKKQHRPS  
RKSSILVRRKSSIVVQQMPSIRQRRETLAPLD

>comp3630\_c0\_seq2; 246 195 1484 LEN=1577; translated  
MTTGTATQQKWNRWGTSSYTVMPHVSPESKAIETYQLRPTDVVLSFPKGTGTTWTQTV  
CEQLRTRAEGYDGFGDITERQPWLEFAHDCGQDLDDGLYDAYKPRIFKSHQLLSAINPGG  
KYLICIVRDPAAATLLSWFSFQKAKGRPGYAEYKDANEYIKHRPELFGGHHIFGTNLWQEV  
KILPFRSELRLCPTLSATSNFLRLTNDPTRXSQMYAEIWSARNDPVSVKVLVYEALIAADG  
PNDYMDHLPVIHDFLGLRNTNHTSPEEDEETKTLYQKVAFLVSRAEMVRHAEKFKDTFIAE  
MGKKHGRALRIMEPAAKVRSKSDKRAELDEDTLWLEDQWLEKITPHTGHATYDEFATEL  
SDLFFEGVVDEKQVEKAGAEPLPLSHDEIEKKQHRPSRKSSILVRRKSSIVVQQMPSIRQ  
RRETLAPLD

>comp3634\_c0\_seq1; 112 516 695 LEN=839; translated  
MIFKGQDAWRNHHLFQRLWASFPFGFRNAVFI FGAYLVVDSVLEGMKPKSAKIEHGGHH

>comp3639\_c0\_seq1; 935 90 1793 LEN=1832; translated  
MTTAAEFKALGNAALQAKKFSEAIANYSKAIDL DGSNHVYFSNRSAAYLSKGDGNNAL  
ANSIALNPEFTKGYSRKGAALHALKRYNDSIAAYNEGLEKFPNDPALKKGLADVTREK  
APPAGMGGGPPGGGLFSPSMLAQMAMDPRFKQYLDDPTVMGKIKMIQQNPPLLPTMMSDP  
KMMEMLGLLMGESPGSSQPSSPPAPAPTAPPKKKEEPKPKPMEEDWSTLSPEEREKKEI  
QKKARLKEEGNSLYKAKKFEEALAAIDSTCMTFLLNKAAYVFTMKKYDECIEE  
CNKSVEVGKENMAPFEDRAKALTRCAKAYQKGDLANAIE MCKSSQLEAYNKDTRLLKS  
LELEKKKKDKLDYQDEGKAQEAQKRGNDFFREKKFPEAIKEYEEAVKRAPNDAAIRNLS  
AALTKIMDFNGAKVQVEKALELDPKYTKAWARKGDIEMAFKEYHKAMESYKNGLEIDPKN  
AACKDGLQKVTMQINYGRSQMTDEQKREQAHAHAMADPEIQAILQDPLVQQLRDFGENPS  
AAQQAMNDPHMRGKIQKLIAGVVETA

>comp3639\_c0\_seq2; 685 90 1945 LEN=1984; translated  
MTTAAEVNRYGHSGEFATFLVSRFCRRRRFDGLLADSELKLTQRFLPLVHSFPFXFKA  
LGNAALQAKKFSEAIANYSKAIDL DGSNHVYFSNRSAAYLSKGDGNNALDANSIALNP  
EFTKGYSRKGAALHALKRYNDSIAAYNEGLEKFPNDPALKKGLADVTREK DAPPAGMGGG  
PPGGGLFSPSMLAQMAMDPRFKQYLDDPTVMGKIKMIQQNPPLLPTMMSDPKMMEMLGLL

MGESPGSSQPSSPPAPAPTPAPPKKKEEPKPKPMEEDWSTLSPEEREKKEIQKKARLKE  
EGNSLYKAKKFEEALAAAYDEAIAIDSTCMTFLLNKAAVYFTMKKYDECIEECNKSVVEVGK  
ENMAPFEDRAKALTRCAKAYQKKGDLANAIEMCKSSQLEAYNKDTQRLLKSLELEKKKKD  
KLDYQDEGKAQEAQQRGNDFREKKFPEAIKEYEEAVKRAPNDAAIRNNLSAALTKIMDF  
NGAKVQVEKALELDPKYTKAWARKGDIEMAFKEYHKAMESYKNGLEIDPKNAACKDGLQK  
VTMQINYGRSQMTDEQKREQAAHAMADPEIQAILQDPLVQQTLRDFGENPSAAQQAMNDP  
HMRGKIQLLIAAGVVETA

>comp3640\_c0\_seq1; 662 1 1773 LEN=1804; translated  
GSGKTLAFVLLPLLSAAKRRPWQRKKVASPRIITICPSRELAKQVGKEYSKLAGKAFGVAT  
VFGGVPIERHVSLKLYKPKQIVVTPGRLRELVRGHDYDYSQVSTLVLDEADLLDLPQDSP  
DVFSAIEDIEKALEESDDEDPEYQMLVVSATIGKNVKDFAAEMEFPESSFNIEGIQDSK  
KLVDPSSGGAADSAEHQISAASSSNAATVGHWHMSCKSAMRPEITANLISVLSPLRTIVF  
VPTKSATESVA AFLSEKAAGTTIRILHGDMSSARSRCIGMIREDAIRKEQQQSPQSEAG  
QILVATDVASRGLDLPNVDLVVQFGLPRIAGKDGITINPELYAHRGTGRFRGGSNDRNW  
GPAANRYETANAVALYDPAVGEGLVTELVIAIEDDLGVTIQSMSIPSSAKVVDAAAYQRL  
SLDVLNNDSDQDTPSLSSSNKSRSTDLAAYFKQQLKSDKRVDSSDPEELLGHLANAMVR  
LSKLDPSLSPYTSQSSLLTGDPMTTLRLYPRSIGSSSLTPPVVTSFCKQRGSGKLGRRV  
ISKKDGSAIFDLPEKRANKLMEIIKAEERKDDDGLEYGLEIPIISLPEL

>comp3642\_c0\_seq1; 318 400 1670 LEN=1714; translated  
MNHGXAVGVANAGEADGDIIDVEVKEEEVIEPPKPEIKTQFCITGISPPLETALNEAVSK  
LTNVTLKEANELVEIGAVWAKIDVMTEDDVLQYDSSGEELYADLPQGWGNGSDAGTGT  
EEEKLEEYIAKMESQRFRRILSPRKLQPGTDLRIYPNRRFPACYSIDGKSLLYQDFTFI  
VVDKPPMLPTQPDASNYHENCPCGAQDILGPFEDIQGNITRRPLLCHRVDSSVGGCVMS  
KDRNGQRVQELQRQRKLKVVYLAVTTKPVPLGMHLHMMWSPQTRGKAGGPPCQLVSHI  
APESRRKARQFWTRCILEVTKSEPI TVNADDYDPGDKQHYQNTIRLVTRGRKHQVRAQLSS  
LGCP IIRDTLYSPMSGITLGDLEVGDEEALENAIAQCRVPEEPIGLQAHAILFGGIKARA  
REPW

>comp3645\_c0\_seq1; 388 57 2204 LEN=2434; translated  
MKCLKKRSLVTFWAAFVAMPQDSQVSATSSCRSINQIVCATDAFSLCQALEETGIDIT  
LNNREKDFTFAPNTDAFQHVLRDLKYNDIYECPKGTLRELLFLMHKNNVINKSGLKDR  
CGERLEMVNEEFTRTVCENGETKIFQKGAGNSESAKPEVIAFNIEACNGIMHIVDEVILP  
SHLPGLSSRKPTKKPTKKPTRRPTPKPSRPRSPRPFAPLEASSCSKFPRCAALGLTGE  
CCPTDEGVKLDCCVEEAIYFRPTQKPTIEISAGSCSRHPKCAAKGLTGECCPTDDNAKLSC  
CFDIPGSCSANPECEALGLTGECCPTDENVKLDCCFAGVFPVSGSCDVYPRCRELGLKGV  
CPNDGTGQKLDCCSEEPGLPILGESYCTNTPDYSCYQFGRPECCCLKSTIECPKIQPGCEI  
GWPVIGDSYCTYAEDFSCYKNGRPRCCLDSDLYCPDERPECEIGFPIVIGDSYCTQSPNFG  
CYRSGWPECCGDDRSSNGCPNKKPGCEIGLPEVGDSDYCSDDPDMCYEMGYPSCCLERDL  
TSCPNKPCQCNIGRRGCELQDSLPSLYDFACSMRSFEILCYLLGEAELDERFDRDGSYTL  
FAPTNQAFKRLGKTTMSDLLVNPREGREILEYHVSDRIYFEEKLFCDRKIDTLLGDSSD  
DFIITKCEEDKDNQLKSQAGNGNRVWPLIIATDIVTCNGIAHVVDNVILPKEYL

>comp3645\_c0\_seq2; 380 273 2333 LEN=2563; translated  
MVLFCPDQIVCATDAFSLCQALEETGIDITLNNREKDFTFAPNTDAFQHVLRDLKYND  
IYECPKGTLRELLFLMHKNNVINKSGLKDRCGERLEMVNEEFTRTVCENGETKIFQKGA  
GNSESAKPEVIAFNIEACNGIMHIVDEVILPSHLPGLSSRKPTKKPTKKPTRRPTPKPSP  
RPSRPRTRFAPLEASSCSKFPRCAALGLTGECCPTDEGVKLDCCVEEAIYFRPTQKPTIEI  
SAGSCSRHPKCAAKGLTGECCPTDDNAKLSCCFDIPGSCSANPECEALGLTGECCPTDEN  
VKLDCCFAGVFPVSGSCDVYPRCRELGLKGVCCPNDGTGQKLDCCSEEPGLPILGESYCTN  
TPDYSCYQFGRPECCCLKSTIECPKIQPGCEIGWPVIGDSYCTYAEDFSCYKNGRPRCCLD  
DSLKYCPDERPECEIGFPIVIGDSYCTQSPNFGCYRSGWPECCGDDRSSNGCPNKKPGCEIG  
LPEVGDSDYCSDDPDMCYEMGYPSCCLERDLTSCPNKPCQCNIGRRGCELQDSLPSLYDF  
ACSMRSFEILCYLLGEAELDERFDRDGSYTLFAPTNQAFKRLGKTTMSDLLVNPREGRE  
ILEYHVSDRIYFEEKLFCDRKIDTLLGDSSDDFIITKCEEDKDNQLKSQAGNGNRVWPL  
IIATDIVTCNGIAHVVDNVILPKEYL

>comp3652\_c0\_seq1; 549 326 1971 LEN=2282; translated  
MAAVPLAGFTDVADHGPHLSPVYRPWFFLLFLGGDXFRFSGGKVEAHDNTNKFQNFYAHL  
SRRKKNRRRSTSHIIVPRGGANRFLPNDEGDFVDDSEHMKKRNPIRRWKDNHSRSSTK  
RFDGQTTKHSPPVYQYFGKSRNRGGGAHSHPSHSDETS LN FILLGPNVDHWKTVGQTLA  
SRGFNVMACERMIDKDGDNPTQNGESQYEDAPHLVLEILDALKWNTAVLVGCDDESLLA  
IETAMMLAPNRIAGLILCGDLAESNRFAADSGNARTLDTLLHRNLDCPFVIVWDGGLRSI  
ASGSGSRGGLSSTFDENDFDGRCAILGGGSAPHRTKPEYFAWVLARFVEEKLEYHPRDYV

GGKMRHANSESSANDNGRIKAVKDRGRILRNLNLPFGIDSVVSPEGRLLLGRAVAAAI FY  
TSCMKVLFVQYGAIKAGVISVKNSVDSVEALRRKMCQATGAFVMNFGYIPKFCKFSYKRT  
EEKGENGVGSRSAKAGRSTEDKERNETLS DSTPSSPKDDADHSQKEDEDNDDTLRIKPL  
FFLDNI FT

>comp3652\_c0\_seq2; 488 326 2127 LEN=2438; translated  
MAAVPLAGFTD VADHGPHLSPVYRPWFFLLFLGGDXFRFSGGKVEAHD TNKFQNFY AHL  
SRRKKNRRRSTSHIIVPRGGANRFLPNDEGDFVDDSEHMKKRNP IRRWKDNHSRSSTK  
RFDGQTTKHS PVVYQYFGKSRNRGGGAHSHHP SHSDETS LNFILLGPNVDHWKTVGQTLA  
SRGFNVMACERMIDKDGDNPTQNGESQYEDAPHLVLEILGAVHASADVHHFVCLSI CLP  
ACL YDLSSD TTRRNKNLQILIVFLPNCIDAADALKWNTAVLVGCDD ELLAIETAMMLA  
PNRIAGLILCGDLAESNRFAADSGNARTLDTLLHRNLDCPFVIVWDGGLRSI ASGSGSRG  
GLSSTFDENDFDGRCAILGGGSAPHR TKPEYFAVWLARFVEEKLEYHPRDYVGGKMRHAN  
SESSANDNGRIKAVKDRGRILRNLNLPFGIDSVVSPEGRLLLGRAVAAAI FYTSCMKVLF  
VQYGAIKAGVISVKNSVDSVEALRRKMCQATGAFVMNFGYIPKFCKFSYKRT EEKGENGV  
GSRSAKAGRSTEDKERNETLS DSTPSSPKDDADHSQKEDEDNDDTLRIKPLFFLDNI FT

>comp3660\_c0\_seq1; 236 1 353 LEN=529; translated  
XFLQHNTLHLIMFKSVIALALVASAAAFAPANVGF RSNTALNGENDDKVEI IIVEQVGC D  
EDKVVPAKFI DDLGLDSLDTVELIMAEIEEFDCEIPEEEAAKISTVGEVIVSFVDSL

>comp3662\_c0\_seq1; 157 1 646 LEN=690; translated  
XPGAELHSIEISCIEQGPRAEGKWPWGNFAKESKEYQNLLDRNLLHCGDASD VDWLYQIW  
NEKIYRRNKLGGSTSGT PPLKIVVDDGSHLAKHMVHSVFFWF PRIEPGGILII EDIQP  
IEEANLFR TQFLPQAMADLHFCGDPNQNKDEACFPQLYRLLQSIHCEMHICV LERNEVPA  
IPDLSIEDSKPPNALDMTQCYTFANSFGAGMEAI

>comp3663\_c0\_seq1; 182 1 376 LEN=535; translated  
XQQQQQHQHYDQENTPRGPASPTDSVGAVRPTRGGRS ANTEADDKSHYSAFDYIRAVQ  
RQFTQPYKDPSPDKSMATSDSIRAEDAGSALYKKGYPQKKYENELVKQIVKRRHLALIQ  
AGEEP

>comp3667\_c0\_seq1; 447 114 1019 LEN=1100; translated  
MPEKQVNPLINLAAGGISGAVSKTLTAPLEKVKLAIQNQDSDPRVISGEMKRYTGMGDAF  
KRHISELGPSSLWRGNFANCIRYVPTAAFNLAFKDTIKRMFPKYDKNTEFSKFAAAQVAS  
GSAAGGATNTIVYPLIYVRTVLGADLGKEKKNYGMWDCLKKT VKGNGFTSLYNGIGPSTV  
GIVVYRGAQFGLQDILKAFNPYQKDFTAIGLASKFCVAQVAVATSGVVAYPFD TMQRR LQ  
IEASKPKGEQMYTGMADCFGKILKTEGPGGFFKGALANVLRGTGAALV LVIYDEI INAVS  
K

>comp3675\_c0\_seq1; 314 526 1644 LEN=1887; translated  
MGDREDKLP LPKG WIRTF SNSQKRYYYSHSETKHTQWHFPTASEANDP WMAKRRAE TNRS  
SQQQQPAKKKQRT EKGA AVASLSDVDALLDVADTT SVAIIVPFRDLHKEQKRSEHLSKFI  
PHMIRFLGNLKT TERRISDYHVYIVEQSD DGRKFNRGKLLNIGFDIARKHKGRNGQKHDV  
FIFHDVDLLPSKQLNEAYS KFPTVPHHIARCWD RYSNNPKYFGGIVSFSSSDYKRINGYP  
NTFWGWGGEDELQLRCNALGIKWDFPRLSSSASSSSTPPITDLEGMTLKEK LKFLKSHR  
EWKCMVKEALEEHEKNWKTNGLADLQYKVLKTTPLDSK DASKAKATKITVDVKLNPNNH  
WANDKCGVEYMG

>comp3675\_c0\_seq2; 191 526 1792 LEN=2035; translated  
MGDREDKLP LPKG WIRTF SNSQKRYYYSHSETKHTQWHFPTASEANDP WMAKRRAE TNRS  
SQQQQPAKKKQRT EKGA AVASLSDVDALLDVADTT SVAIIVPFRDLHKEQKRSEHLSKFI  
PHMIRFLGNLKT TERRISDYHVYIVEQSD DGRKFNRGKLLNIGFDIARKHKGRNGQKHDV  
FIFHDVDLLPSKQLNEAYS KFPTVPHHIARCWD RYSNNPKYFGGIVSFSSSDYKALTAIR  
TPSGDGEYXLIGPYVAFNTALWFRMDPLVIGIETD SHPFLFMRIFPCHTKQRG GEDD  
ELQLRCNALGIKWDFPRLSSSASSSSTPPITDLEGMTLKEK LKFLKSHREWKC MVKWEAL  
EEHEKNWKTNGLADLQYKVLKTTPLDSK DASKAKATKITVDVKLNPNNHWANDKCGVEYMG

>comp3678\_c0\_seq1; 395 1 1500 LEN=1800; translated  
LKSRVVLVTIQAIDCSKPHLEICQLTLQITVRQTQQVNCDSNXAKGLVDFIDLVLSTTQY  
PTIDKMSSIGGTSRKTFRLLSFALVVTLVFLFLEGEASSAVDSKRNN DGINVPRFEVYDL  
PAIQWACEPFLEAHERFHLNPMKEKTRDLCLKLRGGKLGDAANDVVVLEESTE GAAENTN  
RSM DVSSITVLEDEENEVEVDV EEDLSSPSSPTTGELPMNGSRPKPTTIENEH LDSADD  
EHPVPSQESISEPSASPTDYTF SVFQKGDGHETDPDGIPTRYLNMQGGRRDLAKTALMNT  
VKWREENDVDTILARPHPKYDVSKAVFPHYFCGRDDTQH VILLQRPGLMNVKLAHKNGLT  
GEELLFHYIYVMEYLWRIIDPEPDATMTSII DLTELNMSILRKREQLRIGSLFLSTMDAH  
FPQRSHRTFLINAPRWF GALYKIASPLLESTKEKIMILSQGKEQDAVLRD LLDLDCPIPD

GEKLENV PAGIMEEELAIL

>comp3678\_c0\_seq2; 435 1 1553 LEN=1628; translated  
LKSRVVLVTIQ AIDCSKPHLEICQLTLQITVRQTQQVNCDSNXAKGLVDFIDLVLSTTQY  
PTIDKMSSIGGTSRKTFRLLSFALVVTLVFLFLEGEASSAVDSKRNNNGINVPFRFEVYDL  
PAIQWACEPFLEAHERFHNLNPMKEKTRDLCLKLRGGKLGDAANDVVVLEESTEGAAENTN  
RSM DVSSITVLEDEENEVEVDDVEEDLSSPSSPTTGELPMNGSRPKPTTIENEHLDSADD  
EHPVPSQESISEPSASPTDYTFVSVFQKGDGHETDPDGIPTRYLNMQGGRRDLAKTALMNT  
VKWREENDVDTILARPHPKYDVSKAVFPHYFCGRDDTQH VILLQRPGLMNVKLAHKNGLT  
GEELLFHYIYVMEYLWRIIDPEPDATMTSII DLTELNMSILRKREQLRIGSLFLSTMDAH  
FPQRSHRTFLINAPRWFGALYKIASPLRESTKEKIMILSQGKEQDAVLRDLRDCPIPD  
GEKLENV PAGIMEEELRNFCMARLEEAGAEMQVVEEV

>comp3680\_c0\_seq1; 357 1 1636 LEN=1848; translated  
XDSSIRSNGVAATAAVATPLALWVSSAALALLLSLPGCWADPSSRGKNSVHTHDAAYAR  
LGVRPPDEHNRVLGRGGVLELPIARWSRIHGRILPLLHLFEGGRDRRPPDFVFNLRVLW  
CKLLSSLDPEPAYEGRRSLPGKGSVWGGNSGDATDAVLFATYRMLPPCSIRWPLRYL  
GLWRFFPRWMHANI ELRTAYLKGALRRVLAPSGASTTGPDRCVVLGGGYDPRGAVLSA  
GKGIERYVELDLPAVVD SKRRLLSRAGFCVEGEDAGGSGRARNVSGTTPRGVRLEGVDLN  
DDEAVDRVLDKIRRELADDPSSDPASGKPGVWRVVVSEAVL MYLLPGKARRVLEGLAER  
FRGSDSESGFASAFVADRLVPRRNTALDAAPTGSVVAADSTAPSAGASSDAAVIDPR  
GTEESEVRQWLETSGWELRELLFKPGXYQTPGHNCGMTHVIGVEAHAHTNRIDPAPLRI  
DGAVLHHCVGFGTNER TNGNQSM TDGASFLPLSMGCRDGF FRGPIGRRDYGAVLGPACVE  
CPASD

>comp3686\_c0\_seq1; 190 444 872 LEN=1295; translated  
MNTTGNILQWTALLRGPSTPYSGGVFLAIDCGADYPLAPPSITFVTRVFHPNVHFRT  
GDVCLDILKKEWSPA WGVQAACRAILALLSDPDADSP LNC DAGNMIRGGDMLAYNTTARM  
FTVENAMFLAWPSTATTTDKEG

>comp3686\_c0\_seq2; 216 10 685 LEN=1108; translated  
MSNTPIEEYGEQSWDQSKAKDNSVQNEQKYTGVTGNTT SERQDKAIRIKPITMSLNLA  
AKRLRKELO NLKRTKEPDPDIYLPDGNILQWTALLRGPSTPYSGGVFLAIDCGADY  
PLAPPSITFVTRVFHPNVHFRTGDVCLDILKKEWSPA WGVQAACRAILALLSDPDADSP  
LNC DAGNMIRGGDMLAYNTTARMFTVENAMFLAWPSTATTTDKEG

>comp3687\_c0\_seq1; 304 287 811 LEN=1610; translated  
MGKGP NKRNKTTKRKGKCYQSTDDGEEQPPSIGRRCQKSNKRRDNNQQQKNGNYNRGDN  
DYDTDDCKLRKTLNADGLEIVEM SADGNCLFRSLSDQLFGDYGKMHYDVRAVVCDFMEQ  
NKADFQVFLVFEDEDEDQCEEDARDFDHYVGNMREQQWGGNLEVVAARLYR

>comp3687\_c0\_seq2; 454 287 1324 LEN=1479; translated  
MGKGP NKRNKTTKRKGKCYQSTDDGEEQPPSIGRRCQKSNKRRDNNQQQKNGNYNRGDN  
DYDTDDCKLRKTLNADGLEIVEM SADGNCLFRSLSDQLFGDYGKMHYDVRAVVCDFMEQ  
NKADFQVFLVFEDEDEDQCEEDARDFDHYVGNMREQQWGGNLEVVAARLYRRSITVY  
SETMAAFTIDHGESKSMGPDLLVSYHDNDHYN SVRNKLHPPKLV RNGLPMNDILSNKIH  
TKNTNIYETTHQGSHEIECITTSFSALPLSDKREETE KNTIKNVKRNAPCPCGSGRLRYK  
KCCLARQKHATRVERLRVKRQDEEESLPAETEEERSHGMFRVVAI

>comp3691\_c0\_seq1; 222 816 1133 LEN=1491; translated  
MADVFGSEYVSLHVRKSNRAAFHLYSVTLQYEVNDVEKGYADGEDAYDMRCYFKQRSTP  
ANEESSAAVGGTNESSSTEETDGPPTRAMHQLQVSDAAAPVAAGM

>comp3691\_c0\_seq2; 222 555 872 LEN=1230; translated  
MADVFGSEYVSLHVRKSNRAAFHLYSVTLQYEVNDVEKGYADGEDAYDMRCYFKQRSTP  
ANEESSAAVGGTNESSSTEETDGPPTRAMHQLQVSDAAAPVAAGM

>comp3694\_c0\_seq2; 265 145 1067 LEN=1107; minus strand; translated  
MVTQNSDRILSGSSDHPVGLSFAVGGAVGRSSLLCSAGACAYVCKQTKKERRPMGFVDS  
WVELSRVESSRVEPNGTEPMNGGDPSSSPPLVFLLP SGLLPPLPVFPEAGVQLVPDLL  
AALLLELAVDDPALPPLVVLKGLHPVLLGRLLSRGRVPEVDLHDP RVSEAVGLVVGTTVA  
LSRGPALRPPVRRGGIVGEGLSAAGK GKAPLGP EGGDPAPLEALGGGKRCGGVARIAEA  
VLLVAGPPLLQDGPAPFAAFRLSTEGGFRGGRGGSGCVRNHGDGLGWDGSASGGSGTGDG  
ARRLFDR

>comp3698\_c0\_seq1; 799 57 2318 LEN=2361; translated  
MAVGRDADDMIASLMKEMQONQGYHSEQTLTRDEDVNAHDGKETGQQNNSKFTPTPRR  
RLLPELPEYDPNFAQAGSQSIWNPM AEGKCGSPGRNASDRAQISIVPLMVPTNPRIEVIR  
RRVFEKFRQETHLLQEFQTKNLSFSSRSSASGGSFSKNKSKLP IPSMIDKWHMDAKLEE  
RNILFQNM AASSLS SSSSSSKPSNTSLPSAASTTEILREIATRKKHGIHVYDPILLNQHS

PSIFIETILKQVRKMWQSSNERVESNNNSEFPKFKKAQQVQKALFRLVCQARESFET  
QLLQDVRQESIRSTTAKKSRRSNNRIPKLSRSPPTDGDSSPSLVRVAFSGVTLKHP  
AYLEKLQRLYDRTKERRLKLHSPDNFCAADAMHHNLSFEEALFCLLCRYDMIQAGLQA  
GVPGSIMDVLLERFDCRMECFASPLNCRYDCFASAFVDVDAAFGSKGSFFELPLSDND  
GDGNDTEDDSSLSSRDGGICYEANPPFCEGLIQKLSETIDDLVSPQRARNHRRPIMFVVF  
VPAWRESGCYQALLANERLEGHLLLEQGDHWYAEQTQHRRRDSFRVASFDTSVLFYQNA  
AKRLWNVKGDVAVLDELAKAFGQDPGNMQENQTILPQGRRTKPATGAGPSTPAVLPI  
ESNVDNPLSTEDRKESISTSQTESSSTRKQKASTKEKKRKNWQQDEGKAQLNLLASL  
GLSSTTKEGTADKSKPATSHKSKRKKKIRKK

>comp3699\_c0\_seq1; 233 141 1409 LEN=1477; translated  
MPSSFIVLRLSVCSLLLVAFCFSKTTHSFVLLQRGTIPTSISIPTATPQFEQRDKIRQGF  
KSSATGRPQRLHTYLEARNASKSPVNNATAFKTIAQPKLIRGEQYKNENSTLPSPEVIA  
AKLGVRPSKEASKGTWQRAWKLHKRLIPLHSTDGCKPPDSSLNLACMWWKALSNDRSS  
PVYDKELSYDLLPSGWRKILRLRRFYRLLHANNVELRTAYLDGRVGEIAAQQQNGGNPKK  
IRLVCMGAGYDTRGVKMIERTTVDRVIELDLPEVVNAKERLFWRLLKRRPWLKEFEC SMP  
TLVPSDFNDLLDVEQKLRALLLGDEPDGPDEKAEWHTIFVFEGVMIYLNQDVPSSLLGLT  
SKILRENNLEGSICFADRLNENVPGGDYDAGVNELKKNWELKDWSPKPLARHMGYASLS  
LQ

>comp3702\_c1\_seq2; 130 100 542 LEN=936; translated  
MGSCMSSNAGVAEGSASAKSSSSKPRAKAKAKQAFPGAGHRLGSSVPEPALDPTKSERRA  
AVLEAAEQRARKQKGGRAKRTQTAKAPSGXAPAGAQQPAPDAVDGLVRLDETRTERNAK  
NETKRTEPQCSARWFEWLVEPPPFL

>comp3704\_c0\_seq1; 389 618 1643 LEN=1643; minus strand; translated  
MLSFSSEQSPLLIKSSKDQGRGLGSVKNKPKKDFQEPTKEKTVVRDKSTTHNKSADNA  
TIYTLAFVVFVQAYLLEGVFPYAGFLTMRLLSCKNNGYENDSSCSTKHAIDEENVGKYAG  
FVACCFMVGRTVTAVAWGKIADTYGRVFLKVSLSVASAITSIGFGFAKTYWEALLWRFLM  
GFANGITGTIKCLLSEIRASSGSQTKETKTMAIVYGMRYGFLICPGITGYLSDPIKQYP  
STMASVMRPIKSLLRAYPFVLPNILACGLCILACLLVKNHVDETLPNEKCEPFPSFFTAA  
QGILCRYLPGCNDNTTGSCHKDSVQRELHGTILPDTDKMSGGN

>comp3706\_c0\_seq1; 320 1 1045 LEN=1540; translated  
XEDVFLANGASAAISHLLTALVSDPACGIMIPTPQYPIYSATIDLLGRRVGYLLDERNK  
WNLNLEELERSLKEAREQGTNVVGFVLINPGNPTGAVLSREAVRDVVRFCRHNLVLLAD  
EVYQENVYDEDAEFYSCKRAAYDVGFLGSEPGTEAIELASFHSTSKGVFGECCRRGGYME  
LTGFDQTIKDQLYKLASASLCSGLNGQCM TALMCRGPPSPGDESYESHEAEKTAIFESLKK  
RARIVEEGLDAIPGFSCQPAQGS MYCFPSVELPQGAIDRAREEGKTPDTLYALSLLERTG  
ICVVPASGFGQEAGRYGFRTTFLPPEDDMARSVEAMKVHHQEF CERY S

>comp3706\_c0\_seq2; 356 99 1058 LEN=1553; translated  
MIPTPQYPIYSATIDLLGRRVGYLLDERNKWNLNLEELERSLKEAREQGTNVVGFVLIN  
PGNPTGAVLSREAVRDVVRFCRHNLVLLADEVYQENVYDEDAEFYSCKRAAYDVGFLGS  
EPGTEAIELASFHSTSKGVFGECCRRGGYME LTGFDQTIKDQLYKLASASLCSGLNGQCM  
TALMCRGPPSPGDESYESHEAEKTAIFESLKKRARIVEEGLDAIPGFSCQPAQGS MYCFPS  
VELPQGAIDRAREEGKTPDTLYALSLLERTGICVVPASGFGQEAGRYGFRTTFLPPEDDM  
ARSVEAMKVHHQEF CERY S

>comp3708\_c0\_seq1; 334 1 1261 LEN=1691; translated  
XLLKYIVHALQSRES DGTGEARVGCAPTGVA AVIVGGSTLHSFFGIGLGKGS PSSI LQK  
VRKNSSAMDRIDDTDLI IDECSMMSELLETLD MVSRRIRNGGVFRDEPF GGMQVIAFG  
DFFQLPPVYRNDGTDWTRPFCFESPVEDLGLSENVVELREVQRQEHGDFVDLLNKVR  
IGKVTEQDI RELNRQCLIGPNNPIPTDGILPTRLYVLN KDVDSENI NRLAELKGREIVCK  
ASDNWRQSMPLGTPAATKKMKESIAMEIPDEVRLKIGA QVMLTRNKDLQRNLVNGSRGV  
VERIVKGPEGNPVPIVRFD SGLVTKVPPVESERFNP DGGPGCLVRKQIPLKLAWAITIHK  
SQGSTLTRASLDISSAF EYGCYVALSRVKSLEGLWLEK PASLRHIKVSPQVVDAFGGLE

>comp3710\_c0\_seq1; 241 1 1222 LEN=1774; translated  
ILREGTEGLVNYSLFLDEDVPKSESPLSVLIEKRIDMLNCSIVGPELGRGFVMLLTL S FV  
SHSPRIHLLQSFFHVSEDDITEELFRIDLPAPTKSESNPERAHNGPGLDSEIAMILLYLA  
SNPKWIQGDVLELSCDGTGASGVVGLLSCVASKLTSMPDELKAFKRERKEVEDEVLSL  
HSGQKRRENFSVFPQGVHRLT L SDESPEFLHGAQEMIQRHFRSSASPPDVSIEQVEWSQ  
QGPRRRYNREYRTVVGSDLDIPFNAKELSKAVANMLLPSNVLAAANMKEERPGVDPTVP  
PTFVHLC PDYRDESRYLRQFLEKGHLM TVRTNYVRMERLQFYFQALPQGSPEIDL D LLDG  
LEVQQDTSRDYQSMTAIHHPDYAGDGLGEYFFPLETGAYEGGLSPL

>comp3710\_c0\_seq2; 291 1 1210 LEN=1762; translated

XDDDEETTERAPEDYTGKTIYQRTFYRLSSDSQVQLPNALMIEERLRFLPDPEDEYMLP  
LGPRTLILREGTEEDDITEELFRIDLPAPTKSESNPERAHNGPGSLDSEIAMIYLASNP  
KWIQGDVLELSCDGTGASGVVGLLSCVASKLTSMPDELKAFKREKEVEDEVLSLHSG  
QKRRENFSVFPQGVHRLTSLDESPEFLHGAQEMIQRHFRSSASPPDVSIEQVEWSQQGP  
RRRYNREYRTVVGSDDLIPFPNAKELSKAVANMLLPSNVLAAANMKEERPGVDPTVPPTF  
VHLCPDYRDESRYLRFLEKGHMLTVRVTNYVRMERLQFYFQALPQGSPEIDLDDLDGLEV  
QQDTSRDYQSMATAIHHPDYAGDGLGEYFFPLETGAYEGGLSPL  
>comp3715\_c0\_seq1; 253 134 1059 LEN=1059; translated  
MGLLLLRIIVTTLVAVTALRFLGRPPWDPFDGSGGAYIRIRNKGGKMSHSMHRVSVYLDV  
GTAWNTTASTRTTTLVPPRAWRYLQQEEDDLASIVVPASDNNETKPTTMPVTTTTLAPT  
SSESESLVPPVDNDQNVTSDDDISDNIQSATPSSTPTITESGPDNTNGNETSTLPSMVPT  
TVRTPPPAGVPTIIAEPFTSTANPTVVTALIPPETIAPVPEVPSVGTKEPSTSAPSP  
AVEAPPVASPIPYDVADKRAHNIYNIGAVVSRPTLTSVGGGETPTYSDGNTLGNERRKV  
DESPKLGIX  
>comp3718\_c0\_seq1; 426 46 954 LEN=1028; translated  
MTRQSVKGGYCDWPDTGGCALTKLECDPANFRSVRQMGGAPVRAHGGSCRWQESIKKTV  
LGRCTTGDDGVPTQCASEVEACPETDATRGFLGEIPECTVETTSFGRCDYGMCAWSHKHC  
VEDNTWDAFDEGCTCDKVQVGACTRFVDGERESFCVASEDACDDEQTLWAPHGVKQASGF  
DCYLCREKAPPSTAMVTDENDGFEAIAVESDFGKAPGRNSAETTTIIVMAVLGVVISLLI  
VGVVWKTFFQARRAIKRSNDGVFSKEEAPPATDIEISKNTGNAGEFGPSTMDDEASVLS  
DD  
>comp3720\_c0\_seq1; 373 1 1347 LEN=3036; translated  
TQSKKFVLELNHSNQLIQTIMDPTVQEEETGLPIAHDNTSRGIRCVPEYKHALGVLLLT  
AVEFFPFENVLCSIAALFYCLFFGVVALDENGKVVGYFLGQSPLTIGLSRKKVGI  
TVVCVSSKHQKKGIAKTLGKHVMEGKCEEFSPEDFDEIILQDQDTWNSPSWLFSDRNGFRYSPT  
HDLIRRFGLVGYVQIILTGNHTLPCQFVKRYAKTEEEHAEADAFETQKGI  
IACLISGILPSVYWICFWIMSCDNGVKAKFAGWVFLAVYFLLAVRFALAHLLAQERVV  
FREYDNWWAPIGLFWPIATFVGIPLLGWTGGFYIGVPGINYLHDKYKTALAQM  
YLPINLFTLVLFFFHQLARIVSPGVLLWAGGLLDVVGAAFFCSITDLAMPTVA  
FPGAMAIRRNWFLFLVGLWVSWCAILVCGILLPNENESSRFDLSIAACASQ  
>comp3720\_c0\_seq2; 373 1 1347 LEN=2895; translated  
TQSKKFVLELNHSNQLIQTIMDPTVQEEETGLPIAHDNTSRGIRCVPEYKHALGVLLLT  
AVEFFPFENVLCSIAALFYCLFFGVVALDENGKVVGYFLGQSPLTIGLSRKKVGI  
TVVCVSSKHQKKGIAKTLGKHVMEGKCEEFSPEDFDEIILQDQDTWNSPSWLFSDRNGFRYSPT  
HDLIRRFGLVGYVQIILTGNHTLPCQFVKRYAKTEEEHAEADAFETQKGI  
IACLISGILPSVYWICFWIMSCDNGVKAKFAGWVFLAVYFLLAVRFALAHLLAQERVV  
FREYDNWWAPIGLFWPIATFVGIPLLGWTGGFYIGVPGINYLHDKYKTALAQM  
YLPINLFTLVLFFFHQLARIVSPGVLLWAGGLLDVVGAAFFCSITDLAMPTVA  
FPGAMAIRRNWFLFLVGLWVSWCAILVCGILLPNENESSRFDLSIAACASQ  
>comp3724\_c0\_seq1; 320 219 1067 LEN=1541; translated  
MGDAISSLLFQPPPPTYLHPSRHFVLTNTVTSRIPAFYIERPNAQVTILFSHGNAEDLGM  
IYDWFNDLARVLRVNMAYDYTGYGKSNNGSPSEENCYADIESAYQYLLEVRGLQPEQIVL  
YGRSLGSGPSCYLASKTANEGQSIGGVILQSPLLSAYRVAFDFRFTMAGDKFPNIDKAPS  
IQCPVFIHVGTQDEVVPPFWHGEDLFMALPQQWRAPFWVEGAGHNNIEALLRPTGAFV  
DKVVEFLDLHIGARRGRVAKPIPVPECVPLAIREMNAARDGISA  
>comp3726\_c0\_seq2; 714 231 2167 LEN=2167; minus strand; translated  
MKIRCLLPFLAVVGEILVVTAVLSDYAIGDSNINVESLDDRIFHFQDKVSPNISFAVSESG  
FPASVSDWFSVFSNFATLSIRRTIEIDXMITVFLVLLIAWYAATYFSTVSRYLKPEKKKK  
SKAAKSKVKKNKSSKSSPAYEVWASDQSNVSGEERLGVKGSFLWVFDTDGIQQLSGK  
EKATPLPCTPTKTGKPCDAFEIFPPELNQVDAGGAPTQKQDKDISGFGRLHGVLDVDPQNK  
YVSANFFTPGGGFIGIIDVETKEAISLFRVTGFSTKAERSVHMTLWSTDGSALLSANLHG  
KAIERINIGRSDGKITSAEFDKSASIGLGIGNTIEEASVFEGVNAYGRQLLGSVVGQY  
SDAGMGDLTPNGYCKQDGTSSALPPTGRNTNNVPCIPSTENNLYTSLGGGGLLVMDLK  
TTPISIVGEYGGKIFNGAGCGGTQVDQOMFLNAGISAAAAGSDQSTFTVYSMDDTAYSHG  
QNVADDPPPPTIVYKDNNTNTIGNVDGVDTPNNTGQIPGVTTTRRDSHGIVSTLNKKFVHQ  
FDRIQNVVEVFDTKTYERFSYDLTSSKNGQLGRPNAPPEEAGPCLANSVTDDVNLVLDN  
PSPDVLERSPDGKFIIVGFRGPAPVSVGHSAQGSCPGVGVVEITEGGKX  
>comp3727\_c0\_seq1; 31 1 163 LEN=373; minus strand; translated  
XSGVPSGVPPGEGWALANKDGAELSPATDGAMLKDGAMLKGLSVCGPPNVVGS  
>comp3732\_c0\_seq1; 202 971 1506 LEN=1506; minus strand; translated

MGQNTATVEALAKAWTPRLLKLETNSSGNSLDHEQSQHWRACLA AVQRTLPLFQTTGSQN  
GGASAASVPFVCRYRADLIHPLATQQVHELQSMVAKHEALQSLR TKLVEHFPCNSSSNNN  
EMRNRILTSTSR AELDDLYAPFKPPAKGSILERITSEHPKLVETIDELWNAKDEPDDKR  
>comp3737\_c0\_seq1; 227 481 1268 LEN=1268; minus strand; translated  
MGRALVLWACCFCCPRADAFPTARRAGVGRPRALAQRHAEARPGGGTAGGRGAGDANANA  
SADADPDDNADAPRTHRIEFVSPLLDYGYPPAARDLEARQAGGTNERHEKPI LLYLPGFD  
GTYVCPFLQFPELGT EFEVWCMTIGMEDRSTYDELKSVVLDVLR TDLAAGHRAAEAVPAG  
ASSESRSEGESETEEAVPGERAPAAGGSGRFSGLFGGNGR KAGAKTTGRPVYLAGESFGG  
ILASDVARTLLEEQNAPGGAGGA  
>comp3742\_c0\_seq1; 503 275 1990 LEN=2110; translated  
MQSLKMNSNTYKTTLLD LLI V GAGPVGLTAAL EARRLGLSARI IDRKKKRSSHDSRALVV  
HPRVMELLEPIQDGAVTEKIENAAFNLEGIKIYLEK WYHMNDSDDCFDCLNANVKRTIW  
GDTNYP SLYFLPQYETERILEETLNACGGQVDYGV SLENLSQEGNLVTSILRNSNGD TTE  
IVTSTWVLGADGGRSKTRDLVGIKMNRLQSDLYFVVADLV LKGDLP LEDQLSGRGGHVFP  
TGKGLIALLPLPTRNSYRFV GKAPVGVTSADQIELNATFF EELLFDRTGRKFHV ELGKWQ  
NIFHVTHGASDSYRNRNVMLAGDASHVHSP IGGQGMNLGIQDANNLLWKLAWAKRFLDAV  
SNEEEEDETTSTVDTILESYHSE RHALGQNVIRSVEMATKLMNAKSRFVQFLRGVLMRIG  
LRSTRANHNFRKVGQLE TAYAPSSSSII F DGNM KKPCIVSPGQ RVPNIRLEDG SNLHSHI  
DRVQHTWVFLNPHE SLSSRSPNVIGTKV VFLVPAKSEEQVSVPKITEKALTAQQILLVRP  
DQFVAGVGR TQEEMLNQLRKVGINEKAIAM  
>comp3742\_c0\_seq2; 511 363 2077 LEN=2197; translated  
MSSPSWHSKLRFCSDTTPPFLV FSELDXTAALEARRLGLSARI IDRKKKRSSHDSRALVV  
HPRVMELLEPIQDGAVTEKIENAAFNLEGIKIYLEK WYHMNDSDDCFDCLNANVKRTIW  
GDTNYP SLYFLPQYETERILEETLNACGGQVDYGV SLENLSQEGNLVTSILRNSNGD TTE  
IVTSTWVLGADGGRSKTRDLVGIKMNRLQSDLYFVVADLV LKGDLP LEDQLSGRGGHVFP  
TGKGLIALLPLPTRNSYRFV GKAPVGVTSADQIELNATFF EELLFDRTGRKFHV ELGKWQ  
NIFHVTHGASDSYRNRNVMLAGDASHVHSP IGGQGMNLGIQDANNLLWKLAWAKRFLDAV  
SNEEEEDETTSTVDTILESYHSE RHALGQNVIRSVEMATKLMNAKSRFVQFLRGVLMRIG  
LRSTRANHNFRKVGQLE TAYAPSSSSII F DGNM KKPCIVSPGQ RVPNIRLEDG SNLHSHI  
DRVQHTWVFLNPHE SLSSRSPNVIGTKV VFLVPAKSEEQVSVPKITEKALTAQQILLVRP  
DQFVAGVGR TQEEMLNQLRKVGINEKAIAM  
>comp3744\_c0\_seq1; 565 150 1157 LEN=1186; translated  
MAPAETDAAPNTEEDPPMFSK WREFNINDEARDGDGGAGGENEEDTAGLFCMFDEEEDVY  
EDVRYDYP SFFAEGDGASTTTVTIRH HGAYPNSTGLAVWRGA EFLARFLCDAQQEADRK  
AGREEDGGSGIGVA AVRGK KVL E VGAGAGLPS IVAHSVLGAGRVLVTDGDFDALNMKHN  
VDANRSTNSISNNNNNTIACLQLI WGTTHAEP ILETHGKQDVLMADCVYMVPSLKPLWE  
TIDLLD TDG VVYAQTAASAVPWEDFRAALDRHGFETIHRVAGTAALSPYEAADRGS ES  
GSENE NENEVNNPGASKEEE EYERGIYVFRRRP  
>comp3746\_c0\_seq1; 124 201 579 LEN=1436; translated  
MSVTIHTTNGDLKCEIFCDTCPR TAFNFLALAA SGRYNGTIFHRNIRGFMMQGGDTAHVT  
GKKSSIWGN DVTFPDEFHFPNNKHDRRGRLSMANRGPDTNKEVFR TTDQELQVYGFICDAI  
DALFI  
>comp3746\_c0\_seq2; 221 201 758 LEN=1133; translated  
MSVTIHTTNGDLKCEIFCDTCPR TAFNFLALAA SGRYNGTIFHRNIRGFMMQGGDTAHVT  
GKKSSIWGN DVTFPDEFHFPNNKHDRRGRLSMANRGPDTNKSQFFILYEQQPHLDNMHTVF  
GQVLDGWD TLDKWERLPVWGERAQRSQKTTPELPEITGITIHANPLADEGIVYPTPSG  
PPEKK  
>comp3747\_c0\_seq1; 357 1 542 LEN=1187; translated  
XGSAEESPPKNLQEMETTPPALPFDSRASGMVYQARNQQANDNYEDNDNKNHNNGINNVN  
YVNIINNINNNI INNNNSININNDVNNGIKNNTNNGN NNVYNGINGISSNIQH THHG F  
QQMSENSFLATAMAANGPPPPAFMATLAGSVATMLGGGTEGG SLLTAADASAARFP PPR  
W  
>comp3749\_c0\_seq1; 364 271 1516 LEN=1533; translated  
MSTAVSFNNE SLGDDTDDSTASSGISFHSKAAIKHFCDVDVEDSGSVTSSSAERNFRLVD  
GSKNLRLELMGKQVRDLEQQRSKRQRDL PDGGDGSGNP DAGPKRTVVGIGIGWGEVRR  
KNKTHKGKPRKGDALSLALSPGSAEFGKASSGDLSTAMP SRVPERASRVVGF SKERFE  
RSQRPAVEDALAAPKSDSSGSLDPCEELEKKCLELEATGRELSERIDETVLRALAKHL  
AEQLEGHAVFLRQLSVRKETTQPEHRESDGGTDPYRRKLRKLLANAGSTWAF LRKHHGP  
LRAELERVRSRNKGLAVRRHRRQNATAELPGTPGHQRVPVQNGNPRDRGPPPPVPPPDWL  
VPPNVLPAGKETRLVRRRLPERRAPATPNDSMVVAGIVSGPKRTIDHGNNRTHY

>comp3755\_c0\_seq1; 205 168 1558 LEN=1558; translated  
MAMPLSILLLAETLADPHRVFSISSISVATIPTSTIALPTTQAAVASASSLTIQPVNPAE  
YLVESNTRYKFKKARTRDPIGDDDEKMHSLQLIHADLFPDTMEYLKAMDGKPYAIRSTN  
GPNVLYDLLSDTDKGSVVEIARTYAGLECAVALDPIILSPEEISEANKSQFDLHIPELC  
EDKSHICLKLDTSDTSMGGSKFDLEFYLNNGTSGSVAPTNTLETGGSSDPRLKAMASAT  
GCIQEGIKENVKFDLEGHHLVNYDATPGDQSPAQQTYQVVLSLRANVGFLGHGTTLAET  
DGSRQCERRRIRPEVRWKGREKDGFLARLRRCRRHKSRLRNRKLQTLQPAKQMGNKILRPV  
QLRRRAVHPVEQFEFCPRVLLRTPAPPAPICAGDSNEVPHDGHQSSSDGDNTFLVNEKT  
DGGSCSTGPTGTPSSTGRPVTRGHRLPLEKSRDHPVGRKRTRKX  
>comp3763\_c0\_seq1; 674 40 1749 LEN=1837; translated  
MALLCWSSRFVWRWHAQVLMATSLAAILVLSLVSSNADNVGTFDLVGLIADLPTKQFYI  
NGTWVEPAPPSSETFKRFINVVDPSTAETAAKVAIAGPEDVDAAVKAAKEAWLEWSYHTP  
LNERKRYVQKLARIYASKIEEMAQLISTEMGSPIEAARESHAWGGLSNIESSLELIDEF  
FEKPLGDDELTTILYESIGVVMITPWNWPLNQITLKVVPALLVGCTCVLKPSEESPLSA  
LLFAEMVHQAGFPFPGVFNLVNGDGPFTGDSLTKHPDLDMISFTGSTRAGRQVAVNAALGP  
IKTTLELGGKGANIFFADVGDEWMEVVVNGVESVFYNSGQTCNAPTRMLVQQPFYINMAV  
ELATNIAKTNSPVD SAHEDGDEHIGPVVSRNQFERIQEYIQIGIDEGARLVAGGLGRPEH  
LANHPSKKNGYVVRPTVFADCKPSMTIMQEEIFGPVLCIVPFTTEDEALQLANDTPYGLT  
NYVHSRNFNRRRRMGRLLRSGMVEMNDAAGDHGSPFGGVKGSYGREGGIFGFEEFCIIK  
ALTGFIPGEDDLFFDQELETSAGTEEAEL  
>comp3764\_c0\_seq1; 607 357 1493 LEN=1794; translated  
MSSSSETTTTTTTTTSTRYWNREAFASSSSPSSFEEQAPVREARIVSLSFPGDPNNAPLESE  
TSSQLPPGARLLQVGGTLADLDLEALRKEQANVAVFVSPGVTRETLAGLIEGIPSLEWIHC  
RSAGIDVLTSETLSNSPDELVMTNAKGAFSSTLAEYTMLAISYFAKDLPRLLRNKREGNW  
EKYSVLEIRGATLGIVGYGDIGRAAARLAKAYGMRVVALRRNVPAPAEIAADPLCDAVYG  
DGSENLRNRLFGEVDYVLCSLPLTEATHKMIGKDQFDHAKKEGCVFINVGRGPIVDEEALV  
EALKDGRLLKGAGLDVFTKEPLDEDESELWNLDNVLLSPHNMDQTATFMLESTQFFVNEENLP  
RFICGQALLNPVDKAGY  
>comp3764\_c0\_seq2; 551 357 1370 LEN=1940; translated  
MSSSSETTTTTTTTTSTRYWNREAFASSSSPSSFEEQAPVREARIVSLSFPGDPNNAPLESE  
TSSQLPPGARLLQVGGTLADLDLEALRKEQANVAVFVSPGVTRETLAGLIEGIPSLEWIHC  
RSAGIDVLTSETLSNSPDELVMTNAKGAFSSTLAEYTMLAISYFAKDLPRLLRNKREGNW  
EKYSVLEIRGATLGIVGYGDIGRAAARLAKAYGMRVVALRRNVPAPAEIAADPLCDAVYG  
DGSENLRNRLFGEVDYVLCSLPLTEATHKMIGKDQFDHAKKEGCVFINVGRGPIVDEEALV  
EALKDGRLLKGAGLDVFTKEPLDEDESELWNLDNVLLSP  
>comp3765\_c0\_seq1; 191 140 740 LEN=740; translated  
MQPCSSVEGSHVTQPLFGGAIACDLPAGWKDLSVDRP IPDNQECFQNSLVDENPIMLVVE  
ILERQEQIGDQDAASFFFNELAERNVDLQTKNDIRFFTLAEPVLATALLGDASVVAGTNT  
VLTCAGYGYQKVAMGRDYDNAGNSRRENQEVK CIRVDLCVLRQLQAQETDLLVTISR PVDD  
INLNEASLDSSSAESAILSQX  
>comp3767\_c0\_seq1; 224 607 1459 LEN=1459; minus strand; translated  
MAFLNGNDFAGSIDVVFCSGHRIFEELVSDCKGSAPEVKCSCCTGCCDASGLNCVLHDP  
FSAIDTDRPSPPTPRKSVGAQDASTGATASTSSAAQFAGTSPSQEEPLKELLSAVSERTLL  
EEKHTDQFKAFMWMARMDPSPVDVATTSRHDIMQKYIMVLFYISTGGKNWRHQNSFLTDV  
SLCDWEGLTCNDEHKIVAIDLEDNHLNGTLASELGALGPSLQDLRLGGNALFGSVPSSELG  
VLP SLRTLDTLTDNAGISGTIPPSVSLRSLPNLETLELAGTGIEGX  
>comp3774\_c0\_seq1; 175 1 1433 LEN=1559; translated  
XSKAKAMTMRPLVLI SAFLLFECLLKS AVKSHAFAPHTKSTLAFPKSPRFGTTDCRMVLK  
DEGGDDGVDSIACD TDV I IGGGLVGAATGLALSRRGKSCTIYEQTQSLRKVGAAIGLYP  
NGLSALEHIAPDVAKMVRKNCSPCLVFERRDASTDEVVRSSTSVPHLNETSPVMYAWFLLQ  
QHLVEALPEDCLQLGHSFYQSYKVLDDGRVEVYLLDNGKEVTKTCRLLIGADGIHSRVRQC  
LLGEPPTTNYGKVMYRAVIEKERVDRVLEIPEGSQISWQGT EIGKSFVRETTEGIITV  
TAAALDDSPNGDSRSANATVPHDNFTHKKHLQSLFSGFSPTVGAIIGLLPDTFHRDFLRD  
INVPNETGWCDGQVLLVGD AVHAMTPGMQGANLGLLEDACEVLETIVQKRPLSDFVRAR  
IDRVRAIQERSAENTLQSNAYTRDNASTPFQRRKYSQCFKDDLYRWKPSLTKAPTRE  
>comp3775\_c0\_seq1; 287 103 723 LEN=1413; translated  
MGNKISLEDEMVNLRIVSKQMLRSSKKCEKNEKAALQKLLKAIQQGNHEGARIYQDAIR  
EKNQALNHLRNASRIDACSSRIETAVRMGQVTDGMKGVVKGMDKGLASMDIEKISSLMDK  
FEQQFEDLDVKTQYMEGTMNATTATSTPAEQVDTLIEQVADANNLELGEAFSQAGPVGKK  
TPTVKESTVAKPVADDLEARLANLRN



>comp3775\_c0\_seq2; 198 103 812 LEN=1502; translated  
MGNKISLEDEMVNLRIVSKQMLRSSKKCEKNEKAALQKLLKKEVEAILILQSIMQYFFVNS  
SLMRTAHCMTAIQQGNHEGARIYQDAIREKNQALNHLRMASRIDACSSRIETAVRMGQV  
TDGMKGVVKGMDKGLASMDIEKISSLMDKFEQQFEDLDVKTQYMEGTMNATTATSTPAEQ  
VDTLIEQVADANNLELGEAFSQAGPVGKKTPTVKESTVAKPVADDLEARLANLRN  
>comp3778\_c0\_seq1; 285 1 1343 LEN=1595; translated  
XAAPAGVAESSVARPPSMTPAIEAAAAMKRNGDEANDSSAAVSTPPSIFVSIASFRDSET  
RPTLQALFSRAKHPHRIVVGIVAQLVDGEAYDEAIWESIVRFSQSPEPLAPEPHQIRAMR  
MHARDATGPCYARGLCQSLYRGEDYVLQIDSHMRFRDHWDDYLVRTIVDLRARRLVAAAD  
VNEAAQADKILLTAYPVGYTLNPNVPSETRGTYLVPWKFDNGLMLRQRGRLLRRDPVAAP  
DPTSARVVHRQYLYAGGFNFPGPRVVREVPYDTNGLHHLFFGEEPSMAVRLFTHG YDLF  
APAESACYHLWSRAHRPPPPAGTTDPLRRELDRSLAAVQRQLLGGESPTGTTTTTTHG  
LGTVRTASEFAERLGVDFRRRAFIREGWEWGSLSPGDFVGGTGEDSGEEPRLPNPTPSHG  
GSEWSSLDRTAKDLIGAFRLRGLQDAEE  
>comp3780\_c0\_seq1; 322 1558 2526 LEN=3056; translated  
MVLPEKFAERLSLWPRQQNEGRQQQTKIETTPIDSIRSADVRLVETIEDFPSSAARQHAA  
TYHIGARLILYQSIAYVVGFWMIWLFPTINRQLQYYDITNHLWLVI FQGFFPEPLQGAFNI  
LVYRYTHYARLKQQHPDWTRRELLRNTLRFSFLGPPKDSQSARAVEIAMPFEFDNDGNSN  
LPDEQPRDTSSYGGNNTQIDSIGEFNVSDNNLQCMNSVDFNAKFLDNAYVRNSISSLMGD  
LMVDYADDPSSLNNGNFVEFGNQDLFSVSLPVQSSFPFVTRHGLSRQSLDKSKPDLMKNF  
QVDELEDDDDGNLIPEKNTWDKL  
>comp3780\_c0\_seq2; 420 235 2292 LEN=2822; translated  
MAGPLEFGPKVEIFLSILPLFSGLSLIGSGWIIIEVVTTTRAKIQT VYNRLLLGMSVVNA  
FTSVAYMFSTIPMPVDSTDAVWAHGNTQTCTAQGFFIQLGIIPPIYHVCLSVYYLLILKF  
EVTEYTIASYVEPFMHATGLLFGLTGVASIILDLFNNGTLWCWIAQLPFNCEESFALPE  
GEETTCVRGDNAFIYRFIFFYIPLWLSMILVLAVNVWIYRTVVRKRDQKAKKLHAIHHAKH  
GRPTLGKQVSLSKSHKKT SIFLRSPPKKTGINFTFGQHPASLSTLKN SIDKGEKLHIAT  
SSGPM LVPISGETELEIEEQRETSVRVSSDREGEYETKEHDHIEKDVQSSRSSHGDNR  
IPTMVLPEKFAERLSLWPRQQNEGRQQQTKIETTPIDSIRSADVRLVETIEDFPSSAARQ  
HAATYHIGARLILYQSIAYVVGFWMIWLFPTINRQLQYYDITNHLWLVI FQGFFPEPLQGA  
FNILVYRYTHYARLKQQHPDWTRRELLRNTLRFSFLGPPKDSQSARAVEIAMPFEFDNDG  
NSNLPDEQPRDTSSYGGNNTQIDSIGEFNVSDNNLQCMNSVDFNAKFLDNAYVRNSISSL  
MGDLMVDYADDPSSLNNGNFVEFGNQDLFSVSLPVQSSFPFVTRHGLSRQSLDKSKPDL  
KNFQVDELEDDDDGNLIPEKNTWDKL  
>comp3785\_c0\_seq1; 349 1 1538 LEN=1625; translated  
XSEFTAKGLMIEQKNWLEIYHPWERWSTGQELPHVMVGSRIAPHFSFVMKEGQTPPLP  
ISEPELITLMDKSGIGTDATIATHIATIQRDRYATKDNQRFLPTPLGIALVEGYNSMGY  
QLNKPDLRRETEHECNLVANRQKTKEEIVPLILNKMKD VYLTAAREARKLDQSMARRFQR  
IGAGNDHTEL VQARFSQCGNCQQPMSLQKQERRTGRRRRGGGNNNNNDTPRKL LFCNACQE  
GYILPRKGI PRPKISEGETNNNNNTPVKCPICNFQVVAIARGDGYEGNGYNVCPKCYNDP  
PADHGGGGSGGGGTHPCFSCSH PACALAGGTQGGDIEVFACPF CREKNVPGGKVT LRKN  
SRGYVLS CANYSGRQRC SYTIWLP RASRSIEVPPGEEHVCTRCSTHSPVRKLA FQWKPGG  
VLPHLGRETTACVLC DARFRQDVQINLPQMDRVGTT SRRTASLRPNHHGNRNNHGDRAR  
SATTNAGNNNFVCFRCNQPGHYASACPNANNQ  
>comp3786\_c0\_seq1; 427 321 1826 LEN=2155; translated  
MAPRSRLQRKRDTS CSAQEEISKTRQHSSCAEDLLDDL CRKHMDLPAQDFAMGCGFLHQV  
ALGVPTEEVDRLLSDVPSLVNFRDYDRRTPLHIASSEG HLEICKLLV KRGAKINRSDRWG  
LAPLDDAHRHQHLEVLQFLQKSGGKFGSSSL SINLISACVEGDIDEVGSLL EYGKIDINS  
GDYDCRTP LHI AASEGQAEIV ELLCEKDADVNAKDRWGARPLDAAVFANNAKCISMI EKY  
GGTRGSSATCSFGHDAI LDLIHTY GKIRDGVL SMDWHDVQDMLTGIG EKPTDEVVQK LFE  
VADKDKKGIITTEEF LANHETFLSGRPARIILVVG GPGSGKGLL SERLANECGVVHLSSG  
DLLRDEISQGT E LGKHHEIVQK GELVSSAIMV TLMQKRMKDHPGKRILLDGF PRSQENA  
KDLVTL CGKPELALHLTCDDTVLLERIMKRGESGDRSDDNFQT AIQIRIRTYHKYHNLTID  
FLREENVPIVFLDCSKSPGVVW  
>comp3786\_c0\_seq2; 385 321 1442 LEN=2251; translated  
MAPRSRLQRKRDTS CSAQEEISKTRQHSSCAEDLLDDL CRKHMDLPAQDFAMGCGFLHQV  
ALGVPTEEVDRLLSDVPSLVNFRDYDRRTPLHIASSEG HLEICKLLV KRGAKINRSDRWG  
LAPLDDAHRHQHLEVLQFLQKSGGKFGSSSL SINLISACVEGDIDEVGSLL EYGKIDINS  
GDYDCRTP LHI AASEGQAEIV ELLCEKDADVNAKDRWGARPLDAAVFANNAKCISMI EKY  
GGTRGSSATCSFGHDAI LDLIHTY GKIRDGVL SMDWHDVQDMLTGIG EKPTDEVVQK LFE

VADKDKKGIITTEEFLANHETFLSGRPARIILVVGPGSGKGLLSERLANECGVVHLSSG  
DLLRDEISQGTGR

>comp3799\_c0\_seq1; 640 77 1333 LEN=1551; translated  
MRFLAFSALLVAADNAKLTAFASSVEPATGGSPPEPGSMIDFEAWEALHRGIGSDRGYGS  
ESERSLRKNI FQENIAVVQRHNDADFAGHTSWKMTMNSPFADLTADEFSSLYLMDAQECS  
ATTPPATKAKLVADTLRSDDKALRVDWRTQGIMTPVKDQGCQGCSCWTFSTSGCLEAHTCL  
AWGKDCTQWDGFAEQQLIDCAGDFNNFGCNGGLPSQAYEYLYKYNMGMDYEETYPYKAKDG  
AECLAKDGGKAGGFVSEVYNITSGDEDDLVTIAIAQVGPVSIAYQVSPDFRFYQHGVYDSYN  
ATTQSTMCNNTNMDVNHAVVAVGLGTTADGRHNHNDGDTPTYIYVRNSWGT SWGMEGHFW  
MKRGENLCGVSDCASFPPIVPSKEEMTQIWKEQKKQYFKDKLAKEESKEEDSLRYLRKN

>comp3807\_c0\_seq1; 364 1 789 LEN=917; translated  
HGSPSSSLPSRNRDNI STTNQDMPGTTSSKSGSKRWFPLESNPSLINSYIQKLG YDTSL  
YEFVDVSTEDWALDMIAQPVA AVLMLYPLTEKQTSNTQDDVVATAEMKDKVWF TKQRIG  
NACGTIGLLHALLNAPEPIRIFKKDSWLEKYANDCPI SLDPVAKAERLEEDSKI EEMHDE  
ATSSEANATDRGSVNDEVLT HFIALVCVDNKLYELDGRKEGP IDHGPTSQATLLKDATTV  
VKKFMAKDPTEMRFTITALAPK

>comp3823\_c0\_seq1; 374 257 1855 LEN=1971; translated  
MSLTGEFQEDETERLLSDFSESSFLSATGRWATATPLTFSSSSPSSSYGSIFMNSSRV  
NNSARTVPNGNVSVDEGP INRFRGDARTDFADIEGGSQQHEDEEGSLDTMTT SNTNRAV  
SGDSTGDSSRDVNDGDEQERQQPSEGRDAEPRDGAIGNLTRRLRCLFSTVTWPIVPLGT  
IVSLALLWVLYAASSLDLEKNC SHPLHSYALVSLVLVAYIPNHSLVRSRMFHSRERDGP  
IRPARVRMYDQFFHTICLLYVYTGVTLIQTCQEDIVDRNSIDVPKNELALPNNGPLNACQ  
ATCPNLYQAMSVYVATLELFTFALILPLLFLPCIYWLFLQRATAEADAFARLQDHLQEED  
ALLRNGGVTTGEILDSLETVKMVYRGP GSSAHEITNINDNPVAEGESE PQELWILPRDVG  
LEDTIGTKSTMRECCICMTNFD FEVEGSPSCEIRCNGNDKFEKRKNLKRVNNDAMDEVGH  
EATPTEPSRIVRTRCGHIFHEECLKGWVGGMWSANPNRAGGNNTTGDDSTPDW

>comp3840\_c1\_seq1; 1277 1 2656 LEN=2721; translated  
XASSGGVFGNHEMDISVAGDPNHTVLDRAERLKKQANAKFNKGDIEAARALYSDALACIP  
TTGFYSRQV KALLSELYSNRAVTFYRSKQYQESLDDCDKAIERNPEAEKSYIRKARALVG  
LERQTDASRCLQDAYKLFPTSKKVKEELSKI IDQRDTLGNLSGKGGSSDSVDFNASVGS  
SNFYPPSHTGSKAAQTLSTGREELTYADDIELSDKLRNANAKFNRGDVAGARMLYTEAM  
AVLPNDRENEVVRTCLASLYANRAVTTYRDQEFQSVRDCENAIELDPKGEKPYSRKARA  
LASMQRYYDAIQCLEEGKRQVPGSDKLEELVKIKQEVGDAIGTDSKAGGAENANLGH  
GHAPTVP SATDANDT SNFFVPTVGAAMGSVPEGKSQEFDLPTKIDPEEFERA EK LKKQAN  
AKLNKGDVPGARVLYGEGGLACMPGGEHTPEGRELAANLYANRAVTYFREKQFRET VNC  
NKAVEFDPKHEKSYIRKWRALMALGSFDDAYRCLESALKELPESERLNEELENAKEEKKL  
ITQVNELIEAKDYQKAHDILHNIVKVS DNVALWLSTARVDTFLGLTDSALS RVEKVLGFN  
PKHGELRVRGYATFLSGEMEQQINLLKESLEGDI EDTSNDNASGILQACQIKMNTFHKG  
QARV KRGRSREAVDLFTA IMEDGQEP I PHGAPLYGILLTERAEANLLSDQYEAALADCAE  
AISLQDNLTAWTVKTEVYYALGR LQEARDELAVARKTWGARNETIEDAYKKTDFELRLQ  
KVDNELRFLVGTVESGKPLVDESGILHMNHSQRGNRNGLTASDKSNSNSKSSSKSNSNSM  
VPPSPMKRSSDINGHVNKRAQSRGKQREGFKLSSVLKSVGRQSNQ

>comp3842\_c0\_seq1; 624 244 1770 LEN=1856; translated  
MSVDNITSPVAAAFPNIQWDALGSLRLTAQETALLRMAETNP IDYTLADSRDASMYARVL  
LKL LAEAAAAGAGTGEVSTYIEKCSDERAMRALD VDP LGVVTHYALTKLNEIISTLSKGE  
SGVTVA AVFYVKG D GILVDQWKALLRILNKSGKGDIFAQKSASMSLGKILIASCPSKGP  
SKGRTVSYISAKEPMEALIAWIVS QLKNVAGSLVGLCIPALVVLMEALESRLIFAKASGI  
KYMSRQLLSASKSGSPSDGQQKFGSGSVQQLYALSFCMWILSYELNSSWEIRADFAKEGV  
PVKALCELIAAAPREKVVVRVSLAALNNLATCVDTDDAHPAGQTPHEGKFFLSEMI GNGLM  
KSI SLRDRQFTDPDIVEDIDNIHKL LVANYKEMSRWEVYKNEVENGLHLOWGSTHTEAFF  
KENAKMFEGPDGDFRLLKVLITLLSSKDEEVVAIACYDIGEFVRFYPNGRSITKRLGAKE  
LVMP LIESENVELQRHALQCVSKLMVQNW

>comp3842\_c0\_seq2; 171 244 474 LEN=609; translated  
MSVDNITSPVAAAFPNIQWDALGSLRLTAQETALLRMAETNP IDYTLADSRDASMYARVL  
LKL LAEAAAAGAGTGQ

>comp3847\_c0\_seq1; 397 470 1414 LEN=1984; translated  
MSHKRNSSAEKMDKFI FCGSGDRWISVWKIATDDDVGTPQVITRRLK FVQKLGPHGTW  
VKALVYDDESQLLHSIGCN CIESWNC SRLDSDHLQDDNEDKLLPIFHSIKRTIENC PAVG  
TTLSSDLLCLCLVPPTVDSDEGLSRLLVSGGVDGRIHVWTS DQYV KRKEGNSYVDVRNPL  
HIALAHDRVNAIAFSSAMDVIFTIGNDGVL S LFRV SFGKGFELISRVEIEDSSKETLLR

LTAMEIVVDSREQNECLVAVGTS DGELHFVTTTRIGDDGSLVSQLQDDHVKVAQNSMIYSI  
SCKEEEGTKSAPRVW  
>comp3859\_c0\_seq1; 276 349 1391 LEN=2255; translated  
MSNAVRAFLLLSFVSVIVEPFPVALSPKSSATPEHARLFISRDDSIDAENVRNIDTQAEIG  
SNSSGSEDTKALSGLLDEMFOAKQEMSREKKELELLSSQDADMPVLGNDGVYRIISQSQL  
EK SXEGKLVVKIKCILSTLRQSPYVSLIFLASFRNFKDANSKLVFLKFSSPICAACRML  
KQKFQTLHRSPKFAGVPVVFADIMI SNKKVKDPFRDYVTSQLRVQRVPSIHFYARGNDS  
DANHIY CDDGGGACSWPKIQRQMLAFVGEHYTAPEKVKTTHEMSSSNAAVAEATSPXVNY  
DDNSDFNNGYQKDFQTQTD SRAYSILAYVENKKNVEYDLVFGPRKR  
>comp3859\_c0\_seq2; 340 349 1292 LEN=2156; translated  
MSNAVRAFLLLSFVSVIVEPFPVALSPKSSATPEHARLFISRDDSIDAENVRNIDTQAEIG  
SNSSGSEDTKALSGLLDEMFOAKQEMSREKKELELLSSQDADMPVLGNDGVYRIISQSQL  
ENFKDANSKLVFLKFSSPICAACRMLKQKFQTLHRSPKFAGVPVVFADIMISNKKVKD  
PFRDYVTSQLRVQRVPSIHFYARGNDS DANHIY CDDGGGACSWPKIQRQMLAFVGEHYTA  
PEKVKTTHEMSSSNAAVAEATSPXVNYDDNSDFNNGYQKDFQTQTD SRAYSILAYVENK  
KNVEYDLVFGPRKR  
>comp3862\_c0\_seq1; 315 317 778 LEN=1108; translated  
MTPPP HVKIIISGAASTLLVLGLRNLFPAGAKIPFLPKEHDLQAYFWGTKNPDELVPGQK  
AYSKLSGVNLLVLA AAKLAVLFTHAHKGTFLRQNLFLALGASQVAGSILLVSGEEEEKAK  
AAGASFWTMAAILGGEGVLVLLHDALMRDRPVKP  
>comp3862\_c0\_seq2; 315 197 658 LEN=988; translated  
MTPPP HVKIIISGAASTLLVLGLRNLFPAGAKIPFLPKEHDLQAYFWGTKNPDELVPGQK  
AYSKLSGVNLLVLA AAKLAVLFTHAHKGTFLRQNLFLALGASQVAGSILLVSGEEEEKAK  
AAGASFWTMAAILGGEGVLVLLHDALMRDRPVKP  
>comp3863\_c0\_seq1; 269 1 1442 LEN=1442; minus strand; translated  
XASPENIGQKLCGAHDKIETMVDALGSSTPQKSFPNVISRKGSHIKVAQVENGNREILI  
QVIDKEKT TICAPGFSRLYDHI PDMVSQDSVKNEIIQVEDSGQYVPLEATDEVERSVAAS  
GSSRVHGTIPNVGRESSEHDVALVEYDSRQDNPFEE SNGLPSVVESNLLQQAVNCQSA  
TKD VVATEFDVISTLCTPKFDQESVSEMSFSLV SERAKDCKRLMAPAVASQLDLSSCGSD  
PDHIFAKKSEPEDQNKGCSVETPPTMEKDELKSLVRLVASRDKPPGTTQRERPIYSLPKK  
MPFHRTQERWRKGS PAEKFRKRIRTPSTPNRVETSRSPPFFGRDKEGRLVPTDGSVVGWFI  
SPGRYSSIGSPCRTRCTQSNAIITG SVPFEKISLSKGS HR SRMRNENDSYSSSSSLIGS  
ASPKRSTSANIQTL LHSVAGRSRSPAVSLFSRMPHGSQSAIRKLRNHCDINGKLSGKTL  
R  
>comp3866\_c0\_seq1; 498 63 1856 LEN=2109; translated  
MVVIRTSIIATLLLLLFSGTERLAQGQNNENRGIYLD RFTYKNRNQKNNVKVNGNDHTVI  
DYAPDNWGDISCNEGSKLSECI GYPDKWETGREWGISKNYCKSCPAGENNGCGRHHQSPV  
DLQRGVGLDFNVSSKYYS DIANECIDLHWMKYEDSFCSMDQLENSDAFTIERHALRIAQP  
ISVYDNIANDKDGVL DGVKLECRLEGRGSRFGRIDYSKGFSEWWHL SHIDIHTPSEHYQD  
GVQYDGEIQLQH FYSVPARETQTNVNNEMGTVSVFFMAYEDAAPYRYLDKVICQWRRKEY  
EVRKECGLDPVDSTYPGCFPLNKGRNLRHKTGSEKAESKFKRHPKGFRTIHDVILYNDF  
NKEHPNHTDVHVHMEESNWDPPDDS IDWDSFVAEQSQKLKDEEELYQKMMEFENRTSGNG  
NTTEEALREERYRKLIDYEEIPWFNYWPMIGVQTEYYFRYSGTQTIPPCYGFDFSSSRK  
TNHWRVMKDP IRIHPRQLVELRRLIAERIA PKGDPMKSCRADTA AAKVNIDSSRDPSPDKK  
YVKVDTARPLQSWDRVHYKTFCECKDWVSKW PADRQWCKIQDMNTRFFKKKYNFDAY  
>comp3866\_c0\_seq2; 286 152 1141 LEN=1394; translated  
MGTVSVFFMAYEDAAPYRYLDKVICQWRRKEYEVRKECGLDPVDSTYPGCFPLNKGRNLR  
RKTGSEKAESKFKRHPKGFRTIHDVILYNDFNKEHPNHTDVHVHMEESNWDPPDDS IDW  
DSFVAEQSQKLKDEEELYQKMMEFENRTSGNGNTTEEALREERYRKLIDYEEIPWFNYW  
MIGVQTEYYFRYSGTQTIPPCYGFDFSSSRKGTNHWRVMKDP IRIHPRQLVELRRLIAER  
IAPKGDPMKSCRADTA AAKVNIDSSRDPSPDKKYVKVDTARPLQSWDRVHYKTFCECKDW  
SKW PADRQWCKIQDMNTRFFKKKYNFDAY  
>comp3878\_c0\_seq1; 249 130 419 LEN=419; translated  
MTEESTPAPPAPAVGTNTENPAAAAGGPKKKKEKKVPPGLVIPP KRPKLTKAERRALQEK  
QRAAKAAAQGGKAGGKQLQPTPKHVLAAQQQQQQX  
>comp3886\_c0\_seq2; 1047 628 2589 LEN=2626; translated  
MDQPASTNENVGSGVGVVNDLMRVYENLTQSSTPQARVPDASKALSIA YNTNNGNSN  
SNVPAPAAAPLYPPQPPMGYP IPPPPGYQQQHQIASATTTARAPKNPLHTLSKAPSQA  
HPTSDNNQEGDGPNAASYPQQQQRQGT SAYAPAPMGEAQPGSPPQSGNKDGGSHHSAQ  
PPGEE THHGNHNIVRSSII SNQQQTADASSESDKSGSGGRSRRKRKQQQEGVNSSGGGK

KGTRNKSKKEDGRWSKRFTWPEDLHRDFVSAIFDVGLKHSSPSAIMEHMPKHEQITTE  
IKSHLQKYRLHRVSKKEFISSYEASLRNFQONQSNVSTLVSGSGEVA AHLTSTALGTNK  
NGSSGTVSKEGADHSNGALAVVHSGDRPKNISQPIDDGNDSLMLPQLTEEEKQSPIGAAM  
GYLMGLFFSLKQQLVIQRSLEASGEKAKGNTMFSSSPVAIAPGSTNIIIPAAATATAAAVA  
AGVEFAANGTMQQSQQLSAPVSIKMEENSMMKREMKNQMALQNKMRALKQQELAKYNN  
INNQEAVPDPVMNTAAQHGGSTDPHFSETGGGIDRSSNSMLGVHTVVRVEQKQHQP IGGNN  
SNAVATQSEMAGTDMSSGQAYSNNNDTSM LDAEDFWHTDVVDEQLFEFLMNN  
>comp3889\_c0\_seq1; 640 206 1813 LEN=1970; translated  
MYTNGKALYHCMALTIALWPAANANDSDGWIRHARNLSTRDFMQECDQVLMNAAHIEHHS  
YLM SHFADEVTDLCHMIAPNPDQGSCRSTGFESLNGSLKRAFFRQAVQHAGTANFPVDLV  
ASWGDAGYIISDKSNVEKDALRNDLCSEVYSSIGEDFIDHIPDSKIPIVSSNEPKRMSPP  
VSAQEEPSTFTTVVQVEKEDNVLNMGAIISISCAVAALIVFFYFEARRRKAARVSRSPHG  
NKGIDDDGATRVSTFAGGRNNRFRNFRRLSSSTDGSFGPVEEVKDAINNADWDRVYKL  
ASQLAENDDSLSLPSLDSFNAENRSHLCAEDQERTKTLDLAASGDWTGLAVTAALYAGE  
TSASSHDINCGIDSPSSRRQTLSPSQSQDVEEGCASMEQMVSGLGVALNAGNWSQVSKYA  
NLIKDQKNACNSFDTDTDVISSASVSSAGSNDTEMSKKQTIEKLMRSGKWKGVSIMAN  
MYEMESKQQISSTSVRPYPNSPSHPYTERRSIVRTKELQHEDRVQENIVSFRQDP  
>comp3893\_c0\_seq1; 308 317 736 LEN=928; translated  
MLPSTTTFAFVLLVCAAVLQAEAF'TTTTRKAGCSSALQADRRDFLNAAFSTIAVTSFPLI  
AGAEDLADDLAMPSEEEQRKAEADAAAERLRRKAELQKKNSNP'TDFRDLAKEREKQKNL  
QMSKEERNALCEELGRGC  
>comp3912\_c0\_seq1; 647 228 1886 LEN=2078; translated  
MSQGVYQIDFNAVAAGKRVSSSKRKIRWRFGFANKQALGEGLNGTDCRGEEHVDVTIVWS  
ITSGKRQIMMDGKEVHYSTNRAGVLDHSHWQLKGNHVVKV'TCHAAPPMSAQPGFRQYDLSI  
DGQSF'SMPKVFQIGIKGAVPGQSPGRYRGYQSHTQNFSSDAPLTREQEDAQLHKA IQAS  
INESRQHLGEIPKGNPPPSNNTSDLLGFAGPPAPQPGAYAPPSSDARSVASYSAP'TTYD  
QSFQSPPPPTYPAPAQPSVAQGAIVPAVAPPSYQAPP'PPAAVPTYASPSVPPQYVS  
PPLPPQQAFTSPPHVPPAPASTPVGDVFGHLQAPVNDPFAPKPPPPVDLATAVMSAYHS  
PPTGTATPQTPMNERNEAQSATPQTNGNNGAALSMNSLTIASAAEEKPKSEFERALCNLV  
NIDHIDEPAEGEVKLTMMRKDEK'KKKAVNGKSVKPPICLGIAGSNAPLSQIQKDFASPK  
SQTTEGMNAPPPGVFSPHAAQGGALV'VHGQGPPLQQAQGFVGVGAMLPNGGFQ'NQKNAV  
PGQYMQQR'LYQ  
>comp3918\_c0\_seq1; 289 63 932 LEN=1048; translated  
MVLPAENPRIIALFDVDGTLTVPRGEVKEDMMDVLKELRKKITV'GIVGGSDLPKQQEQ  
GEGIVDEVVWNFSQNGLVAYNNGELLESNSISKHLGEDNIKRIVN'WVMKYLAELDLPVKV  
RNHETPTEKFHLGSDCCPLTITRARSIACLDAIQIFREELLSNSEAAXLNISPIGRNCSR  
EERNDYEVFDLANNIRK'NMVEAMKKEFSDLDMTYSIGGQISFDV'FPTGWDKTYCLQYLKA  
EDFDEIHF'FGDKTFEGGNDFEI'FTSERTIGHTVTSPEDTMAQLNELFLS  
>comp3918\_c0\_seq2; 375 63 818 LEN=934; translated  
MVLPAENPRIIALFDVDGTLTVPRGEVKEDMMDVLKELRKKITV'GIVGGSDLPKQQEQ  
GEGIVDEVVWNFSQNGLVAYNNGELLESNSISKHLGEDNIKRIVN'WVMKYLAELDLPVKR  
GTFV'EFRSGMLNISPIGRNCSREERNDYEVFDLANNIRK'NMVEAMKKEFSDLDMTYSIGG  
QISFDV'FPTGWDKTYCLQYLKAEDFDEIHF'FGDKTFEGGNDFEI'FTSERTIGHTVTSPED  
TMAQLNELFLS  
>comp3922\_c0\_seq1; 882 258 2651 LEN=2786; translated  
MKVPQVALLFVLGVSTTS'AFTPATKAFATQOTSLSYSTKAQEEAIFQSLDRNGALANDIE  
ELMKAPGSSKSKSPKAI'EAELLASGKSDIKNYMKKFEGISGA'AVVYKSLLDHGV'VVNGY  
SGGAVLPLLDQFHPDN'PRHAELGAEP'IRWITNSNESSGHIAEGYAKSYPINGEHK'PVGV  
VVATSGPGV'TNLV'TPIQDGMCDG'VPMVVL'CGQAATTAPADAFQ'SAPAVQIAEPCTK'FSYQ  
IKSAAELPFVMDYAFYV'ADN'GRPGPVFIDLPKDLQ'NQLTSEMIDEYVESKIPDKKHDDA  
MGVASMFTAQRDTGEAFKAI'RLGFEEKLSFEINDQ'NDLVPISSTTDAFNADH'HSNKIF  
WTTNALTGEPNPITKEGDLEVN'AEITDDILKFIKRAK'KPIIAGQGCNDSAEELKEFAEK  
LQIPVCTTLHALGCFDERHDLALN'FVGMHGHPTPNFMVQ'eadLIINVGSRFDDRI'GGRMS  
DFVPGARKAAELGVGGI'IHVDVRLTEKAKQIEPN'FFVHSTGKNFLRTMNKALSQEEDLPV  
ETSEWIERKNELEAKYPI'ITIPKFEPE'ITITMADENGVEKTAIKKPLSAQSVIKVMDQ'ELLK  
ADRIDDAI'FTTGVIHQMVAAQLITWTQ'PRQMLSSGSLGTMGVSLGYCIGAKLANDK'KIC  
ISVDGDG'SFNMTFTELKTVAEQGIPIKILL'LDNESQMMVEYWQ'RLFHNDRKLAVRNK'NPD  
YQTLASAFGIRSMIAE'SEDELEEKMREFLFDY'PDEPVL'FHVRI'RRTPCLPLVAPGQ'PLDD  
MILEDINVEVDQSAAPS  
>comp3925\_c0\_seq1; 213 93 917 LEN=941; translated

MPLDSKTHSTLRGAVLIYVVLVKFLLSSPTIGAFWNGCNLVTHFQSRVKYSDPSHCRMQLCASDSGDDSTSTDDPRISANLVYFDIEVANEP IGR LI FHVSNPSPLPKHAENI IQLAKGARRGIDPKAHYVGCEFDYSPVAVEDGMGRYRWSHQLKGRGRNGIGRADELIADPKSLSE CCHSTFGGQYGDLYTI IDNDPGVLLTVPVVGPGYSSKFSIVRVGESPKWKETLLINS GVIGRLDGSLSLEVLHAMARQRRGPPTVVAAGVLQ

>comp3927\_c0\_seq1; 485 1 1356 LEN=1464; translated  
TGMPYAVGELELALALEDCVSQAILLISRQTSDDGGDEGATAAATAAVKNLGI LTASNRDEWTS NRARLIEAIPGMKAALEKLESGLLLLCIDGEDNGRNAQVDSLSONARSYLMGTQGRWYDK SIQFIVTPSGNLGLNGEHSMMDMGMP SVGLCQYILGQEASPNKRETEPKQKHPTPLFSPKV APIFANQTIKELTNASLDETKSMVQKATADFDKIRSSLDLEVQSFQGYGSTWIKTNAKCPDAYVQMAIQLAIGKLTTSKAFNGNDGSRYVPWATYESTQVRSYRYGRTE TTRSVSEES AKWVGSMLGNNSNAEELKGMFHEATQAHVSYIRNASQGGGVDRHLFGLQMLLAEQEKQNK QAVDLFEDPLFVESKTKWVSTSTLPVNPFGFVVPVDPDGFVAYHIESNRIFFTCTSYKGL APALSHYLEESLVDKEMVLKADNPNDRSKL

>comp3929\_c0\_seq1; 90 1 251 LEN=251; minus strand; translated  
XTNGEELGDPCCTWVAGSSEGANPVPIEAFVPSHPGLASHVPEGPVLDLATFCESEGGSG EAI VADVEVDAAEDEDSSLSVVDX

>comp3931\_c0\_seq1; 309 120 674 LEN=872; translated  
MKLSIPTIFVVALFTKDCDCFTSGKARNSAVFLPAANSEHAENDENGGVVSRRSVAVAAY FYSASASLVAAPMVSAFETSDFSLPTYDTKMSGFGESESYVKKGKIATLGESGDAMMT DPGSDEKEKQAAAMRKAEEARKAALAKKLAERKALEEEAKRRAIEKKARDKERMKKMWSS DFSE

>comp3936\_c0\_seq1; 945 560 3280 LEN=3779; translated  
MAPMMMATSGQSGSVVRATTSRCLKIRTLADVLPTVLQSVVSSGKMSILFFLGGHMLFA LWLPPFWLLSFVSEVGVYITVVC SIFLVGRAIRMI AFPGSSYRISSEIEKEFAKYSVRI ITVSATSLIDLANTIASNDTYEIPSLWKRAKSYRDRVLGVYLEVLHTLTFQDDN NISPNS ASGLNKYGNLYLVDIGNLSGLTAEAMTDGRVLLNHLNDV LGQVNHLEDEAKSFLENGIG NPSESARRIARNIVASATELRDLAESLKPPTTAGSTTALSGDDGNLSVDEVRRRLEEEQ ANASIMDTIRTGLSSILPMLDPPPHASIFGFVLRGCVLSRYRGARQLWVQRPSSGMIDC LYIPAKPTGTPIAGTSGSRKANAVMYCNPAGLIEIAAGMSLAGGNVTSEIDNDDNCWTD FYTQAGFDMYLFNYAGFGRSYGGSFCGMC SRPTDGSYTHGVWDRIKRIFYGLLFSFTPTP DSLRADGVAVGSFILSQMDVDSLVIHGESIGGLAASHTGRKLSENSHHKDRISLLICDRT FCNLEAVAQRLVGGWSGYAIRMLAPLWSTDVVGDFLSAKCPKIVANDAADV IADSSSLK AGISFWKEIKRSASSTNGIGWMDAPLHHRMADWENVCVAGSQYVPQPRITRMTAPVWPA DKHMSLDEAFHFAACAKRIGKVASIEKKRFAAMVSSGILNAEEGVADGCQAPIYLVWKFL GCCEGLCGSALGVTVKSGFDTTVSWLCSMCFVGGQTVVEGMEERHKCADLNELTQVSSD FDCRPPGWEHQESD TVVHPKPIPEVVAALQKIVADNPND EILNSASHEVSYVVGTLNYVT ARLSAKATIEASWKSRLHLTGPMAEGCFMNLHCGHNHQYSAVERARLKAVLQQVTEATS SPFPLV

>comp3936\_c0\_seq2; 885 560 3043 LEN=3889; translated  
MAPMMMATSGQSGSVVRATTSRCLKIRTLADVLPTVLQSVVSSGKMSILFFLGGHMLFA LWLPPFWLLSFVSEVGVYITVVC SIFLVGRAIRMI AFPGSSYRISSEIEKEFAKYSVRI ITVSATSLIDLANTIASNDTYEIPSLWKRAKSYRDRVLGVYLEVLHTLTFQDDN NISPNS ASGLNKYGNLYLVDIGNLSGLTAEAMTDGRVLLNHLNDV LGQVNHLEDEAKSFLENGIG NPSESARRIARNIVASATELRDLAESLKPPTTAGSTTALSGDDGNLSVDEVRRRLEEEQ ANASIMDTIRTGLSSILPMLDPPPHASIFGFVLRGCVLSRYRGARQLWVQRPSSGMIDC LYIPAKPTGTPIAGTSGSRKANAVMYCNPAGLIEIAAGMSLAGGNVTSEIDNDDNCWTD FYTQAGFDMYLFNYAGFGRSYGGSFCGMC SRPTDGSYTHGVWDRIKRIFYGLLFSFTPTP DSLRADGVAVGSFILSQMDVDSLVIHGESIGGLAASHTGRKLSENSHHKDRISLLICDRT FCNLEAVAQRLVGGWSGYAIRMLAPLWSTDVVGDFLSAKCPKIVANDAADV IADSSSLK AGISFWKEIKRSASSTNGIGWMDAPLHHRMADWENVCVAGSQYVPQPRITRMTAPVWPA DKHMSLDEAFHFAACAKRIGKVASIEKKRFAAMVSSGILNAEEGVADGCQAPIYLVWKFL GCCEGLCGSALGVTVKSGFDTTVSWLCSMCFVGGQTVVEGMEERHKCADLNELTQVSSD FDCRPPGWEHQESD TVVHPKPIPEVVAALQKIVADNPND EILNSGEF

>comp3940\_c0\_seq1; 227 324 677 LEN=881; translated  
MVLPVATSASISRLVSHSASGASITDDFENVILNESSRSIDSEQDYKDELAFCRKLACIL TKERELPKLCQGFPAVLQTVNKHAEEQQRRETLHQKQQRNVQANNTASFMPPI SDR

>comp3948\_c0\_seq1; 421 93 1238 LEN=1482; translated  
MMLRNCSRALSRTGPAVAPRSCFSSSSAAKGDGPKVTVKDPAPAEPKTKPKKQQLVAV GGNALQRRGDRLTIENMLKAAAQMAPTLAELAKDNELVLTHGNGPQVGELALERAAATFD

VLGAESMGQIGYVLAQAMQSAGCTAVPILTQVVVDQYSEAFKDPTKFGVPIYGSIEAQAL  
AQSLGWTVKPDGEYFRRVVPSPPPVEILQIDAIKTLLEHSPGILPIACGGGGVPVARVPA  
NPNTLQGV EVIDKDACGAKLANELDADGFIIIFTDGGGIWENFGKPEAREMEQATPEYLR  
GTKAGAKFPGSMGPKVNALIDFVEGSNKP GAWAAVGD LK DAAKIVAGEEGTFVREEVENG  
VQWRAGKSGPARKESKDPPPF

>comp3948\_c0\_seq2; 276 1 958 LEN=1202; translated  
MRSTLCILRRAMASTDPSLFGFLPRRLASLASLPVLTHGNPQV GELALERAAATFDVLG  
AESMGQIGYVLAQAMQSAGCTAVPILTQVVVDQYSEAFKDPTKFGVPIYGSIEAQALAQSL  
LGWTVKPDGEYFRRVVPSPPPVEILQIDAIKTLLEHSPGILPIACGGGGVPVARVPANPN  
TLQGV EVIDKDACGAKLANELDADGFIIIFTDGGGIWENFGKPEAREMEQATPEYLRGTK  
AGAKFPGSMGPKVNALIDFVEGSNKP GAWAAVGD LK DAAKIVAGEEGTFVREEVENG VQW  
RAGKSGPARKESKDPPPF

>comp3951\_c0\_seq1; 372 117 956 LEN=1541; translated  
MAARIAVAASGAARRIGATLDTMGANMEVAKYTERLVPSSRIVSVDGVAPALPGANNFIA  
PSASVIGNVTIGEHSVWYGATVRGDVNNVKIGTKTSIGDRAVVHVAKIQGDHPTVIGDN  
VTIGAGAI VHACTIEDLVVVGE SAQVMDGATVGTNSVVAASIVTAGTKIPSGELWWSGAP  
AKKERALTSEEIAEISESAHDTLELAYLHAVENSKDYKQLVEEEEEDRLDRKLRKNAWFD  
NIPDPDDVLGQGVPGRIFNSTLTNPEEGLKMHAEKAKS

>comp3957\_c0\_seq1; 159 379 798 LEN=1031; translated  
MIIGARPIIIPAAAGLLLLSGILHLSSAFSVQPP LTARDYTTSSTSAIGYTMQMP EFVVTL  
PKSTWYDVANPTARRIVYDDGPTDEFMFASVGS DWPELNDIDMEERDNELPESMPNQPRQ  
PWSRFNPLRRAKNLIRRIL

>comp3957\_c0\_seq2; 164 379 621 LEN=1141; translated  
MIIGARPIIIPAAAGLLLLSGILHLSSAFSVQPP LTARDYTTSSTSAIGYTMQMP EFVVTL  
PKSTWYDVANPTARRIVYDE

>comp3958\_c0\_seq1; 787 68 2869 LEN=3015; translated  
MARSSFHLSLCLVAIIACLSPESARAGLSATAEKNSNQLYHERKESNVEKNFNQLPSIE  
NEVESLFD EVSFYSAFQPSPLVDQTEHNNEIEDVFRRALQFQPTVNAPTFFQGAQGTRNRG  
TSFLGGHLQEVGVFGG V GARRGGV RSGGQPPLQVQDQVRLNGHGPIPKTKGKQVSS LKM  
AKSTKS IKFAKDKHKQFKKDKRYKGEKRDIDHKLTKSGKKDEKFSYDPYDADDDNFPLHD  
DWTFD SWSWEVEEDDYEHHDASAQFKMPDSSTQSSGFGGALGGMRGWQAGTINSDISE  
TMMGRMDLGGFSSISNWK PASEAIGAI PQQTNHMLHQ TDEASQNGVTTAQTNHYGQVTQ  
MGGVSSHTGVTTAHANHNSQPSVQTGEASQSIQATTSQSNHNSQPAQTVGSSQSIGATTA  
QYDYSNQPTQTGGASQSKGATTAPYNHVTKSNQLNFPTIQHMFVSGPIHLKAHSPVDVST  
MDPEIFAILQ SILTPYLQETMGPTLHAYTLEVNYSPGHGKNVKGKDVVETLIEVNCFAFKVI  
SDSVESFKSINH VQASRWIHDFFAGPEIYKLL EALRTDNIPVNDITFVDQAFQVSATVAE  
ANSQMASGRYPVSKNNEKSSNGAFIGITLSVVI VGMIFFLHHTGRLPSKAQVGA FSLTAR  
DSVAKHGATARHSIAKHSK SARKSIAKCI PSSMKRKESRLGKYTDDEVEGGRRRTYSGTF  
RRHPPGGLQKAALQKKPARSEEYLGESASTSSSSAGGAARSCRKSSSFTDMLEQDDYSFS  
NFEGDYEPSICAPSTPSRRTYNGDEASMTDTLGYDSSAHSRSLLDKVSNTV SQAASLLSP  
GNSSYKQDASRSPIPSSAPRRVTAADIASPNADNWSIQSYQTKTPSRRSPSNHPLYRG  
WNDSGPELRMQKSEINDSEESPGRKRLNIPRFT

>comp3968\_c0\_seq1; 353 72 1280 LEN=1545; translated  
MPNPV LVA AVEGGGTSFVVAVAEINMQSNNTQILHRAEIDSSHDDPNRTLEECASF FRNH  
KNISEDGYRALGVAMFGPLGCNAERKEHYGRILPTTPKKS WRGVDILTPLVKACESEGER  
GRKIAVKIDTDVNAPAVAEYLAIKADPTATSNPISSLAYVTIGTG VGVGLVIHGQPIHGK  
MHPEGGHVVPVQPLEGDNFTGYSWGANSKNPFRGKHTVESMTSSVALAERLEQLQGEEGNS  
STNQQLNLR SCLADLKD DDDHEVW SHAANALANLCVTLALVTSVEKIVLGGGVMMNRNGLIE  
KVRQQTRFLLNGYLGDLTDADLSEWITSSSYGSDVGLMGALVLAQQAIAEEAEREKATVV  
PIKCLKQIAYGAGLWHGFGLGLSAAYIGICLWARS GKSSRR

>comp3980\_c0\_seq1; 265 83 796 LEN=924; translated  
MTDQSSEFVTTAFTI PLEGYTTPPSYENESQNPYEYMPARPIGGGFLADATNDGDGSSCK  
RPF SKRLILDLDNKDIPMF PAPERFTGNHINTIDYNRN YNKRLKAKSSAFSNEEIDIFSTT  
SIVRKSLLRMQEAAITLQRLKKERAEANGTPDETRDSSPTGALSLSPLNISDRRSLIFH  
STLQLHPSSSFSSLDSDSGSHCQSEGHTTKLKPRPSQQGVALGREIRRRDSGIARCA

>comp3985\_c0\_seq1; 498 141 923 LEN=1084; translated  
MITRISFRNFLVMLAVFPSSVSSFNPLNTPKSSPSFHIEDGLKAATVDSTNEEDSWNSLT  
RMIHSTIEEKG GDSLSEEAKDEI IKTAVAGSVLGTVVGSPLVVG AALGYAGSQMLQGEKG  
DKAKQVMGQATREVM DRANSAIVFAKQELENEKDL SNVSAKILLAIKDKAGEIKSEAKDS  
PAIMVEK LKQNMNSVESQDFKTLPKRSFGALKALLE SDEVKNVSTSAIDA IKAGLESEE

MKALQNRASKAVKDTLDSKK  
>comp3992\_c0\_seq1; 372 106 1260 LEN=1374; translated  
MARRDDFVIFYLALPIAVCIICFAAELQALTNTKSYTSINRRSSHISIQOTIQHRRFLLGIR  
SKITASATLAGGDNKSEETIRVGDLLSDLPTPTLLIELSLAESALKNTTSLDDALSLLS  
SKSVATGRPDRVSGNNAIDETVCEQLLDGSIFLHTRVTDTSVRDRINREHGSGKSPVIG  
GVDACPDHRVKGAYLGLSNHHVGGYYWARGMGIGASLEAHGVAFRETPTPETETGER  
KNTGSKSSEKLASDVGDDAGRSGGELYWTRRSSDPTKSNSTSGSDAASGALCRGDTTEE  
SSNSNDGKRSEWADFLVPGDTVQLIPYSPVRVLRRESAFQRLVGVRRVGRPLGADPIVERL  
WERETATAEESSNTTGFGLVPL  
>comp3993\_c0\_seq1; 327 291 947 LEN=2499; minus strand; translated  
MSLRVYMQDLILAHTSCNTDDDYEEENSIIKITIVNDNSSSSLSYNYEDESSHKDRGQCDP  
SPSSAESMQIVEICNSFTDPVDECDKSSSGYGLQSSEHRVAQHQNKSLSDAAINNKVM  
LDDFRRRQCFLRAKHPNRTAQANSQALQISPEPLVMEQTTMFVTPSASPTKNSDNVA  
EDEDMGIGVSEDNTFRCRMASLKSSIQEDQESTILPLF  
>comp3998\_c0\_seq1; 429 204 1760 LEN=1870; translated  
MSSSSPTKNFNSPAAASFESQPHSPRSIFENSVVRTTEEDAGVIAEDEVNCQTKSKSLVPKV  
IIPCGHDGYEKSRSSVGEKDIVLGRRYAVXNVEDALKTDWCMILTRNSLISFPLIFPPIV  
VDSQSVQNRSEDNRFRRIIVNLYRDEYISSNSVERATIVSKVIALLEKDSYSFLRSGSLRT  
PFSNRNSSYPSSLCDGYGINEGDSNGGLES GMFMDGQIRQMVSTSF SRLGRRRSRNDSSSE  
FKDAIRQQRQ MIDATLNRTPN TLKNPAPLTKDKVSYLKASTL GANQSIAPQQQDGPQD  
ELVPPLRASRAPAHSETKLAADKVQKVRPFSSAHESCLLQECQPKVPAPRQCGGELREDG  
LLWSSGSR TSLSLLEGMDSTLVPTTSYLLPTIEENVFGTKARAGPNSGCSDDGTGRMEFE  
TIGYTHQKVGELTIVRPILLPGVVGASSPAVKNETNEDRHNRRTRTSHVGN SDAFSTS  
NLLVLSDKVHPDGLDENPHAMDDVNSVVSPTMLFPSQ  
>comp3998\_c0\_seq2; 441 204 1650 LEN=1760; translated  
MSSSSPTKNFNSPAAASFESQPHSPRSIFENSVVRTTEEDAGVIAEDEVNCQTKSKSLVPKV  
IIPCGHDGYEKSRSSVGEKDIVLGRSDSVQNRSEDNRFRRIIVNLYRDEYISSNSVERATI  
VSKVIALLEKDSYSFLRSGSLRTPFSNRNSSYPSSLCDGYGINEGDSNGGLES GMFMDGQ  
IRQMVSTSF SRLGRRRSRNDSSSEFKDAIRQQRQ MIDATLNRTPN TLKNPAPLTKDKV  
YKASTL GANQSIAPQQQDGPQDELVPPLRASRAPAHSETKLAADKVQKVRPFSSAHES  
LLQECQPKVPAPRQCGGELREDG LLWSSGSR TSLSLLEGMDSTLVPTTSYLLPTIEENVF  
GTKARAGPNSGCSDDGTGRMEFETIGYTHQKVGELTIVRPILLPGVVGASSPAVKNET  
NEDRHNRRTRTSHVGN SDAFSTS NLLVLSDKVHPDGLDENPHAMDDVNSVVSPTMLFPS  
Q  
>comp4006\_c0\_seq1; 176 60 248 LEN=866; translated  
MADRYGIVVVLKAKEGKIDELIELGKGHFVRQHDGREPGATCASIIMPLPDEPNTVRFFE  
QV  
>comp4006\_c0\_seq2; 191 60 380 LEN=632; translated  
MADRYGIVVVLKAKEGKIDELIELGKGHFVRQHDGREPGATCASIIMPLPDEPNTVRFFE  
QWIDKESYELHSAPNENLAVFLEAAGPILDGAPIVLS S PMLHYEKK  
>comp4007\_c0\_seq1; 369 166 1002 LEN=1224; translated  
MISKHRTAKPSTNELLVASGMALLVIIASLSDPVA AHRR IESCNHHYRKMYP RHYYYQRS  
DCAFRRQKSLYNSAMNALDELVLAT TNSLSRQSRSRQNTAFSKQRQLRYSVEDFGTKGL  
ELVIDLPGSNARDLAVEILQKDGTDVITVRGNRASHQNKLV TNLGF S QSF EVNSDDIDID  
SITAHFSAGVLRIMPKIEREGTKKPIAII STNEYDDIVPIFVAKRDNRNDP SERKGNRQ  
VVIEKNLEKSGDLKNSEKENYFTRGDNDLFISEEEDVW  
>comp4012\_c0\_seq1; 407 7 753 LEN=974; translated  
MKSFNVALSALMASSAMAFAPSSSTQSSTALNAEMPDRMWDKMVDPTERSASLPWLPRPI  
NLDGSMAGDVGFDPFYLSSIPKNFAGFIQPPSWEETEGIPTLYWMREAELKHGRVAMLA  
FGWVATDGGFGVTLRFPDIIYSVENIPNAYNAHNILVDQGSMAFLLFAVAFVEFCTGAAL  
VQVSKGELEREAGDFSLDPLQFLK GKSDDEVMMKKTRELLNGRLAMLAFSAVATQTALGP  
ETQGFYPF  
>comp4024\_c0\_seq1; 220 1 936 LEN=936; minus strand; translated  
FGSTGANIAMSTGGSMSPSLVRDTGESILDHHHLEDYSCEMGNTSENQNPTEDDLIDPID  
PKPTEDDPKPTEDNIEISSCLSGSTMLEKEMKGLPKSHSSKVKADREDNSMIRVDSKDQ  
YKAIGEHSIDPKIAEVESKKS PSENSEIEAPKKELTSLEKHICNDGRHRSIGGKVDEAASG  
DAKKT HNEKINRGPTRKRKSLAVEKRTESIETLPDTNTKGPKTRRTRNRVSPSDDISAVC  
RDADAVYEKRFMKAI ERGVVSLVMSGVEPKNMACVTSFCTMKSLNNEAVKVNVSSTIDSD  
TTMCMPTASNN  
>comp4040\_c0\_seq1; 193 294 956 LEN=1222; translated

MSSSSSSPPQCGVDYPELVVFDLACFWDQEMYEMPALPSKTVSGILGDSGQEGVTGAYS  
GRNKISMHPGSMVALQEHARGDVYPGMKVCFASSADTPFAEKIGRATLKLLEVLPLGLTVW  
DLVLKDWGDKDVNQIGRQPPLSSNKAQTHFPFIRKLTGIPYDKMLFFDDCNWGDHVMVG  
RGCTEESTSRGVVGHRTPSGLTIKDWYRGLLELYREAQQQ  
>comp4040\_c0\_seq2; 129 294 713 LEN=1542; translated  
MSSSSSSPPQCGVDYPELVVFDLACFWDQEMYEMPALPSKTVSGILGDSGQEGVTGAYS  
GRNKISMHPGSMVALQEHARGDVYPGMKVCFASSADTPFAEKIGRATLKLLEVLPLGLTVW  
DLVLKDWGDKDVNQVRSRN  
>comp4043\_c0\_seq1; 205 116 1410 LEN=1652; translated  
MGRSQREEKKPCCTWPRILVLVVLVLIAGGVCLWKFGPWEDTINDVLDSIPIPGGSDGKIP  
PPNDYIPQTLTPVSGATASPTAAPPDYDFIQCNDSGTTTPSNCCNGLEGLCDLRVNEVM  
YATLHNAMATFENGFLFGPNHKFQLEGALEAGYRGLNLDICNCGGELQFCHGECRIAYFR  
ASCKEFFSSKVGLIDXLIGIIFSGICALGPREIVDVMQSVNTFLDENPTEVIIFIIYQVND  
DVDQEVDLNKFDYDQLLLVDGLVDKLYVHPDIEAPWPTLGEITDPEFNKRIVMFHYGGPNC  
SIDPLACPDGLHLYEYEGSDNDWEHSGMESIRDRVNSCELGLNGFNKRDFVGLNNFVSP  
SQSTAANKANEYSEVLDYVNTCSALLETDINFVLIDFWSVGDLPRTQDHNAALIERRRRQ  
LQREERGLLRAE  
>comp4043\_c0\_seq2; 311 116 1315 LEN=1557; translated  
MGRSQREEKKPCCTWPRILVLVVLVLIAGGVCLWKFGPWEDTINDVLDSIPIPGGSDGKIP  
PPNDYIPQTLTPVSGATASPTAAPPDYDFIQCNDSGTTTPSNCCNGLEGLCDLRVNEVM  
YATLHNAMATFENGFLFGPNHKFQLEGALEAGYRGLNLDICNCGGELQFCHGICALGPRE  
IVDVMQSVNTFLDENPTEVIIFIIYQVNDVDQEVDLNKFDYDQLLLVDGLVDKLYVHPDIE  
APWPTLGEITDPEFNKRIVMFHYGGPNC SIDPLACPDGLHLYEYEGSDNDWEHSGMESIR  
DRVNSCELGLNGFNKRDFVGLNNFVSPPSQSTAANKANEYSEVLDYVNTCSALLETDINFV  
LIDFWSVGDLPRTQDHNAALIERRRRQLQREERGLLRAE  
>comp4044\_c0\_seq1; 747 183 2402 LEN=2580; translated  
MFIIEKNRAKNGRNGSLNRNVRKSNLASLISVAFMAMFLTAVVLWHDGRKTTTPARRNTSN  
RFLTDVDADQPTLDDDNARTATCKRFLMFLNGTTDSDHQCAFYNAYRSADCAHETHAN  
IFGVESADKDNSSTDDVIGIDDFEHWECDSIKGYNNNCEHDSGVHSLQLLGVLLVFL  
VCTMIKAMLKWDVNWLDPACAFILVGTFFVGMRLRLDSRLVPKLSFDNDLFLQIMLPPI  
IFEAALSIDKKAFRDLFPILLFAGIGTAFSSIAIGWMVHRVSNLGTNGSNLPWLDSL  
GSLISSIDPVATLSILSGVGIAQTDTLTYLIFGESLLNDGVAIVLFEVLKDHLEGGDSL  
NDAYKEMSMHFATVLFGSIAIGAGVGICCTLYFWALREKQSAVTEVGIFFCWSLIPYYIA  
DGLHCSGIIAIMVMGFILDFYVIGGVNQEQHAWREVLQOEHENATMQNTRNYSVSNQLN  
RVLKDAFSGKGHILDASRNHVGF LAHVAMIMETAIFAYLGLFLFKDNEWNSRLIFTAIA  
SCVSSRFMMVVSLSFLVNI AVFLDFENRIGSICKSVNPFQRINLADDDSVGSHTRKYLD  
RKTQLVLLLAVRGAVSFALVENIPVWDNVSKTGSQFKAELKAMTSSSIVFTLFFVFGALT  
YMAVKHDPESDSRARAVLLNRLNQPMDGTELSETQFERDGRSGGHHQTMSNGQHADGS  
RGPQEELNDSDAVYQSSNEW  
>comp4047\_c0\_seq1; 150 114 566 LEN=1232; translated  
MVVLEAAAIGAASYGIYKGGEGAGIQKGKDCRKEFKREQKRSSQSVLHQKTRSRSSRIAE  
IVQMKNKGNEASAAAVTSARGAGTGSGLHATSFA SRLKSANEASTDIDDRHRAVME  
TLR  
ASRKEESKKEAKTKVGSKLKALTNPFKKK  
>comp4053\_c0\_seq1; 371 53 1723 LEN=2086; translated  
MRRYPSTPAFVFLIAASFSLPLRQLTCSGSEDASFRFRPPPPPPGSSFNVTSDIGR  
GYR  
NDANKEGPTSNNGSAESYGYDDMQHRQKQQQEREELSSSSHSSRYPFYESTESVGG  
PHT  
T  
QSQVDRSSSFREREQKQTSSLP IHYDFPISDDGATE TMGKGSQRQRIDNTRDGV  
DDEE  
GMTSSARKDLVTRHWSTKRKQVQIQTVIGLVGYGSGRFFLKS LMGDSMDVQWLGC  
FSAVA  
FIVSTWFRSPIGELSRVAVGLSLILVLRQRTQVIRREYPTWRVYVAA SVGMIRGG  
PRDARGK  
P  
RGRPRFPFPPARNPWKYSRSPRDPDFNMTFALASAMVGS AVGGNLPFIPNWIGAI  
IGAAF  
SAFACTWQESHGDLARTMGMRRVVRVTELWEIQADLQIIPKATVVSSQIIDKAMIL  
DRK  
HRVKDRFLSLATKGYAQATRVAEQVQQQORGAKSSEGRNERVENDRVMPRGEDDES  
IRGG  
QRGGYDRGRDEKGDYFDGKPENGRRLMPRDKDGRDSYDFRERQGP RRRYEDDDDF  
DGSR  
RRDAYNHDKDSKDYFR  
>comp4053\_c0\_seq2; 203 478 1170 LEN=1533; translated  
MTFALASAMVGS AVGGNLPFIPNWIGAIIGAAFS AFACTWQESHGDLARTMGMRRV  
VRV  
TELWEIQADLQIIPKATVVSSQIIDKAMILDRKHRVKDRFLSLATKGYAQATRV  
AEQV  
Q  
QQORGAKSSEGRNERVENDRVMPRGEDDESIRGGQRGGYDRGRDEKGDYFDGKPE  
NGRR  
LMPRDKDGRDSYDFRERQGP RRRYEDDDDFDGSRRRDAYNHDKDSKDYFR  
>comp4056\_c0\_seq1; 770 1 1237 LEN=1493; translated



XRHQSNSKMKFSTFAFLATAGSAAAFAPSTGFQGR TAPLN MATEAAEETKAF AKLPASVK  
PGVVVTGQALVDLLDHAKKEGFAIPGVNVVGVSSSINACMEAAK KYGGPIMVTF SKGGGYFI  
AGKAADD TDDKASIAGAVAAAKHVHEVAELYGVVVLHTDHCQKAWLPWMDGLIAENEKF  
YKENGKPLFSSHMLDLSEESLEENISICKDYMEKFAKLDILLEFELGVTGGEEDGVDNTD  
VDASRLYTQPEEVWYAYEQLSQVENAAFTCAASFGNVHGVYAPGNVELRPEILHNTQKYF  
AEKLDNGE EKNMKFV FHGGSGSSVEDIQYAI EAGVIKMNIDTDTQWAFWDGIREYEAKYH  
DYLQGGIGNPEGEDKPNKKYYDPRAALRAGEEAMAARLCKAAEDLKCV DVLN  
>comp4059\_c0\_seq1; 500 1 1178 LEN=1336; minus strand; translated  
XSIVMNEVIRIHP ELQKNVVELLNMIEQSRLQIDQQMDHQKAQDLALTASNVT LKNLQNL  
LERYSPMQILYDRSRKANRISLR LKLLVSCNYIKTAIAIIVTAVDKESSASNIEIPTGDDK  
LCDV LGVDARSGLP HPLWTKKHDAILIRSVAKHGWVDVDANLKNIVNDKKIKWGF PFEAS  
NNAPVQRIGE QEMKNMRETAGRAASILNEKPKILEILTGFNKKLGR CATAIDIFS FNYSV  
FLPKVAHMLCALVFLFFKVIDSYGLTQQSEDDENDEMDDGEKKWRVDNRMLHQASKKSEP  
VKEAVDLP AKKDFVKRAKIVIQKTF AKLRSEGTNSKSISSSTKAIDEDVKSNE SHGYIVID  
QGSRCNILLAEMIRALVKGSTKVSQIRHMVR  
>comp4062\_c0\_seq1; 306 113 861 LEN=861; translated  
MVDICLNDKQCSNGGVC SGNKICIPSGTYGARCDAQNVDS DTDISLCTEDGNQCQNGGVC  
IKDTTEINNVTVDANFCKCPDGYFGGRCHGHSGGGGSAAVPDGTTWISVCTQDGGECKNG  
GTCVLETE THNGQVVDAN YCRCPDGGLGSSCDFHSSGPDGTGDEDEDKPEPEDNTEDEV  
KPVVPSRSVCTKDG GQCKGGTCVLATEKVNGQTV DAN YCICPDGGLGSHCDPAKSSGQGG  
ANDEVKSDEV  
>comp4065\_c0\_seq1; 184 60 733 LEN=733; minus strand; translated  
MSSNNIRRNPNNGSRRFLYGDQDEDSFSAHSSRSRNTQRSAGFSTRDYIVDQSVNLMDIGI  
GDSASSVSLPARSSSIAGMFRSSVETEILNRFDEYGDAA PMADAE EYIDNDKRRRGTAMW  
RKCRKALCSMYTLTLLVSLTGIFLVVYTLVLT VNTKGREKTDSVTKADNKSGSGSSNKDA  
NHERYGMIRSRIVDAGVTSEGLFDGGSKSPQKLALD WLVLLED PAX  
>comp4069\_c0\_seq1; 258 159 842 LEN=903; translated  
MDANTGTPGQSASAMGTLVGMNTAKEKWDSSGANDAVSKFSASIPDSTKDYISQTTGQF  
FSRERLRTVSVCFGIGEE RPFYVEKTPSLLL VRLKHNFQFFYLN YLLMLAVLFLGLTLFVT  
PSAIIIGIALLAMAWVYVIRASQSGSLKIGSFSVTQTQATIVMGVVS SLTLIWI LSSVFWW  
ALGSSGFLT VLVHAGLRDASMHQDGEDQVTMVGEVEPAGEQA AFLGQV  
>comp4074\_c0\_seq1; 269 229 672 LEN=730; translated  
MARVVRNINPTGNGAAMAIPGYGVAEQV FVGGFANFLSIYNI VITARVLLSWFPQAQGV  
GVLQPIFQITDPYLN LFRGLIPPVFGLDLSPILAFVLLNVM TNVTA AVGAEITADDRKKL  
QESSPFAVKPYHKKNSQKKYSPLMMQV  
>comp4077\_c0\_seq1; 319 253 1785 LEN=2348; translated  
MHSAIQICRSSVLLK LISVLQAPTWTNGYVFSNRNVPICEAGCHCYGSEGNCP SFPTVT  
EDMLKTFRELNLVNPMKVWCDPLQLTECISTLEEGEACVVDLIAPDSIQEAPCPSGYSYR  
LTTVPSLEDAIAEGQYI THTGACGTCSS LQDLALMIEYPNLPYKAQQCFFRSSALKNIEE  
GIACYQEIGFTQTCSATLAYHQKRIETKVVDINAQLGHMMGIWGDVSDI IKDYVSSWLHA  
KNFSLILQ LLLIHPFPISTDSSCEDVTGCGPCVDNFGIT AQLELISGRTFANS GYPSQKA  
QQCVNIAPIDVIGGIDICAYAPIE EPPAMETEAPTMSPTALKTAVPTPTSIVQTSQY PML  
STTQEPVEPPTGLPSVSLVEVTTAPAPVENVAPVEVTTAPVETTEKPVTTAPVEPTEKPI  
LLITAFPTPD PAPLPTADLYFQQCLNSAAIEVRMGALSGSGVVCDCVEAEKGVTNNQDA  
SRVPVDLLRQNAKSSMIFVRLMRIAVVLA  
>comp4077\_c0\_seq2; 365 253 1678 LEN=2241; translated  
MHSAIQICRSSVLLK LISVLQAPTWTNGYVFSNRNVPICEAGCHCYGSEGNCP SFPTVT  
EDMLKTFRELNLVNPMKVWCDPLQLTECISTLEEGEACVVDLIAPDSIQEAPCPSGYSYR  
LTTVPSLEDAIAEGQYI THTGACGTCSS LQDLALMIEYPNLPYKAQQCFFRSSALKNIEE  
GIACYQEIGFTQTCSATLAYHQKRIVDKGCYQCATWAYDGD LGRPSCEDVTGCGPCVDN  
FGIT AQLELISGRTFANS GYPSQKAQQCVNIAPIDVIGGIDICAYAPIE EPPAMETEAPT  
MSPTALKTAVPTPTSIVQTSQY PMLSTTQEPVEPPTGLPSVSLVEVTTAPAPVENVAPVE  
VTTAPVETTEKPVTTAPVEPTEKPI LLITAFPTPD PAPLPTADLYFQQCLNSAAIEVRMG  
ALSGSGVVCDCVEAEKGVTNNQDASRVPVDLLRQNAKSSMIFVRLMRIAVVLA  
>comp4083\_c0\_seq1; 508 97 1052 LEN=1052; translated  
MMKSWADHCSSDED TDDNF SVGDEEQSDDDACEETSIEDDFSDKVRLQEQQQERTYDFP  
DRPPFTAFIGNLSYDIQEADQLQKALVDVVRHLGERITPLGGHISYDRDNNRQHRGFGY  
VELN TLEELKIVMKLND DQAKLAGRKVQVNTANNHNRSN NNFNRRGSSHNNHQHNSRG  
SFQNDHRRNSNSGNNST DQKPYEKVDGSKFRGGIFSNKNNNNGSHNNGSHNNRNSNR SQ  
PTRGA AVPRERPSLKLAPRSKPIEGEGRSSASNIFGGAKARDEQAW EKNRHEREEKQKQE

KQANEKKSTAKKHNNNNNX

>comp4092\_c0\_seq1; 212 236 886 LEN=1568; translated  
MAFVPAFLLRGVDSFALHLSAAVYTRCRSTNASTDLRLWLSPEEITASLGPGRRTIASEPF  
SWNELKEIVVNGDPTMHSRSMEVQESYLLHSRRIKSEWNSMNDYILHSKFGFEKITKNEK  
FCSSPSLEQAKLEGRRESKLLRNEYYPYFVCHGIEHWCLWKLGSKVEPYDLWDWAKNKLIVEM  
DRGNQGEIMSWVNPPNLQSIIPDIDHAHILCLRSDDI

>comp4114\_c0\_seq1; 246 1 540 LEN=540; minus strand; translated  
DAVADDDDEDADMVTGPGSSSDSNVIDAMFRVAEFMSSPPTDGGVTFTGFYSLPTIQLLSG  
DREFDLSMSELKECWADGSLGATRVDRAFERVWIEVQYEFQDIMTEARKEARKKTTKK  
KVRGGAKSVSATPTTTTIGDNLSDKELEEVNQRVKNLSDDEVGSVLDMMEQMDPAQEARLK

>comp4116\_c0\_seq1; 650 137 1634 LEN=1736; translated  
MNTSKANVEEPKKVSTTEESDEAIQNGKDDGKNAENVEPSREDKAPITGDKAKRFLPAYK  
KANAALTFPEKEDHCARELCSVLSVEQVMNLTFSPHARLTKMMNLMKYVDEKSKSEKDFC  
ISWLPEGKAFVIYNIKEFTSNVIPKFFKASKFCSFTRKLYRWGFRQLNRGIGPDEPIIFG  
NEYFQRDNADLMVNMRISITAASIRKRESDLLRHMLASKKRALLSDHTSSYVPHQDGKQFN  
MAAQFDQKQSVSRMANVLASQQRFGGGGVGSDDGGFSTNLSHLNNQELQMMYQSVIDQSR  
KSSNGPDSGIAPIISDAMSQMSNPYGGFNTSGSSHQQEFNQMASMHMNSSSSNCSAMMGG  
STSNFMNSQNCNSSSFDVAVGGNGCNGRMNMGNGYGNAMGLNGAFNNMMFSSDSMYGNS  
SSRGNNGFNLSQQFDGDLNGGRKSLMNHGGKHNFFENGNYNFNFSAPMMNMINQQLFNLSS  
SAGPGAGSDDLDFGGGQY

>comp4116\_c0\_seq2; 679 137 1543 LEN=1645; translated  
MNTSKANVEEPKKVSTTEESDEAIQNGKDDGKNAENVEPSREDKAPITGDKAKRFLPAYK  
KANAALTFPEKMMNLMKYVDEKSKSEKDFCISWLPEGKAFVIYNIKEFTSNVIPKFFKAS  
KFCSFTRKLYRWGFRQLNRGIGPDEPIIFGNEYFQRDNADLMVNMRISITAASIRKRESDL  
LRHMLASKKRALLSDHTSSYVPHQDGKQFNMAAQFDQKQSVSRMANVLASQQRFGGGGV  
SSDGGFSTNLSHLNNQELQMMYQSVIDQSRKSSNGPDSGIAPIISDAMSQMSNPYGGFNT  
SGSSHQQEFNQMASMHMNSSSSNCSAMMGGSTSNFMNSQNCNSSSFDVAVGGNGCNGRMN  
MGNGYGNAMGLNGAFNNMMFSSDSMYGNSSSRGNNGFNLSQQFDGDLNGGRKSLMNHGG  
KHNFFENGNYNFNFSAPMMNMINQQLFNLSSSAGPGAGSDDLDFGGGQY

>comp4126\_c0\_seq1; 325 129 1421 LEN=2047; translated  
MPKHQRDNRSRRSAPYESGEVEEGEERERNRSSNRSSGNRRSKSASSSIHTPCATFDD  
MNLKPDLLKGVYAYGFEEKPSAIQQRAIKPIVLGRDVIAQSQSGTGKTAVFSIASLQLLDE  
TSRDVQVMVLSPTRELAEQSQRVMQSLGDFMNVNCHACIGGKSLGNDLKELEGGVQVVS  
GTPGRVYDLIKRNALHMSRLKAMVLDEADEMLSRGFKEQIYDIYRFLPSPCQVVLMSATL  
PSTVLEMTRKFMNDPIKILVKRDELTELEGIQQFFVAVEKEEWFDTLCDLYDTMTVTQSV  
IFCNTRQKVDWLAEKMRNSFTVSAIHGDMQDTERDAVMNEFRSGSSRVLIATDLWGRGI  
DVQQVSLVICYDLPTNRELYIHRIGRSGRFRGKGIAINFVKEDDVRTLKDIEQFYSTQID  
EMPANVGDLL

>comp4126\_c0\_seq2; 204 1 1092 LEN=1718; translated  
ILCKMANKNTTLGLTGLEPLTCRYKNRVTSTTLRCSAASSRFSFVDVLLPIGWKTSHKFS  
TLCVLKYDDPSHLFLNNFMMVFFNKVNCHACIGGKSLGNDLKELEGGVQVVS  
DLIKRNALHMSRLKAMVLDEADEMLSRGFKEQIYDIYRFLPSPCQVVLMSATLPSTVLEM  
TRKFMNDPIKILVKRDELTELEGIQQFFVAVEKEEWFDTLCDLYDTMTVTQSVIFCNTRQ  
KVDWLAEKMRNSFTVSAIHGDMQDTERDAVMNEFRSGSSRVLIATDLWGRGIDVQQVSL  
VICYDLPTNRELYIHRIGRSGRFRGKGIAINFVKEDDVRTLKDIEQFYSTQIDEMPANV  
DLL

>comp4127\_c0\_seq1; 337 133 894 LEN=1206; translated  
MISLASIKSDTFLLVWNIA SVVTFLLPLFAFTTARLTTYGNEDEDENQNGNQNNQYQSNYEN  
PDYYDEYGNYPNHWWEFWKKTNNRRNGNEENEDEL SAPWWYIWGEREGREPEEESRAV  
LFVYLWLSLALLACIAYVGNCTGTVNIKLEKLRVILLGFANCCFVTIILLVGSSEDTIRTEG  
REI EETGFYQRAVLLFLTCIFGLLQSI VVSWTSKR IKKLKIDSLTGKSDEYVNVVEFDN  
APPAGSSGPSVPV

>comp4131\_c0\_seq1; 196 64 351 LEN=499; translated  
MQIFVGSNAYEVDPSTSV EALKLQIENAEFVPAHQICLMNGADELEEGTLETNGVEGD  
DA LEMRMAVTSGMRKKWKKKRMRRRLRRKRRKMRQAR

>comp4143\_c0\_seq1; 407 74 1024 LEN=1291; translated  
MGRISSAIRVVALFSAVCSSLSFVAPALDSFNQRQCGDNNLHRHQSTRPAFGLDDTTDDR  
LVDIRNALEKMSKLSQSKDESHMQTFETRIRKVISSGESSIPGAGRGLFATKNIKGT  
V IGFFPVDGIGVEFDDGSSICGLTPEDQTYFDNTPKSNYLLNLFGRRLGTADFGE  
DAQL FIDVNPGRTS DASTPWNGHLVNDGATVLENSQGLDYYAASQRRKNCVNI  
PFGPSPLLA

VMTTKKVKKGEELFTTYGCLYWMEYILKPDEEVADVTEAVQLQARETAQDLDFDAMKDAQV  
TYAKQQAEIEESFAQM  
>comp4144\_c0\_seq1; 75 1 223 LEN=223; minus strand; translated  
XREVDPTVFMHQASEEDGGVVSFADIGGLNEQIRELREVIELPLTNPELFTTRVGIKAPKGV  
LLYGPPGTGKTLAR  
>comp4145\_c0\_seq1; 69 1 205 LEN=205; minus strand; translated  
XGVGDGSESTDNVTTTRGVVDNPQVALQPSIAQTNLLTQNLNLANFNAAQRQAAATTTTNLP  
NFQPLIALP  
>comp4151\_c0\_seq1; 821 153 2752 LEN=2752; minus strand; translated  
MKSIFLFSALWSGASSVLAACDPETTVSLAGGVSKLTVTGFVDPIINYFSSVPGTVSKWN  
VLHSVSHENKCSACVTGLGFSHRDLTPAACTVFRASIPYVKGDSVVLKGYDLFPEVLST  
GDELVITAGEPCGSVSSPAAPSIDASGLAVFGATSYYFFGGHAFLLTAASIFLAMVPFSA  
AAEEAVPSITVEIYVDVDKLLHEDSGNSDCPPETTLWKHHDSVFGGYEGCVSEKYLYPCA  
QYVRPEDEWNVDRVPIDFVDGECIESGYTQXEQNLLDLVGGSSAGRKSMASSVSLFSMVL  
DLSKLXRNNLTMMSPPCFHPNPFARIAMKYIPRNPQGDTLMEKTGLKPTAKFPLRRG  
PYPYKTAEGFEEALDDSDAKAVALDFLVYLGAIIEESAKDDWYVTINEGAEQGISLWA  
AKALEIAATTCNRDIYVLMAPAYGYDTGTIASWVNQNAEDFYSGEECLCYPLCNEPTVT  
VNVGFFPGNIPEALGGDNVTYVADSTSPWFFESMVFPEEESHRIAFPGIPNRPQRD  
ASHDASRIARDQPTQPNPTQSHPTQRVFLSPVFLGSRFWHSLPIQNPSGVIKTPQLPANR  
RVCDGVYVWPMYFGMRGFEIPLDEMPDCDGSYAITKGYASVRAGFITIKKGSEEFAGY  
VSKITSPFHLSYGTLSQWTWEGQMIQKMMMSRRLDDPTSWSVGAYSEIMKEKWEVVTEA  
FRDCPVLELTNSLAGAYAFFVYKDPYLGQSGTYPSFFMDVLGIRATTYFWGFRGADPSE  
YFGEVSTTDFTRMQLYRDVEVYHEVARRARIVCSDTASIGDLVSIDDWQAAGLASSRH  
LEEGHDPETRRRLREELPHLHERKLA  
>comp4158\_c0\_seq1; 366 1 656 LEN=1037; translated  
XDDDDDDDDIPLAALKSKSPAKKKKTEAKTKTKAKAKAKTPAKKKKATPKASASKSTAS  
GSSTKDDYSYPSFALYGTESLKGKLIQNLLCRWWYAIAPDPSAIPKEPPTDYDAMDGF  
GVFICTQGEVGTIKDFRDKENTPCFNNFARKSSEELKELLVEAINEQKRQLVQAEGTGT  
ATEKELDTMLKWAKKVNKADTEAAKILKANKLSIPA  
>comp4164\_c0\_seq1; 216 139 915 LEN=1219; translated  
MVEITDIPFVKPLAEWIWGEEGSSSCLSQVPFLSGPCLSQLLTKALGVLIILASMLNKIP  
IMVNLKAQSAAGISRNSLYGEAIVYANCALYGFSLGHPFTAYGENASLLLQNSVLIVLA  
WNFLSKTNTTPVGSDEKIMAILFFALYVAAVLNFLPEDYWYMLMSTTWPVMLYARGSQVYE  
TFCVKQTGNLSIVTTTTMNLVGAVIRILTTINETGDVVMSGYLLSGSLSLMMFVQHWMYL  
KNTREIAKKAEEAKKTD  
>comp4164\_c0\_seq2; 195 820 1185 LEN=1489; translated  
MAILFFALYVAAVLNFLPEDYWYMLMSTTWPVMLYARGSQVYETFCVKQTGNLSIVTTM  
NLVAVIRILTTINETGDVVMSGYLLSGSLSLMMFVQHWMYLKNTREIAKKAEEAKKTD  
D  
>comp4181\_c0\_seq1; 153 1 442 LEN=700; translated  
XFLADQAFACIPLARRAKTSALESIRDTTSLFATQAPSIARWVKTRTMNGLRITFAFFSD  
QLKHVDYSNGVILPYLKDRWEYAFDRAEQEQRIREEEKLLKELLLLLAAAAAAAKEAAEHQ  
MLWTQTMVAGACAFAGSVATTILWSVL  
>comp4186\_c0\_seq1; 239 137 990 LEN=990; translated  
MAKPSPLQPETGTLSSLSPSPRGKKRPGWGKQPAGIETGSELASGKQEKQHRHPERQOI  
QHQQKQQRPNLRAQRIIVLGAGISGLACARELQKRGYEVLVVEARSRVGGRLKGEVLELG  
ADYPVTLPELSATRTKTKRKRKTEGSSASKARTKQKRTTGDGNDSDSNKENHTATTRKH  
PIDVGGALIHGIENNP IHQITSQMGVPIHSVSEYCLLTDENGWPFDPKTDERTSNFFND  
LDVTFARAKLQRDSGESFGLFERVCREKTGTVAYGSKQKQKQX  
>comp4192\_c0\_seq1; 364 93 932 LEN=1133; translated  
MESEATTTAISALNWANGLAFFFNVLATFGSQSAKGMQDNATLSAKYQTLVTPAGYAFSI  
WGIIFTTQAAWTIMQFGEGRSSSFVTETVGYGFVSACLAQALWSVVFGLQITASIVPM  
VAILVSLPIAGRILTGSNDDESQNFVWTAFPMLIHAGWILAATLVNTNVVLVARGAST  
SVQTLAAWASLAVLVSCGVGLLALPMASSGMTTSVSTPTVVVIPCVLAWASYAVSRELGK  
PKASIAATNFSPEVVARTGMVARNGAFLIMVLVVLVALLR  
>comp4196\_c0\_seq1; 72 1 103 LEN=404; translated  
XIQSVVEAENGESGALCNSLHVVVEVESGESVSE  
>comp4200\_c0\_seq1; 269 39 653 LEN=697; translated  
MAEETHPLQNEWVMWEHKANQGPDPKDKWENMIQLCKISTVEDFWRYFQHLPKPSQVFF  
DGECKRTVGPESKTIIEEYSFFKQGIPEWGDPOQVNTGGGEWFCRQCLASEVLDLYWQNLVM

SCVGETINDAVAPEGGESIEQYVNGVRVVDKSRAYPMYKLELWLNTRDPAIKDKIKNKLV  
EIIITDQSSSTKKLQPKFDWRDHS  
>comp4214\_c0\_seq1; 1383 187 4047 LEN=4641; translated  
MLTKFESKSARVKGLAFHPVRPWVCASLHNGVIQLWDYRVGTVIDRFEEHDGPPVGVDFH  
KTDSLIVSGGDDYKIKVWDYKLRCLFTLLGHLDYIRTVEFHPDPAKFPWILSASDDQTL  
RLWDFQKRSCLSVLTGHNHYVMCAAFHPSEDLIVSASLDQTVRVWDTTGLRKKQTGQDVM  
DPMRGPQVSATTNAAMNVQAELEFGTNDVVVKYVLEGHDRGVNWACFHPTLPLLASAADDR  
QVKLWRMSETKAWEVDTLRGHANNVSSCLFHPKHDLIVSNSEDRSIRVWDVSKRVGVQTF  
RREGDRFWILAAHSNQNLLAAGHDSGMIVFKLERERPAMCYNAPRSKLYYVRGREL FARD  
YSRGDGSNDIPIASLRRVGQQAQTDGIGSAPRTL VYNAHNPSEGNVLCSDIDGGSYEL  
LTFNGANVTDGKRGACLGPVAVFLGRNRFVFLDRHQRIIVKNLNETTKRVQPPVANVDA  
LLDGGASGRVLLRADDRAILFEVQSRRILGELTAPKIKSVVWSPDGSKVAIVCKYGVVIA  
DRQLEQLCSVSDNVRKISGAWDCSPSSDGTASNLFVYTTLNHIKYCLPSGDSGTIRTLET  
PIYAVRVVKDQLHCLDREARARVIAIDTTEARFKLALANKKYGRVMHMVNHSRLCGRAIV  
AYLQQRQGFPEVALHFVREPKTRFKLALACGDIEAAMESAFALENQTQQNSEIEGGSSTDE  
TREIWSELGAEALRQGNVEMVEMSYQRTKDFDRLSFLYLMTGDTEKLRKMLKISNMGRDI  
MGRYHNALFLGDAERLAVLEASGNLPLAFMCAKLHGLVEDADRIKVAIETNEGEEKMQT  
VLEQTLAIETQNDRSGRLLQPPTPIFRDNNWPTLEVQKSTLADLTAAPVEEEEEVETQAA  
LNAVSELEDDWQDAVDDSDLAADLAAADDDFGDDWGDGDDGLDDLDFGNDLDDVDGD  
DFDNIADDSGFQLPPSGRPPAACWVANSSHAADHVAAGGMSSAMQLLNRQIAASEFSVLQ  
QNMGCYAGSMMSVPGIAGSGSMALPLMRNDSGDHPGNASLPRTYITPKNLVDGVKSGYR  
FFQGGKFNDKSAFMAVLTQIPLVVTNNPKEQAQIKHVMNVCREYITGIRIKGAMAEAGK  
DPVRATELSAYFTHCELIPAHMVLALRSAMGTAFKHKNYILAASCARRLLELPEMSSERN  
ADLKNKAMKVRQKSEQIARNEHELNDETKSFKIDCATLVP IYSGASYKSCSYCGSQYAG  
DDMVNKL CSTCGLSQVGIKTLGLVTG  
>comp4226\_c0\_seq1; 80 1 226 LEN=226; minus strand; translated  
GDVKAVYIECLDYQKRGKGTRSSLPEDFFRYEYKVNNEIASCIATTPIISLWDGLVMGG  
GVGISIHGKYRVATEX  
>comp4233\_c0\_seq1; 297 1 549 LEN=719; translated  
QQQIPRSLPVDQTTSFQQIEIMKITAI IASMAIGSASAFAPNPTIASSATQLSLFGGGGE  
GGEKKAGGGMDQLAMFKKAQEMAQKKNKLDQELAAETFEGKGADGKVTATCTFSPSKNP  
MDPQPDPYKVFDFDEDEWYESSAPEDISAGVKEALMDGIAVTNEAVNAKYSQLEEDIKNL  
QA  
>comp4234\_c0\_seq1; 956 1 1845 LEN=1845; minus strand; translated  
XALGSSNGDGFQPDLEKQMKPEETVVATGTANEEDDEFGEFETGPTFHDGGVDATDHSKD  
EFENREKKVENSLITSVDFPMVTDLGMTSEPMVAVAPQMI PATSAPSSLSITDAFSDMP  
VQEDATLPSMQHNMATNTILEDKNLDEVGDVGFNGFEKVEAAPSEPKRNDQTKDDGDSDD  
EFGDFGGVSSSDRGGNNELSSGSDVMGSDCVGINMEGDLPPSMTDIGRTVSEPIRVDETL  
VPAKGMGTGHLRSISIDDAFGELESTEDRPLPSLEMMTANSNVGCLSASEENKKKRNES  
NDDFGDFTAVRPQPEHLAGISSKSDGDEDFEDFAAPLENDERPPEKSHDKSEPFEST  
GTMAVSDADRQIPIFDALGTEDAPLPSLEMLAATPDPNVESKDLVGVVDTHNNSDFGGFK  
TADTHPSGSMGTNERNEQGELRYVSDDMKNESTSDDYLLQASTVLSTPAITETGPSLSI  
ADPFGNLEVPDAPLPLGMSFGGTS DTRMSASKGTTASIVDLYGSSTTQNVGDSGDDFTSS  
SGIERRGTVLSEADDFGDFGSAKLTI PADCNENSPGMAEDEF GDFGSAEVVPPIDNEIQD  
GPSEEDDFGDFGSAEX  
>comp4237\_c0\_seq1; 267 292 624 LEN=895; translated  
MVLDEASERRFHSSDSNDNDEHQPKVYTYFTDIPLGLYIVRGDSVLLGQINPEEEDETI  
QQGTVIMKKLDEEAFEAMVQGDDEGDEDESADEAAKGSHLEWDFDKDLA  
>comp4237\_c0\_seq2; 268 108 902 LEN=1173; translated  
MEENSEQQPATPMPPPPQVPPQKQPPLVGEVPPASREAMSPVQRGRGRGRNSGDGRGGS  
GRGGRSGRGTGAGGRTIHPNARGRGRGRNQPNQGTQKIAPNTGIPFGHVPAYLPG  
SSSLVEELDQRSMVVLDRDGRHIVGKLRFTDFQFSNMVLEASERRFHSSDSNDNDEHQPK  
VYTYFTDIPLGLYIVRGDSVLLGQINPEEEDETIQQGTVIMKKLDEEAFEAMVQGDDEG  
EDESADAAKGSHEWDFDKDLA  
>comp4243\_c0\_seq1; 314 680 1971 LEN=2078; translated  
MIQPLANLTNYCNLGCISWLTREFQGWEIFXMIFGACNVVGTAAVPKGSTNAVGNHGTVT  
TCTVQGFLLIYVSLMTAFSYCSFSVYSYVGTLNKFDKSAFQNGMETYIHVLVHLYPLATA  
LYITSQQLFNNTGFGYCFVEGDPICGGSPRATNEAIVPCDRGGQTYQTIQLVELLWDIP  
LFIMLLFP TAVMITLYLKVKKRQDSILILSCEVAQQSLYLLVIYAGVIPS AVVHTLDFW  
QFLTTELATNLTLSNVMATLCGLWTVIMYLYFSNPKTESVQKYRGGEEDGDGRENND

ADELDP S L S D G V R M N S G E S G A N I F S F C P E T E T E H N S T N D N N Q S N H L S L V A A G T K T T N T D P  
T N A S T R R R N S S T K S R N R S G S D R V S R K F S F N I F D G T N A S S A Y S D F I F D G D S E D E R E D H R E T  
Q Q W S S V Q D Q I

>comp4243\_c0\_seq2; 404 328 1836 LEN=1943; translated  
MEGHDLPLPENYYGSSRTPLFLFLEFGMRRMADSSETNEMAEPQEA EAVPPIEFTHHQLI  
AGMWTTRITGVISLVSSLVVRALKRRRKVFHRLILGMGVHLMIFGACNVVGTAAVPKG  
STNAVGNHGTVTTCTVQGFLLIYVSLMTAFSYYSFVSYSVGT LKNFDKSAFQNGMETYI  
HVLVHLYPLATALYITSQQLFNNTGFGYCFVEGDPICGGSPRATNEAIVPCDRGGQTYQ  
TIQLVELLWDIPLFIMLLFPTAVMITLYLKVKKRQDSILILSCEVAQQSLYLLLVYAGV  
IPSAVVHTLDWFQFLTTELATNLTLFSNVMATLCGLWTVIMYLYFSNPKTESVQKYRGE  
EDGDGRENND S ADELDP S L S D G V R M N S G E S G A N I F S F C P E T E T E H N S T N D N N Q S N H L S L  
V A A G T K T T N T D P T N A S T R R R N S S T K S R N R S G S D R V S R K F S F N I F D G T N A S S A Y S D F I F D G  
D S E D E R E D H R E T Q Q W S S V Q D Q I

>comp4251\_c0\_seq1; 152 136 447 LEN=632; translated  
M V V R L R L Q R F G R T H A P F Y R M V A A N A R A P R D G K F L E I V G T Y N P I A N R D G M K E I R L K E D R L K  
Y W L G V G A Q P S D R V A W I L G K F G I L P P P P S R F N P E K S R V K K A E E E

>comp4257\_c0\_seq1; 367 343 1320 LEN=1651; translated  
M S R T P S L C G G F L T D K R S M V A F T W S V T T V L T I F A F A T A L V L T V K V H T H Y K Y L E R Y Y D G D D W  
Y E Q N Y A Y N Y D N S Q D E E N D N E N E D S H D E K Y R D Q I R E S Y M L L S S M S A K S V T F V A F Y T M V L A  
T A L S M Y G T M A I V G F T S L R G V Y I A P C F S I G S N K L K V G I F G G A I V I F A N L L L V C A V V L G E V K  
V A G N Y N Q E K E E G E D G E S S E P Y E V E R I A T I L A V T F M F L S V L Y T I F A V L L F L C H A G E E Q S I  
L R I E Q G T G G V G I G R H V N A I G T S I P P S S L T R P S A K T T P L V G L G V G V D G N V D R S Y D S A L G V  
G Q I Q S S T L G D G R G F I T M D N S S Q G T E

>comp4261\_c0\_seq1; 433 706 2207 LEN=2385; translated  
M T L F W D I F F W L I P V W V F L M I P F S T F F Y E A D D G M L M A G T S V D P N P V K K S R I L S A L G Y T T G V  
V V F I T V L Y V V A Y M T A S E A S I S V Q D Y M G N D L V S A S A L G N D R R G V V I T K T S I G A S G N F T T A Q  
L A E M E G N P Y D Q A Y A S T V E N M G S D T L V M Q V S I S T F F A A L M A W L G W F L F A V F G G I G M A S M P L  
D L I L V F K N R P R N M D A V E Y A E A Q K S L R D R V N E L V D I G E L I K I E R A N N P N M G T V G G M G G Y F S  
A E K R K E A R I E R Q A L L E F K Q G V Y L L E Q D V E D F K A C T S D Y D N Y N P L R P Y I A L F L G I C S I V I S  
L V W M V H I A V Y I L P T P P L T P F L N S Y F A W F D K W F S L F G V L S V A L F T V Y L L F A A V T G C F K F G L  
R M A C I Q L H P M V L G K T Y M S S F L F N T G L V L L C A L P V V Q F S A Q A F S D Y A R N S T I N Q I F N V Q I E  
N L T F F G W W F T Q K V F V Y I F F S F A G L T M L Y L L V K P K E T G P S G V X P P G P V A I E E G L S K H F K Q S  
S A S K P T I R E N E E K F R K E T K K

>comp4261\_c0\_seq2; 782 37 1787 LEN=1965; translated  
M A D I F L I V A T S V A F L L M L V I A I Y L L V Y Y S H P D D R N D A Y F P K L V V I I G I M L T G A T C L L L P L  
D V A N N E G Y A G C D G Y N T S L C G G L N M T L F W D I F F W L I P V W V F L M I P F S T F F Y E A D D G M L M A G  
T S V D P N P V K K S R I L S A L G Y T T G V V F I T V L Y V V A Y M T A S E A S I S V Q D Y M G N D L V S A S A L G  
N D R R G V V I T K T S I G A S G N F T T A Q L A E M E G N P Y D Q A Y A S T V E N M G S D T L V M Q V S I S T F F A A  
L M A W L G W F L F A V F G G I G M A S M P L D L I L V F K N R P R N M D A V E Y A E A Q K S L R D R V N E L V D I G E  
L I K I E R A N N P N M G T V G G M G G Y F S A E K R K E A R I E R Q A L L E F K Q G V Y L L E Q D V E D F K A C T S D  
Y D N Y N P L R P Y I A L F L G I C S I V I S L V W M V H I A V Y I L P T P P L T P F L N S Y F A W F D K W F S L F G V  
L S V A L F T V Y L L F A A V T G C F K F G L R M A C I Q L H P M V L G K T Y M S S F L F N T G L V L L C A L P V V Q F  
S A Q A F S D Y A R N S T I N Q I F N V Q I E N L T F F G W W F T Q K V F V Y I F F S F A G L T M L Y L L V K P K E T G  
P S G V D X P G P V A I E E G L S K H F K Q S S A S K P T I R E N E E K F R K E T K K

>comp4274\_c0\_seq1; 318 126 1358 LEN=1461; translated  
M L G R T A A A R L A Q R G A R C S P A A H R R A F G S T T S L G A T P P G D D K P D L F L P K I T D R R L N E G G P G  
G R Q S N A D L R V A I F G A T G F I G K H L C H Q L G H N G A Y A Y I G N R G D E A E H R E L K P M F D L G H T R F V  
F Y S P N D V D S M R E V I G D A D I V I N L I S K T Y A S G Q P V Q T D K F P F I G W Q T N H S L E D V N V R I A K Q  
I A E L C V E M Q V D N L I H V S A L G I S E D H P S E W A R T K W A G E Q A V R E T Y P W A T I V R P T Q L F G S E D  
K F L H Y F A N M S K M Y G F I P V C G D G S V L T Q P V W A P D V A K T I S R I T D A P E K F Q G R T V D C F G P S D  
Y T Y E E L G K F V L D L T E Q D K K I M H I P E K Q Y I M M A K A L G Y Q S F V S F N E D M A K L W S R D I V P P M T  
Q E E Y R N Q P E E G K I L T M E D I G I T A T P I E K E A F S Y L H R F R T A G H F G R V D G Y H

>comp4274\_c0\_seq2; 169 126 470 LEN=739; translated  
M L G R T A A A R L A Q R G A R C S P A A H R R A F G S T T S L G A T P P G D D K P D L F L P K I T D R R L N E G G P G  
G R Q S N A D L R V A I F G A T G F I G K H L C H Q L G T Y R L S R P A R L R H T H S W N P I N R Q T D R

>comp4275\_c0\_seq1; 103 151 464 LEN=464; minus strand; translated  
M G F H G A K F P L P F G P A Q G E E G M R K N I E M V K K W R E A V G E D Y P L M I D C Y M S L T V P Y T I E L A R R  
C E P Y N V K W I E E T L P P D E Y D G Y A K I K E V S T T L L T T G E H E Y T R W G X

>comp4300\_c0\_seq1; 456 191 934 LEN=1046; translated  
M T I A L S A M P V T I R G P A N V D E C I M S S Y L E Y Q S F W P S I P P L A L T T S S S T S T T V S G T S I S T R Q

RPSHSDLVAKASDISGRKLCCLPPVKSSRKRPSLIDDEPSPAENHVNSGYCNSRKRKIKLC  
SRTFTLALNPDAATRNPSTTLIMLPSEFESKGNDKLTISSDEDEDAGDDCCHDSKPPVGF  
SKKETITPLSSPPSSRFFEEEEYVDGLHQDRNFFPQPPTFRRLTIRNSSDLDESIEEFT  
HRRLFSE

>comp4301\_c0\_seq1; 459 1 1534 LEN=1665; translated  
XDDEEEAEYLSDTDADDDWATEEAPFSEREWRPRRAGRFLARTWGLARGCLSFVLNVDNVW  
DSPAFATERGAGGASKRKKCVVFFWFVAVLAGSYTIERSVFKLLVDRSGPFRLVAVSAVVA  
FHALLAGGSLLSAVWSGRRGEREGPWGSSGAASAPALRALGIPVVDAGLMALLDVTVHMM  
LVFLTGYHVAPTQTVILVQWTLPLTALLSQFFHGDGCVAACLPHQGPSERGHP SAGAGTA  
AGRPLPGWGGLSIEHVVGSVVISLAVLLALAPSIYTTLVLDNEYFRYASPTKIPTQTAYNT  
ILFVSSCLPAAASQLYKEHVFKHKQPVHQDHLNLFVLSVFQLVFAAIVSPLAYVLLGFAA  
SDDWTELYPSSGFGKNLAEGLECFAGVLDEEEAENGFYDEANCRNSFSLVALYAFSVIGV  
GVAVDKIVNGGATKVMYRGVSAGIILSVTSLYLYDLHIPDFNYGPAIDSLNLVCLILLV  
GSEIYHRVSLQDASFETVYPEIESFFDDITE

>comp4301\_c0\_seq2; 430 1 1649 LEN=1780; translated  
XDDEEEAEYLSDTDADDDWATEEAPFSEREWRPRRAGRFLARTWGLARGCLSFVLNVDNVW  
DSPAFATERGAGGASKRKKCVVFFWFVAVLAGSYTIERSVFKLLVDRSGPFRLVAVSAVVA  
FHALLAGGSLLSAVWSGRRGEREGPWGSSGAASAPALRALGIPVVDAGLMALLDVTVHMM  
LVFLTGYHVAPTQTVILVQWTLPLTALLSQFFHGDGCVAACLPHQGPSERGHP SAGAGTA  
AGRPLPGWGGLSIEHVVGSVVISLAVLLALAPSIYTTLVLDNEYFRYASPTKIPTQTAYNT  
ILFVSSCLPAAASQLYKEHVFKHKQPVHQDHLNLFVLSVFQLVFAAIVSPLAYVLLGFAA  
SDDWTELYPSSGFGKNLAEGLECFAGVLDEEEAENGFYDEANCRNSFSLVALYAFSVIGV  
GVAVDKIVNGGESQATKRSSAGHGKFGSHFLFCFFYWTF SFCLGSRLTATKVMYRGVSA  
GIILSVTSLYLYDLHIPDFNYGPAIDSLNLVCLILLVVGSEIYHRVSLQDASFETVYPEI  
ESFFDDITE

>comp4303\_c0\_seq1; 250 1 639 LEN=639; translated  
KKKKKKKKDDSDSDSSGSSSSSDSDSHKSKKERRRRNDDRTYFSDRKTIDTRSTAEMT  
DWSRMPPPSYAQPVQTMPIIRPVIYSEYDYHGLRNSRDIFEDEQALLLSAKRAAKLARFE  
SRMKTSLKSSLGKVHKETAARLIKAKQKAKKIEKKAVSEIEQTEKEKMKMSRSMRKLKRE  
KEKMAEKLAVMEEERSESKSQQQHNLQQQQQQQ

>comp4306\_c0\_seq1; 331 41 694 LEN=1211; translated  
MKISSSIFSVAAGLLAVACNKSSTLVSAIEVGDLSLPDGLTLHHGFPPERIALADRTKGKN  
VLLVGLPGAFTPTDPVAXVPGYLANQKALKELGVDDIMVYCVNDGAVMAAWAEDQGKCM  
ADAEDDEDITLHLYADPYGEVTAALDMEMTAAGPKMVGLINRSKR FALYIVDGVVQIARV  
AEADDDPAGDERPDITLAEAMIDAIGDYNKKAAGGEL

>comp4306\_c0\_seq2; 315 41 895 LEN=1412; translated  
MKISSSIFSVAAGLLAVACNKSSTLVSAIEVGDLSLPDGLTLHHGFPPERIALADRTKGKN  
VLLVGLPGAFAFXADLIQSPGSRXVVAALASLITRVVLFHSLHFNGPFVSVSVSISLRFGL  
FLTTRSLRDVLYQSRLPAFHELXVAPQGYLANQKALKELGVDDIMVYCVNDGAVMAAWA  
EDQGVKCMADAEDDEDITLHLYADPYGEVTAALDMEMTAAGPKMVGLINRSKR FALYIVD  
GVVQIARVAEADDDPAGDERPDITLAEAMIDAIGDYNKKAAGGEL

>comp4307\_c0\_seq1; 232 1 406 LEN=406; translated  
NNNNNNNNEDYCLNSCLEDGLDYCIEGEEEGQMDIQEFAECRALEVEGQNNNNNNQNYA  
NGNSYVQYYTGAYCTSSGVYAGIFTDPACTKHAPKGTYEKINYGYSLPTTPLVSSSTCLSC  
KANQYDNDNNNNNYX

>comp4312\_c0\_seq1; 482 1 1672 LEN=1672; translated  
XRATQGNFIKRESPADNGHNI SNRXGPNPIRDERRPIMNDPEAKNHIINDTNDVDILQR  
KAHIMRSPVTVAAPSIAPSTDADDEDNGPTVQRKRRSLECEKQHRRQNRNRCDANKRALF  
LLATTAAAAATICLSSTSSMNMIFVESFSFNPFRRGLRWRGRGTGGGQTISSASSSPAEEE  
IEKMSKSLQNSIEKNYNSAKSTRNATPSLVDWKVQSDGKITGRSMNHPLVPDGEIITSL  
VDPNCLEGGVKAGDVIISTVRGTYELKTPPVGSSYFSSASNSQTFSEDVFSYTTTLPYD  
QQLAFLEELTDMIKTKQAAVEGTSSATVSQPASSSIAGSTVAPVAAKTL DATPSTAAPEV  
DTSTKIQEQPEQPTQGAIQRGEPPKRPTYISISNIQQNQEQSKSKDKSSSTSNNNNSVLGG  
VATLAAATTAATVTLGGQAGSEFLDGAKRQVEAQVPPQAKELIASVNTQVQKQSKVVL  
YLEEQIKAAEALEEAHLEEKTKTAWNGLADYLDNQEIAKRETVSTTPITSSSEPGEAITS  
ARISVGEAGTRMAAVEEGX

>comp4319\_c0\_seq1; 401 98 925 LEN=948; translated  
MRSYRQKVLISIFLVTIFWYDGFTRAYVFRGCP SRSTYSFHGSYENLSSMRLNFSKDSGR  
LSDLSDFGASSFDELEEEVLASTRAKMDFKQVKMTITEQPPPLSNEPQORTAIMAAQWKIS  
LAAASFVSTFVTIATHSNFLITSVVFSVFLVANQDPLEEEGAAGALARLLGRLTIQSVE

TTKPKLRAMAKAAITSEEEESQEQVIRLLQQRIEVLEENENADLKQWKKQRNSADTLLSQYA  
LEELKAMARANNLPVGGTKIQLLMRLLENRVLIPM  
>comp4319\_c0\_seq2; 200 253 516 LEN=539; translated  
MAKAAITSEEEESQEQVIRLLQQRIEVLEENENADLKQWKKQRNSADTLLSQYALEELKAMA  
RANNLPVGGTKIQLLMRLLENRVLIPM  
>comp4320\_c0\_seq1; 299 39 695 LEN=805; minus strand; translated  
MHAGGSSLKLLDFFGDDKLFKSGAERLVIAGGLKYLFPFI FIGTRIPKPDVRSRSAAKAKR  
KWLAEELKAQIIRIFYALSFLDAQSPKDAMSRFVAKFVEDDLKYCDRLVELLLLVYDERKR  
KAEYSFFRSDIEDVLDANQVTLASF EAKLNGGGDICNRLAAITAFVCANSKRCHERISLQ  
LRMQQSGVSLIKDALNEFAASLESGRQKRHIESLSEQI  
>comp4326\_c0\_seq1; 138 1 450 LEN=450; translated  
QHQQKQKSKSTNAVLSRLCSTIETIECVLGIRGQSMNGEKTNQNSIVGSTNKIQISK  
QDPSIPC VGTGDKDRVDSGDGIAPTAANTTASTAAGEKQEGNGKTNANSREINEDAIGVN  
NILTEVDNAVIAAQTIAFQPTNANTNTNTN  
>comp4332\_c0\_seq1; 169 1 494 LEN=494; translated  
DELDVTFHEASRSQKLSQSNGPITGILXRKNNSNNQAEAHHTTEPIMSDNDRRGSSSLFSNS  
GAGPSGSAPEGQPPPGAQRSSSVLQP GALGGIAFGIDFDDSDYEDSDEDEDNEPAAAAPG  
AGTGGPNHRPYVGGFAAAAYEAARMHHTQNTLKKQQKQKQLQQQQQ  
>comp4334\_c0\_seq1; 74 1 381 LEN=1034; translated  
AITYPKRMKLFQEA EFQAARDNKIQAVLPNLPVFRNFLT CNTAEGIPWTPPENDDID  
QRISVGQGTENDGEDNAQPSNNSNRQITNSNRVSEHQNP HWTTCSPVSLGSTLAIGIPA  
VIQVFTW  
>comp4334\_c0\_seq2; 91 1 465 LEN=1118; translated  
AITYPKRMKLFQEA EFQAARDNKIQAVLPNLPGEYPLVLGTIRFLDCSNKLTSGFFCRA  
QVFRNFLT CNTAEGIPWTPPENDDIDQRISVGQGTENDGEDNAQPSNNSNRQITNSNR  
VSEHQNP HWTTCSPVSLGSTLAIGIPAVIQVFTW  
>comp4336\_c0\_seq2; 147 1 602 LEN=906; translated  
XPIHFRQSSAKIKRQNRNQT HEAIPQKTSETTKMKNQSLSLALLATLTSFLVGRVVSVDV  
DYEALNAAAEKNPAFRRSLENRHRSLQNKDKPAFDFFDPDEDTCDNSKNPTEDRALLSA  
CDFSRFPTCGDNEEICYNRKPSRDHFHRDNHQHKFYIQYDRVFCYPDSWGGCSSCTPGRY  
CKSEKRCILEEVGYPCQEW F  
>comp4337\_c0\_seq1; 508 546 2449 LEN=2893; translated  
MTRIQSMTIDPGAGLSVTPQDSDEEDDNDEEQGDHQLDLHHVNNDDRDGSKPFMTSSYL  
AAVSPKDHQRRKKRKNKAMKDISFLRKRTSTLLALTEPESYLSGQQEAPHQQAHL SRGM  
KINLNTFNFLIDGWAFSGESDADKAMILLERMEEMYRYGEDSPVCPDVR SYTKVINAL  
SRSKHRDSANLAEQLLYKMEAMAESGENPSAKPNTFTTYTAAIEAQSYSGIKGSPEKAEEL  
LEKMIQKYQSGDPDVVFNARCFNAAISSYAKSALPGAAQHA EYLFERMDGLYMSGVVEEAK  
PNSFNYSNLITAWANCRDQEDENGVC SARKAQEILERMEQCYAAGDESCKPTTVSYNAVI  
DAYAKSKQEEAAERAEQVLR RMGALYKEGADIQPNTRSFNTVINAWAKS GRADAAEKAQD  
LLDFMTNLYEDGNAAVRPDAHSFCTVINAFARSNQLT DKAERANNLFRSMMDAYEKDPKM  
SHLKPNNVAVNAV MNACAYTIQGDINEQNRAMEIAHNL LKILEDSYGSADQITYGTFLK  
VCANQMPDCATRQQIMEVIFQNSARDGQVGNLVIQQLRAMGPP ELYYRLTGHYIEEDIRM  
EDLPKEWVNVVEXTMEEAQARRPPQQLDQHPVE  
>comp4337\_c0\_seq2; 491 546 2366 LEN=2772; translated  
MTRIQSMTIDPGAGLSVTPQDSDEEDDNDEEQGDHQLDLHHVNNDDRDGSKPFMTSSYL  
AAVSPKDHQRRKKRKNKAMKDISFLRKRTSTLLALTEPESYLSGQQEAPHQQAHL SRGM  
KINLNTFNFLIDGWAFSGESDADKAMILLERMEEMYRYGEDSPVCPDVR SYTKVINAL  
SRSKHRDSANLAEQLLYKMEAMAESGENPSAKPNTFTTYTAAIEAQSYSGIKGSPEKAEEL  
LEKMIQKYQSGDPDVVFNARCFNAAISSYAKSALPGAAQHA EYLFERMDGLYMSGVVEEAK  
PNSFNYSNLITAWANCRDQEDENGVC SARKAQEILERMEQCYAAGDESCKPTTVSYNAVI  
DAYAKSKQEEAAERAEQVLR RMGALYKEGADIQPNTRSFNTVINAWAKS GRADAAEKAQD  
LLDFMTNLYEDGNAAVRPDAHSFCTVINAFARSNQLT DKAERANNLFRSMMDAYEKDPKM  
SHLKPNNVAVNAV MNACAYTIQGDINEQNRAMEIAHNL LKILEDSYGSADQITYGTFLK  
VCANQMPDCATRQQIMEVIFQNSARDGQVGNLVIQQLRAMGPP ELYYRLTGHYIEEDIRM  
EDLPKEW  
>comp4344\_c0\_seq1; 283 283 1401 LEN=1651; translated  
MILFHTTPKHKCFMWFLLATVAFAGENKNFNLRGKLSGVDDPQAQAGARLLRWQESSTT  
TAVTTATATTTTTLNIANLAIGDMECEEAAGGSVVC AFRTVLP TSASNLNTGSVLVDCLRQ  
NGSNSQYCVTTEVYRSSYQSIPEPKPQPKPEPKP PPINPSGGPGSGINPNIPRPEPIQN  
VPDVPNVSPDPAPPQVPPVTPAVMLRADGCPEKTQLTGVRCDDFVPPGASETYCNYFSSG

SSTILRCGCTLRVGGV PARWVCGAVEEAE EEPPLAVSLQPPAPIGGISANVQSVVPPPD  
PPGQILPTINNPAYCADTEAEC DGASCYMHQRCTYYV LDEETGDPTGANECGCDPMNGIY  
KCYKSPNPIFNP

>comp4344\_c0\_seq2; 216 283 1587 LEN=1837; translated  
MILFH TTPKHKCFMWFLLATVAFAGENKNFNLRGKLSGVDDPQAQAGARLLRWQESSTT  
TAVTTATATTTTLNIANLAIGDMECEEAAGGSVVCAFRVTLPTSASNLNTG SVLVLDCLRQ  
NGSNSQYCVTTEVYRSSYQS IPEPKPQPKPEPKPKPPINPSGGPGSGINPNIPRPEPIQN  
VPDVPNVPSPAPPQVPPVTPAVMLRADGCPEKTQLTGVRCDDFVPPGASETYCNYFSSG  
SSTILRCGCTLRVGGV PARWVCGAVEEAE EEPPLAVSLQPPAPIGGISANVEVLQSTSAL  
YYTGNRSHVCLHCFDSVVSYPYFSP LFDPLLKYAWSHNNTLQFTTMNRKSKRSKAVVPP  
PDPFGQILPTINNPAYCADTEAEC DGASCYMHQRCTYYV LDEETGDPTGANECGCDPMNG  
IYKCYKSPNPIFNP

>comp4349\_c0\_seq1; 218 293 682 LEN=898; translated  
MSSMNFSTSKQYVRPPQRGIFPLDHDSECRPFMEKYLECLNDSSQVHHKCKPLSKDYLCQ  
RMDRQLMSKENLDDMGYAKNKDVVGAKEYDKAKEKAGFIAGKHIEKSSKWWFQSYKAKWW  
GDDKEGEAK

>comp4349\_c0\_seq2; 195 306 473 LEN=689; translated  
MGYAKNKDVVGAKEYDKAKEKAGFIAGKHIEKSSKWWFQSYKAKWVGDDKEGEAK

>comp4355\_c1\_seq1; 463 156 1184 LEN=1422; translated  
MMMRITTVVGLSTAWFLCYVANIGSSVSATRAFHGQSHSFGVLSSSMGKIIHPPFLRACT  
SRALLNTRGGADSDDEEEYSEEDSYDEEDESDEDEDLFDGFDLDEHSSDDFKEDNKFQDI  
VEEYHRTPPITKAYLTSSFAVTALGYVMTNNEFPPI LTLDWNKVFKGGQIWRPPTAFNLN  
GSLGLIGYPMTHFVHQYMSFLERLAHNKPYDFWIMILFGMTSMLVGYPIMKMSPRFLGH  
NLSTFLVYIWSRMFEGVDVGVFEFIIHKAELLPWFLLAQTFLLGEPPTLDFLGIVFGHV  
YYHFRKVGMLSAPQWLIDWYDNSPKAEILRKKYKTISSDFGV

>comp4359\_c0\_seq1; 243 1 572 LEN=601; translated  
XRHNQPGSDFDCRPISSQIFVDRILSAVAVVADPKTPLVVCSEKFDSSQPAHRRSFRIDI  
IETFMMEARKRGGTSRESVGDYDIETNQGVGAVDMASASPYSRMAKDPVEVVGAPDGIL  
APGSPAESHSIRSLAKGFTWRVVASGTTIAIAKIVTGETTIAFQIGFIEFFAKIMIYYL  
HERIWAKIRL

>comp4361\_c0\_seq1; 470 98 1600 LEN=1600; translated  
MPPVMRYFVLFICFGLKGGVAIDCGVSYNSK SAGKQDDVQFTECEPVQQRNESGIHFQG  
PSRAPVSPVDIKIPIGSAFPPTPENTIAGRVPVLEPKEAASSPHSIPSFRPTLSATLVS  
NVIRSATDAPPGD TNWCPQAVVADEYACASILPSGASWGQCTYLVLKMN GSTSTESQTC  
TCTRSNPFWSCQVDNFSLTPPSGSAPSTLNTAFPSSTPTTRSF DNVIPTITSSQISSE  
SPSAIQTVDRTDIPTISPSVAYSSEPTGSPTAGPSLLSSDSPSLQPTSTSSIGPSNIPSD  
GPSLKP SDGPPSRPSIAPTASPSLLPSDAPSLVPSSEGPSVHPTRMPTIAPSATPSDGP SL  
RPSVGPTAGPSVLPSDGP SFVPSDDPSLQPTRPTIAPSFFPSDGP SLRPS SAPTTSP SM  
LPSDGPSLMPSDGPSLSPSVAPSTKPTGVPTIAPSSVPSDGP SLIAGGSRLRPGKAARRT  
PFPTDTPSLVPSDGP SLMPSD

>comp4363\_c0\_seq1; 91 1 534 LEN=761; minus strand; translated  
LVYWNFFLDFGPLNLGQLWRF TKKLNRL LALAEKDGSTVLFYSTTHPNKRACAI FLICAW  
QVLELHRTPDDAMFGFSATAYNANHSTAKTNGSNASDVNRSNP LPLSGLGSQTINPLP  
PFHDASPYKCTYQLTLRDCLGALVKARQFQFFDWGDRFDIKEYEYFEQVEVRRTNQV

>comp4365\_c0\_seq1; 427 187 1416 LEN=1734; translated  
MASDHCSDLKPAKEGIEFEALPWNLNHP EHSYVHLTTKTGEWTK EHYDPTTDTGALFDS  
VYKYDETDLPLSPACCSLNYGTTIWEGLKCYRDKDGN AIVFRPDRNFHRFSNGAKNMVLP  
PPSRELFMRGIQHALQKNSHLIPPHGEGMKLYVRPMLMGSGEQLGLYPSKQFSLIFVYVSP  
TGNYFKSATGGLNLHLETRRCRAARGGVGNVKCSGNYAVALKPLMDAKEQGFHDNLFLEL  
ETYREKGSLSAILQEMSAANIFFVLKTGEIVTPSLDRGTILPGVTRDSVITIVNEFADD  
LKEAMMKSTGQDANITVSSRDVTVGEVKNATEAFCTGTAAEVVPIARLATGTDEEPFEAV  
FEHGKTEAGPITS AVL SMLREIMVGDRSSKGTEGWLRNPFAPPEEFCKE

>comp4365\_c0\_seq2; 253 123 867 LEN=1185; translated  
MKCTAFAQLLVCIEFKLEQGN YFKSATGGLNLHLETRRCRAARGGVGNVKCSGNYAVALK  
PLMDAKEQGFHDNLFLELE TYREKGSLSAILQEMSAANIFFVLKTGEIVTPSLDRGTIL  
PGVTRDSVITIVNEFADDLKEAMMKSTGQDANITVSSRDVTVGEVKNATEAFCTGTAAEV  
VPIARLATGTDEEPFEAVFEHGKTEAGPITS AVL SMLREIMVGDRSSKGTEGWLRNPFAP  
PEEFCKE

>comp4366\_c0\_seq1; 233 34 1226 LEN=1226; translated  
METRYLHQHCRNICLAILIVLLG LLVEPTSSFLPLQRLEHKCRITKDV SASVLD DNTIP



ESSPPSIHSTGEGSIDRRPHEQRTTGPRAARRMNHAFRYLYR'TTSHLYENVTALEYL'TTF  
YSEEQVMEMNRTFPPLLDL'DVSRHVHPKIRFLQETILQSNRDEMPD'GSPRQNK'NADT'LS  
IMNLS'DYEIPAQYFGARLEKTIAPSHAFLEYMDLPHGLP'LLMRKDDN'DERNETHR'GKRT  
TTLWQDFLISCRRTKQFCALCNQWQREKEHKL'GNSDIPRAQITAKQIEAFHFIFGRGLMA  
ACRGELVQASNPWPLEHVNITSKEVLELLIKHG'ANPLEKDIRGTTLLHWAAGSGNAEAFE  
TLLPYFPDRLLEKTERDGATPLHWACAGATS'GEGF'GTGG  
>comp4368\_c1\_seq1; 190 1 1087 LEN=1159; minus strand; translated  
QLQELLSVQWQYRPTAINGLRVVEV'VGLALLTGALFYDIGND'TTATGFVKVNSLLFFSV  
HYGEFLEVFFCDVRCRILRSCKIESYTFQAI'VLLRLLTPTLFAPIFHYRTFTRMYTSVGS  
TYLWYIAVEDDVVNKRNYAVGPLYLSRLI'VVMLAESFWPFLYV'FVCYPLASVVGDWTVVI  
KIGMLLCLNNAAYISLGSCLGVLFP'SPIPQGMIASTLFSQTS'LVAAAGFYTTLPVYLSWIRY  
SSPVFWTFSGIVKAAAYTWSDTYKCIK'GSNLAGNNRCFIETS'PVIDDMKERG'INAAYGDA  
QSDNIWLQVCMLILL'LLFLLQTTIYITVNV'RCSRRKKAKEEGIDDSERSAGSAESKQCKMS  
G  
>comp4371\_c0\_seq1; 589 167 1360 LEN=1488; translated  
MAPKEKTKTDPAPRGQKARQASAGALYH'DLLRDLTDHNLFFDELVDMIPSKLYIEGQSGD  
DYNPKYFKGQAKESKEARRARNKQSKRAK'FDPASAETTTQIKQRLEGGAGVPQAPTAPKR  
PSSGAAKATAGTPDARASRIEALREKLHAK'LAEKRG'NRPVDPGSVSKRAARRAEK'KKRQE  
EAIRR'NKKKAASSAEAGSHKRPRLSV'GASGSAGDAASDLAMVDFGRLSGLN'PVGN'GYTE  
VNKALKNLSKSKNLEKMLADAESK'KKRLEELKQSDKQEDKEKAASIEWGD'TLREATGERV  
KDDPAKIKKALKRRAAKKLKSSKAWKTR'EMESAQSKM'DERQKIRNHNLT'KRKLGG'SAGANL  
SSKRIETEAEADGKKKTGRRLSRAGFEG'KKQDFL'NKN  
>comp4389\_c0\_seq1; 304 20 595 LEN=647; translated  
MGVNLRLQKRLAASVLGCGKRKIWLDP'NETNEIALANSRRNIARLQ'RDGLI'IKKPSV'VHS  
RARVQLRNEAKRKG'RHGTGIGKRRGTANARL'PFKVLW'MRRQRVLR'RMQLKLRNAGKIDKHI  
YHSLYMLAKGNQFKNKSVLLEKIH'ELKAVVVQE'KALAEQATARKTRAKNRLERRAAKEAK  
KAADAEAAASNL  
>comp4392\_c0\_seq1; 499 121 1494 LEN=1699; translated  
MNAQTEKMGDPNHR'SAGATASAMELHQQH'QQA'PMGSSGPPH'MGLGGHPRYSQHAEQELR  
PGGPPPPMGYGGPSALSHGSF'GNSYSSYP'PAPYGGDGGYGGAP'PPGSHPPGYPRGAAAAA  
AAAAYSMPPHSFPYGAAGYGP'GGYPQSAPHPAYPYGGGYEGHYGSQGANLHRPPG'SFRGP  
SPVNP'SAAPGRGNRMQNGLLPGAVAPL'SDLNLSVSGSSALTKK'GGSSTAGTKGLPGSA  
LSDANGKRS'GPPQSLKPDQGEVERLRAAAATEITTEEVKPIQ'TDFHFFVRENIEQYRSLA  
EEEVKRSMEDQSATPD'PMLVNSNLNTRLMSAWECLTKETRD'TFMTHEETDRRRFMEDEI  
ASRHCATLTARGKSPRAVGGDSLKELAA'LQRQKHQEQEKKKQESGTDGGT'PNTVAAKTKT  
DGE'EKKAESAKEESKRPGD'SGGDVHESPAKKNKVSQ  
>comp4395\_c0\_seq1; 374 1 603 LEN=906; translated  
VNMYAQYF'IGAKCSHKDGKSIHLGVFTD'NGCTNSAGSGVYEA'FNYGSSLPYSSEPIIAVN  
ECL'SCLQVDE'DANDNNNNNNNGN'NNNNQNYNQNYETTEL'CCQSYEMSAK'CETKLSNYL'GQ  
YFYADTSACDFINNILPNLHNAARKIS'GGSTSSVGGSSAATAFAVIFGLT'TALLGAYS'FF  
LYRKIHR'AKVNLAQAEMGIA  
>comp4401\_c0\_seq1; 1473 64 2193 LEN=2767; translated  
MPAESESYAFSADINQLLSLIINTFY'SNKEIFLRELISNASDALDKVRYQSLTDSSV' LDA  
DSELQIKLIADKGNNTLTIEDSGIGMTKADL'INNLTIAKSGTKGFMEALSAGADIS' MIG  
QFGVGFYSAYLVADKVEVVSKNND'SVHTWISEAGGSF'TVTDTEDSGLKRGTRII'LHLKE  
DMSEYLEEKRIKDLVKKHSEF'IGFPVMLYTEKTTEKEVTD'DDDDDDEDEDGDDDKPKVEEV  
DDEEEAKKEKTKKIKEVSH'EWHLNSMKPIWMRKADEVTHDEYVAFYKSI'NDWEDYAA  
VKHF'SVEGQLEFKAILFAPKRAPFDMF'DGGAKKKHNIKLYVRRVFIMDNCEELMP'EWLQ  
FVQGVV'DSEDLPLNISRETLQQNKILRVIKKNL'VKKCIEMFNDLTENEDTYAKFYEA'FSK  
NLKLG'IHEDSTNRAKI'AKLLRYKSTKS'GEEMT'SLEDYVGRMDDNQPGIYYITGESHQ'AVK  
TSPFLEK'LQKGYEVLYMVDPIDEYAVQQLKE'FDGKKLLSATKEGLDLADDEDEKKA'FEE  
AKEKTEPLCKLMKEV'LGDKVEKVVVSNRLADSPCVLVTGEYGWSANMERIMKAQALRDAS  
QSQYMTSKKTMEVNPTNSII'SALREKAEADQSDKTVKDLIWL'MYDTSLLTSGFSLDEPAT  
FASRIHRLVKLGLSIDD'DDDADGEDDMD'DLPLD'DDDDDNEESAMEQVD  
>comp4411\_c0\_seq1; 33 1 925 LEN=1181; translated  
RIQYKPN'TDRTEHDEDTKSKSQQ'NKAARMNKLQNSRNIAEWIIIASAIAIVRCHVSNLAS  
GIVGAAAYDGTADRDPGSAKNIGWDPKR'SHPCTVETISMEDFLKKYRKQGGLPPLYPRP  
LVIKSRSGNPQRNQRFQELTREDTIRDS'FPANFTVTLSSNSFSEHRRTIPLSQYLEE' EVA  
TGPPLDADTKSNETWYLFGETYSDEWKSLLSEYQVPPCQAC'YDESLVALSFGIGNSGSGV  
QWHIHGPGFSEAIHGRKHVLYP'FEDQPAFHPDQ'TSLNWMHYNYPSFEQLED'RPLECTLD

PGDLIYL

>comp4411\_c0\_seq2; 54 1 1039 LEN=1111; translated  
RIQYKPNTRTEHDEDTKSKSQQKAARMNKLQNSRNIAEWIIIASAIAIVRCHVSNLAS  
GIVGAAAYDGTADRPDGS AKNIGWDPKRSHPTVETISMEDFLKKYRKQGGLPPLYPRP  
LVIKSRSGNPQRNQRFQELTREDTIRDSFPANFTVTLSSNSFSEHRRTIPLSQYLEEVA  
TGPPLDADTKSNETWYLFGETYSDEWKSLLSEYQVPPCQACYDESLVALSFGIGNSGSGV  
QWHIHGPGFSEAIHGRKHWVLYPFEDQPAFHPDQTSLNWMHYNYPSEFQLEDRLPLECTLD  
PGDLIYFPDMWWHATINVDDYTA FVSTFTQEHFLDRSETKKAWA

>comp4416\_c0\_seq1; 909 1 1330 LEN=1511; translated  
XSHSFTSIIKMQFSKAVLCLLASAASVNAFAPAQSFRGLPTALEAKKSIEDLSDDDELK GK  
KVLVRCVNVPLDGKTIITDDTRIRSSIPTIEYLKSKGAVVTVC SHLGRPDGKEDKFS LAP  
CAERMSELLGQDVT LAPDCIGEEVSKVVDAASEG DVMLENT RYKKEETKNEPEFVEKLA  
APFDL FVNDAFGTAHRAHASTEGVT KFLQPSVSGFLLAKELEYLDGAVANGEKPMVAIVG  
GSKVSTKITVLEALLDKCDTVIIGGGMVFTFLKAKGLEVGTSLVEDDFVDTAKEVMAKAD  
KLGKTILLPTDIVVADEF SADANSKVVTADAI PNGWMGLDNGPETTAAQKECLSTAKTVI  
MNGP MGVFIEIKFASGTFDLVNILADITKENGCVTIIGGGDSVAATEQSGRAGDM SHIST  
GGGASLELLEGGKVLPGVAALNEA

>comp4417\_c0\_seq1; 231 194 633 LEN=1177; translated  
MARQVARIRKSSFKKLT FENDRREGETKSVQFGTIEIRDYSQCLGDHPDVNRGAPVSLDW  
DYQSEQSYDIEEYEQRYFRKKRTHQQMIRLA FERKHILKTLGYSEEEIETR SKSVK KDRK  
KRXTNEADDDFRAFHN DIGENATMDD

>comp4423\_c0\_seq1; 336 384 1196 LEN=1384; translated  
MFFSRLSFHYNDKSAIHGTNTSFKAVDKVACEDDLTELFPSNRLKALWDWRDRK KKLGI  
LVSKYDHCLWELLRLHKARELDADIHVVISNHDALRP IVETFDIPFHVTPIEKPTSKAGA  
TSEDDYTRSDKSTLPLHELRLQLELLKEVDVVILARYMQILSPEFLNHFPDGI INIHHSF  
LPAFIGGSPYHQAH ERGVKLI GATAHYTTEELDDGPIIEQDVTTVSHRDSVKQLMKKGRV  
LERNVLLKAIEAHLDDRIVVHGNRCIVFGD

>comp4433\_c0\_seq2; 318 276 878 LEN=1466; translated  
MKYLLFSLFFMLIGSGYSFSTPSRVFVGTPTKTRTRLVQDCMTPNPKTLKSTDTIEDAIV  
ALLSAGFNGAPVIDPITNNLVGCVS AFDFIQREETGVLLPFDMEDPENQREMSINARKIV  
ATTVGELATEPALTIHMDTNMKDAAEMLTQKQKHRLCVVDDNNNLV GILSTSDVMRNIVE  
VLKALPETSSAEMS NSELAP

>comp4437\_c0\_seq1; 665 1 1739 LEN=1739; translated  
XQGSGLSNTERPSSPIKSIKKSIRNRLQRIKDGKESRQRHSQRSGLSRPSKEEKQEKT  
QEKKQLQLQQKPKQKQHPFNATLSKQKSPQNAV GSSGKKQKVP AASSAKQVSSKSNNI  
SESNAAIANRNTKPLVKNFISPSSQTLQASTRTEERREEKSPVRNRREKR NKSTK KHP SQ  
DAKTKQRNSFRSFSSESSDDYDYS DHTGLGANRTYDSV GDEEDDYLD RRYRSYDTRGWSY  
STRTGSRSSSSSSSDGSYDSSSSFDDESTISATKRTMRMAVHRNP SDDASSGRGRSRNP  
RRRPPSSPRAREDHISSPRRNPRMQTNRFVDDDDYYE GNTNTDDESQSCYSGISSGNE  
YSRSCSSGVTSGGT FETNDDDDYSSSSNDADERDFRNP GGGRRGNSPHRKHVP SDDDEDQ  
SECWTEAPVRTYDSEEE SDRSSGSYSKKNHGQCVLDPVTTYDCEEGYNGSGLGLDLTRT  
QTDDQTYTSRDIDPEEFAAFVQEQEAAEQRAERKKTDKSEGKDAAVGSGVFSWIFGGTAE  
TTEPEERTAPASPARRGRSPAPVRS PRAHQGDTDRRAFFD

>comp4443\_c0\_seq1; 429 1 950 LEN=1044; translated  
XGGASSFHHDKVSLTGEELAALPTLLIQMAGDEALNRAVAEEHGGPAGV PGLAGDLDP EPH  
PLDVIVAVPPSHYMEHLSTGRYQNR IYATEKYPDG SVLGANTMMGHDILFDPTQNRIGWA  
ESSCDYHELATKHGFPDVLGDELQTAETKEA IATEEEEEEDQVEAKEAFDVDHVEAEIQE  
EEAVAVAAGAEHQHEQHNNNDEQGNDGPAGDTPEEPTAPSLRPADASKSSTAYIAEGPE  
GPQTALLALGLLLAVCAVCGCLYRCCPRGPPARAAYHRAPEIELNGRSSYKDFGDEDL  
EEEDDDVADEYGD KYE

>comp4443\_c0\_seq2; 267 212 838 LEN=932; translated  
QFDPTQNRIGWAESSCDYHELATKHGFPDVLGDELQTAETKEA IATEEEEEEDQVEAKEA  
FDVDHVEAEIQEEEEAVAVAAGAEHQHEQHNNNDEQGNDGPAGDTPEEPTAPSLRPADAS  
KSSTAYIAEGPEGPQTALLALGLLLAVCAVCGCLYRCCPRGPPARAAYHRAPEIELNGR  
SSYKDFGDEDL EEEEDDDVADEYGD KYE

>comp4469\_c0\_seq1; 468 1 922 LEN=1184; translated  
XGGWGNLGGGVTQLIMGSALFPLFKSFYGGDASKAWRVVSVVPAVVAFGTGIM IYKMSDD  
CPKGNYS DLKKHQMAEVSAGASFRQGA FNINTWFLFIQYACCFGVELTMNNAALYFKD  
KFELSTESAAAIASIFGF MNLFARGLGGYFSDKGNQYMGMRGRLWAQTICLIGEV LVLV  
FAQTNSLGAAITVMVFFSLFVQAAEGTSYGIVPYVDPPATGSISGIVGAGGNTGAVCFGL

GFRNLEYKTAFMLMGFTILGSSALSLVIFIKGHAGLVCGEDAPKEATTATLAVPAKDAEA  
SEDVNEE

>comp4472\_c0\_seq1; 681 89 1684 LEN=1889; translated  
MEGTTTLADALLGDLDDLMSDDDEDQNEVAESEEVDASKDANNVGESMDGMIPSPFKSS  
SMIESEKTRTRKRAQSQFLDNRSKLNHLKIIREQNDGNSTVNDNSNTNSSVGAVERRRKEE  
EEENHQMVVQSNKYLASLAEEMQRAHSLADTYRPFPELEDLLPNPLDYKNAIRIIGNE  
TDLTKVNDELNEILSSNQIITLSMASSTTSGRVLTEKELEEVDAATYTEELLLVQKDL  
KFVEDSMESLCPICALIGAPTAARLLGLSGGLQELTKIPSCNLQVLGQTKVNSESRAGL  
SGGSIRQHTGLLADCDLIQSLAKAYKKKALKVVAAKLALVARFDFSNVDSGRQRSASAGI  
SYRKQLEEKFEKWQEPDRAPVAKALPKPNLEAKRRRGRRMRMCKERFEETAMMKQANTR  
AFSTQQGEYGDAMGITMGLLDTADNGGAIKRVTEKRRMRQANTKASRKRAMQMAQQAKN  
KDGLASSVVFTQTTGMELINPEAQKERVKAANDKWFSNAGFQSALPKKGT

>comp4473\_c0\_seq1; 193 151 759 LEN=1007; translated  
MGTTIIFHITLDYLAAILVAFSFLFTPVQSMETPNGYLCNLCYSRENEYHYPPPSIEQKVV  
RFTSPISSTAASEQERESTTVTSINVAFGMPWDIGTTCIDVWNKVLVDYKPNIVDESS  
CRSMAALFAPQCCNQHEHEREREVEVSVKEASFTGLEENKTQTELRRESIGSDSHNLQRRGR  
RAAATSYNLRGYSLTGYEIKRR

>comp4476\_c0\_seq1; 261 226 909 LEN=1167; translated  
MSVMKKRILLVGLCLSTSMVGLAHAMENVGLEIMEAESSQNTPASPRTFVRSFLRTKSEK  
SNKKSQQLLGSKSKKDKKEKSKNDSNKPTSPPIPSPTNNTKSPVQPTMAPTKKPTIS  
PTTQNSETTSESSQSNSGPTGSPPTIPTPLSPPTSSPTTFSPPTFTPTDQGVNARLE  
VAALSAVGQSDTQAKSQKRKMHVEREPRIFNRMGLIDQDNSGIGGD

>comp4477\_c0\_seq1; 375 111 824 LEN=1345; translated  
MTTAGTLRLSSAGNSSNGSGTSTSIDAYLERITGDASLTTAQKNNCLKTLAVVLKNLIDP  
SKGAAPGDAGIKYRTLKLDNPKLADRLFCASVRDLEDDRVGMVEASRTLVLVEEAPCPS  
ARETLAREVLPAAIARAQASALQPRASVHKKARTDADRPAAALPVQQPLSEKQKARLLLEEK  
KRLEKERDRLHKQTVRAQIAADKRVRLHDENWKPASAAADKTGNGLQSFDRDRHGEQ

>comp4477\_c0\_seq2; 149 1 784 LEN=1305; translated  
XFVLFVGFVASSRLVVPYLTSPHLPLFPSEHQHFLWFRNRCRRNENYAPWTRQHDTTQ  
QTKPNPMRQQKTLAVVLKNLIDPSKGAAPGDAGIKYRTLKLDNPKLADRLFCASVRDL  
LEDDRVGMVEASRTLVLVEEAPCPSARETLAREVLPAAIARAQASALQPRASVHKKARTDAD  
PAAALPVQQPLSEKQKARLLLEEKKRLEKERDRLHKQTVRAQIAADKRVRLHDENWKPAS  
SAAADKTGNGLQSFDRDRHGEQ

>comp4479\_c0\_seq1; 1016 94 2328 LEN=2430; translated  
MATKGDSFPSYVTYGLLHKSNDYIDWIRVERDCVVPNETDSSPNVDAESTEPIDVTSCES  
EGERTEATALDVRAFEIFRSLQQKEGTDDGEQNKIEDPILKNNDENESDDDLIGIGDENH  
ISPGFLFGKGTKLQMELEERGMMNKFSSNIAAKIMSAAETSSFGVFDANWNPLRFSRHSNSDV  
AILLYAAAKEQTRPDEESVTEASAWKRRTSIEKPGALSVDAAADTVSATACAKDGFSCL  
QDIETEIERGTLPPVVRSSQQQFLVKQSVNMFFRKESVQFFACFPLRNSPRTIYRFDM  
DGS DGTNGDQSRASAKWKGLARISSVSLASLKKQSIATGESNELSVGGDNPPAPKLSL  
NERLSKMKVSSATKTDDIRRLRSSLNTEKFKFENSFRSTVSNTKKKFSEKFRKMPSL  
SPNAEATEEDIVDYLEEEDIVIFDSSDIVDAEDQKMGDDSTNNDIVAAANGANNDAAT  
VGTEHETVSEESQNAQGPAGYVALSIDDVPGRFNFADKSLSLPKVLDLDFDKYDAKAT  
FMVISSFLSPFHEPDMIRLLQEGHELANHGIRDEPMDKTLATSVDALFLEALDECNDKIKD  
LQQKANASNHDEFATSTDN SHATIPIGVKWFRAPQSRYSYTKVMEEGLAKRDMYNVMCDAY  
AACPIIEDGAWIAASLSKQIKNGSIALHMPALGFRGYCLTALELLEDLVVRNFKVV  
TVSELQRISEQQKASATTTGSSAE

>comp4480\_c0\_seq1; 539 192 1637 LEN=1868; translated  
MAKVEPANTTGEAALARKHRIAMRKQRAVSSCSLSEDESLCERARSKRQRVALDAEVEPM  
VISSATDSVSKKTPNDILESIIKKKPHITGIKKQSRYPGVEMTKEELKAWRKEARRV  
RNRESAAASRKNREAIIEQLESQVKGMQSKYDTALGYIIHLQEQLRQIGMSPLSCPSSVL  
LQDLEDLNKDSSECLPRQTVSPPQSPPTPIEQSSVEVDPLHLTPQAEHRQQDRQRHLVLRN  
DPDKNFLSQPSSRHSPSHPAIPNSQKHIIDNMIIRPIASSRSIKPLIIHSAASA AVHSAA  
ALCYIINNFOQRSSPGANEKTVNDCGGIDHELKAWAHTVRD TVVSDDDAANAFKTVTN  
GDSPSRHLAVSQTMTMETDHSSFGSDDDTVIESEQPMFLDGLPPVTVNDGCIDEIDEAI  
LGCDVGTEDHDDVMAVFLQDTFEPNASRSQVEPSLESVVDSDNDIDALLIAENEALMLFPDR  
S

>comp4480\_c0\_seq2; 624 192 1538 LEN=1769; translated  
MAKVEPANTTGEAALARKHRIAMRKQRAVSSCSLSEDESLCERARSKRQRVALDAEVEPM  
VISSATDSVSKKTPNDILESIIKKKPHITGIKKQSRYPGVEMTKEELKAWRKEARRV

RNRESAAASRKKNREAIEQLESQVKGMQSKYDTALGYIIHLQEQLRQIGMSPLSCPSSVL  
LQDLEDLNKDSSECLPRQTVSPQSPPTPIEQSSVEVDPLHLTPQAEHRQDRQRHLVLRN  
DPDKNFLSQPSSRHSPSPAIPNSQKHIIDNMIIRPIAAKISPGANEKTVNDCGGIDHEL  
SKAWAHTVRDRTVVSDDAANAFKTVTNGDSPSRHLAVSQTTTMMETDHSSFSGSDDDTVIE  
SEQPMFLDGLPPVTVNDGCIDEIDEAILGCDVGTEDDDVMAVFLQDTFEPNASRSQVEPS  
LESVVDSNDIDALLIAENEALMLFPDRS

>comp4483\_c0\_seq1; 354 150 1447 LEN=1447; translated  
MVLPLITSSFDEDDSI SVMSLNDRDDKNNTCNNSVTSNLSPTSAGGGTVINLVNRNKR  
QRFTSESPFTEESENEGRQESKPKAKRARITMTIDEPIAAEATAAMKNFPSEATQGSFGV  
SISNQNDQHGIARPSFEDLSAELCKIVDAAHYSRHEAIAALTNLCQWGYTDDPVFLEEML  
ELGGIQRVLLYLKNNEGDPACVAMAAKAIMTCTVRSKPKHQSFEVSKDIVRALTKREGIEI  
LLQASNECGRESMASQVEALRWIWSALFNITDKSSAYEVGDLEEQRERLLGVFENGVNTM  
AKLGGNIIAATAQKGLTSPVSKGMNDSHVKLVHVVVGGISSRMMYXGGADYQLRAVQWI  
FSSICGGVGSRKRTAMEMSTNRRKRRIVRPSRTVKAKTKNTTKLKTITENSNSVLASQVM  
GLVFITLSNINNN

>comp4484\_c0\_seq1; 360 413 1537 LEN=1727; translated  
MPAAADYLVGPTIGEGSFVYAVHKTQQRKVAIKVMEAPVMGATEHKHRQLWKEQKTA  
MILNERRILSLPELKSSKWIWNLWAAFCESENRYLYFVMEALATGGDLQGLIDRALTSRA  
KSKRDAWRTDVPFYASQLIEAIQFLHSTGILHCDLKPENVLLDAATGDLKLADFGCALD  
TNRQQQNRNPSSPPIMLPRGTARYSAPELLQAESPLALDAAVDYWSMGCILYAMFRGKSP  
FDRGSEALTIRAVFDYLDGAPSDLSPKQKWAEDTNDDESTRYPLYRLSQGLFAMIPGDRT  
TFWATSVIPLFDSKSKQGESVGGDDAIHGIDNRRSATFATTSNESGVLPSPDPDKQVESA  
TLRNGDLGWVAFQL

>comp4484\_c0\_seq2; 360 413 1537 LEN=1904; translated  
MPAAADYLVGPTIGEGSFVYAVHKTQQRKVAIKVMEAPVMGATEHKHRQLWKEQKTA  
MILNERRILSLPELKSSKWIWNLWAAFCESENRYLYFVMEALATGGDLQGLIDRALTSRA  
KSKRDAWRTDVPFYASQLIEAIQFLHSTGILHCDLKPENVLLDAATGDLKLADFGCALD  
TNRQQQNRNPSSPPIMLPRGTARYSAPELLQAESPLALDAAVDYWSMGCILYAMFRGKSP  
FDRGSEALTIRAVFDYLDGAPSDLSPKQKWAEDTNDDESTRYPLYRLSQGLFAMIPGDRT  
TFWATSVIPLFDSKSKQGESVGGDDAIHGIDNRRSATFATTSNESGVLPSPDPDKQVESA  
TLRNGDLGWVAFQL

>comp4485\_c0\_seq1; 237 1 2390 LEN=2596; translated  
XKIIISNTIAITNTNTIDILATKTSSMSDYLNNGPPDPIAFFRQASDANVGIVDSSLADI  
EDGGDSRKPCSGVTCPPSPRRNQEAPARERPPPBGHDWPYRENLSFSRSLMFYAGAVTVE  
NVKACKNIEKCRSYRKKYFGSHSSIVQSEILMDAKSNDQSALS YRMGSDGVMEIYHSEDM  
EKTNNLCVPTIEDFERDYRDMTKMVNEGFMRSYCFQRLQLLSSAFRSHTVMNASMEAE  
QGNLLGTDFFRTLKIDNHIHAAGAPTAKQFVNFVMNKLQTESD TVVSSDGR TLGQVFEQA  
GLDKDHLTIDAFNVLADYSVYQRFDFNFNAKYSPPFRMADMRRIFLKSNNHIGGRYFAELK  
IVLNRREESKGHASGMELRLSIYGMERREWDDLAEWMLRDWKGGDFPGPLVSECNRWMIQ  
IPRLWRIYRSKPGKDATTGFNEMLENI FAPMFEATLHPERKPKLAEALTHIVGIDSVDDE  
GAPEVRVQTFWTECWQAMAAFCRWISWLIVFNVLKLFP LLFPACFLPLFSSKAACGCQR  
PHEWTPGNPSYWWQLYFLWANLEVLNLSLRKARGLNTIAFRPHAGETGNPLNACTYMLS  
ESIAHG INLHQVSLQYLYLDQVGISSSPLSNNFLFRKIRESPVGKLFRRGLNITLST  
DPLLFHMSDDPLLEEYSVARATFDLSMTDMMEMARNSVIQSGFEEEFKQKYL GKDFRKG  
VTFCDERLTHVPLIRAKFRAEHLALEHMLCALTAAGKGPSVLAEMKTQFGLARDAHRAILF  
DNLDEIDASFPPELGQL

>comp4485\_c0\_seq2; 441 1 2242 LEN=2448; translated  
XKIIISNTIAITNTNTIDILATKTSSMSDYLNNGPPDPIAFFRQASDANVGIVDSSLADI  
EDGGDSRKPCSGVTCPPSPRRNQEAPARERPPPBGHDWPYRENLSFSRSLMFYAGAVTVE  
NVKACKNIEKCRSYRKKYFGSHSSIVQSEILMDAKSNDQSALS YRMGSDGVMEIYHSEDM  
EKTNNLCVPTIEDFERDYRDMTKMVNEGFMRSYCFQRLQLLSSAFRSHTVMNASMEAE  
QGNLLGTDFFRTLKIDNHIHAAGAPTAKQFVNFVMNKLQTESD TVVSSDGR TLGQVFEQA  
GLDKDHLTIDAFNVLADYSVYQRFDFNFNAKYSPPFRMADMRRIFLKSNNHIGGRYFAELK  
IVLNRREESKGHASGMELRLSIYGMERREWDDLAEWMLRDWKGGDFPGPLVSECNRWMIQ  
IPRLWRIYRSKPGKDATTGFNEMLENI FAPMFEATLHPERKPKLAEALTHIVGIDSVDDE  
GAPEAACGCQRPHWTPGNPSYWWQLYFLWANLEVLNLSLRKARGLNTIAFRPHAGETGN  
PLNACTYMLSESI AHG INLHQVSLQYLYLDQVGISSSPLSNNFLFRKIRESPVGKLF  
RRGLNITLSTDDPLLFHMSDDPLLEEYSVARATFDLSMTDMMEMARNSVIQSGFEEEFKQ  
KYL GKDFRKGVTFC DERLTHVPLIRAKFRAEHLALEHMLCALTAAGKGPSVLAEMKTQF  
GLARDAHRAILFDNLDEIDASFPPELGQL

>comp4487\_c0\_seq1; 236 443 1064 LEN=1236; translated  
MTLFFNFGGDRPVYYGALDVSLSPGAEAEAKAAAMYLEQFDLDDLVSPLSRVYGAEQV  
LSLQKDLDTPVVRMEGFKELDRGSWCGKTKEEIGLEAMAKFDACDESVTPEGGESYPFLK  
TRVLEDRDAVLDGLPAGGTAAIVSHLQVTRSMLSALGIPTAKMAGLGIATASVTCIDYN  
PDGSQTVHFQSFKPDVGLKESVDGAN

>comp4487\_c0\_seq2; 236 443 1064 LEN=1141; translated  
MTLFFNFGGDRPVYYGALDVSLSPGAEAEAKAAAMYLEQFDLDDLVSPLSRVYGAEQV  
LSLQKDLDTPVVRMEGFKELDRGSWCGKTKEEIGLEAMAKFDACDESVTPEGGESYPFLK  
TRVLEDRDAVLDGLPAGGTAAIVSHLQVTRSMLSALGIPTAKMAGLGIATASVTCIDYN  
PDGSQTVHFQSFKPDVGLKESVDGAN

>comp4487\_c0\_seq3; 194 1 907 LEN=1079; translated  
XNEPLNSSPRPLRRLKMERTARALFIFQILICVTVRNFLASSFAPIANVTGARRYRLFRM  
KSSLSAKDLKLNLSGKIIGPEIPSVEVSSKRLFLVRHGEVINPGGDRPVYYGALDVSLSP  
LGEAEAKAAAMYLEQFDLDDLVSPLSRVYGAEQVLSLQKDLDTPVVRMEGFKELDRGS  
WCGKTKEEIGLEAMAKFDACDESVTPEGGESYPFLKTRVLEDRDAVLDGLPAGGTAAIVS  
HLQVTRSMLSALGIPTAKMAGLGIATASVTCIDYNPDGSQTVHFQSFKPDVGLKESVDG  
AN

>comp4487\_c0\_seq4; 194 1 907 LEN=984; translated  
XNEPLNSSPRPLRRLKMERTARALFIFQILICVTVRNFLASSFAPIANVTGARRYRLFRM  
KSSLSAKDLKLNLSGKIIGPEIPSVEVSSKRLFLVRHGEVINPGGDRPVYYGALDVSLSP  
LGEAEAKAAAMYLEQFDLDDLVSPLSRVYGAEQVLSLQKDLDTPVVRMEGFKELDRGS  
WCGKTKEEIGLEAMAKFDACDESVTPEGGESYPFLKTRVLEDRDAVLDGLPAGGTAAIVS  
HLQVTRSMLSALGIPTAKMAGLGIATASVTCIDYNPDGSQTVHFQSFKPDVGLKESVDG  
AN

>comp4489\_c0\_seq1; 450 404 1444 LEN=2037; translated  
MGLNWFHDLLEISESIVRRGANFALDQLVLDLRLRAIYHPINGLWACCVGTYLGASSMY  
GLQMTDDDKTELLQSSLYLKDNQAQAVLLKAGGCKALLPESVQNWLQQSSSSPTLEKTI  
DISVGLSDKSTSDSDVTEVDEHDQIFRGSTVDEDFEKIGELSDVSQPSNMVHSFKDER  
MKRLSGSESQQEAKDPTGWEDVSQTDPEVEVFFRILRNMMAMDIRSYAEALPRSQIENVGI  
VALMALGIRLSLRRASYDRAPLLCAGVAALSFGTIIISREAILGNIYNKQSMHIVCKDIAS  
SILDKLLKRYSSKKTFFAMVTMLIFCRRKQKGKMGAPRNSQSFKTR

>comp4492\_c0\_seq1; 615 91 2184 LEN=2778; translated  
MTMAIGIQSLRRRSLVLQISLLLATANIRCIRAFQIRSESVKNLAGRTSMSSSSCLSG  
SANPLLEAWTQPFSLPPFDRIQTEHYRPALEVGMEEHLRDLQAIVDNPEPPSFENVMVAY  
DRAGRTLNVKGGVFGNMCSSQNTPELQAVQTEMSTILSRHRSSTYTLPLGLFDKVEQVHRE  
QQAENGGRTREDNRLTERIYLDFTSRGAHFDTDKQAENADIQAKLASLITEFMQNVLKD  
EEQYELVLRDLAGCPDSLVEAAKNAEERKKADDEYVITLSRSLVEPFLTFSSRRDLR  
ETAWKAWTSRGEMDPDRDNKIATDILKLRQKQAKLHGYKNFAEYQCVDRMAKTPEKVE  
LLENVWEKAKVSANAERKELEDYVKQGGSLGEDEKDIENGVAWDWRYAEQVRIAKYD  
FDESLLKPYLSLESVTNAVMAVSNKLFGLKYIPRDDIKTYHESVKAYEVRNEREDDKLVA  
IFLHDNYARPFKSGGAWMSEFRSQTKNLSEEMKEEYQGIPIVTNNNNFARGKNTLLSFDD  
ATTLFHEMGGHGHGMLSDCTYGRLSSTNVLRDFVELPSQLMEHWFEPEVLKEYARHYET  
GEPVPDELIEKMNKARSFNQGFATIEYTACALLDMLLHQVDDYENFDMSTFEREELDRLG  
MPQGVVMRHRPAHFSHLFASSGYAAGYYGAYKLAALL

>comp4492\_c0\_seq2; 645 91 2370 LEN=2648; translated  
MTMAIGIQSLRRRSLVLQISLLLATANIRCIRAFQIRSESVKNLAGRTSMSSSSCLSG  
SANPLLEAWTQPFSLPPFDRIQTEHYRPALEVGMEEHLRDLQAIVDNPEPPSFENVMVAY  
DRAGRTLNVKGGVFGNMCSSQNTPELQAVQTEMSTILSRHRSSTYTLPLGLFDKVEQVHRE  
QQAENGGRTREDNRLTERIYLDFTSRGAHFDTDKQAENADIQAKLASLITEFMQNVLKD  
EEQYELVLRDLAGCPDSLVEAAKNAEERKKADDEYVITLSRSLVEPFLTFSSRRDLR  
ETAWKAWTSRGEMDPDRDNKIATDILKLRQKQAKLHGYKNFAEYQCVDRMAKTPEKVE  
LLENVWEKAKVSANAERKELEDYVKQGGSLGEDEKDIENGVAWDWRYAEQVRIAKYD  
FDESLLKPYLSLESVTNAVMAVSNKLFGLKYIPRDDIKTYHESVKAYEVRNEREDDKLVA  
IFLHDNYARPFKSGGAWMSEFRSQTKNLSEEMKEEYQGIPIVTNNNNFARGKNTLLSFDD  
ATTLFHEMGGHGHGMLSDCTYGRLSSTNVLRDFVELPSQLMEHWFEPEVLKEYARHYET  
GEPVPDELIEKMNKARSFNQGFATIEYTACALLDMLLHQVDDYENFDMSTFEREELDRLG  
MPQGVVMRHRPAHFSHLFASSGYAAGYYVYLWAEVLDADVAAAFKETGNVFPDMAERVR  
KYVYSAGNTEAPDELFRKFRGRDPDIKYMLEKKSLSVSAS

>comp4493\_c0\_seq1; 165 1 858 LEN=1077; minus strand; translated  
TGIDWYSIAGYNTHPSDTLRDIFSSGKDVLVRVDADGFYYSTYIGYFYLPKSDSDGDPF

TSNSVFRMEVAPNCQGVWIRAPRHDGTSRVIRMNSGDSVTLTYADTGFGTGYWFTAGENE  
EWNGSTNSFKIERGDGTFDPYDMNVNCVFTFTSEKCSYYSYYSYSGMGGFRNRELKGYAGEAD  
EPAIAFREQESGARRLQTDSDDEFALAGGETIILDFGSRRLEGSNARLLQATQDPLSSTI  
SVDATLSTAFDEIGELRTASGNRLQRATGVIGLLLAWATAMVAFAW

>comp4494\_c0\_seq1; 478 188 1690 LEN=1982; translated  
MPSSSSRDVERRFLLAVNDVCFVFLGGS AWILVNGIYVQIPFIILFFDGDYGVVSKITLC  
VTL SALLP IFGSVSSFGSLTSANHVCSKLNVCNINAI CASMGGTESTSGIDEHERSIHTG  
ITLVLSLGFVTVSLVLTIWTEQILSR LAPMLVASFAAGIVGTTSSILYYPHAASAVSSKTN  
TAKRQTTAMLFGTAVSNL FVALVAILQQQEQRQQI SERAQATASMR SYFRLILVLMWFAI  
VGFLGTLVIRRFGDTPKILESEN NKTQSALESPLLEENYLQPGNTETILHRRSFQKA  
ADVSLSFWEVSSLNSTLNTAQCALNFLVFFLP GIVPYSVRDSSK DENYNNTTSLRYLVVSQ  
LVAQTLGVLASSGAGGSSGARASFCYRRPDS DNNHSAAPYQLGFIFFFLWIPLVFLSFEN  
DLACGAGIPIVLNALLNGAYGYCNTAWFHLLNDNHCSQNGDTSNGTPTS AVRVMGTHWQ  
IGATMGSAIAFELVERGVFG

>comp4495\_c0\_seq1; 553 1 1749 LEN=1902; translated  
RKTTHGHQMEIVAISSDGA AVTVSKPSVTEVGVNDSFSTDSTCSVPND DDES DAAGNAN  
PPPRGPFSGFRQRR AERIAARTSLRCERDEADAARKKAI EEERRRAQEQQRKAEEA IPER  
LIEPDLGSLRAGRISVTVSKTESNSYGFGLAQVPRKKNMVKVDALVNEGDKHLLSQSPLR  
EGDILKMVNNQEVTDYRTVM LLLMGMEGRVTMVVETPATQGNPAMVQAF CRKPLPETTIG  
IEFQVVEHNTTQNSLCRDPNGTMEVTTTKLLQIKTVNPDGYLAHSALRQGDFVLAINDKP  
CTDTTAEAAAAMILESESTVNILALNPELAQKHCSPTRAQRWMRRARRTG VGVAGGTM LG  
LGLIMIPLPFPFPFGEVLVVGVSVLGTEFEAPKRVAR SARNALQNAVGNGEKTVSAEVL  
KQMESVSSNDDGNIAGGSVGPDDNVGESEHDCKDENPTESEKVVLRDSFLT VIGHHQTG  
MPIVSGDETEPSDEATNVVDCWSQANIDANIENMYSGNEHDMPS SPTGTRHFLKNVGRNV  
VLPFLDHVVG DGKQGESQ GK LLESKPATAKEELNIT AATTEN

>comp4496\_c0\_seq1; 273 335 793 LEN=1104; translated  
MSSGCITKYDYKNINFSYPSRFCLKGLTLRFSSTSRIVRLTKRFNHFIDDANSGSIENSN  
DVNSYHDTSGTRSSSTTDAVMVEKVKIAACGDIDSDEDDDEMEQEEMFVEAHVSPA FEH  
GATEWGGPRRGGRFPEPTRFGDWERKGRCSDF

>comp4496\_c0\_seq2; 193 28 489 LEN=737; translated  
MLVPSPSLIRLIALRVR SNALPSLQSNSTSTSTARTIRSCYPVQSSAFSSWFGNKSEENS  
NDVNSYHDTSGTRSSSTTDAVMVEKVKIAACGDIDSDEDDDEMEQEEMFVEAHVSPA FEH  
HGATEWGGPRRGGRFPEPTRFGDWERKGRCSDF

>comp4496\_c0\_seq3; 193 28 489 LEN=800; translated  
MLVPSPSLIRLIALRVR SNALPSLQSNSTSTSTARTIRSCYPVQSSAFSSWFGNKSEENS  
NDVNSYHDTSGTRSSSTTDAVMVEKVKIAACGDIDSDEDDDEMEQEEMFVEAHVSPA FEH  
HGATEWGGPRRGGRFPEPTRFGDWERKGRCSDF

>comp4496\_c0\_seq4; 273 335 793 LEN=1041; translated  
MSSGCITKYDYKNINFSYPSRFCLKGLTLRFSSTSRIVRLTKRFNHFIDDANSGSIENSN  
DVNSYHDTSGTRSSSTTDAVMVEKVKIAACGDIDSDEDDDEMEQEEMFVEAHVSPA FEH  
GATEWGGPRRGGRFPEPTRFGDWERKGRCSDF

>comp4497\_c0\_seq1; 541 181 1989 LEN=3121; translated  
MATSNNC SSSDSPTSTSSRDRASVQTGERNQ RNERQQRNQRLLLRVLEHRHKFPGRLS  
RAIERARCT SAGRANGV PPTTPEAPLVPSPGTTSDSDSDFLSRIRRD FEEWLFSEPSKSN  
YRPPAQNRSSRVGEEQRQASRLELR SNANANADENDSESETATASDI AVSGLDDRVD TQD  
QVELALRCFPEVLTARRFGLYPIFWLAKSIHSVSFIPLFAKIGNESGLFQDFERGGLVFG  
GCGKYINVSQLAAGVADAGHRNNASNNDHDQAYHRLVDEKFLASIKDLRESRLMEKKDI  
ANHDLLGALHRQSI FPEQRFRYLVDWDP RNTLLK K KAYGTTLSWDLVSR YI INNIGENHL  
VTGHSHTVHNQSNHNRSKN SHNHKSNHNGPQQCATAGVEMLFELAL KYFPIETGFLF  
HKCDVRRRKRHTRGVTDY YFLY CDDATLKRRCRCKHTLGSSRRSLSPSSSSPQPGVAREN  
HEHGFFEQR SASSSLPTNTATTKGTTKTRATVTKTMTPYRIACEIY GIECANKILETAL  
AGVIDGTSNVASSSTANSSSND DDMAMALINAASDPNVLD CVYIILLQRDPGLCKPNGK  
RN

>comp4498\_c0\_seq1; 334 1 1106 LEN=1106; translated  
XETLKRQLDRRQLSELPGTDRHQVPVSEEKDG GGDASADATLPSENE LLLMIGHCMRGLA  
ILGRGKEVENIFARVAIMPLIRSKI SMGR LDEGGSRGECAGLKS LLED MVLSVSSTFGRV  
LELSEAMFDLETRVEVDLITDG VWP IAT ALMADAGIKMAIFSPGLAGILQSNYVTLDFK  
LSKLAGSLLRESGAADVGAASTSTSASAAVPSHLATAQSESESLAEALYTPRLSAETI  
RRAQERIYLHPKTAEF SKKWNLP IYYQLRFGDC CARLNKAIESTTREGWTA EVFTGDKAS  
ETLVRNDVGFELSFVELYD TLLGLWKPDVILQPLTNRFLRGAVQLIGRSVAFVKAGMDG

ELKFGDDGN

>comp4499\_c0\_seq1; 329 334 1332 LEN=1413; translated  
MSLLTTEEWWTDFVAGWVSGAVGVATCQPLDVTLTRFQAGRVLSAPGLEVAVQGGVTASAV  
RSSVRGLVGEFGLRSLWRGSSPMIGAVPVQNALLMGGYGF GKRYSEGARGADTGACDALL  
PVFVGGCAGGVLQSFLMSPVEWIKVQQQTHASSGAAATASSVSVLRRFLTHRHALWNRGL  
TATLLRDGIPHGVWFATYEFCKLRMLAGPAEAASGGTETPGAGAEDGPRSSLYKTVAVPV  
VSGAVAATTAWAVGYPFDIKTRIQASADGVRVPPGVWETGIKLVVEEANGNLLRGLYRGF  
GLKLLRSVPASMGVFFTYELVSGAIAGAGSNP

>comp4499\_c0\_seq2; 270 334 1340 LEN=1340; translated  
MSLLTTEEWWTDFVAGWVSGAVGVATCQPLDVTLTRFQAGRVLSAPGLEVAVQGGVTASAV  
RSSVRGLVGEFGLRSLWRGSSPMIGAVPVQNALLMGGYGF GKRYSEGARGADTGACDALL  
PVFVGGCAGGVLQSFLMSPVEWIKVQQQTHASSGAAATASSVSVLRRFLTHRHALWNRGL  
TATLLRDGIPHGVWFATYEFCKLRMLAGPAEAASGGTETPGAGAEDGPRSSLYKTVAVPV  
VSGAVAATTAWVSSANLGPFCFDTAVRLLVWVWISRATHGLCSFFLLSIPNSHTQAVGYPF  
DIKTRIQASADGVRVPPGVWETGIKLVVEEANGNLX

>comp4501\_c0\_seq1; 172 167 976 LEN=1154; translated  
MKSDGNHGARNRKYVIGIIGGSGPEAGADLFGKVSMNRKMGETYKSDRDAPNILLISVS  
ELGGPRTAIDVDPNPDTYEQSRTALLDITRKIVPLVDVFCVACNTLHMFEAQIRETV  
ALGRNPSMFVSIISSTIKACKDELNGDESAKISILGGPVTMDLDGNSSYRRLVEEVGKDY  
FYRPPSSCTSILQRVIWKVKQEGTAHTSGDALTEYEGLLRDVASQSVKVCVLACTELPLI  
NAKHITDLPMKFIDPAEVVADALLSVAHR

>comp4502\_c0\_seq1; 260 235 1002 LEN=1093; translated  
MTARTNCDTSSYPLSKMSNNAMTVNHRDAKSSLRKQKNRAWATTHGNNKYFRDHNRRSI  
ATSSSRKGM PASSRTGALAKPRHISNAKRAVSLPADLRNTTALATKDLFWFLPKRKHRT  
HCSESDDPYQAPRSQQRHRRHCSESHYPCKATDATVVVTDTRLVECGRTELHRSHFRAFD  
EFNGMTAHCREKTSSSGNKFRLSPLKNLNWSGDYFVDTADEHDFPLLGLEIMESVTENEI  
EKENQTKFIRHQIPK

>comp4504\_c0\_seq1; 377 665 1816 LEN=2144; translated  
MDSTHCSVRGTSKIIGYHHLGSTTTTSTSSGPEMSAPASRQRKIPKIMHQHGRSVCVPSR  
LYNLNQWQKQHLMDDRDNGDNEGDEWSIYFHTEDAMARLFRAAIAVRQGAAGPNTRRH  
GSPLIISDDFPHLGQILRTRCIKNRSFIRGLLWRFVCLYIYGGMFVDLEYAPPPTESYGDN  
MNTIIDDNRNDAVFFIASDKDKGDSNNLRNSWGGINTNIMAVSPEHPILYYAIQHLLFQI  
TTDGYADQDSDNKTIQHYIVSDILERSLADFMDKQSVSLFEFTLGKHSTESRTKTYSGTG  
KRTVTIIDSSSGDTSSIGTSNHRHFQMIANFQRKPRASPIVDGSSFDHKVFSPSNQSLR  
KHPPSCLHKILADISKSSSEVGS

>comp4505\_c0\_seq1; 254 72 671 LEN=958; translated  
MESKTTTDPMPFERVTRTLDEFGRNCFIDEDGIAATNMCTIHGFFNKCPAGSSSLTYAGTK  
NSIDAKLACPLDSVAQSDWREASQKGLCDCEASLLDGECEVIEEQMDCQCFGCPDGTLLG  
FAYSCTTPIVGPCLSFDCYGVNCKGFDPGNLTGEKETFAPTEMAQDEDEDTSSARTIGDP  
NNHVMGTAVMVLALLRMIM

>comp4506\_c0\_seq1; 407 363 1864 LEN=1948; translated  
MTVISVASIPIGRVERLHTAAVTEATAKEDRTDGILRTNTSTTTTTKALVTTIRDPNPHR  
SPTQTAKQAQAGANSYPTSLQRDRLGRTAVGAATAGAFPSTGTFTLETTOXSAHLLNG  
DPAHQFPFSLYQPLADAPKSDTATVCSGSMLEDIEDVGSYHDGESTTSGQLSASKQPQQQ  
HHHNYPPPTGAIRRSNSKEGTRLVDFERSQEALRAVFPKQSKSAAYASLSQESSQSHAG  
ASTSAVATASGSNDEDAVQHKKGMGPPLSRHWLLQQHGNSPFRGTGSVKSIGSNTGSDVVV  
NVGSDCGGSLTDAQSVLSQEDTALLSTVNSEISSDVPPAAASAASAGKSDAIDEGVPHPL  
LCDRSDGKTNGRTSPGGTIYRGRGIRRYKGRFYALPLKRFHQDGVHLHSDSEPESGVDRQ  
LQKHDRWDDRSGSDLRFGGQRGGERHNYHGHAPSRRDRSRSRSRSPPAEGRGRETRSR  
KMDQARGYALEKNRDDDGGSS

>comp4507\_c0\_seq2; 593 177 1076 LEN=1249; translated  
MSAKRYPRSVVPLALLLALFMAVSVLASTEGSQRIAAGRSRAEERGGIRLAGAGQAAG  
SSDDDDDDNANEDTTAAPKKDDRSSPAVSPKTSQKATAPTEPKTSSPSKATTVSIASR  
TSSVASATKEPLSASMQFETPQTASPQTSQVSKSSPSSGSKPEKDAAASSKPSASSS  
DTTESPVASGTTTTTSSVGVGVGTEGNQTATGDDDLALASPTADNGDDNFASVIFST  
SNNSTKPLVLPKEKEQPKQWPEIVGGIFVAGGISFFLATYCKNYQKRRQYDQVPASLTV

>comp4508\_c0\_seq1; 616 117 1388 LEN=1643; translated  
MKFQLAVLSLFCASPVHVQSFAPASTTPSSSTRSASAASPSVARSVPLFSTAAPAEQTE  
ETLELNADYQAALDQATAAIKAGLQGASPEMLSSVVHFCTEYVSAHQANAKQPTENSA  
TAALKRISEAIQFGKKGFMGEDKQFGVTHDALRGNDPISEEIGNTLDFYQWGCDFFRHF

IDVEDSIVLGEDNLKAMEQASKGENVVFYANHQSEADPQVMSILLEKAGYTEEAAKVIY  
VAGHKVTTDSLAI PFSMGRNLICIHSHKXHDIDTDPDTKSQKSRQNMKAMGGMLSKLKQGGC  
ILWVAPSGRRDRDTSTGKTP IAPFDSKTIDMFRLMGTKSKVKTNYYPLSMVSYELCPPP  
DFIEAGTGEQRNFRFVPGVIGKGDQIDAESGSEDAFHGAFEQTLADYHEL RERIFPGTA  
PEL

>comp4508\_c0\_seq2; 224 1 720 LEN=975; translated  
YPPRKGEDNLKAMEQASKGENVVFYANHQSEADPQVMSILLEKAGYTEEAAKVIYVAGH  
KVTDSLAI PFSMGRNLICIHSHKXHDIDTDPDTKSQKSRQNMKAMGGMLSKLKQGGCILWV  
APSGRRDRDTSTGKTP IAPFDSKTIDMFRLMGTKSKVKTNYYPLSMVSYELCPPPDFIE  
AGTGEQRNFRFVPGVIGKGDQIDAESGSEDAFHGAFEQTLADYHEL RERIFPGTAPEL

>comp4509\_c0\_seq1; 614 63 845 LEN=1194; translated  
MADNWDDSDDDWDVDDDALDAKLGLNKSAPAPVNNFDEEDLALKEKAEQDRDLKINLK  
KKGSA LA AKKQAEKDRQDDLEIARKALELEAEMEANMTLDERKLMQRKREEESELDMMGD  
AFGGGIGDGGVGRKGVQQAGDKVVMKMDKDHMKHARKVADCMKGHGKIHLTSIFIKVQ  
QSKDLLDDAAISDIKTCNVIKNEKVQASKRKVKGQAQKSKKQEKIEKAKAQAIQNELFG  
DSNQYDEYDEYGEYEDAFF

>comp4511\_c0\_seq1; 234 29 721 LEN=1031; translated  
MAKRNNMHNTSHANINTVRFSLAHVPEHHQDLGCMGTRSAWNSDEDYHSSKNRDRVALPP  
RRPSRIRKNPNGLNEEVFVSSGIDGQRMPLPYREARQLSKPSTERKSILKSKFSHRDSTI  
SKIPSTSKCPESPNCISIASDDSSSAFDRGATSLCSSLLRNHRDSVLDLHRLARHRSGVNC  
PRKPSIADESITDSSILNDESDDRSMSTLGQSNHTFGSNPPLTDLLLEM

>comp4512\_c0\_seq1; 246 553 1098 LEN=2502; minus strand; translated  
MHPPPCPFSRLRCRVVSLRFVVASLLRRASSVLQNNTKLHGAAKALDCDDLLSSWNSEGSP  
NGKKE SFLVDFSGGGKHPNRTVRALELGLQFQAGFAAEEITVYAKAQQGEGETGGARWR  
KAEEIEAEDDHQLSFALPAEPEPTTALKIVFGETTDFYGRV IYQIQVWGKNLGNDCDKS  
S

>comp4512\_c0\_seq2; 246 461 1006 LEN=2410; minus strand; translated  
MHPPPCPFSRLRCRVVSLRFVVASLLRRASSVLQNNTKLHGAAKALDCDDLLSSWNSEGSP  
NGKKE SFLVDFSGGGKHPNRTVRALELGLQFQAGFAAEEITVYAKAQQGEGETGGARWR  
KAEEIEAEDDHQLSFALPAEPEPTTALKIVFGETTDFYGRV IYQIQVWGKNLGNDCDKS  
S

>comp4513\_c0\_seq1; 228 198 1502 LEN=1621; translated  
MAAEEEGEGNDAVEGDI IRDKVDLWVPRLIGSVTFLCSIFILGLSWRRRAYVFHRLVLGI  
SIHLIVSGVCLIWGAAAIPSDASDAVGNYGT VATCTVQGVLLYVSFHSVFFYVCLSLYS  
LLGVPNNFCDKRRLVAEKWIHAGVHVFP IASAGYLVGIEAFNNVGLGYCLTVSDPLACN  
NPESGVP CERGPSVEEWKALNMFWIVPQLLILLCPTAIMIALYFQTRKHQATVRIASADV  
AKQSALYLLSVYWI VLPFLVQQLWSSSLSTTG YSTEP IAFFVFAVLSTSNAGL FGLWILLF  
YLCFSFDISISSMSATRK MNTVAEDKGPQR PGRSGRPTVATSPKTHNIFRSQDIVGAGEP  
GSPLATSHSSKSLGSR TISFNIFDGTNAAGAFAD FVFDGSDDEKADATETAYCIGLQ  
PAFQEDPQRVPPST

>comp4513\_c0\_seq2; 223 198 1346 LEN=1465; translated  
MAAEEEGISIH LIVSGVCLIWGAAAIPSDASDAVGNYGT VATCTVQGVLLYVSFHSVFFY  
YVCLSLYSLLGVPNNFCDKRRLVAEKWIHAGVHVFP IASAGYLVGIEAFNNVGLGYCLT  
VSDPLACN NPESGVP CERGPSVEEWKALNMFWIVPQLLILLCPTAIMIALYFQTRKHQAT  
VRIASADV AKQSALYLLSVYWI VLPFLVQQLWSSSLSTTG YSTEP IAFFVFAVLSTSNAGL  
FGLWILLF YLCFSFDISISSMSATRK MNTVAEDKGPQR PGRSGRPTVATSPKTHNIFRSQ  
DIVGAGEP GSPLATSHSSKSLGSR TISFNIFDGTNAAGAFAD FVFDGSDDEKADATET  
AYCIGLQGP AFQEDPQRVPPST

>comp4513\_c0\_seq3; 197 498 1646 LEN=1765; translated  
MAFQCLGISIH LIVSGVCLIWGAAAIPSDASDAVGNYGT VATCTVQGVLLYVSFHSVFFY  
YVCLSLYSLLGVPNNFCDKRRLVAEKWIHAGVHVFP IASAGYLVGIEAFNNVGLGYCLT  
VSDPLACN NPESGVP CERGPSVEEWKALNMFWIVPQLLILLCPTAIMIALYFQTRKHQAT  
VRIASADV AKQSALYLLSVYWI VLPFLVQQLWSSSLSTTG YSTEP IAFFVFAVLSTSNAGL  
FGLWILLF YLCFSFDISISSMSATRK MNTVAEDKGPQR PGRSGRPTVATSPKTHNIFRSQ  
DIVGAGEP GSPLATSHSSKSLGSR TISFNIFDGTNAAGAFAD FVFDGSDDEKADATET  
AYCIGLQGP AFQEDPQRVPPST

>comp4514\_c0\_seq1; 238 238 858 LEN=1151; translated  
MTNSSIRTRSNI FVNSFTWNNKRI IRSENAMKNYKRHDGKIHRKHRLQSIPSM EGLVL  
RTAKVDISTNECDENKAPGGGLINQDEKDVFFLASPSSLLIPPCNPTRSLPELPYKRQQR  
SQFQYEDKVYIPKFDPSLLQFPILPSPPPSPSKSRAAGSKYSKKKQVGKRY SAPKHNPW



DPSHIPIPSGIRLLPKTRFVLPDNC

>comp4515\_c0\_seq1; 425 331 1512 LEN=1792; translated  
MCGKRIPAASSLVSSAPTGNVRCRGRQTIPYFYVLGASLLMLQIVVAATSSNIGNFQGI  
SFAKSHKRPSFAVDRSIPRGALFGTATEDFDDEEEDDEEENDDIRQHPEYDKLLAYR  
MKQQVLLQLRATYLSSETLAKRGLPIATIQDVATPEGTSPQKVDWDCAMSTEEDPGHCLI  
SYEPEPGAKLVVPIELAHTDKWITLAALNRLRRDDPSKVEPMWNDKYAVLTSWFSFNSRY  
SLLQHMGPKGVLSTLLDGNRLPLVVGILVLLVTIQVLPPIIEAVMNRLLVSGFVWERWPS  
WYRYVRVGLPFKLLILQVAFGQVSKAFSALVVFVKDKLVDMECRILEETIPLTVGVPDGP  
YDTDDDEDDVDQEETDDDEHDESSDDDDMDE

>comp4516\_c0\_seq1; 410 136 1437 LEN=1844; translated  
MSYAYQNPTRTTTLLLLWIGLLGCSTRTIHSFVHIQARASNPRQSGSAGNHNHRIGSAKH  
HRPSAGPTPPATGFDGSSSELYGSEGSREEDIDEDASYERAQRIMYNQLSRKRESVRYQII  
AAEACEPLAMRMAEKYPDRFHFHPTTWAKFPDGTDNIEIGGFNPNRVVSGEKVLFVLSF  
HSNDTTLQSFQVMICLLQSFIESLTVVLPFSPVGTMERVTNEGQVATAATYAHMFSSLPN  
CGRPTRLMVYDLHTLQNRFYLHGNSVASLHTAIPLLKEKIEATGINCVAFPPDDGAAKRF  
GMFLDMDLEIIVCGKTRGEGDARSVTIQDGNADGKHIVIVDDLVTGGTLYETGRVLEEA  
GAASVNAFVTHGVFPNESWKRFRNKGGDRACFEKFWVTNSIPTVTNDLPEEDGIFEVLDDL  
DLIIDDLDHYNSI

>comp4516\_c0\_seq2; 362 136 1590 LEN=1997; translated  
MSYAYQNPTRTTTLLLLWIGLLGCSTRTIHSFVHIQARASNPRQSGSAGNHNHRIGSAKH  
HRPSAGPTPPATGFDGSSSELYGSEGSREEDIDEDASYERAQRIMYNQLSRKRESVRYQII  
AAEACEPLAMRMAEKYPDRFHFHPTTWAKFPDGTDNIEIGGFNPNRVVSGEKVLFVLSF  
HSNDTTLQSFQVMICLLQSFIESLTVVLPFSPVGTMERVTNEGQVATAATYAHSEYSXSV  
TIAVCAVPQDLASDTHTRTHHTLVPTLFLVVAVAHSSSLVSRSHSVLVPPQLRPADAAMV  
YDLHTLQNRFYLHGNSVASLHTAIPLLKEKIEATGINCVAFPPDDGAAKRFSGMFLDMDLE  
IIVCGKTRGEGDARSVTIQDGNADGKHIVIVDDLVTGGTLYETGRVLEEA  
GAASVNAFVTHGVFPNESWKRFRNKGGDRACFEKFWVTNSIPTVTNDLPEEDGIFEVLDDL  
DLIIDDLDHYNSI

>comp4517\_c0\_seq1; 292 1 1051 LEN=1197; translated  
XDAAMFRKRTKKAANKSNLRRKRDEDEDPVGENVSGNDESEGDAAATSARIRSTLKKQKI  
LATLPMTSGGSGRFRASAKQNRSGDDHHQQQDGSQAAELSVLDTKHKNMSEFIEERMA  
SSGAGREGGTGPAGQPPEASASASASTEDDLRSLAREVAGETEPLAPGNEGPEQDG  
DQGAGGAALLGGTGIAEVILPSTRHEPVALFTGQRGHRHFSEGRSSAVPEGERHGRSLPE  
TTPKPLVRFSGKASANLLETKGSSEGGKHSRREPSGGEGDLGPEDGKADADRKGDFAFR  
GRAAASSSLSDQDPGGDDRTRHNRWKTGQNRDDVVYRQFLKALNPRNI

>comp4518\_c0\_seq1; 517 227 1612 LEN=1640; translated  
MTSLSATKRFVSPSLSELVRFVGLSFAFLLVGDVLMVQSLSSSPMTMASSKIPETPS  
TSTIQQRSTFVRPSLEESSNTSIQLSNVDDVDESVELKTRRVFVGLYAAGIASTLLGSS  
PDMASANEPISTVDSTVEETLLQVPTLEISDAAAVDWNISIFQKASKRALGGGKAGASAAV  
IQVLSLMWLRTSMNRQYRYGGDLKSSSLKELWEEGGIPRLYQGLPFALVQGPLTRFGDTAA  
NVGILALLESIPETQTLPLPVKTGLGSVSAGLWRIFLMPIDSSKTAMQVEGKEGLKDLLE  
LVRKDGPSQLYNGALAQAAATAAGHFPPWFLTYNYVDELLPAVSKADDLLLSLVRSAVLGL  
CASSVSDVTSNSLRVIKTTQTARLGGTNGSGVDGTAVSVEKKENDDQDNSNDPSYAEIV  
QMIIEKDGLAGLFGRLKTRLLTNALQALFVLFKYFQQA

>comp4519\_c0\_seq1; 389 163 1359 LEN=1454; translated  
MNNFIFDADRSYNQTTANIRACIDTNLTYASNANYHNQQKPPRMTPRRASIAYFADEP  
TRRSSIAYFADEQSKTDLAFDSNEIFRPEHVFEIDDREDKSIQYARDQRVERSTKPTQD  
SLTISIFPSSKNYTNKDLFQPTRTSVRKDEDQPSKSSNKIGTSMQFFDVFTPTAPATDR  
EQYQQHNHHQQYQQQHQQHQQCGPNLTPLESPPKEHNTRKRKATDETPAPKKSFKLR  
FRSHQAQGWMEKYEELLDYRLANGHCLVPNQFPENPPLAEWVKRQRYQYKLLKGLGKHSSM  
SDDRVALEKLGFWVNSHDAVWEERLKEKQFKSIFGTNTNVP SKYKQNPQLAIWVKRQR  
QYKFLTEGKQSTMTPHRMEKLRREIDFSWSGRCKTSSV

>comp4520\_c0\_seq1; 363 1904 2953 LEN=3489; translated  
MTKRARIIMESSTTVTPVARSIKSSCHSEDSGHVWLVTIDYDGSPEGCSDCGHSTSCVF  
GSEAERDRFLASATMIPDSTDSGGAKSKPSIVGYSVQRIKTSDATKREGFTGSETAAG  
AGNGQASPNERTALLNPTQHQRHSATKHNDNFNIDHPSLIQGDDEEECYNDFNELSK  
GFDALVKRFELFRRVIEHEDLLNQRMSWIIAQSFMAAFISTGSDNDNNNNRRFLSIT  
AAVGLLTCLVTLPALVAAGKNIEVQQHIYFAGIRSDSLCQRLHGHGRDRSWGGDTEHKLR  
SSSSHLLPNTAFRSRFGVPIILTTVVLLSIVQVAGWCGLLVALIMADDDR

>comp4520\_c0\_seq2; 363 1653 2702 LEN=3238; translated

MTKRARIIMESSTTVTPVARSIKSSCHSEDSGHVWLVTIDYDGSPSEGCSDCGHSTSCVF  
GSEAERDRFLASATMIPDSTDSGGGAKSKPSIVGYSVQRIKTSDATKREGFTGSETAAG  
AGNGQASPNERTALLNPTQHQQRHSATKHNDNFNQIDHPSSLIQGDDEEECYNDFNELSK  
GFDALVKRFELFRRVIEHEDDLLNQRMSSWIIAQSFLMAAFISTGSDNDNNNNRRFLSIT  
AAVGLLTCLVTLPALVAAGKNIEVQQHIYFAGIRSDSLCQRLHGHGRDRSWGGDTEHKLR  
SSSSHLLPNTAFRSRFGVPIILTTVVLLSIVQVAGWCGLLVALIMADDDR  
>comp4521\_c0\_seq1; 104 1 498 LEN=560; minus strand; translated  
XTPTTNSNSYYLRDNDIVHTEETMDQKSPILGNGTIHSPPQSKIADQSLHRSALLGDRPL  
DVALDVHPPDPGPNAGGKVGAAHGLVAARGRNVDAHPEI GLGVGRGGLQKDPEAVVPGT  
ELVGGPAGGTLRREPDELLVALLDVLDRLPQDRCAAAGWQPRNCNEK  
>comp4521\_c0\_seq2; 150 1 792 LEN=906; translated  
ENESESENDGPPGEEDRGP SRGPV RPS CGWR LG AACFGTAS FLLSCLFLYLTVMNLGATY  
QQNIVRLRLNDSFAILYPDDYHTGEMCAWSDRSPEGEFRTFASLREVEETNGAFTVVHCG  
ACGACSNWEDLSLQWTTTRTFLAQASKQCCRTSILGSVEDVQECNEELIGFTPECAACWTT  
DELCARDNCFWIFLQATTTNAETDFRVGVDDITAASCDEAMCGPDFAPCVGAIRRRMNIK  
SDIERPISQQCTPVQEDWSAIFD  
>comp4521\_c0\_seq3; 231 90 1079 LEN=1079; minus strand; translated  
MELFTRLLLLNQSRNTNPLAPECILKRNAIQWSEKRNETKQEKNRVRRGNSIALAASPWK  
AQPTNHKTQGVSTQTPFVPLTLGDRPLDVALDVHPPDPGPNAGGKVGAAHGLVAARGRNV  
VDHPEI GLGVGRGGLQKDPEAVVPGTEL VGGPAGGTLRREPDELLVALLDVLDRLPQDR  
AAALLGGLGQKGGPGLEREVLPVAACPTGPAVDHRKGPVRLDLSQRCKGPELPLRGPV  
APGAHLRVVVVGVQDRKGIVEAEADDVLLVGRPEVHHRQVEKQAAQEEGGGPEAGGSQP  
PPARRPDRPPGRASVLLAGWTIVFAFAFVL  
>comp4522\_c0\_seq1; 154 36 131 LEN=836; translated  
MASAAIQAQANALNAKMEGEASKMLDEVERVW  
>comp4522\_c0\_seq2; 198 36 494 LEN=591; translated  
MASAAIQAQANALNAKMEGEASKMLDEVERVWMRKVAKQSFACAVKCYDKAGTSGPAESL  
EACTRSCQAPYQQSSNLVQQEVAQFQNRRLNRNMQECQEKARDMIRPGTENDSYAMSKVET  
ALITCMEKQVNEHIKLLNPMKERITSVLKNYQ  
>comp4523\_c0\_seq1; 714 213 2075 LEN=2976; translated  
METRILLLSLLLSAVVATRSVVEAKTTVSRIEFSSSAIKYKASERLLENDGQSAVEAFLS  
EHPQNDSEVTNSI INDSGYDPYPDGTAVRYQDQDGTWMNGRIDTYNSDTKVYTVKWEDN  
VLEDFSDLNKVDQLVANAEQVQITNTEEQVTTETNDDEVDEQFDWDDNEKLGQAPSSNGS  
PYRGSVPEDFDGYTYQYDNLADYEPWP IGTVTLLLEFS DGWYEGKITSFSLSEDKTNATY  
VVTWSDGTGDRFVNELEWMDLMVANAQHYEPWSIGTQTYGYPNPDENDDPSEKFYLDGEI  
TLFADGAYTITWSNGEAVVYSDFDEVDEFVNAAAAYFDPDQFNGYNPWPINTPVSWDFDD  
GWWDGTITGFEDGVYEVTWSDGTNKYYSNFEKIDQMVAFGAGEGFLEGPSSESYSSGDDYY  
AISGYELGTLVYAKFEDGWAGYIDSYDDDDYYIVLWSESSDRFLPGPDMDMVMNNAQY  
IQYDFNLYPEGTQVYAEFNGYWYWGTEIHSSESGFYELWEDGERTVHVAGAYLDDMVSNA  
YYAGNSGNVLSFTFGIVALMLIVLGGSGGLAFFYMRGRKQRRSAELTEQVQENELDLDED  
VASGSEYTDENGRIRANVV  
>comp4524\_c1\_seq1; 205 635 904 LEN=904; translated  
MADSDDYGTNDYDIGTASYGETVGSRRQSYEDEQSPSESGSSSSSSSSSSNIDSDSVSQ  
NALFSGESCSNSSFRDANTTSDYRHDDDD  
>comp4525\_c0\_seq1; 405 118 1236 LEN=1424; translated  
MGSASGKAKNFNTAADKDNINEMSGGYRRASHAGSWYSDDDESALDQTLRYLAAAAEEG  
GDERQEDSESSSLRAIICPHAGFSYSGPTAAYGYRALEEELSKHESPVRRILVFHPS  
HHVYLNCAVSGASAIETPLGDLPVDAELRDEILSLKKSGLGGEAAFTVMDRDTDEAEH  
SGEMQYPYIAKVL RNAKQRKGGASLP IPI LPIMCGSISNVKELEYGKLLTKIVARKDVVS  
IVSTDFCHWGSFRYQPTAATAAGTKTTTMEIFEYIQNL DREGMRHIEMKEPGAFA  
EYLKNTRNTICGRHAIQTWLNNAVHSETASSVTNTNAALDIEFNKYAQSSQVRSMRESSV  
SYASAVARVSRV  
>comp4527\_c0\_seq1; 493 156 1429 LEN=1429; translated  
MEQPNEQYRSDSHRENTTMMVAGHSPSPNPVPSMEKKNISDAIVEHQSRILDREGIYLTD  
RMFDPPSKICGSMILKLSMGNNGNKKKKKKKNEQSLEDKSDPSSAMMTMLRSKMQKKK  
RNDKKL NENKKSEKQQVLVVPASTTMSI SEPTASVSFLPSVPPTNTKENADEEMLFRD  
VQLLLKEIKTANGTRKEKSTSEEKPKKAN EK DIPSSITSYNRRFRDGEKEKLR IKDIENW  
EEESLDSVYIDDSVGDKENDTTIDRLKLERKFYRSEAKTLRSELGNIKEELSELRKFLQR  
LPNNKDENHEPSEGHQVQHESDAASSMTLKSFDTIYTEHGD LFSNLEDANKVLR TKQQR  
ERNSTKLERPVPLYAANLAQSLPRDILSVKRDTNNMDIRSGSDYQEQR TSPKVRRELS

SERFS

>comp4527\_c0\_seq2; 812 156 2330 LEN=2848; translated  
MEQPNEQYRSDSHRENTTMMVAGHSPSPPNVPSMEKKNISDAIVEHQSRILDREGIYLT  
RMFDPPSKICGGSMILKLSMGNNGNKKKKKKKKEQSLQEDKSDPSSAMMTMLRSKMQKKK  
RNDKLLNENKKSEKQOVLVVPASTTMSI SEPTASVSFLPSVPPTNTKENADEEMLSRD  
VQLLLKEIKTANGTRKEKSTSEEKPKKANEDKIPSSITSYNRRFRDGEKEKLR IKDIENW  
EEESLDSVYIDDSVGDKENDTTIDRLKLERKFYRSEAKTLRSELGNIKEELSELRKFQR  
LPNNKDENHEPSEGHQVQHESDAASSMTLKSFDTIYTEHGDLSNLEDAKNKVLRTKQQR  
ERNSTKLERPVPLYAANLAQSLPRDILSVKRDTNNNMDIRSGSDYQEQRTPKVRRELRS  
SERFYAMISSPAPKVIVENQRVGTGQRTSNNQRNITICKSEHKNDPEEKGDQVAVKNVS  
PYRTRSYRSRSMSPMRRRNKLNPPSPSVGKTRGDNRKSERSVSRPGHSHEAALKDEMKN  
ERLVMQNDGVVNSRRSINHAPEEKNSGMEFNYYDDAKNFYRSYQOSSEPDAAKELGNISSK  
TESSQSDSLPNGRNATSFTFNEPKSPLFDLKAADRKYREMRRSMQVGSNNVGHHLPECE  
SESDSDFLGYCTTDDSQSENDDSSRLSFQHQRPISRNFSLKKMCDEEEESSDSILLRPL  
PPSR

>comp4528\_c0\_seq1; 461 260 1666 LEN=2406; translated  
MMSIAVCPISLTLALALTAAPGVSGYAI PKSKFLPLGVGNQSKMQTKAPVLSNRRGSL  
LRMTKDDDSNKKDSSDVSPSNNFSDAPTTKASSSKREMLKFALPALGIFLANPLLSNID  
NAFVGKTVGTEGLAALSPATVCTDQLLYLFLFLSRATTGLVSRAGQSKTDFEKKKAVAE  
AGSAPLTVALMCGLLLTIFYAYCTPNMLSMLSVTPALRGPASSYIYWRGAI SWAALAQSV  
SLSILLATKDAITPLKIVALAAGVNVIGDFLFCVFPRLRLGVSGAAAATTFATLLSSAFMV  
KGLKKKGILPKIRWPSRKELLSLMEFTGPLLGITLTRMFGFVKMQTTAMTLGVKQTAAYQ  
VCLNLMVFFLLFAEPLSOLSQTQLPELIEAGDGEQVKS NFKSVLSLGLAMSSIAIGGVAGL  
ATYFGSFLFTSDPAVQALAKGAAPSLFLT VATAIFASEYYSEIGKAIT

>comp4528\_c0\_seq2; 535 260 1906 LEN=2270; translated  
MMSIAVCPISLTLALALTAAPGVSGYAI PKSKFLPLGVGNQSKMQTKAPVLSNRRGSL  
LRMTKDDDSNKKDSSDVSPSNNFSDAPTTKASSSKREMLKFALPALGIFLANPLLSNID  
NAFVGKTVGTEGLAALSPATVCTDQLLYLFLFLSRATTGLVSRAGQSKTDFEKKKAVAE  
AGSAPLTVALMCGLLLTIFYAYCTPNMLSMLSVTPALRGPASSYIYWRGAI SWAALAQSV  
SLSILLATKDAITPLKIVALAAGVNVIGDFLFCVFPRLRLGVSGAAAATTFATLLSSAFMV  
KGLKKKGILPKIRWPSRKELLSLMEFTGPLLGITLTRMFGFVKMQTTAMTLGVKQTAAYQ  
VCLNLMVFFLLFAEPLSOLSQTQLPELIEAGDGEQVKS NFKSVLSLGLAMSSIAIGGVAGL  
ATYFGSFLFTSDPAVQALAKGAAPSLFLT VATAIFAITVDGAMLASKDFGFMLSQGLVMM  
LLQLFLKLTWCSSISTIFATFTLRLGLYALCCLLRAGLGSNGLGRAMFKSGRVAFFKRK  
INGLASGN

>comp4529\_c0\_seq1; 283 907 1464 LEN=1852; translated  
MVSITGCFLSVCVLPALVFLKNGDLP SARQVTLGT FATIGATGSTVALHFVFGAYVLEMK  
PVTNSNDDTNGDDQONPLLEATTRSIFGFWNDIHFVDFPKNDVTPYVGMPPFANFCANEI  
PLYVHPERLDSTTRQLLLHNAVGSSSSEKCDSSSHGDSIDIKDYRDINEGASSKRKKE  
DDEL F

>comp4531\_c0\_seq1; 685 137 1870 LEN=1936; translated  
MTTGAIITKAELPRDLPGPSEERFLVIVCEPDGIKWSLHDGVSFHYAPT VFWTTPHLQDE  
DRSASPCKSLTRFLCQHALAHIFGASDYHKATKQ NATKTA AKRMAPSTTIYVLS SNKQHE  
TDLLFLFSEVPSRILRFSASDFDAQALSSVKATIGQLAAMHAIKKDYGSPVLLMECSVA  
IEYFGLDGN SKFLGGGVCAGMP IRCRSLFDYCNNQDFPSID FERYTKLTEKAKKSGTPMS  
LFSTDPFQRVAASATAEMAGQLRNIVRQFLGLVGPTDAPVTVVL CGDDTHLTRELLTDNC  
SSIVAVEPDVEFPGPSKVTFVVRKNMAAYGVQHLLSASKEQKVPLDADDELREDLVGLRA  
AFIKEPGNTKIHRGSITRVVRGAVFEEDSVILLLLDEGDNVTLDLIKLYDCLSLYQEVGEE  
SKIENKEVWVGEKQOASTKVQVELEKKNVFATRKTILSEAKEKEGSIVKMOVAPPENDKR  
GAKRPRQSPSPKPKKASKESPEKYVGHRIAKLFDSPNPDDDEGDMVLYFGSIDKYNGETKL  
WHVTYDDDDDEEFFDFDEVRDGI LLWAKNKDDDKNAKS

>comp4531\_c0\_seq2; 523 137 2053 LEN=2119; translated  
MTTGAIITKAELPRDLPGPSEERFLVIVCEPDGIKWSLHDGVSFHYAPT VFWTTPHLQDE  
DRSASPCKSLTRFLCQHALAHIFGASDYHKATKQ NATKTA AKRMAPSTTIYVLS SNKQHE  
TDLLFLFSEVPSRILRFSASDFDAQALSSVKATIGQLAAMHAIKKDYGSPVLLMECSVA  
IEYFGLDGN SKFLGGGVCAGMP IRCRSLFDYCNNQDFPSID FERYTKLTEKAKKSGTPMS  
LFSTDPFQRVAASATAEMAGQLRNIVRQFLGLVGPTDAPVTVVL CGDDTHLTRELLTDNC  
SSIVAVEPDVEFPGPSKVTFVVRKNMAAYGVQHLLSASKEQKVPLDADDELREDLVGLRA  
AFIKEPGNTKIHRGSITRVVRGAVFEEDSVILLLLDEGDNVTLDLIKLYGTHMHICDVLKQ  
ARYFAHRVSFRFLYPLRLGGV LVARSVFLSALACSNLCSLSLSLILADCLSLYQEVGEE

SKIENKEVWVGEKQQASTKVQVELEKKNEVFATRKTILSEAKEKEGSIVKMOVAPPENDKR  
GAKRPRQSPSPKPKKASKESPEKYVGHRIAKLFDSPNPDDEGDMVLYFGSIDKYNGETKL  
WHVTYDDDDDEEFFDFDEVRDGI LLWAKNKDDDKNAKS

>comp4532\_c0\_seq1; 440 278 2110 LEN=2341; translated  
MAQGANGDDDDSSFPALDERRVSFNDRFDSYYSRTAAFYGNLLKVSQREHWQLASPMTK  
HVFPSEHSAQSAGSFKMPRTRSRSFNDYIESRDNDGYSARTFKTTAMPTWKTNSNRGA  
TSPVRTKESDPERGGHQGRDVRKDDGAMPFSLSVLYGAINCTIVLPVIMSFGNI IYRDDA  
FIAYMPVLIKLTFLSGMVHQLCFSLFSTLDFAVGVSQDAGLI FL SRMAHDMVQYCRARNY  
DDDTMLATVTVGLGCAAAALGVGLI IIGKLG LASVYQMLPTCVIAGYLAYIGWVFGYSGL  
GIMAGESSLTPALLVEKSLYILPGVAGGALIYVSVRKRHAAVLPSCITLLLVAFYVILL  
VTGTSVETATENGWIRQTQDEPAWYQTDWYDQVQVDAALPQLWLTWLGMLFVVALSS  
LDVAAIELEMNDPLDYNKELRMVGI SNFVSGLTGGYTGSIYFSQTI FSLRIGVRSRISGF  
SIAFFTLVIVLFPFILSYVFNFFYGSLLSMICIDLVEWLWEFRHKATTAEYLLGLSTF  
GLIQVLGVEYGIAAGVVLYVACRQLEIDVGELKTVYVEEDENTTRSCIEICAEPDETTKLV  
VNGDDSQPHF

>comp4534\_c0\_seq1; 302 1 1593 LEN=1593; translated  
XSTTLNLSSSESSAVVSLQDL SGNLITTTSTTPQANRVI IETELSNLTESPSVKESDRET  
IGGRNATICGELILLPDQIAASMIRLYQLELKKNLRYRRFILEQRLHNIQRVSVFSPSE  
GDPHPKRKMVVNQKFEVTLNHTNGDTGSSDVGERMSLSKAFLYTGWLDAAGQPHDDKIL  
RFEDGQEQYKGNVYKQRHGSGINRWPDGQKYDGEWRHDSRYGRGAHTWNDGRTVAGSWKD  
GHGRLFYRWPNGAVFDGNANMGKKEGRGVSTRSDGSVYNGNYKNGKENGFGTVIRPDGVK  
FRGHFRDGGKKEGYVMLWQTRTYEGEWSNDKPHGRGRVWWSNGAVFSGRFQQGSFSGMGV  
YTWPSGEKYVGMWENGAKSGHGTHTWPCGKKYDGHYTNGRKEGYGRMSWPDGSAYCGGFR  
HNKRYGRGIQTDRDGAVVHCGLWKDNIPLDEAGGTTKLPVVEGGTPEFRLGMKNARLWS  
GSSTDTGGLESFDHVQRGENPLLESESRQDADAVHHRSSICQSSGPAIIERVX

>comp4535\_c0\_seq1; 284 772 2204 LEN=2204; minus strand; translated  
MWATPDAKELCALYVSAGVPIYPHSLGHSYHTLIWRLSIEVKQLQEQQTKNSINSVDIST  
PPNAPGAPRAAETIPVDPFYNERDDMRMREELILGSGRVGLTYLEEKAMHKLNSKYTES  
HADRI RSVNWRRTSTNARGLPQVPFMPFPPTASGRRETHADWHAAGRCASSRQQLSRS  
NSFSGSRFRTPSTILKVHRHLLDQHLLGRSGVDDGEGSMPTPPVSLSADFFHPPFFSFLST  
EETMRNRSNGSDSMGRTTTTGNTSLLPAYYQPVSGRNLESDDEDNDARRAGSMGSNYTDDS  
DSDFEAEMHPRPDIMEPLRLRNADEIVAAGAAMQPPAMVPPVPMVSLGTRPTSASASI  
ISEMRKSSHQLTVQSGILSNIELDVYSTSSKSLKIGDDSKAGRQLSHYLKGRFAAYHRCL  
ERHISKNDNDGFEECILDFWDEF L PQTANIHYD KHTAVPRISRLDEF LTKPCPKAVX

>comp4538\_c0\_seq1; 383 99 1265 LEN=1314; translated  
MTNFMMAKRLGLNGMSAATMRVGKYL VVASTPASSLAATYSSKAFCCSSPQSECGGAGIGN  
VEDRILPSTFTDSRLFKKCRHPMTAS IIGAPMTYGPFPVGTDYGPKKLRERGLRSNLTKL  
GWRVEDTQDLNFDVSNQSHVDPDPNARNCSLVGKGCSSLSEVVETKINDGHFPLVLGGDH  
SIAIGSLAGILRARPDTGI I WVD AHA DLNTPDTS GSGNFHGMPLGLLMDHPDGQYDFSKL  
PGFEFLVDGPRISPEQLAYVGLRDVDPMERVWIKKLGIKTFMTD VDFLGI GEVMKQVLE  
HLEGRPLHLSYDIDSVPVLAPATGTKVRGGLTYREAHFVAEFVAQSGDLASA E VVEVNP  
NLSDDDGANETVELGMQLITSLMGKSII

>comp4538\_c0\_seq2; 383 97 1263 LEN=1312; translated  
MTNFMMAKRLGLNGMSAATMRVGKYL VVASTPASSLAATYSSKAFCCSSPQSECGGAGIGN  
VEDRILPSTFTDSRLFKKCRHPMTAS IIGAPMTYGPFPVGTDYGPKKLRERGLRSNLTKL  
GWRVEDTQDLNFDVSNQSHVDPDPNARNCSLVGKGCSSLSEVVETKINDGHFPLVLGGDH  
SIAIGSLAGILRARPDTGI I WVD AHA DLNTPDTS GSGNFHGMPLGLLMDHPDGQYDFSKL  
PGFEFLVDGPRISPEQLAYVGLRDVDPMERVWIKKLGIKTFMTD VDFLGI GEVMKQVLE  
HLEGRPLHLSYDIDSVPVLAPATGTKVRGGLTYREAHFVAEFVAQSGDLASA E VVEVNP  
NLSDDDGANETVELGMQLITSLMGKSII

>comp4539\_c0\_seq1; 551 372 1472 LEN=2044; translated  
MSAPAPATVNGTADGEAPQPMFQMSNPAATTNGDGATPSIGGMLDIGNLDLEELFVDCYY  
DVPGMADMANDQHANAPAPAAPVPTPV SAMHPAVAGDPAASAGMVAPPAPPAPQPAAVPS  
AAAPAAESSKRPASEIADGPSGGQLTAKQKLERRENRREHAKRSRLRKKFLLESLEQEQ  
IHGLQEQLDKFKKAIRTEIPAPRAEEVIDQICGHENKYTPLPMPSGFGPVKTLMEPDFRL  
MSALSGSQNF AISDPTLPDNP I VYVSQGF LDTGYQLDQVLGRNCRFLQGP GTDQSAVD  
VIRKGI SEGIDTSVCLLNKADGTPFWNQFFVAALRDAENNVVNYVGVQCEVSKAVVEKH  
MGKEKK

>comp4539\_c0\_seq2; 458 1 1074 LEN=1646; translated  
ASPTASTLLPDGFSFVFQAATTNGDGATPSIGGMLDIGNLDLEELFVDCYYDVPGMADMA

NDQHANAPAPAAPVPTPVSAMHPAVAGDPAASAGMVAPPAPPAPQPAAVPSAAAPAAESS  
KKRPASEIADGPSSGGQLTAKQKLERRERNREHAKRSRLRKKFLLLESLOEQIHGLQEQLD  
KFKKAIRTEIPAPRAEEVIDQICGHENKYTPLMPSPGFVKTLMPEPDFRLMSALSGSQQ  
NFAISDPTLPDNPVIVVVSQGFLLDTGYQLDQVLGRNCRFLQGPQTDQSAVDVIRKGISEG  
IDTSVCLLNYKADGTPFWNQFFVAALRDAENNVVNYVGVQCEVSKAVVEKHMKGKEKK  
>comp4540\_c0\_seq1; 445 1 661 LEN=955; translated  
XLGLDEVLHACSDTLDAHYIENPVLYSTMKSAILFAMVGSAAAFAPSQQQKTTSLSAWK  
DENVIGITAPMGFFDPIGLSKNKDDATMNMVYREAELKHGRVAMAACLGWYLNAGVHPAF  
NSSLSNNPLEAAKELPAVGWLQFVLGCGAIEWLAEKIKDRPGYVPGDLLGAAYWVDNTDE  
GWVDYQNKIEINNGRLAMVAFMGIITQDIYFGNYGDMIFKN  
>comp4541\_c0\_seq1; 886 128 1873 LEN=2055; translated  
MATEKDDVVLVEHTDVTVDATAATTTTTTTTPTVSDDESGLDGGNKVGAKEPCKPEPLQ  
IVSIGTEEDKFAFQFHEERLNSIMRKIPPGWKVSVVSVVGAFRGTGKSFLLTWFLAYLKEK  
KKSSTGDLIEGDKKWFETIESIENDAFHWRGGSERNTTGIWMWSQPHFVKRGDDTMAIL  
IVDSQGMFDNETTMSLTASIFGLSTLLSSYQIYNVDKRIQEDNLQQLALFSEYARLAVEG  
TNGDEAKKEETGDVKPFQTMFLVRDWQHFEDDEEDYDRMEEEMNEYLQKVISEREAKDLQ  
ETREQIFACFSKTSFCGLSHPGMAVIKKNFKGEVSKMDETFLLNLLDRYCRRVFVENLTP  
KVIQGREVTASELGSFIKAYAEMFASGASFPEAATMLEATATANNSNALNLAVGEYKDYM  
NRISGPNCSSYIKPKELEDDHRHLLMKALNKFDSMATFGSKHSIEEARQSVLEMINNEFA  
VYASLNEGRNPLAGLETYIVPLTVATASYILRAVADMTCSNVSQTCRNTSELLSHIYAVV  
VIFMLIIMATKAQQVKEFLGRVKGAVELVANSNGDTKMKKD  
>comp4542\_c0\_seq1; 206 168 578 LEN=1155; translated  
MKRSSSIAALDDTIDVKLGNKPHYDEKLLVSSMMLVAIAEEDRQGRFLRTQRSNGSIGS  
MSARSGCGSYGSLRGWGSNASRKSYSKVDLCSLSDENSGDIANRKISTKIQKKCSTLTLQK  
GGANGRSSTENAELETW  
>comp4543\_c0\_seq1; 471 147 1505 LEN=1849; translated  
MIVMRKAKIFFVLLGCHNLFAGYGVNSDIIEMNSISRNNDKHKGRNLVNMVPGDRVSSI  
DKSSAICTADSGDQVEIVRTVVDYVYAIESTDKITTKDSIGRTMIRLLENKLFERSIRP  
AVLWCYFDEPQNTRRNLRLDVAADFQGDHLRKLTLLEARRRLSIVSVSNPDDEETTIE  
CNFPTNHTGNCTVMHGKVTVMHHATSDVSLAVASIFDSTQKAMDYNEIFIALDLDNAAN  
ITNIEWLGETEEEEANGGPIIVSDVPIISEVNIDEIEQKENKQSLAYALTIPVLLLI AF  
ALLVTKKKTKRKIKTREQVRAIRSFDDVLIGTGDPGSGFHEGMYHYTCQGVRYLSTNCAD  
CIETKRNGFFALTDLLETISEKSLEDEDFSTHRKKHFVNASQSALGKKHSSIDVHVCNSA  
RCPICTYKPRDVCVFSRSENFALGALREGELEV  
>comp4544\_c0\_seq1; 226 57 560 LEN=615; translated  
MASDDVTTGNVFDLKLKSLLELNQAKQEEGRLOALTSRYAQLRAAAARLTASSNAISE  
ISPSSEGKEVMIPLTESVYAPGKLRPNKLLVEIGTFYVEKKPSETNEFLNRKLIKIVDA  
NSENITKAVQATRQNLDSIAMSMQGMIEIRARQEGQRHRAAAEGSK  
>comp4545\_c0\_seq1; 742 271 2439 LEN=2463; translated  
MQKTLNPNALSQQLDKSSWLWTPPGSTRKKYEPHDFPGYGSYDVNISPKSDMEFIDSSF  
ESKEHEEKKLGELEATAISGNDILSSTFYVSGLVTLASAGKLAPVCLALVGFVLYLFRGIY  
HETVMALPCNGGTYNILLNCTSKQTASIAAVFAIIAYITTVVSALEAVAYLQITILPESV  
EIDQQAATISLFFFCLLTNLGISESAVVAKTIFVIHVTVLSSLTIMGIIFMI SHSDLLY  
ENWQTPYPVSDAAGDILTGLSLFTAMFYGFSSAMLGVSGETSSQFVEEQAPGVFPKTLKN  
MWMGVVVFNPLLSLISFAAMPLNDILENKDTVLARMAGIVGRWLQSRRLRISEEHVSI GSM  
FSLIISVDAFIVLAAALLTGYVINGLIRRMMDRCLPQFFLISNPWTGTDSFILVGFLL  
LCVSVQVILLSDVEALGGVYCYAFLTVMTIFALGNVLLKIKRPSLPREITTSWFQSI LGL  
IAVMTALLGNVGLKPELLTYFFVYFLIVGTLVFMFQRVQIVRLLLYKVFKSFHKPQDCDV  
EESDSEGTEDESLLSRKLRVSSRINEEEEGMMSGLVPEPPGSGYESCLERIANVKKFQ  
DTPFIFFMKHDDLHMANKAVLYIQKNEQTNKIFVHCAFTTEGGLKKNTEGLQEHVKLLD  
LLYPRVKISLLVNSNFNATTVQWLSRTLEIPTNAMFISCPDENFSSIKKSQQLQIRIITS  
SD  
>comp4546\_c0\_seq1; 490 1 1414 LEN=1825; translated  
XVQCPRSRVETNTILRRNYLPNQMSALALPSAFFLLLIGARSVDGFLQEHNRRTGSIWD  
GRTTEASGRAGRRCFLEALPVRSEDTDPSSSNPAAGATDRRRALKATGMVAVSLWLGDTL  
GPD SIPSKWAASAAEEAASSEGASKTILITGCNSGIGLEAARILARRNPADRLVLACRTQ  
AKAEGAARQILAE SPSSNLVAAECDLASLDSIQKFAASLDKQPLDVVCYNAGIALNTKGE  
IERTTNGFEKTVGTNHLGHFYLLHLLQPKLNTSTAKVVVTASSVHDPESPGGKQGV PATL  
GDLVGFARDGKNFQMV DGNPYNGDKAYKDSKLCNILFCHELQRRLGSD EATKNIVVNAFS  
PGLITSSGFFRYQNPV FSSI FNVAASSVFRVAETPEYGGAAALAYMTTVEGTSGKFFDSKP

GTSFKYAADGNDYQGAFGKEFAPVATSTESMDDEKAKRLWALSEKLVGIST  
>comp4547\_c0\_seq1; 472 1 1177 LEN=1292; translated  
XTTNFILANQEGSKQLKEINKHTRQNHIMEVDSTGDSTGVVGETRIAVHPLAIVHMSDQ  
YTRITSGGSPMDKTDPPVGLLFLGLEDQTTATTGNLNNNSNVHEGPLIQVLDADDIPVEVS  
ETSTMQVDLHKAVFPKHKVVGWYRAVASHSDDEEIEPTSEDLGITKLLKNHYTSSDLESF  
CFCLLKVQKENKGDCEPDDAAMKTEDATDTLNLKELP INLYELQKFNNNTVLVGLSNW  
QLDTSPAERIAVERVMKDQPLDGLESESSQSPSQNPFILETKAIGHSLTSMNDRVEFLVA  
YLKDIQEGKTPVDHGILRQIQQIVGCLGPLSTLATCTNEGEEKDLQLLTHLAIIVARTVNS  
MQSYTEKFRVMNEHKTASFERQQASTFPSWNF  
>comp4549\_c0\_seq1; 184 1 433 LEN=433; translated  
RRLGDSGRQPIPISIHRRDIDSLVPLPNHPDR LHASKQATTKAEQGSPPLEPRIAAASK  
GTLSDSKQASAENK GKPRALGSEQIMSDTPSTASSTDPSSDP IVADYTPLHETSAPASS  
VNGSGNSHNANANSNSSSNSNSX  
>comp4550\_c0\_seq1; 248 187 1175 LEN=1175; translated  
MIASYSMHSNHTVHRPTFICESPRQVYTARNDVGPLSQKQTIPPVAILRNLPIRKEPSLN  
DIICARGRGYWDHPGNKMYRQCIDLAKAQYCRAPNRLGKSLIVSEIIDAIHNSGXGIFHG  
KENEWVECNENSIREKVTQSLRDGLSFKYSSSITRKREKKARVQEAIFYGDIDVIVHSNKA  
VSQKIKDLEKKVEWANRNYGIENDARVSDEAIMKIFDEGNLNILETMKKDRSILDQLHQI  
GRKKTSHVHRVSLPLSPPKMGSRSEFSLEFPLPFSTANNNEPGKISPSASVDLEAVTVQ  
QHDEYVFD SNGKMDIDLESTSTMFLDNIVH  
>comp4552\_c0\_seq1; 432 312 1451 LEN=1808; translated  
MNQEEEEKEEVIEGSVFLPDPSPKPNFGMRASWARDIPMKDDKGKADSNGVPPNMVCISED  
PDELFDVTIGFWHSSQPRHMLDIRIHRAADDNADDEGKRDLLKDSVYVLDAYMGGDFSR  
FHWYHPKPNLWAMYGTRVNDYLNHFVNGERHSHKKTTRAPFAIAVDVKERWFGFDATHYF  
FDEKTHRMTGSTFRLLLRFLRWGYTLGKAQLFKFQPPFFVNNHSQDLTNSDRTEENTLR  
FINCQASVSLCALWWMREFDEL SKEPEHDATNTDLICDKLSPLLPFRIRMENYVSVSPL  
WKDVSKEESRKQMD EFLHGAAVKRAL SDEFSEENVTKLLVLINNSAGTTAPTQTIEGTE  
AGVIGDSSIQQNGRFVCR  
>comp4554\_c0\_seq1; 114 180 848 LEN=984; translated  
MCSIIRYLKLLSCLYLASDCLGLSHQDPSISRRAHAFAQTASVAAAGLVTAGASSTKIAG  
AASPDLKFQTSQSGIQWADARVGTGQPLKPGATATIDYVMSTTGARYGTKIYSTTDVDRP  
YRWNLGDGSTIAGIEQA ILGDGESLTPMRPGGIRRIVIPQSLGYAKLAADSRTL CVENGA  
PGPIPPPKEAFEEYQRFKNIYCNERQYQPDIVMDVKLYGQR  
>comp4555\_c0\_seq1; 519 392 1831 LEN=2283; translated  
MDQSAGTVDFDDDEWDGTSPFWVHCVAGSMAGVAEHILVYPLDTRTHIQVCAACHFN  
PATHNASTQAATVA AHKHAPGNAGTP SARHLP PPGSVLQAAA SATSSSKSSIAQAVCKTK  
AANLTASPR TGGMHHLGGSGSPGTYNLSILQAIRQLVSQRAAVSQTGSA AALEATATTT  
ASPPGVPAFAPRDVTRLWRGVQ TILVGCIPAHALYFSTYEIVKASTL DDKDGNVTAYGSAL  
AGGAAVFGHDLVLGLPLDTVKQRLQLGHYNGLT DALTQMIRTEGAVSLLRSFPVTLATNIP  
YGMIMVGTNEFLKDQWTRIKVANDGGSDGNSDENYHIDHSELTMGVTLGASSLAGLVAA  
ATTTPLDR IKTYLQ TQQLAPKCLLQNNHSSASSPEHCPLNNGSGGSGPSAGSTNPKAPRF  
KPIVADWRQAALRIYQOEGYAGFFRGTVPRI LSHTPAVAISWTTYETFKRYLKQH FVEE  
>comp4556\_c0\_seq1; 311 197 1204 LEN=1235; translated  
MNSTNPSPHHQLPKSHSYFDEWFNIPSKNSSSSSIHPITSLIQCLDPKAHINEYWEQLTRP  
DGRLF TQGRTTQAVYGM LKHSAGSALVSQNESGGHISGTKILAATTFNIGQPSPEQPDEG  
EVVVQVSGTGGRN VAGDSKSQQHYWESLQSWLQRTIEQDEMMAKSLNLLTGK SCLQLVIT  
VMVLEDNGNVKDTALLACMAAWK DTRL PKVKGDLTEVQGLWLRPHPELPVNINEAVRCA  
SNEETPNQVRQRHYRVSLTMGIWVHPRDQTIHLIADPSNLEEPFFEGSITIVVSLANEK  
LQVDYTGKVPLTGHIVALAAKLALARAREVTILS  
>comp4558\_c0\_seq1; 1375 141 2186 LEN=2292; translated  
MLSSSVLRRSLSSLA AKKATTPGVSIGAFDGIARRFKSDDAGDVIGIDL GTTNSCVSIME  
GRTARVIENSEGARTTPSVVAFVHGEAGAEERLVGMAAKRQAVTNPENTMYAVKRLIGR  
GYNDKEVNTIQGLVPYKIVKSDHNDDAWVADTQGTKYSPSQIGSMVLGKMKETAEGFLGR  
TVSKAVVTVPAYFNDSQRQATKDAGKIAGLDVLRINEPTAASLAYGMDKADGKTIAVFD  
LGGGTFDVSVLEIQGGVFVVKATNGDTMLGGEDFDEELLSHLLKEFQKDSGIDLADNLA  
MQRLREAAEKAKRELDGLAQTDVSLPFI TADATGPKHMNAKISR AQFENMVQPLVDRSIG  
PCKSCMKDADVDKDDIHEIILVGGMTRMPKVQETVEDYFGKAPSRGVNPDEVVAMGAAIQ  
GGVLKGDVKDILLLDVTPLSLGIETLGGVMTKLI PRNTTIP TKKQQT FSTAADNQPQVQI  
KVMQGEREMAADNKSLGEFDLVGIPPAPRGVPQIEVSFDIDADGILNVS AKDKGTGKEQN  
IIIKSSGGLSEDDIEQMVRDAESNAEADAKKRQLIESKNEIDSLIYSTEKSVADNGDKLD

AETKTEVEKAI AEAKEVKDGEDLELINSKKEALNQASMKIGQAMYANKGEGEGAEDKKED  
ENTQDAEFTEKKEEKDDEKK

>comp4558\_c0\_seq2; 1375 242 2287 LEN=2393; translated  
MLSSSVLRRSLSSLAAKKATTPGVSIGAFDGIARRFKSDDAGDVIGIDLGTTNSCVSIME  
GRTARVIENSEGARTTPSVVAFVHGEGGAEAEERLVGMAAKRQAVTNPENTMYAVKRLIGR  
GYNDKEVNTIQGLVPYKIVKSDHNDADWVADTQGTKYSPSQIGSMVLGKMKETAEGFLGR  
TVSKAVVTVPAYFNDSQRQATKDAGKIAGLDVLRINEPTAASLAYGMDKADGKTIAVFD  
LGGTFDVSLEIQGGVFVKATNGDTMLGGEDFDEELLSHLLKEFQKDSGIDLAGDNLA  
MQRLREAAEKAKRELDGLAQTDVSLPFITADATGPKHMNAKISRAQFENMVQPLVDRSIG  
PCKSCMKDADVDKDDIHEIILVGGMTRMPKVQETVEDYFGKAPSRGVNPDEVVAMGAAIQ  
GGVLKGDVKDILLLDVTPSLGIEITLGGVMTKLI PRNTTIPTKKQQTFFSTAADNQPVQVI  
KVMQGEREMAADNKS LGFIDLVGIPAPRGPVQIEVSFDIDADGILNVS AKDKGTGKEQN  
IIKSSGGLSEDDIEQMVRDAESNAEADAKKRQLIESKNEIDSLIYSTEKSVADNGDKLD  
AETKTEVEKAI AEAKEVKDGEDLELINSKKEALNQASMKIGQAMYANKGEGEGAEDKKED  
ENTQDAEFTEKKEEKDDEKK

>comp4559\_c0\_seq1; 524 1 1231 LEN=1231; translated  
ELTNDHIRGMLRSTDDIVRPMVHPASIWDEEGTGKDYRALVLDRIAEQRGASRKRKKGVA  
FRDVPGPASSGGVPSLTRPFLADASESGGPGLHPVLQRLWEDNYWRANERPCPYRRLDPG  
GDGNDNDKDDKVVDVEHVRRGTAASDDESTVGGRSELGVGAEKDDDDARSRLSTGQEMP  
RDDEMDFPVANDEEDEDDEMDAPVPDFGDDEEDPTNLAAGGDEEDLLDLGMVNDMVLDS  
DEDDRQDDGEDDEDREAIGDAASSSTKWHKHTVRVFRHLRKCLRDPNADTDEDGGIANEG  
LPDSVGFADLTKNVVSRRNASSVFFEMQLKTDWDFIELEQERAYGDI AISAGLRFGEDAP  
EHWRTKRKRKRNESKRKAWKVGHVFRKQRCQNKNYNDSNSNSD D NAFDRG

>comp4560\_c0\_seq1; 322 153 1546 LEN=1601; translated  
MFGSVTCGALEPFLSVDGVDEIFNGVEKKKKKVRVLRWSSNDGDRDRDCSDSDCDWA  
IVVATSEFDSKTYHVHRSVLGAGPRKSVFFSKLFRKGNKAGSNSTRIQLDEQDAESFPLF  
LDFVYGAAPGADESNSKSLKLNVEDFGAPNAVSLRHLAKVFDCEGLTLAVNTFIQKDL  
LRTGPVYLVEAHHYEDNRLIESSKRLCIENFALLDTRAIVGLPPELQSVMSGVIRRAKS  
AHESTPEEENALGYHVGEVVCQYFEKNPHEL SAPLLELTDEEVIKEIAPEPAIGITALI  
RDLDAKEIRPNSGEWRGVVGLSQR CARAIVREYGWKDFNVKSALEEYLYGPCADGSSST  
KLDSL FATSFAATLEGAQNETRTPFKKQGVRLQQONDELQRQNQKLKEEVDQYKSMAAS  
TKEEYLLKXASEESKAAKFLIRQTLLHRMRALSTTSSRRGG

>comp4561\_c0\_seq1; 527 314 2215 LEN=2532; translated  
MKVLSIFWGVHIVVVAVLFELGPPFFVVEAAKDTEQNPNSRSSSSSSATMKESSPSRL  
RRTTQVLQVAIEESDRKKQQQLKEISSNNHYDNGKIVHNKPGSNSDERRETSRHLQAS  
KITAMNHYQAVKEENVLMNVNEMVRMFERDDRGDRGYYSMSMEPAKRPTQKPTRQPTYR  
PTNRPTNRPTNRPTNPEAPYFENISRPPTRSPTRPTRPPTRPPTGSPTRSPTRSPIQVDPN  
PIPTPVVAPVVPVNFVPTPNGDTICGELTPQERETLILGQLATYSGGDVTSPTGTPQNE  
AFRWLIEKDSAMVCPEDFLNVQQR YILAVLYFSTDGNWFWNCNALSSPDLRQCPGGDSQR  
FLSSSDVCFWYGISCNRLRVSGISIDENNLRGDLPDELGFMEQIEDIDFDGEIEEGLNFL  
SGTIPSTFGLLEKLVTLDLDSNQLTGPIPEEIFEAKRLTIMDLSNELTGTLSPNFANLE  
ELQILFLDNNGFNGSIPSEMGAMQRLRFLRLDRNELTGSIPDDWVAMQNL RVMFLNNNGG  
ITGTIPEFLGEFVDMQQLSLFDTSISGTVPSSLGQLTGLVNLFLHFTDLTGTMPQEICNL  
RTTGALNFLTADCA G TIRNSSVPSPIVVPFVFR

>comp4562\_c0\_seq1; 1066 332 2344 LEN=2742; translated  
MFHNGGGGAGRSPVYQIDFTAVASGKRIASSKRRVRWRFGFANADALAAGQTGTDCRGE  
EHDVTIVWSITSGKRLVLM DGKETHFSSSRNNLFEFSWTMKGNHVLKIAAHAQPPMSAAP  
GFRQYDFVVDGQSFFTFPKVFRGLAPNDPRGAGGSSSGRRRDASNYGNRSNNGYDNYGG  
RGGDMVPYANGAGGGDVRSMNSNNIASIEAPHNPEEEDAYLRQAIENSLKEGSPNRRP  
APAPAPAADNLLDFMTPAAPAPVAALPPSTSQYPGDYMGAPTPQQQPAYAALPPSNTAP  
AGPPTQQQQQMVPTGASSDPWGMASMANSLPSTQGAVAPAPNPY G APAPRPPQPAQQP  
PAAAVPGQQQYGF AAAPPPFGSPPTSISATPKETPV TQASSLGFASPLAQPFPPKEQP  
QLQPQLQLGVEQEEQPIPEQEPVVEPAPAPAPPSPALLSMNVLSGQPGPLVTEAMTNGT  
AGQAAGSMADQAYAKLVNLDADFVLDVQDKSADSRQNPFD MAGTTSTANANLSLADMKTKK  
PSEPKKSVMNSPAPAPGALVLSGNQQGNFGGYGGMGTMGQPPATGMMGQQQPPPLQQPG  
YGGMQQPQM QGYQPLPLQQQQYGMQAPAPPMQQQYGMQPPQAQY GQQQPTQQQQAYGQP  
PPLQQQPYGF

>comp4563\_c0\_seq1; 944 502 3018 LEN=3234; minus strand; translated  
MAWTMIRRSRQWFP SRNQMRRTGTNHHQQR AHKHATTSPGLWTS AAPS AAGSSSARTFL  
DSRQHRHRSWGMHAAHKPSHDGGDHYSSSVSRKNRRRPRRLSSSLAATTSASSSSSRLYR

YRDFLEKGEHDRVLSYLTIDIEGDKFYLDYVDNSKILTWIPSDDDAEPNGNDTEQSPFS  
LSYYSCKEYPPARFPYNNRMDVDSNSMLVFGGDLWDKGGFDLYVTRQLMDLKRRYPDRV  
VWVLGNRDINKLRMMQELGLPPAESSTDKSNTGAAAASNLVPHYHPGLTWFRGSGRVGDP  
SGPLPSMVPGDRLRWILGNTMGSPDAMEHRRQELAWAEGGCRETGGTSAASSAEGISDCD  
VVRSYQESCHPRGEMGRFLAEGLLAAKVGPIFLVHGSLPLTKDTMERGLRDGGDGSNIWD  
DLTFCMPWINKTHEEYSEDHRFESASDLGVETIEDWLDVNRVFNRFASRNVEAWERDIARLER  
EAGQQATNATHNASDGVVEEESKDSIWAYRAGYGNPSSHSGIYYSDLVQYGMGMIPGGKKN  
PTVVYNSFTPEGMPFFLPPPEESGGTNGDCEEALGTEHASERDSGNNPSSSESDVAICTR  
QFFERSSMRLILTGHKPKQGDMPSPIRVDRSSWVICADTSYSGDTKWFHDERNATNPSKME  
RRKRQEEEQHEKRKRSNLGRGNSISFRGETAVSEVLVELSGKDLSPESVSYHGVLSDGTE  
YESVNLDDGEDESGAVSADDAGSNSNGSGSCGSLDSMPATAAILGRVAPTNMVPDPLNS  
PHEGRWWTGICRDGSHLYYAGEGYNVWNYIVSPSIDGNRSNTKYIDNTASESDAKK  
>comp4563\_c0\_seq2; 944 425 2941 LEN=3157; minus strand; translated  
MAWTMIRRRSCRQWFPSRNQMRRTGTNNHQQRAKHATTSPGLWTSAAAPSAAGSSSARTFL  
DSRQHRHRSWGMHAAHKPSHDGGDHYSSSVSRKNRRRPRRLSSSLAATTSASSSSSRLYR  
YRDFLEKGEHDRVLSYLTIDIEGDKFYLDYVDNSKILTWIPSDDDAEPNGNDTEQSPFS  
LSYYSCKEYPPARFPYNNRMDVDSNSMLVFGGDLWDKGGFDLYVTRQLMDLKRRYPDRV  
VWVLGNRDINKLRMMQELGLPPAESSTDKSNTGAAAASNLVPHYHPGLTWFRGSGRVGDP  
SGPLPSMVPGDRLRWILGNTMGSPDAMEHRRQELAWAEGGCRETGGTSAASSAEGISDCD  
VVRSYQESCHPRGEMGRFLAEGLLAAKVGPIFLVHGSLPLTKDTMERGLRDGGDGSNIWD  
DLTFCMPWINKTHEEYSEDHRFESASDLGVETIEDWLDVNRVFNRFASRNVEAWERDIARLER  
EAGQQATNATHNASDGVVEEESKDSIWAYRAGYGNPSSHSGIYYSDLVQYGMGMIPGGKKN  
PTVVYNSFTPEGMPFFLPPPEESGGTNGDCEEALGTEHASERDSGNNPSSSESDVAICTR  
QFFERSSMRLILTGHKPKQGDMPSPIRVDRSSWVICADTSYSGDTKWFHDERNATNPSKME  
RRKRQEEEQHEKRKRSNLGRGNSISFRGETAVSEVLVELSGKDLSPESVSYHGVLSDGTE  
YESVNLDDGEDESGAVSADDAGSNSNGSGSCGSLDSMPATAAILGRVAPTNMVPDPLNS  
PHEGRWWTGICRDGSHLYYAGEGYNVWNYIVSPSIDGNRSNTKYIDNTASESDAKK  
>comp4566\_c0\_seq1; 196 781 1452 LEN=1642; translated  
MPSVGLYFGIYSFCKKTFQHSDDPDNYEQRRALYIGLSAAIGNTIASASRVPEYVVKQKLQ  
TKAYASFGEAMRDLSYRTLFPKGSIASQTLRDVPIAIVTLLTYEHLKSVWKTRAQNRFPK  
VPVRSWDLVGGLSGGLGSYVTNPMDVVKTRLQTDSQLYNGSIRTCAMMTLEEGGPAFL  
RGSIPRLLHKVPANSFFFLFYEFFRSILRVQDDANFSMAKDEK  
>comp4566\_c0\_seq2; 250 246 1334 LEN=1524; translated  
MVQLTVLVIAIATLLSTPVVSSKSPPLLPQNTTHRRGQIASSSRNSDTIRYASSVTSSR  
KSQEAPWVSGFKNLSASGLAAGCSKLLLPFDTIKTLQQAASVSGTTSLSVQAAQKILS  
RPGKGFLEFYAGVGVAVIGSMPSVGLYFGIYSFCKKTFQHSDDPDNYEQRRALYIGLSAAIG  
NTIASASRVPEYVVKQKLQTKAYASFGEAMRDLSYRTLFPKGSIASQTLRDVPIAIVTLL  
TYEHLKSVWKTRAQNRFPKVPVRSWDLVGGLSGGLGSYVTNPMDVVKTRLQTDSQLYNG  
SIRTCAMMTLEEGGPAFLRGSIPRLLHKVPANSFFFLFYEFFRSILRVQDDANFSMAK  
EK  
>comp4569\_c0\_seq1; 266 38 544 LEN=756; translated  
MNTINFKVTTPPLGENTITSETTVFVFKFKGNKGPNDVVCVFGSGTGLQPDIKSFYAGG  
TNCQAKNGCGVHVHSGLSCKNTEQGGHWYNKDVLSDVPWAITGYEITSAAGTADFASCV  
YTGFVDVATNPDLLEGHAFIVHNEDGSRASCGI IKKGGKHNKSTKTRL  
>comp4570\_c0\_seq1; 224 91 525 LEN=691; translated  
MTSDSKQVRFGDLTITEYPIILGDNPSCSGAPITIDWKPMGSYTRNLELYEYTRMQRRHG  
RKKLVIPVQKRSQMLLDAGYTEEQI IKRALEVAQIKTQRAETLNEPKQNGFDKFSSSLVK  
SFSKLLKIDKSGNPKPTTVAARSA  
>comp4571\_c0\_seq1; 195 322 1225 LEN=1225; translated  
MDQKHSRQQILWLLIMATVTCCLSSVVTAFAPPPHYCSKRTNSNSLRHFPPTKQKTAQ  
AVTAARIAPALHVKKQSTADFEYQELQIQLDAMKKQNVKPSQLDPSKRAELRSYVEEILS  
RRLPNMKTVDSSVPLPLRLRSALPGTKWRMAFTTQSLMAEALPKDATITMDFASGSGSAA  
TGSNRVDYGLDFFKTLALKRLVARSTYSVMEPRTDGILGSAIVQITYDKIVTDVDMGFNSL  
GIGMFGMLKGRNTYIQTVFFDNKLWIESGVDPANGETYYNVYTREDKSDSAGNDDDDDD  
DX  
>comp4572\_c0\_seq1; 872 139 2772 LEN=3074; translated  
MLSSSLGNWEELRRNESANILRRERDQVLDVLQNYINEEDEGPAKNIAFCHLVSLMPFNA  
IQNQTSBGYNDFAYEASVAIAMAI SHLNEGNLILVKEVEGLNERCNIRFTAEIFDTQLDP  
GITMNRILELTDTSGRHPSAFLGAFRSVAVSGPSSIIITGLQGYPIISGASTSALLDDKNQ  
YPKFARTIPSDDGVATSIIQYFSTFLGLEHLAVININDSYGNSFVRGLKVAAAKHAPNMK



IAQIPIEENDESIAKQAIIESLKQTNRYRFVFCITFKPWFDVIMEEAARMEAAGDGKYNWMP  
DSFSGALSHRKFERSLLQKAYQGTGMLTSSAKSGSKFQSFSSMQALKNEEDFQYLKTL  
IPRFDQTPFFELNSTFMHPINIDYTVFFYDAAILLGLAVCEATGDDLRTGNTLYDQIAK  
FSSSQVSGTVALDPNTGTREPNSALYTLTNFVERGGIDEENGMDMVEFETITTDQYSNG  
TWSSILNYTFNDGTSNRPLGIPSPSTDKNLIESSIRSVMCTLCALTMLLSIGFALWTWYF  
RKTKVVRASQPPFLLLLICLGSFIMGSTIISLQFDHKIADLDGNNIACNAVAWQAFIGFGI  
VFSSIVCKTHRINIVMRNALRFSRITVTVEDTIKPVLLLTSLNILLLSLMTALNPITYET  
QIVEADEFDQPLETYSYCSWNNSLRVYIPLAVVNLISVIVAIVEVVKARQIATEFSESQY  
IFRALIYMVVVFFIGGPIIFIASDNPALAFVSSGIIFVATCGILLLMFIPKIIYQRKRY  
LMKKKGTKNKRYSFSLGPSLTDNALESYYNTGGKILTKTKQKELSEEVKMLKRLKE  
ARGTKKNESERTPCDQFQVVEGENSGDDIVEDIEDI

>comp4573\_c0\_seq1; 203 437 1168 LEN=1751; translated  
MSRATSTPGGKPLYKIIVMLGDSGVGKTSVLRPLTNPDRPLNHDISATMGIEFDTQMLDT  
PQGVKAQIWDTAGQERFARVLLPTYFRKAKGVILVYDITNAKSFESLSERWMAQLNDHS  
NADDLAKLLVGNKSDLESSREVTSEKASAFQCQEYGMFELETSAKSGDNVLQAFEKLGIV  
HDRALNASKAKGGVGGAGVGGNGSGAPKASDSGKSDAAGDGTVKLEDSGAAGGADANA  
CGC

>comp4574\_c0\_seq1; 250 992 1894 LEN=2479; translated  
MANKKRKNAQKKATVASSGRSSRQSSKPGSDCGKGERSSHHTQQRSFQSFPLHLVPNNE  
YAGKDNARELRELCRGRVWVPSFFSHKECRAWVDFCESFGNAGNGFQYTAHPASKYIT  
NRECYRMQQENASELSDRIFQRLKGMTITPNKNCNGKGDANSSKPKETNACPTILSRIQ  
NDTADLYPPPXSYPGPIGCNPNLRVYRYDEGHAFGRHVDETNVCGGATEMTMLVYLSACR  
GGATRFHIGSGRRSSFLAFEPVEGALLLHVHGKHCLEHEADAVLAGQKYVLRDLDVYGRR

>comp4575\_c0\_seq1; 450 1 1582 LEN=1794; translated  
XFLAAMFRMIFVCVAYEQIEGHALAFVLFQVLLNVAITNAMYIWLGTQEYTRVTLPLCI  
PKISLSAPVAVFVKIYLICTVAISVVKIYGTLLFVLGGDISWYLI PVPFTGKVLGQIID  
LIWMTFNAILPFYFAYVRAENEDPFIIEIDAPKHIYRSRDDGGHNLGDANGEDEPQNGDS  
GPATETTGLLTGGSDQPPDEETPDEAPAPPVAPTGPRIIQGQENLDSIKGSEGNDN  
LANIFKTEGYTEAEAILVDGGWISDIFLPSGCEPGSKLTVRCNSTWNVKIGNLKGVGSKV  
VATKQRLVVVIDGVWTIQEWADEKGFVVKQQLNDRFKGTGGKYFVVVANKRVVYHNA  
DLEACKNFLMTKFGHGASRPSRMVVDVSGGKVEDPHSCGGQNGGGMKAGFNKWWQGW  
DIRSMNTVAKTFLKTNKVGGPPKNDNLLHFNPKDYKDVELHTYDGSWIRELKLPKANGI  
LSGSSLTIKCNSTWGVKVLPGNWQKDVATKTTLALIVKEGKWIVKK

>comp4577\_c0\_seq1; 193 104 639 LEN=639; translated  
METPEKTPEPAPPARTRRAGKRSRGTIAATMAVAAILVVTGGLMALTSPSADGGSSPLAK  
VFAQAQCTDPCVPGSEDIMKPKAHGTSEYPVVSVGXTNSATERTSGPAWKRSDAVPPAVF  
VATVEPTVTRTLFVSVVAVSCNNSHSHRENRI FVSQELVCCVLLLAFFSTRSNKICV

>comp4577\_c0\_seq2; 328 104 802 LEN=1100; translated  
METPEKTPEPAPPARTRRAGKRSRGTIAATMAVAAILVVTGGLMALTSPSADGGSSPLAK  
VFAQAQCTDPCVPGSEDIMKPKAHGTSEYPVQQLRWGVDWDLADRINNFRHYAEYSY  
WESTSFLSDVRENIETESGTVTFYDSGWKGSPLFTAPRDRTWADFVDESRNHGWPFRDS  
EVDWNYARVLPGGEMVSVDGSHLGHNLPRDKGNRYCINLVS IAGSLPKDDDE

>comp4577\_c0\_seq3; 128 238 558 LEN=558; minus strand; translated  
MFVRRHSVHFSDKGLCGIVLGAIRHRPLEDFRQSKPDLRYGRLPQNKTSGKRISINRNNLF  
HERTADANATILTTIQKKNQRNVQHSTKRENTNGSHAVSKLTDIPI

>comp4578\_c0\_seq1; 287 1 798 LEN=839; translated  
MLEAERNLFGNESTEMSKSPIHNDKQWTQPPVRRSCKKFHIMPFKMILNICLLKLLLMST  
MMSHVPRGSAFRRARSVNSYGLQHRIRIKNLSMQSPVTRESGDASLLEPAVVSSRVFDTDK  
RPIILFDGVCNLCNNAVNLALDWDPNAKLRFSAQSNGKSLLENNGRKADDISSIVLVT  
KDGAFFKSDAVLKITTEELTPLSLLPLKPAAMAGRFLLPKLLRDI IYDSVADNRYRLMGM  
NECRFDADGEFEDRFVDDIALKKP

>comp4579\_c0\_seq1; 596 117 1331 LEN=1429; translated  
MKFSAAILLSLTLSIEAFSPNASPSRTATVVRSAVDEAVDTKDSKGGGETKDLLIRAA  
KGEKVERTPVWMMRQAGRHIQYRDLCCKYPTFRQRSEIPEVAVEVSLQPWRNYKTDGCI  
LFSIDLTPPGVCEFTIDEKLGPMVDPIKNWDDVKKMHPIDPSAAAPFVAETLQILRKE  
VGPETAVALGFVGCPTYLATYMI EGKTSKEYLEIKKMAFNPKLLHTILQNLADSIGDYAL  
YQIENGAQLIQIFDSWAGHLSARDYEEFAMPYQKQILDKIKKHHPEIPTVVYIKHSGALL  
ERMAGTGADVSLDWTVDMAEGRARVNKGRELAGLSGPGGVQGNLDPGVLLSNHDTIRER  
TEEILRKAGPTGHVMNLGHGIEACTPEENAACFIETVRNFRHEE

>comp4580\_c0\_seq1; 167 1 388 LEN=508; translated

XTNSTFTMVFTVAAATARRRIAVMATRHAAGQKRSMSGGPAPWEWEGIDKVVVRGVFPGDH  
QLAMAIMGYTSLLILLFKMKSAVSKKAPEEKIAAAPASSSSDGGVPSIESPEFGEWLGSP  
SFEAFLEKA

>comp4581\_c0\_seq1; 413 76 849 LEN=1317; translated  
MFEAQMQDGKIFKAIIEAIKDLVQDCNLDCEEEVAIQSMDSAHVSLVAVRLSAGGFSNY  
RCDRPNLSGINTANMSKILKMLGKDDSIITFKAEEDESPDNLTMLEFEGGKTTIADFDLKLMD  
IEAEQLGIPDTPYQCTVQMNADDEFQRIVRDLQVLGDTCTISCGKEGIRFSVTGNIGNGNI  
LIRSNDEQNEKDRVTITMDEPVLELNFALRYLNFFTKATPLSSSVIISMSPDVPPVVVEYPI  
EDFGHIKFYLAPKIEED

>comp4582\_c0\_seq1; 371 117 1670 LEN=2183; translated  
MCINTQVERNPDQMDGTTSLPTLEAEVETTNTTRPSKRMSREEVSACADSDSLCLMIIG  
DNVYDCTRWQKYHPGGHLTVRALCGKDADAFNVTHPRWVTERMINKFLYATLEPDDEGT  
ISNDSNETSDVTKDARLTISTRPHGVKDDDEATLAFRLLTEKLEEAGLFETDYTFYFRKF  
AVYTCLFLLILGGVLLSESLMVHTFSGILLGIWQQQLAFIGHDLGHNAVTHNRVHDSYLG  
LFVGNFCTGISIGWVKRSHNVHHIATNSCTYDPDIQHLPVFAIDPVLVTTKLFSTYANIY  
MPLSDVTHVLVKFQHFLYYPVMAFARFNLYIQSLNHALRLSYATAGDLIWGQKLQIASM  
GGFWAWLLALTFSLPTWESRVLFFLSAHIVAGILHVQITLSHFPMETYTGVTYDDSSNGF  
LRTQLATTMIDICPTFMDWFHGGQLQFQVEHLLWPRLPRHNLRRVKGILQSFCKEHLIYH  
QATFFKANCMVLDTLKQTAKSTKTFSELFHESANLMG

>comp4583\_c0\_seq1; 371 51 995 LEN=1115; translated  
MATAKENANPKLFSVDNPGRYSRARQTPLDWIHLGDFRERRRGASPGGASPFVVPVPTTAG  
DKAVLRALADASRSDPRGVGLLRKAGLAIPVRTSASSPGKTAGSLLVPSCLADFSRPVFR  
IIPRDDDDDEEKGDVEEPRPGGEAKQNDVDNDDDDNDET DHGGHRPTGFSETEVSAAEIEF  
DIIRNVQDPEHPNSLEQLGVVSLEQIELSLARDRDRGGTTHRNKDEIRIRFTPTIPHCSM  
ATLIGLCLRVKLRSLPPARFVGVDSIEPGTHVSEKAIKQQLRDKERVRAALENKHLGAV  
VDKCIRNGMEAATD

>comp4583\_c0\_seq2; 286 51 942 LEN=942; translated  
MATAKENANPKLFSVDNPGRYSRARQTPLDWIHLGDFRERRRGASPGGASPFVVPVPTTAG  
DKAVLRALADASRSDPRGVGLLRKAGLAIPVRTSASSPGKTAGSLLVPSCLADFSRPVFR  
IIPRDDDDDEEKGDVEEPRPGGEAKQNDVDNDDDDNDET DHGGHRPTGFSETEVSAAEIEF  
DIIRNVQDPEHPNSLEQLGVVSLEQIELSLARDRDRGGTTHRNKDEIRIRFTPTIPVRNA  
MQRNAMQRKNNHRSDTRRGSVGFIDLRCPHQIHQPLVRIEIPCNARNLSWLPAAAPHX

>comp4585\_c0\_seq1; 289 302 1230 LEN=1230; minus strand; translated  
MRVSFCKRWHVPARAAAQGNHGPVAVFHLSCCLGLDWSTELERHVPRRPQGNADAQGP  
VPGGGVPIRRATPVGGLGFVSFRLVLRHFSPPQALSQPVALVALVPTAGTSPSGVVTAGW  
ASLVPFVAAPAPVVSVCPSGVAHAHQEVGIDPEVVAQALGRQGRQNLVPEADPLFLLRP  
AAPGLRVVPGVLVPKHAAAQAPVAALGHKALGVPPGSKFQTLHRCVAGARSASFASVRI  
ANEQAPIVLGQEAVLVVRKIGKGVGAGRVEEAHHRFPKNRAGAAFVAGGGVPKIADQV  
RQLGVPVPAX

>comp4586\_c0\_seq1; 722 253 2028 LEN=2212; translated  
MEIEEDDQPYWYLLNCVAGLEMDLLRQVKQLAQDLQADVVKFVVPTVTKTRSHGANRMV  
RETKVKYQGYVFAKLRLTRETYPYPIRNMDCRSWMGTINMKGKYLPPAPLPLSDEEIES  
FDLENPKWEIDEQDKSTGNDSDGIILDTHENDMKEMEEEEAAIEQEVERVYKGLKVEDMIK  
VTGRNFKFGEDGIVKRLKEEMVLIIRFFTYGQTFDEWLDPSDVRKLTDDDEVKGLGGPGKP  
ITQQDLEGRDRREDKPKQKFDNRNSVGAFFGGPSRERRQDRNERRFGGEMDHKQERENW  
SQFKENEKRGRRRGRSYDDGNGVEFRPASEAEGDVDSQWGRRRRSNQQEDDWSFVSQGPS  
DYNKKNKSSPKEDTDDFFASLMTDLSKIDIGHSGKSRDQPQESSGSDSDDDFFASLMSE  
INDSPSSQKQKSTNGDDDDDDFFASLEREIRGSKSATSKPKRAEKETKPDISSAPTADE  
DDFFASLEMELETLGSEKSGSEQSADAAEDDDFFSLESELSTDLSSSETIDAPASAKQ  
TRAPQVTSSEFDASDLKKRTVPELKAILEKDRGLKVSQKADLIERLTSGV

>comp4589\_c0\_seq1; 441 83 1618 LEN=2301; translated  
MTSTSRISVVIQLLICTCAVLSAANANNNDENGKNRFERKRIINGNDVTNEMINNRD  
DTAREYLESWLNDFELKQDQKQVQGRRLAYLESMMDRLLMSMSMPTKSPSSEPPNSKTPTA  
PITPTEFPTSKEPTDMRPTRSPLPGPTLPTRVPIPTKAPINAPSEPFTYNPVEVPTLPNP  
PTPAPFSAPTRPCIAADKERNLYQAVSSTDRSVFLNINTPQGMAYSFLLEEEPSFICSP  
TLMQRYGLSTFYFATNGDSWTNNLGWLTGVQECNWFVGCNEGLFATSLNLALNANGII  
PNEISAVSTLQKVDLFSNSITGKLPNRLSRLSSLVTLDLQDNLLTGDAFPRGITSLERLV  
SYRISNNQLTGSISADITSLRRLKELWAGNNMISGSIPSNIGDLRDLKTVYVNNNALTGR  
IPSELGLIPLLEGLVMNDNSFFDVIPSQLFNVASLDTIRLDNNFLVGTLPDPSIGQLTDLEI  
FRVENNNLSGKIPESIGFMTSLGEYGTSRKF

>comp4589\_c0\_seq2; 549 83 2083 LEN=2192; translated  
MTSTSRISVVIQLLLICTCAVLSAANANNNDENGKNRFERKRINGNGDVTNEMINNRD  
DTAREYLESWDFEDKQDQKQVQRRRLAYLESMMDRLLMSMSMPTKSPSSEPPNSKTPTA  
PITPTEFPTSKEPTDMRPTSPPLPGPTLPTRVPIPTKAPINAPSEPFTYNPVEVPTLPNP  
PTPAPFSAPTRPCIAADKERNLYQAVSSTTDRSVFLNINTPQGMAYSFLLEEEPSFICSP  
TLMQRYGLSTFYFATNGDSWTNNLWLTGTVQECNWFVGCNEGLFATSLNLALNNANGII  
PNEISAVSTLQKVDLFSNSITGKLPNRLSRLSSLVTLDLQDNLLTGDAFPRGITSLERLV  
SYRISNNQLTGSISADITSLRRLKELWAGNNMISGSIPSNIGDLRDLKTVYVNNNALTGR  
IPSELGLIPLLEGLVMNDNSFFDVIQSLFNVASLDTIRLDNNFLVGTLPDPSIGQLTDLEI  
FRVENNNLSGKIPESIGFMTSLVSLRRLNDFWTGTIPDVFRNYKQLDYFDVSNMMWEESI  
PKTIFSIETRLAYMSNCLKGTIPSRFARPPDLRDLYLDGNLLTGTIPPIKDGQLKLLN  
ELLQNNKIIGTMPDSICNLRSKFLLDLWSDCGGPSPEIECEFPECCNRCFEAEALSMT  
RRKDRN

>comp4590\_c0\_seq1; 488 134 1498 LEN=1630; translated  
MASNAGTKKLISGLTTAIRNRPFVVLGAAGVVGVTGYKQYKAEKRLAEDAKKRVLVLPF  
HRMKIVEEKKSPASALFSNLTGSGVENGGVGTTEKTIEMQSDELITLIKEAAEDPSIVSMY  
VFGNGGTISTGGWAHLEEEIRNALETFSKPSSTVDEDESARTNETKKTGKAMHAYSNTFG  
GQKSMQEYYLASAFHKIHLQPQGDLLNLYGLHTTNLFIKDFLKKYGITVHVWKHGQVYKMA  
NLFTHSYYSKEHLENAEGVLLPIHKHVCNAIYSSRHEQLKKYGYDFDQFWSMVENAGSLP  
ANVAHQIGFVDHLLPLKNPLDALLKNNKREMRVRKEGVGGVDTDVEDASSIMTDTTSPPTS  
GSDDDSDATEKVDTKREKENTAVAKSGDENSSSAAVGDNWKLGTDSGSFQADSQIFIDAY  
SRQRSKLRKKRASSGNLLESLLSAFGIGDEVSK

>comp4590\_c0\_seq2; 871 134 2497 LEN=2779; translated  
MASNAGTKKLISGLTTAIRNRPFVVLGAAGVVGVTGYKQYKAEKRLAEDAKKRVLVLPF  
HRMKIVEEKKSPASALFSNLTGSGVENGGVGTTEKTIEMQSDELITLIKEAAEDPSIVSMY  
VFGNGGTISTGGWAHLEEEIRNALETFSKPSSTVDEDESARTNETKKTGKAMHAYSNTFG  
GQKSMQEYYLASAFHKIHLQPQGDLLNLYGLHTTNLFIKDFLKKYGITVHVWKHGQVYKMA  
NLFTHSYYSKEHLENAEGVLLPIHKHVCNAIYSSRHEQLKKYGYDFDQFWSMVENAGSLP  
ANVAHQIGFVDHLLPLKNPLDALLKNNKREMRVRKEGVGGVDTDVEDASSIMTDTTSPPTS  
GSDDDSDATEKVDTKREKENTAVAKSGDENSSSAAVGDNWKLGTDSGSFQADSQIFIDAY  
SRQRSKLRKKRASSGNLLESLLSAFGIGDEDEKSKEVKEKIAVIKINGAIGEMTARCAEK  
ALRKVKEQKDIKCVLVRVDSPPGGSINACESIHQEILDLPQKVIVSFGNVSASGGYIYSS  
AERIFALPSTVTGSIQVMMRMNFKDLAKQYGITFDSIPTSDLSGSNDPFYFVNKKMNE  
FGNQADRSYHRFKSLVSSGRNMSMKDVEKVAKGRVFTGEQAKKVLVDELGGLDEAIDYA  
QQNCTSSGAARVVNWPCKSFQFLSMLGSDEEGANNMDEYDVPDVVHVALSRFVNLNNS  
WTPSSRNIELGGIYSIFGNGCFACPSLPVTSVGLTVDENAAIQCMLEDANVLKGGFASH  
DGTNNGM

>comp4591\_c0\_seq1; 248 1 961 LEN=2170; minus strand; translated  
XFRDIEREGPSVFSDLYEAYKVRDYKYNMIENVDFNPVQDLRNLVAETAQQAAMSHS  
AEESALKSAQNMYETIVQPGSQMEKHLSAFGHATSLQLTEAWKSVKGMKERLDTANFLSE  
RRKALMKQVRGNRAMLTRMREMSYAVNSKQMAALMRTITEAHEALESIEAAAKDGFISAA  
GKLADNSLFKRQEPRRYARYSSDPILGIASSPLCITLFLLISTESILRTLKRRGFERN  
IGPVTYYYHPGSNYASESMNSENIDHNGLPPRDGSKTIPVVFHIGIGVGLIAYIPVIDAL  
MESGRPLFLPELPYVSAFRPW

>comp4592\_c0\_seq1; 1112 256 2664 LEN=2772; translated  
MKFSSLAIAVVLAVTTSQLQSTEAFTSVLNPQAHGTSSLLKASTQERDAENFQRRLLATR  
LKQNSSGENVRSDGSDDKNDGVLLEDADGLGVAESTASAAQEPAPVEAEDESTAESV  
LLNGSVADAEVEKLMSDIEIESEKIVAEIVEEEECQIDEETLGPVDPLCADEEQAAGFRA  
GLKNRISNTLQSLRGISKGDKAFDEEEEEEEIDGDMLEEGWFKRGESSALRRNAEYKFA  
LKCVRSLKPRSMKKKGASEEIKQAQIDAATFIRDGLLKLGPFTFVKLGQVVSTRVDLPL  
KTFTDVLTQLQDDVPPFSGARAKEIIAKELGAPTDEIFTDFSETPLKAASLGQVHTAYK  
GKKVAIKVQRAGLKEFLDVLKLNLRKLAVLLDKFDPKSDGADRDWVSIYEEESERLLYLEI  
DYLNEADNGERFAKDFKNIDYVRVPEFYRDLSTPRVLTMEFVESLKLTDIEKIESLGLDR  
ELLAKRTADAFRLQIVETSYFHCDPHGNLCVDEKGNLVYYDFGMMDELKPNVREGFRKF  
CTALFAGGPMVNDATLAKNAKQLIDGVEEAGVLARGSDRLAVEKLARYFMRAFKNQNLGK  
SSNIKETLGVLDLQTLTENDSFRFPSTFTFIFRAFASVEGIGKGLDEKYDIGKLAQPFIE  
KFTETQKGYENETQKQFSIFQKATGLNTKDIETAVTSPKKVAYIEETLRSMEEGTLKIRV  
RSLENEKALERMALTQERTENVLLATMLLNVAAGFASKQLVSGAGYAGFAFFLQAFMANT  
KVKKFDKTQAKFVQTKFNNGEE

>comp4594\_c0\_seq1; 224 113 313 LEN=523; translated

MAGKKKANDAANQAKEGLNALTAGKTDEQKANENRAKDRNAAYEQKKREREERKKKLQSQ  
WADNKK

>comp4595\_c0\_seq1; 234 130 1614 LEN=1803; translated  
MTDGSVASDPVYDLVVVGGVGLACLRATLRGWKCALVEGEVDLLSHASGGNSGIVCT  
GVDTRPGTLERALIRDSVSEFRTYCQSHNVPMRPGSLVCLFPWDVTSNEKDGADNIAND  
PDCTNGETGTHHLFPLEKVLKESHVAGDSGAALFGNGQKVLLEKEKNVSPSLMGAVHIPG  
EIVVDSWVYSISLAHALENGAQIYTNFRVTSIKREEIGDQDDGNDRTWKVSRECGNEPS  
DVPTVIRGKAILNATGNWSDATEKVAFGSSEWVAKPRRGQYRVYNSNDQTQIIHPLQPI  
SQRTKGFVSTLYDQLVVGPTALDQSSKTDRSIDPKVARELDGHIRRVIIPNIDTEKSYV  
GDYVGIRPGTNRDYQIHLKPEKRWIAVAGIRSTGLTASLGIGNYVVRLLQSI LRDP  
SDA LREDGESQVHDQASSERVIKTPMPKVEKLAEDFVTNGDGCCTIHGLRYRVTHPLTKLGF  
KSLMSNKLPSKSCR

>comp4596\_c0\_seq1; 248 20 793 LEN=1830; translated  
MNDGEHVDDGTTVRVSVLPNPPSEFDVNESLSGALMNLELKDRIAIQEEIHGVRGAVDE  
TPELLRQSLARFDELLNARKEKDPGNRLRNITRICPSDLATTEAGPAGGNGSSKEPVIK  
PKKPCSYLNDPDIRLRFRLRCECFAVEDAVQRMINFLEFTAILFGDYVAERQIELTDFNTK  
EEENALQNSRNQYLPFRDRSGRRVLVGVGNCNFHLEYRLRYKILMYLFWVWVSEDVETQRR  
GIVI IHLIFDEDEDGVENMW

>comp4596\_c0\_seq2; 392 20 1660 LEN=1727; translated  
MNDGEHVDDGTTVRVSVLPNPPSEFDVNESLSGALMNLELKDRIAIQEEIHGVRGAVDE  
TPELLRQSLARFDELLNARKEKDPGNRLRNITRICPSDLATTEAGPAGGNGSSKEPVIK  
PKKPCSYLNDPDIRLRFRLRCECFAVEDAVQRMINFLEFTAILFGDYVAERQIELTDFNTK  
EEENALQNSRNQYLPFRDRSGRRVLVGVGNCNFHLEYRLRYKILMYLFWVWVSEDVETQRR  
GIVI IHLIFDEDEDGVENMWESQLRPGIRKKIRELHKLQNGSLPVREAVIHQCLRNTPFRT  
LAAMYVFGDLAHRHSIYQQHFGELELLYRMASFGITPDLIPVSSTGKVKFGAHISWLKV  
QRIKLQTKNDS DIVECPRLVDVVFKHGPAYKNNPGNMYFRELI EISLGDHLDGTDKDEKCK  
ITMRILKQIEARKGRILEWSKRESTWRVVRNRNVMRKKIAATFKQQHRQRKTTTQMKKTI  
ENALYIAADNETSREQANPKRYDSDQLYHERKRVRTGCFDCDGAEDPDFSCFGRSFHP  
TWGGND

>comp4598\_c0\_seq1; 222 1 1236 LEN=1283; translated  
XNTTRTKQNETTVEVVCDFPELRLMTLACGLLREYNLEDRLSSSGSVTFFAPTDEAFARLG  
DEHPDVFDTVLPGVDESILLYHLANGGFSLSDLECTGLVPTLLEGRSSRTKCVGDDRFQR  
GPGNGTGGSAGEGLPRI IDPDL PACGSLVHVVDHVLLPRLPAAATATGNEPPVGGGTEE  
RATGGPTVEPTAXGIARADAASNIADPEAKHGANGCRTNPGADHPAHHNAKHGENRGAY  
LAADLGANNH SKNLGANNHATNLGAEHSRRCGTTGTRGPPVAGNGHSGSRGPRRRHPVPN  
AGVDLVRDVGSHHDPFPDVLGDVGS SHIHPLPDVVRVGRGLRHRRSAAFRAIDRCIPLFRVF  
FSVDSV VAPLTL CQRLLRSVLWGKCGSSFGRENVVIDN NISSTTTAFFGMNQ

>comp4599\_c0\_seq1; 265 127 660 LEN=1465; translated  
MPRKFGLKVDLNLKENHEGYIALSKCPPIVGQS QLQKAAHLSLNPSSAPS KN TAALVAKR  
KQKAMAIAMKPGSQVAMNAFMMYMSGSNLNI FTINTVSSAILTPITSLFMIERTFGPLDV  
DAQMAKSIYVAINLAWLGIGLYKMSAMRLLP TTSADFADAI VWKDMMETSSIPSII S

>comp4600\_c0\_seq1; 468 170 1372 LEN=1481; translated  
MKRVVSAPQLHPRFGTQSFQMRVEKINDLGPLLEHKEYGTESPQAVRTPSNESDKYGT  
TDEDEDYGFYDAIDGNQEDSERSTTSSLQDEIQNSTPSAEIASGRPSRRRSSGKKSSLKQ  
RSSYGEDFIPLDFERKEFNRLPKPDL SQRTRVPEGASTEKANGMIRSSSSGLFRVVSEP  
ILFRPIYQE QFDIDDLSSNNEGRL ENSDASNSDGNALD NSDSSFVEGAMKKRISFGT  
IQ IREHSVTIGDNPSCSYGAPIQLDWKHEDMEDLKVEDYEAYRPKTRTKDKLYLSHF  
KRM DL LKQSGHSTSEIKESRRKTKKHRNQREWTKFVVMNYPTVSTMEDAIESGIRKMKR  
SLSKSS LGSKEDI PRVSSKDDMN VIRDKALLLDMIDNDG SNATAPF

>comp4601\_c0\_seq1; 217 111 743 LEN=762; translated  
MTSIVELFPKCRKLAYDSRQQLAQVQNGTLHASELFI SLDEL SRQLELMNKLV MRERPAQ  
REVWKRKIHEL RVEADGVRRAGEHYDRLVNTNVRQQKERDEL LTRRRQRKENFSSV  
SERD MNNLADESKSWSQSQYMVNDLIANGEASLSALVEQRQRMTGVS RFLGQIDDR  
LGISNSTM KIIERRDITDAYFVLGGCVITCIVIIYFTWL

>comp4603\_c0\_seq1; 190 269 1231 LEN=1231; minus strand; translated  
MLSNI VFAVLACFV LNASATHAFVATAGRSNKTRRGRLLGGPQRRPPAETATSLSDMKR  
PVLDRVASFLFRLENDRVES SVVDDKGRKGEPMWSESDSLANRFS AI VATNGLGYRFK  
QFVADIVAGDDYDVEEVNRI DAFISEHPVAMFSFTTC PF CRRAKDLLDEKGIPIYGVIEL  
DELDGNAGNEXTGKPREKDRQNLGAVDLYRGKLRGLQRRAGAPAPRGIRRS GPDAAGGF  
IGAHGSIGGLPTELRTVRIDAWYVLHTMLNAQTHGSAAA WDCRVASST DATV RPKQLGHR

SPQLRHSRVSESSNTVPSKSNX

>comp4604\_c0\_seq1; 577 134 1834 LEN=1870; translated  
MSNPNASAASGLFIQGSRESGEDVRVGNVTAVVALANIMKSSLGPVGLDKMLVDDIGDVT  
ITNDGATILEQLEVEHPAARLLVLDLARLQDKEVGDGTTSSVLLSAELLKRGLGDLVQKQG  
LHPTTILAGYRTALKAAIAYIKESILTPISSLDSKHLLEAAKTSMSKIIIGKEGNFFAEL  
AVDAVKSVAHTKEVSGKNGIRKKKTIYPLSAIHILKVHGKSSLESYLMKGGFVLNATRAS  
QGMPTFLGDPDETSEVKIALIDMNLQRHRMAMGVNIQIKDPKEIERIKQRELDLTKKEI  
QKILDTGAKVVLTTKGIDDTCMKYFVEAGVYCARRCPKEDLKRLAKATGGQVVITMADME  
GDESFDDESALGKCRAIQETRVGDGELLKIFGCSGSGASTIVLRGANEYLLDEIDRSLHDS  
LCVIKRMLESNSLVPGGGAVETALNVYLQEYALKTLDTREQLAVEAFADALLVIPKTLAV  
NAAKDGAELVSKLKSIIHKSQRPCENDDLKKNYGLDLVNGEIRDSLAAGVVEPAISKIKS  
LRFATEAAITILRIDDRIQINPTEQQ

>comp4606\_c0\_seq1; 836 127 1949 LEN=1949; translated  
MNFIKDLSIDKIQNLAEDAFNQAKPKTDVEARVYECLSHKNWGASGSLMNEIARDTYDME  
RFQVVTNLMWDGMENQRPAAWKIVFKALNLLDHLVKNGAERCVDARNHGHIILRSLGQFN  
YYEGTIDRGLGVREKSKQILEMLSDDERVREERQKARKLREKFGKFNKGASGIGGGGGSS  
GGSGYGNQDSWNTSSGGDGGYGEGGIYDNEKAYSGRYGNSSSTAAPTFASSIPGKSKKSKK  
KKKKQQAAPAPAPEPVGDLGLGFDDAPAPAADTGGSSDFGAFQAPSAPAPAPAAATNASDDF  
AAFQDQIRSKNAQQGPDFAAAPVQQFDFANNNNSGVGNNTMNNNMMNNMNSNMNN  
NNNNMAAMGNFNNLSVNTGAPTGGVQQPSASPSNDDDFGDFADSKLSPSLSKPVTKSSD  
PMAGLINLDSLTKNASKKMSMNSPVAVEAAAAQYQRDMQNGVQGMQALMQGAPGVVSVSA  
GGSDAIISSMMGPVPTQPQRGSNFSMSTQAGDGNPQMHHQQNFNQGMQNGMVGGMNSQM  
QGGMMYGNQMGMQGGMNNTNMNQMGMMNQMGQQQQMNPQMMGSMGMQGGMNQMGMQ  
GMNQMGGX

>comp4607\_c0\_seq1; 242 163 696 LEN=1634; translated  
MSSFGSWYDEQKAAENGGASNSNWFSIDTDEVLPLFNAENLQGFSEFNKQTMEGQMPKK  
ILGMGYQQRFKVFALLFLSGLFFALAFFVGVPMALALPKQKFALESFTCGSITFMGSFGIM  
KGPYEHLSMCTMERMPFTIYILGSMMTTLYLTCTKGGMKGYALVLISGVLVSLW

>comp4608\_c0\_seq1; 209 1 1128 LEN=1349; translated  
XGLLYGTVWHVRHPKPRTARSFHAASSTMLSNIVFAVLACFVLNASATHAFVATAGRSNK  
TRRGRLLGGPQRRPPAETATSLSDMKRPVLDVASFLFRLENDRVESSSVDDKGRKGE  
MEWSESDSLANRFSIAIVATNGLGYRFKQFVADIVAGDDYDVEEVNRRIDAFISEHPVAMF  
SFTTCPCFRRAKDLLEDEKGIPIYGVIELDELGNAGNEXTGKPREKDRQNLGAVDLYRGL  
HRGLQRRAGAPAPRGIRRSRGPDAAGGFIGAHGSIIGLPTELRTVTRIDAWYVLTMLNAQT  
HGSAAAWDCRVASSTDATVRPKQLGHRSPQLRHSRVSESSNTVPSKSNVPIFVRSTRQY  
EGKQDSCRKNNKHACL

>comp4609\_c0\_seq1; 287 57 422 LEN=813; translated  
MTKSSFLGGALSFKGDKKKSKKSKKSKVKKHLKDEEATAKISRETEIPHHNRDDVLLSD  
DEDELTDAEKKALKFKKERQQEENKIIAAQSHRERVEALNEKLGNMTELNDIPRVSAAGN  
G

>comp4610\_c0\_seq1; 942 27 2111 LEN=3001; translated  
MSAATSNPAEAVPTPAPMTGAAPVPGQAGPGGDEGPAPFHSASLYVGLVDPDANEGLLFE  
IFNAVGPVASIRVCRDAVTRRSLGYAYVNYHQMSDAERALDTMNFSMIKGKPCRIMWSQR  
DPSLRRSGVGNIFVKNLHESIDNKQLYDTFSLFGNILSCKVVTDRGTGLSKGYGYIHYET  
AEAADAAIDKLDGMLIDGQEVQVGHFIGNNRPNQDDF'TNCYVKNIPLDWDDDRLNKEFS  
KFGTVVSAAVSRGIRRRKKKPFKKEETKAKESDEEKEVEKKDEAKEESKEEEGEKKIESLG  
FGFVNFMDHDSAVAAVEGLNGKTHKFMQDGEEVERDLYVGRAQKKSEREREMRAKFEAK  
MDRISKFQGVNLYVKNLDDTVTDDMLRDEFVIGTITSARIMKDMGKEGRSRGFGFVCF  
TPEEATRAVNEMNGKLI VNKPIFVALAQRREVRRAQLEAQHASRGPPPPAGQAGMMRGPM  
GGPIGYPGMPAMYMGRTGPGGGMQPAYPMAMPQMMGPGGRGGQRPAYPMMGQPGGRGAY  
PMPYGGVMPGRGGRGPMQPNPRGGRGRRGGAMQGRGPQGNQQIKFNQQARNAGSVPTGP  
AQPPVQAAQQMPPEAGLPTASALASASPEMQKNMIGERLYPLIHQSQPDLAGKITGMLLE  
MDNSELLHLLLESPEALKAKIDEAIVLEAHQSSE

>comp4611\_c0\_seq1; 298 1 530 LEN=769; translated  
XFEQTNEIPNKIGMKSTTTKRQLSSSTPNTTTMSFRHESKTMKTLNLLRGEQQPYEVT  
TNSEDEDDSTDQSNRDEEFKTFHGIQSQNDHDHSDLYRPLTPEEADQDLAEFFTAL  
DFDISFGALPLTQVQCETDATIRNYSKTLLEQHTSKRRRLLSPRIHVKRKAMMEET

>comp4612\_c0\_seq1; 306 296 1313 LEN=1467; translated  
MTILRVASWNLQAQDYVKEYKYPWTRKTPGCLEWDHRKSLIVDKLLDKKAQMDIVCLQEA  
QMSDFSDDLKDVSPVFDGVIQNVTRGHNVGGAPWPELTSFLKQYFTQRIFSRSLGRLL

LGTAVLIRNSCKLKLKRVESRSRALIATLEDKDTENNLYICSVHLDADKSTDPKKREHHQ  
SQRRSQLKSLLKRINYACKQEKQIIEAPILIAGDFNMLRENPLNELLVEGSLTTSPSAY  
VSLRDAYLEAERHDFRSIPVYHQSVLEGGNDIGETASNEKHLVKTYKGGAILDYIWTSDE  
VKVVDTLLYHPDSSTVGTEKWPCHDHPDHLPIGIDIDW

>comp4612\_c0\_seq2; 249 671 1426 LEN=1580; translated  
MLVSAPWPELTSFLKQYFTQRI FSPSRYLGRLLLGTAVLIRNSCKLKLKRVESRSRALIA  
TLEDKDTENNLYICSVHLDADKSTDPKKREHHQSQRSQLKSLLKRINYACKQEKQIIE  
APILIAGDFNMLRENPLNELLVEGSLTTSPSAYVSLRDAYLEAERHDFRSIPVYHQSVLE  
GGNDIGETASNEKHLVKTYKGGAILDYIWTSDEVKVVDTLLYHPDSSTVGTEKWPCHDHP  
SDHLPIGIDIDW

>comp4612\_c0\_seq3; 359 296 1216 LEN=1370; translated  
MTILRVASWNLQAQDYVKEYKYPWTRKTPGCLEWDHRKSLIVDKLLDKKAQMDIVCLQEA  
QMSDFSLLKDVSPVFDGVIQNVTRGHNVGTAVLIRNSCKLKLKRVESRSRALIATLEDK  
DTENNLYICSVHLDADKSTDPKKREHHQSQRSQLKSLLKRINYACKQEKQIIEAPILI  
AGDFNMLRENPLNELLVEGSLTTSPSAYVSLRDAYLEAERHDFRSIPVYHQSVLEGGNDI  
GETASNEKHLVKTYKGGAILDYIWTSDEVKVVDTLLYHPDSSTVGTEKWPCHDHPDHLPI  
GIDIDW

>comp4612\_c0\_seq4; 327 212 1329 LEN=1483; translated  
MSKAKLSVGWGCKLYVIAVIXPALYLQYDNTSSGQLGKVFVFRSTTRTKSVLNRFYTD  
AFVPNGCLVSQHKNKLLQAQDYVKEYKYPWTRKTPGCLEWDHRKSLIVDKLLDKKAQMDI  
VCLQEAQMSDFSLLKDVSPVFDGVIQNVTRGHNVGTAVLIRNSCKLKLKRVESRSRALI  
ATLEDKDTENNLYICSVHLDADKSTDPKKREHHQSQRSQLKSLLKRINYACKQEKQIIE  
EAPILIAGDFNMLRENPLNELLVEGSLTTSPSAYVSLRDAYLEAERHDFRSIPVYHQSVL  
EGGNDIGETASNEKHLVKTYKGGAILDYIWTSDEVKVVDTLLYHPDSSTVGTEKWPCHD  
PSDHLPIGIDIDW

>comp4615\_c0\_seq1; 244 37 1059 LEN=1270; translated  
MIAWNISIALLLISLESATAFVAYTDAHRTGCFLVLSSSSSSHSNEIEESEDPSSSLSNNR  
SKNRRHFSDVFSQSASMAAMCSCSSPLLLPQPAHGLAQITTPSREAIGAFDPPRNAFM  
DAAFAQGMVGMVDYEREAYPKKKEIFKALFSSLPKNINSNEEPVIVEIGMGSFPNALYY  
KGMKGLDIIGIDPNDWMEGYAKDNANRAGLLNEDGDNLR I IHGVSEALPLLDASCDAVVC  
TLTLCVLDPAKSVSEIKRVLKPGGKFLFWEHVLSQTDPDFARQQILNTPNQVKRADGCH  
LDRRTGETIREAGFSKLDLQYIELKRFGFLNPTVCGIATA

>comp4616\_c0\_seq1; 118 1 378 LEN=1299; minus strand; translated  
ATFERQRNELVTMQKSTQVIGQSVYNRMLQSARAREWISDEQSRLGIMHSTPMVATAKQA  
PAAAITSPVDAASVPEPSSVSAMLSENDRDILTIKLTSKAI SKQKKMARKKRKAAMMDW  
GDDDE

>comp4616\_c0\_seq2; 118 1 378 LEN=1043; minus strand; translated  
ATFERQRNELVTMQKSTQVIGQSVYNRMLQSARAREWISDEQSRLGIMHSTPMVATAKQA  
PAAAITSPVDAASVPEPSSVSAMLSENDRDILTIKLTSKAI SKQKKMARKKRKAAMMDW  
GDDDE

>comp4617\_c0\_seq1; 553 973 2793 LEN=3153; translated  
MEQRSGRKERSQTFKWFSSSTLLYYFCDRMAMYMNHRYYTCLVSSSVVWGKKGSKLIILKL  
QRPVLFEFKAGQYAYLRISTINNEWHFSAI SRPSSNLEFYIEVHEGKTWTKHLWNLF  
DEVTSGSFDVASLKI EVMGPYGSLSRGQNYSHTLAIGAGTGVVPILSMYKEHMHKLFRL  
DPKKFFIELNSSERRQRRIEQAEQAQTGSLAQKIFRVLNGKYSLLRNHKTILTSGSSYDA  
DNLQEDDHETIYKSATAATLPIYGSVVLSSLPVLGVALFALMISWSTIPIE IYPSMAMIL  
KYFTIAFQTCFALVSIFFFWNADGILAYVDVVFVVISPFADWYWIEVCSDFQKLLPSDITL  
FSILIWYMIGRFVVKAVSPNQSVRYRVTKHVQSSQVDQLKFLWITRSASQVSEILPDILM  
LWDLVVKWGIENAQKVKITIHVTDPNELSCALLRKEYENSEFFRNGGIIFRRPNLRRV  
IEDHTIELINSRVNSHSLAFCGSPSLSNEIEYNKISNDVITAMTGHSQSHMMDFVSESY  
GGKKAASSNKKRKGDTLSLEIDHDEDEGVEVQLLTSRKNLSYYSNESCLDCLSFMDIQK  
SFEISV

>comp4619\_c0\_seq1; 117 1 189 LEN=580; translated  
QQQQQQQSRPQIQQQPQQQRRQQAQPRSQMSRPPYVDPNTNI IYETDNAEYEGFLTKQ  
SMW

>comp4619\_c0\_seq2; 362 1 782 LEN=1130; translated  
QQQQQQQSRPQIQQQPQQQRRQQAQPRSQMSRPPYVDPNTNI IYETDNAEYEGFLTKQ  
SMWLKDWRRRFFLLKGSKLFYC SNEYSTPHGMIDLALCTTVKSADLKRKRNSFEISTPE  
ITYLLYADTEQEKDDWIGRVGKAI VRCSSTYYSQSASGSGVRRQPQPQGYAGNYQQQQQ  
LHQHSAMSDDDDDIYYEDPNENPYFNDXSGGTNQESGPGDGRCPGNVAQRRTTEETTQRG

MVQQHNATQHDTRHNVAET

>comp4620\_c0\_seq1; 258 1 1083 LEN=1514; translated  
ITPPLRPYFILLPNFLPQMNSNTEKKTTKTAKAGGYQVPWIEKYRPRKLQDVVGNEETLV  
RLQAIKADGNLNLILCGPPGTGKTTSVHALAHELLGDSYKDGVLLELNASDARGIDVVRN  
RIKSFAMNKVTLPKGRHKIIILDEADSMTTAAQQALRRRTMEIYSNTTRFCLACNVSTKII  
EAIQSRAAILRYSRLSHEQILANLLKVCQAEIIPYTEDGLEAILFTAEGDMRHALNNLQA  
ASSLAKGAGDMVNQKSVFQVCDQPHPTIVRDIIDSCGRGNLHEAIEQLDELWSSGYAASD  
IIGTVFKVTKAHDLSPEGEKLEFLREIGFTHMRISNGVNSYLQLLGLIARLCHMVEVTQQ

>comp4620\_c0\_seq2; 94 1 487 LEN=918; translated  
XQTLTCHSNLGIIFYFSPHLDGLEAILFTAEGDMRHALNNLQAASSLAKGAGDMVNQKSVF  
QVCDQPHPTIVRDIIDSCGRGNLHEAIEQLDELWSSGYAASDIIGTVFKVTKAHDLSPEGE  
EKLEFLREIGFTHMRISNGVNSYLQLLGLIARLCHMVEVTQQ

>comp4621\_c0\_seq1; 310 130 1137 LEN=1313; translated  
MSTATETGEAGNHSGCNSSCDKDPYTSVPICSPASSPSTPASARVPSLAFGLYKIPDSDE  
GVGIMADAILEAGYRHLDSASIIYGNERSLGRALALALATTAAPSNGSKRIERSRLFVASK  
VWVNDQQRGGRDAVRKSVLQSLRDLGLDYLDLCYVHWPVPGHFVETYRELMDLRREGKILH  
LGISNFRIEDYEELEAAIIPPEEFVPLVHQLEVSPFLYRPETLRYFKEKGVLLAASKAL  
HRAATLDDPVVEAVAESHSHRGGAGVTPPQVLLRWGLQKGLVVLAKTSRSLSRMVENRDL  
LDFELSLAEVERLDALTPGAIETREALEAQRREG

>comp4622\_c0\_seq1; 416 250 1281 LEN=1467; translated  
MGKKAGRDPGAPKRNMAYLLYQNAMREDFKSINPGMTFGQLAKYTSAMYSELPPAEKET  
WVQRAEADKARYLHELANYVAPPGYDPKGDIVSTLQKTGRKPKPEKDPNAPKRNMAYL  
LYQNAMREQFKRENPGMTFGQLAKYTSAMYKNTLTPDEKATWESRAAQDKARYDAEIAAYQ  
PPPQHDARGVLIIEHRPRKRSKRGRPRDPAAPKRASGAYVFFFTNYMRPKVNEEFPGIKFVE  
LGKLLGERWRALTPVQKKEYEDMAAEDKVRFQIEMQQYTANQAAAAPPSQEAASSTEAVS  
QEHGTSSYYDPTVGHNALAGHEYNAHHAQSYHHPYQQQYHAA

>comp4623\_c0\_seq1; 362 1 989 LEN=1194; translated  
XPHQHANKKERNKPKMVASIPRTGSAASTAAARPFVPRACLLLLLAGTSATGFTLAPSLV  
ARCRSVPPRSPVVRDYADDGSPSDYDSSDLPEFKQVAVDEREEDVAIRAALKQELLLL  
ASVTDRGAYCSREEKDIDVLDVAQLEALNPTKDPAAANCGGEWDLGYSSTQLFRSSPFFQA  
IRVAVGEENKDVAVENGALHAQATSGSRVGRVQRQSITSETLTSEVDLEVGMLPGLPFSIQ  
GTVVSTASLDVVS DKRWELRIQNTRVKGSNIPLFDQFVDNLQMELPVGDYFNTVQGTTPV  
IPMTTFYVDDTLRITRDVDENFFVFIRE

>comp4623\_c0\_seq2; 327 1 1310 LEN=1515; translated  
XPHQHANKKERNKPKMVASIPRTGSAASTAAARPFVPRACLLLLLAGTSATGFTLAPSLV  
ARCRSVPPRSPVVRDYADDGSPSDYDSSDLPEFKQVAVDEREEDVAIRAALKQELLLL  
ASVTDRGAYCSREEKDIDVLDVAQLEALNPTKDPAAANCGGEWDLGYSSTQLFRSSPFFQA  
IRVAVGEENKDVAVENGALHAQATSGSRVGRVQRQSITSETLTSEGXVCVCGVDGVFLHW  
VVVEGAARILPTGAGAESGGPGWSQHSKPPRIKLVNDRLSFPPGITAGFEYRPSASV  
FWRSDHVRNPAHTGFLFCATQSHSSLLVYGAVDLEVGMLPGLPFSIQGTVVSTASLDVVS  
DKRWELRIQNTRVKGSNIPLFDQFVDNLQMELPVGDYFNTVQGTTPVIPMTTFYVDDTLR  
ITRDVDENFFVFIRE

>comp4624\_c0\_seq1; 313 200 1528 LEN=1543; translated  
MSSACMYSSVMQSLQNSDIDWNQFLETIWERKCHRFFVFNEDKLSKSCSENNVWTEMVH  
RGWAVLTQLMDGSLVGDGDRSQKASIIATGKGDCDSPLLFRDLQPMDDPDEIHRLYNNS  
LYAAYLAGTSIVWNHVDLKS PRVAALCEDLQGSRCKPEQEHERRTYSYKSLKLDRAFFPH  
AYANAYLTPPKSQTVPVPHADDRDVLVFLVGRKRWRVYQQIPIHYPTTHEQVKGSGIAPV  
ESVLKGPLAFDSDLQPGDVLYIPRGMVHEAKTDTGNDVPELSFHITVALATYDWTLVGN  
LSRMLQTKLMNIGELLPSSTDASSARTSNTTSPMNLRRSILPTTRENFRKRHRDEGKG  
DDCKSVTDANGAASPARLDCGGFLVDTGAIQKIDSVFKLRTEITAESVAEAMDHRIKA  
HNLRASGKRNALIMIGEKDESQ

>comp4624\_c0\_seq2; 465 200 1951 LEN=2341; translated  
MSSACMYSSVMQSLQNSDIDWNQFLETIWERKCHRFFVFNEDKLSKSCSENNVWTEMVH  
RGWAVLTQLMDGSLVGDGDRSQKASIIATGKGDCDSPLLFRDLQPMDDPDEIHRLYNNS  
LYAAYLAGTSIVWNHVDLKS PRVAALCEDLQGSRCKPEQEHERRTYSYKSLKLDRAFFPH  
AYANAYLTPPKSQTVPVPHADDRDVLVFLVGRKRWRVYQQIPIHYPTTHEQVKGSGIAPV  
ESVLKGPLAFDSDLQPGDVLYIPRGMVHEAKTDTGNDVPELSFHITVALATYDWTLVGN  
LSRMLQTKLMNIGELLPSSTDASSARTSNTTSPMNLRRSILPTTRENFRKRHRDEGKG  
DDCKSVTDANGAASPARLDCGGFLVDTGAIQKIDSVFKLRTEITAESVAEAMDHRIKA  
HNLRASGKRNALIMIGEKDESQCEPKKAIADPMDLVVGPVAAKNVSLETHIRSSTPIER

DYAQKKSSASSSSAAGLNVRDEIGDDVAEIVTKIKIQPQQNSTFRVGDVDFHKLLEAYSHS  
LVCKLTSLSLAKRAVELGAFVAVCDWDGTEVPRAKRRKIDVNI  
>comp4625\_c0\_seq1; 343 109 1203 LEN=1896; translated  
MISTRSSLCLRAAAAASRMGRALTPSRSPSSVGLPAAARSFVSPFVGEERLRIRSLLSV  
PGCDGRKIQKSRALGADAVVLDLEDVVAHDRKEEARKLVRETLLEDEGRSFGASELCVRVN  
GLHIEHAIRDLEAVLPCPRLRYIVLPKVESAGDLLFVERMIEEHRVGRVVGASTSTSTSTS  
AEETPRRDVRLAAIESARGLWNLREIVETAAPERYGRRFPLEGLVFASEDYNADVEAI  
RTPGAEELLYARSKLVVAAKAHGLQAIDMVHINFRDLDELATECEAGRRLGFTGKQAIHP  
SQVATIHEKFSPLSDVDFAARAMAAFEETEAGSGTCIVDGIADVLPVYKWA VKICRQS  
ERPA  
>comp4626\_c0\_seq1; 231 141 1571 LEN=1571; translated  
MTDATQTLLVVLGVTWLAMVATLLIPSLSVQTHSFSARSDEMDAHLLRSSKDKSAKSR  
KRRGSRAIT IENLPAVAAAALNVPTSEKILSNDDVDYQSIIEKWQMPKEAISLLRDVRSR  
PVGFDYNRETDILALRHPLKTGGTSFSMMKKEIFGDGVMPGSGKSQWFKRQDFEKALQEH  
PPEIDPNYWRNITAFYTHSFLRETDENKNLLNELRARVPVLEEKKFRLMTIVRRPLASGF  
EFLGNKMSHRNILRVERDQGCRLSHSESDSDLGTNEEEKQECLAGTREKRCGFLLKTE  
RFFFEFCGSLDTMLERGGAHNQLYQSLMGFLPEPPEFERSMPTLKDVAIYTIQDLGGLMD  
VHKYKEDIIMFLITERMKESELCLFHYHFKIEPVKERHALYKHCRLRIWEERHKRIVEE  
REQFDYTVWRAANSVMDVMAAMRLEIKGRIDAGESLDEIPFLGQGCYDDTTISSTX  
>comp4626\_c0\_seq2; 228 141 1344 LEN=1685; translated  
MTDATQTLLVVLGVTWLAMVATLLIPSLSVQTHSFSARSDEMDAHLLRSSKDKSAKSR  
KRRGSRAIT IENLPAVAAAALNVPTSEKILSNDDVDYQSIIEKWQMPKEAISLLRDVRSR  
PVGFDYNRETDILALRHPLKTGGTSFSMMKKEIFGDGVMPGSGKSQWFKRQDFEKALQEH  
PPEIDPNYWRNITAFYTHSFLRETDENKNLLNELRARVPVLEEKKFRLMTIVRRPLASGF  
EFLGNKMSHRNILRVERDQGCRLSHSESDSDLGTNEEEKQECLAGTREKRCGFLLKTE  
RFFFEFCGSLDTMLERGGAHNQLYQSLMGFLPEPPEFERSMPTLKDVAIYTIQDLGGLMD  
VHKYKEDIIMFLITERMKESELCLFHYHFKIEPVKERHAL  
>comp4628\_c0\_seq1; 297 53 895 LEN=1124; translated  
MASCLQKFHSSSAYRLFVLWMLYPLACVIFSLFWAWPIALADKTAYLNAFFFEMLFTG  
SVIPLTDWAPPTDGTGSFAIVNLLAVAHQVILACF IGVSAGPMIEGLLDIKGGMLMKKID  
PEGTLLIPRTKSGFLKMI VFYIIIVVLSIIWAAYWGGFMSLAEGWPFLDGFVTALGVIT  
SGLTVLQPKFPVTGWGLFCGFYTGVMGAAMLGLTIAVASVPLLGVDLAYDDSPAVRIFP  
MLLLSAEQREKLGLKGGCCGAKGGDSKEESADNGGVEEAA  
>comp4629\_c0\_seq1; 304 153 2294 LEN=2303; translated  
MPLNLSYRLFQPTTVHLRHETYLIISLALLEYASIRDLRFAAFVTVWLSRNLVVRWLLTA  
HDTRTSVSEWSLFPVIKYYRFQFNPLENFINFITTTVLAGQTFDRPNPHVVAKF IGTHM  
LNDLMAENNLGNLNSNPNRNNRRGGNSSSSSHSHYGNSSKKNHYDLVCDWCKRTFYK  
IKELSPSSLAVASSEAYWTNLMRSCGPPQLVQLFLLFLYFCWNFPLSENGGGIVRYF  
TTIYTDVAQVLRDIYNI AVNRNVIYHYGRHDDSNGLVNTNHALIMETLKDSGSAMGYSG  
DIAIDNTKAIGQYQHSFSPWTWIDLWYIIIVCGTCLSMALYGRILLPIPDVAGSCVLSF  
RLRDGAGGKILTNVGGGGGNKGSRNNSQRGGSSSIGGLATGSGGGDPNFDQPWLEQY  
QSIITEHRLKILNVAFVRVVENLFLIAILPRTDFACKTTGQCPNKSGLGELAKVLFYAG  
ITEPLRSDSQYYQNDGKNPFSVGDNPFRPPVASALMIGISAVVITVSLLLAQAATLNR  
HLGITGYLAGGWVADDQQTHPSVTDKASKSNSRNKSTPESLAPEWVPRKRYKKGELVT  
YERTVYRATTNNPEGCPYDFYLRATHKIFRNELGHPATSRVAVFVSTVQFGLISLLILMV  
LVHQLILGEDEPGERTTCLLWTLAANLVAVFGTVSVAVPNYSEFDRLAADLMN  
>comp4630\_c0\_seq1; 239 767 1339 LEN=1578; translated  
MAISKNTPKQNNMLFMLASLACNGQNKARDSIPAAVAVSDASDDDRSVTALPQVKEVVVA  
RRRRRPIKRIIPGNDYQCSPLNSPPGSSLAIPKKSLESIKILRCPRKTNKIESISLTT  
YNKKAASVHNQRQKKTRCCIRTSVSGSGLALAHDDDEKLKQVHSPLDLPSFLPCPAIALR  
NVEISLNLG  
>comp4631\_c0\_seq1; 732 1 1707 LEN=1866; translated  
PTGGSTGGSTEGSNEGSNEGPTGGSTEGSTEGSTGGSTGRPQGENSTEGSSNSSSSSDGSN  
QHGDGKRPSEQDGNVVDNQSDSSQQTGSNKSNDENEANNDSTTGSSSIENNGSTE  
NQTGGEQVIFNSDNI FDKVLEKTD SATAAFCPDVSPDREVLVNWLYAVEFIPNLTEEQK  
EQAVTIMELKLVSEVLKCN TAVSVLPGKRAVRQRNLVEERVENNGIAGLNYMPLDAKNE  
IVCFNSNTAAGVCETYFGRMEMYLEE DAVVQVAINEILHSIRD TMERKNEFP AVEGIVQV  
WYLEPDLSGVSKI S GADDTIGDQKPPIDGSFSTGTLIAFAALGVFVFAALIMGAFRMRRN  
NHDGISTLEPGSSSLGCSAFTTGND SYVKQSNFTTMLPNSYNLDDGDNMSAIP EGDSSDA  
DSRYECSVIVSDGGYTS DGS RAGDALHPSHFDTVLGAPHGDEDNLDTRDRLFENDENY



EDISSMGNRDFSNHRKHNLVSADDVGLGMRHSTVDVHQCTSANCKICNYKPRDVF IHNS  
PHTPDVSLGNFFNEQPPSPPETPDEVEL  
>comp4633\_c0\_seq1; 113 629 1309 LEN=1900; translated  
MVPKPHSCDGHSHDHEHSDNDLGLSLRPQIDFDGKCLNEELPNMGRDVLKLHEERLTSD  
PFLRSQDDPELLLYIPFTEAVTITHLSVRSEPRVMEFSPAAPRTVRFVSDRDDIDFDT  
ARELAPQCTVDLVPPDHFVEGTVDYPLRPAGRFQNVSSITLFFEDNFASLRLDDEDEVAT  
IVTYVGVKKGSRQKRMAVDVYETRGMKKDHQVPGAQNEIG  
>comp4634\_c0\_seq1; 118 1109 1644 LEN=1729; translated  
MAXIVNIDVTTFNRRGGYHGDLNETFLVGNVDDD GKRLVKTSFDCLAAALDKVKPGTLYRD  
LGTAIHKTASKNKCSIVRTYCGHGIGSLFHTIPNVPHYHKNKAKGTMKAGHVFTIEPMIN  
LGNPGDFTWGDNWTAVTTDGKRSSQFEHTILVTDGTGYELLTGRENEPVMTWDAALNSR  
>comp4634\_c0\_seq2; 191 549 1517 LEN=1602; translated  
MSEPSWAKYFSFSGSLR PALQSPKRVPRTIRRPDYADHIAGVSESEQRDKRNHNNIRVY  
TSEELDGEDGLRHACRMGREVLNEGAKAIRVGVTTDEIDRVVHEACIERDCYPSPLNYN  
FPKSVCTSVNEVICHGIPDFREVQDGDIVNIDVTTFNRRGGYHGDLNETFLVGNVDDD GK  
LVKTSFDCLAAALDKVKPGTLYRDLGTAIHKTASKNKCSIVRTYCGHGIGSLFHTIPNV  
HYHKNKAKGTMKAGHVFTIEPMINLGNPGDFTWGDNWTAVTTDGKRSSQFEHTILVTDG  
YELLTGRENEPVMTWDAALNSR  
>comp4634\_c0\_seq3; 285 132 1355 LEN=1440; translated  
MALTCSSPGCSNAVTGNLACPNCKKLGLNNYFCTQECFKKNYAAHKQVHVIAKQVLAASG  
GQSATCSTAPQDGISCALDAPAETKMSEPSWAKYFSFSGSLR PALQSPKRVPRTIRRPD  
YADHIAGVSESEQRDKRNHNNIRVYTSEELDGEDGLRHACRMGREVLNEGAKAIRVGVTT  
DEIDRVVHEACIERDCYPSPLNYNFPKSVCTSVNEVICHGIPDFREVQDGDIVNIDVTT  
FNRRGGYHGDLNETFLVGNVDDD GKRLVKTSFDCLAAALDKVKPGTLYRDLGTAIHKTASK  
NKCSIVRTYCGHGIGSLFHTIPNVPHYHKNKAKGTMKAGHVFTIEPMINLGNPGDFTWGD  
NWTAVTTDGKRSSQFEHTILVTDGTGYELLTGRENEPVMTWDAALNSR  
>comp4634\_c0\_seq4; 171 132 1482 LEN=1567; translated  
MALTCSSPGCSNAVTGNLACPNCKKLGLNNYFCTQECFKKNYAAHKQVHVIAKQVLAASG  
GQSATCSTAPQDGISCALDAPAETKMSEPSWAKYFSFSGSLR PALQSPKRVPRTIRRPD  
YADHIAGVSESEQRDKRNHNNIRVYTSEELDGEDGLRHACRMGREVLNEGAKAIRVGVTT  
DEIDRVVHEACIERDCYPSPLNYNELRVLLVWFRFRPVGKLR CYDKILEGSDSGLGLFL  
FLTSCNSFPKSVCTSVNEVICHGIPDFREVQDGDIVNIDVTTFNRRGGYHGDLNETFLVGN  
VDDD GKRLVKTSFDCLAAALDKVKPGTLYRDLGTAIHKTASKNKCSIVRTYCGHGIGSLF  
HTIPNVPHYHKNKAKGTMKAGHVFTIEPMINLGNPGDFTWGDNWTAVTTDGKRSSQFEHT  
ILVTDGTGYELLTGRENEPVMTWDAALNSR  
>comp4635\_c0\_seq1; 98 1 232 LEN=232; translated  
XEGIPDQQR LIFAGKQLEDGRTLSDYNIQKESTLHLVLRRLRGGMQIFVKTLTGKTITLD  
VEPSDTIDNVKTKIQDKE  
>comp4635\_c0\_seq2; 108 1 136 LEN=221; translated  
XEGIPDQQR LIFAGKQLEDGRTLSDYNIQKESTLHLVLRRLRGGF  
>comp4636\_c0\_seq1; 269 81 674 LEN=1040; translated  
MSTRSLITPTSKDVGTEKFKV VILGDESSGKTSI IRRAVDDKFSKEYEATLGVDLFTKTI  
CTPGQKDIRLQVWDTSGQERFKSSIPSYIRDCHIAI IAFDVTTRGQYDSIEKWVTEVSEL  
REQDEVWIFIVGTKCDLPLSQR CFTQQEIDEKLNELQRKEAPNNN ILOIYIETSGKAGFNI  
RRMFYNIITTKLIDQSSQ  
>comp4636\_c0\_seq2; 245 81 602 LEN=1147; translated  
MSTRSLITPTSKDVGTEKFKV VILGDESSGKTSI IRRAVDDKFSKEYEATLGVDLFTKTI  
CTPGQKDIRLQVWDTSGQERFKSSIPSYIRDCHIAI IAFDVTTRGQYDSIEKWVTEVSEL  
REQDEVWIFIVGTKCDLPLSQR CFTQQEIDEKLNELQRKEAPNNN IIVLSFFI  
>comp4637\_c0\_seq1; 301 142 930 LEN=1335; translated  
MRTFQFLIFLVLSGIVVSSEQK IAAESTKEKVKYRKDASGDNDSDVELEV NPERKGGGF  
YRDDLEKGVMDDIKLDNSKIKKNRVNQRNKNLRKETEKVNFVYGLDGELEPVL SKDDLER  
HITENLLEEKEANALRRAGPLPKGIFDERRSGTDGHGGVVLTEEELEDI IKENNIDDQEA  
EVFRALRPYSYNYRAPSYSYRSSSYRGGYNSKGGKGYGKGYGKGSYSYQPTTYSY  
TSYNGYSYGHRKRSYQY YFY  
>comp4638\_c0\_seq1; 487 1 901 LEN=901; translated  
DDAILERAQREYIASMLESARGQPSSMAVVREAPTSKPKTNTGAPSKRQAPPAETELDR  
RVKQVLQVLP HFGEGFVEVALGLYKGDVEATVATLLQHPADGDSADPGYPTALRMLDPKL  
PRR KREFVAYQTAEEEEAASAREARADVKERLALAEKQKREFEALVVVSASASADPPPK  
PVDGGGGSPTDQPKPGAARKLTRKELRQKLRHQHRRVLADEYNDYDDQYDEVDIK LGA

ADDGFTTDHTSAAGSANNMTYEQIKLYNKIVQEDMSDASFWESENRTNKKGSNNAGNNNN  
X

>comp4638\_c1\_seq1; 415 96 921 LEN=921; translated  
MDTASPVDAQQLVSDLEGLAVSATAPSSPQLLPSLQQFYRLGLVLFRIILDDNNGDGHPV  
AIAYRKLIESLSEEMLEPVFRDLRRASGRLLASGTVRVEDTLARAARSVAGLVGAFSDGG  
APDPTCGDGKYRSRGRSRLCRLAYDHEWTSTLAAFYDRFVVAEKRQQRDALPDPDSSASEM  
ETNKTAVLSCLSRMLLDGLILPVPFHRKRKNAPNTPPVEESLLEAIRSMEEESIDCLRDL  
QEWQLLGGDPFRRTLEESLSHIGGNRHRGGDDDDDX

>comp4639\_c0\_seq1; 354 98 1807 LEN=2221; translated  
MARGHIERTLLLLAGVLVIGTQLHPAEGQENTNVLGTNGLYLDRFNVDATVQRPDGFDTY  
GPSDWENIECDERDALQSCCLAYPKWETGRAWAVNRNYCRWCPASDPDRCSRHHQSPIDL  
QRAVGKEPGTDWLANECIDIHWMKYEDSTCTMEQLIEADAFTIERHALRISQPIAVYDDF  
RDDPDGVPDGVKLECRKEGVGSRFGRIDFSKGFSSQWWHLSHTDLHTPSEHTQDGVRYDAE  
IQLHFFYSVTAREAGINNEVATVAVFAQAYDDVAPYFPLDKVICQWRRREYEVRTACGLE  
PIRLSYPGCFPLKRKERSLRKGAKPGSATPRFQTAHDVILHNDHRHTDPNHTHTRLRMEE  
ANWGPAEDKDWDTWIGEQQSKKMEADEALYHSMREEHHGGNHTEALHRDFRALFQFEELEW  
FNYWPLMGVVRTEYFRYSGSQTVPCCYGNFVSESRGTGNHWRVLDKPIRIHTRQLAEIRR  
LTAERIAPPGSAVGSCTPDTASTVTYDEADPTKIVSVENARPLQSWARPHFKTFCECKDW  
PSKWPEDRRWCEIEDEDERFYDKPYNFGW

>comp4639\_c0\_seq2; 304 160 1416 LEN=1830; translated  
MEQLIEADAFTIERHALRISQPIAVYDDFRDDPDGVPDGVKLECRKEGVGSRFGRIDFSK  
GFSQWWHLSHTDLHTPSEHTQDGVRYDAEIQHFFYSVTAREAGINNEVATVAVFAQAYD  
DVAPYFPLDKVICQWRRREYEVRTACGLEPIRLSYPGCFPLKRKERSLRKGAKPGSATPR  
FQTAHDVILHNDHRHTDPNHTHTRLRMEEANWGPAEDKDWDTWIGEQQSKKMEADEALYHS  
MREEHHGGNHTEALHRDFRALFQFEELEWFNYWPLMGVVRTEYFRYSGSQTVPCCYGNFV  
SESRTGTNHWRVLDKPIRIHTRQLAEIRRLTAERIAPPGSAVGSCTPDTASTVTYDEADP  
TKIVSVENARPLQSWARPHFKTFCECKDWPSKWPEDRRWCEIEDEDERFYDKPYNFGW

>comp4641\_c0\_seq1; 571 153 2210 LEN=2262; translated  
MNSPINATGKQDGGSCIGDEERQGGDSVYAAAIRLCCSKCCSYLKPNDYDEIRADKVHVTP  
LKCWLCLGLWQKEEPEEENSTDEEKKCLEEFKRSGIFCLRRAIEEACSPYGGIGRKSNGR  
FSRMPNQHTHTVLSGLDCLRYKWLASFSSNSHVPFSVYLQDLKQHLHSRIKSIIDKDDEN  
GEKDCNREKEKNAQSWKRENHQVFEEVEEQGLSIHLLCLPPKDYPMALALNKYMKTNVAG  
KKTKNQRNRYNKRQKCGPFTTQGGDPRQNLVRLRSKGYEWISQSTAEQLSASLSSSQAS  
PSLAMLFLNDSAPNNSMTMTKMEYQVAVFRRPYLYGYTYKSRRDVSQTPFVVMREKLSS  
PAVESGAKSVANEYDAIKSNNDGGVTAPLPKKEAQTGATSVEEQICGPIKDLLGVSTR  
NNITLPSDNDSLTMVGNTGGGGVLYGMIKFHASGREDDMVRMLVRSNSPTCHGRPFVQ  
IIDALKGIASPIELKGLIETINHSSAESKTTTALPASRNDSGRNEGVSYGKNPMGVGIS  
PDI FRVPAATFSGLQGDTESKTKHYGCYCWSKNTLPFDDNGGNELTQIIFKDLIFPLAI  
QQKTPVRVMHRRSNSVRDRNVLDKATRVDHDFRLELSTQAGTYVKEFVYVYGFRTIPS  
VSSLMGCKTNLLELDCEGIEIPFSS

>comp4643\_c1\_seq1; 144 1 812 LEN=812; minus strand; translated  
ALLAGRVPDGEELDPLPAHLEVLDLKVADGRDLVLEGGVREPEEHRRLGGASWQGTEN  
GEACNGVGSSARAFPREKKKRDNVTVVRGPAQRGAKRNKREEGKPRELLWCGVCQTRTAT  
WGGEGDKSRGVSQKQKSIKIRPFDPSSIRSVQPNRDHGTGEERRTFPTEASPMSTLKRKSY  
GNVFGGATGGADMVAGVYVLFVVFVRQWDLHFLVRAGVGVAIAVADAIVPKLGVLAVVS  
EREKSSGIVSYRLVSCSTKYGRIPVGYKX

>comp4643\_c1\_seq2; 153 232 468 LEN=468; translated  
MSAPPVAPPKTFPYDFLFLKVLIIIGDASVGKSSMLLRFTDDSFDEHIQSTIGVDFKVKHL  
EMSGKRVKLTIWDTAGQER

>comp4644\_c0\_seq1; 27 1 1792 LEN=2321; translated  
RAAQGRMCVIVPERMRGRARGIRKPRPDPGRADGGSLRCGASASRLGGSPSPVPRPLRW  
LLFAVVLALVGVAPAEGQRQRGGHPGKVLRHADAPRPDPGTATDLTGSVLGRRDKKRLE  
RRIRGGRLPFLSQWPRPSSRKRSLADLDLEVVVASGVEHGYPREMAADLLHKGWMA  
DQTEHSGGMIVLVAIEDHRIEIVVGD SLAHVFGADWCHSVLYGRGVTEAFRAGRYGPG  
ERLLDEVEDRWGEAGAETATETHAGPHSGRRHRSRTGTAVAYLAALAGGYAGLPFWQRF  
GGGGDPRYGHGHGEGHGHGHGHGHLPTGDPRHARRRGGLAHGPRGLDMGMGLP  
LPLLSGLGALLGAKRGARLAGVARRHRPFVTFGERDCGAQRIEGSPSAAAAGANTKRP  
FRSPPLSPLRSEEQRQRLRDAALGGTALGDSAGGPPGGPRANTTRPFERRGPGPRDRS  
GAGGPPGRSALPEPAGTTRRNPTRVGPAAGVLPVAVERRGSKHSTEQQKLSISPWWHRAP  
PQICTVRVPAFPMKLCIVEQNYCTTSFFPNFRIKIKTDCDFCFRVWTEDLTILNHE

>comp4645\_c0\_seq1; 943 182 2569 LEN=2609; translated  
MSHVIGMTNRISLCLQLLVIVSVATIPPAYSFTSATVSPRSNHRSQKSAIAMSSSDAKQD  
VPYGAWESPISSKSITAGSVGIGGLHVSPDGNNGDIVYWTEGRPQEGGRNVLCRYDPTSE  
EKSERDAVDVTPKDTNVRSRVHEYGGGAALFAATTEGSDKEDTLFFIDFASQQQFKLALD  
GGSGEKEAATDDTGRYRYADAIYDKQRKLIICVREDHGVDGKSSPKEVVNEIVALDPNE  
PAREPKVLVTGTDFVASPRLSPDGNLTVSIVWDHPNMPWDATKLVSVLALPEGDLLSSSTE  
VGEPTVIAGQDGDTSVMQPLFHPSTGQLFYISDESGYYNMYIQDGGEAHSLLPMNVDFGG  
SSPGWMLGQMGYTILKDGRLAAVIKRDGSSVLIVADILNYTPGTPVASVEYTSDDGLPMQ  
FGAVKGGTSEDTKDVLVYFMGGDPSTPASVYRWSLEKKS DATILATSSTLKFDDSVISIPR  
QIEFPTTLGTAFGYYYPPKNGAYHCTTESAPLLVKAQEGEFFENVCELFEQEFLSSAFR  
KDCLALCSAGDQETIDXLMYFFLSSPTGATGTMFNAGIQYWTSRFGFIFDVDYGGSTGY  
GRDYRRRLRGSWGIVDIDDVCNGAEHLVNEGLADGDRLCDGGSAGGYTTLGALAFRDVF  
KAGCSLYGIGDLTALAADTHKFESRYLDGLIGRYPEDEAVYKERSPIESVDKLSCPILLL  
QGEEDKVPPNQAEMMYEALKQKGI PACLKIYEGEQHGFKAENIEDALDSELSFFGKVF  
GIDVPDSISLQVDNM

>comp4645\_c0\_seq2; 921 136 2370 LEN=2410; translated  
MSSSDAKQDVPYGAWESPISSKSITAGSVGIGGLHVSPDGNNGDIVYWTEGRPQEGGRNV  
LCRYDPTSEEEKSERDAVDVTPKDTNVRSRVHEYGGGAALFAATTEGSDKEDTLFFIDFAS  
QQQFKLALDGGSGEKEAATDDTGRYRYADAIYDKQRKLIICVREDHGVDGKSSPKEVVN  
EIVALDPNEPAREPKVLVTGTDFVASPRLSPDGNLTVSIVWDHPNMPWDATKLVSVLALPE  
GDLLSSSTEVEGPTVIAGQDGDTSVMQPLFHPSTGQLFYISDESGYYNMYIQDGGEAHS  
LPMNVDFGGSSPGWMLGQMGYTILKDGRLAAVIKRDGSSVLIVADILNYTPGTPVASVEY  
TSDDGLPMQFGAVKGGTSEDTKDVLVYFMGGDPSTPASVYRWSLEKKS DATILATSSTLKF  
DDSVISIPRQIEFPTTLGTAFGYYYPPKNGAYHCTTESAPLLVKAQEGEFFENVCELFE  
QEFLSSAFRKDCLALCSAGDQETIDXLMYFFLSSPTGATGTMFNAGIQYWTSRFGFIFD  
VDYGGSTGYGRDYRRRLRGSWGIVDIDDVCNGAEHLVNEGLADGDRLCDGGSAGGYTTL  
GALAFRDVFKAGCSLYGIGDLTALAADTHKFESRYLDGLIGRYPEDEAVYKERSPIESVD  
KLSCPILLLQGEEDKVPPNQAEMMYEALKQKGI PACLKIYEGEQHGFKAENIEDALDS  
ELSSFFGKVF GIDVPDSISLQVDNM

>comp4645\_c0\_seq3; 944 136 2232 LEN=2272; translated  
MSSSDAKQDVPYGAWESPISSKSITAGSVGIGGLHVSPDGNNGDIVYWTEGRPQEGGRNV  
LCRYDPTSEEEKSERDAVDVTPKDTNVRSRVHEYGGGAALFAATTEGSDKEDTLFFIDFAS  
QQQFKLALDGGSGEKEAATDDTGRYRYADAIYDKQRKLIICVREDHGVDGKSSPKEVVN  
EIVALDPNEPAREPKVLVTGTDFVASPRLSPDGNLTVSIVWDHPNMPWDATKLVSVLALPE  
GDLLSSSTEVEGPTVIAGQDGDTSVMQPLFHPSTGQLFYISDESGYYNMYIQDGGEAHS  
LPMNVDFGGSSPGWMLGQMGYTILKDGRLAAVIKRDGSSVLIVADILNYTPGTPVASVEY  
TSDDGLPMQFGAVKGGTSEDTKDVLVYFMGGDPSTPASVYRWSLEKKS DATILATSSTLKF  
DDSVISIPRQIEFPTTLGTAFGYYYPPKNGAYHCTTESAPLLVKAHGGPTGATGTMFNA  
GIQYWTSRFGFIFDVDYGGSTGYGRDYRRRLRGSWGIVDIDDVCNGAEHLVNEGLADGDR  
LCDGGSAGGYTTLGALAFRDVFKAGCSLYGIGDLTALAADTHKFESRYLDGLIGRYPE  
EAVYKERSPIESVDKLSCPILLLQGEEDKVPPNQAEMMYEALKQKGI PACLKIYEGEQH  
GFRKAENIEDALDSELSFFGKVF GIDVPDSISLQVDNM

>comp4645\_c0\_seq4; 966 182 2431 LEN=2471; translated  
MSHVIGMTNRISLCLQLLVIVSVATIPPAYSFTSATVSPRSNHRSQKSAIAMSSSDAKQD  
VPYGAWESPISSKSITAGSVGIGGLHVSPDGNNGDIVYWTEGRPQEGGRNVLCRYDPTSE  
EKSERDAVDVTPKDTNVRSRVHEYGGGAALFAATTEGSDKEDTLFFIDFASQQQFKLALD  
GGSGEKEAATDDTGRYRYADAIYDKQRKLIICVREDHGVDGKSSPKEVVNEIVALDPNE  
PAREPKVLVTGTDFVASPRLSPDGNLTVSIVWDHPNMPWDATKLVSVLALPEGDLLSSSTE  
VGEPTVIAGQDGDTSVMQPLFHPSTGQLFYISDESGYYNMYIQDGGEAHSLLPMNVDFGG  
SSPGWMLGQMGYTILKDGRLAAVIKRDGSSVLIVADILNYTPGTPVASVEYTSDDGLPMQ  
FGAVKGGTSEDTKDVLVYFMGGDPSTPASVYRWSLEKKS DATILATSSTLKFDDSVISIPR  
QIEFPTTLGTAFGYYYPPKNGAYHCTTESAPLLVKAHGGPTGATGTMFNAGIQYWTSR  
FGFIFDVDYGGSTGYGRDYRRRLRGSWGIVDIDDVCNGAEHLVNEGLADGDRLCDGGSAG  
GYTTLGALAFRDVFKAGCSLYGIGDLTALAADTHKFESRYLDGLIGRYPEDEAVYKERSP  
IESVDKLSCPILLLQGEEDKVPPNQAEMMYEALKQKGI PACLKIYEGEQHGFKAENIE  
DALDSELSFFGKVF GIDVPDSISLQVDNM

>comp4646\_c0\_seq1; 367 111 452 LEN=503; translated  
MKELATYMLQIGGNASPSKEDVTGALS AVGVEADSASLDKLFADIEGKEIAELIEAGKD  
QLAKFGGGGGGGGAAAGAAAEEEEEEEEEEEEEEAEAPAGGGGLFGDDGDGDY

>comp4648\_c0\_seq1; 545 1 1358 LEN=1425; translated

XADPQSFFLVEFLGSHEFIWVREADIVENFNPQEDPNKKDGHQRSKKISRKSLANILGSK  
IYANALEEAQWALEEFELQLQDIGGSTEGMEDDEHEEGYSYSVLSQSDDEADDDDLATE  
DLDQDECNELLATNGLLDVSVAGRKRRAQILKQOKLNAEKKQKTVKAKKARADKAKKAKD  
EKQKEKERRQEKRDLEKRRRKRMREREKALKGVQHQQKKRKLSDPAPGRRHLIASKRDR  
EAIVSGYVSRAAKAGVYKPLGLGGEQRWIQSAFIDSTNLSGMALAFRASAGLIPMPKQDT  
GAPGKIVLMPWDKIRLRGKKTSAERSEVLLKQIDLLEKEIRLRKASRTRRENRLKGVLQE  
VIKMEAGIAEDDKLSRENPLKSKKPHPLAGKKRKRSGASAADPKAAADAKKEGSGSPS  
AKAAKPEKPAASAAASPGGPAEAPAEAPAGAE

>comp4649\_c0\_seq1; 745 175 2121 LEN=2478; translated  
MMMQPVPVNAPEPGVIVDKLEGHVHVSDSGTIDEKKESPAEEHAEYNMMSMQQEQRLLI  
QQHYIHNPYAQHQHQYPPHMMAGMVPPQQVYIQHQQQHHQLPLESQFQSMGLGDTNGGG  
AGQGGNDSNNNNNSSEDANNGDSRNNVNDGSNDRNDESDNGNGDRIANEDGGDRNGNEDE  
PIKLFVGVQVPKTMNEEDIFPTFNDFGPLKDVSIIRDKHTQLHRGCAFVITYLSASDAEQAQ  
EALHGRHFFPGARRPAQVKAEPSPVQENKLFIGMLSRRAGEDEVRELFAPFGEIREIYMI  
RNGDGTSKCAAFRLRVGRDAAVNAIEALHNNLVMEGAARPLIVKFADTKHQHRVQMRSV  
RRHEMFIGGPAGGYPGPYPGHHMPMGPPVPGGPPHQYAAHMGAPPQMQHYGGYPGPGA  
GGQMYNPMGYPPAPHYPSPHYGGFSEKQGGPDGGHQHSTHPQRMKDGIRGNPRHHNQ  
STNPRPREGPAGANLFFVYHLPHDLTDADLATAFNPFGNVISAKVYVDRYTGDGSKGFGFVS  
YDSVISAESAIEQMNGFQIGNKRLKVQHKRVHNNGGGNGRGGGQHAGIGHHEQQQPKPQQ  
QQQQPPPQGIPLDTAPSNAALDSGKVPDPAEGSAAPSSGGETSGILP

>comp4650\_c0\_seq1; 238 77 433 LEN=692; translated  
MSNPLKSFQQGFQETEDSRIGRLSERVAEGSVDSQKHSDEYNRPNMFTHLYYLQDEPRQR  
GYNVYSNMSSFFKGRDGGAAASSFHSVRYNNEEAKKKRAALVEKYNVESAVATHGTTE

>comp4651\_c0\_seq1; 709 341 2001 LEN=2001; translated  
MPSIVHARHELKYLVMVQEVEVIVNQHPKKSMSVEMSNSIGELDTYCNKPLLLAPVTATD  
AECGDTSDDATKTTSGPEDEDEDGSRIECETDDRDANNEENSLSTLDSNSISSAAVANAL  
ATEDAAAAIPNFPECNKKATENKRSVQFEPMSTMYVFDDESEGECEDEVEGDEVRAEQE  
SIDRDVFCYSTNAIASPKPSQSDPSDSLSCNKYYIENAWYSANDIKAFRADAWLTVNWM  
VLNGFAGENMAYITGKHLLEEAVALDSGDHPEQDELKLDSDTESAAMLSARVQQEKDQKDP  
QPRYSFCSRGVECRTPGRIVKNKRRLDAMRAVLLYQQMQKNSRRVQRRKAIKEQQRSNS  
NKGYDNCNETDYDHLERLRIEIEIDTEALANVYRSYCEESCSVALALGRQDALDAGIPK  
PPP IENRNSNPVVDSSPPGLTLVASSSDVSSSSSLSNSTSATSVTASVAPPKLPIEPEF  
LTHRRSRSLSIEDPQTIGKVIIVDCPSLCCDDDDDEEDLATLVLSLYVRHPIVEEYGCGEQ  
DEEEHQQKQLSX

>comp4652\_c0\_seq1; 275 82 921 LEN=1575; translated  
MRRTTAVFVSVPLAVSLALVALAICGAGTTSFTAFTAPAGSVSDRGPSGSSLASTVAQAPP  
AEQQHWMDFMKFGGTSPGFDVIEQTRAFSECKTYDDAEGYFDEDYVFRGPVGPITAKDV  
RETQERFNVMDAYPDLVMEKFGYTVDPENPYRCYWFERWKGNTREAVQVGPLALPPTGQV  
AVVPTHVMSANWTPSGKIIYLCLSGPLDRFEGNTMGQGAVFGLLKTAGVPLPVPVSVGNPS  
LSFNQKYVAPLISQKAFSADADVPGWKSTAKGADANDV

>comp4653\_c0\_seq1; 356 154 798 LEN=1027; translated  
MNIVLSTTVLASVLAAPAYSFSYLDLGGGVAVAPPASSNGASYLDALNGAPVAAAPVAE  
PVAAAPVAAEPYVPAATAPVAPAANYHDSLSTGATEISGPGIMTHADTLNTGANSLLGGA  
GIITHASSLLTPSALAGGAGIQTHCDSLSPSSGSSVSYNPFGSASVASASFSGSTADGV  
SFTLETGDISGLVADIKAGAKLRLTGSIDSISYN

>comp4655\_c0\_seq1; 312 370 1299 LEN=2658; translated  
MGGDGGVIASNRKFMRGAGTADCVDLHRKAAQKFNPKAMSTCSLTKTPLLVRASSGSS  
SSSSSQGAIVADPYGVLYHKEAAVRALLKRAQKRGYGDAGNDASIGPQVRRADLYEVR  
FHLDGETPVCPISGKALNGSIPALLLVPGKQAGAPNVVSESTLSRLSQEELEAEFGAIAKK  
VRLAPDPLLEQIKEEV RTEQEKDEEERFRAKKEKRSKDKSSKRKRGSKESGETKKKRD  
KSGHKECPPLPSATHKISSSSSSSLGQQVQKVN SAIQQNSVLSSLFTNKNASSKVTEK  
EKKDNLFAR

>comp4658\_c0\_seq1; 641 87 1975 LEN=1975; translated  
MLVSFTIFHKGGRVLFQHSDEASGEDDDSRSRISINTWLEEIYFNPTVSKTLHKNQILVDG  
TTRQVVEWEETSELIALAVYPDLRHEDSPWIRSLLAASLQFYQV FARARSAGTGEDKENS  
NATNVFQGPAAASPESQSLFGKTFEILVQKHRSESKLSSSAAAASGARSNKASGASGNS  
NKGKKEKRQWHDGNAKVTEKAMKELDKSAAATAEAIVKSEEQALAEARAAYLPTDADLAD  
FDIEDTTQLADDENDGDGDEQGGSGWGKSLQGLFEQMTGQKVLTKQDLEAPLTEINKLLT  
SKNVAGDIAEQICNKVRDSL VGKLNMYRVKTAVRQALEQVIGELLLPSTELNLLRKVV  
SKRDQASSFFAKSKTQRPFVIAVVGINGVGKSTSLAKLAYLKSNGCRPLLAACDTFRSG

AVEQLGVHARCLGLPIYSKGYAKDPSAVAAAAIEQATKEGNDVVLVDTAGRMQNNLPLMK  
ALGKLAENQPDMMVVFGEALVGNQDQVRMFDKAVSFQNRNQRVSAILLTKFDTVSDK  
VGAALTMHTVNAPILFVGTAEIPPAKTVDGVDGVSPLPLACQHWASGGLWLRTEG  
ARVAQTEKRTVAGRNLKRPERVLRIVTKW

>comp4659\_c0\_seq1; 983 263 3523 LEN=3620; translated  
MASASSPDLQGLAQKLLSGDFDINLLDQIVGAAYDPI SPHRAEANKALMQLESPDLWQM  
ADGII EQSQNPNSRFFGLQVLDLDAIKIRWKVIPKDQKEGINKNFVVGKVIKMSDETMMKQ  
EKVFIGKLNLTVEILKQEWPNWPSFISDLVGSSTSEVLCENMQILKLLSEEVDFDS  
RDQMVTEKVKRMKESLNGEFSQIFQLCQFVLEHSQKPSLLRVTLKTLQRFLTWIPGLGIF  
QTNLIETLLNKFFPVPLFRNHALDCLTEIGTLQDLEPQYDPLFRGLFTTFLQRLRDIFAP  
DMDLRKPFQEGSEEDCFFIQKLALFLSGFFKAHFRVLETPESEQALISGMFYLVRISEIQ  
DVEIFRICLEAWHMLAEDLYKADNNQSSFYDASATSRVNLNNGNASSRSSRKFVYSSVLT  
GVRQVMIANMAKPEEVLVVEDENGDIVRETTKDTDVIAQYKTMRTLVYLTHTLNCEDES  
IMLSKLSQVRVESKDFDFNVLNLTLCWAIGSISGAMSEDEEKRFVTVIKDLLGMCEAKRG  
KDNKAVVASNIMYVVGQYPRFLRAHWKFLKTVVNLKLFEFMHEVHPGVQDMACDTFLKIAT  
KCKRKFVTLQQDEQVPFISELVESLPSIISDLEPHQVQSFYEAVGCMLNDRGPNVAIDRQ  
VLQSKLMEMPNTWEVIMDQAKLSVENLVDPATIKEIKILKTNNRLCRSVGGGLFTYQLQ  
TFFMDMLNVYRVYSERISAAVAQQGAIATQMSLVRTMRSKKEVLRLLITFDKSGPPEA  
EPMTVAKGFIPVLDPI LGDYKRNIAGARDPEVLTFTTVEKLSNVVDEVPKIMEAVF  
ECTLEMINKNFEDFPEHRIRFYEFRLAINQHCFPALFNIPPEHQKLVVHAIWVAMKHKER  
NISDTGLEILHELLLVNVRTPNVAQAFYQYLLSLIQDVFVMTDRFHKSGFKIHATLLR  
HMFHLVQANQVTVPLFEPSTQPPGQTNPAFLREYIGNLLITSPNLSKTQVSKFVDGMFD  
IKMDLSTFKTHLRDFLIELKEFSAEDNSALFSEEQEAERRRQEKAMMAQRSAPVPMIKPS  
EIDNDL

>comp4660\_c0\_seq1; 259 1 673 LEN=696; translated  
DDDDESEEAVKASLDVGTGTTTNAAAAAATTTSTHMSEAYS DPVLEASIMEDVEKMRVFE  
IKEALRIRGISVTGSKDTLKERLFI SLMDAGTNRGLLRNNSNNDDNAVRCDATPFDSI  
QFDWRWDPARAAKEYRSNRTFETKPFPPFHCGIECPTVGS CDGTNGSVAVRFGVVLHGDR  
GASGPNLNLIERNTRKLRHETKRIESKQNERSRNEGIANNPHY

>comp4662\_c0\_seq1; 939 95 2251 LEN=2843; translated  
MKTVSVFV FASLLANAESSSLFGVRHFGKALGATSTKQQIGDKTVETQDAVQSQLCDAIK  
LRGGGDGSI SGPICIGIDLGTYS CVGWRNDRVDICANEQGNRITPSYVAFPKDGSSSGG  
RLVGDAAKNQASQNPTGTFDFVKRLIGRNYDDATVQKDKKLPFEVAKDKNKPIVRLPK  
EIGSKFPKSDFTPEEISGMILRKMKETA EAYLGTEVKHVVTVPAYFNDAQRQATKDAGT  
IAGMKIERVINEPTAAAIAYGLDKQDHEENILVFDLGGGTFDVTLLSIDNGVFEVLATSG  
NTHLGGEDFDYRLMEYICISQFKRKS GIDISNDKRAVQRLRKQCENAKRTLSTQTSTMIDC  
EALSNGEDFSLTLSRAKFEELNLDL FKKTLTPVTQVLKDSGLSKNQVDQIILVGGSTRIP  
KVQTLLESEFFGGKLNKSNPDEAVAYGA AVQGGILSGDAAEATKDVL LLDVAPLSLIE  
TAGGVMTTLIKRGTTIPVKKSQIFSTYADNQPGVNIQVFEGERGMTKSNRLLGQFELSGI  
PPAPRGVPQVEVSFDVDANGILSIGAHDKGTGKQETLITITSEKGRLSDEEIERMVQEAEE  
FAEEDAKEKAKIQARNELEAYLYNLKNSVND SLEGLSEDEKQDQNTAINDGLDWLEDHP  
AAEKEECDSKQKEVESIANPILKRAYESSAGAAGGADDFLGEDLDGVDDGPTVEEMD

>comp4662\_c0\_seq2; 527 95 1504 LEN=1698; translated  
MKTVSVFV FASLLANAESSSLFGVRHFGKALGATSTKQQIGDKTVETQDAVQSQLCDAIK  
LRGGGDGSI SGPICIGIDLGTYS CVGWRNDRVDICANEQGNRITPSYVAFPKDGSSSGG  
RLVGDAAKNQASQNPTGTFDFVKRLIGRNYDDATVQKDKKLPFEVAKDKNKPIVRLPK  
EIGSKFPKSDFTPEEISGMILRKMKETA EAYLGTEVKHVVTVPAYFNDAQRQATKDAGT  
IAGMKIERVINEPTAAAIAYGLDKQDHEENILVFDLGGGTFDVTLLSIDNGVFEVLATSG  
NTHLGGEDFDYRLMEYICISQFKRKS GIDISNDKRAVQRLRKQCENAKRTLSTQTSTMIDC  
EALSNGEDFSLTLSRAKFEELNLDL FKKTLTPVTQVLKDSGLSKNQVDQIILVGGSTRIP  
KVQTLLESEFFGGKLNKSNPDEAVVRKRSIFTSCLYFDYNDIASDDTK

>comp4663\_c0\_seq1; 390 269 1042 LEN=1078; translated  
MAEESSSSSSAGEAIREAALSAENAVEKCTANVAIEVPPAANA AEGAPAAVNSAGEKRKL  
DEGDGEDVVDTPSTSIKEVSTDDAPENKPKKAKISMPPPVSSSLTDVEKYTLECPPPSDN  
TNEADAKTKITTPNMLFGLHPLIQELPLQKFL EDYGKVLAITVRSASFASRYGHVTFETV  
EEARKCYTSINGAKLLHKAFLVQPSMASAAPKASTSMDSKSKESKDTETTEVNTISTDSA  
GAAAATAAATATATPT

>comp4665\_c0\_seq1; 177 231 422 LEN=502; translated  
MEAMSVLLKSNNETSAELDGTDTMDVDGSDGEIDGLEASGAAA WSSLVVLFTSFMGASF  
LGS

>comp4667\_c0\_seq1; 113 1 697 LEN=1205; translated  
XNKNNRFLREGMILRTKESGGSNSDYTSRELVERLRSGPYPLEIGFQNLAAAGGDAISDLG  
TSIVTPKDALDLAQKTETPSAGGNSGKARGVEYSITTTQQKPPSECAIKSRRNDVLEIEY  
EASYVADENAKKVIYDASAFRGTGNRPYQMVLSGDMIPGVDQGLYDMCPGEQRVLKIPP  
VLGHGPNRRRLYRIPDKYVNLWVGLVTIDSTIREDNNVSRDERESRFAY  
>comp4668\_c0\_seq1; 268 409 1143 LEN=1321; translated  
MAEATQKRRLEQGKEEPAGLDSEWNKRMKERLERIKNKKMRDTSITVMQRGLSFSNTKDN  
KQTTNFDEEGNIVTSGAGRIREELSQENGRIEFLTGKDAGTVEICVQSI SASPKRPARLH  
VMVKDEASDNEFDDDDAYYDDDDHVSDSKANTKKVKDPDHLEHRELTQTMTRLERDLQSL  
QNRKACINNADFNKDQEHKFHEQSVSMNRATKYWPIIQILVILILTGFTQANHIVGYLKS  
HRIV  
>comp4669\_c0\_seq1; 149 214 369 LEN=1194; translated  
MAAVPDAEAMARERRKESFEYTRVFLGKRIKCTLTDGRTLGTGTFICIDRL  
>comp4669\_c0\_seq2; 128 214 753 LEN=781; translated  
MAAVPDAEAMARERRKESFEYTRVFLGKRIKCTLTDGRTLGTGTFICIDRLKNLILTDVL  
EERSIDPSDYKHRVGSSEPESTEPPTARCFRRVERKISQAMVPGXAAGAGRAAPRVGSYGS  
VVPAAVLETTDAPVMMGGGDETTGGTQRGAALCDEWHATQCDATQGMREKQSRAPPCTV  
>comp4669\_c0\_seq3; 113 69 418 LEN=871; minus strand; translated  
MPCVASHCVACHSSHNAAPRCVPPVSSPPPIITGASVCEHRGRRHDAVAAYXGEQLDP  
HQPLAGDHGLGDLALDPPEAAGRGLGARLGRPDPVLLVVRGVDGSLLEDVGDQDQVF  
>comp4670\_c0\_seq1; 600 75 1121 LEN=1291; translated  
MYSAFFVVAIFGVIVDAVAEAESAPLLSIYKTPALMEIQFASENEFSADDIYHIEESA  
ALYLQELLTNDSESLRFVEEQDSMIDVSVNVKTTQQLNGNEISLNSEVDVIHYGEVGIADLA  
ALLTFLVNRNNTDSSLIYLDQVVNADASVELISFDQVSESI PMATDLTRMSSYSELANAK  
ESKRTLSFVTTLLSITLFGMSAILIIVGGGWLVLRRKKVKALLDREEEFTRMTMNIESKP  
TAETDSGDDESPSKEDMNKKKQGPLAVYGIIVKTTTPPKMGSESNPDDMATPMSVMSDYS  
TNRAPIGIMSMRKLVPNIQRDDNESESEGEDEEQQNVERGFGSMKKLQY  
>comp4671\_c0\_seq1; 197 951 1875 LEN=2601; minus strand; translated  
MPI SNARAIPPPTVPDPPIHVSLLCSARSVPVLPPLPLGVFKRRARSGRGGRTAARRLPP  
CSDSGSDSAAPGGPACTAASATAAGVLARAHGPRPRRVVRAAAGCPVGRGGTGS GPAGS  
HAKASHRALDLGRVLPPELVEDVLLVLLVQDGVLRRYRVAGDRAPPVPAALHVAASA  
VAVAVAADPVPVAGSARVDADGIDRGDAEVAAVGRVGGEEAAGPPPRVPLVVEVARV  
WVRLWIVRLGDAGGPSARVAVAVAVAVAVGNGGSGLSVAQLPMGAGLVFKATVPAATA  
GGTESLG  
>comp4672\_c0\_seq1; 295 295 519 LEN=519; translated  
MGKKKDDSSSEESSDDSDDESDDSSDDSDSDSGSDDSDSDSGSDDSDSDSGSDDSDSD  
ESGSDDGSDDGSDDG  
>comp4673\_c0\_seq1; 365 1 846 LEN=941; translated  
ATAAEPAASIHVPATLADGCRFPLASFGFLQIYDDSTAYKLTTLTALECGYRNFFASVLAGN  
QKGFARAIKDSNPREDLYICGSVVSNRVSGFENARQATTKGWKRNMEAFVGGIDYLDQ  
IMLDYPGPDCESIQQOWTAFEEMHAQKLTRISIVSNFSARQLDCVLEKARVKPVVNLQPY  
SVAYHPGDAVADNASRGIIVQAWAPLGGSLGGRFDKNVKKACGKIGKKYDKSFAQVALRW  
IVQSGSFSTTQSKNKDHFSEDLNIFDFELTEEMKTLNLSLA  
>comp4673\_c1\_seq1; 140 141 403 LEN=403; translated  
MIFSKRATAALALCSVLLVSN SPLGRALSTKSNQSNQIQTHGSGVDRRTAIQRAGIAA  
AGLGTVTGGGLFLPNASPAVATAAEPAA  
>comp4674\_c0\_seq1; 179 720 1172 LEN=1585; translated  
METGSELSKTVATFIVQKILLEETGLNYVCATAERFYAVSTVLANMVHLLQVHPSVRLK  
HVRCYLRLADHPRAREALKTCLPASLKDGTGPHLHNDLTVQKWSQLLTIVGSDDGDP  
SGDNGNNGNDNTNPLLTQPSSTGYLQKDSK  
>comp4674\_c0\_seq2; 268 120 1109 LEN=1522; translated  
MALTSSSNSSSHSLTSGPNSASGGGMDLPLVQLTNAESREVLLLELSKKRETFAD  
LAPILWHSTGTVAALLQEIVSIYPLLTPTLTAHASNRVCNALALLQCVASHADTRQPFL  
AAQIPLYLYPFLNTQSKSRPFYLRSLTSLGVIGALVKVDDTEVISFLLSTEIIPLCRIM  
ETGSELSKTVATFIVQKILLEETGLNYVCATAERFYAVSTVLANMVHLLQVHPSVRLK  
HVRCYLRLADHPRAREALKTCLPASLKDGTGPHLHNDLTVQKWSQLLTIVGSDDGDP  
GDNGNNGNDNTNPLLTQPSSTGYLQKDSK  
>comp4675\_c0\_seq1; 430 115 1662 LEN=1759; translated  
MLSRVLPAAARSRWSAYSHARRRCASSGSGTTTAPSSVSFEKMETDKRYKPTTDVPESLL  
SSPEGSPSPFSIRGQFREGRAAYLDMSATTPMDPRVLDAMGPYMGVSYGNPHSKTHAFGW

EAEAAVEKARAQIAALISGDPKDSSENEENENQTESGAPKKKRGRRKGVDPKEIIFTSGATE  
SNNLSIKGAAHFYKRRKGVITTTQTEHKCVLDSRSLMEGYEVTYLPVQASTGRVDMKD  
LEAAVRDDTILVSVMAVNNIEGTLQPLREIGELCRSRKIVFHCDAAQMLGKMPDVDVEYK  
IDLMSMSSHKIYGPKGIGALYVRRRPRVRLEPIFSGGGQERGLRSGTLPHALCVGFHAC  
ELAARERPFDEEWIGYLSSEKLRGIEESIIPDVVRNGDPDHNYPGCLNYSFAYVEGESLLM  
ALKNIAVSSGSACTSASLEPSYVLRALGVDELALHSSLRFGIGRFTTEEEVDFVLELLRK  
HVVRLREMSPLWEMVQEGIDLKEIQWSQDEHHHHH

>comp4677\_c0\_seq1; 557 1 1629 LEN=1975; translated  
XHRANWMATRVLGNLEEQFDLVLFCLPPGTGRDWIGFASVGRFDSYNNQWCGRVSIQLH  
EVGHSNLNLAHSGEKKAGTSDYDDQSGMMGFSYPRDDWPRMCFNPAKSYQLGWYKROQLAI  
DPTKMLLADHQYGYVEGESESESYGIGYDTHDDTDDDTVSTAKPISTTTTETSATSVF  
VFNADVADYRATDDYDDYIGDDDDSNHHNATAVFPASADADADAGDNDHTDDRAVVVLR  
LRETGSGETDYFVGFNRASGANQETQEDANEIVVVEKPSGGSYGYQSWKVAALGTKGQSI  
VVPFRGSLVSAFVEIKLLADTTTGYSGSNTNTNQAPINAPVAITSYRRADPCNGERTLL  
FEARGMTDGLGGREASWSLRVDPDKKASGNNADENAASASGARGGYLGFSGYGPRESFR  
RDFEVCQNTCYIFAISSETGGDDPSGSEGEAAWGGVVEGFLNGEKVFDTRDEPKQNQKQNH  
EPPEHDLXLALAFVLLLRHPPPAVPLGLADLQDPDRKQEQKDPEGLQVGPREPQEAVPEA  
VER

>comp4678\_c0\_seq1; 204 308 2023 LEN=3265; translated  
MNALRKAGGCHEYYSSIALSSRARNAAASIGPRTYPSCEESKIRDINDNALDDGGIVDGH  
SFAVVDIEEAIDRLGMMGFQYQVVLACGLCFASDAMEILLLSFLTIVILQGEWGLSEAEAD  
SIVSVVFAGALLGSLVLTPLGDRWGRKPVFFVVAATISGFGILTAFCTSYSQVLVVRFLV  
GVGVGGLTVPYDALGEFMPNTFRGPNMLCTSFFFWTASSLAVPLFAWLTLRTPDHPDGGS  
TQESPGGGWSRAFFVVVLCALPGVLTSTVLSLLWVPESPRWLLTRGKHDQALAVLRRAAARNG  
RDPYGSFPEHTRLADHRLPSARTARDACSPQPWRKISLLLGQWYGLAFMYGAI IAVSI  
VFSSTHYGSANDNDDGDSNADDTGGGFDFDYQALCITSFAEMIGLTLAIKCVNRMGRVST  
QAWAYSLGGFCLLLLSLLDYFVGGGNEKGGFEEGENDVSRRWLLIGFAFLSRMFVMTATS  
VTWLHTAELLPTAIRATGHGLGKAIRC VNA

>comp4678\_c0\_seq2; 252 308 2341 LEN=3134; translated  
MNALRKAGGCHEYYSSIALSSRARNAAASIGPRTYPSCEESKIRDINDNALDDGGIVDGH  
SFAVVDIEEAIDRLGMMGFQYQVVLACGLCFASDAMEILLLSFLTIVILQGEWGLSEAEAD  
SIVSVVFAGALLGSLVLTPLGDRWGRKPVFFVVAATISGFGILTAFCTSYSQVLVVRFLV  
GVGVGGLTVPYDALGEFMPNTFRGPNMLCTSFFFWTASSLAVPLFAWLTLRTPDHPDGGS  
TQESPGGGWSRAFFVVVLCALPGVLTSTVLSLLWVPESPRWLLTRGKHDQALAVLRRAAARNG  
RDPYGSFPEHTRLADHRLPSARTARDACSPQPWRKISLLLGQWYGLAFMYGAI IAVSI  
VFSSTHYGSANDNDDGDSNADDTGGGFDFDYQALCITSFAEMIGLTLAIKCVNRMGRVST  
QAWAYSLGGFCLLLLSLLDYFVGGGNEKGGFEEGENDVSRRWLLIGFAFLSRMFVMTATS  
VTWLHTAELLPTAIRATGHGLANALGRIGGITCPFVISRDTSLRTIGLVMFFVSIILTSMV  
VKSLPETTGKALGNFAVSLKDQVQGPSILPTTPEAHVVDSRSTHELSSNEDSTNKSTREL  
QGD TAAHGKAESFSQIV

>comp4679\_c0\_seq1; 633 256 2045 LEN=2188; translated  
MSPVPSDGPSTPPTDFPTESPAPSPSEIPSTSPSMS PAPSMKPTGSPSEIPTSFPSDS  
PTGPLLITVVGVELKLRNVTGEREMNLSDLKYFEETTLYLQNEVDQVPGVFKIEVENTL  
VTNQTLIQVNGNGTIMEKDSMLRKRSQLQEQNTDLIITMDVVVSAVLRSESANFDVFFE  
DFFKLEDNQNKLRSMLEQENTFAKGIFFNGEIVSSERLSKKGNGTAVTGIVLAIIVALVI  
GSGLLWIWIQTRRIADRESTDPRKLTNLGTISKSYSDDGNATGAEKPRRIRITTSDELRL  
LIQYPKLNENDALSSASSSQLMYIPTIMPTESNIEVDPDTPGTAFFINEFGTPSNSNGFA  
TPANANGFATPASANGIPTVSTSGLVTPASVLSRGGNSTHTGASSKLLVPTMKPETAPA  
LDISSAQILKDISSATARKQKIPLPNLSIKSPFRREKKTAKSEDDYDYDRSSMFAGAG  
VVGAMNNVSPSDXKEKKRKTWQQYLYDMPIEIEGGPGVTTVAVVPHGKRKSTSRSLNSR  
SHPMVIIGPPDKSNSDARSTRTKNRDKHGVDIVDEIAYLYSTNADPPPRNSDASI

>comp4680\_c0\_seq1; 653 1 1629 LEN=1629; translated  
AASPREQIPQYGRWSSSPTQAIQAAAAALQPVAARNRNQNHQDQTVRQEI SIVNALFFSA  
FAVAVAVVVAAVFLFAFELVLRSAIAAKHIAVPWAHRRNAAEGNXKESSPARQKACAVAN  
KNKPTGSVAWMGICRAIAVAVAVAVAVAWIVLGLLPDSTTGFFENKPHPTGFERPAG  
PTKTGLHPETPGAPRTSGRKKKNKPPNIVVVLTDLDWTLGGATASTLKKTRRLGGGDG  
NASGNGSGNSNSNGNGNSNGNYENESPRRQQRSPGHQADLIRDFLARYDEKRRNEPP  
RGRSGSPRRRTATATTTATTARIRGRTKSPGRLPLWNPEKTVSEKEEQEQEQHQEQHQ

QEQQEQEQEQQQPQEQQQQEEDRKPQHQQDDDEHDAADGESQNQQLHGGDRKLSGSLSTYLQS  
TSEPVCEKGSBNKNDKENDSNDGSFDSSELTDQFPEIPVRLRTVKELETCNGYNAQDTDE  
DDKENPQQQDDGADPGDQDSKIYIDALIRGRDLQHAKELERHAELEKLHKLFEASEKH  
RTE  
>comp4680\_c0\_seq2; 668 1 1608 LEN=1608; translated  
AASPREQIPPPQYGRWSSSPTQAIQAAAAALQPVAARNRNQNHDQTVRQEISIVNALFFSA  
FAVAVAVVVAAVFLFAFELVLRSAIAAKHIAPVVAHRRNAAEGNXKESSPARQKACAVAN  
KNKPTGSVAWMGICRAIAVAVAVAVAVAVAVAVAVAVAVAVAVAVAVAVAVAVAVAVAVAV  
PTKAGAPRTSGRKKKNKPPNIVVVLTDLDTLGGATASTLKKTRRLLGGGDGNASGNGS  
GNSNSNGNGNGNSNGNYENESPRRQQHRSPGHQADLIRDFLARYDEKRRNEPPRGRSGSP  
PRRTATATTTATTARIRGRTKSPGRLLPLWNPEKTVSEKEEQEQEQQHQQEQHQQQEQEQEQ  
EQQQPQEQQQQEEDRKPQHQQDDDEHDAADGESQNQQLHGGDRKLSGSLSTYLQSTSEPVCE  
KGSBNKNDKENDSNDGSFDSSELTDQFPEIPVRLRTVKELETCNGYNAQDTDEDDKENPQ  
QQDDGADPGDQDSKIYIDALIRGRDLQHAKELERHAELEKLHKLFEASEKHRT  
>comp4681\_c0\_seq1; 152 370 1662 LEN=1737; translated  
MISVRSTAAYVRRSVFATAGVKNRNIHSHKSTISSTPSKVEQQAASPPSSASGEGSGGV  
PVLASLAAAASGVGVVGAALAVEQSTADTCCPPYTSRGGAQRFQDQETFGGRFARMLLACD  
PTLLLCGDETLAARERLTAEAERESNSNANNLFSTKESRSLWESKRVVESALHPDTGE  
FIPRPFMRSGYVPYNGPICVSMVASTSTIPLLFWSWVNQSQNALVNYNRNASSPMTNET  
LMKSYTAAVGSALVVAFLGSLTFVQKRYPPAKAKELMKYVAFPSAVVASSLNCYVVRSP  
DTGVPLTDQEGNKVVLDPKSENTSQIAARRGVESTTASRALLQAPVYFFPSLLMGSLLPPL  
KRFLEQHPRTVPTTFLVLSVGLGLPATIAIFPQVAEIKSSDVEEKYRHLIDPKTQKP  
YEVFYNKGL  
>comp4681\_c0\_seq2; 136 370 1104 LEN=1852; translated  
MISVRSTAAYVRRSVFATAGVKNRNIHSHKSTISSTPSKVEQQAASPPSSASGEGSGGV  
PVLASLAAAASGVGVVGAALAVEQSTADTCCPPYTSRGGAQRFQDQETFGGRFARMLLACD  
PTLLLCGDETLAARERLTAEAERESNSNANNLFSTKESRSLWESKRVVESALHPDTGE  
FIPRPFMRSGYVPYNGPICVSMVASTSTIPLLFWSWVNQSQNALVNYVSCVQYGI  
MFPW  
>comp4682\_c0\_seq1; 322 189 1004 LEN=1079; translated  
MEIIVVTCIVNLVHHIFRHWNEGRVLRRELIGSADIENSNITVAANDIEIASRR  
VGRILDAPPVDDNTRKRRRDELIYRNLILHHVMAVPPSSNSQSQEQQKDDTSNTNNEPFS  
DSDISGFAQQQFDVNTETKESFPPSSMLPSLVFCNRANTPKLDEEEKRAAAEVLTHQKCC  
GICLEDFAVGDIVVHKWRRRDQGTTPKPKVHNTDYRGRDLIPAGKGGDEKRYKRNKDKR  
SCNHCFHENCMIQWLQNHDCPLCRANIIQE  
>comp4683\_c0\_seq1; 326 218 1433 LEN=2252; translated  
MTEAEAEYPLPEQILPEIHDAICNPQIWIWVPSVPPDVDPRSSLLRRNHP  
SLQPVYRQVFLCRQQDAAQAYQIIQPPAFQPVVLSHGPTWGYLFMGMVILPRR  
KDDMLYEEMEAQQRVAIKRDLNVTNELRNGSKENPFKEIWRMOTIGDHHVCAI  
IEALQAENYLYIITPWCGGGSLSDNLPLSPNDRYSVEDQARILFQQI  
LEDLHHLKVKVHGICHRDIKTANFLVSESGRVLIGDLAMSFVMPFMV  
PETLLNRPFDGAKCDFWAATVTLYTLVTGLPYLYRTPRPDDILFRYC  
IMAKGLSRDRHNELVKEIIESEVDNPQDVSLSTVVEHICNMSYDILEL  
FENSLSLIPEERWGSNKHANPDGCRTEEATMAIYFDDALAHDEFEHAKDTE  
INGMK  
>comp4683\_c0\_seq2; 332 218 1478 LEN=2297; translated  
MTEAEAEYPLPEQILPEIHDAICNPQIWIWVPSVPPDVDPRSSLLRRNHP  
SLQPVYRQVFLCRQQDAAQAYQIIQPPAFQPVVLSHGPTWGYLFMGMVILPRR  
KDDMLYEEMEAQQRVAIKRDLNVTNELRNGSKENPFKEIWRMOTIGDHHVCAI  
IEALQAENYLYIITPWCGGGSLSDNLPLSPNDRYSVEDQARILFQQI  
LEDLHHLKVKVHGICHRDIKTANFLVSESGRVLIGDLAMSFVMPKGGIVK  
DIGTFPPFMVPELTLNRPFDGAKCDFWAATVTLYTLVTGLPYLYRTPRP  
DDILFRYCIMAKGLSRDRHNELVKEIIESEVDNPQDVSLSTVVEHICNMSY  
DILELFENSLSLIPEERWGSNKHANPDGCRTEEATMAIYFDDALAHDEFEHAK  
DTEINGMK  
>comp4684\_c0\_seq1; 246 175 1239 LEN=1606; translated  
MVRYNRVSMTSESDHGSQDTIAVESHSPANDQKLHPSINPLARIESNDRSLSS  
KSYKSRGSDAQDYLNSGSHRFGDSGSDDDIDEERSPLTQNAEYASNDGLEN  
MPMPGDDRSVTPLSFLPSMAAISFDLDDDDDEVEANLQRYHLDFTSTENG  
DYLARVDIDEGDSDQGAASGSSNWCSSGAKYVWFSVQSARQKARRAQMLLDQ  
TERNWKQSLKICVLTSCDNTDLGIFLFAIIALVWIVVLLFIRNPVARRKGI  
LAGIILVAVRMGARPFHHLKHWQRSSLRQRCVCGSAQDSSLDGMSQRGLE  
LHSIRDDEKRDYNHADGLMSPVSAGSDPTVAAI  
>comp4685\_c0\_seq1; 464 338 1441 LEN=1717; translated  
MKSSIVLQSNKDDGKIIATRMRKQRHGLANCTIFRGQCPRTDQMMQKWHKN  
IDLMMKELTI



TDDYSSAKVMAPTLVLSSENQMDPDFTNACRKNYPKHFDLITWAEDFLHSSDQEKKLEPK  
KHPVCEETAKIKETQAEIFLEEAASDSIGNPKKRIRDETFMSTRGKKNRTETSLRFHA  
SDRERQNSPRCIFSPIKEKPLKESKSVMPIAPLPSPILADNSITVALAPHPFNTSKLP  
KDNVQSLEVVAGESSLLSERTCRRQRSKIAFGQNLLSASVATARTLQFKSQNDNSKAD  
KSKTANLIGGKRCCESSIYRPTLVPIKEETGNKNSSQAPDTHEDSDKENSDESTNVPPRS  
ILSVTFL

>comp4686\_c0\_seq1; 259 252 671 LEN=927; translated  
MSSGVQVDDEIPKLFEEFKIQKLRFYTYKIEDKKIKIDVVGPKESTYDDFCSAFPENE  
PRYGVIDLEFETKDRPTSKLIFISWNPDSGKIRDKMIYSSSKESIKAALNGVGIFINAT  
DSAEILDLEESILPVVKKFA

>comp4687\_c0\_seq1; 414 190 1029 LEN=1221; translated  
MKQTCCLHDLRHSFQWIGIGWNVVSVLMVGSTAILAEGGGDVDSSESAASDSDGSALVGI  
LVLFAGAFVQALQYVFEEKVLTMDIPAPLLLIGMEGLWGTIFCVTVAYPLVYYLPGDDHG  
SYEDPFNTWYMLNNSPTIQIAFWVYFFSIFFFYNFFAVMVTFLNNSVWHAILDNFRPITVW  
VTDLVIFYCLTPTLGEEWTFISWVQVGGMIVLLYGTAIYNAPNAGSISLKGWEYSFGFNF  
SEYKAVEEEMMLDKQFESRKLSSRKLSSFRGDLAASLR

>comp4687\_c0\_seq2; 559 294 1526 LEN=1718; translated  
MMGLHGKIDGDIIEVFEKPIFQTFGMFLGMTFALLMHFVVMALKIPFPGYVHDGASQESP  
DDEERGEKSGLLQKSKGENAATTTPTWMYFFLAIPAIFDLAATALCMMGLRYISVSIYQL  
LRGSGIIFVAVMKQTCLHDLRHSFQWIGIGWNVVSVLMVGSTAILAEGGGDVDSSESAAS  
DSDGSALVGIILVLFAGAFVQALQYVFEEKVLTMDIPAPLLLIGMEGLWGTIFCVTVAYP  
LVYYLPGDDHGSYEDPFNTWYMLNNSPTIQIAFWVYFFSIFFFYNFFAVMVTFLNNSVWH  
ILDNFRPITVWVTDLVIFYCLTPTLGEEWTFISWVQVGGMIVLLYGTAIYNAPNAGSISL  
KGWEYSFGFNFSEYKAVEEEMMLDKQFESRKLSSRKLSSFRGDLAASLR

>comp4688\_c0\_seq1; 489 310 1260 LEN=1371; translated  
MGLVRQRLAMGLASPPSLDRCGAFGKAFSSGDSEPTAPKTPSSFAVVDHSRAYEASMEG  
RHGQQLALARLEGIGKDDLFPDFEERKFLERAKLLEAADGEGGDVEEAEDEFGL  
EEEDDDEEEDNDETTGRYNRDSVRLKKSVALTLRAGYPAGGLFAVVELAGSQHKVTT  
DDLVLVVKLPIENYPIGSVHTLTDVLLVGS SHRTLVGMPRVAGAEVDMVEEITQDAKV  
VIFKKRRRKHRSQRKNGFRRLMLLRVLDVRLPEEHRDHAHVGRDESLEDLDTVNQRIGGD  
DEVSFRDNGGRSMASA

>comp4689\_c0\_seq1; 401 277 1197 LEN=1281; translated  
MKRARCASSGGGTGGREASDAVSLRNCLVLAATAAVLLVSEPVSAALLCASEARVQQPCLL  
ASLPKHRNGNRHRAPGIGRRFRGENGPCGLVHRSHRQQNRNQLWYVARSGNDNSSDDAA  
DKDRSKTGMSIKKQREVEFNEFVEAHGDDLSLRAQAAKLRAEADSLRTNLDEAREARLQ  
KETDKVDGWIEDLLIRARVGGGDGTEPIELLNTVDQVTEVLRDDRYSAEQVLKIFRRLS  
QLRDESRSNCSPLMELLVDATGKLDGQERADNPKNRWNHKKVERVLRKKLFARDWNIQYVS  
EDEENW

>comp4691\_c0\_seq1; 303 1 1311 LEN=1839; translated  
PNKTTSTKTSKQTSTVKEIKPAIQKPSINDEEIDTRAIDQTDKPSPTTEEHANKTTSKTSK  
QTSSVKEIENPPLSNHTNATIPGDEEPIEFKRYEKVVIATKIHGPHQWTLVEQSLCLLHF  
AYNHKVLVDIVVFAEPIPNEKIEEFRKVVAPAKFDVVMNIGLQEEIAALTPEKRELF  
ERCQVKSPGNLTFWSNCRDPKRRKGSRLAYNWQAEFRSVRVWEHPALDKYKYLWIDSDG  
FSSRPWKKDPVEYFIKNGKVMFDFNFPQGSTKQFTKEIVDSFNATVCDLELDKQKGLKR  
NLITHEEYGILVNGNKNKTVNCSANI SMIHGFMHITDLDFYRQPKVINGLKGLLGNCF  
CRRPDDQLAVTIPAAIYAPEKSWDMRMHGFNLGVVHNFVVDGHEKNKPPGFSRWYEGGK  
KQLPRADKVCKVIHRE

>comp4691\_c0\_seq2; 348 1 1659 LEN=2187; translated  
XLSSSSFNMTERKEKEHLNLDLSTKATESISMYSXALLIRESSTLKKEVYRMKLRIER  
SPVPGSPRESQGAWSMSMFFWTFLLAFVSGFNATKSI SYNAEYLATLQKNFSPLSTSPS  
VVSSATNSTTTGDATEPAIQKPSINDEEIDTRAIDQTDKPSPTTEEHANKTTSKTSKQTS  
SVKEIENPPLSNHTNATIPGDEEPIEFKRYEKVVIATKIHGPHQWTLVEQSLCLLHFAYN  
HKVLYDIVVFAEPIPNEKIEEFRKVVAPAKFDVVMNIGLQEEIAALTPEKRELF  
ERCQVKSPGNLTFWSNCRDPKRRKGSRLAYNWQAEFRSVRVWEHPALDKYKYLWIDSDG  
FSSRPWKKDPVEYFIKNGKVMFDFNFPQGSTKQFTKEIVDSFNATVCDLELDKQKGLKR  
NLITHEEYGILVNGNKNKTVNCSANI SMIHGFMHITDLDFYRQPKVINGLKGLLGNCF  
CRRPDDQLAVTIPAAIYAPEKSWDMRMHGFNLGVVHNFVVDGHEKNKPPGFSRWYEGGK  
KQLPRADKVCKVIHRE

>comp4692\_c0\_seq1; 801 1 2445 LEN=2997; translated  
KSSEFANDSNVSKSPNFLDEIKSIAEKQKETPSPAPEKNEPKKKTNFLNSIRSRIGAKG

GKQKEEKTAQIDDSNMRETKLNFLLEELRSKAESHKEAKEASHSVASLGIDVDGTHSTTDS  
VEAKILQSQQQLDPKSTGNVSNLPTDQSPSDQKPEPSKDYLDLRTLPEPYTDNTKKLLRE  
LETNDERRKKLERSLMQNGIPISEEISYEEAKDKIAEITESMKS LTVAGMDSFAMEKKYF  
QLEEEELSKYTAALMLTDEYAKETRRLEQEWEDESI EGDNIIAIRKLRSHMPVTIRHMTEDQ  
LATAETPNGMTLPKAFARKFKRTNIIQLIRVDPGNIEMMHPSLLEGMRTAGLTLTERRAL  
HHHLKDVGERWAERRADPSIEKKWQWYQILRSKFKETLNAYLRVQVQHGPPEHNYAKRN  
DTDGSGCRLIGNQCPKADATFDYSQDYGYTKDATYESSSDGNQSTIDFNKGKPKASKDF  
VDGQKASEAEILEEYRHRRLRMDAHETEVDKLLRELYHSNKRLQRLEKQLTNAGLSLPKE  
DVPYSVAKTRIAELTADLQKVGIEGSTNDSQOMAKLEYTFGQLSQELDKYTNALMLTKE  
WAQEQKEKERQWEVDVSCGNYEALQKLRHMPVGVNRNMSSESLATEPTPNGKILPKAMAK  
KFKRTNII LMLRTDPSAIEQMHPSSLLEGMRRTGLTLTERRAIHEHLKEVAPKWKATAGDK  
MCKERKMMWHASLQSKLREMLERYDKHIEEYGGPPGSHECPLIGNQCPVKADLVMDYNGDYG  
YPDGAEYEQQTVAKSNLLSMEELEKRRREDQFGY  
>comp4693\_c0\_seq1; 249 387 1049 LEN=1179; translated  
MSDPVDRATALEDADDTLRSATGTRKRSFKMEIRLVQDQNLRNKYTKRLKRLLENELRTLKA  
DLKALQAEHRGELFISGGAGDPDGNGGDPTRAGSNMLNEASALQDKTQDALSNTKNMIA  
QSKEVGVATLEELQRQREVIANIDKEADRMGDNLARA EKL VKEFGKRMSGDKFIQCFAVV  
NCLLLCGVVVYAIVKRRGGSLFGNEPAPENPLGNRMLRGY  
>comp4693\_c0\_seq2; 285 384 1127 LEN=1257; translated  
MADIQWEDTLVEGVEQIRSILDGVQAMSDPVDRALEADDTLRSATGTRKRSFKMEIR  
LVQDQNLRNKYTKRLKRLLENELRTLKADLQAEHRGELFISGGAGDPDGNGGDPTRA  
GSNMLNEASALQDKTQDALSNTKNMIAQSKEVGVATLEELQRQREVIANIDKEADRMGDN  
LARA EKL VKEFGKRMSGDKFIQCFAVV NCLLLCGVVVYAIVKRRGGSLFGNEPAPENPLG  
NRMLRGY  
>comp4695\_c0\_seq1; 203 145 621 LEN=1045; translated  
MNSTFFGLVPLLLLALGTPSPFVCDAWTAVTRLGRRYRSAPTPTLAGGPPEAGVIHNPPT  
RLHMVGTGFSFEDGEQILVSVQKPFQIVLEQGGGEDDDQIVVTEVDPGGAAGRAGVRTGD  
VLVAVQNASTVSVDLAEVLGFIAEKCPRVVNLRFRRPG  
>comp4696\_c0\_seq1; 220 9 377 LEN=907; translated  
MNMNMNMNMNFFSRPMRGMMMMMRGMRRPGFFMNVANNPNIMVNMRRGMTTIVITIGRNI  
LKERSALKEVGAAQPDNERRLKIAAKNSSKNFVKKVPASGATKGS SPRGSNRASERRN  
EQ  
>comp4699\_c0\_seq1; 234 253 993 LEN=1011; translated  
MTITINDVALRNVSELEGRMKANDVKHRKEALFHCCEIVLGKLLGTGAFCEVHELEDVR  
LLNVKELPGCIHSKCRIIDEENERRKREHLRLACHDAKGKLRVVKHLRPDLAADRGMKV  
FSRAAVDCLRELNILSRLCHKNVVRVRSALSGRNVINKSDNSNKDFMKIASQNDPKAFF  
IVLERVEETLSQRIRQWRLSEKPKAIDSSISDADTMLPLFYDPDKLRFGLHIASAIDHVHS  
HGMI FR  
>comp4699\_c0\_seq2; 334 253 1680 LEN=1721; translated  
MTITINDVALRNVSELEGRMKANDVKHRKEALFHCCEIVLGKLLGTGAFCEVHELEDVR  
LLNVKELPGCIHSKCRIIDEENERRKREHLRLACHDAKGKLRVVKHLRPDLAADRGMKV  
FSRAAVDCLRELNILSRLCHKNVVRVRSALSGRNVINKSDNSNKDFMKIASQNDPKAFF  
IVLERVEETLSQRIRQWRLSEKPKAIDSSISDADTMLPLFYDPDKLRFGLHIASAIDHVHS  
HGMI FRDLKPDNVGIASGGIAKLFDFGLCRSMPLLEDDKTL SYKNNAKREPVMSTVGR  
RYMSPEMISGDGYNQKTD CYSWSMVFYEMLSLQKPYARYNREAHKV FVCDNHGRPCVSAG  
NVPWSSRDLLERTWAHDISDRPCMKA VCKELELMIDTVEKQALPLVERSLRAVFEAKLL  
AFDENEAVPCLGTTCPFNDDQHPGKRYSSHSPQKSSGTETSISVPDLSIVAAE  
>comp4701\_c0\_seq1; 971 404 3040 LEN=3229; translated  
MASCTDSDSDEEDEADLQNSITRNTVGEALSHEEAWMINLGRSDNNEWLTGPRDPDEW  
FTGKQPKICPGVDGKEVVRSLPLRLDAVTRESAMEYFDNSWTLYETLFAGLNGEYFYR  
PPPGLRHPQIFYYGHTACLYINKLRVSGVLDKPCNAYFESIFEVGVDEMLWDDMHKNDM  
LWPTVREVHEYRQVYEVVKAIDMNH PALDSDNGPITVDQSHPMWALFMGYEHERIHLET  
SSVLFREAPKHLVQAPANWPPVHPSAYNETTSSNPVEGVDYPSNEMISVKSDKVDLGKPA  
NFP SYGWDNEYGERTVDVPDFYASEHMITNGEYEFVKEGGYRSKEYWCDDGWAWRTHR  
LKWPFQWQSGPAGSHEYNLRTIFDVVPMKWDWPVDC TYEAKAFCDWKTKKYGSPTSKP  
YRILTEAEHHVIRHRDNNLEAARKDVSADKVMVTSGEDFPAGSHGANLNLA FSSQSPVGQ  
FDP SHTGHRD TTGN AWEWTE DHFNPLKGFVHHVYDDFSTPCFDGKHS MIVGGSFASTGD  
EASVFARFHRPHFLQHS GFRLVASDEDA PATHLFAGNFGGQAAARDAANA EAAE SNPSN  
ESINANDTNVYETDDSLHMYLGLHY PSSGAKEGVSPILPHNQSPVHCTHFPQ RVARLLTS  
LNPERTTNKALDMGCSVGGSS FELAKSFDHVD AFD FSQKFIDA AKSMQAGEKMDFKVPTE

AELFETVEAVLEPGVTPPEVSSKVNFFVGDACKIDELSSVKNGGKTTYDGIIMSNLLCRL  
PDPVACLNLGLSSIVNKGVVVMVTPFWSLTFEFTPRGKWLGGFLDPVTNEEIRSKDELQAI  
MEANGFEKIHHEEEMPLMIREHARKYQYIISEATAWKKK  
>comp4702\_c0\_seq1; 577 571 2439 LEN=2793; translated  
MANMNALITILLAIIIGILTAPRSSTTCVSAMPEVQHTYFRTNIRNAAKVVRVNEIDIGNG  
NGNDNYNNNGFSTPDADLREQQQENGDATEVFLKMLGGSMPSPSPSQPPSEAPTSTTKP  
SLFSPFSPSNAPSLNTDFPSASPSEIEGRDDPLSFVPTESNAPSTVPSTSPSTSPSIGP  
SSITSMIPISISVEPSSKPSIPTSSTDRPSASPSVSIQPSGMPSQAPSLSPSPSLSPSTKE  
PSTSPSGSPTKLHSAFAPSNLPSFSPSLGSPNLPTDPSFFPSKLPDTPFSPFASSDSPTEE  
PSVLPTPAPSLPTDACLTPNDRRDGIRAAALVGATNATLVDDPFTPQGKAMFVIIAGDD  
LKLCPDDPKIVQRWTLAVMYSTNGDSWDQCFDGDSCATEMDDVGNLSLVNLLSPVDECE  
WFGIRCITLDDGRRVERIVYEDNNLSGTIPTELGLLEELKVLGMEQGTGGRIPSELGR  
LDNMI FIDLDFNELTGEIPSEIYQLTDLQTLNLVNFNGTLDTRIGNLKSLYFFQLQNN  
LFSGTIPTEAGGLVDLETFNVHRNDFSGVIPSIGICDMREADPVKFKSLIADCQCKGRWGK  
KNPEKVECPCCSGCGCKNEKEG  
>comp4703\_c0\_seq1; 225 71 478 LEN=789; translated  
MGKGSNVQKAQQARERNQKKGKTKDEERRAASNKAKQDACAKKCI VCLQTFMVNSRPPLL  
YQHVVAKHPDMLADPTRCFPELVGYDPSDPKGEKAAAKAKQEA AAKKKKKKGAGGGMDDL  
DSL LNAGLKKGKKK  
>comp4703\_c0\_seq2; 120 71 337 LEN=1176; translated  
MGKGSNVQKAQQARERNQKKGKTKDEERRAASNKAKQDACAKKCI VCLQTFMVNSRPPLL  
YQHVVAKHPDMLADPTRCFPELVGYDPR  
>comp4704\_c0\_seq1; 236 89 625 LEN=910; translated  
MVKHGRNKKRRRAGRIGKTIKNSGNFKRWDPDLHKKIKNPTVREHWDPKSFSTANLAAIG  
LVGNPNSDVRNTNPLQKPKAVTDVSAIELFDIPDSDELAEQKEKRCPI NEEDEDQKYIAKCM  
SKYGV DYGRAF RDIKINMQHTENQLRKL GARFLLSSDQRIVDVPEKVKSLVSTDGA  
>comp4705\_c0\_seq1; 242 501 1217 LEN=1899; translated  
MGLTQTKLHHRVLQONWSAIRRRLQTS DGRVWVKTKNPCGDLPLHLACYGGQTPPFV VRA  
LLQAYPEGAHVRNDGGFTPLQLARVNYRTDHPFREEVLEFLEVYTN GNANTPEEQEEDLI  
SLSQYDDAKPIVSYQTSATCVICLEN EADHVVI PCGHQCLCGDCAKKVLAVGRSGNSNSN  
NNNGNDHHEHTITKQRFPCVGRCKIAAIVKVSAPPACVEASAPPLCVEASAPPLCASE  
>comp4706\_c0\_seq1; 1484 242 3274 LEN=3575; translated  
MMILKKQRPVAVLAILSAATAFSGLYSSTTDAFTPVAPRQSTS IGP RNSSFCAQQRLVTGR  
QLSKTNKVRSTATTALRMSSDDFNEQKYTEAGWAVVAALTKAADFYQTATVESPILLDLL  
LNPAKHKAGDDAESARKAVERVLKDVKCDVKALRQELETHLAQQPKMQGDTSSQQKTMGY  
SLPRVLEAARSAMSTLGDSFVSAEALLLGLVKEDDRFTTKAFLKQDIKYTDVSDAVVKMR  
EKAGPIISRSAENNYDALLKYGIDFTERAE EGKLDPVIGRDEIRRAIQILSRRTKNNPV  
LIGDPGVGKTAIAEGIAQRMVAGDVPD TLQGCKLIGDLAALVAGASMRGEFEERLKSVL  
EEVQNSDGEIILFIDEMHTVVGAGAAAGSMDASNLK PALARGQLRCIGATTINEYRQYI  
EKDKALERRFQVTTIDQSPEDTVSILRGLKPRYETHHGVRIRDEALLAAAKLSHRYIPD  
RFLPKAIDLVD EACAKLKNELTSKPTILDEIDRRIIQMEMERLSLQSDYESGEE SQEAN  
KDAGKRINVIDKELEELKNEQQALNLKWWMAEKGVDRIKDIKTEIAQVMLEIEK CEREFD  
LNQAAELKYAKLPPLQEELEKLELAGDETELDEGDRMLRDEVIADDIADVAVVWTGIPPT  
KLLSERARILSMGDRLRDRVIGQDEAVEVVTEAVQRSRAGLNDPTKPIASLIFLGPTGV  
GKTELCKALSDFMFDTEDAIRIDMSEYMEKHTVSRLLGAPPGYVGYDEGGQLTDAVRRK  
PYSVLLFDEMEKAHPDVFNIMLQLLDDGR L TDSKGN SVNFRNTIIVFTSNVGSQDILDLH  
GDDSMQKEMMKERVMDAMRDKFKPEFLNRIDEHVI FNRLDKPALREIVKLEIRRLEKRLA  
EKEITISVSDAALDFLTDIGFDPVYGARPLKRTIQKELETVVARGV LAGEYGDGDI AVD  
AVGDRLEVYKTYDGGYNSNNTGGGYEADYGNPAGYQEDFSETPPFN  
>comp4706\_c0\_seq2; 432 242 1168 LEN=1266; translated  
MMILKKQRPVAVLAILSAATAFSGLYSSTTDAFTPVAPRQSTS IGP RNSSFCAQQRLVTGR  
QLSKTNKVRSTATTALRMSSDDFNEQKYTEAGWAVVAALTKAADFYQTATVESPILLDLL  
LNPAKHKAGDDAESARKAVERVLKDVKCDVKALRQELETHLAQQPKMQGDTSSQQKTMGY  
SLPRVLEAARSAMSTLGDSFVSAEALLLGLVKEDDRFTTKAFLKQDIKYTDVSDAVVKMR  
EKAGPIISRSAENNYDALLKYGIDFTERAE EGKLDPVIGRDEIRRAIQILSRRTKNNPV  
LIGDPGGE  
>comp4707\_c0\_seq1; 434 336 1072 LEN=1902; translated  
MTSPVAHQIHLALVAXPRLGETKEKPKPKQKSNSATCTRSNKLQTAKPFAMFDIIQNSE  
SCASSFEARLIKKYWSKQNEHSLPSFLGKIHLLEDNSKQIECTVARTQENANNTTPKEEMK  
NDIMAGYSKIAKDNPWWEQETCDDHHA VPFH SKEDEYHPPAVEQRDEKDWKVCED EETK

TLSTVQEVFDANVNHGSGLSSEGDSSSTITSSSAGAEFKLFDSEMSVVTDESSMGDDDYNK  
EDKDE  
>comp4707\_c0\_seq2; 456 458 1042 LEN=1872; translated  
MFDIIQNSESCASSFEARLIKKYWSKQNEHSLPSFLGKIHLEDNSKQIECTVARTQENAN  
NTTPKEEMKNDIMAGYSKIAKDNPPWEEQETCDDHHAVPFHSKEDEYHPPAVEQRDEKDW  
KVCEDDEETKTLSTVQEVFDANVNHGSGLSSEGDSSSTITSSSAGAEFKLFDSEMSVVTDES  
SMGDDDYNKEDKDE  
>comp4708\_c0\_seq1; 291 268 1164 LEN=1515; translated  
MTALKIIRDFPCDLSDAPRTKRRKSESSLRHVMEGGSEVQKNQQQQNEILSKVAPSL  
FVAHALAENGLPDRIDPLSIEYLMEFDYDDGFSFHDMPTVLMMAVKSGNVDALTRHYVTR  
DRLLAQRNHGETLLHLACRLGVALVKSLLCDAQMSALVLDKGRTPHLSLCMAMDAKN  
VRDVTNYPNCDQLESMLLLLREKSTLVVFQDKEGKVPYQIRQSECMKTNDHQRTHLLYS  
VINEMLASEQVVERVVEEISSRAKSLRLGQRLSTIEKINTLLDFSGIEAAIMETGLSI  
>comp4709\_c0\_seq1; 552 131 1312 LEN=1484; translated  
MRVCTSSLSVRSIGTGEIAPSPTESKKEDTSSNDSSAKPFVVRNFRGFTSDWLHVKNKNT  
KYGTAKENTKTLTKQRTGSTDSSNSESELEGEETDKSNFEASYDTTDLSYHNASEQEGA  
KLVHQALTADEQSRMPDAYMPLRHYRAEKGDIKAIDAIFTLKWRKEFRVDNLVSSLED  
DEAKKKGTYSNSVEIDDQDDEVDFAAILRKENETGKIYVRGYDKDGRAIMYMRPGRENT  
MHEDNNMRHLVFQIEKAVRCSEKNGHGKICLVIDYEGFHMSKTPPMSTTRRTLDILQRHF  
CERMYRTYICNPPFVFRSFYAMIKPFVDPVTKQKVCWVVGKKGMDQVVEDVGGPEKAAAQ  
LEKCCGGSGNDVRDFDSEEMRLPLKIAFDEEC  
>comp4709\_c0\_seq2; 305 175 865 LEN=1037; translated  
MEEEFRVDNLVSSLEDDEAKKKGTYSNSVEIDDQDDEVDFAAILRKENETGKIYVRGYD  
KDGRAIMYMRPGRENTMHEDNNMRHLVFQIEKAVRCSEKNGHGKICLVIDYEGFHMSKTP  
PMSTTRRTLDILQRHFCERMYRTYICNPPFVFRSFYAMIKPFVDPVTKQKVCWVVGKKGMD  
QVVEDVGGPEKAAAQLEKCCGGSGNDVRDFDSEEMRLPLKIAFDEEC  
>comp4710\_c0\_seq1; 255 286 1035 LEN=1066; translated  
MDKDRLWMPSSGLQKRREERTILSPHFVANYHSPTPTDSTVEKDGACIQDYGFQSSPHPS  
DSFEVSLHRLPRTLNSEIELVFPEIASQAKREKREQAKHKKDECTKENTKRNDHKREYLV  
IPTFHVTRFSILERNDRTEDEIRVFLRFRDFATEFKHRLSQKDPFSRLDIPDIDGASTF  
SDSVHTNSAYDEVASTRSILGYSTFLYMGIIQIVQHPRIGYEKLAHTIVAYANCRHAAET  
YLELLKKYQ  
>comp4711\_c0\_seq1; 161 1 956 LEN=1275; translated  
DGKAKDGKAKDGKKRRVLDDEEIGKGRIYLRSPYESSPVTVSSSPRNARRPETSVPPIVG  
TSKAKTASISSLESTLDSIFSLASFVRHAVXACHIFQHGGSDGRVAESLSSTASISGSS  
FAPSNPNHNAVRLKKFECTREFFGCEDGSHKCEIKEGGCGKDVPYGYPPDLSSVFSYCY  
CPPQRDSKAAQNAVSSPYSESVRVGHTRGSRTPLTREMRFDHGRNHTSSNVTDIPTRAS  
ADSSIVPHTNPAVVARYERCSEFGLVWDTHSVPEGSNRDQVAYLPGKYGNGLWGTSSGA  
CVLGNNISERGRVRPTRN  
>comp4712\_c0\_seq1; 432 254 1264 LEN=1457; translated  
MEEIDDQAMLRVVEHLIEQFVGREENEDLKFELMMLVLRDPSVVKDFSVTTLSQRATS  
FAMEIDDAATPREVHKQLIERFVGREENKALKRRIKELYHRFLPSEYWEKYGFLPVDPM  
VVQDVSIRASNKSFNRKLERVMSIDYLFVFDQPEAEFDGDCNSNYDYNRRVSIKSNRAK  
NESGTKEYFCGEAAFVDTPRLLPKCTINQLLREDTVIEVFDETSDTPCPASNVSRLLD  
WHYDPRLAEASDNSPPGGWTCISIFLEKNIDDFDDCCCNLRLSVEIKFEAGMKLLHHRDG  
FSYENLSDVQTLGDIRSGFDGEVVDISLETYWLTP  
>comp4714\_c0\_seq1; 312 146 787 LEN=948; translated  
MSHQITNDGAPPPPEASGSETTAPVANKLEEDLKKAPRVMKHMNDHGDLSLVAYVLAFIG  
VDDPSRTSDNQPHQAGLLAAVQNGSLAIASARLTDVVRTDGFVLEVLVEASAPGSGEPPG  
PSVLQGVLPYGRPLSGARDLHAAVELHHSAAHRLGVVYKARSGYYKGSVAALARRVLG  
KPKQRSAGWALVAAATAAIAAVARRPAAAA  
>comp4715\_c0\_seq1; 356 450 1689 LEN=1689; minus strand; translated  
MTELFPPASKRAARLLTIGALLTSQVASAADSSQGVSLYDFVEYTTLQREDITGLYLTMG  
GTAESENNCFGGQYKSMHNVVHTIEPVYFNTATDTTPLITVFTYPEGLIQEIVFGE  
ESGKFINLQYNLDLLKRKDETPKTDGPDGSGVATTFPKTQSYGVWIGFPFRQLEQVYLAG  
DIVVRIKEGFTNMAASLVATDRVAEAIARPPILDTLESENSNPDEAFANRTLTVVTAARN  
ASVTLEAGHERPKPIEAVASGSADLSIAGSVEHIQCTDNAVCIVDGKVSYGNCTDSFVAG  
NATLETDDCSCVAIVTAANASSPINGVSDPGTPKIQRSSAFGDEFFIRTADTANCLDT  
TYVPPVRAVTDGPSTTHAVFSCPALQGMLEDETGFSTKENPHGGMSPPAPFSX  
>comp4716\_c0\_seq1; 514 1 1636 LEN=1867; translated

XQVSQTELWSKISKSRYPNHVRNVYEIDDPKVVVFFCGFDPYRCRVPVGSKTEGGEGS  
DKTAMTPVPGGNQVMGGNNSALKVYLYSRQSGRLIKVRNDPRNELGLTGGSTDFCQGMV  
IIDDYNGTLPNPTKQDTAYGHSKHGQIHASNVSEWTAIAHFYWNYYYYYRLGDSKTAIR  
EAVLETKPSLEEAYRHYQDREQIEEDNDFVSI VPLCKGTFISYDNVDFTLRNYRQVATIR  
CNKKWRETAVPKIARHEVVRFSEEFVASATKRRATAKRRDITDLAAGHRVSRQVTSLE  
VVGPPPAKRLRSSHHDEARIDLRLDDNNDGGGGGENDHPQQPPNGDQAYGRVSDGRTES  
FEERGRQDGGSHPQAAVGFQVQHLHQQLQAWYDNRLEQECSRWRQDAVLQQECQNL  
LAKAANERELYDLKTFQLKARGDVERLVAEVEHLRNRGAPPQHQPQFSPGGPAAEHAQV  
DKLRREVQVYKSRAEFYKKEETESKKAQIENLVQERRRFEERVQELEDAQLDDNGGSNPLE  
SIVTI

>comp4717\_c0\_seq1; 108 128 430 LEN=547; translated  
MTMIRAFARTRALKGPARNVDLMTKWWGKKRPAEGQITRSISAHEQYVVGPPWLKTFPQ  
KVVRAPTYIIYPGGALALTYGSIKWASDATAAEDYSHRP

>comp4717\_c0\_seq2; 135 128 256 LEN=683; translated  
MTMIRAFARTRALKGPARNVDLMTKWWGKKRPAEGQVSKH

>comp4718\_c0\_seq1; 285 330 1118 LEN=1491; translated  
MKSNIPIFSSADEDILSGSSGGRINSAFSRNEFSRVIYIDRIFQQRGRNNQORDHEVKIR  
ASDEECQALADR FELKKIETLEARLSIRPATEALAAAGTSGGGLPVEAEGTIEAHLTQTCV  
RTNEEFVDFVEFPVYLIVKPVTSNNKDDIELMIAQQQEEEEAEAGGKKKKKKKFKPKKDD  
VFHQNKTYNLSDFLDQSAIQEADFGGAGDGLADTVEDEAIYSLSSDQLDVGELIAQTF  
CLELDPYPPKPGTDPVSWEITG

>comp4719\_c0\_seq1; 128 1 534 LEN=605; translated  
IKVNETKVIKISGVTKAPIRRYNRNKIMLPLSMLNVAAETSTPLLVKGGDTYNGRLVS  
CDSWMNMLTDVVCSTSKHGDKFWKMPSCYIRGSAIKYLRLPPDLLDSTKQKVQEDERRNK  
IMREQNNGRGRGGRGRGRGRGRGRGRGRGRGRGRGNNNNYGGGRGYNNNYQK

>comp4719\_c0\_seq2; 177 555 890 LEN=961; translated  
MNLTDVVCSTSKHGDKFWKMPSCYIRGSAIKYLRLPPDLLDSTKQKVQEDERRNKIMREQN  
NGRGRGGRGRGRGRGRGRGRGRGRGRGNNNNYGGGRGYNNNYQK

>comp4720\_c0\_seq1; 280 1 688 LEN=999; translated  
XAAFFPSNDWGIAHTTKLSNLSIMSILEYNGAAI IAMQGDGCVGIAADRRLGAQLATIA  
TDFTKVFRMSPKLYVGLGGLATDVQTLHQLEFRMNLRLKEDREMPKVFVSHLLGQLLY  
EKRFPGPYFVEPIVAGLDEKTGEPFLSGMDLIGAPVHTKDFVVTGTCTGNMYGMCEALFKP  
NMNPEL FETLQALLSSVDRDALSGWGGIVHIITKDAVITKELKGRMD

>comp4721\_c0\_seq1; 824 711 4179 LEN=4739; translated  
MHVYDRYVHRITLSQOTKLRRSISLANSIGDHRVTAEQYLLKINECLRDIDQPLIPSTIN  
NFLNRRFVLKKEKEIIDIFLDCDATTNLVCHLKLALLVYKIKDHGFGGQHRTELIQIL  
AVERLAALTVYSRVIVLHALQILKLRANPRAEYVWRNILLNSTGDDLSDIKTLTDAKGDY  
YCMSKLIYDDIKSETVRHDILIHMRKEGAMQVTRRHGPTRRGPRRRYLMAWRKILSDVDD  
TLLSSGGHYPAGIDKRYPKKVYPVGLAFYRELDLIGISGPDW PENRVGNLVFLSARPHV  
YKDMSEKSNFAKFEKLRAVGEDGRRGMHTTPLLGLAGDLASGSQYITNDFEPLAQKKFEN  
FKRYVSIYPEYQHIFVCDNGQGDVKAGEMMHDNFPYEQATYVHLVQARERTYGYNPERW  
KETEFRCFFRTPYEAALHAATQDPPLIRMNGLNRVCSDAVKDFNAVPNKKWQSPKQKAE  
RRAELNQS IWKANKTLANTDAGVVCLIKAEERLWEDGAKVTRTPYNGTIRGFDPEFDLYDV  
ELDWRPLDVQVREHVRNIEDETIRPKQKETEKRSSSVLETVVETDEVTIITEGGDETGF  
EGERTNGDENDRSALQGLTVTCSTTPEDYAAPENDKILNSISIDSESTTSETESDNHA  
LGTNSSLPAVKTAIAGKASRRGKEPDDSFKATAKICGRSISKFIPTLPTFNDKKGTPLF  
SFWVPNPRKRTGEKSTPYGPGVVVDHRIDQKVVVDMVGWTARAYLNEDDVKVTKESLL  
STLFRQAISDIPSPKYDHFYIKGSIIRTPYGNAEIVPLPIPNDNSIDSNDTENKI  
ICLGVTSWTLADGSHPKLYSTVKACQTKWDAHEAKGIFSAFGTLVSSINREIKDRLTTA  
GTQKMKDDGLATPKFKQYRDSA AVSTAFNGRVMKFRKSDGFYCVCLSSWKL ANGRNPT  
AWLQENDVSYQIARGCKEYGPVLT KMGVSGILESVQPTTGIHIVSAPSARMVLYLQPEAI  
CRGLKAAVGEDVLTAYGEGIVERDYKVNNTYVIKLNWGNARIYAKAETFDRLRDSMRDRD  
GAFGMDWLLRFFSPSDSIHQGTRSRSNSVSGTSTSVLSLKTIRGSSDDHHELDKQPQE  
WDDFLIISDCFNAFM

>comp4722\_c0\_seq2; 224 267 779 LEN=1075; translated  
MDKAMEKLEPVIQKVDNFIAQYPSVTQYEKFKDLEEKTYGPKALFFVGMCSLIMFMVIVT  
GGMKLLSNLIGFLYPAYMSFKALDGGKGVGDATQWMMYWITFCSINLMDETFSFLSSTI  
PMYFIFIKIGLVVWLYHPKTTGAQIIYSSGVRPYLMPMEGSSVTTGTTKD

>comp4723\_c0\_seq1; 225 115 618 LEN=865; translated  
MNRSIPSTTILARAACLLVACSVLSDSLVSALSSPSSLKIRVCQSGCLGKCRGAFDPLE

SFEKLAAGTGDSDGIRLEETFCMNQCKRGPVNRMINADNGNVLVFDDAMNETEAGRKAFO  
GVSNDGRVEHLWGIANQLLAKGASGSPMEGVAEKGSADKLNNDIMPTK  
>comp4724\_c0\_seq2; 375 1 1229 LEN=1319; translated  
XTCKTKGTTMAASIASARVISPSRAEGQDQDHNGIHGLHLLSNVVDTFLLHHDNAKTEQSQ  
YLPIESRHYGVPRVSACPSPTEDVLGRRINAFVSSQDRSWSIEHLKSALQLPVSHPNF  
RFRNAAIASFSEMVSNCPPPIAIGIDGLKFIRSNLVPPSPPISPQDASLHEKFPPIRHSQE  
ILTQQAQGLAEDPTLDASLKRKQNFNANRGLRKRKIKSAYKNCSVREVKKTSPALKTNC  
DGDGTKISIAELNYIKHKAVPMREKWMARFSELAEFKKKFGHTKVPHPNFPDSPKLAEWQK  
FQRQQRKLFFVKGKHSQLTPEERVAMLEKIGFVWEARIDAWESHYQNLKRFKGSNGHLYVPV  
ANTVLSQWVKRQRKQYKQYKQKQKQESSLTTDRVDRLNQLGFIVDGRNVTD  
>comp4725\_c0\_seq1; 213 1 572 LEN=752; translated  
XDNDNDNDNDNDNDYDEEEDSNSNDIDEAKDLSLIADAEETNRKLRDRIGRLRQAIRS  
IRSMEAIKKGKGMVEEYGLRVEADALGEDLRFLEAKQEGLETFLFELHIQRLDLLRLEED  
LQKERVREEAKERCAPTPYGKKNERVAAGAECTTEAGRETTETETGARRSAGPCPMSASEP  
SESGWQAWCV  
>comp4726\_c0\_seq1; 151 236 919 LEN=1063; translated  
MNQVECIDRRAINDNNSLERCKLTEILDRVLRMVHPENDPTESAPLRSFCHAEQQPRACP  
LCQNTGGERFCNASSNPCGANPQPHRSNGHDGRDPGNGTERERPPVSARKVRFCHRVEM  
MTRQSESVTIDSERLKPMPATVKSLEIVLPNTTRENPEGAAIDRLFRPPAVARGRISAG  
AGHNRWASEEGNPHIDHVPSMPSRRGRNGRRKIGKDAGTGTRTNRRR  
>comp4727\_c0\_seq1; 228 1 754 LEN=987; translated  
XQYQHQQYQHQQHHEHDFGFTQNNVQDSSVAFYASSPYSHSDPHTSKAHNYGVPLAL  
DGSYHP IAPTTEPSVASQNNPIRSSHYNQQPQCHSHPHHHHQNQWHGRDPTCGAPFAQ  
IDTNHPVVSAGFPSSDTPAKATASHRSAPQEPGAEPSSSESHATERRSATKMLRVTVFGSGT  
GGTDGDAPRKHDRSETSSAGPHSGAASKRGLIDAGKHAFLRGRGRQPQQGSTTTTRLTH  
ADWCASEYVV  
>comp4728\_c0\_seq1; 225 1419 1820 LEN=2088; translated  
MQSSRSQAVPATNDPSNATGTKENPSALSTPSKPADHSTDTAESSVDETGRGMQQQQQS  
SPAAAVTRSATSSGSGTTRELRRARILVTVKRTESYKRWLEENPIQRQAI IAGTATVTAE  
EIVGKESSLPSSK  
>comp4728\_c0\_seq2; 342 684 1682 LEN=1950; translated  
MSTEAGQTKRRLSRNTIESEERLADTSTNKPNKGADTETQTGEPLRSRQQHGTGDGDKTK  
NVGEQPGTIGEGSADTGAPDALGKVPDDTSHQNVVPGDGTROI IAVSANKNPTAFFQLA  
RKFLMTNEMCDLSALEGAI VSAVDAAHLLERSKLATIVSINTSYVNVEPKRRRQOKSEEP  
TSEAIKKEGVPISIQTSRNTMQSSRSQAVPATNDPSNATGTKENPSALSTPSKPADHSTD  
TAESSVDETGRGMQQQQQSSPAAAVTRSATSSGSGTTRELRRARILVTVKRTESYKRWLE  
ENPIQRQAI IAGTATVTAE EIVGKESSLPSSK  
>comp4729\_c0\_seq1; 513 167 1621 LEN=1851; translated  
MENLNRNASFTRESFGSHSVKVLMSDLSGKDRDKETVPVRFEDQHI I PKLEQRKKGSL  
RRLKPF DSEKDERPSECDAIDFSSNDYLGLAQSTQQQHKVEELYTTLP SRYLGSTGSRLL  
TGDSEFAQNLEKRLAKWHKRPSAMLCNSGYDANLSVMSCLSLNSTVIMDELCHNSIQMGL  
RLSKGYSLRKFHSSSLRDLKRI LNEEHKNVDQPGKPAI I VVESVYSMDGDAAPLKDILDM  
ALSYNACVIVDEAHGLGVLGENGLG LLEEHLNHP SLLCSVHTFGKAAGCHGAVVCGSL  
NLKTFLLNYGRPIVYSTSLPLHSLASIACSYESMTGPAGRRLRRDRMRDRARLFRDLFAEK  
ILKQGIRHTPGDLVPIGLVPSASPINALI IPGNSRCLFCDNLWIKSNRSIRLYPIRSPT  
VPKGQERVRIILHAHNTEEEIVYLIDLIKSTLCLDMGIMKHHATGKVSPPQRPKR IHRPNI  
MSKL  
>comp4730\_c0\_seq1; 560 154 1326 LEN=1369; translated  
MAFVMLSAQIVAFQTTSVTISYGR TSSKAATTVS YATTNTDSNSSDKSI SDAQRLLEKAA  
QLRAE IATAEGKTVEQVEEEASQAR IQREKQE QKNREAREK IRQE QLEQKSQQQPTLQVP  
VTFDDMVRQGARAVERAFHDGKTRQVVRFNLVGEEDGASSATEENQWPGGAKQMYRESGK  
PLTNALLREVRAPT KRLDSFPEERRTNPQLKVQDIWDFDGTALHTAEAAEGPSADIQAMV  
FPNTDTKYLN DIDEISQAMGKRLFLVNPFWRNIDSWGFN I LAPGAKKAENVIYGGTGD  
DDAVPFEETYVLNVFSVRGEQCVALKAYPYDQWQLFAFREDDYYPNNEEYSTCIRLGSCEE  
DPTSAIITELLNERPEFKETKTMRQMKKLG  
>comp4731\_c0\_seq1; 228 117 681 LEN=681; translated  
MADAFPAEDQGGPLLLYTDLAF AEERPKNLDRNQPKRDRSNSNAEIVGEACE SDGGGRP  
GGDSRLVRAVARSPVFRERIGTAVSLNAEFFGDVSWPRMVCFVPGVCE SAETWTVQHL  
ARICASKEWRLAVLEPEGHGLSDGVPRGLLRPGKWERVYGQVTAFCGHALEVDRMQKEQL  
QFQRQQQQX

>comp4732\_c0\_seq1; 153 1 544 LEN=1156; translated  
XKTTTKSPISLFFVTPVMFLPSTVTVVKRRSYVTLGRLSAAWSPVRNSRGGRLAAATESLA  
HPGKRAMGTTIVEGVDFDTIAREWRCKWSAENDKQSLAELQKILNEAKAEIKAVKGVKSV  
QRVVCGCLDFKVVVALEDSKFGWEESGFAPEESFLEKIKKIDGVSVVETQTYTLMPE  
F

>comp4732\_c0\_seq2; 151 396 960 LEN=960; minus strand; translated  
MDTKTVNKTDQDDGFRPTTVVIRHGERLDYVQRAQGNWCQANPEQPWNPLTDEGVEMA  
RALGTALKEKILPEMRMAPIAAVYTSFPLRCRQTAAGIIGMSSVITDENNSGSDGNGT  
AKSSLKVRVELGLSESMNENWFRSWSLPGADGTWGYKKEVPLNQFEVDPRALQPAETLLN  
WKDSTADTX

>comp4732\_c0\_seq3; 153 1 544 LEN=1303; translated  
XKTTTKSPISLFFVTPVMFLPSTVTVVKRRSYVTLGRLSAAWSPVRNSRGGRLAAATESLA  
HPGKRAMGTTIVEGVDFDTIAREWRCKWSAENDKQSLAELQKILNEAKAEIKAVKGVKSV  
QRVVCGCLDFKVVVALEDSKFGWEESGFAPEESFLEKIKKIDGVSVVETQTYTLMPE  
F

>comp4733\_c0\_seq1; 431 317 1543 LEN=1670; translated  
MNMLHNDYDDNYFLLINSFATPEPTNVTLSDIEDIDEYLPEQELIVDDSSSLPSTLS  
HGEVGATIPDNEPVKNDGKSFVGATKNDTKESVQGNALSQEAIIGISVGGSSILLIAIAFI  
MCCFCFVKRRVEEGNDVKSTKEIRSLDQSKNENNDPDDVESTDLASTDDVESQAMYSY  
NQSYGDSGSVYTNNGSHIKIHLINSYNTSGNDSASYAYSLEPGIEASVVGSLSANAGGIS  
KHSGKMPIREIPQVSMAASEGRENHSNNNSERQKQNTIPDFHGNTFIESAPSDLKLTASE  
LQMLPSNLRSSDDEDESDRHEGNQKVTRKVLAPAGKLGVLIDTTVEGPIVFKVNEGSELS  
GKVFPGDIIIAIDEVDTRAMSASAITAVMVRTAKQKRTLILGVDFMS

>comp4734\_c0\_seq1; 298 129 1862 LEN=2213; translated  
MSEASSNGTTNGKSNSYDLASSSKNVVVRTTENWLELFLTTPKEYRFGQWKEKIADKSL  
SGRILRPLWDFLSRKIPNTVAPNVLCLAGLGLLQAWYVIYHYGGAPTGPYPFFAAMVI  
TVFFAVNSMVLVHADRIQRTPGLDFFKYATDSAATVFLCVLTIYCLLGGRIKDDKGN  
VDTMLEIQWYAVQTTQLVLFVKHLSAFDRQAGLRFRFFSGPGEVIFTAVSLLFFRATIGF  
DWLWEYTRLAFESSLLKVENHIGEYGVDDITKTYNSITPFLLVKYAYYSMYLLAVTRTL  
LLKDPHGWSRFLSASLLMRLIPALLYFHSDDIVRVGGDIGGLDTESLGGDVPVGMADV  
ICDGLFMAVLTSDLTLAKMGGREIHPWVVLMSLAAVFSHSTILALVVYYVAVFADLCAY  
LNLPLLTTCRNVYCDGIYDLCHVGHKMLFQNALTYGNRLYVGVGDKDANAYKRPPIMSS  
AERCAEVEACKAVTKVIPDAPCWGLTKEFLDLHQIHVVAYGQEYLERFPDPKDDPYRVP  
REMGIARPLPRTQGLSTSDLIRRIQNARPADEKNSPT

>comp4735\_c0\_seq1; 506 1 1064 LEN=1241; translated  
XSSEDIPSQMSTDTNATLSEDTITSIEPSVNDKNELEDIENPVSHTVVSQPSRSNITLSEDE  
EIDSMAPAVDFSLYLEEDNTDEELLSLSQVSASKQSCGTGILPTEIDIENESDLSTSSDDF  
VYHQQQYQEDDLISTSSHNSYLRAISDITASASSKTDRVPTKAVDDIQIEIPYGHEAEV  
EDYEEYDEDYRVFSFSSKVDNEGFRVFSFHPSNELILQAMEGASLRKVDIEQATARALS  
KINTVTSKSRQETGSESRQRLERSKNRVLGYSFLLLLLVINGNSLIQSLSSSIGIDDF  
QIPAKGHSDLTLVWDDKVLHPSVQDSTSEISKKYENAHNVACVSKVGCLALGSI

>comp4736\_c0\_seq1; 472 1199 2842 LEN=2860; minus strand; translated  
MTAVEWAKKKPPQNGPKPSCIAGKEARHDRNNDNTSSNEILFEEKVFFCEGDVDGAKHDK  
SDPRFASGVVPLPLAVQHCWPTLFPPTISSSKKSIRKGVFWVSSSSNSDGSVRTMGNDRD  
AWCNTSLQSSRSPFRK GKCDTQIHQFDCIRRKVTRTKEQHFRKRGTSTKDLIRRSIGGKL  
RIAFIDKYLAVVVKPYGMPVHKVVDSP IAAARPAANIIGTNGVADINDHSRSGNCGTDADK  
EKDRCDNDIAAKTGEKIVSMHELLLHCGLLIVARTRPAARFLSHAFENRSEFLVKRYRAI  
VHGHEGGDEHRDSNAAGFVRSPLSGKECCSEYRVVRRFEVDPAEENS PRDSNYENDDH  
KKKASTAPRVPLTLVDLFPHTGRKHQLRRHMASIGHP IAGDTKYGNQSDDDARLLLHVPT  
MLPQHNGGASSLDTSRTRTSDNFQRPRDGPALPLMLAAVEIIFPHPASTADKSLQSEVEA  
PRAALESSIWEPNRDNGSHRTSDATEDTDHYVMAEDA EHSYNVSNGTQRVQIDIMPDIMKC  
ISRHSSI

>comp4736\_c0\_seq2; 488 1199 2851 LEN=2869; minus strand; translated  
MTAVEWAKKKPPQNGPKPSCIAGKEARHDRNNDNTSSNEILFEEKVFFCEGDVDGAKHDK  
SDPRFASGVVPLPLAVQHCWPTLFPPTISSSKKSIRKGVFWVSSSSNSDGSVRTMGNDRD  
AWCNTSLQSSRSPFRK GKCDTQIHQFDCIRRKVTRTKEQHFRKRGTSTKDLIRRSIGGKL  
RIAFIDKYLAVVVKPYGMPVHKVVDSP IAAARPAANIIGTNGVADINDHSRSGNCGTQPLM  
EVATSKNENRLDNDPLRRPAAVHRLDQPTYGLLIVARTRPAARFLSHAFENRSEFLVKRY  
RAIVHGHEGGDEHRDSNAAGFVRSPLSGKECCSEYRVVRRFEVDPAEENS PRDSNYEN  
DDHKKKASTAPRVPLTLVDLFPHTGRKHQLRRHMASIGHP IAGDTKYGNQSDDDARLLLH

VPTMLPQHNGGASSLDTSRTRTSDNFQRPRDGPALPLMLAAVEIIFPHPASTADKSLQSE  
VEAPRAALESSIWEPNRDNGSHRTSDATEDTDHYVMAEDAHEHSYNVSNGTQRVQIDMPDI  
MKCISRHSSI  
>comp4736\_c0\_seq3; 519 1199 2950 LEN=2968; minus strand; translated  
MTAVEWAKKKPPQNGPKPSCIAGKEARHDRNNDNTSSNEILFEEKVFFCEGDVDGAKHDK  
SDPRFASGVVPLPLAVQHCWPTLFPITISSKKSIRKGVFWVSSSSSSNSDGSVRTMGNDRD  
AWCNTSLQSSRSPFRKGCQDTQIHQFDCIRRKVTRTKEQHFRKRGTSTKDLIRRSIGGKL  
RIAFIDKYLAVVVKPYGMPVHKVVDSPIAARPAANIIGTNGVADINDHSRSGNCGTDADK  
EKDRCDNDIAAKTGEKIVSMHELLLHCLPQLPMEVATSKNENRLDNDPLRRPAAVHRLDQ  
PTYGLLIVARTRPAARFLSHAFENRSEFLVKRYRAIVHGHLEGGDEHRDSNAAGFVRSPL  
SGKECCSEYRVRRFEVDPAAENSSPRDSNYENDDHKKKASTAPRVPLTLVDLFPHTGRK  
HQLRRHMASIGHPIAGDTKYGNQSDDDARLLLHVPTMLPQHNGGASSLDTSRTRTSDNFQ  
RPRDGPALPLMLAAVEIIFPHPASTADKSLQSEVEAPRAALESSIWEPNRDNGSHRTSDA  
TEDTDHYVMAEDAHEHSYNVSNGTQRVQIDMPDIMKCISRHSSI  
>comp4737\_c0\_seq1; 518 280 2177 LEN=2215; translated  
MIGGADHPPNCVKQEGRTRKHKPPRVVWVGI VLVLLVANRWWWKELPSAGKLVGHHHHYHH  
PIQSAIAILEDPKDHSGSNQSTTTLDSLESKSLTSLRDRTSRNDTEPTGNPLLNEMLGG  
SQPTSGFFPSSNNRHNRLRLQFETGTRVTLHIGKTGG SALRQLVRSASEYCRSHNHNGT  
VRDNPSSQSTAIENHGEETAAILHHHMCALARVTD SRASDDGEGGDGTQYQTNGKGEPP  
GRGLVHLDRNLHKTLDTSHFVLP IRNP IDRLVSWFHYERHFQAVLGKRHSHALHDLVDPH  
RCNYRTVEELVLGHGGAPGAGTNSNSHNSNSIHKDIRKRGNRFFDDFFPSGIASEYC  
SRLARQCLEGSIPCYAHNFFNYEYLEDVLRILMGRSRAANTTANATSNATTSNMDQA  
PVPRIDVIRAEDSAGDLNRTLLEWTGLPVTPEMDSFYTVRKPFQVDTHYSSNEITTATTS  
DNDDNDQSHSSNDIVAQQKPPPLSDAAASTLCGWICPELLAYAKIVSHASNLSQGDKQR  
TLDRLEDESCGGGRGEXSEALRGDLLLLPAGPQPAPAEVLRARHRHYQVRPVVKIGGGDGC  
TSEAVRDI PRADWRGHTPASNDTRSALCCNRV  
>comp4738\_c0\_seq1; 651 491 2359 LEN=2693; translated  
MFWFRVSIQSRNLGTFGTGKRSRGNALCKTCFYFLDHNYGHSRQCSIRNAPSFAPDDPK  
FTSFKGTVSFQDEYDNRIGTFLTIITRSYSSASKPEASATMKVTKMGMSGKARIPFVIQR  
GGTSKGIFFHKEDLPKCEELRDIVIQDAFGSPDVRQIDGLGGADVLT SKVAIVSKRMDSS  
GCTDNVLADVDFLFGQVEFGRPSSSPDATNLVRKRILYDVNCGNISAGVGPYAIIEGLI  
EVNDDTVAADIGSNDNSGIRCPAYRQTVRIYNVNTGKVIIEVVPVTKVLEKDEADGCGD  
SWNDWTVVEEGGYEIDGVP GASAYLPLDFSNVGTLTASDGSSNSQTADTRDQGSRLLP  
TGNVRDAVVVDGQSYDVSLLDVANFVHVVDGRQLGLTGKEPSLEILKNSKFWNTVRRIRF  
EAAKLVMEEDEITLTKPFTAVVFPYLPDHGYESIRGDLICDAVDQEKDEPPSGENHDGRT  
NHAGIDFRSFVLFCDHPHKAYPGTASNATAAAALIDGTVVNDV LNNPIETTTLEPNKRTR  
EKIVTIGHPSGRMEVSSRIKETLGDVHGAIEPIDRDDGKSHNSKEYFLERSVIGRTFRR  
LADGFLYLKPDTVRRWKEAKTE  
>comp4741\_c0\_seq1; 381 121 1515 LEN=1562; translated  
MNRFGYL IPTLIILSICCVSFVFRYSLTGYAINEQRHHHFQEVATNRLRKRVRNGESERLG  
SGQVNLQDGVDENEEYDVC IAGAGLSGAVIAERYASQLNKKVVVIEKRDLGGNCDYID  
DETGIRVSQYGAHLFHTVNRVWVYVQRFSDWTNYEHEVVGVEGKHVPIPVNIETVNTL  
FGLNITTTTEEMDNWLSQE QVKEYEQPPRNSEEMALSRVGKRLYELIFHPYTIKQWNKEPKD  
LGPEVTARIPVRNFDNRYFGDPYQALPTNGYTSIFENLLCHPKIDVRLNTNYFEIRDNL  
RCKHTYFTGPI DAYFAHMGYKKLEYRSLEFERKVVKNTGDRGTFQPKFVVNHPSSDTNFT  
RIVEYKHLNQT SKDTILFVERS KDGGEPPYPVPNEENKALYQKYQELAEKEPNVTFVGR  
LANYKYFNMDQAI INALELFDKDTGLSEENDDSISLCVSTSNGD  
>comp4742\_c0\_seq1; 164 1 372 LEN=810; translated  
XNDNGNDNGDGNNGGNGEPKSNWNKMIVTIVGAILGFIVVVLGIWFAHQRWKRGNNQKY  
LEIKEGGXHADELGMSCADLDTKTGISDNEFGQLSTREQRAHLDAIDNLFDDQGVKKS  
ITSS  
>comp4743\_c0\_seq1; 506 249 1481 LEN=1791; translated  
MAFRELVNRCRGGVVKHELMALTGTTSIDDVHKALQDLCNEALAEATEAVNDETWNRL  
QEEPYNIDLNEFFNGYGHNLNLETGNFRQYPSSEKRGGSERFLYIGEDPRLNDHYATTEA  
SYLGGEGVNKFYNEEAKKFFLQAPTSNFEQGCRSNTAMCCWQRDRQYLDNRNGCGFNDCS  
NQNPMDNTDLCWTEEDGTIFPYPGDETENDLHCHGFAWGNDDGGVNTEAKWNNLFFVSMY  
DHLYQRYGVESITNDPKIAGDQVMCGCVEDMAPVARADCTEAI GLLNYTSYFDPKRLA  
IKHVPDSFELNFRSCRGYDYMPFYQPKDYKANQNDLDLENSNNDLAAFVFRQYLEGKMTD  
DQVDLVEKTIIGYRNPKVNEENDEEREKACANAYKERFGNDNYVEREIEIA  
>comp4744\_c0\_seq1; 686 78 1409 LEN=1737; translated



MGDKKDKKKKSKDDDDKDKKKKSKSDDASAASGGTEDKKAKKGKKEKEDKKGKKDKKGGK  
KEEAIPEESAHDSESVASEKVEEPPPAEEEEPPPPKKKEKKEKKEKKEKKEKQERSVEEVEEAAQA  
IEIQLFQPDPELPTKGAKKYGDVKTDQAQKKQCKKTYKFLNFDPWNEATRYDDDDLCDYV  
IEYPDGCKVKYEFEGFSGCIYPFMLCFALKASTDTVEVVYDAYPKALKETDFWIGNAYHY  
AALYDAP IPIVNFLLTKFPEGIKTTNYGR TALHMGALYGCDENLIELLAGKYSKACQIV  
DKDGYTPLHHACERGAGSTVVKALFGKHPAIVFHKAVNDMMPLHLACNSTSNVRVIRALL  
LAAGDNSICRAVDVMGNTPLHLALTSVAPYESIELLVASCPETVWTKTTNGELPLEIAQR  
KRAPQDVLQLEKMMERLLVERD  
>comp4745\_c0\_seq1; 290 349 1131 LEN=3016; minus strand; translated  
MAGTYSTLLSFAIPGMIAFGQLSQYFSAQKIMYPEVYSSAVGLFANLAFGLIFVLGWPIIP  
GFAGFGFEACPIVTTSVTYVQLLFMVIVFVYIQKLHEPCWPGFKASEITWDRIKTFVELY  
FPAALSSSSDFWRVAVIGSMAASLGEADVAVFNTAYRIMWIALIFVVSIAGAAAINMSIR  
LGKRDPYGARQAGHVSIGMVVIMLCILGFFILLKNRWFGLIIFTNDEEFLSLFQQCSVPFT  
ISLIFMNLSVAIERIPYSMG  
>comp4746\_c0\_seq1; 359 227 1183 LEN=1413; translated  
MVALPARKRRICCTFVVCLSWESFSIGFLGPQATCGRRLAKGKMHSIPVLNAFAKNSGE  
DNGEPEGGIADPSAGSDDDDDDGDDTVRLPTGKSPRSPGVLLPRQLPRGVLVSAEESRRR  
ATERSLLEALRDGDDAVGELRDFWRAQPRNYRDGKHETEHERGERFREAAALGIGDPSSW  
ERSREVLLESLCGEDPTFLQAFALLSKLYCLEGKLEDSRAVALEVLKLPWHFLAIE TMVA  
TSYALNKINASVFWASRRLLPPGRAEQRSEWIDRAIGESLELEARIATLEVTGGDVTGGI  
SFDWSSES DR TGDDDPWQ  
>comp4747\_c0\_seq1; 257 135 680 LEN=966; translated  
MSEHDTNEIENNEIQEQYRMMAQMEAMRVKDN TGFD SVEYKRQRLLLEEQRAQEEKEAT  
MPWYTKPTPRLPQAKTAGGGENGSSGSRAQEPPLPFTRANRRFGRNSRNRDGRVRVPDLC  
LGVVVAVHKNGSVEEGSSCRESNGNSDTVATTWCWCDRVLRVHVLSTLVQCPECWTVGPV  
T  
>comp4748\_c0\_seq1; 501 59 2054 LEN=2259; translated  
MTAERSQGAQETLACTSDNHSARIQSPENATVTSGVESVGYENNPLSCHDDWR IALYYIY  
IDLTPLEVDAHIGIQRNYCEEHGLKGRIRVSTEGVNGVLSGTHETL RAYERAISTALQAP  
TRHQICENEHQHRN ILPVMNARASTTDT CNPADGTICILDNNEKTKLEEEAQN NVKDDNY  
TTTIDL DVKYCRLRKDLP IEKQLFDRLVVKRTTNVIGLFDQSLCGQQEQQKQKR NK SERY  
RRRERKREEQEARRCSNLPNQQQQLYSAENKVKSTKNEASSPKSNHARN DNDIKKQQDG  
EETSSTLENPSPLLDMSLRRTVMEEPLNPARHLSASEWNEKLDETSSSSNKK SALLLDV  
RNVYEMKVGHF AHPSTPTLLTNTRKYS DLPMLASNRDMQERDQIFMYCTGGVRCERVSM  
LVHELYPDKEIFQLQGGIQRYLEACSEQPQQQEDNQEPHSNQQEAVDRKDGAIGKKNPGY  
FIGKNFVSSLSLFGYLLLELIVRKICSDENFWIRGFHFNSCLCYSVKQMI VSTDFFR  
PVHESKVFDP RRTDPVHFGETVGRCLVCAKPHDDYDNGHSPSDNKEARCNNCRMLILICN  
DCRPKYRCHGEEEIDHGIKDEKTAAREEKDSSNEHSVRPLLYCNLDQCIHEGSSPDPELR  
VFTK  
>comp4748\_c0\_seq2; 578 59 1873 LEN=2078; translated  
MTAERSQGAQETLACTSDNHSARIQSPENATVTSGVESVGYENNPLSCHDDWR IALYYIY  
IDLTPLEVDAHIGIQRNYCEEHGLKGRIRVSTEGVNGVLSGTHETL RAYERAISTALQAP  
TRHQICENEHQHRN ILPVMNARASTTDT CNPADGTICILDNNEKTKLEEEAQN NVKDDNY  
TTTIDL DVKYCRLRKDLP IEKQLFDRLVVKRTTNVIGLFDQSLCGQQEQQKQKR NK SERY  
RRRERKREEQEARRCSNLPNQQQQLYSAENKVKSTKNEASSPKSNHARN DNDIKKQQDG  
EETSSTLENPSPLLDMSLRRTVMEEPLNPARHLSASEWNEKLDETSSSSNKK SALLLDV  
RNVYEMKVGHF AHPSTPTLLTNTRKYS DLPMLASNRDMQERDQIFMYCTGGVRCERVSM  
LVHELYPDKEIFQLQGGIQRYLEACSEQPQQQEDNQEPHSNQQEAVDRKDGAIGKKNPGY  
FIGKNFVFDPRRTDPVHFGETVGRCLVCAKPHDDYDNGHSPSDNKEARCNNCRMLILICN  
DCRPKYRCHGEEEIDHGIKDEKTAAREEKDSSNEHSVRPLLYCNLDQCIHEGSSPDPELR  
VFTK  
>comp4749\_c0\_seq1; 1026 614 2986 LEN=3353; translated  
MAMATAFAVLVTCGDSAVFSPKMSLEPRTTTTTALATAAAAATNTRPSINHRKGRSASDR  
PVTRAKKRSRMLS IQSSNENKKNRWLEQEEAEKYDGNNDSDNDGSSNGGSDDDDDYSLY  
SAYATGYISALSCR SYRIALSEDYNDYYTYTGGQYQREQRHDEPGEKRSPTIIGQETVLW  
FDYVLDNSSDNTDDDDNDYDDYYSYNGEEENEQGEKEENNR SRRKLEDEGDGVQGDDEE  
EVDQDYNYNSYNSHRGNIVLAKDWLAHSGGTLTSGCQQLLDPLDVFEDYVPSMDDGR  
LVF SNLYYGPMCSDSNSNTTVA TVEMGIFLDSCHAHLPGLTYLLNHKVLSDWMTGVPVG  
NSGTRSSGSSNGSSNENEDNAMDGSSNEFNDRNPYDYMYEEANDDFNDIDDDSDSSSKY  
QNDLKRLNSYRTL VHQLNYYYNRDP TDCSSHQDVCQGQILQKAIDLNSCRSVDQELETGAY

AYYGDQNGDDSTAYYDDAYNNDGQSKSQSGDEKSADYIDDNAVQEQAQNYGAFVEVDDG  
IENSNDEENICYQIFQNVLEQYSSRFSSNEGDDANRNENGDEGDYDEQEDAEEYEGIC  
YGILEMEIDSSSQGCSLENYDLSSSNKDDDETETTNTAWTLLQQELEEYVGIKDPNSID  
LLALFGIALGVVCLLGLLAWGVDMATKRRGSGTGQSRQSAHKTKSRKSRRTKVTKESS  
AANKRAAPLLGDEDRVGDTPDFVEDPAVLALASSSSSKGFLRAVESIEAVFRPEDRELK  
SMTLSEGEFA

>comp4750\_c0\_seq1; 401 606 2501 LEN=2769; translated  
MEFDELKALAKYQKSVRLHRRGIRDITIAAFNCTAEVNSLREAVFEEEEEDVLKCLKQSAEKK  
KEEARADGRESAMHSMASFRDSRAFANSKVAGQNLAREAERENELSETIMNKTLQEDAA  
KDRLKKAQATLELANAAQHHTIDTGICKWAPAVCNLINSGSSAATVTDEAIQANKDIQE  
ALLQIRNAEIERAKAIKLNHLASTHANLSTSMFADAEDFKTQSQEQWQEAQSRSSAAKE  
ESEAEKDMEDAKLEESDIATKEQEIRDDLNSRIIFDRVVEDRRKESIAREQMTHYLKLV  
RERRTQWREKKTEATHHVARAGWEALLASVAASCLLVVSSRILATFRYRQPLRWIVREM  
PYVPQDLLYLNCWAWIFLLAMGYGGELLTAFHDRGFVARAAITILIALVAAAILQVTLHL  
IPSVCALLRESRLDSGAIQPLVQEVVIRGIIIALTSALELLLCWCWGNIVFQRVHLFN  
TFVWVIAVLCMSTFYWIVVRREHVHTRIDALSRFSNSGLLVQGGNNGESERYSLLTASDL  
ERSQSSMSGYSEGSFYGATRKS LGTNLSSIGSPTSMQSIPIGRSTEPSEQEGDFGSLAD  
MYQAQAF'TTPWHSELEKVRLLFEIYIASVAIW

>comp4750\_c0\_seq2; 401 399 2294 LEN=2562; translated  
MEFDELKALAKYQKSVRLHRRGIRDITIAAFNCTAEVNSLREAVFEEEEEDVLKCLKQSAEKK  
KEEARADGRESAMHSMASFRDSRAFANSKVAGQNLAREAERENELSETIMNKTLQEDAA  
KDRLKKAQATLELANAAQHHTIDTGICKWAPAVCNLINSGSSAATVTDEAIQANKDIQE  
ALLQIRNAEIERAKAIKLNHLASTHANLSTSMFADAEDFKTQSQEQWQEAQSRSSAAKE  
ESEAEKDMEDAKLEESDIATKEQEIRDDLNSRIIFDRVVEDRRKESIAREQMTHYLKLV  
RERRTQWREKKTEATHHVARAGWEALLASVAASCLLVVSSRILATFRYRQPLRWIVREM  
PYVPQDLLYLNCWAWIFLLAMGYGGELLTAFHDRGFVARAAITILIALVAAAILQVTLHL  
IPSVCALLRESRLDSGAIQPLVQEVVIRGIIIALTSALELLLCWCWGNIVFQRVHLFN  
TFVWVIAVLCMSTFYWIVVRREHVHTRIDALSRFSNSGLLVQGGNNGESERYSLLTASDL  
ERSQSSMSGYSEGSFYGATRKS LGTNLSSIGSPTSMQSIPIGRSTEPSEQEGDFGSLAD  
MYQAQAF'TTPWHSELEKVRLLFEIYIASVAIW

>comp4752\_c0\_seq1; 251 56 766 LEN=919; translated  
MNAVNFPLIVTLLLFIFIGERAPVAKAFVVPSEQHNAVSAIRRTPASSQSTKLGIVWDPN  
PDNDTGLVEFPTASQKSEIKREAKKRKARKQMPFSFSFSDDETNGPWSDETIQAIWQQLTE  
SEMMELRGICRESRKDVYQ TALWFCEDLEDLIAPSSSEDEDEGQGDDEEGGIHLPVALVA  
VKGHTALIYCPTLPIDHPKLLIRTSVQGKNVWKARPKPPRDIRGQIIREPKSEYE

>comp4753\_c0\_seq1; 276 194 1288 LEN=1523; translated  
MVSSTSFSLPGA AVGAILAGFVSVS GAALTPQEYEEAKNGGWLNDIDIESGNDDDFNTS  
GIISSQHNSLRGNASATEDPVISVGSALCSNEQFSIMCGLYNETVKNNTIAGRIQGLDWG  
LSYYERFTLFAPVNTAFLTPVVTLPALSVRDFLDTHI INRALS FEDLSRTCFYELETR  
NLGETTTTTYCEIDGTPRYQVGEGNVASDRPEFLSRSFVNIRAGNGYIHAIDAVIKPSQFL  
NPETAAPTSKPTTMEPTRTPTKSPTRSPTRAPSRRPTSQPTS SRPTFRDSEETSETTTEES  
SNPNALISPGSPHGKLDVEGRKVVREERGKVPSSLP SDGPSMLPSDGP SLRPSDGP SF  
LPSS

>comp4755\_c0\_seq1; 619 1 1291 LEN=1867; translated  
XLACL RACCGELPLNGRLWVALLDKAATGLVVDQSLVGRRRARGDADAGAGAGAVLLQR  
THKERCMWCPHVLPIGDL SRIPPAKT TSGGGGEEEEKEAVPTLQQLLEADCAKRPLSTT  
ARRYYDFDTKPYDFEVEIPAGLFSFGGGSGKNGSSRIETDTENDTKQKQPWKTRSMRFS  
ALTGYLFLGIDRVLDPPTTTTGGSN AHESRRLDRSELAVPPTLDLTRLSEGQSHPGPVLY  
DLVGGALCDEGDYVAVLKDHAAAAA LAERQVASNKNSNNEKDNDPKNGEGSDSDDEEDE  
TWKLI EAETIPMSEL DVLEFLKGE GND DSEEDDDSDSDDEGGPCGTLAVYRLRTEAV  
SSSSFSLQRHL PQNETVFDEMNRLLSDIVLSQVTGSLDSLSTDYIIEEEIYEEI IEDTD  
DDEAEGEDA

>comp4756\_c0\_seq1; 437 88 1128 LEN=1415; translated  
MTDYD VDHHSRNGEDERSIKVCQGLTEDQRREIRKRQRLRKEIDDLDVDQARDKNEIF  
KQVKYVRECVL DSENVEEITKFKGNKIDQLIQIPRYDADRVVSM LVKCKGITRGYSYFD  
WRGLGDQVGVCFNAIP SQVSFLNGPLVDGKEVKVKQRAKRV RSTQPESDAEEERPEDIKG  
HTARGKNQLSAVKENIQNVERALVKKVDSTYRARSRLTETYGGKDDSSGKIKKMTRLKK  
KIKRHRDVNAIELLFPNSFTQTVENLYHYSFLVKEGKASLDVRQNKVLDEESGLKIDGG  
PVVKYVRDKNPPPPRQAI VNLTMEDWKNLCEAYEVTSSCVPHREG

>comp4757\_c0\_seq1; 485 363 1004 LEN=1303; translated

MKfVATTILALAGSAAAFSPFGKKAAPAVAEPVPVVDTLVGALEPVGFWDPLGFAAKAD  
DNTLRRYREAELTHGRVAMLAAVGFLVGEAVEGSSFLFDAQVSGPAITHLSQVPVGFWLA  
LTISIGAAEQKRATIGWVEPENVPVDQPGLLREGYLPDGDIGFDPLGLKPEDPEEFRLMQT  
KELQNGRLAMIATAGFMAQELADGKGIIEHFTA

>comp4758\_c0\_seq1; 454 197 1741 LEN=2322; translated  
MSSTSGRPSRRRSVIVSGLDMYKKVPIDLMEGTKRGSVLSWIALLAMVTLFLYETNEYWTT  
KLVKDLRLDQKDHTGDKRLRLNFNITMLDLRCEWAVVDVSVLGTQDQNVTAHVTKWDLDA  
DGVRSNFQGRNRNQKDIDLDFDETVEITIDELHENGEDALSLDKESLHFAKENFDFLFVDF  
FASWCSHCRDLAPTWEKLAELMNDHHDYDNDLDDYTTKPEKAKTAKDHIEDSQNNRDDDGN  
FQQVVVAKVDCVEHNDVCNEHNIQAYPTLRLFLVDGTPWMDMFAENKNEGTRKLSGSSDYN  
GHRTVLEMIEWLHFVEEQVREDDGARTLHLAQAARNRLDGDKKAEDKKWNDPGIQKKK  
RHHHRVRKNWKDAEHPGCQIAGHLLVDRAPGNFHIMARSKHHDLVPEMTNSSHMVNSLYV  
GDPTALHWIQERRSKIPTIEIPAITPLDGNVYTTDELHESYHHYMKLVATKIDGMKVGSR  
ELVfyQMLVNSQLAYYEKDVAPeAKfAYDLSPMP

>comp4759\_c0\_seq1; 668 1 1758 LEN=2128; translated  
ETDALNTTLGDPVFFADNLAQLCEWGMRFSDVDFEAPSASPTTFPSEEPTIAPTLSPTSST  
PTTSPSEQPTTSTPSSTPTETLSEQPTTSSPSSTPTETHSEQPTTSTPSSTPSLVPSSSTP  
SDHPSGVPSPGQPTPAPTDLASKAPTAPVLTTRAPTGAAPTATPTKSPTTAPVAPDVPTEPP  
SGGEVEPPTSSEGERVSNTIEGLRMGMAGITEMSPSAETEWQELTASFSSSFVFNLDKDK  
VSNFVTTYEVTGVSPITVQQGRQLQLRANGNSRHRQSLQEQQIVVEYQTQVEYNTVDLSE  
FTPEFLVTAPFATQAERTAYVTLTKTTSTTDLANIKGVSETQLPVTPPPTSAPAQKDAIIL  
TLPALIGIACGGAGLLILILLFAIYCRKGSVDVGGDAKSADEPPLHVDVKEDEVSTLAGPN  
GPPTYGDQSVATMDYDYSKAYGGAGDTSVSSAGGTFGSNTQNLSPANAAATGAALGVMG  
DDESYNTKYDDPRAAQGMEEVIHIFAPPGLGVVIDTPDDGAPVVHAVKDTSVIADRII  
VGDKLVAVDEEDVRSMTAIVKSKMISRKGANPSRKLTVVVRTVPLE

>comp4760\_c0\_seq1; 430 736 1374 LEN=1476; translated  
MAFLAKYDLGKQEELQTKVDEKISRKKEMKAVSKAMKGREATLQSLPLEITVGADGSTQT  
ARVADLQKGAQHMIIVAGPRKVCKDALIGANLLKMDFALSNNLVVVPYETDADDSAAPRS  
GGFGDRPSYETQPYIAKANGEDWEDIQQEISDAVEQSGENVKTEGIAIIVVANNGNIIRR  
GVGTVPWRLMVEQLEETVNPTEEKGLFGFLE

>comp4760\_c0\_seq2; 545 83 1141 LEN=1243; translated  
MKKQLLFSVGLVSAIGGASAFVPAQTAPNAIGSRKSSSHGRDGLVSVSDANSPQSLSSRT  
ALLSDKKGGLDESMRNKLVTESIAPWRTLRLFLYGSFGSFAVGGLLNGSEAIANSNSP  
DFNLQVELVNLGIDFGVVLMFLAKYDLGKQEELQTKVDEKISRKKEMKAVSKAMKGRE  
ATLQSLPLEITVGADGSTQTARVADLQKGAQHMIIVAGPRKVCKDALIGANLLKMDFAL  
SNLVVVPYETDADDSAAPRSGGFGDRPSYETQPYIAKANGEDWEDIQQEISDAVEQSGE  
NVKTEGIAIIVVANNGNIIRRGVGTVPWRLMVEQLEETVNPTEEKGLFGFLE

>comp4761\_c0\_seq1; 270 96 350 LEN=967; translated  
MTSSENKTPDANKANANESSAPSAGATKQEAQEAIEEDEFEEFQGANWGTGEEDAED  
TQQWQDNWDVDDMDDDFTKNLGMN

>comp4762\_c1\_seq1; 663 1 2427 LEN=2519; translated  
PDVESHAVPNPQFFVDNLKPPNPNRHSQSYDSLHRASSGELSSKEVAQGGQEQQDQDLER  
RNSNVVEDCSSYSVSSHTSDDSIENERNIHHLDNSCHDNRVIRHHHLDNPQAKFDRRQF  
LPKTSSIYGNIGGESKCPFTVPCNCTRQRQFFTVSSAPKNNESAGLFIISLGFATYVVFAS  
LYIFGLQEGWGKLDICYFAVITLTTAGLGLVPTSNGAKIICSIYIYFGVAFIIGLLGSY  
IASMLDERSYREAIANQIRACPNTIRNIRYASERRRAAFGPVSNKVMERVAQMHAS  
TLHRDPKPVRRAEAPNLLPPGRQHPMERNKVDLSTTPKSPSGFDSMSPSFRRQLLGSMP  
TSQILLRQSHTRHGSMDLRKDNNGFSASHLKGGLNRSFHDSPNSSVSPQSGLSVAGRFR  
NNSADIHIPATVNEGAQSNYGTNNTASMPPTPEPPLEAKEDNNGNTNPEDPPPPLSEIP  
LKNHQVMENDDLTTEDSDSYSDSLDSEYGVRRRRKKYGARSADAAYVIRTLREALVNSM  
VIIAFGCLGFYLIIEGLSMIDSWYFTTVLLTSTGYGDIAPKSDGGKLFATVYLLVAGTILL  
NNMSMISMIPLERKRRTAQAVLSQFGDSLDDALRELATGPLVQRINLERQDPRGLDEC  
TREMIFALAMMIRLGKVTEQDINQTFAAFRKLDVNNNEGVLNSKSI IAGMIHKRRRTMKNHN  
NGNGRTRYSGMSQYGSWMPVAPPYVDGNRANSTNNGNIYVSHAVPNSQGHSVHYSDH  
TPLLSLSERGPPLHSNRRRSSTSYSMDE

>comp4763\_c0\_seq1; 265 277 1864 LEN=2265; translated  
MAVLCWEALHLGSNLEIMVMEQQLIATANEGRIAALERIKRLQSASGSGDGPTGRRDYLV  
PIVEQRAQQSEEHLPGSCGAFDHSVRRPRHGCVNKDTETVFCNFENLRVDPRKIHVMAR  
GGEVLSVTVMGREESDEFPLYQRGAFSTPVKPHFEVPEFRQNMHYLGDVNLALRYPTSRN  
KHRLDLCKKIYKGTTLFLTRYEYVNLFHFTVTDWVNAFLVSSAQNHRDEKPDVVFLDG

HAEGLLDSTWKSFLGNFRFVKHMDEGSGDGLCFERAVFVPAGYKSELFNEWRIPRCPSK  
GMTDAFSEFVLARHGLLQQPEVARGRIVLIDRQPFVSHPRSSTSNFLRQFRASDLDELQR  
RLERIPGTTVDLVRLETLSVREQLLELVRAHVLVGIHGAGLSHLLFMAESRSHVIEFLPD  
DQVDFFEYLSRWKIDYTSIPFLDTLSGGPIDDAVESSKTTWEQSDSESRQHSMGCMDCF  
DALWAGLAACLSNQLAPWYRLEGRNSEANHETLQNSLHKKLQRTTIFL  
>comp4764\_c0\_seq1; 658 139 1452 LEN=1719; translated  
MNVATRGLVRAASKKGAAGVAGRQGKLLSTLVDATEEFPVGPALIPPEPAKASKASVSTLPS  
GLTVVTEDACSTSTVTMTYPNAGSSSESLDEQGAALINKCLAFCSGSGLSTTLVNRTIEN  
EGATPFAKADRTSATLGYTVEPDNALGLVPLLALDCSLEKWDVRDAKKLANYQIDEANKS  
LEVVLTEQIYAAAYGASSMGRPFYSAGASAYEIASFRTRAYGINGAVLTATGIRDHEAF  
CTEVESELLSEAPTGDASGSPKPKLLGGESRLSSPSMGYAHVALAFDAKGTAPMRNVLHHC  
FGLLGKEAGVTSFVAGEMVGVYASAPTAGAGALDASITDALTASLTPEVIEKAKTLAKAE  
AAFDLDSGSVGLAAAMTSAVLESGSALDAATVATAYDSISESDVAAAASAMLSNPALAA  
VGDIGVVPYQGTFFASRF  
>comp4765\_c0\_seq1; 576 111 1310 LEN=1486; translated  
MASEETTGDASGSSLLLNQPVVIDNGTGTLKAGFAGKTKPKVVIGTKVGRTKHTRIMPGG  
ALETEQSLSSSGPSSIFVVGKLLDEHRGAFLLEYPMDKGHIVDGGWDGMEALWEHIYSKPG  
INVKAEDHPVLLTEAPLNPQNRDRMAEIFFETFRAPALFFAPPAVLSLYASGRTTGAVL  
DVGEGVTHAVPVYEGFALPHSVTRSDVAGRVDVTRQMQLLLRRSGLSFTTTAEADLVKTMK  
EESCFVTRTPVADESMEKDSRTQYTLDPGQAVTLSKERYEAPNILFDPSLIGSEEAGVAD  
ILVDSIMKSDIDLRLSTLFSQVVLGGSTLLPGFGDRMLYEVRSRSPSHTKIRISAPPERV  
NSAFVGGSSILGSLATFKSMWTSKTDYEEYGSNILHRNKL  
>comp4765\_c0\_seq2; 523 615 1646 LEN=1822; translated  
MPGGALETEQSLSSSGPSSIFVVGKLLDEHRGAFLLEYPMDKGHIVDGGWDGMEALWEHIY  
SKPGINVKAEDHPVLLTEAPLNPQNRDRMAEIFFETFRAPALFFAPPAVLSLYASGRTT  
GVVLDVGEVTHAVPVYEGFALPHSVTRSDVAGRVDVTRQMQLLLRRSGLSFTTTAEADLV  
KTMKEESCFVTRTPVADESMEKDSRTQYTLDPGQAVTLSKERYEAPNILFDPSLIGSEE  
GVADILVDSIMKSDIDLRLSTLFSQVVLGGSTLLPGFGDRMLYEVRSRSPSHTKIRISAP  
PERVNSAFVGGSSILGSLATFKSMWTSKTDYEEYGSNILHRNKL  
>comp4765\_c0\_seq3; 409 322 1086 LEN=1262; translated  
MAEIFFETFRAPALFFAPPAVLSLYASGRTTGAVVLDVGEVTHAVPVYEGFALPHSVTRS  
DVAGRVDVTRQMQLLLRRSGLSFTTTAEADLVKTMKEESCFVTRTPVADESMEKDSRTQY  
LPDQAVTLSKERYEAPNILFDPSLIGSEEAGVADILVDSIMKSDIDLRLSTLFSQVVLG  
GSTLLPGFGDRMLYEVRSRSPSHTKIRISAPPERVNSAFVGGSSILGSLATFKSMWTSKTD  
YEEYGSNILHRNKL  
>comp4766\_c0\_seq1; 283 121 651 LEN=1102; translated  
MSDTEMKSPKSAKKSKKSDRTSSASAADAATSGKTYEERVAASVIAKPLACKKSTKKAH  
KLVKKAATAKRIRRGVKEVVKGLRKGEGGLCVLAGDIYPLDVYSFLPCLLEEKVNPYIFV  
PSKQDLGAAACTKRPTSVVLVKDKADKKAGDKKFDGQDLMDTLLKEAREYNPVDGN  
>comp4767\_c0\_seq1; 547 1 1760 LEN=1760; translated  
DESTHDRSDEDDRYRYEYRMARRSQESNISSANGDRAARYRASGNRPSSPGARALDRG  
EKRGGAAGTLDPCERMAVRRIGGGAVSKEQHEELIRINRKVFDKLRHARIDRLKQSNVQLA  
NELRRARALEPEKEEQDPNHPSETSWEEGVYKSQLELLQSRLEITTIQADKRQRELSAS  
NELARSEHEFAVARLRKRISELEISNRRLALQLEHCKPKQPKPQADTPNQDPDCDSARG  
GKDKVAAELQRWKDRNAFLEQKVASLEEKLSEIQKPEKQDQQFQHAGEGVEFPYEDTSFF  
QRKHGEGLPGGIGEGSAGNRESNSAVAAEIGESNSHNVDANESPEDLSESSRGNSGNRSN  
EEHSNKNLLLLDSSRESSNGENPGGEHDCKNLLDDTNDTESVELVCSGGIGIGRVPDEIA  
KRSSGGTSLRLVYEHDFEPTPLATAEASNSVCGEHKTGSGIDPHDASFESATSMVLIER  
ILELESVLRHERRDMDTPEKAGFVKALQYRIEKLTERGYERVDSNXVTRDSFVLCMIGFVC  
QQMKGAAASKEELGLTSTGEGYFGHVQQICSSSMIAIISTNVMINDVR  
>comp4768\_c0\_seq1; 456 1 1087 LEN=1112; translated  
NVNVNVNVDGNAGDPVSVMASASFPDGTAKDSNLGGDPLRPSSNDEPFDEAFDEAFDE  
FDEAHGLSRPNQQTVEPSPSTSDKSGSGDKSDKTSNNNSDNNTADNNNNNTADETRDDGF  
FRMDLFETAQAAAEQMVERTTSLGLGFRTPSRPATTPEASPASNEKEQPGYSQRLDVDVS  
GEPNPWDLQPARTAGEPCTQDAKANADAKAKANPSADANANNHPFRACGRSVEELVETG  
RECVGTVGRATEKAALDLESSCKGKTAMDYPAAGSSEAHRRSEPLAALHPLLEKTLLEE  
LGDFVEYHRALLEERGVPVPCGRGKRKGRSRHDPTEKCEHENENEVPLNVAIEVEMKEK  
A  
>comp4769\_c0\_seq1; 504 1 1470 LEN=1722; translated  
XGAAAIEDAVGKRMELGDAGLEAVFGKGEVAFVPHMFDREALNASADKGLGLLGRNHVAL

VDAELTGMPPIILDRARPEALEAGGGLFETDGENRDPFRFRFVLLQGGNYDKLDRKGWDT  
SLQAFARFYHSLDDPSGIHLLIHSMESYLIASDSNNEEDAPPMVLPQGYNIRLALHELGL  
PKTAYTVDQAKHAPEVVAAYKKRADVCLHPSKVEGFGMNVMECQIVGTPVVTTKYTAMED  
YTKFGRSVPPLQTIIRNPDQLYSMAMPDVEGIAKALGELYLEHKALAAGDEGYKRRREQEI  
ASFNDWLETTCPDAVADKFGELLPRAIDEFSARETARGLLLTGAVPTEGAYEVSSGYHA  
TIADWDAPWTLMAPDGTVVTAPEELNKMAWMMLLADNSSSSPAMAIIVPPTYEDGTKADE  
RLFMEGKLP LLVRYVLC SLQGLSTRFSTLMAQA INVSGNSVKRMPDGVAMIDRNTIKGA  
TTAPEGRSEL

>comp4770\_c0\_seq1; 229 187 894 LEN=1119; translated  
MILKGTLISSLRNCASRGLVVPSQSRDFVSRRFASSNSSNTPPKKTNNLVWQVGTVAAVV  
GAYAIGLNFTQVISDRAKENEDDDIGDEALREITSRVFFDMSIDGNEVGRIVVGLYGNV  
PKTTLNFETLAKGDTTHPRGRKLSYEGSTFHRIIPGFMIQGGDSRTTMVPEVYRSTATNL  
LTNETGLHVFDTDPEFCLWPPIPKIPMALNSSSPQKRHPGWTHDMSFLVKFWME

>comp4771\_c0\_seq1; 424 1 1072 LEN=1525; translated  
XNLSKQGRKIESNWNTAMSNRLIDGETYLEGLIESLSTLPAEMRRNLELMKMDMASCSSL  
VEETMKLQQNYLLRVEGKMGRLLEVVDGKGVRLTASRDETDSTKTKDDDDGDEKMAGPDDER  
PVVIPTTEELMAYIHEPETRSKIENLQSDALQQAEEKVAIANQTFELIDNLCRKLDTDL  
EMERSLLARNGADFNHSSGGVNGAVSGTSSSGTSGGLSSTTTGGRGRGAPKKDDLA AVQ  
EVPGSPDWILAKVITLDPQTGMKLSDEDMESNKVFNLPESQVILERMKNLRIGDVVFA  
VYPDTTSFYQGTIAQPPRKAAGGGMFVMVTFVDDAATGKTLDKAVLLKHMVMPPPP

>comp4772\_c0\_seq1; 681 324 1985 LEN=2566; translated  
MSSANSYGEYEPYGGPDDFAEFDEDYSTTNDVRDPGSYDGEDYNYGDEDEDDEQTKTNS  
ADPYKEYGNEYGTDDDDSDSESSYSRDEYYGDDRDEMPDDYYYDEDDQFYDEQDEEDR  
RKRARLRRAWICCFVMLCCLLLAIIAFVIFLITRSKDRAPEPTPMPTMEPWVPTDDDDYM  
YDDDIILNPGVVTAPMAPFNRDCEESEGIEYSGEFRNIMDQCACLGEIVDVPDDVAEMRN  
LIIERVAPKFYGNFTIPLNSCDPANMAATWLATGDNRDGGEARQRFAMALNFYQLNGTV  
WDFMDGWLGPFNELWMIQCNNKGI VNSLALDANNLFGPFPEIAKLTGLASIAITRTH  
LTGTIPTELF SMPKLELRLYANRMTGSIPPEIVKATKLESLRLETNFFHGELISEIGAV  
STLTDLNIGFNDVQTIPTIEIGKLNKLYLRVSNNALSGRLPSEIGRIDALEVLAMTNNL  
FFGSI PSYFGLLWNLDRFRITGSGVGGFLPTELALLSNLERLDIAISNFHGTLMTELGQL  
TNLCKSLEIRMRW

>comp4772\_c0\_seq2; 650 324 2435 LEN=2528; translated  
MSSANSYGEYEPYGGPDDFAEFDEDYSTTNDVRDPGSYDGEDYNYGDEDEDDEQTKTNS  
ADPYKEYGNEYGTDDDDSDSESSYSRDEYYGDDRDEMPDDYYYDEDDQFYDEQDEEDR  
RKRARLRRAWICCFVMLCCLLLAIIAFVIFLITRSKDRAPEPTPMPTMEPWVPTDDDDYM  
YDDDIILNPGVVTAPMAPFNRDCEESEGIEYSGEFRNIMDQCACLGEIVDVPDDVAEMRN  
LIIERVAPKFYGNFTIPLNSCDPANMAATWLATGDNRDGGEARQRFAMALNFYQLNGTV  
WDFMDGWLGPFNELWMIQCNNKGI VNSLALDANNLFGPVRITESTVQSDAMLELVISF  
FKSLQDALYSSHPADTNFYFVTIVGLNNRQIICVLFPEIAKLTGLASIAITRTHLTGTI  
PTELF SMPKLELRLYANRMTGSIPPEIVKATKLESLRLETNFFHGELISEIGAVSTLTD  
LNIGFNDVQTIPTIEIGKLNKLYLRVSNNALSGRLPSEIGRIDALEVLAMTNNLFFGSI  
PSYFGLLWNLDRFRITGSGVGGFLPTELALLSNLERLDIAISNFHGTLMTELGQLTNLFK  
FSLHDCDFSGPLPSELGYLWNMTRLQMKNNQFTGSVPRHWGRMAELEQLTLEGNQLSGTV  
PIEVCDDLNDKLGQFVVDVCYNRRRTGFGFDCEPDCCTLCRDT

>comp4772\_c0\_seq3; 771 324 2267 LEN=2360; translated  
MSSANSYGEYEPYGGPDDFAEFDEDYSTTNDVRDPGSYDGEDYNYGDEDEDDEQTKTNS  
ADPYKEYGNEYGTDDDDSDSESSYSRDEYYGDDRDEMPDDYYYDEDDQFYDEQDEEDR  
RKRARLRRAWICCFVMLCCLLLAIIAFVIFLITRSKDRAPEPTPMPTMEPWVPTDDDDYM  
YDDDIILNPGVVTAPMAPFNRDCEESEGIEYSGEFRNIMDQCACLGEIVDVPDDVAEMRN  
LIIERVAPKFYGNFTIPLNSCDPANMAATWLATGDNRDGGEARQRFAMALNFYQLNGTV  
WDFMDGWLGPFNELWMIQCNNKGI VNSLALDANNLFGPFPEIAKLTGLASIAITRTH  
LTGTIPTELF SMPKLELRLYANRMTGSIPPEIVKATKLESLRLETNFFHGELISEIGAV  
STLTDLNIGFNDVQTIPTIEIGKLNKLYLRVSNNALSGRLPSEIGRIDALEVLAMTNNL  
FFGSI PSYFGLLWNLDRFRITGSGVGGFLPTELALLSNLERLDIAISNFHGTLMTELGQL  
TNLFKFSLHDCDFSGPLPSELGYLWNMTRLQMKNNQFTGSVPRHWGRMAELEQLTLEGNQ  
LSGTVPIEVCDDLNDKLGQFVVDVCYNRRRTGFGFDCEPDCCTLCRDT

>comp4772\_c0\_seq4; 560 324 2153 LEN=2734; translated  
MSSANSYGEYEPYGGPDDFAEFDEDYSTTNDVRDPGSYDGEDYNYGDEDEDDEQTKTNS  
ADPYKEYGNEYGTDDDDSDSESSYSRDEYYGDDRDEMPDDYYYDEDDQFYDEQDEEDR  
RKRARLRRAWICCFVMLCCLLLAIIAFVIFLITRSKDRAPEPTPMPTMEPWVPTDDDDYM

YDDDIILNPGVVTAPMAPFNRDCEESEGIEYSGEFRNIMDQCACLGEIVDVPDDVAEMRN  
LIIERVAPKFYGNFTIPLNSCDPANMAATWLATGDNRDGGEARQRFAMALNFYQLNGTV  
WDFMDGWLGPFNECLWMIQCNNKGIIVNSLALDANNLFGPVRITESTVQSDAMLELVISF  
FKSLQDALYSSHPADTNFYFVTIVGLNNRQIICVLFPTIEIAKLTGLASIAITRTHLTGTI  
PTLEFSPMKLKLRLYANRMTGSIPPEIVKATKLESLRLETNFFHGELISEIGAVSTLTD  
LNIGFNDFVQTIPTIEIGKLNKLYLRVSNNALSGRLPSEIGRIDALEVLAMTNNLFFGSI  
PSYFGLLWNLDRFRITGSGVGGFLPTELALLSNLERLDIAISNFHGTLMTELGLTLNLCK  
SLEIRMRW

>comp4773\_c0\_seq1; 1052 253 4101 LEN=4243; translated  
MGSNAAPAPAPAATPVKDSEGKTKPLQRAKPAHEKRTWPEDYDRDAPEGFALSFGRMTR  
IWNNTWYSYMNVLVSKGAAINGASAKQKHNRNSNEPNTNIAEDSHDPSSSSDTDKNDDDG  
AVEDIHLTSDDLWPVPRKMQSTRLVNMFESNWKNASRTRTSPNATTTKRQLMKTWIKIAT  
PTFLPAGIFQFVSTVLVSVMPVLVRRFLSILEKETTDGSSILREGLSWAILLTVMTLLNG  
FATQRYRHQSVKGTGIALRSVAVNMVYRHVLMVLSRGRKRLTSGEINNLVAVDAQKLYEVT  
QEGHLI WALPLSVVLVTVWFLCLVMGPSTLVGVVVLVGFPLIKLVTKRMTEARAQRLKYS  
DDRVEITCSMLLGMRTTKLNGYESKYEARIKEARSKELRWLAKEQAWWATTLMTVSSPI  
LAMASTFATYVLTSTESEPRVLTAAITFGVLLLFAGLRFPINFAGLLIGSAAQALSATRR  
ICAFDRPLREGGSRGEEQDPTGSLRLLLESDGDKDNKDIPILITNGRFRVGVAPEDLTES  
SSIVNDNETDSNVNNSDAAA IKNITDQSTSLGENYNNNIENGNRDNLSFTVSEFNFE  
RGEVMVCGPVGSGKSTLLNGILDEAEALGPNWSESATASTYSTPMVQKNGRISYAPQDP  
FILNLSLRENILFGSDFDVERYNRVLDACALRPDIEQLGGSDLVQIGERGVTLSSGGQRQR  
VSLARAAKQPDSSCILLDDPFSAALDSGTGKIVFEQLIAGPDALLRDSAVLLVTHASHFI  
SHRAVDKVLVNMVNGRNEFLGTWEELTHFNDEEHDDQTRRAVDHIQSQIRENTDGHNHST  
ATKEGDSSSNLDNKNKSSHHFQQQPESSSINDNKIMQQELREHGLSSMKTWILWFKR  
AGGAWFGMTIFFFLFLDRFAYVAVEWFLASWTSAGAYEPVTILGVDFDAQSDGLQAQAQYL  
KVFASIIIVSLLATAVRSEFAVTGGVRATKNVFNMSLESVLSAPMSYFETVPMGRILNRF  
TYDTDVNDVTLTQKISMFIIISCSWYVASIAVQVAIIPWSALALFPVSMLYLLFMHYRRLT  
GPDQRIDALSRSPIQSMISECLEGSTSIRIFHQKVNFRKFEIIVDVNNSALLNYISVQ  
RWLSLRMEILGSVVMIATVLLVCLNETMRLSAGLAGLLITWSANFTITLNLVQTFSET  
EAAITAIERVDAMADLPSEKSRETAKEFLPPTSWPEQGLLEFKNVSLRYREGLPLALDNL  
SFAIPAGKTCGIVGRTGAVRLL

>comp4773\_c0\_seq2; 1210 253 4761 LEN=4862; translated  
MGSNAAPAPAPAATPVKDSEGKTKPLQRAKPAHEKRTWPEDYDRDAPEGFALSFGRMTR  
IWNNTWYSYMNVLVSKGAAINGASAKQKHNRNSNEPNTNIAEDSHDPSSSSDTDKNDDDG  
AVEDIHLTSDDLWPVPRKMQSTRLVNMFESNWKNASRTRTSPNATTTKRQLMKTWIKIAT  
PTFLPAGIFQFVSTVLVSVMPVLVRRFLSILEKETTDGSSILREGLSWAILLTVMTLLNG  
FATQRYRHQSVKGTGIALRSVAVNMVYRHVLMVLSRGRKRLTSGEINNLVAVDAQKLYEVT  
QEGHLI WALPLSVVLVTVWFLCLVMGPSTLVGVVVLVGFPLIKLVTKRMTEARAQRLKYS  
DDRVEITCSMLLGMRTTKLNGYESKYEARIKEARSKELRWLAKEQAWWATTLMTVSSPI  
LAMASTFATYVLTSTESEPRVLTAAITFGVLLLFAGLRFPINFAGLLIGSAAQALSATRR  
ICAFDRPLREGGSRGEEQDPTGSLRLLLESDGDKDNKDIPILITNGRFRVGVAPEDLTES  
SSIVNDNETDSNVNNSDAAA IKNITDQSTSLGENYNNNIENGNRDNLSFTVSEFNFE  
RGEVMVCGPVGSGKSTLLNGILDEAEALGPNWSESATASTYSTPMVQKNGRISYAPQDP  
FILNLSLRENILFGSDFDVERYNRVLDACALRPDIEQLGGSDLVQIGERGVTLSSGGQRQR  
VSLARAAKQPDSSCILLDDPFSAALDSGTGKIVFEQLIAGPDALLRDSAVLLVTHASHFI  
SHRAVDKVLVNMVNGRNEFLGTWEELTHFNDEEHDDQTRRAVDHIQSQIRENTDGHNHST  
ATKEGDSSSNLDNKNKSSHHFQQQPESSSINDNKIMQQELREHGLSSMKTWILWFKR  
AGGAWFGMTIFFFLFLDRFAYVAVEWFLASWTSAGAYEPVTILGVDFDAQSDGLQAQAQYL  
KVFASIIIVSLLATAVRSEFAVTGGVRATKNVFNMSLESVLSAPMSYFETVPMGRILNRF  
TYDTDVNDVTLTQKISMFIIISCSWYVASIAVQVAIIPWSALALFPVSMLYLLFMHYRRLT  
GPDQRIDALSRSPIQSMISECLEGSTSIRIFHQKVNFRKFEIIVDVNNSALLNYISVQ  
RWLSLRMEILGSVVMIATVLLVCLNETMRLSAGLAGLLITWSANFTITLNLVQTFSET  
EAAITAIERVDAMADLPSEKSRETAKEFLPPTSWPEQGLLEFKNVSLRYREGLPLALDNL  
SFAIPAGKTCGIVGRTGAGKSSITVALFRLVEVESGSMMLDDVDLTTLGLSDVRGRGMSI  
IPQDPFLAGANLRECLDPFGQRTDDEIMEALESVRMGRSSYSGVAPPSVEVVLSTKLEEG  
GSNYSVGERQLLNLARALLSQPKVLVLDEATASIDGETDAFIQKMLRTRFPNTTLVTIAH  
RLNTIMDYDYVLVMDAGKAAEFDAPAKLLGGGDGDEKGIIFSQLV DATGAESSKALRQMAK  
ESW

>comp4774\_c0\_seq1; 537 286 2475 LEN=3671; minus strand; translated  
MSSSFNATTRNGEAAKSYTSSQQNQKQEQTSRGAELIPKAALTKYPPAPRDESEAEASFR

RQAIDKAHESSAISWLQHIENHDADARYSRKLRHRTSSKDYSASFHSICAGTTLQKRRC  
NSVISTTPKRITKREGNRPSASFVSTSDNRGSNDVEMVSDVAAFDGLPSKRGSGKTRDM  
PKHKREWNQASWEKYCTRHIQLLVSLAFFSYLGEFSRYSIDILFGGGCHSPGTIGWYRV  
GWHICTTDPGTTESTGGAFFVDLPTNVIGCFMGLLVSGDGESIAVNLPVAALGRTCFQ  
NWWVTHVGLRTGFCGSLTTFASWNTQMVKMVVGNKGTALGYSQVVSALWGYIVGLYAALQ  
SYQFGAAIAFALSRCFNPFLAREADKI IDKKAIGVLINRDLPDFERRFLHSIFLEESERH  
HHNDTNTCDEPRENLAKYSSGYESFYGDHAAHLRTWKETTDYRKGAGMQEESFVAELQ  
EIEKMLLVDRIEPRQELLNVARDAWVGALRNWAEALDEEEAKLAMRNTGLEGNNDGDD  
GNFDIETKLEDAYFLASHSSPIEFALTLSLFLLLTTGLLLLGFVYYSNPTESDSVWRSYR  
TQCLAALLSPFGTYSRWYLSRLNGRIRHERWEWLP IGTFLANAMASVVSALMAAFVGLN  
PEANPLAVVCKAIQGGFAGSLSTVSTFATETVGLLQALPRAFWGYYSFGSMLCAFVLG  
VASYAWFVV

>comp4775\_c0\_seq1; 276 252 1073 LEN=1073; translated  
MFFHKILLSVAGLSLLASSVSSQQIRGHPQPAARNLQVPEVCVPEPIRTLANGTDVFAE  
KKFLVVFLAEPQNRNFIDVLALQKTAPTAYDSDVDCSLSEGSIRSLKNCTVVTRNI IYE  
EASLLMECLEYSSNSLDGSSFVVTKNSYTDQPYCGCQCAGDDGVSFQAFKQPNGTCTGSC  
PCSGPRPECNCPAPNNATLVENWNTLYQNASDALGVNVTIVNATDVRVLQNCVNTFNITY  
NATSVXPSRAGDEPAHPRSHPVAYETAHQETDEAX

>comp4777\_c0\_seq1; 500 1 1094 LEN=1135; translated  
XNLNFVVTKSTIKNIENMSAPIESGSILGMGNPLLLDISANIGQDVLDDKYGVEMNSAILAE  
EKHQPLFKELVEKYDPQYIAGGATQNSIRVAQWMLTAANKPKHTAFFGCVGDDDETGKTLE  
KCAQSDGVHVHYMKDAETPTGACAALIKDGERSLVTNLDAANNFKPSHLESDEAKQIIDL  
AKIYYSAGFFLTVSVP SLVEVAEHAANDKTFCLNLSAPFIVDFFGDQMATAMPYADFLF  
GNESEAAAYGKKHGMGEDLKEIALKVAALPKKNEKPRTVVFTQGSESTIVAHNGTVTEY  
AVEPLAKELLVD TNAGDAFVGGFLSQLAQGKDMEACVKAGHWGAKYIIQTSQTQLAKAC  
DYSP

>comp4778\_c0\_seq1; 434 97 1419 LEN=1877; translated  
MPKIRRFSSRQNGRPEDGGVDDIFADPSQPLPDAPIDRRYRRNQLYKRGPNNDQQRSS  
ATRQGTSTKGP RRKGRNQSQRKHLGRNQHRRNANGNSSANHLHQPTGENVTDRKNPL  
YQPAIDGGRSDPLQRKQPQPHPNRKKQPSNRMPRRKAQSRQNNQPTVTTDRGENDDHAK  
TLLWDSPLPCIPLWQEEKMI EFMFQRNGKKERGMMDKPNFLVTKYKKAVERN LAPSKDER  
MSLPQVLSLRRHHIKLLNPPKSMQGLGTVDVIRE SARIFEVVI EEF LKRSSVDYLTED  
DQKRKARAE GASLAVTPDFLLRTPVLLRKRIRREKPRGKQIVLPGERTIHWIEAKMYGAS  
SIPHGSTGAVGSVLAQARKYVDR LGEGAF LFMMGCGERLAADLNDVGVSVLDCFGNTVSL  
ERVHEHQRTWCANGEGVILP

>comp4779\_c0\_seq1; 131 1 1325 LEN=1325; translated  
TQHTMLLVECARARAIRNLPVGTTEALKEYLANIKAVEAAERQKTVERTLGILVCAPHL  
DLPQAMHCAGFREKECSDPGLLEKVR SAREESGPEPLSPKR RRRVEIYRQVAALAEALAE  
KPDPWKLT YGDQLTKKKVVAHIKATLLYEAGGLGAPSVCHLVYREHGALPSEDSIRKSCR  
EGRAGQV PRLWARKWSHLAPPEIEDGDAPCPKKARIEADERETRHA AAHIEATLLLESEK  
KRPNGMGAKKVVAQINEEYGTSLNAGT IASYVQOGLAGHPKNTKAKGFPIPPRPLVRP  
EEQAAEERARKDLEETRIAAHIKATLLFEAEKLLPCGMSSKQVVDQV NREFGTKLNARTI  
ARYVREGLAGKPPKKNRPS TIFLPEIAQHVLLRRLNELSEQASQGGGSTHLVRS AETQL  
AVGFIPQCHHFYVIQYSDFGSX

>comp4780\_c0\_seq1; 515 126 3019 LEN=3225; translated  
MTQLRNLLLGASVLVGIDKSDATFDKRGASLRGKARKHNGRKLVS EDANLGEFFPFTQWG  
GCGATLIWGDILLTASACDEVKSKTVLVGAHRSNEEQGGSV KRKIVSRHIHPEYNQENLL  
NNFMILKLN ETVDVQTALINATIAIPTDPELYGVGF GFTPSLVHVNEIYRSFHH SVLDT  
SELLQSGNDQGSVLQKAKMTIIPHAVCNAYDQYAGFIDDGSMICVSDDDATCLGDNGGPL  
CAMIDNKCLQIGIVSFGDSCSTRLRPTVYSSISAAYGWIEKMICHVSSKPPSSCQT VVKI  
REPYPGLSE SFTGRSAHKNSKELPLPSTHLESKVPTDYQSFIPSNKPSPVSSLMPSD GGS  
LAPSEKPSFHNNKPSADQDNRS LRKQAIRYKMPRYPRTDLDVTVRKEPDGIHLFFWRF G  
SPH SKLGLCEGDCNIDDDCAEGLYCYHKDP SVTSVPGCVGTDTSRTDFCTIKSDQNSSVH  
DESSRIDETA KLPVLSLKKLGQCEGDCNSDEDCAEGLYCFMRDGNVESVPGCSGVDNSRT  
DFCTTKTVSGTNTSTNGPRI SNQVLIGDGAMPMLFVYPENPPDISNLPLLACQGD CDNS  
DCADGLICYSRHGEETTVP GCSGESTQXTDFCVDPAYIMSPTFEPSRKASGPPAETAGRS  
ENEPLEPTSPSRTWNAIDDLFANAAATQPPTLTPTS IPTQFIEETLAPTIPSPSPLIP  
TSTIASPSQSQSSVSITVAIFFDPWPEEVS WKIESEEGDLITAVTAGSYTSTIDQTFELV  
TVKPGKMYRFTIADAGNDGIAGIGNLYEIVMTENPDIMLLDGDGVFENGRTKMFYVPNTE  
EYPTSAPTEPTISAPPTFNNTVNVYLTIVFDNWHQETSWEITAADDPTVVF AEAAYD TYRG

GEKITNEIPLPPGQEYFTFTINDFFEDGIKDG EYLLKSADGIILFEGNGDFGASRNHTFTV  
PENP

>comp4781\_c0\_seq1; 763 1 1078 LEN=1228; translated  
XEVEGMMMTDDESSIEVEPTKMT EEEAAKAEAKAKRKA EKKAKKKAKKEKKKKKKKAKKE  
AKRIAKEKAAAEAEAKTSGNEDPPAEAKVLATAETNTIPEEESANKSNVTAEVDDKMAVG  
EEAAGAEAEKNTDEEAAERTQADNAAIAEAEVLLAKQLDEVEAEVIDAERLAAKEMAEVE  
AKLAAAEKAFAEAQ RSEKKNLVNTNDALKRDDVHPTIERPKLAAFAERAKSFKNRISQEL  
EDRKERIGNNESAEQEPNGRSWRGRLSQGASVESKNEQTRGDESAEQQLKTSTFANRAKN  
WRSRFGRGANNNSTDSTVASDGNSEATAGKNAINAFPKVLFNDGGESNSVKEPEIGSI

>comp4782\_c0\_seq1; 462 163 1845 LEN=2137; translated  
MSSSNVVKVRKRRCRREMEDASDEQSNNERNVQGDEANRDNQPILPLEGVIACLSGFAQD  
RKDHLHNIILSLGGRYTRELNL DKNTHLITEAAQGA KYNLAVSSDPKSIHIITSSWLSST  
MESGQRASEMAHVLA STMDSSEGNQTQTRSSSKSSVLSLMDNALDEVVAPCDRLSR SFLF  
EKFQFFLIGFESSPELKMKTSVLIRRGGTIHWDMNEEISILVLSDACDDAVQKAAKIVT  
SHHPNIPPAVSPFWIIESYKGITLQPTANYPP IRTROPKLR SNEGQIRSSKRASEVTSRT  
TSLASTASNVSIFRGCLFSSVRTSPTVELGSSLAMNPIIEFNQKEIDNLIKAHGKILCT  
KLLDALRIDA EKSTSEIKRKCHVVCWGGSPPRLD TNPLVSQLKRHNLC ELILVTP IWWQT  
CVSVKRRRLRPEYMPVVFVPQSWSMKSVKLRSEE VGGKRRQHSDAVTKLQISLTFGQSEK  
AMLINLIRAIGGVYHGNMSSATTHLVFKNTATGLKQKKAIEWGLRVVSVQWLYHILEHGY  
RGVHKDEVGCENRFSMGIDS

>comp4782\_c0\_seq2; 408 163 1961 LEN=2253; translated  
MSSSNVVKVRKRRCRREMEDASDEQSNNERNVQGDEANRDNQPILPLEGVIACLSGFAQD  
RKDHLHNIILSLGGXVRITIFIKFDIKPTAPTQIVACQTLALYSCAIQKLGKRYTRELN  
LDKNTHLITEAAQGA KYNLAVSSDPKSIHIITSSWLSSTMESGQRASEMAHVLA STMDS  
EGNQTQTRSSSKSSVLSLMDNALDEVVAPCDRLSR SFLFEKFQFFLIGFESSPELKMKTS  
VLIRRGGTIHWDMNEEISILVLSDACDDAVQKAAKIVTSHHPNIPPAVSPFWIIESYK  
ITLQPTANYPP IRTROPKLR SNEGQIRSSKRASEVTSRTTSLASTASNVSIFRGCLFSSV  
RTSPTVELGSSLAMNPIIEFNQKEIDNLIKAHGKILCTKLLDALRIDA EKSTSEIKRK  
HVVCWGGSPPRLD TNPLVSQLKRHNLC ELILVTP IWWQTCVSVKRRRLRPEYMPVVFVPQ  
WSMKSVKLRSEE VGGKRRQHSDAVTKLQISLTFGQSEKAMLINLIRAIGGVYHGNMSSA  
TTHLVFKNTATGLKQKKAIEWGLRVVSVQWLYHILEHGYRGVHKDEVGCENRFSMGIDS

>comp4784\_c0\_seq1; 544 1 1871 LEN=2162; translated  
XKNTNSCQNGRSFAFSYTSKIMRPSTSSSEASEQAVIGSDNSSLGSDSDSEEGWGFLGGL  
STESMASANWEKKEEEGISNTSGRINEPIESKNVVS VLPMGSSSREVPSYEVTGGESKQC  
GATAATSDNIVEQKISQRAFCLSPNGQILKPPVQILDRSCEQKGNITIATSDIDKGQVIF  
TEKALLGIQVVPSTTSLADTKSGMYAVRSCQLCFRSLESASCLSEGLPFSELWPIPEY  
DDPTTMECVAIGDPNEPAVATHEYTRTKSGILT CRDCGVMFCNRF CASNH SKVVGDCCRC  
TRAIKGVVKSIVSGERERRQLTEQYNNLDT SNSD NSGICNCGAEQEDFGDSEALVDIDP  
VLILAAMFVAHVHVCRKNGDGFRGNDGDNEVASDTL FYG LCGQAEDVASLSLGSASIPS  
SFSDDGDQNSK SPLPLLKEYNAIADAIELTEMERRSSSLCSLQQFQKIAAIAQRNSISLA  
TGSPFRYYQGMIRKTTGGRGSSRQQQVVS DVARLLGAKDGKLT KDMDRIVEEKCVVKMG  
IFTLTARMNHSCDPNAEIRAQ EYVDCNVDIVAKKNIRRGEEICISYVYLGQNP SNSVIAR  
NRRQRELRSRYLFCQCSWCSRC

>comp4784\_c0\_seq2; 547 1 1829 LEN=2352; translated  
XKNTNSCQNGRSFAFSYTSKIMRPSTSSSEASEQAVIGSDNSSLGSDSDSEEGWGFLGGL  
STESMASANWEKKEEEGISNTSGRINEPIESKNVVS VLPMGSSSREVPSYEVTGGESKQC  
GATAATSDNIVEQKISQRAFCLSPNGQILKPPVQILDRSCEQKGNITIATSDIDKGQVIF  
TEKALLGIQVVPSTTSLADTKSGMYAVRSCQLCFRSLESASCLSEGLPFSELWPIPEY  
DDPTTMECVAIGDPNEPAVATHEYTRTKSGILT CRDCGVMFCNRF CASNH SKVVGDCCRC  
TRAIKGVVKSIVSGERERRQLTEQYNNLDT SNSD NSGICNCGAEQEDFGDSEALVDIDP  
VLILAAMFVAHVHVCRKNGDGFRGNDGDNEVASDTL FYG LCGQAEDVASLSLGSASIPS  
SFSDDGDQNSK SPLPLLKEYNAIADAIELTEMERRSSSLCSLQQFQKIAAIAQRNSISLA  
TGSPFRYYQGMIRKTTGGRGSSRQQQVVS DVARLLGAKDGKLT KDMDRIVEEKVRYRLQT  
SIADAIHCAGGPTGVREDLKRLEPVIDSSSFLTIIFLNLVLYLLALWCHKIMRSAVRCQ  
NGRDIHADR

>comp4786\_c0\_seq2; 311 132 1703 LEN=1888; translated  
MAMATTFNSVEQRVNDLLAPPVFNEDDTISKELLKLSLKERNALEEEIHGVRSLNPDET  
HLVDRSLRDFDQKLLLVAAERQRTREKKILTLHGFDNSECFKSNDVLRNVRIYQNCNGQ  
KSKITIPPLCDCYVNDPAIRLVFLRGELFDVEKAVRRFINFLELTSELFGDFVAHREIRI  
TDFRTPEERTALRNSRQMLPFRDRSGRQVFCIGDCGTGLPAKLRFKIRMMLFWTTTKD



IQTQRKGLVFCWPSSSEILSKLSKSDLLYRQKFMDARPVRFVSWHICCCQDTPMCRAIGTL  
WVSSRPDVRVCTKVHIGGLIETQYMLHGFGIPLDIIPLSHTGTIKTANHIQWINALHYK  
LQEAEGGEEIVICPGFHDVLSRKGQRYASHPGNMKFRRELVQMSDLHERVPRTQKFQVTQ  
SVLFKVEILGGRFLEWKSPSNVWIVTKDRKSIHAKIAFAFREIKRRKRLAAQKTRTSNGN  
FNDDSPDLNREEVAGSAVDYSMQGYQDQKCFLFCRESAVHSNN  
>comp4788\_c0\_seq1; 419 1 1246 LEN=1390; translated  
XPTFEDQQEDAMDSANNNNDNDNNNNNGDEIAEPAMHASNGYTSGDVVKKLKAVLSLMAS  
PLTDEVGSTRSVLSGLATIFLAGASIGLVTPGNPVLSPPYRSVSAAGYVYFLAWSVSFY  
PQVISNFKRKSVEGLSPDFVVLNVIGFACYTAYNASFFWNTTIQEYKRRFGPDAEITVQ  
SNDVAFAIHALVLSFVTFQCIIYYNYFYCPGPTGEIDRRTRTVIQLSRPVLAVIVGIVAI  
CVGYPALVLLGKSSSSSKNDNLDVLLGDDDALARFNWLDFLYLLSYIKIFISLIKYPQ  
VVLNVRKSTVGWSIWNILLDFGTGGLSDLQLVLDKANAKDFSGITHNKAKLALGSLIV  
FDIIFLVQHYCLYSSAEPTIRNEQNEPLLPTTDSDEGEVQEVSEEEQSQPETIFV  
>comp4789\_c0\_seq1; 573 249 1574 LEN=1766; translated  
MNAEGSELRSNDPSPMSNAGDGGVRTPTIDFDDWAVDPFSLSKRIDVFSFAGVEEDAPN  
ADSNRASFPSSGAVVGNKSTLTGTEDKKTLVANQKSRKRNHAAQSQGKQATTVSSKNAS  
SAKKRSDCIPISRRKKKPKGMPKRPLSAYNLYFQAERTNIIASQQAENGPRIGFEGGLKI  
VGKKWRDLSSADKKEYEKLAEKDSERYRREMDAYQKKKAKRFEEEEASRTPVVSIPSS  
TSAQAAPFDLRFPKRQGSIQIVTIGGEGVGNVAFAPPEMSSVSSSLPPGTTTIPYRP  
AHSAHVEQPQSRHALQQNSILEALNIASAVGGAVTRVSPPNYYPHQTVPDNGDLPPYTPV  
HRNDNYPMQPGMEVVLADRNGIDRKYRVQYTCYSMTRQNANKYIESLTRSSNSSSTTPAP  
PPPPPVATTMGANTEYGVWGV  
>comp4791\_c0\_seq1; 269 63 455 LEN=740; translated  
MIRATPFLLLAALAASANAASCPIPAVMPVTGDTCSSSGQMCHYAQKPDGTVCGDCDFWT  
CNCVGGSFFCSCSGVGCNDLKTDEDSMDLFFNNVTSDLVEDFEMDSGGFVSSLGLAASG  
VVLAATVAGL  
>comp4793\_c0\_seq1; 243 1 833 LEN=1182; translated  
XEPNRTEPTETKQNKQSMVSHCFQHRAIAGIALLLGRLSASSGLATPRSFPKLPDLG  
PWEEAAAAPLPGESRRGFLGAALGVCLPLALGGAPSASLADEYGRETEAPTATGESFEIC  
TKRGPLGACQKTEVRTASNDNDKAEKYFRQPTLVRRKDTEARTAEATEGNVLIERLKKQ  
SEENSEKNELLVYQRTLLNDSSASFGPFDGQVLIILNEDGRGFLLANPQAMRLKKAGLIE  
NNQKKFVRQPTKEELDAALAPEPAGPGFLDRFLGGGP  
>comp4793\_c0\_seq2; 163 316 459 LEN=808; translated  
MRLKKAGLIENNQKKFVRQPTKEELDAALAPEPAGPGFLDRFLGGGP  
>comp4794\_c0\_seq1; 581 1 2270 LEN=2636; translated  
XRNREKRDTRKSGSMKASAGKSRCKYLLILLCCGSYQLWMGFHGLGTNVPTNQNNDIYSDQT  
EVSPFWRQQRQEQHDRNRISRVISNQSARGYNQGFDIGTKTVHSGSINGTSSAIQLRPT  
KVKDTAPLNDTATKLSKEDHEKNNNSTDIETRITLDLEPPVDTSELSVEKKGEQEKTSNE  
FGNESNEDTRKSNDEPAAPASDQSIDDKFDYDGFSSDYTNATEQEEHPTAGFIGQDAF  
SGSWWQSKEQFLRYEEVENENPPSPEGASFDVMDINDDNMRVTRDWIDLNVEHMSRWFRG  
LLETNRHNSNPQPTLERILEIFQNYVHSEDRLFWMERLEHESDRAKHQHNNHNIHNFDAQD  
WLEVSQSTIAVIAIMPYGQYGGAEITKWSLAATMMSLVQLGVGRIIVSGNQDSYDQQSFV  
QEAWQEVLEVTKSWTTSKQKRMTHSFCSCDKEILTDKANATEGENKTTATATTASLVES  
NIPYAALRRLRYILLHRDDEFKAGKDKAEAIRRCWAGSSKGGQNKTDSDSDPMDQWKYV  
FLGEPDLIILNTRPLALPKLAGALTGGGVLAPHRLQPLPHASDFGVNGLDLDLKLKLLIPNL  
PPHFDNIAQIDQYERISNDDTHSSGNHGGDIHGHTKTRLSNHACCDAGNQKPYRQFETC  
DSWWWNCAFTALQYYDDNHYEGALEALVESNNETYVLDLHKRHSVYPMVRLKRGTVVFA  
GGEGRMCNPSQLGTCKRQDKTERNEMKENQSKKNR  
>comp4795\_c0\_seq1; 87 201 641 LEN=923; minus strand; translated  
MLSEQGSSRWDEEEEEEGTPVPFGTGLGSPKRSPPAPFSVGFRSPHGARSRSPHAGHPS  
RDRSDSSERLGGATPSSTTTGTPWASVPRVAEGSRCSGEPFPGRCLREPHPWGGGQLEEG  
PDLRELVARADLVQELAAPVGPASA  
>comp4797\_c0\_seq1; 230 22 534 LEN=775; translated  
MTITYNTAQVQIENQGTGQSIRSVKVLHKYSNVYRNSLEFTGRLQPGKKILMNETVEYNTG  
FLTTCGDWWFVSFQMEDGSVYQSNPHNFRGIFDWVEQLGQKKIRDRPTGNNGLEKAACNI  
ALSILNSESTVGFKKHILRAKDSVNTIVIKKDKIIFQSQSGNSVTGVMRV  
>comp4799\_c0\_seq1; 204 119 847 LEN=1327; translated  
MGKKRADGRGSDSTLRPLACELSLHRSDGSALWKAGSTHVLAAYVGPIAPQNMNNEGVDV  
GKVSVVIKSGKADNGTYENEMGKFLTETISSCVDVSRFPRCIEVVLQIIQSDGSLGCL  
LHGAVAALMDAGVDLLYLPVATTFLVRSIQSGANATTASKVRLDPTSAAAAEERDSSIIV

LVNEQRRPERILGSHTVSGIDLDELSCVQIASKACSAIPTFWRLAIEQKLRKRESQTLW  
SR

>comp4800\_c0\_seq1; 245 1 1375 LEN=2080; translated  
XASQALPLPQTRDIALGTTIAFGLAPSKAAKDRVTRYREEQNRPAFDLDRATELDPVLR  
ESNRTESIDSNPIQFIPIQFIPIASDETESNPSGFLLAASISGLRTAEGRGTTAAAIPEV  
LASSSPGGTLYSCFLATDPGGPPEREACCGAIAGARDPGGGPSDHARCLAEMAIEVPSGVS  
LGGDPGDTARYAWAVPGDGSASAEQRLGRETVRTISPYHKTAVPVPGIETGLVVSRLGAE  
GGMHRLFHHEITLPGTPAGDSGANPRYYLYVTVPSGMFIDLDDPFEAPQGGRIEPA  
GGDASRDAGFEATCTTGPSAGTETGPAVSVFRARLHAAVCDIEQPSFASGQHLLVWELEV  
LGASKPGATERIGFATKLHLRYPRPSPDGERWIDLPAVLPVDPVGGGRIAGWEDPVRVAA  
GRDGDHDWIVAATVGACLVGVAAMVRDISGVSLWDDA

>comp4802\_c0\_seq1; 684 192 2015 LEN=2301; translated  
MASLSLPPPRNSTGVALSSTKASDVAESTEMVVSADNDNERTEDFARPAKPKSNSAAN  
NKAPTYHQCKAAADLSRLPPSERKKKKLKVPRSLKDFDDGGAFPEIHVAQYPRHMG  
LKKKKGQVASSGAGGSISTSRIVNVEVDKNGEISYDAIVKGGTNSDKTVYSRYEDL  
EAKPEDVALPSAAEEAETANRTQLALQKLLVDKLTALNKPSSAIAANANTSKDIEKNTQ  
FYKYTPRPDAPGYNPAAAQRVIQMVPAQVDPMPKPKHQHKKAPRGAEDPVPVLHAPPR  
KEERDQWNIPACISNWKNTRGYTIPLDKRLAADGRGLREHTINSNFATLSESLYVAER  
RQEVRLRAQVQKCLTMQEKDRREELRRLANQARLERSAALGEASSAKEAVSDETGDRR  
PQQSSISDEEHSDDRSQRQSNQKSNKVEDEDDVVAARQERLRKERRRERERELRQEN  
AELKKRLEKERDVSEKIALGVHTGSGGAGEADSRLYNQSAGMDSGFGAEDEYNTYSKPL  
FDRQGVTSASIYRPRTRGETEHNADSYDKLVKGATSKFQPSKGFAGAEGGADIQAGPRTA  
PVQFEKS

>comp4803\_c0\_seq1; 303 359 1448 LEN=1540; translated  
MDYGMSESVSDNIRAEIFTEDEYVPLVDGIIISQAIDDQKHLFQIDPRTLSNNTKVFS  
LLDDPYKAKMKFCLRHTFFSGPESDNGSIPINYLESILTVFFDLRAAVYVGFVVEQKEL  
FGSDRNNVTEKEGYEADGYICHPEYERMETPKEGYGPVVCICAELNQEAIDEGGGET  
LYSTPYDVVGNLPSLTTANLTIYAFFPGLYLVLGTEFWIRERYLGDELIRTVQYSVKDG  
VAAVGLTEYECITDYFCMFKTFLLADFYILPGVISGYGSVAFVAFGSRSDNEVGRRVLET  
HGLRSLQQEAEDPNSDLFVALPVTNRRPELKS VETAAATNISYKRSTLWFIACSATGALL  
SF

>comp4803\_c0\_seq2; 311 359 1351 LEN=1443; translated  
MDYGMSESVSDNIRAEIFTEDEYVPLVDGIIISQAIDDQKHLFQIDPRTLSNNTKVFS  
LLDDPYKAKMKFCLRHTFFSGPESDNGSIPINYLESILTVFFDLRAAVYVGFVVEQKEL  
FGSDRNNVTEKEGYEADGYICHPEYERMETPKEGYGPVVCICAELNQEAIDEGLYL  
GLTEFWIRERYLGDELIRTVQYSVKDGVAAVGGLTEYECITDYFCMFKTFLLADFYILP  
GVISGYGSVAFVAFGSRSDNEVGRRVLETHGLRSLQQEAEDPNSDLFVALPVTNRRPELKS  
VETAAATNISYKRSTLWFIACSATGALLSF

>comp4804\_c0\_seq1; 642 151 1554 LEN=1801; translated  
MFGWINDCTECLVLTKFGEETWQIQIKEKAGCEVEDGGFLRYKYYPDSDTVQLVVAASEVL  
GIEVDDVLFVAFGDYFIDYVQENGYSNVLKLCLGSLNLRDWSNLNSLHDHLQASYPKGFVAP  
VFWSEDEASSKCAILVHYYSHRGSLLVPLVVGIIKKVARVYFDIEIEMDQLQLQDENE  
KHTSWRITTVDPKLTAILRGEKIRTSAEKRRGHETFDGEETISTSTSTASQNRYLNAFRT  
GGNVASDLRAEEFVKRHFYNASCELYHALTLEQYIYLSKYWKVNENEEKFCYEVWVSLQD  
DDPSTWASLEDLPSKLLPEMITKNKYFGGMVPKTKYPPGEDGKPKQSVPLISVVNGITG  
KSKNLVVKKDESLLEDGIYNHPDMEGAGVKEFPPGWQQRIVAGEVEIQCDVWNEETDDS  
YHSFSLLEDLKTASTKQLYDLVPMSPDPIKIVLQCEAVEVDEEWEDI

>comp4805\_c0\_seq1; 398 139 1233 LEN=1434; translated  
MSFQHVLIPAIESEPIARQEASKAGGLTNDALSKNKAYFFEKSGGSKRAELLEKASAPE  
KKQIADRIRKQYTGAEDESSKRVQAMGDDEIVNLLKMQEQASNCEITCLTIPTPLNGQTAV  
SMYGGDDQARTKNHPYNPRATKMLACGHAFPPNSTSGDSGKPNGIYGDVVFVGRAIDDEG  
KDIWERVDLTPAEVEGDLYKQWCKIARRKGGGGGGQGSASSLSKTLQNFQNNQQQMCPS  
AAVAASGTPAIAADPANENQAKYTWSQTDDEVELKFFVVPKETRAKNVTAQFGCKSLRVS  
LSGVDGCETNELLLCDGVTWDQIDVDGSTFTLQDEPGAKPTGRELCVSLEKASGGQWNY  
AIEE

>comp4806\_c0\_seq1; 305 182 1262 LEN=1283; translated  
MDKKISSEAEFALKTAKERAVAILIDSDVTLQESLQELERARELAGKAGLSIDSSIVKPV  
DTTSLDAGVPSTTSNWANETTCGHSNTDHIVVTTGDPRLDRIAELKRNLRRHRAMQPED  
RGDDRWDKPKLPGERRRIVREQDKDEYPPISGWCVFINQMTVKMRHDPNERHDQT  
KVVQQLAKIWRVGMKDEREYFTKFGTSPFSVTSFKCWQRLCSFRFARTVNYQNRQFFLP

HVAADDARKEYEQVIEYRATGSYKPSKHFKRLGNSSVWVRRDKPSPLEEEICSYESI QF  
PKRPPELDQYEYEEREIRGILKRKLLKGLLNDDGETWKEGVDFEAELELERKRRKLLKI  
>comp4806\_c0\_seq2; 357 182 1147 LEN=1168; translated  
MDKKISSEAEFALKTAKERAVAILIDSDVTLQESLQELERARELAGKAGLSIDSSIVKPV  
DTTSLDAGVPSTTSNWANETTCGHSNTDHIVVTTGDPRLDRIAELKRNLRRHRAMQPED  
RGDDRWDKPKLPGERRRIVREQDKDEYPSPEPISGWCVFINQMTVKMRHDPNERHDQT  
KVVQQQAKIWRVGMKDEREYFTKFADDARKEYEQVIEYRATGSYKPSKHFKRLGNSSV  
WVRRDKPSPLEEEICSYESI QF PKRPPELDQYEYEEREIRGILKRKLLKGLLNDDGETWK  
EGVDFEAELELERKRRKLLKI  
>comp4807\_c0\_seq1; 836 118 2750 LEN=2843; translated  
MSDGSVDDL RQKGNHEFQKGNLDNAIAFYTSAIGIASETDTAAYIVNLCNRSACHFQMD  
DLEKAKVDAELAWRASEESNVKSAYRLAKTLIGLKEFESAIVLKKALDIPDLKETEKKS  
LQELGRNVLT KMDQPSGEDETSIRFAQRPLSIREFKK GKSLGVGNFSEIVVVEHKVTKEE  
FALKILEKKTAA DLAKRQHPNVYNEIAMERRVLLQRVPHHPNI INMYHAFRDFNNLYL M  
DLHNVPDLWAQLRYNGKMGVAPGSQVRRWMMQLVDALEHLHLHGIVHRDLKPENVLLNK  
RNHVVIDFGTAKDLIETDLNGPEFVGSTLHRTLRF SVLYCSLLFLLFRAFLIRMDTQIA  
QIEPEQSCSNQCP SLSVASLHNAIQFQLHLMQAPDFMAPEAVTGFSGMPNQPAQA MEHG  
AAPSTAATDLWALGAMAYILHTGSTPFWSPPYLTF LRIKRGLLPRNTWGI PDEDAWDFI  
SNLMRVEQNDRLGADCFEVEESGKVHVKGKGYDVLRSHPYFAKTDPGDESSVLP SLQDLCV  
RACAE LAKQDAMDLDVCDRHPPGDGSSHDLERLSVRQ RSLVCHVLDKSKAFSRGDETRIF  
QRFFASETDSL RARVRPASRDFVGLTQMNDDEYKPLTGRGSDDPYATKIEPEPTKIAVLT  
NPMLLGAGGV SPEQE KAYLKGWKN CIAAINKKRPRAVVCAKAI PPKFWKFLARIRDSIH  
VLWNDG SVHYSFWLNGFQGLVLQSSGLTEESSPQMLWLREQMEQARMAKQQLFCFCDCDP  
GDLSP IVQKRLARGRVLCLSGLSNQ TAPFEREVCYSANETLDDDT SVKSTDSTEDDEDDGS  
TMRVYGTSENGLRWITVHERDEWHSEFEAIDVPSAV  
>comp4807\_c0\_seq2; 882 118 2553 LEN=2646; translated  
MSDGSVDDL RQKGNHEFQKGNLDNAIAFYTSAIGIASETDTAAYIVNLCNRSACHFQMD  
DLEKAKVDAELAWRASEESNVKSAYRLAKTLIGLKEFESAIVLKKALDIPDLKETEKKS  
LQELGRNVLT KMDQPSGEDETSIRFAQRPLSIREFKK GKSLGVGNFSEIVVVEHKVTKEE  
FALKILEKKTAA DLAKRQHPNVYNEIAMERRVLLQRVPHHPNI INMYHAFRDFNNLYL M  
DLHNVPDLWAQLRYNGKMGVAPGSQVRRWMMQLVDALEHLHLHGIVHRDLKPENVLLNK  
RNHVVIDFGTAKDLIETDLNGPEFVGSTLHRTLRF SVLYCSLLFLLFRAFLIRMDTQIA  
QIEPEQSCSNQCP SLSVASLHNAIQFQLHLMQAPDFMAPEAVTGFSGMPNQPAQA MEHG  
AAPSTAATDLWALGAMAYILHTGSTPFWSPPYLTF LRIKRGLLPRNTWGI PDEDAWDFI  
SNLMRVEQNDRLGADCFEVEESGKVHVKGKGYDVLRSHPYFAKTDPGDESSVLP SLQDLCV  
RACAE LAKQDAMDLDVCDRHPPGDGSSHDLERLSVRQ RSLVCHVLDKSKAFSRGDETRIF  
QRFFASETDSL RARVRPASRDFVGLTQMNDDEYKPLTGRGSDDPYATKIEPEPTKIAVLT  
NPMLLGAGGV SPEQE KAYLKGWKN CIAAINKKRPRAVVCAKAI PPKFWKFLARIRDSIH  
VLWNDG SVHYSFWLNGFQGLVLQSSGLTEESSPQMLWLREQMEQARMAKQQLFCFCDCDP  
GDLSP IVQKRLARGRVLCLSGLSNQ TAPFEREVCYSANETLDDDT SVKSTDSTEDDEDDGS  
TMRVYGTSENGLRWITVHERDEWHSEFEAIDVPSAV  
>comp4808\_c0\_seq1; 581 298 1781 LEN=1913; translated  
MAKPQPEKPPRKNVEKYGNNSSSSSHVSSSESNKLRGHDVSIYPSKSSKNPSRDGSRDE  
YDHDHHTFATATTASATISFSNSEAHSIASEAGMEVVMSSNQSEMERASPVVEEYKTHSFP  
AGKXHFYSRQAIFIRVVGSGAYGVVISAKDSKNTDGENVAIKMVPKAFNDEIDAKRILRE  
IKLLNHFQHENIISLVDMMPPTARYLED FHDVYVMVTDLMETDLHRIIYSKQKLSIDHAQY  
FIYQVLRGLKYIHSADV IHRDLKPSNLLVNSNCDLKI CDFGLARGIREKNTEGQGGTMLL  
TEYVVTRWYRAPEIMLACHEYSKAIDLWSVGCIFAELIQRKPYFPGEDYIDQLTICEKL  
GKLQDKDLDFVTSEKARFMRKLPKTPAPLREQFP SAPADALDLLRKL LQIHPTRRIDV  
EDALSHSFLSQLHNEEDEVAAEESFDYSFENEKHLRLRLQELIWREAGHFRPSCLP VAPS  
RNGGSTRSNRRRDP  
>comp4809\_c0\_seq1; 361 20 1162 LEN=2024; translated  
MVGFRPLGWMGISTAVTLVFLLV SINALGNNGSGDLSSSYVSVRALDNYGNAVQLSHAKEA  
AQRYGRSVVVAVVDIVHDQNNNSTGKQPEISRANEHKEHQTESVEEFHSSFLMVISLGN  
SPILHPIQLPLESDPTSLLAICFTGVKGDANWLLQQIQKYAADVWERYGTTVMSVPAVSH  
VVARLLGRFAAQPEDREWQSSGLPGKHSDDDHQSSWSRPLGVQTMILSTGVQDVQKPK  
LLIVEPSGRVLNPLARSASGCVSLAAMGKESDKIQARLSRLISGKEQERKTGIGPFSFSS  
STRDETQTSSWEDIPPTYERCDSLIRV LLEETTGSNTN NIGSQQNNGGGEIMVEGYSLD  
RGQIERQIFRYENANTFVPL  
>comp4810\_c0\_seq1; 706 149 2231 LEN=2307; translated  
MLVSSKVM AAFLLGAVAPSTTNAFVTKASSASIQRQNDVSLNVL PPLIIGPMLRKMKEEK

AKKNAPMATEADLQGQAPGLRVGGSTWKWPAVWPYDQNFPTPTEDI PKPAAGQONAMAQMM  
TGGAPVPPQPQVIEVEKLDPIEYWQVEKADTKTEMDEEAIAXIETVSIILDSMLVVYDYD  
ATRIISIDGLVKTHTDXTVPVHVQLSVTSHYGFYLDKDGMSVLELGAAEESYLPDGIKLSR  
HVGVLSDKLMGENPSLTDKLIIVDLNKVIKDGVDVSDDELRLKLAEEPFDIIMANTAEFLM  
HPREVFKTAWFLLKPGGECFNAFGTKTAFGDKFERAQTRMWRDYNDDQHMWVAGSFYQFS  
AGDGWQNVRGFDISPESAKENFGETGPLDFLNNQKDNNIYVQATKGYQDDSIDESDPA  
KSINSKMWMLPTLEDRDKKLVVPRLGSRYSYTVLKNPKRKDAIRDHIQYLPKIYEALIKMDA  
FAFTFEMQSOLAADLVLPDFDANDEQIKALKEGLGLRTPSKEFWEPVQQLTGAMDINDK  
INLLSYIVPRFGSGDEKQEAALLAYASGLKPTFDTLRSKCPDMPESDIQLLGTTELLNADI  
LIPDRSTKEEFAAWLGAMNADEMKSILSVRKGLNEESDTQLKAFKKQKQKEDEEKRAEIRK  
EYEQVKDARKNRTIIFNPATGNFQELEKQKFLF

>comp4810\_c0\_seq2; 797 149 2101 LEN=2177; translated  
MLVSSKVMAAFLLGAVAPSTTNAFVTKASSASIQRQNDVSLNVLPLIIGPMLRKMKEEK  
AKKNAPMATEADLQGQAPGLRVGGSTWKWPAVWPYDQNFPTPTEDI PKPAAGQONAMAQMM  
TGGAPVPPQPQVIEVEKLDPIEYWQVEKADTKTEMDEEAI AELKRHYGFYLDKDGMSVLEL  
GAAEESYLPDGIKLSRHVGVGLSDKLMGENPSLTDKLIIVDLNKVIKDGVDVSDDELRLKLA  
EPPFDIIMANTAEFLMHPREVFKTAWFLLKPGGECFNAFGTKTAFGDKFERAQTRMWRDY  
NDDQHMWVAGSFYQFSAGDGWQNVRGFDISPESAKENFGETGPLDFLNNQKDNNIYVQ  
ATKGYQDDSIDESDPAKSINSKMWMLPTLEDRDKKLVVPRLGSRYSYTVLKNPKRKDAIRDH  
IQYLPKIYEALIKMDAFAFTFEMQSOLAADLVLPDFDANDEQIKALKEGLGLRTPSKEF  
WEPVQQLTGAMDINDKINLLSYIVPRFGSGDEKQEAALLAYASGLKPTFDTLRSKCPDMP  
ESDIQLLGTTELLNADILIPDRSTKEEFAAWLGAMNADEMKSILSVRKGLNEESDTQLKAF  
KKQKQKEDEEKRAEIRKEYEQVKDARKNRTIIFNPATGNFQELEKQKFLF

>comp4811\_c0\_seq1; 357 1 1607 LEN=1607; translated  
XFGFENKYVRQIHWKLTDSGREPLPTSQNTIESKDVLRGTNAMIVLPVETIGGSGDSREH  
WTADATGLLRRRLANETIAPEVALNLEGADSHHVGSWIAIFAFSLTAIGSAVSLASVFFI  
YHYRSNQIISVCQPPFLYLVCVGLLSISTCLNTTLGHSSERSQTSLDASCISWIWCV  
SMGDLIIYLALVCKLWRVEKVSFRKQKILVRDVIWPLVFAVVI AVAILVAWTVSSPPY  
YEREIVVGNMGKIYSVIGICYEDGGIYQLVLTMMFLASATVVYWLSLRTRKLPETLSDSR  
RITQLLSHLIMGLFVLVNTLVMTLEMTTEVFVGAQSDAESNARNLVRAGAFLTNVFYQFL  
FGMTSVGFVVPKIWYVRYEHVHGRLP SGIHKVAGGRVTVRVNHQVRVGETVGRPSSDGIG  
RPPAVRKVS AFGDTRGDLRDRVP SHDDPPCPDHGGIEGDGGDSEGVDALEYVMEVDSSTS  
SAGDDEKSSTDVENNSAVFDLVDKIAFEQDGLNLRVLYITIMYFQLMRKCDNRMT

>comp4812\_c0\_seq1; 317 210 1144 LEN=1508; translated  
MSDEIPYAQPFPWTEEQPPRAKSIRSLRKRKFVVGSLAVLREKSLGSTSKMGNVAKNII  
MLNFHQHGIEIDGDMESDANKFNGIGLSDGSLQKETTISNEESNTASKMESGYQSIFVPLL  
KAVTESGTSQVSTRQILGKVCLLLHPGTLPGIMDSKDMVLAALHFLSSTNDTKSKYILKL  
PLIRPLQAYS DLERRNYEKIGDWKLDIEEKLKAEEIFLSSPSSWEWQKRESLSLRLSE  
ADEQSLFMRGTVPLCALASXKKVKTEGVKKRKAIPKTKTESLASAVETFTDENATSDAL  
EGDVSYENPF

>comp4813\_c0\_seq1; 401 157 909 LEN=1125; translated  
MTSTRYSSLALLAIACNSVASFGGVAHAFSLGPFPAATTSTMAPSVRRF SVLHASEAET  
AAEKPKKQAPPPPPIDVSKLDIRVGLIEKCEWEHEEADKLFCEEINIGEDEPRSIASGLK  
AHYTSEEMTGKVLVLANLKS RKMVGFPSHGMVLC AVKEGESEDS EDIVELLSPPEGAV  
PGDRIVCAGFE GEPATENQVIKKKMLNTIFPDLKVNSEGVA VYKDVPLAIGEGDEASVVT  
SGSLKDVIIS

>comp4814\_c0\_seq1; 141 1 893 LEN=977; translated  
GIFVCPLKNNCILFXAASVIVTTPQELSFADVVRGVEMFDTVDVPCVAVVENMAYYSDP  
ASQVNNKDELEEDVRKMLAEKGLLNNGDGDKFAEELVQTVLKNKATDPVQIFGPGHKKRL  
SDQWGI EHTYSMPLMDRIAANGDSGTPYVLENPESSQTQIYRELAKSVVSEVAKAKFASR  
RPEIEYIEEFNIIQVDDEPLDSATLRRACRCAACVEELTGKQILKASDVSDDIKPLRMSG  
TGNALSVDWSDGHRSLYPYRQIRSLIGQDEDNTALAPKTTQESESTESDQKSCSCC

>comp4814\_c0\_seq2; 403 202 1983 LEN=2067; translated  
MENKSSLRIVLTI AIGASILFDCNAFVTRTTTTT SATAKTYEQAQPEHLYLNQNQYYSGSS  
STLLSSVTDDSTTTTTSENIPINNEWQGEVLKTLKSIIDPDLGQDIVTLG FVQNLKLEA  
ERKVSFDELTTT PACPVKETFRRSDCERLVSALPFVGSVDVTMTAQEPSNTETD TSGMAGI  
GAI IAVSSCKGGVGKSTTSVNLAYALQSQGASVGFDCDVYGPSLPTMVEPDDDMRVFVG  
RQIAPLQRNGVRLMSFGYINDGSAIMRGPMVSQLLDQFLSVTQWGS LDYLIIDMPPGTGD  
IQTLTQRLNITAAVIVTTPQELSFADVVRGVEMFDTVDVPCVAVVENMAYYSDPASQV  
NNKDELEEDVRKMLAEKGLLNNGDGDKFAEELVQTVLKNKATDPVQIFGPGHKKRLSDQW

GIEHTYSMPLMDRIAANGDSGTPYVLENPESSQTQIYRELAKSVVSEVAKAKFASRRPEI  
EYIEEFNI IQVDDEPLDSATLRRACRCAACVEELTGKQILKASDVSDDIKPLRMSGTGNV  
ALSVDWSDGHRSLYPYRQIRSLIGQDEDNALAPKTTQESESTESDQKSCSCC  
>comp4814\_c0\_seq3; 247 202 1146 LEN=1198; translated  
MENKSSLRIVLTIAIGASILFDCNAFVTRTTTTATAKTYEQAQPEHLNQNQYYSGSS  
STLLSSVTDDSTTTTTSENIP I PNEWQGEVLKTLKSI IDPDLGQDIVTLGFVQNLKLEA  
ERKVSFDVELTTPACPVKETFRSDCERLVSALPFVGSVDVTMTAQEPSNTETDTSGMAGI  
GAI IAVSSCKGGVGKSTTSVNLAYALQSQGASVGI FDCDVYGPSLPTMVEPDDDMVRFVG  
RQIAPLQRNGVRLMSFGYINDGSAIMRGPMSVQLLDQFLSVTQWGS LDYL I LDMPPTGD  
IQLTLTQRLNITAA  
>comp4815\_c0\_seq1; 545 246 1463 LEN=1538; translated  
MNSKQKVMVLLQVIAAVYTIVGHDRFNGLFASAFLEPPRNGNGTGATASTRAYLKRHKNDL  
VPFSETFSAATAASRNRI LGLNPSKRIHGNASDSL FALRATLLPCWSVANRLTRTDAQAL  
LDQDDLLPSSAYGDRKTLGLKAAEQECGGDLGNDDEDAGVILADDPRLARTYAEFFLASL  
DVL L DAAVGHLLSSGAGAGGSAIQMVDIGSGLGRIVLYSALTRHGRGAGETDTGEESWRVC  
GIEISSVLHNGALELVDAGMGRELFRSCGGDPGREDERKGDPSFLSKSNKLSFHLGSATE  
PEGSALLGSADIVFSYSTVFKAKEYFDPDVGALLLDAEEWSRPLGEACKPGCVAVTTDRAL  
DPRFGWKLVERIDVNPDPVLTGTTFVHVLETNEQNESEAMGTSQL  
>comp4817\_c0\_seq1; 1630 158 3319 LEN=3756; translated  
MAEEQKVVVDPPPWHMTMSKEDVISELDLPADIRKVG L TSKQAAERLEKYGENKLTEKEKE  
TLLQKIWNQVNNILV L I L V I V A V I S L I S A F V I P N E V N P R Y T N W I Q I A I I M G V I I I N T I I G  
L I Q E G S A E K S A E A L K N M L S S D A V L I R D G V E T K V P A A L I V P G D A V V L S L G D R I P A D L R V I E  
V N M M A S A E A A L T G E S V P I E K V V E K I D L K D G Q L P K Q V P L G D R K N M C F S A T L I A Q G S G V G I A  
V A T G D E T E I G T I N K L V N S Q E K T K T A V L E Q I D T I S L Y L A G F I M S V A L I T F L Y E W L H I K T S P  
I M A L N T S L V C A V A M I P E G L E A I V T V T Y A W S T N K M A G L N A I V R A L P A V E T L G S V T V I C S D K  
T G T L T T N V M S M T A F V T S N A H Y K N N V H A T E R T P D N L V R D D T F F G E K A D I A K V I R R N E A K K N  
G G E V A V E E G E V E A E S D V K I D P N D K T P V G Q G G S A S S E F W R Q A L I G G V M C S K C T L G K D G T R E  
G E I G N P T E L S I L R A A Y W S G V D V N K A K D A S P I I A E V P F S S E Y K F M A T V H D S C P E N D G P G M D  
D K L I I H V K G A P D R M V K L C N T Q A V A G Q L G K T E P I N A D F W Q E Q I A I L S S H G L R V L A L L R G T L  
K K G S V S Q G D A L K P E F V R D R E P W L T M V G L C A I V D P P R P E C I V A I E E A H H A S V R V A M I T G D H  
K D T A L A I G A S L G L V D T E H P A A V T G P E L D A M S D D E I K K A V M T Y N V F A R A S P E N K I R I V K A L  
Q S Q G E V A S M T G D G V N D A P A L K A A N M G V A M G K E G T D V A R E A A E M I L A D D N F A T I L S A V K E G  
R V V W D N L R K V L M I N T P I N N A Q G L S V L F G I I C G F N R G T A Q N D K V I L T A I Q V L Y C N L I C A V T  
L G F V A A V E P A E D G I M D V P P R R V G K R L I G R F L F L R I A L G T V V L V F I T V A S A F W A E D I L V N Q  
Y G L D K F S R E C I D R V H S Q A S N S L T F G A C F V T V S A R F S F S N A V H P R A F K D N P A V L W S L L I V T  
L L Q L A I T Y I P V L N S V V F A M A P M K A F Q W G I V L L G G L I V F I S L E L E K A L R R Y L K A H G S D V D D  
S E Y G I F D N K V P L P N Q D I R L P K G A S H L R L T H V K D  
>comp4819\_c0\_seq1; 384 960 1685 LEN=1782; minus strand; translated  
MPSRQYAAAY I I G L F P S V Y D W L V N V S A R S P L I D D T F S Y D I S S V Q S P T W M G V L N W K N G S L L V  
S L L W T S I L V N I D R Q W V S A A I W S V I A S L F A V F G I I H S F S A G F S N F N S P S W Q Y C W D A D G T C  
W E Y S E Q W M E F T A Y L M V A A T F V I L H F V S K H D E Q M K D P I D D E S R H A F D D W F K D A Y K Y K D S E G  
N T R D S R I D Q S G E E M K E A M A N P G N E G A D A M K L V Y G E G H P E E V Q D N P G N E A A K S L S K A V E M A  
A  
>comp4820\_c0\_seq1; 189 1 1149 LEN=1205; translated  
XVTSNEKGSKDRSAPRWESPGARRQARRRASSCEENRRLKPPPLGHREVLDFVGCSSDD  
EDRTQTRNAPKNGAEKRTTPDHVGARGDRASNAPATHGNQRPRAPPSNTGAGDERKTAAG  
PQSDARTTGLGTTTRSQPAPAWSTGSNGSPNERPVLSQQTPSGTNGGETPRAAESGARS LP  
KRTRKRKSADTVRILYRPRPEDVPPERWLNSSIGRTREELNSIRDMVQYMGSCKFGQSSV  
CSKFGRVHAI VMSDEWNDLAQRNDVLQNWYVGLGPRKRLARLVGACESTIPIFQAPKKE  
HRTPEIFVYGHYKVLGLQELDPTVTIKGIERDIKLSFAFDRFDGRLDAIIQGGPVRSGST  
PGSGSVESGQVLAKGHEWVQTP  
>comp4821\_c0\_seq1; 591 134 1843 LEN=2301; translated  
MATNSNDVPKNDSILSDEHDCTSWHAGGDYNPLPHVLPEGDNAAPLEVMGSSASDKLVII  
MVGLPATGKTHIAKRICRFLSFFHDIPSQIFNVGDYRRQLCGAQQPASFYNPENADGLAQ  
RKVACDAALADLMEYMSLEDGVRVAALDATNSTKERRRHIKSVLKKEKNNIKTIFVESICD  
DEAILLSNIHKVKLSTPDYKGVESKAVADFMARRANYERYYPVEEDDGAFCKIVNSHR  
YVVHNIRGYLSLKVVFVMNLHTMPRTFYLTRHGQSEYNLLGKIGGDSGLTPAGLEYARR  
LAIFAKEEIIATPRPEDHMHNGEVKSGGSDNEGRIQRPCRLWTSTLRRTRETAQFIEHTNF  
RHTFDNGDNDWCQFRPKPRRNLDLEYAGTCDGMTYKEISEVFPDEF SRRQADKLSYRYP  
RGESYMDVTLRLEPLAQEMERIREPLLIVGHQILRILYAYFMGLDRKEAPYVSIPLNNV

IELTPHAYGCHEKRYCLMMKEEMLADGQDEPVTSMPPVAQKGSQDVGLYDTAKKKWTVPRA  
ELLKKRSSVQEIDAKYEEDDSIMNAPSC

>comp4821\_c0\_seq2; 150 569 1486 LEN=1947; translated  
MPRTFYLRHGGQSEYNLLGKIGGDSGLTPAGLEYARRLAIFAKEEIIATPRPEDHMHNGEV  
KSGGSDNEGRIQRPCRLWTSTLRRTRETAQFIEHTNFRHTFDNGDNSDWCQFRPKPRRNL  
DELYAGTCDGMTYKEISEVFPDEFSSRRQADKLSYRYPRGESYMDVTLRLEPLAQEMERIR  
EPLLIIVGHQGILRILYAYFMGLDRKEAPYVSIPLNNVIELTPHAYGCHEKRYCLMMKEEM  
LADGQDEPVTSMPPVAQKGSQDVGLYDTAKKKWTVPRAELLKKRSSVQEIDAKYEEDDSIM  
NAPSC

>comp4823\_c0\_seq1; 461 862 2319 LEN=3844; minus strand; translated  
MCSAACSIIHWLLVSSALVSVFSSFWLAPRTICQDGFSSHITSNWRIRRNKICISGRRGQ  
MREHPLFGASVDDDDLFSYDHDVNLPKLISLFGGSPDLLRLDSNNGIRGVYANKSLKEG  
EILLKMPSSCLRDDQPPLWLLLEHQQQDQSEEESESALLIQDWVTRLAACVLEKQHEQK  
IKKEADCLDRATQAWLKLLPSRSLRQFLPIHWPEISLSETNYMPLELAVDSAYFARAAP  
MGDLMGAI PSSYCNNGGEIQDTIEWALDLVQTRSCRCALRFSGESTGGDVKDLRVLVVPV  
DMINHSPEPNAEFFRKDDYMMVQALRDIAADDQVCISYGGSTVPAWRRLLFSYGFCDTSSG  
DGDGFAVYEDDTVEIVLEDRFRFEVSPTEIPGELIQYQAQAAGIDSDEPLDIELTPEIG  
LAIVDHLTNAANSKRKRDEAINAATNSSEESLSVPLRLVGDLLHESHRRTLLTCAGGLRE  
YLGQ

>comp4824\_c0\_seq1; 571 71 1285 LEN=1521; translated  
MMVFKKVFLLKVLMLVCLIAATGIVVADDEASPPPKDDAKAQSETKTDNRQARPLAKEIPQ  
DTFDVKSHFNWGTYYDPKNVFCGKYDCYILGFYDFDKEKPTQKMITKRYRALSRRHW  
PDKSKHPEAKERFQKIARAYEVLTSKSRKEYDDLRYDQDSYLKKGSDVVFTFAPQTD  
AFVILIMGLINGFVYFAQFNWKKVCDRLAKAAIEDWNSSQGGSPESKDLRERALEIYA  
KEKGDSDKDDTVVTKKGGKGSKVSNEKKELENAALRPIVEKLAYEITDFGAGFHKPTWK  
DLAILKLAVWPYHLAVGTAWQMKFWIRRIQKLDLNDDEEKNVLTERRAVGRVIWEFSTDDER  
ETMVKRELWDLNLKEWNEEREFQAQLSKTEQKQYKLWKKHEKMN

>comp4825\_c0\_seq1; 150 81 584 LEN=1112; translated  
MTKDDHGDGNSVGDXXMSVDSNYYGRLADSSRNKDVLTLRNSTQDSQELEIVIDERKKE  
LMTKTRSVAYRLAASTPTPTAREQEMEANGDAGGNHDGHEEQRSKRQKTSGTATSARATE  
RGFLEVTQKGTPIILNPSEETVRGPIRLRLRLPPQSTELGREARE

>comp4826\_c0\_seq1; 368 1240 1818 LEN=2221; minus strand; translated  
MPKEGKCVKKAATAKHKITASKSTKGLTSSQQKMITIAAISLQMQNNVVSRSIVAMQLK  
LTLKSVNNALSCLKKQKGLVTMDTGVSVSITQDQVEQANLDSAKICKNNREHHLNTMDTFK  
LTPKQRQLFEELSDGSRKTKKNVASSLGYNRMKSFQNLMLPKKFGILCYDKDTLWLSDA  
MFI FEARKEGSP

>comp4827\_c0\_seq1; 306 229 1239 LEN=1863; translated  
MATTOGQLRLWILLSLALQLLNLRYETPHQPNAASRETKVVG DATNYRGVPHDTTTVG  
ETIVYGHLMQKTAGSNINGMMATKYDNVCGNKGSSYNFVNVQERQEAITNMENGNRAE  
VSFGRKGVPEYNEVRDTIGFANCDYISVETKWKWNKQDIVDALDFEKNMRLELHVPCR  
LDHLLSLCNHRNKKFQCPDISDEDAIASEIKKCLWAGPKKEAKEDKVSNILINNARFDPK  
LRDESHSKGIDLKCFSTFPVENYINYMGGQFMRKRRIEAPFVDRKTNKDREKTECLLNQD  
DNYKATVKRLVLQLDFMGYYQFCEDCMGSSDQLKLS

>comp4829\_c0\_seq1; 258 298 1146 LEN=1430; translated  
MIKEVSGMRVSELKAEKGERGVDFSDCFDKESMVAKLASARVNGVGEEDNDHEHQSGESG  
ENTGDAAAVDANTPQDFDRDAALRELKGMRVRELREELGRRRIPRAGLFEKEDLVAALLE  
ARALASVFCATGSLVAGEVTEVSEVARREIGFGGGPPLLLDVYATWCGPCQMIAPFLKE  
IAAEKGTGLRIAKMDSQNPGLSSELRVQGLPTLVLFVRSGEVDRIEGAPTKEQLLAWID  
XPPVTDGETAGSGFDRVGHDKKRTTG YQEARGKTGAIVLSF

>comp4830\_c0\_seq1; 432 8 973 LEN=1675; translated  
MIRSLRVTSVIAWKSCKRRRWWPPLSATSSLVPPKQTSFQASFSGIVSSYLNAAI PGNY  
VSRNNDVPSQPIGLFFFSTNCKRDPNNNESEHDAPTQKPKQTIRDQLKSIPNILTISRLAS  
TPLLCYWIINDEPYLAIVGCFFAGASDVL DGYIAKNYGQKTVLGTYLDPFADKFFINSLA  
ISLCYSGILPMPILLWASKDVLLLGGMGWYLYQEQTNFNFNSIHSKPLTVTPSTLGK  
ANTGLQFATLAAGILTPVPPDVLQPTILESLCWMTGASSIVTTISYARGGKGFTY TAKN  
NQNVKKRDAADANSANGNNDT

>comp4831\_c0\_seq1; 598 130 1485 LEN=1742; translated  
MPSLIDNVTNDDDESELEAGADPQPGKKEDEAETLGERASKDGTKADEDPDAEKSGCFAS  
FLT KFCAFYWQNEFLILIVCAILLARAYPPLGATYLA PQYTATWIAVMFIFLLAGLGLKT  
EEFAKAFQRIYFNTYVMLFSFGVDSSIVFGISRLVAHYNIINQGLADGMVIAACLPLTIN

MCVVLTKASGGDEASSIFNSAFGNLVGVFLSPALILGYIGVSGEVKVLNVFFKLAIKRVLL  
PIIVGQLLKYFCPPVNDVFKTYKPKFKKLQMYSLVFIYCVFCKTFGSDEASIPIGDIFL  
MILFIGISLTIILMLLAWYSLRLLFFREKPKLRIMGLYGCTHKTVAMGVPLINAIYEGDPNI  
AMYTLPLLIWHPMQLIVGTFLSPRLLAWVESYPVAGDKAGSGDDSNESGETFAEKKVVG  
VASADGDDDVDDAVGDANSIKSGKSIEMDV

>comp4832\_c0\_seq1; 572 299 2485 LEN=2810; translated  
MAAKAEKAEKKKVELKKRLARLLRNSDNKICADCPEKRPGWISFIQPQQSFALGSKVLAS  
FVCLCAECHKKLGTDICYVRSIKEDFEKDEIEHAQHSGNGIINEIFEGHLRKTSTDEI  
GIKPLMDADVSKKERYIRSKYVDLYFYRKSAYHKQIADMNEVLAESRKTTKKKKSSK  
PAGKKRRKSKELGAFLEKMNDSKESRCSLTVGNTVSTPISNDDGNHFGSINVENSEDE  
LTLVTDQGSMSGEPQDARTIKRGRSRRKLGKKSISELDIGKRQIERVEVRGGPKETDRVE  
DGEAGAGVHVQKTMKRIKRLSKTTTEIGNGASQGDDRFLRVHLERARASQGDGHFRVPL  
QKSGVRQGGDRFLRVQLQKFGKRVTVGQSFVAVSVDGRGRNRELGGKVIRAKLKMFLNGFT  
ASPADELLASLITDLVLDNLGSPTRDTKKKARSKGRRTSEGLSSMDYLETPARDENKK  
AKIRQRNTSEDAKTTDRDNANLEQNSEESIDDNGFKLIDSSTFCTKRSSFSGNSWNSSGSSF  
TKPYKKKGVGLFHNRRQGSVEFEGSTTIRHNRERKSAIFASLERESSCEHFALNDHNS  
DSFEWETLQRSSNSDNGSFRVRAAPRRSRSSDTLMRVAPRRTRSSDAIGMQSSSSKMRGV  
SMKSRVPIRSRSSATVPKTTLMPEWKTYKSRTSIKNETKLLKEEWEKLLKENEDVFS  
FEKFSKSF

>comp4834\_c0\_seq1; 274 266 1237 LEN=1844; translated  
MRRTPIASALSGKSRTGNGKGSRSIDNKNNGSAASQTSVCKFCARNPPALLVQLPVLGRK  
KRAATPYCLSCYITTSAVRQDPEKYVTIFDEEEKAKQLPAIQNLFSCEFLELQHELSEES  
VRAFKKQKSDPLAMLSFSSGSSSSSFASKRRKLASNKGQAPDPRTKQEGRANDGGFLRE  
IDLPERLKRQKQEEELQNLQQLARMNQAAASARRASRIASPLTKSTMNKRRKSGSKSIWN  
LAMDKGKDGKLSSTSESYQAAAMPATMNVSCTCGSKDVRFSFGNITSRNQDVRKGEIWGT  
DRGDEVINRFQCNICGRTWNEAE

>comp4835\_c0\_seq1; 212 254 736 LEN=1189; translated  
MSSDPYLNSFRPGEFPGSGVEYRWSGNSGEAMSVSAPVYIEKVLGWIADQINDETKFPD  
DDEDETEALRVFQTPQFAALCGQIFRRLFRVYGIYSSFFGTLEALDMAPHLNSCFKHFMY  
FCTEFGLLPEREIEPLEVLVVKPIRKKYAAKQGAVTAPGR

>comp4835\_c0\_seq2; 272 275 967 LEN=1420; translated  
MAPASTGTFFQLRHRSGTMRERLHSYTKRTLGAAGSYNDAVALPQGESCAAWVAVHAIDF  
YNDVSTIWAVMSSDPYLNSFRPGEFPGSGVEYRWSGNSGEAMSVSAPVYIEKVLGWIAD  
QINDETKFPDDDDDETEALRVFQTPQFAALCGQIFRRLFRVYGIYSSFFGTLEALDMAPH  
LNSCFKHFMYFCTEFGLLPEREIEPLEVLVVKPIRKKYAAKQGAVTAPGR

>comp4836\_c0\_seq1; 563 121 1785 LEN=1999; translated  
MSIDDEARRAMQGPPTTQSEFLARSMQOSTSGGSNPRQTSMASSGPPSAQYRVSQTPEGI  
DLESSRIAPEIQSKEGADESTARMRYWVIFGLLIVICVGAIAIIVPLYVVKPQYESDPV  
IIQTGAPAPSASVVPNSSPTQAPTPKDVPTLPPTTAAAFATFVNQFALEISGSEAFENPDS  
PQYKAADFIAANDAEPRLSDKAMLGDLYAASVYFSTAGEYWFECSSQSDNCPDGISWM  
SSNVTYCHWSWIGCNDAGRIVDIVFSENKGNLTLTSELGLLLELEQFVAVNDDIKGA  
LPDELGSLTHMTHLILANNSLSGRISDTFLENSPVEVFMVLSDNKFKGNIKPSLTLMP  
SILQIFLRNRFSGPIPEELGALPHLATLDLAGNRFEGEIPDSIFSPMTENLYLGGNSEITGT  
LSPAVGSAANLVRLYISGTRISGSLPDDLFTLGHLSLVLVSNNTLTGELPESVANLGGTL  
RLMKLDGNKFGSDMPSAAINSLVSVNLTFDRNSFTGAI SPTTCRRRGDGYHDLQILSVD  
CAEVTCCSCNNCAL

>comp4837\_c0\_seq1; 419 1 1335 LEN=1335; translated  
FKITESSLGRCLFPIIPIERTGSNCDLSSPATQLTVQADSQRNNIHTITXHHYQQQQQ  
QLALQHHHQQQQQTALQQQQPQEQVYREPVMQVQDHSIQIDVRDHQQQRQLIQASTET  
QQRHQNLASQPAVQQQVAHLNVQPPPSQSEREAQAHAHLQAQSHAITQHMSDTAMQVP  
APP IQTEPQVQAQSQSFPPQTTYAYPPHQQVHQEQEQQHDHMAPMAIPAPAPMVGQQ  
QDHNLA PVPMPAPQPLSVPAPPLAQPTQF SHAQTPVTQQQQQVVRMPYSQENQEHMLPTG  
SHQVANVSYEQRQPQHQQNYDAAKIPANLHTQQSGAVPGQIIPAPLQQQQQHPQLQYT  
QPSMPSAPETLQLPPPQQVDTQQQPAYSQQDHQQAYSQAQPQTQDATSISAPPEPCISAS  
AQHSVQHSYYPQEQPHDPHQQQQQX

>comp4838\_c0\_seq1; 454 69 1340 LEN=1561; translated  
MTSDYKHGSYRTHRNSNQYAAAFGELHKDDAYSKRSRQSRMSEASGVNYLSHQLKQTAS  
FDFASIDENSENIRNGANSRFSMGTTKTTNTLEDSYSRAMQKMNRGDFDPNRKVTSDAE  
KGRFDDKNRSSRGSKAESQSRHSNTSSKHTQMDNHSARRASKSKNSATTGKKKRSVSK  
KDPSEETIALFGANGVTGHYFLQQAMEAGYNIQALVTPGMPLDFSNNERLNIIVTGSLEE

IEKIQAVVHNATYVVCLLQDNDQETMKPPVGNIEDEAAANESYSFFNLFVHNLVPILEQS  
KTCRVLLYEATSLAKDSKGNAPFLTMTTKLAFGKNWRWNKKEQDRIVQYLAAQTENAAF  
NYIVTRPSATLIWDRPSRKKLAASKSKPGFPFITNIDLAEFTLNALRMEKVYNSCPYVVO  
DGI

>comp4840\_c0\_seq1; 245 127 279 LEN=279; translated  
MTDVEDFEDMEDSMDSMEFASGDDGGDDVDAEVVVDDNDGEEEEEEEEEE

>comp4840\_c0\_seq2; 245 1092 1244 LEN=1244; translated  
MTDVEDFEDMEDSMDSMEFASGDDGGDDVDAEVVVDDNDGEEEEEEEEEE

>comp4841\_c0\_seq1; 428 273 1643 LEN=1834; translated  
MTSEDDKFSRPTASQAAYEKTQILSQQSKLSVLKECIQPVRWESVQKSLLGKGFSEV  
YRVDINTPELKDKKCALKYLSPKITNIKEGSFDLAAIDLATEANLLSRLNHENI IHLHGV  
FGGELRTSYVDYEKGYFLLLDLHDTLPKRLDQARAKERRRILSGSISFPKMLERIEDVA  
LGVSRGLEYLHQNGVFRDLKPDNIGFTKDGKPVIFDFGFARELHTVKAGDIAGSLRYMS  
PEMAFGQDPKLPDSVYSFGVLLFEVCTLEKPFKQFNQQAEFKEKVLIEDYRPPLTSIPST  
ELRDLITRTWNPDPKNRPMDSVVKLLRVEVALSERQVQKGLGLHRPKSCSSNISGTLK  
RGSTMAALTSNAMFRRGSFHAENKTIVSTPVSEMSDPISDLVDMGRSSTRKVSISSCS  
SASDISQCNSHSLQKSEFTLGRLRKPFRRRPAKAS

>comp4842\_c0\_seq1; 274 17 499 LEN=653; translated  
MKQFSTLIAVLLVYNSIGTEAFVANTRSSRSRAVITSSRLAAGPLQKFSNPKEYNKVVEN  
LMFTRGITREEAVKEYDAYLNNPNDYALNKGEAYYKSLGYKSLMDGVIGEAKEKEGRGDEV  
RARIEKFNQESKAKGLATISFFIALGFYKITHPYVPLH

>comp4843\_c0\_seq1; 156 145 639 LEN=1485; translated  
MPTGTNQAHVQDWGSVNVGRASRPTAKKSVGVEKRYGAGGNASAHSGGIMSARKLEEATD  
VGTIAKVDMSLRKAIMQARTAKKMTQKELATAINEKPVVAEYESGKAIPNPQIISKLER  
KLGTKLPRPGKSKLAKDTKTARKPGQSAAAAGLTRGGPAKRR

>comp4846\_c0\_seq1; 335 225 1517 LEN=1690; translated  
MNVVLKVRNSLQRLPCAANKAVSCFTCGTDTTSSSDSCAEIRTGRVIDASFCMDLPNKSVT  
ATQLYYDRVASESDCYSISNPSYCPYDGEDEREDHNNNDNSLATQASRTKSGLQKSKHE  
LSGIFEYPGNFMDSSYETFSPIYIPDDTRSDAENSTRALPDNINKNNTCDKPEMPET  
YRNDRRDMTFNKI GLGIVGLVTDVVTSKASRTAGGAGGASRARTIPTGRMNTSSGFRSN  
INDWNGPSQIIESREGSGLAKKNCDCGSGESQTRELPSFGKSREFRSFGSNRSQRSSLD  
GSLYSLKPTFVTDDDESLLGQSMQYSYITPTRSAEETEMETASAERAEEFSSIIYQSAIFFD  
SHGLRSRDSFDDAAEYPTTTIASKPRDREGAPSSVRPRGFKGKRPPFPFLDNAGTVPGVS  
KQHLRLVPP

>comp4849\_c0\_seq1; 604 216 2387 LEN=2554; translated  
MKVETPQILWNEADKGINAPLLSIDILESGLATPNQSNCAQSQSQTSENRSKYSHVLV  
TAGNAASINLWKICFGSHRHKAAQOSTDLEKDDASVGLSECNSSIFQKQTRPLFNKIDYMM  
SLNRHDATVNCVAFSPDGLHLATAGDSGNI I IWSVPVVKRGNNGRHFVSTVTKENDLIV  
RIVSTHCEGIVDLSWSADSKRFTVGTIDSCVLIYEDKHYGINACSPDTHRKESDWQPVFR  
NSDQHGFSVQGVAYDPLDVYIASMGGDRTVRVFPRKTPQKSKKKVLRPANASTSVRSNAS  
RSLVTPPPHQHQRMAVQILTEAKIDIGKPKRIKQRLVMVEDSTNNGTGSCKNHNNTNEHH  
VKQIKHKLFDVDESNCESFFRRLNWTVDGAFVTPAALWHENNDIDAGKTTQTSASTSPLF  
STYIFARHRFEOPYRVLTGLDKPSVVVRPNPILFELPPSVLEESKENQYPLTSKSNQASK  
NLMHEQLPSTNPCGLPYRSLFAVLTLDLSILYDTHHAAPLSVLQGLHYSGLTDCCWSSDG  
MNLMVCSSDGYISIINFAPGELGNVYVNHSCSDDAASTTVQPHSVDKTEENVETPAPVEF  
EPLPPCDQDPMPAVLVAPAAKRVKKTRITPTLVNSISCHSLRTQDEAIEAASTTNVAAT  
KRAISETIVGEAVTKLSLDNANNIGKTIISTETKNTAEEGNTSSCEKPKKKKKRVQPLLIS  
NNI

>comp4851\_c0\_seq1; 251 135 707 LEN=739; translated  
MATIVFETTEGNFKAELFTEKMPITCGNFLDLIERKFYDGLYIHRITPQFCVQFGCPYA  
LNPHVYYGTLDDDAGKSGPDDTSYKSCNGKEHTRDEYGNIEDEIVKGISNEEGTLSMAN  
SGDPETGGSQVFINVNDNKHLDDWNNSSSDSAHPVFGKIEGYDIVKKIEAVETLSEQPVE  
PIQLVSVRKI

>comp4851\_c0\_seq2; 235 135 793 LEN=825; translated  
MATIVFETTEGNFKAEXIYGENADYMSSEITWSFENRSLTLTKDSILWMMKSSSGNFL  
DLIERKFYDGLYIHRITPQFCVQFGCPYALNPHVYYGTLDDDAGKSGPDDTSYKSCNGK  
EHTRDEYGNIEDEIVKGISNEEGTLSMANSGDPETGGSQVFINVNDNKHLDDWNNSSSDSA  
HPVFGKIEGYDIVKKIEAVETLSEQPVEPIQLVSVRKI

>comp4852\_c0\_seq1; 291 1 795 LEN=795; translated  
NNNKIKGPDGDADTNSISPWFVGHFTPNHGSATSNKKNLFFKKKGDSAKKASSEGG



SAAPKQNGKRGKNDSKRNRLLNWKDSGTNRRGNSPLSSTAVLGTLMYVRDYRRLRDGRIL  
ALVHAAETVVEKVRSLPYAIVDARILPDVEELEFPDPATDGSESLPSPSIYSCGDHPD  
EQFLVDSLRADEDASAGPARARAVEDSIHVYHRYECDSEQRLDGIPNKSDLGILDITHNA  
ISRAHLPYCPFAASSFLNATTAATT

>comp4852\_c1\_seq1; 208 1 727 LEN=1314; translated  
NNNSSSSNDARNHPDTKDETGASGSSPSEKDPARAAPSLEFELLRRGITKIPPSDRRFS  
YNAEPTYASSSSEETKESTTHSWTTDELEYELWLVLDYFLKATKKEISPVLLRLLPSEPE  
MPRAWPPGFSLKAAHDTKHGNSQGDPGRSSGGGGYPHRRRQRRLSYSAAYLLEAVLPIG  
RAVGSGRSVCSSGGSGVDEAEIQELRALLLSVPSTRQRLRVVLERFHRWRLYEECDFE  
A

>comp4853\_c0\_seq1; 83 1 225 LEN=225; translated  
XDNKDNKDNTPKDIDSNDSHLAYGNTHHTRQQINQEPIALILKSIDSSRNKRIKRNKPNQ  
QYETQLGPKNTTTTTTX

>comp4854\_c0\_seq1; 487 115 1410 LEN=1903; translated  
MKFGIFGSKKKDGHEADPTAGVLSDPPEEAESGVNMKWNMDMYVEIDDDANETIANESYNST  
TEKRCGGRTIPGSMSEPTMDGSRMNSAFVNKSFANNEEKQDDGPDLSLEVPSNADSGTITN  
STTEDCTINVDDLDPDHLPPQGVETNSKDFSITNNGKYLNNYFANAQLMRWKHAAEEGPIF  
IQVLAALAAIGAMTTTTIYPLVTFYTVWTAPLCICALHTTVLCSLIVTFEMRAWCVRNPM  
LRARIRNLLVRYLNLVLRFLWGRGLLYIFAGSMNITIIYKPYTSYSGFTLIALGILAIMVG  
GSSALNLEHLRSLTDRSFLWSKFVEADSDSDNMINLTFNSLIWSLGLLEDDFYTYRAF  
SDVDKRSHSHITFDEFQYWWMASQGDDETTLTMAVSKISAFPSVAPSHYAVANSNYVPKH  
IKDHIPAHIKV

>comp4855\_c0\_seq1; 313 1 1130 LEN=1195; translated  
LFSLQGNFFAPPTIGSPQHRISDELPHYVSLHXSIRVQASLHLLLEMKASEALGLCKLADS  
GVASVTSQARVANLWAGMGSIRLECSGGSQKSI IAKRIRCPCDPSSIGDQRKAASYRVE  
ASFYASKYCRELSEEGICCEGLHTEDDGKGSITILMRPLPNETLSYMEGKVAEAAVRSVA  
KLHAYFWGSERAREAVEETGLAEQGTYWYLDTRPDEYDRMDGNRGLSARLKRAAHGIDAA  
LKEHEYQTIHGDLKACNMSLSRNPDFVTLVDFQYLGKACPAKDLAYLFCVCGIDVDDDFE  
ARREDELLRLYIEELAANGVDDADAPLPTMEKLKEALDLSYCDLYRWMLGWVWNGGFL  
EGRVEACMNNYGS MYN

>comp4855\_c0\_seq2; 279 1 1073 LEN=1360; translated  
LFSLQGNFFAPPTIGSPQHRISDELPHYVSLHXSIRVQASLHLLLEMKASEALGLCKLADS  
GVASVTSQARVANLWAGMGSIRLECSGGSQKSI IAKRIRCPCDPSSIGDQRKAASYRVE  
ASFYASKYCRELSEEGICCEGLHTEDDGKGSITILMRPLPNETLSYMEGKVAEAAVRSVA  
KLHAYFWGSERAREAVEETGLAEQGTYWYLDTRPDEYDRMDGNRGLSARLKRAAHGIDAA  
LKEHEYQTIHGDLKACNMSLSRNPDFVTLVDFQYLGKACPAKDLAYLFCVCGIDVDDDFE  
ARREDELLRLYIEELAANGVDDADAPLPTMEKLKEALYVSARCCARFRKLEPIPFS

>comp4856\_c0\_seq2; 330 177 1517 LEN=1702; translated  
MATTRATTEKKNQNEHSSPCYYKLSAAELPDDLFRKDVPTVEWIGGKEEDNKNADDARPW  
IATSSSPSGFPFGDLKKVHPIDRMVDIERCIGISLYMVGNTVFPALPSLAFALGMEA  
AKYLFWFVVVYHGGYALWRLWMVPIFLRRYNRGSRKDDLNPVDPGYSQYLYTERNTTK  
YCSTSYVWPASLHRPALEKGPNNDRPVIYCIIPHGLAPYGIYGYPYFSKVWNSKLCSWTC  
APVLLSLPFVGYFLKAIYIIPAKSKNILEALTKKDRNVGVIIDGIEGMFHNANATNTDTE  
VGAAILKRKGVKIALKANAALVPVYGFHAEVYDILVDFPGIMKYLSTFGVSLTPFFGR  
YKWFLLGPPKRNVPITVCLGDP IYPPESSSSSGDETTTPDPSNTITQEDIDEHHARLLKGF  
EKVFDTHKRGYYGEQTGARKKLVFCK

>comp4857\_c0\_seq1; 150 148 452 LEN=452; translated  
MTQNKDHHGTHVDVRGAKSKI IGLISGSVVSRRREKQSTAKIDNPLSSDDLAPPPPSDRLN  
YALLIVLYTLQGI PMGLSASIPFLLQEKI QKMTAASAAAAAG

>comp4857\_c1\_seq1; 586 1 1691 LEN=1999; translated  
XAAGTDVAMGATAASAVAAEAARASYNANAIFALCSWPFSLKLLWAPIVDVAVYFKRFGR  
KSWLVPIQTLAGLIMVGGSDFVERQLGLGNVAAVTESGVDAASAAAAASMNVRGVTAFFV  
LYFLMATQDIAVDGVALTMLSCKNRGRGPICNSIGQNIYFLSFVGFALNDVESANTLW  
RPLLRLPQNPNGVLSLKGFLRFMGSMVLTAVVAIFKREIKEPPKVVDSSNIIAKIGR  
ANSNVSEDEDEDDNELDASEIGLRETYHRLWAVSQLPVAVRWFIVLVSYRLPVALSNDVK  
FLKAVEYGLSKSTTAILSPTIILPLGILVPLVASKIWHMAPLTQFMRAYEWRVTIIPLLD  
ILMLRILKSGQPHNTSFFWGAIVASTAGQAICNSLQFNAQMTFFASRVDP AIGGSYMTLL  
NTMANLGGTWPASFVMKLLGWMTPTVASTAESPTKASSWFGEDPYEFVQITILSVLGIA  
WIIIVLGPVVRRLAVLPDDSWRTQLLDDDDGDDDKITKGKKAEEKSSKLSSVARKRGASKP  
RMSAGTKRINAMESGGVEDTKTK

>comp4858\_c0\_seq1; 495 1 1376 LEN=1615; translated  
GLPGTFIFWACSTIKQKECRFSSQHNIDTFFLLCNPGSYWIERNVNPPIIFVLFSVAVVVK  
KGMCSFAQKAFAFASRNHHPKGVVKILIIDGEIRINDADDEGYAFGSEIEDDKGGEDDLGE  
NNHLSSEFEPFSSYNTDDEKKTTLRREHEDDISVALLHVSRYRTGYELIETILDEDIDVRNA  
GGTRVTVDAVSPPLTGAVIIVWTAVSIVICLILCCCMAAALEDLLENQEPEPAPLRRPRR  
QRLTTDQVRELHVGIFDGNKLVYDEENPTANGVGEYCCDHILQHSNDKNFPQPTINSMDT  
CTICLDDYQIGDKLCCPLCGHVFHAECISKWLVERSATCPLCNLDLYEEEEVDDNSEGEED  
EYTNNERQARNGSAPTTQVEPDMNEDASTIDHSIGSWLRAIFRSPYWRNRTTGGSSGLEA  
LAEPLLQQDQPEHPTSAGIDVEATPSNEESSTGPTEID

>comp4858\_c0\_seq2; 584 317 1639 LEN=1878; translated  
MKEGLEYEARLQRVNGADHFCGKGSWNVTVPSDGLPVAVVVKGMCSFAQKAFAFASRNH  
PKGKGVVKILIIDGEIRINDADDEGYAFGSEIEDDKGGEDDLGENNHLSSEFEPFSSYNTDDE  
KKTTLRREHEDDISVALLHVSRYRTGYELIETILDEDIDVRNAGGTRVTVDAVSPPLTGAV  
IIVWTAVSIVICLILCCCMAAALEDLLENQEPEPAPLRRPRRQRLTTDQVRELHVGIFDGN  
KLVYDEENPTANGVGEYCCDHILQHSNDKNFPQPTINSMDTCTICLDDYQIGDKLCCPL  
CGHVFHAECISKWLVERSATCPLCNLDLYEEEEVDDNSEGEEDYTNNERQARNGSAPTTQ  
VEPDMNEDASTIDHSIGSWLRAIFRSPYWRNRTTGGSSGLEALAEPLLQQDQPEHPTSAG  
IDVEATPSNEESSTGPTEID

>comp4859\_c0\_seq1; 328 212 823 LEN=1627; translated  
MTKRSSLIKDLKDKCVPYFERDEIMPYLGDKLGKGGFNSVYELEKIELDETSVPVNDQQRK  
QRSFVTQNIQKLLAVKFLNESAMSNSNEFCNGAADLLEAKYLSAISNHPHPSIISLHG  
VAAAGAAGFATGQMGYFLVVDRLYDITLTKRIDIWKELKRRKLRHPSNSVKKLLQAMFLQ  
RLHVATDICGAIRHLHSLKIVFR

>comp4859\_c0\_seq2; 383 212 1105 LEN=1407; translated  
MTKRSSLIKDLKDKCVPYFERDEIMPYLGDKLGKGGFNSVYELEKIELDETSVPVNDQQRK  
QRSFVTQNIQKLLAVKFLNESAMSNSNEFCNGAADLLEAKYLSAISNHPHPSIISLHG  
VAAAGAAGFATGQMGYFLVVDRLYDITLTKRIDIWKELKRRKLRHPSNSVKKLLQAMFLQ  
RLHVATDICGAIRHLHSLKIVFRDLKPDNVGFNFEGRVKLFDFGLAKELDPLQKTGDGMY  
EMSGGTGSRRFMAPEVALGQPYNLSADLFI FCFVLGISGFRESLWEDEPRRASRESN

>comp4860\_c0\_seq1; 309 106 1621 LEN=1873; translated  
MRKNDSSHQNSPLINKEGDENISVEERLQDWAFLPERDSSSADRKLLDNSWSDLYRMIHD  
DKNSKKTILDYIYSSPHEVEAPIANGDTPFRALRTGCDFDVISAMIEVAPNASKDKGY  
TPFMEALCPEPTICTDPMRVDVDMETLIEHFRPEAVRNPLALGYLCSKGNPSVTSLEL  
VKLLISHCPNAVQTTNGATNRNMLPLHSACESGMSIDVVRYLNLNLFPAASSTKCEPCNSM  
ITSKGPYVLDVEARLPIELACVSKSPSDVVKLLTERQTKNMNQMNNTDGYDANFGKLLLL  
IAWATRKSYLEHGKDGTVQRPNYKEIEYLLPMTNSKERLRVNLAIITENAWDDAQSFY  
TKLLCDCTSVNGTMVLHAAVERGLINISKLICDISPSLARKRDRNGCLPLHIASTVEKHH  
STQKTPMAEFLKSANRRKVVIQRILIAKYPRALVLKNHEGRIPCEMAGRYASGTVAINAK  
SSILREDFSAFCTKKHDVYGVGKG

>comp4861\_c0\_seq1; 408 668 2234 LEN=2601; translated  
MAASSSSPLSSFIFSGDNRHNTASYASQGTTSFSSVSVRSNVTGDEKFSVMKINTETG  
AIRRIQMCQSEIMVQTTLSPRDLVSLRLTSKKERREN RVGKSLVEQMRHPPTIMARNKFI  
LLSMGPVRAVAEPDAVYVFDVHSKAAKLFATDLAKVYEEERSEAIKNKTLNHEEPTLVE  
LETVLTDAVDSFTGRIRIFEPVNDLLLRLISLDVEDVSNNTNTHQMAPLKEQLQSFEIFV  
TQAYDCVTQLLNDDEAMLQLLLTEQEGGDIGAVQLSHPSSFCNGSQIVSPLVCCYHIAL  
ISNVSEARRTNTTVDFERHQHVEHILGIYARRFSSVIOEVNYLLGRIESRQEYIELELDL  
YRNRLIRMNVDLAILATATGVTALSGTFGMNMVNGFEESHAFVTSATSALAALSVGH  
FFRRMVSGNVIQQAQERIGEIRTMSNALSDMSALDYAVKQIRGENMNKTEFKEQLAGA  
RHSKTCTDEEVDLLFRVLNTHKDDVLDKEDFVEKRDSGESP

>comp4861\_c0\_seq2; 443 668 2116 LEN=2483; translated  
MAASSSSPLSSFIFSGDNRHNTASYASQGTTSFSSVSVRSNVTGDEKFSVMKINTETG  
AIRRIQMCQSEIMVQTTLSPRDLVSLRLTSKKERREN RVGKSLVEQMRHPPTIMARNKFI  
LLSMGPVRAVAEPDAVYVFDVHSKAAKLFATDLAKVYEEERSEAIKNKTLNHEEPTLVE  
LETVLTDAVDSFTGRIRIFEPVNDLLLRLISLDVEDVSNNTNTHQMAPLKEQLQSFEIFV  
TQAYDCVTQLLNDDEAMLQLLLTEQEEARRTNTTVDFERHQHVEHILGIYARRFSSVIOE  
VNYLLGRIESRQEYIELELDLYRNRLIRMNVDLAILATATGVTALSGTFGMNMVNGFEE  
SHTAFVTSATSALAALSVGHFFRRMVSGNVIQQAQERIGEIRTMSNALSDMSALDYAV  
KQIRGENMNKTEFKEQLAGARHSKTCTDEEVDLLFRVLNTHKDDVLDKEDFVEKRDSGE  
SP

>comp4862\_c0\_seq1; 407 185 1589 LEN=1589; translated

MASISRRKNSLVGGVGLVAASIATVWALQKWRQSRRGNDKRSSTSTILTAHEQLIEGGT  
PLIELKRVTKLIGRSVFKMESMNPGGTGKDRAALNMIRMAENEGALPPPDAVPTNSTDY  
DSSLFLRPSVPSGSSHGNGTSATAEHTHTDADVPTSAENGLTMMILQALERSRTGGLVV  
EGTSGSTGIALATLCAARGHACLVLVLPDDQAVEKQRILRSLGAVVYEVPTASISNPKHYV  
NLGRKAAKLARDKFGISAVFVDQFENLSNFDIHYQQTGRELLRQLYDQNRSLDAFVMSSG  
TGGTIAGIATYLKEQRIHNNNDGEVRVVLVDPGPGSALYHKVEHGVAFAVEQRERYLRKHR  
YDTLAEGIGLDRITRNFSSGLSCIDRSIRVTDQEAVIDMAHWILRTEGLWIGSSSAMNLVG  
AMKTALSLEPEDSSVVTMICDGGQRHATRFWNPKFIKEWGLEWSPDCLX  
>comp4863\_c0\_seq1; 411 26 829 LEN=886; translated  
MRLAPTLVLAARASSLLSPPPTLPTARAFSAQHSNRSSNRSSNHKRNMSTESDQDQGP  
ARQLVVDVDFCFRQFGEHPQSGSYGGTVFSSLTVAAFEVAVANARFREEDLRDGYAPFCKHV  
FLENDFTGDDARVNVLPVEGNEKIRTEYAARNDKELPVLQRFIPLAVGGAEEELPRAKY  
LDLILYSRDQIRKENESMGNNENVEGDEEAPWGVISIKAQMEDFELPMNPITQMRNALGKD  
QGGSGIPLTREYMKSVVEYWTANVNV  
>comp4864\_c0\_seq1; 380 81 743 LEN=907; translated  
MASDQIRQMVNFILQEAHEKANEIRVKTEHDFNLEKQTLVHEAKLSIQDDFAKKEKQHEI  
QERIARSSEIGACRVKMKQLRDELNKLLEGGAKCAVVARGANYPQLLQKLIQCLIKI  
EENNTEIYCRTEVDVTKGVLPDAIKEYVEIMKRESGVTLSPNVTMNADADKNLPESSHG  
GIVMTALNGKIVCDNTMSARLELVYEELLPSIRSIMFPDE  
>comp4864\_c0\_seq2; 259 444 961 LEN=1125; translated  
MTXAKKEKQHEIQERIARSSEIGACRVKMKQLRDELNKLLEGGAKCAVVARGANYPQL  
LQKLIQCLIKIEENNTEIYCRTEVDVTKGVLPDAIKEYVEIMKRESGVTLSPNVTMNA  
DADKNLPESSHGGIVMTALNGKIVCDNTMSARLELVYEELLPSIRSIMFPDE  
>comp4866\_c0\_seq1; 375 1 936 LEN=975; translated  
RKAQSEKSDSHIKNLLRQGSIIILRKRGIYGMKPLSVQAPLFRSGLLIVVSVLSFCCKNG  
LFVVESEFTLKRDAARCKVDREQLQAFEATWINARRKSTSLFQQRQARRWNGNYKHKSK  
KLSQVDPKSKKMLNLTANGVTKLEKRMETLQHVLTKAMIWKMFMNDYPNLEIELDIGD  
PDYLPDVIGATSKGYDKASIVFWGESGRMKVHKALDLMRRYPNAHIVHCRWAIDIESFMG  
PFVEYLETELFDEEDTSWWKGF SFASLPLEVWDF INEDTGTILIEKSDLSWRELDLSQLD  
FNRTSLDEDNI  
>comp4867\_c0\_seq1; 313 45 947 LEN=1195; translated  
MRSSHLCVPIILLSAPRAVTGLQTNPHHQASREILGGLVSACGAGLVVGGAPQPARSAA  
AVQDSLVDVDAFLRKGVDVTGGTMGVSSQAGKSRPETGVFRLDGSVSRDKKTGDVSAEIVV  
NGSNGEKMAVFSYSSPWPLAEGPFYDIECRNQKTSQDGAQVQVTTDVGKTVANIDNAFI  
LENLLAPSGRFSFYGQPTDVKIKKSTTVGDYRIIDLSFATLSQATQTEIPRKAQLVATIP  
KGSSQAIVLVGSAPAARWNGSDQVVFSTIESFRAIAAPKSSKLRKRRKERNFTSIDENGE  
>comp4867\_c0\_seq2; 275 45 1105 LEN=1353; translated  
MRSSHLCVPIILLSAPRAVTGLQTNPHHQASREILGGLVSACGAGLVVGGAPQPARSAA  
AVQDSLVDVDAFLRKGVDVTGGTMGVSSQAGKSRPETGVFRLDGSVSRDKKTGDVSAEIVV  
NGSNGEKMAVFSYSSPWPLGKNERECAAWSCKLNNDNICYAPLPLYDPERAFIXESKEVS  
QFSPSSTCFSTHPAEGPFYDIECRNQKTSQDGAQVQVTTDVGKTVANIDNAFILENLLAP  
SGRFSFYGQPTDVKIKKSTTVGDYRIIDLSFATLSQATQTEIPRKAQLVATIPKGSSQAI  
VLVGSAPAARWNGSDQVVFSTIESFRAIAAPKSSKLRKRRKERNFTSIDENGE  
>comp4868\_c0\_seq1; 12 1 212 LEN=212; translated  
XQNSDAPPITATVKLATPKRKKSRPRPQEREQEHRYMEDTNNNIRVGSGRNTNREPHI  
GTQQCQPQP  
>comp4868\_c1\_seq1; 105 229 495 LEN=495; translated  
MTKNKNAKRQPCSGITTHKKGGLLGKKSIPITVEGKVSNGRCLACDPFPCLTPAGQAS  
VAIEEVCQSPVRQAPLNNNSDNRSGGGGE  
>comp4869\_c0\_seq1; 1075 266 3208 LEN=3963; translated  
MSSEDEFDSSFLDDFDVDAVAAGSATPEKRPKRKSGSDGFGDTSFLDDFDVDAVAAR  
GGLPANKKRPRVTPPEPHQQRHCRHPSTAFPTEELEACAKHYGYSSYKSGQLDAIRAVL  
RGQDATVFWATGSGKSLCYQIPALYSKKTAVVISPLISLMKDQVLRNLNLSSEALATYLG  
SAQTDGAEQRALRGDYRLVYITPEKLMTGGFLDRLAALDLCCVAVDEAHCVSQQWGHDFR  
KDYLHAGEALRNHPRLRTPVPIIALTATAVPRIQNDIAKNLRLRSPHVNKQSFDRTNLSIR  
VTLKERNHPLPSAMEPLIRSLLEEKSGSGASSTIVYAATRDATEEVASYLQQRKCNKNS  
AVDVRAYHAGMTTDQRNETHVRFLTGTAVVVATVAFGMGIDKPDTRRVIHWGPPKSVVEE  
YYQQIGRAGRDFPAECVLYASPSEFDKYMDDFYIGDLGDPARQASIQSTRALKSFALDK  
EGCRRKGLLDFGETPAFGERCGTCDTCLAQKQFGDDALRDFGPEARLVL SAVSGLREAS  
IGTIEKVLKGNIVEGYRYAYRTSPEALQTMETETRKALPRARASIQFLREMVSTLSQKGY

LTEATKSANLGGGNYKRSWTVYNINETGRRCLGGTEKVVLPVPESIREAERQEKARKDRV  
LKNLEEKGVSLDKLPSELEETGDGEVIRAYTKWNNYVALQEKLGKEGRNAELEELLSLVQ  
EWRSNAAVEHTMAPASVLPHEIMLSISYAVATYPAGVKVSRSDLIAAGARTRELES LADI  
LNSWIDRYRAADNPSGSSASDQAKDVP MRFASGGPTQGGKWEFAVYKPKKKTGMATWES  
SYERFAAGESPQAI SMSPANGRP IQVMTVVGHIQDAFLHGRPVLDLQRLSSISKPPTKNQW  
MELEQAKESTGMDPVGNPSCSGLDGGSFLLTEFLRPVMGDDFMETPREDRSESDKARFGE  
WCGVLKWYLFMKRAGVEPVF

>comp4870\_c0\_seq1; 248 74 676 LEN=1036; translated  
MKVLSLATVRTGNELEDPIVCSMSSELSSFGFFQRPTIKEMLGFLTRTFMKRTEPGQRQS  
ITHENYVVHCYRRSDGLGGTVTTDLEYPSRVAFVLLTQLLDDFTA AVGDTWKTC TTPESM  
AFPAMEEYLQKYQDPSAADKITKIQNLDDETTQILHKTIDSVLERG VKLDNLVERSNDLS  
AQSKMFYKQAKKTNSSCCVIS

>comp4872\_c0\_seq1; 815 110 2689 LEN=2914; translated  
MGGGQRSSIVAESSASEDENNVLIIRISKRFIILTFVVSCLVAFVGHVSRIVLIDNPRN  
EFMKAYQREHVSIDGAMGTPFGSKDEGQFTLPDPVLQSGKTPPITTYTSKNFN TALSSST  
THSRWMTQDGEDLDNGLLENE SNGDQCRSSTNDSCVEDEQTEEEHLPAGQHLLIDIEH  
VDALFLNSEDRLATAML DLVNECGLTLLSYHCHGLHPSGVSCAGVLLESHVSFHTWPEEG  
VITLDFLTCGPNSSLPIVPLAEKLF AVASDALRAMEPKMIWAHKFRGFGRENGSASEVTD  
MFRFPVQG MNDFKKEIASIQTDYQTM DVYD VFRPGRHDMESYEKSLSNDGSYEALHPELF  
EPDRLVYLDGVVQ SCKTGDAAYHEALVHPAMFAHENPKRVAIVGGGEGATLREVLKHN TV  
EKVIMIDIDEQMVELSKKVL PYWSDCSMLQDSTKSCFDDPRVETYFLDAFKWFIDRF SDE  
KSDDFDELFPDVIIMDALDPQIQKEFVDALYDGGPF LRS L PNALRESGILVAQVGEANSI  
QSPSGEHSIDRN RINFIETLVSLGFPTIRDYEEESHQFDDPW EFVAAFKDFDYKVDWYAE  
SPVIDLKIRERGMITTAGGSPFLHFDGATMKS YRYP SKGSETAF CRLKPNEVDCANGHGF  
DLERDDVMVSSLEIKPSSLGVKAGRGVFAKT DIPKDSYVGLKEIGSSVHINPHVFEVMKE  
MKEIPWAYS NYHGKELEAYTNLYGHFFVSQGETEVFIDSTIQCMINHGCMTSNIGYNIN  
VTEASADPLSMSEEV TSSYIGRQYIYNPAKERQVRFYSSSTPRRDIKAGEELLGN YL GMA  
GADNPHWKDVVLALRDHCV

>comp4873\_c0\_seq1; 433 235 873 LEN=1069; translated  
MTYEEMIQRVDCYEITVPKPLGVIFGENPDPYLGVLVDDVSEGMNGGKAGLRMGDQLLAV  
NEQV VIGRDFDTVMGKLQEQPGR LNLVLYRGPVQG LFTVLSNQLGEGQNM YEDEDEY EES  
EEVMDENYESPVRIEVKEEKPLTPGDFVKA FGKLG SMLGETLTAPVEQEDTGAPPPPKK  
KTGFFGIGGESVQLDGEDARGYRREKIEPDDF

>comp4874\_c0\_seq1; 640 836 1762 LEN=2325; translated  
MTYYSDETEIISDDDDVSI SDCSSSFHFSDNVV LNLGLDN NCN NCYNNTKGKYE EANRAS F  
PLLTNHSQRTQQSFFSLKDLVSMGT VSSLS DNETPDDSDGGDTKDTNTDGE EEEKQYFN  
NDDTERRIEITFASSNISMDQR PQEQRQLRIITGRRFINEDTILSDGEEDLCELTEEVMG  
NNDEEELTIKES ETEMEERFDDDL EEEEEYRVL LNDV DDETGT RKR DVRSKHRNDEYSI  
ESV DDETVEEEEIIEIEEVILDDNEQSEEEIEEVIINNNEHGEEVFICHNGEAGKEAIEE  
VALEQYEL

>comp4875\_c0\_seq1; 479 209 1231 LEN=1942; translated  
MICVPTARLLFFCAFCDRAVSFTP KAIWAHQTRKPCQQFAYRDSNEEDSFESLVEEATF  
GATGLYGGDFAGLAATFNPGDGSFIPIPDYLIPEDLKEWGQEPKCLQVLVSEDVHDDGSG  
ESCLMSRVTTKILPETGCGVDNMETMIASDEIDLESQWKSDDDNDGLEDVVGLQYPLGEE  
KLRVETIFGLEEEYGVDRIRVAIDLIPSEENFAIVSPMVLTLERRTSSISSGGTIAEGGG  
LDGR TVYMLLGERLRSETTFVDEPSMSNENY YDTGNDIRYVGLPANISIAFGWLNEGRDT  
WMLQVSHITSNGSRRVVS RQFTVASNNELDFEIRSWVEDL

>comp4877\_c0\_seq1; 50 125 482 LEN=482; translated  
MRHHKIQAAVRRILRLSFLGLAFAGTTAAFS AAPP RAPARSGARPS PARLCSTRSGRVA  
EESFLMKPFQTASGETVNPYRVLKVPRSAERKEIREAYRRISKRYHPDIVRHKDVLPGNX

>comp4877\_c0\_seq2; 77 215 662 LEN=731; translated  
PVTHHTTSHQIAPRPN SNSHDDVEAEWERIQLSYDILSERKRRMQYDRHELIADPGA AVQ  
RAAFEAAAAGVVGLGKGI FRAGSSALDLLGGAGKR DAGGERWGRWRRVALNRIESSKTEP  
NGMVVGD AAGGETEWSSCDGPVDSYCKQ

>comp4877\_c0\_seq3; 154 566 1112 LEN=1181; translated  
MLPFA SRNPYRVLKVPRSAERKEIREAYRRISKRYHPDIVRHKDVLPGNCSHDDVEAEW  
ERIQLSYDILSERKRRMQYDRHELIADPGA AVQRAAFEAAAAGVVGLGKGI FRAGSSALD  
LLGGAGKR DAGGERWGRWRRVALNRIESSKTEPNGMVVGD AAGGETEWSSCDGPVDSYCK  
Q

>comp4877\_c0\_seq4; 77 344 791 LEN=860; translated

PVTHHTTSHQIAPRPNSNSHDDVEAEWERIQLSYDILSERKRRMQYDRHELIAIDPGAAVQ  
RAAFEAAAAGVVGLGKGI FRAGSSALDLLGGAGKRDAGGERWGRWRRVALNRIESSKTEP  
NGMVVGDAAAGGETEWSSCDGPVDSYCKQ

>comp4878\_c0\_seq1; 164 1 546 LEN=781; translated  
QGLKQGTARDRGDTKQRYNTPPSPSPRDDKTTMVWGAIKNAIGLGNPLDSLPEGPTRLPD  
YFPLEPKGCEKPSQKLFKCLSREATEKARDMERSVGFHKSHPD VVVVGLDPKAAEAVAND  
PENPEFPKPGDNPLDECRLF IANYMKCCDRNLKQKRNRLQETVVRVQEEYRYQGPTASAE  
E

>comp4880\_c0\_seq1; 374 163 1416 LEN=1587; translated  
MRNVARCPPNRPRGISRAVLGLAFVAWVAAAVSADAPPGRGPCAFNEGEDREDLYGSHPS  
LCAMLDRLLEEDPESVASELASFARAHGRLVGETIGDPGAPLSEHERDPAQLPVVFAHGMG  
DSCFNDGMVRIGEHTAGLLGGVYVTCVPTGDTKTEDTTNGYFLNMDASVDFAAARIAADP  
ELRGGFHAVGFSQGNVIRGYVAR YNTPTVHTFLSVNGVNAGEGTVPGCFPSGGAAAATL  
GSVCDLLEEQASRRAYTEFAQKHSFQSNYWRDPRASEREAYQKFSQLARWNNNEGPELHNA  
TLNENFARTSRFVWRATKDSMVWPSEGEHWGSPDPDDPFGKPVLP MNETEWYTEDLFG  
RTAQEAGKNVFETFEGDHLRF SMEDFDRWVRTYLVGGGETERAGADAI AEAATAATE

>comp4881\_c0\_seq1; 539 1 1438 LEN=1959; translated  
XSVWKAEGFHASQQQLQWHRSP LLQRAPVEGA AFVVRGGAERSATVEEAAETETETLPTWE  
DLQSALEDLRSGAPEEKPVLTLYRDTNGWC PFCERVWVAVRAKGLPYQETLVPLQKPEW  
YKQMVPTGLVPAVL FGHGETEDKTDEGGSEPTSRRELWVESDAILQALDDKFPD TVRLTRK  
GDEDEYKALDLQNRVQAEGFRFAYGNRNGTATEAELEEIRSGFEAVLDELDEALGAQTGG  
NFR LGADFSGIDAIMVPTLERWRYQLPLTEAFDILEGRPHLREWFEAMDAFPAYSGRVAG  
DEYSWTATASMFLRYFGGGEDKPKVAEG IARADAAAEDLSGGFADGLGSIATPREAALEA  
AAKLVSNHDAVLRDCLGAVEPKSQGHI PRADEEKGPTVDALLRHVASLLLD AARGGERAT  
PLAPPSIRGGRSTGEKTQ GALALRTVAKRLCVRPRDMGAPSAALLRGILATVADDLSPVE

>comp4881\_c0\_seq2; 625 67 1461 LEN=1982; translated  
MLFLSDAFLDFVACNLLFVCLFVITNQWIRLPKPIRFH SFLGGSHFILTSPSTPRWFALL  
SRTKKLKP SDTNGWC PFCERVWVAVRAKGLPYQETLVPLQKPEWYKQMVPTGLVPAVL  
HGETEDKTDEGGSEPTSRRELWVESDAILQALDDKFPD TVRLTRK GDEDEYKALDLQNRV  
QAEGFRFAYGNRNGTATEAELEEIRSGFEAVLDELDEALGAQTGGNFR LGADFSGIDAIM  
VPTLERWRYQLPLTEAFDILEGRPHLREWFEAMDAFPAYSGRVAGDEYSWTATASMFLRY  
FGGGEDKPKVAEG IARADAAAEDLSGGFADGLGSIATPREAALEAAA KLVSNHDAVLRDC  
LGAVEPKSQGHI PRADEEKGPTVDALLRHVASLLLD AARGGERATPLAPPSIRGGRSTGE  
KTQ GALALRTVAKRLCVRPRDMGAPSAALLRGILATVADDLSPVE

>comp4882\_c0\_seq1; 879 86 2443 LEN=2497; translated  
MFAGKFLKQTGSLFSSRGSTDTSAVDERELHDL EGRELQKKTNSREIRSNSSASDYSKEY  
FEAPSMSIDSDIDRLEDLLQMGCM DALFLPQDPKPAAKKSLVKVNSQGHRELNLNVK GAL  
ALGLEAQMR EDAKNRKEGNHSFYLEDGTKVPEFHKNDFRSLMSLSHESASSGDFDDGRS  
DDSDIRNANFNQPFQLP PPHMQQPH PASWQH QHQHQHYNPHMFHDNQN DYYQQQYHQMP  
MMAQPN SPYAMVAHGISPPFFHQAPPQERKSGIMEVKSEVSAPGRMPLQIVLENTSSYE  
EDSCLSYENAAAPDP PQLSSLERIPEDDYSSCASSEKESDTSIVACGSMKSDNGKNSRGS  
NRASKGDVPKEINPNEILPKEI VPKSGKRLTNLERWKKANIQR LYLKKNQMALTGIGSPE  
ESPAAQQSRRGEVNL PVVNDKPEDTVSVGSDEAAQSTVSGEEAVEEASEEATQ PVERSG  
SDNTTDTKTTTTEVSNHRS AHTVSTDDHAKPFDEPETVSEAMTFDSILSRRIEKRRATK LK  
MGTRSDLASLDHDDHSMES SGWDRDDTENHLPSHGHDSSKPRKQERRKNPFEDDDFLCS  
DDGEDEDEDEDEDYHPLLTKSSSDDD GIDIPSPRHYSKPSRPMPLPRAHQGSSPRYT KTT  
VASPQRAVLS PRSNGGNRSGGGFSPSSPRSSYHQKSSPRVSGRVAAAIQKFEKKTPTAKH  
QPQGYQPQKQRSVRANEWHGSIENVSEKMASASIGGKVPQYSPDPVGYGIDEVCSYDT  
PFDES

>comp4883\_c0\_seq1; 1028 203 1969 LEN=1999; translated  
MRFSTCAVLLLVAGVDNIAAAKKAPRSASSRRSSSSGRPSRRSPSSRRPPVSKRRA  
E IYEDDEDYDVGFDDPFDEDEYEDAVDDAESEEEEEEEYRPKRKSSGSSRRPPPRKS  
ASRRSSKYDEDDYPPRRRQSGRRPPPGRRP GPPPRGNRRPGRGGRVVPYTNRRQQPSTF  
TRGLSAIRNSMPDASSVKEAAMKSLSVARETT SGLSANLYREVKGLTSSELEQVMLKATR  
PDDTPVKGKHAERLVGVTYQISARYDIYDAVLRK LKMAEKDWRTTIKALYILHRFSAD  
GSPEHAPALKARVRELRRTRDPKRGKFFSKLLLAGDTSEETAKYRAFLGRYAHYVLLR  
AQCFGMFDEIAAPSAKDTKKKKAAPK PITSTSLKADHLDAKLLLETGLACVLKKG EEN  
ENTALAVERVASDLLGLTTAVTGALTRALKDDDLKGA DPVLIKKWCEFYS ELLPQTRSM  
VKKTAPTLDAYGLFLPSRMGPTLSQDLLQKGLKLD ESSSAGDAEESETSKKEASSDEEKE  
SDHADEEAAGESDAPLEDEDEVEEELDDMEYEYDEEEYDDEDEL

>comp4885\_c0\_seq1; 256 1 995 LEN=1031; translated  
XPVLP SLS DRLGARVALGHDAVGF GFTDRPKDPFWYTAGQSSRIARAVLAKETQGTVEPK  
EPVCLVGHSMGSLSVLRLALLLPEETPKLVVLS SPALGLLKRRAEPKTPPAARSILRAIG  
AGLAKKMLLPPSRYLLRRAIGAEGAWKKGLEAAWGDPSALKEDSDVLRYSWPSIGAGWED  
GILRFVRAQALPAEDDLEDDAVLLEKVLLELPSTRVVLVVLGERDRVVQGSALRAFLESVEK  
APRAQARFSPVVVELDRLGHNAFEEDREVFCDLLERLVEDHWDG VVADDDYDGDWQDGI ES  
NPIHTIRGRVATQYCYPAASKSRTVVRAQYF

>comp4886\_c0\_seq1; 513 106 1938 LEN=2938; translated  
MKGNNRRGRVCNGVALRWMRDPQMRRRIILFTIAASGILYCIVDRIQMTSLLLLSPLDDTY S  
NSYYLRSSLPSSTTDIHRSTLSGSAEPEHQNNVLCDFYLAESAIPRGGLGVFTTLPLNKG  
DQAQGWPDICIYLT DARQSKGTEIDTHTWQSFRFGAQLGGRREVRAACMGLVTIFNSMG  
MKEYASARPDAKAGLIHTNGGLDRSRDPGAGAITHYYGASSVAIRDLLPGSELMLWDSGH  
GGDQYALDEVKNDGRSELGIELVPPP IRSPEWLQKHGMCADNIQVKLATDP SMGRGAFAK  
RFLEKGSVIAPAPLQMYPNRSKFMPTDQERKRREKALDIKYENDQLLVNYAFQPKGSTL  
LLYPYGPVGLINHANKKSGKINAVLRWSNHMNHGTQWLDSSFSLDQFWKMQYPGSLIL  
DFVALRDILEGEEIFIDYGT EWEEAWKQHVKNWKPYVSSKNHYVYPADEM SRHRDPIKPY  
RTELEQETKPYADNLMMVCNTDISDNRKARRKWKPTKFWAENLAEC SVLTRS YDES LKTF  
LYQVQLWPDEEETDSEDGKQIKYVDFDVP HSAIRFVDKPFQSDQHIPNAFRHP IGFPEEL  
TPSFWKNDSD

>comp4887\_c0\_seq1; 431 82 1308 LEN=1490; translated  
MTSSSKKSSRQLTSAILVALAISSNPQFADAFVPP TNSVTTSESRSTPALLAGFGSSASP  
SPKNKKKKGKRGKTKNTSETPDQLKQRWANKMKKVYGGTSKEAIAAGTEKRI AHLMKNSLD  
ESVQKALELREIVQMFERRITGMGPEDIRQRY SQEELTAIQNRRTFEEHMETNDLTEED  
LQVAMQKLTWDASADAKACRSVTGNMPATFKNRVTKAAQVAYEAATDKE SLVLDVGCY G  
VLVFPFLKAGFKPSQIHGVDLSGEMIGHAKSFYDPVASKGSFEARDFFGDTEDDQKNKYS  
SVLFC SALHDLDPKRAL LKARDDL DKGPGSRLVIVHAQGA FHVLNQNKNQNP LLVPRGL  
PTS AELKEWLCEEGEDSGKSSMKLVHEPAEPKSQQEVREGYLAVLETV

>comp4888\_c0\_seq1; 326 329 1549 LEN=1846; translated  
MATESLFD PQKQFLSKPLRQRMQT TTFPCFIVVIVVAIAASNLSLSRALS NQRCIHRSR  
RSVVSSFS TVGFHPAIGSMKAEHANGVKTFRSGVQLYASVKSSNKTRKRKQKRGSKKVS  
GEEKKRGSPAPAPGHSVSEDELHQHLDAQFN YGNSSPVGPRSRLRGIIEKDGGEKDGIED  
ENADTKMREQQFFLRQLN NRPTLV LNANYLPLGYMPLSLWSWQDAVKAI FKGSVTVVDVY  
PDITVRASNIKVPLPSVIALNDXRPPEADQARVYAQERLSEGRVHMPV LREPVP HDGPLP  
RPRDPEIDGRPAHVGEHRDL LQEMQRQEV EHTAGRTGFDRDEAE PASDLSHPGGTGGEV G  
PDDPQAGPSDVEALPGHPGTAAPSSASGASGTKGDEEFIDDRYFEE

>comp4888\_c0\_seq2; 298 329 1669 LEN=1966; translated  
MATESLFD PQKQFLSKPLRQRMQT TTFPCFIVVIVVAIAASNLSLSRALS NQRCIHRSR  
RSVVSSFS TVGFHPAIGSMKAEHANGVKTFRSGVQLYASVKSSNKTRKRKQKRGSKKVS  
GEEKKRGSPAPAPGHSVSEDELHQHLDAQFN YGNSSPVGPRSRLRGIIEKDGGEKDGIED  
ENADTKMREQQFXSEAI EQSSNVGIERKLP GK FATNHCGAFACWRISMVSGKVLPSPR LQ  
SKPLSPVFSIATGLYATESLVVAGCRQGD FQGQRHRGRCLSRHYRSGIKHQGAPAVRHCP  
ERFRPPEADQARVYAQERLSEGRVHMPV LREPVP HDGPLRPRDPEIDGRPAHVGEHRDL  
LQEMQRQEV EHTAGRTGFDRDEAE PASDLSHPGGTGGEVGPDDPQAGPSDVEALPGHPGT  
AAPSSASGASGTKGDEEFIDDRYFEE

>comp4889\_c0\_seq1; 943 259 2715 LEN=3004; translated  
MRIFAAALLLLNTDGN SVGAQMMGGYGARREEKHHRGEYHEEPEHILTKEEIGDRDRFW  
KRNLVEESIVHEGVNHYHNIKNCIQERL TEKEFSELKTVNNHSVRSIGRTIDDPNNHGIP  
MLVTVENAMHP THVRAVQTLASCIR SFLPHLYESRAMYQEMNLDEDDGSGGNCPTH LAPL  
VGVFLPEVDREMAATLEVAYRGT PGIATVKEDQADPHMPRDKKLYPPAEVGV RASEHLT  
YSDFPRLAEHHDGDTCYTMNFAFSAPGDYEGGEFFILSYDDDGENEFRDTIKPNQYDALV  
FLGGRYLHGVNEIHGGHREMFSTELWAYPDT PFGSSLWSNFPNNMEDYVERCNKEQAKTG  
SDTCTLPYDLITPFADSREEV RKKYEGGGDDDEDDDDAKQYDYDRSERDGHGDPLPP  
PLPGIDRQH DNKIRPNRVRPN SLRATR VVFTDGYGKEMELDDFY PHEDEPDFLVPKKLG V  
AEMEP IRWREDLSPVDGPDGESFVIGFPPELHEEFKKYVARSGMMRIA HQILYQEELEP  
DEQRIYTLDDGEKWTAMVQGSWDTDMVWLD PGDESCFESLLGVLRRGGFDKVLDKVGKTF  
DLNGLMIQGVGAI FLSEYTKTENMHVDI PGRSGSFYNIIVPVHI PADDVAIFKISDKGDD  
FQGR IKLDPNVGVVLGGESRHGTGECNYRKR EDRFLSFAVYVADINDENIEMIAGDSTSL  
WPTQGD TFFFESQKRLWTRD GKNSLARDRGRAPMNIQDSLPECATMDRDLCTR DVQGM R  
LACPKTCELYLEDDVYYSRYFPNRTAEPPTCDNPACDA

>comp4890\_c0\_seq1; 544 1 1736 LEN=1919; translated

XGDTPTDVVKESIEGSREVVDQIYKAEHENLKTHMAHMENDETNVDEDSDDDEAPDLIAI  
APDRVEKRPDGGGDGAPASNSPDGSGVETPPPCPVITILSGFLGSGKTTLIQYILKSPD  
HGRRIAVIENEFGEGLAIESLIARDGIDPGSGSLQDLIELPNGCVCTVKDSLVTLENL  
IAKRSLDLYILIEASGMADPGPIASVFWLDDALESRLKLDGIVTLVDGRHILDQLEATEE  
AARQIAYADRILLNKVDLLEGNAPGESVTASSVRSRSVSEVEQVLRKIHPTAPILRTSFS  
KVPNLDWILDADCFSGFDHLEVEHGLAHASSSAGKTHGNSERGHGHDDHNNHHHEHGDGH  
DCSECCEHDGTDHHTHEHHHHHADHHEHTHTNSISTVAFEQPGTVDVARLNAWLADILWPN  
QDETDKVLTAHLRQEEDGGKHDEGRGDPPMGNTRNGRHESGSKEGTQQQIFRIKILSV  
EASDDYFWDESGAGDVCDSEAGGRGSSSSSTTTTTLVLDPRRFIVQAVHDLWDIQPV TSA  
NLHWNTGEERVGKIVVIGKSLREADLRAGFEACFLQDA

>comp4891\_c0\_seq1; 167 82 444 LEN=1335; translated  
MPAPTAHRHMSAAHASTEGRNSNSGNHRQNHHRRLQSHQSAANSQARLEQLFDEQDHR  
CSEGNRKALLAENLDQLRGLAKVLEADDWKYHSNNTNSNNTFPWPSTMLSSAGGGSNHA

>comp4892\_c0\_seq1; 123 1 869 LEN=1011; translated  
XSHSNSSHSSQFRSNSHLRSNSFPSIHDQDRRWVPALPGPGKTHHLSQLPPLRVRDGV  
GVRVRLWALPAPAPPLSVPRCWVPEANAAEAETEAGAAPTXTIVRWSSGPIGSGVSPD  
PPERNAWDALWLSGGPLPESLHLDEETAGEVLELVLVGSFYGSSVFGCHERAASIGITGSL  
LEEVCGPEVVLGLEGSFWHKRSTVLGRAAVWLNARIPEVASVVVSDLEDLEDFEERDEE  
SGEVLFRDRKSEDFNGDRATMEYQGLDPDRGPFQPSAMGGGGSMINPA

>comp4893\_c0\_seq1; 169 1 839 LEN=973; translated  
XENEFCLNEKGTAVQKCFLSHSKEIDRAMGFPTDTFYEAFPWARKVHTLLNQWTS  
SHIPPPPLPDPGTRKILLITAHPLPESFSMAIAGTVEDTARKEGHEVQRIDLGLERFSPSLT  
GDERAGYFLDRDQETRKTLPHQIRGYIRKLRWCDTLFVVYPTWWMGTPAVLKGFFDRTRL  
LHHTWGFPEAASPASILPAGLAPGLTNIRRVVIGISTYGASRAAVLAAGDNGRSMISRPIT  
AVFHPDCTVLWHGLYDMDFTTLPQRQAFLEVEATVRDRV

>comp4895\_c0\_seq1; 503 186 1715 LEN=1910; translated  
MTANAEARALLDQLMGVERDALLPAGAALPRKNRPLGDGGMILPGAARSKSCYDRDIDP  
LYCAWGVDIYELFVNTKSDIGPNPYTADEAARKEYVSLPREEKDRLGYESRFLVVKLQEL  
VQHCDRTVNRNHEKLRKRELQRQAQKRGNDYVVDVSEEKVEELVRAECQLEDMKEDLVKAL  
KILDEVQIKEEAILDEQRKELMLKKAKEKPNETNGETTTVKAEEGGDEPEKAVTKEQETPD  
AAVKTEDEQGANPTIVVDRQGVESDSTNNEAIKTNSDGKLEVQKDDGDRKELDKNDANG  
DPSGSATLEELGKLALQSLCQIATIIISQLGPQEESEIELHAKLNFVRSDDTTDKTV  
EVSGNFMASARDADERIAAHYAGKYVGVWKLVRDKYQEMVKKYGRYGPGRGGGAPLM  
SHQKYQQMQGGGGHGDRLDRYRGRGDDRRGGSSYGRDGRWERRGGYGRGGYGRGDSRGGY  
DDRRRGSYGRDRDRDRGGYRGGGGYGSRR

>comp4895\_c0\_seq2; 485 539 1945 LEN=2140; translated  
MILPGAARSKSCYDRDIDPLYCAWGVDIYELFVNTKSDIGPNPYTADEAARKEYVSLPRE  
EKDRLGYESRFLVVKLQELVQHCDRTVNRNHEKLRKRELQRQAQKRGNDYVVDVSEEKVEE  
LVRAECQLEDMKEDLVKALKILDEVQIKEEAILDEQRKELMLKKAKEKPNETNGETTTVK  
AEEGGDEPEKAVTKEQETPDAAVKTEDEQGANPTIVVDRQGVESDSTNNEAIKTNSDGK  
LEVQKDDGDRKELDKNDANGDPSGSATLEELGKLALQSLCQIATIIISQLGPQEESEIEL  
LHAKLNFVRSDDTTDKTVCEVSGNFMASARDADERIAAHYAGKYVGVWKLVRDKYQEMVKK  
YGRYGPGRGGGAPLM SHQKYQQMQGGGGHGDRLDRYRGRGDDRRGGSSYGRDGRWERR  
GGYGRGGYGRGDSRGGYDDRRRGSYGRDRDRDRGGYRGGGGYGSRR

>comp4897\_c0\_seq1; 1103 175 2520 LEN=2817; translated  
MMALDCGSLEFLSPFPLQPVSVDNSDFDELPEERLEITRRNLQEVQANLRIKNSEYEDL  
QQEMKFHAIKNEELMDVVNAFRSSSVDRSRDIMKAKAEQNSLTLQNHALRDLTLTKSGEE  
IAALQQEIREKTAEGESLSSQKRSHERLQAQLNDLVKTLKVEVSNVDIPSEWINFKWIG  
IGGKGDASDITYEHSKAIELISGITAMNADRERLLKESKLYSQSDGAKEARIASLERQL  
RQTEHERDELKETTDALHQRMAVREGKIGALEELFQNIINSNRTLEARTRRKSQVSMDRSQ  
RSLLEDDDDDEDYDCVDIDSTAGDKSVAQTFEEMFVNIWTSVTGGSRGDDNDDSSRGN  
SSQASTCLSTNSYHTKQIEDELQAAARQEFEEELQESHQLLNEDYESAQFKISDLSARLEE  
TTIKANSFEKKAGLREVMLKDVIIQQYKELQLEHSSSLDRVEQLKQKVKVVFVQREQEREQE  
RIASEAVTANGNVKGSSTVLLVEETPTFDMSERTERTSNDTEVGEDSPSSPSHGLEKNFA  
MEDYERLETECDRLQHEFDVAIEKINELEKALETAKAEVRDSQATQVEQARKIALLEGEK  
TDLQERLIEASAKIMDSQSTHTQRTVQVEDELRLAELREQEARAKQVQREKDLWEVIEQY  
KKLADEKESTEGKETEAEQDQMLTKVKIKQRDLVYERYRMEKALEEAVATEQQQLASDME  
NAKNEAAKCREETKAIRKRLAGCHSHYKQLREEYTLQEQENEELDYRLSEAQTNGRVESL  
S

>comp4898\_c1\_seq1; 521 10 939 LEN=1029; translated

MTNILLVLLSSFFVCAAAFSELPVLPSPSPSVAGRSPARYRMRNPTLSAGPKPDLEELEPG  
VSDSNFGRMAYWDESYAPQSSSESGPSEEPNVFSWYCGWEDELGPFFFEELVPDKEALVLP  
GIGNDVAIRDMFVGGYQRLMAFDYAPQGVCECARAMFGEDRLRTISERLGRGRQPPQTED  
TDGNGVLRVCDARDLSSEYGDNTFDVAVLDKGTDFDSIYLSGGKDKKARANLSMAVAEMKR  
VVKEDTGIIFSVTAACVDAVREAFDSDEDWHQLRDLGSMHITEDGYASNNVDATMLAWQLR  
RGSTGAAAT

>comp4899\_c0\_seq1; 251 231 1193 LEN=1758; translated  
MGTSKDVKSKNKDTGSSKTTSFSAAAKFLLIPTTATFILSAMGFSYTTIAALPYVVIKSRM  
LNADKGESTAQFWTKFLIMEVFYCAMLAFVLLPMFQFTGFHTLAFYLPMTITL  
HRRRHQYGPFGTFVQTFVDVPLVAGYICRELFGLRLLAPWADILDITIVQGSPPFPD  
IAVLAEPYINVGLIINMCREYGGAKDEMKRCGIVQCYLPHQDTPSYESLVKGAHIKQ  
FKKHNPVKRVYVHCKGGIARASTMSLAHYVSNEQDPSVAIRAMKTKRPVVFAGVKDFPA  
IIKLNDRLSKEQQEPKAK

>comp4900\_c0\_seq1; 427 370 1605 LEN=1947; translated  
MVIQAQTGSGKTLTYLLPLLSKLENRASVQAMIVVPTRELGLQVATVAKRLVARRFMVMS  
LLQGSQKLRQRAWAWAETPQVIGTPELDMVQYAGLPRISSIKTVVVEVDACLHQS  
GTSLQGSNIKNSDARTLSSSLHVLLSKFLSPTYADDGIDEDDVIADDSNKKRKRKF  
RHRQTIFCSATIPQHRYFLKQCKSNQWTLLEPVYVCTSPGEALPPTLKHAYMVCQSKTKK  
MGTLRNLLKLNSTPNKVMIFVDSTRPLDSIGKNLSDNLDEGILYEDRKTILDDIESKPV  
VSILHYDDSLSRAGATKAFTGSDFRVMVTTDLAARGLDILGVSHIIHFDLPPDADTYL  
HRSGRAGRLGKKQVISILSDDQEFVLKRLMNALNVDKCVGRQKAKKNS

>comp4901\_c0\_seq1; 1079 266 2884 LEN=3156; translated  
MARWFRSEPMYVSLILNEDAAHDCLADLGLGLVLFQFTDLNPELTPFQRRYVSYVKRCDE  
LERILRYIHGEIDRFEDLELAPAGSVDSFLEESVGTQKTDRSGNSKLDVLETDLGGYERQ  
LRELGLYSEKLTQHYNKVELQQVLEKARDFFRDRNESTTTPRLDIMRFQSIAGVISTE  
EKVRFERMIFFTRGNLSVSPAPIEEPITDPETGKEADKSVFLVFFKSKAIEVKLKRICD  
AFMAHRYTLPDMDLATVEKLLLEENARELEDSETVLKKNRDTRYKLCCKELAAKCEKWTWI  
VLKEKAIYHSLNMLKADVSGMLRGEVWVSENDDVARAVDRAHSSLDMAMPSLVKPVQD  
PWPTPPTHFATNKFTYAYQEFVNTYGIIPRYREANPALFTAATFPFLFGVMYGDIGHGLFL  
FLAGCSLVWNEQAVENGPKPDELTAGLHTGRYMMLMMGFFAVYAGFVYNDCFSLGMNLF  
TRYSGFDGMDGTTEEGDVAVLNAPYGSDESVPYFGLDPIWHVASNELFFNSFKMKLSVI  
LGI IQMSFGILLKGSNAVYFKQPLDLFLEVGMVVFATSLFLYMVVMIFMKWSIDWNHRM  
SLATCYDPTGTEWQSDWTVCDGGTQDANGLCTPWGHSCTDSDTTADKCPDYGGSGDGCQ  
PPSLITSLINIALAPGSVDEPLYAGQAALQNLNLLLVAVVSVVLLAKPIVLHQRAQEAH  
AKEVHVAVDGCDEEHGHGGDDHGESDEEHGFGEIIHQAIETIEFVLGMVSNATASYL  
RLWALS LAHSELAQVFWQKCLLTLPLGWLPTYLGFLFAAITLGVLLMMDVLECF LHAL  
RLHWVEFQQKFFKGDGVRFPYPSFKQIITDAM

>comp4902\_c0\_seq1; 108 1 381 LEN=413; translated  
KKSVMGRPRSTRGRRLHDSEMPPPPVPNTNSLVSGPMKSVEGWVIFVTGVHEEAHEDDIRE  
AFSDYGRIKSIVMNADRKSLAKGYALVEFIERNEAQDAINALHGKPLLQKIGVHWAF  
KSNSTR

>comp4904\_c0\_seq1; 286 207 1097 LEN=1280; translated  
MTEVIFSSHFASSHPCNHHHSLQSSNSDFVDTKKKTLMTTEATDFIFLNQALPIDFEP  
GEFDVICSQGGKAKVHTGNIYFRAVVQKRAKEYSKTFGKKDKSKIVRDI IQHIQTKSPSG  
GFVQKIAVTETIKGRCSWKLIDAERAREKVSQCLRNILVGQYRSSQDAKKRSRKESNLKK  
IIDFQEI VASNHVFSERIRQLAMMIRKNCLSEPQFLRLMSKTNLEI LLELKNQTVQRKV  
QSRTPSTVRNHEEEVEFANESFPSPCTCGVDEILKKFQSDEMYILLQQPDTKRRKTK

>comp4905\_c0\_seq1; 487 333 2514 LEN=2646; translated  
MKI ISSFTVCFALSTVLFAAPAIHGMPANPLGSFIETQPDGTNITLRLHGDPHDAWMTDE  
HDYTVVKNSATGFFVYAQPDGNGNLEPSSEIVRDSNDDEREVFFEEEEGHQKLPSSNSD  
SVVDTQSSPSTTVNGTVITTISSFNKQKNIRPTKRDCRDKICGEHDERGDNHQENILQGL  
RGVNTSPSTNTATSFVASTYAKRHGDGPGKVRRLNVLVLLKWSHDNDRVLPREDYEV  
MNNRGP NARFCPTGSVRDVFLENSYGALEVDSYVTDWIPMDNTEAFYSNGDKGTTTRI QD  
AIRYALNYVDGRIVDGVSVYNKVDFDFDEDRDGYIDSITFIHSGYAAELGGTDFYGRFY  
EER IWSHKWSLYHEQFQSKKGRNVVSTYHISGLWGLDGSRIGRIGVLAHEMAHFLGLP  
DLYDHDSSSRGVNYGLMANSWGSNGQQLHPPYMSAWAKMILGWVTPIEPTPGTNIIEAA  
AEQNPFQPVYIIQEGFPEGEFLLIENRQPVGYDAYLPQGG LAIWHIDYGSTKSYNIWDV  
YMRQSREGYP AQEGWPENGNHYAVALLQADGYDLEMGFNFGDYEDLFHASDVDELVPCR  
RKHDCQYPNTDSYQGGNIVRSNVHITDISESGRIMTFDYWVGEFGTIPTNSPTGYPTYFP  
TSFSPVPPTIAPTTEKERRKGGKAGSAGR IANALVAF AERADGGYSKTNTGSLAGVERKN



EHSTKA

>comp4906\_c0\_seq1; 144 1 898 LEN=974; translated  
RKNVKLTLQPLSADVEFFPEHDPMSYDGMRKVGGRAQFATSNYFWSSSSPSPTPQQSTV  
SPNSFFGSDNEHGKYGNQHGAPLRRKAVDYSKKCPQYPARKFYVALDCEMVGVGINSRS  
SLARVVIIDWKGQILFDEYIKQSEPVTDYRTFVSGITEQDLSQATMSLETNRNRVSAILF  
NHILVGHGLENLNLVGINHPWWMIRDTACYEPPMNNRNFVLMRKLKDLVHENLGKEIQ  
EFGKPHSPYEDARWAMNLYKSVRSWESSVRYLVQRSVIESSIGRLHIECASRSQMIY

>comp4907\_c0\_seq1; 780 255 2114 LEN=2245; translated  
MINFIVLSIIFCIISSKNGSFKNFIDAFVIREQNTVIRQCQDQSAAMFGSDAFNICRSRR  
GLNTGKGTDLRNIRPRKVVASQGTMLFESVVTDDDVTGREQNQILSKEPTNSSLPTSSQ  
SKASSTSSQIQVMPMDEKSAEPSTNTATTNISGKANDMTTHDKTALLGKMKESAEKDN  
ADLPHPTANGGYSHTKASRAKISAANKGKTPWNKGKARSPEVRARIAAGVRRARNRQVFLK  
KLEDIGMTEEEYEAKKKEERRIKEAERSRRTANGGYRPTETKKKISRILKEKHAKGEV  
KKRAKPDPNRVRGFTHSEETRKKISQSLRKRWQNDKQFQKKMKDSFTNREDVRKKISDS  
LKKKWQDPEFRNGMMDKMSKRKSGKDAMSYYDDNHRKKISEAMKRKWQDSSYREKTLTSIK  
KSAQTRKVSSPRAKQKLPKSKPSPTRTKSPGIEEVKPMKAGDIPKRKTTRKRVTRKKTIT  
KKAVKVEDGINDSSDGNSKVTAMTAVKNVRGKRKSIKGVTSSEKSPSVSSIGDKGPIAS  
KEKKKTAKKKKKEKDGSVTRLREERRDLFDLLYGDEDEMNDDEEQNLGKLLSDSSSDKMD  
ILFGDEDLDAFDPYGLDDY

>comp4907\_c0\_seq2; 338 1 778 LEN=909; translated  
XCAWTSYPSSRYEILDKMSKRKSGKDAMSYYDDNHRKKISEAMKRKWQDSSYREKTLTSIK  
KSAQTRKVSSPRAKQKLPKSKPSPTRTKSPGIEEVKPMKAGDIPKRKTTRKRVTRKKTIT  
KKAVKVEDGINDSSDGNSKVTAMTAVKNVRGKRKSIKGVTSSEKSPSVSSIGDKGPIAS  
KEKKKTAKKKKKEKDGSVTRLREERRDLFDLLYGDEDEMNDDEEQNLGKLLSDSSSDKMD  
ILFGDEDLDAFDPYGLDDY

>comp4908\_c0\_seq1; 193 122 1291 LEN=1809; minus strand; translated  
MPWVRNKSRRRWTGQDQRAPAWPRGAPPPREPLVPGSGIAAGSARNAVHTHRWRVHSI  
RGRPVVSAVRCALPPTGARRWFLPEEVHQRRRPFPGNHVRRSRNNNQIAHRPVRDVPRSV  
PQVVGSLDDHEFLGARLPDGFELVRERAVLAQAGIEGPHRGPGLPAELPLGVVQPGFDVA  
VLASAAFVPLCEEEEPGEKLDERALLENRKGQPAQDPGPEQAVVPPQLGSRNGGHHVPPG  
RRGGQDQLLDGGRVPCRQQESHGGQPPLRHHRRRGRPGGFSTVPVVDLPHEGLAAPGPP  
EGEGEAPLVRVPGVRSGLDPAADQVGGVGPPEGGAATLCRLSLVSVLDAGQEGEIPGAKP  
DPDGVNEKNVVVVTAAGFVFAIATVAAG

>comp4909\_c0\_seq1; 298 1 544 LEN=1014; translated  
SNLSTAVFNDEHIDAELKRINQKEVIMSSNSNNTQGNIFLTENLAFSMPILVLCSTYAY  
FKIVPLKYGVPILVGVFVILQIRGQVKTTLREKKIENMDESDMNDLALELEDDAEDKKEE  
EEARKLEKKKARLAERLAAEERKAEKAARNQGGKSGDDDEGDVTVFAKGSRNQKKKN

>comp4909\_c0\_seq2; 303 417 671 LEN=1141; translated  
MDESDMNDLALELEDDAEDKKEEARKLEKKKARLAERLAAEERKAEKAARNQGGK  
SGDDDEGDVTVFAKGSRNQKKKN

>comp4909\_c0\_seq3; 303 437 691 LEN=1161; translated  
MDESDMNDLALELEDDAEDKKEEARKLEKKKARLAERLAAEERKAEKAARNQGGK  
SGDDDEGDVTVFAKGSRNQKKKN

>comp4910\_c0\_seq1; 412 111 1908 LEN=2029; translated  
MFVRDVVVSlyfCALCTLIIMDGsvATEHRRNRHLTSQFKKRQRIGNDNHHGMQNSKRS  
LIVGGKDATQYPGSIVFLSDRIDDLSCGGTLISPTIVLTSGHCEVSLVTHAVFGRYDHP  
DRRSTGKFANSREIRIPIKQEILHPDYDDISLTFDVMLLVLEISPNDHSFAEVTEKIP  
YMRLHSPDISIDHIADSLASPNGGGIWNAGAPEQTNLPLKAVGWGYNVDPTDDDLPTP  
KSTETLQEVTLNVRNEVCLRNVEDKVDNSQKYRYRITDDMMCTYAKDRDTCNGDSGGPIM  
IPNPNPNSPGEHRFIQVGIISWGEDCADHAYPGVGSRIASSYDWIRDRVCSIDGASAPN  
EFGCVLGDHEFTSPVPSASPTTDEDKLVASVNLDALSMDFRSGDPSDVQVKVAIEIFLD  
VFAKETISWVSLVETNTGISVMRISEKTYQHEDRTKHEVVLTEGISYTFNIKDAFGDITQL  
GFYRIYVIDETKENDIGRLLVKGLGKDFEFERSHTFVVNSPATPNPASSRPSPTPTP  
TATFDENTPIESGSIKRQFHERFGILKDVPSYLKTPFAISKHCETYCTNALVKEQYL

>comp4911\_c0\_seq1; 578 241 1991 LEN=1991; translated  
MEGGNAAPSATGEQGVFNAGDPSTTTGGSGNSGANGNDGEDGSGRGGSRRLSNVEQQ  
LLAEDNAATAGGFYPRGPAPGLQGVTAAGMGMYGGANDAAAQGVRAQQINSIYGAAGLGG  
TAGLGGPGGFRGVPGLLPQGFEDPSGGLAGLQAGGVGGPPGLGGLNAMNGLGVRGPASA  
LQQQQQQAMVAQQQVLAAQQQAGGADFQGLMPTGFEGADASGLPGNLAAMTGYPMFNPAA  
AGLGVGADGSAGGGMMNPNAGPLGGGAPSAATMQAVRNATAGAPSLFDQGYQFARSEMA

LVRHQAAFNNLGMAGVGLAGLDRQGAAGLRALGPNPYGSYPTDPMGMGAAGPVGTDPYL  
ARGGAEGGANAQHLATIPAIRLAQHRSALQRRMMANNLPERKDGSPVVLVYQESDEHKLT  
AYQCLLRKQLELFEADEDVRCSTRQGR TAPIKLGQVGLRCRHCAGVQLAARTKGAAYYS  
QTVEGIYQIAQNMSKVHLCECYRIPRDVRRQLIVLRSDCRAIGGKEYWSENI RALGVY  
VDEGILRVKKAPKEESKEESKEESKDEAKDEPMEEESKEESKGEV  
>comp4912\_c0\_seq1; 425 1 1414 LEN=1564; translated  
XFVVSALLSKMGFQTVLTFEQRKASYLHVLFGLIASRLHILAKAECGSFGCSLTAVDII  
YDESAREALSILRQTDPKKNSHDEGTNGEYIDSLKLLDQRSEALSKEIAGDESKTTLTL  
RGYKGGRLQDQINQDRAMVVS PMDILTNSKSTPIVQLLGVFDGHGSGGEKTSQYAVEQI  
PSLLATKLGAI FRNEDDRESRKQENLIAESDSPVVEALKETFDEVDKNDPTRGDAGCTAT  
VVLRVGKKIFIANAGDSVSFIGIYITGESISTHLQKQVQIVYQSREDKPDLPDEKARIEA  
AGGYVSI PPDDNGDVSRAYYVDEHRRRLRYGLAMSRSLGDWKVQGVIAEPIVDVLTLEDEVV  
EQALSTYAKACGSKIIEESEEF GDESNGSCHVVDESDIHAF AASISDGMMDYLN TNDIGQA  
LAEAFFDSENSSHPHSA AENLITSAAMGWEGEFNGQYRDDIAIASFIVPLR  
>comp4912\_c0\_seq2; 256 1 1122 LEN=1771; translated  
XFVVSALLSKMGFQTVLTFEQRKASYLHVLFGLIASRLHILAKAECGSFGCSLTAVDII  
YDESAREALSILRQTDPKKNSHDEGTNGEYIDSLKLLDQRSEALSKEIAGDESKTTLTL  
RGYKGGRLQDQINQDRAMVVS PMDILTNSKSTPIVQLLGVFDGHGSGGEKTSQYAVEQI  
PSLLATKLGAI FRNEDDRESRKQENLIAESDSPVVEALKETFDEVDKNDPTRGDAGCTAT  
VVLRVGKKIFIANAGDRYVWFVGLSFLANGXMTQRGPQPVYQRNSVSFIGIYITGESIST  
HLQKQVQIVYQSREDKPDLPDEKARIEAAGGYVSI PPDDNGDVSRAYYVDEHRRRLRYGLA  
MSRSLGDWKVQGV M  
>comp4912\_c0\_seq3; 287 1 1039 LEN=1688; translated  
XFVVSALLSKMGFQTVLTFEQRKASYLHVLFGLIASRLHILAKAECGSFGCSLTAVDII  
YDESAREALSILRQTDPKKNSHDEGTNGEYIDSLKLLDQRSEALSKEIAGDESKTTLTL  
RGYKGGRLQDQINQDRAMVVS PMDILTNSKSTPIVQLLGVFDGHGSGGEKTSQYAVEQI  
PSLLATKLGAI FRNEDDRESRKQENLIAESDSPVVEALKETFDEVDKNDPTRGDAGCTAT  
VVLRVGKKIFIANAGDSVSFIGIYITGESISTHLQKQVQIVYQSREDKPDLPDEKARIEA  
AGGYVSI PPDDNGDVSRAYYVDEHRRRLRYGLAMSRSLGDWKVQGV M  
>comp4912\_c0\_seq4; 394 1 1497 LEN=1647; translated  
XFVVSALLSKMGFQTVLTFEQRKASYLHVLFGLIASRLHILAKAECGSFGCSLTAVDII  
YDESAREALSILRQTDPKKNSHDEGTNGEYIDSLKLLDQRSEALSKEIAGDESKTTLTL  
RGYKGGRLQDQINQDRAMVVS PMDILTNSKSTPIVQLLGVFDGHGSGGEKTSQYAVEQI  
PSLLATKLGAI FRNEDDRESRKQENLIAESDSPVVEALKETFDEVDKNDPTRGDAGCTAT  
VVLRVGKKIFIANAGDRYVWFVGLSFLANGXMTQRGPQPVYQRNSVSFIGIYITGESIST  
HLQKQVQIVYQSREDKPDLPDEKARIEAAGGYVSI PPDDNGDVSRAYYVDEHRRRLRYGLA  
MSRSLGDWKVQGVIAEPIVDVLTLEDEVVEQALSTYAKACGSKIIEESEEF GDESNGSCHVV  
DESDIHAF AASISDGMMDYLN TNDIGQALAEAFFDSENSSHPHSA AENLITSAAMGWEGE  
FNGQYRDDIAIASFIVPLR  
>comp4913\_c0\_seq1; 305 1 1291 LEN=1347; translated  
XQDQSY PSTKKRYMIQRNHRKQONTKPNDRGLGSNDIPTEQYYGSGRSDLIMGHKGRPF  
GRCRQFHIAASAI SVVGAATSVPMI VARGGGAPLPPPLPEPAGDGASRIREALRKDFPEI  
DALCSDAYLESVASV PGRSLDYAIHRKVRESLEWRRCYGVDDLRS AFLHVRGEGGGSETH  
PATNGGGVFP AHAQEPSDPEGGVREPKEVNATPTTSDDSPVSTNSENGTIRESHFVPT  
PELVEVCASGAFVLRDEEMIGDLRDP AVQRDE DGSFRRENCRRLV VHADTSRLNWWRTGV  
TAGLQYHVLVLEEALERIR TENQNRERNLRESVGE EAVGPLSESLVILVDTTNL PRLPPP  
LSAPRGM IQLMRKAYPDRIYRIYVGPVHPWLRKLYNYLSSSLRPRTREKIVLLDEAPSLA  
RFGSVRTSLQ  
>comp4914\_c0\_seq1; 452 365 1703 LEN=1983; translated  
MKSSTFLPAAVSAFLFITAQPSEAYIAGTKTKPKAPLIKKRIARSVDTTKIGSITVPTVGT  
TGTISWSSNKIFSTENKELDNVVAEAYRSNAFFD TAERYGTHFKTAFGMGYGETERM TS  
KYLEKAKLAEGPSLV EPVVA TKFTPI PWR TT VQSVVDACEQSCKNLGVDQIDLYQIHMPD  
IVQPLRAF GKVETKDRIYWEGLAECYNRGLVKNVGV CNYGPTLVEQCHEALAEKGVPLAS  
NQISY SLLGRHNGS QETIDKCNQLGVKVLAYY PFAMGLLTGKYSNAFISENDSLNGR KKS  
NLELADLERYAYGDGESIPEGGIQPLLKTMATI AKRRKKT LAQIALNYIISKGAVPIPGC  
RTVEQLEDNLGAMGWRLSPT EVKMLELEADKLGFGFDGAGFKRTNEKFVVTVLKNGHWIE  
NNILDEEVMFKSIS SAKQNKIVAMV  
>comp4916\_c0\_seq1; 464 68 1642 LEN=1771; translated  
MKRYLTAKALAFALASQKSTKAFSS IARAVPNSFR T SRNGNSFPSIKSGYNSVVRNMV  
QGVVIDNENCLVNTNPATGEIISR VKCTSPDELEGI IETARASQRAWRMKSLEVRVGLL K

ECIEELAAVSDPMIKLIVQEMGKPIGEAKEEVDYAVEDQDEYFDILLDAIKPKAYGKSTV  
VRHPYGVVAIMSPWNFLGEMLLALPSLASGNTVIVKPSSEVVPETGALMVKTMQKILPE  
GVIQLAQGSGSVGAALVAHPGIDLVAVTGSSATGKKILEAAAPQLKRVILEMGGKDPMVV  
CADADLEKAARDAVMSLSNTGQVCCSIERIYVADSVYDEFQELARVAAMDYRVGNMGDA  
GNNVGPVMSKMQKDQVHEQVEDALAKGAKLLHQSEIPETESNKGGSFYVPTVLADVDETM  
KLFTEKTFGPVVAIAKFDGTEEEAVRLANDTEYGLGSSVYTKDTRKATRIASLIDAGQVG  
INCYPLDNMGVQCPWVGHKASGFGFHSGKDGCLQFSIPKTIVSG  
>comp4916\_c0\_seq2; 252 68 646 LEN=784; translated  
MKRYLTAKALAFALASQQKSTKAFSSIARAVPNSFRTSRNGNSFPSIKSGYNSVVRNMV  
QGVVIDNENCLVNTNPATGEIISRVKCTSPDELEGIETARASQRAWRMKSLEVRVGLLK  
ECIEELAAVSDPMIKLIVQEMGKPIGEAKEEVDYAVEDQDEYFDILLDAIKPKAYGKSTV  
VRHPYGVVAIMR  
>comp4918\_c0\_seq1; 412 157 1792 LEN=1856; translated  
MASTNSTENAPALDPLPCEILADPTSADGIGDRLREGLHSFLDKLGRDDVFLLPDFDFT  
RFHSHKAGKITQMIARYYGCIPSPGSPAPPPSGFPPPQEFKIMPALGTHAPMTREQIETM  
YGPFLAGLSDAQGGPFLVHDWRKDVVTIGHVPAAMVREATNGMVDRPWPAQLNRAVWEK  
RLALHRGGEKEAPPPLVVSIGQVVPHEVMGMANFNKNLFGVGGLEAINLSHFIGAVYGM  
ENMMGRADNPLRAILNRASEDFLQSKLDLWYVLTVVAPNGSLRGVFGNTIECYRRACKL  
SMAANFTMLDRSPSKMVVYLDPDEFHSTWLGNAIYRTRMAIADGGELVVLAPGVKRFGE  
DETVDRLIRKHGYVGTKKIMDCLNTGDDGDGDEETASSGIGRNRELAENLGAVAHLIHGSS  
EGRFRVTYCPGPHLSREDVEGVGFYADLGETLREYGLDPKDLPGDGWRGGSGSGEFFFI  
GNPALGLWAVPDRFEDDGRRGDPASTTSSSGKQQPNHMLFLVSGNDAQAKAWHDTTTTA  
LDHY  
>comp4920\_c0\_seq1; 187 221 865 LEN=3825; translated  
MTRISISASTIRTLDDSTVHSDSTCSFTPSSEDEQAFYGRNEAAQDITSSCSHSPCAPLGPS  
SPESPASPVEATATPTSTSSSGKKRVRFGLSVIHEHAVQLGGSGVPGSGPSSISLWREEN  
CYTVDSLEEYEDSRPCLPRKSIEMLQPKSQRVLDLLNAGYSMNQIRVCSNECDEIRKLRS  
LVVRGRQGVDHRIKRVYFQHGQLFPNEDCHQE  
>comp4920\_c0\_seq2; 171 221 853 LEN=946; translated  
MTRISISASTIRTLDDSTVHSDSTCSFTPSSEDEQAFYGRNEAAQDITSSCSHSPCAPLGPS  
SPESPASPVEATATPTSTSSSGKKRVRFGLSVIHEHAVQLGGSGVPGSGPSSISLWREEN  
CYTVDSLEEYEDSRPCLPRKSIEMLQPKSQRVLDLLNAGYSMNQIRVCSNECDEIRKLRS  
RTVSRVQFGYRTKSNLKKLLTWKKEQPKNE  
>comp4921\_c0\_seq1; 880 106 2346 LEN=2589; translated  
MLKLRPFRGTAPQQYRNGTRGSKERPQRASVVTLLATSEKAKEAISNRSALRKSKEKN  
VGGSVYRQPNEKKDHESTKTVKKWMRRVLPKEFSSPRPDGKPGFLPRIKTTSAKKS  
KLSPTVIACCNTVTDESSSKYSRKNDDSPREMILAGPLSSFGDILRSIENNGATLSTMR  
ADSIKRNENIFFEDDDTCESAEVAAQTAVANNIKKRELKSSCSTRSRNEGLWDMHKS  
KHGKEEPPVIREEQKNLSTSKAEILSKLFLRNQNTCETEETPINTLMQTTKHDEKAVD  
KENDREIHFSQLFRADIISLFPFGHPDDRKKKEWPVAESNTETYAERNETNCSDSSVMA  
TSPLHQTESAMTSREIDEKLRDETNNVNDLSLRPTESGEQNEKDFIGLVIITFDPTWDLV  
PDESNFSTIMPRSRLKKFHEIENYTDSELLGNFAEDEFSEESIDLIAGLDESFDTEPFSK  
DFVAPKSLSGSSELGFHFDRERFKVDPLHEEEICFYSDDESSIESRTAKCQMINLETMS  
QLQNGIEICFPAGKRTEVIFRLVESDNAGQDEDVCCSTTTSEEYTDCEIYEQQVPVNNHT  
NSPIHSSSTQSPIPIFESTPELHSPVLIKELTANLYLPRIVNKDASDESSPTNEAEIATP  
IFQTVPNKHLKTPPHVYVPLSPRSGTSTYYISILSKDTPDSRYEGKDACKIQFYDAVMEKS  
PAIPSNYRDVQNIDSFHSPMGVCNST  
>comp4923\_c0\_seq1; 248 63 995 LEN=1083; translated  
MSPLLPHSQDPALLESFYRVNSMPGKNVRGKMGIDCFQLWLAIDESSELKVLDSVKEIIGD  
LHNASLMIDDIEDNSKLRGVPVAHSIFGVATTINTANYAYFLALEKCHALQNPQAMTVF  
VGE LLNLHRGQGHDIMWRENGTCPTEEYLMVKDKTGGLFRLAVGLMQAFATTNLRD  
TALVNNLAVYFQIRDDFINLVDEEYMKSKSFCEDLTEGKFSFPVIHCISFPEDHRLSSI  
LKQRTDDTDVKRYAQQIMVESGSLQYTRKCTSLKREITTEIERLGGNPPLMQLVLELLDI  
QIHEMNSVKL  
>comp4924\_c0\_seq1; 1089 133 3015 LEN=3100; translated  
MKINSLALRAVLLLAAGINTNAFAPPKTGTTTAKMLSFSSSQONAVVKSALSALFTATVSS  
AAQVGS DLGLE YAPIAPFGKAADANLGD AKRILGGKANLAEMSELGLSVPPGFTITT  
ECCDRYCFDEEWNKSLPKPLMDEILDSIDAVEDEMQSKFGSPENPLLLSVRSGAAISMPG  
MMDTVLNLGMNDEVVEGLAKKTGNPRFAWDSYRRFLEMFGNVVLEIPRSHFEDELDDIKY  
EKGVNEDSDLSAEDLQELVGRFKDVYGTMDLSFPQDVHEQLKLSIGAVFNGWMPRAIKY

RQVENIRDLLGTAVNVQAMVFGNMGDTS GTGVCFTTRDPNVGTPELFGFEFLINAQGEDVVA  
GVRTPRPIAEMQDVMPEVYEEFLKNTKILEEKFGDMQDI EFTIQEGKLFMLQTRNGKRGG  
EAAVKIAVDLVGEGLIKDEAVAKVLPHELDQLLHPRFPDVELQEYKDAVISRGLPASPG  
AAVGR IAMSNEKVVENKENGIP SIMVRDETS PDDVEGMFAAEGILTARGGMTSHAAVVAR  
GWGKPCICGCTSLSVDEANGKI I LTMDGDSQKTFKEGDF ISLNGQS GEVLEGSQTVAPPA  
ITGNLKT FMEWVDDARE IDVLTNADTPADAKEARKNGANGIGLCRSEHMFFKPERIAKVR  
QLILGNQEKEALKELKLFQRDDYEGIFTEMDGLPVTVRLLDPLHEFLPSLKEDSVLS  
ECAEQLGITVDELKEKVEAMEEVNPMGLGRGRLGITRPSI IEMQTRAI EAALNAIDAG  
VDAQPDIMVPLVGKIEEFRHQKALIQSVAKVFEK GKSCNYKIGTMIEIPRAALTAHQI  
AEEAEFFSFGSNDLTQMTFGYSRDDVGSFVPNYMSQGI LQDDPFVTLDTGEGVQLIKMTV  
ERGREVRPNLKVGVCGEHGGDPRSVHFFSNEAGLTYVSCSPFRVPIARLAAAQASVERKK  
>comp4925\_c0\_seq1; 369 264 1382 LEN=2237; translated  
MSQPGLTRGVPRMYGSEILPASANRSKTRLHDDGNGSLNTKQSRYPYSVLTGGKFSNKQ  
RQNNDWVEGDWCWEEVEEQYEDDGICFDGWSRGSWCWLD SNHSSSSNDEQQYEDNTRRS  
SRLASIRTTVNSGNLLECEICCVRKPVQEI SHCSNVTCRTNVCAMCQLRFISCRRGVYD  
SNHIDEFSWIDTVQSKRLCCQTPLDVRVFAKKFFARDIEKLLTSDNSGIEIADR SALISL  
FKYLRGIRKATESARADGFYNEDGPDIDIEGLFDE DENNEYHTS NSNDEYGNDDRIVNDN  
HYGVRNDDNDNNTMVNGSPSGSRQVSGRSRRLIRRIAKANKRHRIQTRNSDDAWVPGSWC  
FTEDQSTEETEA  
>comp4926\_c0\_seq1; 275 406 1350 LEN=1624; translated  
MVKVLDRAKFLSASAATFASGTAGFVAANTNPEQCEAKAVAAGSQNPRYIDKELQMSLGD  
DGSGNPRTRGILVRRMTGDSTPYEFPVQPVRLVQTWPEEWPFEKQDFSRSDPSNDKGFYT  
IPKLVYHIDEPAVASLTQYYRKNIPAKSDILDICSSWVSHYPLEFPETMKSISATGISGL  
ELGFNDQLTGGFEARDLNEDPTLPYKDNSFDVVTCVVSIDYLI EPVKVLKEVHRVLRPGG  
KAIISQSNRCFPTKAIAMWLQMNDRQHLELINGYFQYAGGFEPKAFDITATLPDNGYRD  
PMFIVEAVKESKSD  
>comp4926\_c0\_seq2; 237 406 1481 LEN=1755; translated  
MVKVLDRAKFLSASAATFASGTAGFVAANTNPEQCEAKAVAAGSQNPRYIDKELQMSLGD  
DGSGNPRTRGILVRRMTGDSTPYEFPVQPVRLVQTWPEEWPFEKQDFSRSDPSNDKGFYT  
IPKLVYHIDEPAVASLTQYYRKNIPAKSDILDICSSWVSHYPLEFPETMKSISATGISGL  
ELGFNDQLTGGFEARDLNEDPTLPYKDNSFDVVTCVVSIDYLI EPVKVLKEVHRVLRPGG  
KAIISQSNRCFPTKAIAMVRTLLLFLFFHILLQAKLLSVALGCTSDFSFVFLTAHALT  
AVAQMNDRQHLELINGYFQYAGGFEPKAFDITATLPDNGYRDPMFIVEAVKESKSD  
>comp4928\_c0\_seq1; 623 117 2552 LEN=2966; translated  
MEFDGVFELLETAKRLEKNDQRIEAA TKYYESC YLMRRI LSRFPRSEQDSPTCRLLEENI  
RFYNQAAQALYFDDGSLEPNSAPTPTVVTIRHSLSNDS PDDVSVLTPPMIALPAISHEAR  
QSEKYDKSRFTQSDDFNRMISLANTRLGQAIDL DENNQADAALKVYISAAEMYLGVIKLT  
EDSPLMVSITNVKRRLLSSALDR IEALKNPARSQPPNRQQQERPGSLRSDVSNRESSHSL  
SYLSEEEI AVLKSSLIASGLFLPFSEEEARSLSRQVAAQKSTFKPWIDPDGDL SLSEKQ  
KKRFYAWSRPHEILQRRSQMGFKQRPPSMISNISPYTIRQQYVTD CSFIASLVCALFEK  
RFRKRLITPIVYPQDKGIPVYNPSGKYIVKLWLN GVARCVVDDR LPVDRQSNLLCSQT  
SGDHNHLELFCPIIEKAYMKLCGGYDFPGSNSGV DFLSLTGWI PERIFFPSQHGETRDFE  
TTPDRAWERLFSANSFGDCLITVSTTRDI SEQKADDLGLVTGHAYAVLDVVFQSKNGTKLL  
QLKNPWARKGWTGKYSSHDKMSWRDQSLRSEVGYDPVEAAKQDDGVFWI SWEDVLRFFRN  
LQLSWNPKLF SYRVTTGHFWPVEQGPKIDTFNVGENPQYI LVLS DQAVLKKATI WVLI SR  
HVSKQE QEGAEVHDFLTVHLLRNSGKLERVWYPQSKKSIVNGCYTNNPHVLLRHDVTGPE  
DKYISLVLSQYEKKKDLAYT LSCYSTEPFELRRPPKPLPRKLNLSSEWTKHSAGGAFGSN  
KFFVNPMFELLLLTEKTTIQMRCTTSNALAGM  
>comp4928\_c0\_seq2; 535 117 2692 LEN=2713; translated  
MEFDGVFELLETAKRLEKNDQRIEAA TKYYESC YLMRRI LSRFPRSEQDSPTCRLLEENI  
RFYNQAAQALYFDDGSLEPNSAPTPTVVTIRHSLSNDS PDDVSVLTPPMIALPAISHEAR  
QSEKYDKSRFTQSDDFNRMISLANTRLGQAIDL DENNQADAALKVYISAAEMYLGVIKLT  
EDSPLMVSITNVKRRLLSSALDR IEALKNPARSQPPNRQQQERPGSLRSDKPPDXLSRQ  
VAAQKSTFKPWIDPDGDL SLSEKQKKRFYAWSRPHEILQRRSQMGFKQRPPSMISNISPY  
TIRQQYVTD CSFIASLVCALFEKRFRKRLITPIVYPQDKGIPVYNPSGKYIVKLWLN G  
VARCVVDDR LPVDRQSNLLCSQTS GDHNHLELFCPIIEKAYMKLCGGYDFPGSNSGV D  
FLSLTGWI PERIFFPSQHGETRDFETTPDRAWERLFSANSFGDCLITVSTTRDI SEQKADD  
LGLVTGHAYAVLDVVFQSKNGTKLLQLKNPWARKGWTGKYSSHDKMSWRDQSLRSEVGYDP  
VEAAKQDDGVFWI SWEDVLRFFRN LQLSWNPKLF SYRVTTGHFWPVEQGPKIDTFNVGEN  
PQYI LVLS DQAVLKKATI WVLI SRHVSKQE QEGAEVHDFLTVHLLRNSGKLERVWYPQSK

KSIVNGCYTNNPHVLLRHVDVTGPEDKYISLVLSQYEKKKDLAYTLSCYSTEPFELRRPPK  
PLPRKLNLSSEWTKHSAGGAFGSNKFFVNPMFELLLTEKTTIQMRCTTSNALAVNIMLIS  
LPDTKITRDKRNLRELVNYSKKPILDSGNYRHGFTITEMKLMDPGHYALIVSTYDGDQLG  
KFMVTIETSEKITTYIA

>comp4928\_c0\_seq3; 602 117 2801 LEN=2822; translated  
MEFDGVFELLETAKRLEKNDQRIEAATKYYESCYLMRRILSRFPRSEQDSPTCRLLEENI  
RFYNQAAQALYFDDGSLEPNSAPTPTVVTIRHLSLNSDSDVSVLTPPMIALPAISHEAR  
QSEKYDKSRFTQSDDFNRMISLANTRLGQAIDL DENNQADAALKVYISAAEMYLGVIKLT  
EDSPLMVSITNVKRRLLSSALDRIEALKNPARSQPPNRQQQERPGSLRSDVSNRESSHSL  
SYLSEEEI AVLKSSLIASGLFLPFSEEEARSLSRQVAAQKSTFKPWIDPDGDLSEKQ  
KKRFYAWSRPHEILQRRSQMGFKQRPPSMISNISPYTIRQQYVTDCSFIASLVCALFEK  
RFRKRLITPIVYPQDKDGI PVYNPSGKYIVKLWLNGLVARCVVDDRLPVDRQSNLLCSQT  
SGDHNHLELFCPIIEKAYMKLCGGYDFPGSNSGVDLFSLTGWIPIERIFFPSQHGETRDFE  
TPPDRAWERLFSANSFGDCLITVSTTRDISEQKADDLGLVTGHAYAVLDVVFQSKNGTKLL  
QLKNPWARKGWTGKYSSHDKMSWRDQSLRSEVGYDPVEAAKQDDGVFWISWEDVLRFFRN  
LQLSWNPCLFSYRVTTGFWPVEQGPKIDTFNVGENPQYILVLSDAQAVLKKATIWLISR  
HVSKQEQEGAEVHDFLTVHLLRNSGKLERVWYPQSKKSI VNGCYTNNPHVLLRHVDVTGPE  
DKYISLVLSQYEKKKDLAYTLSCYSTEPFELRRPPKPLPRKLNLSSEWTKHSAGGAFGSN  
KFFVNPMFELLLTEKTTIQMRCTTSNALAVNIMLISLPDTKITRDKRNLRELVNYSKKPI  
LDSGNYRHGFTITEMKLMDPGHYALIVSTYDGDQLGKFMVTIETSEKITTYIA

>comp4928\_c0\_seq4; 556 117 2443 LEN=2857; translated  
MEFDGVFELLETAKRLEKNDQRIEAATKYYESCYLMRRILSRFPRSEQDSPTCRLLEENI  
RFYNQAAQALYFDDGSLEPNSAPTPTVVTIRHLSLNSDSDVSVLTPPMIALPAISHEAR  
QSEKYDKSRFTQSDDFNRMISLANTRLGQAIDL DENNQADAALKVYISAAEMYLGVIKLT  
EDSPLMVSITNVKRRLLSSALDRIEALKNPARSQPPNRQQQERPGSLRSDKPKDXLSRQ  
VAAQKSTFKPWIDPDGDLSEKQKKRFYAWSRPHEILQRRSQMGFKQRPPSMISNISPY  
TIRQQYVTDCSFIASLVCALFEKFRKRLITPIVYPQDKDGI PVYNPSGKYIVKLWLNGL  
VARCVVDDRLPVDRQSNLLCSQTSGDHNHLELFCPIIEKAYMKLCGGYDFPGSNSGVDL  
FSLTGWIPIERIFFPSQHGETRDFETPPDRAWERLFSANSFGDCLITVSTTRDISEQKADD  
LGLVTGHAYAVLDVVFQSKNGTKLLQLKNPWARKGWTGKYSSHDKMSWRDQSLRSEVGYDP  
VEAAKQDDGVFWISWEDVLRFFRNQLSWNPCLFSYRVTTGFWPVEQGPKIDTFNVGEN  
PQYILVLSDAQAVLKKATIWLISRHVSKQEQEGAEVHDFLTVHLLRNSGKLERVWYPQSK  
KSIVNGCYTNNPHVLLRHVDVTGPEDKYISLVLSQYEKKKDLAYTLSCYSTEPFELRRPPK  
PLPRKLNLSSEWTKHSAGGAFGSNKFFVNPMFELLLTEKTTIQMRCTTSNALAGM

>comp4929\_c0\_seq1; 487 79 1392 LEN=1447; translated  
MSSRKDMESTIRAVRCHRFAVEKKNPDEENGRKGPSRSTYQRRSPKALRLKDCLSLDR  
IAFIESTNPSETRNDTRVLIRTEYAGIQYDPDALQALGLYQVKPELPHYVPGMDVVGLVLKV  
IPSPSRSNSNVAARIQPGDRVLATMMDFGGTGLSEIVLAPLKHVYKLPKLSRCPVQS  
AAGFANVGRNYFAAYHALVEVGGIRLNTAYHPNTNHDKIILVTGASGGVGMATIELAKAM  
GCTVIAGVGSNSKREGPISVGADAVLCYGRSKAERKQFRKQVLEVSKTMAMARKANKGVD  
LIVDVVMGNLFEEALVGLKPLGTIALVGFAGQKPIRPGILLVKEVRVAGSIWGSIALE  
ATEERSDNKYQTMVETILGFFATGAIKGRVDRIVPLNRFIEAFEVFEVVKGRGNTVISFV  
DHHDSRAESNNARSRL

>comp4930\_c0\_seq1; 359 1 1321 LEN=1524; translated  
XASASASAFADPSPSPSPAAPPLPITESFTEDEVLAREAAARAWSRDVLAPSVRSMDIAS  
AIDPLVLEDLFDQGFMGMEVPPQDLGGSGLSFTAACLAIEEIRVDPVAVVVDIQNTLVN  
TALRFWGTSPSQRREWLPRLAGGGCLSAFCLSEQAAGSDAFALATTATASSTDGSSFVLN  
GSKLWISNAREARLLLVFATVDRSLGHRGVTAFVLDRERHGNGNGSDDDDDGNGTITVGQP  
ERKLGRLASSTCPVHLENVRVPASSVLGTVGEYKICIGVLNEGRIGIASQQLGIACLA  
YDLALPHMMDREQFGRPIAEFQGMHQYAEMATEVHAAELLAYNACRLRERSGDPSSGGRS  
SGRFAKEASMAKLACSRVAEKAASKTIEWLGGIGFTRDLPAEKFYRDCKVGSIEYGTIN  
MQLQTIARILREEQASGKQR

>comp4931\_c0\_seq1; 289 271 650 LEN=650; translated  
MQMRCNDNHGNIGNSKMSRRQTSRRSRRHRIISHFPPSLMRDASQEGDGVNRNHIDCLTD  
AINVLQEGRRSMSSFLQDGDQTHSSGGSGDGSIRDSLHQRVSIQQQQQQQRHQHQHIIHQ  
QQQQQQX

>comp4931\_c0\_seq2; 289 422 801 LEN=801; translated  
MQMRCNDNHGNIGNSKMSRRQTSRRSRRHRIISHFPPSLMRDASQEGDGVNRNHIDCLTD  
AINVLQEGRRSMSSFLQDGDQTHSSGGSGDGSIRDSLHQRVSIQQQQQQQRHQHQHIIHQ  
QQQQQQX

>comp4932\_c0\_seq1; 1439 366 4438 LEN=4454; translated  
MSTYMKRFASSTKKTDTNANIKKERTVAPALETAKQKSYRRHINRLVPPSETPAEMAPST  
ESRQATKSNNGTRPGTKSKSPTAGITKKLSTRRLRRVRNPSISSASDVIVSSGHQSEKLD  
TSNTEPPTTDSRVSPTEKSKTERHSDNEGDDEVLEDVEKPNLEPESSAPTSALWDEGKV  
GNNSMRASSTRSMLLEKENMQRELTEVQLDRDILRLQLLEAQTELETSRTSLRDQISVLE  
NQLRTFQQRRERRQSKIISGKKMDDGKSKESSHPPDPNPVNEDESAKQSAEDNFRDHNNGFD  
NGLLEQIRTLERDRESREEVERALRQQLKDMTEESKEAKSQAIAEDRVRALQASIDASK  
SASSTRENAENEDISVQVNTNGNEKDQVNDIDTEGVSEVASLKKSYDTLKDNNHVDSEQ  
DRRKRVDVSSEKLFARSNNKNEVVHNLHLKLDDEEMAKLKLKERRRSRAVSATASFSTHR  
FRALGDSSTTSFRNEHKRDDVRIAIAPDISPRSLSEETSITGLPTNTSTRQPDQLFDG  
IKPTQSNPVMIGQTLGSIPEEAPNCVVNYEKELKILNTECKKQELIDSRMEKETFET  
ALEESTSEILKRLSLVSEKAISARSNEEDEALNLESNVKDEEKGALGKLEEKNIQLAKSL  
ETVMNVKVQLEVQLQNAMQQVNESRDEVKLNSEVTSYRSSLEQHVSEEKRLTELIESTK  
NETALQAHVTRGRSEQSSYERPTMKEESNDKDGLEKILSPENDSKVAIESLLNERNNSA  
LEERKAVELKLRDTSKELDESKDRESVLEKLVQEIISDKLEATQKELSGKQNRLEQASTQL  
SDLEKELVGRGISKTSEENENVDFQRQIEEKGICITNLQNELSNKDRRLQQAEEQLYELEK  
ELFGRDEEIDTLNAKRQYIEDYANRQLTEMQRALEQGVVQIDRLEEEKLLQDSIQKYEE  
QIEKQGGRLAEASLQLSELESELEFAKDDDIIEEIELSVIAMHALEIQRLEALEDSENKRRD  
LEKQLASAKRMEYLESLGGEIKRGDETSTTEARRLFIEDERKSKELQSSKNQLNRQLQN  
VSKLTELNKWLQLESASDEKQELIRTLTDATNRVDLLQRELEEASNVIKDLNVTNAGL  
KDDLDCAEQEGDKNRRRISQMEEQKEALSEKLESAMDNLADLKKNYKESQEREALGNDV  
IEKLQANLRSQAQVDESETEIRVRNLTEQLESERRSLQMTFVRRNELEETENESLKNRIRLL  
IEFEFEKGDNAAGDDQELREQRIEELAVAVSRRESETKRLGTKAAELEEHMNPSEKGE  
KLCNEPILASLEDKXAGPPVQHLTQKGSNETGALIT

>comp4933\_c0\_seq1; 844 158 3085 LEN=3274; translated  
MSSSSANESAWVKRQRDRQIVVLVDPYSTGCVVAQELQKRGYLIVAMWTIGFNEEMKSHV  
PVSCGKMEYFEQIDQLETNEATMSKLLLEVAKGHEVIACLAGEAGVDYADAFSEYLASVS  
PSSSKILTNGTSHIPNRRDKYIQQELCRKMGLRSVRQAGSDKFDENIQSFLKSEFPFVVLK  
PTESAGSDGVKLCYTFEEAKDHFETLMNGQLVNGGDCPSVLCQEFNLNGTEYVVDHVS RDG  
VHKTCMIWVYDKRVANGANFVYFGMKPVPDSTPLASILIN YTRRVLDALEIKHGPTHGEI  
MMTEDGPELVEMNCRAGGDTFAPLAKALTGAYSQVEMAADAFVDPFAFAQTPDRPSYP  
FKAAGQEVIFVSRSKGIVKSTPGYKIIKMMPSFLHMDGMKTEGSSVVDYITDLVTGIGSVI  
LMHKDPEVVKRDIDFVRYLEDINGFFVYETKLENLARPRGDAIVFSKTKTSPSKPPRAPH  
RRLKSTDTSHHQHVFSDDGNLVRIMSNDRPELGGFGMPMLTKRMTTVDS SREAVVLID  
PYSTGCCIAEEIMKRGFSVIALWTRGFSPMKTHVPLSCGNIKYLAEEVEEGETLAQTSQK  
MYEAAGSLRVVACLAGEAGVDLADALSEHIKVRTNGTVIPNRRDKKIQQEIRKHGLRS  
IRQAGGSDFGVEVKHFLETEPYPVVLKPVESAGSDGVKLSHFEAEAEHFVLMNSQMVNG  
GNCPSVLCQEFRLRGKEYVVDHVS RDGGEHKTVMVWVYDKR PCHGAEFVYFGVVPVDSERE  
AKIVIPYVQGVLDALAIRNGPSHAEMMTPDGPCLVEMNCRAGGDNWRPLCRHLTGGY  
SQVEATVDAFLDKQQFSVLPSPKPPSPFKASGQEVILVSYGRGVKATPGFDIIKEMPSFV  
YLETGVRPGSRVDYITDLFTGIGSVILMHKDPAILLEGDIQRIRDMEKNNELFTFEQQSRY  
MKSPSIIIGMDKLASA

>comp4934\_c0\_seq1; 113 1 655 LEN=908; translated  
LFFANLEHRVHPPKYTQGPSSVTLLEMASGRLLKELAEVGVKVDQSSGVSARATSDDMRRL  
KKGINGPESTCYEGGIFEIDISIPKQYPFEPKMKFITKIWHPNISSQTGAICLDILKDQ  
WSPALTIKTALLSLRALLSSPEPSDPQDAEVAKMYLNDRKKFEKTAKFWTESYAKEADYE  
AMIKGLEDMGFDRASAKKALEKHDWDESRAVNELLGM

>comp4935\_c0\_seq1; 345 484 1452 LEN=1678; translated  
MKHKCTHGADANKSDRLASNINEERMETVSEESIDNSIAN TVNPGVLKSKEDLSSILLEN  
ENECVNHKNSKNYSSSIEVPSHLLSSSISESSYSSLYISIHNDKRN FEDNDSASGSFSD  
SNSDSDPENMMKEYDDGLDINF SIARSRIADDAANEALKRLGNCECWTLISVGCSSAAD  
AIHERDSRPIWQQLNQITDSRALAPFGECGLQFSVTNVPDELQLLDLPYSKTKNPERIA  
MVNSXQKFDNSGEDERDAIYSVKISSDAIERCNGNEGGRFCDEEDVNSVETFVSLATDG  
ANKEISYDERGHKKIAYETIEG

>comp4937\_c0\_seq1; 806 78 3415 LEN=3523; translated  
MKRGTGISTQRLNLTSTGSIYSDDKAPEWNLKRIYGREKESKIIQNCVDKGSNGVILK  
CSGSGKSFVVDGQHFEEEDGWIYATGKHDMRRKQEPYSALIDALDGLVAKWMANNSAAQLC  
RMNSFNLLVDDMEFLETIVPKMFREVKAECYKSRPKGLQTTSSQFGTEATVDSKTINAA  
FWRIMSFLSESKPIIFFLDDLQWADQASLDALQALSTTGNIEGFWLILSYRDEEVSEGDP  
VSTCLDFIKEENECVETIHIITNLDEENVNIVCSLLEQDPEQTSSELSKVIHNKTAGNPF

VIQFMKMLRHESFLNYNAMILQWEWGDVGMKEQIVHVSNDVADI IAASMSKLTESLFLAL  
QMASCLGKVVPMQVLIIEFIGTCVVEEASNDEELAICGALVGIQLQGLKDVDFEAVKFGIL  
VRLEDDETYVWAHDKLQFVAYSMIRRNKLNKVHKS LGMILRNMYESNPENCWALYMAADQ  
LNRLTNVCCDNLNADIALSSLQASKISISKSAXFPALDMLRSAAEHLTAIADPWKTNYQL  
SLEVLSSLAEMAMRFGSHKEAINAAIQVDRNAKILEDRSRAQFIFILHKLEGGNRDYKGA  
VESIKSILLDYGVKFPTKIMPGQLILEYRKLRLTRGGAGEAFLNLRHLNDAHPKDRRTKI  
IIILLARLIEYLDHGEKTTDLQSYAAMRILNIISSKEGTCAATALGVACFGSNMIQDGREY  
DAREFGELAIKLVDSFSPKVGSGHALVHSHVAYGVLSQAVPFHDLPLLDLNRISLRGG  
GISEGAMAWIGYAYTYMVCVGLPLHPLDLDLSSFSKNARQFRLPATFKVLFPIIRQAIQNL  
QELKSNPTLLKGDADFQEKELKNFKDLGHKMTLRDINSFRLMLACIYQDWKIAEELVVAL  
EPYLGDKLFI RGHILLVYMGYACIVLSRRANMI TRLHHRQLGRKI IKTFKDQLKNGSPN  
ALPVMMLEAIESPSKERFDEAIRVTARLGMVQHAADVYENAGLFFTEQNEGLAEYYFS  
EASKLYTDWGATGKTKDMIEKHNFLGSSSLNRNQSNFGFIKGRTRFSPETMLSMQEIKIGP  
GSSERISDITGGISKGSNLSSSVASTLFTSTK

>comp4938\_c0\_seq1; 633 1 1685 LEN=1889; translated  
XATLIGDYQANSIRGILAI FHNQLVAKLIVKITARQSLWLP IENLYHHPMTSTSKFLLVA  
VVWSSCFTTFSSGFQGHNLNIHGLNAGKRTTTTLHTIPESLAEETWQAYLDEDTTGLIYYF  
DTSTGESRWEPTSTFPEVRLPRRKQRLADNLRREYRKERIEAMETEDEGEIVGGFSA  
MTSVLDQEEAVVEETESVDDSQTEDEEEEEQPSGGFFGNLFGGNTADQDTIEDTASVEEIT  
EEESEQPTEKNFFSSIFGSGGSASAEVEDTGVI EDEPAEPDEKKS GMFSAPFFSTSSDR  
AQKEVQEKIIDDSPKPIKIEIGSHILPHPAKVRWGGEDATFIKGRTFGVFDGVS GAEKLD  
GVPLYSR TLASEMKRMCGMNGETVQDMTAYMSSAASYADGAATGASTAVVASIGEDGFLQ  
ALNVGDSACMVVRDGVKTAKTREISHYWECPYQLSESDSPDQPKDGT KLNVELIPGDIVLM  
GSDGVFDNMSSDQLLELVAKSPSVKATTLAKRVCDASRKISLDKTA VTPYSKQAQRGDR  
DYRDGLGGKVDDISCI VVACK

>comp4939\_c0\_seq1; 175 1 318 LEN=758; translated  
IGEAVKSGEDLAAPITFTPFKNKDHSNYVANQGR LRSEVGDAAKSGEDLAAPITFTPYK  
NEDHSNKVANPNILVATEKKGKQMKTAGNLAKPITHIRDAMKNVSM

>comp4941\_c0\_seq1; 522 220 1740 LEN=1740; translated  
MVLVCRSGFRARNSAVVAASFGRHHPAAGGSCARDGNLRTPSTTSR LFSKPKQKMSKSS  
SSSSSSSKRKTPPPPPLLPEDFPEWAYEPRDFFRFEILHESTKSQARVGR IHTPHGII  
DTPGYAVATNAALKGVDLRDADKAGQQLIFSN TYHMLHPGADLIAEAGGIHNFTRRD  
RPFITDSGGFQVFSLAYGVSQFELS SKGELKRASKSKKNHNGNGMGKDAVKVSE DGVVFR  
SYRDGSKFLLTPESTVEAQKIGADIIIPDELPPYHIDR KVL EESVDRSHRWEARSLRA  
HIENVREQAMYCVVHGGIDRELRTKSVDFLTSLPFDG YAI GGS LGNVKQELKDLLDWMMP  
MFDDSDGKNRKGKPRHLLGIADEENIRHAVARGIDTLD SCYPTR IARHGTVLTKDGPLR  
LKSGKHSKEFGTKIDGACTCPTCQHYDRAYLWHLFKANEPLAVTLAAQHNIHYMNDMMRT  
IREDIMEKEYDVPSSTKTCSIYFSTAX

>comp4945\_c0\_seq1; 316 434 1183 LEN=1424; translated  
MPLGDEESAIILTSSPKPDGLEERVTSLSLSANGQPQHPQQIPMATNHTPSARGRHSLE  
MKKNQAPPMPKLLHPILHSLPLHFRFGLNGFLSNVLFMVAYNA AVVQFGQNASSTIYAT  
VYLIFIPISHAFISLLVFGWPERYVRS LMSNAPVGLTAIVLGAALTAYLDEIEFNGWVAD  
AVTEYWAMMGYKIETTTDATTEPTTVQDEESRGGGEFYSSLFVLI VTIWTFVLSVMVNAP  
QESQEKKDL

>comp4945\_c0\_seq2; 245 306 611 LEN=852; translated  
MSNAPVGLTAIVLGAALTAYLDEIEFNGWVADAVTEYWAMMGYKIETTTDATTEPTTVQDE  
ESRGGGEFYSSLFVLI VTIWTFVLSVMVNAPQESQEKKDL

>comp4945\_c0\_seq3; 162 434 661 LEN=877; translated  
MPLGDEESAIILTSSPKPDGLEERVTSLSLSANGQPQHPQQIPMATNHTPSARGRHSLE  
MKKNQAPPMPKLLHP

>comp4948\_c0\_seq1; 231 484 945 LEN=1721; translated  
MDSSNHEHTASAARPPRASPLAEPKNGTPTAVKDTNIASTAVKRPLASATLSPCAHEAPA  
AQVAAADNQTRENTTNSKAIQNTKKKKPFQAQKQLPFKAKKTLKTKKKKKFSSILSGMM  
KPKEKKAADLVKDREEARLKHLLGGGAFKVDKI

>comp4949\_c0\_seq1; 279 1 647 LEN=666; translated  
QQQQQEEEEPPNGESKSSSGDTTAETALSDARIPRAELARRMGQLLGR LHNI GIVHGDLT  
TSNMVLLPAESKPEPRDDTPSDGNGDAFELALIDFGLSKSTDSSEEQAVDLYVLERALL  
STHPDLPGGFETVLEEYKATTEGDQAPGGDAGKSKKRKNHCQSALVRLEQXADAGEETG  
VFWLIRENEEPSKALRRAAPPRPALRYTTPRYNRK

>comp4950\_c0\_seq1; 365 143 1518 LEN=1622; translated

MAQRDLNQHRRTQASLPKFSKSRDGEVEGKGRVSYGNDDIGTWEWKGGKGGDKKSKSS  
KKGKSGKKEKKEKYYGYSWVGKTPSQYQTKLPTLNPLVSPFTLPTLVPTPTKNLGS  
SDSEDARPSTETSNDPCPPERTIVPPSPSFVSTKNPTRAPSPTIATDKENTMSVNLPIY  
AIDYTFQSRTPIKVDLFLQLTQSFKNYMLTAYEVSAQVTLVDFSTSFVTAHFTPG  
EPIHIQYNSTAYFDSK SINIPTAQNLVVLNSLVSTQAYVDDLQSQLEEVNPFSSSTEA  
IFTDPKDLVPTQSSAKTEVGAASASVAAALYPYSSSECPFFTHEKSTDDNVYDERVKKEI  
KGDTTVAGETYVMENDHFSQGISLSDSLSMRSSEHDQLPNSTSLGGETIHQNI PKSRTIK  
ETGNVHDVSNHSPAVKNKPRITIEDIERLLSLGDCDII  
>comp4951\_c0\_seq1; 212 386 1444 LEN=1634; translated  
MCKPEQASKESDPQSKDAKDEVIGTNPKRQMSKNKSQQKDVASMSVLSGVLHGCVVWV  
FAANLPFFLSGADVYHKLQHASFRYDASISLFDNTVLTGTYAIAAMTLAIAFWILRT  
SNRAETQVAAKLSKLSALMLVLYATSTFAGGLGHHFFLTVDSRNTNLFVWLTVCVGGVY  
LAPMTGMIGNECLRIFQPRSNCPPLLKSMPLLTDTYWCYGSIGTIAWILGFSSFPQRPV  
CDIFLAGITQTPCTFYFMAFLYLVEHPVITNAVKNRGLVGFIMNAFLLPLYPVLVFNFG  
SLGVANAIQHANLFWAWGLQGMTMQTVVKALVEEKTEASRSPSSSDQKTKDQ  
>comp4952\_c0\_seq1; 434 1 1373 LEN=2027; translated  
XTKPN SIRETPFKALTMRLMVSALLFLGHCPGLVDANTGIEALVSKAKRKFYSYQSDP  
LNLRLGIQAGEYDRIYIQYHQCVWSELDSYSDNYEESGCSGDENGDKPWYMGNTQCYRA  
NVAYSLYGVRAGDESPQDACRRYYINTFFTSNGIEEFGLVGLNHEDATTQCTLVGD  
ENGDDADGADYDSFQHNTIYQNAQSYTTFCADGRFVNTLFGGAYCTGKSDLEVLDPD  
DLNSELMELECALVYTAENENNGGNDVGDENENARKLEDEGERDEGDNDQQENSDEE  
DNEDDNGDQDNEKQENEGNGNDKGGTLWNVLSHSSTCSILEYPNACPDYRAKKHFDMP  
RTSSGF SRRLNPVDWFLVFLVGLSVLLAVTLIEDRQPEEKRSKASFLLDLVLDPAL  
DPGDLGGDLGDDREEDLGDDRESTQQEEIEAMVVNT  
>comp4953\_c0\_seq1; 163 413 852 LEN=1459; translated  
MTPLKDLVEKVVTKAICHKXQPPPLVLTDDTPYTKNESMETTIDSPCVLTTSKSSASQG  
ENEKDSLAPAFLCRDDYPEGWLIYHSVLGVISLTEAERYDEQQLLDKGS DKNQDYRKK  
TLHFQ SATNETGIRLAKTIATGSDGS  
>comp4954\_c0\_seq1; 336 170 1204 LEN=2075; translated  
MRIFGAVSAFLVLVSPILLCEGFANAGKRRGLRSTFDSIEGLLRVSREDDVVDNPNLS  
ESPTPIPSLESQFRHPLDQRLTSLVRNAPFYDLAEETLRRAPPLIEQGVQLDMLASSVK  
VSPQQLPELHDLLEACTVLNFPSTFVPELYVQSNPQANAYTLALQSRNNSKKDKDGNPY  
SSSVIVVTSALVDRCTPRELQSVLGHGLKCEHALYTLGNLASSPLSRLPVMGPRVD  
STLQDWRLAAEYSCDRAALLVAQDSNIVASALMKLFAGTSRYDLNTEAFIEQSLDYERQL  
ESANPLVRMSIQRQQRTHPLPVRVVAELEKWFQSDDYQKLVPSK  
>comp4956\_c0\_seq1; 627 158 1705 LEN=2045; translated  
MPFGAKYIGIALGITSEAWGNTGLGNDPATAPSDVDDETATRITALLIRICAWIMPRGM  
FTDLSTTTMCRSMLVNDTLWPEQVSEEVVVQLRDYVKSILLGYNDVPYHNFKHCYHVTIS  
TNKLVDMI VHKKPDEKPSNTFGFRDDPLMQLALIFSALIHVDHRGIPNRQLALEDEELA  
MKYNDQSI AENESLFIGFSEILKKEYDKLRSVIFPQREYRRFRAACVNLVLTDDIASPE  
RTQLGKSKWKAAGFDPYETVERKVMKKAQGHREDPTQILKDMHVEKSANEDESSVSSYN  
SYEDEDNNGREARRIQKSKDKELSGKALKFHRRLSQAGTSTPSSPRKSSRLGFRRTMDL  
TGESIETYPGKKRVSASGDGLFDVPQIDLPPEKIDDLRESVIMETI IKSADVAHNLQGF  
DQMAKWSDCLYLELRKGFVENRGDDPSNGWFNNQIGFLDFYLLPLARKLDDTGAFGDARG  
GIFASSIENNRARWTEEGMDVTMNI IKQAKDYPN  
>comp4958\_c0\_seq1; 535 261 1865 LEN=2320; translated  
MKYFLVPAVCLVLLPKGVSSFPSPASRATSRLPPPVAVATSAATTTSTRLFGYNPIEDET  
PEERAARMELVRKLQOTFYKEGIDDDHQEHTTEETQTGTGDADTRVELEAEAAATTPST  
TVLRDLPLWRVQWRELPGSQNVLVHVPHTNMFKILKGRTPWGGFGRNATTGDS  
GASTMDGDHYFGHVFLDKGSENLDNPDHALQVGDEGLMRISDARQIMDDGRLTLLVQAL  
EKFRITRVVRSHPYAVADVLELVVDEEQVASAAGSEASPGHEAAARALAWHPFEVRVAM  
DECELARDASGRMGLSVSPLSNYDAGQAGGCAGSNPPGEDADLVAIAERDAWLKLELL  
RLLGVAARGEVGLPVPTQILGLLPKTSALAPVAEREAGKSETNP IAI ALEPRPWGGFS  
LVGTADRMEAAETATVGTHTSESPFVRI DAASYRSPPLRRAQRFSYAVWTLIDSVDLDSA  
GGDGEDPYGRARILEIGSTRERLALATEKMDRICALLQRIIRMHDGRGSGVRG  
>comp4960\_c0\_seq1; 440 1 1525 LEN=1622; translated  
XAPLSPPIESCANS GGASEDSPSLWYSLVSGKIRASVCRDPTNFDAVISVYAASSCD  
DLVCVSGSASEESTGETGSSCDTHWVAEEGTTYIRVHGSSSAETGSFNLFLETLTNDVT  
ELCSDENSEGTVDEACVACSKERANRIAMFDDPNVDRCRCIENDGTGGFHLTCVYVSC  
CNPRQDRCGFDTFELDIESEGGVSSLSYESFYFMNGNGEENQANEIAI IKDQECLEMRD



PYQQCMAKEEMTGGEDSKVFCDCRGI SEEGDYMLLCSYDAHDYCSTGSSGGDEICATI  
LFGQTI SQYGAVASDFRTYNFRSGGEDRELVVDRSTDECTVTVNDQQCSSCRVIECDTGP  
GREDALDVSARVGAGTRAFHDL SIDCSNVFGGETATYECGSAGVGELSLLAGELSAASEA  
EAPSPTPPQTLPPNAFPPTLPPVTKPTLAPETPASAPPVEPNTTTLLVYDEGAGGEGESSG  
AFGPRWSHAQTTMASAAATAVLAISLVL

>comp4961\_c0\_seq1; 281 307 1764 LEN=1907; translated  
MVLIVAGVFVLIWVGAI FSMGF SHHQNAKHNEHHLAADYDL SNVRKPRHLTNDQKRQQFE  
SMKTHKTGTKKHGNGSTIKNPYEGWQPVIDPNQDMGNKKCDSWRTCFIKDHSCPAKCRDS  
KSDMGEAPPRPGFTPDYGAEDNNEKAQAVEWIPDVTVLHRMLQAGKDEHGPNWPPPLV  
TDTNRELCEQIGVFGGQNDNVALNAIPMRGKDLLGKGIDYSSTRMKRAPRVLCMVYTM  
ENNHTNIRAIRETWGP GCDGFLAFSTRDDPRLPAISLPHDGEEAYGNMWQKVR SIWR FV  
GTHYLEDFDFFFQGGEDLYVLPQNLRSYLADAIDDPNTQDFFGGRRFQQGSQNIFFNSGG  
AGYALSRATLRKLI DTGLDHPGCFDPDKSSMEDVFIARCLKDVF EIGLVDTRDEKGRERF  
HPFSPGSHYTWEPP TNGKRDWYEAYNRLWPPKLKEECCAPDSVSFHYMKK PAMVRHVHAL  
LYNCD

>comp4962\_c0\_seq1; 1174 341 2674 LEN=2732; translated  
MDRQLLARATENSEAPTPGYMYLDIAKNAAGNPQTSADIAKYLTGRLASKNNPNIKFKCL  
KVIAKTAESPYSRQFKRCLSQDPRAMAAIKEATQFRGRPDVVRGDQPFEKVRQAAKEAL  
DAIYSDTPAVAPSGGGGSFASSVSSSYGNPSGGYGGAPPPGAGAGPRRMEGIGNPMFSDP  
RLEPQPQGISNMTVNEVVSEAKDTIIGMIKDPLARNASVQISNRQGMPPRPGSYSGPGGS  
FNSGPPGRSNLMNQTNGQWTMASNRGPGAVAPPPNYANDSAYYKSREAAGGNAYSWAQAN  
AGGAAGVGGSWGAAATAHQATPSITVNTIPGMGAGVSGGAGTGVSDGSYEKQLVMELCP  
PGGMKPEPPDKLAQFARVVSSLNPDFVCPVLLDCMEEGQPWIIRAKALCAMECCIKNGQ  
KPGAPSNAFADFLHACNGEFAPLANHSRAAIRDPARRVLNLLGVATPVGGAVMPPVSHAA  
APVAAPPAAAPPAPVANLLDFDSDVPVAAPAPVAPPPPPQQSPPKAPNAAAGGGS LFGGL  
NMASTPSTASAAAPPAAPPVAVAPPAPAAENGLLDLMSGGAASPAASSGTAEPKSAFGFM  
NTETAAPAPT PPAVAVAPAADMFSNL SVKGADEPKSSEPAPAVTTPSATTGSAFGFMNTAA  
GTPTAGAATAPTASPSTDSFDPKNAASPSTQTKMMSMSPEQMAMMYQQMMMQQMMA  
QMAMAMQQQRGATFMTMPGHVMQNPAASKSTFAFM DPKPQKDDKSFDFVKDAMKSEK

>comp4962\_c0\_seq2; 926 205 1758 LEN=1816; translated  
MASNRGPGAVAPPNYANDSAYYKSREAAGGNAYSWAQANAGGAAGVGGSWGAAATAHQ  
ATPSITVNTIPGMGAGVSGGAGTGVSDGSYEKQLVMELCPPGGMKPEPPDKLAQFARVV  
SSLNPDFVCPVLLDCMEEGQPWIIRAKALCAMECCIKNGQKPGAPSNAFADFLHACNGEF  
APLANHSRAAIRDPARRVLNLLGVATPVGGAVMPPVSHAAAPVAAPPAAAPPAPVANLLD  
FDSDVPVAAPAPVAPPPPPQQSPPKAPNAAAGGGS LFGGLNMASTPSTASAAAPPAAPP  
VAPPAPAAENGLLDLMSGGAASPAASSGTAEPKSAFGFMNTETAAPAPT PPAVAVAPAAD  
MFSNL SVKGADEPKSSEPAPAVTTPSATTGSAFGFMNTAAGTPTAGAATAPTASPSTDSF  
DPLKNAASPSTQTKMMSMSPEQMAMMYQQMMMQQMAMAMQQQRGATFMTMPGH  
VMQNPAASKSTFAFM DPKPQKDDKSFDFVKDAMKSEK

>comp4963\_c0\_seq1; 1518 392 4918 LEN=4918; translated  
MNSSSGMMHRISQWGRSRPSEHFHSSVCQSETFRRHPMKRARNRMSSSKEKATSF LCGQS  
ILIRKFTPAAITALAI FSMFLPETIAAIPLSTRPTIIGVETHLSDIDYRNLQRQSELQQ  
CKVALGVGDGNRDEMLGQEEYVLFVNLLASKQNSDYDAHSSFDKLPQGLKDNYNFADVS  
KGGIDVAGFRPGSAATEEQDEQLSGVCQSTIASILDSNSKPKTPVVAPTSPPGDSNSV VV  
VDVSEVDCSKMIERAQCNDVLSISDSYQNDLLDESDYVKFVNRLSDNKYARYRFEELPSN  
IQENHKKFVTVDGQVDISGSKPGQRVSDKQDEF LDFFCETDWN IQNPGATLTQAPAGQP  
ANTLPPTFDLFFCQRSMASDLERNLNEEYVIFLNRLTNNEFIGQSFEELDSFLKKN  
FSELAGEDGQISIIYGSKPDQKSI SVKEKEHLENICIKTGNALNGISDPDPTPTPTPVEVE  
VGIPSVPEPSGQMSLPPTFDESTCLIAIASSDPDDDDYMNQDEYTEFVVRLTGKAFEG LTF  
EELPSLPETYNLSVSEDNGIYTYGAKPDESPEQDQEEFLQQICLVAVAYSQTEGWTE  
APVIVTEGTFPPGI SEGYNSFIVSNRGGLTADDLVSGLN RDGLDQAYTIFIERAIEDSDI  
VIGLVEENRLRRRKLGVDLAPNSPEIYILDDIDCPEGLSSVEKCCQIAFAKFLTIDEED  
PQTVSRVYTYNTQSLISNRFL EIVLKEVDPRTTLRIVDASYPVLPEIEITDPPTTAPEVE  
EEKEEEEEKKSAAAGPVVGFALFAI VICAIIYVLVKGVPFDLPFGLKLP AFLDGRRRRVGI  
KGEDGAEGGLVQGDDERSASGPFGLKSSVFGDDEEDNDEEGQRQNLFGFVGK KKKKNDDF  
GGFGLSRDGTQSYGTSVNHKKYDYEEPSEA ESEEDS EDDQRSVDEDN AFGGSTASPTW  
GADNVFGSDPSSSTPGWADADADGDEDFFGESALGDKKEGEGSGEGSEESFSSDDDT  
YESGELDPSEENSEPI SENS AIDAVEQESFSVSADFS DNSKSLSEKLMGDELK KKNDDM  
NDAIDKGDWDAVVNATKSF GKSDVDSTMSKTP LGDSEEMDFDDDDSYTDYSGSDEGSVYS  
ETSATTTSEILEQRAEYRTQVEELVRI VLPNETEKVDAMMDQFKGREAE LVSTLQTMEER

SGNQARAAVHKSPPAPQQNAGYSAANGAGIQGGEGSTAGTAAIAAASLPIPAEEMFDE  
DEDGDDTFGGGSFGTFGGGGVEPIAEEGEEDYEEEGIEREYSDFEDGSRYSYSDDEGGSR  
SVGSRSFYSQEEGSGGSRSFYDDEEEGPNQNGDEEQGVPPYDDEGSKSFYSQDGEGRSFS  
YSQEGSVPRSYHSQEGSGVPGAGTAGKDPGARGAGSAGRDRDLVRGAFTARMYPVVPFAST  
ARREAGAIIPKSEATIAARKETPRRAAFRRARREAGTTTRKSHQIEQIKTTGMVDSVEHLN  
IIEYSILAV

>comp4964\_c0\_seq1; 214 160 1197 LEN=1471; translated  
MTKAPAALGAILCVLRGLGILATLGERAVGFPMMAFLPRACRHFVGGGRQASFYRAGTVAA  
RMASNTTDVAGVVGGEILASKRPGSLPADLATWFDVSLPEGRGICVKTANETACFPQS  
PPGTELEPDHWIRSFHSDIEFGMTLKQTRNSFWLGRLLAMRMALGYPGYPVIRDYGRP  
RLREGAFGSIHKKGRGVALASHVADPGLPGAIFSGVVDLEMTSRPGRPSLAKRVLTA  
SERESLGGIPGIAADEEVLLRFSLKEAIYKAAHPLLCQYVGFQEAQVTPPLPDGTASCSWL  
LESGADDRIAGLTAHWRTIDDGAYFLTSASVFARPDFEGCPLADE

>comp4965\_c0\_seq1; 147 310 495 LEN=851; minus strand; translated  
MAIVHENTIDGSEQVRVYAHPCGMQHDAQTQRRHGDVPPVGVIGCTHTNHPTSILFGKND  
P

>comp4966\_c0\_seq1; 458 228 1631 LEN=1834; translated  
MTLLHHGIANLTLRRLSTKYATAIRRLIASSSRVAAIGSGEHLSPVWGHLTTMQPVKGEGI  
YLWEADGTHKHTDFTSGIGVTNLGHTHPKITEAIREQATKLHFGQMNVMPLPQFVELSEKL  
DEITPDGINNFFANSGAEATEAAVKLARHASGKKNIVVFKGSFHGRTAQCMAMTTSKYI  
YRENYAPLPGGIHVTFPFPYSYFYGWGQEAQVDFCMKELDRVVMGQTSQDETAAIFVEPVL  
GEGGYVPAPNAFIERLREFCDRHDILMVADEIQCGFGRTGKMFAIEHSGVRPDILIMAKG  
LGNGMPISAVGASHELSRWKTGTHGGTYGGNTIVARAALATIKTMRDEKIQEKAAAAMG  
EYLMDKLRALDRIPPIIGDVRGLGLMVGTFTDPSGKPAQDVAGAVRSACIEKNLLLLLS  
CGTYDNVIRWVPLIVTENQIDDAMDIFEQAVMNATGGMSSKQKNIA

>comp4968\_c0\_seq1; 390 568 1410 LEN=1410; translated  
MISLSKEKAAAISRQNTALYDTSRRFGRNNEAERLKRKRDELEAKALQQELLTEVREAEQ  
ARKRIERDIREAEERRRALDEQSSSTGRDYIDNLRSGRAGAVNDKVFVLDGTGSGKGRGP  
SKLDIERERLELELEQLKSKQKAEENTKLLTTYGGLATVVGVAANVLNANGDLGDVGTAS  
GLRQLFPSTSKYLTDLSAENDNQRITAAAACKASGNIEMPYLDKIAEAELEKKVKEERTV  
KEEARELDRLAREKEEARKKGLIEAEQKAEREAKEKAEKEA

>comp4969\_c0\_seq1; 252 1 955 LEN=1167; minus strand; translated  
TDRPTDRPNQPAKQPRLPVSEHDRDETEQNVPTPEPNPPVPPAAGVLADRRGPGLCFSF  
RPPAPASSSRPSTRLLGGGFVKDPSNYKAPSKSYGKKELEPIKDLIDEESGMREFFESNE  
PWQPLFRSVAPDDSVPAAMFLGGAAGEGLETTETSSPWRKLPVPTDEADIAVLGRFLDA  
MQTSLIEDIPVDESTKDDENDLHFLFEEGRMLVCSRYHVQVQIEKGSVETFDRLFSICWS  
ELTELREAGEEDSGSLIVAPGFYDELRRFVDMNLQRPLQWLGVGFEVASLEKGGGLGVI  
RIIYKLSDIPTLPRG

>comp4970\_c0\_seq1; 245 1 968 LEN=1227; translated  
XNRSCVENYEAITMDYSKQRHFSLSLMLLGLFFIGGSSILGVGNVAFVPRSSCLSSKS  
IQTATAIAASNKPIVVTLTREDGKNTKLRKIEENTQLMEQIDILEMPCIAHADGPDYER  
LSSTLLSERWDFVAVTSPEAAKVLASAWDAVRDNLPSVAVGKATEKSLKDSKIPVSFVP  
SIATAKTLAKELNPVHETKKTSLVLYPASAKAKKTLQVDLMARGFDVTRLNTYDVTATWG  
DEEKESRRVEVACFASPSAVEGWLKNTGNTDVFAACIGITSATACREHGWDEKQIFFP  
EAPGLEGWIDAIQDATEASRNT

>comp4971\_c0\_seq1; 549 1 2043 LEN=2187; translated  
QEAPHREPTTDGTYKGSFVLFQRTYNTAMPDLTSLSKPEEAIVTHLDWEISVDFEKERLC  
SVATYSVRVLESNATTLNLDTAHLDIASVTCGDGNPLKFTLHPAAEDKSYLGRRLEIDL  
RRDSNDKRIAVSYSTTKFCSALQWLPPPQTAGKKHPYLFQCCQAIHARSLVPCQDCCGV  
KMTYTAKASVPSWATCVMSALLKKEEEDKASGGKTYTWDQVVICSYLLALAVGDLTKRT  
ISERCAVWSEPGIVESAAYEFSETEMFSTAEAITGMDYAWGRYDLLCLPPSFYGMEN  
PCLTFVTPTLLAGDKSLADVVAHEIAHSWTGNLVTNATWDHFWLNEGWTTLWLRQIMARM  
KNNPKFLDFDAIEGRKDMADTVEEFLVSAPENTSMVLNNGDGDPPDSYSTLAYEKGFTFL  
LYLERLVGTREFEKFQAYVARFASKTLTSTDFKDFFLQHFAGNSKVGEDWDWAFYSQG  
MPPVLPPLDQSMKASTDLADAWCAFDRGTASSPPATNETSAWASGQITCFLDALQSLTA  
EKALKVSTLRAMNALYRLAESRNSEILFRYCQLAIASEDESIIHVAVRFITSQGRMKYIR  
PLYKSLYRSKMGKNIALSTFLKHKDIYHPIASKMIAIDLKDAMEGSTTNSLMPNTNHILM  
TGAAIAVAGIAVALVRKSRK

>comp4972\_c0\_seq1; 721 232 2025 LEN=2223; translated  
MFCQPKIEPPRLSLLGQNNNNQLTSSQKKRKSNTIAGPSSLDEENRLQRSTNLTINTTD

CDLSPQKSYQHQINKSPRLEKSVKNNEVEDNIVVDKMKDSTNLAIDTLNDDLKSSNIHSK  
NPSFNASECASEVSSVSQRREWLKSFQEQSSNIFRSLTKDERPEMSQSRQVDNRNKKET  
RDGNTEKDPQRSPPASPAKSNVSNRKRKISISHYPTGVTNSATKPKQRRPAINRRASSAVM  
MRSWKDPRVHEGVKATDEGYASVASLSKWLENDPTSVKKKRHIRRGRNIISKSRQFERGL  
EDVIVLENKISRGAVGDKKKWLENAFQSVQEEHEDDTSSISYGYVQSDVGRSFRSHPNFN  
RQGAQTEIITDDAASSMSVSDKQTWLKNAFSKSSDERKRPAYTRARTDIVHNRGQNRDET  
ASRAKMMFKERSARKLSSAQSRSSLMPDTPKKSVALEAPVSSSEDFPEDEAASQPEEVIV  
AKSEEEAPIEPKKTQVISESVEEDEAPVDFRAARQALIERSSKNGHNTQVVNKVFLRKKK  
FEKLEAESRRKSMGVGLMLKSSWDLVDTSSGRPSNVYEKRYVPTQNIAPKKSFEELP  
>comp4973\_c0\_seq1; 413 136 1689 LEN=2127; translated  
MKSRSCFEAIGLLFSRLRVKNKGKDHKIGNGRVRCDFSGNRSCGNATCDLVSDTEDVFA  
RRPGHDNESTFYFYNHASQAPLSPEVQRIGIEQIQASPHDPNPNEMAHTSQARIRELF  
TKLIDGGCCDDIDEPIENGEVLKATTDGSRIAAILPSTAFATLAARNIEGQRRQQRKYG  
NGDSYNPVSGRILVLQDQFDSAIPWQQMCDESKGKLRDLIVEHPDENACPSVTSNGVRS  
NNGQGVIDGIGAPNGGWTQAVLQKLSDDHSIIAACLPPLHWSGTLIDLEAIGAVCRH  
RNIPLVVDATQAVGIMACSVRKIRPVMLACSTHKWLRGPGCCLAYISPEVQDDWIPLDF  
HGRGRDFEAGADSWDVSKNEMGPKGYPERYYADSRKFDSGGKANPFLPMLRTAMEEVCK  
IDTGKAQIRLKTLMQPLFDWAVRNGHSIKLDPAYHLIGIVLKDKTPEEMIEISKRLAE  
KKIILAVRCGGFRVSSYLNTEDDVRKLIIEGLQDTV  
>comp4973\_c0\_seq2; 230 186 707 LEN=1145; translated  
MDPFLQVQDDWIPLDFHGRGRDFEAGADSWDVSKNEMGPKGYPERYYADSRKFDSGGKAN  
PFLPMLRTAMEEVCKIDTGKAQIRLKTLMQPLFDWAVRNGHSIKLDPAYHLIGIVLKD  
KTPEEMIEISKRLAEKKIILAVRCGGFRVSSYLNTEDDVRKLIIEGLQDTV  
>comp4973\_c0\_seq3; 189 200 808 LEN=1246; translated  
MACSVRKIRPVMLACSTHKWLRGPGCCLAYISPEVQDDWIPLDFHGRGRDFEAGADSW  
VSKNEMGPKGYPERYYADSRKFDSGGKANPFLPMLRTAMEEVCKIDTGKAQIRLKTLMQ  
PLFDWAVRNGHSIKLDPAYHLIGIVLKDKTPEEMIEISKRLAEKKIILAVRCGGFRV  
SYLNTEDDVRKLIIEGLQDTV  
>comp4974\_c0\_seq1; 297 1 433 LEN=700; translated  
XAKAKDEAEARAKEEAAAKAEAEAKAKEEFERAKKEALAWAKEEAAAKAKAEAEKKIKI  
NIICWSGDMVVIDDVCNTTIDEVKERLVTLKSVAKEHQTLLEGGIELSVDDKSLLDYGI  
GDDDALMLDNPDKKKKQGGGWFGW  
>comp4975\_c0\_seq1; 583 1 3017 LEN=3272; translated  
XQPNTQPKPTQPSQIQSKTILPTQEMRLMGKSSVRSFQGCNSDNTIDSQRQRQPPL  
SSVATARTARAKLCTFPTKSSGSWISGGIWAALFWCLYAVAQCGLLHVYHSAALRRSGVE  
IEIERERVVPGNARYTNGNSKSSNKSSTNEQSRKDKPPAPPTPDGIFNGYPIYKLRGA  
GSNFTGDDTSHSGDSPAPNHKNANANANSTPANKRSSTSRPLYXPVPLRWGDLETTRFP  
SKVEHLARGELEVPFLPLPVFVFDTEQQEYVFLDPNEHPDTNHEHIEHISRQQQQQQR  
NPRSESGTKTETMPHHPNPSLQKILRKQREQVEAQERKAKRVNANAKANSADIQGKKKPL  
LPLSFKQPSLFDSTVYRNLTISVDGKGDVTVDVINGKHYGVSIGSMNGKWGLVDGQR  
LKWFPRIEWGGVPLDVDVYTLPSVVVVPFHSLASNPGLVWDDFLPMYTLDDMFGLLH  
TIGDDDETGGANSKANTPPDLLPIRYILPPGPTGDARGLWAGCDWLDRAQECHAML  
QKFGTLLGTRRSYKTHGFSQQDTEKTRDGDVASKSERSNTPVLTASKMPKIPITTRDVE  
LRLRKDYDDNDWQQISQRNTNTNGDSPPLSPTQKRALVCARNGLAGFGAISDHGDGSRSH  
GWEENDYKVSYNQGRGGKLDWDFRNFMI RNLYGENNANSNGSNFVENENATAIVRTTFVPA  
ATASTGIHERDPDRRRVEGITQGGKEEQRPYYIADSVFRGIEEIGGHQREQQQQNEWYP  
PASITWGPDEPLVVLFSLSKTRRRDFVKEANDLRRVIAERSGPDDPQIVETHKFS  
YTLEKQIQMASRAAVVTFVFCGGGAIASFVLPKASVQIYNEKGGIRHNIDTQLPARLDW  
DFFNNAAGYLHVQWLPVISIDKTRRQPHKTEPNTTTIPGSSGAKNVPSDLIFGELRRIHR  
ERKAFFLSAASHPEDGGERISVQKEPNKPNHAILLLSPFVYRIY  
>comp4976\_c0\_seq1; 326 1 439 LEN=439; translated  
EPSTVEKQSDDGFGFDSARTQSGTLDTNQADDDGFRGSPQAEASNIQNGDIDDDDNFG  
DFDSAPKNVELSGHGDQANDGCCCCGFRDFNATSPNAEISNDGNESHNDNRDNTFRDFGV  
VTSQTEASTVEQLADDDNDADFDFGX  
>comp4977\_c0\_seq1; 930 106 2880 LEN=2903; translated  
MAEQRTVTDASTKAIKALVLRDNGHSTADPMHLAAVLFNGDDSIGARVCSKAHGASDV  
TLIRRNLQKLLLKRPSQSPAPLEATPSHALAQLLNRAKAAAANGDALIALDHLIIQIFE  
ERELKKAIE TESGLTKKAAQAAVDEIRGKKKVTSSASAEDQYEALQKYGIDLKSAEGL  
DPVIGRDEEIRRMVQILSRRTKNNPVLVGEPTGKTAIVEGLARRILEGDVPETLKGVS  
RTLDFGALVAGAKFRGEFEERLRAVLDEVKSAEGKMLVFVDEIHLVLAGKTDGAMDAAN

LLKPM LARGELRMIGATTNDEYRKHIEKDTAFERRFQKVI VNEPNVENTI SMLRGLVGRY  
EAHHGVRIADASLVTA AELS NKYITSRFNPDKSIDLMDEAAATKRTALDSRPEQIDQLQR  
RILQLEIETTALKREKDKSRKREKELQEEI SNLKEEVAPLNAKWEAERGRADELKESKT  
KLDAL EAKLLQA ERVGDYVKAADLKHGAI PDLKDHLANIEREEAERRKNRNKDDDDG SIM  
DEVVTPEDIAGVISRW TGI PVSKLSQTDRE RLLRLDQRLQQRVV GQNPAI KEVTDAILRS  
KAGLSREGQPTGSFLFLGPTGVGKTELSKALFSELYDGD ERHLIRIDMSEYQE QHSVARL  
IGAPPGYVGHDDGGQLTEAVRKKPYTVVLLDEVEKAHPKVL TILLQVLD EGRLTDSKGR T  
VDF TNTVI I LTSNIGAESLLVLTENSQEHEVEAAHDKVMEKVRY SFAPEFLNRLSAIVMF  
NSLGIKQLEKVLHKS MKGVKRR LASRGIKIELE RSGVQA ILEASYTPSFGARPVERYLEA  
TVVTKLSRMLISGELTSGTIVHIEGKEMTQSESEHGRI AKRSRNGHHL YRLENADYDN  
EVKND FEMIDANDSEMELMSTQLN

>comp4978\_c0\_seq1; 1330 210 3830 LEN=3894; translated  
MRISAAGISFVAALCFTTASVSAFTTPSQR AISIQQQPSVQGSQATILNEKDDKKNFFS  
NMFNGSGESNDGTTALRGKLPHP SVRPHISPLNLLGPD PQEKSSDPLPVHPDVRSGTL  
PNGLPYVILPNKSPGRFEAHLQVFGS SADELEPQQGIAHLTEHVAYMGSRKRELLFGTG  
SQTNA YTD FHTVFYAVCPVKT PPRGDMPLPMALDALVDVMEARTEGSRLEKERA AVLSE  
MTMVNTIEYRVECQILSTLHRENRLAKRFP I GKE SLIRSWNTDDVKS WHRQH YRPNVLL  
YLVGD INPDEAEKVIAQKFGRLSAEKQ GSEIRLEEIKEMASDLSEAVVEGSV KAAQSWHY  
PPVRHDWCAPIDQEVPEL IIPANSLEYDLQLQESYPLDEKTNFLESEE VAPGKQIRPHI  
FRHELLQS FSLHFFSKRPVEPIVDIDSFRKSLARRVALAALQIRLNVGGRSDDPAFTFVE  
FNQLDSAREGCAVCSLDMTAE PHKWKEAIHKSLSEIRKLG VHGVTMGEMERYASSLMTDG  
EQLAAQGDRI SHGDQLSYLME TVANGHTFMSPEQSYHMTAKALSSLTIEDVNA AAAELCS  
HVTALKDGELPLSGPVIAVACTPKGVSEDDPAYCDEHSLVQAIYDACQIDVEPEEDVVP  
FTLLPEDKLAQAMEENPPVWLG GQFSDGTPNTAPDTITRPF TLRR LGNGIRVGVSYNSHE  
SQRGHLRLVAPGGRDAEKRLGF KKGSM SIGARTMQEGGAFGPWTREQVELFCVDHLLMVE  
INCSEESITVDFVFP TNNVGNVGF GDDVQLGITGTESVLQIVREIIVGFKWEDDALGRAK  
SSFR TTHE SLLKNLENFSTERIMEAMTDNDDRFLS IDVDAVNDI SLADAKNAVMSQMSPS  
NLEISASGDFDVTEVLEMIYKYIGTIPADANSEFLKEDVGLEQGA AVGSVPALPKPGKFL  
ELELADSDPRAVAYVAGSAPNAWGYLS DGTSMADYIMSQDKRATDYDRQRKHPLFGHVA  
LLLLSEIANRRLFSYVRERKQLTYDANFSFTGFERLLGGFFLVTVTASKENA AKALQACK  
ETL FNLKKGQRITPDNVESAKRVV LNRHDFELRTTAYWAQLMSGIQEESVPLKGPLSFTD  
FAKVVEAITPTDLQLALETMGIEDELFTAIGRTVQTNVPTDDEDETPLVRQAPAIGMRR  
GGALRD

>comp4978\_c0\_seq2; 1285 210 3961 LEN=4025; translated  
MRISAAGISFVAALCFTTASVSAFTTPSQR AISIQQQPSVQGSQATILNEKDDKKNFFS  
NMFNGSGESNDGTTALRGKLPHP SVRPHISPLNLLGPD PQEKSSDPLPVHPDVRSGTL  
PNGLPYVILPNKSPGRFEAHLQVFGS SADELEPQQGIAHLTEHVAYMGSRKRELLFGTG  
SQTNA YTD FHTVFYAVCPVKT PPRGDMPLPMALDALVDVMEARTEGSRLEKERA AVLSE  
MTMVNTIEYRVECQILSTLHRENRLAKRFP I GKE SLIRSWNTDDVKS WHRQH YRPNVLL  
YLVGD INPDEAEKVIAQKFGRLSAEKQ GSEIRLEEIKEMASDLSEAVVEGSV KAAQSWHY  
PPVRHDWCAPIDQEVPEL IIPANSLEYDLQLQESYPLDEKTNFLESEE VAPGKQIRPHI  
FRHELLQS FSLHFFSKRPVEPIVDIDSFRKSLARRVALAALQIRLNVGGRSDDPAFTFVE  
FNQLDSAREGCAVCSLDMTAE PHKWKEAIHKSLSEIRKLG VHGVTMGEMERYASSLMTDG  
EQLAAQGDRI SHGDQLSYLME TVANGHTFMSPEQSYHMTAKALSSLTIEDVNA AAAELCS  
HVTALKDGELPLSGPVIAVACTPKGVSEDDPAYCDEHSLVQAIYDACQIDVEPEEDVVP  
FTLLPEDKLAQAMEENPPVWLG GQFSDGTPNTAPDTITRPF TLRR LGNGIRVGVSYNSHE  
SQRGHLRLVAPGGRDAEKRLGF KKGSM SIGARTMQEGGAFGPWTREQVELFCVDHLLMVE  
INCSEESITVDFVFP TNNVGNVGF GDDVQLGITGTESVLQIVREIIVGFKWEDDALGRAK  
SSFR TTHE SLLKNLENFSTERIMEAMTDNDDRYXTDKIVCVSALLVFALPYCHASRLTHA  
HAHIHILPLVLDLCHSFLS IDVDAVNDI SLADAKNAVMSQMSPSNLEISASGDFDVTEVL  
EMIYKYIGTIPADANSEFLKEDVGLEQGA AVGSVPALPKPGKFL ELELADSDPRAVAYVA  
GSAPNAWGYLS DGTSMADYIMSQDKRATDYDRQRKHPLFGHVALLLSEIANRRLFSYV  
RERKQLTYDANFSFTGFERLLGGFFLVTVTASKENA AKALQACKETL FNLKKGQRITPDN  
VESAKRVV LNRHDFELRTTAYWAQLMSGIQEESVPLKGPLSFTDFAKVVEAITPTDLQLA  
LETMGIEDELFTAIGRTVQTNVPTDDEDETPLVRQAPAIGMRRGGALRD

>comp4979\_c0\_seq1; 311 1 1098 LEN=1764; minus strand; translated  
HMTRQLPNKFLPKSATS KGD RRIRGTTKLESFDHENRRAGSTVYSVSANEHPADPSRTR  
SKTSVSR TNWMEAAAATKKRGPLHMG GRRGFSLSQFQEKRR TSTAGNASFVTPANRNR  
KTASINTVGLGYDGT VFPKENKILFQQSASIQEIPAKRMVTP INESDRTKQLRQQQAEV  
AORLQESTTKEKSSGLSSALVNSSNVKQSSRCRKGVTSEKGRKSDNCEVDAFLAAMGGAV

DEDKVRSAKSRFANEVAADEYVKNRRKLELEKLEASNESRNKKKHQNAEQRMTKNWYCF  
NCRQTYNQRPGRCISSNHNVKNRFGLKESTSKDEERNALHKKSVQDGGHLHLSGIEWRDS  
GRFRT

>comp4980\_c0\_seq1; 523 248 1303 LEN=1531; translated  
MTINAFLLALLASVFAPIAFGQDSNSTCASIADIVCAEDNLNAVCEALSISGLDDDLAEE  
TWTVFVPTDEAFEELGRDNDLYLVFGNDTVPLTDLLLHFVVPVGVALTSDLLPCVAGENLI  
EMANGDDSRTKCRRGIPVFQKGFNTQEDSPQFIETDIMACNGVIHILDKVMLYESLPHP  
IPVADAEPEPEPEPVADAEPEPEPEPEEAIEEAIVEKQCOTIVELACSNPRFTTVCALVNEF  
GLADDLSDGMWTVFAPSNAQAFDNAPPFPADVDLNFVLQGHVVANEAIRAEDLVCTEKIEM  
LNGKLTTRTVCKNGTTYQNGVDNDDNRPEIVLADIEACNGIIHAVSQVILT

>comp4982\_c0\_seq1; 209 1 338 LEN=338; translated  
GDGDGDGDQDEGTTKPDNSAAEGMDGGLDSQNNDDWKEPAGKVSGLSDLSGATGGAVGDM  
VSPNMDEATKKNPHDDQDEATKTPANAEDDDNTGATGDGEGDTVSPKVDEAT

>comp4983\_c0\_seq1; 384 331 1453 LEN=1453; translated  
MMQRYFLIIASTILSALICVDIAVVDARELFESFNIGRIGPDSSSWFEPVSLWNGKGVPTQ  
NDAVVFEDESPTYAAIDKDIVASVSELIIGRSASSDSIGSVQLDLSQTKLAVQQDMTIG  
ELEGSDGSVYVDDNASIAVEGSLTVGSGGNLLVLAKKASIRTNLSVRGDNSSGGGSKIV  
MGVASTLTVAGDKRTMVNEMIENGLIVKETMDSTATLKVGTTDGNTVVTVATEPPEPPIS  
CENRGLKYRNQGRKNCKWVAKKKNRCKLSWKKEKLSAWCPGSCNKSCIDDGDGNNPCAD  
GTLKYKNIKKNCRWVKRLTRSRCKLQVSDGVKVVSEICKKLAANANFYSAKAKFTTHGKK  
SINEFNKISIIYVRQX

>comp4984\_c0\_seq1; 249 1149 1496 LEN=1868; translated  
MQEGRAKLFDLVYVSSDNDSDQMKGEIEGGWDSIDYEKKEDRSMLKKCFGICAQKEMEAL  
GITSEQRKGGIPTLLLIDKGNVVISPDGIPDLMGDNKVEDPLAKWKALLLPKES

>comp4984\_c0\_seq2; 308 752 1249 LEN=1621; translated  
MSSTSLSKCLTLVKNVDESSLAPIIALYFAASWPCDCVESKPYVSNVFKMQEGRAKLFD  
LVYVSSDNDSDQMKGEIEGGWDSIDYEKKEDRSMLKKCFGICAQKEMEALGITSEQRKGG  
IPTLLLIDKGNVVISPDGIPDLMGDNKVEDPLAKWKALLLPKES

>comp4985\_c0\_seq1; 310 390 1529 LEN=1976; translated  
MGAKALLASSASLDDTSSGLGSTSQGAPMQKAIAYRTISLPIPEFDVNVVPSIWIYPFQNG  
ANGSQPAEIKYSYRISLRRIQQLLARWDFIPDFISKNFALNPSITTASTVRVVDGENIPI  
SVTSTGTNVVFLAHGFLGSRSDLAYLAEDLTAQGFVVCVASEYEPESLEASYPRLEGLDRVV  
INQLLIPYVQDMVPQPILSYSAIGHSLGCGTVLQMGDDSWNRVLMGSGKAPELPSLGNVK  
PEVSTTTKYQTPVVGGRLLFISSVNDGPVTSWGGGIKIPQGYTVLEESQLDTATKFDRAA  
LVFDREDAPNHISYLSENVNDAMLSFSLPLLPTKALNIPVLDVDFKYANSRDSVPTGNVL  
KPLISKFLLTAPELASANH

>comp4987\_c0\_seq1; 156 160 696 LEN=1056; translated  
MIRAARIAPPSLSSLASRAVVRGNSSVGVGLPGRGTRARFLPLPARSHSTTTALYSPVAA  
ASRSGGGSIRGTPHGFLSSLRGFSSLLWPPAAVPNTAIFPGLFAPARTAAAGEAASLSCR  
SNSSSILSWAIWLIKRTYQPSLLKKRQCQGMKRRQSVGGRRIFKRRRQKGRKRLFGA

>comp4988\_c0\_seq1; 359 349 1710 LEN=1842; translated  
EGTEALADGEYDAIVLGTGLKECVISGLLSVKGKRVLQVDRNGYYGGDGASLNLTNLF EK  
FGAGQAPTNLGENRDYNVDLVPKFIMACGNLTKMLLHTKVTRYLDFKSIAGSFVYKGGKI  
HKIPTSGVQEVLASPLMTLFEKRRFRQFIIYVDQYKEGDSTTWEGRDLNMTMTMSELYKDF  
GLQPDTAQFISHAMCLKLDEAHMNEPALSTLKEQLTYMYSLMRYGTSPYIYPCYGLGGLP  
EGFSRICA IHGGTFMLNRDVDEIMFDDNGKATGIISSEDGKMMAKAPMIIGDPSYFSQD  
KIRPTSQVVRICLLSQPIPNNTNDESAQIVIPGPQVGRVNDVFVCSMGHALQVTS PGVY  
VAIVSTISEKHDPDQDLEPGLKLLGRILKRFITSVSVSQQYEPVSDGSDVNCFISKSFDATSH  
FENDCDDL SLYKRVTGEELDMNINADSVEGDY

>comp4988\_c0\_seq2; 281 349 1455 LEN=2008; translated  
EGTEALADGEYDAIVLGTGLKECVISGLLSVKGKRVLQVDRNGYYGGDGASLNLTNLF EK  
FGAGQAPTNLGENRDYNVDLVPKFIMACGNLTKMLLHTKVTRYLDFKSIAGSFVYKGGKI  
HKIPTSGVQEVLASPLMTLFEKRRFRQFIIYVDQYKEGDSTTWEGRDLNMTMTMSELYKDF  
GLQPDTAQFISHAMCLKLDEAHMNEPALSTLKEQLTYMYSLMRYGTSPYIYPCYGLGGLP  
EGFSRICA IHGGTFMLNRDVDEIMFDDNGKATGIISSEDGKMMAKAPMIIGDPSYFSQD  
KIRPTSQVVRICLLSQPIPNNTNDESAQIVIPGPQVGRVNDVFVCSMGHALQVTS PGVY  
VAIVSTIR

>comp4990\_c0\_seq1; 199 148 680 LEN=790; translated  
MPPQHLHDSVSNXVLDIIALRKDGLRGQAFVVFDDVQAATAALQTEQGFTFFGKDLKLA  
AKEKSDRIAKRDGYVPRAKRRKREVN SAADGGEELTEAAGKNTEQANLDSAGAPPPSS

GAPTAKVATTSATQQQPTHILFAENLPSECNEMMLAMLFRQVRLSYETIWGSNGWTV  
>comp4990\_c0\_seq2; 321 194 910 LEN=1270; translated  
MTSSIAQPNNNTLYVSNIDWKVKPLLRALYSLMTRHGKVLDI IALRKDGLRGQAFVVF  
DVQAATAALQTEQGFTFFGKDLKLAFAKEKSDRIAKRDGTYVPRAKRRKREVNSAADGGE  
ELTEAAGKNTEQANLDSAGAPPPSSGAPTAKVATTSATQQQPTHILFAENLPSECNEMM  
LAMLFRQYSGFKEVRIPRPLAFIEFDTEPHATLALERLNGFKLTTADALTLTYGKA  
>comp4990\_c0\_seq3; 269 194 805 LEN=915; translated  
MTSSIAQPNNNTLYVSNIDWKVKPLLRALYSLMTRHGKVLDI IALRKDGLRGQAFVVF  
DVQAATAALQTEQGFTFFGKDLKLAFAKEKSDRIAKRDGTYVPRAKRRKREVNSAADGGE  
ELTEAAGKNTEQANLDSAGAPPPSSGAPTAKVATTSATQQQPTHILFAENLPSECNEMM  
LAMLFRQVRLSYETIWGSNGWTV  
>comp4990\_c0\_seq4; 251 148 785 LEN=1145; translated  
MPPQHLHDSVSNXVLDI IALRKDGLRGQAFVVFDDVQAATAALQTEQGFTFFGKDLKLAFA  
AKEKSDRIAKRDGTYVPRAKRRKREVNSAADGGEELTEAAGKNTEQANLDSAGAPPPSS  
GAPTAKVATTSATQQQPTHILFAENLPSECNEMMLAMLFRQYSGFKEVRIPRPLAFIEF  
DTEPHATLALERLNGFKLTTADALTLTYGKA  
>comp4991\_c0\_seq1; 477 100 966 LEN=1020; translated  
MSEELKNSHKKALKSLEGEKRAAVKAKGMKGKKEALAAVEADFATKLEASYQE  
SLASLSLES LNISADNNPNAQEVASDDKNDYDDEAAAARERKRAKAKKRDRQKEKEA  
ELEKQIEEENANAGPLRKIELEQIQAVLTPLKLVSEVDADGHCLYRAVAAQSDRNHMA  
IRSLCADTLAKHQEEFAPFCEYTNEISTFDEYVEKVRNSAEWGGHLELRALGIALGRPIY  
VYSVQSGAKPLAIHEDTDNETKMREPILLSYHLHYALGEHYNQVVKD  
>comp4991\_c0\_seq2; 427 100 1118 LEN=1172; translated  
MSEELKNSHKKALKSLEGEKRAAVKAKGMKGKKEALAAVEADFATKLEASYQE  
SLASLSLES LNISADNNPNAQEVASDDKNDYDDEAAAARERKRAKAKKRDRQKEKEA  
ELEKQIEEENANAGPLRKIELEQIQAVLTPLKLVSEVDADGHCLYRAVAAQSDRNHMA  
IRKSRGFQAMGPLSFIFAXMSSDLCLIAFCLLIYDHRNF IACCSMVVAINNIGSLCADTL  
AKHQEEFAPFCEYTNEISTFDEYVEKVRNSAEWGGHLELRALGIALGRPIYVYSVQSGAK  
PLAIHEDTDNETKMREPILLSYHLHYALGEHYNQVVKD  
>comp4992\_c0\_seq1; 399 160 1299 LEN=1656; translated  
MRPLK KIALLG VFNFYCSLSRTDAFVSNVAVGSITKQGLVITGQAPFEP ILEAARRQQF  
PQH FVTVNDSELTAVEEKTDL EETLLSRQDPTPK ESEYSAEQVINFLFLSATFGYALYT  
ILNIDKGMTRGWSASEIAMRIPLDNWGAYESYLD SKPIVTKTLINVI IYLLGDWLSQTAF  
RGENLLEFDISRTL RNF IGLCFG PLVHQYEFSDAILPPENGLITRLQKILMDQTIYLT  
VKCSVYISAVGLLAGEDLSSVTQSVKDKIGGIVITAWKFWP I VHCITYSVIPAQHRILWV  
NSVDLVWNAI LSSAAQRSSVFEEVDDEEEV SGLNIGSREFVVAVDQSDVSTAAVDEVEH  
DKFIDQFN TTTSSGVLVAT  
>comp4993\_c0\_seq1; 430 636 2318 LEN=2764; translated  
MALFRKGRQNDAPPRVIHITANVNSEEP RGGSGNGNGNRHKGILQTPTKTSGVPCGILKP  
SSYHRRGASSDKNKSNSDSSNTPSTVHTTWTNDSN SSSSTSTSSDSTETRSLDRI ICNLHA  
KHGSTDGSSQSSSARGNSSHLPPSATNTITATTPREQKLREARIRHI EDLNERI KAAK  
ARKLVERKAYRREDRLLKLARELKVASKKLHSRALDIKQVEESNRFLEERLARTKQELC  
ELRASRPELEHRLKSESMVRVANERSKHQFQLAVQDEKLESVKTT HQLRQCQELCESVLDA  
NFELDRLRGCLGGDNNKATSTPPSSPSRRRRAGTAKTTIGSTPERAQWWR TTGGTVLLVC  
GLAMVIAMALFVDGNHRAAGKMRSHSVPSAGLSMEFVPSSESASLRESIDSAPKALPYS  
RILALEDSAAISNDLLAPIAVHAIGVGSTASPDETTNKSQGFDTIVRKELSVNRSISSRG  
TSSREVIEDGPVVATRNPVDVSTDCPLPIALGTEGRLGNTCLGPTVERKRRFP GPNEFA  
ASVARLVLDGTTLTGTINRRE  
>comp4993\_c0\_seq2; 430 814 2496 LEN=2942; translated  
MALFRKGRQNDAPPRVIHITANVNSEEP RGGSGNGNGNRHKGILQTPTKTSGVPCGILKP  
SSYHRRGASSDKNKSNSDSSNTPSTVHTTWTNDSN SSSSTSTSSDSTETRSLDRI ICNLHA  
KHGSTDGSSQSSSARGNSSHLPPSATNTITATTPREQKLREARIRHI EDLNERI KAAK  
ARKLVERKAYRREDRLLKLARELKVASKKLHSRALDIKQVEESNRFLEERLARTKQELC  
ELRASRPELEHRLKSESMVRVANERSKHQFQLAVQDEKLESVKTT HQLRQCQELCESVLDA  
NFELDRLRGCLGGDNNKATSTPPSSPSRRRRAGTAKTTIGSTPERAQWWR TTGGTVLLVC  
GLAMVIAMALFVDGNHRAAGKMRSHSVPSAGLSMEFVPSSESASLRESIDSAPKALPYS  
RILALEDSAAISNDLLAPIAVHAIGVGSTASPDETTNKSQGFDTIVRKELSVNRSISSRG  
TSSREVIEDGPVVATRNPVDVSTDCPLPIALGTEGRLGNTCLGPTVERKRRFP GPNEFA  
ASVARLVLDGTTLTGTINRRE  
>comp4994\_c0\_seq1; 276 173 676 LEN=922; translated

MAGDQYNLGLLDDDDYKVSVLRTKLLGIAECFMYRLPPGSTSPFRADGWPLTKPLQCVSL  
RVERRGDVLLLIIFTYTHGDEGAIGQQKLFALCPIDIVNQTDVAKQKIEHFVEAVLDSTRY  
FVVRVKDEKADREALIGLGFDRSEAGDFRAALSKYENDIKKEQRKR

>comp4994\_c0\_seq2; 167 191 596 LEN=842; translated  
MLNVDLPIQNISADGWPLTKPLQCVSLRVERRGDVLLLIIFTYTHGDEGAIGQQKLFALCP  
IDIVNQTDVAKQKIEHFVEAVLDSTRYFVVRVKDEKADREALIGLGFDRSEAGDFRAAL  
SKYENDIKKEQRKR

>comp4995\_c0\_seq1; 834 235 1899 LEN=2016; translated  
MVEDTKMEDTAGIAPTKEEGPDKQVNPPSVPPLAAGRRRLERLLGGGSAAASSSGPSDNA  
SGRPLARLYTYGTPVKVTRRWLTASGAAGEAIISSDIVSAATLLDPSHEDCRTRSLLLA  
IDESSSMEVEGEDNDNGNDGGEAPSTQAKDEPEYLSASRREVESWLLSLQVRILWKAGKH  
PEAMELVEKGIAILLEQVTIAAKKLTSLPGGSVSSLFPLLARLYRYSLVADSMKDPSVT  
AGLRNVMAKAHNMAACLRDVSQATLLNLMLRDLLLEHSQVEQANKLLSNATFPESASNNE  
LCRYLYYSGRIQALRLEYTTAFSNLSQCLRKAPTNTGLGFRITVQRLLVVVQLLMGEIPK  
RHFVFSKGMKTEMAPYLAITQAVRRGLAVYTKVVSEQSSQLRRDDTFTLISRLAQQVVK  
AGLRKLVHSYSRSLSDVANRLGLPSATSAEFVVAKAVRDGVLDAIHHEEGYVQSHDLV  
DVYATKEPAEAFHRRRIAYCLTTHNDAVRGMRYPPDAYKKQLEASRGNRRGKRGSDDKTDE  
EKAQELEDEFDEDEDY

>comp4995\_c0\_seq2; 458 235 1076 LEN=1266; translated  
MVEDTKMEDTAGIAPTKEEGPDKQVNPPSVPPLAAGRRRLERLLGGGSAAASSSGPSDNA  
SGRPLARLYTYGTPVKVTRRWLTASGAAGEAIISSDIVSAATLLDPSHEDCRTRSLLLA  
IDESSSMEVEGEDNDNGNDGGEAPSTQAKDEPEYLSASRREVESWLLSLQVRILWKAGKH  
PEAMELVEKGIAILLEQVTIAAKKLTSLPGGSVSSLFPLLARLYRYSLVADSMKDPSVT  
AGLRNVMAKAHNMAACLRDVSQATLLNLMLRDLLXTLPR

>comp4996\_c0\_seq1; 503 174 1964 LEN=2071; translated  
MNGSENGNHRRRRASATGSMPTDVKVFLSRPTYPLGGTVVGTILIQKGPLPLPLPSEPSG  
EGEDGEDEADLHPLRAILESVTVYVAGFCKIDSRWHDSRDYKKIYGMHPYLELLQOQDEL  
TFDADLLEQSEDTVCIWATNGMEALDLPERTEGRRWGGSDADFQRGLGYDGEDSDSKSMGD  
SGNDDDESDDCGAASAIGRNVLAFTFRVDIPSDLPHSVHATTCRYYYMANVLIKTKTQQQI  
LKRGFVVTGSSGPDGDEQNKRIQARVRVFGCEVGVVAHSNGLPCHLSSTEIHRPRGQL  
VVEQDHLVQYQPNADVTRMVRTNATGRPVCILTVIGSQSLSPGSRVHLQWDFPKVLLS  
NREVAMRTRRRKNSLDGNSSDINDYWI PCHQVCAQLQGEYAVFEDDTKTRTQSF LFDA  
CHERVEPGVTDRIKTTLWSSAGTNSDNGSDNTSFFEGGTPPCDLKTDVMEVSTWCKV  
DITIPDQQRDRYNSLSLTIPCRVRHRSSESELEDRDALEQPVAPLHELFLFGGEDSLP  
ATAAAFPKADIRSDLKVLSLALEEAVAGGSTLSASRSRSGHGGLEQRTEAPIGRIDE

>comp4997\_c0\_seq1; 896 1 2705 LEN=2963; translated  
XLLEIQFLQYTSNKSSIKPADVGRMKQLQVLQSNETNPSILEALVAQEEDISYSMSAAQF  
SSPTSRGSSIAMNTKPTTSSKSNVSYELFAPRATAQVSRLSRIAALTAGQTALGSAKSKN  
NQPSAVDSDEATILKAMSPPCASSDSISLSKENESSTVKTALKEATESSDHLTRLLKHTT  
SLRLALRASINIAEDISNRHADLIRHSGELSAAADRLQGEQEMLCRHAEIEIGMPLKHYDA  
VDNIGILVGVLFKGRVTVRGLAKIKVDNDDFPSILDQIDDAVEFFARESGGREALDAELK  
RQRRSSAKEQFETS GSI EY YRRSLALQEAALFLIREAVVDRISNTTAQVASGLDIPKTP I  
AADKLEASLVYTRFHGISSRSNRLLTLVKKRLHCGEAYHELLQLCRTTYCNSRESLLKTT  
IRAHMDKLDKQHGLVGMTRLASVFLIRLCTVETALYLDFFGEEKVSEEGKDPDSDSEIKT  
KQPNQSKRAMALPSTRAKEDATYYDREFQAYLASLTSALHRTIRGLVTLDDLDTLCQIV  
SVLREERSMASSSPTTLAAARSISSVIEDAQERLIFCATNTLTKEVIRFKASPSDLDPN  
KLTKNTKQSQEGGEDDAIKKQLQVYESWFPMPRSVLRILSKIFRVVEPKVFEDIALQSVQ  
SCTRSLRDGAKYIEKRSGTIHADL FKVHLLILREQLSPFDIDLRSVERQLDFSDAGRAV  
SRFLANRNRRFLSMSAENALVTLLEGVSVNEESVDSKRDL EEGLRNACNDFIDHTCDSV  
AEDVMKLVQAQLNSATPESLKGASFFEASKVRDILSKTQENFEPKAKDIRNKMNLYLENPT  
TQSILLKPVSKKISKGLEEIRKTAYGMANDTGGWDENVRAEILGMIDDLERVVKRIGRAA  
K

>comp4997\_c0\_seq2; 598 1 2111 LEN=2111; translated  
XLLEIQFLQYTSNKSSIKPADVGRMKQLQVLQSNETNPSILEALVAQEEDISYSMSAAQF  
SSPTSRGSSIAMNTKPTTSSKSNVSYELFAPRATAQVSRLSRIAALTAGQTALGSAKSKN  
NQPSAVDSDEATILKAMSPPCASSDSISLSKENESSTVKTALKEATESSDHLTRLLKHTT  
SLRLALRASINIAEDISNRHADLIRHSGELSAAADRLQGEQEMLCRHAEIEIGMPLKHYDA  
VDNIGILVGVLFKGRVTVRGLAKIKVDNDDFPSILDQIDDAVEFFARESGGREALDAELK  
RQRRSSAKEQFETS GSI EY YRRSLALQEAALFLIREAVVDRISNTTAQVASGLDIPKTP I  
AADKLEASLVYTRFHGISSRSNRLLTLVKKRLHCGEAYHELLQLCRTTYCNSRESLLKTT

IRAHMDKLDQHGVLGMTRLASVFLIRLCTVETALYLDFFGEEKVSEEGKDPDDSDIET  
KQPNQSKRAMALPSRTAKEDATYYDREFQAYLASLTSALHRTIRRGLVTLLDLDTLCQIV  
SVLREERSMASSSPTTLAAARSISSVIEDAQERLIFCATNTLTKEVIRFKASPSDLDPN  
KLTKNKQSQEGGEDDAIKKQLQVYESWFPMPMSVLRILSKIFRVVEPKVFEDIALQSVQ  
SCTRSLRDGAKYIEKRSGTIHADLFKVKHLLVVRVIHYSILFETA  
>comp4998\_c0\_seq1; 436 156 1160 LEN=1721; translated  
MVPSTLKRKLATIEAKNRKGSKKRGLTTTCKKQNKTTKASSARSTSKKKDPTRSSISK  
PRATSNSNAPCPANGNSRVQGDARLQGNRRKVERSPPNGRARCQKCRQIIKRGEIRVG  
IPISSASAKTTAYQYYHNRCLSDVHKPGCVKETHSQIREKILSQANLLWNLQQYWVLLG  
TEKIHKLVIALPQNERDLFKVLGATSSSFYPYDHSRLKYLLDIIRKARQKNEAVSTAAALG  
GSTAQRQMAANSSRRTNDPSEVIVIDDTDEDEVDMDGNKSDSAVPEGLEKDDRLGDDDD  
DDGEVLVGGTLSAQVIQQKFDQAAANGEILTID  
>comp4999\_c0\_seq1; 320 1 1303 LEN=1371; translated  
DRRRNEMKHETGFTNPVLDTNPGIFPTSNLFGNSFIKELTFSFKFTKTIEDKNGRSNFN  
DSVLFAGSKELYPVSEIVRRVQPSFRRSLIALELIEIYVDLTHTKPYTIPNHPFSSTRTG  
YLKHIEKYKSPVQKTPYIRVGQEGADGVLDLKNKVVIIVTGANSIGKDLATYAAAKGAKLY  
MFCRSKERAERAKKEIVDATSSSEVDIVLVDLDELASIRKAVQDLQSKENKVDVMVCNGG  
VLLNEKQTTKEGNEVTFASHLLGGSYLLSOLLIPQFKAEDPRIIFVSSGGMYNVFPDW  
ATATNSKGSTHEYSGNLAYAYAKRGQVLLAEYAKMYPGIKTVSCHPGWTLTPAVDQAYG  
DNKKYLEPMRRTTWQGSEGIAWLMGEKGESELESGAFYLDLDRSPQRKHLGPVTFYTKNKQKDI  
DDMMANLKQTAGC  
>comp4999\_c0\_seq2; 395 161 1168 LEN=1236; translated  
MGGAIISTTQFFLQGRKNFTQTGYLKHIEKYKSPVQKTPYIRVGQEGADGVLDLKNKVVIIVT  
GANSIGKDLATYAAAKGAKLYMFCRSKERAERAKKEIVDATSSSEVDIVLVDLDELASI  
RKAVQDLQSKENKVDVMVCNGGVLLNEKQTTKEGNEVTFASHLLGGSYLLSOLLIPQFKA  
AEDPRIIFVSSGGMYNVFPDWATATNSKGSTHEYSGNLAYAYAKRGQVLLAEYAKMYP  
GIKTVSCHPGWTLTPAVDQAYGDNKKYLEPMRRTTWQGSEGIAWLMGEKGESELESGAFYLD  
RSPQRKHLGPVTFYTKNKQKDIIDMMANLKQTAGC  
>comp4999\_c0\_seq3; 396 161 1306 LEN=1374; translated  
MGGAIISTTQFFLQGRKNFTQTGYLKHIEKYKSPVQKTPYIRVGQEGADGVLDLKNKVVIIVT  
GANSIGKDLATYAAAKGAKLYMFCRSKERAERAKKEIVDATSSSEVDIVLVDLSEPRI  
GESKNEGFLLQLRSFIILYFNGSTRKLTLSRSLHINHQDELASIRKAVQDLQSKENKV  
DVMVCNGGVLLNEKQTTKEGNEVTFASHLLGGSYLLSOLLIPQFKAEDPRIIFVSSGGM  
YNVFPDWATATNSKGSTHEYSGNLAYAYAKRGQVLLAEYAKMYPGIKTVSCHPGWTLT  
PAVDQAYGDNKKYLEPMRRTTWQGSEGIAWLMGEKGESELESGAFYLDLDRSPQRKHLGPVTFY  
TKNKQKDIIDMMANLKQTAGC  
>comp4999\_c0\_seq4; 321 1 1441 LEN=1509; translated  
DRRRNEMKHETGFTNPVLDTNPGIFPTSNLFGNSFIKELTFSFKFTKTIEDKNGRSNFN  
DSVLFAGSKELYPVSEIVRRVQPSFRRSLIALELIEIYVDLTHTKPYTIPNHPFSSTRTG  
YLKHIEKYKSPVQKTPYIRVGQEGADGVLDLKNKVVIIVTGANSIGKDLATYAAAKGAKLY  
MFCRSKERAERAKKEIVDATSSSEVDIVLVDLSEPRIGESKNEGFLLQLRSFIILYFNG  
STRKLTLSRSLHINHQDELASIRKAVQDLQSKENKVDVMVCNGGVLLNEKQTTKEGNE  
VTFASHLLGGSYLLSOLLIPQFKAEDPRIIFVSSGGMYNVFPDWATATNSKGSTHEYS  
GNLAYAYAKRGQVLLAEYAKMYPGIKTVSCHPGWTLTPAVDQAYGDNKKYLEPMRRTTWQ  
GSEGIAWLMGEKGESELESGAFYLDLDRSPQRKHLGPVTFYTKNKQKDIIDMMANLKQTAGC  
>comp5000\_c0\_seq1; 238 164 958 LEN=1004; translated  
MAESGTRATESGGSSPRKRPRKEAPPPLVEGVGEHKKARGQRAAIEDPKKTSKIWLNHKL  
VARPNYITSYGILMYRESTASDDPGSRRNSESADEPAKDNGCRNSHGNVPHHRKEFEYLL  
GLIPQGNAWTVFKGLPEPNETPEETAVERFEFEETSRLRFPYFPNTGKNVFTTKLYGVST  
KLLQIYLVSPPELDTSRFDVVKVVTIDGSGRFSGLPEIIEIRFLTKDKAIEGVRGKGN  
HRIAKIYKSQISILERADSILHQE  
>comp5002\_c0\_seq1; 304 112 884 LEN=1441; translated  
MSTAGVADASVGDDKANVDNMSLLSITEGENDRGIPHVKFIDDVDAFAASFSPSSAELL  
IGAYSELHSHKFTFETSLTQKSTLNFKIGLALILRSMTHRLKGLQVTLQNTIEKHSDLR  
TFFILLEQNYNLKIPDIEKSLALVKNLQSKQKAGETVTTRYNLADNVYKADVDTSVGIV  
NLWLGANVMLEYTYQEAIDFLSKNLETCRRESKIVKEDLAFVRDQIVTSEVSMTRIFNWD  
VRKKRAEAAVQAPSSXW  
>comp5002\_c0\_seq2; 370 112 747 LEN=1304; translated  
MSTAGVADASVGDDKANVDNMSLLSITEGENDRGIPHVKFIDDVDAFAASFSPSSAELL  
IGAYSELHSHKFTFETSLTQKKQNYNLKIPDIEKSLALVKNLQSKQKAGETVTTRYNLAD



NVYGKADVDTSVGIVNLWLGANVMLEYTYQEAIDFLSKNLETCTRRESKIVKEDLAFVVRDQ  
IVTSEVSMTRIFNWDVRRKKRAEAAVQAPSSXW  
>comp5003\_c0\_seq1; 271 64 813 LEN=919; translated  
MAPQSQSTMLDSFFGSKSNILCSNGGGLGGVDHGQYHCYQSSMAAIPSMPSMPSIPSCSK  
ENGGDHRNAVRSKHYKQPQLINSTIPCTPKYVPQRQNTPPIKKKKNHTKRVTFITQEK  
IREIPSLSSYTRGEIDSLYLSRDEMNRSHEECWRLVLDLMTGIEYEDHEQFSKRGLIDLK  
DDSVDRRRKMRDQTYQIVLGVQQFHRDNKRAQATMDVVEVTANLYRKASVQAKEEAELEAA  
WFDAAVAVRV  
>comp5004\_c0\_seq1; 648 139 1884 LEN=2305; translated  
MAAVGQQEPTPTSARPGKAGRCNYDQWDKVTRTLVNEAEQEEQEIEESKKALGLDGKYA  
DSQAHAEEREKAKDVLKAKKVLKEYQKRESAVRTELKGLLGPPPSKNGDGEESKATES  
KTVRVTRDMIDAGKRVVVIADTSGASQSDTLVLTSDLSSLESKMKANTTTKPKQYAEDAE  
NDVDESKEKGVVERKIYGLIKCFVTNVHNTILIKCKVISGSLEINHCSNVVVKIERDATV  
ATIQAADLCENISIIFNDAPSGKNGATYAGGIPMDTSTDSKNRIYWGQDKEDRIFHAGVKN  
MRVQINRDGFMETERICDYTFDGAKAIGNATEEEFQFVTSCIDEELVTEAVVREGSTTGQ  
NARPLTKREIEEEKVKREKAGNMATQMAENMFKFKEVKGDKGAKKVKTEKPKPEEVPVVE  
DAEEEIEEYAGMSKEDIDAVVKECEQNKARGNEAFGTGEYAQAVLLYTLALDKADELPD  
DKDKTKLFARDVTLNRAACFLKLGQHEKAEADAKLAHEYNNQNVKAFFRHGLALHAMKD  
YKAAISILAQAYKLEPKNKSIKEALRFAEVRNLNQEMLRKRME  
>comp5006\_c0\_seq1; 316 82 1194 LEN=1272; translated  
MSDGPYGRHGFSANSNAGGYGGQAGGTSYGSQQGGGGYAAPSYGQSYGGGASYGASGGQD  
YGSQYGSYGGGAPDNYAGSDNDDGKKGAKKSIQVQALNMYVLMWAGFITASLLVYFLLS  
GGDFSF LMTYGGMARMFGFGILNLKTFKSQRATGVSKKTLQLYCCVFFFRLTISIIRHEGY  
LPYDKSGDWLYHFVEGMSLLLCTVSLYACTSPFKHTYQADLDKFGFEMVPPGTGAVYLAV  
PILILAVIVHPNLNADFLSDTAWTYAMYLESAALLPQLYMFQKQSSGVVELLTAHFVFAL  
GFGRVMEFLFWIYSYHELADASGSKLPGYLALFSQAVQLIMMLDFFWYYYLAVKNATPLV  
LPSHGGAGIV  
>comp5006\_c0\_seq2; 214 421 1236 LEN=1314; translated  
MYVLMWAGFITASLLVYFLLSGGDFSF LMTYGGMARMFGFGILNLKTFKSQRATGVSKK  
LQLYCCVFFFRLTISIIRHEGYLPYDKSGDWLYHFVEGMSLLLCTVSLYACTSPFKHTYQA  
DLDKFGFEMVPPGTGAVYLAVPILILAVIVHPNLNADFLSDTAWTYAMYLESAALLPQLY  
MFQKQSSGVVELLTAHFVFALGFGRVMEFLFWIYSYHELADASGSKLPGYLALFSQAVQL  
IMMLDFFWYYYLAVKNATPLVLP SHGGAGIV  
>comp5007\_c0\_seq1; 421 247 1503 LEN=1941; translated  
MGQCSTLPSEGRQSRGGREEESTYRDSRSRKSLOVDSRTAQAAQYSQHQQVTTGHNEGM  
DSTEPMDTREDIPLPPAIATRTRCYKLNLDSDLYPHHSVFLGPYVDVPPPLTCSLSSDSA  
ESYSPLQVAINTAKIFRGIQVKGDTILSQNARATRSNRGSKTKVGEKSRQATKIDKAKD  
LVEETILTGPADSEEPAKMQSIVVMGEYDDMKYLVRDGAKKLREGSEVADESLSRSLARG  
RDENSSNNIMAKVSSPRKRGSMSGPRTPNKSRQFSQSGVPPKLSHPRDRLGISRKEASS  
ARRDNRDSNADRASSNGDSRSGRQEGDWGNTLPVSFSRQFQNIWNCGATGERSDDRMHSP  
TQQVASPRDGKSPMNDSSGMHNNQAKVATQPYQHKAUYEGRDSQQYGTRESGVTTTRAN  
>comp5008\_c0\_seq1; 414 1 1009 LEN=1405; translated  
XNNNSNNNSNSNKKRSGNRCDPHEHRELDFHEWEGPSTGSPWAARQEAFLPATEPEQVA  
LSVTASYSTSPSSSFGIPPWSSPMVPPSPPEEAHPPLVLFSSRSRQSPSTKDLPLVLRP  
RNALRNAPPVCPGQRIRRSSPTEKIRSPPGLSRDENGNQFPQQQQQQRQEEQQARA  
KSSCPETSLSLSLGLTQAQYKDTLRMLERIQKSRSFQTAQKQKQDLRPGNCPAAKT  
RTRTPTRTAPTSLQHPQPPVESIASEAAPWKENRGVDSQKPGDFYIGDEEAGDGF LAGG  
HAPAQQPQETLLLLGPGGVGHEHERETGEDIFELDL  
>comp5008\_c0\_seq2; 459 1 1390 LEN=1603; translated  
XQQQQQQQAQHEHEQKR DENSTIDIDMSDRIHIRKVS SVSSSHKGPSSGTIDNAHQH  
IHEHPLTVSALSQREEYSFRDKNSSSPAASSCASCSSWSGSEDDYDEEDHHIRVREREQT  
PSHSRAATEPAAITNTSDAVTAHVTPRSQSSLLHHHQEQSPNTRHLEALSLDRPGSDTKD  
IIRNNTKVDVPPPTMIHPMTKRISVPSAAPSPPAVARVVTMPPTNGLQSFLQTANSNANT  
NTQCGQSVSSKPPALPFHDQHRRHQHQQHSMHSHSHSHSHPQAYPHEVQCHSQYAPHY  
GLPPPQRQHFAQPAYSQAPNPMGAPVFFPPPGAVAPAF LPHYEQPPRMLQPGMEVILR  
DPSTGIERSFCVQYMANSMTSEQAHEFKNANAHCMRSMPTMFDTHANMSQRGTTNTPKS  
HGSSSLSTSTNVCAAPHTRNSSIEQRSVVEAGKGTAIQIARV  
>comp5009\_c0\_seq1; 394 206 1579 LEN=2475; translated  
MASTGTDHLVETTVDSVLSLSIIQKSFPEATSYSVRDNIKQANAEGFRVVLEGIEKENDS  
STSLFIKKVKAREYSHKPWGD LRR TLLYSRTEARFYTDILPLMREKTKTANSKWSIAPNC

FYAETILDGLVGEDESTSASKGESASDPFYNETDTAILDHKGGLLVLES LGDFYQKSPL  
TPEEATECLRAVAGFHATAYEDAAMLKVVSDRLCEYGGSYHLRNRNPKELKNIQTWAEF  
CKRVGSAAPEVFERPSVNLAKRVQDMAESI SEELSPAYNDKYATIVHG DYKAMNVFLAA  
DKTEEGKECAAVAASPLPIIIDFASTGVGLGISDVAMHITHAVPPEHLVDGGEEKLVETY  
LDALNKALPDHSRPCYPRDVAMRHYRLAVIDYFRFIMGRLWRGASLETFEKRKDSMNSVY  
VNRNIDAAINLIERADSYLTIFEEESRMNTGRSNMTQ  
>comp5010\_c0\_seq1; 575 102 1790 LEN=1928; translated  
MTVEPSSTTDQSERKKLVKARWGILRNALMRGAQEEQQQKHSIHCFPGFNLLKGI PVNL  
TSSLSGSQSESCQIEKWLTEYRWCD AENHTLEQNIDNMEIAILALAAACFPKGKCMRIIRT  
IDTTSGDGDSEIENDFSSNWLESIKQRCQPSVRVWKASEEEVLEQKCAAKNVVTTLLVQ  
ETSTSTKYQTLRYNLDNTKCNVSTIVTVESLDCILWTRPRETRLSLDDLISHRKNKGV  
DNTGNICIWDSERTLAYLLYHYFDDFFSFTKVN SDDDSMSIVCSCHNDSGDPDSCIVFQQ  
QEKDHSKVRVLELGTGMAGLSAVSLGLRLAMRQRKNGDETNESNDNDDESEGKNKKDIHI  
TLTDGNSNGVKNNAINQYLTELNSRTMLKERGIHSNYLDLSVNCATLLWTTDISGEKNTK  
KEYSYLDQDVILVSDCVHFQNFHAALAITTLRCLRVGGS AIFCQPRRGP SLNFFNLLST  
ATSETGFTRSTSLLSISRFSHP IIDQKHDES LVQHSDIYDENLHRPEILAITKLR EITEN  
DRMRFISFQQRYNPVKSKITEE  
>comp5012\_c0\_seq2; 250 82 618 LEN=1138; translated  
MSDQSQTATNKQTEPSRCAKGCFFGNPATGGCCSKCWADMQSALKTKAAVAAA VPPPS  
PVCKTASTTAPPSLETASAPVAAKTETPR SASASNLSSSASTPSVAGASGTALETPAAVA  
PSAATAAAPAKKKKKKSSYKNMMASMMKESSANKNDADAAIRKVTGGGTFSKIDKI  
>comp5013\_c0\_seq1; 483 1 1375 LEN=1755; minus strand; translated  
XNSNSSNNGNSTTAAIQRHRHSSPREKERSNCAIGLFG LPRSFKKYVLP SLEANVIRPN  
AAYGCDYFVHYKQDSEEAGRSRGGSVRPDDVLLLRGVVETVHNEHWENRHQQQRPATD  
TINDGRITTTTAAFLPTMPPMPTVAFVSDTNETFWDARFEHYLKRYRMARDKDTGNY  
LFYPYKEPTYEYPGTL DNIIRQWHSVQAVWEAMEGHQQQNQQHQHQKQTKNRYDRV  
AMLRNDVVYITPIDIYRVP ELGTSTSSKGGGNEIYSTSVVPGFAKYPVNDRMIYGPY EAV  
EIWASKRFENIELYATDPNRNKGMLHSETFLNASIFEAIKGLGSQRGETETETATTPAT  
VEKSSSNSSSNATTLARQARNVYRVVEDPWICFLRVRADGAVWIEDCDPKKSGFGGGY PG  
GEANYTDLLTKFLPNHGKRCRRRLVRDKQRRIVELACS  
>comp5015\_c0\_seq1; 292 1 511 LEN=529; translated  
XDVGDFDFGLAGEDKAKLVYMR EAEIKHSRLAMLATV GWPLSELWDKPLADAVGLPSLLT  
SSGDAPSLNGLDKIASAYWVAIISLAGIIEIENMKMKEEKGKAYIPGDCNFDPLNLLP  
QDKNGQMEMMTKEIKHGRIAMMAILGF AVQEALYKAPVVAETPFFFHPIF  
>comp5016\_c0\_seq1; 797 55 1431 LEN=1701; translated  
MADNNSNNNTNTNTNDGPO PAMTAEV VVTPCGLLLGCFTCLLGCMLPFLCCCAVTATA  
ADTAANRAQGRFDNVQGWVIDDLVEEKT LNLGIPDDDDDLIKLSQESGDEKPEESSAT  
SGKKVKDSKYDVLGVPTDASASKIKKAYI QARKWHPDKNPSDEAKKKFQEIGEAYQVL  
GDEKLRGIYDRDGEGLSADKTDANVENIDPSFI FTFLFGNDCFNDIVGRLQLVTQQ LVA  
GADGQPKCTAEEMREMERRRVLRLALALRKRINAYVSGGNT EAAKA EWKKEGERLVEVRY  
GQELLN TVGKLYVLIVTQITGTFGEGLTAKKEGFD MKFDAAKNAQNAAKKTQGGATGAEQ  
DALPSMIQMMWNLNVIDITSTIREVVMKLCCKDKSVSSDIQQKRAEAIKVLGSIWESIESK  
NKEEKDARTMYMSATQAAMESHLDKVSKDEAAKSGASN  
>comp5017\_c0\_seq1; 356 219 1388 LEN=1782; translated  
MAPFISSIRYNSISFLASLAVLAISSAEESVEFSV VTPDAHASLRRRLGGNENNTAQPRR  
QPRIIGGSNVNDPSEYPYALMNGRALCGAVLIAPT FVLTAAHCVGADDDFEIGAIIDDS  
NSIGSWWNSLIGGSSASGTGTEYAIKSRIVHPDYDDL NMFNDIALYELQQAVPDTVPYAK  
LRREPLTEAGTQLTVIGFDTDASEWIQDTSTALQKTTVNYVTESTCQSRLRSHLIGPDM  
LCAFAEGRDSCEGDSGGPLLEGPWGASSDELVGLVSWGLGCADDNYPGVYTRISHFYDW  
I IENMCEMNPSGVPDGVACYSMATTPEETIAPTIFPTDGYGDDDLYSNWFYTD DGGVYAH  
LDDYVTDNDFGNFWDVTDWVSGIFGL  
>comp5017\_c0\_seq2; 288 521 1551 LEN=1945; translated  
MHTINFVRYSNRDNLGIIGGSNVNDPSEYPYALMNGRALCGAVLIAPT FVLTAAHCVG  
ADDDFEIGAIIDDSNSIGSWWNSLIGGSSASGTGTEYAIKSRIVHPDYDDL NMFNDIALY  
ELQQAVPDTVPYAKLRREPLTEAGTQLTVIGFDTDASEWIQDTSTALQKTTVNYVTEST  
CQSRLRSHLIGPDM LCAFAEGRDSCEGDSGGPLLEGPWGASSDELVGLVSWGLGCADDN  
YPGVYTRISHFYDWI IENMCEMNPSGVPDGVACYSMATTPEETIAPTIFPTDGYGDDDL Y  
SNWFYTD DGGVYAH LDDYVTDNDFGNFWDVTDWVSGIFGL  
>comp5019\_c0\_seq1; 259 491 1282 LEN=1703; translated  
MTRLSTPPKSKNRLGIADSNVRPIEGNRRSQNIPLPMSHMHR TQSEVQLCEDMETAEQRD

LNMFYRVVNGIRDRQMQLVRENKSSVAAAAFYNPAGHLTEAERSLAHIIHTRNAPLDRKN  
GRDNSNARRTNLNLIGASNPQQIHTGLNSGVPILEDHSECDLMEHEKESYERTGAEDN  
EWSVAGFDNDSPNTKMSLDSRQNEHYQYHQNLVYQQUESTVYHDQGVSAAPMYEKPTNTLS  
TATLNPSRSSSNIVDEGMFDFEL

>comp5019\_c0\_seq2; 259 374 1165 LEN=1586; translated  
MTRLSTPPKSKNRLGIADSNVRPIEGNRRSQNIPLPMSHMHRTQSEVQLCEDMETAEQRD  
LNMFYRVVNGIRDRQMQLVRENKSSVAAAAFYNPAGHLTEAERSLAHIIHTRNAPLDRKN  
GRDNSNARRTNLNLIGASNPQQIHTGLNSGVPILEDHSECDLMEHEKESYERTGAEDN  
EWSVAGFDNDSPNTKMSLDSRQNEHYQYHQNLVYQQUESTVYHDQGVSAAPMYEKPTNTLS  
TATLNPSRSSSNIVDEGMFDFEL

>comp5020\_c0\_seq1; 305 1 1232 LEN=1417; translated  
GLWIAAGFEHVQVNAIDTXLHNSLFEFNVLQTLIKVNITRPLLLATILCMLVNPKAAQA  
KLEIIVSTFRYLVLVSKDKKWKKANDDPASFFSKDSDGELIVLRKKTVVFLRHGESTWNDT  
FNKGDRKMSSFVLGFIPIGFHSLATEWYFLVRGMSDESFFDPSLSAKGIGQAEGVARFL  
RETDAQYATPREAKFLSLVKGEKSEKNEAGEMCVLVSSNLRAISTCAIAMKDRLDQKIP  
GDNIIILQELQEASINPDAQSITPAFEKLVTSFTDSEAVKSIYANQSDTSINKGNKGIKS  
NGLQRMEAFCNLLFATDGYESVKGNDGDDSNNAATILGNANNVMCTGHSYWFRAFFQTYL  
PRDFQHICKTKKLVNGGLVGFVTLCHTKVKETGEEKFMIDPASLTVLYAGF

>comp5020\_c0\_seq2; 320 1 1405 LEN=1590; translated  
DQTVIFENSNELTPDHMDGQFLSQSNINIEIAAPVVIFILLINFSGVRAKYQEPPLQKRT  
VTQHTQVAEKYNGTIRSDSGPAIFGLMLRALDSSQHHSALAFGYHSVHAGQSKAAQAKLE  
IIVSTFRYLVLVSKDKKWKKANDDPASFFSKDSDGELIVLRKKTVVFLRHGESTWNDTFNK  
GDRKMSSFVLGFIPIGFHSLATEWYFLVRGMSDESFFDPSLSAKGIGQAEGVARFLRET  
DAQYATPREAKFLSLVKGEKSEKNEAGEMCVLVSSNLRAISTCAIAMKDRLDQKIPGDN  
IIILQELQEASINPDAQSITPAFEKLVTSFTDSEAVKSIYANQSDTSINKGNKGIKSNGL  
QRMEAFCNLLFATDGYESVKGNDGDDSNNAATILGNANNVMCTGHSYWFRAFFQTYLPRD  
FQHICKTKKLVNGGLVGFVTLCHTKVKETGEEKFMIDPASLTVLYAGF

>comp5022\_c0\_seq1; 944 329 2845 LEN=2866; translated  
MAWTMIRRSRQWFPNRRNQMRRTGTNHHQQRRAKHATTSPGLWTSAAAPSAAGSSSARTFL  
DSRQHRHRSWGMHAAHKPSHDGGDHYSSSVSRKNRRRPRRLSSSLAATTSASSSSSRLYR  
YRDFLEKGEHDRIVLSYLTIDIEGDKFYLDYVDNSKILTWIPSDDDAEPPGNDTEQSPFS  
LSYYSCKEYPPARFPYNNRMDVDSNSMLVFGGDLWDKGGFDLYVTRQLMDLKRRYPDRV  
VWVLGNRDINKLRMMQELGLPPAESSTDKSNTGAAAASNLVSPYHPGLTWFRGSGRVGDP  
SGPLPSMVPGDRLRWILGNTMGSPDAMEHRRQELAWAEGCRETGGTSAASSAEGI SDCD  
VVRSYQESCHPRGEMGRFLAEGLLAAKVGPIFLVHGSPLTKDTMERGLRDGGDGSNIWD  
DLTFCMPWINKTHEYSEDHRFESASDLGVETIEDWLDVAVNRNFASRNVEAWERDIARLER  
EAGQQATNATHNASDGVVEESKDSIWAYRAGYGNPSSHSGIYYSDLVQYGMGMPGGKKN  
PTVVYNSFTPEGMPTFFLPPEESGGTNGDCEEALGTEHASERDSGNNPSSSESVDVAICTR  
QFFERSMRLILTGHPKQGDMPSPIRVDRSSWVICADTSYSGDTKWFHDERNATNP SKME  
RRKRQEEEQHEKRKRNSNLGRGNSISFRGETAVSEVLVELSGKDLSPESVSYHGVLSDGTE  
YESVNLDDGEDESGAVSADDAGSNSNGSGSCGLDSMPATAAILGRVAPTNNMVPDPLNS  
PHEGRWWTGKICRDGSHLYYAGEGYNVWNYIVSPSIDGNRSNTKYIDNTASESDAKK

>comp5023\_c0\_seq1; 392 468 1844 LEN=3300; translated  
MAQSVNQHMVTGFGRTVRRIRNPNPQDVLSGRGGGINSHAGNKAFRSWVEERKPAYNLAE  
NKQAKTEVAMQVQVQVHNQRPVAGRFLTKDKSMEGTGGTTWWVEIDEAKALAKTTQALRE  
GAPKIREALQNQTGSPLLGPNSRPKPPKRRKRKPSGKAANRDGSITTATGQPRVGINLGA  
PLDDDDSEKQILQEFKQDVCHLKRYKSEQLLLPTSNLQVYDQALVQLHANA EKAKKV  
AAERTGGTQQNVQKPTFFPATGSR IAPLTSNKVFKEKYSQQQQGNVPPAMP AIDPNAAT  
PPLMAAPEPNNSIPYLSLNAQPAPKRARLRNNSLALSDYDENALDPATDEVPAFVDPFA  
NETDVLLNNGVLP SHATSFVPDQLSKSGDRLAETSGQSSRLNYNRSVHRYLDRILSFSS  
NPLHLWEDGLKGNNEQVETRVVDIRDDYFLCDALPQDE

>comp5023\_c0\_seq2; 344 468 1709 LEN=3351; translated  
MAQSVNQHMVTGFGRTVRRIRNPNPQDVLSGRGGGINSHAGNKAFRSWVEERKPAYNLAE  
NKQAKTEVAMQVQVQVHNQRPVAGRFLTKDKSMEGTGGTTWWVEIDEAKALAKTTQALRE  
GAPKIREALQNQTGSPLLGPNSRPKPPKRRKRKPSGKAANRDGSITTATGQPRVGINLGA  
PLDDDDSEKQILQEFKQDVCHLKRYKSEQLLLPTSNLQVYDQALVQLHANA EKAKKV  
AAERTGGTQQNVQKPTFFPATGSR IAPLTSNKVFKEKYSQQQQGNVPPAMP AIDPNAAT  
PPLMAAPEPNNSIPYLSLNAQPAPKRARLRNNSLALSDYDENALDPATDEVPAFVDPFA  
NETDVLLNNGVLP SHATSFVPDQLSKSGDRLAETSGQSSPAYFFYENDRFNA

>comp5024\_c0\_seq1; 104 1 529 LEN=684; translated

RRAWKIACSSSVNEKAI FASLGNRKIGIQSFAMDFNSFVVISRISIDLKVIANFSDQLFA  
THVVIKIPVPKNTAKAKIKHSFGRAKYEPEQQAI VWRVKRFPGKAECHIHADV DLMPTTR  
PKPWSRPPINA EFQVPMFTSSGVHVRFLRVYDKSGYHTSRWVRYITKAGNYQIRI  
>comp5024\_c0\_seq2; 480 176 1450 LEN=1605; translated  
MISMIMILNQKGDIMISRQYRDDVSRAGADSFRLQVVATKNTGTEAPVARIENNSFLYTR  
HLNMFVAVTRSNVNPALVF EYLYQLVRILKSYLGDEFDENAMRNNMTLIYELMDETMDF  
GYPQNC AVDVLRLYINLGNVKAKEEQEPSQLTSQITGAIDWRREGIRHKKNEVYIDVLES  
VNL LLSNGNVL RNEVTGAVQMNTKLTGMPECKFGLNDKLVIEKEGQRKPGVEIDDCTFH  
RCVRLGKFDADRTITFIPPDGEFELMKYRVTDNINLPFRMIPAVQEEQSLTKISIDLKVI  
ANFSDQLFATHVVIKIPVPKNTAKAKIKHSFGRAKYEPEQQAI VWRVKRFPGKAECHIHA  
DVDLMP TTRPKPWSRPPINA EFQVPMFTSSGVHVRFLRVYDKSGYHTSRWVRYITKAGNY  
QIRI  
>comp5025\_c1\_seq1; 99 1 773 LEN=773; translated  
DDDDENHGDHSEKQKNQTETDATNEPPEPEEEEEPRRKRHDPATAASPAAKDPDDRRRK  
RCWKDLLES LFAVAEAVGSDLASIWGGL ENGLRRLWLA AVAAHPLKAVLKEALALEEDAS  
QGEALMVWIYALCVHLSANVDAGPEPGDPSGLAGAVEDWVAVEMKDPVRPLEGFRSELW  
DPARDEWRPLDVGAQEA AEKGGADLLEAWGAEVGLAAGASGSDRGGAGETAARVPKRTN  
ERTTAGDALNHPNTTAX  
>comp5026\_c0\_seq1; 500 88 1671 LEN=2341; translated  
MTNDSAIQNIQRQAE LKSLTLEAIVKECSNKSSSVHADLRAIADGLSTGRELDLTI LTGG  
LCNYSY MVHFKDHEKNKDVALFAKMTFGQPVLFPGMNCP LNRTNCEYQMM EWYSKVSPFP  
ETT VTPYFCIDVEGEEENMKVLATEFAPS NLEE QGGHAFIEGGIIGKGFACNLAAGL GAL  
HNSEVTD PFDNGEMKPF FLALAGMISTIFDGYDGSDEDDGDSKNNNEDDPVEELDMALEL  
GKSLGKHNLDKIVESYRECLQRTDCYIHGDFHPFNILVEGKPKTPGD LIEENGDDGKYSI  
IDWEFTHCGPMGKDIGFFSAFP IACLF AHA AQGDVMSAESIYQFLGTLWKEYS QVIKLDQ  
KENLSLTDVYRQVLGFGS CFLMGYGAIGFHMEYLP IEEGDATEDILNKVQASLRLGLKV  
LNWGFGEEDTLTIENLQGRFNEAIREEMSRLTPPADRKSSKRSSILRETGRRVSDSHT  
LFGLSKNFERISISSTPSGMSPRNSLSEKRTSILQAEKLIADMDYEF  
>comp5027\_c0\_seq1; 390 181 1791 LEN=2409; translated  
MEELQDAIEDAQYVNAIATQVQGRPVLSWHFPETEELERWEAKKIEEGANASNGLEVFG  
IDWCLQRAIGFFLFSEFLKDT CNDWLRINFIEDVIHWRKMRGRQRIERAKRIAQKFLKSS  
PVDKVTGERIYPEKREIVTHDMFRQVPKLTETEVKELISANKVVDYDSESPVPNSIGLT  
GPVLDEIFTAISEAENKYNNESSG SERSINIESAELREATRNLPDRRSVREKYSSMKQLT  
ESLKQVDPKNLNDLFAKADVLVIESLRKKYWQQFTESEKFVRMKNFLWFYDRPVEPDDFF  
SMRVLGRGGFGSVTACKKGTSGKLYAMKVMNKKRIKVKKSELLALNERKVLA AVESPFV  
NLKYSFQSTDDIYLILD LMTGGDLSYHLQKGSFP PRECRYAARVMLGLQALHDKGYVY  
RDLKPENLLLADDGRVKITDLGLATKITPKLHGAAGTRGYWAP EMLRREDEDGRRMPYNQM  
VDWFSFGCCVAEFITG SNPFRSQTALKFGLDAGKETKVRQSNTLGFDTLIHNDFKM  
>comp5027\_c0\_seq2; 511 181 2184 LEN=2295; translated  
MEELQDAIEDAQYVNAIATQVQGRPVLSWHFPETEELERWEAKKIEEGANASNGLEVFG  
IDWCLQRAIGFFLFSEFLKDT CNDWLRINFIEDVIHWRKMRGRQRIERAKRIAQKFLKSS  
PVDKVTGERIYPEKREIVTHDMFRQVPKLTETEVKELISANKVVDYDSESPVPNSIGLT  
GPVLDEIFTAISEAENKYNNESSG SERSINIESAELREATRNLPDRRSVREKYSSMKQLT  
ESLKQVDPKNLNDLFAKADVLVIESLRKKYWQQFTESEKFVRMKNFLWFYDRPVEPDDFF  
SMRVLGRGGFGSVTACKKGTSGKLYAMKVMNKKRIKVKKSELLALNERKVLA AVESPFV  
NLKYSFQSTDDIYLILD LMTGGDLSYHLQKGSFP PRECRYAARVMLGLQALHDKGYVY  
RDLKPENLLLADDGRVKITDLGLATKITPKLHGAAGTRGYWAP EMLRREDEDGRRMPYNQM  
VDWFSFGCCVAEFITG SNPFRSQTALKFGLDAGKETKEKAIDYATLEMIPEFPETLFE PD  
AADLCRRLLDKNEHARLGSKGCEQIM AHPWFKTCNWEA ILSDKKTPPYVPPKDVNAASQS  
EIGTFREDEKYLECVIDEKDGKYYSDWNWTPHAYAAEVIDFLIYERETGKPLLPMDENS  
SCCCSVM  
>comp5030\_c0\_seq1; 1142 337 3249 LEN=3551; translated  
MMDHSRLAQQANNSTASSDSSTTPGDTRTSNDGVG SVNTNASSGHSDGTGGSSNSNNRVA  
VDKSTNSLLLDNYVDNTFEKVELDLDR TLTLDSWAGSGLDVGPTQSVSKI GLSSKLGDIG  
DDFE EPWKKIADSYFKESTTNSFDDQDAQTQTQTQTSALHNQQAP ELMEGTGDSNSSMS  
VLLGLRPSGKSGSSKGSNI SDNSIERLLRGADAPFDKSNYSFEKVLGGSDNSLNSLDKI  
ISMDFDTTDTDRTNTHLSYNDHASNDMSEMLTLLPTDVDQVVSANDFKINNGRNFSAT  
TNNKSASVDP SLTLNQQNVDNAGDSGKSYNDEL LASSLRNAVSDSDHTTSVDGAAAKEN  
EDDNHSSVT SNSASSTTHPSLKNNDRQHKFDGAFDSESSLPSIEVGNIPSSSTSEQQTGP  
RSNSPSVHPFLPSNLSLSDHARRDSQRRRQQQQQQREPYLKDQQQQQGGKRNNNSNAHSSI

VNIVNNQLPQLSPQTANNSTSNQRAQMDYAGLQQVVKMLIRRLQEIERAGMGKNHNHRGQQ  
FFAQQQQMILQQQQQQEIQRFQGMGNSLKKQPQNGLNLSLQAKAGQQQQRQLPLSNQFQQ  
RLQQQQMGLSQMAQMPIGFAPTPIAIDPTSPFSTSI TNDNSSNTNNALRKQQQQPSSIF  
AETAANSNSNISSVIGSRKETPLQSF LRNKRSSIGSVSGNITAPQLQPQSKFSAGSTPF  
GGNNNMVTTASILDATPMDFGAQSNNPFLRKQMMASMDRSVSGCNTSARGRRSSAGRNSS  
SSLSSSIRQSMMLQMAPGGSRHQRSNKANNLMNSRSEHGTTSTSSSASNLSSGGADYQS  
TGITQRHASADHMLGSSRHSMSVGTAKAQNRFRNAVSRSSSSSFGTLTKSKSNGGLKGD  
FSAGSLIPVKGNGVGGGGGFGAKHKLSQNSTISLRSQSVPFMIQRGGGSASERQQQRMG  
EGNNHNDGWV

>comp5030\_c0\_seq2; 1142 385 3297 LEN=3599; translated  
MMDHSRLAQQANNSTASSDSSTPGDTRTSNDGVGVSNTNASSGHSDGTGGSSNSNNRVA  
VDKSTNSLLLDNYVDNTFEKVELDLDRTLTLD SWAGSGLDVGPTQSVSKIGLSKKLGDIG  
DDFEFPWKIADSYFKESTTNSFDDQDAQTQTQTQTSALHNQQAPELMEGTGDSNSSMS  
VLLGLRPSGKSGSSKGSNSISDNSEIRLLRGADAPFDKSNYSFEKVLGGSDNSLNSLDKI  
ISMDFDTTDTDRNTHLSDYNDHASNDMDSEMLTLLPTDQVVSANDFKINNGRNF SAT  
TNNKSASVDP SLTLNQQQNVNAGDSGKSYNDELLEASLRNAVSDSDHTTSVDGAAAKEN  
EDDNHSSSTVTSNSASSTTHPSLKNNDRQHKFDGAFDSESSLPSIEVGNIPSSSTSEQQTGP  
RSNSPSVHPFLPSNLSLSDHARRDSQRRRQQQQQREPYLKDQQQQQGGKRNNSNAHSSI  
VNIVNNQLPQLSPQTANNSTSNQRAQMDYAGLQQVVKMLIRRLQEIERAGMGKNHNHRGQQ  
FFAQQQQMILQQQQQQEIQRFQGMGNSLKKQPQNGLNLSLQAKAGQQQQRQLPLSNQFQQ  
RLQQQQMGLSQMAQMPIGFAPTPIAIDPTSPFSTSI TNDNSSNTNNALRKQQQQPSSIF  
AETAANSNSNISSVIGSRKETPLQSF LRNKRSSIGSVSGNITAPQLQPQSKFSAGSTPF  
GGNNNMVTTASILDATPMDFGAQSNNPFLRKQMMASMDRSVSGCNTSARGRRSSAGRNSS  
SSLSSSIRQSMMLQMAPGGSRHQRSNKANNLMNSRSEHGTTSTSSSASNLSSGGADYQS  
TGITQRHASADHMLGSSRHSMSVGTAKAQNRFRNAVSRSSSSSFGTLTKSKSNGGLKGD  
FSAGSLIPVKGNGVGGGGGFGAKHKLSQNSTISLRSQSVPFMIQRGGGSASERQQQRMG  
EGNNHNDGWV

>comp5033\_c0\_seq1; 819 151 2637 LEN=2839; translated  
MASFSGGGSSVSEKKEFFENCISEQKQRESLYAPPSVASTTSRTTDCMSNGSRTSEFL  
EERSDSESLFHNISDRTPDES YGTFTGFTKSGSTSDSDFHFFTRSESDSEPDSDVNF  
LLFEQENIFYESNEKNTSLGITSINCEDEVKGDVSPQSHSYLQKAQSLDEKLLPFLDEEL  
EEEPGSQAFVEVPNHSSDLTSTYGRVNTFEF DAWVSNHITSCSEKKDKAIEQENEIQRG  
VEESEIQRVVKIQVTTTPAPTKDFQGVDDFAAKGKKNIDVMIAEFQKVSELSKELSF  
PTSRNSDDYSNSQSYHASNQINEIPKDSTTHPTNSAEESLSYNL PALSIDDINILKEI  
HEKQLPTDVCISKDYVCAESTDCSIDSLGNAETTKSVCSRSGKSLGSLRYLRNKGEGM  
GKMLKRAKKGMSAKNISSLMKKT VKSKTAKELSANEKQASKASADHNQYRDFNEKLA  
ELLMRRHKGISKASQYLTTGKNLLNNGAQYKKNHDFVRSKEMIQAHTYAFVGRQLAKQY  
LLEHQDEIYDSTTMMTQSDLTSS ENEDAINAFEDFFFAFLHCVGPCYGYEDNHGEIQVHD  
TLEILSKVSEETDAINRRLPNNGTVNDGKEKIRAAIERALQQTDSFDQKDEHETAQDRN  
LAIRQFLSDLQSFYQVDTFLNLSSVALSRKCTSESTREGNSSKSQIEQDGTDETEAAQCS  
GSQEEGQSQESKFSMISKSLSDNCSGRSSFLACSVSTTRSMRPEKTVKRSR SKEREGRKEE  
SQVKGIEP GTTVLKI PMKKRGR LKNKTKPTNDNKKKKWLSAIRIKRKA

>comp5034\_c0\_seq1; 150 105 500 LEN=500; translated  
MATXIKSRKEANEFLSCAHLSD EEIFLEFLSLDGGDESRGDEKVNTDGTGRGIAKKKMP  
WKS RKEYCCERTLWRRAFRRRTAEIRALASELRDGSGRARIDEDGRLVPVFEP PPRAD  
LPPPGRAAETNAX

>comp5035\_c0\_seq1; 282 340 1086 LEN=1277; translated  
MSNDSKFSASALGELKETIRSQTKEIERLKAQLAKSGGGKSKAASHGGGHGGDV ELTVE  
ELNKYLHDPFYRVGLERVGWLGIFLGSLSATALIMNVFEETLEKHIELALFVPLLAGHGG  
NTGGQTVGTILSALSAGTIKVS DAPKVVWKESCAGILSGSILGAI VAPIAYKVLGV SFHV  
AVVLF FTLPVSMIASTLGSII PFICVLVRLDPSVIAAPAMTSLVDVAGLMGYFM IANYI  
FKLYGLEL

>comp5036\_c0\_seq1; 179 89 388 LEN=783; translated  
MSLATSRIVATRMARRAPVQQRRGIVDYL TNYPDKVNEIKKIQRGGTQQGEANPTWL  
KQSDKMOVAGFVFAVAGMGLVRLGSGYK LATGTGKIPV

>comp5038\_c0\_seq1; 363 49 1332 LEN=1660; translated  
MGKKRRLPQPVTSSVDDDSSKVGFD RPNDNERKGGIPPPSSSDNEPPTRNTEQLYASH  
VTYDCTMNRECI PCAYKIGCFDVALDKEFCRRRPNQRPDQCPRSKVDYNTAANNNTD TD  
GVLGFRRGMSILTVGDGDFSLGIAQRL LQKKFSSDGKDQKTFIVATS YETEATLRKV  
YPDFDKTLRRLDELGVIVAYSVDATRIFDTLSVSAKGRIKTIKGRFHRICWNFPCTAISN

GQDGQNKAMEENKNLVRKFVQNARSILTTGGGDGELCLCHKTKPPYNQWNLEEVALSSQKD  
DCDSTTKSPPLLFFYSGRIVLDRFLLPPYTPRKALDRKSFCHDACFYIFAQKSSDEPAVK  
RKNLFLPTIIPHEQPAAGNKESRRENRTSQMLIKVTTELLQLIRERHINATPRKKRKRNT  
KHTNRSF

>comp5039\_c0\_seq1; 486 1 1984 LEN=2040; translated  
XVSKMRTSLVISPVLAAADNSSQSCRVSGRKFDVKTLPADLNRVYKRLQEKFGEEYALTVV  
FVIRTAVELHRAWHMTLLTSRLLQQIKDRFQLRMSWNLGVTDLVFRVEDGLYELQRRVPY  
DYDSEYQDMYEKAAVALIEGHIGIHDALIFQSELKDGKHTSRSGFLRENPGRLVLYPLQ  
AATCCVIFFGGDWDAGIAAVCGLTAGLIEGVLSSKRVFANVNDKMLIDFLIGVSTGVI  
GGLFYFYMSSQDDLCLKGVFLGTLWFFYGTAFFVIGLLEIIAGELQTVTRFLAVSVKTF  
VLSVGSVAVGMTLVAETVYEEWTNQFDPEANKCNSIDLSEKWWRLPLFILCSVSVLGQYR  
FIIMNYWAGLLVQVAAYEAQYRVMGYDYKAHEFDGMDTVFADLAGAMAAVFAASMVCFFI  
DNLRHYSNLSVVGKSAEETKLSRSGQLTNKIYECLVFGSSLGLGRGLFRRHANCKKKLS  
EIAKAEGKNKMEVRLSVEEEEATMVEAAVEAQETNVWSLLMPAVYQLVPGSKLAQFWYKLI  
FPSEESTGIVDSPETALWLTSVALALGLILGLTAVRLLGFSLITIASVRKKIESEDEEI  
GKSTRQRRERRGVTAQSNDFDPSDLVWEKEFDLKYGVNASTDSNDENKPSDSSEEIVMVC  
A

>comp5040\_c0\_seq1; 560 180 1958 LEN=2463; translated  
MGSLYDDNCFRRIGTRSLVVLVWAWIANITLGYKSLRGLNGERLFNTPLAQAFSSSRKRN  
HHSSIQGRFRHAATIFPTTGS SHYKDNDNSTTSVIPSLDGKKVRIPPPISDTTPCQVLD  
IFHDGEEFYFSPPEQYSVLPKGDQGGFHIVKEYTVMPPGTVIGDDVLKVIDTYQKRKNVN  
CITLQNALLALDPERYPTLTSARKACRKGKILVKQHKMNLGTLNIDRHDCDNNSSNNNWS  
VNDGNSCVFRRGRVGLVFPGLIGSGLFLGTYRKKQCYPNIDYPRPQFELEVYVEDDHL  
AVVNPSPGIAYVSDTRMDSTGTSGNRRTIQFLLPFVLTTPPQRGTQGGLLRRPGIVHRLD  
KATSGLLVVAKTKVAMESLKEQFRTRQIQKLYTAIVNGDLLQEEIMQRKQLQADRLEDGCD  
DESEHQSSSEKTSESSSWNVIDYPLGGKYAVTAWKVLRRSPSLNARDGMLTKILIRLHTG  
RYHQIRRHFGWCRKPLVGDPLYAGLLQAHFRKRGLYLCSGGISFFHFPFGNNGDGCNK  
TNDKEKNNKDVGMNTQRRRVEITIESPKRFDKLMNAEEAWKRSKSSKENIDK

>comp5043\_c0\_seq1; 180 1 1042 LEN=1377; translated  
XAPSHSRAGFPMPCAPEIVVDGILPETARVFRSAVYPALIEFHALRVVDKAAFAQDPRPS  
SRSGKRGAAAPLPKPPPTLKRPGSYRVLMTGDLLRQDQLVMMMIKLMRLLKRAASLDL  
CITPYSIIATSPSSGMIEFVEDSVPLSAILANHNNSIARFFRSVAPQAGARHGIRPDVLS  
SYVRSVAGGCVLTYLLGVGDRHLNLMITKTGRFFHIDFGFLFGRDPKPLPPAFRLTREM  
VEGMGGSESAEYRQFCSLACQAFNALRKSAGLVNLLHLMDSAGIEDLSNNPSADADGVI  
AKVEERFKLDLTDEQAERFFLGLIHESQSALAPRLMDVVFHSIAVARR

>comp5044\_c0\_seq1; 305 148 993 LEN=1051; translated  
MATSAYMVLFPPEDEGKTDGSSSRCLSPSTSFATSGSRIANNPFWLGVGVGVIILSRVASYE  
IKRRRFWQRTRLKFLSWLYDGVSSATATGGEPEKTRQTPLLQKLRKPSLISELNGNPLVRR  
SESDENKDNSVCGQHVELVSPDWALSSDLYCDIVRLPSGTELMASKNAPGVEFYVLENGN  
QYVDQNGEKHQISAGFGFIVDPECARGFLVGGMSNLTFRATDVAMSDGHNHVRLQASS  
LSSAAAIVRAGLRKIHLRIDDNPLAAASDQTNRLPPSPCED

>comp5046\_c0\_seq1; 359 1 697 LEN=784; translated  
XGLSHRHPIVEEYDCGEHDEEEHQQGLSHRHPIVEEYDEEDDDERNERSRDTTEEE  
GSQQSRASHATNHSSSFVAISVSSDGCTNKDNSNNKGTIDVSVVEVTLHYKNPTTSLPS  
TVQTDDDHASHNHQEIPIHIESIPPSHNRDASLPAPKVWKSPELSCSSSKPCASPDATAN  
ELDLPSVANKPVIAIAHESSSKVAHDLPSPPSPSPRSSSFDRLLDVVSGLYW

>comp5047\_c0\_seq1; 350 56 1759 LEN=1937; translated  
MALQTGVFHTAGAGVLRFLILLVTSLVVALAFFLGGAAAHEGSPRGCSLCPDGGEIEFDPD  
APIPFFALPTADNPTCGDLAFLASMVPHDSIRCTEDLQPHAGYCGCPNVEQSNICSFCDP  
GDAPDRPDLTLLMGDTCESLYRYVSFFNQDQCNSLQYSKIIGNAYECGCDISVAKLRQAD  
LAPLQKQHNCNLCADGSMPPDPDFYLELGQMTCEGYVDYAHSLNPRQCEIQSRRGTFFALF  
AFQCMCPGAEPACVKQENPELCTVSLNNSVDHDEKCECYSFCDGEFVGC DKYPGHFLGD  
KCSGTKISGCNYASAIVDVAPEPKPEPEPIDDPNSCSICPDSSNNIGNPEAVLPPFSGI  
TIPGLLEEPTCRDLIDHLGKKS KGDTECKVAQSRLSHLCGCDGAEPSC TLCPGGVPPSFA  
SAMATVDETECEQFASTVLTWEADTCEGGESYLSVMAARCGCVTAEWVPCVLRQPVLCV  
NLLRSTDEVCECYNFCGSEFHSCADYPGRLLDESDCPEGAEAIAGCNMALATSQRCSRGS  
IGPPCDGYYEEVAQTKLRHNLRHNLRH

>comp5048\_c0\_seq1; 449 202 1206 LEN=1206; translated  
MRHANSNSNQHHYDRSRQDHYEDEARLGNQD TENHPYPHAIASPYHQQNVIFEQQNRRVM  
QQMQSSGYMNGMPQYPEEVMQYNFQMNQNGFNKTGHINGNNIMNPQMTYGHRQTLPFED

EQDNIRFREERNHRYSELYEESYAPRSSTPSGMMTSTERTRGTRAHTSTSRSTSGYGSS  
MVSSSSDSDTDDSNWEDNIF SALNDMAGNLKKMGGIHCNQAGPDTTEVQLKINLPLPIHS  
LDAVAKDAMATLSPKKCSNMQYDNNFDMEEQFLGAMDKLQGNMMPVYKSLFESQSDSSSF  
EDDDDDQSESTYEDPRFLPTNANIEQQQQQQQLQQQ  
>comp5049\_c0\_seq1; 135 1 740 LEN=871; translated  
XRSLFDHCSRNNLTNTPVQHSDMSRAPANILDRPLGGRGSRADVQISLSSFAFLYSELVQ  
YHQNRVDSISELERRLESSGYGVGLKMLELISYRNRXDLNSNNDAMICIGFTKTYAAQTR  
NQThERIAFCLDPGVEALFGKPADSLERSVENADEFMIIDNDPLTSTFCVSPADFGQLSV  
DAYMSGIVAGVLTGAGFSARVTAHSVALEEGERSNLNSSLPPRKDKAVFLVKFAPEVLER  
DAAMDR  
>comp5049\_c0\_seq3; 185 1 683 LEN=814; translated  
XRSLFDHCSRNNLTNTPVQHSDMSRAPANILDRPLGGRGSRADVQISLSSFAFLYSELVQ  
YHQNRVDSISELERRLESSGYGVGLKMLELISYRNREHKRETRLMNVLFHFVSTQVWRALF  
GKPADSLERSVENADEFMIIDNDPLTSTFCVSPADFGQLSVDAYMSGIVAGVLTGAGFSA  
RVTAHSVALEEGERSNLNSSLPPRKDKAVFLVKFAPEVLERDAAMDR  
>comp5050\_c0\_seq1; 146 1 559 LEN=706; translated  
XCKKNTFNDFVDVGRWLINDQKITTSQDLSCEGRSAGLLIGASMNQAPGLFKAALLGVP  
FVDVVPMTDASIPLTVVEWEEWGNPNEEKYHKYMMEYSPINNVQSGARYPSCLLTGGLH  
DPRVQYWEPSKFAAEIRHRSDSANSGPCCLRIDMAAGHFSASDRYKYLRELAFDYSFLLD  
QLGLVE  
>comp5051\_c1\_seq1; 759 218 2302 LEN=2797; translated  
MVSLSGAPSLVRRRTTTTAAVLFPVLLVLTAAATVWFRPSSYYHDFHFRDGGIGIGEVAQT  
DPLASASAPKSAPGSNPNHEDDGPAMVPAELLELGVYDESRDFVNERGFSPTGWEEP  
ADPTVWGPCRFTPVPRPGSSFSMAADVSWADRRRWTRSNETANATALLSRSDDYRNADPD  
DFEYRVAVALSOLTGHNSNEKHPPFKGGWCRPGFLIIGAGKCGTSSLYHYLMGHPRIVP  
AIEKQIHYFKYHANTRPLAWYYGHFPTPQSFLDHGALMTGEASPGYLPYPEVAKLVHQTY  
GGTGQDAGTDVGMSLQYLLGDPAYRKRAPAVPPRIIAVGREPLDRMYSSYRYNYVPTI  
EHLRSRGHPAIRKHHRYGTKAKKKSSHKEHASEEFVFEFNHPDDEYYMPYLFTEEFVRA  
ELKQLRGCIFYDWGPRKTYMQWRRDSIYGKTIKLRNGAFVDNESSIAAGKNATDSSAPPPL  
IALDDVCYGKSVNKTVYREQWAEMQMNNPEKKVLLNKNLHLTQALIGRSLYTFPLEWWYL  
DVHKSPQPIIFVCTDELTDSETLSELTAQLGLPAFDGFDQVLAEGAYNVGGHGRGYDTATS  
WEELELEKQKEQQQNNDESSRYSSSGSGGNRTRHRYAAAEDVPTAPKGAAPGTLTT  
NGIPLPEDLYRELKDFVDPLNERLFAALTGKRCNW  
>comp5052\_c0\_seq1; 228 204 1160 LEN=1262; translated  
MISNTEGSEDAYSLRSGVARLDICSVLVLCVGFYSLLANTYLFQQHESSLLLHDENDA  
TLQQCLDSAGGLWTPQENNAIYQYDGLHRKNISTDFRILCTSLNKRITWGSYRLRCNDL  
KRWTDVCAPNVDITVGVSEIEQIHSMWGKKAHDIKNNSISRIGPNNNDSMNVDDIFYNATI  
FVKLSLRKEFPQFGNKFIDLVDYRKAENIPLDMHLIFQTSWQGPTLFPNHSSSVVEHW  
YNSYPSDMTNLGDPEYLPSEIEQKSPRHLNIATIWNTRRSLDPTEGGCPRLKTPNVKYSCI  
DKVSLVSNHEYGSQNNEA  
>comp5052\_c0\_seq2; 341 204 1604 LEN=1685; translated  
MISNTEGSEDAYSLRSGVARLDICSVLVLCVGFYSLLANTYLFQQHESSLLLHDENDA  
TLQQCLDSAGGLWTPQENNAIYQYDGLHRKNISTDFRILCTSLNKRITWGSYRLRCNDL  
KRWTDVCAPNVDITVGVSEIEQIHSMWGKKAHDIKNNSISRIGPNNNDSMNVDDIFYNATI  
FVKLSLRKEFPQFGNKFIDLVDYRKAENIPLDMHLIFQTSWQGPTLFPNHSSSVVEHW  
YNSYPSDMTNLGDPEYLPSEIEQKSPRHLNIATIWNTRRSLDPTEGGCPRLKTPNVKYSCI  
DKEFDITSWYLDLFNKSDCEDMARTMASSQLGTGMLYYNLFKFDALVVLAKNHTDKLE  
YGNVQRAISQMRSGVPILEVRGRVFEDEFMDKYNYSCAFRRYNDGRTSQKTRPLMSFDEA  
VEKMSPEIRRQCQVQGLEIVKDYSPSKIGQKFLKAVGYHGEFQC  
>comp5053\_c0\_seq1; 579 670 1812 LEN=2660; translated  
MDAAIHNFMRQRRPSNLLHCMRDGNI DAFRYIEYSKRRRVDFLKRANFICTMKSSLQ  
QQRQHQQRQQLLRQQRPSLSGMNTVMQPAMSI PPVVPVSVLTKLPADLAAFVNAAAPS  
SAFGVGMSGLAFSKVQGSAAARRVSNAGHRQDHQFVSSRASSMPLPFASSFAINSTNYNN  
ARSATTTTANKRNIGSRIVSVEEDCSSNAKLGSAADDKKTNKRMASSSIPKVISSPPS  
PSLYQQRQENRQQLSCKPHRRLEKEELEAAEALLFGMGRDCKVNKTPENAAAAAQGRS  
LGIDKRNVASVSEYEQQAGEEVSKKRKIDHCHHGLCTTAATDDDAESSTIVSAEEETS  
LDNSINSMTQKCAKCIAREFR  
>comp5054\_c0\_seq1; 261 187 1095 LEN=1586; translated  
MSSHPLIQVFLLSLV DATDAFVAQSPVASRSSLNNGSYRKTGSSDSRCFNFLKDALDKA  
FNSNDGSLDKDKRAGQYDDIYAGEEYIESDPSADDKLTDVQRKWRQSTAAFDTVVPEMIAG

KSFTLDLFLSGVPDRDPSNDLYGSRVNISSRDKSTGLSLPSAPSASVQLDFLENGECRCS  
ESDFTSGESNGEWKLSDDGKVLRFSDAIGYTRTVQTKGSIQNVYWTDEEEKSIQTSTTY  
SIPPGMVYGDVQVSLGRKPGTFEVEKEGVLRLKSTGMFGIGTQLVACGKFVPKLKIDDA  
VA

>comp5055\_c0\_seq1; 790 1 2174 LEN=2204; translated  
XNGNGADGNPEDGRNGENAHLEPYATQATTYRYALFEYGDLDLSVAHEFSKRRLGMTDMEV  
TENEYDEVVRSRKRLLKEEHNWTFDDWFHVRSGKGNKNDKESTDRKNNKNDPAVHLVL  
EASVPPWEVEMHRPSIRNDDGVSDGSKNATAEDFRLHPAAECVRCLESDSEASFEEDFD  
PSDDGIGSYIDFVYRRMMAETLATTEEKPGGEVVPGEQPQNATPCNADTVDGKPLDNSGV  
GSCSDHAMENQWFHCVDTRDLGCEAACHAESLKQHWYDLTQEESKLLSNPEEVQKDACP  
VDESGSRMFLPAYKLNPELIELERLKSEGLLVQHEEEDDNFEPEDHDNSLDFTFFSFEL  
FFGNNTDNIYTPHVKMAYSFFLAHCVKSLDNWEAFFSDIFFGGTIPDALGRLSLREEKS  
RGSVHVRSPILQQWDPESENSYVWSKRDEEDYITCPFFFPFAFHLVAKGSSPRTWSSQLFD  
NLHNSRDHEEKNRTRSRRRVADSIKSWILDSIRRHSSDPKSSDDQECGGWFASFLRAVHR  
EIIYDDIDVSDAAVLLRKNYMKSLSGNRFAXHNIGKIAMPKSAKESLTKSSHALXEQTDLSP  
EEHLVTPRVEVLGKILIDVWMSLVDFSLLLKIASICSNEPRDNVVVVCYVGSAAHAKAVR  
DFFCGPLGFKRKASVGKFTWDDCEAQTLDLPSKLNWNLSELFXMLQRRTEYYCKRVLPAQV  
VSYHA

>comp5056\_c0\_seq1; 374 197 904 LEN=1015; translated  
MITPGIQSFFLCSWAVLLLFSTRSEGFLPTGTPRKNSVSSPFLPTNGSLPGCSVATKSTS  
TELQNLFGNLFQSQKQEGGDTESAGSSAPQPVVEIMDIPARVIKIKPLKFYLLQFLVLS  
QQNTPFKGAWLLNANEEVEEYLEVYFSDGTGMVSVQFDDLYGLKIQKQQRPSLQYLLQE  
SILLHALLDELEAIAFGQGGDDGEAVDEEKRLQFAEGNKDVLRSRAREALPARAA

>comp5057\_c0\_seq1; 198 172 1035 LEN=1073; translated  
MGRMEPKVPSRRIAPCLPQRSMASWPKVRPKRIRMITFDITGTLVSFRGSLEEHLGAAT  
KHGKVNVDSSQFASAFGRAYKETSCLHPCFGGEDMTAKDWRICVLKSFKYAGATMDDYT  
SEMVFQRIYSTFGSSNAYEIFPDALPFLNWAHRNGLVCGVLSNADERYGDSILPMLGLTH  
DELQFQCYSKDLGIEKPDPRAFVAAMHRGEPLLPDSREPLEPSNVFHIGNDFQKDFQGAR  
RVGMHAALLDRYQETELASEWRRRGVVPVFTDLLDVVEFLGRSDCILG

>comp5057\_c0\_seq2; 140 1 1015 LEN=1053; translated  
XYEYEEYNTSNNTGTDVVFSSYGMNNVFRNKAVVTNASTCCSLHTIRASMGRMEPKVP  
SRR IAPCLPQRSMASWPKVRPKRIRMITFDITGTLVSFRGSLEEHLGAATKHGKVNVD  
SQFASAFGRAYKETSCLHPCFGGEDMTAKDWRICVLKSFKYAGATMDDYTSEMVFQRIY  
STFGSSNAYEIFPDALPFLNWAHRNGLVCGVLSNADERYGDSILPMLGLTHDELQFQCYS  
KDLGIEKPDPRAFVAAMHRGEPLLPDSREPLEPSNVFHIGNDFQKDFQGARVGMHAALL  
DRYQETELASEWRRRGVVPVFTDLLDVVEFLGRSDCILG

>comp5058\_c0\_seq1; 128 76 673 LEN=975; minus strand; translated  
MCTWCGDGI LCCIGRYDVGVAA TVVGSTCLRN VVVPPHETAIRLEADLRCLICSDLQSF  
QCSELACPVNRTDTPSSRRLQDALKDLVSGTLVEVRDNRLHVVMGNLVS KDANVLQERLD  
SRDGGV VIRRNLQRRGPVALDDELLEAGRNL LLI VLGAVLLQDILQSSHGFLSLGGNA  
TSAGGVAEARNRSQKCSG

>comp5059\_c0\_seq1; 411 94 987 LEN=1719; translated  
MSTSYRIARKALARTSNLRLCSQWSLP SATTVDLSRTKGFVAAKHMSTSSAGGSLLTTL  
AKENPYKDVVRYEFKNRKWNLHHVDFYSEALAI GLEENGLQPGDVVLSWLP AHFSESMVL  
QFACSKAGLVLYNLDPTLATKDTEAAKEALAQALTVTKANVLISQEAGSDVNYVRLCESV  
IPEIRFFDFAEGKPFITPRFPHLR LPIHAGFDQDDKWGMLLLKQFIVPADNLS DHLHGFT  
VDGSTPFLGELIVDAKGIPTGTGKIQTNDEVAKSGALETYSKILSRDFHVVEGEGVVW

>comp5060\_c0\_seq1; 268 171 854 LEN=1259; translated  
MASTDQT EITLKGSDIVSEFFFTAINSILYQRGIYQPETFKRQSKYGLTVLTTTDDGL  
LKYLQVMAQVDSWLLNGDVQR LVVVSGVDSGETLERWQFNVDLDGGSEGGDENRAPGT  
NPNNTAKNAASSDSKSKSNKSLKEIHGEIQAIIRQITASVTFLPLLNEPCSFDLLVYTKKD  
AAVPTKWEDSDPCYIMNSQEVKLR SFTTSVHKVDSMVAYREAEDWEL

>comp5061\_c0\_seq1; 115 1 1171 LEN=1171; translated  
XLPFGVAVQERKKKSKKETIDCRNRTTAHRANTTPTTMECVDPDHRFRASHPWPSFGL  
GASSPAFQPDRTSARGTPRAGSAKRQRGWELDHPRHERVEEPGHCPPEHHVILSSSQEEE  
EHDESPMHRGDDDFYGEFRPSAGKRQRLAPPPGEIADVPPRSSDADLFSPEEPRLVPE  
DWFVPSGEAFGDTGASERFESEHECEHECEHEHEHSEWKNRPPPAGPDSSVSRRCVVEQ  
EARASGTRGLSPGGTTEASCHVCHRAFR LPPPAPLASVMPANALLNYFAPLRPQKGRDAP  
MAKGAPLPASKGICAXLRPAGLQGVPAVRGLRQALLLLLHHHRGRARGRPRDLLPGLL  
LVPAAGIFGSVGRLLWVAPSSEPKYNTLCMGR



>comp5063\_c0\_seq1; 269 1 441 LEN=1884; minus strand; translated  
XTVTQMMKAVDFEKIANASPETWNKKKEEKAEAEETEKAPPLTPSVSNTHIGNVNPADTAG  
CKVIPGTTTPGSNKEVTAKDNVQMHTPTVQTKESSMKTLEHTSKQQHFYKEAKDNPKGKG  
PSASAAIVKMNSEFAGAVLNHKTVLR

>comp5063\_c0\_seq2; 253 36 623 LEN=1800; translated  
MTECTTSQQQAWFLYAKYPLFSQWEFALKGGKSVEGEIYCIDPEADLIVVQDVENGITMI  
SLESIEAESPPSSCAGKNEENTNASCSTTIVDEPSIDVVHAKKTLEDREKRAIRLAQESL  
KHLNPKALPKGQLVFDRLKACNEVVWKSNSIVVLDIVVDPPYTQGDCKILAKAPGKQG  
SLDRVQKIVSSISRT

>comp5064\_c0\_seq1; 459 109 1662 LEN=1865; translated  
MLSVLAAAPFLLSLSTVTATTPDHVSSRLMIHVPHKLFVAEGYDHREALFGIPPYGGISIT  
QNVYYADDQLCDPVVDTTKGYPRREEDANGKMEEWKAPYILMVDRGDCTFVKKVRNAQRA  
GAAGVIIADNTCLCSDARCIELSDNPTCETSEPIMADDGSGSDISIPSMMLFKHDADMVK  
DQLIEDQPVQLEMAWSLNPDDRVEYDLWTTTPSEKTSKKFLEEFKPVAKALGDSAYFTPH  
QYIYDGIKTNCRGNDGENFCYNLCTNNGRYCATDPDNDLDHGISGADVVKESLRRLCIWK  
HYGESDGI GEVWWDYIIQFMDRCNTPDYFMNEDCVNDCYKRAKVDRDKIERCMSDSGGLR  
KDNSNALFDSELELQEQRGVVVLPTTFVNTAAMRGQLTVGTVFGAICAGYAEGTTPAICE  
TCSKCSDVVACATKGKQCQDSGSSSGQVSAHTFGFTIVFMAMAFAGAGYWHYQKTRDDMRE  
QVRGILAEYMPLEDNDADGGPGPMEFAMRGGNTPLFA

>comp5064\_c0\_seq2; 383 286 1377 LEN=1580; translated  
MADDGSGSDISIPSMMLFKHDADMVKDQLIEDQPVQLEMAWSLNPDDRVEYDLWTTTPSE  
KTSKKFLEEFKPVAKALGDSAYFTPHQYIYDGIKTNCRGNDGENFCYNLCTNNGRYCATD  
PDNDLDHGISGADVVKESLRRLCIWKHYGESDGI GEVWWDYIIQFMDRCNTPDYFMNEDC  
VNDCYKRAKVDRDKIERCMSDSGGLRKDNSNALFDSELELQEQRGVVVLPTTFVNTAAMR  
GQLTVGTVFGAICAGYAEGTTPAICETCSKCSDVVACATKGKQCQDSGSSSGQVSAHTFGF  
TIVFMAMAFAGAGYWHYQKTRDDMREQVRGILAEYMPLEDNDADGGPGPMEFAMRGGNTPLFA

>comp5064\_c0\_seq3; 424 909 2189 LEN=2392; translated  
MEEWKAPYILMVDRGDCTFVKKVRNAQRAGAAGVIIADNTCLCSDARCIELSDNPTCETS  
EPIMADDGSGSDISIPSMMLFKHDADMVKDQLIEDQPVQLEMAWSLNPDDRVEYDLWTT  
PSEKTSKKFLEEFKPVAKALGDSAYFTPHQYIYDGIKTNCRGNDGENFCYNLCTNNGRYC  
ATDPDNDLDHGISGADVVKESLRRLCIWKHYGESDGI GEVWWDYIIQFMDRCNTPDYFMN  
EDCVNDCYKRAKVDRDKIERCMSDSGGLRKDNSNALFDSELELQEQRGVVVLPTTFVNTA  
AMRGQLTVGTVFGAICAGYAEGTTPAICETCSKCSDVVACATKGKQCQDSGSSSGQVSAHT  
FGFTIVFMAMAFAGAGYWHYQKTRDDMREQVRGILAEYMPLEDNDADGGPGPMEFAMRGG  
NTPLFA

>comp5065\_c0\_seq1; 412 210 1319 LEN=1442; translated  
MTIPRHLRQRSEFLTSLKRRRRWSFRHSVVLGILSLALVGCLRYLAVPLAYDYSPHST  
RMQNTNDSYSGERLFDSPGDVPMDLIRSFDAIILVGGGKPRADRPPVYVERRCDDAMEI  
VRTRSESYANDTKHKHKHKHKGAKEVDHQLPILCLCSAGTAHMPQLLSADGLPIWESTACA  
AYILRESHRTNNGTGASLGTTPSLIPPEISIFVETSSYDTIGNAYFARTSHTDQNGWRKLL  
VITNEFHMARTRAIWDWIFSIPPAVAMGVAAGGFGEFPAFDLYLESPPVGMAREAI  
AA  
RKEREASSARSVDALSKKYSHSLGDVYRFLTHDHALYAASPLVDRGKATAADILEDVND  
AVKKS  
SYGLS

>comp5066\_c0\_seq1; 605 43 1431 LEN=2184; translated  
MVSTRLAFLLVSFSLGQLGDGLNIFQGVFLAGVGWAQGAAGTALSMLGLTSLVMQPFAGN  
WVDTTSDRRFLVFLASVITACSASTILFVHPSSLNHVLIYASKFVEGIASSFINPCLAA  
LTLACFGPTQFDEVMA SNVYWGHSVAAAVLAGIVAFVSYPRIEYCFLVIGASALVAIV  
FIRYLPQGNPLWGRGLDASSIPSLEYSDTDEIGSSQSEDSTENEISSESTPLAPTNC  
SG  
ENTPQVASYWEVLSEFRTLILCMTGFFFHFANANVLLVGLGELMGQGDEEQEGVTRTAIPL  
TAGAIVVAQTTFMATHWADGRTEQGWGRKPLFLIGIATLPIRCALIILLKDAGHQYLLA  
TQLFDGLGGGLFGLIHPFIVADITFGTGRFNAVMLGTASAFGLGATLSNYLGQRVAEHFG  
YVHSLMASFVISFIPILFAIFMPETLGRRTTTNTKSVSLH

>comp5066\_c0\_seq2; 605 43 1431 LEN=1833; translated  
MVSTRLAFLLVSFSLGQLGDGLNIFQGVFLAGVGWAQGAAGTALSMLGLTSLVMQPFAGN  
WVDTTSDRRFLVFLASVITACSASTILFVHPSSLNHVLIYASKFVEGIASSFINPCLAA  
LTLACFGPTQFDEVMA SNVYWGHSVAAAVLAGIVAFVSYPRIEYCFLVIGASALVAIV  
FIRYLPQGNPLWGRGLDASSIPSLEYSDTDEIGSSQSEDSTENEISSESTPLAPTNC  
SG  
ENTPQVASYWEVLSEFRTLILCMTGFFFHFANANVLLVGLGELMGQGDEEQEGVTRTAIPL  
TAGAIVVAQTTFMATHWADGRTEQGWGRKPLFLIGIATLPIRCALIILLKDAGHQYLLA

TQLFDGLGGGLFGLIHPFIVADITFGTGRFNAVMLTASAFGLGATLSNYLGQRVAEHFG  
YVHSLMASFVVISFIPILFAIFMPETLGRRTTTNTKSVSLH  
>comp5067\_c0\_seq1; 506 24 1208 LEN=1266; translated  
MKMKSLCNLSAFVTLTTFGASTALFVPSGWRQAHALKNNESRFLSQRGASSSSLPDTGTR  
NAERNNEFVEGLMGNLSKLCDRYIMNGSPKIREQIFNVLDQIATEAVDRDLVNQSIIRIVK  
RAGVPVHKTYLEKYSELGASDADRRRSEADKRSKWENEKKAAGKSALSRRRIAGSDGRPD  
LLTPSLLDPDSIATIAGEKKELQKEIQNGSKDRTPQNSMSTKAAEEAACRVSEIIAKAGS  
GDSFDGETLGVGGLDDVLVQIKRRIWTPLAAPRLLQELGIHPARGLLLYGKPGCGKSL  
ASTLGSLSPFRPITVVSQPEILDKFVGSSEKNLRDIFDNPPDIYEKFRVNEEDGGDSL  
SAAIHVVVMDEFDAVARSRGSDGKGGQDAGVA  
>comp5067\_c0\_seq2; 703 24 1751 LEN=1944; translated  
MKMKSLCNLSAFVTLTTFGASTALFVPSGWRQAHALKNNESRFLSQRGASSSSLPDTGTR  
NAERNNEFVEGLMGNLSKLCDRYIMNGSPKIREQIFNVLDQIATEAVDRDLVNQSIIRIVK  
RAGVPVHKTYLEKYSELGASDADRRRSEADKRSKWENEKKAAGKSALSRRRIAGSDGRPD  
LLTPSLLDPDSIATIAGEKKELQKEIQNGSKDRTPQNSMSTKAAEEAACRVSEIIAKAGS  
GDSFDGETLGVGGLDDVLVQIKRRIWTPLAAPRLLQELGIHPARGLLLYGKPGCGKSL  
ASTLGSLSPFRPITVVSQPEILDKFVGSSEKNLRDIFDNPPDIYEKFRVNEEDGGDSL  
SAAIHVVVMDEFDAVARSRGSDGKGGQDAGVARDVSVNQLLAKMDGVQPLAVPTLVIG  
LTNKRSLIEPALLRPRGFVQIEIPPRTNEQRFSILKVHTQHMFATAGRLQVNDPPDPS  
AAQQIENADTSTLLAYEDLLMKLATLTDEFSGAAIAGVARAAASRALERAVSQFSDEIES  
RETLSIMDCLVTQDDFYEA VNDVRESMGTRDHS  
>comp5067\_c0\_seq3; 141 1 449 LEN=459; minus strand; translated  
XRNDIFLNDCRSTYVVI IAHTGTPARFTIRIDWFTKSRSTASVAIWSSTLKICSLIFGDP  
FMIYLSQSFERFPIKSTNSLFRSAFLVPSGKDEDDAPLWDRKRDSLFLRACACRHPDG  
TNAVLAPNVVNTNADKLHLKLFIFITVD  
>comp5068\_c0\_seq1; 719 1 2541 LEN=2789; translated  
XSNNTHTNP IAIPEGLTSSTEHRSSSKNYHHGILSAAAAANELEESFPAPPRACFPNAA  
TENKASAPTSVPDRQGEAPLPVRVRGVARLLVDAASLPALVHAGFTAYVLPREDPYKV  
LKI KRDRNNRDAIKKAYREMAKSAHPDKNRHLDPDVANKRFHRIQEAWELGDKTNKRK  
YDQHLRDKEARERRNRPTKQKEQERRQREKEARETRERFQREQERMKKEQQRKKQSEMH  
AQEAQEALLRISTLEQLHERSNLFDKNTNTFKKHFLCVFVGNKKAQEQTAEKDYQFPYFPG  
PRGTNSFDWTEIMQTAKVRFNKATPLTRAFRVSARASDPIIVFAKKSRLDLFEFETYTG  
GNLEDWVLRMMQTSVSVVNR YASGGPTIKIFFDDGDTLRSAGKAVPPGFMLQIPLKISDR  
LLVVDAGTDDFTGGVIGEKRQDLEKLRDEKILDRIALDRMYAREEGERFDIGRGGHTT  
RVCYDLSTCHR DATREKCEGRSRFFHAMCAKSCGVCIESNYWNGIYYLLHKPLDTPD  
VPCVRRILSWLRDHGEFGSVFVHDL SHMWEKRRNIMFGFVFTGLVLGIQIVLLARMFMMG  
NRRSSGRGRAGECTFFSSPAVVGFLVANSAAIGARFWSATPRHKVPPFLRGFRADLKG  
IEKSSYQLLRILFCLGAVSSYVSIAGVRRRLRPLILRETATFATIVLATALLLLIGIDHYF  
HREFTGDKLWKRHRMQWESIWDLRKNAAIAIIVSGILSGALIAGLGRFMKQYIRPLYLV  
LSTANIGLWSGLLLFAVHFDRFFYEDLKHTTEMRMSAAIPCLILGLIWGMSG AHLVSTYR  
VKVKVD  
>comp5069\_c0\_seq1; 477 1 1449 LEN=1538; translated  
XAFQVMAAHSAMELPIKELKPVNMRKFVYLQLILVSSAADVATPDP IPPPLGDMPPALVE  
SAPAI EVIETYSLPNPDAIAVDPTGTFVSGTKDGYVYKTDIESGDIETIFSPKDFRPDY  
FVNQTDEEVRGLCDGSTLANENTCGRVLGVKFDLDGETGDCNGLWMANSYFGIYEGTCGA  
PWEIVKRVAIEGGFVNDIQPLSDGEGNFLYYTIHQSKTRNELPYVVLDTMPSGSFHRL  
ETSNYTTEQLGDGIYFANGLATSSDEASIFISETTAARILRYDIMSGEIEPFLNLPILP  
DNIVVQDGELLVPGYTRNEDMETFLKDPALIAFASHQFPDYVQHRFKSMIAPQGNLVIYD  
ESTGRMKEQIFQADGGLFSLASSATRLDNGDYVVGSI FVPAATRFRILPHISQLPSSSET  
TNE DNGNFVEWVFDPNLVSNKELGPESGTDSEPELEQSSSSSTEKTIIQVLVVLTIISFA  
NA  
>comp5070\_c0\_seq1; 443 1 863 LEN=1016; translated  
XSTSQSSLVPPPPSANADHPSFSMIFEGLVAPSPQMKMVQCKKDSIEKTSANVCKP SLSF  
FSLPLETEKTYSKNELNATNAIDL VVPDFVDPKSFAGMDALQNHDKGGRTFSVPLSKENQ  
VSEGTSESDSVEEIEIGDVNHILDLLLVNSPKSEGHYVNSPETNSLPGEDISETNPGDCWI  
PSQSTNKKSTTDEAKGPSKVCNFEINSVKNIAHGNNQCNNLLLLNSPALQ SRAQTEETAS  
ATFMSPDVYHEQKPESETPETLLLSYNEKDSFVENSTSF EFSSEPQT  
>comp5071\_c0\_seq1; 231 81 1412 LEN=1504; translated  
MDPTTDKSRAPRSDFYSEIDVKT KHPDNEVDHRPNGGPLLKLLWSEEPLTGQTLFLGGEV  
GSDGKIYCI PGHSRVLVIDPETDDVTLIGSKELVSNGT KFKWLRGIPIGDVIYGLPCHA

SEVLRIHVPTQTITKIPIPYETFYEDPAVAKQQRKMIWKYHGGNICHDGCIYAVPQSALH  
VLKIDPETDTCSLVGPELPGKYKWYGGVESGSSIYCVPQNSPHVLRISPEAITLHG DYGE  
GGHKWHGAAAADDGTIVCIPNNVDTVLLVKPGEEDDGPTEIGDGSFIQTGRHRSDGKY  
KYLGAMTGTNGKVYIFPSGSEQVLEVDTARNIARNVGPNLDRSGMERIFQNKWQNGLTNP  
HDKCVYAIPLSGETLLRIDCSNDRDAGGDGVEVTTWPLPSPFETLTKWEGGVICANGLM  
YTMPNNCKAVLKIQPCNWKPDNE

>comp5072\_c0\_seq1; 683 161 1822 LEN=1851; translated  
MRXL FVPLGLVIGFAVAYEQRIKHTSHKLDVSGGQATSDDR FDEIPPIIWLHSVRSAAD  
AFVGYPA AIDRSFDTANIFPSALHDAAYPRRKL VFFSNSTHKHDSVLCYSTREP KPD TTN  
DSGESSLAESISR SYAEKETDGVVELATTSSLLTDL SVDIEDDLIPAILEASGGRKGIVA  
SIMNAMIGSGCHFIDETKTKAGTTPGLVSDRVLSLMEGLFDAADVTPDIVTYSLAYEALS  
KDDPDDTDGLADSIETAERSSK KIAGGKRRKLLASSRRKVTSSFSDAEDDLRELLGADF  
EVLLET DGFVAVNKP SGVPCFHARTTTAGKIKRGK GKKKGGKQ QNENKANDRLPSDV  
SLEDALVSCNVPLSTLNPEALGLVHRLDRGSSGCLILAKTNELHARLVSEFFLRRTTKQY  
VALVRETQASSISKKGSIDHAVGGRSARS DYQLLERYRSDGDDAAMVGF EIFTGRKHQIR  
VHAAEVLGSPVWGDPLYGAGDGGPNTKPPQ QERIFLHASRLKIPVLGVDVESPVPSWVES  
TLSTFG EKNETKD

>comp5073\_c0\_seq1; 459 53 673 LEN=870; translated  
MGITREGRHKRRETGGRRAQFCCKRKYDLGRPAAMTKIGEPRIHKVRCRGGNSKFRALRL  
DSGNFSWGSEVCTRKVRVLDVAYNSTNNELV RKTTLVKGAI VVIDAHAFKAWYESHYGVK  
IGVKKNNKEGETSGQSIDLSSKSAQVAKK LKARQADRTLDEALDAQFASGRVLAKISSRP  
GQSGRCDGYILEGKELAFYQRMHKK

>comp5074\_c0\_seq1; 1074 1 2602 LEN=2730; translated  
XPPRSTAAETPSPAEEEEDEGSSFLYCC LSPNHSFDK LKDG TGESGRLPPSSGALRDEFE  
QTAVIEEPSFGKQLGYREAEQAFAP EYDEATLASTIFTEANQGSEPRNPRSPSGSWHPRS  
TSGFDPEGASPCPSTHRSWDGN DAGEMGDARYPRNEAESWTGPVGNTEEYGRGQDCDAEQ  
IEMELGSYHPDPDHISLSSNDTDSLTYNGEEEA AITEQVKT TVKAECELEDYDVS NVLHGK  
RSFKSKTTEDGSSILPLHSPSE RRRERRKNAMKAHRDFLYNMSTSASACNTEDHDRNDADN  
AEGA VDSGEENGSDQHEGEVAVETPGIAGSSSSSGSKPNSIVHDNAGRSSDADK PDDIIG  
MVRNAFTVMISSKA EDEPDPEASVLNESK PDLQVDQETAGLPLAQEEASTSGPQSPVEEA  
LNAA YRFFAPSQADEPLINEPVHGEKQ IILQCTNVEPNPVS RPEVTVEDPVQEFPP EETIE  
EKNSIHS LPSIHSVSSTPSDEAVTNKLEL PPKPKAIKDVGYNVEGI PLELRPQKIWRVPP  
STMIAEEENYMSPTCAKESYTAQIAEAPASPPESIRDAGREQAEDASIAEQQHEPSPPSD  
PVPSQMESDIDTNDKKLGRHAQRFR RGRDLRRFNRR LQQGDGEKRPVPTKEPSLSADPPE  
KQYSDT SNPRVQRPHRDVVPSPIVAGGGETIRD TAAGALAAPSMPDPVSPRSNKAD FVVG  
SRRSNLSEIRSRIKQRKSKLQSRHQAEQLSPLNRRR DAASPQRIVSKHNTADAPT KRSG  
IEAAKTRNATVRS AENTPVVNAATDRRDDSASCSSKDGDEF DDTITFDEDNMEGMIDAMT  
PPRVQRYLEASSPMQSPNTIGAAISLD

>comp5075\_c0\_seq1; 562 107 1234 LEN=1408; translated  
MKNQLKALSLGDGNDLTPDLTVDMK KLTQTFKTEVVNDGKKAEMIKDCEEIYQDWKKILA  
SASYLTSEYPTILDAFHQTELVESDFKSGDILKGVEEMEKVYEDIEEVYQSRAQLMHSFI  
AIERWTGNIDLIVKQ AIDFCEKHQKAKEKAE EAEKSLKLR LRKMESRILHRMHL DHLV  
KMGKGLDKSTIESSEPEPTTVVKEETKTIVVKHISMREEAEKFASSVEEDTKALVVEAEN  
IEDFMKKNKTTIDAFVND SKEIKKDWGASLKA IANVQSI IPLVTKALDEVD AIGNLIQDA  
CGAASLNPTAIIAVIKDGKKA WDDFEAIYQLGQKIKQVFEHLVVLEAFIKATVQLISTGR  
VLVKAYQASCPIKL

>comp5076\_c0\_seq1; 193 1 922 LEN=1220; translated  
XIELLTSSAPLYQLHKSKNMATTD TMKRPYRHSSTTSRFPPTS LQDITEMPRHLEGPYNQ  
DGPHERMEQRNTYGS GSNSTNNKKT TTTSGSSYDDQLLTKGERVGA IIGLVVVL FVVLYF  
IMLNIRVRRPRSRK HRRRNTGRRKR TYEEDHDSTTDDDSSTAELEMAEQQSVTPYALTK  
NEDKQVDK PQVSQARSWLWNLFKRTVQEEDKNQLHQAPKHTVGS SDCYRHSDEITFPF  
DEKSSRRVANGTTENLYVSNDDSVITLRDNDERDTNGDDVFDGIEDRDVLASVRLSSAST  
AYTTNQI

>comp5077\_c0\_seq1; 236 53 541 LEN=1234; translated  
MDVSKNETSHGEDEFFGSQDDFERGSSLRIG EFGNMNEHEIDAKRNELKHVGF LDAYDEF  
KESRMQEGFERGFLDSFAAGKIIGKIIGEATTLEKIYEQQSEDQSANSHCASCKPVRSGK  
VELIRDYFTNKFQKDLDSNNGKQGLRNLI SKTEEYPTTGDF T

>comp5078\_c0\_seq1; 106 1 484 LEN=670; translated  
XKYRTIQYVLVLLNSFNWASSHKLISDNLVAFQLPCTQNKNEKNMKAKSTCIAAAAATTC  
VLGHSVLMNTPGAEAFSQAKAPIARASSPYAVAVSTSRMAAAVADSDVGCSCPCPKCQAA

KSQSAGCPCPNCKGAAAACDCPDCSGAQRGQGCPSCACQGA

>comp5080\_c0\_seq1; 1025 278 3082 LEN=3424; translated  
MVSALQSKQKENRCSNSSTEIYEDESTSSDGSTKCADSSNSDMTTEPPSRSTSGTKISFL  
ATLVSILGVAVFGFLAGRIYATGSVDGSLALLVHPLLAETLGSSKEEAQCVEEDLNDTRV  
TLQFNAYAEIEEDEDDETTSKIVDDDEDEEEEEEDDDDEVEGVGNLLQLYLNAYGLEDHFADY  
DGTNGKEIITEFMEDMVEASYDCEEMFPLYGHFAHDTSKHGGKSDTLQALGMFRYGMQV  
SLKAWPKEGKIMADFLYIPPRSTEKETYAADEDDEEVSEETLLACVDSLARFFYPDDVIE  
PSGVVGD SLNVGHVSQ L GPFESLSKHGKDPFRFRWWVDNKVRGMKPVDLNDADLLEQMGS  
SDDWVNRVTSVQSPFQRIDIVDSEDDYETMPWLEYYSYSDSEKFSEYRAYMESHPLFRAD  
RLLYLDGVVQSTLQGLAAYHEALVQPAMFTHPNPKRVAIVGGGECATLRETLKHNTVEKV  
VMVEIDPVIVEVSKLYLPEWNCDSMFKGSSRYCMMDDPRVEMHHL DALKWFRDRFSDEARL  
EGHELYGTEEFKFDVVILDALDPQNAVDFVEALYGDGAF LNSLYNSLTD TGVLLTQVGE SA  
YIGDISETYPDNFNQYRAMYEKGLKNQGFKMVFHYEEPRAGFNGIWFSFYAAFKDDSSRAR  
WQMNEAQLDLEIRKRAIQMVDDRDVEEGELKGPFDVFDGPTMATYRFPSKHAQVIYCLRD  
PQPYGCTTNI EDHHSRRRPIWEPTGFDPEIPNFNADNFALVGSNGKGLVPRVTIPEKSYL  
MLEQSIHDVVRVAPSTSSILERASAKSVLGTITIGPVARFVSGNANGLTMPRRRDIHSAYRV  
DSGLLSFIKHGCNGNFNTETETHSFLTEDSADPDVVP THGLLRGLYSNTVMKEVVFNP SH  
TRNTIRPEFLMSSRTINEGEEIFSNFVPPWYNKAGW

>comp5080\_c0\_seq2; 1014 278 2872 LEN=3537; translated  
MVSALQSKQKENRCSNSSTEIYEDESTSSDGSTKCADSSNSDMTTEPPSRSTSGTKISFL  
ATLVSILGVAVFGFLAGRIYATGSVDGSLALLVHPLLAETLGSSKEEAQCVEEDLNDTRV  
TLQFNAYAEIEEDEDDETTSKIVDDDEDEEEEEEDDDDEVEGVGNLLQLYLNAYGLEDHFADY  
DGTNGKEIITEFMEDMVEASYDCEEMFPLYGHFAHDTSKHGGKSDTLQALGMFRYGMQV  
SLKAWPKEGKIMADFLYIPPRSTEKETYAADEDDEEVSEETLLACVDSLARFFYPDDVIE  
PSGVVGD SLNVGHVSQ L GPFESLSKHGKDPFRFRWWVDNKVRGMKPVDLNDADLLEQMGS  
SDDWVNRVTSVQSPFQRIDIVDSEDDYETMPWLEYYSYSDSEKFSEYRAYMESHPLFRAD  
RLLYLDGVVQSTLQGLAAYHEALVQPAMFTHPNPKRVAIVGGGECATLRETLKHNTVEKV  
VMVEIDPVIVEVSKLYLPEWNCDSMFKGSSRYCMMDDPRVEMHHL DALKWFRDRFSDEARL  
EGHELYGTEEFKFDVVILDALDPQNAVDFVEALYGDGAF LNSLYNSLTD TGVLLTQVGE SA  
YIGDISETYPDNFNQYRAMYEKGLKNQGFKMVFHYEEPRAGFNGIWFSFYAAFKDDSSRAR  
WQMNEAQLDLEIRKRAIQMVDDRDVEEGELKGPFDVFDGPTMATYRFPSKHAQVIYCLRD  
PQPYGCTTNI EDHHSRRRPIWEPTGFDPEIPNFNADNFALVGSNGKGLVPRVTIPEKSYL  
MLEQSIHDVVRVAPSTSSILERASAKSVLGTITIGPVARFVSGNANGLTMPRRVRTKTIVFW  
VIGFVFLSVLVLTFLVHAFRSQ

>comp5081\_c0\_seq1; 174 1 1113 LEN=1280; translated  
XSVDHIETDWKVDANNITEYNKYESLRTSALSISAQFDNETTNIMKLAGLILLCCLLMQG  
GHGYNIIRKNTVPTTKDTASSEKDTASATSRRNLLRSAAALSAGALLGIANAEIAVADDD  
VDTPLYFGVGCWFHWHIQHEFVVQGEK GILGRGPHQFTSAAGYAGGKSTDKEGRVCYHNFSG  
VADYGKLGHEVVG MNI PQSKIGDFSELYFSLYNPKTKXYVGLQFREL LCVRFNFRAAH  
PTIIGFCIKTKCIFVISIIDRVDPMDRGAEYRSLIGLPGGMKHTSYPLVESAAEKAGFKL  
VEGKGNPDPTLKGQIVVYVDSTKFPFYQGEVYHQYHNDFQSPAYGKEYNNLVEVALEDGR  
IKGTGCPDRW

>comp5081\_c0\_seq2; 274 1 990 LEN=1157; translated  
XSVDHIETDWKVDANNITEYNKYESLRTSALSISAQFDNETTNIMKLAGLILLCCLLMQG  
GHGYNIIRKNTVPTTKDTASSEKDTASATSRRNLLRSAAALSAGALLGIANAEIAVADDD  
VDTPLYFGVGCWFHWHIQHEFVVQGEK GILGRGPHQFTSAAGYAGGKSTDKEGRVCYHNFSG  
VADYGKLGHEVVG MNI PQSKIGDFSELYFSLYNPKTKDRVDPMDRGAEYRSLIGLPGGM  
KHTSYPLVESAAEKAGFKLVEGKGNPDPTLKGQIVVYVDSTKFPFYQGEVYHQYHNDFQSPAYGKEYNNLVEVALEDGR  
IKGTGCPDRW

>comp5082\_c0\_seq1; 382 1 796 LEN=1438; translated  
XTNMGKENSTTTNNNASLVSSSSSSNSKSLGKEGNPGQNDGLKPVAEKSNNGEGIVSLVS  
SSSVRKEGRPDQONANPLKETRNEEGVASCSSKVSSLRKEGSPDQONTRATPEKKMAFEKEA  
IAGDSVRVGGSDGNKSPGSRPSGEHQQQHQPKHFDGTNGLQQEQEQEQPDQKSDGSLE  
TAADPEPTLGTTEEAVGETNGTSPGTS DNESRPQGGDRSGADADGSTIDNDDSDVVFVE  
VVRPYGITTSFGHDLVVTKSEVDF

>comp5083\_c0\_seq1; 436 49 918 LEN=970; translated  
MKFSTALTVLSLGGSTNAFVNNQFSSPPVTALDARKPFITGNWKLNPQTKAEAVDLARGI  
ADSITEDSPADVGLFVPPFFLETVQDIVGDKLIVGAEMVTPEMKGAFTGGVSPAMLK SIG  
TEWALAGHSERRVLNGESDEYINAQCKLLVENDMNVL CIGETLEEFKSLVDACEVQL  
KKGLEGISADQMSAVTIAIYEPVWAIGTGKVKATPEIAQSVHKSIRQILDKMYGSDVAESTR

I LYGGSVSPDSVDGLLAQPDIDGGLVGGASLDATSFGRIN FESADVMA  
>comp5084\_c0\_seq1; 1000 369 2804 LEN=3449; translated  
MSSSARVSTNQSVSPAPIATATTTTASTFDTTTTKKKFKGNLNKLTAPPVAPVAQGNTKTN  
SSSSKNGFLLLSTKRPSSAAGTGSGGILSSKSAQNSGKPIPSLGLHTEFSSSTHDALMG  
VVVGASRL ENHQQPDAWGVAEKQQQEQQVQKEISVTAASTETNRNNPDTKTREQVHKNSI  
EEKSAFEVKQKERPPKSEADQRNVDGNQGGYRTSNWDEYGGDRMQTGGGKDSNESSKRKE  
TTDDQAAIMTKLARQRAEQKRNEEENRMMEQKERAARLRELETKMALKKKEDLASKKTA  
RNAKGS DGVNNDLESRSR SRIVLEK LKQKESGTSPASTTPARTQRALYDPNTPSKSYSSL  
VAGSSMKQDRNLKNPEPNTKHLSSSITSSKKNVQLQQGI STYAADPE SFD RKPVIQLA  
SYEDRDRGDRNASAAPRMLFDPKSGSMIEVTSRDEGAANARNRKAGKKNKNSRDKQSKKD  
LAVDNGGNADSKGRRKVKGNKESSINQRGKGMAGES SSKKDIISKPKKLNISDPKRLP  
RTCGVLYARDKKGGFVCS DGEGLGYGVHVP GGRVKNAEAYS NYVNTQKQMKQGTMLN  
YDGINHDELVLETGFRI SEAKEPKHEWIKPNEKIELITGDEDSPTLQATAREWAPHTTTF  
TLSEHGKMARSSTGSFEDEDDEEEDVDDDEVAPLGLGFDPALNMDSVMQSPSIDPSDGLG  
AVDLTTLSLEPALQGVAKNSHIFAFESGATWGASNSEGNNDWGMHSGSAYGNGQANNNGG  
VSTSFLSLS TANTWGGFGSPLNGDNSKQS GE  
>comp5085\_c0\_seq1; 226 37 474 LEN=593; translated  
MKAITV VLLLLFVSAQEILGFVRPVSRS AASRPLSADQSTTDSIEFDGGYVGT PFEHPSS  
LAGIATGILGFV GKAI AEADEYEIAELPPVWVPAIFGVLLIGVGLT TSLGNVMDEEASL  
GMQSGARAKKEIERSR SSSYFGKRPK  
>comp5086\_c0\_seq1; 270 1 940 LEN=1045; translated  
XWLPLNFQSLVLFVAPVRNPNCFDPTITNVTFLLPSEM KIAHSLFRRLAASSRPAAAVQT  
TLSPFRGAMGSAASSAASAFFCSGTPVDMPLSAISNHPSAGSR SFSSKSNLLEILSREEQ  
EEIETGNTEMPPELSDLKATIEKSWKIVEDGATTNFFRIESSSNKIQVSFHCQDTLEVE  
EPEYDDSMEEDESDEEED EASAPVRFTVTVTKAGKSLNFACFSEYGQVKVEGVSTTSYSTA  
EYVHENQGTLPKHEYQGPDFTELAEDLQEGLAEYLDEECGVDSDMAAFIAMFADYREELQ  
YVDFLKQAQSIVS  
>comp5087\_c0\_seq1; 563 233 1495 LEN=1605; translated  
MDVELGGIGRSESKAYPRNHGSFFAKIQLYMRQHTLATVATVGF LGFLLIVSSDQLNDSG  
IGLRTSSSMGSAFSGSLHGGYFSVADSKIGENQFRFAAVTDLDQLSFIKDAKKPSYRSL  
LLPGTITYHKNSRKYTMVMEDDATR TLVTKHNEGGRGAEFSELT VFDNRLLTFFDRTGEV  
FEIMNTKDGKDSFVAPRYVITEGEGD TDGGMKWEWSTIKDGLLYIGSMGKEYTRPDGSIE  
NVNNLWVTIMDNHGEFRINWTDNYNFVRKVLGCPSPGYVIHEAIRWSPHMRKWVFMRR  
ISKDVYDDVVDEKRGSNKVVIVDEQFRNAEVVEVKMADKDGLHGFSSFAFVPGTNRHAI  
ALRSVEEDCAINLDDCKQRSYIVIFDVVTGDVLMDEVKIKEDMKFEGIEFVNMYTKPHLS  
>comp5088\_c0\_seq1; 158 219 493 LEN=493; translated  
MVL LLLNKKTLVVLTA ILSVLVTSASANTEVEYD GQKNVGSKLLRSGNEGNERGEHRELN  
LANMLNQINSVIDSTPAPQPEKKS KA AKA EKX  
>comp5089\_c0\_seq1; 188 451 1077 LEN=1246; translated  
MIDPEYPGTAVERMLAVRARV TSLTTEELSGPWDEVRRKILWAGGLRDLPNARPGQYTG  
HSFNDYNHVDLTCMRDDVSDNENDGSVKMIAIGNQLGPGIRQASLPELGGSSWSTCAIG  
CNQDPPQDVAHIQFRSRIAFKLVWCPTETFDTFVLVDDD GKKLAQGT PPSGLPSLRERQV  
NYKISAGSKYAIVADQIAKGLSTSTETM  
>comp5090\_c0\_seq1; 1148 136 4261 LEN=4499; translated  
MNSDASIKSNKNSNNQNNKKNHSR DGIHAKLSAYPTVDSSDVGSNVNPD TTGGNIAESR  
RSNTRFRSNSVFESNTRSSDVKIMSRQRQEPMAIPKSYD GARSSPFI FRDGIQPAPQLNR  
VHSSTIPGMSSISYCGYLYKRSNKPQRTVDALQQEQRDHYGHMHRPIHEVYSASGVPEFP  
VMPEISLNSGNDT SVDHTNSERIALDHDQDGKISAFNVHSLPARNDSITGLAQSLQPLMH  
QQQQQCTLSPPRDESKKTI AKNP IQIGLEMGAFFGIDLKDSNHKGDGDDNHSEEIDFDPI  
SPPTEQTIGTMPGTDNTEARVGFPKTTTTVP I KFRPSNSRNVPGEI PSARQPIPMITNEK  
SSSSTSPFHESLHRLCSESSQPLSDV SITNGNDGIPHDFVDPEDGHLWRAYCYVLEDGIL  
YFYRNAHDGNHAEAAAERRKNTSTLLGANINQ TNDSTFSTSYSDLIGNDGNIRANRNSNK  
KQRPLTSDTTT SRGQLISGISALKISVPSAATTSRRRSSAHDL SKSPMVRPGRNLLHHID  
PSGFSLPDIDPDIDNRIYWEKRVVMDCVRGVRTAERQYGLNSFELLAMDEDSDEDSSID  
TLVLKQNPTEMKEWIFQFHRTLATFMRNFIDNVGSTSTRTS GTFENRRPSSDMLSSSL  
SASDLKEERGALPQSLSEKHLTRLISTSPSLNQT VLSHGHRISLKRMDLKRSSSGSAS  
LSSTPDAGMDYSTIPFAITDPSPGNIRTPSSPTTSRH LIPPPTQRPF LNKA FMSTDSK  
NSRDPDL PPTKSSVPDPDIYRPKQSSNTNKYVPPHQRSKSKYLPPHLRRQQNQSQGSFM  
GSSSALNNGQNSQKQEEIIPSTETVSPPTQDKLDIVNQSTTG FVLGGCADPLLLKGSIL  
DAAIIPKASRLEKTI SEAYGSFGGGFSKEKKASNSSLRWEVGAISECGVRESNEDSYIL

TNDLLNAFDSASYGSEAQTAWKEDDTHDSVGLFGIFDGHCGNQGARFAVEQLGRFIHSEL  
QNEIRNIDENPFSPSNMESVLHEAIVKMDDEFCKLCQQGGREWESGATALVALLANENLV  
IASLGDRCRFFCRFVENNESYESDGGWEELEIGADDFSSSVEKGESESEPLQRCFWREVT  
TVHSPSAEQERARIEQANGWITTEIPIGQFGRMDFHDEDVIGILKRCMRYPSSTGESF  
TDSERSTKECKAAPQRIIHSRVCGELAVSRALGDRDFKAGFNSSSTQRNDDIDKLGRT  
FDHTSAWESPLWLTFPENHDCRFRGDLVINTPDFHRVRLGKEGVSMEFLLLACDGLWDVM  
DGDDAIRVVRDLLYRKNVTAKKAAARLAELAIHLGSSDNITVVLRVLFNRNDIE  
>comp5091\_c0\_seq1; 254 1 1103 LEN=1230; translated  
XNQTFRTSDVRCALLLFFFLSSSVQGRQWQSIVNHDIVDKSNIDSSRYELAIEIAPLFNP  
EEKSPTEIPTAPKVTTTTVWTAGVPTSSPTKTLPTNGPTLVPTAFSPQNNGGCQEGLRP  
YELHMNDQWGDGWDGTTITIEGISDLDPMAADLPTASMTNTNTNAEGETVVSITQTVDFD  
TFDSNKQTDPLGKIFEGTSLSQGYHDFANICLLPNRCYRVVTSGGDFLGEVSWDIRLGASS  
EPIILSGRAPTGCTFSIPDEHGHFCENTCSDTMPASGAANPSELTDHPQLNEDAAGAE  
TEFIQAPAGTEEPTAAPETVFMKSGTLDGVSASVTPVTQSMLSGGTSAATRNTLKNFQSL  
NAEDSSN  
>comp5092\_c0\_seq1; 668 331 2232 LEN=2509; translated  
MASLGGSVHSAGSTSNPITKDLQLNILVHDKLDKIKKYTPFHRWKSFLTRFDTFLETEG  
GKKPAREASGRIQNLQCNLRADVLIELIERGDLSPITGRKTVRAFSALKEFCQDLDTG  
RVELQELVPGNSMDERRLGTYKHFVHGASLIEECFPQYVAMRELEDKVQLISDSTRDIDR  
EDVLDKTRQELFRNYKKQVTRFCVDMASLDFYEIMLKCVFELNPPPEHEESGDEELTIFLR  
PFVRNTGTNGSKNRGSGASLFRSKKGFEPHAKVINPVKIDAEETETIASVTILALDELG  
FNLKKGHDVEILDQLRVRYNNDNNVKNPKTSTLKDLDNIENGDLVLTIEQALVPIQVRR  
SEGEAVFVELMIDPHTPLKELKATLDSEKNRHEGMERVSADQIILLDGTTELTEDEKTCF  
DCGIASGSIVDLKSLAKIALAEAMKEQIDKILIVDTKYGTMTFGVGRQEAIQKAVVTPKT  
VRVDFLEATNSDIDKNHMLQSMSSPNLNVKPKQIVIAKLIKIEDYEIEDAAVHNLWGV  
NLKKTQRQRSTAIFFVDLKTNAVGFDRKKLMDMNFITVVKVNDPSVLGDNKKHEVNET  
LEQAEVDQKQYDFVARRIRIFGIESLGLQYTD  
>comp5093\_c0\_seq1; 275 205 1020 LEN=1261; translated  
MSVQDIRREYRPMFYFVFDGDMVSDLELLRKQVSLVNLAKPGHRCVVSITSPGGAV  
SQYGLAASQLVIRKAGIHLTCCIDTVAASGGYMMASVADTICAAFFAVVGSIGVVTHIP  
NFQRFVNEHKVDAYLMTAGEHKRTIDVIGEVTEEGKAKMTEQLDDIHMAFKDHSVSLAR  
LQKDRMEKVGTEHHLAVQAKEKGLVDQIMTSDEYLESVCEEFDIEILEKIYKPKGLSGL  
LGDNLTSAGKVVKSVDVDRFQPSVEPQPMIAIV  
>comp5093\_c0\_seq2; 464 187 1767 LEN=2008; translated  
MGRYSTADFGYDFPAKAEETKSLVPAAINEDHGGNAKNGAVANFVGKPEQSEDGAGYEL  
YDDHQRRKQEQKQAYRYQPAKINRGENFFADSKESTGVTINPVEICIGAFCCITVTFII  
FGGILVLFVKYRSDPLLLVGSVLLVIAAGSCLCGCTAICIGTTADDLIDAKGTNGSKAD  
PHFHEVQVFRRLNDRFQKGCMAEDGLLDVRLDVVGHMKEVKEALNKEAKEKEKEKKN  
REELERRVKHDLKAGMSVQDIRREYRPMFYFVFDGDMVSDLELLRKQVSLVNLAKPG  
HRCVVSITSPGGAVSQYGLAASQLVIRKAGIHLTCCIDTVAASGGYMMASVADTICAA  
FFAVVGSIGVVTHIPNFQRFVNEHKVDAYLMTAGEHKRTIDVIGEVTEEGKAKMTEQLDD  
IHMAFKDHSVSLARPLKDRMEKVGTEHHLAVQAKEKGLVDQIMTSDEYLESVCEEFDIE  
EILEKIYKPKGLSGLLGDNLTSAGKVVKSVDVDRFQPSVEPQPMIAIV  
>comp5095\_c0\_seq1; 420 508 1641 LEN=1881; translated  
MAVATRKRKATRAATATAAASSTRSGTKIKAEVDNEQGTERTTITNDQKNSNNKYKLLM  
ILSPAKTLNLKDDVDPDGIGLTKPLDGLKSRTEVVAAMKSHASSASKLGALLKTSQKITS  
AAQGYWQQMSGDASGGTTTKPSIFLFGAAYSGLDIGTMATKANLEYLQGHRLRIVDPLYG  
WLRPMDEVEAYRLEMATKGVFAKSKTKGIDPKVKLEDYWKAPIRSCIEEERQADANAT  
TNPAVIIVNLASDEYSAAVDVPAGRIVKVVFKHGGRTIAVHAKRARGLMVRFMAMNAVES  
LDELLEGFDFLEGTFRPGESTYKGDHENFNLALGSRQPKQEKEESASLAKKQKTKKAR  
EQPLTLVDFDRPGTWKRS  
>comp5096\_c0\_seq1; 413 257 1288 LEN=1623; translated  
MTSLFTVVVLFALLPASNGFVVLKPSRSLVSTRTSSIHQKAYAPAIFLSASASSAAETQ  
ETDLSPEVLAEVLEVATRAAKEAGDIILGNAGGAEVTERKANSRDLTLIDPLCESTIRA  
TVLEQFPDHDHDFLGEEDVDPGAEASAAIDNKLSDGDKSDWLWIVDPIDGTTNFVHGMPLN  
MPSIAAAYKGEVVVGVYDPRDEIFCATRGGGSTLNGEPIKVGEQNELGDVAVVAMGSP  
GEE SMKMSLLGAQTLMPKVRTIRMLGSAAIMLAWIANGRLTAYWEYDLSSWDVAAGALII  
QEAGNFDTLAGDPFSLRTRKTVASNGKIHHEELAALNEAGVV  
>comp5098\_c0\_seq1; 655 73 1899 LEN=1963; translated  
MRIIVAATTFFTCELAGLGHAFANLSTPRSFIGGTADTTSPRPGGFVSAVHGAPTPLK

AASNGEETFDDSCDVLVLGSGPAGCAIASVLGASGNLDVVVANKDFDADWVVPNYGVWKDE  
WQTILDRYGSVIGIDLNDGEVNGVIDREWVPTDCFFGGSYDIP TENRMRLDRPYCRVDRFA  
LKKSLTKNFRVVKANHISEAIGINMFS PAGSLVHDEEDGTTIKLQPQDADASPLTMRKIV  
IDTTGHETKITLKDSEIESTPPGFQIAYGALVEVDESQSPNLSMVGPYDKEAMTLFDYRT  
DHFDFGDEYTSIKATKAPTFFMYAMPLEGNKIFFEETSLVARPAVSFQECKDRCFTRLEHLG  
IKVANVEEECYIIPMGGALPARDQRILAFGGAAAMVHPSTGYHLCRALMGATDAAEAIE  
EELASETPNLDRAVASAYNALWSRENIRQRNFANFGGEFLMKQDVVGLRGFFDGFKLP  
ELWGGFLAGWPGLANNEYHESWAKRIWFGLNFIVKLPVPVALDMASSIATYSIFNEGWSL  
IQSVTPFLDPPPSYEQNNYRNGDIAAKREAVQMIRETKAFAEMPTVAIIASSSSELN  
CNEPVEQT

>comp5099\_c0\_seq1; 848 313 2652 LEN=2945; translated  
MSEKTEIEFGSDNVCQKRNCLRNCRQPLVIETPFGVTLRGKQQLRAAVQALAFGALILG  
CSAYHAYSTAFSEDDFSFDSDELMLRLQDASNATNLDQSI PGESLVACDDLKADSWWM  
TVFYIIGILYMFLALAIICDEFFVPAL EELSGPRRLNMSMDVAGATLMAAGGSAP ELATS  
IIGTFRQSEIGFGTIVGSAVFNILFVIGMCSLLAKDVLTLTWVPLFRDRTTYTTLGLVLA  
VFTGFHTKNNIQLWESCVLFGMYLGYCLLMWQNKKNLYKAITGKVLVYPDEDEDGDDGRT  
ASNGSGGSDQNGNTDNKDKKEEGADEKDVKSAGGMRS SLQKQSSKSSVHVSASHISQA  
SFRGSDKSTASHPHFLWQGTFRAGILKLLKDADSWADTAGAGMVSKIMGDADYVFEQVVK  
DNGEIDREELRQLFDLLECYATHEEMEEVFVQLDANKDGVISRKEFT EWYFRSEERMLS  
QVRHVFDQIDVDKSNTLDKDELKTLLSTLDPHVSDTDVQSALSEMYKHGSPDEITFDEF  
EWYKQSIMYEHQLQKIEENMVGVCNLYPPKDGWARDWAYIICLPLVFLLTFTVDPVQR  
PGYEKWCYASFFLSIAWIGGFSYFMVDWAEIVGNFTFGIPDELMGLTVLAAGTSVPDLLSS  
VIVARRGQGDMAVSSSVGSNIFDILVGLPLPWILYSAANKGTPVVVSQEI VDVKNCCRSL  
LLFLSASTIKPSQFLTNLFI SLTDWLGRTCGIIAYFGRHDC LGDYFYSLSRVEVDEGVRW

>comp5099\_c0\_seq2; 757 313 2770 LEN=3063; translated  
MSEKTEIEFGSDNVCQKRNCLRNCRQPLVIETPFGVTLRGKQQLRAAVQALAFGALILG  
CSAYHAYSTAFSEDDFSFDSDELMLRLQDASNATNLDQSI PGESLVACDDLKADSWWM  
TVFYIIGILYMFLALAIICDEFFVPAL EELSGPRRLNMSMDVAGATLMAAGGSAP ELATS  
IIGTFRQSEIGFGTIVGSAVFNILFVIGMCSLLAKDVLTLTWVPLFRDRTTYTTLGLVLA  
VFTGFHTKNNIQLWESCVLFGMYLGYCLLMWQNKKNLYKAITGKVLVYPDEDEDGDDGRT  
ASNGSGGSDQNGNTDNKDKKEEGADEKDVKSAGGMRS SLQKQSSKSSVHVSASHISQA  
SFRGSDKSTASHPHFLWQGTFRAGILKLLKDADSWADTAGAGMVSKIMGDADYVFEQVVK  
DNGEIDREELRQLFDLLECYATHEEMEEVFVQLDANKDGVXEFISAVIRVYPACASVIA  
SFFIVHLSTLTFTFTFFRGCXISRKEFT EWYFRSEERMLSQVRHVFDQIDVDKSNTLDK  
ELKTLLSTLDPHVSDTDVQSALSEMYKHGSPDEITFDEFSEWYKQSIMYEHQLQKIEENM  
VGVCNLYPPKDGWARDWAYIICLPLVFLLTFTVDPVQRPGYEKWCYASFFLSIAWIGG  
FSYFMVDWAEIVGNFTFGIPDELMGLTVLAAGTSVPDLLSSVIVARRGQGDMAVSSSVGSN  
IFDILVGLPLPWILYSAANKGTPVVVSQEI VDVKNCCRSLLLFLSASTIKPSQFLTNLFI  
SLTDWLGRTCGIIAYFGRHDC LGDYFYSLSRVEVDEGVRW

>comp5099\_c0\_seq3; 793 313 2734 LEN=2948; translated  
MSEKTEIEFGSDNVCQKRNCLRNCRQPLVIETPFGVTLRGKQQLRAAVQALAFGALILG  
CSAYHAYSTAFSEDDFSFDSDELMLRLQDASNATNLDQSI PGESLVACDDLKADSWWM  
TVFYIIGILYMFLALAIICDEFFVPAL EELSGPRRLNMSMDVAGATLMAAGGSAP ELATS  
IIGTFRQSEIGFGTIVGSAVFNILFVIGMCSLLAKDVLTLTWVPLFRDRTTYTTLGLVLA  
VFTGFHTKNNIQLWESCVLFGMYLGYCLLMWQNKKNLYKAITGKVLVYPDEDEDGDDGRT  
ASNGSGGSDQNGNTDNKDKKEEGADEKDVKSAGGMRS SLQKQSSKSSVHVSASHISQA  
SFRGSDKSTASHPHFLWQGTFRAGILKLLKDADSWADTAGAGMVSKIMGDADYVFEQVVK  
DNGEIDREELRQLFDLLECYATHEEMEEVFVQLDANKDGVXEFISAVIRVYPACASVIA  
SFFIVHLSTLTFTFTFFRGCXISRKEFT EWYFRSEERMLSQVRHVFDQIDVDKSNTLDK  
ELKTLLSTLDPHVSDTDVQSALSEMYKHGSPDEITFDEFSEWYKQSIMYEHQLQKIEENM  
VGVCNLYPPKDGWARDWAYIICLPLVFLLTFTVDPVQRPGYEKWCYASFFLSIAWIGG  
FSYFMVDWAEIVGNFTFGIPDELMGLTVLAAGTSVPDLLSSVIVARRGQGDMAVSSSVGSN  
IFDILVGLPLPWILYSAANKGTPVVISDGLVSSLILVGMIVLVIISIHCQGWKLT KVL  
GGIMFLLYIVFLVQAAVLGLPFVEVCVE

>comp5099\_c0\_seq4; 884 313 2616 LEN=2830; translated  
MSEKTEIEFGSDNVCQKRNCLRNCRQPLVIETPFGVTLRGKQQLRAAVQALAFGALILG  
CSAYHAYSTAFSEDDFSFDSDELMLRLQDASNATNLDQSI PGESLVACDDLKADSWWM  
TVFYIIGILYMFLALAIICDEFFVPAL EELSGPRRLNMSMDVAGATLMAAGGSAP ELATS  
IIGTFRQSEIGFGTIVGSAVFNILFVIGMCSLLAKDVLTLTWVPLFRDRTTYTTLGLVLA  
VFTGFHTKNNIQLWESCVLFGMYLGYCLLMWQNKKNLYKAITGKVLVYPDEDEDGDDGRT

ASNGSGGSDQNGNTDNKDKKEEGADEEKDVKSAGGMRSSLQKQSSKSSVHSHVASHISQA  
SFRGSDKSTASHPHFLWQGTFRAGILKLLKADSWADTAGAGMVSKIMGDADYVFEQVDK  
DNGEIDREELRQLFDLLECYATHEEMEEVFVQLDANKDGVISRKEFTWEYFRSEERMLS  
QVRHVFDQIDVDKSNLTKDELKTLSTLDPHVSDTDVQSALSEMYKHGSPDEITFDEFS  
EWYKQSIMYEHQLQKIEENMVGVCNLYPPKDGWARDWAYIICLPLVFLLTFTVPDVQR  
PGYEKWCYASFFLSIAWIGGFSYFMVDWAEIVGNTFGIPDELMGLTVLAAGTSVPDLLSS  
VIVARRGQGDMAVSSSVGSNIFDILVGLPLPWILYSAANKGTPVIVIGSDGLVVSLILVIG  
MIVLVIISIHCGWKLTKVLGGIMFLLYIVFLVQAAVLGLPFVVCVE  
>comp5100\_c0\_seq1; 241 35 478 LEN=542; translated  
MDAAKVAELRKRQFRKFTYRGIELDQLDLTNDLMDLVCARPRRRMSRGLKRKPMALI  
KRLRQAKKEAPPGEKPRGIKTHLRNMIIVPEMIGSIIIGIYNGKMFVEMKPEMIGMYLA  
EFAITYKPVHRGPRGVSAAHQTRFIPL  
>comp5101\_c0\_seq1; 188 411 875 LEN=1352; translated  
MLAVRRRRRGSSRKVESADESSEEGDAGSTLQLMHAPVTDVPEFSEAAASRLCKIERSV  
EPMKTRNETFITKRSDEIGEMFTIDLGPQLGIFQIETSTDEQVFEYSSPISGKLLYCLS  
SATGEWINMEDGHQFEGILVRDLLRSNCIGLPDL  
>comp5102\_c0\_seq1; 631 96 1928 LEN=2128; translated  
MKLSLLSFLLSAVTSTAFLSPTKVSSVSKSTASTSIWSSLKEDETTTTASSETDAEAEGL  
PWWWDMVWKLDMMKTGEDGEDIIFGDSANVLRNIEQIYGGYPSLDGCPLAEGALDDIAD  
GTMFIFGLQRYKYNYGSPYKLCFGPKSFLVISDPIQARHLLRDGNKSYDKGMLGELLEPI  
GKGLIPADPQTWATRRPQIVPAFHRKWLEYMIGQFGYCNTPLESNLKADTTGKVEEMEE  
KFCSVALDIIGKSVFNIEFGSVTKESPVIKAVYSALVEVEHRSMTTPAPYWDLPFANQLVP  
RLRKFNGDLELLNVLDELIAKAKETRSEADIEQLENRNYAEAKDPSMLRFLVDMRGADI  
DNKQLRDDLMTMLVAGHETTAAVLTWSLFEVSKNPEIKAKLLEEIDRVVGDHRPTYEDIK  
EMKYTRLVISESLRMYQPPLLIRRCRAENTMPKGAGREARVIRGMDIFLPLYNHRDER  
FWPNPDTFDPERFTRPYKNPDVDPDWKGFDPVKWSKMLYPNEIASDYAFMPFGAGSRKCVG  
DEFVMEAVVTLAMTLRRFEFDFDEDKLVGKDDIHDEPSGLNHPVGMRTGATIHTRNGLH  
MNIRRRQHSQ  
>comp5102\_c0\_seq2; 540 96 2075 LEN=2275; translated  
MKLSLLSFLLSAVTSTAFLSPTKVSSVSKSTASTSIWSSLKEDETTTTASSETDAEAEGL  
PWWWDMVWKLDMMKTGEDGEDIIFGDSANVLRNIEQIYGGYPSLDGCPLAEGALDDIAD  
GTMFIFGLQRYKYNYGSPYKLCFGPKSFLVISDPIQARHLLRDGNKSYDKVSDSMLFFLIQ  
EYGFSEFDSVLESSSVSGCQYSSLTEIVYMCRLYVSINXGMLGELLEPIMGKGLIPADPQT  
WATRRPQIVPAFHRKWLEYMIGQFGYCNTPLESNLKADTTGKVEEMEEKFCSVALDIIG  
KSVFNIEFGSVTKESPVIKAVYSALVEVEHRSMTTPAPYWDLPFANQLVPRLRKFNGDLEL  
LNNVLDELIAKAKETRSEADIEQLENRNYAEAKDPSMLRFLVDMRGADIDNKQLRDDLMT  
MLVAGHETTAAVLTWSLFEVSKNPEIKAKLLEEIDRVVGDHRPTYEDIKEMKYTRLVISE  
SLRMYQPPLLIRRCRAENTMPKGAGREARVIRGMDIFLPLYNHRDERFWPNPDTFDP  
RFRTRPYKNPDVDPDWKGFDPVKWSKMLYPNEIASDYAFMPFGAGSRKCVGDEFVMEAVV  
TAMTLRRFEFDFDEDKLVGKDDIHDEPSGLNHPVGMRTGATIHTRNGLHMNIRRRQHSQ  
>comp5104\_c1\_seq1; 555 219 1469 LEN=1597; translated  
MTSGLHNFPKIELHAHLNGSIRETTFLDLAEERNIQLNESFFNASPSEITHGIGDFGSND  
RTGLIHKNQHRSLVDCFNIFAEIGKVVIDLEAIERITREALEDFAKESVAYLELRSTPKR  
LLPARQWCDETFSLASVAIEDLATKRQYCERVINTIINFQNEEEERYRKELETSNSLKDL  
NSQRLPMMACFIVSVDRSNPVDQGFENIDLAIELAKEYPGVVGVVDLGGNPLKRNFLFR  
DCFQKARQSGLLSVTLHCAEVPCTDDDQGSAAAYEDALSILKFGPDRVGHALILPPSLQQI  
LAKSGIPVETCPTSNVMTTELVEKSSGGSLAEGVKRHPQLRQWLKNKHPICICTDDPGVF  
NTNATQEFLLQEAFLLENDHFKEIVMNTVDYSFAKEETKATLRKRIRDKLELKL  
>comp5105\_c0\_seq1; 802 103 1707 LEN=1707; translated  
MVLAEELGGKLRSLRKLHTSSGHVTATKLNQVLTEVTRALIESDVNARLVMTLRNNVKKK  
VERLIEDDESETEEDSDAKKEQRASNVSKMVQKAVVDELVGLLEPSRKPYPGMKRGKPNV  
ILFVGLQGAGKTTTTIAKFANYQRRGWKTAMVCADTFRAGAFDQLKQONATKLRVPPFYGSY  
TQADPVAIAEEGVDQFVKEHYEVIIVDTSGRHRQEAGLLEEMQEISAAPVAPDNVVLVMDA  
TQGQAVFDQAQAFSNAVDVGSVVIITKLDGHAKGGGALSAVAATESPIIFLGSGEHFDDLE  
PFNAQSFISKLLGFGDVRGLMEAMNGSPDDKEELMEKMSKGEFTLRDMYKQFQRMNMG  
LNKMMGMVPGMPEYLPVPGGSDSNRNLKFLYMMDSMTDKELDGVDFSDHEEPQTMRSR  
IRRIAAGSGNHKPEVQMLLQVHKQFEGMVSKMGKSGMVGKQAQAQQALAAQMRNPNFI  
NQRLNQMDPKLLEQMGGREQVKSHMENMARGGGGMPGMGMPGMGGMPGMGGIPG  
>comp5106\_c0\_seq1; 917 85 2631 LEN=2711; translated  
MDSLWQDEAQLANMFLEEDSNRSSSESNSNDFYFNSTAHLKKNLATTDFKELSNDLVAK



QVDHLVPSKPASSSSPVRSQQQLPSIRPPLPTGTDRVEHQKSRKFAVFLRIRPLQIYK  
STLEQDDVNSKVENASTIEVLEPSDKSNDETIFPTTIRTYPPMVSNVHKVMNMRNARSN  
FAYAKEFHFDVRMGPKISQKDVYFAAAAPIIHDLNLRGRDKRTELSRVRESALLFSYGIT  
NAGKTHTVLGDINSTNKANWGIIPRAISDVVFQRNRVKLNVTSTTEASESSMGCKHQPPC  
DLYISFFEIYNENIYDLMPKAAANSKHKSNLPAKIRECRGQTFVRGLKLLKVRNEEH  
GISLVKEAYNKRHTSCNNLNMDSSSRSHFVCQMEIVPLRQQSTPFVPRDFSTETDGGKKAS  
NIDLMSGYSTDEEAVARSRLSASTIWIIVDLGASERSKRTRVGSIRQKESTKINNSLMTLM  
RCLNAMKENGDRRRGNVPIPFRESKLTHIFMSHLTSKSAARTAMMVNVNPSVEDFDETQH  
VLKYSRKAKLIEMNIDEFGAKRKQFFGEEYDRNGRKKFKCENSKNCDLKKPKHPLLSRMA  
KKLSPKALEKIVVKNVTVKEERIVSSRSYDHAKIEALKNVQIAEERVYALKNKNTQLQ  
VELESKEDQIRAEVAMEMEARLRETRTKQKEKYDHLRSVMQNQMSKNDVLSISRAGNQI  
EELLDKIDECEQEMLRMSKEHRQEVICLNAQIDDLNRTKEILAKEKVEHTIEISNLKQAL  
KKSHDEVIHLKGFKKCDNIEMDEENFLAGSIKAIKKRATIKQKIQPRKALGNATNQSSSS  
RVLQMSIN

>comp5107\_c0\_seq1; 337 43 1033 LEN=1471; translated  
MNLKSSYSYCSFQLLLLLLLQNADNAASFVSVSTPYRSSSSKNHRVAGTSSLHSRTTRDVV  
LYSTNEGKEPVSEEQKAEAVGNLVENDEWEGLTMELSEVIKMAVVEDIKKNTADFIGKDN  
YQVGDITKEIDNRVKSEIASMRGNDEYQLGDLIVXDRWDGKWNKGWVSRIDFLSVTRIF  
SRQVRDLVLISSVSLAKDMTEEMTGKPYEAGDLSKEIDSRVKGTVASFCGKDEYEFGDL  
TQEIDRRVKDRVSDYIGKDEYEFGDITREVEKRRREWVKGYLGEDAANKYKFGDLTMQAL  
KNISGDDDYQFGDLTKKFVGNIFGKKKLLK

>comp5107\_c0\_seq3; 435 43 921 LEN=1359; translated  
MNLKSSYSYCSFQLLLLLLLQNADNAASFVSVSTPYRSSSSKNHRVAGTSSLHSRTTRDVV  
LYSTNEGKEPVSEEQKAEAVGNLVENDEWEGLTMELSEVIKMAVVEDIKKNTADFIGKDN  
YQVGDITKEIDNRVKSEIASMRGNDEYQLGDLIVVIDGMAKDMTEEMTGKPYEAGDLSKE  
IDSRVKGTVASFCGKDEYEFGDLTQEIDRRVKDRVSDYIGKDEYEFGDITREVEKRRREW  
VKGYLGEDAANKYKFGDLTMQALKNISGDDDYQFGDLTKKFVGNIFGKKKLLK

>comp5108\_c0\_seq1; 486 128 1912 LEN=1989; translated  
MAEGKKKASLKRPKRVRLQDFTCIEDPHYPGCLPGGNRFFGTPSSSSPKSTDVSKRKAED  
VFDDKVVWQQIISFCDCGSFGRVLVQSSRYLYVVGHQPELWRDQVLRKCDAEKLVISRVGPS  
WKDITYVRMFHDKNHRNNNSDNSSKNETETDGASAYRPHRPMRPNVYSDDIYRSHLCRS  
FAIPPAWLKSDASTEGTQQHWHREVDNIAVDLNAETFFANYEKNQPVVVSAGAANGSA  
VEKWKEWDYLTSKNTKDSYRSTSGAAPLPGNFSLEAYRDYTVSTRYLEESPLYLFDRTAF  
ASNREWGDDFFPDFYKCPYWDPSGEFGHDMQLYLGEKERPDHTWVIMGPKRSGSVFHD  
PNATHAWNACIRGRKRWIFYPGQPPPGVFPADGDEVALPLSVGEWIIQYWKHEHTEQYR  
KRPVDQRPMECTTHPGDVVFPVPHGWVSVVNLDDSNIAITHNYVSPSNLGNALKFFVEKQ  
DQISGCRDRKESIKPEYIHGELVKALAIKEPDHLNRAMKQTGWTCRAWEETPKSDETVIT  
DDDEHSSSSNKNRNRKIDSVOGGNEQGTNKAEEELPTSVMSKTEKVPAFSFSFL

>comp5109\_c0\_seq1; 325 173 1783 LEN=1930; translated  
MSFDNNGYAANSYAAAATAGYGSYSYSGGRGIGSSAGVGGQAGDVDSGLRRRRGNTHLNGGY  
SNHHYNGDYNGDYDDERNKGGKSSSTVEKLDFFMFPKVAEEFTVKTQGGMATLFAYALIL  
ILVTTEIFTWREQNRLTSTAVVDTSLGKKMRVNMNITFPSLCCDDLHLDSIDVAGDSQI  
NVEDTLVKKRLLHMNGKLFSSQEEIKAEELNMHHQEQRLKLEILKSKLPADYCGPCYGAHERE  
DQCCDTCDDVIEAYKNKKWKTDLQYTSEQCVREGRDNEAPKMTKGQGCNLSGYMTLNR  
VAGNFHIAMGEGIERDGRHIHTYNPEDSINFNASHIIHHLISFGVEDGHEPLNGATKIVTT  
DTGSTGLFQYFIKIVPTTYVGHGVNFPEFDQNLPSLFEEAEFFASSDHRKIETNRYFFTE  
RFRPLMTELLDDEDYMDDDSGKAAADTGYTGGHHNKKHHSKQNSVLPGVFFIYEIYPFAM  
EIKQNEVPFTHLLIRLMATIGGVFTLARWIDSVLSERMSGNTRGDMRTPTRFSVNT

>comp5110\_c0\_seq2; 376 40 1057 LEN=1057; translated  
MAVTRRRSRRGGKNEEELEAIPQKAKPDQTSVVPVEEGDQENDEAEERNTDSSDAGEDN  
GNDDDDADNDSNDNDGENTNDSDSHDGSGTGTRGAIPTPAAPGQRAGTPGGNGPAKQK  
KNALTHLVPGYTARMKLDSSSLDRYRCGIGELGRRAEKGDASTRGFVREATASKAGSAMS  
SRRGGFLPSSYEASYSHFKKGTRAAPDTSAGRGWFGMKPAAMTEELRTDLAIIRNRTYLD  
PKRFYKSSDKHHSVQVGTVEGASEFYSSRLAKKDRRANLTELMAAATAASYAKDRFR  
KMAREKAYQAXAAENQAQEEVPQVLLGGGAARLGAEVGGG

>comp5111\_c0\_seq1; 418 214 1200 LEN=2511; translated  
MATEGFVPDADTADLQREEVQALEAIFEDAFELRSIRKQDDEDGMDTFDFPIVYCIKLN  
MDTADDDGSGNSGYDGTKNWPTRPLTVEVRYPKNYLSDEDGDDENTARGATATDPTFRLL  
HENSVELEFPSSVSEGLLAVLAETAESERGMPCVLSCLYAARDYLDRDREWDDRSNQPARN  
EGNDLDGAFKNCSIDAISHDNQTTHTNDSCHYACLSTHLLLDHKPDNLLKTGFKCRRLR

GFYKFGTPGIAIAWGDQIEDFLDVLKQAMPQKKFDLVFCRTWENIQEIPNVWESVDP  
TLKQELDKLGLPEEDYYTALGLEKRGK

>comp5112\_c0\_seq1; 981 137 3397 LEN=3724; translated  
MPKTTSSCGVLLWLTLLAGCLPTTALSVDQSKFRTCEQTSFCRRHRHQHSASLYQYRIDP  
DSVHFHIPSENKHGSDGPKHQSERDADQTMNDVEKPDVDTDTDNGLLKSLTERIFGKSPH  
EDDANQNKKDPYVRGPPPTLTGTMTVNTATETSSGKKEYLNFVHCISDGMVRMRITVYR  
NRNDDDHGKTPHDKARTTYDELVLTTENMEPAEHVNWVRPGEDYLVELLGSQDEANRYMG  
LRYGDHPTTKEKSGMLFLMRLDSFATYLYRESDLQQGPVIAMGDKHMTHEIRRKNVVD  
GPDNGNLDDMVAEESGDAEQPEKEIVGYWEDGLAIYADGTREERKEQKEATDHRQLSEL  
ELDKEGMWEENFGPHTDSKPHGPMVSGSDITFPGSKFLYGLPEHASSTALKQTTGNKAEY  
KNPYRLYNLDVFEYDLVPMPLYGAVPLIVSQAKTGTSGVFWFNPTETFVDINDESGS  
KTSHWMESEGIIDVFFIPGPTPKDLRYQYAKLTGFTPLPPIFGLGYHQCRWNYKDEQDVY  
QVHDKFEELDYPYDVLWLDIEHTDGKRYFTWDNHLFPHPKPMQEKLWSQGRMVTIVDPH  
VKRDNGYYIHKEATSKGLYIKDKDGKNDFDGWCWPGSSSYLDFTEKARSWWADQFSYDR  
YHGSTPSLYTWNMNEPSVFNPEVTMOKDLLNLNGDEHREWHNIYGMFLQORSTMEGLIR  
RNKEENTRPFVLSRSFFAGSQYGSIWTDGNAAQWVSHLEIAAPMLLSLNVAALSFGADV  
GGFFGNTDAELMTRWMQAGAYQPFFRGHAHDAKRREPWLFGDETMMLRKAAMARYALL  
PFWYTLFHEASVTGMPVMRTMWMNYPHIESLYAIDDQYLIGSDLLVVKPVTAPHVTEI  
IFPGDDIWYDAESLVMVSKQGMQGAQVEIKVPSDINTVPVFORGGSVIPRKLRLRRSTHTM  
TRDPYTLVALDKDGRASGLYMDENTFNYSKNEFASANILVEINGSRGRIRNAPT  
VGDWKGTSSESNKMIERIVVMGVETHPSSVDEVEGSELGFTHDSNAHVLVIRKPELSALVDW  
EVNITF

>comp5112\_c0\_seq2; 671 137 2092 LEN=2327; translated  
MPKTTSSCGVLLWLTLLAGCLPTTALSVDQSKFRTCEQTSFCRRHRHQHSASLYQYRIDP  
DSVHFHIPSENKHGSDGPKHQSERDADQTMNDVEKPDVDTDTDNGLLKSLTERIFGKSPH  
EDDANQNKKDPYVRGPPPTLTGTMTVNTATETSSGKKEYLNFVHCISDGMVRMRITVYR  
NRNDDDHGKTPHDKARTTYDELVLTTENMEPAEHVNWVRPGEDYLVELLGSQDEANRYMG  
LRYGDHPTTKEKSGMLFLMRLDSFATYLYRESDLQQGPVIAMGDKHMTHEIRRKNVVD  
GPDNGNLDDMVAEESGDAEQPEKEIVGYWEDGLAIYADGTREERKEQKEATDHRQLSEL  
ELDKEGMWEENFGPHTDSKPHGPMVSGSDITFPGSKFLYGLPEHASSTALKQTTGNKAEY  
KNPYRLYNLDVFEYDLVPMPLYGAVPLIVSQAKTGTSGVFWFNPTETFVDINDESGS  
KTSHWMESEGIIDVFFIPGPTPKDLRYQYAKLTGFTPLPPIFGLGYHQCRWNYKDEQDVY  
QVHDKFEELDYPYDVLWLDIEHTDGKRYFTWDNHLFPHPKPMQEKLWSQGRMVTIVDPH  
VKRDNGYYIHKEATSKGLYIKDKDGKNDFDGWCWPGSSSYLDFTEKARSWW

>comp5113\_c0\_seq1; 241 1 1527 LEN=1785; translated  
LSAPLSMPVYPGLVQGHVLCAGKEFPLTGRFNASAILTVEEKQADGLLSDEELFGSKEVY  
LEALENSTSKGSFSMEKVAVFGGIFIAVFKTHPSIKNPWRDVSIRSIETVNYDIVDLSHP  
MQGNRMDGNHHEGAIMDNIPYSRVFYHAFPGAIIITHRGRRYKIVSMTRPPAFGVGFRSTV  
TLGAYAKPSAHRYCTRPLSNLKITVVKQTERVDLMDKVTTTKESDQTPDPSTIFADDFDP  
SSGSFAGCGTITVKNRVHGYKISLVTRDELSSRAELSLPDMEDTYAFWIDCDATGLGKL  
MTPQSFQYGVHALSHALCNVAPRFVPCVLNDVQCDHSFYSPTRVIFDSRAGGSGITAQL  
WKSIFRPNGLVEAAIDLLESCPCVDDAGYTGCCPACIQAGECIKFNDFLCRSSGLIAR  
HMLRRLEKTERYKLAMEEHAESDVEMVEDDRKKRKENRPFASPREKRRRAMRAAMDIDA  
TKPRQLVIGRPSWPMDCDCSIPRQQQEG

>comp5114\_c0\_seq1; 382 99 548 LEN=1062; translated  
MADEYTEEQIAEFKEAFSLFDKDGDTIDNDELGTVLRSLGLQPTEEVEEDMIREADKDG  
NGTIDFMEFVEMMPSLERDDNAEEEMLEAFRVFDTDGNGSISAEELRQIFINLGEKLTDE  
EISDMINEADKDGGEIDYKEFVSMMFSG

>comp5114\_c0\_seq2; 239 481 732 LEN=1246; translated  
MEFVEMMPSLERDDNAEEEMLEAFRVFDTDGNGSISAEELRQIFINLGEKLTDEEISDMI  
NEADKDGGEIDYKEFVSMMFSG

>comp5115\_c0\_seq2; 158 731 1714 LEN=2440; translated  
MNSNESDDSNRGRGHGSRVRSIVVAKCPIPGKSKTRLIPLMGEEGSRMAKAMLSV  
LKTIDGCAELDSVRKILLYAPGTDEGLKRMQTLVAELGLVTEAEPGCESTGGGKESWNL  
LLAMASSPSDLKSHVLGKLEDALVRVRALDRQLRPPNGVVFVFLGMDAPILPLNDIVEGL  
ERAAGETAAATLCPALDGGYAMLCVPGSADPARTFSSVCWVSHPMTGMSQIKALTD  
RGIPTVVGKAVRDIIDEAGDVEELCRLQLQESRAPDSPPHGSDRRTKNLEEPGKWSS  
RCTAGDNGVSSHPVCHYTRRALVEAGLVAEHETGGSLDE

>comp5116\_c0\_seq1; 252 71 814 LEN=1350; minus strand; translated  
MIDKKKDNPGLYTVKKVFIACCQHSNTTGTKPVILFSSVSFLAQEIRTNLSPLTPPLSSIL

GSGATETLRTSLLPSAALSLSPAVPTFSPGRIIRLSFGSPPSTPSSLMPLNEGVPVIT  
GPAERTVVGAVFPTLGGGDAALLAVSSFFSRYSTLASKASSLGIRDAIAVSEYFPS  
TTSRLTFSPIALLGITIFFWVYSTSMKPKVRFSTSTSTTVSDVPSIAINPFGTTYLTIA  
SANSSTW

>comp5116\_c0\_seq2; 469 138 1298 LEN=1493; translated  
MTNFSFVFALAASLLSTTTTHAFAPKSTLVATTAATAATMNHQNSAQGMFTGIVEEMGTVV  
KMEDRNDMTLWDGSIGSGTELTVRGSSVMDGAYLGCSCVSGVCLTATVLDQHGTFVTG  
LAPETLDKTYFRSLQPGQAVNLERASEIGGRNSGHFVQGHVDGTGTIVDKRVDGDSLRIT  
VQVDEEFADAIVRYVVPKGFIAIDGTSLTVVVDVENRTFGFMLVEYTOKKIVIPNKAIG  
EKVNLEVDVLGKYSETAMASLMPRLEALEARVEYLEKKLLTASNAAAAASPPPVGNTATP  
PTTVRSAGPVITEGTPSFKGGISDDGVLGGDPNDNRMMRPEGNVGTAGDSDNAADGNNEV  
RRVSVAPDPKMDNNGGVSGDKFVRIS

>comp5117\_c0\_seq1; 514 116 890 LEN=890; translated  
MADKWMHKLTEVAGEYQNDKGNAIQMAMKLAEMTDDLETDEQKKASKKAMLKQAEALTG  
QVFGTQSKPEEQTAEDDDADYVPPKASKFNSGSSSTKKPAGKPSYLISKKEDEKQTES  
SEGSSNDEDKQNNNEEDEEEYTPPKASKFQSSSKKNSGKPTYLISKKEDSESPESND  
RDETAADQIEEEASSVEDDKAEFFYTPPKATKFQSSSKNNSGKPTYLIAKKKEDPEPLE  
GSNNGEETAADRIDDALX

>comp5118\_c0\_seq1; 331 85 858 LEN=1078; translated  
MAVQQLMKTFLLVLSLGLCQTADALASTRTSQKIFAVEDRITEDRRIQPFEASAGAEFSR  
RTALRNFGVASAVLFGSSAGFTKPLPAVAADDSDAYLYKIVRVREATQQERRLITTKGF  
KDQQRANVKLAVKFMVQNYRLSDSVVGASGYLTGGNALQMRADAGQGAQNLTILEYF  
DSSDVENIKVGNMAGKEEIVVKGLEATQVKLDEFLLGFDDETVNVKVKAKVQEENELNV  
KEFDRSLGDIINLAPPS

>comp5119\_c0\_seq1; 360 604 1741 LEN=1741; translated  
MVNEIEYDPDNDYFAILGVSPVVTQAELEKRYKLVKLHPDKHPLGARKYFHVFPTRMQ  
KAYDILKDHSEHMMYYHYRMRYTKMFFQSKSNGWSEYLCESWKHKHKIDTETKKIDAL  
ISISEKWKQEEKRRDTRAQEEHHRKEHEROKEIQAEKRRQEEEAERQKRKREEQAKE  
REKRATEDEAEDNAELKAEKAELEKVEQLEFEIWELEKQVKRAKEVENRESELRLLEK  
DKAIQELNEALNDKMNELRNEFRKRTQTREEQHEREVQNKAFHETERETQKIDRKRVRD  
SYRSWDNEMRSIVEGDGPPPAKAPKRPDFYNPALAGKRTARTVGSARKPEGFAPCTRTRN  
GEPRNRDSVGLHNNANACE

>comp5120\_c0\_seq1; 257 1 861 LEN=1135; translated  
GKSKKAKQPKPASSYSYEAVDGTGPNVLEASGWKELQDEHKAGVLSGTIDGSGGVFE  
YAITGDESQIVTVAVPPGESCQGEPSMMYLTSPVSMKVSCGADWFGRCGGESCCVNF  
NNHTGEVGYAALTTNQLAKVVPVLSLSSSEVGGTLIVQQGAYMASYGHVELSYDCDCNLV  
RCCCGMGLVRQKITGSGTAFLLGATGTIVEKVLAEGEVMLMDTNCILAYAESCTFDLKK  
GGIVNWIGGEGFFNSLKGPLVVAQSMNMCLLES LAEKMYRR

>comp5121\_c0\_seq1; 877 164 4378 LEN=4732; translated  
MGKVVDVCVLSIASFLGNVGVALTGFMAI IYLFVYQIIVLAGYDGNLRYAVFIQALALF  
SAQPLLLRKAIEITKHASWKILHYFIPITIIISTPLGQLTGDAISTDLIEIVAGFLVTFVAV  
FEMYQKRKLFKFRFRKWCSSVGNNEEKKEPVDEENPKSRDTGEETSTNISRDTSQGNVLL  
MNDHNGETNAENDASLLHTPEGGFFGQYNLGLKTLDNFSFVVKLGTKKKCTRKSFAIKII  
DKSHLLDDEAEQLQEEITHLQQLNHPNIIYLQDLYDEPQKYFLVFDLMHGGDLLARLSGV  
RFFSEAEARRIAKDVLGAVRYMHDHRIAHRDLKPENILLASGDADCEVKLADFGFSKKEV  
RPNSFVTLCGTPGYVAPEILKGTPTYGCKVDMWSFGVICWVMLVGYQPFRGESEQEVQIAI  
VRGKYDFDEEFWEDINDSPKEFITSLLVSDPETRLSSEEAQCNPWFSDYKCAERIVDET  
TPVFFMVGSQRSNSNLRMTLNEREDLGGPHPPHIMREFMPIIDKFGDLSDDSFRIILLD  
HVCTFVERNQVPWTDKHKGCINFLRPIVYKCALESCNRVKDARHSLRNETPICNGIYLLS  
IFDAIMTYFTKVNKRLKLVCKSMGMSQYHDILLEFYGSKRLRYIYLVRDPRDVAMSFVKT  
PVGDRCHWHAIIVTKWTKLQACALRIVKECEPELIYKLYHYEDILEDREEMKNLYDFIGERRF  
GGVKRSTASVYMESEVENVALAKEGRESKLAHRLSSQFMNLSRGISFFASQFEKWRHPDT  
GLQEDAIQILETVAHETMKTLGYEPHLVGVTTKPSVWNDADLAVFERLNQEGISKMNEDL  
GRENPDLLARRIYQAAALAMVPVYKPEVWVETDASFDEIVSTGIQKILNEDELLKRRDIT  
AEKCTTKSGLRFRWACGTQRGYYPDNHDKPNQDDWIAQTASTEEDVHWFVSYDGHGTQ  
GHKCESEFARKEIPNEFQKRIATGQSFPLALEKAHVTVHNRLIANPQIETELSGTTAGTLM  
LMDDQCIIVSNVGDSSFILGWEEESGHEPPKITAKTLCTPHTPNRADERSRIERAGGVMT  
ADQRDGLAPMLRTRDRSDDDEPLRISWSESAKVPGCAFTRTIGDGMHKLGVVARPELF  
EHSFNQNDRVVVLASDGVTEFMDQDTCVRIACAEACPSRAAEALIREASKRWKSNSDYMD  
DITAIIVFLDPSKVAFREIDPLATAGETAGNNHLHHHGDGNLHLIVPTGSDSGDGSLEE

GPRAIGPWASFWTLLAGGFSGFLGGICGIRGPPVILYFLHPPYPVTFDKKSQRATGAVIT  
ATNVAMRVAYYVETLVLETKESYFRESDLVLYLCVVVSSILGVLVGTGLFDMKDSRNN  
IRLILSFFLLMCGISLLISSFHF  
>comp5122\_c0\_seq1; 530 1 1536 LEN=1631; translated  
QRNATQRNTTQRNTPDPRAPFLSQTAGHRSRGLPETAQKARRPAQNPMFSSSVLRSAPFR  
RSTLLTVAISANAWVANNAFAISARRAIAPATRTTLAEAAPSFSSSAEFGANEGARHGA  
CGRAFYPRDVYYDAEAKSKLEELRALRRDEIADGGGAASGGGNKTNTNSTTLGVLKESGG  
KYSGLTTLIGYKGGPLESQINQDRAVVLSPFVVGNKKDTDGAGGSDNDSVNDNNSNKLI  
GCFDGHARLGEVVS DYVVKELPKLLASKLDKI QPKSNYTDQVSQAITETTFVEMDR TAPAE  
ISGGCTATIVLQKGSRLYVANAGDSRSFVVVYRAKAKTAEVVYISREDKPSLPDERERVE  
KAGGK VLLPPTGTSRVLYTDPESGLTSGLAMRSRIGDWEVGFVGPDIIDTIDIDEVV  
EQHS GGSEDDVCIFAVSATDGCMDYTNPEGVAAVLARSMYEDESPHLLTAMEQIIYATAA  
GWERAKRGTYRDDIAISVCAIRIPPSLLQGR  
>comp5122\_c1\_seq1; 298 222 884 LEN=957; translated  
MPTLPGREPRKRRARRCAKAE GKNLLVDRGETVPEEEWIRRMLEHLSRDGHRLVAGK  
RIVLVASSRSAPPSSRKGQKHSTASLWVSRLASRAKSLCLVVSEQEEEDDEEQQQQHGLR  
DGSENGGSSAGGAGPCSILWRNTEVVGSTELEDLLRKAGEGGDKAIDAIVLSTTSAEVVH  
NDPFVNDFLRRTDAPIHMSDDCADGFCYYSRLQEGANIVLW  
>comp5123\_c0\_seq1; 309 52 1642 LEN=1642; minus strand; translated  
MMNRIITTKSLKAKSNHTVFKDEQKIMWLYKNDPFAVAPDRLDAMRCDAVQGPRAAQR  
AGWAGSCLRPQKRLKDARIDAGLGFVPGVPLDVPLVVARKDAAGVPPERGRQGAHVPAH  
PHRVRRGGVFGPLSASGRGPPQGPVREAVDHVEPNDSLVPETPQLEYGHDVLVEEQGGP  
QFLPPGPERRQLGHQHPQVVPVEDVPPADRHELVP LHRSLFDEGLVGVVGDQKGVPAQPQ  
ALAYGRQDAGGLD VDDLDRDRPFRKAGVGI AIAATAIERRFRKVPGAEQRGNHGATVRGP  
VLSPLARRDVGHVYPSAVHQGEKVVPEARVAASRCREAPAPVGA AVLGRVVTGAPSPVEW  
HRDALDDNGLPPLARPAAVAAI VAAAAANVVAVLIDGVAAAAAMRVVSGRCHVVAFFS  
LLAAAAVVAGMNAV GALVEPHPLPDRGHPPGGLEFALVQGFLELRIVALLLPACRLEIGE  
MVVAKVFGFGRKVAVQ GAPARAGTRRESLLLLLKHGREAPLSQRSVRCCVX  
>comp5125\_c0\_seq1; 371 223 1536 LEN=1932; translated  
MNGLWQHHLGESSVSGDDCQLEEFGTAEHDRHATLRYRDVANAGPPARPLDFPSPKVFRG  
ELVDLRARDHKSGTIHYLKNVLI RSTVNSNNGNRYFSNISICDTAYLVTKKVSKTVYGC  
VSLCIVLKR IKNDPNDSTNSSDATKEEDRQDNNMDCSLIEWESTDDQAAVKISEWKKIHA  
LRGKHLEDPIKEVSVMQLLGNHYHQHISGALEVLQDDKCLYTVMPYCGGGDLYGR LVEFMG  
FRSVRSDTANSVVATGFDEHSAR IWFRQLLQAANLLQKKGVCHR DICLENILLDEDDNIC  
LIDPGMSLRVPYTDSETGGVGDVSAGTSRRLMIAQGGGKLMYAAPEIISKTTDVDAFAI  
DLWSLGVVLFVMMVGLAPFRWAHASDKRYARISSGDLNGMLKELGISISPEVCNLLQGF  
WADPQKRLNLAEVIQHPW  
>comp5126\_c0\_seq1; 278 92 1214 LEN=1214; translated  
MKTSSSTLRLLLCVLGSATIRRCYGGKGT PRS IGRFLQIRGGEASYPDYRGANLPPDLPE  
YGDGDGVQNGRSPQQGGHNRHYHDSQQQQYPAGDHGGDPRYNSQQPPYYPQQSDPYYHQ  
HPPSHPSGYPYGENPNQGPPLPSGHGQEQQYPSLPGDPSLYQEEEEPEMDMNSAFGGGIG  
DENSGDGSSGMDLSSFDFKEYILKGLAKLYKKKILPLETSSGYGHFHSPLSPADFVAPPQ  
VLLLGQYSVGKTSFIKYL VGRDFPGIRVGPEPTTDRFTA I LWGPNDKVVPGAALCSQQNL  
PFTGLSPYGNFLSRLEGV EADSAILRNVT LIDTPGILSGQKQRSRNYDYESVMKWFGER  
ADLVIIMFDAHKLDX  
>comp5126\_c0\_seq2; 150 137 527 LEN=527; translated  
MKCSVGKTSFIKYL VGRDFPGIRVGPEPTTDRFTA I LWGPNDKVVPGAALCSQQNL PFTG  
LSPYGNFLSRLEGV EADSAILRNVT LIDTPGILSGQKQRSRNYDYESVMKWFGERADLV  
IIMFDAHKLDX  
>comp5127\_c0\_seq1; 296 64 1185 LEN=1529; translated  
MGLNLATRYGFVYNQVARSTSLRRSQIPSPWRQHPWQNKQHIASQTAYQDPALSWAQA  
NPRLAQQCLNPPVDGEDHFLAERSLQSFEAYLEWRKWF PNEIFHESEGVDSGDQREN  
AIAI ISHLLSAPLTLASQFRKLMEYFSQSSPNENGASERVGF DLCCVGARAEASIPAVYW  
REFLRLSMASMSIRSEFPCDGRVLLERKSLELYLDFVGPDI PSKVSKQSVCVP EEKRNHT  
ASSASISLRNYRYGYFHDVPAVNASNQKGLWDAYVFFNPGFGHPNLQQSWEPTLKL LLD  
QGRSGFHKKKSILLT AHSEKDASRDFSILRDVYGLKTVEYKENPFASRVTYEDPFEKEH  
FVRPNHYVATILL  
>comp5128\_c0\_seq1; 290 110 826 LEN=1015; translated  
MGNAAGKAIDEAVLVEGLTNKDEGRFISKPFVSNEGGITKIKNKGKTWVTTDGESLLWTS  
KSSGVFKCHSVITDAGGSQVAIIVTEKKAMTSSTNWILKTEPSFDGQDPVSEEDLQKAGI

AKKDEPSGILLYKFSKIEVNRKLTGVCYTYGIVKGQEDFLPLYVGERLSSMGFKALFKEV  
SSTNEDGILVAKAYMPGMSMSPHVEVAAGVDMLAIVSIGYALAGDDSSAGALAGAGVV  
>comp5129\_c0\_seq1; 472 90 956 LEN=1166; translated  
MSSEPADQFIQMTDSEAIFFEECDKLEKGRRLRRAALQTGILTIVSILCTIYTTIAVRW  
VLI EWQQPEKTIYDIAESLTMFKIGIFFDIVVTICDIVIGITLGLIMVGAGVNPATAVTI  
CTFKIVQQAVSAANIIFLIAAHLDDGASPIYEVIQKYFYSDNMPPIGTQISYMFLLINQ  
YGYFQQIFGGVYMFLLGFTIVLWGVFPRYMGYSMCLAGVGYVNSCLYLFFPGYDGVVS  
WLLLPALATHFWLAGWLLVNTPHPSKNRDLWGSRPVAVPQYPGKQVEP  
>comp5130\_c0\_seq1; 305 565 1794 LEN=1898; translated  
MKILLCGGNVAVHVLTSFIASQPRHEVCILSLYPGEAERLKDAISEKGIRCTHDLGDDAY  
GRPVRISSSAEDVADETTKLVVLAALPSFAHESYLRALKTCLKPGIMVGAMPGEFFDILLA  
RHVLGDAFVDASTVFALETLPWACRILEYGTVEILGTTKKEVDAVVASKRGEPPHMAIEV  
LQSLVGRPLVPMKPCNFLAVTLMNINSIWHPTISYGYRDRDVTKPFDEAPLFYEGADEY  
TGEMLAAISDEVLELKRVLVQKYPELDRSLHHVRDWMLRSYGDDIGDTSNLHTMLHTNK  
GYKGLRHPVRPVVDEESGKKQYLPDFGYRYFSEDVPMGLIVTRGIAELVEVPTPKMDRVI  
LWCQKQMGKEYLVEGGTSLSGKDLGTTTRAPQSFQFTDLDTFMKTNHVKA  
>comp5131\_c0\_seq1; 497 56 1762 LEN=1901; translated  
MATSPRLPVLIAAGAPCGLVAATTLKKEGIPFVILEKVSQRICSNAGSGFELAPTAVAI  
LEEGLCLDLEKTRLVSRYRGMCLATMEGRPLRTDRLGEGYVGGSLNRAELQRFLLGVLFS  
SPKDEEGLVLCGSGVESYRETKNRTVVVELASGKEFEFCALLACDGIRSRCRDRMMGDLS  
REDSLHYCKAVCYWGKTLAREGTALEKEFLSLQSEAPRTKKAKARTKTKTETQTLSEAKAH  
AQEEPGLALALEDHRRSSFVLSLATPRVPAVLVFIQHQTEGGETTSTSNTKSKTALMLN  
WGITVASKNEPAARGDSTRRGGVLSSEDEKKQLLSLGGKKEPKKRWGGATKTKAKTTNR  
SLLANIEDFPILLEELLAATPAKDITEAGFYDRKDLDPYTSEGKLVALLGDAHPQTPYL  
GQGVNMAITDAYIYSSAIADALQKSRNKSSTTTTTTETEAA SVADAIRWCDPDFRRRDNKS  
AVRWARFLCDFSSSSNRIVCWLHFAYCKHIVSPEEFLSTIEKTDRSNARYWKYFVERYGT  
RFFSGIKNPDQKKIANGIEIKPLREEAEC  
>comp5131\_c0\_seq2; 348 56 1319 LEN=1319; translated  
MATSPRLPVLIAAGAPCGLVAATTLKKEGIPFVILEKVSQRICSNAGSGFELAPTAVAI  
LEEGLCLDLEKTRLVSRYRGMCLATMEGRPLRTDRLGEGYVGGSLNRAELQRFLLGVLFS  
SPKDEEGLVLCGSGVESYRETKNRTVVVELASGKEFEFCALLACDGIRSRCRDRMMGDLS  
REDSLHYCKAVCYWGKTLAREGTALEKEFLSLQSEAPRTKKAKARTKTKTETQTLSEAKAH  
AQEEPGLALALEDHRRSSFVLSLATPRVPAVLVFIQHQTEGGETTSTSNTKSKTALMLN  
WGITVASKNEPAARGDSTRRGGVLSSEDEKKQLLSLGGKKEPKKRWGGATKTKAKTTNR  
SLLANIEDFPILLEELLAATPAKDITEAGFYDRKDLDPYTSEGKLVALLGGTQWNGTEYN  
GX  
>comp5132\_c0\_seq1; 182 1 454 LEN=1100; translated  
XQKVFVSKTILNNSQKFDLQPPNTTMSNMMEKVKRASNSVFNAGAKQMLKMDVLFLERE  
INTRKQSFQIEIYDLMAELEKSEGMSDQDKEAKIRAAFDNARKDIAVIEAKKECKKEEIG  
VLAATQNAAGAVPEPAIPSSGAVLTTGHPPEL  
>comp5132\_c0\_seq2; 163 1 487 LEN=1133; translated  
XQKVFVSKTILNNSQKFDLQPPNTTMSNMMEKVKRASNSVFNAGAKQMLKVRKYGRLSR  
LRMDVLFLEREINTRKQSFQIEIYDLMAELEKSEGMSDQDKEAKIRAAFDNARKDIAVIE  
AKKECKKEEIGVLAATQNAAGAVPEPAIPSSGAVLTTGHPPEL  
>comp5133\_c0\_seq1; 294 1 990 LEN=1131; translated  
QHSTALHCTLLPQPLAIESKRSNTNPAAEKNSPTRTAPTKDNTPTTIYDITMRCDTMRPT  
HPAAPAPGSPHPLRVLAAAMGLLAVAQRAHPASAFSPCPAAGGARPGSLRMADAPADTTWT  
NLVPADESAPVRKTVLEDGKGLPKKGQTATIQYTGRLVVLGGDSGGLAVASWTPGAVVDC  
WLAEQQGLSGILEGPFQAAQGVDFLLDGRFTEDFLDPLGLENKLQRKKAVMAARRLR  
TSLEGYEDGAVFDSSSDKEGGVFRVAVGAGKTIKAVELLVAVMAVGERARVRSRCDYGYG  
SEGYRTSRGDVVVPPFCGLEFEFVELVSL  
>comp5136\_c0\_seq1; 597 132 1688 LEN=1884; translated  
MTTIPDIDEETLNSGAEGFMATQVFVKNPGCVGMTYDDLIVMPGHIGFVGDVVDISSDL  
TRNIRLQVPLVSSPMDTVTEHQMAITMALQGGIGIHSNMKAEDQAAEVLRVKRFKNGFI  
LDPVCLSPENTLEDILELTKLKFSSFPVTDGKMGKLLGIISGRDTAFIDDISVKVSE  
FMTPRSVLTCADGISEEANEILKSKKGLPVVDEDDQLVGLVARADIEKNKENPRAS  
KDKKNKQLLCGASIGTRPDDKIRAKLLADAGVNVIVVDSQGDSEMIQHLKATHPQ  
VDVIGNVVTPSAHNLIKAGADGLRVGMGIGSICTTQEVCAVGRAQASAVYHVSKYARK  
FGIPTIADGGIKSTGHITKALSGLAGCVMMSMLAGTDEAPGEYFYQDGVRLKRYRGMGS  
IEAMKSGSEKRYVWDTASTHVKVAQGVSGAVTDKGTLLRRYIPYLMQGIRHGLQDAGIQSI

DIARERLYNGKLRFEIRSPAAQKEGGVHGLHSYQKRLY  
>comp5137\_c0\_seq1; 454 106 1815 LEN=2597; translated  
MKRRSLEDVSKSDAAKDSIEDPYNRDAAADGWYMCSLGCDDGGQQQEIQTNISPTSTYDAP  
GADIFLNQTSQTFNKVRRRRSRTKNKDQHDNVGVSSSKHTDLSLASELSRSLIEDREK  
ALEEIHGVVEVSDDEDPMEIQNLDDQVKEELKRIRYKQAYEKA AFLSSAYVTDPDFVIYFL  
RTDNYNPRKAAIRLVEHFYKLELFGEHTLVRDIMYDDLSEVEKNILNSGFVYCLPKPDR  
AGRHVMI CNLSEFLKTGTLMMDNRAVWYISLRYIQMFPSLSKLG VGVYFAHGMCNVFDN  
LSREHFVPKTAFLGNALPYKFASVHFCFEKNILASALQTTLMMSLGKYARIRLRSHCGSR  
MESTYTLKSF GIDLEEFESDGLMGHAASAHSFLQQCQKFDQYYQQKQNT RLLPRPNDVLL  
GRGRPFQLYPGNLALTAIIDQYRDEYTTSKKMHKKAITAKVVNDILRS GGRFLKKAEN GK  
GVDWDKVD FETARLKVSHSFR TMSKWHADNEDEENENRGDGQKKGGGEDESLSKISPI NT  
DTIESLGLIIEPI SKNETLSNKRRKGQNY  
>comp5137\_c0\_seq2; 420 106 1940 LEN=2722; translated  
MKRRSLEDVSKSDAAKDSIEDPYNRDAAADGWYMCSLGCDDGGQQQEIQTNISPTSTYDAP  
GADIFLNQTSQTFNKVRRRRSRTKNKDQHDNVGVSSSKHTDLSLASELSRSLIEDREK  
ALEEIHGVVEVSDDEDPMEIQNLDDQVKEELKRIRYKQAYEKA AFLSSAYVTDPDFVIYFL  
RTDNYNPRKAAIRLVEHFYKLELFGEHTLVRDIMYDDLSEVEKNILNSGFVYCLPKPDR  
AGRHVMI CNLSEFLKTGTLMDMVRSPLLKCFLDNEKTRNIFKFSEFDCFLSHQFHLLFW S  
TFYRIEPYGI FRLDXIQMFPSLSKLG VGVYFAHGMCNVFDNLSREHFVPKTAFLGNALP  
YKFASVHFCFEKNILASALQTTLMMSLGKYARIRLRSHCGSRMESTYTLKSF GIDLEEFE  
SDGLMGHAASAHSFLQQCQKFDQYYQQKQNT RLLPRPNDVLLGRGRPFQLYPGNLALTAI  
IDQYRDEYTTSKKMHKKAITAKVVNDILRS GGRFLKKAEN GKGV DWDKVD FETARLKVSH  
SFR TMSKWHADNEDEENENRGDGQKKGGGEDESLSKISPI NTDTIESLGLIIEPI SKNET  
LSNKRRKGQNY  
>comp5138\_c0\_seq1; 197 149 667 LEN=1045; translated  
MTDVESSVPRRANKPVNPYS DGPQN SRWNPINFVPRILWMSFSFYVLFDRFNIYHTIMH  
SPDVSHEWFKIGLAASIALFSIKAYVELYTGKIQKKEVSYKAVPQLTHAAILLIFVSGIA  
FHIALWPVYGGKSMVIMFLVGAFLLNFCLMFPTSVQNLVAIVLFTFFLQEQ  
>comp5139\_c0\_seq1; 452 270 1190 LEN=1417; translated  
MTFEKGC SVEAFGFILAVASASPQEKVVVEYHRSSKSTKRLARRRRKIPLALI QYNDGG  
GAEKKPSYKKNSETSLALGIHMDALPQKVQPQNPTMNVGKAIKDKDASVIFIVQSENYDT  
IDQDIKPPPPSSIVSTTSLEDYI INSDKNDNDKQDKTREYPVIQKVNARIRKNQLAAM  
DETNALIKMLRTADDSTMSMSMGFGPSKISMAPMTSPTEMTQTSGYVPVLTPTKNDGPPK  
RPSVSTNANSNSIVLPTESIPFPDETTSSSVADVIEDGASTVFLASAHFFTIVIVLGC I  
F SCLVS  
>comp5140\_c0\_seq1; 430 1 1416 LEN=1496; translated  
XCRLQRWVGGTGNFQPILOHSVNREKSSQQHDTQQPITTTSDQDEDEQXRSKMGVMEKIK  
EIEAEMARTQKNKATNYHLGTLKAKLARLRNELFVEQSGSGSSGEGFDVARNGDARVA  
LIGFPSVGKSTLLGALTATESEAAAYEFTTLTCIPGVMRYKGSKVQVLDLPGIIEGAAHG  
AGRGKEVIAVARNADAILIVLDAGKEGLNRHREILERELETVGIRLNQRPPDVKISKRKM  
GGGIRFSSTVPQTKLGPPEPEKVVTQILREYKII SADVLAREEITVDQLVDVALGNREYKP  
ALYLYNKIDTITIEEVDQLARQPHSIVGSVNKKWNIGQPLEDDALKQKMWEYLGLTRIYT  
KRKGSPPDLEEPVLSDIRKGTTVRSLCANISTQMLRDFNYALVWGKS AVHAPQRCGLTH  
RLDDEDVVQIVTKTIKQQNSSSYAMLAQEYQDKHKKRLEAKKQKQKRLRG  
>comp5141\_c0\_seq1; 11 1 475 LEN=781; translated  
RSSGGRARSSSREEVEASLEDGRQVPVVPGEVVP GSGAAVGPVEVEASLEEGLRVPV LVE  
IEQLVPVALVAEVVLQQRATTELGVAVVQDSLAAVEIGVAVDLRIGLTALQETHQKAVAE  
DGVEANLELDPVEAGPGVVVRENQGTPVQEA EVGQE  
>comp5141\_c0\_seq2; -41 1 448 LEN=448; translated  
XEKHL EAAAGLGAGVDQEIAERDLEVAAVLEAKVDQEKLTVP AEIDLGA AVELGAKVDPE  
IEPIGLQALSVPGVEVGLEMLPVLVETGQEVVVEHGAAVDPEIDSRALALVEVGQEVVAV  
LGAKADHEIDPGLPVEHGVIADLEIDPRVP  
>comp5143\_c0\_seq1; 143 208 839 LEN=1126; translated  
MSIRGTASVRRRDSSISKSAFFSSMPGSPENEEELFEEEGAESLLDSFDSYIVVSVLTA  
TASFAALFEANLEDKFWGFHNAWVFICAICSLSGIYXDGRIFPQLDLR TYRGDRKGPLH  
RDLLRAHGVS DAGLLDVPSEPGPFHFAADLYRGGQGREVPDTLSWIPPGALDFHVPRL  
DDNHEGGGPHFCASRREETKEDLEVYKVRW  
>comp5143\_c0\_seq2; 143 363 994 LEN=1281; translated  
MSIRGTASVRRRDSSISKSAFFSSMPGSPENEEELFEEEGAESLLDSFDSYIVVSVLTA  
TASFAALFEANLEDKFWGFHNAWVFICAICSLSGIYXDGRIFPQLDLR TYRGDRKGPLH

RDLLRAHGGVSDAGLLDVPSEPGPFHFAADLYRGGQGREVPDTL SWIPP GALDFHVPRL  
DDNHEGGGPHFCASRREETKEDLEVYEKVRW  
>comp5144\_c0\_seq1; 299 224 1192 LEN=1309; translated  
MQNVFSRGRILIPGSSRLYAKEHAVTMANIASHRQLPVSVHPKKKTLHGFGRRLLFSANAD  
AAGSSSASGKSFRFSFRSGFDWYSKKLDPITTKCISAALISSLGNALAQKITHQDRQ  
QRRDEWERKHADKPTQHEEHEPRGEPFELNLAQIGRFALLNATFVAPVLHQWYQFINRAV  
PGRSMSRVLQRTFWDEFVFSVYIPAFLAMLWKLEGVANDRILEMIKSECPSIIVAEWAL  
WVPTMIVTFRYAPVKFQVLVINVVGVVWQTFLAYSANNAHSSSGAEDDSVDQE QK GKATD  
TGIVIPEDKKPLVLESIVQNKQ  
>comp5144\_c0\_seq2; 229 224 937 LEN=1132; translated  
MQNVFSRGRILIPGSSRLYAKEHAVTMANIASHRQLPVSVHPKKKTLHGFGRRLLFSANAD  
AAGSSSASGKSFRFSFRSGFDWYSKKLDPITTKCISAALISSLGNALAQKITHQDRQ  
QRRDEWERKHADKPTQHEEHEPRGEPFELNLAQIGRFALLNATFVAPVLHQWYQFINRAV  
PGRSMSRVLQRTFWDEFVFSVYIPAFLAMLWKLEGVANDRILEMIKSECPSIIVAEW  
>comp5145\_c0\_seq1; 197 162 647 LEN=793; translated  
MASTVDLLPSNLQQTQLI IERSNASGGGIRVILLSTAEGVPLGRVYSSADHASPLDEEV  
LSNIESTWAPASKQFPLLHMGKEVKVVKVVTAIYDNRITIFHIYQAPVVVTLVLVGMNANLG  
AVRSTAIPLLKEILEPLCSTLLNSLAPAQTDHGYPQQGYQ  
>comp5146\_c0\_seq1; 639 368 2800 LEN=2939; translated  
MVASSNSVTVARGGVGASRDDTVLDDLLLSRCGTSPHIMRRRMNSPSSSTANRNPQKESS  
LTASNTRKRLQVELERQLFPPLNDGKNSTSSGTVMNKNNTNQHMRRVRSNDLAQSKRDD  
PSVRRSIFGPYFQEKPRSNSVPHLVRSQLPPPPPLTPPLEIDSPVPAREEPQAPIRSF  
RSSSDFV VASKKNGDKNDGRHRRKSQEQLHRHNL PVDYRVFAPSQHQAAATSAICYRYREL  
NRDHEKEYDSVLERQVSVEHSLPPFSPSPLIRFCSETTTTTVAGNDSFSLNTHPNGIRRSS  
SNISSHDREIHYHGVSLLTPISILRPSRYAGSKRESSSDSNVAVDTGVISQDSAGVTSY  
TRSNKNRNATIEEEAEEGHHLSASMSASFNFPRSYIDSSPILKAFVASPTDDGSFSGIH  
LVEEKESDIAPQVPLGAASVASSLKPTKFLAPDISRSDEALDGRPSSGITAAATDGF  
KDTFSDKDTTDTVVLKQPLQQEQKLRFDPRVTVTEFEDPIPRKWDENELDQHKREAI  
AIAQNYLRQHRVAEAWYRRSTLDPVTNTYRKKALFSLPVFSSMYSDNRTENSQESPRGAI  
VPSEPRIRKILIVEPNPAILSLFHKSMKSMFESAEI VAARSSEKALRLVEESIAPTRHDA  
AAFDIIVIEQALAIRGNHGAKRSDTCLPGLLGMFLKKNHEPIISAVPSTKIHRGSELIEQ  
LRELSLEQQTQFGNADPPRSSLLIGVSLRPERDGAAMRQAGADLVWGIPIPSVGRNLND  
LVSKLQDKRSATARPTSTPLLPDQSNPETK  
>comp5147\_c0\_seq1; 399 19 2006 LEN=2128; translated  
MFWLWIIILVAYGTLTQWQLLEASAPAVPCFDEGENGDSSNPNSWRRCYRPAVRVGESLTL  
QLELFSSPSGSGAAGGTIPRWPVETCRIDLAVPPVGKLPGLVTD SKKGGSIGSSSDGSA  
MPSNGSDNTNEYRDEKSSTKPEGNQRCEVIFSKEARHRSSIQSEVQPLKARFVVLAPLG  
GDNNGRVK IETMAPXFLTRVEKRD P NSIMRLLMSNPNGAPDKDSGTQVETCRSDSTESN  
NCTIGSNTGDNDSNKIMWIPFVKFGRAPVIRFVAEERGYAFLQRADGIRL KALNSTTYT  
PLLYVDELSLQGAQIELAPFEANKPAFELQIKLGSISPMVDTLYRQVQDAFETIEGSFF  
QGSELDELRYFLQDENLYRFALTNII STLHVWLDYLAFRDEVRFYRGKQNL SGVSPSTAV  
TKMICSMI ILLYLIDGGGT SWIVLFLSILSFVVD A WKVLKLLRPTPTRSFVVKIREFAS  
KQEEEIAEYDRIACRRLSMLIYPVVCWSIYALKNYEYRSLYSWFI SNAANGVYTFGFIS  
MCPQLYVNYRLKSV A HLPWKVFLYKIFSTFVDDAF AWLIE M PLKHRLM LTRDDVVF L CFL  
GQVYMYRVDKTRSN EFGYSYGEDEDDTSQELN TTEGTDKASP SDSTRKHRNEVPSSSKLK  
DE  
>comp5149\_c0\_seq1; 502 262 1822 LEN=1943; translated  
MSPKSETCDAGKCTPKEPSHEVLRMP SFYQRQLPDTCVAFASRQGK LFRSALENGLKS  
FYNLIEQHHTQTEPAYCGVSTREYR VILVCCSNF SVKSFVSKSGTTHGQSFDY YCPRLS  
VVM T LNALAVDPGQWKG VWRWYTESMLNCCVDLEEIKKDGITL RDFQCLAH CQLSVES  
RYCDETFSLNEFRVVERACIEQSVEE EDELEHNGEDENQ LLECLIVSYSRKTLGQTGDG  
HFSPLAAYDKESDVLILD T ARFKYGAHWTKLPLIYEAMKPLDKSSGKPRGYALLSFVPE  
HKTDNIAIDT MATTHGDNKSSGPTNTNQLSTQPASILFRSKMNQKGRRLYKEYIKSLRE  
ETYEQGDIPYSAVRSYWKDTHGPI SVWEIIVPTRLHNEKEKELLRQIRRLLAELKDR TM  
NEAIPESIEGNNDNRRKEGCTAYDLC DNAPVRSTNHTAYVSAEETLYLIYLATLSEERR  
YNYIMNFESEASDIARKQIITEADMIASAIKVS DQLTSL  
>comp5149\_c0\_seq2; 539 262 1704 LEN=1825; translated  
MSPKSETCDAGKCTPKEPSHEVLRMP SFYQRQLPDTCVAFASRQGK LFRSALENGLKS  
FYNLIEQHHTQTEPAYCGVSTLVM T LNALAVDPGQWKG VWRWYTESMLNCCVDLEEIKK  
DGITL RDFQCLAH CQLSVESRYCDETFSLNEFRVVERACIEQSVEE EDELEHNGEDEN

QLECLIVSYSRKTLGQTGDGHFSPLAAYDKESDSVLIILDTARFKYGAHWTKLPLIYEAM  
KPLDKSSGKPRGYALLSFVPEHKTNDIAIDTMMATTHGDNKSSGPTNTNQLSTQPASILFR  
SKMNQKGRRLYKEYIKSLREETYEQGDI PYSAVRSYWCCKDTHGPI SVWEI IVPTRLHNE  
KEKELLRQIRLLAELKDRMTMNEAI PESIEGNNNDNRRKEGCTAYDLCDNAPVRSTNHTA  
YVSAEETLYLIYLATLSEERRYNYIMNFESEASDIARKQIITEADMIASAIKVSQDLTSL  
>comp5151\_c0\_seq1; 924 222 3347 LEN=3387; translated  
MPSTIRDRINSFEAASSLQGGVPSRPIASISPRGGALGTRDAFKLPHYEGEHRHQON  
EKEENKQPQATKQPKPHRFNRNRRETQSRSKFYRDMKNANNAETALSDVNTNSSGNNNK  
NNPTSASNRRERGNRMSHNEGNQPFEESSSTTATASENRRSRIRQSQQIRENSISATTTN  
FTDLRRQRRMLQNQRRTYQAPSNDSSATAAKSQDIDQSEASTTMFGRENLASTVDPSPGR  
TSTASSLNIASSSPGGSRSKLSRLQRRPNGINERQSSIATNTTRNSGYSAVTSVVRNT  
TSDNATSKHLSPVKLENVSAASPNTKSMTISKLSMATAAGLSTKTRRQNEEVSSPSISSTR  
HSNRNRKESDDNNDNNGTNLRSRSHRDDSDDIGGAASPQQINASLEAPTDDDATLTSVH  
RIMEGSSNSNHHRTTIDNSNNHHPNSHQNSVNYTYEPLQSNHNPSTSGRDSGSGVGPWKP  
NRGVHSNSNRNTIWKEDKSDKIGYGLGGRVLRTEYSSDYDMDDISKADRSRHSVHSDVG  
PSTSQATDANDFLISSRYNNSNAINSGLNNNNSAATMGTKRIDDDRTFDYGRDDSDN  
GGTSFARRRREADQRRARLAAQNLDLNSNNGSIVHNNQLGQSIHQGGGSIIGNNGEPKLL  
SKEEMEHFTAKDNPALRLSAGVAAVATVGLAVAGPAGLLIGVAAGGLGFGFMQIPEDERI  
KIQDRAEKAMNTLQEKACDASEAVTSSCLSTYEDSGVAEHVPHCLSSNIADQLVPCPTG  
QTAKSENLFNPAGATAPAGSQMTGPHSAGTNHQEHPSASPAGPMMEQPKAAPMSHNERMR  
NKKVACLNRVRIPIAQIHLDPDTSQPRAWLDVVASANTSNDQKNEAMEEILLLAKDKRR  
AKIFLDEGILDYI IWTISRYLEKLEAADKKTDFWAFPEITANEKSAANLAALCCVTLGKAH  
CAAIHTEGDLMLSMYERGTVPPEERQVAQMLHEVPHHARVTKISDPTIVEPSKEVFAPRQ  
LTLAQAEELARSIAKAVADGQM  
>comp5152\_c0\_seq1; 1229 271 1764 LEN=1949; translated  
MKFSSIVVLAAPGATGFAPFQRQFTTPRTVLRKVEYDLDLGIIEEAPKKKGGKKEAPAP  
VPAPVPAPAPAPKSKKRASKKAPEVPEPTVPVAPAPAPKAKAKKVKPQPVKTPPPPP  
LPVTKPAPKSASASTKASGVALGVAPLVLAPLAILGAGRSVLSGTERREKIQKEIEEFE  
QAKKKKQLQAEVDGGGLVQAAGFLGAAGLSLGLIVANPFGQTSNSPAPVKAPAATKQAPK  
KDVSAKTSSAPPAAVKKEKKA INAQRKAELKSGYDLSLDAEVKADEKAAVKAIKEEKAL  
EAAVKKDEEAAQAAKKEEAAQEA EKKAEEELKKDEAEAKALKEAEKKA EKAANEAKAKE  
LAKKEKEAEAKANAAAEKEKA AKA EAKAAAE EEA EAKARAEKAKIAADKAKAAEAK  
AKEDEAAQKVKKEE EAKAAASAPAPAAPAPAPK PAPA PAPS GDAALGKVLGGESGRI  
LPKEELDPGVLEFLKKY  
>comp5153\_c0\_seq1; 398 68 1316 LEN=1853; translated  
MASSNQENVGVALALVFGAGASTGIGA AVVFIPSLVKIASRRVLASSLGF SAGVM TYVS  
FIEIFNKSADSFENAGHPPDKAYIYATLCFFGGVLAMLVLNLLVGVLLGKRGHHDEL PK  
KAKKSTRKSVDKQLVDGVNDCPTCCSADPVKQLNDVHRMASVIEHEIEDAAKQAAEVSNA  
EEEQEKVVSVDLEEKSKMETVDEENIPAAELVEPAGDSAENKRLHKMGLNTALAI GLHNF  
PEGLATFVAALQDPKVGAVLAIAIAIHNIPEGRKRRTLF IARLPTPMAGVGDYSKESLLR  
TKLIKTLASLPFTGLCVALPIYYSSGNRMKGFLWALLSGASEFIAALLGWAVLANSFSES  
AYAILFGLVAGMMIMISTKELLPTAHLYDDKDTVVSYSFIIGMVVMALSMCLFQL  
>comp5153\_c0\_seq2; 362 68 1387 LEN=1924; translated  
MASSNQENVGVALALVFGAGASTGIGA AVVFIPSLVKIASRRVLASSLGF SAGVM TYVS  
FIEIFNKSADSFENAGHPPDKAYIYATLCFFGGVLAMLV RTEHEFLKRRRREP GGFVESI  
VAIVVENEVCXAIYFFFRQTVTHASQNNCGADCAWGLVFGKQSKVLNLLVGVLLGKRGHH  
HDEL PKKAKKSTRKSVDKQLVDGVNDCPTCCSADPVKQLNDVHRMASVIEHEIEDAAKQA  
AEVSNAAEEEQEKVVSVDLEEKSKMETVDEENIPAAELVEPAGDSAENKRLHKMGLNTALA  
IGLHNFPEGLATFVAALQDPKVGAVLAIAIAIHNIPEGLCVALPIYYSSGNRMKGFLWAL  
LSGASEFIAALLGWAVLANSFSESAYAILFGLVAGMMIMISTKELLPTAHLYDDKDTVVS  
YSFIIGMVVMALSMCLFQL  
>comp5153\_c0\_seq3; 412 68 1189 LEN=1726; translated  
MASSNQENVGVALALVFGAGASTGIGA AVVFIPSLVKIASRRVLASSLGF SAGVM TYVS  
FIEIFNKSADSFENAGHPPDKAYIYATLCFFGGVLAMLVLNLLVGVLLGKRGHHDEL PK  
KAKKSTRKSVDKQLVDGVNDCPTCCSADPVKQLNDVHRMASVIEHEIEDAAKQAAEVSNA  
EEEQEKVVSVDLEEKSKMETVDEENIPAAELVEPAGDSAENKRLHKMGLNTALAI GLHNF  
PEGLATFVAALQDPKVGAVLAIAIAIHNIPEGLCVALPIYYSSGNRMKGFLWALLSGASE  
FIAALLGWAVLANSFSESAYAILFGLVAGMMIMISTKELLPTAHLYDDKDTVVSYSFII G  
MVMALSMCLFQL  
>comp5153\_c0\_seq4; 348 68 1514 LEN=2051; translated



MASSNQENENGVVALALVFGAGASTGIGAAVVFIPSLVKIASRRVLASSLGFSAAGVMTYVS  
FIEIFNKSADSFENAGHPDKAYIYATLCFFGGVLAMLVRTEHEFLKRRRREPGGFVESI  
VAIVVENEVCXAIYFFFRQTVTHASQNNCGADCAWGLVFGKQSKVLNLLVGVLLGKRGHH  
HDELPPKAKKSTRKSVDKQLVDGVNDCPTCCSADPVKQLNDVHRMASVIEHEIEDAAKQA  
AEVSNAAAAEQEKVVSVDLEEKSKMETVDEENIPAAELVEPAGDSAENKRLHKMGLNTALA  
IGLHNFPEGLATFVAALQDPKVGAVLAIAIAIHNIPEGRKRRTLFARLPTPMAGVGDYS  
KESLLRTRKLIKTLASLPFTGLCVLPIYYSSGNRMKGFLWALLSGASEFIAALLGWAVLA  
NSFSESAYAILFGLVAGMMIMISTKELLPTAHLVYDDKDTVVSYSFIIGMVVMALSMCLFQ  
L

>comp5154\_c0\_seq1; 297 1 1540 LEN=2188; translated  
RSLTNVLSRGHKKRYYSWYGMNTSIVETHQEAPKHRSARVDDRVARGDQQGIPNKKVR  
KKGVMVMSSTRACTACHAAKVKCVKVEGSTKCKRCERLGLKCI EHSRQGGQTRRRRKA  
KTKVQKNDVQECKFSAPICTPLNCNITNDKGSVSKKSTENGASTCYAIPMGYTSTVICD  
GSGGNNMRNNDGSLKQKQDPDPSTICAAMDALEVEDKII CSSITSGLGKDHFGNLNHI IRQW  
IALAFSRRSFSLLARASFIAEKMKIPMDDIISNQSPFAAATDSEPMDFLAADILLSKKER  
KTLGYPIDLREIPWDLLESVQIDPNRLEETTRNRCIAIRWASQGSTRYWTSPVFCREFAS  
TAEIGQVWEENKEGYDTIDLFI EKSEKGRFAQNLFIHIFVNSKPNMPCYVTKDRHKVQRR  
NNAPPIEANVIQTIKLLDLASIH YCEIQFLDDDISNANNLVGDGLVRANKRDYIDDHSL  
DNIDPFLGDGIEFTDIPVTDEMIEFMKLISGE

>comp5154\_c0\_seq2; 324 539 1845 LEN=2493; translated  
MQLKSSALRLKAVRNANGANGSXLKCI EHSRQGGQTRRRRKA KTKVQKNDVQECKFSAP  
ICTPLNCNITNDKGSVSKKSTENGASTCYAIPMGYTSTVICD GSGGNNMRNNDGSLKQK  
QDPDPSTICAAMDALEVEDKII CSSITSGLGKDHFGNLNHI IRQWIALAFSRRSFSLLARAS  
FIAEKMKIPMDDIISNQSPFAAATDSEPMDFLAADILLSKKERKTLGYPIDLREIPWDL  
ESVQIDPNRLEETTRNRCIAIRWASQGSTRYWTSPVFCREFASTAEIGQVWEENKEGYDT  
IDLFI EKSEKGRFAQNLFIHIFVNSKPNMPCYVTKDRHKVQRRNNAPPIEANVIQTIKLL  
DLASIH YCEIQFLDDDISNANNLVGDGLVRANKRDYIDDHSLDNIDPFLGDGIEFTDIP  
VTDEMIEFMKLISGE

>comp5157\_c0\_seq1; 102 1 202 LEN=202; minus strand; translated  
RKKKKKKVLRKDSKEIPPVEITDSSATEESKAENEEIVTRKASRSTRKIVETNNARPTQI  
TKTPSPQX

>comp5158\_c0\_seq1; 629 117 1993 LEN=2254; translated  
MEEVQQLAELEETKESRKIVSRFWNNGNSDDDDGESDGNVPLPVMGAVKIFLLEKKTXX  
KSFHRVEQNQDGS DSDGDEEMRRSQDPDYAWEQIRDEQIFLEPPTKWI PSQNA STSTSD  
IRVRQAI VEDLQKQE QDSFVRV FVSDTHANHRDLAHLPRGDVLVHAGDFSKTGETGSIE  
DLALYFHENKQNNENHQTSMIQEII CVAGNHDLTLDQDYHRNWSKFHRKAFD TTVAEKA  
IRRHSIYLRDEGCDVVVKQKEEEDGTAPIHIWGS PYSPEFFDWAFNKDRGPSIRKIWDQI  
PSPHPSTSTVTPCTV SFDDNGGIGGEHDSAVGHESEPASSSDSMQQQRQHQAQPI SKQV  
DVLITHGPP LGRGDLVFLDETESKTTRAGCYDLLRVVQGRVKPRVHVFGHIHEGYGVTFD  
GTTMYINASSTSQDYEVINPP IIVDVRVPDAITKGKSMNYERN SKCASISQSNNKPPSAW  
VVRPKSLFRNGKTNICSVEQLIDWCLCNQHEFIANELRSKFVTVKIDNSTNEEMSSSSSI  
CRSNTCNYYD TLQSRKRDLCLIASNGRGSNAGHEDAISITAEQVFELLAGVLGYHFGFR  
GIRDARRKLAKMVLHLYAESFESER

>comp5159\_c0\_seq1; 273 1 1195 LEN=1583; translated  
XMACSKRTRPVETSPASGRSARLSILTALLTSLCVTVCHGLSPQLHG VADAYNNGIVDRQ  
AFLVDGFWSCSSIALATTTATTTSEIICDNGALMGELAVPGAYSSVCMGLPERAVPLPRY  
RERMSKKQSPDAESTIVVQQNTGGSGNTGMTVWNSGLLLTRLLDTMVDELHRQGDGNGGE  
SIFWRNQDVIELGCGTGLCSIAAHLRGAKSVLATDGNPRVLQLAEANIRKNCYNNSDADD  
GATTNISASSSPPTIQAQPLQWGF LDAMDYSERASFMI GADLTYNPGSWRALAETIETV  
LKIENDSIDPVTGTRVKNDRCYFLYLSVGHGDFNVNAEMDGF LSVAKEVGLVNL DGMVEG  
IDVSRLLLARLSDSEKKILAQGGGVRVSVLGRKNSSRK

>comp5160\_c0\_seq1; 190 81 665 LEN=865; translated  
MVGATSDSLTKPRQKRTHIEKSPVTSEEFMAGAPLTNEESISSSRNHSSSDESGARNFEG  
WKNTGKLSYNTDAAFAGLVAGMLQIKRRREQEAVPISPALNERARDKKTISLWLRSNKA  
TRNIRRNCNGCYEDQKNNDDVFC AQSQSCCSSTSSSICSWGLVRNEKKPKLWRENNKRK  
ASPSLHKAKPSTTH

>comp5162\_c0\_seq1; 1024 1 2535 LEN=2552; translated  
ASYGKMTAVDVAPGIVAVGTD TGS LHIFTYGGGRRVLRPYLSIPSPSNDMAIVVCKISV  
GKEKVSFVAVYQRGRKTHRGAKT DGSPTPR TSSGVSCYDMPLPKGN SPAAVTAPSARHDL  
DGRNVSSSSSLCDAVFNENENELQLCVARPDGLYTYSTTQKVDVSPIDGSKLAICLVPSPK

AAGTSREMVSSTGSGFVLVASTDSKSRRAVDLYDPHNKLVAFHLLSPGHATAIRAAG  
VTTPPTRSADGSLQNGRSSAVVFTSGGSLVTLTEKETAQKVNLLVQKNLYSAAIFVAYAD  
PSYETEDITLLYRRHAEYLYRKGEYSSAIEQYIHTIGSLEPSHVI FRFLDAPKIPLLKY  
LEELRSRDLTTPVHNEELLRTCYLKLNDETESAEIAAFASSRSMDESLSTMVAKSPKDAFA  
TICSFQAPEAAEALAVYGATLARLLPRETAGLVVSLCLGTFSPQKLADSQAAMNAKLL  
LEQPVDDRDRACDPYPVHVFAFAFLENPKILRLILTHCNRNKCYLSPSLRRTLLELTLQE  
WNQAKRTGDMEAERMRRKEAIAALTDSSHREIGDYDALVIVQLAGFEDGELLLYERLQMG  
PMLLSRYAKDGGVKARRQMLAMCRNDPEISADVLGYFVNMVTERMALAEKEGVDDGEESD  
DEVNDILEDIQDTLALAKRQGVLPVRIARILAGEGTGQFSGSSAEASDRSPVRTVPLS  
VALDYVGDILDESKEISRLKTEVEDYNQLCNSMEAQIDALLNTSASASQORIATTQSE  
EPSKQLSPRIHVEDMYTKVRLHLDKNDKQDNKADLSREAFWRDMDQSEDSFQTLARFFAQ  
NVIQ

>comp5163\_c0\_seq1; 756 135 1769 LEN=2201; translated  
MVAKSTSVPLLEDKSPSTKINDDDDSGNEGFPSDEDHLIHEILKNRSWMKEDIGSEDLED  
DELEKEMEMLSVAEQEVSQEISDAIRSFQNLGAVNDRSRRKSDSRASRRTVIRTEGKNW  
ETHYTSQEKPARINQEILQIRSKRKIHTSISNIRQVEIDAIERDTRDSVNESHPSEACH  
GVYDIGNRDPPEEMLFIDDESDEEDSSNVIDSVIPHMSTNVKENENENEPESVDIYS  
LKDFEGFDGSPFAQWHREEEGLSRQLPDLETGSNNFLEEEFFVGDIIHENTNKTAGENTK  
DSGTNNSKKQQDANGSSNLEWHSEEDGLDWTWQRAKQISDLEWGKAELFEEFAFWKEGFE  
TIPVPNSKIKTSSSSIRENDRNASSGKSHIPSASESRRSIEILALPTLEHHVKDIQDVG  
AKFDRQPIQSASDESVTQSVHAPAESTLQIDFENNESIFQKSTQLFHSVIEDSPLICIEE  
SKNDCSFAPEPTVLIIEAAVRGNEKPRKKQNHSCDLRTIILAVHVVLAIVGIIIVFLAFL  
RTDL

>comp5163\_c0\_seq2; 756 135 1769 LEN=2335; translated  
MVAKSTSVPLLEDKSPSTKINDDDDSGNEGFPSDEDHLIHEILKNRSWMKEDIGSEDLED  
DELEKEMEMLSVAEQEVSQEISDAIRSFQNLGAVNDRSRRKSDSRASRRTVIRTEGKNW  
ETHYTSQEKPARINQEILQIRSKRKIHTSISNIRQVEIDAIERDTRDSVNESHPSEACH  
GVYDIGNRDPPEEMLFIDDESDEEDSSNVIDSVIPHMSTNVKENENENEPESVDIYS  
LKDFEGFDGSPFAQWHREEEGLSRQLPDLETGSNNFLEEEFFVGDIIHENTNKTAGENTK  
DSGTNNSKKQQDANGSSNLEWHSEEDGLDWTWQRAKQISDLEWGKAELFEEFAFWKEGFE  
TIPVPNSKIKTSSSSIRENDRNASSGKSHIPSASESRRSIEILALPTLEHHVKDIQDVG  
AKFDRQPIQSASDESVTQSVHAPAESTLQIDFENNESIFQKSTQLFHSVIEDSPLICIEE  
SKNDCSFAPEPTVLIIEAAVRGNEKPRKKQNHSCDLRTIILAVHVVLAIVGIIIVFLAFL  
RTDL

>comp5165\_c0\_seq1; 682 142 1899 LEN=2256; translated  
MAIRKGGSSGETKVKPAQVAKQIKTLLKELPEIRADAARLDELRRVFTRLEAAGELTFT  
VGAQSDSSANNVSTAKWCSFLRKSHDDMVSQLCERVKLGRHASIRCLWGVIAGSPITSV  
SKVTNNTNRKGYKNSSSSSYKYVNADILKNWMRAMALQESSVMDKGMHRMIEAEFFSPY  
RDIQYFSLGAISKIASSVYDGDDEDEKTKVGGKLELLMMIPVPSDDDLGSKQFLFP  
PPSNVTPVDETEVESESEEEETDEESDMDSEDESSDTERLKEETLESRPKKRQKKESTH  
RFSFQQTRMFRREYKKAWLAVLRPLPVASLKKALHVLQPQNLNYVAQPLRFADFFMQAY  
SDHSSGIIGVLALDGLFLITKYGLEENFYTQLYKLVSSRLMYAKYRARFYSLMTKCLV  
LNTMLPAHLIAAFIKRLCRCALSAPPSALFALALVSNLLKKHPECYCLVQRKEGMEIED  
CFVADVDDPVECRALQSSLWELAVFERHYPAVATLAKSIGRAEEDQAPLYNIDEFASHT  
YASLFDQEKKKKTALTFFKKPTSLFTNDIFFGCVETGDTEKEN

>comp5166\_c0\_seq1; 406 1 683 LEN=683; translated  
XNIVQRIFCLHNRNDWQNTAARATAKMKFYSFLISASYLGFVTEASAGSGATRNPVGR  
GATRI PDDINRSLKSDKRIAKVGTNLVNGSVMPRQKFRGNNAMILDEGKEDDEGSRND  
NMILDEAKEDNGGGFGSSI INKKKENEMKNKKDNDEEDKKNNNPKI INEDEDTSENEK  
NNNKEEDKNNNNQEKNNNKEEEKNNNGNKNNEEGMSKEDEKNNNQ

>comp5167\_c0\_seq1; 706 190 2364 LEN=2852; translated  
MITYNRSAFGWRLIFRAHGSAYRSVLPMSISVLAFLYHKYNTYAGFAADDVLHPYAI  
GVLVSSSTFLIIFKLSQSYNRYWEACSSTYQFMSKWL DATSHTCCYHMQCDHYNDIKPPS  
FYDYPELNHLNMTRDRERSHTHSIHVDDEETKDDNNVGLRNRKQSQTQTSAPTENYPPM  
PSRKMFSARSLSGSIRSDASSGEYGRNAPKDLKGRSTEEKSKEYKARAVAKSINKTSSHR  
SLPRAESRRAWAKEYSKMSTFSESIRTYNLDVSRDMMDESEDEIYEEGIFDEKSLEPI  
LVGKPRMDGNWGEYYSKKKKKLSTFMDPNPNKIDSKGFASMQGGRTPPLFIQELAHLS  
SLMNAVALATLRNDKEESESPLSIYEPGSPWPEVDPNNEELLKQTGFKAFFTALKTFLGV  
GLSKEERSEHNAQPLPVIGGVSDAEIHFLQLARGASAKTQLCFNWLTEFIIREHLAGTL  
GDVGPPIISRIVQFLGDGMIYYNHSRKIMFIPFPFNHAQLSVIFVLFIIIVVPFLMHQYT

DEPAVGALLTFLTLVCLQGINEVARDLENPFRNFPNELPLVTFQAQYNEALITMYAGYHP  
DFFWNGDQVLRMTQSKSKKQGLSKPNGSKSLSGSNGLQSIDSGFSFAGENTPPTS  
SVNAPAPVTNSLGNDSDEVAFMKRELEMQAKLIEQLFAKVGSTGSSFDELLPRAGATGLHEKDGA  
PAKK

>comp5169\_c0\_seq1; 223 283 942 LEN=1069; translated  
MYQPHRCTEGVHVWLLSSMADEDGVSSSKCISISEKNRNRNRDVLVCQACIAATCISIAFV  
FSPKPAVADVTKIASSTALRALKRAQDQLPTKLLPDAQANNFVGIKARLREAPFDEFK  
NALILVRGGEDGPKASELLRAYKLIASLEAIDATASLGMKGRKVDPFQLGLQYEDVAKA  
LNSFLEVGAAYAIPLQEAPSMQESLRYGSIDTKVLKSE

>comp5172\_c1\_seq1; 467 1 1763 LEN=2447; translated  
XGLRSAEGPPRAASTTASTAATSSLTVAHSMGGIVARRVLEQQQQQKQKQKQKGY  
DSGDGSDFRVHQMITLATPHSNPLYAFDKSVADYYQKWLRFPPRHGESENENDNDNERAP  
LMVSI VGLRDEMI EPAACYLDGPNSETILATKLLSSGPRPSDANQETTTAATPTKGLGM  
DHRAIVWCHQLLEEVREILWSFIDTGGTGSRDRLHGSLERFSGGSNNDQQSSVRFARDLE  
ELNQDLVELFGSLASVCMQASMLYNLPYLLALYAVLVVLSCAVAAPSGSVVFGTPALPP  
TELLPLGGTVVLGWVFRGGDLLGSTTLLILALVADSVRLLLVHLLGKLCGRDHKPRSRNPF  
RTLGRALLSTVLAVSFLSTGAFCGVQRFSGSEGLTEFLALWAPRDLVAFVVYCCVATSICT  
LSLAGMGCACDDRGGAFAFEAHLVALVVLVVPFLAAGPLALAAWERGTRPSSWWTLLSLQ  
VPVGARALLRAASSAARAGNGKPRDRGARTTGSPGGRPRANPGTPRDFRNRKLSLARSAA  
LVLAACWMCREPLLSRGTGYLVPQMAEVLVWVDAVYVVAAGNAS

>comp5174\_c0\_seq1; 600 219 1543 LEN=1614; translated  
MASGLAASIRGSTESDTFDLAGQTPATVTTNITQAFKDPFPIDEMIRITFVTGAGKLRQ  
KYDEGCAKAVTSSLRALGFDEDRAASCVRECAGLFLQHDTGKNLKTVVVFPRINDASDP  
GGGDDNEGGGASGSDSLLLRGSGXGGDDCPVPDQHVSKPLEESLSFVEPEKGCNAAISD  
IQRLVSSLEERLMEGVILDDNEQAFYDTMSVDDLKEKHNI VKEAMQKQVETDGNITPEEH  
KQLLTQVSDRLDTINADLEAAK IENKPKKA EKLSNMKTKVQQRQAMLK ITPKNPAPLRY  
QSEIENLNVELIPLKLEDSTKGRLLSVKETKTARKDEILEEITQLENDSRGWFEEDAS  
FALRVKSKAAAKQASKASAKKSSSTS AKKSSSTNTSAWSSSSSLGRRPVAKARGKVRGAK  
KKTSGGSGGVFAAMMDDSDSD

>comp5175\_c0\_seq1; 121 1 485 LEN=730; translated  
EXEAAACPLPAPREAPSRRTALHRREGNASARGIDDLSPSRRRDLKRPRHGEAHADATLS  
SAVSKSLTLDERVVGREREQQQQQQHQQQQRQHPGSASPGGSGSPNLISPSMSTQSLGH  
ARRHGTDAAASLDKKVDMSALSGLAALSTAFLKLEDDDGSP

>comp5176\_c0\_seq1; 929 329 2893 LEN=2971; translated  
MTERRASALRPSTRGSGGLVNGNKIQNVSFSEDPMDHIPKKAQELRLSSPSNGSSPRRTS  
FLKRKSKSSKDNKDTSIATNGKENNHKAGGNSIEIKLKNPTGSSGASSPRKWSRRF  
KGFSLFGGSGDQRNGYGTLNDSSNYENDGEVTTAVEVDPVMTIFESRNTQVRVFTLAGDS  
NESVISGGGLSRNSRDHQNTKRGESSKNANS GSGSTGNVKQFMSRALFWSKSSSKLSE  
EEMKREAKELGCGPLIWESAATPTGPEVIHTKNNRNNNQKRNQKTPELTVSFTEDPKARA  
AVSKILAKASSAEHVHFRYFYAVKCYLKALTILOKQAKYPDDHPTVVKTVRLMNAHNVL  
ISYKNSANIVKMGIKNEDAGELVKALKMYTIA YRIRRDNL SRNHP SLVLLNMLGSIQIK  
RGELLEAMQIYELALSDDSTVVPEAPTESA APRHQQQQITTKDRNLLAKSVTFREMGTIY  
EMWGNVDEALKFFHKSLCEVAEWRESVRSYKSRNRIVKNTDGGCDNGNDDEKSGSISLR  
TSSTESQHYSIDIVQTVSSNIGDSEMELVFGSKGSPKNCSESNKSRNKYERFFFNEIDL  
KAKDGVKNSDENSHADMDLSLTLHQIARLYCSQKGFDRALDAYEAALRGMKTALGKHPN  
VAVLGNIGNLQKEMGDLDAAYKTYQEVGLGIESYRLGLSHPDVAITLHNIATIDAARGNY  
QHSLQLYQKVIGLQKQLFGEDNISVAVTAACMGDVYEKIGELKSSMSTSFDEAVRIKSSVL  
GRHSLEVGRLLHKLGLSFLSTDYVEAESYISRTVLIYRLNKLDEHHEWFVDANRDSADI  
DGALALGVADQCEI

>comp5177\_c0\_seq1; 221 181 882 LEN=1364; translated  
MTDVTLEEVWTEVQQRKADATGEGDGNDSSESPPLMNLKNGYTTDEASQVRESVHEDCF  
NVVPPPVDCPAWLCIVLPCINHLKSMKAHKNCIPEDA EVLNRGRWIRYDAASLVLDGDIR  
LEEGDVVPADCVIAADEGELLVDL RVVTGQSRPKQVSGINAKRRDQRTLLFGGTVVQGHA  
TALVTAIGTETTLGQLIKNGRFPVPEKESDDMEETIMLTEDSTMRMEMGTMS

>comp5178\_c0\_seq1; 546 99 1565 LEN=1736; translated  
MGKRSLEEMTTSNDDTTKMKDTSNKSSDGDGDPMDVDDQKAPPASKLTIPPRGSLDTL  
LNRPSPFANE GALPIGEFEP TENKASALLSNARVLVVGAGGLGCELLKDLAMSGRFRDV  
HVIDLDTIDVTNLNRQFLFRQKDVGSSKA EVAAAF INERCPWMNVQAHHGMIQDKDPSFY  
AGFNVILSGLDNVEARRWLNSTVVGLEVEDDGDPTDPE SIVPIIDGGTEGFSGQARVIL  
PRITSCFECSLDAFPQKNFPLCTIAETPRKPEHCIA YASILLWPKEFPDKKLDKDSPED

MKWVYERALERATRYNIEGVTYMLTMGVVKNIIIPAVASTNAIVSAACVLEAVKILTFCSQ  
TLNTYMMYMGSEGVYSHSFVYERKDDCPVCTSKVRTVTVSRRTTLNELLOKLCENNGSGS  
LNLRLKAPSMTTAGKLLYMQKPPALNASTKPNLDKALSELVAEGEEIAVTDVPLQHTHLS  
LAIAFEPE

>comp5179\_c0\_seq1; 335 1 1020 LEN=1094; translated  
VLNHNVPFRPVYVHFLSANTQLRKYTNNGSRRHYFCSTTSNHNPRESPGVSIMMVPPHNA  
HEDRSAIRQALAILAQEGVRLDTSELGYELDSFVMDDEIQSRQRQKQRSRSKSPSRTRNL  
KNKKSLEPPTQSRVYEDGVSSTSYSSSSTSSSSASSNREVGKAKRSRSKVRSRRTSP  
KRPELRETPEETGEKSVRFSNYDHTINVPHILDFTPEEIQRCWMDEEDYRSIRTRSLALI  
EMMEDEKKYPIASADYMIVNKHLVCRVGLGEKTTQCTRELERVQRKLYKSVFRVQEEELREE  
GIIDDEAIRKASRKYSKKSIIKTARFVGISDEVNVASKFG

>comp5180\_c0\_seq1; 194 434 1169 LEN=1169; translated  
MSVSVNAIDARDEMLKTIAEANNLCIHAQYHYQRAASADEDFYRIEFSALFDDKSLKLNLS  
AVEEATIGTAKLQRAFSLIHQNSYLNHRFPVLMSPAGSIHTEELERLSSAVFLGNNTCDQ  
KESLYSSMMQFVRKREQLSIHQSSLAAVDVQIRSGPAYMTYNTRGAGRRREHPVNYFVP  
DSPQQVQPTACTNIEPIPIPIKITHALIIISQKHMYSIPIRDESQVGEDKLEETNTVQSR  
SHPFA

>comp5181\_c0\_seq1; 656 153 2000 LEN=2647; translated  
MMKRCLLSRSFRRHRQGSFASKGFDLLRFLSSSQPTSDQEGGEKVFIFYSSSGLPDFIE  
EWRDRHKFRKVGYGLAAITAASVCNTVMIFEEQTVFFTAGFGALTASYWIIIGKRDMEQRSQ  
TIRRNFPVLGNMRYLLEMIRPEIRQYFVEGDDEKSVPFDRNHRAIAYERSKGGAPATIAFG  
TRRDTEAIGYEWVNHSLYPTSLKDKQVRVLIGGNNPDCIQPYSSLLNISAMSFGALS  
AILALSSGAKLGGFSHNSGEGGISEHHKKGADIVWNIGTAYFGCGKFSENGVRMFDP  
FAENSEHAKMIEIKLSQGAHPAHGMLPKEKISPSIAEARNLKYVPEQDCHSPSRHNAFN  
NSIELCEFIKELRDLNKGKPVGKIKLCLGQPTFCALVKAFLETGIHPDFITCDGGEGGTG  
AAPPEFSNSVGTPLTEALS FVHAVLVGTGLRDPTEKSKSKIALIASGKVLTMGSMYKNFA  
LGADVNAARSFLFSLGCIQALKCQANTCPTGITTDPELSWGLDPSFKQVRVANFHKAT  
VEACIELMEATGIESWKKIQPMHVTRRVALGKSKSYEEIWEHLKVPKGGLEEGIGPDSLL  
QVWKNSDVVSQAASI

>comp5183\_c0\_seq1; 747 1 1478 LEN=1520; translated  
XTFVSKLRVDSGKSTSSKLLFIDLGGGKRLGGSALATVYSQLGNEADLEDFATLKKAM  
EVTQDLIDKRSILAGHDRSDGGLVTTLLEMAFAGNCSIDVTIPSSSTGTEIDTLFNEEAGL  
VIEVAASDVESIMKAYSASVPVEEIGTVAAGDSIKIAVGSSAPCIESKMTVLRDVWEAT  
SFKLEHRQRNPKCVVQEEGLKSRQAPQWKLTYEPKPTDDSIMKSETKHKVAILRQEGSN  
GDREMISAFLSAGFDAWDVHVKDLLDGTVSLEQFRGIVFVGGFSFADVLDSGKGWAGVIK  
FNESVYKQFQDFRNRPDFTSLGVCNGCQLMALLGWIPQKGLPEERQPRLLHNESEGKES  
RFSSVAIGKSSAIMFKGMEGSSLGWVAHGEGRFFFPDESVDHAVKKNQIPLRYVNDTN  
EPTEEYFPNPNPSPGGMAALCEDGRHLAMMPHERVFTTWQWPWTPSDWKDLKAGPWLO  
MFQNAREFCDNN

>comp5183\_c0\_seq2; 1739 101 4054 LEN=4096; translated  
MTEKIIHYRKIDTSHSLPSCKEQLASLGLGEDADKIDTVERESCFNVQLSIDGDLEPT  
QKDRLEWLLAETFEKNHLKLEKSFDEESSPGKIWQVEFGPRMTFTSAFSSNATSIKAC  
GVPVERLELSRRYRFLSDDISDTAIKELKMLHDMTEEEYDKPLTTFDNGAQFPVET  
VPIMTEGRAALEKINAEGKLGDFDDFDLYTNLKFKEKLRDPDTECFDMGQSNSEHSRH  
WFFGGKMVIDGEEKEDTLFKMVKATLPKDVPNNSIIAFHDNSSIEGYECDNLRPSSTTQ  
AGSVKVGKQTLHPILTAETHNFP SGVAPFAGAETGTGGRLRDMATGRGAYPVAGISSY  
VGNLQIPGYELPWEDKSFVYPSNLAAPLDIEIKASDGASDYGNKYGEPVIHGFTRSFGQR  
LPNGERFEWVKPIMFSAGIGQMDGRFSEKGEPEKGMLVVKIGGPCYRIGIGGGAASSRVQ  
SSENADLDFDAVQRGDAEMENRMRMRACCDLGDDNPVSVHDQAGGNGNLIKELVEP  
IGASYDIRNVNIGDDTLVLEI WGAEYQENGLLLRPESRELF EKMAERENCP IAIMGEV  
TGDGKVVVHDSMDGSTPVDLPLELVLGKMPQKTFVDNRVKMDLEPLKLPEDTTVMSALDR  
VLRLLSVGSKRFLVHKVDRSVTGLCAQQQCVGPLQLPLANVGVTAHTHFGITGTATACGE  
QPIKGLIDSAAMARMTVAEAMTNI VWAKMSKIEDIKASGNWYAAKLPGEAKMWDACVA  
LRDCVLELIGIGDGGKDSLMAASCDEVTKAPGELTMTCYVTCPDVTKTVTPDLKCPAS  
GSKLLFIDLGGGKRLGGSALATVYSQLGNEADLEDFATLKKAMEVTQDLIDKRSILAG  
HDRSDGGLVTTLLEMAFAGNCSIDVTIPSSSTGTEIDTLFNEEAGLVIEVAASDVESIMKA  
YSDASVPVEEIGTVAAGDSIKIAVGSSAPCIESKMTVLRDVWEATSFKLEHRQRNPKCVV  
QEEGLKSRQAPQWKLTYEPKPTDDSIMKSETKHKVAILRQEGSNGDREMISAFLSAGFD  
AWDVHVKDLLDGTVSLEQFRGIVFVGGFSFADVLDSGKGWAGVIKFNESVYKQFQDFRNR  
PDFTSLGVCNGCQLMALLGWIPQKGLPEERQPRLLHNESEGKESRFSSVAIGKSSAIMF

KGMEGSSLGVVVAHGEGRFFFFPDESVDHAVKKNNQIPLRYVNDTNEPTEEYFPFNPNGSPG  
GMAALCEDGRHLAMMPHPERVFTTWQWPWTPSDWKDLKAGPWLQMFQNAREFCDNN  
>comp5184\_c0\_seq1; 445 117 929 LEN=1026; translated  
MKIYIPIISFLAVASAFSTTKRCPSSSRVATESNTFLFAETSPSDATADKKKPMTPKEVE  
AQLKARRELGEASTHPKIFSDLLDDMKEILLILEKRIQEGPGSIGAAEVDNFVGMASKNV  
LDEMCKQKEYERLEDAKSPPAEPSPAATAAVSTPAPVIPTSEAIASGKNESPEDDEFFNP  
DDMSEGGPGYSPDGGQGSIPKDTTNTYVIVPGMDEMSPEEYQKALQKSIIDRQSVRKSSGT  
YGNRNTWDYLNGLSGGTDPPVVLKQDEDNLEN  
>comp5185\_c0\_seq1; 498 67 1002 LEN=1390; translated  
MSNDPELSKLLDDNEYEDVEIQNKKTPRVVKGRVISTNPSPTSANGNAKKSASRCRLPC  
WCTCLVITIGIFVLFALVVLGFAYAGLRDVVQHLTIETDSPKKFPIVDMSPLELRIVKDR  
ITLFAEQVAEGATSNLDDLVVTQDEINGFISNSEYLVQGHMMITLKNLYEEYSLEPMDVF  
GFGGRYFEGNEYLALDGAATDKKENTIEMKTEIAANPSDWFDPGLFFAQLQYLVTKNEDG  
GQGVLELFLDKGTFFGQELTVDDHENLLEGLYNTHFDDDGVEYIAEVIKIGIGSVSIEEGQ  
IIVKPRRTTKN  
>comp5186\_c0\_seq1; 451 225 1424 LEN=1441; translated  
MISFLLSIAGIIHICSAFSVHTPTSRSLSSRPLVGFETIERHYHQPTELRSSALSSNGDL  
LPGISVIDDTNGVIFQQMEILQDSLYFRLFCVDILASCEYMPQELFECYSETCEVYPVDD  
EEVPENIREVDFREHDFELDGWARWDMPSNDYYDLEEFPEGYTGVDGSEVWQFIHDKIGF  
TGYDYDDNHWKADFNKAVSGIHSLSVAQVTKGIQDKIDAGEEFTDDEVWRDPKVEFDRRL  
GRGGEQPMAMENLYFAYMLFLSAAAKAKDKLLADCDNGSIDSESSAILKGFLELPILCDP  
AVEVAAKKLHDHAMDSQNTLWEARMRTRDLLRIMNCVQCNCRLHGVAMLGGLSTALQIHL  
LGRTGEGGDPNRIHRVELAALLCTIQKFSKAVEFCKESR  
>comp5186\_c0\_seq2; 223 1 970 LEN=987; translated  
XTRRYVWSNQXFIKLSLRPCIFVVCRVIIHIAAPGDWSSHFFAIFSQVPENIREVDFREHD  
FELDGWARWDMPSNDYYDLEEFPEGYTGVDGSEVWQFIHDKIGFTGYDYDDNHWKADFNK  
AVSGIHSLSVAQVTKGIQDKIDAGEEFTDDEVWRDPKVEFDRRLGRGGEQPMAMENLYFA  
YMLFLSAAAKAKDKLLADCDNGSIDSESSAILKGFLELPILCDPAVEVAAKKLHDHAMDS  
QNTLWEARMRTRDLLRIMNCVQCNCRLHGVAMLGGLSTALQIHLGRTGEGGDPNRIHRV  
ELAALLCTIQKFSKAVEFCKESR  
>comp5187\_c0\_seq1; 572 1 1276 LEN=1276; translated  
XGSSRLECSADLKPSPKIQEKLITPLIKIPILYIDTGILVERKVLHGMDDDGRGDIVHDW  
SAFRDDNGEIFYHNSKTDETSWDPPPDPNAPFNPVETKEGEDKEDKNKEEEEKTTATARDW  
VEYMDDEKGEPPYFNTVTQETVLERPPGFSSGEEKNOEKPELKEAEEAVPAEENKASVP  
ATGDWAEFQDDEGRTYYYNEKTEETSWDPRPAGFKPKGKEDVDGNQNLISPGYSQSPALS  
KSEDEKKTTKGDWVATQDEEGRTYYNEKTEETSWDPRPENFKETDSKKCSDKTNANGTS  
PMRNVPGNEEDGTDEENKTAEDWSEVQDDEGRTYYYNDKTEETSWDPRPAEFRVNAKNGND  
QARGEHEKEGEVAEKKEETDISAKSKAHASDWVATKDGEGRTYYYNEKTEETLWERPAGF  
NPENEX  
>comp5188\_c0\_seq1; 538 268 1293 LEN=1329; translated  
MSEQFDVNSPTLNRVFMASHTDHLVILMNAIATSCKLITSVQRAGIANLYGLAGEQNS  
TGDDQKLDVLANMMINALVNSGVCVSVLSEENEEP IIVPPGKAGKYCVAFDPLDGSN  
IDCNVSVGTIFSVYERRPGSNGTVEDILRSGADCICAGYVAYSSAVEMVFTFKGGDVHGF  
CLDSTIGEFVHTRVKMLFPETGGKKIYSCNEGNSRWDQAIKDAVEIFKDESNPYAARYV  
GSMVADIHRTILYGGIYLYPADVKSPKGLRLLLYEGIPMAMIEQAGGIASGMFEGKIQ  
KVLDLVPDEIHAKCPIIMGGKRDVQVVYDQFAKHGADVPTL  
>comp5189\_c0\_seq1; 595 98 1135 LEN=1308; translated  
MSSWFQSSGLTSAFESLNETVQAVTESVQEAIPTEHKEFLSKLTLNTDEMISERKNYKDE  
EFRKAAAKDRLNRILPWETLDAEREILVEECRDAILELSETEETFFGPFEMPLLNVDLVS  
QETLEIGDETNGDEEEEAQESAAGEEDSGFVDGTSFVGEENNRTGVSEESQEMLAKLEPLP  
PLLEDFDLDEHVGLIQRVLKEDPKLVMMQAKLSGGGARERIFWRNYFFHCAFTRYKCGLS  
LDEIWSHQEESSTTKNPSDTTSTEYGDADVSTPVPDDVEEEAIFDNTNVQDETKTSES  
SSDGLDGTGNTCSFQLIDEDLDEAGGDPPELDELEAEIARELED  
>comp5189\_c0\_seq2; 588 98 1297 LEN=1470; translated  
MSSWFQSSGLTSAFESLNETVQAVTESVQEAIPTEHKEFLSKLTLNTDEMISERKNYKDE  
EFRKAAAKDRLNRILPWETLDAEREILVEECRDAILELSETEETFFGPFEMPLLNVDLVS  
QETLEIGDETNGDEEEEAQESAAGEEDSGFVDGTSFVGEENNRTGVSEESQEMLAKLEPLP  
PLLEDFDLDEHVGLIQRVLKEDPKLVMMQAKLSGKYQYGVFFITTCFVCIDLLYNFVSR  
CFFSRTKIHLMLVNYFSSIDGYLFFDSSGGGARERIFWRNYFFHCAFTRYKCGLSLDEIWS  
HQEESSTTKNPSDTTSTEYGDADVSTPVPDDVEEEAIFDNTNVQDETKTSES

DGTGNTTECSFQLIDEDLDEAGDPELEDELEAEIARELED

>comp5191\_c0\_seq1; 598 314 2549 LEN=3224; translated  
MQPTEESHQENILEISAVEVEYSNASNQKGTITPSNSSDEDEDGNTKPKNDYKDYERDPF  
FAFVPQLARWGCGLLANEGRIVQKGVLSAPGFTKDFLADTYRYYRENPRILYKEIVSGFT  
VAIMQVPESIAFSFVAGVPPPLSGLQATWWMAFITGILGGKPGMISGAAGALAVVVTKLTA  
SDGVLSYLTVEERLNVLYMTMFVCGLFQIGFAVFRLAKLVRLIPETGMIGFMNGLAIIIF  
MAQLPAFQYCTSEPLFIECEVDERQWLTFFGGQPVELSLVLVHVAMCMAIMHFFPKIPKIG  
KLIPASLVGLLVGTLIEWTLFRKVIQGGTRTEALGILYGSRKSAILSQRKKDVANSLEFFP  
FIQVAETAPIAGAPPKFDWPTIPTDGQTIQTMLLFAIQLAAIGAVESVLTQACNEITDT  
VPKISDSNQECSFAQGLANLVCGLFRAMGGDAMIGQSTINIMNGARHRVSSTMSGVFMLLF  
TLVLSPFINLLPIATLTGVLFIVVISTFQWKTFFVILRYGRSLSVAILLVTIVAVFTNLA  
IAIAAGIILSALVHAWDSGAHVADVELKDMIINGKRVNGVKYVHIRGAIFFSSTRKFVN  
MFHIGEDPDTVILDLDKDALVIDHSAVAIQGLTHRYGLAGKRVIILNIGGKCVGRMRRTH  
GDHDKFHEQISHKVQDIECQMKADNGSESSDFESETASIKNKVRDLQDLKMFQTNLDGID  
KEIEKLGREENRYSVQSLEDKKS

>comp5191\_c0\_seq2; 614 314 2452 LEN=3127; translated  
MQPTEESHQENILEISAVEVEYSNASNQKGTITPSNSSDEDEDGNTKPKNDYKDYERDPF  
FAFVPQLARWGCGLLANEGRIVQKGVLSAPGFTKDFLADTYRYYRENPRILYKEIVSGFT  
VAIMQVPESIAFSFVAGVPPPLSGLQATWWMAFITGILGGKPGMISGAAGALAVVVTKLTA  
SDGVLSYLTVEERLNVLYMTMFVCGLFQIGFAVFRLAKLVRLIPETGMIGFMNGLAIIIF  
MAQLPAFQYCTSEPLFIECEVDERQWLTFFGGQPVELSLVLVHVAMCMAIMHFFPKIPKIG  
KLIPASLVGLLVGTLIEWTLFRKVIQGGTRTVAETAPIAGAPPKFDWPTIPTDGQTIQTM  
LLFAIQLAAIGAVESVLTQACNEITDTVPKISDSNQECSFAQGLANLVCGLFRAMGGDAM  
IGQSTINIMNGARHRVSSTMSGVFMLLFTLVLSPFINLLPIATLTGVLFIVVISTFQWKT  
FVILRYGRSLSVAILLVTIVAVFTNLAIAIAAGIILSALVHAWDSGAHVADVELKDMI  
INGKRVNGVKYVHIRGAIFFSSTRKFVNMFHIGEDPDTVILDLDKDALVIDHSAVAIQGL  
THRYGLAGKRVIILNIGGKCVGRMRRTHGDHDKFHEQISHKVQDIECQMKADNGSESSDF  
ESETASIKNKVRDLQDLKMFQTNLDGIDKEIEKLGREENRYSVQSLEDKKS

>comp5191\_c0\_seq3; 544 314 2658 LEN=3333; translated  
MQPTEESHQENILEISAVEVEYSNASNQKGTITPSNSSDEDEDGNTKPKNDYKDYERDPF  
FAFVPQLARWGCGLLANEGRIVQKGVLSAPGFTKDFLADTYRYYRENPRILYKEIVSGFT  
VAIMQVPESIAFSFVAGVPPPLSGLQATWWMAFITGILGGKPGMISGAAGALAVVVTKLTA  
SDGVLSYLTVEERLNVLYMTMFVCGLFQIGFAVFRLAKLVRLIPETGMIGFMNGLAIIIF  
MAQLPAFQYCTSEPLFIECEVDERQWLTFFGGQPVELSLVLVHVAMCMAIMHFFPKIPKIG  
KLIPASLVGLLVGTLIEWTLFRKVIQGGTRTEALGILYGSRKSAILSQRKKDVANSLEFFP  
FIQVAETAPIAGAPPKFDWPTIPTDGQTIQTMLLFAIQLAAIGAVESVLTQACNEITDT  
VPKISDSNQECSFAQGLANLVCGLFRGKLGASRAVQRDSLADGFARMLRHNTKSNXAVVTS  
YSAMGGDAMIGQSTINIMNGARHRVSSTMSGVFMLLFTLVLSPFINLLPIATLTGVLFIV  
VISTFQWKTFFVILRYGRSLSVAILLVTIVAVFTNLAIAIAAGIILSALVHAWDSGAHV  
ADVELKDMIINGKRVNGVKYVHIRGAIFFSSTRKFVNMFHIGEDPDTVILDLDKDALVIDH  
SAVAIQGLTHRYGLAGKRVIILNIGGKCVGRMRRTHGDHDKFHEQISHKVQDIECQMA  
DNGSESSDFESETASIKNKVRDLQDLKMFQTNLDGIDKEIEKLGREENRYSVQSLEDKKS  
S

>comp5191\_c0\_seq4; 560 314 2561 LEN=3236; translated  
MQPTEESHQENILEISAVEVEYSNASNQKGTITPSNSSDEDEDGNTKPKNDYKDYERDPF  
FAFVPQLARWGCGLLANEGRIVQKGVLSAPGFTKDFLADTYRYYRENPRILYKEIVSGFT  
VAIMQVPESIAFSFVAGVPPPLSGLQATWWMAFITGILGGKPGMISGAAGALAVVVTKLTA  
SDGVLSYLTVEERLNVLYMTMFVCGLFQIGFAVFRLAKLVRLIPETGMIGFMNGLAIIIF  
MAQLPAFQYCTSEPLFIECEVDERQWLTFFGGQPVELSLVLVHVAMCMAIMHFFPKIPKIG  
KLIPASLVGLLVGTLIEWTLFRKVIQGGTRTVAETAPIAGAPPKFDWPTIPTDGQTIQTM  
LLFAIQLAAIGAVESVLTQACNEITDTVPKISDSNQECSFAQGLANLVCGLFRGKLGASR  
AVQRDSLADGFARMLRHNTKSNXAVVTSYSAMGGDAMIGQSTINIMNGARHRVSSTMSGV  
FMLLFTLVLSPFINLLPIATLTGVLFIVVISTFQWKTFFVILRYGRSLSVAILLVTIVAV  
FTNLAIAIAAGIILSALVHAWDSGAHVADVELKDMIINGKRVNGVKYVHIRGAIFFSST  
RKFVNMFHIGEDPDTVILDLDKDALVIDHSAVAIQGLTHRYGLAGKRVIILNIGGKCVGR  
MRRTHGDHDKFHEQISHKVQDIECQMKADNGSESSDFESETASIKNKVRDLQDLKMFQTN  
LDGIDKEIEKLGREENRYSVQSLEDKKS

>comp5192\_c0\_seq1; 214 1201 1803 LEN=2148; translated  
MQSNNQSRNLRLHQSQINAYRKAANQAIKDWALSVPLQPMEEHTDKTVFVERCIAAISTA  
APGTNALPNWHLSTAKATATTEIRRRATAIYEKYHPVEEADEGKNNGSGTANASEAIAVE

NGAETEDGEATSDGISDDDDGQAQTSKLAAGKSNQPNRNKKGSGQKI IATRKKGTNAKGGP  
RGIRGGRGIRQGGRRGRNGK  
>comp5193\_c0\_seq1; 294 88 1002 LEN=1172; translated  
MTIAKSLEPYVCGGTAATFGSCCIHPIDLAKVRMQIFGQINPGKVPVGFPTIIKNMIASD  
GVTSLYRGLDAAVGRQMVYGTARIGLHTKFSGMLVEQNNQPI SFVQKAASGMASGAIIV  
SIGSPFDIALVRLQADGMAKPEDRRNYKNVFDALIRTAKEEGFGALYKGVLPNILRGMMS  
NVGMMSCNDQFQEMYAGLLGDPMVGGPQMPTRILASLSAGFTAALFSMPFDLIKSRMAQ  
RPDPITGEMPYKGVADCVMKIIRTEGPLGLYNGFSAYYGRCAPHAMIVLLSKDSITKAYR  
NAFD  
>comp5194\_c0\_seq1; 434 92 808 LEN=1462; translated  
MSNKRKAWNEAMLSAAGSAALPKALQPRTQKRRSDRRKKQDRRDKARKTSVLHSSESKEF  
RAATWMDALEDEVPLTGADGEGADGGDGDSDSYDELDELEGGNKKKARGGRAKSKSKSSKKQ  
QENSLPKRFKARSMANILLEEVNRDDGVAYAWLADEARDLPQTNSSSGRRAKIPRLPARK  
FCSVTGMEGIYTEPKSGLPFANLKALEQVRERPPPWMTLAGSIAVHEAVKSIRDEGEP  
>comp5195\_c0\_seq1; 331 70 717 LEN=961; translated  
MRMPVPSYSTSPHHSYNAPQRKLNRSSTFKDINQSICNIDRTASENSINPRLQFGPRVTY  
NPSKSSSTIDRSVSENNISPRGRFGPRVTYKPRKPVEETRPECLRMFHETMPETKYLDSEE  
ECRLAASVYGFGEALESEESSPEDEKKEKKKSSSKKSKKNDRGNKEGIKKEKSDKSKKKS  
SSKNSKKDDRKS SAKSSSKKSKKDRKDSEKQ  
>comp5196\_c0\_seq1; 218 74 728 LEN=838; translated  
MTAIAPPPPTTTTNTASAKSNPSPHKRIHHETIIDAPIELAWAALVDVEDWSWNKWTRLE  
LPEGEGPPSPGKTGTLRACYEGDRSWESFGFEFAAVDDGSGSGKHKGNRRTLAWKGSVG  
AFGPFCLFRGYHSVSL EEAADGSGRTL LVHKEDFGGLLPALRMGLPYKTLDRNYRLMNES  
LRDFVEARHRETAARPSKRAAAAATRS GAEGCEYYHYW  
>comp5197\_c0\_seq1; 358 933 1550 LEN=1993; translated  
MTYFDRATGEKVNASKFLIFQYMFARRSKEIGVTLVMFLMGIALTCFLGYHIYITSMGQT  
TNENSKWGDVKKWYKAKQKMHRAAVEEAKVNPFFETSTNSERSTDIGNAHGDSEKQESQES  
FDPGP IPKNLYNRGFVENWKEVFFPLSLRKDALERGGYTKAAILQKQKQQQERISKEAEC  
PTGSLCLADGATNSSSPRSDKPKDV  
>comp5198\_c0\_seq2; 215 1 1065 LEN=1205; translated  
TRVIVKRVVRDDFNCLQFMKARRWDGASNI PYNDRNTNSAPFLLSAKRFPTKMGGIVSTL  
AFPSPEKEWSKADLLQRKRLDQLVFLKTRSGYRIPAVHIRRDEDETKFTIIYSHGNAEDVG  
LSLSYLDNLSRCCDCNVLAYEYCGYSISEGEASEKNCYECIDAAYRYLVEGKREPFEGNK  
RVSAQTSIPVDPSRIVLFRSLGTGPTVDLAARLLSRTGESRCIAGVVLQSPLESAGRCV  
LGEFASCALYPLDLFRSYEKIEKLAPVPVFMHGVDDKVVP CASGRALYTSLTNERKRRQ  
ALKRKNTTKNDIEGKPSVEYSPKWIAGVGHNDMPEFECMNDVAKFLNFLEQRRR  
>comp5200\_c0\_seq1; 301 1 778 LEN=928; translated  
XPLPSSLPVRNTHCNEIRIRARTVLDMSPTPSNSSAWVALTAFAAGAATALVASKILSGN  
KTDKRNAGATIEGEDLSLFYGDVEELTTITPSRKFLPEELYGNLVRDCIVFCVDIVLVRT  
SEGKKECLLVKRSSEPVKGAWWWPGGRMLKGETFFDAAERKARQETGLSDVTCVQVLGI  
WNTFFPTS NWDTDADKGTQTVNAIVLVELNSGGDVELDDTSEECRWIPLDPEVAEANGED  
KYVLQGLLR LKAWNPSYAK  
>comp5201\_c0\_seq1; 732 63 1841 LEN=2102; translated  
MGLGTTKRWRIPRRS KSKSKAKKESDDDDAFPTSSSESDDEPSVLEEKALPASMSDVEDS  
DSDDDL YLDNDIDKSLDKIADLPKPPPTIPASDFGDPGNVKG TNSNTKNDENHDIHIIV  
HSKQQSDHNLYNIVRSNQQRDIIDDDDFSDSDSDEEFSNYEEDMERHRQETRSSPFMSD  
VLHKIEEESHDDIDRRNSED SKGQSNEEQSKSPNNDNTDEAGPPQNPQADKTAKKQKHK  
TAKKRVYKDRAGNPLILPSHRELSKELCKIVATDHYSGAEFLRALERLAEWAHTQDTNLL  
KHFLTYGGVVKVVDLREQIEDPRCEGEFLMECIHKACDVICNVCFVGKFGINEDIAVNV  
ATVVVKYEGIE TLLMASNEYNEANKDHPLALKA AEGVWNAIMNVYCNAETAMTKKLSMLV  
LDAGLQMLARIGSVDHPVAAETIANVFNTFYRITYHYGYVTNEEFQKLDILTHCLDVFKRD  
VTSSDGDEELLEEAISFFYGCHEKTLFGKSSDYERVLPLCVMGLREFAYDNANIREWATK  
LLDGACSNIQKKE TIMMAEGAIEALAPLLTAKDVDTAEKDEVKLRKIIAA  
>comp5202\_c0\_seq1; 306 403 921 LEN=1348; translated  
MSQSRAKKNPPPAQPVPVLPVNSDVLQEDLQGEAPNSTRVQEKVNVAECSAGSSGEDCS  
CASNSDANSIISLDEYMSTSEEAGAVSEKNIRIAIAVHFYV LGAPPPSEWKERTITTI  
AKAFNQNRKAFRNTIRSVIENVCRCRSDGKKTGDRARIASGRKPILKSDS  
>comp5203\_c1\_seq1; 365 1 1355 LEN=1775; translated  
XGDAQTATSVLRLVARSISTSSRCTGF AVAFEKLLSDPGDGT TTVSAEFVLTIDHHES  
MGFAEVKKKCNEINSSLAQAMDDGDMQLAMAAAQKQEGAWPEDFRNRIVEEFLFEDDDGD

GPLDETGPPPPERGGGAKPNLESTIDSLLSDLNIEVQGFQNEDEDRRDVPPFGMPGSPVYSSD  
DIFLGGGNDGVFWNYAGDNADGAPYKSSLGLRMVDAVVEKAKQRHPRVIAIGDVHGCIDE  
LQDLLRECDYRPGDLVVFLGDLVSKGPDMSMAVVQMAREIGAIGVRGNHDFEVVRWHQAIM  
SGVDPVVGSEHFHIANCLTKADMKWMYSLPWYI SSPDLGALFVHAGFVSGIRLAKQNPR  
LMMNMRSILPDGTVTSKFFNNWPWARLWDGPQTVLFGHDADRGLQQYEHAIGLDTGCVYG  
GRLTACILPEKRLVSVGARREYFKYRRKHYD  
>comp5204\_c0\_seq1; 344 97 1239 LEN=1239; translated  
MRALNVFRLSLTIGILATAESTNHISEGLDKVSDTAGDSFESKDRDLQYYNNAFTFFT  
TGAPTERPTHKPSPYPTPRPTPLPTHKPSMPSPFPSPRPTPHPTHKPTMMPTKFPPTPPP  
VPGPTRLPTPNPTPEPTPRPTLHPTPRPTKMPTMEPTSPPTPEPTPRPTAFPTARPTRRP  
TPFPPTVDPTRPTNNPTRRPTAPPTPRPTNFPSPREPSDEPTNSEEPSENPTNSEEPSEEP  
SYGSSFSSSFSSSLGNSGCGETIAEIVCAPRNNNILGRLCTLLRDTGLYNTLDDCNGRYT  
VFAPNNQGVQRFLDFADDFDNLVNNIIGSDDIGFIIIVDPNNPIQRRKLESQKSSKASSST  
SSSAKLSSRRLQNMNMNMNM  
>comp5205\_c0\_seq1; 146 67 657 LEN=1244; translated  
MESAPTNLATTSSGGSLPLFETDSVAHLETNLDDATGESLAFIAIEVLLDHGAIDAWIAPI  
VMKKGRPAHTLHCLCKDTINGGEDNPTITKLELMFLHTPTLGVRIQRGIQRAKLRKRSV  
SVATPFPNTVRKGRVDVKVSSFKDGRVVRTKAEFDHCREIAIEEGVGIQTVAEAAIKAYH  
ENHIERLESSVSGKGL  
>comp5208\_c0\_seq1; 593 145 1719 LEN=1976; translated  
MKTSQKTIATSALVILLSLSTGMLSMPIAVGATFAVEKINKQRGDASHTRNTLRQKQSNK  
AKLESIVRSQNLPLPLHDEDLPIENAQQKWSLNSDVEFLPADNIDRKIVHRFLEQQNY  
DEEEEEEADGGMTGMESIYNVEPFAYGVDEYDEYQQAWRLMGFIVDCYPMVDDDYQNGGS  
GSGDQGTEDGCSRYVLWAAAYVDLDYEGGGIGEYQYYNVTQNSWDTASCDASGSSRCQKMD  
CHLENTDFSLGFFKHKSYYDDWMEQLFKHEGICVWNDEEYAFMKNARKAWPQGCIDSYTM  
TDDGTEIYYDIKPIQGGDIRVGLYTDTCIQIKEYVSSGSDNPITVENILGNFFEGGGSGSG  
DNYNYDFSSTLEESMARWDSAFGKFRICQPCVAYDLENTDGTGFYDDDSGNSGDMFDCY  
DDADYTNVNQCCKMFAKTMMNTATFRDMSLGRYQGTLTATQMNGFSGSKNWRQEAWENAL  
TYLFLSFSLIVFIYGSVYFYKAKVATNYQPTFGWINFKEPLVMT  
>comp5209\_c0\_seq1; 664 69 1319 LEN=1520; translated  
MTDAPVYMATVSAPTNIACIKYWGKADAKFNTPTNDSVSVTLTQSDLRVTTAAASPKFE  
KDRLWLNGEEEGASTSKRFRACVDGVKLLAADPEKWKDLKVHVSSYNTFPTAAGLASSA  
AGYAAALVAALAEMLDAKEAYPGQLTTLARQSGSACRSLYGGFVAWRAGTPEGRSDDKEP  
TPWSDSMAVQIADETHWPELRAVIMVSDAKKDTSSSTAGMSTSVATSTLLPHRIAKVVPE  
RMVAIEKAFLARDFAAFAGELTMRDSNQFHVCADTYPPIFYMNDVSRQIVRIVHAYNQWA  
GETRVAYTYDAGPNAVLYTLEKHSVEVGALMAHYFPPGEASVESFYNDASFASDLGGFSL  
DPSLLAATDKCGRTPASGDVKMVYHTKAGPGPQVLDNETDGNLDPVTGLNRYTKPN  
>comp5210\_c0\_seq1; 218 1 930 LEN=930; translated  
XSVQNIATRNYDFVFDKSSDLVMLYSNKKHDI SELVLNSIVRDRKVKQKKEKRAKNGGL  
TEKQKKAQEAKAARKKKEADRLARQKKIEEARKKRLADIEAKRLLREKKEAARKKKEG  
NKSKEDDKTTEQDNNKLNREKIEEFTIVAFALGMTGVANAQKVGHVNLDRVIANMPET  
RSLLAIEIKISKTYKDDLEASAKKLDGKIKKYTAEQATQTQQANEQRAQEVQGERARLQ  
AEQAALQDIQEKQKGLIPIFAKAEKAINDIASSKGLVYIMDASAGKGLLVAKGVDIYED  
LKAKLGLLPD  
>comp5211\_c0\_seq1; 266 35 1063 LEN=1558; translated  
MNHILLKKSFTLIAFTVHLTSSLQPARKIANITRNHLSINSSLETATPSSPSKMSTEFIG  
KDGENGSHSKKDVITFSSSFLPDRGDDRQQQPEATRITALIVLNYKIPNKSVLLEHLWKT  
SGTRIAADGGANRLYQSKDLIPDRIRGDLDSLDPDVRAYYEGRDVSVEQDFCQDTNDLD  
KALQALVDADGNDSSSPSSINRVVIYGAFGGRFDQEMASFAALYKWAPLFDGQIYLYSDE  
TFAFLVPAKKECQILLPFYDHSVLDGGEQPEMGEPTCGLIPLGCPCEIITSGLKWDLD  
GSMPLFEGGLVSTSNHVMKPIVTVCASHPVFTAELASKRTL  
>comp5212\_c0\_seq1; 676 1 1665 LEN=1690; translated  
GAGVEFLCGRNEVTSLLDLQDGRNGFWLGSSESGRYVSAKAVLVANGAWMRNLLPVPLEP  
HKQQLSLRMPKDRPPIILKRVLFGGDSYIVPKADGRIVIGATVEAGSFDSAVTPAGIMHV  
LSYALELVPGLADLPIEETWAGLRPTTPDKGPILGETPWENLYLAGGYWRNGVLLAPKTG  
HLLATLIASQNKGEENTLLSRDDEAMLEAFAWDRFTSPEGGKRMAANARYAASMYPVHKR  
KSGTGVAADVGTGELGYSYSTARSAEERQKDRKSLFGSDGFDGIDSETEDLFEKAAMMGRE  
DAEVFEGLDGESSSSSESTSDHTGGSPSSSGDGDGDKSLKFYYSEQETALGELRVLDSD  
ESSPAAPSPEEIEETVPYDGSADAITVGSADNDAPEGDEADGDDASRLELLYESIRENKA  
KQKVDLPDQDIKDRPDPGFRISHVCKKTGKVRMPYVQPGEFFESLEQQEQKEEAEVE



TPPSNGIPTDEVEGSGSAPSSSGSGENYDETTYDGYQEIFKANASSSRKEELEKMKLARIS  
NRSSAPPREVRKKE

>comp5213\_c0\_seq1; 377 1 1178 LEN=1223; translated  
XPYEKESQYERIIQIPMPCLVIVGHPSAGKTTIAYLLKERALLHDAIDDVVLLNEETEC  
GCIQTDDNTNERLETSKNERDNKVT'TTKQELYENSLAEKQTRGALKASFDRAVKKSGGTN  
SSNRRLVILDLSLNYIKGFRYELHCISKAAGEKHGILWVLNRLSVVEEWNKDYSPPLLQEL  
ISRFEPDNRNRWDKPLFTIDVEPTSVSGCSTGTESNLQTRKTHSSKNEVLEHSVYNMHS  
LGEAFGTSRTKEQTDNNTETQRSKSAFSAASNASKAPKSAFRRRKKASPPSASEKNEK  
KIASVYNQNNKIIIFDTSMMDDSSAQDGI IASEKPSDVCTSKSALS PGVPQQSIPNEGQTS  
GKSLEEKLEILDIFLLQTKNLKEGMSTRQYD

>comp5214\_c0\_seq1; 166 76 309 LEN=622; translated  
MALRRPPTRVELKADDIDEYTKIIREKEMSMEDPMAMQHGEAGRSSGADGGRMKRSNMT  
GAKKSSAAQRIGIGRQR

>comp5216\_c0\_seq1; 373 1 1427 LEN=1679; translated  
XQSSSTMINQQLHHRGREGVSDAAKNGMLPRTTASAAEPVNGKTRRKNFNFAVFGSSGLVS  
KQSFLLILFFGTMMGYVILPMIVLRTNSIAQSGSVQLKKVLERESKSKYRNLNDAAMARLV  
ENKNLMTQSLPTDRTPAIMETASLSDRRKKILVTGGAGFVGSHLVDKLMMEGHEVTVV  
DNFFTQKKNVAHWMHPNFSLVVHDVTEPLMLEVDQIYHLACPASPPHYQFNP IKTIKT  
STEGTLNMLGLAKRVKARILLTSTSEIYGDPKVHPQAENYWGNVNP IGPSCYDEGKRVA  
ETMYSYRDQGDVEVRVARIFNTFGPRMHPNDGRVVSNF I IQALQEKPLTVYGEQEQTRS  
FQYVDDLVLNGLHALMNGDFDGPVNLGNPDEFTMKDFAQYVKKLTKESEIRFLDKTQDDP  
SKRKPDISRAKEKLDWEPKVTVEDGLTQTIKYFAQVLEEAGEI IPTGPQASKPQN

>comp5217\_c0\_seq1; 575 151 1374 LEN=1420; translated  
MNLSSAVAGLSATLALGAHSFTPTSSIRPAAASWRNTNTALGALDEGMMGRLENIKRSYN  
ALTERLGDVLDGSKLLQKVMSDRASSEEVVLAYDEYTGLEEELEGAKELFQDAGDDPE  
MKEMARAEMKEIEPKLEPIEDKIKILLLPKDPNDRNVMLEIRAGTGGSEASIFVGDLLD  
VYRKYISSQGSANI IDESTGDDGGYKNIVMEVKGDVYSKLWEAGVHRVQRPATESA  
GRVHTSTATVAIMPECDEVDINIDKKDIEISTMRSGGAGGQNVNKVETAVDLLHKPTGIR  
IKCTQERSQLKNKELAMKMLMSKLYDLENEKRDMEERARRGSQVGTGGRSEKIRTYNWKD  
SRCSDHRIQQNYPLNQFLGGDIDPIIGAMIMKDQEEKLKELAEQNAV

>comp5219\_c0\_seq1; 369 325 1599 LEN=2313; translated  
MDDMSGSAAHCEDGKPLTRTTSWQKDLNSTTAEVTFHVVGDAYVDFFSFLDGEWPESGG  
DSRLGEPVKCYAGGSSVNTATHLALIRNFTDEPKPPVVLHTVLPDDQYQIILMDHAKS  
HEIPIDNRRREGDASTTGHCIAIVSGGERSFMTHQGVVGNFSADDLDVEEIGSTPHTLHL  
HIAGYYNIPGFWNGKQKLEAVRNMKRMPDKNTTISLVTQHDATKEWDGGLSDLFPL  
LDFVLMNDLEARSIRCAKGGKRIGYEHEHLEWADYFGLDRSSKTIITRGEKGSVALQH  
KRILSKQKPIVMNSIDPTGAGDSFTAGFLFGLWSWKLGRRETTETKPGEREGMDGMNGG  
DGAWPTEAIEEGMRWGVSLASAAVMIRGASVPPDGSEIQKILEQAKEPEYPVFDNGYSQL  
SSCY

>comp5220\_c0\_seq1; 548 1 2050 LEN=2407; translated  
XFFAKEEHQLKNLFPMRSNNRKRYSRFNEAVISAAQKDSNTPQIIFGENGCPEFSSTGC  
ALLSLSQLVRGSDPSALCDQILSSSSIRDVSDLIILAFVTRNIRGGKGEKDL SYAMFLRI  
WYHYPETAKKLLPLFANHYGYWKDFLLLTEKSQTKKQSQELVEPILEESINLMRAQFQAD  
LDALAKYEAQKQDGDTEGMDRGMHRSEIDADHADVVGKIISTGPKISLLAKWLPRENT  
YFDKKNLNFVQRFLNEGPIERRNGSKIWKSHSKKSFRKEVKRLTSFSLPEVYLSAQRADE  
IKFHMLSSKATLKL SRALLNEKVDGSVRRPNDAKRQRCALFVDHLTQKGLKGSTLMPDE  
IVAKIMKGKVPSPNQEKVLDQWKDLWNTAIEEVQAKSKLEGVDFDPSKMVPLSDVSGSMS  
GKPMVAIAMGIGISEITHPAFRDMVLTTFESTPCWHKLNPEDSIVKKVRSMLCAGWGGST  
NFERAYDQIMKVCVEHRLAKKDVP SLIVFSDMQFDLAQGSFRRYGACYDRSRCVMTHETI  
RSKFATTAQILGWKSDPTPIVYWNLRDTCGHPVEKDTGTVLLSGFSPSMLKMVMTG  
LEADKEVEVDADGAVRTKKVRVPAEILRKILDDSIYDPVREILVASKEGLLKHYDYVKP  
QWACMAAGSTCHADCLDEDFTLL

>comp5221\_c0\_seq1; 623 181 1603 LEN=1603; translated  
MSGQSATIAVGDRLLDLSFLTHDPEGLSPATDVENC SYHDSFYDSVRMVMESDMNG  
ALRDSKNDTSLSEYLDGDDSTPPPCDAGTDTNTYTNVTTINTNATTDGEVSDGNVVL  
SPPPSAPTMLHDQRKLEEGLIPLPESSTSSASSSSSSSSSAPSGGKVDSPASSIAVTPATV  
LPPRNTRNDEFVSSGSSVIPDDSSRREESGEMMAVERGEHDEATTRPLFEDQRDENKLI  
RFAPHIYSVLGEPNGRMDLPLDAENDERPLFGRTSTERQLDIFDQDNSPSYASYGGN  
GDYGGDDASVSCISGDDGDESKIKNKILLSGAFVGAAVVMEFVFGTFRKKEGNEVL  
DEIGALGKDSAVNNNGAIFSDNGALASNNVTVGSNGT SIAPAEFAKASFSSGSSNNISL

AMGQPVTTTTTGSAATNSASTAAATSAKSSATTSAATGSATSSATSSAASSAX  
>comp5222\_c0\_seq1; 1220 186 3176 LEN=3474; translated  
MTVVQGLPHHEDALSGDPYNVKAWNYYLEEMDDLIRGKISDLSSSGGMKVKQTQAQNTTN  
YSLPELIQLRDMVGRRSVQLLPRSYKLWKLHWEFVVSRRQQYLGSSAVLGCFERAMVTLH  
KFPRAWIAYLEFAHTQQKEEINGTDNENSI I IHPTQLRHLVNRALAEIIPVTQHDKIWPVL  
LKYYRSNSKTAAYIPKETKLSVLRRYVQYNPAATKEVADFLADDLGQWGEAALMYVDL  
LNHDDVRDGGGSGFSGSKDMVITSATERKDLWMSLAKICTQHPVEDEIGLDFAIVRAIL  
TNSNNSNKTFQGGALRYLPREMEGVLWSQLADAWIRRGFEQLARSVYEEAIESVSRVRDF  
TILMDAYLQFEEGLLEATMESQAEMDDDEALEEDKQDGVKDENDWDILLPHQNRDDNK  
NSKSASMSDLELALARAEDLTARRPILLNGVLLRQNPDDVGEWLKRARMYKDVGQTHQAA  
AALEDGLKTVKARRAIGGNSNQMVILAKIYEEDCKDVAKARNLFDRI CNQWVYEFKNVD  
DLAECFVNWVELELRQESWDDALDIIRASVIIPPFAPKWTRGLPKSLRLWDLMLDLEESL  
GTTQTTKDAYSRAIDQKIATPLHVLNFATFLTEQKYFEESFSAYERGIELFQFPVKIIVW  
KAYIDAFLLRYEGTKVERTRDLFQRCLESCPPEESTDFFLMNGQFEEKHGLTKRALGVYK  
KMCETVPTEDKYTAYQLFIAKTGKYLQGTATRDIYQNAVQELEDEVASKLCEVEFANMETS  
LQEI DRARAVLTYGAQTADPRRNEEYWRANNEFEI SHGNEETFREMLRIKRSVEASFSTV  
NYNAAEMSGTDSKATETLSNEDAMKMAEREGVQLNPNTSTISGFVASSSSGKRSQAAS  
LDDMEERVAKLRKATAMAGQTNEGGDEDEIDIDELVDELEGDDEIDIEDEDEDEDDND  
KEAEKEAGNRASNAIQDISTKSVPAAVFGGLVKNS  
>comp5223\_c0\_seq1; 379 248 1504 LEN=1621; translated  
MIRMRTNGEPSQAVRGPVSKALLGFVVAAMLGASSFQLSSVGTISSRHRNRTTRKGR  
IVARSMGMDGNLDREETT KTKDRDLLRQERSSGLLRLAKLSLQDYEWIRIGVFKDRDADR  
VEESLARMGDEASYVRPMDASEKSIGPLGLWEKESVEWLQQVIDEEARRAREIVRLGGI  
LVRPMDASKVPGEVEELGPLGAIERRVDFVESIKRSEQERTKNMVL RPKDVEESKRGPL  
GQAE LRASEAIREILQSERMRVQESRRREGLVRPIDIPGPLGELEMAVLEIVRAEEQRKL  
EIEENNSAYLVRPMDAKTKGPLGELEAQATEAVKRLTDEERERVRNIQRYLDENRPMQOS  
ERTALGVLETIVVGIVRAPILFYQIFNRVKDLLESEPMGRDAEILKENEANANAKKK  
>comp5224\_c0\_seq1; 324 1 581 LEN=1205; translated  
XITNCQEITFDISPTNQQAASMVVIEAREINSSIDMAMEVDRSNEDTHGTTGQTKPVP  
EAMADDENDTKSETSDNAITCPLFMTGLPKNFATNPQLAAIASLLDDDEATDDNDEDS  
DAIQKDERPLDRQDDKIVSADACSKRNLRSIRTQRRRRQLRASPYPRPANDGNAKRKNGS  
VGEITL FMMNWK P  
>comp5225\_c0\_seq1; 257 306 977 LEN=1176; minus strand; translated  
MTKNCWMSFPFVMAVYVQRCGNQNRVHFIQTNEFFAIRFCFSYGYAETQEHLDPSEIISL  
PFPLVNSTIFAILPVFVLMIVWTVYNPSTVGWKILSLIKVTGFIFVIFGLCGNDLIATWE  
HSVSAALFLAALLCTNLTEKRTSKLLEELPFYDHSDDLSTIRLYTTLAFIIPFSILSVLD  
HGDQKQRWPCPVFMGGTYGFAFGSVGGIFLNYFKAKKLEKVK N  
>comp5225\_c0\_seq2; 257 306 977 LEN=1478; minus strand; translated  
MTKNCWMSFPFVMAVYVQRCGNQNRVHFIQTNEFFAIRFCFSYGYAETQEHLDPSEIISL  
PFPLVNSTIFAILPVFVLMIVWTVYNPSTVGWKILSLIKVTGFIFVIFGLCGNDLIATWE  
HSVSAALFLAALLCTNLTEKRTSKLLEELPFYDHSDDLSTIRLYTTLAFIIPFSILSVLD  
HGDQKQRWPCPVFMGGTYGFAFGSVGGIFLNYFKAKKLEKVK N  
>comp5226\_c0\_seq2; 657 172 1935 LEN=2079; translated  
MNRHAVEAKAVEDGYDYIIAGGGLAGCLLADRLSADGKKVLVLEAGTPDYNMIVRIPA  
GILRLFRNTKYDWQHETGGEKACNGRNVFLQRGKVLGSSCTNVCLHHRGSAQDYDDWGI  
PGWKASDVL PFFKASQKDMTDRSPEFHGKDGDWVMDVKYQNPLSKRFLEVGEKAGLGTN  
DDFNWNSRPQEGVGRFQVSEVNGERC SGAKAFISKALKRKNCEVRTGTMVRRIDFDGSKT  
ATGVTYDLMGDDTMTPFNAKLNDGGEIVITSGAIASPQLLMCSGIGPADHLKDHGIPVH  
DNPSVGKNLQDHPAAVVSFKTPQKGVSVTSKLRFLGLTNPFP I IQWLLTKTGLLTSTGCD  
HGAFVRTSASSRGQPDQLIRFLAALALGPDGMTTFTTQFRNKKNHADGYSFQSVACRAKSK  
GCVRLASSNTHVKPKIDGGYLSDPADLKTTLREGIKLGRQLGNRPEWGEYLGEEVYPGIDV  
QTDAQIDEYIKNTIHTANALTGTCMGTGKDAVVS PDLKVI G VNGVRVADSSTLPNIPGG  
QTATPTVMIAERAAFLRSPQQSVTTTTTEVIMEEKAVEEPAPELAAA  
>comp5227\_c0\_seq1; 305 105 752 LEN=945; translated  
MTGKESTPLLQKNGDGNNFYFKKLQKEGSSYDSTTDADGGHVETLPHGSSEEDFAPRAL  
GESIKKQRRPSEPTGIFGKWF GSKKNDANVSETRMIKPRKAPIKVEPKVFFANERTFLA  
WMHVSII LAGASVAI L T L S D Y E N I E K Q L Y G L I M L P V A V A F L V Y A M Y Q Y V K R A H M L R N K L P  
GPYDDTVGPTVLSIMLMVSITAQFAIKMISSANRV  
>comp5227\_c0\_seq2; 273 105 919 LEN=1112; translated  
MTGKESTPLLQKNGDGNNFYFKKLQKEGSSYDSTTDADGGHVETLPHGSSEEDFAPRAL

GESIKKQRRPSEPTGIFGKWFGGSKKNDANVSETRMIKPRKAPIKVEPKVFFANERTFLA  
WMHVSIIILAGASVAIILTLSDYENIEKQLYGLIMLPVAVAFVYAMYQCKFSKNAFVWRYE  
RVVNMNRNIIIRSMILLRHAACLTTHIHYTHDDNNQYQCVEXKPKDVKRAHMLRNKLPGPYD  
DTVGPVTLSIMLMVSSITAQFAIKMISSANRV

>comp5228\_c0\_seq1; 1821 116 4063 LEN=4142; translated  
MGEGADVIRDEHAWVPARVVESDGTTAKVAVPQYACEEITSDGGKAATGFKTAEVKL  
KDYHSGVLPQNVNESGTLIEVNDMVDLPYLHEAAILYNLKSRHVRALPYARVADIVIAV  
NPYQWLTHLYEDEVRMHYAQRIVWDDNENDPRIGLDPHIYEISSLCYKGLALEKQNSIL  
VSGESGAGKTETVKICMNHIAITVQQDPNEEKMEGMSPVVQRILDSNPLLEAFGNAKTRRN  
DNSSRFKGYIMLQFEHLAPEGGAKPRSALAGSACEVYLLEKSRIVTHDSVERTYHIFYQL  
LSSSDEIKSEIWEGLTGKVNEDFKCVGTSPKIGIDGKSDADNFTDTKSALELVGKGEPEY  
IELFRAISAVMQLAELVFAPDPSDEKSVITSKKEFDDLQKLLGVEPTTLELAFTEKTIK  
TRGEEYKVPLKADIATESAGAFKEIYAKTFLWLVRALNDATCAENNPAGDVEYGLIG  
LLDIFGFESFPVNGFEQLCINYCNEKLOKQFTQDIFRFTVVEEYKQEGLDLEEIKYDDNSD  
VLALIEGKGGFIRALNEECVVRPSGNDPTFVSKALKANKTVACLIQKRTFSPLEFGVHHFA  
GSVIYCAEGFVGRNTDTLPVDLAACAKMCKNEIISKHMDNNSASNQKKKEDPKAPPKRA  
KSSMTGDTVMTQFKTQLTSLMKGLASTSSRYIRCVPNTRKAKCVMHNTTLDQLRSAGV  
VAAVTISRSAFPSKLDFPDVLRYGILNPEKDKAYPDDKAEIDEMLTTLVLRFEKTRKDG  
SISKAFVAVGKTKCYFKGGCLEFLESEKAKIWFKWAVKIQKVIRGRLTRDLRERERAREE  
ARLAAEKAERERIEAEERAKREAEKARKEEEERLAAIEWEKNREAREEAERLEKIRLAE  
EAEKEKARLAEERLEKIRLEKEKARLEEEARLEKIRLEEEAKARAEAEERIAKLKAEAE  
KKRIAEKARIEAERIAAAKRAEEERIAAELRRKEEERMRAQRELENKSAITIQCMFYQY  
TARQFRDRKKEKLLQKRMGKKWKAATKIQAIAARGFLQRPKYRQALLDKAEEDNLKNQL  
GNMEAKLEEAQARKQELEVDKFKFEQEMEDMKEKLEKLEEMANAGNSAQHQTLDIES  
GKIEYLRKENAKLRKQSDSTKREYKTLKEQNTRLKEANDSASKSFNELNNHAKGLNATN  
ARLIKNDVAFKKQLVKMKEDLKNRQAFYLAEAHARVAYQKTLARIVSQVQNSRDAQLVE  
DVVIWALECEAEAKAERAALENAGQKAPPGVINAAPKRAARPMDSDDSDSDSDSD

>comp5229\_c0\_seq1; 212 238 633 LEN=1010; translated  
MNPIRLLLVLSTTMVHSFTGSLRLARPHDGFSTTGKEVMSDIDIMCLENAAADLCSYYD  
ECDIEEREAILNRFAAETEIMVNRATMNGLVKHLKTGDHKLHLEDEEVEESLGAKILDLLD  
TEVRSGEGLSP

>comp5230\_c0\_seq1; 389 191 1288 LEN=1618; translated  
MRNTIRDALSRSSSSNTYGISNVRTRGSACMEETPLPTVRRFQQPFLFCLLLFSICSA  
TDSFQQSDWRNNRRQHRISLASSLQATSANGPPLIGVYGGDIFDPCSDSNWYSRQRQR  
TRKKRKQRRAKTACNDAEYQKRKQEWADRYTTLEGLRETFGSNRNKLYGDLVATRRRLY  
KSLLP TAVCELVL DLEVKPEELAQLAYDARKAAKLYARERCHLPARVFANCYDGVRSFRR  
YGRFQVEGMSYDQIFNKYYERSARERSMRKISSQKKEQGIDIGDVGTDVSHGWDEEDI  
VTQTCMKILESACRTNPFIDQLALSSNESNNGRNKKRMDRKELEQIAQKLEQDVRKLLD  
PYNQL

>comp5231\_c0\_seq1; 450 814 3102 LEN=3241; translated  
MSTETVDEENSDKAMRKAIEGARIRAIREEETQGQHQLTRKRPRYTPYLP SLAGKKKPKP  
LQVETVEELRHAILDQQLRLSDTTIVEAKSQSNVDAAQT TAGKGVPPVLDHAVRDLIKER  
FVNGTTPGHRLPEDKATLALAEI EGGGMRGCVSAGMVAAL TALGLSDTVDSIYGSSAGSVV  
GAYMVSQRQVCLDVYVDILPASKKLFVCKKRMVANLASLGLTQMLGKRNSRKTGNKQKID  
FISSTLSPPSPLPKTLRERLLQTQPGMNISFVLDGIMGDDHGLRPLDVQAFRENSEKQK  
LRVVSSCVDPATGKLLSKCFGSKEFFCKDESLTSPDRKRQGLFACLQASMTVPVSLIDFF  
PVXFVLECDVVWTIVCYCFESMKGSIKIKRRRGSSHXIVEKDFQMTSIALALHMQITLTM  
IFGMLSTNXGATGPPINLVRKNEASEDPLPCFADFCEP IPYRSAVEEGATHVLVLTTRP  
EDFVPLTQPTVYESGVAPLYFHSHGQKGVAEFFEKGGQYIYAEDLMLLQEARHKGSEGI  
LVPPPEILYGVPRTNEISKNIIRDNDNSWNKAHLFPLRVPKGYKELEALSQDKDEVLEAVR  
DGFMTAFDSLKDIVGLENLEGSKVAEMLFPSSGDEIKTEETGKLSLSPVEEELRTRKV  
NVPGAPIPESRLAMNKEKSLKLSRGI FRRPRSIFRRGGAGGLFGHGRHDEAEGNGIEEKHE  
MHQWREEEFSATTLLECLPGFQDGKYSHLAKGLIEEQRRRTTI

>comp5231\_c0\_seq2; 759 574 2877 LEN=3016; translated  
MFSPSVLSLRRSISSSSSSSSLSPSPSPVMMEAVPSGRKRRKFQVQRKRIFSRTRRGYRN  
DGDGIVILVDEDVSSEPETPMSTETVDEENSDKAMRKAIEGARIRAIREEETQGQHQLTR  
KRPRYTPYLP SLAGKKKPKPLQVETVEELRHAILDQQLRLSDTTIVEAKSQSNVDAAQT  
AGKGVPPVLDHAVRDLIKERFVNGTTPGHRLPEDKATLALAEI EGGGMRGCVSAGMVAAL  
TALGLSDTVDSIYGSSAGSVV GAYMVSQRQVCLDVYVDILPASKKLFVCKKRMVANLASLGL  
TQMLGKRNSRKTGNKQKIDFISSTLSPPSPLPKTLRERLLQTQPGMNISFVLDGIMGD

DHGLRPLDVQAFRENSKQKLRVSSCVDPATGKLLSKCFGSKEFFCKDESLTSPDRKRQ  
GLFACLQASMTVPGATGPPINLVRKNEASEDPLPCFDFCFEPIPYRSAVEEGATHVLVL  
TTRPEDFVPLTQPTVYESGVAPLYFHSHGQKGVAEFFFEKGGQQYIYAEDLMLLQEARHKG  
SEGILVPPPEILYGVPRTNEISKNIIRDNDNSWNKAHLFPLRVPKGYKELEALSQDKDEVL  
EAVRDGFMTAFDSLKDIVGLENLEGSKVAEMLFPSSGDDEIKTEETGKLSLSPVEEEL  
RTKVNVPGAPIPESRLAMNKESLKLRSRGI FRRPRSIFRRGGAGGLFGHGRHDEAENGIE  
EKHEMHQWREEEFSATTLLECLPGFQDGKYSHLAKGLIEEQRRTTI  
>comp5232\_c0\_seq1; 899 100 1506 LEN=1521; translated  
MKFSAGVTAMMAATTVGGAFAPAKVTGTASALSSTATETYTFKSEEIFKEALDLMPG  
GVSSPVRAFKSVGGNPVVDHVKGAYAWDVDNKYIDYVGTWGPAILGHADDDVLEAVSK  
TMAKTSFSGAPCLENELAKAVIDAVPSVEMVRF TNSGTEACMGMIRLVRAHTGREKVIK  
FEGCYHGHADAFLVQAGSGVATLGLPDSGPVSAATKATFCAEYNNIDSVKAI FEENKDE  
IAAVILEPVVGNISGFIKPTKEFLQGIREMCDANGSLLVFDEVMTGFRVSYGGAQEYFGVT  
PDVTTMGKVI GGGLPVGAYGGRKDIMQQVAPAGPMYQAGTLSGNPLAMTAGIETMKKLSQ  
DGVYDELERKSKMLVEGIMEAGKKHGHISIQGDWAGGMFGWYFSEEKVNFAEAAKSDGEK  
FGKWHRAMLERGVYLA PSMYEAGFMSMSHTDEDIEKTIAIADEVLSQL  
>comp5233\_c0\_seq1; 260 1 775 LEN=775; translated  
XAKYIDTVPYCTGTWNCNLLNKTESDPGQADRTMRIVSIVQGVLMLLAAVRSEVPPAEQA  
ESSLRGGQENDSVGAEE SLRQLRSRLGYSGIWRGRSRYRTRTYVDDYDDDDDDDDNDD  
DGS IAGRYNFKSMKRSYQKKGKGVGKGYEFKSMKKGYGKGDGKGYNFKKEKSYGKKGASS  
YSKSSKHYGSAKGGGKGTSLHYYSKSSKSNKGKKGKISYYSKSTKKGYGKKGK  
ASSYSYSSKSAKKS YGKKGK  
>comp5234\_c0\_seq1; 345 103 1464 LEN=1731; translated  
MDFGGVDVDVGVVEVGSYGLFLWDAANLWIGRILVTIAIVVLWDSYVSILERKQKYEQQP  
QKKQQR YRGT PGP RNTD GQLNEDVSVLET PRKEASDRSVPKTTMHDQENESVDASNVTSP  
VPASYSSTESEKRL ESPTATAAAAATSVSAAKTTEKKSTSEKAAIVARTQAVRKMKGTSNE  
HPGMEGFSNWYEVETSLFRIYTLAPRDP SVVTIPPYVPHSRRGDVSIELEVTNHTNYNIH  
VFWVDYHGNLVRKGNIPRNRGVWKQSTYIDHPWVFQDADTAQIYLYVPPFRAIPTTPEVS  
TIGSDGTTALHKFALINDWESAFYIGIQDDVLPFPGTARLQNPLDAINWTLKHM SRANTT  
FNLLPDLDTLQAYLINVLQHPDRVKYRQLRIASPRFR TIWASPLRGVLLAVGFVEAGPYA  
ELGCDRPLSSQRLQDVGLLSYLLNEWKEKESAA  
>comp5234\_c0\_seq2; 296 103 936 LEN=2083; translated  
MDFGGVDVDVGVVEVGSYGLFLWDAANLWIGRILVTIAIVVLWDSYVSILERKQKYEQQP  
QKKQQR YRGT PGP RNTD GQLNEDVSVLET PRKEASDRSVPKTTMHDQENESVDASNVTSP  
VPASYSSTESEKRL ESPTATAAAAATSVSAAKTTEKKSTSEKAAIVARTQAVRKMKGTSNE  
HPGMEGFSNWYEVETSLFRIYTLAPRDP SVVTIPPYVPHSRRGDVSIELEVTNHTNYNIH  
VFWVDYHGNLVRKGNIPRNRGVWKQSTYIDHRKCRRE  
>comp5237\_c0\_seq1; 462 318 1376 LEN=1417; translated  
MTRQNVDELIDEQEETPQEAQRKMRNDK KLYALPAGNLSRNFNATLYKELINAPFEIYE  
SAFGVGKEEREESFPV FIVPDWRSDNTGIFSAFSRTATPLTFQNMQTLLSWDEIVDASTG  
AEEELLSFMSLNNFHASLFI GKTLGDAASHTPFLGLIVSYHQHSQKNILVPPFAKLDHFFH  
DSSEKHL LVESQVKVDHLLHEILD SERAFNTTNSFFHPEI IAETHKNNKREQLEDVEAL  
HFRRLFQLLIRRTFLFSYGYADCLMVEPHNLRTCLDDTFSLVVQMEASIRDAIDDQLLKD  
LEAVTQIENS SRYREACVLVDMYGT RACSDSPNSNVRGLGR TAYSSLSSTFL  
>comp5238\_c0\_seq1; 117 1 1016 LEN=1285; translated  
XGHMYRTNFGIGHNMKEILD AHRPPGGRLGAGHVGLFETITNSLHMQGLALASLGVATS  
LTAQHIYALTPYAYLSKDFTT EAAALYTHHQYIAGFLMVGAF AHGAIFFVRDYDPELNKNN  
VLARMLEHKEAII SHLSWASLFLGFHTLGLYIHNDTVVAFGQPEKQILFEPVFAEYIQAA  
SGKAIYQFNVLSSSTSPATIAGNQVWLPGWLEA INNDKNDLFLTIGPGDFLVHHAIALG  
LHVTALILVKGALDARGSKLMPDKKDFGYSFPCDGPGRGGTCDI SAWDAFYLAMFWMLNT  
IGWVTFYWHWKHMTI WGGNPGQFNESNYIMGWLRDYLW  
>comp5239\_c0\_seq1; 544 1 1219 LEN=1270; translated  
XAVVEKKYPRFEMKTPKASLLAVLAVVPSVTTAFQQPVAHRYNAVKVAPFTKSAVSSISS  
PMRPSSTSLVMAVEAASEDAGAGGEKSLGKKIFD TYVRVADVATTLFPLWTVLFSVAAIK  
TPQSF AFTTEYFTAALAALMLSMGITLTPQDFLDVMKEPISVAMQFSLCYAMMPALALG  
LGKAFALDPAMLAGMVLVGSINGGQASNLCTYIARGNVALSVLMTTATTLGAI FMTPLIC  
KAVLGTVPVDAVGIAMSTIQVVLAPIAIGMTTNKFFPNFVKQILPITPVVGVLSTCLLV  
ASAVAQVSEPIMNAGLQLQTPVFLHLLGGLVGYFLPKLTGFSEVKSRTMAIETSMKSSA  
FGFLLAKLHFQY AARVPSAVSVVWMLTGSLLAVVWRYIPVGDEE  
>comp5241\_c0\_seq1; 802 33 4402 LEN=4402; translated

MSVNIAADDACSTRRTRSCISKLRGRDPLVEIADFLNQFQSHFLSLSAKKRINGGCGDR  
FRFGEITAVDLKDALKFQSLMERIQLEQETFIAGEYLRNAEGSESMAGRIAVRKKTELE  
RIQKNICGVPDRTKLVLSMLWNCKVWTCVVAQDHLVSPARLMPCTGRKEAGLCCFSPFL  
NIPCSKYFAKLLPPVPVEETRPMAESEASIAEDSATSQKQPAAVTEADNATPASSRIPAF  
HRKKKFRCCSLALPPNKYTWEAYARFAIMATLVGDQEFATDVDGSDSAWKNHKESSLIQ  
SFKSPLCVYELNTYKTKGNSSSHKQFSFSPSTDLVPLWIRAHNTQSLRQLIQLFVKKRR  
DKYDDDDASCSTNAIVRGINRSSEGKELIVNDESDADTDAKQDTETAFAFERKFEATFRGNP  
LDTKSQMLKVG DYVDQLVEWAVVNQSI FTYQYMKNNILTAHLRKQEDGQRRKRKRQRSNV  
CRNIRC NENCEQQRFKLYRACQSYILRWFARRNRAVAILFSMRLKHLKLDIGCKMDKNS  
LEMANALEKAGFIVKAQENMRKLPDRIHEDLNFSRIDRRLSISGRYDGSV SITCQSQV  
SNLLKTVLKTCTPNDKAYKHLITTAIDDLDFGLTSPGPFVYDKACELIDSSNKYTLS  
YLADLLESVPKPWVEKCCRCNKVCSSDLRTCFNCEQVFKETCAASASGTLPTAISLKDLI  
RSFPPLHDIFKFKHPKNIDRPFDFMSDNEWVEVLKIERKSNIDENQARLGISFISTEDC  
SEQFDILHSDAMSLVELMPSETKNGGANLLVPLRTSHKGCCLVVTVNQELPGGRAGLQIG  
DIIIGMEIEKNSSSHSKRNVEAKKRFTMSDLSKRDRETELLKNGSTKIKLIIRPPINVVE  
LATNWYSVIKEENEKLFNILQRMDESELWYCGSCCEPSTHDDRSVFL EASYCRAVIRRV  
GMESYAKPFLEDNKTSSSHFCLRRLDSILTDIMMVESNEESYDAAKSFLRPSLANSTRQ  
RLLRAATSLEKQPM TLLCRAMKGLIESSVLGANDRNTHQIAFITHFLVVFSSWCVGGTVK  
SSSFKRLAGPPEIFQLCRVPWLGSAYSACVSRPSQKMAICNAQVCLNHS LDSEEKEIERT  
ENAIKEYTMRASLVGTSFLVFRCDPLVECVSSAFPIDTKSQLIEFLVASYLPSDYHDAVV  
KGRRKDRYDQISKNDGIYHLIPVVS CDQQQFLLERCKMRNEHQNNI ISEISWTS LDVNLN  
DGVTRYSSAALRKKIKESNSIRLAIDDAIIRDVCNSSTVLSDFSFYFQKSIDSEITMGVS  
SLRARNQDLTLEITNKLIESLLKGGSTAVVRQLSSSSSDVNPISQVEEQKTPSKWKI IK  
HDENSDDLEFGLARLQPLIPINPIKPSQCILTLPHISEDQYMLFYSDLIFYDERDKEIL  
ENKLSPPNFFPCQDLRS

>comp5242\_c0\_seq1; 665 106 1734 LEN=1884; translated  
MIKIAAPAFALLMSGFAAAQNGSDQDQSATLVGNLVDDCVDFDPNAGVDYFPNKYSKPI  
IKSYGDRDIFGEKFPVPHNTTDFLDIEYFNNTYKIVTNLHQDPPKYL LYQCGTQIPEDVDV  
DSFDLVTSPVHKGLALTETPQIPYVELLGLRESIVAYIGDSFYVTSPCMTHMEGETPM  
IETVYNYSIQEELIDDFRERNPD AIVSGPSNNVVGEQVIVSSATQERTNVATFDWISFF  
AAFYNMEGEANRITSNMQESYDCSSDVASFMAAEQRELEAE EGP TIMWANYLTYQNLGWS  
VGECPTWDHAYYCEYATHCGATVLTREPGVGVNKTWGSPTVYWYLNDEEMLDMGMDADIL  
IYSGSDWNEIYALKNETLNKMKAVQNGQVYDVLGQGS SAWYEQRYAEYDVVGLDMCNIVG  
YAPASGHQNRWFRNVFTDPIGELEECDVLGGEISEPYVPPQQECVRPLIAPSDDAGSEDT  
LMPEPSASADAGSEDA PMLPEAAPT SDEPFATVPSTTGLESAATR PVTIGTATILAAVVF  
FL

>comp5243\_c0\_seq1; 220 327 1055 LEN=1229; translated  
MDRGDAAE GMKHSLGATNSMEIQHYRRGWTQEFFCCITKSDFEYMNEEGETVAKSKEDFS  
FVCRCCFAPCHAFDMTITDTKTNSEFLEVNRPFRCCMGNLKCCCRQEATVFSGDEHLGDI  
QESCWCFVPSFRVLDETEKEVYVVRPPTSCGNM CIDCFPDGKWCCPHGCCMIPC DVYAI E  
NGVEGTPKIGRMAKIPKETFKE TFNEINYYKIDFPENAT TNEKGLLLGSSILVNALYFEN  
SE

>comp5244\_c0\_seq1; 160 496 1306 LEN=2915; minus strand; translated  
MSAVDEVHENETDEDK KPSGLDEALPMEVDDQDFFDQKSSSATAANSAMKPESC VSAQSS  
SDEDQSNNE SPIDSIHTD WSESDYLD AFQRKLSRGALGLTHSDRNSIIEEIHGVNTHIQE  
ESPDLIRSSLLSLSTELRALVQDNAANGNTNSKEPSLSTAYILSQCIGSSSKRTYVNTPE  
FQLRFLRCDNFDXEGSGDPDDEMAEPGRSLWGLCSLQ AHPDYGFHKKRAQNTSERMAAS  
PPVSGPERATCLDLAGGDGVQLRSGSXGYAW

>comp5245\_c0\_seq1; 617 171 1421 LEN=1421; translated  
MGGGKKRALGGSGPSSSSSSMSVVEKQLILRGLSCGGFSESDLSNCLRQSGYRVDVAAERL  
VTGQFQPSKANKRNKGFGRSSASTAPTSQTNDGTAPCPHKVATT PRQKPTLHLQSRPAM  
PQLPSAAIDL SIDDDPTSLKVMGASHSPMPSPMEGTSPSSSSSILVTPKGTTPVAKKAK  
GLAPVPRGGKTTTTKPGHGDEEWLLCHRWVG DGVNLSRHGACDYQEEFRVLMEGSSSSSA  
TTKTSSCPPKALRFRSKSHRMDGSFPRHLSFLGTL LKHNLIRLKATALMEEKQLPVGAQV  
AFGIRVWIVDPVRF FAVFRDGNKNGGGRSSYSKDFLYSGRNARMGQAATAAVSR SLLA  
SCRECAFLLLQWAQH GKQETRNDADGNGTGGTSS ENESSNDRGVDGSDDDDDDD

>comp5246\_c0\_seq1; 1277 101 2875 LEN=2900; translated  
MRFTAASAFALVSTTDAASFFKSTPSIAQKYGLDVGSTTRSLTRQDGWFAGVATRGGAT  
EEDPTKKAKKKKKKTVSASTKKSSGKQKSNADSDES DLSVAILGGSTDRNAMHVFKYSG  
EEGHSVVGMT EAMMEMGLFEGD TVSIKGRGKKTMA SVAVLSEADVAALSDGSSDGA AI

GMSTDAMKNAGVRAGDKVTVTAAPNVKFGKAVLISPMLNSLKLSGIDEETMTDENGDEVK  
LFEDYLAPYFSDKFRTLYRGDTFVVDGPKGELEFQCVEIDSVEKDGDNACIVVEETVLEC  
DGEAIEEEVDDLENAGYDQIGGASKHLAAVRELVELPLKHSELWRKLGINTPRGVLLTGP  
SGCGKTAMARAVAAETGAYFFVINGPEVISKRAGESETNLRRAFEDAEANAEDYNGAIIIF  
IDEIDSIAPRREKAGGEVEKRIVSQLLTLM DGLKSTSKVVVMAATNRASTIEPALRRPGR  
FDRELDMGIPDEQGRLEILQIKTRDMRLGDDVDLEFLARNTHGYVGADLQQLCMEAALEC  
IRGKMGLIDFDKDQVDKILDSIVVEGKHFDHAVGIVAPSSLRENQVEVPDVKWEDVGGL  
EDVKRELHETVQYPVEHADKYIKFGMSPSKGVLFYGPFGCGKTLLAKAIANEAGANFISI  
KGPELLTQWFGESEANVRELFDKARAASPCILMFDEMDSIAKTRGSGGGGSSEAGDRVIN  
QILTEIDGVGARKNVFVIGATNRPDILDPAVIRPGRLDQLIYIPLPDFKSRLAIFQASLR  
KAPLDPAVDMEVLARSTHGFSGADISEICTTASKLAIREAILAAEERKEEAENDDDEEDS  
SSSSSSKEKTQAVGEQMLITKRHFNFAMSRARRSVTEKDLVLFEEFAEKQKAGRGEAANN  
FKFGESNSSGAAGEEAKEDEDLYS

>comp5247\_c0\_seq1; 402 77 835 LEN=1211; translated  
MALRLAASRFKNGVHFATSARSLSTGADHMRSKENYEAVLDKFAEIRACAVLRTPPTSES  
CPKAMQAAIDGGFKIVEFTLTTPDCLQHLSDFRAYDGDVMVGC GTILTPEDAADAMAAG  
SEFIITPVMLPDVIEWCRDRNIVCVPGCQTPTEMVNAYRHGAPLQKLFPGVAGGPGWVKA  
VSSALPFLSINPTSGVDLDNAGDY LKMGAA SVGLVAPLFDQEAIAAGDFDQIAQNAEKVM  
ANVREAGPYQRK

>comp5249\_c0\_seq1; 519 581 2257 LEN=3480; translated  
MAVYDSSYDFLGDALSFEHGDALLTGSDYRFLLDASNNETMSPSEDIIPVATTDGFTKN  
QDIFLVYMG RVFGFLSILAGFYIFYWAWRRKEHVYHRLMMGISVYLILTRPMFVYGVSAV  
PEGTPGVWGA KGT TATCTAQGFIIHIGGMAAPTYF IGLSVYAWAVVAYANFDAKKYQWIE  
KYIHI LANGYAWGSAIYILSIQGFNHS GFHICWIASIPFGCGDETDIECTRG PQNISQVM  
SIFVGI PAVTFLV VPTIAMLALVLF L YRQQRQQHQDQNRQRDDERQE QVPKNQMEQQE  
PSDSSKNDASN NTEKAI SMKSIRSLLSARSEHNRRRGISALPYHGLTPKLVAKQSF IYV  
GVIYFN YLPGILQHMVGAFLNHKSFFLSLLASSITAGSGI WYALAYRYFSTTG VVLDG TK  
VEVGF GIRDNAKLQGGNIDDQNNAGNARSVTASESHGFSSMQLD SVIEEGDCNESD NSLQ  
RTEEVKGSNDKPLPRASSSSSNREQRRQAEHKQFTFNIFDGTAPVNSRYSDFIFDGDDED  
QQGDDEESRFWSSCQDLR

>comp5249\_c0\_seq2; 519 581 2257 LEN=3363; translated  
MAVYDSSYDFLGDALSFEHGDALLTGSDYRFLLDASNNETMSPSEDIIPVATTDGFTKN  
QDIFLVYMG RVFGFLSILAGFYIFYWAWRRKEHVYHRLMMGISVYLILTRPMFVYGVSAV  
PEGTPGVWGA KGT TATCTAQGFIIHIGGMAAPTYF IGLSVYAWAVVAYANFDAKKYQWIE  
KYIHI LANGYAWGSAIYILSIQGFNHS GFHICWIASIPFGCGDETDIECTRG PQNISQVM  
SIFVGI PAVTFLV VPTIAMLALVLF L YRQQRQQHQDQNRQRDDERQE QVPKNQMEQQE  
PSDSSKNDASN NTEKAI SMKSIRSLLSARSEHNRRRGISALPYHGLTPKLVAKQSF IYV  
GVIYFN YLPGILQHMVGAFLNHKSFFLSLLASSITAGSGI WYALAYRYFSTTG VVLDG TK  
VEVGF GIRDNAKLQGGNIDDQNNAGNARSVTASESHGFSSMQLD SVIEEGDCNESD NSLQ  
RTEEVKGSNDKPLPRASSSSSNREQRRQAEHKQFTFNIFDGTAPVNSRYSDFIFDGDDED  
QQGDDEESRFWSSCQDLR

>comp5250\_c0\_seq1; 278 1 908 LEN=908; translated  
XSRERTTVVIMDLIIDFLSGASPYHAELRTFGQAFMGALAVRSGVNKNKDLNWFHAFALT  
TIAAFGGWFGFVVMGKPTSLITNGDVTTLTATAIAFVLLTYSPMDIGYRFGTLLPVKILL  
NSWAQLFRGLGMIGFINACAAEVAPSKYYPTPILGPVVYGTLLGNMGAFFLKGFKHLEK  
DIPWAFQNGLVVGLFYHLYTHDKVGSVGVVALRSFVQSTGIQGTMTDKMFATIVVTA FMQV  
SGMMMLPEFYGPSFNLLLLPKRMLMGT PKTIDSA AIEKDLIA EEEKEQRNQATKSKKKKK  
KKT

>comp5251\_c0\_seq1; 735 1 2374 LEN=2779; translated  
XPGSLSIMSLTNGSNSSSWPRSV PQEWSIPLVVLAKSGTDLGHEEELLPFVNDMMDNPEP  
FLERFKPQELSNSVWAAATIISKRPQAAMGAASDAALGILRHTSRELIRREGEGYKTQEL  
ANSAWAMATLGFVKKQTTSATSKDCHLTHYTYLVSDDPEGDRALMEEAMKITLEKTKQ  
NLRRFTSQELNNLCWAMARLEEKDEGLIHMI GRELANPRKSVNSQDLSTSLWAMATMEYY  
DEDLYRSVVARFPGIGPHGFNPQEF SNTVWALATAGVVPEYSNAFDDKLLPSDLRPTKEE  
ALRDPVTSIFAAAASELIRRNPEFKTQEIKDVLWSFTRVGM RHP ELFRSMAEYLVGKEDN  
LETTGRGLDEFNSQGLANLAYS FARHTQLGGETMKNKYERRC RIPFTGGKLAYYTISYLDV  
GEGLLRKLFAAIAKAGLENYDNL SKCSAQDVSNTVWAFGILGLKHERFLNAVEGTLRKM  
ESYVRGDKSSFIQGE MSN ALWALATLNYIPSGLLS LVERYFLELLHHGLTVSNISRLIT  
RQELANIAWVA AVFGEYPSKLIKMLYMGILGVGEKPD PAYIQNVYNDSGIQATHSN SMLY  
LQIMMDFDLGRKKNTFALPNDFPSAWASSMAVMNDGSSVDS SNGIMEISTTTSGIQNRIS

MAFDRIDFGHVDEHLFTMKDLATEFDIQMPPFPVEVLSVDIANIESKIGIEVDGPGHWVS  
NIDPATNHNILASVGEYRGPAPNESKKGSDHNRIFEYNIWNSEDQMINGATSLKQRMFQ  
HMGWDIINIPFW

>comp5251\_c0\_seq2; 1021 293 3632 LEN=4037; translated  
MAYEIDDVSKVSREERPNLIYRYIRCLRSNKRILRTEKELERITKASTTITKMVVTKTKA  
TTTDTSDARGWSKRIWSAEPEDHKEETAQGVLSLLASTKGALSSVAGGGTMSTVNFSTSI  
HRIARHMTLYTTKNLPGNERAKILSDPRFALLICSTSEALLDGAKEYESQYKSNNRKMNP  
SSSGRVCFGARELSNIVWAI AKLNIAPPDSVLKVDIDNAEKLLREKSKDVRSIIFEVAKH  
RASPGSSSSSPSASSWIPALSELGVLVDVAVSSKALDLDPKRFQQQELSNLMWASATTKR  
PSENVFKYVSSIIASAEQRKHIKLCNENPNKDSVKDEKGAVPQEWSIPLWVLAKSGT  
DLGHEEELLFPVNDMMDNPEPFLERFKPQELNSVWAAATIISKRPQAAMGAASDAALGI  
LRHTSRELIRREGEGYKTQELANSAWAMATLGFVKKQTTSATSKDCHLTHTYTYLVSD  
PEGDRALMEEAMKITLEKTKQNLRRFTSQELNNLCWAMARLEEKDEGLIHMIGRELANPR  
KSVNSQDLSTSLWAMATMEYYDEDLYRSVVARFPGIGPHGFNPQEFSTVWALATAGVVP  
EYNAFDDKLLPSDLRPTKEEALRDPVTSIFAAAASELIRRPNEFKTQEIKDVLWSFTRV  
GMRHPELFRSMAEYLVGKEDNLETTGRGLDEFNSQGLANLAYSFARHTQLGGETMKNYER  
RCRIPFTGGKLAYTISYLDVGEGLLRKLFAAIAKAGLENYDNLSKCSAQDVSNTVWAFG  
ILGLKHERFLNAVEGTLRKRMEYVRGDKSSFIIQQQEMSALWALATLNYIPSGLLSLVE  
RYFLELLHHGLTVSNISRLITRQELANIAWVAAVFGEYPSKLIKMLYMGILGVGEKPDPA  
YIQNVYNDSGIQATHSNSMLYLQIMMDFDLGRKKNTFALPNDFPSAWASSMAVMNDGSSV  
DSSNGIMEISTTTSGIQNRISMAFDRIDFGHVDEHLFTMKDLATEFDIQMPPFPVEVLSV  
DIANIESKIGIEVDGPGHWVSNIDPATNHNILASVGEYRGPAPNESKKGSDHNRIFEYNI  
WNSEDQMINGATSLKQRMFQHMGWDIINIPFW

>comp5252\_c0\_seq1; 236 150 695 LEN=791; translated  
MSILRRSTDARPYWSLGIANIVFVNALFFIAIQSVTSKDTTCGATATPPQKLLNSAFVVF  
KPHANTEKVVRELVAEKLESAGISILFEDDIGGEEIDRNLIDQHYYSIASKATILPAEKI  
PVPPKVFRETFFGEEWSKVLEENRAANALDACKRFGCSPEELNEAWNKVSTVKFGGGFYCG  
E

>comp5252\_c0\_seq2; 349 150 1208 LEN=1233; translated  
MSILRRSTDARPYWSLGIANIVFVNALFFIAIQSVTSKDTTCGATATPPQKLLNSAFVVF  
KPHANTEKVVRELVAEKLESAGISILFEDDIGGEEIDRNLIDQHYYSIASKATILPAEKI  
PVPPKVFRETFFGEEWSKVLEENRAANALDACKRFGCSPEELNEAWNKVSTVKFGGGFYCG  
KVSVNGKPELYVFNFAFFMTMRSKFVVGKDNIGHCFTVEWSDTSLWSSFRHEILGPTDPKK  
APSNSIRRSILDQYKNLGLSSVPNHSNGVHASASPFEALAEKLNWLSLNLESDSLGGKL  
LDAGISETRIKEWCLDPQIKTSDSSTGSLFDELEDLNVDCCVSKLLELNRLN

>comp5253\_c0\_seq1; 242 482 841 LEN=841; translated  
MNDQFGFDLGFGLDCFSPOQIQQPQAQQMQHQQQVQHQQHGYLNNNNNDNNNAGNNGPCM  
DGYNPNQVSNVLGGRAQHGHSAYNNSINASGALHSRNNNSVGSNHNRRNHLHHQQQQQQQ

>comp5255\_c0\_seq1; 305 1 351 LEN=600; translated  
NNNNSSIDDEEFTYVPLAEQRRIEEKAKETDAGQLQRAPEDKPEMPMAIPTDGSFLEVMK  
RKLEEEQRAAKERTDNENGNNGNNEEQKQGPEPPVPTDNNDDDDDDSEGPAPPPAV

>comp5256\_c0\_seq1; 368 50 1465 LEN=1912; translated  
MVRCDGHNQKYSTIDEEYAGIDFSNWKRGDWCWLSPPPSPPRKPCKPIPSVSSHPPQKR  
RLSSEDTGDTSPNPLRFHKKQMKVKPDFVSSSGGIHISHHRHESTTPTPEMLMEKRGSSC  
KTKAEPGDRGNDTNTVPAIATTVSTSKQWFLPKQEKRETEHKLRAAREKAYEKYADRT  
LLHRFRGIGLLGGNLQMTFPPSPRKGCPKTFDENNNIRQGYPRPRRALNHPNVALATGEKF  
NMEAF TIATFSGFWQPNGPNFAAQPTAAVTSLPGCMFEDRSLAVPFFIKRSLTKRGAKRE  
GRILGWEYVGNRYASDPDLTLWGSAGSVPDACKRGLIEDRILRSAASGDDDFGRRILDHW  
RNKLNVALEQQSDSGNDGENDTPNSMIQRAIAMGYGPATNDKDLLRLVLELDEYHEQYII  
EFVEYDEAIYKYCSKGPTSKNSRGEVQATRGGALATAEDWYFNSNENMVML

>comp5257\_c0\_seq1; 371 375 1475 LEN=1580; translated  
MNSANSIPNNRAATEKTNHFPWKLYDMLHTAEKRNEEHIISWIRDGKAFKVHKRDQFIE  
EYMKKIFNQTKFKSFQRQLNLWGFQRVQIGPDKGSYFHPLFVRGRRDCCQHLSTRAKLG  
AEKLT HAGILEKQEPQNSPYSMATTTAESLSTTGAAILPLAVATPSIVEGNCNTVSPASL  
LGAFVNF SRPASATAIEHTVQGHSLQTLSEFLHYHTSERRKEIRKAAISLSPELSTV  
VGSPVFAIATDTSKQNRSEYQQKYHNDYTHEQQEKQSRIPPRQPKIEVSTGDHQQKDEK  
ESLNFQQGRTKFDRQSKIECQGQKSRKRVTS SGLEALLAVTAQRRREEEMALLLGI PDGE  
DTPRTK

>comp5258\_c0\_seq1; 618 224 1882 LEN=2489; translated  
MTQRGRYPIGDEDVVTIKGRYLYKGDGDRFFVKGIAPPPAPVKIDIDGWITVLEQL

ANDTDINAVRIYDMDCYHVDDTYDPFLRRAAELGIYVIVPLTSSEGDGNLSRDTSPDCY  
PQKLFHYGKTCIDKYWDRPNVLMGVIGNEVMNSFTTYKSAPCVKSYLQDLVKYSRSLSSQ  
SSSSRKAFPLIYATQHDSPTSELHPDEAIKLTLDYLSASCASGTERSDGALDLVFGINIESW  
CSSSESFVDEDDGITESSYHSLWRTFSGKNKTVKIVDAVTGDF'TLEQVLPVSPIPVAVPV  
VFSEMGCRRDFNRDNPLIPEDLKNIRDWKQIPLVSSSEDGKMADLWSGFIAYAYDGGGFD  
VFRMMGGNSTKWNGKESLPPSTEYNNFRYQLSKVNNRSLTGESSFSLSEIAEIDQSTLSC  
KDATAKIRKFFGVKLYSLSEMPSYFPEVRDNVKRLTTFDPRAPPSAGTPTESSITNRVAS  
YGELHLLISVLLFVLLAVGFLLGRRRGERPNIRFGWLEQRFGNLVDSNNNKRHFEDENI  
PLKSADMNYGSM

>comp5259\_c0\_seq1; 310 211 1116 LEN=1862; translated  
MEDQFVSGFQASLPCDPLASFSCLVVNGQSDRTFTLAANVLPVTANCNSNLERWHRNDLI  
LGRFWQPEDGIDEALFESKSEEADHLKSQPHYLYGEVTALGVRQLAYEMGIANCDGGED  
RRNRFDANAENYNNEDDGGGIVFYDLGSGVGRVLTQMYIDQPDRVEKSVGIELSEGRHE  
IGINALKGIIGEDLVERFDGLYSGGDAMPHPFPIELIHGDATEVVLDRTRTHVYISSLCFP  
KNVLLTIQEILLKLPKIRVIAALNRLDTILQLEGEWQERNVPIQMSWGPSTAKLYRKVK  
S

>comp5260\_c0\_seq1; 155 695 960 LEN=960; minus strand; translated  
MAAPEIAPVNPVNRKKKKKPKADVDSDDLDFDEKSVKSTRSSRSRSTRSKKSRKIKRI  
PKRDSSDYLAQDSFVLDSSSLTISTKSA

>comp5261\_c0\_seq1; 377 627 1803 LEN=2351; translated  
MAFAEINPQLGHRALAKSTNIAVENLEKQVTANFTFMLFVSQIASLNAKIENTLQSKSDG  
TLVAAAKEVTLAPIRGPPSKVKCRRTLKGHFVKITALDWSTDGTTVVVSASQDGNLLWDA  
LTTSKMDIRLKSAYVMSVCMMDKSGQYVAAGGLDNACSIYSVGGTDQAQLKTELVSHEGY  
LADCKFFHSPSKMLTASADATALLWDVEKQI IDTFQEHKSNLTEIQLVEQDMYLS CSTD  
MTIKLWDVRCAKEGQSVQFTTGHAGDVNGITMLPNTEGAFSSCSEDGTARIWDIRSYGEVA  
SFGQLVQQSERDPFSDDDAGFTSISASYSGRVFCGHSEGSVWCYDIFSGNKNPAYILGN  
VHEEHISCVKVPVGEVLCTGSDWDFNLKFA

>comp5261\_c0\_seq2; 369 59 1153 LEN=1701; translated  
MAVTLQQRDLAAKKEIASLNAKIENTLQSKSDGTLVAAAKEVTLAPIRGPPSKVKCRRTL  
KGHFVKITALDWSTDGTTVVVSASQDGNLLWDALTTSKMDIRLKSAYVMSVCMMDKSGQY  
VAAGGLDNACSIYSVGGTDQAQLKTELVSHEGYLADCKFFHSPSKMLTASADATALLWDV  
EKGQI IDTFQEHKSNLTEIQLVEQDMYLS CSTDMTIKLDVRCAKEGQSVQFTTGHAGDVN  
GITMLPNTEGAFSSCSEDGTARIWDIRSYGEVASFGQLVQQSERDPFSDDDAGFTSISAS  
YSGRLVFCGHSEGSVWCYDIFSGNKNPAYILGNVHEEHISCVKVPVGEVLCTGSDWDFNL  
KLFA

>comp5262\_c0\_seq1; 644 155 1666 LEN=1842; translated  
MPTTAATTPSEQTDEENSGSVAPPTGCSLLPNDGNGNPNDRCAENSGKGTDKAAKKARK  
RLLNKHLKQRNKLRYETRVQQGILRKDKSLEEEARKDWENYKQLLQNDPNSVLNYTGEE  
EAPGTTASVCQTGSHCCQLNQSSRYRHSQSLRSSEDRKRVREGGAWLLKFWMKMAPL  
LALSSPPSNNDNDSPGSKPITSKTTKEQQTIRAAKLANMDRGTQTESMFDDMALLGYT  
RQKFYERALLAFASLDRLDPCHRENEGDAAVDGTGEGKDGNAAGGIGTPRGKSAERKLV  
GMWGRIGTKQVVSIGCGPGCDATGVLAFESHGAQLENGILLMDFVDRWKQIVLDQLI  
ERIVPRYVPFVRAVGCDVRDSLPTEQHPNKQDNKNHRALLELRKESPSRNRLIVVSYLL  
TETRHKWKSFHHLLSMLQGTESLLELLTEPTAWQLHEFLACFSSSDADLVRAHVWLDSSR  
DLPHMQSLDKRNGPAILMVCTH

>comp5263\_c0\_seq1; 969 282 2939 LEN=3057; translated  
MTTKSGMATMEHQISFSHEHSAEAQHRSHSPVSSVSYLAREEPTKLSWSKLSHSPSSVLYS  
SKDDKLEFYRKQLRCEIGGYMYREGETVRTFELKCGSVRDFPCVCPDLDPLWCPYCG  
IYLSPKWASSAASDSNIERLRSNAPGFFCLKDGETSDPFVGIESGIRQVCSCALTDEG  
KPVSKCDVASPEFGHNSEKKEGGYDHTKGNESGTGDSGNDTVSSAIAEGNTSAHNSMSS  
NASASANAYGNGNGNGYGTGVTAGETDLNTDPGGTQRLANPNKDNNGKSTPGFNDN  
DSFPKMKTTSSSAFNDKTSKDDTSKESNGNTEEKTTYKNGSGVNDGDDDVCTLELPGESG  
ETMTFRREGESYGPFLNRNCQAPSKHPCYCDPDAYRQMDPCYCGFDLGENSLLCARHNETV  
SFFAPDGPHEVRTCSISIQGTPITNCETSHPYVVRSDGNASPGASSHQETITTGQK  
GCPKIDPSSGRVVAVVPDGFASFGYASTVMGTGCGDKQWPAFCDASSDAEPTSAQVSSV  
TTSQQGLHNTLSVDIRDRADVLYPYCVYLDVESGSPVCARDKEEVVYTNDEGIQVKCSCV  
IDEKDSRVDGSFTCGPYTGNNETKTEVGLSKEQGGNNTGTPNTAFANENNTKTEEFNE  
VEEAKKKEEEEEEDYDDDDVGTAYNVGDEKDVKLVDENKNNHVPSTTGIGSSLDNNVN  
KNIDKDGNALSSGNLGSNNNDIPSMPNGSNLGDNIMNKNMNDKNSDILISDLQGEN  
YNKNLPSMTAIGSNLGGNGINKNI INNNGGGVIEDSNLPGIGSNFEGGALANNRPTLRPT



MSP IYVPQSGTIATYGGTSGNSIIVQILLTTIGWAMGTMLILKTI  
>comp5264\_c0\_seq1; 473 49 882 LEN=971; translated  
MNTAAELQANRPDGSAAEAGVEGPRKYLIGGNWKCNGTWDENLDRVKMFNECGSIPANVE  
VALCVPDINIPQLLTGLRKDIAVGAQNAGVNGKNGAFTGETGSHQLKAIQVTWVIIGHSE  
RREGFGMAGETEELCAEKCKVAIDNGLKVMFAIGEKKKEERESGVTMDVCAKQLEPLAKIL  
TAEDWANVAIAYEPVWAIGTGLTATPEMAQDTHASIRKWVAENVSEPIATATRIQYGGSM  
KGANAEALLAQPDIDGGLIGGASLKDDFFNVINGIPK  
>comp5266\_c0\_seq1; 308 518 2851 LEN=3017; translated  
MDVDERGTEDGIPTTPTDEGSALSPLAPPTPSRPLEVGGGSVFGSRRRPRFGGVMSDGDA  
DVNEETENDINDENHEGDFLDAQDGFATPRGTDIDVAEAAQAFRGFLRGFRGLRGHDDSD  
NEIDDNSLPPPVSSELESVMQRTGPASLDVDMHLCFFDAACQKLYHQLLHYPSEIVP  
LLDLVVRREMEELRAGHQEQHESHLPHEPPVVQIRPFNLREVQGLRCLDPITVDTLVAIQ  
GMVVRCSPPVVDLRIAHFSCCVCGHAHNVAVDRGRISEPAVCPSCGTRDSHRLEHNRCSE  
ANKQLVRLQETPEAVPAGRTPASLAVYCFDDLVDAAVPGDRIEATGILRAQSVRVNPRAT  
RVRSVYKTYLDVLHFRRITGMAGDSSEPPRLQSQRRELKIQDPQRRQPLPRRVGTASGRC  
KLLTSEKKEELVALSRRPDIYDILTRSLAPSIWGLDDVKKGVLCMLFGGTQVRRVNDGEN  
HDHDDTRPRKRGDINVLLCGDPGTSKSQLLAYVHKLTPRGIYTSKGKSSAVGLTASVVRD  
PETRDPVLEAGALVLSDKGICCIDFDKMSDATRSVLHEAMEQQTVSVAKAGIVSSLRAR  
ASILASANPSESRYNPRRSVVENLRLSPTLLSRFDLVYLVLDNASPDADRRLARHLVGLY  
QETPTAGEPPLDTALLRDYIDYARATVHPRLGDAAEEELLERYLKLKRIKGTGNNGTLAAT  
PRQLESLIRTSEALARMRHAPLISGADAREARLLSVATLASSTDPKTGRIEMVEVP  
>comp5267\_c0\_seq1; 524 370 1680 LEN=1746; translated  
MYTLHPPIPIRIESETTTTGIGGGGDNKSFVGSVRYQQQVAAPSESYNRGNANTSKNTAT  
NPQHHRSTESPIFRCCNDTPLSSPSSSRHLSAPCCRLNFNPSADSETTRTTTTTATATT  
ICTTDLKSLSSSLSTSPMVVGRSRPDCGAFFSSSSNLAASSASSPYFMRFQQQLPLRP  
RSNTTISDESDMKEIITAGEEAKQTNEPNFEVVAGVDGHADSDSERERGEHFTSADEAGP  
LEPGISSSIGSSLFRTTRYNSSESDSSDGNAYNTAVFDPGLDFLRKNYNYRTACELSRD  
PSREEVLPGRESASKSTAVVFCQDQGSKHPRQAPTSQSTRQSLGSIQDDGTSCKHPEALA  
MKLHRKHTRATYVMGGAAVGTMLLPVVGTVVGGALSGYSVNLYLKRKEKHAQRKWDRDNF  
QTNADASPVAKYAVFV  
>comp5268\_c0\_seq1; 208 212 712 LEN=1306; translated  
MAPRQRNISPPSPATSEDEDSSSFDDGLKAPLIQGEHPAPAMTANKVDATTRAPPKSLRI  
TEADIARDNHDWFNVVALPVVVIACALNYEYPSFHYSKGFWSMWAATTMYFFLDFSWVT  
IVPTCVKSPVVIQKHHVAMIYLLGPIIYYPQYRWLMGAILSVEVNTW  
>comp5269\_c0\_seq1; 628 1 2026 LEN=2669; translated  
XGGNGWILSVLATMILLAAGVNVYVSVSQDFSATDWIAGASTRDMPHIREMTSTTHILST  
AENPVSVQNTAAATEPTGLERNERTATKSLATTHPKELKTNSPTASGSSSGSSASKEPA  
PEPAPKQTPTTKTVAQTVDEGQDEQPDRTGNSNSILDEIIANFTEPKIKLLKSQKEMDW  
FRKRAILFRDEIIVAKKIRSFYKATDDPLSRSGDPDHYAIDQGNNTVAAKRIYDENKL  
AEFNKMNNISGRPDPSSEGPYLDVMVAGNPKCGTTLTLMANLRR IAPMPVKDVCTGATHTLR  
FAYLNWPNDPNCNALVTEHLGPDQTRWMRGSKCPRLLNSNLLLGHSAALLPSTKLIIGIRH  
PVLWFFSFSMREDAQSKLQTTYDNIELCKCPVNPLTGVRPRSCDSHPDENCFGECCGA  
LMCLHRSRLHLTLARLKGKTALSKEELKLLAPNDNDGGENLNFNAIQNPVFLYDLTQMRND  
TYWEDLAGYLGVSNVPHDYRSGHGVNRHKNLIRSSAKDYKKNLLCDPHLDFFRSKIM  
TYSYELGMWIQNYWLPVAADPDRPDVVVAGGTSNTSATDEFWAI AETYKVDPCGRLVRRP  
SDGLYVLRGDVGDDETNSTAVEFPTGTAPLHPVYGHLLNTTAVPQCRSHKKAQQKRTKDEKS  
FGTTGLAPSSAAGRT  
>comp5270\_c0\_seq1; 475 139 1020 LEN=1174; translated  
MVLYIIGLGLSDEKDI TVRGLLELVKQADSIFLEAYTSILGGVPKEKLEAFYKPVTVADR  
GMCENDADELIIDPAKEKNIAFLVVGDPVCATHTTDLVLRRAKEVGVKVMVHNASIMGAA  
GACGLQLYNYGQTVSIPFFDDKWRPTSFYPKIKYNNRRGMHTLCLLDIKVKEPFDAMMK  
GRTEFLPPRYMSVNVAAEQLEAEKLEGEVYDGGKTL CVGLARMGQPTQKIVAGTLEEL  
TQADLGGPLHSLIICGELHLDLVDVKEYLIEGSTYQREFEDKSQDNENGAEN  
>comp5272\_c0\_seq1; 1194 1 3274 LEN=3359; translated  
XTCKAVPSSSESVLKTNIASSTPNKFSLLARRFWTSKALELAIGIGMRIIGEAVMAFLLSA  
LALRGIGVSSFLRQAVSRTSTTLAAKGGGGGRKKRPNKPFASITILPDTGFNQANAV  
KREPEIQEFWKDYGLYDKLSETASAEGKERFVLHDGPPYANGSLHCGHALNKILKDFINR  
KQALNGKQVHYIPGWDCHGLPIELKVLQTMKSKERQGLTPVTLREKAASFAKATVEDQSK  
SFQRYGIFGDFEKPYLTLQPKFEAAQIRVFGEMFQKGFIFRGRKPVHWSPPSSRTALAEAE  
LEYPENHVSKSIYVGFVVEPSDGLKEYHSEDEPVKVAIWTTTPWTMPANLAVAINPELS

YSVVNHASTGKLVVATDLIETIANKVGLPEGESFEIVSTMPGSDLVGTKYTHPLYDRNSP  
VLEGGDYITTESGTGLVHTAPGHGQEDYLTGLKNGLELLSPVDDAGKFTIEAGEEFKGLN  
VLGEGNQAMIDALTTAGALLKVEDYGHKYPYDWRRTKKPTIFRATDQWFASVEGFRRSALK  
AVDTVQWVPEIGKNRINSFVVGRGDWCISRQRSWGVPIPVFYDRETGNEVLLNDSTLEHI  
EKIFAEOGSDAWWKLDEVDLLPEELKAEADKWKKTDTMDVWFDSGSSWAGVASERDELA  
YPADMYLEGSDQHRGWFOSSLLTSVAVNDKAPYKTVLTHGFVLEDEKGFKMSKSLGNVIDP  
LYVIEGNNKKLEPAYGADVLRRLWVASVDYSGDVGIGPNIKQTFESYRKLNRNTARYLIG  
NLADFVPEGQPDSTAVPYDELPSLDKWMLGRLSASLKEVDEAMDAFEFQRATQELLRFAT  
AEMSNFYLDVAKDRLYISASDDFRRRSCQTVLHALIEGFAGIASILPHMAEDIWQNLPI  
EKTTESEVFEGGWPAHLAEFEQFESEKDWLVRAVRDDVNKMLEGARNDKLVGASLDAAAYL  
YMADEEKRKILESLAGDVSLVPPVKTNGVDELRTTLMLSQIHIVDSPEKISESCDEKYI  
STADTISGCVVGVAKAKGTKCGRCWFYDEQIGKHGLPHDDACQRCNDIAIVFEKTTGPEF  
VRPPVEEPVEA

>comp5273\_c0\_seq1; 134 1 555 LEN=1066; translated  
XTAKHKTENCQQQRNQNTKVTIATLYGIFQDEHKCKKTTFKDFKRLQNDPPSGVTGAPM  
DTNIMLWQAVIFGPDDTPWEGGTFFKLVLEFTEDYPNKAPQVRFLTKMFHPNIYNDGQICL  
DILQNQWSPYIDISAILTSIQSLLCDPNPASPANSEASRLYNENRREYNRRVREIVEQSW  
QDES

>comp5274\_c0\_seq1; 473 561 2489 LEN=3004; translated  
MAEKNHRVSDSSLLLEEKSMNSMRIESNVFRMQSSIADLSIDLSTNSGSGMRCGINDPS  
KVSLEIHKQTRSDPNPDYDYPQDYCFPRGLFPFNQSTEERRSDTAEYQHCHGLHQQDVHT  
FPHAPNLHAPSPTFCQRPIMIGPQLTSQQTGTGCTAQSSFIFASSRINFASPIVKSIRQDV  
RSMTEGTRLVPHVHEGQPNDRSIRFLNNTTEDTLQTRVILGTGSFTQVTSVTINPRRNDSD  
RQGSQTNHEYRYACKALKQELISTGGDEFRHAASQLAYEAHVLSCLDHPNIKIRGLDD  
KGVVLFERTDRGFLLMDVLCETLQDRIDRWGKSSTTYAMNMTGSNFHGNHYGKGNMNV  
ALLRRHLKVVICLLELASALEYIHANHIHRDLKPANIGFSSTPCPNHPEGEEIYTRLQL  
FDFGLCHEFTPSRSTNTLTKMVGTMRYMAPEVCLEMTYDYSCDIYSYAVVCWELWTHRT  
PFEAMTSDLYRELVCRRGFRPYDQSKEEYDSLRFWSDPRTKRESSMRETLNKNLPI  
REISVLLSQAWTPDPQSRISCSRIQNQLKLYKTLVELQLEAQDLSESANNTDFDEGNNDH  
DNHDVHEYCKNYDEEDAQQAFQTFVTDNVNYSIDRASWKCCD

>comp5274\_c0\_seq2; 473 435 2363 LEN=2878; translated  
MAEKNHRVSDSSLLLEEKSMNSMRIESNVFRMQSSIADLSIDLSTNSGSGMRCGINDPS  
KVSLEIHKQTRSDPNPDYDYPQDYCFPRGLFPFNQSTEERRSDTAEYQHCHGLHQQDVHT  
FPHAPNLHAPSPTFCQRPIMIGPQLTSQQTGTGCTAQSSFIFASSRINFASPIVKSIRQDV  
RSMTEGTRLVPHVHEGQPNDRSIRFLNNTTEDTLQTRVILGTGSFTQVTSVTINPRRNDSD  
RQGSQTNHEYRYACKALKQELISTGGDEFRHAASQLAYEAHVLSCLDHPNIKIRGLDD  
KGVVLFERTDRGFLLMDVLCETLQDRIDRWGKSSTTYAMNMTGSNFHGNHYGKGNMNV  
ALLRRHLKVVICLLELASALEYIHANHIHRDLKPANIGFSSTPCPNHPEGEEIYTRLQL  
FDFGLCHEFTPSRSTNTLTKMVGTMRYMAPEVCLEMTYDYSCDIYSYAVVCWELWTHRT  
PFEAMTSDLYRELVCRRGFRPYDQSKEEYDSLRFWSDPRTKRESSMRETLNKNLPI  
REISVLLSQAWTPDPQSRISCSRIQNQLKLYKTLVELQLEAQDLSESANNTDFDEGNNDH  
DNHDVHEYCKNYDEEDAQQAFQTFVTDNVNYSIDRASWKCCD

>comp5275\_c0\_seq1; 794 525 3659 LEN=4141; translated  
MPSQSRGFACDYCGLQHDTLLEAIEHEQTQCPQALQAAARTRPIGYLNAQPQQGLPQQY  
PSYYLQQQQQQQQQQQQQQQHRHGFTTGMGPLVSSSTQGAETYPYARSAHYGEYGRRI  
SQAPAVPGMEAAYSQKSGEGILASTQTTSRPCISLFDSPDPGERLNRDPVTLIQNIEL  
FEATPEVIAEYERTSGDTNRIEPNQVGI RCNCGSGSNSSGSRSTISGAILFPIDLET  
IGECARISDRHLISCEMTNPDARELGVAAASARGNNENDDQSSKLLVDYCVQFCREVG  
ISKRGNNKLGIEF IGSSATPHGESFVPPSQQQQYLTMTQTRPLGVGTGGHGTRQRSQSD  
TPPANFPFYQENDRTWHCRYCSYIPHLRDPKSIWSSPSGVHPPNSFVDQHLSLCRAIRQ  
QSISSMPLPGRGLLPSEQSPFVLPVSYANPPSMQLGMQGISYPPVSWEATTALGGMGGM  
QYPPVGLLPHPHQDPSNYRYGYLPPGLVQPHSLDNSLGGRSGGRFLPMGQGDNRGGYSER  
GAPIMPSMQAAGAMGPSYALGSGDNTADSMKDAMSFLASYDADYARDPASAEIPKLVLD  
EDHLLLTDFYFWLMKQLRLVRF'TENDRKRTRGGKREKIKVGYGGLQC IHCADLPMSRKF  
SNVDRLANSFAEIPGHVLCRRCPQANKDALMRLKKGHPDQMSKLPGRSQKIFFRRMWR  
LHEGDPQDDVVVESTARAHAGSESKPPVPTIKTSPEKSIEDLSHSGSITVTSDETILVI  
QRSAKEAAKALAE STLNKSGPLSPSSRILVAIPEDKEWLSIDSYVRKQLEVF CATEADV  
AAKADRKYPI SVGQVGIRCIHCAISQGNDAVGHAIAYPYISIGIYESVKEFHRLHLDSC  
PNLPATSKAKLKSMMKGASSLSSVLRKYTLAAKALGLVDTKEGIRTGGESTPINSVAAFT  
FSEVDDAEPLTKTKEGGEKETEPNLHGTTNTQAIRRNETGESTNEHFEEAAASTSVGMKRS

GSFTSPEMESQPKMAKTDGGPTEV

>comp5276\_c0\_seq1; 553 82 1692 LEN=1948; translated  
MTNKLHLLFGCYSFVAVLSALSNGFIVKCTESRSGRIIHTNHIAESVVRLLKVLQSPELD  
SSNEKEADGSEKKWVEDFTFENGDAARCRPDFEILSSTTIGDDNSIEPNGNGNTDSSDE  
TGKINKKRLIYLDGATSQKPAQVIQDTAEYYEHTNSNVHRGAHTLSRKATAAFEDGRDT  
VASFINANSRNEIVFTSGATEALNLVASSYSRAIKLKEGDEILLTEMEHHSNLVWPQIIA  
QETGAVLRFVKIDFENTGCLDLDHMETLLNENTKIVGFQHVSNVMACINPVKKMVAMVRA  
KASPNAIIVLDACQSLPHMKVDVQSLGVDFLAASGHKMCPTGIGFLWGKEELNSMPPF  
MGGGEMIDQVTLEGCTFAPAPARFEAGTPPIAEVVGLASAIRYLNSVGMKVEAFEHEIA  
AYLYDRLSEVDRVTVLGPPKGVVERAALCAFYVDGVHPSDLSTFLDMEGVAIRAGHHCCQP  
LHQACGISHSARASLYIYNTKHDVDCFIEHLENTIKFFFTGLQNESEGQDDDFVPI

>comp5277\_c0\_seq1; 430 103 1176 LEN=1956; translated  
MKIPTSIFLALTTTCRVVDGLARGPIRSQLSKRSLVDTPIRRISITPEVSSSENVRNEIE  
QTSKPAIQSRKQALRSIFVASTTCVLSSTLATSPSVAYDSSFPVELSDADKSKFVTIGK  
RINSQQRKENAEMAKVKMDQNLASFNLKNDLPLSLTWGLALFFASGSRSNPLANPLANI  
YDEKEEKWLEDNAGLFSPLPLPFLFLLGFVFFLLGTVTQYIFLQLAEGDSGVCAGLAGV  
ALINGGFFEFGRIASGEKRMTRDEKDRAVELNEEFGEFAEKRLQSGGSCHRSDVVKSFRR  
YFAKYRQADSQQYPLTDLEIEKLLRFWNETQNERKAEMTSSGFYYGIQINSDADVFA

>comp5277\_c0\_seq2; 248 270 566 LEN=1346; translated  
MTRDEKDRAVELNEEFGEFAEKRLQSGGSCHRSDVVKSFRRYFAKYRQADSQQYPLTDLE  
IEKLLRFWNETQNERKAEMTSSGFYYGIQINSDADVFA

>comp5278\_c0\_seq1; 400 1 754 LEN=1160; minus strand; translated  
XVVAAVAVAVVAVVAVVAAFLPTRGRPLRLGRHDHPRLGKEVDDSEVPVELVLPERLVVVG  
EHLAKDESLLGRGDLVDPGRPPLEGSDRPSGRAGDRESLLGRVEDGDLHVRGGIGFPAL  
AFNVAAAAAAAFERMFGFSAGGSQRLVVKGTVVRGGSVHRVVAGDAGVPAAVAPIGGGG  
RHGGSVVVAAPSDRPVIAVGVIRVVRGDVNVVDVVDVSVVDVNVAGVAGVLFVSWTKHKD  
GCRVVLVSDFG

>comp5281\_c0\_seq1; 291 300 1328 LEN=2484; translated  
MQAATQKALPLAIRHVNATDTNTPQKSNNYPSAKTTTIHNMTTADTSPVESSSQTCPRQ  
VLLHENAQQLNNAANFMVEVGLDEAIDALALLESLRDFEAPAGDETSRVYCLDECIK  
QPLETGHTTPIASILRLNRHRNDPPDRKRPRGFNFIDRALPCIDIHYRPIRVITGGQSMG  
GNFHAIIVTYNTALAFHLRASFMTTTIAKYEYVSTQRQLQRLQQLLELRRALALYELAYEIQR  
DQNTRGPMVMQTNADESKGSVYFQSILLNNVGHIIHLLMNNPVNYKRCVEKISISIEATKL  
VRAETENDYGDKKKNNDSFLRKRSSPATVFSFDEERNSSTIAM

>comp5282\_c0\_seq1; 252 1076 2221 LEN=2379; translated  
MEGNRAYVRLQCYDIDSAHPLVEAHARMYVLDHKLKMHPLRLMDPNDLGGVLYPSVPAD  
IVHHIDCHSPLSPQRLPFVERSNGLVLRTLDSSTGNRDQIICPVCGEAYGTYERLKKHVE  
YNAMIEAKEGDYPTERSHVGFQFPVIKPLTLDDVRSHEETLSEIIVVVEAIDPQLSGTF  
QSLQSYKYEDIVFGSEFAKCMSVNKERTEFLVDMQQFHKTYYKNNPSIKHNI FDSIKRTKS  
DKTDPSTEHRVFDMSKRLKSDKSIENRRFLLSHISEDTFEDDVSEYHEQDIDLDDDEVSL  
ENGGTYFSRSYNTFSSLHNP SGNLASIFTGRFHSSQSTRRSSTSSILSTNSSITVSEEEI  
NTSMSQKRPTYDRLPSYSSHV

>comp5282\_c0\_seq2; 252 1195 2340 LEN=2498; translated  
MEGNRAYVRLQCYDIDSAHPLVEAHARMYVLDHKLKMHPLRLMDPNDLGGVLYPSVPAD  
IVHHIDCHSPLSPQRLPFVERSNGLVLRTLDSSTGNRDQIICPVCGEAYGTYERLKKHVE  
YNAMIEAKEGDYPTERSHVGFQFPVIKPLTLDDVRSHEETLSEIIVVVEAIDPQLSGTF  
QSLQSYKYEDIVFGSEFAKCMSVNKERTEFLVDMQQFHKTYYKNNPSIKHNI FDSIKRTKS  
DKTDPSTEHRVFDMSKRLKSDKSIENRRFLLSHISEDTFEDDVSEYHEQDIDLDDDEVSL  
ENGGTYFSRSYNTFSSLHNP SGNLASIFTGRFHSSQSTRRSSTSSILSTNSSITVSEEEI  
NTSMSQKRPTYDRLPSYSSHV

>comp5283\_c0\_seq1; 207 125 1153 LEN=1233; translated  
MKSRESIPNQSILLRYFISAVSVQVVLQLIYIDFRISSTLTHNIFHSAPDETSANHTSLR  
DVSGQGVSHHDTGAIPTIEALASTTTFSSTLGNLYMKYKKEIADYRPIMRKWCEETKSC  
KFGDYEVEMLYMLVREHKPQNVFEMAPNRGYSSHWILHALHLNDATSKLHSFDIHDSTK  
FMSPDYQARWVFTLGDYSELYDEGKLEMDGYDFLVDALHEPEFARGYCQRLFANHIRPN  
TVVAIHDIADSSGRGRESEEVYKYLAMANNARNVFTYSRFAMPNSLYAPQTDIVLPKIN  
KIRSDLGIIPDCGTPENCAKHDQGFMYFENNDAPTIFFTLN

>comp5285\_c0\_seq1; 486 25 1179 LEN=1516; translated  
MTLLRERETTIRELKEGSEEELEEKQLRQLQKSLSVYESTIESLKGKETETEVELEKVTAL  
EKHDARMGELEETDHIRQKATEEMANATATAAASSAKLILELQEALKERDEEIAELEADL

EEFESEIERRNNNSQHOREQPQSGELRTLLEEKKEKRIQQLEKERMARAEQSRSLQEKEISE  
ESMEIIRDLQNLCCERDMKIESLKADHAKVEVHQLRGELEETARNHAKDMKVLVNRNTNALQ  
VSLLEKMNRVAALEETNRELSGESYGSDFMANAVEEAARNSQRMERTLSWFSFSTEKKAQ  
VSCVPESLDSSTAFLTTPCTSTSSSDSTTEDCTSSDEEKEPDRRMVGAAPRLPPLHSTEQ  
PEILDDQGAVTGRRSSFWSMMRNQ

>comp5286\_c0\_seq1; 1489 308 2941 LEN=3210; translated  
MPNNKNGQVKMSLGFDIGGEPGMAALPTRPKERGPDDDGSGFKRRSDYDNNRRDQEISR  
SDGDDNWRGGGGDSFRGGGGGGFDDRRSGGYNRGGGGGYDRGGGRGYDRGGGGGYDRGG  
GGGFDRYDNNRGGGFDRGSGYDRGGSGFDRFDRNDRRGYDNNNDRSGFDSFRRGGADR  
GAPPDRRGFSSSQIGGVGSAGMRPRMQLKKRTVPLPEPQKEEEKKEVAPVEDKTAKEEA  
VVEATQAPVTESASEKDETPVADVAPEPEEDGWETVEGVKNKSSKDASKAEKKSSEGGK  
KNSEENAERKKKREPEVVNSRAAMLESAPTIKRDSNDANNNRRDGGRRNRGPPPVVNRKF  
EQLADEERGGKQEREARRGPPVADSRFAAAAEADEMDRRSRDEFTRSEGPPAVVNSRFS  
AAVEADKDYNNSNRNDDFDNGERGPPQETNSRFAAAAEADRDRNYNRENNYDRADRGPPV  
ANSRFAAAAEADRDRNYNRENNYDRMDDRDRGPPPVANSRFAAAAEADRDRDYSDRDRDYD  
GRGDRGPPQASSRFADAMENDRDRSYDRQNNRMDRDRGPPPVANSRFAAAAEADRDRY  
SRDRDDYDGGGRNRYHDDRGRGDFDGGGRDGYDEQPRYQSRVQEPKSSVADLLKPKARME  
ENILKVPTEKQASNFLAPPSKAQSENVLKPPTKAPAAKSKAPVAAPAPAVDHTAL  
LAEFASGKKLGDLLKAWIESQAVIPSVEKLVFHLLETQPHSPDVECEWAAPEKYGAALL  
SLVEDDLLKQMGVLFVAVQKYCDKIGMPKLDDEYVVQSMFRSMYKYDLADDETFAWKEDE  
SPENEAGKLVKAVIQTVDFWNWLEEDDDDEEDYEDEE

>comp5287\_c0\_seq1; 574 84 1445 LEN=1494; translated  
MRFTSSIVCAIAAFAASSTAFAPQARQGVSTARFSTAAEEVGVSVQVERNENFAKLAGGYLF  
PEIGRRRNAYLEENPEMADRIISLIGIGDTTPIPPIHLNGLVEGAKKLGTAEGYSYGAE  
QQGGLLEKIAKVLVNDLIDASEVVFVSDGAKCDIMRVQQMFGSKVVSAVQDPSYPVYVDT  
SVMGQTVGNPETMQYDNIIVMKCGPENGFDPYANLPRADVYLCSPPNNPTGAAATKE  
QLTEMVKLCKERSILVFDAAAYAPFIRSENVPKSIFEIEGAKDVAIEVNSFSKYAGFTGV  
RLGWTVVPGLKFKDGLVDRDDFNVRVMTAFNGASNIQVAGGLACLDEEGQKEINTLIDY  
YLENAKILRDTFEEIGYVVHGGTDAPYVFVELPEEIGGSWDAFSMILEKAQVVTIPGAGF  
GPGGEGFLRLSAFAPRDSVIEACARLREVMKKD

>comp5288\_c0\_seq1; 306 252 943 LEN=943; translated  
MAFSLCGSVSSLLFDFCFIWCLAMASGMTKSAPITKEPSSQRTTTRFKLQFDGCLRPPRD  
PGFPTIPYMAVCSACVWVHRSRNSDWVDFDRNDVDDNDETLITPLAVGARALPVSTET  
TSQHAIEYEGLLLGLQWVDFFSLPDWNIIQYTFEAENSRALENISGIDSYTSTMRQPQRVLI  
SIEGDCKTVIDQLSGKAIIPRKLLESLHVRAQSLDELTRNRNVVINDDDDDX

>comp5289\_c0\_seq1; 117 1 292 LEN=363; translated  
XEAKSRFPENLRIDYALSREQTNSKGGKMYIQDKVEEYADEVFSKLENGAHIYFCGLKGM  
MPGIQDMLKGVADKKGLNYDEWLKLLKKNKQWHVEY

>comp5291\_c0\_seq1; 207 82 501 LEN=633; translated  
MINRIPVLSAIISSAVIFVSLATDFTEARLGNPGRGLLPSKFTSSSASEVRDADLQAGN  
SLDLRQQEINRHEEVPINEGVAVPNENEGCDVPCSDGSGRITVCHPRAGGFVQICTERES  
FDDHKAKGDVCGLCISADM

>comp5292\_c0\_seq1; 508 196 1728 LEN=3188; translated  
MRFFLLLVGILCSLSTPSWLVEFGQQQLPQTTLARSSVGNTQVFLGPPKIDEWELRS  
GAVRGTVSNHPELDPGYEITTSPLETKPVAIKDNTVVVTLVSGSKYRLLKGIKTAASKDAK  
AAPATPRSTMSLFGGTAKKEPKPAPAAAKAKPKPRAAKPAPVAKAKPKPTPKAKPAPK  
APVKQAPKAKAAPAVDYNLNGKVVGKGCAYLLVGTQIRSSSKRSQIFYAYEADSOGVT  
PTGPRLTVKLANSRERLAAESRNYDRVFSRGRVAFSLQGSASCVFVKKVALIENADDSPLT  
KGI PRGSSALVLESQDQNLRTRALES GGGLKGGDLRKA AVNVCRCVESMHSSGLVWTDLK  
AENFVVLAGSGEVRGIDLESADVRSAPADYSPEACPPEFAAAEKANRGYEFECLEKNYDT  
WSLGMLLYELATGNNYFMGKSEDLITRNLATLELVDDESTGRVKGLDAIPDKNLQDLVDQC  
LSVDPGKRPSIGQILLHPYFLTTGFGPITF

>comp5293\_c0\_seq1; 309 335 1300 LEN=1636; translated  
MKFFGTPQAAMAAALSVASSTAFAPMPALVHGVPVLSAPHQRRRRRGARGTTTGLASSRQ  
EDAEDRIVSLKKSWSDDQSGVCLPSEETEAPPALAMLGNLKKKYWKLPPAPEDQFIMTGDI  
FTFLFYAFTSHSINDAIVGGLLEDPSLTIPEAVRELDPLQTVVKLQTPVWVDLASNPV  
FGNPSVDHALEVTARESLMNHWGILLSTEGSACVALCTCWLAVAGYLHRSFSFDNSTYCGG  
DKALTKTVETWATAALLLAWCAAGAEGLAGHPALQALVCGQCHPPSQVVLQSDLLFV  
DSLTVLIAWRWSAHRILNTFR

>comp5294\_c0\_seq1; 757 188 2323 LEN=2423; translated

MKTPTLLLSTLLSSRAFNNGRYLVQHSLASQSRLYSQAEEKNNPVSVETKDDWISDSLS  
DADDLQAGHLSPTSASQLSQFVQGPKNCLIFDTTLRDGTQGELVSASCDDKLKIATRL  
AAFVDVYIEAGWPGSNPKGKSNRRNFEALLDPMGDTHGXDFLTLGAMQTDLEFFKRAK  
AELTEHARSKLVAFGSSRRKNTAVEKDPQIQALVESDVSTVCMVVKAHSWQVTEILRATR  
EENLQMIYDSVEYLTNLGKTVLVDLEHFFFDGYKDDPEYAIACCESAVDAGARCLVMCDTN  
GGSMPWEVTDTTTTAMVKHFEPFCTIGIHCNDSGMAVANSIASCHAGVGLIQGTINGIGE  
RTGNADLCSIVPSLALHVETDMTCKDKVPELTKLSRFVDEVLNRTNPNTAAPYVGRSAFAH  
KGGLHVAAMERSPLSYQHVEPEESVGNEMRVLISELSGRQNI MGKMQDMFGSEMDVGQKSA  
RSLAVLNRVKELENMGYQFEGADASVHLMILYSTQGYCPPFQVLDYSAQCYDQTMDSASR  
LMTTRADSSTARATIKVRTVSDDPDLEGSGLSFVENLEVSDGAGPVDALAKAMLKALTPS  
HPSLESIELTDYKVRILNPNAAATKAVTRVLIDFRDAETDQKWTTVSVDSNIVSASLNALV  
DGFYALIEHSDTCMLCDDFFAYTKNPSVPSWWLASTLHLPKQRNEFATAI

>comp5294\_c0\_seq2; 760 188 2225 LEN=2325; translated  
MKTPTLLLSTLLSSRAFNNGRYLVQHSLASQSRLYSQAEEKNNPVSVETKDDWISDSLS  
DADDLQAGHLSPTSASQLSQFVQGPKNCLIFDTTLRDGTQGELVSASCDDKLKIATRL  
AAFVDVYIEAGWPGSNPKDLEFFKRAKAEELTEHARSKLVAFGSSRRKNTAVEKDPQIQAL  
VESDVSTVCMVVKAHSWQVTEILRATREENLQMIYDSVEYLTNLGKTVLVDLEHFFFDGYK  
DDPEYAIACCESAVDAGARCLVMCDTNGGSMPWEVTDTTTTAMVKHFEPFCTIGIHCNDS  
GMAVANSIASCHAGVGLIQGTINGIGERTGNADLCSIVPSLALHVETDMTCKDKVPELTK  
LSRFVDEVLNRTNPNTAAPYVGRSAFAHKGGLHVAAMERSPLSYQHVEPEESVGNEMRVLIS  
ELSGRQNI MGKMQDMFGSEMDVGQKSARSRLAVLNRVKELENMGYQFEGADASVHLMILYS  
TQGYCPPFQVLDYSAQCYDQTMDSASRLMTTRADSSTARATIKVRTVSDDPDLEGSGLSF  
VENLEVSDGAGPVDALAKAMLKALTPSHPSLESIELTDYKVRILNPNAAATKAVTRVLIDF  
RDAETDQKWTTVSVDSNIVSASLNALVDGFYALIEHSDTCMLCDDFFAYTKNPSVPSWW  
LASTLHLPKQRNEFATAI

>comp5295\_c0\_seq1; 263 77 745 LEN=866; translated  
MKAKELKILRKALVKANRCEELLKGFGTETVLSVNNNANYENKLESCSGHNRKYCISIIIF  
SLSRQMTENRFKECLGLFEKNMAEMYINSSWGLNMEEKSAELKDDKARFLALDDDCKLS  
GFVHFRFEYDDEESPTCGVLYIYEIQIESIYRRCGVGRRLMRMTQRIAKEQSMTKILLTV  
FKKNRQAMTFYRDKLGYGIDESSPSKFGDHDVDYEILSLKIS

>comp5296\_c0\_seq1; 560 1 1900 LEN=1978; translated  
XQSLGHATPLTRHFLSNRFRSDLNASNPLGTGGKLAHAYEAFVKDAMMRAGRGA VSP TAL  
KRAIALFAPRFANRNQHDAQEF LAYLLDGLHEDLNRI R R APYVEMPDVTDGQNTTIAAAE  
AWNARRRNDSLVMDAFYQGQFQSTCVCPCRNHVSVSFD AFNHVSLEIPSSGAAWATVAVP  
VLVHFS DGNRPVRYGVTLRQASVLDLKR AVASLSKIPPEKLI VTDVYENSIYKLLDDK  
QSILSIKSTEDTIVAYEVTPYTVKDTLHMIVTHSLSTDP SRSGEAYADQTTSGAVGGTDG  
GKGAGSDGNGDGP EENYFGLPFMTS IDAKNSSCRDLWQLLRGLVRRMVPEFTGPIAGEGG  
SRPEKVLVHVVD AQGRPRRIVPKMGASGATSVLPECSKTLLSSILGEDCAENFLFLNLV  
WKPLASNKNGSRIDPKRFLDFDIDPTL TEAIRRQOSTSRSSSTKQGVTL DQCFHSFSRPE  
RLDRNNMWYCSRCKDHVQALKTMKLWRLPNILVVHLKRFEFKHALRRDKLTTYVDFPLAG  
LDMNAHCARSNTTTDKNDFANSYVPADYDLFAVNNHYGR LGFGHYTSFAMQWDETGISKE  
WNAFDSSVHPVEPSEVQSSAA YILFYRRRVFH

>comp5297\_c0\_seq1; 897 235 2604 LEN=2740; translated  
MGHSRKLIRAI SPTISDHMRQNA AQRRTILGISKALDKRLYRMAKGVMPPISQTEQVALG  
CGTIGFDRDIFTGNPSLQHLVDTYDPKLTDEEQAF LDNEVNTLCELLNDHDVSM EKDFNK  
ECWDYMRDEGFFALKIPKEWGGKGFSTHAVSLILCKLSTQSFDANATVAVPNSLGP GELL  
ARYGTDDQKEYFLPRLADGTLIPCFGLTGPHSGSDATSLIQSDCVVEERN GELGVVASFK  
KRYITLAPVAGVIGLGLNLSDPQGLLEGKGT EGFTVALLERDHPGLEMGKRHMP LNAAF M  
NGTVEGDNVWIPMSNILGGQERC GF GWHMFVECLA EGRGVSLPAGSAGCGRTVVSAIGAY  
SRVRKQFRVPIAEFGGIQEALSQAGSDALIT IAGTDLMNAI VDNHEAPMVVSSIMKQNC T  
ERGRRI VEHGMDIAGGAAICRGNNFMGNAYMSLP IAITVEGANIMTRSFQIIGQLTRC  
HPHMLELIYSLQAPIEEEDKAIKTF TSQFYKVVNHGATNFVRSVTRGVGSTISSMTRSKK  
EFRDGDKLLAHHEKQLLRLSANFALTADLCFTLGGRLKFEELLMGRLADAMGAI FLGYST  
LHHYSRNRGVDGLEAITEHAMLRL EKDAQDALKEASDNFPGPLGTVASVVMKMGCFPLGS  
ITRPYNAPNDLTKESRLLTTPSGLRDLFSEHVYMAPEGHIHQPSDLMRALPLC V EADK  
IASSLRREKREPTQEETDIIAKAEALRDVLIQVDVFDHLTDAEGEGYVRPALLGTEERL  
ASLDQKRF G

>comp5297\_c0\_seq2; 897 445 2814 LEN=2950; translated  
MGHSRKLIRAI SPTISDHMRQNA AQRRTILGISKALDKRLYRMAKGVMPPISQTEQVALG  
CGTIGFDRDIFTGNPSLQHLVDTYDPKLTDEEQAF LDNEVNTLCELLNDHDVSM EKDFNK

ECWDYMRDEGFFALKIPKEWGGKGFSTHAVSLILCKLSTQSFANATVAVPNSLGP GELL  
ARYGTDDQKEYFLPRLADGTLIPCFGLTGP HSGSDATSLIQSDCVVEERN GELGVVASFK  
KRYITLAPVAGVIGLGLNLSDPQGLLEGKGT EGFVALLERDHPGLEMGKRHMP LNAAF  
MNGTVEGDNVWIPMSNILGGQERC GFGW HMFVECLA EGRGVSLPAGSAGCGRTV VSAIGAY  
SRVRKQFRVPIAEFGGIQEALSQAGSDALIT IAGTDLMN AIVDNHEAPMVVSSIMKQ NCT  
ERGRRIVEHGMDIAGGAAICRGNNFMGNAYMSLP IAITVEGANIMTRSFQII GQGLTRC  
HPHMLELIYSLQAPIEEEDKAIKTF TFSQFYKVVNHGATNFVRSVTRGVGSTISSMTRSKK  
EFRDGDKLLAHHEKQLLR LLSANFALTADLCFTLGGRLKFEELLMGRLADAMGAI FLGYST  
LHHYSRNRGVDGLEAITEHAMLRL EKDAQDALKEASDNFPGPLGTVASVVMKMGCFPLGS  
ITRPYNAPND DLTKEVSRLLTTPSGLRDLFSEHVYMAPEGHIHQPSDLMRALPLC V EADK  
IASSLRREKREPTQEETDIIAKAEALRDVLIQVDVFDHLTDAEGEEGYVRPALLGTEERL  
ASLDQKRF G

>comp5298\_c0\_seq1; 594 137 1972 LEN=2434; translated  
MGPRERPRGDEPETTESTPLISNATPAAIVSVSSEATPGGSDPSSEARKHKEWLT TTTSA  
LSFSLLVQSYLLVSVFPYSGFLSMHLIEGLTEETAGSYAGLIASSFMAGRTFSSFEWGKA  
ADRYGRVSVIKASLLLSAVFSLFGLAGSFPMALALRFL LGVCNGLIGPIKTLVSEYAHG  
DQTKETKTMGIVLGMWGYGFLINPAISGYLSDPAKQYPAELVEAFRPWLEEY PFFFLPNL  
VGC GFCLVGYALTHAFVTETLPEEKRPFR LVP SIGLWSWIEAKTSQNP KILRTVSSWGL  
FKHLHSEEDGEISENNWSVVVSP TGGQATDGGGDTNESRDDGGNTATIASLLQRNSTRQH  
LLVYWVYSFLIITLDEIFPLFCISKTSGLGVTEKII GNILSGTGLVYVAMQYFLLTGLVN  
RFGFYTALT VSAALSVPTGIWIPLSLVTNEGAAEGALNGASLAYLSIVYAFIRAFSSVVF  
STITMLLNRTVPAHQRTMNGLSMLGGSLAKACGPLFGGVLF SRVNSVTPPF GSVLVYG  
IMSALGGLLVLTQTF LRMHGDVDEPAQMS SSPPPPKRFPEDDPETEFCITMDCNDQEDS  
SREETDSPPAF

>comp5299\_c0\_seq2; 220 1 466 LEN=490; translated  
XHNNNNNNNINNNFI INNNIDRNMNMNMNVDDWFQ PQRQH QHDPHQIATMPDDRSDSDC  
IEETPLRCIIISKAYSGNDLLWYMSKEVEVTDGGSRRRKTFSFYAP LLLDAPPDLPVYPSQ  
TSM LVRQHQRWRGLAGSTTIQPPTVEVIDADDL DL

>comp5300\_c0\_seq1; 232 1 640 LEN=933; translated  
XESSTIRRRKQYNTILAGPHHCTNTGTVIKKNQAKMISSTRFCLLASIACLW MFSATAF  
VAGPAVARRSALFMAEGEEVKSAPKVS GEELEVMLQDWDTP LVIDAYATWCGPCLLMSPE  
FEQA AKELDGKVRVFKLDTDENEEMAARLA INGLPTLLFLDKYTPPEGSDEEASAKEAGA  
QAVLKGRIEGALQKQNILDFCNFHFFDGP EPKL

>comp5300\_c0\_seq2; 122 1 351 LEN=644; translated  
RKPTHNHRFDRERC GPCLLMSPEFEQA AKELDGKVRVFKLDTDENEEMAARLA INGLPTL  
LFLDKYTPPEGSDEEASAKEAGA QAVLKGRIEGALQKQNILDFCNFHFFDGP EPKL

>comp5301\_c0\_seq1; 441 72 1574 LEN=1636; translated  
MKFGKVSQTIKANISGVGGSGHKLNDGGNRDAVQNDQPREAIVG PLQSEGNHAFISVRS  
PWEWMDGVCTQNGAGLVAITRVGASGDLPSGKLASIAAVAVASHPRQSSTSRRRQQRGI  
NTAATDANCTLRVEIVSNRSTGHNSNHARPWSLEVFHCTSQAFDGLDDKDELARTLKR CR  
CEDMNISPPS QLINWDVTKEECRN VVGNLPHLSKESNGDSSTAI AVLKEP MGSRGTVGF  
FVRDADEIHSII EQHRQRAVSESGFLDNLIAQKGRIPSWVLQAEVKPCLLIRDRRKFHIR  
TYVVCVETNVM LDEPLDGE EEEEDLVKLF LYNRHEIRIASEPMPSSPCDAAGSSERSRG AH  
ITETFDRGLLQDEPELVARNLHHKVENFVANAMEALY PDMERRVAR SASALDGENEASRG  
CMVLP HKFAIAGLDDLVT EQERIYLL EANINPAAPPPE TVTEEFQSHLIGFFRDTMELVT  
SGSKTSDRNNFFSTKSILRR

>comp5302\_c0\_seq2; 179 401 907 LEN=1396; translated  
MTKEVIDAGGNV GASQAARLGKYFSLMMLVEVPASAVEPLEESLRTMKDLSASVCVAKDD  
DDSDKVAETDSSGNTIGYQ GAL SLEGADHPGIVNKVTKILSSNGLNIDSLETTDELAPGG  
GTVLFRMIGITHAYEPLSAGFDVEKIKQELEDLGN DLNCDIELIDLEE

>comp5303\_c0\_seq1; 1525 1 1525 LEN=1795; translated  
XGADVGADVGADVDVDV DVESEPTSASKSIAKKVNGNSREQSSAFCLLVKDDNDILPEWI  
AYHYHVFKMRRLIVALDPDSETSPLEILQSFASSETSFEGRFHLDF TIWNKDYTP EFFQ G  
DKKDYSKIPITVKEEIHFKKKITDPKR LTAADIENRHILSTAWHRNETYNKRHQTVVKRV  
AHKMNNHRFRQRI FVRECYRKIKEEQMDAYQVGQGEQQDSGSLISWTVHIDTDEF LVPN  
PWISAYVQSN SSEHLTNHSSVNAYEHKEDYEKLLNLTGYKPHDLVALYPKRPSD VSLWNF  
FSDYISKLP RYKECIVIPRVLFGDKEEDDGTSISTTFANFSGMSASWNHAKFQSLRWKYH  
ARFNSSI ELSKTIVRTNTLDLTSNRGSEPVIS IHRPLDSCPPQELSLQIYPKVR RVHKPL  
VAYHYLGSQERYLSRKDPRRNILSFRKLN SHANDAIGDENYDADMTNTTQDHPSIWLEGW  
LDAFIE THGADAVFTVLGNPYATVHMQQ

>comp5304\_c0\_seq1; 322 1 1202 LEN=2205; translated  
XPFSIMRQTPSMIVVLPRAMRITFLLLLQQFYGAAFQREPHLHLRGVQYHSSNLGRSSCV  
PSLVQINTRTCPVAISMLPTLPPSYEYDSSVSFFQQRATGTRIRGRKELERSVQRWEKDFR  
EAVDDELVRTILNDGGGNGMKLQLQPRLDTVSATTTSPPTLLVVRWNLTYYVDPVQVMVSL  
AESVPGWTVDLSTYTDKVEEERRFSYSAVGRLFARAI FTGCFRVPMACIEGVSTCEFVQT  
ESGDTSSKRRKIRSIVEDLAYAQDLNRGVMANRLCARDLQFFLETVRKPPPEYYNELNSAE  
AKRSGSGTNGVKQDDEYWEDRLASLLPWRVSPGMMDPLYIEAQAEEDIAVNLPVLFGVF  
SIAVVVLFASWIAPNLIGQSLFGQPSYIVPPSELNEIIAF  
>comp5305\_c0\_seq1; 330 13 889 LEN=1145; translated  
MSFDDNGGKFFAGGTFVSVIVLSSVATNFVTNLATERITKAKCHEGDPRIDEDQDCPEGDV  
DKAKSKPKKGGNATKKSVRKKTSTSAAKKKNASVKKTGRKKQMITDTDKKTDDSRQSDSS  
DDDPEWEAYHLHSEKSESDAFWNENYRRLQEFHSTHGHSGVPIHWRVPEQFADWVSRQRQ  
FFREIQSGYRRPSIRDEGRWKRLQILNFPLDYEKWHWQQKYNELIEVLHGKEYDENNTNI  
PETLKVWANHQIYLNQSDVHSRIDSERRRGLEILGVLKKNRVEDCASYS  
>comp5306\_c0\_seq1; 635 144 2159 LEN=2248; translated  
MKIAAATSULLVAHAQRTEASGRVAETDKVQTATTREAVEPSGLLRSSARATLRGRHNEN  
VLGEYKSKSERRNLERNKTALNKLGNLEELKNRRKTLQRTSKNYEEEEIAVPTSHEDQQL  
VDLGLGKGRLLLESSERTDKESIFDQNSVRDPSVATTADEETKDQGTSTTSAPIDVFDGAA  
EENDFFLANAHYLCEYENCNCGSFSFESMQGIIQCSSEVVATGGYCATTMNYCGEPVDVC  
YRETSSLEAVGPQDYTYTVCSTFSKPYQQHICVTFDASAEDDNNINTRSEVLSDNNGISE  
VVNYSQSSAPCKVEFNNERCSSCSTELRTYERIFVDQSIGDRHVLSSYQRRFCQVDCSNA  
AAQDHVFNTCDTNDLSTLRENVVFGDDCTRCPPCGMGFHM TAGTAMGSFPVIGDYQCSGL  
ELGAI TGFFSRDVCGDIQSKAKEYCGCEPNFYDPNLVLPPELLTEDIEAEKSRAIGGDGDE  
LEISNPDNMFVLPGDTIGAESCHLCGANSAKIANPNLVYLPNGKQTTCAALEGAGRLGM  
MTVDYCKFIAMPLAFAECGGCLTWGKGEDEEVDAGHAGPWTTSD EILRLNGNPVNETTS  
PIPRLYRENQELNVTSPLNATSPPKTSSPTASPPKAVSALSTDEESSAPIGSTMLSCFT  
MVPISLLVYFS  
>comp5307\_c0\_seq1; 652 1 1731 LEN=1873; translated  
PTASPTASPTASPTADPTVTPPFAGIVSYEFPATETTDFLHGLCVKGAASPKKIAVTSND  
ETLSYTKIPKFKEGTKLWSKFKQFVGPLGKDMCLGGTYLQPN EIRLIPKGTKISLEAPAG  
FDKPV TICAFVEANGPKRDGGWPAPLKDDGFKVSEPFDWASGNEKDNLARFYCKEFTVEE  
PEDELDRFELFAVGDNKKPYGKLEATSPLTAKVFFEAHPQQFIKKN SVVDVALYAKVPK  
GKSCDKGTLSSADGYDVEVGELFEYPEYNKLYGGKGPFPSTSNGLIGAAEFIIISDFTA  
PSGDSQIYFPVGDGDGEINLCVQVSTQIDYRGNKGDIVSRIDTHYAVSVDLTGDFEFK  
EQTVKIQSTDASDLKDQIQSAVDVTAFLCKKGNKPIEEITFREGE DFRICVQPVVEKDTR  
LDYSVVKFDEVVCSNAEIRDVITKKGPDALTLVDKAPDKKGT LGFASVVTNGYLSKNED  
SFLCAGKVTLRSKQKQILPGRALRSEETVAEFLIQRRAE EEAADDENSEGGVFGLGIKI  
APPTDEDAAYSAPASVASPVSMFALAVASMMATLWF  
>comp5308\_c0\_seq1; 365 1 1080 LEN=1173; translated  
DDKSDKDDKDNRSKEDKDEKNDKSNNDKSDKEDKVDKDRSKENKDD SPTQSPTAFLTS  
SFSSTSSWVSTDPDNDSPIGSPTQRPTQRPTRKRNPTRNPTKNPTRNPTQSPT EAGTSS  
STSTTTEIENAEIENDNNSNQINSQNDKDNNTSNSSSNNDGGSNNGSSSSSNN SAPF SFL  
DLPRNLPDRWRAGYDFGGAASDPRDRSGGERDACVEDAPPYLLSLGPEPDRELQGP PPRP  
FGEGLPPTELCCGSLAKYFAVASGKACGFLQVPS PSSL SVAKSWDHAPGVL CVLES GGD  
VRIVEGNGVGGGSLPAFCGREFP MGGGIVCVARESSPAVRERLFGSLRRG REEARGWPG  
>comp5308\_c0\_seq2; 346 1 1519 LEN=1612; translated  
EDADADPKQRLRLRGDTRLPVVAFLVGTALAAFFRAKGSLSRSPSPSR SLLLPA AAAAL  
AFRPMPTARSRAFRRNGTGRAEAGSESELQAQAQASSPAAWGGDLHEEAGVA AELVANA  
LRLCLELRPRCQEFTSESKSEGAFFRRDKADGTPLTALDLAIQGYVLSNLHRSFGGDSFLA  
EEDASLLRGAPDHKGLSERSHGLASRLDPGLGFGEFLDAIDLGTNGVCGGNRKGESDT  
NGRCWILDPIDGTKGFLKGHYTIGLALCIDGLPVVGV LGNPCSPSIESSTMVAVKHGHL  
RYYRGGPCCSGNNGSSSSNNSAPFSFLDLPRNLPDRWRAGYDFGGAASDPRDRSGGERDAC  
VEDAPPYLLSLGPEPDRELQGP PPRPFGEGLPPTELCCGSLAKYFAVASGKACGFLQVPS  
PSSSL SVAKSWDHAPGVL CVLES GGDVRIVEGNGVGGGSLPAFCGREFP MGGGIVCVARE  
SSPAVRERLFGSLRRG REEARGWPG  
>comp5309\_c0\_seq1; 384 1 1535 LEN=1572; translated  
XQIRIHSTCVATVRQSLRAGQILSSTDHPASTRALPDRLSEGIKAE EHGECTTDGGVIL  
FADTQGIMFSFCERQRPRLRILAASFV VACAKATPPTGDAPASVSTGDFLFE EEPHSE  
FSDCELGCANGGYCRFVHGTEEDLARAAMSGALVESCRCP EGF TGKTCQFLAGADVPPER  
RCQGETNAETQASFHGCDAFADAVSDFAGAMCRSPVTEYCGGGFGVQSRASVSFCTNG

GRCKRDKVIEATFLPKDPEGGRSSDGTGCLCPRNIFYGPHCEFLRMDPSDGNLVFAEVEVA  
PDDTRLSSGGTDPSSSTSPSASSLRSTVDYETATKSRGAATLVFLLAPVTIIGLLALSVCVS  
RTFLARHPGAAHRTGMLQRARLFLRRSNGSKDHKTGALSSSLSSKPWDGRSDTSSDCSDN  
GYRHCCSYADDENKVFVDQVNFNEEDELGIASMASRLDLGPIDEDTERPDAFXATNHEARR  
VSMYRLHRVSKVWRLALIWTDLGGLLQSSV

>comp5310\_c0\_seq1; 333 1 1426 LEN=1574; translated  
XYACLKLFVIKPRKLSAVFLLLHSNSLYMNTNSSLFRLKMRITAYLHWLFFPPLVSA  
EAVSPLVFRGGSANRLDQGSNALVPDLGQDILQEKKLNTNSAVDEKYLERIVQSQWEKHR  
RWRVAVAKKRKFKVDASRISKLVLSFGAVAQVGSTQLDKYASLSKYKSTASLLGSVCIAA  
AGLIKNIKILTDEKIHMHVTSYATSQAIAEVYKFRANVKPYSQFKMNPDEALNLLRSRCS  
SISESTSDEKFYLTRQDSSPPPGWLNTVDQYMEKRIDDMINRFYVVKRGRRLKQRAAFCSR  
CENALLGLSGAASFCSAQQLSGPLQKVFSSTVGGWGAFTTVSAAFANHIAKEKFNDIAVE  
YFEAAAKLQDVKDSWPPTAAMSGSPDWEEQVAKSENVILTTIEEWAKAKTGNEDLHLKAA  
PPVKKDPVWNPVICGTDES GFYPASDRAEWLVTKNMTQADAQKKVMVEFPERF

>comp5311\_c0\_seq1; 474 350 2221 LEN=2510; translated  
MMELDSYIDRYTGENRLRRLIIAAAGPRENCNLEQRKRALNLAEQQLRLRDDNVLLEYRE  
IFGGGSEARRADPELFEGFPTYDANWANSTESRNNETRFVLEGRFTTAKSRLHKDAIRTA  
CLALAAHDKRTGQDTFKSLADLLGKSRGDCGNEKNKYINNKAQVKNALYLAMDVCTTRV  
QTAQLGLLIIESALNAGDYFMVREYTGVESTLHSLKEKVGVSSTISRNNRIDKNQDPNQ  
DAILRDIGVKVQLAKGIERMVSGDYQTAANVLVALVMKESDGGIGSNNVSNENNHYYQEN  
SDSDACHTLHWPGVTAPEDVALYAGLMCLVTRDRSKMIALADHPDALELVPSVKELLVHW  
SRANYAPCMRAFMSAVGLSQSSQSSLAPLLSQPLPMGMVVDLYLTPCRWDALVQTIR  
ETCLIEYIRPYQRVKLDELRLNLFVSSPTTNGNESTLDALIDMLADLIDRDLPTTTRL  
DCREGVLFQTKALDPAAPNLQAMEEKILDDTHAMLVRLACLEHDLGLASNDASSLGGKRG  
NMGGRQHLSRQKSSRPGCNQSQRSRSGILDSSSEDEECVAGNVYETFAPAASRANPRGDVGD  
NDTHMIDAESSHANSAMPEDMY

>comp5312\_c0\_seq1; 346 1 1748 LEN=1968; translated  
LTLGYAISAAVARSWAVYVSGFFHGWLQGYIVRESVVAIATAADNFLQWFVNLPI SNA  
FGEQEQCCPLAAVILLCTSLLVGTAKESARFNTVMTILNISVLGFVVIVGWTTGNVKI  
QENLLTPSFFPEGFDGVRAGLFFSYLGFDMVSCLESEVRNPEKNMPIGIVGSLVAST  
IIYCVVSLTVGMVPIKLLGDDVPVNALLANACCTHNEQLQDIAIHSDDTYECLSYPS  
KGSSIFALLFNRSRLISFAAIFGLTTATFACLMGQPRIFFSMAQDGLLFKIYGRVNPET  
GVPTAGTIIITGITTAFAVACFVDLESLANTISLGLTQVFTFVNAGVIVLRMTPSLIQIEID  
TKNDDEESDAGQGSNKKTEADAGWNLSSSENTAQNERSYLIPCKTNGRERTNNICSSCTA  
TCCAERRSLLPDEGGAVLVREASREFRSSLRSISSIVDNGESFESQHLLEVELNGSKPY  
WLTLIFTVSAVLFSASMSXLMHRNKVIGIDHYATFGSYVATTAEQLARDFQLPVRSGC  
AIVRHIFQFLYDGFNALIHMVNNHPLASSGRLFLLLLRLNAPF

>comp5313\_c0\_seq1; 314 101 1219 LEN=1326; translated  
MGNRSSSSVRSAGPPPLLSAAVVGDAKFRDFWMGNDSDVLDNAQDNNVLHALFSCRLEN  
GRCSEILGFINESVPRSQLIKAHRRANKIGCTPLWILVAYGNVALLTEVLDRDFEKGQMD  
LFSELIEQSNQGDSPFLATCSQGNMGMMRYLKEEITYPSQFKAALTRKNKKGTTPLOIT  
VANNHESLLEYMLLVGEVVVRKQLEECNSIGLSLFHICSERNAHEILQTIKFMDDKSS  
SDRSDTFDKIISLKDKNGANPIHVAFCGNVEVVEVWIDFVKKACSHVDNDSKSKIVAY  
LDQLDGQGRTPYWLGVVQGRSRIGELLAGEGVDTENPKMVLEIEEAQEKROKASAARQHE  
NQTIDGSALLNR

>comp5314\_c0\_seq1; 272 101 772 LEN=1084; translated  
MAASPVNVYTEEKAQRLIRTFASLAFCLLIGWFEIMILRPAQDMAQEMEHLDPSEIISL  
PFPLVNSTIFAILPVFVLMIVWTVYNPSTVGWKILSLIKVTGFI FVIFGLCGNDLIATWE  
HSVSAALFLAALLCTNLTEKRTSKLLEELPFYDHSDDLSTIRLYTTLAFIIPFSILSVLD  
HGDQKQRWPCPVFMGGTYGFAFGSVGGIFLNYFKAKKLEKVKV

>comp5314\_c0\_seq2; 257 349 1020 LEN=1332; translated  
MTKNCWMSFPFVMAVYVQRCGNQNRVHFIQTNEFFAIRFCFSYGYAETQEHLDPSEIISL  
PFPLVNSTIFAILPVFVLMIVWTVYNPSTVGWKILSLIKVTGFI FVIFGLCGNDLIATWE  
HSVSAALFLAALLCTNLTEKRTSKLLEELPFYDHSDDLSTIRLYTTLAFIIPFSILSVLD  
HGDQKQRWPCPVFMGGTYGFAFGSVGGIFLNYFKAKKLEKVKV

>comp5314\_c0\_seq3; 255 101 640 LEN=952; translated  
MAASPEHLDPSEIISLPPFLVNSTIFAILPVFVLMIVWTVYNPSTVGWKILSLIKVTGFI  
FVIFGLCGNDLIATWEHSVSAALFLAALLCTNLTEKRTSKLLEELPFYDHSDDLSTIRLY  
TTLAFIIPFSILSVLDHGDQKQRWPCPVFMGGTYGFAFGSVGGIFLNYFKAKKLEKVKV

>comp5315\_c0\_seq1; 405 279 1467 LEN=1631; translated



MRLATPLSNL DVAKP ININTKSYYPSEKQQLKAYGFGLTENQSVSNHLREADVITYISNDE  
CFGRGINFNVLNSNEVMCTDPFAGKTATCLGDSGGPLTDASGTTLIGVISFGSGCEADL  
IPDGHVRLSQVSEWVQDQICLLSANRPASCGPSAEYRDPQAFEVVDFTHDFYPEHTTFA  
VRSKSSQKTVYAGPEYIIPTRNGNHKESIFLVPGEYTFEVYDLEGNLLSERGNLWKISV  
LFDGCTETEVASGGPSFKNEQGTFKVI SADKATHNSRCISKNDEIAIEMNECLTKKQAE  
SAGVAFSTSCCAPDEATGKIELACFNKLG IHALSTTKPAQTQQIAVVGVLGMSADRV  
LRQHQVETA AELVAKASGALQVEQGEITGISVEDE

>comp5315\_c0\_seq2; 498 285 1869 LEN=2033; translated  
MMSYLIFFLLTLTASILEGSTIVADELEDPFAYMLRKPRI VNGDKSNPSNRPF FARAGYD  
EYFYTDDILCGATLIWSDIAITAAHCQGFANGLLILDQQTNDYTKLTPINRQIRHPGWS  
ISRQNLNYDVLV MRLATPLSNL DVAKP ININTKSYYPSEKQQLKAYGFGLTENQSVSNHL  
READVITYISNDECFGRGINFNVLNSNEVMCTDPFAGKTATCLGDSGGPLTDASGTTLIG  
VISFGSGCEADLIPDGHVRLSQVSEWVQDQICLLSANRPASCGPSAEYRDPQAFEVVDF  
THDFYPEHTTFAVRSKSSQKTVYAGPEYIIPTRNGNHKESIFLVPGEYTFEVYDLEGNLL  
SERGNLWKISV LFDGCTETEVASGGPSFKNEQGTFKVI SADKATHNSRCISKNDEIAIE  
MNECLTKKQAE LSAGVAFSTSCCAPDEATGKIELACFNKLG IHALSTTKPAQTQQIAV  
VGVLGMSADRVLRQHQVETA AELVAKASGALQVEQGEITGISVEDE

>comp5316\_c0\_seq1; 340 1 933 LEN=1010; translated  
XTAIDIADQFDEPGRSSGHTIASAEFNNTTRKMAAGGSFFFRGAVLLAAGVALMASGGSD  
SLRAAAF SAPSPARTGRIDNPLSALEPKTEATACGQETTTTTTAAANKAPAAAVSLGLAL  
AVGASALAGEPANAYIPSDYASET VQTSIQDLKKASGNVDETFKVYESIAGIITEGKGVG  
GQINYKGIQLERGYVADEDTTIYNPGLSLLTESEKERLVEAVIDARKAGLEGNQWSENNE  
YAFEF LRQKLDPFHITELRGFLGIVPFYGAAYLAVLAVQQ LFRDGFQIAYLVGVAFFL  
PIVGLVLAGP

>comp5317\_c0\_seq1; 875 53 1912 LEN=2076; translated  
MDAESGECLANATLLSKVDA TFSNPVFVA AVVVLAAYLLVEKYAI IYHTKLWIEYLTTSI  
PTLEVSMTP EESEDDGVKGD PVTEMLLNADDKSKLNCYDPSTKQFIGHAKNMTAEVNE  
ILVKAKAAQAEWAKTTYAQR RMVLR TIQKYIVNHVEDICRVSARESGKPKVDAMGEILT  
TCEKIR TICEWGEFWLRPDSRPTGPM MVHKS AWVEYVPLGVIVAIAPWNYPFHNSINHVI  
SGLMAGNAVVGK VSEHASWSAAYFGRILHQALVVNGHNPDLVATVTGLAESGVALCTSPL  
VDKII FTGSTPIGRRVMESAANL TPLVLELGGKDV MVFRGDVKVPTIVPFVMRGCFQNS  
GQNCVGV ERVVVYESILDEFLEAVVPRVKALRQGNPLP SCGADGKVD CGSMIMPRQLEIV  
KALVDDAVKKGAVLHCGGKPNPNLNGQFF EPTVLSGVTPEMDIFNQEVFGPVM TIVKVP  
DDDEECIRLVNHCEFLGSSIFTADDARGLAMGKRFKTGMLTVNDYASNYLVQSLPFGGV  
KESGFGRFAGIEGLRALCCERAICVDKSSWIRTSIPPVIDYPINAVKGF PFTESLVQLFY  
NESILGKIKGIIGLIKNGA

>comp5317\_c0\_seq2; 875 141 2000 LEN=2164; translated  
MDAESGECLANATLLSKVDA TFSNPVFVA AVVVLAAYLLVEKYAI IYHTKLWIEYLTTSI  
PTLEVSMTP EESEDDGVKGD PVTEMLLNADDKSKLNCYDPSTKQFIGHAKNMTAEVNE  
ILVKAKAAQAEWAKTTYAQR RMVLR TIQKYIVNHVEDICRVSARESGKPKVDAMGEILT  
TCEKIR TICEWGEFWLRPDSRPTGPM MVHKS AWVEYVPLGVIVAIAPWNYPFHNSINHVI  
SGLMAGNAVVGK VSEHASWSAAYFGRILHQALVVNGHNPDLVATVTGLAESGVALCTSPL  
VDKII FTGSTPIGRRVMESAANL TPLVLELGGKDV MVFRGDVKVPTIVPFVMRGCFQNS  
GQNCVGV ERVVVYESILDEFLEAVVPRVKALRQGNPLP SCGADGKVD CGSMIMPRQLEIV  
KALVDDAVKKGAVLHCGGKPNPNLNGQFF EPTVLSGVTPEMDIFNQEVFGPVM TIVKVP  
DDDEECIRLVNHCEFLGSSIFTADDARGLAMGKRFKTGMLTVNDYASNYLVQSLPFGGV  
KESGFGRFAGIEGLRALCCERAICVDKSSWIRTSIPPVIDYPINAVKGF PFTESLVQLFY  
NESILGKIKGIIGLIKNGA

>comp5318\_c0\_seq1; 444 734 1991 LEN=2073; translated  
MKRVVVP EXENPPVQMPDKDAELRLADLQATITEEYKRGNF TNALATSQDLLKQTQQHFG  
YNVDHPATASAMNNVGLMHKLLGNFTEARQHYVAAXAVYASVCGRDHASAMTLHNLGNL  
NKSQVHF DASKATDRLSLVESALEYLEEAYAVRIAELGVEHPHTIATR SAIGSTLAAQV  
LYQHKLVENNTEGSEKIRKQYVALNPQQITEQQWRAAEEHLRESLQTAIDNPRGKQIKNN  
QHRKNSNKFRKNGGKVKIKQLQNKIPGNPGSSFSITTL SAASAAQNLA VFLKSLAMTMD  
EDSPGRKYNLYEAKDLYENVQQV RTQLLPSDHPDYATKYSLAE LLEVLAAVPSSGEGTD  
KEQEERQRHQESADALRQEIIDTYDPPNKKLEEIDSLVPNDESQRIEIVVEKTKGTQNH

>comp5319\_c0\_seq2; 411 52 1467 LEN=1667; translated  
MGEPIVIQGTAVSAPAQT TQAVTYGAEFETPSSNNPEPAKTGCKDPLFAILFYCNVAALL  
IVVVLYGIPAMRESDSSTNYLRVTAALVFGVTSFVAGLAGLFLITCPALMIKVG LIFS  
VAVAIAYCVYAFLYLNLVFGILAVVFAALMACYARGVWSRIPFAAINMLTAATAVKANLG

VTIFAIFFTILEVAWLVLWAIAMVGVDKTTKCDANSQCDINYGILFGLFVCLFFFTQQVL  
QSCVHNVAGTVATWWVAPNESGCCSKGVCNSFIRTVTTSFGSICFGSLIVAI IQALRAL  
ASAARGNDAGFLACIAECILACLQSIVEYFNKWFAYVGVYGFYIEAGKNVMQLFRDR  
GWEAIIADDLVGGAI FMLCCVLGLI IGVVGVVYASINSEFKTLAQDSLGAAFGIGFVAGL  
FVASVILSTVASGVNTVIVMFADAPQEFNQNHPELSRKMRETWTQFYPGSV  
>comp5319\_c0\_seq4; 368 52 1595 LEN=1795; translated  
MGEPIVIQGTAVSAPAQTTQAVTYGAEFETPSSNNPEPAKTGCKDPLFAILFYCNVAALL  
IVVVLYGIPAMRESDSSTNYLRVTAALVFGVTSFVAGLAGLFLITCPALMIKVGLIFS  
VAVAIAYCVYAFLYLNLVFGILAVVFAALMACYARGVWSRIPFAAINMLTAATAVKANLG  
VTIFAIFFTILEVAWLVLWAIAMVGVDKTTKCDANSQCDINYGILFGLFVCLFFFTQQVL  
QSCVHNVAGTVATWWVAPNESGCCSKGVCNSFIRTVTTSFGSICFGSLIVAI IQALRAL  
ASAARGNDAGFLACIAECILAXPPEYCGVFQQVGLHLCRYVKS LGFEIDYAYGVSVALK  
ASRTLVLIDSVLFYLFHFSFCFTGVYGFYIEAGKNVMQLFRDRGWEAIIADDLVGGAI F  
LCCVLGLI IGVVGVVYASINSEFKTLAQDSLGAAFGIGFVAGL FVASVILSTVASGVNT  
VIVMFADAPQEFNQNHPELSRKMRETWTQFYPGSV  
>comp5320\_c0\_seq1; 174 1 589 LEN=716; translated  
XEVVQPSDAGTLQFFLEAKARTNTDTKRTASFPTIYLTTQYITILRANQKTHLAMVITMP  
CRSLTGVLSSLLLLLLCSPPAASF LAPHRSHPTTHRGS LPLCSSFP PPGHPGGFPQ  
QPPPGGAEATDDAAAGSEAEGQANTRFSKFAPDPSLDTDEFRLQLRENMKADLERRRSE  
DPNRGNQVAKNYLDSL  
>comp5320\_c0\_seq2; 174 1 589 LEN=920; translated  
XEVVQPSDAGTLQFFLEAKARTNTDTKRTASFPTIYLTTQYITILRANQKTHLAMVITMP  
CRSLTGVLSSLLLLLLCSPPAASF LAPHRSHPTTHRGS LPLCSSFP PPGHPGGFPQ  
QPPPGGAEATDDAAAGSEAEGQANTRFSKFAPDPSLDTDEFRLQLRENMKADLERRRSE  
DPNRGNQVAKNYLDSL  
>comp5321\_c0\_seq1; 478 179 1546 LEN=1794; translated  
MSDKTEDQNGSASSPNSNWTKEQLTGKSVVSTAGLAEATASKLTVSPPKRKSIGKAPKDE  
GVDPSLWGRPGHLTDAQADTYLRFKEIVDLRGGDFRDTIFCFGEEEGEVFALCRWLRARK  
FVFNVMVMVEGATKCEASAKKAGFYADPAVALGCAEAVYNRQYPQCYSGF AKNGSPV F  
Y SKVGELDIDAVECVTTISNIVKYHWHYMMHDFANRLRAHKKKNPQFNEFECVCILDLANL  
TMGKLN SKTLAI I KEQSAIDSLCFPETLNKMYLVNSPRFFSATWTVIKGWL DARTANKVE  
VISSRKAMEKALLEYIDVDQLASDYGGKGPATQFSMEKDCFTGNLKR LHTETVYLRTTAS  
VTCDIQAGEELEIAVYTRSTIGAKFTVSDAKGGPTWATDVP IKH DSEDL EKMP SNVTITK  
ENIKGPATVEVKAKSMGGRFAGSTNYLVVFSVRSP  
>comp5321\_c0\_seq2; 358 1360 2349 LEN=2597; translated  
MVMVEGATKCEASAKKAGFYADPAVALGCAEAVYNRQYPQCYSGF AKNGSPV F  
Y SKVGEL DIDAVECVTTISNIVKYHWHYMMHDFANRLRAHKKKNPQFNEFECVCILDLANL  
TMGKLN SKTLAI I KEQSAIDSLCFPETLNKMYLVNSPRFFSATWTVIKGWL DARTANKVE  
VISSRKAMEKALLEYIDVDQLASDYGGKGPATQFSMEKDCFTGNLKR LHTETVYLRTTAS  
VTCDIQAGEELEIAVYTRSTIGAKFTVSDAKGGPTWATDVP IKH DSEDL EKMP SNVTIT  
KENIKGPATVEVKAKSMGGRFAGSTNYLVVFSVRSP  
>comp5322\_c0\_seq1; 669 325 2513 LEN=2513; translated  
MVSLSSVPRFLVSAIFGLAAASQLLTARADVNF SITP SPTFSPT SFGCDQNNKAI FQESA  
GSDNYPYDEDTIEILHQDIDSVTIRVHQLWHRDGAPMMAVAYRAEVGEQETCSMDVPEEG  
LISYGSYHQYTAKCMHGYAEVSVYGFVGPAAFDVDECEACTVSDSNYIGYYVVVPCVPI  
CDPKIPDCFEGTQVSLADIGDEQKCIYNSAPVTVVSENLP PAGDVPENVMFRVADTWAFD  
DFSDGGRAQLSVYFQDPNGEDRCETA E VTPNFADVF EAKCDYDATATVVVSLSSDLHH  
FP ELRPEICGPDDGLGGCAYEFVIPCMDGLICPESFTEPPTTFPTFSPTAGDENLLPTPF  
GEVDCVDSATATFEGAVGNVKS VFLQEPVVIDS QDIDSVTLSIVQEFSPVAFPMVSVSY  
RDPITLEQQCLERTDFGPGQDLGLMAACTKGF AEIELFFYVGF GDDFDPECEACSVPE  
NNYAAVNI AVPCAPRCGPKVPNCVDGPIVVDADIDDDRP MCLYEFMPVVVEREDTPDD  
MVFVRVENTWNPAL EFTGYSVGYVHPGYDFPICDGEFFDGRPPPLPEKPFARGSEKLAXD  
PPPLDAKRAFQAPYFEFHQSPLLEAKCENGFASV FVS VYSQMIRHSAARLANDSENGCGL  
RYDSGSCTYHVLVPCDESVRCGRQGTETPTLQSP TGVPTKSPTGSPTPGPTKSPTDAPTE  
APT KAPTEAP  
>comp5323\_c0\_seq1; 341 1 1038 LEN=1266; translated  
PKQNKCVQNQNQNNQA SAEAAKLGVSFHYDASSFFRGLDVVLSVPLIRLQEA VDSLPIH  
ELKGLVVDVGPLNDAPKSI LLDAFASYPDIDVLLTNPILGMLPREEDQPSSGKRPSSEA  
GVTVMTPKHHNNPLMGGPTGSIWEGRMVVERARVANVPRCDRYLSIFERARCEVVEETS  
NEHDSAIGDAQFVTHLIGRLLSRDHLLTPTPIMSEEYKDL SKIAEMAAAGSFDRFYGMK

YNHKTATNHIRKLRNLAALCELAARGAYLDAKEELARGDRQKLLSETRLLLQELAKTE  
AFDESPAASTASSESESDVYEAITDGYEAITDEIDDEGEPLFVLK  
>comp5324\_c0\_seq1; 234 801 980 LEN=1301; minus strand; translated  
MFTFEVLDDAVDENSEAADLEELLHDAKWDEEDAMQEFVDDVRNRIQHERLMVFRLEEE  
>comp5325\_c0\_seq1; 425 192 1064 LEN=1505; translated  
MSSNDAVSSNNNSEEEILRKKLKPDPADQVIDAVRTYFYGGKEDVEIKLKKELESYDDR  
NFWITVDGTDYLAKVHNGVESRDLIQYLQNDKEDNSYKKSIAIHLQNAIMKHLNNCGIST  
NIPQEPDIATENTSSSTPVAVVSLPVHSHKDDSPPLVLRLLGWVSGRPMSDHHMLPIECLA  
DAGRFLGNLSVALSSIPDADHLQAAKRYHQWDGKNTADLRDFVKYVTDERRRSIVNSVID  
AFQKDLIDSKVAETSFKKSLIHADFNDANFLLGDDFCVSGVIDFGDSVER  
>comp5325\_c0\_seq2; 404 192 1526 LEN=1586; translated  
MSSNDAVSSNNNSEEEILRKKLKPDPADQVIDAVRTYFYGGKEDVEIKLKKELESYDDR  
NFWITVDGTDYLAKVHNGVESRDLIQYLQNDKEDNSYKKSIAIHLQNAIMKHLNNCGIST  
NIPQEPDIATENTSSSTPVAVVSLPVHSHKDDSPPLVLRLLGWVSGRPMSDHHMLPIECLA  
DAGRFLGNLSVALSSIPDADHLQAAKRYHQWDGKNTADLRDFVKYVTDERRRSIVNSVID  
AFQKDLIDSKVAETSFKKSLIHADFNDANFLLGDDFCVSGVIDFGDSVESWNILDLSVAM  
AYAMLNAFGKHQRSLAAAAAVLRGYNSVRPIGPEERRYPLLLIACRLSCSATLGAYSQAQ  
NPGNEYLLLHATPAWNALELIWGTDPERRSSVLETVQEVFDLACSSCETDKKTRVIGCTD  
LNFDPDPSVPDPLAGARSRKRKEME  
>comp5326\_c0\_seq1; 944 236 2356 LEN=2612; translated  
MGGNNKQHESSNDGENRELSVIVRRRLALYEEETRLLRRAHGLAKQKDDEERRLYQRSI  
GDNTVPVLPKARAKPTTPGTGASNGDEAKDIVSDNSSSDGGDGFGLATIESEDESESENS  
SSDEEDEDDEGSDNESGIVGTPSSAIESTKTATTKPQKTGKLSGRKQKRLGQDINRHADN  
LIRVDLPLPPGSDSDVDEGDGNSTSLSLSPHLHLFPAAALLPNNKLLGPFACASDQAGIVRD  
LSETMSSESCEDGLVVVLLIQSGRFAGGVFRRGKCLAHRATTRYTIRKGGKAQSVQDGS  
RRPKSIGSQLRRAGEEQLNEDVKLALTEWTKKRYIADASLLFLACPKTMRSTVFSVPSAN  
SNRAGGNKSKHKTDCCMLSKDDDIRKIPFDVGRATFHNVEVVYKVLMTVDLCHVQELGS  
TTSERHAIESHGVSVTETADKDESAHDDLEEEKRKRKEKLAADLPMTPLHVAAREGNLT  
VLLDLVHKINHGADDCPGVDQAPAGYSCSTPLHFAAAASKNVDVPTASAIISALLIQARAD  
PTVLDASGRPPYFLAGHDKIREGFRKARAALGEDYCDWDSAAKVGPPLETESDLEAKKKRE  
AEKKRRKKARQKEKKEKDRAAAAREAEERRAAEEEARHTAEAKRIRDQLPPKPTAANACD  
FCGKICKGRNASKNMFRRLDYKYCSTECVKNKHKRELMAAAAMARFG  
>comp5327\_c0\_seq1; 279 204 1205 LEN=1429; translated  
MSQSESRRENLRQRSQILQDKKEDARIQLVIQDSIGKNQFSKHLMKTFVLVIITALFCTI  
AAVLNHRPRFLERFWKQVPRPFHLATRYPKNIILDRDLPRFFGHYSIATPENLLARQAV  
QKVLRSRKKLRSQAGPIKSTLKAWDDSNVEQLLKQIGDEFELAYRRESTHQENGLLM  
WCLLASQVTEGFFTESVEILDSILELTRNRGIVVRKQPARGIVDGYDALSTTFYLHPRTN  
HDKVNWIPTKMLSMFISSSNDERVDDNNELAQRMLYELLVNQGNEEEYLILEEICQETPP  
KRSIAFDTTEDPNGCYFVVPNKYGGIFGPEEDE  
>comp5328\_c0\_seq1; 533 237 1649 LEN=1676; translated  
MYPISVILTLVGMITAGAARIVVVKIYYQIELEESRPVTPPLFVTLVLYLVGQALSLLVHFV  
CVRFDYSKRERSDNGIGYDTIEMAAMKLDDDDNNNEPFVAAVPPKAIEDEEQADRPAGT  
DATEETDTECGSGDGSDDDETDPVPGDEEGSECERAETGSDPRCGGSPLHAGGPVRVDPGDG  
LLEEGNSDGRRGHGKERPPPRGRMRRRGSKTGLTSDSREAVAWIHRIPWYLKPGIPGFFN  
LCNSALRWACLRYVAASTAEILISGLELVLSFFAARVLRKRIISRRRWIGVSVVTVAGIVL  
VGFAKLEETRDSSETHNFLVGNLLIVGQCVFVSVLQDLSEEVFMQEANFPATLLLGMEGL  
FGLVFGPLIYALFFDEEISFTRFNI EYQIGLVVLLVLLTGILNIRTTEATSSMTRNVWKQF  
RIMLVWILGLLVYYLGS GGRLGEAWVPDLSLFLVGGFGVILTGVFFYYSG  
>comp5329\_c0\_seq1; 1251 1 3651 LEN=3689; translated  
SNSNNSSNSNSNINIDDIRASTSRAQLQTPRSTSGHKQKGSNRYRHRRTTEGNRGRSK  
RHKNGFQRREDGNSNSTSTKNSSTAGGSSWTDPSVILYAMGSWWWIFASTLVYLSPLI  
VWTGERVLGCLGSMCGARCQRTGRPQGRGGSLSVESDGGGADEEPSSETTAIDDSVASPP  
PPSRLAALCRRCRVPFPNLRMGSVVPWRIVFWALVFLPSVVVFSYGTHQGMDRARQNLSE  
RLGDGGEAAGSQUETESSLLDWIGALVLASAMPAGTAGMVSMGVYIFGTVAKHSPLWSAEV  
ILPYTTNKRGGSDSIGTTHSDTGQNETSQKGDNRNPSHGHENLMRDALRLHQWAGYMTF  
FWFLLHSVLYCVIYGYLGVVSHRQEDIAAQAASDIAAAGNATDDGVEASATAMGSASTTR  
SLVEIFFASVWNAIYPPPECRPILGRKDGAGSDGEETGNRRLDIVRLLDEDKQQUESTASG  
QSFPYCYGYRNFNGAIAIALAFSVLVGTSLELVRRKNYRFFYASHIVCAVVFVLTMTVFHMK  
RISVYLMPSLLCYLSTTIPTVIQAMVSAVRDGGVRIEDFRTLENDGGSSDSNNLQGCAL  
TFSVDDTGVSFSGAYDRKKCGAWTTYRPVSVKICVPSISLLWYPPFTVIETNSIKNAHVGDK

IVNGTDPGAGDSGSDVSNNGDGTTKGDAGGSIQCTILFGTVGYFTKSLWKRMRDAQEAKN  
GFRISLANENGDEFIDEEPITDHPLEAMNQTPKALPLILVDGFYSGASDWIESALGHDSV  
VIAAGGTGVTPLFLAFLPKLIRVLTDDLSTVLSGTADEESPDGRDALREGSQETVASLKI  
SFLWCCRDESLIRHVLATYLLPLFRGREHELWQTKSMLPENANDPPFRDLAINTNGVFR  
LMIYNTSRDRGDKSPFELSASDDGVGSIRCGDSRNSASISARGLAMRPSKFQFSPSSRS  
GATIGVVGFSLITLVGMLLHHRASDYVQEERLRF SIRAYGIYAVVVWTIAAGFATEFLWR  
CRCLCSPTAWHRRRGYAVADGDGPDSSSSNLSVDPNHETGGGEELAIANENEF SERGKAR  
TSCAEARSCIGTASLLPGRIYHEELLPRTD SFLELGI SNGRPAFHGDDDDGLHDPCSNES  
SPSSPAAWADEVRRELIDADRPGVFYCGPDGLLEAIRSGVKAGRERRLSGGRDARNFN  
RDRVAECVFEESFQM

>comp5330\_c0\_seq1; 369 305 1681 LEN=1848; translated  
MRFFQRRKDGMGVEQQGSATVAFHPAQNVDSKHSPPQYHHGDGIHSLRKDPFAPLTQEEL  
RQCSNTNLHDIDDKTESTIVENEPKNRQSIGRLVRKLNCSASRKS IHGVDQDPIAFTDR  
TGSLSFNEGGMNRATRSDGLTLERLILPSKSIESAASSDITRPVLITVKDRDTKQPSTKD  
VRDRSNCVTPEMKRSFVVGEFPVRTSSFRSRSSARKRLHDVDYHNNNLTRSASVSGRWVN  
NGGKWEHSSGGINSSNSRNSPNSP IRTSSNLSKKNTERDLEAIRVAQDLARRERWKR  
GLENELYKKSSTAAGRSNTKSKGPIAAAKRYIEGESSNNTEDDQSLSDSTQGSHTTGTSG  
YDDTTGESSLDEWTDGSTTDNDSRVRYHQDYPQHQQRQYRKTKSGRRCINNEQLARSV  
AEDVGIFADLILSDGFACFGTAAAITKETVASCRGNDV

>comp5331\_c0\_seq1; 270 1 1019 LEN=1492; translated  
XEYANEIENIANEHAKEIEKITNEHAKEIEKITIEKESKSVEPQTIEEQACL DLGDGNNM  
DELLSAHKQV FVAMPAKAAGSSMKSFTSKCMKRGWSGNYTDRWVENVLAKPDVLKELLHG  
PLEVPPLIASHMYEDADFMRLMQAATKETLIVYIHREETSRLTSAIRYVMDHRKCEPEFLK  
EHRANNDKKTCTVEEQTLQI IQDRKTNMGEIEYGAVELLTCRTYSAIRSNAPKLVFMH  
YKQASKLQKLLAKRFCPRQGDSLKNVRSEDAKIQVELREGGSVVTL DQWLDAKQHFLELA  
LGMKETMTCQHETKSMEETL FACPDETFYWTPEMNLVSR

>comp5332\_c0\_seq1; 282 169 642 LEN=1501; translated  
MKKHQQECSEIHTIQIFREASSCIPRSSLRQCNCQCPGRTVSIQSTTCVTPPTSQKQDGT  
YAIGCDWAIEMDEDLVEEPSTLIEMKESNSDQSSLSYFETPLISIGQDQSFDEYIT  
ANDTDSFHDSNDFDSDSMDDIWEQGLTRSVSCFEME K

>comp5334\_c0\_seq1; 834 69 1262 LEN=1424; translated  
MIVVSVLLCFVLCIARTEFR LIQPDATDSATPGVVVALKWNKQGALSDPLETAHERDMGF  
LRDKLYDAAGDRDVPWFYKNSSLSHIRRS GGQTGDASPATPHAKTWHKYESAHQNTNRA  
ASATATKPKAVALKAKPTTAKSFFGNHKASAANKAKPTPKPTPAAAKAKPDNKAAPKPTS  
QKRSEASKPADEAPDEAKEGSSPSNEHGDTNATNPTVAIGNADDFVGD EDEDESEDEQDMK  
TRRAKSIEIVRKLKERDDMLDALAKEEDGDTEREKPTLVKGAMDAFCHATS GSPSTDVSV  
PAQANKKKRRKVFRET TKMNAQGFLVTTTEAVWEE IDEDEDEAAAPASSAAGNHTKAAPAA  
TTTTKSKPRPKKAAPPKKKASDMKQGS LKGF FAVK KKK

>comp5334\_c0\_seq2; 916 128 1633 LEN=1795; translated  
MSAATAIQPLPNGTSAVLASEQVLSWLHDEESLVT SQR IQHHCLRDENENDGEGEGNEDE  
SSSLLLSRREASFLLR AIYEKDPCRYKATLCTRETFRSVP SMNHKKEAGR PACSAEYKT  
TEFR LIQPDATDSATPGVVVALKWNKQGALSDPLETAHERDMGF LRDKLYDAAGDRDVP  
WYKNSSLSHIRRS GGQTGDASPATPHAKTWHKYESAHQNTNRAASATATKPKAVALKAK  
PTTAKSFFGNHKASAANKAKPTPKPTPAAAKAKPDNKAAPKPTSQKRSEASKPADEAPDE  
AKEGSSPSNEHGDTNATNPTVAIGNADDFVGD EDEDESEDEQDMKTRRAKSIEIVRKLKER  
DDMLDALAKEEDGDTEREKPTLVKGAMDAFCHATS GSPSTDVSVAPAQANKKKRRKVFRET  
TKMNAQGFLVTTTEAVWEE IDEDEDEAAAPASSAAGNHTKAAPAATTTKSKPRPKKAAPPK  
KKASDMKQGS LKGF FAVK KKK

>comp5335\_c0\_seq1; 430 320 1363 LEN=2915; minus strand; translated  
MEPARIRQFAYATASFLLGAWAFVAVNAISGPAFEP IIAACTNPDFASVEDFVENTGYHE  
YEPMVGLGAFNLLVCLITQFLFELRTHPAGVLTWGGVVLVSLPSVGLGTFEGARRGARG  
PIRYPVVLG LLYQLFGISVVFPLIFVPAFVFGEGERGAPLTRFRVAVAHAMPVPI ILLTL  
AVFLAPTD SALWTT SAGILG GPILALMGLLFFF DKSSELATTRKAAEATS RGLQAFYAYL  
AVVGLGWYALVGIAYQSYGTSFGDLWRDIWVEAKPSVAFMTIDTG VFYLAIVLLVAYRS  
GERMAAKAILRTSFLGPATALCLAMIEIEKETVCVMDEADKSTKKED

>comp5336\_c0\_seq1; 111 108 410 LEN=854; translated  
MKIRTLFQLFALFILAVAS AQSSAIDDEHTERRLRGPHKAGR GFNKRPFKGGRGKKGPYK  
GPYKGGRP AKKGFNKG PYPYRKG GPGRKGPYKRGRGGPYKKGW

>comp5336\_c0\_seq3; 111 108 410 LEN=863; translated  
MKIRTLFQLFALFILAVAS AQSSAIDDEHTERRLRGPHKAGR GFNKRPFKGGRGKKGPYK

GPYKGGPAAKGFNKGYPYRKGPGRKGYPYKRGRGGPYKKGW  
>comp5337\_c0\_seq1; 656 294 2123 LEN=2561; translated  
MLTYAKQAINFARVYLSVTRKDMQFYASLDECEVNPNPNLKNLTSEDLQFENPRVVSFKT  
IDNKPAPETETEKVSTVPIPKSLVLKNDKRAVPVEPSPANNDLVLDTNNELVLAANDELV  
LAANNERNRSAGDAFGLAPSELATLTRERVRERFREAVFSYHPDRNPSSTTVQMQVIRDA  
KDILLAACDGNIPeIENDTTPVALIANDVSPACKANAIVPQITSGIAIKNEAAIQIAQT  
NVPQITSDIALSCPKTATGTKLPASLEALQSLQLQKRETSLGFYEKKSTKRPLPFVGYE  
FKDSGKLLRKGIKRNVFLGNSTIEPCKFPTIALIGYTSNSNKSVMFYEFKDSGKRLRKG  
KKKNILKPQPPSNDSDHPNSEGNLVTDAEKKNICIVNASKQRLLRSLSTNSSHGTGTLPG  
TNLPTVEYVREITDKDITTHEQPCGRKKRAKRIHEEKLDTDAEINEDDNRSSSTGFKKNA  
LLQETDTSNDQSNQPSCAIIGDTNDEISEEESASQKAFHTNQNPHGSLVPFPLSIVLPRQ  
GDLVWVMQGKTEHMAIYVVELRNSTEGVGYEEVKVRWSTNRLAQYVPLRSVRVFEMGTR  
GARKRRVRS  
>comp5339\_c0\_seq1; 441 108 1696 LEN=1696; translated  
MMAIALVALLTALSLLTAYAHDPDNPKVLRSRARLNNSPVPVPEPNYVINLLSERDDATQ  
NDYGDATFDGNPTSIKLGLDFEVVYVGTDDSPSTSLYRVLGVYKYGDSCGDEVFGATNAL  
ADAFADNKVSQSIIEISLNSVDSSEGGETYESLFWVNDADGSTRYVDGSMRVQFCFRVSI  
SDLDTVPFEADAVWNFPETYDASFRLSNSVQNLANQDTWRSSITVNLQYTVRSLCNYVP  
ADNQEPERYECLTESKLFRTIQCIEPGLVKSEEEVDDVNTGSLEIERVTEFHII  
QEPAETSGMTVTRKAIDGSDADGLTVVEYKSMAITPQDGSSPRKRVGGNAPGAIQIAVVS  
TPLNAAFFLQVEQPVDVHGQVLYRDSNRRSLLKANSMYLSSSTLAEGSIESNTTEGLVLP  
DVQVNLIGEEKTVSHSINTNPGGDFDVKLSLDESFKLNPQFEHSSSTLILGIMICGILLG  
LIAIHGILYVLGFRMTSPGVRVGYRSRGTYGKDDISFCSSINTFGAIPA  
>comp5340\_c0\_seq1; -81 1 408 LEN=795; translated  
PGMPFKVDVHGKRFVTVCPQNAAGPGQRIQVRLPISAPRAKTPPRHTTPPRHTITPPRTP  
QTPPRHGGTKTELFVTVPPGVRPGRGFRKIRAHGQEFIVTCPPNASPGRTIRVVPVKVQVE  
SPMVQVFKQQGESYC  
>comp5340\_c0\_seq2; 538 1 1300 LEN=1300; translated  
XKFQSSSKKNSGKPSYLIAKKNEDPTTSVESAVAAGAVVTAATSVAAATSALETNDASAA  
ETERLEAVARKKAALQAKLQAEAEIERLEREAAERAAAERLKAEEAEASERRRNNKAT  
AAAIGAVGVAAAAAGTAAVASKKSDDEESDNDDEEALAAKQRRRQEEKAKARRQQEK  
QHPKPSAPPAPADQTMTTYEVTVPQGVSEGTDFKVQVEGQQFEVTCPIGASAGQIRISL  
PTTDFSSSTASHNSHNSGKVPNASIEESTSTTMHFVTVPAGIFGGMPFQVDVDGERFN  
VNCPQNSGPGDRIKIALPTKSGGTGLSSSHKTHDPESFTSSHTSHSSTKAPETKMHHVT  
VPAGIYPGMPFKVDVHGKRFVTVCPQNAAGPGQRIKIAIPTTTGGAGAGGRGRSKSPQPT  
GTSLHHVTVPAGVY  
>comp5341\_c0\_seq1; 237 400 943 LEN=1675; translated  
MALFDDQNNCLVPMCLDNGNATEHRIEITTELEVRNPDDHLLVSADVVRDDDRDYKG  
LHSNSEVEEIEVIDEDECRTREASNSGDHAADETQSRIDGSISSGPIVTFSTLFDLTL  
QGPESVDNETEARQKLAEKHRVKSQAKRIGPPESIQIAAVTEASDVASVLGRYKFTFMK  
>comp5343\_c0\_seq1; 261 181 618 LEN=927; translated  
MPLTENQEAQMKTVFTKYAKNGSIGSKEIGAACRAGGLNPSEADLALWKGETKSGLDLNG  
FQRFMGGKFDKTNDTVDEIIEFQAFDTNGTGTIPVGELKVMLTSMGEELSEPEFATLMD  
ECEVENGEVSYLQLAHMIFGTTGDE  
>comp5344\_c0\_seq1; 373 139 1533 LEN=2185; translated  
MKTFFYNANGIPVVQGMSCENKRTSRSSLNHSINDAQISDAIARKQQDEIDQRLSYAAT  
DHHKSSLTSMNNTVMIGDRNRNGGSRQQEGSIPRGEIQPTAFRDVGWAILFCAHVIAIGY  
ATAHFAPLIASDIANEYAGGAHRWLEQELQQIGDGFYNDSDHKYEYDDKSFKNYLGFIPD  
DTDRSESIYWEQQNRVLNNGDQDSELSMNTLLTIMAISGAVGFLISSLAMSLMMAIPTA  
MIKIALTFNLIVTTGVLVLSIYIGAILVAVMSGLGLILTIYYTYIVWRRIPYAASTLVTA  
LTAVKCNMGLAFFAYNNLVVTFWLSLWVSTAFVATFYVVGDCDAEGYCENEINGFLVFLF  
LVVFFWTTQVIKVVHVTVAGTVGWVFPGEARGCCSSAVRNSYWRVSVTTSFGSICFGS  
LIVAFIEATREIVNSARSGENGLIICIIDCILHILEQIAMYFNKW  
>comp5344\_c0\_seq2; 456 139 1941 LEN=2001; translated  
MKTFFYNANGIPVVQGMSCENKRTSRSSLNHSINDAQISDAIARKQQDEIDQRLSYAAT  
DHHKSSLTSMNNTVMIGDRNRNGGSRQQEGSIPRGEIQPTAFRDVGWAILFCAHVIAIGY  
ATAHFAPLIASDIANEYAGGAHRWLEQELQQIGDGFYNDSDHKYEYDDKSFKNYLGFIPD  
DTDRSESIYWEQQNRVLNNGDQDSELSMNTLLTIMAISGAVGFLISSLAMSLMMAIPTA  
MIKIALTFNLIVTTGVLVLSIYIGAILVAVMSGLGLILTIYYTYIVWRRIPYAASTLVTA  
LTAVKCNMGLAFFAYNNLVVTFWLSLWVSTAFVATFYVVGDCDAEGYCENEINGFLVFLF

LVSFFWTTQVIKNNVHVTVAGTVGTWWFVPGEARGCCSSAVRNSYWRSVTTTSFGSICFGS  
LIVAFIEATREIVNSARSGENGLIICIIDCILHILEQIAMYFNKWGYVYVGLYGYSFVEA  
SVNVLSLFQARGWSLIIADYLVDTVLLMVSICVGVITGIVGALLGILMEQNGAVVVGAF  
IGAAIGFVLCSTLFGLVSSAVNAVIVCFEAEPAEFQSNHPVLSHQMITAWREAYPTEFGY  
>comp5345\_c0\_seq1; 438 110 1816 LEN=2044; translated  
MITTTCAPPKKVEVVDKSKKNKVEMAPSDQLIMYMSPKEVMNDPLGALASAAALAAEASEA  
SCSDASKDATKKEPTTVKTDNRKAAEMEGENGTTKTSQTTGKKTEEETADSETIAKQTIP  
PTITIRRELSLTDNSRPSKSAHPQHIYPQVPVAGYFGPLPGHPPHAPVPHAPPHAGYYQA  
AYGPWVGYGEHPSAPVPYGSVPHWKHPHAPPPPPHAAAAHHPHPRPHPHPHHVYHDGH  
YPPPHPPPPAPQFGFARSITADSPARSITSPAPDHEGEGSRKRKPSTKEYSPSNSPPSLV  
RTSPPLPEISLRKQTAHVDSIRSKEVKSCSDNRAVFKRRASMGKWTEEEDELLREAVADY  
GGKSWKKIAGRLTGRTDVQCLHRWQKVLKPLIKGPWTPPEEDGKVIELVKVHGNKKWSFI  
ARQLKGRLGKQCRERWYNHLNPDINKGEWTNEEDKILIQAHSELGNRWAEIAKRLSGRTD  
NAIKNRWNSTLKRIMSKDASPESKKRVKLVLDGLADSQPVKKDREGTEFRPKAKKQKLQT  
RHELAAHTLSDLSSPSIKRHFRGRFASKW  
>comp5346\_c0\_seq1; 134 810 1055 LEN=2150; translated  
MGFRFVGGGRACWYSLGGSNADGHRPRPGGQTVLVRGGKGDRLSAGKSPLLLPELLLL  
PPGETVLESEKRRHALTLERE  
>comp5347\_c0\_seq1; 299 609 998 LEN=1386; translated  
MSIVGGNGGSFRKVNLIQISQTIESLQLICNSINQSKDNWWLSPAMLSSVEGMRTSRILKD  
QQEALLVEEEKDDIDDFAGQEGQTNDNGDETEEMIDLQADEFEKDFADTDSANCEQGTDA  
NISDDETIF  
>comp5347\_c0\_seq2; 299 707 1096 LEN=1484; translated  
MSIVGGNGGSFRKVNLIQISQTIESLQLICNSINQSKDNWWLSPAMLSSVEGMRTSRILKD  
QQEALLVEEEKDDIDDFAGQEGQTNDNGDETEEMIDLQADEFEKDFADTDSANCEQGTDA  
NISDDETIF  
>comp5347\_c0\_seq3; 392 229 873 LEN=1261; translated  
METSHETILNNTLSAAGLLVEENKATKEMRRSISKFARLLMCPLCNKIFDRPATLAACAH  
TFCMNCIDRHSKHSVCPVEGCGMPSIVGGNGGSFRKVNLIQISQTIESLQLICNSINQS  
KDNWWLSPAMLSSVEGMRTSRILKDQQEALLVEEEKDDIDDFAGQEGQTNDNGDETEEMI  
DLQADEFEKDFADTDSANCEQGTANISDDETIF  
>comp5348\_c0\_seq1; 165 1 813 LEN=928; translated  
IRITFNLSLAIECTRPNIQFDLMENNGVKNPIFVYVAEGTQHSIGITANGAAFSWGRSTS  
MGQLGRDNTDMPFKRPGRVNLPNSVRVTKAFASNNSDPESGHSAIIDDKGNLWLMAGCDRW  
QQGLGSSNSGSTGYTWQGGKQWQDRFQISQSVEELMKKDNYSGIRDVALGGDHTLVLSS  
NRRFVYAYGKGGDGLGFVKGPFVSAPKRSPILSGKNIAAVCAVESC SVTLDDVVGATIAK  
VGKCRSSKVSEGISRCVENARRQGLLDSNK  
>comp5349\_c0\_seq1; 223 1 360 LEN=1468; translated  
GQDSP IARKNKISDSTKKDKMMNTDNDETTIIKLSMPDEEGNVDVFEISMMAAKISELV  
RDSFPEDEDEEYSDDVLEISRVKGPCLAKVDFMKHHHESPMKEIPTPLGGSSFNVDVSS  
>comp5349\_c0\_seq2; 339 1 609 LEN=1282; translated  
GQDSP IARKNKISDSTKKDKMMNTDNDETTIIKLSMPDEEGNVDVFEISMMAAKISELV  
RDSFPEDEDEEYSDDVLEISRVKGPCLAKVDFMKHHHESPMKEIPTPLGGSSFNVDVMDQ  
EWYQNFVSEENLGGDNTMLFDLLTAANFMGIKELLDLSCLKVTFQLTGKSADDIRKILRL  
PELTPEEEAQAARTEHKWIFEDS  
>comp5350\_c0\_seq1; 250 100 756 LEN=1021; translated  
MLALKKREAEKKAEEEEAKAAVAAPSVSAPSESTEEGGQVSLFGIGGQKKTGGESSA  
TKKTPGEIRIQDIGELDGGKVAEVTFPKPNDLTSFNVSITPDTGYWKGARYEFEFKVP  
HYPHSPPKVECKTSIYHPNIDLQKVKCLNILREDWRPVL DINAVIYGLIYLFYEPNPDDP  
LNHEAADLFRKDIQSFERLVNRTLGGTLDGVTFERLV  
>comp5351\_c0\_seq1; 163 346 744 LEN=962; translated  
MPELFQKKVAIFGVPAFPFTGTCTTAHYPPYQKLQDKFVAKGVDKLCVSVADPYAHYNW  
GKTMGNDFDKISFLADVGDGAWARSNELEQDYTVVSLGHR SARFSMIVDNGIVTAFNLVED  
ADGDAELLLEQA  
>comp5352\_c0\_seq1; 280 543 1295 LEN=1445; translated  
MYAPPFGVSLMVQHVHPCLPSSSGLAVEPNTADANPNANGPPSTSDSIFDLAEAAAGSA  
SGGGDGEVRRITITMYRDGFVVDGYPYRLDDPANKEFLKSLARGQTPSELTGDS SSGNIT  
VGLIDKRGEDYVEAFRSFSGAGQSLGAGSGASAGASSGVFDPGALGEAPPPPSGASTT  
AIAVRGLDGRKVVRLSRTATVAELAASLDPRPQQAFRMVAGFPKPLVEEGATLEEAGL  
VGAQVQLQKA

>comp5352\_c0\_seq2; 350 123 902 LEN=1052; translated  
MSNIRGLYDDKNDESSDDENNRYVGGIGARGGGGSLAVEPNTADANPNANGPPSTSDSIF  
DLAEAAGSASGGGDGEVRRRTITMYRDGFVVDGPHYRRLLDDPANKEFLKSLARGQTPSELT  
GDSSSGNITVGLIDKRGEDYVEAFRSFSGAGQSLGAGSGASAGASSSGVFDPGALGEAPP  
PPPSGASTTAIAVRGLDGRRKVVRLSRTATVAELAASLDPRPQQAFRMVAGFPPKPLVEE  
GATLEEAGLVGAQVQLQKA

>comp5353\_c0\_seq1; 601 445 2298 LEN=2339; translated  
MVSGKMQIDNNADTSTNNINTQPGHPYTPAGKKIVFWESLYRRKSNFHEHLAGPMSDAIE  
EDEEDEFSTFDDFENRSYNDNENAHDNRLKSSSDSRSSDENFWKQAWKEGWGNSANYDK  
YINGDDDWSIYIGDENPTLLPLSTNDMFGFMLASLGATLGSLLGGIGGGGLVIPCYYVVTK  
LDLKQAIPLGSVTVLGGSSIAALMLNMKRRHPLADRPIIDWDLILVMEPLVLVGTIFGSI  
HRVMPGKVLVLLVLLLSIVAHTTLTKARMYDAEKRYIEHLKSARSDYLTRVASFRTAF  
RMSTGAWSDDALHGAGMDPEKASYLPPEPVRTESLDSQSLATTPISPKMDMHERQRILI  
LNPDFVTLRSDMLEQEKITPRGKVMALIAKFSVLMFLNITLGGGAFRSPWGIQCGGVAFW  
VVHIIMIAFLISSAWAAQTYLVNRHELKEIRFDYVHGDIKWDQRKAIYPCFFILAGIF  
AGMFGIGGGMITVPLMLAMGVHPAICTATSSTMVLFVMLSSSYAVFNILWDYAVVCF  
CIGFIGSLIGNGIMQRARKTDTGAVNFERNFSFIAYCTGYVIMLCALCMTLQYILQIVLFH  
DDMSNSEVGLCAGYRIN

>comp5354\_c0\_seq1; 836 102 2168 LEN=2209; translated  
MSKRYNEKRAALAQAVIDRELDQGYGREDFESNVAKDVRGAAMGEGEEELFEKKMSKAEK  
KAAAKAAREAKRKAKGLTKKKKGGDDDEKAAAEKKNAAKILDPNASAEKREAALEN  
LSREEIIVTYESRKGMHANARNINVSQVTVTFHGKPLIEETDLVINYGNRYGFIGPNS  
GKSTVMKAIARAIPIPENLDIYFLNSEYPARDDITALEAVMESNDEVQELEAKAEHLND  
AMAEADEDEQAIEIQQTLEGIYSRLDQLDASSAEARATQILFGLGFTQKMQHMKTKFESSG  
WRMRVALARALFIEPEFLLLDEPTNHLDMEAVLWLEEYLSNWNRIFFVCHSQDFMNSVC  
THIVRLDATYKRLRYFSGNYDMYVQTRRDRDMVQMRQYEAQORDIAEIKDFIARFGHGT  
KMRVQAQAREKLLLEKLEAGLTQLPEQDPDWDWSFPDAGELPVPVLSVENLSFAYPPGVE  
LYSNVDFGVLDLQTRVALVGPNGAGKTTLIKLMGTQLNPTKGAVKRNTHLRISRFTQHFEE  
KLDLTMTPDLDFFKQKVMPEQPIEKIRPLLGRYGCTGDQSQIMDQLSAGQKARIVFAIIA  
HERPHLLMLDEPTNPLDMESIDALARCINKFKGGVLMVSHDMRLISQCAEQIYVCDHKKV  
TLYKGDIMKFKLHQKKENSKNLAQHMNG

>comp5354\_c0\_seq2; 761 1 2072 LEN=2113; translated  
XGCDGRSNEKRAALAQAVIDRELDQGYGREDFESNVAKDVRGAAMGEGEEELFEKKMSKA  
EKKAAAKAAREAKRKAKGLTKKKKGGDDDEKAAAEKKNAAKILDPNASAEKREAALEN  
ENLSREEIIVTYESRKGMHANARNINVSQVTVTFHGKPLIEETDLVINYGNRYGFIGPN  
GSGKSTVMKAIARAIPIPENLDIYFLNSEYPARDDITALEAVMESNDEVQELEAKAEHL  
NDAMAEADEDEQAIEIQQTLEGIYSRLDQLDASSAEARATQILFGLGFTQKMQHMKTKFESS  
GGWRMRVALARALFIEPEFLLLDEPTNHLDMEAVLWLEEYLSNWNRIFFVCHSQDFMNS  
VCTHIVRLDATYKRLRYFSGNYDMYVQTRRDRDMVQMRQYEAQORDIAEIKDFIARFGH  
TVKMRVQAQAREKLLLEKLEAGLTQLPEQDPDWDWSFPDAGELPVPVLSVENLSFAYPPG  
VELYSNVDFGVLDLQTRVALVGPNGAGKTTLIKLMGTQLNPTKGAVKRNTHLRISRFTQHF  
EEKLDLTMTPDLDFFKQKVMPEQPIEKIRPLLGRYGCTGDQSQIMDQLSAGQKARIVFAI  
IAHERPHLLMLDEPTNPLDMESIDALARCINKFKGGVLMVSHDMRLISQCAEQIYVCDHK  
KVTLKGDIMKFKLHQKKENSKNLAQHMNG

>comp5355\_c0\_seq1; 533 385 1473 LEN=1884; translated  
MALTIPELKKITPYVRRAEELDRDQGNPESRLVAYYCRQFAVHTGIPLATSPAGKLCGL  
ELLGVLGEKEAMDSFTRDESKFLCEKFAEKIFDKADTEDQSGEANRNTARTFYAAASFL  
EILQQFYNDDDSAEVAEQKKKSVYCKWKSTEILKAIKEGRTPTPGGYGEETNNADAE  
KEEDTPVAIAVEDESPVMPEVTEEDSHDDNGDEDEDEDEEIKPNVPVEDSGDDSGDEVG  
AQVPLGPPPAYPIGIEPVDLPLPPPAPPVKPPLVFDLPPPAPMSFPSPIVPTPTPTPTP  
MEKPKMTTLFGLANKKKPKKKVGRAEIA DATELTRFALAALEDKDIEIAAERLEQALQCL  
GR

>comp5356\_c0\_seq1; 1010 176 1882 LEN=2243; translated  
MSDPVSEQYDSCGLPEKIVGTENDSEEAESLEFEKLELMCEDGATKEIDMPTTPSQKKD  
PNSDGEGETEGAEQEHGTSFLEQGEDAFGGDDGRNEKKDDDDNDDAEEEEYNDYSPEAD  
DRKPAKQPPNRKRSKKNPGDDGCSRRNTKGTTRTSRRTRNKIPKYFDEDEDEDAEEFS  
EEGAGEDPCDSKPPAAGASASNGGDSAEESAENATEEYKSNSEAQDEAQDKGKKR  
KADFQSPDKTTDRVEKSSSETSQSSDIEDGSEEPVNDNDVVKSPKKKKKKHADQEDAKA  
FTNPKKKIDGESVKEEDEEASMNVKKDNVKNVKNVKKERSSERKTRKSHAPNDRMRDLLE  
RKKTWTKKKETKLLTVKDVRKAYETEGTNKDDALLSMLMAYYIAGVKAVTFDKLFEGLGH

RPKNKAI EKAWKEVRAENLVEEAPATAGGGSKKAKKVFRILTQKGFDRAAPEGYEEETLSP  
AKTSDELHDI IKGNKNNYSILVFEILLEKKDEGVSLTTRELADECGVDKDSHGFFYGFK  
WLKDNGYAVSDGRRKNAKYSLSEKCFVD

>comp5356\_c0\_seq2; 1010 703 2409 LEN=2770; translated  
MSDPVSEQYDSCGLPEKIVGTENDSEEAESLEFEKLELMCEDGATKEIDMPTTPSQKKD  
PNSSDGEGETEGAEQEHGTSFLEQGEDAFGGDDGRNEKKDDDDNDDAE EEEYND DYSPEAD  
DRKPAAKQPPNRKRKSKNPGDDGCSRRNTKGTTRTSRRTRNKIPKYFDDEDEDAEEFS  
EEGAGEDPCDSKPPAAGASASNGGEDSAEEEEASAEENATEEEYKSNSEAQDEAQDKGKKR  
KADFQSPDKTTDRVEKSSETSQQSDIEDGSEEPAVDNDVVKSPKKKKKKKHADQEDAKA  
FTNPKKKIDGESVKEEDEEASMNVKKDNVKNNDNVKKEKRSERKTRKSHAPNDRMRDLLE  
RKKTWTKKKTLLTVKDVRKAYETEGTNKDDALLSMLMAYYIAGVKAVTFDKLFEGLGH  
RPKNKAI EKAWKEVRAENLVEEAPATAGGGSKKAKKVFRILTQKGFDRAAPEGYEEETLSP  
AKTSDELHDI IKGNKNNYSILVFEILLEKKDEGVSLTTRELADECGVDKDSHGFFYGFK  
WLKDNGYAVSDGRRKNAKYSLSEKCFVD

>comp5360\_c0\_seq1; 291 261 1304 LEN=1356; translated  
MKVFLNYEDNENKDFHKALKITLPSWKTGPVTNLLNQFAESYNAKFQETNPLDASEIHL  
AIREKKEQAYGSMAGIPETRMVPCND AVVIETIPDRSDVYICHGAGRTKAEVEAEKAE  
QREQEELRKNVTIALTLAAKTGSRRVDLTRHVDTTSSLRYFMKQPSIGLAVPRRKL MVND  
DSSQALELKLFFVYDVFVSSLAFPHVYFDPDFLVSMKTS DWDEFQMIPGCMTGRCSEVK  
DDGKFLFLGGMDLREQAQGEKLLKSIDDFNKAQSAGGAEAAPVLERLRNAMFEIGIDKELFD  
QVVDGMKKKYTQSAANESELLAAVSQELGKELKTSMKAI AVDQLRIK

>comp5360\_c0\_seq2; 293 261 1175 LEN=1227; translated  
MKVFLNYEDNENKDFHKALKITLPSWKTGPVTNLLNQFAESYNAKFQETNPLDASEIHL  
AIREKKEQAYGSMAGIPETRMVPCND AVVIETIPDRSDVYICHGAGRTKAEVEAEKAE  
QREQEELRKNVTVTCTHFGCQNRFPKGGYPACRYHKLPPV FHETAKYWACCPQKKAYDWD  
EFQMIPGCMTGRCSEVKDDGKFLFLGGMDLREQAQGEKLLKSIDDFNKAQSAGGAEAAPVLE  
RLRNAMFEIGIDKELFDQVVDGMKKKYTQSAANESELLAAVSQELGKELKTSMKAI AVDQ  
LRIK

>comp5360\_c0\_seq3; 258 261 1130 LEN=1492; translated  
MKVFLNYEDNENKDFHKALKITLPSWKTGPVTNLLNQFAESYNAKFQETNPLDASEIHL  
AIREKKEQAYGSMAGIPETRMVPCND AVVIETIPDRSDVYICHGAGRTKAEVEAEKAE  
QREQEELRKNVTVTCTHFGCQNRFPKGGYPACRYHKLPPV FHETAKYWACCPQKKAYDWD  
EFQMIPGCMTGRCSEVKDDGKFLFLGGMDLREQAQGEKLLKSIDDFNKAQSAGGAEAAPVLE  
RLRNAMFEIGIDKELFDQVVDGMKKKYTQSAANESELLAAVSQELGELKW

>comp5360\_c0\_seq4; 256 261 1259 LEN=1621; translated  
MKVFLNYEDNENKDFHKALKITLPSWKTGPVTNLLNQFAESYNAKFQETNPLDASEIHL  
AIREKKEQAYGSMAGIPETRMVPCND AVVIETIPDRSDVYICHGAGRTKAEVEAEKAE  
QREQEELRKNVTIALTLAAKTGSRRVDLTRHVDTTSSLRYFMKQPSIGLAVPRRKL MVND  
DSSQALELKLFFVYDVFVSSLAFPHVYFDPDFLVSMKTS DWDEFQMIPGCMTGRCSEVK  
DDGKFLFLGGMDLREQAQGEKLLKSIDDFNKAQSAGGAEAAPVLERLRNAMFEIGIDKELFD  
QVVDGMKKKYTQSAANESELLAAVSQELGELKW

>comp5361\_c0\_seq1; 620 176 1801 LEN=1995; translated  
MACGYEIEDITDPSQISQAKAIFPGVGSYGSAMKVLKEKGFEQPMREYLSARDRPFLGI  
CLGMQTLFESSDEHEEGADAIPGLGVI PGKVIKFDETKMVPHIGWNGR KSHKES SVLKY  
VNPEDSAYFVHSYYAPITDENKEWILTSTTYCGQPFISGVQRGSVVATQFHPEKSGKTGL  
NILRGFLEAVENGTLNNAKSIPVDPKAETMLAKRIVVALDVRTNDHGDLVVTKGDQYDVR  
ENESDGAAVTGRGGVRLGKPVGLAGRYYDEGADEIAFLNITSFREGVVEDMPMLQVLEQ  
ASKSIFVPLTVGGGIRTYTDQKSGQTSVALEVAARYFRAGADKVSIGSDSVHASEALIAR  
NGEKTGESSIETISHVYGAQAVVISIDPKRVYVASKDDADKKHVVELDDGSSGPNGEKF  
CWFQCTVKGGREERDICA VTVAKACQTLGAGEIMLNCIDMDGQNGFDLPLMRAVS GEVS  
IPVIASSGAGNEDHFVEVFSKTNVQAALAAGMFHRKEVEIEACKSAMRENKIPARNVCTS  
Q

>comp5361\_c0\_seq2; 257 176 841 LEN=864; translated  
MACGYEIEDITDPSQISQAKAIFPGVGSYGSAMKVLKEKGFEQPMREYLSARDRPFLGI  
CLGMQTLFESSDEHEEGADAIPGLGVI PGKVIKFDETKMVPHIGWNGR KSHKES SVLKY  
VNPEDSAYFVHSYYAPITDENKEWILTSTTYCGQPFISGVQRGSVVATQFHPEKSGKTGL  
NILRGFLEVSYFLSFFLVANQFC SMTQIFSVQLPSDLTLCF

>comp5363\_c0\_seq1; 625 144 1811 LEN=1883; translated  
MDEDEEDPFDFVGDSDSDNDNDAEQVVTSKESMEFARSLVDATNEKISHPKSESGRS  
TAIVSTPVSSERNNDNCQDRQLEDLSYLKAWENKWPDP MYKGEILLVSPLPVGGGRGY



VATTP IAPGTLVLVESPMMTWPDEQIGKKLGMVSVKHLIEHPNASKIVDDLEDIFYPTKEQ  
VDRYNGNEDGTMEIGSDEYEQIPKMIQFLKSELASSAKGEESGEPNSKEKDQELLDLVEL  
SKTLHIRSRDNTELTEIDIIRLLLLVLRYNGLSEGVYRHVAMLNHDDYPNCAKFLPTGGKT  
FSEVRTTRRVQPGESLTISYLPVVSHASRRKVLWEQHRFDIGVKHLKGERYKMETIASS  
LPPSPIQGVADETLTDRIELATEELEKMQAEIEASLHLTSAATSAQTFETVKALEQTALE  
LYKEAGEQLQNLNHILLIPIILILHMDICALVLRDSSLNSVQLGVI SRQVVSAYHLLPLQ  
KLLLGADHFDIARTTLDLADSVSQQLLSRS AKTLYNLNFP SMD SFAAWSTFEHETRKEHNR  
IKALYPHDVEKHINV

>comp5364\_c0\_seq1; 456 224 1876 LEN=1970; translated  
MSEKKKGQESSGQDGKILMTEEDFDVSESSGDRFDGTGAECPTDKVEGVGPKGSRTDGNTNG  
AALVPGAFVSNPLNSSGFLAHTGSDAEALVTVSTTNGSKEQYLAEAMRVDRDKIVVAT  
EVNDDEEPKSKSYTKRLIAIAVVGVI AIVIVLI INFTIGKKQKPNNEPTDPTISDSITTP  
EESNLSIEKYSERRSSLIEILTPLVSDPEVFNPEPQASPDRIEAELEWLVTSNPARFSIL  
GLKEHSSNTTYNHSLEEQSETNSDTVVQQIRQHFLALFYFATNGPNWEEQYRFLSDLDP  
CLWNTFRSTATEEDEFYVPKEVDARGI ICNTQGRVSFMHMWWDLSGTLPPPELSYFKDSL  
REINLAGGSISGSIPTDFTLEKLEILAVNDNCLTGRIPGFSDLPNLYIFNTYGNAGLVG  
SLNEFCNGTAYQYKNEVTA FVSADYCGNYGGLSSSGVECNCVCCNPNNFECYSQEWGLA  
STVFSQIKRKNKYAKSFEKSCLTFEHKQWVEEECPCLVESHTLGND DSPYYACSNCTVDG  
VRPSHPNWDD

>comp5366\_c0\_seq1; 248 1 523 LEN=523; translated  
XSLMPSDGPSLSVLSSSKPTRAI IAGKSLPSSDDISLFPSDGPSLVPDGPSTLTPSDG  
PSLTPSDGPSLSPTIPPSSGTSLLPSDGP SLIAPNHVSSKPTYAQMKPSSTSI SQRLLPPG  
IFTRRTPPPTGVP SLAPSDGPSLQPSDGP SLITEDPIDSP TASQSLLPDAPSLV

>comp5367\_c0\_seq1; 425 285 1457 LEN=1500; translated  
MGAASQTTRRITFHWNVRVNP KGFSSSPPRPRRDTRLLSSLLPSLPSSNSNSPNASL  
PIVLSPLDENYFLNQVETT IARVFRQQQHQHGDNDVNILDL PKEQREAFGIGRNL DKRLK  
SLRKNND CPCRWMQRKHCICSACPSV VNDGSEIHGSNDYNSGSLKRIFLVMHHEIGLKV  
DTAKLILSSFPFQSKLVVGGIGPEHQHSMQEMLESIHDSKR TLLLLFPDETAKT LAEIVN  
PQKSTREERQPSKDCEKCKEKTQVNER SMDTYDIIVLDGTWAQARKFHSRYFPSDESPPS  
LQRVQLSEGSVDILNKGSTETGHQLRRHDI AWRQVGTFEAFRLFMRDWSREFAFTARND E  
FELWKQIESYQRISNDAALRELGP PRFESK

>comp5368\_c0\_seq1; 424 175 1386 LEN=1710; translated  
MAAMVQDDNMVPEERVSSPINSSGDAQLMARLSIADGSEGKTKLSSASNISSNNNGSNN  
VRRNSKHTVNEEISP SDSLKAQAPQARDIKSSDLMRGPPARTSSGKKRSNNHNKQT TNSK  
AQEASKALHSLQASAANNDRI IRATPKGSSAGAQTRASPPEEPEYIEEDESSEMSASDE  
DGSWITWFCSLRGNEFFCEVDEDEYIQDDFNLTGLSSLV PYYEYALDMVLDVEMP MEDSLT  
EEQQEIVESAAEMLYGLIHARYIVTNRGMHAMYEK YRTVAFGRCP SVFCQGPVLPVGLS  
DLPRNYTVNVFCPRCHGLFFPKSTRQANIDGAYFGTTFPHLYL MTHPDMIPAKPSQTYVP  
RVYGFKNVNESSLFYKNHEEGPPKKSIDGSGRHSRRSSGRSRRK

>comp5368\_c0\_seq2; 423 175 969 LEN=1839; translated  
MAAMVQDDNMVPEERVSSPINSSGDAQLMARLSIADGSEGKTKLSSASNISSNNNGSNN  
VRRNSKHTVNEEISP SDSLKAQAPQARDIKSSDLMRGPPARTSSGKKRSNNHNKQT TNSK  
AQEASKALHSLQASAANNDRI IRATPKGSSAGAQTRASPPEEPEYIEEDESSEMSASDE  
DGSWITWFCSLRGNEFFCEVDEDEYIQDDFNLTGLSSLV PYYEYALDMVLDVEMP MEDSLT  
EEQQEIVESAAEMLYGLIHARYVR

>comp5369\_c0\_seq1; 461 1 2119 LEN=2447; translated  
XVLQPLIDSKEYCSGAAPGQNRSEKEAKATDAQGTHVKKTMAERAI SISSTSMPLSRSKK  
RQLRPRIRGALRFVPLIFVAVFQQEAA TKAFVATAFRPPGTTAKFPFHRHCTGSHVLSIP  
EADALDDDCKERIAAGHIE SGIWKGTDDPSSSDQLLLLARDFVDRPEVFSLLMSDFGF  
PALVAHQTRALAMAAIRREQA EVRREAELEV PONTQDSGDASRTSNDSEAVANPGVTDHR  
DGVVGARHSIGGEPAADEKAGVA AKRF SHSELQSSVVNERARRRMR SLEDYNYGLPSDYA  
KVYPKLASELDEYTFMTQ PSTYSQESPIRDATAKVYMNHAKLFLGWCCRKTEGNRDETE  
ASDASL FALIPNKDKESADHI IRFVLWLR SREISVSYEANLLRGI IKLLKFRFARESNSD  
PLEGQNTFDDIPLIREVRKLHRDANQRQLAPRSSDETKKWITWKDYLEVVRKV KNEVLE  
LIEGYENLPASERTYPGGEKEGLYSRQKKVAEAYQRYLILAILASIPDRQRTLRELEV G  
RTLAKDPETGCWTVKHGPGDYKTGKH YGERPAMQLAEELTPAIDDFLARWRPALEPSTGL  
LLVQARTGKPMTSNSVFKRVVRC CFQHTGKKANPHLLRDILVTHVRETEASEKELEALAL  
YMGHSIQMQRTSYDRRTLGA KVAPAVELMRSVNGSPGGRAPPRLAG

>comp5370\_c0\_seq1; 940 151 2025 LEN=2155; translated  
MRFYASSRGGSRSLATMALATTQLIP SQSYLSSRVMVTA FSSSLAVKQVNSLKEARGYSS

SSTDNLNMSKMNQSFETWSFDEPCKTMAWSPLSAVELTASGSGLDNWTDDADLVFVGIFA  
PSKEDSEEEEDDDKEEEVVEPTLSGSAGDLASLGGAI SNLMIENFKDFKNGAEAGSTLP  
TMRFYEDGKTKRYIVVGLGSEPKDSSESIGSAIGKALATKCDSEKKAVSAKFLLPESI  
ASDSKNLKLSSAFYSTLYADNRHRTGKVVTPAEDLKSLLTLLSDGGSDSDTMQDSLIG  
KKLATGVYMTKDIVNAPHNVLNSESADTARRLAEESSGSLTCKVLGKKECEERGMGAYL  
GVARGSETEPQFIHITYTPSEGDIKRVGVIGKGLLFDFTGGYNIKTQMMELMKFDCGAA  
AVFGAARSIGALKPPGVECHFVVAACENMINDKAIVPSDILTASNGKTI EVLNTDAEGR  
TLADALVYCDKELDCESI IELSTLTGACMVALGQSVCGVFTDNDDLAEELKDVSKVTE  
AWRMPMEKSYNKQLKSKVADMTNLGGRYGGSITAAALFLQNFVNKKKPF AHIDIAGPV  
WDD QIGATGFGAKLATEWIRRQGESDE

>comp5371\_c0\_seq1; 223 369 1436 LEN=1891; translated  
MTTSGDSSKSTTAHTALSEIDDDGAFRRRTASSFTSTIEVGGRFEPANRYHLYVALACPW  
AAGTLAALKHKGLDSIVGYSVVHPTWRRTRPDIEGDEHCGWHFANPGDPPVQNSNGYGSF  
DCDDALIPDRVNGAKTIRDLYEMAGDTSKYSTPLLDWRKEKTIVNNESMLILKIFNEAF  
CNLLGSEGEDTDRPNLFPPDLQSQAEWNELIYNAVNNGVYKCGFATSQSAYETAHSELF  
AALDKLEAHFGESGHTFLMGDTLTWLDIRLYCTLVRFDPVYVIYFKTSHKRIGSDYPNLL  
KFVRACYREAAIRDTTNIKHIKMHYFTSHPALNAYGIIPVSNPPLLETSTEGEHQ

>comp5371\_c0\_seq2; 223 195 1262 LEN=1717; translated  
MTTSGDSSKSTTAHTALSEIDDDGAFRRRTASSFTSTIEVGGRFEPANRYHLYVALACPW  
AAGTLAALKHKGLDSIVGYSVVHPTWRRTRPDIEGDEHCGWHFANPGDPPVQNSNGYGSF  
DCDDALIPDRVNGAKTIRDLYEMAGDTSKYSTPLLDWRKEKTIVNNESMLILKIFNEAF  
CNLLGSEGEDTDRPNLFPPDLQSQAEWNELIYNAVNNGVYKCGFATSQSAYETAHSELF  
AALDKLEAHFGESGHTFLMGDTLTWLDIRLYCTLVRFDPVYVIYFKTSHKRIGSDYPNLL  
KFVRACYREAAIRDTTNIKHIKMHYFTSHPALNAYGIIPVSNPPLLETSTEGEHQ

>comp5372\_c0\_seq1; 201 1 895 LEN=950; translated  
XGSKTDEELLQSSVAALDLLDQYTMSSWDLSSKSRRFGSISRSARSFFRSSSRSSSRSGS  
RNSSVRSVAVSSDDGIDHAYDTATKKTIIYLIRHAESEENVHMHGMQELGTSLVGGRVPTSE  
NLSSSLKFIGGVAKGDIDSKLSEGGREQVKELHLSVLKSDGMENMSSVINDVDIIGHSP  
LV RARDTCYGGFGLHTNGVCENVVELKCLEEATPWETA VQGRKKT VHKRIDELQRWIDN  
QTD ATTIALVGHSEYFMIMLGISRAEKFWNCVVKVEYAAGKWTGLTLKHRLTSSKPMGVF

>comp5373\_c0\_seq1; 340 296 1630 LEN=2044; translated  
MTRHKSQRVFLFGLASCALILSFVITYSRQNRKRRKSEQKSKPGACSCRDGRITKATKTT  
AAATNGLRCKPMFRWQDPELTRTILESADQRAKRWVSFSLHGAHMHVGVQVGRSHDPILI  
LDTVVMKPVRRKHTGIREVAFYEAIQASSKRSGFDRYCSLFS EDPGNC DRATVAEETKLL  
YRLEPYTPRYFGTVEYHEGPEGTTNRAVPPDAEREPALLGIGPSSYILLNNAKTFSRP  
CVLDIKMGTQTFEPGAPEEKRLAELGKYSPPQETFGFRLTAMRIYDPSHNDADADGYVY  
PKQFGRSLATRGEVKEALLRFLGGAGLPEPVRSHRTSAIQRILSKLKLKIGWFRDNRSFS  
FYGSSILVAYEGDTEPDDVSGVQPDMAKAKMIDFGRVRRQAGGDPGYSKGVATLVSILEE  
ILRESFLEESRYISPKRNGHAMNR

>comp5374\_c0\_seq1; 183 108 584 LEN=1374; translated  
MSSGIARGRLVEERKAWRRDHPFGFYARPTSKGDGSSDIMKWEAGIPGKEGTDWENGVFK  
VSMEFSEDPYSPKPKCKFVPPFLFHPNVYPSGTICLSILNEEEGWRPAITLKQVLIGIQDL  
LDDPNPNSPAQSEAYQLFIHNKTEYKRRVQAEARKNTP

>comp5375\_c0\_seq1; 206 340 979 LEN=979; minus strand; translated  
MTLFEIYGDGFDSTRDGRKDEPIHPSAPSRNRLYPEDLLDVFFRLDSVLDGGKQSI E  
ARF ADLDRSEATLGTFGDALGGFYRDAQITGQLLEVDQGFLSAVSGAGRPGAHHHGRS  
FFEG GKRVASRDTCRREEAPWESPNASVPTKAETKRRRDEILGIVFGLSLIKIYSGNEN  
GLNGS ASLQEVWPVLLISCTAHRYVVGCRWSVGGKEVV

>comp5376\_c0\_seq1; 374 81 899 LEN=1237; translated  
MKSYSPIITLLALSLALRQEHAAGFSRPNPEGGCSRAVSSSAAQQSAGNRRDWLQAA  
GVV VATTAAATPRVARAEKQKMFAPGGTLVDYQVGVVGNERASASRRSDNSNVVFGQ  
DY YKFGTAPSF IPEGDTSFPVKMPFVLSQORYDGLKKYRERVQRGIDKVASLKSSIS  
AGDFAS IPPADDPEYSIRPMGLLANAFLASENTGTTNELFLARWYINEIYLDLADIK  
QAPSKEAAE TAHANAAILALNSYLGMLNRSITAKVGDPPFVLV

>comp5377\_c0\_seq1; 548 95 1744 LEN=2375; translated  
MDNEVADATAAKQAKAAAAKARKEARRALRRKLEAETAQTLKDLGLSASAVDVGASKS  
NA NRPLPAPPVNL PADSCTICLFYQYKEPAWKS KDHKAALNKVTEFAKAHNVTGR  
GRC APEG LNCTLTASANDIRAFCYALRDWDPAFNETDFKLEDGVENKHRFRFTTLR  
KVDEL VGYTLD GIKAPSLNRHAGKHLEATEYHKMQQKDTVIIDVRNAYESDIGHFQ  
PPEGGAELLDPKMR TSQDFPKWLNAPETKEKLNKTVMMYCTGGIRCERATALLNQITE  
AEPEFDTKGVVMVRG

GIERYLKTFKQGGYWKGNLYLFDKRMEQAPPEKSQEALDADVESKCCLCPKPYAKYRGQH  
KCARIIPSSGLPCA VPVIVCDECQKTATDEPQCLACPLCVKGYQTPETAPDLIGQKRKLG  
LIEKGGTDLVTGQKVARKNVDVASQRLFVGLPLTTTASLKRKAFGDAKIETIQWIVDHT  
KAFYGSFAFCKMASIEDAIKAQSQGTIPLLQSKKIKRQKQKARVCFAPLRENELWPLESY  
TETEPPLG

>comp5378\_c0\_seq1; 829 319 2349 LEN=2486; translated  
MSEYAALHATSLLLVGNCKTSESSAATSRQVTASAAAVTTITRS AHGDTVFTTSDLFP  
DDEQDFGFKQPSAKNFRKSAANDNGIETIMQLSSNNSNATHQSNLVLVLPADDLSDGPDE  
SRWRSHGITRRRKLLEEDKRIGGRDFSMSFDCSVQRYFVAHWALEQFHQLYQKSSSSST  
DSAKELEELYLMGHRVVAFLTECLPRHPGFARSPFVRQRCKQELDHLMKCLELVAIRIDE  
QVCNQFVDDGDFFLDSMLAAEMANEDEDQEQKSPRRFRTPSKAKQNNSAFAEWEVDFPD  
DEFGLKGEATKCVSFKADFERTTAESPTAETVGTNGTESLEPSDTSYTNFDSSDNSKGS  
EEALSRSGSEVTRGGSCDGSNDYRPARDDDQQDVFDSEFSPPEDEGALDLPVSILK  
GVRDLFLKTIACEPVLYETDSEAADSWANTADDAKSRPCLPSSSGVTPTCDPARIAFRDL  
MNKLPKHSILQRNNQSKLLGGFLSRTPLNPPDRSPASSPTLIEILGERNTNKPAGVAHTD  
FDDVIENEIKEYLDSSQDEEDPKQFVESCHAKMSTQSKSMDMGTIRHRKPRDDRSSVSSY  
VSSSSSTVASTTSSQSLKSLTNKTGSQTSAFSSFGAHRKEQQMQGSEASKTIFEQDDWI  
SFDNSSGDSFFADSSF

>comp5380\_c0\_seq1; 348 1 1092 LEN=1174; translated  
XDDLTTSTAVVA AVVAVYIQSSLYLKPQHEAEQSKSTMVRSHEARGFGMLISAMKIPPHI  
RILCPEQIGHGEDLKAALDGNPSNQFYKKEAGRETANTMLESTSEFLDVVQAGPNCNAFG  
ISLGGALVYSLRYKRPEIIKKTVLVCPAIGFCLDDAFVDSIVKGTNNFVDFQSRDDVKFL  
FRDLLSTGPYEDTDATNPAAPAPAATTATKQRRKKYPIPPFFMEAIYRQSQKTTPEGHYR  
KMMLALLETTGRVNNCNDDEDFFGDGNENCRDDNARIFRATSDVDPKSPRLLLWPENDQ  
ISNCAKGMLYFEHSIVPSSSSGADTGTIFETIPDCGHCFDGRMIYDVIRPRVKEYLLD  
FHTH

>comp5380\_c0\_seq2; 419 83 1288 LEN=1370; translated  
MKRNSRRWFEEATVGSHELLKAMELGQKHGKLVGPKSVFLPKCGIRMRYYEREAQPIAD  
DQHQPQHLPTLLFCHGISEEARGFGMLISAMKIPPHIRILCPEQIGHGEDLKAALDGNPS  
NQFYKKEAGRETANTMLESTSEFLDVVQAGPNCNAFGISLGGALVYSLRYKRPEIIKKT  
VLVCPAIGFCLDDAFVDSIVKGTNNFVDFQSRDDVKFLFRDLLSTGPYEDTDATNPAAP  
AATTATKQRRKKYPIPPFFMEAIYRQSQKTTPEGHYRKMMLALLETTGRVNNCNDDEDF  
FGDGNENCRDDNARIFRATSDVDPKSPRLLLWPENDQISNCAKGMLYFEHSIVPSSSSG  
ADTGTIFETIPDCGHCFDGRMIYDVIRPRVKEYLLDFHTH

>comp5382\_c0\_seq1; 190 227 721 LEN=890; translated  
MSDRKVQFNGIDVILPSLERVEYTRQEAATWVSPRELKMKTRKDIKATVMLVLKGDRAH  
LDSESHNTRGLEALTREAAATKKKRKSQTRKVVIVEQHDPELSKKEYMEVTEASRNEARA  
IALQDAKYARSNRDISDDPTQPSDIEKRDDLEQIVGKAGDLGR

>comp5383\_c0\_seq1; 229 142 707 LEN=707; minus strand; translated  
MTAIPMDHEEAASQAPEASSKSTEYASVPVVPVSPVGGPTEPSEPVSQAPEQASALEET  
QGQAQAPPDAYNIFFKHTRSRIVRGLPEEGTVAETVLSIEHIVVNSTMPKQSRKSHGIS  
FGDLARRIADRWKTIGTNQRALFDHYASLDMQRYRREVALWKAKKMRELAGSDVICGNVI  
SSNSINSSX

>comp5383\_c0\_seq2; 321 142 898 LEN=898; minus strand; translated  
MTAIPMDHEEAASQAPEASSKSTEYASVPVVPVSPVGGPTEPSEPVSQAPEQASALEKQ  
KEKQKQKQAPKPKQSEAQAQNAAKPPEEAPKQNPNSKAKAQAKAKAKQTPKEKPKQKRRT  
WKKPKDKPKRPLSAYNIFFKHTRSRIVRGLPEEGTVAETVLSIEHIVVNSTMPKQSRKSH  
GISFGDLARRIADRWKTIGTNQRALFDHYASLDMQRYRREVALWKAKKMRELAGSDVIC  
GNVISSNSINSSX

>comp5383\_c0\_seq3; 190 79 702 LEN=880; translated  
MTNQRQILKIVLCSLLAASTVAMKDPATGISFDSESRARPIFGVGARKKGPICKVYVGMV  
GSEDLKEELSSISRSESKGKKAVDALRKGASNSSTAFVLKMNFKVSEKMAQAIADSVKP  
RHSSDEEVGQLKDII FEGVQGKGA AVKGTVIEFDCSDTDGVEVTVDGKCGKGVSSPGLAK  
ALCDVYLDDKAVSPKPKESILENCCAE

>comp5383\_c0\_seq4; 190 148 771 LEN=949; translated  
MTNQRQILKIVLCSLLAASTVAMKDPATGISFDSESRARPIFGVGARKKGPICKVYVGMV  
GSEDLKEELSSISRSESKGKKAVDALRKGASNSSTAFVLKMNFKVSEKMAQAIADSVKP  
RHSSDEEVGQLKDII FEGVQGKGA AVKGTVIEFDCSDTDGVEVTVDGKCGKGVSSPGLAK  
ALCDVYLDDKAVSPKPKESILENCCAE

>comp5384\_c0\_seq1; 137 1 266 LEN=568; translated

XSSSNTNSSNSNSTNSLENLSRFELMFLPQERRVMKAVKAKAASRRLQRERSRRLHYCLL  
ASVVTGIVLVVAVYVVVVQERNDDGPGTD  
>comp5385\_c0\_seq1; 318 1 1190 LEN=1728; translated  
XHSTTASNNSSLTRESAKHHTVAKQYFDRTRFVPSATGFSTIDPGTPLTEHAVA AVRNE  
TKRNQTKPMSPIASASASSGTGPGDAAAWASPHRRRIRPRRDP SRSGSRGPGLVVS VVL  
FLLALSRLQGAAGEQPSR SRHPSTGCISSGTELLRAVTAYYDPEGQAVDSYGTP IEDWC  
LSPSVLDALYREGSDLETRFSATWEGIVDSHGETFAGGLEGLALAWLGASTNENHVCA  
DLCAPAGEDVRVPVVPVFPDPEEDGIRDEDEAVGNDPHEDAASDNRDQEEPPSLSASA  
TTRSTTTTSMVLRLIPVKLVAVLSLMCLALGLRQMYFSVDSDSRCWCCCKWFSVFGSR  
ASYEGIDPSDVSEHQKNVEFELLELAELDAEVVIS  
>comp5386\_c0\_seq1; 425 540 1271 LEN=1521; translated  
MATGTTIGDLHSHDDVKDLQSEGLQGS PAYSLRRLQDTRPKKDG HQRLNPLEGSELKSL  
VMDDR YDYTGNGYYDRKGGKGGADYFGGKGGKGGYGGKGGKGGVYQGGKGGKGGD  
KGGKGGYGGKGGKGGYENPTIPPETEIPSLNSSSTPSPSDSPSKSPSDSPSNTPSHSPSN  
SPSYSPSNPPSDSPSNSPFFSSSLSSQSSTDTTSANDADEVGE GSNDES LTSDAADRIG  
IGS  
>comp5387\_c0\_seq1; 420 103 1080 LEN=1304; translated  
MAVANGWAFRPHLTKTIRAAGLVAATKGQAYQKHNRCV LQMGYYVEAE EEEEEAKNI IDRS  
KTHMTFGIRCKEELQISIPSPSSSSGNSAITKT VVGLVPLVDDAIDKEAE EESFVFSFD  
DVKDDENVEPTNARTVSRMLNLLFHSEYGDDEESSP SWTLVEIGADPIFPLAVA EWMEAV  
GSEQKIVTNVIVKHSDEQRLRVLEHAHLFFNQ RKPSSSTLTFSTKPLTDDSNPWIETLQ  
KGTNNKIVVLISNEKFATQLLDKMKENANPTANPAGDFVYRTIIPSTIMSREKLLLDGFG  
CQSVGFGDENGDDGLDFWEIVPIRQ  
>comp5388\_c0\_seq1; 223 184 1005 LEN=1253; translated  
MSNSKPSIDNKT KPHPSEMGTGLRRLMICGGTDGIGF SLLASELLRSKYTEFYILGRDFT  
RVRRLCKRRDDEMEPEKSSQKVIEIPCDITHLNEI STAVAKIGDDSIHDFVLTIGTFTSG  
KIADIIPISSEENDCKNVVAEHFHLNVCSTIHLVRSILPKLVAGDSQILVCTASLALKAR  
SPYGLQSATKAALRSVVDTLRIELAGKTRVMVMPPSV DTKIFEKAGDSRNTDGYPASR  
IATIIQFMLDCPPDICVPEMLIEQHHRVHEK  
>comp5389\_c0\_seq1; 410 123 881 LEN=1435; translated  
MTLSSSLT TDSAMFNPINLEASIGRIEDHTINERACEAEQVSRSSPSSYFSSSQHLKNAI  
HIPTTKSRTGITRTSSRTPFQTEAAANTSARS DSSNSLLPQYPPISETDHEIKERMRLTE  
SVDWSNSLVIANSPKNTESVIEATENADQQSMMEVTVDDFVLSAE EANS LDTLDTATI  
QDDPNGFWDTPAQVASTMSVDRDVDMTTAVPFSVTI SSQENAFMMDENEDGILVEGEDA  
DASPIRSSDMEW  
>comp5390\_c0\_seq1; 584 353 1654 LEN=1690; translated  
MKFAACSTMVLLAASSSGVRANSAAIADLPGLVDG VRRHLN LNLGILGSPTRPTNSASHS  
PYEKIMGHPVFQVTTSWGSA YMNMEELSQDDEDASAGAESEGSMLGVAKSGDEAAGIRKD  
RYRTISLYYMDPDDAIGAHAEFKQMDGMKDADVR ITS VSLAKAVRSACNLGNLLTGQPI  
DFHKGTVLPTKEGGLRHKILPPKKQLYYAAF CRGKERIGLFS DSSDEKESQKDHASAAV  
IGNAALAYRNAQRKQAIRDRKLAYKPKNQLEADYAHMDGNL GIPVFYVPGMERRRRFR IKS  
LVSGGVRKEIPLFFNYEDLQEAWQKTKPIGGDKD TYLPNEPQGV E VFNLDVLTSMKEQ  
DKMAQKRAKESQNRVLQSLSQPFRNFRNLVDS DDEAAML DGI VIPS SDACTYKEGIT  
ARGNGKARLRPMR  
>comp5391\_c0\_seq1; 395 1 1201 LEN=1897; translated  
XLPKDECKHQNTAMNPEHITGTVA AEVIGNNANCSG SVCMM SLSNHHEKTTGIDSSSCY  
LGNSKNRANEDHRAVITEVKENDDKEGQYPPKTKGMKKHRVSGTDAMMEKTNKVASSLKD  
AMEELDR IWDVDDDDNSCASSLSSFDEDEHEKQM QNVE SLPSSPSRNRVRQTAALLVRVFS  
NELYDPAVQALAEHEELRSEAINLTHQLEISQREVKRLKGSELRSKESI QNLLKAVDRST  
EEAKDSSQAKLVEAKLRADLLQTRKERDDLHHE SMVSKRSLELVTNEANSLKQEKSR LQK  
ENIRLEREARSARVLAESLSRSKNANLNNGNDEHNAEFYKRKTRDLETHLQGM TARLAEK  
NQELMELRHCRDRNLSQNRLEALRAGKKISNKKIRVSNAR  
>comp5391\_c0\_seq2; 328 1 1338 LEN=2034; translated  
XLPKDECKHQNTAMNPEHITGTVA AEVIGNNANCSG SVCMM SLSNHHEKTTGIDSSSCY  
LGNSKNRANEDHRAVITEVKENDDKEGQYPPKTKGMKKHRVSGTDAMMEKTNKVASSLKD  
AMEELDR IWDVDDDDNSCASSLSSFDEDEHEKQM QNVE SLPSSPSRNRVRQTAALLVRVFS  
NELYDPAVQALAEHEELRSEAINLTHQLEISQREVKRLKGSELRSKESI QVSI VSDVLI  
RFASQSIISQRFFVFSHSNYXIHFNHRKTNNECSQNL LKAVDRSTEEAKDSSQAKLVEA  
KLRADLLQTRKERDDLHHE SMVSKRSLELVTNEANSLKQEKSR LQKENIRLEREARSARV  
LAESLSRSKNANLNNGNDEHNAEFYKRKTRDLETHLQGM TARLAEKNQELMELRHCRDRN

LSQNRLEALRAGKKISNKKIRVSNAR

>comp5392\_c0\_seq1; 160 259 1158 LEN=1688; translated  
MGGITEEPTTKIINSDDSDCNDDAGCTKRSDEIFKKTLAHSLHRRKVALAKQHNGKN  
TVRFSTVRIREYMLCLGDNPVTRGAPISLDWVYIRDNCYELEDYEQGKHS�DRNSDVA  
LATSTSIPAKLLPLERIHILKERGYSRSEIKDAMDRAHKIREQRLWTKRHCVDRFQTF  
VRAMSCFSLSQDERIKCVDVETCSSTALSSSDLSLVHETDKSLREHKARWKRQPRNSLDL  
MTSQRKQLQRNHLYKPRNLLKMLRSWHEKPQETDSIDTARHMSVRLEIDGSTLVILGGE

>comp5393\_c0\_seq1; 903 35 1465 LEN=1519; translated  
MSEEAARKIKVAAEERNFLFSSESVEGHPDKLADQVSDAVLDACLKADPFSKVACETAT  
KDNMVMVFGEITTSKIDYEAIVREQVREIGFDSFEDDLGSVNSKGLSCDSCEVLVRINK  
QSPDIAGGVHVGKSDLDVAGADQGIMFGYASDETEQLMPLTHMMATQLGKKLTDVTRKDG  
LWWRPDPGKTQVTIEYKQHTDGSVTPIKIHTVVI STQHAEPKAKRTEEQSGKDNRGKYE  
GEEQIAPSMDEMNELIHDKVIKATLESIKLKSAGESALSIDRETCNLHINPSGKFIIGGP  
QGDAGLTGRKIIIDTYGGWGAHGGGAFSGKDPTKVDRSAAAYACRWMMAKSVVKAGLCKRAL  
VQLSYAIGVAKPLSIFVETYGTEKEGLTAAQITELVKIEFD CRPGALARDLALREPKNK  
TAAACHFGREPFEKDGKFFSWEDPIDMSKYASMSTEDIDKECAAQKEAILKKWVD

>comp5394\_c0\_seq1; 273 105 1709 LEN=2042; translated  
MDNNYTHEEDASPAVAGMMAQDVTCTVSTGGHGDENSKSIPSTSATMYSKCKSPYSTSE  
FFFRLWENRWILLGQVLSLLLASGGAAQATLHLQCGLSAPTFAMSLVYLGLFAIHCPLL  
WFRRWRESKSDGLSTVESEEEVVFDQHAYSNSNDANGHAIASYCRPERSEERLPITVE  
HGEKDAVHPIHSQTTNDNISMRVSKPLLKTYFWYLLAFCDTQANALTI LAFRYTTLT  
SVTLFDSLAI PSAMILSSLFQSTRRYQALHYLG VFLCMVGVVFNVLQDYKSDNEI IETT  
DSSSYTHKLRGDVCAIVGGLLYGLNDVLTVEVTLSETRDTTEYLG MIGACGSIIAILQAFV  
LERVEIQGFLSETVGISVDGDEL RACSTAEAMWLLVAFVGV TICSYLGASRFLMVSEAL  
FNLSLLTGDLWSVVFVFEKIVPRPLFFCALAAVLSGVVYEMAPSPALEKRHHGGKHSN  
NIVKECTEGTPIRKDGI FRET TDGGDAEVISSDSLEECGGDSNTLEIELKGI VS

>comp5395\_c0\_seq1; 279 201 518 LEN=747; translated  
MTQKITTNMLLGLLVSSVAINSNCSVHAFTGMKSLSRNCRGNSLNARSPSVVFM SDDRSK  
DDEIAKLEEQRLKKEEKTSEETA VAATTTTTIEEEEEDEDRGGG

>comp5396\_c0\_seq1; 235 1 905 LEN=1324; translated  
XNSPKSSLTTTQSCGHYGVVSVISWCLVSHVNFTINFNTTRNRRNTSL SFFQKLPYAARV  
AIVLEECGEPYETIAIDLQNKPTFCELYVRANIPNARAKVPVLEVLGKDG AHRISIVLA  
ESLVVADYLADRYPDVGLTPSTSEDRAVMRLFSEL CGASVFSYWEILRARGDDEKFESAV  
QKFKQGLINTNAFLEKKGKSGGPF LFGNQFTLAE CNVAPFLQRACNVLP AFTGARNAEMR  
DYDSAGVDPKICEEEGLIRLKS WVC AVLARPSVKYVELSDEEMNQSVSKMLKRFEEMEK  
K

>comp5397\_c0\_seq1; 381 150 1208 LEN=1404; translated  
MAEKPISQNGKTDISMTDPSKFRPSPPAFQCGEELQEGGGTIGKSGVSFYCSLPQDEKRL  
TFSCRDRSVGVLESKESAITNDEFDATQACAMD PFFFDEGYTLAGRTGFQVWSGTRLMI  
ESLLFPLPDDKDRLVAIQKEINSADGKNILELGAGVGVGTALSAATRCRVLLTDLPTLV  
ENSLLPNLKQNRDES RVEEATNETSWLYKASSNIEFEEDNEDVVFSLGNRGGWAS IAT  
IDWTKTLNKEVSSVSLDWIVASDCVWLVSMLDSLDDTVDSL FGLNPRARLILSFQRRDA  
GDNVRF TSVPSILGSVRRRGSIDCLAWRHVRQEGMTEPQEVFLFEIVPGSK

>comp5398\_c0\_seq1; 180 78 461 LEN=696; translated  
MTSAQNHQSRVHCTTEREYWEAIESAGSNLVVVD CFAEWCPPCRQIAPFFDALSLEHP  
EVVFKVDVVKVPGIGRILGVWAMP SFFFLKDGETVGSFTGAREGLLRQGIANGGRVGGV  
CSSCAVQ

>comp5398\_c0\_seq2; 131 78 729 LEN=896; translated  
MTSAQNHQSRVHCTTEREYWEAIESAGSNLVVVD FLPSGEWFVVMQRSAGQRRARPST  
ERRKTRGGGFVRCFRFVSFRSFLT TSCVRAAKPSSRRGVATPRTIAQVSPLPADRPVLR  
PVAGAPGGRLCQGGRRQPGDRPDGRLGDALVFLSQGRRNGGV LHGGEGGPPAAGDRQR  
RPGRGSVLVLRGAVSTAYSIGDLAAPPWRAVRFVPR

>comp5400\_c0\_seq1; 466 487 1564 LEN=1721; translated  
MISQLELSTMHQPQLLRKLSKPSKVASILDWKKASDNTVLALNIHKNRVGI AVASHPSLG  
IPCIELDPLRFDDSHGNRTNISRSIDRHCLERFSDIIEDYKVRRLQSWLDQTRARVDSL  
AFLRF CASDTLSFFLWFR LQVCGVVVNWPLQHD TGRMG AACGRVIFALEQLVERSNESTV  
DIAEERLVGGNAAANDAKHDG VGISLRPFCLWDAGHIDVKQRADPSKRVD AFGRCASYG  
REAREPPVARGQERRDNENENTYFASKEQYYEDELTVVLGVWDDFCREHWPDL YETRGGN  
AEGILGKADGAHQAPASPSNDYGDSE PATPEKLP IRVSSPRLQNMAMKQKCLITMR

>comp5400\_c0\_seq2; 485 487 1446 LEN=1603; translated

MISQLSELSTMHPQLLRKLSKPSKVASILDWKKASDNTVLALNIHKNRVGI AVASHPSLG  
IPCIELDPLRFDDSHGNTNISRSDIRHCLERFSDIIEDYKVCVVVNWPLQHDTRMGGA  
ACGRVIFALEQLVERSNESTVDIAEERLVGGNAANDAKDHDGVGILSRPFCLWDAGHID  
VKQRADPSKRVDAGRCASYGREAREPPVARGQERRDNENENTYFASKEQYYEDELTVVL  
GVWDDFCREHWPDLYETRGGNAEGILGKADGAHQAPASPSNDYGDSEPATPEKLP IRVSS  
PRLQNMAMKQKKCLITMR

>comp5401\_c0\_seq1; 662 56 1666 LEN=1750; translated  
MEQNQQQEDIGVQASATEAKNSHSNRSPVRAKRSGRMLYESSFATSFTSARGQKRPPGFV  
ASSLDYKSTGVNAASSPSLTTKPGRNLSLHNKQKKQKEQLEVEQQQLRQYRSGQSQPTRAQ  
GNFGPPPHSITTIEDLESMSSEEQIYKLFMEDPELYESFIKSTETERGSTPTGARKARRST  
SKKPSSESKKRRSAKAKTIKSESQDREIPYFQWIFLLVLVGVAIYQGYKTYSSSTSTKD  
KNSIVSRRIKGGKQKNKGGKSDKKVRVKTKEVSQRRSEASSLMEKKHDVETANTAGRP  
SSSKKKKMSKSKAKTNTFTGDSKEEQNKPDLDSSDVSEDDQALETSSKLDSTAPSN  
PSTIPNREEDNDGEWQTVTKSSKGSKKEKALPPQNFHEDKEVIAIPVVESKQDNPSEKAK  
DDPESPEERNTFEDSDFIEVKSKKKRRNLSNSGKEKTNNAQSAMS VETTSIEKPSVTKN  
ENLSEEKQNGESVASTEEDAALALKLHEEMNLSKTDMSNSQEEGWEEVTSKKA

>comp5403\_c0\_seq1; 323 107 1699 LEN=1809; translated  
MMHRAPSRGDSEARQAQAPPWGYVDNPAEVNNSFLSQEHLLELSYTDIRNLSSESDSN  
RNKREKNAHDKVEDLLSKMLQTSLEDRNAIVGEIHGIQNLAPEESSEMIDAALSEL DQE  
ISNVPPRSRQSFDRSQDIAPNGYINSSEFRLRFLRCELFDKRAANRMVQFLDVLSELFG  
DVVLKRPVMMKDFSKHEEMQAFRVGHQQLLQPYRDRSGRRVFAVGGVGLDVPLLTRVKILI  
YIILAASEDVETQRKGIISVIWPGTNTPSADKKS NVKLDRI MFMKRIYGNLPLR TCSIH  
CSPSNELNTPFLRVFRTLITLTMPHYLGRLKFHAGQPIELLYSLKTFGIPAE LIPITDTG  
NIKTIYKQWMLRRIIDNAQELSDHAKMALNFIECPGLNDVIFRTGTSLYCHPGNVRFR  
CLMEQKHEIPSYIIQKTRSELAAQIIEETEAEAGGKFLKWDQRNMYWTPIEQSQVQNKVLL  
AIRDFKYKSKIKRAHLEANQDKSFMFLNGEEHNANEMCFGTTFSELSER

>comp5403\_c0\_seq2; 196 107 1844 LEN=1954; translated  
MMHRAPSRGDSEARQAQAPPWGYVDNPAEVNNSFLSQEHLLELSYTDIRNLSSESDSN  
RNKREKNAHDKVEDLLSKMLQTSLEDRNAIVGEIHGIQNLAPEESSEMIDAALSEL DQE  
ISNVPPRSRQSFDRSQDIAPNGYINSSEFRLRFLRCELFDKRAANRMVQFLDVLSELFG  
DVVLKRPVMMKDFSKHEEMQAFRVGHQQLLQPYRDRSGRRVFAVGGVGLDVPLLTRVSNFN  
VYSXSLKWNKTDVRQDI IELXII LRQLIPC NFRLMPPNLPPLKVKIL IYIILAASEDVE  
TQRKGIISVIWPGTNTPSADKKS NVKLDRI MFMKRIYGNLPLR TCSIHFCSPSNELNTPF  
LRVFRRTLITLTMPHYLGRLKFHAGQPIELLYSLKTFGIPAE LIPITDTGNIKTIYKQW  
MLRRIIDNAQELSDHAKMALNFIECPGLNDVIFRTGTSLYCHPGNVRFRCLMEQKHEIP  
SYIIQKTRSELAAQIIEETEAEAGGKFLKWDQRNMYWTPIEQSQVQNKVLLAIRDFKYKSK  
IKRAHLEANQDKSFMFLNGEEHNANEMCFGTTFSELSER

>comp5405\_c0\_seq1; 854 148 2361 LEN=2468; translated  
MDQLIPIVSKLQDVLGAVGQNTQLDLPQIVVVGQSSGKSSVLEGIVGRSFLPRGTGI  
VTRRPLILTLVNTRTPGSEQPEDENRDPNSNEDGEGVEWGEFVHCPGRRFHSFQQIRQEI  
VRETDRLTGSKNGISSDPI SLKIFSPYVLALTLVDLPGITKVPVGDQPENIEEQIQEMILE  
FISNPNAILAVTAANTDVANS DALQMAKAVDPYGNRTIGVLT KL DLM DPGTDAADVLLNR  
VYALRRGYIATVNRGQKDINEDLSIRSGLQKEEEFFNNHPVYSTDRNLRGKCGTKILAKS  
LNNILMHHIRDVLPELKNRITIMMADVQQLDALGGPGQQSRNTLGGTLLGLLSKFASNF  
ASIDGKGGELGSSEANTKNLALVELFGGARINYIFNDIFATSLMTAGPFDGLSDEEVRT  
TITNAMGTRRALFVPEIAFDILIRRQIARLESPGIECVDLVYEELQRIAAQSEPKELTRF  
PFLRERLCDTVSTLLKRCMAPTQMMVENLVKVELAYINTSHPDFIGGARAVASVTNRAAN  
MEPMRNQELHIHTGSTGVPETPASQADSQYFNADASNGGEQTPYHDKDGGIMNFI FRGK  
PTPIADGRSHSGSLPAVVHLPSVPANMKQTDIPPSDRELSEMHVIKSLIESYFKVVRKTFI  
DMVPKTIMFFLVNHVKDAMQNELVSELYRESEVETLMKEADDVAERREQSEEMRDLGKA  
LEIVNEARDFNTISQVE

>comp5405\_c0\_seq2; 790 349 2549 LEN=2656; translated  
MGHGI TRARALIPFNSNPI SKKCVNRS AVNLQESLVYWKASSDEV SFPEEPVSLPVDXL  
ILTLVNTRTPGSEQPEDENRDPNSNEDGEGVEWGEFVHCPGRRFHSFQQIRQEI  
VRETDRLTGSKNGISSDPI SLKIFSPYVLALTLVDLPGITKVPVGDQPENIEEQIQEMILE  
FISNPNAILAVTAANTDVANS DALQMAKAVDPYGNRTIGVLT KL DLM DPGTDAADVLLNR  
VYALRRGYIATVNRGQKDINEDLSIRSGLQKEEEFFNNHPVYSTDRNLRGKCGTKILAKS  
LNNILMHHIRDVLPELKNRITIMMADVQQLDALGGPGQQSRNTLGGTLLGLLSKFASNF  
ASIDGKGGELGSSEANTKNLALVELFGGARINYIFNDIFATSLMTAGPFDGLSDEEVRT  
TITNAMGTRRALFVPEIAFDILIRRQIARLESPGIECVDLVYEELQRIAAQSEPKELTRF  
PFLRERLCDTVSTLLKRCMAPTQMMVENLVKVELAYINTSHPDFIGGARAVASVTNRAAN

ERLCTVSTLLKRCMAPTQMMVENLVKVELAYINTSHPDFIGGARAVASVTNRAANMEPM  
RNQELHIHTGSTGVPETPASQADSQYFNADASNGGEQTPYHDKDGGIMNFI FRGKPTPIA  
DGRSHSGSLPAVVHLPSVPANMKQTDIPPSDRELSEMHVIKSLIESYFKVVRKTFIDMVP  
KTIMFFLVNHVKDAMQNELVSELYRESEVETLMKEADDVAERREQSEEMRDLLGKALEIV  
NEARDFNTISQVE

>comp5405\_c0\_seq3; 808 148 2469 LEN=2576; translated  
MDQLIPIVSKLQDVLGAVGQNTQLDLPQIVVVGQSSGKSSVLEGIVGRSFLPRGTGIVT  
RRPLILTLVNTRTPGSEQPEDENRDPNSNEDGEGVEWGEFVHCPGRRFHSFQQIRQEIVR  
ETDRLTGSNKGISSDPI SLKIFSPYVLALTLVDLPGITKVPVGDQPENIEEQIQEMILEF  
ISNPNAIILAVTAANTDVANSDALQMAKAVDPYGNRTIGVLTCLDLMDPGTDAADVLLNR  
VYALRRGYIATVNRGQKDINEDLSIRSGLQKEEEFFNNHPVYSTDRNLRGKCGTKILAKS  
LNNILMHHIRDVLPELKNRITIMMADVQQLDALGGPGQQRNTLGGTLLGLLSKFASNF  
ASIIDGKGELGSSEANTKNLALVELFGGARINYIFNDIFATSLMTAGPFDGLSDEEVRT  
TITNAMGTRRALFVPEIAFDILIRRQIARLESPGIECVDLVYEELQRIAAQSEPKELTRF  
PFLRERLCTVSTLLKRCMAPTQMMVENLVKVELAVSFNDAFEIQRKSCQFLVIHFLVVT  
DSFHFVHLFGSTSIPAILISLAEQXAVASVTNRAANMEPMRNQELHIHTGSTGVPETPAS  
QADSQYFNADASNGGEQTPYHDKDGGIMNFI FRGKPTPIADGRSHSGSLPAVVHLPSVPA  
NMKQTDIPPSDRELSEMHVIKSLIESYFKVVRKTFIDMVPKTIMFFLVNHVKDAMQNELV  
SELYRESEVETLMKEADDVAERREQSEEMRDLLGKALEIVNEARDFNTISQVE

>comp5405\_c0\_seq4; 744 349 2657 LEN=2764; translated  
MGHGITRAARALIPFFSNPISKKCVNRSVAVNLQESLVYWKASSDEVSFPEEPVSLPVDXL  
ILTLVNTRTPGSEQPEDENRDPNSNEDGEGVEWGEFVHCPGRRFHSFQQIRQEIVRETDR  
LTGSNKGISSDPI SLKIFSPYVLALTLVDLPGITKVPVGDQPENIEEQIQEMILEFISNP  
NAIILAVTAANTDVANSDALQMAKAVDPYGNRTIGVLTCLDLMDPGTDAADVLLNRVYAL  
RRGYIATVNRGQKDINEDLSIRSGLQKEEEFFNNHPVYSTDRNLRGKCGTKILAKSLNNI  
LMHHIRDVLPELKNRITIMMADVQQLDALGGPGQQRNTLGGTLLGLLSKFASNFASII  
DGKGELGSSEANTKNLALVELFGGARINYIFNDIFATSLMTAGPFDGLSDEEVRTTITN  
AMGTRRALFVPEIAFDILIRRQIARLESPGIECVDLVYEELQRIAAQSEPKELTRFPFLR  
ERLCTVSTLLKRCMAPTQMMVENLVKVELAVSFNDAFEIQRKSCQFLVIHFLVVTDSFH  
FVHLFGSTSIPAILISLAEQXAVASVTNRAANMEPMRNQELHIHTGSTGVPETPASQADS  
QYFNADASNGGEQTPYHDKDGGIMNFI FRGKPTPIADGRSHSGSLPAVVHLPSVPANMKQ  
TDIPPSDRELSEMHVIKSLIESYFKVVRKTFIDMVPKTIMFFLVNHVKDAMQNELVSELY  
RESEVETLMKEADDVAERREQSEEMRDLLGKALEIVNEARDFNTISQVE

>comp5406\_c0\_seq1; 211 35 466 LEN=716; translated  
MPSVIYNTRVFKIGLLFILSWGFSVAHEVVLGVSETTTTATTNHIAKSASGDTAPLRFFA  
KDHTDALPLDLQIEPNATEAESAIASRRATPASFGIEGKVVPEEDDRPPLKADTASGNQN  
AYSATTKTTMLLLGCTAQQLL

>comp5407\_c0\_seq1; 229 277 795 LEN=1171; translated  
MSIIASSSPEIKALLPTTSMPPAADKTDDYSGNDSSTYGFPI SCERNIIDDCSGEISPS  
LPRDIHCQHORSIGSLPHYSLEEDANHDIAEAESENKCIPTFLSTSASVDERRRGKFDGSN  
NWFIEHRDQHNGP SMNRFGPTEDRDVSTNNKENSILGDETDDELTYLERYCM

>comp5408\_c0\_seq1; 117 367 1227 LEN=1227; translated  
MAAIAIPARTRSVPPDDPRXPPP IPEPDAGQARGQAQDGGPFLDTEKLADRYALCQDRYE  
AFRFRYYHLGADLDANAKRTTDSADRGTKTNGEWIAETFWPGLELAEAILLDLPEAGGWD  
DGSCHTARAVAAGHASEALRLLLRILRWLEEEEDRDSFHGVS AVVFRRRKRAWAEASKGGG  
HNDSLARCREYLEALRGLAREQSRGRWSTYEPMRRAVAGEWGEPEPGRELEREPVLGSG  
LHKGRPHLAVGSSGKRGGENARASQGTSGFFRLDDCHAELCTGRSSVX

>comp5410\_c0\_seq1; 276 99 1268 LEN=1408; translated  
MVRVARRKAGHRLPPARHLAVAALAVVLVCKLAFGGDGD SYKYKYNADTSTKDASASPA  
RGGSPVEVSPVSRFTPLAYGTKSLKERTGELVATAISEGFRHIVTGGHSHSHNETGVGHGW  
KASGLGRSELFLQTCFVFPFNRAFDAPDPLDPEQAPESIEEQVRLSVSISLKNLQTDYLD  
ALVFHNNKAKRWADDEIRRAWKVFEELVDEGTVKHLGMTSVHDPEWFETFWNQSRKPEI  
VQNRFHNSNRQYDVNMQEVFRRHNTQVQRFWLLNGSSRGRRSKDEAEARGVTPAQLMLGF  
VMSMGSQTCLVGTKTQQHMRDDVEVARCYP SLFWWEAGSAGDTERAGSDEARVSYADKLG  
KQPGDRPLPGPDEAARGAMDYRPCRSAAR

>comp5411\_c0\_seq1; 557 282 1727 LEN=1842; translated  
MSTEPGNDPSMTPAPPSTTYIRHCDPNSTGEGLGSHARRTYPLLQVALHFVTVIWEY  
DQQPCWKNNEYREYYSQECMELGPWLGFDTKLSDLDRDRTINVPLHIDGDDARFGNLRGA  
PELINFCL EEFIRQHGMDFVGRQDRNRDYPFVLTLYGRFHHQDDPSPVQLQWMHRRCR  
QWKDIVHQRHESL LERSSIDDDGDANDRNCSSNHVINTTKMTRVSDECSITTFVPLN

IVVHVRVPEDICTQEWKDANSVSHVLTALEQFLRQWNNIRHEQQQKSKKSGLEVVEKYTT  
KLQLDVYTEESFTQAKEDFTAAALSEMRLLDHNGNDDADPTASPAIISQLRFHRQTPLL  
PCVQSMASDVFFPASSYLSSMAAFHTSLIVLPNESTRHDPYFATHLKYRRKYHRKGV  
SRVDVDTETSDASICSANTS GGNESSTSTTASSSHVCPIVRVEEEEEELKEATLRLWQGT  
R

>comp5412\_c0\_seq1; 170 1 766 LEN=1004; translated  
XDKPKHDIRKQEAQNSSRILAQLQYWVLQWYSSLKDVLDLDPDPDPPPRATELLPQTMPAA  
TSENSTCLMMISAPCRAVSPSPLEAVAETETEMSVSSKRQRCDRVSFDPRTSIVYIEPL  
SEFTDEEKETLWYDAFEMAWFKESARNLFRNRYSSSTSKRNNNRKTHDRESKERSEGHGAC  
VADVGCVATAATTVAAYYGNENIVTDGEEEDSTRGMEVFVVPARQKYNKKFVRNVLEAYHV  
RCTGNDEHVALLSERW

>comp5413\_c0\_seq1; 1094 105 2333 LEN=2504; translated  
MKFSFALPALLVSYVAASGSNKSAFTPVVRVHYDDVLENEHFSLLDALEDSSGIIISMTNLPQ  
NFAKVKKEVMGSLHSLCLLDQQEGGSIVGEESFGDGTVRRSFATATTAEEGPLRLELEDTL  
TPSTACQAFEGNLQLFRSIAMKATNKFTAALSQEMEPHLMKPLLTKKGDNNSSYDTIQDL  
VENGEQLEHFHSYQKIERISEEYHDDDHEEMETIDVHADQGGFFIAFTPGIMISHGKKDG  
EASASDGFYIVEEDSNGAPIRVEFDVETDDLVFMLGDGVNQYINNRLIDGENIHRRLRA  
TPHAVSLKLHDPQARVWYGRMVLPPNDALVAAETVQTTLYGDVRRRLVETPDAYIPAG  
LGCSSPNMRALQHSSNHNEPSACEKGTLCWARCMGLSDYEITEEMCEEQNLGLKCINPR  
GQFQTGERHGDFWPACSNTTQEVTPYPVIAQKNEVICTNATWDAFVADTDGITYDHSFDL  
TTEKNSGTILQWSVVDEEQGIVNGRLVFNDFVGLALGFADPDGKHNGMNGGNILMALPG  
TNYTPQFGLVPLTSAGSDEISIEIAKQKSALLATKTDPEGSIVSEYKISPHGSAFRHW  
SEPTGINTAQNSMEVHTNECATSMTEFVVSINGQKFNMDGMSMIWAGNSNDYHVGYHGR  
ANRARFNVNWKTEAEFWTDKEDEKVAPAEDDHGDHKKHKGNDHDDHDMEDTEMDD  
SGVGRLSGYFTFFVAAVPPFLF

>comp5415\_c0\_seq1; 282 46 1117 LEN=1235; translated  
MAHNPIFRKKYDGRKQKLIIEYFFSKALFGIPDLVFPVVGCVAFGTTAVSTAAQRFIGI  
STGTFKVPFSLGFATVCGASLVSEQAAILSYELKRDPKRSFEYVQKKIRHQFLETSRNV  
MGSSSLLRGEKGHFQKLPMEIRVCLLGLLAFKSLGGRFWGIAPSSYTHLGSFTRWSIPC  
TENYANTKERVMIEQMGRKWGCHTCGSKMYFSSAKSGITGKSYRFVGDHMPKSVAKHMN  
NQWFRKIGLWPKVKFRFYPCVSCSNVQGSILSKTGSGLGLLPKHSWASTMHGAGGGTSA  
HFHGFTPRINHLAGGVLAIAIVVGADDEIAKGNPKRLKQWQKQIQKRFTNELRNF

>comp5416\_c0\_seq1; 344 2065 3135 LEN=4039; translated  
MYSSKKRKFISDGLDVLESFSALEGDPLGVHTLILGTLPSDKSYGQNLSSKKEILLRGGDG  
HQNYGHSRNSFWNIVGSAFGFHRKIAFNQVNIILTDQGYAVWDVLSQAKRKGSLDSNLV  
KGS�VPTDLPGFILDHPNLNRFVFAANSAEVFCKKEVWADWLATGKANASSATTTDRPDG  
IDNDDNFSCDATIETKFWIQGEVLNPETFARTNSIFGKKKTVLIVDDAAIARSYSKTTY  
VEHDGTLRMIELIVMPSTSPANASNRPEKEKKWHVACYRLREPPEYYICPGCEFHRKR  
HGSSATGNDEYEYEGKHFHDCPYREDWKAMKLLKSKSLKKQDADFDAIDPFGWYL

>comp5417\_c0\_seq1; 250 208 612 LEN=1217; translated  
MPQSNKGLNAARLKANRAAGIGDEMGRLPARVKAEMICCLVCKAELKCTKTNTMMLH  
AESKHGKTLLECFPGATAEAKAINAKLDAKSGGKGGKGGGDMTKAERKKKNAAMADNL  
LLAGLSAGKKKGGK

>comp5419\_c0\_seq1; 369 366 1634 LEN=1902; translated  
MGLPRSLLLLAASLVSETFANDPFLKEILMGRCYERWSGSPVVPPTTCGELVGSFLN  
LLESRTESGLTERAFAEAYTSKADFSSPRDAGLVRVALGGGSQDGTETEERTTSPFGL  
LEGGPWVTPETTPGGSLLDGLVFCANGNENCTRESSGAYWKFASAYASFARSAEGHLS  
ILLEDERVDGAFLERAFLSHLGASGVEAVGIWGVDCASPLARKVSSFVAETVGLPCSCGG  
PDVVELALCGSASTSGAAAEACAAYRRGKEAANATDNANEDAGGAPGEPDSGTEPPLATA  
DGDAIIDQKDERKHGGWFFPWFFLAIGGYLWHKKKHPLSPCEPGRHRWCEDRTYDCIK  
GDLFLPSTSPSFRTQGSRDEPPTSSSGSGITDSSSSMKYSSFANSYHGSGASGSTGGVAS  
SQ

>comp5420\_c0\_seq1; 390 93 2747 LEN=2747; translated  
MLPRSAAVASLGALLCLQLIYDAMGQOSETERLMLLGEKGHVYERYDRDDKTPYSSVSSP  
NTGHSSVRGRRRS GSSSNKIKNNSRNSNAMRTDNITRQIPAGQGRLRRHLTTEETTCLRW  
KVEIRYEEYEESHWECEFTNPDLLEATQAQTRDHHIIGTNHFDVDAFLDEQGAESGTTTL  
ILSTGVELAMTESENQELHLGRNQVAMEDNAIEVTENDDL MVRRLGLADSIGNLRTLIVR  
VSASDTEPPSAEKLYDDMFGEYCLKSQYKRCFSFKLNI TEYLPDEEVTVPVAEGVAGGI  
VDVQININAVESSYNLQRLANSAAARDLFGVSMWSGGLNGIFDLVLFCLPPGSGSWVAYA  
YLNWRDSSYNGPYCGSLSATLHEVGHNLNLEHSGVYYGDAITQDYGDASGMMGFSYLND



GPIQCFNPAKNWQLGWYDDKLLSVEPESLRNGPSTYILNGVVDYQDGNANGYVVIRIGDF  
YLGFNKASFNRTGLASGDQVTVTKMTIPYRYTTGKSKLLVAMDAGSEYAI FEENVLVKF  
VENANVEDAVIELSLFDPSPLEPPCETQIIVDVVTDNYPQETYWGITDPGGAI IAGQDG  
YTDPNSSSRVVEGLCDNVQYTFVAVDYRDGICCEQNGSIVGTYDGNII FEASEFEFR  
LAEPFI INRRTLSPNSPSVQPSAGPSYIESASPTIAPSASPSASPSTSLVPSSMPSKSP  
SEKPSTSTAPSELPSASPSMVPSETHSEETGLPSLFPSSLPSEGPSDFPSTSPSHFPSS  
SPTGLPSSSPTDFPTQHPSETPTVFPSEFPSSIPTIAPSVPSPSRSPTEVPSNFPTISPTK  
SPTKNPTSAPSNVPTSPPTDLPSTFPNPTNSPTHVPTNVPTNV  
>comp5420\_c0\_seq2; 79 90 892 LEN=892; translated  
MYSTHLLQLIDTETEFVXEQNGSIVGTYDGNII FEASEFEFRLAEPFI INRRTLSPNS  
PSVQPSAGPSYIESASPTIAPSASPSASPSTSLVPSSMPSKSPSEKPSTSTAPSELPSAS  
PSMVPSETHSEETGLPSLFPSSLPSEGPSDFPSTSPSHFPSSSPTGLPSSSPTDFPTQH  
PSETPTVFPSEFPSSIPTIAPSVPSPSRSPTEVPSNFPTISPTKSPTKNPTSAPSNVPTSP  
PTDLPSTFPNPTNSPTHVPTNVPTNV  
>comp5421\_c0\_seq1; 372 174 884 LEN=1014; translated  
MAEVCLLEPPPSNDEESTGMDSSELWWTSNDYENNRKHKSLARRMLSSSL SALPDPNDV  
DEDADGSYRGLERLLDGGYCKARMRRVIRVVRGEQARHFLDGVGEASDLAIAQVYGALC  
VKSQAKRLGRFDAMEARKALEDNWEDDDATASTSTASVEDSSASLLEEESESPAID  
CDRGQVEEPINNENDNATPIVAVNSKTKGKLWSGRLSLRTNYKFSMSNMNRRPHAW  
>comp5422\_c0\_seq1; 444 157 1380 LEN=1651; translated  
MSSEKTSVTPRRSLFPKSYSKKESKKEKVFVTFSPYARCLKLEPQNLSEDERACLWWQKN  
DYEDFARLGKII SKAMLEGGSEVWLRSKCTPFCASPTSSCSVSEYGNAATVPTTTRDDTM  
VESHSSTRANPPLHLHNHVSETEPQEFYEMQGWKWHKFGHSRRGLEHIASNSEGRQRHA  
NARYAIRSVLEEQQRQEMFLPKGYFDVVKFRSVYLKQTHWARLLALAAAGESD TDAVQTNF  
DESRRKPREHYLKKHFDNNIDNAATNNDVDIPNFMKTIVSTARPTKKNLNDANTISQICF  
RNSQIDPRSDNSKLGHNKKNKVTGKTQLSSKPAAPESPSSPDEEGKAKETVVND DAS  
TSTEDSSTSNLAKMAAGWGGDESSSQEDMSFVLIGMGIAEKPNITVG  
>comp5423\_c0\_seq2; 598 231 1871 LEN=2208; translated  
MLMHSFVLDALATTGADTF SHFEELINEHRKMCLANGDNNWNSSSSDHEPKQSRLKRLVP  
TVGVFHTPLPLRRAYEAYNAKYKLD RRRHLAISFNEIRHILNLAQVMAFSEAMEPAGHRS  
LSTASGNNAGRCIFSRNPLDSPAFTPLNGKEMGAMPPLSLDAPAETPTMTVTASKQT TDD  
SSDDSSDSGPFGRGSPMITFDGDQTL YSDGANFESNPKLATYLYLLL RNVTVAVVTAAG  
YEYQTAKYEMRLSGLLQFFRQKKPLLTEEQLNRFYLFGGECNYLLRLGSDYGLHPVREHG  
AGGWMATKYLGLDSPANWPQEDVTRLLDLAEESLRGSM LDQNLQSRGRFLRKKRSVGMV  
PIGGDAAPIPREALDETVLRAQDHLDRHNLRGNSRASTIPYCAFNGGRDVWVDVGNKRVG  
VQILQSYLGVPAAETLHIGDQFLNTGNDY AARQTCPCIWI INPDETTYVLKSILRLAGID  
LLTVEHGDADNHETTTPTATMRRG SNVDFAELEERRTNAVATMDVFTGELITKG VGTGAA  
SSDAKQ  
>comp5423\_c0\_seq3; 618 65 1714 LEN=2051; translated  
MKSMLMHSFVLDALATTGADTF SHFEELINEHRKMCLANGDNNWNSSSSDHEPKQSRLKR  
LVPTVGVFHTPLPLRRAYEAYNAKYKLD RRRHLAISFNEIRHILNLAQVMAFSEAMEPAG  
HRSLSTASGNNAGRCIFSRNPLDSPAFTPLNGKEMGAMPPLSLDAPAETPTMTVTASKQT  
TDDSSDDSSDSGPFGRGSPMITFDGDQTL YSDGANFESNPKLATYLYLLL RNVTVAVV  
AAGYEQYQAKYEMRLSGLLQFFRQKKPLLTEEQLNRFYLFGGECNYLLRLGSDYGLHPVR  
EHGAGGWMATKYLGLDSPANWPQEDVTRLLDLAEESLRGSM LDQNLQSRGRFLRKKRSV  
GMVPIGGDAAPIPREALDETVLRAQDHLDRHNLRGNSRASTIPYCAFNGGRDVWVDVGNK  
RVGVQILQSYLGVPAAETLHIGDQFLNTGNDY AARQTCPCIWI INPDETTYVLKSILRLA  
GIDL TVEHGDADNHETTTPTATMRRG SNVDFAELEERRTNAVATMDVFTGELITKG VGT  
GAASSDAKQ  
>comp5424\_c0\_seq1; 235 1 904 LEN=1035; translated  
XDVLTIISLNSNCVLFRTSRFSNHPDI STTKMSARKFFAIFSLGLCF CASVTEGR LFA  
RASSTSSNDVAGPAEHESETTGLSRRPASVEIATRKFHDFGEP SKNTSMCARIHPEQLP  
EECSCEPHPYSLVVECHKVFSSTYFN DNTIGMKIDLDPCEEGAKISLDVTEEDHNIDFP  
LAGIRAGERKDVP I PGLAMIVPGVGNVGLDVSVFIAGNP TLLRLKVGLNACAQLSTDHQV  
CASSIPGLSTIFPWYVLKGTYNFGG ICESKSGAGVDGNVEVDGTNNSDDTKEKKAIVIEQ  
K  
>comp5425\_c0\_seq1; 606 36 1583 LEN=1923; translated  
MKYSAAALSLASALLAAPVAAQPAISVHSGT TNPSKCYWTIMDQM QIQSKNP IRMTYRA  
VGSSTGQAEFIGDGVLSDNMFGSGDIPLSQEKFD SLAQGSFFHLPVLLGAI TFFHSAPVG  
DQKLNLSACTLSKIFKREITDWN DSEIILANPNL DLPRPAPITVAHRVKGSSSTASITQY

LNQACPEEWPEELVGKTIWDVDTIGCEGSGGMSACIKDIPGTIGYIDMGHGHSEGLAEI  
ELQNAAQKYISTKEAAELGGIMAAAENADLPDTLQGSFANVLLNQQGSNTWPI TAMTYI  
YVKKDLTFIEDPAAQSLVKAFRAVYSDDYIPQCEEEFGFVRIGGELREKALAAIETITT  
SPGAPEWSFEIDTQKNAGQSDYVISKRRKSYSELEQDKLVEMMNKMSFRIDQLEAQNAAAL  
MSQETVSATPVSSSPASSKPASSDFMKTSSSTGAFGTFIDEELDEDQQVKTALIMSSVSI  
ALWVVAVLGMIVKYASGSTASKASKPEEMMEAGMN

>comp5426\_c0\_seq1; 252 460 1572 LEN=1679; translated  
MRQNYAYDLYPRELVGLEEKWNLTQNGADFQGMKYRLKYIVSDFILEMLRTVAYTEECE  
EGGVEIPSSHMTYEVTFFDDTPPGDGLLERTFNIQTEVNPVEDSLVYKTVIDPETGAKLA  
EVRFCMLTVLRTNTPNP IGVNFLTETVVGFTANLTSGFGV SANVGPKEKIVTTAAESYNVN  
AYLCDEYNEELTGSALTNARTQGQIVRACVTPDQDARDDGVFMKAIQDFTWFRDYGGGLG  
MVSQVAVQDSQAASNLLTILYCTPGSITCAFESILFASMFLTPGDVSGTGTALLQLGDSS  
EERKRRGLESSLRSRLQDAGDLPATDFGLEFDLRLGEEYTGTLKTASSPKLELMHSIAT  
MGTIALINLL

>comp5427\_c0\_seq1; 233 195 569 LEN=659; translated  
MISSLGARAFSTARALAGRNAMARPFPGPASSTARFLAAGAGDETSVVTVCTNKIREALET  
TEVTVTGAYDDPNGSHVSIEVVSQKFEQGRPLQRQOMVYKAIWEELQGPVHAVDSMVCKT  
PDEA

>comp5428\_c0\_seq1; 900 113 2665 LEN=3205; translated  
MSATANGGSGNASKAPAVSTGTPTGPSRLSNYSFVIGTTLICVFFVTLSSMETLTSHFVN  
LAGMSSPGSSSSTIEIKEIPGNKIDTGSLLRKKSKSSKRSKKSATLVKSGADGAVNPAI  
VNWDVVNEPKKEGKPKKEEKESKTDESGSKKKQGIENGNNDSSSPTPFTSALDSVIDAR  
KDMIKKLKKQYKDNFDTIFRYDKEADDASNNEKYDGGVPTHKKLQMKYRPIRPLAPKDL  
YRTNHWGKESDELKEYFLKSDAKYWNSVENLQRKMMIKLLLQKAPDAKGSNKYVWATG  
GHSAAAGHGNLFKESYTKVMEATAVSVFDAAGLELEARNFAMGATSSAAEMSMCFKEVYG  
DDVDIFSWDFGMLEARYYLSGRLLHYATRGLSNQQDPQSI VPAFVGLQELDESRRKSMV  
ELHDAFRGTGSYAEDSLAENGLALFLTDTSYWKIMTEAVPETSGLTSAEIEELPELVRY  
FKCNGGIEKGD PFCGEKKYSEEVCPKRDGQVSWHPGWKYHALLGNMFLTEMLLGSVT  
TLEKEVREIKNGKGISDDDALAELLGRLLLEEKTLQNF IHSATTQKLPKSHDKVYWNNT  
EDNWEMYPEVLEYLSVNATDDFRDRFNALDRQALFVGPSICHTARLPSKTRFTGTLTNQP  
EMTGEQAI FGRETYFVGMIEEEFHDQNVAKQQEGIVSDDNHEITLVSILKEREKDCGEEL  
AAPDYHDYFMTHSSEGWTSLSLTFPNDAEQAAAYNYKQADRYKGLIIVPRFCGFGQCEEGF  
LGYREYNEGKWEMVNVGVPVTALTMMGHEAILLEHESGIVFDRNSEGRYDLEFRVNEPNS  
FIKISAFIMY

>comp5429\_c0\_seq1; 111 155 787 LEN=1223; translated  
MSSVGFPPNLSEELLLKVASYLPPRDLLRFQCVSKDLSNLDTDSIWEWHCEERWKPWPY  
RLTDQKRVELNSGGTETFGMTWKRRYMFIEKDATRTTLVSRDLQNLKWYLSFVLSGIRGE  
GRSDHLP IEFAGFEVLLVPGYPPLSYQIVNKTPPSNGDRIRKNLRGDQPF SRKQYLKISN  
FPPHLISRKKSDAEWLIGNENVIMVSRGEL

>comp5430\_c0\_seq1; 223 279 1730 LEN=2140; translated  
MVSSSSPEPSLTYLRPEVLK LKESLDQFIQQEVI PAEAEYHEHMEGRHSNGKGRNDSRWS  
LDAMP PCLSRQLSRARELGFWNLF LPPRLLKYPHWDPKLLGPVDPNNVLCPSITLTYREY  
GILAESMGRSIELGSMACNCSAPDTGNMEVLLLEFGTPAQQKQYLKPLLEGKIRSTFLMTE  
PDVASSDP TNLLETVLINHKQKQNGNQSYTLKGRKWWSTGAMDPRCRIGICVAKIVDEKEG  
EGNDADNSSVKGANLHGQHTIVLVPLPNPNVRMIRALQVFGYDDAPFGHAEVGLENVPLT  
QEHLIGGLSGGFKVVSQARLGPGR IHHCMRSIGLAQRCELMLELSTQRKTFGKFLCQHGS  
VQKDI AASFHDLQARLLTLDCAHRMDTSPNGPRGARQHISSIKVAVPALCLNVIDRALQ  
VHGGLGVCQDTILASAWAGMRTLRIADGPDEVHRRSVARIEIKKVVMAKQEAQE QDQLKR  
SRL

>comp5432\_c0\_seq1; 198 698 1318 LEN=1985; translated  
MPKIDAILVLGSDGDRLAGKYYGDFLKTADDGHSREETRHNFEKEVQKIGGIVARPDAA  
EVVSVRGKTVVFCGSSQGGNGEVRIVHVGPSNESELVLAHLCEGMHDALAQLMGTTDR  
TMVLDNLELVFLLLIDEHCDDGII LETDGSKLASAVLLRDEDAQPGEGGTGGQPQT  
PGLPPGVTAGDMTLGQAFRQARDQFLSGGM

>comp5432\_c0\_seq2; 185 146 781 LEN=1448; translated  
MLAPLMPKIDAILVLGSDGDRLAGKYYGDFLKTADDGHSREETRHNFEKEVQKIGGIVA  
RPDAAEVVSVRGKTVVFCGSSQGGNGEVRIVHVGPSNESELVLAHLCEGMHDALAQLMG  
GTTDRTMVLDNLELVFLLLIDEHCDDGII LETDGSKLASAVLLRDEDAQPGEGGTGGQPQT  
PGLPPGVTAGDMTLGQAFRQARDQFLSGGM

>comp5433\_c0\_seq1; 580 205 1491 LEN=1491; translated

MGSGRRDLLLQPVLPALRKSTIPFTPARTKVYAIAPSASGYSSSSRVLGNANGDDDDSSSE  
STGGERLPHGDEGFYEGNDASGDGRNHRDREEDQELSSYPSKEHIYSLQDENS DLQKRI  
QRLEIVLRDNGFDRDGKRIIISPGRATDGAADGRCIEMMSMMGMDPERPTVLTKYMEF  
KVLELQDELEAMELDRDLRSMIRDLKASGSGTKPRMPKGAETGEGKELENDDESSSSSD  
SDNESDSDSDSDNEHARNKAKSRSMKLRDGGVSDDETDDDETDDDDTADDETDGDESE  
SSVSDDAGSQEESTRAATPGNRATPDESRKQEEKMEELRLKKSLEELLTKVVDESTKRE  
TLLKQKVNELEAHIDETEHKEELLREQMRSEFETKEKEENQATIAPPENTI SSDQYREQE  
EELQETKKK

>comp5434\_c0\_seq1; 177 1 365 LEN=773; translated  
XNSNSNSNGAIGLINEYKGRLLFFVCELRDDDFPSDEEHPPPPSPGDFENKNNGRDLSSC  
RQQTGIRLSLEHSGFRWFKDTADGKSRPGEELSRLLRFHSGGKVRKAIEMAYRVVKEEVN  
G

>comp5435\_c0\_seq1; 389 108 731 LEN=944; translated  
MKVVAFLLTTLSCAGAFSTSGSTRSGRKSFGFLFAEEADVAEPETMGAEAISALTSVKTHF  
TSVDVDSILPHRYPFALIDKVVDPVKNKVIKAVSRNEDFFNGHFPGQPVMQVLE  
AMAQLAGVILNTADGIEEGTIGFFGSADGVKWKKPVVPGDLLVMEVEIKKMNLRFGIVKA  
SGKGYTDGDLAVEVGEMLMLAKPEKK

>comp5437\_c0\_seq1; 692 213 2882 LEN=3275; translated  
MKARELSSLTALLFICSIYRYEAFVNTAPSSSTRPNSSTETSPAILFYSTRRNFDADCSS  
RAGHNKRRSGYRRQHQRNFVRKPRNDAAIRHKND EAYNERKWLQATQDVLEKEAGSL  
VKGKHELVS MIKGWKHKFAKMDPEAPIRIELLIKRLHDERLAGNDEAKADISMYNSLLDT  
WCCVALFGTNYREQSGKSVNRLASPLAASQRAREILMGMQGN YDLAVEAAGSNTTALDWA  
QPNEESFGLVFDVVLKVEGVAPARRLVAVMEHVSKTGRNDLAKPARKYMRLLNAYANSH  
DTNAGNLAEGILRHMIKIGEIPD TVCYNIAIKAWSKARRGRESAEHADRIEEMQAPKDV  
ITYSSVISAWSASGMQSHAVVRAEELLREMEETPEVEPNTVVLNSIMSAWVKS KNPAAIN  
RTTELLEYMEQAQHAPADLVSYNTHLHALSIHSHREPDAQRANDLLTSLEARYERGEIR  
FRPNLFSYNNVIDAWCRSQASDAAWNAVKLLRNFINHDSKYQPD TFSFN NVFSALSRTNR  
PGTTLLEHLLD YMEIAYKNRIFKNAKADIVSYTCVIVTLARSGEADAAERGEKLLERMK  
EQYKSGKTYMKPTRVVYNALIDAWAKSGRGLVSRKAEALLKEMEEMCAMGDASVAPNVI  
TYNNVMTSWARSGTRCAGNMAVKYLD RMTMINGTEGKIEIRPNDKTFHTVINAIAKSPNE  
MKAQKSLQILRRMDKLYQSGYTGAKPNAVTYNNVLNAAA SSGTSTDFKTKRKALDTAIFT  
LQELQSSQYAQPTESTYSTFIEACYNLLSTDDLEVELRDI IENTFECKEDGQIGDMFLSR  
LREAAPKDL YEDLLSEVIVANRDEVKVDLDPQSWRCNVRRGGRKSRQP

>comp5438\_c0\_seq1; 338 138 1103 LEN=1495; translated  
MNGETLGFSLTMSSTSLDKGSAAKPLEKKKVA VFGTGGYLGCCAYGFLQRAGSLYGTGID  
GVGAPRAIVATSFSGSANLNSVLSKNFVLAQADESYIRLTDMTSSESIQSKLRGFDAAVLA  
TRYSFKTLPITMGSYGKGPNDKTREFFMDQPRSATTKLMQDPEYSDQVFLDTLEACKNSK  
KLKKLIVETDAEFDAEESFVGDKYIQALEESEIPTYTYIRPIGRMENIENFTFKKG VQTN  
LNIGRANSVEELWPVENKPIYREHIAAVCVQSLMTLGWEENQVIQVDQSPDVLVDVVKV  
NTGKEWCVNSSIIQNSLAALS

>comp5441\_c0\_seq1; 131 111 535 LEN=1050; translated  
MEAIHGRPSLWHNLSGGTIGFLGVATGRLGIPLVSPAHAYRYGVSPVLA FGVYGSISG  
VMAXDAGLEALLRSNEELSEPERKANGRPNSWTGAKSRKRAKPN TTRQNTAQHDGLGGCR  
LAFWSIEGNEAGKQALSPTIR

>comp5441\_c0\_seq2; 84 103 728 LEN=1243; translated  
MYFYVDTKSWAYQKRCLTYP IQSSAVATILFSAIDIFQGVPLQNV MNPRSLGTYFGGIYC  
YHAIQCPMEAIHGRPSLWHNLSGGTIGFLGVATXPAGDPPGLPGPRLPV RGVVPAGPGLW  
RVRVDLGC DGRDAGLEALLRSNEELSEPERKANGRPNSWTGAKSRKRAKPN TTRQNTAQH  
DGLGGCRLAFWSIEGNEAGKQALSPTIR

>comp5442\_c0\_seq1; 419 114 914 LEN=1089; translated  
MDFGKRHEQQQPLVSSQYD LLTPSRRAQLMFGSETLLMDSKKQNE LLWARVFRQEKNIAN  
LSEENGRQEKTLAHMAEENRKLADMTARLREQLEVQAE LNKDLANRNDELANRN TKLASY  
LRAKDTQISVLKENKKS LIEKNSNIVSYLKEMDKFIGSIQIKQEELFAQQQLRFQHSVT  
DGGSTKRRRDEQKSNHGTGRNTKARGDVEEENDKLVRVVSIGSARDDKTPNARVYVIEDS  
ATDVI STSSSKDGEDGDDTTCGDSRA

>comp5443\_c0\_seq1; 428 434 2026 LEN=2072; translated  
MTRMISMDSTVTPIKNGSTRNWDLDSNNPEIPGGKASSGNYPEYVENHSYSNGDHGDH HH  
QSP LNEKVEVIKAI DQLQGTATATITNNHTSESQSGKPSDLLSKYNPLNAPVILDGWNRT  
VQVHLIVDVTGGEDINPASKLLLSAVQRSKYTQLKAVTFVRPSIETIDFFSRKPG LPLLF  
LVDWGSMDRDRCHRLQLTLENIREQEKNSKRKREKEQPYFLLIDSSGSTRRTGCSYLFVS

NSDDRRDSETAISYARANDNSRIRLAKRSIVQNRIFYDRRNNKVHLGDVSPNQWDGAPSDY  
SKPILHSPFALRESFVMSIQNITKGRVSMNDSKRTVDVGFVWKSVDYSHYGFYRRDIGK  
VVKTLHSSINKEAGTRMENLVQISYTDKEGMEAGNVQYKYTEMELLRCKIVVIAQRDEWE  
DHFRLMESLASGALVMTDRMVALPAGLEDKVNIVIYDNPMLKDLIKYYTKPKNKNKRKR  
IALKGYNLVMGRHRSWHRLEELLFGRPLTNVDQPDAPAPKKGALPTFKDR  
>comp5444\_c0\_seq1; 372 277 1452 LEN=1856; translated  
MQEQRRSVRYALLAAILIMSAKRALCLHSVPSQEGGSEEEYSSRSTDDMVNNDTSSNSSG  
AGTTGKIPFVGPLHSFYQDPFAKGFETITRVYTDVQDKLAHFDDVLSNDETSSSTPSS  
LPPTVPIVLPYWECEGVSSTTVPVPLSSLTIRHLLGGSKPGSFEEGCGRGDTVGVGGGIG  
RGGSNHDDTHPRLVVPLTSLEIVLNSGQMRIFQPGDVILLEENCLTGGHILQGHEGNDMI  
VMLLTLPHAYHHAGKDRNSLSSIFENNFVKQSPCKTGLVGNNDRTESRKNIVVPSRSS  
RIRRRRLGLGIIGAGVSLAMADFLGKVAPLALALAAGGGLVAVGGTYSIIRLGEYGLDEL  
FWHERLLKLGGSSTPVNDGNEKEDKDQDS  
>comp5445\_c0\_seq1; 412 126 1616 LEN=2019; translated  
MVKRSIFRRRRREGDDIEHIRTLELEGYATAMGAVLIVGVGFAMAHMCFVLLQPACIYQQ  
DNSTLNPPTATMDTAPFNATPPEPGVTPAAVPKTAAGVAITKSAHTSDSHATTTANTK  
TESMPGFPTCTDEQFAVLHKQLPPEGCEENAKKPKTKMCSFAKETHCGNGNPHWFYDF  
IHLPLQSLSSDDDPFRGIIVGCNKGYEAVEMLRIASPPNEKYNLSQWKEEFLKMGSSSEGE  
IDTHFDTSVDCADGMATSNRSGRIQNAEVYCLEATPKTFAKLVETRDALGYSDEELHLS  
NLVVGANFDEDDMDLGLVTTDERIGSMGVGLHHAQTCEHKKHKNVKNKCVRVPTTTID  
GWIEKHPKLSSTLSTTKRTPILINILSITAETSDYEILMGSASLKNIQYIDFNHYHWYANW  
ADHSLNDLIMRLKKKGFACYFTSTNENMWRTIDCWQDHYEIKYQAAVGCNVNLPDAKPL  
LAKMEEMFLSTLQDTE  
>comp5446\_c0\_seq1; 601 148 1263 LEN=1452; translated  
MSQDGKPAKVAASDDSSSSSSYSDEEDEDLVLEGVLRVNPASDSSSDEDSCEEDPDE  
TTKPPAKKQKNDTNEKSLKSTTRDPAIERKDDKQSTTKNQKQLQKKNKKKKKKEKNSGPE  
IVDMEFTFCMDMEKFFHGIKNLLASSSPAYGATASGLTDLMIENAAVGTVISTDYSGYQ  
PGQQKDPDYEGVYGFASVLNVSTHGDSSSIQALKKLCCLSKCPGDRKKELETVLSGTTKR  
PAGFYFQSRMVNPLLEIVEVLHQQLVMDMDWAVERAAGQKTKETERLRKSLDFGAFVR  
IAPTYREKSGTASYKYFDELLELANHAEFAYEIELPKTFGMEETPYCTVIVATKTGHRAA  
VQQLREMVGGG  
>comp5447\_c0\_seq1; 405 106 1311 LEN=1582; translated  
MGKKSVAQLRRLEKRAAERGEKYVPIEIPPSDCVQDKSTSKETIGDKDKSTTGKNSCR  
LAAAQKLLKILKNIENDELKSKDRRSAKRKAEAICSEETGIPVEELLDWYEKNKSLHDN  
KKGEATVSGRRRDPLIAFVQQLSYETTRDDLMDHIQSHLGGFPPASQINKITKIRLLSDP  
QTKKSRGMFAFVEVDDPEFLYALLKHLHQTYLKGRRINIERSSAGGKRNSQARKSKLEHYRKE  
QGAYFAEVENILAEYKQNGELREDELDEGVVSVCKRHSGPVVQAAVAEYIEKGGDRMNN  
PSAYLTLVTKFAKEGIHDVEDTGKSKTLKPTRKRKEAPPTGDQDGRQKKEWKGASGFAR  
LGVDMMSVKNPSREGPRDVSKIFPSSQRGRGRGYMSNVRR  
>comp5448\_c0\_seq1; 280 827 1471 LEN=1612; translated  
MPISQNIFDAESQARQSLSSSEFSVATRGPLHTASSSPFQSSNAVLRQQDHFSSSSNSRHG  
PTNVTHPQQTINNQQLESSVADTCRWLIDAGVPMSAFDPVSIQDISRSAPLAVPQLNTSA  
TSSFSPTISQKTVKQEIKTGNSSATNIMASVDNIGDLAPQMNSSGGNDNNYDLTSLFTMS  
LPSNNSASIAFDNDHLLTDLLPGENLPLVDDSLW  
>comp5448\_c0\_seq2; 328 129 1340 LEN=1481; translated  
MIQDLWRSKEQRNLAPLSVPGASSAGSVRVVSGSGFRYVIPFPFRLHEMLSNVDTLHDSS  
IVSWLPDGRHFVHDPFRFVETVIPSFAFKQKSLKSFQRQLHLYGFQRVHEGPDKGAYYHE  
KFLRDDRDLCLSI TRAKAPKRNRTASTKTTTNTKKNKVP SLYANTKTTE TRGSEKSSL  
SAMPPTINMPI SQNIFDAESQARQSLSSSEFSVATRGPLHTASSSPFQSSNAVLRQQDHF  
SSSSNSRHGPTNVTHPQQTINNQQLESSVADTCRWLIDAGVPMSAFDPVSIQDISRSAPL  
AVPQLNTSATSSFSPTISQKTVKQEIKTGNSSATNIMASVDNIGDLAPQMNSSGGNDNNY  
DLTSLFTMSLPSNNSASIAFDNDHLLTDLLPGENLPLVDDSLW  
>comp5449\_c0\_seq1; 671 57 1517 LEN=1656; translated  
MVTSDLLFRVAAAITFGVVNVNGVDANWLPWSSSSEAQVGSVSLNQFQSFWIEATDII  
SDLDSYDKLWIKPHSCVWSECNVDDTDDGYTGDNRDGEQWYQYRTQGF CANAAYS LYGR  
KKEDGRFP SFGCSRRHFINSFFTYGGADNLLKSIGESPVVYNYNGEDNGSNDNANNEDG  
NGSSANEICVEIEYGSYDDNVNEDQSGSGSNDNNEFSGTLGCGPDGEYVIAAFESS  
CDGNYFAGIVNNFDEYNEQHSAGCHNIYQYGNESVEDVTMLLSNSWSCRRLYPNGCP  
DPYGGKQSYDFAIRTVAHGGNAERAYRNMMLKPLHIVSWVLLALT VTVFILT YLVKNES  
RAIESKGRNFVGYLRCIGEDIVTGWGCFCTLIVNWCRRSSCEDGQSSTEGSAAKDDDDNV

STDDSDNSYVKVEEKQPKKKNRVGVALKRSVSAFVKLKGKTRGSADKEKSKELQKEKDFS  
RSPTWH

>comp5450\_c0\_seq1; 525 1 1628 LEN=1815; translated  
XANARSYQNSCARDFSKRTTMTSPSAKTLLAILAGIVAKASIAAGQDPANSTFPSELPY  
IGDLIEEAFPTWCIDEDEQRIYDVETCEDGSPNGRWSPLYFTKEFSGADPALGGYPTDID  
VQYAFYYGAPFLGQACAGGPHHCSEDFDGENLNCAACPKVKTDENGNPNGPGHIPPHIAL  
AAVQRFYNDMAGDQDMDVADIYADAFDYEANACRILPDVLLRMIRTYFPRDPETGEAYYP  
PPFTELGGGYPLEFVNLVGETCEKEKAKHSEAGEMEFCFEQHSGDASLYPEYLELGHGSPH  
YCTKEGKEADVINDWCPYIYFGPNRGKYRHPHVAFAAVETYLANLVMPDKCGTTWDDSNY  
PPEVDTPAFPYMEDMTDIDAMAPTQPVINDDGHFVWPGPAGTKKKPAKGFNFDFLYVTAS  
DAIDGYCGLPSDKTCYALGWPTCCLASDSECPEEKPACDQGQEPPEDEPTSVPGASYCTW  
SPETDCYASGWPACCEDEDAETACPDERPLCEIDPPTPEPSTDPPLTGTSYCTYAPDYDCYE  
NGW

>comp5450\_c0\_seq2; 210 211 723 LEN=910; translated  
MEDMTDIDAMAPTQPVINDDGHFVWPGPAGTKKKPAKGFNFDFLYVTASDAIDGYCGLPSD  
KTCYALGWPTCCLASDSECPEEKPACDQGQEPPEDEPTSVPGASYCTWSPETDCYASGWP  
ACCEDEDAETACPDERPLCEIDPPTPEPSTDPPLTGTSYCTYAPDYDCYENGW

>comp5450\_c0\_seq3; 595 1 2126 LEN=3477; translated  
XANARSYQNSCARDFSKRTTMTSPSAKTLLAILAGIVAKASIAAGQDPANSTFPSELPY  
IGDLIEEAFPTWCIDEDEQRIYDVETCEDGSPNGRWSPLYFTKEFSGADPALGGYPTDID  
VQYAFYYGAPFLGQACAGGPHHCSEDFDGENLNCAACPKVKTDENGNPNGPGHIPPHIAL  
AAVQRFYNDMAGDQDMDVADIYADAFDYEANACRILPDVLLRMIRTYFPRDPETGEAYYP  
PPFTELGGGYPLEFVNLVGETCEKEKAKHSEAGEMEFCFEQHSGDASLYPEYLELGHGSPH  
YCTKEGKEADVINDWCPYIYFGPNRGKYRHPHVAFAAVETYLANLVMPDKCGTTWDDSNY  
PPEVDTPAFPYMEDMTDIDAMAPTQPVINDDGHFVWPGPAGTKKKPAKGFNFDFLYVTAS  
DAIDGYCGLPSDKTCYALGWPTCCLASDSECPEEKPACDQGQEPPEDEPTSVPGASYCTW  
SPETDCYASGWPACCEDEDAETACPDERPLCEIDPPTPEPSTDPPLTGTSYCTYAPDYDCYE  
NGWPACCDGGADSCPEEKPVCEVACDTLVGMVCSVDDLSQLCSLIQIRAGLVDALSTGSWT  
VFAPQNSAFERLNVGDWSKDRRLRLLLHVVVADEVLYSSDLKCVSPENLITMANGFDSRT  
LCRGGVPAFQKGRSNDSDDIPAIVLDDAVACNGVAHIIDEVLLYKEYD

>comp5450\_c0\_seq4; 226 220 1221 LEN=2572; translated  
MTDIDAMAPTQPVINDDGHFVWPGPAGTKKKPAKGFNFDFLYVTASDAIDGYCGLPSDKTC  
YALGWPTCCLASDSECPEEKPACDQGQEPPEDEPTSVPGASYCTWSPETDCYASGWPACC  
DEDAETACPDERPLCEIDPPTPEPSTDPPLTGTSYCTYAPDYDCYENGWPACCDGGADSCP  
EEKPVCEVACDTLVGMVCSVDDLSQLCSLIQIRAGLVDALSTGSWTVFAPQNSAFERLNVG  
DWSKDRRLRLLLHVVVADEVLYSSDLKCVSPENLITMANGFDSRTLRCRGGVPAFQKGRSN  
DSDDIPAIVLDDAVACNGVAHIIDEVLLYKEYD

>comp5451\_c0\_seq1; 431 608 2053 LEN=2363; translated  
MGFSFRPKISPSYNTNKNVLLFESSKLLKKKPSVGGNERSSGLPTASTSKRRSSRSASS  
GASSLRIRTSSLMSLGTGSLGRDGKVVSVFVSPKARSAYGFSSFFPSSAPTRDAEISGT  
RLDFDQAQPVSTTSMAPSTKSRIIGRCCSFLRVSDLAMDESVAATSVASEISYINEMQE  
HTRHPVNNPPPGIEIDPKERWIALCTTAGETANDVSNNGSNSEHTPIAPKAVESLANYGM  
TTALDESMWVPDSKTDKLIKASGGSEWMKHTFHEGLVKASSFSDISAKDVLVWQGSYKH  
GLFGSEIPAIRSAGIVNSSAKKMVELLVDSRVKEYNKISLGRTDIITFDGNFDEEGPFG  
KSITKVMKSESKPPMMSPLSLT SVLHAKKIPNGSGYLIVNRSVHRPEDET VASSMKTEIV  
MGVNLVDFD DNAHESKSGGIERCLMINVNHMRSPMVP MYIAKKVAVTSAHKFINDIRAL  
A

>comp5451\_c0\_seq2; 385 462 1505 LEN=1815; translated  
MAPSTKSRIIGRCCSFLRVSDLAMDESVAATSVASEISYINEMQEHTHRPVVNNPPPGIE  
IDPKERWIALCTTAGETANDVSNNGSNSEHTPIAPKAVESLANYGMTTALDESMWVPDSK  
TDKLIKASGGSEWMKHTFHEGLVKASSFSDISAKDVLVWQGSYKHGLFGSEIPAIRSAG  
IVNSSAKKMVELLVDSRVKEYNKISLGRTDIITFDGNFDEEGPFGKSITKVMKSESKPP  
MMSPLSLT SVLHAKKIPNGSGYLIVNRSVHRPEDET VASSMKTEIVMGVNLVDFD DNAH  
ESKSGGIERCLMINVNHMRSPMVP MYIAKKVAVTSAHKFINDIRALA

>comp5452\_c0\_seq1; 358 1 1516 LEN=1680; translated  
XTRDYTAQHSTARYNTTRGAERTDQTRPDQTKPPHAPRTHQTONTAMFSNQAELS VNRPV  
AAVDAVRGDRVNSKFLAGTSSVRESEDNHLLLRFHFDANQLGIDARLSHPTGPGVGCIRT  
SPADPSYVLT TAENNPSEATLWKIPPESIDSVPADLSDGGDDNDHDGNYGHDESPSAN  
YGGAGSDGASAMEERAVLRGSASSGASARLTDLAWRGAAWDDGDPSTESTMGDVATLCS  
D  
GTLTQWDVAFGSAESTRSCAADLSSPLRPGLPPRMAWDPHHPDLTAVSSGEAVTLVDWRE

PPSAPSLGSSGRPHHRYGITDLDFNPKNPNLLVTSGRDGLLKFWDLRNTGSGFFDADSGG  
GQEIVAGGSAGRTKKQRPLLVARGGHRHWATRVRYNPFHDQLVLSAGTDSLVLNLRMSTI  
SSAPLLTFDDGSAEDGESLPQGQHQNQHNTQEGPNVRVSRYEHMDSIHALAWGASDAWI  
YLSASYDGKVVLNHVPSKEKYKILL  
>comp5453\_c0\_seq1; 196 862 1068 LEN=1424; translated  
MPKALPALILVHDNKILDSWKGLISPAQLQDMLAKHVKNGTKTCDNNPVATKPRPFRGIS  
FFNESMAL  
>comp5453\_c0\_seq2; 255 294 920 LEN=1276; translated  
MVSSRPYIRYHGSPLFFMIKNILFFVLVSNIEKAQSFVSRPLHPPSTRSYTGNDSSLNA  
VNSKSIIVAVTDSNYKELFSGEKFLLLDACAQWCGPCKLIEPLLEQCARDWKDTLVVGKFD  
VDGANSESRDLKVELILQGAMPKALPALILVHDNKILDSWKGLISPAQLQDMLAKHVKN  
TKTKDNNPVATKPRPFRGISFFNESMAL  
>comp5454\_c0\_seq1; 148 1 1051 LEN=1225; translated  
GTPNTPASKQTTSNRFVQSQCPLRRPSSCNWLPVVFDEYQNDVPAEVPPTHREKRKGGH  
RPLCPAPLREGPPRRIGQAVHYSYAEQGRFAFSDEASAERHARRLQGWRRERGFVVGIGG  
PVGSGKTALVVALIKRLAAPGAGHPPLAVVTNDIFTQEDAQFLWRNQDVLPAZYKAVET  
GGCPHAAIREDVSNLACEDLTESTLLGSDAGGACATPPPLILCESGGDNLAANFSGELA  
DLTLYVIDVAGGDKVPRKGGPGITQSDLLVINKIDLAPAVGADLGMRRDADRMRSTGGH  
AHDHGHDDHYNHSDPASGPTVFASVRDGVSLDEIEAFILEKYRKATAEA  
>comp5455\_c0\_seq1; 247 75 653 LEN=870; translated  
MSPIASILFFCIIYCASTVDARVSGSLVAPKPSKPRIFRSSINRFVDKLFQETDANND  
GQISFEEAYIGCLMLYVQLNQSAPIPPPDRKKFRIFSQAAEGNKWNNKKNALDLEQYE  
NMLKKLVARAVLRLTSHKIVTIAGAPLLAEMIVRSLAKRKKGFEEELRSIIPLQFQDATI  
PTLTSKAFHRGLW  
>comp5456\_c0\_seq1; 260 1 949 LEN=1158; translated  
KKKKTQDRNHFFSMKPPPHQFDCFNHVDSRFNDGTHYAKTGEMESLSGCPMKEIVGDVFS  
IVKRETSRIKESFTQKRKRSHDLNDFLFKGFENKPKKQRFLLPDDENTSHPATNVPPNGI  
QRVISSRSSSVSLETGELEMLNKWKQSVASNSRQGS DATITQKVRALQTNFLVSPIRYCL  
ASHPSIVSSNWELKGTVDSNYLKEKCRVTLAPSSYSAVMHSSRDLSINGKLELEIEMITA  
RRKELAAALRKPINSRFDVDNVYLHGLSLKIKNGLRLTDFEVDWLERMKNNTKYGSIEKD  
PSFNQELESFDLQVA  
>comp5460\_c0\_seq1; 713 408 2528 LEN=2761; translated  
MGVMEDESPMSFLAENLVAVVVTGCVTLGLLGALLAVKSESKSRAATSNKQAASSGAGK  
SNTVDRAKYPGGKLTVYFATQTGTAEFAKELEREAKDHGFLVKIEDAEELLESPEHMADF  
ESRSPFGADSKPDETPRAVLAATYGEGETDNATELNFQMEDILAAANEEEEEPQKPLL  
LEYAVFGLGNTEYEIFNAMGKFFDSAMEKLGTRVYNLGLGDDSDLEADFEKWKDGLWA  
TLKKRYVNEGALLPTSAEDGKLSLPDCEYTVSWEEEA STGPDSANRASVPLDTVYGSK  
HYFTA VDCPVTVVKELRSPSDGGSTVHVEIDISDAKNLDYKTADNLGVLPNAPEVVEEV  
AEALGFGQDLDRVFLGKGVNQDGEHEHEWHLGFPFSPITLRECLTRYLDLTSAPRRSDLK  
LLSSYAKDPVDRKALQRLSSKDGAKEYKEKIVEGKIGLAQILKLCPSLEIPLHLIGNVC  
RFQLPRFYTIASCPKVHPNSIHLTVAVTRENRPDGSLEFEGVCSTHIAQGLNQSLRVFVRP  
STFRLPSTLSTPVLMI GPGTGIAPMRALLQDRKHQSEQEGAKNMYNALYFGCKREDLDYI  
YRDELEGYKSGGILNDLYLAFSRKDP SKKEYVQHLLKKNASSTYTLLEKQGAYVFCGGV  
KMGHDVTETLKKILVEESNGSMSQDDAANFLSKLSSEGRFVQELWS  
>comp5461\_c0\_seq1; 216 250 699 LEN=1697; translated  
MNDRELGSLPAAKSALEAPLDDDRSLRVPCYCEENVWRLAYRKTYLQKHQNKIDTPNKSC  
SYHVAFVSNPKGCVPMFEQVAAADRENPFWDYHVILLMCEEDDSSTARKGHVFDIDSHL  
PYPCPLDEYIERAFPNHTEWKDEYLPFFR  
>comp5461\_c0\_seq2; 340 250 1017 LEN=1586; translated  
MNDRELGSLPAAKSALEAPLDDDRSLRVPCYCEENVWRLAYRKTYLQKHQNKIDTPNKSC  
SYHVAFVSNPKGCVPMFEQVAAADRENPFWDYHVILLMCEEDDSSTARKGHVFDIDSHL  
PYPCPLDEYIERAFPNHTEWKDEYLPFFRVDASVYLRHFSSDRSHMFDNEKKKWNAPPP  
LYDCI V PSETKKRIDLNGTNNNTSTTTFHQYMTISKNDVVD SRQQHQQQNSKYEDSPFGR  
IYLSQLIQRFGIHK  
>comp5462\_c0\_seq1; 906 57 2405 LEN=2738; translated  
MVFVASTNEVGLDLRANARTKLSKEKNGDNFGGSNYRYGGKAEIIRSKRASDHMKYLT  
KASKMGEDVESIADTKTNSALTVPGGVSDIAWYDGVFSSLFGGNTCEDRNDMKNVDGSI  
LICGSPGNQTDVSLVGPVFGQMGDCQAQTQYDEERQDIDNESASEGTVSTLGKDLGDDLK  
SLPSVNGGILPGEDDTHIDVDIDNLPMSPRMGT RKSFGNKTKKEVSKNENFESLVEKKIKN  
LKSERSSMDVSKNVPYLRQKVFPMTAGRNDSEYSSNGHRNLDPAVLETRRKFLVRELRSA

ISKHGRFDVRCANITAALGDLYDENKEYRQSLRLHKDVVSVYSVNLGDDDKKTLDAKLRL  
AKVQENAGDIDGAILNYNFVMMMKDLKGEKNPDVVEVLTRIAGCLKKKGKYESSIKLLK  
RALKTYREVLGDTHPTVSVTVDSIASLYITIGEYEKASAILLEEVAKLKAATLGVTSKEVA  
SSLSELATSYECAEQYGKAMKNLKKAYKIYADIVGEHGEKAI I I L E R I A L I Y Q A T G Q Y K K  
AAIAYLGVLRGKKRALGGSHPTIADTYFHLGVSLRQSNQFDKAFKCIKQALNIYVGEKGE  
IHDVQMIAEVMHELAI IHKANHNTSDAIKTFKQE IAVRRKLGQPEYPLIAQALNHLGVAE  
FELKSHNRALNYFMEALAIYEKNRVETASKAADGTVVAGTDMAEVSYNTGLVFEESLHNKK  
RARNAFIEAARIFKENGYSTSHPHYSKTIGLKLRLGYNFQEIDDKKSNSNPSESRNSRR  
RG

>comp5463\_c0\_seq2; 187 1 1119 LEN=1287; translated  
QINKPRKKMDEAKVTNTLCFRDGNCRFLMALAVGWLCLFVPSLVQASRGPPYTEEVRVQR  
HHERGYEFPFHSYNPDTPGWRRMDQRFQVMALTDQMKGWGWIQTCNAAVTAPNFTEY  
GWGLTQAPDLLTDIRQTIYDNLNSARSEGGIDVIGGPNTPLFIDAPHLNERALTELQPI  
LEAWSGVELVPAIAYGFRLYRNESNLWMHTDRAQTHVISCYHIASSDDSEPWPVIVIEDY  
EGNTQMAYLEPGDMLLYESSKNFNGRPTTFNGSWYTSLFFVHWYPKGEWNRKDHDIESHYA  
VPEEWNELTPTSREHPDLKVIGTSMLEPNCPDNWCNLAKAKKVYGPQYGTVLTGKTI  
SLNLEDEDAEEL

>comp5464\_c0\_seq1; 228 1 1166 LEN=1508; translated  
XTFSPAISIGPKAKPQPFRTPPFPQPSGYNKKHIMIPCRLVDRRKRGRKVFQGTLPIDLL  
LAVLLAVLGVANTTKHIFVDGFDLQDHRLSYGSLKSRVTVGLEYNSSSQKLHNRVPQTAA  
EDDQPSKEKVTNYAFSVRGGSRVTRTAIAVSVQPKRRSQIVPIMVSLVIGSFSVLEIIES  
LHKEVESVVGHAHGMFLLSLIRLRSVAILQTQTEELAEAVEELTEGKETKAGSSKKSFL  
SFWKQALLRFVSRHVAIAACVMASIASIVEVVEDLKPGAHHGAVFLALSELNYQVNRFS  
HIVDHSNGGKKKSEPKGLLFSFRSIVLGPLLFLAAAAFAAFEVYEDTRPGAHHAVALAL  
AELIENLDRSKVLRKRFRFILFGPKMAS

>comp5466\_c0\_seq1; 677 84 2372 LEN=2795; translated  
MAVLSQTHVSSADVTVSSPGISAEQGGSGAKVQSGGSNAPILSPSTVSQVSQEDNNTGGD  
DSENDNNWKGQSWSQEDDKKLSIVSARKKALRKKKNGQPADSSDLMINWQIGSTMER  
DGEKCKERYDFLRQSQGGRGVPWTRQEDEQILALVAQHGAKKWSSIANSIAGRSKGQCR  
ERWHNHLNPNINKSKTWTMEEDRI I I D S H I R F G N R W A E I S K M L N G R T D N A I K N H W N S S M K  
KKIEKYLKERKVDPTAPVVDESGRFLLRREDIEGCLQALQQSGSNSKSIKNQAKSYAGRP  
LGSTRNLNHHMHPNRMVPLATPMSAAQNPAAYNSMMKRQYDAMMVGAYPGMGYTPKSVKRVK  
SSSEYNKNSKLAEMSPVNKKILEEFLSELKGGYIKGVYHSALERRRIVEKAVKSGSIGEL  
NALGLSQSEYSRLQKAVPMNQSRRLDGPKWATPQQQLYPHHRYSNGYMVPPHPMHGWH  
PSPLYPMAQLFPGYPPVPPPTPLPTNNLPTPSSTKDSTQLQQASSKIETLSNSLSLKH  
SPILRTRKDNVQKDTKSKDNFELGESSDLGYTLDEYALLGSPCAKGSKSNCFSPFLIPTP  
NKSSTPGMCTSWGDDAKLLHDTFSKGYVSSSKSSSANTPRVFFKDDLTEQSILLDSGTK  
VKHTNEETPFQSDFTMTGPRPKSRIGVVTGSGRERIRGAMVDERDNLSTAILATPKSPK  
SGNVQEIDHSLHHIDAYSVIKSPHLFGSPIVKAARSMPMRL

>comp5467\_c0\_seq2; 764 252 2270 LEN=2515; translated  
MSSGGALSMGRGTRKRPALSSSSPASALILEQDNEPPTRRARRDVLSCLETLQAELEH  
EQSLRALDSKRFVQIKQRLKRCDFAMEEAKDCKALMEEMREENERHMDQLKRAMARTKA  
ELREVQEELEERFVGVKSGSDGPRVDMLKEGLEEKEAENEQLRGTIDQLRCMDKELLE  
EQQSVDRQSRMQPGGEETEGLISEARPKALRELNRVIRLAETERKNRQYKRIAEDAQRK  
TKQFLQEKEQARVAGKRIEQLEQELQRAVKAEESTSEQLRHWQSLGVEMVRVVFAPGAAK  
SRDPDIAVVQKHLNDAKTRASASEKHESELKKELEKANEAIQILQAEKSSFRKEAAWEE  
QRLEQEKRQQLYQKDMKVLRSQEGVYKREVESLRSIVKTFDELPLKASQGGSVGTNSGGN  
SHPANVRALEASLEAADQENAVLKEATNELRGDLKTSMAEKKELQNKHATVLEKFGKLRD  
ALYAERAKAEKAEERANRAEILAGKGSFNPERTRVLHMGANPLTMALKEEIGVLKKQIEL  
LSSAETNKKTKSAFASDVPNKLHQRLKQSFKEQISRYREGVYLMTGyrVEMIPDNDRYT  
FKVRSMAERERDYLVFQWPEGKEVTSLLDNLNTEHAKMLTKSPSYEYMTKFHSLPAFLSS  
VQLSLFEKQMTI

>comp5469\_c0\_seq1; 502 180 1364 LEN=1595; translated  
MPPSSSDGTPWVERYRPKTLDDVSHQTEVSTLKNVKTGRLPHLLLYGPPGSGKTSVAL  
ALCKELWHPTQWRRRVLELNASDERGISVREKIKQFASLSVGKAGSHTAPQARKDFGT  
GSHGSADATAGEASEQTGNTNDSEAKSYPNPPFKVILDEADTVTKDAQAALRIIEAHS  
RITRFILICNYVTRIEPLASRCAKFRFQALPPSTMKERVTAIAREEGRKQSGGRNEAAV  
ITDRQIDAVLAVSGDMRRAVTSLQSVQALLAGQPGTAADIDEEAIYELAGLPPGAVVE  
VLYQSLLSNSFDTMQAAVKNVLDHGYSVQTLQKLLDRFLETDDLDELGRARIAIRIAEA  
EDKMNDGADEYLQLMTCGLALRCLQESANKMKQ

>comp5471\_c0\_seq1; 358 26 379 LEN=643; translated  
MKSVALFVTLATASAFAPVQQTVARAATTSLSMQAQSPKKGMIAMGAAPVTFSS  
LATVATEGTSEWFGVDDTRLLAVLFFVHWAAILTLWLQQYGDADDEDEDFGEIDYTG  
>comp5472\_c0\_seq1; 627 365 2182 LEN=2416; translated  
MYHTKPHFYRQLLLLLLVAAATFSCRISNGLVSSFAPVVSIVPRLSSSSVSCESGRSIC  
LRARSSSSNDNESDEEDEDKMSVDFFFNI SKSNLDSNKNGRSMDAGIQEMVSGGTSSD  
YFYSFDGSTDFPLDDSSGDQAHSENSNSDVMVVDWECLLDALPYHVELGIHAARTVWPH  
LNDLCNFDTRQWLENKLYAMSHVLGCPSPDGPPRHEGHRHVACEFALATRLILEEQALDR  
NESTGKNGKYSRKFHPRSEINGSDFQEESSRSRRPLTAGELAVNWREFIRSTLIVKYSRG  
PDGKLLKTEPTLELEQAIEEYLTPSSSESFKPSFASKPFLPLFPQTKFALRNSSTKIVIR  
ISHRFDELVARKLNKQLQLGPHERIAKTYKPENAIRRLFLNEDKNLVLLLSPEHYNDG  
NGIGNSKKYDNGSHQNHATEESCLRSIMKFAHQCSNRYQEKGEVEDVTTRTATTITRSPC  
IVWVDSWHRQLTLPVFGDAIPSLKNGKNTAECTVIAAEDRSPGTGEEDDGEDDRTIA  
PSSSVWLSLYLAEWPSIDSSTSASETARATILSTTFSENHQAAMVYPWTDCLSWDDAEDI  
LLPADW  
>comp5473\_c0\_seq1; 104 1 255 LEN=856; minus strand; translated  
ENESEGLDHVIGEMCTDLTRMTSINNTRISFIERLTSDSDIYFNKRVEEQAVIVAKCQN  
LMKRTKEKAKKAKQKKDESLNLPW  
>comp5473\_c0\_seq2; 212 176 1564 LEN=2022; translated  
MKITNSAAATVLGSTSVVFDLHGSSSSSSSRDSSGSYFVSSGCLSIDDLCEYNDYSSFC  
LLKKHDFYDRVSTGTWTFVPTNQAFDRVSNGLASLDDHSLSKVLKSHLVEGDLVSTLNS  
VYESGDYISVGRTPENLHSSSESLCGGGVYIILNEVILPPSIFSDMSQFVQSKEDKSVTS  
TDNLPTSCYVSPMCNDIPTKGYVDPGSGFTNSTGFDTVQTDQCCNICADGGVTNIGPYDY  
LLLDLMWNPTFCNALEDGHDFTLTHMPSMRCSPSLSERLSIHGLWPSWLKTFGTCCNATG  
SNKPLDPHEVTNEWDNSLRRLRMLLEDWYDPVLYNGRFNEDNGCQICYVQNHQKHLGCLYT  
DSPEEYFQAGLDMYDIVEEQRKQIDSMHGTTITVKDIEILFPKKVNVVCDPQASTSTDY  
QTFSELQICFGDELTIIDCPAATYESNWTACKHSIMIPSF  
>comp5475\_c0\_seq1; 540 37 3144 LEN=4973; translated  
MTDESLSMDADTVLERQNDNRLEVFEDGLSANCEIVGLLQFGRGNPSSDEYFYNPSQEDI  
EHVVSTLLAIEHLNNTANTSLVPELSGIHECPIITFSAFAEASIIIPSYAFEVVDRLTRPET  
DSSARNAERPLPCAFLGAKSSTISSATAMVTGMRGFPQISPSSTSVSLNKNVEYPLFGRT  
IPDDGFMAEVFLQFLHDTLGRHFFVFFSDSYPRSVYESLRRAILDLGWGSLGGRETEE  
ESKDTMYLQSYLLERDADGRDVENILVDAIDAFNRSEFRYAFVITDVTDDSLMKLAYDS  
ELAGYGDYQWFFADTFSLSSRKFKKDSVLVKAYNGVGSIKANAI SDMEIHDAYVKQFRDS  
KRDHLKHYAKLVREAVSQKETDDDDINVSNTIVSEPVYKIMGGTEDSLFLDDVPPFLNES  
DWIGDDMNSKYTPFTYDATILLGLSACAAVRRIGDSLVLGNEFFEKIKQTRFAGVTGDV  
VLRDLGTREGHSAHYSITNWRAFDGDDDDMVFFNETTAYAYHPGDDQNWDDVSVFVYQG  
GNVSI PPDLPPPVS INEVNAWIRVAVYALVATVLAATVGF AIWYRHRQCRVVKASQPF  
FLLLL CVGVALMGCSMIPLVVKENEVEDLDLNCNSFAWLVTMGFGITFSTLFAKTYRINX  
NRTQRKEMPASKTYGSGHGLPRRLDMRMYVVFVSI VVSPSAGSSILALYPHVLMEPLNVSF  
ILCVSTL FVS YE VNMMLALMSANVPI THEEF SRK PDR FGRDTEIYSRCMFEDSLPYIGT  
TAAVNL CVVCLAMYQAWRARDLSTEF AESMYIAGALFVTL SATILAVPLLLIVKENLDAL  
IFIICALVFTLTTSIMCCIFIPKITFHLKDKRSGQSASRTRFSSVYSRASSVSANSAGEV  
ILTSKPQKALISEISDLKRKLGRAEKRERILDLRNAQLEKQLSGSGLNSKEESALTFRT  
GPALSGVTGSTKKYVSFQEDTISSSNTKTPRVSELSLEMEREEKQELQVNDESDHASHG  
GDEDPLSNGLDNSAV  
>comp5475\_c0\_seq2; 588 37 3009 LEN=4838; translated  
MTDESLSMDADTVLERQNDNRLEVFEDGLSANCEIVGLLQFGRGNPSSDEYFYNPSQEDI  
EHVVSTLLAIEHLNNTANTSLVPELSGIHECPIITFSAFAEASIIIPSYAFEVVDRLTRPET  
DSSARNAERPLPCAFLGAKSSTISSATAMVTGMRGFPQISPSSTSVSLNKNVEYPLFGRT  
IPDDGFMAEVFLQFLHDTLGRHFFVFFSDSYPRSVYESLRRAILDLGWGSLGGRETEE  
ESKDTMYLQSYLLERDADGRDVENILVDAIDAFNRSEFRYAFVITDVTDDSLMKLAYDS  
ELAGYGDYQWFFADTFSLSSRKFKKDSVLVKAYNGVGSIKANAI SDMEIHDAYVKQFRDS  
KRDHLKHYAKLVREAVSQKETDDDDINVSNTIVSEPVYKIMGGTEDSLFLDDVPPFLNES  
DWIGDDMNSKYTPFTYDATILLGLSACAAVRRIGDSLVLGNEFFEKIKQTRFAGVTGDV  
VLRDLGTREGHSAHYSITNWRAFDGDDDDMVFFNETTAYAYHPGDDQNWDDVSVFVYQG  
GNVSI PPDLPPPVS INEVNAWIRVAVYALVATVLAATVGF AIWYRHRQCRVVKASQPF  
FLLLL CVGVALMGCSMIPLVVKENEVEDLDLNCNSFAWLVTMGFGITFSTLFAKTYRINT  
IVRNAKCRVKLTVRGTVPVALICGFVNMMLALMSANVPI THEEF SRK PDR FGRDTEI  
YSRCMFEDSLPYIGTTAAVNL CVVCLAMYQAWRARDLSTEF AESMYIAGALFVTL SATIL



AVPLLLIVKENLDALIFIICALVFTLTTSIMCCIFIPKITFHLKDKRSGQSASRTRFSSV  
YSRASSVSANSAGEVILTSPKQKALISEISDLKRKLGRAEKRERILDLRNAQLEKQLSGS  
GMLNSKEESALTFRTGPALSGVTGSTKKYVSFQEDTISSSNTKTPRVSELSLEMEREK  
QELQVNDESDHASHGGDEPLSNGLDNSAV

>comp5476\_c0\_seq1; 724 97 1407 LEN=1545; translated  
MSVPSMSGFAMMSPHRAVLEANPDDDAGQVRLLEELQSRGRAAVGAKSWMDAKLLYEKCL  
TMTGCSLVDKNKEAIFHSNLSLVENSMGEFEKARVAEAAATQDDPKYVKGWWRLLGQALLA  
LHRPEEALDAFSRAKVLDPNTKALTKLVAKTKKQVEEEKALMMETEGDKDSGKDATKTTV  
SMPAPPPKSVKSTKPAAAKSSSSAANATGDDDDDDSKLFTKSEPVRGYKVVNGKKTSYF  
HNELDEKSRELIGDIAPKKIENPAPTPAAANASKQGTSVWNTGGTWEERNVTEWAKKTL  
DFLLQTTYTLPPSSPAPGAVARVEKVAKLGDHASVAVVRGKTRFIYEFCKLEWELDKPD  
DELSCAGSL SIPDIDGTIALGEGYEIHDFGIESVSNPSVRPLVDRFVHRGGFHEALNEQI  
DDWVRHFKAHEGPKDA

>comp5477\_c0\_seq1; 610 96 2305 LEN=2346; translated  
MNHQSKTNSNFHREDEQPATEELGSLFSRLKCKNTGEEIISSRKSLKSKTSSKKVHKILTP  
WL VNDRAAKISGESISKGIQVDDRINLPMRTEHVIYPSVEGNSVEIQSTLAPASNSKTQ  
VQNKNSIGSVLFGRRRRSSSSKNAIKSSEYNESKSYPOFGSFPENESDEDKTRNNKLRGS  
EEKIVSTNPVNGSDNLSTVAEKAGIKPTRTNSYDQRFYSNGTNSILDNDDDCGLPSMM  
TSSTISTKYDVGDTSENKTGVRCSQRDIVTPRRRNSRSPSPSRMRREPMPMNPSPKNG  
KVQHHQKVKFKNDWNHEMLMAHEMNKQLSLSLSSSFCGTMNSNSHEAGKAHKKKATIQN  
DWDHEMLMAVEMKKQLSQMSSSFCGTMNGKNRETSFSGSTRESLRQENEKISVLSSSAM  
SCLNPTSQSLSSGKPNSTMHGTDSGNENNQNLINISGTRQMSTK PATNTLCGAVSSALLL  
DVKDDDALWKYYERNKMPQLPLYQDQISKYREHITKQDPPPGSTAKAPVSNGEGR I IQDA  
PRFAGISNSNRIRPKVDLQXDIDAACCNKLLTKSTQACPSKADGYDHRPYDNETTGFQ  
INQGTNNNVSDRELQLRLQYESLMGYQNQASYSHEPVKPSKEQLLDQLRLAVRKASAE  
LD SLYLQKGI RSDFRERYNMRTMETEDCSEESSFMPEYYGRNTQQRHL DHEEEALDY I ISTG  
SIHSP TNRKDKYDFSY

>comp5478\_c0\_seq1; 1334 505 4686 LEN=5362; translated  
MPPSATPSSLSKSTQLGSGSDKTSETTLAFNSTEAEAEASQSLALLLLLLLEINEGDETL  
NLDDDEDALDIPISTETTDHIPMSLVNGNNGIDAKAKPSFLVICTVDGYIMVLNANDG  
SLVYAFSSGIPLAGPSEPLDEDIFADGTRGSPNNNNQDYERRIVPFPDGQLYDIGDGGMS  
VKPLGISVQDILANPAKTCWKS GKSTRNTEASHGKWDRDVGNDGYDDASYWDDNINN  
NEL DHI EDKEECGIVTATKISL FALDSFTGNLVWHQYPNGTTLKMDDHETAHGDNDHTNP  
NA SSSGRKKKQDTQSTVLLQREDVVVQQIISTDN GEPVWNV TWATLRGLEFGESDDQGR  
PRS PRGHGSGDLLPPEQGLLPTGEETTDGNGFGKDDCDSV FSTRLPDILFSEDGTSITAVES  
SRSNCPPEIMWTRFPKTVASV FGLNGKSWEPLTVLDDVGAGPSGSWNGEKHLLPQSSN  
NYDDNPTDLGKELAVIKQPPSHITSHEFVNRYRTDRLYHGRDFLFRNGIRFPFHTQ  
RVA PTLQSFPTITGGRDDKDNRSFVGSNYLQLPSPEGYSDDKTQKELSVRLEWHI  
WLLAAI GVVSLMKSCYRIYEQKEQEATDTNAVRLQAMPGMNEQKQISVTQPTTSDS  
KKEERTAT TKTSTNGSPKVVDDSTPHYGVGLIDGSIPLIQYTRYASEFEEIGALGKGG  
FGSVFQCRNP LDKRDYAIKKVLI RSDSKQPQSDFTNR LKRTLREVKSLASLDSNI  
VRYYTAWLEREQLN GGNDSENPSDGT PGASDYMMSYTRTSHVKGFGSGQFSES  
VGSMPWKSNNNFLNPF GSGG GLPPVFDHSFSTSSGQNH SISEVPEALDDYGFV  
FDRSNT EGEQCDETARNERTETQVIR P QSKSTTV PSSGGGLPPVFQNSATSS  
SCQSHNIPGVPDALDDYGFV FDRNSTEDEHSVTS ATEESLKNQAVPELKS  
AIKNGTILPRNKSRMNAISFQSLRSSRSSIEESTSEWSQESKN QSDATQEGNES  
NTIEEKVAEPTVSQKYILYIQMQFCSQKTLADFLSNEEARRGPGSSIG GIDIP  
YALSFLQTCQGVKHVH SKGLIHRDLKPNNIFIDDDGAVKVGDFGLSRASSDSNK  
GDGEADSSVVVGSTNNPSNADITAGVGRSYASPEQMKGSDYDSDTDIYSLGI  
ILFELC YPMYTG MERNIVLSNLRNHILPNLWETVAVDFPRLNSLVLSMI  
SNKPKDRPTAQAVVEQ IQSVLEGFTISSLDKRDYEGSILLRVEIMFCENGL  
HKTMNLLREALPNLIDIVQYGLRS STSKGQMKSIMFAIVPRPQQPEDEPE  
DAPECS PASIGALMVKKLSEKTLSEKTPCDNPQ VLLIRQVSATKYA

>comp5478\_c0\_seq2; 1231 505 4806 LEN=5482; translated  
MPPSATPSSLSKSTQLGSGSDKTSETTLAFNSTEAEAEASQSLALLLLLLLEINEGDETL  
NLDDDEDALDIPISTETTDHIPMSLVNGNNGIDAKAKPSFLVICTVDGYIMVLNANDG  
SLVYAFSSGIPLAGPSEPLDEDIFADGTRGSPNNNNQDYERRIVPFPDGQLYDIGDGGMS  
VKPLGISVQDILANPAKTCWKS GKSTRNTEASHGKWDRDVGNDGYDDASYWDDNINN  
NEL DHI EDKEECGIVTATKISL FALDSFTGNLVWHQYPNGTTLKMDDHETAHGDNDHTNP  
NA SSSGRKKKQDTQSTVLLQREDVVVQQIISTDN GEPVWNV TWATLRGLEFGESDDQGR  
PRS PRGHGSGDLLPPEQGLLPTGEETTDGNGFGKDDCDSV FSTRLPDILFSEDGTSITAVES

SRSNCPPEIMWTREFPKTVASVFGLNGKSWEPLTVLDDVGAGPSGSWNGEKHLLPQSSN  
NYDDNNPTDLGKELAVIKQQPSHITSHEFVNRYRTDRLYHGRDFLFRNGIRFPFHTQRVA  
PTLQSFPTITGGRDDKDNRSFVGSNYLQLPSPEGYSDDKTQQKELSVRLEWHIWLAAI  
GVVSLMKSCYRRIYEQKEQEATDTNAVRLQAMPGMNEQKQI SVTQPTTSDSKKEERTAT  
TKTSTNGSPKVVDDSTPHYGVGLIDGSIPLIQYTRYASEFEEIGALGKGGFGSVFQCRNP  
LDKRDIYAIKKVLI RSDSKQPQSDFTNRLKRTLREVKSLASLDHSNIVRYYTAWLEREQLN  
GGNDSNP SDGTPGASDYMMSYTRTSHVKGFGSGQFSESVGSPMWKSNNNFLNPFSGGG  
GLPPVFDHSFSTSSGQNHSISEVPEALDDYGFVFD RSNTEGEQCDE TARNERTETQVISR  
PQSKSTTV PSSGGGLPPVFQNSATSSSCQSHNIPGVPDALDDYGFVFD RNSTEDEHSVTS  
ATEESLKNQAVPELKSAIKNGTILPRNKSRMNAISFQSLRSSRSIEESTSEWSQESKN  
QSDATQEGNESNTIEEKVAEPTVSQKYILYIQMQFCSQKTLADFLSNEEARRGPSGSSIG  
GIDIPYALSLFLQTCQGVKHVHSGKLIHRDLKPNNIFIDDDGAVKVGDFGLSRASSDSNK  
GDGEADSSVVVGSTNNPSNADITAGVGRSYASPEQMKGSDYDSSTDIYSLGIILFELC  
YPMYTEVCNTKLTCLKQRVKLNGSLQLYPVSFGLHIDFLSYLTGDGAQYSFEQPSQSHS  
SESMDGDVAVDFPRLNSLVLSMISNPKDRPTAQAVVEQIQSVLEGFTISSLDKRDIYEGS  
ILLRVEIMFCENGLHKTMMNLLREALPNLIDIVQYGLRSSTSKGQMKSIMFAIVPRPQQ  
PEDEPEDAPECPASIGALMVKKLSEKTLSEKTPCDNPQVLLIRQVSATKYA  
>comp5479\_c0\_seq1; 369 206 805 LEN=1013; translated  
MNNHKGILALALVFVAPDATLGF L IHRQAPAPSSRFDGNPFRDLDDVIDLAEDCASNFG  
KYSFEEIKQCRDEIHAHRVQNALGDSTTPDLIKERFLETELTMQLERLQNDMPESYLF  
DEGSFDEGIDTDVGLDGILLDNGLIAMDLPTPRDAASSEN RAGTKQVNVWKDLVAAEGLV  
ESIAICGMLGFMMMAPNLN  
>comp5480\_c0\_seq1; 275 1 1145 LEN=1252; translated  
XFIRSRMKSFSQSERDRKYKNNSSTRSFLWDIVRWVTC LHHALFLFN FVVDRCDCLVTKPR  
PRQKSKLSSARTALPASREELY PPLVLLGGIAQTKSSWDHHLGALAEHRQVLVYECIGQG  
EKAIDNNLDASLPAQARRLLEQLDAEFTTGGRSNDDDNQLVVDIAGFSFGGRVAMAAAC  
LQTDGVSQKIPDHARVIRRLHLTG VGC DRSDYGHVAMRSFSELIKSDP SLRSFAWSILL  
ATYSPAYLRGLPERTLERLVDF IASSNNADGLLAILDQAEVSDVEDPWHVVNMADRLVSS  
GETPEFSEGTGSKGAVTGKLCVGEFDRMAPVEGVAL LQKKGWIRHGVDVLPDCGHAVL  
EQPRAWRESVLSFLNANGAVS  
>comp5481\_c0\_seq1; 452 200 1777 LEN=1910; translated  
MVQIASSLQNPVGGGRGAARPLRHRSRRTAWIRPCLATSFCGLVAVVWGLYYHVLLLH  
KSEHQLVSGFEKQQQQQQQQNRPHQQKQKERQEQRALLLSPEAYPVYGT HMELEWNGS  
NKNGNNEQNNGNNSISMVYAVPSRSTPGRILATNKPPSATGTADPLGRIRGVVLLHAC  
THSALKFFAPSESDSCPSCVGLSEEMRLARIVLERGYAALAVTCSNAKSGCWGGHEDVRI  
QHALREFWRASVPMEAGRDPGALPAETSAPVYAI GASSGGAMA AKLVAEGVAR SATVMVM  
ALRDQLLDRLALPHEHKLYLAPMVRDKGTTNRVRKNYQYITKQQEQRSREDPKSTAGNN  
HHDFQVVLDETSCKPLPVTSHYLWNRVPGMTLEAAQIIVDVLLRHGHLDPSTHLFLIDPT  
RSNWRDHLLLETRDGGKDNSSNHPEHNNKARPPSLELPQRDAGPVQQRPKNDGESQLLLW  
GTFDLTPGMSPLAKALHRAWAFHEYCEVVEKSLDFFEGTRKGTQ  
>comp5482\_c0\_seq1; 450 140 1366 LEN=1519; translated  
MEGLGGPVDLERY SADGIDPSLEDCCRREV VGNRRHNALTTTLRRHDVAALAEERRRRHLV  
SMPNNADDEACRCS CDPNSDGG EYKALTEFKERKQREHSVSEQYEEEQEQIAREEAAAYE  
RKA AVGSGNDDSDSDDEFDYLLED EFGVEDETIRLLEEERRAELEYQVLVRQVAGHHGYG  
VHRQLHPTRVLRIGGLGRDAAKSKGVPPPQAVVLHLVDPE SITSASLDYYIEKELAPQC  
PGTMFLRSGRSVLSMDSDLARKSLPPNVLNPDRLPALVAIRDGVAIHACPRLLGLGAE  
GGEIEPGAVRHWD RARVLR TDPPSDDVCLIRPEEEAHMDFMLSQAQPPAPAAREEEEDH  
YNCGVEGCHKYFRHEHVGVKTEEQSGLVVKEDKILGMGDFEYCQFLEE  
>comp5482\_c0\_seq2; 349 397 1514 LEN=1667; translated  
MLSQRPF GD XDVAALAEERRRRHLV SMPNNADDEACRCS CDPNSDGG EYKALTEFKERKQR  
EHSVSEQYEEEQEQIAREEAAAYERKA AVGSGNDDSDSDDEFDYLLED EFGVEDETIRLL  
EEERRAELEYQVLVRQVAGHHGYGVHRQLHPTRVLRIGGLGRDAAKSKGVPPPQAVVLH  
LVDPE SITSASLDYYIEKELAPQCPGTMFLRSGRSVLSMDSDLARKSLPPNVLNPDRL  
PALVAIRDGVAIHACPRLLGLGAE GGEIEPGAVRHWD RARVLR TDPPSDDVCLIRPEEE  
AHMDFMLSQAQPPAPAAREEEEDH YNCGVEGCHKYFRHEHVGVKTEEQSGLVVKEDKILG  
MGDFEYCQFLEE  
>comp5483\_c0\_seq1; 408 1 1715 LEN=1837; translated  
QALVCTGTIARGLPKGFSEARAQTSIRSVSSLPKRKKDIPTKQRKMYEDGIDGDSLREVV  
ATAIKRIDIGTAVLPEPLFCSDTDQADSGPGSEGYELLGGETSSGRNSHRDSNREGRAPD  
ELHATSSSTLYARTLRSEFNALVVEHHLKWAPMCVSEPGPFVDGSLSTRLGRYDFHHADA

IVDWGIRYNMVVKGHVLVWHVXIVSIAMQCNPCIVSQLNAVQCLQRNGILFVLGRQTMHG  
DHLVCFWEKNIKCTQLSLLFLSFFACIRSIDPTPHRPQLLEDLEPEEVREQLRRHIFFT  
MGHFRGRIRVWDVVNEALAPDGSLSAENVFFRKLGPYIEECFRWAHEADPDAVLLYNDNK  
VEGMNGPNKQKADGFYRLLAGLVKKGVPVHGCGIQAHFNAAGTGRNRVPTPRMVKNQIHR  
LGKLGKLVNISEMDVRVSKLAPELRQIAQRQIYHDI IAAALTEPAFDGLWLWGFTDRHTW  
VTQFYSEDEPLVFDSESYGRKEAYYGLRDALSSIARGGTVGAHVALDSDEDEDGNRWGHAW  
MPPLLEEEETRSSFLDQYGDDITGDQRPDWEV

>comp5483\_c0\_seq2; 303 1 1870 LEN=1992; translated  
QALVCTGTIARGLPKGFSEARAQTSIRSVSSLPKRKKDIPTKQRKMYEDGIDGDSLREVV  
ATAIKRIDIGTAVLPEPLFCSDTDQADSGPGSEGYELLGGETSSGRNSHRDSNREGRAPD  
ELHATSSSTLYARTLRSEFNALVVEHHLKWAPMCVSEPGPFVDGSLSTRLGRYDFHHADA  
IVDWGIRYNMVVKGHVLVWHVXIVSIAMQCNPCIVSQLNAVQCLQRNGILFVLGRQTMHG  
DHLVCFWEKNIKCTQLSLLFLSFFACIRSIDPTPHRPQLLEDLEPEEVREQLRRHIFFT  
MGHFRGRIRVWDVVNEALAPDGSNVKLHNSPWNRLQEVQYDAYKRYVQXDAELILSIE  
YSDLISIACTFLGSLAENVFFRKLGPYIEECFRWAHEADPDAVLLYNDNKVEGMNGPN  
KQKADGFYRLLAGLVKKGVPVHGCGIQAHFNAAGTGRNRVPTPRMVKNQIHRLLGKLGKLV  
NISEMDVRVSKLAPELRQIAQRQIYHDI IAAALTEPAFDGLWLWGFTDRHTWVTQFYSED  
EPLVFDSESYGRKEAYYGLRDALSSIARGGTVGAHVALDSDEDEDGNRWGHAWMPPLLEEE  
TRSSF LDQYGDDITGDQRPDWEV

>comp5483\_c0\_seq3; 434 1 1494 LEN=1616; translated  
QALVCTGTIARGLPKGFSEARAQTSIRSVSSLPKRKKDIPTKQRKMYEDGIDGDSLREVV  
ATAIKRIDIGTAVLPEPLFCSDTDQADSGPGSEGYELLGGETSSGRNSHRDSNREGRAPD  
ELHATSSSTLYARTLRSEFNALVVEHHLKWAPMCVSEPGPFVDGSLSTRLGRYDFHHADA  
IVDWGIRYNMVVKGHVLVWHVTSPLLEDLEPEEVREQLRRHIFFTMMGHFRGRIRVWDVV  
NEALAPDGSLSAENVFFRKLGPYIEECFRWAHEADPDAVLLYNDNKVEGMNGPNKQKADG  
FYRLLAGLVKKGVPVHGCGIQAHFNAAGTGRNRVPTPRMVKNQIHRLLGKLGKLVNISEMD  
VRVSKLAPELRQIAQRQIYHDI IAAALTEPAFDGLWLWGFTDRHTWVTQFYSEDEPLVFD  
ESYGRKEAYYGLRDALSSIARGGTVGAHVALDSDEDEDGNRWGHAWMPPLLEEEETRSSF  
LDQYGDDITGDQRPDWEV

>comp5483\_c0\_seq4; 329 1 1649 LEN=1771; translated  
QALVCTGTIARGLPKGFSEARAQTSIRSVSSLPKRKKDIPTKQRKMYEDGIDGDSLREVV  
ATAIKRIDIGTAVLPEPLFCSDTDQADSGPGSEGYELLGGETSSGRNSHRDSNREGRAPD  
ELHATSSSTLYARTLRSEFNALVVEHHLKWAPMCVSEPGPFVDGSLSTRLGRYDFHHADA  
IVDWGIRYNMVVKGHVLVWHVTSPLLEDLEPEEVREQLRRHIFFTMMGHFRGRIRVWDVV  
NEALAPDGSNVKLHNSPWNRLQEVQYDAYKRYVQXDAELILSIEYSDLISIACTFLG  
SLAENVFFRKLGPYIEECFRWAHEADPDAVLLYNDNKVEGMNGPNKQKADGFYRLLAGL  
VKKGVPVHGCGIQAHFNAAGTGRNRVPTPRMVKNQIHRLLGKLGKLVNISEMDVRVSKLAP  
ELRQIAQRQIYHDI IAAALTEPAFDGLWLWGFTDRHTWVTQFYSEDEPLVFDSESYGRKEA  
YYGLRDALSSIARGGTVGAHVALDSDEDEDGNRWGHAWMPPLLEEEETRSSF LDQYGDDIT  
GDQRPDWEV

>comp5484\_c0\_seq1; 919 186 2105 LEN=2704; translated  
MLQYDNSAFYFFALSFITIYLVP SWIYIAKSFKKVLFADDASIGAVSRTSAEKAKADALK  
KDSGISKLFKSRKFLYNFVITIACTILFFWLLFSVKEDGIVNSFDPFNILEIDSGADTKT  
IKKAYRTL SLKYHPDKNPGNREAEAKFMMVSKAYESLTNEESRENWEKYGNPDGKQSLE  
SIGLPNFL LQTQYRNLV LVVYLI F MVGII PFCVWYTYSDSSKFGEKDIMYDTYSWFHNTL  
NEHTLVKWLPEVMAASAEFRNHNVPKTAEDKKDVSQVMGLVKTNMQPKHSLPAIVKSNV  
LLHAHLMRKSDQIESEQLQDDLNRLRLSTSLNDAMI AVCKHQDHMQTAMNCIEFGQYLT  
QAMVVKDSSLLQLPHFTEEEVKHAEKKGKGAANIVEYRDQDDQKKGMAFTFTEEQSDVL  
NYLKMIPDIDVQTKVYVDDDEDSNVYEGDLCTVNVMLTRKNLEKGEKAGLIHAPYFPFK  
QEAWWIILGTKEGKI IHIEKVVDPSRVVEHEIKFLAPRVGEYEFDLFVKSNAYVGLDQH  
KIKLTTLDNSVLPFKVHPDDAELDDEPTLFEEMLANVEDDSDDDSDDDSDDDDEP  
DEAIPAKSEADMKKDR LKNARNQDDSDSDDDAEVYAD

>comp5486\_c0\_seq1; 293 66 419 LEN=724; translated  
MKFIATIAASLLVATQGFIAAPTASMTSLRMSDDQATATGVTGKVKFFSDKGF GF IAPD  
NGGEDV FVHFSAINKDGFKSLNDEETVTFDIEYDDER GKYRASNVNGNGDGIQKERW

>comp5487\_c0\_seq1; 327 175 1005 LEN=1089; translated  
MSGQSKSRKLCFELLCSLWFVSVLSHTRPIHGFAAVANRPRPGSSSSLSAYQKVFVAG  
GSRGVGHAVVEKLSERGTEVVAVLRREESAKELSSLPVKAVLGDALVQKDVENAMDGCD  
AAITTLGGTTDDRRVDYEGNNNVIESAGILGVQRILLVTSVCGGSSKAAAPPHVFEILRD  
VLSAKEKAENVLIEWYTN SNWSIIRPGGLVSEPATGEAVLTEDTTAIGSIHREDVADLVV

RAMDSPRTERRVLTAVDPSIASQVAVEGKEIPAFEL  
>comp5487\_c0\_seq2; 338 175 1290 LEN=1374; translated  
MSGQSKSRRKLCFELLCSLWFVSVLSHTRPIHGFAAVANRPRPGSSSSSL SAYQKVFVAG  
GSRGVGHAVVEKLSERGTEVVVALVRREESAKELSSLPGVKAVLGDALVQKDVENAMDGCD  
AAITTLGGTTDDRRVDYEGNNNVIESAGILGVQRILLVTSVWQVTAARMRANRVVLLFW  
AAQRGVVVWCGAVWRWPNAGYRESGTIPLLFLLTTFSSFCGLSNRWIRPRWSARNAIQ  
SNAIQSNTMPCCHARSRHSGSSKAAAPPHVFEILRDVLSAKEKAENVLIEWYTNSNWSIIR  
PGGLVSEPATGEAVLTEDTTAIGSIHREDVADLVV RAMDSPRTERRVLTAVDPSIASQVA  
VEGKEIPAFEL  
>comp5488\_c0\_seq1; 330 1 2000 LEN=2361; translated  
GDYNIPKIRINIKRIYLIHDTNXEIHSEGNILTMEKDNNKNCSHLEITDGMVDVELAKEL  
LGMSVDDRNKLHEEIHGVRQCQAVKETPELIERSLLEFDVELNKIAKKNQKSSSDENAYM  
IMLSRRRELLQDQDGNVQKNHYALDDPAFRMRFLRCELFMARKAAERFWKYLN FVVEQWG  
EIALDRPVCMEDLMNNKEHRKYLKRGHMQILPFRDRSGRRVLVHLGNALRGVDP IVLSKV  
IFFLYDSCTRDCIESQQAGIVVNEFQSWDINVAKFFSMEALGMMTRSLECLPTRLVTQH  
MCVSNTPGSRMIVDLFFLHG YRDKR TKVNMLFHRG SVQETRYSVRSYGIPTQLFPM TATG  
NIKL VYLNQWIKTRLILEQQEHIQR LKLGTESY LK GKDKSGQQEQSTLANHVDNTS IDGN  
EDPNNIPMEIEQKKSAREDRQVIVECPCLNDVVFRQGTPSWGNPGNATFRQLMLDHF AKQ  
ELLKRNTNEGCTSESDDCVLKNANSNAHANDNLVFCDWLMDEIEVKRGG RFLGWDKERVA  
WVQMKTDQEKQLAKIRQKVFIAIYNCGRNFNSALHLPVQNNVIGQLRSSSRNDNLNTTT  
HTTKANRPAKHLTMDNSYGNR GDSGDES LQYQFLNEGKRASPPNGTFCLSVCKRASKMPK  
KSGNHP  
>comp5488\_c0\_seq2; 330 1 2000 LEN=2177; translated  
GDYNIPKIRINIKRIYLIHDTNXEIHSEGNILTMEKDNNKNCSHLEITDGMVDVELAKEL  
LGMSVDDRNKLHEEIHGVRQCQAVKETPELIERSLLEFDVELNKIAKKNQKSSSDENAYM  
IMLSRRRELLQDQDGNVQKNHYALDDPAFRMRFLRCELFMARKAAERFWKYLN FVVEQWG  
EIALDRPVCMEDLMNNKEHRKYLKRGHMQILPFRDRSGRRVLVHLGNALRGVDP IVLSKV  
IFFLYDSCTRDCIESQQAGIVVNEFQSWDINVAKFFSMEALGMMTRSLECLPTRLVTQH  
MCVSNTPGSRMIVDLFFLHG YRDKR TKVNMLFHRG SVQETRYSVRSYGIPTQLFPM TATG  
NIKL VYLNQWIKTRLILEQQEHIQR LKLGTESY LK GKDKSGQQEQSTLANHVDNTS IDGN  
EDPNNIPMEIEQKKSAREDRQVIVECPCLNDVVFRQGTPSWGNPGNATFRQLMLDHF AKQ  
ELLKRNTNEGCTSESDDCVLKNANSNAHANDNLVFCDWLMDEIEVKRGG RFLGWDKERVA  
WVQMKTDQEKQLAKIRQKVFIAIYNCGRNFNSALHLPVQNNVIGQLRSSSRNDNLNTTT  
HTTKANRPAKHLTMDNSYGNR GDSGDES LQYQFLNEGKRASPPNGTFCLSVCKRASKMPK  
KSGNHP  
>comp5490\_c0\_seq1; 285 123 833 LEN=985; translated  
MLYSVILPTYNERENLP I IYYLIDKSFNDAKLSYEVVIVDDSSPDDTLGVARAIQKSYGE  
DHSVQIVSRKGLGLGTAYIAGLKAAGDRIVLMDADLSHHPKFI PQMVDLMDKTKVEIVT  
GTRYARGGGVYGWDMKRKLT SKGANFLADFLNPGVSDLTGSFRLYERKVLEQILPEIRC  
KGYAFQMEIIVRSK KAGFRVDEVPITFVDRIYGESKLGTK E IIMYIQGLMQLFFTT  
>comp5490\_c0\_seq2; 222 123 563 LEN=684; translated  
MLYSVILPTYNERENLP I IYYLIDKSFNDAKLSYEVVIVDDSSPDDTLGVARAIQKSYGE  
DHSVQIVSRKGLGLGTAYIAGLKAAGDRIVLMDADLSHHPKFI PQMVDLMDKTKVEIVT  
GTRYARGGGVYGWDMKRKLT RYVELCW  
>comp5491\_c0\_seq1; 94 1 638 LEN=638; minus strand; translated  
XAGLGS GIKSVTKGTVAGIASLIAQPMV GAKQGGVAGFFTG LATGVASCVALPATGVCVG  
AYQVGRGVYNSAEAISSSNKGMVWDEKKENGIT TIVKDRTY YDLMGVPTNASQGEIKKAY  
YVKARKCHPDKNPGDPTAANRFQELGHAYQVLAN DQSRAAYDRDGLSINDDKNQKLHMSD  
IDPYIFFAVMFGADSVKPYIGELWIADKAEMFL  
>comp5492\_c0\_seq1; 275 48 1280 LEN=2508; translated  
MSNNTNRHNTKLLFLALFLVLSLGLVLSQSIPHTSEQAVAS PQPNENNTSTENTQLVYLE  
REQTF AAPP RRVDVTRLPGIFPRGARS LYKTDLDWIALRGISPWKVRVRSGLKFVFGGGLS  
QLLRVTRAFYFRSIPATIYDARA KEAEGLTKAEFFERYGFVVLNHTSAMESD WSES DR  
NIAALLGAYGNRSKDGSSYQAIIDDFRNGDTPVKRIYAKETTDLLRSILPRAKNVMGPS  
RGIRRYPTNNLNKGF AKQVHNDYGLDFDAVVERNPFDFG SQKALYEEKQADEYMLVNLW  
RPIKPMSSSELRSFPLCFLDPTTLQEGDFVEVDSASLG VVTALKENPEHRFYYPDMTV  
NEVVVFKQFHQLRIETSARMPVFHTAFADPAADETTEDRV SF EYRVGILL  
>comp5493\_c0\_seq1; 394 146 1000 LEN=1109; translated  
MPKAKRNASLNRVARRRGVALENLPSQETRKKNESGGGVSNDKKFEKATPSVDQKKLIVD  
KSNVQEGIQKNTANKDSSINQPDIPPKQQLSRGQRKRLAKREQFLKKEKMILSSMLQR

QEEQKKRIDGLDAIKQALMDTSFNGRNQSSISIKPPTQHVSTNKAKRKLVAKEVEHMNLI  
LQHPAFKNNPFETMQEHLRNTLAEERKQOEILSRKRSEEEKQKNEAKKSIKKKSQKKNTN  
HGELDECGHFILQAVYGVDTFSATKILINFRIIQHSFVIGYTKF  
>comp5494\_c0\_seq1; 389 79 1749 LEN=2388; translated  
MKNPYHGGNFRGDIQHNNGSASASKSVAFLRWTFVGLSVACFVQISYQQHLRVSSGYGD  
LSQSPLRNSAGADPDVPPVRGNARSIYKNDGSATKNLPPIPRFVVDPLFKAEQDRIDSAAD  
EETRCKQYGVPLPRDSKSRQRRIFFGSMLANENPEVIVAHAEAYNKYDVVALVESNTT  
HFATPRTMNFGPGSISVRTLQSESELFGRNTTKVVVDYWLEDEPDLKMSREVEQRNTIW  
KIWLKEGMAPWDVGMADLDEVTSRDFLNALRVCDPFLRYDADHRPSCQTPKMALSTMQ  
FESTPLCVKEWEWFHPDLIAGHCILGVGDPQGRATPERDITVGGDRRIPAGNRKKGWSND  
YKKYPEDVLSNDRFPLWDGRDIREINGNEDNLVNFDRPFREGMGDTAVYGTAYHLHNWFK  
DLTVLRHKYATYGHANPDAGKKTLSNIQGDLMLVRCRGLGNNPALEIGKLPDDGYPPY  
TSNRLLSLEESQKRREVGSNDSAIRTNANHMFSLGGNRPFFQNRTYVLERHALVQKLR  
DDEQRFGLSKDPHNK  
>comp5496\_c0\_seq1; 416 156 1358 LEN=1456; translated  
MTAFSLTLTLRCLTVQSWVLLPQRALKSRLGGTMKPRMALNGNIKKPTPSILSMVSTS  
ATSINGNGVSKEDRALLARALEHAKLGFHTFPNPAVGCLLVREDTGGIIGSGFHPRAG  
SPHAEIFALLEAAGHVESGIAAAKNVLHGDDVGEENLQELIDTYKGTSEDDAISDGPEKLF  
GNAFADIPVTAYVTLPEPCCHYGKTPPCAASLALAKVNRVVVGFDPNPRVDGGGVKVLQD  
AGIDVDMADKGCARIVDSFVKRILPKNYDSENYSHVTGQMRRALRKMAGQQKMENTLQQ  
VGWSAKSKATTEDAVDELVLPEWIEHLDALLWQEELVNIRLNKAVGKKLAKQLGNRIA  
STLGAHVAQVVGHTVLLYRPGIRPVLDLEELVRTQNVDDDE  
>comp5497\_c0\_seq2; 460 58 1801 LEN=1801; translated  
MSFATATMLQLLIVAALSLSIVEGDEATDASVGLTTVVSASQVRDWNERSYEHFRTEY  
RETGCVEFLGDFPVLTAEEEDSFGAHNSILTRGRSLQMSMDDTSGGMMSCSYMLYDLGRLA  
ARKKSSGVAAGKAQATAGADCVGGYAGIYPCENVDLVGFVVDLPLPRSGEPANAANDV  
WGWTSSTDREFAIWGTTEGTFVVEIMDSPSNPYFVWGFMESEEDGSALQORDIKVIGDTAYV  
GAEKDNHGIQIFDLNRLNLMVRSDCSSPACQSLAPDHVYRFGFSDVIGNSHNIVANEESG  
YLYFVGSRQGCNGGLHIVSINDNPLDPKFVGCFGDDGYVHDAHCVKYRGPDDRYQGRDIC  
FCFNESVVTIVDVTESNFEILSRADYKQTYGTHQGWLSSDHKHVVFGDETDLQAVWGG  
REPRVRTMILNVENLSSPKNYRERFGKATIDHNQYIRKANAAGLNYNENNDLIFQANYEA  
GLTILQAINYDEGLREVGSFDTFLYGGEDPYFSGAWSTFPYFSSGLLILISSLREGLFIV  
KPNLGDALVTSEQPIESPSKPPSKPPTKQPSQPPTQSPVTVX  
>comp5498\_c0\_seq1; 163 1 328 LEN=555; translated  
XEEEEDEEMISLEEASMDMFLSEGWKEARSNYDPSNTATKKRQEEEQGNLIGTVAKLAG  
GILALVLFSQLIPVQEDLSKYSSIKSGPATTTIDLGD TNKVKGQTMGDL  
>comp5499\_c0\_seq1; 308 97 1143 LEN=1873; translated  
MKGGIILLAFSLTAFFVEKGGAFVVFVAPQSIRSPLPSGEGMPTSRHFAILGDGDTDNGAD  
FPDDDSGLAMFMSASLNSRLKEVQEEESKLPLVVLDSMLPRQVLELQINNDLLIELVRDC  
LKRESPPFFGMLGIARLAGGQQVHLTRGVEVEILEDKQLQFLPEGQGVKMALRATDRRFEIQ  
KGGIESIGGEDGYTVAKVDFLDSAQEEAEIQAIRRDENYVADTEEYDRMSVARAIMKA  
KEFTSPNVNMAKNLSLVDRWIELARERERSSGQIDQILNDLGIKIPADQPSEAFWVGAL  
INPIPAMGVSLAIRPALLTAKKAEQRVEVALNGLLRSIKYMEGSASLV  
>comp5500\_c0\_seq1; 213 177 1061 LEN=1193; translated  
MPKAHHRHQHTIGGRSPCSGPIPSETSNDGSLPFSSSPRKVSFEDNRSDSKSSICSDDTV  
LMENNKGKQISEGTESGREQLPSTRRKRSLLVRPITSLSLVDLARSMEVEDDGSMTSGQD  
GTDRLERKSKRIRSFSLSPRSVISNSDISNAHQDHRLWSPSASVVEESESIKKSPWGHF  
IDMVPNEDSNYRTSTHPNFSNMLKSYRRIPSQNLMGGLQHRSLRRSIPYCESEDYRPRRT  
QHATPSFIGLKTDSHLVNIMSETKNNFRLTPRSPNTKKGQQADRLIGVFSDLQL  
>comp5501\_c0\_seq1; 198 1 677 LEN=1055; translated  
FLQPKNESYRIGNRNRNRADSSSTIRIKMSNSRIALFGXFPGLLSTVLATGIEALSFSIDL  
VRESTKNHLHSRRHFVGMASAFVAAAPLVSPAVSYAVQEGNAKERFVAARKELRSLIDD  
YAEISKGGDAVRARLGTQGISSDLFGIQKVLKTLSEEADDLVEYTEMMEEFDAYYFQAE  
GAAYQSMFVEHSSAKGTPESFLKTAKTDILQMEKYMDQLAVQLKL  
>comp5502\_c0\_seq1; 636 441 2165 LEN=2423; translated  
MGNALHRATDRCSIALEAATSTPTGTVAVAAGALVSAGMVAKNRKRICKSVCEDLPLYFL  
TYHRSTVVTVFGLPLSLLWNFAMNARSKYIHTFHSAPHLHNDRVATIQQKVRNRPKNAP  
ICTARPGWQSVLSYRNYKSKWNAIEMPLYDILEVDEGSMIVHVEPFVSIQQLTHALNPK  
GLTLFPVPEMDDLTVGGLINGTGIESSHKYGLFHEIITELELMLGDGSVVVATADNEYS  
DLFHAIPWSYGTLLALLSAKLRLLIPCKQYVRLTYTPHRTREGYVEHMRELSGEYNKEVEN

GRKNTVPVPMFVEGLAYSLES AVVMAGDFVDAKDVPRGSANRISLWVKPWFYKHKVEKILNE  
GEETVEYIPLLDYYHRHTQSLFWEMELMIPIGNHPVFRWLLGWLMPKVSFLKISQTELT  
RKLTERTHVAQDFLVPTRKMFDFLAICDEDFDRIYPLWLCLHDHAPMPGSLKDPVAVPKP  
SNGHEMYIDIGVYGLPRCVHEKREEDFDMKRSMRAVLKLLVDMNGFQMLYADVFFFTREEF  
EGMFDHTGYKKLRKYKADGGAFKEVYDKMNILL  
>comp5503\_c0\_seq1; 365 171 1187 LEN=1413; translated  
MSYNTSGNLRNDGTF TAAGKGVKCIPTKDKNLQFKKLKAIQSNQVCFDCPAPRPTWASVT  
YGVFLCLDCSATHRNMVHTTFVRSVDLDEWTQRQIDAMRLGGNANARKYFRSHGLTDMH  
GKIEKKYTGAARAYRAELDKQLDIAAAKRGEEETASGAVASTGGLENLSLQDQQKAAAV  
SQTAVVKPVAVAVPTAKKASELAGAKGKLVVTPSSGNLLRKPTTSLKTGSLGMLRKPVG  
KTMNTKMLLKKPSGGTTSNVKLRNLKLPVDDKMTGFDDMEEKPAIPAPATAPKPIVAVPV  
APVAVVEVKKEPPKPKLSAMQSGVSRMQSMNSDFFSGI  
>comp5503\_c0\_seq2; 365 159 1175 LEN=1401; translated  
MSYNTSGNLRNDGTF TAAGKGVKCIPTKDKNLQFKKLKAIQSNQVCFDCPAPRPTWASVT  
YGVFLCLDCSATHRNMVHTTFVRSVDLDEWTQRQIDAMRLGGNANARKYFRSHGLTDMH  
GKIEKKYTGAARAYRAELDKQLDIAAAKRGEEETASGAVASTGGLENLSLQDQQKAAAV  
SQTAVVKPVAVAVPTAKKASELAGAKGKLVVTPSSGNLLRKPTTSLKTGSLGMLRKPVG  
KTMNTKMLLKKPSGGTTSNVKLRNLKLPVDDKMTGFDDMEEKPAIPAPATAPKPIVAVPV  
APVAVVEVKKEPPKPKLSAMQSGVSRMQSMNSDFFSGI  
>comp5504\_c0\_seq1; 320 90 1139 LEN=1449; translated  
MTTRITLFFALTIGRCLSFQNFQMPNFPWSGNGGEGKGLLKT TNGGILQPGDTVAVVGAS  
GNVGLLVALRLSDTYKVNIGIVRNADSVKPFEGREDSISL FETDLLEEVTSTSKPETLSC  
PDSLYPALCDANAIVI CTGTTAFPTKAWRSRGEFSVTSEVINALLDSKFDVREALNQLDA  
KGLNTPRNVDNLSNKLVLDAWKASSKVSRAIMLSSIGVTRRESMPFPILNACGVLDK  
AAGEQALMDSASEDGF SYTIVRPGQLFGGPPYDNNYYLGT LFLQDKDSETQDVNLGKGDIL  
LGDTLRSTLAEVTAQLMEGNSARDVDFAVVNVKGDAPTADSVNEKLVAL  
>comp5508\_c0\_seq1; 251 1 892 LEN=1340; translated  
XEELSSVPDTSKDKHQPTAEVQRRGQEELPPLSADAI SGIKRRLWEETANGLGKVVRNLR  
VAWYKGDERVYFKREEQOLEKYLPLFQYGLALFVFSFFNF RATKTTPRFQKWRGTGFLERIR  
PSPPELSKASQQRQGLRQVSSIKSPPTVGYLERKRKQNVDEALNSMKYFTDFLVLSLSIG  
TSATLFLLEKCGNNLR TDFFEEAPLVAGRSLIADKICPGMLEL CFSDLQVRKAFEDNQ  
KDRPWEASSFDPNLHTFFIFINNCQKRKDYESSLRQQMQQATTLKSGAILIPHTGVQ  
>comp5509\_c0\_seq1; 561 209 1711 LEN=1939; translated  
MMKLKTGNPERLFLFCFFWSFCSVNI FVYVIAIAQTNLFRGFKTGKEDATGAIDDVPLT TTL  
SNGVVVPLAGLVGNLQRNLVETS IHEALKDDHRIRLFDTSHAAGNEREVAKGITTGVKA  
LKDERESLGEEDRKKKI QVHVVTKIWYTHLGYQRTKLAVEE ILENFEEAINDPNVDLKL  
TLIIHWPKCFDEIPWМКCKEEDRLPERIKNAGPPPHLDDNAWKESWVALEDLYDAHNSV  
DNNKNDSSSVIAAIGISNFDRASFETLLSFARIRPHVNQIN VWGLLHNKWMIDLMNEAN  
VHMQVFNVMGMIRHVYENPKAHHLLMIANRVHQYIQDSVSVAAEENSGRTLEKVFV  
QLMLKWFVQSGISVIPRTSKFKHLDQNSAVLSMIPDL DDEETEVS RAMVALIENEDFE  
DDVLLQVRFHATVADMFLYWVPDEGDVEKQVAFIEKGS SYEESAHPGHVFKVYQAYDPDQ  
VRTYSIGGHYGD TQDIHVEL  
>comp5510\_c0\_seq1; 318 959 2164 LEN=2472; translated  
MEANGLTRC SLPYSFESPVVCDEMITDDGASASTPPSRDPAAMTTDAMPPAPISPCGSPK  
RYS PFSVSSLNDQVARYCSNECVQRRCGTAAMRTVCNNVAVAQTRVRQIEDHLVAGQQQG  
HGSPPSLRDQLFAEKIRLIDALVVMGWEHYRCFLEESECFEKAEAAVRHIYEEALELSVE  
LFC SAPPATGTSIANNRMLMLLLTLD FDEYCESLLGYQLARESTSASLTADSNGADAAA  
GVRGADGR LAEILKPAAQGNAYLQQVHELWKTGA FERFDVAASHEEEHLAKIHAAGLCL  
VLF RKLEYKQTDLKATERQFRYLFDEYLPRLAQP SMNNI IATKHARILFQDGTPTVYWS  
LLADSYRKEWA EHLEGYGSGAAEELFDM DMEDEDEDDEDGL  
>comp5510\_c0\_seq2; 318 591 1796 LEN=2104; translated  
MEANGLTRC SLPYSFESPVVCDEMITDDGASASTPPSRDPAAMTTDAMPPAPISPCGSPK  
RYS PFSVSSLNDQVARYCSNECVQRRCGTAAMRTVCNNVAVAQTRVRQIEDHLVAGQQQG  
HGSPPSLRDQLFAEKIRLIDALVVMGWEHYRCFLEESECFEKAEAAVRHIYEEALELSVE  
LFC SAPPATGTSIANNRMLMLLLTLD FDEYCESLLGYQLARESTSASLTADSNGADAAA  
GVRGADGR LAEILKPAAQGNAYLQQVHELWKTGA FERFDVAASHEEEHLAKIHAAGLCL  
VLF RKLEYKQTDLKATERQFRYLFDEYLPRLAQP SMNNI IATKHARILFQDGTPTVYWS  
LLADSYRKEWA EHLEGYGSGAAEELFDM DMEDEDEDDEDDEDGL  
>comp5511\_c0\_seq1; 550 40 1239 LEN=1897; translated  
MAATIPPTCDNDGDTVLVHLVLTGASGYLGQHLLSQWITKGLGLEEEESPAPNRKYKTK

ITALYNRSEGFPGAVESFCSSKSNKSGRGSVDVAVRSIDL TNADDVRSFVSESSLLAEDS  
SPGHKTTVFNVVVHSAALSSPRVCQEDPDRARAVNVPRDFDAVLGTASASRRTAIVAL  
TDQVYDGTTRTEAFYTTETETKGLEPVNAYGQTKLEMEKLLLRGRDSDPMGDCFALRSSIIL  
GPPAPIDPGCAHGTFLDFCRSRGETETPTTFFFTNEYRSVVRVDRVLDTVRGIVVRRVLLG  
RSGDRGEKAAARVVYVMGGPCRVRHLDMARAVFDKFGYDPKLLLATDQTSPLDISMD  
SSLLFRHGILAGSDDKTQGLATESYLKALVDYAFDPGEEK  
>comp5513\_c0\_seq1; 448 170 1525 LEN=1715; translated  
MKIALTSYAIPTLLLLLLWGTTLILGFVSAEETCTTSNDCESEDSYCASSGTCLSVGACAEV  
SDCSDPTNQPFALVMCVGTMECREGMCGMKCGMDGDDRMACDANSTDPSVCGERAYCSSE  
GICTKIGSCAIADDCFHQNNVGFVALCFGNMECTSEKKCEMDCDGGSDAIMGCDTSEDC  
LGDDDYCSTEGICMENGSCNVVDDCSNLNNTYAMIECVGTLTCESNMCGKVCGFDFSASA  
GNASAVEAPAAFCTRDEDCLSLAPRERTGLFAPDETFEYFYCADGTQRQMGSCATSDC  
SNPANRLYQDKKCLGYLSCDVGTCDRICGQECLRGRPGRCANPCAADPATACPGAVSCI  
TDTCNCSCEAVYYGEAGNILAGCGSGETSVDQSAAPESGETSVDRSATAPDANDRVPT  
SVASSLESGAAVLGSLGALAAVAFVLLAC  
>comp5514\_c0\_seq1; 382 163 804 LEN=1062; translated  
MAKSKNAKKNHVSKHILKARQDDTATDDVDGKSSKSMKKKKGKTNSHIKHPDEISSYL  
TQWKASKSEDSSVRASSQWKFNKNTQSWMIRHMYEADKMPKSSFMLLLEYLEGLEGKTIK  
DRMRSDASRRRHRKEYCKHNPDENKKGGETEKGTEDEKGGDQAEKSSRAAVFTGDA  
ELEYEEAMWKKLNDHEKRRQYKRARKILDLMKN  
>comp5515\_c0\_seq1; 197 94 387 LEN=519; translated  
MTAEAEAKQLDSVTDVVKAEIDTAKAQEAIGLIRSKTNDDQQAALAAVTISRGDVELI  
VSELEVTTEVAERTLREVSLDAKGGNVVEALRVLIA  
>comp5516\_c0\_seq1; 254 1 791 LEN=791; translated  
XEQQLCFDRRRFTVRSRTILEFFGGIHPDPDCPHCSQDQSEMDYQHHLNRSFCHRPGE  
QLQQQSQVRNGMKRARDCCGGFPLVDAAFASDPSCEQASKRFKRTGHGGALGKRPHCDAGD  
RSGPLLHKSDDDEVSLTEEAQASPSAFPHHSTFIPREQHRHDQRDCQRGNAPVGPNDSSS  
SIRSTTATAASTNGVAHATDYQPMNSLLGNLHMMRQQQQRRRQMQGARVQTQAHNATTVH  
PQLQQRHHQQHHNYNHYYQQQQQ  
>comp5517\_c0\_seq1; 327 112 1113 LEN=1212; translated  
MGRFLSLGALYPFLAFPSIRALSTAAESAASKRLVQEPTWSDVAIKAADFTISQRQKL  
ADLGALDIQRPMKIVGTPLENNDNIDSESKINTNSKVTKTIHFQRHGQGFHNLCIDVWRE  
RGLPIDFDSTDPENPLIREFFLDPPLTETGRRQSMDDRIQCAALTPELVIVSPLLRCIQ  
TAKLSFVDHLP SRNGKIDPRSADYVPWVSHEGCREELGLLVGNKRRPVSDIVVDHPDIDF  
SAIEHDDDLWETYGVRRRETLQKSERIYAFLTEYVMNRTE DNIAIVCHSAYLFTLLNAV  
MDIESEELRYWFLTSEVRSMKVTFETNDDYRIQ  
>comp5518\_c0\_seq1; 423 258 2024 LEN=2135; translated  
MGNPRSKQPKKIALVGSTGGGTATLGHDTVTLVEMIRHHLGCIHAGADSSTITSTGNDE  
KALPPHPLVTLGTVLVFLVSLDSGAGFDSATGAEAEATLLFLADGGREMIVRDLDRINDTMR  
DFEKG IARDFQNNELHGIIGV SCKPSLV SSTLQAAAEMGAPLTGTGGSSSLSEAASAFEGL  
RLIGNAGGSVGTTPETKAVSFASAFASEWGLGYDPAAAGAAMRKRQTASQTNPSS TATA  
TPTSTTADRPTWKSVLNSCLPGFWGVMLLKRILRTPVGDWLP EGDRRAL EYAMEFHV L  
PMVCAVVMATSRRKVESVQMAALLAAAACRGSILGGLLSGWCAAILEERLLYASILRWKL  
PATFTNLLTGGLVGVV TATLMAPLSPYLGAATGKFRNLTA VYLWGSAGSSNDNDIHESL  
RLVFSLLGCLFCYGSKVGWYHSIFLPLILIE MELGDP SMLGALDVLALVLCAGVCLGL  
LVTGNGEDKGLARRGMTTNLLYGDFVEAYYPHAEKYPLVNAAGYAASALSSAILTTDCRS  
SAYLPFPAAVWLADDREAFLAASLIAFFIPFLGTVVNHTL FVRKRKSE  
>comp5518\_c0\_seq2; 217 147 557 LEN=668; translated  
MELGDP SMLGALDVLALVLCAGVCLGLLVTGNGEDKGLARRGMTTNLLYGDFVEAYYPH  
AEKYPLVNAAGYAASALSSAILTTDCRSSAYLPFPAAVWLADDREAFLAASLIAFFIPFL  
GTVVNHTL FVRKRKSE  
>comp5519\_c0\_seq2; 340 347 1042 LEN=1201; translated  
MITTTATRSQPFVVPATPNGMRPGNPNCSQRSVCLGSSSMIRSGPPSLSSSSLLSGIQT  
EMDTSMFLLPDNP LLSPLLIATVALVLLISAQSFINKMLEGDQGLGAF LSDGSGFNRSGF  
RPSNRGDDGGKDKDPLPWLKLPRLDFVEVAGQNELPPPDAANEMDEEERQRAYEELEGL  
RLRLNRELENVRKRRAQDGETSTGDDIAEARRLQTKLEGLMKLYGIEYETD  
>comp5520\_c0\_seq2; 304 73 1233 LEN=1961; translated  
MAGR NATL D LLSV ESSDSIARIDENPIPNAAIGIGNRPNRRRVSSFDISLLSDQSIRKRD  
LHEFSVHY SVSTSSWITRIVTFRGAAEENERRCLSFSFSKENEARKFGKAYSPPKMMVGS  
IRCFCCSAKFTSKCTS NYCKNCGVQICEKCSRQWGIRMIPKTYLGGLFNATSKTVRVCKS





AAEFTKAEMDLLKERNNGQPEKDTYEDITPKTSASVSDVDYGDADDSRSVSTHSMAPSIL  
SKLDADAI SVRDAVDARDGGPPLMEDDVKLVNYVSPGGTAHGNGYLEAVWSRLMAIADWD  
KEMKKYIGLAAHYSAQGILDEILGVVEIAAIGHFMGVPQANAYIIVGTVTGFTGTISTGF  
YECTGVLIPOAHGARNLMI GRYMQLGIFFYMTMLPGAIFWCFFTDRAVMFYGFDEATA  
EMGRKYFLATLPGYIEYGIDAVLFE LLNTVGYEKEYCTWFVTVISSLLHSGIVVGM LWWGVD  
DLFILGAVETVSGIICLIVNLA ILVNRGWLDPYWEGLFKTNGLRDWRVAVKNVINTALPLS  
VAWILTYGEWEIMTFYCRYMSDTGAEVAAWGLMGYLWSTFETLTDGFGDAAEVRVGFMRG  
AGQVRLARLSTDKALYVSFIVAVYATGILFVMAKYIPGWMTDPDPTLQRMIFDI IPLIGFG  
QVLMVWGMVAWAILGAQGRIRIATALEFFISWGIGAPIAAIFVFLFNYNIEGIIGALSIS  
YTI STNVYLYMLHTSDWENLSAVVVARSAEKGTYDEFYWDEL PDNIQDAAAELGYNKWI  
WESDDMEPVSDDKDDELTPAERKAASLLGYTRKTWDCEDNTE DRDDSSSSSESSDGESW  
KNLSKEAQSAAKTLGYTQAIWDNDGSPPTEEKDWDELSPTEQAAAKTLGYSEKKWNADDD  
DESDLSSDTPKPRKQTGNGNVLEQAFGSIRNACTFDSNSTC  
>comp5526\_c0\_seq2; 288 102 607 LEN=860; translated  
MSSTIGFGESDDMEPVSDDKDDELTPAERKAASLLGYTRKTWDCEDNTE DRDDSSSSSE  
SSDGE SWKNLSKEAQSAAKTLGYTQAIWDNDGSPPTEEKDWDELSPTEQAAAKTLGYSEK  
KWNADDDDES DLSSTPKPRKQTGNGNVLEQAFGSIRNACTFDSNSTC  
>comp5527\_c0\_seq1; 411 391 1467 LEN=1769; translated  
MAGGKATTAPKNTLVLSLALLLVQCCGKVAAGWGNYNNNNNQDYSIYGNVASRDWLVDGS  
SLSIQVLGCVWGVVYDSEEAGCLEDESEDGTYNWMANCRRPQVAYSVYASDSGSASCN  
SGTFVGSFMTTGVSEFLGNLEAYDQNFNYDDDNFNDEIPECYGGDNGYVGLDCSDGAF  
SLNYNDQYCMSRTGETYDELKGINNIMNNYKSCSSAGGGNNNGDGNSLIASLVYYSTPC  
QSYDYQLCTDDASFTARSNGVSSASGIPKSWSSVNGGGHHSWVTKLKYVIGGGFLLASFI  
MFTGILFTNRRRRRAMMMRKYRQAKKAKRDKGNRKSRSRSGSKRRSKSKGRDKSGDGVFT  
>comp5528\_c0\_seq1; 705 273 3087 LEN=3600; translated  
MKPFDVYLRRAQDPEWSPHYVDYASLKKTLRMFGKRRRKLQRGDLKWSTVLEEEPHAGGN  
QSYNHPDANGSDNDNNIIFGYTLQDISMGMNGNDTNE SRLRGCGGVFGGETKTERLSRI  
EHDDFKKALQAELDQASRWFQTCWIELQSSAAFTESNDETEEENTILKLYGFAVVICVL  
RQLLLRYNAHVRYDGMFLSEYEILQPPQSGNESSSLMVSEAEYERATDDDFSLKTVVPS  
LLASLEPLQDRMMLTPSYWMDSSVLKNVHQGGTPSSAKPAGTDPSSSTFRARADELEAL  
LDKTSWKQQTRQSPNKTERILQTI RYFYTMGTAQMGISMEPRFLFSQVRGFKKEMKALAL  
WRERPLDVADGIAYGDEGDEAIGAGMDPANVWPLVNLISCYLFMMNNYIIEPSSAYAN  
ALGSSDALSGIMMGMAPWFALTSAVGYSIWNTNTSYKQPI LFSGVLMVVGNTLYGAAYSQQ  
SMVMCLVGRGISGFGAPRIINRRYVADATPFLSRTMSSAAFALTALGAASGPGFAILLD  
MVPEFEFSLPFLGVQTFNGMTGPGFFMAVFWFFFTVLIVLTFREP NRSGLEELRQREAAA  
AKKKAEDDASAALRESFDGEGDRSFRDGAVTDDDDDDASSVGSLSVGSAMDESGVSKHS  
PLYCVRNMTRATALCMALIFMKRIALEVSKQRFTIHFFTPRKLCERFCVVRTTELNEKPT  
PLVFCLYFSTILSLGFSFPNLMASSELQSIGVSTSVITKNRYAWSIRNVGVLHLVNGIIV  
IPVSI FAGWLSQYREDRYLAMWFMGITSLGLLAMVDLTDLVDTE TSDSYNDHIPLSVGPV  
QYIAGSLVAFSGIEACESFVASLMSKCVPSALAVGTFNSGLLATLVGTGGRAVGD LFI  
TAMGLISIRNLLNLLIIPGLALMILSMFLLWRNYTIVAV  
>comp5528\_c0\_seq2; 726 273 2903 LEN=3416; translated  
MKPFDVYLRRAQDPEWSPHYVDYASLKKTLRMFGKRRRKLQRGDLKWSTVLEEEPHAGGN  
QSYNHPDANGSDNDNNIIFGYTLQDISMGMNGNDTNE SRLRGCGGVFGGETKTERLSRI  
EHDDFKKALQAELDQASRWFQTCWIELQSSAAFTESNDETEEENTILKLYGFAVVICVL  
RQLLLRYNAHVRYDGMFLSEYEILQPPQSGNESSSLMVSEAEYERATDDDFSLKTVVPS  
LLASLEPLQDRMMLTPSYWMDSSVLKNVHQGGTPSSAKPAGTDPSSSTFRARADELEAL  
LDKTSWKQQTRQSPNKTERILQTI RYFYTMGTAQMGISMEPRFLFSQVRGFKKEMKALAL  
WRERPLDVADGIAYGDEGDEAIGAGMDPANVWPLVNLISCYLFMMNNYIIEPSSAYAN  
ALGSSDALSGIMMGMAPWFALTSAVGYSIWNTNTSYKQPI LFSGVLMVVGNTLYGAAYSQQ  
SMVMCLVGRGISGFGAPRIINRRYVADATPFLSRTMSSAAFALTALGAASGPGFAILLD  
MVPEFEFSLPFLGVQTFNGMTGPGFFMAVFWFFFTVLIVLTFREP NRSGLEELRQREAAA  
AKKKAEDDASAALRESFDGEGDRSFRDGAVTDDDDDDASSVGSLSVGSAMDESGVSKHS  
PLYCVRNMTRATALCMALIFMKRIALESIVGSTSVITKNRYAWSIRNVGVLHLVNGIIVI  
PVSIFAGWLSQYREDRYLAMWFMGITSLGLLAMVDLTDLVDTE TSDSYNDHIPLSVGPVQ  
YIAGSLVAFSGIEACESFVASLMSKCVPSALAVGTFNSGLLATLVGTGGRAVGD LFI  
TAMGLISIRNLLNLLIIPGLALMILSMFLLWRNYTIVAV  
>comp5529\_c0\_seq1; 142 348 858 LEN=915; minus strand; translated  
MNPERCAYCNIVNTNCIVQRLPPVGGIVPKVLVAVLLFSQFRVPVHEELDVADRLLDVVG  
LADADHVLGRAPTLGGGHVDLDVVVPADMLDFRSAGPDDTVEEFRWDVDLLMNEPRMGDL



>comp5534\_c0\_seq1; 739 244 2021 LEN=2486; translated  
MTTKRLRASVLVVATTLSDFVHYSSSQTRCNGAGPAASDSAPLSSLELWPLGRGGFHD  
SGADSDSDSDGATQRTAVKELTAMASTAALAAALVFSPLAASAENELADKYGGKGFDS  
VDQNCLVDRCSVQAKACLADDPSCRKGLTCTAKCLGDNSCITGCFARFGNKNLNLLKCT  
IEDHDCIKIAILPGGADKPGEEPRAKATVANFDYKTMEGTWYKVVGFNPNYDCYACQRN  
TFALPATTKAEGASASASDTTLVAAYNNEPYMNMGVEFSMPHLLPDGSPPPPQVRESLA  
VFGKEDLRKKDSANAGLLSIGLNEYNTNEVMVFDDKGSETNIVLNKGKENEARYSRTAHS  
EGEMFGLSXVSFDL CVFSKWL DVGSDCFACDSLYGAI PNASCLSITFPPTPTFEWENWYV  
IGENDPGMPEFKFIYNGKTRQNTYDGA FVYSRSKTLPEPESMSRVYAI AKEAGMNP DQFC  
RIRNGCFDQQKEEPLFGPDKIGAPTSEPLRGLIASTKVSELLGVEAVSARDFNVQGLGLS  
QQLQPEPKAYDSGTNSNRPWYEVADYLENPHRHFEVMDSLRKPM DWSESPR

>comp5534\_c0\_seq2; 767 244 1887 LEN=2352; translated  
MTTKRLRASVLVVATTLSDFVHYSSSQTRCNGAGPAASDSAPLSSLELWPLGRGGFHD  
SGADSDSDSDGATQRTAVKELTAMASTAALAAALVFSPLAASAENELADKYGGKGFDS  
VDQNCLVDRCSVQAKACLADDPSCRKGLTCTAKCLGDNSCITGCFARFGNKNLNLLKCT  
IEDHDCIKIAILPGGADKPGEEPRAKATVANFDYKTMEGTWYKVVGFNPNYDCYACQRN  
TFALPATTKAEGASASASDTTLVAAYNNEPYMNMGVEFSMPHLLPDGSPPPPQVRESLA  
VFGKEDLRKKDSANAGLLSIGLNEYNTNEVMVFDDKGSETNIVLNKGKENEARYSRTAHS  
EGEMFGLKFWENWYVIGENDPGMPEFKFIYNGKTRQNTYDGA FVYSRSKTLPEPESMSRV  
YAI AKEAGMNP DQFCRIRNGCFDQQKEEPLFGPDKIGAPTSEPLRGLIASTKVSELLGVE  
AVSARDFNVQGLGLSQQ LQPEPKAYDSGTNSNRPWYEVADYLENPHRHFEVMDSLRKPM  
DWSESPR

>comp5535\_c0\_seq1; 580 374 2308 LEN=2695; translated  
MMAIDHSPNRKSKHHNGNLRHNSGPNEEEMVPGMLISPTGSCSTNSSEENNGRWSQNL  
SSSLRMQEKFASALSAKRRTSREKQKSNLHNEHQQRNNHYQASQISRSQKEVQNVNTNS  
SILMGAIEIKRQLSQDSPVGAARFDHRGSSIAARRRGDDWVRDSSGGTRLDRDDWDPWRT  
DSNDETCNDHNSGTGNERGVKNDDYDDTLRVLQQAHFIDKYNKPRSEEPSRALPSPATK  
KSETQNE DATRTTPRSYNCLVQRVSEMDSTFASSIGQGYLPKSLMRNLTCGQLNTTSD  
ATTKVEIKNEREDFANCNLDFLANLHVEEKNLNSIMKKFTEKQQLLPDESQCINYNPEAS  
KKGLPTGNPSRGTPGTSRSQPCRVTAAAIPEFKMISPRTAIHDELMEDPAYRHALKAGTL  
WQSLCSQHVRFPALWWDGQEP IGPPLGSTKKRKKPWSYLGRHRVQGDYKLNLSLIGNRGSS  
GRILLHLVVRDVVSGEPIED IACGCYHPNARGIRTTPDFNRIEDCRD VWIAHRRRVLTR  
SLLDADFDDNSL CSDSDNDEYSWTTIESLLRHQNKGV DASP LGAQGGKSCVTNTNLKAVF  
GSKPPVYTVFVPEGELFELFQNRLDGSI PASVALLRYYLR YRIG

>comp5536\_c0\_seq1; 262 167 622 LEN=1301; translated  
MVAVSDQLVWEVIKSNNSFLKKNRNGKTSRSGKIEFSSEKGNVKS LNRFKYSGLANTKVCD  
VVCTDDNKAELIVKTASKCATQPAK GKASIALNKSDFRKVESTIKKSTSDV FYRRDLEAA  
MLGKWTKVYQANKRANGVKKGVPPKMRGTL

>comp5537\_c0\_seq1; 563 1 2236 LEN=2450; translated  
XNAMSFIASIKRFTVDIPLTVLNGATAIGVITTTTALLLYWRSIEKHKEEFKSKLARS  
YRDPDSKSTKAIKILELHPDFVREHSSWQLKSLGQYLSLTLRFITEKTDDKSRSDGKNE  
ATEKESNSRLVQALERELYV LMAALLMKTLGETMGAVFLPVMGSGQAESII GAVSSKIVH  
YIMAQIILVDSRHTEDWDPTEDRAAMPLNVSEVIXVSELASVALMLDHETKPLGK LKQLET  
MKAQAQIILP TTAHCLNDP INRLIRPNNDLSTNPQICLTTIWCLRXXFVNLNQLT DGNQM  
SLSPLQWMQKGEIGYNPTYDTPITSGDEGTEQPPVLV PNPVVEEHFEKAIAGMEDRIRG  
SGATYDPSDRSHPEPVPINNTILPDLHMGWGD AKVTHTKREVL CNRLFVLLTKLSYNYE  
LRKTKKTDNIDDDSGEPYFVVQMDGKNCVFPDQFVEVLYDTGHSIEVCPRSTITTFGLAA  
CVKEKDGSWTNIPLAFFFRRTGYESSHRRPAYFHPLHGGIDLSIEGALVGNKDTGEPK  
DIQFYMAIEGMCGWQSNHNPDPVPIERVSTCDPYTREQALAAVRMSGIMGCTFNRI GTDM  
DLPFGGYGLVGCNDTAALIDRAVRGSTNMYPLLSTGRYLMHITRFLMAFHDTIAGADEH  
GAGAEGDGDCCCKTHQIASDTLRLVSAACSMESDIHCAPHGMAGAARRYSNYPRPFQIT  
DDSQSVMEIAREYEDLETTVQTNIP

>comp5537\_c0\_seq2; 634 1 2023 LEN=2237; translated  
XNAMSFIASIKRFTVDIPLTVLNGATAIGVITTTTALLLYWRSIEKHKEEFKSKLARS  
YRDPDSKSTKAIKILELHPDFVREHSSWQLKSLGQYLSLTLRFITEKTDDKSRSDGKNE  
ATEKESNSRLVQALERELYV LMAALLMKTLGETMGAVFLPVMGSGQAESII GAVSSKIVH  
YIMAQIILVDSRHTEDWDPTEDRAAMPLNVSEV ISFVNLNQLT DGNQMSLSPLQWMQKGE  
IGYNPTYDTPITSGDEGTEQPPVLV PNPVVEEHFEKAIAGMEDRIRGSGATYDPSDRSH  
PEPVPINNTILPDLHMGWGD AKVTHTKREVL CNRLFVLLTKLSYNYELR KTKKTDNIDD  
DSGEPYFVVQMDGKNCVFPDQFVEVLYDTGHSIEVCPRSTITTFGLAACVKEKDGSWTNI

PLAFFFRRTGYESSHRRPAYFHPLHGGIDLSIEGALVGNNKDTGEPRKCDIQFYMAIEGMC  
GWQSNHNPDPWIERVSTCDPYTREQALAAVRMSGIMGCTFNRI GTDMDLPPGGYGVLVG  
CNDTAALIDRAVRGSTNMYPLLS TGRYLMHITRFLMAFHDTIAGADEHGAGAEGDGDCK  
THQIASDTLRLVSAACSMESDIHCAPHGMAGAARRYRSNYPRPFQITDDSQSVMEIAR  
EYEDLETTVQTNIP

>comp5538\_c0\_seq1; 880 335 2008 LEN=2700; translated  
MSSPNITTTIDATTTVMATVVVPPSPIEDVTEEAATKTHEETPEEREQRILTLTMLARQLE  
YYFSAANLSRDTYLS TLRDLNDSYVPVSI IANFGKVQALVPYESA LEAVVVAATDHS DLL  
EIVELDEVGKKIKSSQEEKKDESETTTIIVAVGSI SQQP IPMSQIQPTEKTKQVSNEESP  
TGSSPSSTANSQLASTVASAGVQNTI ILRDVAEDMEEKTLRDLFNFEGCPSVETVREDLH  
NCWFVTLDTESKDDMFVMMKLR TTKYPSGDSVKARLKS SASANSSSTPTPNIVFNPN I  
STMFSPQFSNNGNMTANSNSNGNHSRKKRSSNNKGRSSSSAGTNTNNKPKSNQQSMSGT  
SKRRNGKDESSLGRPPFPPTAGVKVAGNNSKKIQSKPPSMGESNFP SLPLSTDGNSKPCQ  
VEKVPTDHEMMRGCEKERNASGFSDSSSTATTSTASTPTEAPPSGVVSGGYAAALLKPA A  
PTPVSVKQKETKVVSQQQSVDKGKESKKKDNKSKDVKLSTKNVPSSESISVDLPAVSV  
QPPAWGKGRSFADIVSA

>comp5538\_c0\_seq2; 413 335 1075 LEN=1101; translated  
MSSPNITTTIDATTTVMATVVVPPSPIEDVTEEAATKTHEETPEEREQRILTLTMLARQLE  
YYFSAANLSRDTYLS TLRDLNDSYVPVSI IANFGKVQALVPYESA LEAVVVAATDHS DLL  
EIVELDEVGKKIKSSQEEKKDESETTTIIVAVGSI SQQP IPMSQIQPTEKTKQVSNEESP  
TGSSPSSTANSQLASTVASAGVQNTI ILRDVAEDMEEKTLRDLFNFEGCPSVETVREDLH  
NCWYVNW

>comp5539\_c0\_seq1; 634 69 1358 LEN=1389; translated  
MADSSSCGGQEAATNLVPENDTLPPETPTKEDWEVQRDDHKQSADQAFRARGFKTAIDQY  
TKALS LDPEFVVLYSNRSAAYLANGESSKALKDARKCLELDASFTKGHSRLAAALMALKR  
YEQAKASYQHVKLEKDPKNA AATRGIELCAKEITKRMTLEEQKRQEEKREKKEEAKKAEAA  
AAAKEEDDDDLLNGFFDEVEEVVAKKKEVTVPSNNAIRNDRET LGSTQQQIERLLQPRYE  
WRNLN PYYVLQ LPAATSTDDDISRRYKALSLLLHPDKNRSTLSTEADRDRAQLAYDQVQK  
AKTILADASKKRYTQSLVEEGMKNGEARWKREQHQN HKGKGSVSSGNETLESIQEKEVM  
RIFAQVEAKRKDMEERERKFEQREQQQEDDQLEKERRERKFNKQWKNQDRVDKRVGNWRD  
FDAKKRKKL

>comp5540\_c0\_seq1; 370 261 1304 LEN=1397; translated  
MSDFKRAKLDDSVSTKVI GTHSGSFQADEAMGCFLLRQLPEYRLSKIVRSRDPKVLETCD  
IVIDVGGVYDHEKKRYDHHQRDYDERFDSGKEGLTDGRCTKLSASGLVYRHYGKEVIKAY  
YPNLSGEHLDLVYTKIYDSLLEALDAIDTGVEMSTTELVYRD TTGLSSRVARLNPRWNEV  
NENGEPEYDERFMKASNL CGEDFLAVMTKIVESDLPAREVVEKAVLARLETDP SGEIIC  
FPTGGLPWKGHLYELEKLHKVEPLIKFVLYTDQGGMWRVQAVTVEGKAFENRSLSP EEW  
GVRDEDLEKLTNIKGRFVHAAGFIGGNTYFEGALEMARIALQSSK

>comp5541\_c0\_seq1; 1402 234 5003 LEN=5187; translated  
MASNVLCGQAGLLQLPPVRKSKSGDKPVC SMLADAKLHPYL RVDRKKLKS DSRTGIEVFK  
ISKNGKLQARRLGISPDNRCLLVTTNRVNSFKSFLKVATGNTHDPSSTKVIDVSRIDRLI  
KGQLSKRFLMENHHSDDLAAGGGTHS QSNSEAFLEQHEATSITIVYRQTRAERLSSLSLS  
SATEAGDASYGGRIGSSI SGGLNKTVNMNASVSGDESTIASRSIKSKGQSKGHGKAPVES  
CAYYGGECLDLCITDPKDFQQLVETLEELMELYKKERRWERSVLLYQHHRIDMGR TDV  
SDPISP GDWISLCDRLNAPLRRPEIKSLYKDMQNELKRACKELGTELDFLDSGLPPWA VA  
ELLKDLHFQSTTAMGLKYTKQDPTLRLWHEILDSDPVPILNKDGSKNMMDTKMINQSAST  
DTTISPVALLSFIRSQQEFKASLEDATEI IKA VKAQKSFKHLAAETGDAGNGNPNP GGA  
GDGRLTKDEFMNFLLS DTNDLMDPRKGVNADDMTHPLSSYWIMSSHDTYLD CWNPDHIV  
LDEQMYLAALYRGVKCLELDIFDDCSLAPKPIAREKPTSVDDPCI SVRVALRAIRQYLV  
TNENSFPIIVNIENHCSYEAQEK LADYIYEDLGSIGLIVVPDNGSIDSSDLLPSPASK  
GRVLMGKRPSIVEDGAKVINDDFDDENDV S IDEADFAIPNVKSE DGEDSERGIVVGFDA  
KGP IRVYNEREQNTIEHSPGELLYIAKQELETAELQAAQVEMKAI ALEEASLRVEKYAD  
ALIRNAGLSDEAVAELLQRLNGEDIDPDRHLD SLPRRDEGVEVEDFFADAVNSAKLTFAK  
ADQFALQAAEETNRALQQLNQATERLHEAEKLR ETSFVKGKR VVSKFQKA AKIAREKQEN  
AAHAHRRVEKLRQMLEECETGANSANNVNTAMTEAKISEKRAAETEARAARAAAIAQKD  
RARAEETRKEEILEQEAGLLHEKLE IARKEKEVRMEAQRCAATYEKLSKQIKLIENS R  
QFIEEEKMEGELSEENKEFLTKGGKVHSHKHA AKVEERN TISLRMDQMATEISEAAKLRTI  
SQDAFEKKAHEWKSQADTA AKFRRVVDKSSHAAEDLAEHAE EEREANLRKVARDRAQSH  
VTQKDSYKSSLEAQLAEAERHTVVADGEAVASRKEADRLAKANESYENSGFEDISAIIEG  
RKLTRTLLAEYEK KENQKAAEEKAAELKKEYETSDNVFSGAKQNSALHEKVLKNQRQE

DKNALLAVNSAKATRMKAQLALEEARYAQSVVSEKLVVVKRAEYKCLKTERVVEIPTQLA  
NMTFLHTLKQKYWERSLQLPSTHVHSFADCILDKLALKNKDSFVDNLKNFTSSHLCRTFR  
SWKDAEDSSQLNTDPLSQWSLGCQLVSLNFSTYDEHLQKADGRFRRNGSCGYTLKPEFLR  
SYDSIPERPESWKIHLVSGSYLPTPDSKQVGGNAMSYPNPFVKINVYGGDLGQRKGEHVT  
STVMMNGLNPVFDKMGFIFKATSPSLAILTFTVWDKAENGTEEFIGGSAMPLSCIREGY  
RSVPLFDKQNTTRGGAFAYACLLVKAKRMT  
>comp5542\_c0\_seq1; 185 358 645 LEN=680; translated  
MNSRLKLVKMSGKATLGYKXSMKCVKRGKAKLILVASNCPHLRKSEVEYMAMLAQVPVHH  
YSGDNIALGTACGKFFNCSVLTIIDGGSDILSQN  
>comp5542\_c0\_seq2; 217 85 408 LEN=443; translated  
MVSKKAKKQDNMNSRLKLVKMSGKATLGYKXSMKCVKRGKAKLILVASNCPHLRKSEVE  
YMAMLAQVPVHHYSGDNIALGTACGKFFNCSVLTIIDGGSDILSQN  
>comp5543\_c0\_seq1; 700 219 2789 LEN=3131; translated  
MPMITKKFTRGSLKRASSSGISLANDSEDPSKAEIIQLKTARARSKSMQNRNAMNQHRR  
HRSLSRDPQSRQPSADIGGQTIRNYSHPNDTYNQAFNEAELQTAMSSLTEPTWAPSDLGR  
SDVKPPTHHRQNQQMQRSRTGNYNNVRYTSRPQYKKNLRATVVTISTGKDQKETKILLLDN  
NDTRKSQEGIEASPIDPDEERNDEADDKTTTTGLDHLPTKPKAIRSSDLRDGVSSRDDAP  
STPKHDASSSRARSKTRRAGDQSSVSKTRGRSGRPSSDRKSLRRSSSVASRRSAHSTRTG  
STAPTVPSSSTASSQSRISRTKSKIRGVSTRKKNVNDNKSXSSTSRSSSVPTMSDSKRKQ  
RTLSPVPLDQKSDRKNNDNEFMDAILDITSEIVEDPAVMSVRSKSKQFHPPSFRSLVESPF  
DCRPTPSSAVEAARMRLRRLRRSSSNRSVSSIQSESIISMSTASRRQTEISGGNLQES  
HRSPQIIPASPSNSRYGSRSHKLAQDVHVKRIHERRQKKREEHEKERKRRQKNEEKQR  
KEARASALTNETDTEEPQYTTINTLLYDFLVFNLLLVLSFPQYLVSLWSRFTFSKQWSAR  
RKTVVVTGARSPLAAETARQYAAQGANLILISHSSTSVEDDLWLVVEECHQLGSSNVRSY  
SADLSKADSAEQTLQAAEDFNETFDVVILNGENKSHGCLFEEIIDVHEIEDMVKGNTIG  
CLTTLHYALKHIPKTSRIVILSSTSGLIASPYKSVYGATQHALKGFCDSSIRMELNSNY  
TERRAPKICYASFPELIGKNIHHQNCNIHISRMGAENPPMKTHSWAAIPLQKAVHDLLEA  
VALGERDYGSPRHVKAW  
>comp5544\_c0\_seq1; 255 58 762 LEN=1461; translated  
MSAKKYVAAVLGGSGSVGRHVNSILADPSCDQVLLVSRRELEDIKSMDPERVTVHVCDP  
LDDIATKDYLAGTNIACFTLGHGSSRKSTKDDLVRVDATIPGEFAKACKKAGVTHYCIMT  
AVGSDENARWSSLTKTAAGGGWYNHVKGLAERLTIEAGIPYTYVAQPGALLGSPHTPKIV  
EMIPNFILPAIYSSAHVKDIAGMVTTTANAYQEDKTVVKITGGIPISEGRAQ  
>comp5544\_c0\_seq2; 255 58 762 LEN=1224; translated  
MSAKKYVAAVLGGSGSVGRHVNSILADPSCDQVLLVSRRELEDIKSMDPERVTVHVCDP  
LDDIATKDYLAGTNIACFTLGHGSSRKSTKDDLVRVDATIPGEFAKACKKAGVTHYCIMT  
AVGSDENARWSSLTKTAAGGGWYNHVKGLAERLTIEAGIPYTYVAQPGALLGSPHTPKIV  
EMIPNFILPAIYSSAHVKDIAGMVTTTANAYQEDKTVVKITGGIPISEGRAQ  
>comp5545\_c0\_seq1; 305 187 1281 LEN=1363; translated  
MASSSRISTTRSAVVFAAFALAVAKLLLFRNNTGDGTAQGVAKVRHIESMYDESVRLYTD  
PYAKSMYQSSVVEWMGISMIDRLLDVSFPGILELLTLRTRKWIDDQIAIHVVGSDDETDS  
SADATAIPSCRQLIILGAGYDTRGFRDLDFPEGFVEIEVDQSPVQASKKRILEDIATNDH  
KVASRLKNGMVTFPVDFNNSDDDDVGGHSIGKGLGSFFSTEAGDQTMVVLLLEGVTQYIP  
KSATARTLQHELLPRGSVLLVSYVPQTVFDDDTDRVSRLVLKGASLVGEPWISVWTRQ  
GFASFLLSECGGYQVVSDDSGVRELHEQYLAPLATREKDLPHNRRSRNMRNQVPPIERVYV  
ARVV  
>comp5546\_c0\_seq1; 215 155 988 LEN=1149; translated  
MAVKKTPIALESYAVPLMMIFLFLQIFLIPTTICALSGSHGSPSSVNTGSKPSPSDRIL  
TPEYYRSVYKGLKIDQWKEQPVQNGGNTPWDIGNHRPQPAIVRAYEEGKLRGHVLDAGCG  
VGENCVYLAHKFGISSVTGFDLSEDAVKIASDLVALEDERETTAATPFWTKPRFLAASCT  
EVADKHGSELLEGLTGEEDDKIGPKLFDVVIDSGLLHCLSEEAASSYVQQISKLLKPTT  
GRFYIGCFSTENPDPWDNPRRISEYLRNDLFSRETW  
>comp5547\_c0\_seq1; 999 1 1980 LEN=2035; translated  
VGFVLCFLTLPDLTLELRRAKFSATASLGVIHAGHVTEAMHLLQPYLPSNPSVGEDGTG  
GSAVSAEGGYAEGGSLYALGLIHGSHSGSSAEKRKETSDFIRTHLRASHANEVISHGAAL  
GVGLTCMGSADFLVVNELKELLDTDSAVAGEAAGMAIGMVLVGTGAGNVHNSLPAEGKEE  
ITEIVSELKNYARETQHEKIRGISIGLALTQYQQEENADALIEDMRDTRDPVLRYGAMY  
ALALAYCGTGSNKAIRILLHTAVSDVSDVMAAVIGLAFVLFKTPERVLPQLVKLLMESF  
NPHVRYASCMAVGIAMAGTGDPESIAMLEPMLDDMTDYVRQGALLGTAMIYMQQSDTSNN  
RKVKAFREKLSSIVSEKHQSTLTKMGAVLSIGIIDAGGRNCSISLGSRNQFTQMTSAVGL

VLWLQHWHPMLHTFSLALTPTYTIGLNKDFKFPKFFVVCNSKPSVFAYPKKLEEKKE  
EKKKRVETVTLSTTAKEKARQARKRAKEEGAADSSDAMDVESEEKTPDKTETEDSDAMEV  
EKKEEPEKKGKKKREPEPTSFRVTNPSRVTKAQSQFCAFDLSQRYRPIRVEEKPFQVIL  
TDSTPGEEDLGAVKAPSLPEPEGECAPPEPFWTPPEDPVAPKEEPEKSKEDDTKPSAA  
>comp5547\_c0\_seq2; 1424 72 3215 LEN=3270; translated  
MATRPQSTPLAPDAVATASGYIALLQEEDPALKSHALKKLLDCVDHLWHEVAESLPDLES  
LSEDFDLPLETRRTAAAVASRVFFHLEEPSQALRLALEAGETHFDLRNKHRTPYVESLVA  
AALDAYIRERRKLIRQQUEASDATSTSTNADAEASADDTGISIEQLRGMVYRLLDACCQE  
GRCDHALGIAFEAQESEKLEILQASGPDEGLLKYALDASIRVVASKSFRQEALAVIADC  
LCQLETPERKRASVDTLIRVYQLLQKPDVAVGLADLLKQSSEEDALLCYQLCFDLVDTG  
DQAFVASVASELEPLLGEHKKDRWASVSRVLTGGFSSELALSFLHKQSQADRLVMENLKK  
SLEERGSGRSSLLHNAAVMTHAYLYAGTTNDSFLRDYLDWMKKASNWAKFSATASLGI  
HAGHVTEAMHLLQPYLPSNPSVGEDGTGGSVSAEGGYAEGGSLYALGLIHGSHSGSSAE  
KRKETSDFIRTHLRASHANEVISHGAALGVGLTCMGSADFLVVNELKELLDTDSAVAGEA  
AGMAIGMVLVGTGAGNVHNSLPAEGKEITEIVSELKNYARETQHEKIIRGISISGLALTQ  
YQQEENADALIEDMRTDRDPVLRYGAMYALALAYCGTGSNKAIRILLHTAVSDVSDVDM  
AAVIGLAFVLFKTPERVPLVKLLMESFNPHVRYASCMAVGIAMAGTGDPESIAMLEPML  
DDMTDYVRQGALLGTAMIYMQQSDTSNNRKKVAFREKLLSIVSEKHQSTLTKMGAVLSIG  
IIDAGGRNCSISLGRNGFTQMTSAVGLVLWLQHWHPMLHTFSLALTPTYTIGLNKDF  
KFPKFFVVCNSKPSVFAYPKKLEEKKEEKKRRETIVTLSTTAKEKARQARKRAKEEGA  
DSSDAMDVESEEKTPDKTETEDSDAMEVEKKEEPEKKGKKKREPEPTSFRVTNPSRVTKA  
QSQFCAFDLSQRYRPIRVEEKPFQVILTDSTPGEEDLGAVKAPSLPEPEGECAPPEPFE  
WTPPEDPVAPKEEPEKSKEDDTKPSAA  
>comp5549\_c0\_seq1; 300 60 1058 LEN=1248; translated  
MSSSTSNEKTSAVLTEDPKSWIGKSLVSVTQITPKGDFLVTIAQQMRDIVRSEGGDRL  
KHKLLATIFYEASTRTSCSFQAAMRLGGKFLHVDGNGNSSAAKKKESLEDTIRCLECYV  
DAIVLRHPLTGSVPKVVQATTKPVLNAGDGIGEHPTQALLDSFTIWDDELKEDPKVVVFLG  
DLKHGRTVHSLAKLLSQLRPQSDLVLRFCSPSSLVPEYIIEYCKNNGVATELFENPTEA  
CKGAQVLYVTRVQKERFETEEAYESVKGSYVIDKAFMELAPKNMIVLHPLPRVDEIATEV  
DTPRAAYFRQMENGMVYRMALLALVMGKSSP  
>comp5550\_c0\_seq1; 211 283 699 LEN=699; translated  
MDTPVPTSEPTAFSSSDLTTELSSDDAPKAPKPTLTDVLEDVPLPNATPVAPPTVAPVPV  
PIPVPTNPPVPPPTVVPVPIVVPVPTNAPIPLPVPTAAPVPLPVPTNAPIAVIPDTPPPAPQ  
VLVDVEVTEPPTHTSSTFD  
>comp5551\_c0\_seq1; 148 1 705 LEN=819; translated  
XFLSSRVFQENELKNELKNDPIDPTEPANXTAGPTALPTPAPTCKPPTVAPSGVPSGEP  
GEPTLPPSAAPSPAPTTPPTKAASKATPRPRPVAQVGHSGQQEPQQLVPAPRPVPGSP  
TKAPIDQSIIPVMKPRPAGHATKNTSEGVATIPVMKPRPPRPAEVESGGSGPSKQGTQEE  
PRPQQENEEEEEDGSSHPHQQLLNLELHRTTQISGLRRQPKIDERPGKALRLPAS  
>comp5551\_c0\_seq2; 142 1 850 LEN=964; translated  
XYFPNGDLVGEAECLCESFGQDMCDFVPEGWVPTPAPPVAPVVPTEFPTRTPTKEPT  
PAPSVSPTQRPTGSPTQKPTAGPTALPTPAPTCKPPTVAPSGVPSGEPGEPPTLPPSAAP  
PAPTTPPTKAASKATPRPRPVAQVGHSGQQEPQQLVPAPRPVPGSPTKAPIDQSIIPVM  
KPRPAGHATKNTSEGVATIPVMKPRPPRPAEVESGGSGPSKQGTQEEPRPQQENEEEE  
DGSSHPHQQLLNLELHRTTQISGLRRQPKIDERPGKALRLPAS  
>comp5552\_c0\_seq1; 411 1 1236 LEN=1999; translated  
KQIAMASTAFESDLDPNVEQDSNYGPTGNNSHNNHRGINGRNSKRRQSQNSDNLMLQR  
NSTKLNGTNLEPQNYRYGNLEPQNSYGQSYSPFPTSIDDADPSSLFNSLTAGFCSTAAAA  
SGSFFSSISSTDLENDPELTPGRGNSNNDNSNSNSNIEACPPHASLPLKIEINGKIVVVG  
GGECPSHLNWKTGVVTDENGVRTLLTNQQLLESLRRERNRMHAKMTRDRKKSFIATVEKTI  
EELESNKRMAAALTDVIHFQRSPPCSPAATTLVSFRNENDHHDHNDREHNHGNDNANHT  
EPERNDSGSRNHGQNPVSVTPCGSRSPAPAAGERDRYTSVALSSVPSLIPAPPDSFVTF  
VDGDRDGDGNHGDGDRNGNNGIVNNNTKLDSEQLPPPKRFCHGFSIAPY  
>comp5552\_c0\_seq2; 375 1 1404 LEN=2167; translated  
KQIAMASTAFESDLDPNVEQDSNYGPTGNNSHNNHRGINGRNSKRRQSQNSDNLMLQR  
NSTKLNGTNLEPQNYRYGNLEPQNSYGQSYSPFPTSIDDADPSSLFNSLTAGFCSTAAAA  
SGSFFSSISSTDLENDPELTPGRGNSNNDNSNSNSNIEACPPHASLPLKIEINGKIVVVG  
GGECPSHLNWKTGVVTDENGVRTLLTNQQLLESLRYVFLCCTAFTSYCYFWKLGGLLLVS  
CLVFLSSSSDHNHSLPFLSSMFDCLDVSXERNRMHAKMTRDRKKSFIATVEKTIIEELE  
SSNKRMAAALTDVIHFQRSPPCSPAATTLVSFRNENDHHDHNDREHNHGNDNANHTEPER

NSDGSNRHGQNPPGSVTPCGSRSPAPAAGERDRYTSVALSSVPSLIPAPPDSFVTFVDGD  
RDGDGNNHGDGRNGNNGIVNNTKLDSEQLPPPKRFCGFSIAPY  
>comp5553\_c0\_seq1; 250 686 1385 LEN=1442; translated  
MKLFYDSPTSVLGLNQVDELSKFFESARDLDES DPVAKHVAVLMAKKDAPPSKLVSSSLR  
RAVTTVAGGFKDRLARRPQEKILILPSLQEI SRNPDTLSITPAQTQIQASWIDKGSKLCD  
FQSTFMNQVDMSLHMGNKPVGTNGLKRMKFCDFVIFSSSVTEENVIVGGHSIWFRSFFRT  
FLPFEENHVGKKKKVNCVIAFTLMKVVRESGRSTYMIDPKSVDVYGGFH  
>comp5553\_c0\_seq2; 387 342 1272 LEN=1329; translated  
MPYITFDPILEAEKEGTLVAEVVERKTIYFVRHGESTWNDTFNKGSHRSQAFAAIGFIPG  
LIKSVFELYLILLGKMSWIFYDSPTSVLGLNQVDELSKFFESARDLDES DPVAKHVAVL  
MAKKDAPPSKLVSSSLRAVTTVAGGFKDRLARRPQEKILILPSLQEI SRNPDTLSITPA  
QTQIQASWIDKGSKLCDFQSTFMNQVDMSLHMGNKPVGTNGLKRMKFCDFVIFSSSVTEE  
NVIVGGHSIWFRSFFRTFLPFEENHVGKKKKVNCVIAFTLMKVVRESGRSTYMIDPKS  
VDVYGGFH  
>comp5556\_c0\_seq1; 51 1069 1451 LEN=1451; minus strand; translated  
MEVIKNIVFVENGKLVRTKLSVPEEERAGILEAGLEKIRENSIKIDEVLPGTTPTGVWHS  
FEADRAAFATVASSGPCKIWLMPSEKFRAVISRPEFSMVMAAMANRIRVGSKSIRNLLLE  
KVKDGASX  
>comp5556\_c0\_seq2; 51 952 1334 LEN=1334; minus strand; translated  
MEVIKNIVFVENGKLVRTKLSVPEEERAGILEAGLEKIRENSIKIDEVLPGTTPTGVWHS  
FEADRAAFATVASSGPCKIWLMPSEKFRAVISRPEFSMVMAAMANRIRVGSKSIRNLLLE  
KVKDGASX  
>comp5557\_c0\_seq1; 260 1 343 LEN=448; translated  
XQQQQQQRRARATYNDPSVEMKYQVALQESYTMKVEDLQQELNSRGISTQYCMVFKDFCV  
EYAKAIAENRQKVVANDEVPGEGEGPGFFGDDEGDYDPTYRDVVMQKYDPSMWI  
>comp5557\_c0\_seq2; 260 1 343 LEN=451; translated  
XQQQQQQRRARATYNDPSVEMKYQVALQESYTMKVEDLQQELNSRGISTQYCMVFKDFCV  
EYAKAIAENRQKVVANDEVPGEGEGPGFFGDDEGDYDPTYRDVVMQKYDPSMWI  
>comp5558\_c0\_seq1; 1051 1 3289 LEN=3289; translated  
XDNANIGEYSGSKEQEGDGNPSDKGNQPGDEIKENTEEDVEEKTDRMTSKVEANMRDKAS  
IRDDDSGKERKGDGSDSTSNKSDQPVEITGVTEEGVEEKPDRMTSKMEASTQDDASVVDN  
DSGIEREGDGNLAERSNKPRDDIKEKSI PCQKDSDEILDAVPEPKVTRTRSGRVVVKPVRRL  
IDGCETSIGGENQYGRAHSVDFEIDETEDHALDDSSKTVTQAASSTDVQETTNLQLSNTE  
ASLESDRTTDEVTTQTKPNEKFSPPSMDDEKEEPSNGTTDNSWTEMKPIGDDEEVI INSSI  
MNGSTKMSPMFGLSEDALYQNEEVHTLGDGDGDGDEENSTNNAVATILNVTSDHRPFVQR  
FDRHALKDKKSFVKFVATRLTGFDIEVKEKSNKHDLDFPSSDYPI PDSVFEKRIPPIIES  
STSSSVSSPPEIDMALHIEEREDGSCKNDDENDLVPLFDLIPSKCEISRESCVGEESRKL  
ESNLSEESQRRKRLKQSGISQNGSLSSFSTHQRSSKSMFSNKRSSRRLRRQSSRLTL  
SLSNTQHTKSPYMPVENRSLVDDKVQIEAQQGDPAVQLVGDWTDIEANFSPVPDTEEMT  
EAQERSVI FHETLAAFSSLENIDFLRDLPLSRSEEVKPTSSLMWRQLIANWKHSESCA  
MLARPSSIQLSKLTKDVGFFGVDDDFSSSMSTIQFQLDSGNVFFSNDFVSSRAYSLLRFT  
NADNYCEADEGFLVLRTRYLCDIGPGTSSSEKKKSTAEELQHLSKLTLENNEHGCTIG  
ITEILREAKAQLPNLDKI INCVVNYASQNDPSSIDLECYDITSSSGVKDYTSIRRKARRK  
YSGDVLQVKDVLRGEITFPDEASLICGLHCLQSMNGRNKTVPPFQIVRLKLNLFRTTSV GK  
EIYTALPTGYRHILINLKLECLII ELQFQIAQLFDIMGEEGYQLHHDIMSSETDMKESF  
ASSTSGQSTTKIPTEENPEATSTHFVRSILTNPDLAIISRQMGKMKMNHCRIDASNSPV  
ISSTNHSVNSESVGGIGALAAQAALRKSQKHKDIKSCLPKLPVGGIAAIAAEAALKKSQKQ  
ESEHGAQKPPVVGIAAL  
>comp5559\_c0\_seq1; 705 1 2799 LEN=3012; translated  
LLSRHSHLLTPVAEALLSAIFPFRWVGLYIPVAPLKMMDILDAPIPYFIFGLSSDYFKAVD  
VADRPADAI FVDLDLDTIHIGRNPLPRMPEPDAQKLAASLEEAGGSVYVIPNSGIKGCIM  
AGSDKDLLVPNEQPRYAHMTTMTGLGADAFVREALFAASELAYGGGEADRTASGGGSSS  
NRGNRTGDGSDGKKKPRPLFRASPGKRPPVASPIKPRFAKNKKADIILSRSHYAMNQGN  
LLDMAEPEGFSVAGIRGAFLRFVATFAHYQDSLLENSGRRLFDEEKFVGDVASKGRPMA  
FLRNVLKTQLFQRFLEERRENPNLPEIRFFDESIAAKRNRSKKASLAMKKGQPTPFLDDK  
TSWKIREVYASPPNNFGIPDTEATYRYETFPVLDKTRFGRIRPPPQHTNLDSVRY  
KKSCLKRRKKQSELVTRAMKPVLAAPKAVAARRTAKDLESTLVALSMDPTGSEAKETIGR  
GAERKTKRTPSRGRVKTLSADTIMMDARRKQAILLDVIVAFQALCRGYLVRRYHHEGVE  
WEQDESLDRKLAYRHYHVRKTRATMIQSVVRMFVVXEESRAHDSGNRSFSKPPASPERTA  
EVRSDQMQRDRGCQMRSGKANESDLPRTEADDCTRSEPESEGRAGSVENEDRDEGMDAYA

NQIFVLWARLHVSLFFRTRLWPEISGCRFTVGLRVAESELLRLWDIAGVSNRSNGHSRTN  
TKLLFRSAVGFNDTCPRYKECTNKILGDKSIASKFDNARRMEETERLQIHERLGSSVSG  
DDLAELYSGFGIQPKKKLKKVALSRKLWTDLPLANLSASSMHRIFPELHNSLGVRFVVP  
SKGRRFRNAPKASVPLVDHALWEEISTQGRTRKRCVQEVGMLFINKVSPMPKKVDSNTNT  
FEIHSFLRATMEVNGFESIEEARRSVITQYLG

>comp5560\_c0\_seq1; 336 176 907 LEN=1228; translated  
MLITIHFYFDSGNICRDPPTGERVLTNPCKTFTQSNGLTVSCGEVQEWVQDVRLSGGSL  
EETRYCELTQYLAWKHCDGDPDIPSPNDVVDLNPVCNLCGNPDFDFEFVQPKNKLT  
DTGCCGRYNCEILYYGASQGVLSANLCSVIKEKSGPDCCNLDIEAPPVNENNDNEQNDE  
QNNEVDNENENEDYNNIEVEEENEQSDDEDPEEDNNEIEDNNDQIDCQDDPSFRFKGRESK  
NCDW

>comp5560\_c0\_seq2; 302 145 954 LEN=1275; translated  
MLFYGHPNCWLLGCVYLIIYFRQVYHCEGTPLEGNDYACNICRDPPTGERVLTNPCKTFT  
QSNGLTVSCGEVQEWVQDVRLSGGSLLEETRYCELTQYLAWKHCDGDPDIPSPNDVVDL  
NPVCNLCGNPDFDFEFVQPKNKLTDTGCCGRYNCEILYYGASQGVLSANLCSVIKEK  
SGPDCCNLDIEAPPVNENNDNEQNDEQNNEVDNENENEDYNNIEVEEENEQSDDEDPEEDN  
NEIEDNNDQIDCQDDPSFRFKGRESKNCDW

>comp5562\_c0\_seq1; 178 509 1552 LEN=2005; translated  
MGITSAFKGLRRSRYAIANSPGILTPSRHASKSMRAASSGSSASSTSVVPLPTREQLSI  
LAIRSAIPMVGFIMDNVVMITAGGAIDSTIGVSLGISTMAAAGLGQCCSDVAGITSGGI  
VDAAVSRLNLRHHGLSPQQDLTRVARVCGTIGACVGVVTGCLLGMTVLFVCMDDKADRAR  
RAKELKSIFESVMNDGHKLVAERATLFLIDEDSNELWSQVATGMEGENIIKVPSTKGCV  
GTSVTNNIVCNVDPAYASEDFNKEIDVSTGYRTVSILVVPVIRSESGKVLGAIQMINKKQQ  
PQEGFDGDIADNSNDATIIPFSENDEKVVSVLASHVASFIRVVESE

>comp5562\_c0\_seq2; 211 1169 1702 LEN=2155; translated  
MDTDKADRARRAKELKSIFESVMNDGHKLVAERATLFLIDEDSNELWSQVATGMEGENI  
IKVPSTKGCVGTSTVNNIVCNVDPAYASEDFNKEIDVSTGYRTVSILVVPVIRSESGKVLG  
AIQMINKKQQPQEGFDGDIADNSNDATIIPFSENDEKVVSVLASHVASFIRVVESE

>comp5563\_c0\_seq1; 220 1 805 LEN=1087; translated  
XPISAFSRTLFCMEQFSFLVERGETETTEKQHRERQSEPRNYKSKKQAMITPVSPSSRI  
FLAVPILLVLMHGTSIHAVCPQEYNADRSSHHTSRMVEEDDSGNWGELLKSCPLKIALF  
APCIDTESDLSECTVCVTDFVANSGLTSSGTGDDNNSNTNTTSTECDKVQTEVCSAVSV  
CSEKCGLSATEGNGKIASFFQFGSDCDTLFTDLLACSLEAEDLIPTCESLDTCGSVVDS  
SSSASSFFLSRAVAATLIMVAPGVASLL

>comp5564\_c0\_seq1; 570 341 3255 LEN=3455; translated  
MEIRHRKNARASRISNPVAMGALFVAVCCLLGFNAVIRGNTGDTAAVSRKSSVVASAPNG  
DINNNNNNENTSNRNTQTIGNNSNNVVYSRFGVTVFYPIYNYAKDKDGEAPPASPVE  
KLEEDLRHSPSVTVVGLDTHPPSFLESCGTGHGIAVVDAAGGEQTTGAVSERFRQLRA  
SRQPHLAMELLKYCALDHYQGGLYVDHSHLLTSTVENLLSRVEAGGNGNLAVLNDPKISP  
ESIHGALLYIADDSKXFGAEETEQQPIDLRRRGHDPLAAVDRRVGPGILPALFAQVALRP  
GGKRRRRTVREPDDRGEHPLVFAAAHLQPI CAGTEAAHGTDFSLRAEQPPVSRARS  
DGAHR IAVSCRVPVCGMVWHGMAWYGGWKIRFGFVLAWACAIRLRFVVGRAALDGPKA  
RLPGRNSLFLCAXD GALPPLPTGRDLTFLPPLSWSFSYVKTFFPFLFLNDRATISGDNRCS  
RRLTQNCPEPNGFCCSIYDSITHIPTMMTKHLLLPYQVLPPTSDLPQPLNADKGEFDEAD  
LPYISTISERVHARPEGHALLTPNF FETLLQSDCLPSDKKSDCLRNKQGSNCKTCAHAC  
PCYCKALCHVPVEEKFVSKSLVISPIIYAKEPSRLVPRIVHQTYETVTSEKYPNMSRLI  
ESFKQSGWEYKFYTDMSLNFLSTHFPPEVREAYETLRPGAFKADLFRYCVLLIHGGVYA  
DMDIMLETNLDLAIGPDIGFMI PHDEPGTPVNRMLWNGF IAAAPGHPFLAKTIE TVVN  
NIRNRFTGVDTDAMFCPNPEMSMLHSFDTLFTAGPCILGAMVNKVLGRHGQTSFEAGEID  
LWERSKQDALQNGTKFVIGVDDKPSKIPGRTIILSQNKWDMGSHRFTFIEKNLVVAATD  
LPGADDRANQETTKHEYSKTHVKAGIYGLDRLYTDNVRANENLRFYVDAQWSRYVQRGTR  
DPGGTASGSKT

>comp5564\_c0\_seq2; 612 341 2872 LEN=3072; translated  
MEIRHRKNARASRISNPVAMGALFVAVCCLLGFNAVIRGNTGDTAAVSRKSSVVASAPNG  
DINNNNNNENTSNRNTQTIGNNSNNVVYSRFGVTVFYPIYNYAKDKDGEAPPASPVE  
KLEEDLRHSPSVTVVGLDTHPPSFLESCGTGHGIAVVDAAGGEQTTGAVSERFRQLRA  
SRQPHLAMELLKYCALDHYQGGLYVDHSHLLTSTVENLLSRVEAGGNGNLAVLNDPKISP  
ESIHGALLYIADDSKGSARKKQNKQASTSVVGMIRLLLLSTDVSVLVSSPLFLPKSLYGL  
VAKDEGVGELSASRETTAGKTHWYLLQHTCSL FALGQRPLTAPISPYALNSHRLTQNC  
PEPNGFCCSIYDSITHIPTMMTKHLLLPYQVLPPTSDLPQPLNADKGEFDEADLPYISTIS



ERVHARPEGHALLTPNFFETLLQSDCLPSDKKCSCLRNKQGSNCKTCAHACPCYCKALC  
HVPVEEKFVSKSLVISPPYAKEPSRLVPRIVHQTYEYETVTSEKYPNMSRLIESFKQSGW  
EYKFYTDMSLNFSLSTHFPPEVREAYETLRPGAFKADLFRYCVLLIHGGVYADMIMLET  
NLDLAIGPDIGFMIPHDEPGTPVNRMLCWNFGIAAAGHPFLAKTIIETVNNIRNRFTG  
VDTDAMFCPNPEMSMLHSFDTLFTAGPCILGAMVNVKVLGRHGQTSFEAGEIDLWERSKQD  
ALQNGTKFVIGVDDKPSKKIPGRTIILSQNKWDMGSHRFTFIEKNLVVAATDLPGADDRA  
NQETTKEHYSKTHVKAGIYGLDRLYTDNVRANENLRFYVDAQWSRYVQRGTRDPGGTASG  
SKT

>comp5565\_c0\_seq1; 817 284 2359 LEN=2421; translated  
MKWTFNSVMLSTILFSTARHALAFVPGVQRAASRQMATAGSSFASRYSMRSPSTPARLM  
ATVAPEKQAAEDKDTDFDELPTNDNDNLLRIRHSSAHVMAMAVQKLFPEAQVTIGPWI  
DNGFYDFFFFPEPIDPETGETIEARKLNDQDLKKIKKQMDKIIQKDYPIITKEEVTREEAE  
RRIKELNEPFKLEILEGLQEPITIIYHIGDEWDLACAGPHVESTKQIPKKALALQSVAGAY  
WRGDNREMLQRIYATAWKDPTQLKQYKMMEEAKKRDHRMLGKKLDLFSIQEDAGGLV  
FWHPKGSKVRKIIEDFWKTAHEEDGYDIIYTPHIANLDLWKTSGHFDYGEDMFDQMDVE  
NEQYQIKPMNCPFHCLMYADELRSYRDLPIRWGELGTVYRYERSGTLHGLFRVRGFTQDD  
AHVFCLEPQLEDEIVKVCDLIETILTKFGFDKYEIMLSTRPEKAVGSDEIWDAATIALRG  
ALEKKGWDYGIDEGGAFYGPKIDLKIRDAIGRQWQCSTVQCDFNLPERFGLYEYTSKEGT  
KERPIMVHRAIFGSLERFFGILTENCAGDFPFWIAPVQLKLLPVTDSDVQDYCHEIAAKAK  
KAGIRVEVDRGTERLAKQIRNAEQQRVPIMAVVGNKEVETNKLAIRSRLKGLDLSFVDE  
LLEELTTCVENTVEMTKMGEVEEKEEPASKK

>comp5566\_c0\_seq1; 235 269 716 LEN=716; translated  
MTSDMPIAHSSSMSSTISANNGAQQQAEDAVIDGNAEPHDGTALTDSTNASNNERPEPTT  
APGLPKPVAIRAESRDTSMCSRNSRDSLRSSVSMRSTFTLELERLFLEQLTVEGTDAQVE  
AALRTVEDEELFFADTPVIGNNNSSSSSSSX

>comp5567\_c0\_seq1; 250 368 1672 LEN=1884; translated  
MNFSAAEFNELNASAFPYSERSLEQFRMEVSDDEISKADAITEAAVSFTAAENSSSFTNI  
VGMDAQHEPHRITPQSSLVYREASSSSRTTTATENNLNKNLPLLPPIAGSTGDRQTPLT  
IEKRNSRALNSLVGLVDEYAVNSTARTYIGCQVVRTPRVRDAGLDLDESPGHYFNACRDGN  
PTAGTYSSTDREKGIHKNQELMVNLIHPNFGPLDRERNQCHDRPTSSSNSITITYGITDC  
NKKVTRRRRESHKTKSDADKSSNISNTHSKQNDFITTHSKKNKTRKTSPTRNSNTNTS  
TMFSKVGECLEPRQRSRAIAINRSQPVGYNRSEGOANASEKVGCDAEYDYATWRMYNRII  
DHRRKNLLRYPQAQPEGQPSAKEAATNQTVDES AVIHHPSPVIGGQYFLHQSOLPYPA  
DEYQEEEDIFDFEL

>comp5568\_c0\_seq1; 91 141 452 LEN=452; minus strand; translated  
MPAARWSRIVNGAYSTAQNNSTALPHSFRACGRSPPVVGSPVFAAEHGGPRGTRERPE  
AAAAAAAAAASREKGPLHHQARQRELSLRRFRPRKGRRIAIAI

>comp5568\_c1\_seq1; -16 1 657 LEN=657; translated  
QRATAFESSTKQPRGSARATQHRTSTQRDKTTIMKEHRTKLRPSQRQTHKLQRIEIMDET  
AIPSIWNTPPSHGHGSGNTARGSGRKGRTGEQEXRKSPPTEGPRPWPVPRRLGPEARP  
RKVQGRTPKTESATGAATPKPPPRTVSGHGQRGPARPGSSTGTEGHRTGLLAPTQGPAL  
AEAAGTPQAGAGRGRVSPLAEALLFFVLGARRRWRWRWX

>comp5571\_c0\_seq1; 286 309 734 LEN=1039; translated  
MNELTEENDKSLKEENKKNYDKIQTALVTETAFFSALIFSLWLASDNPFAPLSFLFGSI  
FGTMYTYGLGKYVSTVGGSIDDAGAVEGAGVQARFAFLIVLFIIFLGKFRPYGLQEIPSI  
MGFFTYQLASLSQGLKEEKID

>comp5572\_c0\_seq1; 203 248 655 LEN=1915; translated  
MTSSKDDATTSSGNAAKSNTRRIQALEAKAVAEATAEADAKYIPSVALMNSSDPLALVRQ  
VDGLSDLSEYEEKESVYVGRSVPISAGGSLEIPIQVAMPGSVVEYAVENKQYDFGFSITA  
ERDNSVTIVKVSSPV

>comp5572\_c0\_seq2; 308 248 1108 LEN=1587; translated  
MTSSKDDATTSSGNAAKSNTRRIQALEAKAVAEATAEADAKYIPSVALMNSSDPLALVRQ  
VDGLSDLSEYEEKESVYVGRSVPISAGGSLEIPIQVAMPGSVVEYAVENKQYDFGFSITA  
ERDNSVTIVKESSRDASVNGPITGKFLVGSVPCWVRFKFNDFSWMREKVISYKVTVKP  
PSLETLYSGRRRRRAKACLKAI EEDLTAADKRRKAAGDQLTLETELEELRREVTQKAKSL  
QAARDEEKWCMDRVALRTEQKKLLDSRLQDGWEDEENAAGDESDEE

>comp5574\_c0\_seq1; 187 204 794 LEN=901; translated  
MERFSEMRRFLFPYRAIVSRNPTFHDTWHRNQAYQFRFKVTTSRAKSMLGFSTDSKPTVI  
ELRQAYYEAACLCHPDVKEDDHKLDLFRFKDAYEHLIKGGHVTDHISDEISLDEEKEYRR  
ACMDVLGLKAEIVEESKQNPMLHWLSGKTDGAQYWRNFFTAHGGLAQKLRPPAGYLASN

AKHVAKASESRRRRR

>comp5575\_c0\_seq1; 361 183 1518 LEN=1777; translated  
MFRDNFNFNRIVLRAGIASFLLLVSVSASPEGPPAKGVPLDREHLPKQDAPTKFIGVNA  
TGDPVYMPLLGAGTWQYDDDEAYESLCKAFGAGYTFVDTAYGYKNQKGVGRAIRDCWKGN  
REDLFVLTKIPGGNTEQNRARFRPNKSRFGAKPTGPGLRRDPPVRGLFSRTGSAHAVLLL  
YRSHGTNAFGRDHTYRAVPNATRCNATQHNAGGRNASEVQRLHETNLEELGLDYVDHLMT  
HFPADWEETIVGAEARQEEWLALETIYHTGEAQTIGISHYCSRHILDVLRVATVTPALNQ  
VEYHVSGDVGDMETCSDFGITFMSFSPLCGPCSYEPEDSLVNGDLVQEVAGAYQHGNA  
TTPGAGKPVVGSQVALRYIVQQGIPVVPKSNTMAHVLSNREIFDFELSEAHMERLGRARA  
PSAEAGDCGVEAPALASASALATA

>comp5575\_c0\_seq2; 387 183 1277 LEN=1536; translated  
MFRDNFNFNRIVLRAGIASFLLLVSVSASPEGPPAKGVPLDREHLPKQDAPTKFIGVNA  
TGDPVYMPLLGAGTWQYDDDEAYESLCKAFGAGYTFVDTAYGYKNQKGVGRAIRDCWKGN  
REDLFVLTKIPGGNASEVQRLHETNLEELGLDYVDHLMTHFPADWEETIVGAEARQEEW  
LALETIYHTGEAQTIGISHYCSRHILDVLRVATVTPALNQVEYHVSGDVGDMETCSDF  
GITFMSFSPLCGPCSYEPEDSLVNGDLVQEVAGAYQHGNATTTPGAGKPVVGSQVALRYIV  
QQGIPVVPKSNTMAHVLSNREIFDFELSEAHMERLGRARAPSAEAGDCGVEAPALASASA  
LATA

>comp5576\_c0\_seq1; 532 82 1161 LEN=1278; translated  
MTTILFVSLFVWPVNAFLPPSSITSSQSAPLRLIRGNCPVATIGAVKIDANSMTSTA  
LAANRDGKSDKKKPSKAQGVYVRPSGAIEQSGFFVPGLEGPKVRLVIGLVLLAATGINH  
FVLGTYTGEEGISFSEGTAVIVSVLLLFQFAIEYAKEAFLPPPQSSVSSSSATRKKIQDS  
LSAVAAAASEVLEQKWSGILALDDGQEEKYRSRVQWAAAASYLAMPTTQIMLLASSGEDNR  
GDIRYRLGGKEANQADDGTTIDFGVKAALDELGRSGKGGRIALPLNHPAVEALLPMAASLPA  
DSESTADGEDLRPLRTVILQRIADDSCWMASSDQLLAGYTSGLDKWLGQMAEYVGDHRH

>comp5577\_c0\_seq1; 854 338 1915 LEN=2135; translated  
MAAKATTARKRRSTGRFAVGLLLLLLLLLLVPGETAAASRRASGTKKKSHDKKQFASDNYY  
TVLGLTKKAKEKEIKSAYRKLALRFHPDKVKDGEDPEEAEDIFVRVSEAYSVLSDEKERRK  
IYDRYGNGLDAYEKQDPASAGFGGFGGSGGGGGFNGFGGFGQGGGFRQSSGGGFGG  
GFGGFSGGFGRGGNHGGGGFDPFMSFEEMFSGQAGGGGGFGGGFGGRRGGKGNRDRPPA  
LFPKGQSHVARLGSPPKFPDQDSKHMVMVLFYANSNQASRAVSEKYEHLASQTNLPYKVG  
VDCKLSPKEEKFCAEKIEPGHDLPSFGMVVDGELLRYEDFDSRSPSSKALHEFCMDHM  
PKRYVRNINNVPIKERLLAPEEETASSSWFQYSSSSKPKAKPPRLPAVLLLTDKYETS  
SMFYGLAYYFRDRDFVFGESRAKNLKLSQTFQVKKYPTLVAFVSPVSGSLVGKTVPYDDN  
YHTIRYTGPPKKEKITAWLTKLNTVVRESKHKDSNTGRRSGRTEF

>comp5578\_c0\_seq1; 683 1 2889 LEN=3062; translated  
XGDIDLHKDRPRGEPQGLEELKGGKNRGDRARMIGQSRRRIFNGRAVPGQNFHGTMG  
NXDESEAANKNRQREPLDQDSACALRRVCGSKRNVVSLAQRRSAQEIRKSKSRLGFSEVA  
FDDERRVFEPEDEMEAKNENKATVKKRGSIALFFFFPDNLFEVDGITPMDLTYPPFPATNQ  
VIGDDICGSENERENGYNSRDRIIITGIFSHPVAAELALTLAERCVRHILGMSDHLDDA  
EESRDLDFLMRHIPSLQLRVRGSLGDRATEDLFRDYSPSHIFYFQSDSFKTPDEDDNDN  
EATDFKTHSGTNLQOICNAMVKLQCSNTTDANGVKTNLLYVTSTVSEMNDLDNGNRLSV  
ATISTFNQITLDAYRMQYQLNVRQLALPNIFGPFKEGAAWLLSEKSIQARNEENLRKTQ  
WYPYSSSNPNPMSQPTISIIDAVQSILVSGRLVHVHGEKSVPILEAARSQTATFVELSK  
ALVPLSTKSIQTDKKNVIEALLPILSWNYKRYKPHQDPSNFDVSPVENDKIATLGLIN  
TRQNLMDNTMDSAAVSQLERRQHDIFPCIATCTSYVTCKKSAWDTKVNVTQATKGCFT  
LLYTADFSSALESLPEMRESVNDAPWPRDSFCQVAFVSSRSTIVNNALAENDRSTIVKND  
LEDDDESKISSRESIDEWNGKVSNNGWKLIWIDADEESISQMSIMPKIVPETLLDQSVQ  
FVYVVEPQHFEILPPLQLMWFMLMGRQLTAAARTKKRDSGTNEEWLIPEQHIAIFHTYRN  
SDIEHLDDQKADYMAKAAQFILDQSGKTNLSKGEDQVPLKNRRQVQAYAKSLLRSEEDV  
KFELIDTPLLIIPIHNRLGRQLRCEWYEEHLFWSTDDNINLEGLSLSYVLYRWRHQKRL  
PNTDDDKWGMIMLGEDGKSLSPSSVKFRTLVDKVEDRQEILPELPPAFRKAQSLNSE  
EDV

>comp5579\_c0\_seq1; 520 389 1270 LEN=1554; translated  
MVATSDEAEKDLNLIIFYDDESSIQEMIRSTSGLFATLDKLTNEIEEDLVSAEGTPSV  
SGSNESPPCNDEEDDESYSDDDEAAAYSDEEDPDSGETKLFMMDDLVAELQIQLEEDSD  
EEDNTSVNDEGKGNKNEPQNTDQACRAETPEDVEKENHRVESQYQLRQSVNILLEQVI  
EMKILFNLDQTNHVRNKNHDKISANIQKKIEQGEYDADRLEHLMGAISSYANMNSRKS  
YVTKKKKKRKRTRNKHKQRKPTASVQTTQSLHILHDSLLALEEKFAREDQPRH

>comp5580\_c0\_seq1; 540 1 2406 LEN=3091; translated

DDDDGHNHRLGEAERVRSFMHSVDPSPAPRGCGDRPASAPSPPPRSGSGRGLPFLPAPSE  
MADRNETETVVPSPKPSPLFSPSVFSAASSYASSPSSSRVPSFRAIYSVNYNNGNRSGSL  
GIASSPLVRARLPLFDRRSETPRTLDDPKRASITPGTDKGGRCSTGSSNSNSYSNRNSNK  
NHNYHRGAEISRLLLEGNELDPLQWERFVSAKISSSGMLPRVPTFWDGSPTRKTCGGTWT  
PSAAPKAGAEVSPAAAPCVATPSTVHNPTSSRRACRTPPSPPGLAGLPGNNGTSPSRGP  
PGEERERPGDGLGQILRAKDDDEEEERESPAPPVVVGKAWAPPKTLRLPQASVATSMAAS  
VLLSFMVTTASPPESSSSSPSPGPPQVRVLPWKRQHPATSAANTVLGYDADDDASACTVLF  
GPATKRRRKTAPRRI SNFLEQNEDDPATTDGTGDPGRRIAAEPLCEIRSGNHGNARSTFK  
SGKRRKSRTVSIPTFEEETAIVSKAIEWPPLLAGSCAAPSSPGDYGPVGSTLASPGRSNK  
ANTPAVSPSSAFKRI PRRYLDDPTLPILRDGMRLSAPDDKDHLNSLHCFVRKELLEVFVL  
DDTIQLKAEEDSEVLSADKNSIPKRTIGRPRKSRQREQRQRYQQIHRVGI RCVHCGRKP  
SERGGVTMSTFFPKSLEDVYRGVCTWQRIHFKACRHMPDHFVLYKHHKSDSKSRGKKAH  
WIRTALEMGRNVDEHRSGVVWTGKR PADATNLSMVRTHGKNDPLPRLRSPVAVALDLTR  
PSPERYQSDAPGHSGEHHSV

>comp5581\_c0\_seq1; 484 205 1326 LEN=1808; translated  
MTSGDGDPEVAAVGSEKAEVERQNSAVVPLIDIPIVEDKSSAHLLSLETTSKSLVSALR  
DSGFALVRSPLLTKEQLQSEALRAASQFLAKETKSKVASENGSAKNEEDGNETKPGSIDVI  
PHPTDPKVYAMLSSQAQYELVESDTHVISAYISALRSIKKEVLRLLIAIGLGMNDDVDFFA  
KLHDEDNDDLRIITYFPTFSETTGNRCKEHSYGTITLLSTDGVSGLELLSSKEEGEAKW  
LPVPYIEGALVVNVGSLLAGWTNGALKATLHRVAGPASLNSGSDRRVLI EATKHSRTSIA  
FFADPNANVRESLETNENNQNFKGALGGMSVADYIRWRS GGNGFERSGVSF TPEERKIIA  
KGETAASVENCNR

>comp5582\_c0\_seq1; 229 379 2079 LEN=2097; translated  
MVDSLALRMPPLVDKKNANAEISCSECKGPVFSGLD TYRVPMALHELNRARLVQSMTKA  
LTETEQEPSISSPENPSLPRGVILLEGGKQTRYDTHHEPVFRQESYFHWAFGVPEADT  
YGAISLPSGDATIFIPQYGLDYEIYCGSSPDLEQTRSKYGVENVLPIDQLDEFIASELAP  
SDDGGDDARLFLLSGRNTDSGNYAIPAHYKGI AKHDERNTESLFPCMVESRVFKTKAEI  
ELMRYTNWVSSMAHVEVMRSCRVMMEYQLES LFQHFTYTHGGCRHMSYTCICACGPNPS  
ILHYGHAGRPNDRDLVDGDIALLDMGAEYHCYASDITCSFPVNGKFSADQLMVYNAVLSA  
QIDVITAMRPGVSWTDMHRAAERAILEGLKEGGLLKGD TDAMIDADLGAIFMPHGLGHLI  
GLDTHDVGGYTEGIAPPRSDRPLGNLRTARNLEAGMVVTVPEPGCYFIDILLNFALANPA  
QSRFLNADR VNEFRGSGGVRLEDDVVVTE DGCENLTVCPRAAEEVLDVMAGGVWPPEKDV  
LPELRRNWVRNERGTLVRFELPSATN

>comp5584\_c0\_seq1; 471 1 1413 LEN=1869; translated  
LEEKVSAVYQRLSEVLSSRAQALQNEPIDAAEQAKPPIDLS DPEGRPYKIHMWDDTTLE  
SPREDILVGEGWFEYAGKR NENEGGSPSPWFVPTDDPASADLIVWITTMGQHELEK PPL  
DPVDHARKVVVLDYSDGCTVHHKRDEIRGNNT ELAYFKRSFVFKDDFNVFLENCTELDSG  
ILPYSYSGSRVMMV PND SNIATTKHRAELFSRIGTMYNYHPPSDWNSTRVTTSTTKP  
VDQGYFRDERYDNFLV PFAERRWTLTNV LVLNDEYHSHNIVR TKIIGWTHEFCRAKAHHP  
GHDPNGTDVVVDGANNANGTSDALEFLDSSSEDPTFAAYVGLVRRGCDGHCFCGQNYLRHL  
RDAKIIVTCNPSGYEGDFRLWESFLSGAMVMVDEMLIPD WMPNPLVHGVHFVTYEANNRT  
DFLTKLAYYSHPDHLHEAEAIAKNGYRFVLEHHMATNRVEYILDNIHRTD

>comp5585\_c0\_seq1; 244 1 1392 LEN=1533; translated  
XRIESNQITQRTTRPPAPRNQLRIF SRLVSSRRKAGQQTQPQRDDHETPREDAVRPISR  
RAPAESVFPASARPVAVLRS AFLPLWLVLVLAARPPSGAEALSSLSMAAPSSGAGRVAV  
VTGASRGIGRGIALELGSAGYTVYCLGRSSREAEPTGVGYQRPVAKGLDLTVE SAAEAVT  
ERGGRGIPVPCDLGRDGAIEDV LASRVDENEGGRLDV LVC SAYATPPTGIRGDFWEQDLE  
MWD CVNGLGLRQVYAACRAAAPRMIQTARNNGG GASSPPLVCLVSSFGGKSYTFNVAYG  
VGKAAIDRLAVDMGYQLAKHGVATTALYPGLVRTEANLQMEADGTWDEQSGGLDLSMGET  
PSFSGKALVELAALPREAMMERSGSVEVVAELASEFGFCEADGSRPFSIRSLGYLLPNFV  
FPAIEKELGEGKELPGWIKNNVNVLLPWSTFSSGPPPEMDDR

>comp5586\_c0\_seq1; 759 305 2320 LEN=2601; translated  
MELPFAVESPDVGTEDNGARNNSLQQSESDSLVTASSQGSFIHSTENNLHIIPDHCGPLI  
PNTPQEILLPSHHHAQSQQHQQQHQHQGQLVVI PGASEEHTGGMADGGYGDPEYDFTYV  
NVTEIEAGEDGVLLLEGEDFGIPQDQVRGDVLAVLIGMQENDGCSILNKTESANEMALKA  
SEAKKNGDLLSALEYHTKAATLYKDI AKVIRDRNPPLASSLLLLSQTQAKSAIALKGI VK  
LNPAELRQILSPSSRDSGDNVPVAAA SHKERLRAAVRGALSSHPHEADLSDS QFLGSAEN  
ETTGLLATTKNRLTSVLNDSK GARKKKNDDIRNDHEGTL LVAEEQNI SNPIDVMMELE RE  
LRDIDMAPELGNSISSLDTRMQNRMKGSMMGDG SFMVVPPGSSSYMASSMWGTPNNPRQI  
ANNQQGTAGVRARANRVQAPASRPVHHP SQIGAAPVPSNKYAQGLESSWGWNTNTASQIL

TSSVMSLGVRGIEGGPINEISSGQSTQNTKQIMRLMDSLKTLGDENAALLREVEELQAAR  
AEAKAARETMKRFKSEYQORFNSLKKALEKFRQENPTGKNGSGPVNTSEFMKNASVSDQ  
LQRKDQLIEKLTRDLKKEKEESKKSLSVLRKYESFYRDIKARSAQKAAQRQTQQQRQNSK  
QTRTATSRVQR  
>comp5586\_c0\_seq2; 333 305 868 LEN=1159; translated  
MELPFAVESPDVGTEDNGARNNSLQQSESDSLVTASSQGSFIHSTENNLHIIPDHCGLI  
PNTPQEILLPSHHHAQSQQHQQQHQHQQQQLVVIIPGASEEHTGGMADGGYGDPEYDFTYV  
NVTEIEAGEDGVLLLEGEDFGIPQDQVRGDVLAFLVIGGMQENDGCSILNKTESANEMALKA  
SEAKKNG  
>comp5586\_c0\_seq3; 384 305 955 LEN=1087; translated  
MELPFAVESPDVGTEDNGARNNSLQQSESDSLVTASSQGSFIHSTENNLHIIPDHCGLI  
PNTPQEILLPSHHHAQSQQHQQQHQHQQQQLVVIIPGASEEHTGGMADGGYGDPEYDFTYV  
NVTEIEAGEDGVLLLEGEDFGIPQDQVRGDVLAFLVIGGMQENDGCSILNKTESANEMALKA  
SEAKKNGDLLSALEYHTKAATLYKDIKAVIRDRNRE  
>comp5587\_c0\_seq1; 289 99 809 LEN=1509; translated  
MGENSVVNLVYELPMSIPDDAPCASITSFFSRILPSTGFGAYHTSIDVDGNTYSYAVGGI  
SKTSVANKHRGLPPEANFKESIVLGCVSSSTTDSQSDIERNIQKCLDYLRKNFFFTPTGYH  
LAYRNCNHFSSETLATALVVPAAADLLRNRAKSYPGYINRLARTSRMVLDESADKTEGTTG  
PCDVMKEAKASMGVNNENLSSKSKKAVSAGEKEKQRKQKELTEAQKKILAKIKSPKK  
>comp5589\_c0\_seq1; 402 66 755 LEN=1825; translated  
MSKLNALLEKAVNDILAYSAGEDVQKINGQDKTGKRNRFVETIEAQISLKNYDPVRDKRF  
SGTFKLPVPRPNLKCCLVGNAAHCEQADRIGVDHMSVEDLKKLNKNKLVKKLAKRYDF  
FMASDNMIKQIPRLGPGTLKAGKFPPTLISGGDDMQEKINEVKATIKFQMKKVMCLNVAV  
GNVSMDAKQIIVNTQLSANFLASLLKKQWQNIQVYIKSTMGPAPIQIYF  
>comp5590\_c0\_seq1; 267 130 1251 LEN=1364; translated  
MYGLVTTKIFIAVGTFFISFTSAAAPLRVIRIDDHLFSIGNMVAAGVLLAGGLVHQLPDS  
SESLEDKFGDYPLASFIAGLTFTFFLLLEEYHLQMKDNELEFAQIHGPRISDSEQANQQ  
RPHERSLISHDTPGNNGCCIIASENDCAAYLTSSTRSDAERNEECRTIPKKKIDIHRR  
STSGTNSVLDSDMRDYSFSYQHPVHYHESHVNHAKGSLSSVLLLTALSFHSLFEALAI  
VATDTASITSTTSAVLAHKAFAGYALGSAMVASHMRELHVLVLSFVFLGCSIAGVFLGIF  
LLPAIDADNSVTVIGIIQAMVSGTFLYVSIVEIAMKELMTHREGKSDLPIQTWQIRKLLG  
FLVGYLMMSVLAIW  
>comp5591\_c0\_seq1; 282 169 1086 LEN=1329; translated  
MTSTAVILRSVILASVASLPSLGFQLPNDLPLPSAAQASGSRHRHSPFLLRQRPVVG  
LPLSGLWGGIQGSKENEESDNGDEVNAEGGTEEDLIPTENTSPVEIVATDSSDVAALNS  
SSIGSEKSLWVLLNEIGNNFKAMAQRATVKGSESDSQQSKKIVYATKACVYYTLFILYRAY  
RGFFVLLPATFLQVYRKMEGAMNSGNLSLEQVGFTEGQDPANKTTTWRKLTVLSILTTV  
ITASYIIGGTLKMATRFLRTIAKTSVSKSFEAAADEALDFETRISVGVKVVGGEDAGSP  
SGLAP  
>comp5592\_c0\_seq1; 130 1 290 LEN=526; translated  
XNVPDFETIKTTNFIGIEILSLANTNGFSAQGISSTKEGSGGTQEAGENREQKQENHGTE  
SKFDRLSPHFVRVIHGCHRATGICAAQRTETPRRFL  
>comp5592\_c0\_seq2; 130 1 290 LEN=801; translated  
XNVPDFETIKTTNFIGIEILSLANTNGFSAQGISSTKEGSGGTQEAGENREQKQENHGTE  
SKFDRLSPHFVRVIHGCHRATGICAAQRTETPRRFL  
>comp5593\_c0\_seq1; 282 54 1160 LEN=1478; translated  
MALMDHSMGATAIGACVVVGAVIFKQTLVAFADIAHLINQLFFKVFVAYAGMVPKSVE  
MRVNGQVRAHYLERNLKTSRSGNSTCQDILVVPGFATAEATFMAQLIPAMNLSPETRV  
CIMEFPLHGKNVENFDGKTFPKPQQTVDYALAFVEAVGLGKTSETKIPLNLFYSGMGAI  
CFQMLAQKSPGTYSRAVLLAPALENTMDDDFNALSTKDPKRVHGWETLPECKEFFTTTSAG  
GFYPTKLPYVVLAVHRQRELTYPHRSFFFTNFFRRLHGGGFLEPDEAKQKLLRAHRK  
TPVLVVCGRDDCISLDKCQRFFGSDNECFLFRELLDTGHVGGPADRRAMFTILDMAGP  
IAAEFLFG  
>comp5594\_c0\_seq1; 144 266 1192 LEN=1415; translated  
MAANLCDYRILKSEFLGEVEVSRTYTGSGNETVTTVHSIRHHIHNRMNLSQQGAPVLVL  
HGGPGLPSDYLLPLRDVPIYRSIVFYDQLGCGRSPGPETNEAYSIESSLDDLEVLIKKIG  
LTRFHLYGQSFGGILAFEYMKRVAERGSDDAPRCLSAISSAPSDVDQMDANWDARVASL  
LEEDPNSSTVMNRFARHACRSISADGEKPKPLADAYENAATRVRVWNRQHCRMGGQTL  
GIFSAHAILYGDEGRNDFVTAECLEAWKDAFNHKKFVRVKELENASHHGLLEDGKTYGRIV  
DSFFSEYD

>comp5595\_c0\_seq1; 575 100 1182 LEN=1927; translated  
MKFAAALATIASLGMAQAFITLPSSTSTTASTTALGAERPKEAENVLDLIGGTPLVKLSKL  
NEGCEAEIVLKLESFNPNANSVKDRIALSMITQAEERGDIKPGETVLEPTSGNTGIGLAM  
VAASKGYDLILTMPESMSMERRVLLKAFGAKLVLTAAKGMGGAIKAEIEIAATQGGFLL  
QQFNNADNPKIHRETTGPEIWADTEGKVDILVGGVGTGGTITGCGQYLKPLNPSLQIVAV  
EPTESAVLSGGKPGPHKIQIGAGFIPGNADTSLLEDEVIQIAGDDAMEMARNMATQEGIF  
CGISSGASVLAATQVAKRPENKGRIVAIIPSFGERYLSTALFQNLWDEASAMKAESVEA  
>comp5596\_c0\_seq1; 564 210 1535 LEN=1869; translated  
MPSAASSSSSSSLSSSSSSSSPKSITDDNSNNNCSDTKRSSSNYYLTEEAKKNLKAITYR  
GADNSLIYQYVLSPLAGYLVTTIIPKSMAPNTVTSGLAWMVSAYLSHWWFAPDLVFEFC  
ESDSRDPSCDPPRWIFLWNAISLLVYQTLDNMDGKQARRTGSSSPLGLLFDHGCDINSI  
FGSANVIIAMGLVPSESLLSIFLLIFVPMVFFIATWEQYFTGELIMPIVNGPTEGLLGT  
AAVSFLSFWFGIGVWEETHAYDLLSAATGFGGGQDSTPWKNSEFLVGAI SVLSVQEILLK  
LAFGLQKRATAALVPPFAMAASFFVIGWIGPEIWL SIPRTGMHLSMLLFVEICTELMLAH  
VTEGSFRPWRQIAPLVGIAAWVGLSGSAGGNHGWVAPALVAYTWCLGAYLVTKCTLVIR  
EICDALEIWCFDIVTPHCRRL  
>comp5597\_c0\_seq1; 396 215 1212 LEN=1297; translated  
MSPA VKWDQIXEPISLSPRRLSASPQDSQPNYPEGGDETDLLOSPEGESTPGGGDATGTS  
KEDFVGLVEEVMKSSKSEHIPRLLANNIEVIIGLQGDGAQIITSILEDADKADGEKDGDD  
SVYTQTLQTIDMILGFAEDFVRQAQEMDAANKQLLGIKAMVTSSENDQSVAGGEGRIIS  
KEDSASKREQLLDTIMKEEKNFSSGFLRHIDGECDRISNQEKLTPESTRLLDILRMIQT  
RVLEELGQDLGEAALVLGQLMGYEKEEELLGVLEAGLTVRGNEFALEMASLTEEALDGF  
RVPGGADPELVDKVRFIDRRVQEFLETNEFQ  
>comp5598\_c0\_seq1; 175 541 1134 LEN=1622; translated  
MKRDLTKERSSIAQNRLGATLSSDNAHETICILEKGSIH TLVQRLASSSGTKIELAREVP  
VEVRTYEQVGASMAWHKDDILYDPPQVEVVFTLENDSDCVTMWVPDKGEGTAGETNNDII  
QSQETHPNSMLILLAGGPDHCVTSLKRGRVILKAYVCEGATYVGEEDLHQFGSVKSNT  
NANRTSKPKRRKQKRRR  
>comp5599\_c0\_seq1; 438 475 1533 LEN=1973; translated  
MNSIIEENAFDESNSMFMNNAKSTIEDNCEDQGLSVSALSGEDTDVSLLLGEEVSHCNDH  
YAENGETKQPRRDDSEEDTGTIDATTLVSTTSSNASNYFLPHHKHNDSLCYSTTSSTCD  
TEHQRVAPSSYL TNSNLG SFQQAFPSMFPGQTLPPHHSKRTEQPEGKSSNSNSHLP  
SY YYYSSSYQNSTLNDIEVGMNLNRTPAVGSNVYQKRTKTS DRWVLFYDDGETSSLLR  
PNSA NSWRGALKCFSPRVVLTVLLCSVILFNL MRYGTHFKHQFETYQHGSNSLGGSSK  
VDTSV DYIKLETIGGAANSYPYSESWKDDDSL SLLSKLESKIHAVGGRENENGGERR  
>comp5600\_c0\_seq1; 883 79 2433 LEN=2614; translated  
MTSISQ NARTLKMSTSPRNHYQHKINQSYIGANDMNIYVSSPVPVSDVHNGSITNIKTEA  
SSMDSNPHNVSNTSSSMKFSSSHHHQYHHGTRPSLAGFDPFSEQQTPPPTKSIAPDTRG  
NSSPSGEVDLAFEGADSGYSKMEKHRPHRLGLGNVENFDNEQVDTNGVASAGANPSKKT  
T SAKGPMKKVNF LRKSI LAKSLT MARQISAERNPSTQKTPSAVSPVSVVSLNDNVSN  
PGN NDEHLP GKQ QMTASTITTPNPKGMPSSF I HADQSPSLPSQPLVLSKGPTSLTQD  
LLELKEG FQNHATLEIPLLTTPHKQRNKPNYAPTSFLTGTQSKGIDYEAPVLT SCLFN  
DATPFQLEI PSLLEVVTMARLNEFVENYRKQDQNL DLRQFVGLSRLQLEHKLQTS  
CATTSNHSSNKNIA TSNNILVKEHIPIVQSLDCSEHDHDEITATTNTKGGEISIQGFT  
TESGGENHSADDRTE AVIFQQRNFTVVFRTTEQQAKGLQGGGNSKSKKRAVDLND  
DENGSEFPDLNKNPN SRCTIEVYSGFKESYSRIEECFRQVDKLV DENPFCDVFFSGY  
SFGGALATLAAFRYAKA RPFMRVGLTLGSPKAGFAGFRQAANALPNLKV MRLELGK  
DARCQGP TAGGSHAGHTVVL NHTGSGGPTGSSGNSPHNKSNAASKSTGGGNAAT  
PPVSQGPFPSSPSDHRKPSVSVYKFA TPKHKNGF FKSNNPGLKKYISTLEDLAT  
LNKTSGRSASSLTWATDFANNAGEGVVNN  
EK RQMV  
>comp5603\_c0\_seq1; 160 1 398 LEN=760; translated  
XDSKYHRYSTTNESTMSALAKTLEPLMKRAARTYQV LATELNKMGLRAEDLMSRDEPE  
VNEALEL ASPDVVEGRYRRLKRASDLAFKQKELQDYAPDMI LDPMKKEI SADVDKIM  
KRD LEFDLLNNHKKG  
>comp5604\_c0\_seq1; 398 51 1650 LEN=1676; translated  
MNGNLDALTTIFTEFYWVTVVFMFLIHVGF CMYEVGASRRRNHMHTLMKNVMVIPLV  
TV TFFFFGWWIYWAFPMFPFFGGLNHEMASANLPWSPN MATNLDDRITGVFWAAFL  
LFSWTA ASIVSGSVIERIRSSALWVHAVLIGSVWWIIDAAWGWHYDGMVKYLG  
YHDAYASGVIHA IAGGYALGVIMVLGPRIGKFAADGTPRDI PPHNPWMLTIGIFLI  
YTGFWGFYAACNVPLI SPEVIGGQITGTTWTATNIYLAPTSLSAITFNFLMSLSG  
GLMAAYV VSKGDAFWTFSGGL

AGIITASAGNDLYHPVQAMLVGAVGVVIVYKLFHWVERRFKLDDAVGAVAVHGYSGVVGL  
IIAGFLLWGAPSSPFEGYATINPLGQTLGAVIMFFCLGFLPAFIVAKMQAAAGVLRIPVE  
VELQGLDYQNXHAYEDAIVQVIEADKAYLNTKPTPAEXRIRHMSTIGYESWAVDLAEVGP  
IYPFQGYEIPMVVAGVIFWLAWHRIQFVREGEHLEQARKMGDPEKIRKHLERY  
>comp5606\_c0\_seq1; 458 292 1722 LEN=1989; translated  
MAFALVMGTASADLQDYIDDETGEVKSFDPNQFSIHVVNKSXYRADVYWDDGWQGV  
TVDPGETMGVTTSSQGHAFITRHGVRENLYPEAVEGEEDKPLRIVAQKPNEKLV  
PEGAA  
PLRGERAEKNRCVDRYSMCAGEGETSLSSDSSVVDTSGARNRVFRLQCTLLDSV  
VNLFRCLPFPATKGLCSEAPGWMIVNCCCKSCDEELNASELLDADIRCSRENLMG  
GPPAWEPGDLNKLFEKWVTDEDFQOYTPNVLS SPGAKFGGRDGPWIITFDTFL  
TDFESDQIWKGGELAGFDRSTDQGGQVNQFGEMEQQVSKTRTSSNAWCTDKCE  
MLPGVISATEKIQKVTGVPKVNYESFQILEYQKNQFYRMHHDSSDGKDDTAAG  
HRILTFFLYLSDVVEEGGATRFTKLGLDVTPKKGRALVWPSVLDENPEISDR  
RMYHEATDVIRGEKRAANHWIHLDYETPNLWGCTGAFS  
>comp5606\_c0\_seq2; 458 292 1596 LEN=1863; translated  
MAFALVMGTASADLQDYIDDETGEVKSFDPNQFSIHVVNKSXYRADVYWDDGW  
QGVSIATVDPGETMGVTTSSQGHAFITRHGVRENLYPEAVEGEEDKPLRIVA  
QKPNEKLVPEGAA  
PLRGERAEKNRCVDRYSMCAGEATKGLCSEAPGWMIVNCCCKSCDEELNASELL  
DADIRCSRENLMGPPAWEPGDLNKLFEKWVTDEDFQOYTPNVLS SPGAKFGGR  
DGPWIITFDTFLTDFESDQIWKGGELAGFDRSTDQGGQVNQFGEMEQQVSKTR  
TSSNAWCTDKCEMLPGVISATEKIQKVTGVPKVNYESFQILEYQKNQFYRMH  
HDSSDGKDDTAAGHRILTFFLYLSDVVEEGGATRFTKLGLDVTPKKGRALVW  
PSVLDENPEISDRRMYHEATDVIRGEKRAANHWIHLDYETPNLWGCTGAFS  
>comp5607\_c0\_seq1; 138 1 892 LEN=1022; translated  
XVKRDVFWFDGVDVDSSTNDNPEIVYVSSPAPLKSLANLELYEFATGPVQHSK  
TPNRNHRDVS LPPSSFVAGQDPFVTALKIAVVTGSTRTSGPPSINGPRIASFVR  
HELEERGNTIVAEIDPRDFPLEKPEFAHRRRTVPKPLREARAVLEEADAYVCIT  
PEYNHAPSPGLVNVLN HFGSSVFSFKPSAIVSYSAGQWGGTRAAIALRPI  
LSELGALPVSAMIHIPNAQDAIDDDGTPTTDPKRWKEYCGRCFSQLEWWADA  
AKNHKEIADPFEESEKPFRLTPSQRNAPKKQ  
>comp5608\_c0\_seq1; 182 1 1007 LEN=1196; translated  
XNTSGRYDTTHKTKNKNLHLASSISRSLQYINQSLNFSFSSGPKYRELMGEG  
GWVQHRGTLERIDLEMLSRYQQNSLSGDDVTIPAFTEESNTDDNWYSITPTIL  
RWEETFSAQVGN TSGAQKALEKKLENIHRELLFVNKPSGLLSVPSRSLNDCL  
ATKLQSSYPGSKPCHRLDRDTS GIVLFGTYDAHRDISMQFAARTTSKYVAL  
VAGRPEKDHGTVNLP IGTKRTEGGFNRTIGGYKPRDSVTEWSIDKVFNDAT  
TGAVFTRVRLKPI TGRGHQLRLHMKAI GCPILGDTIHGE GSIAMCSSRLC  
LHAQTLEVDWDGLRLKAESVPPF  
>comp5608\_c0\_seq2; 285 185 1318 LEN=1507; translated  
MGFQRLTGTVTRTLVAIMGIVYGAWRRKINAFHPNQSSRVVAGVGYIARHGQ  
MLLRCEKTRTESSVQTLNLPISKRIHLGGPKYRELMGEGGWVQHRGTLERID  
LEMLSRYQQNSLSGDDVTIPAFTEESNTDDNWYSITPTILRWEETFSAQVGN  
TSGAQKALEKKLENIHRELLFVNKPSGLLSVPSRSLNDCLATKLQSSYPGSK  
PCHRLDRDTS GIVLFGTYDAHRDISMQFAARTTSKYVALVAGRPEKDHGTVN  
LP IGTKRTEGGFNRTIGGYKPRDSVTEWSIDKVFNDAT TGAVFTRVRLKPI  
TGRGHQLRLHMKAI GCPILGDTIHGE GSIAMCSSRLCLHAQTLEVDWDGL  
RLKAESVPPF  
>comp5609\_c0\_seq1; 570 1 1962 LEN=2182; translated  
RMDTAENSSTEGEVISLLQAHERKCKQKRGVNTFDRMEVSSSESTRFSASSL  
LGNVSTGGDTIEVDNSNVRDLGGNEKPLNEKNILTDVKGITADSATLVMANES  
HAQKLNRYQDDESTRDCPFVLELGEVDVAATTRKSLSSNSFTLN RVHDHVQNL  
VNDITIRQTSSNIDKSVSFDTEFIKTINVNSGPSDDL LDKPTNVDIASFTSM  
IFEGLHPVRIQEDGLSDSFTRS GKSNDAVGKIVCDRWRQFIEAVCGEVE  
RRIDQEGTAATSLRSLVEEDPGLYYSIQHRFQSSGEHSFIR  
ESLKRLEVEAGQILIGYEWNSWLATVLESFHGPLTDIPQAF TDDISKIDEAL  
QQSKILETDVSFMNDRRTKRARRKSLARHRMTV TALERIEIESIQCAIKAE  
LEQMEREKVDLLKATTSCYDFRHN AELHDGLKVEAEISQRSFSSLRGLHS  
VSVSTLSESDIEISIIIGSCKQTYLELMYKGTCKGTANTNVLSKIDSSQK  
MEKSLYVYHGS IATFLEIATKRLIYMAQKSDIKGEFRINDHLLRYAWLAG  
RLDIVAKEFQVVQRRYRGKLYRDSKGSFSFIVEFESNKS KMVADFAI  
ESEYPSFPVEVRLDLISGQDLERIRKALVKNAPGFGSLSRACDI IHSIMNG  
>comp5610\_c0\_seq1; 631 106 2310 LEN=2388; translated  
MVRSAPIVGAETERDGREMNMHRIVEDFNYS TFSRSLNRTLIAEKYGVSWR  
SETSNEIGVKIIYSGADPNANAASALD ATLSETGVCQNLDCRDFMCIGWCDI  
TALGKNGVIESLAEVSHI IALMMPETNSFTGSGSIQTQAIAAMQINTMLRKY  
PELTGKGVKIGIISDSFNARAG TLAGRNVA VNGTSEEADIESGDLPGGDQ  
RVKVLTEVEPDFFPVSDEGRASAQLIYDLVP

DAEIVFSSGFLNAGGFFASAI EELVEYGCDVIVDDVSESDTILLTTYEDDFVANFFRLTL  
FLNLYGLFVQFQSADLXXADGFEP I FQLGPTPKAADNAATVDGVAYFTVARNLASRSWENR  
GFKDTACPNNP I FDDY I SCHDFGNGNPLQRIAKFAPNPLTFYWDDPWTSVSGLPGPESDL  
DIFAVDIETGDILKRSATVNSGGDAVEQLVFPQFFNLVIAKSSGSPSLIKWIDRGLTS  
SDPPAESATLTGTGLAPGVA AVGAASEKQVFGQLELEPFSSQGGIPLIFNDDGQRFQEI  
VLKQPRFVASDGSYNTFFGYLEPYEFSIGEQLRVPPRFYGTSCSVVNA AVGVILIQAM  
SLFPGERRLLNSKKTGEEGGVNSTSAKNESEEDQDVRKGFSLPFDVYKIMEDTAIDM  
NEGGFDL SFGF INAFDAVEMVVQKARKGTKSKKASKKSGRIESVSTECPVESFLGPIG  
SYFDDSYVANATLS

>comp5610\_c0\_seq2; 598 106 2454 LEN=2532; translated  
MVRSAPIVGKAETERDGREMNMHRIVEDFNYSTFSRSLNRTLIAEKYGVSWRSETSNE  
IGVKI I YSGADPNANAASALD ATLSETGVCQNLDCRDFMCIGWCDITALGKNGVIESLAE  
VSHI IALMMPETNSFTGSGSIQTQAIAAMQINTMLRKYPELTGKGVKIGI I SDSFNARAG  
TLAGRNVA VNGTSEEADIESGDLPGGDQRVKVLTEVEPDFFPV SDEGRASAQLIYDLVP  
DAEIVFSSGFLNAGGFFASAI EELVEYGCDVIVDDVSESDTILLTTYEDDFVANFFRLTL  
FLNLYGLFVQFQSADLXXADGFEP I FQLGPTPKAADNAATVDGVAYFTVARNLASRSWENR  
GFKDTACPNNP I FDDY I SCHDFGNGNPLQRIAKFAPNPLTFYWDDPWTSVSGLPGPESDL  
DIFAVDIETGDILKRSATVNSGGDAVEQLVFPQFFNLVIAKSSGSPSLIKWIDRGLTS  
SDPPAESATLTGTGLAPGVA AVGAASEKQVFGQLELEPFSSQGGIPLIFNDDGQRFQEI  
VLKQPRFVASDGDHDSNKPHDEF I SWMTSPQLVVVAFNDTHYIFARRTFFQSLNDNIXS  
SYNTFFGYLEPYEFSIGEQLRVPPRFYGTSCSVVNA AVGVILIQAMSLFPGERRLLNS  
KKTGEEGGVNSTSAKNESEEDQDVRKGFSLPFDVYKIMEDTAIDMNEGGFDL SFGF  
FINAFDAVEMVVQKARKGTKSKKASKKSGRIESVSTECPVESFLGPIG SYFDDSYVANAT  
LS

>comp5610\_c0\_seq3; 659 106 2190 LEN=2268; translated  
MVRSAPIVGKAETERDGREMNMHRIVEDFNYSTFSRSLNRTLIAEKYGVSWRSETSNE  
IGVKI I YSGADPNANAASALD ATLSETGVCQNLDCRDFMCIGWCDITALGKNGVIESLAE  
VSHI IALMMPETNSFTGSGSIQTQAIAAMQINTMLRKYPELTGKGVKIGI I SDSFNARAG  
TLAGRNVA VNGTSEEADIESGDLPGGDQRVKVLTEVEPDFFPV SDEGRASAQLIYDLVP  
DAEIVFSSGFLNAGGFFASAI EELVEYGCDVIVDDV RADGFEP I FQLGPTPKAADNAATV  
DGVAYFTVARNLASRSWENR GFKDTACPNNP I FDDY I SCHDFGNGNPLQRIAKFAPNPLT  
FYWDDPWTSVSGLPGPESDL DIFAVDIETGDILKRSATVNSGGDAVEQLVFPQFFNLV I  
AKSSGSPSLIKWIDRGLTSSDPPAESATLTGTGLAPGVA AVGAASEKQVFGQLELEPF S  
SQGGIPLIFNDDGQRFQEI VLKQPRFVASDGSYNTFFGYLEPYEFSIGEQLRVPPRFY  
GTSCSVVNA AVGVILIQAMSLFPGERRLLNSKKTGEEGGVNSTSAKNESEEDQDVR  
KGFSLPFDVYKIMEDTAIDMNEGGFDL SFGF INAFDAVEMVVQKARKGTKSKKASKK S  
GRIESVSTECPVESFLGPIG SYFDDSYVANATLS

>comp5610\_c0\_seq4; 626 106 2334 LEN=2412; translated  
MVRSAPIVGKAETERDGREMNMHRIVEDFNYSTFSRSLNRTLIAEKYGVSWRSETSNE  
IGVKI I YSGADPNANAASALD ATLSETGVCQNLDCRDFMCIGWCDITALGKNGVIESLAE  
VSHI IALMMPETNSFTGSGSIQTQAIAAMQINTMLRKYPELTGKGVKIGI I SDSFNARAG  
TLAGRNVA VNGTSEEADIESGDLPGGDQRVKVLTEVEPDFFPV SDEGRASAQLIYDLVP  
DAEIVFSSGFLNAGGFFASAI EELVEYGCDVIVDDV RADGFEP I FQLGPTPKAADNAATV  
DGVAYFTVARNLASRSWENR GFKDTACPNNP I FDDY I SCHDFGNGNPLQRIAKFAPNPLT  
FYWDDPWTSVSGLPGPESDL DIFAVDIETGDILKRSATVNSGGDAVEQLVFPQFFNLV I  
AKSSGSPSLIKWIDRGLTSSDPPAESATLTGTGLAPGVA AVGAASEKQVFGQLELEPF S  
SQGGIPLIFNDDGQRFQEI VLKQPRFVASDGDHDSNKPHDEF I SWMTSPQLVVVAFND  
THYIFARRTFFQSLNDNIXSYNTFFGYLEPYEFSIGEQLRVPPRFYGTSCSVVNA AV  
GVILIQAMSLFPGERRLLNSKKTGEEGGVNSTSAKNESEEDQDVRKGFSLPFDVYKI  
MEDTAIDMNEGGFDL SFGF INAFDAVEMVVQKARKGTKSKKASKKSGRIESVSTECPV  
ESFLGPIG SYFDDSYVANATLS

>comp5611\_c0\_seq1; 1234 698 4423 LEN=4927; translated  
MQGVPTKNVSSAGKNNLQQQSQPSPTSVKDLTIDVNSPPI DRGLPSPIDSKSRRNR  
KPKARGNQGE PVASPARNPKNTPNSTKNKSSHNNSPNNNSNHTSSPFCSPIVSWRSSRPR  
NGNNNSRHNTKNNKQWNHPSPRFSKNVSSPAC PASTGFPTSKKQHDAPMKKRDL YFALHV  
ERVGIAPLPENETQQQKAVARVTLTNWENEIVLDTFVAIPVPVTD FYETGIRPEHVKN  
TKSTNAIGSAVAEGVASDKNIAPA HSSQCFSEVRKVEQMLRGKILIGHELDEGLQALGL  
VHPTTDMRDCSVYFSDERKPGHSSLKSLEELSRKELNRWSVKASKARVAKDISNKEAIF  
SSKDH SIKT PVLVCVTSMDIYK KHRNAWETSLIVQARERERQQQEHL LKISEQRQQEQE  
RARREAQQRCQQYRDAITTVSMNCETVRTGRKTLTRVTIVDGPSRNVVLDEFQCMVFP

VTDF TALDAKIPGMHVPRHQTDNSCSSKPI SVVRALVEQSLRGRLLVGYKVEEGLKALGL  
THPWAQTRDIAYYPPFLRNASVADTSMVTVRPLDDLSEDFLRQQLRPVGDRCRPLDVCRT  
TLCLYEAVRDQWEGQQRDSYPHHVHPQHSQNLQPQQPGRMMTCSPSASSVGMHLSPHPNH  
YNHQPNHCYGGQOTDLTSYGGPTMILSPTQRQQYQPHVMEEQQQRPDMSRNSPSSWFPWG  
KNQPLQENQVGGASQMLSPQAYQVLQEVSGVQYASFSPSKKSFQDNSSVDSYYGNSSYI  
EGTSRYEESTVGGRSGLISETVATESLISSLPDESSSVISSDQPLSTVGSPrLCLKNDSP  
SSSSWFRFGSKKSKYPTSNVDKTNCE TMAAVQEMEVLSDDGMLPTPTTLFSSKGLEKDNS  
KSQPKTDNAETITEGTAMSPSLFSRKLFGFRKPSISTGGKERSHSPSSCSSESTIDELSI  
AAEPEGFPDTATEASIEITLSIPNSTETEGGDTCSLLVEKAESTTLASRPSSSSWFGFR  
SSKSLGSKCKNFPSDSLTKVSDPTVMPYHLGLPSAPTERTAAMEDDWLQEVMTGTDDLS  
PWLNENPQDKGGEETGKSSATS RQGASWFGFKRGKVTSLNKVTPLTNGFDSIGMEMNQD  
PRGDSAWRS DSPKDDYWSAATNTPMSGSD EETLSTILMNANSENNDSDIFRPRARLPT  
ESTVPSVATEVASEEEKCVSDDCYSKELDFGAVESFNFLKI  
>comp5612\_c0\_seq1; 349 117 965 LEN=1051; translated  
MASSSSRLNLCHQSSFAENTLVTIVPSFGYSGSFPLLSCTQSVNVGPFTAGMPSDVPLW  
VAKALYRRNFCQIELPEWLSAPFLTSILKEERESVLLSTRLPFHYYE IARALDCCLTDSK  
NPSGKATKVVLQDLVAVRSDKLRMHFHLSRSDLVHPPAGYDRVDENGNYTQDSLKGKSP  
APELPIISVTGICSYELNKVGPFLQRAFSDYGF LTRRPQAAAGGGGTSEPTKGPASSSSS  
AHSSEYDKDGSGLLEGDAGNGMDATSRRVSVARSRLRRFRD  
>comp5613\_c0\_seq1; 108 339 804 LEN=1057; translated  
MVIDGNNFLGQRGVTGLPRDGDKLAEKLV AISGTQGGSSTPNDVLLVFDGRRDVDLERTD  
SKLTDSFTKVQLQHGTIADDFLVEEIEQIRKEDPSRRVKLV TADKRLRARALGIRPTVKQ  
VVNPKVFWKKYVPRMSGQKKNPTPHMPRGNSGEE  
>comp5617\_c0\_seq1; 627 197 1942 LEN=2572; translated  
MATAMATGMATATARLRSASRAVGR TALRFGPAGPVLNGHRTVPGILLPTAAATTVSTV  
PWPSFRRHPSFSTTTPDRGEP IPGEEGSEGQRQGGQQRQHVRDPPAASW MKAYRLLLEKH  
HREHGTTMVSTTAAADDGSGPSIAAWASLQRKRHKSLSPEQKELLNKIGFVWDYQEARWL  
EQYERLCDYERRKLP SKLRATENGASPIDLESVFEKRYHGDPVLKRWVDAQRLRYRRESI  
SAEKVRLLEEVEGFFWDVKEARWAEMLRRLSVYAEAHGGSCSVPQNYADDPQLACWVANQ  
RQRRHQLTSDRIQRDALGFVWDVRELRWLETYEAYKAAFFGGGTCCGARGDDEQARQLGD  
WAIKQRNCFRRGTL SARRVQKLEELEDPSDGSRFVWDPHEENWMDMYRELEDFRSVHHHV  
VVPTRSSSVGGNETAREGDASPEDEPPRSSSTSSSTNPYKQLGTWAANQR RAYKMGTLSD  
KRVELLERLGFVWDVPRAQWEDSYRRLLEYQREQLEAGREASQSTMVPQH YDKDPQLATW  
VKEQRQCRKNKSLPPDRERLLEKIGFVWTVAGTGSSPPPGD  
>comp5618\_c0\_seq1; 166 120 386 LEN=386; translated  
MNIQFIPFICLLALLVVSDAQPGQ PDDKDDKMDTPTDGGGSENC PAADQIVDGDPCGDFI  
PAGSQEASCFVGD TGEQCNC PGQETPDPV  
>comp5618\_c0\_seq2; 166 307 573 LEN=573; translated  
MNIQFIPFICLLALLVVSDAQPGQ PDDKDDKMDTPTDGGGSENC PAADQIVDGDPCGDFI  
PAGSQEASCFVGD TGEQCNC PGQETPDPV  
>comp5618\_c0\_seq3; 166 65 331 LEN=331; translated  
MNIQFIPFICLLALLVVSDAQPGQ PDDKDDKMDTPTDGGGSENC PAADQIVDGDPCGDFI  
PAGSQEASCFVGD TGEQCNC PGQETPDPV  
>comp5619\_c0\_seq1; 271 133 1044 LEN=1287; translated  
MSSDKNFVQEYHYHLSLSSTWTGIFGATFTVLITLDDSIWLM PFVATGGCEKRSRFVHA  
GVFLGTLMTLSFFCAIALGFVSWFGQNTDNDTQSSIRRVEIQLE C ISVILCWAIASGF  
IKKQLKHRRRLREDHEGRDRRQHGT RDESNAVLRTEKKKDDVKGAETSHADDDSEKFR  
ALYGSISGPPVRKYSHDNDLCMPTSNEKEPSTDTDGLAPMTVASLTALGFLDEISYFPT  
LIVGNVFSVSELILGTLFAGLTVLAIQVFLFGRCKPFIDFLDERVPLYAIIACFAAIMTC  
RLVW  
>comp5620\_c0\_seq1; 370 192 890 LEN=910; translated  
MTKNRSIRSFVTRSTLTAIVFVWCCA HSEAFQATPNQK PALSSLAPAATAATTLAVLLT  
LGTPLEPAFAASKESPTAGRITINQIPPKTVRIEARDLPVVGKLVSGTYARVDESSVAGP  
PSVIVSSPRDTIGAIKKATTGGHVEFDVGGSVGLRTHLDVDIAAEKSGVASVRVASDLIP  
QLPFRNAASSLYGQGRKESQWNIVTNMGSGESYFNTKTGVTQYEQPSKF  
>comp5621\_c0\_seq1; 622 130 1534 LEN=1534; translated  
MSSEITTVSASIADTHIDPSINDTNNDANSDEVGTEKITPIAVAKTEEELS GKDDSDAPSP  
LVIAAKPPNSAMDTAKSLNESNNKI IKELDDETAKTFFQILMEILTNDENS DTIAWLPHG  
RSFIIYKKKKFAAQVLVKYFKATKFTSFRKLN RWGFTRVTRGTEMGSYFHKMFLRDNPE  
LCLRMSSHTSSKYHSHHHDPANPIQNAPHMHGHLVMNPGGVSGFMPPGALGMPVVPFPF



YGMFGMAPGATTAGMVSPPNGIPPPAPMQANMPAPPTTAAEFSSQQNQYINQQLQQLQWQQ  
FQLQQYQHQQMQAAAAAANHPNNDGAPYQQSPPGTLPLYGGNPYPPLQPLQQAISDLDP  
NTPPIALTAPEPPVVGQHPSTGQAENGQHPSPARPVQQLQQPQQQDQATSLMHPSTHG  
GAHASQQHPHYQNQQLHPSPTQQPPNNNPYGHNPYQYGGQQSSLSIRX  
>comp5621\_c0\_seq2; 646 130 1836 LEN=1836; translated  
MSSEITTVSASIADTHIDPSINDTNNNDANSDEVGTEKITPIAVAKTEEELS~~SGK~~DD~~SAP~~SP  
LVIAAKPPNSAMDTAKSLNESNNKIIKELDDE~~TAKTFPQILMEIL~~TNDENS~~DTIAWLPHG~~  
RSFIIYKKKKFAAQVLVKYFKVGS~~PGSFLCRFNKYDYTYITILMPFFDVVXGNDLTF~~LQS  
LKATKFTSF~~TRKLN~~RWGF~~TRVTRG~~TEMGSYFHKMFL~~RDNPELCL~~RMS~~SHTSSKYHHS~~HHH  
DPANPIQNAPHMHGHLVMNPGVSGFMPPGALGMPVVPF~~PFY~~GMPGMAPGATTAGMVSPP  
NGIPPPAPMQANMPAPPTTAAEFSSQQNQYINQQLQQLQWQQFQLQQYQHQQMQAAAAA  
NHPNNDGAPYQQSPPGTLPLYGGNPYPPLQPLQQAISDLDPNTPPIALTAPEPPVVGQHP  
PSTGQAENGQHPSPARPVQQLQQPQQQDQATSLMHPSTHGGAHASQQHPHYQNQQLHPS  
PTQQPPNNNPYGHNPYQYGGQQSHVPHGPPHSHQGVSN~~GNP~~PPVGH~~L~~GGEHYGGQQPS  
QVQLQPYYPYQYPQQQPYHHHNPQQQQQQQ  
>comp5621\_c0\_seq3; 580 130 1657 LEN=1657; translated  
MSSEITTVSASIADTHIDPSINDTNNNDANSDEVGTEKITPIAVAKTEEELS~~SGK~~DD~~SAP~~SP  
LVIAAKPPNSAMDTAKSLNESNNKIIKELDDE~~TAKTFPQILMEIL~~TNDENS~~DTIAWLPHG~~  
RSFIIYKKKKFAAQVLVKYFKVGS~~PGSFLCRFNKYDYTYITILMPFFDVVXGNDLTF~~LQS  
LKATKFTSF~~TRKLN~~RWGF~~TRVTRG~~TEMGSYFHKMFL~~RDNPELCL~~RMS~~SHTSSKYHHS~~HHH  
DPANPIQNAPHMHGHLVMNPGVSGFMPPGALGMPVVPF~~PFY~~GMPGMAPGATTAGMVSPP  
NGIPPPAPMQANMPAPPTTAAEFSSQQNQYINQQLQQLQWQQFQLQQYQHQQMQAAAAA  
NHPNNDGAPYQQSPPGTLPLYGGNPYPPLQPLQQAISDLDPNTPPIALTAPEPPVVGQHP  
PSTGQAENGQHPSPARPVQQLQQPQQQDQATSLMHPSTHGGAHASQQHPHYQNQQLHPS  
PTQQPPNNNPYGHNPYQYGGQQSSLSIRX  
>comp5621\_c0\_seq4; 688 130 1713 LEN=1713; translated  
MSSEITTVSASIADTHIDPSINDTNNNDANSDEVGTEKITPIAVAKTEEELS~~SGK~~DD~~SAP~~SP  
LVIAAKPPNSAMDTAKSLNESNNKIIKELDDE~~TAKTFPQILMEIL~~TNDENS~~DTIAWLPHG~~  
RSFIIYKKKKFAAQVLVKYFKATKFTSF~~TRKLN~~RWGF~~TRVTRG~~TEMGSYFHKMFL~~RDNPE~~  
LCLRMS~~SHTSSKYHHS~~HHHDPANPIQNAPHMHGHLVMNPGVSGFMPPGALGMPVVPF~~PF~~  
YGMFGMAPGATTAGMVSPPNGIPPPAPMQANMPAPPTTAAEFSSQQNQYINQQLQQLQWQQ  
FQLQQYQHQQMQAAAAAANHPNNDGAPYQQSPPGTLPLYGGNPYPPLQPLQQAISDLDP  
NTPPIALTAPEPPVVGQHPSTGQAENGQHPSPARPVQQLQQPQQQDQATSLMHPSTHG  
GAHASQQHPHYQNQQLHPSPTQQPPNNNPYGHNPYQYGGQQSHVPHGPPHSHQGVSN~~GNP~~  
NPPVGH~~L~~GGEHYGGQQPSQVQLQPYYPYQYPQQQPYHHHNPQQQQQQQ  
>comp5622\_c0\_seq1; 149 1 554 LEN=554; translated  
RYGAYCSVTGR~~TKHRRRLNS~~NI~~VCLCTYNFFMVASLKRKRK~~SEPKQKLETGWKQ~~RWLTPS~~  
RSLFVLFV~~SLLR~~RII~~HS~~DL~~FSIF~~DSANVQ~~VETSSNNGNETKETKSSRPASIQ~~MEMSSNS  
GRNETKENNA~~AKELGKPKSSRPASIQ~~METGSGSGRNETKESNDA~~KELGKPNSSRPASIQ~~  
DTASX  
>comp5624\_c0\_seq1; 288 77 556 LEN=688; translated  
MSNFTTNEEDQREAAKLQARLRNAASDDDGNNGNNGEIDSAATYHP~~IPNVTMAEGKHKYVL~~  
MSAVLPNSSERQNFVVS~~SAFASYHRDAAEPMVAAL~~ESSGYK~~SVAITGGGRISLDTNKR~~SI  
SVYGF~~SYGFLADHALSVSVIK~~NDER~~YKDFDVTWS~~NEGY  
>comp5625\_c0\_seq1; 515 59 1330 LEN=1584; translated  
MAPNDSSYVRSHSSIAGKHVNVGMMTSGGLAPCLSSSVAQLSKY~~WIEALA~~QGKISGLTLR  
MYVDGYSGIL~~TGHSFV~~PESEWEGMDKLNFLGGSP~~IGNSRVKLTNLADCEKRGFI~~KAGEN  
PLEVASQQLLKDEIHVLHTIGDDTNTQAAVL~~SKYLMDEHNGSVIVIGMPKTI~~DNDVIPI  
AQTFGADTAANQGAIF~~FQNVVNE~~STASPRMLVLHEVMGRDCGYLTAKTAQYYRDILSKQN  
LASSIFPSNQSSRDIHAIWIPEL~~KLDLIAEGARLKKVMDENG~~CVNVFFGEGTGVEEIVRD  
MESNGEEVPRDAFGHVTLNKINPGQYF~~SKRLANYVNAEKTIVQKSGYFARSAAANE~~FDRN  
LIGECAKVGVASAIEGVSGCMGQDEEKEGLPIRPIEFERVKGGKAFDLKQEW~~FQIMLKEI~~  
GQI  
>comp5625\_c0\_seq2; 344 262 1065 LEN=1319; translated  
MDEHNGSVIVIGMPKTI~~DNDVIPIAQTFGADTAANQGAIF~~FQNVVNE~~STASPRMLVLHEV~~  
MGRDCGYLTAKTAQYYRDILSKQNLASSIFPSNQSSRDIHAIWIPEL~~KLDLIAEGARLKK~~  
VMDENGCVNVFFGEGTGVEEIVRDMESNGEEVPRDAFGHVTLNKINPGQYF~~SKRLANYV~~  
NAEKTIVQKSGYFARSAAANE~~FDRNLIGECAKVGVASAIEGVSGCMGQDEEKEGLPIRPIE~~  
FERVKGGKAFDLKQEW~~FQIMLKEIGQI~~  
>comp5626\_c0\_seq1; 229 326 883 LEN=1466; translated

MNSLAAANGGGATETSASTKKIIDLSKLEKTACYARNEHSRFPWTNLLIGDTRLGCKSD  
ADEQLILHFSEFSEFVVRVHSIKLTEFNNGVEPEENPTRVLLFVNRNLLGFEDIDVDPTTT  
LELTAEDLKENADNLLKQVYQYQVKSITLFIEDNNGGEVSALGGLKQYGLPVATTNMAD  
FKKQG

>comp5627\_c0\_seq1; 461 80 1378 LEN=1462; translated  
MADLDDLDAIKQLFALSSEKPGTVAELEEDAIISLCSAAKELFLSKPMVLRRLNAPIKICG  
DLHGQYFDLLRLMDHSGRPPNTSYLFLGDYCDRGKQSI EVLCLLFALKLKDPERVHMIRG  
NHESRKLSRMYGFYDECKRRYNPELWEKFVEVFDMPAVAIISDKIMCVHGGLSPELEDL  
EQINAIERPCDLPEQGLLCDLLWADPEPGIEGWENDRGSYVFGEDVVEEFVKKHDLDV  
IVRAHQVVEEGYDFFAGRKLITLFSAPNYTGEFDNSGAIMIVDSMNCRFQMLKPSQKTD  
RPKKGQELTPLQRLMRSNQVKNALTAVKAFGKPSSEDI LKKMNEKRPCKEASSDYRSMN  
RKKSETKINEADFSNVRFTDNALILETENLTRRKT SWGDVFEEDLYYTEEQIAEFRYEAFN  
SEMDDDEDDWFN

>comp5628\_c0\_seq1; 226 1 1102 LEN=1248; translated  
NPMATTPHSDLAQIHLREGDLQRTNGNYTSAVGDYSRCLEILQEHNRTPEDEKGTTPRNLDLDR  
KIADTQFNLGLTYLTSSSDLQKALAGRTGKTEDPASEARKKKEAETLARDHCERGVLQOV  
DCAGTFCGILAGLGCADPETVLSATRGGGSPGPKTTGLDDGGAPLLSEAATAASRRLEAW  
RTAAAALVGRDFPEVAPSFSGGEDHRKVLDDLQLLDEIQETIDEAERSLEGVRQAAEIRVR  
AQEAAEGKASEEQKHADGSTTTIGFGPATAVAATVASGASAKPVMVVKKKKKKRTGAGAT  
EDGSPGKPAANEASGGGGKRARTDWAPEPPESRDWNPCGTQAVLVGRMPRFWSVETPG  
ARQPTTE

>comp5629\_c0\_seq1; 511 1 1606 LEN=1727; translated  
XNGQNNMISSNSVSMNRMNMTNQMHQIYNQMDPPIPRVIHSAPVVSGPLGGPLTSPRS  
VNAGSNGFTPYNRGGVHPMPYSNMKAI EEEEEFISDPTAYTSCMDTLFGSSIENQRDKLRT  
KKAGFSACNPLNVSTSDVEVEVDIDLQSPSARKQRSRNENGF LCTGIRGPGKKFDYSCGKV  
PNHFGPHNDSFVSDANEKEEVSSSKSSSKSVDSKLILDVSENNNPKNESENEENTQDR  
ASPKFSYEKIASSATEPDEKEAMGSHSSDGVLSVCNESYDEQSYLVDTMSVMNFKKTQCT  
VNTMEDTDFPRVANAFTEGPIDFQKSHVSKDDHSDQDNKRKPSKTSRDGVSNGDHPND  
EVD SFKTKNIGDLADSTNSTRANANSVPTLHEVGTAQSTEEARTEEGVVEVCTEESLPG  
VCTEESIGEMDTERS IHPTSCTGAEAEIDYLADDVPSFDCAYPSPFDEPAEPRKGSNTTFP  
LTRSSSGGENKQVNANSSPLKPCMREETLKP I GALIAKNTKLVANSDFSSTAVQ

>comp5630\_c0\_seq1; 630 69 1989 LEN=2558; translated  
MSPPSTQPPLFSSLASIFRDVGLYHRQREMLDLKESLGDWQAEDAACAFDEGKIRSL  
WPVEDGEESIDGDEDEEGDENTDDESKTSGSGQSQNDSNDNGSDSDSDSESN TDGLEVV  
FRNESAPLVLCWVSESGKLHFFYRLEPSSLTQTVTQDARASFRRLKTDHLEHHPGHAF  
CLGYAGSDTEAEQVRSSRSFFRRDWGDKRSGSGRGCN GEGQIGADEDTSSASSIAVGGYR  
PFAPSSSSSSSSSLSSVLSRRIQLV TISHVATNEGQPGARCLRRRLRGLSCLKARAWCL  
DPWRRSAMHGKRRSDSEDDGDIETGTETHRRSLDPRGWRVEARWVRTE SKPLDTTAKVY  
EEVALGGWPCCLEPNWSSGGDTV SARKLERDIRAAAALLPPQARAHLRKHCR I WVNRSLEW  
GPSDCPVKGRGCCYHPGRAWLTRNGLS AKKHMCEVENDAPNYRKDCDLWIGGVM LHEL  
HAYHHGMVPDGYKNKEIQECYELAMKEGLYDRVKYHSNCSSSSSSSSSNGNKR SWNQYNGG  
NKSHNGVIFPNSTMHCYDSGGVSPSPPAYSCVSPTRPSLPSLGYTYSSSHNGTNHEGETN  
HYYGRNNSSENLFREQQIHL EQSAEKAATKVRIPVATS

>comp5630\_c0\_seq2; 630 171 2091 LEN=2660; translated  
MSPPSTQPPLFSSLASIFRDVGLYHRQREMLDLKESLGDWQAEDAACAFDEGKIRSL  
WPVEDGEESIDGDEDEEGDENTDDESKTSGSGQSQNDSNDNGSDSDSDSESN TDGLEVV  
FRNESAPLVLCWVSESGKLHFFYRLEPSSLTQTVTQDARASFRRLKTDHLEHHPGHAF  
CLGYAGSDTEAEQVRSSRSFFRRDWGDKRSGSGRGCN GEGQIGADEDTSSASSIAVGGYR  
PFAPSSSSSSSSSLSSVLSRRIQLV TISHVATNEGQPGARCLRRRLRGLSCLKARAWCL  
DPWRRSAMHGKRRSDSEDDGDIETGTETHRRSLDPRGWRVEARWVRTE SKPLDTTAKVY  
EEVALGGWPCCLEPNWSSGGDTV SARKLERDIRAAAALLPPQARAHLRKHCR I WVNRSLEW  
GPSDCPVKGRGCCYHPGRAWLTRNGLS AKKHMCEVENDAPNYRKDCDLWIGGVM LHEL  
HAYHHGMVPDGYKNKEIQECYELAMKEGLYDRVKYHSNCSSSSSSSSSNGNKR SWNQYNGG  
NKSHNGVIFPNSTMHCYDSGGVSPSPPAYSCVSPTRPSLPSLGYTYSSSHNGTNHEGETN  
HYYGRNNSSENLFREQQIHL EQSAEKAATKVRIPVATS

>comp5631\_c0\_seq1; 423 1 1276 LEN=1276; translated  
QTITPLQFGE SRPRSDSLGCEAPVRSESDERGTGRHWSNETSHRGMYP LQQVLD RHRGFRG  
IPGPVFP EHERSDGEVEEAKARQAGGKAPSGGGHPALVGPDLFLL LQGR LFEKNVSLVVC  
GESHNDAIDVTRRSPGRFDPT EGWIPIADSSSPEGDLDLRSGLPRVLFVSGGDGEDRPS  
GPAVEEAEREA AAVTIQTEREAETTA AVI PYTETEAAA EAEASTTETTTGPTTTAEMAAT

TTTTPTTAAAAAGPTSPSLETIAIRFLYPINGKKNRPVTLGKAKELAKEFVDKYEIEEEM  
FHCHLVLLWIATTATPGSSHQRVEKQAFLEIETEENIDYNLYERYIDAEEDEEEVYDD  
WVVFPSNAAYVESEIQRRNRRLALPDLVAQWMDVMMVTNRESDFYDYDDDDITVGTAEESD  
DEDGG

>comp5632\_c0\_seq1; 342 299 1762 LEN=2255; translated  
MKSNRDAKASNRHRVPHGKPLARRVTFVTKLSMAMCIVYVWVLGTLSSLHNYGYHNLHSF  
RKSFGFQQSALQEFKTKRPIAEVHVVSLLLESKFVFRHRNFDFLANGGNEVDDDDDDGYN  
NDIPTEQRRPKVSVRWFEALDGMDEVLDEWHQRTQLYRLNATEFAGPDAAGRKHEYASP  
HAVGCYLSHWKLLERAWNSWVGKQYQRRNSKDRYSNDGEATGGTETLSDGKRRRLRLRP  
DMLFVFEDDAHCVSNLIERTWGVVQQLPKDWDILYIGGKPFYHTMGKSLSDYVAANEAP  
NNATNGIADKKRPSDRELLQRKCNGEFGTSLSGPFPSEGAQWRNAGKFTTNDLPPYYQT  
KTTLNTNAYVVNPKRIRRVLRVLSQPMYELPIDVVLAKDMFREFYDPVGTNSSSNSAPL  
KAFLTPSMYCDQNSKRLIVDRDKPPPWEGYWLPWRKKMKGFDPVSAFVWGTIAGLPNMC  
SSLASKQ

>comp5634\_c0\_seq1; 522 85 1293 LEN=2064; translated  
MVFSVPPPPLDDPNVSDPLECPPLKWGILGCRVSNDFCQAMKHLPTQSTVACAARRTES  
AEAFAKKHSIGKYYGSYDEMLQDPEVEIVYVGNVHSFRRSTGEKCLLAGKHVVLEKPFAC  
SVEDGEYLISLAKEKDLFIMEGMWSRFFPAVQKARDLALGGEKILGEIATVFSDFNFNAA  
DSEEYPSFVYQRKLGGANLLVGPYIAAASLFFDGRMPEAVKAMGQVDQETGVELQAA  
VTLSFSPTDVTVKPLMGATDDGLGNVYPKLPGSGVALLSFGFLCETPEETVVVVGSCGRMK  
IESPGHCPTKLTVEVKAQGRGQVGNLTFEYPLPEDTEEIINSGGYFYPNSAGFCYEA  
VARCIASGKRETPQFTLDETMLNLRVIEQIRNQLGVKAVNDE

>comp5636\_c0\_seq1; 251 61 576 LEN=639; translated  
MNIYTITVFIIALQSAQAMVSPAVTCCEENGGTYEILDGSDGQSGFCRKGDNTEEMTFM  
YQNCPPAPMPHPSNEPTTRYSVYAVNNCDATVTANFALRLSSNGGNRNSRVQVQQGQCKY  
VGPTNLDTVTYTSQGSYVSRGNDSCLSIGNSNNSDCNLMGMAENACVINLC

>comp5637\_c0\_seq1; 134 123 251 LEN=251; translated  
MPRIDSSDEAEYEEEEVETPSRKRRASRGVVTYNEDYDDEEE

>comp5637\_c1\_seq1; 375 1 291 LEN=1035; translated  
EANNTEDENNDVDEDETDNDEENDSDSDGGDDDDDEELGKALLGPEIRDDEDA  
VDFVPEEVDEDEDEMDDDDEDDEADEEGKLTMTICLLK

>comp5637\_c1\_seq2; 438 1 315 LEN=948; translated  
EANNTEDENNDVDEDETDNDEENDSDSDGGDDDDDEELGKALLGPEIRDDEDA  
VDFVPEEVDEDEDEMDDDDEDDEADEEDDDASDDQDGPQLKKQKTS

>comp5637\_c1\_seq3; 582 1 432 LEN=432; translated  
EEEEEEEEEVLDLEYEDQDENGQEDAEAADEEEDADTADNAEEDDDDEVEAE  
EGESEAEGEPEEEVEAEEDAEETAENAEAAEADDEVEVEAEEDDDEVEVEEEDP  
DTADNEEDEDDEVEAEAAANNTEDENNDDEDENDE

>comp5638\_c0\_seq1; 218 177 839 LEN=1047; translated  
MEPDNSLPLQLLYEFDGKGVGSSQIEGWNTNEDVMNPYNVTSNSNVEVVQFGD  
HDSIFDIQSSSTSPRQITHDRISESAHIRENLPTEESRCEDSTSSPSQPKPST  
KRKRSRSLVSSSWNERFQELIRFREANDHCFVPHNYPANPKLSQWVRKQRHQR  
KRKEKRLHSTLSDERQELLTNAGFIWDSHRAMWQERYQSLELFQMTNGHC  
NVPNSNFHDSLSLNSW

>comp5639\_c0\_seq1; 360 118 2243 LEN=2351; translated  
MMQKQRRRRRNEENAMNARSYDACDESKCVSRGLSHLYNYSFTCYGDNKDFH  
MMCADGYLPQVVDDEDLVLTEGLNDGAPLLLNVFGIWGAVGSDDSNFQYFTCC  
PPDDLSAETKNVTRHCSDPILGETEGDSNATFTCDEYDIQPYPRMMKQPRLY  
VHPDDCFNKFEGNPYMCCDASGAENAEKILEDETCVPRTESYDEAKAMNRYGGI  
IPITCDFPDGGFKFPRFIEDDGSTHP SQWFHYQCCRSIPAIPFIIHDSPF  
KLTVPYILVLSALAAIGSLLVILGLTIPLVIQLRTEAHRKLNQVRDTGDSG  
SVIIPRLPGRSRASLYSTTICSSQSSGQQTARQSQRHTTSSYSRQSQFSRS  
QYSRPSYSSYNYLIYLAIPLDALAMALYQLSMSASMINQKFNMKFHSVVV  
FPLLRIFSHEIAINLAYMISAILYINALMSYEVLVLLRSFTQVRRVQPPSL  
TKVTLQALSVCFAIIMVVTDFVRRTAGREFLDGNLHRSQSLLAWGGRYGITIL  
VMPILFVMVCVCIIFWKGYLPAIKGNSPKERALRELVWYFIRIVAVIFGIWLP  
FILLGGWTLMNQGGIGDSWYLALVQLLGPIGSLFTTSVILTKSDVRAHTL  
NLITLSYLRDCFHSRCRENREHAEGGKKKEENDRSQXKSTVTVFKNMRTY  
TYEDPCSLESTDMVTLQAVAEGSDPNKTEDYNA

>comp5640\_c0\_seq1; 394 48 1387 LEN=1387; translated  
MSSKHSKGPTEFGGPIGAFGTVVALPLLVLILAHWARFGCLDLDFAAIFR  
GHRDLIFGGEDAMELLAKCTLGLLWFLGLVLLWKILPGKWVEGAPVIDPEAD  
HSAASKDKAPLRLLKYK MNGHATFWTVMILLVATGFPLNDYLYRHYERLAFV  
DILLCFGLSAWLYRGSFQKDLPTGR

NKILSHTGRSGNAVYDFFFMGRELNPRSLGGTFDWKEFCLELRPGLILWVLLNIACAQEYK  
VTGVSVSGSMVLLNVFHAIYVWDSMFMEKCILTTMDITTDGFGFMLVFGDLAWVPFTYNHP  
AKFLVYHDPRLSNPVLACILGLYVLGFVFRLSNRQKDI FRNDPSDQ RVAHLTYLP TKRG  
TRLTSGWWGLARKINYTG DYMMGLSYSLLCGFDSIVPYYYAVYFLILLVHRSIRDDEL  
SEKYGDDWNXVQAAGAVPVHPRDYDR

>comp5641\_c0\_seq1; 731 113 1414 LEN=2201; translated  
MPPKKYTKINGIMKLNPEYKRWKDAQNAAGSPAPATTVVNSAQALPIVSSMDDHMTMND  
DLKQEIPLAESTNATIEMLQEP EIAAEAGMAPDEMIDELGAILAKYEIPIGLTNKMLLS  
EYQSLEFIVDDSGSMQLPTDSNDPTTRRPMSRWKEAEIRVKEMIEI IAYVPFEQIGIEFL  
NRKDRISLKREGRDPKSFLEDANRSIDAVFARKPAGTTPALEKQLQESFLRGQGNNIARYF  
FGDGRPNGGQRAIDEI IKILRHRSDPESNPMTFLSCTNEDEAVEWMKDAEEIAAFCSESD  
DFGDEAREVYKDQGAALPYSKGFHLICQLVAAMCPEDLDAMDESVPFTKYTLDNLLGVVS  
NDESYKH YFDNFLKAQRERVVEIDERTGQPSRLDTIRKNTRWDFNQFRSTNGPATKIAQV  
GDFKRQLQQASQF

>comp5643\_c0\_seq1; 375 1 664 LEN=744; translated  
XGMAPSPSPFAGGTAPSPSPFGGGAGPSPSPFGRGNTNANPSPFGGGMAPSPSPFGSGG  
MAPSPSPFGSSNRAPSPSPFGGNTSSSPFGRGNMQQNSPFGGRNAKKKGPCRFFAQQKC  
KKGDNCEYSHESGGNSGFGGGFQQNNHGSSGQGFQQNYNNNNKVGKKGPCRFFAMGKCK  
KGKNCPLYHETGGDSGNGFGGGNQGFSNNNWN SFGRRRR

>comp5646\_c0\_seq1; 505 129 2014 LEN=2058; translated  
MMPSSLVRS AKRQKLD SMRGNPYEATGALNTNGYHYNTLLSLVDMLVSVQSSDTEDFIEI  
IEKIRSHPFLL EHD SLRRNKVAAIH DYHKTVMISKLHGNLILRLGFL LASFKEVSLRVFS  
SLVFC LRDLYTND DISMENLNT EEEFGELFILIPKV VRIIDDKIDESNVXEAIKMRD TVL  
GCYQIMKSWLRAPRLK KVLAYSSTNTLEDFLLSLIIVIDQRI IKSGSGEEEEIQNVLACL  
GSICNVEAEFRILLDVT KSAVQLRQASPHVNLSPPLVIFFWRCISR VHSQRQTKSERKIQ  
LDFADRAVEAIMPYCASEDHLLSNKATVGITELIGETDYNTRIRLITFIVESVKKKIVVD  
NDGSYGKVEENEIDGNLVALLECFGLCINTENVCDYFFQIDWEKVF DALVSI SVDQKNI  
YASEKSAAVVLPILNSLVTKVEQPLAPLFHKAIEICLELTHSESI SIVKRTLDLLFDLVE  
NPGVERRIRASLAPDMINALALLSPKAFLL EESTKSKLAQT FALLVEGVGNIHF LARQT  
SNLAF LVRLASGSYCETLQSRAQQISVSVLMK LARNPCNRRILANQPGLLSSLI RYTRMT  
PEGTDLFVESKLSRKEMKDQILLVADAL

>comp5647\_c0\_seq1; 92 189 851 LEN=1130; translated  
MAGGEEVDHFTPGAGLSAPAMIKATPLHHGPVLKLVHPVLYSILPAFFQRLILALPFLRS  
FAPSWKERHLILGGSYLYKFKD PHSQIPKGS PFVETLTTEIVGHDTSLQFPEIGNLPAG  
CTGFFAVSTLRRQH FYAVSTREEALLWFRSLHDARQDSITRNMGHASNPYPSSWKYFDS  
LGKSLVKT KARIKDRMERSTFDSMEMTSFTDGP IARGYHG

>comp5649\_c0\_seq1; 507 92 1232 LEN=1232; translated  
MDNDAINDNKNDTPPTSMIPC DCEQFIPQQNLELHRLRSCRAGR SNGTGNDRGQDRART  
AAAVTTLR TTT SIAVGE EKQGDHSDCNEDAQKRVV VTAIDSASRRHRKTRRGNTD DSNM  
AQSP PVSRAEERTGSLDQ SNEIIDLMD DSESSSRGSDSLDRMDVSYGSTPMNDHGDSMA  
VNLTGIDWEDQGEDDGRKMPARDASAHEAPSEDEALEDDAGE SHHDSGADRKPPAIDP  
GDDENSSEPAENDARDQWSCPRCTLLNENTSPVCDACGYHNLEIENALIRRN NYDMLHTP  
EEHPHQRPQQPLPAS PSSHGLIGSGALIGAAVGMAGNWLQGRGTL SGALNGGSTGAM  
GGVLLREVLLSNNRDN NNNNNX

>comp5650\_c0\_seq1; 823 283 2025 LEN=2244; translated  
MARTLAGILGISGVISSRAFSPTANTNLGHSRQRHQREAVVLQSI FYDDFEGFSDFSLN  
QNSPDTE SNNNNNEATPSLSDTDIFASLRARQDSLKEEQRIEEQTEKAVEVDLIERERL  
NYNWNEANC VSTVRLTIDDWIRMAVDLYPMVVC GSSRGNLYLGNLDDGDQLDCLEGVHS  
EEIHEDIPDDVAQACIQALYDGYDGNPFAIAMKKDLVSSGREGGIYACTIIGEEVDVA  
SGSRGGSVRQTKLRLQREGKFRGLEGGTDSNGKSIPPLITSLVFDNRGTLWAGGYDGKL  
RGYNHEEFDLDDRPLMLRQKAPDFDIDVGAPILDMNVEEETGIIVVTTHTKGVFLYSLHD  
GRFLFHCNPFAPSKLRQNASISQRQFARTAMAVLTNNSTALNESDSDAVLIIGSYGHM  
YQIQLSIATDEKNPSRTLLVTSEGTTKITPKHMGPVVCL ESPSPGLFVSASHDGTMRVWD  
CSGRAEDDDDDNDIDDDDETRAVAEESKGP KMPKVLYALSGYKVWLGSVFANERKLVS  
DGADNTVIVHSFDEDEDAI LRSQQEDEDNND DDDFSSLA

>comp5651\_c0\_seq3; 422 83 977 LEN=1095; translated  
MSESSPAVLGDAPIDESREQPSGVPT EAVPREGEENTA AAFSEGANSASLAPDDD GSGGQE  
HDVVDDVDGEGEDED AKSMASASHAM DDEEIEDEEMEEDSEETG SVADSGAAEPEAENAN  
AGVNAKAPNEAPAVDAP IKKKRGPQIPASARKGRAPVKGLNIPFR TVKKAMKLDPDIP  
IVQNEAAIMTTLAAELFLKRLANQS QKICKSRGKNTIRYEDVADARSNDPALAFLERSFR

DPSKAVGFGGGTGSNTLGPEKNWHRAIPTRTNERTNRMPFLRWCVRGMACDTEAML  
>comp5652\_c0\_seq1; 402 119 1423 LEN=1613; translated  
MKKKDKSSTNKISNNVTVGTLADAQKPDQKQWETGRGALGKGSPPKDRYVYCDFAQIKEEE  
YDVDYEIDQEGLLQALDESTTMAAAQSAQHQSISYLQQPPVLRASGWVRSQRFPTKLYA  
LLSQPQLSNIITWMPHGRSWKVLTRIFETSVLVFFESDNYHSFNRVINAWSFRRKSSG  
PDRGSYFHELFLRGKPHLQKYMRLPRTHKKLAMSKSEEPDFFELEKTSPLPTLDQARAS  
LESRKYLRLRDHFDKETVVQGGMADHSRSQLPAPPLDKNGNDQAKRQGSQHDAAALQCR  
TMLATKGAPPKGTGTLNNDVQFVLGVQHNVNARNGLKVPESLFRNLNHQDKQLKDQLELQS  
RITGQHQQVTIRQQQEQQMIARHRAQILHQFEQEQLRAQSVHKAELTQQQSQMNLLRQ  
MDLLQQQHHRNGF

>comp5653\_c0\_seq1; 585 143 2200 LEN=2640; translated  
MGWFDDSDDEDQPREIGSLGEKLGKGTDAHNVEKKDDEEDPLDAYMKTLDKTAIRSKS  
GGNTNTDDDDYNFREGDTNAASMSGRLDVENEDEATGHVWQKKKVGKKNSSSNNGKSV  
VSDRVTNPRGASAKHALHGTFHRASDQQLQEDQNGNVDIRLEQVQHDMKYTHFRKCLL  
PLSPQVSIHENGSNESRADPIIRNTPEGGRWREENVTCQPPTLDPIYDFLELRDILPVE  
VMTWNAMKHLTSPTPVQSQTGLVALCGKDAIVTAPTGSKTLTYLWPIVSHLMVNHRS  
TGSSSRALILVPTRELALQVEQIARSMFAKLPLTALAITGGNMGRYQLSQKLASTKPHCI  
IATPGRLLDVLSAQKSRQWLLPNITILVLDEADKMIQMGFSNQVTQVLQNLRPDRQSL  
LVSATFSSKLQRQCQKWMHEPFRISVGKTGESSQHVTQHVVCLPNTQAKIEFLKELLPTF  
AGVGRTLIFSATRQRVEDLAADLSTIVPMETLHGDRHLSDRKAALKAFRKGDTKVLVATD  
VAGRGLDIPQISTVITFDPAKNWDTHVHRIGRAGRLSAEEQQQHGSAYTLLLPNSVDFQA  
SMIRAYEKEGRPIPREVEELVAKKNNRFTWQDRISNNSQGGRMFSDSSGANRSKGNH  
GIDRGGRLHNDPSENYHGLETKRRRFS

>comp5654\_c0\_seq1; 842 128 2341 LEN=2439; translated  
MNKTSGSGFGGSASDKQKRNGKKEARKRENGTWTWHELEKFLAQHRDSRTNASIDRS  
VLNTLKKVLRCAQAPDWWWKGLQKMYLLAIKVSIVLTEQYQDWGDPDDTESAIGALEEL  
AEMSKILVASSTASASDASVSSAKGHSSSEKTLSTKKYENNTHDNGSINAYNWIRDQTSK  
KRSVKHKFTVKDMLLPKAVLQLKEEAMAASKKFIHQPECSMVGTHDYRQKMRPLAFSMV  
EGSSFESPKHYYPAGGGCKRYRQSRLLPNSKSGSSPSKSSQSSAAILWKELSAIPTALPVEY  
SSIFVRALETELTKLRVLIIGPEDTPYANGCFFFDVIMGDDYPNKPVKVQFLTTTSLFPT  
ACGNKRVRFNPNLYADGKVCMSLLGTWTGSPWTPKESTLLQVLVSLQSLILGTANPFNE  
PGYERMEGTPSGDRNTKAYNVMIRQOTLKVAMLPFLYNQLGGNVNECSGMNDCKAAPVPR  
ANASIRGNHKKRSFCNASFPNHYFSEFKEVIQQHFRIKKRSIQTLQFLQWLKEDVAGLEA  
LISEYWSVFNQLEEQKRLKLSASKRSRTITGTFVTASPAIPRSKGRGNKDEAIELLPDSE  
DENSNSDNNRKMVSNTVELLVDSDDDNENCKAKHVDYRKPAAATIELLVDSDDDNNYGV  
DAQSVSEKKSAAATVDLQINEKQKSVNNEDEPDEAIELLTDSESSQRDGEAQLNSKKPTE  
TIEILMDSDDENPAQNK

>comp5655\_c0\_seq1; 608 527 2374 LEN=2506; translated  
MMYCSGDADLKQKPSKDQPIRSGRSLDKYERFENWLRKNGAQFDLLELREYDDSTGSI  
VDHGNEEHDEAEKKEQOMPIDNDHGSCGEGDSEMRGVHARTRLPNTVCVAIPRRCLITV  
EMGQETPIGRSILRSDLDLDAKPHIFLMIYLLWDRKVNKNSFFHPYIEILPQTLNMP  
FWSPQELELYLTGSYLLKQIEDRNEAIAADDYYAICQIAPLDKICTLQEFKWARMCVCSRNF  
GLQIDGHRTSALVPHADMLNHYRPRETKWTFDEDRQAFTITTLQPIQAGAQQVYDSYGQK  
NHRFLLNYGFAVEDNRELDGFCPNEVPLELNLSPEDPLYQHKLFWIRGEMNLVGSAAALV  
ASSRPHSAHAKRVRICVSNENRTRLLFSLLRAMNCSADELRAITSPVSDMRSLFMTEHR  
SSLTSYYRSCRDIRHPLSLKNERQSMVNLQIISVALAQYPTSLAVDKADLLDEHRYPF  
SNQRHAKIQVRGEKEVLYHFATWARTALEVLEIEQELREEQQRGSVEVQLGKGVIVNDD  
APSRRGSFDAFVRKMEQDEAEDGVHHTIVRYCADVLGSLRREELKSMRRQRATLAATSLK  
SSGDAGKGGNGYC

>comp5658\_c0\_seq1; 275 216 788 LEN=1007; translated  
MAADPEAKKETTWDRITGPKLFKTVTNWNGIHSVPLVPLRILTGMLMIHHGSEGGIGPAN  
FGTAEFQGFVDYVMAPHFGFLPGPLELWALHDYAEFFGGIFFALGFLTRPAALSLVMT  
MSAVYFHLAVGAQGFPLGHVSNYSYDFEELLYALIFLVFVFNAGPLSIDSIIYKNIA  
PEDLSDTNSQ

>comp5659\_c0\_seq3; 531 123 1610 LEN=1610; translated  
MKRPQLRAHASLPLSVGTSALSSARKQQQGRAGRFSSLWSPVGLVLCACSVVSFYAGAS  
IGYHAGAASAGVRRPPGNDAVSPEEPGAPVYDAGELEWLRTNKEHTHQEKLEERRIKTV  
ERDLMRCHKANRDGDKDKDKDEDEPTNDGGNNPFPFHSDFSEHTGQFASGMHLVDR  
EDFAGAFDTGVPLDPSGFGNDRVLLLYSDPSAFPSGGEKTSKSPVVSARDATANCNLHI  
VYTQTGRKKQCVALMGQYESYHLHRFMRVDKTEKRGAVDPSLPLVQVSRGYQQNGRSHK

VPTVENSETHWDNLVAYLQSLRGKDNFLEATLDPILKKVASHNDHNTVVVMVCNFGQSEL  
LWNFVCNARAKGFGDVLNILLFATDKETHELATEYMGITSYIESIFGDMPRGAARAYA  
DRTRFRQMMAAKVYCVQMVSVLGYDLLFQDVDIVWYQNPLEWFHDTNNPHYHFDMYFQDDG  
NHSLFYAPYSANTGFY

>comp5660\_c0\_seq1; 397 1 1404 LEN=1609; translated  
XSSDVHVGAGGLPVVANSQQLGCVGNFVQKMSVKKKSKQRGSLEKSGASKDEDSSS  
PLPRIAESEPLQLPTAEMASTRIGDKSEAIVADSDEFKEYFNIERSPIWSGSNKGWQLT  
WGIWHRLPRDERKKIALEHGMKSIGEFEEYVSLQQAVDDSEYSMVELVENSHTTTTISN  
VASHDNTVHQTKGFEENREEESDEDDGDDLLHNEATELATELTSEELVAVGGNILLILPS  
EILHQIVAWLPADAYGTLGLVSPHWKFFTRTEVVYKRICERLYLNQSKRRQLHVSFRFGGS  
YRRMLEIRPRVRAAGGCYVLKYSKYKKIERDMWCEIPIGAVLETVYRYRYVYFHEDGRCLY  
ALSNSPPKVMFPRILNVLHKEETDPAIVTGTQVQKYNCTIIAKQPWHTVKFEITIVPE  
SVHGRFAALTIDRHVTSVSGEIDDWSYDLVEHEVPDKRFRFMKDGRL

>comp5661\_c0\_seq2; 261 176 712 LEN=1032; translated  
MLARTTRSITRVAGRRLQAPSLAATRGFSDDKKKDESATIPFGVGKWLGEKSDHLIPTD  
KDHDTRPKHMPEFFPEDIKKEMKEMGLEGIEDLDELEQKNIDGYNDLGLVPPEGTGTFFAS  
PILIPSRRTSRVVGYPDSHAMFWFTIHADDNTYYIKDLGLFFKMLPIPAEEDAAHAH

>comp5661\_c0\_seq3; 175 1 583 LEN=903; translated  
FFKLT HNASKLIQIDETNQTPSITRVAGRRLQAPSLAATRGFSDDKKKDESATIPFGV  
GKWLGEKSDHLIPTDKHDTRPKHMPEFFPEDIKKEMKEMGLEGIEDLDELEQKNIDGYN  
DLGLVPPEGTGTFFASPILIPSRRTSRVVGYPDSHAMFWFTIHADDNTYYIKDLGLFFK  
MLPIPAEEDAAHAH

>comp5662\_c0\_seq1; 257 624 989 LEN=1985; translated  
MDNSNREAKELYAENMGLRDSIQKLEENERLKKFVEQQHQRGAGTVSAKKNNDKTIVL  
ERFEGEHLDFDTEPSTSSLSSQAVATNEMKEELWCDVLDGDQCPVEPSVSFGEALRDRA  
YW

>comp5662\_c0\_seq2; 334 624 1643 LEN=1848; translated  
MDNSNREAKELYAENMGLRDSIQKLEENERLKKFVEQQHQRGAGTVSAKKNNDKTIVL  
ERFEGEHLDFDTEPSTSSLSSQAVATNEMKEELWCDVLDGDQCPVEPSVSFGEALRDRA  
YWLVMFCLRDWKYIFLRIEVPVSVLWFITGNSPLLIRIVWHRFHTGLLIMQSLSGIIL  
SRNELLLANHPVIIYYLTMMVGAGGNAGNQASVRVIRGIALGTLNEQTRGQFLIRELKMA  
GALSLILSAAGFFRTIFFKTPFPEAVTVTSALSILVFTSICLGAILPLILERIGIDPAHS  
STTIQVIMDILGVALAVFVSGLILDGPLGAFLLPKLGFS

>comp5662\_c0\_seq3; 343 624 1514 LEN=1719; translated  
MDNSNREAKELYAENMGLRDSIQKLEENERLKKFVEQQHQRGAGTVSAKKNNDKTIVL  
ERFEGEHLDFDTEPSTSSLSSQAVATNEMKEELWCDVLDGDQCPVEPSVSFGEALRDRA  
YWLVLGLLIMQSLSGIILSRNELLLANHPVIIYYLTMMVGAGGNAGNQASVRVIRGIALGT  
LNEQTRGQFLIRELKMA GALSLILSAAGFFRTIFFKTPFPEAVTVTSALSILVFTSICLG  
AILPLILERIGIDPAHSSTTIQVIMDILGVALAVFVSGLILDGPLGAFLLPKLGFS

>comp5662\_c0\_seq4; 307 624 1651 LEN=1856; translated  
MDNSNREAKELYAENMGLRDSIQKLEENERLKKFVEQQHQRGAGTVSAKKNNDKTIVL  
ERFEGEHLDFDTEPSTSSLSSQAVATNEMKEELWCDVLDGDQCPVEPSVSFGEALRDRA  
YWLVLGLLIMQSLSGIILSRNELLLANHPVIIYYLTMMVGAGGNAGNQASVRGMFAVSTGR  
GASGIISTYXVSLKSTKPLCFVGLFAIHILKKYLQVIRGIALGTLNEQTRGQFLIREL  
KMAGALSLILSAAGFFRTIFFKTPFPEAVTVTSALSILVFTSICLGAILPLILERIGIDP  
AHSSTTIQVIMDILGVALAVFVSGLILDGPLGAFLLPKLGFS

>comp5664\_c0\_seq2; 267 92 715 LEN=753; translated  
MPI SNCFGSKVAVTSVLLVVLGIFDTSQSLLEHYWHHSKPLHSSYQRLDWGDSKHFTFLS  
NRLTSLGIASDGYDSVEAGSRVEGDPHVETVLFVECGFGNDSHGQSATKA AVRACRNSI  
EFNSIPSVSRLIPNGYQGLKLDVLLAVPPKYKDSL DLSEVQKVFYPYGSVRFQIQDGMVA  
PSGIAIEKLGQONEDM VVVCAAVTVGY

>comp5665\_c0\_seq1; 176 593 985 LEN=1683; minus strand; translated  
MNGSRVAGHMAFWLADSLPEPNRVLFRFAIVRSLDLSEGAPFLALVGQPPNLLQGSVVVV  
GLVLPDPASVDLWVCWSLALALLELPPLLLGACAGTSARVAVPAAYVGPQQGSRRTGG  
GNLGAVAVPF

>comp5667\_c0\_seq1; 556 363 1790 LEN=1824; translated  
MPDTLLVKKLSENATLPVRGSEWSAGFDLAASRPQTIPAGGRGIVHTDLSIACPPGTYAR  
IAPRSGLAVKKGIDCGAGVVDADYRGPVGVVLFNLGTEDFEVQKGDRIAQLILEKISMAA  
VEEVADLDETGRGAGGFGSTGVSDPPAGSHKKPKTGDIHRAARPVSGNRNTRRVGTRAAM  
DEIKAAF GASRITNKPAKKRRTIRRPDALVLNHI VDG FADHLGRTEPDFEFALET FDDD

FMEDNYETFDFIKDYSGYESEEDGLGRRFKARVMCDYDINNRTVVSEYFAIDNIYFEALS  
YTKEGFQARNHGISWMKIYLSKQGLDQFVSKFEEVWGVIKDSLFTDDEQGLVSLPVSF  
DEEDPPVWTLNVLVLPDGNNGNENDEEPGFGLLEEWGTVPEVMRPPIDYRSRDRRGIYLTGTGIF  
TMSFRVVADGATVETLEAIRDDREYDWGSPLLGRIDLRLVGTTRVIRETRVLPLT  
>comp5667\_c0\_seq2; 457 363 2040 LEN=2074; translated  
MPDTLLVKKLSENATLPVRGSEWSAGFDLAASRPQTIPAGGRGIVHTDLSIACPPGTYAR  
IAPRSGLAVKKGIDCGAGVVDADYRGPVGVVLFNLGTEDFEVQKGDRIAQLILEKISMAA  
VEEVADLDETGRGAGGFSTGVSDPPAGSHKKPKTGXVSRVEKSRVDFDETRRVEFRREK  
WNRHRHQIPRRILDRTVSKLKGNSNTNKL FHVTL SFFYRFLRLHLTPVQPNAMPASFSDS  
IHRAARPVSGNRNTRRVGTRAAMDEIKAAFASRITNKPAKKRRTIRRPDALVLNHIVDG  
FADHLGRTDEPDFEFALETFDDFMEDNYETFDFIKDYSGYESEEDGLGRRFKARVMCDY  
DINNRTVVSEYFAIDNIYFEALS YTKEGFQARNHGISWMKIYLSKQGLDQFVSKFEEVWG  
VIKDSLFTDDEQGLVSLPVSFDEEDPPVWTLNVLVLPDGNNGNENDEEPGFGLLEEWGTVPE  
VMRPPIDYRSRDRRGIYLTGTGIFTMSFRVVADGATVETLEAIRDDREYDWGSPLLGRIDL  
RLVGTTRVIRETRVLPLT  
>comp5668\_c0\_seq1; 286 110 1006 LEN=1395; translated  
MDRYQKIEKPDSALGEGTYGVVYKARDKQTDEIVALKRIRLEVEDEGIPSTALREISLLR  
ELTHENVVELKDCVQELGKLYLVFEFLDKDLKMYMESCSGLLSPLLKSYLFCVVRGLAF  
CHARGVMHRDLKPQNLLVTRDGRLLKADFLARAFCPPIRPLTHEVVTLWYRPPPEILLGS  
QTYAPPVDVWAIGTIFVEMVTKRPLFPDSEIDQIYKIFRLLGTPDEDVWPGVTHLQDWN  
AAFPRWQKRPYSSAVTKHLDNAGMDLLERFLFYDPKDRITAKESLNHPYFDDLDKENI  
>comp5668\_c0\_seq2; 185 1 1250 LEN=1639; translated  
XYVHGIGPRKPEKNKNDICIACFLMDGP IALENGSPYKSFTAEATGPVVAMYWDPSVTYVL  
ILILTISFVTSLTTLQLIDLGF DGITMTYVVAQLMLYSCI AVASRPGNIASKNNQSTLH  
SYQKIEKPDSALGEGTYGVVYKARDKQTDEIVALKRIRLEVEDEGIPSTALREISLLREL  
THENVVELKDCVQELGKLYLVFEFLDKDLKMYMESCSGLLSPLLKSYLFCVVRGLAFCH  
ARGVMHRDLKPQNLLVTRDGRLLKADFLARAFCPPIRPLTHEVVTLWYRPPPEILLGSQT  
YAPPVDVWAIGTIFVEMVTKRPLFPDSEIDQIYKIFRLLGTPDEDVWPGVTHLQDWNAA  
FPRWQKRPYSSAVTKHLDNAGMDLLERFLFYDPKDRITAKESLNHPYFDDLDKENI  
>comp5669\_c0\_seq1; 314 1 740 LEN=881; translated  
DQTGGDEPFPPSLPLRLPHGDSSSVRADIVLPSGACL RINRTVP AWALPAQEAAVLYLCR  
KHSWPAGAVAGGRPFRRGGGGK GIDAGGVGIDDGIGVDEDDGVEDDDDDDDDNGVDNGVD  
EDNGVGVGVDDIDCNDDEDDIDRNDDDDDIDPPAFPVPDPKRWKPLGAGRFRRPEAPLG  
SAMQPVGGRDPRGSGSSDGEDGDGRFGDAAEGTSDSECECECDKGFLVDMIAAAWNKHT  
TLQQYK  
>comp5671\_c0\_seq1; 480 135 1379 LEN=1426; translated  
MIAAATILCSTSGRYATAFSSRSTFAGSVIRQGTLMSSRRTYSSGTMTMKLQTAIVGLPN  
VGKSTLFNALTESQGAEEANYPFCTIDSNVGLVKVPDEKLENLSELNKSVKCVPTALEFV  
DVAGLIKGASTGEGLGNKFLASIRQCD AIVHVVR CFDDEDIHVDGSVDP IRDAELINLE  
LAFADLAQVEERLSRIRKEQRAGKADPAEQAALEKVC ALETDKPARFADLLEEEELAIK  
SLGLLTRKPMIYAANVADADLAEGNEMVDRLEMSVTEGAKIVVSAQVEAELVDLESED  
RTEFLESIGVSL EDCGLRALIREAYDLLQLQTYTSGPEESRAWTIRKGWTAPKAAGVIH  
TDFERGFIRAETVSYDDLIECGSEAAAKSKGLMRSEGKDYVVQEGDVMLFRFNV  
>comp5671\_c0\_seq2; 257 1 861 LEN=908; translated  
LFLFFYSFYDKTDPAGKTDFVGMDFSHLWINFFRISNFVVDP IRDAELINLELAFADLAQ  
VEERLSRIRKEQRAGKADPAEQAALEKVC ALETDKPARFADLLEEEELAIKSLGLLTRK  
PMIYAANVADADLAEGNEMVDRLEMSVTEGAKIVVSAQVEAELVDLESED RTEFLES  
GVSL EDCGLRALIREAYDLLQLQTYTSGPEESRAWTIRKGWTAPKAAGVIHTDFERGF I  
RAETVSYDDLIECGSEAAAKSKGLMRSEGKDYVVQEGDVMLFRFNV  
>comp5671\_c1\_seq1; 836 1 1825 LEN=2132; translated  
XDSRPSLKDLPKIKILLRIIRLDSYHKRESAQRETNIAQAQIRHRKQNRQQFLIMSMVYD  
EYGRPFVILKEQQAKNRVKGEATKANILAARSISNILRTSLGPKGMDKLLVSPDGDVTI  
TNDGATILSQMEIHQQVARLMVELSSSQDDEIGDGTG VVVLAGSLEQAEILLNKGIHP  
VRIARGFEAASQVAIQHLEKISEKVEFSKDYLDPLLTAKTTLNSKILQPYKEEMSKIAV  
QAILDVADLERHDVNFDMIRMEGKTGGSLSDTELVNGLVLDKEFSHPQMPTIVDNAKLCI  
LTCPLEPPKPKTKHKLQIDSAEAYDELYNQEQEYFRDMIQKIKDSGANLVICQWGFDEEA  
NHLLLQQELPAVRWVGVEIEHIAIATGGRIVARVEELTPDKLGTAGKVKQLSMGTNNSR  
QQDRILLVLEDCANQKAVTVLVRGKNMIVDEAKRSLHDAMCVVRNLVKDNRVVYGGGSAE  
VSCSLAIKKHADTVTGVDQYAIRAFADALDDVPLALAENAGLAPIEEVTAIKSRQVKEGN  
PTIGLGLLPLDRADLNVGSKTGDHTMDMKELGVFETLIGKQQMQMLAAQVVKMILKIDDV

ISHGNYQ

>comp5672\_c0\_seq1; 345 119 1248 LEN=1248; translated  
MPEDGNANDRKTTPANDSRPGNNSEVAVVLLSGLPASGKSTLAKSLEARYNRCAGDADEP  
GRRLIHIEYDELEDSLLPPNGDAEESNDTASRRRDawnRARESALERMERELRTLGNERN  
LPPSPLPPDGSGGALASHVVLMDDNFHLRGMKQIHRLLLLGYRPIRFGILHLDTPLLEVCL  
ERNRNRSGRRRVPDDVIVKMATVLEPPRAAWEAGSAMTIVGGSGEDPGEKTLIEDIVRFL  
EQCPAIVEVPPEAPIDPEQLAADRARTRESRVHNLDRLLRACVGTVARFDKRRAGAANAA  
RKKLMEDFRAGCIDFATVDSGDGGVADAFLLDLVVPMEPPDANTNANTADADSTNPEEYGS  
DAHAPSTKRSQLGELLX

>comp5673\_c0\_seq1; 212 83 466 LEN=966; minus strand; translated  
MNRNRPCNVCYLRGVSIIKIDGAGDGNVSKFPVDAIVGASDVWASVGAADGAADGATDGAD  
VGDCVTS DGLKEGSIVGDGPKVPISFLIASSTVLQIVMRLSSMNLDCDESKSILAAPP TQ  
QKGACDM

>comp5673\_c0\_seq2; 347 1 1479 LEN=1618; translated  
XKTPIDGNIVS CPNEHRGSGVSRLLALS KLPNRSSHKRTNGSPDSQVAQTCXNIMMRKFNQ  
QKCCFLWLIASLLLLPDLVDCMNGSITDSKGLQRRKAQSYQLSRAYSHHQCVDDMYSSD  
LDGDMKLSEDEYVLFISKRSRGEIGADGYTELPFSLISTFIYGSCFCSYMSHAPFCVGG  
AARIDLDSSQSKFIEDNLITICRTVDEAIKNEIGTFGPSPTIEPSFKPSDVTQSPTSAPS  
VAPSAAPSAAPTEAQTSEAPTIASTGNLTFEFPSPAPSI FIDTPPPEPDALACVNFQY GIR  
NDEGLTSADIENEIGNSYKSDLIVATRFVTIQALNETFPEDAERLRKASTDRSPSKTH  
KNRLTIVNLGRFGLDEYYSPQGERISSILAVKDEGKKFRRRTAYLPVTTENRISNMDSRR  
LVFYTDSNPPVISSIFDN SHCPELRIDGIVCSIVDTKVCVTLEEGDDEDDVKEALLD GIE  
KSFDDGSFASAIP

>comp5674\_c0\_seq1; 277 402 899 LEN=899; translated  
MASQRMACLLALVAALFVVIPRAPLASAFAPSIPLKASTKALVPSGSSDSDSALGVYNS  
YGYGRDWDYDYGGLAFGTSQYRQRYNDGYSGGVNL SHNGYSQQTNVARGGYGGLGYDD  
YGGYGGYGGRMGGYGGRYGGYGGRMGRRGGYGYDDWDDYGGYGRRG

>comp5675\_c0\_seq1; 488 68 1388 LEN=1388; translated  
MKFASSALSLVAFAASATAFAPISRDSVAVPSTTSLSETDAMSFDFVVPVRPKRVARKVEV  
EKAIPKPAKTEDPPFFLDESRTATS AEDISPEEVRALFKLWNNALATGDSRLVASRYST  
KSGAVLLPTVSDTPRTDYDSIKDYFDGFLKKQPQGEILSGNIRIGNGWCQDAGIYEF TMG  
AENGAKVKGRYTYTYVMEDGVWKIAHHHSSVMPEGID IATPITKEEVQGLFHLWNDALAT  
GDSSLVASRYASKGVLLPTVSDVPRDDFASIKDYFDAFLLKEPQ GKILESFVTITGNWAQ  
DVGIYEF TMGATGAKVKARYSFVYTYEDGQWKIAHHHSSQMPEEVVPGPASITNDQVRGL  
FHLWNDALATLDPDEVASRYSVATAPCLLPTVSDVPRTDYDSIKAYFVDFCKKEPQ GKIL  
ESYVTVGHNWAMDDGIYEFTX

>comp5676\_c0\_seq1; 187 124 654 LEN=1147; translated  
MVFTI IQDPFDVGCDEDSQLDQNVMGNEHPRDKYTKGLGDRYEIGSYNSNAASRTGGMN  
QLRNDSDYNATKCYKSKTAHKTNGLREDRYSNL CDANEC SRVIMTNNGM PRASLDPYDMR  
ISATGHTTNNNKYSRMDRTFVDN NHCMGEYDNFKENE EVAASHIDRYECRMDKYSC

>comp5678\_c0\_seq1; 468 100 1419 LEN=1534; translated  
MLSIGNLTASPGQKVSGNVPIQRSPSATGGATNSSN NATTPPTTAQGESENN S ISLFI PM  
TIVRGLNDGPTLVVLSGVH GSEYVPIRATQKLARELDPSAIRGTLVLVHIVNLPAYLGRT  
VYTS PNDGKNLNRVFP GSADGSPTER IADFLVNEIYPLADGLLDMHSGDANEQLG P SYTA  
YYGKAGSEDI IQKSKDMAFSFGLGLVVEFQWELQGNSSKVSTFSGAIWAGSAAVVRGIPS  
IDVEVAPGMGAAPSGSINDVYQGVQNVMGHLGMFLEENATTSNDTVEDDHPCLVTNRRFI  
DAPTEGSWVALVNTGSFVKEGTL LGTITDFSGRNTIFEAKAPCDGLLLIRFETPPVLAGD  
TVAVIAVLGDGSDQLRSGGQFRLDPSKVGALVLWQWSAAIGWLVALGLSIFRRSR R NG  
LYREQPAHQAVPVEDGSMT

>comp5679\_c0\_seq1; 300 268 927 LEN=1858; translated  
MPVDIISPDPGKTS PATVAIDVTASYPNGVRELKQLLQYNEQLYMPEELMMANDS I K VWN  
LDDDDDEDENPAEKVQPKMFRNDPFRVSQEARRMLINRVSI EESTDGIHQDHRLAAAAAA  
AEMVVEETKEDLMSPLYIPSEPIAPEI PRRVSSTLPPRRPSQSPVVLDRGTTRTVVLD  
NDDL DIGRHAQPGAEPNPRPSHRRRGHRRNHSHFDFQF

>comp5681\_c0\_seq1; 306 653 1708 LEN=2130; translated  
MWEEC SWK VSSLSEIPLDYPLERTRRGICNASITEV VNRISKCLRLLSIEAKFENEYGT A  
KCITSDMVSFHIQLYAGGFKNQESITVELQRRSGEPYFLRVCNKILDAADGGQIQEETI  
PARKKVPLCIMKMPVAKMKCIQGVNKP DHSQEPRRCMNRSLQILRSKEKDFDVEDFEVLC  
FLTDPLKTRADIVTTICKGILQDHHYSFIRDAIENALETDVVLLLEDYESRGRLDAGGKLR  
RLATILMSNVLAQTSSDGCLANAIQNEKWFADFLIPSLSDEVKNFEVSSNNAYE AISGLN



HMAACSEIARHLIKEECSLDDLRSANDFAVHNHKL LASET KLSL GILGYLI  
>comp5681\_c0\_seq2; 403 149 1471 LEN=1893; translated  
MDFNDTNTNDVTETGGTANVLFGMKREGLASMEETQPPLRAVSLLDRTTTGLQCSTDSKN  
EGKEYTKNSKRMSLESKSR LTSNRNGAKDMWEECSWKVSSLSEIPLDYPLERTRRGICNA  
SITEVVNRISKCLRLLSIEAKFENEYGTAKCITSDMVSFHIQLYAGGFKNQESITVELQR  
RSGEPRYFLRVCNKILDAADGGQIQEETIPARKKVPLCIMKMPVAKMKCIQGVNKP DHSQ  
EPRRCMNRSLQILRSKEKDFDVEDFEVLCFLTDPLKTRADIVTTICKGILQDHHYSFIRD  
AIENALETDVVLLLEDYESRGR LDAGGKLRRLATILMSNVLAQTSSDGCLANAIQNEKWF  
DFLIPSLSDEVKNFEVSSNNAYE AISGLNHMAACSEIARHLIKEECSLDDLRSANDFAVH  
NHKL LASET KLSL GILGYLI  
>comp5682\_c0\_seq1; 654 98 2176 LEN=2357; translated  
MEIYDDDDVDRRIRPQQVRKTELKLTNGDDETNDTKMNRRLSKKERKDRKNLQKKNKM  
EVKSLQTNNGHNNQEDVEGEEERIRVECMETYSPI DIPEEPPMELASQGEKSKVNNDKKI  
ANDEGECRTL GKWF PNAI LKSI SYTNTGQFITNKNCQKENRQMKANEEDLIVDNPRSSL  
VLFYQYTTNDGSSDVTNERNKKWDRRQLQLLITYLSTIAHRRNLGGRI RVATEGVNATI  
SAVDTTECTAKAALRHFAEDLRRFDP RVFSHTDFKYLDLDPADRQFKEFKIFPVQELVFY  
DIGETDAPLDSKLVK KYGNNSNSESEVSGGGIHL DASSFHEMLQKDNTVVIDVRNNYET  
ILGRFDGQQRQKEGPT EKIDSRGCSSSGTNGGAEYIDPKMRKSTDFKSWLAKPTTQEKLG  
NKTVLMYCTGGIR CERASAYLRSEM KDVKVGYQLKGGIER YLKQFKDGGFWRGKNFVFD  
KREAVGVDNPHGDGGILRKVERRQRKMHEKKT EGSP LTA KCCVCGDSWD RYVGGKKCLTC  
GVPVLMCEKCM SLKPKDTPGMELKVRCP LCV EGVTVLAKELVFTANGIKNKIVSSAKAA  
ISGNSVEKVS GDYRNKCEIVDKEYESKKNLGGTGKAADSVLKWGGGHAINKKLKKMKRR  
VCQFGAECVRKDCFFYHPQRESSFKATTEGQK  
>comp5682\_c0\_seq2; 281 81 1378 LEN=1559; translated  
METXPLGSFNLHNNRVTDL PADRQFKEFKIFPVQELVFYDIGETDAPLDSKLVK KYGN  
NSNSESEVSGGGIHL DASSFHEMLQKDNTVVIDVRNNYETILGRFDGQQRQKEGPT EKID  
SRGCSSSGTNGGAEYIDPKMRKSTDFKSWLAKPTTQEKLG NKTVLMYCTGGIR CERASAY  
LRSEM KDVKVGYQLKGGIER YLKQFKDGGFWRGKNFVFDKREAVGVDNPHGDGGILRKV  
ERRQRKMHEKKT EGSP LTA KCCVCGDSWD RYVGGKKCLTCGVPVLMCEKCM SLKPKDTPG  
MELKVRCP LCV EGVTVLAKELVFTANGIKNKIVSSAKAAISGNSVEKVS GDYRNKCEIV  
DKEYESKKNLGGTGKAADSVLKWGGGHAINKKLKKMKRRVCQFGAECVRKDCFFYHPQR  
ESSFKATTEGQK  
>comp5682\_c0\_seq3; 531 98 2261 LEN=2442; translated  
MEIYDDDDVDRRIRPQQVRKTELKLTNGDDETNDTKMNRRLSKKERKDRKNLQKKNKM  
EVKSLQTNNGHNNQEDVEGEEERIRVECMETYSPI DIPEEPPMELASQGEKSKVNNDKKI  
ANDEGECRTL GKWF PNAI LKSI SYTNTGQFITNKNCQKENRQMKANEEDLIVDNPRSSL  
VLFYQYTTNDGSSDVTNERNKKWDRRQLQLLITYLSTIAHRRNLGGRI RVATEGVNATI  
SAVDTTECTAKAALRHFAEDLRRFGSICFELKTIVIFIGILEIXPMNAFP SLDP RVFSHT  
DFKYLDLDPADRQFKEFKIFPVQELVFYDIGETDAPLDSKLVK KYGNNSNSESEVSGGG  
IHL DASSFHEMLQKDNTVVIDVRNNYETILGRFDGQQRQKEGPT EKIDSRGCSSSGTNGG  
AEYIDPKMRKSTDFKSWLAKPTTQEKLG NKTVLMYCTGGIR CERASAYLRSEM KDVKVGY  
YQLKGGIER YLKQFKDGGFWRGKNFVFDKREAVGVDNPHGDGGILRKVERRQRKMHEKKT  
EGSP LTA KCCVCGDSWD RYVGGKKCLTCGVPVLMCEKCM SLKPKDTPGMELKVRCP LCV E  
EGVTVLAKELVFTANGIKNKIVSSAKAAISGNSVEKVS GDYRNKCEIVDKEYESKKNLGG  
TGKAADSVLKWGGGHAINKKLKKMKRRVCQFGAECVRKDCFFYHPQRESSFKATTEGQK  
>comp5683\_c0\_seq1; 173 379 1101 LEN=1500; translated  
MSKAGVDGALIVQPINHKYDHRVYTDALKGHPDKFKGILLFDPSESDPDAALARFEELVL  
QGYVGVRFNYPYLFEGKMCENEAAVKIFKRCAELKFPV GIMCFKGIDLHYEDIESLCDTSP  
ETVVVLDHFGFASVENQDQFEKVL SLKNRNTVVKISALFRLGDPGAPKYERV RTERFEPL  
LEAYGPDRLMFGTDFPFVTQEEIGYQGA VDTVLSWSSPEEKSAVMGGTAERLFGVWGVN  
>comp5684\_c0\_seq1; 226 1 871 LEN=2028; minus strand; translated  
XMAPGAELTHAPMEPDMVPGTAYFEVMKDIAHTLDFLMPQYNGYVRSYVDFAGALSHFT  
TLANELFEGDASKIVYGFCINDCGSFNLDG FQSAEVMKWLAGEYPCNGGAFFWVANDDFN  
GNWSTEVNNQIASDADLCLDQSPVDPVPAPVPNPTLSPATFSTQNPTVSPSPKPTSLPTQ  
SSTPYPTSAPVVNPTNQPIPSPPVSI GSAGCCSN DYKTCASWCNESRQKCGSPMCASMVW  
LENGSLSSDTCVSRWGACTNDVSSCCGGLVCKGESRWYKQCLAPNDPAPN  
>comp5685\_c0\_seq1; 221 144 1220 LEN=1809; translated  
MPESSTAGNEMPRPLRIVSLIP SATDICVHLGLGDNVVGITHCCDAGDVPSSALVVTE DQ  
VHASSNSQGD IHAKVVENGQKAVETMETNTRDASDPAACSLTTEEIPTLYPINKELLKKA  
DPTLIVTQDLCHVCAPSSATVFRALKEAGIDARVVLLTPMNLGDVVENMQQVADAAGISR

RGKELCDELARANLRLLLGDTVVRKHKRPEQANKKVLVMEWVDPFPCGGHWIPDMARLIGTEL  
AIDPNPDGRSRRVTWDEIERADPDVVLVACCGFDLERNLDDASSSGKHFGRLRSNREGNL  
YAANGDQYFARPSPKLLTGAVVMALGAYNERDEPDVVRAIRDLPFSSRAFDSIEAMEF  
>comp5686\_c0\_seq1; 793 271 2039 LEN=2194; translated  
MTGKTEGVKDVXKKDRKLNRRSDNSDDERRHRRRTSSRTEKMKKRRKKSSKEKRKKDRK  
RHPDTDESSLYSSNNSDSYSRRRRHRRSKKERKRRRREDAEDNHKTKKSRIDTKEKSRK  
ESSSTTSSAQTVSLALHNLLEKPDFGSELPLILIRLAGGTTFDLGQVTDPSIATGLRS  
VFEALEIYGKVKQSSGMWFMQNPCCATRRDELVLLKVIKIRSLLEIGLMEELAKFENKQ  
RVEKEEQKQADETLKPDERRKKMEFTLKILEKFLKDATLGSQATLTCMTIVEGESVSVD  
GIPDENLKTALLESLEKCGLEKSEIEEDEDDEDDDDSDSPLMGYGLPDSDDTDNDIVQM  
KLAIMMSACREGPPKRKSIGPTRPMTAEQQALKKMPENNRKEEEDNDEGPLLPGEVR  
KAPGPAMSLEMIKAQAEHRELQLKATASGVPMPTNAGGREEWMIIPGEHDFLSGIKSGQA  
IKSRGFQNKSRDADKKSQPIHPAVQAEMDSIMQAHQDARGPSLMDLHRSKKSQEKELAS  
RANNGKKEWKWRDKDLADAGRRVDKDALGMILGGAAGDLKSKFAGGFNR  
>comp5687\_c0\_seq1; 1006 84 2600 LEN=2732; translated  
MLVDQGFSPAYDSSLNGSKSMPREERKLRNKRKSKGAHNINGKDNRSADNVGSSFSFSP  
SMDTEDRYIALLRNEDELLEKFAQVNVKYQDLLKRPAPFMTFVFCGMQSAGKSTIMERF  
LNSVLNIVQQGTGTRCPLDATCIHDTTCNTAVCELYGEELEPEDERGDQLTVNDVFERITN  
HNKKLGDEDRFSTEPYLYNRSANVQNMRFVDTPGIISNQSTGKDNREDIKSILRSEMRRK  
PNTKLCVLLPEKFEATNPILDFCDDTLGGRKKWIDDATFLMTKFKDKLEDARTSTKANDF  
FDEFFLNKCRPHLVITPTLDREDLPPDKLFEERTKLIQKADVYENDKFEQWREGHERYCI  
ENGGVEDPLHIDIETKIGFPSAKKVMREIMLKDTIERLPEVISSLRNDLDKYNAEYKNLE  
DKMKFNDPQNLNRNVTRMLFQVQDRILNYLDGDLELSLKFDPKQLTLDDELDEEEDSEWS  
TRSLNHHSEKEDHWRGRVSNLDEFDEIYAASRFLGGKQYQRALEFFRVIMIDALPDPFQ  
LRDKVANLTGFLSGGLQENWERAMVEITRVCLKDVSHPLNYVIKHIGSIFRRLFPAL  
QDVKQGERFSAEFKQIPAAVERFLQSEFDSVLWNLKKNASNEVHSSMEPMYSSIDPNLPT  
FHCKRLVNHQKDLFVKKDQKQFVSVDEDEKQFENSWLSSFKHRAVALINNSNNSAKLF  
LKDENRKRATTKSFLPDERAAMITKEETEMILQRSFEYIVGLMEFNLIIVFRFQLNYHLF  
EGFKKAIKETLLTKVNDADWDELVRPDSTIGERLEIVEKQRQGLQKSLDMVLRMQRII  
>comp5688\_c0\_seq1; 55 1 322 LEN=965; translated  
XNKQSFLDKTQIDNRRIRSIKPNRIVGNRRNRNRMSRSLGFLPRGGPAVAMGIASLTFVG  
AVFYSHDSQVRDRETMKAGVERDKERIKQKRAKQQQRPQQSLDHE  
>comp5689\_c0\_seq1; 185 83 394 LEN=787; translated  
MIPKINKIFSDKIPELDEKQEDLLHQVKNVRTTPRDARFPAQNQALHCWNRVNEWLVCLK  
QSGDDADDKCQVYRQYSTSICPDAWIENWDEAREENRFQGIKI  
>comp5689\_c0\_seq2; 185 180 491 LEN=884; translated  
MIPKINKIFSDKIPELDEKQEDLLHQVKNVRTTPRDARFPAQNQALHCWNRVNEWLVCLK  
QSGDDADDKCQVYRQYSTSICPDAWIENWDEAREENRFQGIKI  
>comp5690\_c0\_seq1; 697 1 4075 LEN=4181; translated  
XEEEKAPFAFSLQSDFHGNAGMEHSTGIATVQKLLPAGSKVLLLEDFVKEYAPACVVSS  
FPEAAPARTRAETIPNRTEEMTTPVPVPRIPSIPEQLRMI IAPLPTCKVLRNTNGPRSS  
KAEKISLCRESVRTLVYDVVYSLVHRRERLQRRRKYQRKRMHSRRNKPPPPPSVGAEMQ  
VVNGNCTRSETNGKNENTSCRVSSTASKVQSDISNGSDRFESDDGRNVLARGFVVSREG  
DGPPPTGMKAGISYLHPNENVTFCRSSPVIRRLHELVGDEVLRITILLHTRCFLPIVGDCH  
ADGMAKSAVARKGKRNRKRRRREGRDVQDRDNGDSRNYILLCGPPLPSGTNHPLCKTSDRN  
SRCLQNDLPKRKRKRRRCFP SNALSLRNGT PGLHLHANDIISRYSLMYCDAYTPHVALPK  
SHPFSQRIENQPSHPHPNGD TDYRFVNLVFDLHLENKKNQRRIRKRLEGNGRAVCEKLW  
KNYTRCRNYGRLLERYCGLPNDYLEETTASRTSSSSPPSSRGS DNERLARLARAFTPKDG  
VVSFLGSVLRQVFPAGFVWGSERNFQSVMASVRCFVRLRCNERLANKNILHGISITELWL  
YPTTKHQEPRAAGENPLGGANESNDRQTHSRCRGKNKSGRKQRTNHEAATELALKALRWL  
FRGFI IPLLRSFFYVTEFEFSAKEVQYRKPVWLSFRALSVRKLT TAPGTS GHRSRHSIL  
PKGQAHNLNRGQTLGLSRLRFLPKPTGMRPIAQLSRNVPIRLSLPTTAEATAVVTEGRFY  
RKRSLASDSQGNDRPGKRANTGSSTITATGNVMGPDVHPSTEPKPFSEFSPSEL SHVF  
SRLPTNVILERVLVLTLECGRRKRPYNGMDNLQEFYTRYRNYVSHIKQQFLQEGSGSN  
KMQLFFAKVDIEKCYDNINQHLYLLNLAQDLILNNTYVIQRIKLD SANFGGAENATRFQTL  
VDSVDDYQSFHSNKHALARRSRSTVFDLTKCTLTERKKILDLLREHLLQHTVVTSGRYGR  
KLLLQSGISQGSTLSMLLCNLYYGQVEKLMFSEDGHL PWSNSTANAKSTPTEPAMHLI  
SRFVDDFLFISPDKAAFQGFDRTHEGITELGARVNSKKTLVNVR SFVQRNADDGRTQSI  
SLSVSSKLNRSVLFPCWGFDFDTETGEVFCDYERFQGGKLRDGITIDYDGN EGRKMEF  
RVRTFVYPRCLPILYDSSINTFETS VGNFYQMMMLFAACKTAEYLRGHI THNVDHVVR CIR

GLPQYAVWSIRCRFEKSPGTTQDFGAVFAINGHLASVLSWKAFCDVFSYLQGFVITREL  
REEASSSSRTMTVRKRQVQRIVSRAFEDFQIRHMIEK  
>comp5691\_c0\_seq1; 663 146 1972 LEN=2272; translated  
MAESRD TAGSSSAGKQRRRVKSGSGSKSSSSSSSSSSGCSLCPGEIVCTDRELKSSRSTE  
LALLLGAAIVGLYLFQFAELMQSMPEISSRISHYRLGGNLLNLAKEIDSGMAGGEAWEED  
EDQDGTKKHKYKRKKKKKNKDKKNKNKDNNDNNASIPTGVWPVSVRDEEFETMIHVGDLET  
VMKVPRFWSPVHNQQRFTREQARKIGTCAVPDPSNGSSARGEDCPPDERTIFVGIASR  
DFECLRTLESVFHRAKNPRRVRVGVVDQIVEGEDVRCDEPVKPCGEDPQQALCKYRDQVD  
VYTM DAPLSVGPVFARHLGYRLYRGEYYATQSDAHVTF'TTDWDADIIEQLEATNNDMAVL  
STYLT DVQGSIGPNGNSLRNTRPIMCNTYYEGGPQGLHLRHGSQPERTPAIHGTPQLQPW  
WAAGYSFSRGHFLVNVPHYDYLQSMIFQGEEMSIGIRGFTVGYDFYAPERSVCFHHYATGA  
NTKVRKKVKHFWENGSRYAGTGKKAMKRLLGIVHMNPEVDPSEWDHTD VDRYGLGAVRTP  
EQFYSVFGIDVVKKKTQGHLCFVSERARMHKMFTPKLRSDGMGIDYSTIDFRWVDPSP  
TRETREDES  
>comp5694\_c0\_seq1; 765 141 2091 LEN=2492; translated  
MRTSTAVDIDTTCTEDNEKNAIMAIQCRQNNEVFLRRKFGRVAEAVIVAAGAAIFLTCSL  
NCCTGIHAFSLRSAAKGSTARVASTFRNDDHLLPGIHSLPFATTTSLQTYTTNSRLWA  
KEEEKEDDRGDAELYIVSSASKNVTEDPSVPFETPMVDDDGIVTNRKPTSGPARTGERDV  
TIRGDRDEVGRNPVPGAAIKRAKNELDYVTIAQENPSLETDLDKTVNAVFGAIAFCQKI  
PSKVEEAIEKTQQLPGKVTKSVQETKKSVEETIETTQKVVKTVQEFDPKVTKSVQETKES  
VEETIETTQKAVKTVEEFPKVKESIEDTAHDVKVLFGLERPSLKKRMQQKIPMTAKEE  
ALDLAGKATVATAKVAIWAGKGVGSMWAKGTKLAYNNTIGPAVEETWNEQVASINNAINA  
TTKAIQDVP SKITSPSSEVLDRKDPKRP SFTRKRERKETTIVPDSVSKIITKSPAQLQK  
EINDAQNLAKEISAALDAAERAMKMNPNRELEDPMIEIGEVS PAESTSKAAVRPSTARNN  
GPFWNRRQKQNKTPSIDVLARLNVAKTQDQLDAELKEEQALEKEIADALAMAEQALMTSA  
PANS GTS DGGSGDSKKN TGDHHRPIPTHQEQQNDPIKSLPSASATARMV  
>comp5695\_c0\_seq1; 281 62 1192 LEN=2163; translated  
MDENNEPEWESASNDQAFREQVREHARETRGGAPQASEEPVSPAVTSVRWDLGEDNSNN  
QNGNDVSFLTSETQNIPE TNANASGRRRGLASSLCSNCRSKCSLRYFLHVWDIAFTSIWI  
LFGAYHLFFNKNNESRSTHMI LLLVTCVLLAVLNALRGFLWIWTSVPSLYTICFCGCCY  
YSEDELADIASRLATNL TSLGILYGGIAGVAWFGPDALPWCDFFGSWCHKLIPHTGTI  
PIAL TAVSIIELCRWIFLQGLSSSSPVRGADYYNDDVASSHSQSSRRHPWWFGRQSNPD  
GDGLHEP LLEQDMAVNGQPSWAVT SWFRSPRNTNSNTSNAEDGVINGDEEDVESVLDLSL  
EDWASRAESDPYWWTR  
>comp5696\_c0\_seq1; 461 1 1729 LEN=3399; translated  
XKRISGETIPPSHYMLPISSKQQYQHAKRRMPGPLGPAAILAGPGAIAAAKHLAVRAATS  
PGVSTSTLTAVFYWSFQKLPDWVKKDICFQNLKKNRENIATEELEGLYSVVDKLQNVAS  
NIQELDTNIPQLHAALLAYIQLSGQIKIQQVRDYCSVPDDNTCTSQVTTAITRDNLYET  
AGRPVDLFTLRSLERIGALQFATFAYEELETLSEKLHKKDYTVLHHLKVDIRPGRVAHY  
IAVSPAERNV VIGLRGTSTLGDLLTDCCGHAVPLVDDDDPNADKL RVEIQAEV PNI VLAR  
SDEQTMEVISGHERIVLENDDDGDNYTRCHEGILISARNVLDEIESYKPLIECNKYVI  
LCGHS LGGGTAVIVATLLRSKYPDLCLDPENKI HAYAFGSPVLDHDSAIAAVSYCTSII  
NNADLISRLNITNLAVSLACL RKIQSKLVENDLSPTGPLTSVAFFNKIAEGPSGTPMLTL  
LELNETIDEAHNNIALRKPEHLFVAGRVL LAFNPWLDGPEGPCDDSTTPNIATNLQCVET  
TGTSPVFQRLEIDGLRCFTNHLTSSYYEILGMKYEF  
>comp5697\_c0\_seq1; 426 797 1756 LEN=1926; translated  
MVDLAGCGTAATENWRNQLPLAKIKKIMKSEDLILQELEKDRLEKKAEEGQMPSSNE  
KTKFMISGEAPVLM SKACELMIKDLSFRAWRH TERNRRRTLQKQDLHA AVGESEVYDFL  
IDIVPRVTTTTPKMQHAHTTHLSSSSVPGTATMIPPTMGMQVATGMPVGLPAPAMPQQT  
TQSTAVIDHANAGMMQLIGTAHPLQAQQHAAQQQTTQFHHDPSQQIVVGTQQQPQTQIP  
QPMHAQVVQH HHHHQQMQQFAGMPQMP SAASQSPAGAPITLPQTGGVNTLNSTAPSASS  
ATAAAQMQAQHWPGGVDDPP  
>comp5697\_c0\_seq2; 455 545 1570 LEN=1740; translated  
MAGLPVLAGQQMDEGLENNMWHGSADCIRAIDAATENWRNQLPLAKIKKIMKSEDLILQE  
LEKDRLEKKAEEGQMPSSNEKTKFMI SGEAPVLM SKACELMIKDLSFRAWRH TERNR  
RRTLQKQDLHA AVGESEVYDFLIDIVPRVTTTTPKMQHAHTTHLSSSSVPGTATMIPPT  
MGMQVATGMPVGLPAPAMPQQT TQSTAVIDHANAGMMQLIGTAHPLQAQQHAAQQQTTQ  
FHHDPSQQIVVGTQQQPQTQIPQPMHAQVVQH HHHHQQMQQFAGMPQMP SAASQSPAGA  
PITLPQTGGVNTLNSTAPSASSATAAAQMQAQHWPGGVDDPP  
>comp5698\_c0\_seq1; 328 1681 2562 LEN=3093; translated

MKFQFVGSFPTLVVIVAALFLGGNPLNNVFAQIESATNSAAYDKNACQPGSHDVPNPYP  
ADLVAPDHFYVKMPSTVSDGIP I IFEVNRWTSPFGADRFFALAKDNYFDCAAFFRVIPSF  
VVQWGIASDPVETVKWGTAIPDDPVMESNTKGMVSFATSGPGTRTTQIFVNTADNSFLDT  
QGFSPFARVVQGMEEVFLGNMNVADPVPNQFTYESEGNAWILEDYPAIDIVKGLPQGDS  
VTNTTTEVMLTLEEKPDDEEQEELEENPFESDSSSSGSSSSDISSDASSSASP  
>comp5699\_c0\_seq1; 389 145 1008 LEN=1377; translated  
MSTNLNYKQVANVSRRTWDVEAYEKRAKDRAKNTDANSKEKRKVFSTSKQVERDGNVQE  
EFVPAAGAAGPQLSERAFKARTSKVSILDAKIGSVEIVNPEAVATTKSMVENGE  
DSAVTKSGIGWHCKVDCFLKDSLAYLDHINGRKHQRNLGYSMRVERSTKDQIVSRLAAL  
VKAKERNKNSGLKPKMDAEKDFNEIVNTKDEELRRNIEERKRARKERKKKKERLKA  
EMLGHKSEVSTPEDETAVEERTGDGVDPNIAMMMGFSFGASNNIR  
>comp5700\_c0\_seq1; 477 32 1000 LEN=1081; translated  
MTFFKKAAILSTLCSSVAFVTLGMSKQSATSLKSAVVDFSKYEGLGNDFILVDDRDKDA  
PSLSPEQSEKLCNRNFGIGGDGVIFALKPPSDDYDFSMRIYNSDGSEPEMCGNGIRCF  
FLKDLGADAESYQVNTLAGRIIPVMNDDGTITVDMGEPILKAADVPTTLAANFEDDISV  
EQDLECNKKNWKSASVSMGNPHCIIFVDDLENDIDFESDGPALESCEAFPACTNVEFVQ  
MSDTHLKMVWERGAGPTLACGTGTALVIAAIQAGKIPSGNKVRVTLPGGDLFIEWNKD  
TDNKVFMTPATYTFSGKAALK  
>comp5701\_c0\_seq1; 789 1 2249 LEN=2614; translated  
XQTATPHHITHTTQLQSTNRITHQPEPRVILFEAYNPKQNTKQSTAQRERGGTPIILH  
DCTGRNTRAPPHHPAMVSLSHSPGGILRVLLAASWLATVVLGQDRTLYTGWTMFKDNT  
PTQTAFVGDKLTFIWTIDNLQNVFIHPTNDCTQTGRIAGNQSPTTEYVFPEDAGKSLFF  
ACDIDDRCEEYGMRLIVNVIISLDNNNDEDNTPAVSLTQEPTAAPEFFKFRSQSPTFAP  
PSEPARTPEPTIAATDFPTWAPPVVPTDVPTVSPTPDPTGFPTARPTASPTDSPTVSP  
TPTTPPNPLPTFPPTDRPTTLEPTVAPATPGPTVSPTIADNGSDGTTTRVAMRGLQMT  
ADAFSDETQSAWRGETEAFVTSHYESDHRGISFVTSIAVTNHEALSPPSRFRQLVRGR  
TPNTRGGPNDRRLQESSVVVTYDQVVSYRDASGKVFSEAYLATSFAFSEQRANYVEGLR  
ATGDPVLEAVTDSPPVTIGSKTTPTEAPVSTPVPSPPTPKSGGLSTTAIIGIACGAAV  
LVLAALVAIYSRGGSGDPEPDEDGDSPPKISIKEDEVSTLAGPTITNPNTGAGERSIGT  
VDYDYSKAYNGEHSLSAGGTFGSNTQNISFPMNADATGAALGPYGEDGTYENQFRPGA  
KVKEEILTIFAPPGKLGVIDTPDDGAPLVHAVKDTSVVVDKVKVGDKLVAVDDEDVRT  
SAIKVSKLISRKSANPSRKLTLRRTQIG  
>comp5701\_c0\_seq2; 282 1 499 LEN=864; translated  
XHHFCLPLACRSRISIGTVDYDYSKAYNGEHSLSAGGTFGSNTQNISFPMNADATGAAL  
GPYGEDGTYENQFRPGAKVKEEILTIFAPPGKLGVIDTPDDGAPLVHAVKDTSVVVDK  
KVGDKLVAVDDEDVRTLSAIKVSKLISRKSANPSRKLTLRRTQIG  
>comp5702\_c0\_seq1; 200 1 1136 LEN=1328; translated  
RQSEPTPRKRRKQNPQKQNSSRQTYRTEQTMPPRLRSRETKPPFRNTDASIRAILTE  
SRTVALVGASNKKHRDSYEIMSLLLERGYDVYPVNPFLAEAGETIHGRVYASLGEVVG  
SADKEHPGGRARRGRTRTIDLVDVFRKSSHAGAVVDEAIAIGARSVWLQEGVVEDAALR  
ALSAGLRVAMDVCPYHELPRLGHPASAGERSFXRQREQNKTKQNPPTHATTNHGAASR  
ATANAADPEREPGKGTSSVRGTDPANANEKKNKRKRTGTWLRQRQLTGTETQPTPGR  
NATGDCCLOTPQEHLLRQDAQNGNVTEIECCAMASALVPARRQQCGREGGFSGHGTDLV  
FRNTRREAQCNAFELNAK  
>comp5703\_c0\_seq1; 328 377 1279 LEN=1512; translated  
MISFQESVETLFTGIFGCGRSCNYPDFSDYSDCKENQNDVQIRFSSKPEKYLNSSIMITN  
EKNCSILNETATTCQDSFLNESTSSLDNNGSVVIARLPLQPQQEPPRVRLHKRELVAIPP  
GGSMKSWSPVMPHSLADPVFVSKKEHQRRMPIISPMPAPPKIQRLTLDDAQAFSGHPRR  
QRHNRTPSTATSRNNSGEMMYDIDGLPVEVPEAFSRSLDFLFSFPLSHKENGPLGD  
LCIVEECDRHRDADRASYPSSWHYQKRGMEVETSAYPYPHKTRKQDESILSHLNSTHITL  
>comp5704\_c0\_seq1; 241 95 867 LEN=1192; translated  
MVSLQKAVLLVAVSWRSATAFVGPSTALKSKSSASFDTACHETLTVPGMWGSLNFGKG  
DFKFYRSFDSFMSPTDEDKAEYPEVFNLPKGVFEVSMTKPLGIVFEEIEAGEGVFVQDI  
VEGGLADVQKIQPGDVLIGVTAIKVVGKNIIPRDRDDNEMGRMRWLMNXLF SFYLLLI  
SVSCWAILKAKWERRMIPARKFDFDFTVVGAIKSNEPKWSCSDVVLMPFERPSECD  
FMEFFEPFPDNPWKQQQ  
>comp5704\_c0\_seq3; 303 95 745 LEN=1070; translated  
MVSLQKAVLLVAVSWRSATAFVGPSTALKSKSSASFDTACHETLTVPGMWGSLNFGKG  
DFKFYRSFDSFMSPTDEDKAEYPEVFNLPKGVFEVSMTKPLGIVFEEIEAGEGVFVQDI  
VEGGLADVQKIQPGDVLIGVTAIKVVGKNIIPARKFDFDFTVVGAIKSNEPKWSCS

DVVLMPFERPSECDSAEVDAFMEFFEPFPDNPWKQQQ  
>comp5705\_c0\_seq1; 241 203 1135 LEN=1885; translated  
MSKKIVTSAASLRCNQCLSRFLSDALSISTSRSPSLSISSARFSSGLPPPVATTNNTRS  
LLSRAAFGANTTDNNDWTTTIRRSMATNRKVIDAKNARRLKIQQKKKNANKPGAAVATA  
EDASGETADKNSPFLQHQEWVKFQQSITVEGFQTGQTTTATALKKSRRGGKQARRKREKEL  
ARLGALSDPSEENISAVAQKFPAIRYSPEETEELLKQAYATLPERAGKRGNRNLRRQAER  
WRRVRKIRSDYKAHILEAHHRMEARSYKRERTKAAREEAAHLRQKDVEYQGAVLRRWAE  
TMGSGNAS  
>comp5706\_c0\_seq1; 574 167 2192 LEN=2741; translated  
MISEKRLFLAAAAVLAANNRCLHTSAAPLDDLITELPGFGRTPTPQFSGYLDASKGCDT  
KVNGPVCKIHYWLA MAESEGDSEGASDKDNKDKDKDPRTVLWLNNGGPGSSSLGWLQE  
VGPLMLNASGGLMENPWGWTKAGVNLMAIEAPMGVGF SYCSRELDEKQPKPCVNTDTNTA  
EASRAALVDFFTTKFPELARGDFYIAGESYAGVYIPTLAKELLTHKDSKDGVVPLKGIIV  
GDPCTDNAAQNDSMDSIWYSHKYGLMDNEVYDVLASDKCSDYYRKLTEELMIGRRSRGK  
DRSNARGTHSSRSHQSVGKRWSHVTAADLNQELEAIEDLTERRLAAEALYRSRVLGIEE  
EEDTKEHKLLRSAASATKGNNGNNGNANVAITNI INNLSFAIMGEQNSCSNSLTSNCCCT  
MDGEGVVVVENLPFQHIQQSAVGTTKISGLCSSTINAAIQQLCRTVEHRKQQSGIKPSTS  
SGIEGEAIKQNSLEYDTSFLTVGSSTSADLENSDKIIIGNQNSVIYDGEYELKRESFL  
KQEEASAATRKT SWNRKSKRRIQLNGNEGNHLDAARSPPTSLSSSLSSLSSSISSSSSL  
RSSERPCMRKTLFPDGPIMRYPYRQVSLGSLKIGEEEEEGEPKDGFELEADSDISKKCSGN  
NSISSLASVTSFAE  
>comp5707\_c0\_seq1; 362 349 1284 LEN=1584; translated  
MSPLTRFLNGRASAHAPLHIPHCTNTSEDEFKSEVLLLRLLENNIKDDKLVAVTQSLHEK  
EQEVIDLRANMSVVNTSIHRLKRNIAATNTELERENKQKVIDDLLLKIKNYDQRLKEQS  
AIIAQHQHLLQKQTSQDQDLNARVIPFLMNSVSI LRPSVTNITAIYQKGGYQQQEHQQR  
QYSKLESTKAHLSNNTTTTNSACSSTKSTKSTQALSSVESTSKKASKYAHISMADRW  
MNRYNELIEYKKEHGSTLVPQRYKKNPKLGKVVTHQRSSCLTEERKALLDEIGFVWDATR  
KGPLPVSILKS  
>comp5708\_c0\_seq1; 362 192 1400 LEN=1526; translated  
MAVSTICLLFLASGPAPANSLLPQVRIARNSDAFRGIALCPTSPSRIGSAPSSSALKGSL  
TPLPRDISPFDKSASKGRDVQGELRKLATVALERALSSKDGPPTRLELEFPPLIGGDQSK  
TQFDDFDNVQELNQNQAWCVQWLPTLAQSLNQSADDKRVWFVLPDTKEVELCKEEWAGE  
RYRQSAVFCIEAVAQHYATSNGGDENEAGYSKWPWGFASAVNRLVKGDDDEEGSGTGL  
LGDERALDSLSDAGSPSLHLVCQPGNGGPPVEDWINVKKFHDNAKLSGSGVGPPTIVVNGA  
LDKVRDGYYPFIFPALAKTFDFYKSFQPIFLKPVSDKGLYGWLFKVYGEWPQVFLQK  
RTVTKASGTTIEVEDIQALVSDTRPTYQECIQALLACNVEAN  
>comp5708\_c0\_seq2; 273 192 1573 LEN=1699; translated  
MAVSTICLLFLASGPAPANSLLPQVRIARNSDAFRGIALCPTSPSRIGSAPSSSALKGSL  
TPLPRDISPFDKSASKGRDVQGELRKLATVALERALSSKDGPPTRLELEFPPLIGGDQSK  
TQFDDFDSXVFAVLVIFVFNYESSTSPRKISGSFQKTNKTTTIDIVRVVFLGFDDTNPYRP  
DLASQTSKNSTRTKPGASSGCPXLAQSLNQSADDKRVWFVLPDTKEVELCKEEWAGERY  
RQSAVFCIEAVAQHYATSNGGDENEAGYSKWPWGFASAVNRLVKGDDDEEGSGTGLL  
DERALDSLSDAGSPSLHLVCQPGNGGPPVEDWINVKKFHDNAKLSGSGVGPPTIVVNGALD  
KVRDGYYPFIFPALAKTFDFYKSFQPIFLKPVSDKGLYGWLFKVYGEWPQVFLQKPR  
VTKASGTTIEVEDIQALVSDTRPTYQECIQALLACNVEAN  
>comp5709\_c0\_seq1; 386 184 1152 LEN=1152; translated  
MTMAEQSYGGANYGSSTIYGSNAYLDSTETEYDAYAQAWRYLGWYVDCNNGSSRYDR  
SGSHSHSGSDQQSFGNNYCQRYLMWAAYVDETYSGGGIGEYAI FDTTKGSYDSTACDTN  
NGSCKLMDCHNPASTNWKLGIVFKEASYFGNDAFFEQLFKHEGVCVWNDSSLYEFMSET  
RESSFSSGCLDTGISYGDYGLYIDLKPSFNNGMITYQLYEDYVCSTEYEGNDYNLESVAAS  
MGLLYGDYMQAWNDAMEPFKVCPCRAYNLQQTSSSSSSSKKTYYSYSSSSSSSYGGYWR  
YTGNRDLEDEKAESNKVEENQED  
>comp5710\_c0\_seq1; 2296 307 3963 LEN=4011; translated  
MTSYQHDTTKDGYMPIGGSETARPDSSKSKWILAGVVAVLAVFCGKS LYKPAKSTQI  
AMKKSGLTINEDGTVMFLFDKLRKRFVMEYDAKSNFASFLPGVGGYLGKPVWAFYVNRGQI  
VSTFGIESKDYPLLEFNAANKAYQVTSYIGFRFTVVRGTRKGASVLGNSFQVEPFSPARS  
NLDDPGDDPKPKRVLYVGTNEVEIEEIDGVNGLNTGVKYYVLP EENFPALVRRTTFTNT  
GTTDLELEVL DGLAKMEPSGGKLDGMLKSMGRTLEGWFGVYHADDTLNMPFYKLSMEPGD  
TAKVTIEEKGNYSLSFIESEDETAELLPIVFDKDKVFGKSTSM EYPRGLEASSVGKILDN  
KQYGESKTSSSFAAVRSVTLKPGEDITIASVYGRADHIDEVPEIAEIVTAPGFIAKKFAR

AREMINEMTVGVETNTTNPLFDTTVRQMFLDNSLRGGIPTILGNVDDDTNYDEDEPGVKVY  
HSFSRIHGDLERDYNWFSIEPAYYSQGPNGYRDIAQNRNDVTFPRMGGFDVKQFLSFI  
QADGYEPLTVEAQVYVFSDEHEKADEIAREVTVDAKSAKVLGEILKGGQFRPGQLFQLADQ  
LNINRIDDDKFLNTIMAASEDHAMALFGQGYWADHWYIDLVEAYLAIYPDGEELMY  
DNELRVFFSTATVRPRADKYVLDYTFDGTQQHVLQLEATYYDMDKAQEEDFRSSKTGLL  
GIEASWQRTEDGVTFKSTPIAKLFLGSLKFAMRDAWGMGVEYEGGRPGWLDSMNGLPGM  
VSGMPETYELLLLLLKYVKKVVDAYDRDVEVPSELGTMITTVEAALDKLEGASYKDTFPL  
PHDVPEPLFEYWDTVATAREEYREAVEYYFSGSTTTYTGKEVSKMLKRWIEEIEELGIERS  
HDFGTKGFDDGTSGVPACFFSYDVTEWELTGEHNEVGLPLVDAKAMKVGVPFPMFLEGPV  
RYMKTIQDDKKMTDYERVLTSGLRDQKLGMYFLSASLTGQSYDMGRQIAFAPGWLENQ  
SIWMHMSYKYQLLLRGLKYDQFFDEYKGGGILPFMDPDVYGRPLTECSSFIASSVFPDP  
SIHGMGFLARLSGSTAEFMDIYQLMFYGPMTFYLNNEEGDVEFQLKPAIPSWLFHDDDSHG  
DSMMDEDGQYIVSFKLFGAIPVTYHNPDGNIYGIPPNKYVIVMKDGSSTEEINEDFIPNK  
YALKIRRAKEVASIDAYF

>comp5711\_c0\_seq1; 508 67 1692 LEN=1692; translated  
MKFLQITVATISSFSFLVEEVHGHGYMFEPISRNYYSNQFGLTWGTEPNIPMKEYCFHCL  
NTKGVGSVCGTSEQGVNYDSWLDLQQPISWNSNGNVYQEGGIITVETFLTAHHTGHMEL  
RACPMGRASTQECFDQHVLEFVEDVNNFDVKMPKDENYPERGYYYGSQAFNNRFRAMNFR  
LPQGLTGEEVLLQWLYVTANSCSPEGYAEYSLNSHLPQEFWNRQLSTCTPEQFPPEFYT  
GDSPERFVNCAEISILPNDNNIHIDEPAPTPTPTPEISTQSPVQVISVPDVSPPPTPIATP  
ITNESESRIAYVGNWQACPTDEQIAQYTHVVIQFAVSYQWSPGKNICSETCEIAMPPVC  
ENVNRPDLIAKWKGMGKKVILSFGGAGMGGSWAGDNNDCWDYCFGRETKVIDRLTTIVNE  
MNLGDIDIDYEFYSDNQNGSGFSKGAERNFLTEVTVGLRNSMAPGAELTHAPMEPDMV  
PGTAYFEVMKDIAHTLDFLMPQYNGYVRSYVDFAGALSHFTTLANELFEGDASKIVYGF  
CI

>comp5712\_c0\_seq1; 200 1 558 LEN=741; translated  
PPYRTYRTVKYGTVCFFRFSHDDRRCPGDKHHDHPAEDSAPLQLGSASRPLGQWRKQD  
LPDGPAGGMQTNKAGETGGGGDKDGTGTHKSRGARSSSMDGSVETVSSMSSIPSISIPSID  
VSPDENEWESGLPSLGGAEVGRAPEREREPEAGQPPDTKPDARQFWLLFYLGHLALCALHDPT  
PRTFA

>comp5712\_c0\_seq2; 767 1 2559 LEN=2688; translated  
PPYRTYRTVKYGTVCFFRFSHDDRRCPGDKHHDHPAEDSAPLQLGSASRPLGQWRKQD  
LPDGPAGGMQTNKAGETGGGGDKDGTGTHKSRGARSSSMDGSVETVSSMSSIPSISIPSID  
VSPDENEWESGLPSLGGAEVGRAPEREREPEAGQPPDTKPDARQFWLLFYLGHLALCALHDPT  
PRTFAVHVLDFYEQGIFDRKAI RFLSDLGLFPASEVDSQGLVAIAPGSATAANANARANG  
TSTENRVSVAVGVDQRESLGLVDRHGDREVVAIHASSGLAAIGDTTEQALSPTTNVLHH  
IGSAVPEVTTLHSPQTLRSLLEADRIRNKLKQHDNAYDNSTKKKHPTTRGTATDGDRLPID  
HGTRDKPKSWDVKHYPLSMSHYQREFKEIALLNSGAFGSVYRAIRKLDGCEYAVKKITFD  
IMGYSHESI ERVIREVQCLAVVNDHPNIVSYTTSWWEPTWMTSNASDSFGARETLAIEAP  
SVKDLSLPQNDDSSSWSPDSGYDDYWDSTNDAESSRNARKDPRNRAQNRNKISLYIQME  
LCLPKTLQDWIRERNLQIPESDHEKRMGPALEIFRQICSGLAHIIHKSDVIHRDLKPANIF  
SSSDGKVIKLGDFGLSKQLHEIVHQQQKQAGSSKPTSPRPQSPSKNYSGLSNRSPSRNDA  
IVPLRGETRPAQAALVRCNTVGDNLTAGIGTASYAAPEQVQLNTYGTAVDVVSLGLILLE  
LVCCFETEHERLHNFQQCRNQRPVPGWLEENHPDIASTILACTHPNP SKRPTASALVDAVE  
LKT PRAHKEIQVLRGLQLAEKNAEIAEKDRTEAMRLEIERMQKSLASKKWNRP EEGIAV  
TDVETFDDEECVH

>comp5713\_c0\_seq1; 210 51 401 LEN=566; translated  
MGSSQSSATSSSSANMKDFINGQISANKIVVFSKSYCPYCTKTKQLFAQPEYKALNPVVH  
ELDKMGDGPQIAELLAMSGQRTVPSVWIGGTFLLGGNSETQAAHKDGLQSKLGLN

>comp5714\_c0\_seq1; 505 190 2508 LEN=2576; translated  
MSGDNSPVTENDHAREVSPNTSDGHGTSKSTSRKGDGREN SGDKLSSHAMHPYRSDQPQ  
STSGLTKKVGNRRRI SRSTRSPDDESTISNGSSELSKRRSVSRSESEKPGRES DRAPLP  
PSRMREHDS DGP PKSVSRKEPRSSDSLDEL RAPREHKEKQRVTLRGGEDENNVGQ  
PSFNSSADSVGTSRTNR SRKSSSSTSKTEDPTTDESSQLSDKMRRRNSNSGGSSKQSS  
TRSRRSKSEREQGNRLSRSRSNRSPQSLKGGTDERSSSRKQLTSDDRSSSRKLTSDDRS  
SSRKKITVSEDEIMALLGSTYDGPLNTGDDEEVRSISPKLEKRISRSRGTTSPRRNSPRR  
QNSPHRRSSPHRQSDKRMIRASNDPDLTTDKKERKQRI PRRSR SDELEPNNGLNHFL  
EKDLGSRERRKGAIGRSVASATLSGSR SILSTRSSQSRRRRQSSSTGRILKHQVSPDVV  
EEENLSDDMNSDMINGFNHDDYDDQESIDL DLATARENFAQQNANAKLQLHLNKTDEL  
LYSVFPKHVANALRNGQKVEPENHELVTIFFSDIVGFTDISAKLDPLKISDMLDRLYNSF

DALSDYHDFVKVETIGDAYMAVTNLTKEQPDHCKRITEFAIDAIRVANQTVVDEENPSMG  
FVNIRVGFHSGSVVSNVVGARNPRYCLFGDTVNTASRMESNSQKNRIHCSEISANLLRRQ  
CPRMRIYPRGTIEVKGKMGEMKTFVWHTEGSAVHKDKKNGTIRGFMKSIGKRG  
>comp5714\_c0\_seq2; 443 190 2616 LEN=2684; translated  
MSGDNSPVTENDHAREVSPNTSDGHGTSKSTSRKGDGRENSSGDKLSSHAMHPYRSDQPQ  
STSGLTKKVGNRRRI SRSTRSPDDESTISNGSSEL SKRRSVSRSESEKPGRES DRAPLP  
PSRMREHSDGPPKPKSVSRKKEPRSSDSLDELAPREHKEKQRVTLRGGEDENNVGQ  
PSFNSSADSVGTSRTNRSRKSSTSKTEDPTTDESSQLSDKMRRRNSNSSGGSSKQSS  
TRSRRSKSEREQGNRLSRSRNRSPQSLKGGTDERSSSRKQLTSDDRSSSRKLTSDDRS  
SSRKKITVSEDEIMALLGSTYDGPLNTGDEEVRSISPKLEKRISRSGTTSRRNNSPRR  
QNSPHRRSSPHRQSDKKRMRASNDPDLTTDKKERKQRI PRRSRSELEPNNGLNHFL  
EKDLGSRERRKGAIGRSVASATLSGSR SILSTRSSQSRRRRQSSSTGRILKHQVSPDVV  
EEENLSDDMNNSDMINGFNHDDYDDQESIDL DLATARENFAQQNANAKLQLHLNKTDEL  
LYSVFPKHVANALRNGQKVEPENHELVTIFFSDIVGFTDISAKLDPLKISDMLDRLYNSF  
DALSDYHDDLKLRKLFMPQQIGMCSDXKSI EGDFLTIFVDFFKSCFESIGDAYMAVTN  
LTKEQPDHCKRITEFAIDAIRVANQTVVDEENPSMGFVNIRVGFHSGSVVSNVVGARNPR  
YCLFGDTVNTASRMESNSQKNRIHCSEISANLLRRQCPRMRIYPRGTIEVKGKMGEMKTFV  
WHTEGSAVHKDKKNGTIRGFMKSIGKRG  
>comp5715\_c0\_seq1; 199 377 820 LEN=946; translated  
MSLKRINKELVDLGKDPANCSAGPVGDDMFHWQATIMGPDDSPYAGGVFFLDIHFPADY  
PFKPPKVHFTTRIYHCNINSNGGICLDILKDQWSPAL TISKVLLSICSLLTDPNPDDPLV  
PDIAQLLKTDRARHDSTAREWTSKYAM  
>comp5716\_c0\_seq1; 520 301 2019 LEN=2119; translated  
MSAPTPLVSGSSPGSPSPKTEKD GEMIPNATSNMRSSCIRKTSSTIKKILSMALILF  
SVIVISAAIITKQTVATGENNVHPILALAVFWLSLFWLSVMEGGLNCMVGLQPI SQCLYK  
KSHPKTYRCTSVAHKSQNIERFIVGRQYLDLMIVFITSFMVSAIDGASVLGLPKIVNVIF  
LGS DLAVILCTIVFGQLIAQINCAHSM LDFINNVWMASTYIALCVEASGILHAVYFVQI  
IFTKIVDYKHSKEQELNASKNNSGKSSTKTMNTSVDSRDSSEESDESSEDEKFEIKC  
DHYESSLSPSKSLYQKIFFWIRVVFSLAISIFAIVVFSTALVNGD TTVRDNI PVAVSFV  
SLLVLLVLGGFMEALQIALFAVKHLPSECI EANPTAKRNCEYILGKAGSSKRDNNDKNSRL  
QSFLVGRQISQTVIMFMIARIITVEMKVEGETLFGVTPQIQSVFFDSGLLNALVSTIFAS  
LSWRVTANFFPMLYIGCPLSIWIIRLCLVVEGTGICDAAWTLAKIPAYLVGYKSDDEWIG  
DSIYTNEKDLETGGLENTILTKERSTVSEETEW  
>comp5717\_c0\_seq1; 770 1 3724 LEN=4178; translated  
RRSRPKERQQFAASLLGRDKGRRKLQLFNDANSPKHGALGFGICNDLFADVSVRRGSLA  
GGFRQRNSDPRTKAVTGIFVPNLRRTDHRPMLLI SKKGRVRVLENPENLDTDDDEYINK  
EDEIDNDNTESNLILDLSGEGTLCIDGERGLTSIVAHPNFLENGWVLYYTRWSQWCLE  
DPVLGPQNILVRYTMNSTLLLENEQLLVEFGVLGERVHNGGGMMFGTDGYLYLATGDGG  
VRQHAQNRQNLHGSLRLNDDGSPDDNPYARNSTLGVPCGKSDGVVPEIFASKEGGENV  
FCSEIYAWGFRNPIRMALNHKGSNSEKVLFSISDVGAQLFEELSWGGTDYKEKDYGWPNL  
EGPCITDSIDDCPLSPDSNRIDPFHYVHKS YENGGCVAGSTFVPDGIWPDEYKYLFI  
FIFLKIYNLIEDPESECRESCSPPTSGYSNETFFESIHEEGENINEARIIDMFFGPYKDT  
EALYVIKYGNNSILRIRYTGVLGVPPVAKIKIENEQENIRKDTTSSLPTSSASNI GTGQ  
VLPLQKTTVVGKGQVINFDGSGSFDPEGNLSFTWDFGDGNNSTANATNLSYAYEVAGEY  
NVSLVVTDSKNKEHQAFFMVLVRKTP TVDMLSPKEGDLFSMGDILHLDGEAYDNQGNRIP  
DDQLIWEVRVHQDDQLDSSLNKRSGNDFHLDPALGPEDLNGFLS IMLQAMDDDGLTTTIV  
RKINLDVVDVKLTTDPEGLNMTIDGVAVISPYHIQSWVNFELPMEVKTEQSYRFRKNWSD  
DNTNSHI FVTTPRENATIDATQAKERAVSITAI FCLDSNAPCGDVTTTCCSGICDEMGE  
CKDELQDSVSVETKPTAENVSM TDPDLLPPYPHGTIVASQIMPHGYDTEPDQKPGSPGID  
SSIFDEPEL DVINSSTILDEQSNLGEQNA YYGLRYPYKWLLSIFLTI FSIAPCYLGWKYL  
QLKRQMEAE TKISTDKEVSEDEPLTPKTVAI SSEQDTPVPLFESNTSNI SFQRSGTIWRD  
IAEETERRAKLRKYCKDTPKTPDTAEYRGSPSSFDSFSSPSSVLTNNIDQTLVRLDDL  
LSKTF SRKLSRISFCQKQEHNDLSDGGDRKSGDLESDFIEKIEDSEQSTLAPLWLSN  
QNSVPGSPMRDSSNCSKTAGENLTLGSLYALGSSKGD LNTSQVVRLSEMCDNSVKVQDN  
NLSAATSNTSEGNLRANDAANQQNRSDAAGDGGGHNHSNI  
>comp5718\_c0\_seq1; 127 1 1259 LEN=1259; translated  
KTRGRTKTGRGDRAVTSRHRWARPIALLMASLVAGCGLPRVGP TKREIYAGSVQKQGD  
SFVVTVNDRVTRATAVQPALGFTEQFQ NAGLLGSDLISP GD TLGLTIWENVDDG LLAGEA  
TNQTTLGEVQVDGSGFIFVPYAGRIKAAGNTP EGVRRVITEKLEQQT PDPQVEVRRLAGN  
GSTVAISGAVSGQGVPIEAPTRTLSAMIASAGGIAIPPEVAQITVIRGDQRSKVWFQDL

FKYPQFDIALRGGDRILVEADTRAYTALGATGAQSRVTFETQTL SALEAIAQVGGGLSTAA  
ADPGVFLRNEPMEIANQVLGRDLOQAQRLVYVLDLTKPNGLFLARDFSIRDDDTIYVT  
EAPFTQWSKVIGAFGTGLGXGWINGVNLALGRLLSQPSDGPAGEARASRRVYFNGG  
>comp5719\_c0\_seq1; 502 112 1185 LEN=1221; translated  
MARINARCLLRSFHSLSVQSKQGPRRLSPNAMLVPAALPGPLALAHRAFATDSNP PRRRP  
RRKKAKYEQFSDAKLATGGGVPTTSALEDPFQFSGDSIEEYREKTELSPWVPV PDSVARK  
IFDRALPEEEESSDTSKADEIHVELGCGDGRVNFHAI EYGVKESIGIDVDEEVVKRADDR  
LNR IHPKPKLSFVVS DLM DPESPAWTEHVPRATIL TMYFATDGLEKIRPLLEQALRGKRC  
KVFACGYAIPGWESQIVETVLDIPIHFYDWGNDEVNMMTIQPSDSLADKLTANGMGMPGA  
PSDNMDQYMGRKNKKSTFVQDPLPGYHPDDQIDYGMDDFEEKTKKENGDLKEKST  
>comp5719\_c0\_seq2; 332 112 1332 LEN=1368; translated  
MARINARCLLRSFHSLSVQSKQGPRRLSPNAMLVPAALPGPLALAHRAFATDSNP PRRRP  
RRKKAKYEQFSDAKLATGGGVPTTSALEDPFQFSGDSIEEYREKTELSPWVPV PDSVARK  
IFDRALPEEEESSDTSKADEVSGFVGAVGLSIHVSFVHXNVGRGLLFVWFDSHSPICF  
LDHSINVLLIHVELGCGDGRVNFHAI EYGVKESIGIDVDEEVVKRADDRLNRIHPKPKLS  
FVVS DLM DPESPAWTEHVPRATIL TMYFATDGLEKIRPLLEQALRGKRC KVFACGYAIPG  
WESQIVETVLDIPIHFYDWGNDEVNMMTIQPSDSLADKLTANGMGMPGAPSDNMDQYMGR  
KNKKSTFVQDPLPGYHPDDQIDYGMDDFEEKTKKENGDLKEKST  
>comp5720\_c0\_seq1; 178 1 495 LEN=609; translated  
RTATRTLAI FSEARQVQYSINQPIKMISDNAKIGTGLLAGGVACLFLGIMFFFD PALLAI  
GDVLF LIGLTLTIGPWRTLRF SRSDRIRGII SFFGGVILVMMRWGMIGMICQLYGLVYL  
FGQFFPIISQSMQNTPIIGDILKIQAVEDFFSNFGGSSRRAPV  
>comp5723\_c0\_seq1; 109 233 405 LEN=405; translated  
MMSCTKSFVSFVLC LSLASPV LARTSIATGGGAGGGASRDSIKKATNTGSSSKPTNX  
>comp5724\_c0\_seq1; 260 233 932 LEN=932; translated  
MALARHVTFVHQNEGLEAQPEDLSDDDDDSGRAAEENSDFNEEKGI VSPRLLREYISRA  
RRHDPVVPPEVAPYI VEAYVSLRMQDRPGKSNNGNKVGDQTVMTARQLLSILRLGQALAR  
LRFSDYVAREDEVDEAIRLTHMSKASLSEETGEDGKIVRREDVMSRIFNIIRDYSATSNST  
TVEMKLAEAMVIRKGF TVQQMQSCLEEYEALEIIQINQNRTQIHFI SLYWVPDX  
>comp5724\_c0\_seq2; 477 1 1707 LEN=1707; translated  
XNPGGGGRRVGV LKLETRGSKF TKFQELKLQELPSQVPMGHI PRSLSVYCRGELTRLA  
SPGDVVTLDGIFLPQKVNDGHGAARRAGLMSTLYVDAQNLSVHKKSFD DAATKRAGEEK  
AGGLDADVRRVASAEDPVGVLSRSIAPEIFGHADIKRALLQLTGGVFRKMADGMKIRGD  
INICLMGDPGVAKS QLLKHVVSVAPRGVYTTGKGSSGVLTASVTKDNTTGELSLEGGAL  
VLADRGICAIDEFDKMDADRSSIHEVMEQQT VSIKAGIVATLNARASVLAANPLYSR  
YNRHKSLS ENINLPNSLLSRFDLMFLILDTPMDRDMALARHVTFVHQNEGLEAQPEDLD  
SDDDDDSGRAAEENSDFNEEKGI VSPRLLREYISRARRHDPVVPPEVAPYI VEAYVSLRM  
QDRPGKSNNGNKVGDQTVMTARQLLSILRLGQALARLRFSDYVAREDEVDEAIRLTHMSKA  
SLSEETGEDGKIVRREDVMSRIFNIIRDYSATSNSTTVEMKLAEAMVIRKGF TVQQMQSC  
LEEYEALEIIQINQNRTQIHFI SLYWVPDX  
>comp5725\_c0\_seq1; 389 104 1267 LEN=1405; translated  
MPITNPHFKLGQDKIDEYLENGVLVVENILADDELEEA KGLLES LRRRGIKSIDVEDEE  
SALAFQKLSSTNGSGGVLDIFHDDWKLKLIATHPKLFSITQQLWKAGYNCGRDKDSLPE  
NQR FQWHPYGGDIDFENKGYCYIDRVGYRLPTELAQEWGDR IYKRNGVT SVTSK KKKKL  
RSIQRSLTPHLDCCPDTLYENTNKWRPIQCFVSLTNNLEANTGGFEAVLGGFHRTFD AWT  
KIRNGDKTAIGQSKATINKAAPCLGEYTHIRPKEDADVMKRVNHSVKAGSAVFWDNRI P  
HANAYRNDNKSVPRAVVYASF LPDIELNRRYVENQLLAWKLRKPIRDQWNHIPEEQSPCS  
NEDQIASSDEGIFTEIGKRLMGIEPW  
>comp5726\_c0\_seq1; 153 1 353 LEN=609; translated  
XEETDEAGPD TTTDSEPEEETDEADPDIEVDSSNSNSTST DDELDGEDEEDVPDGEVPEGP  
PPP GP AQVPEPNPYK PFLHVDNLR YAATNLIRPSRVWQSRIDRQNELNANPSTIAAF  
>comp5728\_c0\_seq1; 445 116 1435 LEN=1528; translated  
MLAIRFKEALVFSGLIALACHIHADNPEESSKASPRSSASSPTRPLVFGILSQPFYDDE  
SDHDPGDNGYSHTYIAASYVRWLES GGARSIPIPFDAPPFLVEDILGQVDGVLPFGGSS  
LPSSAITIWELLHSEKYYYPDEKEGRQGDRIP LWGTCLGMEFIVQLAADVVGSGRKNCEM  
DRGCAYDRNILEKGYDSTNVSWPLLEVRKSGLYKPD SVYEIATTYNVTLNHHHLGISPDR  
FRNNSGLSRRFDITSINYDHKGKAFVSTIEPAMEARN TDL SKPSPFPVPYGVQYHPEK  
NSHEYGLYPGT AIPYEAIDHSQEGVDFSIYEARFLVDLARKNVLNRIHDGKKNKYNKPD  
LYPMVFTYPRRVGHKFEKEYILPPAKHWTDKIEALDNSDFRDRNPEDDGESEEAANSWYRD  
NWKEQRRAEKLPSLRGRHD



>comp5729\_c0\_seq1; 558 340 1617 LEN=1830; translated  
MSLLDQKTQQVFGTQCHTQLLMSTSATS DRWGIS ETSRWDKEMDEQTAGNQEIDTDGNES  
TVLLQEHQAWSNAVDSALKTLKKRSTLSQSELKKAEDVEAIKARAQLLVSNLYLFDQGVK  
SAIVNDWENDGKEVELTLDSTGKYSSASDEADALFSIVRKLKGRSRIVADLLKETDTAWE  
VLTEAELDLQSACGGDGETGIDEGRLAIVKERLVRTARATKFQAPTIEDDNSKTKSKGSS  
QNRREKRPALGTPASNVRKLISPGGCIVLVGRNRRGNEHLSMTVARGNDIWMHSRGCPGA  
HVIVQNRRGGPTVTEECLQFGADLAIFYSDLRNEEKAEVTAEPKHIIQKPRGAPLGAVKL  
REEWKT FVGRPGQVPELKEAREESGQTDEYHMFDAKAKHRRRTKQVREEDRAKKRRQRE  
KKNQR

>comp5730\_c0\_seq1; 485 68 1219 LEN=1590; translated  
MGENEDSNTKSGDKAPMSLNDRLDAARAMAESSPSECLPLLDGLQKDVQAVGLFSKNET  
IDDISTKSI PFLAIDHLLAVVLGNLPVQPGAMARRKENLQRSFTLWTQFLERLELLEILS  
KEETNEFHRLLETQQQVSSGTSTTISSPVNREEKIARFKAKQQQRKEIERLQSLKDRRS  
RCDVAPEDEFDGHDLDSLERSMTLKEHLFLKLEALESWSQSLRELPMIEQMIKMDEERQQ  
RQKFSGKGNDAVDPNRRPPSSSNKGLKVTHVSKDAASGQLRFKREEIRSKVFQPGWSQPT  
MTLEELGEREYQEAVEREARQNAEAERVKQPRRYEQQLANDGLEDNADLVDAKLDREW  
DDWKDENPKGSGNKHANRGDKNF

>comp5731\_c0\_seq1; 1081 161 1963 LEN=2351; translated  
MRNFLFALLFCLAAGTTVVVQAAGGGKCSSEQLKCPTEECESGYSYVTDCLDCEGNLNTF  
NGEDKCFTRKLLSSKNPSPQYLWRDIIGMLVWFCAAGVATACGVGGGGIYVPLGILLLN  
APKPASGLSQASIFGASLGGLLLNLRNMHPFTAKIETTAVAGNGSPAEEERAVADVPTND  
DGEPTETTKYYTRPLIDYDMALFLAPMEMAGAVLGVLIIQKILPNWLYLFTA AVILGF  
KKTFFHKWWDTRAKEMAKAALEAADSEEQAALDPSANAKKDTATDNDNENSEG PSSDNGE  
VEVTASASMAAEDNDENNEAEIVMDSEKIAKRTWFLERDARQYPVEKMF CFGVLWIGLTL  
LTFKGGKGVESLVGIDCASPWYGV LIGIQFLWTLGFATFFAIKLMRETTQKKAVNYPFH  
EQDVLWDFQKTRFYAFFTFVAGIVAGLIGIGGMV LGPLMLVMGIYPRVSTATTATMIVL  
TSSSVAILYITSGMVPWQYAVTFFCTCFTGALIGKTYIDGYVKRTGKASVLIFLLAMIIA  
LATLGALVIALLRNKA DWCFAGFNKFDLADAVEVVCVPTETERMLGSSSFYGDVVRGY

>comp5731\_c0\_seq2; 1081 257 2059 LEN=2447; translated  
MRNFLFALLFCLAAGTTVVVQAAGGGKCSSEQLKCPTEECESGYSYVTDCLDCEGNLNTF  
NGEDKCFTRKLLSSKNPSPQYLWRDIIGMLVWFCAAGVATACGVGGGGIYVPLGILLLN  
APKPASGLSQASIFGASLGGLLLNLRNMHPFTAKIETTAVAGNGSPAEEERAVADVPTND  
DGEPTETTKYYTRPLIDYDMALFLAPMEMAGAVLGVLIIQKILPNWLYLFTA AVILGF  
KKTFFHKWWDTRAKEMAKAALEAADSEEQAALDPSANAKKDTATDNDNENSEG PSSDNGE  
VEVTASASMAAEDNDENNEAEIVMDSEKIAKRTWFLERDARQYPVEKMF CFGVLWIGLTL  
LTFKGGKGVESLVGIDCASPWYGV LIGIQFLWTLGFATFFAIKLMRETTQKKAVNYPFH  
EQDVLWDFQKTRFYAFFTFVAGIVAGLIGIGGMV LGPLMLVMGIYPRVSTATTATMIVL  
TSSSVAILYITSGMVPWQYAVTFFCTCFTGALIGKTYIDGYVKRTGKASVLIFLLAMIIA  
LATLGALVIALLRNKA DWCFAGFNKFDLADAVEVVCVPTETERMLGSSSFYGDVVRGY

>comp5732\_c0\_seq1; 511 350 1798 LEN=2062; translated  
MSLLATAQSSRRSALS LGKRALSAMAASESSPASSSFP SYVLKAPT TDVTTLPNGLRVGS  
ETTVAETATVGVWIDSGSRYETEANNGAAHFLEHMAFKGTSKRTQRQLEEQIENMGH  
NAYTSREQTAYFAKVFKKDVVAMEIISDILLNSNLEPQAIEREREVILREMEEVNKNQE  
ELVLDHLHATAFQGTPLGRTILGSEHNIRTLTRDQLVDYITTYTAPRMVVAGAGAVDHD  
ELCGLASECFGALPTESPALSSDSSYEPATFTGSDYRVKFNS EDVGYMAVAFPTDSWTS  
EYAFPLMLMQLLLSYDRASGMGHNYASNLCQDVAENELCYSLNTFNTHYKDTGLFGVYA  
VCPDNKIDDA SWYIMNNLIRLVHVS VGDEEVERAKVSLKAAMLSNLDGHNNVAEEIGRSL  
NYGRRMTPAETFCRIDAVTTDDIKATAYKFFNDKDHAAVGGIHELDPDYTWFRRHSYWL  
RY

>comp5734\_c0\_seq1; 311 352 1587 LEN=1888; translated  
MESSLNARLTFEQVRASGEP CRPLEFP PPPQVGKIRVRALVIDSNTGERRGWSIIHREDF  
GISSKIANGHCEPQFVAYAPSRQLQTAIYGSVWACVVLKRHYGVAANNDAAIAVGI EP  
PCAPIVWETTNRFAIKMVEWAKVQQSRGALLEDPKEIAAMQYIGNTSPHLLGPVEALQ  
DNDCLYNIMPYCNNGDLFGVVVNYAQESGGERGMPEPVARYWFRQILKGLFHLQSVGVCH  
RDLLENILVDNENCLIDMGMCLHVPYNDPAIPGNVVDARRGSTRRLMRPQGVCGKHNY  
MSPEVYANTGPFDFGFAIDLWSTAVILYIMFTGFPPYEMADMRNKRFEIIAKGRVQVQLEE  
WDVHLS EDAGDLLQNMKVDPRERLTLAEVMSHPWVNGDVQPPPPRQSFH

>comp5735\_c0\_seq1; 264 83 1003 LEN=1191; translated  
MGRCFIQIVMGPA GSKSTYQCAMQYHASTLGGARKRTIHVANLDPAAEDFGYQLAFDIR  
DLISVEEVMEELDLGPNGLVYCM EYLLSNLDWLQDHLDSFDDDEYLILDCPGQLELYTH

IPLMRNLIDRMRMWGYAHTMAAVFLLDATFVGDTSKFLLSGSLLSLSAMIALELPHTNVLT  
KCDLLTDEEVEDILDHGSATQMWDREQDRQSLIMPTPFVTAASSNQGDEVTEEQRRLER  
RRRHRQRLTDSISQLLDDYSMISFIPLNIRDEESIDALLTCVDGSIQYGEDLEVREYDGP  
EANDDT

>comp5736\_c0\_seq1; 335 240 1220 LEN=1309; translated  
MSRHGNSRAYVVDHGENFVPGSEADAPNLAPQPLDHFKRGYLERANQRERDVANMDNPGGN  
GENGGGPQRDNSRYSNKSERGRGGEGPMPTRYSGGNNGPFNGSGRGSNGGRDQRDSHYGGG  
GVSRDDGRRSSSSSYQGGGRGRGGRARRDTPYRGDPGSSFRGARGDRRPSYYGDRDDR  
GGGRGGQQVIMGLDIQALVDRLVLRPGCDIYRELGITRESNMAVFQSGKAVTAIISNLARR  
RNLRIANCVWDWIDHIGIEKNTFHYNAMISACEKVRDYNKALRLLDEMKEKKVSKNEVTF  
SSAISACEKCGQWRIALDLLDQMVHR

>comp5736\_c0\_seq2; 303 952 1773 LEN=1862; translated  
MDNPGNGENGGGPQRDNSRYSNKSERGRGGEGPMPTRYSGGNNGPFNGSGRGSNGGRDQR  
DSHYGGGGVSRDDGRRSSSSSYQGGGRGRGGRARRDTPYRGDPGSSFRGARGDRRPSY  
YGDRDDRGGGRGGQQVIMGLDIQALVDRLVLRPGCDIYRELGITRESNMAVFQSGKAVTAI  
ISNLARRRNLRIANCVWDWIDHIGIEKNTFHYNAMISACEKVRDYNKALRLLDEMKEKKV  
SKNEVTFSSAISACEKCGQWRIALDLLDQMVHR

>comp5736\_c0\_seq3; 705 952 4047 LEN=4047; translated  
MDNPGNGENGGGPQRDNSRYSNKSERGRGGEGPMPTRYSGGNNGPFNGSGRGSNGGRDQR  
DSHYGGGGVSRDDGRRSSSSSYQGGGRGRGGRARRDTPYRGDPGSSFRGARGDRRPSY  
YGDRDDRGGGRGGQQVIMGLDIQALVDRLVLRPGCDIYRELGITRESNMAVFQSGKAVTAI  
ISNLARRRNLRIANCVWDWIDHIGIEKNTFHYNAMISACEKVRDYNKALRLLDEMKEKKV  
SKNEVTFSSAISACEKCGQWRIALDLLDQMKKEGAGQTAIAYNAAISACEKGLVPHKALE  
IFEQMKREGVRPTVVYTYSALISAAEKGGQWKLALLEVLEEMKAAGHGANVIAYSAAISALS  
KGQMWHKALELFREIESSGGKPSIVTYNATMTALEKGLQWERALDLFDEMKSKNMPVTVV  
SYGSAISACEKGLQYRQCLEYLDEMTEMGIKKNVIFGAAMSCMEKSCRADIGFQLMERM  
RLEDVAPNVHIYNSAISACARCNLWEKGYELFVEMDRIGVNKDVVTYNAVLDAVSSQVEL  
GRRLFKEGVERGFYARVSRGLGTQWLELDLHFLSLGGGEIALGWWFEECLVPYLINTSKLE  
AVQSIIVTYGKTRSRGARMNDDGMRLRVRAMLKYMEIHETPQPNKGRIHINKSALIEV  
VKKNGGIRFDLEGYTRFKEEETTANKFPDVVQQVRPRFRPARPGQPPGTFIRDGDPVP  
PYRSPDDKRELDHPVDRRSFSFRKSRDDRFPDRGPDSARPSGDDRMPPDRASSNYGRTGE  
SPRNNQDQRYGDEWRGGQORDAPRRGAFGDQEGHGDRGSRGDRPENGIDHRRSQRGYGYEG  
GRPGIGNDGRGGERQHEYDERRGGVRNWDSDGRDNMRSTNRDYDPNLRGQAGMDRRGR  
DERDGRSSMSRPDQSYSDRRPSMDGRGGPRAPRPGPPQNMHFQDRHSDRGSRSSSGPN  
GGGRNGPNDMPADFRGARNTDLNAQASYRNEEELASTRKRPYDDYQKQQPSSRGYDIEP  
SYAKAAHSITX

>comp5736\_c0\_seq4; 737 240 3494 LEN=3494; translated  
MSRHGNSRAYVVDHGENFVPGSEADAPNLAPQPLDHFKRGYLERANQRERDVANMDNPGGN  
GENGGGPQRDNSRYSNKSERGRGGEGPMPTRYSGGNNGPFNGSGRGSNGGRDQRDSHYGGG  
GVSRDDGRRSSSSSYQGGGRGRGGRARRDTPYRGDPGSSFRGARGDRRPSYYGDRDDR  
GGGRGGQQVIMGLDIQALVDRLVLRPGCDIYRELGITRESNMAVFQSGKAVTAIISNLARR  
RNLRIANCVWDWIDHIGIEKNTFHYNAMISACEKVRDYNKALRLLDEMKEKKVSKNEVTF  
SSAISACEKCGQWRIALDLLDQMKKEGAGQTAIAYNAAISACEKGLVPHKALEIFEQMKR  
EGVRPTVVYTYSALISAAEKGGQWKLALLEVLEEMKAAGHGANVIAYSAAISALSKGQMWHK  
ALELFREIESSGGKPSIVTYNATMTALEKGLQWERALDLFDEMKSKNMPVTVVSYGSAIS  
ACEKGLQYRQCLEYLDEMTEMGIKKNVIFGAAMSCMEKSCRADIGFQLMERMRLLEDVAP  
NVHIYNSAISACARCNLWEKGYELFVEMDRIGVNKDVVTYNAVLDAVSSQVELGRRLFKE  
GVERGFYARVSRGLGTQWLELDLHFLSLGGGEIALGWWFEECLVPYLINTSKLEAVQSIIV  
VTGYGKTRSRGARMNDDGMRLRVRAMLKYMEIHETPQPNKGRIHINKSALIEVVKKNGGR  
IRFDLEGYTRFKEEETTANKFPDVVQQVRPRFRPARPGQPPGTFIRDGDPVPPYRSPDD  
KRRELDHPVDRRSFSFRKSRDDRFPDRGPDSARPSGDDRMPPDRASSNYGRTGESPRNNQD  
QRYGDEWRGGQORDAPRRGAFGDQEGHGDRGSRGDRPENGIDHRRSQRGYGYEGGRPGIGN  
DGRGGERQHEYDERRGGVRNWDSDGRDNMRSTNRDYDPNLRGQAGMDRRGRDERDGRS  
SMSRPDQSYSDRRPSMDGRGGPRAPRPGPPQNMHFQDRHSDRGSRSSSGPNGGGRNGP  
NDMPADFRGARNTDLNAQASYRNEEELASTRKRPYDDYQKQQPSSRGYDIEPSYAKAAA  
HSITX

>comp5737\_c0\_seq1; 508 110 1429 LEN=1634; translated  
MMFKAACHTILLCTLAAVNAAKDDEYYRAGMGNPNVDLKMWADAHNVIQDLDEFSLYLIQ  
YHNCAWTQNRNTNEEQESGSGDETDYWMGATPSYAANVAFSLYGLKGEKFKGCNENTF  
INSFTTNQGFEGFASAIYYAGATSTDYSGVYSSECQGGAGIACDYDVGFASVTYSTDTCN

PAYATGITDTLSYMNSDFKSAQCVKIYDYQQSYNSGNRELKKTESKNEAEQDGKTEIDEN  
TDKEDRNLQNNYGYGYNNGYDYSYGYNNNYDYSGTPLSILYYSHACFIQNYWDPDGGCP  
DPYGKLEYQENFNKGVRRMSMKVDTYVNYRANMKIGQRYVIGVFLFMTAVAMLATEQYM  
AYKAKKRTNKSSTSDSLMKPGSHRKKTVVELVSTTGNKIKKSVRGSSKGRKKKSSKKKPT  
PNKVTTEDYDAPTLLEMTDA

>comp5739\_c0\_seq1; 192 98 670 LEN=1107; translated  
MGEEEEKQPKRPSTVDFKIDESAESTKKRPSVKRGMSSKRKSLRASFLRLKSLSFRRSGGER  
GADIDTLRGTHGPEFEGYAKINRSGGAGISCGCFGGSGDTKEKIILIKGAYCFVFNESD  
PAPKYAIACAHMKAKIHSPSHGVHPVTIETALGDVEWDLTFQQKQIAKQFADAFKKQAAV  
GESDEVKVI

>comp5739\_c0\_seq2; 234 98 814 LEN=984; translated  
MGEEEEKQPKRPSTVDFKIDESAESTKKRPSVKRGMSSKRKSLRASFLRLKSLSFRRSGGER  
GADIDTLRGTHGPEFEGYAKINRSGGAGISCGCFGGSGDTKEKIILIKGAYCFVFNESD  
PAPKYAIACAHMKAKIHSPSHGVHPVTIETALGDVEWDLTFQQKQIAKQFADAFKKQAAV  
GESDEVKRLGHDKLLNKRGSVRYAEIAEKKLEEQPEKKENVLLEDVNRIEPMAGC

>comp5740\_c0\_seq1; 473 327 1490 LEN=2071; translated  
MGGGEISASGWAKGILLSILASVIGGISKLAIRKSWLLQAGGDRNSGNNNDNLLPGEITNN  
HIAAENTTGGNGDEQMSGQYERQRKELIPYVLRYSGMFVMSVLPICCVLAMNFASPSIL  
APFSGTLVWVILGSPFVNSEKPSRRQIMACCLIIILGEVVAMFGDHTNDEGVTVEAVRK  
SYKKPSFISYFVGLALYIALLMYWINFSESFIFRRFAWGCSSGGAITGCQNFLKDSLTIK  
ATEPDQKLPLIFYPPLSLFAAGTAFVGLLLLTACMKRYDATYSSASFVGSFVVSASIMAAV  
HYNTFEQLDGVINYILYFPGILILMVGVALVKESGESDGYDDIPEQQRGLDADQVGFND  
SEASMFTKTVESVFLFRSVFSQVMNLQ

>comp5740\_c0\_seq2; 481 327 1493 LEN=1924; translated  
MGGGEISASGWAKGILLSILASVIGGISKLAIRKSWLLQAGGDRNSGNNNDNLLPGEITNN  
HIAAENTTGGNGDEQMSGQYERQRKELIPYVLRYSGMFVMSVLPICCVLAMNFASPSIL  
APFSGTLVWVILGSPFVNSEKPSRRQIMACCLIIILGEVVAMFGDHTNDEGVTVEAVRK  
SYKKPSFISYFVGLALYIALLMYWINFSESFIFRRFAWGCSSGGAITGCQNFLKDSLTIK  
ATEPDQKLPLIFYPPLSLFAAGTAFVGLLLLTACMKRYDATYSSASFVGSFVVSASIMAAV  
HYNTFEQLDGVINYILYFPGILILMVGVALVKESGESDGYDDIPEQQRGLDADQVGFND  
SEDFVYTEVSELGREETLSRNVCS

>comp5741\_c0\_seq1; 502 1 1516 LEN=1570; translated  
XNSLPQVNCLSSACDFQSAKNSKKELEFAPAARNGSMLSGIRTGKAKKKKSKAKTENVPS  
EPNSDATSIRDPHPRIVNSKVNSSNNTVANANHKNEANLSVAERLKQALASGVFPQKSSK  
PSTATEEAPASSGSYMERVVGKGRVEGTSAGASMIVLDAPGTSASYSKKREEDMTATELA  
AKERATGGENSMSWNEHMARNIMRVGKRRKMKARTAAGEDSDEEVERMKRHLDPYHLNES  
GSGSSAKRAAKQLEKEEQDRRRRIDRYQKQEKITSMCSWWINSSFAKHRLLAFGKHVS  
LMMAPPNSSLLPGHQFYLVPLKHAPSMAECDDPDVREEMKLFRRSLENMYAKERKGLVLC  
ETVLPNKNFWQTRVEVIPIPFSQLQDAPIYFKSALVEQAEFFGTHTKLFRSTSHKKPLRSV  
VPKRFPYFHIDWGNIASTSDSTGYAQIIESSFPDRDFGLDLAGMMELDPVRFQRKVKFPK  
DTESKLVAEFSKWKSFWDWTQRLED

>comp5742\_c0\_seq1; 237 86 268 LEN=268; translated  
MDLEKGAELREPLLDSDSGADGNENENRKNKQEEERSNIGASFWGDEAEGDDDDGDD  
G

>comp5743\_c0\_seq1; 485 247 1152 LEN=1577; translated  
MTIEEGDSDDNSLRRSEATHDSFPIAFLFILTFGMSALILGCIQNFGCSTVTFPPQVSTAV  
DGATLGSFNNGVFGYEFVGVDFNPNPFEESSTSSDNTNYDES VNMEMWEVCRRYGTLGE  
DMKLAGVETEFYSYKADYMKAAQGMIIAFSLGLVMMMLIVCSVPNGGILCVMQWKCYGLF  
FFLTSVFGQLSLLIFSSSVCLDNPILGVIDDNEKIFGRLGDTFEETCEMGI GAECGIAS  
VLWFVTAALVCCEKPPGRYKEECLTHMLRAHQELMARRMKKAAALEEYQQRREQTNNNE  
Q

>comp5744\_c0\_seq1; 251 214 792 LEN=934; translated  
MGTISQLRTVYLVSVVVLSTLLQSSQAFMLAPTAASTRYSTSFSLPASAAAENEVESTL  
TPKDKKVYQFLQELSESNLTFRIVVINGAILESTNLLGPTFKLGQSPKTGNHIVTFAAE  
DQSFEFHVMPGQVASVALVEKESPIGNKTMRLMRLLNADGGSCSLILADDSQAASDWYG  
GMTETYGSDFEF

>comp5745\_c0\_seq1; 200 1 958 LEN=1315; translated  
XSTQTASPENPTLKNPSKPSNMSTASDAPLPKSVIFGTAGLGGCMGWVVVHPFNTAAVR  
ANLASASGQTFSSISKAIKKDGFRSFYDGLSAGVARQVYATSRFGLFETFRDKLHEYRGK  
TDFASRVGVGAVTGGIAAYISCPMEVCVIRMSNDSLPVKERRNYKSLPDTTFTRILKEEG

VSAFWRGSNPFVARAMMVGVFQVATLDQFKDFYAKALDQKRNSISNVFCSAMTSGLIYSL  
ITMPLEAAKNRMASQKPDPKTGKLPYTGTLQTVTKVASDSGFLALYNGFAPYYMRCGHT  
VTMFI FVQMLRDQYKGFMM  
>comp5748\_c0\_seq2; 219 1 533 LEN=714; translated  
XALTADLSSCTLPATKVLFFVPSPDSSRRVNPVGHKYLVENSWIITPATTIASTPSPTRH  
KTSRNNMEKASATNDLDERNSSSGSVNEDKAKGVTDLVSDMLLEMENDFKKSNGSIRDRMR  
EMGSKLDGLEQSINGLMHDAGLIDGEEESPDSNPSRRPPTNSSPRTTMTATSDSV  
>comp5749\_c0\_seq1; 430 182 1534 LEN=1592; translated  
MALSTKTKPSVDRCPMTMSIATTLTDFSSSSSTELSSSTSIDERIKQMAERAKNGTPFTED  
EIRDIANSLQNLAPVVDNKKVASSCKEIDFSGLKSLGVAHLSHKDWAVTSENSDKLCE  
TLAVESSPSDASSTDFPLSAPARQLLERI IKEGNWDGAVRNANRSDRPADEKSWAVLVT  
GVNGIRKTTSMYQPWFGLLSEAIICPATCGASETQKQKAPKGLPTGSNSFFRQLDHMICT  
LCNEEFTRLYAWSTSQLPKVEDDGKPIPSDEVVDQYSKYKAAIFSRYRTISELLGALLLK  
QAQKVDINCMMETSGRDVAMFHYVDHFFGENTSYNKLALHFTINDLTFKQSVDRRMIDE  
IQRGSQALGNSNVFDIVYTNQGGPYGSKVLDGVQADSDRVWESEVLSGNVGEDWYKATIA  
INAHETEPWTAQAVKPDGSLGTFKFAFGPKK  
>comp5750\_c0\_seq1; 434 108 1664 LEN=1853; translated  
MTSLCSASGEDIDVPKDLECLICGDLENAVSLQACAHTFCVCFRIHYREAKKKRCPLC  
KVSVDNLRKALLVNGAVQKRVREFKSKHSILQPSLPFHDKLPNAQEAPIREQMQRRNYS  
MLLKHGKGLQKVKKEYSLPTSNGEQELVDRLRYFQCMWDAELDTIYTPLRPSSELVAKFK  
KKERLQREEKSRAMMTGSINDSKHMKNLTSSLLNDNTRKDQKVRNERKVSATSSGNAQFD  
IKFRSNFEALIAQGRKHMKGPGCPRRVYDDDNIDNPAPTNSLGSNEKISPNIDGSC  
AQIVANINVRISNRTHNNGVTSVGSSEVHGSSLNRKKRPLVSPCTLERKKNTLCYTAKES  
LGASESNIFNGHSSKIASNQTTSSGQLRPSKSKQKGTVINNPYRKKQRRSPSKAKADIQDK  
GGNSSCAILPFQKRKFQTCNTLGDGGKRSSTVLAQENITNGNTIGSNRRIHQNKTDSSSL  
SIGKGSQDSSIKTETIPIRKKYVIRNPYLKSSGKKDR  
>comp5752\_c0\_seq1; 422 39 488 LEN=657; translated  
MADQLTEEQIAEFKEAFSLFDKDGDTITTKELGTVMRSLGQNPTEAELMDMIQEIDADG  
SGNIDFPEFLTMMARKMKDTDSEEEILEAFKVFDDKNGFISAAELRHIMTNLGEKLTDE  
EVDEMIREADIDGDGQINYEFEVKMMMSK  
>comp5753\_c0\_seq1; 214 213 782 LEN=905; translated  
MKTIEIIRSSPRPETSLRFSPEDEKSNVGLTRMECCCSNVGNSGIGTGIFYRNGYCS  
TGPQDFGRHTVCVQVTEDFLEFSSKSVGNDLSTPIPEYHFPLKEGDQWCLCAQRWAQAYA  
FGKAPKLYLRATHEKTLDYVEFAVLRQYALDGKEADAEEKGLDEKRNILENIFGQESSPS  
SPPNSESEE  
>comp5754\_c0\_seq1; 293 106 1161 LEN=1161; translated  
MYISEKNCSALRSDSVSSHKRIVSETKTIDKNLKGKNGNDISNNAKDTCTNSKTKSLDRFP  
LTKDKQQKCLRTTNVTVEVSGSQFCIVPTLFQHIENLPWKKQKERPRGKKRTTLRLNANP  
DVFECVLRFFLHGNLDPKELSTRRAKTLIDFVSPLDPVAVKPLVHHLNVFVAGQSSSSV  
NSKRSLMLKKSISNFSWTKLVHSHRGASTASNVDNRNNAATVSGGTTTSTNPPRECGDSA  
ANNAAKAALPTPMGSSSSAVTTVPTQIEQPIPGSITTAAEVSVCSMDEASSVSKLSLQSS  
WTQVPDENSLSVSGSASAAHASSSRKPAPDPVPAPVPAPVPVPAPVPAPVPX  
>comp5756\_c0\_seq1; 447 261 1667 LEN=2251; translated  
MSERDIGAGYHGRKSSSGRGRGRGGGRGSGSRTRGAANEIAASTNAAKGANAEDLH  
PNDKSIKDAPIRNHRFQPKKGRGTWGETSNRNHNKKNHTRNNSYNNQHKKAYDKGKRG  
QLPLKVYYTGDGEEDRANGFAGMHRDCKALRYKVHKPMCDLPLLRMVRQSEATIEGTTI  
TEDGKIDALLVVPDTKQRYLYVCSDTSLDRFEEDPRGAERKLRAEIFGGSEGGTTPVDES  
SFKLSCAGCLLFGHEPNGFCLVASPSFEAIDAVREESLRSKNRRADGPLHHDHAHFVAGL  
PRSSLWDLHRAKTRAQNAGAVETILCHLSGQVVSAGTEPTADRLSGGIELGHHLTSALS  
TQNGTKHGSHRKPAPAVAPGDVGDPESSWVFIYDGGSSLELDLPGGKRHLGETSLEGAIR  
ETEESEASLVWDPSWVVECLESKKASERGNRYLLRPPQSFLEQRGGDG  
>comp5757\_c0\_seq1; 1148 337 3945 LEN=4023; translated  
MIRSESGTDLHLLHSSLVFPFHIIDFEVNGIGGGFVVVNHYGDYGLSAARIDIGVLGDDWR  
DIDSALLYLHSTASLTSTKCTTGLNLGGAGVLLYFCSRNQFTDSNRKTLAALVEELKG  
FTKSNILCLPRNLSNEDLTHMYKNEIVTMRHDNEGIDNAFVPLAKTKRKGSAIATESF  
DYPKALITQEENLVAKSAAYSSFGSILTLMAKKEWTSARIVLLGVTHLALELYQLLKR  
ETDTVFLSNPHPSKEDLQSKIPSDAFISWDEAHKSKEEWDIMVFCQSCPSLDESVISSI  
RTKAVISVSDLLPMDKRRREEVLLTLVKRDI FEAADGISDLGEIAKVFLAGGTTFSFN  
DAFGMGCRVMEKKLHLHGIVHSEDVTAKRKFHDLMLHALEKDENARLFGLGTMHQSSDR  
MTAWLWSRARS MCPSYRAMSSK SATVKPEKVSYLDMSGNGAAARWICKQGKKIHI TCID

VCAKQSYENRNI SDEEGLGSQIDVVQGSYERLNSDYSNFFDGCMSQDAFIHAFTKRSAFL  
EAFRVTKGGGWLII SDLMRGDGKDGNEEMEAFVKDHNITSWATPNECVQLATEAGWSEVR  
FIDCTTEINVS LHGLLKKIKSMIKS GEYEGRN LQLLKT HRVLSNRIGQADRGI FKWGII  
SGRKP YD VVFMSEPPVSPESRSMINYSVNSLDGDLKFGT DVLV VNI GEKLDY EKIMELPS  
TTRLIVTLSAGLDHICVKA AEER GIRIRRA AREAIVKSVADYLLSNVIFGLRNGFQNVGV  
PFPGASWDLTWN SDGVDLDCSKIGF IGMGAI AIE TAKRIRSLSKSCEL VYHVP SDIRCRF  
EEGTHHMYHVGIADLLSTCDV IIPMVPLTTSTTGLINYS SF SMMKRTAIFINMARGKVVE  
TAGMLRALDEGLVRHAILDTTDPEPLPPDHDLWNLKNCTITPHFATNTTYVRKELVEDIP  
NQVEDTLEERGILRLEEQRMRHELSDAYRITREFGLDELVWNHISVLLSDGSFLITPGSR  
MFDDVGPEDLVKSSGNITADI IHEAVYKRRSDVKAIVHLHTPASVAVSCELEMGFVPLAQE  
AAPF IGRVSNHPWHGVSNDREEQALLGEAVKNPKTNTLLMENHGFCTFGKTLGEAWVLAY  
YFDKACQ TQLSCLQTGQKIRYPS EDVLAHAAEQSVLPEFLPGACEWDALRKMLTRKQGRF  
RR

>comp5759\_c0\_seq1; 1018 161 2122 LEN=2312; translated  
MARVTSKALLLVALLGSLQTAASIHRAGGVRELSFQHP IEPHLP HQGVSKGTGSSSLPVNK  
SGKSARDDSGDSPY YYYEYQKHGKKEKKGKSSKSGKKEKHYYKH NKYEVEMEVVVDY SKST  
KGVPKFEFIEIGHKSWKSSKDSKSGGAGNEGDTMYAKDAKSSKDGKKPKSYGSNGNTNK  
QTKAPSTVSSYPVAPTSSAAPYSSPSTPVPTMLGSFGVK IPEYSLAYNLLTTLEPTNKEL  
SELEVATTSYLDFFVDFDKDDFTVFEVFTTEIVDSSTQ GKVVVVSFGKSVARFDGLSL  
IAPTSEQLDSAVVEAFTGLHMIQYEDWLKQMLPSNNIFIGSKVQYLQDDEGIADKARRGI  
GATGIAASAVAF TLLVAGAVLYKSKSGDREGQTDKLNKASGDMTVAGETFAGETYDGTFA  
GDTYDGTASVSAASIDYVRRFDGDEEDGMKKNLGA IPEKPGWDDSDGGENGEPYSGGGI  
PANKTGTA FRKGVTSAPRTASFEDVALQAPAYGSGFRHNIMPDPSSSEDDQS QMSDSELS  
QFVASTRQVGTHISGDNTLEIKSLLSMDSMDDHSSGLSVRDNSSRRLRTVAEIEALLSS  
ELNDDNGASNTDGKEPETS RPRTV EIE SLLTADDD ESIVESPF SDEDESIVE

>comp5760\_c0\_seq1; 166 889 1101 LEN=1543; translated  
MDMSDLCGRTIKVS LAQQNQLNKLMSMGGGKGQAIWSSDEWFQEHVVG GSEEDRQKAKE  
AAQDRETLKD

>comp5760\_c0\_seq2; 280 258 713 LEN=1155; translated  
MSMESSNTSGDAGIIVTSKRAVYVGGLEDVTPQILRSAMIPFGTIKSLDIPMDYKIGK  
TRGF A FVEFDDPEDASEC I FNMDMSDLCGRTIKVS LAQQNQLNKLMSMGGGKGQAIWSS  
DEWFQEHVVG GSEEDRQKAKEAAQDRETLKD

>comp5762\_c0\_seq1; 221 103 570 LEN=1438; translated  
MTRAEYGSNSVNVEHNETTNLIDNEGFMKSMSETDSNGGASNNNSDDLYESETWREYLL  
SWRFLELVLCVVPVLLMGMYFEFVNPEPMTDRPIPFQYAKGGSTAMVEEGIDASSDFHRS  
EGGDDEYKSYTNI IWRSSNLEENTGETVSHVAYIVW

>comp5763\_c0\_seq1; 1030 107 2740 LEN=2740; translated  
MDGPPEGGSSEQE QPPGIAGPGIVARNDG DIPFAFDASIGRSGFRIGIVAPESPVLFYRP  
EHAPVPI PQQHDAGNATTSSARLGGFWSGDRNRNRHSNSNAF SRYRGGSLSCFSTTTGDE  
KSEATSSDSGPETGETAEAS P SPPPLKNQKTMEFQAETKQLLDIVTHSLYTDKEVFLREL  
VSNASDACEKLRHLQSASDSASDLTFVDKERPLEIHI ELDEVESLTI RDGTIGMTPADI  
VSNLGTIARSGSKQFMNQLEQARAESSDDNGALDAAKGIIGKFGVGFYSAFMVADSVAVT  
SKPATVTDGEDHTVSVWV TSEGIGSYELAEIDDSDEGGNTQRFDRGTTVKLFLKEDYWGLL  
SESKIKDVLNKYSNFRVFP IYVNGDRVNTVEAVWARDPREVDEETYSEFYKYI ANAIDEP  
LETLHFRADAPLELRALLFVPSFHSEKYGMERMEPGVSLYSRKVLI EHKSPDILPDW MRF  
VKGVDSEDLPLSISREK PQDTALIGLKKALTRRFLSQLEKMAKKQPEKYVDEFYREYS  
HFLKEGICHDYEFQPVL SKLLRFETNKNTTRDLISLDTYVGNLRPEQDKIYYLTAPSREA  
AAMSPYLEAFEANVEVIF IYSAIDDFVMANIGSYEGRQLVSVEKSDIDL SKFEKKKDSN  
DDKADSDDDKDKTSDDDNDSETKLSATEAIDVCTWMKKT LGDKKIVSCRPS SRLVNSPAI  
VTDNESGMRRMRMVDNSDGRDGMPLPAQNEINPSHPIMVGLHQLKETEPVLARVLAE  
QVYDNCLVAAGLMDDSR TMLPRLNDLLVSLVKGAKDSKKS RERGAHLWMHRRVLLQESAR  
SPSLIQELGNGGVIRENISFVHFLDAGPTAAITSLYVX

>comp5765\_c0\_seq1; 1010 132 1904 LEN=2026; translated  
MGADDVARQHAMVEFLGTFPTLSGSPPEQLSDLS DGVALFEVLSEIAPNHFDPTTIARHL  
GDNWALKSSNL RKLIRNLEY YCHEDLQKDAAE SFQKISSNVGKISRTGDADAIETLVELV  
AAVAVTC PQKSEVVG RIMSSESQIQMKGII ESSLELLEDYVIEENDDFNVEDDPEMIF  
SEEAGEFGVHETGKANHEASLFHANHLKQSSDADPGELEQALAEAKRELAAQKSVMTDIR  
EDADKAQSKLRALVEDLQDR LAKRQDELITSEEELRDATNVLDDLKSRVGELEEEKAQLA  
DELDLASAKANQLHKA EATVMA YKKKLEGVGMNQMTDLEDQAAGYLRQIMDLEGEVKK  
TATLQRQVDSLQKRLGDLEKQKNDSVDSLKSSSTTEISELKD TLAEAEKAKKLYMDELKEL

RAQQAADSEVDIVGFETPAQVSSTAQRERTMRLEIENTKLLKSEVENLKKASSSGEPVTT  
VSNAEVENLHNQINALKEQLEKKNNAENKKIVSDKDKLEAYTKRTLAKFQDKYLVALQECK  
AKLKEKQDKIEVLESRSATEKSAQKREERLLSSTIFELGLSIMQNRLKDR  
>comp5766\_c0\_seq1; 125 1 698 LEN=1618; translated  
XSGDEEYLSTGDTDNETDTEETDTEETNAVDRTGGRVDDFWRYDVLHAYEREFTVNGGMSWL  
RATNSTVAVFVELLVEKCGTMCDDQIVLNELLGLDDDNAEAHRGTGGLRMEWGASHPSTGR  
SAVTGHSVKIWERDFVFRGVVAADSNVNGETKPPKCPPKERNWISMPRIDDHNVVNFLLD  
QLPPIHTSNRLRKPVRKRKHRLTRASSHMYKLALYDVWDTIAAIVLLTHWP  
>comp5767\_c0\_seq1; 456 1 978 LEN=978; minus strand; translated  
XRESLKKLEILKRQLCGGDAFDKDRVAIDVHLCARCGVGDVQRRKEADKTIAAVGDILNP  
GVGVKPADEKTVHPIFEIGDHIHLAIEKGREHELIRAGTAAHAITARAADVRIASAAVD  
RVIATAPGEKIVAVFAKDAVIALAAAHAVIACACVDGVLTGAAADVIRAIIAKDQITAKA  
ARYAVIACAARERIVRPPCDHVIAVAAQDAIRPKAAANNVIALAAVDGVIARTTADIIV  
SGATQYEVIAIRGGNPVIACAPIETVIAQAPRNYIIAIVAADQSIVRVCAEQHFARVTRHN  
EIARKPEHRDAHLSHRHSLIPEFHPFX  
>comp5768\_c0\_seq1; 748 342 2117 LEN=3023; translated  
MLLSRSIVNAVRSQNPPGRFLQKNGKTKLWNDVGDQRAQEKTSSQALREGAPDIRKKVAAA  
ITASTSGDSNSGFMNETVTSAQIPVPPSAPQHQQTDATDPSKSLPSNGRMTARESQQLYQ  
HQQQQHALDNSNNNMYGRNGMSSGGHGHMNLNERGRMVQNAVMMANNGMNVNGQHCEQSN  
NNIQNFQIHQHPYQQQQPSYNYRQQHQHQLHHQEYQYQPQNQQQQLAYYNKQNKQQESNN  
TTTVPPTVDELTAATPVELETNGLSFGSIAMTDDEMHLLQQAATISRNNPADQQYSIEN  
MSKNGRHNQRHLVSREYENNNIDSNVNKNNDIINRSAPVPAAPTGETLEPTGTSSIGDISM  
MSGGTNFSNFQMKLDPNAGGTSFGTMSYNMLNNSDPNMVDGGLMDVVGTSTFGSMSLDKN  
SRDNLFRFRTLEIAGGGREVPMPFRNETKAFGNLLDCSDTESESSRDKDQLTKQKSQAWAIM  
KTTLEKQTSKDLMPPLGRAPHENNAPQSSVTSGNPHPVFDNVEIALPTTTMEPNLSTL  
SAWSAAEDDSSAAVVAKNQNALSTNREDDEEGDAAATPAPPPPQLTKTDSF  
>comp5768\_c0\_seq2; 733 1 2012 LEN=2918; translated  
XKIIISQQQDIENDSTLATAQTPPMNMYANHPLKDIQKPHEHDVLCGRGGGTNNHIGNSHW  
RMLVAANKQLYITLPRKQKMLLSRSIVNAVRSQNPPGRFLQKNGKTKLWNDVGDQRAQE  
TSQALREGAPDIRKKVAAAITASTSGDSNSGFMNETVTSAQIPVPPSAPQHQQTDATDPS  
KSLPSNGRMTARESQQLYQHQQQHALDNSNNNMYGRNGMSSGGHGHMNLNERGRMVQNA  
VMMANNGMNVNGQHCEQSNNNIQNFQIHQHPYQQQQPSYNYRQQHQHQLHHQEYQYQPQN  
QQQQLAYYNKQNKQQESNNTTTVPPTVDELTAATPVELETNGLSFGSIAMTDDEMHLLQ  
QAATISRNNPADQQYSIENMSKNGRHNQRHLVSREYENNNIDSNVNKNNDIINRSAPVPA  
APTGETLEPTGTSSIGDISMMSGGTNFSNFQMKLDPNAGGTSFGTMSYNMLNNSDPNMVD  
GGLMDVVGTSTFGSMSLDKNSRDNLFRFRTLEIAGGGREVPMPFRNETKAFGNLLDCSDTESE  
SSRDKDQLTKQKSQAWAIMKTTLEKQTSKDLMPPLGRAPHENNAPQSSVTSGNPHPVF  
DNVEIALPTTTMEPNLSTLSAWSAAEDDSSAAVVAKNQNALSTNREDDEEGDAAATPAPP  
PPQLTKTDSF  
>comp5769\_c0\_seq1; 301 184 975 LEN=1241; translated  
MHGNGHTNTHTGQFVSCSLPRGTTLPVQHAQSAMRSAIGEMELDEILHNRSRLNALIKGG  
LQEAALPWGLEVRRYEITEITPDHQIRIAMDKQAAAERDRRENVLRAEGDKRRAQLTSEG  
VKISLTNESEGNLVKVQNEAEATKQRILLEAEGQAEAIRLTAKAQAEALELISTQINKKG  
GSEAAKLALAKEVSMYADMGSKSNITMFNERPADVNALLSQAVVAVQSATQAATTAPPL  
EADDQKPPAEAIMSHSKVETPE  
>comp5769\_c0\_seq2; 574 132 1373 LEN=1639; translated  
MTLTTRSLRVCRRAGAVRLPGFSGTSTNTTTNTTTNTTTNTNAFVGDFYSSGPKRQFSSY  
VLDGFREGSGVGGGIPSRWPVTRPNTIFNIVPQGFKYVVERFGKLHSIEESGWFLAIPLV  
DQIAYVIDVRERAIDIEPQAAITRDNVSVSEVSGNLFVKFQDPEKAAYGALNPLYSVTQHA  
QSAMRSAIGEMELDEILHNRSRLNALIKGGLQEAALPWGLEVRRYEITEITPDHQIRIAM  
DKQAAAERDRRENVLRAEGDKRRAQLTSEGVKISLTNESEGNLVKVQNEAEATKQRILLE  
AEGQAEAIRLTAKAQAEALELISTQINKKGGSEAAKLALAKEVSMYADMGSKSNITMFN  
ERPADVALLSQAVVAVQSATQAATTAPPLEADDQKPPAEAIMSHSKVETPE  
>comp5770\_c0\_seq1; 263 39 1184 LEN=1337; translated  
MQSDKTIQFWDYHTENNSLEWISKPGKELLAMISDQLEIEKNEDDNGCGDNDARGRNK  
VVSMLIEIGGTSTLVRDVKSYVEERHSGISVACGSDVSRVCIDTNRKRDCESVDGDYSN  
KTPGKGESSIWYEVNLILEGEPSTRNWDVVIDKGCLDTFFLFRSRQGAQNRVYPESLRLV  
LDKIHGWLAATTPVGGSCGGGLDSNRNTSSGTGGKSRFIFITPRSKIKAVRDYSGFSSVR  
RLPLPPMYRATLESKQCCRINDNTEAGAAFRNDINSKTIIPGKESVLSPGYMFVCTRND  
YQPGVSQVFSNGSTRGSVPTDDNRCPCCLLTFRDFRKAENVEFRGEAYWTRRWKAHGLH



FISDYIVKAQEEKAEAVKAAESKLTAKYEAIIDGLKSAA  
>comp5778\_c0\_seq1; 339 70 600 LEN=765; translated  
MAESKQNMKEIKVDKLIILNCCVGESGDRLTRAAARVLEQLTGQQPVYSKARYTLRSFGIR  
RNEKIAVHVTVRGEKALEILERGLKVKEYELLQQNFSETGNFNGFGINEHIDLGIKYDPTT  
GIYGMDFVCLTRKGARVAKRKIRRSKVGFSHKIQKEDAIFKWFQDKFDGVVLAQPI  
>comp5779\_c0\_seq1; 405 158 1568 LEN=1568; translated  
MRKLLTSVAAIGLLAAPALAQVSDDKVKIGILNDQSGVYANFGGRYSYEAALMAVEDFGG  
TVLGAPVEVTTADHQNKADIASNIARQWYDTEQVDSIMELTSSVALAVQALSKEANKIT  
ITTGAATTELTGAQCSPYGFHWAYDTHALAVGTGGALVEQGGDTWYFLTADYAFGYSLEE  
NTGNFVKANGGEVVGAVRHPLASTDFSSFLQLAQASGAKVIIGLANAGADTQNAIKQAAEF  
GIVQGGQRLAALLFTLSEVNGLGAEAAQGLTLTESFYWNRTDASREFGKRFLERTQAMPN  
MIHAATYSAVTSYLKAI EAAGTDETEAVA AKKELPVQDLFAENGVVAANGRMKIDVYLM  
EVKAPDQITEPWDYYNVLSITIPGDVAYIKPAXERLPARDAVRHLRLMTAHPVSKQDQPRV  
VLSARGLGKDFSGFTAVNNVDLVDVQHARIHALIGPNGAGKTTVFNLLTKFL  
>comp5781\_c0\_seq1; 259 1 1336 LEN=1511; translated  
XDVAYVYISRASLVSNLVLGTLPAEISLLTSLTYLES IENELGGTIPYEWHLNQLNRTL  
IMGFSQLTGTLPSWMPPLAWPNLEYLYLSNNELSGFIPDEFFGFQKLSILALDDNLFTRGT  
DVIWNSLHSLHLYIEDNGFTGTLPLNLIKSHPALVTLDISSNRLNGSLPDDLFRLPKLE  
ILDVHSNHFISSIPEDVPENNQHLKFLALYRNDLKGSIIPSAIANLRHLSHLDLSSNYLTG  
TIPAELEKLSDTLTYLFLGANDYNEGPISFVYDMTNLRELSLKSTHRTGTISGVI GALE  
SLLVLDLDDNKLSGSIIPDQIGMLTNLQFLLLNRNQLTSSVPSHALAKLEKLRVLLLDNNR  
IFGDLNPICGLDDLTTVFVDCGEVACLEGCCFCCLDGQVCHNYDHIASHDPLWEGDYKRQ  
FFDFSSNEENGNNGGRYYPNRDDDYW  
>comp5781\_c0\_seq2; 678 1 2448 LEN=2623; translated  
XSLPGTLKGCSSQCMVKTYSSLEEEKDVYCDNLRWQQQQRKXQKPTPPMAAFPPDPF  
LSPENGGTTEFSGLPIDSSASGDADTTDDSLPHSAISPVARKILLGADDDLFDLDFGD  
ESNNEHKSPLAEFFPFEMPFDREVN GTTNLNYRRERQDSFPDVEELKLSVAAAGKSSVS  
SSLLSERKRQIGCMFLSLVMGIIALIAFVAIAIDARKNRHQTTSIDSNHNKNSVENLDD  
SGSSTLVFDGKGT SVGKYDDREVHLKNYFARYGIVEEINYQGSWTAAMNTPQSEAIAWLA  
NEDTQFPVLPHTNEGPDTPQGYKLLMRYAMAVLYFATDGENWKNDLHFLDAEKPTCDWFQ  
VFPPPMGQVGLCNQNTQEI VGLSLISNNLVGTLPAEISLLTSLTYLES IENELGGTIPY  
EWHNLQNLRTLIMGFSQLTGTLPSWMPPLAWPNLEYLYLSNNELSGFIPDEFFGFQKLSIL  
ALDDNLFTRGTDVIWNSLHSLHLYIEDNGFTGTLPLNLIKSHPALVTLDISSNRLNGSL  
PDDLFRLPKLEILDVHSNHFISSIPEDVPENNQHLKFLALYRNDLKGSIIPSAIANLRHLS  
HLDLSSNYLTGTIPAELEKLSDTLTYLFLGANDYNEGPISFVYDMTNLRELSLKSTHRT  
GTISGVI GALE SLLVLDLDDNKLSGSIIPDQIGMLTNLQFLLLNRNQLTSSVPSHALAKLE  
KLRVLLLDNNRIFGDLNPICGLDDLTTVFVDCGEVACLEGCCFCCLDGQVCHNYDHIASH  
DPLWEGDYKRQFFDFSSNEENGNNGGRYYPNRDDDYW  
>comp5782\_c0\_seq1; 716 1 1791 LEN=1866; translated  
XTIRLMVHGSSSVNPEEFPFSLSSSLSTSTYKSKEFGTVGVSSGLVYKVS GFDQLAKSS  
EQQPERGVQPVVSAESSNRRRPLLPVATESVSLGKEGSYRAFGINKNVTNCINITKSNIV  
INNNNLRSDFCQMPAGGSDSCGGSNNLRSHREQGLKKS PSDTATVTPFSVSSLPLSLVNA  
AWSVLILLVLGTQHGGSGLVPRYGRNAFRAGRGRSCRGGQGLHLPGNWGLLLLLPTMSG  
YSALFADAFHPEASHPSADKTS ENENNNKSNNSAKSRDHGNESTCEADASNNSGTPHPEE  
DQLLLFHYDSTTSTQDEAKRIAKRLSENESSSVSTFCVTAASQSSGRGTTGRQWL GAPG  
NVFVTIGFPMQTYMTMLRERRIPLTLLPLKIGDLTASLVQSELDDENCAAVVG DASGPA  
RVTVKWPNDVLVDGKKISGTLIESSDWFLVGINVAHAPTVPPTTGKDYGRPSVSLHEY  
CGPQQNQQQQSDDDAITEAAQIEHARDLGVGLALGIHRWIQNDPSEKDGTAE SIVEGW  
KRWLDWDAELTLRNDNDADQSRKTVRLVDVLPDGRIRVRHKSGSGKEEVLVSDYFV  
>comp5783\_c0\_seq1; 108 185 691 LEN=1193; translated  
MMWKRTPMNREREAAILVPLVSCEGTISLLFTTRSSRLPTHASEVAFPGGHRDKMNDVSL  
EATAIREAQEELLGKYPWEQVEIIGRASPLPSPSGMPVTPVIAVLP HDIDPDTFFGCPSE  
VEDVFCVSL EELLEVE TSEW SKRFQNSAPVFHALNGKKIWGLTAIVTR  
>comp5783\_c0\_seq2; 123 185 604 LEN=1067; translated  
MMWKRTPMNREREAAILVPLVSCEGTISLLFTTRSSRLPTHASEVAFPGGHRDKMNDVSL  
EATAIREAQEELLGKYPWEQVEIIGRASPLPSPSGMPVTPVIAVLP HDIDPDTFFGCPSE  
VEDVFCVSL EELLEVE TSEW  
>comp5784\_c0\_seq1; 242 37 609 LEN=875; translated  
MMRISTLATIALASFLCAKTQAFSMRMGPEKQTSMESRRGFLSTATAAVVTAALNPIQN  
AAAAPTIYNLSNGIKYAITQDVTKGSYPEQGDIIAIEYTG YLSNGAIFDATHSQGKKNAL



LFLKLGSSAVNEGINSMVSEMKGQKQVQAIIPPALAFGDKGICLENGECLVKPGATLVYDI  
FLKKASIPPP  
>comp5784\_c0\_seq2; 221 37 417 LEN=1000; translated  
MMRISTLATIALASFLCAKTQAFSMRMGPEKQTSMESRRGFSTATAAVVTTAAALNPIQN  
AAAAPTIYNLSNGIKYAITQDVTKGSYPEQGDIIAIEYTGYSNGAIFDATHSQGKKNAL  
LFLKLR  
>comp5785\_c0\_seq1; 527 135 1593 LEN=1593; translated  
MAYLNRIAILAATYVAANWQLAFARRQREVVANNEHNHRRQLIEAYDSFVLYLKMTEYEN  
HDEETWCCEIPDSIAESLEIGSLVCNFEQVSQEFINMSGAISGHYIMKVQGAIEQSLTT  
SEVTMVPSEATVIVEKIAEKDLRHRRLASSLGTQNVLVVRVIDSNGAAQSSVTQLQND  
IFLDNQCLKTRYEECSFNQVTIQPAGVGTGGVVDVTLDPVTSGLNAVLYATERAAQRQF  
RASQYDLVLYCLPPGTGSWLAFAAVYGYQSYNDNFCSSMSALVHEVGHMGLGHSGRGG  
DEYGDTSGMMGYSYFYDDYPRQCFNAAKNYQLGWYNNQRIAINPLALSNNRETYILNGIN  
YYSTDGSSPNKIVTMRLEIYGETSGTDYYIGYNQAVGINSGTTTSINEVTVLQKESGDPN  
SYGRSWQVASLGIGETHITITNFRNSNTDVFITYLSLSGNDAAIEISTLNPTPQPTAPPPP  
PPPPPTX  
>comp5786\_c0\_seq1; 285 175 645 LEN=1257; translated  
MNILNLTNDTPLEIEIEQLQMDLEAPLLGKNNNSYTADDSCVMSFHIADNSSNNSNQVSK  
RKKSIAKNKKKPKQLMIHVNEDEDLDQSSQTTECQVLNCSFYGGLALGIILQALSYYVNV  
FVMPMLQANDASGAGSGAQDALRIPLILGLGLARYW  
>comp5787\_c0\_seq1; 184 713 1333 LEN=1741; translated  
VVLNEDGTGHFLNKTDPIDEEILKSPLAKDLFKIDGVKAVYFGRDFVTVTKRAEAKWQFM  
RPEIFSAALMDFEFENPNKVLDDKPQITDTTILEDDDEIVAMIKELIEDRIRPAVQEDGGD  
IHYRNFEDTGIVTVQLAGSCVGCPSSTITLKQGVENMLMHYIPEVTAVVAQEEEEDEGE  
APFGEEPKKQKTYEERLAAAGIPFSD  
>comp5787\_c0\_seq2; 351 1 1035 LEN=1443; translated  
HNDSLRTAPSIHHTTHNKIRFLQEVLDIRSPGGCRSFLARRWRRVSASAVSNKGQGERA  
TTAPLGVATRGFHLSMGDAFGSQPRTGQTPSQHFQNHNTLLFNYNRNGNSSVQIRTVFV  
QTEENTPNPESIKFLPSNTVVLDNEDGTGHFLNKTDPIDEEILKSPLAKDLFKIDGVKAVYF  
GRDFVTVTKRAEAKWQFMRPEIFSAALMDFEFENPNKVLDDKPQITDTTILEDDDEIVAMI  
KELIEDRIRPAVQEDGGDIHYRNFEDTGIVTVQLAGSCVGCPSSTITLKQGVENMLMHY  
IPEVTAVVAQEEEEDEGEAPFGEEPKKQKTYEERLAAAGIPFSD  
>comp5788\_c0\_seq1; 353 211 777 LEN=893; translated  
MTNMIKDVFDKQVLELKKLWANKRQLLFQLLNLAMIVFSALMIWKALMCYTKSESPVVV  
LSGSMEPAFQRGDILFLNNSVEQVGVGDVVVFKIKDRDIPVHRILKVHQDGPDRVELL  
TKGDNNRVDNRGLYAPGQLWLEREDILGKAVGTLRYVGMVTIALNDYPVLKYVLVGMGL  
FVLTSKEG  
>comp5789\_c0\_seq1; 426 103 993 LEN=1062; translated  
MKTKLSTLLVLQLVFAHATTPTWAFSPQLEQRRASPSAVFASTEDVEEMFCGPLVSSRRN  
WFHGIMVTAASSILVSLPVAEDA VVAASEAPTPLAMKEFVDPAGLFLSLRVPQGFYTLRR  
TQKGDLPDAKTGKGRGSSIFTAGNMAKAEVIAVERFPPSRVLEENGINEEATGDLSTFPGI  
GDPKAVAALIIVRREKDNQQTQTKTLDSELVTPDGKTLTFRKTEIDVQKPELLLEQTGL  
SRLFRITVAKATLDSNDGNIMAVFASGLEQDYTNQVDGPALEDSVNSFQVTNQSQS  
>comp5790\_c0\_seq1; 483 132 1653 LEN=1653; translated  
MEDSGVEVAGGPVNAKRQRKRIEKKKKMKFLFRKVGRQIGKRTGRGKQKVEYFSSHADKS  
MIEYSLDQYQOEIAERGHQEEHRQGRDDDEWIRSPDLAGGIRTNTANGVNNLEGQSIEVD  
SYFNPFNWMSLTSESTPENEERKEINEDEREGIEIEENDGYLADQEKEKTPERIGRKA  
NKIESAALENMERYSVHPDTSIQDAEARQVRKIKKHSKSRSSMPFASRVKSSGRIAKHP  
PKVLTKETSGSPGDASIVLVSSVKRMVAANQKKAATLVTSVRSMLLSSEYKSPKLLL  
SVRALIHDAESKARKRRFAWRERGRITRESKAKMETEKAKEFEDTPPMGVVLLKSPSFD  
EESEASLHSDASNHGERSKDNGTDEYGTETETEWDESAGVIIHDGGTSSETSEDYVGESDW  
DGLTRDSVYSTGTSFDHECTRDATYSTGTSFDHECTRESAYSTGTSFDESDFDDDESSLE  
EYCATVEVVRDVAEESDDESGDDDDDDX  
>comp5790\_c0\_seq2; 269 137 656 LEN=656; translated  
METEKAKEFEDTPPMGVVLLKSPSFDSESEASLHSDASNHGERSKDNGTDEYGTETEW  
ESAGVIIHDGGTSSETSEDYVGESDWDGLTRDSVYSTGTSFDHECTRDATYSTGTSFDHE  
CTRESAYSTGTSFDESDFDDDESSLEEYCATVEVVRDVAEESDDESGDDDDDDX  
>comp5791\_c0\_seq1; 105 154 648 LEN=1480; translated  
MKPRRRSPFRPLPAACPAPPLLRMTCLLLTLTLTLVLSMAPGALGFGFGAATGKCGRTS  
TPFVVPGHPLSLFGRNRTPCAKRPLRGILPLPSRSGDPFREPEPEEEEEGAAPVPSGGT

DPGVPPQDGFDEGEGFAKYLLPYAVALVGSVLATAALFRFVLLDY  
>comp5793\_c0\_seq1; 487 1 1031 LEN=1186; translated  
XAGNDSAGNDSTNDSTNDNDADNDSTGNNDTGNSTGTDNNDTNSDTDDKNNKDSNETDN  
DEDTGSNKDSGNKDGGNGNSNASSSSRPGNPDES LAKALGLDKSDLACMANSTGFIDRS  
ETLQGAEEKEYQAMAQLSPSIHQPKKVGYPAEASEEMERVCKAEGGAWFIVPRGDVTCESK  
GCIHVYVNFNCVADTDSCAYMDPMVLVRFVFFKEVLGLNCHAGCDDQEHNDVYNKKYDQKP  
SGTAKPPAASPKPQTRAPHATPSGSGNLFHGASQAQTQAQTSASGTSMITAAFAVCAVLG  
LIGFGAVYHKKWSGRSGRQQLRQGDIEMMGNNDNEHDLWFRPIS  
>comp5794\_c0\_seq1; 439 204 1670 LEN=1867; translated  
MPQTKHEHLCSTIGTSTTLAESTLASPDSSSNRSEFITENTVCGGSPDSDRDESGSRVSDS  
KNELVSQLEKYNDTLASIFTPNHSGPNDTDIGTGSSIVRVAPDELKIQLLGTGKHCQV  
HLVTASLSQTGDRVGKAKYACKSIDPERVISVKDFLDAASDLASEAKMLSELDRHRIKI  
RGLCSKPFASFTDTPVIPSVTRQGSYPKGTSTNGIDGFFLILDALKETLGDRLKRQRAE  
AIEKASRKRAKNYNPFKKVPPCDMTAAVTNADRLALYERIKHVVVGIVSAMQYLHSRKIV  
LRDLKPANVGFADNEDVQLDFGMTRPLAECSPDEACGSQLYMAPEIMNDGRYTLKGDVY  
SFGVLLFELCSLQAPYAKEKQMMIKKYQPPQPKSGLSVLFRKKYRSPDDGSNIRQKSARE  
VSMILVFDELSEKVGKHHLRPAEDFEELKALIPCERLCVLIQDCWSGEPPEARPDFDQIQOR  
LNEIFAKQ  
>comp5795\_c0\_seq1; 249 843 1364 LEN=1605; translated  
MTSSPEGGSDAKEQPAEPTPSRQQSPSTNNKPKPATKSAPLRSTNASAKVTSTRGGPNRNK  
PPVRMEATGGSSFEAMNAAAIAEEENAVVPATSMLAGLLPTLVAGLVFTTAGSMVGYVWN  
SEWTE TASSVFSYFWGDETEDEASSPYGSNTNSATAEEYLGDFYNAAPVTPDR  
>comp5795\_c0\_seq2; 249 711 1232 LEN=1473; translated  
MTSSPEGGSDAKEQPAEPTPSRQQSPSTNNKPKPATKSAPLRSTNASAKVTSTRGGPNRNK  
PPVRMEATGGSSFEAMNAAAIAEEENAVVPATSMLAGLLPTLVAGLVFTTAGSMVGYVWN  
SEWTE TASSVFSYFWGDETEDEASSPYGSNTNSATAEEYLGDFYNAAPVTPDR  
>comp5796\_c0\_seq1; 244 182 625 LEN=942; translated  
MFALRRTTISATVGSTGRKSSLSLVSVTAPDETRSEQYEDRKNVFQTLFTTRSFFAVPS  
PPQSSVDVLSIATATAANQWSYCWKSNFSSTTAPAFSLLDQLQQPMLLETLYRKGIYLIS  
TLKRRRKMNMNKHKLKRRRKNRMKNKK  
>comp5797\_c0\_seq1; 309 387 1001 LEN=1308; translated  
MGIGRRLMAEVLEAFPKKEEDEAAGISAQERKKMIEDKVYHIYLDNPEDVGGAHTRWMSGV  
VATDDVEKYCDPLFNKNPKIKREKELHKNEPESEKKASELFEQALYQSIDLPVVDIAIK  
FFFSNGFLSGLVFSYKIIPEMRQLAAERGEPEGNMSVVVSRCSVEGAECTHYIPLSKGIGF  
HAGQPSTEDYQEVFLTKGLALLKL  
>comp5798\_c0\_seq1; 505 176 1660 LEN=2069; translated  
MDDQTLESSGSAITPRMSICLKASRDDPDMAFLTEIEDDGFSLEDNNAENDNPPSKDEP  
SSTSNHRSKTRRSLSSSSILLTGTPHSILSPSMSYDSVTNTTTTKMPTEDETDTQFGKS  
RQRGKRRKPGNDRVRFSESVHFRNYMHVTEITSEERAAAWF CGSEYRTIFRNNMRIIRSI  
AKREKELKKTIAKRKKEEQKLLKLLKKNKGKHSNNSNELGSCSDCGLCGDKSDLYWEEII  
SIERDEEQGYSVIRGIENEIPKRRKRDQVYLQAKYTI LSLQADLDAHMEAMQDEYEERMQ  
KLI EGF SRTKNGK KKKHRRNSFSMSSSAQOMERDERTEKEIRDITATNKFOFAQYAQS  
QYNNMIEAIAERYSEICKQHAKNALEAGCGDERTARAIDWLEESSRRNSVAVESASKGVL  
VDTAVLSDDADDKRRPSTSTVTDNETIIPPLSMR SIDEARNSDEVESLKETISKNAAS  
RMKRARKFLRRLTM  
>comp5799\_c0\_seq1; 302 648 1253 LEN=1327; translated  
MGKDNVYDTGVDNVGTVPASLATFLAVEKMAAEGSPVQLILNGGTGCGFKRKGGAIGDVF  
LTTGVANHRRRIGIPGFDKYGIGTLETTIDPTKIAEELGYKTGICTTGNSLDKTDKDEY  
MMENDASVKDMEAAAIAWVAKMQNLPYMGVKVITDIVDGGVPSHEEFMENLMSAAKSLQD  
ALPKVVVDYICNHNQMDVKEEL  
>comp5799\_c0\_seq2; 376 186 953 LEN=1027; translated  
MTIKHVLVPIVMEAEATPFVEHLELTQVEDFFPSQTPFLAFSGTHSETKVTVITMGKDNV  
YDTGVDNVGTVPASLATFLAVEKMAAEGSPVQLILNGGTGCGFKRKGGAIGDVF LTTGVA  
NHDRRIGIPGFDKYGIGTLETTIDPTKIAEELGYKTGICTTGNSLDKTDKDEYMMENDA  
SVKDMEAAAIAWVAKMQNLPYMGVKVITDIVDGGVPSHEEFMENLMSAAKSLQDALPKVV  
DYICNHNQMDVKEEL  
>comp5800\_c0\_seq1; 324 1 686 LEN=998; translated  
XXXQKKATKATIASMYSSSSFLILATAIALCSVDAWTATSSASSFGGRSLTSTTKQVVV  
LGNGSNMMDKKGKANVPPQMRGQYARQQEMAAMQQMRASSVPGDDGLPVFNLFVRTTSQ  
KIWYPCGSFKGDDRSAALAKSWSEGGMLSGISKQLDGGIAGSLYSDLAKLKDTVMRAYP

QLRKKSNEMEFQYKLAFLDGLPEDKAKQTFVPEPKPKGALDGLRNIFS  
>comp5801\_c0\_seq1; 277 1 635 LEN=667; translated  
XVNVNVNDVDVNVHTTAARGSIQKRSFSSMQELPPDDPQAQFKPTPPPELNMEMARG  
IQSANHLILKHGKQRLLELLAREPEKSTPLVVKWQRMMEIYLGAQLHVVAALGYETSEQ  
GIMLYTQQLAQFVGTCKDPSVQEDFRAKGRDTWREMLVVAFGLDREAIEEKYGNELSIVD  
ARNIVHRVATALIEPEILEEVATRVSLVGVV  
>comp5801\_c0\_seq2; 172 1 488 LEN=923; translated  
XVCLFCWLAGWLADGLHRPGSNVSGGLSTTPELNSPRPKRFLPDPFPAPRLMRCATFATPP  
QVGQLPPQTDPTQTEMGLKHSIIQDVVVNNVYLGGETPLTEELGFGTGSKGYALMQYVMAY  
HESDPLCAQYTSSTMTKIWKAAGLDLGEANPVASKLPMSGPQ  
>comp5801\_c0\_seq3; 376 1 917 LEN=1352; translated  
XVNVNVNDVDVNVHTTAARGSIQKRSFSSMQELPPDDPQAQFKPTPPPELNMEMARG  
IQSANHLILKHGKQRLLELLAREPEKSTPLVVKWQRMMEIYLGAQLHVVAALGYETSEQ  
GIMLYTQQLAQFVGTCKDPSVQEDFRAKGRDTWREMLVVAFGLDREAIEEKYGNELSIVD  
ARNIVHRVATALIEPEILEEVATRVGQLPPQTDPTQTEMGLKHSIIQDVVVNNVYLGGETP  
LTEELGFGTGSKGYALMQYVMAYHESDPLCAQYTSSTMTKIWKAAGLDLGEANPVASKLP  
MSGPQ  
>comp5802\_c0\_seq1; 1786 73 4935 LEN=5040; translated  
MGKKQPLVQLIPTTREVKPPRDSSDAKETSSDQLPQHFLDASRNPFGTTSSEPTSDGKYS  
DTRLIWKGKQPPRNSRNETNVTMRNRSTTNTSESSKTKNSTSSCEESSDGLCSFVHS  
TGSISLSAPNLSSSSPARKHDGLEWKIETEANSTSPGTGDCGSPISKRNVSQIAIQNFE  
EIIELTREASDEVERKSKTAAARSKNRTRRSRQLSQKASVSEGSPESSFFSTSFVSAMD  
EHLASRRPNRLPTGDSIEVRKATSQDHQTVLSTEAQVLVPEGQPILQPETPQRPEQMQL  
ISFRSPSTINGLRRSRPAEAAATWFTVPPSPTWGVPEREENRTKEQIDKYESVPTFSEE  
EANNESQEESEFVVKSEPKKEFSRHRNSKNTRQKHQRKRTHHTQRINKKKQKQKQEPYQL  
VRVEESNAIEVLRQSNIEPRHSPKALSTAKKVLKMLSLRRHHTKSPSHSASEAPSINKLV  
NIDEDNSTGAIELLSNSTIVPTTAPISITRGTASANYLSDNDDDDQSREDNILVDNTAA  
PSSPLEENGKNTSNTCTVDNDHKLSYKIAGTCVSTPTLVEEKMSIEIKVAKTLLPINND  
SRDDSSSSDLVEEAFVDDNMPLPDAAMGQSAASLFETSENRPSSCLDDPHSLDEKASNVV  
APLENEVRKSVNDNSKHASSLQQHENGPTTKSPAIPVVKIPAPKDTVANYPTNYSNTTR  
LVTNRDQSSSDSNASVSTGKVRQVKIQVHTGSGDGNINNIIEVSPSVASLSDSKLAVQE  
PDVKQGTLAIAKPTNNESTPEKGGSPVVKDKKYTTMVVKPLQGAVSTKPVSTKAVAKHVV  
RVNVLGVAGIVVDRNRCRDVTGYKLSAPPEQMKALVGISEPGRSVDNVSAFSGSLIHAP  
MVGKERNRDTTSQRHIAVWASSHLGETPGSIVESNVLETDIADSASRVNLNLVALAKSDH  
DWNHHAUVIGAAQLEITNEMMSDGNRTIDLVPVQTVAKDGPLSSNSNTNSLIKLRSTEER  
KGIRKLLCEKVSDDWANQGRVSHLTAAYAIDPTGDSMIRIQVRVEEVHTSTDQEKIKRF  
GSFANRTAATEETDDSSLEGFKNAFDPADFIGGTSPNSMDEGLYSKPVLELPSDFDEDEQR  
AFQTVSWKEKLLKNQIEDIDEDPGCRVFGRNISIPSTSTSRLSVVKHFDDGLENIADQV  
FDTNQCAGIRSDEDLFSLDRNETVTTMENYTEYADSGVTLLTREETVTAQKLLLEEMKEA  
LGPVPSMTEMKSFAKELALTSGEYFFSKKVRKSENGVDGDNASVGSATPSAVLTSEESLR  
KKQDDDNKTHSTVSYESEANRFSETKFDIDNDIAITAEEEKTLDSYQAVPVARNDGYKG  
DDEESTLRDSTALMNEVVEEDENEDARHAGNRGDDKPSLPSVVENIAEVLISIQIQPCSFF  
GTKEPAEVAFPNGTWDQNSVPRNPQTVDPDSDEL SIGELTATSLEKDEIYERNRKFMSK  
LRLPTDIFSRNASPTPDDEQLGNHRQLVHRSSSVSNQDQSTSENYFSDYEDGASGVTSI  
YDNSRSTGSNSTKQTKNEQRDLMRRRSDEVTKTSTTGETGASETNASLQRIEEEEEDVKSA  
>comp5803\_c0\_seq1; 500 116 1818 LEN=2092; translated  
MASFRSSXALALLAALAQPILSGRSEAEAPGHPGTAARGHFEAAPPVPRLTREAFDN  
LPVPGKYLQLVPKSMPLDERESFEFFWDLATRAPESQPFLMSRVDCGREPGFCRALVG  
PHVLEHMESTKTRFLLSTEFSDDGRIGINVFHQDSLDPNTVNTWVRYTISRREQESLLMGG  
DDLPESRSGGRKNIALMLSDVGLGVRSDIWCFLGLAAEQDQDQVHLFLHDKSNSIGDGP  
LCPMGTNIGTNVLHALANRRIFAIPGNMVLGTQWGSASLLKAIYVLLRYVYVYHPEFRGAD  
RYFLVSENSVPLVDPKTLRIVSGPGYNGIDDNGNRQTLVVFQELLPGQPSPTERIDRYR  
RLRPRYEREREPEEGSRGKGRGEQTTDRARTTTGHETPPHRLDLALSDFSIVETWMVLD  
RAAGAWFAAHDYFAEFELSYSAEESYFVSLCRRFGLSHRLASAAHHTDAAPAAGSEHERP  
ERPEESHMYTQWSTDFGTRHPDITLITQETLQRWGDGRDKHSFLFARRISEQTRIDL  
PWIKDGADAASGVATTGTHHVTSNEL  
>comp5805\_c0\_seq1; 756 231 2255 LEN=2367; translated  
MASSADDYFGTLGGSLMKDLLADLQVDDNDWSLEQLEKELAYLDQEPSLVEQQSLPSLNA  
ASLVVSHAQERQSSILPILPLEKNAVPLPPPGMGNSNAADAWSLSLQNFSTLSLQDDFLA  
ADSARKQTRPPPPPPGLASLVGAEDYDVKEKQVVGPPGLGGGAPKPLPVQKVPVSAEM

SKTEPIVDPQPSSTTANDIPKEATTLPASNVPTMMPVQGTVVPPQPKPPSMMPLQGAVM  
PPPQMNPPNMPPQGTVMPPSQMQGRMTMPPPPGQLLPPPPMGVPVQMPMQMPPAIGTPV  
AAPVTGVVVGSAVSTPGPAWQTPSQVPMPVLHQPTAFAAKAYCNPYPRAPP IPATALASS  
CMSGRDIAYVVHAIMKPLLLAGTSENDYYIQYIKSRVGGPGSDPINPRRIKDATHDVASR  
TTKSKEWASEKSVLGHITKTNVARPRALIATPQPSTDQENKEQRQRANLWKARVYSDQAY  
QAYQNVIDIWRAAPSKNGIPPQVQIHLVVKLMKCMGVVLDNEKKVYTVSTDALKLILKLDK  
GRTLICRVLEQALLPPNAVQAMLPDLLDII IAMPTSSGKEMSNSAIVEEKTVGRLFQAIA  
GIVPKLINITADTLVKCLEVAMVHGKSATRSIVRMGCMHSLQLKGAQVVPQDPSEDVKQAW  
GNAERKFMSGLQGA

>comp5806\_c0\_seq1; 244 1 706 LEN=1116; translated  
KEII EAETQLQPNNTSSSARMQQHHRFFLVAFAVLVSTLSQNQSLALLIPQQPLSPTTHG  
RAGHRLQMSAAATPSAVSSLSPVTDASNGAVVDDLAERLKGKRVALYFSAGWCPMCTSE  
PALASFRQAASDSGKDVEIVYVPSDRSDADGLERARAMGLCVSKERAADYKKEFKIWAG  
SETLAFGFGRRSVPALVVDLNSDGKELAFLEPAESQGARCLGDWPLDDESNGVW

>comp5808\_c0\_seq1; 619 49 1767 LEN=1920; translated  
MLVPFKYLVNPIAIIILLAGSVASATIRRKQSSIDNQNSDSKHERCLLQSDHPDRMTSFP  
GWDQPLPSAWYSGLDYELEGGMIHTHYVLVQAEDHEGNDELPLIYWTNGGPGASSLFG  
LLTEIGPLMLSDESLKTDAYKETGIPTPIYNPYTWTRLG SILMIDQPAPVGF SYCNDDDT  
KNATSHSCGGIAWTDELTSLNAYTALQTFYKTKFPCLAKKELYLTGESYGGIYIPTLARR  
IVEGNGKEDNSTIPLDLKGFVAVGDGCLGTETSMCGELGSVGFVDYWHLWFMAGHHQIPLS  
DFRLVMKACAHSDKPGFLTTPNSKNDEL CRAAVSKVKEIGGFFEYALYDECTYENGLKW  
KRTLGLLDSMSTSSSSSKDNSFVGGALNDYPCGAGPVLEAYLKLGPVVFDAFHRSTFFE  
VDNAEGDFDYTPTEPDLQPFYKEMNGKLIKLVYNGDTPAITSFATQNWTSHLGFDETL  
GHWRPWTIDGCQKMGYVERYEGMDFLITRIRGAGHMVPTYKPEASFAFLKAWLRDEDYPT  
FDANCTDPESFSSAKSNRGAASSSSSFENIEIE

>comp5809\_c0\_seq1; 318 466 1662 LEN=2540; translated  
MIQGRNLWIVVVLATFLGQESTGFSAPVTTNSRSRSVSNQRASTHLELIAAGGNFFDDF  
RSERRDGGSGEDSGNGKDHHNRVRNERSSDSTKFVTGDDLHRLRHQVLAMRLELQEARRS  
GDI GRVDDLERAIMKTQQVDAEFVYTVSLERQELALQAGDVIAAQRFFHEKAMDARSSLPQ  
FQLEGLWVGKYGEEQGYEMINVTYHGDTLVAHKVTS GAKHVPRGAETFRVDLAPQFPTE  
TLSNRNHNHRQTGSEPLLNQSQNDLTPIELGESAAKQWGCKYLQRFGGQGVASEG  
YKDSQWMDGQLILVNEYFSFAWLP IGHQVFFGRPTAELVVKLMKDESKRESAVSSPARSF  
LEKCWEETEHI EDELEADRSQQSSWNTNIYYDQDGC FE

>comp5810\_c0\_seq1; 375 682 1593 LEN=1593; translated  
MSSTILYKFRASSTFEALPLPGAAARLFDVKKAIVKANKLDTGTMEFDLAVRNADTNEEY  
GDESMLLPRGTRIVVQRLPAGRGQGF LARMARNEHGGMGNSYQQQHPSGYYTIDNQTR  
ENEDEFV ESSSGAEKELAAALQAVTSMQAEGPTMVGGQAAAMGAVRGGRGPPRPAGMGG  
PPTKPGFHQSIAGSNASKPGSSSHFRPNADPELREQEKKLQPKKRATGIPRTFLNLSAPP  
QTDGNKEGADGEQQAPLLQPNKQGFKELVSRGGGQSESTAGTRRDLDYVLKLTSTTVPEH  
LQCA

>comp5811\_c0\_seq1; 238 267 1748 LEN=1952; translated  
MNDNRAFSSPGQSASASRRFRTAQFTSVAALALLAATSTNRVESFSAKIHKNHRPGFEP  
QHEQPGAGLTVISHMRLSHRRTVSSSSLQSTSETKSGIDSSIAATNTTANQASVAKAER  
AWTLAPISAENDMSLMDAMADSELQSDETEISLMSKLT SADVLGPLFTIAFVIVFLCNTL  
LNSGEISDTFLAMDHLHQKLNVL SKISWFPQGQFQEAQLVVALVMAFSAFAQALTGFGFAV  
AVGAMSSMPWLLHSELFGVITPVAATLGALVGFILLIPYAFTETVTEEEEPGLEWDQILPL  
LIPCTVLTVPVGIQLNMMVDPLLATRVLAAALIMGFVGYKLVPTIQDALSSDESMADNEITS  
LVATEPEPTDGF LQSQTAAAILFGSAAGIFGGAFDVQGPPLCVYGDAGKWSPARFRNNVLA  
VVCLNSALVVAIDAAQGS LGGFYYSYFCLTSLPGVLLGIVAGQWASERIDPVLFKNLVLV  
MCLGLGLQLLTVS

>comp5811\_c0\_seq2; 375 289 1770 LEN=1974; translated  
MNDNRAFSSPGQSASASRRFRTAQFTSVAALALLAATSTNRVESFSAKIHKNHRPGFEP  
QHEQPGAGLTVISHMRLSHRRTVSSSSLQSTSETKSGIDSSIAATNTTANQASVAKAER  
AWTLAPISAENDMSLMDAMADSELQSDETEISLMSKLT SADVLGPLFTIAFVIVFLCNTL  
LNSGEISDTFLAMDHLHQKLNVL SKISWFPQGQFQEAQLVVALVMAFSAFAQALTGFGFAV  
AVGAMSSMPWLLHSELFGVITPVAATLGALVGFILLIPYAFTETVTEEEEPGLEWDQILPL  
LIPCTVLTVPVGIQLNMMVDPLLATRVLAAALIMGFVGYKLVPTIQDALSSDESMADNEITS  
LVATEPEPTDGF LQSQTAAAILFGSAAGIFGGAFDVQGPPLCVYGDAGKWSPARFRNNVLA  
VVCLNSALVVAIDAAQGS LGGFYYSYFCLTSLPGVLLGIVAGQWASERIDPVLFKNLVLV  
MCLGLGLQLLTVS

>comp5812\_c0\_seq1; 640 1 1949 LEN=2326; translated  
AEPP IYPPEFYRVQQRQRDRNDATKPWRHAPNHTAVADASSWTHAERSWYRSEFEALNRD  
SVFSL LLEEGESASTDTVLQWSDDQDEDFGLIKEHGRKRHQQGLYEYHVDVQSAGENGSN  
QLLVLEAAWGNDAHVGNPSGKTGSTTNKSGDSASPGHRGRPEPYRPRLIVEPSLCHAFRH  
AGAIANFSTPHVLVTHMNENWGALSSEVAGRTAEWGDIVRNWRALGGSGGCDPLELEELY  
LDSPHTLAVFTTQHQUALFDHPKVHSIPIGVANQRGFAEDFLARLRSQKKRSDQRRARVGS  
RVSPPGSETPHAPDRPQLLMINAFPSDTRAPQIEAVVRSFASSGHRVANTYKAGTGY  
NELSRSKFVLCPSGMGYDTYRIWEALSMGAVPVLERHTYRYEAVGSGRGRATILRTVGDG  
EGNTTTTAIGSSIGNTTNNTTTPFLLEYSDGWQKTL DGLPVVWTERGKDG GGGFEGLTPE  
FLERAYDDLAARSFAGGFYKELTSLYWIRFLESFLLLPDQARREPPQEAPLRRQSQTQ  
KWNLAMESLSSTXQPPPPQPLTAGAQHFAPWTTNAGALHRRPDNRQHHPGSRIVAKQER  
ESAARAQLLAGRRAPRHKPLPFQEEGTFKVQCDCCCRGERRMMWDDEAW  
>comp5813\_c0\_seq1; 381 68 958 LEN=1437; translated  
MKPAILFLSMLSAASAFAPSFLGTKLSSGLS QSASTT CLEMKYTLVLVRHGESTWNDENR  
FTGWYDCPLSEKGLKEANDGANLLKEAGYTFDVAYTSTLQRAIKTLWIILEEMHLMYIPI  
VNTWRLNERHYGGLTGLNKQETVDKHGKDQVLVWRRSYDIPPPDCDSSEYYPANDPMYA  
NVSKEDLPKSESLKLTEERFMVEWDANLVPLIKSGKKVIAAHGNTLRALVKHLDGISKD  
DITGLNIPTGVPLVYELDDDMNPIAQEGAIAPLTGKYLGDLDKVRERIGAVAAQTK  
>comp5813\_c0\_seq2; 353 341 1111 LEN=1590; translated  
MKYTLVLVRHGESTWNDENRFTGWYDCPLSEKGLKEANDGANLLKEAGYTFDVAYTSTLQ  
RAIKTLWIILEEMHLMYIPIVNTWRLNERHYGGLTGLNKQETVDKHGKDQVLVWRRSYDI  
PPPDCDSSEYYPANDPMYANVSKEDLPKSESLKLTEERFMVEWDANLVPLIKSGKKVII  
AAHGNTLRALVKHLDGISKDDITGLNIPTGVPLVYELDDDMNPIAQEGAIAPLTGKYLGD  
LDKVRERIGAVAAQTK  
>comp5814\_c0\_seq1; 401 68 1789 LEN=1900; translated  
MNKEANDATSKDDAFDYVIVGAGPSAMGILRGLLEEISEGFSRNDCLSPFSIAIVERGQG  
PPHDEATISPHRWYEAANPNSSSENVKLFSS EILGRQMDIPCGIGLGGTSNVNACLCLPP  
LQODLESWPEPYRSCIRSNASYLKTIMERHNAIHYASMENMCTPFQQENSLLEFGTRVPT  
MVEWNTTAKPVRNRYDALVKPFLKQHPYLEKYLHWFRGYEAQRLLLLTEDTNHVTGVEC  
IFVGNECTSIYRQIYATR RVILCTGAIGTPALLMVSDLGNKESLCGVGQNLQDQALLARV  
FIKAPSRKVEVASSNGIVALGHLNIPEKDCKGNCAVFQVAITDSVADASIIPSVVAMALR  
WKFQNI FLMKLVENAFRCVRAFVRLAILCTPLGSILHYMTTTMIFLMHPLSKGSAISP  
KDEESIREPKRLQNMSIQVDPKYL YDPRDMRSLKTAWDALERATHPSSFEIFPRPIFFAL  
SPFKRQWFQIYCHCFLLPYYHYAGTCAMQSGIDSEDKTDWVDTCLKVRGNNGLYICDAS  
VFPSMVSNPALTCALGYEFSRMISTELSKKE  
>comp5815\_c0\_seq1; 170 201 512 LEN=970; translated  
MNRLSSNQRTETLSSRQGEAIRSELDSLGIARTMKPSASQDSFGKAMEARTLTSTIPQR  
FQSRNYKWELSFSSARNHSVLSNDEVAKLSLNGTNNFRWEQHR  
>comp5817\_c0\_seq1; 423 375 1385 LEN=1458; translated  
MYTMRMEITCDNEYKARNIRGFCHLYDQEA VATGIQEALDKEDSWVTSYRCHVLSLMR  
GGSVAGVVGELFGKANGVTKGKGGSMHMY SKEHNFFGGHGIVGAQVPIGAGLAF AHKYN  
KPGQPMNVAIGCYGDGAANQGIWEAANMSNLWDLPMIFCIENNHYGMGTSIDRHSSISD  
YYKMGNAIPGLRIDGMNVLAVTEGMKFAKDYVGNNGNPMYEMMTYRYHGHSMSDPGTTY  
RNREEIEFTRTNRDP IEHVKSCLQEAGFM TAAEIKETEKRIRKEVQKEVKKAKEWAVPEA  
NEVVEDIYAKSLTPHDSTHPPFVRMPDMAKSFKFDV  
>comp5817\_c0\_seq2; 465 204 1358 LEN=1431; translated  
MVRASRRAMSTSHTFDITGSFEIHNFE SGPSETAEVSKDQLVAMFETMYTMRMEITCD  
NEYKARNIRGFCHLYDQEA VATGIQEALDKEDSWVTSYRCHVLSLMRGGSVAGVVGELF  
GKANGVTKGKGGSMHMY SKEHNFFGGHGIVGAQVPIGAGLAF AHKYNKPGQPMNVAIGC  
YDGAANQGIWEAANMSNLWDLPMIFCIENNHYGMGTSIDRHSSISDYYKMGNAIPGLR  
IDGMNVLAVTEGMKFAKDYVGNNGNPMYEMMTYRYHGHSMSDPGTTYRNREEIEFTRTN  
RDP IEHVKSCLQEAGFM TAAEIKETEKRIRKEVQKEVKKAKEWAVPEANEVVEDIYAKSL  
TPHDSTHPPFVRMPDMAKSFKFDV  
>comp5818\_c0\_seq1; 490 528 2003 LEN=2120; translated  
MSLQIRRSSRIRGMKSDNGTGEQVRRQSVRLFQGKSV DAGTKRKRKRGNNNKDVSLSHDG  
IIPVVPSEKRVTRISISGLKSCPTSESTPDAGVDGKRETA KRGRKVKATTVASTPIRGTN  
AIPVTPPEPISCNIDVSSEKNSKTKTIAKTKSAKTKTPKTA AETKKKSGK KKKAKT  
TTKKKKATTGTAIWQAPAGWRETYTLVEELRKDKTAPCDYMGAEALVMPMRDETENGDED  
LLKTRRFQTLIALMLSSQTKDAMVGQAMKNLRDTS DSGSGLTVASILAMPKVLNSKIYS  
VGFRNNKTKYIKQVAQILQEEYS GDIPSTADEMIKNLPGIGPKMAYIIENICWDRQSGIG

VDTHMQRLFPKLGWVSPDTKTPEQTRKQLESWLPREFWGDVNLWVGFQEVQQRQKIL  
GKALQSSRPLEALRLLKAVEFDVGKEWDVMLSSSLSATGEKELPWTDDNEMEKMNAMI  
EGALLEGLTK

>comp5819\_c0\_seq1; 442 227 1507 LEN=1629; translated  
MDEIDRSYSKAPFSFSDGPSTITDQIGLVFFFATLLSVVVVLVCSFRQYVASLSDAGDET  
CATTFFAKICCHCRERTASVREDETEQYDLRLLALALHRQLNEEGREKEREKERELKRR  
ERRMWYFYMKPYSVVISESNLLRASGNSSPSDDLVPVNHTETETQAPSIDSDEDEAGENA  
DKRRDFACTTACEEATLGGTTAFDEENLGCTIACDQADEHPTLCLELCDVAEGRRCFDGT  
CALCIEFYCAGDTVVWSDLHCSHAFHKECLMQWLTKGKKRCPVCRHWFVPGTKIDDKQTA  
HGGAWQCALSEMQKREEQAEQEAGESEPGNGESTETVATETSDSDAASRSESSGLEILHA  
DSSDSEQHDGTGYTIGFDASQMVDIESTVIPTNTQNETDKFCANDSQDGLKHSGEPRQ  
CNEDTV

>comp5819\_c0\_seq2; 217 750 1647 LEN=1769; translated  
MYIEIESVISESNLLRASGNSSPSDDLVPVNHTETETQAPSIDSDEDEAGENADKRRDFAC  
TTACEEATLGGTTAFDEENLGCTIACDQADEHPTLCLELCDVAEGRRCFDGTALCIEFY  
CAGDTVVWSDLHCSHAFHKECLMQWLTKGKKRCPVCRHWFVPGTKIDDKQTAHGGAWQCA  
LSEMQKREEQAEQEAGESEPGNGESTETVATETSDSDAASRSESSGLEILHADSSDSEQH  
DTGYTIGFDASQMVDIESTVIPTNTQNETDKFCANDSQDGLKHSGEPRQCNEDTV

>comp5820\_c0\_seq1; 325 348 1204 LEN=1355; translated  
MSTRNAFLIALLLAKSGSGLSPGRVGPSARATTASVSSXRNEAVSIDATPDRRGLASA  
LGVVGAPTMIALTSIPSPADARDELFRPNPLTNPLLEQVRIMEQAEDNIKYGGELERGD  
AGNKGVDAYPSSLVPIKIDKELNEIRTLVRSNGENKPSNEAMSQALAILQQPTYEKVN  
FKKTFNKYGDNIYSDPDRANLYLGGGATPKTEQSIAYLLRNDVLTNMENTLRAELEYLIK  
SEENEIEDLYSYADICTSAMKKYLAQVPPQQLKEAERLLSSEQSS

>comp5822\_c0\_seq1; 603 1 2007 LEN=2476; translated  
PYISSFALKSCGVGIALKTNGTKNEEGIGLDAVKDSRLHCCNSTMAGNKERNVREDSVRR  
TNLKLNRKGTGKKS GSGINKITIHGA AVLAVAI VLGVLNKRNTPTTSKSVLNPD LAID  
PSFADFL E IACDKNGTSSSVDPSTNKAWCGNGKIEATRRTFQASVAGTRPIRRGDTLVEV  
PREFQIWEIDALRSDFVESENLLKARHEQTGNPLAGGAFLAAYLAHERKRLTERS NRQQN  
LEMAASANASKDELRESYLQSLPSWEELSAYHPILVSQSDLKSMLTPHSLNFAVIIMYKV  
MVESEYKAMAIVSPKGFQQITL E EYQVARIHVLSRSFSPGPDACKAEVEKYFRPDDLER  
VKSTWGMRRSSKSTFEDGCHAMVPI LD TLDSHPRPNVLYTYDSEKQAFVISA KSKISPQYE  
LINSYGKYSDSLFLAKFGFVNGDGSYQASMA LFHRPFDI LMGEDFSLMPNVVMNGKDD  
ESETQSLMDETLNHQRKEMKRYLTMD DGYDDCIQKDLHPEAFKLRKRLKLMHLIRMANDPS  
SWIATLQPRKPRSRPRESINLLISEPPKFNPSNVQVNLIKLMNTCRLIVLN EEDYDGRA  
IQILEDNLENKDFVVPMEGKALEYRSLKYLGRMTASALMQYTPVKMKQEFETVRQLNK  
ENAFGNSTW

>comp5822\_c0\_seq2; 653 1 2190 LEN=2311; translated  
PYISSFALKSCGVGIALKTNGTKNEEGIGLDAVKDSRLHCCNSTMAGNKERNVREDSVRR  
TNLKLNRKGTGKKS GSGINKITIHGA AVLAVAI VLGVLNKRNTPTTSKSVLNPD LAID  
PSFADFL E IACDKNGTSSSVDPSTNKAWCGNGKIEATRRTFQASVAGTRPIRRGDTLVEV  
PREFQIWEIDALRSDFVESENLLKARHEQTGNPLAGGAFLAAYLAHERKRLTERS NRQQN  
LEMAASANASKDELRESYLQSLPSWEELSAYHPILVSQSDLKSMLTPHSLNFAVIIMYKV  
MVESEYKAMAIVSPKGFQQITL E EYQVARIHVLSRSFSPGPDACKAEVEKYFRPDDLER  
VKSTWGMRRSSKSTFEDGCHAMVPI LD TLDSHPRPNVLYTYDSEKQAFVISA KSKISPQYE  
LINSYGKYSDSLFLAKFGFVNGDGSYQASMA LFHRPFDI LMGEDFSLMPNVVMNGKDD  
ESETQSLMDETLNHQRKEMKRYLTMD DGYDDCIQKDLHPEAFKLRKRLKLMHLIRMANDPS  
SWIATLQPRKPRSRPRESINLLISEPPKFNPSNVQVNLIKLMNTCRLIVLN EEDYDGRA  
IQILEDNLENKDFVVPMEGKALEYRSLKYLGRMTASALMQYTPVKMKQEFETVRQLNK  
ENAFGNSTWTA AQLRLGEMQSLHAVSGIAMTFARKLLEGMEEEQIGVQFKIRESSCPKAY  
TDILDKDLN

>comp5823\_c0\_seq1; 306 1 1052 LEN=1504; translated  
XPRADRLGRSEAFSESLQARQDHPDHHDHVCEPNVRRERTLRVRGIPEGNPPRRDRRPK  
EAI RQGPVEGDPDEL R KVRDLDEYNDEPISINTNTNTIGSHHSNAVGHGGRNTSHGNTVV  
PSLSLSGSFAPEPDPENNFSGTSNCCGARSHNAPCRERGLATGIDPVYNAIPGLHLEPS  
PLPPPTQEHTDNDDL SAAEFDFPGVIAAAPGDRSRSRSPPPG SVVIDVDAESSCDDL S  
LAEFELDPLPFFGSHDKNQSNQPVFRPGLPTAVLPAGGGANNYHNNKNKNTMPMPQRTKQN  
SELLFGLGLAAPPGLRKTTKNNPFSLQAMQRSSDWKERE FIDLTGPTDV

>comp5825\_c0\_seq1; 838 200 1819 LEN=1979; translated  
MAPFEDGVEAMTLPENRFVDTI ICTTDDHQAEFWMRKLTPTPIGGAASVFLVVAVSED

WSGSGGAGNGLGTLYAWEKACAYASEHVEGGPDLRALLAEGSISAALYHTAGKGTRMAPL  
PASENNNKPGVKLPFPKQITVLEAVVRQTGIYASSRKGRLSVFWGDQVFLPPQKENYLYE  
PSHHIDIMCTLLGDTAPTAKWTDQGLDKYGVIAVLKESGDGKVAEAAQVEKVSHEATK  
MLGELGTIAQVGPSLGSFSVSAAILAGLCEEYSSELTQKQGMMDTPHFWMPLTLPEDSY  
VQLMSQKGVDSSTSKVHYQRMKAFSEKFKAAANAGSAFGLFGAVDVGKDACWWDYQQLKLY  
SKNSLLLLDDKNPESKLLRKFLGIKEGPFQGFAPSDVMNHHSYAFDCNIATGKMRNSLL  
SHVTAREVNAEGAIIVNCVAPKITAGKGAIINYNIIGEREIVAEEGKVMVAVSSEDTGTSME  
ICSRMDIDGGKVVKEVVEGNPMSFEQVRNNNMDANISQVDLKRKENYTIIVTERIFQTMK  
>comp5826\_c0\_seq1; 754 96 1727 LEN=2323; translated  
MALRLAATRLSSKTAAKRTWLDRSITSRFTPLRCYLSTEAGEAKIESVSLGENIPAPPMV  
YIAGEEMTHYASDLIVDKWIKPYFDTSAWETYDLSCSRDETDKVLHDAVEAGKRIGAI  
FKEPTITPSAVQVEEMGLSKAFGSPNGAMRKGNWGITISRDTIHIKGIELGYKNQVLFER  
HAVGGEYAGWDKVGEGLTLLTYLPEDGSPFVVDKRDLDENNVVVVYHNPYDNVKDLA  
HLFFKRCLHKTVPYVVTKKTVFKWQEGFVSTMKDVFQDYKETFLEEGLLERSGGELVH  
LISDAATMQLIRWTDGGFGMAAHNYDGMMLTDQIAQVHRSPGFITSNLVGVNDDGSLIKE  
FEASHGTVSDLWHDHLAGKETS LNPLGLVEAMIGAMQHAAMLAERNPDDDTKLATKLLKI  
MNFTE TLREAMHNTFRYGGQTRDMSGPGGFTTEDFIGKVAWRLQRYLAMQDEEAPPQVLV  
EPPRKYRRNLHIDTEAVNKMFKFDKDGDFIDYTEFEAMMIKLNLAAPLKKTKEEEEKEP  
WGK  
>comp5827\_c0\_seq1; 225 297 908 LEN=1335; translated  
MRNVAGDGD CMFLAVALASATSMGLGGSDKLLRAIS IETRDIVAQVLSSTGKLYIGKDNI  
VDASRLLESATMQEPSTNTTEDYLAALRKEGRSGGLYGGPELVALSNILRRPISTYEVD  
QDYLNQQESMGDDTSSEVFFPIVCKGSFGDGVFEDPCITSIPDSVIVSNIQPGAYSWR LH  
ILVLDASPTKHA CVLLPQQIYD  
>comp5828\_c0\_seq2; 526 68 1414 LEN=1504; translated  
MSTRDPFKMSLR LKAVTGALVAVWLLSLTTVVVSFLPPQNGRATRTRTSLSIGLKLSSQTA AI  
CEITKDSPISKQSTRSTWLDKGLLLSFTDGLKTNPIVVDWLM SALVESLWKEEQAAQQL  
ALKESNLASPCNGPDPVFLDQLEETDRALENMRGGDWKKNLQLYCETKRARNGESNPLSV  
DLRFLYIPTAMYALRPESTSTPGKQRGRNRADGKKRRNEIMGLLQRQLEEFASSSEGNAD  
VLYSIRTVTMDFDDCSVKQPEIVTNSNSLSETDDEFPE TKGQAIRQWQPHFIYVQGGNTF  
WLHYCMEKGDWTKDLIDACCYNPNNDNEIESPFSAVYCGVSAGAILAGESMQTACWKEWD  
NPSVVP GKETYEDWADVRGLDVAGRTSIFPHMTEEWQDVAERKTEELLESTLNAGNDDDL  
LSSSVCCIRDDQAYIVNGRRQTIEMLS  
>comp5829\_c0\_seq1; 513 1 1268 LEN=1407; translated  
XLNERKAYEAEVAELSHTVNALREEIGVKDHTILDGNRTLQSRIDVLEEENAALSSELEH  
TTEQLESAPSQSLVDSMKRELRLILKRLEYNAEDPMPESDPEIAGRNEDEGKDLESVLVA  
KLRRVEADLVKERNKNTDLQKAQEALNEEVKTLQARVDAETVVATLEQDL DRAIKSSTA  
TKAQGSDAETTTAAAMP MAPSDPSALQSVLDPNAPPPPPQVPPTPTSAQEKASDDRSVA  
NIIMSQRDLRTRCDALEAERDSFKRELQIQVEASESLRS DN TKLF EKMYLQSYNKSGG  
GRQGSNAYARQNSRDLDEALEQR YEASVDPFRQFGKSERQRKLQEMSPMERTV FVVAK  
TMLGTKEMRTFLFFVYSALHLLVFS TTMHWSHSDSGHDCLLLQE QHSHLPPLHDHSGETA  
GS  
>comp5830\_c0\_seq1; 340 258 1352 LEN=1562; translated  
MVASDEANLHPTNLSRGRGAESRLRLYLVRHGESEANHRGIFAGQLDSPLTKGGASDARM  
LGESSVLLPTSSGARSQTKGQKEGSERTCPFD CVYSSDLSRAHDTCKLMLEGMHQRQLDG  
RNSYNNVNE DQETTAPGKVSGLCDIRLDERLRERSYGT LQGMPWNSDRSETNKIWRERGD  
SDTMPKWE SDDDIWIRVKSFLSELVEEELLSQSDKSIQQPDRLDVVETT VTI GNDEYMSG  
DSCREDTASDIVNNNPKRILITSHGGVLRQILLRLVGVSKLKEMGATFD AKRKNKLI TPN  
TSLTILDF SIRSEHDATAENRCAIDGECLKEDH DSEGFRGVQIEIKVFANTDHLNGDVR  
IHDD  
>comp5831\_c0\_seq1; 182 172 423 LEN=423; translated  
MTRRNPTSHFIIIAVITFACALSIIIFVAREKDLLNALQETAVPEKGLQVVDPAKESPRETP  
KISIDASKSGSQETAASEKGSQVV  
>comp5831\_c0\_seq2; 305 1 1203 LEN=1530; translated  
DPAKESPRETPKIPTDASKSVSQELILQKTIPIGSIENFKIGSKIHVPSR FWTCHRNVD DR  
EQKDRKLFVHVFKTAGTTFRQFFRNYAHICNRRIITIRCTGVLSESLANQTSVWMLKGS  
DSAVRGMGYNAGPCIPYDFVDGESNILERQSITSIEEIQAYNVRQKTRLFEEVSYSKLRE  
YDIDIISGHTPIGLHSNWFSEDEKVVTPLYITFFRDPIDRYVSSH LQKNKEMVQQGREKS  
WDFEGALAFIRNSIQKRRKDSLDPYLM TSAQKVGIKNMTEARRTNLMKSNLAELPVVIGV  
VEQMKDSLNLIRHAINSDKNALVENMIADLDIHRQSKRRLLEMNKSKLST SALVREIKKD

SDLFSLKLNLLRYEYEVYDYAVELHKQVKRLSEVVESMP  
>comp5832\_c0\_seq1; 145 1 897 LEN=1281; translated  
XNGNSNSNRNVFLYEKTSLGTTVSLCRCDMSNGPSTRGSRVWFLTELDEEQPNTDCDRD  
YYYAPPPSTSAAPPEPHRGRPRRQLPPDEGWTTCPGGHGIFPAPGVSKELHFHGGPGADP  
HRRRLAEWITDHGVVAIGLSAPGSKFAGSGSRSRDGNWQSLSETEDCVGNRRHRENGIAS  
CLEILMELYDEEDTNRNDQLPGHNGSRARVSSSLGTEFLVKFAAWCLWHRGILAQTKTRQ  
QIHRHGVEAAGSAKXLTNDCRDTGAGIGNELSVSAIDFQIATLKCETVGESEAEIEFRED  
>comp5833\_c0\_seq2; 116 189 644 LEN=1256; translated  
MAQQQLPPPQMNISGPAWANPHGIPQHQTSTKSTATGPIGVQHESEFFAPLSTLDEPIR  
ETIMRDVRSVARKLKVLLPMERSLPYGGYSGVQSSESIDLTERDKLIIIESLRDWDLWGP  
LVVCLTLAVLLSIKAPVQASLVFAAVFCAVW  
>comp5834\_c0\_seq1; 156 99 230 LEN=484; translated  
MTQQIALFRLLREAKQFNDFRFRAYAVRRIRGGFEKNRHLEG  
>comp5834\_c0\_seq2; 169 99 353 LEN=892; translated  
MTQQIALFRLLREAKQFNDFRFRAYAVRRIRGGFEKNRHLEGDAAQIALKEGQEQFSVL  
ARQSTISRLYPSAQSVMEAPTAVV  
>comp5835\_c0\_seq1; 611 1 1586 LEN=1603; translated  
XGGEDLLISVLSTIACHGILPELNFEEYKDEQHQPENGGKHENENENKEHDEIPSVAAS  
KGSNGTHKIPGFRALQQLWEARSQPRAGTVEKKNKTGTGRDHESISGDNDSDSDCASFATAG  
DDSLRSFLTAACHEANNDDYDQSHQTRRRGNGNNDNDSDNGIIGMNVVDVVDADAEDAR  
SLLSGLSGRSVAEGLYGLWLRMPWPLSALLLPEQHLPSLAKAPEEARGRGLPAPPSAPL  
SDGDVYFRGGGETDCGEKLCIEILLDHGGNECLPSESSSVTGGSSFADRFRVVAYSVGE  
PLGNKAGGPDWFCPPFLSASFTEAPGSEPEPAKETNTPKKKKEKKKKTKKKKKQKPRP  
WYEMPQSWEDIAEALEGLAQSTAAPTALESSTGGSSHGNSHGPGCPQNGPSXGGLFPAD  
QARAHPAGEPPDPARREGQARLGTDDGNGAFPDAAERLPAKPLRRQKRTKETSEET  
NERTRVAAGARGMDPHPARDALDVGMESSRYESVLNVAPAPTKLESIM  
>comp5836\_c0\_seq1; 383 246 809 LEN=1168; translated  
MKLCSQTAILCTVLVAAAAIDVAEASDRKQHIRTSTKSKETLKERKRNLIKVEDSVNVDTEMV  
RVLMGSDMSMSPSYSGGGGGGSSTNSNSSSNNSNGGGSGNGTSSGGSGSGTNNGSAS  
EDGDASGNVPSASPPGEGMQPTVAGDVEPPEPFDGSAGTGAEDSSASRRKVGVAAITTAA  
AIVPLLL  
>comp5838\_c0\_seq1; 807 1 2314 LEN=2997; translated  
XKMGYRDDEQLIPKSKGSWQGDHGYNSIHNAEEGSTNAGGKDRGAEGVATSWLASITE  
MISTIPAVMVLASWNIMLAIPFGTMFFSNDVPLSHEVKEKLGRLMSLLALGICQTLIGGK  
MTSFEALTLWAMAEVAPFYQAFAEIAANNCGDDPSRIYPTTAYLISLSTISVGLAFLMCG  
AFRIGKILSFFPSYVVLGVIIGVGVWAAKQSVTVSVSPHVFDFGADEDGLWNYMITPHFFL  
SAFFGLAIRPLRVFIPPERFLLLDPTYYSIPIVFCVITVFGVPPFDEVVEAGYLFKAPT  
ANTTDDQPSVFAEAAELWTKFDFSKVQWDVAFQAVPQIFATSILAVMVTAPFVPP IATLL  
DMDDFDLDFRIFIAHGLPNII SGLLVPGGIPACACYSSSTALYVNSGGKGFANSLLAGTSF  
ISFVYGPALGGYLPRCMASAMLIDVGINLFLEGVADQNSKCDPLEYTSIWV IITVTTVFD  
QTSGLIAALFMALFTSTFSSSNENPVRRMCAATFPSSRQRNDLELAVLDNPITGRKKIV  
IIQLQGSVFFGNIAKVQDQVFGYLGKREIHDSIVIFDCTLVSSLDSSACIFFDKIQATLK  
KDHRVATIVFVASPPKLELEKAPERRSSLVFRSQNPRRHRANSILFHVDEINPAVAFGER  
NNE SHPSHKRRSSALTVRGSFDNDNEQKHLTQICGTCFDYLDKALAMCEDKLLSMANIPI  
SKMTIPKPF TFIGEDEEVDDPDRAMAINMLKEYCNVKDTGLIKIIVDGMKR  
>comp5838\_c0\_seq2; 896 1 2686 LEN=2889; translated  
XKMGYRDDEQLIPKSKGSWQGDHGYNSIHNAEEGSTNAGGKDRGAEGVATSWLASITE  
MISTIPAVMVLASWNIMLAIPFGTMFFSNDVPLSHEVKEKLGRLMSLLALGICQTLIGGK  
MTSFEALTLWAMAEVAPFYQAFAEIAANNCGDDPSRIYPTTAYLISLSTISVGLAFLMCG  
AFRIGKILSFFPSYVVLGVIIGVGVWAAKQSVTVSVSPHVFDFGADEDGLWNYMITPHFFL  
SAFFGLAIRPLRVFIPPERFLLLDPTYYSIPIVFCVITVFGVPPFDEVVEAGYLFKAPT  
ANTTDDQPSVFAEAAELWTKFDFSKVQWDVAFQAVPQIFATSILAVMVTAPFVPP IATLL  
DMDDFDLDFRIFIAHGLPNII SGLLVPGGIPACACYSSSTALYVNSGGKGFANSLLAGTSF  
ISFVYGPALGGYLPRCMASAMLIDVGINLFLEGVADQNSKCDPLEYTSIWV IITVTTVFD  
QTSGLIAALFMALFTSTFSSSNENPVRRMCAATFPSSRQRNDLELAVLDNPITGRKKIV  
IIQLQGSVFFGNIAKVQDQVFGYLGKREIHDSIVIFDCTLVSSLDSSACIFFDKIQATLK  
KDHRVATIVFVASPPKLELEKAPERRSSLVFRSQNPRRHRANSILFHVDEINPAVAFGER  
NNE SHPSHKRRSSALTVRGSFDNDNEQKHLTQICGTCFDYLDKALAMCEDKLLSMANIPI  
SKMTIPKPF TFIGEDEEVDDPDRAMAINMLKEYCNVKDTGLIKIIVDGMKRETLPKGI I  
WNLGDRGDSAKLFVQGAFFVEDEDEDDDFRFQSKMTLGSFLGLRSLILDECHLARTARC



DDECTFYSLDRAAYKRLFQESPEAASLLEVSLARYLSHKLRHVSNRIYQARSLPV  
>comp5839\_c0\_seq1; 114 121 254 LEN=254; translated  
MVNGGKPLAKRPLLTRAEEIAEAYLTEQVVKIITSKEDGSKEDX  
>comp5841\_c0\_seq1; 272 1 1002 LEN=1002; translated  
AAKRVSSSSVLSALSDANERIKESGVASVALDPPHIAHAFVAVSNAHARQRSARAKIA  
SWKSRASRGLWAESFGFEAEAMRRRVLSGFDAETLLAAGLPLVAPYRLEMNRNQLASLVDS  
SIVELFGAQVANLEKRTSKRLGSQLLKKLDSTPPEEVASENAAAIRAAMVSFEATMGDLE  
VPSLSLTKAKPCFDMESKLTDEAINFYDSPAQAQIKRTKKVAEVVSKKKPGQRSVDLGLD  
LVAVLRPDGFGSLQGFAGYQLGGNSITLGIHNDADDPAXDFPVRGGPAAAPAHPAQAARG  
RGDVMWKGRCGGATPNVLKKPLARDNILDNYLXX  
>comp5841\_c0\_seq2; 718 257 1963 LEN=1963; translated  
MSRVSLFLASPLLALVVSALLASGAHAVTSPQYSTLMGSSGGLRLNTIASSDVSTSEGV  
VSVITSPGTESFLVGGSSDADDVLSFDGKQLLVCRGATLRGTSPSERSALAITSLVSDAI  
VVDGITEGDVRAAGFGKNTRHARTLTALFRARLASSSGDAVEKQALVLCVKSAPSADGDS  
LDEILAKEVRDLFEATAAEAKETKASFDDLYDVSVVSVTSKEDASETATAKSLAASLSS  
SSSSVLSSALSDANERIKESGVASVALDPPHIAHAFVAVSNAHARQRSARAKIASWKS  
ASRGLWAESFGFEAEAMRRRVLSGFDAETLLAAGLPLVAPYRLEMNRNQLASLVDS  
SIVELFGAQVANLEKRTSKRLGSQLLKKLDSTPPEEVASENAAAIRAAMVSFEATMGDLE  
VPSLSLTKAKPCFDMESKLTDEAINFYDSPAQAQIKRTKKVAEVVSKKKPGQRSVDLGLD  
LVAVLRPDGFGSLQGFAGYQLGGNSITLGIHNDADDPAXDFPVRGGPAAAPAHPAQAARG  
RGDVMWKGRCGGATPNVLKKPLARDNILDNYLXX  
>comp5845\_c0\_seq1; 350 928 2067 LEN=2169; translated  
MDQMDQKPIEDTLCASVKENNDKPDILIREPEESMNDAFEVFEVSKGRRDDDEQVSVNDN  
LTLGATTIEDTYSCTPSMYEIEKFHRELELELFGEVNEVPSMIGQILELPIAENRSSAT  
RSSRGRDYVQNDVLNARDSDLKRVLIQSDEYPCDAFTETSRSGSTACDAMKNSQTSSTV  
IPAIPTRTTTHQFPSSQNCHHSTTFHHDALPAPGTGWEQHMNYDGFREYNDSLCDPFPP  
SMANGMRHSMQCHRHEIHSKHSQHIRDSTEETDSIRKHSQCRQGSLLDSSHGTDSKRAIS  
NGHIVTSSDFKDLPFCHRRLCDHYRSSSSRSFRSTSLHGPVKVCHVPLSGHISASQLVNGT  
NGEHCFSSNATITITEENL  
>comp5845\_c0\_seq2; 350 1107 2246 LEN=2348; translated  
MDQMDQKPIEDTLCASVKENNDKPDILIREPEESMNDAFEVFEVSKGRRDDDEQVSVNDN  
LTLGATTIEDTYSCTPSMYEIEKFHRELELELFGEVNEVPSMIGQILELPIAENRSSAT  
RSSRGRDYVQNDVLNARDSDLKRVLIQSDEYPCDAFTETSRSGSTACDAMKNSQTSSTV  
IPAIPTRTTTHQFPSSQNCHHSTTFHHDALPAPGTGWEQHMNYDGFREYNDSLCDPFPP  
SMANGMRHSMQCHRHEIHSKHSQHIRDSTEETDSIRKHSQCRQGSLLDSSHGTDSKRAIS  
NGHIVTSSDFKDLPFCHRRLCDHYRSSSSRSFRSTSLHGPVKVCHVPLSGHISASQLVNGT  
NGEHCFSSNATITITEENL  
>comp5846\_c0\_seq1; 411 134 1060 LEN=1497; translated  
MATWNPKRNNFTLCCFFLALLLEPQTILSSGYKGRVLRGSIDGQEKVSGNRTLKQKMVA  
NKKRNSKKRQISKIATSTRPVKPKSPVQSSTIPVVLPAQPTPSPIPALGSTTPGVLPSPS  
ATNAIPVAGSVTPVVPPTPPTPSPFANLFTAAPAPVAPNLLTASPIPFPAIGRIPVVSRT  
ETEPSGGEGPSGTMTDSSTSEESSGSTSSTTWGFAWDSACPEEASQLEKICIGSGKITID  
DCKSCIVSASFMSSTDYMMKACKTQFCNGCDGGQYLDCAQAANIQKFPVVNGGATLIREK  
ELPEDGSD  
>comp5847\_c0\_seq1; 197 81 569 LEN=793; translated  
MIRSTTLAALMSWALVARTTCAFTATSCSVAAPAKSAASTTARFMSFEDFGQETPEDTKE  
RIQELVDNHPVLLFMKGSKLFPPQCGFSNTACQILQSFIDFHSVDVLSDEAVRQGVKDFS  
QWPTIPQLYVCGEFLGGSDIMIEYQSGELGELIEKAKADMI  
>comp5849\_c0\_seq1; 464 1 1585 LEN=1804; translated  
XESILDEENRSNNQSIRRSAVIDQFSSKERLEYSMRQQTLSMADSTSSVSSVYERPVV  
AVMFFIVFIIFHITLQLKTAFAQIDIARSLTTNDLASDQISDALADQQRQEKKKKSDHS  
ATSLIHNVESIKQALGGGESGETVTLFNNDNNLFPEKVVGVQEHRSDDDHHDISSPSEDS  
DHTNNLLVTTRMQYELDLDFFDTEGEGNQAISEAKKTQKKKKKTRAFFGIMTYDS  
ESERKRNLIKRTFLSYFTNHTNRTLSEDEYNEKHHWICSLNDLDYGRLEHPEKCRMAY  
AFVQGANPNGTTMLLNFESYPLSLPPPFFETKKEQKDA SDSVYLN IQENGRFGKSPWF  
RYAIDVLERHGWKDFDYIFKSDGDNLIYTPNFFRMDKLPQKRAVRVYGGRRPLNKNKCG  
GDSDHDCSQMVGPHFMAGGCYFLSLDLAKFISDETTFDHMAVKLPHEDMTTGNFVYSHPK  
KIRVVKEPRKKGVIRTHPVKKDRAFKHRWNKMLKKEQVRLVAAQVNDE  
>comp5850\_c0\_seq1; 191 232 810 LEN=861; translated  
MGIDLKAGRRRTGHKSSMKVVKTKNPNRLLIKLYKFLARRTDSKFCATVLKRLHMSKVN



GFAMLCAGSIRSKNVKNVLLWNLLDSCGGGIAFWITGYAFAYGGETSTAEWTFIGSENF  
LMGEINHAYWFFQFAFACALSSIVAGTIAERTQMKGYLFYSFFLVGFAYPIVAHAFWSTN  
GFLANVNAEPLWGSAGIDFAGSGPVHMMGGLTALMAALVLGPRMGRFYDDDGSPLETPAD  
IPGHSTPLAVLGTALWFGWYGFNPGSTFMVSNNGNAGEVAALVAVNTTLAACSGALSAMF  
TSTWLSYRSIGLHTYDLAYTMNGLLTGLVAITAGCAAVESWAAVVIGIVSGWVYLIASKV  
LIKLRIDDAVDVIPVHLVGGAWGLIAAGLFSTPDLMDKAYGQSDHVGWVFEWGRGSGNFT  
LIGIQLIGILFIIIGWTTALMYPFFYVNLNYFGALRVDPLEEATGMDISRHKGPYINVDQSK  
HENEAEEELQKSRRSLLGNSSGRRSTGPETSPERANPTAVEVEESA  
>comp5859\_c0\_seq1; 244 235 930 LEN=1202; translated  
MTIASQEKSHYRYEQQLRRRHSIAKIHRSSSLVGNPAFIIIGLSLALMGAIGFFAAMIHL  
TSKVEAFRPVYASHHRRHGSSTRVFLEDWVADMIDKELYRQDHRKEYEGEWMMKKNKGA  
LSRLSDSETSPSGYPSSMLELDGEDRAAFADHKRDERMAFLKPEKYCADRCVATGNCDIF  
EDFYELGPEDVLKFCEECVLFSEEAESDGGEYSSACEVPDAFYEKEPPLRP  
>comp5860\_c0\_seq1; 771 1 2382 LEN=2618; translated  
XTEGTQKSYTLGAAAAPPAAPAIQPSKSFMEGPPPLGSGAMGGVSI SDAFEGLSTEP  
TTTTTLPSYVQPAPAAAPVVVEPPTPQPEPSYVVPQPVTAETVEPPTPQPQPSYVQQA  
PVAEPMAASTTPPAPTAAATYEVSNHQEELEKLVVLQKKAENISLKSQGLNMTEEE  
KNVQQLGQTVAEITALSSDLGAQRQVLEAKNRLLEARAELKAQQGXEGVSLAAWITLY  
DVVLTKLNSGFRILSDXALKNWRIQPQRLLSAPKTNAFI IAPLPLFPLWLTLLFELCLHR  
VLTTELISEAEQTKEAIESATETLQSNAAAPPPTSQPVAGPEVDLFGTSAPATAGVQDSQE  
PEGFMNEHTIPNETKNLPAGVPSMPAPSSAEIAAPGTPTRPPQPMEQQQIAQAPPAMY  
SNYAAPAPPQAPQAPPPMPSPMPERSHAREQQYLSPTNLNRPPVPGHFRQSSGFDSGFL  
MGGSPTVVYPDSGAPDADNVSQAASHASTGDYGYDDQAFEVVEGMKKRAKAADGVARDA  
EAASSKLAAEADELADRAEANYRSLMAAAEKKKGRFGGKMMMDGAEQAGKDAE  
EIKKHFMEIQGRALEAASVAAQTREEADKLLVEAAEELKMAAVASAQQKQPAPAPVPAP  
APPQTNDYYGNMAAPPKTGAMPMPQYQAMPAPTVMVGYNGYNGYNANGGAVPGDGYGQ  
QQHQNYGQASQPPGPMGANGGYDMPPAAAFQMQPATAAPTAGGGALREPFLIFTDGNGL  
LDLVNLETCAANGI  
>comp5860\_c0\_seq2; 950 1 2172 LEN=2408; translated  
XTEGTQKSYTLGAAAAPPAAPAIQPSKSFMEGPPPLGSGAMGGVSI SDAFEGLSTEP  
TTTTTLPSYVQPAPAAAPVVVEPPTPQPEPSYVVPQPVTAETVEPPTPQPQPSYVQQA  
PVAEPMAASTTPPAPTAAATYEVSNHQEELEKLVVLQKKAENISLKSQGLNMTEEE  
KNVQQLGQTVAEITALSSDLGAQRQVLEAKNRLLEARAELKAQQGTGKLVTELISEAE  
QTKEAIESATETLQSNAAAPPPTSQPVAGPEVDLFGTSAPATAGVQDSQEPEGFMNEHTI  
PNETKNLPAGVPSMPAPSSAEIAAPGTPTRPPQPMEQQQIAQAPPAMYSNYAAPAPPQ  
APQAPPPMPSPMPERSHAREQQYLSPTNLNRPPVPGHFRQSSGFDSGFLMGGSPTVVYP  
DSGAPDADNVSQAASHASTGDYGYDDQAFEVVEGMKKRAKAADGVARDAEAASSKLAAE  
ADELRADADRAEANYRSLMAAAEKKKGRFGGKMMMDGAEQAGKDAEIKKHFMEIQ  
GRALEAASVAAQTREEADKLLVEAAEELKMAAVASAQQKQPAPAPVPAPAPPQTNDYYG  
GNMAAPPKTGAMPMPQYQAMPAPTVMVGYNGYNGYNANGGAVPGDGYGQQHQNYGQAS  
QPPGPMGANGGYDMPPAAAFQMQPATAAPTAGGGALREPFLIFTDGNGLDLVNLETCA  
ANGI  
>comp5861\_c0\_seq1; 165 949 1269 LEN=1853; minus strand; translated  
MPLKSAYVQGSTFPNGFQIAAFASSCLCLARKALAAPVIDAENARRVDCPTFFCMKPLW  
RSVGRGTAIEWLPEMRQKKIWD SIRIERILRDVIVEW IQSSQGRMV  
>comp5864\_c0\_seq3; 192 176 790 LEN=1630; translated  
MAHQSSNVFWKQQLPNINAIENDDDKNIERNVCMVQISDPDRREMMPPPEKKTRNHSAS  
RTMATAKLVGSHKRDYRCRVGDPKGLLLLSFPLKHLHILESIEFARDRRKVNKRLKSI  
GGNWNTHKNDTHETATCRFCYKNGASVKKDEIIIGWLPNGNAFKIYDKGRFVSEIMPHY  
FLGHGKNAFSFETFLRCLDLWYV  
>comp5865\_c0\_seq1; 488 64 951 LEN=1401; translated  
MPTKKKNEAALKKLEDTMVDDDDGEEDEVEDVGGGSGRGRKRRESKSYEPDDFTMASHNH  
TLKLSVVPKGRGKGLGDI PAVKSSMNKYKLNTEELLFAYKFVFSNRGTANKKAMKSKLLE  
FSGYLPPLPKGKYNKEQQDEKDEVFETKYATKAFRMNLNQIKTLCTFFGVYNDENGKPL  
KKDDVIDRLLDFLGEPEDESLKKTISSEKQKKAQVQKQKQKRAAGNLPEDPFSLIRDYKKGK  
FPSDSAMRQWVKAYIVCIDMETATTKDAVHTATAKFGVDMVSKKARIKELLAAEEI  
>comp5865\_c0\_seq2; 416 64 1057 LEN=1507; translated  
MPTKKKNEAALKKLEDTMVDDDDGEEDEVEDVGGGSGRGRKRRESKSYEPDDFTMASHNH  
TLKLSVVPKGRGKGLGDI PAVKSSMNKYKLNTEELLFAYKFVFSNRGTANKKAMKSKLLE  
FSGYLPPLPKGKYNKEQQDEKDEVFVSPASFSGGRHLTLSEIHFQSARLSFSKPARKL

MKTKYATKAFRMNLNQIKTLCTFFGVNDYDENGKPLKKDDVIDRLLDFLGEPPDESLLKKT  
ISSEKQKAVPKQKQKRAGGNLPEDPFSLRIDYKKGKFPSPDSAMRQWVKAYIVCIDMETAT  
TKDAVHTATAKFGVDMVSKKARIKELLAEEI

>comp5866\_c0\_seq1; 287 1 1403 LEN=1509; translated  
XEDAQHRIYYPIMVKPTSSAASAANSRRGQRTIRSLMEFLRFQARLEANKPTFGQFLGLS  
VSGNDAETNKEDYFSTVREDRFWFLDASPSNSIVRSGERRRQEQSLVFRYRFPNRNLQG  
LHKGTRKTSISESGMNCGPVGLSTYTSILDEVTSFSIISATGPSYPRPGVSVTMQSQWGP  
AYDATSSLSFLEEVDIVTTITKKGRNLAFVRAEVRDPSNYDGIICYFDHVKYLTVGWGMG  
LLLTPVGMWFLNLYSRYILPYLYRRKQRNHSNNNNIESNRHTIHSIDILDSFLLTSDTTAT  
FQFGPPHTNGFGGLHGGVQAILMERLGEVARRELLKVLQSTTNSGADDVGGAAKISCTS  
NSGDWMEAECQRLVISYQSSASRVLELEAHIINPPRLDHPSVTLRIEILRNGNQPOANNQ  
SSSSNNESINSIGNRGSQKPTSTEFKRVVSEGILTFVSTSPKTKVQ

>comp5867\_c0\_seq1; 435 143 1132 LEN=2173; translated  
MTSETDKKETCSSTDAKKEGIVKTTREFAEKLEKLSKPALEFLIVLIPMVVETGNKLYAI  
WIKLDDAIVKSIIGFAFCFFGGMYPTVFAGLQAAEQGGRALVVKSIGELSEEATRIINES  
KKDDKDSGTDKLSNKDYMKQKTLFVLQKMNPEKVN TALCNIYSVWLAVISVLVVFHARTI  
QMANSIAEFLAKPADRYFKPIVATALPPEYQQWVPIIIPWTCRTVGM SLAWTLT SIQVAF  
ASSLQGGMLLARSAYQVLRKRNITLGG L IVDQSNSTVDEYLA YGLAALGLSFQLYFRLN  
PPFPLNIILAPFKLFEWALRYGMMKATAY

>comp5867\_c0\_seq2; 456 143 1352 LEN=2393; translated  
MTSETDKKETCSSTDAKKEGIVKTTREFAEKLEKLSKPALEFLIVLIPMVVETGNKLYAI  
WIKLDDAIVKSIIGFAFCFFGGMYPTVFAGLQAAEQGGRALVVKSIGELSEEATRIINES  
KKDDKDSGTDKLSNKDYMKQKTLFVLQKMNPEKVN TALCNIYSVWLAVISVLVVFHARTI  
QMANSIAEFLAKPADRYFKPIVATALPPEYQQWVPIIIPWYVQYCRHSIFVACIMAPLVL  
IPVENQTL LWDVSVKISSLIVPKSIQSLSPPTCYICSPKSFCLAFIRACFYRTCRTVGM  
SLAWTLT SIQVAFASSLQGGMLLARSAYQVLRKRNITLGG L IVDQSNSTVDEYLA YGLA  
ALGLSFQLYFRLNPPFPLNIILAPFKLFEWALRYGMMKATAY

>comp5868\_c0\_seq1; 330 186 956 LEN=1245; translated  
MKVLVGIKRVVDYAVKVQVQKGSVSLNNVKMSLNPFC EIAVEEAVRLKEAKAAEEVVAVS  
IGPKQCTETLRTALAMGCDRAIHISTDLRTDYMELQPYAIAKMF EKIVDQEKSDLVLLGK  
QGIDSDCGQTGPMLAGFLGWPPQVTFANLTPNDGGKGITVERETDSGTETIKIPSLPAVV  
TCDLRLNEPRYATLPNIMKAKKKKVD TINADDLGVDLT TYNEVVEVFAPPPRQQGIMVES  
VDDLVDKLRNEAGVIS

>comp5868\_c0\_seq2; 330 424 1194 LEN=1483; translated  
MKVLVGIKRVVDYAVKVQVQKGSVSLNNVKMSLNPFC EIAVEEAVRLKEAKAAEEVVAVS  
IGPKQCTETLRTALAMGCDRAIHISTDLRTDYMELQPYAIAKMF EKIVDQEKSDLVLLGK  
QGIDSDCGQTGPMLAGFLGWPPQVTFANLTPNDGGKGITVERETDSGTETIKIPSLPAVV  
TCDLRLNEPRYATLPNIMKAKKKKVD TINADDLGVDLT TYNEVVEVFAPPPRQQGIMVES  
VDDLVDKLRNEAGVIS

>comp5869\_c0\_seq1; 187 84 566 LEN=1135; translated  
MRSFMDVDVHAAQRVGAMTLAGFLGGAHAFAFKGFP RRAAALGAASSCALVGTSLFALER  
VASVAMRENNRNDKSDEELDARDWRSTLSSHAFGGVFGALNGYLYHRQPLRGMIAFTP  
FMLF IGMIEVEAKKRKQORLDEL LDQRQNQTQAATTTTPE

>comp5870\_c0\_seq1; 354 1 2159 LEN=2849; translated  
XMTSRFLEEGSILRAFFSFYLVQLFFAAIAALCVYIEPI SGGSGIPEVKCYLNGIDLPRV  
LDVKT L FCKVIGVTC SVSAGLPVGKEGPMIHS GAVVAKMVSSGNVKNDRQLRDLVTCGAA  
AGVCTAFSAPIGGILFALEEGASYWSPSVTWRTFTCSMIALTALMMLESIGITFGRVGF  
DLFSGNFIF EKGQSSYAIYELGIFVAIGAAGGLIGAI FNDVNERITHWRMKHVNTSKKR  
RFMEVMLI STLMSCVMFFSSSLAWPMCASISDIIEEESDRQNL YEKLVFRCEEGEYNELA  
TLIFAE PGDAIRLLFHLHKNASTYALLAFFLLYIGVAVVTYGI AIPSGLFVPSLLSGAA  
FGRFFGNQLRKLPHLAFSNTYSLIGAAAVLGGMARM TISLTVILLECTGNEQFVLPML  
VLMTARIVGSVYND DLYHIHHLKKGVEFLEAELTSITLH HNLVAGQIMGANVIFIRPVE  
KVGVVYDILMSAKHSNFPVVD TDDRNVLDGTIGRNTLC ILLKERAFGYPMNDTHVGPNGH  
TAISSNFLQVYERKYHPLVQWDVLYRSYPRYPDAKDLRITDEDREQLVDLRPYINNAIT  
VQETSSVEDVGD SWRAC SAPDHFQFNLVQYCAIPALVSHSCFSISIRPMLCNAEIVMRA  
QRTYSMFRNLGLRFLPVVNKYNQVVG TITRSDLTPDALAETMLQKGKKHEPVNNGSFMR

>comp5870\_c0\_seq2; 389 1 1999 LEN=2689; translated  
XMTSRFLEEGSILRAFFSFYLVQLFFAAIAALCVYIEPI SGGSGIPEVKCYLNGIDLPRV  
LDVKT L FCKVIGVTC SVSAGLPVGKEGPMIHS GAVVAKMVSSGNVKNDRQLRDLVTCGAA  
AGVCTAFSAPIGGILFALEEGASYWSPSVTWRTFTCSMIALTALMMLESIGITFGRVGF

KLFSFGNFIFEKQSSYAIYELGIFVAIGAAGGLIGAI FNDVNERITHWRMKHVNTSKKR  
RFMEVMLISTLMSCVMFFSSSLAWPMCASISDIIEEESDRQONLYEKLVRFRCEEGEYNELA  
TLIFAEPGDAIRLLFHLHKNFSTYALLAFFLLYIGVAVVTYGIAIPSGLFVPSLLSGAA  
FGRFFGNQLRKLPHLAFSNTYSLIGAAAVLGGMARMTISLTVILLECTGNEQFVLPML  
VLMTARIVGSVYNDLHYIHLKKGVEFLEAELTSITLHHNLVAGQIMGANVIFIRPVE  
KVGVVYDILMSAKHSNFPVVDTDNRVLDGTIGRNTLCILLKERAFGYPMNDTHVGPNGH  
TAISSNFLQVYERKYHPLVQWDVLYRSYPRYPDAKDLRITDEDREQLVDLRPYINNAIT  
VQETSSVERTYSMFRNLGLRFLPVVKNYQVVGITITRSDLTPDALAETMLQKGGKHEPVN  
NGSFMR

>comp5871\_c0\_seq1; 253 417 875 LEN=1233; translated  
MLAGVVVRSIETSIQIYREIIDKAIDHNNLLLIGFSWGGAVVAEMIARGMLGGQDQPS  
ALLIAPTSLVAKVAFQRDAATRICKERASLSLMNSTPKVIVVHGEFDDVFCPNQDRWNR  
IRGVNVHILPDSHIFHRSSSQHALIELMKRQL

>comp5872\_c0\_seq1; 510 126 1259 LEN=1733; translated  
MNPVGMNIARSSRYRLPSRCRRVRHPQSASLMKTRSLAFSSTTTKHEKVYLLPKRIIL  
LRHGESLGNVDDTAYSTIPDWKIPLTRRGERQALRAAKELVDLIDGELFAYCSPYKRAI  
GTWDIIEDYIESNNKKKNDDEEQSSNDKDRVGEIIGMREEPRVAEQQFGNFQNPCHKVRT  
AKSERRTFGRFFFRFPEGESGMVYSRCSFLATLSRDIKQIDLRYSLRNQETNNKANE  
NETEAGNPLCAMADMNILIVCHGLTLRLLLMRYFQLTVEEFESSYNSQNAKLVMNRFVY  
DDSDADTDPGNRKYYCSITDTHQFREYYKLDEVSKEALNLLGDISNKKPSYWRSSSTRMDD  
EFNGGLLLVDGDDDDLEE

>comp5872\_c0\_seq2; 437 126 1386 LEN=1860; translated  
MNPVGMNIARSSRYRLPSRCRRVRHPQSASLMKTRSLAFSSTTTKHEKVYLLPKRIIL  
LRHGESLGNVDDTAYSTIPDWXNTVDEAVSKSLRLISRIIFSIXQYLLLRPIEIQEAHI  
QFDLSILDRLRGERQALRAAKELVDLIDGELFAYCSPYKRAIGTWDIIEDYIESNNKKK  
KNDEEQSSNDKDRVGEIIGMREEPRVAEQQFGNFQNPCHKVRTAKSERRTFGRFFFRFPE  
GESGMVYSRCSFLATLSRDIKQIDLRYSLRNQETNNKANENETEAGNPLCAMADMNI  
LIVCHGLTLRLLLMRYFQLTVEEFESSYNSQNAKLVMNRFVYDDSDADTDPGNRKYYCS  
ITDTHQFREYYKLDEVSKEALNLLGDISNKKPSYWRSSSTRMDDDEFNGGLLLVDGDDDDLEE

>comp5873\_c0\_seq1; 150 203 587 LEN=811; translated  
MAQRDPNSTDSLHPGVVTAEHVRQKLSKQLRIDLDDSEPVHILRTASPPSSPSEETTPSS  
TTTTTNPLNFAELDDSKIQALADDLVPVDEEGRCLIRINRLGEYLAVIIGLGGYAVPLR  
VLVRQRV

>comp5873\_c0\_seq2; 334 328 984 LEN=1208; translated  
MEDLPHGKAYKGDVVTVKAGYARNHLVPQKLALYATPQNF SKLGIVDPDFETEEERIARL  
QRESNMTAAEDRYLKSDLLKYLNRKVLQIWRNVDPNSTDSLHPGVVTAEHVRQKLSKQ  
LRIDLDDSEPVHILRTASPPSSPSEETTPSSTTTTTNPLNFAELDDSKIQALADDLVPV  
DEEGRCLIRINRLGEYLAVIIGLGGYAVPLRVLVRQRV

>comp5874\_c0\_seq1; 282 154 933 LEN=972; translated  
MAPSDDEHSGSETSTGEPDSGSSVESERNEESETIKPKKIHRSLTETEDFNKKLKRGG  
VIYVARVPPRMTPTKIKSLLSDFAEVTRVFLQEEASVRKRRKKEYGNSGGKRYIEGWVE  
FASKRKAHIAESLNLTPISNHKRNPFGTLWNLKYLHKFKWSHLTEKVAYERRVREQKL  
RVEMMQARRENAAYVEMVETGKKLDKIEERKRKRGDSEFTVSSTKDKKTGGEKRHKHRQR  
KPVQEGTRATKSAILGGLL

>comp5876\_c0\_seq1; 459 130 1641 LEN=1950; translated  
MPPPPPPSKSYLLVLDSDSSSDESESYFQQYNRTFENINTVAPPQVLDTKNNINGRV  
NNDFFSSLVDESKNDQNOQDSSSTKLTKNQKNQKKRLQRKKKKAQKEANTLKGV  
FSDVSIREFPRAFSTDTVPAHGGWPLGMKLEGHEDLDQIPLDEYETSKQKRLHERWTTML  
SARDKVPGPSKSPSKSSPSSKSDPVAPFDEKVIQMVGAGAACGESCSSEENCNVVYE  
TRQWDYKSRIKNPIFRSVSEDERHAIFLDASEFTCSEIQKHVNSNSVRRARSNSIGNHN  
HNSNNRRRSNSVGNHDLGNSMKGFNEEYNQAMVHHRNELEQIRFERNKSGATGCNC  
RKLVVYLPSPDGSGGKKAQHRRLLKPSKLVQELKKNLYDSKVASSSREQMEKILHKAWEK  
EPCKDADCFVRNGKACQADACSCWHDHSHVHPKHSSGSDGRGLTNDDIRTRCGNPLGTY  
LVETEAEIAYRTNILKAQKLQME

>comp5877\_c0\_seq1; 317 94 1020 LEN=1586; translated  
MRAGEASSAPGNPGFSFSSQLSRTSIATLSFLAMVFCGTTFFSSAMIHHNVRAGTKAS  
SATSGALSSSFPRRVFCFGDSLTAGTSPPNHDLFPYAKHLEESLNKHKLNPSDNVLDNI  
ERTVQVRWKGYPGWTAPSLLRNGGLSDIIEKAAQQQQQETEGSVSSSEEEGQHTAIDL  
VVLACTNDLAHSDGQSIFESIKSIEHQAFSQGHVHRTIALGIPPSGWQVHSESARSAL  
EVNSKLESWSATTSTSDAKTVFVFPFIQEYDRNSDLWSPDGLHFSKPKGYQSIGESLAPIV

ADILWNNK

>comp5878\_c0\_seq1; 911 118 1413 LEN=1467; translated  
MAKKGKSPSKKQSRKTGKDSAEKKKGVVDVKITWDDIAAMSDSDDDAGGEKAIELSCKKAK  
DLRQNIANNLSGLLASINQKDGDEEEFEEAVLDESSDEEDDAQSEGDGDEDEGQGMEE  
EEEEEEEEEDSDNNESFIDKIKIKSND AEDDGDSDSESSDDEMDEETKKKQEKYARLENN  
NNINSKALSVVAAELNSVHSMKMPWAETFVIVPPTPLPFGENGDPESNPLDIHDDLKREVA  
FYNTALEAVNLARPKCQEAGIPFTREGDFFAEMVKTDDHMANVKDRLIFENKKIEAVAQR  
KSNKEQLRAKESQANRLAEKAKRKRDRHFRDVEDWANSAAKNRGGGLRDDVDDHFLNNRY  
DGGSPSKKRQONADKKYGYGKGRFRKQONDRKSMNDMSGYNPRGNFAGGMKKTGSGANRAG  
KRARDAKRSRR

>comp5879\_c0\_seq1; 603 1269 2393 LEN=2940; translated  
MTTASVSASSSCSNVSEPTANTKKKSTASVAPHTPPTTTSKFGSELEKDERFKRFKRRSE  
SFASTEGSSTPKKDREIMESIAMTTEERQRLEEEEMKAQHCHPLVLKIEAEAEERRELENDR  
AYRRSTSGNNSRTQATGNRRLLRVRSGSARNVDQLANFLEGGDDNDDLSALERAI IHSIGQ  
GERGSRGSANSNNDSSSTQNDLDQQEGFP LLRSLLTGRLLDIHNGNASSISAAAARRSTWYR  
RQRHPHSAFASSLMALSEEEQIAMAIAASMQDQEQQSAQNDDSNEDGSDNDETAEEESN  
ETDPGNNSENEEDSNTITTPDNEDPDADGVSVAASSAVASQQCRHQNGDEASTITELARVV  
TDSRSPNVDTGITA

>comp5879\_c0\_seq2; 638 208 1788 LEN=2335; translated  
MGNQSSSSSPIDIERLRHFSRNGGSLGLSRTELDKRCQPSGLYGSCNWDDKVVRRLLISD  
GKIAARLKGEEYPDPSSGCNMEECPICFLSYSAVNITRCCNAVICTEYLQVRPQKEKDS  
ACPFNCNENFSVTISKKKSLSLVPGTISSASSMTTASVSASSSCSNVSEPTANTKKKSTA  
SVAPHTPPTTTSKFGSELEKDERFKRFKRRSE SFASTEGSSTPKKDREIMESIAMTTEER  
QRLEEEEMKAQHCHPLVLKIEAEAEERRELENDRAYRRSTSGNNSRTQATGNRRLLRVRSGS  
ARNVDQLANFLEGGDDNDDLSALERAI IHSIGQGERGSRGSANSNNDSSSTQNDLDQQEGFP  
LLRSLLTGRLLDIHNGNASSISAAAARRSTWYRRQRHPHSAFASSLMALSEEEQIAMAIA  
ASMQDQEQQSAQNDDSNEDGSDNDETAEEESNETDPGNNSENEEDSNTITTPDNEDPDADG  
VSVASSAVASQQCRHQNGDEASTITELARVV TDSRSPNVDTGITA

>comp5880\_c0\_seq1; 341 451 1917 LEN=2105; translated  
MTAASVVLFSSTAMMAPALPAFADTTDTDFITVATTTSEKEQESMLLKGVSQKEIARRA  
AEQRNGDFSSSVIDEVWTLLSNYIIDQSFNSQDWNKVREKVESKGVKVNFNNDKSMKIVT  
EMVQSLGDKYTRVLDDKQYAAIQKFDLIGVGVTLMPNSQKDIIGAPPIAGSASDKAGLK  
MGDYVTAVNGIPIRGRNAFDIIDQIGENPNAKQVSFSLRDKGPSTIDSIGNPQADNFV  
VTLERQTMVEVKDPVQFKISETRSDGTVGVYRVVSEFNLSLVNSSLQHALSELNKEGANAYV  
MDLRGNTGGAFQSAIEISGLFLRDRVATYVVDNSNOVELPFRTPKLQDLSIDPETPMVWVI  
DGLSASASEVLAGSLHDNCRAVTMGDKSFGKGLIQAVYGLKNGAGLVVTVAKYITPSGSE  
IQGLGITPDVLPGLKNMPAPVYVPLSTDTSKIDWRDVRERLSSKFCVSPEDRVPKPTPT  
GAVAEAAAL

>comp5882\_c0\_seq1; 956 134 2392 LEN=2446; translated  
MVKFTSGALSACLLATGATAFAPKSFSGKHASSLSMSTNTAPNSSDVLWTPSWKSGERDE  
VYGEIGKYCEDLSFVTRRKRTRTVHCGPIKFGSEHP IVRQTMATNTADVDATEIQVMRCA  
DEGFDLVRITVQGRREADAAKIREGLFKKGYDIPLCADMHFQPKVALMVADCLEKIRIN  
PGNFADGRKDFEEDIYETEEDYISERQYLLDAMYPLVERCKELNRCMRIGTNHGSLSRV  
LSFYGDTPRGMVESALEFADICRSQDYHNFVFSMKASNPLVMVQSYRLLAAEQYRMGWYD  
PLHLGVTEAGEGEDGRMKSAVIGITLLADGLGDTIRVSLTEDPEFEFEPENRLAEIAESR  
LAINEDARERQA AVKPYKDRDVTSYQRRTGSLPEQKEGDVVDARGFLHRDGSVLSVVT  
EMLSKENVQYLYQELGCKTAVGMPFKDIATSDSIYMPTIPSSD TDARTALRRLIEVSMG  
VIVPAEELEKDLPLNAVALVSLKDAIANDGKLP EGAIRLALALDGDDETDEEILKVKDLEP  
IMCILKPKKGISHLHSSRRVFEIFNDNEIETS VVHHFTTDTDESNEALALQIGTQIGSLLT  
DNGDGMVEQVGEKTPFSVDFLRKTSFSLQGARLRNTKTEFVSCPSCGRTLFDLQETT  
ANIQEATGHLPGVTI AVMGCI VNGPGEMADADFGYVGTLP GKVDLYYKKEVVRKGI PNDD  
AVDALVDLIKEYDMWKDKDEEEETEAEAVTA

>comp5883\_c0\_seq1; 316 191 766 LEN=911; translated  
MKTYGTLEAESIKCAFSFTFSRDFPALVT CYAALGFTTPCATLWAHFAATNGSKCAAEICI  
PGKGGITELNGPAPECAPSACMECQDEFRRDDDFAGLEMQNAGITERITRDCDDFYRVI  
HDPCIGLDPDYDVGGAVDNSGDDTGGTTPASTPEETTATQTEEPEPSSGTTINGKTTYAM  
AAWLAFSFAAV

>comp5883\_c0\_seq2; 271 626 958 LEN=1103; translated  
MECQDEFRRDDDFAGLEMQNAGITERITRDCDDFYRVIHDPCIGLDPDYDVGGAVDNSG  
DDTGGTTPASTPEETTATQTEEPEPSSGTTINGKTTYAMA AAWLAFSFAAV

>comp5883\_c0\_seq3; 467 77 1147 LEN=1292; translated  
MTRVLLL VVVASTASLATAADFLGTARCGDCWCITDDGTTCPSDTVGISDSFSDDTDLFLG  
TFELTNSPNFLKLSATGGDCFPFKDSVGAIDRYEESNLDQCIASDEDDDDVVCGYVYDAS  
STTCEGRKYSIQNFASSNDAMASNAHIVHKGSCGVCSSAQDFSTRMKTYGTLEAESIKCA  
FSFTFSRDFPALVTCYAALGFTTPCATLWAHFAATNGSKCAAECIPGKGGITELNGPAPE  
CAPSACMECQDEFRRDDFFAGLEMQNAGITERITRDCDDFYRVIHDPCIGLDPDYDVGG  
AVDNSGDDTGGTTPASTPEETTATQTEEPEPSSGTTINGKTTYAMA AWLAFSFAAV  
>comp5883\_c0\_seq4; 297 77 823 LEN=1484; translated  
MTRVLLL VVVASTASLATAADFLGTARCGDCWCITDDGTTCPSDTVGISDSFSDDTDLFLG  
TFELTNSPNFLKLSATGGDCFPFKDSVGAIDRYEESNLDQCIASDEDDDDVVCGYVYDAS  
STTCEGRKYSIQNFASSNDAMASNAHIVHKGSCGVCSSAQDFSTRMKTYGTLEAESIKCA  
FSFTFSRDFPALVTCYAALGFTTPCATLWAHFAATNGSKCAAECIPGKGGITEVTRTRSTR  
NIVPTFVQ  
>comp5884\_c0\_seq1; 498 110 871 LEN=1048; translated  
MSDNKLR CALIYRIGSGGTAVCVAKYDHAGQYETHGGADSSLYGGHDKSYAEAVAGVVTN  
DPPSGLSQSGTLGGFKVVQSDQH QIVYGADIDGLCCATITGTQYPSRVAIGMLQDLYTDF  
SAKYGDAAKIAAENSLSKKAKSILQAVSKKFEDPSAVDKTSKILGQVDAVKGMQDNIA  
MLKNT EKAEDMAAKSEQLNEQASVFKKRSTDLKKQM QWKNLKM TLLLGGIVLVIVLSITI  
PLV NKAKQVASSF  
>comp5884\_c0\_seq2; 216 110 400 LEN=652; translated  
MSDNKLR CALIYRIGSGGTAVCVAKYDHAGQYETHGGADSSLYGGHDKSYAEAVAGVVTN  
DPPSGLSQSGTLGGFKVVQSDQH QIVYGADIDGLCK  
>comp5885\_c0\_seq1; 269 106 1125 LEN=1376; translated  
MSGSVCAAGGAVAETDPPAMSLPGGDEARGGFGRFRRYREELALRQRKQKQKVR LQDQPD  
GFPDAPNGTAPGEKASNDGPGENDRKDDDDNDGGGTVLRDL SGARLVVDENG SVSVSFAD  
TEGGP VHGI PSMVPEGTTLLLRNL RDCRVAIHLPLPAVHLV GIRGTEVDF FNGGSRVPSG  
GSLPTNTTIHATDCHGGSVLRFERPAQQLRIHGSIGLGIGVAERPGAHRGAASTTPASSP  
DRQWKPGSII LEASRDLCFTVPPIDHRALEADTRAYWHGVVVRDFH WLRKGVPSPNFRVE  
VLGGNPPRGEGLPGEERGPSGETNRGEDSSDDSDDEL  
>comp5885\_c0\_seq2; 82 1 626 LEN=877; translated  
XLCLLELPCRIAFGVSLAARHLPLPAVHLV GIRGTEVDF FNGGSRVPSGGSLPTNTTIHA  
TDCHGGSVLRFERPAQQLRIHGSIGLGIGVAERPGAHRGAASTTPASSPDRQWKPGSII L  
EASRDLCFTVPPIDHRALEADTRAYWHGVVVRDFH WLRKGVPSPNFRVEVLGGNPPRGE  
GLPGEERGPSGETNRGEDSSDDSDDEL  
>comp5886\_c0\_seq1; 467 181 1209 LEN=1287; translated  
MVVEARKLSDSIQKKAADGEEDNEDIVRALDAMGYDEAAQYVYGMAYPDWKKRHAQKASD  
DQMEKFNESKPLWAAHDKKVLAKRSEELPPPLPVDSNGKNTADAPVCAINPSKDNNGTT  
TKPSLLSNVCCEDIDSIDH SKPKTATENTLSSAVQSTASSAFAPPDLPADLSFSLGILTV  
SDRAFSGGYETGDL SGP AVRQAIESILESSAGATLEGVETAIVPDESEAIQQKLTGWSS  
SAAPLDLVITTTGGTGFAPRDVTPEATAAVIERSCSGLMAFCGMHTRSQQPLAALSRTAG  
VRGKTLIANLPGNPEAVRELLPVLLPLALRAVADMKT TMGEF  
>comp5886\_c0\_seq2; 536 55 1266 LEN=1344; translated  
MATEIDNP NYVETHLPPSVIKRLESGAFEQLCTHLRERSDEVQNI DLM TVSGFCRNCLSK  
WMVVEARKLSDSIQKKAADGEEDNEDIVRALDAMGYDEAAQYVYGMAYPDWKKRHAQKAS  
DDQMEKFNESKPLWAAHDKKVLAKRSEELPPPLPVDSNGKNTADAPVCAINPSKDNNGTT  
TTKPSLLSNVCCEDIDSIDH SKPKTATENTLSSAVQSTASSAFAPPDLPADLSFSLGILT  
VSDRAFSGGYETGDL SGP AVRQAIESILESSAGATLEGVETAIVPDESEAIQQKLTGWSS  
SAAPLDLVITTTGGTGFAPRDVTPEATAAVIERSCSGLMAFCGMHTRSQQPLAALSRTAG  
GVRGKTLIANLPGNPEAVRELLPVLLPLALRAVADMKT TMGEF  
>comp5887\_c0\_seq1; 325 291 971 LEN=1419; translated  
MTRGLNPATTFSAEDVQTLRNVRDIY YQGIIGGGLG LCGGLV TYTGAQWARKLGF IKGK  
SLNRNTGMLVVLSSFAFGQFFMASTTGKELVHLLHPIYDGWKGDPSSTNDERANHNASSG  
LVDPKRLREMYRARRKSLMETLHHQKGGISDSHSGHWVEERSSEEGAHDV GSESPAQVDP  
QRLREMLARRKSLMDTMFHQNGGISDSHSGRWVEENSETKFKKEY  
>comp5890\_c0\_seq2; 440 314 1619 LEN=2293; translated  
MTASVLP SHLSQAHVKNVRLCGSIPRIALSMMQOEATR RPQSAPHLPMFTSSDRQDMFL  
KSNI AVSEKDENC VAKQLCSQLSTVKQQLEQTFESQKLTTPQHSLFSGTIPSTLRRTP  
PTYEAPSWAVPATGESRLEXEHGLSNFCTSESSMPIVLQNQTNTNAXFLCFVSSQP VFD  
VERQAPVDLTSRAVFRVGRSPQSDVQLMHVTSRRHAMVFHHTNGSCYLVDCGSAHGTFI  
NGVRISSTPNDSNVVPTRVRRGAI VRFGGPGAPS YMLKSF SFGLEQMKETLIPDMNEYA

ANLPTPMLTAMVEHNTRFNLSLGSASKEELMVQRHFSKRSFDSMETVLDQCSDDEMDEN  
RHTAPVRLSSPPMSPEQPLRLVSPELNCSTSSQTPNFKRRRVTFSDETLLAVYPTLVTPD  
VSSDEQDQDIECCS

>comp5890\_c0\_seq3; 492 314 1513 LEN=2187; translated  
MTASVLP SHLSQAHVKNVRLCGSIPRIALSMQQEATRPPQSAPHLPMFTSSDRQDMFL  
KSNIAVSEKDENCVAKQLCSQLSTVKQQQLEQTFESQKLTTPQHSLFSGTIPSTLRRT  
PTYEAPSWAVPATGESRLEPVFDSVERQAPVDLTSRAVFRVGRSPQSDVQLMHVTSRRH  
AMVFHHTNGSCYLVDCGSAHGTFINGVRISSTPNDSNVVVPTRVRRGAIVRFGGPGAPSY  
MLKSFSFSGLEQMKETLIPDMNEYAANLPTPMLTAMVEHNTRFNLSLGSASKEELMVQRH  
FSKRSFDSMETVLDQCSDDEMDENRHTAPVRLSSPPMSPEQPLRLVSPELNCSTSSQTP  
NFKRRRVTFSDETLLAVYPTLVTPDVSSDEQDQDIECCS

>comp5891\_c0\_seq1; 281 249 665 LEN=852; translated  
MREFQHVFGDKYLRNDDGDEMGRGIGDVSSASASTSTLSAELLAIPTNQHARHDLVAIGD  
HIEAEKDRLLNCFLEFGEEVCSKIQQAGYWADYIDPCSGLPMLTKNCNKVYSEVDGMECL  
LNYRAYNAGFCKVLTHPRW

>comp5892\_c0\_seq1; 371 94 1431 LEN=1535; translated  
MISRTCHIASFILIAVSFLIGESQGFTTSPSGSNHRQGRTOHTLTYSAVDEFSLAETELS  
LLKKAKKGQKVTASPSQSMYGKNNADELLDAATQKATIENEFKRRITAKVRETGTDSMKH  
YIKSMCNHELLNKNEEIIILAREIQILLKWEKQREKLEEEELLRPPTYAEWATSIRTNMTVP  
ELKKQIRRLRAKTALTESNIRLVVSIITKRYQNRGMAFQDLAQEGILGLTRACEKFDPER  
GFRFSTYATWWIKQSIMRAIADQGRITIRLPVHIHDQLSALRKAERELKSDFGRQPTTAEV  
TERTGFTSERIDFLNRVSQQSISMEQELTSSKVKGSGAGVGGGGNSLTIGDMMGDPDQK  
PVDQASYQMLKDDLSRLICTLNSREQAVIRMRFGGLDDGRPKTLEEIGKRFSVTRERIRQI  
EARALHKLQRQPYRNHAVKCYVKEYS

>comp5894\_c0\_seq2; 240 1 618 LEN=850; translated  
YDRLRGKQVETIDNRQSTTLLSSTTVYHVLNNPTGTSTHFENPKSPAIRQQRHENMFSSR  
SILLLIALVVAVSAGTSKEGLEFLAKKATEEGVVKLESGLMYKEISPGNNSGKKAKVNT  
PECHYAGTLIDGTEFDSSYKRGQPLTFAPNQVIKGWTEALQIMDEGAKWELYPSELGYG  
DRGAGASIPGGAVLVFTLELIDIKL

>comp5895\_c0\_seq1; 535 493 2370 LEN=2544; translated  
MRGISVETKDTLFEIKGGKGN SAVANGGGSRKKRKSAGGNSKGGTASSTTKARKKAS  
QEGYFRLKVKDNGCGMRHDKIPDLLGRVLSGSKYGVRQTRGKFGLGAKMALIWSKSTGV  
PIKITTAHLLVPKSKSKAYNIDTSSLEPPKVVSTCVLDIDITNNCPNIEHRLRKNEDGW  
VGTELELVIAGNWTTYSRIVSYFQQLAIIPTPYARLELVYENRSEPHRNVTVRHDRSEQ  
MPPLPKEIKHHPSSVNNIIVSQLIERSNHKTIIELLTKELSCVSRALAVRIVKECGWDK  
DIIEPSDISGRDLTKLVQVLRVTKMFKAPDGSCLSPGLEYNLNLGIRKVLPEFEVATSRD  
KPSAYEGHPFVVEAAVSLGGKEAKEGLNVVRFANRIPLLFEAGADVCTRIVATSKINWSLY  
KIDQKRDKIGVFSIVSTKIPYKGTGKEYIGDDITEISVSVKALQLCCQQLRVHLVKRN  
ALRDQRDRKSKLVKYPDVSRSLSFALLEGMRRRDDIAEGVNPMSPPRKRPRREQHWQEK  
HVDTVVEELEKGDITISIRKSLEETVDAQNLNEEQEEAKKSKTKDRIPIFMKPMPDMN  
SNFDIDHPLFTFRPMVCPVMPVVDK

>comp5895\_c0\_seq2; 600 114 2264 LEN=2438; translated  
MARVNSSDSGSSTTKTKTKTSEGGQGEIQKQSPAEFFADNQAIAGFDNHGKSLYTSIREL  
MENS LDACESIGVLPISIQVQIEELTQDEFNIMRGISVETKDTLFEIKGGKGN SAVANG  
GGSRKKRKSAGGNSKGGTASSTTKARKKASQEGYFRLKVKDNGCGMRHDKIPDLLGRV  
LSGSKYGVRQTRGKFGLGAKMALIWSKSTGVPIKITTAHLLVPKSKSKAYNIDTSSLEPP  
KKVSTCVLDIDITNNCPNIEHRLRKNEDGWVGTELELVIAGNWTTYSRIVSYFQQLAII  
PTPYARLELVYENRSEPHRNVTVRHDRSEQMPPLPKEIKHHPSSVNNIIVSQLIERSNH  
KTIIELLTKELSCVSRALAVRIVKECGWDKDDIIEPSDISGRDLTKLVQVLRVTKMFKAP  
DGSCLSPGLEYNLNLGIRKVLPEFEVATSRDKPSAYEGHPFVVEAAVSLGGKEAKEGLNV  
VRFANRIPLLFEAGADVCTRIVATSKINWSLYKIDQKRDKIGVFSIVSTKIPYKGTGKEY  
IGDDITEISVSVKALQLCCQQLRVHLVKRNALRDQRDRKSKLVKYPDVSRSLSFALLE  
GMRRRDDIAEGVNPMSPPRKRPRREQHWQEKHVDTVVEELEKGDITISIRKSLEETVDA  
QNLNEEQEEAKKSKTKDRIPIFMKPMPDMN SNFDIDHPLFTFRPMVCPVMPVVDK

>comp5896\_c0\_seq1; 233 132 1042 LEN=1042; translated  
MAGVGCNNILLVKVGGSSITRKALETLDAESLAWFSTTIRSI VNRFLDDAAGNVVETS  
TEFDCEKPSIVVVHAGSFGHHTAKKHGLGKSSPPPDGMNLTRDLVTGIARTRQSVKKL  
NGAVVSHLIENGVNAVGISPCLNVPGLMTHGGDEYNGVTVLVQSIRETLSAGLVPIHGD  
AGLYGTYRDP SARDRFQSMSAGILGGDTLVEIIATHPLIRRKISKAIFLTVDVNGVYTKDP  
KVFQDAVLVKNIFIDPVSGDMNEVSASGSQHEHDVTGGLEGKLC AATNVAKTGIPVVVA



KCGS

>comp5896\_c0\_seq2; 179 132 1144 LEN=1144; translated  
MAGVGCNNILLVKVGGSSITRKALETLDAESLAWFSTTIRSIIVNDRFLDDAAGNVVETS  
TEFDCEKPSIVVVHAGASFGHHTAKKHGLGGKSSPPPDGMNLTRDLVTGRKKSGGCSTGF  
VCGCMERKKINEGSSDTLHCRKVLRGHAKAVKLLNGAVVSHLIENGVNAVGISPCLNVPG  
LMTHGGDEYNGVTVLVQSIRETLSAGLVPVIHGDAAGLYGTYRDP SARDRFQSMSAGILGG  
DTLVEIIATHPLIRRKISKAIFLTVDVNGVYTKDPKVFQDAVLVKNIFIDPVSQDVMNEVS  
ASGSQHEHDVTGGLEGLKCAATNVAKTGIPVVVAKCGS

>comp5897\_c0\_seq1; 460 1 1192 LEN=1296; translated  
XPFEPHCTGHTPRNSDRSEQQHRRRKMWGAITAKAQMLGDSAANKAKQAKLTADILMIDN  
SMDSRKRAFGIAMYDYL SPLTKSADFYAASDKLTELVRPNIILAQKEIQALAARRVKQKE  
ALAKAEADRAAAFPTKAENYGQKLFNIGKAGLYHGGEAKIKTELTVTDRLIKGHKEDFGV  
ALFNFAFAEAEDEKGF LPTDRQIRNVYDTCRQDLTTLEQQKKAKEDEIVELGGRRVSSETP  
SIVQKPSAVPANATMNSTGANSTFVAASTFMETNDAPFSATNQNTGYGATTTTPQQSAPFP  
TTTQQSPAMVQVAGSGIFSHIVPSNASAPASGGYSNAGPFHVSQGGFQNGAPNNAFA  
PQPAAAPVDPFSAFTNQPPSSSSQQQGSADPLVGGF

>comp5897\_c0\_seq2; 469 309 1334 LEN=1438; translated  
MIDNSMDSRKRAFGIAMYDYL SPLTKSADFYAASDKLTELVRPNIILAQKEIQALAARRV  
KQKEALAKAEADRAAAFPTKAENYGQKLFNIGKAGLYHGGEAKIKTELTVTDRLIKGHKE  
DFGVALFNFAFAEAEDEKGF LPTDRQIRNVYDTCRQDLTTLEQQKKAKEDEIVELGGRRVS  
SETPSIVQKPSAVPANATMNSTGANSTFVAASTFMETNDAPFSATNQNTGYGATTTTPQQS  
APFP TTTQQSPAMVQVAGSGIFSHIVPSNASAPASGGYSNAGPFHVSQGGFQNGAPN  
NAFAPQPAAAPVDPFSAFTNQPPSSSSQQQGSADPLVGGF

>comp5898\_c0\_seq1; 229 1 900 LEN=1135; translated  
XSSFTWVSNAMFYIMLCRMLSNDVVCFRCAVSRFWEQKRTTSIHFNLLRDSIQFKSNTI  
ELTPRPFFAVHFLLFETNRNTVGEVGLQYRLKGYGIPVDLTPLTDSGNIKTMYLKQWLR  
LRKIIETGITPSGVKTSTVSIIECPGSNDVIFRPGTSM LCHPGNVAFRGLIEAKQNRITV  
KRAEKEEVALEIIQEVRSTGGRFLMWDNGGWSELNDIPLISVKISISYRDFKTKVKTIV  
QQHQEQQRKQNLASATNDFLPGGDKKRKRSMIPTFCGTFEXATNNDYHDNDDNQIAID

>comp5898\_c0\_seq2; 462 110 2067 LEN=2302; translated  
MPPNSQQQSNANAI FDEMVDSSDENQAYATSHSSKTASDFDTRIHSMGCEYNGKGNINA  
NANVNVNNETRDRGRSTKPRRTKESDDLDP SAI IKKYEIQCSNMGSSDQRM LGS HHQL  
HPQSQQQAAPNTQGLVGEEDADTDSTSSSTAASAIATATLSEAGSPFASGM DVDEMLSR  
ELLKLSFQDRIANDEEIHGVRCLAPEENRLLSLALASLEREIERIPYKPAYDKAQAYAL  
VPRFAKTSYVNTDDFRLRFLRCELFDVRKAAVRLIGYLELMVELYGLFALQRRVKLQDFS  
KEEMQILRSGGFQVFPFRDRSGRRVMCTVGNMGMDFPTLRLKANFYFWMTAAESVESQQ  
KGVVFLVWPGPNDTLRAIPNQTDRALHCKCNAAPIRIAAVHFCLPNKPFHLLRNIMAA  
TLGLAYRLRLKFHVGEVGLQYRLKGYGIPVDLTPLTDSGNIKTMYLKQWLR LRKIIETG  
ITPSGVKTSTVSIIECPGSNDVIFRPGTSM LCHPGNVAFRGLIEAKQNRITVKRAEKEEV  
ALEIIQEVRSTGGRFLMWDNGGWSELNDIPLISVKISISYRDFKTKVKTIVQQHQEQQ  
RKQNLASATNDFLPGGDKKRKRSMIPTFCGTFXIATNNDYHDNDDNQIAID

>comp5900\_c0\_seq1; 95 1 283 LEN=1256; translated  
XNEDLGVLELLDKPTCILNSNNDTDSIMNNNVEDTFVDYAEVEIDGVMGDTDS SPLYRTIV  
VTLSATMFGTVLASFQGM LCGEGASITREYAG

>comp5901\_c0\_seq1; 337 217 858 LEN=858; minus strand; translated  
MVRLADARCPVPFSSAPAPSYLRRVLD FRAIRRALAVPLATTGALPALKPPALLPPKPGA  
PPAPMEKPPFIPRGGGLPMFDGWDFMKPFDGAGAWFSLVLPNENCEFVGLGWL PNDIGF  
ACWGAGAPNDGAVAAPKDGAGAAAPKAGTGAPPNDGAGAEDAGAAAPKAGAGVAPKDGAW  
ADGAGADAPKAGAGADAPKVGADGAGAVVPKA

>comp5902\_c0\_seq1; 585 139 2967 LEN=3163; translated  
MARFSRNVGARTEALIYRNRVFW SLLVFATAWLCVMMSFVPKLLIGRVGEETKAWSLSLK  
GGDGARIFSSYPFQSLPGGDAVSGVVFGRGEKTRSYEGERIFRSLPSSPPSKDTTTTPK  
ALPLMDPAIRCKNWNVVTTIFDPSEAVRRASWVEGWCTVIVADTKTPEGYMEKLRNMGGI  
VGSDESRFIRTGRRRSEKQEGKDEDEGIVVFLSIDDQKEWMKLERGSSSATS DSTAVGK  
FLEAIPFRSFARKNIGYLYAIAHGAQKIFDFDDNLLPVSLGKDGEERVFAPFHNRDALE  
NPAMVVTGPTAFNHHNIMGISVNGT SWPRGFPLTQITNPATRGRIALESKAFRDVP MSEI  
GILQFVADNPNPDVAIHRLVQGMNPTTGETVHFKRHVKYDSNSSREEAANYNTVSEIS  
TEGSLLVPSHAYVSFNAQATVFT HQAMFGLLLPHTVMGRVADIWRAYFSQRIFREVRTPK  
RESSFGNDGLKVVILPPDIVQERNEHNLLGD LQSEEHLYCRTEALLSFLDKWEYEGDKDG  
DNRSIPAMMEKLWIGLYERDFIEKQDIEVLQLWLSALVEVGYEFPKVQSN SARQIRDVVV

MGQFNYGSSKVADNQDELMTNLLFWYQKWRQRFRKVVIRGPF SADLAKEFSEQHEIDVE  
STRDRLSHDKGFVSPMDNLLSTLKKYEDDPTISGVLYVHDDMI VNVTVNFDG VNRRTTTLV  
GTRFLTAPQPYRIHPSWASNSKPNSTDKTLIFTAPDGFRT EKWYELLGHLENWDHNPECI  
HQFSNIANDPRIKPYLEHDETIENGNPYLSVPYRMQADFLYIPTRLSRKYEEIANLLIEH  
NAFLECGVPKIVQHVTASSNVIFKFVDLCTSF LNRRRTRGSLNMITRCEPEYANSQPNTPL  
PSPHGAIHPIKINARGYKTWGM LFDWATSGTTRLNVADYEN

>comp5903\_c0\_seq1; 631 288 2645 LEN=2919; translated  
MASSVAAKMMQVFARSKTAPMPIMKRARNRLISPSSITIRQASVFSHFITENTNTLTAKQ  
SSVNAANKDWHSPFFMSDTTIAEKEAWLEDLLTETNNSNTNIISTTEHHQRNRESESSI  
DVEAFLVVLKALASPAVEDAGAPRRADVMMNRLKLKNHYNIRPTSECYQYAIQAWANST  
KEQSMVIRNRSQRWFNEIVGKSGDDLSSIIQPTYGNARTGQDSFNVEPTIECFNAFLDG  
LSRGRQGKSKRDRQILLENAKMGEVILRRLHSLYTHR SKRENNSKNEMSHKNRDIKRQTE  
TSIAIRPNTETFNFVIRGWTRCKHEPFIHERVLAAILRLMESYQRGNPAAFIVDRDAPRPN  
TKSYCMAMDALISEAKRKARNYMQRRRNHVEFGDKYEETENTHLNGIDEINEAASILK  
YLHDLYDAGVEGVVPHRVPYNILISGWAAIASFSQHKHYQTQNSNQGEFKAEEILRTM  
ISHRENGFIEASPDVISYERVMLAWANSHPNAGKRALWWLKQLWKDYDLYPDSTSESSH  
KSSLLPTVRTYNVVMKALASSDGALAAENMLLDLGEKYRGSTDHPGLCPNSESF SIVIRA  
WLESAKQTRNVDERISSLRAYEWLSSLRGIENENNLSTPELFIGLLTMSKSCAKQRPH  
VLDLAMQIFEDYRQSRHRLDCISYATLLQVGLRAHSRRSGEIREAFVEKLF AECDDGLV  
SNVFI RTLVDDPSNECKNLVNRVSQDWPLPSSWSRNLKNNNNRCTLIDTKSSSERRVLR  
RRNTN

>comp5904\_c0\_seq1; 530 226 1422 LEN=1853; translated  
MKTSSSTLLGLFVLLILLCMISIMQSIHLMEHHDVHVTSEESIGNIPIDAMV SIGTEPLE  
HEKMFEDTLKDCMPFVFEEDGDRKKNKKECKTFVPEGSKERIGVLAPPKMTSALVKFINI  
VLAKAKKEGGDEIAATGAEVISTHMAPYGYGKTHGLTRMIRVVPQPLLLGTTDTLKA AV  
QSSPTPMSLNDITINDLKAALRQQIRYHCRNLHIAAHTAMWTIGVEDFAEIGREVLVETA  
QEFFSLDMDQDDLNLVINEYDKLGDDEENQGVVEKDDDDNSLAQLNMYADGAKLMGL  
MQTKAKSEVRKAKAKEKTNDILKMLDDVLLDEM KISNNLTNWPCE SFWTVGEPDNRLELS  
PIIRSISAAMSPNCTAPYTTCTFVKKDKCEAKGDGVCN

>comp5905\_c0\_seq1; 1272 46 3129 LEN=3164; translated  
MSKSTKAPKAGPDPLLLSRKEVDVLYDVFDVVRKALALLNVEYIVTGGSL LGAIRQHSIL  
FCDDDIDIAVIDHRCGEEDGGASAPSIYESVVVPR LQ SALDEVVADESND CRDRCVYQIK  
PWEGGDRIRSKRYNSVFDLFLVLRKYPTLQSFRSVVGVKRNGRAQPEAYVDSILD TVQAS  
IGARRAGNRD SHGSVAVEDADADARARESVFPWFQFATRKA IEMWPKEVYCAAGASSTE  
PSNHRESPSQSMNTVDELFP LQTNLKLGLTGVCGPNMPVTLLKRAF GDDCFDVYRSL  
HHQQKQS QNKSQAQSETQQQQQQGTEIKGTEGNKKDADLPPLVAPGGT WEDSPKVPLED  
EHYLPMQPLARKRRRPTLHCKERLFEFLDVQAKKEAEERERFSLRQPSGSDAIPPSGGA  
KTVYMDGVFDL FHVGHLEAIRQCAELGTRVILGVTGDEDATGYKRKPVVPQAERVAIVSA  
LEQVDAVVCPCPLVVTKEFMDAQKIDL VVHG FANDADAERQKEFFEVP MALGKFQRI GYY  
RGLSTDRIRTIQERDRQDQHRLSGDGENQAKDGSDEQLTIQTKGEEEEKEDSVAMSVPS  
DVAEPRIQNGDGAGRDSL ANETAPTKTASQPNPQWFGAALAAATNDAPLLPTDFPPLSLR  
TVIEPHIEKARRRRREALGAIRAATGEPLYDSVMKNFLRQQEQLRVGTTREPLEGNNSID  
RKLSEGLSSLLSAGLPPD TDL SRLHEIPLLDGRPAKDRLLHSLTQNP GPFQTSYDAYV  
RTVCI PRMASAIEASERRNGNESFCCEEIYYQAFPCRIVQPHEFSIGPHADVAYGHHPC  
SINCYVSLTDPTYSGISSDINGDEMGS SPSSSLFLESRPGAEDWHALFSGNDEGFPRLEL  
FAGAMNLHWT TENKTPRTRVSLDFRLLDGRV FQSLKCGGHLEGGQMDVYRATPGYYHRCL  
RSKEPVTKPVAQNKTGGTWD SWIRDKDYL NNGSGGEFPHPDFRVGFPWTVKNWDKFWRK  
NTKPDDK

>comp5907\_c0\_seq1; 473 577 1779 LEN=2123; translated  
MTVVFGAAVCVTEEAWKEKTKCDHIVNVFYQYLDNDANGVPDDPRVHAEIVDKNYLLFVP  
ATEEWEWEDAWSKMGSSFHDQLGYIQMVGTWETNLNSCVVPSNRGASDTRSTWSAFIDTD  
DKDCQGGRPDYGDASIEEILHLITVGA AVYPSKWGGSFESEVGVAIEEANGNCGWHDG  
NYVNPSSNKCSGQYAFEGVYKNCRSCEVWVLM EGIYWAVVSYIGGLYTI GRAEFAMNE  
WLMSTPDSNMEITPSGVTNAISLEAGSPALYAMVSDSTSEGLHLWLP T IMPNGNYKGFDDN  
PPRPTLPPAPDKSPTSPTYDGTSLITSTTTSGCIDDKDFR FKNKEKKSCEHWVAKGADK  
LHKRNVRRAIKRKRKYRNKR VWEYCPATCALVDLGDC A

>comp5909\_c0\_seq1; 474 357 1490 LEN=1701; translated  
MKFSFTALSLSQLLAFACPASAMFQIDNSPNLSGNRGLRKL LSKARRLEDNDEGNDDG  
GNNGGEQNQEEMEAFLMDFSMKFMECIPDQVLTADADYNDHFGVVIFRLCPANSCSDNSGC  
KSGYADFAVDVGTYYVDAFLTDQADNMNWD DDKFDGDEMGECTQFKAEGGNDGVSYYVGP

CTSDGKGVKLGFLFEDQYCYQESETS FETISNGWGLPY SNGGLVSTQCT SCTEDGGLREMC  
SDLYENSPHRCEKEFDKHYDYDTNFEMYRYGQDTTGCTKIDVMLNPKGVFSQGA VWTDA  
ILAVMLLVVTGAGYAWYSSWWEEQKLNLEEIDDDDEDSQAYHLGGDEDEDHSEFSQHGA E  
LNDSTLTPEVVAEGTMA

>comp5910\_c0\_seq1; 574 238 2376 LEN=2459; translated  
MTAAIMAQQKPINLFMQDLVRKNIHNSNDPKDDSDSTTIATFDFAKKEALHRNDSISNSIS  
NSINNSDSSVLT SCTGTSGSYFLSDDTTITD TTASSRSVVVISDNARVSARARPKQTAVL  
NPVRS SPHIRKLTASN RWGADCISQMNKNLNHYTL SNH SRDGLV VSSSHSSESRNRWY  
PDELKLP SRGNSSSSNNKNGKSNDT NSTDPSIRRGVSDSCLTMPRRSWKQQLEPQLEIEE  
DSTEELVEQLLNAKT NANTNTKRIVSCNNLSAYIEPNHTTATPSSDIVQAKKALAKSFC S  
QKSSSEDLKAASKAVQRDLHRVDSMELPNSRCNHKFP TQQQPRKQQRKSKRPVAPGGP  
SSTALLLNRRLLDI ISSPDGQESLRRLT SAATAPGECV PKPAVKDKEEISNRLLDKTVS  
TSTL KLLQKRRQTSSKTNRITVYKSIDNSSHSIYSSVGEGESAFSSSTRSKRRNNSMKKIT  
RSSSSTVSILEKALGEMAPKV KTTSTKTKS KTIATSNSKSTSPKVSKTSSMP SRSGKKL  
ERSHGVP SRSGRHTSSRRERNS IDEEYSRSIQSRNDS SSKMLLETTIGDDKPLPRIKKV  
TLGAAVGTDTTCTNSNTPPRIPGMGSLGGSSHRGARSRSSSGKKGVSTKLTSLERVLGGM  
APRSRTSSGSCTSGDTSNRERRRRAASRSMEDAPPRPTPRKNSLQISDGTTD

>comp5911\_c0\_seq1; 832 1 846 LEN=846; translated  
QQQQQQQQFPMSNAVPPPPPSLSQDAIGNDNSNGGGIAMGGGMFMGRLTQFLDVVAPQQE  
DDAGDGF GHGDGWD DDDVDVDDVNE DGGWDDDAQELLSMLDDNDDAAGGASSLAPNDSS  
TVQTNQAVVAPIPNHPPPPPPPPPPQCQANDRVDESFGGETLLSSAAVGTASTLGAANDV  
LDTDWETNDPNSNNDVGGGGWDDDDDDGFSFGDDAMEP VAMGAE EADENKPLQSPPEPVH  
VVPPPPPPPPQSNFANNNDVHVS VVENDDDFGLDQDGDGWGDD

>comp5912\_c0\_seq1; 541 1 1551 LEN=1683; translated  
XVLFGN NISIRLLPIQIRFDLKPVAFLSCRQDFGWL R DENLRCHR TTTTCRFLHGLGGVS  
ARCWNPSICL FVIGVGTIKSVEKTIESINASAKGRKPRGTAENGGETSGNDEECGYD H  
VPWLGSV SSTNGQGIDEAARYEELPPSVFSPTGRLHPVEAAVRAGKVATPLSNLLVAIKC  
RDG LLVVSTYPVSPNVDARIASLAGSNQNTNISSASIQQGNDDNSGHSDDGIESNQTTN  
ETLDVSGSNNSNPHTGEESH TYP SLFLFEETCASTSTGPIFDIHP CMV GATAGNAVDNRI  
LGEKLLDLGLATTNFEEDDPLAGAADRVAKDLANQLQVVTQDITATQKQRLGRMLASSAV  
VLGNKKLWRIDPTGQFWDQATV LGHDADRAEEAFCCRLF EQCERRHGDDKNGIHPREL  
LESMT HDEAFEFAKEFLRHQTATQRQPKSNTALRSSDTKASIDASATKEGGIELPVTELS  
SQTYWQAVILDYASLTTRGT PRRILRRGSFGIQNKE

>comp5912\_c0\_seq2; 355 115 1092 LEN=1232; translated  
MRICGAIARQHAVSCTVLVEFLLVGILLSASLSSASVSPSSRSIKTIESINASAKGRKP  
RGTAENGGETSGNDEECGYDHPVWLGSV SSTNGQGIDEAARYEELPPSVFSPTGRLHPV  
EAAVRAGKVATPLSNLLVAIKCRDGLLVVSTYPVSPNVDARIASLAGSNQNTNISSASIQ  
QGNDDNSGHSDDGIESNQTTNETLDVSGSNNSNPHTGEESH TYP SLFLFEETCASTSTG  
PIFDIHP CMV GATAGNAVDNRI LGEKLLDLGLATTNFEEDDPLAGAADRVAKDLANQLQV  
VTQDITATQKQRLGRMLAVRCD CDVW

>comp5913\_c0\_seq1; 635 228 2207 LEN=2263; translated  
MTTDRKKEENTTAKVMEMGERENGDHQSNQADGTQAEDGSEGSRSSRSIWSNLEEDVET  
VSSGVSP TTNQGSQLSHQ TGMSKPESEESLNIARKENMAVMTWRLVMFGVLIVTTVAVAV  
LVFLFVSNTENQEFVKSFDVDSNKIEESLLSTMDTKLEAVDSLAMFMVTNAREKNQTPY  
TTLNDFGSKAAKMRILSHAIALQYVYVTEEQRPEWEAYAKANEGWVQETIEIQREDTTF  
SSPTYIPDYDTNHSTSIRYAGVPNGTGPYPTPTWQTYPMLPTGTMSAYNWNAIQHRL LGP  
GIEKV VADHKVIGPVLNFDDSNEGSGTNRMVVWAGRHS SSPDVNPKEPIIRVLYPILDT  
ATGAI TVDEEDSKVVGIIASSFYWKSYLEN ILPNDENGLV VVFENACNQTFTTYQINGHEA  
EWMGTGDLHEPEFDGMGKTLTFEEIGMNSANS GGRYGGLPIDMDYCAITVKTYPTVMKD  
SYQTNEPVLYTIIAVGIFVFTALVF IGYDKLVSMRQKKVMSTAVQSTTIVSSLFSPNVRD  
RLLEGNGDTKAANNVTGSIFQPTKSRLRFTFLNDGDSSTDSTKPIADLFTDTTVLFDIAG  
FTAWSSVREPTQVFTLLETIYGAFDN IASRRGVFKVETIGDSYVAVAGLPDRKDHAGKW

>comp5913\_c0\_seq2; 1044 228 3788 LEN=3837; translated  
MTTDRKKEENTTAKVMEMGERENGDHQSNQADGTQAEDGSEGSRSSRSIWSNLEEDVET  
VSSGVSP TTNQGSQLSHQ TGMSKPESEESLNIARKENMAVMTWRLVMFGVLIVTTVAVAV  
LVFLFVSNTENQEFVKSFDVDSNKIEESLLSTMDTKLEAVDSLAMFMVTNAREKNQTPY  
TTLNDFGSKAAKMRILSHAIALQYVYVTEEQRPEWEAYAKANEGWVQETIEIQREDTTF  
SSPTYIPDYDTNHSTSIRYAGVPNGTGPYPTPTWQTYPMLPTGTMSAYNWNAIQHRL LGP  
GIEKV VADHKVIGPVLNFDDSNEGSGTNRMVVWAGRHS SSPDVNPKEPIIRVLYPILDT  
ATGAI TVDEEDSKVVGIIASSFYWKSYLEN ILPNDENGLV VVFENACNQTFTTYQINGHEA

EWMGTGDLHEPEFDGMGKTLTFEEIGMNSANSNGGRYGGLPIDMDYCAITVKTYPSTVMKD  
SYQTNEPVLTYTIIAVGIFVFTALVFIGYDKLVSMRQKKVMSTAVQSTTIVSSLFSPSNVRD  
RLLEGNGDTKAANNVTGSIFQPTKSRLRTFLNDGDSSTDSTKPIADLFTDTTVLFADIAG  
FTAWSSVREPTQVFTLLETIYGAFDNIASRRGVFKVETIGDSYVAVAGLPDPRKDHAVVM  
AKFARDCRQQFSELCSILESSLGPETGDLNLRIGLHSGPVTAGVLRGQKSRFQLFGDTVN  
TAARMESTGTVNKIQVVSQATADLLRAAKKSHWLQARTEKVEAKGKGLMTTYWVEPKNYAS  
SQASTASTALSHEVQFSSTRVSSQTQRLISWNIDVLERLLKKIIARRIALKRKATPVNWS  
KPHKNMIVLNEVKEVIKLPYDSKYHYHAENPDSIILEPRVKFQLSQFVTEIALTYHDNPF  
HNFPHASHVGMVAKLLSRIVAPDQDFEHEQLHDHTYGITSDPLTQFACVFSALIHAD  
HPGIPNSQLVKEGTEMAKLYEGKSIAEQNSINLAWNILIEEKYPPELRKTICETQQEEAR  
FRQLVVNAVACATDIIKDLKSARNKRWEKAFSTTNPNLKLDQDLINRRATIVIEHIIQAS  
DVAHTMQHWHIYIKWNERLYAEMYKAYVEGRADKDPDTWTGEGFFDFYIIPLAQKLS  
ECGVFGVSSDEYLNAYAIMNRNEWEKKGKDVVASYEKKYKDDKALA

>comp5913\_c0\_seq3; 575 228 2299 LEN=2299; translated  
MTTDRKKEENTTAKVMEMGERENGHDHQSNDQADGTQAEDGSEGRSSRSRGIWSNLEEDVET  
VSSGVSPPTTNGSLSHQGTGMSKPESEESLNIARKENMAVMTWRLVMFGVLIVTTVAVAV  
LVFLFVSNTEQEFVKSFDVDSNKIEESLLSTMDTKLEAVDSLAMFMVTNAREKNQTPWY  
TTLNDFGSKAAKMRILSHAIALQQYVYVTEEQRPEWEAYAKANEGWVQETIEIQREDTTF  
SSPTYIPDYDTNHSTSIYAGPVPNGTGPYTPWTQTYPMLPTGTMSAYNWNAIQHRLG  
GIEKVVADHKVIGPVLNFDSDNEGSGTNRMVVWAGRHSSSPDVNPKEPIIRVLYPILDT  
ATGAI TVDEEDSKVVGIIASSFYKSYLENILPNDENGLVVVFENACNQTFTYQINGHEA  
EWMGTGDLHEPEFDGMGKTLTFEEIGMNSANSNGGRYGGLPIDMDYCAITVKTYPSTVMKD  
SYQTNEPVLTYTIIAVGIFVFTALVFIGYDKLVSMRQKKVMSTAVQSTTIVSSLFSPSNVRD  
RLLEGNGDTKAANNVTGSIFQPTKSRLRTFLNDGDSSTDSTKPIADLFTDTTVLFADIAG  
FTAWSSVREPTQVFTLLETIYGAFDNIASRRGVFKVEVSESNFVIIPDYFAVRRVLGYSYI  
VVSASASFCQTIGDSYVAVAGLPDPRKDHAX

>comp5916\_c0\_seq1; 303 1 1601 LEN=1701; translated  
XSSSSSSSPGHATAIRRWEDPKGNIRRLYQWHTNLSTISSSTENQLAANKRRLALVGR  
ILIAPEGINGTVSGNRAFVEAYVERLREYDSVFGATETGGSNITDADLRIFRDVDYKMSY  
DSSPEPLFPDLKISIVKEIVSTSGLDVVDVPLETGKHLTPEEFHQVLEDSKNQEQSKEI  
ALIDVRNTFEHDIGYFVDPRTKSKAIDPETTTSSFDKFCERNAEELRNKKVMYCTGGI  
RCEKASVLLKRRGVEDVNQLSGGIHRYLEKYGNTGHFKGLNFTFDKRVAMKPNFATEFCN  
DTGKDLESDDHKAPSCDDTKDDSYDIVGRVCEDDPFDELCSRVCTVCRDLVLVCEKCR  
SRSSLREYHCKRHSEWKNCYFSFLEIFDLNELEAQLNALRALRDEDSMAKSVRRTLTRQI  
NKVESRIRAVNDGSQSVKDNAPRRCRSCQEVLGQACDGKCGWGFWRKVEVLPPLTTNENKT  
QGVGICDDSKNTSNDSTKRAKIAAKRGRRAKQKLEAEMEFLRPPAGSTLASE

>comp5918\_c0\_seq1; 275 1 1583 LEN=1752; translated  
XVGAPVAPPTEKPVAPPSEKPEPADPTPRPTPAPTLSNFRIMFRQDLFEDVVKDDNSITF  
SLRFEHFSDPCTGCSLVARFYSYTDENRCVTSNDSETPIPQIAYDTEMPKNAYHEISLFP  
SARVDIELPLQEWEDNNDDDIKLCIRFGIEYPVTNEVVSHIDLPMPTINAHNGEYVGSFSA  
SGQLADDSNVVTSLTDIQVSDKVDVQAFLCGVPVQGITGLGTPSATHYKVGQKFRICV  
DIMEVDHTYYVDNIKKMVCKVEGQYEKTIIEDGMATDGLTDVKWSGDVSEGWIQIGIVER  
QKVS GGVTGSVVTSTVVS GYVGADAGTIQCEGTVEARLWAEANALYSLDNDVEVHYIHTL  
PIGVA FKECYDLCELESYWYYGLQCLNIDEGVIDCVC SNPNYVSGGSVDVFHYPELPRRI  
EQTDQFTKNRNSGECSDIEIYSGFFLGGFNYPFVYETTYKRRLQESNAETESEEFGFSI  
TIGIQNEVDDLRLQDLAAPGADPKVWTIADLVAGLATAVALAMAAI

>comp5918\_c0\_seq3; 315 1 1567 LEN=1736; translated  
XVGAPVAPPTEKPVAPPSEKPEPADPTPRPTPAPTLSNFRIMFRQDLFEDVVKDDNSITF  
SLRFEHFSDPCTGCSLVARFYSYTDENRCVTSNDSETPIPQIAYDTEMPKNAYHEITRVD  
IELPLQEWEDNNDDDIKLCIRFGIEYPVTNEVVSHIDLPMPTINAHNGEYVGSF SASGQLA  
DDSDNVVTSLTDIQVSDKVDVQAFLCGVPVQGITGLGTPSATHYKVGQKFRICVDIMEV  
DHTYYVDNIKKMVCKVEGQYEKTIIEDGMATDGLTDVKWSGDVSEGWIQIGIVERQKVS  
GVTGSVVTSTVVS GYVGADAGTIQCEGTVEARLWAEANALYSLDNDVEVHYIHTLPIGVA  
FKECYDLCELESYWYYGLQCLNIDEGVIDCVC SNPNYVSGGSVDVFHYPELPRRIEQTDQ  
FTKNRNSGECSDIEIYSGFFLGGFNYPFVYETTYKRRLQESNAETESEEFGFSITIGIQ  
NEVDDLRLQDLAAPGADPKVWTIADLVAGLATAVALAMAAI

>comp5921\_c0\_seq1; 284 72 868 LEN=938; translated  
MENSFLALPLSVLVTQVSSFASPSTAVALSAGARSWQEGPLALLNDNNQDNHYAPSRAE  
FLSKTSSAITAAASLSLVPIDPAFARGRATLEQAYDRYSSRIIDGGNFYKTMKTMVAKD  
DWAGIKTALQEPKKTAKADNAKIDGGIQERAAQAGQFSDARVVLVALDLLAAQFSDNSISA

KTKAMKDVVEEIRSVVEMQSI CKQALGEE SAKGGFFGVGKKQASKKELSNRMKELYIIG  
GTAWNRYAYEANAGIPKTVQQLPFL  
>comp5924\_c0\_seq1; 525 1 1906 LEN=1906; minus strand; translated  
XVYTRKFMVIESINLLREPSSVGLSRINNQT KFFHSSSTGFEESTLLEKYGDKMPGSNLNS  
SRSTGGAAAILSRKRLPASGAGEESNGVRTTNNESR TTTIGR GDGNSIRDANTGIENNNS  
SSARSSTSASTNSNNGSTRKMRRGSFRRTLMLQRNKRSNNGSSSSSHSKREGNAVDGGATP  
ATAVTNQLPVSKRNSTYHDQSSAPVPLKGSV GASVAFAL EERETGAC SPTLTSSNV TTPV  
RGSQQRHERLPRGHIETIRKHYGSNREGVLDIYEDVLKISP D ASDREIRIAYFRRGREIL  
GDNASSIKINKKNQKAIKQLDPAIKSRFQAVSMAYEILSTPAWKEAYRKQGGILNTPGAR  
ASPLVPKVVEQDGVGLSHPRITVGKKKQQEQEPDFVSYPLASRASFWENTNANTGNP  
SAMFPTTFSSDPVLPAPSTASRSPKRLV GALRKS KFLGNSGDVDNSNSRSRRQRPSAS  
VRWKDHVEELIFVNHPDEHGSSDEESSE EADYSSD DENLRGDDSTGNDAGNSRASSRPA  
LPVAVDLYSEPADPGYNAQENNSNNSLSYSSRSGSGSTRRRKKNKARIVIDSEELSHLKL  
MDSEAEKH FVQDFWDFEESMDGILTLVDSIGGGGX  
>comp5924\_c0\_seq2; 582 601 2362 LEN=2362; minus strand; translated  
MVNKMPGSNLNSRSTGGAAAILSRKRLPASGAGEESNGVRTTNNESR TTTIGR GDGNSI  
RDANTGIENNNSSSARSSTSASTNSNNGSTRKMRRGSFRRTLMLQRNKRSNNGSSSSSHK  
REGNAVDGGATPATAVTNQLPVSKRNSTYHDQSSAPVPLKGSV GASVAFAL EERETGAC S  
PTLTSSNV TTPV RGSQQRHERLPRGHIETIRKHYGSNREGVLDIYEDVLKISP D ASDREI  
RIAYFRRGREILGDNASSIKINKKNQKAIKQLDPAIKSRFQAVSMAYEILSTPAWKEAYR  
KQGGILNTPGARASPLVPKVVEQDGVGLSHPRITVGKKKQQEQEPDFVSYPLASRAS  
FWENTNANTGNPSAMFPTTFSSDPVLPAPSTASRSPKRLV GALRKS KFLGNSGDVDNSNS  
SRSRRQRPSASVRWKDHVEELIFVNHPDEHGSSDEESSE EADYSSD DENLRGDDSTGND  
DAGNSRASSR PALPVAVDLYSEPADPGYNAQENNSNNSLSYSSRSGSGSTRRRKKNKARIV  
IDSEELSHLKLMDSEAEKH FVQDFWDFEESMDGILTLVDSIGGGGX  
>comp5925\_c0\_seq1; 346 134 1123 LEN=1446; translated  
MQHQELIHD TCTIDATPPLRRIE IYPPHLLAQKLN RAGYLIT TGDYDGSIAL LTKALKL  
TEENVAADKSMQACCKYCGLESILGMSTDSRVSILESEKEDCTGVTADDFQQSACHACE  
RDEDMNYS LGEDFN SFG LHGHPQKSY PASPSAFE ERVGFVYDRPFLVNKNSIEEGHFMGI  
TSLIILVNLALAHHLKAVSSSYANSR SILLSSNMQVLRQALQLYE IAYQLHNDYIQKP  
TKTLSTAQPEDCNRNIGSLRFTMILSNLGEIHR IAGNAIKHKMCLEHLLSAIMYMVDCN  
IIMNSAEMDGFYHNVIPIMLTDNCAKAA  
>comp5926\_c0\_seq2; 153 486 848 LEN=1135; minus strand; translated  
MKRHNYATGSNKG RQFPDAAHLPTKTPKTGSI AVDWFGWITWLSYHV VLSYHMWERAVQ  
QPIDFDKIGHEYDKNALPGHIVIRQGRYEYHGIIA AFVLDKNDHIRFTIVCTTGSHLELN  
W  
>comp5927\_c0\_seq1; 129 296 1066 LEN=1066; translated  
MKSSSFFFTAFFSSFLSGVVHAEYDQGLVSDG SFLRRGLQAPLPTCTPMGVSPYEYTVY  
TKISYEGVDFDFTNLTVLTQLED SFKTSYNSF IGCQTVSANAFKILGLTLVLG SNTTEKS  
FLIGSSIRSNAGEFECTPAAP ELFSNATHPQV LSSPND C SCKGPTSTIMKNGYNIAIHTG  
DCPQNI TGVKQLCMGACTENTTDV TYTNELVSI PCNLGTDVQSTPSKSPTKRPTKRPTKR  
PTKRPTKRPTKRPTKRPTKRPTKRPTKRPTKRPTKRPTKRPTKRPTKRPTKRPTKRPTKRPTKR  
>comp5927\_c0\_seq2; 93 1 387 LEN=749; minus strand; translated  
GSLGSLGR TFRWPLRGT LGGSLRGT LRWTFGWSALDIGS QIARDANQLIGIGNVGGIFG  
TRAHAELFHTGDILRTIASVNRNVSVLHDGGSGALARTIVGTRKYLRMRRIREQFRGGG  
RTLKLSSV  
>comp5929\_c0\_seq1; 802 107 2045 LEN=2063; translated  
MTAARLLL VVFLAATTPTPVASAGSGSHDESDCLPWIAPSYITEQAATIPKFLFAGRN  
YEQNSTLPLSELAIPLVDFDFEDFTRQRAYGAQV LALMENFMWTQEKIGSMWEGYFSSPAV  
VPGVGILANYHSTYSNADFLHASMLLRETGDEF PKAGEASPSRGAVTPYFNATLKATQNI  
PAGMEIFADYGEVWDGNFTENVFQDKIHR YDYHLADEMVKKLV DLYEKHPDMSLDMQEDV  
MDFLIAKVLTTVAGPNAKTIESLIPANPRK LKQIQDMGGTFMYRYRDMVRSQEWLE TNGF  
CLDTIRQEVSKIPDAGRGAIANRDIKKGETITITPL LHIADKTLTMYPVDEEEEFDEE  
NGPIGKQLLLNYAFGHPE SNMVLVPTG PLVTLINHGGSKASNAKLEWAGEGDVLSNPGEF  
FSYDVDQMAEVEDTVLVMKV VAKADIKEGEEITINYGT SWQTEW DAYEERWKQNRGKPH  
PLKALDLRNSYKNKPLETGESLAANPYPENVPACFLYVRQFPDGRQMVHQEFGTEMNQF  
ESPTRYEDYDTSVLYIVEVLD RREAPGFFYNYTVRASLG PETNDFADIHDVPHAACTFFD  
REYSSDIHLEGAFRHPIGLPDNMVPLAWRNIVGSHTNQC GAMQSN  
>comp5930\_c0\_seq1; 1076 119 3104 LEN=3104; translated  
MGAPVEKAAAGNGKTSNKVRVVCIRPLAKYEINNGSKSIVTRVPGLTVDGPETLQIEES

HDGQDSTRFYELDAVL DGESTQKD VYEKSGARKAISED LFSGYNATILAYGQTGSGKTYT  
MGTAQNTVDSTRDEENDGVI PRACHDLFNTIRERC DGQAKVDCSYMEVYNEEIRDLLIDS  
EKNGGPKQDLRIRETLDGQIYVRGLTERTVTSPLDVYKIMEEANKRRVVAFTKMNASSR  
SHAICVLR IKGVI VVADENGNPNAGDDGVSRTFEAKLTLV DLAGSERL KKTQASGGRAKE  
GISINKGLFVLGQVVSALAERGRILSEIEEQKLNKPRKRKVLPPRKPYPYRDSKLTRLLQ  
DSLGGNSRTIMVACCSPADFNVEETVNTLRYATQARNISNTATANLVETISQEEARKLKR  
DNTLLKQQIADLESTISKLTQQVTPDDLERSMSILQQEQNFHQHQQAAAERAKRRMTVA  
IVEEEEEEESSSDESDANSTDAAGLDRDTSRHSNTSSKDGKKLKNKINLEEHFERSARL  
NDERSDDEGSLLADDIFDNRDKPLYERPKRSPKRSGGGAESVHSVKTIDEVEEDNVELEA  
RLLLAERDVRATAFDSAVVLPALKRVRKQLED SLDES RWIQSEAEKLKEELVQTKSEKES  
AQKAAKQLSEFMKKQKQDLGFQGNEVMMNQLYFCRHKL NEDWVYLVVIIVKYFKEEMRL  
GDYFQLVSKIVDSPDVLG LLGTLNGKMRNDKLNAGKGWWSKEQKAKELETVEAEKRLR  
NDMLRTHLQFFNERLEEVEDHVDYRSQSLEDILEVLTLERAVLQNEFESDEEVHDIQDLF  
LRKGRKLLAELRVLMTTEKPF IKDNGNAEEKEEEEEEEASGIDEISRSAIGSTKKKKKVLNQ  
EGKEEKVQPREDEKETEPVAEVEKAKEVAEEVIDRSAPL TESLTPSLSGSASDS  
VSDTDSEESQLPAIAEEKESESVEEEEEEEPEPVVX  
>comp5931\_c0\_seq1; 692 238 1939 LEN=2613; translated  
MVGPRCSAKPFSSVLERGQFGFPWNSSVREREKNQQQDKKFLVDES GTVGETPPPPPETV  
DALSSLAQTILALLSGDEDSAKALTGTAAEKRELIEQIFESYDACSGTLSVEEAHSLFI  
DLSRSIVEEIIADSPSNDTAAAHSTGNGSDDSNEGSDDSNEDQHRGRIQQGEVARSHARRV  
LDADENGTHTIERVATKLLLLADEHDGKISLTELASIFDTVQKAQSGDIDTFPQPLRAL  
AGSLQLLPTEGTEVAEAAAGKALSWHIGVPGDDHTLRRVELERGLSIVGLGRSADASTYF  
VPELGIVFDAGFHVKSLRPKTVLLSHGHRDHIAALPVHAADKAKIFAPGKLC SLIERFLL  
AEAQLNYGDETTDEETIAALGGFDVNPVSDGDEVLLPRGSYTGSPKPLGVQVFSAPHKN  
GVPVAVAYGLYKAKARLKEEYASLPKSELGELIRRDVQITESYNQGLLFYTGDTTIDLLRE  
RYQEILPKYKHIIEHVTF LGQPSSSELDESTRRKGHTHYSQLHPWICAFPETTFV CVHWSL  
RYSREDVLDFFDHQYGGV PKNVVLWV  
>comp5932\_c0\_seq1; 287 114 782 LEN=939; translated  
MKLLSCLLVGFKWQQRSQLTPNTFYVGGQKGTSTGTFQSQLASSSVSVEDRNEKLSKVLS  
TAENIGQVGYLASEEDQLLMEEVAKEAIPFSLDKPGRFQLKGEHQLVYSAE GASSGRVF  
GNVVGKVSQLFEDDET FYNRVRFGPLEISLRAKREIKNDSTIKVTFLETSFNLF GKTLKK  
GEVSGGGVWKV FVGEVEDEKGGKLV RIMETPSLFILEQDL  
>comp5934\_c0\_seq1; 242 200 793 LEN=1180; translated  
MIVMVGAF TTSLQQICLRNVVSQVNGFNPMYMTESRCNVVIRQGCSEVAVEISSQTRE  
ANAASNQFLLDRRSYLTFLGLAASAAAATWSAFAQPSSAKSYSENAKNLERINNGDYSGGA  
VFDNNPSTERGKKRRAMTGCKT TLSREEASNTILKR SKMLSEKECNQMMAGESEFMLQA  
LRNLDCPTCANGIGRTN  
>comp5935\_c0\_seq1; 378 158 1168 LEN=1566; translated  
MRLQFSLLA VGALSAILDHSVVSALSVD SKSLRTSQNRLFQPHAGIAPSTLSQKAVTKAS  
GSSSQFMNYATVREPIRMPSTTPMVPWKPPNSDRAQMVDINSAMYRDGTLMISR FIDEEA  
ANEIIA ILLWMRSESSIP SLSLYFNVP GGLLR PALAIYDLIQQTKEQGVEIETCNLGLCT  
GMGSFLCAAGTKGMRRAMPNSR FLLQRMGLDKPVRGQATDIVLEVKNIKMWNDRC EKELA  
KLTGQPVERIQEDLKRDFYLS SDEAVQYGLIDEVLM PAPARRAASKEFAALGAFEGEEEQ  
KYQGREAAEGGGWGSQQQASPNKKDDDDDGPKIAKG  
>comp5935\_c0\_seq2; 286 1 782 LEN=1180; translated  
XNANGVANLPLQPPNSDRAQMVDINSAMYRDGTLMISR FIDEEAANEIIA ILLWMRSESS  
IP SLSLYFNVP GGLLR PALAIYDLIQQTKEQGVEIETCNLGLCTGMGSFLCAAGTKGMRR  
AMPNSR FLLQRMGLDKPVRGQATDIVLEVKNIKMWNDRC EKELA KLTGQPVERIQEDLKR  
DFYLS SDEAVQYGLIDEVLM PAPARRAASKEFAALGAFEGEEEQKYQGREAAEGGGWGSQ  
QQASPNKKDDDDDGPKIAKG  
>comp5936\_c0\_seq1; 298 1 656 LEN=656; translated  
XQEQEPEQEPTQSGSNAKANAKANAKTKTKDGAEDHQVSVPTQTFSKWSFAERLSEAFCE  
GIDHRFSCGVGRGMEVYHDYDDKGHAQD DSILGNDGDAKGSKEQEGDHGISGFRLAKQL  
SSDSSAAHGDDRPSPAEPYSTNQIHRHKAFVSEYHKTRRATIHIRERERKETDAACASDS  
KESHLIRTQNDTTQGNHRGWGKASTTIIASNSTSESASNT  
>comp5937\_c0\_seq1; 361 61 642 LEN=1975; translated  
MSEANA AETTKAPEPVAPAPAPAVVNT PAPAPAVNT PAPAPAVNT PTPAPAVNAPAPEK  
PADDAPAPDGKPAEDAPAADKPVEDAAPVSDIKVGSRVAKKFKKRNY YGEITEKWTDDAA  
KAPRWHVKYDDGDEEDFNEKELARAVRLYEKVKKNDQKINPRKPRSTPTKRKSFDGKPPP  
RSNKYPKRKSTGK

>comp5938\_c0\_seq1; 380 429 1793 LEN=2351; translated  
MLRYPFQONQNSTYSDRIPSLPHSAIKTKNFNHNLQAKTNMPGLHFYFHDNHDYHFSNNGS  
KMSLGMKRFCKTCDDDAGRHITKSHSSVFLNRNIGTRLSDPVQEFALPNNSHRRGLFDSI  
SCDRKLNLDILATVSNDDNDPMFFPLTDLKDSRLNVESSQTWIAGGRSPEFVDLDSRSFP  
PASSHLRFLFSKDSTRIDSTTSSSTQLKPKPSTYTSARINTDETTNPSLRKGNIVVLFAS  
DTKKNHPNVKNKATRARFSSHPSNVSRKPATSSSTRHKHWTREDEILRHAKAKESRGKIF  
WRKISEQYFHGTRSAAQCRVRWNNHVQPGIVRGKWD SHEDQIILQMVSKGCSWKRIADKL  
PGRTNENIRYRFINKLDPKPKKTAWTKNEDDILFTMQRRIGNKWAGIAKFLPGRSDNGVK  
NRYYNKRNAFLRKTRLPEKERNGSDETYSSWEPV  
>comp5938\_c0\_seq2; 176 1783 1962 LEN=2520; translated  
MQRRIGNKWAGIAKFLPGRSDNGVKNRYYNKRNAFLRKTRLPEKERNGSDETYSSWEPV  
>comp5938\_c0\_seq3; 331 429 1877 LEN=2435; translated  
MLRYPFQONQNSTYSDRIPSLPHSAIKTKNFNHNLQAKTNMPGLHFYFHDNHDYHFSNNGS  
KMSLGMKRFCKTCDDDAGRHITKSHSSVFLNRNIGTRLSDPVQEFALPNNSHRRGLFDSI  
SCDRKLNLDILATVSNDDNDPMFFPLTDLKDSRLNVESSQTWIAGGRSPEFVDLDSRSFP  
PASSHLRFLFSKDSTRIDSTTSSSTQLKPKPSTYTSARINTDETTNPSLRKGNIVVLFAS  
DTKKNHPNVKNKATRARFSSHPSNVSRKPATSSSTRHKHWTREDEILRHAKAKESRGKIF  
WRKISEQYFHGTRSAAQCRVRWNNVNRSTFDXLSGEEGSKLTIFFLLFLLKALQPGIVR  
GKWD SHEDQIILQMVSKGCSWKRIADKL PGRTNENIRYRFINKLDPKPKKTAWTKNEDDI  
LFTMQRRIGNKWAGIAKFLPGRSDNGVKNRYYNKRNAFLRKTRLPEKERNGSDETYSSWE  
PV  
>comp5938\_c0\_seq4; 303 737 1878 LEN=2436; translated  
MTLEDTSLKSHSSVFLNRNIGTRLSDPVQEFALPNNSHRRGLFDSISCDRKLNDILATVS  
NDDNDPMFFPLTDLKDSRLNVESSQTWIAGGRSPEFVDLDSRSFP PASSHLRFLFSKDST  
RIDSTTSSSTQLKPKPSTYTSARINTDETTNPSLRKGNIVVLFASDTKKNHPNVKNKAT  
RARFSSHPSNVSRKPATSSSTRHKHWTREDEILRHAKAKESRGKIFWRKISEQYFHGTRS  
AAQCRVRWNNHVQPGIVRGKWD SHEDQIILQMVSKGCSWKRIADKL PGRTNENIRYRFIN  
KLDPKPKKTAWTKNEDDILFTMQRRIGNKWAGIAKFLPGRSDNGVKNRYYNKRNAFLRKT  
RLPEKERNGSDETYSSWEPV  
>comp5940\_c0\_seq1; 229 141 752 LEN=752; translated  
MPRSPLPGTQRGKDLVCSLVGSIEKANTTVIHGRRGRSPYGRVAMEDHDNDEDDKNTNGT  
VEADEQGGHGIARTPRHDPEDYRNFCEIDCDDIDYGDASDDNDEMLRPALQAPFPSSDDG  
CDCFARHCIHYHPQSPTPPQNYICPLTLQIMEDPVRDRCGHVFERRAILEWLETTSASND  
GQPAICPISRKPMIQAHAYSSSSS  
>comp5941\_c0\_seq1; 212 106 315 LEN=665; translated  
MDEQAVINAFKVFDADETGVKVISEEIVEALTTYGEMSTDEAEKMIKDAGGKSSFDYTKFV  
KEMNAKAKG  
>comp5942\_c0\_seq1; 291 271 1368 LEN=1809; translated  
MSTVITLCATGVAMGVVHVLTPGDHLSAIATLSVNAESRWRAAGYGIRWGIGHSIGLVLV  
ASIFIGLENSHPGRPDSSGSENDDVNDGTRRSIEVPERIESMAECFVGGFFMLGLGCYSL  
YQHRKRDSIFGHHHHYHAHFLPRENESTSQERSDHPFGLGEGVDEASHNVLPNNAAG  
EEVDDEERSFNSRARDQPHRPMEAMGIDDSHASFYDQHDHESHSPSLSKQFLALCVGIVH  
GVAGPGGVLGVVPAVKLHNLWHSIAYLGSFCASSIATMGGFAACYGAVSTRLSNAGSSPG  
LYDSVEDSDDGDASTDNNSNDDSGNREKFFTTAYRIEVFSASLSVLVGCTWLVLVLYFGIL  
HDVFP  
>comp5943\_c0\_seq1; 219 411 1661 LEN=1792; translated  
MASSDDSVGNIGPRRRRISRNPSEYVHRSSCDRDTNVTIDTLGSVSSNSKSETDFALAPS  
LAQRLVKRTEARVSQVIASSEYVRKNCTLNHI PRFERDDFVLGNLIAFGGF SNVYAITHF  
NVESELTEKPEGIKKFVIKHLNPKLALNPKKLVVGA KDLVMEAHFLSAFDHEHI IKLKG  
WSAAGIPGFSAGRADGFFLILERLSITLSKRISGWREEEKVRKTLTKGRQAANKLLNV  
RLKAAIDIASAVAYLHERRILFRDLK PANVGFDKQGLKIFDFGLAVEIPYHEDPEATFK  
LAGNTGTSRYMAVEVIRKETYNLKADVFSYSILLWEIMALTKPYDGLLGPQVKETVSLFG  
ERPSVPKSWPTAIRRLMRGWSETISNRPTMDVVLETTLTKVHDASSKTSKILLRT  
>comp5944\_c0\_seq2; 140 1 216 LEN=398; translated  
AVNNAMGTANDAVSNAMGGVGDILSNLKD TNETDTEADAIMDEAEADESSSAAYGMLAGA  
VFSVLATVVS L  
>comp5944\_c0\_seq3; 116 396 536 LEN=536; translated  
MFRLTISKVFIAILAAIASYSGANA AVEEALGTASEAVNNAMGTAND  
>comp5945\_c0\_seq1; 380 103 1484 LEN=1721; translated  
MNF SKLSLVCLALDSGSRFVQVQGVANKNPV GKWELHSLSDAEIEVSDSDTPNTAAVETE

IFYEGLFADGQDPIVEIYAGVETGAPCVTGTTPATPLGETTPSLSVSFSTADTNDHPDLVE  
NMVTSNGDIGSVHIHQTLTGEDNPFWTPYKDDRPDVGTFMCECXDIKHSTTVPYPCRLL  
ILYCSFCLSFATSYRFRVGNTHLVFLLLGVRVCKKLETRYISYVDSLITVRYDHEG  
VFQSFASIDVEEISSTNEYVRDEFNSVPVEAFPCFTTGSPIQETYKPGQRFSCVVRPGE  
DDLQNGFGVSGFQEVTCAKESQIVKEGSYVAAITSVSSDSDAVDFLDKEEVAVGPGTAVL  
TTTVLPTMVSGSGSMTCTGVVELTFTAPGSRDLSPVGRRLQATDAGVGESTPFSVSIKVS  
EEKDWSDAFASPAAGNFEGSDGLVVAGAATTAAVVMAAAL

>comp5945\_c0\_seq2; 433 103 1332 LEN=1569; translated  
MNFSLKLSLVCLALDSGSRFVQVQGVANKNPVGVKWEHLSLSDAEIEVSDSDTPNTAAVETE  
IFYEGLFADGQDPIVEIYAGVETGAPCVTGTTPATPLGETTPSLSVSFSTADTNDHPDLVE  
NMVTSNGDIGSVHIHQTLTGEDNPFWTPYKDDRPDVGTFMCECXDIKHSTTVPYPCRLL  
ITVRYDHEGVFQSFASIDVEEISSTNEYVRDEFNSVPVEAFPCFTTGSPIQETYKPGQR  
FSCVVRPGEDDLQNGFGVSGFQEVTCAKESQIVKEGSYVAAITSVSSDSDAVDFLDKEEV  
AVGPGTAVLTTTVLPTMVSGSGSMTCTGVVELTFTAPGSRDLSPVGRRLQATDAGVGEST  
PFSVSIKVSEEKDWSDAFASPAAGNFEGSDGLVVAGAATTAAVVMAAAL

>comp5946\_c0\_seq1; 266 1 1368 LEN=1474; translated  
HLLGALVLLSLKASVASRQSPAASNKGFTFYRHISIQTMKTLITAVLIFLACHHLTGAF  
PSQSAIQAPRKVTRQSNYGPPTTAAFNFRWDPVQLGSGSTFVSTQLLSSASDNTGDGA  
KQENEAENRDLTILATLTSAPFFVLGGALLAFFRPSLFLWTKGDLITLMLALVMWGT  
GLTLTKDDFTVVLKNDLVSPVGVLCQFVIMPMTAFTIGRTLNNASASHGSALFLGLCL  
VGCSPGGTASNLVSLIAKADVALSVMLTSCSTILASIAATPLLKLLVGSTIAISGWTLCA  
ATARVLLPVLLGMLVNAQAPKLASRISRFTPFASVLLVALICGGVVAENASLLASTSGR  
LIPLIVSSVLGLHSIGFLAGYLVPRRGAGFGERTSRTISIETGMQNSALAVVLLARSIGAP  
SIASLPGALSATAHSCMGSILAAAYWRGVDKRKKGN

>comp5947\_c0\_seq1; 389 91 1728 LEN=2024; translated  
MHQRKPLEAEAGPRTAGLSLSGSSSGSFASETNGSSSARQRHAHSSSGSLSRSPGERARK  
QRILALHSGRTQWSRFLFLGLWISIGAWGLVGTWVLEVRRELLDGGADSNLRSRPIQGT  
KTALRWPGRPKPAEAFQRISEAAPECYDLEDPEITLTLVTQVSHDRLLWMEHHCDRVRVT  
GPEDQRKQQRMSIAVYSNATKGEIVDELEAMGCGVITNPESSDATYNEVGVEVSVLSAR  
THGAWNNYPVNELRNLALSRRVTRTHILYLDVDFWPSDSLIEMLLGDDEGNGPPSPVQQA  
LLADPRQALVIPAFQLWRQCAEWADCRGENLPHMEAARTLHGLAHEVKTYKSVSIFDPTN  
VGGHGSTSYPWFQRQAPGSVLPIDCLQSNRYEPFVVVRYCRDLPPFQKAFAGYKGNKVTW  
VMHLVAAGYVFRQVGGTYLIHYPHLDSASRQHWNNSGKKKEPGEEEKPPGESSGNSERN  
SRSGGNSKRSRVDHLFVEFKDWLADTIPASDRRLPLCDDAQDDDGKLVVDHHSKRRQRH  
SGDDG

>comp5949\_c0\_seq1; 683 128 1426 LEN=1451; translated  
MTRKSSIVACLLFLLGTSTAAAATPPVVVPSVTHHTGKAAAQHQSQFQHPHDALSEHVQE  
WVSSRGQTVNEWFGVPPANAAEASGPPTKNEILTLQKAAFAFYGTQRDPEALPLLDES  
KAFERQPADERAGLYRVRGDCKMALKDPVAAVEDYSMAIDLKLPKPAKADPAELPAST  
LGRARAIRSLGARATPEQAKSAVGDYKEALILNSRDDWDTEAEQIEDGAKTNPYAAWEYG  
MALRRNGQYEEAKAMHTFTSDLFDSIGDRPRSVISLLDAGVDAASAEAAAGSASKGGEDAK  
SLLKRAISYTTTTESRDVSLLRVVAKEGEGRIVLAAIEWADKDKSLRADAKEKELSTACE  
RLDQLEQDALSRGRKAPSSSTSTALAVRFNIDDYPGALETSCSRITKNRDFQRDRLELPDL  
LQEKIQKLNQLK

>comp5949\_c0\_seq2; 342 1 909 LEN=934; translated  
XFLMLRLDLVPRKTLREKIIALQCPEFTTRADTGSFFFMYKSMNGIRKTGRARAIRSL  
GARATPEQAKSAVGDYKEALILNSRDDWDTEAEQIEDGAKTNPYAAWEYGMALRRNGQYE  
EAKAMHTFTSDLFDSIGDRPRSVISLLDAGVDAASAEAAAGSASKGGEDAKSLLKRAISY  
TTTTESRDVSLLRVVAKEGEGRIVLAAIEWADKDKSLRADAKEKELSTACERLDQLEQDAL  
SRGRKAPSSSTSTALAVRFNIDDYPGALETSCSRITKNRDFQRDRLELPDLLQEKIQKLNQ  
LK

>comp5950\_c0\_seq1; 189 1 1223 LEN=2016; translated  
XMTDPRKGNIDIVLRNOKILLVRRPNGLPQPEDFRLEQENIVVSDAKLNDSDDRNSLIVLE  
TLYVSIDPAMRGWMSTQRSYLPVPLGSMVRASTVSRVIAAPRALERAFVPGSLVRSEI  
VGVQSYFVMEGYSEARARKRLTRLEMASIPRSTGLSPASHLGVLTGTGMTAYFGLLRVGE  
PKPSDVVLVSGAAGATGSIVAQIAKHVVGCKTVIGTAGTDEKCAWLEANGVVDVAINYKT  
AGSSLSRAIREASSPGKHNAKRAKRMQGGVDVFDNVGSEFLEAALGNLAEKGGARVVL  
GAI SRYNQTGASAGASNGPRNYMNLVRRASMKGFVVFVFDYKKEYPTAIRDLVKWISDGKI  
RCYGEDMRHVIGIQFYPALLSLFRGTNTGKVVVKVNEENAVASRSL

>comp5951\_c0\_seq1; 224 389 760 LEN=1239; translated



MGGFVEVNETAEDAVKRELAEMSITLRSPTLVGIYSDPRRDNRRTASVAYAVHVAAD  
IRPHAGDDAKEVVKIPINEIVDYEFTHDRTILLDYRSSLRGEVVEDHSTEGDFAADIQR  
STC

>comp5951\_c0\_seq2; 224 389 760 LEN=1102; translated  
MGGFVEVNETAEDAVKRELAEMSITLRSPTLVGIYSDPRRDNRRTASVAYAVHVAAD  
IRPHAGDDAKEVVKIPINEIVDYEFTHDRTILLDYRSSLRGEVVEDHSTEGDFAADIQR  
STC

>comp5952\_c0\_seq1; 450 178 1617 LEN=1662; translated  
MKFSGSFVLAACIFATVADTSFVDG FVPLSGVKTPSLSTRLHYDIQRDPQPNDNVWAILS  
NTEKWIAN TLADAQTGNSNPLSRKEVSVCETSNDPAMILANIFRKVKEARQLGESHAQD  
QEALIDEKGEDKHN RITLRQTQVLVIPANEELNQS FHFVDAVINAVNAAR KAARDLVTDH  
SLEKLDEQMYGEAEDRDWVSVNCAHLHPEY GKKTPQQELKEMQEEEEEGEVDLNLKEYK  
RQRILARRSPYPSV VIEVRSMAPPEFAPPPSPGPVSPKSID EIDVESEEGESSGAADDK  
IDADV NKL EALFSKSSLDSDRTEEGDFYESIGSHIETFSSVTPLMVAQN WINKNDASFE  
ITQCAFTVSDATYVDEAYEFVFTNLGMQTSQFLESTGSTGGAASKAQAKDVQKRQYMVLP  
HFLSSSATSLEKFTTQATEI IRTLPSISDKVELTCFHPEAVDEGKRC PVPVIVLQWKGD

>comp5952\_c0\_seq2; 367 178 1782 LEN=1827; translated  
MKFSGSFVLAACIFATVADTSFVDG FVPLSGVKTPSLSTRLHYDIQRDPQPNDNVWAILS  
NTEKWIAN TLADAQTGNSNPLSRKEVSVCETSNDPAMILANIFRKVKEARQLGESHAQD  
QEALIDEKGEDKHN RITLRQTQVLVIPANEELNQS FHFVDAVINAVNAAR KAARDLVTDH  
SLEKLDEQMYGEAEDRDWVSVNCAHLHPEY GKKTPQQELKEMQEEEEEGEVDLNLKEYK  
RQRILARRSPYPSV VIEVRSMAPPEFAPPPSPGPVSPKSID EIDVESEEGESSGAADDK  
IDADV NKL EALFSKSSLDSDRTEEGDFYESIGSHIETFSSVTPLMVAQN WINKNDASFE  
ITQCAFTVSDATYVDEAYEFVFTNLGMQTSQFLESTGSTGGAASKAQAKDVQKRQYMVLP  
HFLSSSATSLEKFTTQATEI IRTLPSISDKVELTCFHPEAVDEGKRC PVPVIVLQWKGD

>comp5953\_c0\_seq1; 215 91 534 LEN=1446; translated  
MAEQFFQKVADDVDA AAEQLWSIFGAGSAEQEDKADATGGPGADSGSFAHQFDFSDTDID  
GLSDEEIQRLLGEE MMRNNPLQDIANDVTQNI VAGQVRNTRKRSQDGGKRSLEGEV TMRG  
IILQQKHERNRSRPLK SGLHLSNDRCC

>comp5953\_c0\_seq2; 369 91 846 LEN=1238; translated  
MAEQFFQKVADDVDA AAEQLWSIFGAGSAEQEDKADATGGPGADSGSFAHQFDFSDTDID  
GLSDEEIQRLLGEE MMRNNPLQDIANDVTQNI VAGQAQPQSAREHFDAFRSAINWSEK FV  
IGLVCFQIVMFL LCLYFSKDRGLAPRISLLVFIGIVVRAAEWLNSIGADHWESFATQDY  
FDKKGIFV GIMLCAPLLLDLSLMLLFFMKEASTLLVQV KRNEIKQKQKKS SDDGKKEK  
VGGRTKTKKQD

>comp5955\_c0\_seq1; 771 1 1702 LEN=2171; translated  
XQQQQPSQLQTNNGGTDANGVPK TIAAHTHLELSDPDGSR LRAFYRLSVDELFGFPPTP  
TDEEYCARLNIPGM TPRMIPGTHLAALSAARFAEVALGAI VHNEAPLAMELCNAV VHCLK  
ESVQEPVQPPYMF EVARSYFLLAVFRAF RGD TVRYFKYRRVCLTYVSKLENATSATTLVA  
AVSFLDAWAYMIYNADEKKVPR IDTSIPPVERPPQSMLARPTAVEMEYNVRCNPACIASD  
PRNQNW IQGAPPVFLNNEAPLRARSLDALACAVRTCCDQANGRF AAISKEAKADNMEAI P  
QESIITPTTTAVLAH ENELCSRNMVLSGFSLEQYEQVTPNSHKNQGMHLVMSAMDAFLD  
NGDDGEGGFTDSQIQSLLSVANIV IENPLLLHHAGPTYHMVSNAAVMLCHLLNSMYVMK  
GGAEGIRKDQELGGGMEAMFE EILDFTALRKL LVIHRRKLP I KLRCHSIPRPSLVAFE  
NGKPFVDLGETLLCACRGCQGFVLMACSPVVAQAQAAATKR SVEAAREAQVEAADEL D  
KTLDDL SHDFNLDDDALLGMLSQLISG

>comp5956\_c0\_seq1; 408 100 582 LEN=683; translated  
MFSRSSAF LRSQVGRMLRNAQQQTHQSQRSMGGGGAYMQTNEFGERLGEAFGTIAWLW  
VFWRFKQDGKVL LGMHPWDHGHSGGDIY GSELRVQGLTHQFQVKKQTEEEMI ANWDKFN  
EKSIVPGE DDDDDDDDDDDDDDDDDDDDDDDDDDDDDDDDDDDDDDDDDDDDDDD

>comp5957\_c0\_seq2; 598 149 2005 LEN=2402; translated  
MRHQHSLNSRREYRGGWSTSIGALLDDPNRKSNCALTC CGIFLYDRTNYLV TGNRPNW  
KRRRTTHIRIPL LILITIAISGMVSTCDDFDNCTSGGLIVFFLELFFVGYLIFL CCLGG  
KNHGVL RQAVHQMRDQQLGGSEEQQTPTDI STNRKPLGCCSCYPYDVVLSVNEGDDPDD  
ADDSRGSKGMASPD LSTCLFRAWSSFCGALCQCWCQCCGMCAIGQEDRELELILEK DGN  
SAALHIDYITFPYSEYFP AIRDLQNSREGSFAKHLALSDLSKRILRYAAFIVLLYCAL  
FIVSQEHYGIKIGVALGVWAQPCVVLYFVWWRWNRFDISLDAVIKYFASGYLIGMFQALI  
VETIIFIPYAAFMAIGIAIEIRGEV GQDTVPATYLT YFSDGKNTAQMMKDYWGLNAIFM  
FVLA FVIAALVEEIVKYYCYWTLETPEQVGRQKSKLSQANYITIGMVS AALGFACKENM

QYVFQSKNVRDEILTLVLRSLAVHPVCAAIQSLGVVKRDIQGDPSSSLGRILFPAILLH  
GLFDFVELLLSYFFAIDMLNTKGTLDSENEGVVTTVGVGVIFMIVGLTYFYFCRARQQRNEL  
ALSDFSEGTSSLELNPIL  
>comp5961\_c0\_seq1; 202 183 884 LEN=1616; translated  
MRKVVSSFPAILGSFVFFLLWLAVVALLGNQLCGLSVHSFAWTAPLRVGAVVGIPTTAE  
AATPTTKNRTLLGVPPALSATTDSDIDYQSDAPTFGRGEYHLSAVVEEGDTPVYRTGSWYV  
DGVLVGDAGEGAAPSYELCRIDTIQVWVTHNCEHGVLRLGLAVGADTDAGENCSSVFLFK  
EPLLEDVEFGPEQLIARIRGVEWRKSVGEGEFGTGPVSLHESMWKENDANAIYD  
>comp5962\_c0\_seq1; 264 1 1239 LEN=1770; translated  
HDDTTGHFEGRDGCVVADRYRILREVGVTGFRVVECLDTKRRRGTRRGRGDGDRGCRPR  
QHCGGGYSCNSDRDRDESPGTIVAIVKIVRNIQRYYSASAKIEADIVEDVNRKKGKRGVTHCA  
VLYDFTSFRGHYCMVFESLGPSTLYDFLKGQNYHPFPIHCVDFDFARQLLETLEFLHSFRLI  
HTDLKPENILLVDGRTISQRGGHSIPQSTRIKVIDFGGATYDDEKKSIVNTRQYRAPEV  
ILGVGWSMPSDLWSIGCILAEELYQGELLFATHDNTEHLALIEKVVGPFPRAMLKATQRE  
VVGAEAFGANGAHKMERVLPADQLSYVNKTPPLESIVATHYEEDAWLPRLLRRLVIDPNE  
RSTARDACGISGSRSGRPGTGEQSTSLSNAAILVSGSGWDVGNEEHARKMSRH  
>comp5963\_c0\_seq1; 197 1 460 LEN=639; translated  
XVHQGVHQVQKQEHHTRRRSKNAAEARASSLRKARLLYELLSAHTASLEEHEHERERND  
PSSNYNRSRFRMALSNNLARIYGLIGDVTLEERRCLGDLLSTILVEHARTANGAGATGNT  
TNNSNTNSSVGCLEGLSSASVLWVDPQAGAA  
>comp5964\_c0\_seq1; 319 1 699 LEN=2428; minus strand; translated  
AVTMEAFERKRAILQALERCATDEDNDTSKHATWLLANLDQINRTLKAASMLQVLYGSL  
YGSPVSGTETPEIKREKMALRTELPKTNEFREFMASLASATDKIGEFAFSFLGDGNGDSS  
NKRLQSDFLDSAKLLLIANYLAETSSTLLASGIEKTIYSGMLNPALKSLLDNFVNNCLPS  
TSETLLVGKRLKEESGIEFELKQLGLAVGMLRAEVAIAADESRAFELNNAMA  
>comp5964\_c0\_seq2; 280 1 699 LEN=756; minus strand; translated  
AVTMEAFERKRAILQALERCATDEDNDTSKHATWLLANLDQINRTLKAASMLQVLYGSL  
YGSPVSGTETPEIKREKMALRTELPKTNEFREFMASLASATDKIGEFAFSFLGDGNGDSS  
NKRLQSDFLDSAKLLLIANYLAETSSTLLASGIEKTIYSGMLNPALKSLLDNFVNNCLPS  
TSETLLVGKRLKEESGIEFELKQLGLAVGMLRAEVAIAADESRAFELNNAMA  
>comp5965\_c0\_seq1; 555 168 1199 LEN=1286; translated  
MSGKKFFRMGKQLYRPPVEDDEDVDEDESEDESSDDDEDTKPASASKASANANLSDSD  
DDDDDEEEDDEEEDDEEETKKRRRSASKGSSKRPKVSSFIDEAEDDDDEEDDEPYGTHHD  
PDDVVRKHYTEEDIRKEQMDDEALELMRQQDRRRAQAGGRYVHERSVEEQAQIEEDRHL  
SRTAADDRSLSSHQRREPSSTKMSSSRPGASSARRHSSVSDDRPGGPEATNAVSQQSL  
VPSVNDPSLWMLISCSTGKEQELVLQLMNKCVAAYARQGRPLGICGVISGQSKGRIYIESFN  
EPAVVEAITGVRGLLQYTMRLIPIQDMTTVMTVVPKPKKPGEFM  
>comp5965\_c0\_seq2; 1036 168 2810 LEN=2810; translated  
MSGKKFFRMGKQLYRPPVEDDEDVDEDESEDESSDDDEDTKPASASKASANANLSDSD  
DDDDDEEEDDEEEDDEEETKKRRRSASKGSSKRPKVSSFIDEAEDDDDEEDDEPYGTHHD  
PDDVVRKHYTEEDIRKEQMDDEALELMRQQDRRRAQAGGRYVHERSVEEQAQIEEDRHL  
SRTAADDRSLSSHQRREPSSTKMSSSRPGASSARRHSSVSDDRPGGPEATNAVSQQSL  
VPSVNDPSLWMLISCSTGKEQELVLQLMNKCVAAYARQGRPLGICGVISGQSKGRIYIESFN  
EPAVVEAITGVRGLLQYTMRLIPIQDMTTVMTVVPKPKKPVKKNWVRMTRGHYKGDALV  
VAVRESGLKCIQCVPRIDLAALGLPPEEARIRKTRVPPQKFYNEQEVAALGYADRRHR  
QRFPNMDYMCDFENNNYDGYMLKEVTVGSMVKPCAENKPTLEELQQFRKRNKSANDDG  
NDENEGSKMAASLLDELSELQKGTGFVSSSSNGGIMTGDKIEVVEGDLIGMKGKVMMSMG  
TTIKIKPLDTSLDIGGTGEIEFLASQVRKHIAVGAHVKVVDGRYTNETGTVVAVEEVEGE  
KDFTAVVLTDVTNKEISLRVSQLRESSEQYSGQDKLAGYELYDLVMLSGGGSANEVGIIV  
RVGREDFTVVNNHGISRDVRPEELRGKRNSTSNRAVALDVQGNQMRQDQVNI AEGPHKG  
KTATVKRMSRSLFLYSQTRSEHAGIFVVRSRKCLLAGSRSQQRGAQVGDASPFATPQSQ  
SSRGGPGGGRGKQDLSLIGTKTVRIQAGQWKGYLGAVCDATATHVQVELHSRLKVMVRE  
RVAVVGDKYGAVEDVNQNDMQNGIPTSFTTATPMHGGATPM  
>comp5966\_c0\_seq1; 920 118 3168 LEN=3300; translated  
MKVSSVALAALCLLANHNGCVESSSPSAGIPAATARRSKFLPWTKARVYNPTGGQTVLQ  
QDQEASESLGVSIPLSQSSTLSANDAPLMRDIEMLTDILSDLVLSNPKVHELREFIN  
GQQRSENPNDAILETMVERAKSLSASECLGMNRYISTALSLVNSAEVQHRLRAIRQHEL  
ENKQQLPGPLYHMEDSIKGTIHHLLDTDGVSKEEIFQKLCNQKVEFVLT AHPTEVNRKSV  
LRKYRKSELLAHLERPDLLPHEQLTGTIDLQRIISSVWGMDEIRRTKPTVQREAAAGLA  
IVDTILWKAHPNYLRKLNACQASLGKKLPLEVCPKIFASWIGGDRDGNPNVTPKVTREV

VLHQRLRAARLYLQDFAELESQLAISSKFSPKMIELAKSVPGTFHQRELYRRVISHLRKR  
LVKTADDIEMKLENENLQESDESTASKTLVGDGEVDEEDIELITKSEDLLQPLRVMHESL  
METGYDLVADGLLSDIFRRLKVFGITLVLPLDIREESTKHTNALDAITRWLGIGSYAEWDE  
DARVNWLSSELSSRRPLFPSERLNKMDFDAGVKKTLQVFQTASELEPEALGAYVISQCQT  
ASDVLAVMLLQKQFGMTSENGNMMRVAPLFFETLNDLNNAPERLKTFLSVPAYVGAINGKQ  
EVMVGYSDSAKDAGRLAACWAQYLSQERMVEVAKNAGVELCFHFGKGGTVGRGPNPALYR  
AVLSHPNNTINGRFRVTEQGEMITQNYGSIPIAEHTLDIYTA AVLRETFTKHVEPKDEWR  
QQMERVSDVSCQDYRHLVREEPRFVFPYFRQATPELELQSLNIGSRPSKRNPCKGGIESLRA  
IPWTFAWTQTRTHLSAWLGVGAGLDASEEDLAQLQDMYNEWPWPFRELIDLIAMIVSKTDF  
SVSKNYDDQLVNSEESKLLGVEVREKMQTRQSILDVTKSENVAGHHVALQRASNSIRAP  
YLDPLNVIQAELLKRFRALDQREDDLTTEEMEKKQTLQDALIVSINGISSGLRNSG  
>comp5967\_c0\_seq1; 327 328 1131 LEN=1187; translated  
MTTLVVMLLALPSFPASVIPSVALTTTTTGTAAHLPASTRHSPPLRPFVDSYQTRATAV  
DDASTSERWTLQEMEDFADSVGVVSLTTFGPGYRAVARAKHDESIIMGYVEGFLRPTQP  
ELLHIDKMEIFQPVMDRVRARRPGSLEFGGISIGLGLLMGYRCLLHATAEEESRGRKPR  
IAEFLAIDDEEFQHKRLVRYRYAGFKVVKYVGDEFESIPDRLVWGGCGTLMEQDISVLM  
DKWSSFLDLMKTRAENGTNSTSDEKTK  
>comp5968\_c0\_seq1; 332 159 1638 LEN=1774; translated  
MPGDDNERDCIVATILALGKGEWSDGDVIMEGESETQTQRQTQTQTGAEKYQGKSHRSHR  
RGRSPVLPGVVIRDGILSYRPFRLKVVLVVLRGSAARSKPDQGGGCDPFRKGCFFPAGQNY  
HGDASSLHSCYALTFSTNRGPLRFEVFEEMPYLPPRRRNHESPVFPGERAPGSRFLRGNH  
ATKDGIGNGIGIGCDYDYDAVYRDADGVVVSFCIARFFFEFCDRYGYDYASSSILADV  
SRAGRTPPPGGRTSGSGTRTRPHPHPNYPNPYPRPNPPKNTTVVLCGNTTDVTLAEARL  
SCVVVRDQARAAEADRANPTGSFIDGPGHPFASLARAVTGDGGLSFGVFGSGLGGEPATP  
EGRSRSSFCSGENDDRIQHEHALHWNRLRARVDSYQSASRPGVAHRGSERNAIQPNATQR  
YPTPSNATEPIAIQRNGTMHHATPRHIKKWFLAACCCVLPASAALDSIPHNFVWHESIDR  
GGAEGIPVGVVAV  
>comp5968\_c0\_seq2; 342 42 1518 LEN=1654; translated  
MSDDNERDCIVATILALGKGEWSDGDVIMEGESETQTQRQTQTQTGAEKYQGKSHRSHR  
GSRPVLPGVVIRDGILSYRPFRLKVVLVVLRGSAARSKPDQGGGCDPFRKGCFFPAGQNY  
GDASSLHSCYALTFSTNRGPLRFEVFEEMPYLPPRRRNHESPVFPGERAPGSRFLRGNH  
TKDGIGNGIGIGCDYDYDAVYRDADGVVVSFCIARFFFEFCDRYGYDYASSSILADV  
RAGRTPPPGGRTSGSGTRTRPHPHPNYPNPYPRPNPPKNTTVVLCGNTTDVTLAEARL  
CVVVRDQARAAEADRANPTGSFIDGPGHPFASLARAVTGDGGLSFGVFGSGLGGEPATP  
GRSRSSFCSGENDDRIQHEHALHWNRLRARVDSYQSASRPGVAHRGSERNAIQPNATQR  
YPTPSNATEPIAIQRNGTMHHATPRHIKKWFLAACCCVLPASAALDSIPHNFVWHESIDR  
GAEIPVGVVAV  
>comp5969\_c0\_seq1; 500 191 2801 LEN=2801; translated  
MAAEIGEPHERFLAGDDSSSTSSAIDTAGAGTSVEQHPSLSQSFSFSPVDREKPPPT  
YDFNILQSTSCDSFVYDSYSSSTADFDFDLDPYRKYKRAWSFIMCITGLFDILAYMEP  
NLRHWYNDGSICVPANFTNTSDFIEFGDGVSNLLVNLDTGPPSPWYCSRYMTFLNRLHDY  
NVVIAFVFSLLWFKQSHTKAKEEYHYNATVKEDRIQLLSPTTIETRSSSNDNSNQKSR  
WSQVKCMKMYNPSFVYRRIILRMALLPVGFYIILFQLIRGLMNGKWLRYRELLIDQPANE  
TAYLLLQDPKEYVTIEVSRAHAKMSTIFAIFLYLKYHFLSVTAVAKAELDTHYIPQLRRK  
LVIRAFRNRNFIQRLKTVLKYVRWIKYIIPLVVKNLKLRGNTMAALRKRQFTKAKKEA  
KRQRLQKSIVKTTSQLEDSAAIILQVWRAYRNYMHHRVLKHFQSNKKLNAAMKIQLVF  
RRASLRAQIKLARKRTELQRLIWLNRKIKKLDDEERRRLELQDEFMTEATNTINKRLL  
MRPNTWFSVSWNSLFLFCILVEISHNALRPWLEIPKGEQINNQKYKSMRMFFAESLIP  
IETPACKEFLLKKS AIRRLFRKDHCEPTRKEVMSAFIDEIIDPEYDLEQLRGDTNNT  
SKPVVPWQCSDPVLTRNNWRTIVRLVFSNPISSESPSCQQPEKTLVDIVITRFHQKIDR  
PTPWYCTKPYSSIHDFYRSTWNFVIDQIQIVISVICFLDVFVKFFTGEIDPNTGELRPR  
FFRRWIFPGLLLQLLVNPAIETFSVGFRCMGLGMEIGPVRVFRWCIAVAVPIAYASKKI  
TIAALHEAEAEYDRELAQYGMMSDYSFNG  
>comp5970\_c0\_seq1; 1071 94 3126 LEN=4096; translated  
MEDQLSFLSGCLSIIVIGASGDLAKKKTYPSSLNLFADGLLPKNVEIWGYARSDIGDNG  
RERIRPYLLQSGRHSTEVVENFLSICYQQGSSYGDLEAWEKLNKNSIEIFESSKSSLKAF  
NRLFYFAIPPSVFAETALAIKTSMQDEEKGFTRLIVEKPFGRDLDTFEELNKTLSQFT  
EDHMYRIDHYLGKEMVQNLTVIRFSNVWTERIWNADNVKMVILTFKEPFGTDGRGGYFDQ  
NGIIRDILQNHLQVLTLCCPEPTVAHGPEAGNAIRDAKVHVLNSIPPIKLEDCILGQY  
EGYEDDPTITNKDNTPTFACIRMRINNPRWAGVPIILKAGKALNERKAEMRIQLKDAPA

AEYLFEGHDCPRNEIVLRLQPKAEIYVKTNVKRPGFTSQPLQTEMELNYDTRFFANNKMC  
NPDAYTRLILDVLQGNQGAQFVRDDELRRRAWKIFTPILHQIEETNVRPIKYLQGSRGPIEA  
DEFIATLGFTRNDAYVYNDSSGKAKAVSGAHGKSKFDFSDDEKSEIGLWGLAVMGQNFAL  
NMASHGFKVCVGNRSPAKVDTTVARAKLEGDFPLVGAMSAEEFIARLSKPRKVIILVQAG  
KPVDETIKKSASFMEPGDILIDGGNEWYPNSVRRSTELLNKGIQFIGMIGSGGEEGARNG  
PALMPGGPKQAYELVAPIFEKCAAQVERTGACVGYLGPVGSNGYVKMVHNGIEYGMQLI  
AEVYDVMKTLTSMNNDIADVFAEWNKGELDSYLIEISEICLRKKDDTTNGYLVDSILDK  
TGMKGTGLWTAKESAERAVAAPTIVAALDSRVLRSARKDERVAASKIFGSPMINAVDKDQV  
IADLRSALFASKICSYAQGLSLIKAASNEFQWGVDLAECARLWMGGCIIRAKLLDNIQMA  
FSTNPDQLNLMIDPGFAKEIDAEPAWRRTVALCATSGIACPSLCSLGMFYFDYRRLRERLP  
ASLTQAQRDFFGHTYERTDMPGRFHTAWTDAHKDIGDVAGR TAGENLKT

>comp5971\_c0\_seq1; 383 328 1569 LEN=2813; translated  
MVDDNDNTPLHVACQLDPPVNIIVISLKEAIAQTNSWGATPLHVAASHRCNAEALKKLIDF  
SPGSLSRLSRMNRTPIHYACMSYRGLDLIAFRVLLLEETLIESRRRKEEQHLHYDREKENS  
ECDSKVSFVIDI IKETNENVKKTTEMLDDEEISLLITDNVSRRTMAASPSDSLSTSSSDMG  
KMNTTDQE QDYSIDNGLYKNNSNIIVTWKDTTGKTPLGLLFCRYRERVKRVIEILEQMKSS  
GTRSPQSHTSLQTDLGHLLWGKARLIVVRLSEECNQQLQQRNKEFQGKRDSDSVDEAHNY  
CSSLGQQWLSLAASWSKERLSCYSRVKEEGSDFSTDNEFVEMKSSDNDERQFRIVHASVGL  
TGYGCPPEMIRLAMSIPYQVREMEDEGDLVLRKLFPLTYCLFFSLLVNIDFIF

>comp5971\_c0\_seq2; 418 328 1938 LEN=2707; translated  
MVDDNDNTPLHVACQLDPPVNIIVISLKEAIAQTNSWGATPLHVAASHRCNAEALKKLIDF  
SPGSLSRLSRMNRTPIHYACMSYRGLDLIAFRVLLLEETLIESRRRKEEQHLHYDREKENS  
ECDSKVSFVIDI IKETNENVKKTTEMLDDEEISLLITDNVSRRTMAASPSDSLSTSSSDMG  
KMNTTDQE QDYSIDNGLYKNNSNIIVTWKDTTGKTPLGLLFCRYRERVKRVIEILEQMKSS  
GTRSPQSHTSLQTDLGHLLWGKARLIVVRLSEECNQQLQQRNKEFQGKRDSDSVDEAHNY  
CSSLGQQWLSLAASWSKERLSCYSRVKEEGSDFSTDNEFVEMKSSDNDERQFRIVHASVGL  
TGYGCPPEMIRLAMSIPYQVREMEDEGDLVLRKLFPLTYCLFFSLLVNIDFIF

>comp5972\_c0\_seq1; 214 230 887 LEN=1214; translated  
MPGFRCRNGTFVYTGSTSRASNESTGNEGILVDQPDAAATSPSVDSVEEATRILSEWDKIF  
NPESQGGKQDTEANEILTSSRDALKASVLLLSAAATEERNRDSVMGRCMLGICAPSAEDG  
VAALKAWVTALELPRGLLHGMDKDGVPIDLSGSVYIKYNSGGVYTFADIRKSGLGFDAW  
KPGDALLESYDGTYRGVYFQVELQDGEFRQYLVPDLIF

>comp5974\_c0\_seq1; 394 65 1593 LEN=1950; translated  
MARLRRKVERKQTDTRVGRPLQLLLVGAFLCFMAMNSLDTVMLEIKTAVLDSYQTVAKV  
TYSVTNSSFLQQQQQQRRRQQHTLPPLEELVDSITNSTHPEKSYPCPNGTIVFPDTPLP  
PTENGTHHKIPKIVHITAKSRCVPPNIYKHLKQWEFKGYGLYLHDDTAVHKLLRYAILDN  
DGKGLVPDLEAVLSCVTSGATLSDIWRYTFIVSYXRSAVMVGVLKREKIIDLCVLFVSF  
PSYALLCLGAQCIPLSVLIIMHVDTRPSSNYKSSSGYGGIYTDLDNSPTGFSENTISP  
DAFFPLEGLGIVAQYFFAVSPRHPVMLQSLNSGISNLKKIKHVMVNNPAINTGPKAIIKIG  
FVEFQKAVGISTDGYIDAGTYMGTLEPLRSYQTASGGNSKIDDELYQNRTILVVGKKQE  
SQEYVDRGGLQHHAKLNYMEAHGMPHYHGRWKKYAGVRDQISCKQHIEMQEERIRAQNLT  
LPPAYAPGMEHNEWYPRYHRANYTYGKRL

>comp5974\_c0\_seq2; 489 65 1405 LEN=1762; translated  
MARLRRKVERKQTDTRVGRPLQLLLVGAFLCFMAMNSLDTVMLEIKTAVLDSYQTVAKV  
TYSVTNSSFLQQQQQQRRRQQHTLPPLEELVDSITNSTHPEKSYPCPNGTIVFPDTPLP  
PTENGTHHKIPKIVHITAKSRCVPPNIYKHLKQWEFKGYGLYLHDDTAVHKLLRYAILDN  
DGKGLVPDLEAVLSCVTSGATLSDIWRYTFIWIYGGIYTDLDNSPTGFSENTISP  
DAFFPLEGLGIVAQYFFAVSPRHPVMLQSLNSGISNLKKIKHVMVNNPAINTGPKAIIKIG  
FVEFQKAVGISTDGYIDAGTYMGTLEPLRSYQTASGGNSKIDDELYQNRTILVVGKKQE  
SQEYVDRGGLQHHAKLNYMEAHGMPHYHGRWKKYAGVRDQISCKQHIEMQEERIRAQNLT  
LPPAYAPGMEHNEWYPRYHRANYTYGKRL

>comp5975\_c0\_seq1; 82 1 834 LEN=1178; translated  
XQNTTQTQPTLPHPNHTEDPRQSAWNPDEDPVGEAPDPGARDALASRSCGPLACNAYALV  
CGSTGEEAAVVDPSFSTPCDLGALESFLEAGGATAVTRILLTHGHPDHVAGVSELTKAWPG  
ASLSLHPLEAANYEGAKRMGRDLFGMDFPNDGPLPAPTHALEDGQVLAIGSSIELSVVHT  
PGHSPGHVAFADRRTSRGANQGGSESDKGRGAAGSVLLSGDLLFQGSVGRDTDFHNSLDD  
LYASIRRLYELFDDDSIVLSGHTTPTYLKKNESQILS

>comp5976\_c0\_seq1; 426 110 1234 LEN=1896; translated

MKRTSEHLCCVLYGLLFSTFYICISYNLGFLLWTPKHSIECGIKKNEDLIPPQRSNVLHNA  
NKETNKKYRNPYDETDSEALSFYNDLELIKMI GEGDVSYAF EARYKNQTVVAKIAADDEL  
YFSDIEIDFFRELNAPPSISNIPKLYYAVRSMNPFFAGNQTYLKKDLKIPSN SARRLTK  
KRRISV LVIDLLENRVDPKGLDDVRRMLKSMLETMQFVHSRNIMHCDLHGNNYFWDGNKV  
SFFDWNAAFKYEPNRVPIHYDRAPDQLFPPEAEHNTSSVHTSVYAFDVYTI GRLLKMLLE  
KNCGVTLKLRKSLKLDTSNKSEARSRLLD SALAYELAEYMMIPDPYKRPDTAAALMH  
PFFEKLTAE EQISR

>comp5977\_c1\_seq1; 511 1 1057 LEN=1408; translated  
XEHDEGSSREGEPKPPVPSLGV LGNVAAQEKEGAELLLGDPTRFFVFSGGEGGAGAGD  
ESSKAPYAGSS LGVPVAIRDPLRTGQPQGRVFPVPV GKLKPKDLRTEKEKQRQEREERLW  
AAAAGKASGESDEDMLIAEEDREIGEAI DYEEAHANWDSDEDEDWAKGLDKDLDRDLLNL  
PREFRYNQEDIEAVIERLESRAE IYQSHVKN TIRTMEQEARSRLDRSDTGDDEPGKQEAA  
DSSSSGEDKAPFFDASTAEKLR SVGADVEKYERLMASLTDDQLLTMFALEANSSSSGTSK  
GETEGSEPTATESARTQVFEGIPGLSPQQIAELTELESFIKVAETESSSATN

>comp5978\_c0\_seq1; 389 675 1622 LEN=1730; translated  
MAQKLRSEASLEAEQAEERANIAKMAFEKFDDNSDGKISKEELKAGLENSLKTEISEER  
VQKLMDFDISGDGYLQLEEMVSV DQFRNQLEAFAREEKQLARDAIVEAQKEEEAARMAE  
ARLALLNDKEPTQTDKIVSVLPYLFPLLD SLQFGRFLILDNPENPLFFALALLYAAYRTI  
PFSGFLAFIALNTLSNNPGLNKLVRFNMQAIFIDIALFFPGLIAALVGGLGGMAGIQIP  
AAVNQAGSTAIFGALLLVV TYASISSLLGIKPKDIPLISKAVEDRMPTIDMFDDAGRFIP  
RNERQEKDDEGEKKN

>comp5979\_c0\_seq1; 173 144 696 LEN=696; translated  
MNL LNFGPRSLIRILQSAIVFSV FSSMWLLQRSETSRTLVDVDVEVWRVGLRKGKDFAL  
AETIQKRNVLLSRRLDITETPIQNVIGF PSKNRSELSAPQSAHLQDVLANPEKEKRQEG  
SYAAVTKDQSVDSENEKQMED IAGNSFRDGRKDDVGSSESHIESYEGSSAGANNDRNEL  
VTTRX

>comp5981\_c0\_seq1; 466 1 1339 LEN=1546; translated  
XMASTVTEDDYSKYS AFNETDSGMGDSSSFAIRSKAGTGASNSLADGDFDNSLVVKQRNQ  
QERVFTRDEF LYLALSSPSSIGAMAWILSAFVAVLYGSSVVVLINFCIPLLLGPFVINEQM  
YAQLGLVSLVDTDHSLAMSDMLQALS AELSIFLLIXIFVSLIAIIFV FVKAVRRNYHKI  
RDEANKLAMINVR LKGNLSRLHRQEYRLSAVEVRF EHL CQRSNK DITQMKHLAKRNATLR  
QKLANLA AKKIHNLLTTMLGLDYNGNCTISEKQIDEIAML MKVFAGKNAYS KFD FHEIHE  
EAI VNSLVKNKKVILIPPSIDDT DSETKESEREYNDERSNGNFTEEPDSVQPSFEGDVDD  
STKEEQSLNAPTDEYEDPSVRSDPSGLLAPEEYARDEV SDEV CNDDFSGMVQKTVTNGTM  
E EPI DIEKLVFSDHDGMAESNNMYQK

>comp5981\_c0\_seq2; 405 1 1321 LEN=1528; translated  
XMASTVTEDDYSKYS AFNETDSGMGDSSSFAIRSKAGTGASNSLADGDFDNSLVVKQRNQ  
QERVFTRDEF LYLALSSPSSIGAMAWILSAFVAVLYGSSVVVLINFCIPLLLGPFVINEQM  
YAQLAPS VRRNYHKIRDEANKLAMINVR LKGNLSNSIAKNTGF PPLKYVLNIFANVEQGY  
YTNEAFGKEECHPSTKIEGKKNLRRIFEGILCALRRSNIGYITL GQTLKFD SVAQFQANL  
AAKKIHNLLTTMLGLDYNGNCTISEKQIDEIAML MKVFAGKNAYS KFD FHEIHEAIVNSL  
VKNKKVILIPPSIDDT DSETKESEREYNDERSNGNFTEEPDSVQPSFEGDVDDSTKEEQS  
LNAPTDEYEDPSVRSDPSGLLAPEEYARDEV SDEV CNDDFSGMVQKTVTNGTM EEPIDIE  
KLVFSDHDGMAESNNMYQK

>comp5981\_c0\_seq3; 334 890 1456 LEN=1663; translated  
MLGLDYNGNCTISEKQIDEIAML MKVFAGKNAYS KFD FHEIHEAIVNSLVKNKKVILIPP  
SIDDT DSETKESEREYNDERSNGNFTEEPDSVQPSFEGDVDDSTKEEQSLNAPTDEYEDP  
SVRSDPSGLLAPEEYARDEV SDEV CNDDFSGMVQKTVTNGTM EEPIDIEKLVFSDHDGMA  
ESNNMYQK

>comp5981\_c0\_seq4; 498 1 1204 LEN=1411; translated  
XMASTVTEDDYSKYS AFNETDSGMGDSSSFAIRSKAGTGASNSLADGDFDNSLVVKQRNQ  
QERVFTRDEF LYLALSSPSSIGAMAWILSAFVAVLYGSSVVVLINFCIPLLLGPFVINEQM  
YAQLAPS VRRNYHKIRDEANKLAMINVR LKGNLSRLHRQEYRLSAVEVRF EHL CQRSNKD  
ITQMKHLAKRNATLRQKLANLA AKKIHNLLTTMLGLDYNGNCTISEKQIDEIAML MKVF  
AGKNAYS KFD FHEIHEAIVNSLVKNKKVILIPPSIDDT DSETKESEREYNDERSNGNFTE  
EPDSVQPSFEGDVDDSTKEEQSLNAPTDEYEDPSVRSDPSGLLAPEEYARDEV SDEV CNDD  
DFSGMVQKTVTNGTM EEPIDIEKLVFSDHDGMAESNNMYQK

>comp5982\_c0\_seq1; 388 154 1965 LEN=2511; translated  
MSEAITDTSKGGGTVEIVDDSSSSSGFHIDTLVKLTEDDPDYSSTSGQIKKNDATEQQQL  
DLERGIDANFASDSTVAKES ETNKQDCSSTTLNSNHDS SAQQQEILRTTPGAFAIERLIG

ESGVVSGPSTAILRTTPELRQMSLGFVRAPDETLPTLAQSETACALLSSQDIYRESGE  
EEQTNVIRAVLVKNNTTHIYEASPVESVAEDNMKNKWSKTLFLCAASAILFVLVTTMAFV  
VAGKTKGEKSMKMNPGSTPDPLKEKRRDYLLSLLAPLSGPAEEQVFNRGNNTAMSMRIN  
ALSWLVEDTRNKISLTTERNDPITNKSVAEVPVPLWKLQRQYVLALFYFATDGVNWDQYF  
FLSTQDECQWTKRFPLANGEKQMGVSCNDEGRVTGISSRWGLAGTLPHELCFLEDTFEH  
LNLAGDLMTGTIPEEYERFTKLRTLVLDNDCIDGTIPQSLRLPTLTRVSFVNTPWLSAP  
MNEFCNRQDYKEGTISIAGDCSGETNGCECCTCCNPDTFRCTDRESGNSWNSYNLNAFTE  
RGFVKFRKNTCRTENSKHWIANECPYIINSNTNLDNTRFEGETKNGAQKGAQISHDAF  
LWF

>comp5982\_c0\_seq2; 432 154 1380 LEN=2626; translated  
MSEAITDTSKGGGTVEIVDDSSSSSGFHIDTLVKLTEDDPDYSSTSGQIKKNDATEQQL  
DLERGIDANFASDSTVAKESSTNKQDCSSTTLNSNHDSSAQQQEILRTTPGAFAIERLIG  
ESGVVSGPSTAILRTTPELRQMSLGFVRAPDETLPTLAQSETACALLSSQDIYRESGE  
EEQTNVIRAVLVKNNTTHIYEASPVESVAEDNMKNKWSKTLFLCAASAILFVLVTTMAFV  
VAGKTKGEKSMKMNPGSTPDPLKEKRRDYLLSLLAPLSGPAEEQVFNRGNNTAMSMRIN  
ALSWLVEDTRNKISLTTERNDPITNKSVAEVPVPLWKLQRQYVLALFYFATDGVNWDQYF  
FLSTQDECQWTKRFPLANGEKQMGVSCNDEGRVTGISSSEYMLNATIN

>comp5983\_c0\_seq1; 782 166 1971 LEN=2049; translated  
MADFQSKRKATDITGGDDKPDSSAIVACPYLDTIQRSVLDLDFEPSCSVTLESQPHVYS  
CLVCGKFFRGKGHKTPAYTHAVDEGHFVFIHLNRGTFHCLPDDYEIKDPSLADVSAALHP  
TFTEEEIQRLLDSNTGLARDLFGRRYLPGFVGLNNLHKTDYINSSIQALAHVRPLRDYFLR  
LSHRNTFVLTSASDKKSKKNKPPKAPRRMSDLVQCFGELIRKMWSNKRFKSNVDPHMLI  
QAISRASKKFRVGHQAEVGEFMAWFLNQLHVGLGGTRKPGSSIIYRTFQGTIELTTRQR  
KTAALAEAAEAGDEEDGNGDAKNGGGGTGMEADNGHDETTTEPLTTDKTTDPDIEETTIE  
FLQLTLDIPEKPLFRDDDGLVIPQEPLVSVMKKFDGITFSEAIKSGVAQRKRYRLLGL  
PPYLILHLARFKTNKYSREKNPTIVAFVKNLGLGSYTFPKNGKEVPPTAEVRAMTVAE  
LRALLNEHGREDLSAHALEKSELVEAAVDFVTKSLPDLADKYDLVANITHNSPADVGRE  
GKHDPLEQESYKCHIEHKSSKQWFETQDLHVEETMPQLIGVSESYLLIFERKAAQQMDLS  
R

>comp5984\_c0\_seq1; 265 72 551 LEN=922; translated  
MVSSRIERFLVAAALAAPTAIEALAGAPQKEFTGAGIGRLNMDELAKGAGTWNCHYDMI  
LVERLQKQKGPQDVEDDGLFVPESDMPRFHLCRVLSKGNREEENGVMVAPDINGLQVGD  
VVAKNPWGIGPKDEELSDGKKLSFMREIDIAAKVTGELN

>comp5985\_c0\_seq1; 715 379 2892 LEN=2936; translated  
MVSGKKNVSHKINKSKIIVSRILIVVVVTCILRQLTALTAVSRDLLQVSTYDDAASKLVEI  
NSVPKSIKRTNLSKGLEIEHKAKEESEIKSITTKATKKILSNEMNDGGDREYEDNIERSF  
VIICMGDSAIDSNYVERFVWSARKIGKFTGWIVLLTDAPEQRYAHLNRNADVDNDKFTI  
LRPEEKHYIRHYDHAPAMVFKQFKTYVLQYLSQDSRLDNVCLVYLDVDIVFGNPVGPLF  
NDLEQKYQIGTNSTTTAQTNTGGNVAAMMMFKGNSKSKSIQGGQMILDRSTSQPCLDRF  
RSLMDPKTSTIDQVHLMQMLSDQKLARKTEDYTSKCEIVIMPQEEKHILFSPSKTLIKDI  
ADGKINDDDPVPLNHIKNTGGDLKSSPEDIAEAYLRYLFRFETDQKDTLGITTKTYLDG  
GQREKGGKEQHQEKSEVKSAAEKKSDVPRSNHDEETTQESSESSNVLFRRSSQNDNWNKNV  
SPNELVTTLADLSNSTEIVSSRAKRRRRRGYRDKKGGKKEKETYEDDIERAMFVISMGEKA  
AKMNTVERFVYSAREIGKFSGWIVVLTADPSDRYANMNNWTEKVI FMDPKKEDTKTHYKV  
SNMVYKRFKTYAIEYMNDRMRLEQVELVYLDVDIVFGSDLGPAFHGIEKTYGIGRLGVN  
TTANVTDSIARGKMMWFKGNKSGKWQIQGGQMVLDRLSLSQPCLERWREGFDQKKVTDYAKD  
QYLLMAMKSEQEAMNRTMNSTDPDLVDLACEIVTMEQAPYIDFPLVTTIKQRSKVLRK  
HPKRKFHYSPMVHVRNDGGTANMRDGNIRPYMRSLLRFKQDPDPLKILKKVHMDTT

>comp5986\_c0\_seq1; 567 80 1087 LEN=1291; translated  
MTGTNGNGNGNSAVVGTSTVKQGLAQMLKGGVIMDMNVEQAKIAEAAGAVAMALERI  
PADIRRDGGVARMSDPSLIQEIKNAVITPVMAKARIGHFVEAQILEACEVDYIDSEVLT  
MADDVHHIDKTQFSVPFVCGCRNLGEALRRIAEASMLRRTKGEAGTGNVVEAVRHARQVQ  
GDIRRLQTMKDELFAAKELRAPYDLVKQIAEDGKLPVNFAGGVATPADAALMMQLG  
VDGVFVGSIGIFKSANPEARARAIVQATTHYKDPKVLMDVSTGLGPAMVVICDIKGPVNF  
RDREGGEYTYSGKVPKELSGYTETQMYGSSWNN

>comp5989\_c0\_seq1; 455 62 862 LEN=909; translated  
MATKFADLAKASKDLLNDYTTKQSLKCKKNAGPVAVTIETGRGEGGALTSKVGTFKFN  
KLNVDKAQATADGGQVLETSLAVAPGVKVSFKSGKADLGDVYTKGNLYATGVLDVVEMS  
KFTTSACVSLPSGIKAGADATYGLSGKTGITGLNVGASYATGSLLGAVTSVKNKFSVNLG  
LLYSVNSKVTLASMTSHSGDSAFNLTAAGGSYKADFGTVKAKYTGDAVSAALIKELAPK

VSLTVSGTASVSAPSESFKYGMGIVM

>comp5990\_c0\_seq1; 370 289 864 LEN=1204; translated  
MNRFAQYIIFFLALMMINTPTVLGSSSTLEVADTKRASLEQIDVKKRILSSPHPHPSVPS  
SGGSSGGSSGSSSSGGSSGGSSGGSSGGSSGGSSGGGAAAANASNLASHNAQKGVG  
LMLGIAAVAGMVIAAVVPIPRRKTATEAKHPLKGLSLNKRIDLAFANLAKHTSSAERPPRDE  
EGRYINADSIV

>comp5991\_c0\_seq1; 281 215 991 LEN=1611; translated  
MPHSSSSYVFEPPISSLPVVGTSKQFPVRRVYCVGKNYVEHVIEMGGDVKRKPKVFFTK  
PNIDGVVYAGCLGNSSDKPTSIDYPPDTKNLHYEVELVVAIGKEPNDCVPNDVLSPNILD  
CVFGYAVGIDLTRRDLDQDEAKSKQWPWDTAKYFDQSAPIGPITPRKEGNEDYFDDNTGKL  
EKRTMALTVNGATRQSVLDLEKMIWKVPEILSELSEKSFRLKPGDLVMTGTPSGVGPVVGD  
RLIGTIDGLVEPVDITLV

>comp5992\_c0\_seq1; 393 288 1970 LEN=2166; translated  
MPIPEMPGTSKNPLRGAVEVIPNRLYYCALKNKETLQNKILIPNPHTNSTSPDQKETVF  
CFHIDDELVYWNFFLDFGPLNLGQLWRFTKKNLRLALAEKDGSTVLFYSTTHPNKRACA  
IFLICAWQVLELHRTDAMDAMFGFSATAYNANHSTAKTNGSNASDVNRSNPPLPLSGLGS  
QTINPLPPFHADSPYKCTYQLTLRDCLGALVKARQFQFFDWGDRFDIKEYEYFEQVENGD  
LNWIVKDKILAFAGPSYVRTVSPEGYCTLSPDDYIPYFKRKNIGLIVRLNEKKYDETQFI  
NAGMDHFEEVYTDGSCPRMEVLQRVLAFAFEKLPNDKGFVHCKAGLGRGTGTCIGAYLMKH  
YRMTAKEVIGWMRICRPGMVIGPQQEFLEYIQSIMWQQGDAMRTKSSQLTSPLPLAPRH  
KHI TNLHSAIHSSSPSSRSTSTATTVPESSSLVLDKTS SHEIGQEII LGGSTGYDHLEG  
ELETAYERERLEGRPGQAEGLLAARQNRNREP IPPQSPQPRGHEQSNSNDSKTAIPVTPD  
TRATSTTSSSSTSLWSRAFA

>comp5992\_c0\_seq2; 308 288 2122 LEN=2318; translated  
MPIPEMPGTSKNPLRGAVEVIPNRLYYCALKNKETLQNKILIPNPHTNSTSPDQKETVF  
CFHIDDELVYWNFFLDFGPLNLGQLWRFTKKNLRLALAEKDGSTVLFYSTTHPNKRACA  
IFLICAWQVLELHRTDAMDAMFGFSATAYNANHSTAKTNGSNASDVNRSNPPLPLSGLGS  
QTINPLPPFHADSPYKCTYQLTLRDCLGALVKARQFQFFDWGDRFDIKEYEYFEQVEVVE  
QIKCESVEVPKRTHQSIPEGSISERILLSHCANNFFCVFLFNKNFPKNGDLNWIVKDKIL  
AFAGPSYVRTVSPEGYCTLSPDDYIPYFKRKNIGLIVRLNEKKYDETQFINAGMDHFEEV  
YTDGSCPRMEVLQRVLAFAFEKLPNDKGFVHCKAGLGRGTGTCIGAYLMKH YRMTAKEVIG  
WMRICRPGMVIGPQQEFLEYIQSIMWQQGDAMRTKSSQLTSPLPLAPRH KHI TNLHSAI  
HSSSPSSRSTSTATTVPESSSLVLDKTS SHEIGQEII LGGSTGYDHLEGELETAYERER  
LEGRPGQAEGLLAARQNRNREP IPPQSPQPRGHEQSNSNDSKTAIPVTPDTRATSTTSS  
STSLWSRAFA

>comp5994\_c0\_seq1; 670 80 1702 LEN=1913; translated  
MVAKKRN LASSNGASRGMRGNSAAGGGGGGVSSKNAHRDTLPGIVWSVVL CIVKCSI  
WFAIAFPFAVATHSLSLVFRPPNLVYLQQT LRYLGFVWKS LTFATPEQERHMQSFSVTE  
KIRLTTTILVHTICSPLSAFGWILDEILYGRRLNGLEPKKAAVENPVFVVS AFRSASTQ  
LARGLVSETRYTCEKGGTSTTEPCFVAPNAMMCAYPYLWLWKL VYAI VGDIPDTLVDAER  
AQTEGGLTKEDVREKFNAGFTPD SMARHANDP FQTD TFDGTF LNCHLN GFVWQLCRGLPA  
SAIEQEFNYACQKEGDALNRR IWQTD MVRHIERLARKTILFHNEGGGETAAGGVRPPQRF  
LLKGHFLSVCPQLREAYGGRARFVTILRDP CERLRS GIN YMAVNPTLYASDP RQQIPWAA  
FAEALGETEAQYCERELQWFGGTGGDES DRLAVTFDSFVADR GKAMGEI VNWLG LVPEDD  
PGEVAIASTSQAKKSKSPRKKKTPSASSAATKKAYRIDRSLAELGVDEKAYRERLS DYLA  
W

>comp5995\_c0\_seq1; 222 231 570 LEN=762; minus strand; translated  
MKSTKDAPNIVADRVVPSIKNFPFAAFDEFFSTSLWPAIRIPSMKPKTHPVMDPMHPPKA  
AFLKSSPHLKGILAW EIDDVDAGVDVVEDKSPA EEDAGASC GDDLRRRC SNNW

>comp5996\_c0\_seq1; 717 317 2224 LEN=2306; translated  
MDVAKMEKVETPKSPAKMSFFRKGW PALVALVGVFALNASLFGPTLSDMPDMSEKMLNRR  
ALAEKRTADVLAMAPTQESTKYTPRSRFGFSRNL SAEDGGVMEYTRRRHRYLGEYVHVDV  
SDQFTKFGKWTVSI IYFAYWVFLMFPNWFLPIGRPGIALGGLSMVVWRYIILMVTEQGPF  
FDAERVIILEPLFLFLFGLMLTTIYLEKMERGGLFDKLRDSLDDPVNWKRSAKIMLMSTIG  
SAAVMNDSVVLIFSGVVV DLCVRHKVANSLPYLLSLATTANTGSALTTLTGNPQNILIVSL  
MYDDISWLDFAANMLLPVVAASVINASMMFLYGAELFPGSSGMMENIGIMFFGNRTPEM  
LAQEHAYYARQAATEGESDGN GWT FWSKLQVLIIVLFLIFFACGF DVCVVSITTGAILMV  
IAAYKRQHYDPKPDHTQYDVEGNLPPKKT YDM DGN EIEPEEEELVTESETTLTEVDYGL  
LMLFIGQFLLIGSFDDTGVPQAF FGLSMGKCADQMTEGACVYWFVTIVTVLSNIASNPV  
CQMLAATFPYATPYDWLQVSFSATIAGNLTMLGSAANMIVAFQAAKVGDRFTT SERHAPF

GIPSTILSLYAGTFLLATFHFAPECSERLGECDQAQ

>comp5996\_c0\_seq2; 655 1 1951 LEN=2033; translated

XREDILVSSSKTSTIMDVAKMEKVEETPKSPAKMSFFRKWGPALVALVGVFALNASLFGPT  
LSDMPDMSEKMLNRRALAEKRTADVLAMAPTQESTKYTPRSRFGSRNLSAEDGGVMEY  
RRRHRYLGEYVHVVDSDQFTKFGKWTVSIIFYAYWVFLMFPNWFLPIGRPGIALGGGLSM  
VVWRYILMVTEQGPFFDAERVIILEPLFLLFGLMLTTIYLEKMERGGFLDKLRDSLDDPV  
NWKRSAKIMLMSTIGSAAVMNDSVVLIFSGVVVLDLVRHKKVANSLEPYLLSLATTANTGSA  
LTLTGNPQNILIVSLMYDDISWLDFAANMLLPVVAASVINASMMFLYYGAELFPGSSGMM  
ENIGIMFFGNRTPEMLAQEHAYYARQAATEGESDGNNGWTFWSKLQVLIIVLFLIFFACGF  
DVCVVSITTGAILMVIAAYKRQHYDPKPDHTQYDVEGNPLPPKKTMDMGNEIEPEEEEL  
VTESETTLTEVDYGLLMLFIGQFLLIGSFDDTGVPQAFFGLSMGKCADQMTEGACVYWFV  
TIVTVLSNIASNPVCQMLAATFPYATPYDWLQVSFSATIAGNLTMLGSAANMIVAFQAA  
KVGDRFTSERHAPFGIPSTILSLYAGTFLLATFHFAPECSERLGECDQAQ

>comp5997\_c0\_seq1; 206 294 626 LEN=626; minus strand; translated

MVDMWRKHFLVAENMLEMECTNLTPEVVLKTSGHVDRFTDLMVKDPVTSECFRADKLLLED  
AIDDLLEKNPTLDAETREEHLRVQRQADAYSPEELDKLLKYECKGPSGEA

>comp5998\_c0\_seq1; 749 86 1996 LEN=2307; translated

MIHKTQSFCSLAFFLSAGTLLLLLDSNAHQVFGCTVFLVGKNASADGSVMCSHNSNDGEF  
DTPRLVKVPAADYPPDSLPRVYFSPENYPRYVGYDRGIPEYYPREGEPHEPFQPIGFIP  
QVPHTYAYLEETYGAVNEMQVIGESTCSGVFGARPIHQHPNGTALFSIDELSRIAMERA  
STAKEAVQMMGDLAVAHGFYGAGEFEGTSESLAVTDPEEAWIFHILPDPTGKSAIWAAEK  
LDDDKFAVIANMFVIREVDPTDTERFLMSKSVHDVAIDYGWWTVEADGLLDFTKIYSDG  
EYSHKFSYGRRVWASYRLAAPSQFPPTDYDLDQSDPVYPLAVTPDRPVSERDLFRFHRDT  
LQGTKFDLGAEGNLAGGPFPTDRWKAGPNEETKVQGNWERAIGLYRTSDTYVVQSKKEE  
RQQPDGSGGMGSGGPGAILWFGPSSPLATIFTPFVVGMSDIPKSFRRSGHQSVMFSRESAFW  
AACYAHNIANLKWSYMIQDITKRQDELEGASLDLVASIQEEYRRHNNMGLVEDAFAKNAE  
AIVASLWLSDELFRYADGFVNSNESEVDQGGIEITKRVGYPAWWLEAVGYKNGPPPPPT  
TPKCCDPPKGRKKNAGEPSPHLLRGAESSGTAIEID

>comp5998\_c0\_seq2; 702 86 2106 LEN=2417; translated

MIHKTQSFCSLAFFLSAGTLLLLLDSNAHQVFGCTVFLVGKNASADGSVMCSHNSNDGEF  
DTPRLVKVPAADYPPDSLPRVYFSPENYPRYVGYDRGIPEYYPREGEPHEPFQPIGFIP  
QVPHTYAYLEETYGAVNEMQVIGESTCSGVFGARPIHQHPNGTALFSIDELSRIAMERA  
STAKEAVQMMGDLAVAMDSMERENSRERVSSSLVPGFHEVVVDLIDHPKLSFYRVFLV  
HNTTAESLAVTDPEEAWIFHILPDPTGKSAIWAAEKLDDDKFAVIANMFVIREVDPTDTE  
RFLMSKSVHDVAIDYGWWTVEADGLLDFTKIYSDGEYSHKFSYGRRVWASYRLAAPSQ  
FPPTDYDLDQSDPVYPLAVTPDRPVSERDLFRFHRDTLQGTKFDLGAEGNLAGGPFPTDR  
WKAGPNEETKVQGNWERAIGLYRTSDTYVVQSKKEERQQPDGSGGMGSGGPGAILWFGPS  
SPLATIFTPFVVGMSDIPKSFRRSGHQSVMFSRESAFWAACYAHNIANLKWSYMIQDITKRQ  
DELEGASLDLVASIQEEYRRHNNMGLVEDAFAKNAE AIVASLWLSDELFRYADGFVNS  
NESEVDQGGIEITKRVGYPAWWLEAVGYKNGPPPPPTTPKCCDPPKGRKKNAGEPSPHLLR  
GAESSGTAIEID

>comp5999\_c0\_seq1; 369 564 1504 LEN=1775; translated

MEQDYGESGKYDVKFHMARGENYKVSTRDGFVNSIDGDI FISPEDLRAFENPEDVGPVDW  
VIVCIKSSSLDDIPGLIHPLLDKRTRVLAIMNGLIEDDLVRLKERNGEEFCAALYGGM  
ALVCSNRTGPGKIEHSYAGLLSGGVAMSRRSFTAEDNQQA FRDLWAPTSIDIAYEP SLLG  
GRWRKCLWNLFPNGISVAMNGITVDKIVNDSGLRRLAFKIMDETVAANADLEANGFGEE  
FFLGDVDKMMMDLSDNMGAYRTSTMIDFVEGRPLEVHYLFTKPVQKARKLGVPTPYLET  
LVTQIEAFQRLRY

>comp5999\_c0\_seq2; 407 206 1399 LEN=1670; translated

MATAFRSISRSSLSTRRGAISKRVAPHRFGKHSSLKASTKSFRFLSSSPSLRFLTEN  
GIGEKGGSERQSVAIIGAGAVGGYYGARLWESGKYDVKFHMARGENYKVSTRDGFVNSID  
GDI FISPEDLRAFENPEDVGPVDWVIVCIKSSSLDDIPGLIHPLLDKRTRVLAIMNGLI  
EDDLVRLKERNGEEFCAALYGGMALVCSNRTGPGKIEHSYAGLLSGGVAMSRRSFTAED  
NQQA FRDLWAPTSIDIAYEP SLLGGRWRKCLWNLFPNGISVAMNGITVDKIVNDSGLRRL  
AFKIMDETVAANADLEANGFGEEFFLGDVDKMMMDLSDNMGAYRTSTMIDFVEGRPLE  
VHYLFTKPVQKARKLGVPTPYLETLVTQIEAFQRLRY

>comp6001\_c0\_seq1; 140 38 409 LEN=521; translated

MIKSILILTALIASGDAFLSSPLHPTRPMAKKLGASSSDSNSFVDTLQTSFRIARE SNAE  
NGGFKQVLADVLGDDYDKEAVSATIEDTISSAPCGKNVLCIVIDRTVQLIPSTASYGHF  
ILT



>comp6001\_c0\_seq2; 162 38 616 LEN=1145; translated  
MIKSILILTLAIASGDAFLSSPLHPTRPMAKKLGASSSDSNSFVDTLQTSFRIARENAE  
GNGFKQVLADVLGDDYDKEAVSATIEDTISSAPCVMYTWENSPSCKKAVEAFETIGATV  
KIVRLDDPWEEGNPVRAVLGRKVGRTSVPFVFGGEYIGGFDGGVSTSAPGMVDMAFQ GK  
LREALSEAGAMK

>comp6002\_c0\_seq1; 565 320 3412 LEN=3963; translated  
MDDGSAGNDGARRDELVLLFELVGARNLVLRRDDYEICQGIDPNSLQPFVVKYNGVRIHK  
TKPSEELGCNPIWTPHSSRSIFLVRTTAIELSRSIMNISVYIKKESALPSMLTTVTSVFM  
GQIHVDSKTIILSHCDEERFELNIEDELGEQTRNLGKLAVRCRVATPSDIEILSVLNKDLS  
ASHMERIGDMMLDSSTRPMEETTSTLFHKRSRDRPLATMMTEKDEAEVAQSSIFQSVGNIFV  
SQTSTCPESGQVMKRVKPYDPDRQEKTEFLRPYDLNVETRLPSWKWTEAGSGSIGKLFV  
EVLSCDDLPNLDSGGEMMGNF TDSFCTLVYEDTCAMTDVIDDELSRWMPWTNRAF SFNI  
MHPASILYLGVFDFDVLGTHDPIGRVAVNVCNLQRDVTHTLTYNLYPSSNVTERKAAGSI  
TIRVRLEWFDPRALLAAMKSRPNMHVNVLKEKTFRVVRYTCYGEYGDKEGFDITLMRSY  
INEIF EYKAGVSYAISDTLRSLILWKGQVEIFSIMLPLHSLILFVVFSTRLVEKPKQLIVPY  
SLLAIAWMMLANLTI RRQHPSPWQSRLSFFDYLNILRTGKSSIPVKCIKEYEGAAEARAY  
ELAWEKRIEKDRKIAERKAELLQEINDISDVNIHTEVSNQALIPVDLLNRLARYQGIVGR  
ICKKLR FVKIILTWEESIVSFLVTATFLSAGIVALALPWGFILTWVGR LIVWGFLGPHMK  
LVDLFLRANEKRDGKLNLDLIKNFDIQSHQARLSREEALKIKDMKEVAFGTYSVHVPSFNL  
SRHHRPLPQSSSRVYRKPPPHRKVGNNARVSVTDLGSRCTLI PGQQLYGAMI PRPEHEE  
EIHKHQRILA EKRMKSVKDFLRRLNEVEGLSEYETKQLKMDIDTATPMAIGYEVVPFEE  
CESVSSDTESESGSTNKSAAALCSLRNFSIKLMSDR LGYVDCREARDLILRSDGVTTTCIS  
ENCEEEDEGMEVIGTGRFQSFQSDYGD EMRSSIDSKDPNVEERLTCALNSTEGSQMVYYRPP  
ENGEVKLKEE

>comp6002\_c0\_seq2; 495 320 3567 LEN=4118; translated  
MDDGSAGNDGARRDELVLLFELVGARNLVLRRDDYEICQGIDPNSLQPFVVKYNGVRIHK  
TKPSEELGCNPIWTPHSSRSIFLVRTTAIELSRSIMNISVYIKKESALPSMLTTVTSVFM  
GQIHVDSKTIILSHCDEERFELNIEDELGEQTRNLGKLAVRCRVATPSDIEILSVLNKDLS  
ASHMERIGDMMLDSSTRPMEETTSTLFHKRSRDRPLATMMTEKDEAEVAQSSIFQSVGNIFV  
SQTSTCPESGQVMKRVKPYDPDRQEKTEFLRPYDLNVETRLPSWKWTEAGSGSIGKLFV  
EVLSCDDLPNLDSGGEMMGNF TDSFCTLVYEDTCAMTDVIDDELSRWMPWTNRAF SFNI  
MHPASILYLGVFDFDVLGTHDPIGRVAVNVCNLQRDVTHTLTYNLYPSSNVTERKAAGSI  
TIRVRLEWFDPRALLAAMKSRPNMHVNVLKEKTFRVVRYTCYGEYGDKEGFDITLMRSY  
INEIF EYKAGVSYAISDTLRSLILWKGQVEIFSIMLPLHSLILFVVFSTRLVEKPKQLIVPY  
SLLAIAWMMLANLTI RRQHPSPWQSRLSFFDYLNILRTGKSSIPVKCIKEYEGAAEARAY  
ELAWEKRIEKDRKIAERKAELLQEINDISDVNIHTEVSNQALIPVDLLNRLARYQGIVGR  
ICKKLR FVKIILTWEESIVSFLGSTDPDTLSQSSIVDNVSSYIPFVVTATFLSAGIVALA  
LPWGFILTWVGR LIVWGFLGPHMKLVDLFLRANEKRDGKLNLDLIKNFDIQSHQARLSREE  
ALKIKDMKEVAFGTYSVHVPSFNLCKFEMIFI IHYPEKGYLIHILIVEIDPARHHRPLP  
QSSSRVYRKPPPHRKVGNNARVSVTDLGSRCTLI PGQQLYGAMI PRPEHEEEIHKHQRIL  
AEKRMKSVKDFLRRLNEVEGLSEYETKQLKMDIDTATPMAIGYEVVPFEECESVSSDTE  
SSEGSTNKSAAALCSLRNFSIKLMSDR LGYVDCREARDLILRSDGVTTTCISENCEEEDEG  
MEVIGTGRFQSFQSDYGD EMRSSIDSKDPNVEERLTCALNSTEGSQMVYYRPPENGEVKLKE  
E

>comp6002\_c0\_seq3; 572 320 3493 LEN=4044; translated  
MDDGSAGNDGARRDELVLLFELVGARNLVLRRDDYEICQGIDPNSLQPFVVKYNGVRIHK  
TKPSEELGCNPIWTPHSSRSIFLVRTTAIELSRSIMNISVYIKKESALPSMLTTVTSVFM  
GQIHVDSKTIILSHCDEERFELNIEDELGEQTRNLGKLAVRCRVATPSDIEILSVLNKDLS  
ASHMERIGDMMLDSSTRPMEETTSTLFHKRSRDRPLATMMTEKDEAEVAQSSIFQSVGNIFV  
SQTSTCPESGQVMKRVKPYDPDRQEKTEFLRPYDLNVETRLPSWKWTEAGSGSIGKLFV  
EVLSCDDLPNLDSGGEMMGNF TDSFCTLVYEDTCAMTDVIDDELSRWMPWTNRAF SFNI  
MHPASILYLGVFDFDVLGTHDPIGRVAVNVCNLQRDVTHTLTYNLYPSSNVTERKAAGSI  
TIRVRLEWFDPRALLAAMKSRPNMHVNVLKEKTFRVVRYTCYGEYGDKEGFDITLMRSY  
INEIF EYKAGVSYAISDTLRSLILWKGQVEIFSIMLPLHSLILFVVFSTRLVEKPKQLIVPY  
SLLAIAWMMLANLTI RRQHPSPWQSRLSFFDYLNILRTGKSSIPVKCIKEYEGAAEARAY  
ELAWEKRIEKDRKIAERKAELLQEINDISDVNIHTEVSNQALIPVDLLNRLARYQGIVGR  
ICKKLR FVKIILTWEESIVSFLVTATFLSAGIVALALPWGFILTWVGR LIVWGFLGPHMK  
LVDLFLRANEKRDGKLNLDLIKNFDIQSHQARLSREEALKIKDMKEVAFGTYSVHVPSFNL  
CKFEMIFI IHYPEKGYLIHILIVEIDPARHHRPLPQSSSRVYRKPPPHRKVGNNARVSV  
TDLGSRCTLI PGQQLYGAMI PRPEHEEEIHKHQRILA EKRMKSVKDFLRRLNEVEGLSEY

ETKQLKKMDIDTATPMAIGYEVVPFEECESVSSDTESESEGSTNKSAALCSLRNFSIKLMS  
DRLGYVDCREARDLILRSDGVTTYCISENCEEEDEGMEVIGTGRFQSFQSDYGDDEMRSSIDS  
KDPNVEERLTCALNSTEGSQMVYYRPPENGEVKKLEE

>comp6002\_c0\_seq4; 488 320 3486 LEN=4037; translated  
MDDGSAGNDGARRDELVLLFELVGARNLVLRDDYEICQGIDPNSLQPFVVKYNGVRIHK  
TKPSEELGCNPIWTPHSSRSIFLVRTTAEIELSRSIMNISVYIKKESALPSMLTTVTSVFM  
GQIHVDSKTIILSHCDEERFELNIEDELGEQTRNLGKLAVRCRVATPSDIEILSVLNKDL  
ASHMERIGDMLDSSSTRPMEETTSTLFHKRSDRPLATMMTEKDEAEVAQSSIFQSVGNIFV  
SQTSTCPESGQVMKRVKPYDPDRQEKTEFLRPYDLNVETRLPSWKTEAGSGSIGKLFV  
EVLSCDDLPNLDSGGEMMGNFTDSFCTLVYEDTCAMTDVIDDELSRWMPWTNRAF'SFNI  
MHPASILYLGVDFDFVLGTHDPIGRVAVNVCNLQRDVTHTLYNLYPSSNVTERKAAGSI  
TIRVRLWFDPRAALLAAMKSRPNMHVNVLKEKTFRVVRYTCYGEYGDKEGFDITLMRSY  
INEIFEYKAGVSYAISDTLRSLLWKGQVEIFSIMLPLHSLILFVSTRLVEKQPQLIVPY  
SLLAIAWMLANLTIIRRHQHPSPWQSRLSFFDYLNILRTGKSSIPVKCIKEYEGAAEARAY  
ELAWEKRIEKDRKIAERKAELLQEINDISDVNIHTEVSNQALIPVDLLNRLARYQGIVGR  
ICKKLRVFKIILTWEESIVSFLGSTDPDTLSQSSIVDNVSSYIPFVVTATFLSAGIVALA  
LPWGFILTWVGRILVWGFGLGPHMKLVLDLFLRANEKRDGKLNLDLIKNFDIQSHQARLSREE  
ALKIKDMKEVAFGTYSVHVPSFNLSRHHDRPLPQSSSRVYRKPPPHRKVGNNARVSVTDL  
GSRCTLIPGQQLYGAMIPRPEHEEEIHKHQIRILAEKRMKSVKDFLRLNEVEGLSEYETK  
QLKKMDIDTATPMAIGYEVVPFEECESVSSDTESESEGSTNKSAALCSLRNFSIKLMSDRL  
GYVDCREARDLILRSDGVTTYCISENCEEEDEGMEVIGTGRFQSFQSDYGDDEMRSSIDS  
KDPNVEERLTCALNSTEGSQMVYYRPPENGEVKKLEE

>comp6003\_c0\_seq1; 195 1 676 LEN=676; translated  
XNNQONPKHVRI RTANTPTNNVRTSHSTNTIISSQRIAMFPSLVPVPGMNSYDDAGRAD  
DDDDLGLSAMMAKTVSAATS SRPARGRSERDRGASRSRSRSSSILRRMVESVRAEKETK  
TTATVNHHSRDGPSIPRRGRSRDRIGGESAAADENKNENDTSTIATNTGRSRSRSVVKS  
IKSRDEKTKTSSKEKEKTKTKRKS KIRRI SLPVT PSEEKSETASS

>comp6007\_c0\_seq1; 339 1216 2337 LEN=2792; translated  
MVKRLPKTKPDVRDVLLEANATPDSDTQIAFRKLRDQLEKDGWWRDLKHESKLLGIWGS  
LVAFGAVAARTGHPVIGTVLLALSMTAAGWLGHDIHGVDPFSDKLRNFAAMAAGLLPVW  
SDKHKHHALTNEQGVEDIATDPFLFQWAPSPENDHPLRKIQHLIFYIPFSFLFALWRI  
DSVKVAISSVRQKRAGSKPGLYSILFHYTWLFAIFPIKVWLP AIFMSGLLSALIVTPTHQ  
SEEMFSEYQPDWVTAQFQSTRNAVATNPFSEWLWGMQYQLEHHLFPSMPRMNYPKLRPI  
LQKFAKDNNVPGGYRESGEFEILKMNWDLYRRVAKADPVP GAPSSRGTIGQQGGILSDN  
SPAAALARASQIA

>comp6007\_c0\_seq2; 452 491 1990 LEN=2445; translated  
MKIIANSKKTMPAAAAALAMLP AISTDAFVMPGRKAAVASVTSSFSPTSLVASTLET  
PNV VVDNELSKDSNSKPRTS LDVRIHGEWYDLTGWRKAHPAGEHWIDWDYDGRDATEVMDGFH  
SEKGRKMVKRLPKTKPDVRDVLLEANATPDSDTQIAFRKLRDQLEKDGWWRDLKHESKLL  
GIWGS LVAFGAVAARTGHPVIGTVLLALSMTAAGWLGHDIHGVDPFSDKLRNFAAMAAG  
LLPVWWSDKHKKHHALTNEQGVEDIATDPFLFQWAPSPENDHPLRKIQHLIFYIPFSFL  
FALWRIDSVKVAISSVRQKRAGSKPGLYSILFHYTWLFAIFPIKVWLP AIFMSGLLSALI  
VTPTHQSEEMFSEYQPDWVTAQFQSTRNAVATNPFSEWLWGMQYQLEHHLFPSMPRMNY  
PKLRPILQKFAKDNNVPGGYRESGEFEILKMNWDLYRRVAKADPVP GAPSSRGTIGQQGG  
ILSDNSPAAALARASQIA

>comp6008\_c0\_seq1; 580 1 1046 LEN=1185; translated  
XLLESKNPEGELLASVSESDSDSDSDSDDDYLPTSNQRRNVFAGFAAAGFSSSDSDSSE  
EDDDDEGDRDQKLS PDRLKDP PPGSRGGKQPQDDGEDRIDFDELIAQNEILRR  
ELDERREKRESEEEAEQAPRALPFHETYDPDDYDANEQR IASVQHRLRKT LASRGVAPRD  
RSSETFDPLDAIAMGKTLQEV LQANI EDLQNKLDAYKRHKEDCQLMARQFALQGGNSKA  
LPAQYVRKQDAADNARRRANVHHAGSHYHMQCSRSMQFGKKYKGLMARHSSQGSRLQASR  
MAAKEMQLQQRSHAKQVTSKKSQ QKKRGEAGGSKKNGGKKGKGGDD

>comp6009\_c0\_seq1; 377 213 1538 LEN=1762; translated  
MKMEKMSFRDKEYV PSTSQNLIESSWDSGILSHEWDGVEFTKSNKLSACSSFFDSL LHD  
HNIADIDFVPD NAKPRSNVPRSVYFHSPEDEKKSANRWNSCITRSNPRTL RGKLNKVS  
SRSNVAPSIETGQGAASRYDESLSPMRSKHPKPGDLESTHRVSTPRRADKSPSMQSDC  
DEPMPTPAAAPSSLKDTGFLPPLWERLNNGNATHQLPRSIPLSAKQVKGRSPSYHCSSP  
PLLI STPPYPLRGEDLQRR TMSKKT TAQNSNLWHDVGS LKPRRAPRNDLIAAETQSKPRF  
PVLKETSSSRSTSRVDGADC SNCR TSLRSLRGKHWGGDDTVAESTISSFKIVKLATDLLN  
QNPPLVSSSTPRNSLRRRSIRVSHALDNRRHSRLHP IRQHS DNSNMERC PKPPVRRRSVS

FDSPIPPVRRRSVSFGSDEEV

>comp6010\_c0\_seq1; 148 88 888 LEN=999; translated  
MMQTGTCCAPMDASSPPRPPSPRHPESSAAPGPADSLGCGNDRSPDAPLPSPLVRFEAR  
YLTSRHRSLFVRQRCYVHYRATYGRWPAPGARRGLPPARNDGDNDSGDNSDVFLGHN  
KRSPPRSPLVRQDAFRSGGPPGSPDYRSAYRSACRSAPSDAYSRSASGARRRRDPG  
QNGQRDGGTRLLAEGVRKQPALGACGRARLRLPAGNALSGVSPLRHQSGARGGSPNGP  
GEGPAQKRWFFDPLISKTSAMNNFLE

>comp6011\_c0\_seq1; 555 54 1907 LEN=2397; translated  
MMKFPLLSSVFCIVLLQFPLRVQGSSEEEERWQRTTTRSRPRPSRRQRRHGFDANVEPD  
LQDHAYSEFVTDYFSLKQDDRQKPRDIVEGTISAFQSLLVGGLASLSTFLGIPIVTVISL  
VASNAVVNENEINGGAVLPAIFGLVVGSIIGTTFTFFISIFSLWRAGVSFLDGLLET  
ALKSWILEGKIWNPYEREWKSKTQSLENERRELLLMMEAQEAARKRRGLVVVDTKLYD  
LLEVSPDASTSTIKKAYFSKARELHPDKNKDDPQAHERFVEVHEAYSVLSDEKRRSQYDR  
WGSSESGSDDGIISPNDFDANVFVAVLFSNGSGIVSTPTIQKYVGDLGIFIDKGYKLT  
ALAQAIALLKEQQGDGEPLNRVLGTLADELFGLENSEMRRKTRSEIATHLVSRAELLS  
GQQCNNSGDGRTYNQKSISEETFRHVVRDEAQIMLRESGFYGPVYLEIIGSSLLFESSLH  
LIPHRAQTFYQKWTSRKQFVQTLYDLVKNIDPSVEAKSHVLEIFSTGNLQGILKLI  
TLYNRMDISTALREAIWRVLDNPSASRSERKRNRAIRIIGEEFSILANTEMALDNDSE  
EAVNQFESNLVLAIQVASKLTT

>comp6012\_c0\_seq1; 257 1 1276 LEN=1645; translated  
XATAIMITSAGTHCYHWRNKMKYVAETS NKWGGRRRTQASIDSRNEIPAEVEAGDNDY  
EINDDYDDENRDENDGQLASSRAIQNDIISKFPQDHLVHCFGYGSGVFTQSLSREKGA  
ANAGMLDLILVVDVTQKFHNENLQRFPHHYAPWLRFGGPNLARMQRQGLPWLPAHVL  
FHVVDADSSGLPNMKYGVVDKDLVGLVWYSLYLAGRMHKPTLNVSRRDDDLVRAQTK  
NLRAATSMALLSSSANDTATS AVSWPSLYRQIAALS YTGDFRMQVGGEDPLKLDKLI  
QAPGQLQRFHDMYRPIFKSYEMSGFLSTSYSSGGGGSGGVWNPNDPSVINQLVRLPK  
SLREGTATGTATTKSTKHLRVNHDVLAKALSAIVAPAARNQSFKGVFTLGFRKSI  
RYASAKLSKGLFARKK

>comp6013\_c0\_seq1; 443 403 2127 LEN=2173; translated  
MSSKLGRKGDPRMHRVAARMANPNLSLYEALCIGGF DYSENDDKSVLDSKQVTLGQR  
KNQLSRRLRLARKSNSGGGKNPPRSPSAVGNNGGATSTSTTENRNITNIVSSKEPQ  
PRENNAFSKAKDHHSTIYRQKVDKFNELATGSFNGNKSIGIGDAVGDHQAKRTRFT  
CPPAPVTQP KLNWNHSLHQGWMYVTDPMNSQVTTTSQSVSQYQPGASAVALSSTL  
STAQAVGLTLEQLALTLSSNTTSLTKLVAEARSGESETKQELMALNLYQNDIKPLY  
TKCLLVAGVDASLAEQNTPTYVKFATKAWEFEGERLQTLRNAMNIGKETKHTVAF  
AESSFQQNYTKSSSRTPTTNSKANNDNSDRHDSSECESRHFHRVGECEGKAVIHK  
PKDGPPHIDFIVNDQIECYQGQDSMSLAGTSLAGRSEKSLDSYWPSKCLKKEVDE  
AGPKSCAKSVGAQFDSNWGHLEPLVQEPKTFKLSEISAQDPEWTFDATDGAGIDN  
VAMGLFELGREVSSDVANC

>comp6013\_c0\_seq2; 438 159 1823 LEN=1869; translated  
MANPNLSLYEALCIGGF DYSENDDKSVLDSKQVTLGQRKNQLSRRLRLARKSNSGG  
GKNPPRSPSAVGNNGGATSTSTTENRNITNIVSSKEPQPRENNAFSKAKDHHSTI  
YRQKVDKFNELATGSFNGNKSIGIGDAVGDHQAKRTRFTCPPAPVTQPKLNWNH  
SLHQGWMYVTDPMNSQVTTTSQSVSQYQPGASAVALSSTLSTAQAVGLTLEQLAL  
TLSSNTTSLTKLVAEARSGESETKQELMALNLYQNDIKPLYTKCLLVAGVDASL  
AEQNTPTYVKFATKAWEFEGERLQTLRNAMNIGKETKHTVAF AESSFQQNYTKSS  
SRTPTTNSKANNDNSDRHDSSECESRHFHRVGECEGKAVIHKPKDGPPHIDFIVND  
QIECYQGQDSMSLAGTSLAGRSEKSLDSYWPSKCLKKEVDEAGPKSCAKSVGAQF  
DSNWGHLEPLVQEPKTFKLSEISAQDPEWTFDATDGAGIDNVAMGLFELGREVSS  
DVANC

>comp6013\_c0\_seq3; 443 215 1939 LEN=1985; translated  
MSSKLGRKGDPRMHRVAARMANPNLSLYEALCIGGF DYSENDDKSVLDSKQVTLGQR  
KNQLSRRLRLARKSNSGGGKNPPRSPSAVGNNGGATSTSTTENRNITNIVSSKEPQ  
PRENNAFSKAKDHHSTIYRQKVDKFNELATGSFNGNKSIGIGDAVGDHQAKRTRFT  
CPPAPVTQP KLNWNHSLHQGWMYVTDPMNSQVTTTSQSVSQYQPGASAVALSSTL  
STAQAVGLTLEQLALTLSSNTTSLTKLVAEARSGESETKQELMALNLYQNDIKPLY  
TKCLLVAGVDASLAEQNTPTYVKFATKAWEFEGERLQTLRNAMNIGKETKHTVAF  
AESSFQQNYTKSSSRTPTTNSKANNDNSDRHDSSECESRHFHRVGECEGKAVIHK  
PKDGPPHIDFIVNDQIECYQGQDSMSLAGTSLAGRSEKSLDSYWPSKCLKKEVDE  
AGPKSCAKSVGAQFDSNWGHLEPLVQEPKTFKLSEISAQDPEWTFDATDGAGIDN  
VAMGLFELGREVSSDVANC

PEWTFDATDGAGIDNVAMGLFELGREVSSDVANC  
>comp6014\_c0\_seq1; 250 1 1001 LEN=1337; translated  
QVHRSGITSELKDWKKGHRVRPYVLLNSQILRLGFALVVYYRLNRKNSTVVRVSWVAHKS  
STIEPRAEAGTALEEEVGAAMKEVQATVDAMAPTRDTAII GNNSIMXHPISSGNVSNK  
NSGDSNPKGKDYENEYELLLAGRDTFLRSKDHQNSSAFEEEEIIYQCAALGASICIPSM  
AATLNSMSVSHRLRMLPHVVASAFPSRFKADQVRDEGQKEGEEVHADSENGDASVGKAV  
VVEDDADDSSANLEDWLDACGNTQEPQPQTSIPHRTVSPKASDGSIHNSDNGDDVSPSA  
ANLGNEKTAEEAVDNKIEDGGDGLDDWLDSVI  
>comp6015\_c0\_seq1; 443 152 2292 LEN=2533; translated  
MPANDGGLGTALLGEKMVMGNLNLITITKLLGEGGFSYVYLAKNSDGGGLLGSQNTNNGRA  
VSPHRGGSNSESNDEIPPGPLVLKVTSIHSRSQRDIAEKEAKLLSRLSHPSIVKMYVAS  
RTVTNQHSKRGKESMHSGKERPQHCILMEFCEGGHALDVCNKLRMEGKRFDRSTLIIAF  
GQICNAVSYLHAQRPPIVHRDLKPVNFLVKNLAYKLCDFGSAVFGHVLDLRTQQARVEADE  
VVQKTTTQMFRAPEMVDLYVAKXIDAIIVSTVPCFDIIFIQFMSSNATSGQFCDDASNKW  
NNFYAPPTFGLWGAALYSMAFLQNCFEESNLAILSRNYTIPDDNPYGDGLVELIDRMLT  
VDYKARADMTEVILCLSAVYSGRPLPPRKKSTRSSKSDEKEQKNPEETTKKDTQND  
SRV GKFRDTSQGYRDENIYDPTKAKEGKKLASNSVAARRKRAAASSAAVSAGQHSPLSDPLTF  
SSIQQSGAELDTDAAFSSFGDLDRKXLI SLT SVAAILMPNITEDSXALDLITVSHIILTRQ  
TGFENSKADNYFFFAFDGKGIQQGSGANDGFDPDVF GTTGWGDSIQDNMENFQRMKLD  
AIDGDKSKEDNAQRVKSRRKSGMKFRSNRDI DAKNPGTDGEGKNERRSRKEGDQKGEDDKEY  
RQRRRSSSRKGRTPRQSGKAFDEKEGFSGDSEKFSKLG SFRAVFNRKQGT  
>comp6015\_c0\_seq2; 543 152 2065 LEN=2306; translated  
MPANDGGLGTALLGEKMVMGNLNLITITKLLGEGGFSYVYLAKNSDGGGLLGSQNTNNGRA  
VSPHRGGSNSESNDEIPPGPLVLKVTSIHSRSQRDIAEKEAKLLSRLSHPSIVKMYVAS  
RTVTNQHSKRGKESMHSGKERPQHCILMEFCEGGHALDVCNKLRMEGKRFDRSTLIIAF  
GQICNAVSYLHAQRPPIVHRDLKPVNFLVKNLAYKLCDFGSAVFGHVLDLRTQQARVEADE  
VVQKTTTQMFRAPEMVDLYVAKKLTQSTDVWALGCCLYSMAFLQNCFEESNLAILSRNY  
TIPDDNPYGDGLVELIDRMLTVDYKARADMTEVILCLSAVYSGRPLPPRKKSTRSSKSDE  
KEQKNPEETTKKDTQND SRV GKFRDTSQGYRDENIYDPTKAKEGKKLASNSVAARRKRA  
AASSAAVSAGQHSPLSDPLTFSSIQQSGAELDTDAAFSSFGDLDRFENSKADNYFFFAFD  
GVKGIQQGSGANDGFDPDVF GTTGWGDSIQDNMENFQRMKLD AIDGDKSKEDNAQRVKS  
RKS GMKFRSNRDI DAKNPGTDGEGKNERRSRKEGDQKGEDDKEYRQRRRSSSRKGRTP  
RQSGKAFDEKEGFSGDSEKFSKLG SFRAVFNRKQGT  
>comp6015\_c0\_seq3; 488 152 2180 LEN=2421; translated  
MPANDGGLGTALLGEKMVMGNLNLITITKLLGEGGFSYVYLAKNSDGGGLLGSQNTNNGRA  
VSPHRGGSNSESNDEIPPGPLVLKVTSIHSRSQRDIAEKEAKLLSRLSHPSIVKMYVAS  
RTVTNQHSKRGKESMHSGKERPQHCILMEFCEGGHALDVCNKLRMEGKRFDRSTLIIAF  
GQICNAVSYLHAQRPPIVHRDLKPVNFLVKNLAYKLCDFGSAVFGHVLDLRTQQARVEADE  
VVQKTTTQMFRAPEMVDLYVAKXIDAIIVSTVPCFDIIFIQFMSSNATSGQFCDDASNKW  
NNFYAPPTFGLWGAALYSMAFLQNCFEESNLAILSRNYTIPDDNPYGDGLVELIDRMLT  
VDYKARADMTEVILCLSAVYSGRPLPPRKKSTRSSKSDEKEQKNPEETTKKDTQND  
SRV GKFRDTSQGYRDENIYDPTKAKEGKKLASNSVAARRKRAAASSAAVSAGQHSPLSDPLTF  
SSIQQSGAELDTDAAFSSFGDLDRFENSKADNYFFFAFDGVKGIQQGSGANDGFDPDVF  
GTTGWGDSIQDNMENFQRMKLD AIDGDKSKEDNAQRVKSRRKSGMKFRSNRDI DAKNPGTD  
GEGKNERRSRKEGDQKGEDDKEYRQRRRSSSRKGRTPRQSGKAFDEKEGFSGDSEKFS  
SKLGSFRAVFNRKQGT  
>comp6015\_c0\_seq4; 498 152 2177 LEN=2418; translated  
MPANDGGLGTALLGEKMVMGNLNLITITKLLGEGGFSYVYLAKNSDGGGLLGSQNTNNGRA  
VSPHRGGSNSESNDEIPPGPLVLKVTSIHSRSQRDIAEKEAKLLSRLSHPSIVKMYVAS  
RTVTNQHSKRGKESMHSGKERPQHCILMEFCEGGHALDVCNKLRMEGKRFDRSTLIIAF  
GQICNAVSYLHAQRPPIVHRDLKPVNFLVKNLAYKLCDFGSAVFGHVLDLRTQQARVEADE  
VVQKTTTQMFRAPEMVDLYVAKKLTQSTDVWALGCCLYSMAFLQNCFEESNLAILSRNY  
TIPDDNPYGDGLVELIDRMLTVDYKARADMTEVILCLSAVYSGRPLPPRKKSTRSSKSDE  
KEQKNPEETTKKDTQND SRV GKFRDTSQGYRDENIYDPTKAKEGKKLASNSVAARRKRA  
AASSAAVSAGQHSPLSDPLTFSSIQQSGAELDTDAAFSSFGDLDRKXLI SLT SVAAILMPN  
ITEDSXALDLITVSHIILTRQTGFENSKADNYFFFAFDGKGIQQGSGANDGFDPDVF  
GTTGWGDSIQDNMENFQRMKLD AIDGDKSKEDNAQRVKSRRKSGMKFRSNRDI DAKNPGTD  
GEGKNERRSRKEGDQKGEDDKEYRQRRRSSSRKGRTPRQSGKAFDEKEGFSGDSEKFS  
KLG SFRAVFNRKQGT  
>comp6016\_c0\_seq1; 454 201 1655 LEN=2114; translated

MKNSSLAFQRRRRVAIALVPPFVSLLCMDAIPASSAFLQSTKQIHSSSSLLYSSSLILSK  
ESEISPKTCNDGSSDCLVSSVILDESSPKEPEQRRYDQSKHSHNPINGWLKDQGLPRGL  
RHALLDNIQEVSSKRIWIVDNSGSMKMMDGHENLESRRDRDGRDEYKDVNKEDDKILVPRI  
GVVSNDFADGDISRWTELRTVNYHATLNSVLGAPTEFRFLNKPNSGGPRNFRVGYENQH  
IHRQSNNNENKIRIFGGGGKNRNVGRKRDSWRAHKIMNRNQPKGQTPLEAVLDVKRDI  
KMRPQLLADGMRVTLVICTDGCSEDMETVLESLKGLPVNVVIRLCTDFGNVLDVFNALDE  
RHDDPSGSFLDVLDDHEGEAAEVYRHNPNWLNALVHLHQMRELGLQGSNGLLDVLDQRALS  
IDEIRDFCALLFGTTADLLPDPDLCWENFVTEVDHLQQREQCHWNPSLGEVTPWVDVDEL  
LAME

>comp6017\_c0\_seq1; 776 183 1604 LEN=1903; translated  
MSESKPLIPNDDDAEMLRRLKAYQMAFFVTFGGYFMSHF SRKSYSTVKQQLELKAGYTA  
SILGAMDTVFMLTYGAGNVINGKLGDTFDPVTILAIGLWGSAGCLLVMTAAVLADLVSVN  
VLLANAVILGTLFLFGFFQATGGPVGTAVMGNWFCDKDAVKNRGSIFGFWTCHQYVGDVS  
AGLVTAWILGSGAHYTWALFVPAVANILFAFITIQLVADPNMGIITPEVKIRQAKFEAK  
KKEMA EKGETIEADTGLQAI SFVDAFRIPMVANYAFAFGFFKLTNYCLFFWLPYFLGKHF  
DPVEANLIASLYSVGMMPGGIIVGYVSDIFGGRRALVIGVFMGLLIVFLSIFAKFSEAPD  
LNPTVLLIMLFCMGILVGGPNNIITSAVAADLASHPSVRGSSKSLGTVTGLINGCGSFTS  
AVGLLAIGPLQTAFGWSAVWIYLLIGCTAAGTSLMGSKIYAEVFPSPNEVRSTDV

>comp6018\_c0\_seq1; 455 1 878 LEN=1292; translated  
XQQQQQQQH HHHHHHQQRQHQRQDQQRLLLTQLRYEPQ GKQQTQFAQPSLSLHQSTQMY  
PNSTHYEPVAPVESSNDVLLGSGPPVTPDCSYHQSPKSTALYIHSAPPSDFNLSFSTT  
EFQVDYGVKGDDSKFSTLKAPTPIEGDGTCTVTSAPSFSAAIATNAYQTGELTSSDVLAT  
GGYSAMLHLLTAKSLEPSQKKHTVAPTFSHNSNNQRQQQYHEQEYKHLHQQQQYQPPEQQQ  
QYYQQEQQQHCEKDDFGVLP LTTLSRIESGTVDSHLRKGEGMEEWDL DLLL

>comp6019\_c0\_seq1; 423 265 1311 LEN=1460; translated  
MGRVAKYKVKVKSFDPPYSKKNRGNVDLSAVGVWGLGDNGRKKKRSLSKAQKLHAKKHRNSS  
KKKGTGGFDDDGFDVPPDEEDEF TMADLVGSIKKKSMKTNEELLGDSSSSLATTTSSFLG  
ASSSVSNDKTEPKNNKTADES YDTIVTSSGNVANIPKTDQDEKKIERLLRVEEQMEQKSK  
LEKQQTQGRMEGESKRAYAKRTRAETREI IKQSTTTVRNLEKLQKKKEFLKNKKNKRRKG  
GAAYYDDEVYDKRRSTRTAIKANQEPEAPVRFNEQAERPPIFRQIPRGA KSKPKTATS  
MASLSKTKGMTDHI EGEKDAMELMRRRIQAQYKA IKQKRRDTGDFHL

>comp6020\_c0\_seq1; 257 78 953 LEN=1245; translated  
MKHRQLYLYLLFCVVPRSVSGHFFWAETDQDADHLTVAFSEHAGVPDKVVERFADRVET  
MAYHNGDTTKNVALALNEENLLEGNLPGLYPPGPAFVSGYLDNGPYERFKDVQFSFGAQ  
IYDSEADYDGFRRPLLRDVG YVPTIVMRNCGGSPGKGSYQFDVAGLPSQGPFGVCLYRK  
GGILLDCGTFSP PQVQELRGEDA HGATPTSVDRFRRLRGRDVANGDRGNSYTMNLSMDSM  
SIESLDEPSLASPNLIYALANQTVVDDASGDISIYIASTSVYFQGPCQADF

>comp6021\_c0\_seq1; 109 1 208 LEN=1351; translated  
XRAEQHDRERGEKQTVSSTKANLKD VNVYDTVEYDVRKEQHMRKEKWKETGKQNKKNNTN  
FDMARALFN

>comp6022\_c0\_seq1; 222 158 403 LEN=1115; translated  
MTNGQRMLRVRFGAAVLLAATRASHATIAVMIHRRRDVAIP SANTSSGSASVFPVPRHSN  
PISGWNNSTEESPVSMYLYYQ

>comp6023\_c0\_seq1; 760 1 2875 LEN=2991; translated  
XKEQQQRERERRVLKKNLLRARDSILYFGESENEPGSGPSEELKSDILPTLTRSYSSVI  
LRAPSPSSSSLDLFD PWDIRDVILQESRPVQERFLGLLAVLMQVTTTHIQEEYTVYNNTAA  
TRKAKQKSAEITDLIRAVQS QLWRTCRLILEDMLAKTTNSAETMNQVTHVLSPIPI TAL  
ATSLRALS AVSGENGNVYAGSVEEIKELIQLVNEAR IAGSETHTHESIDDDKLD RALLT  
AWNCYLSSLCDRALITNNPYDSGLASAAALLRMKSNETGLIDPDITSYNTVMGNAAKLGN  
ATLVADVWLWEDLLVKRGLPEDRRLSLQPNRSRTYNARLMVTNDWAKRLEILDNEIHS DTHD  
NTANGATAPTEMTNIDGFTIDL LLIPLLQAHRRKELFKLIDDDWMITVDRHHHKPPRKGEA  
TDEKQRKQKNKAQRAFQNASAFFITLVQRNGDVCTARELWNR YMLVEIDNNKEVSN SG  
DDSGEETASCNATNIVFPERRHYNILLDGYARLVDEVRDRQGP NLDIAVKKIGFSK KKT  
STNSKKIWQPNGDAGSDLDVVSNSK FYREVQEKAISDGQNLFAIMMAQAQQQNPRNKVGS  
DVYTKSTMIRLCRSGREVRNLL EQASDAT SARAGRSPDKTWLPRSVVRAAITTCGR LGD  
PSMACEIFEDFMFPENDSDRRKFFSNYRAFNNLLGALANGAKMENPKLVMPTEFEFGGTR  
PQTL LGHVHGLTCTEAVVCILD LMTSKNAQTYCVAASALQYAPLDEQSRYTPSSDGVDEK  
GTNTP LGLQIFHNATKNGIHADGRLVNAIFRCYGD DIAGALDGWKTHIRRATDQYENRTR  
LSTRKNMLAAYNGLLYVCGRAERPDIAVRIVYAMKKEGLEINENPYNCYRSGKTTRESLL  
SSRPDEQEDVSKEGKWRMRMLPKLGMVGYENILYVECKKYDTRDRRTQNDKRVRIIV

>comp6025\_c0\_seq1; 631 181 2391 LEN=2431; translated  
MSSLSDNSVCSTKTSQAWAILRRHARDEISNLRLQELCRDNDRVSSLSVSYNATTTPSANS  
MLMIDLSRQRMLETNLHMLCLGTARGLPKFIRQLSWGQNDPENPIVPTRFLLPDQDNPYA  
DGSTPNAKKNKSNRHRHGERDRRNI EQNQKQNDCSRCSIPSYHMALRAPSGRNLEMLTRDG  
LNLVVGIIHSDWNRKRISESLRRGKLPGVTTGMIKDVVVVGHGLTAMALRFVYTALCEDE  
AATIGRRLGMDGRNPKKSGSELGHRMKFLTTVDPVQAAAVTDLDP SATLVI SVAMTGKE  
NRDTTMLATQTLQSWLLSKLGGHGRPEFILSKHCMLVTSNEDLASKHKPESVFLIPDHS  
RCEPFTTCTAATLLPLSIVFGWPAVEAFLSGAHDIDKHFVETNPRHNLVLLALTDVWND  
CLLSPNNNNRSAPYSANSGRILTPYTEAFVAYPAFVAAL EAQVCGRKRKERNNNSSWMS  
SSMSSSLNEMHPQSMSPPPATVQSSACSSLVIDGGLHGIYDHSLYQSPKIPSELVMTL  
DSQLATNGCLLGEENKVF EAQDTLVCSLFAHADGLAFGFDQSNDDHYADDKSPVGTGF  
GGDESNTFVDEQEPAEHNRSNGNRPSTLLLCGR LDAFTCGQLVAMAEHRAVIKAWIWEID  
PPFVNREGSSTTLPRSKRTDLLKERLGMMSDGYSEEDDEDGDDIEHAPGLNLSTKTI LR  
HYANTMKGQRRSAMNN

>comp6027\_c0\_seq2; 209 160 540 LEN=742; translated  
MSGTNDPLDVVQQLIDKNKDSFGQMGFGGFMGYCSGMAFRKAGRAVGVVIGLGMGLQTA  
KSMGYIDVDWTKIKDDAIKPLDTNADGKLDGQDLEVVWKKSQAIMKDSVPEAGGFSAGFL  
LGARRG

>comp6027\_c0\_seq3; 178 61 279 LEN=481; translated  
MGLQTAKSMGYIDVDWTKIKDDAIKPLDTNADGKLDGQDLEVVWKKSQAIMKDSVPEAGG  
FSAGFLLGARRG

>comp6028\_c0\_seq1; 496 1 2694 LEN=2859; translated  
XSSSSSKAEPSSSTASTSSSSPYSSMVITLGQTTGMSPVQAERAVGWSTITGTGLVAAKL  
ALYAYRSLKGEGRIDEISDCTTEVSKEGKVPKDVVTKPQQRRRTASYSILGIFRRTLRRM  
LLDESEYIARAPPPTAEEDAIAEQSEGPLVTYQGSCHCESIQFTALAPRELKAQDGPVKI  
QFRHTQVRASNFR IYAGYEHLKTYVVFYHSSGNKGAHAF CQRCGVHVLVYAPSKSTPFLSI  
NTRCLRDEDNRKIKLTSKKDGI SEGIPVAGQFDNTNMFSDQLSTISEVTQPFHFQMNH  
SNNANAQYKNPVTDLRRRPSDISSMESSIISGDGAI EVFYPTPYDRKNRPKQQLQRPMT  
TTSSVTGGEADSSGSLYKGHNLQMICPTSPPRSGGASIGGIDEFSFGESVSLMDDNL  
SVASPKTATISIRRNQHTLRVKAGGENQSLHSNHPPRHPTVTS PETRNKMKFFMSKYKKQ  
PSSGNKMRERTEIVYVGRKKPKTLAFSAMGFVSHYVKAIQNRDVPRNTTEQLFEMYNRNN  
TTARRITPLELLDRHLFQHLEXFVLELVKSTTFEKEGFLKSERMLRSMRFSVKKXTEA  
SKEISSVRSPLSPSMDDKSGTDFTFENKNDLVGAALAAIRLIGGRIRGMKKGKAERKKT  
TEATPDAALRGFGSGAMQGIAQPYXNEANNCLTSTLDVNAS TTRGQSF AFITSNMLHCE  
MPPLKEATVVTTSPCGMPMVHWEVYLKTSPTLSPPAPSAVHMARLFFGSTFSPKGSLYR  
TSTSSLGPEKTEGNLSLATTLELEGGMLSSISSRSLSVSSAAANSGAETVICSRATGAPG  
DGDTKARAVDDSDATR RVKTSVANWFVMVKNYCLRMFVSRTEGINGFVATESVLDQRR

>comp6029\_c0\_seq1; 301 1 857 LEN=1016; translated  
XLHGNI FVKTQTPNTLLLWHP SKRKTMRKMNSDDDDHQISPTHTPGPTMDAEKDTNI  
RSERPGMRRTNASKPLTHIHFDSSDDV VATIDMPREEFTERWYTNSEYYVFRREATRACK  
KRQRVKQKDKLDDNVSCYTGLDMVCDEALEARKLLVEKALD TVLRTQEVHGKTDGPSAR  
TSGESHGSRNRSNNDNDNDINNDNEGRPPETKPPMDEAIARKYIEISCDTKARALKAAKV  
NENEAK EYCRALRADLVDIGVIARTKTTSLDLSRALHRLRLKSE

>comp6031\_c0\_seq1; 319 223 861 LEN=927; translated  
MSALNLKTAASLMVHLLLVP TTVVEGFQHYHRVSI CHLASSSSTAERGNTVLFNTQGDDND  
DDDWSSSLPLSKSPTPFSQQL EQGKFNPLDYRGKSKTNRSSGSAQAQVNLRSMRMSMTD  
DLLNSLGNKAAMRAVLEENRDFLLEPLESEETLAGSGSIYTPDMSRSERYQAYRKNVNR  
LESSNNAKAKAVLTAMRDFVLEFENEGLQNE

>comp6031\_c0\_seq2; 248 223 693 LEN=1450; translated  
MSALNLKTAASLMVHLLLVP TTVVEGFQHYHRVSI CHLASSSSTAERGNTVLFNTQGDDND  
DDDWSSSLPLSKSPTPFSQQL EQGKFNPLDYRGKSKTNRSSGSAQAQVNLRSMRMSMTD  
DLLNSLGNKAAMRAVLEENRDFLLEPLESEETLAVR

>comp6032\_c0\_seq1; 158 124 431 LEN=431; translated  
MNQGSVPAAQPGARHVSQNVVDTSRLPQPLAKVAPSVDDDAQSLGVIAAPAADETQAHT  
QTQTQSQTHQSSEIGTNNNTNSVAPAHIPVVEETTNSSSSSSX

>comp6032\_c0\_seq2; 149 124 362 LEN=362; translated  
MNQGSVPAAQPGARHVSQNVVDTSRLPQPLAKVAPSVDDDAQSLGVIAAPAADETQAHT  
QTQTQPVVEETTNSSSSSSX

>comp6033\_c0\_seq1; 477 1 2297 LEN=2411; translated  
ERSTHWTI IHPTYSCCIRIVLFQLLIVITAELHNXEKTVKYEVA SSLFISLLYRANANDS

SASLRGSAGIQRRALRVQHPCTLVQIESEYADELGEAELKYGSRERMYNGSGHSNRRELH  
DEDYEVKCELQAEDRAAVGTYFVPINGIERGQLDNIISGDTTLIAEGAMIMDGMWLPAG  
AAIEFGSNRRKLQOASRTKGTKKVLVVRANAQDVTSSSKEILSDKIFGTGNDLANLSS  
QYSACSHGQLEFEPFRGMTEGGFYVDNGVIDVNINMNAIDTSRFVVEDALEEAADKIVGS  
LSDQFDHVMLCLPPGSRVGSSTKNWVAYAYVNSWLSVFNDSFCESLTTQVHEIGHNLGLA  
HSGKDGVSYGDKSGMMGFSYKLLDDGPLQCFNPAKSYQLGWYDEKVVVEIDPNDGTWVGLI  
GVADYENASVSQNSKVVVKILSPDNKNLFGYNRKKDMNSGVLMAANRITVVEQAPNYS  
SDFLANISIDEPTHTFFNFSGSNKNLVVEFVKRQSFNEVTVAIYYDTCVFPSCCNGSTC  
NDPNFWTPTDAPIPAPTLAPQAPTAAPVPAPTFAPQPVPTPVVSPTRLPTTPTPVPTRG  
RLNVLTTGGQINRPKPLLEIFKDGGLGAFHGGGNKVEQNEFYILTAKFQMKDENKLPYIE  
TDLDLDGSNVVQVNFYIIEKMDFTDGFKLQYSTSHGDSWTDFFEYRYGINIDEKQRWNF  
VNAASFEVEKGTSTTKVRIVGDTSKNGSNAVYVAGVSIYGIEK

>comp6034\_c0\_seq1; 513 1 2635 LEN=2779; translated  
XQSSKAKASLSSSDFGVHRSYVFLPMVVRITGKMMCGRWQLHSCPRIAAGIGRRRST  
LRELHSVRSRIRPRRSLLEELTTVQSFARHNTGNRTAATVTDAPSHERGIRNRNSLG  
LRRDENRVLIVGGGPTGLFLAHLRSYNVFPRLVEAQTPEGRFQHPQAHFLNTRTMEILK  
HGLSYCNDHNGNPNEPNDIYRRLRGAMPVVEEWSFRFGPDMTCNTLDGKILAEVVHPVD  
RPLAATEDANGRLVPEAAGDHRTPTSTARERGSALTSPESVGHQAHTFCRILYDALVD  
SPDDEVMYERRATGFDWNEETRLWNVQTDGRDLFDDVDVIVAADGAASSIRKNLFPDGT  
RGGNDSTMLGHTLQRLINVHFTVSEETTSIPPAMLYTIFNTEVLAMCVRHGPGEFVLQI  
PYFEPYQTPEDDFGIESVRKMGISILGNSNGFTIHSIRPWTMGSLVARKYHTDNGVFLAG  
DAAHVFPAGGFMNTGLQDVYSLAWQIAFNRTKQNPKDRTSNNEDGNSTFSSLSIEGR  
TYERERQPVARRNAALSVRNVRVNLNMRACYLDDRHPAFLIQUALDATASFVPLEARRQT  
FRTLLKTALSPLSQLESSPDGIYAQTIKGNLRSLLGSGQGLPLLPYELDFSYGAPGEH  
GTSVDGEDEWSQDSVASFPRLVVGGLFPHIVASVEPTLLSFPRLQPIDNGEDNANGRNR  
FIVTGTTADELRTISTRDLPAQLATDETPCAFCIVEIVSSTGVKPDDTLPSLQKSLQKGL  
GIPILMSRLTVYSNSDGDQATLNGASQIDVIDTSDICDMHMDAHQWEDLNLIPGLSEPNSS  
FKMFVVVRPDGHVAAISSEVPHLENLVLGMKAFLQYDK

>comp6036\_c0\_seq1; 842 292 2745 LEN=2844; translated  
MATCNGCGESFSPSRNAIFRHLKETNGACLKEDYKQFVKYARKTTKAPKVIIMYGYPYD  
GSSCSKSIMIRNGEDAGHILMETINELENEINGFSDEDDNGDGENPNSSSSINNINRSY  
GYSARSAECVKQDEDTAAITEVMTARLYPLHKDMSMENWLDLVQKLLDDKFDEGHDNTMD  
DGNSFRVTPVRIIGRQDMPNLRFNEMDITYRRVEYVLPVDFFSWSPRNAEFKEKIHETP  
IFKENPKHIDHVKETTNPDPATKAFMMELKNFFKLLTTRVVKLDVTDEASVLEKGFSA  
KKLMKRKRDKKQDAEDNRDKCAGCSTSTNAQQKLEGASSVDFKDSRPTKKVKPTKKP  
KKTNVLKRKRYHNFTEKLMAHEYLTYRRLDRIYHRSTLKFPMESSESKMKTTSYMLSMSG  
DMFLTGTQTSRLIGVIVALGNGLIDREFIDCVFDENYPHLVPTPPAPHFGVVSSEVQYANQ  
EGKTRRILSARMSDRYTEGWNNNEATIRRVKDWQNEVYKYVDSKWKDGRDEQGRLRSEQE  
WTEKVLLPWAEKAKEHLEDYKRWKKKQHQSDDLSESSAKHDSHTESSYAPESSRIPQIE  
PIDPTVPEVYKDVLLHHLRKLDAASGEWPMPTSSKRQLVMVSSSDGVKENGKGTESLALACLK  
AKRNELTGSSAYSFAEQGGASGSFVSGIMPGGDKKQPKANSMPDLVKAFFLETKLFP  
DREPSSTIAVNRNAQFRPHTDSGAGAGQSTSLIVGLGTYGGGELMVEGDKHDIRYKAIEF  
DGWKQRHWTMPFKGERYSLVWFTPKGCEGMKGIELDL

>comp6036\_c0\_seq2; 842 457 2910 LEN=3009; translated  
MATCNGCGESFSPSRNAIFRHLKETNGACLKEDYKQFVKYARKTTKAPKVIIMYGYPYD  
GSSCSKSIMIRNGEDAGHILMETINELENEINGFSDEDDNGDGENPNSSSSINNINRSY  
GYSARSAECVKQDEDTAAITEVMTARLYPLHKDMSMENWLDLVQKLLDDKFDEGHDNTMD  
DGNSFRVTPVRIIGRQDMPNLRFNEMDITYRRVEYVLPVDFFSWSPRNAEFKEKIHETP  
IFKENPKHIDHVKETTNPDPATKAFMMELKNFFKLLTTRVVKLDVTDEASVLEKGFSA  
KKLMKRKRDKKQDAEDNRDKCAGCSTSTNAQQKLEGASSVDFKDSRPTKKVKPTKKP  
KKTNVLKRKRYHNFTEKLMAHEYLTYRRLDRIYHRSTLKFPMESSESKMKTTSYMLSMSG  
DMFLTGTQTSRLIGVIVALGNGLIDREFIDCVFDENYPHLVPTPPAPHFGVVSSEVQYANQ  
EGKTRRILSARMSDRYTEGWNNNEATIRRVKDWQNEVYKYVDSKWKDGRDEQGRLRSEQE  
WTEKVLLPWAEKAKEHLEDYKRWKKKQHQSDDLSESSAKHDSHTESSYAPESSRIPQIE  
PIDPTVPEVYKDVLLHHLRKLDAASGEWPMPTSSKRQLVMVSSSDGVKENGKGTESLALACLK  
AKRNELTGSSAYSFAEQGGASGSFVSGIMPGGDKKQPKANSMPDLVKAFFLETKLFP  
DREPSSTIAVNRNAQFRPHTDSGAGAGQSTSLIVGLGTYGGGELMVEGDKHDIRYKAIEF  
DGWKQRHWTMPFKGERYSLVWFTPKGCEGMKGIELDL

>comp6037\_c0\_seq1; 50 1 498 LEN=691; translated  
AKAANGGLPSGVPESPHGFPSDGPWHASCHMSVVLPTACPDALAAALEVIEANVDTGT

EFKGTMSVFDGRSDWIWSSRLTYDRRYTDDQLFGFAGAPGDPSSCFLAMRSRSRSRSLVD  
YGVNYCNMWNVVSRLPGFEGAGAPLVSECYSRNVPSDFVATCARY  
>comp6037\_c1\_seq1; 156 1 514 LEN=514; translated  
EWETTSNTKMQQLRYVVTYACHRHADYSNPSILAIQRTVQRDLATKVAERRPTNHSSTTKS  
VQQEPQQTATGTAAPNMLQQHRSSYDDQLGTARVAAATVDAPDAKASPSAPGRARS AVL  
VFLAAAWAI AVAVAVVVVAPRSLRPGNSKGNKGNRSRSGVREATAKAANGGG  
>comp6039\_c0\_seq1; 482 279 1835 LEN=1988; translated  
MRVAAICLSALLAVMIPTRSSLALATAKSSGVFGVPHGGSTATTTRASTQIASAATMDAS  
TEVPSTDDRRPMHILFLSADTGGGHRASAEALAKQFLIQFPGSTYELVDIWSDHGIFPYT  
NHVELYKQWSAKPWQWRLFYHLSNTKVNVEVSNLHSRFLCGDSIRERLKS D KPDVIVSVH  
PAMNHTPLKSTHKNSKELGKHIPFFTVVTDLGS AHCMWFERKVDKLYVASDRLYKLARRR  
GGTAPEDIVRTGLPIRHGFADQAEKLGQDRSAPQGIQYQAQVRKELGIAPDKQMVLMVG  
GEGVGSLSDIVNNIYAELSSKGV DATICVVCGRNEKLNELATRN FDEVI E E I KAKAEKR  
RNGVRGVLGKVR RNRI AARQAAEASTATMSQKGNIDVMPLGFLTNIPEYMVAADV L VSK  
AGPGTIAEAAA VGLPVMMTSFLPGQEAGNV DVVLEQNFGEFEKRPEKIGERVTAWLQDKT  
LLHTMSQAAMVAGNPYAANEIVEDIGRQTVAWMNLNEK  
>comp6040\_c0\_seq1; 282 148 529 LEN=529; translated  
MDPSASEARGNNANRGSE D GANSSSNDDSN GTTFRASRPTPLTPYSFIDPLGLGMDS PY  
ILPNPQMAANYFAFMNGLNGSAASPATAAAGAGTAPAPASSKRVTVHIVGTNHKNKNNNR  
TSNSNSNX  
>comp6041\_c0\_seq1; 344 614 1609 LEN=1697; translated  
MGSKKDQDTTITIGTNE SLVVLHETLSRALVTPNSSSNLHEKALQEKQEETQRKALSPRP  
LKKRKISIQGT MATQVSATQVSEAVDAGEDEALIRRKQLAAKLRAGVCSKLVLPSSFA  
RTIFVKNTRQYSSSPIELPPFYDPTPADVDI HQNHSHKLYNYVRKGTDMEGFKEFVREL  
RRKYNSSNTSMQGNQPFRCCKNFGESLIHLTCRRGRTEMTRFLVEELVENNAVAARQTLT  
VRDDCLKTPLHDACWTPTPNFELVELILKHCPEQVLMADIRGNTPFDYIRKEDTNLWLKF  
LWQRKHLLRGISTSTTMTRDATPSNVAIPSN  
>comp6042\_c0\_seq1; 116 1 694 LEN=1055; minus strand; translated  
XVTTDAIKGN GAVESPGEQICNLAVKCAPVAQGVAMWAREITRGGEFVSSASYVVISPSI  
MTLARIVYMHHPFTRDDVVEVAFQFLKHSNSEVVYHTMNTLKEQSLRLLLFLCTRGEAPV  
VFSQLMPLLKDPGRSGLDASLIRYFVSGLLEIASPPFSIPFVRS LMILLKAPGSVDALKT  
SYFDKDSKSR LKSVMNYLRTRL SGKLRPLAKEDISLINSVLSIYSPTSG  
>comp6043\_c0\_seq1; 324 339 1604 LEN=2380; translated  
MPAQE LDFVIHDMLAMSAFCYHFHSIRTIVRSKDNTTVKTGFLGFGKPREIKFFRPELI  
ITRNSGIERDPNQQLLHDITPAAIQEFIEENRSLFQDDMDGSLEFDPSDTKKDEPFLVE  
GVLKEQMEDNLKI IDYDDRFSTDKGGLVYMIVTNL TQKTITVCFRGTIGTTDMHTDRDFR  
LNTEAFFGSEDDF SVPKSESHNPATHNGFTTYLTSNRETDSIERPYAQRILACLNAEFGN  
NKDVKGKGFKLFVTGHS LGGGLANLFAFRAAQLKARGDKAVEHLPDMIKALTFAAPCVGN  
EGYEA EFQALEKKGFLRHIRVANEEDVVPTNCISL PFS LAIKGDTSLYRQNGVNLQFHPD  
KTCDIVYGNTKSMLSQFSPTRSLNTHYLTEYRVRVVGKPENEKVYDQTI EDIYKEATNNFA  
A  
>comp6044\_c0\_seq1; 86 232 615 LEN=1684; translated  
MAGRHLGAFSRTLPAKMAVGPFARLIAQAIIPVVAVLARAIPAAYGQALNNAKKAGVDAS  
EAAAPVFGKTI SRSEALMVLNLT EDEVKADPKAVQKVSIDHRSAARRCVFSFVALVVGI  
AVQFDRVW  
>comp6044\_c0\_seq2; 130 232 675 LEN=1237; translated  
MAGRHLGAFSRTLPAKMAVGPFARLIAQAIIPVVAVLARAIPAAYGQALNNAKKAGVDAS  
EAAAPVFGKTI SRSEALMVLNLT EDEVKADPKAVQKQFEKYFEANDVSKGGSFYLQSKIY  
RANELLQEFQAEKQKEASSTTAGDKKQ  
>comp6045\_c0\_seq1; 415 119 916 LEN=1003; translated  
MFRNQYD TDVTVWSPEGRLLQVEYAMESVKQGSACVGVKSGTHVVLGALKRSVSELSSHQ  
KKLLEIDDHICMGIAGLTADARSLAKYMRNECLNHKYVYGAPITPAVIMGDLADKHQRTT  
QTYVRRRPFVGLLVAGVDPQFQTPHLYQTCPSGNMYEFYASAVGARSQSARTYLEKHYES  
FPEASLDDLI VHALQALVGCVSGDDELTKENGSIA YVVKDQKYVLLLEGDALQP YLDKLEV  
KNAQEDED D D D D D E E E K S E D E T M E T  
>comp6046\_c0\_seq1; 601 122 1510 LEN=1649; translated  
MVGSVKLLIASLCLGQVNSQREQLRGRNAKESLDERERNLQVAPTFTFEEQEGYDDYFEL  
PTDVA FSGGQAASDYFTETGDGMEYHWESASGGRVESGGGYFEDATDPATDPPKIGKFTK  
AVKSAKSKEGRYFAKSGKSGKAFKSAKKGKSMKGQHMNTRAYDDKHDGYYEGDVVVEAEH  
DDYFAGTSFGAAVVDTPSYADYFAYDPTTTGRTESDDYFNPAPKPRSEVEGRSSSFQHRS



SANQQQQQQRQRQPTTFDDDFNNEEVVIFRPRPVVTVGGSVFVSNPQTLIPPLVPDGS  
GNTLTVGTQYLFSEEELEDAANVNSQLVPVEVDNARVNFVNLVDGYCDRIGPQDQNSVQGY  
CFFTYTFIDPQTRFISGAFTAQGIIVNSQVPGQLTITGGTMMTGASGLVEVLPAAIDNG  
RNPPLLIQPQAGADPFNDVSGWAHFFEFVDVDFLFFLPDLYAQ

>comp6048\_c0\_seq1; 189 1 1123 LEN=1916; translated  
XSVLLGTLRTARFQGIQTKATFRSKTKATRMTEASPTSTAMP IWITDSRIDPSWIEENMP  
GDFPSVSGCTAEDISNDGRRGNPNRNGSTLLLRVTRRDDGIETNTATKIKTLVAKQIPPS  
GLALSQRLGLAREAMFYNLAPRIKFPVRCCTPKIYCSSGSMDDGSKIIVMEDLSGGFVD  
SGILFGPGNPNNWSRDLWAAIAGAYPTLSRVPTPFVAVANQSFVAMASVHAAFWRDSALLG  
DEYSWLRGSSWTSGSDEASWRASQGVVQASWARYTASEIENDNDGGNNNDEQRIQWDLV  
REILETAMKGISWESQRQRLNAGSNFCLVHGDFWPGNVMISKDQGPATSVIENDGRKGC  
LRQLRLLDWEMVGE

>comp6048\_c0\_seq2; 220 1 1447 LEN=1784; translated  
XSVLLGTLRTARFQGIQTKATFRSKTKATRMTEASPTSTAMP IWITDSRIDPSWIEENMP  
GDFPSVSGCTAEDISNDGRRGNPNRNGSTLLLRVTRRDDGIETNTATKIKTLVAKQIPPS  
GLALSQRLGLAREAMFYNLAPRIKFPVRCCTPKIYCSSGSMDDGSKIIVMEDLSGGFVD  
SGILFGPGNPNNWSRDLWAAIAGAYPTLSRVPTPFVAVANQSFVAMASVHAAFWRDSALLG  
DEYSWLRGSSWTSGSDEASWRASQGVVQASWARYTASEIENDNDGGNNNDEQRIQWDLV  
REILETAMKGISWESQRQRLNAGSNFCLVHGDFWPGNVMISKDQGPATSVIENDGRKGC  
LRQLRLLDWEMVGLGSGPQELGQYIISNMDPSERLVCEETLVRNYYQQLVHELGSNGSSC  
NYSWEECWSEYKIGGLERWLWFLAYFSGQPSMVEWTRFFHDQVKAFFVHDHKIGPANVTQP  
RP

>comp6049\_c0\_seq1; 436 98 1387 LEN=1458; minus strand; translated  
MMGTFNNDAPQLCYNAAKSWYLGWYEEENGHEEVPWNGYWEGKLVAVPDYLEKIKGIG  
NPNDYRAIVKISDLYLQFNRRKAPTLDQPEDVDRVAVVSQLTQVEGTQSWKLGNSLDV  
GEMVESGIWAVKVLSDTEATIPYAKVAVYNSKHDFDEPMVDEARSQMPFPTTAPLPITKR  
RATKNPTPLPTRPTPIHNTHP IHSPTSPSPNPTKDPTFLPTSNPTNGSTPFPTKDPH  
LPTPDPTKVPTSLPTNGPTSSPSVTSSDLVIYEVFPNPKRENDKDAEYIKLFPSTVATV  
SLSEYQVYDSTSNRYSVLTAKPTLGPREFFILCRNKRFDDVESVIPSGASDGCDDQGHF  
LLHDLRSTIILQRQEGGEHEDIDSVQTVDARDHGDKIYARLSDNVNAETECATCFDWFPA  
YDGPKAAQG

>comp6049\_c0\_seq2; 426 116 1753 LEN=1824; minus strand; translated  
MEHLLLRTHTSAGDGKWMFNVDRTSSRDSMKTTRIFLKLIMKRGRHSQRRFANVGRNLLF  
FSESLPPLMKHLRSVYKDPYGSVWVQIHEVGHNNGLGHSGLKRGHTTNSYGDKTCMMGT  
FNGNDAPQLCYNAAKSWYLGWYEEENGHEEVPWNGYWEGKLVAVPDYLEKIKGIGNPND  
EYRAIVKISDLYLQFNRRKAPTLDQPEDVDRVAVVSQLTQVEGTQSWKLGNSLDVGMV  
ESGIWAVKVLSDTEATIPYAKVAVYNSKHDFDEPMVDEARSQMPFPTTAPLPITKRRATK  
NPTPLPTRPTPIHNTHP IHSPTSPSPNPTKDPTFLPTSNPTNGSTPFPTKDPHLP  
DPTKVPTSLPTNGPTSSPSVTSSDLVIYEVFPNPKRENDKDAEYIKLFPSTVATVSLSE  
YQVYDSTSNRYSVLTAKPTLGPREFFILCRNKRFDDVESVIPSGASDGCDDQGHFLLHD  
RLSTIILQRQEGGEHEDIDSVQTVDARDHGDKIYARLSDNVNAETECATCFDWFPA  
YDGPKAAQG

>comp6057\_c0\_seq1; 233 727 1394 LEN=1555; minus strand; translated  
MKHGVVLARQCFHVSRCYEGVLELRRTLSVNGRGRPVVWPVQNLVAPLADHRFDRKCV  
PFRHLSVGFVAVVQDVGSGVEDAANSVTTKVSDGRKAKRNNVVFHDGPPQFFVVPAGLNK  
LAGFDPAIVCCLQQLPLLDVAVYKHFVAVSVAVQVYRDIDIDNIXHPLVSDRLEFRG  
KSPRLHSYNSLEIRGSSVELLVKQNRFTTRTTNKNTDKEESE

>comp6057\_c0\_seq2; 444 179 1417 LEN=2035; translated  
MPLAAAFRPSGLSPRMVPSTFSQTNRVENDRTSSSPTALFMGKKGKGGKGGPPPPAGKG  
FGGAIATDSPIDKFPYAGTVRPGIQSPQRKIVLSSEEAKKILPDYALDGRPKKGSNSPLL  
PWIEVKKPEEIEKMRVSGKLAREILDLAGRAVKPGITTDEIDTIVHEAAILAAGAYPSPL  
NYHGFPKSCCTSVNEVICHGIPDDRKLKGDVNNIDITVYLNHYHGDCSEMFFVVDIDQQ  
GKALLQATYDCWIKACEFVQGRDYKELGAIMEDHVPLGFSSVRNFCGHGIGSVFHTTP  
NILHYRNNEPNGQMAKHTFTIEPMICEGSKVNLNWPDDWTATTVDGKRSAQFEHTLVVT  
SDGVEALTCKNENSMLHFWEKESVYKGFVLSSEAAKERAEALNTKILGDL

>comp6064\_c0\_seq1; 242 512 1105 LEN=1238; translated  
MPGKHWPVVSFTGGLRELRVVEDGSFISMRGNQIVKPLKGCWELVWRKGDPDGTLTFGLE  
LDQVYKRNDATLPGMIYISLTTWSSEGLKNAQSFKKRSTERADMALKKRDEEIEFKMNH  
TNIHQKGLHYKALCAFDEYLMENLKMRRIPSEDEVVHLEGDLYICKSGKVWTHDSPMG  
KQATIGTVSLELLSKKM

>comp6075\_c0\_seq1; 182 1 543 LEN=671; translated  
CPSISFILFGSFSIFPAGIDLVDGVDVPTFLSVLFFRLKNSPSADFDRTKGRFSEEEFP  
SSALPLSIFSLKLARRNNSPREFLDLLRLKEGFSIGGLSRTWSSTLWLINSSNPVRSAS  
FSTPSSWMEGSTSDLARRCCEILGRSMEGGDKDGVALLWLRDRAILGDLERFFLNEILF  
>comp6078\_c0\_seq1; 104 1 238 LEN=238; minus strand; translated  
XGDYMASIGLSDRTEAIIAGSFLEEFPAELSKCDAFIMRYVIHDWGDEENVKILENIRAVA  
SKTEKKKVVVVMDQILDGTGA  
>comp6088\_c0\_seq1; 275 188 910 LEN=1378; translated  
MAKESKGNRNNSHVNGHALLLYPSDGALPLQMYLENALSTVDNEEDPAVTENDVQTAIT  
SAKNDGNSRNSNILVVVDGTWAQTQSMVQNSNDLLWKLPRVMFDETTNSLFDLSLRQEPAP  
HCTSTLEAVSRAIRLLSGSPASAADNDCTGSRGADALEKSLEAMVDGQLRFALDDENARP  
RYRKNETGEGTKPVSKREAGRARKLVSKRRQTSLSLPKAKSKEEIELDRIRFVYIAHMG  
>comp6088\_c0\_seq2; 293 1 977 LEN=1445; translated  
XSTAGSRGYCPRCKRPNVVCICHALPDEPIDCGTRILILQHPREARKRKRSTVPLIGLS  
IQNVEICVGTKEFERGSHPLLDALMAKESKGNRNNSHVNGHALLLYPSDGALPLQMYL  
ENALSTVDNEEDPAVTENDVQTAITSAKNDGNSRNSNILVVVDGTWAQTQSMVQNSNDLL  
WKLPRVMFDETTNSLFDLSLRQEPAPHCTSTLEAVSRAIRLLSGSPASAADNDCTGSRGAD  
ALEKSLEAMVDGQLRFALDDENARPRYRKNETGEGTKPVSKREAGRARKLVSKRRQTSL  
SLPKAKSKEEIELDRIRFVYIAHMG  
>comp6089\_c0\_seq1; 502 194 1609 LEN=1909; translated  
MSFCIQSLNMLQLLLVLLLVDSYSSHTWGGKSSSASSKKSVSFHPSSRSRLEEKYGFRR  
DRRNANSFKLHNVLKSKNIRGGDTNNNNDIQPLRGGSLKTEKGQISENISLKNKVVHNIAL  
NAAAAEAASTWSRKSMSYADGFVEPICRQDDDGTRFSLFPIEHPDLWSMYKHVASFMTA  
DEIDLADLTDWQENLTKNEKHFISMVLAFFAGADGIVVENLAERFCRDVTVPEARCFYG  
FQMAMESIHQETYCLLIDTYITNPKDRELLFSAHTRVPSVEKKAKWAQRYIGSDASFAER  
LVAFAAVEGIFFGAFCSIYWLKKGRLMPGLTFSNELISRDEGLHCSFACQLYSKLERRL  
SEKDIHQILIGEAVEVEKEFEVCDALPVSLIGMKNKSLMAQYIEFVADRLLGDLGYRPMFGSK  
NPFDWDMISLEGKTNFFEKRVEYQKSGVMANLDQTTAGTRGNLNFDAF  
>comp6089\_c0\_seq2; 316 194 1049 LEN=1349; translated  
MSFCIQSLNMLQLLLVLLLVDSYSSHTWGGKSSSASSKKSVSFHPPLAADLKKNTDFAV  
IEGMQTCCLLIDTYITNPKDRELLFSAHTRVPSVEKKAKWAQRYIGSDASFAERLVAFAAV  
EGIFFSGAFCSIYWLKKGRLMPGLTFSNELISRDEGLHCSFACQLYSKLERRLSEKDIHQ  
LIGEAVEVEKEFEVCDALPVSLIGMKNKSLMAQYIEFVADRLLGDLGYRPMFGSKNPFDWDM  
MISLEGKTNFFEKRVEYQKSGVMANLDQTTAGTRGNLNFDAF  
>comp6093\_c0\_seq1; 561 490 2043 LEN=2958; translated  
MRPLLIIKKRPRRQVIGEDGKYMDIELHNHREFPFSEYKPFSAADAIASAPTTNKKPK  
GKNKDKGAVPIDISSRRQLQTARRLSMYIAPADLQOQDETDEESDESHGADDDEEDNILDE  
AEYGYENMEDSDEEDEDIEPSPYKRRGRSLETGKANKHRRIRVGPQQNNDKSGAKKQP  
PQVHLTKVENMLHRVSKNISVEHVHFPPPQLQNLGKEVNAKGPAGDVLTAKEKKHYDEF  
DKLLGYRLKPNPNIVKITSSFLGPLMRIIRIAIYGSRISFNVWTRDPYLTFWIFSLWTL  
LMFVLLIFPWRTFFFCSFILLGPQNIQVVRKYLERRAKQREQEEKEDEEREALKAQLKIN  
DPQRLAEQQQLQSRRTTSPDENKKSEEKDGRRKRSWGLSRKKEEIHQQQDEIHEADMFLS  
PRPAFYAHCKPNKRTSLVPRDVAVPYFRFRKDRFYDWPDPVSRATPMFITSSLGELEG  
GQYSTINYGPRVGSPPHQGPHEQVGLRNRGRINHQKDH  
>comp6093\_c0\_seq2; 733 389 3310 LEN=4225; translated  
MGSNFKGSTGSLSSYDGRYEGNNSGDLFGEYRGYGGFSSDSQIQGVTLRAAESNSGSYTS  
GMNYVSSDFVVGNTHTSSLIASGSQMRRIESDHDQKRKKVRVKPHSAFQSATFMNETDLY  
QMMAGSSNFVFLTSYLTPTKATRHAKVSAVQRHFHGFSPKEDGRIGSLRLEILGCVGLD  
RFKPEVSVYAVCGDCAFTTDIEGTRSPMWPNSKTRATVFLHAYARAFIGVFDVKQQK  
EKEADYLCGRVTIDIASLKPDEYDITFPLRVSSFIYDRRPRGVVRVRFSLHWFERSAL  
LSYLKRPNPLAFSRQAKKFTIPCGDPKTFRNVAVTVHGQDFPGKYTRAAFRSTMREFN  
LSQQNIRFLLKVIILDCILYENPLMSIYFLTSMYCVSVNSIRLAPPFFVGWLIYLLLEN  
NFYFTRTQEGNLGYQGLTIQELFFSLVFDGKKNRKMRRPLLIIKKRPRRQVIGEDGKYMDI  
ELHNHREFPFSEYKPFSAADAIASAPTTNKKPKGKNKDKGAVPIDISSRRQLQTARR  
LSMYIAPADLQOQDETDEESDESHGADDDEEDNILDEAEYGYENMEDSDEEDEDIEPSPY  
KRRGRSLETGKANKHRRIRVGPQQNNDKSGAKKQPPQVHLTKVENMLHRVSKNISVEHV  
HFPPPQLQNLGKEVNAKGPAGDVLTAKEKKHYDEFDKLLGYRLKPNPNIVKITSSFLGP  
LMRIIRIAIYGSRISFNVWTRDPYLTFWIFSLWTLMFVLLIFPWRTFFFCSFILLGP  
QNIQVVRKYLERRAKQREQEEKEDEEREALKAQLKINDPQRLAEQQQLQSRRTTSPDENKK  
SEEKDGRRKRSWGLSRKKEEIHQQQDEIHEADMFLSPRPAFYAHCKPNKRTSLVPRDVAV

PYFRFRKDRFYDWPPDPTVSRATPMFITSSSLGEGEGGQYSTINYGPRVGSPPHQGPHEQVG  
LRNRGRINHQKDH

>comp6095\_c0\_seq1; 448 1 1851 LEN=2238; translated  
GTFCIQFPISCNDPRRKTFAFFSRAGKTPETTYFKPNTASKSNGSQT MPLGDSNGGGET  
ACSSLWWCAAVSRAISNDSGDGLVETALVVGATTVVVLVWLWLLSGGRGKKSNNNGGTGHHH  
YADIPWAPGGLPLLGHALS YQRDPSGFLLGAREACGGSSLFVWNLGRRMVLVCGPEEQR  
QLAGLPDSVLSLREAI AIEIGFEQSLGRKNVYEGTQIHKGI VKAIWSRAANEKNSDSGNEQ  
RGPADRQLVAWQDSIRGAMEKELAVASSAATAGSGVKVEFLGFLRRVMLRASVEMFLGKA  
FLAGWTGDFDFLEEFVGFQDTLEDVTAKAAVLPWFALVALLWPLGRKRETLQRVIEKRLE  
AVLGMDGDNDAGFWLEAVLAQGVPSDVAEFVVGLLFAAHKNPAIGAAQTYLLLLREHGSE  
EVLERCSEAEALLSETDVPVWSGLGEALPTLRACLESLRLTAHSIGGIRKAQRDITVT  
VSAEKGDQLLRNEAAAAAKTITYQISRGTTVGFAHTTSSLDPSIWGADAARFDAGLDRYP  
EDKYQDDYSFTTFSNGTHRC PGRV LAMVQLQLANALLLAEYEVELPETLPALDFERATLA  
QREGPVLVSITKRTRT

>comp6098\_c0\_seq1; 204 1 574 LEN=741; translated  
XPTLGMSIGLTVRMGHI IAYDIVKAKLLAIWCM LFTVVF GAILSTSLYIFRVEIAMLFTD  
DIEVVEGCKAIWGLKSCYVFLHIFGINSAILRVLGLQWRMAIIIFGFLWFVTLPSIIF  
AVHRGGGLYAVWSILPIFYTMQVLLAFS YLTADWESIGKEIHDRAHGEQS QKVPTTEDE  
TKALLPSEQKR

>comp6099\_c0\_seq1; 499 311 2368 LEN=2483; minus strand; translated  
MSPVAISQFNHSRRARSPSSGRNESITSSATTAATEPERMVWRGRAQDTVVSSGTNPNT  
LTRKPKTINRDNDRSNNNSRVQKDNANTNDGDSISR IKNNNNTICGNRRRQCCPGSTAWI  
VAWIVLVLCRQLMTETGLLR TALASYGAPCHYFDRGGWTEQGDECGYGRGNRNRPSRSA  
HGSSVDASSNQT LGSNDKNSSSINITVPSLPSALDLLNPPFKKNYTIRVLGGDSIGDIY  
NSNCNGSDTAVTTTSRKNKNSNNRNIIVTAYYKIPSKHTPERYRDWMKNFLGRFRDPVVA  
FTSPDMVDSLALRCPLSNSSSSNSTSDKDLNRSLSQSPACFPTVLVALPLEELPLAELY  
PKSFWVDQLDRDPEGKIHAPLRGDP RVGGRFESGELYWIWLSKAWFVHEAVGLLMQEQHQ  
GANEEKKSVEEEVAATTRLTSTATAAEGEKEHC PERDKRGDVF AWIDIGSFRQSENETET  
TPTTITSKARHKV LIRHPEVVPDDEVLFWSHSPA HKISSGNDKNKQKKHDYSPVPPNLSP  
YSDDKLSNGRKHFFHAGAHFAGR PESIEKLYFRFLETVDVFVHRNMLLADDQAVMQSAC  
LGYFDGQGYNRPSGGSVNTSGNNGNL CAYATRDMVDGRGGSKWFLAGLLQYGPAAKAY  
RSDRSKLLGAYWRPPSREHYSEYSA

>comp6110\_c0\_seq1; 412 1 1648 LEN=1787; translated  
XCIEEEIATTKKKVEDAEAMRIVHPSTQNERNLTKAKAAHERAKMGLCVMAREHHRTGHI  
LCSRAFGTFRGAGPKSCASLENAVAAQIEASTADLAEHTSIIHRET KTIQSIEGKIAMNT  
NRTTVVNLNTFEVLQALKKGDTEKTNCPICYDVLGNGD GSHGKVYLTRCGHLSCKCCLNH  
WINQKERQGSTISCIECRKRITRNQLICVDPKKVDQDHLMDSKQKARALVKQAAKMLEEN  
FGKLPKPHLWEALYLVIDLPPGIDQDLDESFTAIPGLFLAHLRHFLRGSMPLGAPPNFPAG  
AVSKGSNECNLSSKFRALLSDLPRNELSVVFASSKSI VLHLKRVLETKGFTSKTLFVQGS  
EEQSECAISDWEDSNGSKNPMVLIVQAGAAACGLTLTAASKMFILEPFRKHEEEKQAYAR  
LHRYGQTRREVHCKVYYTPVSVESR LLEWRRRATAHSP EEEKTVYAPLRQNDCKDEDDGT  
DGKSTDQSQSNERSADPEENASGIEDENQIRFL LGIDPPLATTTSTSTVESTTLATTAES  
SSSTNSSSY

>comp6111\_c0\_seq1; 497 1 1347 LEN=1899; translated  
EAAGLEAALDGSSNNELFSSLTVFAPTNVAIENYDLLGFSDSMFNNETDAGAIRDILLFH  
TIAGSVIESSAIDCSNSSLT TANGGSAEISCALDGFVVTGDANANTTAAEAVVRIT  
PDVAACNGILHGIDGVVPSLPGTISP PGLDGPPPDLVLPDDEDCQSF GDAVCSRADLKDFC  
RLVGLSRNDPEGVELLNALD TTAATV FAPANAAATVFSPPNEGLFAYTSEGSFDLTNP GDV  
TKILRNHVVLGTKL LLEDLVCDQ TLEMSNNSTTTTECGMNQAGTEVVKRFQVGDGNSPGN  
PEVIDYNLVTCTGVVHILNGAILPLFSEATATPTSSITVEMSVGATPGD TDGGTDGASAG  
ATPGVSGEVSSNSVDVTGGASADT SASANGTPGPSTDASASSNGTPGLPADGTPGASAD  
ASASSNDTPGVSAGDTPDASSGVPPPWA

>comp6111\_c0\_seq2; 181 1 600 LEN=600; translated  
EAAGLEAALDGSSNNELFSSLTVFAPTNVAIENYDLLGFSDSMFNNETDAGAIRDILLFH  
TIAGSVIESSAIDCSNSSLT TANGGSAEISCALDGFVVTGDANANTTAAEAVVRIT  
PDVAACNGILHGIDGVVPSLPGTISP PGLDGPPPDLVLPDDEDCQSF GNETIIFFMGXG  
FRLFHAVRSETLKSSLFLT NX

>comp6113\_c0\_seq1; 165 621 1200 LEN=1200; minus strand; translated  
MEERVYSKAVNKIGLGNRVIDGKELHRFFSTDEIDSLARDNDWVECIRCKQWRMFPPDHT  
ANVAKLPKEWVCEMMNEYDARMELTCSFKEK DSEWYHHFKKPNKKVLSRTSHTAEAVIR

ETTNVISAAQSEIKVDRDVILKLVTLFTRGKNAARIVTKHYFHEALFSDASTRTNASRT  
NREHPASDTEIFKX  
>comp6113\_c0\_seq2; 165 714 1293 LEN=1293; minus strand; translated  
MEERVYSKAVNKIGLGNRVIDGKELHRFFSTDEIDSLARDNDWVECIRCKQWRMFPDHT  
ANVAKLPKEWVCEMMNEYDARMELTCSFKKEDSEWYYHHFKKPNKKVLSRTSHTAEAVIR  
ETTNVISAAQSEIKVDRDVILKLVTLFTRGKNAARIVTKHYFHEALFSDASTRTNASRT  
NREHPASDTEIFKX  
>comp6118\_c0\_seq1; 365 258 2154 LEN=2246; translated  
MQGFKSTTLFVVILLVSTSLPFLEGARSRDDCRCLTASELNAGDFVLKENLEEDIESLVT  
QVGLANGIADGNATESFQNEYGIGCKAHDAGLSECGAAGKPGEWCDYEWCVVDNGCKLDF  
EPSRIFKKRSYSYAACGFIDESDRGPTLLNGMVLQGVIHNDHRGVEGTECEDKDNPTQTT  
CHGTTMDLARYLVEEPTLNITINKDRAESYGPFFVENLENMDHGACVYAASLGVVVICIGA  
FTKNRQRTMASSFLEMVTAEYLVVHEHTEQLSVMDKVKSIFEPFSPALWGMTFLVFSFL  
GFLMLQEVSWETLREKPSANVKMSLYGSVMAFFARRPGPYCSKDVTSWGGRLTTLAICI  
QILLSGAAYGAQLTTLLVRSVGFVSTIESIDDMVLYKFPICVLRNKIKVLDNAYGDSRFNY  
AINPEDGLPGFNNRTELLAMDKGLCDCLLADEHVMAAHYSMGSHCDKIIVGKPVIELPW  
GLPVSTNYAAPLNTAVTRMMQRGKWRDIMEDAEPENICPEKDINTKTTTPEIHNMLGAYV  
LSGVIAATGIVISLWSYFRKRSRGRSCLKELPSEGNGDEGEQTLAHMEYGSTSNTDYHHL  
QSAMSGLMAEIAGLKATMMEAKEEAAKKKDV  
>comp6124\_c0\_seq1; 339 1 516 LEN=550; translated  
XSFCFVLFCLPPFCSLDEAMATDPANLLIALADLLACRFLALIAIPGRAEGTPVTDET  
AEWRDKFNAEMEELKAQQKAEASADTRKKGGAKGAVKEVDKSGRLTGYQHFTDKTGGTLN  
IEAMEAAAENAQEDINEDLFDVSDDDFDDLDMDMDFDSSDEEDEDDEEEDPI  
>comp6124\_c0\_seq2; 334 266 784 LEN=1199; translated  
MSEELREEQEMEALEAIFDDCLEIISSEQPFWEAVDLYPEQLAADEEDEDAPQNHVGV  
KVVAKIPLDYPEESLPEFNIKVLKGLTEEHEQEELLELANEEAENNRGMPVVYAVCERLRE  
WLENNQKGMDDRSMTMLKRQKEEKRDEVRSESNESVWIQRKLDERFQNDW  
>comp6124\_c0\_seq3; 685 266 1174 LEN=1208; translated  
MSEELREEQEMEALEAIFDDCLEIISSEQPFWEAVDLYPEQLAADEEDEDAPQNHVGV  
KVVAKIPLDYPEESLPEFNIKVLKGLTEEHEQEELLELANEEAENNRGMPVVYAVCERLRE  
WLENNQKGMDDRSMTMLKRQKEEKRDEEKAKQVYEAQKKKEEMTQAESEELAVRRRR  
AEGTPVTDETFAEWRDKFNAEMEELKAQQKAEASADTRKKGGAKGAVKEVDKSGRLTGYQ  
HFTDKTGGTLNIEAMEAAAENAQEDINEDLFDVSDDDFDDLDMDMDFDSSDEEDEDDEEED  
DI  
>comp6134\_c0\_seq1; 123 894 1690 LEN=1690; minus strand; translated  
MLQNWYMASQLHLQWAVLALDNELYEELGPSRAIPAKEEFTVSGPQEFRKGSFQGLTCN  
KVRMALEVASACKMNVVFTDNDVNFQNPFEHDLGRLIRSQRYDYVYQPNQPAWAPLEDQ  
CLKGNPRKEANTGFYFNHKKSEIYRNIAESMLEVCVRPENKIDQSLFWKEFWKAEKRIT  
SRNQTEGSDASFHHCDSLSEYVNPWSQQNNFSKTSKSGSNKRIFQYCCLDPYFYPIGKHNARD  
GPSNKNPVTYHANYASKYGRKVEKLV  
>comp6136\_c0\_seq1; 256 1 880 LEN=1087; translated  
XGIINRDGINDSAPTSVGLRPPDKRPARFSDAMKDDLVAVTEQASKRRKLAMSAQPPPS  
SAALALDWEIEAESVGHGVSAAEDCRHNFVTADLGEDDPAEAATPGSGVADGNPTAGVSNQ  
KAFVQSLIDSSDPKVVEAMFEAAVRATGGGSPADTRAAAILGIHATGAVANARGHEIDLA  
LRLSKLLDARMQKLENRMAMLDDEVEGILEAEKVALEMERRDLYTAXVPALVRGRLTGSMQ  
PVPPIDFGGALSFLSVACNTGTICNSNNIVETCPVPRNETFVELFRSKRNDAEW  
>comp6144\_c0\_seq1; 147 172 540 LEN=815; translated  
MKTKRISKDDSSASQDTNSTVSLYSGNNSVLGKRAADV LASSDLSAFGEKPKPDSKTLR  
EIRESAERLAYELNDFLTKNEVPTTKLLKYNEGNGSPDFSHMTDEAIAIDLQLATARKLRE  
VR  
>comp6144\_c0\_seq2; 969 172 3072 LEN=3114; translated  
MKTKRISKDDSSASQDTNSTVSLYSGNNSVLGKRAADV LASSDLSAFGEKPKPDSKTLR  
EIRESAERLAYELNDFLTKNEVPTTKLLKYNEGNGSPDFSHMTDEAIAIDLQLATARKLRE  
LLPRNRDLFTARENQWIPILLNWLTFHDRPAVQVESLLALTNIAELCAQQSYQHTQAQ  
SSAVAAAAQAAAAVKGDSSSSFSMFYKDGQATYPYPSLVAPAPGSVPFPPLSFSQTL  
SPEAVASFDASLTATI QNSKVF DKSSKDGKSSFSLPPAPLFPSSAQSSHGLFQNAKASQA  
AGINFTSLAPPPGGAHSAVNNFTLPPPTPEPSLTCFPQQLSPSSQHLLLRHADAIPTLI  
SLLSSSNKEVYEQSMWILGSI AVGDSPTSSSGSSSSSHEL SREKSVSARDVILAAGV  
MNQLLRCL EAH PGNLSLQRIGSWT LSNLVEGIFQQQSHGKGGKASDYSSSDEIEMPILL  
PVLRRLLRMADAEVLSYTCWTL SHLCDGPSSHIAEVVTTTRDES NAPKGGLVPRLVELLLLH

PSWRVTKPALRTIGNIVCAECSDDTNQIGTVTDYTEVILECGAVPRLKELVTHTNREIQK  
EACWTLNSNIAAGTVDQIQAVIDSGAIPPLVKLVNRNKKTDQEVRSSEACWVVLNATSCGSDS  
QIEVLVDEGCVSVLGLVLLSEASMVMMALEGLERVLQVEETREMIRREQUIENGEIKDVQKT  
RNP SLVNSSLIEKARESHNSTAVTKRAERIWKQHFVSCALCKKSF SKHRPSDASFCPECK  
CYVCCNCNCKVYHLDYQEELWAETEKTEQKSSKKNKNNKKKKEKAKQKKAKQEMNLVTF  
EGVKEGTRVPQQAAGAVGDQSRSTVSSESVDKELKSTDDIRRTDSSKNSEPIEVDHSE  
GQDEKQHQQPPIDFVLYLQQTGSIIALAKLMDALEYGEDLDEGLDDSELQLIREQQVLNQ  
QQATT

>comp6158\_c0\_seq2; 190 99 545 LEN=768; translated  
MRLTAELIASSEQRTNPLGEREIVLRGLAIPVVEHLGVTRDAYDAMDLDNRLTRLENFP  
RLLRLSSLSLSGNII EAIDSSNLSKNLPLNQLYLDLSHNHISKLHEISNLGKAYHNSNAK  
SESHSSKGNLECLNLHGPNVQRCMRYHK

>comp6158\_c0\_seq3; 245 99 992 LEN=1113; translated  
MRLTAELIASSEQRTNPLGEREIVLRGLAIPVVEHLGVTRDAYDAMDLDNRLTRLENFP  
RLLRLSSLSLSGNII EAIDSSNLSKNLPLNQLYLDLSHNHISKLHEISNLGKAYHNSNAK  
SESHSSKGNLECLNLHGPNVQRRQHYRLTYIHSIPSLKVLDPHQIRITKSERDRARRLAVSA  
AGAALESADVQDEAGKSKTFTFPEGASAEQSFVNFVVEEKELIREMVANAESPADIEEIE  
RSVQRGVLP I KYLKKTD AIQRKDV DENETNSRKRSLPVPESGENQSNSEKIKKHGQ

>comp6162\_c0\_seq1; 329 1 931 LEN=1020; minus strand; translated  
XVSVEKSDSSENP GIRMGMKETS SGRAVCISEISPSSLFARTPLRMGDIILSINNVS LHD  
NADVF DAYAAMGKSEKRITLVAKKGGESLNDFLLAARSQPVMKGKLNHSGHDSFDSQLSS  
KTAGTVGTTASGESGRGGSNDSFESFDGKSEDGVIGFKSTE EWKSNFRHDAVNNTSKAVS  
SPSRRRNEFEFDEESYGASLFGYNASSNVRI IKS YCEDEDIGFKMLEITTEWGRLLVVS NV  
TPRSLASCTDLKVGDAILSINGISFRKKASAARASSI IRDAHREVYIEYQKLSSFS PAVP  
VDLKEDRILR

>comp6173\_c0\_seq1; 773 30 2242 LEN=2359; minus strand; translated  
MVSLSGAPSLVRRRRTTTLAAVLFPVLLVLTAAATVWFRPSSYYHDFHFDGIGIGEVAQT  
DPLASASAPKSAPGSPNNHEDDGP AKMVP AELELGLVYDESRDFVNERGFSPTGWEEPN  
ADPTVWGPCRFTPVPRPGSSFSMAADVSWADRRRWTRSNETANATALLSRSDDYRNADPD  
DFEYRVAVALS QLTGHNKSNEKHPPFKGGWCRPGFLI IGAGKCGTSSLYHYLMGHPRIVP  
AIEKQIHYFKYHANTRPLAWYYGHFPTPQSFLDHGALMTGEASPGYLPYPEVAKLVHQTY  
GGTGQDGAGTDVGM SLQYLLGDPAYRKRAPAVPPRI IAVGREPLDRMYSSYRYNYVPTI  
EHLRSRGHPAIRKHRRYGTAKKKKSSHKEHASEEFV FELNHPDDEEYMPYLF TLEEFVRA  
ELKQLRGC FYDWGKNLLNAFLGFVRLFRLTECTLXYLFELTRGLFAYRSTPFSPQGRKT  
YMQWRRDSIYGKTIKLRNGAFVDNESSIAAGKNATDSSAPPPLIALDDVCYGKSVNKT VY  
REQWAEMQMNNPEKKVLLNKNLHLTQALIGRSLYTFPLEWWYLDVHKSPQPPIFVCTDEL  
TDSETLSELTAQLGLPAFDGFDQVLAEGAYNVGGHGRGYDTATSWEELELEKQKEQQQQN  
NDESSRYSSSGSGGNRTRHRYAAAEDVPTAPKGAAPGTLTNGIPLPEDLYRELKDFV  
DPLNERLFALTGKRCNW

>comp6173\_c0\_seq2; 691 1 2156 LEN=2273; minus strand; translated  
LLRCGFVLLVLTAAATVWFRPSSYYHDFHFDGIGIGEVAQTDPLASASAPKSAPGSPNN  
HEDDGP AKMVP AELELGLVYDESRDFVNERGFSPTGWEEPNADPTVWGPCRFTPVPRPGSS  
FSMAADVSWADRRRWTRSNETANATALLSRSDDYRNADPD DFEYRVAVALS QLTGHNKS  
NEKHPPFKGGWCRPGFLI IGAGKCGTSSLYHYLMGHPRIVPAIEKQIHYFKYHANTRPLA  
WYYGHFPTPQSFLDHGALMTGEASPGYLPYPEVAKLVHQTYGGTGQDGAGTDVGM SLQYL  
LGDPA YRKRAPAVPPRI IAVGREPLDRMYSSYRYNYVPTI EHLRSRGHPAIRKHRRYGT  
KAKKKSSHKEHASEEFV FELNHPDDEEYMPYLF TLEEFVRAELKQLRGC FYDWGKNLLNA  
FLGFVRLFRLTECTLXYLFELTRGLFAYRSTPFSPQGRKTYMQWRRDSIYGKTIKLRNG  
AFVDNESSIAAGKNATDSSAPPPLIALDDVCYGKSVNKT VYREQWAEMQMNNPEKKVLLN  
KNLHLTQALIGRSLYTFPLEWWYLDVHKSPQPPIFVCTDELTDSETLSELTAQLGLPAFD  
GFDQVLAEGAYNVGGHGRGYDTATSWEELELEKQKEQQQQNDESSRYSSSGSGGNRT  
RHYAAAEDVPTAPKGAAPGTLTNGIPLPEDLYRELKDFVDPLNERLFALTGKRCNW

>comp6177\_c0\_seq1; 524 1 1334 LEN=2111; translated  
XRAGTGTGRPSLGSVLEEHRSPVAAASGSDAAKALVARPPTPLPPPPMAVPVAPPPSRAE  
PPRKALSSDGVKDMGLSLAFARIDRMAIQREAEARDTPRRV PNRKLC KTRSGTVALSAK  
EVDRRVMALS LDGILNETKKGRPAPVVRKMVSSKSGTLHKARKKNSKKTGTDKKKDAKSK  
TSKKEKEKATTRASKTGKTKVMEITDDEGGSSPKARSSSRTSRSKSRDKDKKPKDSKA  
GRKSVTRQKSESSRTTTCVSDDDDEEFLQFLEDFASPSDEESVFSDDVSI STCYDS DSSF  
EHRMPLRERLAARAPRPPRRRSPSKKKSSGKKAASSRSGSDTDETKAKKKKKKKK GAGS  
DYSDRDKDPEKKKKKKRRRESAADVATRESLARRGKNQEPATRATKTSKIRRIDHQKRP I

NHQKMPQRQDVQRLDQRGNTCPL  
>comp6197\_c0\_seq1; 306 66 959 LEN=1143; translated  
MGVARLVLLSVVLCFVPSNGFSAAPASSGTSQLSIEDLVRDQLGYFPPNYVKVSAWKKK  
SNESTPLAIQTYPLNGGAKRRQNKAKLPQDQSKEKSEQQPIVQSPFPTLFWLTCPDISRA  
VANLERRGFVQIFEDELNSRSDLAIRLFRCHEEYARLRWKSLEEDRNVLTSSSSSSSPLT  
PSLQMRNMMEHSGISGTNFTDISSWDKDYDSNFESDCGSIVEAYVGKRSVQKKECGES  
SLSSTEAGLVKVPPIKCLHAHYAHYRSTVSEKSTTYVNPVGELIHRQLEKDFPDLDL  
>comp6198\_c0\_seq1; 380 1 1856 LEN=1856; translated  
GGSITRNIQEMPQAENTKVWNEDLVTALRCREEKCRQQFSQRQYLWRDGAAAIASVRKDI  
YQYKNGRIVALPRTLNTNVEEECRRIIEGERTILPEGYLPTTLDEQNMSRGPVARKSVNP  
YHKDPYLQRIKMRGGSYAILMALHFSEAKVMTQKQICNAAQKYCDEEMESNFYSGRSYGA  
WSSKKTLVKHGLIKESRTTQMGRHGQVCNGVFEYSLTEDGKLFIDALLVKFPQSSEERST  
FRANDSNATIHKKNDLYQTKKSTINIKLGKKFIDKENFGRNGIKVPNRLNANEKIEDHH  
CLLLSDSDEDDHDDYDDHGMLNKSNGHRYDEQEIMSSKSQCHVIDLLYSSDEESVSELFE  
YHQIKRNETFDSQVRGLQKSHENILNPIPSSSVIKKEVNLSSKLVIVIDDRERNKNRTPR  
YMRIELSRHLSHASGSLCQIWP SNLPIGEVEEDQLNYGDF AFLIKSKSAFNSKAPVVIER  
KRISDLAQRSSRAHHWQQLHRMRDCCDHAILLIEGNVKMTSNFSTYENIEGESWNPDHHT  
IDDEHAFYRFLGRAILSSPIVKILQTPHEQASYSIGATGLVASLLSWDGNAPKKLPNTK  
VRLNHLYNKLSRGIPWQX  
>comp6203\_c0\_seq1; 230 649 1669 LEN=1669; minus strand; translated  
MTNLMTREGLVFLALMAVFVCDHYAASFLLNQATRAYQPAPFDRSVVKTFTSTPFSASSG  
RNNERDNKNNSRKP KSVTDRSQEEAISLIQDIIRAAVDAGPQAGPVRTLQAYKAFSETA  
REFLPRFGQSPPVFSAPKATRTLFEKLGATYVKLGQVRL LHGVMCFRLTWKFARFLKALS  
TCCCCFNPFSGSXVASSPTIFPKKEYVLEFQKLLDKTEPVEWRIIKRVIEKDLGPI SKTFDF  
VDEKPLASASIAQVHAARLKTGEDVVIKVKQPGIDASLKADLSFV FVASRVLEFLQPDWE  
RTSLSGVVGDIRSSMLEELDFTKKAKNTEEFRRYLAQNNLX  
>comp6204\_c0\_seq1; 396 171 839 LEN=1222; translated  
MIASLTA CLSLLVIQAYAFQEASNA AIFSSRSQLGSIYTHVSLHESSQPFDSQERNLQER  
RSFLSKLALIPAVVLP SLATLPTS AQASGGATAGGAYLLSAKKRYYERVKESVTGLLKA E  
DGLRNGDSKVAKEYFSSSEDGGSWKDLTAAGYLLSNAFRSSSTAPDSLPAVKKYKAFAKE  
VEAFQKTLKKKGAAAASEAFPTVEAALDEWLSEIELPAAREL  
>comp6207\_c0\_seq1; 261 1 827 LEN=1044; translated  
XLNVNDNIDSIRQNI SHWIFTKMKFSKILLLSYILTF SVKVNCTGNLRSSLDDEEVTGD  
LRSVVSNLVRRIEALEEASWNDQEKIFHMENHIITLENKIIQVEGALDAGLEKIQSLEQN  
IRTVEQRNLQLSNGPLTNRPVVSLGNSKKD TDNDSSPCMPVFENNRCIFGNTDTIAFRF  
ESPTFFND DVEFNENVGFDQDADCMPVYNSTSGQCLMNSNFVYQSGNHYYNPNP SKVFFRS  
KEVWMPK KVVFRNTQTSFQGGKLEIKKDVNYTNA  
>comp6207\_c0\_seq2; 313 315 1079 LEN=1296; translated  
MKFSKILLLSYILTF SVKVNCTGNLRSSLDDEEVTGDLRSVVSNLVRRIEALEEASWN  
DQEKIFHMENHIITLENKIIQVEGALDAGLEKIQSLEQNIRTVEQRNLQLSNGPLTNRPV  
VSLGNSKKD TDNDSSPCMPVFENNRCIFGNTDTIAFRFESPTFFND DVEFNENVGFDQD  
ADCMPVYNSTSGQCLMNSNFVYQSGNHYYNPNP SKVFFRSKEVWMPK KVVFRNTQTSFQ  
GKLEIKKDVNYTNA  
>comp6209\_c1\_seq1; 530 1 1433 LEN=1531; translated  
XQPLLSLVD TAFVGLSAKVPAESAAQLASLGPATTFIDGATYLF AFLNVATTNLYSTALA  
QKGGQSD EAEAVVCTASRVALRCGIGIMFFLFAFARPLLALYIGHGADPALIDSAVDYVK  
IRAVSMPT SLLLGVVQAALLGAKDSVTPLIAILYSTVNVVVGDFLLVRVASMGLKGAAIA  
TLAQLAATAALLGPARRRLVRDRSLGLWKKKPAEGSQGEEAVTSKAFLGFAAPVLTLLI  
LGKLA AFGMTHSAAAVPGQPTPLASHQIILSLFFFVSPFMEVISQTAQT FVPSYLAPVN  
EYVEAKEERTLADPLVKPWLDRAFDLG SYLLKLGFI SATIVASLASLIPAFFGMLTSDP  
LVKNGVKPLAKYLWAGAFLTAPVAVSEGILLARRELGYLAGVYVLT TALLPSALLRVKSI  
GGSVDQVWACFAVFQLCRAGFFAGRIWGSVLRKIAGLFGGKEAPAAAAEGSAPAAS  
>comp6219\_c0\_seq1; 410 1 1465 LEN=1577; translated  
XDHTTAE EETQCFLSVVEGDGEC DKRKSIP SARPVLMALSSRTDQRQNYQTCAAASIEKT  
EKYSKSKTQTIDNIVPDIQENRNMGLVQVEERRHEPVKQNYDFENTIPVGESSEGDTSIS  
ERKMNLSPQNMGLDENVGPD LGIVLDKDFDTALNNRDRKESSEI INYNSLDFEALMQDSI  
THASSDQTATEESI QPDSISDDGCESNFDIELEKKLDLMILENPLWRKAMQD TYTKEDIS  
ATQKVGESKTSTPTDLIEGSGGSKIFDESNVVNDKQKKEMKKEPYTAVQYLQSNQWSCV  
RPDAGDLETPLASNVRKPDQDGVGVTKGFSKYPSRSQPTSLPTLH SKDDGNGNATNVDEE  
YSGNNSANPLDLPRFPAISTDFTVDSIALTSTVQTNVESLGD ESLVTRNMINAGTDPLSR

DSED TGRVVDENSTFSTKAIQGF CADDIKKFFAKPSILFQCTGPVAIHSVSSPSHGIFGD  
TGSETEKR

>comp6226\_c0\_seq1; 378 253 1329 LEN=1368; translated  
MVQSA GTRNGVYGAWGNQKTNI LLLLVLMPNAVAFHTMHTPSSPVRGFANNPSLSHKASE  
LNMM SWEDAMFNAQSTASSMASISLDDPSNLLSSVPIMYGAGLLTAFSPCVWGLLPLTIS  
YI STAAGEREDKEIVLPTLSFAFGLASVFC SLGLIAASVGGAVYGNSTNIILPIFSNA  
ICCLMAFQ LLELIDIPALPKTQTTTNSQSSNEQILIDGSGKILSSTKDSSSKTKGEQGS  
LFRTFLLGGSSALVASPCATPVLTSILAFVASSNPLLGGFLLLFYTLGYSTPLLVTAAAT  
GGKALVGLKELGGKDETSIYASIA PWVTPFTAGILLWYGTNGLLTAVLGDP SLAGLLS

>comp6226\_c0\_seq2; 307 253 1425 LEN=1464; translated  
MVQSA GTRNGVYGAWGNQKTNI LLLLVLMPNAVAFHTMHTPSSPVRGFANNPSLSHKASE  
LNMM SWEDAMFNAQSTASSMASISLDDPSNLLSSVPIMYGAGLLTAFSPCVWGLLPLTIS  
YI STAAGEREDKEIVLPTLSFAFGLASVFC SLGLIAASVGGAVYGNSTNIILPIFSNA  
ICCLMAFQ LLELIDIPALPKTQTTTNSQSSNEQILIDGSGKILSSTKDSSSKTKGEQGS  
LFRTFLLGGSSALVASPCATPVLTSILAFVASSNPLLGGXPAAILYPWVRQCYTSMFFV  
FKIKQRVITFYALFYHLIFLQIFD TLTVTAATGGKALVGLKELGGKDETSIYASIA PWVTP  
FTAGILLWYGTNGLLTAVLGDP SLAGLLS

>comp6235\_c0\_seq1; 291 72 1022 LEN=1669; translated  
MTR EEQT IAGGSGANGPPPEKCCISWTGGKDCNLALLECWDRP SLNVTDLV VFRPESRAD  
FEAHPMELMKAQADSLGLALRVMVLSASQSYRDAYVDAIRRLRDDL GIRVIATGDM DLVE  
IENSSDNYIKECCEMLPGGGIRAYLPLWKAEREDCLRTLLVDNGCKVVFSCVKSPWFDAS  
WCGRTLDETA VREMEAIRRGEVDRVSFTEAERSGWGTKDPRRIPLDLGGENGEYHSMVLD  
GPLYRYGIELRAAPGGDAGGIDSRPTASVPLRSVVS GPAKNGEDRWWTYTGTQRWSLVGF  
EVGGVPENGSPEARER

>comp6242\_c1\_seq1; 230 1 806 LEN=897; translated  
XRFSTYAVYWVRAAVLR CIAERDDVVRVPGHVSQAI VKINKAAKRLGWVLQESGGILVTE  
HGK GSKSVVSGAACESPSWRAARA AKCLAE EAGLSEQHFEEAMRARRRRYSGGYVPVEQW  
MESSGRSGAGGYHTDENEDQDRTRMESEANEDIRTVLSRHLRPKEMEALSWRYGLFGDE  
QPAERANRQLLEMEDRLFGPSAVEAAPGAKPASAAPAKGGRWGEAMTFVEVGKMQVSAE  
YTRRLCHGALDKLRRAAEEGTLEPAFLC

>comp6247\_c1\_seq1; 339 92 842 LEN=1118; translated  
MSEETAAAATATPPAAADEDN EEEDELEKLOKEIERMEAEARITRETD DLEKKKEPGEAS  
ASTPGANGGGGDTGGSEADKGE GGSREATSIYVGQVDYSTTPEELLGHFEACGTVERVTI  
VCNKYTGKPKGYAYLEFQTEAAVENATKLDGSEFKGRNLKVM PKRVNVAGYHYQQGGDDG  
GAGEEDVATPAGEATGAAAEDGAGADTA EATGEDGAAGGVATIPTRHCFIR TNRMESNR  
IRRHL LGTR

>comp6247\_c1\_seq2; 284 92 511 LEN=1593; translated  
MSEETAAAATATPPAAADEDN EEEDELEKLOKEIERMEAEARITRETD DLEKKKEPGEAS  
ASTPGANGGGGDTGGSEADKGE GGSREATSIYVGQVDYSTTPEELLGHFEACGTVERVTI  
VCNKYTGKPKGYAYLEFQV

>comp6259\_c0\_seq1; 200 1 1322 LEN=1322; translated  
XFSNSSMIARRSYLSTPML EASNFEESTKRKYLKPI LVLA IYGAIFL FVEHRVNSSILSG  
DQVSERLNATNKIPTTTTGKEPGYEDESIE LDPTDGS AKHSIAIKPKFCSRERIRKGEWK  
AVRREKPLYALDEDAWENKCYQKKQTEKPAI IDSWEWIANENGGDDKADCSFAPFEVHRF  
CQLNSNRTIAFLGDSISWQQFN SLNYLLGATDEYRTTATIKINGVMTGSINNNACSGNTK  
LLWLRDNRAKVSRLHHI IGLYDPDVI VLNRG AHYVESSVLRMELNLTIGRALEWQRDCDK  
RGERDCLLVWRTTAPGFPDCENTPGPIGIDRQAMAKDTVSDP SHPWYQTRLN GHKFWHW  
DFAGQNAIVEDLFQSRIRQLRVSFLDFYEMAILR PDLHIGKGDCLHYCLPGPHDAVNAV  
LLHEMEVXKINSEVTLSPLAAX

>comp6266\_c0\_seq1; 540 1 1877 LEN=2480; translated  
XDDDDEEEVIEGEARLEIQHYGCSEKNLLKTSVYLEALLIGHEEMVTSVAWHPNPKALYD  
EEMILVSSSMDRSIF IWSVTDDGVWTPISR VGSPCGILGGPVGASLLGYLNIQIEPHFGR  
WIMGHAYGGALHFFSCERNTE DRNLNVE SSEQSHMSIEERAALVKWKAQPCITGHFDEV T  
DLCWEAIKGEYLITVSN DATCRQWAPITKLLDAWIEISR PQVHG YTL SAVTSLSTPDHEY  
QLVTGADEKELRAF DGTKSFLRMLRLI SEARGETNCGATRNDISRVD RAYMPSLGLSNKD  
SAADGADEDTAGASTTSTLLPIEKDLGSTSLWPEVRKLYGHNSEIARLTSTLSARTCLST  
QYSTSYFNQVLVASTTKARDVNTAAIRLWDINANRCLQNLQGGHRSTVTALSFS PDGTYL  
ASSGKDRRLCVWKRRTDDNTSAQNELFFLASAVNSSHKRIVWSVHF CPHNPTTLASGSRD  
GTIKLWKITEGAGQGDQNTTVVEYSKFVPSVDVDTGHASKDKPEAVTSLAFSPCKFNNQN  
NGVIAIGLENGFIQLWSVPIIPSLDGNVVERPSTLALF DAHFCHIGAIWKLAWRPRRDE

IGPFVLASCSSDNGCRIFSVWLHNE

>comp6268\_c0\_seq1; 130 1 819 LEN=951; minus strand; translated  
LFSLASKSWLPIPLQRNQYAVAHYRAKYPGEPFRETQNRVTLRETTIHAVECAKTRVGH  
RTQDNSQNNRHSSSVASERSVAVYMASDTGXVNILQRFRRSTSRMQALILRMVRKNSIVS  
FPLPIFEQTKSTIRLLTSPGIEAAREAYVSLNDSGSKDGDHEKDSLNVWTYLDLQSYDTD  
YNIAASDGIGQIKTKNTIALAEDPPHLNFAKPDHLSTFYISIFVDLFLMSYSNCVVYVYAGG  
FGRLGSLVSYRPRCGMAFTENQGVLLQCDPYD

>comp6272\_c0\_seq1; 409 79 1550 LEN=1748; translated  
MTSKIIRNRISQAALYILLGVAFVASLPSTIEAANGVRGQPLRRLSESRVARGARQHLGTI  
KKGTEGSGDKQTSKQKAGRNTPLLKNVQRPVAKAFDKLNKALQKPAKPEKQLPEPEVT  
KINVKKGSGSSRRPSKNPDDLVAATTEIVENGTEHFTEVKVEVYQRELPLPSIKFEIDHSS  
TSGSPTMGDYNELSDVAEEYLDLDFLTSVFEDVPVRHDGTKLFTVSDDEDQYTFVEFKLVLD  
FLIPGEVPTIKYVFLVLLKDXAYQNTGIKSLTNSVSIKRVLPWFGLHYYQFRDSFLIDQ  
LREGLETETSQFFISKLETMSETNPFSGTEKYNVVSRRPMSAAEIIAGEGRKPQVNTVEH  
TGKHYILASVLAGMGCVVLVGAGLLWRNKHSAESSTPVSGQKFSLFDKSRKNDDSSGANS  
TGLYGFDTETMSYLKSLRLRYSKDRDDKTPSLSPKSNIAAVEQTGSYDDGEEESLSDSVNS  
GSGLERVDIM

>comp6272\_c0\_seq2; 448 79 1419 LEN=1617; translated  
MTSKIIRNRISQAALYILLGVAFVASLPSTIEAANGVRGQPLRRLSESRVARGARQHLGTI  
KKGTEGSGDKQTSKQKAGRNTPLLKNVQRPVAKAFDKLNKALQKPAKPEKQLPEPEVT  
KINVKKGSGSSRRPSKNPDDLVAATTEIVENGTEHFTEVKVEVYQRELPLPSIKFEIDHSS  
TSGSPTMGDYNELSDVAEEYLDLDFLTSVFEDVPVRHDGTKLFTVSDDEDQYTFVEFKLVLD  
FLIPGEVPTINFLIDQLREGLETETSQFFISKLETMSETNPFSGTEKYNVVSRRPMSAA  
EIIAGEGRKPQVNTVEHTGKHYILASVLAGMGCVVLVGAGLLWRNKHSAESSTPVSGQKFS  
LFDKSRKNDDSSGANSTGLYGFDTETMSYLKSLRLRYSKDRDDKTPSLSPKSNIAAVEQT  
GSYDDGEEESLSDSVNSGSGLERVDIM

>comp6279\_c0\_seq1; 255 1 1162 LEN=1162; translated  
XDAVDPSSGRRRSSGEPLIARVDLWHGPDSTPQNLAIYLEEEADEDDDDYDEDWGASGSA  
AQGHSPRERSSSNGNGNAHTSSVDTPFSTIIETPQGHNTIAIRNIAETSDDLACVEGEER  
DYDYGHQESWFTPSAPPASDSGHSPLQSVIQRLKATTPQRIDSTIANPKHTQGEQYQDY  
DDYDEDEANQPVVGSCAVELPSNIAASVQVLLQTQFMQPLQARIELELREGDSENTPTGG  
YRVVKRTIVEVFSDEGMHRPFFAVLEAPRKAGWFGSESGAAPPSTRYTTSMRVVNLSTTEF  
PLFATVEPHAVDDHEPRRRPAPSGDQRGEEAGDGPASQPEWTHFGGXEQLRRRVQLHDP  
GRGDLVGRRSKKSGLAGWLALSSKTGGDX

>comp6282\_c0\_seq1; 503 131 1380 LEN=1380; translated  
MVGARATMMRSSMTTRRLVTLFILSSILVSLRHAGMFYTRQLGNVDDGYYSYSDYSNGEERP  
QISVITLDGLETPPDWNNTTAKSTSGSGNRHTATIDSRSEKNHISGNTTIDDKDFEKRAI  
VLISMGQKAENMSMVERFVWSARNIGKYKGIWILITDASYDRYADLKAAPVISEERGQEM  
DGLQNNPTTSLPSLAMKGEEDNLDADMMVTTKEDSDQNAMENKFLVFRPKKRFKAITKH  
GRFTQSKSMNSKIFKTYILQYAKKEPLLDSELVFFYLDVDIVFGNNISPLFKGLEGIYDF  
GLHTTSSEYNQSTNAQIHFFEGNGSQEIQGGQIVLNRYSQPCLERWRELMOATRREYR  
KDQLSLTVMLDEQRARNNSKNASAAASNHNHSAIIGGTPSTSQSHIGASTDDKDKKKKX

>comp6284\_c0\_seq1; 587 1 2652 LEN=2769; translated  
HSSANESVEESGTEVTHSGNAELHMHAPHAVLYPPLILTLGVIVYYCLSRYLHWLPHYAL  
MFLFGVIMGTVSASEVFFRPNNGSETYMHDTLTAWQDINSEVLLLVFLPGLIFKDALGQNA  
YLFAMGIGQLLIFAFPLVLGALTACVAYYIFPFGWSFFLCLTFGSILSATDPVAVAAAL  
LEEVGAPPRLSTHIIAGESLLNDGAAIVFFYIFSRIFYTEFRVVPVGD SIGWSEGKIFAQM  
AFGGTAIGMVAGGTIFVLSKLSRRFGKEENIVQVTAVVGLVYLYFIADLICHTSGVIA  
TVAAGLSVKFFGRSSINDIHLMDDFMGVLEHILNTVLFSLGGLVWGEVLIETHMEGYWGA  
KEWGYLILLYVLLHIIRFVLFAAAAYPITVRIGLRTNWQETAQIYGGLRGAVGIALSIAL  
DNQVLEYGNAQDLSEERRSVKQLYAMVGGIAFLTLILINGSTAGPLLLKGLADSTEERK  
IIEAYKVRLRSEQIDNCVKLLTFKMFKSVDFQFIQDHMPYLRLDTIEQLAEAVESLKDST  
PSSKYSPPHLENVLSVLKRQDRDANVEAHTILTEDSARFLRMQRIESRKKGRKGVCRSSM  
HHMMTGDP LSAKELRLLFISMLQAQYEKLIDEGFLTSQHGLTIAFEQSLEMAESDVNKG  
ALNDLTHLTFYTIALNCTRVAFAKATAWLRDKISSFNDFELHHFILLELAFVTAHERAQ  
DFFQQLGSDAQLSEAGKIVIRESKRQVSKVEEDLNSPELTKFVIEVATYKVCVLLSQ  
SIHGVERLVRYGLLKESEAEHMIEMIRVQKEVRRGKCNMNAHASKRHVSILDVNRRETR  
NSFLGGTGKKKPPATVAENARMASVSADLDGLMESNSIHLEEA

>comp6288\_c0\_seq2; 190 400 1032 LEN=1577; translated  
MIQTSRFLGRLGFTSLILLESSGAFQPRKQNAQASTPSKSSSDEKKTVMSEMNILFE



RHDRVANDLIDKAQEFASHFGKYSYGEVENMRDNLHKKHRVQNMAIGNDEYSSDMLFLERV  
LEDDLNFQLAALEADMPEPYLFRYPDKDPVATASVEAVADPIIFHESLEEDKVANYEKS  
LYGELVQEGVIESIAICAILGLMVTPAHVW  
>comp6290\_c0\_seq1; 588 299 2028 LEN=2028; minus strand; translated  
MAPSPMKTPGKASGPKKVYLFNCPYKEKASAKKAGAKWDASAGCWYVLSSQNLEAFNKWH  
PNENKYLVCYDEKDDAKRAGAKWDATCKQWYIAANQDESRFARWLPSSAGNRATKATKL  
IKGKKSEIKTTKTPTKLSTKSQLATIPRINGDMTVAQLQTECKARDPSIKGITTKRKDFW  
LEHLKVGTPWISAEVPLYDYEPEPSPXKAKQKLTTSALKASKSNSDTKKNNSAVARISAD  
MTVAQLQIECRARDSGIIIGISNKNKNWLEHLVDVGSKWVSQGWKEKDLQNLISANKKKAS  
SQTQQSSSKHKDSVDCRDI EGMARQTSSKNNSKKRLGDFPVNNITIPQQVGKKAKKDST  
SAKKPSVKLVAEVHKNYQQNDFVKKKEAIARNVEIAKQKSLHVHKFPRVHRCAMAKSN  
RLMMNGNARDGECDCYQKREHFFVGRSSTAIYTCEKCFDICQKCFDEENRSESEKE  
KIRKKRQREEREETRIQEREEQRAQRWDSNLRFKNTITKVKGKHLDAESGLKFTVWCSD  
GYDYDGRHSYEGEPTKEFDSVWKTKEEANSRAEYSS  
>comp6290\_c0\_seq2; 584 299 1602 LEN=1742; minus strand; translated  
MAPSPMKTPGKASGPKKVYLFNCPYKEKASAKKAGAKWDASAGCWYVLSSQNLEAFNKWH  
PNENKYLVCYDEKDDAKRAGAKWDATCKQWYIAANQDESRFARWLPSSAGNRATKATKL  
IKGKKSEIKTTKTPTKLSTKSQLATIPRINGDMTVAQLQTECKARDPSIKGITTKRKDFW  
LEHLKVGTPWISAEVPLYDYEPEPSPXKAKQKLTTSALKASKSNSDTKKNNSAVARISAD  
MTVAQLQIECRARDSGIIIGISNKNKNWLEHLVDVGSKWVSQGWKEKDLQNLISANKKKAS  
SQTQQSSSKHKDSVDCRDI EGMARQTSSKNNSKKRLGDFPVNNITIPQQVGKKAKKDST  
SAKKPSVKLVAEVDPDASLQKRPAKKEQNKNYQQNDFVNAQERSYSKRRDCKAEIVAC  
TQISQGPSLCHGQV  
>comp6290\_c0\_seq3; 632 299 2073 LEN=2073; minus strand; translated  
MAPSPMKTPGKASGPKKVYLFNCPYKEKASAKKAGAKWDASAGCWYVLSSQNLEAFNKWH  
PNENKYLVCYDEKDDAKRAGAKWDATCKQWYIAANQDESRFARWLPSSAGNRATKATKL  
IKGKKSEIKTTKTPTKLSTKSQLATIPRINGDMTVAQLQTECKARDPSIKGITTKRKDFW  
LEHLKVGTPWISAEVPLYDYEPEPSPXKAKQKLTTSALKASKSNSDTKKNNSAVARISAD  
MTVAQLQIECRARDSGIIIGISNKNKNWLEHLVDVGSKWVSQGWKEKDLQNLISANKKKAS  
SQTQQSSSKHKDSVDCRDI EGMARQTSSKNNSKKRLGDFPVNNITIPQQVGKKAKKDST  
SAKKPSVKLVAEVDPDASLQKRPAKKEQNKNYQQNDFVKKKEAIARNVEIAKQKSLHV  
HKFPRVHRCAMAKSNRLMMNGNARDGECDCYQKREHFFVGRSSTAIYTCEKCFDIC  
QKCFDEENRSESEKEKIRKKRQREEREETRIQEREEQRAQRWDSNLRFKNTITKVKGKHL  
DAESGLKFTVWCSDGYDYDGRHSYEGEPTKEFDSVWKTKEEANSRAEYSS  
>comp6290\_c0\_seq4; 540 299 1557 LEN=1697; minus strand; translated  
MAPSPMKTPGKASGPKKVYLFNCPYKEKASAKKAGAKWDASAGCWYVLSSQNLEAFNKWH  
PNENKYLVCYDEKDDAKRAGAKWDATCKQWYIAANQDESRFARWLPSSAGNRATKATKL  
IKGKKSEIKTTKTPTKLSTKSQLATIPRINGDMTVAQLQTECKARDPSIKGITTKRKDFW  
LEHLKVGTPWISAEVPLYDYEPEPSPXKAKQKLTTSALKASKSNSDTKKNNSAVARISAD  
MTVAQLQIECRARDSGIIIGISNKNKNWLEHLVDVGSKWVSQGWKEKDLQNLISANKKKAS  
SQTQQSSSKHKDSVDCRDI EGMARQTSSKNNSKKRLGDFPVNNITIPQQVGKKAKKDST  
SAKKPSVKLVAEVHKNYQQNDFVNAQERSYSKRRDCKAEIVACTQISQGPSLCHGQV  
>comp6301\_c0\_seq2; 39 1 498 LEN=555; translated  
XTIVVGKNSDRDRREHTARQNGLESTHTRTAPGCSATSPARGEPKNYVRYGATNGQNLFL  
KVRRNLGRPIGQRGTEMPRLVPGPIPGDPKPGAASPGTTAGKQHDVAPVTPHMANXTQQY  
AQNASNERAAGGMRCNDNGKEANEPMGSIGACMHAVHNKSPQSTKMN  
>comp6308\_c0\_seq1; 636 90 1780 LEN=1780; minus strand; translated  
MSFSAPRRPLDLAFVVVQSPQVPHPMGDNNNSNNYADSDSDETFDDMPPLTDMDTSTS  
IHANIDADNDANTGGTGTNVVAMTGI PSESDIYEETNLRTEYIVSEVDEDEDEDEYED  
YFDEDEDDADTAAEVMMAHYLQVLEDIPEYDTGDVFEDEDEYEEESHAYDDFDEDLEGS  
CNCPCQVLRHIVGRHSSCYEATDSCSDEGDEHDNDVPLDPLASPCAICMEPETAARRFAC  
LPCCSSGSRMATRQDSHGHLPGTLPPTTTDTSSSTRFCYKCLVTCLVKNCGVHRTL  
DHDHGSSDKTNGNTDAQLAGECPRCKLLVLEELPLEDNKDASKPKWQHPLPGGLPKQCL  
AKPPLARKASEEIAHYKRTVAAIPSTEAMFWYVASRNHLRIYLVVLATCPNRYIPEELL  
LTIDPSSSTERIRLLCQWGLIAKRQNSPACASTKSRSLRKRKLSIMQQLWQRGPLGTAAA  
AAEMPDRSDAFWNKHYQAILGSVRTWIRSRACCSLAEASRNLPNRSQTVYQIDPTVQHTL  
HRLSAMYQLGDLDDPAIDRVGEX  
>comp6312\_c2\_seq1; 201 1 1144 LEN=1144; translated  
XPGGTPDAGARRLPDRVVRSLRYERVLGAGSYKRVYLVSATSRPPEGGDIAGATAPRTF  
RYAMAVERLRNKRDVKNFRGVRIPDLIREGPEGGTPVDAGDRELFETIVDWWVQASDVP

EFAGGRPVFPQAQRGDGPLPGLDRAIGRTRSAPRKNFVGSRWMLSFKPVYETDLKRFVRN  
SPALYPVGGSSSETLRGSPVRDEYWSEPVLMGFVLEVLRAKLMHDAGVVHRDIKPKNIMV  
SLSPSASDGLRRRPVI IDYGFSEIGSPTVLDEGGKGGPPGRTAEKASDVCVVRPGQLKGE  
IGYVLVEDLANYRGCQRGDTYAMGKTLYEFIFGSAGLQEARTEQEDRDQEEISVEAARVQ  
ANEFHSLLFGNPTAGNESRFRL

>comp6320\_c0\_seq3; 165 1 709 LEN=1157; translated  
XLLSSNSNIPCNSDKRKMISMNRKIRKRNFRRLHPISMTQFIRSSYVVVCILYPCFCLAI  
IGPNWGHQRQI ISSVLTSSASTVKKNASSKVETLSEPKEEERLQSFRTANELLTFVSR  
KPPRYVQHVLVYWTATDAILSVILNKYCSFSMSSPLIAPQAEQSVVREVYSKLFYFARM  
RPRLLYSIGALLRALSCTPLRHLFDPTVGVGAGIHFFASLASSRWGEYCLLLRSS

>comp6320\_c0\_seq4; 197 1 853 LEN=1047; translated  
XLLSSNSNIPCNSDKRKMISMNRKIRKRNFRRLHPISMTQFIRSSYVVVCILYPCFCLAI  
IGPNWGHQRQI ISSVLTSSASTVKKNASSKVETLSEPKEEERLQSFRTANELLTFVSR  
KPPRYVQHVLVYWTATDAILSVILNKYCSFSMSSPLIAPQAEQSVVREVYSKLFYFARM  
RPRLLYSIGALLRALSCTPLRHLFDPTVGVGAGIHFFASLASSRWVKPLILGWATTKSF  
WTWLGARPVDRAYVPITLSIHEWEEKRKRKRAKIENTKSKKDDAS

>comp6341\_c0\_seq1; 1092 413 2421 LEN=2612; translated  
MYGDNTTSNPKDSFSENNRKLSIPAIPRPRPTLGAMASASSLSSSSFRFGNTEADSTNS  
SRNYSDDSDIPWGDRKPAKVFPFSDYGN DYQHFMEDIDDDDDDDYXNGPEDYDDPDMD  
LVEYPSKEKFESSIATGSDEEFELNTPTKDGVLLPRNSPSQRI IKRLASSSSVVAKPSPS  
PDKKGEATLKT DSHST DDEENGRCDREDDDGHDHDDSSALLAANGPRTTKTTVFG  
DGTAINRELLWAASIFFLVVGISVLTAAVLVIKQSSSILDANSEGRIPSTPSASPPFG  
EPPTPPPVVVAPRLSVQNEWKLVYAAIRDNPLTQSLLVSGDGEEVLPADPTFYEGLVEGM  
VFSEHRDWIPAVMPLSDDNDDLVLNLYGMTTDDQQQIAGNNGNSINTNNHSGGQHIGMP  
PSAAKKNMTPNQKATAWLLYHDRKDPNESVWRWALASIYFKMGGHGWTIFRRDQEADR  
SSPKWFTDAPLCDWERLEGCSGYFKGNGNRNPQAQTHLHHAHHREL PVDLDFDDSNLSG  
SIATEFSLRLYNTGSDEDEDTVLRAITLTDNRLTGRIPGRVFEFLFPSLGKLYLDGNELT  
GTIPYELGGLDALYVQNNALTGDWPEEFCADGENPAGSESENGLTVVDDFGMDCDAIECS  
CCGILQCY

>comp6342\_c0\_seq1; 622 15 1819 LEN=1819; minus strand; translated  
MTESDAELIERCNGTSRTYEKTSIVDFQHSSPDDVALVVDGSCVQEVTFQEFQGFISNVS  
SFLHHESLRHQERVGLLIKSSANAMAVIYGINIACAIIVLDPEKTPIDRCKMIFDDAN  
ANVVIVDDEYHSAFQELASDVI GRKLC LISEVVSFNSSSDSSTAKVEALPEDIFGIFYTSG  
TTGTPKGVVIKHSNVLNLVCWKEFFDVTHKDSILLFSSLSFIMSLRQYIPTLHAGATVV  
IPETALDFESAIVAGKVNKLVC TPSALAAALDMERVANRIEAIQLAGEAPRKNLTDVWSTK  
VSKVFIGLGPTELCAHAVCSQYDGETLCIGYPAANVKLYIVDPNTGLQCPVNVPGELWIA  
GENVSFGYLNREEATKKSHTWLKNGSXLGLAKRLPCGRIQF IGRNDQQIKVNGFRMEA  
GEIYNAMPKTVEKSHVMVQNNALTLFASPTSINVNELKSHLLKILPTYMVPTVIHTLDDF  
PLNKNRKL DVQSLLLMVGTSQPEEEEAQEDADFGLSNRTE TTKLIWCQILNKDVKSIGK  
DDNFFSLGGTSLSAVVVSRMINQELQMELSVHDVFIHQTIHSLAQLIREKEKNVEDSTSD  
PH

>comp6345\_c0\_seq1; 708 241 2624 LEN=3072; translated  
MTTSDQGEEEKTFPSIRELRNELRKELKNTSPOGAIKAKGILDLMFLRYGLDKNTENTTV  
SRNERRRIQKTRPMVDAIDCTQVINAWSKSRRRDAPQALATLRRMYTTFQKDGNCPIRP  
DNVAYNSVINAFKQDFNGACSVFALQTEDFKEGGNTKAKPDAYTFSTMINACSRSNRE  
DLSETAEKLLTTMNDWHARGDLEIGPSTMAYNSVINCF SKSDALDAPERARRILETMVSR  
FESIGSDSNDGHDIARPNAITYNSVLNAHARRGDVEGATEVFERMKKDFESGNGAKPQV  
QTYNILIDGWSKSNNKDAPENAESLLQEIRMESEGKFERGEGPDCITYSAVINCF SKSN  
AYDAPTRARTILETMI SEYENSSEKNSVRPDTVVYGLMNA YARQDTKGASEVFDMMKK  
DYHSGNQDAEPNVPSYNILIDAWSKSNNEADPNQVELLLKEMI QMCSDGDIKKGPDAITY  
GAVINCYSKSNLQDAPQRARDLLESMAIQCKGNDTKEDIRPNTITYAAVMDAYARQDAE  
GATEIFEMLRKDKNCKPNVQTF TILIDAWSKSNSEADAPLEAALLLQEMMGSSSNKKQPK  
TGTLQKDSLGRARDVLAEVFARYSYRMYRPTVVTYNAIMNAFAKRGDVQGATAIFNAM  
DSDYSYSYNKESRTHEKTGPDVRTYNILLDAWARSSDNASAESERILKEMNHRCDKGEA  
HMKPDSITYRTVIRCLELFEKTEKRIEELKSIPSSAAXMTRRQGSRKQLGNRNYGMNSN  
GLRWA FERQLHQCG

>comp6346\_c0\_seq1; 93 1 221 LEN=221; minus strand; translated  
XFMESLTDELYNKAKCIMDDVESKGGMTAFVNDGHAKLLMEESA AKKQGRIDSGVDVVV  
GVNKYRLSDEEEQE

>comp6353\_c0\_seq1; 438 1 1384 LEN=1458; translated

KKNPNDDIGWEPLDRSTSFNRLHPQKNRRNANNRYSYAYAAQKIISSAHRMTMSPAISGL  
VLGLLATYQQVPSAAAFMAPNTNQAMAAAFLKEPSVAASPTSTLRMVGEEFDLSGASGD  
ETNEVRVEPDTHDELMYALGVNLARQLGDIRPLVESGEEAQAQVAKGLLDTVVGRLNDDGQ  
RLLLSKRGRELDQLIAGRANALREKLELRGREMLQNMADTEEVIALDSGVCVHVLEHGPE  
GPGQGARATAGSVVVIHYHGTLSDGTVFDSTLGGEVVKFPLAQVPIGWREGVLAHMKGET  
AMLGIPPEEAYGAEGTPDGRIPGGSTLFFKIQLVLDILSGAVGGAPTFLGADGQPVSSNDD  
SGGSLIGVDGQALEPRRPTTAEPALPAPGRVRRRRSGAPASVPRFPGEATTRKKPCPL  
GIKKPRNTVELFEPILDCSCSQNLAMGLVSLASNNKKQK  
>comp6353\_c0\_seq2; 196 388 1123 LEN=1197; translated  
MADTEEVIALDSGVCVHVLEHGPEGPGQGARATAGSVVVIHYHGTLSDGTVFDSTLGGEV  
VKFPLAQVPIGWREGVLAHMKGETAMLGIPPEEAYGAEGTPDGRIPGGSTLFFKIQLVDI  
LSGAVGGAPTFLGADGQPVSSNDDSGGSLIGVDGQALEPRRPTTAEPALPAPGRVRRRR  
RSGAPASVPRFPGEATTRKKPCPLGIKKPRNTVELFEPILDCSCSQNLAMGLVSLASNNK  
KQK  
>comp6360\_c0\_seq1; 341 44 1195 LEN=1311; translated  
MFGSNQSGKQKRLTSYFGGTKDDKAKNRQSSGKKRPRPVSGTSFRSHNGGSGFGVCPLC  
QLSFAWHILENHASECTGIAINHKNKSAKRSTATAVESKSPEEKSTPKQPTKSEERDEIIP  
LENVIEQNSSFTKTPNAKRKRQSCIVTPRLAPIFQAKAGERGNNQALHSHKQHQQLRPHSY  
EPIPLGLFVYEDFITEEEELILKACVNVDRDVLPAWKQCRFNGKHIGKRWGVHCNLRDRR  
VDSPENLPLEVLSEIVFPKLRQLNLPATKNFWPNEANAIDYRRRQGHWLKAHVDDRKLSK  
EAIANLSLLGDCYMTFCNVSKHRNLAVSEQRVLLKRRCLQVLTGKARYDFSHGIANCDLL  
TDRRVSITMRESPLTRTSPTIDN  
>comp6392\_c0\_seq1; 134 1 855 LEN=855; minus strand; translated  
XEIERVKLGSKNSMKGRFFPTYEYRLFIRHRPADPMSDLFDSQGLIDGIERRDVLMMAK  
NRGRKHTESSMQASKKGSNNYYLSLPLQDDLDLHHRVSVNRLEETKKPSPNGAGLRTCSSD  
LSGQLGRLQSNFVGTQIFTSHLMMRKKPDSLLSKSMHSPTMSDDEALSDSGRQGES  
RRRSCFGRLSLRGKSNNDGRWTFSEPPQPHSSPLALLRPRSGDATPGRNRKVSAAESFE  
SKQYIAETQPLFYEQEDGAIITYTANLLGSRPRIMDVCIPRVNHDGX  
>comp6398\_c0\_seq1; 326 138 1142 LEN=1142; translated  
MRSVSLFVALAFVALGTTVGFTQYRRVEFDGARKTASAALNRRLVACAMSSLDYYSIRN  
TTLEDEREALKSRMPPPVNEDMTKFQVEFRELLEGILYTPPEELSTVLNPRMRAILEGITA  
SYEFVYHAFEILYEDYIPLRLAGRVVYRELKRVVDESKNYKESQINAAMEGTGMPRSE  
VEACWSTFAEIVSDRRLPLEDLESYVGTMTLKYVLDGSGESIGNRAREEGGVSFEEELLVC  
LNNYRIRYSGNDGEETNATAFMGKPATGNLLQALNPSGDAQAARKGHELSPKRQKYNQ  
KYDDMLVQFSKWKPLIPSGEGRRQLILKGCFFVGE  
>comp6399\_c0\_seq1; 282 103 795 LEN=968; translated  
MMKQTLSSLLVTLFAAPSLSFVPQSQRGYIGQNAGRMNRILPSQRAAGSSDDDISTATT  
ESTTDSNDENTGADAGKRSSVFSVQEEAREVLEKVGWAGVAPDMSDPEQPMTSDDPFV  
QNIDAGIREDFGVGLDLDLNPAAKVVNLERELYQLREELEGTDESTIQSITKSIEKKEGK  
LAIERRSVFRGWLKNIFVQAVISFGISYVMATNPSSLFGGFDWYYYNSM  
>comp6399\_c0\_seq2; 381 103 1128 LEN=1575; translated  
MMKQTLSSLLVTLFAAPSLSFVPQSQRGYIGQNAGRMNRILPSQRAAGSSDDDISTATT  
ESTTDSNDENTGADAGKRSSVFSVQEEAREVLEKVGWAGVAPDMSDPEQPMTSDDPFV  
QNIDAGIREDFGVGLDLDLNPAAKVVNLERELYQLREELEGTDESTIQSITKSIEKKEGK  
LAIERRSVFRGWLKNIFVQAVISFGISYVMATNPSSLFGGFDWYYYNSMDSIQVLGYW  
FWWLFIVPSLRRRRPRGFKEALDIAFLGTPLVSLAAPVLTKDTGLIWFANFVIVAGAYG  
FAYLTDGDDSDSDSNKPAWLKFVYKSLDFGSGRERGARQ  
>comp6401\_c0\_seq1; 654 70 1278 LEN=1494; translated  
MKFLLNFLTFLGLATAALPIYGNPKNKAPVKKFDSLNDVKADSALGMSLLSKARKLEDENE  
IDFTWVSNFSIKFQGCHHISQWNDEADGEEDVRIETKRLIRFRLCPAYECSPDKAGGCD  
NYGDYVIDMNTFLESYYEALENYNQYKCEYTANMLCDECDGDDKGGDDFDAEICEYDCYVE  
HGIADTCADRNPYNDEQEQQEEFNLAEYVECKQAEFQNEERRRLDEEEIEYFIGPYCAE  
QGGAI FMGLFTDDTCTSFADYGGQETYSSMAGKSLPYGSESLISMDCVSCKEPEDFNND  
GNDQDEDQVIEMCEQIYQAGKCEQGLESTGYVSSANNNACNYIQGIKVVVKDGIITQV  
GSKANKTASIFIGVVFVAFVLLAAYVYYLKTCLDRASINLSD  
>comp6401\_c0\_seq2; 654 199 1407 LEN=1623; translated  
MKFLLNFLTFLGLATAALPIYGNPKNKAPVKKFDSLNDVKADSALGMSLLSKARKLEDENE  
IDFTWVSNFSIKFQGCHHISQWNDEADGEEDVRIETKRLIRFRLCPAYECSPDKAGGCD  
NYGDYVIDMNTFLESYYEALENYNQYKCEYTANMLCDECDGDDKGGDDFDAEICEYDCYVE  
HGIADTCADRNPYNDEQEQQEEFNLAEYVECKQAEFQNEERRRLDEEEIEYFIGPYCAE

QGGAI FMGLFTDDTCTSFADDYGGQETYSSMAGKSLPYGSESLI SMDCVSCKEPEDFNND  
GND AQDEDQVIEMCEQIYQGAGKCEQGLESTGYVSSANNACNYIQGIKVVRKDGII TQV  
GSKANKTASIFIGVVFVAFVLLAAYVYYLKTCLDRASINLSD  
>comp6403\_c0\_seq1; 48 1 94 LEN=472; translated  
XGRGGRGGMGGAMGGGGMGGAMGGGGMGMMSF  
>comp6405\_c0\_seq1; 651 92 1729 LEN=1802; translated  
MTGLNKKSNMGDMSDDDIDFDEDEDEYDAEKVEKKAIDQQEKLKLKLLQLNLEVYCNDSEYDD  
LRDLGKAVKSGAKLAGTILSGGYTNYSYKIHLDSDGSDNDEGNYGKKEIAVFAKIAFPYA  
LWNPDTSPYDLDRVTAEFDLMKRFSEELKTTSAIDGSEKSPIPRPYVLIDVPAAVDGT  
PRMKIFVAEWVAPTDEQWGNQYIEGEIDL RVVDQCAKTLAVINLADCCDDINQGYVETFA  
KIAKFGDGPVLA VL DREDEDKAVRYVRDVVGKEKMI AIMKEWHIRNRKKEALVHGDAHV  
NMLVERKPNPFQLSSSFGANGDFILCDWEMAHKGHKGRDISNFFSFPTMSACFMAARGQK  
DKADNIIASLKQFWTTYKTALAEGLDTKQAGSANGDDVLDVDRYMEEVFNSAISFFGYFS  
FVAFYIVGVMTEYNETEGLTEKEEKHVMGVLGWIGIRSMEVGFLEPAAEEAFGDHDNQR  
SRMESFFFGMIEQEINELFEARKTSHRRSRRSSMLRESSRRVSDSESGFGRMVRRMSQQ  
VTDEN  
>comp6405\_c0\_seq2; 265 141 875 LEN=948; translated  
MLVERKPNPFQLSSSFGANGDFILCDWEMAHKGHKGRDISNFFSFPTMSACFMAARGQK  
KADNIIASLKQFWTTYKTALAEGLDTKQAGSANGDDVLDVDRYMEEVFNSAISFFGYFS  
VAFYIVGVMTEYNETEGLTEKEEKHVMGVLGWIGIRSMEVGFLEPAAEEAFGDHDNQR  
RMESFFFGMIEQEINELFEARKTSHRRSRRSSMLRESSRRVSDSESGFGRMVRRMSQQ  
T DEN  
>comp6413\_c0\_seq1; 191 1 561 LEN=657; translated  
LLWICLWYPLFTPPNSNRCLLQEWEEKLTEAKEQAETFKRKYNNVKEGKDL SLMEDARSM  
MSQKFSQSVDTNEGESSTLRSSSFRSTTSRPEFKRATESVASMGSNLAAHAKTLVGSFAC  
AGNNERTGQVLSSE RATEEWRDRRNANGVDHSRHP S APYQQGGHPGLEMSHSTSSRSYRD  
TRRV DV  
>comp6413\_c0\_seq2; 696 1 1852 LEN=1948; translated  
XNNNSNNYNQ SASTPSSAARSYRSNSVGRISTGSGKSGPSYRQSL SIRERAMASVEKESN  
SNLNTSYRSTGSNSISPTKMQQQQPQSKSQQQYSSPSPQQSEGNRSRRKSPAHSVRSRA  
RSLSRGRSSTGEDKPAPAVQPPPQEEGQAAQGEAVVSPPELLVDALSGHEDGLLAIAERL  
MEHYDSGYDAMGEAIDAFADVQKLFQHVVEAAHMEGA AFESSRREEEIRELKRRVASGD  
VDHGMADDNDGANDLASPSSSGPVRHDEFIDQDVKDCLEAIRNGVTFKEEQKHAQCFEL  
YERACQAASALLPVDS DHRGRLQLS IARAESMTPDRGCAILRYAMDDVLRSGLRAGKIPK  
NYPLSDPSKRADVLSKPSMGN TQSS EQLNSLVEEMKDVINAPVYENTPLQDVARRFW  
EALQENQKIRSKNEDRLEHNLGKLG DYLLARAEWEEKLTEAKEQAETFKRKYNNVKEGK  
DL SLMEDARSMMSQKFSQSVDTNEGESSTLRSSSFRSTTSRPEFKRATESVASMGSNLAA  
HAKTLVGSFACAGNNERTGQVLSSE RATEEWRDRRNANGVDHSRHP S APYQQGGHPGLEM  
SHSTSSRSYRDTRRV DV  
>comp6421\_c0\_seq1; 510 1 2390 LEN=2390; minus strand; translated  
VEW IETIRNASLKASNSTDVHVCSQFSL LHNRP PKTRNLRDQRKEH LLET LKKG YFGAAD  
EILLVSGSGTKPLSSSPCSETPWNTADGIDAVNDYYENRGDNDVCQTTFPHISVSYNPYL  
SDPHLQDQENSRLERQLATGCLSKIYLPFGTDLDR LRTGLEFCADAIHTAKRKHQRAGDV  
SLVGSFVLP TPRWMAHQKFFRSSQKRVMLDPRFFKSDENQELTAIVVQVIRMYEKHGF  
ELLLEASPSANTLSCTKDDL SFLFDILKRVSASRDDGLGNRCNDSERSSSMGMNFRNN  
SNGVDFSSNSKGTKTGAESSQSPEILKKS LPSLRQDWRSRSSPCILLFGSHDVRLQDN  
KALEAAARSHKLLPVFLWTK EERDGDQWGCPRNTAVAVCLEEALKSLQDSLQSFGLPLI  
YCNCCGPSRHDSREEQLHQQENSHGIRELKHVVEAVGATAVYWNKDPTPEGRDRDAYRR  
RILEQHRLPRRIDVFEAQSSLLYDVSTIELPTGFRGGHFGT LMPFLNHCRKQFGVPSRPT  
PYFETFRILEESSPPEAFDTIFDMHGSTMSTHLRDLKI IDTFKLSHKWDQPIRARFPMS  
KIAQSTVDSFVRNGMKRYETDRSRADISDATSR LSPHLRIGTMSPNQLYWR IEDSEL PYK  
DTKTLGRRLIWRDLAYFQLHCFPSMKK K CIRSHYEAMEWVETIEEDRRFRAWK TGT TGY  
IVDAAMRELYATGWM TQSIRMVAA SFLTEYL RINWTKGA EWFHHTLV DADSAINAMWQN  
AGRSGIDQWNFVLSPTT  
>comp6428\_c0\_seq1; 452 533 1518 LEN=1518; minus strand; translated  
MNSKYMKPVGERTSRGKTTAEAKGLEWTKNVPVTKEYEFVRRDDSHMAKNETGFLEIGK  
ADPTYAYDVGGT WKLLYRKPDEKPIGP GIKPKNEQPMKIFVRSWNDEIFPLDNV K PQDSI  
DEIRFRLEEEHCIPREQQLRLGSGQPLVKDRKSLEEYGIKDEDILDLEPMSITVRL LGG  
QTVHLEVEPQDAIKDIKWL VGNKLDIPIDDCILLFKDKSLPETSTLDENDIHHGDVIDLQ  
QMEIYVIDLDGQKLEYLVSPSDTIESIKNVLEEDTGLKREDQRLCFQDNLLKNDKMTLKD

AGIKHQDTLALQVTVRSTTGGTVDLL  
>comp6429\_c0\_seq1; 105 434 988 LEN=1165; translated  
MVLAPRQLAVAVLFLPGSLSLTNPRCQLQRRRHLASTASGPPRPLLALETAPSSHHGQAS  
DNADADSKPDAIAEQEKKFKIVACSKKRQSLGLDPLSTFGALYSRAAATGVRVEEGPCIG  
SCKRAPCAAVEHDEYFGSVALEGMTSEEFESDAFLNIVTEEDADRVWSCVENAVKIMAAA  
EEDD  
>comp6429\_c0\_seq2; 17 576 1037 LEN=1520; translated  
MVLAPRQLAVAVLFLPGSLSLTNPRCQLQRRRHLASTASGPPRPLLALETAPSSHHGQAS  
DNADADSKPDAIAEQEKKFKIVACSKKRQSLGLDPLSTFGALYSRAAATGVRVEEGPCIG  
SCKRAPCAAVEHDEYFGSVALEGMTSEEFESDA  
>comp6429\_c0\_seq3; 67 434 895 LEN=1378; translated  
MVLAPRQLAVAVLFLPGSLSLTNPRCQLQRRRHLASTASGPPRPLLALETAPSSHHGQAS  
DNADADSKPDAIAEQEKKFKIVACSKKRQSLGLDPLSTFGALYSRAAATGVRVEEGPCIG  
SCKRAPCAAVEHDEYFGSVALEGMTSEEFESDA  
>comp6429\_c0\_seq4; 105 576 1130 LEN=1307; translated  
MVLAPRQLAVAVLFLPGSLSLTNPRCQLQRRRHLASTASGPPRPLLALETAPSSHHGQAS  
DNADADSKPDAIAEQEKKFKIVACSKKRQSLGLDPLSTFGALYSRAAATGVRVEEGPCIG  
SCKRAPCAAVEHDEYFGSVALEGMTSEEFESDAFLNIVTEEDADRVWSCVENAVKIMAAA  
EEDD  
>comp6430\_c0\_seq1; 290 235 1140 LEN=1615; translated  
MIVVCKTTHKLGLLADRQILIKSKTKQNHAKLQKAVPILQESYSKTFNDRTEYQAGAPF  
DTDGSKQAGVLGIVNELFGMYFRLNLRCKNLIRPVETKKLSEKGSMAEMVTTYTYVGR  
LSMFEDDHARAETNLEYALAHCHRDATNNKKRILKYLVPVKLYRGKFPTRLLDKYGLEE  
FKPLVEGMRKGLDRTFQDGLVKYQDRFIGQGTYLLEKCKTVVYRNLFKRVWKIMDSYQI  
KLEQISKAFKWLGMPIIDLDEMECILANLIFKRYIKGYLSHAKRTLVLVLSKRDPFPTS  
SAVIS  
N  
>comp6430\_c0\_seq2; 345 106 1338 LEN=1813; translated  
MVKIREIKQTLLENALINKDPHRLAQVFEPLVGVASSAIATNGGRQSQKHNPQSFTVNGKN  
CGGLLTSLLDAYAAAEVGDNEAAFEAQVKVHPKFNQLFSSSEGNWMPAMIVVCKTTHKL  
GLLADRQILIKSKTKQNHAKLQKAVPILQESYSKTFNDRTEYQAGAPFDTDGSKQAGVL  
GIVNELFGMYFRLNLRCKNLIRPVETKKLSEKGSMAEMVTTYTYVGRLSMFEDDHARA  
ETNLEYALAHCHRDATNNKKRILKYLVPVKLYRGKFPTRLLDKYGLEEFKPLVEGMRK  
GLDRTFQDGLVKYQDRFIGQGTYLLEKCKTVVYRNLFKRVWKIMDSYQIKLEQISKAFK  
WLGMPIIDLDEMECILANLIFKRYIKGYLSHAKRTLVLVLSKRDPFPTS  
SAVIS  
>comp6431\_c0\_seq1; 1221 1 2264 LEN=2264; translated  
XEISKRLFLDIESMGKQYQALHEAQKASQRGDGERDRNLDPLSSSVLSGLQELYIPPDV  
DVTDTLDPETIFGQVDLQONVALAKLVKKSTKRLNAASTDGDDAIRLLDLSIVDSDGDDDD  
SDSDSDSNSDDNSDDGENEASEANSDDDEDEDDEAERIRRRMERAMEDMEEEDGDSGDEST  
EGPGTRKQAEPKKPEEELYDPAEDMNDGFFDLNEMEEFADEEEDFLPNEAFGQPSDDGP  
AKKQNKKS FHRQREGIHMDDDSDNELDSDDDSDGGGLYEEVKRDVKKRYRQDQEDID  
ALYELYQETNPEDDDEDDLDDVVNMTAADYFGAPRRNYMERYKKNHPPAKPSPRTNDGDD  
DSWGEYDFENEDQEGWRDENNDGDDEDELEDMDKDPAPGEGESEEELEAPRRSNADTSRK  
LSTEDKLRKQTDLELEKELINEKPWQMRGESKSGSRPVNSLLEGTPEFEMASKQAPIITV  
EHTMNLEDVIKARILAEDWDDVVPRELDPVGNQKKGAEPEVSQEKSKLGLGELYEREYL  
KKAVGYDKDAEEKQTEEDKAKDEMMLFANLCSKLDALSNYHFAPRPIADEAEARPVTV  
AIAMEEVLPLHVS DARGVAPEEVYATKRGREGILRADSEMDRDDRKRQRQSKKAARRKKR  
KEKEADDKLI SRLQPGLGLNNPYEKRKAREELALARSRGKVTEGEREMDGKYGSSGTFFK  
RLQAEAQQTIQDRSSGQDDAPQKXNKPQIQCLQAVX  
>comp6440\_c0\_seq1; 315 256 1044 LEN=1559; translated  
MLEGFELWVPPTVPNYKDEMPYDILGTDAQIVQFPVRAGRQIMCFSGAMAYMSEGMKME  
CKLAGLGKTFGRLAGGSLFQITYTNDSTEDGYIGMTPDYPGVIVPINMAKAGKVIALRD  
SFLCATVGMGETMTDVGAGFNPASSALAMCCSGMDFIVQTVENGWAFMAMGTVIKKT  
L NQGETLLVDGKSILCFESSVSDVVRPVGIIAAMCCGGEGIFNTELTGPGTVHLQSMSIDK  
LRMLFPPNVQSNPDDGGDGE  
>comp6440\_c0\_seq2; 283 256 942 LEN=1704; translated  
MLEGFELWVPPTVPNYKDEMPYDILGTDAQIVQFPVRAGRQIMCFSGAMAYMSEGMKME  
CKLAGLGKTFGRLAGGSLFQITYTNDSTEDGYIGMTPDYPGVIVPINMAKAGKVIALRD  
SFLCATVGMGETMTDVGAGFNPASSALAMCCSGMDFIVQTVENGWAFMAMGTVIKKT  
L NQGETLLVDGKSILCFESSVSDVVRPVGIIAAMCCGGEGIFNTELTGE  
>comp6446\_c0\_seq1; 290 473 1524 LEN=1982; translated

MVASREXNILPEKRVARPDFAFVPSRQPNYSYQHSNRQGVVMEQRNPEDEQREAOQLQHVM  
HRSVSMNNNPSVAVNPSYQFGPADNIDERDAEDPLCATEYVQDMYDHFRAKEGITSVRP  
LYMENQTHINERMRSILVDWLVEVHLKFKLVPETLYLTINLIDRYLERQEVSRPRLQLVG  
VTSLLIASKYEEIYPPELRLDLYVICDRAYTRKEI IEMEEQILKTLEYNITIPSAHAFLVR  
FLKAAHADKRIVQLSCFILDGTLQSYNLLHYLPSQLAAA AVFIARRTVGRNSWSPTLLRY  
AIYREEEIAPIARAVMAEKSSAAHELRAVNKKYTSSRYGAVANLALSCDF  
>comp6446\_c0\_seq2; 347 175 1335 LEN=1793; translated  
MFHRSSNIAQPSQSVTGNPRRGAFRDLTNANQQENNGGKSGKNILPEKRVARPDFAFVPV  
SRQPNYSYQHSNRQGVVMEQRNPEDEQREAOQLQHVMHRSVSMNNNPSVAVNPSYQFGPA  
DNIDERDAEDPLCATEYVQDMYDHFRAKEGITSVRPLYMENQTHINERMRSILVDWLVEV  
HLKFKLVPETLYLTINLIDRYLERQEVSRPRLQLVGVTSLLIASKYEEIYPPELRLDLYI  
CDRAYTRKEI IEMEEQILKTLEYNITIPSAHAFLVRFKAAHADKRIVQLSCFILDGTLQ  
SYNLLHYLPSQLAAA AVFIARRTVGRNSWSPTLLRYAIYREEEIAPIARAVMAEKSSAAH  
ELRAVNKKYTSSRYGAVANLALSCDF  
>comp6459\_c0\_seq1; 245 1 938 LEN=938; minus strand; translated  
XGSTYKSNKGNNGGFSSSNNDPMSIKGNVCLVEVARVEWNP IQPWQRSPQSKSSGTAFVI  
EGEQLLTNAHVVKSAIDIRVRPHGSTRRFPAQVVCYAPDVDLALLELVGESEKADFFGHP  
SAGEADGDEEEERIARRRRTTKSLEFATELPGLOETVHVVGFP TGGRTICVTEGVVSRID  
LYNRIVAIQVDSAINPGNSGGPAFNSKGQVTGVAFRKRISTKSQKVDNIGYLIPAVLVRA  
FLGRVDREKGTQYLSGTIPYRCHSLENHSLRLAHGVPDFVHGILITSVADAVTESTEDGT  
SAEESPLQLQPGD  
>comp6459\_c0\_seq2; 187 1 638 LEN=1195; minus strand; translated  
XGSTYKSNKGNNGGFSSSNNDPMSIKGNVCLVEVARVEWNP IQPWQRSPQSKSSGTAFVI  
EGEQLLTNAHVVKSAIDIRVRPHGSTRRFPAQVVCYAPDVDLALLELVGESEKADFFGHP  
SAGEADGDEEEERIARRRRTTKSLEFATELPGLOETVHVVGFP TGGRTICVTEGVVSRID  
LYNRIVAIQVDSAINPGNSGGPAFNSKGQVTG  
>comp6466\_c0\_seq1; 224 464 838 LEN=1276; minus strand; translated  
MVMTFHFHTLSAFHDLSSSIDLSSSTAVSVLNVNAMQHMIKQEEPPSQPKPALAIQKL  
AANHNNLVHPVAGLDCTEHDGPQEMEDAQEMAYWRDIKADNSWTS PFLKKDTRQYLT FEP  
DGGGW  
>comp6475\_c0\_seq1; 137 1 286 LEN=286; minus strand; translated  
XTVITDDLADRVLMMSIGVGVLTGLVGLLVGSVNPGLLEDFGVEDGGGVATVAFVVGFF  
VGLGFC SILMSVVGSAVNTVIVCF AESP AEF EANH P  
>comp6476\_c0\_seq1; 101 1 515 LEN=515; minus strand; translated  
AALDRPAGDHLVAQITELMNNELMDRMTALKLVARQQKDKKDEELRFLKSELDRLRAE  
RDQQNLEKLRPEKPPSSMQLVVDKIWNQKRDATEQSYRRQIQDLRDRVRGLEASNCKLREL  
GRVTVEIKSDDDEETRKAKEMARAVSRGRLTRTRSAQRVRDR CERQLERSKX  
>comp6481\_c0\_seq1; 486 102 1613 LEN=1800; translated  
MNRYVLEE QIGQGT FGI VYRARKKETE IHEL YAVK K LQVFP SWKDVVVEREFKAIEMFM  
RKREKERATNDESKENKECFDCCGCHNGSDHLVSVFEVLRERDSCLYIVMEYMKDGCLQD  
YIAAKAKSKAES PQCIQKISQNGHTFRDSETR SILCQIFHGLRHIHSLGYVHRDIKPENI  
LLHGRTAKLADFLARPF GM DRK LKKEAPRRSCNQASSAFHCFKAPVLD DDTGCTMTNYIG  
TRWYRAPELLRTHSATHP I GNGDES KHDVAFYTEAIDTFAMGCVA AE LYRCRPLFEGRD  
EPEQLRLIENLLLTDPPHYRTP TSFFGDDRAKCCDFLDDYGQDERNEG MVRNRLASKIET  
TDQETVRF IHALLHLC PERRPTAWEALRHSYFKVECKNRKSCETQSVLTTALARASSLQR  
TSESMVTPPLASDRCGIYEPRSTAYPR SIGNTGAKSSRKITPTPMIAPT TDCNNTGHKMR  
LETDAVEQYIGIPKQSPWAFHESW  
>comp6482\_c0\_seq1; 706 1 2299 LEN=2299; translated  
XKAAPKLSCFAPDLERTHRAVTRARQEWKREQIQRSKPGDAVLGLPLLNVGMPKSGSST  
LLRFVRHDLKWKATHNVVERAASERDGDQRLSPTRTLTP IPTSPPTPPRRSYVGKLMKQ  
AIDVGHSPSFLLSQGYRAHTQMDYTVVSSSQEDDET NF FPQISLLDEIHASEPNATFV  
LLFRPIDDWIRSVRSWHRLPFRWMEASKPYYGAATQIPGLVLTEDQRTTRTERPEEPLAA  
TESQLRDWWCHVHRHIRRFVDEYPSHTLVELDLYDNHNRDKHEAGDSSSLSTTETLRELF  
FPPGERNRTITWGMANANPAAAFSIGSRPGPIARKTKYEQWNHETQRLELERE LEAST  
RTKGHQSSNSSATNSTLPKTSLEILETVLREEREESKEEGRDWDEECFLPRPFSVEKDVS  
HGSMNSNSAALS NPTNNSDDEVTKGSKAAGTVLLPRVPYPI LNVGLPMDPWS DALRDF  
FSCGLKVVRKALGSNGTRRIGSVGKKMREAVRDAHVGPI SGFFGTNRQVFSALDYTPS  
LDSASAASSSSSSSSSAAIFPQIQLLDELHEEDPSFTFLLPVPPIDEWVKWAQTFHNFSE  
RWARMEMPGLVLTDEQRSARHRPCPLVEKSTDGEEQQQNNNSNNGNHTATLKEDTGNHRD  
TEEQPEETRRCLRLTDQQLRDWWCGHVRHVRSF AE AHGDSHALLELDLSPASRGPTSSAL

NKVFGANQTCIAKLFXETDARGGRILAVQEATHPQDPLDLWYTLQEA  
>comp6491\_c0\_seq1; 52 1 215 LEN=215; minus strand; translated  
XLHEPKTLDEVKSLLLRAGSAGQLVVIDFTATWCGPCQMIAPLFKEMSSTHDDVMFLKVD  
VDENPDTAQQYSX  
>comp6501\_c0\_seq1; 623 1 1775 LEN=1880; translated  
XEELRARAVQLIAERSGSLYLKSETVLFVDMIPHLLQLLGETTGNFLQQSVFAAIDSIG  
RNSCLSSDSVINDRNLEIFSSAVFKASSVISTASQEISEGLFLNIPPESRQLVSSAALCA  
STAIKICGPRALPVLPKLIKPLLNQSAATAFAIKSSISGDDSIDKKELSQARLMQLAILR  
TFTAIIDRMPMLLKPYLVDILKSFQVSEINIDQSHSIQTELIALQNMTTSRIPARLLI  
PAASKSIITTPNLDLNLSTLSIMTDSITKSKSSQVSGMVSIIIKTATYVFDQETNQDGD  
LVMQATDKLLSIVMKLSEIQLRSLYRKIRDWRGDFDATNPEQSSQRRSAFWRFSSALSD  
QLKSIYLSCLSSVFSDAVDELEMAAYYLSKKDSVKKSDGKKRQRISSEESNGLEISSLN  
ALKSLLLCLEVSLRSDAHEGGLWIREMESQRYDKLLTPLGKLLQCRLPCDASNCSFDAIV  
LGGDNHSGSVVECLVALATAAGDEQLWKPLNHSVLQACSDENRPEVRKAGVSCLLALINS  
IGEEYMVLIPECLPILSELLEDPEDEVAGIAQECISQSEELLGESLQDSL  
>comp6501\_c0\_seq2; 553 1 1851 LEN=1956; translated  
XEELRARAVQLIAERSGSLYLKSETVLFVDMIPHLLQLLGETTGNFLQQSVFAAIDSIG  
RNSCLSSDSVINDRNLEIFSSAVFKASSVISTASQEISEGLFLNIPPESRQLVSSAALCA  
STAIKICGPRALPVLPKLIKPLLNQSAATAFAIKSSISGDDSIDKKELSQARLMQLAILR  
TFTAIIDRMPMLLKPYLVDILKSFQVSEINIDQSHSIQTELIALQNMTTSRIPARLLI  
PAASKSIITTPNLDLNLSTLSIMTDSITKSKSSQVSGMVSIIIKTATYVFDQETNQDGD  
LVMQATDKLLSIVMKLSEIQLRSLYRKIRDWRGDFDATNPEQSSQRRSAFWRFSSALSD  
QLKSIYLSCLSSVFSDAVDELVSPCLFHHFSLISLHALTINFICELEMAAYYLSKKDSVK  
KSDGKKRQRISSEESNGLEISSLNALKSLLLCLEVSLRSDAHEGGLWIREMESQRYDKL  
LTPLGKLLQCRLPCDASNCSFDAIVLGGDNHSGSVVECLVALATAAGDEQLWKPLNHSVL  
QACSDENRPEVRKAGVSCLLALINSIGEEYMVLIPECLPILSELLEDPEDEVAGIAQECI  
SQSEELLGESLQDSL  
>comp6509\_c0\_seq1; 701 244 2478 LEN=2577; translated  
MMERNKGRSLHRGRMNATNALSASTLQSPDALCLHVAIIFLVGVSPIGQAQTQANT  
PSTPNTPPPQSSNVASPVDSALPTQPPLSPPIPTNAVTPPIPMPPPIAPPPSPFPTSIPG  
PTVLPNTNFTGTPSVLPFSFSSQPSSLPKSFSEPTISDSPTAQPSAAPTQGPSWLEPSFKE  
NKFRQNIQVGNRVTDDDEQNI IETIYRLQTRFAPVPETELKIMTVCTVDRQKIYTPS  
EESTEGEWLSYHSNVNESEALLRRRRRRRRVEDALDVENNDVTVVVDFTMQYESRYFNV  
TQYPKEFQIWTNDHLDEILIQMQLKLNVTKVEKAQRIVVNTQAPSMPISSSPSIAPSLF  
PTVSHQPSVPLPSLPTGENEDPGGVETTSLIAISASVIVAVGILLVGVFFWYRKRQIS  
LQREESAKLDYQTNAMRLSELSDGRWTTTANAGSNLQFRNSDSKAYGSSFAKQPKTPTG  
LSGAGVILSPNGSLRSNPSLVSEGLIGGDDSGDEADATQILADEFDQYQDQONLEKMRAD  
VEGNLKGCDGMSQAVARALIDDVDYNPYSGAYWGGDGEDASAAEIEASALGSVLDWLKR  
HGNASGREKREFFQETLNKMTASVR YGFGVPEDGARTIHECAGLLGLQLAVEIPVTTIVI  
SGMRKSTTEEDIRDTLGVFGDIAVA AVAPKQKGYGILRFTSDSAAERVMNRFRTTEEIVLD  
DVAVQLIVIKPGSSLEAKEPNGVI  
>comp6509\_c0\_seq2; 255 176 553 LEN=652; translated  
MTASVRYGFGVPEDGARTIHECAGLLGLQLAVEIPVTTIVISGMRKSTTEEDIRDTLGVF  
GDIAVA AVAPKQKGYGILRFTSDSAAERVMNRFRTTEEIVLDDVAVQLIVIKPGSSLEAKE  
PNGVI  
>comp6521\_c0\_seq2; 356 1 1000 LEN=1565; translated  
XPIQSKPNQPKQQRANERNPPSSMFSSLSTAGGLRLASRRILDASRSVAPRSRATPQL  
HLPQRQAVSTA AFRAGVARARTAGHRYLSKDTAKTAAEPAKVGWWSPEFWGFAGSIAAW  
GMSGAAIYDSALQGPEVIVSLTMTPLVMVYSGLFARWAWVKPRNLSL MYCHVANVLAQTN  
QLRRALEYKMENGEQVKEMAQQVGM LGGVAGAAV LGGPAARSALSGANLGIVSTIAAA  
DAGPFTVHFWAPMSKVVISGASMLELDRPTDKISLPQYAALTATGFFFTRYALLVTPVNY  
TLCAVNIALFLSSFWHFGRKVKADFVDAKPD AQ  
>comp6541\_c0\_seq1; 106 1 496 LEN=943; translated  
XGDVGNSHCDGNEFVSYYLYVTYSIGCILMKKVLNLSLHDDVIPLNFFGRHRLRMGTPV  
MAGCFFGTFMVMLPSYYFCYRRREHQEQVIEMMMKYNQFGHATDLPEEPPL EHPFWE  
QNNEGDT SNAETKHDREFRGLIKERKEWQKQDPSFDEIFQERK  
>comp6541\_c0\_seq2; 178 147 734 LEN=1181; translated  
MSGSGTSQTVETSVDGILTSVGGAAPNPNTNRSDPLETAKWTRFLPEAFGIRESVRKSSY  
RWCVREGGMWGIATATAMSLHRLRMGTPVMAGHCFGTFMVMLPSYYFCYRRREHQEQ  
VIEMMMKYNQFGHATDLPEEPPL EHPFWEQNNEGDT SNAETKHDREFRGLIKERKEWQK

PQDPSFDEIFQERK

>comp6541\_c0\_seq3; 190 645 863 LEN=1310; translated  
MMMKNYQFGHATDLPEEPPLLEEHPFWEQNNEGDTSNAETKHDREFRGLIKERKEWQKPKQD  
PSFDEIFQERK

>comp6559\_c0\_seq1; 540 206 1480 LEN=1982; translated  
MIHIPVQSSMSLLLVMLLQLDSKNSLVGATTASQSSQTH TIPSSHQIFKAHFIDDTYLPS  
HSSKSLWVARILGDLRGGGAGDEYDEDESYDVYDDYDEYDSDEEDLEEETPIQRGDRNR  
KGGYDHS MIDPSRPRRQRPPSGYHANDFRGKKGSSSLSSATNAASAATKLATKSLSVT  
GSLAWNALVKQPGKLAHFVIRPKHVLDLVETFGWLRLDQQVVEKSNKGGGDQRTIASVATI  
ELARPPPPSRGSTGQSKRGRSRHRSGPPPPPIVILRRSKSGENDDNEGKDNDIVYRAPFTF  
VRKNKYLGASLSSFTQTSFVAPAFVGENQTRLYGYKGSWQRKLADKSVIKLKGKIYQVH  
KQKFGKKGSGSYVYGPVAVGTFVMRRRISMSEEEEEEDYDDDLDSDEFEYDNDSDDEEYSEAEG  
DEYD

>comp6559\_c0\_seq2; 540 206 1480 LEN=1946; translated  
MIHIPVQSSMSLLLVMLLQLDSKNSLVGATTASQSSQTH TIPSSHQIFKAHFIDDTYLPS  
HSSKSLWVARILGDLRGGGAGDEYDEDESYDVYDDYDEYDSDEEDLEEETPIQRGDRNR  
KGGYDHS MIDPSRPRRQRPPSGYHANDFRGKKGSSSLSSATNAASAATKLATKSLSVT  
GSLAWNALVKQPGKLAHFVIRPKHVLDLVETFGWLRLDQQVVEKSNKGGGDQRTIASVATI  
ELARPPPPSRGSTGQSKRGRSRHRSGPPPPPIVILRRSKSGENDDNEGKDNDIVYRAPFTF  
VRKNKYLGASLSSFTQTSFVAPAFVGENQTRLYGYKGSWQRKLADKSVIKLKGKIYQVH  
KQKFGKKGSGSYVYGPVAVGTFVMRRRISMSEEEEEEDYDDDLDSDEFEYDNDSDDEEYSEAEG  
DEYD

>comp6559\_c0\_seq3; 540 206 1480 LEN=1779; translated  
MIHIPVQSSMSLLLVMLLQLDSKNSLVGATTASQSSQTH TIPSSHQIFKAHFIDDTYLPS  
HSSKSLWVARILGDLRGGGAGDEYDEDESYDVYDDYDEYDSDEEDLEEETPIQRGDRNR  
KGGYDHS MIDPSRPRRQRPPSGYHANDFRGKKGSSSLSSATNAASAATKLATKSLSVT  
GSLAWNALVKQPGKLAHFVIRPKHVLDLVETFGWLRLDQQVVEKSNKGGGDQRTIASVATI  
ELARPPPPSRGSTGQSKRGRSRHRSGPPPPPIVILRRSKSGENDDNEGKDNDIVYRAPFTF  
VRKNKYLGASLSSFTQTSFVAPAFVGENQTRLYGYKGSWQRKLADKSVIKLKGKIYQVH  
KQKFGKKGSGSYVYGPVAVGTFVMRRRISMSEEEEEEDYDDDLDSDEFEYDNDSDDEEYSEAEG  
DEYD

>comp6560\_c0\_seq1; 275 254 980 LEN=1148; translated  
MTQNIINKNAVSGGKPKFLIQFRSDHVT SKNNPRVFFDIEIGGKAGRIQMELFKTIN  
PKTAENFRALCTGEKGVGKSGKLLHYKGSVFHRIIPGFMCQGGDITNGNGTGGESIYGGK  
FEDEWYENELFITHNTPGLLSMANS GKNTNGSQFFFTTARCKWLDCRHVVFGQVEDGWEV  
VKAIEAVGSASGKASDEVI IADCGELKDFKLPKKVVNGDYNNEWKTDHLDEYQAHEAKKN  
K

>comp6560\_c0\_seq3; 436 94 987 LEN=1155; translated  
MLNLKQKQTAVAFVALSLLCIVPMVSAFDPTAFVADAIAYWNSLNLFYKFLVGAPIFFL  
FAAATGLDGGKPKFLIQFRSDHVT SKNNPRVFFDIEIGGKAGRIQMELFKTINPKTA  
ENFRALCTGEKGVGKSGKLLHYKGSVFHRIIPGFMCQGGDITNGNGTGGESIYGGKFEDE  
WYENELFITHNTPGLLSMANS GKNTNGSQFFFTTARCKWLDCRHVVFGQVEDGWEVVKAI  
EAVGSASGKASDEVI IADCGELKDFKLPKKVVNGDYNNEWKTDHLDEYQAHEAKKN

>comp6571\_c0\_seq2; 140 112 804 LEN=1580; translated  
MITARSTLTRNLFRSRKDAQNALAAFVQTPSPSPTSDEQQKPGFARHMTSPAYRRYMQKQ  
KGDVAIKGNQPSIGAAQDGIQIPTNEVARSMGWKFSEMENEALVIAEMKNHGARVEVLR  
RHIMATDDIDYEAAAGEVIEKIAAKNQDGMTRAALPYKVAIATAVVTGFGAIPMVFSIDVA  
KWFNLAFVTMEIPEPSDLETALETGAWTWNWMEPVLGTASYTLLCLOVAR

>comp6571\_c0\_seq3; 187 112 945 LEN=1416; translated  
MITARSTLTRNLFRSRKDAQNALAAFVQTPSPSPTSDEQQKPGFARHMTSPAYRRYMQKQ  
KGDVAIKGNQPSIGAAQDGIQIPTNEVARSMGWKFSEMENEALVIAEMKNHGARVEVLR  
RHIMATDDIDYEAAAGEVIEKIAAKNQDGMTRAALPYKVAIATAVVTGFGAIPMVFSIDVA  
KWFNLAFVTMEIPEPSDLETALETGAWTWNWMEPVLGTASYTLLCLOVARQNMQNLGIKIP  
YTSRLMEKRAAALYEAFFPQYNRRMLHSFVETDAMVKV

>comp6582\_c0\_seq1; 559 1 1797 LEN=1970; translated  
DEMDELGREGVYTIREFEDVSDPRSTVLKFC TDGMLLREAMHDPLLSRYSAIVLDECHER  
TLATDVIMGLLMEILPKRKKGSEHGELKVVIMSATLDAQKFQEYFHGAPLMKVPGRTPFPV  
DIFYTAKPERNYVEAAVRTTLHLHQCEEPGDILVFLTGEAEIEQACEEIREKGRAMDSEL  
VVYPLYSSLPPEQQRKIFSAAPGPRTPGGKPKRQVVVSTNIAETSLTIDGIVYVVDPGFS  
KQKVFNPRIRVESLLVSPISRASAKQRAGRAGRTRPGKCFRLYTEKSFYDDLQETTYPEI



LRSKMSSVVLTLKKGIDDLVHFDFLDPPAPETLMRALELLNYLGALDDEGEMTEIGYQM  
SELPLDPQLAKLILVSPDYGCSAEIVTIVACLSPVQIFLRPRESAKQADEAKAQFHHES  
DHLTLRAFNEYDQIPDNEKRQWCWDFNISERSMISVMNVRRLIGIMKRLDIPLVSSDV  
KGDGSFASADVRKALTAGMFMQVAFRQRTGDYLTIKDNQHVAIHPSVNNRPEWAI FEE  
FALTTKNYIRTVTVTNVDWLVELAPHYFDLENFPKCEAKGELEKAYVRLAHSRKKRGR  
>comp6583\_c0\_seq1; 164 1 454 LEN=553; translated  
XDKVSI IQNKKQHAGQNTTVEIGMLNMRKFLWAFVAEWSFLARDTTAFSVDHRAASPS  
LGHR TASTSEASPAPLQFPASPHRQLRRPSTQLFSLQPLIEDITQSAMSPASGKKTIFVG  
GKGGYVGGRRKREHHSRTLNTIRSNHAFTSV  
>comp6583\_c0\_seq2; 841 1 2479 LEN=2494; translated  
XDKVSI IQNKKQHAGQNTTVEIGMLNMRKFLWAFVAEWSFLARDTTAFSVDHRAASPS  
LGHR TASTSEASPAPLQFPASPHRQLRRPSTQLFSLQPLIEDITQSAMSPASGKKTIFVG  
GKGGV GKTTVSSSLAVELATKHDLKVLVVDPAHSLGDALDADLRRGRGKPVVMDPLT  
RGNLYAGEVDAAEALGDFRESLASFDVDRLAASMGVPMDLLEGLGLREFSGLLNNPPPGL  
DELVALGNVMDENKVDYDVVIVDTAPTGHTRLRLALPQFLDGLLGKLIKLRMKLSGVTS  
TLQAFFGDSGAQERAQTIDNALDRLDQFRIKIKMETALRDPERTSFLVVTIPTKLAVDE  
SKRLVSDLTSQGI AVSDIVMNQCVGDLTETTESNGLLNYQRRQEGQSQWVDKLRASE  
VSATEEYQSNQSPPIAVSEFPFFDVELVGPALGYVGSQHIMTNPSFEYLMNDGNEPDG  
EPRVVICGGKGGV GKTTTSSSLAVSMAAQGHRVALISTDPAHSLGDAIDMDLSGGDLVSV  
PLIGVPGSTGEGSLSAMEIDPSSALSQFKGIVDKLIGTSADTSTGGGSDLSATLRDLESI  
FDTLPAGTDEVALAKVINLVKKGDFDRIVLDTAPTGHTRLMLGTPGFLAELIDRILDIS  
SKINSNAAVKMFITNAASQQGATGEQLDSAATAAKSQLIGFQLQMYDLEDLFANPDQTEF  
LIVTVPELAVRESVRLNLDLTFEDPDMPIKVRNIVANQVLKNDGSDVYTFLSHLGKTQA  
SSIASLEQSMQGMHPAKITKVQYLDTEPRGVFGLKVLGDALVQDE  
>comp6589\_c0\_seq1; 192 1 366 LEN=986; translated  
LLDGELAPVDGFVVVLAVALAAAATAAAPLRMGIATDRLAVERNIDVLAGKVQEGDLEIE  
RDP SLAVDRSSLRGREAVGFAAAARQHGMRRFRKVRVGSVRKDVDTDLAHKEQKGRRG  
G  
>comp6595\_c0\_seq1; 323 236 807 LEN=807; translated  
MDHHNYNEAFATPLKRKLPQQRNTD TDVLTPTLAWEDSDAETLSVGSTSQSSSPATPV  
SCPPTPVSF TTKRRLADDALVYSTPPCNVPGPLRSGLSRRPPPAVPR LAMDLSRLGEDGR  
RDEEDLSFLAFPALYEDAGIPAPSPEDGLPSRAFALEPRPNNGFPALPKRLFQDGTNTIA  
SDPSSSSSNX  
>comp6595\_c0\_seq2; 323 346 917 LEN=917; translated  
MDHHNYNEAFATPLKRKLPQQRNTD TDVLTPTLAWEDSDAETLSVGSTSQSSSPATPV  
SCPPTPVSF TTKRRLADDALVYSTPPCNVPGPLRSGLSRRPPPAVPR LAMDLSRLGEDGR  
RDEEDLSFLAFPALYEDAGIPAPSPEDGLPSRAFALEPRPNNGFPALPKRLFQDGTNTIA  
SDPSSSSSNX  
>comp6595\_c0\_seq3; 323 165 736 LEN=736; translated  
MDHHNYNEAFATPLKRKLPQQRNTD TDVLTPTLAWEDSDAETLSVGSTSQSSSPATPV  
SCPPTPVSF TTKRRLADDALVYSTPPCNVPGPLRSGLSRRPPPAVPR LAMDLSRLGEDGR  
RDEEDLSFLAFPALYEDAGIPAPSPEDGLPSRAFALEPRPNNGFPALPKRLFQDGTNTIA  
SDPSSSSSNX  
>comp6600\_c0\_seq1; 473 1 1521 LEN=1868; translated  
CLSKSWKGGKERNMNL LAFQIITFLFFGLFIFKGLYGNLAHAFSLSTAARRGRNPDHGN  
NANQKYKPVVVVVKI IIDEYGPYPSSGEKNTINKHGDQSSYEPRETEASPLSISIGGGG  
PQAAF GAAAALAVWDSYHVNGIGDKNSSVSMKLT PSCQQP IPPVFLAPVVGKDWTKSET  
IALLSALNTTTSRSSSGDCKECITPASITSQGN NIVTHLIQSEDSITPRIRLWHDQD  
QVVHWYAINDSFGPKGADGLWRNRPSAEDLVSVLSTENCSECDGIILHVIAEAGKDAAGG  
QLDCLPLITDPTLVESHLSFLGIEPVASGESIEEEDALSAGTILEGSWKKTSSLDSVFWC  
PDYALDQAMRKHNIYDTFHKNKGKDESTSILVSTRDGPRGSQI WYPFGDGSSRDITIPA  
AALSTKNGEPIDPTGAGNAYSAAMTALLGNSVPLNIAASIATGVGAVVCEYEGLPTAMIN  
KATWSKIVERIHEAATEVRAKLEEH  
>comp6601\_c0\_seq2; 261 90 779 LEN=1114; translated  
MTQFLRNSLALALVAIASLTAVRGFVSNGETRRGFASSVAGIVTGSSALLIDPSRVFAE  
DAAATPLARYENSNCKFSIDL PSEWTMTEQSLPDRRKI ILYIKPDSNQKTLFFIAFTPTR  
DDFTSLGSFGSVDEVGQATILPKAELA AKQIESEMLSAVSKKQAYFFDYVQSVPSQPKT  
HFRTIFSLATGATGGAGNVLVITTAQTPESDYAAMEPLFNKVLDSYKNA  
>comp6606\_c0\_seq1; 656 273 2372 LEN=2690; translated  
MSGSSSSSREAAVVMFEMVTASHWTARSSSES NVVDDL RPLLLMMDIGSCASAEKHTRVN

CVTASMGDVVIEHYPRIGELLELRAAPVSVGRTSLDISVLVVAHGCNESNGSAETKQVCE  
AFFTYVTTRGPDGKKRFAPPLAAREGTGSYACEKTWERTMAQFRKQLIRSEQTLVKRHNN  
HLLLEEQRSGGNDAAAPSALAI FECSEVVLPRHQNHMEHLFGGIVMGWMCKSALAGCVLACR  
KPPSAFRIRSIQRVDFPKGADVQDHVVLPRITAI F D GGRHAEVEVRVTKRSITREQPEP  
SSGEALMNVGHFYVTGVSSYEQAGSKRRSDIGNTDGGPEEKLSCAVAPFADLLNKRSDLY  
GSNPKDKPSLDLEMARERLNALLTRMNLLAGIGDSIRWDASMELQAPILTILSVLRLCDD  
YIEESTSTYSSNGRGVDENHSGPIWTVPDLLL SHNPPNTTVEWARGEESLFGHSNTFLLR  
GKTVVSRRRPVEPNLSGSGFLEAVYATIRDKRPEWDPACMAIECLERSSSDKNTEAENGKE  
ALEWAVVEYQMKSAIADFRLLCLLQAGAYLRRDGS IAGSGEDDDGDGDSTQEENTSAVLAS  
RSVRHQRSKGT H R V L P S G W V L K T M E D D G E D N D E A K T T D E R L E I T Y V A E F D Y D T V R Q S G A L  
KGHEDYATEELIAGYVGLFVGQWFENLASFYHYRSNDGD  
>comp6614\_c0\_seq1; 362 302 1237 LEN=1499; minus strand; translated  
MSPLTRFLNGRASAHAPLHIPHCTNTSEDEFKSEVLLLRLLENNIKDDKLVAVTQSLHEK  
EQEVIDLRANMSVVNTSIHRLKRNIAATNTELERENKQKVIDDLLLKIKNYDQRLKEQS  
AIIAQQHQLLQKQTSQDVDLNRVIPFLMNSVSI LRPSVTNITAIYQKGGYQQQEHQQRL  
QYSKLLLESTKAHLSSNTTTTNSACSSTKSTSQALSSVESTSKKASKYAHISMADRW  
MNRYNELIEYKKEHGSTLVPQRYKKNPKLGKVVTHQRSSCLTEERKALLDEIGFVWDATR  
KGPLPVSILKS  
>comp6614\_c0\_seq2; 238 441 1118 LEN=1380; minus strand; translated  
MINSPLSPSRCTKRSKRSSILKICNYDQRLKEQSAIIAQQHQLLQKQTSQDVDLNRVIP  
FLMNSVSI LRPSVTNITAIYQKGGYQQQEHQQRLQYSKLLLESTKAHLSSNTTTTNSACS  
KTSTKSTSQALSSVESTSKKASKYAHISMADRWMNRYNELIEYKKEHGSTLVPQRYKKN  
PKLGKVVTHQRSSCLTEERKALLDEIGFVWDATRKGPLPVSILKS  
>comp6614\_c0\_seq3; 124 859 1089 LEN=1351; minus strand; translated  
MADRWMNRYNELIEYKKEHGSTLVPQRYKKNPKLGKVVTHQRSSCLTEERKALLDEIGFV  
WDATRKGPLPVSILKS  
>comp6615\_c0\_seq1; 307 115 558 LEN=717; translated  
MKTAAILLATVSGVSAFTQAVSQNRVATALS AEPVPLANGAMSFNRVCREWRCKYEGDKA  
TSASLEAIAKVVDESLPEIKKASSEITVNRLVCGGCLDFKLMMTVPLEDFGPWEEAGFP  
ESDFLAKIKAIEGVS SVVETQTITNMEI  
>comp6642\_c0\_seq1; 263 1 1403 LEN=1475; translated  
RADVSQVLR IYQNKASKSSSSSCGSNLLSIAETVLLKEMKRAIRGRTKQARNAKIAASF  
LALNGEHSSNNNSDNHYNDDETRNERHMR LARVLLGIGTPEDTEEILSQSLLDNEH  
LLGIIRHNAFGPDPFHYYHRMERELFDANHADTTTTGGNNTTSIASLYSRVLGHYPLAAMI  
NHSCGPTNAARV F Y G E T M V A S A T M D I P R G T E L V W P Y C P P I L P F P E R H S R L E R G Y G F S C S C  
QRCLLEGAAL EGGIPPLPLMGATGHGGAEARLGPDEWSSVLESVEAWYRAVTAGEPPKH  
SNNNSEPRSPNLNGL ECLRLGHTQLYIDYFNQSLAEKGAVEVLLDQATELHRSFARVHNAC  
TEHLSLLHLSYELEAIGGSTSKETGNGXADLDRAPQAGTPLQVFERDSREGPGNTTDGPQ  
AYPDRPKDEEWMSQQNTGGREFFMRMERANAHACRRLAQVVLQQW  
>comp6670\_c0\_seq2; 429 149 958 LEN=1054; translated  
MTCATTTTTTAFASLFFCLALIGSISEQKVDAFTLGGLSPGRFGSVAVTKMPQPVTSIMS  
MAEEDAAEEVEESSEAEETPEDPEVTALKESIAELEGNLADKKSKLQYELEKCEEYS  
KSGYARKVADMENMKRVRSNIASTSKASATAAVLKDFLPIYDTLNSLRETYSEDEFGRKY  
SELNLEQTFATLGVT SFDIQAGDKINFRMKVLESENSNDFEKDTVLRMV EPGMELEGNV  
VRAAICVGS LGAEGADDESSEGEDTTEEA  
>comp6670\_c0\_seq3; 385 149 1250 LEN=1346; translated  
MTCATTTTTTAFASLFFCLALIGSISEQKVDAFTLGGLSPGRFGSVAVTKMPQPVTSIMS  
MAEEDAAEEVEESSEAEETPEDPEVTALKESIAELEGNLADKKSKLQYELEKCEEYS  
KSGYARKVADMENMKRVRSVSRTTIEIGKRQEGRSNWRHAQILCHLKM AIHKFGSTTRL  
PATVILSLTVSFLVSLFANVFLPEHFVAGSTRVFTNTIRSCSITIPQRAFLFNLKNIAS  
TSKASATAAVLKDFLPIYDTLNSLRETYSEDEFGRKYSELNLEQTFATLGVT SFDIQAGD  
KINFRMKVLESENSNDFEKDTVLRMV EPGMELEGNV VRAAICVGS LGAEGADDESSEGE  
DTTEEA  
>comp6673\_c0\_seq1; 378 372 1160 LEN=1655; translated  
MSYNNNTVNANPNYNNNSYPSGNNNSYKKT LKIVIVGDSGVGKTS LMNRFSTGKFTGQY  
KATIGADFLSKDNVIVNDNFMQQRHLVTLQIWDTAGQERFQSLGVGFYRGADACLLVYDV  
TDPHSLDNL DHRKEFLEQVGGGIQGLGDASTQFPFVVGNKIDKANDRLVTREQAEDWC  
RTAASATIMGSQPLPYFEC SAKTSESVEDAFQEAARRAIVYEEYKRSQPQLFVPPMGS  
SNAPINLRGQYDQSNKQPD MCC  
>comp6673\_c0\_seq2; 113 1 121 LEN=910; minus strand; translated

XSAMKMETSVPATSSGVVVKRVLVNVGDKVDGDDLLVEIEV  
>comp6688\_c0\_seq1; 75 1 801 LEN=914; minus strand; translated  
VGRTWKSTSEQITGKTNNVRIKWRSFIFSVLPAPILGALVPGATLATKSVIVTALAAAQV  
AYTLAEAEFCLARATDAVAIKARSAAVCDTYANQGARSAAILPFTSALSGLCAAATAAIV  
ELPFLLETLSASGTVASLTGEMAIVGVLPLFSTLFAAAAASVSKARCEVDAEAAVQAASTLA  
LEYSSNEDEDPILRPFRGVAELIRLVSTSTLEPYQRFYRRFRFSMSRSWNKFKNIFRLFS  
RRKRGGSEDETSNASDSGEEGPVPALA  
>comp6692\_c0\_seq1; 275 1 1063 LEN=1063; minus strand; translated  
XAVYFPTSIDAGVIEAKDSGVNSIRVLIHHLDDDEIIELSATLDVRSYRPEMASIPIALS  
FGLFLVFNIMVHSLFLAIFIGSWIEGSMTRGFKATFDTFLEAATDNGXRVNVSDLKA  
SSSQSHFSTGRISNNWFSLLSMLLLPCYDSILFIVGIFGLMAMVNRSGGTSAAVIKSLTQH  
SSKTRLAQFVIFLMGLAFFFNYPYVSIMIVGNIIGSIFKSFPLSSEKVSFLIDTTAAPVAS  
IFPTSSWVVFSTDLIEREIEKIKALGYEEVSGVSGHSLIISIMYQFYPIFVLGLAVLQI  
LTGREMGLVLDAENKARLSYNSIDPRKTSFSRLKERSFNWYIPVVTLNVFLWYAF  
>comp6695\_c0\_seq1; 339 81 1163 LEN=1840; translated  
MLATKVPSELLPKFLPFRRELTLQSLTALSGNGNGRTSLTSPSTPTSTFSSSSSSLLQTOQQ  
STNSQKRSYVSRAPRPIPEFSVPIGLQMVLDGVEERKKARAAKWERNKEKRRSRGIEDV  
GEYRNQNETIDLSINLNVDPRRPGQALRGSVVLPHGTGKTVSCLVFTSDPSTIEEAKSQG  
HEAGGEELIDSILAGEASIDAYQALATKETMPLVQQLARLLGPRGLMNAKTNTVFDE  
GKVLLEALQEQSSTITYRTESSGILHFPIGKGFDTSKQLIDNLQVICQAVQDAKPEQYGR  
GKKPKNKGGGAGTKGNSKKQSKNVKYWLKAHLTATQGGKSVRLDLRTVDPASPFMKEPE  
>comp6695\_c0\_seq2; 226 682 1409 LEN=2086; translated  
MSENIGIXNETIDLSINLNVDPRRPGQALRGSVVLPHGTGKTVSCLVFTSDPSTIEEAKS  
QGHEAGGEELIDSILAGEASIDAYQALATKETMPLVQQLARLLGPRGLMNAKTNTVF  
DEGKVLLEALQEQSSTITYRTESSGILHFPIGKGFDTSKQLIDNLQVICQAVQDAKPEQY  
GRGKKPKNKGGGAGTKGNSKKQSKNVKYWLKAHLTATQGGKSVRLDLRTVDPASPFMKE  
PE  
>comp6701\_c0\_seq1; 163 1 519 LEN=1060; translated  
VRLASDVLDDQDPSATLAIIVSEFMNPSGDFADRLSSWWTVDVGGGSARALLLTNEKALDA  
AEYAKRRADNDKEAKQWEGHLGNAIEFISPLMFLRRNQRKSNLTGDNTTTAVDLKHVV  
VPKTRREGSIWTPTNIVGRNFTSRHIQKFAEWNTVPPDVTVDHGDGRQAITKH  
>comp6704\_c0\_seq1; 643 284 1948 LEN=2353; translated  
MEPTKDDATMETPEVSVSAPAPGGPDPEEGSFDSPQPKNTTPIPPGPAQAVMLAPTTGK  
QPDRDRTLVEPSGALASPETAVTGRSSDEADERLELMYSKDVAAHKKSSDGPGGDKERRKR  
WLTIGLLAFLAVCTIAAASAVVVLRRRKGPLASSAATAGLAEPDTVSPAPTRTPVPTADP  
SEGPTTGPTESPSAGPTGEPSSVPTGAPTTSEPSSAPSPMPTRDHVALLQEFLLFGSYAVD  
YNETSNMLAIEWLAEEAARIDSFEPDERLVQRFALLSMGFALRGANSTLDAPVNVVPGVD  
HCDWDGVCDDGGDEEGSVTEVRWAYQNRTESGDGRISPEVRLAEDLVHLDLSNNDLVGT  
IPEELYDATNLEKLYLFRNELEGTISTKIGNLDSITHFHLSHNNLSGSI PAEVKSGASGI  
RPLEYFNLYRNRLTGTLPESMRFRDMIYFDVGRNELSGTLPDDIGEKFVSLRHAHFDHNY  
FWGTLPESYNTVGNRLESFSDHNYLSGTVPGKRDLTNKLVQYTLHSNKFDAMDKNCK  
MEVPQGEMIEFRVCV  
>comp6704\_c0\_seq2; 591 284 2217 LEN=2298; translated  
MEPTKDDATMETPEVSVSAPAPGGPDPEEGSFDSPQPKNTTPIPPGPAQAVMLAPTTGK  
QPDRDRTLVEPSGALASPETAVTGRSSDEADERLELMYSKDVAAHKKSSDGPGGDKERRKR  
WLTIGLLAFLAVCTIAAASAVVVLRRRKGPLASSAATAGLAEPDTVSPAPTRTPVPTADP  
SEGPTTGPTESPSAGPTGEPSSVPTGAPTTSEPSSAPSPMPTRDHVALLQEFLLFGSYAVD  
YNETSNMLAIEWLAEEAARIDSFEPDERLVQRFALLSMGFALRGANSTLDAPVNVVPGVD  
HCDWDGVCDDGGDEEGSVTEVRWAYQNRTESGDGRISPEVRLAEDLVHLDLSNNDLVGT  
IPEELYDATNLEKLYLFRNELEGTISTKIGNLDSITHFHLSHNNLSGSI PAEVKSARAES  
APSVSYVFACGEXVRETLDPAHVLLCGVSVPEYFNLYRNRLTGTLPESMRFRDMIYFDV  
GRNELSGTLPDDIGEKFVSLRHAHFDHNYFWGTLPESYNTVGNRLESFSDHNYLSGTV  
PGKRDLTNKLVQYTLHSNKFDAMDKNCKMEVPQGEMIEFRVDCWICECNGFFDLCDXAM  
LLKQKAPADSETYFGDWRYSHHEHNQGLGRWEKMMILIGSTFLDP  
>comp6704\_c0\_seq3; 646 284 2130 LEN=2211; translated  
MEPTKDDATMETPEVSVSAPAPGGPDPEEGSFDSPQPKNTTPIPPGPAQAVMLAPTTGK  
QPDRDRTLVEPSGALASPETAVTGRSSDEADERLELMYSKDVAAHKKSSDGPGGDKERRKR  
WLTIGLLAFLAVCTIAAASAVVVLRRRKGPLASSAATAGLAEPDTVSPAPTRTPVPTADP  
SEGPTTGPTESPSAGPTGEPSSVPTGAPTTSEPSSAPSPMPTRDHVALLQEFLLFGSYAVD  
YNETSNMLAIEWLAEEAARIDSFEPDERLVQRFALLSMGFALRGANSTLDAPVNVVPGVD

HCDWDGVGCDGGDEEGSVTEVRWAYQNRTESGDGRISPEVRLLAEDLVHLDLSNNDLVGT  
IPEELYDATNLEKLYLFRNELEGTISTKIGNLDSITHFHLSHNNLSGSI PAEVKSGASGI  
RPLEYFNLYRNRLTGTLPESMRFRDMIYFDVGRNELSGTLPDDIGEKFVSLRHAHFHDNY  
FWGTLPESYNTVGNRLESFSIDHNYLSGTVPGKRDLTNKLQYTLHSNKFAMDKGNCK  
MEVPQGEMIEFRVDCWICECNGFFDLCDXAMLLKQKAPADSETYFGDWRYSHHEHNQGLGR  
WEKKMILIGSTFLDP

>comp6704\_c0\_seq4; 588 284 2035 LEN=2440; translated  
MEPTKDDATMETPEVSVSAPAPGGPDPEEGSFDSPQPKNKTTPIPPGPAQAVMLAPTGTGK  
QPDRDRTLVEPSGALASPETAVTGRSSDEADERLELMYSKDVAAHKKSSDGPGGDKERRKR  
WLTIGLLAFLAVCTIAAASAVVLRRRKGPLASSAATAGLAEPDTVSPAPTRTPVPTADP  
SEGPTTGPTESPSAGPTGEPVPTGAPTTSEPSSAPSPMPTRDHVALLQEFLLFGSYAVD  
YNETSNMLAIEWLAEEAARIDSFEPDERLVQRFALLSMGFALRGANSTLDAPVNVVPGVD  
HCDWDGVGCDGGDEEGSVTEVRWAYQNRTESGDGRISPEVRLLAEDLVHLDLSNNDLVGT  
IPEELYDATNLEKLYLFRNELEGTISTKIGNLDSITHFHLSHNNLSGSI PAEVKSARAES  
APSVSYVFACGEXVRERTLDPAHVLLCGVSVPEYFNLYRNRLTGTLPESMRFRDMIYFDV  
GRNELSGTLPDDIGEKFVSLRHAHFHDNYFWGTLPESYNTVGNRLESFSIDHNYLSGTV  
PGKRDLTNKLQYTLHSNKFAMDKGNCKMEVPQGEMIEFRV

>comp6709\_c0\_seq1; 111 451 1105 LEN=1232; translated  
MSPSAVQLRGVWYDPWVQPSCKWAHSTPTVIRLYIFYNPFDPDAMPGRGFCRAPPHEGIGH  
RSRDTVHSRRFLAWCRGCCAPVRAASRQGTDRTPKVPRRQARPRRRFGFLQDEDDSRNG  
AIVCARAAEARRPHRELVAAPPMLALLCARRGPTPPGARFPAAPPGHGGSIRFPRAPPLA  
GRGARREHPKRHRREPRARLGPVRAAIPLERTQDEEHL

>comp6709\_c0\_seq2; 111 470 1124 LEN=1251; translated  
MSPSAVQLRGVWYDPWVQPSCKWAHSTPTVIRLYIFYNPFDPDAMPGRGFCRAPPHEGIGH  
RSRDTVHSRRFLAWCRGCCAPVRAASRQGTDRTPKVPRRQARPRRRFGFLQDEDDSRNG  
AIVCARAAEARRPHRELVAAPPMLALLCARRGPTPPGARFPAAPPGHGGSIRFPRAPPLA  
GRGARREHPKRHRREPRARLGPVRAAIPLERTQDEEHL

>comp6710\_c0\_seq1; 316 1 1121 LEN=1237; translated  
XIASHPQGVFSSYRTNHIPIIDGNFCTESIFQSKPIRSNTIQYDPIQFGTAMAPGSNERSG  
ETGQQHQQQAPPLPPRPAPSDGPALSFEADPMVSDIPLCKDGDYAGLVLVTNWPPSPLE  
GVGREYSEFLAAVRSCFDPCDTSVQMAPGEAPTTVPVAVYFQPI SALHVTIATFSRIHKID  
DDGDDRGEKRQRDRERKRALALVEAAARLPGWPKKPFRLVVE SAQIGKKAGILLWRDLS  
GGIEAARAACREAAAAAEQGAAPANGNANANTNKNSNSNTTTKAYPTIPGIVHSTVLRFS  
RVPATPGETVQERFRSGVLQRLGTDLFAAGSAIASDTVRLADETTPYMHFAPDEDHVLWS  
CGLGGGSGSGGAE

>comp6712\_c0\_seq1; 574 61 1539 LEN=1617; translated  
MNTILRVSIRITNIHPFFAIVASVGTTTAGAAWYKNTTRCEVALKADVNEADEQTFRIESH  
LMDRIQQKYLNSNAKDSIPSTLRVLAIDVPEMRTEAFTGECVISHDKVFLDDIAAPKVVN  
VVLDNQDKERNDDKKEKLKIVQKSLARSIIYCSSPQSQQHVGVELLEASFNSLNRFKVRK  
KQSFQNYTYDPGKYDSSNSNENDSDDDNEIDEVDEGELPMDKETLDEIEAPWNQYAWS  
EELRLRINGHIEFDGPVEKSSRYQRVLFGKNYKSTVPAVSRVMDLFI PFSFARSDPDGID  
GRNQSNVRACNKPHAVVANGAALQLVPSLRLQLKCKKADVPLFVVHDPRQWGGNTQAS  
LQEALIAMRSTVKNRIIGKALEQQGSSAFTRGRMLGQVETEAKWQLKDKTKRAKELLGLE  
RGRRRKVEKEDWSLLDADTIKSKLIERKAI RVEKDGSDSKREVCTEELMKIARECCDGSR  
EQTAQKANPDQF

>comp6726\_c0\_seq1; 655 242 1618 LEN=1793; translated  
MGVSEAEKIKEVEEGPEALAAAMDLAEDDGGGERDGGDDASTSSTLDRKLIHADEVVPPKS  
LVLIWILFAAELGFDLITTAIAFFSTIGKQECGTYVYLGPLPMTTTPFFFLIVTEIVF  
LGRAILLTLWPSVFEARRLELHGGLDEDDDNIGNLGQVGFVTLATTEDDEESGSRGESD  
SDGSKTPNGEEPETEGSVTQADASDAEKHESPSPESEEEATEIADEPEAAEEASHPCTS  
ETAREEGGDPKDRAPFIDTSAAPPKGEAFWKRACCCLLRWARNVILMVLNFLTLLNPF  
GCLIAIYILLYQSDKTECFVVLGIESLSIVLHFVSVRMEGGLRTVWSRALHSLVLLPFFVT  
VILVFLVFLREGGMCYSAESRIFLFSGCEICPDTEEPPIDGMCNSTLEGAGGLYEDLQDL  
GSSFASFSDLQKIASIAKRGAEQGDYCEQTNFCFFEF

>comp6726\_c0\_seq2; 420 594 1828 LEN=2145; translated  
MGVSEAEKIKEVEEGPEALAAAMDLAEDDGGGERDGGDDASTSSTLDRKLIHADEVVPPKS  
LVLIWILFAAELGFDLITTAIAFFSTIGKQECGTYVYLGPLPMTTTPFFFLIVTEIVF  
LGRAILLTLWPSVFEARRLELHGGLDEDDDNIGNLGQVGFVTLATTEDDEESGSRGESD  
SDGSKTPNGEEPETEGSVTQADASDAEKHESPSPESEEEATEIADEPEAAEEASHPCTS  
ETAREEGGDPKDRAPFIDTSAAPPKEXFLEEGLLLAPVERPRDPDGAELSHPAESVF

RVSHCLHPAVPIRQDGVLRGPGHRVALDRPALCFGPHGGPPHRMVQGPALPGSPPLFRH  
GDTGPGLFAGGGHVLLGREPDLFVFRVRLDRHGGGAADRRDVREFHAGGSRW  
>comp6743\_c0\_seq1; 102 146 595 LEN=1791; translated  
MLQEEDGRNRAQKTSATTASEPTTTGEGAPDPKRTPNPGNTRKVFYTTCREGMANEYIR  
RHNDIPDVCAGLRTAGIAFLSIHKLPGASNVLVLTITETAGSNLNLGRATGPGSVYRQNP  
VCQKWEVDMETHYHNGWTEMEEIHSSDVEW  
>comp6745\_c0\_seq1; 347 1 902 LEN=902; translated  
XTKLDYWTITARNHCYQQTQVARKKMVFYTTIRGGQCKNSHSHITLTSEEDITCYVGRDK  
HENEYLIKYGWPGDIWFHVEGLSSAHVYFRLDCFGNTKNTSNTSSIKGLLGQIPIDDLPD  
ESVEDMCQIVKHNSISGCKLASCKIVYTPHNSLKKTFGMESGAVTYHNPQLQRFRCDKD  
RQRIKLLEKTKSSDLQIDYEEEMKANERRIIEWKRFLRKQGGGSGVEIYDPVLDLDRGA  
KAKANRQGDDESSGLDSGLAALAEELGLGGGAVQHQRDRDPTRPVAPSTGKTASGNDDDDD  
D  
>comp6746\_c0\_seq1; 297 504 1130 LEN=1130; minus strand; translated  
MNDIFGFVKSVMKSIKSPGNSSENSKTPSSPRDEGNSSDNLQAETTSMPRGAHIPGI  
TVPLSSQKVLKTNESPIGLVSTKDQVIGGDGRCDGKEDTGRALRIHGRSLEANLKTIRK  
ESSAERCNVTDLKTPTSPSTKSPSLATSDTSNVYFDEEGNGEGKENAAATTSVTTTSVT  
IISKPFEDPLETSTVTFGNTTDPKSSLLA  
>comp6748\_c0\_seq1; 460 1 1078 LEN=1240; translated  
XDLLVEVAIAADTSFDYLLIESTGVSEPMPVAETFTFEDSTGLRLGDIAEIDTLVTVVD  
GSRFMSEMHSLENLQARNWHADPEDQRTISHLLCDQVEFANVVILNKCDLIGDDERVQVK  
SLIRKMNPDARILESKFGNVPLDCVLTGTRLFMSDAEKHEKWLQEARYGEHTPETEEYGI  
GSFTYRARRPFLPDMLERVLEDLLGGTEVPFDSSKIIRAKGFVWLAGCSQLQGDFSLAGN  
HYSLLPGNPWWAEIDKSHWPEHLESSIAPLWHEPYGDRQQEIVFIGQGLDREAVCKAFDT  
CLVPPDSMEAGQETWDAMVHEYGDPFAETWDAALALAQKEGEGHSHDHDHSHEAATAAQ  
>comp6750\_c0\_seq1; 708 186 1376 LEN=1506; translated  
MKTPTMGILNSMAAIAVIASISNTMDISIEAFLPSSHYPRPAALGKLTGSRGVETRICM  
FDWVNDLFGGDAKKKEEAAAAAKAKAKEEAEAKKKAEEEEAKAAAEQAAKERAEAEIAK  
QKAQEDAAMLAKAKAEAEAKFAEFEAQQKAEQEAIASISARTKAKAEAKTAVESETEKVE  
DETTTKEEETEIKDAAVETMKTEKKVVAKIKEEAEATVATEAQAEKVKDAANSTAEVED  
VAAAQKDTEEKTTSETAENEDDGELARFNAYLDEVIKKGDRIKGVVQWYNPKKGFIFK  
FQTADEEFEISKAIRKERAVKEHEKKVVTYSPGIYVHHNSLYTPDETYFRKLYPRESVEL  
EVDYDNEGRPTAKDVTGPDRTDIQAILKEKLREAS  
>comp6752\_c0\_seq1; 397 164 1942 LEN=1979; translated  
MAATPNGNRDPSPNKKNKTRNGSGDGGAKQQGGVAPSPRSGGSSAASLNNASKAAAQMOKM  
RDANSKYKNLLKMAKERIEQQEVELKELRGEYQNEFSILLFVSFAKQLWLERSEM CWIRI  
MKVIQDGHVRESMNIXSYHAYAVLFFNSVSLIEYAHFYKFS TMMLVCSGYGETEAERKRM  
EEEVASGNSREITANAKPLEDANDDLNSSDWNLTRVSQLIRVDLESHELNTRGLNHEIWA  
LCHFEELETDEQKFLINNNNSDSTNKKKQWKRFD AESDLTDFIRCDRGEPLTLPPYSLTP  
RQSSRTVSEADKKVSDITEEYRRFRVKSEMTRKQMDAQIRDLQSSQVEATTRQIEGQEA  
EQGMESRGT EHSQ LERMRAE AARQEDQWREAYDILLKENEALKSSGSEALLASQWRQRY  
EACLKERDEAVNKLQSAQQRHEQH KQQHSASFSSPPGIRDGKISKGVGNEGKYEMKYRD  
LKESFRLYRKKAKEIFESQAAAAATNNSAGGKNAADMMVLQMSQQHSNAEEESKLDYLK  
NLMVNYLTADQETRDHMEMAIGTVLKFPTDIAAIIKKKKEDDASWGAYIGYT  
>comp6752\_c0\_seq2; 494 164 1690 LEN=1727; translated  
MAATPNGNRDPSPNKKNKTRNGSGDGGAKQQGGVAPSPRSGGSSAASLNNASKAAAQMOKM  
RDANSKYKNLLKMAKERIEQQEVELKELREAERKRMEEEVASGNSREITANAKPLEDAND  
DLNSSDWNLTRVSQLIRVDLESHELNTRGLNHEI WALCHFEELETDEQKFLINNNNSDST  
NKKKQWKRFD AESDLTDFIRCDRGEPLTLPPYSLTPRQSSRTVSEADKKVSDITEEYRRF  
RVKSEMTRKQMDAQIRDLQSSQVEATTRQIEGQEAHQGMESRGT EHSQ LERMRAE AAR  
QEDQWREAYDILLKENEALKSSGSEALLASQWRQRYEACLKERDEAVNKLQSAQQRHEQH  
KQQHSASFSSPPGIRDGKISKGVGNEGKYEMKYRDLKESFRLYRKKAKEIFESQAAAA  
TNSAGGKNAADMMVLQMSQQHSNAEEESKLDYLNLMVNYLTADQETRDHMEMAIGTV  
LKFPTDIAAIIKKKKEDDASWGAYIGYT  
>comp6752\_c0\_seq3; 117 164 566 LEN=566; translated  
MAATPNGNRDPSPNKKNKTRNGSGDGGAKQQGGVAPSPRSGGSSAASLNNASKAAAQMOKM  
RDANSKYKNLLKMAKERIEQQEVELKELRGEYQNEFSILLFVSFAKQLWLERSEM CWIRI  
MKVIQDGHKRNENGX  
>comp6754\_c0\_seq1; 122 81 515 LEN=708; translated  
MQRNAVDT SARLGPCQIPHTDPNFLSFLVPLFSASPLPPPIPRKDCHWVYQKNKCFGYQ

HGVHIGENYCRKSCGYCNDLPPPTPLPTPDPTVSPTKSPTRDPATAEPTRFFVFRPPPTAA  
TPAPTPKETESSSLVSTLGESIGG

>comp6754\_c0\_seq2; 479 74 1585 LEN=1778; translated  
MASTCSRFSVLLLLLFLGLLLRQAEATDRYVPFVANALDYNDAVEKDNKVKGNCKAGQPPLD  
EPDAQTTKDSVCRETGPCQISYTEEGESVTYKFKTSGSDGKRYADITARVSSKNPKKFEM  
KLFNGRNADETEQFRTKGGKGFDDFYDVTWRRVPIDMLYDHHRVVVFTDGNINMCSIRVD  
WSDKNPTPAPHKKPTRKPTPKPTPSPHHPEPTRSTPAKWSAFEYSVAYDNSYAYEGNCHK  
GDRDDGVDGSYTSKVCINRDDSECHIGWTRPGEWLQYDFFAEEEGRYNVRARVSTNLYG  
KYIRFRLTADDRAPFGKEIDVPAYGWRDFSDVVWKNVYLYRGHYELQVYFSTGYVNLCSA  
AVYRSASKPTRKPTRHPTRHPHPTHEHDNYNDCEDEGYRYFGYHWKDCHWVYQKNKCFGYQH  
GVHIGENYCRKSCGYCNDLPPPTPLPTPDPTVSPTKSPTRDPATAEPTRFFVFRPPPTAAT  
PAPTPKETESSSLVSTLGESIGG

>comp6761\_c0\_seq1; 125 738 1097 LEN=1475; translated  
MAQFCKDFNEKSGEIIYETNTPLRVELRAMSDRSYTFSSIRSPPTAWLVKRAAGIDKGPNKP  
NMSEQPFGYITPEMVHEIALIKQGDDNTWHLPLEGIARQVVGRTARSIGIKVAEEEDLPE

>comp6761\_c0\_seq2; 125 402 761 LEN=1139; translated  
MAQFCKDFNEKSGEIIYETNTPLRVELRAMSDRSYTFSSIRSPPTAWLVKRAAGIDKGPNKP  
NMSEQPFGYITPEMVHEIALIKQGDDNTWHLPLEGIARQVVGRTARSIGIKVAEEEDLPE

>comp6764\_c0\_seq1; 443 48 2024 LEN=2147; translated  
MQLFAAVLALSSTFFGTSFVNADQGCLGGVYGNKTTTKLDIMDSVVRENSLHQIGGQLRY  
ENVGTVRDRPVSLVVTVVDGDYADIAQVWIDRKRKSPYEMNGKKEGGKFANINLQTVGK  
PKSGEGNFRMCFVDTEETNELTTVEKFSWTVYDLDERGNDKINKPVIKEKLIIDTNQARAF  
QLWPNEAQSEVKLSCEDGSQVPCNAGVRTVFHSSTDGTGDDNPTDPNILDQLKRSRVTFT  
TFIDTDCWEFTYDHYCPVEQPEYDGPSPRKTCKKYTGGNFLFAGESEEIINGGECLTPPP  
SPTASPTPVPTAEPTTSPTPSPTANPTASPTVSPTVSPTAGPSSRPTVPPTVSPTTSPTA  
GPTSGPTTSPNSPTAAVDLPTTSLPTESPTSFDTAFPTKFENSDFPTASTTSFDTASPT  
SLDTVAPTVPFTILEMPTTSPTTSPTKSPTPLPTVGATESPTASPTASPTTEPPTAKATES  
PTTSSPTDAPTFTETEDETSKPGDVTLIKNGITDIPLANAIVKQDKSTVTVELHQSWTS  
GTKRESVDSIFYSFRTSIFDQKCYESRDVGSQRYDTIELTCEVLKPIAFVEICVVDATH  
GILVPGQGNNDATVPKCHPEEISPEVPVVCYTVEIKCQTECVVEIERGRRGLRGSYP

>comp6764\_c0\_seq2; 426 48 2188 LEN=2311; translated  
MQLFAAVLALSSTFFGTSFVNADQGCLGGVYGNKTTTKLDIMDSVVRENSLHQIGGQLRY  
ESKTIESMQLKSLILFLNSNQTVLREAGTLTPTLSFSDATQSDICYPSNIFMTSDVGT  
RDRPVSLVVTVVDGDYADIAQVWIDRKRKSPYEMNGKKEGGKFANINLQTVGKPKSGEG  
NFRMCFVDTEETNELTTVEKFSWTVYDLDERGNDKINKPVIKEKLIIDTNQARAFQLWPNE  
AQSEVKLSCEDGSQVPCNAGVRTVFHSSTDGTGDDNPTDPNILDQLKRSRVTFTTFIDT  
CWEFTYDHYCPVEQPEYDGPSPRKTCKKYTGGNFLFAGESEEIINGGECLTPPPSPTASP  
TPVPTAEPTTSPTPSPTANPTASPTVSPTVSPTAGPSSRPTVPPTVSPTTSPTAGPTSGP  
TTSPNSPTAAVDLPTTSLPTESPTSFDTAFPTKFENSDFPTASTTSFDTASPTSLDTVA  
PTVFPTILEMPTTSPTTSPTKSPTPLPTVGATESPTASPTASPTTEPPTAKATESPTTSSP  
TDAPTFTETEDETSKPGDVTLIKNGITDIPLANAIVKQDKSTVTVELHQSWTSGTKRES  
VDSIFYSFRTSIFDQKCYESRDVGSQRYDTIELTCEVLKPIAFVEICVVDATHGILVPG  
QGNNDATVPKCHPEEISPEVPVVCYTVEIKCQTECVVEIERGRRGLRGSYP

>comp6767\_c0\_seq1; 309 1 1327 LEN=1327; minus strand; translated  
XDAKKQSLPLHQSAMDERLDTSQKVMALKESEQDIITGPPWRENSFMRLSACSQIRNGSL  
ETGDYERNISSNCEASIQDDFMGPKAAQTTQAGSINIWSNKNKSHLTRDLQDHLEAPA  
CFRQNKQKMSVGRSMREFLEGCKETVAMADCSSNFDSVPVSLTPRGQEILTQFSNIQDYGL  
DSAPFTHPGKKNQTSSTGSNNKIQVQHSSENTADNQLQTTTATTPFGEKLNQWSPSTTK  
KTATLKKFKNLNGSIDNASGGGEESYVSTLAPDSYNSDNDQFQFQPENSVLKCEDLVWE  
TKERNFENDQKERKSRGRIQTSSHDDGTSTKIRCRKRKFRSSDYFRNRAPAGEPENNI  
AWSSEQGSKETDTSVELIHVTMPDPLKKGSDSTRPYRKSNYVTDWVPSNGLQSLSEDFLK  
EEIWDIAAPDLQTSSTMPKSI

>comp6770\_c0\_seq1; 206 338 895 LEN=1369; translated  
MTEQQQQMATSASHIETAKNGLFNKMFASCAPDPRGSVHRAWGISLLFVVVYFSLSIFEM  
VSLHQSGDASIALVIAVWVTGLIHLALGVLGTFVLKRFPTSFVSGFFLGVLVVLANQNIL  
LYASFHKYTQGSARANQVFASLGFVLFVLAFMALLVHFKNVVI SPMETMGDNDEEQV  
NNTSN

>comp6771\_c0\_seq1; 298 387 950 LEN=1177; translated  
MQLVIPIEDTSSGKCSNHCVEQQQELESASGRWEPRNNGSILSKDLRDQFETMQSVWRQ  
ARRDGEDVDSSSSNNSNRERGGNMRSELKRKERETAVETAIKVDREIAFWQEGEADLEAL

LAAEDEQVTNEEGASAAANNQHAVEENGPPGIREISFVRRNHLQAPVRPAQIQFFFLPPAI  
PTEEESD  
>comp6773\_c1\_seq1; 119 1 1329 LEN=1329; minus strand; translated  
XTIVLYRKQQQRHAQTKHRIVFXESFLILNSSNRVVP CRAVPADRSIAKARNGPPAPPT  
LPTNSTRLEKRVAGVLQLLHDLPHRPVQLLRDPRLLLRQRVEEGVAQLAVDHHVHRRIV  
RPVGLRVPARRLGLRPEVLLQLGVELDVLPGPEGDQRPDPGHRGIDQGLLHARHQGRP  
GQARHDLDPDVLAQRLEPGSTAAPLMGPRPGGGLPEGPLAARGVHGGGVGPPGPEPEDAHV  
PELVDPDRDRVEIEELLADDRDTGGRVVRDQHQPVGLGLVPDNVQGP HHVAEVGPIPRRLER  
LDKGREALQLALSQQPLPLPHLVQAERPSPDPHQPPALKVRHGQHRAVSLRAVHGRLVQELQ  
PPFVDDPVQDHVARGLLQRVHRHPRHGPHRQEGFPAGVEAHRRAAQGRLVPAHLDAIQA  
LARVGGIDQADAGSPRGPAGGNRP  
>comp6777\_c0\_seq2; 42 1 887 LEN=1264; translated  
XFETRAKVVVYLCFGVLAEDVTTQRNGVVSLGFFSYDNDLLFVERESFLRFFDAVPLRW  
SGFHLCPNNPAYSIMKALLLTVIPKEMRRITRIHSGTNLECDYSLRCFGVPTEDIPTTC  
TGKVKTKHLAKWIKVQTSIDDHRRMMARNNYNMYLTPATERIFPGIECPEVNCVLFERSG  
RLASRHPGNVEFSIFLQEKAEAREHMKTLLQOTDDYLYRIQQQTVNRGFRFLAFDETDFWY  
REINNYEVLRKHIFQAQRDVLKRTKAREALQLNKSNTTFVAGLDAKILQTDRRRE  
>comp6780\_c0\_seq1; 667 110 1498 LEN=1939; translated  
MAQPTSSSKSFKKKKNTRAPMLVKGTTAASLAKKRAAADREEASGTSRLSSASRKRKRK  
DRASENNGNNGNNKNVFSSTAESLAVISEYHTLNKRLEQAENDES LTPEERQKIILD LKK  
QQDAMGGLDRYQKASIYGAKSSKFVCADWVPLLKKLEKEEEEEERHAGAKTMTAKSQSD  
KQSESNPRRLRILDVGAIDNQYFGKGYDDWLDVAVIDLHGGQHDTVLVQVDFDYAHEYCA  
GKDLAVAKKEEGKTKKQNNAKVHRDASSVSPSPQPFDAIVMSLVLNFQGDPRKRGMMLA  
LASDSRLLKSSSGDNHGSSSNRTRKGGGMLFVVLPSASLDNSRYCDLERFIEVTTNPLFQ  
LELVEKKRSSKLILLAFRRRTTKASRQQKLDDEQDAANQYGEQQKSNKGKKQKRDQNAHCYD  
VDKMFYGNHEMKRLQPPKPGAKRNNFAVILKSCHNRTSNK  
>comp6781\_c0\_seq2; 189 1 1066 LEN=1066; minus strand; translated  
XSAPSQIELGGDQRQLLTGGSQQGRDSIGIIRMAVSLPRSR LIVFFLNICNAVAFSRKM  
NPKSPNSISIGNEGPKWCEASQIYIGVPENEEVQKLI EESNGSVKIFGYGSLCWNPGA  
DGGLSKASQTLGRVKGYKRVWSQRSTDRGTVQFPPIVCTLLTKDEYHSVVESVAKGSGS  
DEGALSPIDGTHDNETKDYAESMVTEGVIFSVPPPELVQETLAELDFREKGGYARDVCEVV  
EEGSDKTYRALLYRGTDPNPAFSSRCLVDLPFSAAIMSASVGPSPGPNDIYLNLDGFLDR  
IKNSAAQQDDTKTLANMVRSFQKGYQLYFLTGGGSNQHNQLMLNRP GIPSLIAAED  
>comp6785\_c0\_seq1; 691 1 2062 LEN=2153; translated  
XGFRVSSHHPFTSSPPSSLQRSGKMNTKKGDATDGGAKKIGFSLATNKKAQNRATSAAL  
SGSAFSDDEDQSLDEGNDVNTDIPKPLVIPKQKDSRQSLQE QARARRQKEAGHPDVE  
SGDVGNHDAARRAESKSAGVEVPVKREENTQ EADGNSSDGATTDRDRAAIEALEREAAAA  
QGGGHDGTVSGSSQKRVI AVSGDTFQRQRE RERERIDPTKTEDQKKLDEDIEDLPPDISVK  
SQVYKKVIPGEFGAAML RGMWGTGGDNSSNKRKNNDATMPRP SRLGLGATPKMFATGD  
APDTHSRRRPRRQDQVQREERLQQQQEMEKERQRLALDKQRLVQIGSIVYVQRDGRS  
RKEQLPRARIKQLAGVPLNMI LVQYEGDAAPT KTKKGSIELVDRSHLNERPFQEAEDR  
RKSREGDRGERERDPKRSSRGDCSDGRRRDKMGS RDRSYRASDDYEDGRDKDRERDRDR  
TRDRDRDRERDRERNRDRDRDRDRDRDRDRDRDRDRDRDRDRDRDRDRDRDRDRDRDRDR  
RRGDDSSKRHQSSRPSGKTNSGSLAFSESWLTPNIRVIVSSKYGRSMYKEKGVVVDVTR  
NGVATLKMSSGQVLTVPERHLETALPKAGGNAIILSGHQRF SKGQLLERDGGKKNRGVVQI  
FEDMSVVTSLDDMAEWCGLDDDLAH  
>comp6786\_c0\_seq1; 403 155 1480 LEN=1582; translated  
MTIKTLFFGSLLFATAVPIAGFSPPCSEVSTYRDRKQQSPLFPTELKMSTTENKVTATSP  
RAPPRTGLAQTLNFALESPLWKLILVPQARANIVQTAEANEIPWTA AKEWISQTSLEE  
LDTALNEKVSSSSWSSSIPPYYQKAFHAYETGNLSWEAAFEVEIASAAVGARNFPEYGAKG  
EDAFRGAFESALTEAGANVPNSEGGDVVRIIDFGCGTGMSTRQLAQNFQADEIIGVDLS  
PYFTTIGKRILLELTPSSFLEGGPVVSTIQSDPRI EYFVGDAAKASQLEELVGAEGTADV  
NIQFVLHELPPDASRDMVDEAFRLKTTGGQLWICEMDFESPGYAAQRANPLLFSLIRSTE  
PYLDDYAESIADLFSYIQSKSQFLTVPATGRHFALVATKGEESMDRIEGVMKDLRFDKD  
GNYRVEDTHLPTFKRKSETKS  
>comp6790\_c0\_seq2; 60 1 461 LEN=745; translated  
XMNMDMNMNMNMNMNMNMMPNNDNDNRTRVLRALLFYHVAPNVYRTQDLFCNGPNRYV  
RMLRLGTSRTRCEGNRRTAQLGTCNGRGNIPYFTQORDILASNGI IHVISNVMIASPDGTL  
QGCGLLRSRPTPNPTRKPTRNPNTRNPTSPF  
>comp6790\_c0\_seq3; 3 1 518 LEN=518; translated

XMNMDMNMNMNMNMNMNMMPNNPNPDNDDNRTRVLRALLFYHVAPNVYRTQDLFCNGPNRYV  
RMLRLGTSRTRCEGNRRTAQLGTCNGRGNIPYFTQRDILASNGI IHVISNVMIASPDGTL  
QGCGLLXKPATDPKPNQEAYEKPHQEPYQKSIGKSNANADGLPVRNADGCSIVX  
>comp6791\_c0\_seq1; 189 1 458 LEN=1133; translated  
XQTPARKTTRFLNLVQNYSDPFTADNSFKNMFVGRVLAASRVAVRANTSLFTGVRQAQ  
AVRTFAASTFLDPAEVSGRVTDVIKFNFDKVDANKVTDTSKFTDDLGLDSLDAVEVMAIE  
DEFAIEIPDAEADKILSVADAVEYISSHPMAK  
>comp6791\_c0\_seq2; 231 137 502 LEN=1177; translated  
MFSVGRVLAASRVAVRANTSLFTGVRQAQAVRTFAASTFLDPAEVSGRVTDVIKFNFDKVD  
ANKVTDTSKFTDDLGLDSLDAVEVMAIEDEFAIEIPDAEADKILSVADAVEYISSHPMA  
K  
>comp6792\_c0\_seq1; 457 114 1037 LEN=1398; translated  
MKLSLVSFFAALTTLADAASHGASRTTAPWGI PRGGASSKYASKLDAVKEQVLA LASTLPSIE  
ELRKSIVNESTTTVEDLGLKADTIVNKALEEFASSAPEGDDSDVYEAKLEQIEAALDAPLQ  
VLYLKQLALLREQALQNYRAASKASGGGTSEYEAMLQADAFFAREAERSTRDEVSDASEA  
DGGWDFTGAAALQTMNRLAESGQKATEVQMKSAQQQTAMQFLQSQQQMIQQQLQMQLY  
GQSSPWNVGVAYRIPDTNFNLQGSYQQGRANVQLSCVPDEYAPFLGPNGFTNGVGPGLG  
LSLNL SV  
>comp6792\_c0\_seq2; 188 114 359 LEN=610; translated  
MKLSLVSFFAALTTLADAASHGASRTTAPWGI PRGGASSKYASKLDAVKEQVLA LASTLPSV  
R TICNESHKMLETESDAVGAI  
>comp6793\_c0\_seq1; 377 1 2236 LEN=2403; translated  
XGDAASLDWHPRWPFVATGGSGDRFVKVWDLLESSLDPIVSSQNDRHSKRNNPRKEVLHH  
HQENSNTHGSTKSSSSSTYSASSGESLHSSAGGASLSSYGPPNKWDLTSRSTASAWSMGG  
RHHKSTSSGFSKYVLSISASVTQVRWRPPSNDFGPNDKNSDDPNQNETMVDRHDSMLAVA  
TARLTSAGSGTSLWSFHRPFMSLSIVEGHEESA VSD FVWVTRTPQTVPHRKHASEQQEH  
DRMGFKHLASESSLALTSSQRLRKKSWDFSDLDYRGDEQATEVKSVSYIWQNVLSVGRD  
GQCIMQSFARGERRIRHVPSSCFAMANLSPFQEGYGLQCFSVYQDVPNRAEDDFMLTGL  
RQDEHTAKAPGVFFEDLQKHLVNKKKEVEGVGKRLPVLVPKLRFVLDQGS LDANGMPI  
ENEEETLCIAPEVLHLSRFARLYKMPDNQCQTRVELCLYNSTIAEQLKCRPLARMWKT  
ATLLDASGLDELPAHDSASPANAFQFVIFPTVKSLLEFERAEAGDVQTNVALCEVLQVVD  
GGEKTRIPGLGIRLVREWYLSYIDLLHQMCLFSEAAFLIKHSDPAIGALSQQSTTFHES  
CPRCGKPLDSTADTSGANGVSNAGSSGSSRQVCKNCRRRV GICFICHEPVNGVFWCPCG  
GHGGHLEHALQWFGGLDGRAVRTVCPTGCGHKCNFVQFASTFPRTMSMALSDSSPIDHTT  
LAIPGHQARCOMPATSSLYNLDKTF  
>comp6795\_c0\_seq1; 471 68 1402 LEN=1414; translated  
MDLKSGVSPSPSTSR IETVEREENTVARHVPIKGRRRNLGRQARKRRKKYLEIEAAASAF  
VAAAAAVTACTIENQSSNPESTVLESATNPQNEKQKSGSSNIASTNCILPTDRSYILDDV  
RRRTMLSENDRRDLIQQLGYLPGNALQVMARVEDAFSTEDLQHI IAATVAGSKTSSKNSP  
NATATMESSTNCKEIKTNRKDPGMTARMVQTMKPEPLVIKLYPLALRDESSSTKRRRKR  
REEKEDLSTSSDKELDVICQGTSKTVREDQSIHPAASAPHTIPLMEPFPTIYWVTHPLI  
KALISKLELDKVNVRFEQRLLEIRERKAPEKCKYKDNSSSSSLES MKCAHKS YGRERRE  
LLSEQHREYVKKRRWYEDSISSNNHDSKMTPTSKAPFGDGC GVAGIRNPRAVKCLHAAH  
HYWSGNRDNLVGYWVEQELKKRRRT  
>comp6796\_c0\_seq1; 331 178 1314 LEN=1971; translated  
MDDFNDSFVKDDVVFDESDAWN AEEGVDFPFQIGAACA EKLQSKKLTADPTVSTDNQSTR  
SENGSTVKSNTSSALPRLMINFQVHEEISSSTAHL SNEQEGASDVQIQGTLMEVFFGRMK  
VSLSLFDGFDQDSDRIGTLPNPFPSQFQENENXAQVSSDALKNIPFLLESKTRKQNGSFE  
FIPNNVYAKGVGQDENNFKNMSVVTIPKEVLGFVNVGTYR IAQSMEHMPLLLEQKVLHS  
KSTIKVAIQVRSKLSNPDDLSEFSIVVFIPSAVDKDSVTIASNGEFDSFKRCITWGMEM  
LPKGESFMVSAKCALDKIFVASQGAKVLEELNFPVMLRCSRKDR LGSVRFETMEADGHPA  
TISSVVGKSYRIVHRLN  
>comp6796\_c0\_seq2; 391 178 1194 LEN=1851; translated  
MDDFNDSFVKDDVVFDESDAWN AEEGVDFPFQIGAACA EKLQSKKLTADPTVSTDNQSTR  
SENGSTVKSNTSSALPRLMINFQVHEEISSSTAHL SNEQEGASDVQIQGTLMAQVSSDA  
LKNIPFLLESKTRKQNGSFEFIPNNVYAKGVGQDENNFKNMSVVTIPKEVLGFVNVGT  
YRIAQSMEHMPLLLEQKVLHKSSTIKVAIQVRSKLSNPDDLSEFSIVVFIPSAVDKDSVT  
IASNGEFDSFKRCITWGMEMLPKGESFMVSAKCALDKIFVASQGAKVLEELNFPVMLRCSR  
KDR LGSVRFETMEADGHPATI SSSVVGKSYRIVHRLN  
>comp6798\_c0\_seq2; 241 917 1551 LEN=1551; minus strand; translated



MVMLQRQQAMSMRRQSSCPGMLRNQQSNYSHGGSFMSCAMGDDDDNGSISVVSSRQSSSFSS  
MTSDNTEHERRSPSILPSTFGNMNSSRTNSQNLVYHHQAKTPRWVLLVMCGTIMLSWFR  
AVQYRTISYGILSSMDTELESIEFQKRQSTRLWKDATDTKNSFAKQHWKLLKKTQKNFQHE  
TRMLEEMAELEAASDNDNIEIPEAAREKFQNR  
>comp6798\_c0\_seq3; 241 502 1136 LEN=1136; minus strand; translated  
MVMLQRQQAMSMRRQSSCPGMLRNQQSNYSHGGSFMSCAMGDDDDNGSISVVSSRQSSSFSS  
MTSDNTEHERRSPSILPSTFGNMNSSRTNSQNLVYHHQAKTPRWVLLVMCGTIMLSWFR  
AVQYRTISYGILSSMDTELESIEFQKRQSTRLWKDATDTKNSFAKQHWKLLKKTQKNFQHE  
TRMLEEMAELEAASDNDNIEIPEAAREKFQNR  
>comp6803\_c0\_seq1; 265 1 767 LEN=940; translated  
XNSRHQLNQNLVLTNHVLAREKERDNDHGIYYMDPHDALPAVVVLFVSNANESLGFTARSV  
ARRPPFRGGAAQTTRLRASTDSQEAFFVLKKIAGCNWEGSCRYVSEDLKPASFELTGGIR  
FDLPGPSSDNDIVEMNSFIVFPNGKRRDIQMRGSRGSLQRSSMRLESTAGDGPITYIITE  
LGPDTVLVNEVSKETGMVVMTSSLSLVVQDGDGGAATELIQVSHEVVGAPAAANKSAMIEG  
HQVWRFSKQDESSWE  
>comp6806\_c0\_seq1; 149 339 605 LEN=818; translated  
MVRWEGHEIGVLSTLVGCVGILQGSMPKGGWARGFIHRHIPAMSCFLFTVGVTLPTVTVVP  
LRRALGMPTNQYDSDYPGVKYPKYETLE  
>comp6806\_c0\_seq2; 149 122 388 LEN=601; translated  
MVRWEGHEIGVLSTLVGCVGILQGSMPKGGWARGFIHRHIPAMSCFLFTVGVTLPTVTVVP  
LRRALGMPTNQYDSDYPGVKYPKYETLE  
>comp6808\_c1\_seq1; 233 1 1222 LEN=1409; translated  
XLYLTRLLEALYLNDCSHLDLAALGPGPSHQGTGSDNGFEKTSSHNDKNNRNARWTNLKT  
LKLDCENVTPQTFRWLTGLETLAMIRWNPHPNTRGLGSRWIRQLAAPNHGRAAAPLP  
AGNPAFGPTPLLFGRFTTLRSLFRDANLTNRDLQTIWFELPGFPALAKLSVARNPAID  
SFRQATARPTAPGRESASPDAVVAEAERGRPSNLKSLEILHTKITWTKAEVDSLWVWLE  
TIGASVGTLDVFSWTPSPRFDHPRNPRISHLVERTRTIEYLLARNATNTCSMLTGGSAFE  
SGAGENANSTGTGGTEAIARPRNVGGPPRALWLSLALARAYARGYSTFSESNGTFSVQAS  
SSMPFAIAYGFLRHGSVFSAGQTESWCRRKRRFLPRTVKKLVKYPE  
>comp6812\_c0\_seq1; 313 1 620 LEN=620; translated  
XPPFSRASIQGGREASDYGEDDAPPSTPRFGDGKEPQAQHEGSPATPETPLTPEEQRAR  
DVERQREIDELQMEFDMARDQILEIERQQQKREEREFLLGGLGGEHGAANKSNRFLLSPS  
YSTDEDDYYGYDSEELFPVADSPESAVEMLHAFSGARAAKGSPPAPAAQEATAEDRRKQDA  
DDSRMEEIRLVLQKVAALHEQQQQQQQ  
>comp6814\_c0\_seq1; 913 287 3544 LEN=3781; translated  
MTTTFLSVAMTDLDIHKSRCHSQPCIAEQFSTISQDDAARSFLVETNADADDASSISISL  
SSGVFPVEKLYGREIQKASLFDAYDRIVRKRATDVGNEMNNEQDFILVSGSAGTGKTSL  
VELLRQKIQHEGGYFCTGTVDQFNQRGPIAPLADAFADYVQQLFNQGDPIEIEYETQCRIR  
TTIDETELERLQGIVPSLKRLLGNDTIKSIQYDSEEDYVDIKHESDIQDENMEKRGRCF  
FAMAKLMRTIARSKQSVVIVIDDLHYAQEHVFEYLKGMVLDDRNKSMVFLGICRSIDILPS  
DAPITKFLRGIEDSSVRITNIELENLDFHDVEDMVKDCFLRSHEQITSLSNFMFKTSFGN  
PRSLVTIVESIQVEPNFLFYDNAINTWSINTHIAGNLLNHCOPYLLQKCLDSYPSKEKEV  
LMVMACLGSCSTLNMIQEQALQYVSDAITQLVKRGNLKHANMNTYTIRSNVQAEACYSL  
IGEDIQPGFHLEIGLRLMRYLPAEELDDNLFVVRQMQQLGVNLLQAQDQETKYKVAIFV  
RAAEKATVSFSFREAHDYLSAAHSLGSPSHWIDAYKLSLSLYNNLAETEFILHDGDRVDS  
LLSDIDKFRNLSDKLRAYTTMVHVLGVRGQKIAAIDKGISILADLNVHLPRHRSAAKRV  
LSLAKIERGLKRKTNEMLLRLPRMEDEKQSRAMKILNLLFVYSFEYCPDLFPYVVFKMMK  
ITLTQGLSAMSSVAFAGYALLCCLLKGVDHGQRYGDLALDITNRYSTILFNSRCIAMVYG  
IIRPSIAPFQYSFEILREGHRVGLLSDIDCAMLNAHLQFGLMMVMTDGIKVVDIIGSMK  
KLIDLTERNGHAHHLRLLYNLISLLEIGSNPDEDLLNCLTPIEDGLKHALDTRSAFALTT  
MCNLKSFLLMAGQFQLGLDATAFASKTVLNSITMKTQDSILNGFLLYVQGLLTFGAARQQ  
TNQTIIRNKLIRRKRVTVMVMKVFTSKNPTRFGGQLALLEAEFAALSHNYTLAKQKYTEAI  
EFADAHERLVEVGLANFFKGLHLSNDMRNPTDGIYVFENAIRNYDEFGLCVAGKYCREIV  
NNMKE  
>comp6814\_c0\_seq2; 672 287 2875 LEN=3873; translated  
MTTTFLSVAMTDLDIHKSRCHSQPCIAEQFSTISQDDAARSFLVETNADADDASSISISL  
SSGVFPVEKLYGREIQKASLFDAYDRIVRKRATDVGNEMNNEQDFILVSGSAGTGKTSL  
VELLRQKIQHEGGYFCTGTVDQFNQRGPIAPLADAFADYVQQLFNQGDPIEIEYETQCRIR  
TTIDETELERLQGIVPSLKRLLGNDTIKSIQYDSEEDYVDIKHESDIQDENMEKRGRCF  
FAMAKLMRTIARSKQSVVIVIDDLHYAQEHVFEYLKGMVLDDRNKSMVFLGICRSIDILPS

DAPITKFLRGIEDSSVRITNIELENLDFHDVEDMVKDCFLRSHEQITSLSNFMFKTSFGN  
PRSLVTIVESIQVEPNFLFYDNAINTWSINTHIAGNLLNHCPYPLLQKKLDSYPSKEKEV  
LMVMACLGSCSTLNMIQEALQEYVSDAITQLVKRGNLKHANMNTYTTIRSNVQAEACYSL  
IGEDIQPGFHLEIGLRLMRYLPAEELDDNLFVVRQMQQLGVNLLQAQDQETKYKVAILFV  
RAAEKATVFSFREAHDYLSAAHSLGSPHWIDAYKLSLSLYNNLAETEFILHDGDRVDS  
LLSDIDKFGRNLSDKLRAYTTMVHVLGVRGQKIAAIDKGISILADLVHLPVHRSAKFV  
LSLAKIERGLKRKTNEMLLRLPRMEDEKQSRAMKILNLLFVYSFEYCPDLFPYVVFMMK  
ITLTQGLSAMSSVAFAGYGALLCLLGKVDHGQRYGDLALDITNRYSTILFNSRCIAMVYG  
IIRPSIAPFQYSFEILREGHRVGLLSGDIDCAMLNAHLQFGLMMVMTDGIKVVDIIGSMK  
KLIDLTERNGHAHVSYARRCA

>comp6815\_c0\_seq1; 633 1 1807 LEN=1905; translated  
VEVRKLRQNSGGNTESVTGGTGRSDINEQVGVTTSTSPGDQNPENPLIQILPFQLGTVTYW  
QKGSNSINLFSLSDDLQHRFSAIMKVVLQSQRPPQTPYKRPRRKKSMEEELVIYLKRGYSF  
RCVRSEMKNLTVVLAASADGMALKYAPKEMKNLQVVTAAATKQDIRAIKFASDELKNN  
LERVFPFVLLSKCALESASEELRNHPLVMEAVVNWGGKWFYFPSEEVMEELEILTKNPMELE  
ETASEEMQHNFQVASLAVAKNGEALLFGSLKIRSTPEVVTAVTQNGAALRHANPVLN  
VQIVTAAVTQIGFALDYASEEMQGNKEVVTAVKNSGDALKFASDAMKKDEEVVIAAVTQ  
KGGALRFASNELRNLLKVVTAAVKSQAQALMFVSNELTSNMDVIMS AVTKHGHALAYVPE  
KWGNNAEIVTAAVKTCNWVLGQASEELRNDLVLTAVENHGKALEFASKELRSNLKLV  
TAVENYKALEFASEELRSNLKLVTAAVKQDGNALYASKELRTNKQVVMIAVTQHGAL  
QFACEELRSNMSVVTAAVKQDGNALQYASKELQNDTRIVTATVKQDGNALQYASKELQNE  
A

>comp6816\_c0\_seq1; 772 1 2151 LEN=2240; translated  
XEEAILTSIEGRQWRLDRPIFVFFDTESEQPQQRHQPALEREHKLXASTPIKASMS  
TSTSTIAPWPTKMVESHGDRDEAWLEELAHNKDTTYKNQSSLPQLPVPPIEDTLRFLP  
TALPLAESEEEKRALENAVQKFPQAQKLERLLERAASVQKNSWLQHWNTLGYLQVR  
DSVCINVSYYFQFADDRTLGAGKSGKNSLQVQRAASILYATGQYRNIVASGR LAPETLGR  
KNIPLCMTAYKMFHACRIPLPQQDSYRIYDPHYYKHAVVARKGRFYKIPLIDESTNEVL  
SVESLEGHLSQILELADEEDSKTEAPGLGYLTGDHRDAWATARAALLELPGMAEAMEVLE  
SGCVLVNLLDDASPSSRAQCGKQLLCGNGDASNRWFDKSVQMLMVCPNGKAGLLGEHSMMDG  
MPVVGLANHIVSTTYQARDESTTGNNGLETFFGGVADIFGSIEMTPKVLEMIETSKGNFR  
EWTGKHDLVQSFQWYGSFGFMKSGFSPDAYVQAMQVATARLFGKQVGTYEASQTRVF  
RHGRTETRTVSPASAAFVQSLGRNGGQPLSATDKIALLNKACKSHARYIGNAAKGLG  
VDRHFLGLSMLVRDGEAAPDLYSDPVFVRSKWRVSTSNLTHPKLDNWGYGEVVPDGVGL  
SYSVHKDRVIFGITALKEHGGWPERLSQYLEDALVEMRLLVEEAAAASDAAPPTRSKM

>comp6817\_c0\_seq1; 333 1 1084 LEN=1084; minus strand; translated  
XAFARAGGKEYVVASDSHRSLEYIIQHFPDPVQRMIRTOGSFVVRSSWKWPAHMLEKHHR  
VNSEALVDVLAMSKCQFLHGNLSAISEAAIYLNMLNHNQSVNWEDPHRLSPVEFYSMVEQ  
VLATSSGKVSKNANANEVRAEKTSVKIDAKISKGSQNHICKRNAIVYLGQKNHSSYDRNS  
FNSLLESLELMNTNYLSLNNHQNTDVI V FHTADFTDNDMNLIEGRLGSKFREALLYFIDL  
YNTSYWRRPSWHSQDNPHDWYAYPLFSEGYRQMMHWYAIWIRFFEDYRKTGHCLYEYIM  
RFDEDSFLRSPVKYDVDFDMKENDFNYGFR LCSYEMQVTRR IWKIWRNLKGS PAPIR DID  
LD

>comp6821\_c0\_seq1; 414 368 2878 LEN=3159; translated  
MDLTCVICTENFDLKEHIPVVLPCGHTYICRVCVKKIKICHQCREPLYWTPPRPQPPHS  
ITNHPHRSPATGRYSRYNNRYSHTHSPSTPPHPGTGVTKPEEIPPCPKNVVLMVEIEAK  
QRQERLMAEQKARKDQKRKEQRDEKERKRREEREEQKRLRASRQADTTPGSYRPGTHCDG  
QLNEIEVVDIEGDQVKNHVCGNDGQSEEEEDYDYDEISSSSSTLPLGDPPELNSGYAA  
LSGTCGTYAVREPEGLVVLVLPYDTPRPHHITSTQQRERQEPMSDEKKEDEFEDISRKF  
SSLFTDNAKSSDAAIALNDNKGSCAGSRTREPFTIEQGGKQVQVGVLESNDQGVQQLAR  
GRGYVVATTKQLVKGAVNENFIRHCITTHCFLGLLLIIPFWFVLGSCGLFALVFSVISHV  
FGFFSIQLDGTTCIYTRVHTHMILAVGGPMETSCKLEGLMLQSVMGKQQLHKKLNQVTDL  
SMMLRKEIILEQDKTEVPVITPSIQKKSASGTGVDEKNGDAHPTTPTKRLTAAHSHSPA  
EGSLGVTSIASADSTAVELGMENRPTPCPPSTTASGSYVEEHPLAAAYNRQYHPPQTNH  
YAYS PAHSCPTPTNHVEAAHLEQPFLLDDSTYSGVLRVNNDDEMSGMGWAGVLGCGS  
SLFGERLLQPTQREADAAGTIFHSTANVNREFLGMAENSLIQNSNVQRAEALAQVAAAG  
ATTSLRQHRTLESSGSADSPLRGGSF DAGVGGSVNFRGGYSNHGGLGRTRRNLYDQQG  
THNRNASMTNAHHSGESHEPRRQLMMSQMSQHRGVGVASIQRRGLNADLVQMSSSR

>comp6821\_c0\_seq2; 668 368 2665 LEN=2946; translated  
MDLTCVICTENFDLKEHIPVVLPCGHTYICRVCVKKIKICHQCREPLYWTPPRPQPPHS

ITNHPHRSPATGRYSRYNNRYSHTHSPSTPPHPGTGVTKPEEIPLPCPKNVVLMEVIEAK  
QRQERLMAEQKARKDQKRKEQRDEKERKRERREEQKRLRASRQADTTPGSYRPGTHCDG  
QLNEIEVVDIEGDQVKNHVCGNDGQSEEEEDYDYDDEISSSSSTLPLGDPENSGYAA  
LSGTCGYAVREPEGLVLPYDPTRPKHHTTSTQQQRERQEPMSDEKKEDEFEDISRKF  
SSLFTDNAKSSDAALNDNKGSCAGSRTREPFTIEQGGQVQVVGVLVLENDQGVYQLAR  
GRGYVVATTKQLVKVGGPMETSCKLEGMLQSVMGKQQLHKKLNQVTDLSMMLRKEIILE  
QDKTEEVPVITPSIQKKSASGTGVDEKNGDAHPTTPTKRLTAAHSHSPAEGSLGVTSIAS  
ADSTAVELGMENRPTPCPPSTTASGSYVEEHPLAAAYNRQQYHPPQTNHYAYSPAHSCT  
PTNHVEAAHLEQPFLDDDSTYGSVLRVYRVNNDDEMSGMGWAGVLGCGSSLFGERLLQPT  
QREADAAGTIFHSTANVNREFLGMENSLIQNSNVQRRAEALAQVAAAGATTSLRQHRTL  
ESSGSADSPRRGGSFDAGVGGGSVNFRRGGYSNHGGLGRTRRNLYDQQGTHNRNASMTNA  
HHSGESHEPRRQLMMSQMSQHRGVGVAIQRRGLNADLVQMSSSR  
>comp6822\_c0\_seq1; 447 65 1417 LEN=1450; translated  
MQRTKRNCPCCSFDLDFLPDSEKKGKVEEDKCEDDDIDSPLLSSPPNISETFDRLVSAS  
SGVENEGGSQIIIVDTHGHAQLDRGRNNVYELQIARNENSVNHEERKNDFGSRNENFHVK  
TLACSVEPADFGITLKYAATSDSILPALGVHPWYIENLNFASMTSRNIDGSHGDDPENI  
DDFDEIDSEWLLPMEKLLIEHPNCLVGEIGLCKIAKWVRTHPDGKARAMGIQKRIFKKQM  
ILAAKLRPVSVHCVNSHGIFVAAIKELVEMQKNEEDTARAADNERHSGSRRFLLPTVIA  
MHSFTGTAHHVKELLELEDQIDFPNDRFRTAMGKKKVPKDKKEKCSRIMKAPLTSTRPPL  
FYFGFSHTVNYAMCTSEKSRKKGVEAVQAVPLNRLLVESDVHSDADVAGGTIGAISVSW  
ARDIHPREIASATSKNGSVFLGSIGSSNGF  
>comp6825\_c0\_seq1; 208 1 773 LEN=773; translated  
DDDDDTPKTTRKQLLLTVLSNTSSPAKTTLDRHLNRLGFDRSRFIGAVTSGEAAARYIRE  
TFGGPPAAQAERQTERQTKRFFVWCTWDRDNQNPDPLEFLELCGPGIEPTLDVDRADFV  
VAHGSGAIRGVRDGGGGDRGLEVRSMGTFLDDGDLGEGTPIHGLLSRCADANLPMVCANP  
DEVVMYHDGSLKHMPGKLAGAYERILRERSTAEGGEGTGERTPTIRIFGKPHREHFACL  
RDLDLAHRRRNQQQQQQX  
>comp6827\_c0\_seq1; 733 1 1581 LEN=1728; translated  
LATKHTDERVHDHSPGLDKDLPMFVTVEEDFLLKDNISTCLSASENRSVVCCKPDPLLYSV  
SQKAMALMASKTSKETITNDSNQKATTQNFILKRQESLRKMSKEGCRREPNASKEVAGS  
NNERTVTDDKAPQHQLYNRVARKKVSSQFHRHSIAQKETDDNKSTEDTSGNEPMPKNESE  
EKIQRYNNFAKTKDSNGENEEESNISNQPSFHRFKYSRFFKIGTKPTSPIEPKREQPSTL  
RKEGSHNAGAEDKGLIKPSNENKDDNEVGKAAPHRFKFNRFTKIDVAPTSQTEPKRE  
DVGNTDTEDDKDVSIKASTGNERKVAKSKVAPSHRFKYSRFTKNDTALASGVQSIREHPS  
RSEIVLDEKERADSEALPLSEKKERNQMNKTNDSHRFKYNRFTKKDAPLDQTVPEKKESE  
LEDDDTAQFNAKQKQNKTDASLQSLGLKCNRFNKKPLNVDSKEIQDGLDRTDDENNEALT  
ETQEAQTSNSAEQPEASSQPMARSMSIRERRKFFESQSKNYQSSRF  
>comp6828\_c0\_seq1; 141 1 863 LEN=982; translated  
XRVWPLPEARRFDSVAFITFADGLRFLRALSREPRGMPACVRLLDNAHFRLGQALRPDEA  
SWLGRTKDALSKSLAHAWLGKDFGPDIVCATISYEGSASEVREQMAAVSRLSRAGGGVL  
LGPGVGRAGYELTYMIAYLRDFAMTYHVLGESFETFVPWSRIEPLVEATKARIAREHSSR  
LLPGAPFVGCRTVQVYHEGACLYFYLCMGFEGVGSASRVYSELERAADEILAQGGSL  
HHHGLGKLRASFATRSSAAFRSALVSIKDALDEDNVFGARNGLFAA  
>comp6834\_c0\_seq1; 226 684 1544 LEN=1544; minus strand; translated  
MGVGGMVVAATAAPVVVDRPLEVGHVVVALDAPLAGLALDAPAELLHHGPMDDPAVDQV  
LVLGPVQEVPHLGLDPVALVGRPVEHRRVLLAADLERARVLPGLPVDLDRDLALDDDG  
GLPALAELLGGAQADPDLAQVEGPPDRHDVEEAVLAAAGPVAGGHAGVLFVVRQRQVQQL  
LEAVGPGERRGPGPGALRGRGHARDVVEALGPLLDGGPRQLDLAVHAGRVGVQDRVPG  
RPEGDSPGVRVDVQHDDPLRIRRQGDLDVAVGDEGNVVAEVDRGSLDN  
>comp6835\_c0\_seq1; 190 1 378 LEN=566; translated  
QMNGQMNGNTKNQTNRMNNGNSNNQMNGQMNGNTNQMNVQMNGNNEKQTSQMGNG  
GNNNKQTSQMSNGKSDKDVQMSRRRRPSKIPTKMPVQSPTFHFGNSSVRGHAVGVSLTA  
PPTSQ  
>comp6835\_c0\_seq2; 326 258 693 LEN=693; minus strand; translated  
MKSVALNWHLWCYFGRPPPARHLDFIAFAITHLSTRLLVIVSIAHLSTRLLLVVPIAHL  
HIHLIVGVAVVHLVPHLITVVPVIVHMSVRLVIAMSMNCRSIVLILLTGAMHSVHLIAIF  
AAAVVAAAPLATADVAAAIVVVVVVX  
>comp6837\_c0\_seq1; 353 1 1755 LEN=2516; translated  
EEEEEEKQQQEHQPACRRLLVLFVVLIGVVVRKANSAPNPSKEPSTCETARNSTLPHQY  
FFHSSPHENGRVVVVVLGGSNRLWKEQGTSASIAREDRDPSPDFAPGVPVAVPRTASPGAP

FPSGRASQIHGFGGAQQTLRGALAEFSPADGSLLPVPLRLVPEELVAWGQAPKTLEILVS  
EAI EAETETETKTLTGPAPEKCGAPSRFFRRRTVTVLPAVGCGLDSLDIRSEEHPCRE  
SNSNSNDDDAFEWNTSDPIVHIWNDETNGVGIIDRVVGPAAATPAATKPAASAAAATTTTT  
ILLETTFALPGSHRLRVAFGLDAASDRNGNCRYGLSSSSPIRVHLERWYDTPDPFSVQGA  
ARNAEDVNGHLDAATVACLGLGADKQQRQLRAIAAEPPIREAAGRGETVDLALFGRGLGIS  
GRDGSDDGWSLDVALGLPFPPEEEGGGKRAANRHRNDGAARVPGTVLHAVLFRNETASG  
GEGGAI SSEQTARGIGAKASGAXTSSSTATKFC SIVCF TGDVSGGKNTKWGSRKPIPPRD  
PEAIRNIPRGNLKNCRDFSTLSHRGQGNPEARPKCEASFTLAWK  
>comp6841\_c0\_seq1; 261 29 598 LEN=1118; translated  
MASDEDKNRNEGEQPGTEAAAE T GKTTAMVDEPLPRKVYQDDFRPGRGNALQA AVASVFG  
SDLADVNFVERPEGYESA IEMFCRNRNYSCEKRKLPAEGSGVGGTQGGPPPSGQRRRLCL  
LRGKSPRGPF GHVVIARTSVSGPECVHRGAVFEMVHDPHPDESFLDESEPFGWCMFFTP I  
EEQATQLTS  
>comp6842\_c0\_seq1; 459 379 2163 LEN=2330; translated  
MRATQTPDFVGIK RAGDECYEMARETSGLCKTTIDKANEMVAFGQELQTTLDVCKSKYK  
SRGASGAHNSKGIIDASKFKIIQELVEGEKMQSATLLAKELSALSLECVDKSKAMMLSME  
KGIDALPDIVEPFVEQGLKASAA RNKGRKGDPELPDIEASVQDLKSLVSGVETVGLFTV  
VERGSAAFEGLRTNGELSKNMFLSIQEF AESIESVSGSVRGLKRESMTAKSYLKL MGPMK  
TVAKDAWRCLRLSGLMKDFAEQVGR LIHWIIALFQTASAKLGAIW GALANAKDAMAGCLV  
YVTESIRLCDDSKTKSLLLRDTSRNIHHHLSNILKFRKTGAAKAVDSLRELADGDEILLC  
IDLGTNIDDMFTDCVEQVVATIDQINGAIVKMPDVLTRDVP ELACATNCVEYDDEIKQCV  
RGTTNPPGIRATASSLNVD D VRQLKSIQSSIEEASPLTVIHR SADGFASVGSTIETCGN  
MISTSRGFAKTCQTSIESFTNAEWDLESARGHILELVAVRDAGVQMKEFVHGVL ELVRAN  
LALMKAVRSKSKGVAGGAESTNIGSLVGLATEVDIDDLQAIGQGIQKLGSLFK  
>comp6842\_c0\_seq2; 554 42 1937 LEN=2104; translated  
MPNRFASKFANFGDSLKGAVGDAIDKIDDAIDKIDDKIDMPIIIDFVGIK RAGDECYEMA  
RETSGLCKTTIDKANEMVAFGQELQTTLDVCKSKYKSRGASGAHNSKGIIDASKFKIIQ  
ELVEGEKMQSATLLAKELSALSLECVDKSKAMMLSMEKGIDALPDIVEPFVEQGLKASAA  
RNKGRKGDPELPDIEASVQDLKSLVSGVETVGLFTVVERGSAAFEGLRTNGELSKNMFL  
SIQEF AESIESVSGSVRGLKRESMTAKSYLKL MGPMKTVAKDAWRCLRLSGLMKDFAEQV  
GRLIHWIIALFQTASAKLGAIW GALANAKDAMAGCLVYVTESIRLCDDSKTKSLLLRDT  
RNIHHHLSNILKFRKTGAAKAVDSLRELADGDEILLCIDLGTNIDDMFTDCVEQVVATID  
QINGAIVKMPDVLTRDVP ELACATNCVEYDDEIKQCVRGTTNPPGIRATASSLNVD D VR  
QLKSIQSSIEEASPLTVIHR SADGFASVGSTIETCGNMISTSRGFAKTCQTSIESFTNAE  
WDLESARGHILELVAVRDAGVQMKEFVHGVL ELVRANLALMKAVRSKSKGVAGGAESTNI  
GSLVGLATEVDIDDLQAIGQGIQKLGSLFK  
>comp6848\_c0\_seq1; 344 102 1046 LEN=1832; translated  
MTTNDGNSRSPKAIMARLLSRQPSEYETASPSPSPYFSSVSPRVAKMFEILELRANFPQK  
LRKDMDEALDGAAGNFLFHLESSVADLLYASANTSNNHSQEDQPQIGLNSDVDTENQVET  
AIRCFPNVICRRSSTISRSEYNAPIEAQITLQSVAFPLPLARLGLIELGDGTTFATEQRGG  
LVPPKATWCLDNQSSPFDGLNYHLRHPDSRHLRNNQTSTNSLVRL LAPHL SRCTNRHS  
SCNVLFELATTTTELHDP ELSERIDKAFLAVIQKLRAENLFFQH DICGSSKSIYNRNNTH  
SDWNMVTTL CATNPW  
>comp6850\_c0\_seq1; 172 361 1332 LEN=1332; minus strand; translated  
MTVFRPQRHNE LFGTRFWSSQFIRYCGYKDRDSEEIMGDPACVDLTSYLIEKKLWTPPER  
RTAFDILPLVLKIPGNDIPFIYQLPKSVTHEVHLEHPEFPEVKDLGYKWA AVPAISNFMM  
NLGGIKYSAAPFNGWFV SIEVARNLLERYHVTEPLAIAMNMNLSDKFLAQKVS AELES AI  
IHSFEKSDFTIVDPD TVGH SFI THCKRERSAGRECPAQWSSCFSGPTNPVWHLEMRDFR  
VVPQFEYCCDPWRVLDIDGVSGTKAIDTTGHILSEDDFSQKVSMP EVLIA YGSETGKAEA  
VANSLARTLKF CRPTVLTLNGALE  
>comp6850\_c0\_seq2; 120 361 1102 LEN=1102; minus strand; translated  
MTVFRPQRHNE LFGTRFWSSQFIRYCGYKDRDSEEIMGDPACVDLTSYLIEKKLWTPPER  
RTAFDILPLVLKIPGNDIPFIYQLPKSVTHEVHLEHPEFPEVKDLGYKWA AVPAISNFMM  
NLGGIKYSAAPFNGWFV SIEVARNLLERYHVTEPLAIAMNMNLSDKFLAQKVS AELES AI  
IHSFEKSDFTIVDPD TVGH SFI THCKRERSAGRECPAQWSSWIGGLVGKTGTNLDHFLFDH  
SSRSQSVX  
>comp6851\_c0\_seq1; 341 1 1397 LEN=1615; translated  
XNGCKLIRSSLGLVFQVLD SWWIYHDGVRFLPIPSLILPLFYFRYCV DGGKVDITDTTKE  
LHIQFSYSVEWVDEPDLVWRRRMDRYVDSRFLPSSFEIHWLSIINSIVLVLLLTAF LTI I  
LLRVLKNDFSRYMELDDEAIEEEEESGWKLIHG DVFRFPENPGLFCAAVGVGNQLIVTTFC

HLGLALTGLISTTRRGSLLAGAVVLYCLTSFVAGYSSIRMYRQMNGKNWVRCILLTASLF  
PAPTVAIFMWVNSVALAHGSTSALPFTTILTVTCLYGFIAFPPTTVFGGIVAKNYVPAEFN  
APTRTTKVAREIPTEIPWYRSRPFQILIAGFLPFSIAIYIELHYIFASMWGHQIYTLFGIL  
LLAFILLIIVTSFITVALLYFQLAREDHRWWAAYINGGMTGVFIYIYSFYFFFQSRGMS  
GILQSSFYFGYMAVVSFGFFLMLGAAGFQFSLVVFVKYIYSRVKCD  
>comp6851\_c0\_seq2; 742 123 2009 LEN=2227; translated  
MLGKQTILLLLGLFSSIAIVDGAKKIRRVKSGKIYKEHENVHIVVNKVGPFNNPTETRYR  
YSLPFCHEHSTEEEEESDAALEEEVELHKFQGIKQVGAQRHKQRLGESIVGDRRESSPYEI  
SFDDSVWRLLCKKHMLPVDIKKLKEAIHNNYFFEMFVEDLPMWGYIGDIDNEDMIVGEM  
QDSKTFLLPHLNFILGRNNNQIVSAKVTDTTERKVDITDITTKELHIQFSYSVEWVDEPDL  
VWRRRMDRYVDSRFLPSSFEIHWLSIINSIVLVLLLTAFLLTIILLRVLKNDFSRYMELDD  
EAIEEEEESGWKLIHGDVFRFPENPGLFCAAVGVGNQLIVTTFCHLGLALTGLISTTRRGS  
LLAGAVVLYCLTSFVAGYSSIRMYRQMNGKNWVRCILLTASLFPAPTVAIFMWVNSVALA  
HGSTSALPFTTILTVTCLYGFIAFPPTTVFGGIVAKNYVPAEFNAPTRTTKVAREIPTEIP  
WYRSRPFQILIAGFLPFSIAIYIELHYIFASMWGHQIYTLFGILLAFILLIIVTSFITVA  
LLYFQLAREDHRWWAAYINGGMTGVFIYIYSFYFFFQSRGMSGILQSSFYFGYMAVVSF  
GFFLMLGAAGFQFSLVVFVKYIYSRVKCD  
>comp6851\_c0\_seq3; 657 82 2013 LEN=2231; translated  
MTFSEKIMVKTQEGIPRIEQHEPLVSNWMCDEPIDDNNASPNXNDIQPELTIIVNFFIT  
KNRRPFNNPTETRYRYSYSLPFCHEHSTEEEEESDAALEEEVELHKFQGIKQVGAQRHKQRLG  
ESIVGDRRESSPYEISFDDSVWRLLCKKHMLPVDIKKLKEAIHNNYFFEMFVEDLPMW  
YIGDIDNEDMIVGEMQDSKTFLLPHLNFILGRNNNQIVSAKVTDTTERKVDITDITTKELH  
IQFSYSVEWVDEPDLVWRRRMDRYVDSRFLPSSFEIHWLSIINSIVLVLLLTAFLLTIILL  
RVLKNDFSRYMELDDDEAIEEEEEESGWKLIHGDVFRFPENPGLFCAAVGVGNQLIVTTFCHL  
GLALTGLISTTRRGSLLAGAVVLYCLTSFVAGYSSIRMYRQMNGKNWVRCILLTASLFP  
PTVAIFMWVNSVALAHGSTSALPFTTILTVTCLYGFIAFPPTTVFGGIVAKNYVPAEFNAP  
TRTTKVAREIPTEIPWYRSRPFQILIAGFLPFSIAIYIELHYIFASMWGHQIYTLFGILL  
AFILLIIVTSFITVALLYFQLAREDHRWWAAYINGGMTGVFIYIYSFYFFFQSRGMSGI  
LQSSFYFGYMAVVSFGFFLMLGAAGFQFSLVVFVKYIYSRVKCD  
>comp6852\_c0\_seq1; 183 1 1119 LEN=1316; translated  
SDDVLGGRSRILASPASACLVTSPASLKLVSIGTSNALVVKADTDTDTDAFGNETRASP  
AKRARTSDPSGTLPAAVVAPCRLVQPGGSGSSFLVQPHDPDQDLARFFEQRGPSLPPV  
STAELCNLFQAAPGPLWKALEGVHAVVSHCAPGGGEAWFRVEGEEVLKQORALVEFLCEE  
DEDFEAEAGSDASLALGAVADRVGKRLAPLLADKGGPAMGREERSLAIARKTVLLASAPG  
TTGGSKAWRDVDRRRFRPDASKIAFCVLRDLFSKYPSYAWSDLSEQWSSRLPLGERYERI  
TSTTEWIEDPDLGGHGLVDPQLVFSPPSAAGDAGGGEGADRRTGKKGSGAGNNPKGVGLGL  
VDPHAVLVWRGG  
>comp6854\_c0\_seq1; 791 325 2699 LEN=2982; translated  
MPPSSISNAACSSSENDNLLTLLSLPKKWIDFDTKKDLVHRVANIRHFETLLDESTEVSWD  
NPTKENRNSTSTKDSPFDTVVEVDNLDPNGLFVSLDLDSWEETKKAQKSREKYSRDL  
IHLNREAMESAHRAIQRLAISVSKKIEPKSKKKRKKVAPASALRDGTNPLPATETIVSPS  
RLIQYTDTIENGNDDNHIEDIDTKEITTIELCRRLQSLPESKIGLDLSIPLRDEMSAAC  
IDEAPSHPARFRCRIRSNPPVILATSTFESFRSKLFGVGIPIVNTILLHATRAEISWFLV  
NGVNGKEAEELVLRDSPSFIKHAHVGRKLLVVVRPLRESKTKGDSYKADVYIFHNV  
IQDFPRMPIVSPLRDGFIKGEKESDQKSMDTLRVCTYNI LADLYVSRQNGQDSPTTYSH  
VKYEHVEKARRIPMIVGELMAYQADIICLQEVDSVYDAFLQPVLLTLGYDGYYSNKASS  
QREGCALFWSRNVLLESEASSFQVRDLFRPSSNNEKDRGEWKSREIYQLLNSNRQLKT  
VVVEKLGQILQIATLRLKNSSQEHAKEIVIANTHLFWHPMADHIRAMQVYVVAKKIDEVR  
RKTNFDNSLKKNHPPRPFLLCGDLNSDPLSGSQLLCSRSLAPDQHECWKYLHRYKWDID  
DCEVDENMEGGTSGEERRAEHRDGRCEQSI SFAKSCNASPPHIDLPCFPTIVSGCKESP  
PFTNFSLDFVDTLDYILASKLLKLSYLDSCQCGXAAMPSVLDVKKFISMPNEFMPSDHVS  
IVCDFDLIRYD  
>comp6856\_c0\_seq1; 492 95 1321 LEN=1405; translated  
MVSLRIGLAFIAIHMHENGPFTFSSSLVHKSLSARRVALSNHDAHLKMTLSALSSPATND  
VTLPDTSQPLNPQTYAGMIEEGLKKKFNETEIERVLT SWRLVDQGYRKEYVGDKIDASE  
IASSNMIQECHSYVPLSIIKPFWDTKFEDWTQTLESRYTEIREEFDAVMGNMEKLQREGN  
NVWAGALTEDASSYGEWKTLLVMDRGRWDPTNANLFPKTAQAIHASGAPATEIFFASM  
GPSSIKTHSDFTNFVLTSHLALDIPYGENRCRLTVGDETRWINGKSYVFDTSLLHDAE  
NESDKMRYILMMRVWHPDLTAIEKEALQFTFDCLEYDQLLSNEEERFKAEKITEASRSF  
PLIPESGTGFRAQIKSPEISKKGFGKNQKKNKRKQKGNNGGKRGFGK

>comp6859\_c0\_seq1; 361 1 1652 LEN=2030; translated  
XLEDRFRGIAGGSPAAPLEKDGAGGGPGTEGSPGQAGPRFDRDRLSYLSQRIRAEEREV  
FSDPSAVEPRGDRTEHLRSAYIEAETRRLWNFLQGGEDPCPDRTREQTAKTKTATTMAVE  
TACDRVLVSARAVDQQLWPLTLSMVMIGLSVGVTTTAPFPFVQNLGLSTGEYGMVVSFAF  
ALTKLFGNIPFAVLVETNGRKPYPYVTMIAISTGVGCIGLASGFEELYACRLVTGLGVAG  
LSCAATMTVTDISTPLNRASSFAPISAGFAAGTALGPALGGVLIDQIGVNPTFFYLVGGSF  
LMLGGVNSFLLDETLLRKNQSFQWREETKTESKTDDDEGSIKNAFHKALGQWVPLLSEAP  
VRSVCIINGFYWVALAGSQMTLLPLVLTDPHGLAMTATQVGQVYMGMSFVQVFGNPLFAR  
IVDRAGTVPGIVGGCSLISGAMFALPHATASGDLGQMAAVLGVWSAGSSLLSTAPIAHIS  
DRVDDARRAQAIALLRTSGDVGFVVGASTMGLLSDWTGGLDTAMQSSAAILATATSWYCV  
RSAMTSRQKQ

>comp6863\_c0\_seq1; 338 587 2137 LEN=2254; translated  
MEPRTISNAEDASGIVGNAPRARVLSLALRSLPVSGCWAVPVTLSSDDDEFFDYLAVVD  
GSPFLTAPPGAAGALRQTKQRSVTSKRGGNLGPKKTTMLFRSKESFRLGDSHHDDDTSYE  
QYGNTVGGVQWRIAPHLTLVGNKQVADIVARGIKDYACDENGKICCSRSDSGVDTPKGVR  
LLGESEIEPIVIQDES VFTVGVPSDEVITETGGIFFGLMTVDGARPTTLQQLGYDAFVMR  
FGENEASLSSGSRKKDKSNTDPATLVLWNGKQNDGKTNPATPLVDPDFPCSMKLFDLTP  
FGPNLHHYAVLCDFECRWVGNDSISFDCVQENGSNICTSPLKGENGVLSRPLIAVFD  
GLSGCIFSDTLWEEVQRERRRRKHKNEAGGQRRGRGTPENPEESYPVGCTVRLPTISNAE  
KSGSTPTVLPKSSSSHSSTISIVELSSISEHWRVQSFRLPWWYADSVEEKNGNASQAQERD  
NNFPHVIVLGSTFWRNPNIQELAVDTISQRAKIETT

>comp6869\_c1\_seq1; 553 1 1514 LEN=1675; translated  
XDGDGNGNGNGAAARSSVSDQIVKRYLPAYLLAVFSDWAKGPCGYELYSSGEYNYDSHH  
AYLLCSVVPFVSSMLLGPVVCGLADMGGSKRAAVVFAIVAALGNVAKHFRDFRALVVG  
ILEGVSASLLFTAFDSWLVRSHRGAPPETKPPATTISPWTSKAAPSLRLSRAFATAEYR  
NNMVAIAASFVPSVATGAMPFQPLALPNEKGSTAVVYAGGVLNADFLLSTLALLCGTFIG  
LVWDEIPTPEAEERRETRPGSHAEGAGADAGRRLPLWRRHRSLGGASFELLRSEEVFLG  
GAVCSLFETAMFVFAVSWTKAIASRVDDDENIPFGLVFATFMLGCMVGTSVYALLIDETK  
VRNETIGEGLLAVATCTFIAMASTRSATPAVFLVWFFLFEATVGVYFPMMGTLKSEIVPD  
CHRTTVCNLYRVPFNLFMVAFLWVLEHRGMCPESCFCALCACMAGAAFFQVALGRCRETR  
LLSRLSKQHEASFRDRGMQKAA

>comp6874\_c0\_seq1; 551 137 1732 LEN=1831; translated  
MFAKLLVTALVWLINLSVSYGEDTADDNIFVGNNGNSTEDEFPIDWDYEAIIVVRWDIES  
PPIVEYDNLQFDIQFSVSDYIEAEKHVRYNVYKTPECGNPDDIITASDGYMETWVSEDKT  
PIGPGLDENVKVVTVSNKLNSTISQSEIYSEDSLETGTDASITYCVLFGWLWNGDGP  
PDAMMINDMAVTVILSLDLGDDFKITGQNVAAKARDVEISDDRFFVEAFFCDETGKPTL  
VAPKRQGSIVRVCVQPTKQAADVGFQMSIDFDFQAQGSTSQEASIDGKESNALTRLS  
KEGAKQCFDFTVLLASFYESGPEGAPGQINGDGVATLQWGGEGVDRRLQDIFLDQSLEFA  
TVESNSEKDYTISEQLDFDFERLLRDRTSQKSIQLPNFAVQIEEGSQRPPLKADVAKSG  
KLNPLLIIVSAVLCALVVLVSLIYIHYTSPKVRKVEVEEGEDEENNQRNNSQTLPLPSPSD  
EDASECECECEDNSNAFDHEEQRTNQLRLSVIDENPTGVFSARSVLSRGF

>comp6880\_c0\_seq1; 396 163 675 LEN=1354; translated  
MKPDWDKLMDFADSPALVADVDCCTAEGKDLCSAHGVKGYPTIKWGDPSALEDYNGGRD  
YASLETFAKENLKPMS PANIDLCDACKAEIEKFLGMAGEELDKLIAEGNKKIEDNETN  
FKNEVSKLQAQYQKLMDDKDLEEIKIKASGLGLMKACAAHAAKSKGSDEL

>comp6880\_c0\_seq2; 396 314 826 LEN=1505; translated  
MKPDWDKLMDFADSPALVADVDCCTAEGKDLCSAHGVKGYPTIKWGDPSALEDYNGGRD  
YASLETFAKENLKPMS PANIDLCDACKAEIEKFLGMAGEELDKLIAEGNKKIEDNETN  
FKNEVSKLQAQYQKLMDDKDLEEIKIKASGLGLMKACAAHAAKSKGSDEL

>comp6880\_c0\_seq3; 343 1 518 LEN=1197; translated  
XAASIPNNSFPPLRDSFSFFLVLSILSHDAILRTHTIYLLFRRQPTIKWGDPSALEDYNGG  
RDYASLETFAKENLKPMS PANIDLCDACKAEIEKFLGMAGEELDKLIAEGNKKIEDNE  
TNFKNEVSKLQAQYQKLMDDKDLEEIKIKASGLGLMKACAAHAAKSKGSDEL

>comp6882\_c0\_seq2; 363 138 818 LEN=900; translated  
MAAALPITKLAALVVKTLAKPLSKSIKNNFRENQAACKVLISIGQTNHTVTSYMTI WASG  
YRVRSIKPIEAEKALKDGAIEAGESFVVAVTAATVIFEYNRSSKSAARKAEKREKRIED  
QKLNALNLDIRLKAIEDLVRQQRIEDKSLLTQIVPVGTEKAKYVEPPKEQLVPI  
IDNDEVDVSATGINEESDVKERQVAIDSSRTPSEKENDQKQSHSSWW

>comp6882\_c0\_seq3; 321 426 947 LEN=1029; translated  
MTI WASGYRVRSIKPIEAEKALKDGAIEAGESFVVAVTAATVIFEYNRSSKSAARKAEK

RERIREQKKLNAKLNALDIRLKAIEDLVRQQQRIEDKKSLLTQIVPVGTEKAKYVEPP  
KEQLVPIIDNDEDVSATGINEESDSVKERQVAIDSSRTPSEKENDQKQSHSSWW  
>comp6883\_c0\_seq1; 137 1 263 LEN=263; translated  
XTKAARKSAPATGGVKKPHRYRPGTVALREIRRYQKSTDLLIRKLPFQRLVREIAQDFKS  
DLRFQGS AVLALQEAAEAYLVGLFEDTN  
>comp6887\_c0\_seq1; 476 115 1215 LEN=1253; translated  
MNPTEPPGTASTGEASSAAEPKTDTKTNPKTATPSESDVYDRQIRLWGAEAQKKMQNSRV  
LYLHVTGSSEVLKLNCLAGIRAEICDPRPASALDASPCFFTHPNHKSQSGDGESESEP  
ASKKPKYGSVALAVRPLVEELNPLLGSCPIVDKAISELTRDLKGYTVVVASQVPLSEVV  
RLSQLLAEGSVLYTVDCFGMRGASMIIEFGKKDFCYRPEQGKLLDPTPIKDYVSLPDMVR  
VPLHKATNRFHKKGPPPTWIMYRVLMEHQRTGKWLGDPSIDPWEAKKASEGFLAGEGVA  
LTETELDDLVTAGVAQVPPVCAVLGGMVGNEVIKIISGKGEPANNTLLLDGGACKAWTFM  
VKAKET  
>comp6888\_c0\_seq1; 407 118 945 LEN=1177; translated  
MSDRNLFNSNRSPLAKNDEYGVTELLREVSKRNSLSDEERKEVSEMVKRVEQHNAKPS  
MDKMKKKFAELSVVNDMGSNRRTTKNSTVGESDDNGDDPRADKSVKFFANDLFQKFSNMD  
TISAGQPKDPVFDGNGRKEFFRSLSMKGIQSPLKMTNSASTEQQTPSRAEGDRRPEILKA  
FEQSSQSGKELLRNLSKKIQSPLSSVPNKDPPPSAAETA AVSEAFRDIQKIHSPIADL  
PQKEAIDISNEDQKKNATNLNSIQTP TIVDFPEEE  
>comp6889\_c0\_seq1; 295 257 1255 LEN=2042; translated  
MHRSLLGFTLLSSAIGSSAFVTLNVAPRCTTNLFEGGNGGDEENASFDVENARRRLENML  
SDPEKIASGNSSNDGSDLA AAAATPFSFSKFLADNDEPF SLSALPPPPLSTIERSRRL  
VEIKLIECLNDGDDVISELWDHWYSERGSAKQKLQOSSGMFMDESKWEECEQNLIELVV  
EHGIYFAEPVNLATLYFIQKRFDL SYKLCQVVLAIKPHHIGALSGIVEVALGSGDMGAA  
RYWAAKRLPKHVPASVSGSDGAASVYDENEDKKSVDTPRRVEVWQKAVARAQDTLDQAER  
RTKQKFFGEADIHFDSDGGGDTLLDGDDDDGDAW  
>comp6889\_c0\_seq2; 295 257 1255 LEN=2204; translated  
MHRSLLGFTLLSSAIGSSAFVTLNVAPRCTTNLFEGGNGGDEENASFDVENARRRLENML  
SDPEKIASGNSSNDGSDLA AAAATPFSFSKFLADNDEPF SLSALPPPPLSTIERSRRL  
VEIKLIECLNDGDDVISELWDHWYSERGSAKQKLQOSSGMFMDESKWEECEQNLIELVV  
EHGIYFAEPVNLATLYFIQKRFDL SYKLCQVVLAIKPHHIGALSGIVEVALGSGDMGAA  
RYWAAKRLPKHVPASVSGSDGAASVYDENEDKKSVDTPRRVEVWQKAVARAQDTLDQAER  
RTKQKFFGEADIHFDSDGGGDTLLDGDDDDGDAW  
>comp6891\_c0\_seq1; 171 227 439 LEN=778; translated  
MTVSAVNWFKRVLGFGPYFRRRSNGLEGMIVASFLGVTSGIYIWKPILEEMEINRARREL  
EERSASKERT  
>comp6892\_c0\_seq1; 413 583 2115 LEN=2333; translated  
MNCVPVGLGSLGNNNNNIKCDGGLAGGNMSSDSSSSQSSSDDDSMALDDDSVDSSSWSPHI  
QNDANEIKHAYWIQRTIREAIYGRVLFVILKRRRPRSLVLS DGAWEVTRDHCAVKEMSL  
EHIRREKDRLAEDPIKEVASMQYLNRRWRY SQQCSIQQHQLHQLHHDHMVIPPLOQADNN  
SHADVTQSFFAMRDTNIMMPLDLLLDERNLYSIMPYCDGGELFERLDLNERFSEDEAAVL  
DASGAQRKSDIREGIFPYGTVTCLALNASSMVAFFP SHAMDNLPLPSVKGIYTKRVFYVL  
SYLLHLFCVQGLDTLQKVGICHRDMSLENLLVHKDGALI IDMGMCLLVPFCDEDPSSLAA  
PLGNMKNMGESKLNQSTLPGRLRRRSLIRPQGTGKWIYMAPEICRNEEPFDGFAVDMWA  
AGVILFLMLTGFP PWERACHTDERFHYMTAGYLVQMLTEWDIGLTSAMDLLQRMLFLDP  
KDRLSLEQVRAHPWMIIRRQE QPLGLQRNM  
>comp6892\_c0\_seq2; 492 583 1923 LEN=2141; translated  
MNCVPVGLGSLGNNNNNIKCDGGLAGGNMSSDSSSSQSSSDDDSMALDDDSVDSSSWSPHI  
QNDANEIKHAYWIQRTIREAIYGRVLFVILKRRRPRSLVLS DGAWEVTRDHCAVKEMSL  
EHIRREKDRLAEDPIKEVASMQYLNRRWRY SQQCSIQQHQLHQLHHDHMVIPPLOQADNN  
SHADVTQSFFAMRDTNIMMPLDLLLDERNLYSIMPYCDGGELFERLDLNERFSEDEARYW  
MHQVLNGLDTLQKVGICHRDMSLENLLVHKDGALI IDMGMCLLVPFCDEDPSSLAAPLGN  
MKMNGESKLNQSTLPGRLRRRSLIRPQGTGKWIYMAPEICRNEEPFDGFAVDMWAAGVI  
LFLMLTGFP PWERACHTDERFHYMTAGYLVQMLTEWDIGLTSAMDLLQRMLFLDPKDRL  
SLEQVRAHPWMIIRRQE QPLGLQRNM  
>comp6897\_c0\_seq1; 179 1 715 LEN=829; translated  
XNSNSNSNFTNGHGYENSGSRVETFDIAVFEVDPDHCTSRNCDLSKFGVGDLSHFNGGSY  
SNLCKAGRNLNDHSVFKGHHTQLMVP IEGPMQDRIKQRKTARFSGTKERHYEVVLANCHR  
HGRNVRVNGQVFDLVETESIANNLTRGSAAILSSVALVFLALSVA VRVRLGTRSDFE  
RELYGLVPS TDDDG DVAGDGEPREPTEVEDQYEDDNDERGAEPGAGSPDLALANTRVV

>comp6897\_c0\_seq2; 120 597 1043 LEN=1157; translated  
MQDRIKQRKTARFSQTKERHYEVLANCHRHRGNRVVNGQVFDLVETESIANNLTRGSA  
AILSSVALVFLALSVVAVRVRVLRGTRSDFERELYGLVLPSTDDDDGDVAGDGEPREPTEVED  
QYEDDNDERGAEPGAGSPDLALANTRVV

>comp6899\_c0\_seq1; 508 303 1391 LEN=2443; translated  
MAGPANPPGQPKGGFNKLFVMLPVMLAARKLDAEDPQTVQYLRMAYGSMQSLCVLVVLYT  
FMKASSIDDKKASNIVYIPAPPTPFADPEAKKKYTSSEYRAHVLSTARSLVGSTLFGICM  
TVGLHIYKGMAMGLAIQTIMGPFNLFENPLVKAILMGNGFRPEDKIFEEKDLQELTESDE  
VVDETGNVPIPKHQLLASSKTQKAKKSQSPEDAFAEELLLDWDAGNGADVSKFVSAVTKKN  
CNQRSKGNEWTPLMILSGLTNKEDTASAIRKVIIGMGNPVTDKDGNCLHWAAPFHGSL  
AAKALYDYDASLLDVKDNEGKLPLEMAQQEDNKEVAKYLEEVTATAAASKTDGGDEGIRK  
RK

>comp6899\_c0\_seq2; 508 303 1391 LEN=2340; translated  
MAGPANPPGQPKGGFNKLFVMLPVMLAARKLDAEDPQTVQYLRMAYGSMQSLCVLVVLYT  
FMKASSIDDKKASNIVYIPAPPTPFADPEAKKKYTSSEYRAHVLSTARSLVGSTLFGICM  
TVGLHIYKGMAMGLAIQTIMGPFNLFENPLVKAILMGNGFRPEDKIFEEKDLQELTESDE  
VVDETGNVPIPKHQLLASSKTQKAKKSQSPEDAFAEELLLDWDAGNGADVSKFVSAVTKKN  
CNQRSKGNEWTPLMILSGLTNKEDTASAIRKVIIGMGNPVTDKDGNCLHWAAPFHGSL  
AAKALYDYDASLLDVKDNEGKLPLEMAQQEDNKEVAKYLEEVTATAAASKTDGGDEGIRK  
RK

>comp6901\_c0\_seq1; 333 148 1422 LEN=1481; translated  
MFIKKDLRKIPTILSDAVDCRTYDEGNDESNNGTKIKRTKREEPLRILKLGRRKQEFNG  
CVRVLCQPEHFPKLGHLVSVNLYECDIHDLTGFGPVFGASAPNLETNLGRNPLSKGIPD  
DFSEVKSLKHLWDDCKLAGALPRALLKLPNLESLRPLNNRITHLDIGEADMTNGSGSNI  
GNSGKNRDDGEEFEYEWDDTAMKDASTTTNEVTPLKNLILCLDRNLLGTTDADGSRDGA  
GEGDGTGNANPNTSKDAGDDPREAEQSGTSPARAVLPNLAEWFPALAEELLLRHNVHRR  
GVRDWPEHLRILHLSSNRLESLSELSSGGLRSLAHLNLLGALPEGILSDHPGLRRL  
VVSHNPPRLDLPVEVWERMGLLPRAAAGAVDEAPLPPCDIVWQPNPNLSAPAAGGGREDG  
AMEE

>comp6903\_c0\_seq1; 392 1 1340 LEN=1546; translated  
XFKTLTTPTPCQFLSLAVDPAGEIVVAGAMDPFHVYAWNLRNGRLLDVYTGHTGPVAQLA  
FSGGGLLASASWDGTVKLWDMYKANVATESLSHNSDVVCVACRPDGKELVSGTIRGLLS  
FWDTEGTGLKHELDGRDIAGGRKENDRMASDNNASGRYFTSVCYSADGSCVLAGGNSKY  
VCIYEAQQRILLKKFQVTFNRNLDGVLDELSSKNMDFGVPVDEHAGDSEDETTYNALRLP  
GAKRGDDGSRSSKVEVLTRQVSFSSTGREWAAVSGEGLHVYSLDGMVFDPI SLEEAITP  
SAVKENLSLKNYSLALTMALHLNEDALLEQALEEIPHASIGSVVRTIGPEHLERLLAAIG  
TAMESSPHVQYLLSWCLEMLRTHGVHMDRHRSSFMRAFRSVHKAVQTKHDELKTCINQR  
YALEFIESQASLTATAAALAVGKD

>comp6905\_c0\_seq1; 226 1 622 LEN=897; translated  
XMGTGEGGAPLASANLTGASFAGYTNVDGLNWDLFATHQQTGMGVDLTSAFMGTAAYAVDE  
GKKFNTLAGLVLVVAGALALLAVFVAARRRKNRKAFLHARCIDGLALDAEDDPSLDR  
ARCVVDDASLFGQESLPAGYRVRTEGPGHDYGT CANP SCKLCSARDRPGPVFKTDPNH  
SFTHEHRSTLESRRDKEEAERRYESVML

>comp6907\_c0\_seq1; 203 113 889 LEN=1402; translated  
MSSASSSVARGSLYRAYSRSSTSGSISSVENLPRTIARVSKEVRDLMKTPPGGINLVVD  
PETGMPSSLGEIVAEVEGPGQTPYENHYFRLKLVLGVEFPASPPRGFFLTKIYHPNVDMT  
TGAICVNTLKKDWTPTDTTFAHVLSVIRCLLINPFPESSLNDEAGKLFMESYDEYSKRARL  
MADVHGRPNSSAMSEGDDKRRKADLKDEHDS PQRRKSR IEPGMNPLGSKNSNSISSKSI  
GAKQVSGRLKKKSLKRL

>comp6907\_c0\_seq2; 246 741 1163 LEN=1676; translated  
MTTGAICVNTLKKDWTPTDTTFAHVLSVIRCLLINPFPESSLNDEAGKLFMESYDEYSKRA  
RLMADVHGRPNSSAMSEGDDKRRKADLKDEHDS PQRRKSR IEPGMNPLGSKNSNSISSK  
SIGAKQVSGRLKKKSLKRL

>comp6910\_c0\_seq1; 384 1091 2059 LEN=2080; translated  
MSQSPVFITVNHAIQDDGEYDDSSMANSAIQDRVIERLEQIRDIFASDDKGDLLPAE  
LLPVGSIRIPDNLGGVVSKWPLYDEGAWWQDVSATLPAIALFNLSLSSKHEEQHVQDMHV  
VDLCSAPGGKTAQLCSMGFGSDAIELSAKRSRSLRQNLKRLGMEEICNVVVEDGREYEP  
DAMSGPVRGILVDAPCSATGVGSRPVDLRSIDITELSAIQRELLVHAADNILEVGGVL  
VYATCSLLKQEGEDQINWLLSEVGSNASNAQLETIPFAPGEIPGFDDCIDENGWLRVIPG  
VLPGLKFCGDFVARLVKVS



>comp6910\_c0\_seq2; 460 674 1882 LEN=1903; translated  
MDVVPKYAAIYETVESLRLHPKIKVPKQSISFANAVLRNIDREGIPVLKTTSSINNLDLWL  
AKQWVKQYGKDTTETIVEAAMSQSPVFITVNHAIQDDGEYDDSSMANSAYQDRVIERL  
EQIRDIFSASDDKGDLLPAELLPVGSIRIPDNLGGVVSKWPLYDEGAWWVQDVSATLPAI  
ALFNLSLSSKHEEQHVQDMHVVDLCSAPGGKTAQLCSMGFGSVDIAIELSAKRSRSLRQNLK  
RLGMEEICNVVVEDGREYEPDAMSGPVRGILVDAPCSATGVGSRRPDVLRKSIDITELSA  
IQRELLVHAADNILEVGGVLVYATCSLLKQEGEDQINWLLSEVGSNASNAQLETIPFAPG  
EIPGFDDCIDENGWLRVIPGVLPGLSKFCGFFVARLVKVS  
>comp6910\_c0\_seq3; 539 1 1713 LEN=1734; translated  
FCSKAKGTTTKQKLFDRSTSRKHVFKMKDYVACLPTHRLIFIAVFCFVILDQCNGLSG  
KTNLNATPEASRQITHRASAI FALMESMKRKNKFAIRVLEQDPSFLDLQKDRAFARLLL  
STAERRLGQIDIVIESFQRKEKKKNSKPRLSEILVEAALRIGAAQLLFMDVPKYAAIYET  
VESLRLHPKIKVPKQSISFANAVLRNIDREGIPVLKTTSSINNLDLWLAKQWVKQYGKDT  
TETIVEAAMSQSPVFITVNHAIQDDGEYDDSSMANSAYQDRVIERLEQIRDIFSASDD  
KGDLLPAELLPVGSIRIPDNLGGVVSKWPLYDEGAWWVQDVSATLPAIALFNLSLSSKHEE  
QHVDMDHVVDLCSAPGGKTAQLCSMGFGSVDIAIELSAKRSRSLRQNLKRLGMEEICNVV  
EDGREYEPDAMSGPVRGILVDAPCSATGVGSRRPDVLRKSIDITELSAIQRELLVHAADN  
ILEVGGVLVYATCSLLKQEGEDQINWLLSEVGSNASNAQLETIPFAPGEIPGFDDCIDEN  
GWLRVIPGVLPGLSKFCGFFVARLVKVS  
>comp6910\_c0\_seq4; 384 922 1890 LEN=1911; translated  
MSQSPVFITVNHAIQDDGEYDDSSMANSAYQDRVIERLEQIRDIFSASDDKGDLLPAE  
LLPVGSIRIPDNLGGVVSKWPLYDEGAWWVQDVSATLPAIALFNLSLSSKHEEQHVQDMH  
VDLCSAPGGKTAQLCSMGFGSVDIAIELSAKRSRSLRQNLKRLGMEEICNVVVEDGREYEP  
DAMSGPVRGILVDAPCSATGVGSRRPDVLRKSIDITELSAIQRELLVHAADNILEVGGVL  
VYATCSLLKQEGEDQINWLLSEVGSNASNAQLETIPFAPGEIPGFDDCIDENGWLRVIPG  
VLPGLSKFCGFFVARLVKVS  
>comp6913\_c0\_seq1; 534 1 1088 LEN=1126; translated  
XDVLDTNVGFSWGAALGSNSSGAGAKEGSDSDSDSDSDSDDDEGEFGNEKSNSRRSRK  
RQAKKRLEEQETSRRRETALADGTADSNPETAGDFERLLSGEPNNSSELWIRYMAFHLSLAD  
VPAARKVAETALERIEFREEKEKLNVSALLTLEHKFGNDETFQGVIDRACQONNPQVY  
MRACEILANDAEQSSNDPVSVKKADALFATMCKKHKSKKTVWLAHMRYLLKQSRDKDAHA  
LMKRAMMSLGSHKHAETMSRFAQMEFELGSPERGRITFDGLLLKYAKRLDLFFVYLDKEC  
KFGNLEHARSMLERKVEERKLSDRQMKSLFKKWYRMEEEHGTEETQEHVKESARAYVTT  
TK  
>comp6917\_c0\_seq1; 245 149 1179 LEN=1244; translated  
MPNKKRGRXIPLAAPGLLRPMTSRKRARRVTTMFHKLTKERDQALKEGDADKARSCERSL  
EEMGRPEYQRASQLSTSFHSTSRWVLGHLANNGWLYGIKKQALDESGGSTRERRRQSA  
RRRTTRILEVGAINTELLDAAGIPAAAATARPSRKAADASGATPRSTGAAAKNIHVRAI  
DIHSMEERIEEADFLLEPLVHPDREERYDVIVCSMVLNVCVTTAVDRGKMLALLYHQLRPG  
GLCFFTVPKFCLTKSAFLTHGLFKKMLGEKGVGFRVSTRESRVAFFVLERPPEEKDGG  
GEESRPARQLDPVFTREIIRNKGKKFPNQFSVLRSEHVFGTD  
>comp6918\_c0\_seq2; 199 150 542 LEN=942; translated  
MLRFISAIILLSTTSGFHFNSNRKVRSLGTSLSQSDSSSSSERYETYTDGTVNPCWQDIYDA  
DCTMDSIF TARFVASEWIKELPCGSGLEDCDFPEGTVPPEMRPESHNHPEVDVMDFLNIK  
RVDDDSKLSP  
>comp6923\_c2\_seq1; 327 1 762 LEN=1126; translated  
XSNSSNAHLLLPHGKKGLDLALLRKERKRLRKKDEDSGAANANANADANAPTTPPSNA  
DGVRSGIPSMHEAHRILRECLESDGNGNSNSDDPVSGKAFPSAPMVEYLRRELLRWKAL  
DPAAWDGASTQTAAGGLAGRTSYALAI DGDPDTERAWVPRALAARGGTIEAHKGRSWL  
PVGEQRAVEAVFARRTSVRXEAPVAPGTRGGGVNERNRPGPKKAGNKVDDYFNDESND  
DGEDDDDMFGGLDD  
>comp6927\_c0\_seq1; 503 165 1505 LEN=1586; translated  
MFPRIIIAATASRGPAASLARNVRLKERVAVASSPPPGLWRWLGSSSQTASLIQSRSN  
ETETTDPEQNDEPIQIQPQHQMMLKDKHDTEAKRRDDSPRSLPQAKKWRAPFWLPPSS  
QGKRTPHHRRNPKHQQQHRPKPRFRNERLPCRQHLDPNGSAGLPESDWVQLFGAFPMT  
SLDEILESVEGTLRKELEFDPAANRNRRGGVVDLADWNPTEEDPPLVSEITYCTPDAPR  
DDRPEYALDNDVRGGIPDDGDGNDPNPNSDDDETDDTRVESFRVVKAHVVLSPFGRPTG  
WNLKLASPSMVNALLSVANNARVRSIRIGWRFATVKEHVPTPIKMDPRDTRTMLVNDT  
MVRFENCPSDLTEDFLRHLLSRYELTAKGPTIIKWKGRTDGKAPPLTYVVRFASAAAYAR  
AAIREMQKLLKGQAIKLIQYPKQLI

>comp6929\_c0\_seq1; 201 1 1285 LEN=1445; translated  
XHPGRNKTHR VHQPQREMAEGEEAPVRNANEIHGKGVPE TERVPPAERRSCLALVEAVAT  
TGGGGGLPGGRRKVRLELPPRLPPGQREGEDDDRDLWLEGVDR TLAGALGITGCGTIELYDP  
GTQAFRR LDRIDEIPSSCCRLRVAETVPEGPISSTGDGGFLALPWREFSGDIDQDGRFVL  
GDHSIVVQEE SNGSLGTGTNLWDGAVALASFLGHHQGTARSNKDKDNDRDP SLSVEGKRV  
LELGAGTGLV GIIAAHLALGASRVLVTDLEYSMANLEANLSANRCHRTSAERRDSTIDARV  
LDWC DPSSCETALS IWNESGGAHSHSPPPP DVVLAADV VVWDFLVPPLVETLRRVCTWGG  
TGS DTDPPLECWPPVVL LSYQRRSQVVEDLLFQSLREASFRTE DVTIPELASSKIRIYRI  
TYQH QGV L

>comp6930\_c0\_seq1; 468 132 1217 LEN=1652; translated  
MDIQSHYESNGSGPEEVADRLADNGRRYSQFLAQSLNNKASIQISNGNYDEAISDLSYAL  
DLSTSDLNENGETSMCPFQEFSLGSFLMVALEKEEEEQHFC LDVDRPADIQQPERSSFCSE  
NTDRNYEDLDDCVT MEDNDESTFVGFDAA TSNMIESGGSHRNQRSSPLSRDKAQELISLK  
SNEDNEHKEGFIYSCLPCVNSRCIAEGHNLGLVLPVMILFNIAIAHHLKAISLSKIATAG  
STTAMESFEMMQQASKFYH LAYELQRKKT LRRQOHTKRNSDCWNEEHVSMRFMMLITNNL  
GQIHRFTGNPHKQTMCLQHLLGAML YMFHNCDRTVLTQKELDRFFDNLAPVLGTKRCAPA  
A

>comp6931\_c0\_seq1; 1180 516 2945 LEN=3698; minus strand; translated  
MAQKKS RKEEETPSLSPVDSGSE DENTDDEDSVYDS DVPYEDGVDESDEEEFEDQGSSD  
EDEDLLEKQEE DDESDDGMEKLEDNMSNAYETAPRKWNTGKRTISGQKSE PSESNNTEKS  
AKWMHTDDFSSDDEDEDGTGNRIGRVPLH WYDEYDHI GYDAHGKKVIKTASIGGNRVDQA  
LSNADSKGKDRFMVHDALNDKNVALTPRQLELIRRIQGGAYAHPEFDGNAEYIDYFSGVD  
PELSGINSNR TLPKSKFQPSKWEKMQVDELLRKL DKGDI NMDYLTGKIRDMNDANKSSKD  
KDKPFLMWTGGE EDELNMRKGPQHIAAPKLPPP GHAESYIPPEYIPT EDEIKEWEQMEV  
KDRPHGLLVPKKFPNLR SVGAYEHSVRET FERCLDLYLCPRQMKRRLNIDPESLVPKLPK  
ASDLRPFPTAKCIQYKTPHEGDEPPMIRCVTPSPDGKFMASGASDGYVRLWEVETGRLLK  
SWNVSKVALSADDEWEESTGSESVKPVVALEWNP NRAHHCLLA AVGKCAI VIATGTEGQR  
NAEITGALLSSAKRGGNVSSAKASKAVQWVSVSEKETPISMFASASGPV CALCTKSNMTK  
IRWHGKGDYFVTISP KAGASSVLIHQLSKGN SQPF SKAKGEVQAACFHPNKPFLFVANQ  
QHVR IYHLVKQAMVKRLISGCRWISSLDI HSSGDHLIVGSLDRRMVWF DLDSHTPYKTL  
KYHERAVRSVGFHHRYP LMASASDDGAVHIFHSMVYS DLMRNPLIVPVKILRGHEIKNKH  
GVL SLSFHPTQPWIF TAGADGKIFLYQDI

>comp6933\_c0\_seq1; 111 141 502 LEN=502; translated  
MAEEASASADVP MEDAAADPAPVSVXP FVIAIKGMTDQNTGNPPKVASDCPI SCAFLSYF  
THPLFLFAVIFLIGNAMSNTHHAYIFQAKPAAKAAPGAAPRFEIKK WNAVAMWSWDICAD  
T

>comp6933\_c0\_seq2; 235 141 539 LEN=861; translated  
MAEEASASADVP MEDAAADPAPAKPAAKAAPGAAPRFEIKK WNAVAMWSWDICADTCAIC  
RNSLNEPSIEYQANP SPTNDNGLSIAFGNCGHV FHLDCIQRWLKTRSVCLCNKEWDFAK  
IERIPGYGQLGI

>comp6933\_c0\_seq3; 75 1 159 LEN=841; translated  
AKPAAKAAPGAAPRFEIKK WNAVAMWSWDICADTVSENIKHPKPYDVILS

>comp6935\_c0\_seq1; 188 311 518 LEN=518; translated  
MSSETNDDAIVRGT RNDIGIDTGVHPIHNSNNDNDDIDQVSTNSSLAPPDADQILSNDIG  
IDTVAHP IHX

>comp6935\_c0\_seq2; 188 438 645 LEN=645; translated  
MSSETNDDAIVRGT RNDIGIDTGVHPIHNSNNDNDDIDQVSTNSSLAPPDADQILSNDIG  
IDTVAHP IHX

>comp6936\_c0\_seq1; 991 1 2173 LEN=2293; translated  
XCSQNQKLNPIDLALS YNQEELMQMEPSKERIYIGGLNPPRLSARDIFRRLKSINQIEIE  
SASIVDKGVNGDSSDEDEGTRPYLHITASSKHSDSALSII SKQYHNVKWKGCKLIVEKA  
KPHFLDRLEEERRQR RERTTGERANEIRDSIEVKEQPEESEGIPSRIPRRLRVRK KFGDT  
ALHVDTKPWTVESWSRFHKARGKLQKQEEKHKINVIAYNSASKDEHISQPGPMMHRAVHI  
RFSGGETGLNGGIGSNKKNNE SRMVISSASSSDSSTS DSDSDTEASNESINKKEQSER  
YTWSEEDSDSSHSE EEMEQNPD DGSQSTTEILLNQKRKASSNDQKDDGKYQWSTEEESSD  
DEEDGTNRWSSTSPRNNEPLRAVHG TDEFAAGFEDTS SFDRYENDDNFEGYDHGKSGNLE  
SDLTGDVTSNLNILSSIFPDMVDAKP INPNGDVTKSTMGSTESSNVPQSKNTTAYGIMP  
RFDPTAKSSKQFEVEEEPEEEEE PNSGDEESASETRSSIEDADLSDNKENSHTGDIREND  
SGAEVSPAPDIYEQEKLENVFRDARDAWGTEDTGAAA PRDTSATDEDPDKSSGKSSFSFG  
FNLDNDNDASKKQKSKSATEAFSFSFSIPEQDQATEHDKPNTIQEKEDDEHMETATQCDEER

DSKNVNDKVDMITTENVATRLKGLTLPEGDLKTYVDNFFALNDGARIMKDPEGFRRDEK  
EKTEW

>comp6940\_c0\_seq1; 235 118 606 LEN=846; translated  
MRSVTIATRRCTSMDRNVFRRRKRITQHDQHCCHRRQQHSSIRPAARAPLAPSVPNRHNS  
VLYRRNPVNVVSLGREAAVVQQHSGDTFGGGYILPLPHDEKVGTDTTATASTVAFAATN  
NKDSDLLPSWSAAETVMKMMKASYHASHTSGVAAAGGGSRE

>comp6941\_c0\_seq1; 577 279 1702 LEN=1702; translated  
MNVSPSSQETSIPFSESLGSGEVLHRMQGNLPSNTKPRLDIDMKIGKPGGVSIDGVTT  
KIDKEVTKSDLVLPSEGLKQLVTVATAEKEAHSFYADSNPRGDSREDTGRGSTGDEKRE  
TECQLSGTASAQMTEDI STEIGADNDDDKEMKNTDEKASSYVDAAEKI IDEPKTEEAKSE  
QPKLEEGTKDELKEEQPKKKPRKRWKKPADKPPRPLSAYNLFFKRERSIMLGDAAEKDDQ  
EQGKKRVHRKTHGKIGFAEMARIIGAKWKKLPDEDKEEFMVVAKAEKEKYAELLANWREE  
KKKQSIANSVEAGKKRKDLDDDDTDELIKTINEDREQLLKRHSAFRQMCMYEEMALSRLG  
REGRPMPSLDYMRNMPDRPYFGERGQYPNAAEDSGRNILQHMLSLSGHEGPGPMSRMSD  
GPMGSSMGNTMGSMGSMNRGSMGSSGNQINKPIGNSMGNQHQTGHMPMGHPMPX

>comp6942\_c0\_seq1; 703 214 1974 LEN=2152; translated  
MSTRVVTVTTPSFDVAGSPTTKDCNNGETTPSYRPNSSHSYLLCDDPSNHSPFVNPATA  
GGSTGGGSFDACKDRPGGRPHRQRRNWPSTRSTTPVWILQSI AFADKIFVSWWLMWVLDVW  
HKHVPLFLKRLCFWAWGWYFVHTLVVCGWMLYSDDRFYRLSPPSPHSDGKKGKSGSDF  
ISNEYKAYSTLCYPSQFFVVDVPRMRFALSQLNVISSRDIPCEECVERVADGTNSRGVDQ  
TGTNHRSERPFVVPDAQRDHQTVRGLYVTNPNKRSNDNTLSHTRSILFWFFGGAYLAGDA  
EGNLSLANEFMEDCNADAVFVPEYRLAPEAKIDDVLWDAAWAYRYLVKRLQKESSQQNQH  
TDTEIVFVGISSGAIARLLQLLRDRSLTTKEGSSLPVTPSFLEPVLDDIVSRTIKSAE  
PSSSKTKSIRVAGAVLFAPYVDYRDPQPPSGSFVQNSEFDWVVTQAVQHYGLPYLNEFVP  
PLGDDLLRTNDDHSGYNTNGRIQYSPLTHDMNGLPPLCLIASEHEACYDMAIAIVNKARQ  
GVERGDAACPPTEVTIGVWKYCHVFSMMQAFLEPKASIDFAKGW

>comp6944\_c0\_seq1; 407 1 1082 LEN=1162; translated  
XFFMSPVAVSGTSSAFLSCALNVYGSVVLKGDRLQLELYILKFPVSCRGLDATGLTGSG  
KGGRVTKGDVLAALRDGTPMPALVKVEEKGP ELATAPAPAAA AVPKAPT VPAEDLPLPEV  
DTYGSYEDVPNNMRKV VAKRLTASKQEVPTCYTSMEVELDNVLKLRKTLNDHDVKVSV  
NDIVVRCSSLALRDVPEVNGKYDPKTDVSLQDSVDISI AVAI PNGLITPIIPSTDKLGL  
SEISDKVKDLAGRAREGKLSPEEYQGGTFCISNLGMFGIDEFTAIVNPPQAAILAVGGGV  
RRVVP TPYVDGAE EQAKPAIKT IMTARLSSDRRVVDEATAALFMSAFRHYINKPELLLL

>comp6944\_c0\_seq2; 840 273 1892 LEN=1972; translated  
MSPMSALRRLSTSSVLRGRRTVATAIVGSHRGASSSTAATIRLGLKGNNNRYSLPETNGL  
NCTSSIGRRQFHQSVAVLDYDPDHVVIFFPALSPTMEIGTIAKWEIAEGEEFSAGSVIASI  
ETDKATMDFEAQDDGILAKILKDGSEATDLPVGTPIAIVVEEPEDVAAFADYVVSEEST  
GVAGADITMDEAPSSSLEELSTATAPVIGGSAGTSLLLPSARFLAESKGLDATGLTGSGK  
GGRVTKGDVLAALRDGTPMPALVKVEEKGP ELATAPAPAAA AVPKAPT VPAEDLPLPEV  
TYGSYEDVPNNMRKV VAKRLTASKQEVPTCYTSMEVELDNVLKLRKTLNDHDVKVSVN  
DIVVRCSSLALRDVPEVNGKYDPKTDVSLQDSVDISI AVAI PNGLITPIIPSTDKLGLS  
EISDKVKDLAGRAREGKLSPEEYQGGTFCISNLGMFGIDEFTAIVNPPQAAILAVGGGVR  
RVVVP TPYVDGAE EQAKPAIKT IMTARLSSDRRVVDEATAALFMSAFRHYINKPELLLL

>comp6951\_c0\_seq1; 681 1 2696 LEN=2696; translated  
SSCDDQRGYVHLQGA FEKPKR KASPNTQQSESPYWKSSSEALEEAILLALRDHYKRLQLPF  
PVL SVRSDGKNLSRLRLEYNCPYEALQIYA FRDQRISPQTILAPIVNSRGDCVTSKSD  
GCALFGSRPCQATMITTTPLPKDTSSFWPRSNPPQFRRL LHNRGDDEQERSQTRFVYVTG  
LIDNNNDSEVTTGRTLSDWWGKPYAVYRALRQVFGTDIEIFLPKKQNRKQQLIQSCHLGL  
RSASDAQRIVREYQGRVVAWNDGTTKTSQQQSNEGEIHSGQLFLDYATITQSKAKEKG  
EYKKGKGDASRPECTSTTSHVHPGLVVVENFLTEPEEKILLAILTGQPAPWAPQQTNKS  
QTGAVKRLVQHYGYVFDYQTADVLRRENTPF SANCPPMPA IETTAENNDPISMDDLIRQ  
GRGWEVLAQIVEKTRRHEFETEPPSSDEEKSDGPN SQESMTRKMTFPHLNQMTVNYKPG  
EGIGSHIDTPSAFGDGLISISLNSGIVMEFTKVGAKTEGEARVKKLVYLPRRSLVLMAGP  
ARYEWEHQIVTRRTDTHDGTTSRGLRVSLTLRTALS LDGSP LDFESSVFPVWGGSD  
GKRGP GSNALVTPSTERNHVHAVYDAIATQWHHTRGKRGLVWPSATQFVQNLPEGSI  
VADVCGDGKYPFAIWEAGSYVIGTDISLPLESSFDESSGSTVPGTRTVSGYRQSLQKR  
PAVAVADAMTVPLRSDSCDAACIAVMHHLSTDRRLRCL EELERIVGKGRIHVQAWAM  
EQASNSKRRFAAPDVFVFPNAQPKYLDRVSGGAGGPEPE SHGSGGND SVAPHGPKSVAE  
LYSEAYEKADFDERKGLVVFQRYCHMYREGELEDLVRRVPGRLRLVESGYESGNHYVILX

>comp6952\_c0\_seq1; 590 372 1605 LEN=1605; translated

MPSLKQLFGSPLGKSKHKKKPNKDRYNGMDILINDHKKKYTTTPKFLATENSEVTVSLFK  
EEEEETERGTLIESTACHSEEVREDEEITIDFRNYKDCVGDALKKSGMKTAKATKEIQDH  
LHEESEKDETIYFEQRDHYDNRCGDEDFRTAAMPSSKESPTTKNFADKELHLPNCK  
DINCENADIWCDNDDNFRIIVVPATASLSKPEEEQEKREKAKKHESLAESHHRQQQQNE  
FSMDEDEGIYDKVDDFRTTIMPTRISSFAREEKEKSSSAKESSENKEIYVPQQQQQLQH  
ELLVHQNDDFQTTVPDLQGMGESEPRSKESGNLKRVARDDNRYQVSPVNSVEFENHIHTT  
LNANEGATNSRSSRKEYSNKNDKTSSAIYPIPSHLNTTGYHLDDLDDGDDEKX  
>comp6958\_c0\_seq1; 274 33 686 LEN=929; translated  
MSTSTLVKGYELHGWQPSKSLCKDENFMDLCMIITRSKCLKQGSMAICLVKEATTQREEP  
MPATAATELAGDMCGAII SVANNRPLFSETTSDVHAEIAALGEASRNGVSTENATAYI  
TMPPCKNCFGALT VAGIRKIVTRYGPNQKIQAASKNNIEWITISNHAEMMARVNAIVCP  
GSDGKKRKRDRHSDNESVDETGAKNRKSDCTSSSLTKC  
>comp6960\_c0\_seq1; 126 1 990 LEN=1066; translated  
RVLFRSGNRGGGPQWTFRWNTGGGSRNHRYKPKRLKDRFDVKQAQSRILHIVSLEQLETI  
ITATIDGEAVLERDIMICFYTPPLETHLMDEMVYPWPFAAKSSQGIWEDLLQTSVVRYP  
NSNDLTEFFGIPRGRSLEKPVFIFGKKGQKFWDKAAWDRRLSTDERQVFDQWTWKQLEVE  
VVFVNHHDHPVELFWIHDRGGHAKGIIDANGGRAVHVTTLASEWVWRDARTDTLEGAPGR  
WKMTDGTCLYNVKILSDEHRREYVIPKRLCYDLSGHCPFWNRSKGKEDKNPNFMHQWCRK  
ECRRCTPDVDPKANEKRHDGTDYPGSDEL  
>comp6960\_c0\_seq3; 359 66 1409 LEN=1485; translated  
MSVLSAILSFFIFFACSSNNSINHFTWFFPPTVANAAASEITDLYEILGVSRTASVQE  
IKKAYRKALDTHPDKNKGPVPAEEAAAFAHKVVHAFEILSDKSSRNRYDRTGQTSNGNNT  
SNGGGNRGGGPQWTFRWNTGGGSRNHRYKPKRLKDRFDVKQAQSRILHIVSLEQLETIIT  
ATIDGEAVLERDIMICFYTPPLETHLMDEMVYPWPFAAKSSQGIWEDLLQTSVVRYPHNS  
NDLTEFFGIPRGRSLEKPVFIFGKKGQKFWDKAAWDRRLSTDERQVFDQWTWKQLEVEV  
FVNHHDHPVELFWIHDRGGHAKGIIDANGGRAVHVTTLASEWVWRDARTDTLEGAPGRWK  
MTDGTCLYNVKILSDEHRREYVIPKRLCYDLSGHCPFWNRSKGKEDKNPNFMHQWCRKEC  
RRCTPDVDPKANEKRHDGTDYPGSDEL  
>comp6967\_c0\_seq1; 421 1 1403 LEN=1468; translated  
XKISSDAHFGSDRTIPEQNAMGKQSKSKTVEPANDDKDGNSSVEMEISDEEYQELLSQA  
KELTLEEAEQEWMESECRYGEVDVVRALAENFPSSQETLIGFVHPDTGNTGLHMASANGHT  
NVVKKLLVRQYGHSTFKNASGNTPLHWAAANGKAEVVKFWTSQTIVEVDVLEKNAHGRSAL  
TEGFSSQNEVDVAAILEHDSASEEKLSTGSQKGTGGNEDGEEELLD SHVHSFFDKERPL  
KIRELAMKNADNPFADTDRPDQDTTGLSIWSASLVMARWMQAVGMTGYWKDSSVLELGS  
CGVPLMVATSDASRRRFLTDLNPQTVDNLRYNIELNEVQDFVEAKCMDWEDKSTWPE  
EKVDHVIGSDLIYIKSLVPLLT SVIFGTIKPGGKFLYVCPDTGRDGLDAFVEAMKQKCPG  
WVEQVAPKEYHSNPLTNEDEECFLHFQELSSLTMYLYEFPINNN  
>comp6968\_c0\_seq1; 213 86 928 LEN=1213; translated  
MIGIWIPLDRESTDGLPLATKISDLFLGFYDRVPENWILQLVLPVHSGVVFAMLA FYLVSK  
PLFQQIAKLVDPKATWFI VSI AEHNFLLA VFLV VVINSWP IVIDHYQRYGAFD TYCDPE  
GRLWDKNGSGFGPWALIF YISKYWEFVDTWILVLK GKPSFLQVYHHTGIAFCM WVGVLS  
QSSWLKAVLLNSI IHTLMYTYFLIKTISPATQIRSARYLTKAQIGQFFT GIFYSAAVLF  
MGDKCDTQSSRFLACLQVYGYGLIALFMAFSKRKYQKKD  
>comp6969\_c0\_seq1; 211 385 1158 LEN=1335; translated  
MVRTNNLLVSSLALSTCCVSPTYGFTPE SAASRRSHVRLDLDLGFDATEASSSVTIRNKP  
LASIDVDDQINAVESSELPPVLQQITDERRNFQMN LGKAMD TLRKDMPIYILKDT PDYS  
IYHSDITVVDPSGVQLTGIENYKSSIKFLQQFVAFWFQPERNGLQYRLVYDFARSSIRVS  
WHAVLVPKMPLGKPLHVDGISMYRLETDTGKIEHKLENLSINNTPIVPPYGVFSLVQQE  
WLAGTGVPPGGQIPMGV  
>comp6971\_c0\_seq1; 324 196 765 LEN=955; translated  
MVATKSSSKSTVSKAKTGA AKSKKGSKAAMPSTDRIVLAIASRHGLGEEKPSRDMVMG  
LALITNKKSFN TLLNIRKKEGWIEYDKDTVWLTEEGRNYVGNNAVAVPKTNDAMQARLR  
EDMVKGLKPRQIFDIMLDGRWYTR EELADAMGIPNNKSFGTYVSSLR KVVVRD GKKIRLS  
DICFPGRP  
>comp6973\_c0\_seq1; 342 38 571 LEN=571; translated  
MKHCISTGMSEEECQTLVDTCKEVHNQIEAQCGSIKEQCKVDELSTEECKEKVEDCKRGL  
EME ECKVLFPSKENNQIEQCKSTGMSEECQALLAE CREVHHQIKEQCKPIKEQCKENEL  
NPEECKGKVEECKEGLEKEECEVFHKPNNQIEQCVSTGMSEECQALLAECKEIGEMI  
>comp6973\_c0\_seq2; 312 38 501 LEN=501; translated  
MKHCISTGMSEEECQTLVDTCKEVHNQIEAQCGSIKEQCKVDELSTEECKEKVEDCKRGL

EMEECKVLFP SKENNI EQCKSTGMSEACQALLAE CREVVHHQIKEQCKPIKEQCKENEL  
NP EECKGKVEECKEGLEKEECEEV FHKPNNQIEQCX

>comp6974\_c0\_seq1; 794 1 2046 LEN=2162; translated  
FSRDGVCLVLLHQ NPLSRRQDKREYRIQSQTTPHRTAQHRTAPPENPYDTKHTTKQPPPK  
HSPGPQTNMTLLEFQTAQELKTFVESNPVCVVAFA SAHWCGPCKASRPGLEQLARDSQKVP  
VSLVHEDDNDIGDYLHTFRVRAFPTYVLFASGTEAERVEGANLPGLKAMIERHEAKAGPS  
MPSSGGNTLGGSHSEADARALRLARLGGGGGPAEAAATVAEAQ PETKEEQAVPMETEDSK  
PAAETEAVAPQNSNSNSASNSNSNSDEPKQSPVDSL DPEALRNLT EEMGFSLVRAQKGL  
LYSSGNTVESAI EWLM EHQDDADIDDP I PEDPSGGGGSGAGSGAPKAVSYKCNATGKIFA  
TLADLELHANRTGHTDFEESTETVKPRTPEEKAAKILEL KALLKKKRAEREEAEKVDHTE  
REKQRRFMGKEMAQ TREQMEAEQRKRDARARKKEKIEFKKERERIRAELEKDKRERMANK  
GKLKGR LGVDGYAPSAIQYENGSGEEPAAQRPKTSGAGAAR IDECISKVASYRAGDGGK  
CLKVLG LLVGNAA DHPEEEKFKSINMETKTYKNKVKPFV GAKSLLLAVGFGLPEKNNDGT  
HLVLR EDADLELLKATKAKLQ EALAKY GSSSRTDDAAWVMAGAKPTENPTFARED CPTG  
FSSAVGGDPTNSRKRETMLQL

>comp6974\_c0\_seq2; 550 1 1445 LEN=2169; translated  
XQLKQEQLRNQQNRAS TPIGADSS EATPVSSVADPAGNKNPAANPDAAANANETATNTKP  
ASALASAFSPVRTNGNGSNAANTTTTATSNSNSNSEGTVQAFAGLEEMARHSRIRQKAME  
SEVFHDRGGDEEEEDDLNGNVYVNVVNDNDNNHTAAGDATKNQQRQNHDRHVPTSTNR  
RAPMMLAPTKRRLRWHALVDSGMGR LGFKTDPVTTEDHGKRRDTVEILKELADLEVT PDC  
PVEFYGMCTHMADASNSTSTFTDSQMNRFKSL LKRVRGAGISVPTISTDNSAALLTTNLT  
HFSANARVLLAQNDADSRGFVRTGGAIYQRP SF EQLKAVSTLVASVRHVATLRAGESVG  
YDRAYVAPTSVRIATLTIGFADGYPRELGNVGSVSIRGH LFSVAGNVCMDMLMVELGPA  
GETNPGAAVAVGDVALLWGPDEGEEGEGHVRLRDVAEALGTTQSALTCGLNKERVLRKY  
A

>comp6975\_c0\_seq1; 440 254 1549 LEN=1587; translated  
MEMMRLKKGNGNVRSLSSRRERVSLLGDVQIRSSPTSRSNSGLRGREQRRRTRVRAHP  
QDDDAEERISLLNDANSPGK LKRYNRYESIINDGVPWTRSRLMKYVAILVVSSSMSFFLL  
RRESKVIRWEEYHSILEPEGSKKARCFETSRYSLDERCSCDPDNVALKNDDAKLWDSNHD  
HMVSQAKNAPGDL DIVFFGDGIEQLSGTRGLGAEIVEGMEEYFERTFVKKNGGTFNAIA  
LGSSGDTGPNLLWHWENGIRQANLRPKLWFIMVGSNDL FVHKCTDEFV MANALNVAKRIF  
EDQPEAKIVIHGII PRKDNPESTSNALGHLWNRAQGLNLQVRKWKIKHSSRIFFMNVGQV  
LMQNGGMKGRKFLDPNLIDEKMNPTAKGMEKWGDLVVKL LIPILKGFDMAKHRKQTKPPN  
KEEKSQTKGTR

>comp6975\_c0\_seq2; 359 254 1694 LEN=1732; translated  
MEMMRLKKGNGNVRSLSSRRERVSLLGDVQIRSSPTSRSNSGLRGREQRRRTRVRAHP  
QDDDAEERISLLNDANSPGK LKRYNRYESIINDGVPWTRSRLMKYVAILVVSSSMSFFLL  
RRESKVIRWEEYHSILEPEGSKKARCFETSRYSLDERCSCDPDNVALKNDDAKLWDSNHD  
HMVSQAKNAPGDL DIVFFGDGIEQLSGTRGLGAEIVEGMEEYFERTFVKKNGGTFNAIA  
LGSSGDTVCYVCFVNNNISXKIDL FENIVWSCNAQMCLFP GSRNXLNASTFLHQKGP NL  
LWHWENGIRQANLRPKLWFIMVGSNDL FVHKCTDEFV MANALNVAKRIFEDQPEAKIVIH  
GII PRKDNPESTSNALGHLWNRAQGLNLQVRKWKIKHSSRIFFMNVGQVLMQNGGMKGRK  
FLDPNLIDEKMNPTAKGMEKWGDLVVKL LIPILKGFDMAKHRKQTKPPNKEEKSQTKGTR

>comp6976\_c0\_seq1; 123 111 404 LEN=737; translated  
MDNVGNLPPYQQQEFMKYLEQMQLKDSL TMYNRLVERCAEGCVTSFRSKTLDKHEISCLE  
NCAGRYIKMTQRVGLRFAEHQAMQQKRAAEAAAQGS P

>comp6977\_c0\_seq1; 571 276 2664 LEN=2715; translated  
MAELFNGPVSFSDPQDPDRSRPFVHEAMPEDGVEDFSRKDLEEKSLQLMAELLRPLFP  
LGKGVGSEETE GECALDDKVYAEANQMSNELAKGRFVDFCCESEGETRVESFFLQAADTK  
VGREI IKSGMSEDLILFRKVV EGAIVSLQSLLVFGMTYGLTLHPTGVSRAVAHMKDDAEA  
LDVTWPTNGQWKP AHSRLKYL SFLDHDAD EKV PGLQLLSTLKWKRTP LRAYELLTQIG  
VWGKHENLALLRSGVPLRFT ESEEEAAEKVAEESKKDLGDDADT LLEIRRDFRGQKVFTI  
DSASTKEIDDGLGVEVIEGEDGQKRYRYWIHIADADRWATRDSDLFEMARRRATS IYLP  
RSIPMPASVSEQVMSLRAQSDVCALSLGVELNDDGSIVEDNIVVTPSTVRVTYRLTYDD  
ADEMLEDGVGYSEEWQLGRLYTAAQQRQFRVDNGSAEDFIPTQIPQYTI STFPDQGAPD  
DVGIKIDLQVSHNGGKNQSSIVAESGDGNSDKEELPVSSS FLLVTEMMILAGEAIGKWAY  
RETQTPCGNHRKNTLELPFRSQEKPDYRTRERERKIMMDLLDCNIGGGYCHAWYARRFFS  
PAKVTP EALPHSGLGLECYAQWTSPIRRFQDLQVHAAVKRFLRRQRVLELLETGEPVPNG  
LSPSDLGCGLPTQNE DGTLELPLEDADGDI DYGDGVKLLKPVQFVMRNTNKFWMLEHIRR  
LKEADPQLSTEVLVLCVNP SKRQYSVYLYEFGLEWRYN SPAGIQAGDRFMVRFGNVLPQ

NGQMTLVREPNSSKP

>comp6981\_c0\_seq1; 409 1 2546 LEN=2621; translated

XLLGRYQFRQSRGSGQNPTGGLVSAVGSIDNTFPRPQREYIRCLSRLQESSSLRGLDVI  
GRPRELLTAYNHLIECYAGEGMLQAHCRKLYSYIHNNVQSSTSGTNHLASKGDAGDKSK  
SEPPSGPGCPMAASASNKTSPPGQQSGCPVALSSLSNEKPPSERTGCPMATSSSEGKEPP  
SQQSGCPMTMSSNDSLNAIDNHKFAITMFKHMREAANDRWRLRPLMNEVTKIISTSE  
SGGF'TTVALDLSGTGLLYEYGDVVKVILPNDDRQTRSWLHSLKSMNQEYFKLEDMRNLQK  
STGNGWGWGDGLWEALGWGRFEEHGGSGVPLEMIARYIEQGNIRDESSKKFNWVHSPDLDS  
VGGASQMFASPPPIPTERIGSLEPVSPRIYSVSGVEPDRVFLVSKPDDLARHHGYAAMS  
DPKITKVHCSFSPATFFLVPPKDVNLVCVASGTGISPFVGLVDSIRSRTGSYTIHVQCKS  
SDMFCNSQTWLDFTAMNPGAIVMGYISGDRSRRNCPMRYVIRNGAFEETTVLRRRRIISA  
YYFECESFQSRLLETYKSNGLNLAYCCGGVKSAIMPLRFTTESCGMQFEFTCESYGVSP  
LTKESNLLSQIGGTIDLNVHSPIHGGDQILHQATDIMTAMAKMKNSENTNTPDHSIAF  
YELHPHAYNLHRCLRTPVDADAKAFAQFLERQAMSKSVLGNMAMKYAQAVALSSPSSKIV  
KIATELQSSAISAQLSSGDTEQAQKSASYLKELLNHVPESDADSERWGESLSLIPPVSRK  
SSSVFRSSTFSNKTTMSGGEALKRVSFLQEVSLKSAAYEDSDDES WGESLSLMLPSRRKS  
SSVLRRQE

>comp6982\_c0\_seq1; 447 66 1130 LEN=1597; translated

MMMVAAKVQNLAKNFTKRCRVIVCGVGGRMGAIRTGLVYANPRFELCGVCDVNMEAADRI  
ASKYSTRAFDFEGLLDEFSGSKDSTATLDGLVISTPTPTHGDLIKNAENGLGMFVEKPI  
AEIPQEIIEELYQVCEQHNVPLCCGFQRRFDESYARAASVQQGLIGKVSNAHIFFGDSGP  
PSFEFLLEGGNIFYDLSCHDVDFIRWALNDEIESVYACGSSSREELAKCNIQDNATMMMT  
TTRGCVVTLTMSRRAAYGYDQRCCEMFGDFGKVSIGNEYETAIVSDQNGDHL SRLKNSFD  
SRFHDAFGNEMNAFADTLMEKTPWMVKKEDVISVQKVAAAACKSLETNQIIYVD

>comp6982\_c0\_seq2; 347 380 1272 LEN=1739; translated

MHFTFCYRXRAFDFEGLLDEFSGSKDSTATLDGLVISTPTPTHGDLIKNAENGLGMFVE  
KPIAEIPQEIIEELYQVCEQHNVPLCCGFQRRFDESYARAASVQQGLIGKVSNAHIFFGD  
SPGPSFEFLLEGGNIFYDLSCHDVDFIRWALNDEIESVYACGSSSREELAKCNIQDNATM  
MMTTTRGCVVTLTMSRRAAYGYDQRCCEMFGDFGKVSIGNEYETAIVSDQNGDHL SRLKN  
SFD SRFHDAFGNEMNAFADTLMEKTPWMVKKEDVISVQKVAAAACKSLETNQIIYVD

>comp6985\_c0\_seq1; 292 62 670 LEN=817; translated

MNLSGMKLCGCIALLPSSTLAFLKLNLARSEPRNSALLPELERLIAASDSGIDGSYEESI  
KDTMVEISKSREGDQRESLPGRWELIFTTEKEVNFFKTSWPF AEVSLITQRLDITDEK FV  
NNVIGFKGGAFAVTSAGPVDGDDEYDRVAFEFTSAKAVVWGVEISLPLPGTGWFD TMY  
CDDTYRLSRDSRGDWSVFKRIG

>comp6987\_c0\_seq2; 509 1 1611 LEN=1677; minus strand; translated

XAGELTFTVGAQSDSSANN SVTAKWCSFLRKSHDDMVSQLCERVKLGRHASIRCLWGVI  
AGSPITSVSKVTNNTNRKGYKNSSSSSSSYKYVNADILKNWMRAMALQESSVMDKMRHMI  
EAEFFSPYRDIQYFSLGAI SKIASSVYDGDDDDDEKTKVGGKLELLMMIPVPSSDDDL  
GSKQFLFP PPSNVTPVDETEVESEEESEETDEESDMDSEDESSDTERLKEETLESRPKK  
RQKKESTHRFSFQQTRMFRREYK KAWLAVLRLPLPVASLKKALHVL P QNVLNVAQPLRF  
ADFFMQAYS DHSSGIIGVLALDGLKSLI IDCVKDGL EYENFYTQLYKLVSSRLMYAKYRA  
RFYSLMTKCLVLNTMLPAHLIAAFIKRLC RCALSAPPPSALFALALVSNLLK KHPECYCL  
VQRKEGMEIEDCFVADVDDPVECRALQSSLWELAVFERHYYP AVATLAKSIGRAEEDQAP  
LYNIDEFASHTYASLFDQEKKKKTALTFKKPTSLFTNDDIFFGCVETGDTEKEN

>comp6987\_c0\_seq4; 410 1 1408 LEN=1474; minus strand; translated

XAGELTFTVGAQSDSSANN SVTAKWCSFLRKSHDDMVSQLCERVKLGRHASIRCLWGVI  
GDIQYFSLGAI SKIASSVYDGDDDDDEKTKVGGKLELLMMIPVPSSDDDL DGSKQFLFP  
PPSNVTPVDETEVESEEESEETDEESDMDSEDESSDTERLKEETLESRPKKRQKKESTH  
RFSFQQTRMFRREYK KAWLAVLRLPLPVASLKKALHVL P QNVLNVAQPLRFADFFMQAY  
SDHSSGIIGVLALDGLKSLI IDCVKDGL EYENFYTQLYKLVSSRLMYAKYRARFYSLMTK  
CLVLNTMLPAHLIAAFIKRLC RCALSAPPPSALFALALVSNLLK KHPECYCLVQRKEGME  
IEDCFVADVDDPVECRALQSSLWELAVFERHYYP AVATLAKSIGRAEEDQAPLYNIDEFA  
SHTYASLFDQEKKKKTALTFKKPTSLFTNDDIFFGCVETGDTEKEN

>comp6987\_c0\_seq5; 385 1 781 LEN=1041; minus strand; translated

XAGELTFTVGAQSDSSANN SVTAKWCSFLRKSHDDMVSQLCERVKLGRHASIRCLWGVI  
AGSPITSVSKVTNNTNRKGYKNSSSSSSSYKYVNADILKNWMRAMALQESSVMDKMRHMI  
EAEFFSPYRDIQYFSLGAI SKIASSVYDGDDDDDEKTKVGGKLELLMMIPVPSSDDDL  
GSKQFLFP PPSNVTPVDETEVESEEESEETDEESDMDSEDESSDTERLKEETLESRPKK  
RQKKESTQVFFPTNSDVST

>comp6988\_c0\_seq1; 478 152 1822 LEN=1862; translated  
MASCANDHNPPRKITNAALSKTLAEFQPRPSQVASCALNLYRGKLPKKGKPKPGEEWTVY  
AAIVAFHRVDNRMWVSCATGKCTAQRHNECVLHDSHAEVLRRLIRVILSEIMEKKK  
GIENNEKKNTDSRSLLVVSKGYHSDSEERQYRFNPNIDLHFIYISDPCGDASIYSVPCD  
DATRNNNGILYTGAKVIVSEATKVDATDCGGNHQLLSTKGTNASNKVMSEVARNEKDLND  
ISEKAGPVFAEAIQVLGKLRKISGRSNLPAHMRSHSHSCSDKLASWSVLGLQGGLLTKF  
LDPPIVPLASVVVSRDSRLSGNDGDFDNGRAERHQSQRMALQRAIPGRVRSVWEHLSTHQ  
EHELPTWKPSIPKVHIVPETFEESGKAQMIAPRNSNFSGKKRQKQSNNGENMISNKTKEI  
EHGTIGKKAASPCGMSFNWNQNEDEIVTVGVGVKHKKPKTPQDIEKHASRLSRARFLR  
EYSFLWESKDLASSASSIPMYCKRYHQFKEENASHEWTDLKNRILTQNGSPLAGWIRYVP  
ANDDLIDSKGRKADR

>comp6989\_c0\_seq1; 575 161 2142 LEN=2283; translated  
MSFQLHHRFNEDGSSTYTVMCGLDYIEDHLGNITENPIRRLRWSEANLYEVIIEEGDEVN  
DPGRTLYKQSSSLDEDGLLKTGLSGVDSILYQNRTKDNIVLARECWCAAIQGTLINEPGQ  
PVDSTSVVRNPPVWCPVDTNDFNDGKPSFGDPNVCRAQAIQVQDGVVHTAPGSYLAACY  
VEDRLAEFVRSAPWPLCCFWVAMLIYLWVFATNYGRRRCRGYVWRRTMLFMHGRCCVMCGGSP  
LRQIEAPPPDVEEGRSPVAARGEAGEIAVGTTLQDQSTPETNNSNENEDQPNNTSMEL  
VVPTRNTEDSVQNGDDLPPYIDPWFSGSYENYEMLDHDMRDQAERTNNEFISWLWYSAV  
QMEERRVKRERLRRRREERRRRRREGEDPDEGSMLSTEQENLRAMLAPVYWWPPAYPDGGR  
WEHLVNLTSLDARVRRRRRRRMLRTGDNNEDDSDNDDSQPQEQECLFLRTKVFPCSKPE  
TIADHEHFEGKRDRDDNQDVSVEDTNKIRTIGGADSTPSEKKDDSPQTSTIAVENSN  
SDDSETNDPDTTIANYSNLEEEEDISENTCSI CLCEIEEGELVGGHPLWTLFPQGLPQGM  
ADEEQPLPVVPASRHCVPKNTAMSERNTSIQSGGTL SYVMVRIEYAGGDDTSSKHCKDV

>comp6990\_c0\_seq1; 674 332 2707 LEN=2751; translated  
MVDIYLKAPGMKRKIRETRGRLYQRIVARKRPRYLTSWEESFRMPCKSGTFHSKNDS  
CDSTKQHWFGVLDFGGNRWACPPGEASSFEKNTIHKTNFAIGKSKRAGQPSNNGGHPSPKT  
NMPKFFFTLRMEHRQGGAAAKHVGEERFLLFRSDQAGAIKVVFS SSPVTIGDSEDA  
STKMPKAQTCKNPDEEIFTMANAKIHVLYVKD TYRGFNLGGFLFVLC TTYLRERYCNS  
FNPQLSNRPILRGISSVRCLLDAEEDVRRHDKLVQFYEHLGLRRRTRAKTVFINNNDGETY  
RKIPMKIDLVRKNREIERSKWKINHGDHFAAEYSSFLPAVLKSSSGESARLNDKRIDS  
WLIMESGGGNIQLRTTDGRKLEMDQWGNCR LVPVHEGSSGCTNTGFD SFKLLRVSD  
MLDKVLYDKEEYEEERFCLRDKLLREHHHQKYHWLAKKELWMIRSSVFGTFMRLTQ  
SNDLFFSEASFWQADDNFCLTHTYD SPARRQHRRMWMKQSVDYVTHMRHRYSEFNL  
QRMTEEALNITKNLQANPFSISMRREQKDFIERLNTSPSPSFRTYL FHTAELARREG  
HPDWVQFVALIHGLASALTCVRSSSGSIFQSEDSVTHDDQDDFDWTIYVDTRIMGCK  
ASINSTFAEFRLNPDKGDTRYSTRTGLYQEHIGLERVLLSWTGS DYMYWMLKHNGVK  
LPREAYAILKLFPLVDWHSRGEY TALSNDDDEELKPFVADFYDLRYRAHILVLSNP  
AVEEMGDEECRALWANHYSLIANKYGAGSMLRW

>comp6991\_c0\_seq1; 206 445 1104 LEN=1334; translated  
MDSFVFTVANAATGLAVDASMDNTIVNGNLYYFSWAGFVTSILLIIEYLRGVFGVDVYGT  
VRNRAARLTLWAGLLACQLVVLGASANIFD TDCTDFNGYAPESAYCKRTKYGLSLGVI  
GTLFSLVIVAMKMLTTVAPVVVEGV LAFVLCIMNGCGVAFL TSAEGPGSPIGNLYYF  
SWFSWLVSFVLLASVYEDYRGM RTPENEEVKVDGEIPVEAID DV

>comp6991\_c0\_seq2; 280 47 994 LEN=1224; translated  
MAVDPSTGELINNGQSPRFKLWLAFFAFSTIVMGS AVGVKKRENQVSSNSVWAVFCSA  
FSTFTVTGVTMMHLSPLSDYIVGTKWEG IITVLAAFWSATVAVVANAATGLAVDASMD  
NTIVNGNLYYFSWAGFVTSILLIIEYLRGVFGVDVYGTVRNRAARLTLWAGLLACQL  
VVLGASANIFD TDCTDFNGYAPESAYCKRTKYGLSLGVI GTLFSLVIVAMKMLTT  
VAPVVVEGV LAFVLCIMNGCGVAFL TSAEGPGSPIGNLYYFSWFSWLVSFVLLAS  
VYEDYRGM RTPENEEVKVDGEIPVEAID DV

>comp6991\_c0\_seq3; 206 466 1125 LEN=1355; translated  
MDSFVFTVANAATGLAVDASMDNTIVNGNLYYFSWAGFVTSILLIIEYLRGVFGVDVYGT  
VRNRAARLTLWAGLLACQLVVLGASANIFD TDCTDFNGYAPESAYCKRTKYGLSLGVI  
GTLFSLVIVAMKMLTTVAPVVVEGV LAFVLCIMNGCGVAFL TSAEGPGSPIGNLYYF  
SWFSWLVSFVLLASVYEDYRGM RTPENEEVKVDGEIPVEAID DV

>comp6991\_c0\_seq4; 208 79 747 LEN=977; translated  
MVHNFQCFVYSTHNTAYESYFIFPLYVHDHDWQNWQSWAGFVTSILLIIEYLRGVFGVDV  
YGTVRNRAARLTLWAGLLACQLVVLGASANIFD TDCTDFNGYAPESAYCKRTKYGLS  
LGVI GTLFSLVIVAMKMLTTVAPVVVEGV LAFVLCIMNGCGVAFL TSAEGPGSPIGN  
LYYFSWFSWLVSFVLLASVYEDYRGM RTPENEEVKVDGEIPVEAID DV

>comp6991\_c0\_seq5; 239 272 1015 LEN=1245; translated  
MMHLSPLMSDYIVGTKWEGIITVVLAAFWSATVAVVANAATGLAVDASMDNTIVNGNLYY  
FSWAGFVTSILLIIIEYLRGVFGVDVYGTVRNRAARLTLWAGLLACQLVVLGASANIFDFTD  
CTDFNGYAPESAYCKRRTKYGLSLGVIGTLFSLVIVAMKMLTTVAPVVVEGVLAFLVLCIMN  
GCGVAFLTSAEGPGSPIGNLYYFSWFSWLVSFVLLASVYEDYRGMRTPENEEVKVDGEIP  
VEAIDDV  
>comp6992\_c0\_seq1; 300 199 1134 LEN=1327; translated  
MTVDSAPEPEPAVEVCLTPPASPRTATPHSHLLEAYETLKTKEKESLTALVLLKTADEANV  
QLELDETRKRLLEEKTKKMEEMDDRLKLSVSIIECQLSEAEGSAMDQMCATIKERDLWKDK  
ASELESKLEQLQMKESLSQEVETLTSRDLQTATIETSRQEIARLTKDLLSFEDRFSSL  
ADKAVEAIVSGSGTSTGDNRQEPGQESQNEQDERVRTLEALVKELRSSAESNSALLT  
KLSEQKKQWDTERRAALQHKIAGLVEEKESIEKEVAEIAELLEKDKQQRYSGATEIEVNV  
LNPTKPSSVVE  
>comp6993\_c0\_seq1; 287 121 852 LEN=1006; translated  
MSSLTPEHRREEVTASAWNDGMVNGAMMFVPTLGLLWAMKNPRFRKLTNAQSRTAIIM  
PPLFTFAVTSEQKLTHRMHEVASESEHNLETVAWAERAKNKGTTSEEVQLRQLYRQSILD  
TGVRLVDTPTLSAYQSTANFVQSNPFKICIAAIGMPVAYIFYGQGSKNGVAESFQMRLH  
TRVFGQFAVICTLGLVMSLKEVMDRYGRYVTEDEIEARVREMEQTRRLLTKQEYQNALR  
RPS  
>comp6993\_c0\_seq2; 257 275 802 LEN=956; translated  
MSETHNDKTTRAAQPKTHRQRQTVAWAERAKNKGTTSEEVQLRQLYRQSILDTGVRLVD  
PTLSAYQSTANFVQSNPFKICIAAIGMPVAYIFYGQGSKNGVAESFQMRLHTRVFGQFA  
VICTLGLVMSLKEVMDRYGRYVTEDEIEARVREMEQTRRLLTKQEYQNALRRPS  
>comp6996\_c0\_seq1; 169 1 1373 LEN=1477; translated  
XHQRKRLD'TTLHDETATTRYFRAQTMVDLVPGGLSRTCGRHRQWVPAFLWVWVLLSSSG  
RLPQRHHTQEGPPRGKGRPPAVSVSTPGTGPCSVLGFSA TPVAPARRNRASGGDRRRGGR  
SGGSLSRVHGSFRPPPTVLPGPSAGEDPGVEPERATDTRIEEVSIIEFCPCGRWGPRAF  
ATELLSVHGSEGGSTDTDAGNACAPGRIGGVSVVPADPGVYRITARVGGSEGWVLLWDR  
TEGGFPMDGRALAEVRDRLAGDPSFPPLAPPEDGETSAPVAVVSYCPGGLPGSGLRR  
SYYGQELLATFATGELAGVSLRPHAGDPGNLRVGLRDDGDPNRWLWDARLHGGAFPQP  
KDLKRLVRD'VDPKDLGHS'DVSRGAGGAAASGPAMEADGGECRSCETS'DAGSNSNGENE  
NDDGDDEHNDDGNSNDGFGFMDDDDAE'EARRYFGVM  
>comp6998\_c0\_seq1; 628 577 2382 LEN=2602; translated  
MPIPFLQDPNNHNSYQIGFSLSKDVKAKLNNFQPTIVHVTVPDVTCLHLIQYAREKQLP  
LMGTYHSNIPEYFTHYQIGWLKHFAGYERHQYNFLQRLFVPTPFIRRHLMTEDHYRLQ  
NVTELK'VWGRGVDLERFNP'SHRSDYRSRYGFAPNDVVV'TWVGR'LVPEKRPDIFAYVRR  
LAREGIPFKALIVGAGPSE'NEMKSLPNTV'FAGWASGDELAVAYASSDVFLF'PSAVETFGN  
VTLEAAASGLPVVVDGGCSGHLVQHG'VNGFACKDGD'AEAYYKGTLSLVLDKSRREAMSKD  
GRKLSLKYEKRVVCRK' MIDNYSTITEEFYGLYQGDHANRDRKYEQK'PDSFSLSGCYVRPTS  
LILVEFV'FILIFRIMYRIAQCLNKIQ'RLFVSI'GTRK'VSTAKGEAVVASLSKELQSQPFSP  
SSVITAPTDDSSSNATENEEDLTSYS'DMEEPSDDQDTSS'IASSCCSVSSTTEKNR'LPIS  
HVIAILFVKAVRAQGLIECRIRK'WYCR'TMLPSSSS'FSEDIQCKQ'RKRCSEELTPDDLYD  
SDMIALQLKESLLPNSCCNSV'ASTRSSENSLEEDKDAIVK'PTTADKALDPRKATSSSNLL  
V  
>comp6999\_c0\_seq1; 247 492 1082 LEN=1202; translated  
MRFLIIRHKSPLIGPPP'GCRSTIATSTKHKNLELEDLVEIIRSDWKPDRQHKGYITGR  
LNTT'IYRDCWFDGPD'PMPVRGVRKYLNAASQLFDTSKSTAELLAIEIGNDAERNHVPK  
TKSTIVAYWKLQGV'LHLPWHP'SLPTWTGRTVYHLDEENMIYRHEEHWDISVLQAF'TQTLW  
PEVGNVLWET'TTPDAK  
>comp7001\_c0\_seq1; 431 1 1564 LEN=1860; translated  
XLNNQGLKAQAFSPLAVGSRVASMK' MIGGSFLSLLPQGLFNF'AVDGGVCGKMSEMS'EDKV  
RKRRRDNVGGSRTPLLVV'PPTGVFACGNRVLGHENS'DENDRPRKRM'RGESKIDDFV'ASSP  
STPSPVVEETCDCC'CHKPVQCHEDL'KKSQNSDLIKKLP'GDAVAHCL'SFLGSTEDR'HALQN  
TCKLFQAI'NSNDPMLS'KVDVFGNLETGKGGIIQ'ENDNPATASAAL'APFARAGNLQALYML  
GIVKCYCYQDLKNGILMLK'IASTRGFVRSYTLGIILR'DALADEAAK'FMEIAAAK'YFPA  
LQEILPAREMKERF'GEPNADELRRHLD'PVGLNRLLLR'DYVNSAELRGMNT'SHCWN'PLCGK  
WAYKASSNSGCANNSKVNLRMR'SAAAQVQPTYD'VDENMLD'TLSPSNNNEEGT'LSPHRGG  
GIQRL'LGTTNSNSLGFGR'LRPHYHAFDSVAVYLSKDRR'VGLSPSPKVTQALAWN'ENG  
EVD'RVARMKMC'RRCCRAKYCSKLCQVYDWRSSQHKMECQFI  
>comp7001\_c0\_seq2; 367 1 1287 LEN=1583; translated



VCSSDLDRPRKMRGESKIDDFVASSPSTPSPVVEETCDCCCHKPVQCHEDLKKSQNSDL  
IKKLPGDAVAHCLSFGLSTEDRHALQNTCKLFQAI SNSDPMLS KVDVFGNLETGKGGI IQ  
ENDNPATASAALAPFARAGNLQALYMLGIVKCYCYQDLKNGILMLKIASTRGFVRSYTL  
GIILRDALADEAAKFMEIAAAKKYFPALQEILPAREMKERFGEPNADELRRHLDPVGLNR  
LLLRDYVNSAELRGMNTSHCWNP LCGKWAYKASSNSGCANN SKVNL RMRRSAAAQVQPTY  
DVDENMLD T LSPSNNEEGT LSPHRGGGI QRL LGT NNSNSLGFGR LHRRPHYHAFDSVAV  
YLSKDRRVGLSPSPKVTQALAWNENGVEVDRVARMKMC SRCCRAKYCSKLCQVYDWRSSQ  
HKMECQFI

>comp7002\_c0\_seq1; 643 564 2804 LEN=5040; translated  
MTTF SHIPSLV L DSNTTWYSPDLFTNAFNKSTAGVTLRMLTTVIVCFIIYTYTCVLIWEE  
WIQNLALRRVYYLEYNHYERRKSELEYLQKLEDPEDINTDRPIFVVHPEFRDTPVNI GL  
YSVLFRLPGVNLEDDESRASNSDSGVNRQLKVAIEFFDKIVPNQPGFSSSIAALTILPDT  
KRLSQAWKKWFECAGKVRRLKFI RQRLKELENDKNIRSVDDADHQQNI SYTEVSPSHGIQ  
RLYNLDS DTHDALPERNTGPRTRVSRRAYVGSELETARRTASIEIREETNMEMYLNDD ET  
EQMAVYYREFARSSASCGRGCDEHSIRQADYTTLKDFEQEAAEEVHLAIQELHTARKQI  
KGEETSLPEIPEIHSTPSDNLVIKDEDDHELDFPDDVGELSSHADVERGDFSDTGNMFPN  
VTLSLWEEAEKLVGTEQYMVKLGNOVLKRKLNTGRWYNPFKANASEDSRSRSRRVMEKF  
IPSGVLSKIAKSESYAVVTFSTRQAIAARQCLSDGSGLEGWREVDKIPIPPLADAVPWN  
IFDCRGCCR PVTVTIPPQQRFRFKIVVLF LIVFSTIWTYPFYLFTSATTPEALVKAFKE  
VPNIEFYAQYLS PWNLSGIMILFFAILPQIFKMLANS DGASTSIQEAERHALVYYWVWML  
VFV FAGKSLGNIVWSAFRNNQANLESATSILQDLAKIVPTTQSFYWITWMITQTGIILPF  
MYFLQFNNFMFTALRWHCCARATAGG

>comp7002\_c0\_seq2; 838 564 3698 LEN=4953; translated  
MTTF SHIPSLV L DSNTTWYSPDLFTNAFNKSTAGVTLRMLTTVIVCFIIYTYTCVLIWEE  
WIQNLALRRVYYLEYNHYERRKSELEYLQKLEDPEDINTDRPIFVVHPEFRDTPVNI GL  
YSVLFRLPGVNLEDDESRASNSDSGVNRQLKVAIEFFDKIVPNQPGFSSSIAALTILPDT  
KRLSQAWKKWFECAGKVRRLKFI RQRLKELENDKNIRSVDDADHQQNI SYTEVSPSHGIQ  
RLYNLDS DTHDALPERNTGPRTRVSRRAYVGSELETARRTASIEIREETNMEMYLNDD ET  
EQMAVYYREFARSSASCGRGCDEHSIRQADYTTLKDFEQEAAEEVHLAIQELHTARKQI  
KGEETSLPEIPEIHSTPSDNLVIKDEDDHELDFPDDVGELSSHADVERGDFSDTGNMFPN  
VTLSLWEEAEKLVGTEQYMVKLGNOVLKRKLNTGRWYNPFKANASEDSRSRSRRVMEKF  
IPSGVLSKIAKSESYAVVTFSTRQAIAARQCLSDGSGLEGWREVDKIPIPPLADAVPWN  
IFDCRGCCR PVTVTIPPQQRFRFKIVVLF LIVFSTIWTYPFYLFTSATTPEALVKAFKE  
VPNIEFYAQYLS PWNLSGIMILFFAILPQIFKMLANS DGASTSIQEAERHALVYYWVWML  
VFV FAGKSLGNIVWSAFRNNQANLESATSILQDLAKIVPTTQSFYWITWMITQTGIILPF  
MYFLQFNNFMFTALRWHCCARATAGGGPGGVVYR VYVNSGVIFLCVVALAPLCPMVAPF  
STLFFLFITPLLKWFIFVYRPTFDAGGMRWPLLHRILMISVIVSQILLALSFLK KAYL  
LVLICVISIIP TWTFTKTVCEDTFLQSFDDAALLQ TSEL DGWNVNEQMSFDERERYR KWI V  
DCHKAAYV P VCVNAEDNYLTSEPAVVVMDGEGIRSEDNLFQPGETHDSREQSSTSSVMT  
NGRQRTSTIDSYNLSRSQKNYGNRQPGAIYRRMSTRFIHLNSTGENNTIIISEECESK GSP  
NFSRQFEEADLSTFLNEDTDKSL

>comp7003\_c0\_seq1; 656 41 1426 LEN=1560; translated  
MPKAKKL RAPALVSQQVRHEPLGQVIEGDSQRGSKYAPSTSRKRKRKDQVGEGEFLDEKT  
SRKILDMSREQQIEEEIEEQRSWHQKNRRQQEQQAIGKKMLDSDDEEEIEEIEILEEG  
EEDYIENDQGYVNLKDGALGLSAEDEAIVAAMNSGGGIEERKTLADIIMEKIAEKEGEKH  
GDMDEDDEGLPPLPEKVVEVYTDIGKILSRYTSGKLPKAFKVIPSLSNWEQVLYLTRPD  
LWTPHAMYAATRI FASNLS PKLAQRFYLVLLDAVRAD IYQNKLNHYHYIISLKKAVYKP  
AAFFKGILLPLCKEECTLREAAIVASVLRQVSI PVHSAVA IHKLAQMKEYNGAASIFIR  
TLLNKYALPVPVIGSLVRHFASFLHDERDLPVLWHQALLTFCQRYKNEIQDQARESLRL  
VMKAHFHHKITPEIRRELFGASAWKDERAAASTQGGETSMVM

>comp7004\_c0\_seq1; 300 33 509 LEN=744; translated  
MSDEDYAIESTDAGASLTIPMEAGQIKKGGYMMIKGKPKVLSISVSKTGKHGHAKCNFT  
ATDIFTGKKLEDMIPSTHGTVP IVNRADWEI IDIDGDEL TLMDEGGNQKTDLNLP TYPD  
SMAEDIRTAWADGENTVQVTVQGA V GIEQVIAWKKVDN

>comp7006\_c0\_seq1; 167 94 456 LEN=1059; translated  
MFFLFFSTRSSKAYGGYQHSGYHQHQQQPYGYQAQGGYQQQPQYGGGGYQNSGYGGGPP  
IQPYQQGQYQQGPPQ GAYGAPPSAPPVSEWKTATAPDGQTYYYNERSGETSWQKPPGMP

>comp7006\_c0\_seq2; 697 140 1843 LEN=2446; translated  
MSTDDTAENATEAVKRERPEDDNGTQEPSSKLAKNAEADDPSETKTEANGASEIKTEADA  
VAVPTAQAEAEESKEVATGQNEIIQTEGSKETTESAPKETAGAGAGETATPTGLPSGLP

TSEGQPVQAAEIPNIEATLEEKGEVSAVYVGRVIGKGGEMIRDLQARSSCRIDVDQNVPP  
GQPRLLITYRGRKTIDFAKQLVRMLCQENVNEADLPLGDAKREFLVVPATSVGKIIIGRGG  
EMIRELQSRQAKIQVDHKGMSGLDSSEKQVTMTGTEIAVVKAKEMVLFLVANPMMDAMQ  
SLTMLVDDKIQRNGVWGSPPYPNLPOGGQNMQPTGGGGGYGYDQPYGGGGGGHYGGGPQ  
SYQQPPSYGSGSGGMESEIFFAAKHVMGRIIGTKGVTINDLQKRSGCDIQINQDVPPGRD  
CEITLRGMRQGIEMAKNMLREVIDTGNHPYAGGSGGNSYGGYQHSYHGHQHQQQPYGYQ  
AQGGYQQQPQYGQGGYGQNSGYGGPPPIQPYQQQGYQQGPPQAYGAPPSAPPVSEWKT  
ATAPDGQTYYYNERSGETSWQKPPGMP  
>comp7007\_c0\_seq1; 281 249 965 LEN=1026; translated  
MTLKKYILTLIKVFGLCFSSSTAAEDESSESHVLTCAATTKPSGCSTEPSSPTYTNLPSGAQ  
KFQVRNVYDGDFTFLIDERRVRLGVDTPEMKPPQPFKEAKEYTKLRNCKEVLWLLIDG  
KDHYDRMLAHVFVEDTSGNFLCINEGLVHEGFANAYIPKKDKKTFNWKLLDLQRGAREN  
KRGIWKSFVDATVYKTTNGSAYHKRTCSSLNIRKLIIEIKISEATDQGLHPCRSCMVG  
>comp7008\_c0\_seq1; 511 1 1704 LEN=1837; translated  
VSDFAKCDKDTGIATASIVILVFEVSI SERKHQQEKEVANMERQVILSVIVLVCINVM  
DSIMGAVVGPTLIFYVFELGKNKDDY GMMKSVVLSAMIAIPLFGNWVDSNGNKYLVPYL  
TSFFLGIISFVMYFLVILLPKGP IAIYSLMFSRFLDGAAIAGR TLSYSWVASSIPP NKQR  
TIF TLLSSSRTLGMVLGPLTNYLVSEINTEITIFGTTIKIDPNNSIGLLMVGGEIILIVI  
TLLFFQEPPVKDDK LKSTTETS SVTESKGVFYAL THFDIFFPVFTMFVVG CNFSL LGTAF  
SPVARNMGWTPVNI SEVTAYGSI IMAFGMVAS MVVTTTRDVSDAQMLLFGFGTMMFFSGFFM  
YEW WIDGVGYWRFTLPMYLVYFSYPFIGPANRSRYTQAVHSNKELEGSHGIMMSLINQAG  
AAAGLVAPT LVASFVLR TQEDIDASPDKHQLTPGGLYVP IFCAVIITGVIYQH FTEIRTK  
NEPVGDTGADSESTKLLSPRENRTPRASVVEISETFSRASEVNR RMSVDCMGISNPVETK  
YEQELATK LLEDKKIWEELQELDEIED  
>comp7008\_c0\_seq2; 292 1445 2230 LEN=2363; translated  
MGWTPVNI SEVTAYGSI IMAFGMVAS MVVTTTRDVSDAQMLLFGFGTMMFFSGFFMYEW WID  
GVGYWRFTLPMYLVYFSYPFIGPANRSRYTQAVHSNKELEGSHGIMMSLINQAGAAAGLV  
APT LVASFVLR TQEDIDASPDKHQLTPGGLYVP IFCAVIITGVIYQH FTEIRTKNEPVGD  
TGADSESTKLLSPRENRTPRASVVEISETFSRASEVNR RMSVDCMGISNPVETKYEQELA  
TKLLEDKKIWEELQELDEIED  
>comp7008\_c0\_seq3; 616 151 2100 LEN=2233; translated  
MLPVP IEWRVMCNSDTHCFPELLCVYVQESFGPSFVIGMSFDSYVSTRHAGEM LGDNSF  
RLLFVSGSAYDGLQEKSPLYFLTLDNSFRILIKDTGIATASIVILVFEVSI SERKHQQEK  
EVANMERQVILSVIVLVCINVMDS IMGAVVGPTLIFYVFELGKNKDDY GMMKSVVLSAM  
IAIPLFGNWVDSNGNKYLVPYLSFFLGIISFVMYFLVILLPKGP IAIYSLMFSRFLDGA  
AIAGR TLSYSWVASSIPP NKQR TIF TLLSSSRTLGMVLGPLTNYLVSEINTEITIFGTTI  
KIDPNNSIGLLMVGGEIILIVITLLFFQEPPVKDDK LKSTTETS SVTESKGVFYAL THFD  
IFFPVFTMFVVG CNFSL LGTAFSPVARNMGWTPVNI SEVTAYGSI IMAFGMVAS MVVTTTR  
DVSDAQMLLFGFGTMMFFSGFFMYEW WIDGVGYWRFTLPMYLVYFSYPFIGPANRSRYTQA  
VHSNKELEGSHGIMMSLINQAGAAAGLVAPT LVASFVLR TQEDIDASPDKHQLTPGGLYV  
P IFCAVIITGVIYQH FTEIRTKNEPVGDTGADSESTKLLSPRENRTPRASVVEISETFSR  
ASEVNR RMSVDCMGISNPVETKYEQELATK LLEDKKIWEELQELDEIED  
>comp7008\_c0\_seq4; 467 1 1834 LEN=1967; translated  
VSDFAKCDKDTGIATASIVILVFEVSI SERKHQQEKEVANMERQVILSVIVLVCINVM  
DSIMGAVVGPTLIFYVFELGKNKDDY GMMKSVVLSAMIAIPLFGNWVDSNGNKYLVPYL  
TSFFLGIISFVMYFLVILLPKGP IAIYSLMFSRFLDGAAIAGR TLSYSWVASSIPP NKQR  
TIF TLLSSSRTLGMVLGPLTNYLVSEINTEITIFGTTIKIDPNNSIGLLMVGGEIILIVI  
TLLFFQEPPVKDDK LKSTTETS SVTESKGVFYAL THFDIFFPVFTMSSWDAILVCKLFLC  
FCCLFQDFEAPDKLVFETFLKELLFLFIYFHILQWTCRLGTAFSPVARNMGWTPVNI SEV  
TAYGSI IMAFGMVAS MVVTTTRDVSDAQMLLFGFGTMMFFSGFFMYEW WIDGVGYWRFTLPM  
YL VYFSYPFIGPANRSRYTQAVHSNKELEGSHGIMMSLINQAGAAAGLVAPT LVASFVLR  
TQEDIDASPDKHQLTPGGLYVP IFCAVIITGVIYQH FTEIRTKNEPVGDTGADSESTKLL  
SPRENRTPRASVVEISETFSRASEVNR RMSVDCMGISNPVETKYEQELATK LLEDKKIWE  
ELQELDEIED  
>comp7009\_c0\_seq1; 171 364 727 LEN=727; translated  
MERAHTLSDCRAPIDFINRFAHNSVSKKVKTKSNPIQFLKIQTMFSSKILFAFLLLAASV  
QADLRGASSSVLDNTRRELRRAMKMGKGNKPNRECR TLMKACIESGSTKEECRALYPDCK  
RX  
>comp7011\_c0\_seq1; 243 1 714 LEN=1550; translated  
XICFSS IETLCFGEHVERNERNNTNGLQVSISTASTKLN DLKRILADEECFGPEEAPVRR

QRIFHLGREFKSGGRSLSNLGLGRFNNRIIHLSSIRPCEEEECERNGNAGFGQQQSPVAAVGA  
RKRRTDGNAGGEEGVDASSLLPLPVSSPLQSSFLPPFPFMNQNALGMNNDNDPDNRLN  
NAIHASNALCEDRGMPTTYTNTNTNSNNLTANNNSAIDLMDSSDDEEVEVIEIS  
>comp7011\_c0\_seq2; 326 91 783 LEN=1619; translated  
MNQEEPVTFTVVRTSDAATKEVSISTASTKLNLDKRI LADEECFGPEEAPVRRQRIFHLG  
REFKSGGRSLSNLGLGRFNNRIIHLSSIRPCEEEECERNGNAGFGQQQSPVAAVGA  
GNAGGEEGVDASSLLPLPVSSPLQSSFLPPFPFMNQNALGMNNDNDPDNRLNNAIHASN  
ALCEDRGMPTTYTNTNTNSNNLTANNNSAIDLMDSSDDEEVEVIEIS  
>comp7012\_c0\_seq1; 366 89 1069 LEN=1110; translated  
MPKRKSSSVKDALSDVLSEREKALEEGEEKLRREEREAELEAEAEKASFYGETKPSDV  
LHLNVGGTKTSVLRRTLTSPVGSMLAARFSGRWDDSLKDKDGHFFIEQNFETFEIMLKY  
LRNKANGTEKYSIASPSLRREQKQDFYRMLHYFGMTDGIYPTKLMKTVPKIEDAVEIIG  
TKKVIAKEFTTFQMAPDGHSRRVKGFEIRLGTQRIQVGSYKNDVMEKSVGHYEGSFA  
LDLTGSSFLVGGGAKRLSYIEHPEGTVVRSENFGRWTWYVNGELLTVNASNDQVEKIWRRY  
WSNLESLRPLISIEGEVEVTSVELVD  
>comp7013\_c0\_seq1; 148 1 1178 LEN=1178; translated  
XENKDSMVERNEKFGYIPLVEDIWDPALQLSTLCILVFVIFQPDGLCKTKSRSLTFW  
VTIGAVAIATPETTLNLILSTI IHTRSTYAYIIVIPHSFIAAATYRSKHGNNVHYLQSF  
LAFFLYGFGGSIVSDDLMLPVTALSHARIVPCYIIGWSLVWLFPFLLFKKYSNTSSSL  
HYFLNACEAIDSVTTPMGRISRSARELGNKTSAPIVAGLFAGFGGAGVRHAVGESASIAA  
LEAGFWKTLSSYLLWVAVHKCQDEGGNIPNEQERDIMRENNNCDSSYSGDLLRLIMVG  
TAYTLDDTSWNGPGEWAPTCMVLQGGHDQKNRIRIRIPFSDSPGIRSETFAEKGEQQKE  
EYRKNQKTGLGHHHKEKLDLSHKLATTKRKSFRX  
>comp7014\_c0\_seq1; 467 172 1293 LEN=1450; translated  
MNRAGSFTSSNSWILPFMLGASTSLSLLWISKKLEILIIATSSTSRSDKTKPREMKQDI  
LDHEELSFRMLRKA EAVIQWRTSRLILVIERCTNDHNYSAILRRTAEALGIQTVYIMIDPPA  
VMEEDGRRKGTQKEISRTPEEIEQRRLHHIFAQNATEWLTVRDFDSTEDCIACCRKEGY  
KLWVTDLSQEA EALDIYNPDSNEIPEKIALVFGTEAVGASTYMLEQADKRIYLP LRGYAD  
SLNLSVATALITQALFFMDPSLIGAMNEGERKRLRTAWFTKLAQQRILSSKQKKNRKKLA  
SLVKKCETIDKRLKEEPNYHIQPSEQKRLDEWGSYNRELQALDALIDPVKVQKGESSLLE  
IRLVCDLPINEIF  
>comp7014\_c0\_seq2; 506 172 1479 LEN=1595; translated  
MNRAGSFTSSNSWILPFMLGASTSLSLLWISKKLEILIIATSSTSRSDKTKPREMKQDI  
LDHEELSFRMLRKA EAVIQWRTSRLILVIERCTNDHNYSAILRRTAEALGIQTVYIMIDPPA  
VMEEDGRRKGTQKEISRTPEEIEQRRLHHIFAQNATEWLTVRDFDSTEDCIACCRKEGY  
KLWVTDLSQEA EALDIYNPDSNEIPEKIALVFGTEAVGASTYMLEQADKRIYLP LRGYAD  
SLNLSVATALITQALFFMDPSLIGAMNEGERKRLRTAWFTKLAQQRILSSKQKKNRKKLA  
SLVKKCETIDKRLKEEPNYHIQPSEQKRLDEWGSYNRELQALDALIDPVKVQKAVQEWID  
NPPDALTDVRRADTHRVCVFGKNTRDFHKEHWKDMVATSNKGTVQGITATAFREKMGIES  
MGDTSKLHKSGQDSA  
>comp7014\_c0\_seq3; 390 1 1041 LEN=1157; translated  
KTFFQDHNYSAILRRTAEALGIQTVYIMIDPPAVMEEDGRRKGTQKEISRTPEEIEQRRLH  
HIFAQNATEWLTVRDFDSTEDCIACCRKEGYKLWVTDLSQEA EALDIYNPDSNEIPEKIA  
LVFGTEAVGASTYMLEQADKRIYLP LRGYADSLNLSVATALITQALFFMDPSLIGAMNEG  
ERKRLRTAWFTKLAQQRILSSKQKKNRKKLASLVKKCETIDKRLKEEPNYHIQPSEQKRL  
DEWGSYNRELQALDALIDPVKVQKAVQEWIDNPPDALTDVRRADTHRVCVFGKNTRDFHK  
EHWKDMVATSNKGTVQGITATAFREKMGIESMGDTSKLHKSGQDSA  
>comp7014\_c0\_seq4; 351 1 855 LEN=1012; translated  
KTFFQDHNYSAILRRTAEALGIQTVYIMIDPPAVMEEDGRRKGTQKEISRTPEEIEQRRLH  
HIFAQNATEWLTVRDFDSTEDCIACCRKEGYKLWVTDLSQEA EALDIYNPDSNEIPEKIA  
LVFGTEAVGASTYMLEQADKRIYLP LRGYADSLNLSVATALITQALFFMDPSLIGAMNEG  
ERKRLRTAWFTKLAQQRILSSKQKKNRKKLASLVKKCETIDKRLKEEPNYHIQPSEQKRL  
DEWGSYNRELQALDALIDPVKVQKGESSLLEIRLVCDLPINEIF  
>comp7016\_c0\_seq1; 189 235 1038 LEN=1755; translated  
MEESILQTNNDGVSLLRAGNNKGMVRLTRSLAIMKKCPLEGERQVRYRFLQSSQHTQTN  
TDPETSRRIPRYIFGSPIEVIACAQQEGTSRSTSFSETSFLTDTEGRTCKLLSIVLFLNS  
LAHHLWAQEVSEKIYHNVRDELSRSHEVCSALTKTLRLYELCHSTLIFSSGLLCSDLPI  
AVVVKSNVGEVHKELDYQLGQNEQGLYLLNPHQYDRNKSAIACSEQLVQIFMFFFTANGEA  
ERLEDFSDIFSNAMATLNGRVVFAPAA  
>comp7019\_c0\_seq1; 140 291 560 LEN=769; translated

MESQQQPKSVTASSDQYVPETIREGFEEKIIGQGAAGFVLGGMAGIVLSRGGSSSARRVLA  
GFGAGVGMGSAWTRTSMIDIEEFTSTFKKS  
>comp7019\_c0\_seq2; 140 211 480 LEN=689; translated  
MESQQQPKSVTASSDQYVPETIREGFEEKIIGQGAAGFVLGGMAGIVLSRGGSSSARRVLA  
GFGAGVGMGSAWTRTSMIDIEEFTSTFKKS  
>comp7019\_c0\_seq3; 140 363 632 LEN=841; translated  
MESQQQPKSVTASSDQYVPETIREGFEEKIIGQGAAGFVLGGMAGIVLSRGGSSSARRVLA  
GFGAGVGMGSAWTRTSMIDIEEFTSTFKKS  
>comp7021\_c0\_seq1; 296 97 1077 LEN=1335; translated  
MSPLTDVSNADPAKKKSGKTTKKSREVLSTEEKILNRFTQTVDNAPPSMNRSPELIPLY  
MKWEDTKKLRLLVSLATDYAETARTMHESRSKLVNQMAVLSSENSPIFDSVGETTSLGKS  
LKAIQSIREEPPVGKRATISQIVKSSIESESRSLSLQEIIVTTQGI IQERDFRAQVIDY  
ATEWEKVVSEKVESELKKVRALQGTRSHYEKKLEKLRQWADDLQKKGKSIPPAQAEKLER  
NEAKLLEAFEAEHQEAGRLCVLIEEATTNGWRELYHLVKYCKWESFRVEQESNIYSRLL  
PTTLESMKAAFKENPSSLSTNKNAKP  
>comp7021\_c0\_seq2; 296 97 1077 LEN=1335; translated  
MSPLTDVSNADPAKKKSGKTTKKSREVLSTEEKILNRFTQTVDNAPPSMNRSPELIPLY  
MKWEDTKKLRLLVSLATDYAETARTMHESRSKLVNQMAVLSSENSPIFDSVGETTSLGKS  
LKAIQSIREEPPVGKRATISQIVKSSIESESRSLSLQEIIVTTQGI IQERDFRAQVIDY  
ATEWEKVVSEKVESELKKVRALQGTRSHYEKKLEKLRQWADDLQKKGKSIPPAQAEKLER  
NEAKLLEAFEAEHQEAGRLCVLIEEATTNGWRELYHLVKYCKWESFRVEQESNIYSRLL  
PTTLESMKAAFKENPSSLSTNKNAKP  
>comp7024\_c0\_seq1; 181 1 605 LEN=658; translated  
XGIDHSFIHHKSLLLILYLEKMLMRKNNKNGVRSTAVFLVMFLFSLTSVVTSTRAHSSSFST  
SFETASSPFNTNGKTYFLHDKDTARRPLEGNLARELALLSTTYGIDESWKLVPKGGWLIP  
AGYNPFQYQITELGQKFLFEDGSLSDIGRFLASVKSRRKFEAIKSQWLEILRVSKKQGS  
MRIYKSLEELISFCLKAGFLD  
>comp7025\_c0\_seq1; 901 149 3595 LEN=3684; translated  
MTSDSQENINISTANSSYDYDDERSAEILSRIQNETNRIKRRNRDFVEGAPGTPGGNS  
SYDDISLGGSLASSSQGSPQKLNWINDIVSSKRSNQRSSEKGSNFLSQETTKDHRTHLT  
VELKRTSPHKSNNRHESEPSVSSSDLIYSGIELKGSSGESTSSKSGNSVVQSNQRKSS  
FFPLRFSKNMSTTAAEIHKENEAFRKKLIDEVLGKESGKVPMEKVMMI IWQFRDDKEVI  
KFMTRFVSKFAGHRDVFEGIEFYLPQLAHMI IHLETEWDDAILERFSLVIAQQSIHFALQ  
LNWILAGAI EDYQPELDPGTPNPNTHNPLYVRCVKLLTNIERCVVYRKPRSRELQRLYEK  
GNITKAEMHSLEQADRRFTAMQITANTPEVEDEE IFGGELMYKRAVRTSCFKFKRWKKRY  
FAIEERMLNLCYNVEGGTLVRSMPLEGATVQVMKSKYDNMFRVTNRSFEFIRASSLEER  
NKWTKMLGTEASTRRVFGHTDASLALDDNEDAQRVIEELTPSQDRYHFYRQERDFVRRLL  
TDVAEDLRFDPADRKKEAPGLMKKLEIPSYSPMLMSSTDIFRRIHSALWKDTRVFNTK  
ARCPTVMYFLGVRGELEYKGRHANMDIAEYIHLKFDSSLDLDRDTRKVTTFENGQEMLEV  
KMDTFPSPSLDEKETLVVKKVVPTEIEGDENEKSSNDLTELDRPTDSKSPDFSTPQKEDR  
SSMVWGSFTENAVEATPNKRQSGKSPVRANRQLRKFLRESMVSMPRKLAAHHLERKQGR  
QSHNGSSRSTISDVP IAMGRRSSETHGIGEAVYVGKSSVREQNKILKGKLRAGDIDQES  
MARAKEIVCGGETWAEKSFRLMELGKDKPEDKVVHLEIVCLLSKSNDDLROEVFVMQMIH  
YYKSVFIAADLPLWLKTYKILSTSASTGLLEFNQDSTSLDGLKKSEHYPAEGGLKYYEN  
TYGGPDSKSFKAAQRNFMQSLAGYSVVCYLLGLKDRHNGNIMIDMYGHLIHIDYGFCEMGM  
CVGHEFTMERAPFKLTEEYVEVMGGSSECYKEFVHLFVEGMKEARSKCQIALGLVEIMM  
FKSNYPCFSGRRYGGGQALRGFRERLMLDVPDKMVERRAKALIESARNHWGTSAYDKFQK  
WSNGYAI  
>comp7026\_c0\_seq1; 159 393 617 LEN=2413; translated  
MIMGSRSRNRGIGLMKCFPIPKKGRDSEHWDVFKQKYPTDSFAKTSLYGKGYVYASRR  
NKCMGQSLIKNVFG  
>comp7026\_c0\_seq2; 159 523 747 LEN=2543; translated  
MIMGSRSRNRGIGLMKCFPIPKKGRDSEHWDVFKQKYPTDSFAKTSLYGKGYVYASRR  
NKCMGQSLIKNVFG  
>comp7027\_c0\_seq1; 263 386 736 LEN=1014; translated  
MSGSGDYNPPSADGGNMGGQSRMTVAMQQQDAMIDELAVGVGRLRDQTQVIGDEARMHVD  
LLNDMEQNLDAAHGGLDSETRRAARLKEDQSVWRLQLMVAGLCVLFVLLFFMGMSP  
>comp7028\_c0\_seq2; 56 1 375 LEN=375; translated  
XPEAGPEADPEAGPEACPEAGAXSRSSFSSTETFFEIARHGVRLLIDGVAEYERRRVGRN  
LGGGANVAQQDGLAIRDERHVVANLRQRINADQEP IQDTMDDMALAAEIGLNGGRLIGE

VGNLFP

>comp7030\_c0\_seq1; 223 527 721 LEN=1076; translated  
MPYENLNATINDTITFFWDDDENHTVYINPTGNCCDDTGSLLIGDSSPASYTFTETDALNT  
TNYN

>comp7030\_c0\_seq2; 618 100 2097 LEN=2452; translated  
MAATRTRASAMMLKSMMDSAKMKHLARSHLFLSPQAGLKRNSFWRETMESDVLVYDFQDG  
CPPGERGNVMKGLHQAHEIYPNTPLSVRVTELERDKKTNEGTSITYDELSTSLKQKQVYW  
LMLPMCNDTRDIQEYIDMINHIDEDWLKSHGGLQIICETPLGLHNLDDMLANYPQVKGVI  
AGSGDYFRFAQCRDDTLLPKFRWEIINACL RHGVFPIDAPPLVLGIEDGAAIDHFQGGAN  
AGYRAGLILHPKQVRLSNEIFSPCPSYLEECERLIDPWLQERETGYVRASGDHFRGPPHL  
KQMHWSLKYDHQIRGKKTSHIQAVDPDLFADVASLLSKAHRVTDKASENGVTSENETSVE  
RFLNNTSMFLALSSSCHDRHEDVLTNLGYFNVEISATEDGTPRS YKEGAFVASQIKGRRLT  
SAGKLIVTTDVHVLDKDFKTICKMEKRLMEKKNLNFDDHAEEGAYTHVDPRATPRYTRFTT  
EIVRSITDGAVCINEAKDKTVSVDVHDDYCSILNLDAPLHHTHKAVSDSKIKNKEDNLAK  
PVVPSTLHISHHDIQGIMNEGYDCRNVTFHSPMRPEDEFTNRKYVVEEIGSLFDRNSST  
TTKHE SAAMGPGFLSVIWNANGELLSSILLSRNSINDTGSLLIGDSSPVSYTFTETDALN  
TTNYN

>comp7031\_c0\_seq1; 427 885 2526 LEN=2526; minus strand; translated  
MSYHVRLPRLNEPLVTYSTRAPNYPIGYSCAHTLVHSSNGIKGIDSSPHDPMNLSHSE  
ESMVLSETFVPIPLEFFIPASLSGDYDKIYSNVEALQWSILNEVAKRSGLAKGCKVNVQF  
DDRPLLTALTSLNELHSSATPETTLRHNSDQHTTLSVSSNARSSSQNQGNQGNQRNR  
RARTIGTNRRLSRLPYPM SVYSIESTRPQWTGKQNRH SKLFTVLDYV FHPVPLTDHFFP  
HHKIESCSSEMIHSDESESQCF TAEITLEVFRGTTGESNLIEEYIQSIVHNQIALDASQ  
LFVEDIFGLKWSSVQEASSLTQPPSNSSQESNGPISFGPENVEDSSDSIGTTAKDKSNSL  
FASIIPIIATACIVFVWYCTRRYYNRDRKRARGARDHQEKSQAVVRGMKQSTDIEIGIV  
RTETTQSSHDQLSKSSNSNGNPEDEVISATASSDTISSSSSSSTSLKSI SATSDFSDRSIT  
GLPPRPNVVKREGSKQLKPKRKKKKRRKKKVMSLQ RINSRDNISEMPMISESESECDSES  
GGEDEDYX

>comp7031\_c0\_seq2; 524 885 2739 LEN=2739; minus strand; translated  
MSYHVRLPNRRALRKEDQHQRMRKENEALNPDLQWTFIGTKRVSNSESMDEEDD SGLHE  
NGDYVSVVQKDEAAFMYLPRLNEPLVTYSTRAPNYPIGYSCAHTLVHSSNGIKGIDSSPH  
DPMNLSHSEDESMVLSETFVPIPLEFFIPASLSGDYDKIYSNVEALQWSILNEVAKRSG  
LAKGCKVNVQFDDRPLLTALTSLNELHSSATPETTLRHNSDQHTTLSVSSNARSSSQNQ  
KNQGNQGNRRRARTIGTNRRLSRLPYPM SVYSIESTRPQWTGKQNRH SKLFTVLDYV F  
HPVPLTDHFFPHHKIESCSSEMIHSDESESQCF TAEITLEVFRGTTGESNLIEEYIQS I  
VHNQIALDASQLFVEDIFGLKWSSVQEASSLTQPPSNSSQESNGPISFGPENVEDSSDSI  
GTTAKDKSNSLFASIIPIIATACIVFVWYCTRRYYNRDRKRARGARDHQEKSQAVVRGM  
KQSTDIEIGIVRTETTQSSHDQLSKSSNSNGNPEDEVISATASSDTISSSSSSSTSLKSI  
ATSDFSDRSITGLPPRPNVVKREGSKQLKPKRKKKKRRKKKVMSLQ RINSRDNISEMPMI  
SESESECDSESGGEDEDYX

>comp7033\_c0\_seq1; 360 132 1028 LEN=1291; translated  
MYGRQQAHRGGGMQGRQIVLPEPGDVGMVLRGASAFARRHKVVTGGYLLGIVVILLVG  
SGTKLNYDQRREYNIMNTIDVDAEYDASSDFWRANQAYKATKGWFS CDGLCQRNKRKME  
DAKYRLDIIRAEGNQRM SDAKAVAGLFSEVGVGEVQDSFWSYFSAGKQFAKRQSMWDAMF  
MGMRS MGRDESMIEYGLKVLQMQLMNF SMGLIIALFTFVIGLWSIVRSYQPNP IVAVLFF  
ISAACAAFSFVATFLLAMYGTAAGGVYGV LKVAESNLRLQQGHPGQQPRHMHNRP HYD

>comp7034\_c0\_seq1; 310 293 1033 LEN=1138; translated  
MKVPTLSLLL CYLSTASSLSIQPALS AVNAAFEYNPYAAGAI VAGFKAGTADILAQRQI  
RNAAKKVGDAVESVEAEKTAGKELDVQRTLAFLMYGAIYQGFCEFTYNHLYPFLFGSE  
TTTITVLKKVFCDMCIQTPLLTLP IAYYSKALLAKNTFK EAMAHYVDDVKNKGLLFFKFWG  
LWTPVQCLTF SIIPEHFRVSFIALVSFFWV IILSSLS SSSNDELADTTSSTAKIAGVNGQG  
ATKEAY

>comp7038\_c0\_seq1; 459 248 1666 LEN=1933; translated  
MVANSDSITERMPSPSKDFRAAQPSQLPIAEATTKSTASDVLSSVDSNGPSVMAVSRSGL  
MKQSTIYRRHEARLARSYALRDDPRPAFLRVLSGLPGFR IIPPYQKERNQEAGKQDPKN  
QQKETHAPRTVIDTYSQENSFAPYTNVADNAV GSTFGDANTNDNIRAVKWEETMQAMLAT  
GVC SAIGEYVFAHHSNISTAKRAVRNSNTLGPMMMTTTTAA PQTPHSMPYTG GFALRGG  
SLDMPRET NKNHRA LAATKSRPSNVALSKAMSASFSTLLFGTKVFLDATI SERQFGNDA  
NRNSNTTVMGSLVSSATAGGVIGLSQLASLQIKHRRDPSSFSVAQNHYLTSDGSSKLIGR  
NVLASLLYFSIYEAVSFFFASTQTSTSIHPRDSISLSNGKAGGEKGTLSIVMGGAFAVQAQ

AGTMNYHRYARYGSTIWWTRVMFPAASRSAPIHALVFYGYEKMKEGIKTAHR  
>comp7039\_c0\_seq1; 253 65 1167 LEN=1191; translated  
MDYVRKQFYRSKREPGGDNDYDDHDQVEERAIVIHGQVEEATHIISFPGRISLEELRF  
WAYVPNLHENTFEPTGYTNNNIKLDGSSSLQNTQAKTEQKQKERRRQTNNNSYVDIAVIE  
IPLEFAQVNSHHXDLTSGKIGKIEHRDDTSFLSLCDETTGRLLIDHEVFRGYHTVLHIPP  
TGMMMMDRIIDPKAKSIPSPFSQDSKYDVLIANCDQQAYGTGRNIGLSGQIIFESDPLLE  
KVICGDENKNSEQGTRFWSTTPDSSRAEHYYNHVGTKHQQEYGGVPLDSVSMRLLAMG  
LSICFIFSLLSLRIHNGTRADYFTARLNRRNRILENLGSDDEDTDDDGNERSSSSNYRD  
NVNIPLV  
>comp7040\_c0\_seq1; 308 75 749 LEN=1217; translated  
MKLLFSILVFAICNDTVESYITGSSPIGGANWMMKGNNAINHISTKKAPSTETTAAADVED  
LFRKEYNEWATRYGKTTTTDERRFEIFKRNYMMQMQHNNKKTGSFRLLEFGDMTEKEFELG  
EYETQKSENSPKSADNVVEVELVMDDPVKVRMLDSETIPRVSDFEIPHNRRWHEITQQQ  
QRQRQQAPVGFEPKVNPIRYPSMEEPRRRKRVRVRLQVGPDRIL  
>comp7041\_c0\_seq2; 314 313 1710 LEN=2492; translated  
MHSVSQAMELIFSFGVALLASNIDAFSGQPQSSKNPVRVLVTGAAGKTGRIVLSKLEE  
DHRYEPKGLFRTEKSARRIVKNVDTKCPLHVVVIADVTSPFTLDDLSSNSDSSNSNDHH  
SETTVLCGKTDQSEKCNGLAKMDAMIICTSAVPRIRKRSLAAMLVLPWRALRGKPI MNV  
RSMRFAWKHGDYPEKVDYKQKAQIDLAKRLGIPHVVLISSMGGTNPDNFLNSVGKHHHQ  
QHQEEDKDREKQRRYKQGEHGDILLWKRRAEKYLVESGLDYTILHPGGLVDSPPGKGEF  
VFGVDDHLELNHNEEQPAVRTRISRSDIADLCVAALSAGKGGKVS LDCITVPSSTRSTL  
MGHGHSFRMVSPGMGPIPEAKGSESGGRKSKSRKPVNLGSDTRRSSTTAATPTATLSAD  
ASTTAEARLAIETEKQGRQKSAEESLSEFVDSLITANYDLGVDKL  
>comp7043\_c0\_seq1; 520 1 1540 LEN=1588; translated  
XVWNSPEEEAETGALS VSEPQVVLHPSCVWSAMGLPGGDFATCCQDGLRIFTRTSDRMA  
PRAEREAFAQAVQEAHAKKQSGPSPEEVAKLPAWEARLQKRGTSEGQVQLFNKAGVAIAA  
QWSASSQTWIEVQVMGSSDSGTVDGVRVDHVLPIEVDQTTGGGVAKLQIGYNDGENQFVA  
AQRFIDAHMLPQHHLNEIANYIEQRAKSEGRTLGGPPAGATSSAPAAAASGMPMATYEHL  
PAPAYKSFELSAKSAATTLKMKKKIAEHGGVSESQLAAISSLSDTLAATNRYHSSRIQP  
SELETIARMLETLPRAEVFPALDLARLVVAHPSASGPASAGYWTAVVDRALALCTGDDNL  
AGPAAVAIPMLSLRLFANAFRGGPGSLEAVGGRLTDVLA CSQRFLGSANKNVRLSAATLL  
YNTSFYVFSNPDNAPQGAALAVVSQAGTVLRLGAFEREALVRTLVALGTVAMASPGAREA  
ARSASLSSLVEPAASLHGDLARALAREVYSVLS  
>comp7044\_c0\_seq1; 497 360 1358 LEN=1656; translated  
MKFQIADIALILSIACLSSAAAFSPSSLAPRQSAGASLTNRISKTTTTSSNTKLF SQWDEE  
EETSVKRSSFEAAKAATDEDAAKELEEMGDFDATSTYNSDDIGRYRDAIKKRAESIGLE  
KRSAAEIAADQAAAMQKAI EQGEGLVGAAARSNPDQLSDMLDESQVQRLDLSKISNDAPR  
GPDEDVPAIMYDPTNDMTQEEMEEADPIGFKPINEQVAWVLEKSEFPSPPLAVLGETIVTV  
VTVVVTAVIFTQWDELCREAAFNFNFPVPRPEEVQKALEGMLAPGDTILGMGANSMSGQEM  
LQMLQDGTKETIKAVQDGSIKDILAGDVP AEL  
>comp7044\_c0\_seq2; 279 1 772 LEN=1070; translated  
XNPTIITXIAFTLENRNNNAMQYNSDDIGRYRDAIKKRAESIGLEKRSAAEIAADQAAAM  
QKAI EQGEGLVGAAARSNPDQLSDMLDESQVQRLDLSKISNDAPRGPDEDVPAIMYDPTN  
DMTQEEMEEADPIGFKPINEQVAWVLEKSEFPSPPLAVLGETIVTVVVVTAVIFTQWDE  
LCREAAFNFNFPVPRPEEVQKALEGMLAPGDTILGMGANSMSGQEM LQMLQDGTKETIKAV  
QDGSIKDILAGDVP AEL  
>comp7048\_c0\_seq1; 761 344 2668 LEN=3187; translated  
MSPRRLSTLSFPLSLAVGLCCLLGV DGYNGNHSPMIPTNGWTAIEIITEGDTIGPTGTW  
AIPDQMDGLGAFVLSNRWSSGPGDSDSGDTTLRLHVNHEDEEEATITEIDLHKGR LKQAI  
SHAVLTSRAGGASVSNYNFVQ SARVAYDRWSPDGGTTWKYIGGAI SDPAGAGGF CRFCS  
SQFYPADAFGTGRGFQDAIYMTGEECWDSNGRLFALDANDSARDLYLVSGVTGSMPLVRP  
MEYTAAGAWLSAPVPQTA FE EGHGMPFDSWENAALIDTGETNHVALLL SADGGSETLKL  
YIGKFTNAYGYTDRFGFLARNGLAYGRWFYLGGLEWTMNDATDLWESTTKGRFVTDEDD  
AWSESKFEDIDTNPVAPNQAVLAESNSGVYVLDLDFDLRFVGDGSRVDQSGFSVRMVTSS  
DHKDMQYPDNVDWTKNNLIFVNKDNDSSGIWYMNPDGTGKVQVGETRSSGESTGILDVSA  
LLDYPPASAMLT SNQSPSSITLLLNPKLRSVLKEESGSSLFPPPTAVATPV PATIPKP  
VAPPVPAPTRKPLAPLPAPTRNPVALPPLQQSDSTFFETTLDCPKSDSRGRYQVLQAEDA  
ELYSALIKTKARNYCGVGVDFDLDL DAFVPPSSGTDGGYSASSGKSPVFSKKGIFPS  
GNREPVVASRQGNVVGISFEVEITFPGDYEVTVRYANGGPLSSRRSGMFMVDGNFPNNNY  
EYRFGNTYGNWNIWFRESKTVVFETEGTHTLDFFWTEKRDRPNIDWVSVKLLAEY

>comp7048\_c0\_seq2; 121 344 838 LEN=838; translated  
MSPRRRLSTLSFPLSLAVGLCCLLGVGDYNGNHSPIIPTNGWTAIEIITEGDTIGPTGTW  
AIPDQMDGLGAFVLSNRWSSGPGDSGSDTTLRLHVNHEDEEEATITEIDLHKGRKQAI  
SHAVLTSRAGGASVSNNYFVQVSARGTYAGDGCIVAPRTVPRSP

>comp7048\_c0\_seq3; 677 344 2855 LEN=3374; translated  
MSPRRRLSTLSFPLSLAVGLCCLLGVGDYNGNHSPIIPTNGWTAIEIITEGDTIGPTGTW  
AIPDQMDGLGAFVLSNRWSSGPGDSGSDTTLRLHVNHEDEEEATITEIDLHKGRKQAI  
SHAVLTSRAGGASVSNNYFVQVSARVAYDRWSPDGGTTWKYIGGAI SDPAGAGGF CRFCS  
SQFY PADAFGTGRGFQDAIYMTGEECWDSNGRLFALDANDSARDLYLVSGVTGSMPLVRP  
MEYTAAGAWLSAPVPQTAFEEGHGMPFDSWENAALIDTGETNHVALLLSADGGSETLKL  
YIGKKFTNAYGYTDRFGFLARNGLAYGRWFYLGLEWTMNDATDLWESTTKGRFVTEDEDD  
AWSESKFEDIDTNPVAPNQAVLAESNSGVYVLDLDFLRFVGDGSRVDQSGFSVRMVTSS  
DHKDMQYPDNVDWTKNNLIFGKXETANLYASVERTPCVLSFADPYIKQIVVRIYFVSFR  
LPRFDMDFAHMVLSPSFLHVRNKDNDSSGIWYMNPDGTGKVQVGETRSSGESTGILDV  
SALLDYPPASAMLTSNQSGSPSSITLLLNPKLRSVLKEESGSSLFPPPPTAVATPVPATIP  
KPVAPPVPAPTRKPLAPLVPAPTRNPVALPPLQQSDSTFETTLDCPKSDSRGRYQVLQAE  
DAELYSALIKTKARNYCGVGYVDFDLDLAGFVVPSSSGTDGGYSASSGKSPVFSKDKGIF  
PSGNREPVVASRQGNVVGISFEVEITFPGDYEVTVRYANGGPLSSRRSGMFMVDGNFPNN  
NYEYRFGN TYGWNIFRESKTVVFETEGHTLDFFWTEKRDRPNIDWVSVKLLAEY

>comp7049\_c0\_seq1; 594 1 2246 LEN=2374; translated  
XDDDDDDANGRRQLGGSPGDRKQKHCNVNIGFKIRDMKESIWEPAIDFLSDEWYRQEQ  
QVERQRQNRQNHEISGHNHWMFRDLENYADDNYNTNDDFSSLSATSSSRDVASDLRLS  
FVFAFLIVLGLVLRRRMRTRYIIVRARAQEDHLFYASSGSGIKRVGFQDSREDQYEGAC  
SHTLTCGCTDPPREGDEIEDEVQVNDGVSQRKKKPHNEDFVGRGFNCILGMCCGVVCR  
CWFQCLSICALAQEAREMRLLVPTRFQVVDYITHQPFHDYQKEVIDLRRGWMGKTRKKS  
IMPHFNALSRLSRHILVLSISLTVIIGATLFLNPLASFSWPDVILSATFLQSFLVIWIV  
HWIFHKSDLSLDAVIKFFAAGFVIAVPSAFFFEGLLINITLSTAYFGYGLQFMGGDTFV  
EWVSQQYQVFWILVEIFNAYIVA AVTEELCKYYTFRCVEHPDLIFLTGLVSNTO DERALE  
GGVVKYPFSSHQVQQTNAKNPYDDDASHYSRSSHRKSSGRNTGLDPNEDDFEEDDQDVR  
THRQKAAAVTTAMISVAVGLACAENFLYVFLGGGTGAGVSDDGSSAMDGYLQEWIVLLFR  
SIFPVHALAAAMQSVNMIRKFVEAQDVNGHRIGVGRILPAVIMHGTFDAILLGINIFIE  
TSWDEYLEANGNIDDENATPYSFPVNVVAWLSITLVMLSGFLWYYKENRSQRLRLIEL  
EEQEKANLVGTSGYTSPRAPHVSEVELV

>comp7053\_c0\_seq1; 570 130 1743 LEN=2341; translated  
MSLTFPRQLSDSRLGEKHETLDDFHRCTSRNTNVQESKEYTLVVVTETFPKAETQAPTND  
KIDKEIPQPTISSQAENTRILLGMKNRFGCGYYNSFGGKFLNDEETA EACACRELEET  
NLKVGLDEMAKSKVGIQRYTFENHPTEMVMHVFWIHLEETL AYKGGCHDVRECDEITPMW  
FDNINAI PFDNMFADDSLWLTLLSSPLPIEINGSYHFQENCQDTNTILHYHMDVQKKK  
KFSMEQRLFHTLHKNSNLLSIFKEFCYAF CNGVRTTFGRNKNKISFDIVIDVAGGHG  
ALGALFLICTSASKAIVLDPANVGGRIQQAWGKFMGQDKQLSYRRECLRTGLPDELKQA  
LQMTTRYRILVVACHACQHLSEEILEIACRFGVHA AVMPCCQKDRSVGSTWKAASKNLSI  
PVAKMMDILQCGKMMALGSHNVRLKCIDSKITPQNRIVCRALDENEIESRRHSQTEVD  
RAH SKLELVYQKAHTVPGSVHESKMPNFKNFAAQSPVWYMAAGFVAGFLASSVRKK

>comp7053\_c0\_seq2; 573 130 1626 LEN=2438; translated  
MSLTFPRQLSDSRLGEKHETLDDFHRCTSRNTNVQESKEYTLVVVTETFPKAETQAPTND  
KIDKEIPQPTISSQAENTRILLGMKNRFGCGYYNSFGGKFLNDEETA EACACRELEET  
NLKVGLDEMAKSKVGIQRYTFENHPTEMVMHVFWIHLEETL AYKGGCHDVRECDEITPMW  
FDNINAI PFDNMFADDSLWLTLLSSPLPIEINGSYHFQENCQDTNTILHYHMDVQKKK  
KFSMEQRLFHTLHKNSNLLSIFKEFCYAF CNGVRTTFGRNKNKISFDIVIDVAGGHG  
ALGALFLICTSASKAIVLDPANVGGRIQQAWGKFMGQDKQLSYRRECLRTGLPDELKQA  
LQMTTRYRILVVACHACQHLSEEILEIACRFGVHA AVMPCCQKDRSVGSTWKAASKNLSI  
PVAKMMDILQCGKMMALGSHNVRLKCIDSKITPQNRIGKFRSSLCFLAHISDIEFFALN  
QQHAWGFSQSLQSSRRE

>comp7054\_c0\_seq1; 378 98 1369 LEN=1615; translated  
MINLKRLGKHLKDNSSATSFSSTIVKDKPTVRQTLGELDDCLEQIGLRKLIQTRSRSQTA  
RTVVTDVFSECENDLRDDESSKQASLASKTCVERVHRHDFKTI SYLGKGA FSGVQVKNH  
SGETFALKALDSSRIKTPDELTTAAIDLGMEAKILSELNHKNI IKLRGVCSSTFSSYSE  
CTDEGYFLVLDLLEDVLSQKLI RWKKHSRLRLALENRRAILPTANVKMMYKRMQSV ALGI  
VEGMVYLHKKGIVIRDLKPANIGFDRNGNVR LDFDFGMARRLEDCDKGEICGSLRYMAPEV  
ANSEGYFFKTDVYSFGIILCELCSLTVPYDQMMKKPCGSKEFSRRVAKDGM RPSLDQIAC

DATKELIKDCWKPSQSPSFEEIHERIVRITSCDRSETRGDLTRNYRKKFCSRLEQGD  
RNV

>comp7056\_c0\_seq1; 600 396 1391 LEN=1949; translated  
MGTGSSAKSTEQDNGVRDRIDSGEFQKVSPGSPSFESNTKTDEMSYSGILVEKPDETGG  
KEQPPTAKTGVPSSEGAIFAADLTSPPI SNRSKGRTKTGSGAADSSRAQAQPRRIVKATP  
PPRVAPQAAQESGTGASSVSVHSGKSNHNSHNAAPLSSP IGNNANAANELLEESIEKNDP  
KTKQREHRTSRQKNDRERLLKEKRSQRTAEANASGTGEKQKPRVEANPF SRFLSAFVDA  
NPKHKRKEQSTADAENKRLKYGFQDTSGTHGGAASDDTPAAAAVEDSSSSSTREEKEAA  
LPSLLSSPWMAAAAAVALLVVAIAKGSRKK

>comp7057\_c0\_seq1; 513 269 1401 LEN=1401; translated  
MTNLRSDYTRDGDDAPSQRNGSRRSGNGIRDKWRLAIP IRKVGRIGSNGNSNSNSINNAK  
AGNDDDRQC PVSAAKVDPKQTVVLCASCDRCRARKTRCDGKRPCGNCASRYMKKHKLT  
SIEGVDVALFECNYS PAKRRGVPVGRAGQTRKAAEAFGNSIGGRGRFGAPNFLSHAGVNS  
DALQTLGGVAHRSSGMMSATTSALEAIQMRQMMAMKMGNGMGTVVSRGGGGSIQGIMG  
RTLGGAGASGHGSMPPGGLAAMNSGSQQRQHIQQQLNLIQQQLQAQQQMGSGGGVADGGLGA  
IAQRGDSSSGIIASAAMGLPSIDGVEAARRMKLNDQTNQSLSQLQLQOERQLLQQVQOQQ  
HQOQQOQHRRRRQQOQQOQX

>comp7057\_c0\_seq2; 512 269 1564 LEN=1794; translated  
MTNLRSDYTRDGDDAPSQRNGSRRSGNGIRDKWRLAIP IRKVGRIGSNGNSNSNGKSNAL  
NKDYCEYEADSEEDVYADLPP IEVKNDKESRSTNRRRPLKSALLARTKKQNPAAASRTT  
SMMPDMLLETGLTLVEQEAAALLSREDGFNF EYTHASATNGGRFGTGNENGFDPATTKTT  
KNTSTSTITIRKAVRIDENRNTTFQGS LPTGTPVQTRQQVQDASSNGNGHSENKDADAYRG  
VYGSPYGC PSTDSTSSSSNSNSYEP IPRDPEDWTVEDDLSTIEDNDNR TLLQYYKRGAG  
KDCDSL SCLSLACALPLACGLLCLDSLADTKLLEEAMPGSRARRSNKTEVLAPWGRRRTP  
AKTATRSRNTKKNQNHQRRRGRSR YNGDEDGDEGSS ILDGNNCFVREGNCDVFPSSIE  
LPVNKIIAPCW

>comp7058\_c0\_seq1; 265 84 677 LEN=846; translated  
MNVIAAYAFLLSLLFSTVDGFSFVLMGRRGKGD LKRALSGNDGQSKRRGKNQDPTAAMNDG  
KGQEITGVSLPEEGTIKGEWFEFGDKKVVACANVRGEFYALQGD CPRCSFDLYRGDLIVDDP  
GFEDLPRVACPTCSTTFSLKTGLYGPPLKRTGLAGFVSGLAKTATANQERNADAYTITVD  
PETGRVYSKKKVLKVVY

>comp7059\_c0\_seq1; 625 49 1947 LEN=2528; translated  
MEVPSIVKRKSTIFLAHETKAMILIDEKKMKSKIGVKHENDDSSLFSSVSSVKPDDDEN  
CSSSTALMVSSAISTECSVSISSSLSLSSDFGKARGNEEENDSF SFPRHSFSPFSLRAN  
YLLVILIIMLADGLQGGNRVILMYSISFGNXXTEGWYFSGTDFSAFFLIPGTHLYVLYEG  
YGFNVASLYALGFIAGGV TTPITGPLIDKFGRKRSAILYCALEIGINMLEQYPFLAGLLV  
SRIVGGVTTNLLSSVFETWLDTEFHNR CRAAKPGVDAFARSSDDTTTVSESTNEWNVVED  
DEDDIAKNEYELIMRDSV IISNLASIASGYLAHMLAERYGAVGPF RGAVSCTAIAFVVIS  
LLWKENYGGPSTLSCADKQTEDTLLGLETDIDNEGHSPNNQGNSSSSSKSIRAYIMKGF  
STLRADPKILYLGV IQGLSAGSLQLFIFLWSPTLQNFAPGQEATFTTNNLSLFG LFRWAV  
DRNGEPNYGLIFGAFMAAGVAGGFCAPYIRHAVAL LFLQSD ESSLLQTVHVGT KRVSVRP  
MELEFLLGVNYISA AVLMLVPSILQKSSPESF SISI LAAFLFYEF LVGVSMTYEGVVRSLH  
LPSNARATMMM VPRMIVNLAVSLGVLLTKYIA

>comp7059\_c0\_seq2; 690 49 1842 LEN=2423; translated  
MEVPSIVKRKSTIFLAHETKAMILIDEKKMKSKIGVKHENDDSSLFSSVSSVKPDDDEN  
CSSSTALMVSSAISTECSVSISSSLSLSSDFGKARGNEEENDSF SFPRHSFSPFSLRAN  
YLLVILIIMLADGLQGTHLYVLYEGYGFNVASLYALGFIAGGV TTPITGPLIDKFGRKRS  
AILYCALEIGINMLEQYPFLAGLLVSRIVGGVTTNLLSSVFETWLDTEFHNR CRAAKPGV  
DAFARSSDDTTTVSESTNEWNVVEDDEDDIAKNEYELIMRDSV IISNLASIASGYLAHML  
AERYGAVGPF RGAVSCTAIAFVVISLLWKENYGGPSTLSCADKQTEDTLLGLETDIDNEG  
HSPNNQGNSSSSSKSIRAYIMKGFSTLRADPKILYLGV IQGLSAGSLQLFIFLWSPTLQ  
NFAPGQEATFTTNNLSLFG LFRWAVDRNGEPNYGLIFGAFMAAGVAGGFCAPYIRHAVAL  
LFLQSD ESSLLQTVHVGT KRVSVRPMELEFLLGVNYISA AVLMLVPSILQKSSPESF SISI  
LAAFLFYEF LVGVSMTYEGVVRSLH LPSNARATMMM VPRMIVNLAVSLGVLLTKYIA

>comp7059\_c0\_seq3; 712 49 2127 LEN=2429; translated  
MEVPSIVKRKSTIFLAHETKAMILIDEKKMKSKIGVKHENDDSSLFSSVSSVKPDDDEN  
CSSSTALMVSSAISTECSVSISSSLSLSSDFGKARGNEEENDSF SFPRHSFSPFSLRAN  
YLLVILIIMLADGLQGGNRVILMYSISFGNXXTEGWYFSGTDFSAFFLIPGTHLYVLYEG  
YGFNVASLYALGFIAGGV TTPITGPLIDKFGRKRSAILYCALEIGINMLEQYPFLAGLLV  
SRIVGGVTTNLLSSVFETWLDTEFHNR CRAAKPGVDAFARSSDDTTTVSESTNEWNVVED



DEDDIAKNEYELIMRDSV I ISNLASIASGYLAHMLAERYGAVGPPFRGAVSCTAIAFVVIS  
LLWKENYGGPSTLSCADKQTEDTLLGLETDIDNEGHSPNNQGNSSSSSSK SIRAYIMKGF  
STLRADPKILYLGLVIQGLSAGSLQLFIFLWSPTLQNFAPGQEAFTTTNNLSLFLGLFRWAV  
DRNGEPNYGLIFGAFMAAGVAGGFCAPYIRHAVALFLQSDDESSLQTVHVGTKRVSVRP  
MELEFLLGVNYISAAVLMVPSILQKSSPESFISISLAAFLFYEFVLGVSMTYEGVVRSLH  
LPSNARATMMMVPRMIVNLAVSLGVLLTKYIATQSAFVVVALLMTCSGILQLSFVSSQEW  
NTIRRKSSHRARSLSSSAKLVWSSAFKPKDD

>comp7059\_c0\_seq4; 777 49 2022 LEN=2324; translated  
MEVPSIVKRKSTIFLAHETKAMILIDEKKMKSKIGVKHENDDSSLFSSVSSVKPDDDEN  
CSSSTALMVSSAISTECSVSISSSLSLSSDFGKARGNEEENDSFSPRHSFSPFSLRAN  
YLLVILIIMLADGLQGTHLYVLYEGYGFNVASLYALGF IAGGVTTPTITGPLIDKFGRKRS  
AILYCALEIGINMLEQYPFLAGLLVSRIVGGVTTNLLSSVFETWLDTEFHNRCAAAPGV  
DAFARSSDDTTTVESESTNEWNVVEDDEDDIAKNEYELIMRDSV I ISNLASIASGYLAHML  
AERYGAVGPPFRGAVSCTAIAFVVISLLWKENYGGPSTLSCADKQTEDTLLGLETDIDNEG  
HSPNNQGNSSSSSSK SIRAYIMKGFSTLRADPKILYLGLVIQGLSAGSLQLFIFLWSPTLQ  
NFAPGQEAFTTTNNLSLFLGLFRWAVDRNGEPNYGLIFGAFMAAGVAGGFCAPYIRHAVAL  
LFLQSDDESSLQTVHVGTKRVSVRPMELEFLLGVNYISAAVLMVPSILQKSSPESFISIS  
LAAFLFYEFVLGVSMTYEGVVRSLHLP SNARATMMMVPRMIVNLAVSLGVLLTKYIATQSA  
FVVVALLMTCSGILQLSFVSSQEWNTIRRKSSHRARSLSSSAKLVWSSAFKPKDD

>comp7060\_c0\_seq1; 484 59 1351 LEN=1505; translated  
MKFSTVAILGLIVSTASAFSTSVSRPNRAPFSTSLGLVETGEYVDRDVYTFDEWATSCGVQ  
KCAGFQITTTQDGSDFFAVTDQDLPAGTPIVYVPELVSSNRAQEEFGQSLQYAEDRIKE  
GGVANQIPIFRLGVKILAEWEKGEQSPWYWLNSMPRIFMNGVSMTSACFDALPPYAGWL  
AMKERANFVNFKKALLSAPLNEQTVTNEELVKWAYNVALTRSYSLSSSCRRIAPMVDYFN  
HASEPNLDIQYDDYACTVYASRDIAAGEALTI SLGTGTNPSPLFATYGFLEDESSPGTFCK  
LMDLQDDMPDMKLGFKDLLFYKNGEIAPEVYDLVLYSILKTDPNFELGPFDDACMAGDED  
TKNAYHSQYFSYTYLEYLKNHVDNTLVELDRLSNMAASYDPNAHPRAPLILQHNAFVKQTF  
EAVKYNLDSM

>comp7061\_c0\_seq1; 224 294 584 LEN=662; translated  
MKRLIDANKVVVFSKSYCPFCVATKNLFKSLDVVEIEVLELDRMGKEGEELQVALFQETG  
QKSVPNVFNKGKHMGGNDDTQAAAARNGTLQEMLKSA

>comp7062\_c0\_seq1; 372 1097 1840 LEN=1952; translated  
METPSPPLILEEFMEVQFLRQHARQQAIEVSHLRKPYANLTFCEKGSSEFPNGESKAAP  
REEGDI AKHHEIMLIVARGEKGVKGGARWLGHLFVPHAAHEAPVPQIVGDLFGNGECKSK  
AAVLLVHRGPDGVVKDSGLHASAGLRQPPDFRDAKEATADQGGEERSEKKDAGPVVLLP  
GCFPPLLLSLLL VGHVSGSEFFGGYGFCSGDPDLDLLEYTDSVGE PYSNAWDDRLLDVGT  
RVGSVRR

>comp7062\_c0\_seq2; 372 843 1586 LEN=1698; translated  
METPSPPLILEEFMEVQFLRQHARQQAIEVSHLRKPYANLTFCEKGSSEFPNGESKAAP  
REEGDI AKHHEIMLIVARGEKGVKGGARWLGHLFVPHAAHEAPVPQIVGDLFGNGECKSK  
AAVLLVHRGPDGVVKDSGLHASAGLRQPPDFRDAKEATADQGGEERSEKKDAGPVVLLP  
GCFPPLLLSLLL VGHVSGSEFFGGYGFCSGDPDLDLLEYTDSVGE PYSNAWDDRLLDVGT  
RVGSVRR

>comp7063\_c0\_seq1; 633 119 2105 LEN=2144; translated  
MSSSGTENSQQIFHLDIHAWLDSQQTSHGVRHDDYAQYHAYCTRRLSRLSHKPSGAKAYL  
VNSSKYASSNPSPKPTPGGRHAF CGRSHDTFALTKEVEVEADAAEPVNAAAATKTTKV  
QVPVSHENILWYLLVNAERSWAHANEIQKANQIKRRQPI LKKLKRANKWAPAPSGKSKFS  
TDEETQKECEAYAAMWSANYALEQM QYQIASEGYARAMSLCHELSGENDTDNSANDRTND  
VQRLERHDLFITRADTILRPLFRYCYELKQAGQPTMEEPRLQSSGQEQEHEDEDSIVFR  
DRELILDNKDLRVL LLLKLSVEQEKEEA EKSSATLKETQFLTALSILDDAMEVVQ LLE  
QGLSKASSSSGPAVQAKLQYSLWRGYLQYSKTRKVM EHTENLLTTDSGESSMGP AEKVHI  
YDAVLQHA KSLNLPHPDDGNNSSGGSANEDEFILQVQANILRLRALKAYYMGWCY YTQL  
FKYGPALAXLEHSAKLSERAEEIEAACDEDMPHADKYLQQLLEDLPLESATGAVRAAMALQ  
QRQHARKLQKAAGAAAANGSSPSCWQEPVTTDRPLLLRLYEYDGGAPDVPIADLRPMLPLP  
CKPVFYDLVYGHAFDTAKSVDALEDFLYQHTAAPVSSVVDKEEKDLGNGGSSSGMFGWL  
RG

>comp7064\_c0\_seq1; 283 137 580 LEN=791; translated  
MTPTQSCSKSGVSNTRQRFMFGGAGAGSPTEDDTEYDPEAEKGIANAAAAMGMSAE EYKLA  
MRAREQLVKSM DAKMVKGGNADTVLVERDVNNPPKQLDITITEAGKELGRDALSKKLVD A  
INKGSEEAR KGRQEQEMLKWWQSQG

>comp7065\_c0\_seq1; 251 96 695 LEN=1104; translated  
MRFESQDFIMSQREWQENRRRAKANDHSATKQDGSLSRDGTQYNASGSGLRKQYGYSSQT  
KNIARDDSRSTQKKNVAQHEVRHRRDEADSDSDSDVDSRDESTPNVPSDFSKKELQE  
LVRSRRRQKQDQSTQVQSQEQRQTSTYSYHGYADKFRQESLDSFVAARNKVKESNRDLG  
VENTRGMDCLLLCLMPTNVW

>comp7067\_c0\_seq1; 129 1 1280 LEN=1673; translated  
XSRSLCPTSRIRRHRYRILRTMVSGCENGEFDETDVDERYRQLSGSPGPGDEEDRLVGL  
LAPFYLYLVENWNGISMTETQLGEIVEMLVPGNDDGSSSTEETPEEKLDDPAQRQTTPCH  
HQGTVETDERYVVCVDFAGPHCKVETGMATVLDPLLRSLGDGVLRRNRKVSVTDKEDRV  
RIETEGGETFEAGVCVSTLPLGCLQEHLRRPQGEPPGFRPPLSRAKEEAVSSLSWGSYKK  
VFLTFDRVFWPVDPPMIGLVRSTPETGAKDPLPGRHLVLYNLWAGRGIPVSEAILCGDL  
GKWAFGRTEAIRDAVLGFLAAAMGIPGADLSSSCMGCHVTRWEEDPFTRGSYSSVCLDT  
SDKHLSELSAPEWGGRLLFAGEATEPDHMGSVHAALMSGDRVAAEVLAAVRHRCSSNDRD  
VPTTRC

>comp7068\_c0\_seq1; 261 137 631 LEN=1782; translated  
MMTENKIDGKVDANLSGGISQFAKGAFTSENFEEAGRYTKEKVAELKAQAQEGDRSLRFL  
AFVGGIGCIVVGMIELTSRIVRLQLVDALIDVYIIMLGTVVVILEGKDMFLSRRLVQNVN  
KYALFLKFLWGRGFLFFLCGTLQLTQIDLFNLIAGKFKSKWNR

>comp7068\_c0\_seq2; 387 137 943 LEN=1646; translated  
MMTENKIDGKVDANLSGGISQFAKGAFTSENFEEAGRYTKEKVAELKAQAQEGDRSLRFL  
AFVGGIGCIVVGMIELTSRIVRLQLVDALIDVYIIMLGTVVVILEGKDMFLSRRLVQNVN  
KYALFLKFLWGRGFLFFLCGTLQLTQIDLFNLIAGGYMCAVGILYIIVGNNTAKKLKAIK  
KSLYSEGALRTKFAANVEGDGLDVKQFRFLCDDLGLDFTARETEAAYGHIRKMGAEATND  
KLSYDDFKSWWDNVEGGDEIHDCAFNFV

>comp7070\_c0\_seq1; 221 674 1782 LEN=1840; translated  
MGYLCSATESDLQAGTLRERAYESSPPTPRASAPLALHRKKRTRAEAFSCSLTRTHARRP  
TRPLSPNPVSSDDSSDEDDTERETVEGTHACCTLAKRRLGRPRKKRVGFGDVAATTTYL  
ASDLTRAEVKASKRLLWSTKQDRDLDAQAECQVVKAFRASHAREVRSFSSVCFTSMQVPL  
TLEASDLLERARISVPLAIRGMEWGIAPRLRKRKEHVSSVLSAQAAISESLLEKVVAS  
RSLRSSRSARIMARIIGEGDVGIASTTALTVTADGGEPVAKAEARATANATAGAKEDGP  
AGRDASXRAPGKPGARSAAPEAGALEKQSGKEAGHHSRINERGFWSSSVPLCPGMARLCT  
DRMTMAPNL

>comp7072\_c0\_seq1; 428 1 946 LEN=1313; translated  
XRHWAMVLPNDEAVAGSNLMEVARHSVRDAIPNDQDAEPGGGWDEEMRRLVGFAEASEEQ  
ANHALGIGDSDDYEALTLKNVYGAYNRGDAPSNESCDNQQEQQRAAEAKRCAMFANLMNQ  
RMNKLLEDHRARASSGGRAASSSPNGSESSRLGMAFPFPRHGHQLMQALTKRMQLDSR  
TDADTLEVNALPVGFKKRLHSYFRASELLRHFFGLQRLAQETDANGSGGGADRDAYK  
QKLEKIKNGLRTHLGDIDAMRNEQEMTSEEGKTMAGMCKQIMDQLNSAFKSSEEAATNTGG  
FVPSGSGGFTTVETF

>comp7073\_c0\_seq1; 171 1 1098 LEN=2246; minus strand; translated  
XGSENDWFIGYNEAVGAQADTAEANMVAVSQTEQKFDDDYDSSKLSWRHAALPVGNVY  
GINNFGGTEYGVYKVFVSLVGTDATVEVITSTTRVPPSCGGVGRFRIGLLTDDYSYDTSW  
VFRDSSGAVIDQDDGYAKYSYNTQYFNSAEGYYCLSPGCYQFEIRDTHGDGLTEGDGRY  
TGTLDGVEIFSGSEFGYSEVKDFCIGAAPVPVLECEDDGTFSFRGNSKCKCGTKWLQRF  
GNINKNRXEAATVQEEVGGKTGLRILQGNLRPGRSGTLRLGAEGLYARPGPCCWSGGN  
REDDDPGFPCPGRTVAVPAGGLAPXIVRSDGAFGSETAATEVACLGSFEPIGIESGPEHR  
HVLAN

>comp7074\_c0\_seq1; 656 204 1811 LEN=2025; translated  
MVIDRRGLALFVTTALATTCAAFSFGVAPGATRQSSSLKAFASDRGENAAQFDHFTVSD  
DSSSPSVSTGTGTFGESTTIPLSPPPMARPAESSNLARAQSAPPPADMEGEPEPAQPQLSV  
WERQKAAEVQGGSLRTWSFADQHKIDMIQVHMKTDRPMPNANVELWQGPDPNPQKVAIYC  
EDGSTRPFRCFLATPYTGNSISIRNTGSLEYPLQAILEGGKVMNDPETKEKMERVQTAK  
PKICQGGAVITERFEPGVQSAQIFLQSEGRPLQCRIELIQGPNNVKQVMEVYTEEGTTRP  
FYAIIQTPGYGTGIVIRIVNTSTLEFPFSVTVQPWDVGFADDDYDARPTGGSPFFEISGGA  
EGRGIGNSNLRSVGSPTDSMGMFGSFGPSSSTTSPAPSPAKAKVKNMIAPKEQPPSL  
EPEPEPSPIFLQNEEFVSSSKSSLSQDPIILTTVVPAPRRKAAPKASPPPPPEPELETEVE  
AQLEVEADPTPIANDPPSPPRRKGPVQKRYVPPSPPPPPKSMVFLDIDPAYK

>comp7074\_c0\_seq2; 463 395 1306 LEN=1520; translated  
MERVQTAKPKICQGGAVITERFEPGVQSAQIFLQSEGRPLQCRIELIQGPNNVKQVMEVY  
TEEGTTRPFYAIIQTPGYGTGIVIRIVNTSTLEFPFSVTVQPWDVGFADDDYDARPTGGSP

FFEISGGAEGRGIGNSNLSVGSPTDSMGGMFGSFGPSSSSTTSPAPSPAKAKVKRNMIA  
PKEQPPSLEPEPEPSPIFLQNEEFVSSSSKSSLSQDPIILTTVVPAPRRKAAPKASPPPE  
PELETEVEAQLEVEADPTPIANDPPSPPPRRKGPVQKRYVPPSPPPPPPKKSMVFLDIDP  
AYK

>comp7075\_c0\_seq1; 413 1 1159 LEN=1418; translated  
XMIVTFMRQQKHTPGKHPKPEQKDNDEVNLANMSSNEDSKKSGSEKGAGGILGKQFQKMR  
RRLTVTGSKLNIDGAFDPSAFTSGEFRIKKKDEGMKVKTAVTEFHGVSCKGHAPYNPRKK  
NQDSMIMKEETKTNSVIFCTLDGHGEHGDHVSFAWFRDKLVKEMSSHPSWANDMNVAVADS  
IAKVEKDLLKNYRIDAEFSGTTLMAIVRDNHLTGVNIGDSRVILGKETNGKIVPVEITH  
DHKPDTPKKERILASGGRVFAVEYDDGIDGPPRVWLGHMDVPLGAMSRLGDVVAHSAG  
VISEPEFTEFDLDEADKFLVIATDGLWEFITNEETVDYVVGQSGPAAAVDTLVTEAGTR  
WMAEEQVIDDTTVIVANLFGWKPSSA

>comp7075\_c0\_seq2; 361 778 1764 LEN=2023; translated  
MRRRLTVTGSKLNIDGAFDPSAFTSGEFRIKKKDEGMKVKTAVTEFHGVSCKGHAPYNPR  
KKNQDSMIMKEETKTNSVIFCTLDGHGEHGDHVSFAWFRDKLVKEMSSHPSWANDMNVAVA  
DSIAKVEKDLLKNYRIDAEFSGTTLMAIVRDNHLTGVNIGDSRVILGKETNGKIVPVEI  
THDHPDTPKKERILASGGRVFAVEYDDGIDGPPRVWLGHMDVPLGAMSRLGDVVAHS  
AGVISEPEFTEFDLDEADKFLVIATDGLWEFITNEETVDYVVGQSGPAAAVDTLVTEAG  
TRWMAEEQVIDDTTVIVANLFGWKPSSA

>comp7076\_c0\_seq1; 209 25 739 LEN=739; translated  
MSSFTRTITHASGASCQVHDFGACLLSYKTGAGRECVFLSRDAKLDGSKAVRGGIPLVF  
PQFGQPDKSMPQHGFRTNFVKVDESSVFDNEESAGITYTLELKDVKNSRGGLWDENEF  
DCSCSYHVEITGKTFSTRIEIKNTGGKEIPFQTLHTYYLVDGKAALDGSNCYVTGLEGY  
AVSDKVSGAEYTMGSDPIVIEGLTDRVYTPAVGKDVVDVVGVEGKAIKVTASGKCSX

>comp7076\_c0\_seq2; 211 63 738 LEN=738; translated  
MFLQKVHDFGACLLSYKTGAGRECVFLSRDAKLDGSKAVRGGIPLVFPQFGQPDKSMPQH  
GFFRTNFVKVDESSVFDNEESAGITYTLELKDVKNSRGGLWDENEFDCSCSYHVEITGK  
TFSTRIEIKNTGGKEIPFQTLHTYYLVDGKAALDGSNCYVTGLEGYAVSDKVSGAEYTM  
GSDPIVIEGLTDRVYTPAVGKDVVDVVGVEGKAIKVTASGKCSX

>comp7077\_c0\_seq1; 894 143 3076 LEN=3107; translated  
MHPFRTLALVAITFPLLWHTDEAASSRDASGGSRILLLDNDNTIYREEYAGIESQIVHGT  
HSYCRDVLGMDKETADDLYKQYGSTIEGLRHTTWKDLSEAELEKRWGFYHAYVDVDP  
SVLRPETDAGGSGSTGYSHDSREENKMARQLLKSSPLPLAWASNSPSWHVRRVLRALGLA  
RLSSPGDRVMFTPDRLPWYPTKNQPEAFFASSNDEDGDDYSSCLDLEKISIFLDDSLFNL  
NRVREAFPHIVDRVHHINRKHENERGESSKLVGNGEENVVQALLQDFGLIDPGFRLSQTK  
YLESKNKVDIKSLNVIWNKVVEGELEDKLLKGVPNQDGNQTLIVDLGAGLLSMLDLLLHGD  
DENGLAALVSAADSKVNTIRYTAYESNQELYESCNRLLSWGFGVVEDGTSDAVDYQKEH  
NGKMFVRVLRNRFVEGSDGLAEGTTHPDLIIGCCFADLMDPEQLVPDLMRSFGLVNL  
SSLSTRGTLIYFPIFTTGTQFLPPGPFGRSDGKTIPSDTVGFRSYSRALDVLGHNLD  
PHLLQDIMEDYGAKLIDFGASDWKIDPEKDAYLHKTMLYFFGSTGGPQLLKEGWDAPGWI  
QRARNRPAIRVSNRDLFRVLPDGERDPDHNDTEAEKEAQLSEISFTAPYQVTTVQKD  
IPSQLGPRQVLVRASYSLISGTELKIFKGNFDDDAALDVNIKDMEDERMAYPLSYGYCL  
VGVVDCGSDVSRKDFVGNVFTFSPHSTHVVTADAVQILPSGIDPKDAIFMPSVETAL  
SLVHDANVRIGENVAVYGQGLIGLLVTALLSQGRSDEPGWFNSITTFDMFPDRLAASSK  
MGASQALVPGNKDHEGFVDSIEVSGNFRALQSAIDQTLNNGRVIIVGSWYGSKDVSLKLG  
DFHRSHKTIQTSQVSEIPANLSRLWSKERRFAYTWDLVKQIRPSRLLTKIISLDEAQDAY  
EALDNGSEIAIAFDYNR

>comp7079\_c0\_seq1; 315 1 614 LEN=692; translated  
XSANTGFYYVRNNPRTQFFFNSLLMAGDLILSTSSHQIALIALNEHVSLYGLTVKIWER  
NKREFPGGFLYHNRKAAGFMKELMAFGDNHNRDEPAGDNNNDNNISNSNENKTYIFHMSW  
TKNKNDKVKFFQMGVEYLDGSCKSTEPKDLAKKHKPKISDENNNNNNGCCLAMPKIQCH  
YRDKPSKIPCNDSPTIDKKGKPFW

>comp7079\_c1\_seq1; 75 1 499 LEN=656; translated  
XRIESSRVESAPRRLGRTRFDATQCDGFPCHGMRRKSGMHGAKQASTTLRCPFDLPGHR  
AGKPAAFRGRTGIPPRRVTPCAGTPPPRRLLARSLPPADTACVHSVAACLQTATRAALF  
VSFGWTATGTVLWQTANQTRAAEVVRSRDILQAMTNDKMLRKVTKY

>comp7080\_c0\_seq1; 633 55 1521 LEN=1632; translated  
MKIETVSSSANGSAAAGSRI SAHTHISGLGLDENGDAIVPMAEDAQGSAGAVAVNTSGLIG  
QVAAREALGVVSDLVHSQRLAGRALLLVGPPGTGKTALAMALAQEVGSNQS NKLPFCHMV  
ASQVFSREVKKTEVIMEHFRKAIGLRIQERKEVYEGEVTELTVEETEDPLGGYGRITISHV

ILGLKTAKGSKTLKLDPTIHDLSLSKEGVAVGDVVIYIEANSGAVKRVGRSDSFATEFDLEA  
EYVPIPKGDVHKQKTVIQDVTLHDLDMANAHPSGGSSSSQRDVLGLLRSMGKPKKTEI  
TDKLRAEINKIVEQYINQGIAELVPGVLFVDEVHMLDMECF'TYLNRSLESPIAPIVVFAT  
NRGVT'TIRGTEPSGIKAPHGIPLDVLDRLIVPTLPYSVQEMISICQIRARTEKLDLTPD  
AFRLLGAIGEKASLRYAIQLLTPAKLVAETQGRTOIVPEDISQVDELFLDGKASQAQMLLS  
NDSIGLMS

>comp7081\_c0\_seq1; 597 447 2165 LEN=2295; translated  
MFPMAALLTTCLLL SLLADNTDGGGPEMDDMNLGLGRRLRFRNPSTSRWLQITEPMKNDF  
DENAPELVGGLRYLTLGGPSTFGRGLGEKRTSEAYPYLLSSEGTIGQERVRNVAQSQYET  
GDLAFAASLCTQSLVEGESARERAKEGSSLESEIDSHLDSWSSSSVAYDVITLEYTKDG  
TSDAASAAYTSSMNLTRRLRKRYPSTIVVVQLWSPDLVYYDPVANRNVSF AEWRNRN  
EQNNQQYQDKNRLKMKKQKLLSVEAMKEHVWTFRDLSPAEQQRSDLENMVVIEEGEYR  
MSRPRNINDSLDIIMDWFL EEEIKEEEEDNTSLSLHYTL SRRGHSVVAAGLRDVLALSAV  
PRTRQNDSGAFQVQSAPRQYLGWSGSDSCQLWYRTGKDRIPDSLEYSIGLKSEEFYPKQ  
YALEVVSSKGGTLTVYNHFDEDRIVYLTYLTT SARAAANKVYPKTKVSMVKEPMQTGHTT  
IVLDPAHDDNSDVMHRTRTSAVGLVKARSKGILEFTPLEEYTVHHRIVGISFLTKEKTP  
HDVPEFAISPRKLLISKSDDAIANEDMEGEE

>comp7082\_c0\_seq1; 541 198 1448 LEN=1623; translated  
MKFSHVATCIAAAATTVNAFVPATSYRSTRSQLMSTATDASAYADVDRYVSDHPNINNIPP  
HIAALVGRGLHTKEDHPIGIVRAKIQDYFNSLDEEYKIFDAEDPIVTCQCFDDLR IEPD  
HPGRSPSDTYIIDETLLRHTSAHQSMHLKDG YERFLCAGDVYRRDEIDASHYPAFHQ  
EGVKLFDKDAVSGADGLTKEEWLASPECKMIADDLKNVLEGLMDHLFGPVEKKWSEDFFP  
FTEPSMECEILYEGEWLEVLGCGVIHTEVLEMAGREDRRGWAFGLGLERLAMILFKIPDI  
RLFWTDDKRFHKQFKAGTITTEFKPYSKYPPCFKDIAFWLPEDFVENDFFELARGIAGDLV  
EKMELTDEFNPKTGRTSKCYRITYRSMRSLTDDEINALQMELEQVGT LGVEVR

>comp7083\_c0\_seq1; 197 88 492 LEN=1479; translated  
MTMEDGILYVKRKEGMPETATKATYEMEYDKHRDDQLNTSVVSALVGGFSLTNSWELERS  
GSFLDTITYVLAIVAVHACTCSALTSALLYRVLTCSDPEKATVWMQKHSFLATLPYGFV  
FGTLCYLASVVLVAW

>comp7084\_c0\_seq1; 420 464 1573 LEN=2307; translated  
MPKNKSRQQRVSSDSSNISCASEKIQKRQKRASSPALLHNTTCTRKMFCMAAATVLAT  
STTSMTITEAWAFNGIANNRNK PALLYSHSNPNPLRCGPSASLYLATRKGTSPLSKTST  
RLYSSFRTRKRQKEKEHEDARKEIFGFRRALRGVARKILPTKWFGTAKEKEALERKQQV  
KNRVQSELDQMLKGAPLFRMLGKLVAAPLMSKVA STVAEASYQQAETMEAILDETRSYL  
INDPTTVDLIGTPIQIQPHSQRSGTTIINGKRQMRMEFTTEISGPKGSAISRVSATNEG  
IGQLLVEGNSRVYQVDISSKAKSSSRFGRSSSSSPPRSNGGNSFFGGTKGNTDDDNIEA  
EIEKKTNR

>comp7085\_c0\_seq1; 1098 675 4526 LEN=4849; translated  
MATTSPNGSTKICTGKSGHDRTNSSNSTPLPVANIYVDSTIPLTRSRTVPNGKVTLGQQ  
QLHPHPQILETSPSRQPERCYNSSGINNTINHSEGMI PASDSNDWHQQQIIISNSPSRQH  
HFSQAF PDSQEALFEQRLCEDIYGVAVRKINQNGKSNLRYVKCLYVDSSEILHSSDDP  
STTNLNGPQNFSSSRVSSSRHSRGLSALSRFLSGGNHSSAAGTPSDHDAHRSLSSGS  
HHQIPTHNQSKNKTRVLVWGKKKDVVPLDHFTA VRKGVNERSRNP CETSRI LSLVTV  
DIHSEDRKNAVSLDIEAPTRLDRDKFATAFSRFLNVPLLEEGESMKSQQFTPRTPNTSFP  
HQQYSHHSFSQQQQQLLPLNQAGGGDSSRSIARSIKSDLTAQSWKGDPHNNSIPDIAL  
TATNSQTTNGGSSVRSSSNKRQQQNAPLPVVTARVGGAPLTNGIISSKPPRNMRST  
PPP IHPGTNLTAQNNSNSNSKHPQQSTANGSSRTGSEVDDPPLASLPSSSTRSRGAN  
NCNNDNAHDTYLN TISSAATKRGMVLEIPMATKSKLVSKTSLNNQNPAVSTPTTTATG  
AHVNSNTTLHTPISTTLSTANAKNHYNQGEAAMSDMDMDGSIVSSITGVGFQDLVE  
ELHLALERMVELDESRAEASRAVVAEQAIQSAENSNSKDWNTVTHKAAEAAAATAQKR  
SAEAMAKARIAEERLEMERKTSALRKKQIKEAEQMV AHWQTRAVAAEVQRFVAVAEALETE  
RKRIREFVLQQQQEDLINQQPPNTFVSSSELNTSAGNVGTTEEVDRLRSNLAMESARRRKL  
LDELQDLRGTIRVYCRLEASCHDSKHSATLEMVSNEILVLHQNSSEKGHKISDTNQSQL  
SFEFDGILSSDMSHEDVYAEFEAACASVVEGFKICVMTYQGVNSGKTQTMLGDIRLNAV  
RSVSIENEGIH LQAMRQLFSILEQRDRFQDIVTMNLVEVHDERLTDLLAGTKFGEEHGK  
VEESRKSQRQQDLKPTGTAEKQHPMGANSVSSSRPKLEIKTNRDGETVVRGILSVTV  
ASYQDVLRVWTESLTRRTRRLTEQDLVDHRAVELD SHVVASLKIISKNICSGVTTTGRMQ  
FVDLASSEIVTNRPFSGSIDGVSSATS KRNSSSSPSEQLEDWKFSNKSLNTFREVVLA  
RNQYQRAVPYRNSTITHILSDSLEADTKVVVIA CVNSRDEEPSTTACTLQFAQEMRKKVVV  
GKATRHATIAPVGTNISNIKPK

>comp7086\_c0\_seq1; 353 1 791 LEN=833; translated  
XPPKVDLLVQRLNDSIGAALKTSEEWASAAVAEPPGDSVPDGMAPACIVIDEETDRQA  
KDIRYQESQVEGGWIEDHALIDEDGRARCAFHFCKRKLFKDSSFLKKHLIKKHSEFLRAEI  
AKCHDSYMMTSDWAQEQRPVPPILVDCGHRFGLKPSVPLGAAEPIAEDPEPELWKREER  
REFEKEAELELRRERFQNSQNYHNNHSGESMDATLSEGRSQGRKNNFEDVDDMKVEKVEI  
AFDSLEIPLQPPKKKKKKKKLL  
>comp7087\_c0\_seq1; 74 1 257 LEN=363; minus strand; translated  
XRNSKKVLERIKMKSMLASSSTATVKELLKVLGVRISPAVPLVFKDGFATVVFREFRI  
GKDLVSFGNVLEFLFSFFNVVCGDV  
>comp7087\_c0\_seq2; 744 154 1716 LEN=1736; translated  
MTVNLLYVGRQCALATLVYFASTARTIAANPSNTNARDDINNWSAGKLSRGEEAFSLRQ  
FDEALRLYQKATQVEPSNGTNFYKLFVRVHNRMRKFSALSIDIEKALELEPSNNAWRMOKA  
KLLQALGQCDRSFVEYQQVMQONQANGEGASASTDNI EELLRQAGECDRVIITTAQTALMN  
QNYPEAAQYFQMAKYVDATQATDLLLQKATATLETGDYYSVISDTGLILKSYPKHLEAF  
RVRGMAYFWLNEHEHAVRHFRFREGKLDPEHKGCKEGHRLVKKIDKKKKKGD TAMEAKNFE  
EAI EHYKGAI AIEPGHKNFNRLTTF LVIQAYSKNKQHDEAIQLGREISATDGSTEAFWAL  
GDALTEAEKFEEALRIFRDALQAAPEGDNETQOKAQRKVKEAEVALKQSKEKNYYKILG  
LPRTATPKEIKKAYRALALEWHPDKNADNVEEAEEKFQDISEANEVLSDPELKAKYDRGE  
PVFENQNGGGNPHAQHFFHRGGGGGQHHRFHFNSF  
>comp7088\_c0\_seq1; 590 21 872 LEN=986; translated  
MTIVQTEDTRNSEWRKSNVGSRMLEKMGWTEGKIGIKRNVNTTALRAVKRQEGLGIGAKR  
QTEGGPSESTGTFAAVLANLKAHGTGDQSSSKKKKSKKEKKEAKKAKKAKNALSLPQ  
NKVLAGHARKMRAAKFGAKSAEDLACIFGNTEVVATATNGMVPYALPVIAGSGGAKKR  
SRAGETETKAKPTGSSDDDGESSSTSSSSGDDQANAAQTTAATGDSEPEPTSKERKRAE  
KKRKKEDKENKSKEASSSSSESKKAKKEKKS KPKKSKSEI  
>comp7089\_c0\_seq1; 262 141 815 LEN=878; translated  
MLIASTTFVSTRRLSRHYNFGAIEFKYFINHVNKRYDGTKTSAKLTFHEDEHQKPENHR  
ACNRKYRGILKIRESSSGKGLGFATKDFAI GDLVMSRPVVTTKERSSHTVQIDWDRHI  
LMDLPATLVNHSCDANLGIQNNNGVRDEDDGEEYFGAYDFYAIHP IREGEELTWDYETS  
EWELSTFFQCTCGSTKCRGFLRGFKQNADMIRQQNGEYHAAYLK  
>comp7091\_c0\_seq1; 112 1 664 LEN=1193; translated  
XPRETARAI CCAFSAIDTSPEALRVATPGGGIKTERDSGSGNGSLRSRLQSHSQSHSYY  
YPPGLRAIEVTANLRTRWFS LPYGDQCLCLTARVFEHVGGFPDQCLMEDYXAGPVPADAV  
HREPPP VCGDAKRGGPF EATERIAVLSGHSAVCSRRRQKHGVLVFTYTNSRCVGRYN  
DGSVSPGELFCEYYGTERPPARSGGEESPWEKGI PPPAGFA  
>comp7092\_c0\_seq1; 432 215 1571 LEN=1732; translated  
MTKNKFSTSAVALILLGFHHL YQQQPWARVYGFQFDPNI IHRTPFHRGNHRCQEIIKQRD  
ALAFKGRAESNIDPYI SPARVGARYPLFMVTEGDEQPPSFDEGSTSINYQLVLQNVANQA  
LIGYQIWTGGTGFRLLSDQAHFGPGAI ILALPXLIPLLQLSRAIETSESPFVSGNLSTN  
MAVLRIFGPRKKP IMAFLVSLLLATSTGIVEETVFRGQGGVFLVKENTYFSDLALS LTI  
IYLLLSIALPGFANAYGNGDI FTGALLSTLLFAVLHTNPLGFFKGD SFIDNFSLLILQ  
IINGGTFCTLYLLTGNLAVP IITHALYDFYTFYKTHLVDVAGQMTYAEEEEALMPCSSNG  
VEDKWIQKRGEDWLKDAKQSFYLMDTNRD GELSRKELRIALYSYGITLSKI QSEEEVQA  
DIDQSGTIDFDEYLEFIGPTGSRYKAIRNTLL  
>comp7092\_c0\_seq2; 473 215 1482 LEN=1643; translated  
MTKNKFSTSAVALILLGFHHL YQQQPWARVYGFQFDPNI IHRTPFHRGNHRCQEIIKQRD  
ALAFKGRAESNIDPYI SPARVGARYPLFMVTEGDEQPPSFDEGSTSINYQLVLQNVANQA  
LIGYQIWTGGTGFRLLSDQAHFGPGAI ILALPXLIPLLQLSRAIETSESPFVSGNLSTN  
MAVLRIFGPRKKP IMAFLVSLLLATSTGIVEETVFRGQALPGFANAYGNGDI FTGALLST  
LLFAVLHTNPLGFFKGD SFIDNFSLLILQIINGGTFCTLYLLTGNLAVP IITHALYDFY  
TFYKTHLVDVAGQMTYAEEEEALMPCSSNGVEDKWIQKRGEDWLKDAKQSFYLMDTNRD  
ELSRKELRIALYSYGITLSKI QSEEEVQAADIDQSGTIDFDEYLEFIGPTGSRYKAIRNT  
LL  
>comp7093\_c0\_seq1; 531 606 2591 LEN=2942; translated  
MESEVLIERQDEDEEQSFMEEIGEETSEQNEKTFSEEDQEQLLIDESHMRLAIEYAKSQ  
TAGNNSAYPMPTVGC AIIASDGQVLGLGCSSYKND AIQDALEQTGLDVMPLREWCVTWPA  
QAAACWKLRRDDLASATLYVTLEPLASRRGETLPPLTQLIELSGVSRVVI GTPDPVPERAG  
MGSQSLHRQSGLDVSMGSVLESECRELVEPYAERTNSKLQILARKHRARTGRPHGLLHCS  
VVDSDDIEAFAQLGNAFGKLSGGQTL SFRDFGSYEMAPPEQIWAEGEGEEENLFPELE  
VEDDIQVDGDDDDIDSFFRDSAETKRSNSGNVIMPWYSQVDAVIGTFPREGNNGPMKENN

TIKSRNLGLKWLSTFGRELPPGVERILVLDATDLENLPLSNDDPNLPDGV DVEQFWRGTG  
RKPTRVLLRKGRRSSQAEGAARAAVAEEAAKAALATKEA IETGEAESAAEAAMEYHSAA  
LKATEMIQEELSKTLERKQQLQSFQVGVVETLNGRNPIDVMEHLGKRNGYGSVVWRAGCWG  
QRGVQSILDGAFQSVSAHLAVDANGGRFWQQLAERAVQGACGPESRVKVFCSDDDVSLE  
FCDSPNADGDCVLT KDGRPVRHVRLDCRVALVDRERSREFV IAPT KRLDRKVI EEEAPWF  
L

>comp7093\_c0\_seq2; 531 606 2591 LEN=2795; translated  
MESEVLIERQDEDEEQSFMEEIGEETSEQNEKTFSEEDQEQLLIDESHMRLAIEYAKSQ  
TAGNNSAYPMPTVGCALIASDGQVLGLGCSSYKNDALQDALEQTGLDVMPLREWCVTWPA  
QAAACWKLRRDDLASATLYVTLEPLASRRGETLPPLTQLIELSGVSRVVIPTDPVPERAG  
MGSQSLHRQSGLDVSMGSVLESECRELVEPYAERTNSKLQILARKHRARTGRPHGLLHCS  
VVDSDDIEAFAQLGNAFQKLSGGQTL SFRDFGSYEMAPPPEQIWAEGEGEEENLFPELE  
VEDDIQVDGDDDDIDSFFRDSAETKRSNSGNVIMPWYSQVDAVIGTFPREGNNGPMKENN  
TIKSRNLGLKWLSTFGRELPPGVERILVLDATDLENLPLSNDDPNLPDGV DVEQFWRGTG  
RKPTRVLLRKGRRSSQAEGAARAAVAEEAAKAALATKEA IETGEAESAAEAAMEYHSAA  
LKATEMIQEELSKTLERKQQLQSFQVGVVETLNGRNPIDVMEHLGKRNGYGSVVWRAGCWG  
QRGVQSILDGAFQSVSAHLAVDANGGRFWQQLAERAVQGACGPESRVKVFCSDDDVSLE  
FCDSPNADGDCVLT KDGRPVRHVRLDCRVALVDRERSREFV IAPT KRLDRKVI EEEAPWF  
L

>comp7099\_c0\_seq1; 570 157 1668 LEN=1833; translated  
MAPLSTTRNQQPQPGAPASSETSLEEHGCLEANVLSVYDLPYDPVIPKAVTLSVRGM  
FVSSGPPLARQKDRNSFRFAPVMPDKTKTQGGNSIGASKAKTSAASAAPIKLVAPLREL  
YQETLKIRVVYEDPEKCLETELDRQLHIHEQKWLILNLAPTTPRPGTTHGSSNNGSNGNA  
NTSESAIVKSTATIPSVAAEDMSPPPTIRIKFKLSGPYRPEIAALVNLARTWFGVVD AIE  
GKISRSSSAMGNSLPNIGINFNKNLLLVPAAFLAVVVAAPVLLAGVAALALPFLLP IVL  
VCAGLLATVALSGLLYSSTSTGRSKLGSLLTPLVETLVVSRPGQALVYDTGPRPTPVS  
CRQIMPDTMWAKLWISLLIDAIGSSSYLLPLAGEGLDLAWAPAQT VLMAMYESTSPNLK  
YLSFIEEALPFTDIVPSACIGWACEFLPKLWKDHAERTNTHVDPEVTRAVTQLVTTAANV  
VRTRNSRSSNPTAVPPATATSVY

>comp7099\_c0\_seq2; 492 157 1818 LEN=1983; translated  
MAPLSTTRNQQPQPGAPASSETSLEEHGCLEANVLSVYDLPYDPVIPKAVTLSVRGM  
FVSSGPPLARQKDRNSFRFAPVMPDKTKTQGGNSIGASKAKTSAASAAPIKLVAPLREL  
YQETLKIRVVYEDPEKCLETELDRQLHIHEQKWLILNLAPTTPRPGTTHGSSNNGSNGNA  
NTSESAIVKSTATIPSVAAEDMSPPPTIRIKFKLSGXVSI AAFVSHRIAFLERAVWFCF  
DALPQANFHSRVCD SFSSCTHASHHRYRPEIAALVNLARTWFGVVD AIEGKISRSSAM  
GNSLPNIGINFNKNLLLVPAAFLAVVVAAPVLLAGVAALALPFLLP IVLVCAGLLATVA  
LSGGLLYSSTSTGRSKLGSLLTPLVETLVVSRPGQALVYDTGPRPTPVSVC RQIMPDTMW  
AKLWISLLIDAIGSSSYLLPLAGEGLDLAWAPAQT VLMAMYESTSPNLK YLSFIEEALP  
FTDIVPSACIGWACEFLPKLWKDHAERTNTHVDPEVTRAVTQLVTTAANV VRTRNSRSSN  
PTAVPPATATSVY

>comp7100\_c0\_seq2; 437 207 1370 LEN=1785; translated  
MRTMASTVCILFAVLLSLSLTAVD AFSSSNRLVHNSVRQCDGRASVSSATGTRRHRLGM  
ISFGGSGDESKEELPRDVKEAVSNCRQATQTALQKRISRMDIEFPVGTDFGVEKKAKPKG  
GGRRRRQAGGDTDTSGGPTQSM LDRSNRELARLFVEMFQPVGGDNIVVSFADELADLAK  
ANWKNDAGASCRV LAMNRS GA AKKKKKKKKVVLT SARGFAAKMAAEVEDNDEGTGGQGG  
GSGPFQLPNTLEALFVAPGPKELVIDKICETVGMGTLVLLNARLDKVTNFGTEAAEK  
LFTEDFESVFLAAAPQQEAPGCLLYRAFPGDWVLARKPSVGRPKTILSQPEKPTNEECR  
ETFDNLEISDLEKNVEGFVDNVAGWFR

>comp7102\_c0\_seq1; 316 121 933 LEN=1288; translated  
MSSSEPTKQEPNDSNKERPRSASSAWSFSSLFSSSSSFKDRFQEFDDKQRIERLSACQEL  
DKILSDCRERHQREDPSKLGINEDNGDHLDPIESVSI GLRNMKYFGWRGILLQRKREA  
NSPTDGNVEVQMVENDDGPDLSAFHDKIRSSCAREQHAVWACRAVATGCGKDI SELKRC  
FESVDIFDEDGIDNSSMEPARLPQH IIRVLTTPYTNYEGIEK VADSTDGNNNDVASLRNR  
IPCHDIQRRLGSCVTANGRALLERKQQRER

>comp7103\_c0\_seq1; 324 523 1681 LEN=1681; translated  
MEGQPWASSTHGPR SALNGMDLRHQGGDHNFLGSQVYKSN EPPFFVSQPPDTPVDRLKL  
STKKNYSLRVKGYTTPNCGGAGIGLILEDSCRKETVWSARMYVPGDR TVFEAEYSAILG  
MDYSHNVLGIQRLTVFSSNHIIVNQFQGI FTVTKSNLALLLD TIXGVSTVLAKFCNARNQ  
PGKKLKAFAQAVKALATRKS LNVRDRYWEVECHDPIRK IRRNPLKMGRWRK PDRPAQSAI  
IDPSRIYRLQFDGGAKECLGVMVLYDDRGT EIWCGWHFHPDAASNNVAEYMGLVCGLRC

ARSLGVAKLIVEGDSLLIVRQINERYRKRKGELVMFRREAFEVIKDLSYFQIRKISRAN  
KRADWLASHAMNIRQSDGFIRMSFSGG  
>comp7105\_c0\_seq1; 272 1 1146 LEN=1160; translated  
QQAETEQRNSPKSHQTRILIIQFIIQPATTTKVVSRREGFMFFFAVLLGTVVSTTGTTFV  
GTDVLPVPPATFGTRTSPSRSRFSLSTVRSKSYGKLLGLNLSSRDTDTAVFCLRGGEISL  
PDDEEEGSGIIATKLRNMIRSILDISDNKIPIFSGFLRTCFKLTLETLTGMSILPEQKSKK  
KDKAKSKPAKNESKSKKASSEDGVKTKKPSKKGAAASKSSAATQKHLSTSIKSSNPNY  
RIQKELKSFIKSPPPNLSVQVGTNIRIWIIVTLKGAKDTIYEGEVFKLRVEFPKDYPTVPP  
SVYFLKHKHMPVHEHVYTNGDICLSLLGNGWRPTMSAQSIIVSILSILSSAQSKSLPMDNA  
QHATAKPGQFQKDWVYHDDRC  
>comp7106\_c0\_seq1; 413 1 1126 LEN=1335; translated  
CYLPERLDEDEGGAKRSDSYTTEKDIENALAIHDEIDGVECAEVSNLSLLAPPSELFQDE  
LKAILQVESQHYKPLNYFEFDGCRSGVNNWRRRLCEWMFEVTDHYDFDREVVSFAFDY  
LDRSISLAYGPTSNKNLSKKDYQLYAVTSLYLAMKVHGMDSVDGKRIKLRI SAFQELS  
RGCFTTETIAAKELELLTLFKWHINPPTCARCIFSLRLLPTWSSMEWDIPREDVVCQIF  
DVAKYLTELSIFVSDFSFSYSPMISYSAILCALDYVEESIKPMPFETKIRFLVSIRQIS  
NAFFPESEDVRKLQVMLRKLAPKMFLKHLKHYQLPRTVSLNDVDPANSVLGKTSRSISPI  
VLGGDEPKTKRQKV  
>comp7107\_c0\_seq1; 217 127 663 LEN=714; translated  
MEPATVTIRVAGLGHKLTLEGLPASTTTVDDLARIHEATGVAPRYQKLVGPRRLVLDYR  
DGESEQHHCALGGTSLSGAGIVGRTKLLLLHSGLYAAEKDAREALEAIEGEIDALEASI  
RGGSAATKAGFVAEMVTRLCKLDAVDPRGSGAMRAKRKELIQRAEGLEALADASKC  
>comp7108\_c0\_seq1; 285 158 1530 LEN=1554; translated  
MPSRSCFSRTIFVPIRSSIQRAAQPGRTTQKRKDL SIGKEFTKEIAEMTRILSFATPL  
HLALGLALIDDVNNANHPSTGLREEHAVASEFYSELLENHVESDYFSPLPVEYIDTDEL  
ESFDWKNVSGISYLTSLNQHPIQYCGSCWAHAALSALADRIKIARSGAGTDINLSIQYI  
LNCGTESVSGSCGGSTMKLYRFVKDGSYVYDTCMPYIACSAESLEGFCPFVDTTCSPL  
NTCRTCDTFVENGGTREIDIMPNTIAEYGYRYPQDYGYGDEPNTNIGTPDTIDHNNST  
NLIRMVKA VKAEIFTRGPVVASINGHGLAEYVGGIYN NATASRDTHAVSITGWGREEQT  
QQDYWIVRNSWGEYWGEMGFFRIAMGQNILGIEKKI I WATPNNFTEINYPCHENGGNCGP  
TMHTYS DPSSLSSDSRXAAATPEEILISAETIAKIEI  
>comp7109\_c0\_seq1; 520 1 742 LEN=1008; translated  
KDEPMEESEKACKEQSKDDDKGTEDESNKESKIKSEPKDDSMGEADEDKDKEDKDEATE  
KSKEESKDAVTNDRDKKDDAASKEKETDNAKKGAMEVEAAEKGDDEKTKETQDGATPVND  
DEEETEKPTSKGDAADAEDHKNSEKSVGGGVGEKAEQKNPTKEKEDEKKTNENVMEAD  
KNEDSKKQENDEDEEGTTEIDAKESKNDDQTKAQSQSTSDGRFEDCCDPLCNGTLQQQI  
LDSNED  
>comp7110\_c0\_seq1; 417 108 1756 LEN=1838; minus strand; translated  
MVNDGGKGVTYNDRDVFVFLPENLGPRLMGLSSSVGDDSSSLAYLSPALAISSDPSAVAHG  
RGLIATSDISAGELLVHPPTVRADVSQLRIYQNKASKSSSSSCGSNLLIESIAETVLLK  
EMKRAIRGRTKQARNAKIAASFALNGEHSSNNNSDNHYNDDETTTRNERHMLARVLLG  
IGTPEDTEEILSQQLDDNEHLLGIIRHNAFGPDFHHYHRMERELFDANHADTTTGGN  
NTTSIASLYSRVLGHYPLAAMINHSCGPTNAARVVFYGETMVASATMDIPRGTELVPYCP  
PILPFPERHSRLERGGYGFSCSCQRCLLEGAALGGIPPLPLMGATGHGGAEARLGPDEW  
SSVLESVEAWYRAVTAGEPPKHSNNSEPRSPNLNLCGLRLGHTQLYIDYFNQSLAEKGA  
VEVLLDQATELHRSFARVHNACTEHL SLLHLSYELEAIGGSTSKETGNGXADLDRAPQAG  
TPLQVFERDSREGPGNTTDGPPQAYPDRPKDEEWMSQQNTGGREFFFMERANAHACRR  
LAQVVLQQW  
>comp7111\_c0\_seq1; 386 177 893 LEN=1228; translated  
MTLQMFQLQMTGYMFKNAEYRLSMSQSLGMSSSLSSNFMLKGVEEELPKEDDPLVSGKI  
KGLKIRYRKRADTDTEEVAKTTASDDVEAEDGMEIEVDAAAYMSELRDEVSRRLDEL  
EKKETKDEALKQDLLLYIRTLPAQELKSLTNTMSQDVLVCMKGLVQAVLAGIGDGI  
TVTEQSGEAMAQLCMWQLAVGYNLRELEVREEMKKNMMSLMGDSSADDSGLSDLGAFE  
>comp7111\_c0\_seq2; 717 160 1647 LEN=1982; translated  
MMANTPSTRHLPLCAAGRGVIPVTLVVGLLLRITTTDAF SVTAFRSASRHQWRSVWTQQT  
NVVLFSSVGDGNGGGGSGNDGDDLGDFLDPMKPKDSENMKRAREYMSSETSLPISFDSIIA  
DDGTD AIDE TVDEIADKANDVDAESKDVDLMSDQPSSSLISSSSSSSSGSENATSSTLF  
GGGGDGDGELSPPSPSLLAKNPYMQVSKISPSDLISKFTAESDPRVQEAVRTTILGLIG  
SLPKMAFETTSITTGQRLASLMFQLQMTGYMFKNAEYRLSMSQSLGMSSSLSSNFMLKG  
VEEELPKEDDPLVSGKIKGLKIRYRKRADTDTEEVAKTTASDDVEAEDGMEIEVDAAA

YMSELRDEVSRLRDELTEKKETKDEALKQDLLLYIRTLPAQELKSLTNTMSQDVLVCMKG  
LVQAVLAGIGDGKIGPDTVTEQSGEAMAQLCMWQLAVGYNLRELEVREEMKKNMMSLMGD  
SSADDSGLSDLGAFFE

>comp7112\_c0\_seq1; 1006 82 2406 LEN=2466; translated  
MSEVAALMLCALGGKSGSAADITAVLEASGAEVDADKVAIAADMDGKDINELLAAGMEK  
LKDVPMGGGGGGGGGGGAVAAEEEEEEEEEEVVEEYPKKKKYSRDGENPDPWQVEAL  
SVPFTEDHGKWKLLKGGSDIKSWQGYFYPASQFSVKNYLFSGVNLKFPDYLYMSKNYYD  
TSWSSRTHRRLKNVIVTMDFIPSRGAVKEVAAAGKGLTKSQEKMLKRAFTSADNNKSGTI  
SFAELEEVKAVDQVVDGEEGDKFFQQMPDFANRPVSFEELKRLLQRLYNRVQAGRYV  
ALSLFEAECMRAVMHHLPLIPGKDCAVALLRDRDSTYGYQRARSFQDSTAKACY  
RFIDSSLNYPREVSLLFRAIQENNKEMRYNYFVEVMSNRNRKQKDPATSALSKVFINAD  
EHHVLNYKIAAGRITAMLKARGMYPRDCFNAIDRRDRDGLLNYYDDVVRGLAWLGLPLDQQL  
LLDFMKEVDQDKDGYINLDEFKAAVGFEDDGTMASNAAFNNGMPLPPMPSDNKEKRVVN  
IPPPVLAAVKVKVVKVTKFHMWNSQGSMSRKKISIWEPVIQSGAFRQNKESFSLGHFAG  
SGYDNP SRDGKDRLCIEVTDTTGSWVGSSWLPVLDKFMHPARYRLAWSVTHGSNPFY  
GWEAVPPGDEFVALGFITGKQDKQPDVKRMRCVPRDWCKPSGYLAKIWDSSGSGGRQGS  
WVFNTLNLVGFVSGSDPPAKKGHDLKSSRFFLKEYSDTNAKNVAPAGGYVNPKA

>comp7113\_c0\_seq2; 281 313 780 LEN=1089; translated  
MVLRLSPLIPYNALDYISGVTSISLKHYSIALLAMLPGIIMLCSIGASASSLSDRTAST  
SNATVKIVTIVSGLLFGGCGVFMASYYSKLELDRILIDQSTGSSALYYVAHELSQLNEAEE  
IAIELGRDEESDEEVVDDNESENEEGRDSEQIHDSW

>comp7113\_c0\_seq3; 289 339 1256 LEN=1565; translated  
MQRDRDHRRKRVRFLVGLILLSCILCVVDFARDKIESALVGFLEWTREHTYEGMIAV  
ILCYIVATVCFIPGSLLSFGAGFAIGSSVDTTFMGIALSSGCVFLGASIGSICSFLLGRY  
LFRDCVLQLAFSYPFQAIERALETGKGLKIMVLLRLSPLIPYNALDYISGVTSISLKHYS  
IALLAMLPGIIMLCSIGASASSLSDRTASTSNATVKIVTIVSGLLFGGCGVFMASYYSKL  
ELDRILIDQSTGSSALYYVAHELSQLNEAEEIAIELGRDEESDEEVVDDNESENEEGRDSE  
QIHDSW

>comp7114\_c0\_seq1; 441 176 1687 LEN=1977; translated  
MFNRNRNSGIDNAVRHPKSARLSKHGETSDNDFDKQAEYLIPAEVRMISGCHSLETSADV  
ANIYSIAEPGKLPSPPEGRAGGACTTVLLSILYDAQKKGNSGADSVTFQRLLELRRLAQ  
TGMSQIPQLTSSRPLELKETPFSLRSKGPFIGNGRYQQQRQGESGTQRALLVGINYGG  
SGQLSGCINDVLNVKKYICKYQGFLEKHVLLIDDRHHHTRENIIRALRRLVEHSPG  
DSVYFHYSGHGLLDPNYWDRFKSRVSNKKYDETLYPVDHVTSGQIKDFNLFHHFVKPMA  
AGVTVTCVMDCCHSGSVLDLPYSYRPTNDGTIRMRSMDSLTNLYLYILAGGMLPSHG  
ESIAENLETKTGEALDSIQGIGVEELSSDIDGFENVYTNNGNIFSDTTGDNIDIVGTAGD  
DGNIPVYSSDNLVCEAGSVPGQGITDGDGNGAGVFGNQNSDGSQAQDFVADDYTSADCD  
CGGEDCDGCDVVGELLNTMFENS

>comp7115\_c0\_seq1; 1325 374 3922 LEN=4457; translated  
MKSSITIFTLWAALASRDCAAWAPVGLSASRATSIDRRNRNFSSFHTKIQPSSTSMYAT  
IEDDEEQEQANKPSEKDSVSEAFNTEVNEFFSPIPYSELITGVIKETFKGENRVSQTPDS  
VRGLVKAGFTVIVESGAGDNASFNDSYIDAGAIVLSDAEQVFQDADIITKIRPPSDEEV  
PRLQKTLFMSIQPAINTELYASLTQQGTNIFALDCVPRMLSRGQSFDTLSSQANIAGYR  
AII EAADAFPRFFAGQMTAAGKVPPAKVLVMGAGVAGLAAIQTAKNMGAIVRAFDVRPVC  
KEQVESMGATFLEVDIDEDGSGAGGYAKEMSDEYKAAQRKMMLEQAEDVDIIVTTALIPG  
KKAPILVDQDMLSLMKAGSVCVDLAAANGGNVAQTQPDIIITTSNGVKIIGYTDLP SRLA  
STASNLFANNIAKFILSIGPQTKEKGVFQIDLEDDAVQNMLISYGGNARWPKITPFTP  
PPPPQQEVAEVVELTPEQEKALVDQRSKDAFVKNTLIASAAAALLVGFGLTADSSSSVNL  
MATFGLAGLAGYQVVWGVAPALHSPMAVTNAISGCTALGGMLLLASGDHTGASLIPDSP  
AHWMGAIATVLSFVNIAGGFLVSGKMLDLFRRPEDPKEFFELYGIPVGVIVAGLAAASFS  
DVGDIGLMSGTASIAASLLCISAIAGTYALNFLFSFVGPKRMPSSLNNYSFFGXELFLLI  
LHIKTALANQETARTGNFLGMAGVTLGLAATTSDMAIAGASPVVFFQQAGLLAGTGAAVGT  
AVASKVGPTELQPVAHFSLVGIAMAGAAGEYLGNSGALPAGTLSSIIYLATFIGGVTF  
SGSLVAFGKLSGMMDSAPLKLPAQDQINLAMLGACALGMGAFLGPDIAASLLSMDADTVG  
LASLGMMAVVSSVLGWHLTASIGGADMPVIVITVLSYSGWALCAEGFLLNPLLAQV GAL  
IGFSGAILTWIMCEAMGRDVSVILGGAGSDTVASAGEAVEYDGEVTTVTVEAVTEALTE  
ANNIVITPGYGLAVAQAQFAIADIAKNLKAAGKNVRFIHPVAGRMPGQLNVL LAEAGVP  
YDIVFEMEEINDDFDTDVTLVIGASDTVSSAAEDDPNCIYGMPVLRVWKSQGVFV LKR  
SIGNTGYAGMMNPILFKENIDVLLGDAKDTCDALKSAVSAKL

>comp7115\_c0\_seq2; 1407 374 3802 LEN=4337; translated



MKSSITIFTLWAALASRDCAAWAPVGLSASRATSIDRRRNRFSSFHTKIQPSSTTSMYAT  
IEDEEQEQANKPSEKDSVSEAFNTETVNEFFSPIPYSELITIGVIKETFKGENRVSQTPDS  
VRGLVKAGFTVIVESGAGDNASFNDSTYIDAGAIVLSDAEQVFQDADIITKIRPPSDEEV  
PRLQKTLFMSIQPAINTELYASLTQQGTNIFALDCVPRMLSRGQSFDTLSSQANIAGYR  
AII EAADAFPRFFAGQMTAAGKVPPAKVLVMGAGVAGLAAIQTAKNMGAIVRAFDVRPVC  
KEQVESMGATFLEVDIDEDGSGAGGYAKEMSDEYKAAQRKMMLEQAEDVDIIVTTALIPG  
KKAPILVDQDMLSLMKAGSVCVDLAAANGGNVAQTQPDEIITTSNGVKIIGYTDLP SRLA  
STASNLFANNIAKFILSIGPQTTKEKGVFQIDLEDDAVQNMLISYGGNARWPKITPFTP  
PPPPQQEVAEVELTPEQE KALVDQRSKDAFVKNTLIASAAAALLVGFGLTADSSSSVNL  
MATFGLAGLAGYQVVWGVAPALHSPLMAVTNAISGCTALGGMLLLASGDHTGASLIPDSP  
AHWMGAIATVLSFVNIAGGFLVSGKMLDLFRRPEDPKEFFELYGIPVGVIVAGLAAASF  
DVGDIGLMSGTASIAASLLCISAI AALANQETARTGNFLGMAGVTLGLAATTSDMAIAGA  
SPVVFQQAGLLAGTGA AVGTAVASKVGPTQLPQTVAAFHSLVGI AAMAGAAGEYLGNSGA  
LPAGTSSIIYLATFIGGVTFSGSLVAFGKLSGMMDSAPLKL PARDQINLAMLGACALGMG  
AFLGPDIAASLLSMDADTVGLASLGMAAVSSVLGWHLTASIGGADMPVVITVLNSYSGW  
ALCAEGFLLNPLLAQV GALIGFSGAILTWIMCEAMGRDVSVILGGAGSDTVASAGEAV  
EYDGEVTTVTVEAVTEALTEANNIVITPGYGLAVAQAQFAIADI AKNLKAAGKNVRF AIH  
PVAGRMPGQLNVLLAEAGVPYDIVFEMEEINDDFDDTDVTLVIGASDTVSSAAEDDPNCS  
IYGMPVLRVWKSGQVFLKRSIGNTYAGMMNPILFKENIDVLLGDAKDTCDALKSAVSA  
KL

>comp7117\_c0\_seq1; 133 173 853 LEN=1336; translated  
MRKQVQPSSSCERDQPARRPSSPVSPQRPLPPWPVVPAPYASPAPHDRRACPGAPVQQ  
KKSRSRIFAFGERDYGEHEASPLRPRLLFFGDDGDGCGGQERSRPSDREATGEDVDCGNF  
FVRRFEASIESPRSNTGTLGSSSLAPTSASTPSATSASPSRPTTTSRRIISPQRGSNRENT  
IDERNTNAEYALGQEPGTTLAGQGITGRSRSISNTSTNTSDARKRT

>comp7118\_c0\_seq1; 399 328 2073 LEN=2529; translated  
MAGAFRHSTLTI AKIPRRSQSSLALSMTNNTCSKQIHGNSFRNSLPRTHNAYGIGHNNFH  
STSTCRSPENKPSAAFPHLRSP TSEHARELFLLMNSRPGSLLTLLDCTKESGDANAESL  
EKYNVDWTGHYRGFSSIVVRPNSTDEVSRILKYCNEHLVGI VPPQGGNTGLVGGSIPISSK  
EIVLSLEKMNTIEDDGRESNVLRAQAGCILQDLQDHANKNGSLVPVLDLGA KGTCCQIGGNV  
STNAGGVYRYRGLSHANVLGLEVVTP TGDVNLGYSVSHLKDNTGYDLKHMFIGSEGT  
LGVVTKVALRCQPSVSRGAIWLS CNSLQDVVKV LNIARTERLSEILAAFEFMDGDVLEL  
VRQTHPFIRFLLNAGD TDAPMQPYSILVETHGSHDQHDREKLESFLECIFEGLVTDGV  
VAQNLGQIEDFWKIRELCNPSSAASGYVYKYDVSLKARDFEGFIRDMKLR LGDVSHASS  
ADHLLCVNWGHIIDGNLHCNIVSGGKFEKDTGLEKF INECVFQEV MKRNGSISA EHLGL  
QYKHNYMPQIKDPPTLQAMYDVRS LFDPNGIMNPGKYL PST

>comp7118\_c0\_seq2; 48 1 212 LEN=1046; minus strand; translated  
XGKKIDPDEIFPEVHSCDLEAIFGRRKSKNYRSRASSGNWANDQV TAAEKL VYKRQMGFA  
TDHAMDSTGV

>comp7119\_c0\_seq1; 656 138 2189 LEN=2313; translated  
MAPFVKLRKTKLPEDQHHPSEYRGI FGEKGDSDDWNEAVRDFPNKVPRFESQDDCLQFMK  
EYVRHHGGSNPGFPHLKHIFTTLITWDQIEQILIPAITKARKEPSQAKKVPQDYGRTPDD  
NSRNIYERSGGKEVVDAINFRLNLP FHKATTPVSVLNTLKYLF FHMCKGIYVMIRDGKVR  
IFCPFSNRDYRNTWSGR LKIEGGGSLEEY YAKKKGICRKENIEEDLSVWWANGNI CNEL  
SSNKNETKYQIQVWGDQFLSPLK DMLAEACRERQIPDCEFFLNKR DYPQLKVNVERGIPV  
EPYGFIFDKDDRDP AQDVLDVDEHKFKTYAPIVSFYAAAEDRFSDIPWPSS EDWEGACGL  
VFPQTFLYKEVDEEGYPVFKPPRDLFTEQNFQKFKRGWYEGRVATAFFRGTATGGGTTVD  
NNQRLKVASLSHEWKDDEEKGDPEFLDAAIVGWNL RDKKEAAHPMTFLRPSDFKFTAGR  
HHFTPIYEQSR YKYL VYVDGHCAACRYAFMMRLG SVILKVEPRQVADRMWYFPLLQPYVD  
HIPIKSDLSLEEKIRWCREHDEECREIAENCLKLYDKYVARAGLLDYVEMVTKHIAKRH  
IEAPGWWEAPPPALPPP KLNKPTTLCYEHKGTGESRLCVRCQEDADKEQKELEATQKLAA  
SEKSKKQRKQALRERMLKRSRK

>comp7121\_c0\_seq1; 585 1 1103 LEN=1351; translated  
XLSAGVVEASC SACRGRQVLHSCGRRSLPIDYEEIARAEREKKEKEKEEKKRVRAEKRRL  
NDQKRREAKRQKQREAEQEQRREEEQRKERE EQARLQEA FASQDLHRHKRKEALVSYQAA  
HQSSTDSREAVLSSPPQSVSNGHKQ GAVGAAAAAATAFRHYLPSHQKPAAAFPEEYL  
SGYAAPVQSQAAGANFQATYQAGNHLLAQQQQPPETTAYPATDHPVARVSDAPSVASS  
EQAAF SRP THSSEADLLL VFAGHNTAKTPTAATATPAALQTATAGL GAPNHGMEGGPAST  
AANQTYPSLSLFSASHGFDAVSTTIEDDQALAHVRKGI PSYASLRGQGDGTGGFWAASAP  
GANGTGR

>comp7122\_c0\_seq1; 744 363 2423 LEN=2866; translated  
MTSTEWVQVDPVPSIQALAPHASEELFGGDFLGDELMDIYNAAVVGGDENDDDLKEMSSL  
LDTPTDAKKPEAIDGFGAFRSTSFNNLSTALLDPNPESATLSIVPTVEPSNDVPPGSV  
STRVISSSSLEHSLVISPPQPLVAPTSSMVTYVTTTGGTKRKKTVAAANAGPDLKRKSVSG  
SKQKKNVQKGAATKVKTKTSCNPRKVTI SSPDLATTSVVPRTTVLAPTKPISPSVSVHA  
PAASIKQESGPIATSAQNSASQSKASAAPQAVSSAPVAAPAASVLSNPPTEADFKSVA  
QAAVNNLIMNAGSNNTATKSKNEKTTETRPNSVVPVPSATSIPVVTPTIRVDTSTEHVKAL  
TGSNWVAVCGGITSTDSNNQNSDKLNRARRSNLTPDERARQNRDRNREHARNTRLRKK  
AYVEELKATLSALVTQRDAAELEKRHASQRELEQREVRFRVLEEFLLKLRGRNEANAARWA  
AILEENFTLTMFVNFVFRDMVHSNDGSPRYEQVLTGVGVEVMNDSTLFSNFLQNFCKLGNNE  
RITCVYNCDRNSFFMDNVCVAMMDWTAATHGVSGQRVLELLKQIRAKFSPASNKLI SVIM  
SFDTGAINSQLNLIQAQKQSSSEADAAAAAAQVAANEADALLDSLEMPHFEPNPGSFISSR  
SNVVPSSGSSASSNDDKAVISSDDE

>comp7122\_c0\_seq2; 744 589 2649 LEN=3092; translated  
MTSTEWVQVDPVPSIQALAPHASEELFGGDFLGDELMDIYNAAVVGGDENDDDLKEMSSL  
LDTPTDAKKPEAIDGFGAFRSTSFNNLSTALLDPNPESATLSIVPTVEPSNDVPPGSV  
STRVISSSSLEHSLVISPPQPLVAPTSSMVTYVTTTGGTKRKKTVAAANAGPDLKRKSVSG  
SKQKKNVQKGAATKVKTKTSCNPRKVTI SSPDLATTSVVPRTTVLAPTKPISPSVSVHA  
PAASIKQESGPIATSAQNSASQSKASAAPQAVSSAPVAAPAASVLSNPPTEADFKSVA  
QAAVNNLIMNAGSNNTATKSKNEKTTETRPNSVVPVPSATSIPVVTPTIRVDTSTEHVKAL  
TGSNWVAVCGGITSTDSNNQNSDKLNRARRSNLTPDERARQNRDRNREHARNTRLRKK  
AYVEELKATLSALVTQRDAAELEKRHASQRELEQREVRFRVLEEFLLKLRGRNEANAARWA  
AILEENFTLTMFVNFVFRDMVHSNDGSPRYEQVLTGVGVEVMNDSTLFSNFLQNFCKLGNNE  
RITCVYNCDRNSFFMDNVCVAMMDWTAATHGVSGQRVLELLKQIRAKFSPASNKLI SVIM  
SFDTGAINSQLNLIQAQKQSSSEADAAAAAAQVAANEADALLDSLEMPHFEPNPGSFISSR  
SNVVPSSGSSASSNDDKAVISSDDE

>comp7122\_c0\_seq3; 744 325 2385 LEN=2828; translated  
MTSTEWVQVDPVPSIQALAPHASEELFGGDFLGDELMDIYNAAVVGGDENDDDLKEMSSL  
LDTPTDAKKPEAIDGFGAFRSTSFNNLSTALLDPNPESATLSIVPTVEPSNDVPPGSV  
STRVISSSSLEHSLVISPPQPLVAPTSSMVTYVTTTGGTKRKKTVAAANAGPDLKRKSVSG  
SKQKKNVQKGAATKVKTKTSCNPRKVTI SSPDLATTSVVPRTTVLAPTKPISPSVSVHA  
PAASIKQESGPIATSAQNSASQSKASAAPQAVSSAPVAAPAASVLSNPPTEADFKSVA  
QAAVNNLIMNAGSNNTATKSKNEKTTETRPNSVVPVPSATSIPVVTPTIRVDTSTEHVKAL  
TGSNWVAVCGGITSTDSNNQNSDKLNRARRSNLTPDERARQNRDRNREHARNTRLRKK  
AYVEELKATLSALVTQRDAAELEKRHASQRELEQREVRFRVLEEFLLKLRGRNEANAARWA  
AILEENFTLTMFVNFVFRDMVHSNDGSPRYEQVLTGVGVEVMNDSTLFSNFLQNFCKLGNNE  
RITCVYNCDRNSFFMDNVCVAMMDWTAATHGVSGQRVLELLKQIRAKFSPASNKLI SVIM  
SFDTGAINSQLNLIQAQKQSSSEADAAAAAAQVAANEADALLDSLEMPHFEPNPGSFISSR  
SNVVPSSGSSASSNDDKAVISSDDE

>comp7122\_c0\_seq4; 598 65 1957 LEN=2400; translated  
MSSLLDPTDAKKPEAIDGFGAFRSTSFNNLSTALLDPNPESATLSIVPTVEPSNDVPP  
PGSVSTRVISSSSLEHSLVISPPQPLVAPTSSMVTYVTTTGGTKRKKTVAAANAGPDLKRK  
SVSGSKQKKNVQKGAATKVKTKTSCNPRKVTI SSPDLATTSVVPRTTVLAPTKPISPSV  
SVHAPAASIKQESGPIATSAQNSASQSKASAAPQAVSSAPVAAPAASVLSNPPTEADFK  
KSVAQAAVNNLIMNAGSNNTATKSKNEKTTETRPNSVVPVPSATSIPVVTPTIRVDTSTEH  
VKAL TGSNWVAVCGGITSTDSNNQNSDKLNRARRSNLTPDERARQNRDRNREHARNTRL  
LRKKAAYVEELKATLSALVTQRDAAELEKRHASQRELEQREVRFRVLEEFLLKLRGRNEANA  
ARWAAILEENFTLTMFVNFVFRDMVHSNDGSPRYEQVLTGVGVEVMNDSTLFSNFLQNFCKL  
GNNERITCVYNCDRNSFFMDNVCVAMMDWTAATHGVSGQRVLELLKQIRAKFSPASNKLI  
SVIMSFDTGAINSQLNLIQAQKQSSSEADAAAAAAQVAANEADALLDSLEMPHFEPNPGSFI  
SSRSNVVPSSGSSASSNDDKAVISSDDE

>comp7125\_c0\_seq1; 718 107 1396 LEN=1553; translated  
MNAATTYVVKATVLLCIGRHVCEGFTTTPPMTHRQHQNEAISGEISRRVNTVALSTTPP  
PTATRMALRSSFYDDFEDFEMNKDGEDDDDDDEDEYAEIDERSIADFKSKMSNLFDDSGG  
DGDKSAEEGMGTIDDLIDFARKQQAEDSASASAVPAAAAGDWAKATTEIGPGTVLVANP  
SKFCDEGDYGRMSTANEPSSGGKDFFASALGRTGPAPSLAKFGLTQPPRHLGADRQA  
DLLPVVVVVSTEGGQVQGVLLNRRRTGYLLGDLEQPSADNGDSNEDMAPILEKFCIQPLWF  
GGIDSLSVGLDMLHLCPVTKDATKITEDNVYWGSDPAQAQDAMEDPSLDRAYSGFDFKFF  
VQSTIWSNAGSLQSEVDDKIWFPAKVSQNIIFKSRDRMGTKKAQPLWTEIMGLMGDEYGE  
IMKNFYATE

>comp7125\_c0\_seq2; 346 144 548 LEN=548; translated  
MGRKKGGGRGKKNRGDDDDWSDQEEIPVGGTPNATEEPAAPKLSRKQQKLAKQQAKKAAAQK  
QQQQKDSDDSDDLAALMGGKMNLGKKKSGNYSDDDDDDDEDSSDDEMLPPMPSKRNNDRG  
RGRNNRGPPPPMDDS

>comp7127\_c0\_seq1; 440 169 1638 LEN=1862; translated  
MPSSTTDSNNNTTEGLSRNNTVRSFKVMDVLRGANELQQRLDREYASAVASGKSPEAPEK  
VLHLEVGQPESGAPKTVADA AVEALTMPRAKTNVMGYTDAFGLLDLRQRIRQHYVEKYSN  
SDDRTEQQQQSLCVPDVSQIVVTTGSSGAFLLAFTGCFDPSDTVVAIASSGYPCYRNILQA  
LGCEIATVPINDEYKITATELSQEIRDLADGRPSIKGLILSSPSNPTGAMLT PKELKEL  
CDLCNKEKIVFMSDEIYHGISYGNVPEATALQYAAADTEHPVNIENIVVINSFSKYYSMPG  
WRLGWMVPPRFVQAINKLQQNMFINAPTVSQTAALRCWDEETIQELETHVTKYRANREV  
ILARFESSRSPGGEKQQVLKGLTLEKNVAPADGGFYVYVDLGEDNICINENANLDSVSM  
CEELLFRYYVAFTPGIDFEDPNC PKNMGRRFRIRISYAGGTENIRKAMDKFTEFWNSFWLV  
EIANAKNLV

>comp7128\_c0\_seq1; 625 30 1574 LEN=1988; translated  
MAPDHSRESTTWIKKVQYVVSLTLLGLCVALCTAGIVANQTPVAAASNSAVALVLMWVL  
ILWLGILEGGQGSVLGLQPVNSEKFKFSHPYAFACTEL AHKGDNLNRFIVGRQFLVVLV  
FLLNMACTVVDVDFVPGVPHALMSSMVASGLAVMIITVVVGQLAAEVNATNCMLDFIDNR  
LVWVTTLICLMIETSGLLHSVYLVQCFFSNESMSKESTDKTFQQKVWYWGRVAMSVSLLT  
VAMAVTCAALWHDETTMYPGLTTMASFALFFGLVCFGLGLEGIQIAAFVVKLP THIVRA  
SPAAGANCDLVFRGKNFKAVLIGRQICVTTSMFLLARITTTNVPNDLIDTSATDSTVLG  
MPACIQNFNTGLPGALITTVVASLWWRILAAAFP IAFMGNSVVYWTIRLCLCLEATGVF  
SSAWLMADGIKWMRLRFQTDVVYFSDGDKDIDLELNKYGVDDSQTLLSVSTGKNDSESTFL  
TSSSSNGNFSTYGSNSSQEFDTFSNPSPSPSLEF

>comp7128\_c0\_seq2; 284 1 675 LEN=1089; translated  
IRIHIRCCDACQOEHANCDLVFRGKNFKAVLIGRQICVTTSMFLLARITTTNVPNDLID  
TSATDSTVLGMPACIQNFNTGLPGALITTVVASLWWRILAAAFP IAFMGNSVVYWTIRL  
CLCLEATGVFSSAWLMADGIKWMRLRFQTDVVYFSDGDKDIDLELNKYGVDDSQTLLSVST  
GKNDSESTFLTSSSSNGNFSTYGSNSSQEFDTFSNPSPSPSLEF

>comp7132\_c0\_seq1; 1049 147 2819 LEN=2830; translated  
MANIAP TSAANYRSVTPAMNNVRRGVGASSGGTPNSMNMRYTDSFNPIDTPQQQSFNQ  
QSNHGNLTPSSTGLRLTLRKPMGIVFEPMYDPNTPSIQRGV RICDLPRTGAAALSRLKLE  
VGDELLSINDKTM SRLFDEIMDFIEADPEEVNLLFRRPRKETLHARQGINLNKASPN  
GPGVKWIDDEERNVSGGKAKPETSTMSRRSGGRKDRKSSRRSGNGSSSRNHDEETLQSE  
DNDYSRSGTGRSSRGRKRRRDKPYESEFLDILIDTICANPDSVCRDRRRGDDDYSD  
DEFASRDDSTYVTYESEDRELKMKKSKQSKGSKNRDDDSSEYGDETEEDTLDDKRS  
ANSSSKREKGSARLSPPSEGLKSPSDMMKKKSSSGKYEDDGTLETVDSVERN KAMEAALA  
PDPTPPLGLAPNPEPAAGPVLP SDTDDDGNPAPIKTVEYDDMDNGADVSVMESLGGPSLL  
IEKQRQAAAVVATKVAVPPVPADIENFGKDYPLDFGFSREQTIQNDPLRFYTFVVKGLL  
QEHEPEKVRLLLEKLLAKYRGREDHLVQKLSVRYNKEEEEEQDQHEHGLGAARSFEDAVNQ  
GKGSAHANATIQTARERLQNDGFQTDQWPEKETKEQDDEDDKQPEMQSESGTEFSGDSID  
GTSPAVIAQVSELLNYVYKTSVPGQIDRVSTIMRAYEGREAVLLELLETKALIKANREK  
ENAGQLPSFLRNSANAQRNAGNEMSAADGDVPPVTPMATQAAINDDISSMSGVSSPAEQ  
QHAVNAGVLKQINGHDIAPHSAPGTDGNAGHEVEFP RATSSPQKLKGARAPVPEKGD  
AKKKGIFGGLFGGKGGKSKDADK SERTASRTRGLRSPMGRKLNPTETSA

>comp7134\_c0\_seq1; 421 34 1089 LEN=1257; translated  
MVRFSQLCLALLAVDCSVEAFNVLVIGGTRFSGAYLWKSLSYDEGHDTVFNRGKTDPRPV  
ARESDVDFQARLAASTAIKGRKDPESELKSSIDPSKYDYVFDMNAREVTDTKPLAELFVN  
QPNFKQYVFMSSAGVYLKSDEMPHLERDPVDPNSRHKGKLDSEDCRKLNI PWC SFRPTY  
ICGPQNYNPNVERYFFERADGDRPVCIPGHGQHLTGLGHVEDLATAMTNVIGREEKTGKV  
YNLQNSQAISFDGVAKAAGKVLGKDVEI IHYDPASISFPEGKAFPMRPQHFFFTNIHQAM  
TDLDWSPKYD TVESIMKDSYENDFVHIKAAGGLKND FICDDIVA EHA KAMA

>comp7136\_c0\_seq1; 860 1 1952 LEN=2422; translated  
XKNKLEDK KYSSRKAQFCLRIHSHSHNLTTATMRFNQSVVSVLGLFLASAGCANAF TP  
LNLVSHAGRFATSLEASKMEKLPESCVRVTLEVP GPATKAAYEKVCTELSKTVALPGFRK  
GSKIPPQVLEQAMSAKGRNALKTQAIN TLLSELIESALKEEHGLEPIGQPSLETAEEEL  
ASGFVPGEDFEMAVKCDVWPD IQWKKVEGAVDPEKPYMGLKGTYTRKPFDKSKMDKALTD  
LKERYATLDKIEDGEYELQMGDACTVNMEGYMANAEGGKGEKLPDAASGDNVEVILGEGR  
YMTGLVEGLLGA KVSQTREITVTFPDKLRDKTLAGKKA VFDVTVLEAQKRNIPEITDEFA  
EKVRAGLTAESLIEELQTAVDQEDA KEFTPARNSALAKALSQVMDVEVPD TLVTNQARDK

FALMMSDMRNNNGVADEEIKKQISPENFLKYKKIVKDDIVADFKVSMATDEIARIEGIEIE  
DYMVEEQMESIKQEMQESDDDFDEAGIRARVEATLQRQSVMDFLAENADLDVKFVEGEGD  
FDSSLMEKLAEEESLAREQEMESQAPKETGESPATPPDVEAVAEVPAEEVVEEAPVDE  
AETETVEEESDPASDSDSVAEERDVSSMSLQDQAFYALMDSGALNRDGTK  
>comp7136\_c0\_seq2; 448 122 1105 LEN=1575; translated  
ESQKLRDKTLAGKKAFFDVTVLEAQKRNIPEITDEFAEKVRAGLTAESLIEELQTAVDQE  
DAKEFTPARNSALAKALSQVMDVEVPDITLVNTQARDKFALMMSDMRNNNGVADEEIKKQIS  
PENFLKYKKIVKDDIVADFKVSMATDEIARIEGIEIEDYMVEEQMESIKQEMQESDDDFD  
EAGIRARVEATLQRQSVMDFLAENADLDVKFVEGEGDFDSSLMEKLAEEESLAREQEMESQ  
APKETGESPATPPDVEAVAEVPAEEVVEEAPVDEAETETVEEESDPASDSDSVAEER  
DVSSMSLQDQAFYALMDSGALNRDGTK  
>comp7139\_c0\_seq1; 461 1 2124 LEN=2224; translated  
RPEESSRVILLSGPPGVGKTTLAHIVARHAGYRPVEVNASDERSSSGVLKDRIQRAMESTT  
INFKPGNTGADGNNAADYGKPNCLILDEIDGADAKGAIQGLVDIVKAEIPSKSSKQKSGT  
TYLRRPIICICNHKYAPTLPPLPYATHFSVEPPSPARLVVRLKAILNQEKMAMMGGGPL  
LHQLVVSSEGGDIRSCLFTLQFAAAEAKNSTDLSQALAKSLSGTGLKDDRNDITSTISTVF  
RKTTPKRARFSSSKLLVGSSSSSSRDSENRASVSRVMAAVEGLGDNSAAINALFLNVPRVS  
YIDPAFDRCSAALELISFAVDANQQQSGYALPVVTTAGIHLPCRVEVKPDLTFSSRELADM  
KYSRDSNLGLVQRFSEGLPPGAKNLKCRALLSEEFIPMTWILSAGEGACSLSRPASSID  
ILTSPEQEAARKHVSSLCALGLTYVVDREKEETKERVSSFRASVREMRMEPIHRLVEYS  
SQIPPGRASRNEIPAQLKELLAHQVLLLEGFRNRESPRASGSPVKKKAGIAAAESSKTPVT  
NGAEP'TTTTEETS'VVT'PAKVTPR'KLDQWSRPTGLTLTESKEVKVCQAF'LAVLXKHGSGEF  
FGVKNP'GGKSYFFDFSF'IFV'TLLPSPHFFQASPSSTPGN'FLGIAARKGKA'AKSARRAARL  
GLNRASSKKQKLAHSGSGFLLSHVVRM'KYVKGFTQAVRTPCRLSDLE  
>comp7139\_c0\_seq2; 485 1 1983 LEN=2083; translated  
RPEESSRVILLSGPPGVGKTTLAHIVARHAGYRPVEVNASDERSSSGVLKDRIQRAMESTT  
INFKPGNTGADGNNAADYGKPNCLILDEIDGADAKGAIQGLVDIVKAEIPSKSSKQKSGT  
TYLRRPIICICNHKYAPTLPPLPYATHFSVEPPSPARLVVRLKAILNQEKMAMMGGGPL  
LHQLVVSSEGGDIRSCLFTLQFAAAEAKNSTDLSQALAKSLSGTGLKDDRNDITSTISTVF  
RKTTPKRARFSSSKLLVGSSSSSSRDSENRASVSRVMAAVEGLGDNSAAINALFLNVPRVS  
YIDPAFDRCSAALELISFAVDANQQQSGYALPVVTTAGIHLPCRVEVKPDLTFSSRELADM  
KYSRDSNLGLVQRFSEGLPPGAKNLKCRALLSEEFIPMTWILSAGEGACSLSRPASSID  
ILTSPEQEAARKHVSSLCALGLTYVVDREKEETKERVSSFRASVREMRMEPIHRLVEYS  
SQIPPGRASRNEIPAQLKELLAHQVLLLEGFRNRESPRASGSPVKKKAGIAAAESSKTPVT  
NGAEP'TTTTEETS'VVT'PAKVTPR'KLDQWSRPTGLTLTESKEVKASPSSTPGN'FLGIAARK  
GKA'AKSARRAARLGLNRASSKKQKLAHSGSGFLLSHVVRM'KYVKGFTQAVRTPCRLSDLE  
>comp7140\_c0\_seq1; 265 898 1503 LEN=1603; translated  
MAIANQTRISDQSI VHTDDSTKTDSVSNKTD'RKSYKRPLRC'GSSPFKCTNMPYLP'PHSSR  
DL'SLDTIT'EF'PYLEDKFSMSLPCSLFSSSFDEGNSQKVRKSHHNKTRSLDFVMDA'ISIVG  
IDEREELQSTVSVSSPTPFTRSR'PLSPPLASVSDDESVDSSR'KDEERSILRESRWDC  
QSRDFVVRKCD'SAPTCP'RAQ  
>comp7141\_c0\_seq1; 265 1 1715 LEN=2039; translated  
RYFTNP'NKHSLAGAVLQFKLEFFLGTIFPAKYSSVARKAHWCVENAPMDHYDSGGKXKVK  
RL'IVIEDQNGSAKPKNGWDSHNMP'WLATFLFAVTLGLFELFRNLHQMEYI'SFHGEDGMS  
TLLDQPLVTSNRNNTAKTTIAYAVSITHFEVDQNKNEPHNVFDRAAVLHQSIKVAMMKSP  
RYDYHIYAFVHPDAVGAKPLLQRLGYRVQIRDT'PFNISKVSNPELVEAQNGCCSEREYL  
KLYSYLLSDYPVAVHMDLDTIVLRSMD'DVFDMMMLKTGEGPSTSQQSELF'SRKSTMWTSN  
PQNNIKSTHSSKRVL'ENPENINFMFTRDYNMVDPSDPPYKQPYQIGVQGGFLVIRPNQRD  
FDRMIEIILSGGEEYTI'GDGWGSKLGYGGYYGAATI'QGLASFYDYHEKAQRSIELNKC  
RYNTMVDN'PYXFDKGSNKTLCRTLESECEDCRKTKLEDVYSAHFTVCGKPEWCDTLD'PDK  
DRLCSQLM'KKWHQTRL'NKTLEW'NRFSSSKNGNDKANLMYV'PQLNGVDPSESRGKLL'ESN  
KLGHCDGENYIPLQYPAMATTS'LHSDEAPLI  
>comp7142\_c0\_seq1; 152 139 861 LEN=1175; translated  
MTVGSSEPLIGGASLSDTPSRTLFT'PQTARVPKTSYAGFETPTRQPRTPFVFLSDRKSVP  
TELKNLQERTIKRRRDFVARMHELDCHTAKLMSKYAEERM'DLDLATCDTFERTI'IHPLLS  
STERLSLDRQASMNRSVGI'PALERRVGAIDAQMTHHINVIMSDAKMDKLD'SIHDELQRSV  
KPEIRIENKSNKIEAGIVQRFESVVG'TINKSYRSEWASRYVFLYFRALPFDFSSPLTI  
>comp7142\_c0\_seq2; 204 139 1041 LEN=1088; translated  
MTVGSSEPLIGGASLSDTPSRTLFT'PQTARVPKTSYAGFETPTRQPRTPFVFLSDRKSVP  
TELKNLQERTIKRRRDFVARMHELDCHTAKLMSKYAEERM'DLDLATCDTFERTI'IHPLLS

STERLSLDRQASMNRSVGIPALERGVGAIDAQMTHHINVIMSDAKMDKLDSDIHDELQRSV  
KPEIRIENNKSNKIEAGIVQRFESVVGTTINKSYRSEWASSRAEIEVLQRKTETGVPNRKE  
RVEVTLAKISELRARVREERAKRIAADQAIYEDIVRKTSAMKRAMIAMASDGDSTSSASS  
>comp7142\_c0\_seq3; 192 430 1064 LEN=1378; translated  
MXNTLASIQILVANEVYEDGDVKXTWDLFLERMNILLSCHRSSHVQSAFLHDKDCHTA  
KLMSKYAEERMDLTLATCDTFERTI IHPLLSSTERLSLDRQASMNRSVGIPALERGVGAI  
DAQMTHHINVIMSDAKMDKLDSDIHDELQRSVKPEIRIENNKSNKIEAGIVQRFESVVGTI  
NKSYRSEWASRYVFLYFRALPFDFSSPLLLTI  
>comp7142\_c0\_seq4; 244 430 1244 LEN=1291; translated  
MXNTLASIQILVANEVYEDGDVKXTWDLFLERMNILLSCHRSSHVQSAFLHDKDCHTA  
KLMSKYAEERMDLTLATCDTFERTI IHPLLSSTERLSLDRQASMNRSVGIPALERGVGAI  
DAQMTHHINVIMSDAKMDKLDSDIHDELQRSVKPEIRIENNKSNKIEAGIVQRFESVVGTI  
NKSYRSEWASSRAEIEVLQRKTETGVPNRKERVEVTLAKISELRARVREERAKRIAADQA  
IYEDIVRKTSAMKRAMIAMASDGDSTSSASS  
>comp7144\_c0\_seq1; 517 192 1592 LEN=1920; translated  
MQLRRNSEPHTRNRDRKGVPLAPIYENEHTRDLDEMRFVPLRNFMSSETILMQARQWNSSI  
SNDAASEDSYHFNGNSADADSGVDDRNDNTSKKAELPLRIIVDNAKSYIQPKRWQRCAS  
AHSVMLADNRWEDSDSSSNHGPLTSSSSLSLSSSLASSMQPRSDSSSVSPISKTPKSKCL  
KKSSKFSSNPASSSSSLSPRFSSLIIPASTSESSTNFSINNSNRVPHSPPPPKAEKRWGN  
GLSSSSLSNRFKTNLCKSSAKKSGDFEIPLNDDGERSDDSECSVQSF CSTDEKRTTTEI  
ITQAEAVVGSTNYTRYNYPETNYPPSLDPNFSVSKSIDRKEGAPVRPERVPSADTF CNEG  
REVRAKQRKAKNPLGRNFQWDTPTTAGVPVNTSANRCSSTTISARRNLLRGTGLSPGIR  
RVMKTSFDDRNSRKQPMADVVKTN'THTMQSMRSPGNSASASSTRR  
>comp7145\_c0\_seq1; 523 178 1665 LEN=2130; translated  
MDIEWVIYHLTHNDDDEFTSLVDLDIDLCRSDDQDQWDRLLIGLSRNRTVTSVELLRGYQG  
SVVNEDDLRRLFEALRLIPRLSKVKLDCFTTFDLEHSELLFRNNSTIEELWVENCHFHRD  
NTGSSSDEDNDIDNDHDGKDDDEGYNQYERFLGHLASMHRLRQLRIEMPMQLSRDAPLAH  
LLRCSSELRSVVLETSTARTVQMIRNATRRQNFADTMVALRSNETLETDFDMDFGISFSEF  
KEVAAMLKHNNTLKLCLRLDPSTAIINSIGEDSGAYLSDFHNDFNDSVQSLFEALKTNT  
NSSLRKFRQYNMEDRNLEFTLSKEGDNNSNRKKIVQNLIIEIGLDMLECNLSLEFFSFFLF  
DLDFYRGGGSLREKKQLFLRLNQGRKSVLHPSIRERVSQVVFIEQLAKHSIDDLGLFY  
YISMNPSICKPPTEDAVCSAITSVISRQNGCDPKITGDWASSISLESGLVEDQQVVPQTK  
RCRFRDRISQDQVTKP  
>comp7146\_c0\_seq1; 292 165 1145 LEN=1464; translated  
MDKENSFRHQPTTASRPWNAHHQKHTHSFDKPSPLSGISDGFSPDDEMAQRARQGKKWAL  
NDFEIGKPLGRGKFGSVYLAREKQSKYIVAIVKLYKSQLKAGVEHQLRREIEIQSHLRH  
SNILRMYGYFYDSKRIYLILEYSPGGELYKRLVQKVHFSERSSARYISDLATALDFCHTK  
HVIHRDIKPENLLLGAHGEIKIADFGWSVHAPTSRRNTLCGTLDYLPPEMVEGREHDKFV  
DVWSLGVLLFEFLYGGPPFEAEHGSATYRRISRVDLRFPAKPEVSEDAKDLIRKFLVKDP  
HLRIPLKDVPKHPWVVRMLRETKTSY  
>comp7147\_c0\_seq1; 230 1 583 LEN=885; translated  
XTRSAPTIPCFRFDFTDTRTVRTLPIITAESTPQERQQHAMTRYSCGLVCALAMVTPDVAS  
CFAPQPASLSRPTAMVAGTTLFAEGESESEGQFNWLEEWAMQKDAVALMKVQERTQVRM  
LAQMTEDRIYEITKLLDAMVDEATGEISESDLPKAKELAVQTRNLQKEYKDLVTGEPSTL  
LDTFQNLKLGEEDE  
>comp7149\_c0\_seq1; 554 1 1976 LEN=2169; translated  
XECAALTLFQRFDTPTDI IHAIQLLTATKASRRNPATSPSPATAQRNTTPRKQDLVDVPNE  
LVDVATAARRGVAVGWCGFDRGGVRAAACTGVCLRSKSTRARSPRTNGETHLV GALNGIA  
RRKRIAGGGEAPSRAPKQQPRKGLGPETVTKPIAVGSPA EATTVLAMEPEIQHSSDVNEF  
VSPSELFFAGDTPIPVTSRLHIVTPKEDTPRGTWPIFRIMDEDGSRDGGNDGYMHDGDA  
DNLVLGTSSPANKANGSNVMEPSASKNHAPGLSKLRDSLKLYPNHSLAIEQNGLFQPSK  
FEYADTNSRDTLQRLLRHMVRLREMDSIFQNAQRQGRISFYLT CRGEEGIHFGTASALEP  
QDIILGQYREQGPLMWRGFTVQQFADQCFGNASDLGKGRQMPIHYGSRALNYQTISSCLG  
TQIPQAVGVALRLKMMMAAADSEAKKAVSLAFFGDGCTSTDFHSGLNFAATLECPVIFFC  
RNNGYAISTSTREQFAGDGI VSRAPGYGMAGIRVDGNDVFAVHA AVREARTYALENNAPV  
LIEAMSRYRQGHSTSDDSLQYRS AEVDHFACQSDPFDRLRKFFERHEHCGVTDDAIQSV  
IEEEKRAVL DALRTAERKPKPLEDLFNDVYHEMPPSLKAQQAKLNEHVSKYPPDAYAF  
>comp7149\_c0\_seq2; 428 1 2095 LEN=2288; translated  
XECAALTLFQRFDTPTDI IHAIQLLTATKASRRNPATSPSPATAQRNTTPRKQDLVDVPNE  
LVDVATAARRGVAVGWCGFDRGGVRAAACTGVCLRSKSTRARSPRTNGETHLV GALNGIA

RRKRIAGGGEAPSRAKPQQPRKGLGPETVTKPIAVGSPAETTVLAMEPEIQHSSDVNEF  
VSPSELEFFAGDTPIPVTSRLHIVTPKEDTPRGTWPIFRIMDEDGSFRDGGNDGYMHDGDA  
DNLVLGTSSPANKANGSNVMEPSASKNHAPGLSKLRDSLKLYPNHSLAIEQNGLFQPSK  
FEYADTNSRDTLQRLLRHMVRLREMDSIFQNAQRQGRISFYLTTCRGEEGIHFGTASALEP  
QDILGQYREQGPLMWRGFTVQQFADQCFGNASDLGKGRQMPIHYGSRALNYQTISSCLG  
TQIPQAVGVALRLKMMAAADSEAKKAVSLAFFGDGCTSTTDFHSGLNFAATLECPVIFFC  
RNNGYAISTSTREQFAGDGIVSRAPGYGMAGIRVDGNDVFAVHAAVREARTYALENNAPV  
LIEAMSYRQXPSQVSEWDIENHKAAYVSKTLFVFEILSTNNRFCYLQTIIDNKARVMIPSS  
IEAAEEVDHFACQSDPFDRLRKKFFERHEHCGVTDDAIQSVIEEEKRAVLDALRTAERKPK  
PPLEDLFNDVYHEMPPSLKAQQAKLNEHVSKYPDAYAF

>comp7150\_c0\_seq1; 622 124 1311 LEN=1518; translated  
MISRTSFAAVLLAATTASAFVAPTHNNNNHHHRIASASTKTSLSATDRLEQGDPVLLVGP  
GFQQVLVLAHMARAGLKPIVVASQTKLDSFFKSFLKTGDAEDHVGDEDPEGLHKQIRDDS  
TIGMPEAGDPYFAGELKGVVFCAEAEVLPKEFVERVIDFEDSGMSPFADGKPARTICLLPV  
SNKQTKKANNWIPIFNMDSKKDDMWSNFKAFAVAHPSYKEADGNASIVRFGSLLGGSTD  
GPPVLRDYGLDEGMYKMTLEQYRDMRERAFDRYKLSAQVLKGNTINARPADQDTKEKDAL  
AKYPGNVREMFPIILGDYPEIDRTNRHTLASGLVQALMQPVSAIGKEITILSKASSEIPTE  
EEWLEMFANPAAASWDPDFAFEFPEKYGMFANDDLN

>comp7151\_c0\_seq1; 1024 156 2798 LEN=2824; translated  
MGRKWRRNKKNKHSGEKPRDSNKNPDWGKERDPYSIVEAGNFRMEAFYAYQGIHGFRMS  
TDPDGNAGDFVECSASGEKEAERQRWLKALKSSLPISFRIGNNVDPDLRKHLLILELEEF  
VGKKMKIEVEPKGGKRRQIREQQYREQEEQKNEGESEDMRPELEKEVWRWISAAERISYI  
PHAYQVSIKQTLRRNSALKPFHDWIKIQTEAGFITRQEAVSMIPPIVLDPKPNHVLDLDM  
AAAPGSKTSQLEIVNLPDKDCHEPKGCVVANDSDVKRAYMLTHQTRRINSPAVFITNC  
DARFFPLLNNDDIKNNESPEGIFDRVLADVPCTGDGTARKNPGIWKSWALNGYALHPL  
QLAIALRGAQATKVGGLCYSTCSMNPIENEAVVAELLRASEGSLELVERKSELENLSR  
PGMTTWTNLAEARSAREIKNKKKNNPKMIARRKAWEEKNGEKKPESTSTGAGENNEKEI  
EKVETVSTEELEPKIISNKTVPKPDMSDDKEELKLLVESAGMVEYLSHDDVPALMRKRIR  
SSCFPPTPEEISKFNLHYCMRILPQDMNTGGFFVALLKKVAPLNARVRKKFEKLEKDIET  
NNTNSGISTGDEKGGKDDGDSEPKTKKVKVDDPAKDEGAKEDDMIVETDEKFSENATKTI  
ERGAGGEKDKQRKEEKNIKDDFLPVPDNI FNPLKEFYGLDDESFEE SNFMVRSGGDGKI  
LYFVSKTIRSLIDRGIQDKLNVINSGLKGFTRNNKECVVDYRVAQEGVHFVAPHMKKRK  
FAANLKFEMCLSGPTVQIKEFDEFASKIRELSMGSFVVTLLEGYENDYIKKLIIVLWKT  
RGDAVNYLVTQTEIDGIRCKLRAISKIQELEKEAPSVAEP

>comp7152\_c0\_seq2; 166 86 307 LEN=798; translated  
MPETKFDIGMTCDGCANAVKRIILMKMDGVTDIVTDVEAKSAVVTHTDESVPPLMLEKLLK  
WSSASGKSVALAA

>comp7153\_c0\_seq1; 287 1 1120 LEN=1230; translated  
XGMNELIASSTQSSANNAIKPAKISNLLLLSDKLSVPTHSIPEEVTASPLFIEKQKNQI  
FEHTKMSDRKYTLGYIAYGAI AIAISSFCLDGGVSAFSLPSTTTTRLSNTSPSLQLSVDDSKV  
VEGLDSRRELLGRAAGAFASASLGALCMPSSGFAAPNPPKSLSEEYRQGTAAALADMDEMA  
PVPREAYKKLPSGTIIADLRPGKSEDGXGKDREPRQSAMGEFARNQSAVSWYFFVKHKFH  
TGRGSLFEFLTTSLSFNSLNTIRRTKVLKRSNGYFVDSQVAYDGVPIFTVGDGTAI  
AGVDEGVQGMASGGVRRLLIPPSLAYVDGLEDGKPGMPVGFGRQQMRRVQNVNRKDVPG  
EYIYLEVQVTRVR

>comp7153\_c0\_seq2; 294 1 1105 LEN=1323; translated  
XGMNELIASSTQSSANNAIKPAKISNLLLLSDKLSVPTHSIPEEVTASPLFIEKQKNQI  
FEHTKMSDRKYTLGYIAYGAI AIAISSFCLDGGVSAFSLPSTTTTRLSNTSPSLQLSVDDSKV  
VEGLDSRRELLGRAAGAFASASLGALCMPSSGFAAPNPPKSLSEEYRQGTAAALADMDEMA  
PVPREAYKKLPSGTIIADLRPGKSEDGXGKDREPRQSAMGEFARNQSAVSWYFFVKHKFH  
TGRGSLFEFLTTSLSFNSLNTIRRTKVLKRSNGYFVDSQVAYDGVPIFTVGDGTAI  
AGVDEGVQGMASGGVRRLLIPPSLAYVDGLEDGKPGMPVGFGRQQMRRVQNVNRKDVPG  
EYIYLEVS

>comp7153\_c0\_seq3; 325 1 959 LEN=1177; translated  
XGMNELIASSTQSSANNAIKPAKISNLLLLSDKLSVPTHSIPEEVTASPLFIEKQKNQI  
FEHTKMSDRKYTLGYIAYGAI AIAISSFCLDGGVSAFSLPSTTTTRLSNTSPSLQLSVDDSKV  
VEGLDSRRELLGRAAGAFASASLGALCMPSSGFAAPNPPKSLSEEYRQGTAAALADMDEMA  
PVPREAYKKLPSGTIIADLRPGKSEDGVVKTGSRVNLQWVLRKSNGYFVDSQVAYDGVPI  
FTVGDGTAIAGVDEGVQGMASGGVRRLLIPPSLAYVDGLEDGKPGMPVGFGRQQMR  
RVQNVNRKDVPG EYIYLEVS

>comp7153\_c0\_seq4; 318 1 974 LEN=1084; translated  
XGMNELIASSTQSSANNAIKPAKISNLLLLLSDKLSVPTHSIPEEVTASPLFIEKQKNQI  
FEHTKMSDRKYTLGYIAYGAIAISSFCLDGGVSAFSLPSTTTRLSNTSPSLQLSVDDSKV  
VEGLDSRRELLGRAAGAFASASLGALCMPSSGFAAPNPPKSLSEEYRQGTAAALADMDEMA  
PVPREAYKKLPSGTIIADLRPGKSEGDVVKTGSRVNLQWVLRKSNQYFVDSQVAYDGVF  
FIFTVGDGTAIAGVDEGVQGMASGGVRRLLIIPPSLAYVDGLEDKPGMPVGFGRPQQMR  
RVQNVKDVPGEYIYLEVQVTRVR

>comp7156\_c0\_seq1; 198 177 1797 LEN=2306; translated  
MAPKTSETLLTPAEEATIDSCANHHLTRNPVSATSVADDFDRDLTLEESKTPEACKNVA  
PRGPFADHYTNLASASGGARVLFATDDWFATAENLLEDGPPRFDPEAFCEQGVLDGWET  
RRRQAGHDWCLIQLPKRSEISALELDTAHTGNNVPRISLEICDLPAEELSGMVAKLPG  
AYERLLHGGVVRTGRLPGEVAAASEAVERSAGWRELLPETPLSPGFEPTRMHYVRLETPA  
TGNLVRVNYYPDGGVARLRCWGTS LGDVKPATTPLYMPVQTCDACTVVAHSSVSDPSELP  
SRQPTHEHRESSLDQGGIGGACSNKHYPWRLLIQPTLGRDMGDGWETARHPSRPGILRR  
QRGSTLLDTPSLDWAVVRLGGSGSRTGVAKIIVDTKHFRGNYPESVRIEGCHSLPCGETE  
APEAAGGYDPSEKSGEWFSLVPRSRTPDAEHVFERSRGQLENADRVPVTHVRVSIFFPDG  
GSPASGSTAERSSPWSGRAGRTRQTPASGGLSQRQSEPRVPVRLRNKQQQQQCLEQFTI

>comp7157\_c0\_seq1; 407 106 1391 LEN=1391; translated  
MRLKKLTSWSGTRGSKVRRQVEKEKSSKGSRPSSPNSPNNLGLDSSPIRSLKHSPG  
FGTSPNKGEKGPATSETDRGVLRKHEDDRPCLLFEDVEDEDEDMGYAKNIVAKEIEAN  
NSAVKDKKLNSTENIPTKKISNTNPNQKSLSLCTPKKTSLPPQEIIMIDHLAVPPSPMREP  
NVDIMASPSMNKRLDDQGLYLNFNDSSPRTPLGDPVGDIAHRQLKDAERLVRIVLGR  
PSKGDQNFLEPNTILQAIRSYALMKAELIELRAKQETEDGPPAILQALGSPTATTPSKS  
IPSLYSPRRSVQNSHFFSDDVNGGRSRKHGKSSVVDKASPAASHEASIPSSSCAELTH  
AKEMIERLQKELKANETILELKKKINTEENEENQYPIKSPNTIEIQNENADEKQLMKKQ  
NHDFREEPX

>comp7157\_c0\_seq2; 387 1 760 LEN=913; translated  
XKTTNKVENEENQCPITSPDTIESQENADEKQSMKKQQGDIHEEPKQPENINLLLNDTI  
HCPEFVPAENMVAISGEKQQEMEQTNTTDEEITSSTTTVEGENRREAKQSVMIKEKIIIST  
TTPAKGEEEMQISQEEELNLQLETNQKKQIQTPILDEENLLGTTMAQAGEETQTSRGESDQ  
KVRKVENGLNRYDENDKKKSQAATIDKEHILESTTTSNKNNTSILMEVSHNTANSKSN  
LASSSSLSNTPQS

>comp7158\_c0\_seq1; 188 57 335 LEN=1479; translated  
MTPTRSAACLVLVLLAGTTTNAFSPVAKTTPVASATSTTSLRFGFLKELGLEKPSWLPDF  
GGKKGEEVPAPAAVEAEDADAPADEAADTPEE

>comp7160\_c0\_seq1; 696 448 2835 LEN=3313; translated  
MAALKLVPPNATGSAATTNANHQHHTFLPDPPSNFSDNSLSTELLRLSFEDRVAMEEEI  
HGVRC SAPTETPELLECSLREFDALLMARKLNHGSGGNPFGIDGSGKNGTNGIHAADGNG  
TTPVYIRRNLNRVRSITCSSDCGNEQSWYSQLPHSENQPTLHQQTNSNSPTTTYCYL  
NDPEVRLRFLRVDLFVASKAVERLIHFIELTCELIGEVVAHRPIGLQDFTNRREEVALQN  
SRSQYLPFRDRAGR RVFMGVGSCGMHLDPVLLHKIFAFMHWTVSGDVETQQKGVVVVWP  
TEEGFAINENTNKNEPPDSEGWERSIRPKLDKMKRMFQKMKVGFPLRITSRLGKYKDT  
PFFRALSALYYIGFDSQNRMYKAHFGEDTELRYALASYGIPEHLLPLSNSGTVK TANHS  
RWINALKAKQNRQRLEKQQQKQKQONITMNQHGTTNNIHNYFYAEQQMQPMMASL  
SSSENSYNNTTNGFTIGNTNDNNAESELDEEIVDCPGSRDVI FRKGPTYKNNPGNMVF  
RSLIEATHEEHKATRKEKCRITWEIVSKIEEQGRFLDWSKSKEMWVVAKDREKIRTKV  
AACYKQFHR SILAFQEQRLKLSQRQQKQAKHHKNATNLTSEPQSPQSSSLPLPQQVQHN  
YVDGCDHPGGPEFAQERNGDALQQAVAITGMSPKPHVLHLYGSHSAKDGYSASIFSKKV  
GRPQRGVS RFAVVAAGAIIRVIVRPPTPRNTRQERALMKALPILGKKKTRSHNRKKAID  
VLERMKELMVMYEPA

>comp7160\_c0\_seq2; 569 448 3166 LEN=3644; translated  
MAALKLVPPNATGSAATTNANHQHHTFLPDPPSNFSDNSLSTELLRLSFEDRVAMEEEI  
HGVRC SAPTETPELLECSLREFDALLMARKLNHGSGGNPFGIDGSGKNGTNGIHAADGNG  
TTPVYIRRNLNRVRSITCSSDCGNEQSWYSQLPHSENQPTLHQQTNSNSPTTTYCYL  
NDPEVRLRFLRVDLFVASKAVERLIHFIELTCELIGEVVAHRPIGLQDFTNRREEVALQN  
SRSQYLPFRDRAGR RVFMGVGSCGMHLDPVLLHKIFAFMHWTVSGDVETQQKGVVVVWP  
TEEGFAINENTNKNEPPDSEGWERSIRPKLDKMKRMFQKMKVGFPLRITSRLGKYKDT  
PFFRALSALYYIGFDSQNRMYKAHFGXVMVWDTILEIARSTRCCRIGLVLIHGNVIY  
ALLYLAGVAQGLIRVAKKLFCCCLGKTMVDCFIILSCQNTHQKYSVGVVFFHFFIILLTAIA  
FAVAEILYKCIIVSKGEDTELRYALASYGIPEHLLPLSNSGTVK TANHSRWINALKAKQ

NREQRLEKKKQEQQLQKQQQNI TMNQHGTTNNIHNYFYAEQQMQPMMASLSSSENSYNNTTNGFTIGNTNDNNAESELDEEEIVDCPGSRDVI FRKGPTYKNNPGNMVFRSLIEATHEE HSKATRKEKCRITWEIVSKIEEQGGRFLDWSKSKEMWVAKDREKIRTKVAACYKQFHRS ILAQEQRLKLSQRQKQQAHHKNATNLTSQPSPQSSLPQPQVQHNYVDGCDHPGG PEFAQERNGDALQQAIVITGMSPKPHVLHLYGSHSAKDGYSASIFSKKVGPRQGRVSRF AVVAAAGAIRVIVRPPTPRNTRQERALMKALPILGKKKTRSHNRKKAIDVLERMKELMV MYEPA

>comp7162\_c0\_seq1; 541 100 1470 LEN=1470; translated  
MTTTIPRYELLHHGAAANSSPKAIACLNTGGDILQGRDEECGAGSEVGTTELIYASHLM LNVAKPMKLFVGNKADSGDETNVKNHEKIWNVEQTLRTSTSLTAEVETAAANVSTRTA KRVITCVVQLKWLHQDSAKNRNRDDVLVCGFSDGSLTSWYRPGSKDWEEYVLLSHSEG SKHKHFSSDENSNDKDDVTEMKGRSITDIDGYVIYGNHDEEKQTLNLSIVTCSGGAQYF QFSLLLSINGRNDGASTGRQRKEPQYAAIKDTKNVIGTPSNTVKFHTIVSSEGEKSTRHT IDGKQNIRGIFLVGTAAPRHNKIHVLVLPPTVQENDIPAAPKYSGSLTGHEDWITCFDWN TNFELTFVHKANDGESGAIPTVDCCYLASGSQDAKIRLWKWVTTTCKVEDEIAFSDRQIG DSQASIKEQGISSIDESGDGRNVDVADDDDDDEEEE

>comp7163\_c0\_seq1; 353 52 720 LEN=808; translated  
MNTCNLKMKVPIAVAVFAVSCSSVMGFAPVHHSNQICAISADPQAPTATCLYAGGFGGGG MGKKSNGSNKKKNSKEIKLKPKQQWDRYSEFKREPQIQVAVRIKEGGSDEWLEVGRVKS KDNKFIEAAVFRQRAIIAEHAKRLYPVQLSSKKSLEWGYKSSEEAETTEWKAVDKSSMN EVVELDGFVIGFEGRPDPSSGFYCVYDGGRLKIGEETSFV

>comp7164\_c0\_seq1; 473 113 1315 LEN=1431; translated  
MATNATTRPSKIEKDTSSSDRCISRFFRPRKPSRDEENDLKLQRENDVILGSDDDTDD ETDDPSCDKNDSVDVANEKRGPEKPGARCELNTNIEILDDDDPVDACDVISQKEKVESN RLATAKEEDES LGHSDRNFNNGSNLDVDTDGDITTKRPRIASPQKPSVAVGSVKENPFAR FAYSASDASEDNVKTTLNGLDSLSSWQRHSFASKSKLRKSNIANQSNDIKNVSSSRIRVS LKQKQKDFVKIKDISPEEQSKIVRKWQSMADSSAPLEVRRYQVLLAARLHARCQEVTVRK AMKTLRDYFSSLAEPKMTVSVMANIDPGLLASHISNLQFYNAKAKQIVKAAQELLERHR GIVPEDECSLLKITGIGKTFADLLAFVNTREAHKKFGECK

>comp7165\_c0\_seq1; 689 585 2515 LEN=2836; translated  
MTDQQLWDRYIWEQYVGEVEAFEDLDRNTNERVACFIPGVGCTVNSMLELGNHSAQGSQF DEVVDRTPGAGAFTPYHSTPTIINAPEGFNDGVEPGQELFATYGDEWIPWIPGAAVTF S KNFKKADKLMEEFEDWIVEHEENPATKDDVTDELLEDMMWKVMIDFPNVGPRQWEELSVLP REWDRGRLEKELKHVKEQQKRNQETTSSPLPLPNPPSTSTRYWADKGVSLFLREEGKCQ DHIRPDISEIPHAGRGAFASRDLPKGTIVGYAPLIHVGTHGKDLFEIVYNGESKHGMERF EYRDIEDEDEVDGDLEEMAESASNRQNRQYTKQDLVLNYSFGHKNSTLLLTYPYAMVNY IN HSAKDGDPNVRVQWPTRFVAHKPEWLSDELNFFRDSVDKIGLSFDYVALRDIKEGEE ITMDYGDEWVGIXLFLRSLRARIESVLFVLMLEFFASLAVGLRTRCCFLAISHSSRCLSI ARKDQAWKDHVASWTPPENAEYVHSSKFETDYLRTPELLEEPYPWNLHTLCTEYYTKK PGDLENSYSSTFVSDRAEQLLPCRVLDRISLEDDDEEEDYLYTVEIQTSSENSVVVVDYPR SDNGIQLYDKAYS PMWHMKEAFRHKIAVPDDVFPENWMTKQD

>comp7165\_c0\_seq2; 823 60 2159 LEN=2480; translated  
MMLSSAARSRLVLTAAAALFLANAADAAQGGACAPAGPSSADGTCLNVNTNLGDADDVDC GVYMAPSTIGDHSNLGIFTAKAMKNGEKVPYPEIIVPLLWRIFGEHPAKSMTDQQLWDRY IWEQYVGEVEAFEDLDRNTNERVACFIPGVGCTVNSMLELGNHSAQGSQFDEVVDRTPG AGAFTPYHSTPTIINAPEGFNDGVEPGQELFATYGDEWIPWIPGAAVTF SKNFKKADKLM EEFEDWIVEHEENPATKDDVTDELLEDMMWKVMIDFPNVGPRQWEELSVLPREWDRGRLE LKHVKEQQKRNQETTSSPLPLPNPPSTSTRYWADKGVSLFLREEGKCQDHIRPDISEI PHAGRGAFASRDLPKGTIVGYAPLIHVGTHGKDLFEIVYNGESKHGMERFEYRDIEDEDE VDGDLLEEMAESASNRQNRQYTKQDLVLNYSFGHKNSTLLLTYPYAMVNYINHSAKDGDP NVRVQWPTRFVAHKPEWLSDELNFFRDSVDKIGLSFDYVALRDIKEGEEITMDYGDEWD QAWKDHVASWTPPENAEYVHSSKFETDYLRTPELLEEPYPWNLHTLCTEYYTKKPGDL ENSYSSTFVSDRAEQLLPCRVLDRISLEDDDEEEDYLYTVEIQTSSENSVVVVDYPRSDN GIQLYDKAYS PMWHMKEAFRHKIAVPDDVFPENWMTKQD

>comp7165\_c0\_seq3; 302 1 731 LEN=881; translated  
XSRNRSSQIFFDEVKETNTTMMMLSSAARSRLVLTAAAALFLANAADAAQGGACAPAGPSS ADGTCLNVNTNLGDADDVDCGVYMAPSTIGDHSNLGIFTAKAMKNGEKVPYPEIIVPLLW RIFGEHPAKSMTDQQLWDRYIWEQYVGEVEAFEDLDRNTNERVACFIPGVGCTVNSMLEL GNHSAQGSQFDEVVDRTPGAGAFTPYHSTPTIINAPEGFNDGVEPGQELFATYGDEWIP WSK



>comp7165\_c0\_seq4; 712 585 2354 LEN=2675; translated  
MTDGQLWDRYIWEQYVGEVEAFEDLDRNTNERVACFIPGVGCTVNSMLELGNHSAQGSQF  
DEVVDRTSPGAGAFPTYHSTPTIINAPEGFNDGVEPGQELFATYGDEWIPWIPGAAVTFS  
KNFKKADKLMEEFEDWIVEHEENPATKDDVTDELLEDMMWKVMIDFPNVGPRQWEELSVLP  
REWDRGRLEKELKHVKEQQKRNQETTSSPLPLPNPPSTSTRYWADKGVLSLEFLREEGKCQ  
DHIRPDISEIPHAGRGAFASRDLPKGTIVGYAPLIHVGTHTGKDLFEIVYNGESKHGMERF  
EYRDIEDEDEVDGDLEEMAESASNRQNRKYTKQDLVLNYSFGHKNSTLLLTPYGAMVNYIN  
HKSADKGDGPNVRVQWPTREFVAHKPEWLSEDLNFFRDSVDKIGLSFDYVALRDIKEGEE  
ITMDYGDDEWDQAWKDHVASWTPPENAEYVHSSKFETDYLRTPELLEEPYPWNLHTLCT  
EYYTKKPGDLENSYSSTFVSDRAEQLLPCRVLDRISLEDDDEEEDYLYTVEIQTSSENSV  
VVHDYPRSDNGIQLYDKAYS PMWHMKEAFRHKIAVPDDVFPENWMTKQD

>comp7165\_c0\_seq5; 173 585 926 LEN=1076; translated  
MTDGQLWDRYIWEQYVGEVEAFEDLDRNTNERVACFIPGVGCTVNSMLELGNHSAQGSQF  
DEVVDRTSPGAGAFPTYHSTPTIINAPEGFNDGVEPGQELFATYGDEWIPWSK

>comp7165\_c0\_seq6; 800 60 2320 LEN=2641; translated  
MMLSSAARSRLVLTAAAALFLANAADAAQGGACPAGPSSADGTCLNVNTNLGDADDVDC  
GVYMAPSTIGDHSNLGIFTAKAMKNGEKVPYPEIIVPLLWRIFGEHPAKSMTDQQLWDRY  
IWEQYVGEVEAFEDLDRNTNERVACFIPGVGCTVNSMLELGNHSAQGSQFDEVVDRTSPG  
AGAFPTYHSTPTIINAPEGFNDGVEPGQELFATYGDEWIPWIPGAAVTFSKNFKKADKLM  
EEFEDWIVEHEENPATKDDVTDELLEDMMWKVMIDFPNVGPRQWEELSVLPREWDRGRLE  
LKHVKEQQKRNQETTSSPLPLPNPPSTSTRYWADKGVLSLEFLREEGKCQDHIRPDISEI  
PHAGRGAFASRDLPKGTIVGYAPLIHVGTHTGKDLFEIVYNGESKHGMERFEYRDIEDEDE  
VDGDLEEMAESASNRQNRKYTKQDLVLNYSFGHKNSTLLLTPYGAMVNYINHKSADKGDG  
PNVRVQWPTREFVAHKPEWLSEDLNFFRDSVDKIGLSFDYVALRDIKEGEEITMDYGDDEW  
GIXLFLRSLRARIESVFLVMLLFFASLAVGLRTRCCFLAISHSSRCLSIARKDQAWKDH  
VASWTPPENAEYVHSSKFETDYLRTPELLEEPYPWNLHTLCTEYTKKPGDLENSYS  
TFVSDRAEQLLPCRVLDRISLEDDDEEEDYLYTVEIQTSSENSV VVHDYPRSDNGIQLYD  
KAYS PMWHMKEAFRHKIAVPDDVFPENWMTKQD

>comp7167\_c0\_seq1; 304 536 1885 LEN=2033; translated  
MHIFSVGFLLTAVACAFMGMYHNANLWCWIAAAPACPYDQEPHQIDNWQHYEEKADKCE  
ESKYDDDVDVYRLAFYFGPLWLCMVFITVTMGLICAVSRIGCSKKSIA SCLNRHKNSRQ  
KANTDSRKHENDSVEEQSEGDEQSNSSISGAGDAFKRQKANSNSRNHENNSDEEQNGGDE  
QSNISISGARDAFKSDRRSSFFIPAKKKRKT PRNENTTHVLKVLESYLTASQQA KNSQS  
YGSRVVYKQAIYYTLAFYATFTFATINRVFQHFGVSFFPFILLHSFTIPLQGFNLVIYR  
YFHFVRLRQRNPYPFRILLQWTFRWTFLGPPPGARRDSSQKFQSFELPNNGKSTKSRSF  
GPSGAFDSHNCEYSEGSDSVVDDDAELERMPRIEDEFENSFWFDYTPSAELAYEYHTTRA  
LNPAQYPSTLNNVPTQYPTMVTDFDSD

>comp7168\_c0\_seq1; 317 1 1249 LEN=1408; translated  
XGGQELGRYEQLNCITKVMYDMAQD SPESAGAVWSRRIGILRNAHDKRLRDSSFIRGDEE  
MEDGGFWSAWPTTGVFLMRSLGHI FPVTD RRHHVVTPAILLLAQYTAQT PVLSTYDLTM  
GILCSGLLMEYSKEAKRVPEALSFIASAIRLFS PDDAGNLTPALQTAYNQPFCESLRK  
NISRYEDASLPSLKIENDFIMSEESPEIAVTLTLLSLCIGLAEKYVEALNGSFSVSAE TEML  
YDITNAILSLQPKSY PITLQKKISKTAALIAKVCPAQRIP LRRRGKPTASEMAIKTLAPR  
MEDPTRYMSRDKGKSAQA AIDRTRREYKREHKAI SRELRLDGQFIESERRKEKERKDG  
KARAKRQKNFNWLEGEVAAMNEQVRQGGGLLKG GGTGLARAKAATAKMGIKKGGKF

>comp7169\_c0\_seq1; 353 1 987 LEN=1518; translated  
RNLEAQLHHYANHNKSVIISDEAFSRMGIIVGDSVDNRIVLYRLLNKYYPGRV RVVVMYR  
RYEWMQSMWNEGNKPHKNFYDPVSPYKEKFQKWPSEGKTC KTFLEYITRKHKKVARDK  
LKWSEYQKLAEIDNIHVAEYLRRLWKNHSSNVMLNMHEMEHKN DGEDITLLLRENLSL  
VAGDVLRMAKANASYVGRPNPSKNFDYDR LAVKAHERGLLVNQSATLRF EIAQIAEKYLL  
QKLNKTKDSL PNFVCLNQPTHLESLLQKSLQYEREIY PDLSEEATKHHEEAFFKAFERKKFC  
NFDTKLIEDNAVQNFFT KDIPQLDIR

>comp7170\_c0\_seq1; 285 60 863 LEN=925; translated  
MVQSNNTDKTSRSPIVSLNRFERKKNIGLLIRAYAYVQVRDGGAGLPPLVIAGGYDARNA  
ENVEYR GELGTLAKELKVDVDFRLDISDAERASL FQTALCVVYTPDREHFGIVPLEAMHA  
GTPVLAVNSGGPVETVRDGITGYLREPTPSAFGTALLEWTRNPERATAMGRAGKKHVEEV  
FGTERFRDEWGVLVRETAAAASRRKAGRPSTGLVLWAGVPGYAVELAVAYAAVLLATGI  
LRWFGALGASQSI PGALRAAVVGREEL

>comp7171\_c0\_seq1; 877 1 2089 LEN=2283; translated  
XVKSEKAKRNFNRYRTRTFTDHRVQSRDICNTQPHAFPF GSIATMLFPAVHQLGFQAGQA

VSNFISNTAKMMDTNNVNSGTILDVLTDSSELLVKTASAFRLRYVLTLPSTLYKTWWFNLVAK  
DPLHVAIETIMLSIVYMMLSRSTEGYKDSKDKLTKREQEELLWEWKHKTRAPLAPPLK  
EKGNNGNDDDDGKKSNKDNNSKNRQVHFDNDDDLQIVVQKQEGKWLTVTPDHWITDPK  
QRKSTNATTGNKRGPKNVSSKNKTAKKSKADKSKTTTTPPQRSEVELRVLNFNCFDFLGFQ  
TSEALRQASTEALNKYGCSCGPRGFYGTIDVHLQIEEEISRFCRTDQAILYSDGASACS  
STVAFAFRGDLVVDDEGVYEPSTGVYLSRANVHWRHNDMEDLERVLKELQAIDKGLG  
RKPQAQRFFIVVEGLYKNLGTIAPLDEIVALKHKYKYRLILDESFSFGTLGKTGRGTLLE  
HDKRPMYDAEITIALENAMSGIGVTVGNEEVVDHQRLSGAGYCFSSASAPPFTSSASIA  
SLRVLEERPELVERLQSNVRYTYQRLQLQKVDQHNTTNKTKCYNLVVTSDSRSPIVVLQLE  
RESVYESAIMSGIMRECLQRGVIVASTTPLEETLGEAGGTAASSSCATELAPCIRMTVS  
SLHTEEDANTAIDALIESAALVTSRYAASSPVSRTT

>comp7172\_c0\_seq1; 186 374 529 LEN=854; translated  
MEDPTNGKIKAQNVGTGPMGGYVQGAPRRNDFRNDGYSSSSDGGYRNDGF

>comp7174\_c0\_seq1; 200 1 838 LEN=975; translated  
XDDDEDSSSSSPFIRISKSTFRSGMQVIGQFNLFILARCPQNHLWIMDQHACDEKYNFE  
QLCKKTVMHVQPLIRPLPLELNPSEEACVLDHMDVVFASNGFRFRFDETAPIRHRSLTSL  
PHSGAHEGRKAVAFGPSDVLSALCAILTEGSSYEAGSGGTGTDGTGLYGNAVRRRHAGGSQ  
SETPDRLLARLPKAIAMFASRACRTSIMIGTALSREKEMEAVVQKLSDTDSPWNCPHGRPT  
MRHVANVLPFLEEDERRAETYASLPAISVVPAAEEAERES

>comp7175\_c0\_seq1; 200 1 821 LEN=1283; translated  
XRKNKEVTAITYNSRDASRIKMDRNIVMGRNINLNLFFFVSVQISRVTGFVTTKASSVA  
RKYAIHRLSSATLDSVSSDEKMEETREISNALTEPVDEAFTPYRGEQPKALSEIFVPQV  
FSHSLDGVENIEEKLWVPQTDVSVFRPLCFVSGGYVNLRLVRGAGLLSRHRHPGPVH  
GHVLKKGWSYLEHDWVAEAGSYVFEPPEIHTLVVPEGVDEMITLFHVTGSLLYCDPDGN  
VVGAEVDFTKLELAKKHYEKVGGLGEDFVQQFVR

>comp7175\_c0\_seq2; 77 1 324 LEN=786; translated  
XEGVDEMEEANDLQPNEMAGHDNTKKVLALSITMDCKHTALSSHNNKTRYFFSARKITLF  
HVTGSLLYCDPDGNVVGAEVDFTKLELAKKHYEKVGGLGEDFVQQFVR

>comp7177\_c0\_seq1; 353 1 1921 LEN=2502; translated  
XVATHSIFSLSHLFGIPLSEATATGMNRSWKNSDSGSNASTKSKETLVKGQNKISISVKHQ  
RAVRDYNSSPMRQPYSPCNDTVDLSYISSDEDDSFLLHHRADKSSANSRVRLNRRRARFEE  
KEEGYSLKIVSVFYVAVTLSSMHIGFFLRAPASPLPAPTHQIPSRASRKPMVPIGRD  
RSPKQREVDFLEVGFVSDSFEIANKTKKEFISQDAFASWWLGKEKFLVETLETMSA  
SPEGASFQVFMKVGAKQMRVTRDWMDSLIEHMSKWWKIILDPWEYTPNGGTRKRNDVEGY  
LNRIIDIFRTYVFSEDRRMFWDITTDKYRTEWLEVSQSTIAVIAFLNTRDQNGADELMK  
WSLAATLMSLRQLGVGRIVVSGSEERTETEEATVRAAFKIVAEATKDWDPSRKLVSMEF  
CVTADARTGDKDTALNIPIAALKQLRHVFLKQTPASVTECWLGGSF EKRAKKWNYVFLGE  
PDLLLTTTPSSTAALARELRRGNVLAHRLQPMPSADFAEVRPEAEDDGVMPLPRTLPG  
FDRVEDADHIDTEWSSCCDAGNLKPKYDYESCIFFWQCGYKYERLHLQHEEGRPNPAEAH  
KIINSYPLVRLTKGTGVVFSGSEIGRKCTPQLGPCTKDTL

>comp7178\_c0\_seq1; 302 334 1389 LEN=1653; translated  
MAQSLTRIDDSRDILQLMIRQEESSYYKCPHYLSLEERSTQTLVFTPVPSVLQVVEEMASL  
VTDIRAEPMSNCKGDDHCASPGSSTCDLYGDLRAPLRAFLPNSRSEQFQEVLSLSSWRHR  
MLEWGNVAVCVTFGIDASVLESFAFNILDRIYAVEISHSNDAFENLSLTREDFQLFSMVSII  
IYKMFVSRNQLRVHDLLEMAQGFYTADHITTTTERDILEALNWHVNPPTVMDYCDVYLT  
FPQHLYGCGYNDAYSPASQWSSSKRVGEKQRRKCRRCQSMVGIVLQDLFFVDKPNFLTA  
LAAVLLAADAFRGCARDNSFVLEHFLRNIQGVVNIQKEEFDSIIRRLECYC

>comp7180\_c0\_seq1; 398 1 1122 LEN=1122; minus strand; translated  
XGNYQINKAPLPATTSTIPSIIQQQQQQQLLLALLLQQQSNSNNNTGAAMVDLNLALSMAL  
SSPEGIRLLNSFAIGAGVSGTQQNPHVNROGQQPQHDTPSIAQTNRMAVHNIMPLATTM  
IASSQQDALANNQPSLFLSPQSIQQPQLLLQAPPTLPSAQSPAFQLHENANATGGASA  
GMFPATAAAAINQHLATRAAPPPLHPSSAVSTAATNPSCSSTSRNSGAMGSMMLTVNNVNS  
QTGCGKNVDRNVRNLLKKRDKNSSTMKRVNTSNSSYPATKSRFPRIILYNEADDGILGEY  
QTLRLRQQLELFEADGQDVINGTFRQGRTPPIKLGQIGLRCRHCSTPVSIRSKGSVYFSQ  
TIKMYQIAQNMSKX

>comp7181\_c0\_seq2; 58 1 902 LEN=1091; translated  
HTQGADPKRPHERAKPATEAPARXATGAKTPPPDQEPFAGPLSVQALPVAGLPGPWLRG  
QPRAARPPPTPPREESPPGAVSQGRSRGSIARPIAARKGGRNAAAPGPVQEPLLPGAR  
DPPPGAAGPDLPPP GPGRGEGAGGSAGARCFSRNRCRGRKDHLRLGGSRPKGVVLEA  
LPGRDGADPAEPERQGRIRPGAERERHRRAGQPRGELPEFCVRGPPGGDGGGAAGTAEA

HRRAEKGRSEDGARPREKKAAGKEKMALVAEQSTPP IHSTPLNTAIPPTERNGHFSDA  
>comp7182\_c0\_seq1; 424 108 1175 LEN=1693; translated  
MASTSTIRLGPTDDNPSAHLQKAITAFFENKNADHSSNGD TD SGFVIRNKYFSADISLK  
GIGMETNGAQDETAASTIEDGVILVFD AVQSNPDCCRDQPNAGAIATFDSLHATHQRAIS  
DHTCGDLLRLCVGVSLSELSPELGRGDHEKEYSRRILWCLDNGYEYIEADLSEEGQQKG  
RDDRDKDGFARVVEAIEGTVWSSAAMSASKSSTLTKTTYADGKSAVDKSAPPAATKSCKGE  
ETIETKPEGSGYEPVAPPVAAAKSDNAASVFLKEEMPALDPEDQVTEKLFVEMESVLK  
EASEIRQASKSGVLTDDERRERAGNAALALVNLMGQFGLDEEDDDSYGSDGSMVE  
>comp7184\_c0\_seq1; 229 346 999 LEN=1112; translated  
MKLHVGEDTEVRYALGEYGIPVDLIPVTGTGNIKTNHHPWIKIRVMVDMSAHDDDKNGA  
NGSLGRIVECPGSTDVIFKPGKRLMCHPGNVLFEELVVSRIQGSDF TASKRETHR WLANE  
ITKKRGG RFLKWNDEGYWEKMEDEDEISVKISTACKTVLKKVKQKSGSRIVVESSTFAF  
QENNLGRNVGDN GTDQGRSRKRPF GDCFCGDTLPDSK  
>comp7184\_c0\_seq2; 154 1 768 LEN=843; translated  
RCCCSRIIRANEPISDLSASYREGIERRHAQHDEANLPTTATMKALNQENEAISKGEKTN  
DDEV SPLIDVMNAALPQNYQQEKSRAVDECI AEDFLKMSIADRNSVADEIAGKSCMAREE  
TPEMLAASLARLDVELNAIPLKKKIGYLSQKFSKTYINDCNFRLRFLRAELFEAREAAV  
RLAKYCDFVLELFGSVALQRKIWLSDFDRKEIKWIQMGYIQMLPFRDSFGRRVILQIIDA  
SVLREKRVRSNNVN  
>comp7184\_c0\_seq3; 345 1 1680 LEN=1793; translated  
RCCCSRIIRANEPISDLSASYREGIERRHAQHDEANLPTTATMKALNQENEAISKGEKTN  
DDEV SPLIDVMNAALPQNYQQEKSRAVDECI AEDFLKMSIADRNSVADEIAGKSCMAREE  
TPEMLAASLARLDVELNAIPLKKKIGYLSQKFSKTYINDCNFRLRFLRAELFEAREAAV  
RLAKYCDFVLELFGSVALQRKIWLSDFDRKEIKWIQMGYIQMLPFRDSFGRRVILQIIDA  
SVLREKRVRLKTFIFLALVASEDLETQRKGVVLIWVPGGPKDWRRREP SDGRLSHLITQ  
RHEVVP IRYAAFHYCMPDNPF FRIVRSFAVLYGGIGSGTKSRMKLHVGEDTEVRYALGEY  
GIPVDLIPVTGTGNIKTNHHPWIKIRVMVDMSAHDDDKNGANGSLGRIVECPGSTDVIF  
KPGKRLMCHPGNVLFEELVVSRIQGSDF TASKRETHR WLANEITKKRGG RFLKWNDEGYW  
EKMEDEDEISVKISTACKTVLKKVKQKSGSRIVVESSTFAFQENNLGRNVGDN GTDQGR  
SRKRPF GDCFCGDTLPDSK  
>comp7185\_c0\_seq1; 281 345 749 LEN=1149; translated  
MNHQLRQDPSITSSLRSGSMEKHSQYQEQNQS FALGNSASDARKPWTSILQLNNRGPF SR  
EGLEFDKMLLKAVFWWRDSHEQQQRQRQQQLREHDVDNDELYDDDDGEIVDMFLDNV FY  
LIGMPEQVAPAAAA  
>comp7185\_c0\_seq2; 571 345 1697 LEN=2097; translated  
MNHQLRQDPSITSSLRSGSMEKHSQYQEQNQS FALGNSASDARKPWTSILQLNNRGCVNI  
TLGNYSEASRIFEALS RQKASADSFSAVVRYGCNHTGLGHPDGAYINSAADATPVDNSS  
SRAHERPNVEDTEEEFDYDDCSIDSTSCFDDDEDNYDDYMEENDELYKQP PSLVSLDATY  
STGSYTTELEAFTSSQSSGQIQHLQRIRRM TASSQLQTFSTFGKDRYLEEQLOQKNRDP S  
HSAIQRKSMEHIEIYCLPIVMDHEH WLSASAEDQTFVLI FNTAVCNHLWGMALQQQLKEHSQ  
NQR IHL SQQTERVFLVAFKLYRLALNNA STQQHASPASP DASANGNNNSIDYRLSVLALL  
NNLSHVSKTLLGPF SREGL EFDKMLLKAVFWWRDSHEQQQRQRQQQLREHDVDNDELYD  
DDDGEIVDMFLDNV FYLIGMPEQVAPAAAA  
>comp7186\_c0\_seq1; 382 87 1043 LEN=1256; translated  
MADPAEGTPDAGTEANHRKRKRREPLRIGLLGCGAINSTVAKMIANQQAGPSVLAAILVR  
RERSEEEVRSVLTDDSSPPIAPPKSQEPRAAAAAAVRCTTDADEFFAAGSDWNICIEAAG  
QAAVREHGKRCLEMGRDLIMITSIGALTD ETLYRDLRSAAESSGARLV LCTGSM PALDWMG  
AAALAGCGEVLVTQIKPPGAWLGT PAENDHPDLLSLSEPRVLFEGSSREAASTFPKNANV  
AAMLALATAGLDATRASLVADPRAGGNRVLLSFRGAAGTIAVEVEAAPSKTNPRTSAIVA  
LSVVKAIRKLCCPVV VGL  
>comp7187\_c0\_seq1; 333 41 619 LEN=851; translated  
MKLAILLSA IAGASAFAPASHQATSTTKLNAADLET LRGVGPETGGKIFDPLELSQWAPI  
DHLRKAELANGRSAMLATVGVWFPTFWTFEGPVTTTDPVEAFWAADNQWWAQFIVFCAVI  
EGIKYRGEMEGKSFTGEIDKEACL DWTGNWAKMSDTQKEDMAMKELKNGRLAMIGIAGFI  
ASVVVPGSVPAL  
>comp7187\_c0\_seq2; 333 41 619 LEN=944; translated  
MKLAILLSA IAGASAFAPASHQATSTTKLNAADLET LRGVGPETGGKIFDPLELSQWAPI  
DHLRKAELANGRSAMLATVGVWFPTFWTFEGPVTTTDPVEAFWAADNQWWAQFIVFCAVI  
EGIKYRGEMEGKSFTGEIDKEACL DWTGNWAKMSDTQKEDMAMKELKNGRLAMIGIAGFI  
ASVVVPGSVPAL

>comp7188\_c0\_seq1; 331 80 991 LEN=1576; translated  
MALKKLLIPTTFCLVLLGIVSDTALAFVPSKSTGTATQTRLPSQLGVGVPSTAEAIQEM  
SNARFAFGMCFYGalGIGSIGRELIPIVFGRYQTTSSLESdGSIAVRSGSAVANSDEDLR  
IWGYPEKIYKkDVEMILNnkLTPLAIAKKYPIARDEDTDPSYeyThLTeAVPFLGyEGFV  
KANPGANPVALRAVFDsFSNSIGGSNAVSPITAQrNIETyLDNkKVTGALAKKLNGGKSL  
GIAAFVFLlLILLGVGDALAI FHLWKGWFPEWQGFSDIPASLFDQNIgiAVLPNFFVGDVP  
PIP

>comp7189\_c0\_seq1; 606 591 2975 LEN=3022; translated  
MSPRLLKAKILLDQLTAMEDQEPsLADAAAKNNGSDSQDDESTVVVPDtvWSNGLLDGSD  
FVTRYAFRQGVKIAEPLVKYDPVAAEKnlFQQPNRWFVRNVQIAGPLGLWAVGVVQDYLI  
SQSSSSSGTSAaAKKQADASRRRKRAIQLRKAISNLGPaiIKAGKALASRPDLLPSEYLE  
ELQKLQDDVPRFSNELAFRTVeeELGVENfSDVFDLEeDEPIAAASIGQVYKGRlKANGD  
LVAIKIQRPNCEeIIALDLYILRWWSGIYnkIFQLLNRDINVQSIIDDFGELIYREIDYV  
AEAANAQRfnELYASVAEQVfVpKVYSdlTTRKVLVMEWVDGCRlTDSDRMQQFGLDKSX  
AGGYTGSVVDQADSGKRYELMSLSQSYRFVNNQVEDMSSKTKFEIVETRKMfLpFNSSVW  
FCFDLFXLSIGFFHADPHAGNLLACPDGRLCYLDFGMMSYVDRAQRNGFLLAVVHIVNRD  
WPELVRVYRSLGFIPNDTDakPIEVALERALPDVLNADI SELNFKNVvNKLGDIFyTFPF  
SLPPFYISIIrcMGVLEGLAIQVDPTSRIISEAYPYVASRVLTDPPQDLQeALKRLALTS  
DGRVVRWNRLEGLLDEAKGSSGYDVTsALNLLTDYLISeEGDAVLDDLDAGIVHEADNLGT  
EGISYILAAGRALAIRDEISAVNAFRSLQSVITREKNLNEEVKGVLPePTESMTRFGKIL  
SLLDIGAETDYSKLVPIVRKLALEPKVQKTANDVTARLGERALSRTLRSFLGLPPPvFDG  
KGTSASTVFEESMS

>comp7189\_c0\_seq2; 739 591 2813 LEN=2860; translated  
MSPRLLKAKILLDQLTAMEDQEPsLADAAAKNNGSDSQDDESTVVVPDtvWSNGLLDGSD  
FVTRYAFRQGVKIAEPLVKYDPVAAEKnlFQQPNRWFVRNVQIAGPLGLWAVGVVQDYLI  
SQSSSSSGTSAaAKKQADASRRRKRAIQLRKAISNLGPaiIKAGKALASRPDLLPSEYLE  
ELQKLQDDVPRFSNELAFRTVeeELGVENfSDVFDLEeDEPIAAASIGQVYKGRlKANGD  
LVAIKIQRPNCEeIIALDLYILRWWSGIYnkIFQLLNRDINVQSIIDDFGELIYREIDYV  
AEAANAQRfnELYASVAEQVfVpKVYSdlTTRKVLVMEWVDGCRlTDSDRMQQFGLDKSK  
LVDTLVQSSIRQILENGFFHADPHAGNLLACPDGRLCYLDFGMMSYVDRAQRNGFLLAVV  
HIVNRDWPELVRVYRSLGFIPNDTDakPIEVALERALPDVLNADI SELNFKNVvNKLGDIFyTFPF  
SLPPFYISIIrcMGVLEGLAIQVDPTSRIISEAYPYVASRVLTDPPQDLQeALK  
RLALTS DGRVVRWNRLEGLLDEAKGSSGYDVTsALNLLTDYLISeEGDAVLDDLDAGIVHE  
ADNLGTEGISYILAAGRALAIRDEISAVNAFRSLQSVITREKNLNEEVKGVLPePTESMT  
RFGKILSLLDIGAETDYSKLVPIVRKLALEPKVQKTANDVTARLGERALSRTLRSFLGLP  
PPVFDGKGTSASTVFEESMS

>comp7190\_c0\_seq1; 192 1 845 LEN=1491; translated  
XRFQYDELpvtIVDDDDNLDNTNSSEsIIlFLLSfIKSRKMHSIAGFRRKCSRnKSNfS  
RGSSNGATIQSPRNSNPRSSSPeIAPKSPiWSPLlFSGSSPQYKTGKKSAGDSdKQSAAS  
TSLGGGSIRSLSSSPFAGRHRRQPSLDLCTIAEDRRISSNSLNkMAITTPAKTIARTPTI  
MLTTHfSEPLGLQQLPRLEQQPRRDpYNDTDDDYtNSNDSfDCDNCWAYNKSRlPNDRG  
CCFFGFSGQLGVSDSEKwNGARGSSSFHSRSRRLQRRISL

>comp7191\_c0\_seq1; 590 430 2318 LEN=2618; translated  
MvvVXFQAIpKQEGKNSNkKSIRKRKTTTSLSTISSISSSLFERPSWLQCDPFPYAQLDV  
QGQQPYVKPFEDYHDQeENYLHNQQQPSErIVSYDTGGDSYGQPIDPPELsvGRGRSNK  
NKQSKHYPNIRPSGELGQPEQKRKHREpDLQRIQSYTTDGKSFAQPIRPPKSSVGRAKTN  
NNNNNRKRKYFGTGGEWTLQQQNQEEKEQRQSYASGGSSFKQPTQePEPSVgQRNAKTR  
YSQLEKQQLDGSTTTTQAKKNASLHSYGTDTVQPIVMDHQLPLSALSsdVRSpFLSGSKNY  
YKAKHYYPKIERSLTMANQeGLKPYSAIRSNSNSsvIKQeITFPPAESPPPQRlATEM  
GRDIATAESISPYPRVQTQSPMLLAKGLTAGRSRFNSsyKTQQIYPKVRIPSPFSFQRRT  
QNGSLNPNYEGGVSGKEPNDPPIQKKGRIPRFKGVPRRTQISPFVKPKYSDSEKTSSSG  
DMYTNDNLSEASLDYSTNSDLMYTEESSNTYDNGVNGNFYgQGTGDGVFRSVESYNDVYQ  
GFGGENAILDYGQRNDGYDHNEEAREQYLQGLYDGDADDDWYSQSHSFQIPITINICGRE  
EMNQGNdSTEQTINININvNTNEGEGYyEW

>comp7192\_c0\_seq1; 179 1 1608 LEN=1693; translated  
XSSSNNAGAARVSRRCRNALSPATPYLASFLRGLAYACSPDDAPDGYVLLCMAENKLLI  
DLLSQRLQTPSTTVAAFSNPMVYCYNSFLGLPVARQAVSYFLANRFLYAPAESGSGAGEG  
RHFRGPSPIMAGTTAGTARVSLPQALQSINPAHIGIGSGAAGILNGKMLRKNRQXPKRNA  
APVDQNESKKAFSGVDYLFFFGANGSFxiVSLAYLVLALFFLLGDEGDAcLIPAPYyAAF  
ESDLRIVARVVPFAVHMADPASGPSASELDLAFIEAKSQRLNPRFLLITNPNNPLGVVYS

STIMRNAVAVARKRKVHTIVDEIYALSTHRRHGHGFESIISILDNRLGNDVHFVWSVSKD  
FGASGLRFGVVYSQNETLLEGLANLNVFSGVSNPIQMVVSELLTDDDFLDTYLDESRARL  
RRSYHICIEKLEEMVLPFVPAVAGQFVYVDFSSLLPQKTTEWEQKLSALLIDHARLVLT  
GESQRERTPGMFRICYAWVTPEVLEIGMERLSRIVAKIRMDWSDLNESTLSGVII  
>comp7192\_c0\_seq2; 260 1 1453 LEN=1538; translated  
XSSSSNAGAARVSRRCRNALSPATPYLASFLRGLAYACSPDDAPDGYVLLCMAENKLLI  
DLLSQRLQTPSTTVAAFSNPMVYCYNSFLGLPVARQAVSYFLANRFLYAPAESGSGAGEG  
RHFRGPSPIMAGTTAGTARVSLPQALQSINPAHIGIGSGAAGILNALFFLLGDEGDACLI  
PAPYYAAFESDLRIVARVVPFAVHMADPASGPSASELDLAFIEAKSQRLNPRFLLITNPN  
NPLGVVYSSTIMRNAVAVARKRKVHTIVDEIYALSTHRRHGHGFESIISILDNRLGNDVH  
FVWSVSKDFGASGLRFGVVYSQNETLLEGLANLNVFSGVSNPIQMVVSELLTDDDFLD  
TYLDESRARLRRSYHICIEKLEEMVLPFVPAVAGQFVYVDFSSLLPQKTTEWEQKLSALL  
IDHARLVLTGESQRERTPGMFRICYAWVTPEVLEIGMERLSRIVAKIRMDWSDLNESTLS  
GVII  
>comp7192\_c0\_seq3; 201 1 1799 LEN=1884; translated  
XSSSSNAGAARVSRRCRNALSPATPYLASFLRGLAYACSPDDAPDGYVLLCMAENKLLI  
DLLSQRLQTPSTTVAAFSNPMVYCYNSFLGLPVARQAVSYFLANRFLYAPAESGSGAGEG  
RHFRGPSPIMAGTTAGTARVSLPQALQSINPAHIGIGSGAAGILNGKMLRKNRQXPKRNA  
APVDQNESKKAFFSGVDYLFFFGANGSFXIVSLAYLVLALFFLLGDEGDACLIPAPYYAAF  
ESDLRIVARVVPFAVHMADPASGPSASELDLAFIEAKSEVASSHFRASCFQDSSFDVAVF  
RGFFVVPNPGASCLIHILCCLLLSINPSGVLLFGTKSLGRITATAQSQILVDHEPKQPAGR  
RLQQHDLRNAVAVARKRKVHTIVDEIYALSTHRRHGHGFESIISILDNRLGNDVHFVWSV  
SKDFGASGLRFGVVYSQNETLLEGLANLNVFSGVSNPIQMVVSELLTDDDFLDTYLDESR  
ARLRRSYHICIEKLEEMVLPFVPAVAGQFVYVDFSSLLPQKTTEWEQKLSALLIDHARLV  
LTPGESQRERTPGMFRICYAWVTPEVLEIGMERLSRIVAKIRMDWSDLNESTLSGVII  
>comp7192\_c0\_seq4; 282 1 1644 LEN=1729; translated  
XSSSSNAGAARVSRRCRNALSPATPYLASFLRGLAYACSPDDAPDGYVLLCMAENKLLI  
DLLSQRLQTPSTTVAAFSNPMVYCYNSFLGLPVARQAVSYFLANRFLYAPAESGSGAGEG  
RHFRGPSPIMAGTTAGTARVSLPQALQSINPAHIGIGSGAAGILNALFFLLGDEGDACLI  
PAPYYAAFESDLRIVARVVPFAVHMADPASGPSASELDLAFIEAKSEVASSHFRASCFQD  
SSFDVAVFRGFFVVPNPGASCLIHILCCLLLSINPSGVLLFGTKSLGRITATAQSQILVDH  
EPKQPAGRRLQQHDLRNAVAVARKRKVHTIVDEIYALSTHRRHGHGFESIISILDNRLGN  
DVHFVWSVSKDFGASGLRFGVVYSQNETLLEGLANLNVFSGVSNPIQMVVSELLTDDDFL  
DXYLDESRARLRRSYHICIEKLEEMVLPFVPAVAGQFVYVDFSSLLPQKTTEWEQKLSAL  
LIDHARLVLTGESQRERTPGMFRICYAWVTPEVLEIGMERLSRIVAKIRMDWSDLNES  
TLSGVII  
>comp7194\_c0\_seq1; 553 73 2067 LEN=2254; translated  
MKIFPLYTLTLLTEKLNFAATAEGGCGFCEGGSLSNPDALIALTSPFQVHSCFEWQQQSSL  
TEQFSEDACNFIGPFYEAICGCSDI PQTFDQCDL CGSPEKVF SNPSKGLLIPKSNSEIIL  
CSAVYNGVRLGAVPPNDCQVLRGITNFCGGCIPGPTTGLEETDRVSTLPPSIEAFVSNVE  
SPEPTASPTNAPSAGPTTEPTSAPTGVASAEP SYLAT TNSSSAVTEISGRRQIDPPTIEN  
FVNLS EIPVTCDCLPSTGIVSTPDKLITMIKSDNKIVSKTCGALLWDVRAGRDHIDETAC  
SFLQPF FGA VCGCSTFTPLNDEEAQTDTKKTNIETNQKMCENPAHAFOKPYNTLQIPG  
SKTTEITCGGLFSGAMKGA VSGEECEILSSLAYTCGGCGTFQSRFYEEATPEEQCIDCFD  
DNESMYIYKDFGASGTTFHKA FSAPLHCDKKNKKQPGRSKNDNCSKLLYPELEGCVLAP  
ITSFDDLLTIQSIIPPGKAA YTA VH KDGA VLKEDAETCYTSTENDLDSVQISRNRV SERL  
SSENC RVENWMEGLEFGYSHDQYENSGESTRSSSAINGALNTCELLKMGWANYNTGTNVP  
SSTWENGQLSYCNLGPVQEVGAVWAVEPEGQNYGDLRDVSRNWLLPGAVYKCKKIYSCF  
GEKD  
>comp7195\_c0\_seq1; 302 1 1487 LEN=2087; translated  
XPIDLLSPAPPFRITIVRTGIEDPVELGETRLNKS PRQPCKPLSRHKSTQLD TTTQLNSTQL  
NSNRSMETPDQTD RRRHRRAPRTPSSFSFRRTVVLLLAASGLSAVRSLSPSSPRPNTNT  
NTKTE TNCLSDHHPIGGHPQKNKNPSSSSNSNSNHQRTLPSRRQLLDETARITVAAIAAG  
SGAPWMAGIQPAAAVAAPSDAKPRGPVAVVGASGRTGRLCVDA CLR RGIRVRALTRTGE  
WTAPATPEGAPRPFGGDTTGLLSVARCDVANDSDQSIGEALSGCGAVIYAASASKAGGTA  
LAVDHTGVTRVASACLGVGNRCVLISSTATTRPKSLGYVFTNLGVGGNIMGEKRN GER A  
LIEAFEAGERTLAQGAALPSYAILRPGGLEEPKRNKVLGPPSLELSQGDVFSGIISRAD  
VAELTVELALSEAAGTRNTALELYYTDSVVPVEARFGGLKSESASAGSKLRLHGGTYEE  
LLGGLAPGIDFAAVS  
>comp7195\_c0\_seq2; 353 1 1781 LEN=2381; translated

XPIDLLSPAPPFRTIVRTGIEDPVELGETRLNKSPRQPCKPLSRHKSTQLDTTQLNSTQL  
NSNRSMETPDQTDRRHRRAPRTPSSFSFRRTVVLLLAASGLSAVRSLSPSSPRPPNTNT  
NTKTEINCLSDHHPIGGHPQKNKNPSSSSNSNSNHQRTLPSRRQLLDETARITVAAIAG  
SGAPWMAGIQPAAAVAAPSDAKPRGPVVAVVGASGRTGRLCVDVAVSKNLPRVHRIESNGM  
AWRGIGVHFVSQCLGLARNFVVSNSNPQRVSERLFLFSLPLRDTKQIHPATALFGSVLFS  
LFSFFFTPLHSSCFPPSAGPRQCLRRGIRVRALTRTGEWTAPATPEGAPRPFGGDTTGLL  
SVARCDVANDSDQSIGEALSGCGAVIYAASASKAGGTALAVDHTGVTRVASACLGVGVNR  
CVLISSTATTRPKSLGYVFTNLGVGNIMGEKRNGERALIEAFEAGERTLAQGAALPSY  
AILRPGGLEEKRNKVLGPPSLELSQGDVFGSIIISRADVAELTVELALSEAAGTRNTALE  
LYYTDSVVPVEARFGGLLKSESASAGSKLRLHGGTYEELGGLAPGIDFAAVS  
>comp7196\_c0\_seq1; 267 125 458 LEN=458; translated  
MSNAGSEIGSEINADHEENIGSNFLSRLEVSLLDADGDEDLDIEEEVIDIEEVMELNMM  
KEKDRREVKKNREKGGKGGKTLHEGVDPRLFPSYIKEEEEEKNGDDGDNGX  
>comp7197\_c0\_seq1; 656 1 2578 LEN=2715; translated  
XRITTKFASTAISGQTITGRVTTKNVMRILDRVRASGKCPPSLTCEDTNEDFDAIAVEVV  
DANELCLSSSQTVSDDFAKLEMSSTVSGSKEISNQNAVFISRRSVILTVVGATPTENS  
TLAAVLQNDYLGVVQWMDLILRGTVGGIDLLLHLLTNIQQLPVTKGIVKESGMGKAIGS  
IEKHRICVDSPNKVAIVERVNAIKEAWKVSVKVRKDKTLSSSSTPLALKRDLEASSESSL  
LRAKKPKLDDTKKSSLSLLTKVAPSSILSTDDKHGVANVDSSKKVGSILAKKTGKRLKW  
KDHFGGTLEASKILEDDHTLRDENPDEDISGFGDRKSRDRNRERELLAKAKKAKLSDDDD  
EGLVLTVDNLSIQVQPTIAWNI PPSLPERSDATCNNSKEKLAQTTRMATVTPVEYSSEYN  
VPMNPAPLSDVEQALDMSQSSTVTQIIPFFVLQQPIAPDLAPKVIPTSTPAYSPLLAQ  
PSGIANVETVQSLGLPPFLAGQNLQSLRTLANTPELLRSFVDSNGMYDQIRLMNLVETLS  
QNSPSSSQHQGEKTGFQQQKAIQNTSASGLYGQASGHGGMYGMPSENENKYGGQSAYGS  
NNNWQNGMKTGGYRGAQNSSEGNLHLSGYGPGTTQSEI IALFSPYVQVSEVVMKATFCF  
VNTNDPAGAKQAREALNGALLGGQPVRINMAQRKNRDNMQQNGVSNSTGSYYGRNTGMQA  
SNTGYSGMTNSGFVQPPPPPMGISPSQTGSDVRDDRGNPATKNLFFVAGYGQGTSENQLRE  
IFSAYAQISGIIISKGTFSFVNTTDKNAAIHAREVLSGTMVNGGVLRINFAKETGRLGTSF  
DLTYGGVGGQHQRNSHYGR  
>comp7197\_c0\_seq2; 667 1346 3679 LEN=3816; translated  
MSSSTVSGSKEISNQNAVFISRRSVILTVVGATPTENSTLAAVLQNDYLGVVQWMDLIL  
RGTVGGIDLLLHLLTNIQQLPVTKGIVKESGMGKAIGSIEKHRICVDSPNKVAIVERVNA  
IKEAWKVSVKVRKDKTLSSSSTPLALKRDLEASSESSLRAKKPKLDDTKKSSLSLLTK  
VAPSSILSTDDKHGVANVDSSKKVGSILAKKTGKRLKWKDHFGGTLEASKILEDDHTLRD  
ENPDEDISGFGDRKSRDRNRERELLAKAKKAKLSDDDDDEGLVLTVDNLSIQVQPTIAWNI  
PPSLPERSDATCNNSKEKLAQTTRMATVTPVEYSSEYNVPMNPAPLSDVEQALDMSQS  
TVTQIIPFFVLQQPIAPDLAPKVIPTSTPAYSPLLAQPPSGIANVETVQSLGLPPFLAGQ  
NLQSLRTLANTPELLRSFVDSNGMYDQIRLMNLVETLSQNSPSSSQHQGEKTGFQQQKAI  
IQNTSASGLYGQASGHGGMYGMPSENENKYGGQSAYGSNNNWQNGMKTGGYRGAQNSSE  
GNLHLSGYGPGTTQSEI IALFSPYVQVSEVVMKATFCFVNTNDPAGAKQAREALNGALLG  
GQPVRINMAQRKNRDNMQQNGVSNSTGSYYGRNTGMQASNTGYSGMTNSGFVQPPPPPMG  
ISPSQTGSDVRDDRGNPATKNLFFVAGYGQGTSENQLREIFSAYAQISGIIISKGTFSFVNT  
TDKNAAIHAREVLSGTMVNGGVLRINFAKETGRLGTSFSDLTYGGVGGQHQRNSHYGR  
>comp7197\_c0\_seq3; 378 1 1590 LEN=1727; translated  
XRLLFNRRLDQILIPVFFHERKAKLSDDDEGLVLTVDNLSIQVQPTIAWNI PPSLPERS  
DATCNNSKEKLAQTTRMATVTPVEYSSEYNVPMNPAPLSDVEQALDMSQSSTVTQIIPF  
FVLQQPIAPDLAPKVIPTSTPAYSPLLAQPPSGIANVETVQSLGLPPFLAGQNLQSLRTL  
ANTPELLRSFVDSNGMYDQIRLMNLVETLSQNSPSSSQHQGEKTGFQQQKAIQNTSAS  
GLYGQASGHGGMYGMPSENENKYGGQSAYGSNNNWQNGMKTGGYRGAQNSSEGNLHLSGY  
GPGTTQSEI IALFSPYVQVSEVVMKATFCFVNTNDPAGAKQAREALNGALLGGQPVRINM  
AQRKNRDNMQQNGVSNSTGSYYGRNTGMQASNTGYSGMTNSGFVQPPPPPMGISPSQTGS  
DVRDDRGNPATKNLFFVAGYGQGTSENQLREIFSAYAQISGIIISKGTFSFVNTTDKNAAIH  
AREVLSGTMVNGGVLRINFAKETGRLGTSFSDLTYGGVGGQHQRNSHYGR  
>comp7198\_c0\_seq1; 566 125 2086 LEN=2951; translated  
MNVLVVEESPPSSPRGGDRAGVEARNRLESRGRIGVPKNRGQSRQQRQRRVGTSTSL  
AFPVIVALCGCILFPGVNFGAFSPSARNGIRGRPRGTGTPRVAPAAQSVELQWQPFEG  
SPSPTILPQVRRRTLPRTRSRSFPTTTRLTASGDAETQEPSKNTKPGVFANAAAKFRA  
RPGTYLMI PVIAGFVGWLTNYLAVQMI FYPVQFKGIP IWRKAEVPLGLLGWQGVVCKTA  
TMSRALVEMVETQLLTVPEAFARLNPQKVVAGHLARAVPQLGEEVIRDVVGTAGAAGEPFP  
LGLWQKVFGGGGWYSILRFCNARVLTGVVKDLIRNSERIFSLENCVVDQMILDRAKLGQ

LFQKVGRVELDFLTNSGLWFGFLLGLIQMAVALVWENPWALSIGGTIVGLATNWLALKWI  
FEPVNPTKIGPFVVQGMFLTRQKEVAAEFSKFFADNIVTSKQIWNLSILTDASTRPALSQV  
LGGHVKRLLSIAFGLFKGLPSPETIGKVTESAITNLPGHLSGKLHTYVDGALGLETTLR  
TQMEAMSPAKFERVLHPIFEDELTLIIAGGVLGFIAGLIQQGLETGKIKVPPLPKPLQE  
LMARCKTSCSSAVQRLKCVLKKNNNKEKGSSQKNGQNDNVGYDIDNGDGVSGE  
>comp7199\_c0\_seq1; 549 192 2378 LEN=2684; translated  
MSGAPRLPSICVGVLVRSLLLLLFLSLSIFRVDGRRRNPTLESSNPSETAGRRLTESNDE  
SEGATTTALLRHVSNDDGSSRSLIGTNVDVVKATTPDDHLVTNLPLLKDFEAKHWAGLL  
PVNDKGDGYLFYWLFAPDPKVLQEEKDRGRVKQDESNVPLVLWLNGGPACSSMDGLWLEN  
GPFRLDTGNGNGEWGNIKLDPHSHHAPAYVLYVDQPVGTGLAFTTSGNYPNNDQRVNED  
FYYFLTEFMKLGHPNLNVQKNSDGLLTLGRPFFFSGESHAGHYIPSMNMYIRKQANPKT  
LKQRQNGGVVMPPLSGALIGNWLDPVYQYSAHEAAYGYGLIGKAQKRSLALAEKQADL  
RKGRYTSGTFCGLLEKVVSNLKGKGNDFVVSQYDQRVWEKRRFARDFPPGHKEVEAFGR  
THIVANAPIESVLSAIHAMPWESGQRYRECTDPPYNALKHQDGLGVVDIIVEVLEDDTQ  
KTRLLFFNGVHDLICNHVGNENALEALPWKHRAEYINAERYGWNAASTNKLGGYMKEFQ  
LGFLKVLDSGHMVPMDVPSIALDMVRAVYHEPFNTFRQDINPVSESEVTQNSNGCKDCP  
VCEECTMQTCEERFQVSKGSSMLSGIGWGVTAFCAMAGCYCLYFYGSKLLCRRRRQKYYS  
DASGAVELSASSAASNGGYSVDVNDVASESDGLFYGDEEFEDQKIDLSDPFSGGSDDDST  
RRRVRGLS  
>comp7201\_c0\_seq1; 620 118 2208 LEN=3663; translated  
MTRSIHRYYSQAVFAKKKTWPRGVAIQSWGLLSSESPAIAAPSRDFASFHRNKIEGEFGA  
YAKQYDNSIQSPEIFWKEAADSLHWFEKPSTLERNEDNPYLHDWFPDGKINTSFNCLDV  
HVNNGRGDQKALVYDSPMTGKKEEYTYNELLEKVSLEFAGALQNDLGVKPGDRVVIYMP  
PQAAIAMLACARIGAVHSVVFVGGFASHELNSRIDHSTPKVIITASCVEPTRIIPYRPIL  
DDALRLSKHEVESVVVVQRSNVEECELSADVDYDELMKHAEPVKALPLPSTHPHYI  
LYTSGTTGLPKGVVDRDTGGYATALKYSMDTFYSSRPGDVFWAASDIGWVVGHSYLI  
YGPPLLHGCTTVMYEGKPVGTPDEGAFWRIIEEYKVKTMFTAPTAFRAIKQLDPSSE  
FSSKKYDLSSLENVFLAGERSDPEIIRWLERTLPHIPPIDHWWQTELGWPAVGNATGL  
GRVPIRYGSCSLPVTGFKISIVDDEGNELAPNELGNMVIKTPLPPGSMKTLYKDDAR  
FVEKYMOKYPGYYDSGDAAFIDEDGYISIMGRDITINIAGHRLSTGAMEEVLLEHPS  
VADCAVFRVKDDIKGHLPGIIVVCTKGTDPADHEQICDDLAMVREKVGPAAFKNVSV  
VAECGLPKTRSGKILRGMMSKIANGETYTISPTIEDKSVVEILEPKILEMVGKRV  
>comp7202\_c0\_seq1; 676 127 1746 LEN=1811; translated  
MSSPFTPEHVAEWISFGPKLKGKPTPEQQVAAQERKKKCTEMKVRLAKELNDPAWTEK  
KIEKELDRLVAAGESAANEIPRPAYLDPPSGTRDFYPAEMRVQNWLYGKFRESARLFG  
FQEYDAPVLEHVQLYERKAGEEIVDQMYNFVDKEGDHVTLRPEMTPTLARMVLNKT  
NLQGTGEVRVPLPLKWFSSIPQCWRFETTQRGRKREHYQWNMDIVGVDHVHAELELL  
AAAAYFFKSLGIGSDLVGIKVNRAVLEAVLAKHGKQKNPTDGGDLFASACVIIDKLDK  
IGGCAVTEQLATIGVSSESAIEILKALEAPTIEELAAQIGDDCEAIEHVKRLFELADE  
YIGDYLVFDASVVRGLAYYTGVVWEAFDRSGELRAIMGGGRYDRLELYGGKQIPCVG  
FGFGDCVIMELLKDHNKLPNFVGSVDYVVCFSFSPDLYGQAANISLKLKRMGTGASV  
DLMPTPKKKVAASFKHA DNAGARRMVFVAPDEIAKGVVRIKDLRTRKDKNGNAIQVDC  
PLDALDVTVDLVAKAVEAA  
>comp7204\_c0\_seq1; 449 169 1365 LEN=1628; translated  
MVQIHAVSAILFLALIASKPIITVDAELPDAKASFSSSNHKPSNIFRGDPFDTDWDD  
FDTVTKRNSAKTPQFSSSRGSSFFFGFGREFSFFESAPCRVYQSSNDDGEDRFGGYAY  
DSDADGYDLSNHEDDRNDEDDDDFFSRMERYRQRKSISSISSGGFNDNEGYSFSR  
GGRPPFNPWQDKQRRRREQRQHQPRIIQGVQDWMERVDPKLSLQSLPKIVCRIE  
PNTTLKLRKTFRPLKTIIVRLGADYNTQQGIWQFKSSWEDSIIGKITLSGNKELQ  
LTKSWQMSVGGVEDLVTRLRRLRATINLQTFQAYAKVGFRTERTLPIDVIEGFTIL  
KRLPLDGSNGNLKLEVKANVALPEPEIEYRTESQARSLTGMGNVEVSI  
DEMNNLLLDY  
>comp7205\_c0\_seq1; 621 76 2079 LEN=2079; translated  
MDSSTVTADTRSEAI SNRISFKQVVVIFVGI LFLAKQFESSLK FETGETLWQNTAEKH  
SHNITQQEIIAPLDEINSTPRNTR IENDKDKLQRLPPRDDKEGREGIIREGKVTVR  
SKRNSRKNKSKNAKHDTWRKGEDEPDLI IPLHIDTEKLEKNQFGNDYDVAKAEAN  
DPLLDILPSTYRKSETLPTWMKEYFDWHR IQTASMETNWMGSDDYNRKDEGMVNEE  
EYIANNRKYLIVHCLTKEKCGGLSDRLKPLMSVATAAHQPTGLNGKEHRRILLIRW  
QRPYRLEEFVLPNEVNWTVPSYMEKALS RKEENRSPEQRFEGSSIKRVSVRKKIE  
LFSEEHEDTTVMNIKLEEQDGGRGFYQYIVDVAYGSNETATDPLHIKLER  
YQGVKTKDSQREERAFQSWNKIYHSFRRTIFKPSEPVRALIDDKLRV  
LNLTPGEFLGVHYRADYGMGEAERSGPELIGNTASTIVGKCASLLTDGSP  
IYFASDTTSAIERVQEESTVLSTKNIITVTTPLAADLAMNKSLAENPKNP

LHIEWDMGPVEDFYPTFVDLLVMGSSKCMIIYGQGGFSGFASLLSYNASWCWYNFATKCDLP  
IERQKFVSPVASTLPSECCIPHKIDRKQSKIARKERLQEEKIKKAQLAEGSANDGSGSDD  
GTDDGTDD

>comp7208\_c0\_seq1; 986 1 3357 LEN=3532; translated  
XKQNHYNQYHEPRTTFVFLSTHEQSLRTNYHGNDEPCTAFATGVIPLDAFIIIGSDRDP  
SLLAAKRGEKGLAPKLKNTIHLSTPNSGIVAGLSSSATSALPIPPTRSTRPFRSIVDNGT  
NWTREIAAALEFLQTGIPMAKEGSIVHEGWIRQNNNGSQHYSHHHHRRFIDHFSETNFDST  
NDLKKNEQDQONASKTDRIIEEEDSIPRISPSLLPVGSIQNI SRPPDLVRQGRWWEKWI  
V GQNLKESQKQEDVDVIEDLEEPDVQQQSSSQPQLNQNRQPKISATAAAP IHAPGRRLEG  
DYAIKVQIPLANVRNNNKSEVGVVGGGGFGPDHQNVRQNSYFASLQSTSHQSIARSSIL  
REWELRVAHGLEERHLHGQYNSNHFHQQRHSNPAML DGRMYSAKESYPMMMFSLRYE  
PKKEEAVRRRQKLEERGGGGTQFFIMP SRDWRGISYRALLQVPVTHKDDDESLPPDESKHA  
QVVTSTATTPTTRRNKNQRVLFDRFAPRRNGSKGYDASDPTADSKE SDGETTPQESNELN  
VDSDEEDERMGGDDTYVAGLLDDPEMVQGRHRNVMIGDRGVGP IVSSTIQFVKPKLLKADL  
NKQFRERFDGYEPPESQRKFIKAKVVDGIYTLMDPTQELGGEEDDCSSMKDDNDT IETN  
TGGTLNTPTRATS SVSSQSKSNNQRFHRRRLGSTSSASLSTGGGVDEAGSEGDR ETIRMP  
PSLTL SKIRSLKQALAAAVRAKLEISTVALAIIYFERLCLDCRVDKSNRRLSFAACL  
LL AIKINEAHVGI IITKAIEDSSTSKSKTSQRIKSLIRPTKKSSNMFASLLVFFTE  
DWNIS LKHLFAAEWGVFAALQFRLTAKPSDVAFHFKRLMKT LGSDPRRYLGSKVYRSW  
QRTLAE EFRRQWEERVEARRQRKEEKLLQQLQREIEAADRRGSSSSHGGSVGEKQDEK  
DIEDARE VSSKTLEPKGLPPLGTTNTGRRRRYFGEILKSRLGGGGITGPPKRSVST  
ERRRQNGES MMATPSAISKPSSAATGGPAKQRLRPLSQSKSMLSLSARGREMIGKNFV  
IDEVPKSQVVL RMMKEENIDTKIELNTSVEDPGGGKNGILIDGEGGIII

>comp7209\_c0\_seq1; 808 225 2498 LEN=2535; translated  
MDCVSLEQELASAKSALAKLEEKQRQQQENEEEDGWGEDFNDVQDTPSSVLERLLLLLQIT  
TDSL DLSQDYLSFLETTRGILGESCDKDGNDVFI EHDALLAHAQLCEELAHQVILKHAT  
TIMDACPALYEEAYLPLFGYVHECLVTLFRDELQSSRYPTAQGCKNLLNSKTGIEHLASI  
CQHVVRL EKIHEETVNAVEGVEVATNGNTAMLELFHPLLD R VYFHFINTASNNGDNDEL  
P LTVTRIDRLPEWLLNYVNSNFLQEQQPFV VVSVMGPPQSASQFCEELVRLIEWVLVEQR  
K FFDDPAIVGPKSNPQALLQSIEQFLEFDSALLELLADTTSTSDNMNSAAVKKSTINL  
PVT PFSGLMDLLVASSDDLFDWWIQRERESVSTLFSDESEDDNTSKTQLASHISPRAE  
LFCALIRSVQLKASTLTVPGKYLREVAVP ICSQFVDALHETSVDLRNRLVQQHNGQQAS  
PQTSG IVDSEKQLLVSNINEWIEIINGTQLASQLLSKERAVSSQSDHDLGRFGRSLERL  
VEVMM DEFAVTFVETTLMEQAKFANYMLASHILASPEFAEETKTWKS GITVELEDTKT  
VLQYFQ ETCDSILQPEKSLDDDLGIVEEHLSSFAPLGMRRARVADRIVDKLLEVALDS  
NQVTPDIWL EGAKIFAHDVQVLVGSFSDIPVVRLLDVTKFMTQDYDSFFGLFSAIGGL  
MGSDAFLDIE ELNADTTLHEEATSM LKAKNINCRLEYAVSILNRRRS

>comp7210\_c0\_seq1; 425 603 1706 LEN=1946; translated  
MFESILSALLNRYGEEHHRVGSALHNVAVANLRAGLLNDARDAIEEAVRIRKLT  
LGEDDP KVADSLVEYGI ILLSMKKYKKSINVFEDALELREIECCEAEDGESKREAKL  
KKAKIHHNIGCVNFEIKNYDEARKKYMQAIKEQKEIFGSMWLSAFRLVSN  
TSKPGHLTMASMCNKGYI DLEQEKYRDAIETFTESLKIQKVLL  
EADNKLILSTMTNIAFCHCKLEETERARAVYKDLV KLQSESYTEQ  
SQRGWSQSLKCLIYCQVVSFQFEDAFDNLRRLEEYLT  
TKARDKHKNAASELRKTHQLMGEVNYQIFKFP  
TSLDYTSRLTCTNTCGCADDRANVDVSNWFPK  
PKPVNGSKMSGHRMTYA

>comp7210\_c0\_seq2; 542 151 1584 LEN=1824; translated  
MGRKSKDVGRSGNQDDREQDGFGR LFSFGTVDTSVSENSVEEFDSD  
FDESIDSGETTYTD IDDSQSEESDEFTEESSHGASLVRFDKELRAKH  
RAACKSMTIGKYGRAIKMFESILSALL NRYGEEHHRVGSALHNVA  
VANLRAGLLNDARDAIEEAVRIRKLT LGEDDPKVADSLVEYGI  
I ILLSMKKYKKSINVFEDALELREIECCEAEDGESKREAKLKKAKI  
HHNIGCVNFEIKNYDEARKKYMQAIKEQKEIFGSMWLSAFRLVSN  
TSKPGHLTMASMCNKGYIDLEQEKYRDAIETFTESLKIQKVLL  
EADNKLILSTMTNIAFCHCKLEETERARAVYKDLV KLQSESYTEQ  
SQRGWSQSLKCLIYCQVVSFQFEDAFDNLRRLEEYLT  
TKARDKHKNAASELRKTHQLMGEVNYQIFKFP  
TSLDYTSRLTCTNTCGCADDRANVDVSNWFPK  
PKPVNGSKMSGHRMTYA

>comp7211\_c0\_seq1; 290 74 775 LEN=1288; translated  
MAVLQTKHATLILLLLVLACVLGLASAGTNEAGLAFLEENRGKPGV  
VELPSGLQYKVLRRG RGTAHPTSGSPCSCHYEGTLIDGTVFDSSYER  
GEPASFPNQVIKGWTEAMQMMVAGDKW EMYIPSELAYGDRGSP  
PNIGGETLIFRMEILAIQGSSTPALQCKIASPDDDCNEREKTY  
IGKVS GYDASKASKEIRRLRSILGGPMKDDL RDWARRRVNILEQV  
VEGQEAEL

>comp7211\_c0\_seq2; 286 74 957 LEN=1470; translated



MAVLQTKHATLILLLLLVACVLGLASAGTNEAGLAFLEENRGKPGVVVELPSGLQYKVLRRG  
RGTAPTSGSPCSCHYEGTLIDGTVFDSSYERGERPASFAPNQVIKGWTEAMQMMVAGDKV  
RVAMNSWRWVSSFALCRLELGEVLWVRLCSLFCWIAGLLTLALPHNVSHQPPRLFYSVS  
XEMYIPSELAYGDRGSPNIGPGETLIFRMEILAIQSSSTPALQCKIASPDDDCNEREKT  
YIGKVSQYDASKASKEIRRLRSILGGPMKDDLRDWARRRVNILEQVVEGQEAEL  
>comp7212\_c0\_seq1; 562 57 1166 LEN=1636; translated  
MTMAANENGNKVALITGITGQDGSYLADLLLKKGIVHGI VRRSSSFNTGRIDHIYRDRH  
DSDVKLFLHYGDLCDGTNLITLLKIKPTEIYNL GAMSHVKVSFDMPEYTADVDGIGVLR  
MLDAIRAAGMENDVRFYQASTSELYGKVVETPQSETTPFYPRSPYAVAKQYAFWILVNYR  
EAYGMHLTNGILFNHESPRRGRTFVTRKITAGIARIVCGLDNCIYLGNI DSKRDWGHARD  
YVEGMWRMLQQDEPDDYVLATGETHSVREFLEKAFGHAGITLKWKGPTGTVDDEVGVEEGN  
EDRVLVKIDPAYFRPTEVDLLLGDPTKAKAKIGWEATTTFEELVKEMVEHDIAMMKGEVE  
DTDNVKAAN  
>comp7212\_c0\_seq2; 442 423 1244 LEN=1714; translated  
MSHVKVSFDMPEYTADVDGIGVLRMLDAIRAAGMENDVRFYQASTSELYGKVVETPQSET  
TPFYPRSPYAVAKQYAFWILVNYREAYGMHLTNGILFNHESPRRGRTFVTRKITAGIARI  
VCGLDNCIYLGNI DSKRDWGHARDYVEGMWRMLQQDEPDDYVLATGETHSVREFLEKAFG  
HAGITLKWKGPTGTVDDEVGVEEGNEDRVLVKIDPAYFRPTEVDLLLGDPTKAKAKIGWEA  
TTTFFEELVKEMVEHDIAMMKGEVEDTDNVKAAN  
>comp7212\_c0\_seq3; 442 523 1344 LEN=1814; translated  
MSHVKVSFDMPEYTADVDGIGVLRMLDAIRAAGMENDVRFYQASTSELYGKVVETPQSET  
TPFYPRSPYAVAKQYAFWILVNYREAYGMHLTNGILFNHESPRRGRTFVTRKITAGIARI  
VCGLDNCIYLGNI DSKRDWGHARDYVEGMWRMLQQDEPDDYVLATGETHSVREFLEKAFG  
HAGITLKWKGPTGTVDDEVGVEEGNEDRVLVKIDPAYFRPTEVDLLLGDPTKAKAKIGWEA  
TTTFFEELVKEMVEHDIAMMKGEVEDTDNVKAAN  
>comp7213\_c0\_seq1; 590 240 1691 LEN=2065; translated  
MTILARSRLFGSGTHPKAHVHSLSSFKAAPLATGASSRTRLQQQHSQTTNRRFGSVAA  
ASSNAWTRSRSSNGSRTNGSTTYFGVMASAAAATSLLLAPGSLDWN SPSTTLCEEAAPAG  
EGNSIPEESEHDPYDNLPEEDEPTHC SICLTYRQGPCRPYWRKVEACTKDHEKENKNKAE  
EGKSPSDKSKGDDSSDEGDPSSP SERCFKYMMPWIDCASKYRNLYTLIEMDTNYTEGIQ  
ELEATSRHFCWMTGKEPAIDWTKWQEYISSKEQEDEDQTS AETTKNSSKDQGTVSDADPS  
VAMWKTLD TALGDPELV TIETKVPPTIQSPDGDSSGLGILECAYVTDQDNNVIGFAYGTK  
PSELMSDSKDTNKGTEENTTEDNKTTARSNEKSGDGTSEDGGEKMPVPLNIRLVVSR TREF  
VLSASYTHRRIAEGTAAA AKTNGSDSSKKEDAKNFYLESHLYRSKPFSLADAPKAPQQK  
TEQ  
>comp7213\_c0\_seq2; 501 240 1887 LEN=2261; translated  
MTILARSRLFGSGTHPKAHVHSLSSFKAAPLATGASSRTRLQQQHSQTTNRRFGSVAA  
ASSNAWTRSRSSNGSRTNGSTTYFGVMASAAAATSLLLAPGSLDWN SPSTTLCEEAAPAG  
EGNSIPEESEHDPYDNLPEEDEPTHC SICLTYRQVRRRVALRANDRGKSDXEVL IHLIVG  
FPEHILSEATNSKNSQRFDSITVLFELFHSATSFSIKFMGPCRPYWRKVEACTKDHEKEN  
KNKAE EGKSPSDKSKGDDSSDEGDPSSP SERCFKYMMPWIDCASKYRNLYTLIEMDTNY  
TEGIQELEATSRHFCWMTGKEPAIDWTKWQEYISSKEQEDEDQTS AETTKNSSKDQGTVS  
DADPSVAMWKTLD TALGDPELV TIETKVPPTIQSPDGDSSGLGILECAYVTDQDNNVIGF  
AYGTKPSELMSDSKDTNKGTEENTTEDNKTTARSNEKSGDGTSEDGGEKMPVPLNIRLVV  
SR TREFVLSASYTHRRIAEGTAAA AKTNGSDSSKKEDAKNFYLESHLYRSKPFSLADAPKA  
PQQKPT EQ  
>comp7215\_c0\_seq1; 674 1 1870 LEN=1870; translated  
XSTDVIRGILNLLRDGSEESSLD PFGMIQELQASLSIKKDQSLEERSLDIANTSIRIGHGG  
STLYDRRDSEELSTPPAPFSV FYRSPEQRSKDLS DATNWLREKNSDNYLDPTGDFFKLDS  
ILPRKRDQSFEDRAKVIIEGLDWIRGQGMVKDDANDELTFQELSSLGISKSSPEKRLED  
LENAI IWIRNGKVKPGKNDP SRDFYKLDKLLPKKRGQTSEERGRAIESTLDFLRSHNASP  
DDDDVIDKYSVIGSIPVSPRTP EQRYKDLNDILNWIRHQGEN DGIYDPNGYFQKLDVLP  
QKRGQKVKDRSRQIEKFLDWVKGEISSDEIETPLLDEIKAVRHIYRSPEQRIEDIEKVM  
NWI TRRGKKDKIYDPSGDFRKLDKLLPKKKNQPLNDRARAI EGALDYIRNTGISLKD DGI  
VEKLSKVGVIPI SKRTP EQRVQDEHDVLEWLRNKGKNNNFLDPTGDYQKINSFLPKTSGQ  
SREDRAKEIEMALDWIEHKAFFGTDYLLNSFDQKTIDSDEGDNETKSKTYVEILNLWLNKNA  
EKENKTYDPTGDFKKIDKMI PKKRGQSFEDRAHEIEEAEWMRQKEDNNKSKGKRNEKDS  
VRTIQLTVRKSPEDRLKDVDDILN  
>comp7217\_c0\_seq1; 194 401 877 LEN=1070; translated  
MPVNAAPPISVIAEELGYFPINTKGDV MYVPKRVSRKSSPQAI ELANALKEKGITMYGA

YWCPHCSRQKELFGAEAWSVMNYVECSPKGYGFKGQKMCQGIDGYPTFKDKTGRIVNVSG  
ERPLEFLAQQVRFNSNFDPLLEEDLPSAIGTACKLPARQ  
>comp7220\_c0\_seq1; 411 104 1078 LEN=1104; translated  
MPHQRFPKIKILHMAPHEMRFILSETDTSVANTLRRIMIGEVP TLAIDLVEFHENS SVLN  
DEYIAHRLGLIPIRYQPVDSMKGQDCNGAFLPHRECVCYERCPRCSVEFELDVAFDEANT  
FRSEEELMAPLTITSKDLKSNENVI PAHFLSQDEQDESQDAGVAIVKIGPGQRLK LKAI  
ARMGIAKEHAKWCPVAIATYRFWPNITINEEQIATLTMEQKQEMVDVCPDKILEID DVTG  
SIKAVDDAWDRCTYTEDLQEFQQSIKKRKEDDDFVTV EAAEDKFIFTVESTGVM DADEIV  
ISALRVLKDRNLNYLAQEVENIKDM  
>comp7221\_c0\_seq1; 55 1 485 LEN=780; translated  
XTMKKASTMATTGFVFLASRTISI IPTARAFTLVTPKHA AVTARNRFLSTSMNASGPRQT  
AIEERLTEAFAPTFLDVQNTSHGQKSDESHFKV VVVVSEAFEGTRLVGRHRAINKAVSESD  
GSLGFHSLEIGA AKTPEEWNQNSNVAPSPK CQGGDGRGMKN  
>comp7222\_c0\_seq1; 1521 90 4145 LEN=4203; translated  
MSEETRFPI PASLQDLEREPYNLLPYPNDFDDDNEAARADSF SRLVTSIEQGNQ TLLTDG  
ICLFQKQDPHLNEVHYTWMDGERTQALYTLVRKSTSLAPGTRWALI QALCQSVKILSSLL  
EGDVNSNPDDREAIQGDKAMAMPQSSQKTSRQNNVFSQEF RDAMACHLYMLFSIMFFMES  
EARIGNSSGNKSSSRGGVKKGGKSTGDSYLDGEDTIKMRATCADAM LIAAQSMGANRFK  
LWKRGVADESVIVLPCRIAYQMLE SASGVIARKAASGDAALAMIAATV DSCDSLMTIIA  
ALMDLMHSFEHLAPLCAELCTLVSTNKLGV ELIREVGRLDTSRSGGSDSANKASGIKFVA  
PFVCELALCLPQLVLSNFSHLLHLETEPYLLRSAILTALGHIIEFIGKSLQPNSS ESSS  
SQSIECETSPGNLQKRSALLDILQERSLDISSYTRSAVLKSWIRLADSGSIPVERVLPV  
TRMAIDRLQDKTVIVRKQSLQLLTSLENNPFMGDLDPKPYRNKLAEMYSFVKDNL PENI  
KEAYEASLAEARANEESENSILQLEQATLAAAIAEANTMDGVDELNVRENEFRSKVQALK  
FAQSALDFIDHFEDASSNLHGMLLSANVSDVTEALRFFVKARHFNLPCAVTGMKQAL TLM  
WSTEQNIRDEVLKAFLDVFI AKPGTDGKDFLPSNQIANNLLILMSDANVSELASIEEAIG  
SLVKDEKIPAEVFSLSATVIARDRDRASALHILAMAANTDRAIVDSKSR LKII SDHA  
LGDRTEENRDWKMAQAGALALQRVDRAQIDTSCAKYLVLEYIIIEQLCTIARGDWCID DVE  
KDTLQWFSTAEQVIGALFVISPEPEVCCAEIVNGMHNQTLGGSSKVEECHPLRLARFFHV  
LGHIAIKLLVYTEALSGSVRRANAKKCLKKQEEADKAKQERMSESCRSIDEDIEAELGME  
AELEAENERQVAEIAEKEIVGRGLLSVFGPLLVRVVANDGEKFNSEILRQTSALALCKFM  
CVSSSFCDQHLPIFTALNNAPEDDITLRANTVIALGDLA FRFPNEVEPYTPRIYSCLRD  
KSTKVRRLTMLVLTHLILNMIKVKGQVCEIAILLRDPDQIRDTARLLFH ELSKRSNNP  
VYNLLPDIISQLSLVELAKEDFRYILAFLLGYIKKDKQNEMLIEKLCQRF SKCRTISQKA  
DISYCMQKLVNERSIKFLVDNFKLYKDALHDDDVKRNFASILSKAKKVAKPELQGLDE  
FESKINQEA EVGMENQLAGEKAAKAKARASKRYGRRLPKAIAE EPILESDNDSNESEIE  
SEDDVPSKPLTPVNPKNRSGRRACRKRTRNLM  
>comp7223\_c0\_seq1; 314 422 1534 LEN=1665; translated  
MYLSDVQDEHVWTRYMAVDKMRHYKQVLYSTHDLKRFSINGETFSRQAV EDENIFDIVDA  
LVLYQGGKDSTIQELVLESFVLSVPGWKSLSGALRKLFR LKFLFREILVVPPSGFDDSR  
DHDDGIRLVEGLSGLVEACP NLEELHLVECNLHPRACGF LSGDLFEGPSPRRPPSLRVLS  
LEGNP IGNEGVCLLAEAIRDNGLVALDLDLDRVGC SSGMAALADALGDND CLESLSLVGN  
EIGGERGPLRDEDERDICPGEGRDAGDGADADKAGCFCDLLARNTRLKRVRLFQTEASQ  
ISPPPPPVRESFAHVDFLLRLNRRGRRYLGDADVIPKVFPLMLESASDDADVIYSFLKSQ  
SGFTKYRSLQ  
>comp7224\_c0\_seq1; 441 192 1166 LEN=1343; translated  
MGANQSHQIPPVETKSKKEKTFSTEGAGDSNEDMPIFPSP TGHEYDEIDKLQSELPSLID  
EESQQQVDDYRDACNNGKGPVVACFATAEFLSMFERKHMEAFKLFENTCFRPLKDKSPNG  
KEVDGTKAYPPACFN LAKMLMTGKGGVPVDRKRAYDVFD RACRGGHGGACHIQAKMLLSP  
PGALGKGI PYDPYKAMDLYQGVCDMGDSVSCFTLATM LLLRGDRINKMAKNAS PQELQGQE  
PIKQRKNEDDRSAKAMEDFEYIPRDPKRAEQLLKSACRTGAHAPSCFN LTVMYQNGDDGV  
PADPVKAEEYK KTEKAVQTLGGL  
>comp7226\_c0\_seq1; 103 1 285 LEN=285; translated  
NTFTCTSA LFKMVQLTKYSVLAASLAVA AVSGTTTEEMVNIDLIEADADFERLLGGTYGS  
MKPRGMKGAKSSKGGKGYKGYGDDDDDGKGGKGS  
>comp7227\_c0\_seq1; 364 166 1725 LEN=2247; translated  
MLPSSSTNSFQIVESPATSCARSRI PDRGFAREGTSLMVSTERPAGFDVASSPDCSLRDF  
DPDLADMIDSENTRQRQGLEL IASENFASKAVREVLG SCLTNKYSEGMV GKRYGGNEFI  
DQIESLCMARALS LYGLDSEEWGVNVQPYSGSPANFEVYTALLNPHDRIMGLDLPSGGHL  
THGFQTAKKKVSATSVYFESMPYIVSPDTGLIDYDDMEYRAKMFLPKLLIAGGSAYPREW

DYKRMREIADSVGAKLMVDMAHISGLVAGRVVESPFQYADIVTTTTTHKSLRGPRSGMIFA  
RSEYMDSIDSAVFPMLQGGPHNHQIGALAVALEASEPKFTEYAKAVITNAKALGKGLES  
RGHKLATGGTDNHLNLLLDVDRPLGLTGAKVDMVLENASITANKNSLPGDLSAINPGGVRG  
TPALTTTRGMEDEDDFEQVAEFLHRGCKIATEAQEIADRKLKAQLESSEGEIKRKTKKVLLKDF  
KQVLESDQDIKAKIDELRQNVEDCHPILFARMELGNFVE  
>comp7227\_c0\_seq2; 364 166 1725 LEN=2060; translated  
MLPSSSTNSFQIVESPATSCARSRIPDRGFAREGTSLMVSTERPAGFDVASSPSDCSLRDF  
DPDLADMIDSENTRQRQGLELIASENFASKAVREVLGSLTNKYSEGMVKGKRYGGNEFI  
DQIESLCMARALSPLYGLDSEEWGVNVQPYSGSPANFEVYTALLNPHDRIMGLDLPSGGHL  
THGFQTAKKKVSATSVMYFESMPYIVSPDTGLIDYDDMEYRAKMFLLPKLLIAGGSAYPREW  
DYKRMREIADSVGAKLMVDMAHISGLVAGRVVESPFQYADIVTTTTTHKSLRGPRSGMIFA  
RSEYMDSIDSAVFPMLQGGPHNHQIGALAVALEASEPKFTEYAKAVITNAKALGKGLES  
RGHKLATGGTDNHLNLLLDVDRPLGLTGAKVDMVLENASITANKNSLPGDLSAINPGGVRG  
TPALTTTRGMEDEDDFEQVAEFLHRGCKIATEAQEIADRKLKAQLESSEGEIKRKTKKVLLKDF  
KQVLESDQDIKAKIDELRQNVEDCHPILFARMELGNFVE  
>comp7228\_c0\_seq1; 375 173 1252 LEN=1543; translated  
MASRLFARRALPAAAATLAASPSFFSNPGAASCDASPAIESKPDASEFLKASSKPKAGM  
NPSATGEFHKLFPKRQLWQPRVEYPMWDEDWDGREPASTGSKDEDRRRKRKLKKEGVTRH  
IILVRHGQYNEQEKEDEKRLLTPLGREQADHTGRRLREMIIEGVAGTEFGGCSVKVVRVSN  
MARAKETADI IASHFPEVPRAEPDPLNEGRPAHNIPGGRASSSTVERTDESHRRIEAAF  
QRYFYRAGDLPEASIEHDADAAAGNSSESANADPNSEGERKEGGRHEFEVIVCHANVIRYF  
LCRALQIPPEAWLRLCTFNCSLTYLTIRPTGSVNCRMLGDIGHLPYGKSTFSSHAGFNW  
>comp7228\_c0\_seq2; 352 173 1207 LEN=1789; translated  
MASRLFARRALPAAAATLAASPSFFSNPGAASCDASPAIESKPDASEFLKASSKPKAGM  
NPSATGEFHKLFPKRQLWQPRVEYPMWDEDWDGREPASTGSKDEDRRRKRKLKKEGVTRH  
IILVRHGQYNEQEKEDEKRLLTPLGREQADHTGRRLREMIIEGVAGTEFGGCSVKVVRVSN  
MARAKETADI IASHFPEVPRAEPDPLNEGRPAHNIPGGRASSSTVERTDESHRRIEAAF  
QRYFYRAGDLPEASIEHDADAAAGNSSESANADPNSEGERKEGGRHEFEVIVCHANVIRYF  
LCRALQIPPEAWLRLCTFNCSLTYLTIRPTGSVNCRMLGGEFCF  
>comp7228\_c0\_seq3; 299 538 1969 LEN=2008; minus strand; translated  
MVHDKIRHQEKHETFLETKLTPHEHPAVHRTGRTDRQVRQRAVEGAQPQPRLRWDLQGPAQ  
KVPDDVGVADNDLLELVAAPLFFPFAVGVGVCAFAGVAGSRIGVVLDAQFREVPRAVKIPL  
KGRLDPSVRLVGLDGRGRGPPPTGDVVGRSSLVEVGVGFRPRDLRKRVCDDVGGFLRPGH  
VRDPDDLHAAPELGAAGNLDHFPETPACVVGLFTSQRGEETLLVFLLLLVLAVDPKDD  
VAGHPLLPQLALSAAVLALLPVEAGSRPSQSSSHIGYSTCRWDAMQQNAMQHSKEQDRID  
QHHTRILNEPQIRQLKQEGYIYSSKIDLSTLIASSNISFAQYGIHCHKNAPLVAIAAVS  
EIVCETPPVADGFIPAFGLEEAFRNSDASGFDDSIAGLASQLAAPGLEKKEGDAASVAAA  
AGSARRANNRDAIGIWRMQRKRKLSKERTAGCYKKWLGLELRLGLVWSVPVEQG  
>comp7228\_c0\_seq4; 290 343 1723 LEN=1762; minus strand; translated  
MSNIPEHPAVHRTGRTDRQVRQRAVEGAQPQPRLRWDLQGPAQKVPDDVGVADNDLLELVA  
APLFFPFAVGVGVCAFAGVAGSRIGVVLDAQFREVPRAVKIPLKGRLDPSVRLVGLDGR  
GRGPPPTGDVVGRSSLVEVGVGFRPRDLRKRVCDDVGGFLRPGHVDRDPDDLHAAPELGA  
NALDHFPETPACVVGLFTSQRGEETLLVFLLLLVLAVDPKDDVAGHPLLPQLALSAAVL  
ALLPVEAGSRPSQSSSHIGYSTCRWDAMQQNAMQHSKEQDRIDQHHTRILNEPQIRQLK  
QEGYIYSSKIDLSTLIASSNISFAQYGIHCHKNAPLVAIAAVSEIVCETPPVADGFIPAF  
GLEEAFRNSDASGFDDSIAGLASQLAAPGLEKKEGDAASVAAAAGSARRANNRDAIGIWR  
MQRKRKLSKERTAGCYKKWLGLELRLGLVWSVPVEQG  
>comp7229\_c0\_seq1; 285 176 835 LEN=932; translated  
MTMVGEAFLPPNPKNSARTQHKSVLQQLQSENNEETSRRDFVSTTFGFGVSAATGLVMVSG  
QPALAAAASQEEMDKAKVIKGYQRLQYLLDNWEKETTVCMMGGDKLEVSCDRTPIKVMDY  
LGFKSTTDPLYKGEKTLRRLYDIAPANRDESEFIEAVEIFSENAEEASSMAFVSSWGEANP  
GGKDRVELFIERAKKNVIATRNSLKTVIDILDLDASKK  
>comp7229\_c0\_seq2; 285 179 838 LEN=935; translated  
MTMVGEAFLPPNPKNSARTQHKSVLQQLQSENNEETSRRDFVSTTFGFGVSAATGLVMVSG  
QPALAAAASQEEMDKAKVIKGYQRLQYLLDNWEKETTVCMMGGDKLEVSCDRTPIKVMDY  
LGFKSTTDPLYKGEKTLRRLYDIAPANRDESEFIEAVEIFSENAEEASSMAFVSSWGEANP  
GGKDRVELFIERAKKNVIATRNSLKTVIDILDLDASKK  
>comp7234\_c0\_seq1; 735 325 1977 LEN=2425; translated  
MKVTPNMGLQGLGIAVGTMVVLAFLTAKPSVEREVRVAMIGNSLMYNDLPRLLLEAMSNG  
RLSQDSCLHGSASLKSHLYYNGMFMVVKWDTGNARIWNVDNADYEGAAEAYTEYMDYNGN

NGDDGNNYDDDAQQQQQYTYQLDSTQSHIYDFGACTVPQLLLGRDERLVEKYSDNYTDD  
YNEDDLDEDEDYDNDNDNDNGGNQRHQRQLRRERARRRMQHQSQRHETQHQLITRPSSTET  
QSQSNLRVLEQTYHYTYAADDAASVDDFNNDNNADDEYNTYSVVDSFTDTYALQNDGKNP  
CLLSANYFFKQSQYDEFNGGVPKWDYILINDMSRGPCTTPRAESMELLVDVYVFWILK  
TGAVPVFMVTHAYWPSTRDMSGLTDIPTFMSLTYEGYREYAEAISYILPEHQPKLAPVG  
LAFLLVWEENPTMWANLIHMDEIHLTPGTYLEGLIVYATLYGHLSPRVVLLNENIANLF  
SNARRMTPSEHIQEAYPTLDNARYLYHIASRIMNGALPRSFKRYSNGESVDFEPNDSSSS  
SSNNNNNNNN

>comp7235\_c0\_seq1; 448 195 1220 LEN=1395; translated  
MTPPKYTRFSDYEYSRPPDSPAAPSPFPASVDLKGGLNANQLALLGTRLNQLQAMPAP  
TEPLKLPKNGRKNPPSTKNQKAQKKQQQLLDDKSSKDTGDDDDDEDENNSKESSELEVA  
SLHPEDQIQKSLREITSLLLKERTGGRQHYFPRPYQEKQVVFVLANFVFLFSLIAISA  
EIQARAPGWHAAVEQQLMNVQDCSKDKESLFCVENGDMAGLVASVILWMSRSAATKRIF  
LFGFSSPNKLWTAVYESLVTSICWGFSYMFIIRGMNPDNNRDFLRRYWKDAVYGSLAGFN  
AAFMKQVLKNLIPQEVIEDALQERQLKILSWLPSFKPRGEL

>comp7235\_c0\_seq2; 978 112 3172 LEN=3172; translated  
MTTQTEPIEHLEEKIESVEYEEPQTTEKSETTMILSDGDQPNTDPTAATTPEDAPNKSI  
SFHDENTTEVVESIGFPIESDDDATGASSTDSVDADGDAGMITDVTVDVADAKVDADADPE  
VDADLDGGVAVDTSAAACLEPEGTTPIPKGKHSRRFDDSMMLDVVLADSGDEKDVAAAGEQ  
PPIPTPLEITENRSNVTSPMLEADPTDHEQRSRSRSPRKIPREPPGSAVKRARSKHAVER  
EQQMKKTTDNHHPAEQTPTPKDNGVQPEGAGAKKENS SDGKLESVPSMPMETAAMDQ  
QIYHEAMESTTLTSTNDRDPNAYIGGSENEQQPFESSQTPASEASGMGLETKNIKAVDNS  
GGGVAVKPIASNMFHAHATRTTPDTLSPDLLSDYDPIPIPLLPPLVVPQIGSVGSYDLSL  
MQGLHQPPPARLTPHNGYQHPLPQRPSFTQQPMQQHQPTPQSMQLIPHQVATMPGGKRK  
IHLHLWEQVKAGTLSNNEPEKSGFLSFRKKGILRKRPSSDISSPIVEYGKATGAETESD  
QWTNRGTLTVSWYEGTTSIELQEHVQNSVRRKLGKDSIKLVDFRVLDESSDPPEEIVLC  
PYIPDGSRLTLRFATTNDGYMTPPKYTRFSDYEYSRPPDSPAAPSPFPASVDLKGGLN  
ANQLALLGTRLNQLQAMPAPTEPLKLPKNGRKNPPSTKNQKAQKKQQQLLDDKSSKDTG  
DDDDDEDENNSKESSELEVASLHPEDQIQKSLREITSLLLKERTGGRQHYFPRPYQEKQ  
VVFVLANFVFLFSLIAISAEIARAPGWHAAVEQQLMNVQDCSKDKESLFCVENGDMA  
GLVASVILWMSRSAATKRIFLFGFSSPNKLWTAVYESLVTSICWGFSYMFIIRGMNPDNN  
RDFLRRYWKDAVYGSLAGFNAAFMKQXPEEPDSAGGHRGRPPGAAAENSLVAAELQAAGR  
ALTMKAKNDALLHRARTPSKQIPVLHAAATTKRGFISSCYVTCIITKTIEILIDFFQEI  
G

>comp7237\_c0\_seq1; 535 210 1417 LEN=1768; translated  
MTSLPRAIVAFAILSSAMGFVPPKTETRIHGSTALQIKNSDRARTERLLEESMGDDWRLF  
RAKLVAREKASKPSETNNIENQTPTPSSHSTSDSENEPQASSSSTPPSSSKQHDELEKQ  
GQLGELFGAAISSIFKSGNQKESTKSSNENIYRGDSIGRGIPOSELTSQDPFLSADELPI  
HIKPKKYTPVDKHRWAHEIDHIEPGCVLIANEKLGGVFCQTVVLVVDHHEKTGTTGVVIN  
RPLDGNLLKIASEQTNLDLSLKLAFSSPVTYGGPVLT EEFVAVLHGFGHVEXFKKLAPG  
VYIGGSEELMSEVRI SRFDPRNALFIKGHAAVWSGQLEREIQKGVWYIASTSSDFLLRYA  
GAPVTEDDDETDLWADILNLCMGKYAEIASKHSGRGDRRMP

>comp7239\_c0\_seq3; 118 1 814 LEN=906; translated  
XFNCCSMVKSFSFFRIFASSAAISSMLSITRPVVAWTVRQNCRVALSSLASATGRLTRRK  
LSLETTLSTLHGSSLLPGKSLRFDCLENVRRSTAKRFMVSNELGTEVSFRPGDKVQVEVVN  
FGPLGASVEVIGLGHGDDVPLLPVDAPEAYGYGLIMQREISFFRSARNNDVVRGEILPA  
YVQKVAEDGKLDISLRSYGGKAKSADAGTKILERLKEVGGRL EIGEKSSPQEINDEFPG  
ISKSVFKKALGGLYKKGLVKPGPKLIKLMK

>comp7240\_c0\_seq1; 959 123 2045 LEN=2377; translated  
MFSSQILVFLATSALLHPAQSFAPPSSLSASSKASSLVNLGKSKRKGGGGGYSGGGKK  
GGGQQPRQEKQSVQDRFDAATRQFMFTLSGLSKMLPDKSKKILDNIHLSFYPGAKIGIV  
GLNGSGKSTLLKIMAGVDTEYDGLARPLPGASIGYLAQEPVLEFPPTVQENIDEAMKSSQA  
VLDEYNEKSMKLADPDI TDDEMTQIMEDI EKLNDQIEAGDMWELDRVVS RAMDSL RVPPG  
DALVENLSGGEKRRTALCRLLENDHMLLLDEPTNHLDAESI QWLETYLDKFKGTVCIT  
HDRYFLNNCAGWILELDRGKGYPHGNYETFLDMKNKRL EEEKKAETAATAAKAVANELEWI  
RTNPKAKGNKSKARLNRYDELLLAAPTELNRAGQIYIPPGPRLGNEVIEVTNLKKSFGD  
RLIIDLSFSLPPAGIVGVVGPNGAGKSTLIKMLTGLEE PDSGTIKVGD TVKMVSVGQER  
MDELDSKTVFDEISEGLDEIELGTSSIMSRAYLSWFGFKGQSQQSKVGNLSGGERNRAQ  
LAKLMKAGGNLIILDEPSNDLDVEVLRSL EEGLLNFAGSAFVVS HDRYMLDRLCTHILAC  
EGDSKWHYFPGNYAEYEEDRMKRLGESSIKRITYAPLVNS

>comp7241\_c0\_seq1; 1011 635 3853 LEN=4074; translated  
MSYSQDLQQQLQQQRVKVAGYALQQRLGSGSFATVYKGRVEQKESQQEQPQTMSDDDE  
NDSSCDSSTTQRQDKEPPRAVAIKAIARTSEKLTKKVLQNLEIEISILRTYRHPNIVCMH  
DVQKTDRHFYLILEYCGGGDVQHLIRSRQKGRLSERFTRRLMRDLASGLRFLWGQELIHR  
DIKPQNLLLTGRIPPEELVDNPLENAATSCSESIHDDPNQGFSLKIADFGFARHLQTAS  
LAETLCGSPLYMAPEILQHHRDYDAKADLWSVGTVLFEMIAGRPPFNGENHIDLRLNIQRK  
AVRLPHDVRVSKACVNLLRILLNRNPLSRAGFKEFFEACDAFVALGCGGVATGDYEGGVN  
TNSSITKGGSNKTIIGGGIVGGINRIATKDLGTIHENDHSGTNPTSSDSLMTVETTAERN  
QQEVAPTNTVNTSVVSTNATRMTMHPHQKHQQPLPPSKISPNIGYQATSNFIPNSISMGN  
NSANPQLSGRPQTFYQQPNNRNRLAPLQSSPPSSTGILYLNSRIPAPLPSPTTQNAEEQH  
PQPQRHRQQTQHSTAGYAAAGAANGNSVSQSQVSSNDDSGFVMVEHTKSPTSSQHFYAT  
GSQQNLHRNNEITEHRARSSKGMMLSTSPGTGKLLLLGMVGRATIGFGVTVGNNAAPSHTV  
QHQQNLNHTTRMTKVVDIAAANKMLATAEDVGRRAVSVVAHLGDSRAYLGMRLVFKTNEEG  
SSLLSTALMEGVVEEPIISCTGSTNSTDKMYDVSTDNSSSTEIMAPARRRSSTCTSTERTI  
SADVSEEEEEEMPFAISPDAVSVSLPSRSNPSVYNRGTSSVSMKKSSTTKVSPQTI RNRF  
SEALACYLKSLKMLKGAVGAAQRVTKDLKIDIAQLAQMNLSNPNNKIGSDVPKLGQRCEI  
TSNWLCSQFSGVLERADAANAIEISKLVGSGSSDVGENAGHQQTGSTTSVEELIYNHALAS  
GRDGAVKHLGQYDGARSCYRSAGLLAETLLMEVNIGADDRKILEGYVDGFAARIGELDQ  
LMLQQSRMTISSNTAPTSQSQQARRGSGIVGLIGPPPAAGMTSSPFVVGSPR

>comp7241\_c0\_seq2; 873 109 2554 LEN=2775; translated  
MKQDDAKADLWSVGTVLFEMIAGRPPFNGENHIDLRLNIQRKAVRLPHDVRVSKACVNLL  
RILLNRNPLSRAGFKEFFEACDAFVALGCGGVATGDYEGGVNTNSSITKGGSNKTIIGGG  
IVGGINRIATKDLGTIHENDHSGTNPTSSDSLMTVETTAERNQQEVAPTNTVNTSVVST  
NATRMTMHPHQKHQQPLPPSKISPNIGYQATSNFIPNSISMGNNSANPQLSGRPQTFYQQP  
NNRNRLAPLQSSPPSSTGILYLNSRIPAPLPSPTTQNAEEQHPQPQRHRQQTQHSTAGY  
YAAGAANGNSVSQSQVSSNDDSGFVMVEHTKSPTSSQHFYATGSQQNLHRNNEITEHRAR  
SSKGMMLSTSPGTGKLLLLGMVGRATIGFGVTVGNNAAPSHTVQHQQNLNHTTRMTKVVDIA  
AAANKMLATAEDVGRRAVSVVAHLGDSRAYLGMRLVFKTNEEGSSLLSTALMEGVVEEPIIS  
CTGSTNSTDKMYDVSTDNSSSTEIMAPARRRSSTCTSTERTISADVSEEEEEEMPFAISP  
DAPSVSLPSRSNPSVYNRGTSSVSMKKSSTTKVSPQTI RNRFSEALACYLKSLKMLKGAV  
GAAQRVTKDLKIDIAQLAQMNLSNPNNKIGSDVPKLGQRCEITSNWLCSQFSGVLERADA  
ANAIEISKLVGSGSSDVGENAGHQQTGSTTSVEELIYNHALASGRDGAVKHLGQYDGAR  
CYRSAGLLAETLLMEVNIGADDRKILEGYVDGFAARIGELDQLMLQQSRMTISSNTAPTS  
QSQQARRGSGIVGLIGPPPAAGMTSSPFVVGSPR

>comp7242\_c0\_seq1; 710 230 2001 LEN=2316; translated  
MAADDRGVEEEMRNPNRNGNGHPFPLLSIASSPFSSFTWRSRRMSDEATNRHRTDFVVLD  
VLGSGGFGKVYKVNKLDKCYALKVVPMPESVDLEHPTTFSDSNPSRKDRNNEPLQLRR  
VLREVEILSGIPSNDHIVRYAAWVEKTDENDLLSHNQEDSCYSDSCRDYQQSTTDYDE  
SSVSYSYSSGYRSTEKDNDEETRYNRTRRSGPVCHLCKLSYDDWEVGFYEWGLIDSVLQP  
LDLCVDCYKQSLPNNIDTSKMNIRKVRPYRRRLYLMEYCDSTLEKTMKILQQGRMGNRK  
NDHLLLEQTDKATSDGFQSNNNNDDFADRCWSYFRQTVKGVVAHLHASGIIHRDIKPNVFL  
ANEGLAEGTVKIGDLGLATIDATRTPVSNNGSHQDFESESEEEGEEKNTETDPNNKASTG  
VKQSSGVGTFLYRAPEIDTGRYNEKCDVYSLGILLVEIFSNFETAMERAKVLGDLKRTA  
TPKKTVPAAAGGDGEGGLAFHVQLAHRMTALDPNDRPTCAEILDELNDLSVFRSTKGSNPS  
RSSSSLSLSPSPANDEYEENPVLMEKDREIARLRNLLAAHGISYEEDDAR

>comp7243\_c0\_seq1; 322 95 721 LEN=787; translated  
MTFKNQIALLFASFACCDVDWVLANENLPDASSRRSFFFEESGRFLLLSAVTVAVPFP  
ASAKYGEGETSMEIPSYIDYLIEKNTAGDYSNALYKADPATVLKRLAESERRLGEIGDLA  
ERKKWSEINGLITGLTLSSSMSQVVSIASTSGTSKKTQVEQAVKVKADVFAIGQEA  
NRKNAEGCSRQAQLASTDLKGLLELAFE

>comp7246\_c0\_seq1; 661 473 2161 LEN=2315; translated  
MDPHIGQPLMRGYEYVGRQLQYISENPTLCPGNDNDGNGNDQTFDIVTPMDGLPVALVAQA  
GGCSIMEKARVASTMIRPANNVQYLI IQNSSKRGAPTVLANSNQYGDASHDSKQSQIFP  
GSRYYEGSSMESLLQSLTGNEDYDGDSEFYLD FSAMDLDQPHGRVLTHTLDMSEQSSWG  
HDGAINLAVMYVTFVAVGDELFRAVENESARDRRRGTRILMNSKESDVSARTVIVWMLIS  
FVCACICCCLLACIQTSFEEEEEDQEAPRRPVRRLTLEEVRRARFPSFHFNP EHNQNNN  
PSHACTNDETEGSTAEDVQPKCGYMLSDLECTICLDEFVPGVRVRELPCGHVVFHSTCIA  
RWLIERSAVCPLCKLDLYVEPEEDEDSDGNNNGDSDDPGGESPPGEGFASFFSSWWGSR  
TINSEGDISLENPVDGAPAAANTGEETTTAPSQDQPLGAFVEGDTDSGATSEEGESRSWW  
PFSVETAPHTEEEEERLGNRRRRRPRSPGLPSAAGVLRWTMGVFGRRRQHEQQQLPSQEST

DDGNMVTTELTEPLVPRGSLEEV

>comp7246\_c0\_seq2; 608 1036 2529 LEN=2683; translated  
MEKARVASTMIRPANNVQYLI IQNSSKRGAPTVLANSNQYGDEASHDSKQSQIFPGSRY  
GGSSMESLLQSLTGNEDYDGDSEFYLD FSAMDLDQPHGRVLTHLTDMSQSSWGHGAI  
NLAVMYVTFVAVGDELFRAVENESARRRRGGTRILMNSKESDVSARTVIVWMLISFVCA  
CICCCLLACIQTSFEEEEEDQEAPRRPVRRRLTLEEVRRARFPSFHFNPPEHNQNNNPSHAC  
TNDETEGSTAEDVQPKCGGYMQLSDECTICLDEFVPGVVRVRELPCGHVVFHSTCIARWLI  
E  
RSAVCPLCKLDLYVEPEEDEDSDGNNNGSDDDPGGESPPGEGFASFFSSWWWGSRTINSE  
GDISLENPVDGAPAAANTGEETTTAPSQDQPLGAFVEGDTDSGATSEEGESRSWWPFVSE  
TAPHTEEEERLGNRRRRRPRSPGLPSAAGVLRWTMGVFGRRRQHEQQQLPSQESTDDGNM  
VTTELTEPLVPRGSLEEV

>comp7246\_c0\_seq3; 544 473 2372 LEN=2526; translated  
MDPHIGQPLMRGYEYVGRLLQYISENPTLCPGNDNDGNGNDQTFDIVTPMDGLPVALVAQA  
GGCSIMEKARVASTMIRPANNVQYLI IQNSSKRGAPTVLANSNQYGDEASHDSKQSQIFP  
GSRYYGGSSMESLLQSLTGNEDYDGDSEFYLD FSAMDLDQPHGRVLTHLTDMSQSSWG  
HDGAINLAVMYVTFVAVGDELFRAVENESAXGSPSPGRVSEAXHKQASNAFSKVYLPKMLRT  
TIEIDRLRSRHHFCVIAESI IRNRVCCFEGTNLWFLFVAVSIGXVKENPYELKGI RCQ  
CTNRNCLDANFFQCLCVHLLLFARVHPNELRGGGGPGGTTKTRAAPIALEEVRARFPSFH  
FNPEEHNQNNNPSHACTNDETEGSTAEDVQPKCGGYMQLSDECTICLDEFVPGVVRVREL  
PCGHVVFHSTCIARWLIERSAVCPLCKLDLYVEPEEDEDSDGNNNGSDDDPGGESPPGEGFA  
SFFSSWWWGSRTINSEGDISLENPVDGAPAAANTGEETTTAPSQDQPLGAFVEGDTDSGA  
TSEEGESRSWWPFVSE TAPHTEEEERLGNRRRRRPRSPGLPSAAGVLRWTMGVFGRRRQ  
HEQQQLPSQESTDDGNMVTTELTEPLVPRGSLEEV

>comp7246\_c0\_seq4; 385 1712 2740 LEN=2894; translated  
MNSKESDVSARTVIVWMLISFVCAICCCLLACIQTSFEEEEEDQEAPRRPVRRRLTLEE  
VRARFPSFHFNPPEHNQNNNPSHACTNDETEGSTAEDVQPKCGGYMQLSDECTICLDEFV  
PGVVRVRELPCGHVVFHSTCIARWLIERSAVCPLCKLDLYVEPEEDEDSDGNNNGSDDDPGG  
ESPPGEGFASFFSSWWWGSRTINSEGDISLENPVDGAPAAANTGEETTTAPSQDQPLGAF  
VEGDTDSGATSEEGESRSWWPFVSE TAPHTEEEERLGNRRRRRPRSPGLPSAAGVLRWT  
MGVFGRRRQHEQQQLPSQESTDDGNMVTTELTEPLVPRGSLEEV

>comp7247\_c0\_seq1; 324 495 1526 LEN=2478; translated  
MIRQSLRSLRSLRSPRCVFRQQRSAHRSPKPLPTSAAGKGTAGLRKVAARASSSAAA  
GTSGGGPLSRALPAFSRESLRGALPLIGNGAYMALASGFLMTDMLQLRLMLVGGYAGLVS  
FHALHPKPLQIPLRWSALFVVVNAGAAALLFVDQWIGALLTDEERALYEEHFRDGLTPGQ  
FYLVLRKASTREVDDGVVLTKEGKVSPLYLFIKQAKVYHHGTFAAYVDEGGFVNDVAF  
QQMQGEEEGSDEPNRDAGAYGTVVTHGDCKVLVWDQEEELREYLRERPEMDRNMKYTLSQH  
LVRSLKQREVRRRLSASDQDELEQIEMTMPGRREFRRMRTSAW

>comp7247\_c0\_seq2; 278 495 1737 LEN=2689; translated  
MIRQSLRSLRSLRSPRCVFRQQRSAHRSPKPLPTSAAGKGTAGLRKVAARASSSAAA  
GTSGGGPLSRALPAFSRESLRGALPLIGNGAYMVSPAPIGALNADAGRERQEGPPVGGEI  
VGSLLVPLPQLLRRTTNSLSYAHLSLAKTATSFPPLFFSFLPQALASGFLMTDMLQLRLM  
LVGGYAGLVSFHALHPKPLQIPLRWSALFVVVNAGAAALLFVDQWIGALLTDEERALYEE  
HFRDGLTPGQFYLVLRKASTREVDDGVVLTKEGKVSPLYLFIKQAKVYHHGTFAAYV  
EGGFVNDVAFQQMQGEEEGSDEPNRDAGAYGTVVTHGDCKVLVWDQEEELREYLRERPEM  
DRNMKYTLSQHLVRSLKQREVRRRLSASDQDELEQIEMTMPGRREFRRMRTSAW

>comp7248\_c0\_seq1; 112 1 341 LEN=464; translated  
XLVTPCVYLISEAVEASIRNKESIMSAAVAKLMNPAFYKQQWASTCSRAYAKYHPTIREN  
KATVLFHSM LAISFTMYTGTIARVHPEKQEERA IKRQALHEYYEKHGGAPHH

>comp7251\_c0\_seq1; 925 140 2659 LEN=3342; translated  
MSEAESDKLAAANTIDNSGAENVSGEDRDLVERVVAKNESVGENVSVLGS TDQKLDWV  
LTNYDKKNSE PQSLEEEELKRLQALRSYLLLDSEREEQFERLTALASRVMDVP IALVSLVD  
LGRQWFMSNRGLGDVRET PRSSAFCSHAILSKNEILIKDAKKDPRFVKNPLVTGPPFIR  
FYAGAPLETPEGYKLGTFCCI DTKPWPDGLDLGKQNLREFAGLAVEVMI SRKKRREREE  
EKNSQMIACAHDLLTPLSGIELSLHLLKEDEDFQSKIARKHKGKMMKVETCSGIIQEIC  
HSVRTTYAETKSSFEQSLMTAKQERVKISTVIDKLYTAIEPLKTDV LITIKADPDL SKEI  
ISDPSKLFRCALNYLVIA CKRTKKGQITLTLFSKEKPGTDKKSILFVKCEDTAPAIDVDV  
YEHLFRPPSNDVALFEESKYVDSEKREQNLDLCLFSVASEMNVIGGEYGFPRSD EDDNG  
CEAYDKEIGSVTGSVFWFCVPCMELEDDPNAESEEDDNKQSSVSEDDVIAVEKSVKDDL R  
SEDDSKVTRKRRALVIEDSAI IRTMLCKILAKLGFVSEAEENGMQGLEK LKSTLYDLTLI  
DFLMPIMDGLDCMQYRNWESYHRPWMTQRIIGISAHATQEDVEKGLKIGMDDYRAKPI T

AKVLSDLIKCDQQVETSRRLELERREALIKNADKPSEDTEKTKKKHEIDGRAC TLLMIS  
PRSEEEHTKQIQEVVKS CGWQTTTASTEREALVWLKMRTWDLVLDVETLGP AIGDFREWE  
SKKRQNLQERITLMMEKVDELKGEPPKGLDALAGKPMALTAVESLLERTYLHLA GTRGK  
>comp7253\_c0\_seq1; 371 275 1776 LEN=1776; translated  
MYSNGRIDASDHGRLNDSMSSIGTTSSIRRRASTNSIPGGAMDLYYGHFSLAD FQDGKRF  
SADDHTTILRDTQTAMQNISSRLLLGGTSSRPTAAVQDSKKNVNKSNNESAA MDRVRLGV  
GLYRNFPLARQALQNSQNRQAALKKGGHKQMNHVVRGTGWWRTLLTIEDRALD NILGPWL  
VVCCNAILACLLEVEVWDIQLPVEALEQWDTIYALVLKTSLAFLLVFRNLRCAMR FWEARG  
YWGNMNHQTRNLVGTLLMYGTHSPNNRDAAIQWGSALCISAKNFIRSERHYEP NELAGFL  
TRHQTKRLSEANHGPLYAASMC RHYIEKIFRVDADTPPGLAHAYTVRMQECESYVAGMIE  
SVSGMEKIRSTPLPIAYVAHLRIFLIAYTFILPYVWVNEWSWATIPLTAVTAFALLGIEG  
ASSEVEIPFSKNRTNHLALDAYCLVILESVTCLVVQDANLHVQGRKKGKGSVDKFKMFRAT  
EEIDEASYESSSSEEEEDDDDX  
>comp7254\_c0\_seq1; 636 78 2045 LEN=2315; translated  
MTEGDSTIYPRKRFLVYFGSILVCLGFRWYGYSSRALKEIRQQLSNGFADPLIHATNASL  
NDDTFCPSVLI EAGAESLSSSHVWNKLEHQILNASYGVLPFRFQSLDNTMVREYTGWV GSM  
FSFYTASRLRRSVMNPAPPEEIIQLLKLALAIKHHNALASDENRRSLRILVLGGSV TAGI  
GCYWPDLN LGVPPAKHWSIPGENCVWSYFLERLLNQVIFEGKDIVKIDNIASGGISSEFGA  
LALEYQLFPDPDRVPDVVIYAFSANDAQEPNPKAVFYEYLQNFVAAAHLNPNCDNHAPLV  
ILLDDFYADVPPSVALQQTGNIYMLSHWNNLMAVDYSSTVGSKVIVEDLAWAPLLSSNVQ  
MHSGVGMHMGIAWTILYNLLDSMVNVCNDVGLQTI RPDRI TENKANASKNILPREHDDHN  
ALTIDPRISSNLEKGEPPMQHF GKVREMVKDASYVRLQLEENVNRTKEVCSELSAKGKEK  
SPLRCSWSWFFNKSTNFVHSAQVRNKMNEVLLFNNGWAAEGRPVAQPRSGWYSHSPNSEF  
AMK IENIAADLNFVVMLTMTKSYSSKWWGSKLAVSTMVVKNSTTPDAVTNQASPVDW DND  
SLFYIDGFHEIKTSVHFPHKVP IRGGASPGDSVIVYAKLVGGSEFKFAGMAFCAY  
>comp7255\_c0\_seq1; 333 1 831 LEN=1285; translated  
RSSRLNLSEQSTKEPIADDRRLRLTLPLPTTTTTTTTTTPAIRKMTRQFGSQQTGGKRRSAP  
RKPPSLALAAATVLVLSAPLGLPGAESFCAPNPPSAVPRRTEPVLFLADGDVSRRTALASL  
SLLTGTA VLAAGPPPASAA YSSEDVGEIRAVLIEARKQLETVPALLADEKFDGVRTLLTE  
APLRDCWSKTTPILKKYAEALGDTGGDELAAL EGREELLQHLRFLDMAVYNNVFNPIATE  
GKTGASKALIDSYYNDPTREYETSKRALDELLILSK  
>comp7256\_c0\_seq1; 206 167 688 LEN=956; translated  
MDEIVDGVKSPGECYLIFEASSGGRMLLLYSKDRIPKNAVGFWCAGPGRS IQGFKFKQGG  
GRVELIKGIAGGDQNRKRYFSGWCQFIKLAKAFDGYVIKFPNSEQGV EVDVIGFKTEEEK  
AYKLDLDAGLIEVAPFDAISVVPKHNTTYHGIHNIPQQIFLESGNKAGAATTI  
>comp7258\_c0\_seq1; 502 1291 2268 LEN=2909; translated  
MLRRSTGNKVKRLQE QANLAQSALTSLKIAEDRALSEIRGTRRDEIMEEPESKEEDYPI P  
NYCPSSPEDIKARPPHLTIPEEDEHAGSMTGRSLGGNSTTKSELEIEK FYRELELEMFGE  
EELPSMVGQMLEVPLKDVDTTNLMTDPADRLEYCSVNSAMSDKDLDDALLEQE QNRSMIS  
EYLLEDADNDSPKLDHSTQHDNGDRDGN SNYLSQLTQPIHSDQIQPGNYSLWNKSSPLTF  
PALDGPPIDTHGSVVDNQTSQHRQHETIPLHAGMTMFEDCALLGGRSNHESLYFKKKRRS  
SRNKDMNAGPKVHFIPPPHLSPSDW  
>comp7258\_c0\_seq2; 548 639 2117 LEN=2758; translated  
MASIEQHSVSSRSWDRESRRSEAGQSTQTGEISLADSRSLLEK KKKVNFVSVVTIRDYER  
VVDNPSCTIGPPVIGWHYFETRVIDIESFEAGRSYRKVSSHILITREEREALLLNWGA  
SFHDIVEAVRNLKIKNQRRQTVTNL GKVERIEEAFESATRKLKSALMLRRSTGNKVKRL  
QE QANLAQSALTSLKIAEDRALSEIRGTRRDEIMEEPESKEEDYPIPNYCPSSPEDIKAR  
PPHLTIPEEDEHAGSMTGRSLGGNSTTKSELEIEK FYRELELEMFGE EELPSMVGQMLEV  
PLKDVDTTNLMTDPADRLEYCSVNSAMSDKDLDDALLEQE QNRSMISEYLLEDADNDSPK  
LDHSTQHDNGDRDGN SNYLSQLTQPIHSDQIQPGNYSLWNKSSPLTFPALDGPPIDTHGS  
VVDNQTSQHRQHETIPLHAGMTMFEDCALLGGRSNHESLYFKKKRRSSRNKDMNAGPKVH  
FIPPPHLSPSDW  
>comp7259\_c0\_seq1; 2013 225 4274 LEN=4414; translated  
MAPKTI AHRHKVDPVSPIPVRRDDFPKSQQHQQLPPSRHQRSRSQPLT LSKPMLITSAG  
RSASAQGRELDDLRI RYEETKQRMEKMRDKSENNKRLIEMSGLVKSLQDIPV GIDKAEG  
STFVNVQRKIEAIGFEMKEAKKRYDEL RNEESFQTDTIKEQESQIRSMEKQIQLLTERIQ  
QEEQDQEQKMAEEKQKASTAELEQKIMLQDMEIMNLMGEIDMIKKHNRTHGQDRQNTI  
GQDIKLL EANNAKYEEIKKMEKDLAKMREEQRAQKMEQETFLLKQSEESNGFVLKPTAT  
TFAEISKLEDNLATLRLEQE KSSNVADAPKKEEATEKKPASSRIQKHQPWSMDLAWKDSM  
LEGNKKKEAELEVVANNDITYGEPVSPESDQRDQELLGLPSFGQKQQVEVK SATKKTENS

AFVGISSLSVASCSSSESESESESESGSVIFLNKQRHKNPFVSKDNNTYDVKKDNDHSDT  
SATVGGSSCGMSRDGDSASVSSSSLSKPTMPKRSVELMPTDDGSIEAIEVGHRLRKTESTES  
CDGAYSDNESSVEYSSGESTTGNNTNGDSSNDSSVGEYTSGESTRTTETRSVLAQIPEEGE  
LEESESEWDREHTSVLSKGPSTPKTNDEPKSKDDNVSDLLLTKQLKDAEDKYENLKKDYE  
EKISMSSESQAKKLEDEYSKDISTTESIVKLEENQKLRKEQSNASKKTWKDSADKKRLKR  
IKEENKMLLKNMEKQNDIMMKADQNFDDLKEHLATLEELEAKKKRYDQLVLDFTKLADR  
NKDAKDYSRLQTLHNAVVMKLABMGEENENLEKQRDEAMDQIERKNAQIRGFDDGIIAEYN  
KVEYDLKVLRETHEETVKELHDLTEKNKEMQSSYDNDFANAQQLESLEQDKANAIAEIEK  
LMKANMDLSAMEVQQNESEVRVTMLEEELKKTQEELGVAKNKSSNRQRQLKDVIQYKAL  
KEEHSCTCDKLARLETTVNLGNGSAIQEMKKLEDAVEQAKKEAQNNAVKAKEAREGDMRI  
VLQHYEKLQIKFEKLLAKSESTKSETAVEEEEEKQDEQDVFVWPGEERDARKEKIEELEELL  
KESNESLSWRDEEIAKKIEELKEARKQIEDLEIEKEQLQADVLNMQSQLAQREAKDAEDR  
KKDEKDNLRVVAEHHRLQKTYSSLQRKFEEVKSSELVKVKNQAKIHEQEEKHAQKRVTNI  
QTEYVNLQADYDVVVAQLERFKVEMATSVIDLKEKGTIIPDMTSKETEKNNPVIASPDIS  
PKGSDVAIPLTASEENETTISDTAGKENKEVISLIDYKENEKAVPELTLEEKEKGIIDAA  
SEVNDMTIVHEDSFYDESVDSDSNGIAEF

>comp7261\_c0\_seq1; 257 339 1151 LEN=1238; translated  
MRAPSLELFILALVLGSSWNGKKSLSSEALSASDSQGGGRASGKSTAMEDKPRTISTVHLGY  
QDKEIDIFVPGKWSRHSSANVGSERRSRNDHRGPSDFALSKLIAHSPGLVDERNVLELGS  
GLGMVSAVACKYSRANHVAITDRDKSLLSLAYASCVLQQRSKASVSRCCMDWKKPSTWPQ  
QDYDMLLGADILHDKRSISPLVNVVIQHLYCNGAKAGARKQAVIVDPVNQVNRSDFFSAAR  
RAGLIVDQTEFPGPSDQVLLSISPSDFGAR

>comp7262\_c0\_seq1; 218 1 1231 LEN=1288; translated  
XNELVEDCHFETYNNEGDNLVHLHDKAKESTKMVSPISYSGSCASQSTVMMIDSHLAVDQ  
LKTILQIETKYRIPNASCQEASNEHRIYPYSEWRRRICQWSFKVIDHFKIDREVVSRAMS  
TLDRYSYIKTSYSRNCFSNDTSKEIIDSRTFQLVAMTSLYLAIKLSDNDEGQYASCRKLT  
LNSFVELSRGQFCSEIEISQMECSILDELQWEVFPPTPMTSMAYLMRMMPSHESLQYTGCK  
SYNLVLVHLHELARYITELSVCHSNICTGYTSSQVAYASILLSMELLTPVALPLHIRDQF  
NTAVALVSHRSGGTILSSQDDKILYLQELLRNSFWPEILVEDCEYGEIGHPIISMAKDFGF  
IDIPHIVSPHHTIPTISSNNGTAMHCQSLSASLDKEPDLRSSPICVNRHF

>comp7263\_c0\_seq1; 542 468 2573 LEN=2668; translated  
MGHRDGPWGWNRQEIASLLLLTHRQVIPAEASIEFLSGGNGSGTSTVSRTYDTSTDSRKA  
LAELDKGNYIKVIDDSDIETVRMIFTRRDIIPVDNGLIFGWEPGYLWPMDELKQSPVNDG  
DKNYDEAYHDELTAIHLHNMRRHPIVSADHETKNWYDADDDCEFEQEAPATTQKRS  
GGRTSSTRPVWEGDTSKRKLLHQMLKYSDGSEHLVCVCTKDHALQPPEESRGEVARALLY  
MNLRYGTLTAAHTERSFRRDGTAFLGLTLTDCPPTSATGEDDQGEATKNYSMGYFSRLVQ  
WHLEDPPSQHEIERNQKICEQYQGNRNPVDFYEEWALLDFNQIEREVCNSGDSEPDQE  
GGKANFHYDDDDDFVVTQNSTDEDWNSDADEDEKYVCGLMPGDISFFMVQPATDSDE  
SNDFEQDEEWQRESFGLVTLVSLKPLILYVAGVDNDNNAEVDGPMEGNHYTGDRGVLVK  
EVPQKGI PAGSYFGYKQLYLGQWDPVLNDNEDHTFRFSVHQLYLYCIDRDHGIQNPST  
MEEYKILAAMSTTGHSFGESELPYWDKFRKHSDIIVSEVFSNGIHYGTIVLPEDASDY  
ELSGGYRYVGPPTYTKHKDYAKALIDEANWKPMNMLDLEKEVGGKVENEASTSIFDDSVRN  
AIRDSGMQQLIEGTRIGMNEDSSSAYGERPSIFTRELSSIW

>comp7264\_c0\_seq1; 476 36 1925 LEN=1967; translated  
MSSKQFSSSQFICLVIAISCLATACEGFLSPSHLMATRHAHDVVQSNEKLTPTSTVLFSS  
VSRNRKRSPSTFKGKKKNSGKGNKKNKKKPGKWDRRRSKDQLERQDALAAQPRPILTRY  
EDERDGEVNESRFLSSQGNILCKHFESCPGCVTDRRVGDVEIIRSAARFFSSTAIRKNRV  
DVERSGEDWVIEEEDDGFYEVVVPSETTKWRTQAKLVATSKSGSQWANEGCKFGLYKRGT  
HTVMEIPNCEVHHPSINRAVEVLTKATEKTGTTPAYSDDNGLRYVQLQVERTTGKISLTLV  
WGTSELKWTQPALSRITKELLKSEPDLWHSMWCHCNDSPGNNIFSRNPRAWHRLSGHEFV  
REPMPVGDGLWLYFSPLAFRQGNIDGFVDIANDVARAVPGGSKVCELYAGVGMLGLTSLV  
YHHLNHQYKDEVTGYGEPLTWVRCSDENPANPRCFSSASVRSLEPREITEYQQAETKEPKT  
LGDLMKAMEAGGDDFEDQVAQRTGPKATYMVASAAEALKAGQALGADILIVDPPRKGLED  
EVLEELCKPFNAKQPCVESPTMLAVPDYLVNWTNDVQTLIYVSCGF DALARDTEKLLSSG  
GGWKLESATGYVLFPGSNHVETLCIFRRQ

>comp7265\_c0\_seq1; 1262 223 4233 LEN=4281; translated  
MILARITSSCLVLAPLLLLTASRVAAADAGSTVDDPHAESVKKIFAWVHEAPDGFVTPKQ  
GVSRMVEGNTDTPLIIVALEDIAKGELLVQTPWSHIHSKTLASDDALGWYCGTTRSLAE  
EMRKGADSFYAPYAMYLNNEEPDNQLTHQYSPNAKMLHQVIGTHPDEVNRSMPFDRKDTM  
EQRLMPEGIDASLDVNWFGICGADPSDKIATKAASMVIRADDYILIPAYDAYNHRNNDK



HNGKEYMNARTLTTMDKYHQTFALRDIKKGEQIFISYNMCEQCGRIDGEFGTAEMYREY  
GFVEWFPQRWWYPGFGDYHEDDNPQETAQFDLYQEEVTGNLTVVWTHLSTDAQKLARFEV  
FLQREIRRLNRLKNI EWSDMYNDWTEQWKESGITSYEWSNINLFVDANIVAMTVALEDL  
RTNSGPVANDDDDDGDVKEPSREPLTISPEALKVLERNGSHYDLLEQPEKDDLAYRYTC  
DNSADFEFIMGYVDTEVEIETDAGQFVNFCESEFYFNTDPEAVDVCMDVDDVVQICSSYRPQ  
QHEYMIHAAAKYLPKVKRVAFVGGNSMLLHEILKYPEEDELVLVVGLELDQTI TRKSFKH  
FHTDPHFDDPRVEWVFGDVAKSLMVLPESYWGSFDLVLVELSEKMLARNVSTSEGGEVD  
LLSALSLLLNPKTGI IAKQELYVDKLSQVFDYAI ELEFESEPVICSQTLALGSNGIDFFHA  
PVYDHGVAVNDQSI AAMDKAHRYDLMHDFRTLPEKSCGEEERTKKTESSEDEENEMPSFGV  
LEVVTLEQVKKPFDSDQIVVDPGFHVVEHTTQNKEDPTMLTVTVLEEGYVTARVQRSEDE  
DFSLGFDIHLWSQTHRIIEFRKALHDAYGGEVISSYKIVAGGMFGSRDETKRAGLPVPLK  
ASDRCEENDGGAANEESSKNPLDDVLVNSIAVQEAVSLVGKGDVVAAVFCGGTSEPCTSYD  
ALSGHKSVEAIPLYACSSSTAGGNDVTELYACERKII EELMSKLGFTSKLDMFVIDGNSS  
HEMYQIVNSIFDTHNHREFLLNNHSIAVTWSPGASSKKDPWARELLDRYRQIHNDPVKL  
GEFEIRLGAKKFELGVVSTNDPQMNYGFADLEKQIQDRLVAEQSGSGIVVELRKIHGGLY  
NYMEQYAPKRFSSQKDYDNTLAKEHFSAQVPLGRQTI FQYELDPELKKQNFNDHDLGLSI  
VYLEKVLVYGLAATPGLFDLKVTTFASVKKHQIPVGDGCVFLLFGDNFNLVSVWDGREHL  
DINFFAFGILLSAPEVKNKINSMINEVSPLKAVAIDTQPRGIGRVVNFPELLETLSKSVL  
YEYQYDDDENHSQGEL

>comp7266\_c0\_seq1; 286 413 1303 LEN=3245; minus strand; translated

MAISSAESNFILDGCQDDCRADGRSRRDFRLYSSVVGDFALSYG SARIFLATKENHVLVS  
IKAEMAVPASSAPTEGAVEVHVDCVKGTNTQDDDESTISNLLVPHLVDKRNL CIAPGYF  
AWKLNIDLFFVNSGGGSLIDACSQGIHAALQOTLLPRISVIPATQGGENKPTLQIDSDIK  
AAGKILGVGNAPI IIVTVTVLKHKRTHLLIVDATTEEEICAFKVVHVLDRGEPLSSSCRK  
RKPTICALHKAGGALPFEILQDVTSFVLEASGSSCAVESESLPHLLQDNFSIQQ

>comp7267\_c0\_seq1; 780 687 3599 LEN=4488; translated

MTSGTTRVSAALLHTTSNLLHQNYGEASQQRDRGGSKVQNANTTSLLSPPFFVNTYNPWSS  
EQKGISDANPPQDANHHHHSIDDDNDLSL SVPWGEINIVVTVDVHSWIAGNHRDDPRNWP  
LDEHRNRVQDADYGDILSFYQRLGDLVKDHNSNNYKQQRDLFFVMNGDFVDGTGLSENPP  
RHLMPLLKHMPWDAINVGNHLYSDKTQVFLVQRDGYDSKMGGNRSTIYPVATPPIWNGR  
YLSNTLLTETMEPMTGKRYTYLVGPNTNITLLAFGFLYDFHENGPAATTTLSVEKVIQQD  
WFADVLSGGRNSSTGNDYGHEAWKPFDAVLVLAHMDCLDPLVATILEGIRALLPPDKNI  
PVQFVTGHTHRRCHARLDDHSESEFEAGRFLDTIGFVSFDANTRTTQATNGSNMNRQSDSN  
FRHRFLDANKQSLQLTLMRSSHL SHGGNQRLSFSSEGFGTPEGRALTRAIRD TQKDLGLD  
VVLGCSPTYGIFDYETEPITRAPSSSDANPPRNDWFSESSLWGLYVANVLPRLRPL  
ALSRQARDDSSGEEAAEAHPLFLAGTGLSRYTLFEGPVTVNDVIAISPFNNSIVEIVAKR  
KGT TDSPEGELLPWYGRELSLLL RVNRLYATS AEYGM PAFVASILPQQDFVRENEGFSLP  
AASAIDPDR IYRLYTTDYDSWRLISVLA IILKFGEGETEDGSVDNNTSFSNDAVDKMLASEP  
LPPITLGRSYETQKACLALGKNDGENENHHNIDRCYYTAE LWKEFVRDAMP CDAVATSSS  
GHNIRDPPLVSSNGGSSSSSEEDGHRIDLLRAQLLQPSFGYSLHAQRPRQEAAPHTGDP  
QEA SVVDLAGDEKAAAALVGMASIAAIAL LFFFPPRGDNEPPTRGGAPPRARFRQRCNE  
GRDHSRRRGNHRTPTAHATTNGNSDSDSDSNRNSV PDEEVQLIPLRRMDTGNLSEHSTQS  
SNYSSSYGSI

>comp7268\_c0\_seq1; 798 256 2469 LEN=2550; translated

MLTFNRSSVDKLSAAVSNVSNAAVASMAQVSKASETIFSNLSLSNSNNTQLTYAAGAVV  
GLYMGSIVVKKSFNMIDAICNRTYIYNICWEDPAVDHQLLKITPDDVIFRICESAGDIVLD  
YAI EGPSKIVVCDMNQHLWLFELKIRMLRDPKLT YE EWG IWGSSDVSIALSVWKRMRH  
TMSAGGRKWWDGRIERVFRQGFVTTGSTGFCSKFLIPFVMFFCGFDFKEWSEKGFSDYI  
QANYHVIERSAWCMRRLFPSIIAPFAGVPPNIGPEFYTFEYETILKEIFMDPDFGTSN  
YFYRFYLEHGKDKSCCPRTLQEVHFEALRENASC FEWHHSTVQETMERVKPHSF TKLVL  
LDHMDWMPNSMVHDEWIALQRATVPGAKILWRS AFTHMGDKPF FNNLDIYDLSPQWYPKD  
RVKMPYPTFLSHMPKDPFPFIDPEPSPCQRASLARKMSTTAKMILHPLTAGLAGTSAHGD  
KMSSFYAAQARGYDAVRENMLVARPEMISALGP IRNGHTWLDIGGGTGRNLHYLRAQLDR  
FRTIVVLDICPELLEIGRQSALESFSPGQCERIKWVCLDVNDPNAGEELAKITGETGRG  
FDTITFSYSLSMIPEWEKALCSARSLMSNHGRVLVADFDTYTEAGTSAKDWAIRTWYKQD  
GVRIDARSREVILNTVFAGDEYTN TCVRM QKLAGVRI PHYVACCRKRTDTLHDGHRPS  
FPDFSKLENGVQEEKKE

>comp7270\_c0\_seq1; 412 195 935 LEN=1138; translated

MSRLAALATTVV LALFAPHVSEALSPVRPASAASRASFS SPTELRMGGRTNQORREDRKR  
YQKNNKMLDFIDKEVTPPEELVGDLEEISADPGDDELASLVNCIVAAADGRKADNIVAIRV

SKVSTITSFVVICTGNSRPQNQAIASIVRDEVRDNFDM LPGATGVPEGSADSGWTILDYGSVMVHVMTPRSRLFYNVEGKWKDQGGEYMDISAAILPNAVPQEEEAEEKGGTMEGLSEEDPFFWS

>comp7271\_c0\_seq1; 358 158 1156 LEN=1255; translated  
MAQTAPANQEVSNGPIFVDTQHEDLVHDAQLDYYGCKLATSSSDRTIKIYNVSEDSSELS  
ATLQGHGEPVWQVSWAHPKFGVILASCSFDGSLVLIHREIRPRDWSLLHAARHLHESVNS  
VAFPCHEYGLRVAAASSDGRVSILTHQPDNSWSTEYITDNPLGVNSVSWAPMGAYSDESS  
TVDAAAPADSLRLVTTGGCDNRIRFWLEQPETGQWVEDPSCPVS KD LGHSDWVRDVAWAPP  
ILPNVNVVASCSEDRTVLIWTQNGKNKEWKASKLHKFDGPVWRLSWSTQ TGHILAVSSGD  
SDVSLWKKGIDGKWEQMESIEEQATSEDDVVQG

>comp7271\_c0\_seq2; 289 158 1347 LEN=1446; translated  
MAQTAPANQEVSNGPIFVDTQHEDLVHDAQLDYYGCKLATSSSDRTIKIYNVSEDSSELS  
ATLQGHGEPXLASLLGASEVWRYDMTGRQKWSILNLFVAACFVEIVVEKGLFAGQNPSF  
LGMHNFLFYNTSSNSFSSGFVAMINSDSGFVQLDGSVLIHREIRPRDWSLLHAARHLHES  
SVNSVAFPCHEYGLRVAAASSDGRVSILTHQPDNSWSTEYITDNPLGVNSVSWAPMGAYS  
DESSTVDAAAPADSLRLVTTGGCDNRIRFWLEQPETGQWVEDPSCPVS KD LGHSDWVRDVA  
WAPPILPNVNVVASCSEDRTVLIWTQNGKNKEWKASKLHKFDGPVWRLSWSTQ TGHILAV  
SSGSDVSLWKKGIDGKWEQMESIEEQATSEDDVVQG

>comp7272\_c0\_seq1; 341 163 813 LEN=1065; translated  
MMIKRSSIVAVLAVLSGAHAFSPEVSRRRQSFEALVGGVATIVLPGVLP LLLPANAVIDEET  
PRVVTRMGGLLEPFQDGRS IKMMAPSGWNKFDGEV GAYDLKWQDLVSP TENIKISSTPV  
KSTTT SINALGEVQTVGDSLAAKRNALV SATERQTDGVLFYKFEFAISD GTHQLLQLCV  
CKGKLWSIDANSTEKRWSKADLYENVLGSFMPKLA

>comp7273\_c0\_seq1; 342 582 1403 LEN=1819; translated  
MPSIESVPEEIRARTEFVAAIRTGIDALMGRCGFSRERAVATLLKELNRGMQQQQESLST  
TIPGTTSRPTDDEIFDAMRKHKLGVDEATRAVTVSRAMRREMLSRRDITPAEAIDRLIAR  
ISLDNILYESGEDDDSDDDNRGISALNMPKIDLVS SSSSSLS P S S P S T S S T T S K T T G H F  
RKNARNKKFTSQSPRKQKTSHHHGTGNNILVGKKRGMDEMDHSGSKNDDEVETKAATGR  
PLRGAKRLHRASANASSASSEASTGSSTRSVNK

>comp7273\_c0\_seq2; 309 244 834 LEN=1250; translated  
MRKHKLGVDEATRAVTVSRAMRREMLSRRDITPAEAIDRLIARISLDNILYESGEDDDSD  
DDNRGISALNMPKIDLVS S S S S S L S P S S P S T S S T T S K T T G H F R K N A R N K K F T S Q S P R K Q  
K T S H H H G T G N N I L V G K K R G M D E M D H S G S K N D D E V E T K A A T G R P L R G A K R L H R A S A N A S S  
ASSEASTGSSTRSVNK

>comp7274\_c0\_seq1; 464 1 933 LEN=1500; translated  
FRKLNFLSRI IKPITTRALT VATRPTSLKMAEYSTADQVARFAAAQEEKNERFLNIDSV  
YNGNEIMGKRILVTGGNRGLGYEIVKQAVADGATVIVMCRSSNDELEELVGKWNVYSGID  
VTDTEAVKGGMKRIKSDGGALDYVINNAGYFYEPCEKITDSSLNFEELKQIDICALGPL  
RVNAAAVESKALADDAKLVIITSQAGSAEWRKVQNKDEGGDYGHMSRAACNIAGVLQAE  
ELRSMGYSVLMVHPGFNRTEMTAKYKHIWDIEGAVEPSVGAKRVLYEAMQSSLENTGTFV  
NAEDGLQIPW

>comp7274\_c0\_seq2; 568 151 1140 LEN=1707; translated  
MMFLRQSSIVFGFIAATS NVAAWVSQSPSVASANRAVVSSATRPTSLKMAEYSTADQVA  
RFAAAQEEKNERFLNIDSVYNGNEIMGKRILVTGGNRGLGYEIVKQAVADGATVIVMCRS  
SNDELEELVGKWNVYSGIDVTDTEAVKGGMKRIKSDGGALDYVINNAGYFYEPCEKITDS  
SLNFEELKQIDICALGPLRVNAAAVESKALADDAKLVIITSQAGSAEWRKVQNKDEGGD  
YGHMSRAACNIAGVLQAEELRSMGYSVLMVHPGFNRTEMTAKYKHIWDIEGAVEPSVGA  
KRVLYEAMQSSLENTGTFVNAEDGLQIPW

>comp7275\_c0\_seq1; 255 59 652 LEN=692; translated  
MKTVLASRCVEIPDGVDTV KARVVGVTGKLGSLTRDFKHIPMECRLVTKMEGEEGEEVE  
KKYLQVDLWFATRKLACVRTVCSHVENMIVGVTRGFLYKMRVYSHFPINVSTNSGNVE  
IRNFLGERRVRKVLLEPGEVYVRS EDVKDQIELSGIDITAVSLTAAKIQQATNVRNKDLR  
KFLDGIYVSEKGPREE

>comp7279\_c0\_seq1; 733 198 2000 LEN=2823; translated  
MKCFKSKSSLLFGLLAFLSIAVNASTAERS SPTAGHFRVVLDS PRGNEKKTRLMLKNKIQ  
SSVADVDLRAMVERAKKEFKTISEKTRHIGEEAKEIVETFKDSLQHYSRKELGIYAALTV  
ALTVTLKT VVFSKSSSKTLDL GKISYILASTSALTATEKLSSILEFHNKYGRSAKPELA  
ITPSIVSSDGKTFIRTVKKT LKHTSYQPPSNNVPAQSRPAQVVIDTVSAFYDPDSEPTIAK  
SLPASHNAVIDTMSPSMRRTLKARRIRVRGGATKSALLQRLEIGGYFATWYALNIVYNIV  
NKKVLNVLPAPLTVGTIQFGV GALYCALVWMLKLRPRPTLTKTGRKSVSVGAYHMLGQL

ATMIALGAGPVSFTHIVKAVEPFFSAMVSGFYFNKWMPPQVYATLIPVVGGVGYACMKEL  
NFSWLAFGAALSSNLFFALRAVVSKSALQSGSATGSNLSPPNMFGLVTMAAFLISIPVAL  
FQEGSGFSLWTAALDQVESKAQLIRAI FVSGLFHLYLNNEVMYALGVSHPVTLAVGNTM  
KRVF ILVASVLVFRNPVTVQAGIGSAVGVSGVLLYSLTKQYYESLESKAPASKSKGKGR  
>comp7279\_c0\_seq2; 733 198 2000 LEN=2641; translated  
MKCFKSKSSLLFGLLAFLSIAVNASTAERSSTAGHFRVVLDSPRGNEKKTRLMLKNKIQ  
SSVADVDLRAMVERAKKEFKTISEKTRHIGEEAKEIVETFKDSLQHYSRKELGIYAALTV  
ALTVTLKTVVFSKSSSKTLDLGKISYILASTSALTATEKLSILEFHNKYGRSAKPPELA  
ITPSIVSSDGKTFIRTVKKTLKHTSYQPPSNNVPAQSRPAQVVIDTVSAFYPDSEPTIAK  
SLPASHNAVIDTMSPSMRRTLKARRIRVRGGATKSALLQRLEIGGYFATWYALNIVYNIV  
NKKVLNVLPAPLTVGTIQFGVGALYCALVWMLKLRPRPTLTKTGRKSVVSVGAYHMLGQL  
ATMIALGAGPVSFTHIVKAVEPFFSAMVSGFYFNKWMPPQVYATLIPVVGGVGYACMKEL  
NFSWLAFGAALSSNLFFALRAVVSKSALQSGSATGSNLSPPNMFGLVTMAAFLISIPVAL  
FQEGSGFSLWTAALDQVESKAQLIRAI FVSGLFHLYLNNEVMYALGVSHPVTLAVGNTM  
KRVF ILVASVLVFRNPVTVQAGIGSAVGVSGVLLYSLTKQYYESLESKAPASKSKGKGR  
>comp7280\_c0\_seq1; 325 1122 2054 LEN=3440; translated  
MARIRYYRSRSHLAKTGNQDSQEEVHWKHALGVVLTVVGTGIYVSSMSTADADADATGII  
TGKTSPTIFSRHGESSASDIDFRSHLIGDFAAAAASAGYATYISCGRQARRVVPVYVHLP  
GCVFVAMVLISVCAITMTATMNVSDVISLSASVVPDATILTNRSDNDFCSSLFGWTCRE  
YLPRSIFLGVVCGAIAVGMINWSLNHVSAQAAAANSAPPIAASIIIGIVFFAEPLPNFTA  
ILAASVIVIAMVLCSTDATTSKTKNKSDEDEDGDAADTLREQSAICDETTPSKGGKVIS  
RARKSLPETC  
>comp7281\_c0\_seq1; 561 1 1081 LEN=1081; translated  
XVNSLNEERRKTPHGPTTAERNFGNEIYLLVRNVGMWRRMETKAKLIEKTEWSIYILES  
LQEI DEGCNAVLFWSYASWRRRHTATPHGNSRSLERENERENDSHHQNHHRDGYVDDRN  
RWGDDHHNHTDAKYDHYEGGDRCPETSRLFGDYQEAYRRNLEVTKLVRDGLGRSTNDERL  
SRFLRDNYVHCKGCRATFAKRYDDLFGTRIHSPPQQKSSHNGTTATTTTTTKTTDPANQA  
SNHGSRRTHHFFCTDCFDANFNSILKKIKRDEDVKARRDLELLIEHQEQEQGNKQQHTN  
PGTAAGKSGKRRKKKKKKKAKKNNNNNNNTTNEIDNGNSNGHASPEATSKDADDQQQQQQ  
Q  
>comp7285\_c0\_seq1; 530 118 765 LEN=1287; translated  
MSSIEIVTNAEREKIARPRPEENAEDAGTSEDSSPMAAAPSKRRRKLNDGSATKTEKPSS  
GFLAAVSNFLSGSWFWPSSMPETKIADLSSTEEKEPATNENGEKADELSEADGEQIKNDK  
EENADADRKSDESTKADDADSKDDNEKDKGDDNDEEEKTATPTAADIKDTSKKGNEGNN  
TKCSKNLANKVEKKSSSLSPKETSPKKRSKKN  
>comp7285\_c0\_seq2; 530 118 765 LEN=1151; translated  
MSSIEIVTNAEREKIARPRPEENAEDAGTSEDSSPMAAAPSKRRRKLNDGSATKTEKPSS  
GFLAAVSNFLSGSWFWPSSMPETKIADLSSTEEKEPATNENGEKADELSEADGEQIKNDK  
EENADADRKSDESTKADDADSKDDNEKDKGDDNDEEEKTATPTAADIKDTSKKGNEGNN  
TKCSKNLANKVEKKSSSLSPKETSPKKRSKKN  
>comp7286\_c0\_seq1; 365 411 1550 LEN=2265; translated  
MPFFTRIMQSPRFLACVMGGFLISVMASPSFPFVNGPLAVLLIITVTFCLLSISMGYDD  
ESIEIRNKQGTSCYKKAELYLLIFAPSFALSILLIRLFSRNKFFTVPGLEFGPKNGDMN  
EFISNIAFLGGSGTAFGHWIQGFLASFLLRVNCCKCKKNDVDDLSFHSDSDGNADDQRMW  
RCGRTPPGMNIANIAAAYGTIYPTYNFVKRCIRTPDTFATSSYMNGMEWALGFWTGHAA  
GFIADTMFYNRMRPIANASGSDSTAETVVSIIIEEETRPSSAITTTTADVPVPEPTIRSE  
DKRWNCPPFSFVLLMLGWVIGTLFLTSVFGACIMTGYTWNKCEGESEECVNYPDEFPA  
IIAFIITMVPTLTVCAVLC  
>comp7287\_c0\_seq1; 399 1 1518 LEN=2008; translated  
VCSSDLQNRKGMPSAIFSKKAYQLGLHLNSEYIQSDSFRLCFLRKALFHIEDAAIQFFRY  
LDVIYDMFGQVALMRPLYLTDLTERELRYLNRGQQQLFPSRDRAGRRIIAFLGCNNT EYT  
LREKYRVRTYLESVMAQDETQKLGYSIGVIQRSGKVDLGGERNPKFFQRCNKACPVR  
SALHICFPNGHFAYYFIQIAVILFCDRKMRSLLRCHRSTLETTCSLSGYGIPSGDIPIT  
SGGKVKTKNVT SFVKARTAEAVQKHQIETHCRHRHQQLLRDQSAQHLQNAAVVGAS  
PKTAGGGYPILVRSLIDCPDSRCVVFGNKGMYEHNGLRFRHFLIDTEMRRTRIKNFD  
ESVTSMVQFVRDIIDEAKSGESTGGVWSKGETFRFYKYRDLFLYAEITDPLELQRRVHQ  
MLRDSRKRSGDEDLNSAEGCPAHTIIYSNDNVASIRDSSSGDTTPTPTGLQPTPGAMG  
VTSLDDSWPTEPNQNSGKRIKTSNA  
>comp7287\_c0\_seq2; 511 1 2438 LEN=2928; translated  
XFTQSMRDHGAHQTYSSCDEDSHQFGKFSEVAFGNDPRFCFRATENPEKSPTNGANPEYA

NIPLPKTMSNCPQDIQPVKKSALQSAGRIHNRNTNPNPDANSERSECVWEPLVHTKPNGNEN  
NIVAQNNFLALGNSFDYGAESTLVDRSIFDNLRRISGSSAHKNI PRFVDGTRVSTTEYSR  
TSTDMRKNKNQHHPDMDIEQITEKFSKVVIRLLNMGR IHEYKNDNMVKT PALLK PSTV  
QVQAE TIEAEKVQAKEKFEMSADEREAIANEIHGVDNCAVAENPSMIAASLLALREEDH  
HLHEDLLDNPRSNQNRKGMPSAIFSKKAYQLGLHLNSEYIQSDSFRLCFLRKALFHIEDA  
AIQFFRYLDVIYDMFGQVALMRPLYLTDLTERELRYLNRRGQQQLFPSRDRAGRR IIAFLG  
CNNTEYTLREKYRVRTYLESVMAQDETTQKLGYSIGVIQRSGKVDLGGERNPKFFQRCN  
KACPVRCSALHICFPNGHFAYYFIQIAVILFCDRKMRSLLRCHR GSTLETTCSLSGYGIP  
SGDIPITSGGKVKTKNVT SFVKARTAEI EAVQKHQIETHCRHRQHQQLLRLDQRSAQHLQN  
AAVVGASPKTAGGGYPILVRS LIDCPDSRCVVFNGKGM YEHNGLRFRHFLIDTEMRT  
TRIKNFDESVTSMVQFVRDIIDEAKSGESTGGVWSKGETFRFYSYKRDLFLYAEITDPLE  
LQRRVHQMLRDSRKR SKGDEDLGNSAEGCPAHTIIYSNDNVASIRDSSSGD TTPPTGLQ  
PTPGAMGVTSLLDSDWPTEPNQNSGKRIKTSNA

>comp7289\_c0\_seq1; 380 66 1315 LEN=1872; translated  
MRNSSSSLSQLSKTAIVLVVVVAVFFLSTVPKQLGFYRWLSE SISPQLVGCSPATILSED  
QWGFTFGDLYGDEADNDGDAAYXEPAGGADGPGDRSESGTG YEVSLALARLGVGVTMAC  
RNPEK CASAAEKIGADEVVARRIARGRGLPTEIIVDVSSLESVKAFCDRFLAARLAPLD  
MLFLNAGIGDIGPSVDGSLRLSADGIELIFATNVVGHLLYRLLLEPLLLVGSSEGEVPA  
RIVLTSSCTAYDSL PYRVATDLETLNGVSGKSPFRYPQSKLAQFLWARELTERLSNSGG  
GRRSVYANA AHPGFVATDIW DKNPFDPLGGCLKSLLLSAKSV MWTPPEGAL TLLYLGT  
AVDKLREDDIRGQYFHPQSRWMDNYPLAGETEAYKKDLQKRLWSFLEELVAEHVA

>comp7289\_c0\_seq2; 123 1 522 LEN=1079; translated  
RWRPCTAYDSL PYRVATDLETLNGVSGKSPFRYPQSKLAQFLWARELTERLSNSGGGGR  
RSVYANA AHPGFVATDIW DKNPFDPLGGCLKSLLLSAKSV MWTPPEGAL TLLYLGTAVD  
KLREDDIRGQYFHPQSRWMDNYPLAGETEAYKKDLQKRLWSFLEELVAEHVA

>comp7290\_c0\_seq1; 519 53 2080 LEN=2258; translated  
MDQTKSKYPESASYQTLESNLRREPASQLRRPKQIPLFGLLFVLSIVSTSFN ILYAHYT  
NVDLNQAVATRSVKAAMIYFVEQKDNIKLSNNWGIAESNPKEQQRKFFRYDEAGPKPIA  
GTARSHALPNAV PVTNIIPREYAENKEYHISQRKNSTLPHSF IKPFPTSKAGK LKQKHP  
ELYRDLGNYNWNHTYHDDYRTLYLYNPSILPLHQTVRREQQSDKDPDWSATDLQELTG  
GDLRVRYVAVFRAYLGCNCFGRKNGDR TLMTAGEQISYMAIALLDESLDVI EGTVDLIDL  
NAFYGEGIRGYFRQFAEDCRISLLKGTINLICNSQMKRIRIKRKKFSGEVKQKQESNYPP  
QTPPPGYGTKEGMAFPYIFPNIHGHGLEVTLLSHNVNIHGGKNMNVFRAPVEPDFGVVNE  
KPTEYDYLLQ TWVPVPHKYEKLIVPDGGHENDSKVPKRARRSEEHAVTPLENLPQPTFDTP  
DVAHNITRCDDENKKAMNCTDPVNTFWENGKDHGNACCVKMLLPHKDVNERNTTIEVM  
VGI SHKTSQRSNFWLLDIHKRYENVGHDQFVSRFVAYDAKPPFDIVARS GWFC LGFADE  
GESVGPFGNTLAGKNKR VNLDLDFEHFNCPVIHFVSGFAEAVGNSSRAIISYGIN DCHPR  
MYFVEKDDIFQLLTQ

>comp7291\_c1\_seq1; 716 1 1852 LEN=2007; translated  
XNPSITFD TLLVPSAQLTRWITHP ELQHR LAKPDNWGFLKHVHPRIKMVQDYEPGEGDEP  
PTDAGRHRTRYQLLLLPSSV PKGASNHTATGVPPGPQQTDGGDDVWLAGLLASPSDES GG  
EEATVAWGPPRTMPIAYHQLSFQYLLKRLLP EEVHPPPSAYEQIGHVAHFNLKEKHL PFG  
RLIGEALLASSTTSSGGSNHQNSNSIKTVVNKLGKVDGKFRTYECQILADAF LDPARNSA  
RNDDGSTTHHHPSSSLETTVVEDGVSIRLNVAECYWC TRLSGERKELVKDIVCRSNPSSD  
NPVVVADVFCGAGAVCMLLAKKIRERTRSHQQQLLPRKQKEGKGAQPPILTVLANDWNP K  
AIEYMEQSI AANGMDNKEKDDGNLIQS FHRFELSCRDSYDFL FELGEELPVPMP PPKVR  
RNRKLG RKP AKNVPAAADSPRTTEDSNDRTKRIQWEQKRKPLPDHVL MNFPLEAPRFLGA  
LRWWSWKRL EQGHLEKSTAHQ TWFPFRFHVYTFARSSEPKAGDEEEMAINVVANELLPYV  
FADETCHGNRSADGDRDENEQIEVAKTVVFRKELNEEFGTDISTRMVRDVAPGKV VVCV  
SFSVTPKLIRYMQGDYS

>comp7292\_c0\_seq1; 590 151 1851 LEN=2294; translated  
MNYNSSEKSHFFLLALICLLTVLAAAVDFDDVDPSTVIAKASKSRSEQSPVQKDRSVAIY  
DNVLSNKTADWLHLECVAWSEDAEQRKDKQRQAQHATAADPNKKSNNDDHRYLDP IIEFP  
LEHPERHSPLQQFLNGLLWQMEERQHQAAPLEPGAAGQTSKR TNKYYVEYWTRQEWQHI  
LAHQDMDEGLYRQRSHQRWSE RQKQPQGEASPNARGDLSSAPSGQHFDLDRHPLFGHVLY  
LRVGSRVKGPTVVF GAANGGELVEQGVAGSSTMVSVPAWKGRLLRFGKDLLHAVPRPYDV  
YWTFDQSEQHSIHHPRAEWERSVLLFNLWEHGQGGDDPSQ TREQQQLLLV DKI LDCGDGQ  
WIPDR TTCAMSENQNKENVAKHTGAAHNADGEQELFSCNDAGDWE EIPVVRKTA FESPQA  
IKTATATTATTAPDDDDDLFSLLLYFAKWWWNYL LLLLLDSDSKAVEHFSVPLMGDPRRT  
GIDARVARMQSRKKATRDNTNPDTHEAKPNHYSPARESMAESYWPTIVEIETDPRYQQH

SLVLVPSGEGQQRHRSRNGGDLPEEL

>comp7294\_c0\_seq1; 426 418 2142 LEN=2726; translated  
MSKKGEVHRMVS DISSAIQSSALLSLLDEAKANGSLPEPAIAIRDDQASLSNVNPNRRRT  
KRREKTTKQRDAILPKCLADIPQSTLDERIKPIKRALERVDAEKLLNLELIHPSASSRLE  
GQTTLGARSKTGKNQNERNDXIEIASALDCPMSPIVNLPLSLVLAPTNRVENQLSTRAQT  
CTLYKQRVYCRPISDQILPKLCVDDGEDGDDENAAMNNAHDEYRNSVVRYLHIAEIPDQY  
TIGIFVFGPNQRIPLHDHPEMCVLSRVLYGDLQRLSLDLDRGEQEHNRRTSSKSMGEVD  
SVAMRDMEGDKRFDEPFVRS LDQDHHASSSWLSRSATWLR TSLNGRNFVSGGN SHNDFD  
HHQKQFPNGTKLAFKNSIDVLQAPGVVALYPFEGNLHEFVAGPHGAAVLDVLLPPYDDEC  
KRDCTFYHIRVDNATSSMSTESTSPVSSSTTSVASENSCQNQSRSLTIEEQQSNEKYRG  
IETENTNKVMLGIEKHEQSFHTRRIPCLVVPTGQPETFHCISGRYRDIGDAEDDYDAMES  
DDSSEESIMEGSHFDGDNKNMLHGDIIFGDDIKE

>comp7294\_c0\_seq2; 507 418 1977 LEN=2561; translated  
MSKKGEVHRMVS DISSAIQSSALLSLLDEAKANGSLPEPAIAIRDDQASLSNVNPNRRRT  
KRREKTTKQRDAILPKCLADIPQSTLDERIKPIKRALERVDAEKLLNLELIHPSASSRLE  
GQTTLGARVQDGVYCRPISDQILPKLCVDDGEDGDDENAAMNNAHDEYRNSVVRYLHIAE  
IPDQYTIGIFVFGPNQRIPLHDHPEMCVLSRVLYGDLQRLSLDLDRGEQEHNRRTSSKS  
MGEVDSVAMRDMEGDKRFDEPFVRS LDQDHHASSSWLSRSATWLR TSLNGRNFVSGGN SH  
NDFDHHQKQFPNGTKLAFKNSIDVLQAPGVVALYPFEGNLHEFVAGPHGAAVLDVLLPP  
YDDECKRDCTFYHIRVDNATSSMSTESTSPVSSSTTSVASENSCQNQSRSLTIEEQQSN  
EKYRG IETENTNKVMLGIEKHEQSFHTRRIPCLVVPTGQPETFHCISGRYRDIGDAEDDY  
DAMESDDSSEESIMEGSHFDGDNKNMLHGDIIFGDDIKE

>comp7295\_c0\_seq1; 123 470 975 LEN=2284; translated  
MVKRKSSGGGNALSALKYCECACKDYITTTGTGDEDEGEDGCPNYDFVKDVATPPLCPPEK  
DLKVC DYRFKYIGCTFEVIQCVATYSCQCFGGKWHCGLLHYEGQDCEEDDPRDPRRTSGM  
PGTRRMRLWNDDGVPTGDTCDPDDPLPKPPQEDSSALEDEEEDIVIPM

>comp7296\_c0\_seq1; 451 358 1902 LEN=1925; translated  
MKYNLSKGRLEKPNASGKEKENLSKSDKHGSRTEKMPSSIASGKSSYSSRSSSSSKRRSS  
SNAGGSSKGMSSSSLRKSDPDAFKIFILLQPKLKT FELIQLIYSSNDTTVGKIIAMIP  
ENATEPALGSQKYTGLCRPKTQEEIVDHELLASEPRANTGVDSAKITMGEILVAIPDGYT  
GADVAVLAKQILSNPKIVKLLKRS DPLAPKRSRRSSRRGQPPRRSR SKEHVDVMEKFDEE  
DEMKEQEEMKEQE QRMKAMEHAAQEAAAANAQIPTKSKTDIHRNIDQSSLRSSSMASTE  
GSLEDEKSMESLQESIDESYSSWSKSF DASFSTSTVCSGVSKRSIRRRERQSRMKIIM  
SVAGCFAVMLAMYFSDPHGYGRSDEEKLVSAATTENPMGLRGILQCVFLLVFLYQVESF  
IRTTSTKSDQDNNRQEKSSIEFLQSTTAMKCLKSRFAKLLKKSSRSRRGAVGAFDYDE  
NTRTQKLRSFSLKGSNHQMRSATSLHDNSDTGSL

>comp7297\_c0\_seq1; 875 199 2688 LEN=2845; translated  
MSTKTSIDTLESLREVQPQRSLKRQRTRSAATTMTMTT TTAFLALSAWNASP VFSFGSLA  
SSTRKGMVTP TSVRFTVDEYHASHSTLTADGLLSNTPSLFRSPQHHLKLEEDYSSGGTAS  
VSVSSVYGEDETRDEDHEPRRRLP AWLREDKGRVQENIEKLSAMLSSSSFFTESEAMK  
VTYAIREEAAQNDAHKMAGAAEFCLIMVETMEMGLDALVAAAFHFCECIDARERSVRWPRR  
DCGHPNTNQSVDSL SHWEFRLPPIQIDSF GDHAAKIERDAARLKRLEVVASMVVHSTSH  
NNKGGGSVAKKAADNLRSLYTTEAKDWRALAIRGAACLYRLRGILSERQATERELGRKVP  
LSRDANRVCREAFRIYAPLASRMGMHRLKNELEHAAFQLLYRRQHRTYESLLQQTRSSH  
ARSASRLGGS LFFFQNPSEPNIGESMKQVLAHVQASMTKVLEGDVFMASVEDFRVTAR  
VKESYSTWKKMLRDGFDHITQVPDALALRIVLDAKKAHPSESDAVTRARERALCYAQEL  
CKTVWRPCEKDPFRFKDYVANPKENGYQSLHYTAETRWNDEDWRMELQIRTGEMHKVAEFG  
VASHWNYKAQAKPGQRNKEAASSNQDGS DAKSATYGTVLVEESSNDSSSQHLFGKVTIAN  
NDRSSDAYLRSLQEWHEKQNGSSPIRQTPLVLWDNEAESLERAERIRARTQRLAPYLEA  
LANEQDDLQRKSVFVFPVAPLDGGSGSLSSDDHEGSGDGLALPTEGTVVALPAGASILDAI  
RRCEIPIEGTGNSTNSVIRNGIPASLNAQLQNGDVLSIPSVPSACAMP

>comp7297\_c0\_seq2; 875 942 3431 LEN=3588; translated  
MSTKTSIDTLESLREVQPQRSLKRQRTRSAATTMTMTT TTAFLALSAWNASP VFSFGSLA  
SSTRKGMVTP TSVRFTVDEYHASHSTLTADGLLSNTPSLFRSPQHHLKLEEDYSSGGTAS  
VSVSSVYGEDETRDEDHEPRRRLP AWLREDKGRVQENIEKLSAMLSSSSFFTESEAMK  
VTYAIREEAAQNDAHKMAGAAEFCLIMVETMEMGLDALVAAAFHFCECIDARERSVRWPRR  
DCGHPNTNQSVDSL SHWEFRLPPIQIDSF GDHAAKIERDAARLKRLEVVASMVVHSTSH  
NNKGGGSVAKKAADNLRSLYTTEAKDWRALAIRGAACLYRLRGILSERQATERELGRKVP  
LSRDANRVCREAFRIYAPLASRMGMHRLKNELEHAAFQLLYRRQHRTYESLLQQTRSSH  
ARSASRLGGS LFFFQNPSEPNIGESMKQVLAHVQASMTKVLEGDVFMASVEDFRVTAR

VKESYSTWKKMLRDGFDHITQVPDALALRIVLDAKKAHPSESDAVTRARERALCYAQL  
CKTVWRPCEKDPFRKDYVANPKENGYQSLHYTAETRWNEDEDWRMELQIRTGEMHKVAEFG  
VASHWNYKAQAKPGQRNKEAASNQDGSDAKSATYGTVLVEESSNDSSSQHLFGKVTIAN  
NDRSSDAYLRSLQEWHEKQNGSSPIRQTPVLVLDNEAESLERAEIRARTQRLAPYLEA  
LANEQDDLQRKSVFVFPAPLDGGSGSLSSDDHEGSGDGLALPTEGTVVALPAGASILDAI  
RRCEIPIEGTGNSTNSVIRNGIPASLNAQLQNGDVLSPVPSACAMP  
>comp7298\_c0\_seq1; 784 158 2464 LEN=2559; translated  
MSLFAIRRFLVVAIIVAAVAIGDADPDAESSPIRSEKSEQEGSSSTEADVVDAREEGSVV  
SSSAIEPDLFSDINILVVSDVHSFVGGHPHEPDRNADYGDLFSFHERLKEHCCEAEGKGD  
LFLFNNGDWLHGTGLAMDGNATNLLPIVNAMPWDSLTMGRQEATYTDVLRDMSETMLPAF  
HGKYITSNVVWNETKEPEYKRYQFLKGRNSTILVFGFLYDVASPTTIQVVPVEEAIQQE  
WFQSLLRDDYKEYEYDAIVVLAQIDVYSPLIEDIYEAIRENVDPNMPIQFIAGHSHKRER  
VSSIKRDFVHKMEPGGLFDITIGWVTIPKFEATKGWSGKSQELKDAFRQEFNLNTSKTVLR  
SRLGLRDEDQQGLETAGGRAISKMIHNTQERLELNQIVACPGHDYFRNISIHADNSLWKL  
WREHVVRTQIFKKAEDRVIMVSKRTFRYDLRSGSKHDAMTLDDVVAIAPYMOKVIYVGDV  
PDWMIRRMNNTFNTFSHNIIPDYVLAGDIDDVKTAEYQLYTHEEDVPKIKAKLEKFNF  
KDFVLKPTGQRDTLYWLNIVRNAYPCKGSENEKFKVPYFYDPNELEEEESTDGKVTSDEMG  
LDFDEQGSSESDTDEEIVWTLPPGEEYKGYIPGKGEVKKVPVSVYENYKTQEERDKEKQEK  
KAAAASRLSSKNLKSQEQERKTHKKIVKGFVVFALFLIPVCLIMQVTGRNDDNDG  
FGSGGALYDQEEMRLKRRRRGATKKTRSRKDRSGSFHERPLKEIEII  
>comp7299\_c0\_seq1; 139 1456 1593 LEN=2003; minus strand; translated  
MWNGKLENWFSVILQVLNEIAFEVSHDQSQEHWCFGDVEQCGA  
>comp7299\_c0\_seq3; 139 1334 1471 LEN=1881; minus strand; translated  
MWNGKLENWFSVILQVLNEIAFEVSHDQSQEHWCFGDVEQCGA  
>comp7300\_c0\_seq1; 259 189 1910 LEN=2572; translated  
MAAGALGSRASRPINNGIRNGNNTFGLNKKKNMRQONTKNNKASYISRAIFALVLLMVI  
IEYVAYTSLTLPISSEPKKESEGRYFESRQKKGALTLRERMRKKRVEEKLRTERRRHKEKQ  
KILETYRNTSPDPAKVQKYDAKYKNIHTSTQTDVTNLSPEEFHDQRIKTVEHLLHMGVE  
EDYDLEELPPWSLILDNFHPQTKDDEPIILGLECYCEDFRKMHSKPIIGVGPAGLFTSTGTN  
LIANLMTFNCDGPLKRRGNRKKFSLVQVPWGKHNPADARFHHQVPMPPVEDREAILPVVA  
IRHPYTWMSAMCKHSYNTRWRHVHKKCHRGLGLENPVWKPYPGFKSYNETHNVTNSYNL  
AHMWMWYKPYFLDEKYNQTPRLMVRHEDMVYRPEKVVSRICECVGGVNSNP IKDWEDPD  
GFQYLEEGANTGGGHIHRSGLLTAILKYQPLRNWYDQYTATDREIMKEAFQGEVDPEL  
RNI FDTFQYKLYDDVAGPTPHDIIQVERRKAMEEKEQVLAEAKAVAKRNGDLTASQVE  
RLKAHNMKQQRKNAKKGNRGNPMHHRKYKAAQ  
>comp7301\_c0\_seq1; 408 83 1596 LEN=1837; translated  
MDFPIRLQPLERNKRIFWNEEIEEYLAKQPTPSLNSNSIEFDEDALQLSLDAVVLELERE  
LRAFTNRKTNGCDPNLGSVARTGKNILRWYIQIYVEHRVQQRHKKIQDGRKMDILRSP  
GILSTVVSILQWSVDNDLKLARDASLYIFYATYSHHPGDKSASNGIDHLINHESFPQIAL  
EMLVANDS IPLHLSLVRNLHSMTVSFPGARATILDAKIHYPDRATESAPWAPREPTTIN  
FSKACLSLIRWLLDDESSFPYNPEDKGAELVVEIFNCFYAMRKGQELAAPSTVISTDDG  
DLSLEKLIVRILKLSPTTKSLETASAENIWKQINECKLAAISLLMDSASFGYLIENGC  
FGTLLLEVFERQVDCTVDNTRLEGSAAATLLPILIVLNRYSVANRNIQILVKDFVFPRENE  
KRNNQLIXGQEKDEYESFGCTEDTLRGLKILVLLSWVDGYVKRCSAELMWTLCDSYNEFT  
TRVGLGNALPLLNAKGLSPIPIPS  
>comp7302\_c0\_seq1; 492 157 1591 LEN=1591; translated  
MVIWRTSCACLAVALASLAVAANAFAERASTGVPSRLLSQASDDADGPGLSRRQVGETV  
AALGLGVSVFVGTRENKPTDYGLWVLPVGTYKTKKTLIKEIVPDTIWTLDQKFGILNVQV  
PIRSTVVKLKGGLFLYNPVAATPECVNMLKELIKAHGPKHIVVGSVALEHKAYAGVLA  
QKFPTADVWLAGQYSFPVNLNPNFLGYPLSRTKTIPQRTEDAPEEWRETFDFLTLGPFK  
SRDGAFTSETVFRHRESKTLIVDTVLEVTDEVPEILTIDPAPLLYHARDTVTQVVENEA  
TRRLGWRRVALFGLFFTPSAIDIKDADVAYQERRADINPDLGLIYPWDWVRDDTLSDAL  
KGLLCAPILQALILNRTPIQVLDFADEVSKWDIDRIIPAHFKNDLKYGGADYRKAFFSL  
EASGVPKGLPKPLDADMQFLKESEAGLIDSGAIVPCPPLPGGKFRDEILAQTVLKSIX  
>comp7304\_c0\_seq1; 391 767 1975 LEN=3776; translated  
MTNEPELVDPTTPKNEGIDACSKGTRAIGDLDLSSLGIVGGASGDESSSPLSSTTCSPVI  
ARTPLSPALEEPASNDCLPVRDADRPAPNVIANAHSIANANTNTHSNAHSNANAPGTH  
NARASPGRSVFSRYWKKTGQQPIPLRSMRSVASTREPGSPTLAVRGSHPSPGRPRRS  
DAECHGDDPVLRWASNADLLEMDEAGDDDDSCRGRPFGRGHPVASGAVQGGQQQPSNCP  
SPARRSILPVAPLSHPALRTTSSSSRRSSDTGNGLWRKSVSLPCVETHHRLITPSDK

NLSMPRLTPAPGASCLRPFQKYSPhrkaAGTPGTDASVSSSSAATTVASWTAASSQMGLQ  
NSSSSSLASSNSVVSFLDAVDVRHFETPRETYAQKGWSEYFG  
>comp7305\_c0\_seq1; 376 235 2067 LEN=2511; translated  
MSSGGAGTSEYAAAAGCSLIEQRESLRPSRKRSTSNVLRKNHNGGSNTGIDSVLDECSLV  
LFTWGRGEDGQLGLGDSDDQDEPEYVDSLGRVGIACGSGHTVVVLSSTEGEVYTWGRGD  
DGRLLGHGDNWGWYVPRITRSLERQVVTKVTCGSYHTAAVTGNGDLYTWGGGMYGKLGHN  
EAGHSTPKRVDALKGLAVNQIACGSRHTAIVTSSGAIYTWGDKENGVVGHGDTTGHQYTP  
KLVQRLAEKRIVQLSACAFHTGCLTADGEVFTWGEKGFRLGHGAERNCHVPRLVETLVG  
RKPRQLSCGGFHTAVVTEGRLYTFGGGEHGQLGHNRRFNKVKPTFVEALAGVVFVSIAC  
GWSHSVALTSKGIKFTWNGDGHGKLGHSGRKVCVPNEVEKLDYRVVRSVSYNEHTAAL  
VEPFESNALGPGSAAFPVSSAYASQMRSLVNDEEFSDVTFLVEDQPIYAHRAILVQRCD  
HFAAMFRSGMRESVEPTIPIVDITRNVFLLLLLEYVYTDVAVKVDVDYAIELYIAADIYHLD  
RLRDMCCTVVRNRLNAENAGPLVQTADKHKHTLRDVCMAIYVENFVAVSKTKGIKEVSH  
GLLLEILSQR  
>comp7306\_c0\_seq1; 392 177 1899 LEN=1899; translated  
MTYGRFLEYLELWVKQVDLYDNNRINAIVLASSPELGNRPQAIRVEIPVGASQLIQKLKE  
YNIDFDAHPLPQKSLLVTIASNLILPLVFIAGLIFFFQNSENFPQNNGMSPMNLGKSTAR  
FDQRPETGISFDDIAGIDEAKAEFEEIVSFLREPERYTLVGAKIPKGVLLVGPPTGKTL  
LAKAIASEANVPFYNVAGSEFVEMFIGIGAARIRDLFKKASENTPCIVFIDEIDAVGRER  
GAGIGGGNDEREQTLNQLLTEMDFKENGKVIIVGATNRVDILDSALLRPGRFDRQITVG  
LPDRLGRLGILKVHARNKPLDKDVSLIQIANRTPGFSGADLANLLNESAILATRYKKDSI  
TKNEVNEAVDRIIGGIAGSAMEDTKNKKLIAYHEVGHAIVGSLLQNHDAVEKVTLIPRGS  
AKGLTWFAPDEDQMLISRAQLLARITTTLGGVAERVIIFGETEVTTGASSDLQQVTRVAR  
QMVTRYGMSILGPIALENDNNEELLFKGEMSNRIDAIEVCRIVNHCEQLATRIVRDNRVIID  
LIVERLLDAETLDGDEFNRNLVXAIYSSNDNEIKR  
>comp7308\_c0\_seq1; 209 1089 1406 LEN=2082; translated  
MVPLPERDMERIQLNIKEGKHPKYCGDFKMYVGNISFQSTEEDLFEIFQSIGPVGDAIIV  
RDDTGKPRGFGFVTMRNKADGEKAMEELDGADLNGRNLNVRPSNN  
>comp7308\_c0\_seq2; 251 307 993 LEN=1669; translated  
MILLAVAVLMTSSSVSAFNPSVPSVRTANFVLGADVAGSATEAPSGSPANSSKGSVDPKQ  
SEYGKSLELPDYASCQCGSTYALTLEAMGPGKGGRRMECSVCGHTWFQSRDRLATLGD  
GYEMVPLPERDMERIQLNIKEGKHPKYCGDFKMYVGNISFQSTEEDLFEIFQSIGPVGDA  
ILVRDDTGKPRGFGFVTMRNKADGEKAMEELDGADLNGRNLNVRPSNN  
>comp7310\_c0\_seq1; 532 35 2050 LEN=2479; translated  
MPDQATETSQRCSGTYPGLAFVTRRRSSSTGDLQKFTSEGHWYEEILNNAVAGGTNGAT  
AAGAARRKSLLFNKNTYTSMLNLSYKTGGENQRRSSIIFPLEALTADSSVEFKNPDL  
FSEVHSMFMSASIFALAEVRKAARDGRIDTDGLDIIISTPVLGGAIKTFRLNKEFFLGE  
LKDADYDFLRSVAQSTNMDSSSEESGEYCLSKAEDSEHNRKENALKLINSVSDYFGDDNI  
ELECMMVTRIPSSKQITLIFKGSTTLQDWIKDSKVIVSDIENPVGDRPEQLQMIGVHLG  
FREYLYGESTTVSTENSSRSLSLTSLPDEGVEATIESFEENKVENPCTDDDNISPTANVS  
RESLTSTSAIILKYLGLDVSSLKKGQNNLRSSIGKNVESPFASIIENNEECIGTENKIRSES  
MTLSDIRENRANRSLCRILNEVKSLRKHYRDKIYITGHSLGGALGLLAALAEIAARFG  
NVDRPVTFFGVANPRAGTEGFRDAVECLEREGKFRCSVHGHLDIVTMLPNSFIRKSKRR  
FCQSGFELVNLSESSKFYVHRSEQQNDKYFQRLGLAVFKPHKIADRHHLTYLKELELLE  
RPLHKLHLNDFYDKFVDQSLFPCSKKKMTPSVVRSSIHNRDNDVVVLEQPTKKERKRVLS  
ADDFIDQELSL  
>comp7310\_c0\_seq2; 451 35 2261 LEN=2690; translated  
MPDQATETSQRCSGTYPGLAFVTRRRSSSTGDLQKFTSEGHWYEEILNNAVAGGTNGAT  
AAGAARRKSLLFNKNTYTSMLNLSYKTGGENQRRSSIIFPLEALTADSSVEFKNPDL  
FSEVHSMFMSACESRTRGDFAGXIDSPELVAPLWCCDLSPHRPIQIELFVYCRRIISPXL  
FLSTFNRFNSADMHLIVLFLSAAIFALAEVRKAARDGRIDTDGLDIIISTPVLGGAIKTF  
FLRNKEFFLGEKLDADYDFLRSVAQSTNMDSSSEESGEYCLSKAEDSEHNRKENALKLINS  
VSDYFGDDNIELECMMVTRIPSSKQITLIFKGSTTLQDWIKDSKVIVSDIENPVGDRP  
EQLQMIGVHLGFREYLYGESTTVSTENSSRSLSLTSLPDEGVEATIESFEENKVENPCTD  
DDNISPTANVSRESLTSTSAIILKYLGLDVSSLKKGQNNLRSSIGKNVESPFASIIENNEEC  
IGTENKIRSESMTLSDIRENRANRSLCRILNEVKSLRKHYRDKIYITGHSLGGALGL  
LAALAEIAARFGNVDRPVTFFGVANPRAGTEGFRDAVECLEREGKFRCSVHGHLDIVTML  
PNSFIRKSKRRFCQSGFELVNLSESSKFYVHRSEQQNDKYFQRLGLAVFKPHKIADRHHL  
LYLKELELLERPLHKLHLNDFYDKFVDQSLFPCSKKKMTPSVVRSSIHNRDNDVVVLEQ  
PTKKERKRVLSADDFIDQELSL

>comp7310\_c0\_seq3; 331 35 1778 LEN=2775; translated  
MPDQ NATETSQRCSGTYPLAFVTRRRSSSTGDLQKFTSEGHWYEEILNNAVAGGTNGAT  
AAGAARRKSLLFNKNTYTSMNLNKSYKTGGENQRRSSI IKFPLEALTADSSVEFKNPDL  
FSEVHSM AFMSACESRTRGDFAGXIDSP ELVAPLWCCDLSPHRPIQIELFVYCRRI SPXL  
FLSTFNRFNSADMHLIVLLFLSAAIFALAEVRKAARDGRIDTDGLDII STPVLGGAIIKT  
FLRNKEFFL GELKDADYDFLRSVAQSTNMDSSSEESGEYCLSKAEDSEHNRKENALKLINS  
VSI DYFGDDNIELECMYMVTRIPSSKQITLIFKGSTTLQDWIKDSKVIVSDIENPVGDRP  
EQLQMIGVHLGFREYLYGESTTVSTENSSRSLSLTSLPDEGVEATIESFEENKVENPCTD  
DDNISPTANVSRESLTSTSAILKYLGLDVSSLKKGKQNNLRSSIGKNVESPFASIIENNEEC  
IGTENKIRSESM TSDIRENRANRNRSLCRILNEVKSLRKHYRDIYITGHSLGGALGL  
LAALEIAARFGNVDRPVTFVGVANPRAGTEVSKVRLQNFAG

>comp7310\_c0\_seq4; 412 35 1567 LEN=2564; translated  
MPDQ NATETSQRCSGTYPLAFVTRRRSSSTGDLQKFTSEGHWYEEILNNAVAGGTNGAT  
AAGAARRKSLLFNKNTYTSMNLNKSYKTGGENQRRSSI IKFPLEALTADSSVEFKNPDL  
FSEVHSM AFMSASIFALAEVRKAARDGRIDTDGLDII STPVLGGAIIKTFLRNKEFFLGE  
LKDADYDFLRSVAQSTNMDSSSEESGEYCLSKAEDSEHNRKENALKLINSVSI DYFGDDNI  
ELECMYMVTRIPSSKQITLIFKGSTTLQDWIKDSKVIVSDIENPVGDRPEQLQMIGVHLG  
FREYLYGESTTVSTENSSRSLSLTSLPDEGVEATIESFEENKVENPCTDDDNISPTANVS  
RESLTSTSAILKYLGLDVSSLKKGKQNNLRSSIGKNVESPFASIIENNEECIGTENKIRSES  
MTLSDIRENRANRNRSLCRILNEVKSLRKHYRDIYITGHSLGGALGLLAALEIAARFG  
NVDRPVTFVGVANPRAGTEVSKVRLQNFAG

>comp7311\_c1\_seq1; 69 1 260 LEN=1242; translated  
XSSSNNGKPDGAPKRTI STARAYACTNAMEYFAELSA AFLGGLDDTNEYNKWYPFNRKQL  
QKHDPRAYSLLSRLWKVDVGLTHSH

>comp7311\_c1\_seq2; 69 1 260 LEN=812; translated  
XSSSNNGKPDGAPKRTI STARAYACTNAMEYFAELSA AFLGGLDDTNEYNKWYPFNRKQL  
QKHDPRAYSLLSRLWKVDVGLTHSH

>comp7312\_c0\_seq1; 777 1 2995 LEN=3442; translated  
RSRELLELGRCLPGGDI EQYTVALLASSTVSNRGKPRTIHKLHTLSIQLTEVTNMTETKE  
TDKTAGR VLLPSYVQPQSYDLKVT PDLTAYSFDGIVSIGMVTGDSFSEESKKITLHSKE  
LMYRSAEFHAADSGKVVKADEVSCDDMNSIPVYCMIGRAIGEYNSAYFADDILSQSFPAT  
ASISTLLSFRFMXNMKNTT VTFVFAESIPKSSITLTKIDFAGCLNNQMAGFYRSHYKDTD  
GNDKIVASTQFEALDARRAFPCVDEPSAKATFLLTLIVPADLECFSNMPESKRVT LGGNK  
VEVSFLET PKMSTYLLAYCIGEFDYVQGITKYGVLIK VYAPRGRSASCQYALDCGCKALD  
SFNDFFGITYPLPKLDMVAIPEFAAGAMENWGLVTYRDVDLLIDPDTASNSQKQRVCTVV  
CHELAHQWFGNLVTMAWDDLWLN EGFASWAENYA ADEIYPEYQMW DQFCSGALQ TALVL  
DGMLSSHPIQVPIAHAAEVEQVFD AISYCKGGSVVRMVKAVIGMDAFRQGLGNYFEKHAY  
GNTETIDLWKAWE EASSMPIPELMASWTEQMGFPLLK VIGEDWQDDNVVLTLEQSWFLTD  
GSEPPEDGNDKIWTIPIISCTSEGTQQDMVLMREKTATITITIP LKSKSDWVKLNAGQEVPM  
RVHYSDEMLARLSTAVASTDLTSPSDRVGLIQDAYALVKANQIMSPESLMKLLAAYKDED  
DYVVWKG IASSLSGLDSVLSADEEMYSNFTKFAKKLVLP LVDKVGWEAKPEDGH L TSLLR  
GLMINLLCKFCSD DANVAQEANNKCVAFFEDPIENAKVLS PDIKEYVFM IYLKNGGQKEY  
DTVKAYYNVAKDNAERKLVNLNSLGSIGDPK LKLETLDWTTSGEIKLQDFFYAI GSVSISG  
KEGRTITWEYFQEHHERLKG MVGTANPSLMDACIVYSCGRFASLEKADEVEAFFKENEYP  
KNERRIAQMI EAMRANGKLLVNLQASELSKEDFWDQL

>comp7312\_c0\_seq2; 863 1 2847 LEN=3294; translated  
RSRELLELGRCLPGGDI EQYTVALLASSTVSNRGKPRTIHKLHTLSIQLTEVTNMTETKE  
TDKTAGR VLLPSYVQPQSYDLKVT PDLTAYSFDGIVSIGMVTGDSFSEESKKITLHSKE  
LMYRSAEFHAADSGKVVKADEIHVNMKNTT VTFVFAESIPKSSITLTKIDFAGCLNNQMA  
GFYRSHYKDTDGNDKIVASTQFEALDARRAFPCVDEPSAKATFLLTLIVPADLECFSNMP  
ESKRVT LGGNKVEVSFLET PKMSTYLLAYCIGEFDYVQGITKYGVLIK VYAPRGRSASCQ  
YALDCGCKALDSFNDFFGITYPLPKLDMVAIPEFAAGAMENWGLVTYRDVDLLIDPDTAS  
NSQKQRVCTVV CHELAHQWFGNLVTMAWDDLWLN EGFASWAENYA ADEIYPEYQMW DQF  
CSGALQ TALVLDGMLSSHPIQVPIAHAAEVEQVFD AISYCKGGSVVRMVKAVIGMDAFRQ  
GLGNYFEKHAYGNTETIDLWKAWE EASSMPIPELMASWTEQMGFPLLK VIGEDWQDDNVV  
LTLEQSWFLTDGSEPPEDGNDKIWTIPIISCTSEGTQQDMVLMREKTATITITIP LKSKSDW  
VKLNAGQEVPMRVHYSDEMLARLSTAVASTDLTSPSDRVGLIQDAYALVKANQIMSPESL  
MKLLAAYKDEDDYVVWKG IASSLSGLDSVLSADEEMYSNFTKFAKKLVLP LVDKVGWEAK  
PEDGH L TSLLRGLMINLLCKFCSD DANVAQEANNKCVAFFEDPIENAKVLS PDIKEYVFM  
IYLKNGGQKEYDTV KAYYNVAKDNAERKLVNLNSLGSIGDPK LKLETLDWTTSGEIKLQDF



FYAIGSVSISGKEGRTITWEYFQEHHERLKG MVGTANPSLMDACIVYSCGRFASLEKADE  
VEAFFKENEYPKNERRIAQMIEAMRANGKLLVNLQASELSKEDFWDQL  
>comp7314\_c0\_seq1; 297 169 1055 LEN=1055; translated  
MTKDDLFCMNQHVTSFAREKKAKNGTASILGEIREQLHDLWDGATMKTMETTNHHDDCNH  
GCSCDSYHGHVHDDDDHKTLMLNDLCKTSLKLAQWEIDKVNQNPISCDDDDDSSMAKRI  
VRLSKTMMEFIDETEPKAETRSETKTSFLLSADQLDQIITXVPAKHLSDVLRGERFSGGH  
DVLRLRLEKPHGTGLDHTLLMDHGWHTSSARAAKATAARGDSNPKHPRVEALDSDSRNDG  
AANSSTLFVCGERSGSIASGQREVRPVGRVPVEHADGNSQRP RPVPESEAIAIAIAI  
>comp7317\_c0\_seq1; 483 79 1074 LEN=1191; translated  
MICRSTAVLSLALVATALVGSKSFVIKPPASATRNGRAPFVAAGATEVVRQGAVAVDPVVS  
SETDHENKNPRLSGLALALDDGTRKSHSMAENTAFVQGFVKGISSPDSYRNLLTSLYYVY  
RAMEEDVLDKADKDSVVGRLDEAPLRRLPGLEQDMEYFYGPEWRTAMDPPSGATKTYVDR  
ILEITASSSPTAGDNGELSP EQMPLQEPYLFVAHQYTRYLGD LFGGQMMGNMASRSMDLP  
SDGSGVAFYTFEGVDSVRDFITSWYTELYTLDLTETQKQEI VDEANLVFALNIGILEELE  
GSPWAALFAMAMSRADFTNWSNIKETKNGQ  
>comp7319\_c0\_seq1; 166 539 1360 LEN=1657; translated  
MYPKEPLPLQIRRSNKPEDPPGKIAVRSSSSSMCAAKIVTKRDEKPGSDIPASQCPSLE  
EFIRLMQAKVSHESNNAVPAAAESSCESGSDSSCAGKTESSWSSASSFDDSEDGGSEAVE  
PRHIALMKTATVEETSANSNIKYNKNQKGSRLRNKNDYGDKKISGRYTNYPSETKKNFSD  
TSAMKKGSSPAISNAKATLDLSSALRGCKSSASLDLSDACKRYREAGPGVSGLGARAFRR  
QDDWVGGSANELNVPEERWKVKATDRSRSNRYF  
>comp7321\_c0\_seq1; 394 68 2259 LEN=2974; translated  
MTGLAANTFPPSGILSLVVYILLVASSQA EHDASNSKHDEF GSSSLRGQQQRHRELKRPDYP  
CILVRVETEYEQVEVEEGSIFSHFVDNAQQADVDEVRCE LSEVDVAKAGGQYFVPI MGIE  
NSQLNYIESGVSTLVAEGAVLMDGALQIPQGA AIEIGTVDDVEFNDGEDEGGFMRWRS LR  
MQQGSRRMAQVGTGKVLVVRANAYDSQTTGSRMEISNNIFGTGGDKVTLKSQYEQCSHGK  
LVFEPYDNGNGVREVNIHTDVNGKNRFDIEKAMTSA AENQMGNLANQYDHSVLMCMPPTG  
SWVAYAYVNSWLSVYNDEWCQQLSTLVHEMGNMGLA HSGKDGPNPYADRSGMMGF SYKGD  
DTPQQCFNPAKSYQLGWYSDCVVEWNP SRQGTWAGVVVGVADYGTNSNGKTCVIRIPRPR  
NGEDLYIGYNRKKMNSDVMDSGDKVTIIEKEDGYKVS NF IAGLHPNAGTKQVFYNF EYE  
GRNLVVEFSSYGSSIDEAFVAIYFDDCEHPCWTTAPQPPTPLPTAAPVPVPSDPQEE DDD  
PNKTP IIFEMLPNPREEEAEYIEIFNPHSSSINLS DYLICVQNGRNREPRCDQLMEFNLD  
PGAYFMLCRNKLYVADSRTCHQVGDNLNFKDRR KQFVTLQQITNGSEVGTVTQT VVVVDKL  
SLRRPKKFPDYMIXKKRTNGQILCVLLDLVAATFV VVSTSIDITIVVFEVDIDMFTEFS  
TETTAPTYKL  
>comp7323\_c0\_seq1; 482 1 1419 LEN=3106; minus strand; translated  
DGTTSVLLSAELLKRGLGDLVQKQGLHPTTILAGYRTALKAAIAYIKESILTPISLLDS  
KHLLEAAKTSMSSKIIGKEGNFFAELAVDAVK SVAHTKEVSGKNGIRKKKTIYPLSAIHI  
LKVHGKSSLESYLMKGGFVLNATRASQGMPTFLGDP DDETVSEVKIALIDMNLQRHRMAMG  
VNIQIKDPKEIERIKQRELDLTKEKIQKILDTGAKV VLTTKGIDDTCKMYFVEAGVYCAR  
RCPKEDLKR LAKATGGQVVITMADMEGDES FDESALGKCRAIQETRVGDGELLKIFGCSG  
SGASTIVLRGAN EYLLDEIDRSLHDSL CVIKRMLESNSLVPGGGAVETALNVYLQ EYALK  
TLDTREQLAVEAFADALLV IPKTLAVNAAKDGA ELVSKLKS IHSKSQRPDCE NDDLKNYG  
LDLVNGEIRDSL AAGVVEPAISKIKSLRFATEA AITILRIDDRIQINPTEQQ  
>comp7324\_c0\_seq1; 682 1 1652 LEN=2359; translated  
SSSSSNIGQATLRARVIPVLCFPYRAPRRATN NNTREXVSASDDRRNQSLEQGHHP LWS  
LNLNLDSMAQAGAGNRAQELLRRIHALYEEGY YEVSPDIVSYNSVLKAWKEEEEEPEAALE  
LLETMIRNEKEGAQREAFKVRSSSDANS AKDKSDKTIRVDVISFN TVMAAFANQGNHDK  
ALELLRKMQNKPDKNRGTGTEEKEDDYFYPTPDTIT YNIVLYSLAQSNDPGTA AKAENLL  
REMMMQKERTGLSVVDTMSFN TVLYAWSREGEKKDHNPGTTGKSGVRKR PVPSPKMAA QRA  
EDLLTIMEELSEAGNLSVRPDVSYTTVIQSW SKCGEASGTDKARVVLEQMVDKGLQPNQ  
LTYTALMNALNKAGQPENAESVLRQMIA ANHQPDNVALSSIIDGWARVSSKDRPEAAKRA  
LQILGAMK KKKD SPWMRPTALTYTSVLTALAKSGTRD ACDQALD LLEEMEEAYAASGDD  
YDANNVSSGMADAKHDKWSIRPKNIHYN CVL DAYARSSRADKAIKAQHLM TVMENHSRL  
DCRPDTISYK  
>comp7324\_c0\_seq2; 781 1 2078 LEN=2203; translated  
SSSSSNIGQATLRARVIPVLCFPYRAPRRATN NNTREXVSASDDRRNQSLEQGHHP LWS  
LNLNLDSMAQAGAGNRAQELLRRIHALYEEGY YEVSPDIVSYNSVLKAWKEEEEEPEAALE  
LLETMIRNEKEGAQREAFKVRSSSDANS AKDKSDKTIRVDVISFN TVMAAFANQGNHDK  
ALELLRKMQNKPDKNRGTGTEEKEDDYFYPTPDTIT YNIVLYSLAQSNDPGTA AKAENLL

REMMQKERTGLSVVDTMSFNTVLYAWSREGEKKDHNPGTTGKSGVRKRPVSPKMAAORA  
EDLLTIMEELSEAGNLSVRPDVYSYTTVIQSWKCGEASGTDKARVVLEQMVDKGLQPNQ  
LTYTALMNALNKAGQPENAEVLRQMIANHQPDNVALSSI IDGWARVSSKDRPEAAKRA  
LQILGAMKKKSDPMMRPTALTYTSVLTALAKSGTRDACDQALDLEEMEEAYAASGGDD  
YDANNVSSGMADAKHDKWSIRPKNIHYNVLDAYARSSRADKAIKAQHLMTVMENHSRL  
DCRPDTISYNSLMMACAHATGNQQMREQSFEIALRTFKILASKGGTTGSIQQREQLLAHK  
PVYELYPTSATFAHLFRACRKLRLPDNARRQTILSKSLVICQKLGLLNFLVVHVQVQLACQ  
SERAWRETAGDLSEYIGWKDDFKRCGKTVPREW

>comp7325\_c0\_seq1; 322 337 1779 LEN=2500; translated  
MVLPKPVSRRKDDSMPPFLGRSSLPLVRSKLFVGTTLVLFMWSRSSLYPSNGMYSIGAES  
STTNHRTIDETTRVEKPEPAQPPKIDTGTSDRHDLISPEELGRLIDELRGDDHRLVLRWD  
ATKHTRRKQRRGGCDELPRALDAVASEGRGVGASDGHKALACEFATFCITDNPRQARLG  
QHEGIHAHVGLVASPDVRSAMASHLIYIATFSNAKNHRAFVEHGAVGALGALVKSEAS  
EPIQAMWAAAALQNLAAASYCDTEGNGRCYWRWDKALDRPVLVIKNSSLPMISDGEARR  
QILDDPDLVRLAGHACRGPVSGTEGPGNPFPEHAGVAGRDDRSPNIVPWWAAAGALKNAAL  
LSLSPGFLEALDPAMPFCRMARSDDWLEANKAGHVLDRRRRDPWFPGGGEDYEAPGA  
ELCVDRYFVDGEGYDCSGYERAGGDECATGDATGTTRASEACCPGGGTRGGPVRPGAGG

>comp7326\_c0\_seq1; 437 212 994 LEN=1080; translated  
MATSTSAFVPSNRMLSKTLPTQKIGNNKSIESVLFMADENETEWSAPTSAMIGGAGVNN  
AGEPPFEIRGFSLGNLVI FSGIMITILSFAEYLSDSGADGLNVSGLGFVYIPVFLAGAA  
LKYAEIEPVPCISSPAAERIFDDKATEIIAKIKQDVTRHRYGDEAHLDTTVKKLGLVVP  
KDYPQLMELREDVEDGELTFTMVWQSIDTPYKMWADERRVKKYETFFGPGVAAEVVKIDA  
EQRLVGIKLTTSSTPAVAA

>comp7327\_c0\_seq2; 399 77 775 LEN=1225; translated  
MGGTRMSAEERKRVILGIYHKEQLVYTEKEITSLAAKAGVNANSIPDIHQGMIDDALVE  
KTKIGGSNYFWSFKAKKDRAAQVRYETTLKAIIEELKPRVAEAEARLADAKRGREEDDDGD  
GRESGSSEKDDGDESGAVPVRGRAKKLARLEELGKEKAALQTELDKLENDPATLADLE  
KELKLVTAHRWTDNIFECKSYLVKGRGMQKKEACKFLQISSDFDYPEETN

>comp7328\_c0\_seq1; 386 225 1739 LEN=2637; translated  
MQISSNALTLYVIVASTSTYAFVHRPRLPHTLPSIEKGGTALGYIKENYETGIGPDILR  
KHKRKPVIDAIVVEEVVLPDVGSSQTSTRTPPTPHARPKRSPNTRIRKELSPDFDDA  
FISEDVPATAPLEPSIWDNTAKCIQGGALRTWAIGAPEVDHTQVLLKSTHWDSPLRAQI  
DVYNGPGHAPMKLAVYCAESLSQQPFVSVIPTPGFNHQSIGIKNSGPFEPPIEAVAIADV  
ESAREQRKRQRERERQHTDPNTQPLQQGGYTGFINVSDPTPARTTLGAGRHEERPTSGLG  
LFAEKLRLDLGLRKEIEGTSPVEYASGNEQSSSEELFEFEKNVDSVQVLIETRGLSCQARI  
EVTNSGCDEILQVIELSIEDGKERPFFAVLDTSQRTSTTVRVLNLDPYSAFPITACVEPY  
TINSDDDDDCNYKHDEDQAFGFDFIDASIEEDQGSDDEMIATAAASDSSAADGEGESDMY  
AVPDITIPASLADYDFDEEFFFFAS

>comp7329\_c0\_seq1; 239 1 1040 LEN=1054; minus strand; translated  
XTCSITYIKYIILYLVVARARVLAQKQVDSLNSNKDVEDDDGPTNPIQLKFSDGSMIVTH  
ISYLTMLPFDVGNPLYGTDAIQGLEPWHEPMKMTVPNESFKAI IQWHNYSIAEHLGYS  
SCVNIVDGAAGMGSCDRIILDGNRPDGGIAELDSQVVRQGEADSVLIPQFISSQFVAVFL  
IIILSLPLSLLIKTAWMWDKYQILLYSVGGQKSPANTNIAIQTEYGMNTLIKLAIDE  
LRNATKGIISKVDGKPIEIPQPSWFRGKIWPQGLMINWNLDGMKETGWSSDAFSDTFRR  
PFGGVNIWYGNSEMSADGALHGWAEGAFAMANRSLDGIRSAIDGL

>comp7330\_c0\_seq1; 301 257 1936 LEN=2432; translated  
MKKIVTKSFVGVILLYFVVDLSNAFRQSFQKRQLACRDFLLFANEVASARVNLALPKPTN  
AAPWPRNRRLRKYFCSTEYRDFEVDNRIAEDGDTDEEEAEATFRSNDDVEKFFDEAERDEN  
RKNFPRGKPEGFYVTNQYSIPEEGFEVLLRTVDTEKNLLKDGCTGGISREEIDRLGITGT  
NITLPIALMLLDAAEAYPSLSRARKSCRKGVVVNRGSLVNVNRETGKEEFDQDTCFKGRVI  
DRVYIPGDVIGIQCRMHGCGYGFDTTKPKFDLPVLYEDSHCAIVNKPAGIVCYCYSQRDDNH  
GVMTVRHALPFVLKPPKRGTAGIYLRPVGVRHLDKPTSGLLVVAKTKPALVNLKQFEDR  
RVKKTYTAVVNGIPEEPIETSITSEALNLGIDIGDGDQASKWQLIDHALDKKSAVTVWK  
PLNYTKSLKAKDTTLTLVELKPKTGRYHQLRRHMSWVRGCPVGDVSYDGGGEATSLRGR  
GLFLCSNIRLEHPYNTIEGRTEWEGLEPEQKWANGTLVLSLSEDGTTVEVHASIDLPNKF  
ETFLATERRRYEKFGDDVA

>comp7330\_c0\_seq2; 204 1266 2039 LEN=2535; translated  
MTVRHALPFVLKPPKRGTAGIYLRPVGVRHLDKPTSGLLVVAKTKPALVNLKQFEDRRV  
KKTYYTAVVNGIPEEPIETSITSEALNLGIDIGDGDQASKWQLIDHALDKKSAVTVWKPL  
NYTKSLKAKDTTLTLVELKPKTGRYHQLRRHMSWVRGCPVGDVSYDGGGEATSLRGRGL

FLCSNRIRLEHPYYNTIEGRTEWEGLPEQQKWANGTLVLSSEDGTTVEVHASIDLPNKFET  
FLATERRRYEKFGDDVA  
>comp7331\_c0\_seq1; 264 50 1402 LEN=1402; minus strand; translated  
MKAQRRCYFVRMEPKSTLKSVPVHPFQNGTARLARTIYERAKRRAAGSRSAECGSRVALRC  
IARPRASRRSGCSRLPLVRIDPDDHFALLHPVAHHGLARQPPRAVLHHLHLRHALGVQN  
VGPLHHADAAGPAEPAGPAVSLRLGVEPPGEWVVQLDAPDEHPLAQLVAREHLDGGVGLV  
LLGGVLEADPDGPQAAEALDGQDKDVFVLAVERGNRSPDRLDPRVVGQALGRHGKFFFL  
RNRGLLLLWGSPPPAAHQDGRENVAGVETGSFRGSALHHPNRSRDADPVAPATRQLHQFD  
PEATPVVFAPGNRDKNAVDVVGGVVLGFEPDPALVFGRFLDKPRGPPRFYHRQGQVVSIE  
VHGGFSGALEDLRRDVSGRLSEEGRLRQRDYGGDTIMPARDCEAEIHRCCAAAEALHCSL  
LGDGPAELCFVLVVFGRIGLWLDARIMVAAE  
>comp7331\_c0\_seq2; 264 89 1441 LEN=1441; minus strand; translated  
MKAQRRCYFVRMEPKSTLKSVPVHPFQNGTARLARTIYERAKRRAAGSRSAECGSRVALRC  
IARPRASRRSGCSRLPLVRIDPDDHFALLHPVAHHGLARQPPRAVLHHLHLRHALGVQN  
VGPLHHADAAGPAEPAGPAVSLRLGVEPPGEWVVQLDAPDEHPLAQLVAREHLDGGVGLV  
LLGGVLEADPDGPQAAEALDGQDKDVFVLAVERGNRSPDRLDPRVVGQALGRHGKFFFL  
RNRGLLLLWGSPPPAAHQDGRENVAGVETGSFRGSALHHPNRSRDADPVAPATRQLHQFD  
PEATPVVFAPGNRDKNAVDVVGGVVLGFEPDPALVFGRFLDKPRGPPRFYHRQGQVVSIE  
VHGGFSGALEDLRRDVSGRLSEEGRLRQRDYGGDTIMPARDCEAEIHRCCAAAEALHCSL  
LGDGPAELCFVLVVFGRIGLWLDARIMVAAE  
>comp7332\_c0\_seq1; 345 202 1323 LEN=1424; translated  
MQQDVRYYRIGGDQPYRDDPTSAPIRIGSVGTTTSDNLDLKKKQSYPLSPATKGLGYCCSLA  
SGPREDEGPYGRYYRDDFNDFSWNCSIGTSDDEDGIWLNRGDPAGSIMCVMVWILMGYSCL  
TVTLLAKTGGISWYQSSVYSILVTMSLACHIKTTFTDPGAVPASAVPTEPQRMMSERLSM  
CSQCQTFKPPLSHHCRCICNRCISKMDHHCPCWMMNVCVAGAGNLKHFFFLFIYTWTCNVYCLV  
LLGWNFFCATEDCFNVVLTQLVRIMTVLCVGSFLFTSSMIMNVIYIGIMTGVTIDRLK  
KKAADTMKDSIEEPVPLIDIFGIGPWWTWPLPIDPIFEDFDAVMGFATPQRLLEQILRE  
QAQQGIEGHISPV  
>comp7332\_c0\_seq2; 353 400 1464 LEN=1565; translated  
MKSAPIRIGSVGTTTSDNLDLKKKQSYPLSPATKGLGYCCSLASGPREDGEPYGRYYRDDFN  
DFSWNCSIGTSDDEDGIWLNRGDPAGSIMCVMVWILMGYSCLTVTLLAKTGGISWYQSSVY  
SILVTMSLACHIKTTFTDPGAVPASAVPTEPQRMMSERLSMCSQCQTFKPPLSHHCRCICN  
RCISKMDHHCPCWMMNVCVAGAGNLKHFFFLFIYTWTCNVYCLVLLGWNFFCATEDCFNVV  
LTQLVRIMTVLCVGSFLFTSSMIMNVIYIGIMTGVTIDRLKKAADTMKDSIEEPVPLID  
IFGIGPWWTWPLPIDPIFEDFDAVMGFATPQRLLEQILREQAQQGIEGHISPV  
>comp7332\_c0\_seq3; 240 1369 1623 LEN=1724; translated  
MTGVGTIDRLKKAADTMKDSIEEPVPLIDIFGIGPWWTWPLPIDPIFEDFDAVMGFATP  
QRLLEQILREQAQQGIEGHISPV  
>comp7332\_c0\_seq4; 240 1228 1482 LEN=1583; translated  
MTGVGTIDRLKKAADTMKDSIEEPVPLIDIFGIGPWWTWPLPIDPIFEDFDAVMGFATP  
QRLLEQILREQAQQGIEGHISPV  
>comp7333\_c0\_seq1; 222 964 1485 LEN=1521; translated  
MGPTSAPIVSDLVSKGYAHLTYEHERDDVPHRASFSFLPDPVCARIAMCLMDDEFRFNA  
TSYGEKLEHDIHGAKKIEMATMMGGIFSEGICLPAKGDYGEIATALYILFCGDILHQESE  
VYINHSDLIQGSFSGIGISPRSNLARFTSLYRKAADLFTRTVNFKTEEQEER  
>comp7334\_c0\_seq1; 746 61 2151 LEN=2578; translated  
MEMPVGQADVGVLVALLASAFLTNRSLTRGCSTPCTPRRMLKKNKDTGSEEIDAMET  
ETSEGLDKAPVIVFHHFGSKSFHDKILLFETVSVRLETLLQFAVKDCSQRVRLIHFLPED  
AGASVLHEMIHEMGHDYSATFKEAKSYKEVAKLVGSSRVCVCSGNFDKALYTIHELKANG  
ADVGVLLSLSLSCMRSGSFNRADLLSHVEEILEAKILSTTKAAVKWLLPDGPSLSAAAEK  
RCEETHLKIIVPEGVVVKPELNEHRLLISTIFKENVCKVELKKIGKGFSAKHFCTP  
TIKTNEGAKAKGAMIFLKMGEDEEVAKELDVTRQMMMTLGNNPCQVINYAEAGETGGMLL  
TLANMGDDGPKGFATLYSDLLDAAGEGKAKKQQLSERLESAVEYVFGTLCVRLHRAKAR  
SEAFSAASCLGLCYDYDGKDPTEMKENRLSSFVWLQKVWRKWGGTGKLASSVQNKMREVL  
GEDEANHPTVNFGGLELPLNIVPALLQDNEKLRALAEKTAKYSQCLVHGDHGNMIDS  
KDNRYLIDFGRTGIGHAFEDLTWLESFCAMEYCDWNEVELADALKIVPSLAAAFIDTCQ  
AKALDDALTASLTPRVIAMWSIVRALRVKLGDFLPDFADEKAVKVVEENADMARLLCLR  
NALFLGCAPSTKPAIKKFAFALACAYGKEVVTMLSXW  
>comp7335\_c0\_seq1; 775 110 2479 LEN=3385; translated  
MVIKKEKEDVFANFRHLDDNAVPDNEETLNRVVENAMLLHGNVSAAPAANGTNRSSKIF

DDGVFAEFKLEQETEGKIERQQLRDEERRRKSKEKSLRNRIWKSVRFAIDSDSYSN  
SDSDSDESI IHGRPQQHDHNNHRRHPNTNSSRRSWRTSRRSQRFVHHGYHEHNNTRHE  
HPETNGTIGNKKHSFRKRSEKRKHLISIQEDSYNSDYDLERGGDEAFSYEKNYFSNDENE  
DSDSDNDNDNDNSAIDKEEYDSVITRKTGMPIGGMSIRSTRRTNNSDDDDNNTERDE  
KYHWVSPHSSDLVFEFDLDAIVKDYEKLQRNLDFGINDKQSELCRYRDHRVDEDEGDE  
NELKITAHRNLRNLWVEYFPRTNAILFKVFPVPLMFIVFFSIFLGDFLGKFKEMKNEIEQN  
NQIMRDKHELEKYPYEETLYFMFGLPILCFDYYLEKEGTEEIKHDSNYNWTAIVEDTSAK  
EFTNETDAFSLFSFNSSMLNLSELLGYELPPIYTKESYNATYDGDSDMELTLGEIKTYMAM  
CEEAGADIVSRFIDFSARRMVMEAVGTMSFHWMRWCWNTTELGDVNPFRPNKDQLQATTQQ  
DEFYDKNWRENQKFLYEQYLSEANCSDIACRNAALRQSVENANGSEMCDINKGASAWFWF  
VFMTTVGYGNQSPETTHGRLLVGCLGWIIIIIWAVVLYVAGKILGIVIDDVFRKCNCRIM  
TGDIPSVIVWGAWSGLWIVAVGEIYRYWLNNTEDPHHYDWAMFVQNDAGDISTGDAYWFS  
YISLLTVGK

>comp7335\_c0\_seq2; 945 110 3118 LEN=3182; translated  
MVIKKEKEDVFANFRHLDDNAVPDNEETLNRVVENAMLLHGNVSAAPAANGTNRSSKIF  
DDGVFAEFKLEQETEGKIERQQLRDEERRRKSKEKSLRNRIWKSVRFAIDSDSYSN  
SDSDSDESI IHGRPQQHDHNNHRRHPNTNSSRRSWRTSRRSQRFVHHGYHEHNNTRHE  
HPETNGTIGNKKHSFRKRSEKRKHLISIQEDSYNSDYDLERGGDEAFSYEKNYFSNDENE  
DSDSDNDNDNDNSAIDKEEYDSVITRKTGMPIGGMSIRSTRRTNNSDDDDNNTERDE  
KYHWVSPHSSDLVFEFDLDAIVKDYEKLQRNLDFGINDKQSELCRYRDHRVDEDEGDE  
NELKITAHRNLRNLWVEYFPRTNAILFKVFPVPLMFIVFFSIFLGDFLGKFKEMKNEIEQN  
NQIMRDKHELEKYPYEETLYFMFGLPILCFDYYLEKEGTEEIKHDSNYNWTAIVEDTSAK  
EFTNETDAFSLFSFNSSMLNLSELLGYELPPIYTKESYNATYDGDSDMELTLGEIKTYMAM  
CEEAGADIVSRFIDFSARRMVMEAVGTMSFHWMRWCWNTTELGDVNPFRPNKDQLQATTQQ  
DEFYDKNWRENQKFLYEQYLSEANCSDIACRNAALRQSVENANGSEMCDINKGASAWFWF  
VFMTTVGYGNQSPETTHGRLLVGCLGWIIIIIWAVVLYVAGKILGIVIDDVFRKCNCRIM  
TGDIPSVIVWGAWSGLWIVAVGEIYRYWLNNTEDPHHYDWAMFVQNDAGDISTGDAYWFS  
YISLLTVGLGDFYLDSEGFFYYDLMMWTGCFLAGFTFLSTFLGQVADVITNVFPDNGDSL  
KEQLMNTNLVKKRQVQFKKENEKGIKLEKLEVMDDDDKELVAQRVTRIRVKKNLLIHL  
LYQTKSEIEYRKRGERYENLSYSKVCQEEENMLNEVLSNTVKEREKLETYRRTVEVCSAPP  
PGSARARSYFEDGTRVDGVGKHLHRSKGKSVKKRIKASTYL

>comp7337\_c0\_seq1; 796 231 1989 LEN=2598; translated  
MAEGTTTTASASSRRKTRKRNGGKKNETSAAQKGGKGSASGNKKS GSGSNNNNN  
SPPPPQIKITIRNIQNSDKFGSVKLVLEELVSKLIDSCVEKKANNQYTIELDRTAVRHL  
ITEEEKIEEYRMEFLRGQENQRPETVEGGDCDPDEDEKEKTEENKEETHNDEGANGSTV  
VDGKEGVSEKRNCDKLDVILAPKMVSSLPTILARPLYVPPRKRTRRRGERGGTACVLLIG  
PKIEQKKVVTAMKGNVKENRQSDSPSEPQSEDQKKQSDAATVMDDSEGSIAADQQAECG  
GDATTATKALTAAPETPISYPRELAKGRLLLSNAIKALIELAAVDSKTQEFAFSGCIVEQ  
SMNGKTKMFHNNNSRPDRRDGTIEGTADYKEWLENIKQKEELKARPKPAPGGGVAAAN  
TTTATGDEVEEDGQILSSLVQHLRAKKEEAKRKNQKKEENS KGGKTKGEGGQFENGKK  
KKKKQRNLKSHPQEGKKPALTTKAARKKEKRKKQVRAKKRLEAAKVAAPMSVLKSTT  
SATLKPDELVLTHSVLKTENTTKMAEAILETGRNGLDYVVPILLN

>comp7339\_c0\_seq1; 90 1 324 LEN=357; minus strand; translated  
GSGIKRVAHVMDDEFQGNLRALIWNEKQSWWYVLSNETQIQRKVDRAVNYWTAVPPER  
SSSWGLLREANRGRKRSQLEEDNLPANKQMKPYHQAAEDHSLVNGWY

>comp7342\_c0\_seq1; 235 1 782 LEN=923; translated  
XKYAPRHPKGGTHIVPPSVRAGFAMHDAKASRSHLFLPIPSTHVLLFLGYPVGTSIEVRY  
KLRAFPIPTHEHIPVSVTGTIKTYVKQWMHAREVIEQNYFMNNSNVTIVECPRLDDVLF  
HGISFNSNPGNAAVRRLIINTYKEQEIIVKVKRRKMVLAIIEEVRKNGGRFLVWVNDGWWN  
ELLDFFDDMIMAKVEYI IKDVRRENRSIRQQQQQLKVVSSSTSIFCSASTNVQIPSSDEED  
GTSDRNCNCSGLMLPAMRRR

>comp7342\_c0\_seq2; 272 1 1660 LEN=1801; translated  
NQNNQNSQLSKAIQMVENDDDANVFDAITISPLQQQQLLQLQSPTPSQQHGANDDYTD  
PKEDPKVDVLLSEELLKLSCKERNDIQEEVHGVDCLAREETPELLEASLEQMARALEDN  
RITPFHTKEALRRARVLPNSYVHTRDFRLRFLRNTLFDPIWAAKKAADYLRIAGDIFGE  
KALERPILFSDFTAKEKQYIRKGHCQFLPFRDRSGRRILAVVNPTLYTGDSEPLQQMSR  
EERDDSMFFMQAKLLMYMVWTAGYDIETQRRGIVYLCWLDPTHQPKQNFNLVSGIPRLNM  
TSVFTVRASAVHTCSPDRPFYRFFRNLIIIGSTQANRPKVRFHGTSIEVRYKLRAFPI  
TEHIPVSVTGTIKTYVKQWMHAREVIEQNYFMNNSNVTIVECPRLDDVLFHGISFNSN  
PGNAAVRRLIINTYKEQEIIVKVKRRKMVLAIIEEVRKNGGRFLVWVNDGWWNELLDFFDDM

IMAKVEYIIKDVRRRENIRISIRQQQQQLKVSSTSIIFCSASTNVQIPSSDEEDGTSDRNCN  
CSGLMLPAMRRR  
>comp7342\_c0\_seq3; 264 388 1149 LEN=1290; translated  
MTSVFTVRASAVHTCSPDRPFYRFFRNLLIIGSTQANRPKVRFHGTSIEVRYKLRAFGI  
PTEHIPVSVTGTIKTGYVKQWMHAREVIEQNYFMNNSNVTIVECPRLDDVLFRRHGISFNS  
NPGNAAVRRLIINTYKEQEIVKVKRRKMVLAIIEEVRKNGGRFLVWNDEGWWNELLDFFD  
MIMAKVEYIIKDVRRRENIRISIRQQQQQLKVSSTSIIFCSASTNVQIPSSDEEDGTSDRNC  
NCSGLMLPAMRRR  
>comp7346\_c0\_seq1; 388 1 1335 LEN=1774; translated  
XEIVRSEDQQAIVFFNRTIHDMRNPPNSSTPLLSHIDEGTPSMDSDRDPREEICQSQPK  
GESDSSSPGLGDAYETWSDSSDVIHQAFFHTIVYMSLGVVGYSFLLDTQWSIIDSLYFS  
VVIFFTGVYGDLCPNSSAAGMIFTLFFALYGIVILGIFLGLGEMAVERRQQLKNEVLEH  
TRKSYITSIIINSVRPSLRQSFSSIIIPVGEIEEEKIEHGCSFLADVFNIAREQTPNIIITL  
AVLGSPIMMLENWSIIRSVYWLVTGTTIGLGDHPESDWSKVMCIFYPVAVFAFAGTML  
GRIATFYVDQRNDKMEAEFFARALSVSDIKKMDLDGDSEVTKYEFVFLVFLMTTLQKVEQSD  
IDEIFDLFHHLDKTNNGILTADDIAYISDRTSVLQRESDASLIKKNLAKFYQYDPKGNPCV  
PQLVSGNLRDPKLMWGNPCVPPAK  
>comp7347\_c0\_seq1; 448 1 1896 LEN=2031; translated  
QQNSIMMILSSALVATLSLISHTESFAPRARVRSTSTALSALRVNEKVQSALFVSTSDPIT  
GDGSLPAGTTVAAPKVAQRWRKSTKQLATLGPSSGDKEMIETLFLAGADCFRLNFSHGS  
QEQQKELLMTIREIEEKYSHPIGILGDLQGPKL RVGEFSNAEGEYLVAGNTFRLDLDTAL  
GDNTRVNLPHPEIIGASEVGHITLMVDDGKVKLTVIEKGADYLCNVDPVPGKISNRKGVNT  
PDSILDISPLTPKDRSDLDYMLEIGVDWVALSFVQKPEDILEIRDIVDKKIPSGDLKPSI  
MAKIEKPSCFESNNLARLVELCDGIMVARGDLGVECPPEDEVPILOKTIIDECREQKPVV  
VATQMLESMIESPTPTRAEASDVATAIYDGADAIMLSAESAAGXGMFISSEISLNAKGR  
VVSPTVNFSNLXFFFPSTRTVQYPEESVAMQORIINRVEGDPHYRRYLDANVFGHDNTPD  
AVIVAANKQVSKTISAKSIVCFSLTGSTARRASKNRPSVIMAMSPFKEVSRQLALSQVY  
PDLPKAGSYGYTVSEEGMFDYENPIVEEASDDLIVLKSACRAALKKGLVSDPDDLIVVT  
AGLPGFTPGAANVIRIVPAAGPSCWEGVCRA  
>comp7347\_c0\_seq2; 153 1 372 LEN=388; translated  
QQNSIMMILSSALVATLSLISHTESFAPRARVRSTSTALSALRVNEKVQSALFVSTSDPIT  
GDGSLPAGTTVAAPKVAQRWRKSTKQLATLGPSSGDKEMIETVRARQHNLKKNENSCRQ  
RRT  
>comp7347\_c0\_seq3; 631 1 1785 LEN=1920; translated  
QQNSIMMILSSALVATLSLISHTESFAPRARVRSTSTALSALRVNEKVQSALFVSTSDPIT  
GDGSLPAGTTVAAPKVAQRWRKSTKQLATLGPSSGDKEMIETLFLAGADCFRLNFSHGS  
QEQQKELLMTIREIEEKYSHPIGILGDLQGPKL RVGEFSNAEGEYLVAGNTFRLDLDTAL  
GDNTRVNLPHPEIIGASEVGHITLMVDDGKVKLTVIEKGADYLCNVDPVPGKISNRKGVNT  
PDSILDISPLTPKDRSDLDYMLEIGVDWVALSFVQKPEDILEIRDIVDKKIPSGDLKPSI  
MAKIEKPSCFESNNLARLVELCDGIMVARGDLGVECPPEDEVPILOKTIIDECREQKPVV  
VATQMLESMIESPTPTRAEASDVATAIYDGADAIMLSAESAAGMYPEESVAMQORIINR  
EGDPHYRRYLDANVFGHDNTPDVAIVAAKQVSKTISAKSIVCFSLTGSTARRASKNRPS  
VPIMAMSPFKEVSRQLALSQVYVDPDLPKAGSYGYTVSEEGMFDYENPIVEEASDDLIVL  
KSACRAALKKGLVSDPDDLIVVTAGLPGFTPGAANVIRIVPAAGPSCWEGVCRA  
>comp7348\_c0\_seq1; 159 1 864 LEN=1380; translated  
XGRDTHFEKSQTGLQRTTHAREDETTQRRPALPPALATPQAPTHLLACFLPMGFAAGHER  
LKNVHAYWRKNPVLSPRTTAGKVVMTFYFSIPVVLGYALVAPLADRTEAAAGERLAAA  
ASGSKSEGSSGRPEKVGAGGWGGVRLAESSARTQEIINKTNLERFLKKQRRLKEDREREQ  
QARADRADGKTPNQTRPNQTTGGWGNPAAPSEGNAPPVHEKPGGFCRTAYPPGMPLVNR  
RKINLSGTTNRNPGPKLESATPQRIGSEFGLSSGNRWAVLNQCSTTV  
>comp7349\_c0\_seq1; 438 408 1829 LEN=1970; translated  
MTKLIIVRDGQHFSSIKFFDCDTKSKEFAEVLTMVLKNNATSSLVVKGGNVNGNTTSEGHR  
PFSQVCEMGLSLSNEASIAVALREGLMNNLSKSLRSLGSLNFKNEGPNTKNHGDSSESCG  
DEYDWCMLIHKTTLRNLDLGSPLSTSTATNLSNALSLNKSQYLDLTGCYLDQSLSK  
ILKSLQEHPSLTKLNLNRNLFGLKSASTLALDAVAQLLRSKCSNLACLVLSSQQHPRNLV  
TNAFDNSMYAGELEKQRHQIAFARALNALSTNTLRMIDFSGNHCLSDLTSLREALSSCL  
VTNTGLLHVNVSSCDLTPFAIEYLAKNCIPHCSRRLKSLVLFDDDETSEIDVENKGWTTAQ  
SALFSALQTNKTLETFGELDGVITNFESRNRFHLLNLNRAGRRLAANDLPLGAWSHVL  
ARAGRTEIDNRDHDLCISITDTIESPTISSTKSTAASVVFALLRGPALLDNRQQ  
>comp7350\_c0\_seq1; 454 87 1745 LEN=1759; translated

MLRRKGSWSRITNYSDDRDIVVSLRSAGHGDTLDRNVDLVLSSKVKIDVDGNVVELSLGR  
NNRSTTAYQMSRQLRLEGGNYTDRSPYWDLPEVSGGLRKLKLVLYSCRSI PPSLNDRLD  
LSCLELHFCDGNTMAQQGYRFLSASTTTPIAPSMSILSSI FDT PASHDGTIESKNKNDKH  
ECVDRVVRGRLSLLKTLGIHGCVWNTKSIQWMKWMVSPICYNTIDAVTPSETSNHPCEAH  
CSATKTTICRERCCTSHLEVVRFSWLQDDLLPALLDFLSPWKETAGCVRVGTTSRMRHLS  
WIHSEMSDQGFERVLRGVVLPPFHPNLSSIDVSSNRIRSLQFLLQTEPNDESSCNQEQLHQ  
FNIPSYHSLRSMNLHHPILKKKACFDPLEQQAFETLLLRFFPLLGLSLTPSWEDWNPAIE  
YLLRINRGGRILIDATKVSRTIASVSLASSSDQSRVVTLDSISDCTTSSRNNQDAALMQK  
EEESC SAVPKSPTTTISNPRQKIPLSVWPLVLHRAYQTSANGFLPPREDATAALYYLIRNG  
PAISELFICNTG

>comp7351\_c0\_seq1; 232 53 859 LEN=1049; translated  
MTIPTARTALSSVLKTTASRRRSFESIAGLRAISQSHRSNAAPRKSFSSTAPMIDHPFSGP  
NVAEEIVSTRTTTTNTSADSSIKNLEDFVEKIPHVVRQRKMENIDPGAPNDPVAKLFRQ  
SNLSKKAWMQYSHFDSTKPYTRNLIATDHETYTL LLLLCWNSLEESPIHNHPDCGCWLQVL  
EGEVQEVRYDHRQLQCTMDIVYRSGQLSYITDNTGYHKVGNPSSQRAVTLHLHYAPPFERCQ  
CWHSPDDL PKNPVEGKSVNHSEYGRVLV

>comp7352\_c0\_seq1; 504 1 835 LEN=1045; translated  
XNNSSSSTPASSNSNAAPFNWGAQPQGMPPDPDRLLAMMENPMMQQMIQQMADQNPDA  
LREALEQQNPMFQMFAGNPAAANQMIRQAMNPQAIRSMLEMQRAMGGGTGGGAGTGGSM  
DFSLLGGGPASSTPTSSSSPPQDLSSVMEQMRAMMGAAATGGAAGFSNPWLSQQPQQT  
QQQPPQHPADRYRSQLES LRAMGFDDERRCIELLQRHHGNLNRAVDALLSEPEAQAPQVE  
AAATTEAQTEAQAPPAANDPSPEPPLHDPKDARDKDD

>comp7353\_c0\_seq1; 481 334 1292 LEN=1292; minus strand; translated  
MPPRRRGSNLAGRSRDIVSQVEDKLLKLGAKLPACLESTRSSLRVLKIRNPVGSFGRYDN  
DTKRACALLEYDVRDYNKNHGDGDEIEITMEKLAKAAFMKLDKDFRDFHQKIGNFRDNLRS  
QTATNPTGATGKRPAAGAKLNAANKAGKSGNKGETRIVFRDSSISSLAIRLGAFVFNSS  
DVAVRAQKFFWDAVGHKQKSKKGGVHGLRDMQRNQALYEAACFYLVATSGTESQPKIRR  
RKNKPLGDSGDGPEDNQQLLLSTFLDVIKEAPSQFQTVLDYAKKLQLEIEPPSKERAGNR  
GKSAGASRRSSPRSSSTSSR

>comp7356\_c0\_seq1; 408 91 753 LEN=1194; translated  
MKFTTYSTLALATISGASAFAPSQTHPRPAVTTFMSEDAETGGKIVAIKEETVEFTAGLI  
GGVAGFVGGPIVAVGAAAANYVSKADNEAGEIVGAVSKSALEVYNLATLDSKYEVLA  
SAQASLEGALDKLKAQETIDPAAIAKVEGALSSTKAKIEEVNDEYDLVGSVGTALGVVGD  
LVEKTIKIGELNEEYSLTDKAKTALSSAVDKAKDAASKA

>comp7356\_c0\_seq2; 408 91 753 LEN=1406; translated  
MKFTTYSTLALATISGASAFAPSQTHPRPAVTTFMSEDAETGGKIVAIKEETVEFTAGLI  
GGVAGFVGGPIVAVGAAAANYVSKADNEAGEIVGAVSKSALEVYNLATLDSKYEVLA  
SAQASLEGALDKLKAQETIDPAAIAKVEGALSSTKAKIEEVNDEYDLVGSVGTALGVVGD  
LVEKTIKIGELNEEYSLTDKAKTALSSAVDKAKDAASKA

>comp7357\_c0\_seq1; 249 692 1297 LEN=1407; translated  
MILIALLPVLSVLLFMFSNNAHAFTTPI MEKTRATVSSSTAQSFAPGPLDFDFLDAP  
SLLLVKADTKSTMVLAKKAAASLSLPNTATAAVNPEVTAQVLNVSSHALMDFPSLYQSAT  
NKKPSKLRIQYAQVAGRLMILGIGMLPHHGFTPEEILVQFFLLHANMKPIIRSIRLWNCI  
NERKCAAECSELEFEELDSL R

>comp7358\_c0\_seq1; 630 203 1414 LEN=1531; translated  
MRIAASRYASGIVSAIALAVLESRGACAFVPGSRHGAPTRTRTSLNTVTTTTTPVGKAEA  
RAKAKAKPRLVDILEDEKGHINPQLAQLIWKWEKSQRNLNLDLPDFENYSTRTGLRWKDL  
VKKTLRALHVIESTSTAASASAPHLQRRSLHDDL IQEGVIGLMQALKTFEHEARPNESE  
ESFAKAQIQIALDAFTLERAKGMGNPTGTGKPLSMESTVEIADPLETESYYYNQDEWEVR  
EGLVLDNGKSVQREELVEDFLDETLQYEGEDQMWIQSQSI AAPLRDSIPESLDDSDQGIT  
ETSLMEDRATSPDDLALKDMILYNVDDFLGNTLEDIESQIIQMRFGLDGVPKTKQKEIAL  
ELDLTIRKVRKLQKVS LAKLRARFTERYINDDTGHEDFWEDTV

>comp7359\_c0\_seq1; 645 1 2769 LEN=2824; translated  
XNIVHSSALLLQILLSSFKARMTLIPSEQDPLLGNKEVKIAGTGEESSDDHDFVPLKDRA  
WSFSSHRRQVATAGTSPVPGRRKSVAVEASVENSTNTPVVPDGSRGKHYIFCLIIYAVVN  
VIIAVPSLFGYAAVIFNHPIFSSHMNALSKLLISSSLVHQLGFLMFSSLPFAIGTVQDAG  
LIFLSSMANTIANTMIDDGNNEVEILSTTLVILCAGTASLGLVLVVMGKFKLADAVSFLP  
MPVVGGLYLAIGYFCVLAGTSLCISQPMMDPKDWALLLDVSNLKLAI PGLITGLVLTLC  
RLATSSGTLPLFVMVSI PALFLRVLLGLDISLEEARELGLVGETSPSPVPSDLIHIVDFSK  
VRWDLIVEVIPTWFGMVVVSFASCLDVAAIAIDMGQPLDTNRELATVVICNFMSGMTLG

FTGSYIFSQTIFMYRTGVHDCIGLMIMIVYMYIVVSPVNILEIAPLFFLGSTLIFIGYD  
LMSEWLWEVRHQVFLSEYFIVWFTFLSIHAVGINFGILIGILIAICDQILTAEESTGVNR  
INKRSRAVYTKGDAKLIHEKAYCSFSPKIIISLEVIIGNLFFGSSLSVLNQIYKIGLGTDD  
QTKIDVEDLIEDSSMKYPTTPPKFVVLDLGMVTHLDASATRGCFQLAKMAGKKEMICA  
SGLSPRIEWMFRKHEVAYETSEEEEVERAALLATMETTNNNKQLERMLIFHTAAEALEFC  
ETLFLHDMNDSATKSPRSSLNESVLEQRSRAHTISTILSNFIGATEHQTEILEKLMDLRY  
HNELIYNAGEVIFTRRSHSDAFYIVLNGCVANSTSSSTFQVARKQRSVSVGAGRVDQLTKR  
IGSDHIATLWQKGGVFGFNDFLLDRRRTFQTVATVDDTKLAVFTHSGMNTIATHDPELYS  
LMQQVLLRASTLDLANCTCHDV

>comp7360\_c0\_seq1; 681 305 2068 LEN=2355; translated  
MAQIPAHGPTNYQHLSIERKTAAPMPRFRFRFLSLLLVLTPGTFAFVELPPLAVRHGHIH  
PNPCFATINKDEGEAFLPGVSCSGERIAAVVGATGYIGKAVVRESIRRGYPTTAVVRPGSN  
FDAASLMGNVSANVNDNDNDNASVSNQQPTNKVVFVSSSHGAGEVELSPPPPLTVHRFDVS  
KMEPPSPEAPLGAREDSPVLFEPGSVDVVVCCCLASRNGTPRESFAVDYLASLRAAEARA  
AGARRFVLLSAYCVKSAEREEPHALQFYAKKKLEDALAEMAEESNGAFSYVAVRPTAFF  
KSVSGQLEAVRAGGPFVFLFDLGGATAACNPISESDLASALIDQVLDNTHANTHWNLGGP  
DSPGLDKLQGMESMVGALGLDRPPVLVYVPIGVLHFLVGTGFQWLADAFRSDKLADAAELA  
RIVRYAMEDVSRAPPNESNGTGNGTIPLPRRCACAAECPPFVLQCLLDTHRYTLVFLCLS  
VFMVSYPIDQCSDEQTKRVNNTNNIPIPIFSQTHVHMHMHTQMLTTPDERYGEMTT  
QQHYENIAKNGQEYDPYTSAYGILKDRERILEESSKAVAASAAGMAN

>comp7360\_c0\_seq2; 708 305 1783 LEN=2070; translated  
MAQIPAHGPTNYQHLSIERKTAAPMPRFRFRFLSLLLVLTPGTFAFVELPPLAVRHGHIH  
PNPCFATINKDEGEAFLPGVSCSGERIAAVVGATGYIGKAVVRESIRRGYPTTAVVRPGSN  
FDAASLMGNVSANVNDNDNDNASVSNQQPTNKVVFVSSSHGAGEVELSPPPPLTVHRFDVS  
KMEPPSPEAPLGAREDSPVLFEPGSVDVVVCCCLASRNGTPRESFAVDYLASLRAAEARA  
AGARRFVLLSAYCVKSAEREEPHALQFYAKKKLEDALAEMAEESNGAFSYVAVRPTAFF  
KSVSGQLEAVRAGGPFVFLFDLGGATAACNPISESDLASALIDQVLDNTHANTHWNLGGP  
DSPGLDKLQGMESMVGALGLDRPPVLVYVPIGVLHFLVGTGFQWLADAFRSDKLADAAELA  
RIVRYAMEDMLTTPDERYGEMTTQQHYENIAKNGQEYDPYTSAYGILKDRERILEESS  
KAVAASAAGMAN

>comp7362\_c0\_seq1; 195 245 1155 LEN=2076; translated  
MAGPRGQSFYDSDGMDGAFDNLNRNTEEDKAIDNLLSASLLRLKFEDRNDLREEVHGVR  
LSPEETPELIRESLSRMDEEVEAILLASRENDFQHAYEQARYLPTTFVNDRDYRLKFLRC  
DLFDPVKAADRFIVHVDYLLHLFGPXGPKGHLKADFFVNEEAAAALRGGNIQLLPFRDRSG  
RRVVVALSGCFSYPPETRVKLYLYFAHVAHADCVETQRKGIILIGWCNTESLFDGKSIRF  
PGSPGIKPVVLPNGRHVIDSISVRVISIHFCYPDKPIYRILRAFVYIAFGDIMRSRILFH  
HGT

>comp7362\_c0\_seq2; 231 245 1761 LEN=1928; translated  
MAGPRGQSFYDSDGMDGAFDNLNRNTEEDKAIDNLLSASLLRLKFEDRNDLREEVHGVR  
LSPEETPELIRESLSRMDEEVEAILLASRENDFQHAYEQARYLPTTFVNDRDYRLKFLRC  
DLFDPVKAADRFIVHVDYLLHLFGPXGPKGHLKADFFVNEEAAAALRGGNIQLLPFRDRSG  
RRVVVALSGCFSYPPETRVKLYLYFAHVAHADCVETQRKGIILIGWCNTESLFDGKSIRF  
PGSPGIKPVVLPNGRHVIDSISVRVISIHFCYPDKPIYRILRAFVYIAFGDIMRSRILFH  
HGTSLQMQLMGYIPVQQLPSTDTGMVKVKNHIQWLKMHKLIKEDPSAYANVCECPGL  
NDVLFRRAGSCLAHPGNRFRKLNIESKKDEHARSNQTGKREIAWSIVEEIEENRNGRFFSW  
DTKRTCWVLMANRVEIRQKVAMMIRDFNRHSKAAKNPQSNDSSTTFKKNQDGRKRKLDSM  
DGFTNCTPMFRLQPFHTRSMHGEI

>comp7362\_c0\_seq3; 179 245 861 LEN=2263; translated  
MAGPRGQSFYDSDGMDGAFDNLNRNTEEDKAIDNLLSASLLRLKFEDRNDLREEVHGVR  
LSPEETPELIRESLSRMDEEVEAILLASRENDFQHAYEQARYLPTTFVNDRDYRLKFLRC  
DLFDPVKAADRFIVHVDYLLHLFGPXGPKGHLKADFFVNEEAAAALRGGNIQLLPFRDRSG  
RRVVVALSGCFSYPPETRVSGFVAN

>comp7362\_c0\_seq4; 179 245 861 LEN=2115; translated  
MAGPRGQSFYDSDGMDGAFDNLNRNTEEDKAIDNLLSASLLRLKFEDRNDLREEVHGVR  
LSPEETPELIRESLSRMDEEVEAILLASRENDFQHAYEQARYLPTTFVNDRDYRLKFLRC  
DLFDPVKAADRFIVHVDYLLHLFGPXGPKGHLKADFFVNEEAAAALRGGNIQLLPFRDRSG  
RRVVVALSGCFSYPPETRVSGFVAN

>comp7364\_c0\_seq1; 711 202 3807 LEN=3896; translated  
MLSICFSFRQRRRNRKFRNPLGAVLGVLYAVVNILCKMQTVAFVEVALSSGRGRKNT  
PLGRTEVCNKNDSGRASEMYSSTSSSTEQAIKSNAPRRLTTDNGNIKSERNNYNDNGKKY

ERSPKEMNNRQRRRNQHHTTSGTRSSSECQRITKELDAIRSPPGIKDWITDTIWQHQQNST  
LQSPSPWAGWNVHEQVSFVKYLRQRNAYASIVPFLSGLDPNPSDREMDKDNSLRPGKSSR  
TQNHLLVKVYTTALFALSACTDSGQQDWNHGLDTKPMVLEILDQMDRNHIPATTLTYVAIF  
KNLQGRPADVAQMIRFLEQRERNLAPKAKNPGKLDWADEVYHAAIYACRSHSNRFRRTSRS  
SDNGYGSRNESMNPFDNKDWQTAIALMQMQSKGVSPTSQTYLAVLEVFGQHP SKMAVM  
KSI IQQWKNKAAGVCNNEEDDRIWATALNACAVAGDYCQALKFIEEMMSEGCAPNLRHC  
TALLKAI SGAKGYPQDQLAMTALNAMMGNETAALLETQDGDNGKDYRVLLPCTDLDIVALN  
TVLSIVVKAGNFEDAMVLFNR IKRGKFRNAAGGMITPDRITYHNLLAGSSDPETAKRIVK  
EMRLSRRNRNGAIPPTSVTYAHAISTCQRAKTPDLSTVNQLMKWASEDGVKHTVFMYASA  
IWTAQRCGDLRCLLELYEEMERTGCRANSVVMNGILTALCDRGNASALNAFHLMKDRGF  
QVSPIALKRLVFLTIQSKKNQLTEKEKEATLSAILDRLPDQERTVKISSPVFEALICIIHA  
SRGDIDQALSVDKINGTFDAACLRAILLAYSTGPKSLWSDAVELLHTTIIIEESPAFGKV  
DQIALSHTLTTCSRANEFEESSL SLLSLSLYGIPVNELPDGFP HLSIVALNALIAACGRGRP  
DLSIFVLNEISSRYGLRPDSRSYSAMIACNKAQHAEKARNSNNSQETTNDMDGEYALQ  
WWECSLALYRRMTEEGLKPDVQTHSSI ISSCEAAGEWQRALWVLQSIIDKSADEPDDATP  
SLNVYCWNAALSACEKGGAWVEALDLYERMLES PFQPNVVTINSMMEALDKADQKELAQS  
IYDEGLELGILHPWKETTDDKDGTPIMALDLHNFSESMARA AVRKTMDNWLDEKDETTGGGL  
SGDFV IITGKGKHSASHPVLQRVTKQVFREEYGIEAAVDKSN SGR LVI STGD LLELYSGK  
SW

>comp7366\_c0\_seq1; 240 103 873 LEN=1082; translated  
MAPVVEETQLPGRMKTFTCFRGLPSIFSTAAIVLGTAAANTFCENVMFRQKSGNDDLVI  
FVGPWSYRAPYSPEWGGSTLVYSTCRSYSYLEEYQGFDTYF DAKTRTVQAFSIIITPLVGG  
LLLILTCGGTCGKSLSKSWKIIGYLLFLTALQGITLLIENSSICYDNPVIQYLEAKNSD  
LAGTFPSECKWAGGFKINVAAVLLWAGAGACLLLPPLVIHERPRQEQTVTYTTQGPDGK  
VQETHVAVVKGTPVEP

>comp7368\_c0\_seq1; 522 1 1528 LEN=1882; translated  
XNNMNSGSDNHHGVGRSPPGMSASGDARQAAAKGPESAAAGSLSSVNPSPIDNAASAKS  
TGTPPSALEQPLQHSIPSSDSRSPASLSTTPTLATNMMNAKESSSPVPPAAPS VKSPI  
DPSQITSTEGNKSPI SPPLTS AVETAQTPLGEASEATAAPPATGGAGSIVSEYYDKAHLR  
WSDRSGMSEILELKE SVDAAGAA YDLASAEVINSRNRNLDDSLRKWEVASGQHLQLLQRRE  
SWTPEDAQRFAFVLSLEITSRAELEQARHLLARSEELLTKAQLDYINKMRRRYHEEQIWQ  
DQWRVLGTGTWALICLNSCVFLGSQYFQRRRERERTETIAQLIRDSNNGNNAQAEGSQ  
VPAVATDEASDAAPAPVVQTEDVAANKKEATDDSVHAREASTSEAPAKEVTGKGPYPRVT  
LATERIGNTVATIGAAVNKWEHRLRTDAKEFVVSTHQKLHKALPANIAGEMPQSVSDIDV  
PSAII GASVGGITVLAASLLVSSLSGRRR

>comp7369\_c0\_seq1; 551 87 1958 LEN=2254; translated  
MSKRTGGQSEENEIPLESQQSQSKEDGLKADGYLDEEDEDDEDDTYRLRVYGYSGDSEDS  
SSSATTTKNTLQLSREFVRNINCNKRSR SVRRFSKRLSKQLSRSMDRRRSSIKESLPDTP  
QGWVFLSAVASAILAYEVR LQFSLTKPPATFCQLPSGSYVEKIYEQLTGKASSSLVGGK  
GKDSRITNILSKPIQPSLFGVTRGMIASTAAYLQGGPSSSRQNFVRFREIFIMSQDGAQV  
AVDWEFKGAQKQTANVEGEKNASKSEVNTSQQEILNGIIRRPVVIILHGINNDS SFGYMK  
SLSSSFCNRGYVSASVNFRCGCGHRLKTPRGYNAA YTGDLRSLVRQISVRLAENVSIFIV  
GNSLGANIMTKYLGEEGMAGTLPSCVSGGASLGNPLLIDSKIVRFPFNVLMLG VKKIYL  
ENWKAVRALNDARSKEIHKKGFLAPTIAALDNAVAPALIRNNPMYPFEAKIGYETGEEYEW  
FDASSYRIRHISVPFLNITAEDDFIVSKPSRNKLGFC LANPNVMNVETRCGGHLGWQEA  
PPDGLFGGSSWADTATSDFFDAILNIKRESSSGKIARSNKTRIESDFGRSASLPLRREK  
IDNELKDLQREAI AFTKEKISRL

>comp7370\_c0\_seq1; 565 63 1733 LEN=1897; translated  
MLISEKERTSPFSVSGVPSVVFAGNGMKNVATVNKIGAPKANNKGQSYRNINVSNNIVAH  
ESDSEGFRKVFVKGRNSGLPKVDILAIVDHAI EDGPTRQAKEKAANKKALSRAPI PRGSLR  
KPSSFSTK PSSSVRKSLIRSLSEDLKSKSFECKADNSAYELEAENKSDNESVISSMKKQ  
EMELKNVLRKRMDERA EKNTIRRSASRAPIQGEIRTKAPGSVYKNKAEILKPAVKKR  
EIEPSTSITLVTERPSSSRKRGSRNCTTESERSTIKQTDVPKKEKTKMKGGKQKHITDG  
NLRQKEREENHNKMIANEKPSKRVMQLRKQLEETQQKLRVTVVSNQELKELDQDLKKAK  
EAIRFRIMKVIYITQKNKNFEVFEKYQE EVDENQRWIDEYRSANEILRDTL KELPKEIADL  
KIANQTM EKANRDVAGHLEV LKASEKLQSEKDRLLATSEKLNKNEHIPRYRQQILRGELH  
FEAESKAKNIYRDCL IETMKKIEQSRQKDLIEDVFALFSEKEGDVNT E FVAKFLTDHSD  
SSTDSYSDSDKCNDYE

>comp7372\_c0\_seq1; 1230 393 3707 LEN=3912; translated  
MSSNSTGFAIPETSGFAISPTNAATPCTKPDQPKDVGVL SASSKNTAVTSTPSTSKLVAT



KNKPAKLTSTVEMKTKNETSSGAESKPKPSTSNPSKTSNKKDDKLQLTVKKEKTSAAALVS  
STTSTTTEGDATGSTKLPHVPHASWGAEDANGGIIVKPHDHDVLSGRGNSVNHHPGNEYFR  
SLVRHHKLAYVRCPKPQKEQF SKLIVSTVDRDREPPGRFLKQNPSTKLWYNIQTQKALDKT  
RQALREGAPATVAGLMLSQGLTPSAAAAAGLTPSQAVSSMSGEGEMGNKGSASTGGTNP  
LNHSHHAAAHAAAAA AVANQQQAHQHQQAHAAMAAAAHSRLVNSQYYNAAAAAAGNY  
TNSPKVAPPMPSSVASSGTAILEGAGNTSDNKSSTKKT PPPQSPHGA INPHQQPPPS  
NPYPPSANSDEALKYQAAQVIRMASAATAGNNTPTNKNKTNGNGNPSNPPGSFANSAAALAA  
AAGTFNPVLEHIMAQHARGTGGAGSNLPPPGGGGMDWNAGRQAPT PAGRGGDYPGQYLA  
YPPPPPPSSSGQHE DAYTKSQRQEAYIAHLQERIQQQERQLLTLC SHILLSPSGAPPMA  
NANPNNGNSSVGGTNGNSHHGGI SHPQFAAAAKMNA AAVANINATTSAVKELQNYAQN  
QNTPNATASASAMIARERANEHNAVHRHAAAIAAAAAASNAGKAGVGVAPHLVPSYVVSQ  
PPSSSVTVSSSPTVTPPTAGTSAATSNSSTVPAPSNS SKKNTQSSSLKMNKEKKS GGSAA  
TVVTKTKPASEKSNQPTDDGDAVAALLALGIGGKSPSSSSPVGASALSSRGAGATLTGGD  
KTADAEF SASASKKKRKMSSGRRSLPIKKKQIQQQQE INKNNNNNAGGSFLGPTPPQQQQ  
HKQQQQNGATIPPTMNSIILAQNRGAVIPKAADMAPAPELYLYGETPIHEPHVHDVLCGR  
GALTNEHPGNEFRRLVRSNRQLYRSCPKHTKLLVAKAIVQAVQRTQRNPPGRFLEKTKT  
ADGSVSNWTWPITYKSAVEKASQALREKVTPNWGAPPSNFPLSKALEAARAVAYLEKEYP  
SGDGFGGTNLLALIMAVVQSAGLD

>comp7372\_c0\_seq2; 1230 566 3880 LEN=4085; translated  
MSSNSTGFAIPETSGFAISPTNAATPCTKPKQDPKDVGLSASSKNTAVTSTPSTSKLVAT  
KNKPAKLTSTVEMKTKNETSSGAESKPKPSTSNPSKTSNKKDDKLQLTVKKEKTSAAALVS  
STTSTTTEGDATGSTKLPHVPHASWGAEDANGGIIVKPHDHDVLSGRGNSVNHHPGNEYFR  
SLVRHHKLAYVRCPKPQKEQF SKLIVSTVDRDREPPGRFLKQNPSTKLWYNIQTQKALDKT  
RQALREGAPATVAGLMLSQGLTPSAAAAAGLTPSQAVSSMSGEGEMGNKGSASTGGTNP  
LNHSHHAAAHAAAAA AVANQQQAHQHQQAHAAMAAAAHSRLVNSQYYNAAAAAAGNY  
TNSPKVAPPMPSSVASSGTAILEGAGNTSDNKSSTKKT PPPQSPHGA INPHQQPPPS  
NPYPPSANSDEALKYQAAQVIRMASAATAGNNTPTNKNKTNGNGNPSNPPGSFANSAAALAA  
AAGTFNPVLEHIMAQHARGTGGAGSNLPPPGGGGMDWNAGRQAPT PAGRGGDYPGQYLA  
YPPPPPPSSSGQHE DAYTKSQRQEAYIAHLQERIQQQERQLLTLC SHILLSPSGAPPMA  
NANPNNGNSSVGGTNGNSHHGGI SHPQFAAAAKMNA AAVANINATTSAVKELQNYAQN  
QNTPNATASASAMIARERANEHNAVHRHAAAIAAAAAASNAGKAGVGVAPHLVPSYVVSQ  
PPSSSVTVSSSPTVTPPTAGTSAATSNSSTVPAPSNS SKKNTQSSSLKMNKEKKS GGSAA  
TVVTKTKPASEKSNQPTDDGDAVAALLALGIGGKSPSSSSPVGASALSSRGAGATLTGGD  
KTADAEF SASASKKKRKMSSGRRSLPIKKKQIQQQQE INKNNNNNAGGSFLGPTPPQQQQ  
HKQQQQNGATIPPTMNSIILAQNRGAVIPKAADMAPAPELYLYGETPIHEPHVHDVLCGR  
GALTNEHPGNEFRRLVRSNRQLYRSCPKHTKLLVAKAIVQAVQRTQRNPPGRFLEKTKT  
ADGSVSNWTWPITYKSAVEKASQALREKVTPNWGAPPSNFPLSKALEAARAVAYLEKEYP  
SGDGFGGTNLLALIMAVVQSAGLD

>comp7373\_c0\_seq1; 472 227 1465 LEN=1566; translated  
MPASTSSSVPLIKGYIPVRLNLPQPFVARQGEDEDDGTEDAFFVREHQGRSAENDNA  
SNNQGT'TTKGTTLFVANAPVVPVGVSTKLLLSIFGRFAEVTRVTAVQNPRAAATAVANE  
DGDGFGITSHATSSSDSIFAWTDKEAFLPTFLPPIILSSTEGKYAHVVFSSAKELKKAKK  
ALEDLMSASSKGGKSSRRRSKDQSNKTNKEHALIVDKLELQTLSDESMRQREEILRITVK  
EASDDDDDFGDGENTGTTKPKQTKPEQPTGLVAVQRYRESRFLKNRSKLMEECNVAVMQ  
AYEEAEAEAKRLAIEAARAEPDADGFVSVSYSSAVGSKIDLEQSATATTPSRRKGNKRTRK  
KKEAYGAGELTDFYRFQRADNRRTMEDLRRKFEEDVRKVKRLKQEKEYRPF

>comp7374\_c0\_seq1; 630 499 2931 LEN=3101; translated  
MTSAETSTAMSVTEDDGYGNSSSNCNCTSSGSKRLATEEATPIAKTPPGRIDVSVLDHAV  
HSSPPPSRHNLEKTNHFGVTGTPMSTCSTATNTTATLTSSTFATERAESKAPYPNFARR  
SSSLASSSSCSRQSSSIHGIPLPSPSRRLDRQYAKRLAASSVFRHGSTARSPVSVSQ  
DGSGITRSLDCDSSMIFRPKSILSKIDAGSNSSTGRSPRRFLFPSPPTKESPSNIGKSH  
SNTTFLRSSNSNASVSQYSTSTSTGSHSNSSSTSLSSRRRRNSNLSASMDLGISDRFV  
PSRATSNLQNVNLWGMNSSASQTGASSPSSPSRRSQADADTRGDGGSNTINTGTDETS  
NTAGSVNPATGRVNETSSITQQLHNVLRLSELLGENISPYSYAAAAGSSYGRSPSGS  
SVPLRDMNRLRFHSPRAYRDTIYDGTMGPTSVVNSFSLTPFGNSSSQQLMAAPQKHRR  
KIAKVPFKVLDAPALQDDFYLNLDVWSSQNVLAVGLGHCYVLSACTSKVTKLCDLTFAE  
DVVTSVSWAQRGTHLAVGTNKGEVQLWDTIKEKKVRTMKGHTARVGTTLAWSGPTLASGR  
DRLIFLDRDVKSDFTRLNAHRQEVCGLKWSYDEPAFLASGGNDNQLHVVDNRNPSAPV  
HRFTDHTAAVKAIWSPHQHGLLASGGGTADRCIRFWNTLSGSALNCVDTGSQVCNLAWS  
QNCNEIVSTHGYSLNQIVVWRYPSLSKVVTLTGHTYRVLYLAMS PDGSTIVTGAGDETLR



SNGGTNENESLLRELDSEFIHDATSYLIRISHTPAQDKVFPGRFTYQTDLRKPLGPTLQNS  
YWNAKENYQFDYNLLRHNGAIYALSQAYARNEERHLEEARETDKLGDLGHRQRSILGAIE  
RGVGYLRDNALLPVPGHKEWLAAWERTDIDDPHSEPEMAKLGAGLAMIALGKMEAIRPD  
SVSLEKELRRLGAFVESLQNPQDGSFTCKYEWKDGPNNEWVSLYYPGEAALGLVTLAELE  
LEREEKAASGEKPGMVT SVHLELEHQHNAKTAGDNDVPKLSKRWIMVATKALLYLEQLR  
RDEALDDI EPDHWALLATARLLPILDRQRQALENKSEKKQADLEYWLVYNHGVRVATSIV  
SDHTTEGLKHKGCFTYDFRTCATSTRLEGLLAALTFVQSESEIFLGGNSEEEGEDKKGNH  
ADATELLRDRIERDVGMGIRFLEAQKQTDQNSMRGAVPGMYSGKKPAALSKSNDDEEEG  
SEDGEEDYHLAEVRVDYVQHSMSAVIAYESYLLSKTQQAkkRFHEIVHEKVRNVADPILH  
HVRKKIDTATRSSTFVNYSILALLLCFVAVIALAYCPLSILPSSRSRHRTRRRRLKRRD  
>comp7377\_c0\_seq3; 194 1 656 LEN=820; translated  
XFANSALPLLVAALTFVQSESEIFLGGNSEEEGEDKKGNHADATELLRDRIERDVGMGIRF  
LLEAQKQTDQNSMRGAVPGMYSGKKPAALSKSNDDEEEGSEDGEEDYHLAEVRVDYVQHS  
MSAVIAYESYLLSKTQQAkkRFHEIVHEKVRNVADPILHHVRKKIDTATRSSTFVNYSIL  
ALLLCFVAVIALAYCPLSILPSSRSRHRTRRRRLKRRD  
>comp7377\_c0\_seq4; 222 1 526 LEN=748; translated  
XFANSALPLLVAALTFVQSESEIFLGGNSEEEGEDKKGNHADATELLRDRIERDVGMGIRF  
LLEAQKQTDQNSMRGAVPGMYSGKKPAALSKSNDDEEEGSEDGEEDYHLAEVRVDYVQHS  
MSAVIAYESYLLSKTQQAkkRFHEIVHEKVRNVADPILHHVRKKIDTATPLLNLC  
>comp7378\_c0\_seq1; 347 1 1000 LEN=1292; translated  
XTTRHHTTPHHTKPKVQANPNRQPKMFLWQQRVLLLSALLSATPSPAIASSFVMP  
AGKPSGRPAFVAGRQEIGTGSCASKVLGVSPGGGGDEETAVPQAESGAEP  
CATSAPLAA  
SGATPLGPGAKTPPGFLRSRFRFPWNRVDPDYLTYARCLAIPVFGVLFYASLN  
GTSHLYT  
GTIFALASATDWFDFLARRWDISTAFGAFLDPVADKLMVSTSLVLLSGRHGK  
VAAIPTL  
IILARELAVSALREWMAQRGERD TVKVG YQGKVKTFLTMTALT VLLYAPAEAG  
TASILYK  
VGIPMLYMSALITITSGSVYFMAAAPALLGTKQ  
>comp7378\_c0\_seq2; 256 384 731 LEN=1023; translated  
MVSTSLVLLSGRHGKVAIAIPTL IILARELAVSALREWMAQRGERD TVKVG YQG  
KVKTFLT  
MTALT VLLYAPAEAGTASILYKVGIPMLYMSALITITSGSVYFMAAAPALLGTKQ  
>comp7378\_c0\_seq3; 122 1 659 LEN=659; translated  
XTTRHHTTPHHTKPKVQANPNRQPKMFLWQQRVLLLSALLSATPSPAIASSFVMP  
AGKPSGRPAFVAGRQEIGTGSCASKVLGVSPGGGGDEETAVPQAESGAEP  
CATSAPLAA  
SGATPLGPGAKTPPGFLRSRFRFPWNRVDPDYLTYARCLAIPVFGVLFYASLN  
GTSHLYT  
GTIFALASATDWFDFLARRWDISTACESLSLFLFVRTGSX  
>comp7379\_c0\_seq1; 329 296 787 LEN=787; translated  
MTNTAGSSRSIITVGM LISLLPTKALLGGNHPSSGAAATPTTRDGVCASLLGT  
APRTC  
STTSLCMSSYDGGW DNDNFLDSLGGGNNAGEPSEAI EQANDEYFRQSR YGRPA  
VNDGNA  
QQGWV PQRQQQQQQQHLQEQ LQGLQEQ LQLQQQLQQQLQQ  
>comp7380\_c0\_seq1; 327 1 1343 LEN=1408; translated  
GCFDHSSFI EGLQKSYTFLLVSHQSIATSLGILYRSIHSSFSYFQIELLTART  
KRMKFS  
SASIIAATVSVGLLDWKCADAFVVGFGSLQSKSALMDAASSVGN TENDELLAQ  
KKLLS  
LLGPKTFIDPVLADPITKEGVRITSSSGASLKITSPTATYGG SANTYLNLL  
EPVSD  
EPLK  
KDTDPSSLLKSALRQVVPVPPPLRGPVNSFLGDEENEYVPMRDLFTNPTV  
SFAYER  
GWR  
QGFAAAGFP GPDVEAQMATDYFAPVVALANPDSVVVDMSCATGLFTRRLAK  
SGKYGR  
VMG  
CDYSDSMLTEARRRIKADPELSPKSLKTSLDLVRDLVGGQIPMKTESVDCL  
HAGAAM  
HCWP  
DLNAAAAE IHRVLPKPGGRYFATTF LSTYF SNVAAMDGQAGASPSQQAFQY  
FDSVET  
LKDL  
LVGGGFDECKVNI EVLGTACVVIRAEK  
>comp7382\_c0\_seq1; 1710 312 3689 LEN=3855; translated  
MVTNSSAALSAALATVLA VTMVDAFV VPRQDASKYLVD TALDAKKKV VVIG  
NGMVGQR  
FM  
ENLLEDADPEEIQ LATFC EEPRAAYNRVRLTSYFETRDP SALSMTSDFDENG  
ATSWY  
EEN  
DVELYIGDKAVAIDVDAKTVTGKSGKTIEYDACVLATGSFPFV PPIPGKQR  
PGV  
FYRTI  
EDLEAMLAYAKDNGVTSAAVIGGGLLGLEAAKAVKDMGVTSHIEFADILMCR  
QIDEG  
GH  
NALVGKIE SMGLEVHCGARTEAFVGEDGTTDMDSMSPVSALRFSNEGWD  
DLPVQ  
MVVSA  
GIKPRDELARSQCTPEGGIALGERGGITVDSQMRTSADSVYAIGEIALYNNFI  
YGLI  
APG  
YEMAAVASKIVAKDLLQNAPEEEEEPGFYGADMSTKLKLLGCDVASFGV  
NQPK  
PDEDVQ  
ELVWNDPFGVYRKLIFNKAGTALRGGIMVGDASDYDKLHKLAVSAEYDGG  
PAPL  
PEGVT  
ASMLLTPPSARS DSEEEEDADLSDPNAQVCSCNDVNVGQLKSAIHEL  
GVEE  
ATLPA  
VKKC  
SKAGTGC GGCEPLVKKFLVAELES MGGKLN NNI CEHFYSRQELMALIR  
LEED  
PEK  
VDSF  
QKILDSYGS AIAHEHGDGCETCKPAVASILSSLQNK LIMRPELIQNLDT  
NDRAL  
ANMQR  
G  
GTYSVVRVPGGELTPEQLIALGEVAKKYNLYCKITGGQRVDLFGAAKHEL  
PDIWE  
ELGA

AGFESGHAYGKALRTVKSCVGSWCRYGVQDSVSVFAVKVENRYKIRAPHKIKSGVSGCA  
RECAEAVGKDFGMIATENGYNLYVGGNGGATPVHAELLAADIDEETVIKYLDRYLMYYIL  
TADKLERTAHWQKLLPSGVNNGGPIEHLKEVI IEDSMGICEELDKRMELLVETYHDEWAE  
VVKDPELRLKLYQQFANTEENIEKHDMLEFVDMRGQLRPADWPKDGPQTNWEAPANDIFA  
NSEKSWVDVGDVKEFLPNIGTSILYGDSQLAIFNNEARGEWYATQNMCPHKQAFVLSQGI  
VGDKEGTPKVACPLHKKQFSLETGEGIGDEPLNILTFPIKIESGRVLTTELPAIPELDAIL  
GTNGLRVQKSDCIDIAGDAASLMKSIKPNLFPSKNATSVGDSINA  
>comp7383\_c0\_seq1; 390 522 1289 LEN=1355; translated  
MRIVSQLGLVLFVLAGSAVEAFSPQQQSNASPPKHSVQESRRELFKKALTSVAGVTGALAV  
SGLAPAPAAAASGGATAGKYTTIPIAKRRYYGRVQQSVHEFLLLGPEIVQADFSGPMIQR  
FDPQGLVVVEAKRKDVNGQCTKKNQDCKGSEIRDSIYNDMKTSMYLLANAFRLNQTKAPD  
NLPVRAAKKFFKEMDLVEKAAKKRKNDRSEVVFHAAAALDFTFLDLVELPPTDSNWY  
EQEFDRAVGSSARIT  
>comp7383\_c0\_seq2; 164 522 764 LEN=827; translated  
MRIVSQLGLVLFVLAGSAVEAFSPQQQSNASPPKHSVQESRRELFKKALTSVAGVTGALAV  
SGLAPAPAAAASGGATAGKYT  
>comp7383\_c0\_seq3; 212 522 902 LEN=1100; translated  
MRIVSQLGLVLFVLAGSAVEAFSPQQQSNASPPKHSVQESRRELFKKALTSVAGVTGALAV  
SGLAPAPAAAASGGATAGKYTTIPIAKRRYYGRVQQSVHEFLLLGPEIVQADFSGPMIQR  
FDPQGM  
>comp7383\_c0\_seq4; 181 1 452 LEN=518; translated  
XFHASWYNLLFPIDLNVLKLGLVVVEAKRKDVNGQCTKKNQDCKGSEIRDSIYNDMKTSMY  
LLANAFRLNQTKAPDNLPVRAAKKFFKEMDLVEKAAKKRKNDRSEVVFHAAAALDFTFLDL  
VELPPTDSNWYEQEFDRAVGSSARIT  
>comp7384\_c0\_seq2; 116 62 298 LEN=1333; translated  
MSNAGGASISTEQLKARYVGTGNADMSKHEWVTNQHRDITYASHLAHYDQLSYMAVAENQS  
IGRMRLRLLDKMIQPCGP  
>comp7384\_c0\_seq4; 124 62 337 LEN=1066; translated  
MSNAGGASISTEQLKARYVGTGNADMSKHEWVTNQHRDITYASHLAHYDQLSYMAVAENQS  
IGRMRLRLLDKMIQPCGPPPKKINRMVEN  
>comp7386\_c0\_seq1; 484 159 1229 LEN=1921; translated  
MFLVRQALATSSGSGRCCGSNGVAKRLPNPSQLLIRRQRQPVNPALFQQHRHNSCGGNAS  
GTSDKKNLPTALLQRGHNSNHCSTRFSVVPVANHNHNSRSLAEADRHPQQQQRR  
NMASSMAKGGDADPSAKPEAKALAFVGTGLGHERDVAEGVLNLRQSGVSGDAALLSMV  
RSLAGRWEVDEDAGLEALVESVTVELARSRGKTTVGFVWLPASAWPSREGEDDTAVEVDK  
TRAFWVEGFEDMSLTDVAKFGDGEADVLGEMIECACSGIMACSTCHVVVQPEWFEEQAGG  
EPSEAEQDMIDLAYNPKETSRLGCVVLTPLDQNAVFKIPRGANNMDFIPFEDKD  
>comp7386\_c0\_seq2; 481 159 1356 LEN=2048; translated  
MFLVRQALATSSGSGRCCGSNGVAKRLPNPSQLLIRRQRQPVNPALFQQHRHNSCGGNAS  
GTSDKKNLPTALLQRGHNSNHCSTRFSVVPVANHNHNSRSLAEADRHPQQQQRR  
NMASSMAKGGDADPSAKPEAKALAFVGTGLGHERDVAEGVLNLRQSGVSGDAALLSMV  
RSLAGRWEVDEDAGLEALVESVTVELARSRGKTTVGFVWLPASAWPSREGEDDTAVEVDK  
TRAFWVEGFEDMVRFCVLTVVAVLAVFFGVVVCVCDSSAGSSMFWNPFYRAAQLTDVA  
KFGDGEADVLGEMIECACSGIMACSTCHVVVQPEWFEEQAGGEPSEAEQDMIDLAYNPK  
TSRLGCVVLTPLDQNAVFKIPRGANNMDFIPFEDKD  
>comp7387\_c0\_seq1; 476 549 2468 LEN=2517; translated  
MAIMHTPSQTFCTAGWIDPDTSPDVLTQTQPTAIIPGKIPSPTKVTKLRKGETASPTGST  
PRPSASPTQAPSSFPTSTPDSHELVEEFNVVGRHFVGDGNDPRWTALEKNDYTNDAHY  
YAASNAVTDENGELIITTEAVDTDIITQDDHPKKKIRKTKHFKSAMLQTNKFCFTGGI  
VEAQVTLPGKSNIGGLWPAFWLLGNLARHTYVGSSQHVPWSSNLCTEKAFSAQHSACS  
EVAHFGLEKGVGRGSPEIDIFEVQPGKIKANTGVFLESSVGGQPFMSASFQVAPGRPDQRP  
GGGYWPGPGQWYDGLVGGKNTSLNINFYGNYNHFKDDPHPEKSDYWSDAVSFNRQLEEKH  
FNSSHVYRLEWDVPTEDKDGYLHWFLDGDVLVAINGTGIREGGTGSEVSTEPMYILLNTA  
VSSQWGFPTKCPANCECDEFDCNSKVYADRCGFSDFCDMMTKGKEPPKYKIDWVRVYQD  
PTKNEQKVGCSSTPERPTRQYIEAHEKLYKTDLDEHPLKPIQVGRGTCNPLATDISAQACG  
GEERGRCTKGNVCECREGWVPHCLAADGYDDIDWDPPDKLSDVGFDPKFLVNLGLAVGL  
SIVALGIMVSAIFRRQLLEGWTPPIPEVEVKYLSRQSNKP  
>comp7388\_c0\_seq1; 529 97 1209 LEN=1275; translated  
MVRLLITLFLGAACTGSATAFAPASNPVRAEITSLSMANALIVQNKGGGHGELGFQLAKK  
LAAGDKIEKITILQDDSCDREAEPFKSYSSHLPEVDVVYAKLGDSEMDTNGIQDLLGGEK

FEYIFDNYSKGPEGSSKALCDVAKDWGCVKLYVYVSSAGMYQPTDETEFPMSSEATTPIKE  
SAGQAKMDEYIAEECKLPLVSFRPQYIYGEKSNKHDIWYFDRLTAGAPLLIPSPGTQK  
VSLTNSEDVASLLVAPLDNEEAAVEQRFNCGTDKLLSYDEVAYLCAEAAGIAKDDVKIQ  
HYPGETFGKAKFPFRLTDFYVTPDLAKEKLGYSGASNDLQENLKWYYENYKARGKKNVDL  
TKDQEILAEI

>comp7390\_c0\_seq1; 794 99 2994 LEN=3041; translated  
MMAATSSSTAIVDALVPTTTTAGTTGFTNNLDISAFQSKRVRSLAAIIVAASKDDNDLSS  
SFPSMPEDIKSVGVNKNSSQRKVRKRRSNKKKIRTIPTRKNSVPKAISSDVGRGDNDSDS  
LKLHGSIPKLSIDIFEGRASLNTVDQDKPEKSIKVVKTKTKKSINEESARSAATTKKSNNR  
KKVRDTPAGVAWRAGYKSSKRTQGRIQKAFNEVMPSTHNDSHSRAKLVLDLTLQTPPEF  
CNSVNLVCALTYSAKALGYQRVGHVGNIEFRNSLQETFDILHGLVVHRAEGLFTPRQL  
CNVWVAIAKHVDRDQDLLLSQKNEEDSDSPQRRLEETIDEIAKQLTTILFNEDNDDSTAI  
KSTFQQPKIKLGEICMACWAYGKLRPREIPPGWPGPPQMGSVKTQDSIVADWKTEQLGTL  
NKDSAASNNLGSDDSDGSKDVSETGLLFDAMGYALCQSVNNNDLDESKLLEDCTWSELA  
NVGWAFASHGRCSRPESEMLLKSVAQEASERLKEDGTIANNGNYQRFLVRDITQLLWSLG  
TLQSDNFRLLADDLVFLVESLTTNLQLGAKKGSFARGRPLQRWSCADLVQTSVALAHARI  
DERPLLHAIYSEGIHRLMEGASSNYNASLTTSLSTKKTTSNRIVPMGEDRRTTFHPWETS  
ILLWAQARLYLTEKEGNEFAEFTEDAPLFFLDLTLRNNSGSFEKSKIGPQEANIVWSLVI  
LEKYDSTEAILLIDLIFEEAAAATAKNKSMQLEHAHQWQAYFMLQKDCPEAVRRVPEWFA  
SYLKEKWSLEKARFKLSARHKSLSSTLELMGVSHINEHEEDIDVAIILQPDAMVWHETD  
MDKDTSSAAPNATDHVSVAIEFDGPNHFTRVRTEPQEPSGLPPRPNTPRALGHTVLKYR  
LLKQQGWTVVRVPYEFDKIPFWASMERQRYLQRKCLKTHANIKFSEVDVSEYKALTPDRK  
SRYP

>comp7391\_c1\_seq1; 691 145 2358 LEN=2441; translated  
MPPNNRKEKIFAFCDADDDDEIGESNDGQESGKNNGEEETSNTKEMGTDCSSTEDFDSDGG  
SEILMDAEDEDEKPKKQSHRCAFVAALAVAYACEKRRQLRITKSPFLAGQIPPNSLVR  
SACNKLMDTDEGVFKGPIVPTVWAGTRGGLSTSAAFKAGPSPNVPSVLRVQEIITSSYD  
GAEICLVWEVPPNNDDDKTEGQRRREEILGSSLSNRKAETSNTKIQNPTVLILHGINNSS  
GYGYVRSQRMTDRGWNAAVDFRGCGLAQLRSTPRSYTAAYTGDLRSLVNQISARMMG  
GAECNVTAATASAPLFLVGNLSGANLLTKYLGEGLAGTLPRSVAAAGVTLGNPFVLRANR  
MMFPHSVLIGAARKANYFRHRTALRMAATNDAGCPASTRNDFRVTRSLIYDPRIIISLA  
SLDRAAAPYVMVRNSAHPYETRIGYGHGRDRTTPRYSAPTSTKTDSSRSSNETSKPVIE  
PQTPEDFYWRDSSSFQQGRHVSVP LLHVQARDPLCFANARRLMGHALQNPVYIETEC  
GGHLGWWEESGVPNAGWLGAPWAHKAADFFEAUMDAGAEERFAESDKTVVASPIDDAH  
NLF SRSCSSRSGVLGGEAVPQEDDKTRTGSSSSADSMRCRSGASSDDNGDGSRRARHTL  
GLRRPANSQQQHHHHTEEQPP IAYIAVKKKFRMLSLRQDFSPTFSEERARRLETNRT  
LERQSSISSLRLRLSRL

>comp7391\_c1\_seq2; 214 368 1042 LEN=1065; translated  
MSTPAFSQATVLRPFGLLQHQRGGMVGPMPGGVNSFQDVGIRDYQIDESNSGNNVNGLMD  
TIGFQTGRNTNATRNLTQNSGKKTMMNNLNGVNGFTNHQQFQQQQQQHHHHHHSS  
QPQRANRRPTSSGSSHHHHQHGHRRSASEMSEIESYLLSSDTTQHDDDNHTSHTDDVST  
VFNPNRGGVDAGAAPSAGSPVHQEAAMFWNRSRSSAGDRLY

>comp7394\_c0\_seq1; 253 220 777 LEN=857; translated  
MSENGPERTRPYILVTGTPGTGKTTTASLIAEKTGMQHVNVGELIKQLKCYEGRDEELDT  
NVLDEDKLLDAMEVILDKAAEEGKGI VVDFHVCEIFPERWFDLVLCLRTSTDVLFDRITK  
RGYNEKKRSENMEAEIMQVILEEARESYAHEIVHEVQSNTVEDMDNNVIRVEQWQKQWLQ  
DKGYD

>comp7394\_c0\_seq2; 248 532 984 LEN=1064; translated  
MQHVNVGELIKQLKCYEGRDEELDTNVLDEDKLLDAMEVILDKAAEEGKGI VVDFHVCEI  
FPERWFDLVLCLRTSTDVLFDRITKRGYNEKKRSENMEAEIMQVILEEARESYAHEIVHE  
VQSNTVEDMDNNVIRVEQWQKQWLQDKGYD

>comp7395\_c0\_seq1; 981 312 2801 LEN=2919; translated  
MKAVATMLIALGAATGAEASSAFTRISTFHICKQIDPTCNTDDQTNAETIWIYYGSGSDLH  
LVYTDSESENLFVDISNPSSPAADGIVPLGGEPTTVRVIGDYAVVGVNTSPDFVNPTGK  
LAVVDLESKTIVHEIELPGQPDVSVSSNWKDNDGSPYIAVAIENERDEDLGDGVPPQL  
PAGLVSIIITVTDLASPESWTTVDVPMANDPSVVGACLYPDDPEPEYVAIHPDNTKVVVSL  
QENNCNVVIDLASASITAAFDAGSVTLDSIDTTEDGLILQKPSLSIERAGEDVQEHHELL  
REPDIAGIAGSSDYFATANEGDLGGSRGWSIVDSTSGEVVYDSGLEMEWETARVGHYPD  
ERSGNKGNPENVFYSAFGEKEYVFLSERSSVVFVYLMNGPTEPELVQILPVGTGPEGI  
TTIPSQNLVAIASEVDERGDKIRSSITIFELTDGATPEYPTLVASAKGNSPSIPFAALSG

LAADLTNENILYTIEDSFYNKNRIMTIDTSSFPVVTTEQRIMDSGDVLAECLAGNFSSM  
ALQVDVAMINSEDNTVNIDPEGISVSVDDGGFWIASEGKGTVGDEDEKPFAPNLLKTTTE  
EAVITDCFLLPDDGSFADQLRFGFEGVAEDGKMVVAVQRAWGDEPNRLAIYDVSNSDW  
KSVFYPLDEAESQNGGWVGLSDISSLGDKFLVLERDNQGGPDAAIKKIYEIDLDGYSMA  
DGVTI EKKLKVLVSDLLASQGGQILEKVEGLAIKNGMMWINTDNDGVDDSSGESLLMSV  
GIFDETGMTSSSDSDVDDITTSGAHAGFSIALLTVAACLAPVNLTLVGL  
>comp7396\_c0\_seq1; 233 334 723 LEN=723; minus strand; translated  
MSVNPRLLDKTKTSLVLQQQLHRPSIPKVSSENSTLGASVGATSYASKNTITDNPSAMDH  
HSQCTTPYQTTLGEVTGLAGVLDPTLLSTAQKLRLQQLLQHNIQQQLLQLQKLQAQQLQ  
VQQLQAQKLQ  
>comp7396\_c0\_seq2; 834 1 2856 LEN=2856; minus strand; translated  
AQQLQVQQLQAQKLQQHLLNLHQPQQQRHRPLLETAIATTTTAPSDDDVCLPPLKLTDLK  
PSILVIFKRLIKEHATEYSSHATTHSKKTA AEKLTKSSEETKNNISSKDEVVDQIYCSLS  
GFCQPYPNLMVDFPSRERMSELIRSSLEFTLELRASQSSSSLA AAKSKLTKKKKSDTHEN  
HTQDGATTLASSPLPPSMSVRQKDAIVLAAASATRTKELAGANTAKHSGGPNTPLMDPGS  
VDRENIGGGAVLLSPSGIQVAPEAMAPLKNDA LSVAHQVAIVAAHQQLAAQLWKQHRQQ  
QQEQQNREVCNKALGRALGVPKPNTNGLTCFHEDVLAATYKSSAGGLSESNYQAQALCN  
AMGLPPISTSSASLEHLHI AKLKSSVND SNKNLSLSGSGITATNPTPMTEEDFCRIIHG  
LKASLPSFSQNVAARPTATNHAGVVPSELNRTITHGTL LDRSGACSPGLMATARELELAR  
ISLALATAAGIATNSTAASSAEQQTTLARVAQSSVGPITSGPLEAATEGIINSNALVADD  
RSTDLAGMMATARQLRLATISLAEATAAGIATNPTLTSSVEPQSTLAQPVRNRFGP IRSS  
PSESGVVGIPNPVLES GTTVLTPVCRFSFPIVVFQEVDRRFLREFECALRQQLVIFEAE  
MADVEAYRRNTIKYTDNDNGVSGERRPKSIRISQIGIRCRHCATKGGKSNTQRAFWYPTS  
LNEVDTYSEKIYEEHFRSNCSA IHSVNLKDLKMLEDKKNDVSSRKRIKNPF GDKYWSVM  
LSNMGIYEDKVNMLRVNRGKNGVTD SASAVVTSPVPSNNITARDIKREQKKKRAVSEE  
SNAPRRNISGKAPAVIESSDGEQEEINKGRNSIAKKRNL SRHNEGHRSSLNSSADESSS  
AKEENTTKKTRSDGNSKSSSSSRKKMAEQRVKLPNRRTKLVPHSETPNRKERA  
>comp7396\_c0\_seq3; 169 1 697 LEN=697; minus strand; translated  
XGVTL SNISEKIYEEHFRSNCSA IHSVNLKDLKMLEDKKNDVSSRKRIKNPF GDKYWSV  
MLSNMGIYEDKVNMLRVNRGKNGVTD SASAVVTSPVPSNNITARDIKREQKKKRAVSE  
ESNAPRRNISGKAPAVIESSDGEQEEINKGRNSIAKKRNL SRHNEGHRSSLNSSADESSS  
CAKEENTTKKTRSDGNSKSSSSSRKKMAEQRVKLPNRRTKLVPHSETPNRKERA  
>comp7397\_c0\_seq1; 664 149 1351 LEN=1444; translated  
MKFSAVVMSVALAASQTSFAFVAPSARSSAMSRLYSSEMKEETAAPT TTTTETAAPDMKEFE  
DKVVEETASELKAAATAAAVAAPAAPVTAADYVLKTI DKSKI VPGRNAETDRSVAVPFLK  
RPPKLDGTQAGDFGFDPLGLTEEFDLFTMQEAE LRHARLAMLAVVGWPLSELFAPSWMLQ  
NGCAPSVLNGFNVPVSAVAVLAAFGAFGFF EYKTALRRNDNTAFGKMHRADLADCKDGEYG  
VAGDYNFDPLGLYSSIGNDAYARKGLREVEI SHGRSAMLGITAF AAWAALTGHP IVENS  
MFFHPNFELPALVAAYYAFGFFYERDEESADTFFRYKLSSEGNARLENMKIGGGESAAPSL  
PFDVDAIKEIPDKISATVENLQQQYSKLENAYMDNVVKKD  
>comp7397\_c0\_seq2; 679 149 1372 LEN=1465; translated  
MKFSAVVMSVALAASQTSFAFVAPSARSSAMSRLYSSEMKEETAAPT TTTTETAAPASPIPA  
ADMKEFEDKVVEETASELKAAATAAAVAAPAAPVTAADYVLKTI DKSKI VPGRNAETDRS  
VAVPFLKRPPKLDGTQAGDFGFDPLGLTEEFDLFTMQEAE LRHARLAMLAVVGWPLSELF  
APSWMLQNGCAPSVLNGFNVPVSAVAVLAAFGAFGFF EYKTALRRNDNTAFGKMHRADLAD  
CKDGEYGVAGDYNFDPLGLYSSIGNDAYARKGLREVEI SHGRSAMLGITAF AAWAALTGH  
PIVENS MFFHPNFELPALVAAYYAFGFFYERDEESADTFFRYKLSSEGNARLENMKIGGG  
ESAAPSLPFDVDAIKEIPDKISATVENLQQQYSKLENAYMDNVVKKD  
>comp7398\_c0\_seq1; 891 251 2371 LEN=2527; translated  
MGTGAAKKTS HSWRHTMLATALLLQGSATAKGVVQLKLNPRHVELERRRQRERNLHPVA  
TAIEEEDGQRHNEEQYRRRGKAQQVGALYEGY GTHYIDLWVGTPPQRQTVIVDTGSGIT  
AFPCGACSDCGAPKYHVDALFVEKDSSSFAKSTCASKSDCIMSRS SCSGDKCLVSMAYAE  
GSRWNAYEA VDRCYVAGPHETPLVAPEGASLEGDDMNRHAADLAFDMTFGCQTLVTGLF  
KTQLADGIMGMSNQASTYWSQMFEAQKMGPD RQFALCF SRPVHIAREGTEAGAMTLGGVD  
TRLHRTPMVYTPNFNTGRATFFSTRIRRMMLRDGKYGTSVQSTADNPNLGLTVL DIDPSI  
LNKGGTIVDSGTTDTYFN SAIGGEFKRVFRKITGREHTNSGLDLTEEEVLALPTILIQLI  
SNDETNGHVDDMFHTPGLAGAMDKPNKSDVILAI PPTHYMEYDEKSKKYTSRFYTTTERSG  
NVLGANAMMGHDIFFDVDTKRIGWAESDCDYTAKVRENGYDFDITGELKKA EAAGTAAKE  
SKECSSISSGAKCQKVEGCTWGWGKCSKVG DAPPKETPEEPKETPAETKETPAEPKPTPA  
PLTPDYMQEIPPLRTWVEDHLVAIGSFVVL SLLLCCYCLFCRSESSRGRYEKASLEPV

SIEMRNGNGMRKIQSFQDEPDDDDSHVENGNNGSKFRDEPEFEGDFM  
>comp7398\_c0\_seq2; 822 129 2027 LEN=2183; translated  
MRQCITQRRDLPMDDRAQGYGTHYIDLWVGTPPQRQTVIVDTGSGITAFPCGACSDCGAPK  
YHVDALFVEKDDSSFAKSTCASKSDCIMSRSSSCSGDKCLVSMAYAEGSRWNAYEAVDRCY  
VAGPHETPLVAPEGASLEGDDMNPRHAADLAFDMTFGCQTLVTGLFKTQLADGIMGMSNQ  
ASTYWSQMFEAQKMGPDQRQFALCFSRPVHIAREGTEAGAMTLGGVDTRLHRTPMVYTPNF  
NTGRATFFSTRIRRMMLRDGKYGTSVQSTADNPNLGLTVLDIDPSILNKGGTIVDSGTTD  
TYFNSAIGGEFKRVFRKITGREHTNSGLDLTEEEVLALPTILIQLI SNDETNGHVDDMFH  
TPGLAGAMDKPNKSDVILAI PPTHYMEYDEKSKKYTSRFYTTERSGNVLGANAMMGHDIF  
FDVDTKRIGWAESDCDYTAKVRENGYDFDITGELKKAEEAAGTAAKESKECSSISSGAKCQ  
KVEGCTWGWGKSKVGDAPPKETPEEKETPAETKETPAEPKPTPAPLTPDYMVQEI PPL  
RTWVEDHLVAIGSFVVL SLLCCIIYCLFCRSESSRGRYEKASLEPVVSIEMRNGNGMRKIQ  
SFQDEPDDDDSHVENGNNGSKFRDEPEFEGDFM  
>comp7398\_c0\_seq3; 125 251 563 LEN=563; translated  
MGTGAAKKTSHSWRWMTLATALLLQGSATAKGVVQLKLNPRHVELERRRQRERNLHPVA  
TAIEEEDGQRHNEEQYRRRGKAQQVGALYEVSSLVVWHAVARIX  
>comp7401\_c0\_seq1; 464 179 1609 LEN=1663; translated  
MTVPHNNDNEDSSGALANHGIPLSSSGVESNDFFLGDYRHNREILDNLEADPTDGEVDED  
RLIYAATKKFATINMDIQNRESFRARRPLVSSSALRCDDSDSSGELICPDTAPQRTTRM  
AEMRMNFFRIFQQDNSYLEVSREEIRRVAMHKRFAEGSEFSFNYNVLLIIASILAALGL  
GSDSVATI IASMLVSPLMGPVGMAYSATI QDFTLFR TAFMTELV SLLACIAVGGVLTCC  
MIPFVDVPDEWPTPEMESRALMTSFWIGIPVAFFSGLGVAVSVLDEQTS SSVGV AISASL  
LPPAINAGMLWTTYFFNEAGTNEEIGDDAQHRFFREGVISLGLTLANIALI ILLSSMIMFR  
VKERVNIKRKKIFWTDLGLARCIYRNLAVDN PADAPNPVRRMARRVSLYFHKGSTNRAS  
NNEQSSEISFRSNGSNYSSGFC TDVDVPQGS EDRRHKKNL SVVLEEKRSTSSSTSV  
>comp7404\_c0\_seq1; 368 113 1075 LEN=1392; translated  
MARIFTGKPTTFLRTQTYSTQTTHRRCTVLDWVTISEEHGIYVADLGMSPAQC DALVTTT  
EQACKGHYAAITYAKQTLGCREYPALARAVVSPVHSMVYAITQRFREGGPPGEENDREE  
AAEAKDGGDGRPPNGGTTGGDAPAGALDSAEP SLSRPGDGEPRPPARVLQLDEREPHIVK  
YDVTKKERQKLDMDTKSEFTFLIALSNGCGMDYDGGGTYFECLDATVHIQRGHALVFP  
KLRHRGTKITRGLRFLLVGFLVDKPLPLQASDAPAEKTKTEHKPERRDAGGDAPAE  
SPARTVSPAKQVLPVAVDWC  
>comp7405\_c0\_seq1; 512 1 882 LEN=1115; translated  
DDEDDDLYTEKELDEL IETIKVQDAFLFLKSRGWDDKLLPLVDMFNHRNGPQRNVEVTSV  
HDGGGDIAAYTTRDVAAGEQLQYTYSECFDSTCAYSAMVNYGSQPILADYGFVELYPQR  
WYLGADDDVVAPEADDDDYSTVVDGKVQDLTVEVTTDENDDSKIVLRWIFRTPNTASL  
QWIKEQLDRLKSIEAEVTRRVEGLGTIYEKGHPITDLYNLEHEGETLLDYHRAVYVQVLEL  
ALKHADDPVAVTAENHRDHMVELRRTVTVQWTVDELKHELLSSSSSRNGADEL  
>comp7407\_c0\_seq1; 781 161 2318 LEN=2496; translated  
MAPSPMKTGKASGPKKVYLFNCPYKEKASAKKAGAKWDASAGCWYVLSSQNLEAFNKWH  
PNENKYLVC SYDEKDDAKRAGAKWDATCKQWYIAANQDES RFARWLPSSAGNRATKATKL  
IKGKKSEIKTTKTPTKLSTKSQLATIPRINGDMTVAQLQTECKARDPSIKGITTKRKDFW  
LEHLKVGTPWISAEVPLYDYEPESPXKAKQKLTTSALKASKSNSDTTKNNSAVARISAD  
MTVAQLQIECRARDSGII GINSKNKNWLEHLVDVSGKWSQGWKEKDLQNLISANKKAS  
SQTQQSSSKHKDSVDCRDI EGMARQTSKNSKSKRLGDFPVNNITIPQQVGKAKKDST  
SAKKPSVKLVAESVPDASLQRKRP AKKEQTSSANKKHKIKDGNLKSADVLLSTRKKEGP  
KSATTVEAETIASSTYTRITSKMTLSTLKEA IARNVEIAKQKSLHVHKFPRVHRCAMAK  
SNRLMMNGNARDGECYDLCYQKREHFFVVGSRSTAIYTCEKCFDICIQKCFDEENRSESE  
KEKIRKKRQREEREETRIQEREEQRAQRWDSNLRFKNTITKVKGKHLDAESGLKFTVWC  
SDGYDYDGRHSYEGEPTKEFDSVWKTKEEANSRAEYSSAKILGGXPPEIDIEDNEVVKSK  
LVDGLKNYTVAPDDSSRWTGVVPTALVHL PNSSMNRHNLDRGSSMHDDFLYNEQTCF  
>comp7409\_c0\_seq1; 152 110 397 LEN=397; translated  
MTPNFLRLVRLLLCLDAAARAL SFGNHDEVRRSRNPLGNTGSSATTNLYAEGSGKCHREE  
HRVSRDAIAATVKAASLT TGMATAEVTWRSTAYRG  
>comp7409\_c0\_seq2; 586 110 1530 LEN=1687; translated  
MTPNFLRLVRLLLCLDAAARAL SFGNHDEVRRSRNPLGNTGSSATTNLYAEGSGKCHREE  
HRVSRDAIAATVKAASLT TGMATAEVTWRSLVEDACLAHAVGTPNSADASFLPPGTLRT  
IEAGKAAI INDWLSPEETKALCQDARDCFRGGHFTNFILSRNPKKADRFANDRWIMP SFA  
SSQGIRDGPFVDSAVGNLQVRESLRRKMAAVKAALANGLTDRPTLSNDVAQTHEMEYLR  
GEGAXSESAHLELKRAHGSRLPLKKNASRRSVTWLVYLNDDWTPEDGGQLRLHERASDSI

VPVGARNANDLQVGWLREIPETGKGEQPVFLNPFCKRKRKRDGSMDENESCMLYTFDDNSGEN  
KRRELSKQFPFNAALYLGGGDKLARNFMVDDPEDRKRFLHIDAPKSLVSELAKTETPPEG  
EDGGERIHDILPRAGTLVLFDSVSLPHEVLRTNRERFGVQGWFHETIQQQTQQ  
>comp7409\_c0\_seq3; 634 110 1543 LEN=1700; translated  
MTPNFLRLVRLLLCLDAAARALSGFNHDEVRRSRNPLGNTGSSATTNLYAEGSGKCHREE  
HRVSRDAIAATVKAASLTGMMATAEVTWRSLVEDACLAHAVGTPNSADASFLPPGTLRT  
IEAGKAAIINDWLSPEETKALCQDARDCFRGGHFTNFILSRNPKADRFRANDRWIMPSFA  
SSQGIIRDGPVDSAVGNLQVRESLRRKMAAVKAALANGLTDRPTLSNDVAQTHEMEYLR  
GEGALLNRHTDEHHLELKRAHGSRLPLKKNASRRSVTWLVLYLNDDWTPEDGGQLRLHERA  
SDSIVPVGARNANDLQVGWLREIPETGKGEQPVFLNPFCKRKRKRDGSMDENESCMLYTFDDN  
SGENKRRELSKQFPFNAALYLGGGDKLARNFMVDDPEDRKRFLHIDAPKSLVSELAKTET  
PPEGEDGGERIHDILPRAGTLVLFDSVSLPHEVLRTNRERFGVQGWFHETIQQQTQQ  
>comp7410\_c0\_seq2; 236 249 476 LEN=476; translated  
MEAEIDLAPEDIETVVEEFDKDGDELDFCEFKTMVKYLTRDSKQRSSIVMDDIMLQLGSV  
EEGLDEEGDDGDDDDDD  
>comp7410\_c0\_seq3; 263 439 795 LEN=795; translated  
MTSPEERALEDERKLVFESFDKHDLDSDGKLSRAELISALQEVMEAEIDLAPEDIETVVEE  
FDKDGDELDFCEFKTMVKYLTRDSKQRSSIVMDDIMLQLGSVVEEGLDEEGDDGDDDDDD  
>comp7411\_c0\_seq2; 832 1 1968 LEN=2016; translated  
XPALALFLISLCVFSTTSSKDDDAKFMGLAESVHPVRRRAEIAFKLLGKAEFVAYYELNR  
FGDVKIGSGKDDKDGKNESSLSLSTGDDVSIQTDRIFFSKSLPHLCASVVGFSAVEA  
ALELGHFVDEDDIDKGGADPNAAGLVAVQTLFRDSSEKEYERSLVTELGNLLRRRAVGANL  
AELVRASCLMAAFRSALKVHPSSTTRRFDKELLAMDVDILMIALKVAQDEQLKATTAIV  
QADRNPQLVVPYKYPTKKEGNFPDPEEVGLPFGLAELKQQRKRTSMDLTGSTTSFGNDKE  
SEECLTFSQSVPLVRSIHARAACASFALSQEELGQSFLQKKGSGSACYVLDVCEECVN  
VAAVGMKADANSSDEGDIETAVQVMANVAALQHSPLRFLFTLMRGMCHVGMIRSDQLAET  
FQYAEATLKGADKACDNQVGTMYSKVYECARGKIDAHLYALEGFNWVQKTCRDMPNAYC  
EGLIGYIRNVFDSLGPMDGSRAGLHFSCCGHVAERLVKILSDRALEDGSRSDGGLPPIA  
KIDPFGLYNMSSDVDEFKFFATSTGVPQLADCFDELKSITSAMLDPLPNLLRPENSAR  
KRKYPYLSLEKVGNILEKYSSPGMTLMGGGKVPAGMLTLDKKEVVALLNLRVRSYK  
>comp7412\_c0\_seq1; 991 228 2339 LEN=2419; translated  
MGKRKTAKTGDKALYGSREQLGNQLGSKRSGRHGHGHGHGQDHEGERKRRTKTGENPIYG  
EVDRFHNEKDYDVLRLDRETRGQTNSEDEDLAGTTRSVLDLAAGETTSEEEDGDNDGDDS  
LSSSDGSGGWHDQGGTDPYWSSEEDSVSSSNRSIDEGDSEPASKDDPRNWGKRKSLYY  
HGDTADLEIGQEEEDAYLEEEAAQEQASRFEEMDDYDFVLSSENDNEDGNDGAESKNEMT  
TTKKQHEEPTTIRYVSRLSKKEKTRKLEQQFPELLPMVTYFVSNIVEDVKVVRTKVGV  
TALLDGEFTAESVGATIKGQQYLLTKAMVQKSLALNSVVYILLRLALVGDEDEATTNIRAH  
IMDQLKKFTSLLGRLEEDVQRKTSIDIALQLDNLIEAAALVEYLLGGNDGVGSAVRGTC  
DGETNNAKRNDNRNLEQPKRGAIDGDELSNGRSDGGDGDFFEEKRAAVARQKQKDFERT  
LNEARFGLRPNEANTSGRASRKTICMPMVDDFGDLERDHATSNSHLASAVNTIEQRSR  
KRPPAPVMAEDLDDIDEYDDRVRVHGKMMEEELGKLDQNGDYERMDDAETSDGQDPDAGE  
PGFYDRIAAQSQERKFLRTSLYGVVPKFPRVDGEVVGERSIGRVILKNRGLVAHKAKIN  
RNPRVKKREQYRRALIRKGAUVREVEAGEGNRYGGEQTGIKSRSRSRKL  
>comp7412\_c0\_seq2; 461 306 1448 LEN=1528; translated  
MVQKSLALNSVVYILLRLALVGDEDEATTNIRAHIMDQLKKFTSLLGRLEEDVQRKTS  
IDIALQLDNLIEAAALVEYLLGGNDGVGSAVRGTCDGETNNAKRNDNRNLEQPKRGA  
IDGDELSDGSDGGDGDFFEEKRAAVARQKQKDFERTLNEARFGLRPNEANTSGRASR  
KTICMPMVDDFGDLERDHATSNSHLASAVNTIEQRSRKRPPAPVMAEDLDDIDEYDDR  
VRVHGKMMEEELGKLDQNGDYERMDDAETSDGQDPDAGEPGFYDRIAAQSQERKFLRT  
SLYGVVPKFPRVDGEVVGERSIGRVILKNRGLVAHKAKINRNPRVKKREQYRRALIRK  
GAUVREVEAGEGNRYGGEQTGIKSRSRSRKL  
>comp7413\_c0\_seq1; 86 1 283 LEN=585; translated  
XRERNPTRDLGKTADLEHVEGDGPAPGNRPGLSQLASLWKGKRGNEIQHALENQPS  
PQGAVVGDQGGHRRRLAWQERRPGGAPEVHSHEEGRIQW  
>comp7413\_c0\_seq2; 724 144 1904 LEN=2175; translated  
MTGTQILQRLKERFEEVSTRYLPCVDFLVQCQOELRKGLQVATTKRYVHSVFRDTLTS  
RE FHTQYISKLPDRFYRKNNKMTDPHLREAYKELQKLVANSKDVESQGCEAVKNTFLG  
GMKDGE SWGLRKWLSKHGGALHCNDTECMSTSCQKLDRELETTTRKLAERLRPMAAK  
SLKLLKSDIPASYQEQSSAHPYLPFFHRLECALRAMSNFDPEDDDVICIIDDDEVEEL  
KAKAAAASSSSSSNKAKRRSSAAGKSKTSESMNGNRGGTKRKHQQVELDIIDPGDDSD  
VEVLEQKPP





GQTSMVQQQQQFLGMQQLSGAAQPQQVLMATDQGLAAPVQTSSLVQQQQQGLGPPGAVAL  
QQAMASTGDI PQGMDQNMNIVQAAAPAMQQQOTSNSQSGNQNVIQTPSAMQLASGSSNAAS  
DQLQASPSKQAVYFYDPKDTAMSQTGEMI QMPTIVYDTNGRAIPVSELQHQAPIYVQPPA  
RGASLTDATSSDAAGSGGIGGQTELVSPTSTRGASLVSPSSREASISMPKSWGASTSQDQT  
IIVATVAVMALLVGALSARRLRKSFSLACIENEAELEDDVAYDDAYTTTTAAASGAMGND  
SYNTFGGWKGDLEKFDV

>comp7424\_c0\_seq1; 398 32 1681 LEN=1681; translated  
MEETTRVDLSRSTSSSSSDSRLPPLLI FNHNPKAGGSIKDVLNELKPIKI ICKCKPFNA  
RGDARRKNLCCREADTVDARKSDALFVNVDEF SRTPLYLMQNDESIGRSSFVIGSIREPC  
SQYLSLSWSYGSQGEYFMQRFITKEPANLYYGQNPYPFNTSEDFRFRNWMSHDLVTGLV  
GDRIWASYATSLNKWKNPSEGLVQSVDCWVVVENFRETLLNCLRAYETKGGGLVDWSLPTV  
SNLVRQE QEFQKAENERHNSRRLYTNSKDKNDALHDPKSKHHSPCAMYFDNSTEHLVQDG  
KEAFVYGLFGYKGCCEPGNSFLGARTASAVDEETTNTGNLPAPPNVWSNPLEIALSLGL  
VAVALYFGLARRTTGRNTTSTTQNSMVVAAGSKSASTDSEEREQELQQFLPKTSSASAAR  
KETGSAIVPTAVTRRSQQDGRTHVGGPSGEIVWAEAWRRATRSSKEQVFPWLSGPGRAGR  
YKPVSV EATDHTDR TALLL GWSAGPRLELARHGWCTSTDWCCTISSNKEKHL SFVEGRCD  
TPPPTVSPSX

>comp7426\_c0\_seq1; 430 237 1442 LEN=1629; translated  
MANVPGTTRDEKNDNGLSPVVAPDSSSLLLEATGADITPNPPNPNVIQAPEEEEIFFDDQA  
DLPPMEKKVVGAAGQLTTAEMLLETLDRNFQMSRLATQYYYTRHFMMFLPSVSITMISG  
IMAFMIKSEITMSETVSNWIAFLVGSFSIMNVFLQNL SNELNYDHCCKSQRAVSLGLKRI  
LAEMEFHKSTTGPIEIKIHEIEKTMNTIMGQNDATVPAAITSAYELAKTRLSLRLFPV  
RFDDNDPYASNKLSWSQTMHTVHNELLCAIANSPGWPLRIPNAEEVVQIAIQRVVEILKE  
EQHNELYKALLDQELIRVKNIENKRKRKKERLRSAGAFSGIASAMRKNEKIKGWSSNR  
TTDESTALLEKAPENSGGQKYWSMLANGTSNHDNNYDSSIP

>comp7427\_c0\_seq1; 634 266 2523 LEN=3506; translated  
MAIDKSVDKSIQKTKAVNVI GNNYAAVFPYRVARFLEGGXSSLSKSSSNNDNMEDEDIFY  
EYRENHQTKTIGKRELQREQKGAWALLAALEKAKEAQYVEVASLITSLETLLPREGQQG  
TDENGEGARQPVCSSRSNKLPRFSVEDTKSLTGDDVVALLEATRSGRLIEIHTIRALI  
EAATVVFRRSRHPDRLVELPPLSKLQQVQVVGDLHGSLNDLATV LALMQSRSGEPCASNRI  
LFNGDLADRGEHGV EVICIVCALKLAYPEFVFNVRGNHEDLALAIAYGLAAEITRKYGAG  
CRKVLRLPTLD AFFRALPLATVIERDALIVHAGPPPPSSDGSGLADLLLRDHPILTGCLS  
RTVVDTGCKNDN SSSNNKLQKEEKVSKQIIESMLWSDPLVDECEGTLHDFGDVENDISGT  
GSNRWV PNISRGAGYKYDASVVRNLLNREGLSRMVR SHEPVRDGCVRVIDN SSSYNSSC  
PKHKNKPMELFTVFSASRYPYKEGFNQGAVLEL KANGEH SVLRYATEDDEPLEVAMT IAS  
SSVTEENSRESRNATREYACAIDSDDIRHTLLEALRYNR T AIRNSLRLASVKHQ TIPFET  
VVDIVIETLNLGNEGNHLKQIGAKTTLAKAMGIQCPDTELPPEHVDVDRCFEVLLANPTD  
RATRPQRSRLRSYDSYPWLF SVFELDTNQDGF LSRSEWDECVRTINSK LPEGLGIAADRT  
WEVLDTEGYGKITMAEWERLGHAI ESDIARLD

>comp7429\_c0\_seq1; 329 202 1329 LEN=1961; translated  
MRLISFFTYLFCNARNPLVGKAAAFAPLSLQAHVASRRKHPFIVGSM TLTTSSTSAMTI  
GITGESNPTSTFATATQYTIDDSICSPTKAETLEKAVYKACRSLEVYMEKKPTAAHTRRA  
FEVLVEMIAEEGSNGYEGIILDSGCGTGKSTKLLASSIYPQHLVIGVDRSLARLTKTKDN  
RQGGGQSGNNDERKGGNCENSPHTDKREAYCHRLSNNAYLVR AELVDFWRCCIEHGWTTE  
DEKGGDNL SKISHHYMLYPNPYP TKARLSSRWY AHP SFPLI LKLG I QTMVIRSNWEGYL  
KEFSQAI VMANAFYVGHSD EDSLHGGSNLALPYI SSAKKGPTERTDKAMAL TNFESKYDN  
VGESTYELILERAHT

>comp7431\_c0\_seq1; 1268 262 4855 LEN=4910; translated  
MNTNNGNSNYNGFPSIADAGNGVVYSGIEGSYGESYSYGEQQCEDGSGEYYYNEYPMPQQ  
QQALYNPYQQQHSE EYGD EYGMTTPYQQQHNEEYGMATSGAWNQQCAEKRGDYVYASEFS  
PEYVDHAI SALAYDSTYDCMYLTSTTQSMSSSRHTKVKNHRA SLLLNYSSNTQTRDYFLY  
SSVAGHPEAPLAHLRAIYESIYGF SKVAVSTTSGVQQRGGQSSFYPPPHAYIPAYGGGEV  
AEIRSYHNHHVQHNEHNQNRGHI GITELLPLEGGYVASVSPSAVRIHSHGGLQVHDSELS  
GMI SGTIHPHCSSAIPDDGNVAATHITVGGLSMKMTGALGTDNTKTAVNRNNSRVVQPSL  
HCLDLWQGLRVVSR SFKATNHKSN GNSQVGVTCMATSHDKG SVVAGCTDGNIRLFDGSL  
RELATVRSHLGGVSSIAVSPDGNLVATTGYSSRACPKNSIDGMPFCSSLYTFPDPTIYVY  
DIRYLGRGGI PHPFSGMKGT PRHVC FVPDMEGCASNRLLV ASGKNGGGMQIMT PFEKQNE  
NTISFSLPPLQRESITAMSKPKKRELALGTSMGRVMEYRLTGYIENKTIRRKADLAMP  
PFYPDAPAVSLEPSLLQGSPSLRNGTTDEMRS LFSTYILQSTPNVTSIGESFEDAMEVFG  
SLAGM PISIDQRREVNDTLLKEATTGEKDYMLTVPTSKLEIDILANQNTVSN NYK GK KAA

KGLANPNKLLYNDKLYSLCYKEGWNGKQKQPQHHRGKRSNGASSKQKGIPPRYQLQVR  
PGFKASGAFDASQHNNDTGLFPGWDYSSSMPNAWVSPVLLLFYFIP EIRKAALAAQFNGKT  
IGTKAYEKSLSP ELGFLFHQIESLSRYGLLYPHRGNKFKPKIGAWIPSNFVTFLLSTMDAA  
EQMAVLDDSPAAVDLPRRPE SFYRFLAYQLDKEIFSTSSSSSDLKKSAAKPKLMDSLNGL  
DFLSSNQFIESKSTPPTQSMTRALTLDLNYDIFRPGTKRKSIRFGELLQHSLCRSTRLRA  
WNDKSRAYETIVQRKIATSLPQILTLSCACAGRKEQDGLWAWRMNNGGEPWLAETIEVEL  
LADGNVAVTEWHKTESGDGITSSTFRGKSSLPPEVVKLVKASSKQRFYRLQSVLSYVR  
SYEEDSGDDEASGHHVLSRVVSADYKRRVLKSQAKEARKLAEEVSALNSPEEIELELQELLL  
SSGITAEDYVCRAESVEEQLTSLDEEVNGLSNDWIIYNGYKVSKT VVEDARAFHVVPFKE  
PVLVVFHAVDENGMLRNTNEENSESQQVAKSVSASVMNPSSLSKNSGDILTDRCLQRLQ  
KGRPLAFDAEFVSVQEEESA VTDTGQKEVLC DTRHALGRISIFDCPREETIVDDHVLPRE  
PVVDFLTRFSGIVEEDLDVARSKHRIISTR SAYLQLRYLLDQSCIFVGHGLKQDFSTVNL  
VVPNPQILDTVKIFHIPGRRYVSLRFLANFVFRDMQQDTHDSVEDARTAYELYCKALKW  
KKEGIWEKSLQELYSYGEKTSWKLGIKDRF

>comp7434\_c0\_seq1; 189 1 869 LEN=869; minus strand; translated  
XQEREHAFVEDEEISTQLELVKALIDANPDALKT CISSCGCTMDRTRKENRNVTDHTEY G  
YLPLHMACASLCEIQNYRTQSVTGGAGDRIFQLQRQQQHRILELQLGVIRILLDRHLSG  
AFHNENATKELPLHIIVRWILRNCIYDNSTTNNNPNTCSNNICERNETETTPTPTEIKTK  
STDHGHPRSDHGCDYPNGFYVNEKEEQYDSGFHRSDYCCQAECIATFLVMANPNGVNVQD  
YTGETPLGIVQNHLRAIDTNTGTQYTTSDLKEPHDSLSSVGTRFRYIHDE

>comp7436\_c0\_seq1; 551 323 1663 LEN=1892; translated  
MTWHGTALVMMRYKRAAASGILCLERTSLASNNALLNQAQRKFGFVLSGPGRSAAALND  
DKEKGEILCIGRKL TNFSRSFWSCRGGEMDPRDKSLAKKDSVLSDDAKRESSSSSDTNI  
DTNMSTTRTTTPVGSHTYQVSVGVEQGFRSYMEDEHYVSNDGFAAVFDGHGGGKVSRYL  
RKNLYANVQAFPLPLVLEKQEDLSVDGNTGGTEEK LKSTRPRNPTVNDYANALESALEKV  
DSEILKISHWSFQGSTALVWLHEKQEERNTGDDNMPDTPQRTILANIGDSRAVLCRDN  
KAWDL SRDHKPNDPTEKSRIESLGGSVIWCGETDQFGAPIEHQGIYRVNGNLALSRAIGD  
RSERPHVTAPEPIISVPIEEGDEFIVVASDGLWDMNSGD VAVNYVKLSL KAGISKKKIAS  
MMVEEAMRLGTWDNVTVVI IWIDRKL

>comp7437\_c0\_seq1; 437 11 1362 LEN=1910; translated  
MVRALLPVQRFLFGLQIFVGHVCD FQGDFVLYSASIMIAFGFLNPLANPTFSSLFENSS  
XIKTTHNYIDPSCSFQIEAHESTLRALVLTADGSKLATASHKGTILRVWDVATSQNIH  
EFRRGVERANITCLAFSWDDQW IACSSDKGTTHIFYLDNESSGLKDKDKDNSSKSKGSIF  
ASTGSSLLSSGSKLLMGSFSSSTAKSPSKSVCQIRGVPHPLACAFIGDAPHLIAVAGWDA  
DGNGVLLVSEFAAHQEARRVAYHVLVKNASTADETEEERRRRRARGWVPGDETSKNGSGH  
DFSENNPRMHFGHLQISDEMAEESH RFQTQTTEDDFC EVIVQPRQEP I IEDKPPINPSSP  
LSSSNTQQDLEEQQTSPSSSEKGT EQKTS SDGDASNGIDGENNDIIASNTKAGASGDKET  
SECKGTDLKT EADPEPIATNSCSDHDDDE

>comp7437\_c0\_seq2; 473 399 2171 LEN=2719; translated  
MDDREVFMDANSNAVADNSNINKSNTGTSSSSPDFIDQTLNLP AHHHPSQRSQLLT LSFN  
QDGGCLAVGTANGFSVHNLHPQYNLSVERSLRGGIGQIEMLFRCNL MALVGGSDPHAAP  
HRVLIWDDHVPKEIGELSFQRQIVLRVKLRKDAIAVALRDRVYVYHLADLSLRDKIYTADN  
PYGLLSLSTHVQDMVLACPSVTTGHV RVELYGMKRTMLIEAHESTLRALVLTADGSKLAT  
ASHKGTILRVWDVATSQNIHEFRRGVERANITCLAFSWDDQW IACSSDKGTTHIFYLDNE  
SSGLKDKDKDNSSKSKGSIFASTGSSLLSSGSKLLMGSFSSSTAKSPSKSVCQIRGVPH  
LACAFIGDAPHLIAVAGWDADGNGVLLVSEFAAHQEARRVAYHVLVKNASTADETEEERR  
RRRARGWVPGDETSKNGSGHDFSENNPRMHFGHLQISDEMAEESH RFQTQTTEDDFC EVI  
VQPRQEP I IEDKPPINPSSPLSSSNTQQDLEEQQTSPSSSEKGT EQKTS SDGDASNGIDG  
ENNDIIASNTKAGASGDKETSECKGTDLKT EADPEPIATNSCSDHDDDE

>comp7438\_c0\_seq1; 254 250 1431 LEN=2591; translated  
MGVGGWSAAFSTYEG LALFRILLGTL LAAELILRFRFLHVFYTDEG TKPLRLMLPNIDD  
LYRLVCYHCHFGT L FQQMLLVIQVLVAVCLAIGYKTKMAAILS FYMYTSLILRNTWLYF  
ILD RYFYLLFY SMFLPLDERWSLAAVLKPRHANATATATKSIREKNVF INPATVALKML  
VWVIYFDAGSGKYMDPKKGW TYHADPLPALD TYARHTVPAQHLYGMIGPEGLRLMTPLVV  
WVELL CAPVALAGSYLGS AKTVWFAIGVISMMHLGISLCIRNSNLLSYVACCAWL VFLPL  
GWKNADR TNGDITHDRPKKRDSGATTTPIRAQLFARGPTSVVTWVMVTAMVGN IWFETI  
APGCTTESSRLIWSTVFQNRWNVFIGAEEVSLH

>comp7438\_c0\_seq2; 249 250 1857 LEN=2432; translated  
MGVGGWSAAFSTYEG LALFRILLGTL LAAELILRFRFLHVFYTDEG TKPLRLMLPNIDD  
LYRLVCYHCHFGT L FQQMLLVIQVLVAVCLAIGYKTKMAAILS FYMYTSLILRNTWLYF

ILDYFYLLFYSMFLPLDERWSLAAVLKPRHANATATATKSIREKNVFINPATVALKML  
VVWYIFDAGSGKYMDPKKGWTYHADPLPALDTYARHTVPAQHLYGMIGPEGLRLMTPLVV  
WVELLCPVALAGSYLGSACTVWFAIGVI SMMHLGISL CIRNSNLLSYVACCAWLVLPL  
GWKNADRNGDITHDRPKKRDSGATTPPIRAQLFARGPTSVVTWVMVTAMVGGNIWFETI  
APGCTTESSRLIWSVTFQNRWNVFIGAEEYVTWEIAPGRLQDGSVVDVWGQTDIVNWNMP  
GSGAPCTSTSRPGRWRSFPYLAELDGEAEALWGYLCQEWDRNNGVSENKNPGRKLLRYN  
FFMLQADVLPNMGFSSTRKRLIYSHECSSAHKNDRDGLQNQTYGGKEISSDQEL  
>comp7439\_c0\_seq1; 524 29 2121 LEN=2793; translated  
MASPTTLSARDKAQAFVDNFNRSYEEKHVAFENQFWGTMKALSSTEEESPYTELLTKTKA  
EMEDLLSDPAVIKEAKEQQEALANAKGEDVQEVVKVLDVIVRTCRCNEFPTPEKAVREE  
TNKIEGSLEKSRNEMTLGYTNEEGEFIKASSVGLRTVLRTPAPSESTRKSAYDGLRSIGAF  
VCSNGFLEIVRLRNKLAHLLGFEDYDYTVTNAEGFSKSKLFEILDGLEEGTRPLMAKAR  
KDLEELHGVKALDPWNTSYMMAGSVVKKMVS LPCVSCLLGHRI SLLLLLKHVNPESGKKKN  
IENTCEVGSHACYHWLSPFVDPYFPFSKSVENYLR SYAAMNIGYSNATMTL DLLDRKNKY  
SNGFCHWPVPAWIKPDGTHVPSQTNFTSLADPAAVGSGLTALNTLMHEAGHAAHFANIAQ  
PSPFLSQERAPTSVAYAENQSMFLDSL VGDSAWRAKYAKDLQGTPIPFAIIEEDIRAKHP  
FAVFQLRAMLSVSYFEKALYELPEAELTAEKVQSLADEVEIRIQGGLGARPLLSVPHLVS  
DEASCYYQGYTLAEMSVHQTRKYFKDKYGYIVDNPVGP TLTESYWKCGNSKPF LQIVKD  
LTGKELSGDDWVDALKEDLEEHIAQERKEYDGMISKCEASSAEKDGEEPLDLAMTVKFV  
DGDHVISDSSQSGLLSACKEFEAFVAARVAAKASS  
>comp7439\_c0\_seq2; 615 29 1966 LEN=2638; translated  
MASPTTLSARDKAQAFVDNFNRSYEEKHVAFENQFWGTMKALSSTEEESPYTELLTKTKA  
EMEDLLSDPAVIKEAKEQQEALANAKGEDVQEVVKVLDVIVRTCRCNEFPTPEKAVREE  
TNKIEGSLEKSRNEMTLGYTNEEGEFIKASSVGLRTVLRTPAPSESTRKSAYDGLRSIGAF  
VCSNGFLEIVRLRNKLAHLLGFEDYDYTVTNAEGFSKSKLFEILDGLEEGTRPLMAKAR  
KDLEELHGVKALDPWNTSYMMAGSVVKKMDPYFPFSKSVENYLR SYAAMNIGYSNATMTL  
DLLDRKNKYSNGFCHWPVPAWIKPDGTHVPSQTNFTSLADPAAVGSGLTALNTLMHEAGH  
AAHFANIAQPSPLFSQERAPTSVAYAENQSMFLDSL VGDSAWRAKYAKDLQGTPIPFAIIE  
EEDIRAKHPFAVFQLRAMLSVSYFEKALYELPEAELTAEKVQSLADEVEIRIQGGLGARP  
LLSVPHLVSDEASCYYQGYTLAEMSVHQTRKYFKDKYGYIVDNPVGP TLTESYWKCGNS  
KPF LQIVKDLTGKELSGDDWVDALKEDLEEHIAQERKEYDGMISKCEASSAEKDGEEPL  
DLAMTVKFVDGDHVISDSSQSGLLSACKEFEAFVAARVAAKASS  
>comp7439\_c0\_seq3; 264 191 643 LEN=1315; translated  
MFNLQLAEMSVHQTRKYFKDKYGYIVDNPVGP TLTESYWKCGNSKPF LQIVKDLTGKEL  
SGDDWVDALKEDLEEHIAQERKEYDGMISKCEASSAEKDGEEPLDLAMTVKFVDGDHVI  
SDSSQSGLLSACKEFEAFVAARVAAKASS  
>comp7440\_c0\_seq1; 533 1 1418 LEN=1602; translated  
NNNNNNNNGEEANNEEENNAEGEEENNGEEKEQGDDQDEGDEEAGPEIDFLKCAAFTVE  
PKLVDTQSMQLSGAISESAAAALEASSITKMTPKLNTQESVVFVFTYGYGADDQDRKLYMA  
GIDDWVAASYGYGQICH AIDQDDVDYVFSRIPSVFVSVHRYSSHTWYAGFNCRSDGTGFQP  
RLF LDATCTTFSTTMNEYYPFGSDTGEDQANQDYTTQV ASDQTKYMVQNIQDTLEYAQC  
EESDFCDTVLGSSVEVTT CGNGDDDAANGRNLAESGNAYQIEYGASSSIQNACPSIKAS  
MGLGEDYDYTSYQLEWLAVLWSNTENGRQAPDRSRYP SRWVYPAACLLAGAVSVAALFLL  
VSRARAKNWNKAGCSGSESDSSGKKEPLVGNHXPPPPPPQRQLGGLHGPQRDRVQVLGA  
QAQDPPGRPENLPEPLGEPATPLPAGGDGVRVGRTAHRLS GEQDTAQHI IKL  
>comp7441\_c0\_seq1; 609 55 1320 LEN=1530; translated  
MGKKAKSTKGALRAKERKLDKSTLPPPPISVSEEVGSAKLLDEPSLPGSGYKALGQDGYD  
DGGVADLTVIDLDDNVLRRKRGETDYFTSLKADLLPRVTKGPM AHLPRREQIKLAKLL  
FSDEETEEDKTPSEVWADNYDPEDDDDYETKKNRYDNLASARMALSLSSVLRE PACASLS  
LSEISKRR LACYGKAGGEDALRCAIKAIEIASTGFWRDEIELECEESP KVPDPNHEKNAT  
APGLSHPDSLKLRPIRVSELCLRSAYLHKGNALAALGREAEARETYLKVMPMLEPEPRCG  
RLDWERVSIYVNVGNTFSREGDFEKADEQYAKAEALGREHITASEGNQIDGMGIVVIAMR  
ARAFALKRAGREDEGKKVLKDVIAMQINLNAENKKAQKAEKAEKAAELKAAAEANAS  
A  
>comp7442\_c0\_seq1; 368 119 784 LEN=1008; translated  
MFAVAVIAGCRQSVDAFSTVRRSVDHVGN TLQPRTPVTLFGILDDLMEEEENSCEEEEGK  
NDDDERLERLYHSLIFSGDVKSEISRREACTDPGFSEYLVASSKSTRDRDEQQGLEELI  
GLIEEVKTTAAMEAAA EKAALAKAEKDKELRTEAEQAQTAINASESKKLTNADLLKKNQ  
IDAAIALSDDEKPSDFISDCREVVNLSRGFNDSGQMRVGGG  
>comp7443\_c0\_seq1; 267 103 1130 LEN=1130; translated

MPAIYLISSGGARSGKSGYAQELCEYLSNPNIYLATSTVFENDNDFRVEKHKQRDRGDQW  
ITIEEPLEPSKHLEKMKGRVVLVDCCTLWLTNYMMQEGFLSLEDENENDKLLKNGSAQDAA  
ERALRKEIEKFDKMTEPWDCYVIVTNEVSGTHAHDHVTRKFVDAQGWFNQYVAKRAEA  
VVMVCGVPNIVRGPLSKPSLSTAVRASGGLAAPTLEAQRADMLDHYLSKRSIAMDPKG  
YFKFRIDRDKKVI FASYHSCI INEKGEFFDLHGNRLTCHGKSPEPVRTWECRTAKELTTE  
LLEKWDMAKVLVSVGGYIGREAQKAEDALYTGETTDTKTRX  
>comp7443\_c0\_seq2; 46 715 1343 LEN=1343; translated  
MTEPWDCYVIVTNEVSGTHAHDHVTRKFVDAQGWFNQYVAKRAEAVVMVCGVPNIVR  
GPLSKPSLSTAVRASGGLAAPTLEAQRADMLDHYLSKRSIAMDPKGYFKFRIDRDKKVI  
FASYHSCI INEKGEFFDLHGNRLTCHGKSPEPVRTWECRTAKELTTE LLEKWDMAKVLV  
VGGYIGREAQKAEDALYTGETTDTKTRX  
>comp7446\_c0\_seq1; 481 64 1072 LEN=1072; translated  
MTNPPAGAATPSRNPARRHNYANTHTPIASAKRPRSSMDKSALKNRRTAGLSVPSTPLGKFG  
SADANGNGNDRADAPLTPVPSMVTQSVSSPVASTPRAMDRANLSPMHPARPTIRSEED  
SDRVEGATNMVDAIFSPMLKLLGAGEAGEEEEEQDREGGQLEVVVAEHDEAEAEHHRP  
ANNEDPAAEVEVPPEDAADVETDDGSSQGTEYEDEEEFNPFYAFIKSLPHYDDVKSLCPAD  
RLPAKRDDAPPITLVLDELDTLVHCTVEQVDDADLTFPVDFHGMYTVHVRLRPYLNQFL  
EAIADKFEVVFTASQQVYADALLDLIDPSKWLGLAX  
>comp7446\_c0\_seq2; 623 64 1356 LEN=1615; translated  
MTNPPAGAATPSRNPARRHNYANTHTPIASAKRPRSSMDKSALKNRRTAGLSVPSTPLGKFG  
SADANGNGNDRADAPLTPVPSMVTQSVSSPVASTPRAMDRANLSPMHPARPTIRSEED  
SDRVEGATNMVDAIFSPMLKLLGAGEAGEEEEEQDREGGQLEVVVAEHDEAEAEHHRP  
ANNEDPAAEVEVPPEDAADVETDDGSSQGTEYEDEEEFNPFYAFIKSLPHYDDVKSLCPAD  
RLPAKRDDAPPITLVLDELDTLVHCTVEQVDDADLTFPVDFHGMYTVHVRLRPYLNQFL  
EAIADKFEVVFTASQQVYADALLDLIDPNHEYIKYRMFRESCLPVEGNYLKDNLVLRD  
LKKAVLVDNSPHAFGYQVNGIPIESWFDDKNDTELLKLERFLRTLQNVEDVRPVVRRTF  
RTYELIANAP  
>comp7447\_c0\_seq1; 521 1 1746 LEN=1876; translated  
NNNNNNNQNYGDRYKVFVYTESFNPLLFASLTCAYCAIVTLLVLRMKLHRKSNKKRRLGL  
PPASRENKRKSKNGDDEEDNIITDEEIHRYVLPKQEQSVKEAAKVRCRETERIMGLC  
KPFWMEAFVSGICDVFNTALIGKVLGVDSLAIIFYIVTVPTSFTETIIGAVLETVSSLGGQ  
SIGVGSYKLTGQYQCISIIILYTIYIPHAILWITCLKPTLRWFAPDLGEEVIEEGYKYFL  
VSLVGTYYIESYSTVLHSLLEVS DHYGYGKTKSEM VHNLAGVLGFFLYVKANPAGQKSIVMV  
EVIWTCLTF AFLIIDLMVAKRMKWFDDFWKGILRSVAMKNWEAVWLVLKTAAPLSMGNII  
MTVEWELLAI FAASMGGIQVAANGIVGTIWI GILEYATACVASAGEIRVAKLLGNGNPRLA  
KLSAYKCLFLGNAFASIMSLFLVGLPYIPSWFTDDGELHGLVANVLPYCAIGNLTLTIG  
SLAWTLVGAQGRYSVATFHGCGISLLITIPCAALSTYRLGWELPSLAASVVI GYMTSGAF  
NSITLFLSDWEYISYRVMIKNGATEPVEEDEDYEDQDEEPRW  
>comp7447\_c0\_seq2; 644 1 2427 LEN=4518; translated  
NNNNNNNQNYGDRYKVFVYTESFNPLLFASLTCAYCAIVTLLVLRMKLHRKSNKKRRLGL  
PPASRENKRKSKNGDDEEDNIITDEEIHRYVLPKQEQSVKEAAKVRCRETERIMGLC  
KPFWMEAFVSGICDVFNTALIGKVLGVDSLAIIFYIVTVPTSFTETIIGAVLETVSSLGGQ  
SIGVGSYKLTGQYQCISIIILYTIYIPHAILWITCLKPTLRWFAPDLGEEVIEEGYKYFL  
VSLVGTYYIESYSTVLHSLLEVS DHYGYGKTKSEM VHNLAGVLGFFLYVKANPAGQKSIVMV  
EVIWTCLTF AFLIIDLMVAKRMKWFDDFWKGILRSVAMKNWEAVWLVLKTAAPLSMGNII  
MTVEWELLAI FAASMGGIQVAANGIVGTIWI GILEYATACVASAGEIRVAKLLGNGNPRLA  
KLSAYKCLFLGNAFASIMSLFLVGLPYIPSWFTDDGELHGLVANVLPYCAIGNLTLTIG  
SLAWTLVGAQGRYSVATFHGCGISLLITIPCAALSTYRLGWELPSLAASVVI GYMTSGAF  
NSITLFLSDWEYISYRVMIKNGATEPVEEDEDYEDQDEEPRWVFNFMKTSSLDGNDSHR  
NTNRTLVDLTLRNTSSLSVEDDGSNSASSKRSLERNYENGPVTNTSSWWASLGVDDQSEV  
REVLIGPGKLGTYIQSTKRGP MIVRCPKESNQSF IGPMRGTSHRGRRAIIISGDLFLGDI  
IVQIDEIPTDKMCGRELKILSKRSNRESRKLIVSHREGTGLATVYQPGPYGSAAITGVL  
KNAKEIQNKEFEDEGVVAGYFNMGWFS  
>comp7447\_c0\_seq3; 644 1 2427 LEN=4655; translated  
NNNNNNNQNYGDRYKVFVYTESFNPLLFASLTCAYCAIVTLLVLRMKLHRKSNKKRRLGL  
PPASRENKRKSKNGDDEEDNIITDEEIHRYVLPKQEQSVKEAAKVRCRETERIMGLC  
KPFWMEAFVSGICDVFNTALIGKVLGVDSLAIIFYIVTVPTSFTETIIGAVLETVSSLGGQ  
SIGVGSYKLTGQYQCISIIILYTIYIPHAILWITCLKPTLRWFAPDLGEEVIEEGYKYFL  
VSLVGTYYIESYSTVLHSLLEVS DHYGYGKTKSEM VHNLAGVLGFFLYVKANPAGQKSIVMV  
EVIWTCLTF AFLIIDLMVAKRMKWFDDFWKGILRSVAMKNWEAVWLVLKTAAPLSMGNII

MTVEWELLAIFAASMGGIQVAAWGIVGTIWIWILEYATAACVASAGEIRVAKLLGNGNPRLA  
KLSAYKCLFLGNFASIMSLFLVGLPYIPSWFTDDGELHGLVANVLPYCAIGNLTLTIG  
SLAWTLVGAQGRYSVATFHGCIIGSLITIPCAALSTYRLGWELPSLAASVVIQYMTSGAF  
NSITLFLSDWEYISYRVMIKNGATEPVEEDEDYEDQDEEPRWNVFNMKTSSLDGNDSHR  
NTNRTLLVDTLTRNTSSLSVEDDGSNSASSKRSLEARNYENGPVTNTSSWWASLGVDQSEV  
REVLIGPGKLGTYTIQSTKRGPMIVRCPKESNQSFIGPMRGTSHRGRRAI I I SGDLFLGDI  
IVQIDEIPTDKMCGRELKILSKRSNRESRKLIVSHREGTGLATVYQPGPYGSAAITGVL  
KNAKEIQNKEFEDEGVVAGYFNMGWFS  
>comp7449\_c0\_seq1; 361 167 1399 LEN=1770; translated  
MSPKKSSGGGKVLGLFPKKNQEQSQKSKQKRSASNDGRSTTSKSVASQEQWDRSRA  
NTEAFSSANRASKRSLVALAYETTTSPSFRERRRKTGKQQPFPNGSASDSNSAKRSKENV  
PPPSTRSRMRSAAKRVSGNKTTVETSITDKKRVSRRGGWFSFLNPARSSFFQKLCDDTFD  
SIDVDGSGKIDESELYRGLLLIHLKLGIFYGAPACKPLSAENAVTVFQQLDTNRDGLDK  
DEFRSVLTLLMGNVLFRIIFQFVCTLMVMPMLAQTFLEQVSFGWTWLVAVAVPLWKEYLP  
LLECALALDLVKKYSSLALSRLGLELFETTVPLETIESIQKTIEPIQNTVLESWETMVMAN  
VRDIPQETLDSLPLTIVSTMLTLIIVPYSILKTDEFFQFLARKISGGKKG  
>comp7450\_c0\_seq1; 204 192 512 LEN=1046; translated  
MTKSNQNEMESCRSSLGIRCLPVINDQSEFLTILVSSLRSLFGELESHSAEVKVSVPDT  
QEAHYHFILECNKQSTDALRASLTMVTPPAYLERNIYVDFIDISS  
>comp7450\_c0\_seq2; 184 240 449 LEN=1030; minus strand; translated  
MRKDGDESPVSMETIFLDWSKDPAMSSKGGFDIVEALSPDGIYGLIEQKLYGKIMEDQG  
KFDSLEKLT  
>comp7451\_c0\_seq1; 251 89 547 LEN=1077; translated  
MNRLISILVLLMNSGVFVFARPSNDRCIDSLVESEKVNVDNSNANYDYNQGVCGPRS  
DRRAVWYEINGVGKEVTNVCTNNDKLTDFGIFRSCNSQNCKGFPPQMVVTDCAADESN  
QYSFLAKNGESYYIHVRSDVVFEGEGSDVSSV  
>comp7451\_c0\_seq2; 236 275 795 LEN=1000; translated  
MTITTTKEFAVLGVTVVEQSGTKSMELEKXTVNVCTNNDKLTDFGIFRSCNSQNCKGFPPQ  
QMVVTDCAADESNQYSFLAKNGESYYIHVRSDVVFEGEGSDFTIWIYTEVADDVTSTPETL  
PYTEEQTESTNATSTSEEQTMSTTSGESPKTFLNVGISSMIAGFGYGLLSLL  
>comp7451\_c0\_seq3; 307 89 751 LEN=956; translated  
MNRLISILVLLMNSGVFVFARPSNDRCIDSLVESEKVNVDNSNANYDYNQGVCGPRS  
DRRAVWYEINGVGKEVTNVCTNNDKLTDFGIFRSCNSQNCKGFPPQMVVTDCAADESN  
QYSFLAKNGESYYIHVRSDVVFEGEGSDFTIWIYTEVADDVTSTPETLPYTEEQTESTNAT  
STSEEQTMSTTSGESPKTFLNVGISSMIAGFGYGLLSLL  
>comp7452\_c0\_seq1; 244 268 1227 LEN=1562; translated  
MMTNTNKIVLYTFPIPKSYSMTPFGLKTESFLRANDIPYEKVYTTSTFGNNGTIPYLRIF  
SSDDESESSFEEIPDSNAILSRLSKDPREFIRSDANLTTEQKAIGHACLRLMEEHTSQA  
GFYFRYALKMPEFCEATQLRERVFMDGDESKLGNFIYNQFKSKMPGGWMMKAKVRGFRYS  
SPAVVWAMTSEDLVLEDLLSQHVYFFGQSHPGTLDCTVFGHLSQFLYIDIDFPQKKYK  
ESCPNLLRFMEHFKTTHFPDWETLCLKQPNDALDPDNPRMKALAKMKQKAILVGATALLA  
IVGVGGRYFSSVFSSSQEL  
>comp7453\_c0\_seq1; 638 1 1851 LEN=1971; translated  
QQQQQQPYNQRRGVFLGSHSTPKKNNVFLSPVPSQTSFNPKTICSVPLSNNSPVQLQIL  
QMOWTQQQQQLQQRYSNVSMLSNNQSDAPGSI CRNDPIAQTNEQSCPISSANKSDPFR  
ISSNDHPSQQNSAPITEAPKLNKNSLQPETAIRPMPFALESKTSQSRGFQSI EQQKKK  
VEKQNSQIEMLREAYI I SSVSPKASCTSKNVNIADRTMITATPGLKSNRSGNSGMKHQLV  
SPLPMQVPTSEPKVVTPIDVSVESALQFCKPREKGVVNNIQSSSEAVTLDSVTSNQMM  
MDCKMSHTHIPNFLAGFDKVANPKMNHTNPIVTNNQLPELSPAYYTSKSFDDFHRFLGK  
GLPPGVSTSIKFPDLEPLNVTKQGPLVSSNHSADVLKSSLQFKPRTPLNLP SAANN TDG  
TSSGTSEERRICYGMPPLAADFKEVTGMFPDKKPPKLPQTEGVRNDVNSSRHSRMRADHSPNN  
VVLDPHAEHLRSRSSFPAELQPPQGAEDNPSDFRIEDIMLEEIGAIGGSDPDATPYPHTM  
FGDGSIVLDSGAPASDGRPCSSDAYSVSGGGIVSDESIGALSEGSSRIQKRKRDVLPEN  
DLVYVTRKERNCIYGL  
>comp7454\_c0\_seq1; 375 146 1447 LEN=2033; translated  
MEDSGISVRMGSKIAEGGFSVIFHASDTASDASPSQKYVLKRICCHDGESRSACIKESKV  
HYAIMREQKNNQHQSSKIIAAGGGMGGMAGSTTETIRSSLSSHIMPLLGMTFSENNTIC  
YMLFPFLPDSLRRREVDRIIFEPMEEAIGNGNKNGSAMTQSQKNQKTKDTLRMPPWSETA  
VLRWFEQLCDAVILMHADAGYTHRDIKLDNVLLQSAATQQTNKRGNNDSRSGVVLMYDYGSA  
GPLTRSLASRRDVLEISDEASQHTTISYRPPPELFAGELRVADTNTNAAISKDIDGDDVFD

PESVLDYRKVDSWMLGCTLFAIFFGASPGESEFSRSTGQLLIVDPSHNKMLGQMPWPDE  
ETPSSRWYSSDTKELLDWILTKDRGDRPTVKQIRRRVREILSQKPALFAGDGGIILDVES  
QMIDMTFSTKNML

>comp7456\_c0\_seq1; 404 84 2021 LEN=2378; translated  
MQAMMPSQHQRDLVSRDQEIARLQNVNALSQLESAMQQQQQLRRYPQQSSDRNSRKKK  
HKRTNKMSPHAVHIQHVDGGKLGSNVIRTGRQRMGRNASFYTQRVMASLTMPPEGEKYASN  
PIIMRIMNMFERNENVEYLRGKLFATDLFKLCQKVRQILEREPRVVYLQSPCYIFGDIH  
GNLEDLHFFSDNIWRLGMNLTAGNFLFLGDYVDRGMNCLAVVAYLLAMKLNPNQKVFLLR  
GNHETRDVNGWEEHYGERSFIWQCQDRFDRFGGDIGYRIWEACNQVFDRLPLAAVVDQDI  
FCVHGGIIPRPVCMGNPRLRGASTTRIQDILNVPKVAGINPPYEHEDDVYQQVASDCIWS  
PASEEQERISVDPHTGYGESLRGGGAI CFGNKAVTDFLQEQGFSYIMRAHEAHAEGVAVS  
KGARVFTVFSSTKDNQGSQALAGCILVDDDLQVINRSPAYKNQYVHRRDLSLSLQTL  
LEIAKRIKLGVLTPDDTADYEQSDDESDDQAAEEQNPGVASTGGSDDDSIGLPVDDPYG  
YRELLGQQGKTQQEQQYTFACQGRSSIDLQSMSTNLHDSQSEINMELSASSIRMGSSSR  
LQESLRSNNDIHQAVAEGEDNNEDEDSTVNGDDLADADVSMEN

>comp7457\_c0\_seq1; 1202 93 2627 LEN=3087; translated  
MSWLWGTKKDDSMEEDELADEGIQSEEEIHTDSSDESEPEDHSVDGKVTTEETVDDYD  
SDESAYDNSSDEDEDEGDYDEDDDEDDSLVNLIESMTSDDDTVDENLEEADLLTSDEE  
DDETVARVEGGTQENRKTDKVDENETSHPPVDDTDDDDDDGDDDDDDKNGDPVTSFWEK  
SLLVLA AEHDRV DILKLLKEENEKDSLLNTGIPPLHLAITFGSVNTAQSLLRMGSDPS  
VRPNVDVLEERSQPKDSKVDIANIRRFDNVTAWELAFGNALYDEKSMNSKSSGWSMF  
GSTMSGESEGMNEAAPTAKSTNGAQTIVKPVDMAPSKREGIRHAFTAALRSVGGDEAHR  
LKQLLD SGMP SDIDIGGKDLYGWAVDMGSLKCEELLRPDES PDQDGGSTNASPGDDAPS  
DLSSSFVHRPDVQETIPQLKNRLEDELSLSTCLDNLAEEVSVCHGLLLMGGGASA  
LASHVRSRLDLKEQKLYEMENARLECQDAERELADLVHSSGDIGKEIDHIANFNFLNYGV  
EKNAGVHTSHIKLQONENDSDGDGAIDDP SINKEAEAEAEKLN IKAQIAAIENKIRKLRA  
SITDLSEENTRDLAEVQRRGLEGGINLVRGLREELRDFDFYLSEARSMKAVCKSKI SMII  
AHVSKKNINNTEGLDKVPVARRGTTNHSVGYDVRNDATIANDATIGSKSMDYSTDEDD  
EIEEAVLVESPSKIDALQKEESSKETAFDSPKMQTPIQVSEEKRSQESTVNNVDSSTVDG  
KSASQRISSGESREITVIHPGNKGLFTVDLWEVILRIIGFESAANRRSLENKAHHSSTT  
VMI I

>comp7457\_c0\_seq2; 1069 93 2740 LEN=3200; translated  
MSWLWGTKKDDSMEEDELADEGIQSEEEIHTDSSDESEPEDHSVDGKVTTEETVDDYD  
SDESAYDNSSDEDEDEGDYDEDDDEDDSLVNLIESMTSDDDTVDENLEEADLLTSDEE  
DDETVARVEGGTQENRKTDKVDENETSHPPVDDTDDDDDDGDDDDDDKNGDPVTSFWEK  
SLLVLA AEHDRV DILKLLKEENEKDSLLNTGIPPLHLAITFGSVNTAQSLLRMGSDPS  
VRPNVDVLEERSQPKDSKVDIANIRRFDNVTAWELAFGNALYDEKSMNSKSSGWSMF  
GSTMSGESEGMNEAAPTAKSTNGAQTIVKPVDMAPSKREGIRHAFTAALRSVGGDEAHR  
LKQLLD SGMP SDIDIGGKDLYGWAVDMGSLKCEELLRPDES PDQDGGSTNASPGDDAPS  
DLSSSFVHRPDVQETIPQLKNRLEDELSLSTCLDNLAEEVSVCHGLLLMGGGASA  
LASHVRSRLDLKEQKLYEMENARLECQDAERELADLVHSSGDIGKEIDHIANFNFLNYGV  
EKNAGVHTSHIKLQONENDSDGDGAIDDP SINKEAEAEAEKLN IKAQIAAIENKVALSG  
AGPXL SFDRFEECRIEIPLF TYLRAFVFCRFSGSYXASITDLSEENTRDLAEVQRRGLE  
GGINLVRGLREELRDFDFYLSEARSMKAVCKSKI SMIIAHVSKKNINNTEGLDKVPVAR  
RGTNHSVGYDVRNDATIANDATIGSKSMDYSTDEDDDEIEEAVLVESPSKIDALQKEES  
KETAFDSPKMQTPIQVSEEKRSQESTVNNVDSSTVDGKSASQRISSGESREITVIHPGN  
KGLFTVDLWEVILRIIGFESAANRRSLENKAHHSSTTVMI I

>comp7458\_c0\_seq1; 61 1 619 LEN=619; translated  
PSPSPSPSSDSWLLVDRNDHALGVLDRLKLDGPGVRS AALLYGSSHCPDLHRKLAASGF  
RATDKEWRTAWSVREAAGPEAGGTEPLPALGAFLVAYLVV GALDWAVLGDTCSSLLGGD  
GLGAAVAVGLYLSRHVLLYLGLSRFLIDWAGADGEKARRRGDATTRRPRPPPFVGRDEP  
TGSAAAAEAAERPLPKNDPLPPPPS

>comp7458\_c2\_seq1; 241 202 1333 LEN=1333; translated  
MGEKTGVRNPRWLLGWA ACTAALGSIAAADALMLPPNSLKAKLGRMPSALLVSLSSPPP  
EQPGR TGLEKATQRKRQRPAP EQAAARDPSCYVRWNRKGD LWQMOTALTTFRRGSDGKVV  
ELHAQQHFGEHYFRYWN SDVRFNDRHDCVLFELLVDEDLLEEGRGGDQRVTKPVMASES  
DERLGRNLDLVCQASVLDYARSDKWVHADLSSQEFRGKVASRQTS GSSNGDKNNHQDETT  
PLWKLASAGSSSAAAEVAALVAGPPALELAAGSPRKRRLFTNLFLPGRLASGM RALLW  
TTVPSPELSVLLDWSLLGGGSGPGALSSVALPVLTSLARLDLGRVRRFLLGQQVLVSS  
RTNAGPDASAASPSPPX

>comp7459\_c0\_seq1; 697 1 1936 LEN=2203; translated  
XVITERYISFHEKIKVSVYFFRSPLPPLEDQTNRFWRWRKKILLELRLRRRLPRKKNLNS  
TKVVSEKVENEERKRVAIADAIAVAAGKDVRENRLERRADGNAKKAEDTALRPKTVILP  
VPXSSSSDDSDSSIDEKKRRRTSTKSNVVLNKKLLAKLDARGETLEERKERRAQKRAAKI  
QARFGYTAEDNPNFNDPNLHETFTWNKKKEATKTKNTMSNDNNPKIEEIEIETIRRRRKERE  
LEREEMDRLRAEESRMKELENYDDWAKKEEFHLEQQRKRSAILRVEGREKPV DILAKNL  
LIFGLTEEEKKQRAAVKYQERYNALDELQKLDAAELEEPQNI V GILKLAELQELLGDIEAF  
RLLEKEAMGGSGSSTITLYWDALALVVKDEIEFLRNGGEESRYAKKVKGIKDI FRGQSRS  
DLTKMEEEEIKGKVVKSRNEGWNDSGGANDISYWNSVLKQLSVHLAKMDLSKLSKMLVRQ  
LEQLESRKEFLSKQQRDVESIKTQHTTEENSNDMGDQTSRSMVPKNVDENFGNLEEEELGLS  
DEVALANGGGYSWQDRYAPRKPRYFNRI RTGFDWNKYNQTHYDTENPPP KIVQGYKFNVF  
YPDLDVPTKTPQYFLERADTDDFCILRFHAGPPYEDIAFKIVNREW

>comp7462\_c0\_seq1; 293 125 937 LEN=975; translated  
MTVPKLCFQLKLLDTSHKVPSSEKTKLRTNMHSFSQIANVIVSSKEKKMKRKDEDRYSKK  
DMIKNKSNGNQCLLSSRGKSQHFRGGIPRFSSAGIESRVQIESPCPDAFLDDNSSATTS  
TSNLTETIEKLVRFNKKCYVRNTTSRHNYTIQEIDACWFTDEEYCDIRDECKEIKQVLER  
GEELCSTDSCVRGLECRTMSALS IKQEIRFDAMCTVLYEQETGSSPERIAREYAHMSHMS  
KLRARHVGRKDEQEANTGFRSSIERKFDEK

>comp7463\_c0\_seq1; 114 1 1137 LEN=1338; translated  
XAEDSPEPWSAPLLVRS DGPENNPPEPTERDYHLIVAADGMNSVLRKTYGGHVAKRRRRF  
LGTGAMGNESDGLLDLPGDGTTEDRWDVTRHSEATNIQDRHYHVFRGNSTVTRDEVEGLG  
XAFQTWGESCNMRFATVPMEFPLPGGKTREMHTWFITIDDESISSEADPERRKEKLLGAF  
ADWHDP IRQLVGATPAAEISMERAVAHVHSCEPVVNFRRVVEQMRGVVFPSPGSRGPVQF  
VGDAFMTVDPILAQGFTIGMEGAAALAESLERCLRQDLGGATGPPLGQSGGRLAFSPRL  
VRKELLDHRDRMDRLICLLRSSELVQALGQPTKGSLSGWISRWLVRPAMRLAPGFAKTP  
FFNRVMEYSLGLHTGGQNK

>comp7464\_c0\_seq1; 240 1 1273 LEN=1273; translated  
XKVQGGQHTNTGTASAPVRSATTSNANPVPSSQRILLALLAVATALAVSASTEASKAGT  
PPASVPSGGSGATENQWFPVRES DGGEPLDPQPLRLLVKILASALALAIALRSEPSDK  
PPEGVAPPEPLPAARGGLPENENKAEPGEARGEQGEANAQAIHPNHRVPSEGI PGGGDST  
DEPTEADHGEAEDTPPGDPSPENPEEETRSATTPRSTSVVRGQVRELKQQMHTLSTMMER  
LQDKLDXVQDDGDGGRSRGHTNDSSERTKQNDHGT DARIRDLSDTRHRISGVTNERNATQ  
RNAATQCKPRGPATGRSSRGRNRSIDRGGLVEGLAGTPTATVPKGKPVGSVFPVGLPTGG  
FSGADRPTDRSRCDARAGVCPAPAPKKHRGEPKRKRSNTGTREDIPQVRVDIEETS LFI V N  
KLVVS

>comp7464\_c0\_seq2; 221 1 1252 LEN=1252; translated  
XKVQGGQHTNTGTASAPVRSATTSNANPVPSSQRILLALLAVATALAVSASTEASKAGT  
PPASVPSGGSGATENQWFPVRES DGGEPLDPQPLRLLVKILASALALAIALRSEPSDK  
PPEGVAPPEPLPAARGGLPENENKAEPGEARGEQGEANAQAIHPNHRVPSEGI PGGGDST  
DEPTEADHGEAEDTPPGDPSPENPEEETRSATTPRSTSVVRGQVRELKQQMHTLSTMMER  
LQDKLDXVQDDGDGGRSRGHTNDSSERTKHRFRDLSDTRHRISGVTNERNATQRNAATQC  
KPRGPATGRSSRGRNRSIDRGGLVEGLAGTPTATVPKGKPVGSVFPVGLPTGGFSGADRP  
TDRSRCDARAGVCPAPAPKKHRGEPKRKRSNTGTREDIPQVRVDIEETS LFI V N KLVVS

>comp7465\_c0\_seq1; 244 244 815 LEN=910; translated  
MVK SXIYKILSVSKESKEWENNRVCDAPGSWYCPGQYPPALEKILA EK R DFDQLED FNR  
EGGDDEYQKQYFENLKKKGRPPPEDKPNFKRIADRIEE INKEWSDTPQTGLLWQTIKNG  
EVDEFMSLLSSFPEVAHVRS SDGRGPMFWAHEYGRKGMVLVLRKLGVKEDQGDENG I KPA  
DISHSSIKGI

>comp7465\_c0\_seq2; 905 315 3278 LEN=3373; translated  
MTATSTNASNSDAAAGMGSVYVLSKPVLSAVYVAGFLNVLYKTLVESYNIRMYALEEY G  
LVIHEFDPYFNRYAAEYLWSNGSSRFFKWFYDMSWYPLGRPVGT TIYPGMQFTSVWIKMF  
FLPDWSINDICCYVPVWFGVLATMTTAAALCYTAVSSIGKTSRSKSLTLDIPVVSQ LTTGI  
VIPLVRIVEKLLIQYTGSNWGLASQKNPPALEAATFTAMIMAI I PAHLLRSVGGGYDNES  
VATFAMQLTFLCWVCTLSSANTRAIAFGAFSGVMYFYMVATWGGYV FVINLVG IHALVN  
LLLRLKLPFDHLYFSYTSFYTVGTF LAMQVPVVGWTP IKSLEQLGPFVGVGMQALMLMKL  
CEKKFPDMNKWTVRAGVAAA F G I AALPVVIYLFSTGYFGPISSRVRGLFVKHTKTGNPLV  
DSVAEHQAASSEAYFYQYLVVVCYLAPLGFIVTLIGCTPASSFLFVYGIAAYFFSLKMVR  
LILLAAPIASICGGICLAYVWAWCIGGIFGDHRPTLESILSQEIAEPEAVVSEPEADDSW  
LDDVVPDTKKKKKKNGKSSKETKKKPLKKTEAVYSKTTKP INPSDPLWVRCVRVGMGIYL  
TLNVMPVAKNFDDVCHAI AKQI SHPTIITKGTNRHTGEVVTVDDYREAYFWVRDNTPEDA



RIMAWWDYGYQITGIANRTTIADGNTWNHEHIALLLGRILTGPEKDAHRIARHLADYVLVW  
AGGGGDDVAKSPHLKRIANSVYRGLCSEPTCRSFSMKRGGVPSKQLGESLLYKLI SNRIV  
DGVEADPNRWKEVFRSKYGVRIYKILSVSKEKEWVENNRVCDAPGSWYCPGQYPPALE  
KILAEKRDFDQLEDNFNREGGDEYQKQYFENLKKKGRPPPEDKPNFKRIADDRIEEINKE  
WSDTPQTGLLWQTIKNGEVDEFMSLLSSFPEVAHVRSDDGRGPMFWAHEYGRKGMVLVLR  
KLGVKEDQGDENGIKPADISHSSIKGI

>comp7466\_c0\_seq1; 455 53 973 LEN=1135; translated  
MAPQSENETGPDLEISGGDNDAISGGAQLKRKESIFASRDGHTLEFDDILLSTKSKNPE  
KSPPKKILNGLSGSFPPKTLTAIMGPSGSGKTSLLKVL TGRMGDSSKLDLSSGGIRLDSKA  
VDPTNIAIRKQIAFVEQDVTIPATCTPREAMTFSARLRLDKSTTDKEIDDVVNDILENLG  
LQHCADTLIGGGPLMAGGLSGGEKKRTQCGVELVTNPEIVVLDEPTSGLDSYSAQSLMDV  
LKKIANAGATVIVTIHQPPPPVVRKIDNLLLLLLKGRLLYDGCMPPLEEEFTKKGF PKPD  
DYNIA DW

>comp7466\_c0\_seq2; 479 53 1055 LEN=1055; translated  
MAPQSENETGPDLEISGGDNDAISGGAQLKRKESIFASRDGHTLEFDDILLSTKSKNPE  
KSPPKKILNGLSGSFPPKTLTAIMGPSGSGKTSLLKVL TGRMGDSSKLDLSSGGIRLDSKA  
VDPTNIAIRKQIAFVEQDVTIPATCTPREAMTFSARLRLDKSTTDKEIDDVVNDILENLG  
LQHCADTLIGGGPLMAGGLSGGEKKRTQCGVELVTNPEIVVLDEPTSGLDSYSAQSLMDV  
LKKIANAGATVIVTIHQPPPPVVRKIDNLLLLLLKGRLLYDGCMPPLEEEFTKKGF PKPD  
DYNIA DWILQVAQTNSIEELTEKGF FGDARIEHXX

>comp7466\_c0\_seq3; 611 53 1930 LEN=2086; translated  
MAPQSENETGPDLEISGGDNDAISGGAQLKRKESIFASRDGHTLEFDDILLSTKSKNPE  
KSPPKKILNGLSGSFPPKTLTAIMGPSGSGKTSLLKVL TGRMGDSSKLDLSSGGIRLDSKA  
VDPTNIAIRKQIAFVEQDVTIPATCTPREAMTFSARLRLDKSTTDKEIDDVVNDILENLG  
LQHCADTLIGGGPLMAGGLSGGEKKRTQCGVELVTNPEIVVLDEPTSGLDSYSAQSLMDV  
LKKIANAGATVIVTIHQPPPPVVRKIDNLLLLLLKGRLLYDGCMPPLEEEFTKKGF PKPD  
DYNIA DWILQVAQTNSIEELTEKGF FGD RRKNSAENADVSKDSAAAANMKAALSVERVG  
FVTQTVLLFDREIKNLIRDKLSMIRIGSNVVFGLLFGAIFYQVGEASYVLYPEVMASFG  
AISNLLISTMFGVAQSSLMFEPKDRPVFLREYSTNHYSVLPYFLAKFTLECFTVLLVVLV  
QLLVAFFLMGFQMNFFPFLALNFMLAIASTSIGMFIGSCVEDPAVALEMIPALIVPQLLF  
SGFFIQVNLIPFLRWAQYLCSLTYAVRLATLYEFGDCETASCQDLENNGVYQLDSYWY  
WIIILLAIAGVFRITSMVILKMKASF

>comp7467\_c0\_seq1; 151 1 669 LEN=1049; translated  
RRLKECVSASKTSDTSTVVQTS LTHQQPRMSPAPLET CGGTTQQQQPSEGALPLRLTSV  
VRGYGRGSTD LGIPTANLSREN IKLNLVGVSFDDLPTGIYWGFCRVGDNPTIFKTAC SIG  
YNPYYGNQRKTVEPHLIASPGDERRYQSSCGETLLGDLYDQPIRLSLLEYMRPELPFEGL  
EKLVA AIKKDIMDAERLGEKKDPTTMEEKAWVACDDEPIQS

>comp7467\_c0\_seq2; 99 1 585 LEN=1202; translated  
RRLKECVSASKTSDTSTVVQTS LTHQQPRMSPAPLET CGGTTQQQQPSEGALPLRLTSV  
VRGYGRGSTD LGIPTANLSREN IKLNLVGVSFDDLPTGIYWGFCRVGDNPTIFKTAC SIG  
YNPYYGNQRKTVEPHLIASPGDERRYQSSCGETLLGDLYDQPIRLSLLEYMRPELPFEGL  
EKLVA AIKKGWFGF

>comp7468\_c0\_seq1; 747 103 2049 LEN=2180; translated  
MLVTTSKVLLTASMVVAHLAIVEAQANAPSRQPSGMP SGMPSSMP SRQPSKMP SGMPSSM  
PSSMP SGQPSISINPSSQPSVSARPSMVPSLSPSMVPSVLPSSTPSRLPSVQPSLSQSPS  
EAPSALPSSTPSSLPSSTPSRLPSATPSLEPSSLPSSTPSGLPSATPSSMPSSVPTDSAY  
PSQEPTIEDRPTVTPSAAPGQDSINNGVASSATGDRALVAGGYRNHASGDDSVIGGTNN  
ASSGDRSAVLAGNNNIAAGQSSTIAGGSRNSASSKSTTIGGGAGNTVVGQNSIIAGGNAN  
EIGSSSRNGSSRNLAQKDTTSSSTISGGDNRRINSRYCTIAGGGSNKITASSNSGTISGGK  
YNRVKNKNGATVGGGLSNKAEGEQSTISGGKDNVAKGTVATISGGRRNQASASFSSVGGGE  
DNQAKFGFSVVAGGKSNRAKGSQSI VLGGSSNAEGENSII LGKNNKVEGDHALAFGNK  
VEIGTNGDRSAVFNLAGATVSADNEGEFRVVGQMFTI HIEGQDAVTIDSKNVHNLKNLLG  
GRSPGPPSPSGDPSGDPGDVFEKVLDDSDSED TDTGDLFRKINNLLVRRNLKIENVPEAE  
DLDRVDCHESVQHRLRDQVHRQNIKIEEQDRKIEEMRLMMET FVAGNVQ

>comp7469\_c0\_seq1; 162 157 399 LEN=858; translated  
MSEIVGLTEVQDMEAEVKLLKAKLEKVEKAENMSKACSRIAAAVSSNQENDAFVLTEGSL  
PNKFHTMTGSGGEAGCCVVS

>comp7470\_c0\_seq1; 1287 313 4509 LEN=4953; translated  
MFLRRNNASDPGSLGSSMEGNSSSPLREISTLLDKLKSVDASMNVFLDGMINA IAGSGD  
NEVQQRRLRRFRRGEHQQAAPVEAEPATAAAGAPAENKSENTKSQPKTFRKNRQ PNA

RFAPMTDAETASLVETIRRISELVVIGERASADVQSEEDKLRALVKQKDDKASESRSG  
DSVDEEEKRRREQLNECAKIREKISEKKAYAYVYDHFERNGLSTIADILTGKAFDLP  
FFEKRKQTVKAELEGEYKILEESKAEEEEQKEQETSKGLKKRSEAIMKALDTIKESETYAN  
TVLLPPLAVAIQGFQSTSILVQNVKRATSLFFILSNHNINQLIGIPLEEYHIAERSKLEG  
GNKNSAGTPNLMSPRRFASPELGE LATTFFVSFLKSLAMRMNAETLQFFLTYPADTAIVSD  
TDLFEEA QHNIDCHDDDDDEE I PLDE IMSNSRTPKPEL PANRPVAVKTIKVEFPLYERALEF  
CAAHDSFIRTTAMNICLNTLRLSTVEAKTKEEEPGEVAEAVNLEAASGSDSPDGLVHNAK  
ALPMRERLAI AQYVCTPSRVEKLASPIFTKLAQLWGVLEE QFRDMEIAGKVGQSIGNANG  
SGNDDDI PKKANEKIARARELARRKKTGIFNDTSYNLQDELLLLDDMFKVGLTSLNEQV  
IEMMFATFAYPLLLQPLLLYFQRSPVAAEVL FADTLNEHSLGSQIKQSDATATEKAVISG  
PAKSALFCLAAAFQFLTNPPLRLLF TAVFHPLSPNAAGETMIRAKADVACMGKDG RATI  
RIDRFDENGKMFVDQNRETYVFGT VTVGRKEVSGRRSGNQ TGNQDDACVFLAPALSEIFN  
FTGQDGLVARSRHN PYRKAIFQCFTLNREVS DLQDLTVM AVYSAVSVLNEKFLVDLLFG  
LDIKRYENLPKDKRFD SFRGSS TDSFEDDFDRGMGGT IASTVDSRSLSLGALEGGKIGF  
DYMNEVIVSFQRCILNAVPGNSGAWKLN YDLVAANALLTCVRGNSEAIMRASEAIKTRYR  
QASIFLADIPATIDTLFDCGRLWNK LKHLVPANGTEEEKNVLYYGAIMDMIARLNNGSDG  
APVESILHNMLYFTKGVDPKTGHVSLYVS VSSLCSYNDVGARATACSPLEQGDAAGA AFS  
NAVESTSALLKLNLSLVSLINGLVNDK DMLRDQKIGGFIFNGTTELMVSNP SDGKTIYSPI  
SDEFDSALFGTESKPGTLREELKPGSV TTLVGMAYPCVCEVPPSMAPLFSEEGAKVVSQ  
GVTWQSLYL VIMDEDLVLEPE RRPNGKGRVVTLCRLENLTLDRDPDNARVDT SARRMLL  
ICESPDLKPPGMFRFEKKLQPQQLG PFSRCNRWKSSLDIWFEDSNALHAAFTKVFESVVR  
AKASRGSRIKYLSGGEI

>comp7471\_c0\_seq1; 348 510 1268 LEN=1352; minus strand; translated  
MNFVRSKIVPFVIGIALSLEPVA AFSTRSHLLPSFRTSSSTTCKNWLGLDWEVIEFSTY  
GPSEKVLKARRKQAAAEKEKNDVSN DGDISLTSFRQAKQKYGSSNSNDNRQDPSTSSSE  
DDESLSLQAFQSAVASKDEEDKEE IDFDGYKLRDLLVEK WGVPLDIDFQRGSGGNSVYCT  
IMPVAFGSSKCRHESEL DYLMHLQAVVEVLQKYNLDPFVFFIKKTSRAPKRGIESVPYL  
MDLDSDSLKKIL

>comp7471\_c0\_seq2; 348 510 1268 LEN=1577; minus strand; translated  
MNFVRSKIVPFVIGIALSLEPVA AFSTRSHLLPSFRTSSSTTCKNWLGLDWEVIEFSTY  
GPSEKVLKARRKQAAAEKEKNDVSN DGDISLTSFRQAKQKYGSSNSNDNRQDPSTSSSE  
DDESLSLQAFQSAVASKDEEDKEE IDFDGYKLRDLLVEK WGVPLDIDFQRGSGGNSVYCT  
IMPVAFGSSKCRHESEL DYLMHLQAVVEVLQKYNLDPFVFFIKKTSRAPKRGIESVPYL  
MDLDSDSLKKIL

>comp7472\_c0\_seq1; 137 288 796 LEN=796; translated  
MTELSTNKTRLPTRRPKSTTKKSVRFNQM VHVAPFERASPEEANHIWFTNPEIASFKEAG  
RKLAVVYRKWGGNLANEHQHEHEQEHEQEQRRESNDNDNLSIYRGFESCTFVRQRRLLS  
NRCVVYAHKNGMGDFVAAIYQQCNRWSTEVAFVQALHDYVEVFYSNNPX

>comp7473\_c0\_seq1; 403 368 1591 LEN=3113; translated  
METANERPPDSSVENGA AETNMETVVASNRSNLFDIEKSNRDEEKRLGPMRYRLHLIIVD  
RWPRTFAFLHRQLVVC SLIGATLLGGYV ISLAESPNEVSQNDLYLQHDWLLTAIPVQKAT  
TALVHLP TACLTYYYRLMNDTHAASVGNATFIAHKYHHLILDLDNDMEWFKDFVTTSFPT  
INLPPFPDPPVLPPLPGPTLEESAQIDDSNSSASTSVMYAYMAACEAVAGALLHFIVNITI  
DVARYDFQALESNGGGLTFNWNRCWDSKELGLGDPFRPNRRQIEASAYPNQSAYYRAEWN  
RNREALYRNYSVAYGCAEIGGNDTDAETFD DDDNYHYVTPSGDHFSLFHDNVSLFHAYNH  
NDTDTMDRFQCYWEATKESVKDATGGSGCQSNVGS SAWFWTIMTSE

>comp7473\_c0\_seq2; 584 368 2608 LEN=2747; translated  
METANERPPDSSVENGA AETNMETVVASNRSNLFDIEKSNRDEEKRLGPMRYRLHLIIVD  
RWPRTFAFLHRQLVVC SLIGATLLGGYV ISLAESPNEVSQNDLYLQHDWLLTAIPVQKAT  
TALVHLP TACLTYYYRLMNDTHAASVGNATFIAHKYHHLILDLDNDMEWFKDFVTTSFPT  
INLPPFPDPPVLPPLPGPTLEESAQIDDSNSSASTSVMYAYMAACEAVAGALLHFIVNITI  
DVARYDFQALESNGGGLTFNWNRCWDSKELGLGDPFRPNRRQIEASAYPNQSAYYRAEWN  
RNREALYRNYSVAYGCAEIGGNDTDAETFD DDDNYHYVTPSGDHFSLFHDNVSLFHAYNH  
NDTDTMDRFQCYWEATKESVKDATGGSGCQSNVGS SAWFWTIMTTVGYGNFAPETQFGR  
SLVWCLGWVSI IAFGGIMILGT TYMTIADDLFTRFRFNWFKNPLFGVIVWGI VSLWIA  
LIAWDARRFWNTHTPGYEYDTGDSYWF SYITVTTVGLGDFVLEPEGIFISDVFKWTALCL  
HGFVFITSF GKVSDFLTGLFPQKESFEYRLARTDLWGSYNTPVSKSLELLKEIVQEL  
EDRSDPITTTTTTKIIFGNKSERKEHTYRSSFVGNDRALAPDGKTINYHRIRILIEKKNLL  
LKLLED TQYELED RVNNRFVEYLSSAAATDPKSSQQFEQSLTSIEALQHEENVLKSMLM  
GTKEIRTNLQELTSMRTETE QKIENS

>comp7474\_c0\_seq1; 850 1 2595 LEN=2755; translated  
NNNNKIKHKGFHLQNGRSRRVTGKNPRRTSRVCCGVLPVDLPVVGALVFLLIAGVVLVG  
VARTTLDLHKYRSTSTDKVRRGDAHDSQARNRWRNEQRLLDGSDRSEHESPFAPGHAHDK  
KKRNSKRKEGEWAKDHPQAAAFSVSPVRLVRRENHTGETVDYDVVVAGAGPAGLTAALFA  
ARSGLKVYVLGSPATGLLSQTKILDNFPFSFDSEAKKAGKSSAVRSGPEWLKTTLAQAKS  
WGATFGPPGLLATSLERQRIATQEDDPGSETDSSPEQKDVYFAIKTAEDHATIRAWSMVI  
ASGATPRSLGLSGEDKLWGVSLHSCAICDGHLYSSAGSDHRKTVVVVGGGDAALDAALLL  
ARYDATVILVHRRNEFSRVHNLANLEIARSTPNIQILTPYTVRWTITDETEPSRLVGVRL  
TKSGNGEATTRTVKIDGAFVAIGAVPNTQWIKDTGINLDGEGLIQTNLSPGEMPMVTAT  
SVPGLFAAGEVTDKIYKQAITAAAAGAQAQMDAERWLREQRGIVLRTTGKTPDRSLQNK  
SGKDPVSDLESNTDGSNNHPRDADNCDLTLQDCIESIVRKYPVVVFSKPWPCPYCRKALEA  
LSLAGVSVENNQQLLVVDLSKHANTQEIQSTLQAMTGRRTVPNVFVGGKSIGGGDETHG  
FQQRGELVPMQLQEANALRMDDSNKNKDSNNDNQTDGSKKLSGATTGIQTTEKIDEQGKIQ  
KAKPQLSHQYKPKKQKHNDSGWHSSSKTEPCDLALESCVRTVVEKYPILLFSLSWCP  
ECVRSLELLDRIGISRDIHIIDLDDYKPIARDIRGHMYAIAKRTSVPNLFVGGGEFVGGY  
YQTKMLHEAGGLVSMFRGVGALPE

>comp7475\_c0\_seq1; 125 167 660 LEN=1156; translated  
MRAALRHLCQKGEQALKPQKVVAASTTEGYVSXALPGGLEAPRRRQAGGQRPPQGRNPV  
RDLRELLLRDGRVALLGPPPRSTPPLRGTLRTPALQADRPRAEPPGGPGAKAGGEPGP  
AGGGHRGALLLEGRGPRPGQILRGTDEADGPGQRWRWAAVVQQN

>comp7477\_c0\_seq1; 307 177 814 LEN=814; translated  
MATPEPPTADHSVEESHNGEVIYSDAGVAPSGVSKPPPVVQQQAAGDSGSEAVLSSEQVS  
PLAAAFEVFQGRVYNASVVPAPAFAGATTEQGASLPPLARLARLQQEVGALEEEEAATAK  
ASDGGRAFDEEIVKLATDLKHLRAAASSAHANDQDDLTRRIRQQLEEMGGSGRGAGAPEP  
APEELPATGLVYELYGNASNPTTTLQVQQASSS

>comp7477\_c0\_seq2; 615 177 1518 LEN=1536; translated  
MATPEPPTADHSVEESHNGEVIYSDAGVAPSGVSKPPPVVQQQAAGDSGSEAVLSSEQVS  
PLAAAFEVFQGRVYNASVVPAPAFAGATTEQGASLPPLARLARLQQEVGALEEEEAATAK  
ASDGGRAFDEEIVKLATDLKHLRAAASSAHANDQDDLTRRIRQQLEEMGGSGRGAGAPEP  
APEELPATGLVYELYGNASNPTTTLERLLNLERVLGDSQQHQQQASSSSSSQAGPSSTV  
SSSNYKSVLHRLLEDMEQLLATVDASTLEKTATKAKVIRADLEAASKARNKLTATYKKEDS  
KMIQQLYQQMIDLEGLGNYPHLVERLRQLSGLHQQASTFGSRLSELEKEATQVEATIGQ  
LEAGMATLETTIAQNIAMEGNMKKLDEKLAALSWRTPAPTQRNAKDGTKERTVVVRWPP  
GALAGAMRCDAIRLSTVHRAALHTVL

>comp7478\_c0\_seq1; 370 98 1441 LEN=1817; translated  
MQVRRKPPSRRLAALALRSLVLGCLAVSIVYLVGLATVVSEHQQQQLLQQPHPPPPPKKE  
DGPAGGRRPTGMPPPSTVGFVAVTITGCGSDPITEGAAILKHSVHLASAQGPLGGSYGYK  
MYAIYHPGARACAETLEGLGYELVERETPVAVANIEGDFLRSRIEANGCCGEKELVKLEA  
YTLDHPIVVHLDLDTLVLRLDPLFDWMMAGDKARDFDKSGVALQWPDAEVPEQINAFV  
TRDFNMCSPHKQIKPVQGGFLVLRPDMKVYNDFVEIIRKGFTEGGGWGGQTGVVYGSMT  
FQGILPYYYDVLHPGQHVEANHCYVNMADNPNRKRVTVDVHVICMTGEDDCEDCRSRP  
LEEVAATSHFTLCQKPWLCLPQDDVDVIQQRLCRKLHHEWHRIRSDLERTWGRDAYGPGTYQ  
TDHFYGHCDSHGKKGYPPIERPYPGAP

>comp7478\_c0\_seq2; 420 98 1679 LEN=2055; translated  
MQVRRKPPSRRLAALALRSLVLGCLAVSIVYLVGLATVVSEHQQQQLLQQPHPPPPPKKE  
DGPAGGRRPTGMPPPSTVGFVAVTITGCGSDPITEGAAILKHSVHLASAQGPLGGSYGYK  
MYAIYHPGARACAETLEGLGYELVERETPVAVANIEGDFLRSRIEANGCCGEKELVKLEA  
YTLDHPIVVHLDLDTLVLRLDPLFDWMMAGDKARDFDKSGVALQWPDAEVPEQINAFV  
TRDCKPATFVALLSLLPLSSPLALPWRLLILKEWGALLLASVWANAIRFFVSVVVVLAAV  
RCCCGLRPGLAVAANGTVFRSAVNMCSPHKQIKPVQGGFLVLRPDMKVYNDFVEIIRKGF  
FTEGGGWGGQTGVVYGSMTFQGILPYYYDVLHPGQHVEANHCYVNMADNPNRKRVTVDV  
VHVICMTGEDDCEDCRSRPLEEVATSHFTLCQKPWLCLPQDDVDVIQQRLCRKLHHEWHRI  
RSDLERTWGRDAYGPGTYQTDHFYGHCDSHGKKGYPPIERPYPGAP

>comp7478\_c0\_seq3; 420 98 1679 LEN=2134; translated  
MQVRRKPPSRRLAALALRSLVLGCLAVSIVYLVGLATVVSEHQQQQLLQQPHPPPPPKKE  
DGPAGGRRPTGMPPPSTVGFVAVTITGCGSDPITEGAAILKHSVHLASAQGPLGGSYGYK  
MYAIYHPGARACAETLEGLGYELVERETPVAVANIEGDFLRSRIEANGCCGEKELVKLEA  
YTLDHPIVVHLDLDTLVLRLDPLFDWMMAGDKARDFDKSGVALQWPDAEVPEQINAFV  
TRDCKPATFVALLSLLPLSSPLALPWRLLILKEWGALLLASVWANAIRFFVSVVVVLAAV  
RCCCGLRPGLAVAANGTVFRSAVNMCSPHKQIKPVQGGFLVLRPDMKVYNDFVEIIRKGF

FTEGGGWGGQTGVFYGSMTFQGILPYYYDVLHPGQHVEANHCVYNQMADNPRNKRTVHVDV  
VHGICMTGEDDCEDCRSRPLEEVATSHFTLCQKPWLCLPQDDDDVIQQRLCRKLLHHEWHRI  
RSDLERTWGRDAYGPGTYQTDHFYGHCDSHGKKGYLPIERPYPGPAP  
>comp7478\_c0\_seq4; 370 98 1441 LEN=1896; translated  
MQVRRKPPSRRLAALALRSLVLGCLAVSVIVYLVLGLATVVSEHQQQQLLQQPHPPPPPKKE  
DGPAGGRRPTGMPPPSTVGFVAVTITGCGSDPITEGAAILKHSVHLASAQGPLGGSYGYK  
MYAIYHPGARACAETLEGLGYELVERETPVAVANIEGDFLRSRIEANGCCGEKELVKLEA  
YTLTDHPIVVHLDLDTLVLRLDPLFDWMMAGDKARDFDKSGVALQWPDAEVPEQINAFV  
TRDFNMCSPHKQIKPVQGGFLVLRPDMKVYNDFVEIIRKGFTEGGGWGGQTGVFYGSMT  
FQGILPYYYDVLHPGQHVEANHCVYNQMADNPRNKRTVHVDVHVICMTGEDDCEDCRSRP  
LEEVATSHFTLCQKPWLCLPQDDDDVIQQRLCRKLLHHEWHRI RSDLERTWGRDAYGPGTYQ  
TDHFYGHCDSHGKKGYLPIERPYPGPAP  
>comp7479\_c0\_seq1; 362 50 1651 LEN=1946; translated  
MDIETDTISEDTHMSTNHGQSTIDGLRIEQLWAQEQYEMPQRDREAASYELHGVESRYDA  
VEYEKPGNLIQALLEFDYELNNPASSVNAQVKKNYHRALSMNSSYVKSRDLRLRFLRAEF  
FEVTKAVTRFCKYLNLLERYFGDVCLMRQLLLKDLTKRELKLLKEGSMQFSPSRDSLGRR  
VMFFVGNCGAKYSVLERNRVGLYLLFQLGEDMRSQQNGIVTVHLMTEDVYQRLGGESTAD  
MSSFFYSMFEACPFRRSAIHMCFPNELIVRLLKPLMLFLIGKTGRKVLKIHSGETVEYLY  
SLSSFGVRPEDIPTTYSGTVKTRQHMRWMMKVR CAMDEHIENQAMANADCDYSTLYKSKLE  
PFPHIYCPEINCVLFHKNQVAWEFPGNIKFR AFLDEEFPINNEYTKHISTLEEDILNRII  
RLALSRCFQFLLDHINHWDDELTEPDQLRRYVGFAYRGHLRRC SAQRLRQGGRCGTER  
KNRSGGGTKKERNEESSGCLCLNKMSDVCSSNKTPQHFPSTNM DGVMATQW  
>comp7480\_c0\_seq1; 651 199 1632 LEN=1679; translated  
METENSKAATAPTVGVEETEKSETNKIEEPTVSNEGGSEPNKPEETENDVADEDEEDFD  
IDVIDDDVDDDDDGKWDVMPPPAPGEEGSDSNGGEAKDDREVDVEVDVENPAPKEEEK  
AAAPDSTANNLGNRASLVLSRIDVALKMGFTEEEELPLWGYLEAASLVFFFAAISMRPRKEA  
SDLMGNFRHRLQASGDYESDAIWADELGNNDNDNDNDVHKPFFDYTTSDKLRRLVLSLG  
YRDPVVPQSMYIFKNPVVGGAVHSHQDSTFLYTTPTQTCGLGLWALDDATLENGCLWVRP  
KSHFEPLRRQFIRNPRYNKNDGKSDGGESKLTFRTHHDHPEVTWEGGLPESVEAAASD  
TDCGDVSSLNFVPEVQAGDLVVF CGTLDHFLPNFSDRQRHTFQLHLVEGLDAGVAWSP  
ENWLQYNEPTKSATTSTTIATDTVACNGQGS DKGDCDTRGERENQFLRLLDYAKEE  
>comp7482\_c0\_seq1; 743 205 2744 LEN=2765; translated  
MIQTERRRVEALNRSLOKMKTTTTTACLRC DQLSKRARQLDSLTPASDASSMLSKASNN  
LAATLVLMKDAREKFDTIVDCQPAIDRLHRGIVHMQNERSSKNGGKGVSAARHNPFDKN  
SEKEKNVVLTEQDVYAAADSMEIIRDAYEYFIDRRHWRSTSSSLNSLERLHHMGVSSMCM  
LESFHLIDSGQALRMKRVVQEQERRVTPASETAQQTRDR LAAALQNRDLLRSIGEFEEYQ  
PVEARLVRELRGIFEALGGNGFQLTPPIRREPAGLAHHFGHPANRVIIRTEKVGSGMYTNM  
VQRPLKTGFPHVDAYGESRKKVAFGCVDSYHRRLKSERKKKSEKFSSNVVGD PADAAAARD  
AVRCLHGMVVVAGEKNVYRTVVSPSLTKIADEDAVNDEISPFYRKACAAAYS YIAASIV  
DKTMDIIE TVFLKEGCIGHASGAKGDTPPPLTVRQTASAAAAGLRMLDGVRMLG PSLAKL  
CEMLIGDGGDEPQSLASILCIAIHR TTVKNTARTLENLAKAIQEDPIKGS AQRVKDARVA  
LLTIDVARAVKVI SPFDSAYKSVSKRRQLPWPDPNMGEDAGELDSFIRFLVMRLVNSLKGK  
ALNYTKHSADIGHARSSMFMNNTFYLRDVLG PSGNGVSPDDFRIESSWFVDKVNKLF E  
SEKGYLQWEALNTHLTIVEHDELEYQKNDTILSLDSGRLIKSRFSGFNEDFEQIFEEQ  
QQF SHADXAAVSVNDSFCSNLTIPFVLLCVFGFCASRLVDAPQRDATQRNSDFEQIFEEQ  
KELSVVDPRLRDL LQKEVAGVFI PNYRKFYEKYTKIRFSKKHQNEYTKYSPQKIGELLKE  
LYVDPE  
>comp7482\_c0\_seq2; 728 205 2565 LEN=2586; translated  
MIQTERRRVEALNRSLOKMKTTTTTACLRC DQLSKRARQLDSLTPASDASSMLSKASNN  
LAATLVLMKDAREKFDTIVDCQPAIDRLHRGIVHMQNERSSKNGGKGVSAARHNPFDKN  
SEKEKNVVLTEQDVYAAADSMEIIRDAYEYFIDRRHWRSTSSSLNSLERLHHMGVSSMCM  
LESFHLIDSGQALRMKRVVQEQERRVTPASETAQQTRDR LAAALQNRDLLRSIGEFEEYQ  
PVEARLVRELRGIFEALGGNGFQLTPPIRREPAGLAHHFGHPANRVIIRTEKVGSGMYTNM  
VQRPLKTGFPHVDAYGESRKKVAFGCVDSYHRRLKSERKKKSEKFSSNVVGD PADAAAARD  
AVRCLHGMVVVAGEKNVYRTVVSPSLTKIADEDAVNDEISPFYRKACAAAYS YIAASIV  
DKTMDIIE TVFLKEGCIGHASGAKGDTPPPLTVRQTASAAAAGLRMLDGVRMLG PSLAKL  
CEMLIGDGGDEPQSLASILCIAIHR TTVKNTARTLENLAKAIQEDPIKGS AQRVKDARVA  
LLTIDVARAVKVI SPFDSAYKSVSKRRQLPWPDPNMGEDAGELDSFIRFLVMRLVNSLKGK  
ALNYTKHSADIGHARSSMFMNNTFYLRDVLG PSGNGVSPDDFRIESSWFVDKVNKLF E  
SEKGYLQWEALNTHLTIVEHDELEYQKNDTILSLDSGRLIKSRFSGFNEDFEQIFEEQ

KELSVVDPRLRDLLQKEVAGVFI PNRYK FYEKYTKIRFSK KHQNEYTKYSPQKIGELLKE  
LYVDPE

>comp7483\_c0\_seq1; 417 166 1654 LEN=1772; translated  
MKYTSLACLFLSIQPQADGFTPI SNRILPVTSLASTLAPETPMKRGSDDESNGRSSGDT  
PIQITTSKIIIEISQTTSSSPSTIEQQYGPISMSFEELSVALGGAGRAKIVWDCYKLGIDP  
ALMFGSVINLQGDDYESIVNQLPSQRRQTQLGVAALNTLETLYQQSYGGQSNPSVTKIEG  
GVATLSFVSRSGDGTTKLLKMSDGLEVETVIIPFKGKRSTLCISSQVGCRCQCTFCATG  
KMGKLRNLTADEILAQMFFAKKLCRLEDLPAISHVVFMMGMEPSDNLPNVVRAAKALTTR  
PFFRLASSKVTISTVAPTPECFMELAQAPCVMAWSVHAVRDDLRKLVPTTKYSMVELRQ  
GLIDALLTRPENGRIVMLEVALMREVNDRIEHADDIVDFVQGILDQVPGVKPHVNLIPFN  
DIGQSLYEKPSMDDVRAFQNHQLQRNGVYTHVRATRGEKTSAWDNSRLKNQKVRRGKARP  
EKRRFELIDLGGILV

>comp7485\_c0\_seq1; 761 146 3064 LEN=3116; translated  
MSDTQNFRSSQRRRRPPAPELQKQFLRRQRTRSDVGLVVIGYLALISFALWSEWDSR  
EQLHDSINTGGNRGRGRSAGRSALNNQLSEFKQERKEKAATNSGKRRWEKLQYKLRVFR  
GEGFETNETRYRHRPLWEMSEFLPPWMKEYFAWHREKRQTLTEDFWRGNAPGKNRTVSSSL  
RFLVVQCLPRDHGSSGGGPTLPSCGSLSERLSLLPYWLRVAHEMDRVLFLHWAAPTDLSD  
FLEPPVGGCDWRAPLWMRHWLGDNQEGLIRDDSRLLSGDLDYFRSLAGEPLVRVQLRST  
PELEERYNDLRDVSIPQATLEAVFHVDVWRTFFVPESEHIQKSIENTYRDNGMVSGEYVSI  
DLTANSRSILANSSTSLLEATEGEQALIEHANRVVECAKLRGGGPFLAVSSNLDMTRAL  
QSHKSIRMPVFARYKTRNRERRRKNRDRAKELLPQPLMDFDSTGDSARLPDPYYDVFN  
LFLMSMGHGVVTSDSRGVKTLSRLANWIGYDSSRYNLYTPTGCVPIGSSPPSVGATEIHD  
RRTIPESIQHYFSTEMMIDGLDHGGMLTSHHHEDQQELQHSLETSGKSRPESNLPQWEE  
YFEWHRSTKKELDNRSNWKNKYLVLCLETHSKCGGISDRLKPLPMVVWEAFHSQRLLLI  
LWDRPKPLEEWLIPPDIYHQQGIDWIVPSFLKEKMGKLTFFARGADARSWEEGKTLRETKTN  
KTLVTYQIQKSDAGEKIFFEEQQLYAKNCTGANAGSSYSVFRHLWRRLFRPNRLEDLL  
ESKRKEHGLVSGQYAAVHLRAMYGNRVHRDPQESLELAVLGVNCASNLFPGAPIYFASDT  
SFAVEAAQAYATLHGLSIVSMDRDGEANTTSNNGATR SNP IHLDKDKDWRNRPASAYDAT  
FIDLYMLAESRCVAWSNGGYGTFGSLLSHDPDCQMRFFKGRKKVRRCLWTNETVKRQPLE  
LPSINDISVTGS

>comp7487\_c0\_seq1; 332 41 1155 LEN=1707; translated  
MIKSPAKTTQSLFSNNCETR SKELKMSFSESSLEEMVTEIPWFDNMEKELFLQSVPKVEL  
HVHLDGAFSPKDIWDHLQRPHPLIECISVEQKLPWETNPNAPPFKLREQVLGCKTDLDF  
HLCTSRRRYRKRTRPVEERKTSNPNKVRTLGDMMLCFQFFLPLVHNNFDLLESIAFDVFR  
QKEQNI IYTEVRYSPHFLADDPRAHQAITKGLRGLGCNKLTDEE ICIVNQIFCGIDFQP  
EWSAEVIDMANEFQQDFPCA VVGVDVAAGESHFATNSPYRDAHLDMCRKATELGVSVTLH  
AGETPGSELNVGAAILHYGAKRIGHGYRAAKQYEIMDLAKSENVHFECPTSSVVKFQDV  
GMCMIEVYAET

>comp7487\_c0\_seq2; 466 41 1432 LEN=1541; translated  
MIKSPAKTTQSLFSNNCETR SKELKMSFSESSLEEMVTEIPWFDNMEKELFLQSVPKVEL  
HVHLDGAFSPKDIWDHLQRPHPLIECISVEQKLPWETNPNAPPFKLREQVLGCKTDLDF  
HLCTSRRRYRKRTRPVEERKTSNPNKVRTLGDMMLCFQFFLPLVHNNFDLLESIAFDVFR  
QKEQNI IYTEVRYSPHFLADDPRAHQAITKGLRGLGCNKLTDEE ICIVNQIFCGIDFQP  
EWSAEVIDMANEFQQDFPCA VVGVDVAAGESHFATNSPYRDAHLDMCRKATELGVSVTLH  
AGETPGSELNVGAAILHYGAKRIGHGYRAAKQYEIMDLAKSENVHFECPTSSVETG  
SWT KTQWTDHPMVNFKENGVKFSLNSDDPAVFNTSLTWQWRVAMKKMGWEMNDVFNVLED  
TVD AAFAPDDQKRILREAIQKYKAAPDLQONTQFDDRVIYSKPYNE

>comp7488\_c0\_seq1; 603 1 1257 LEN=1404; translated  
EQQQQQRNAGRGRPDFDTDEEEIAHYGPIDRFWRHYAEKKTLLVGGVEYYDTIQSCMDE  
KLTPPEEWASVRQPQELDRSVGTRFLDYEGKREVFLIEVKNAMSPIHAKAVRVLKDCVKNN  
ISVLHEHRPMYQVYEVSEADQSLKDEMGNNPHTLNSIIAIFLPDVVKEQYKTLAFAYH  
HAGWQALVVRDEILDYRAGSYDAAFVPEHAGMRACEYLTIEGFNNLYEHQDGFATSVV  
LNVFLSEGDAYEGGAFYMKDKVNEEYHHVRPDQYSALAF LGGTYDHGVDTIHSGIREALS  
TEFWYYPDLPPGVNLCADFGNIEQHVRNCNKVQKSYRDGK VETDYSAHCAIFPSNSIY  
GVCKSHFGEMRNIYGDQAAGNNDGAESTKADAAAATAIVTDKEKAAIEGVNTKNGTEL

>comp7489\_c0\_seq1; 1501 195 3875 LEN=4350; translated  
MAAMDNLSVEPNAYVEAE STEHVDEIENEDESSVSPRKRGSGLKSSSENPRRKKQKAGKP  
LSHESENDDTTQDKENGRRTSSASRRRTTNESSD DATDFLAGRNINKPNKPPEAGVITR  
IYAENFMCHRKLTVDLNRNVNFIYQNGSGKSAILAAIQICLGAGARRTHRARNLKD LVR  
KDTSSNCAKIRVTTLLNKGD DAFQHERYGDHITVERTIALRGGYNGYKLYSAKNIEQSRSK

KDLDEMLDKLNIQVENPVAIILDQEEAKKFLTGKAKDKYKFFVKATELERIDNTFRNTKEQ  
LMDMEVKS DRLEESLDRDREL VQETKKAYKQHQAIGKLE GKYSK LQINMGWANYKLV TED  
EHTKTFKFEKFEKEA EKKRQELTQAEAVTQEADDPNDERRNRLDTLTAEADTMATLKRDL  
EQQLKKATEPQKALARQFKLLKKEEESINRALLEANQALQAKRDEIVAKAGSAESEQARR  
NQRMQAAEKKIAEEKTRRNEIKQAVTDALNSYEDLEPEVMGAKQIVSQLENQLRGI EGKI  
RSMESSGNSLEIFGRNCGIVKQMV D KATQOGRFKAPVIGPIGFYCKIQPGKEEFAALAE  
QAIGNGVLD RFI VFN DADRKTFQSIRNRARCKMDCGIFQQSQHARYNIPAPPKGVETVAT  
VVS IQNDSVFNCLIDSAK IETKALS RDKKESEDLLL VKDNNRNRAIRGGNIKEVYFLPNG  
DNWKVTKGILHMTSNTRRLKKTIGVDMTAAVEDARNEFQSIKENLRQKNLDFNRLNQKHT  
DYKKQWNIKRREL RNNEREIDQATKEIDEIKAE EAA FVDNDIDTSEEEEEVSTAQA HLEK  
VKENQEK AQDLMKEK VPEIQQIKDKLHEITNRNEMILNDLDEAQQALSQHYQAI EIQEK  
LEKKRQKLEQYEELVSQHT EIVRDAQEVSIKFLDMARKVQYVNDQAERRRQKQREDEGEND  
QMGETQMSVYNEEPTDEDLAMI EIPQNL DGLKHPDYKGRMEQVAARIEAERQRR LKNGD  
DEATAYAKYTRALSIFQAKSHQIEKIEDTTSKLKQDMEQRERRWGHFRDHI SDFTGMKFN  
ETLHIKGSAGTIEFDH HKEELNLSVYKDCNDNGTEQKDVKALSGGERSFTTIALLLALGE  
SLETPFRVMD EFDVFLDPNARNKVIDLLIEVGREMCHRQFIFITPQDVS NVES SPMLKIL  
QMKPPERRTVAGGQEQQLDFAPSQQ

>comp7490\_c0\_seq1; 611 1 3486 LEN=5620; translated

NNNNNNRNRD NSDDVNDNAP IDTVRFDPWVANNIEGATVNTNNFTGAQIEEW RERERRQR  
SSRSFMMFL LLLLLLMDGEEQNQQRRQQRHRSGLRGSSSSSKSRHADNIRSVESDMEL YRAR  
RTQDRSIEDIVLHGNSRYQRLVEKNNGTDFDREIRTWAE EQKNIQTRVIYEQLLKDVLV  
ERP GGSFVKVLVASESNNEAIVADDASKLLHDAASALASESARKQNQNETKDELKSAT  
QKFDEFLYGEREVWHYPWNATGYRGDWKLIDSI ESGGEGTEGVVSNPSGTWSPQNASSV  
VRALSPIEAEVPLSEFLRKQTDPMIGLHVLPPGMELEFP TTGGTKEEVASKPPGRRNGSN  
NPSGNSLRRGSYKANPPPAQLSLTKTSGKIAFQLYSKAVPAMKELSLIDGYMKLYDSYTA  
GYSTRRDVLLRVHGVLVHSIGKLSLVANPGSTGRVALLVNDVAGASPDGNEPYNKGPNT  
NQPSSAEELTGGGSDTNHRRLEELVSSLGNGGSSDGD RRLEELRDHVLKLFHTNG  
YGSADLSLYERLWPEADGFHSFMEHNFHNEYVFAQRSVQDQDASEDAFVYPAEELQERRR  
LDETTGSPEATSEATATKTVINKQTEVELGSEGQVDISSDSLKKPNSLYSKHVI PFPFAW  
DDEEHS LQSYLPHSVRSTSKQEQ LLEKNAGSCEFEISMDVQEEKWTIEQWRK LISRHMEQ  
EMLGSTLGAKMKQGVAVDDEDEPYSRAQTFFKSSGSFSSENSKAQKRSRMEQAWLMAMNG  
TIASPNCNFAATVNTTAIRTDWEATTGKAVNYSFGMMIICLTQIVLLLRQLLHSQSQSV  
MRVSLLCIGWQTVVDALLCLFHVYLSLAMQTLFTAFASVAFFKLLIFCVIEMKYMAII IQ  
ARNANNGGATVEVLRQIALHLRFYVALMGTC LGFFYSENYRKYTYMLLLYSFWVPQIVH  
NVVTEAKKPMNSYIYGMSATRLVAPLYMFAMQSNFMKEIYPE SPIDVSMCQLLVLVWGI  
QAGTLEGQRRWGARFFIPAQFLPPKYDYNRPI PASMLLTDNEGSTFSEQLQKEREAPKTE  
VRPLPVQKSDLSSRGGVARNRKEGKRCKGETGMTAETVTA VPKNLPSIECVICYNGIDSS  
NRAAYMIAPCDHV FHKDCLVQW

>comp7491\_c0\_seq1; 1194 189 3956 LEN=4001; translated

MMRRLGLKREEDLQEQKKGSRNHEQNQYQSPPPNRVPASPYFDDDCHHSENDSSFNFDG  
SHTEFPQSSSNKSLDNF GDAEDYINTMAGGIQSKGYYQSFVME SPPSIRTTPRDGVGNLH  
HRHNHNNNAHMT PGQETGPHFKHNFYDDESPMHR LMRQRQFLSPHKHAIQQLNDNPYHH  
QKFSQSLSSLSGSARVVRWCF LIALSLYLVLFRSTSDLGSHSRMNYDFIMGNMYDINCF  
SGSGYTRGIGCQQPTPYWYKEQMKQAE DALLKRETRKIKRRGR TKLPLLSRVKSKVSVD  
WHNVE SLDENQNHKANDFKEVNSDDLD TASVDMLCGYSAQNSSLVSPESYPASAALNENS  
RVMITGILNPIGLALALRLKQECGVQHVWGV DAMYPNTV LNRLMVHERMLLLNSNSDDSD  
STRQVVL PYLGLDPKSKKLT SKSGEEPRLKSLKDEMLWMRGFEP THVVHLASYSMDAYS  
TLIDPKWKNTHSPYIPNDYATSSIKGEIEEIEPYMFPLRSGMVAMEQLLQTMAEFSEED  
RPQFLYTANSKNFPGSYGVFHAMKQMD ELLVDTYHTGHNEKLPSIGLRLPNSIYGPWGQ  
PGSVMHMLERIVEENGGKT TNSTAGIKKKMDGSDNLDLLYVDDAVDIIISALQHRSDKP  
MKLDVPPERTSSIESLSSAASFLLRDDSTGHQLSGDDQSPQIEKTKEASLILPKTQKTTL  
KDGLVKTI AWHKDR LSPFGPAARSDEDEESPAEKTRFETGDDFLQRHKMKT CGPYD TDCH  
KNNDYLP CNSECNIHDQCLPSVFDGVQDLLYDI SEGCDVVMYTQMMGFNVEDAE LHA EYM  
DDSNLDDNELLVCNFAIVPRES DLVTLVSSKVPMEQLDKFGIEHDNGSTNMKAFKEKKLD  
GLNGRLLYRGWVLVWVKDGMRELSVPDASLLKLSKSKFFHPNVKYGLFVEDNFKVSPLD  
DVLFLVDQMRNKLNDRTLK KETE IETPN GPIIQKVKYHIPAEPARRAAML FAPLRYPN I  
DDPIVEQYRGRRQLTVNHA AKFMSYEVGYQPGDRESASHRRQREFYERIPGVVNRNTEL  
RSNSEPWYRYSMRHWVRSRWVLHDF TLED SRLLRCDWYQEHVQWGNLDLQLSFAKVM AVR  
DLKRR LAHQEPDDR IKS FIEKHP ELHGLTDSYEWHSMETEVNKLYREPTNWD SKPPPSTQ  
VAANANE EEELEENSLDANDTPLYVRIMSERVMATSRKVWAKMRKKLAKAKKERQAE

>comp7492\_c0\_seq1; 402 1 1636 LEN=1688; translated  
XLEKIGYQTDNGAMYCFQRQSNCSVLLREKEYLDSIGIPIGYLSFQAGTSSGRGTAAP  
WCIERWSADGGQDTNHYPDLTGAFREALGVPLQLYAPYFCPNASEYFSPHTPWKSVASDP  
GLPGCEGFAFETASAEDAGAFFAWFLAKGIDRAGMGSFESDFMHQNANCVREFVEDPVHG  
SDAFLAGMAGAALELGTPIQWCYASPGVVLASLSFSPVTNFRVVSDFCYGNSYAIGESSL  
LVWAAGAAPSKDTLWTTENQRTETPGCAWTEDEHEAPAAELHVVLALLSTGPPVIGISDAIGM  
TNATLLHRTISADGGLLQPSKPVTAVDSSSFREDGAKPKGYLYGTHALGPSWIFVVSFRLAE  
AFPVTARDFWPPLGVGQTARLVHRSFSSSPDCVDGADALETGCVAMVSPEATNGHGSRGG  
DMPPIFVAPKSSFGSPGSDLSPSVATVWQECPLSGVVFLGELDKYVALSPKRFRSLDCTK  
DGASAVVRGSEGEVVEITLLVDPHAQSYRVVVKRKPVIASDSAVVRFVFRDHLIQSRITA  
IATTE

>comp7492\_c0\_seq2; 259 71 811 LEN=863; translated  
MTNATLLHRTISADGGLLQPSKPVTAVDSSSFREDGAKPKGYLYGTHALGPSWIFVVSFRLA  
EAFFVTARDFWPPLGVGQTARLVHRSFSSSPDCVDGADALETGCVAMVSPEATNGHGSRG  
GDMPPIFVAPKSSFGSPGSDLSPSVATVWQECPLSGVVFLGELDKYVALSPKRFRSLDCT  
KDGASAVVRGSEGEVVEITLLVDPHAQSYRVVVKRKPVIASDSAVVRFVFRDHLIQSRIT  
AIATTE

>comp7494\_c0\_seq1; 641 155 1114 LEN=1264; translated  
MKSGELEKRREKRRKAEELKKAKEEENTDEIDKHSKRLARAGRKENEDCKRLLRLMGVP  
VILAPMEAEAEAAALCKAGKVWATGTEDMDALTFATPILIRKLTFFANQSSKGAQIQSMNY  
KKAIEGLGLTHDQFVLDLCILLGCDYCDNIKGIGPKTALKLIREHGSIEKILPVVKDVPKY  
TVPANWIPDEKDKDETTDEEAEAAKEATTPAYVLARDLDFHNHEVDTDVELKWKPEQAEEL  
TKFLVDEAGFNPERVKLQIEKLLKHAANRKPQARMDSFFKVVSNPAADAKRKKRLENER  
AKKKQKAAEDRKKKGGKSKR

>comp7494\_c0\_seq2; 761 178 1425 LEN=1575; translated  
MGIKGLAKLLSDEAPDCIREVEFKSLHGRKIAIDASMAIYQFLIAVRSGGPNQQAMMLTN  
ADGETTSHIQGMFNRTIRFLNEGLKPVFVFDGKAPNMKSGELEKRREKRRKAEELKKA  
EEENTDEIDKHSKRLARAGRKENEDCKRLLRLMGVPPVILAPMEAEAEAAALCKAGKVWAT  
GTEDMDALTFATPILIRKLTFFANQSSKGAQIQSMNYKKAIEGLGLTHDQFVLDLCILLGCD  
YCDNIKGIGPKTALKLIREHGSIEKILPVVKDVPKYTVPANWIPDEKDKDETTDEEAEAA  
KEATTPAYVLARDLDFHNHEVDTDVELKWKPEQAEELTKFLVDEAGFNPERVKLQIEKLLK  
AHAANRKPQARMDSFFKVVSNPAADAKRKKRLENERAKKKQKAAEDRKKKGGKSKR

>comp7494\_c0\_seq3; 694 231 1370 LEN=1520; translated  
MAIYQFLIAVRSGGPNQQAMMLTNADGETTSHIQGMFNRTIRFLNEGLKPVFVFDGKAPN  
MKSGELEKRREKRRKAEELKKAKEEENTDEIDKHSKRLARAGRKENEDCKRLLRLMGVP  
VILAPMEAEAEAAALCKAGKVWATGTEDMDALTFATPILIRKLTFFANQSSKGAQIQSMNY  
KKAIEGLGLTHDQFVLDLCILLGCDYCDNIKGIGPKTALKLIREHGSIEKILPVVKDVPKY  
TVPANWIPDEKDKDETTDEEAEAAKEATTPAYVLARDLDFHNHEVDTDVELKWKPEQAEEL  
TKFLVDEAGFNPERVKLQIEKLLKHAANRKPQARMDSFFKVVSNPAADAKRKKRLENER  
AKKKQKAAEDRKKKGGKSKR

>comp7495\_c0\_seq1; 493 109 1299 LEN=1978; translated  
MASVATGVTAMVLRHSLRHLRGCQHCVDQAGVRSSTFRLRNHNPLRRTLSSAKKKT  
DPTEHRSAKAWTSAFGDTSEDDRENRVQIGEDFLGPAAVGRSRKRPRPWRSGQRNAAPSF  
STRDGQKSATDTVTSVDSKHRVPTSSIDSSSLVTSEEPVTGGDLKKNDESLSLPYPKGKP  
WRVLFPPYPHGEPTKSPRQSLWDFHKRIPSLQLRRAWELYKKTWEDGIQGNPTERNEND  
VATKVSSRKGDDGDYLAKETEQQLEIGDNATKNLNAVRKDAQNLLEHAKETTGIYTQ  
DDAKALASEAMKIATECIREFMGGYRKRGRDSEIDKMLHEYFQEEDNNNARSKGENTQFAP  
ESAFGKNGDRDSSDQTILATKRRRKRKPKRGIPT

>comp7496\_c0\_seq1; 205 227 598 LEN=702; translated  
MYSRSGSGGYGRDIEGGGRFNDANTNILEQQNNDRISELSEQVARLKGLTVDIGTEVREQ  
NSLLDKMGEFGLNTGDMLQSSSLARIGIMLDTSSGKHMCMILFVVVVVFLYWMMTYKGT  
SGV

>comp7496\_c0\_seq2; 170 227 430 LEN=689; translated  
MYSRSGSGGYGRDIEGGGRFNDANTNILEQQNNDRISELSDQVARLKILAPRFESKTHCW  
IKWARAS

>comp7497\_c0\_seq1; 333 102 770 LEN=958; translated  
MILLSFLLDRYLPNHRMDRTDHALRFTIWAGLAVLFLTLPLDLYGVVAAGDEEASSSSS  
GLPGPDFFDACSKGETDLVAEAMQSHPEWANARTPNGETCLHLAGIYGASSVTALVLEHG  
GDPNVRSTYKGLRMHPLSWNVYGGHLKNIELLLGAGADVNLDVDFSMVGDGDPVTPMDVL  
LELVKNEKGDDRFSIAIEAVFRKHGAKTMEELRASASASSNEL

>comp7498\_c0\_seq1; 222 117 672 LEN=672; translated  
MQFGCAVLCRAALHETKQNKSHAHQALEQLRASDQGSVLEPGSWEEESLVAVCRSKLSVRP  
HSSRAVLFYHQHPNGSVDKNSLHGACPVLDQKYAANLWVWNTPRDGFAGSPIKKKFRNN  
GASVAAKNLKITGVFSNSGTDPRMDRAELFYRDQFWGKLGKGDVPLKVNTYQGHVWNVK  
DGNIVX

>comp7498\_c0\_seq2; 290 181 757 LEN=757; translated  
MSDLGENDGGETVFPHGIRSHIPEEERITKEEALQLRASDQGSVLEPGSWEEESLVAVCR  
SKLSVRPHSSRAVLFYHQHPNGSVDKNSLHGACPVLDQKYAANLWVWNTPRDGFAGSPI  
KKKFRNNGASVAAKNLKITGVFSNSGTDPRMDRAELFYRDQFWGKLGKGDVPLKVNTYQ  
GHVWNVKVDGNIVX

>comp7498\_c0\_seq3; 713 69 1962 LEN=1962; translated  
MAKKKAKKDSVGRTSQPPKPAVAPPDDTNQPPKAGYLTVMKAVVLLLLLTYGMAVYKVS  
PSTGRNLEATAESSEKETLASAPPTATPQSESCDHRFRSLPMAADAKARSLPLMLHRNG  
EPEACGESTVGEFLEELLKNFRAYGCKPQLDKYRFEAMLATLHRIMAKNNACHSMETYG  
DQTKGLLGICYDSGEDHTPILLDHDKLVPLGSKDGSTSLPCHFHTREGLRVTQAKWFS  
DLVRAASSGENKCEGDNATQTCTATPREAHLAVPAGRVFMFAPSHVGEIFHLPHTGASSKA  
IYLEVLSLKPRVDFVFNFFSRAESKELVDRAIAETSASHRIKRSTTGAGAASLNSKRTSE  
SGFDTHGKTALTIKRRCSALGFDEYEDGFSQGLQILRYNVSKAYNSHLDYIEDRTGELK  
HDYDSAGTGGNRFATILLYMSDLGENDGGETVFPHGIRSHIPEEERITKEEALQLRASD  
QGSVLEPGSWEEESLVAVCRSKLSVRPHSSRAVLFYHQHPNGSVDKNSLHGACPVLDQKY  
AANLWVWNTPRDGFAGSPIKKKFRNNGASVAAKNLKITGVFSNSGTDPRMDRAELFYRDQ  
FWGKLGKGDVPLKVNTYQGHVWNVKVDGNIVX

>comp7499\_c0\_seq1; 833 181 2766 LEN=3036; translated  
MPFGSSSIVPLVASPQGTSLYGQTNNDNCETAFCSSSSSVRLSCSSPGGRSVHSLSVSSS  
GDCYIETHALPLAGTVESEVGHDLHNRNKNACIIRTRLSERVSSALSRYPIELLCVDA  
LSPSSNSSSAPSELGNRNARALVYLPLCLYTKKDVFIKISYEATGATEVEGVASDVFE  
PFEDFLIGNGATNVLRIQAPQKFNGYATLCPAGAMAMLTONPSTGEYCLCAYHNGGSS  
SSMAPKGNAAFTSHYFRMEELADPNEKVVDFCFCQSTGLPLSSLTVAFMKLSGEVLFAT  
PIVFRGTIVPSQTVTKTLEFLESSLEECTPSTATWRQFRAAKRFLDDAFPRHGRANFVTL  
GQVATANGSKRSKPPSEVFNWPVQLQGPILLPELEEYAFEGSAKIEPFATEGDLVGF  
SIGYTEGMVDFAVVSPSSFVPRFKFESPNDSDLDQELTIGQTVNRVLDASSSYGGENDTI  
KDIQLIPDPIIMDDMIHYMTPNQIISISTNTTRIASKKAREHGSHGGRGMFSPPSRRSES  
RPKTTAWNSLDANFIKGGQNPVGAVIDDDVQLGHVLLVRLFDGEMMAINLTETRHLCDL  
ENFAAAPEKVLAIEDGSTAAMSDAEQALAVLEQTRPLTDVVQPLVKDVIKGVTLAQAQV  
GSATAQSDVTPAVLAAVVGIESKCKDIYLPLMTMNEHVSARKAQFKVVIKQKQLHAL  
KEMVANLRERQTIIVREKTDIMLQNSKCLVDRSASVLQSSKDLLPTITQAEFDYFQEI  
KRLDEKSAMWKNEAERLSRKITSLHSDTDDATTYLLNLSPEQQNAGQLLNVCVLLKRYEDK  
LAMDEEKLEECAQDAGILQDA

>comp7503\_c0\_seq1; 389 26 1296 LEN=1296; translated  
MDLLASLNLENLPEQQTRIQTFLGNDPNFDLKLGFDSACCACGKASPKIDCSSCHRVKYCS  
KACRDKDSAPSGIYSDDNSEGGERALGHSSIIICALLGLCNDDEVVEAGDKKELSSFSDDR  
RTAATDRVASEFESYPATLANVLIIEGPCYQDALQKSVGSTLTIHVIGASTDSELWEGHPS  
KEQERNVFCYADALAEVAEQYKMSILLQFFGQPCKPTNINETLDIPPVQAKQSSTKLR  
VTTSNADYDGRSTNKQSSPDILVFFNPGFTCPDYEWKTLSCMKENRFPFLVTTNTEM  
EAVADVQFLFDKFFEDIPPTLKFILENTEDANEMEGTGEDDSFDYDTSSFFSPNPYCG  
LRVRQSGTMANDVYVKSRIYGGFSGPIRETASKKSTTSSKGRKRVDAAANANSKKTNP  
ALVX

>comp7504\_c0\_seq1; 657 58 2957 LEN=3044; translated  
MSPACCPGSGSWPQLLVTSKEDLNKDDLPPPKGEILTIPVEGQEALSIYYAKAAEGKTTKG  
SILVLPDIYSVRVLLPHVRSGDRIGSISDALAGEGYHVALAGVFRDQPYDEAVKGPDDGD  
FLTFFDSFAQDGGVDWFKKQSYEVLGPRVKAANAFLNEKSPGQPLGVLGFCFGQWLQCKAS  
ATGDVDFACAVGCHPTTLESVAVFGDEEAMNALKOPTLALWAKNDKNYLGEYCAKA  
IANSGEVKEFPEMLHGWVSRGDVADPAVKAGVETAIEXRKGFRETHEVAKPTLTKKDK  
ATAMSDNYESEFDRNKNICFLPEDFHNNIATRIVIEETGRMKQNLNLKFFEEMKKDLMXK  
VLYLPTHTTLFKYKYLRIEKKLFCVIAFASTENIKSDSALHNI FVRYDTRYFQIKAATT  
QSIATLHNSCDTSTFAVTEKRDEERMEKDGANEDTKQAETTSRIAFIGSCHKSDKSATPP  
IWETILPPPDDGGDPVTPETPRHLDAWLWLGDAIYPSHRDPVTHKKYGPAPPAEVEAHLR  
AMKHENATIGYKGLDRLDHYHSSRGFDSGGRPLITGVWDDHDFGGNDMGAKMPEKKRR  
QAVYREFLGSAAAGARGEQPDNPSREGMYHRVDLENGRIRILVLDTRWFREDHCIPSI  
AH RIPMGNVAACLTRWMTSGLLLHKYAWLWGKGNCRNAKVLGDDQAWLENELLVES  
SQPSS



TAAKLDPPEL FVILSSVQVWSTNP IMEGWGHFPREQERLWNLRLRTHYGAASPAADIGSRG  
SDRRAEPAPVMFLSGDVHHAIEISGQPGYYEITSSGLTHHCGQHKL YGRVCKPVLDTFSAH  
RSGAPPSRSGKRKNRDKETKVASDEELDGGQGGYYIGLNFVLEVL TGEDGKREVL A  
GVKNATGHTVLEVSQALAGHGFPVPLPPYEQIAHTWDGHLIPYARGFLLWAVIGLASIRT  
LLKQG

>comp7504\_c0\_seq2; 600 58 3165 LEN=3252; translated  
MSPACCPGSGSWPQLLVTSKEDLNKDDLPPPKGEILTIPVEGQEALSIYYAKAAEGKTTKG  
SILVLPDIYSVRVLLPHVRSGDRIGSISDALAGEGYHVALAGVFRDQPYDEAVKGPDDGD  
FLTFFDSFAQDGGVDWFKKQSYEVLGPRVKA AAAFLNEKSPGQPLGVLGFCFGQWLQCKAS  
ATGDVDFACAVGCHPTTVLES AVFGGDEEAMNALKQPTLALWAKNDAKNYLGEGYCAKA  
IANSNGEVKEFPEMLHGWVSRGDVADPAVKAGVETAIEXRKGGFFRETHEVAKPTLTKKDK  
ATAMSDNYESEFDRNKNICFLPEDFHNNIATRIV IETGRMKQNLNLKFFEEMKKDLMXK  
VLYLPTHTTLFKYKYKLR IEKKLFCVIAFASTENIKSDSALHNI FVRYDTRYFQIKAATT  
QSIATLHNSCDTSTFAVTEKRDEERMEKDGANEDTKQAETTSRIA FGSCHKSDKSATPP  
IWETILPPPDDGGDPVTPETPRHLDAWLWLGDAIYPSHRDPVTHKKYYGPAPPAEVEAHLR  
AMKHENATIGYKGF LDRDLHYYHSSRGFDSGGRPLITGVWDDHDFGGNDMGAKMPEKKRR  
QAVYREFLGS GAAGARGEQPDNPSREGMYHRVDLENGRIRILVLDTRWFREDHCIP SIAH  
RIPMGNAVACLTRWMTSVRTVSKYFLLLWQLRMLCGYCRFHILIGFEMLVXFRLVSSRVL  
SFCVVPCKTAYSFSYLKRPRLDALHDXGLLLHKYAWLWGKGNCRNAKVLGDDQAWLENE  
LLVESSQPSSTA AKLDPPEL FVILSSVQVWSTNP IMEGWGHFPREQERLWNLRLRTHYGA  
SPAADIGSRGSDRRAEPAPVMFLSGDVHHAIEISGQPGYYEITSSGLTHHCGQHKL YGRV  
CPVLDTFSAHRSGAPPSRSGKRKNRDKETKVASDEELDGGQGGYYIGLNFVLEVL TGE  
EDGKREVLGAVKNATGHTVLEVSQALAGHGFPVPLPPYEQIAHTWDGHLIPYARGFLLW  
AVIGLASIRTLLKQG

>comp7505\_c0\_seq1; 509 559 2075 LEN=2279; translated  
MRKWHRAPTASPEFLLRRTKSSADARDDAELILTPLRKNNLVRRGRCQSMGNGCDANTPI  
LLSKRFASFGGPEGMYDETQEEARIERTRTEDTRGQTRAPTGRGP IPMRHQYSDIPRQI  
GSEPKPAEVTIPI SDIVEIWTHGEGKNATTKRKT SKNESDSREEHRRRRTIGIETCSLGS  
FELLMESTNELLVLQTF LKINAVQGRVDFAI RTGDDHRDMPAARGSDRASPRCSSADPRP  
GDRTVGR LSDGDDLNELSATIQTNPSNL TNDTAHTDGEKSIDVEAFVAKRMTERLKRESL  
TEKVERRMHR LVSLEERXVSWMLCVRMNDEDACVHAQICICVRIADETL DLGTNSPVLW  
LLVLSLLFVDDVHLAPVSVSVTKCACSCFGDSSVVPMDQSYGVADKEALVSRPRRNTAST  
VNSEVHDEERQHVPNQ RASATANAGA EK IHFDMQVESRESKDFRKKMMLKHGKMPSGLSV  
ESEDDELELLLFQNSGMQVLT KASI

>comp7505\_c0\_seq2; 512 559 1899 LEN=2103; translated  
MRKWHRAPTASPEFLLRRTKSSADARDDAELILTPLRKNNLVRRGRCQSMGNGCDANTPI  
LLSKRFASFGGPEGMYDETQEEARIERTRTEDTRGQTRAPTGRGP IPMRHQYSDIPRQI  
GSEPKPAEVTIPI SDIVEIWTHGEGKNATTKRKT SKNESDSREEHRRRRTIGIETCSLGS  
FELLMESTNELLVLQTF LKINAVQGRVDFAI RTGDDHRDMPAARGSDRASPRCSSADPRP  
GDRTVGR LSDGDDLNELSATIQTNPSNL TNDTAHTDGEKSIDVEAFVAKRMTERLKRESL  
TEKVERRMHR LVSLEELSVSVTKCACSCFGDSSVVPMDQSYGVADKEALVSRPRRNTAS  
TVNSEVHDEERQHVPNQ RASATANAGA EK IHFDMQVESRESKDFRKKMMLKHGKMPSGLS  
VESEDDELELLLFQNSGMQVLT KASI

>comp7505\_c0\_seq3; 564 254 1738 LEN=1942; translated  
MLPSFANQCSAPDDVSVPCSVRRGGESQSSEEPDEANGPQQPEEMTLTMRKWHRAPTASP  
EFLLRRTKSSADARDDAELILTPLRKNNLVRRGRCQSMGNGCDANTPILLSKRFASFGGP  
EGMYDETQEEARIERTRTEDTRGQTRAPTGRGP IPMRHQYSDIPRQIGSEPKPAEVTIPI  
ISDIVEIWTHGEGKNATTKRKT SKNESDSREEHRRRRTIGIETCSLGSFELLMESTNELL  
VLQTF LKINAVQGRVDFAI RTGDDHRDMPAARGSDRASPRCSSADPRPGDRTVGR LSDGD  
DLNELSATIQTNPSNL TNDTAHTDGEKSIDVEAFVAKRMTERLKRESL TEKVERRMHR LVS  
SLEELSVSVTKCACSCFGDSSVVPMDQSYGVADKEALVSRPRRNTASTVNSEVHDEERQ  
HVPNQ RASATANAGA EK IHFDMQVESRESKDFRKKMMLKHGKMPSGLSVESEDDELELLL  
FQNSGMQVLT KASI

>comp7505\_c0\_seq4; 561 254 1914 LEN=2118; translated  
MLPSFANQCSAPDDVSVPCSVRRGGESQSSEEPDEANGPQQPEEMTLTMRKWHRAPTASP  
EFLLRRTKSSADARDDAELILTPLRKNNLVRRGRCQSMGNGCDANTPILLSKRFASFGGP  
EGMYDETQEEARIERTRTEDTRGQTRAPTGRGP IPMRHQYSDIPRQIGSEPKPAEVTIPI  
ISDIVEIWTHGEGKNATTKRKT SKNESDSREEHRRRRTIGIETCSLGSFELLMESTNELL  
VLQTF LKINAVQGRVDFAI RTGDDHRDMPAARGSDRASPRCSSADPRPGDRTVGR LSDGD  
DLNELSATIQTNPSNL TNDTAHTDGEKSIDVEAFVAKRMTERLKRESL TEKVERRMHR LVS

SSLEERXVSWMLCVRMNDEDACVHAQICICVRIADETLDLGTNSPVLWLLVLSLLFVDDV  
HLAPVSVSVTKCACSCFCGSSVVPMDQSYGVADKEALVSRPRNTASTVNSEVHDEERQH  
VPNQRASATANAGAEEKIHFDMQVESRESKDFRKKMMLKHGKMPSGLSVESEDDLEELLLF  
QNSGMQVLTAKASI

>comp7508\_c0\_seq1; 129 1 952 LEN=1094; translated  
KTQKRLVSFLPNTKVFFLTLHIQLIFRGDQPVVDQRGSVGSGLSLTVSVCPKFEPGWLGL  
APQTINSCIRSCFCFYGCHVSKSLYPGGNPIDVLSTTCESRFSFMEISSLEALPGSSLVW  
GIGFPAGFSTGILAAAILAGLCFPFMGHSIVEAGGTAAIESVMRIAVIVAALFILSDFDAF  
QRLLVKGS DACNQDYVYFFVGGWWTLSLVA SLTVLFCREVRKSKEFDPFKRDNQFPNDEE  
PLLEEEHRSPIGYKVP HLP LFP INPDYTHKGLGSCSSYQLGLE YVLSLLVALGLGGFIC  
YLGVTKLDDQFLSDPL

>comp7508\_c0\_seq2; 370 176 1054 LEN=1054; translated  
MPNSEVETNDSKDIAPEEEGIETPQESTSTGGDSSSGDDDDTSEVEDSDLAFKVL PALRR  
SESFIRRRVEKRQCQENLVQRKKN GASKPAKTQSGPVDLDEIDDEEKAI RRHSNYGSFGI  
LPSSSLDGGIYRSYRRERLIKEID SANQRGRKGHEDI LETLRNARTLVFIIDAKVAVTND  
EVVDGIRKVVVDHVR LDPHQDHPNNQKCLLYRDFEGRLFNLVLPSEYSSMEGAWRGNLKS  
FSVQAAALFSFLTRLSLSCAFDLETTDSFRQVSLIVILGLVFIGEYVVL PYRL

>comp7508\_c0\_seq3; 457 176 1897 LEN=2039; translated  
MPNSEVETNDSKDIAPEEEGIETPQESTSTGGDSSSGDDDDTSEVEDSDLAFKVL PALRR  
SESFIRRRVEKRQCQENLVQRKKN GASKPAKTQSGPVDLDEIDDEEKAI RRHSNYGSFGI  
LPSSSLDGGIYRSYRRERLIKEID SANQRGRKGHEDI LETLRNARTLVFIIDAKVAVTND  
EVVDGIRKVVVDHVR LDPHQDHPNNQKCLLYRDFEGRLFNLVLPSEYSSMEGAWRGNLKS  
FSVQAAALFSFLTRLSLSCAFDLETTDSFRQVSLIVILGLVFIGEYVVL PYRL  
PSLSAFALSSNLVGS DWRKLLILV FVVASASTDATFQK VCTLGGILLTCLVLLANL GSH  
SWKYLHWKPFGR LRFWFGALGFPLDSLLGYLAAI LAGLCFPFMGHSIVEAGGTAAIESVMR  
IAVIVAALFILSDFDAFQRLLVKGS DACNQDYVYFFVGGWWTLSLVA SLTVLFCREVRKS  
KEFDPFKRDNQFPNDEEPLLEEEHRSPIGYKVP HLP LFP INPDYTHKGLGSCSSYQLGL  
EYVLSLLVALGLGGFIC YLGVTKLDDQFLSDPL

>comp7510\_c0\_seq1; 412 78 689 LEN=996; translated  
MSYYETVEDIEESEGEVEVEEVEEVEEVEDVPKRRKQKKWKDPNPKRAMSAFFCYSQAERP  
NVKANHPDASFGDVARILSAQYKALSEKEMKYYIKKAEQDKIRYQEEMKHYVPMDDPTGG  
KRKKAKKDPNAPKR NMSAYFLFSVA VRPTVKAENPDAAF GDIARIIS AQYKALGAKEREK  
WDSKAAADKERYQREMEAYRAGM

>comp7510\_c0\_seq2; 275 678 1022 LEN=1329; translated  
MKKYIKKAEQDKIRYQEEMKHYVPMDDPTGGKRKKAKKDPNAPKR NMSAYFLFSVA VRPT  
VKAENPDAAF GDIARIIS AQYKALGAKEREK WDSKAAADKERYQREMEAYRAGM

>comp7512\_c0\_seq1; 275 1 1146 LEN=1277; translated  
XSSSNKNDDDERWTVRIAMKALAPVVRQRDVL DLRVSTSGDHLAFGFR LQKTS GSVSVS  
SHRVGYAPAKGVA AVADTEGASELVVQPAVLATMLEPLKRS AEIALLVSETHRLVSGVSF  
AHDDLPEGSSPSPSAPGRGRDPSNAPLKTETS VGYDDLVEVHYAGRPGAGRGILDSTGIE  
PPGDLHERVVLVFTLKEFKAF LQYCSQAVPDRELRTSIQFFWGGRP IVANTKGDQFSAEL  
VTATLXPQAPGDHENVRNQHRSGALRPLFLVSSRSVPFLRCLVEIFWMGSSDAPAF AAAG  
RASVELRVPLLSRTGAGNKVVVNGRASGDGDEVVVETVEVSEDLACFLGRRDGVGFTGK  
LLTTNHGPTTQRKNEVDMVFSV

>comp7516\_c0\_seq1; 224 1 1159 LEN=1233; translated  
XWEVPIPGTKVSSTDDSEKRSNYVGS ENIAMNGRKKKVRGGIRVSSQCLFLMIECVCLV  
YVSLKLDIVQDPNHSIGDFPSVTTIDNNAGISPEYTKPRLEEYIQGWNITKNVNWLLDF  
SIVGFPKTGTSTLMLYLKNQTESVFIFDDERCELGWNQHVPL LKDLH SKYQP NLLMGIKC  
PRDLEVDFALKNYRSFFPETKFIVGVRNPIRWFESFYNFRIQNRFPMLPPQKLVGKCRKL  
NQGLCTNRANFSQHL SKIEDSRKVFLYDINQLKNKDLMP TFLRDLTEFLGLENPLEKPMI  
HVRPGEQYVSGDYENELRSKRINICEDQYKDLRGLLQKQASESANWILREFLPNPNVKVS  
SPAYFEQLLEMWHNDPCEIAGTKIRV

>comp7517\_c0\_seq1; 591 1 1536 LEN=2228; translated  
DLEETPPTGQEGISHPIAPARLRDRPFVDQGN SGNMSAEAEETKTA EETPKTEEAPAAEE  
ESKKEESKKEEAKKKEDSEELTKRLQKLALERQKQASGERLKV IQNDSTSHLTGAKTFQ  
ELNLPKHLLDAIFAMGFDRPSAIQEEALPRILSDPPRN LIGQAQSGSGKTA AFTLGMLYR  
LEINEPATTQALCVTPTR ELAIQIFEKAVRPMAANMAGLKIQLAIAGTTIDKSVGVNAHM  
VIGTPGVVDWLKRRIINSKTIKVFVLDEADNMVGEDGHRANSL LIKKTLTRSCQCLLFS  
ATFPTEVVKFAEKLIHNADKILIESDEALVLDVIKQLWVDTRQYEGGKLEFLSDIYSLLT  
IGQSVFVSTKKNADMVHRTLTDGGYTCSVLHG GIEADDRDSTMLSFRNGESNVLITTNV

LARGVDVDNVCLVINYDVPVTKDGDPDFETYLRHRIGRTRGRFGKKGSAINLIDDTRSVEVL  
AAIESHFQKEMIQQAEPPDPELADVIEI  
>comp7517\_c0\_seq2; 196 324 734 LEN=1426; translated  
MVHRTLTDGGYTCSVLHGGIEADDRDSTMLSFRRNGESNVLITTNVLRGVVDNVCLVIN  
YDVPVTKDGDPDFETYLRHRIGRTRGRFGKKGSAINLIDDTRSVEVLAAIESHFQKEMI  
QQAEPPDPELADVIEI  
>comp7519\_c0\_seq1; 224 303 734 LEN=772; translated  
MTEIELCISLIFKPLRHHMKSIFDTEASLLEALWVPTLDVIRDISKDDSSDNPISQTPA  
GEKMLATNELTADHLRNVIMVLASLGVLPSTEGATDSSISSKTWSAIEESEYLKFAA  
EWKSAAGNPSAGEAVAGSQDQEE  
>comp7519\_c0\_seq2; 1738 176 5668 LEN=5706; translated  
MNDSHHGSAESLHVSATEINVDAILESSRHLCEEARVVLTSLRGGPPNVARGDLAQDLTD  
LRHRVKTILSTDLASILAPDINASNAINTTGNNGYSSPNKPAQAAPLSPLASSALDPPAAA  
SVSSCGTGDIASTAAIAEGTNSPPVESQQIPPPPPPPPPPPPPPLPQDIEDRSDEGSS  
TVFVEKPPQGGQPTKQPTASPSMDQTVPEPQQAQHLVFPDAVHEHQDVGYPYARPFLLAVMD  
PRAAGPHTLVALRALHRLLESLKPLGGTASHEPFGFVMEPLTKGVNLCKFEQTDAGA  
DEAVEMAIADLLALMVTIDRRSIQIETLMDAFNTVFVTRNTFVHSPALCYHFEDVLTIV  
RTVFKDLDDLNDPAGRYILEFLVNQLLHTPLVGGDDASREQAQMAHDATRVLCRLARCA  
LNYGLKDVSNQVFADAAAASAPDEERGLLQIVQDDLCLSLLLTGQAIWAYQDTPSIIPGF  
ISLEVLSEICSTMSTLWTSVNLRRHLVPPQFEAIFTGFYQALALLRKRKNPTDSDSFHAN  
LSFDAGIEIILESLAEIMCLHDNRQTVAQDGGCLETLFATYDCNIKRSVDVGLMIELC  
RCVGSKVDQEGDIMEVSLHGMESLTNAFDVSNQEKKTSNQNEAQAEGQTTTTTTPPTPP  
TGDSPTDADTPNTEDVFREVPGLKELCAESIIGSMKCLFQDDRASSETTKKERRSRETIM  
KSI VSPAPQSFSDLNRISSSHHLRNIKSKRLLRKA AHLFNTKSSKGI EFLVNSGI IAE P  
VTPRSVASFLRNLVGLDKKEVGVYLGELGKPAVAGKSPKVWERDWFHKEVLEQFCSLF  
HFDRQSLLDGLRMFLASFRPLPGEAQIDRILQAFADSCGNLCEESTNGALKLFSDDPKRA  
SDVAFLLSFSIIMLNTDQHNDNIREDRMKKSDFVRNNTDYGKDITDRGKELPREYLEAI  
YDSIREEEIKTEGEGADGSM TVERWKDVLGRSAE EKH SDEALSTTDAEDLSELVLEQVY  
LPIMSSISALWRVEDTVSGARSGMHGAQGARLGMDIAWEMLMGVRQLGRNDIFCKVFKHV  
CKCSGLLSYVSSGAGRSWAFANSVEAQGA IIALHMIRDASSELDQECWKNIWAMIFELR  
DLKMLGGATKAGKILKESDSDLTEQGRREWTKMLLKKGNGKSPQKPNAGIFASMGNM  
LFGSAEDPSLEENPNDSTSNEALRTSHGKEDHLVWNDIAPSDDEDEKYTSADGEEDFIVRS  
DNHLSLGGQFESQLIQEDILISQALEMPVTGLERVEDTRRTQLTTPRARVRRRLSKSCDFV  
GLVSDSRFMDMGI SNLLEALMSLIT EGTNNGSNRNGAEQNEFPLSPASEAFAEVLICEI  
ALKNRDRLSMLWCNHL SKHYNRDLNLT KTFVENEQEMFSTMSGAMEKAITGLLRISCF S  
LKRGEIANDILSTWSSLLDSCASEEEKLCLLDAFDRHIGEGLRWITRCVDDSSQLSEQGW  
GILSLIRWSVFGASLPSIPSMQTGRSVGLADDDPSIQVYRSLHYLLNVSEAKTQVPSVI  
SGCILFLVITGDKRNCPLKSIAGLDLLQVLNSIIIEGTAKAEKDDLFWKKNWLPVIENIAD  
ASNLSNPNTVRQHALSILTDSFLDKQAGELPVSILCEVLGKICIPLAGERI IKLRRGLRN  
PDQFDGIMTEIELCISLIFKPLRHHMKSIFDTEASLLEALWVPTLDVIRDISKDDSSD  
NPISQTPAGEKMLATNELTADHLRNVIMVLASLGVLPSTEGATDSSISSKTWSAIEESE  
YLKFAAEWKSAAGNPSAGEAVAGSQDQEE  
>comp7520\_c0\_seq1; 403 83 1402 LEN=1692; translated  
MNLCAAFFAVIVLVCDTILVDAENDLTLTITADGAADDRNGVGVVADEILDINDVMDYN  
NSNDEWSSLLSDDGNVTISSEEVGSNLLDLLEAYDLRLESLATMFTGTYPDNPRDSDTG  
CARPGYCESMPTFWKSEVVTPVNVQVNGSLVQAVLFTNGHRNPENPQRVLSFAGAMLWGS  
GVEPEETAMPESTCLAAAYQFKNTEAEPWQHLCLENGYVVPDMPWEAQIRALVEETKP  
TFLTGHKMGCDIAKTIVGILNPDLPVVCWSATGTLNQA WIDAYPGLADALESGNRTNDNMY  
VMQINMDAHSMLLPKPSPGSVANVCVYGNKDRCADNKYPFDWDPTSMCSLSTSGTLGL  
LRGIWDINFEEACIAKEYVGSDFRLRYCPHENYTAQAPTEEGNTTSSSNLGIHGSFVVSHR  
RFSATFLLLALELFFAFS  
>comp7522\_c0\_seq1; 1377 440 6676 LEN=6826; translated  
MSGYGSRRTSNAATRAEMIQAGQRSRQPPIHAPPRQPIINTVPDESEPSYSYEEKSFLPLD  
EEDAIDTFHRQIGNFVGRPGRGRNFGSSLSGASNTTYQPFGRSDRESSRGFYGGDAIK  
GSSVPEKSDNDQVGKSKGGGNKFWRTT SREADSDKNTRTRDRTTLVGNGYTNEAVNDG  
GRKDERSHFNMIKSRQSGGLFASARKHTKQAANRNGKVENHKLQPGEQFSRSNSSSSLN  
NGEARRKSKKLEDEVRLKADAQQQRGEDGAVVDNGYYHEVPTMGMQLSPINHNRNHIDSQ  
KLATQSNLMTALEEEMSGDNCTTDNSY EYDGSHTFLH SKMESTVNGLPHGDIATTTSHKN  
GDTRNPAHASYQREPFQQQIAYTSPMSATGA AVAKLSAYPIHNKPSVDVDSRKNNSSSST  
HQIYDPPISALLQQQKVLRGVPHVHDNGDNRSTTSTMSDLSVNDSSTNHRQQIPSSAYG

NIMLGRNNPHHLHHQQVHQQLQPIFRQHLQHYPHFSTGSAGPTYGTSYPTAPIRAGISS  
QPYPPIPRKSELEGSKTLGNSDSDEHKRRSSTENSQLGNR IAMLLYKCEATRFPFKKMLML  
NQLQMTAADIPVKDLYGTVLGQSLYKLSLGNRLSTIPRKLVTCLPTLKTMDLSQCQLHQ  
LPEQWNLPKLTRLDLSHNRLTDFPEETMLEGLLELQELNMFNGNEVSMIMIPHNPKLLSRL  
EILDLYNNLAQLPEELDRLRSLKTLKVTNNCLGEIPMRVCNMELKTIDVSNPVLQPP  
ETCERGIASMKRYQCLSRREEQSKLEALQSKTRYSKNKTCLKTTPRGASSRRRHGSGRRH  
LDDSSQSTASKSRSQKSQSSVSYNDRRTHTSDGKASAESRTSTVHESSSIASSKQSRVTE  
LQNKTSLVSTSTPPPNSVDAKSALGPTLSSNSYIEHDEVTINKTLKVI FVGMAMAGKTSM  
IKRLIEGEDAVIPKRDERTIGVDIYDWDPAIDRRYEHIDNRILLQDKKLEELCPNANVRF  
SVWDFAGQHVYHATHELFSPRALYVVVWDMGANNHAI EKRGKPLNNNADGDHVTAGSCS  
DSDDESESEKARRADRALERDIDEKVQFWVDCIQSSVPGAAILPVATFDDLFDNSDHDEA  
KRCNLIKERLEKHEERRIKGITDRLKEYMDANGANDAPALRLRKLKLLGSYARPKIIFGDN  
GEDSIVRVSGTKYTGFAKLTTEKINNIATGRETLKSEYPLFRGHVGARIPRLRLKVL DVVR  
ETRAKFKVVQWDYFFRQIQKKNIDADHVSDALHFLTNI GELSYFGDAVSENPRDNGVMK  
SETFCGGPVP CGQDIDDGAIDGDTISIIIPSDKSKNDSPLSNQSGDALSSGNQTSASLA  
QFVFLNPKWLKAVACILCHNLQKIEETRRSLSMKQEIITRPN SFNEAHMTCPVITSND  
VCMLWQAQKSTREAAERLEDESAGIKLKPQFLQLLLVRFRVFIPI DLGIEKAILGRIDY  
SQKSNKAAQTTP EAITRGAISSPGNQS AKDVWQSTYFFLPSLLGPGEPTTEETWYKSSDS  
WIATLCHSVMFPDGVPPGLMERFTATVLSKLY IMAQKKVPDTVEYSLNAISNGRKNSSH  
AGNILVKEVLCWRNAFLVKLGMQVLSPTGEPVSNVEIFTALVDKDSNYCVGSEQMSVGS  
RRLITSGKGQVGDGKKIWSGGYFNVLETFLDVMEEYGGLEFQKQAFCECLVTKSVSQA  
SCWGASVVQRAVQEGDTMIRCRHGKVDLRLICPFASKNYKSDKYDNSKVQGEIQPDTFP  
TDALFKSVVVVGLWDGSKRGKIVRVGSGFIADKKLGLVVTASHTLMNISGEENTPFGENY  
FGMRQKVVIGVIPRQRETEDSGEAVFRYFAKIVAKDPEIENGICRVDACVLCITTRMEA  
DVGGTGEQCGDQIEHILVMNKEALKKEKLSLKVTTDCYDEIVRIIGYNQGGGGLMGP  
VKLNRHIDFARGYTC SKHELSDDGNDRRYKPRKEIVVNCATFVGHSGGPCVNLQGEVIG  
ILSRGDPADNRRCYLVPTGEWLPLLKKSQKDYFVKPRK

>comp7523\_c0\_seq1; 423 30 809 LEN=1261; translated  
MMMNDGSSAQMDGFAGQQSGDPGTTAQAAPIDNDPLPRAPELLFANSTEDKKLYWDRS  
HYDSPESQMKALTKSSTLYIGNMAFSTRSANVHSHFSQIGPVRRVIMGMDRFQKTPCGFG  
FVEYVHREDALLAISNLTSTKLDGRIIRVELDAGFQSGRQYGRGASGGQVRDDKRRGRVD  
PARNNPHKRQKTLNWT PADQVQEQHNQQQPPPPPLPQSQQPMGGDAMAGPVGATGGIAQ  
PPPPPGEPPEGNSRFRDE

>comp7523\_c0\_seq2; 423 122 901 LEN=1353; translated  
MMMNDGSSAQMDGFAGQQSGDPGTTAQAAPIDNDPLPRAPELLFANSTEDKKLYWDRS  
HYDSPESQMKALTKSSTLYIGNMAFSTRSANVHSHFSQIGPVRRVIMGMDRFQKTPCGFG  
FVEYVHREDALLAISNLTSTKLDGRIIRVELDAGFQSGRQYGRGASGGQVRDDKRRGRVD  
PARNNPHKRQKTLNWT PADQVQEQHNQQQPPPPPLPQSQQPMGGDAMAGPVGATGGIAQ  
PPPPPGEPPEGNSRFRDE

>comp7524\_c0\_seq1; 304 84 968 LEN=1061; translated  
MATTTTDF SALLPQNLQVIQGWLADDIPSFDVGGLVVGTEEKQAKLLMKSAGVFAGKPF  
FQHVFDLLGCKVEWQDDVAIEG DYKAIKDEKLCLAI V TGPVRDILRGERTALNTLSRCSG  
VATLSREALERARGLGWDGYVAGTRKTPGFRI VEKYGLLVGGVATHRLDLSQMVMLKDN  
HIWSCGSIEKAVKLARKASGFSQKIEVECQSLEEAIEAATAGADIVMLDNFEPEQLKKA  
ETFKNQFP HVLVEASGGITTE T MPDYLCKHVDVVSQGKLTQGYPCVDFSLKIVK

>comp7526\_c0\_seq1; 1059 389 2758 LEN=2924; translated  
MSTRRARKRDKSATAKSSAHSRFSQGSASHSKRSNAKGI RGRDSPLRGGGADHNKNMT  
MPPPVRRFRHRSISKKTWPATPTSSPITATSTVSPETPRNR TDEHENHNI PGLSRTSVPS  
TFTTASGQFNPNASLLNFDAKSHIGVQGT SFYDSNNSLIAGAEYSDSSPTSSSSSISVSQ  
SPSKLLSTSTERGKESQPSVDNSVDI PDMKEYVIEDPVERTKFKYHLKRGIKKTLTFD  
EQWETSSSGTVVSSLSISAASYILDLAQKESRAKERE EEEALEEALDLYGTWLAEGKTD  
KNIFLMILHEVKKEFKLYAKADKFQD TLLDAALEEE IRRREKIKKEEEEEAKILASHDKD  
DDGDAESARASLPPSSDHNKSTHRRSSRLDEI IEMNTTQKSLRASWDDNEEFDDDDVDDV  
DDSTVADDENKCKNDEWKEPSVTGVKVG YH KASNKTLKRKKSIRGILSRMGSKR SQNDA  
FSVSKGRDRSTAKKTEVNIDQNPESNKDVDNETVDPILSPSSPEDSKNIF SRLRLKKSQK  
DAEQRMEERWKKINSVETKEELWKKINEAQKEKQLFEVGFKKDVERENLDRTSRTVE  
SAPVELRQAVTPTRIS I STAARENTDANIGQAKYDRRKSWAATTSKIEVGRSDTGTEIL  
KTSSSKDSENTQEKEVKSMKKKKKSKENIGSKDVQEQGDTSPQRKEKKKKKKEQKVAAK  
KAAAEVAAAAPLKRKGI PSK KYIKEDKKEDDFIEQSAKLALKGDDFSNEDFLGDGLDDL  
G FNFDDADLI

>comp7530\_c0\_seq1; 504 297 1406 LEN=1534; translated  
MGDSITEGTIVDMPVAVGDYVQPDDVVLVIETDKVSVDVRAPEGGVLTEVLGEIDDVVEV  
GSQLYRLD TDADAPESPSEPMPATEETLTSPASSEPVPAATPPAPAAAPVAAAAAPKTPP  
PAPKVAEAQTFLGSRTERRTKMSRMQTVATRLKGAQNTAAMLTTTQECMDGNLMMEMRKK  
YQDVVFAKHGIKLGFMSAFVLAATAALQEVPLVNAYIDDETKEIVYRDYCDISVAVASPK  
GLVTPILRNTELSMFADVEHNI AAYVEKAKNGTSLDDMSGGTFITISNGGVFGSLMGTP I  
INLPQSAVLGMHATKMRAVVNDKGEVVARPMMYLALTYDHRLIDGREGVTFLKLSIAEKVS  
DPSKLLLEV

>comp7531\_c0\_seq1; 299 1 2632 LEN=2896; translated  
XILDVPANPNPTCQRLQETFGIDFAAVSAPHAWSSHLDLILERSQLPEDKQFQEKDLVEV  
ALHQITHRLPRGVQHLPRDWSPMEKVLKLVARYEHLTSPTKTNTIPPPVTILVMGGSVT  
MGVNCFSFGWRVRSRLCAWPFRLSFLNQMAGFGEIYQRSDDSTKLKVKVINKSVGGVNSD  
VGETILRYEILGPNTYDVI INAYATNDMHINTMQDANKSGADAFGDYIMSIQQEFVRTAL  
SLETSCDNNDRGHHQSPWLLFLNDYLGNEQRSVLATTEGGHGIDLLASYYGFGAISYPDM  
VRDLVYANTTDPNFSPLNWHPPGKVGMRREIHTAVFHR IAVFLVSYYAWVATSTYCGLV  
VWSPDHSVSIRNGLPPRLTKHLVLDTISEEWKNHDRRLRRDSVNSPIAVTNISSENPSETP  
CAALANPRCALSWMSKLNLSNNNIEEYFAPFVHQ PSTTWTVVVDQDSKPGWSPPYDGLGQ  
ALVLDVPLTKRPVQTVVLFVMSYGEK WENSTASVEVLQTTSEGTSWESVLGPQFVTGYH  
GKKTSETYETELDLRMLAPPSTLRIRLSLQGGHTFKLMGIAACDAGGDSTHLVSGSRPG  
FPRQCSIYQRESVVKQLPEQQCNEVAYFEQACSF TKATTKGCTDPHWARETYAKRRRGDD  
PKFRAVFDRACTNVQRVADILRVGTHDVQKYSFGGTGCQKNVTYNDSEPPFASESVCIT  
SRPTKELSSAKLSAGITDAELQILSAKTLDDAIDRVGMKNKPIDYLWLEGDVYEFFAPGA  
ADETLSRVRYLEFP IGYEKGSFEELVLRQLTEHNLVVCYWSGTNHNLRITDCWFVSHYTTK  
AWAKVACVSAAHDDARILLERMELVFAETLLKQVFE

>comp7533\_c0\_seq1; 52 1 267 LEN=1888; minus strand; translated  
RVFMEELESREMYDPRNPAGPLPTSLRPALNRELEREGIRDARAIDLAYEALIGSGESKG  
MLRAEQTEYIDYYDFLKRIGPNSITWPK

>comp7533\_c0\_seq2; 256 86 847 LEN=1965; translated  
MPPPLKSKETPLDDGGDNTLRKEDINNSNGGEATDEDEDESEDELALATSPTAVANGGNT  
VTKLRCLNCWRVARKDCTGSLCIRCCTDETCTVHNEQRAKLAWKKAVTLGTTDLQKEARA  
KRARKIPKGRFKEE EFSYMHDTVVLWDLRSVLEPAPPRQNQAPSGASRGQLALPSAATTT  
TATAQASASAGAEYLNQCKVREEILRRSRKNNSAAA AVEGRPEATKVR RNKYKGTKKRFRR  
LMEDLYQRSLALN

>comp7534\_c0\_seq1; 272 186 770 LEN=1368; translated  
MSTSNSSNNPTEVHRKIAFLGFRAVGKSSIVNSYVTGTFSETYDPTIESTYNKTIRFRRV  
SFSTDIVDTAGMDEF SRLSRNASLGVHGYALVFSIASRQSFEMIEQVNGALLNSLGDLPD  
VPRVLVGTKKDLKDSRQVSTADAQKLADTWGVPYIECSGKTGEKVAEVFHMMLMKEVEADD  
GLLVENE EGGCIIS

>comp7534\_c0\_seq2; 220 566 937 LEN=1535; translated  
MDEF SRLSRNASLGVHGYALVFSIASRQSFEMIEQVNGALLNSLGDLPD VPRVLVGTKKD  
LKDSRQVSTADAQKLADTWGVPYIECSGKTGEKVAEVFHMMLMKEVEADDGLLVENE EGGC  
IIS

>comp7535\_c0\_seq1; 347 448 1545 LEN=1628; translated  
MGGRKDCCGARIGTSFEATR WLSLDICGLIGVTLSFSVHV FALCVIVWYLIEDSMIATAF  
FLLLYL PVSLLALASLFMAWTTDPGAVPIGARPLVTVKPASSMTAGGAGASSSSDSSRSR  
SLRRCHKCNDNFKPPRAHHSVTGRCIVKFDHF CPWVGNAV GAMNHKFFVLFVGYTMVSC  
LCSIGLMIGRTFYCYGYP SPLLHTVVGKTD SNNSMENNKPECTGWNESYLGLVLLVVS VVF  
FLFTSCMFFEQIEAIQTNASKIARMKMRVGTAGTELTRVTEEFNEMFGGNSNQVAHWFL  
PTPVEFPNGMKKVV LGYDWD ETFDAVPYQEPNRDTFDPDRPKLVRRSSRDHDPEDPLRPS  
GGTMT

>comp7535\_c0\_seq2; 387 448 1671 LEN=1754; translated  
MGGRKDCCGARIGTSFEATR WLSLDICGLIGVTLSFSVHV FALCVIVWYLIEDSMIATAF  
FLLLYL PVSLLALASLFMAWTTDPGAVPIGARPLVTVKPASSMTAGGAGASSSSDSSRSR  
SLRRCHKCNDNFKPPRAHHSVTGRCIVKFDHF CPWVGNAV GAMNHKFFVLFVGYTMVSC  
LCSIGLMIGRTFYCYGYP SPLLHTVVGKTD SNNSMENNKPECTGWNESYLGLVLLVVS VVF  
FLFTSCMFFEQIEAIQTNASKIARMKMRVGTAGTELTRVTEEFNEMFGGNSNQVAHWFL  
PTPVEFPNGMKKVV LGYDWD ETFDAVPYQEPNRDTFDPGTSSSSTGTSIELAAVKSTINS  
GDDLSDVENQR LSSNSLVALDRPKLVRRSSRDHDPEDPLRPSGGTMT

>comp7535\_c0\_seq3; 281 1172 1741 LEN=1824; translated  
MVSC LCSIGLMIGRTFYCYGYP SPLLHTVVGKTD SNNSMENNKPECTGWNESYLGLVLLV

SVVFFLFTSCMFFEQIEAIQTNASKIARMKMRVGTAGTELTRVTEEFNEMFGGNSNQVAW  
HWFLPTPVEFPNGMKKVVLYGDWDETFDAVPYQEPNRDTFDPDRPKLVRRSSRDHDPEDP  
LRPSGGTMT

>comp7535\_c0\_seq4; 321 1172 1867 LEN=1950; translated  
MVSCLSIGLMIGRTFYCGYPSPLLHTVVGKTDSSNNSMENNKPECTGWNESYLGLVLLVV  
SVVFFLFTSCMFFEQIEAIQTNASKIARMKMRVGTAGTELTRVTEEFNEMFGGNSNQVAW  
HWFLPTPVEFPNGMKKVVLYGDWDETFDAVPYQEPNRDTFDPGTSSSSTGTSTIELAAVKS  
TINSGDDLSDVENQRLSSNSLVALDRPKLVRRSSRDHDPEDPLRPSGGTMT

>comp7536\_c0\_seq1; 453 96 1205 LEN=1314; translated  
MPVALMTGKSNHGHDATQNQSLRNRTIEVSDWWTLQTSSESSVTHVLDLRSFTEQRRQFLC  
TPVQDSSMSLIVVPIPVSVVEKRSFELPARHVKFSILVAESDLVRAESFLCGSNRKRPNP  
WKVDHVLLEDTEEFWSEAEHELGMVGKEDTGQRIENELEEKYKRQLDQDHDSATQNSRKF  
SKFPLPRLWQPDPMVETVLLPLLVKAHDNNRRSISSQEELEVWDLAAGAGRQVAFVGEEL  
FAVDRTHQIVAVDHRYNKDKETKIVNDFWDRREIGSQTTSLKLNLSHWKTLEEAMASSLTQ  
KKVSAMFCVRFWKPDLVKAIAESGSISSGVLFALSHFCKPSLGASWNFDHPSEKTVLERN  
ELNDIFHTGW

>comp7537\_c0\_seq2; 213 1 840 LEN=904; translated  
CNDPVCTDPTHHDHSHSHDHSASPSVAAECNDPGCTDPTHHDHSHSHSHSHSHSHSHAHS  
HDHEENSTHAGIGTMVYRARRPFHPDRMLSFLRTLPIARGLPEQNDQAEDESKADLVVSD  
EARDVLGAVLRSKGFCWSADSHSNMYWSHAGASFEYKCLGQWWATLPRNQWPEGVDEYV  
LADFDDVQHPSEGTADGGDAASAPKSVGDRRQEVVFIGLGFQVSKQALIRETLDGCLLT  
DEEYEEYRSICYGNPGDGHPEVLLGNRFPVRINSEYINY

>comp7539\_c0\_seq1; 123 1 629 LEN=674; translated  
XTQMLSTARHLGSRTTTTFGRWVGPRTSLHPSSTSPPIGGRYALRSRKCTTSPQSSVVR  
SMTSKSKSSPKSELSTAAAATRAGTGKVDGTGTPYIKDRGPVSWPSLFLVGIAAAASVVAY  
YNIERERRLESAMGRVVSSESDGWSPNPGVMAPRKFKLTPWGYFPEDDGFPGCKLLRMCL  
ILISRLILSNFFFLSFELCLYFSLSSSEYE

>comp7539\_c0\_seq2; 309 1 1040 LEN=1086; translated  
XTQMLSTARHLGSRTTTTFGRWVGPRTSLHPSSTSPPIGGRYALRSRKCTTSPQSSVVR  
SMTSKSKSSPKSELSTAAAATRAGTGKVDGTGTPYIKDRGPVSWPSLFLVGIAAAASVVAY  
YNIERERRLESAMGRVVSSESDGWSPNPGVMAPRKFKLTPWGYFPEDDGFPGSPKPAIGG  
PWSLVDLDGKLVTNASVFQGWLLLYFGFARCPDICPSEMMLKLARVIDQLKETHPQLASQL  
VPVFSVSDPARDSLALREYAKDFHPDYVFLTGSPTQVQEMAKKYRVVYSKAEETDDGDY  
LVDHSIVVYFHDDKGEISDCFTQSMRPKDISEKIEKMTSPKGLVA

>comp7539\_c0\_seq3; 272 1 938 LEN=984; translated  
XTQMLSTARHLGSRTTTTFGRWVGPRTSLHPSSTSPPIGGRYALRSRKCTTSPQSSVVR  
SMTSKSKSSPKSELSTAAAATRAGTGKVDGTGTPYIKDRGPVSWPSLFLVGIAAAASVVAY  
YNIERERRLESAMGRVVSTGKPAIGGPWSLVDLDGKLVTNASVFQGWLLLYFGFARCPDI  
CPSEMMLKLARVIDQLKETHPQLASQLVPVFSVSDPARDSLALREYAKDFHPDYVFLTGS  
PTQVQEMAKKYRVVYSKAEETDDGDYLVVDHSIVVYFHDDKGEISDCFTQSMRPKDISEKIE  
KMTSPKGLVA

>comp7541\_c0\_seq1; 859 1 1864 LEN=2088; translated  
XVAGGTGVVVSFAWIGDGDVFSLLYDPEQDEALKAGINLGAPAEASKGSDFYTVDAMIKNLG  
KIKTYKKGARAVVDTAGKLGVSVEGLMDLGKDTGKLGKGLKGM SRLAHGSATAVAVGAPIMG  
AGKIAVKGTKKGAKRVGKKMPFGWGKKKDKKGGASSLASTDLESDDDEPTTATSPIEIIPE  
ETDPEADERAASQKLEKKHPWVELRMLVGSTNEGDETAGGTTASSLGQLTLRTGGRNPPT  
ILFGGPVLCVGSKFDENDEGVSHFYTKKKGQDEESASVYVSSGPFPCPDIVAWDDDGKL  
CAVVIKGVSVYLSDDPNFVLLGMAEVGSSSLDSGGVISARFLHGVLYCTTKTSVRCVFL  
GDPGESSCHMDAFTLASCNVPIILPSRSIVTDYDSLTPPTIPMPLHHPEILGYQNGSLVL  
STTTGIVAVPLGFPLLRIGSLISAGSDYFQKAEQWFDVAVPNDHEALATFLERRGVPMLA  
LNLGSLSETTIDL CMRYGFVDRLEEVVELFGLKAI RAIDQSSGLSSNIFGPEEGTASLL  
VCVGAYLLSYGRIELVRRATECLASGEKGGKKEAFMLAGLLLSVNESDAKRVIHRSVESI  
EDNSDWVVGPFVRKHVLFNFKD

>comp7542\_c0\_seq1; 9 1 1333 LEN=1333; minus strand; translated  
DNTTQHGSQPRFRSPGFRDTPNPSRSRGRSRHCSHGSDPSVAEPSYHTMPRPFPFAFAVA  
LSSENDAPQRSFSLPFLPSPHKRKTTPSQDREGPRISRDLDP SRHNHRHLKKAFFDPPG  
QKVQAPAPTQPQLSSANPLWFGGGAHAGLVGGXAGAEGRLLRGTILAARGAGGYRRVV  
AAAGTKTPLPRPAEGWLRAPCSSSEGCAGTTGEPRIIRRAPEGVSVVPGTGSSGGLLR  
GNDRCALPGSRQTPLPETPKARVLRKGRGRAGPALPLRVLEGGEGLLVHEGGLPADP  
RRGLRGGGEAPPKRRSPTPRSSSLVVVDPGPREVVAEIPGAAESLARRKRAIAAVLEEQ

QQQQQKRQKAGETQQEQHHHHSQPGRKGERGERAASDRKHRHPCKERPRAQRIREAYR  
RHTAGASDRARAMGAIDEANARHGX

>comp7543\_c0\_seq1; 865 154 3169 LEN=3372; translated  
MKQHFHAVKKNSSPNAINSPLSPLILAPQYESRVIGDDSKVRMQMOTMETKRYQTDVAS  
GVASRTVATNDDNGHAFENSEVNVNRMIEIDEIICSISFFRATPLDEFRRHKLKECVKSNLSL  
LSTKTPASQTIASSWNEDERINEVVRYDRPKITKILTNDVDWKTLCCKHDKQKFKNQKS  
STDNNTRTTVLAEVVAALTNPLLVPRCCHGRCLLDVLLNALLVSPSLISLRRERNANDS  
QKGVSIPTAISRWTPSQLFLEETIRRLSTDKVFFSDSFMTNYVRSFIAAPSSSTMGGTT  
SISKEAASIATTMTNTTGMTPNKGNRLLSAIYWLLSSASSLSSPLLEIDLISSGLLLLQR  
IDEWDIQMDIESQQSGSAMESRSELGCCPVCKGIICDSEDTGSEVIRSRKNKMTLVNL  
SDLHDEELQYEKNTTQQMYSSNVLWRRDYRSKSNVSLSDILGMKQKQETYNKTGRELRC  
RCISSSSSTHLKRKRSEFTATTSSISPDWSTVRSRAYKKFITFGVERQRRERQLWVACSTKP  
IESVERKTMITTSSETSFLWLLTKDAALHIDCPSRRVCLALLAHSLLGGPKNPSYFQEIARL  
FWFGYSSWQKELMVSASTWLRLYSEWLSECAVFDQQEVLWEAIQPIVRFVVMKSVRQKD  
EAEKDRHEKFAEHAACRSSSKSQHKRHCVDNDEIDHFVLPCLGYILHERFNLFQIGPENHQ  
VNRNEHKDSDESVSIGKEFQSFVDLLSIHFGSSKPPWLSQFLEPTGYLVEISLQRLGILS  
FSLSDARKESAQDNCFTSRNSESTIPFFRATRNPFSKEFTMRKAMGRIEQSVLPLENG  
SDAVTLLSPPSDRKSPNQKSKKSKKLVPRKSGIPLIEYLHDSGILCTIFSFCGSKELA  
RVPLVCKAWKGVDRFSDYFWEKAYVAQFGKYRRPFLSPEDATVTATSLDSKHKGSNGKH  
NKAKSLGEMYSRSISLKNSSDSNEIPGVVNLIERAIWVDFKY

>comp7544\_c0\_seq1; 239 235 981 LEN=2691; translated  
MYTDVENPNDRITIVWEQESDARGVIHDHISRELYNLSHTDRNAIYEEIHGVRCLAVEESP  
ELLAKALYAFQDQLDIATPSKCLIYKILKLEKNQANGSDYDEDFRDTADSMDDDDAMNH  
NTATSATKPRRHRPFSMERDDFRLRFLRCELFDVNKATIRFLNYLNLAYELFGNVALRR  
QVRAEDFTKEELRFMKLGFIQLLPYRDRAGRRVMAVLGESTSFHQDLFKKALGIRCSVRT  
NTFREEIR

>comp7544\_c0\_seq2; 434 235 2061 LEN=2456; translated  
MYTDVENPNDRITIVWEQESDARGVIHDHISRELYNLSHTDRNAIYEEIHGVRCLAVEESP  
ELLAKALYAFQDQLDIATPSKCLIYKILKLEKNQANGSDYDEDFRDTADSMDDDDAMNH  
NTATSATKPRRHRPFSMERDDFRLRFLRCELFDVNKATIRFLNYLNLAYELFGNVALRR  
QVRAEDFTKEELRFMKLGFIQLLPYRDRAGRRVMAVLGESTSFHQDLFKKALGIRCSLKT  
YFYIRDVATRDSVESQRKGTVLLLDSSAWDQSGNRTFFSSELYAQTKKVIAAVPTRMVAM  
HYCFPESPAFRIFNALRIVNSTLPLYLLRVRIHIGNVIENRYKMKGYGIPVHMLPLTETG  
SIKVKPFYDWIKLRIALEQNETENTRTYNGCKADNGGDSIRSFLSRVVECPSLNDVVFQ  
GTPSVKNPKNVIFRDKMIGHLEEYIKQRIWEIPNHQLQVHHIDKFCSWLIYDTEVQRKG  
RFLEWSKKWNTWVAMIEQDRIKSKVCTSFRTSRRYFSFRRQAMAKSSPRHP IASSPPG  
STAMDFESVVKSDSEKVYAFVEGGKAATEKKSICFASQESASSTKIDGITLRGDSNFNET  
GSCWMSS

>comp7545\_c0\_seq1; 646 116 1078 LEN=1260; translated  
MAQRWGDVLDSDDEEIQNQPMSTGGGLVIPPTQKSRIDTKGIQIVTSYRQHPANASQ  
LLKTIKVKVTTQKVBREAKAVEKRRQWKKFGNALKDGAEGAQRSTILSKDDIFIEDPNAD  
NDLQDEDAAKELSTNLNAFWSKQQRQLQRKYGVEEKDNAAGGGWNVVGAGGGAASGGKY  
VPPSARGAMAGGVKPERRTDDLNTIRVTNISENTTEADLQDLFKPFGRISRVLAKDKET  
MQSRGFVAFVFNKDDAARAMEKLQGFYDHLILKLEWARPNTPKDPASSGTEFRSGYK  
ALAQDTKEKVSYASNLTKGI

>comp7546\_c0\_seq1; 1018 143 3241 LEN=3387; translated  
MARLPPTKLAVLALLGFCALVIGSIVLTFQLLVIEEKKQRGLLGQQKILKSNVKNTHSPT  
SRSAEAAGPSPTDFEKRLKTSKYTVKQSLPTGAFDIRLWNI FPAPEGGNYKTI GEAYWRQ  
VQAFLRNWKDAAVYPPDPSDYLTYSTDMVRKSSEYRGTHFGSQNKTSNGNDAYHFYPRLA  
LERAEEAGHPMAQHYLANAHSSGIWVPVATGGGEKYDSSRQESPFASLVKDLHVFDWLP  
TSGEHIRQIDKAYLLWHMAAVGGNI ESAMALAYRLDETVSMTDPSTSNGDTCEESLPHYQ  
AAADGIIDQLEVSLHSRAKVI PPMDKHTLAQVHMGGTSSQLDWNKPKDESEALQFYHL  
KATTVPWSINKKSSSEDEKKDEKSKVKKKSAADVQEEEGIDILAAFTLAHFYHHGMRGVE  
QNLTKSVQYIEIAAKHGHWESAGHACIFHLWLGIGVEQNAYRAMKFKIGAPFGYDGLQ  
NKRSKDAKNRGITDPDITTCDENALNGMGLLNLLGIQNVLQVDLPLAEKYFTLAKETGSV  
DAYYNLMMWLGWKTHTFANEKEDGFTSDQLSAKTALPIEGQTKESSEKFLVYKAEVG  
DNMFYKGP IQSDVQKALKLLEAAAKLGHVQSKHRLGSIYAKGLNHTTSLIQFNFKKDC  
LAKQHFKWIVKNASSLSNRLRTAYKEYVAGNFVSVRNYLAAAEVGSISGQVNAAFLE  
RGVCLGLDAADCAKAAVRLWKVAAARGNAEACLRVGDYFYGRHLHGERLHNGPFGWIQYY  
LFPEKYLPILLKERIAEVLNIAQNYVVGKGEYNRALKSSTSSSGTTGANGEGSCPNDNK

SNEGTD SFSKKDF SHEMEEDLHTAAHYQIAGEKHQSARANFN LGFMHQWGLGLKQDFPM  
AKRHYDLALS KNLREAEIAVQIALMAMNAHEFVIRCKVFI EDWVYQRDTVNTKSDSTSNM  
KSATTPSDSAPDALKPTRGVGHAPGSSPNKKKTREEIIAAHIFNRSSLIIVILFLLLLLI  
QLLMSFVGRPQR

>comp7546\_c0\_seq2; 927 143 3051 LEN=3197; translated  
MARLP TTKLAVLALLGFCALVIGSIVLTFQLLVIEEKKQRGLLGQQKILKSNVKNTHSPT  
SRSAEAAGPSPTDFEKRLKTSKYTVKQSLPTGAFDIRLWNI FPAPEGGNYKTIGEAYWRQ  
VQAF LRNWKDAAVYPPDPDYLTYSTDWVVRKSSEYRGTHFGSQNKTSNGNDAYHFYPRLA  
LERAAEAGHPMAQHYLANAHSSGIWVPVATGGGEKYDSSRQESPFASLVKDLHVFDWLP  
TSGEHIRQIDKAYLLWHMAAVGGNIESAMALAYRLDETVSMTDPSTSNGDTCEESLPYYQ  
AAADGIIDQLEVSLHSRAKVIPPMDKHTLAQVHMGGTSSQLDWNKPDSESEALQFYHL  
KATTVPWSINKKSSSEDEKKDEKSKVKKKSAADVQEEEGIDILAAFTLAHFYHHGMRGVE  
QNLTKSVQYYEIAAKHGHWESAGHACIFHLWIGIGVEQNA YRAMKFKIGAPFGYDGLQ  
MNRSKDAKNRGITDPDITTCDENALNGMGLLNLLGIQNVLQVDLPLAEKYFTLAKETGSV  
DAYYNLMMWLGWKTHTFKTANELKEDGFTSDQLSAKTALPIEGQTKESSEKFFVLYKAEVG  
DNMFYKGP IQSDVQKALKLLEAAAKLGHVQSKHRLGSIYAKGLNHTTSLIQFNFKKDC  
LAKQHF KWIVKNASSSLSNRLRTAYKEYVAGNFVSVRNYLAAA EVGSI SGQVNA AFLME  
RGVCLGLDAEGSAEVLNIAQNYVVGKGEYNRALKSSTSSSGTTCGANGEGSCPNDNKSNE  
GTDSFSKKDF SHEMEEDLHTAAHYQIAGEKHQSARANFN LGFMHQWGLGLKQDFPMAKR  
HYDLALS KNLREAEIAVQIALMAMNAHEFVIRCKVFI EDWVYQRDTVNTKSDSTSNM  
KSATTPSDSAPDALKPTRGVGHAPGSSPNKKKTREEIIAAHIFNRSSLIIVILFLLLLLI  
QLLMSFVGRPQR

>comp7547\_c0\_seq1; 600 811 2382 LEN=2811; translated  
MENMNLASRCREAI SHVAMLKKE LAMQQKRTSQALASQREQTRRMTDSL TNSFITFSSPE  
SADRKSQQNNSIEKSKSQRVGQDEDDNMMRLVSSTPSPDRV DLRQRNNNNVEKHKENVKS  
TTITTRPSSPTKEIRDSPATTATNSPYSDSADSDSTPGRNSE DENDKDEKKELYSTPKKS  
LRSQSPAFQGVVDDDDPIFPFSASPHAFSKSNSNRGSSSYDEEFPPDTIEQPESGNAKY  
AKPDRKLSLMNSIDAFEQSFSTDFPDSFTPKESNSVSPSESVQNIYNPFFATPEKKTEK  
KNSFVYSTPEEGKRN LKPTADIGIECAENVPMTVSGNTSSGEP LPKRPEKVTPSAARARY  
EKALHPRIDTTNSSMNGAIKDIEKSSSETNKNPTALVRRIQQKRLDMNLESMSKGNP  
VVESPTRKSIIDIVDTFEHSVIEDVDSGKDQKSPSRFQGP I RSLRRRSVKQPI SYAEPAL  
NTKLRRGDTFFPKTGPEVTDGGAKTDSQRKAMSGVTSAAIVSP

>comp7547\_c0\_seq2; 692 376 2187 LEN=2616; translated  
MRRSRKKQTAATVSREETGPPPVVPQVRRQQPPPEVLQQQRKKHQDEITNLTTKNYRLAK  
ELADLRLKHRDECKNVTRLTMENMNLASRCREAI SHVAMLKKE LAMQQKRTSQALASQRE  
QTRRMTDSL TNSFITFSSPE SADRKSQQNNSIEKSKSQRVGQDEDDNMMRLVSSTPSPDR  
VDLRQRNNNNVEKHKENVKS TTITTRPSSPTKEIRDSPATTATNSPYSDSADSDSTPGRN  
SE DENDKDEKKELYSTPKKSLRSQSPAFQGVVDDDDPIFPFSASPHAFSKSNSNRGSSSY  
DEEFPPDTIEQPESGNAKYAKPDRKLSLMNSIDAFEQSFSTDFPDSFTPKESNSVSPSE  
ESVQNIYNPFFATPEKKTEKKNSFVYSTPEEGKRN LKPTADIGIECAENVPMTVSGNTSS  
GEP LPKRPEKVTPSAARARYEKALHPRIDTTNSSMNGAIKDIEKSSSETNKNPTALVRR  
IQQKRLDMNLESMSKGNP VVESPTRKSIIDIVDTFEHSVIEDVDSGKDQKSPSRFQGP  
IRSLRRRSVKQPI SYAEPALNTKLRRGDTFFPKTGPEVTDGGAKTDSQRKAMSGVTSAAI  
VSP

>comp7548\_c0\_seq1; 534 189 1241 LEN=1425; translated  
MSLSAEVAQFNRAQIQALSSPSGKLTFSPEIVVPEARDPTAILLQGP AITQLSTNIRSR  
AKANVAFVTS DALGTFRFTFCKEQEEARGNFPGPVPIIYCGAENDETKRIVEDLPEIADTG  
VAGVLVSINGGSEISSMGDISGDDSEPSSWLKICKNAIECGLQPIPEVVVKDSTAALWKE  
EEMEALVDKLS ELMGEDPVSIVLTINPTSS EEDSEATDLPLPSISK SVGKRVSIMKSVQT  
AAGGQLGEATRIKASGFTGAF LRRECVPGFASP NVEFSSDFWSACIGDLKSTRSKTF  
NFRSKNNMETQLATQWANYQQDVMDSGALGDMSDGPPPGFDAEGGDYQGF

>comp7549\_c0\_seq1; 989 756 3395 LEN=3524; translated  
MKKIPLNPRKDGEERWATSLSSTPADSESSDQGI RENGTT RLPSSMRTGVGSLSYFPDQV  
ARVSYVASVYV PDLSGNYLKNLQDGMDSLATRLAPDYFP GTTVVRGVSAQVDGYFPAPCPS  
ERYTNCQDVTASIGLYLNAVPI DVNETQFGAGGNYNSYHNYNTSEVDEFVLDPSTMTEEL  
IAFQESFEAAIANNE LQEAIQQQYRQNQDENSNAPVVIVTDSIDTIDSVAESDKDDADGA  
LPLQPATVDDASANMGSM DQQVSSAIAVEETDDVRDVGFATAGIIGTVLVSLLLVAF LAV  
SRRRRREIKSGSGSVVTKKIKKDSNR RQPTNDHGDESGQRL LQNVSLIEVDDNGYDLEE  
AYTGR TMRTAGTESTVSSH TKRKSHEALISLNTVNSGDYSPGDGIHAESTTASEEKRIY  
NKVELPPMEYNHQEEKNVHNSVVT SADATSGKVHTSFNDDQVD TYDDKYDDNEYVMCE



DDNSDISIGEHLNVTNRNARFGLLPKSSSESENLTNSSPAIATSPQQRAAVNTIIRSDEV  
RKETVDSYSSNLSPPGGVDRSSQKAYLPSIGVASSTDSSHNAGMRKQIRPIGELDVAIAKG  
DWAAVEATAAAIARSSTPVDQSPISRRAKQKPLSPSSPISTSDYTEKANELDKLIEAGDW  
EAVVVTAAKFGAEGEAAREDVSRRTSTQGESEEGSHANDSFASNMDYSSADRSNSMGRS  
LTTTASQKERLQEIIRDLVTQMVRDVVPEEVDNVDEMMSQFKGKEEELLETLRTMKERVA  
RKARVESQKFARRNTRFREKGEDAIITNENAIIGTEQSRELHAINSMTAGGRDGIIRNSGY  
DFDGAIVDPDKAAADAAAWAIQRSLDELMEKEKQEREII

>comp7549\_c0\_seq2; 904 750 3590 LEN=3719; translated  
MKKIPLNPRKDGEERWATSLSSSTPADSESSDQGIENGTRRLPSSMRTGVGSLSYFPDQV  
ARVSYVASVVYPDLSGNYLKNLQDGMDSLATRLAPDYFPGTVVRGVSAQVDGYFPAREFE  
SGPNKLIQLFGACCIKREDDMLVDSFKLFLVGNIRPLLTLYLFRLLSSCKPKISLPLVQ  
TTACPSERYTNCQDVTASIGLYLNAVPIVNETQFGAGGNYSYHNYNTSEVDEFVLDPS  
TMTEELIAFQESFEAAIANNELQEAIQQQYRQNQDENSNAPVVIIVTDSIDTIDSVAESDK  
DDADGALPLQPATVDDASANMGSMQVSSAIAVEETDDVDRDVGDFATAGIIGTVLVSLLL  
VAFLAVSRRRRREIKSGSGSVVTKKIKKSSNRROPTNDHGDESGQRLQLQNVSLIEVDDN  
GYDLEEAYTGRMTRTAGTESTVSSHTKRKSHEALISLNTVNSGDYSPGDGIHAESTTASE  
EKRNINYKVELPPMEYNHQEKNVHNSVVTSSADATSGKVHTSFNNDQVDYDDKYDDDN  
EYVMCEDDNDISIGEHLNVTNRNARFGLLPKSSSESENLTNSSPAIATSPQQRAAVNTI  
IRSDEVRKETVDSYSSNLSPPGGVDRSSQKAYLPSIGVASSTDSSHNAGMRKQIRPIGELD  
VAIAKGDWAAVEATAAAIARSSTPVDQSPISRRAKQKPLSPSSPISTSDYTEKANELDKL  
IEAGDWEAVVVTAAKFGAEGEAAREDVSRRTSTQGESEEGSHANDSFASNMDYSSADRS  
NSMGRSLTTTASQKERLQEIIRDLVTQMVRDVVPEEVDNVDEMMSQFKGKEEELLETLRTM  
KERNVARKARVESQKFARRNTRFREKGEDAIITNENAIIGTEQSRELHAINSMTAGGRDGI  
IRNSGYDFDGAIVDPDKAAADAAAWAIQRSLDELMEKEKQEREII

>comp7549\_c0\_seq3; 904 756 3596 LEN=3725; translated  
MKKIPLNPRKDGEERWATSLSSSTPADSESSDQGIENGTRRLPSSMRTGVGSLSYFPDQV  
ARVSYVASVVYPDLSGNYLKNLQDGMDSLATRLAPDYFPGTVVRGVSAQVDGYFPAREFE  
SGPNKLIQLFGACCIKREDDMLVDSFKLFLVGNIRPLLTLYLFRLLSSCKPKISLPLVQ  
TTACPSERYTNCQDVTASIGLYLNAVPIVNETQFGAGGNYSYHNYNTSEVDEFVLDPS  
TMTEELIAFQESFEAAIANNELQEAIQQQYRQNQDENSNAPVVIIVTDSIDTIDSVAESDK  
DDADGALPLQPATVDDASANMGSMQVSSAIAVEETDDVDRDVGDFATAGIIGTVLVSLLL  
VAFLAVSRRRRREIKSGSGSVVTKKIKKSSNRROPTNDHGDESGQRLQLQNVSLIEVDDN  
GYDLEEAYTGRMTRTAGTESTVSSHTKRKSHEALISLNTVNSGDYSPGDGIHAESTTASE  
EKRNINYKVELPPMEYNHQEKNVHNSVVTSSADATSGKVHTSFNNDQVDYDDKYDDDN  
EYVMCEDDNDISIGEHLNVTNRNARFGLLPKSSSESENLTNSSPAIATSPQQRAAVNTI  
IRSDEVRKETVDSYSSNLSPPGGVDRSSQKAYLPSIGVASSTDSSHNAGMRKQIRPIGELD  
VAIAKGDWAAVEATAAAIARSSTPVDQSPISRRAKQKPLSPSSPISTSDYTEKANELDKL  
IEAGDWEAVVVTAAKFGAEGEAAREDVSRRTSTQGESEEGSHANDSFASNMDYSSADRS  
NSMGRSLTTTASQKERLQEIIRDLVTQMVRDVVPEEVDNVDEMMSQFKGKEEELLETLRTM  
KERNVARKARVESQKFARRNTRFREKGEDAIITNENAIIGTEQSRELHAINSMTAGGRDGI  
IRNSGYDFDGAIVDPDKAAADAAAWAIQRSLDELMEKEKQEREII

>comp7549\_c0\_seq4; 989 750 3389 LEN=3518; translated  
MKKIPLNPRKDGEERWATSLSSSTPADSESSDQGIENGTRRLPSSMRTGVGSLSYFPDQV  
ARVSYVASVVYPDLSGNYLKNLQDGMDSLATRLAPDYFPGTVVRGVSAQVDGYFPAPCPS  
ERYTNCQDVTASIGLYLNAVPIVNETQFGAGGNYSYHNYNTSEVDEFVLDPSTMTEEL  
IAFQESFEAAIANNELQEAIQQQYRQNQDENSNAPVVIIVTDSIDTIDSVAESDKDDADGA  
LPLQPATVDDASANMGSMQVSSAIAVEETDDVDRDVGDFATAGIIGTVLVSLLLVAFLAV  
SRRRRREIKSGSGSVVTKKIKKSSNRROPTNDHGDESGQRLQLQNVSLIEVDDNGYDLEE  
AYTGRMTRTAGTESTVSSHTKRKSHEALISLNTVNSGDYSPGDGIHAESTTASEEKRNINY  
NKVELPPMEYNHQEKNVHNSVVTSSADATSGKVHTSFNNDQVDYDDKYDDDN EYVMCE  
DDNSDISIGEHLNVTNRNARFGLLPKSSSESENLTNSSPAIATSPQQRAAVNTIIRSDEV  
RKETVDSYSSNLSPPGGVDRSSQKAYLPSIGVASSTDSSHNAGMRKQIRPIGELDVAIAKG  
DWAAVEATAAAIARSSTPVDQSPISRRAKQKPLSPSSPISTSDYTEKANELDKLIEAGDW  
EAVVVTAAKFGAEGEAAREDVSRRTSTQGESEEGSHANDSFASNMDYSSADRSNSMGRS  
LTTTASQKERLQEIIRDLVTQMVRDVVPEEVDNVDEMMSQFKGKEEELLETLRTMKERVA  
RKARVESQKFARRNTRFREKGEDAIITNENAIIGTEQSRELHAINSMTAGGRDGIIRNSGY  
DFDGAIVDPDKAAADAAAWAIQRSLDELMEKEKQEREII

>comp7550\_c0\_seq1; 418 1 1333 LEN=2514; minus strand; translated  
XTDLWPKDISSILNEKTLDYSEKVLFFQSFVSSLVASTAGAVAVMPDYIGYGESKDYDRA  
YLSPMVYEQAAAVSYAAAKRYISFVSDGCTELTDVASITGYGEGGYFALRGAMALEQNGV

TILSSRPGGTPLDLDSQLGFSFELEETKPLAPGSLDLFLAFFGYAYSNSFPFVSNENE  
EALNSWMNETNPEMNVLGWFNSPEQLAKEQILALLPADTDHIFNEALVSIYHESSEYEGY  
PKNACRSGIVKPDISINLCAILDASLWDLSTEIEFHVSICHSPQDDIIGFENIPNPTT  
LPPNVKIFYSSKLDIMNPRGSHDGSMLCALDPITDITSHSDSEVESNSPVFRQAIANS  
QCKTTATENPTTSSPQPQQCSNLYEGCGGFQECNNLACKIRPTKNGNKLAKICSPNPNR  
NNRQSI AEEGVGGSSRRKERPGHA

>comp7551\_c0\_seq1; 742 170 1540 LEN=1770; translated  
MKFQSAVCLLLALPASNAFVTRTSSVPTVSSSTSLNAERRVVVTGMGIVSCLGNTLEDVK  
KSLYDAEPGISFQEEFAELNIKSNVAGVPLTEKDFKELIPKTALRFMGQNGKYAYVSLD  
RAIQDAGLKPEDYEENPRVAAIIGQGGTSSIPDIVETCDAVKGQVWRWKNKVGPFVTRSM  
GSTCSAVLATSFKVQGPSFSSISSACSTGAHCIGTGMEQIKLNKADVAFCGAGENVNWQFT  
SMFDCMGALSTSYNEDPKTASRAFDKTRDGFVIAGGGMVVLEELEHAKARGAKIYAELV  
GYAANSDDGYDMVAPSGVGERCMQLALDDAARNGAGDKPVDYINTHGTSTPVGDVAELGA  
IKRFLDTKDYQPNVGSTKSLSGHSLGAAGVQEAISLLMMDNDFMAESANINELVDEAEG  
MSILTERKDGPFERAMNSFGFGGTNCALVFDKYHE

>comp7552\_c0\_seq1; 806 198 3435 LEN=3565; translated  
MNNKEDNEIETIEVSSSAQSDNRLETAATVGFDDSFASKEKDIKSETGTTTTVNSTSE  
IKRARFDEGRNELFESEDTKCKGEDEDDTNEAYDEQDDNGDNFTEIPAPCASAFMDWYI  
NSKPPHLDDPLDCNDPDDIESSGGMIQQSVYNSGGAAPESVAAIRTFVGPFNDSLAVKF  
RRRRDRHSEMWRGHVKSYGSTSYKKLDSVPYQHYSYQLANRYKEERQQHEEHLEEMRRRS  
TIVLPAPPQKKRIFAGLARWL VACPSARSKTKNNP IGTYYQEVRYWTRLILILLGLIISA  
VIFIKKLSDFLLETKLKLVTD PVLFGNTTAHDESLTTVANAGKKPLPVMGYFGWKAF  
SFLGFNLFFVTIAFMPVTYRPLSGGSGIAEAKATLNGIILPTCTDLLTALCKAVSVICAG  
AASLP IGLEGLIFIGLAIGHNAERFVPESYPVLKLDNWKRDFAAVGCACGVAGAF LTP  
GGVLFAMEEGASFWSPLLAWRSFAAACVTTIALYLYIWWWDICEDEYDGVHYDSFFDIHT  
LAIYSGLEGQRQLPPNGVATTSQEVVGNQLYFRSVPFRVWDFFFFAIIGIVGGIVGALW  
IEGNYNIAQWRRKLGWGRKGFLEIMGLTILASCVFWFPLPLYTKCNAASQTDVEDRAIL  
RQLNCPDGYYNQLGTLNNGPVGPNLNLWEPAHNWD PVLILAGFSYHVVL LLLLFSS  
ISMGVFIPFLYIGACYGRAFAIWGLADVGDIDNVERDP IVSTYTMVCSVAMLAGVARVLIS  
ITVIMVCSVGTTYMITPFMVASLFAKVVGKAF LGRPGVYDVILEMKVSPLHAHQHGHGHEK  
EKLQTPNTLCSRFSFPCPSLCTPFLGIPFLEAECPNMIMRGLCAQDIMSRAPLITLPE  
EQPVGQLLEYLEKYPYVVDY PVPDPNSNGVFLGI IQRCDLLALLTKRRLFYDKSKGSTGH  
RRAVTFETLVREKVKRVPVLDLDDVKAIVTPGDRARKFLNVT PLYLAIGHYTVNRVTVHRA  
FELFRSLGLRILVVTDAFGRPMGVITRFDLKLLEEVGIDEAYYKSRHDSMEGSYSYLD

>comp7552\_c0\_seq2; 870 198 3314 LEN=3444; translated  
MNNKEDNEIETIEVSSSAQSDNRLETAATVGFDDSFASKEKDIKSETGTTTTVNSTSE  
IKRARFDEGRNELFESEDTKCKGEDEDDTNEAYDEQDDNGDNFTEIPAPCASAFMDWYI  
NSKPPHLDDPLDCNDPDDIESSGGMIQQSVYNSGGAAPESVAAIRTFVGPFNDSLAVKF  
RRRRDRHSEMWRGHVKSYGSTSYKKLDSVPYQHYSYQLANRYKEERQQHEEHLEEMRRRS  
TIVLPAPPQKKRIFAGLARWL VACPSARSKTKNNP IGTYYQEVRYWTRLILILLGLIISA  
VIFIKKLSDFLLETKLKLVTD PVLFGNTTAHDESLTTVANAGKKPLPVMGYFGWKAF  
SFLGFNLFFVTIAFMPVTYRPLSGGSGIAEAKATLNGIILPTCTDLLTALCKAVSVICAG  
AASLP IGLEGLIFIGLAIGHNAERFVPESYPVLKLDNWKRDFAAVGCACGVAGAF LTP  
GGVLFAMEEGASFWSPLLAWRSFAAACVTTIALYLYIWWWDICEDEYDGVHYDSFFDIHT  
LAIYSGLEGQRQLPPNGVATTSQEVVGNQLYFRSVPFRVWDFFFFAIIGIVGGIVGALW  
IEGNYNIAQWRRKLGWGRKGFLEIMGLTILASCVFWFPLPLYTKCNAASQTDVEDRAIL  
RQLNCPDGYYNQLGTLNNGPVGPNLNLWEPAHNWD PVLILAGFSYHVVL LLLLFSS  
ISMGVFIPFLYIGACYGRAFAIWGLADVGDIDNVERDP IVSTYTMVCSVAMLAGVARVLIS  
ITVIMVCSVGTTYMITPFMVASLFAKVVGKAF LGRPGVYDVILEMKGIPFLEAECPNMI  
MRGLCAQDIMSRAPLITLPEEQPVGQLLEYLEKYPYVVDY PVPDPNSNGVFLGI IQRCDL  
LALLTKRRLFYDKSKGSTGHRAVTFETLVREKVKRVPVLDLDDVKAIVTPGDRARKFLN  
VTPYLAIGHYTVNRVTVHRAFELFRSLGLRILVVTDAFGRPMGVITRFDLKLLEEVGIDE  
AYYKSRHDSMEGSYSYLD

>comp7553\_c0\_seq1; 337 294 1679 LEN=1993; translated  
MDVAFGYWCSEAEFGCKFRLFGNLGGELLMIDSGSSTLAFCDIPNPNRVYGVKRLVSDAS  
ITSPSKYLSQCLRYGGGTHGWFGPSYVGNLVELDDDESTPAANSVFSVMDKVVLGTGNS  
CGGIDEGSKGLELSTVRGTWGLGGIPGIGSNTFVLEQDIDWDTWPKLDDREDKSGGRSYC  
PATDTRGCKCPKHVVELPSNFNSAMARRKADQWLSWDGTLGKASGKLTYGKAGQVIDTS  
GTGNTTEADSSQGI RSDAVPKIEIVRNEILTYETT VSQIDVDGSAPLMEPTPYHVDTGSDK  
IYLPNVYTAVTQTLAANPD AVSVLTIYFPRLSGFGNTTIDISITTNLIEDDVFKMGKEG

DRYVFGLHFWRVYVTTASFSFAGDSPYLQLLPREKHILYSTVDLPLSRNGLAGSLTNVTMD  
LTAYMSGSSSKFETVSTKVGAAMALGFATQAFIGWVAFSMM  
>comp7554\_c0\_seq1; 326 1 1091 LEN=1302; translated  
XRQSIINAISDPYFSKPKVIMNASKALRFLKRSASARLSRPLASRTPAPHRCGTGSFLGAP  
VSSVNGTNREFSSMMSMVKELRSASGAPIVDCKKALSENDGDIEKSLDWLRQHGAASK  
KLGDRDAEEGLVACMVAEDGKSASIVKISSETDFAGKSDAFVGLSCHVAGATLNSTSPGN  
LDPQSDVLDLEFESKSVKTALEDAIVAIAREN LGVKQAVKMTTGADGLLVAYVHGKANGSN  
HAGSAASVVEISGEGVTSNPDAANEAGK KLAMHIVA AKPSYLTPECVPEDVVANEKAILA  
GQIADSNKPPEVVEKIIISGRIRKIFYSEVCLTEQDHMVEEGNAKVSKALKEKGLVVKSF E  
FSI  
>comp7554\_c0\_seq2; 402 1 1238 LEN=1449; translated  
XRQSIINAISDPYFSKPKVIMNASKALRFLKRSASARLSRPLASRTPAPHRCGTGSFLGAP  
VSSVNGTNREFSSMMSMVKELRSASGAPIVDCKKALSENDGDIEKSLDWLRQHGAASK  
KLGDRDAEEGLVACMVAEDGKSASIVKISSETDFAGKSDAFVGLSCHVAGATLNSTSPGN  
LDPQSDVLDLEFESKSVKTALEDAIVAIAREN LGVKQAVKMTTGADGLLVAYVHGKANGSN  
HAGSAASVVEISGEGVTSNPDAANEAGK KLAMHIVA AKPSYLTPECVPEDVVANEKAILA  
GQVRYTPNIPPCFVLDISALHSCIDLFTSPPRKWFVDT PFFSSFRRLSSPQIADSNKPPE  
VVEKIIISGRIRKIFYSEVCLTEQDHMVEEGNAKVSKALKEKGLVVKSF E IFSI  
>comp7555\_c0\_seq1; 225 1 696 LEN=966; translated  
XTTTTTTTRLVVSFPVTPLLCNGFDTLHGGAQATAVDIFTSVLLAALEPVPSVTADLHVS  
CLAPAPVESIVVAVCSTVEQGTGGMRPPGVPGEKLRVACDLFREDKNDNDGDGDALVP  
IAKGLHTKYVLKQRTKGFVERNDKHHGGNGTSTKQVTPRSKLYWLAIVHTYAVGRIITLH  
DTSSCLNRTIASCFGNAAGCRQLVKHGYTTGISLDELKSDPSTGPGGPS  
>comp7557\_c0\_seq1; 940 140 3043 LEN=3078; translated  
MSLKLRLDIRKVRACKTAAEERAVIAKESAMIRTAIREEQEHYRHRNVAKLLFMHMLGYP  
THFGQLECLKLIASPHFPEKRIGYLGMLLLSEEADVLM LSTNSLKNLNSKNKFIAGLS  
LCTIGNLATPDMSRDLAPEVDKHLKAGMPYLRKKANLAMARCLTKCPDMVEDFVDRVVTL  
LKDKNHGVLITV VQLMTQVLMIDLKNAEEEGENPFDTDCRKAFLRLVPMLVKMLRNLG  
GYSPEYEVAGISDPFLQVQLLTLRLGAKNEKASEEMNDVLAQVATNTDSSKNAGNAIL  
YECVQTVMGIESEDGLRVLAVNILGRFLLNRDNNIRYVALNTLSRCIVEQQQTDDGSIPT  
DSANTASAAALQKHRNTVVDCLKDPDISIRQRALELIYYMVNQENVE SLASELLNYLVLC  
REHRRDICTRIFRVVEKFSPPDRWRVDTLITMLTIAGREASRDVQSATIIYISRSPDIH  
AYATHKLVKAIRDDGTQRGLLVVGIWCI GEFGLILNPYTYTPMARSDDPPNSVPV SIT  
FEALDCVSVVKAIQAVVERHSCPLFIKERALTSFAKLSDRFSDKGDANALEMIQKLIKHH  
DMSHSLELQLRACEYDSLINACKGIKTSISKPSGEEDLFGVTGGADNGSVSASVIQAAKE  
ALSRMPVVDLKV LQKKQSDTFGSSPMTRNADVNNPAGDGGDL LLDLNDMFGTPAPTQNG  
SSGTGAPKSDMDLLTDIFAAQPAPAAAASSAAGGGGYDPFSAPVPQSNV PAGPANPLDIF  
GAAPAMPAAAPT LQASNPLDVF GAPP AISQPASSSDMNDLFGSTPASTGSAQTMNPAVNS  
GPQSVVVP AFNHEGLTIEFECLKPEVWNKQNSVLI AKCKNAAPDALYGFNLQCAVPKYII  
MEMEPPSSTTVPVGTGANNSTIVTQKVVTNTRLGEKNLV LKLVKVSFTLQGGKVEH MATCS  
GFPSGDY  
>comp7558\_c0\_seq1; 166 1 978 LEN=978; minus strand; translated  
XLHNRSMFVIIRTFVFRGQRPMPSAARVFORVSPGRRGPERKAVPGRVVPVDTRGVDGH  
RSDDAPGGPVPRHGVAAGLLRKGPRLVPGHPGAVFGVQEPGDEDEDGPGPAGRKGELEAGSP  
QGDGVDRAPVDGIPARDNDTGHQPVLVVVNEAAHQVGGRLDRGLAARVEAVDVAGQC VLI  
RWVVESE RRELERRKEEKAGGLVLLLVRVSWVVVWYCGIVVLYCIVLWCRPFKDQGSISV  
RIQE EWQQISGKAEMATR GKKLVEECQTETEPKDHARKALFRLRESTLRPSLDHSLSEKA  
ASGAAQQTRIPNTPHKTPWTKRQKPR  
>comp7558\_c0\_seq2; 382 156 1078 LEN=1102; translated  
MQLCNAPRVSL LSEMFSLEDSEADGHGSSSNNSNNININNNNSNSNNSIRIETMTDLQII  
NEQNGTSYGRHLKPEVSTGTTILALPYDGGIVVCADSR TSTGTYVANRVSDKLVQISEQ  
IYVCRSGSAADTQTLTDYVHYLNQWSLDTGRQPTVK TAAHLMRRLIYNNKDRLMAGVIV  
AGWDPVDGGSVYTTITLGGSLKLPFATGGSGSVFIAGLLDAEYRTGMTRDEARALAKKAC  
SHAMARDGSSGGVVRTVAIDASGVDRDYXAREQPSVRARADLELSAGTPVQHWALAAGHG  
KRKKYE  
>comp7559\_c0\_seq1; 358 133 951 LEN=1428; translated  
MTTDPARSSPTKKRKSQGRGRSNSLPTHVVDYLK TWLMSPEHINHPYPSEAEKARMVADT  
GIDIKRLNWFVNNRIRFWKPRYEAMQKQLRPEERSTKIVKSNLSLSETNSAPSPTELS  
RRSQSRNNFGAQEVTRSDLPKLFQKVEFGNLSSTAMTNDVFATVSDDDSCSSGNL  
LPNRQSPNFHMKKTSMFRRCRKRQRTEIEDDRSHTDYQVEDSPRFKHTFNREEQWKLACS

TSFSSYSDDLDDTNLPSLDDAVHLFGYSTLTSN

>comp7560\_c0\_seq1; 81 57 1005 LEN=1005; minus strand; translated  
MREQRKATRNEYEARDEMKGHDFLSMQPLRWITLPCCLLVEGYLHVSAAGVGNCTLPSLG  
TAGVGPRTIFATLAGVGRIVGIPIRSAGGRVATGAKVTGESVTTIILPVGDKVVFVAVGDA  
VCVTVGAAVAPGTGGAVTTGIGGAVTGSVGGPPGIGAGGGTGTVGVGIXLTRYIRWKLGVK  
PLLKMGNGVTGAAVVGGEVGPVAVGLKDGLVPGCLVGGVGPVAVGFNVGLNVGILVGGFFVG  
PSVGRVLVGLLVLREGRFEGLPVGGFFVGGFFVGGPSVGGCLVGI PVGALVGNFVGGPLDGAFFVG  
AAVGNLVGAAVGAAGV

>comp7560\_c0\_seq2; 110 1 883 LEN=1251; translated  
XPTAAPTAAPTKFTAAPTKAPSKGPTKLPKAPTGMPTKQPTDGPTKNPTKNPTGRPSK  
RPSRRPTRRPTTRPTDGPTKKPTRIPTFKPTLKP TAGPTSPPTKQPTGRPSFRPTAGPTS  
PPTTAAPVTPFPFTFQQGFNPQLPTNVPGQPIPTPTVPVPPAPIPGGPTDPVTAPPV  
TAPPVPGATAAPTVTQTASPTATKTLSPGTGRIIVVTDSEVTFAPVATLPPADLIGMPTMR  
PTPASVANMVLGPTPAVPRDGSVQLPTPAALTYIATNIQRPTLNELRSPVEESG

>comp7561\_c0\_seq1; 429 156 2081 LEN=2119; translated  
MRNQYSSAILFLLGILGRSGSHAFPAPSVARVPTSGRPAVPKNCTRCTGGAFSAESDSDPA  
ARAPQNPDAVPSARKLLPKLRKAASVLLPVLA AAVTLSTRPVHAASSASGPRKLGFWNVW  
SATALLV SIGALPLSMSGLGSLSRLLASACRAVQV SLLGSIVLQRMVGVEHPALVAAW  
VLGVGLVTGATCLSRIQDYDYPGMNRNMYGSIVAGGLTVLGLTMSLQLFGAVQPWFNPQTW  
IPIAGMLFGNTLNAAALGGASITKQFATRSDSVELRLARGATVSEAIRPLVEESYGTALM  
PTINSLAATGIIHIPGMMMSGQILAGQSPQQAALYQIVISFLIAT TALLTVRLVINSSVGA  
MVDARERRLRVGVLEQKKNGR T LASLSKSIASRARWKAHAQPSTDGSPPTASCNKVSPT  
RLSSATNRRNDNKAPVLAIQDLEVVANVEIDLVL RPDGDRVAISGKSGIGKSQILRTIVG  
LEKGGKGENSIALGNPLVPSDLPEFRSRVSLVPQMNPVLEGT PNFYDEIVRCQSQQRR  
RSSGDPVARPSDIASAWGLEAGAFDRPWRTLSGGESQRAALAIALALEPDVLLLLDESTGA  
LDEATSRLVERTLRKSNIPMLVVTHSEAQLGRFCTHRLDLQ

>comp7562\_c0\_seq1; 400 314 2227 LEN=2411; translated  
MGQSCSKLPPMDEAQCQKGLGASEDYIHHTATPTIAHIPPVVDGGFSPKQILTPSRATA  
GSKRNRDGI FSSIRRSILRVGSRVDRNGNAFFGAPQNGKDDGVPNSPRARASTYSHVHDI  
VMYNLSEAEISKHDQNVPMGVIGLKNLGN T CFLNSSLQCLSATIPLTDYFLGYDYRSEIN  
KKNFLGTGGKLV TAYAELTKQLWLGSKSVVEPIDFKKQLQTFAPQFLGYHQHDAQELLAF  
LLDGIHEDLNRVKERPVEEDRDCDGSNDEE DAVENWKNYLRRNKSLVDMFQGLRNTCK  
CLKCGQINIRFEPFMYLSLPI TKDCKSIDDCMDLYLKEDVLKGADQYFCEKCNHVDGTK  
KQDIWMLPPVLIVHLKRKFYNDYGVGSKNDASIRYPVTEWDLKSRVKSSRGVYPMYDLY  
AVSNHMGGLGGGHYTAHTLNRFDVWYEFNDSSYRSVDDSVHQRLFKSSYVLFYNRSEG  
ASMPLNERSPMIRRQSVSRPDLWPHSQVDDPREVKNFRRSHVRRHHDSPGEDPPDFAPRR  
HVDSVSIPLSPKTTAPNASASNRNSY TQPAAQCLSSI SEGAAKMPSIEFAPGKNFVPM  
QMTTLKPSVSHSPIEKFLNGKSATYTTATRGSVKKEK

>comp7563\_c0\_seq1; 1297 219 3218 LEN=3466; translated  
MVVFLSHRLRSIALLA AVL CATENNNNDNNALLV RTQVAEAFSAPVVLSSRNRLSSSSA  
FTGRLSVDNAGETKLALQRRTRTRRAAGTAAESSTKTRLSMAIDRMSNDCVAAIQKAHEI  
GKSIGLKT LRNEIIFVGVIVANPERAARTLQRYKLDLDEIEMSAVKTLKFKKEDLDPDPG  
FNGDNLNEPLPFSEEARII LTKACTIADRLEAPNGAVRSEHVLLALLGYDSGKKIETVPV  
MDLLRTI PALKKNKETGGFTVTQFCSDLVNALPMTPI SGAGEDLVVKD TVVVGGSQAAA  
GSTTTLNDVGVDMTQMAMDGKFD MVFGRDKEIRSALRTLGRRRKNNPCLIGDPGVGKTAI  
AEGVAQVLANGLKEMQNAQKASNPISKLGSKI GDFVSGGNGKSSANGASSTAETVGE  
EEFVYDLPPCPASLVGARVISIDLAGLVAGTSNRGDFEKKMKNLIKEASEQNVILFVDEV  
HNLIGTGGGGDGAMNAANLLK PALARGELRLMGATTTPEYRKYIEKD GALERRFQPLSVK  
EPTVYETLDILGAI SPKYEDFHGVKYTYNGLVAAAKLSNRY INDRFLPKAIDMIDEAGS  
MVKMAEDGESYYVTEDSIQAVVAELTGIPV GKLDTGEKARLKNLEEELEKRIKQSPAVR  
SVAKSIRRARSGMRDGRPVASLLFCGPTGVGKTELCKALAE TYYGQEKSMVRIDMSEYM  
DRFST SRLIGAPPGYVGYEEGGQLTEAVRRSPHSVILFDELEKAHEDVNLNLLQVMDEGT  
LTDGKGRVTSFKNNIFVMTSNIGSKNIVEAARSMSQVEVEDESQ L TSDVVKGAL E EAMRPE  
FLNRIDEIIVFSPLPYDQLKAIARNLIDNTVKRVADDSSITLTVSDNIAEVVTTREALGGA  
STYGARPI RRAVQRYLED TMAEAIMSDFIQEGDSAKVNLKDPNSGKYVVEIERELDGESF  
LIDVDEDAGISKESLDYSAAYGEV PNLDEPPEQEPGAFQ

>comp7563\_c0\_seq2; 580 219 1328 LEN=1489; translated  
MVVFLSHRLRSIALLA AVL CATENNNNDNNALLV RTQVAEAFSAPVVLSSRNRLSSSSA  
FTGRLSVDNAGETKLALQRRTRTRRAAGTAAESSTKTRLSMAIDRMSNDCVAAIQKAHEI  
GKSIGLKT LRNEIIFVGVIVANPERAARTLQRYKLDLDEIEMSAVKTLKFKKEDLDPDPG

FNGDNLNEPLPFSEEARIILTKACTIADRLEAPNGAVRSEHVLLALLGYDSGKKIETVPV  
MDLLRTIPALKKVNKETGGFTVTQFCSDLVNALPMTPI SGAGEDLVVKDTPVVVGGSQAAA  
GSTTTLNDVGVDMTQMAMMDGKFDVMVFGRDKEIRLSALRTLGRRRKNNPCLIGDPGVGKVRT  
GTPRGFARFW

>comp7564\_c0\_seq1; 298 93 851 LEN=1237; translated  
MSILITRVAAPDTHALGWQPLLLLFGLFCGTAEGLLLSSSSRHGANQYSCHRNSNSLFGS  
SPETATETGVVSVTLSDRFQHGRPCFRASAACCPGRRTIACGAKRDGGHDDNDNECWF  
FP EEENGEETAASAPASQSTHTKTSAGVDVSAKKIGPFEPVPAKVAVVLF SAGIAVLAIA  
FAFVSFWPLVGGFDVETFLALRGILDDGRTASGYYYGGGT ESSI LELPPLSPA EQLVGA  
VFGPPPTPQVV R

>comp7565\_c0\_seq1; 455 313 1948 LEN=3105; translated  
MTDQEMSQSSEITTEIQLQASGVASNPTQPPGNERLEMLFIPANRSPENPPSNSGARN  
HLLDHSSIAQSHHSARRALVFTSNVNGTGAHDTGTRSQA PNIAASQSQS SPRHIARCETC  
CIRTFRNFIFFLTYPCVLLITMCCLLAVLIFCVVPTMICMIIVTCLYYCLANDPVPVSSL  
VRHIFIGEEADNSWYVRGGLYPNGNDRDGAEVNRELFQSKLVVRELLQVKKHASSPEYGD  
ADNIGAIDDGHTHERYDSNSKHLHAGEESGGNAKKNEMNRRGLLDSRFSRCHFPPIQILTE  
GKLYRFSEPLKAQMKDNTDKSIRALKEGEAGTSDDIESGLPNHVGEDNDASSSLCFQRT  
AENQLSNRNREIFPRNNVDTHLERNRSECNIQDDTVPDADDTENHGVCARIKNNHFGE  
D TDTLHLRCNEADDNSNKIGVDPKRQEEAYGCDPDESMRDRGAMCDICLLEFEAGDEVAWS  
PNLKCSTHTFHKECILDWLVRKQTCPTCRQDYLGKNTDDDKEWTPSQLKMQIEVKGGSKLN  
DFST

>comp7566\_c0\_seq1; 410 38 1081 LEN=1161; translated  
MKLQPSLLAGFLSTIVWDTTAFQVRISPFPERTGTVPMMATTEECVTKEDLLAARDIDQ  
LLREKACGPVMVRLAWHDAGTFDKNIKEDWPKPGGAVGSIRFEPEILHGANAGLASAHL  
LVP I KEKYPVSVSYADLYQMASARAIETAGGPNLGIRYGRIDVTSGEDCQIEGNLPDAEPG  
PDGIYGHPPGGTVPVQDTEPQGHRLKRVFYRMGIDDEGIVALSGAHTLGRAYKDRSGLGKES  
TKFTDGTTEQKFADGKVAPFAKGGSSWTEQFFVFDNSYFTTLD DSDADEELLKMS SSKAV  
FQDEVFRKHAVRFRD DENAFFESYARAHKQ LSELGCKYSTPEPIELD

>comp7566\_c0\_seq3; 230 224 945 LEN=1025; translated  
MGPTLASRALXNLLVPIKEKYPVSVSYADLYQMASARAIETAGGPNLGIRYGRIDVTSGED  
CQIEGNLPDAEPGPDGIYGHPPGGTVPVQDTEPQGHRLKRVFYRMGIDDEGIVALSGAHTL  
RAYKDRSGLGKESTKFTDGTTEQKFADGKVAPFAKGGSSWTEQFFVFDNSYFTTLD DSDA  
DEELLKMS SSKAVFQDEVFRKHAVRFRD DENAFFESYARAHKQ LSELGCKYSTPEPIELD

>comp7569\_c0\_seq1; 247 1164 2129 LEN=2299; translated  
MKICDPHKHSQDFVKVHQRISGSTEEEEYQPHPVLSKPPVSLNVSRS SHF IPEKGLAPAT  
SDTTSKRVLKV PASWYASMGITNPRSKVDQSEPTPALEYR DYKNQNMQSSNTTNAMFGQ  
PKIPYKPVLP RPFPESP RNEIVPAPLGLPVQMLSDTLAMNNHAIMIQSKLNLIKQHNMVV  
ELLILTN DLATSVACLQYVKPLHQREIPVGP TAMKVVSAEMKCQFLIEEQVERHLTEPE  
YSGGKGYTSLHARMMICQLAPILGPNLGRMDHPLVSITKLRLLGLLEQEACDIFPFIQGL  
EEDILLKSISIKRKLAMD LRL

>comp7569\_c0\_seq2; 324 558 2045 LEN=2215; translated  
MNNEKLETIKRESHVPPFPFKDDTYIIPQPGQLISYLWYTRPNPVYGEKKIYRTGVLC  
SNGSIRFFDDESEENVKTNGERKFIENKFYLNKRGFANGAFRVRTDLVEGATCYEREMN  
LPCKLVQIDKSGAVLVENLLIEDGGKTLWISPDDL VGNFKYSRATKDKKNQSMKICDP  
HKHSQDFVKVHQRISGSTEEEEYQPHPVLSKPPVSLNVSRS SHF IPEKGLAPATSDTTSK  
KRVLKV PASWYASMGITNPRSKVDQSEPTPALEYR DYKNQNMQSSNTTNAMFGQPKIPYK  
PVLPRFPESP RNEIVPAPLGLPVQMLSDTLAMNNHAIMIQSKLNLIKQHNMVV ELLILT  
NDLATSVA CLQYVKPLHQREIPVGP TAMKVVSAEMKCQFLIEEQVERHLTEPEYSGGK  
Y TSLHARMMICQLAPILGPNLGRMDHPLVSITKLRLLGLLEQEACDIFPFIQGLEEDILL  
KSISIKRKLAMD LRL

>comp7570\_c0\_seq1; 524 1 1161 LEN=1313; translated  
CSSDLPEGKSLLT SFCTRFKGPKRKIKDKDGGAAHKAKQNNIKRNASDGKNSKIS E T GAT  
SATTNLSNDENAAPSVQIIDGEIVLQESSVMFPARRTVQEVEEEFQDNIVEEDEQLNIVQ  
ASYNSFVTKGDHGKTRNKGLWSIKETELFYLALSQ LGTDFGSMEALFFEDKRTRRQLKNK  
YRKELIKNPD LVQELALNPKYQVALDMTAFNLEVPKRIEAHENEPPAYEPTDEDGIAI  
PTSSNTEVTKGENNGFEGEVVEEDAEEERRAEASAIMSAENTKMKGASGDNSHWGSQNE  
PEVGAGFDNEMGGFPHEEGPSMDDFFHDDSYNDNDGEKEESLGKRVSEPVVTIKQDASEL  
VSLVPKKKSSKSRPKIRPSSKKK GK

>comp7570\_c0\_seq2; 884 122 1972 LEN=2124; translated  
MAGTGVSLIPRSSKTTKRRRTSFRPATKKS NPNKNKTASAAAKVFTSKNDASSKSADQTG

PSQVDELATSEEASKSVDSRSNIGESLVNSSEAVTENATTESKKTRSSSVASNIVATTSA  
TRKRKANSLNNVIRIGSSLKRKTTRTSTASASTVTEDGKKGATSSDDNGSSTVSTAIIPA  
SKPQNSEEEQNDENPLPLESEENSIATTFRTASACFPILSAQDQATLNHLAKEGKPEGKS  
LLTSFCTRFKGPKRKIKDKDGAAHKAKQNNIKRNASDGKNSKISSETGATSATTNLSNDE  
NAAPSVQIIDGEIVLQESSVMFPARRTVQEVVEEEFQDNIVEEDEQLNIVQASYSNFVTKG  
DHGKTRNKGLWSIKETELFYLALSQLGTFDGSMEALFFEDKRTRRQLKNKYRKELIKNPD  
LVQELALNPKYQVALDMTAFNLEVPKRIEAHENEPPAYEPTDEDGIAIPTSSSNTEVT  
KGENNGFEGEVVEEDAEERAEASAIMSAENTKMKGASGDNSHWGSQNEPEVGAGFDNE  
MGGFPHHEGFSMDDFFHDDSYNDNDGEKEESLGKRVSEPVVTIKQDASELVSLVPPKKKSS  
KSRRPKIRPSSKKKGGK

>comp7572\_c0\_seq1; 211 146 656 LEN=1169; translated  
METLNLLIQGGSYGHVERSKSVEKAGRNNLRRRTEVEYWNKAGWYDDDASMAEYNKGV  
YDTYYVGTDSGASDYSGSSSSSSRSRSDGSMNVSPNQLSAGLKIVA AVL SILVAIIVFRVLS  
RRSSKKAALPARANQTGGACDPLVRLVGVLDREAAAAAAEAHRAIMS

>comp7573\_c0\_seq1; 212 794 1367 LEN=1367; minus strand; translated  
MENAIQGSLSKTDGGFATVFLVVLSTIYSVDGSKSGFQKNMLGDTIQNIMGRGRIRKTLA  
QSTPALTSVMSVYTEKNGSSRMNRRHASLSNSASVSMVSSVKVQSSSTKKRVRSLLDVAG  
STGFYYGIDAQRMIPNRSRQRKPRPPKLEESMVI AIEELKMMRQEMEQMRIEMQQLKRKM  
LGDDASFQIDD

>comp7574\_c0\_seq1; 284 1 1386 LEN=1386; translated  
KGSKGGYYGSKGSKGSKGSGGYGSKGSKGSGGYGSKGSKGSGGYGSKGSKGSKGSKGSKG  
TKSVSIGTCDDICTGSDSPKQPVCEIDTVSEWKEVKSTNCCCSGGASYLKVGFDLDFYSD  
KFVVTGIFSVQEQTSGSVGSKGSKSSGGSSGHNIRIVPCDDTCLTAPLTGTACSSATKEV  
RVSEGDEICFVQLNPLTQQPLFDTRMPMNTVVTFTSDSNEIFVSEIHMSCSVPVIVSPWAA  
VLTPVGVVGFDDSTINTMIEQPGLNPNVLTFTGGISTGYYIAAKNDPHNQAGFQLDLEQCG  
CDCNSPFSAA PVPVPTPFVTTEDSTGFPTQHI SCSPSTVPTTELTPAPNPDNPTITSDPTF  
SPTLLSPTVAPSPSQPTSRTRPPTMPPVGTATTLTPPTVSSGPTIFPSCSHDDDVFTPA  
PMLPPPTTTRAPTAVPVVPPHPDPVPPHHHPHEFTPAPMLP

>comp7574\_c0\_seq2; 182 136 432 LEN=432; translated  
MKLFISSIAVAVTSIVCFAEATATSNDASASAQVKASMLVGGGDERKGRDLTVSYLNNRDE  
VVGRHYDPDDPNSLIGVHFIPVYGAVNYYGSKGSKGSKG

>comp7575\_c0\_seq1; 853 1 3981 LEN=4202; translated  
VFYELLEGATSPEERVELGLEGSHGHRGPEDFRMTACSETFDRRDGVSDRDTFRDLREA  
LGSVGGFSEEKQASLFSVVSALLHTSNITLAAGADESSQPIASESLDHALGLLGSNEAL  
TNALCCKIRARGEVVFHKKLSVQATKALEALIKATYGALFDYIVATINESIASRLQAMN  
LSPRAKDLPRIGVLDIFGFESFEVNSYEQLCINYCNEALQQQFNKVFVKLEQREYEQEGI  
DWSFIEFPDNDILDILIEKKRDGILSILDENCRLATCTDATFCQAIYEKCREHPRFGATQ  
AEKADGSFSIEHYAGTVKYSAANFLEKNKDELPOETTELTTSSSVELLSYLGETLKKNTD  
NESAGPSTGSNNGFLSKQNKPPSTKRMNSSILRTTVGSGQFSNQLRELRDKIDSTTPHYVR  
CLKPNDDLVPDRFEAHI IAEQLRCAGVLEAIRVSRVGFPHRYHEQFIERYGMLTKKISR  
RKRGRDFCSALIDLLIPQVSAMYGKRVGAACKVSLGMQVGF SKVFLRTSVFDNLEILRNK  
KLAQSVVVIQKYVRRFVACNCYFEYRVAAVIIQCFFRQVGASRETRRIKQTAAAIRIQSV  
WRTFMAETELMASRLIAHFGQTYWRGIVARKLCAVAHMEKQANVVQRCWRGHRARRPYRE  
TLRKIILIQCLWRCKVARRAVRDLRREARSISHIAERDRFREESVRLRREIENLRSSKS  
ETGSDHFSSEFEVEQLRREVQRLQTVISHSQMSVSGSTATTHSATRNDYAGTSWPGSASGCE  
DFGGYRSPSLPKSICAHSHSPSTRRDSVVSASHSIGIGMGHVSSPSTSLLDTDPEQEME  
EYQLRNVSGSSAGPSGIFHASISRSILQDDEHRQGMMAEPEGTESKISSSSYGSVSKLHQ  
SIRNNDVITMNRITIEVSDDPLVLVNAQNL DGR TALHVAVESSVQAVTDLLRRSAVNAQ  
DFDGNTPPLHFSTENVIATLLLDDEGKANPNIPNIDGICALHNSVERLDVPSVRLLLKYGAK  
VNVADNINWFTPLHMALQYAGQYSLDNNGRAMIVDLLCGDMLQFDMNEKDREGNTPLH  
YSAQLETPDATEIMSVILEKGADPKVLNGRNQALLLLCHNEDLRRSYEAFQECLHTLLS  
YGADPNHQNSGCTPLHLCLYHQDIDSAIQLI SHSAELHMMWNRPE SWIPDGD PFGSPNV  
LALDMVSVQETS VHRLLAAITGPPKCAPVRPWC MQCKSPQGSSE RSFHCQHCGRHVCSNCT  
RRALQPDFFPKSF DICEASWVCIVCEDILVSRKEEFSNSTSTSATNPTSSLAVDDDELSS  
NRLHLM

>comp7577\_c0\_seq1; 321 1 1874 LEN=2497; translated  
XARLVDSAAIVHGVRTLRFADDTGVYRNGRPYKVRGFCDHDAFAVVGMAVPDR IHLFRAQ  
ASRSIGGNSRRASHNPPDPTALDVYDRLGMLVIDENR L FANNSRWVQNMADLVVRDRNHP  
SVAAWSFCNELGCEGDHELGGPAFQEVTKALDGSRPTLANMFTFHDLSDTIDIQGFSHS  
SRETLDHCHSELPEKPIVMSECCSCNTMRDEDEGCETMSDNPHTTTCNQKAFNARCLEKLV

NASDGTEYSSGTFVWTLFDYYGEPSPKPLTVSSTYGFQFDLCGFPKASAFWFRSQWLLSPP  
LSNDTALGADNTLTKAAAIENGGKPFLLTKTEVHIVESWESPDPHWNETRGNKTRTIHAYSN  
APIIELFANGVSGKQKQSLVPMVEGDAGTYGEWFDVPWSEGILTAFAQSEDGTELARSTKE  
TTNKGTPPSNSDCSLDLSLDCPSKLTGTGDSLFLDGDQDAALVRATIVLNSSGRPVPVHFASH  
NVTFRIVSGPGRVQGTANGDPKSYRSHTSSSHDAYHGLVRAVVRVTSVAGLSAREKHMLK  
SMEVFQNEQEGCAPPSPSATATDSAGLLSFDDERDIVEATSPGFAPVQLTIPTSVSRGE  
ASVLSVAAREAGRVPVDFFASSRQ

>comp7577\_c0\_seq2; 316 1 2017 LEN=2640; translated  
XARLVDSAAIVHGVRTLRFADDTGVYRNGRPYKVRGFCDHDAFAVVGMVAVPDRIHLEFRAQ  
ASRSIGNSRRASHNPPDPTALDVYDRLGMLVIDENRLFANNSRWVQNMADLVVRDRNHP  
SVAAWSFCNELGCEGDHELGGPAFQEVTKALDGSRPTLANMFTFHDLSDTIDIQGFHS  
SRETLDHCHSELPEKPIVMSECCSCNTMRDEDEGCETMSDNPPPRAIKKPSTHVASRNWS  
MQAMGPNTLPGPLCGPSLITTVSEGEVGMMLAVAAFLRITNADCSSSSSLIVSTLCP III  
CIVLCFPERRTSVEAVDRKFDNGQFDLCGFPKASAFWFRSQWLLSPPLSNDTALGADNTL  
TKAAAIENGGKPFLLTKTEVHIVESWESPDPHWNETRGNKTRTIHAYSNAPIIELFANGVSG  
GKQKQSLVPMVEGDAGTYGEWFDVPWSEGILTAFAQSEDGTELARSTKETTNNKGTPPSNSDC  
SLDLSLDCPSKLTGTGDSLFLDGDQDAALVRATIVLNSSGRPVPVHFASHNVTFRIVSGPGRV  
QGTANGDPKSYRSHTSSSHDAYHGLVRAVVRVTSVAGLSAREKHMLKSMEVFQNEQEGCA  
PPSPSATATDSAGLLSFDDERDIVEATSPGFAPVQLTIPTSVSRGEASVLSVAAREAGR  
PVDFFASSRQ

>comp7578\_c0\_seq1; 558 320 2221 LEN=3020; translated  
MNSADSCHEVSGCPGLFVDAFRGHFLRDHTKNADATFILSHYHGDHYQNLPRDGRYTGPA  
KIHCTPVATARLLINVHDVHESFVVEHQYGATFKHPIFRHLRNEKHKTRNDPISYANVTFY  
DANHCPCGACIILIELPDGKTTHLHTGDMRYSKTKFESYPLLTRSIKERRLDLVYLDTTYC  
HPKHDFITQDEAVDSIASQTQELLSVKNSEKTLVLLSCYSIGKEKVLHEASKRSKQLIYV  
NEKKWRMLQCIRHDQLKGRFDCKNRDGSSSFVCEEHTNILEKCTRSSLSLHVIPMGLA  
GEMFPYFQPSFQKI AKYVEDLSSEGFMTAGKDKGKSITESKASQKEYDRVVAFIPTGWAN  
SSNWNKNAISIKKVELSCSRILHVEVRLISYSEHSTFPELVSVFVQYLKPRKI IPTVFS  
ENHKRQIEGRFRNFLDSTRAKQAFFRSMTQKKTSTTSASVIATRQDLNLCVSENIDGLS  
GTIKVDETTKVLGSAAMAQPGKHTALLVGRDEREPKCVEDDEIQVLGVIQGNPCLTTS  
QNSKMTNQRYEDEIQTITSMGFDRGHAKVVLEKYNGNLQEAMNEILSSGTEPNSSDDEL  
SKHCQQVIGSNVRFKTSVVLKRRKISDFFFQKK

>comp7579\_c0\_seq1; 391 234 1493 LEN=1707; translated  
MTRRTSPLGSKSVLLLLQILSLAAAGKNLFATEKNQNRRI TRGSELKKTIPDGMNHREL  
EGSPKHKNQKNVSVFKDKRSGPGALTDKQNSAWFGVDKIDKQIEKPPPQENVSAEFHSG  
RDDIDPGVVSSGSLSSVTSTLDLAEPLQPSLPPSIKTMQPDSPNETKVI AEERLRPIKF  
DITADTLVPIINTSELEPLFRGFIEDILDMNSNDNWPPLHKS SVSNMTIEMFSSNEYPTH  
TNNDEELSSPVKKMAFQLVVNGLVSVHVAEQKAGAI SLSKRTEGKEKKEGVNNETVSET  
ETESPFDHSDHSMMLLYLTFWGTSLREALQKFDLKNPIITAVTVGKKKVISFGIDKDDN  
YLYNGHHESVKKHLLAQTTNGNVSGGPKSSAPVGLKCGLLTVMVSVFGILFISIERLLF

>comp7580\_c0\_seq1; 578 327 2351 LEN=2829; translated  
MTMPFTDSMSFDKMLRGNFTGNPDRVTSSNRVPFDDDDDCYDSDDLRSISVSSEEKNAIA  
EPPAHITVEDSLSQEMMKLSTNDRQVVEEVHGVHMCNCFNETPQFLRQKLREFDIELSA  
VKNSDRRRRRRQARIRKTRESKSGGENKTYTRDEDYDVLKNVIEIRDYLEVIDEEEATSF  
TTEKAPSRSTSSSVTTAFPDGSDVDECEVKKRSCWVNDPVDRLRFLRCELFEVKKSVRR  
FVTFLDFAQELYGDFVADRPMLISDVNTRGEKRAMARIQFRILPFRDRSGRRVFSMGSC  
GYDVEPKLRILWYMYWIASDELQTKGLVIVGWPCDEIINGAGNTNNPYFGMAEDDG  
KNSDASTISSLDDNSVWERSLRPNIANLEGIYQAKAIEGLPIRITAIHFCCQNRPVYRI  
LNSLFYFALNSNYKSRYKVHIGEP I EIRYKLGQYGI PVDSLPTHTMTLKRQSHLQWINF  
RKYVEQGINGNAKKNSDKPPLLLDPNDI IDCPRSYDVI IGKAKYTNNPGNVFYRSLIEA  
THDEHISLTKRQKVDMTWRIVRQMEEMNGRFLKEMNKELKVWVHIKDRNVMRQKVAQSYKE  
YKRNTQVLRSKRQKEHQTKIANSEKRQRTEVPPFIPEFAVAGTDCFAGCMSPSISSEDDF  
ALPSHTSSSMFTGM

>comp7580\_c0\_seq2; 261 228 854 LEN=1332; translated  
MTLKRQSHLQWINFRKYVEQGINGNAKKNSDKPPLLLDPNDI IDCPRSYDVI IGKAKYT  
NNPGNVFYRSLIEATHDEHISLTKRQKVDMTWRIVRQMEEMNGRFLKEMNKELKVWVHIK  
RNVMRQKVAQSYKEYKRNTQVLRSKRQKEHQTKIANSEKRQRTEVPPFIPEFAVAGTDCFA  
GCMSPSISSEDDFALPSHTSSSMFTGM

>comp7581\_c0\_seq1; 164 178 633 LEN=1187; translated  
MSLPRRIVKETQRLVSEPVAGISATPYADNLRYSVAIEGPEDSPYEKGVFRLELFLPSD

YPMAPPKVRFLTKIFHPNVDKLGRICLDILKDKWSPALQIRTVLLSIQALLSAPNPDDPL  
DNNVADLWKSNEPEALKRAREFTQSFACAKE  
>comp7582\_c0\_seq1; 232 281 1169 LEN=1211; translated  
MHLLESEFPFVPPQPPQISFGNDLHLTGVSQYSDTDHVEMGLLGFDFLWADAHSSAS  
PDHIARMILAAERRGLPTIVRIGYQYQNIIGHIQKYLAVAGAQQGILLPQCESGEDVERIIQ  
AVKFPPLGQORGLAGERWNAWGLATTSGICNPTSSNNVPLSECI EVANKNSIVGVLIENQK  
GLDALDEIMAVPELDMIFFAPTDL SANMGLHGQIRHPDVL SKIEEAGQKVKRFNEEQGDN  
RGTIAVGTLLALNANDYAYWRERDFTVLCGVAQCMFVDGAKGLLDKIQDYEQSRKE  
>comp7583\_c0\_seq1; 1310 128 3454 LEN=3733; translated  
MEGEGTEILFHPVSGGGEVNLQYCTTEETEEVRLGKEVVATGNCDDEGEGVERSFFPS  
PVNEEESVNEEQERQPESTNRAFFPASREQTSSSPPNRIDSLVEDDDSESFDRDDTNETN  
TDRFHPALKAALYTEGQEA VWHEDQYTSVSSVYVKPEKQETSSTSNPQKKHRQKMKLFF  
KSRAKKQEA AAVEVEPTPRPVKIHVRKQKVAKAVVLLP PKQEEVGVELNIENSSQDNTSQ  
KERLMKENEMHAAIAENSKQARRLLD TVLSGSLDEEEESDRMVKEAFNHAATARRIAEAL  
NEVGVFQEEIELENVVSYLAEEGEQAALQYRQQQIEQASYEGIDGNNNSNDVEASTVESDA  
SKKQRRGKFGVSEYASRAVNYLESI PKSITGYKNNF DVEGAEKGNNGADFWSDAGISTL  
GLKNDTLEYGFSVEGDANDPDNRTDHD EAGLLRNADMMSSLNEILDGGGTRSTDPKKK  
DLEGEGRSAELQKSGKGLSPRS AVREIGIPRKRKNGPPTEPRRNRGGILGLMTPRRTK  
SSRSETKKKVPDASDSTNSEKKWGVFFRTPRGSEGVP SQLHLVVEETDEDRCEDENSVKP  
TSDPAEGLVEAYS D SCLGVPKDNRYTPAFVSEETKDSVNEKEVKISGETPKNYQHLES GH  
DEDNDLSENINTDKDDLSTSSGTEGSEPKTRDRYQTEPIGKTPRRAGLEVEENINRRQGT  
EEKSRKIGSNEHEGKSTAASDGA KSKMFGHVVDSTGKCKRKPLVPNTVVEETFVVENGIK  
KTSSKLHRIREATLQE QDETQPLAPRMSKPTVGQRVKTISKTKNASTRPSYPSINDSSTV  
FKQAITKGNLKA VESNEEGDDVVPFN YLTVMLKKQIEEKVKTSGPSGTEIQESPDQHISD  
PKPDADSFVA AIRGPRHKEAPGVALEEIAMRNHQNNRDP TIGIGTDEILVDLAPT PRRPA  
RRSSFDDKDEMEY NKSKEEMDDKQDEKCIKTRDPP I EDEENERLRRKMITERLFQAGSS  
SFQEDSKMNDAMKTVP TVMSAESYGE EPEVDRVQIRLNPADSADENNENLEKEGADEISP  
GTRLGRGRRLKLSMSFLKV GKRKHV LGPQ  
>comp7584\_c0\_seq2; 624 1 1745 LEN=1944; translated  
XLIDAWGEGFVNELDYRAE ANATKAFTKAMEERGLGSVVF APEVVDLSSMHVLTTKWVE  
GERLSTSNEDDVPR LCGVALNTYLTMLLD TGTLHCDPHPGNLLRTPDGKLCILDWGMVLN  
VPNDLQLSLL EFIADLNAENYEDVPDDL VKLKFPEDKIDDLRKSGLTVGI AKMLTLAAE  
GGGPKGAMKRMVAQNKEKYAEAL KDFDLDSE EATKERQRLFQEDWKKQMVEDAMSREEG  
SAASTSTTVDLTTKIESMRQQNTDVF AIPDYFVYMSRAFATLEGIGLSSDENYSILKECY  
PYLAKRLLSDDSERARKALRTLLYGRDGKELNLT KLRELS DGLSEYSASTSSVESGNLTS  
DNSEGRNAAIEQVANVVLSEDSNYVQEVLLRETAVALDATVRDAVTSPLAPIIRNIPVTI  
DVDGGASTAPPPAILRPF TLPFELAKASFDLQSVDAIDERRLENVRILRNLVSGSNQDQS  
STNSQNNISPAGAPATETIGKLAREAGKRR LALARIGVRFGGTMA SVQAERLRERSISAS  
HQKDRNVAEISKILASNGAERLEALADAFSSFDNELARRGK  
>comp7586\_c0\_seq1; 513 1 1251 LEN=1549; translated  
SLSDRTRNCARSTEQLSHILCSFQVEGCEKQAQGTHNGMCKRHWRVHFPHQVAAKAEAE  
RKKQEDEKPPPAVGESVYD TVLPAS IAYRPSSI SVVAAEK NANHAAAMVLAKANGEASPG  
GALAAVAANANAAA AKTEGLSGPGATETGASEAGNSNIVSTMPLVTF LRDGALHKPVGWH  
RQAERRARGMFECPSLGCQLEPWEKQLALVE ILLLSGGT PHANFRDLAHAWGRERGFHQ  
VASSVCTRRGEVERKKRSDAGR RGGAAAGSSSKASAAGTSAAVPHRKRKYNTKQQPQQ  
QRQPQQQLQLQQRH QYQQQVPQIQLLQQQQQQQLPPHPHTTTTPMVLPLQQQQQQPLQH  
TLLSEMTPSPVSTMAASAPNPALLPANNNLPAVAMATANNGVGGVVTMRGNVGDSS  
>comp7586\_c0\_seq2; 497 1 1339 LEN=1637; translated  
XASAPPAHRRSNSHGGETG GTNRKRLCRFP GCTRVIKSQGH CQRHGAKAKRCKVEGCEK  
QAQGTHNGMCKRHWRVHFPHQVAAKAEAEERKKQEDEKPPPAVGESVYD TVLPAS IAYRP  
SSI SVVAAEK NANHAAAMVLAKANGEASPG GALAAVAANANAAA AKTEGLSGPGATETGA  
SEAGNSNIVSTMPLVTF LRDGALHKPVGWHRQAERRARGMFECPSLGCQLEPWEKQLALV  
EILLLSGGT PHANFRDLAHAWGRERGFHQAVASSVCTRRGEVERKKRSDAGR RGGAAAGG  
SSSKASAAGTSAAVPHRKRKYNTKQQPQQQRQPQQQLQLQQRH QYQQQVPQIQLLQQ  
QQQQPLPPHPHTTTTPMVLPLQQQQQQPLQHQTLLSEMTPSPVSTMAASAPNPALLPANNNL  
PAVAMATANNGVGGVVTMRGNVGDSS  
>comp7587\_c0\_seq1; 514 663 1835 LEN=2071; translated  
MSAYALPGLFPPI DKVSEAKEVNEPDASFSDGGNEGDSSCANAHSSSDKNLPLHHQKGN  
CSNYSTLYGADCGNSSPSSSNIGCLLSAAIAVKEAKIDPIRWIQFVTGSYPQQYAKQIG  
KTLRRRVSGSSGSSQLSPVGR TASIRTRRDPSKSGKHCTSSSNSISNNK KSPQNEAIEFE



LAITLNGRRYTAKRTMQCIVQLRDDLIREMKRRREWLTESQAMPSLQLPYESNVHSFYTT  
PPHSISTPITTKPEPTKKHCYAVSIPEIPPLSGCDDRDIGIVGRGFTMLHQMVTSYVPVM  
ESWLKNVMEIVPQDSECLMNFLWEPATEIPSDTCKSVSDSINNNNLTGTLNKFKPSSMA  
TLCSIKEMDYDMEDDDSDDEDAAFSDKWKN  
>comp7587\_c0\_seq2; 514 292 1464 LEN=1700; translated  
MSAYALPGLFPPIDKVSEAKEVNEPDASFSDGGNEGDSSCANAHESSSDKNLPLHHQKGN  
CSNYSTLYGADCGNSSPSSSNIGCLLSSAAIAVKEAKIDPIRWIQFVTGSYPQQYAKQIG  
KTLRRRVSGSSGSSQLSPVGRASIRTRRDPSKGSKHCTSSSNSISNNKSPQNEAIEFE  
LAITLNGRRYTAKRTMQCIVQLRDDLIREMKRRREWLTESQAMPSLQLPYESNVHSFYTT  
PPHSISTPITTKPEPTKKHCYAVSIPEIPPLSGCDDRDIGIVGRGFTMLHQMVTSYVPVM  
ESWLKNVMEIVPQDSECLMNFLWEPATEIPSDTCKSVSDSINNNNLTGTLNKFKPSSMA  
TLCSIKEMDYDMEDDDSDDEDAAFSDKWKN  
>comp7587\_c0\_seq3; 514 303 1475 LEN=1711; translated  
MSAYALPGLFPPIDKVSEAKEVNEPDASFSDGGNEGDSSCANAHESSSDKNLPLHHQKGN  
CSNYSTLYGADCGNSSPSSSNIGCLLSSAAIAVKEAKIDPIRWIQFVTGSYPQQYAKQIG  
KTLRRRVSGSSGSSQLSPVGRASIRTRRDPSKGSKHCTSSSNSISNNKSPQNEAIEFE  
LAITLNGRRYTAKRTMQCIVQLRDDLIREMKRRREWLTESQAMPSLQLPYESNVHSFYTT  
PPHSISTPITTKPEPTKKHCYAVSIPEIPPLSGCDDRDIGIVGRGFTMLHQMVTSYVPVM  
ESWLKNVMEIVPQDSECLMNFLWEPATEIPSDTCKSVSDSINNNNLTGTLNKFKPSSMA  
TLCSIKEMDYDMEDDDSDDEDAAFSDKWKN  
>comp7588\_c0\_seq1; 222 1 1550 LEN=2130; translated  
XEDSRALCESMIRNQLVPKLKADIEAESSPRWDPIRDPAVLDLYEYLHAKAVAFDNEAR  
DGTNDGGKPSNEENEDPNQIFPSGQAYKETEGSSKPESDLAEYIRNELIITAVYPKLQNC  
IQRWKPDFSRSSSEKRTLENPLHLWVLPWLPIDHPALLPNLVTDCRRLRGALSFLHRKL  
SAPGNDREYVVAATDLRPWQAVLGARSIPQMVSKDSTVVSRLARLLSSWNAAAAARPEEK  
EPPNWQDLRLLFELHGRKMI SDVDFLSTIEGPVLTNWARSVHELLWGQVSSAESDSTAP  
TGTQDPAVETAVGVYRDWKIRVLVDPLSSDDSPITSFPAKNTGDKPAFSCDHSRLRLRDD  
VQTCRIFCSVLHMIQICKSPSMAASAKLEALDPLEPQMPGFRAIWNRRSLEEKQAIQEDF  
VRMESRSEGETRARIVLKRNRVAEPTFREVVVEEFASDRGVLFQPRMGGKALKDGKQVYLF  
GDLPLYLEGDVIFCHKDSVWRPVSLDQLVGLASNKT  
>comp7589\_c0\_seq1; 453 137 1663 LEN=2106; translated  
MTTETNDGCVGNIDGAFLLGGKVWRSDPSHGIKSTWVILAFWSLLAVVYAEALLARLPCG  
VTLFQSQLHSGDSGRYEFYDYDTCVRQQRKQLDAYDSSVIEEYNDTKIENYVNYHHHNL  
WLRLFERTIGLSPDITVQIVVATILYLSALVLFLETNLVTKGINASKSCCYDDMFCEPN  
RRRHPTTSNRANQNSSGDAVIQRPGNTISNVTYFVASVLIFSSLCLEGQHGNELSISSST  
TLWYSDALFGCMMFALSVSSTLWHSWNISIVHYVDLWSMDSTIIYLILRNLVSVVFYHAA  
IKPGGDQNGNGVSNGLNSGSVEWLIMTAVEKSSILEWQVLRPATLLNTNTKDIALAM  
VYSLI IARLGYFFHLCWKHRYLHGSCLFTVRKRLSSTEQKSNVWTKGHFPIGMGEVCV  
FAAMPAFFVGIPLALQLLLLDHTYGSIRAGMIAHRTL VFGWSYRLLLEKVALDGSFCGIWG  
NQAKGGEPSPFESAKGVHENNIVPMSSPW  
>comp7590\_c0\_seq1; 288 320 1607 LEN=1835; translated  
MKEHGGNERCNSYL RDGGIPLSVSEVSI REKYDNKVAELYKLIKARGEGRPEPTALESP  
TSNEQEKQLHIPKPPRAHLGFENTTPPPIFLSSLLSAYGFLGPIRSILLNTLHEKPWAM  
RGVCLFAGTLGALATTSRWRP LLRKISRGTLSVVG LFFFALAPLHFAYGFRTQRLPAPF  
SAVEDYTRGARVREQNKG YEVFFPPGVGIGDSVDKALIFYPGLMVDHMAYATVLGKLSDM  
GILVLLASAEP SRVCTE IATVEHV KRLRHEI SVLMNISVGEWILGGHSLGGVAAA SFFAK  
KTSSGFPRDIKR VVQWASPEDAGILRRIQEAGPAVDADAIHLESHLGIYGTCDGAVELKG  
SSVMTSKCPENSEIEIIVGGNHAGFAHYGPQFFPKPDWERKGITAE EQQAKAIKWTADYI  
LQSNK NKK  
>comp7591\_c0\_seq1; 305 155 811 LEN=1380; translated  
MMLSTRSIVASKLLQLLVGWKMESSVAFVPTTRLVSTRAGEIPATTSKQLATDSAGDA  
PEFGGAPDNEKESSNDSDSPSYEMGTVKVNDGGS DLTD RFKYK VHALMGDFDPVEGTAND  
ETQDGNIMSALVKFPMQHTFDVVGKVSASTGDDGTNDYAATVKQIIFETTGDESI ECDVI  
PRGKKFIKVR CRAMVESTTMINSIYDELGEMESTVMKF  
>comp7592\_c0\_seq1; 240 66 527 LEN=1773; translated  
MSETKGGYGEVTVKSQEENSRTLDSKPMGDVAVAD CDDSESEDFISLVPMNDEYDVAD  
NNSRKDSSDKSNGKQGNDR TKNDLPPWME SHVDYRRVNPLVALHNEIVAFTRLM EPRREE  
MKIREELLEKFTNLAKSTFKNCKVDVFGSQATG  
>comp7592\_c0\_seq2; 451 66 1566 LEN=1610; translated  
MSETKGGYGEVTVKSQEENSRTLDSKPMGDVAVAD CDDSESEDFISLVPMNDEYDVAD

NNSRKDSSDKSNGKQGNDRTKNDLPPWMESHVDYRRVNPPLVALHNEIVAFTRLMEPRREE  
MKIREELLEKFTNLAKSTFKNCKVDVFGSQATGLCLPTSDIDIVIQLEETEVPKMEETTK  
KKGKRKKSISKQOELEDMENWDKPTGSPLSLLGEALRENWLDDLSYLELIENTRIPLVKFT  
HAPSKISIDVCFNQKTGPHAAALMKQYMDALSPLRPLTFFLKKFMASRGLNQPYTGGVGS  
FLLQMMILAFLQHRERDCYNNRRPSQYCLGALLLEFFFEFYSTDFNFVLTGISVRFDGYFF  
PKGATDRKKNFWQTNRPFSIAMENPLDPTFDVGSFSFRIDLVRQSFIEIAFKVLLSHVSEP  
IIPNTSILRSILEPSDEMWERQRQTTPTFAPPGTQVSADHVPPKDKKEDSELLVIFNFWG  
YYSLVKRHRKSTLSYQTEM

>comp7592\_c0\_seq3; 457 66 1478 LEN=1611; translated  
MSETKGGYGEVTVKSQEENSRTLDSKPMGDVAVADCDDESEDEDFISLVPMNDEYDVAD  
NNSRKDSSDKSNGKQGNDRTKNDLPPWMESHVDYRRVNPPLVALHNEIVAFTRLMEPRREE  
MKIREELLEKFTNLAKSTFKNCKVDVFGSQATGLCLPTSDIDIVIQLEETEVPKMEETTK  
KKGKRKKSISKQOELEDMENWDKPTGSPLSLLGEALRENWLDDLSYLELIENTRIPLVKFT  
HAPSKISIDVCFNQKTGPHAAALMKQYMDALSPLRPLTFFLKKFMASRGLNQPYTGGVGS  
FLLQMMILAFLQHRERDCYNNRRPSQYCLGALLLEFFFEFYSTDFNFVLTGISVRFDGYFF  
PKGATDRKKNFWQTNRPFSIAMENPLDPTFDVGSFSFRIDLVRQSFIEIAFKVLLSHVSEP  
IIPNTSILRSILEPSDEMWERQRQTTPTFAPPGTQVSADHVPPKQRRL

>comp7592\_c0\_seq4; 240 66 527 LEN=1772; translated  
MSETKGGYGEVTVKSQEENSRTLDSKPMGDVAVADCDDESEDEDFISLVPMNDEYDVAD  
NNSRKDSSDKSNGKQGNDRTKNDLPPWMESHVDYRRVNPPLVALHNEIVAFTRLMEPRREE  
MKIREELLEKFTNLAKSTFKNCKVDVFGSQATG

>comp7593\_c0\_seq1; 401 586 1979 LEN=1979; translated  
MPSPRRRKSAAASRYLEAIQIQCGGGTTNVYDEGNVRGRPIPSRNNDSRTRTRTESRNG  
NDGNRTSTVNINGMSCSGNGYTPVPVASGCHPVSSSGPAAKAFRSTPIDRRSGSRTTSTF  
KTKSSGNPQTTSVYEKISVAGKAADCSRILTASTAMMADPSYDSISTSTTTNSPGGIF  
KKKQNNKKKSSPTRPSRRRGRSPTQVPHGTNSISSSTQNRDTGGRYSRSGNYTGALEH  
RVVAGDKDDDDNDIPGIPSGNKMNRDTHKHYRHQPQTTPAPLSGESPSIPRSPHRL  
HSNLTTPRKNNGNSPCSPDDETTKTGPMTPFSVESTSGINEDGEGRIGSHDDSDSPA  
RFLRDVPLEEEQHEHENENHVNEHFGEDETGSTSHYYQRKQQQPRSFENRHSSKIISYPGS  
PGKGLFPKTNPRMPDSPGQPRPNSPSRGTGSLWKFRQAQQQQRQX

>comp7594\_c0\_seq1; 164 1 646 LEN=676; translated  
RPQHNPAPPKGFSSQRTIDGAIARRANRGRGQQRGAEQAPPKRPLSAAAAARPPKRPAPAAA  
GGVVLRLNLLRSTDDYRGEIEIQFLRDSGMSEEEIDRYVVRPRGAVGQQQQQQQQQLDEL  
RKEVAFLAAEVKELRADQNEREQEGERAALVPGTQNEASDSGRGAGLDAALAPMDRMHEE  
KRRRHEAQLLRDHPGFKPKRRLRDLRPVEAAPGQ

>comp7594\_c0\_seq2; 614 375 2789 LEN=3065; translated  
MITSLLMIAASVSNNGNLFLAMLLLAKIIPNADAVWYSEVCPTHMRYKVRIDPSTGKIVQ  
VMHPGFTTDRDDQPYASNSEDETTSESHSIAHNHAIATNEDQSRSPLEGGYNGNKRVLRS  
RMWRNLGDLETDALVVHSNTMTYEHEEIRVQLADEDPASLADQFLDRFRPADHSTDDL  
GWIIPRFLQMMGNDESSADEADLIYFHDTLQEGEFFVKPCLCESSRWTFLNEIEIPSD  
YNGTSDALIKESPNSYGSFGQGINPSNLGQYPNGEYAYVPPGANSKQGQWDDLPLYLCNE  
RAMYCGIPTDPIPVKCYEQNMRDTIARNAPLILLWYLGLAICCCCTVHGRTAGDYVQD  
RVSYFCKKFLCCFWEISYDFNDRMLHRMIADDERENRGRSQENVTPWFYSNQRRMFERSL  
LAQVQWIWRHQEFLEMERREQGLPPPQIKLRVKRFSMATTTQGSDDGGFLGSTVPPVAV  
TKTAAASPHLHSVCTATEATNATPRDNSRKGITASVGESDAAAMI PGKSSASPSAKMTPA  
VMSLVKTSNLARNKDNDRNDKDKDNETNSTEPEADSPPLETNSNGNNDTDEPEFITLTL  
GPSAENDDEHDLGQTAECGGDDCLCRTRSSSDPPHEIHHCKNDSADSLAAPTCTICF  
CPFEDGDRIGDLPCRHEFHVECLKGWLQRKNACPLCNAPVGRPERADPQGAASLDASQH  
SIGSLMQRIRVLQQQNRQRQQQQQQQPPGGGEGEGGATTGGGQAPVAEVQRTYRVGMIG  
SISTADDIAATQTTFRDNRWFFSG

>comp7595\_c0\_seq1; 203 247 669 LEN=904; translated  
MSSDEVQKAQEAAANNAGDALPPTIFDKILSGDIPANKIHDELICIAFRDVNPQAPVHFL  
VIPKHRDGLTQLSKAREDQKALLGHLVYVAQKLGQEECPGGFRVVVNDGKDGAQSVYHLH  
VVSPSCILNWKMLAEWSIF

>comp7595\_c0\_seq2; 215 247 651 LEN=771; translated  
MSSDEVQKAQEAAANNAGDALPPTIFDKILSGDIPANKIHDELICIAFRDVNPQAPVHFL  
VIPKHRDGLTQLSKAREDQKALLGHLVYVAQKLGQEECPGGFRVVVNDGKDGAQSVYHLH  
VHVMGGRQMWP

>comp7595\_c0\_seq3; 203 197 619 LEN=854; translated  
MSSDEVQKAQEAAANNAGDALPPTIFDKILSGDIPANKIHDELICIAFRDVNPQAPVHFL

VIPKHRDGLTQLSKAREDQKALLGHLVYVAQKLGQEECPGGFRVVVNDGKDGAQSVYHLH  
VVSPSCILNWKMLAEWSIF  
>comp7595\_c0\_seq4; 215 197 601 LEN=721; translated  
MSSDEVQKAQEAAANNAGDALPPTIFDKILSGDIPANKIHDELICIAFRDVNPQAPVHFL  
VIPKHRDGLTQLSKAREDQKALLGHLVYVAQKLGQEECPGGFRVVVNDGKDGAQSVYHLH  
VHVMGGRQMOWPPG  
>comp7596\_c0\_seq1; 373 200 1248 LEN=1507; translated  
MKWKLQSFLLAVLLATLLFDEILGESMPEKSDTGNDDTVTTCETTEEVFAPLSERPNEFV  
PSSRPEIRLAVRRWVPEDNEVKSILIVHHGGCGWHSYFDFKLGVLKENGIIILISYDQVG  
SGYSDSIRKRRQYFDTMDRLSDDLTKFVEIDIRKXSVFVLGESFGAMVALYSILKEQQAN  
ATAVADGYVMAGPAITLRPEMLPPRFVIKIVKVLARFFPSLKMGPVDIFSTFDDAFGDPR  
WAEAAARADPFIQEAQVSAPLLGMMAASTLTASDNIVASMDRVEAPFFIVVGNEDTRVVIPI  
SERLVQLARSNDKRLKIVENDRHMLFQDKAEITAEVINDIKEWILARSH  
>comp7597\_c0\_seq1; 248 1 1025 LEN=1025; translated  
XSFDQKNIRRRVYDALNVLMAMDIISKEKKEITWKGLPTAARQDMESMEKEIELREHQIA  
QKKEALRDLVQVCFRNLVQRNHHQEQRQLQHHQERKMGVPEGKIPLPFLVVNTDKSA  
ETKCDMSKDLTFITFNFLPFEVSDNTILKGMEMDRTSSANLRQMFPELRLRYCEANRL  
TDAVLGRGDPGEEAIPTTTTPRSTTPTGTAVNSTSTNTTSRTTSPCTSTTAPREASRSAGG  
AAAAEAAGAAAGWGGWPCTSRSSSHHTTRTRMRMQTHTRCPPPTRAAGWEARHTDGG  
RRPTRCTTTTTTRGPRPWPPPAWAAAGTATRTPANNEVLAD  
>comp7598\_c0\_seq1; 422 135 848 LEN=974; translated  
MAFNRLFKEHIEGLIQTDEVAESVPCADIMSLRECRKGGKACDEIGLDLLRCMAQFKVD  
TTEKVRTTIGVAKYNEYVKEMEDKHGNEKAAQIINEPSEQLKDIEAYQVLHRIANDTHPK  
GAPKTKDDLNNWSYADQVRLEMGEWWDVAVKIIIGYEFGLAKADALFGLKKENDMIHSAQ  
SRLIPGFAERKANALVAAKVEDSVKEAAPGGKTAADFKAADFDDLYPSKDDLEAALK  
>comp7599\_c0\_seq1; 334 1 944 LEN=966; minus strand; translated  
XFVMSYADLIREFVYGDYKWFSSSEWWVKEKKRKNLIFDRQIHGPMGMHISSVWVTAY  
NLLHLASTYCSLPTDVLAHQASNNINNYQAGMWGLPELNKKFKEPDGRPQPQPKGLPPEL  
TKDLLLEDVTSWLRQSDSASSNDCSDQTKHVVKCPFSWVAGLSLQNNVTFFVREYFEE  
QSTTWKGWELSEDKDKLGFVPSPGVAKDADSKIILDFDYSQKIRSVTFFFMKSYGTKWEN  
SELNAKVWSTPSSSDQQVLLVERNMLGTHSKNTSEMYTEEIEFQPVDAAHKIQLEIKLV  
GGETFKIMGLALCR  
>comp7599\_c0\_seq2; 231 1 787 LEN=809; minus strand; translated  
XFVMSYADLIREFVYGDYKWFSSSEWWVKEKKRKNLIFDRQIHGPMGMHISSVWVTAY  
NLLHLASTYCSLPTDVLAHQASNNINNYQAGMWGLPELNKKFKEPDGRPQPQPKGLPPEL  
TKDLLLEDVTSWLRQSDSASSNDCSDQTKHVVKCPFSWVAGLSLQNNVTFFVREYFEE  
QSTTWKGWELSEDKDKLGFVPSPGVAKDADSKIILDFEVKNTSEMYTEEIEFQPVDAAHK  
IQLEIKLVGGETFKIMGLALCR  
>comp7600\_c0\_seq1; 317 532 1815 LEN=4329; translated  
MSTIPITANSNNNSFYISIFLQLYQQERSKETQADSLVPVFAERKTSFGQEKSLPLKKN  
HSNLRSCALATRTTSARPSLQARSELNLYDDNRDSIPIECFNDDKDDQEGSRQLDAKLQ  
KPIDIVDCSTTLRSQSAMSQTNYSNRDSCGELPINMKEKPFQSNHPRALQNAAVLPSK  
RKRKQKEVTFAGFPTLVMKQDRIDKVFCEFLDAVTLVSYVRPICAYSKRERQEIWYTRAE  
EEAMRKQAFIEDRIQIENSIKSNANADSVSTQASTMNTARVGERLYHRRYRNHYKQAAV  
DAVLQEQIRQHSMCRIIYGKRRSAGRNSNSHYSSGILDPERLRKVYRSRGTIQSQKAA  
ETRAQRYLVLGQCNEPANNSWDDDRHGKTEEGFEDENEDEXLLPRFLALGANLQFQVL  
FGDFGGL  
>comp7601\_c0\_seq2; 300 1 1128 LEN=1225; minus strand; translated  
XAAVAAAAPPWISITLVVYNGIVLVVRQDVFHSALALLAGGIVIVLDNGSMRVCVVRTGG  
ISDGAHCPPSQGTIAAFRVGRVLPGEGLVKGCVRPPARGRDILARGDGRFVLVWVRVADR  
SVELLGEVGGQDSRHNVDPLPRVRRKAKDQNRIDSWGVRVRSAGPDGASVLLPRVQSPG  
RGGQVRVIRVQWCRTVDEPPVPLQQAVQLQVQRHDRGKETKGMASNRKARFVRLRCSTDR  
LATVARFDAAAVASEVFALLIVFAFAIACSRSSWCIRVRDRDRAGFVWKRMLLLQMPLLP  
LLLLVMPAPPSTPVALLSWWLLPRLWKDAELFFIWEGETDAIWSACTNFINGMWLALLA  
NRFLVLSGRNTGSTY  
>comp7602\_c0\_seq1; 444 101 1666 LEN=1732; translated  
MARRSNRFAEEFPPIAEAAAEDGGQVFERMRAPLLSSSPSFESNNSNNGGNLSELRHRS  
TTLVSSSAASGEDEDGVEGQYQLPEEQFQPQQRILDRNGMFRQSKGRLGVERRLATEP  
PRDRSGTTGNPCRSFCRWYCWRRIYQEWGKDWFFWLAYKKTAVLFLLLFCSYALIICF  
FGFIYLSLSIFGSKAEVNPDGSTKTI AFCMDINDHMEAMYFSLSTMTTIGYGVSDYYFG

GCYSPLLIVLMQICTAIVFDAVAVXPDFPDLAGGETEPVHSVQRQGDPRPKRAGGPPPDV  
PPRKAQAPPDRGNRPVLLHTARADTAAPRRRCVSHRNDVLCPTDEAAAARRQVWFPP  
VDGPAAGRRAPDDETSPLCPSAPLWFDVLSSESHRYPPPGGGGTGGTGSSNNGERSFPSP  
DYLKANEGCIKEFLYDRDVEVVVLVDGTDEGTGAATQARHSYKLCDMTWNHRFAECVHPY  
SRRQRSGPSNLDPVVSIIDFAFHDTTEVPLDCEECAYVPKQ  
>comp7602\_c0\_seq2; 447 101 1851 LEN=1917; translated  
MARRSNRFAEEFPAAEEEAEDGGQQVFERMRAPLLSSSPSFESNNSNNGGGNLSELRHRS  
TTLVSSSAASGEDEDGDVEGQYQLPEEQFQPQQRILDRNGMFRQSKGRLGVERRLATEP  
PRDRSGTTGNPCRSFCRWYCWRRIYQEWGKDWFFWLAYKKTAVLFLLLFCSYALIICF  
FGFIYLSLSIFGSKAEVNPDGSTKTIACDMGTCQDRILTFRCRGPVGRLSFVLFRAVWE  
TRAVLTDFFRFFALNVLLACLPTPHHTAPHHTADINDHMEAMYFSLSTMTTIGYGVSDYY  
FGGCYSPLLIVLMQICTAIVFDAVAVXPDFPDLAGGETEPVHSVQRQGDPRPKRAGGPPP  
DVP R RKAQAPPDRGNRPVLLHTARADTAAPRRRCVSHRNDVLCPTDEAAAARRQVWF  
PPVDGPAAGRRAPDDETSPLCPSAPLWFDVLSSESHRYPPPGGGGTGGTGSSNNGERSFP  
SPDYLKANEGCIKEFLYDRDVEVVVLVDGTDEGTGAATQARHSYKLCDMTWNHRFAECVH  
PYSRRQRSGPSNLDPVVSIIDFAFHDTTEVPLDCEECAYVPKQ  
>comp7603\_c0\_seq1; 549 137 1363 LEN=1559; translated  
MMLLRNLISALIVLGVSVVAEQQGYDDAAQADDAVQAYDDAAQANDDAQAYYYDNIDYS  
GAFSAGDDTIQYWTDYAILPKRCIVYNNVDVIVFSVQQYKQCQDNPIGTIITPVPNFLQ  
GYLQYYMQIQEDKGYDDYELPEVADYAYCTRVEIQNQELYLQIGCSDESPNSIAVNIYED  
NTCTKRSTSIDGYDDANIDVSEIQLPFKHCQSCVMWVDKNDDEIDDMFYENRKQNAPLCS  
TAWNFKQECRDRKRRSGLESKTKDGNWTPDKVLLAILAVFGFGLIAILQKRQNMNSKDA  
LLEQAAMTAAGLQVHVIGIFFLIIIVITVFALLQLKNITWALLIMNTTLFGYLMKLT  
VDSGVSAGETVIGPDGTIIRHADSDDSSVESVTQTPRNAGTYMLPTIS  
>comp7603\_c0\_seq2; 289 148 732 LEN=928; translated  
MWVDKNDDEIDDMFYENRKQNAPLCSTAWNFKQECRDRKRRSGLESKTKDGNWTPDKVLL  
AILAVFGFGLIAILQKRQNMNSKDALLEQAAMTAAGLQVHVIGIFFLIIIVITVFALL  
QLKNITWALLIMNTTLFGYLMKLTVDGVSAGETVIGPDGTIIRHADSDDSSVESVTQ  
TPRNAGTYMLPTIS  
>comp7605\_c0\_seq1; 316 1 1067 LEN=1159; translated  
XSSDLLKRRKLITLVTQKSHKVTRGPQYAPQRVKKAADLTKEMLDSGSWETTEFKPYNFL  
VLGEKVGGGYLHPLLKVRAEFRKILMEMGFQEMPTNKWVLESSFWNFDSLFPQSHPARDA  
HDTFFIKNPAETVSPEDYERVKEMHEKGGHGSIGYRYDFKKEEAFKNLLRTHTTAVSS  
QMLYKLANQPGGFKPARYFSVDRVFRNETMDATHLCEFHQVEGWADYNLSLGLDGLTIE  
TFLNKIGITELRFKPAFNPYTEPSMEIFGYHPDLKKWTEIGNSGMFRPEMLRPMGLPE  
DV RVIAWGLSLERPTMIKYRINNIRD LFGHKVEMARTRTVPISRYDYSVGAAKPTD  
>comp7605\_c0\_seq2; 508 1 1612 LEN=1704; translated  
XDQITPGNIPQSRVTDGNYSILKKSNSHNSIVKMSSEDSSETAILTFLSSSPDAVIPDTQPW  
AASNLDHAKVVGAIKSLLVEQYVVAEDLKTSFYTLTKEGEGVANGAQEIIVLKALNEA  
GKLSMGDLQAKVGDVAKIGMGNCMKSKWIKKEGGDLVALKKDDEVEDTVQKLLLDLKA  
DDKTAKDLKRRKLITLVTQKSHKVTRGPQYAPQRVKKAADLTKEMLDSGSWETTEFKPYN  
FLVLGEKVGGGYLHPLLKVRAEFRKILMEMGFQEMPTNKWVLESSFWNFDSLFPQSHPAR  
DAHDTFFIKNPAETVSPEDYERVKEMHEKGGHGSIGYRYDFKKEEAFKNLLRTHTTAV  
SSQMLYKLANQPGGFKPARYFSVDRVFRNETMDATHLCEFHQVEGWADYNLSLGLDGLT  
IETFLNKIGITELRFKPAFNPYTEPSMEIFGYHPDLKKWTEIGNSGMFRPEMLRPMGLPE  
DVRVIAWGLSLERPTMIKYRINNIRD LFGHKVEMARTRTVPISRYDYSVGAAKPTD  
>comp7606\_c0\_seq1; 153 1091 1381 LEN=1509; translated  
MMCKAMKQIPPSIGACEYLSFLDLRNCKSLTELPDELGSLRRLRILYLSGCTGLLEIPD  
LIGDLPRLEKLEFDSDSLESIPASCSRFLEEDRAV  
>comp7606\_c0\_seq2; 153 949 1239 LEN=1367; translated  
MMCKAMKQIPPSIGACEYLSFLDLRNCKSLTELPDELGSLRRLRILYLSGCTGLLEIPD  
LIGDLPRLEKLEFDSDSLESIPASCSRFLEEDRAV  
>comp7606\_c0\_seq3; 242 137 1144 LEN=1272; translated  
MESASREEDGVWIVVEDQDLELDGMTLVADRESGDIVGLSSRSCSNEQKRSSMPSLKDHP  
NLKVVLDLHNYRYMRHLHESVCELPDLRRLTLTRCDLLQKLPASIGRLDQLIELDLFDSFQ  
LAELPEEISGCRSLKRLRLGGSPGVANKSLQRLPESLGNLFCLEDLQLDKCKRLKTLPS  
LGGLSNLLRSLRECKELKFLPPTIVRCKLVELNLLKCSLALPPDIGGLRHLEDLNM  
MKCKAMKQIPPSIGACEYLSFLDLRNCKSLTELPDELGSLRRLRILYLSGCTGLLEIPD  
LIGDLPRLEKLEFDSDSLESIPASCSRFLEEDRAV  
>comp7607\_c0\_seq1; 562 1 1581 LEN=2163; translated

XQNAAHRHHQATGNRRVLVSYQATEKPSPTSIRTEVI PRDSSRASERTSGLSLPPHTGDG  
VVSSTSESRTSRDDTTRHDSTLHEKTPHEMTRVKKEKRARIASSAAESGTLEYPVGTLLA  
VDLYGHGNFFEAVVQSTDELQLKGVVQYADKAKTVGALPLLDWIGRIVFVLHEVATVS  
LCCGICFPSSGLSADAPECSSHAYPFLMLRVLALSFCAGTIDLNDTKTVELVDENI ISLE  
DCADDTLSSTDKGFLGRRLTVQWEDNKRYSGKI IKSRLDQKNFVFIHYDDGDKVWYNLSP  
DNERPGRRPATKTKTGAKSKIKSEEEDESASIARRFEKARMELTKKYPVGCTIAVDSYH  
DEHYHEAIVRKYFPNPSKTQQTKGEQWVYLHWLDKDKTKNWVDLNCIKAIKVVPEKIIRL  
DELTDMDKGFLGKRIVVQWKDGNKYCGLATKCAKDNKHFLFLEYDDGDRCWCDLQRESY  
WSIDGEEAFDDEEDEDFCGESSESSDDGGAPSRTPRKRKAGAGQGF

>comp7607\_c0\_seq2; 609 1 1396 LEN=1978; translated  
XQNAAHRHHQATGNRRVLVSYQATEKPSPTSIRTEVI PRDSSRASERTSGLSLPPHTGDG  
VVSSTSESRTSRDDTTRHDSTLHEKTPHEMTRVKKEKRARIASSAAESGTLEYPVGTLLA  
VDLYGHGNFFEAVVQSTDELQLKGVVQYADKAKTVGTIDLNDTKTVELVDENI ISLED  
CADDTLSSTDKGFLGRRLTVQWEDNKRYSGKI IKSRLDQKNFVFIHYDDGDKVWYNLSPD  
NERPGRRPATKTKTGAKSKIKSEEEDESASIARRFEKARMELTKKYPVGCTIAVDSYHD  
EHYHEAIVRKYFPNPSKTQQTKGEQWVYLHWLDKDKTKNWVDLNCIKAIKVVPEKIIRLD  
ELTDMDKGFLGKRIVVQWKDGNKYCGLATKCAKDNKHFLFLEYDDGDRCWCDLQRESY  
SIDGEEAFDDEEDEDFCGESSESSDDGGAPSRTPRKRKAGAGQGF

>comp7608\_c0\_seq1; 560 97 2136 LEN=2222; translated  
MTSFLPMEIKSSVDEASDAKRRRLLGRYRYHFGVLALALFLLLFTSSSTTKKSNVAVCQQ  
QCSARRDQRYQHFKGKDI LNPRDLLKLVSDQKDSLIEQLKVDYGEEHFTNIFMNKDGT  
PFVVPVGDSSSELLKRKLMIKVLSAMKNLRQTESSFHGCDCIHGDVGIASPPAGVETKQAS  
GDN NATSTFDSSFEKYVWATGGHSASAAHGNLYNESYTA FMERDLKDVFGSIGIDFYGRN  
YAMGGTGSAMEVSMCWTEIFGADVDFFSWDYGMTDAGEPYRLMHYAYRGSVSPGRPAFMG  
IRVNLDRYEQDKLIKHLAESGIPVHIEDNPSFSKMRKGI PDSFGLDQAALTAMPEYVRNF  
RCQDMYEKGEPEYCE TEKYTKELCEDRRGKAPWHPGIKTHAMVGHALSFLIENLQSALKE  
LIKNOPEVEILL SRLKQEEENLFDTKISRASFEDYAKKLFYARDKENIESVDPTIFYT  
NSMCHTARTPAETRYLGYLTNTDKVGGPAPIGSETYDVGVEDVDVPLDTEEMVLTWQQDE  
KRQADCPVAVSIDYKDSFMSQGGNWN TLVFPNDAERAAAYGYDPQQQVKG YVLVAFRTCDW  
DRCEEK FVGHKEFDAEGTSWEMKVNGVAVEKLV DVGHKVHLLKGTNGFVFKPTENNDYKF  
EIKVNIPGKYVKVSSFIVV

>comp7608\_c0\_seq2; 415 97 2394 LEN=2480; translated  
MTSFLPMEIKSSVDEASDAKRRRLLGRYRYHFGVLALALFLLLFTSSSTTKKSNVAVCQQ  
QCSARRDQRYQHFKGKDI LNPRDLLKLVSDQKDSLIEQLKVDYGEEHFTNIFMNKDGT  
PFVVPVGDSSSELLKRKLMIKVLSAMKNLRQTESSFHGCDCIHGDVGIASPPAGVETKQAS  
GDN NATSTFDSSFEKYVWATGGHSASAAHGNLYNESYTA FMERDLKDVFGSIGIDFYGRK  
YVSLSSNELMWFVFGHHA DPLFDLXNSACL LLLTNETIVGSIDCSVIDSLSYSYAMGG  
TGSAMEVSMCWTEIFGADVDFFSWDYGMTDAGEPYRLMHYAYRGSVSPGRPAFMGIRVNL  
DRYEQDKLIKHLAESGIPVHIEDNPSFSKMRKGI PDSFGLDQAALTAMPEYVRNFRCQDM  
YEKGEPEYCE TEKYTKELCEDRRGKAPWHPGIKTHAMVGHALSFLIENLQSALKELIKNO  
PEVEILL SRLKQEEENLFDTKISRASFEDYAKKLFYARDKENIESVDPTIFYTGNMCH  
TARTPAETRYLGYLTNTDKVGGPAPIGSETVSTPAGDWQHLHSSKDLFPHLCFASICLSL  
QYDVGVEDVDVPLDTEEMVLTWQQDEKRQADCPVAVSIDYKDSFMSQGGNWN TLVFPNDA  
ERAAAYGYDPQQQVKG YVLVAFRTCDWDRCEEK FVGHKEFDAEGTSWEMKVNGVAVEKLV  
VGHKVHLLKGTNGFVFKPTENNDYKFEIKVNIPGKYVKVSSFIVV

>comp7608\_c0\_seq3; 527 97 2230 LEN=2316; translated  
MTSFLPMEIKSSVDEASDAKRRRLLGRYRYHFGVLALALFLLLFTSSSTTKKSNVAVCQQ  
QCSARRDQRYQHFKGKDI LNPRDLLKLVSDQKDSLIEQLKVDYGEEHFTNIFMNKDGT  
PFVVPVGDSSSELLKRKLMIKVLSAMKNLRQTESSFHGCDCIHGDVGIASPPAGVETKQAS  
GDN NATSTFDSSFEKYVWATGGHSASAAHGNLYNESYTA FMERDLKDVFGSIGIDFYGRN  
YAMGGTGSAMEVSMCWTEIFGADVDFFSWDYGMTDAGEPYRLMHYAYRGSVSPGRPAFMG  
IRVNLDRYEQDKLIKHLAESGIPVHIEDNPSFSKMRKGI PDSFGLDQAALTAMPEYVRNF  
RCQDMYEKGEPEYCE TEKYTKELCEDRRGKAPWHPGIKTHAMVGHALSFLIENLQSALKE  
LIKNOPEVEILL SRLKQEEENLFDTKISRASFEDYAKKLFYARDKENIESVDPTIFYT  
NSMCHTARTPAETRYLGYLTNTDKVGGPAPIGSETVSTPAGDWQHLHSSKDLFPHLCFAS  
ICLSLQYDVGVEDVDVPLDTEEMVLTWQQDEKRQADCPVAVSIDYKDSFMSQGGNWN TLV  
FPNDAERAAAYGYDPQQQVKG YVLVAFRTCDWDRCEEK FVGHKEFDAEGTSWEMKVNGVA  
VEKLV DVGHKVHLLKGTNGFVFKPTENNDYKFEIKVNIPGKYVKVSSFIVV

>comp7608\_c0\_seq4; 448 97 2300 LEN=2386; translated  
MTSFLPMEIKSSVDEASDAKRRRLLGRYRYHFGVLALALFLLLFTSSSTTKKSNVAVCQQ

QCSARRDQRYQHFKGKDILNPRDLLKLVSDQKDSLIEQLKVDYGEEHFTNIFMNKDGT  
PRPFVVPVGGDSSELLKRKLMIKVL SAMKNLRQTESSFHGCDCIHGDVGIASPPAGVETKQAS  
GDN NATSTFDSSFEKYVWATGGHSASAAHGNLYNESYTA FMERDLKDVFGSIGIDFYGRK  
YVXLSLSSNELMWFVFGHHADPLFDLXNSACLLLLTNETIVGSIDCSVIDSLSYSYAMGG  
TGSAMEVSMCWTEIFGADVDFFSWDYGMTDAGEPYRLMHYAYRGSVSPGRPAFMGIRVNL  
DRYEQDKLIKHLAESGIPVHIEDNPSFSKMRKGI PDSFGLDQAALTAMPEYVRNFRQDM  
YEKGEPYCETEKYTKELCEDRRGKAPWHPGIKTHAMVGHALSFLIENLQSALKELIKNQ  
PESVEILL SRLKQEEENLFDTKISRASFEDYAKKLFYARDKENIESVDPTIFYTGNMCH  
TARTPAETRYLGYLTNTDKVGGPAPIGSETYDVGVEDVDVPLDTEEMVLTWQQDEKRQAD  
CPVAVSIDYKDSFMSQGGNWNLT VFPNDAERAAYGYDPQQQVKGYVLVAFRTCDWDRCEE  
KFVGHKEFDAEGTSWEMKVN GVAVEKLV DVGHKVHLLKGTNGFVFKPTENNDYKFEIKVN  
IPGKYVKVSSFIVV

>comp7610\_c0\_seq1; 182 186 806 LEN=957; translated  
MVALLV VAGPNRDSVADGFIVGAFKKVEKDFLSLTRRV TARHILVPDEDVARVLKQKIR  
DECVDKELWVIDAFEVAARKYSRDETTNFRGGLLGELVFPQGYCRSPELDRLQFSVSLGEI  
VGPVETEYGYHLLLVSERTNCPKLDGDKTRMMQTRGDDVFGTLLVEGKQVGVKVDMPPELLMD  
QVKFWSLTLIAGGLVAELAEKLVSNL

>comp7612\_c0\_seq1; 333 347 1537 LEN=1945; translated  
MGWKSVMHDAKLGHRPRLKGNWERDGM YDAFPDLLDRLERGENYKSFYIDDETAERWKKT  
QVPALLDAQTLTREA FHQYERDSIPSI IKNIPAGYDGGKYVGAWGATEHWKLVLRNDA  
ILERKFKCGEDDDEKTIKVKLEDFLCYMEENRDDSPLYIFDSHFLDHKDADRLRS DYSVP  
SYFSDDLFRFISESRPPYRWLLGPKRSGTCVHIDPLATGAWNTLIVGQKRWVLFPPHV  
SKKVVKGSGLVRDDEDEAVHYFSFILPRIKKAAMLKGLPKYKDFCCFEFTQNAGETIY  
VPNGWWHAVLNLDTVAVTQNFCS PRNFDES WIKTRKGRKRM AWKLLCALEQNGYPELAE  
RARFLNERDNFVMKYDPAEIEKRERAEAAKRQKKK

>comp7612\_c0\_seq2; 117 347 1009 LEN=2088; translated  
MGWKSVMHDAKLGHRPRLKGNWERDGM YDAFPDLLDRLERGENYKSFYIDDETAERWKKT  
QVPALLDAQTLTREA FHQYERDSIPSI IKNIPAGYDGGKYVGAWGATEHWKLVLRNDA  
ILERKFKCGEDDDEKTIKVKLEDFLCYMEENRDDSPLYIFDSHFLDHKDADRLRS DYSVP  
SYFSDDLFRFISESRPPYRWLLGPKRSGTCVHIGKSSY

>comp7613\_c0\_seq1; 309 1 1180 LEN=1376; translated  
XQQYSGVHLEPKDYHKKLAESNTVI IDVRNHYEAAIGRFV PPTKDDSGAQTDTKATEGPK  
WIDPKMRKSTEFPAWLDKEETKEMMKGKQVLMYCTGGIRCERASALLQYKMETDES VKDL  
GIKGVFQLQGGIDKYFKEFPDGGYWKGNVYFDKRF AHAPKIDGELHGRVIDKDDENDS  
KLPANAHVMGKCEACHKPWDMYRGKRR CPTCGVPSLICKDCFLADKEGRKKGKEVRCDL  
CVEQGI FSKRQYRENDERFIQDYESKMTAKGLLLPNAAAQDPEVDSAVMAPNP KGITRLV  
LKNMCRKKMTEDALMEALPGITHI VVNTQRNRKNPSAEPIFTGMGWVEMATPD DAARAVA  
KNNQLKVFGRITIGIAFQAPDGKDVWPAPNSRVV

>comp7615\_c0\_seq1; 792 149 2899 LEN=3061; translated  
MVS KAMDALQKQNL YRDHLEKIAKLC DKSGVTNESTSNLNDTDDFLDEEFDTKGVKSFA  
DMLFSPEVTLNLLGLTGYGTPALPTTTT VPEFCDRVDKVLFSLNAFVNTCPTVSNFKYYS  
SKCDPGYWC GCS DPSLERC FPSNDTKETYWAGKFT EYVKDSGTNETKPIYTGWASSY PD  
DYFLCNSTMFC PGKSRNITACEPELCKEGHYCPTPSEITDCPEGHYCRIGSTKPTKCDFLD  
SCSGTKAVNPGSKWYLVLVACVTVYCIACLYTAYLYLNKKFPFRQAEDDVI ELDEVEDEE  
TAKSRKLTTRRQSSVTPKPKFTIGVQFRDLQLTLPNGICIMQGV T GELKGGQFTA IMGP  
SGAGKSTFLSLLSGKTEPTGGTLAVNGEHASLKD YRKVVGFVPQEDIMIRELSVEENIRH  
SAFMRLPASM SRKKLERVYQVMESLDLLRIRSSIIGDEIIRGISGGQRKRVN VAMELVA  
DPSLLALDEPTSGLDSTTSSNL CETLSDLAKTGVNVA AVIHQPKIEILRTFSNVLLLGVG  
GRTVYMGPTENMESYFDGIGFPLPDQMN PADYFMDVIAGLIPCEDNPD FRKEDLFDLWED  
HKKKSGSVDDQNGKIRKPSKSSKSPGNRKATGF INQTYLLFKRAVLQRCRVPENTLIPV  
ILSASAGALIGYFVRTMPQLYYGIPLVRDIENPQNNAASQYMRNYPSPPPQS QFAGIWIYT  
ALAVMLVCIVSINTFGREKAVFKRELFSGTKPTAYWLAKTFESGLWIPL YAAIFVTVNM  
LNNQPIPV IHLFLVIWVTMIGDSGIGHIVSLVVQPSNRGIVLLVSVLVLIMIFSGIMIKY  
KGKHQVFKAFFTFWTAQGFYKGSVTPYEDVFDVKT LNDNMQGYELQDPFGFNILYGLMLTA  
LFWHLAALAVMFWQAR

>comp7619\_c0\_seq1; 403 1 1158 LEN=1213; translated  
STNEFFPRVREKQQQQPQRTKR MAYNQNSGSFDFKKSQEAYSEIVEALSKDMPLIM  
HGCGDVPDRNVNPE SALVLAQLTANYISNLVEAACDSQEILNDGHRPPLPPPPLVSKEKR  
RRPPLPSPYEWPPSAIAKPSKVAASKKKKATKADGTPATTTT DATNASSKDTGAAKPP  
GTTKPNPASNKNPFGEKKKRKR RDIDYWD DPLPEPKIKNKPALDPA AVAAEKGEIVFKGV

PIGDWVGVAGVDFEFEDSRIRSAHVTLPAAVGAQNFI FFPVCHDKHLYGKILDIQATRRSIE  
PILTDSVVMIRMIRAEADLQGLSFRKRRGRQEKRKNDGSGGADAQDDEDEEPEASDSED  
EYSSRRRPVWPGLELLPMHTTLDF  
>comp7620\_c0\_seq1; 288 343 978 LEN=1240; translated  
MTHKIDRVKAYEDFLTFYEDMFLSKFGRIDELNVCDNLGDHMIHVYCKFFNEEDASD  
AKEAMNGRFYDGRKMDVEFSPVTDREARCRDFDEEVCSRGGFCNFLHAKPVPMPPLVRSL  
EAESEADRRRNKEDRRDREREERRARKKERKERKRSRREKSSHRDRDRGSRSSSSSKHDRD  
RSPSRSRSRSRSPGEGGGASDDDYSKSN  
>comp7621\_c0\_seq1; 896 155 1477 LEN=1752; translated  
MIVLSPICKELEEFYFPYFYLQMEAEKKKQKTEHKGMFSSTPPKIVPVTVLGTGFLGSG  
KTTLLNHI LNDGNHGMKFAI IENEFGEVGV DENILSENADEEVI EVMNGCICCTVRGDLV  
VALKKLYDRVEKFDGVI IETTGLADPAPVVQTFVDEDEVKAKYRLDAVITVVDKHMAR  
LKEEKPEGVENESVEQIAFADKVLNKLIDLPDAEELAKIEGEIKKINPAAAIKRTQHSK  
LDPKELLNIQAFELDRVLEFEPDFLDEDEGEHMHDET VTSVALKVKGDPLNVNLMQRWIQR  
LVTEDGANLYRYKGVLA VKGMDKFKVFGVGMIFSGGFDEQPWKEPEEERESRFVFIGKN  
LNHEFLREGFMACRVTDKLRFEIGQEVEANVGEFTKGVVVKHWDEGNAYRIQLNNDKAVN  
VWAPIDIDAYVRAPGSGGKA  
>comp7622\_c0\_seq1; 404 1 1513 LEN=1980; translated  
XRSGNMIDDDLASPEKPKKCCNIYDGNLDAIGYSWISVGRGMMIMSNLFIAQSLLFLA  
ADAAGCNIEGETNNAETCKKKIYGFVPSLITNIAVIGGIASAFMMPICGALVDFTPYRR  
LVGISVAIGLTLIQTQIYTVETTWTFAMAMLQAVSAVFYQLQLVTLNAYLIDVAQDVGES  
RMNRFSTNFISILYASHLLFIFIVVAIQIAFGTSSVVLTAQISQGLNTLSTSLFFGVGWFV  
YMTPRSARLLPEGRSLITEGFRQNWNTLKSIIHTQYRHGLRWFFLALVFAEACATAITVV  
SIVYLTDTLKLDPQTSTIFFFISLVGTLPGCQLGWVWTRKTNPNNTSYKMSMGYLYVVLV  
GALVLEEVP AHYSYVWAFLV GAGVGFYTTTEYLFFSTSLPRGQEAELSGFFIFCTQILVW  
LPPLVFTLLNEINVRQKYGVVATSSFFLVAIGLLMLTSSWDEIVEEAKSGVAKAADIDND  
TKRKP DGGDDDDVND CRNEQD VDDGG  
>comp7623\_c0\_seq1; 209 1 290 LEN=290; translated  
LKDVEDILNWIRSGKPDDELGLPTDEFKAI DQSLPAKKGQSPEDRARDIENALDYCRNTG  
KKPSEVDTSVPPFSKEGLLPSLSKSPEDRLKDVEDIX  
>comp7624\_c0\_seq1; 1067 113 2914 LEN=2924; translated  
MAPKDEKDAIPVESDKKKDDDKAKKLKSEEDLKEESMSEEDKELKERLETVCVSTVTNEK  
NEEAVTIPIRATALGVIVNELRTATASMTSVPKPLKFLRPHFESLKTLYLSLQKEEASSM  
EKEPLEFRARLADVAVLAMTMSKPEDRESLKFKLSGDKDYDALAAMQGESKNESEDNLG  
SWGHEFVRS LAGEIGQEYNQRLIDGADPDSDEAFEDLLKFVHVIVPFHLTHNAEAEAVDL  
LIEVQRLKFLQLDSIDDKNFRRICLYLMKTASFMSDPDDLMELETAYE IYRKQKEYFD  
ALLVALRMDRLDEIPVLMKECEDGLMCKQMCLMLARHRVNYEVEDDPEEDELNELIGNEK  
LSEQFLKVAQDLVDLPKTPEDIYKSHLAETGGFSRRRDVGGAQVDSARANLASTFVNAF  
VNAGFCNDKLMTPDSEWLYKNKDHGMMSAAASLGSILLWNVEEGLTQIDKFLYSNEEYVK  
AGAALAVGILTSVGRNDADPALALLSEHVEGESHTMKIASCTGLGIAYAGTGREDVMELL  
VPIVENTEGGPNTFMEVALAGLALGMVFGKCDNVGGTIVQRLMEASDEELDHS HARYL  
CLGLALLFLGQMEKADAMIEALRTVEHKISKFAVLMLESCAYAGSGNVLKVQEMLHQCTE  
HLTEDAQHQMVAVLGVGLITMGETVGTENVLRTFDHLLHYCELP I KRAVPLALAILHISN  
PEFAVIDQLSRLSHDPDEIISONAIIGMGVVSAGTNNRSRVAGLLRQLSEFYKSKEASHVFC  
VRIAQGLLHMKGGLMTMHPFHADRMLLNGPTLAGVLVLLHSCDLKNTLLDKSHFLLYL  
TCSMNPRMLITVNEDMSWRPVTVRVGVQAVETVGVQAGKPKRITGFQTHHTPVLLGVTDRAE  
LGTEEVLSVSSILEGVVIVKDNPDYEEHDKDSK  
>comp7625\_c0\_seq1; 666 103 1875 LEN=2160; translated  
MSASSLQEFIGQVAGASYKSVSTALYAMGIVALFALHLAGVLFVTPVVSFRLVFPPFE  
NAGSFLSLLRDPVPPYGLKPN DANEDKSGTETEPFLPNARDGKKGVSSTETITHTFFF  
IVHGYQGLGIDLSYLETVIKQACREQIGNSGNGSSYSQETADVDDDFVLVSETAPIDG  
ESSRSLRSEQRKRLCDVVVHTALCNERRTG DGVINGDRLITEIREVVDTM KRRHPE  
PESGAVTTSENEKQRPPRSITISILGNMGGLYGRYAI AKLISRHCVEEEAKDTKANPSW  
ILDGRYKLG LNLFC TTASPHLGVSEHTWIRVPRLAELCIAFTMGQTGSDLFR TNGLLYAM  
ATEAAFL EPLA AFRKR VACANCYGTDFPVPVETA AFLSEASGVPHRKLPEDEACKTGR TN  
GAI VATLSTSPGPEDGDERAESCRIPPRGGRSEELHQMSVALDKLGWKKVFVDLRKEM  
FSIELPGSLQTTQRRSRSDDEGVVGLGEIGGDQAIPSRDVVGAIERLARDDDNGGDRL  
TLRVPTGHNMIVAFSRDRFASFLNRGGRSLVNELGT ELAREMLEWESDGC  
>comp7626\_c0\_seq1; 588 125 2356 LEN=2424; translated  
MDELLELMNDDAVDPQSAVHQLEDDSD EIQEEIPKGQIPRTRTCNKRRDRPEEDRASSTRA

YKKQSKPSNRQHKANLAEASVDDRLGIRMSNRLVSSNDLSELITDYTYHSPSVLSAMTLQ  
HLNLLLQDPTRIIDAAATVAGKTESLVTIGIVFSNTGTRISSNGGAFSVLTIGNLNSGPCL  
TIFLFGAEYGYKCTSCQKQKVIALLSPTLLPANRRDGDNRRESNSNTVFSVYNASQIKIV  
ANARDYGICKATTSSRVKQSDGKWAVIAGKPKHYVNREISEYCEYHRKNRQSGMRQGN  
KFQQLRAIHQETAPMVVATPARRGNLIGSNTSTKPNRFLNHTSFNNDRSRILQAKPCSNT  
GSGSVMPSIGGNCNIPKHMTRQLPNKFLPKSATSKGKDRRIRGTTKLESFDHENRRAGS  
TVYSVSANEHPADPSRTRSKTSVSRTNWMEEAATAKKRGPLHMGGRRGFSLSQFQEKR  
RTSTAGNASFVTPANRNRKTASINTVGLGYDGTVFVFPKENKILFQQSASIQEIPAKRMVT  
PINESDRTKQLRQQAEVAQRLQESTTKEKSSGLSSALVNSNVKQSSRRCRKGVTSEKGR  
KSDNCEVDAFLAAMGGAVDEDKVRSASRFANEVAADYVKNRRKLELEKLEASNESRN  
KKKHQNAEQRMTKNWCNCRQTYNQRPGRCISSNHNVKNRFGLKESTSKDEERNALHKK  
SVQDGLHLGSGIEWRDSGRFRT

>comp7627\_c0\_seq1; 270 130 633 LEN=928; translated  
MGCGGLMDNAFLFDENSTGICSEMDYPYVMHRRWLRGCGSEKGECTPVEHTRVKSFTDV  
ENTPEALVEAIAQQPVSAIEADQQVFQFYKSGVFDDPGCGNNLDHGVAAVGYGTSDDGK  
DYFKVRNSWGASWGDEGYILISRSIENNVNGTCGILSFASMPMLRDD

>comp7627\_c0\_seq2; 201 90 702 LEN=702; translated  
MKLSLETLLLACFAASSTSAEVLDEQLQGAFFAWTKHHAKTYSSEEETRLRLGIWKENHA  
FIEAHNSQEPPPSFTLGHNQFSDLTLDEYQEYNKLGYSVGMTPPRLRSFESTTAATKL  
RKGRRLQDIPDSVDWVEKGAVPPVKNQGAHKNHRRPHFYASEPDGSPFRMSIRKVVHAVV  
SIFFAPHRLLSAFFSLGMCWSCW

>comp7627\_c0\_seq3; 356 1 1157 LEN=1452; translated  
XQITTIHKLHRNFAYSRAITYRPIKFFHPMKLSLETLLLACFAASSTSAEVLDEQLQGA  
FFAWTKHHAKTYSSEEETRLRLGIWKENHAFIEAHNSQEPPPSFTLGHNQFSDLTLDEYQ  
EYNKLGYSVGMTPPRLRSFESTTAATKLKGRRLQDIPDSVDWVEKGAVPPVKNQGM  
GSCWAFSAIVAIEGAHFLDTGNLTSLSEQELVDCDALDMGCGGLMDNAFLFDENSTGIC  
SEMDYPYVMHRRWLRGCGSEKGECTPVEHTRVKSFTDVENTPEALVEAIAQQPVSAIEA  
DQQVFQFYKSGVFDDPGCGNNLDHGVAAVGYGTSDDGKDYFKVRNSWGASWGDEGYILIS  
RSIENNVNGTCGILSFASMPMLRDD

>comp7628\_c0\_seq1; 780 312 2840 LEN=2986; translated  
MSPRDRYDEDDDRKPAAVTTASAPRSATHRMNKAHVSVKPGSSTTRRAPLQSRDPNTISG  
SYRSGSSNSTEYNSKDFRFSNLESSNNECNKRFMNSTNNSGRNFSRTLPGGSNSATNSN  
VMRSYSTSELREGSDPGVPAPARGSAYTTRSTSLPNLDADSVIIEHRRKINGEGYTLHR  
YLRGKMLGKGGFAKYYLCTALDTNKSAYAIVKANLVKARARDKLAEKIHRTRLHMMN  
VCAFKHFFEDKTNCYILLELCHNQSMNEMIKRRKRLTEPETAFFMRQLMEATKYMHELV  
IHRDLKLGNLFLDKNMNIKVGDLGLATKLQSADEIRKTCGTPNYIAPEVIQGDRAIRGH  
SFEVDIWSMGVIMFTCLVGVKPPYEAKDVKATYQRIMANQYKFPNSVSISSDAKNLIVKML  
QSKPSDRPTLDEISVHPFLTSRFIPECLPSNATHVAPRWEASASSSAAQNAFSRPGLLKP  
NTSRLPFVARDANVPSTAQRDERKKPPPSSTTNPSPMMQVQGAVKYAWSAVTSVASPSRP  
VAQQPTPKFRVFDENDRQSSERDIVSRTANLIGIGATTREISPDNPSHRRRAEPASSNTD  
SFTLNDMFERVSIVLDIVSSRDYSNPADSQLVPSVDGGPTKWVERYVDYTSKYGLGYL  
LSDGSSGVYFNDSKKAIVEAQDNFEFIERRRSSEDP SRRNEPTVASHSLSKYPDSLEKY  
VTLLRHRFRKYLIEQHQRSDEDI SRRPVGDNGSGMVFLKKWVRTRHAIFRRLSDQTVQIV  
FYDHTEVLLTPDERYITYVDKNTTRNTYYMTDELVGCNAEIAKRLKYTKELQQLVTS  
SPRR

>comp7629\_c0\_seq1; 264 362 1267 LEN=2540; minus strand; translated  
MDEEKGREERRAFVDSSESREMSLAPAVDEVGGDQTSERSFGDDSNDDGDSVAEGT  
GFLEMMPMKGSRRQYLPVPSSTNASPSFSSDESGLSLFLHKTLTDEGIAFRGFPLESS  
GFSTKLLKFVCWTFLSICLVHLVVAQFFDDRDMFLRLSYVWKYEGDLIVRDCFVFFVGR  
LWEKPGIDHLAWMGALVANIYFESQNYIWFLOHVSVTLFQMHCMWPWELWIFALALIVSA  
ALLILLHALKAWNERILFVKLTEMGLCILFFIAPMITSNFFHMHWHYAGWLMGMHFNVDV  
W

>comp7630\_c0\_seq1; 497 97 1047 LEN=1245; translated  
MTTEYSEKEMKKVLVFGGKTGWIGGLMVDMLKKEGIEVLPAESRMQNREAVAKELDEVK  
THVFN SAGITGRPNIDWCETHKPE TIRTNVIGTLNLADLCLERGIHCTVYATGCIFVYDE  
AHLPGSGIGFKEEDTPNFDGSFYSETKGYMEPMLRNYPNCMILRVRMPI SDDL IHRSFVT  
KIVKYERVVNI PNSMILT EMLPASLAMAKKGLTG VYNFTNPGVISHNEVLDLYTKYIDP  
TYTYKNFTVEEQAKVIAAPRSNNELDTTKLLRDMPEGVVINDIKTAYELCFQORMAKNLEA  
QYGPLPDSLPEKFRV

>comp7632\_c0\_seq1; 276 293 990 LEN=1264; translated



MSAPGSGGLNNRNFNSYQQSYSEKTVAEQQTSTLQDTIATQYQAEETANAVLNQLHGQRQQ  
IQGANNDVWETRQLTEETKRELIALQAKYREKKNKLKVMIGLLAAIDLFXVFPTAALPRI  
FLLLSNHKKQNEKIGSRNKSGFREENCGSCVRLRIDRYALGLSLRSQRLSVAVTNSMNL  
IILLNSTLVMDSMSGWDVEYVSERMNEGRAETTLSSILPARGRIAHTPSLVSD  
>comp7633\_c0\_seq1; 485 127 1816 LEN=2050; translated  
MSSTSNVVDPLRAYLEAVTARLAVLEAHCGVNTASSPPSPGKASAALQKVPSARHIAAS  
GKIFWQFVLTPWLVAGEKEETFYNTNISYDAPRTRSDNIFKFKXIGNKATESAAVKAFDK  
YSNTTVYKFADVCDLIDIGDVGKLSVAFFEGMRYVILASKSKQPTDMTELVEHLKPITE  
PMKEIRGLRLKREFDNHQKAICEMMACCSWVTCRAPAQLPGPFVKECVGSSDFWSNRIRK  
EFKGDENAKLQIAFCDTLKAIVELSDYVTEYHKTGLSFNPKGTSLAESAIRMSDNPL  
QDAAEANRKKDQHAGKSHDLNTVKGGNTAGIFSELANRRSEDGSSAATGLKKVTKDQQ  
TWRKEFKGEVNKKIAVTSSNSPTTPKSVKKKKVGLPVLEYQERGTKWIIENHTKDTAKAH  
STNGLLEVEITDPKQQVYIYNCEEVTIKIKGTKFKSVVVDKCTKVNVI FPTIISGCEIVN  
SKKIAVQSDGICPVFSIDKTVGVSAYLSKESADISSFTTSMSEMNVSIIPDGDDYKEIPI  
PEQFFHKITNGGLTSEVSELYR  
>comp7633\_c0\_seq2; 252 124 777 LEN=1011; translated  
MQFSSQQSQVTKDQQTWRKEFKGEVNKKIAVTSSNSPTTPKSVKKKKVGLPVLEYQERGT  
KWIIENHTKDTAKAHSTNGLLEVEITDPKQQVYIYNCEEVTIKIKGTKFKSVVVDKCTKV  
NVIFPTIISGCEIVNSKKIAVQSDGICPVFSIDKTVGVSAYLSKESADISSFTTSMSEM  
NVSIIPDGDDYKEIPIPEQFFHKITNGGLTSEVSELYR  
>comp7633\_c0\_seq3; 618 127 1671 LEN=1905; translated  
MSSTSNVVDPLRAYLEAVTARLAVLEAHCGVNTASSPPSPGKASAALQKVPSARHIAAS  
ATESAAVKAFDKYSNTTVYKFADVCDLIDIGDVGKLSVAFFEGMRYVILASKSKQPTDM  
TELVEHLKPITEPMKEIRGLRLKREFDNHQKAICEMMACCSWVTCRAPAQLPGPFVKECV  
GSSDFWSNRIRKEFKGDENAKLQIAFCDTLKAIVELSDYVTEYHKTGLSFNPKGTSL  
AESAIRMSDNPLQDAAEANRKKDQHAGKSHDLNTVKGGNTAGIFSELANRRSEDGSSA  
ATGLKKVTKDQQTWRKEFKGEVNKKIAVTSSNSPTTPKSVKKKKVGLPVLEYQERGTKWII  
ENHTKDTAKAHSTNGLLEVEITDPKQQVYIYNCEEVTIKIKGTKFKSVVVDKCTKVNVI  
FPTIISGCEIVNSKKIAVQSDGICPVFSIDKTVGVSAYLSKESADISSFTTSMSEMNVSI  
IPDGDDYKEIPIPEQFFHKITNGGLTSEVSELYR  
>comp7634\_c0\_seq1; 504 173 2185 LEN=2387; translated  
MFVPSIGIGRKKSHSSYCFPPAATSILVAVSLLHLLAYSSASAINIVDRPNTSFFSLAAA  
LSSVSVTSAIRSSGSLGGSSLSASLISVTTTTPTTGNVFSSTAILASQKEFEGEEIDTSKS  
QVETLPSDTSTDNRALSIPDTTSTSIDEASPPTVSNIEDGSSSENKNTMKKHIESLAASSP  
RARACILMAIAMSLHFGGYEFARSAALALFTSSETGFTHPSAYPFAIGLVTPTTLLSLLYW  
YGTLLKADGPRKALRKTTLVLAVLLGDGLVAILSSPAFSGAHNSLTLTQIAVSGLFV  
FQNSYAHLIYTQQWSFLGSMVTPTEGTRWFTFVAGFCSLVCTLTASSVQSIADRSYGLVT  
LVFLTCATLGLSMICADKAYQLSSEHGFDPSLELQKQAKKDEGKTTQATSGEGDNEEET  
LLAKTGRMFKTSPTLAGLFGGEVIAFQSLSTVLNVCFVRQLKESMPIDGERAAFTGQFYAG  
VNGISGLMQFFVLPLLRKYLEPQWIYRLLPMVLMPLLTAAVGP SANGLWIAAVSFFAL  
KSTDYSIRGVATELAYQPLDFDARYLGKEVIGVFANRFGKSGTSMILSALTGMGIMAKST  
RPMSQLAVGVGALWSACSFYLSQH VATNKQAEKVKQRRRGIASNQASSKGEDPTRGGQTD  
PGDDNR IKED  
>comp7635\_c0\_seq1; 148 346 684 LEN=760; translated  
MRPDQLGDRGLEYNIVGFKGGSKNADLAKLLVEASKETGDELDFAVGKGTDRDIPRLVW  
IMDSEQYPSYVAEQYHQFHDGFNFGENYPNSYNLGAQFGKAGEDFGSCPRM  
>comp7635\_c0\_seq3; 309 125 1048 LEN=1124; translated  
MTPSDSHRRSWSFFLCIFLSVSVQIAFAWQNSHPHQKRVSSLSRLFSVNEEAGAIKNAGG  
RRSFFEACSSAAASVLLTSPSLAVLSGPQIAHAAGNDGEEELIDVYFGCGCFWHVQHEFV  
EAEKSILGRSDNKVTSRAGYAGGNLGMKDGVKVCYHNFAQVSDYGKLGHAEVVSLRIPKSN  
FKDFAIEYCKLFKNGMRPDQLGDRGLEYNIVGFKGGSKNADLAKLLVEASKETGDELDF  
AVGKGTDRDIPRLVWIMDSEQYPSYVAEQYHQFHDGFNFGENYPNSYNLGAQFGKAGED  
FGSCPRM  
>comp7638\_c0\_seq1; 155 552 1622 LEN=1938; translated  
MTNVVMRLAHNRGSEMFGYHLRLNNTTAAASQDEFESQKKKLQSNWKSPPRCEYRSNHGTA  
VQLEYSQRKPGRSFLFGMVRDPTKRIISEFFHFGVSVYQKEPTDVNFQNYVLRKQGGNPL  
IRDMTFKDLPIITITKEWQQYLDQWNKSRAGVALGASEADPVSSPNSSINYQTVVADILR  
NYDFIAVTERMDESLVALKLLGLDLRDLVLYVKPSRSAGSFSNGFKDRPCVYLVPSFLTP  
GMHDFHFKPNSNARWTEYSKGDRLLEHAASRSLDATIEHVFGEFFRKELEDFHKAQAYV  
EGICADRIVDICDQSGHDVARDPNRTTTCYIWSEGCDHECFDNEIPNPLPDSVFGR

>comp7639\_c0\_seq1; 221 263 880 LEN=930; translated  
MKKIILLTYEFTYSPFSGNGILARSLVKSFLGLGCTVTVWCCRPSDGNAGGGFVAGNKGS  
ASDNTTTTTTSSNKNKNSPAANSSSNINAVDRVPGSTHTQRRSPRRHSLPPCLPSQASVS  
LSQYCLNPIVERKLELDLMDFDYWWRELDRTQYYALILGYTEGTWDEDLSLDDLPCEDW  
DWDEMTNEQRSAAIHFGYSQDTWED  
>comp7640\_c0\_seq1; 267 44 1069 LEN=1658; translated  
MPCYNLWDHGDGLDIEIPEEIFPDETRKEKDILFDHPQHGYFESCYQGKLLHYRKNLPPE  
GTPIRAIVVWQHGIHGHSGYGMKCS DGRFTDMALRIRMMNAKGYAVYSHDLLGHGFSEGE  
RFYIPNGNWKINRDDLINFALLVADNHPEDTPLILSGDSYGGCLAFHAAHVLTQTEKPELA  
STRFLGCALNCPSFHGDIPSLPVTFLRLYGLAPFFPLWTPFFMHPHPITPERCWRETEPRA  
HFTDQSQIHGLSKGGKPFCLGTAVGLLSALQASQVLIPIFCLPFHINHGSDDYGVPLSGS  
QSCFTNSKTPDSEKELNIVPGGYHCLFSQLDSKSTMQHEIDW  
>comp7643\_c0\_seq1; 543 2344 3641 LEN=3641; translated  
MKATEYYQGKVRRIYNEGSAEKLLHGNFAGGFILKIAVAFVPPIGTTKTAFRITISNGTS  
LYQAGKGGGNNNGTGKKS FQKKMKLTTIGDLQKELLKNPQYGRPNEQKQNKRRKRRRTR  
QRVDDPKQKYVYASQRRANA VEGHDLENKANVQNIPILEAKKMGLTSPANQHCDALVNA  
LEPEIMGQIRVEDDGSNGASGAYAYLINKPAGWSILGEKQKTKKKQQLTNADRSTFDGA  
KRNKSGSKKLSKTRVKIKGEDNDVIEFDESEIMALLTPEERAMVEAESATDGNTFRDIPG  
WYIESMTSLEREEAGIEDEDYDPSDIPDFDEADI IALLSKEEREEYEADKLEQKKQNSKG  
KKGTKGADMQSKYKSMTEEDVDES AVENLKRIKARLTSTKDGSDAGSFSFQRPSLVSWL  
KDKKTAEGNPIRX  
>comp7645\_c0\_seq1; 1619 179 4471 LEN=4643; translated  
MKGKRRNQSCPFSASLAYTCLIIYSILVVARNDPLLSVSATTISSAASKRVVPPSFIRWR  
AGAFGSSNRDDPTANTEDDCDSNEAERKGGKKEKDYNRYNIGNNNSNDAKVEEYVAAMKER  
DAGQDQVDNIPESDADSNPSGESSNKSSSSSSVTIHNKDSSSKGNKGAENAESSVGVKS  
HKKSNGVGD PDGSDDDDDDDDDTDDDLDSLSEFSEEWEEIEETYDQFANDVFEPQVEVKVE  
LVEEEEI LDEEQEVDSGSSRS GSIAAKGGGGVGVRLGR IANRRKNSRRKSSPAKPSYDQA  
RLLSAWNPFVYFPPTRSGLDFLSNNARILDASSKSR LDRRTLYAGLLEW GATNTKLSS  
TRKFLPASSQALQAALS IATQPTWRQSAPRTSGIRLYQDAESTKGSTLGMQETVAMALA  
HSLGCGMLILDDHVINKVRHQMANCGLSDGEMKPAALIKSLLSLASQGELKEGENSGSIS  
ACMKRDILLGLDDPYDERAIISCDDMSMWEKEWRKELQGS SSKPKPLPLLI FIRTNT  
STNLLKSKSAMELLIN ECASNDSIHLVTLGKGIDATTSSLPTEEFENSQDQEENTLGDTE  
NSTPFFGFSNQPNASGQNDPEGSQRFNIFL SRTIDQNOQP GILGAIASPQAGNLFPHMM  
AIQARERLQHEDEDS PARAELEKWAHMLQEHMETNAGKDAVIPPQFFNASLAYTSEDED  
GEQSSISPPEVVEQV LQQAMSELLDRISKMSHESNPQSEISPDLQKAFQVLRSENLR  
RGIAENLARAAPALSDPKCQGVMLSVYVPPPHHMRGQLP GPQNGTQGRQANQQNMGG  
WFQKILSNQEANS DGNEDSDQKNRQKRVRTMAAAA VMAASKAKHPK GKDKSSENKAGR  
NLAKLESICRPIPVGLPQDPVRAKSWNHWITRE GAVIFRQNRKFLNEELTSRNLAI EQH  
TGTRGAGSALRQMMSVRDISAEIVDAVKCAVELEAAKSLRQSETSDQTHEKELALDVDIS  
LSQLLVTEDG SVESKDETVDLSLVNGMNNKTPSVQYIHPSSLESALSMKCHLSPSPSGGL  
SLSSAQASHRTKDEIMALA QDKHERALVSQVSPQDIGV TYDMVGGLSNVKELLRQSITY  
PLKFPHLYSEGIAREAVKGVLLFGPPGTGKTMLAKAVATEGGASFLSVDASSVENKWLGE  
SEKNAKAVFTLARRLAPCVV FIDEVDSLSSREGSSDDSAHGTLTSVKTTMMSEWDGLNS  
GTNGSGDRVVVIGSTNRPFDLDEAVLRRFP RRILVLDLPDLETRSEILEVTLAENRLDP SV  
NLTQIAERLEGYTGS DIKEVCREAVVQISHEQARLLDKGFVDVPEDEVTEGSLQRLRPVTV  
NDFDTALSKLR SVSEKGRELARVWEWNDEYGEIKKEKSNHLP HLMNMYL  
>comp7645\_c0\_seq2; 379 1 651 LEN=743; translated  
DDDDDDDEEEEGDD DAPIDPNDPDAARKKQERRDRQRQRYLDLKKKREAKKFTQLQQIR  
QDGEPTMT HKAPRDGWYRFCVTSSWNQVIAEMEMRKESDLGGLNEEGHVRTYEEQKMME  
EDKLEEDTATEEGIKDEDFQETRQKVKDLRLLNDIQSMQQKERRRLTVHAETNEHSHS  
SMVLNSLME TLLFMAVTGYQVYTIRKWFSGAPVLGR  
>comp7645\_c0\_seq3; 301 1 854 LEN=1195; translated  
XIFYSQLSCYPHSRFFLVIALNTFPPIVANNHIITKSYFVPEGDIESEPNVFLAPKSRH  
PNSPPTFGQIRDAFPLPGQYHFRFKSALVPGTDREKHALPVWMDVVEERQPVP IWKGGIV  
VKVSRVSM EEDDDDDDDDFHGHQAAPVATHAPPAPAPAPTPAHRPAPSVASSGSIDDLF  
GSTATAPAPSTGGSLLDFNDHHTPVASTAHNDFLGMTTPPPSGIQSAPASGGYHGNPNMY  
AAQQPQMHPQQQQQMRQPQQQQFQSFSSQGQPQGGQGAFGDLQW  
>comp7645\_c0\_seq4; 377 88 846 LEN=1187; translated  
MTTIRYFVPEGDIESEPNVFLAPKSRHPNSPPTFGQIRDAFPLPGQYHFRFKSALVPGT  
DREKHALPVWMDVVEERQPVP IWKGGIVVKVSRVSM EEDDDDDDDDFHGHQAAPVATHA

PPAPAPAPTPAHRPAPSVASSGSIDDLFGSTATAPAPSTGGSLLDFNDHHTPVASTAHND  
FLGMTTPPPSGIQSAPASGGYHGPNMYAAQQPQMHPQQQQQMRQPQQQQFQSFSSQGQ  
PQQQQGAFGDLQW

>comp7651\_c0\_seq1; 109 402 929 LEN=1406; translated  
MKPRPQSFQGNTPARNKFSVGYSWLWFLAALPSISSAFLQDYSSFSRPRKADSRDRMD  
LGYLIPDSDQATPPSISSEPGTTRIHMAGPALDEEDRALLRGKGAGRRRGLAHGILCP  
ETVGKMDDELTEGGRNRAVRAFVLDYKRGHPMSCMELLSDEILPHLTTTLRGLT

>comp7653\_c0\_seq1; 499 100 3122 LEN=3268; translated  
MASLEQVISETLSPNADLRKNAEKVLTDSKQGGFLLQLLQLVDNASANATIRQAAAVFY  
KNTVKTAWDESKDLEERKNIVISQQDRVTIKTNLVELMCTVPPQIQAISEAISIAEVD  
YPEKWDDLKPLVAKFNPSVNGVLTADSI FRRFCVNRSDALYKVI IYTLNHIQE  
PLLKLLMQTATQADACANDPVQLNAKMETLRLITRILFSLVYQDLPEFYEDNMATVIGVL  
KKYLEYNNPVLVDNDEEDEQGPIDKLSAIIIDILKLFVTRDEEPFQPFIPFTTLVWNL  
ISKTTLPKHDQVVVMSMKYLNILVGRQFYKDLFKETSTLQQIVANIVIPNMTIRESDEEN  
FEDNPQEYIMTELEGSSTDSRRRGSRELLGAMCRQFEAQTTSICSEHMTKMLADYGADKS  
KWVAKDTAEVSSRKKFQHDVFAFLDVXFATNVGIMIVALLKISLMLGIVIKKQSSSGVSE  
LNHNVLMEFFSNHVLPEMQDKDESSRPMVKASCINFVCTFRNQFSAEQYNELLPVLI  
LRSSYVAVHSLAANTIEQILRNKGRDASGTAFSKITQASLQPFLLQGLFEGLFHIVDNV  
NENEYVMKCIMTTLDKAGENVIPVTNIVFEKLSAALERVCKNPRNPGFNHNLFESIAILV  
KSIKAKDASHITQLEQMLFPPFQTIQMDILEFTPYVFIQILAQLLEFRPSGAGLGEAYTS  
LFAPLLTASLWEKTGNVPLTRLIQAYLEKAATYVVSNNHLMPIIGIFQKLNLT  
AFDLSLQVYAPRESIADHLRTIFQLILTRLOSTKSNLYPIRFGQFLALFSGLYGGQYL  
SDILDRIQPNIVMMLQGVWLPKVKGCASNRVLAQAQIIGLTKLLSDLSPKLLGNDQKQ  
VFAQAITAVVSILASSTFTKEEKDVQNEGPMVYDATFSRLKFAQRPPVDAFEAVDPD  
FFSALRNLASANPGVLSPLIQGLSTDLKLASSFQTMCSKGFSLV

>comp7653\_c0\_seq2; 649 100 3021 LEN=3167; translated  
MASLEQVISETLSPNADLRKNAEKVLTDSKQGGFLLQLLQLVDNASANATIRQAAAVFY  
KNTVKTAWDESKDLEERKNIVISQQDRVTIKTNLVELMCTVPPQIQAISEAISIAEVD  
YPEKWDDLKPLVAKFNPSVNGVLTADSI FRRFCVNRSDALYKVI IYTLNHIQE  
PLLKLLMQTATQADACANDPVQLNAKMETLRLITRILFSLVYQDLPEFYEDNMATVIGVL  
KKYLEYNNPVLVDNDEEDEQGPIDKLSAIIIDILKLFVTRDEEPFQPFIPFTTLVWNL  
ISKTTLPKHDQVVVMSMKYLNILVGRQFYKDLFKETSTLQQIVANIVIPNMTIRESDEEN  
FEDNPQEYIMTELEGSSTDSRRRGSRELLGAMCRQFEAQTTSICSEHMTKMLADYGADKS  
KWVAKDTAISLMLGIVIKKQSSSGVSELNHNVLMEFFSNHVLPEMQDKDESSRPMVKAS  
CINFVCTFRNQFSAEQYNELLPVLI FHLRSSYVAVHSLAANTIEQILRNKGRDASGTAFS  
KITQASLQPFLLQGLFEGLFHIVDNVNLNENEYVMKCIMTTLDKAGENVIPVTNIVFEKLS  
AALERVCKNPRNPGFNHNLFESIAILVKSICAKDASHITQLEQMLFPPFQTIQMDILEF  
TPYVFIQILAQLLEFRPSGAGLGEAYTSLFAPLLTASLWEKTGNVPLTRLIQAYLEKAAT  
YVVSNNHLMPIIGIFQKLNLT  
KATEGSAFDLSLQVYAPRESIADHLRTIFQLILTRLO  
STKSNLYPIRFGQFLALFSGLYGGQYLS  
DILDRIQPNIVMMLQGVWLPKVKGCASNRV  
LAQAQIIGLTKLLSDLSPKLLGNDQKQVFAQA  
ITAVVSILASSTFTKEEKDVQNEGPMVY  
DATFSRLKFAQRPPVDAFEAVDPD  
FFSALRNLASANPGVLSPLIQGLSTDLKLASS  
FQTMCSKGFSLV

>comp7654\_c0\_seq1; 723 163 2439 LEN=2580; translated  
MVYVHENDKEPNSNVHSTSSGSILQNCRRKRIHAGNYTSTESNSEIEKAPRFLLRDEPR  
FEPSQLICPQMSLQVFNVDGGLRRQTALRETATSSIPSTTLRPQSPGTDSATFRHSALS  
RASFI LPSIDEQRNAHDCASSGQRNLAHEGDEGSI SNNGDSSDRPTRMAAVGLLP  
TMDVVSDNSEDLDLFGSQNSNSGGSINNCSSTIQSDFDLFLDNDDIFSTRDNTVTNANIAAS  
KLSWQHKEEDRVSSPQNLNSSEPYSTSSPDGNSHSRRLSSSLNRI FQPTVLN  
WQSHSRKQNERRRSWGTSSSSSHHSTPGYESPRHMRSSSAPS  
SPSKPSLFTSPSSSSSTPLCTTPFSMERFFERKPKGR  
LSSHNEQKQGTNWRPVMHIFYSAGVIFQLLVILILV  
LIVLSRSQASSATQALIRLKTTESELELLKHLRLEDHSL  
HVHELIRKLFRIQTQSNANIADKVIDELVHGKSD  
EATTKEDSSTRDKDTPLLAQYHQLRKMSDELREHEAV  
TNLQEHLQETARDEIMNYGEGPVKVVI  
ELNFEEDNEHHDDAKKHLKLQENGGEKKSIAQMAK  
GTYLSVLLWPDA PHAAWALDQIQRGIWNGAAIK  
WNPTSTLLQILPMIEDPDRGHLGFVEHHEDSDKQ  
QDFDNPDTTHGAWTIGLHETLLDDAKNNTNSRLEMY  
INLTDNKEHRKHETCVGKIFDGF DALQRLV  
ESTVVS  
AEGKSVTNVTIKTISAMHMPHQDFEKAFL

>comp7655\_c1\_seq1; 450 1 1091 LEN=1240; translated  
XLSSTSVGAYEAVRYLIRLNKEDDEEEDVDLGLDFDEIDLEMYLDDDDDEVSTSDS  
QETSSSLSSGERDDFVMDIPPFSEKLLKEMKSVMPNGRLSAILVTSQECIHYDEAPGV  
YSVR

KADLTKWKREFPETATVAYRMDIPRDCRDSITQRLDGYGPWAMVEEPNETGKIDTGSIFK  
ESGLPFTVNEWDPEMAEDIMTGKRKPPGEEEDDDSVIELDANGGFTPDTIRANEKGQVL  
ADIRLAAPLEAYVFPPELKLKASGYSLPLEDSREEENPGMDSPPALDHRGYITTNKAGVS  
RQVESARELVENYHDRFEILLTARGDPFYFEGDARRRETLMEIIGQYEKLGNIYEQLGI  
TGN

>comp7656\_c0\_seq1; 387 187 1224 LEN=1477; translated  
MALSASAWKGLSMAVFTLLSLAGFAAAILLRERANQLWVSSGVMFSAGVLLAGGLVHLLG  
DSTEGFEEAGATSFPPWSYAVSGLTVAVLVCEMVRDVALRRAEAGSRAKNEKQEQKPD  
GASGTSQPSEMKVVDPPGSAEDQSKDTKEIETKAVPVPTDGQQKAGNQRPSLSKNLSHQ  
DLHAVIGNEDIDPLTAVVLTIALSIHTVIEGIGVGATDDVSAIRSSFVAIAFHKSFTAYA  
LANSLVECGYWGDPKRYFYASTGLFVGLTLVGIGVWALSAATGGLGSAIVVAVTSGS  
FLYVAAIEIIPDELETIGEQRQLQTPLIALSFLGGYCLMSMLAIWA

>comp7656\_c0\_seq2; 221 187 683 LEN=683; translated  
MALSASAWKGLSMAVFTLLSLAGFAAAILLRERANQLWVSSGVMFSAGVLLAGGLVHLLG  
DSTEGFEEAGATSFPPWSYAVSGLTVAVLVCEMVRDVALRRAEAGSRAKNEKQEQKPD  
GASGTSQPSEMKVVDPPGSAEDQSKDTKEIETKAVPVPCLLLAIG

>comp7657\_c0\_seq1; 579 43 1116 LEN=1160; translated  
MTTEEKIQAEIEKAKGMKISEMKMMLMAKGVLTSHFVEKDEFVRAAYAEAVVKSSESGLSS  
GLTGFKNNNDGAVEEVEDDGVGITEGLPHYIQLRVEKLKEINNERDALMKEYLAERAME  
AKFQKLSEPLYERRKEVVLGQMDDEIAAAGETKEADGEEMDKGIPMFWACAIQQMPVTQG  
IVSEEDIECLGHLEDIKCINDDNGEGFSLEFHFAPNDYFENTVLTKSVDVFNLLLADEPI  
LKNVEGCEIKWPNIALTHVEVTKQQRGTGKNAGQVRTVTKKVPDRSFFNFFTAPSMPLN  
ETMDEEECLRVEAAFDDEDYDIAQAFRSHIIPKAIIEWFAGDAMEKELEAAMEGEMELKE

>comp7658\_c0\_seq1; 936 403 2601 LEN=3206; translated  
MQPQTMLPVGDDNIPAPHSYRQPTKAVKHGRPLSPNTLDKDIDEYLLGIPAPPPPTPP  
PGRRGGSKQHLVSTSPSDPSNPTSQRKRHRQOQPPESPLRQTPKEQSACDSTFHENDP  
SNESTPTTLPKTKKVKTPSANSTSATNQRTPKTRTPQRKNTTKTQTPTFSKSAEYGSRL  
SFHQVMLENIEKEALLMRRQGATPGTTPRNHSRGSSSSGRKASDYGSSGNGVESLLKET  
MNDISSAAASTMKTLSAQHTKERASAGNLGAGNAGPAPIVCVSIHQGEAGDSDSFGETG  
NHYPHNANDDDDLMSPMATARKETRENQRSAAASKQHASNHRPRMAASLPGVEHMPMLNSS  
SGAEMMKRMGDALKKVVVDATAGANNHQNNDVQRRNDRGDRRGSDENENDWGVGNILAN  
GFGWDGEEDDDDDQSRATYDTWDDENSVLRRLGSGWTVNSQYTAGTTGTAATFGTMT  
YDTGGDTEGGLSVVGPVSAAVAAASAALASAANGDQSMAGGAEVFRDDNGQRIDPLLI  
ERAMKKQQQNLPKESLLGKKSQRKSRQRKRVVVFYDPPIKSLRQYTRPDPELPLKF  
FTEDELQIEDDRYSTMSTDDIEIVAVSSKEGSSINASADDGAAATDGDTRRNTKKCAA  
GKKKSSGGDEEYELGCKPVKGRSGTPIRRRARGGDDVQKQTHSGDTSSNGPRSPRRLVKG  
VQIYLRERSTGA

>comp7658\_c0\_seq2; 936 278 2476 LEN=3081; translated  
MQPQTMLPVGDDNIPAPHSYRQPTKAVKHGRPLSPNTLDKDIDEYLLGIPAPPPPTPP  
PGRRGGSKQHLVSTSPSDPSNPTSQRKRHRQOQPPESPLRQTPKEQSACDSTFHENDP  
SNESTPTTLPKTKKVKTPSANSTSATNQRTPKTRTPQRKNTTKTQTPTFSKSAEYGSRL  
SFHQVMLENIEKEALLMRRQGATPGTTPRNHSRGSSSSGRKASDYGSSGNGVESLLKET  
MNDISSAAASTMKTLSAQHTKERASAGNLGAGNAGPAPIVCVSIHQGEAGDSDSFGETG  
NHYPHNANDDDDLMSPMATARKETRENQRSAAASKQHASNHRPRMAASLPGVEHMPMLNSS  
SGAEMMKRMGDALKKVVVDATAGANNHQNNDVQRRNDRGDRRGSDENENDWGVGNILAN  
GFGWDGEEDDDDDQSRATYDTWDDENSVLRRLGSGWTVNSQYTAGTTGTAATFGTMT  
YDTGGDTEGGLSVVGPVSAAVAAASAALASAANGDQSMAGGAEVFRDDNGQRIDPLLI  
ERAMKKQQQNLPKESLLGKKSQRKSRQRKRVVVFYDPPIKSLRQYTRPDPELPLKF  
FTEDELQIEDDRYSTMSTDDIEIVAVSSKEGSSINASADDGAAATDGDTRRNTKKCAA  
GKKKSSGGDEEYELGCKPVKGRSGTPIRRRARGGDDVQKQTHSGDTSSNGPRSPRRLVKG  
VQIYLRERSTGA

>comp7660\_c0\_seq1; 575 1 2234 LEN=2980; translated  
XKQAKRNDCLLWVQSREKQTPLESPKARAIKMLRNSLVKVIFFVSLWQLLGMMAHL  
NHFIGDAIRELSEEPQLGYSLGGPLHKTKEQESSTANETTKPDGSRFNPSLTNEGQASST  
ERKNLESDTPEIHTRVGGKPGNITTTDSIIYSTESSSFSATKEKCFGSNSDKWIAGNI  
SSNNHDGITPELLDTLMEGPAHFQKLPWLFQDTICHQDSPLRNFSPQNPGRDSTDYLAS  
VENWYHRFFYLALHWKFRPALDEYRSRKSCEAMDARDGSRSLSEFMDHHGIGMDFECK  
DEKFVIIIPMGSIGFGAFLNTQATLNILLALHTNRIPIFSRSYFSWQKRNGKQDPWLLAP  
STCSRKDMQCYFLPTTPCAVTDEDIENAPLYGATHEEQFLGTSVTIPPELEKERIVVLN  
PGLSRKSADTPGMRKIVHEVVTELLGEWRKAQSEYGDSSWSDQDWEAINLAHQWIEKTK

KDPVGLLRQVYVYMLRPNPHYKDLLEKQMSTIRTEDMYPSETVGLAIRGSDKCKSESTCL  
PFDRYMELATDVAYPGLSYPRNISSAVDIDPRPKLIVTTEDPKIYNESLVYQRNSSFPFQ  
FLVNNENDNMQSGSGPKDFASTDREKTIVSSLTALKFHFNAGKVYLNCCSNFHVVLKLLH  
GQCGARRHGHDFVFGNYTDDHSSPAPPVAQCLSEPGIPRRYQICCSWSKKTATCGPLWK  
EYIMEKEKNNLLVKDKYGGVAIVG  
>comp7662\_c0\_seq1; 191 666 1211 LEN=1393; translated  
MNFNTAVDVMNLAQWANASTLQCFADGLGVTCLSWSTGRFEPPTLVVGGAHPIIYRYSET  
SRQWNSIIIVLPPPPVGDVLDVAWAPNVGRKYHYIASAEGKQLRIFKLSRGNDGNGDALEL  
EATQEIPVSNARCQWNVGTGTVLACSGDSGVVEMWKLD FEGNFQAVSSSLQGDVSRVATQA  
F  
>comp7662\_c0\_seq2; 266 91 1059 LEN=1241; translated  
MKFSAANASSTQVISSMHQDYIHGCAFDIYGRMATCSGDRFVRVWDLTDSGEWVSLVGEW  
QAHRSVSMLSWSHPEYGS LIATCGSDHEAKIFEEKTNATSAASRWIAKAQLTEARKSVA  
CVEFAPRHWGLK LATGSADGCVRIYEAVDVMNLAQWANASTLQCFADGLGVTCLSWSTGR  
FEPPTLVVGGAHPIIYRYSETSRQWNSIIIVLPPPPVGDVLDVAWAPNVGRKYHYIASAEG  
KQLRIFKLSRGNDGNGDALELEATQEIPVSNARCQWNVGTGTVLACSGDSGVVEMWKLD F  
EGNFQAVSSSLQGDVSRVATQAF  
>comp7662\_c0\_seq3; 230 91 1189 LEN=1371; translated  
MKFSAANASSTQVISSMHQDYIHGCAFDIYGRMATCSGDRFVRVWDLTDVENGAWLENG  
KPTEEASACLVGATRSTEASLQRESVRQSHLNFFFHKSDFVMDKKCTGLSRIQLLRHLHW  
CGFKTSCGSDHEAKIFEEKTNATSAASRWIAKAQLTEARKSVACVEFAPRHWGLK LATGS  
ADGCVRIYEAVDVMNLAQWANASTLQCFADGLGVTCLSWSTGRFEPPTLVVGGAHPIIYR  
YSETSRQWNSIIIVLPPPPVGDVLDVAWAPNVGRKYHYIASAEGKQLRIFKLSRGNDGNGD  
ALELEATQEIPVSNARCQWNVGTGTVLACSGDSGVVEMWKLD FEGNFQAVSSSLQGDVSRV  
ATQAF  
>comp7662\_c0\_seq4; 191 796 1341 LEN=1523; translated  
MNFNTAVDVMNLAQWANASTLQCFADGLGVTCLSWSTGRFEPPTLVVGGAHPIIYRYSET  
SRQWNSIIIVLPPPPVGDVLDVAWAPNVGRKYHYIASAEGKQLRIFKLSRGNDGNGDALEL  
EATQEIPVSNARCQWNVGTGTVLACSGDSGVVEMWKLD FEGNFQAVSSSLQGDVSRVATQA  
F  
>comp7663\_c0\_seq2; 200 224 656 LEN=1024; translated  
MTGTLHSVDQYLVNKLKLVINPEKYPQLVALKNCVFRGSVVRYYIQIPPEHVDTELLQD  
AAGGKTRQRNKYTNNIESDADGGASNIDNAGDDMKIRNTLSRKSNDKKNIDFESDWYFSD  
EKNQGAGGVRFPAAAAADIGKWN  
>comp7664\_c0\_seq1; 361 119 1096 LEN=2171; translated  
MPIIQQITSAAMALFVVALCFQQVEEVSAFSSTGIPLSYGSATSRRMSTSGRASPLSMSS  
VAMLPEGLAKTVVNGGEMGASPIGRGDILTVKYTCYSVGLGDQDENEAEENVLLARSDSQK  
VVVGDSMVPGWDAALRSMTVGERAVRITDPSLGYGGANS DKRGAAALAALLGVDPAPA  
STALLEFDIQVLAAQSAASAAQVDFMNF DAMALEDDTPKTAEEIAAAYQVRMANKAPEKE  
GLEGWIDTVKNYYFFGFFEGETGEEAPWYLKPSITFP IAF AIVGAAFYVSLLSGAISEK  
AQSVDELVDIVTTTTMMTLLSGVPSF  
>comp7664\_c0\_seq2; 217 146 709 LEN=1784; translated  
MTVGERAVRITDPSLGYGGANS DKRGAAALAALLGVDPAPA STALLEFDIQVLAAQSA  
SAAQVDFMNF DAMALEDDTPKTAEEIAAAYQVRMANKAPEKEGLEGWIDTVKNYYFFGFF  
EGETGEEAPWYLKPSITFP IAF AIVGAAFYVSLLSGAISEKGAQSVDELVDIVTTTTMMT  
LSGVPSF  
>comp7664\_c0\_seq3; 243 119 550 LEN=758; translated  
MPIIQQITSAAMALFVVALCFQQVEEVSAFSSTGIPLSYGSATSRRMSTSGRASPLSMSS  
VAMLPEGLAKTVVNGGEMGASPIGRGDILTVKYTCYSVGLGDQDENEAEENVLLARSDSQK  
VVRMNGASKIICSDAELYIKQSD  
>comp7665\_c0\_seq1; 428 415 1413 LEN=1621; translated  
MTCPPVNI AVGQAIEATSCLISPFGNPNVQDLIPVAIESIDVLELGQSLRVIAQTRIGNI  
LRDGDSFVYQSAFANPNDVFSSEEVVRLQMNLVGINAAGDRVINVFIVTFTNECSSYPI  
FERGESAGWVELVDFGETSSELCTAATETPK EISTLGPT EASAVNYTDTLSGKTTL SPTS  
YPEAFPTDAPEAKPTESPTKAPITSDPTSTPTQESILTEVPTVTLTGGMNVPTNTHQLET  
GSLAPATSTPNPVQITENPLGDIAMDVETANEDSSVGKPPMTPSESFPEPIDVAASMSM  
SMSMSMNRFLLEDSTNREVS VWTPLSDKRGDTF  
>comp7665\_c0\_seq2; 327 415 1522 LEN=1730; translated  
MTCPPVNI AVGQAIEATSCLISPFGNPNVQDLIPVAIESIDVLELGQSLRVIAQTRIGNI  
LRDGDSFVYQSAFANPNDVFSSEEVVRLQMNLVGINAAGDRVINVFIVTFTNECSSYPI

FERGESAGWVELVSSDLHAPARKRHGNQSRPVXCIEELNLTFLSFSSVXVDFGETSSELC  
TAATETPKIEISTLGPTEASAVNYTDTLSGKTTLSPSTYPEAFPTDAPEAKPTESPTKAPI  
TSDPTSTPTQESILTEVPTVTLTGGMNVPTNTHQLETGSLAPATSTPNPVQITENPLGDI  
AMDVETANEDSSVGVKPPMTPSESFPEIDIVAASMSMSMSMNRFLLEDSTNREVS VWTP  
LSDKRGDTF

>comp7667\_c0\_seq1; 280 159 837 LEN=1329; translated  
MPMPSSSLTTTDFLIQAISGTMFAISSFWHGHRRIRSVGISNIPYFDDSPRLDRDPPNR  
AAQGRTPKETSGETRAPVRTILEIPSAEAPLEMAGYERIVMRATTPSKPSTKTSDTAKKE  
PASNEDLREKVHTAKKIIRGKRETAVDLLIWGAIQIAYVAFDVTHKQAMGTAFAYVYLCF  
FEDVLDISTLEKDGKQKHKTKKKIKWFKIMWVSLCLYYTGKLFSS

>comp7667\_c0\_seq2; 375 159 1107 LEN=1599; translated  
MPMPSSSLTTTDFLIQAISGTMFAISSFWHGHRRIRSVGISNIPYFDDSPRLDRDPPNR  
TEARAKALDERKKYDKEEAMRKELSLDGSAGGDDLPDFARVCLLWSVAQLLCGVSIGI  
FDWYTDVIKGAUVFHFDDSPRLDRDPPNRAAQGRTPKETSGETRAPVRTILEIPSAEAP  
LEMAGYERIVMRATTPSKPSTKTSDTAKKEPASNEDLREKVHTAKKIIRGKRETAVDLLI  
WGAIQIAYVAFDVTHKQAMGTAFAYVYLCFFEDVLDISTLEKDGKQKHKTKKKIKWFKIM  
WVSLCLYYTGKLFSS

>comp7668\_c0\_seq1; 141 776 1246 LEN=1304; translated  
MQSLEKYQKTQARAILTNPEKRRGDRDRTPSSGVPVQTHGVPVQRGGPATKAMEAAAAGGV  
RWDAGTTATRAYALERSGGRAIRKXSGVGLASATGGADAASKATTTAKDHRAKPPWPKL  
RRRRVLGAMLPAETIGLPIELSLTLVPLLLIIDS

>comp7669\_c0\_seq1; 470 127 3562 LEN=4335; translated  
MFSQSRLILQANKNAIRATASAIPTMKTAAARILSTASSIPSWATVDPKDMGIDPEPH  
AVRNLVDGKWQPTSSETIVIPHPLDANAPPIFTIPDTQILELDPFYESLRKVPKSGLHNP  
LKNPERYVHYGEISRKVRKETFKRTHFGKNTTSGLMXPHTSETGFICLKGLFKKFRVSFD  
LIVDSLTLFFSVFQTKAGAALSDPKTAEFFTQCIMKCVPKSHGQARGEVKTADFLNMF  
AGDNVRRLAKSFGVPGDHYGQMSVGHWRPYPVALITPFNFPLEIPVLQMLGSLFMGNKPV  
VLKPSEQVSFVMEQFLRLLIDCGMDSDDVDFLNGRGIVAQELIVETPVRLTQFTGSSRVA  
DILLKATNGKVKIEDAGFDWKILGPDVGDVDYVAWQCDQDAYASIGQKCSAQSI CFVHEN  
WKETGLLNKMRARAANRKLNDFTIGPVLTVTTDQILNHTKTLASIPGAKVLWGGAELEGH  
RIPEIYGAVEPTAVFVPLEEMIKEENFDNCASEIFAPFQVITYYNDLDDVLEALERMS  
HHLTAACVSNDFAFQSKVLAHTVNGTTYAGRRARTTVGLRGVWTRPSSHGPGVCAPTQGE  
PPLSRATRARPQPRFAHRSFAFVSFSGSTTEPLVTRTRGRPERMRHRVARSHSDGVVVP  
RNHSRLVCSFPLGGRSPVIVIRAERSFAHTLSNLDLTKLQNTIQHI IARLAQSI ILGAGLL  
YFSALAFSTVIRCKNDLKLGLFVQCQIERPFSFGLVVAVVETFGTVAAGRCPPPGFSDL  
RKRDRPGRKELLQRIGATRIPGGTVVPGIVAIPQQVQIDLWFFGPGKFSVRAFVVRKH  
DGLARIPGWLNRARKDAAGPPTPEPPVLLVDVARLRGHGRAFGWE CRVRARGVTDPCLV  
VLDASACCGRATAAILWRQQRGSVERCAPPTVALLLPHVPVAPRIVGTASTGNRVAGH  
FHQHECFRFRVKEQLCIPNAVSPWQNF LGARGTGRDRGSFVRANHRKPLSFESIGILV  
AVKLGFAAGLPRVRAIVSRIVPVASAEIGSFHQRGKGENKTRFAVVGTTAHRARGIAAAV  
VLGSTAGTGSGLFVAAAARATGTLRGPWHGVESVPFCRQHQLIGSLRIGVLR IKGNHGRV  
ASHAW

>comp7669\_c0\_seq2; 825 127 3379 LEN=4152; translated  
MFSQSRLILQANKNAIRATASAIPTMKTAAARILSTASSIPSWATVDPKDMGIDPEPH  
AVRNLVDGKWQPTSSETIVIPHPLDANAPPIFTIPDTQILELDPFYESLRKVPKSGLHNP  
LKNPERYVHYGEISRKAGAALSDPKTAEFFTQCIMKCVPKSHGQARGEVKTADFLNMF  
GDNVRRLAKSFGVPGDHYGQMSVGHWRPYPVALITPFNFPLEIPVLQMLGSLFMGNKPV  
LKPSEQVSFVMEQFLRLLIDCGMDSDDVDFLNGRGIVAQELIVETPVRLTQFTGSSRVA  
DILLKATNGKVKIEDAGFDWKILGPDVGDVDYVAWQCDQDAYASIGQKCSAQSI CFVHEN  
KETGLLNKMRARAANRKLNDFTIGPVLTVTTDQILNHTKTLASIPGAKVLWGGAELEGH  
RIPEIYGAVEPTAVFVPLEEMIKEENFDNCASEIFAPFQVITYYNDLDDVLEALERMSH  
HLTAACVSNDFAFQSKVLAHTVNGTTYAGRRARTTVGLEEFGRGRLTDRASAHLRKGNR  
LSRQVRVPVNPASLTIDPLHLFLFQGAPQNHWFPGAGDPRGCGIGSPEAIQM VWSCHRE  
I IHDSFVPPSWVDGAQXVIRAERSFAHTLSNLDLTKLQNTIQHI IARLAQSI ILGAGLLY  
FSALAFSTVIRCKNDRKGLFVQCQIERPFSFGLVVAVVETFGTVAAGRCPPPGFSDLR  
KRDRPGRKELLQRIGATRIPGGTVVPGIVAIPQQVQIDLWFFGPGKFSVRAFVVRKH  
GLARIPGWLNRARKDAAGPPTPEPPVLLVDVARLRGHGRAFGWE CRVRARGVTDPCLV  
VLDASACCGRATAAILWRQQRGSVERCAPPTVALLLPHVPVAPRIVGTASTGNRVAGH  
FHQHECFRFRVKEQLCIPNAVSPWQNF LGARGTGRDRGSFVRANHRKPLSFESIGILV  
VKLGFAAGLPRVRAIVSRIVPVASAEIGSFHQRGKGENKTRFAVVGTTAHRARGIAAAV

LGSTAGTGSGLFVAAAARATGTLRGPWHGVESVPPFCRQHQLIGSLRIGVLRKGNHGRVA  
SHAW

>comp7669\_c0\_seq3; 519 127 3225 LEN=3998; translated  
MFSQSRLILQANKNAIRATASAI PSTMKMTTAARILSTASSIPSWATVDPKMDGIDPEPH  
AVRNLVDGKWQPTSSETIVIPHPLDANAPPIFTIPDTQILELDPFYESLRKVPKSGLHNP  
LKNPERYVHYGEISRKAGAALSDPKTAEFFFTQCIMKCVPKSHGQARGEVKVTADFLNNFA  
GDNVRRRLAKSFGVPGDHYGQMSVGHWRWPGVALITPFNFPLEIPVLQLMGSLFMGNKPV  
LKPSEQVSFVMEQFLRLLIDCGMDSDDVDFLNGRGIVAQELIVETPVRLTQFTGSSRVAD  
ILLKATNGKVKIEDAGFDWKILGPDVGDVDYVAWQCDQDAYASIGQKCSAQSI CFVHENW  
KETGLLNKMRARAANRKLNDFITIGPVLTVTTDQILNHTKTLASIPGAKVLWGGAELEGHR  
IPEIYGAVEPTAVFVPLEEMIKEENFDNCASEIFAPFQVITYYNDTLDVLEALERMSH  
HLTAACVSNDPAFQSKVLAHTVNGTTYAGRRARTTGAPQNHWFPGADPRGCGIGSPEAI  
QMVWSCHREI IHDSFVPPSWVDGAPIVIRAERSFAHTLSNLDLTKLQNTIQHI IARLAQS  
IILGAGLLYFSALAFSTVVIRCKNDLKGLFVQCQIERPFSFGLVVAVVETFTGTVAAGRC  
PPPFGSDLRKRDRARPGGRKELLQRIGATRIPGGTVVPGIVAIPQQVQIDLWFFGPGKFSV  
RAFVVRKHDGLARIPGWLNRARKDAAGPPTPEPPVLLVDVARLRGHGRAFGWECEVRARG  
VTDPCLVSVVLDASCCGRATAAILWRQQRGSVERCAPPTVALLLPHVPVAVPRIVGTAS  
TGNRVAGHFHQHECFRFRVKEQLCIPNAVSPWQONFLGARGTGRDRGSFVRANHRKPLS  
FESIGILVAVKLGFAAGLPRVRAIVSRIVPVASAEIGSFHQRGKGENKTRFAVVGTTAHR  
ARGIAAAVVLGSTAGTGSGLFVAAAARATGTLRGPWHGVESVPPFCRQHQLIGSLRIGVLR  
IKGNHGRVASHAW

>comp7669\_c0\_seq4; 481 127 3408 LEN=4181; translated  
MFSQSRLILQANKNAIRATASAI PSTMKMTTAARILSTASSIPSWATVDPKMDGIDPEPH  
AVRNLVDGKWQPTSSETIVIPHPLDANAPPIFTIPDTQILELDPFYESLRKVPKSGLHNP  
LKNPERYVHYGEISRKVRKETFKRTHFGKNTTSGLMXPHTHSETGFICLKGLFKKFRVSFD  
LIVDSLTLSSVVFQTKAGAALSDPKTAEFFFTQCIMKCVPKSHGQARGEVKVTADFLNNF  
AGDNVRRRLAKSFGVPGDHYGQMSVGHWRWPGVALITPFNFPLEIPVLQLMGSLFMGNKPV  
VLKPSEQVSFVMEQFLRLLIDCGMDSDDVDFLNGRGIVAQELIVETPVRLTQFTGSSRVA  
DILLKATNGKVKIEDAGFDWKILGPDVGDVDYVAWQCDQDAYASIGQKCSAQSI CFVHEN  
WKETGLLNKMRARAANRKLNDFITIGPVLTVTTDQILNHTKTLASIPGAKVLWGGAELEGH  
RIPEIYGAVEPTAVFVPLEEMIKEENFDNCASEIFAPFQVITYYNDTLDVLEALERS  
HHLTAACVSNDPAFQSKVLAHTVNGTTYAGRRARTTGAPQNHWFPGADPRGCGIGSPEAI  
IQMVWSCHREI IHDSFVPPSWVDGAPIVIRAERSFAHTLSNLDLTKLQNTIQHI IARLAQ  
SIILGAGLLYFSALAFSTVVIRCKNDLKGLFVQCQIERPFSFGLVVAVVETFTGTVAAGR  
CPPPFGSDLRKRDRARPGGRKELLQRIGATRIPGGTVVPGIVAIPQQVQIDLWFFGPGKFS  
VRAFVVRKHDGLARIPGWLNRARKDAAGPPTPEPPVLLVDVARLRGHGRAFGWECEVRAR  
GVTDPCLVSVVLDASCCGRATAAILWRQQRGSVERCAPPTVALLLPHVPVAVPRIVGTA  
STGNRVAGHFHQHECFRFRVKEQLCIPNAVSPWQONFLGARGTGRDRGSFVRANHRKPLS  
SFESIGILVAVKLGFAAGLPRVRAIVSRIVPVASAEIGSFHQRGKGENKTRFAVVGTTAH  
RARGIAAAVVLGSTAGTGSGLFVAAAARATGTLRGPWHGVESVPPFCRQHQLIGSLRIGVLR  
IKGNHGRVASHAW

>comp7671\_c0\_seq1; 164 305 702 LEN=783; minus strand; translated  
MYS PAALAKDGRGGKLDADAPRQAARPHLEAGVGVRALDGPADGVVNVHNPVPPDKDAV  
KQRNVLQEGIKDEPLDQHRGEGDNDKGDQAQADECSVRRIPCWVRGVLCCVLDTIMVLWCGG  
KFVLF AKHNKSR

>comp7671\_c0\_seq2; 142 302 904 LEN=1285; translated  
MAVDWALRGCCNRDAIFFLFCFYAGYSVLTMLSMNTVVVKPMKLI AIFIHEMGHASAAWLT  
GGSVDKIEVYQNEGGVTNFRGGWKP AIPAGYGVVSFWGGVVFVALSGSQIGATVAAGVFI  
LALLVCLRYSPNRTLVLGLCIAFVVITLTAVLVEWL VFDPLLQYVTLFYGVFVVGWYGI VDI  
WDDTISR TVEGSDAHACFKMW

>comp7672\_c0\_seq1; 282 252 569 LEN=863; translated  
MVD TNIAIGAAIGVGGFAAGIGMLAF AEAQGERSKERSGSLSEN MSTQLSGMF MEDVEVS  
SVEDLGS LTSQLEEALKKSGGAE EEFEMTDEEIKRLEEE EADDGW

>comp7675\_c0\_seq1; 382 507 1382 LEN=2393; translated  
MTLAGVKVRHPWVSESSMMRV TGYPPIQSEQAWKNSNM LLAGAAVHEVVKNFQLNAPQVL  
DITDNGLRSIQTKKTAGTRPTPTQTPPRS NNGMYNSTSSTRSSHDDAPPSY NVVAEAE STP  
APEIPMPPI PSTYDEVNASREELDEILQDDLEFKAFVHRLKISDEIFTIGSSRLDENVL  
LANENLEQEAKLKTQSEVNELHSTLKS KLDFAFSKLEKEQDVICAPPDLKSTIKKLQKAK  
KEAFE ESEELAE EWDDGVTVD DFCRKFLEQRKVHMMRAAKMEILNNQER

>comp7675\_c0\_seq2; 367 1 1221 LEN=2232; translated

EIEEHSTASKMFSWSNNNSTSTSKVGSTYPGRRLQQNRASASAATPIQGSIRPPTHTRAQ  
HLKSYLEDPTLQRSTRRVSSDDTTFDVTVFQTTKGDTLILRVNIPLGSSFAAFCTMTLAG  
VKVRHPVWSESSMMRVTYGYPPIQSEQAWKNSNMLLGAAVHEVVKNFQLNAPQVLDITDN  
GLRSIQTKKTAGTRTPTQTPPRSNNGMYNSTSSSTRSSHDDAPPSYNNVVAEAEESTPAPEIP  
MPPIPSTYDEVNDASREELDEILQDDLEFKAFVHRLKISDEIFTIGSSRLDENVLLANEN  
LEQEAKLKTQSEVNELHSTLKSCLDAFSKLEKEQDVICAPPDLKSTIKKLQKAKKEAFE  
ESEELAEWVDDGVGTVDDFCKRFLEQRKVHHMRAAKMEILNNQER

>comp7676\_c0\_seq1; 1117 1 2358 LEN=2475; translated  
SNNNNNKAIKVRRLVNDPNVVVEDWLHEFLSKEVQSAQLMELFSPGSKANAVVLSLGP  
IRSLHVRSPTPGRSTNPSTKRKQAARTDGEPKCLRLELVSDVLLSPRDAIFGLIDPDEK  
IMLRSGGVGSWQDNPSYTTTATTVVVAAPSRTNGGAGAAADPRTVDPSEPTAAVPPRG  
ARSPAKATKVSATATAFQEQSEASPPKKRQKTLKQEQEIGIPPTVKKASKPSDQKNETL  
STKPVKNPTVSAKKPAISKATAAASSKKIAMAETATAKAKASTKKTVAAGSKPEKPATA  
KTTATASSKKTAIKPTASAEKPAISKTKATSPKKTSMTKSTNSPKRKISVDETPSKKR  
KASKKTLVKGFGGERDVLFGSGKEQHEHLGNEKYHEYIASKISDYNKHSSKREGLIRITAA  
IFRFFRKKKKGWDLGGDSEIVHAKIKSDFNNASKAIDKSTPGETLESVSKKQKQKGSPE  
SHDETSIDLNASRKKTVANDKSAKKDIRPEVDGKANQAKKKGALDPTREKRSDDTISSD  
GDRDPSSQINSTKNGDDNVLSDETDEDNDRRKEMETTKSKENVSTKNNEATKRKKSADKR  
RMAADRDNSSVSDDDDEDRDWLDKIEETDKPSAPKEIGHKKVQEPQKKDPSSRPKSAIP  
AKLQPEKKNATKKNAPPRDDISDGDSSSTSSSDSSTSSSSSTSSSSSSSSSSSSSSSDSD  
DSSSTNGQNAVVKRKSVVVPIKSKSQGAKTTTQKKKSKRKPLLDPNKPLLPDPTNRRLTF  
GEDEA

>comp7677\_c0\_seq1; 666 118 1593 LEN=1628; translated  
MASENTDGATLKTAAASFPVEARVILKGLVKAPHLNGKRGVVRSGLTDAGRHNVIQDL  
DKSVGLKPSNLEYEPIISLDDLSVKELKILIKYKCLQPKNLGMDKSDLRVEVSSSLGESE  
SLPKLLANAKANKDAFIPTTTTHSQAADQLSKMSPDQLRQQAQMMRTMDPDVRRMNPQL  
ANASDEQLRMAADRMEMMANNPEMIKMAAAQMRGMGNPNAATTSNSSRSAAEIPAF  
TPTASQTKQAADMMKNMTPEQFRQQAQMLKTMDPDVIRRTNPQLAHMSDAQIKMAATQFE  
MMANNPAMMKMAMDQMKNTSPEQLEAMRKGMPATATTPGGVPSQANMAQMGADPSEMLA  
GMDKKQLKEMLNTVKDNPMMKQFADMTGMSEDQLRQGVESFAGMDDSKLEAALTMKTA  
QKAKDAWAQADAKVGGKLGKHLIASAVAFGLWIVWYFFLRTAAVDAPRVFADLHQHATE  
DIIDDDPNSEF

>comp7678\_c0\_seq1; 481 339 1835 LEN=1835; minus strand; translated  
MSFQQDANQCPPEESDKEHVSFPLSRRRCRKRKFLGSEESSDDGLISDCATLSLAHSAQEAE  
NDLKDDGMPVSSCSSESCDQSMTSSSNTSALTLDDGFVDPNDSSTHLKVNFDHHDHNTL  
ILPDRRKQKTPGMNSIASPMRRGQPKIKRVHNVMYAKGNLNSDPTWDDTSWSLRILSS  
AETKQKALGNAANVAGKDTSCCLKGGCFCQWNDEREKMNPNKADSAEGKLRSDSGHRLH  
LKLFPIDLHRKAIIPSASKLLDTRQSPSSDFSYVLYRWLRSRLKAGI IHSSFNVLHQMLEK  
FYEEATHVIRKLEKGSQNEEISSLFNLRDRVAGIWCVYAHFFLEVGYLVISQERKKPND  
YTETTISNVFHHAISILSKARDCPLAGSHTAIMVSMARLIVSSSIVTEKDACNCMHKELS  
RGVLLRKIDHQLIPVGIALIFVKGSHKRKDGSRPKVHQFQPEVFFPVLNPSVRIYKQKKG  
SQKPKLKRESSRFYLCQVX

>comp7678\_c0\_seq2; 349 1 1292 LEN=1292; minus strand; translated  
KKIDGQENDSISCTSSHSLQRNSKVKDMLFASRRESFCNEWDDSSWDLPIPSCLPDRRKQ  
KTPGMNSIASPMRRGQPKIKRVHNVMYAKGNLNSDPTWDDTSWSLRILSSAETKQKAL  
GNAANVAGKDTSCCLKGGCFCQWNDEREKMNPNKADSAEGKLRSDSGHRLHKLFPIDL  
HRKAIIPSASKLLDTRQSPSSDFSYVLYRWLRSRLKAGI IHSSFNVLHQMLEKFYEEATHV  
IRKLEKGSQNEEISSLFNLRDRVAGIWCVYAHFFLEVGYLVISQERKKPNDYTETTISN  
VFHHAISILSKARDCPLAGSHTAIMVSMARLIVSSSIVTEKDACNCMHKELSRGVLLRKI  
DHQLIPVGIALIFVKGSHKRKDGSRPKVHQFQPEVFFPVLNPSVRIYKQKKGSKPKQLKR  
ESSRFYLCQVX

>comp7678\_c0\_seq3; 287 1 1201 LEN=1201; minus strand; translated  
KKIDGQENDSDFVYFKPFTIPSCLPDRRKQKTPGMNSIASPMRRGQPKIKRVHNVMYAKG  
NDLNSDPTWDDTSWSLRILSSAETKQKALGNAANVAGKDTSCCLKGGCFCQWNDEREKMN  
PNKADSAEGKLRSDSGHRLHKLFPIDLHRKAIIPSASKLLDTRQSPSSDFSYVLYRWL  
RSRLKAGI IHSSFNVLHQMLEKFYEEATHVIRKLEKGSQNEEISSLFNLRDRVAGIWCV  
YAHFFLEVGYLVISQERKKPNDYTETTISNVFHHAISILSKARDCPLAGSHTAIMVSMAR  
LIVSSSIVTEKDACNCMHKELSRGVLLRKIDHQLIPVGIALIFVKGSHKRKDGSRPKVHQ  
FQPEVFFPVLNPSVRIYKQKKGSKPKQLKRRESSRFYLCQVX

>comp7679\_c0\_seq1; 421 187 2184 LEN=2560; translated



MADRNKESSNTAASDAAGETYASRSDIVEEPLVILSDSDINDNNQSKSTSTVTHAGLSY  
AVSGRLVLGLLGCMYFLAFYQWQWEGMLGSHGLNPVYSYLETQRKKTYGCTINPKSLL  
KLENYYSVEQFSNCLKGFVDHPSLFWFFEHSDRAMRTLVLVSGMTLSALCILGSTSMALMV  
ALWLSYFSIVTSAEMSSFYAYGWESQLLETGFLAIFLCQNWLLPHRLAASDQAAQPEAS  
PLVWYLFWRWLCFRISIGAGMIKIRGDSWCTQKTCLLYHFETQPIPSPLSFVHFHFLPQFVL  
KRAVDLDFVQVYTSWVFLPTTNVAPSSLSKASLVLVRLGGWIQAGFMINIALSGNMS  
MLNHLTIIPALACLDDNCYPVWIRRRFSGLTAHNNKTAEIGMKDDDTVDISTESLQSHRW  
RWTSFRLWIDVGLFMMILVLSKPTVENLLQLNSRQAMNASFDSFRLVNTYGAFGSVGKQR  
FEPVSIAYKINQAGDDGKEPLEWIEIEFPCKPGSIHRRPCFCAPYHYRLDWNWIFIGFP  
PHDYLYNRREKWLVIKILGMEGSKQPTTKTKPTPPWLNLLDPVSVELLKQGRPPLYA  
KVDMYHYEMAAPLWKIASEYFNGVFSDDSSKGGYKIQWNNRYFKENLVPVVTVDGKRDQL  
YLASA

>comp7679\_c0\_seq2; 213 2037 2348 LEN=2724; translated  
MEGSKQPTTKTKPTPPWLNLLDPVSVELLKQGRPPLYAKVDMYHYEMAAPLWKIASEYFN  
GVFSDSSKGGYKIQWNNRYFKENLVPVVTVDGKRDQLYLASA

>comp7680\_c0\_seq1; 1777 1 3387 LEN=3413; translated  
AEIAQLQTQVEDLSRKLDESQKLEQSLDELQTKFQQSEVELAAAKAQVTGLEKELASRD  
REAEDAERSRSETNHYKERARLQADVASLNRRVEQLELDKQELEHNVEDLALDKEQLAE  
EKEALEDMEELKLDYETSSMELEETKMELEDARNMEASAAAAAEEAGGNALAAAAGD  
DAEGGEDQARADLAHNSIQNARMREALIRLREQSSIEKMDLTRQLRTAEKFVEESTNLA  
TQVENLRETNKELEEQILDLDKDMVEQGSAYEIMVEDLSDRVLSLEELSSSLQIIREMEE  
AAEITAEMEEVQAEELKAVNRDMEDETIRLNLEEAIKMQRKREEDFQRTVSNYRKSVE  
LKQEKNALYELHQGGEKESDLASASQKALARAAQLVQDAAEMRKREAAIDRIDSQVR  
MHLNRLLESLLPPSVSAAEVASIKGELLSKVVGKSSLSLDGIARSAKTIRARAWEWS  
NNKADAEKEEEEQAVVEEKMLSLTDEQQQMAATMIHQSEVAHVAIDVSGDLLWLLSAGQW  
PDILSTEASSELGSIMGHSMNELDIVLGSVLNLTKEEGVLSPHQSNIGAFRQTVVTTMQT  
LRSHIEQDGESLVPMDWPKPAALKLFRDASRAKYSSLGCYAAVACVLNAGDAIKSDEEKLK  
SQEFVAVLKPLLRLKLDQAASEAAKSCRLAKLDVLDDETIVSSLSAEAEIWRSSSDDLLGN  
VYNMLLAEDGLGPESIGACEAATDEVVRVVS HFATVLR SANLTDADDNKFHPFSPEIADV  
WEGVTMLARATRAKDGDEDDINYLVRAKNIENSLEDAVESVPELSLAKAKVASLEKSLAL  
RSKEISMQRNARLSDLEKMLARSNAQPSARLVASQASTEVEKSLKEENRVLTEAMDMHRQ  
VEEYENEIRARDSKTPTKARRSRSSSLTPNSSMPARDASRSLSRDSGSEGEDGITSFA  
EAALFRPALQAARRDAAQWTKATINTLLELPRLSVPMQSNPFGEKEEKVADDED CNPLF  
QLSSALSSYQRETASVRIVDITKTSKTPRMQLRDTMLRKAASEQVDKAAAAARQWLES  
RGAGFPQPDSTKPLVGRVKFAGPEPVRTIPTPATGEDLYRIQLHLAK

>comp7681\_c0\_seq1; 162 1 605 LEN=605; translated  
XQQQQQSQSDSQEFVPAVFVPTASPSFSNSTPPPTPAPECPLOCSNGATCKLGEHDYKD  
HPTEPNGSPFVFLQTTQRQGWYCDCPEGFTGLRCNREYVVCPLADPVLDLATGRLDQNS  
TGTPSTDDALEEIGNHVCHYGGKCSISGLTDGAHATIDESQRFCDCEASHNGIPIYFGKYC  
EIEGAVRCDQHGGTSSIGNNGX

>comp7683\_c0\_seq2; 241 258 746 LEN=1088; translated  
MKTSGGQIYDLYYGTSSSTTSVGLWIGCFLVLLFVGRSLYLLRSVRKIRQMKDPRTAASS  
FPHSGSSVKPTTKPLKTLVVLGSGGHTTEMLYLIQNLNPDHYSPIVLTVATTDTTTSIKRV  
SAHPHVLP IQDKENLEENSSSSSHNGQRVYRIPRSREVGQSYW

>comp7683\_c0\_seq3; 267 258 947 LEN=1337; translated  
MKTSGGQIYDLYYGTSSSTTSVGLWIGCFLVLLFVGRSLYLLRSVRKIRQMKDPRTAASS  
FPHSGSSVKPTTKPLKTLVVLGSGGHTTEMLYLIQNLNPDHYSPIVLTVATTDTTTSIKRV  
SAHPHVLP IQDKENLEENSSSSSHNGQRVYRIPRSREVGQSYWSSILTTLYSFVFAFWLV  
GFQVQPDILILANGPGTCLPIAFSAFFFRIVGWKPRTRIFVESFCRVKR

>comp7686\_c0\_seq1; 439 143 1954 LEN=2233; translated  
MAAVLPDNTSSKGLDDGSGETEARTERRHFVSTIGLCSAFSMFYLIMNVFPYSGFMA  
LHLNNGNRDLDNDYPHRYSAATIGPCAGILVSSFRVGRVPTAIAGRCADVYGRKFA  
LVVGLLAMVGLGNLLFGLAPSFAAAVAIRFASGLLNGTMVVVRTAISEIAEGDEALESRGV  
AIMSSMSGYALLVGPAGLLSEPTLHHPGWFGGAGSRTELWFARNLLEDYPFLPNLVG  
SFVALLSLAIVATCVEETLPEDQLRDWRCVPMDTVQWIEQNFVFRQKMGCCRPKNRIGI  
SVATEQHPFSNNPLGMGLVLSRDEATTGALS AKTISINESTPLVQPPALRSSEL PALHL  
ESTNEEKDDNTVLVTDETNGGILGFFLNNTTSTVRYFFYSMWLYAFTSLASSETFFLFAI  
TSKEKGGGLGMNETDIGIVQTIAGSIFVVGQYPVFTFIKKRLGVMGALRAGALYSNVLFFF  
IPIALYFSPTRHNWYQLGYLGLVSGAAGIFGSIFMGCATIGVNGCIEQPSQRASVNGLQ  
SMVASVGRGLGPIAAGYLVAWVMASEAISSTASAWVLYVVLVLMGMVTYASTGSI PVGGD

DKR

>comp7688\_c1\_seq1; 205 844 1521 LEN=1866; translated  
MSSLQKALKESKKGDESEGNKQSKKGTFTFTPI IRTVDADSSDDDSASSDDSSVNSDRKQ  
RKRESEEMIKIRQAINLINSPSTGPNSEKYNSPYQQQSAGQRSAGQNLTYTSPSMGSSPQ  
VASYHSSNPHSMHSPSAHPRARTAEDLSMKDMFVNCVSEVCKSSSSSELLHKVLSAGYKSV  
SNYNDPPVSGTWGDSIDTSQHGYGNRRNCNGGGVGNMPSRYQD

>comp7688\_c1\_seq2; 205 703 1380 LEN=1725; translated  
MSSLQKALKESKKGDESEGNKQSKKGTFTFTPI IRTVDADSSDDDSASSDDSSVNSDRKQ  
RKRESEEMIKIRQAINLINSPSTGPNSEKYNSPYQQQSAGQRSAGQNLTYTSPSMGSSPQ  
VASYHSSNPHSMHSPSAHPRARTAEDLSMKDMFVNCVSEVCKSSSSSELLHKVLSAGYKSV  
SNYNDPPVSGTWGDSIDTSQHGYGNRRNCNGGGVGNMPSRYQD

>comp7691\_c0\_seq2; 514 236 1783 LEN=1799; translated  
MTDAKDLQKSFQALGIPKSHATVGLTNLVASTKQYRSLFIHRRLPDCGWSVDVQIQSLLFL  
FSTLDTNNKTLATGSGSSEEEVRCVGEREGRVYSSLVHRHFGLSHGMGRSGDITEPQ  
PKAAGSSVLVKKLALHLTLDALRRGGGLDAKGAHAHGIILLPLCTGMSMILLGSLRSAATA  
ENEKNDDGEP IRKDVVLSRIDQKSCFKAIHSAGLVCVVVQTKVEGDEVVTDMDAMEAAL  
SEYGERVLAVITTTSCFAPRVPDAVDKVKLCKASGVYHVINNAYGLQCARTSKLINRAC  
VVGRVDAIVCSTDKNFLVPVGGAI IASPNKKVIGDVGKVYAGRASSSPIVDLFIITLLSMG  
MNGYKRLKERTTILETFPKKLQEISEKHGERLLSCPANTISFGLTLDGLARPKLDDSE  
EDYTKSIGKEISSFGAMLF SRCVSGTRVVPQRSQKIMGGESFVGFSGSSTSQYPHAYMTAA  
CAIGVSIQEVVEEFYVRLDKTLTEFETKTKKTEEQ

>comp7694\_c0\_seq1; 170 1 1013 LEN=1281; translated  
XARESSQARMEQRGTTDTVPEGTSNRKLDAKIQXPPTNTTQHASRPGGSEFSASFSHTG  
RIENHAACSRWRETGFAAVPVAVXGGLYPLPPRRIVVAIGPTLLWFDRATTSATTSAAED  
PSCLGSEVRGRKAHRWAPPPPPSEQSGPGTXARPKPQQQEHQHHSSNEPRPPRPAA  
ASAAIAPLMFAAWASDQAFGNRTRGQNEELRAGLLAELRERGHVQTGGGSSGEPFDFWS  
SLGARPVLFWCVVRKASGVAHCLPGVELGDVVEVLEEGVGP GREYNLCRLPAVDGPPGSR  
PPEDAYGWFP IRWLQTMDSYESMVRKQLVHLAKEGRPE

>comp7695\_c0\_seq1; 175 1 659 LEN=974; translated  
XEQELSLCLVTRRAAPHATFPTSLPTERTDPTDTPPLPRAXAMPVPPDPKDGPGGGRSREG  
FPPGRSDSDTGETPAVRWVQLLAPSDLPGGYELDVFC DGLVVAAVVPEGGVRAGEAFSV  
PFLPPLEALAVLVP GAGEGEEGQSGGETETEPEATEATRLLLPENGGGGESGGEP IGA  
ANALAVVVEAAAAAASGGASLSSQRRIERRNEGIQCNAM

>comp7697\_c0\_seq1; 550 1 2129 LEN=2185; translated  
XIVSLMITCNLISTDGDIFDRSTWKVILSSFDAGMSNLDVLRKLI SVCSQKVVPFMDEL  
QWKECNTGSEDKKLRKFDWF IDALDATRIRATVSNFPIFDEVNLNIRLDDVWAEDTLH  
REVDDISRETNEEMIVLLNMSSSDTSRKQGEREVIDPYSFAFILPLILKTIESGFSPKNT  
IPLDESENDGSRNNEEEKEMMP SWNLSKSSVASIQQLCEKGAISFCLISLSSMCETVRSY  
AVSILGLILQACRTNHALDSSSWDRPQLVMI LNSVQRCLLLRKALDESESTVPRVTPV  
ANFMARAALVLPKPDALVYSINRYFLKNENDHGAFQDMKRLPAFMSLFCSSSEDSNQSR  
AERMWALQMISSGVVDGTCYKLLTSCHAPELVLSFFENVRLSNTSSEAKGAEICSMLESF  
RAMIDHGGYGARVHLIRRCGLLSWVMSFCTSRSLAVALPTERSRILFCHLANSLVKIVFC  
TPQLKSSDLVDETCALIQPLVALCLLP SQTGQPSSDVYRASFLALHALSFCLRRVKNDGV  
LFPDVLFPFVSVESLRLIGIADESTKALSLHTLCSLPVSLTKDFEKDTPQGLILLMLQT  
FDNVAVAESSPCMIRDLNLA LLLLQRIALLIERCKIRSTSTNQIGKEIATKVFRRLRSNS  
RFSGTGARALRSRCLRMLMSKNITHDDADVGNIMGIVQRELYTGETCKA

>comp7698\_c0\_seq1; 930 1 3630 LEN=3769; translated  
GPYLTRYNDNDNLSGGNCNDNNDQANQPQQLLVLPDDKARPRGGGTI HGISFLNDEKHG  
CAQWDVAVYGGKRLAFCNLMGIKVGRWDTFQSSTESV PNPMS SAPPFLELDDWVWVVKIF  
PKQSYGDDNKNKTHGTSKSKISLVVGFARHMIEIWNVENSATGNTDDAILSTRLRRFFLNP  
ATVNTSMDFIFLNREYQSKCTDKTRDDNERIDTLWIAAGTSFHKIWI SCISIEDILEKGE  
KEDNASNL SVENVDSANYRSLGSHLLQGHSGVVH SVRWFQDGVNISLASTSDDR SVRRWV  
WDEADGQWMEKWTGWGHSARVWNIST IYASNGLSVSSPSTAFMLISVAEDGTARVWSAE  
SGETLACIHHPTSLWTVDRKTD DDDGNFIIGAVDGISAIYNVHDYVTGRDGLKIDCVAVP  
DDRPPPLMSGKSNCLIKSIAPGKEKNEDSDIVPKKKKTKNKIQSQVIVGMKCWKDASSE  
STPKILVATRQGS LFTFDIHHENWQTCDPWWQPSIGESYGIQANDGNCLAVLDRLSAVAI  
GTARGDIIITSTRQEKIKSH TILHASKLRAVQGLTFYNP SCLISFHVRTVAFWKV FDDI  
FTTSDMQPDCVLQVETKGI PQCCAYDQENERIIIGDSRGNLSYYQI INDEFNGGGQNHWN  
PICVLTRVHQKHITSIKWLNKNTILSAGNDGCLHVS YLDGDILQRGWSYSAPSLTGITK  
IITDKSSIGEESYSGPIVVAGYHGNIYRVMDMDSGYEYIRC DTGGRQRILD CRFI IDECN

IAGRSLDYQLLVCQAQKDGSNVIYVQNSFPQFVPKLLDNPCKLKTAGVKLHGETIFESTFF  
NLASKDLIFLVTASEDCSSRISSWKGGIEIVDSVQLTPQESCCRCVAVSQIDKKSULLIVG  
GGKLALQFFLVKERRNCSDTKSTRDLQITFIGNGLTSKKGASIDHRINSICALPLSDDDS  
RFHLVLAGDSEGCSHAFLVSEDNNQDNRSRGLLVPTTSERPILSIKMLVVCKRILILMG  
TTGGEIDLFDLPASLPQLQESWEDFQSLWSPIGRYQGHQMGNTNTISVQVLSVNSTTRAI  
LSIVSGDDQALCVSRI SVQQTGEINPCLQLVQEPNLKVIPEASFSAIKGVSHVRFHHQR  
YLLSVGYSQQLSVWKIDDDDDMILECTSKLPVDLGDVNCIAVHQSFDESSYLVAVCGMGV  
EVFRKVMESI

>comp7699\_c0\_seq1; 363 106 699 LEN=939; translated  
MDTELANEIAQNCLTTAHVENQLSNLQGGQNLIAVQKERTAADCEKIKAMAEAKSQETLDS  
AANTRKIEAAKAAAEALKLQTI TEAQAEADSILLKAKAEAEAIRLKAAAEAEERAKLLSQT  
SLGQQQCLFEIYADMVKSSNAGVDKVVYLDPAVNKDSPFALGSLDGLNRNLHSLTKVGIA  
SEQHENGKKEKEKEIN

>comp7699\_c0\_seq2; 999 192 2669 LEN=2909; translated  
MKNMNSSKNTKQQNQFIENDGDESUNLIDLKVDGSEEEAKVEGYFSPSNMDFGKLFIES  
PIEDRLPQTLEDCVGFLOGLPLLGNADQNDPQTI VDMINTEMVLDSEVDAETNHSRTM  
QKKKTSHSRAIAFLGHTIRPGCISLYKKYETFYAVSEGRWLLGDSLAWHTDKKNISLD  
TNLITAGNNQVLIIRIIEGQVGLITIQGVHLLDVGTHVFNTGTVQYYGVVEYAKQKYFS  
HGPYHYLNVPKGNKAKVWVEVLGTNGGKSLVPRLIKEGEHF IKSTFFKYVGLVNI SDEYI  
GHDSIHILNVVKGRVAKANCDNLPRLYGEGRHIIESPNSYEGTEIISPDLNLCISHGTIT  
ILQVPRGTIALTNQNEPLLLDKPGLYEFNSNNVHFVGFVDASKRFIELGSKKVILVYTG  
EVAITYDEGHKLKVENGRHVIDSSTHIFERFLSTKQRSIRLITYGAHKKIGKSKGKVGKQ  
REQELDDSDLLVCETKDLVKVGRADVFYSIVDPEKCIQTLNTEELEDLVRETAVATLT  
NIIRSTALNQIAQSRQISAAREEKPLMVANAEVVNDEETEDTTELDQQAATS YFFDRAHD  
EFMSKLHEDFVTRYGVDIANIRMESFKIMDELANEIAQNCLTTAHVENQLSNLQGGQNLIA  
AVQKERTAADCEKIKAMAEAKSQETLDS AANTRKIEAAKAAAEALKLQTI TEAQAEADSI  
LLKAKAEAEAIRLKAAAEAEERAKLLSQTSLGQQQCLFEIYADMVKSSNAGVDKVVYLDPA  
VNKDSPFALGSLDGLNRNLHSLTKVGIASEQHENGKKEKEKEIN

>comp7700\_c0\_seq1; 286 294 1370 LEN=1804; translated  
MKILVNSRVAIAACLLLGFEENGSGGFVAESLHTTNAATTRTATTPHLRRSERTVTIHRNL  
QEDVGEQTEEAPPPPAGEAVEPKPTAEPPPAEVP IENGGQDAAEPPAVVNAEPVPE  
VIVNSEPVPEVEPQAEPQAGDEPSMVNAEAQGENGTEEAAMELGENTESTETEGSKDN  
TETVAETTEEVEKESIVEIPEPTPQPIPEPTPSPVAAPEKPTVKPYVPSNDSYDPVKA  
DEKHAEQELELETELKQEEKVARQAGGLGIFFGILAMIFTAHQMSENPDGLYASVCRL  
AITISSVVVKIICMPCKLMGVGGGPNPYSGHMPISTNDYSYRNDPYRSNANAGFEMS

>comp7701\_c0\_seq1; 330 538 1452 LEN=2016; minus strand; translated  
MALATASAARLTSVRCLLVPVGVEDQVFGGRLLRQFAFAVPVKVLELDVDPDHRIEEQ  
LEGVVPLLQGLWTVVRVGDEACAEPDPGRELCEAAGTRVLAELDRVDPLDTEVFQVKLVV  
PALVVLVGRVDQVAEVLERLAVDDGLVLGVPVKEGEDHVLVALAVPPRKSLLVLPGRGHER  
VDFVLVLHKIEADILEVLQVKISNADVVDVQAHHGVERDRPNLLYRFQDPLALGQSLLAEE  
DPRDKLELVAVWVFPRAQNAIRDQLPGGVVFLAIP IAVGVVNDGDPSVLEDAVHHFGPR  
RKP I

>comp7702\_c0\_seq2; 343 1 1064 LEN=1677; translated  
XQQKNTKKIPKMTTEEAL EEAKAATTPGNSEMNSTEEKHEGNQDGDQLTLFTSHLTNDK  
TFPFHLRWGILFYLIGTFGLLVAADVGSVGTADSILMQEVEANTILNVSVISSVGKL  
WEAKSYPLAIFIAITSIGWPYIKLALATYAWVTPYTNHRRRELLIEIIDALGKWSFVDIM  
VLVEIMVAFRSSVVLGPGLSMEIMIVAQWGFYGFVVATMMSLVSTHII LYFHRSVHYHKA  
ATVASKYDEHGVVEELAADVGGKDDDSKEKDIKEKRGMKELGDLSTGFIVMVIASIVFSF  
AFYLAGVTTEIFEVTSTRGDVSVSTTYSISSLGMEIPKAYIDSGHVGTRFIQFMW

>comp7702\_c0\_seq3; 417 62 1090 LEN=1703; translated  
MTTEEAL EEAKAATTPGNSEMNSTEEKHEGNQDGDQLTLFTSHLTNDKTFPFHLRWGILF  
YLIGTFGLLVAADVGSVGTADSILMQEVEANTILNVSVISSVGKLWEAKSYPLAIFI  
AITSIGWPYIKLALATYAWVTPYTNHRRRELLIEIIDALGKWSFVDIMVLVEIMVAFRSS  
VVLGPGLSMEIMIVAQWGFYGFVVATMMSLVSTHII LYFHRSVHYHKAATVASKYDEHGV  
VEELAADVGGKDDDSKEKDIKEKRGMKELGDLSTGFIVMVIASIVFSFAFYLAGVTTEIFE  
EVTSTRGDVSVSTTYSISSLGMEIPKAYIDSGHVGTRFIQFMW

>comp7702\_c0\_seq4; 247 192 602 LEN=1215; translated  
MMSLVSTHII LYFHRSVHYHKAATVASKYDEHGVVEELAADVGGKDDDSKEKDIKEKRG  
MKELGDLSTGFIVMVIASIVFSFAFYLAGVTTEIFEVTSTRGDVSVSTTYSISSLGMEIPK  
AYIDSGHVGTRFIQFMW

>comp7703\_c0\_seq1; 290 220 1368 LEN=2867; translated  
MSTENDTEEDTHLAWTKKQGHVLSGGGKAESFYTAERGFPFLETDLPHYHLLKGDTHAVF  
KPNLKSAPLVAGAWNRPLFSGGWKYSSDKEERVYNIQTNNLFI DFRVPRSRET VFRST  
ATSLDDLGPRELRLYARQHIFAGFTVLDHEKDRPVATRHHFIDWNFVGVSRTRPNKWWIE  
ANEDTSSWKEFSYATDNNQHYHFEQWDRLPNGNPAPRLALRVSPSEKRKSSTEQSEGL  
CKQQDGVFVVLVDHFNVMGRKLSGEKRPYEVASLVLDLVDDAVASGDLATARSHLGI EGG  
HGTVSSGWKLDCTIPHWNNGKTLLESVGGGHLEVVGTDLTSCSVVFKGLSWSIYDCSFENI  
DELKQFLNGIQHHNNQLRMTRP

>comp7704\_c0\_seq1; 427 35 1859 LEN=2473; translated  
MVRGSGSIEHEGKTKLVAQLPSGYCDLSSVADNARDFFLVGGLERAKELVAAASSSPNSSP  
NFIPADGCRL LAPIDGSLVGKFLCIGMNYKDHCTEQNVPIVPEPVVFSKFGQCICGPDTP  
VAKDEHTEKLDYEVELGVVIGASVPRYTSKENASKYIGGFTVIHDVSARYVFEVWQICTD  
FSGXVFRSLIFLSLEQLLIWVYDIKETGNXKNGGQWLLGKSMDCYAPMGPVIVTTDEL  
LEAVHKTGIRCRVNGETLQDSNTDEL VFGVDDIIAYVSRFMTLRAGDILATGTPPGVGC  
RSPRRLVPGDVVECEIDGIGTLTSPIVGPLAKSGPENAGKNAALAAHSPLMRGQLYGKA  
TACIVTGGARGLGCGIAARLGMEGANRVVIVDLKALIDEVCKRLNRLIPSCHYVGEPCD  
VGDDKAVSESWGKIAESNNGRIDILVQAAGIVGKTNLKTEDVDPENFDVAVMRVNVRGIFN  
GCKAVLPYMREKKYGRIVNISSIAGKDG NAGMLAYSTSKAAVIGLTKTIGKEYAEMGITC  
NALCPAVVRTQMVEAMPTEQVKYMTDKIPMKRCGTIDEIAAMVFMVSPETSFTTGFCFD  
ATGGRSVY

>comp7704\_c0\_seq2; 514 35 1750 LEN=2364; translated  
MVRGSGSIEHEGKTKLVAQLPSGYCDLSSVADNARDFFLVGGLERAKELVAAASSSPNSSP  
NFIPADGCRL LAPIDGSLVGKFLCIGMNYKDHCTEQNVPIVPEPVVFSKFGQCICGPDTP  
VAKDEHTEKLDYEVELGVVIGASVPRYTSKENASKYIGGFTVIHDVSARDWQLEKNGGQW  
LLGKSMDCYAPMGPVIVTTDELLEAVHKTGIRCRVNGETLQDSNTDEL VFGVDDIIAYV  
SRFMTLRAGDILATGTPPGVGCFRSPRRLVPGDVVECEIDGIGTLTSPIVGPLAKSGPE  
NAGKNAALAAHSPLMRGQLYGKATACIVTGGARGLGCGIAARLGMEGANRVVIVDLKAL  
IDEVCKRLNRLIPSCHYVGEPCDVGDDKAVSESWGKIAESNNGRIDILVQAAGIVGKTNL  
KTEDVDPENFDVAVMRVNVRGIFNGCKAVLPYMREKKYGRIVNISSIAGKDG NAGMLAYST  
SKAAVIGLTKTIGKEYAEMGITCNALCPAVVRTQMVEAMPTEQVKYMTDKIPMKRCGTID  
EIAAMVFMVSPETSFTTGFCFDATGGRSVY

>comp7707\_c0\_seq2; 493 1 1798 LEN=2122; translated  
XETQNSTSSRFWNTDSKRPKRTVRACEETS RDPSLLRAVSNSSCIPFQICRWSIFDFV  
FPGRGLTLP AFETEFGTPIKRGGYSNASPMQVQLAYRCALILKDLINPYLLRRLKDKDIKE  
VQRM PGKKEQVLF CRLSDYQRMLYEDFLRSDYVKKVFRGTAQLLGAITVMRKICNHPDLL  
KDPDDDSLVEPLYEGRAPNELKSNNSGSDNDGEADAISGRYQTMIQRSGLKLEILAKILP  
LWKKQGHRVLI FCQWRKMLDI IMEFVAVKGWKFRGLDGN TNVASRQRLVDTFNSDDSYFG  
MLCTTRTGGVGLNLVGADRI ILYDPDWN PQTDAQARERAWRFGQKREVTVYRMICAGTIE  
EKIYQRQIFKTALSNSVLQNSKQRRLF TNKDLKDLFSLKADNGSIVAGNDGVTETSELTR  
GDGYIDPD DENNVADNHDDGETMRTVLK SQGLAGIFDHDVVEGKSKDKRASVREMEAKA  
KKIAREALQNL RQSVNEESNPFGRSFRGAGNASSLLSSI AKRTSEISNAGTLRTAIES  
NQKVQLL KDLQTFVRLNVPTTSEILDEFSSQVSTHDAAAIFRRL LKSIATLNDGKWSLK

>comp7707\_c0\_seq4; 492 1 1709 LEN=2033; translated  
XRLKTPHRLALSGTPIQNDLRELWSIFDFVFPGRGLTLP AFETEFGTPIKRGGYSNASPM  
QVQLAYRCALILKDLINPYLLRRLKDKDIKEVQRM PGKKEQVLF CRLSDYQRMLYEDFLR  
DYVKKVFRGTAQLLGAITVMRKICNHPDLLKDPDDDSLVEPLYEGRAPNELKSNNSGSD  
NDGEADAISGRYQTMIQRSGLKLEILAKILPLWKKQGHRVLI FCQWRKMLDI IMEFVAVK  
WKFRGLDGN TNVASRQRLVDTFNSDDSYFGMLCTTRTGGVGLNLVGADRI ILYDPDWN PQ  
TDAQARERAWRFGQKREVTVYRMICAGTIEEKIYQRQIFKTALSNSVLQNSKQRRLF TNK  
DLKDLFSLKADNGSIVAGNDGVTETSELTRGDGYIDPD DENNVADNHDDGETMRTVLK  
SGLAGIFDHDVVEGKSKDKRASVREMEAKAKKIAREALQNL RQSVNEESNPFGRSFRG  
GNASSLLSSI AKRTSEISNAGTLRTAIESNQKVQLL KDLQTFVRLNVPTTSEILDEFSS  
QVSTHDAAAIFRRL LKSIATLNDGKWSLK

>comp7708\_c0\_seq1; 383 320 1123 LEN=1285; translated  
MPFSTSPAIALRFAAIAGLVVDPSAFVANPRPPLKTKDTALSANSKNIRAAMEATERYG  
IHSPQAKVAWEIVVEFDASTNDSAAYTPNREGGLSQEELNQAYQEVQASMEIMQRNQYAA  
VSFQNNQQLMKDVAAELQAIKLSPPAKKPAPTIPGLWDAK LKARALSQQFGNQSPQAKLA  
WEEVEEIIASSGLNNAVGGNLYQQETCDLVQAAEACMALEELDRFLYENYHVGDNIENND  
QDSTGYYSTQNNEDYGYGNNEGGTTY

>comp7709\_c0\_seq1; 577 107 1909 LEN=2355; translated

MATLSALDDFLDSPEADKGIGTVEARRLI SEIPGDEDEAFKYFVNI VVPRNQSEVSGGEE  
KDSGADEEDESQAARSYRAMTMLKQDLSIPNIPSVLIKPNPDQAGLLAKDLFAGLSVSNRK  
RYSTLHIRELLDALLEVYPEKVMMAASAGGKQGIQEHLGPLLSTDQTLTVLTHLVCYGCT  
GRKGIASAEKSAQHTANLYHQNLRNKFKIGIGQRKKFVRACMDFQLMDRLAKTITTSSTE  
ADLGEEACEAILTMIELIGYPPEDI PQORMQOATNKKEEVSVGEEVLLSPLATTEWWAAL  
LNTLCTDTCTSQORLAISR TCMQSFSLATGNSSRICKSHAPATDATEQAAGEVVDEKEVK  
ITNKLIDWGLTDKIYASLVAQLPLLIKTLDLPSHDILNYKATFSTSGTNETNLDLP IIRH  
PGRYCTVPLGSWRLQLLSLLKEIVVYSGLTSSKSETIGDAIESLMVLPLPAELNKSCKKE  
DENDNEDCTIPAI FNPWPALCSYIWAYPNNDFYGITFFEMLR SVVLKHHEPTLRVILQKS  
KFLTKAIKSVSNHQETCSSVVDCLNLLRRLRAKSLPPNTFLPQYLN SHDGWKAHIDQLIQ  
>comp7709\_c0\_seq2; 625 341 2302 LEN=2455; translated  
MQQFERKKKISEIPGDEDEAFKYFVNI VVPRNQSEVSGGEEKDSGADEEDESQAARSYRA  
MTMLKQDLSIPNIPSVLIKPNPDQAGLLAKDLFAGLSVSNRKRYSTLHIRELLDALLEVYP  
EKVMAAASAGGKQGIQEHLGPLLSTDQTLTVLTHLVCYGCTGRKGIASAEKSAQHTANLY  
HQNLRNKFKIGIGQRKKFVRACMDFQLMDRLAKTITTSSTEADLGEEACEAILTMIELIG  
YPPEDI PQORMQOATNKKEEVSVGEEVLLSPLATTEWWAALLNTLCTDTCTSQORLAISR  
TCMQSFSLATGNSSRICKSHAPATDATEQAAGEVVDEKEVKITNKLIDWGLTDKIYASLV  
AQLPLLIKTLDLPSHDILNYKATFSTSGTNETNLDLP IIRHPGRYCTVPLGSWRLQLLSL  
LKEIVVYSGLTSSKSETIGDAIESLMVLPLPAELNKSCKKEDENDNEDCTIPAI FNPWPA  
LCSYIWAYPNNDFYGITFFEMLR SVVLKHHEPTLRVILQKSKFLTKAIKSVSNHQETCSS  
VVDCLNLLRRLRAKSLPPNTFLPQYLN SHDGWKAHIDQLIQTTTTTQQTPIKNEGKTVNIG  
LGSAYAKQLGLGDVSEYDSTESKSPSDNTHQSELGETNGKKKKKNNKKKKKKK  
>comp7709\_c0\_seq3; 671 107 2125 LEN=2278; translated  
MATLSALDDFLDSPEADKGIGTVEARRLI SEIPGDEDEAFKYFVNI VVPRNQSEVSGGEE  
KDSGADEEDESQAARSYRAMTMLKQDLSIPNIPSVLIKPNPDQAGLLAKDLFAGLSVSNRK  
RYSTLHIRELLDALLEVYPEKVMMAASAGGKQGIQEHLGPLLSTDQTLTVLTHLVCYGCT  
GRKGIASAEKSAQHTANLYHQNLRNKFKIGIGQRKKFVRACMDFQLMDRLAKTITTSSTE  
ADLGEEACEAILTMIELIGYPPEDI PQORMQOATNKKEEVSVGEEVLLSPLATTEWWAAL  
LNTLCTDTCTSQORLAISR TCMQSFSLATGNSSRICKSHAPATDATEQAAGEVVDEKEVK  
ITNKLIDWGLTDKIYASLVAQLPLLIKTLDLPSHDILNYKATFSTSGTNETNLDLP IIRH  
PGRYCTVPLGSWRLQLLSLLKEIVVYSGLTSSKSETIGDAIESLMVLPLPAELNKSCKKE  
DENDNEDCTIPAI FNPWPALCSYIWAYPNNDFYGITFFEMLR SVVLKHHEPTLRVILQKS  
KFLTKAIKSVSNHQETCSSVVDCLNLLRRLRAKSLPPNTFLPQYLN SHDGWKAHIDQLIQ  
TTTTTQQTPIKNEGKTVNIGLGSAYAKQLGLGDVSEYDSTESKSPSDNTHQSELGETNGKK  
KKKNNKKKKKKK  
>comp7709\_c0\_seq4; 531 341 2086 LEN=2532; translated  
MQQFERKKKISEIPGDEDEAFKYFVNI VVPRNQSEVSGGEEKDSGADEEDESQAARSYRA  
MTMLKQDLSIPNIPSVLIKPNPDQAGLLAKDLFAGLSVSNRKRYSTLHIRELLDALLEVYP  
EKVMAAASAGGKQGIQEHLGPLLSTDQTLTVLTHLVCYGCTGRKGIASAEKSAQHTANLY  
HQNLRNKFKIGIGQRKKFVRACMDFQLMDRLAKTITTSSTEADLGEEACEAILTMIELIG  
YPPEDI PQORMQOATNKKEEVSVGEEVLLSPLATTEWWAALLNTLCTDTCTSQORLAISR  
TCMQSFSLATGNSSRICKSHAPATDATEQAAGEVVDEKEVKITNKLIDWGLTDKIYASLV  
AQLPLLIKTLDLPSHDILNYKATFSTSGTNETNLDLP IIRHPGRYCTVPLGSWRLQLLSL  
LKEIVVYSGLTSSKSETIGDAIESLMVLPLPAELNKSCKKEDENDNEDCTIPAI FNPWPA  
LCSYIWAYPNNDFYGITFFEMLR SVVLKHHEPTLRVILQKSKFLTKAIKSVSNHQETCSS  
VVDCLNLLRRLRAKSLPPNTFLPQYLN SHDGWKAHIDQLIQ  
>comp7710\_c0\_seq1; 362 90 1062 LEN=1156; translated  
MILSFYISSSIYSKEYI IGDLPKSGFSITSKDESEAENSVSCGSSTSNISSSGSDGSDA  
STESINSEANMKSASLAFPI TDRDQLPTLEVIAGTASILQNNSEDCHTSVFDDEEPEQGP  
TNDSYALVGASGASVDDMWGTVRQKRVLSSNTLSALNAEAGR NEDSTKRKRGLDQPKEDF  
CAIPEITLGI EALDQI IHPLPRQYI IREDSPSISSSCEKEDEMLSEELEERFRSSSECCS  
VDNPI IPLLTPPQSPRTIGVIEWPSNLVMDSTIMTAYSNLSPVSTSSNNSGSLMSDQSKI  
RTSGEFSTNRSTRRCRTISVATT  
>comp7710\_c0\_seq3; 541 192 1499 LEN=1593; translated  
MTEKVTMMLVNSYQSGNEETEDEEVKRNCFGEGSMRSDLSDTDFEEEEGEEKND AVDAD  
EGRKQGNVTKNSKEVGMDDLVKFVTIGSEI IKPNGVVLYRPTPVLPTILLQT NESHQTL  
KEHEKRSISIGDLNPKSGFSITSKDESEAENSVSCGSSTSNISSSGSDGSDASTESINSE  
ANMKSASLAFPI TDRDQLPTLEVIAGTASILQNNSEDCHTSVFDDEEPEQGP TNDSYALV  
GASGASVDDMWGTVRQKRVLSSNTLSALNAEAGR NEDSTKRKRGLDQPKEDFCAIPEITL  
GIEALDQI IHPLPRQYI IREDSPSISSSCEKEDEMLSEELEERFRSSSECCSVDNPI IPL

LTPPQSPRTIGVIEWPSNLVMDSTIMTAYSNLSPVSTSSNNSGSLMSDQSKIRTSGEFST  
NRSTRRCRTISVATT  
>comp7710\_c0\_seq4; 541 744 2051 LEN=2145; translated  
MTEKVTKMLVNSYQSGNEETEDEEVKRNCFGESGMRDSDLSDTDFEEEEGEEKNDVAVDAD  
EGRKQGNVTKNSKEVGMDDLVKFVTTIGSEI IKPNGVVLVYRPTVLPVPTILLQTNESHQTL  
KEHEKRSISIGDLNPKSGFSITSKDESEAENSVSCGSSTSNISSSGSDGSDASTESINSE  
ANMKSASLAFPIITDRDQLPTLEVIAGTASILQNNSEDCHTSVFDDEEEEPQGPTNDSYALV  
GASGASVDDMWGTVRQKRVLSSNTLSALNAEAGRNEDESTKRKRGLDQPKEDFCAIPEITL  
GIEALDQI IHPLPRQYI IREDSPSISSSCEKEDEMLSEELEERFRSSSECCSVDNPIIPL  
LTPPQSPRTIGVIEWPSNLVMDSTIMTAYSNLSPVSTSSNNSGSLMSDQSKIRTSGEFST  
NRSTRRCRTISVATT  
>comp7712\_c0\_seq1; 356 134 799 LEN=895; translated  
MGKKKGGGMVRIKQTGPTKAQKDMKQMASGNPMEEFMTPPEDMVHYIPPDRNAQMFWPI  
QEIFSMDPNSFFII YPSYLDSSKTVKMGRRIAAENAVDTPTVQDISEALASLSIRHVSQP  
NKGYSRDATTLWDNPNRQVVDPAALESYTKRSLMVELASIIKELPSRARRLEVMKKLEE  
AREAKRLEAKAKKEQAAKQQHKLKSQTSSRSSNKKKGGKRR  
>comp7713\_c0\_seq1; 172 77 454 LEN=698; translated  
MSSGAGIQELMAAETRASQIVAEARMGRGDRMKQAKADSAEIVAAYKAEKQEEFNMMVLS  
KGGSEGDASAKLQAETDKEIATMQALFQKNAQKAVDVLVLLSKCCEVSLEVPTARVRATRKI  
AGLAN  
>comp7713\_c0\_seq2; 238 412 696 LEN=940; translated  
MKQAKADSAEIVAAYKAEKQEEFNMMVLSKGGSEGDASAKLQAETDKEIATMQALFQKNA  
QKAVDVLVLLSKCCEVSLEVPTARVRATRKIAGLAN  
>comp7714\_c0\_seq1; 291 1 1678 LEN=2284; translated  
GESLSESEIGETLQKEVLKSNQKIPDAAAYPGWWSVAFFLLPLIIPTIIVVENDGHAVN  
SNTDDHQNRKLLLEHGLRGGNVGTGESWTS PGVDSDDLISAADPAVLSSNVTIPLHAHSGT  
WHVHVYVGSPPQRQTLIVDTGSKAMAFPKCTCETCTECCGSHASPYFDPFQSTTHRITK  
GDCLLEGISKCLPLYSFGLDSSLQGAEGNSNFCTFTQRYTEGSSWTATEVEDIVWLGSDEL  
VESVEGFLPQLAIAYPFGCQTSSKGLFQKQYADGILGLSIHNTSIVTALYGEGLIPQNAF  
SLCFTHGEGVMSLGGTLDPKKYHFRPIVTTPLTRQQDHGYYSVEVIRLLVGRNNGSDPSG  
EESIVITDSETRPKLLRDMNAGKGCILDGTTDSYFPPSSLARVVRKAVIDYASSSNLHDN  
DSGNGYNAENVDLFSNKWRHRMYTYAEFQALLPTVTVVLANNATVDILPLHYMERVPIDS  
KTGWVVPWKGSRERLANRLYFEEASAGSVLGTNAFFGYDLLFDSTLPGRHRVGIAPADCHAA  
LARSSAATAEGMAMDLO  
>comp7717\_c0\_seq1; 846 102 2126 LEN=2239; translated  
MIRRISGSIPRCTSSSSRPLPPIGSAPFHCSREAAVAAGTRTSRRSISFSRCPCKWSVDS  
DTGVVSLDGTARFQTVIGVEIHAQLDVSTKLFSGCPVPNSKTTKGKSSIVHNKPNSSVWP  
MDVGVPGILPRLSSEAVRAAVLSAGAMNCCVQTVSRFRERKHYFYADLPLGYQITQQRWPL  
ARDGLLVCQKTKKQKNKNKKKQKTKDSSDNAEDTFTLRIERVQLEQDTGKTLADAYTN  
PITNRRESLVDFNRAGRALIEVVSHPDLSSTQASIVVETLRSLFKHIGTCDGKMEEGSL  
RCDLNVSIAPILENEDDGGNASDSSVDCDILSRTGHRVEVKNLNSIRQVQQAAYEALRQ  
SRAILEDNSPTPQETRTFDVKTNTVIRTKEGAKDYRFMPDPLPPLVLDND DALGSGG  
VEAFLEANLPPELPHARERLRTEHDLTDYLAGVVTNDPPAIAFFDEAVREARAQLLGGDD  
RRTRQIPETVANLLCNELFALVREFEMQRLIEEGLVDAAGGGGDSMRYSRVTGQQLGEV  
VAMVLEGIISNTMAKQLLRVLYSDAMGDEDEGEPEESTITPSRVGKSPRTVAKERGFEL  
ITDANELEKLCRTAIGNSPKEMERYKLGKYSVKITKFLLGKAMGASRGNAPERLNEVL  
AEVLEEVAPLDSVE  
>comp7718\_c0\_seq1; 705 252 2430 LEN=3131; translated  
MYGAVRSDDDERNLLPRGRNEASQNIKPASYTGLVVNRFLIILLLAGLVGISITLQSF  
QTQLNVQLSTDEEKIHFLEATVEAQKIIERFNQSVTNADVVEELNTMEDRWDRERGELF  
AQLNNTKAEVREVELDKAMTMLDQTVKLAEAQIQEDIKAVKWNITEMAANTNDRFTMENNF  
MIYQVAGTFTVLSCLISMWHMGSHINKMEQPAIQRKILAILWMCPIYEVIRTELKWLNR  
RNLEPFISGTSFHYDLLFCFSFHASTHFFSAAXAVSSCLSLVIADYAGYFAILKDFYEAYI  
IYQFLSFCISAIGGGDREKVVDAALSKEVGHLLTPPFRFCFCCKKHYENDRAMASAILLQCQ  
GFAMQFVFWKPVISIGQFFCKKYSYGPFFATDAMDWKSLLQFWMSIIVNISTFVAFAGLLK  
FYHAVDTDLAWCRPFKFLCIKGVVFMFTWQGMALKILAEITDVGSDANTADDWSEKVN  
FLICLEMLLFSIAHFYCFVDEWQPGYKVNRYKAKFGETMALNDFFTDLKIILTSDDSRK  
KKKRASSKPKSESTIPEEDESETQDGSVFGSGMSSVDEEEESKNALVQALKSYDDDED  
DELPTQQNDLVDAERRLGNMLDDMLFSPRSVPEDPSHTSVDDNDVIKTEEISRDEETGH  
IEEGTSKETTGLLTGASGETLTNNLKPISIFTVISQHQSMEEDETEVEEGIENQENGKEDSG

NPKEE

>comp7718\_c0\_seq2; 820 252 2294 LEN=2995; translated  
MYGAVRSDDDERNSSLRPRGRNEASQNIKPASYTGLVVNRFLIILLLAGLVGISITLQSF  
QTQLNVQLSTDEEKIHFLEATVEAQGKIIERFNQSVTNADVVEELNTMEDRWDRERGELF  
AQLNNTKAEVRVELDKAMTMLDQTVKLAEAIQEDIKAVKWNITEMAANTNDRFTMENNF  
MIYQVAGTFTVLSCLISMWHMGSHINKMEQPAIQRKILAILWMCPIYAVSSCLSLVIADY  
AGYFAILKDFYEAYIIYQFLSFCISAIGGGDREKVVVDALKEVGHLLTPPFRFCFCCKKHY  
ENDRAMASAILLQCQGFAMQFVFWKPVISIGQFFCKKYSYYGPFATDAMDWKSLSQFWMSI  
IVNISTFVAFAGLLKFYHAVDTDLAWCRPFKFLCIKGVVFMFTWQGMALKILAEITDVG  
SDANTADDWSEKVNFLICLEMFLSIAHFYCFPVDEWQPGYKVNYRKAKFGETMALNDF  
FTDLKIIILTSDDSRKKKKRASSKPKSESTIPEEDESETQDGSVFSGMGSSVDEEEESKN  
ALVQALKSYDDEDDDELPTQQNDLVDAERRLGNMLDDMLFSRSPVPEDPSHTSVDDND  
VIKTEEISRDEETGHIIEGTSKETTGLLTGASGETLTNNLKPSIFTVISQHQSMEEDETEV  
EEGIENQENGKEDSGNPKEE

>comp7719\_c0\_seq1; 84 131 876 LEN=876; minus strand; translated  
MSATPLRTIGDISVSPESFPLPRRLPHGLQNPIISSCREDEGKHVWVKGDNDQSGRNRPPVS  
FFFGLRPNTSIAPANPEDPPSPMLRRSICVXVRGHDGLVKHHAAGKESKQDGLDDQPK  
NVHELGRSIQARDVVGADVSPVTHTVKESHEHQSEGVHARQAGVENEEQKVFFVVSYPHAV  
VYPGTVICQTVHKKHQHSRYKAKNVSDAGTEKVHVKPTKRPSIYRFVQWQQLAALEKKS  
LGKKHLRSI

>comp7719\_c0\_seq2; 303 1 1307 LEN=1430; translated  
XDLQPEKQPTVRVPIPRTEGPQTPMASQETRQRKGGAPPKSGDAGLPMTITKSAGSAAT  
GVGGTANHLKLAMVKPVVKMAKVKRNKFGTGPFEHWNLDCCGLFCASFTYMLHAYGVY  
ATCLILIPPWMSTVDEDEGVRTISAIGHLNRVAFTLVALLAVWAHFKAMTTNPGAVPPDAI  
PLEEANNPDTGANGEGKDGKNSLMVEDSAQPPPRKGRRLCRRCNFSFKPRAHHC  
SICKRCVVKMDHHCWPVNNVCGIGNHKYFLLFIFYTCLSCVYSLTLVLMRFFDCMGRHGH  
IRTHHITCLDRPTQLMNLGLVVEAILFGLFTCCMMFDQASVVTNLTQIDRLKGGIDGSSGL  
AGAIEVFGLNPKKNDTGGRFRPDWLSPFHHTCFPSSLQDEIMGFCRPGCSRRGNGKDSGD  
TEMSPMVRNGVADIV

>comp7721\_c0\_seq1; 166 153 602 LEN=981; translated  
MTELPETNESSNTVGIANKAQSRTEEGPAPDGMGVQRKIIPSSSESIDPPSLTGKRDHVG  
EKVAGDSGAGGDGIAAMLHAFAAADAARTTAGADTSSSTRNTHNKRKREWLSYRGRTRHSR  
VGEDYQVTSLPSVAKPDHARTTESNGK GK

>comp7722\_c0\_seq1; 345 1566 2851 LEN=3096; translated  
MRKTNTLDSSTAAIQNCENISVEQNTVEVGKTKDSDGDFDINDIPESRTMLIQINDESIVM  
NWLKRLPEDESSRGVWAPQPQVATQEQKCSLAGTAIQGAQGNLPHAPVAPSTVRIPK  
READSLFLHPPTASSLDSYNRHSVGPANLADGQSI STYHGTRKRNEPSHHPYPYNPLTPL  
HKDTAVPPQYTSHLWPYPNTAIPSHSASHPHYPYVTVPESPISPAPDIASPGATS  
RGS PRSPTVTAGEAAAMRRKKPRREFEPDGKHESQRLDLSPPVSTVPQLQRPLG  
SYSQVPIASGHPPAGPPPMHPSQHHSSQVQSEQQPWMAYHPMYQPQLQPMGIQY  
YNDPTNMALRTPENNSRSLQHNDSPNNVTMTPGPGDGGGDHSDDDNDFNRRVLT  
LTNEKPYIGGITKHAPNENGIKSDRNQHR

>comp7722\_c0\_seq2; 336 150 2017 LEN=2262; translated  
MPTNLPPYSTLQGDPKPRITCGQQQIMFPHSKSFGNVLTFTPPGFKQTLNVKFPDSRLP  
VCRSCKKNFKTKDNCVRNQHTRPPWTTAYICMTIDESCTDESGKYVDKPFVVRMVQCRP  
FCGIEDFPKSKVPVCSTCKKTNRTRSFCDRDRHKHRKLPWCTVYVMLSTQESADPSTVSA  
APSTKFEGRDENTMRKTNTLDSSTAAIQNCENISVEQNTVEVGKTKDSDGDFDINDIPES  
RTMLIQINDESIVMNWLKRLPEDESSRGVWAPQPQVATQEQKCSLAGTAIQGAQGNL  
PHAPVAPSTVRIPKREADSLFLHPPTASSLDSYNRHSVGPANLADGQSI STYHGTRKRNE  
PSHHPYPYNPLTPLHKDTAVPPQYTSHLWPYPNTAIPSHSASHPHYPYVTVPESPISPAP  
DIASPGATS  
RGS PRSPTVTAGEAAAMRRKKPRREFEPDGKHESQRLDLSPPVSTVPQLQRPLG  
SYSQVPIASGHPPAGPPPMHPSQHHSSQVQSEQQPWMAYHPMYQPQLQPMGIQY  
YNDPTNMALRTPENNSRSLQHNDSPNNVTMTPGPGDGGGDHSDDDNDFNRRVLT  
LTNEKPYIGGITKHAPNENGIKSDRNQHR

>comp7723\_c0\_seq1; 434 79 1272 LEN=1596; translated  
MTAFIEDPVKAGVEWAKKNHFAKFVESKIVDNSDAYPKFDKAQLNLGKVLGKGGFCTVY  
EVRGVDVANRRRLSQAEDAQFIAENCLRKETGDARYAIKFLSPEIVSENGSFIQGILDM  
ATETRVSFSDTEHPNIVKARAFAHESPFDEQYFIMMDRLYDTLEKRIGKWKQNRYSGLN  
GKLLDRKGQKKDLLEERVVDAFDLSAIGYLHQKNIVYRDIKPENIGFDVRDDIKLDFD  
GLAVEKKDSRLIDDDLYNFTGMSGTPRYMAPEVANEEHYNEKCDVYSFAILLWEMMALKT

PFVYVYVMSVFKRVVWNGEHKRPYIDPGWPPSIKTLQRAWCRDISVRPDPFEEITKILKRE  
ATKLRGGSDRGLEHMSRRSTHIFVRDKKSPLSLTSYF  
>comp7724\_c0\_seq1; 109 1 578 LEN=1260; translated  
XQNPIFRTANPTSSKSARSTTDNGECSNGPSRRGARGGALSSNHLYHHHPPNNATSQPTP  
LFQRLHSEEVQSVHQEVKAYKRIVESQNLRLVELERIHGDLEKRLELESRRRQLETTLE  
QREREWTTKFHALETDRDHWENQVTQEQAKNRQEIKLYGKTKTYTECFNGRRCTQQYYS  
MTTKENLALDSQ  
>comp7724\_c0\_seq2; 104 1 518 LEN=1425; translated  
XQNPIFRTANPTSSKSARSTTDNGECSNGPSRRGARGGALSSNHLYHHHPPNNATSQPTP  
LFQRLHSEEVQSVHQEVKAYKRIVESQNLRLVELERIHGDLEKRLELESRRRQLETTLE  
QREREWTTKFHALETDRDHWENQVTQEQAKNRQEIKLYGKTKTYTECFNGR  
>comp7724\_c0\_seq3; 134 1 751 LEN=1236; translated  
XQNPIFRTANPTSSKSARSTTDNGECSNGPSRRGARGGALSSNHLYHHHPPNNATSQPTP  
LFQRLHSEEVQSVHQEVKAYKRIVESQNLRLVELERIHGDLEKRLELESRRRQLETTLE  
QREREWTTKFHALETDRDHWENQVTQEQAKNRRLRDQVVRKDQDIHRMLQRKYDNQRESG  
TGQP IIRNVHRHGDRQQQSSPRQNQHKQDVHQQLGAALNKS PHEI LETTGSMETVRI RNV  
KNVLGDFFFGL  
>comp7725\_c0\_seq1; 345 1 917 LEN=952; translated  
RAQNSTAQHCFQKRMKGDATTPAVFAISVRRSSSPSRSSFFRTTPVHFLAFLLLVFSASS  
APFSAAMSTSSSGNGSGTAPPVSASDAEAAASRTIDFLTMARGLKTTTPRTGWVRQAGPRI  
ESVADHSWRISLMMVAAGSLGSTSTSTPAFSCDANKCIKMALVHDLAEATVGDITPHCG  
VSEDDKHARELAAMETMVRALGGASRGQAXESTGGEILALWKEYEEGTSHEARLVKDMDK  
LEMILQALEYENDGKNEHSLDGGFNSTRDKWRTPIGAAWGKEIESRRRAKDSTEASAAKE  
GSNEP  
>comp7726\_c0\_seq1; 199 85 642 LEN=755; translated  
MSNLISSFILWCCYFGLLLTTSSVQGFVAVVEPNHVFRQSSLSASSQENQETLELFSCKI  
NLFRLRIIRKREDGFHDLASLFAQIGFGDTLELTPLGETADEGEGSDEFTCNMPGVPVDST  
NLVLRALDLMREKTGVNMYFKTNLIKCPAQAGLGGGSANAATAMWGANELMGRPASLEQ  
VSPCC  
>comp7726\_c0\_seq2; 344 85 1149 LEN=1322; translated  
MSNLISSFILWCCYFGLLLTTSSVQGFVAVVEPNHVFRQSSLSASSQENQETLELFSCKI  
NLFRLRIIRKREDGFHDLASLFAQIGFGDTLELTPLGETADEGEGSDEFTCNMPGVPVDST  
NLVLRALDLMREKTGVNMYFKTNLIKCPAQAGLGGGSANAATAMWGANELMGRPASLEQ  
MIEWSGALGSDITFFLSQGTAYCTGRGEILTPIDPPLPTGKVCIVKPDVGLSTPSVFKA  
LDYDELSNMDPDDVLLPAFLDAEGVENVSAEYVNDLEPPAFRCVPRLGELKESLLKVS  
FKHVMMSGSGTSIFCIGEPDDHESFMKKGEMDDVQVFFSEFIDREKGEWFQKP  
>comp7727\_c0\_seq1; 877 97 2095 LEN=2140; translated  
MVKLSLSTLLFLLSTESTLAFAPPRSSVSSSLMELRASSSSSDSLADCLVLGGGIGSTL  
AHNLNKNGVVLAEARLYLGGNVKSHRTEEGFLWEEGPNSYATQPSVVR IAYELGIDDQ  
LVFANESLPPVWNHNGKLHPLPKGQGGKPKGQIELVFGPNGVLK FALLGQLLSWPGKIR  
AGIGAFVGHAPAPEGKEETIREWVTRILGEEVFLRCIDPFVSGVYAGNPETLA IKAALPK  
IARIEDISYSIGWNKFGALFYGGLKRQVALTKERKADPPAPEWPEFEYGNP GSF RDGLAT  
LPNAIAKELGEKIRLEHKATKIEKKTNDGSEYYEATFETPKGTKTVKAKTVVSTVPAHC  
ISDVLEPVMEESEKIEFEKVRKIDRIGVYYPVAAVTVA YPKKSFKDVELPNGFGNLQDL  
PGFGSLNPRSEGVRTLGLTWSSSLFPGRAPKDYNNLLNYIGGSRDVGLADLSEEE IIAEV  
DKGCRQVLLKSDAPPAKVI GMKVWPTAIPQYELGHLPI MKELEEEAEAKHPGLWVCGNYRT  
GVAFPDCVTFGYEKAKEVKSFLDARDNEKEPVKTTESKEATVKVVGKEEKEEEDTAKVET  
VVDDMKEEEVTA AAVEKEKKEEKEEETASVVVESMADDTKEKETTERKIPFFLTEKKVE  
KELTI  
>comp7728\_c0\_seq1; 662 38 1951 LEN=2076; translated  
MIAPKPSPPPTSASKVRASPGRSACKAPLPAKSPSKTKSKAASTNPSPGVRAIASKAGSI  
EKNAVMSLESAAASLAGMQVNKIAAPKPSATPTLAPKRAILSKVTTASGSPYAPKQQT  
ASYPQPKGQAQVEAGGTPSKFSSPPHPAHVPGSKNTPQHQPHPHPHYPHYYPGYH  
PYPPHPGHPSNEKNKGQHPSTAQNGTTPHPSTPKNYYPKPSFSAEGKRLNLASPKPSGG  
ARPPKELNTPNKSFMASIPKMVGEHLAASFSGDGASRLAYEKLEIGIGGGNEDTQMSKL  
KKMMENEDENEAANAIVSHLAKSPGRGFSNLLSSPSKQPPSSPREVSTTSGLSIMARVLG  
NSSSNPKRKQAGVETTS DGP SKNLSSSSVSDYKPFASPKKRQAGSFPGHG PLATAAPET  
PQRDPSSTNGFYSTSGTPLGLSPGLRSLGASALLKNDGIGSTSLTVPFSPAPNHGSQSGL  
LLKGGNEGTSNFTVPYSPAPSM LFR AFDEKTGDENRFAFDHHDHGRVCGEDSNQQLGDL  
AVGADLSDTAHGVA NTMNHPPPPNNGNSLI IAPDEFDAISGLGALSNSPFKTVKSLSQRD



HDNDDGEEKKNSQKPTKSFFARVMGDSKEPSPQKKLF  
>comp7729\_c0\_seq1; 436 121 1401 LEN=1401; translated  
MAREVSSEEDGIKKEKWKFFSIFSSSCGATVFMALYVSTAFNLYGLMYPLTKINLNDFO  
PNSFIHPLWDTEAKMGIKVYLSMKPLFYPEFVKSEFEPTAEIIIIPKETILLWQQPLDKA  
SLSKTFLISSLDCIGEENDDGSACDKEGGVNVDP SLKFAREWLD TQDRASMEDDGSIFST  
IQSAAGQGIESTSILLTIGQGISNKFNLSLFTLGLVEDKTNDDDTASRKGVLERTNVHLP  
VSSPIWSHLMNNSPLYVHVLLVREQFYLDGPDVTLKEASKALAQANTLHSLLVGKVS LVK  
YDTPSHLGRPDRILLWDLAFLFRKYILQDRELGRPPWEMETTKPEYFKAYQQIQQMKIEG  
RKYPYWKPEVAVKYLIDEDSYPSDYAGISGMVSVSCHS QLLSSMVSTLDCDSRFFCCLPIV  
LTPLVVL  
>comp7729\_c0\_seq2; 801 121 2517 LEN=2621; translated  
MAREVSSEEDGIKKEKWKFFSIFSSSCGATVFMALYVSTAFNLYGLMYPLTKINLNDFO  
PNSFIHPLWDTEAKMGIKVYLSMKPLFYPEFVKSEFEPTAEIIIIPKETILLWQQPLDKA  
SLSKTFLISSLDCIGEENDDGSACDKEGGVNVDP SLKFAREWLD TQDRASMEDDGSIFST  
IQSAAGQGIESTSILLTIGQGISNKFNLSLFTLGLVEDKTNDDDTASRKGVLERTNVHLP  
VSSPIWSHLMNNSPLYVHVLLVREQFYLDGPDVTLKEASKALAQANTLHSLLVGKVS LVK  
YDTPSHLGRPDRILLWDLAFLFRKYILQDRELGRPPWEMETTKPEYFKAYQQIQQMKIEG  
RKYPYWKPEVAVKYLIDEDSYPSDYAGISGMVSVSCHS QLLSSMVSTLDCDSRFFCCLPIV  
SDKIPLNQTVTSLPLRISFDRSDMQDEEHRQGATATAGGISPARWRLLNHLSKSL ENQR  
ELGFEQSDIDDMRRLIADTNVTL LAITV LASALHMLFEFLTFKNEVHFVWNNNSDLTGLSV  
RSLFLDLFGQIIIIILYLI EQETSFLMTITAAFGVLVAFWKCHRAAGFAFVPLSEEEKGQK  
SSIINFLPRLFGYQFKAQRLSSKAGSKDEKSGSGKTKSSASDLETTLLEADRQATVWL  
GSALLPMVFGYTIYSLVQQEHASWYSWFITSASSGVYAFGFVLMTPQLFLNYKMKSV AHL  
PWRVLVYKSLNTFIDDLFAFIIRMPTMARMSCFRDDIVFFIYLYQRWLYPVDASRPVEGG  
GEGESAAETNVSDAKKNQ  
>comp7730\_c0\_seq1; 537 1 1566 LEN=1863; translated  
LKPSPSSPIIDPYLFLNPLTTIHHKWKDIHASACIKMMRSSVTTTTMRRLLEGAFRRQLN  
GSLSATSI CAHHPQRGFSSARPKAKESRVAADPSGGDTEPSEKTQNRQPFVKPILEPGEW  
DIDRKDPYHRPKPPRNKLISAEDFANRPPVGFDFNEFSSYEDSMIALSWLDTKTCRQIYST  
YVDMVRHQTDHPGRTSHEYVCRVLAQRFOITTWRAAGVVQLQHAEEQMRNNPELLCEE  
QAQWAEETIMKNISDAYKSERSHPPNRGHGGQHQPVEDPVG I HGLGEPDEISTSWAPTD  
DIYDLEAKLHQANARDD DELAQVMIDEHVYSEDVDESTLPVQTDGVAKGLIRAHKKQONES  
KNEDESLSIAYPETNGQAKRPRWKYVAKVVNTRAMRKKGRKITSYNNNTTNTLVEHNG  
ELRVATVEEAKKVAWKPTRTKGNSYIYEGAQKAWLDKTINGKTEVWGKAPKTSAAAATAA  
AAAGVVTEEPVPTPTDEASAAEDETKEEESGDDTEEQDDSEK  
>comp7734\_c0\_seq1; 614 84 1700 LEN=1973; translated  
MGNALSEEEQEIMEEAYNLEDPGTDKHLNSGTSAPNCQPKHTQRELEPNINGGSSEGDE  
TSMTHKNQRTASTASVRDAQDERRKRQHTSASSSSLSQQQQEQEMTQQEKKLSYFQMAR  
LGYQELVNAIIRPPRADYKMEALGPPAFTFCGRKFRTRDFTLQTKRGNLECSHWEPVER  
IADKIP I VIMHGNSSARVEVLPQLSYLLSMGVAVFSFDFAGSGKSDGEYVSLGY YERED  
LTCVVSHLRATGVVSTIALWGRSMGAATSLMFGSRDPSIACMILDSPFADLTQLAEEMVE  
KGRDQGI VVPTFVVSMA LRMITGSVKKQANVNIKNISPISHADKCFIPAFFVAGEHDDFI  
KKHHA EAIYK KYAGDKNIIIVEGDHNSPRPKFMFDSASIFLQTC LQIPSNWALPVPPSMN  
LMCPPWFYFEMYQNRMRASQRSSARGSQQRLSKTGKDP SGKHGNFDGDQMGMTQDRQREI  
QASLFKMLGQADDPMMDP SKESSRAKPPPTRQDSSAEPNGSSRTPHVVT TIPSDEALR  
>comp7736\_c0\_seq1; 789 106 2379 LEN=2517; translated  
MTTTSSEASSGESLPTGSNLSLSSALQESSSTAEPFSEEQLSNDLALFLSNPSLKAALADG  
SLDLASYSSTVEGELMELETKCVEAYREKTTEIASLCKELENC DGILLGLQEMLLGFQAD  
LGGLSGDIRKLQETSKRLGIQLHNRKAAAMGLRDFLGR IILSPHLVNTIVKGPVND E FQE  
AIGELVQLYRDTHEETKQEWACGESPADTVAGKEMQAHIGQLRLVAVSRIRDFYK KMIL  
LRKPQTNIRILQSHGLLHYATLYEFLMDAAPNIAQELFKVYCGSMSKTM YALFRTYQAQL  
IQLDATKHAATRQDVLAVEDAYLRDSITTKAKKRVDVFTLGNRANVLNITHENPVVAHVA  
LSEHQTFPYERLLKSLQHLVDAVTNEHVVCROFFKRDAFEQLFPPTLQ LLLLEQENYLF  
GCYDALSILLMIKVTHQFRRSAQSRTIHSLDAFFDQITHLLWPRLKTVMELHLRSIKQAT  
PLSLGHVPPNLHAHYVSRRAEFTCSVLVILQKGNKPLPSVGSTSSAHKNSQKTAASN SP  
TRPAQRGLSTVLEVKNSKASAGDMLLQDLNELLDEYIALLGRLSDEHAVNIKKIVFMINN  
LDQAVCIFQERRVAGGKELNRILELLMLQRELFVEEELLHGFSKMIAFVQQTEASLATGS  
ATDKTVNIQVVESLVREFASNWRSGMEEINRNVLSYF'SNFRNGMEILKQCLTQ LLLLYYTR  
FQDVIRKVYKRQPPAFTKDLVPTTMILAEIKKYALAI  
>comp7738\_c0\_seq1; 1411 106 2229 LEN=2261; translated

MKFSSLAIAAVAVAASSVNAFSAKIGRVAQPTFLKATAVDADTKTSLQTAANEARGLAM  
DSIAAAHSGHMGPLPLGAAEIGASLYGSQMZYHAADPQWINRDRFILLSAGHGSMFLYSWLN  
LAGFDLPMEEVKNFRQHHSMTPGHPEFSPSEHNTPGIECTTGPLGQGVSNVAVGMAASEKM  
AAAVYNTDDHKIFDHHIYALAGDGCFOEGVSSEAAAFAAHEKLDNLIVLYDANEVTLDKM  
AEYTOSEDILKRYEAYGWETFDIDGHDLDAVEEAIAAAKANNNGKPKFIKNTIIGKGM  
ETEKTNAAHGEAGVPYVDNAKKNIGLPDGEKQWYVSEGTRDFDDVQKKNKSTYDEWQSTY  
AAWKEANPDLAKQLEDVADNTMPAEDMIKEIDAMGEDAEATRVSGNKVIQEI SRLVPNY  
VSGSADLHGSTRNYINEGGNFGSGFDKTYSGKNLYFGIREHAMGSIMNGFAFHGLFKISG  
STFLVFDYFRPTVRVASLSELGAVSYILTHDSIGVGEDGPTHQPVETVSGLRVIPNLVDV  
YRPADAEETVAAMAHSATRKEGPTALIFSRQNIQNNVDVYMARREGALKGAYVAKKETE  
DLDLII IATGSEVQHAKAAADLPGARVSMPCMEVYERQSAEYKESVLPSSCTKRIAME  
AGVSDVWYKYASKVVGVDKFGFSAPGDIVMKEYGMTPENLSAEIASM

>comp7739\_c0\_seq1; 375 76 1584 LEN=1975; translated  
MIGPSSNSSFSNGSYGLPPSSKAAEAELISKATQTAIVAARSILMNGGSEDEVALKTAKAA  
AESVLNPKASDNDSISGRSTLGVSSLGGAFSGSKKRKAKRQAEVVASMALMSATS GHPPGGG  
SIAGELYGKNIITVRHDEPSVLSGSITSGRRSITSGRPPKMPTPKSQVSRNNNSYFREHS  
QMEGIRDAVPNQEASPYDLSIRNRGSRLLSSSSPMQNFTQRLRALSPTSNESSGLDREEDG  
ETSTVNNADSNLSQTSTMDSNVQSSVDASLRGRSESESESDVDIESDEESDTIHVRDHL  
NEKRKTYKTIGAKRQEKEQWDLGEIILRPLALTMNIMSCGQIVSGEAGDVALEYKPNG  
TKRRSGRRTGRRTRRRRAGSPAFESRDDTFDYDCDDNRKKSSYRDQDFTSSYSGSFLSSA  
SGITEGDSEGEIKVRSSIRETMESLVTKSKKKNRKGKSNGDGKRQISEKSAAKIDSSTAN  
ASNKKKALKRRSSFFKKKKCSV

>comp7740\_c0\_seq1; 890 335 2761 LEN=2834; translated  
MEFEKFTSPFTTSTTCYSCGNKSIIEPGSVGTARFPHEKQIPSAQQMRFATESHILGVS  
ISEGTSLDSENVGKTLCRSLPRDSAKLTCAGYSHWEEKEHEQINAKRSELAEIPSESIK  
DTNDTSGGSEISATVVHRIEALALIDPDLIEEHDFQDYETPITAMNLHRPPSVVIEKDDT  
ASMVPTLTDARSVSHSKQTHPHHRAPSSSSILSGTTATSNMQPLSGGSFHRKTHSELSKG  
SNTTISDAQQSNQNNNNAIESDNDKSKQNSRMLEKSKARLVLRQEYTLRRSSNSNLE  
IDDEMDDGTGNSNVWSYERRWHESSYALLDFRPLCPCLARWKQEQFPGSNNNSDSKNI  
PGATTNTFVGIWLGSAADATLRLYVSSNDPRALVSVALPQEHFVSDSPVMALDFRSVSW  
EGHSDTRKSKTENLALPEPAPLTHTLAVACQDGTIRLITWRDRSMGDGTIKSNYYGHFG  
EIWQKVIQVVDGPLVCIKLDYNHFASFRVIVGSLCGYVCQLTYDNRCSGSESSWEGPFMIV  
QDLFNSSINTEESVLAVDVFDNYVIGTQLGRCLLYATYDSENYFPVWQTVLPYPYIHGTK  
IISRKGERPSVASCEEGELSEALSVAVITRRSFHLFDVAVRGGIPWRRKPTKEHYSPELAK  
IRLSKILDEIQENKESDLATRKSVLETIRHLVHKVEMTAQTHKDDIEKSSSILRAHVL  
SFAPSDKEDSADHIQQPAIVDSAQPRSSTFDSCNQSINEEGKPADPPHWEYSSSDEEDAPP  
EPDRSGADSEDPSTPTERIEQNVVDKD

>comp7741\_c0\_seq1; 373 124 1152 LEN=1482; translated  
MNSRNNYSQGNQNEWQQHGGHRLQHNHQYNSNSNSNIVDNANRRHQGFQQQFQQQQC  
QETLPPGWVEAMDNPNTGKTYCNPQTGDTKWERP SLSVTNTIPQAGPTETSMRGRVFLQQ  
QQKQLPPGWVEAKDPSSGNVYYCNPQTRERTRWERPVFSSLPSTTPPVETHSNRSTPKSL  
VTDPTKDYGHRNRDAASRSSYGGGTNQAATLPTAATPASTTPESTTQATQNTGGEDGFDE  
LLSFTTGQIAHLIMQHRKQKEELSALAEERQVDLSTIVTINKDENHASALNASKYTP  
QLSMISMPSGNERTEPGRLDVRMHALREELKKFGYQPTQPYA

>comp7743\_c0\_seq1; 411 112 1545 LEN=2217; translated  
MTT'TTNKKQSHDRSEPTAVIVTEGEQREPDSISSRQRSSWVPSIVEIPAQPENSIPSLTT  
LSSERQRQLRPLRPLRSLKSNRRNRKQRSKMKNKQERITNVVLVVGVRFESENYWMED  
CPAILREDFPHFRNLKNTIGLCRQMQRQQLQDMNGVSHPANVTKI IHLHSVQKRSQEWK  
TFRAPSSRSPKPEIYPTNDQKQDNSVSMQHPNIEKIERCGYSPSLVDSYNNYEANERC  
KLNGEDAVCPQQGELLIPSPSWSSSGEILLLDALRKAATGNQKQLPAMKHCRSHSHG  
CHGCDYDNGDKTFLNQGKTQIKNNNGKNNTIVLVCGLVTSVCVLNTAMVCREEGYRTFII  
EDACADRGRERHDRVIEELHTQLQQQHYSSSLPHRVSNKHKNKNTSNVVELLTSYRDVLR  
FFSPPQARQQKHQGRVRSAPVVPASRLSYQRNNPHHYHRPRERDEDCLVSFLER

>comp7744\_c0\_seq1; 250 1 834 LEN=1280; translated  
DNDNDNDGGFNEFYSDVLSIDLLAGSLGRYALPRPDYIYAVLVGFFGVLMSSGLIGWMR  
YNASAKNGGGDGDVEAAKESGEHDGSSDENPKARPRSEVVLEKVRWLLDGMVWVAIVA  
WGGFTVVGGGVGGRYVFGHIGNGYFALWAMLIFSLGNCGLSIAFFKREAKNADSCVYGLT  
IASIVVIELSVGVPSGFWRVYHAFNKISTYTLVVAVFSLFYGLLTAGYSRLNSGNYRLDP  
KIRLGFLGFFLLWIIAACLSTFIGPFLFAGNGYFAAW

>comp7744\_c0\_seq2; 226 1 929 LEN=1375; translated

DNDNDNDGDFNEFYSDVLS DILLAGSLGRYMALPRPDYIYAVLVGFFGVLMSSGGLIGWMR  
YNASAKNGGGDGGDVEAAKESGEHDGSSDENPKARPRSEVVLEKVRWLLDGM LVVWAIVA  
WGFFTVVGGGVGGRYVFGHIGNGMQAAALFSLLLVLFVLFSPNPLSVPLPHSLAGYFALW  
AMLIFSLGNCGLSIAFFKREAKNADSCVYGLTIASIVVIEELSVGVPSGFWRVYHAFNKIS  
TYTLVVAVFSLFYGLLTAGYSRLNSGNRYRLDPKIRLGFLLGFLLWIIAACLSTFIGPFL  
FAGNGYFAAW

>comp7745\_c0\_seq1; 521 268 1718 LEN=1718; translated  
MPKPKQRELASMENITSPAPSLSSPEVKKRSRKRRIQSREERSPRSRSKPRSSKKGRKSR  
KDDLPPSCLFSLTPNAVELMAMGIDLFD RRHEGPPGKPSKSNASKAQAERDRVASAESAS  
SAIDGNSAHSRRNELVLRRLRVDLPPVPESVPGKEQTPVAKNPSENNGEQAALYGTLDG  
GRSTIRAMVLPDGIWSKRLERDQAAAGIEGKEASRKIDWIMVHGYASTEKFWHTKYQI  
FPVICLTSISILHTCAPKKSFSPLGKPLFSKGVGLATSFKAQAGTIGTFLKERGPF LTNE  
ELAGSSRIRDPKTESLAAVVSNDENNPETSDALLSSLKTSADQNFKKVHDCLSRHSAMLT  
LQSSSVEPLPSALVLSGTSMPGQSSSTDNEDSSSDPPVPSDSPSKTRQPTQHAWELYNG  
TLREFRTSQMDRQKASLGTNTGRESAERAELVVTQHNAALELALKEEGPLSVELLVSPGV  
EERT

>comp7745\_c0\_seq2; 535 413 1745 LEN=1846; translated  
MANNALHVVLFAAVAMFGIVDIHPFIDGNRLSRIVANYALKWVFPINL FATPAQRNEY  
VVAIERTRHVLSANCSFGDVS RDDLVQVIKYTG VFGALVELLMDRVARAGTTLAALWEEK  
SGLAAEAAEAKAARRVRERASRGTCMICLDEKPN IATLCCGNAIHLNCCA EWLSGNNRCP  
ICRHEMPSISGRVVRAMEEPRERYEEENEDGDT DGTGGQNPEIFERDYQNVVERFWTEVR  
QGSRTNRANRSNPSFLEFFDSTTTLPEDTGVRLRFNDESSGSSESDSDDDV VSLHRLRNN  
ARTRARGNNMGNRSTVNPDIQNIDETTTDSSES IDQGGEHDATTTIVGEEDAETEDNLD T  
TTTTVNESESNTTTTTDDSDSHSQEPRRHEMSMICALHRVATARRWGAQTTFVGDAA CLLE  
EIGIAQDIILESLHNLISYILPF

>comp7745\_c0\_seq3; 535 294 1626 LEN=1727; translated  
MANNALHVVLFAAVAMFGIVDIHPFIDGNRLSRIVANYALKWVFPINL FATPAQRNEY  
VVAIERTRHVLSANCSFGDVS RDDLVQVIKYTG VFGALVELLMDRVARAGTTLAALWEEK  
SGLAAEAAEAKAARRVRERASRGTCMICLDEKPN IATLCCGNAIHLNCCA EWLSGNNRCP  
ICRHEMPSISGRVVRAMEEPRERYEEENEDGDT DGTGGQNPEIFERDYQNVVERFWTEVR  
QGSRTNRANRSNPSFLEFFDSTTTLPEDTGVRLRFNDESSGSSESDSDDDV VSLHRLRNN  
ARTRARGNNMGNRSTVNPDIQNIDETTTDSSES IDQGGEHDATTTIVGEEDAETEDNLD T  
TTTTVNESESNTTTTTDDSDSHSQEPRRHEMSMICALHRVATARRWGAQTTFVGDAA CLLE  
EIGIAQDIILESLHNLISYILPF

>comp7745\_c0\_seq4; 869 268 3190 LEN=3291; translated  
MPKPKQRELASMENITSPAPSLSSPEVKKRSRKRRIQSREERSPRSRSKPRSSKKGRKSR  
KDDLPPSCLFSLTPNAVELMAMGIDLFD RRHEGPPGKPSKSNASKAQAERDRVASAESAS  
SAIDGNSAHSRRNELVLRRLRVDLPPVPESVPGKEQTPVAKNPSENNGEQAALYGTLDG  
GRSTIRAMVLPDGIWSKRLERDQAAAGIEGKEASRKIDWIMVHGYASTEKFWHTKYQI  
FPVICLTSISILHTCAPKKSFSPLGKPLFSKGVGLATSFKAQAGTIGTFLKERGPF LTNE  
ELAGSSRIRDPKTESLAAVVSNDENNPETSDALLSSLKTSADQNFKKVHDCLSRHSAMLT  
LQSSSVEPLPSALVLSGTSMPGQSSSTDNEDSSSDPPVPSDSPSKTRQPTQHAWELYNG  
TLREFRTSQMDRQKASLGTNTGRESAERAELVVTQHNAALELALKEEGPLSVELLV KWHK  
ELLRGLHPEAGEIRTRTVRCGH TVFCPPKQIENQLELYCAGLKSLELR LDMANNALHVVL  
FAAVAMFGIVDIHPFIDGNRLSRIVANYALKWVFPINL FATPAQRNEYVVAIERTRHV  
LSANCSFGDVS RDDLVQVIKYTG VFGALVELLMDRVARAGTTLAALWEEKSGLAAEAAEA  
KAARRVRERASRGTCMICLDEKPN IATLCCGNAIHLNCCA EWLSGNNRCPICRHEMPSIS  
GRVVRAMEEPRERYEEENEDGDT DGTGGQNPEIFERDYQNVVERFWTEVRQGSRTNRANR  
SNPSFLEFFDSTTTLPEDTGVRLRFNDESSGSSESDSDDDV VSLHRLRNNARTRARGNNM  
GNRSTVNPDIQNIDETTTDSSES IDQGGEHDATTTIVGEEDAETEDNLD TTTTTVNESES  
NTTTTTDDSDSHSQEPRRHEMSMICALHRVATARRWGAQTTFVGDAA CLLEIGIAQDIIL  
ESLHNLISYILPF

>comp7746\_c0\_seq1; 450 242 1090 LEN=1168; translated  
MKSAAAIA TLFLAPSVTTFGVSHAPTGHGRSATVVTKSSTASDPESRFIDGVGIPPQES  
LQAKLEEVEDCALPTQKKTMSESI PFLKCPAVLLES DLAGNVGFDPLGLATSDELLLDY  
REAEVKHARLAMLAAVGWPISELED RNIAEFFNAPSVLDDGDRVPSVLNGLDRIDPRFW  
GFCLGMSAAIDMYGVSKSRRGSADYFPGNIGFDPLNLFPPDREGREKMKLA EI KHGRIAM  
LGVVGYVSEEVTKMAVVDTPVLFQIPITETIEEVISSSFL

>comp7747\_c0\_seq1; 251 375 1489 LEN=2339; translated  
MSYFTKEQEA KAVELILKECNFCPRYKDGDSNKS GGANNSQTS MAYVERDENG YVAMVD

LGLHKAVTPKIGEKNNKNNVDR IILAATDTLRLGSTSHWRLPPSIGYLTHLKKLTVYHCK  
GLPREIVHLAGSLEEIAFHFCDELDFENGFPWLEFQSLHKLTD FRIHGRTSSSSREAKRI  
LP I PGLRGLPNLRYLYYRGNPNFGSGDEEHS LWKDKNENQLSRLLVQDLLHPGVRFKNSL  
EILEIERGNL TEVDAAGLVTDVLPHPYKQLXGLGLAQQPCVTGTYP SQAVTADPSLGPVA  
LPKSARESGPEFQKMQRY SARTEEPAEALVPPRRDYEP RARNHRICPVHDEGLAGTRYVL  
QLFWSTGTLPL

>comp7747\_c0\_seq2; 286 375 1817 LEN=2182; translated  
MSYFTKEQEAKAVELILKECNFCPRYKDGDSNKS GGANNSQTS MAYVERDENG YVVAMVD  
LGLHKAVTPKIGEKNNKNNVDR IILAATDTLRLGSTSHWRLPPSIGYLTHLKKLTVYHCK  
GLPREIVHLAGSLEEIAFHFCDELDFENGFPWLEFQSLHKLTD FRIHGRTSSSSREAKRI  
LP I PGLRGLPNLRYLYYRGNPNFGSGDEEHS LWKDKNENQLSRLLVQDLLHPGVRFKNSL  
EILEIERGNL TEVDAAGLVTDVLPHPYKQLRVLVLPNNRIASLELILAKQSLPIPPSVRLR  
CLNLLGNPVLNSKKCKDIRPERKNLLRLLSLHEEITSLGHGITESAPCTTKVLLALDRND  
GGAVLLSKRFRSVLSVWP I VLERANHRIGYHDCSNVLYHF L R N G P V L G L Q K R Q N N R S S A  
AQNDLKGDDFVGMIPPPSPMKGDTRVMPVLRTPLYSIATSIVTPTDTETTSTRKRKISMP

>comp7748\_c0\_seq1; 527 1643 3133 LEN=4058; translated  
MSGMPMAPQQTMFVDQTTTATEIYHQT VPAASNNGSGQAPGVAGIAQHRQQSIYQQPPPS  
LPQISQEASLQQQDGLSSWLYNATSGSIHNS SAPMPLPPGMEIILGNTKYTIRYQSYEM  
TREKAAVYIEKCTGTPFARLSSPPDPAAPGASIRQORLQRQH QHQNPLQSGQRGVDDAIR  
NAAAMSTANAPAESQHNRQQGGFSSLP P P P P S P S T A G P P P S L G D Q R V T T A V P P Q H Q I L G A  
EPSPAASISDAVHRERHPQPRNHMHTLAAAASGLSPPP IQLLQPARGVIQQQQQHQSSEY  
VL P P L Q Q G T H T T T K L E Q Q S S P S Q G Y F W E D G V W K V W Q A G N N N E R A G Q R G A P A P I D D G K M P A  
PILVVG P A P A P M V G Q R T S K Q Y H P P P H Y S Q Q Q E P Q A Q Q H I V A Y S V Q A Q Q H Q P F P Q Q Q H Q P M  
RSTPLPLPPQONSNDGRYTNYPQQPQYQPPLQVVATPGSGVHDSTSYLLAQQQQPPSQQQ  
QYQQQYEQYYPPT

>comp7748\_c0\_seq2; 527 1643 3133 LEN=4000; translated  
MSGMPMAPQQTMFVDQTTTATEIYHQT VPAASNNGSGQAPGVAGIAQHRQQSIYQQPPPS  
LPQISQEASLQQQDGLSSWLYNATSGSIHNS SAPMPLPPGMEIILGNTKYTIRYQSYEM  
TREKAAVYIEKCTGTPFARLSSPPDPAAPGASIRQORLQRQH QHQNPLQSGQRGVDDAIR  
NAAAMSTANAPAESQHNRQQGGFSSLP P P P P S P S T A G P P P S L G D Q R V T T A V P P Q H Q I L G A  
EPSPAASISDAVHRERHPQPRNHMHTLAAAASGLSPPP IQLLQPARGVIQQQQQHQSSEY  
VL P P L Q Q G T H T T T K L E Q Q S S P S Q G Y F W E D G V W K V W Q A G N N N E R A G Q R G A P A P I D D G K M P A  
PILVVG P A P A P M V G Q R T S K Q Y H P P P H Y S Q Q Q E P Q A Q Q H I V A Y S V Q A Q Q H Q P F P Q Q Q H Q P M  
RSTPLPLPPQONSNDGRYTNYPQQPQYQPPLQVVATPGSGVHDSTSYLLAQQQQPPSQQQ  
QYQQQYEQYYPPT

>comp7749\_c0\_seq1; 308 149 886 LEN=1233; translated  
MSRDSNYDHHISIFSPQGRLYQMEYCFKAANSGLTGVA VRGKDSVCVVTQKKVPDR LMEP  
SSVTHLFLKLTQKIGCCVTGPMADSKSMVQRARYEAGK WAFDNGYQMPVGV LARRMADLAQ  
VNTQAASSRPLACIGL FVGV DDEKGPQVFKVDCAGHYLPFFAAASGPKEQEAMNFLERRV  
TEMKEYEIDQVIRTAITCLGHV LGSDFK GSEIEVGSIKGKDGKFEVLTEDEIEEHLNAIA  
DDADA

>comp7749\_c0\_seq2; 297 542 1039 LEN=1386; translated  
MADSKSMVQRARYEAGK WAFDNGYQMPVGV LARRMADLAQVNTQAASSRPLACIGL FVGV  
DDEKGPQVFKVDCAGHYLPFFAAASGPKEQEAMNFLERRVTEMKEYEIDQVIRTAITCLG  
HVLGSDFKGSEIEVGSIKGKDGKFEVLTEDEIEEHLNAIADDADA

>comp7750\_c0\_seq1; 231 86 478 LEN=2269; translated  
MSAAEIDEEIAAFREVQEELQRTRNDLQLVMQOMTENEMVKQELALLDSSTNIYKMGVGP  
LIKNSLDDANETVAKRLEFINGEKNRLEAKNKELENRGGDIAKKVQQMQANLQQR TAAAV  
EEIKKTAAAS

>comp7750\_c0\_seq2; 309 1205 1561 LEN=1690; minus strand; translated  
MNERANGTILTDIAPKDVKQLEVL RPQSAPSMGQRFKQSLEKEKRLEAASKPVQSRK TKE  
NDVAKGT KKNKNKESKNTKTKKQVRKSEVDDALEHGNTSLNEEDEVEEGINWSDEEE

>comp7750\_c0\_seq3; 231 86 478 LEN=861; translated  
MSAAEIDEEIAAFREVQEELQRTRNDLQLVMQOMTENEMVKQELALLDSSTNIYKMGVGP  
LIKNSLDDANETVAKRLEFINGEKNRLEAKNKELENRGGDIAKKVQQMQANLQQR TAAAV  
EEIKKTAAAS

>comp7751\_c0\_seq1; 581 242 1705 LEN=1833; translated  
MTYGIFEAISSQYFFHLRALFFNICIHIREMSDMILD TAGPPLFVEDQKHIIDMDECFD H  
WLQEVCDGVKRNDA AIDEVEIDHSGELHTFDATDMRLLKDAMEGNRFVTSFVFRYITIDK  
KTAELLT TMLASSTNAITNLHMEEIQGGEGT NAAALALTLNPESSIKSLCLIGNSIDEAN

SKAIGMMLKSNRALSELRLSQNSIGDDCISHISSGLKSNRTLITILDLEGNALTDASVSMI  
CNALGHNDKLEFLSLDFNDFGTFTGTRAIASMLRRNNYLKELHLFGNRIDSVGAAALASSL  
RQNTSLKLLILSFNNIGNEGAKALAEALTVNHTLTHLSFSPNSIWNIEAFGDCLPKMK  
GLEELNVGDLFDTPAADSLNLGLKCNTRLISILYVQLPVCEYTVDDDEASEGSSQCSCSV  
SPIEKDIDFFLRCNKSGRSLQLSITPSPSSLWAEVLGKANTNQTTPSGVPDVLVYHLIRER  
DLLCNTR

>comp7752\_c0\_seq1; 229 1432 2169 LEN=2347; minus strand; translated  
MELRYALQTFGIPSTDIPISEKIRTSYHKQWLHVREAIEDGQTDIMECPLVNDVIFRQG  
KSLMGHAGNNILRGLIELKNAEQEALTTSHNHRMNRRTVEELVSEIRESGGRFLIWNE  
QGWSEMMDQKQIFCKIEYKVGGEYRFRKALKMATSRQRQDKFQSSSTHMFQSMQNDST  
GPLSWVANAWGSSEEGKRQGLQASMMMSTRSNNSTSSHGSKSSNSKSSSTNAIYNHNDK  
QHDQN

>comp7753\_c0\_seq1; 456 1 1336 LEN=1607; translated  
XSFYSLIINICVARGYNILFDVVEETMKFCKNLQRVVDISDPEWAPYWTNYKMLKLIKEL  
PSLVPNTDEGKSNDQAEKIRRSNEISGDKTGEGTKQQQPNAPTIQPRSSQQVSI SMGKS  
PGEVAFFKLIHSEFKKASHFFDRATEEFAIREERVRQGMEMRKPN SIMVNEKWALMAKS  
IYRLYKDLLLLETFAIMTYCSFSKILKKHKDKVTGYETKNAFMANIVNKANFTHYPKVL SM  
ITRCEKFYEEVSQNLHKEGKEGLYEDERTSAIVFSFVLCFLFLEPMNAKHLQLSCPLVIVT  
FLHGXNVIRTEPIVSSYPSICVTQNPGLFISMIHRLNEQVLDSADSAALPRERKQEEAPR  
RSGGTDVSAVISFQSSKLSSATSTLRSLVEENEVNAKKAAGPSSIPSTAGGNVSEEVNKG  
EEDEDDSDVERGVDNRAAKRTKVQ

>comp7753\_c0\_seq2; 451 1 1160 LEN=1431; translated  
XSFYSLIINICVARGYNILFDVVEETMKFCKNLQRVVDISDPEWAPYWTNYKMLKLIKEL  
PSLVPNTDEGKSNDQAEKIRRSNEISGDKTGEGTKQQQPNAPTIQPRSSQQVSI SMGKS  
PGEVAFFKLIHSEFKKASHFFDRATEEFAIREERVRQGMEMRKPN SIMVNEKWALMAKS  
IYRLYKDLLLLETFAIMTYCSFSKILKKHKDKVTGYETKNAFMANIVNKANFTHYPKVL SM  
ITRCEKFYEEVSQNLHKEGKEGLYEDERLFISMIHRLNEQVLDSADSAALPRERKQEEAPR  
RRSGGTDVSAVISFQSSKLSSATSTLRSLVEENEVNAKKAAGPSSIPSTAGGNVSEEVNKG  
GEEDEDDSDVERGVDNRAAKRTKVQ

>comp7755\_c1\_seq1; 251 1 1034 LEN=1353; translated  
RNYYPQDIEATAEAAASDLLRPGCSAAFSIDVSSGGREEVALVAELREVP GSSAGIRQLCD  
PLADRIKAAVNQEHSLGLARIVFLETKTVPKTS SSGKIARAWCRKGFLAGTLKAVYQKSFS  
KAGASSALEIESAPGGGPSAVPAPAAPLTKEAIRELRAMGKKELMDKLRTDVARTGQIPP  
DCIDNDTALITILDSLSISQFKGRLESAYAVQISDEYLFRESVTLQKLAEVVRLGYAPDD  
NNDGGDAAAAPPAPGGTADGIAGALGLPPRGEGLRDP IAAPNGNSVSVCRKESLAGQ  
CRDCHRSSAGRQRTNLMVLASMGEIFHPTNPLSGINRISRNL

>comp7757\_c0\_seq1; 228 1 717 LEN=717; minus strand; translated  
XGFSTTDAGSKTEIRGDAANQKYHMFVSTSCSGFQNWQALAFFYFAHKVRQPGTVTRLVS  
GCTDEEEKLKKIHKERVVPLQIPGLQTFEMHVT PGFDDSGGGSQKYWNKPNGLLHMWEE  
SLGFDGKSDHEDDAIVIILDPDMLLRPITADFS SKNYAGGWATSKNTKEHVANNMSPV  
DYSHDVVTHGRPHAQQYGFSGSNWLTSLKGRLEEVVGPDSPALKLSLDDANDYYPAGPPYX

>comp7760\_c0\_seq1; 426 99 1994 LEN=2174; translated  
MTGEVNVNENEYSGSDYGNVAVGDAEAEIDA EANASNGYVGSESPSKDDSLKNNDDDEDGNL  
KPSAICAIKYVGIPVQGFVTFGMGFGLYMMFGF ILGPWGRDLP TAEVLSATSLISIFHSF  
SIFFGIWDLFP IIRGLSWKPYLIFGWIIFLAFNLPIA IGEAIETNTLVILFALSQFGLQ  
LSTTAVEGYLPWITSMESTKTKGSFQTLRDLIMTAGVLCAILFIFFAFSGPKFNCRGYEP  
DPTVPCTTDETMRLQNSLSESNPDDWCHMKCPEAILNYDFSIRTVYTVLITVILLSLPFC  
FFLREEKTKKNI IKTLGRMWRALTKRSVWQIALYALV LGTLMHVENPAYMQFSASHISN  
STFMQIATNVLSILMVSIVLGVLA KYGLGFSWHKLLLIGTLLDAVLEVLRLAFVFDIVRS  
PVLWVLDTPRGFLTMLTSLPITYAVNIIAQEGLEATTASLILTMTTLA AFLARQVISMP  
LLSFFPLLASTEKIFEDSQEVRLEFLKFD SIAILMKLSTLYMLPMLPRQRAEAKALKDED  
ERSPIWGGITLFTLVLMLYSACVATVPYAI PGARCYKLLGGQGCSEDSNDTALVILQIV  
IMTSFCFVIPTVLIYWPILRGKAKFSRDMYL

>comp7760\_c0\_seq2; 415 99 1736 LEN=2349; translated  
MTGEVNVNENEYSGSDYGNVAVGDAEAEIDA EANASNGYVGSESPSKDDSLKNNDDDEDGNL  
KPSAICAIKYVGIPVQGFVTFGMGFGLYMMFGF ILGPWGRDLP TAEVLSATSLISIFHSF  
SIFFGIWDLFP IIRGLSWKPYLIFGWIIFLAFNLPIA IGEAIETNTLVILFALSQFGLQ  
LSTTAVEGYLPWITSMESTKTKGSFQTLRDLIMTAGVLCAILFIFFAFSGPKFNCRGYEP  
DPTVPCTTDETMRLQNSLSESNPDDWCHMKCPEAILNYDFSIRTVYTVLITVILLSLPFC  
FFLREEKTKKNI IKTLGRMWRALTKRSVWQIALYALV LGTLMHVENPAYMQFSASHISN

STFMQIATNVLSILMVSIVLGVLAKEYGLGFSWHKLLLLIGTLLDAVLEVLRLAFVFDIVRS  
PVLWVLVDTPRGFLTMTLSLPITYAVNIIAQEGLEATTASLILMTTTLAAFLARQVISMP  
LLSFFPLLASTEKIFEDSQEVRLEFLKFDISAILMKLSTLYMLPMLPRQRAEAKALKDED  
ERSPIW

>comp7761\_c0\_seq1; 104 275 1177 LEN=1177; translated  
MAAEAASGDQSEANPLARLGLPEPLLLGSASFTRKLIILGEMGVPYSKFVRPIDEKALGDR  
SENAPPEELVLLL ANAKMDRLVEELREGSPDDLPEAPSSGTGWVVLAGDQVVTCGGSILE  
KPESVEQAREFVAGYASAPPSTVGSVVLYHHPGSGIRVEGVDTATIHFERDRLGGGAAAL  
VDALVEMGEPVLS CAGGLMIEHPLTKECLDRIDGTEDSVMGLSKALVSRLLEELAEALRE  
RGEDPEGGRPRPRFRQARTAGARRRVVVVVVPRGRAPPGAKHGCGTVLGAEKMANALP  
X

>comp7762\_c0\_seq1; 1949 402 7490 LEN=7599; translated  
MDDTRKSKSDKSPNNGTNNENNSATGSRARTRHNHDDLPPSPTKTLTSAKSASIGTASLRS  
LKSRVSVASPYMKSWELLNKNTQEDGPFHDKKDDCKKIHRNQTLSGKNRENHRGDALKPAS  
DSLLTTMRSDFFSPPQPTNGFLSTAASLKTGAASASGVSSKTSSIIYGTENTRRSLEDDD  
PSDSMANILDHLTSLSGGNSSTHASVDAFDMRMASGMGKMIWPPGMKNTSSLD RYSNTSPN  
AFSPRNTFHLPNHQRFASYNDTRTESYLDHAPTSMTNRSSLRLQPHQRSQSSSYQFPTP  
NEFSPGAGEDERESNHSHQAQRKSGSKAKPKNDEDYNYNDHIVNGTRNIDSILKTIINHS  
DEDQNGDDDDDDDDGVVHRTPHAAAATKPDDEFIRSAKSRLKVLMSALVASAVSRDAYE  
INDTHVRNLMDSCKQDQETLQGELRKVLEEDADATGRIQELFELNEEILAAMEAGKDALQ  
REKERSNRKKAEEGLTISLLEENRDVFSLICMLRASYEKRKQAALALMKFAKDDQVLRDE  
IISGGIHSFLLTFQQTGRMTRELKVVASLAVAYVLP SYVVSCQTTPSIGLKLKLVKCLHYL  
ATSISVSPSGQVITKEEMCKAASVGVNLLWVNSIQPLIAIEKVKNEFSSSPPSLRPGKSV  
RYGRLRSRTGGGVFDQGHESIQQVELTELAVTLIAHLAKLTESGEVRIDTGYNIVEQVCE  
VDEARPIAVREGLLAIFVEWIRSGVIDKVRPAASALRYLIAIQDKYMAGWIHSQVVNEGA  
VNEIVKLLNESVGDVRLAVTEMLSYLCVAPHTRA AVVDSNGVNYLVSLLEFEHSAPDMED  
IVLFACTALLQLAAGAITGASPQYS DNISKHTHVNDIINGCAHGSFVQIALEHEGKLSR  
ISVEALRVLSEDTDSYRQTRS QLCVSGATETLGLTIKENASIIELLSNSDGS HRYITNAP  
IGDLANEGTQVTMVKDIYRALRALANILEPQRESKKS KNMLRMDPDIKPNELLVKGCLDL  
ASSGGLPGILQVSALSITPSFLENSKMITLDRIDLVEESCRFLANLSPLLLSETAAPGVA  
NWAIDVFEALDGILNRTNEGDGNIIVSNILTELQIDALLGIGALAVYEPLKIRIVNQMLPK  
LLL FKNMGEERIDIATAANQVLLSMGFIEDEITVQVAGNNPQFLVDFLCLQRALLLQAMA  
RAEIRTKVLELWELPLSETDRKSQTQLESYSSDERSMDSRDDPVSKDLFESFTSDYDSRD  
ARVKFLRQYLDVYESSNRLRNYGTHSVEQTSDEGKNMMASHVFP LNDAREEKDWVLSHYH  
AMEASNESQTF S ISGNI PQRVEKLLDSCFP SKILRNYIVPINDFLPSSSFNFRAFMMPKR  
RYFSFRREGELLARLRDKHSGSIDSNDVHWT LGFTNSTFAGEFVESLVQTYLKHMITGL  
SFVRNSEWMAMRDAEKQK DADDGGGLLANLTGSLPPWVSHLTFDNMLNDRDLRALVAILD  
TIGKLSGGQEFDD EISQVSTQGNFICMSIRNSLOIKSDSWKSFQLLGGMGHIQRNPMSA  
PLSTLKI LDLSGNNLGDEVAAMVLELVHDKYSGCSIEQLDLTGNQIGEGTNVARVLRAYT  
EYYRYNHKTGVKMMRNSWQSSLHTLILANNDLSSGQAVLEIFALLKHDALCLRYLDISEN  
GLESDSYQLLASCLLKNTSLRHLNLSGNRFNTTLIDL LLDLDELNGRDAESSLSFLLFQNNC  
PPLTSYQNEKIADFLRKS RKNGIEKYMAERQRKAVVGTAE TQFAAESKGGDHDLIEEETK  
TVLSKSSYPGAQESSLGSNDPGENQITVLF SAPLVFADSENK LHPFAKLDFGMERELLWQ  
CMKEASRDIDMSFDNAHFRLLATLTRRCSVLHYS GHGHQSFLPFEDGMGGPNWLSVQDI  
KELILQDGVV PFKFV FVSACHSGLAGET FASAGVPHVVCCKQESELKDTAALAFTRSFYL  
ALLVGHTVKE SFDQGCKAVRATPNLLDSDEEMK KVVLLPKDGDHNPVFRAKSIREWPQ  
PRSQGSVTSRSSRRRGSRGSHGNVGLALGIKSEL SVRNMMQEDPSPTPPQFFLGREMDL  
YYVLSALLKLNKRLVSVLGD TGIGRSSLV CALCHYINERASTISEIQQIYFIKPKQGDRN  
VLCRSLVRQLEK LQENGKPTDEDIDTEAMLEIICKTLKNDKCLII FDRTELIKSSDVES  
MELPKILSTILYNTKQVRVVI TAHDSLQPAIGGQVEHSYSLGPLTFSNTVKLFAKLCPH  
LYTPDERGMLVKELVQNDEDQM HILPNDLK LKKRTASILSAIGDGI PAKIERAAYSISRE  
DLKNLELAHRIVSESRTDEDNQD

>comp7763\_c0\_seq1; 1180 49 2478 LEN=2520; translated  
MAQKSRKEEETPSLSPVDSGSEEDNTDDEDSVYDSVDPYEDGVDESDEEEFEDQGS SD  
EDEDLLEKQEEDDESDDGMEKLEDNMSNAYETAPRKWNTGKRTISGQKSE PSESNNTEKS  
AKWMHTDDFFSDDDEDG TGNRIGRVPLHWYDEYDHIGYDAHGKKVIKTASIGGNRVDQA  
LSNADSKGKDRFMVHDALNDKNVALTPRQLELIRRIQGGAYAHPEFDGNAEYIDYFSGVD  
PELSGINSRNLTPKSKFQPSKWEKMQVDELLRKLDKGDINMDYLTGKIRDMNDANKSSKD  
KDKPFLMWTGGEDELNMRKGPQHIAAPKLPPP GHAE SYIPPDEYIPTEDIKEWEQMEV  
KDRPHGLLVPKKFPNLR SVGAYEHSVRET FERCLDLYLCPRQMKRRLNIDPESLVPKLPK

ASDLRPFPTAKCIQYKTPHEGDEPPMIRCVTPSPDGKFMASGASDGYVRLWEVETGRLLK  
SWNVSKVALSADDEWEEESTGSESVKPVVALEWNPRAHHCLLAAVGKCAIVIATGTGEGQR  
NAEITGALLSSAKRGGNVSSAKASKAVQVSVSEKETPISMFASASGPVCALCTKSNMTK  
IRWHGKGDYFVTI SPKAGASSVLIHQLSKGNSSQQPFSAKAKGEVQAACFHPNKPFLFVANQ  
QHVR IYHLVKQAMVKRLISGCRWISSLDIHSSGDHLIVGSLDRRMVWFDL DL SHTPYKTL  
KYHERAVRSVGFHHRYP LMASASDDGAVHIFHSMVYSDLMRNPLIVPVKILRGHEIKNKH  
GVL SLSFHPTQPWIFTAGADGKIFLYQDI

>comp7764\_c0\_seq1; 519 1 1967 LEN=2550; translated  
HEHGLSPSSSYRACLPFRPCCIEPNQIPRREDTSTTETSRLRIMDCLEQKPDG SVV VALL  
DFPKGGTVGLDQNI V LKTDDFVGIKNVPPRAFHLVTCKNGNASNSGESARADTNNINTA  
VTVGFVLYGDGHDDGITAGGHLIRRYDPRTEE VASHLASPVDDLTRRNL LQQIQARSSIM  
NPSRVLSYEQLVQGSNSDNHQGGNERDLVMLSQQRVWGEQTRFINKAQS FLLNDLRGLSS  
GEKIVPGCYDPENETTSNGPKKNLQQPEADGRSMVYPPIPVVDLK VSLATHKHTGTARFL  
SRLEPSERTKMFL LASGHDSGNNFTEFVWLNRI LSYDYQNSWEALLGDLQLSYLLFLYL G  
CYSSLEHWKDLLAML SLAVDDGDREENS RKDEKGRRLGQNR RHEALYRGLLRLLPYQLS  
SMTDPEFLEDLDEGGGNFLIPSLARLNRYEARQEQEADLQGGYQDLISKFRHVLSTKFPQ  
TFFTHNAHWVPTITRLRGNSDVDNGCSGCKD TVDGMIDNGNENCFYTDGDY SDEDEEGP  
VVVSSEEIEASLARSSHYISIRSPATQESRITVAQLRKEYPLLLTAAVMSHEDILMTCARA  
LDDKN DASLVREAAAYLEEVXTTPTKLLTLGHVAHQMN LQYMEVDLCDEFEMLDN

>comp7765\_c0\_seq3; 888 211 5040 LEN=5126; translated  
MPSPSSSENRRSSHIVKVEEDGSESRLLAGVPDHTRCNTLITSKY TILNFLPKNIRN  
QFRRFANMYFLV VGLVMFVGT RYPQLYASAFSPYTTWGPLMLFV SIVMEGIADK KRHV  
SDHKTNTDRCIVLENETADTKPVSESVRDAMNRS MINVSKNRQASARAENSALDDIPWP  
SVDIPAVGGMHT EAI FRPIHRKDIRQGH LVVVRNREMIPADMVLVASSGDRGCAYIETSS  
IDGETNLKLRVSAKHKTDPSSYKPLETINEAVQRIAGFTAAGCQSGESSDRIAELITEAP  
NAHINTFAGVLKFP SLLTTIDEEDPENPLAGAGSVKRELPLGAEHLLLRGAVLRNTEWA  
IGITCFTGTDTKLSQNTIETPSKMSQLDLITNKCVLVMILVELICISYLS TMAVLV NENQ  
IDTLWYVGRKVESETNNTWPYLPDLQAPDWATKGQNW FQYALTNVTL LSYFVPLSMYFTL  
EVCNFFLMWLIYVDPEIYDGTDTRAEPRSVTYTDLGRIQYVFS DKTGTLTQNMRFKRC  
SVDGMIFGKPVAKAIPKGD ESDKPTSEYLPARQVVVGVHTASDGKHLGKTKGMTFNAEM  
FLRVMSLCHTVVVEKDL DLPKQEGVSKDVAKEENSPTKAPD GAPPGFAYQAESPDEGALV  
SEASKAFGFQLISR DSTGIRLKC DHPSLFYDEGLIRGLKSGQIDPSAVATGSASGKRSFH  
RTAIASGKDNIETWGLAINKFDSTRKRMSILLRSPPEFGSCA ILLCKGADSAMLPDIS  
AATLNQSGSGSDDSEWAMARELGLETHLGEFASEGLRTLVLGV RFLTDNECDMWLDQFTA  
AATALKDRKAKLTKAALEIERDLHIVGATAIEDKLVQGV PDIATLEKAGIKLWVLTGDK  
RETAIEIGYSTKVLTPKMHVTE MADRGEDFVRAQCAMEFMRLVKAGK LPLYQRS AVDKKE  
KKMPWSFLFSFIGKIL TLCSLNRKR FVLKINIMIRGLLGFKKKAQIDRLESLOEAKQEEK  
DKLIDIVRRRNVRNRAEAILKDYMR RYPNTDNTKLS SDAVPSVFDRAQSAQEVLESQRSL  
GKLSEVDKRASKLSQLGAQEEAEDQEAPIIDDDVLSIKSFMPSKDGNNKSDFDKSRRTVL  
ERMFVAVDRDVRKGR LVKHLHKQKRKRVLAGTDV PNI EP SGDGPRALVIEGAALKHLQND  
ELEELVFN IASQCTSVIACRVTPRQKAQLVKLVRRHHVPEPITLAI GDGANDVGM IHAH  
CGVGISGKEGQAVNASDFSIGQFRFLENLVLYHGRWDFLR TSMVVLYTFYKNA AISGLL  
VLYNNYTLFSGT SIFDQWMMAGYSFVCFPPILSIGMFD RNL DKEYIKQNPEVYKPTQENE  
LITPRTVSRWFILCLVHVA ILYWGQLPQLTMYGGGKTGAFGGLMWNEGT VGDGNVDDWQS  
QGSTIF TSLVLLMAYKVMFESRSIINGK WPAFLGCCSKTDEGYTSRIPYTWYGILIGSFL  
AYAVCLLCYEAIGVFIGVTSGSWFMVGVFPHVFEMSSMNYVLM LIIPIFAMA VDISGKV  
FSNMFYPSQNQIHIEIEAAGFREAKKARQQRKNSGRSRSMSSSDEVS V

>comp7766\_c0\_seq1; 612 510 2362 LEN=2561; translated  
MTSNKLRKRTDGSTATFEGLYRCTLGSPPEEDLFD DNTHYGEDEE ICNEATLVGVGRNFV G  
DPHPGMRLRN LQFDL ASLRQPPTDDNAGETIAGDDDSFLYANYVEKNEEDSKKQAW EIVR  
AKLPDAESDDDN GAVGH DGS LTFQSVFKTRYVSDWNECDFDCCTKADYEAAGM LEYAKNF  
DDNYEF RHSYVRGVPRSFVVDQHTGDI FVSWEGFYKDCEDVHSARNGLQWTIGISRLKTE  
DPSCMALDLNRAKEQYRDFGT FAXLHRPRVDRVPDTRARESVLPYGG LAVVPASMTGTGH  
RTFLMTVLYNPGNELGGM TARVWAFPEGASSTRDGLKRQDLVSE GTRVDGLFYDAGIYDA  
GSLRLNYNPEKGRPDWLCRTVFDAGIDCFPIDFSVDENNGFP IVSSTTSETEVFLTGEQT  
ASFCHLDIADRVRSDPYFKRDSLLATGLDVQWDPVATRPHRIFFGCASRVGGNGHFGSVQ  
SGGSNLKTVLEYGYATAVLF LPSELEGSLEARAIASSYYGADGGDASTGLLPW WCFAGGV  
LLLFLAVAYKHRNRKQRFSSPGALRKETGFLTPYVELHTM NKDHCNNDGSNIIGPLTEAT  
TTMNDDNYKEEEIIAI

>comp7767\_c0\_seq1; 139 82 321 LEN=601; translated

MALFDRAEKMSIGTLTLMALLWAGLFGSDLFLFYFSFCLAFQTGNEIPARNEQDPVDFSR  
VIVAVVCYGLAILTLVPVQ  
>comp7767\_c0\_seq2; 468 1 1279 LEN=1559; translated  
XDYVSEPTTAMMDSLTAQAILPAVRFSASAKPYKVPGGYAITGSHKYENGDLLEAIDLE  
IQRSRPSLSGQITVLYTPKYGPLETPASVSGESLTSMESLMQDSSLDFADNEPILFVAG  
PNLTREANPIGLVTTTILGLATSWYLSVYPFVFLNDKIASRIDSDLQLLDANLQPDLSYLT  
DLSVPLFYCFMGLQLVHELHRLTAMSRGVELSVPVFPVPSFITGITSTVTTFKSLPRNKQ  
DMFDVAASGPLAGIVASSIALAIGAQLTIVADPATLPALPLEILRQSTLGGAIIDAILPG  
SLYVPDGAPTGGIFVPLHPFALAGYVGLIVNALALLPIGTTDGGRLTMALFDRAEKMSIG  
TLTLMALLWAGLFGSDLFLFYFSFCLAFQTGNEIPARNEQDPVDFSRVIVAVVCYGLAIL  
TLVPVQ  
>comp7768\_c0\_seq1; 375 747 1991 LEN=2564; translated  
MANPMDDSFTGNPQNSSDQLDKVCIIGSGNWGSAISTIVGRNCERLAFYESQVNMWVFEE  
MVEVEEEGQMQRKLTQIINEQHENVKYLPGIKLPSNVRVADLAEACRDATLLIFVLP  
QFLPRLPTIREAAHPSCRGVSLIKGIDFCEETGEPVLI SRGISEAMGNFP CGVLMGAN  
VASEVAEGQMCESTLASNFGPPADEMTRQLFDSPPHFRVQHITDVAGAEVCGALKNVIAL  
GAGFVDGVGLGGNTKAALLRVGLREMAKFCHMFFDGVRRDFTTESCGMADLITTCYGGRN  
RKCAEAFARARASSNSARSHKDSGALWSQIESDLLNGQKLGQGITAKDAFKLISSEKNVAN  
DFPLIKIIEYISFEDRPVESIEGIAVAPENRQKKATSLLRQEASYYQPTTSHL  
>comp7769\_c0\_seq1; 257 174 902 LEN=1203; translated  
MNDDHEIRKLLKQGEYRKL YSSILQKHRGSLQGN SNGDAIRGNDSDGHFEDEARLLNQ  
IFQTEVKNLATGIGATAATLASLRFARSRRRAVSAVFGSAKAKVLYEAEIEGKRVGTDNFQ  
KGFATVVEGMFSLWVG YRCYDYASDSSRDSINAI AELPLCKGRSRVAEALCP EWIE TTKT  
HIPGSFWKALAENKQEE RTWAAIQKFSINCEKRLAAERITRKVSSMREDEPVVLT KRVS  
SA  
>comp7769\_c0\_seq2; 177 174 569 LEN=1439; translated  
MNDDHEIRKLLKQGEYRKL YSSILQKHRGSLQGN SNGDAIRGNDSDGHFEDEARLLNQ  
IFQTEVKNLATGIGATAATLASLRFARSRRRAVSAVFGSAKAKVLYEAEIEGKRVGTDNFQ  
KGF GTYHTPSH  
>comp7770\_c0\_seq1; 610 1 1815 LEN=2619; translated  
NNNNNPTRTPPAGKNGKPLTVTVNGNDRSKDLNEHDV VCEKGRGDHERWPGNKLYRHLIN  
VNKETYNLAPIERSNIIGKIIGSIQEKDGFVHHSEATGNWAKLTEEKVRKKVSDDLRR  
EVRRRREKRSHNSLFSAKLRAIKEMEEAEVAARDILERVDDPRQSDVLF GPGARRHPGNK  
VYWHHMKLNL DQYIISP YGARSVISRNIVQIIRGQHGRFLEQDPKTGLWYSISDKRALEK  
TSHALSNM KYTRKRHPDDPPFTAPASLYSMGPHVPHGFFPAPLHQLHQMHPPHPLPP  
PHGHHLAYRAMGPYGEIEGAYDDEMEQEKIEGDS PNTIFAKKRTKKFRLLNRMDVPG  
TVVTPSVEQTPLKGDSSAAKAGSMAPSAIDATAVGIASDKEAGVGTNAPGISGGAVSTI  
VTSTTTTTPAKPQADQTATPGTAKGGGKIISPNSSESSIEFQEQRNPNAHHHQRRI LQQM  
PGSIHPTDAATSSATDIPRISHFDYIKSYGTLPGPAPGAAPPGSNAAFKTLTYAAGMRA  
DEYSPHHAASAAAHMRRYLAPGLPHPHPHQPHPMVTA AHPTASQAEAVARRWAAAAGVGP  
PEYY  
>comp7771\_c0\_seq1; 345 121 1143 LEN=2109; translated  
METAAGSSSRKSRLSVATTVALSVTTTIVLSAIF FYLNDYVVVVVMVKERGSLS SIGMSA  
LETDSRWGIAQRR LGKREHRRQE QEKTEDEEDLKKERRRKRERRRKKRWMQRRKKRSN  
TTQESYRIVCLGNEDITYIPMQRSP SPLMGGMVGNN TNANNVRSSGNLYPGE GIGSQIL  
MNGNVYPSDEISVEFN SVAGSMPDHIPGSIFAQKCMATKGTASFETGTPAIEIQETMCEY  
NFCLPDRGCLFLTSGGPYVFNPFSSDPQSVPVVEAAIMGGTGESSRLYGGARIKTMVRSN  
DDSADGGQVAVLQMDLYYQVLKSRNTPVYIDPTEDKTIDM  
>comp7772\_c0\_seq1; 345 153 860 LEN=2786; translated  
MMLDRYDISRLEESLSMRARRRSDGDDIDNSSNSNLSLSRGSDELSEMLCNQLTNMNF S  
ERNAIQEEIHGARCMAVEETPALIRRLNEFESELYNGDETGGSRHVYRRI LKRHLERIE  
AASKDTSVVHPSNYAIDDEDFRLRFLRCEMF DASRAAQRF CNYLDLAYELFGDIVLERMV  
LIKDFEKSEINIFRKG YWQLMPFRDSSGRRVVFVFFGGIGVHADLLL RVRALSTEC  
>comp7772\_c0\_seq2; 418 153 1742 LEN=2634; translated  
MMLDRYDISRLEESLSMRARRRSDGDDIDNSSNSNLSLSRGSDELSEMLCNQLTNMNF S  
ERNAIQEEIHGARCMAVEETPALIRRLNEFESELYNGDETGGSRHVYRRI LKRHLERIE  
AASKDTSVVHPSNYAIDDEDFRLRFLRCEMF DASRAAQRF CNYLDLAYELFGDIVLERMV  
LIKDFEKSEINIFRKG YWQLMPFRDSSGRRVVFVFFGGIGVHADLLL RDKILFYMWDV VTR  
DSVESQQKGFVIIRQFGNVLNKNVLFNHSMKQRTNKIDFGEIANTMKRLFISIPSRIVA  
LHATVPDNHIIRLLGKI IWKRIFSGPLCNVGPFRVVLGSESSDTKALNRLKSYGIPVDLLP



STETTNSIKSTFHNQWMKTRSMVECGYIEHSEEGRTGDRDDRDENREKINGTFVECPGLN  
DVVFRKGSRLASLQNPGRNLFRLDGLTGLEEKENILEKQRKQTATSAQDTTQIDASTSSS  
ENDDGEHANPSSARQYAASTVCNELSCNETTFLPSALESANTGTSSKSPW  
>comp7773\_c0\_seq1; 670 1 2830 LEN=2947; minus strand; translated  
XSHFSSPENENDSVSEESDSTFGLMQEISQLSVGLMKNSSSNLQKVREVKMLHQDIRKEQ  
DCGTNLSQQRQEQGQEQPLQSDNEDTEVDTSSTVSIILEQSKQTNELEAGETFSIVAKLD  
FDRGRTPFHPKPFENETPSTMSALISQYHKNMRYRGDRCSSTNLKVSSPSKKNLSNSEA  
LPRKAIGTNARKKLSQNGETSSPVEELTVQSGDGPKAKKAKSGRIRPTDVYPTKNANKKN  
ESKDNPSVGTPISNSDLNGLDPVVTSGSMGFVTTTSVEKIVSKHGTLTRRDRQSTPNPSR  
SQEMNSTEHEIAWFTPATPVYRASDIEEDVATLRFGANQNSSQPRHLHPEKIRNERTPA  
APDVYSNSKAQKQSSQCRNTDRRLQNYSPVNQDDEWSPLAQQHSNGNHIFPSPQHIFGQR  
IDKTVYRNCTPYGARIEAKESGIPLETHSKHQHSSDVKIILNRNSIENFEWQAAESISNS  
IATVLQHRNSNCFKLSKRQTEKSSQMNMEVENGVPVPSIQLSEKNENGSLASSTESGGR  
QLDKCGCPSEAYENNADEITIEKHVYAVEETISPNIAAEDQRPEFTSKQRSIPSIDSKYL  
NTRDKGHRDYSKDGNNVVDLADSGMGLTSEESSKCNMDSADAQQHNDTAFKKNSNKSDNS  
AEKSMAMAGKTRISNNPSRDESAHLKAAEKTFFECTQDNSVSVNHETSLSDSFQPLSEPD  
CTSSLDGTSTSDNREKPNSEYIRVLHMEKAIKSRDQAIISNNNGFAKKLSGGNDSESLNE  
SFAVEDRFSDIELSRNGSSIFSNHGNYSESSQRSCMHDDASSEDNKSRLRPTGVENDEDP  
REKRAQEQFNSSPRSYTTSIASSKDNFGCSGIDDAASASGLSSESSVQPIILKNRASEYV  
SSPGDYRRNPTCSSFGHESLLVQSGNHHRMSRRVLMPPHPICS  
>comp7773\_c0\_seq2; 738 1 2965 LEN=3765; minus strand; translated  
XSHFSSPENENDSVSEESDSTFGLMQEISQLSVGLMKNSSSNLQKVREVKMLHQDIRKEQ  
DCGTNLSQQRQEQGQEQPLQSDNEDTEVDTSSTVSIILEQSKQTNELEAGETFSIVAKLD  
FDRGRTPFHPKPFENETPSTMSALISQYHKNMRYRGDRCSSTNLKVSSPSKKNLSNSEA  
LPRKAIGTNARKKLSQNGETSSPVEELTVQSGDGPKAKKAKSGRIRPTDVYPTKNANKKN  
ESKDNPSVGTPISNSDLNGLDPVVTSGSMGFVTTTSVEKIVSKHGTLTRRDRQSTPNPSR  
SQEMNSTEHEIAWFTPATPVYRASDIEEDVATLRFGANQNSSQPRHLHPEKIRNERTPA  
APDVYSNSKAQKQSSQCRNTDRRLQNYSPVNQDDEWSPLAQQHSNGNHIFPSPQHIFGQR  
IDKTVYRNCTPYGARIEAKESGIPLETHSKHQHSSDVKIILNRNSIENFEWQAAESISNS  
IATVLQHRNSNCFKLSKRQTEKSSQMNMEVENGVPVPSIQLSEKNENGSLASSTESGGR  
QLDKCGCPSEAYENNADEITIEKHVYAVEETISPNIAAEDQRPEFTSKQRSIPSIDSKYL  
NTRDKGHRDYSKDGNNVVDLADSGMGLTSEESSKCNMDSADAQQHNDTAFKKNSNKSDNS  
AEKSMAMAGKTRISNNPSRDESAHLKAAEKTFFECTQDNSVSVNHETSLSDSFQPLSEPD  
CTSSLDGTSTSDNREKPNSEYIRVLHMEKAIKSRDQAIISNNNGFAKKLSGGNDSESLNE  
SFAVEDRFSDIELSRNGSSIFSNHGNYSESSQRSCMHDDASSEDNKSRLRPTGVENDEDP  
REKRAQEQFNSSPRSYTTSIASSKDNFGCSGIDDAASASGLSSESSVQPIILKNRASEYV  
SSPGDYRRNPTCSSFGHESLLVQSGNHHRMSRRVLMPPHPICSLQRLEELIFQRERIEMR  
SEESMKGKRIRGKLSAKKRRKTKTFGR  
>comp7775\_c0\_seq1; 449 490 1707 LEN=1875; translated  
MARKSARTSSGRTNASAGDTTTRQSPRKKQKTTAAATKASPPTSNSPKKKTPTKKAADH  
QRITDIDDLPKLWTNEMAEANGSYTFKIASWNVAGLRALVKKSPNALAELCEKHDLMLC  
LQEHKLQEMHLEDPKMKLKGLEDTGYDEHYACSTAKKGYSCTCFVRRRGTAGTANKKQ  
GKIGSFFAPKTKEAAGKCKSKGKAALPVNPELLVPTAVSFSVGEEDNEGRVLLDFPW  
ATIANVYVPNSGQKLERLDYRTNQWDFFLKFMQDKQAERGVPVMWLGDLNIAHKAYDIW  
NNGAKHLAKQAGVTEQERLSFDQLEAGFVDVFRKLHPDAKGNYSYWSQRAGNREPNGKL  
RLDYFVASEEMFLEDSKVI PRDSYMIMDQLGSDHAPVVLELEIKG  
>comp7775\_c0\_seq2; 383 490 1818 LEN=1986; translated  
MARKSARTSSGRTNASAGDTTTRQSPRKKQKTTAAATKASPPTSNSPKKKTPTKKAADH  
QRITDIDDLPKLWTNEMAEANGSYXVAKRSNHSFVCSLLFFILTTPAIYLFAGMVS  
TAFKIASWNVAGLRALVKKSPNALAELCEKHDLMLCQEHKLQEMHLEDPKMKLKGLE  
DTGYDEHYACSTAKKGYSCTCFVRRRGTAGTANKKQKIGSFFAPKTKEAAGKCKSKG  
KAALPVNPELLVPTAVSFSVGEEDNEGRVLLDFPWATIANVYVPNSGQKLERLDYRTN  
QWDFFLKFMQDKQAERGVPVMWLGDLNIAHKAYDIWNNGAKHLAKQAGVTEQERLSFDQ  
QLEAGFVDVFRKLHPDAKGNYSYWSQRAGNREPNGKLRLDYFVASEEMFLEDSKVI PRDS  
YMIMDQLGSDHAPVVLELEIKG  
>comp7776\_c0\_seq1; 393 1 1560 LEN=1560; minus strand; translated  
XHFVVTGYVASNTEGVATTLQRDGSYSAAIMGRLLQSTNITIWTDVDGGACASALCILA  
PSLSHAIEHAHDHFFLINSLLIILLPSLSVLSADPRRVPAYAVPEVSYNEAMELAYFGA  
KVIHPKTMQPAISSNPQIPIFIRNTFNAKFRGTRIFTSSVTDHQSDSCVCGFSSIDHMAL  
INVEGSLIGVQGVAKRFLFGTLEHMGINVVLLISQASSEHSITFATPEEDAARAKETIEEE

FQKELEKNRISNIEVNTPCSIVAAVGDGMKQVTGVAGRFFSALGDAQINIFAI AQCSER  
NISVVVATSQATRALRALHAAFRLSHTTVRVGIVGMNNPLGESLLRLLLEVQRKRWGSFE  
IDLQVCTVAMDSHTDILELKNHDGNESINLGTVRDAMKPVSSSSSESRI SFERDTPGGD  
LTVVRSSHKDLEPLVESLVRDDCAHVIFDCTDDVDASRFHPQWLSQDIHVVTANNTGIS  
GSKEIRDEIHAETARGKLSAHYLKEVTVCGGLPVISTIRX  
>comp7777\_c0\_seq1; 321 111 871 LEN=871; translated  
MKNIFLLFTLLLVLRLGDTAAFLPNASPLSSDGISSSRSSSSSLKLELGEYSINLEKPLGM  
ILEERDGENSGVVVRTVLKDDAAGSAWKTGRIAPGEILLKKGVDVSSSSSFERVMEMLV  
KSESSTTKLVMGDALGRFDMPPNVLKRLASPEDAFFVDAVVREAVRAIRRDGRLGDLQV  
EVIVGAGINNEKRGMRFFAIFSTDGVSTYSCNVSATGVRNDSTSNDSIQIVSLSCAKDE  
GLGRTYDLIQEKEX  
>comp7778\_c0\_seq1; 92 298 647 LEN=647; translated  
MSGFGGSGFGGGNRNNNNNNNSWGGKGGRRNNNSWGGHGGGRNSGRGGRHSGRGRSGG  
RGRSGRGRGPSGLIKICGFYTKRDCCSRVSCQHAHVIKLHAKIDATGKINNNNNNNX  
>comp7779\_c0\_seq1; 365 180 1907 LEN=2216; translated  
MTKGHSYVGVSAALQIPFILLVLTAFVTILLYLVLVPEPNEYGPGGGMIKGGNVKFPHGG  
HPHIYREKHLKVEEGLKSTVQHKREQLAKALHLSASSSSKLPGRRLRILRDKHQIVGERLS  
DITKGKETVEEILLGAGIGLQAIENIASNEPPMKLDEIIGYLDQWIHGLHRVMWQVRKED  
FPVIWDAYHDYAVKTLYIWRDKYLSRMPRRRDESIFLSIATYRDANCANTLKWAYEKAK  
NPEKLFVGLVQQNCHKNCISGVLEGGETNSVGPDLDCYKSFCDGEGKERCDNGQVRV LNI  
DESESLGPYAARFFGSKLWFGEQWYMQIDAHMTFAQDWD AISVEMLKRSPSKKPVITHYP  
PADTENLEELVGEPTPRMCTGFFAVSDVESQIIRIDGSELFDSKYNKIPRFAPFTAAGYF  
VAHSDFLREVPFDPFLPWIFMGEEIIMSTRLWTAGYDIFSPSQAVVGHMYGRQHQP KFE  
TVGRDFSPGTHHTLQMMVLERVKYQLGYPEAAKDMITSKNLLTAVEQYSMGTERPLSQYL  
ELVGLDMTQKEITSMDWCEEEMPPPGFEEFN DLYK  
>comp7779\_c0\_seq2; 391 180 2039 LEN=2348; translated  
MTKGHSYVGVSAALQIPFILLVLTAFVTILLYLVLVPEPNEYGPGGGMIKGGNVKFPHGG  
HPHIYREKHLKVEEGLKSTVQHKREQLAKALHLSASSSSKLPGRRLRILRDKHQIVGERLS  
DITKGKETVEEILLGAGIGLQAIENIASNEPPMKLDEIIGYLDQWIHGLHRVMWQVRKED  
FPVIWDAYHDYAVKTLYIWRDKYLSRMPRRRDESIFLSIATYRDANCANTLKWAYEKAK  
NPEKLFVGLVQQNCHKNCISGVLEGGETNSVGPDLDCYKSFCDGEGKERCDNGQVRV LNI  
DESESLGPYAARFFGSKLWFGEQWYMQIDAHMTFAQDWD AISVEMLKRSPSKKPVITHYP  
PADTENLEELVGEPTPRMCTGFFAVSDVESQIIRIDGSELFDSKYNKIPRFAPFTAAGYF  
VAHSDFLREVPFDPFLPWIFMGEEIIMSTRLWTAGYDIFSPSQAVVGHMYGRQHQP KFE  
TVGRDFSPGTHHTLQMMVLERVKYQLGYPEAAKDMITSKNLLTAVEQYSMGTERPLSQYL  
ELVGLDMTQKEITSMDWCEEEMVRATKSFLALRLVGDSTRVVPDENIVFTFSPFELL LHR  
FLLPRQPPPGFEEFN DLYK  
>comp7779\_c0\_seq3; 365 208 1935 LEN=2244; translated  
MTKGHSYVGVSAALQIPFILLVLTAFVTILLYLVLVPEPNEYGPGGGMIKGGNVKFPHGG  
HPHIYREKHLKVEEGLKSTVQHKREQLAKALHLSASSSSKLPGRRLRILRDKHQIVGERLS  
DITKGKETVEEILLGAGIGLQAIENIASNEPPMKLDEIIGYLDQWIHGLHRVMWQVRKED  
FPVIWDAYHDYAVKTLYIWRDKYLSRMPRRRDESIFLSIATYRDANCANTLKWAYEKAK  
NPEKLFVGLVQQNCHKNCISGVLEGGETNSVGPDLDCYKSFCDGEGKERCDNGQVRV LNI  
DESESLGPYAARFFGSKLWFGEQWYMQIDAHMTFAQDWD AISVEMLKRSPSKKPVITHYP  
PADTENLEELVGEPTPRMCTGFFAVSDVESQIIRIDGSELFDSKYNKIPRFAPFTAAGYF  
VAHSDFLREVPFDPFLPWIFMGEEIIMSTRLWTAGYDIFSPSQAVVGHMYGRQHQP KFE  
TVGRDFSPGTHHTLQMMVLERVKYQLGYPEAAKDMITSKNLLTAVEQYSMGTERPLSQYL  
ELVGLDMTQKEITSMDWCEEEMPPPGFEEFN DLYK  
>comp7779\_c0\_seq5; 391 208 2067 LEN=2376; translated  
MTKGHSYVGVSAALQIPFILLVLTAFVTILLYLVLVPEPNEYGPGGGMIKGGNVKFPHGG  
HPHIYREKHLKVEEGLKSTVQHKREQLAKALHLSASSSSKLPGRRLRILRDKHQIVGERLS  
DITKGKETVEEILLGAGIGLQAIENIASNEPPMKLDEIIGYLDQWIHGLHRVMWQVRKED  
FPVIWDAYHDYAVKTLYIWRDKYLSRMPRRRDESIFLSIATYRDANCANTLKWAYEKAK  
NPEKLFVGLVQQNCHKNCISGVLEGGETNSVGPDLDCYKSFCDGEGKERCDNGQVRV LNI  
DESESLGPYAARFFGSKLWFGEQWYMQIDAHMTFAQDWD AISVEMLKRSPSKKPVITHYP  
PADTENLEELVGEPTPRMCTGFFAVSDVESQIIRIDGSELFDSKYNKIPRFAPFTAAGYF  
VAHSDFLREVPFDPFLPWIFMGEEIIMSTRLWTAGYDIFSPSQAVVGHMYGRQHQP KFE  
TVGRDFSPGTHHTLQMMVLERVKYQLGYPEAAKDMITSKNLLTAVEQYSMGTERPLSQYL  
ELVGLDMTQKEITSMDWCEEEMVRATKSFLALRLVGDSTRVVPDENIVFTFSPFELL LHR  
FLLPRQPPPGFEEFN DLYK

>comp7781\_c0\_seq1; 313 348 1214 LEN=1711; translated  
MNDELGGTSTTRVPAWKLRQQQRQSRPPVSSSLHTRADDELGGGGRSYASRRRANDELGGG  
GRSFDSPSSSSNNDELGGARSARVPAWKLRQMKRGNHFKTDLDDANTVSTSTTGSN  
LSVSSPTHNASHNAPHNASHHPFRTRQRVSRVPGAPDPGLPPAFRAAFRKKQQRKKT  
DSFLNLSSVHSRTTACSNNTNYTAESNGSLGSLGSSSDDDSDFGEDSFASLSDADEDEA  
YRESRNLARLEIEKQQQSKDAKRVGSRFKKKPMGVHGTPLGFIAE  
>comp7782\_c1\_seq1; 404 748 1692 LEN=1926; translated  
MRSTTGPKNGILRAAALAAGTASVIAACCAGVADAFGTTTFVYGPSAKELILLTSKLA  
EGQTSFCLCAPGQEAFFSKKLMYGAPSGDENDGGDAETPRATPISSGDDIQDALSKANTL  
ILVGHDPVDEKALNTLLASAGSDLKVVLLSKMGGSSAGGGGFFGGDAKFSESERALRA  
CASKNLGLSIVRAGQLKGGGPGEPASNDFGLSKQYYNTLFEELSEASCTMAHDRFTLGVDC  
TRGDAVDVFNALKLFGTKTSFDAAPYDTRNINAAMAAMAAALHDKPVEFVSGAAKGTNP  
SAEEWGAILAEME  
>comp7785\_c0\_seq1; 380 240 1523 LEN=2399; translated  
MSVPRKTTKIYRVVLSAATFFVLCLCTRHFQNLQCLPKEMIADNAPQVKYQVDKLEEI  
RRIKNETSSEIETQKNRGNKLEEQKKIIEESSAKISIGENRTNNLEQHTRKYQIDPRYF  
SDPRRFRGEMTKKLSALLEKNIKSYSQLRDEGNLSSYVQDDHPLFNGVKLGDFSIEALLR  
MYPKVDVSTCLKYNADKTGRLLVDTTGWYIEIERSINNVQHKKLINFSLFRKRGDHPFGEL  
PEDRRLKWEWKYAMPVLRMFDTSHPGYSKYFTDCDFHLYLARDLKYMIDANMIPKHENL  
TIHLMKTSSVGTGPGSLWRFLGLNPNYDITASSEADTFLRRSYFEKAEIIIISADNDFN  
LVTTGIGYTRGNDAFLNSALIMGGIIVTKPSALPFDMASVIMGFTKLVHDLRMLISTPLTF  
TNNEPVTW  
>comp7786\_c1\_seq1; 239 1 867 LEN=1072; translated  
XADDDTASEPAKHVEGIVLSTDQCPADGNDTGEDPQHQPQNPQGTCTVKCSQVVVPINAM  
RGFFRQNGGETTTDRPQKRIARRISVLKGSVVPSEEDGEQRHVVFVPPDVTGNDHAIHGV  
LDSSAHVAPRGYTLHLTTTVEDGTADTGSAAVLERAAVLRSKPPTATGAGSPGEP  
VEVYRVVQPSLPRSRNRREGPPPERPPPLQPLGQALTADAFAEQAEAFSSICPGARFLG  
LSSSIDEVIRERAEEKYDDEEKTALESAVGMIGDASADANGSTAGTP  
>comp7788\_c0\_seq1; 380 195 1958 LEN=2167; translated  
MKRTNPYL VVFCLLGLFQESRAWICSPRVSHLAMKGLGPTSTKTPLMSPNRNRQPPNGRL  
RGSTIPLTSSRNC SRKEDSGSKIKSIFSFIFKFFKNLFRLLWPGLNKNFDPNLGAPLPE  
IASLGC PFFGNNILAGSKNNGPEKIFYSEASAKLDHPSIWRFYFLGAPVTSVSGSKNVNTV  
FKSKNFDTMSLDFSSKKTDTKVEKEELFSSKSVMFENDRKKHVFLRRLMGAAFTPSAIND  
GTQKIEKAVMDQLHKLKDGEEIEMEDICEDFTLDIAWRTILGLDLKDGDEIQRFKAVDI  
YTSGLFGVELYLNFP GKHLPTFKARRYLVSKIIERVAYLEENGPDGSTLSAMVFASDED  
SNKKLTREEIVENSLILLVAGTETTAATLTSAMFLLGLHPSIFEKIVQE QRELVSTNGAT  
ITGEVLANCYTLDAVIHETMRI SPVSGGNLRIAKEAMVLDGKQVPGGAVFANIRLTHEL  
DPKITSSSELDP LHSFAPERWLDTE TKPTEDFFPFAGNRRCLGAPLAMAEMRIFLSLLA  
RRIDSFELLGEGSDKTKAIRWNPSSLMRKLGGVPIRTVATNASVNT  
>comp7790\_c0\_seq2; 205 1 1420 LEN=1530; translated  
XFRSRFHCAFTPIRNKDCIVIPMSNILLASIPLLPTLVAIDLLENPWTVANSWFKESSP  
SNGNNEGAEIPSVSSQLLAYLIMGVSGYVLTNKLVLNLIKDYTLRKGIFGKDLGKRGTDLA  
DVPVPEALGIVPGAIFLIFCLVGYATSHPSKLLDLNSALLSICFMLFLGFTDDVLDW  
PWRYKLVLP TVASLPLCCYNGSTSVVPIPLRALLIQTQELTLLGNVASWFVEIDVGSN  
GKFLDLGFFYLLYMGMLAVFCTNAINIYAGINGLEAGQSYVIGCAILLHNFIEIRSQSLT  
QENHLFSAMIILSFVGVTLGLLRHNWYPASVFGDTFCYFAGMTFAVVGILGHFSKTL  
FFIPQVINFWVSVPLFKIVPCPRHRLPAFDASTGLMTPSTFECKPNQYLWLKKNRLDA  
GDVRI PNMTTINMVL SILGPMSEKKLCTFLLGIQLTSCAFGFFMRYIIAEFFF  
>comp7790\_c0\_seq3; 161 1110 1250 LEN=1360; translated  
MTTINMVL SILGPMSEKKLCTFLLGIQLTSCAFGFFMRYIIAEFFF  
>comp7793\_c0\_seq1; 563 1 1967 LEN=2132; translated  
NSLASHTTSSQHK SARLWFLNNAKSLPFLLIPLCDQFSEVASKDGKKKKEAGQRAKPR  
PADDP TISADDNVSTLESHENEKNVGFETKQLSSES KKKRKADEDEDNEEEDNATEKKEK  
KKKKKKGKKMKRDEKDAE ANNEESTGAISSGEEKGFFSEQTFASLPLTEETKQAINMGMH  
EKMTKI QSKSIPALLAGKDLIGAAQTGSGKTLAFLVPIVELLRKARFHTRNGTGAMILSP  
TRELAMQIYGCKELLGEKSTLTYGLIMGANRKTAEERLRKGVNIVIATPGRLLDHLQ  
SPGFVVRNLLVFCMDEADRILEIGFEDDLRAIVKMLPKERQTM LFSATQTKKVEDLARLS  
INPKNAIYVEVESNRKEATAENLEQGYVTCPSDKRFLLLFTFLKKNKKNKIMVFLSSCNS  
VKFHAELLNYIDIPVLDIHGRQKQVKRTTTFFQFQKAKTATLLCTDVAARGLDIPVDWI  
IQFDPDDPREYVHRVGR TARGATGSGRALMFLTPQETGFLRYLQAAARVTLNEYEFPTS

KIANVQSQLQSLIEKNYYLNKSARDAYRSYLLAYASHSHREIYNVHELDDLQAVGLAFGFS  
TPPRVDLAFSARGDKRNVKRKNNAKQKRLGSGHSFSASNPYKRESGDKRQFSH  
>comp7794\_c0\_seq1; 426 292 1434 LEN=1485; translated  
MRRNNQTLILLIAKAVAIATIGSVDGFTVPEYSTAGLSSALKYERNLLTCSAQSKNNDNSI  
CDVDNRAAQSRREMMTKTVALASATFLPASIFSPEISSAAVGTLPFESDTNAIIQGLTIN  
VADASQQKTMIDFLVGAFLQVQRQRIKGSVEETWLGFGPEQLSVPDDFELPVSSFDKYG  
GHASINVRYDSQTVAPFYRQGDAPGNSIAYLALGVPGYRISQMIANGGKILDAYGLVNV  
VSPGGLPIRGVVIAPDPIIMYVAINCQDVKESKEFYEKLGVEQEVYSRPSKGTMTMFEP  
APPKNSVYMSPPNCMGVLLLLQGGKKKAIVPNPVIDSLNIVYNPSTEEESGQELVLTDP  
GIPIRFQSAATFTKTEKLTR  
>comp7795\_c0\_seq1; 399 181 1893 LEN=1929; minus strand; translated  
MANLQPLPDIISTPQYGVCLDGVTONVNRVISEVSCETGAEVYSPPYESNQPCKTPSDV  
IGRCASSLDDNRCGPSSISCGTKSSFYESIDSSCSLLVDSKSSNEKLFKRTTFPACWDS  
AQSWQCALDEQYCLSHENLKYKSWAAEWGPDPCHECVPTGVCYQTTGSDVDDNNTRENS  
FCAISPDCPSTYGMWSARAFLGSERATFQCRFCKDPEDKYFDSYTAGACRKENDSSPSS  
YTSCAMESIDCPPETKFVSSERLAKEGLRCPAELTQNWGECKSATDQVECTNKADSCLYD  
FRFEADGSGCENLYQNSKTGLPTFYFSYCSPTDNDDRDWRDIRCVWDKSECDLSKERWEEA  
RLPNKAWFSGCLCEDVLTGVCKEPSTGVYHCAVSAKACTDPSSYVPQRLKERNIDLSCP  
LCVSRQLHTPATPMPATSPPTIAPRSIGLGSKPRPAIDSVSLQPTLSKPTPSPETSSFA  
NNNKDSGKGENLSSGLIAGISVLVILIVVIVIEAPFLEKYRRGRMNQAQKPDASAVTEEV  
EDATEDQKASASIDIDHDAEFVTASVQIT  
>comp7796\_c0\_seq1; 230 1 946 LEN=1204; translated  
XVRTSGMSQTGQINSSMLLFSQHIPKSLYVKNKQRLKLLKQKHAANEIGNTSLPKTKT  
IAKTTNMPRSSSSPSLSTRKSFPDAFVRLVPCLLVVLASKIASAQEGSSTSCMDKGASSC  
MECLTDENVIGSSTCGWAPFGCLDSCNIIADISCFEAGNSPDLTRGPDVVCAMADESIA  
DDELCSKTDGSCVSTVRANGVDTCHWFGESELMGMDASSAHCGPDPCTMLGCGSAVCDAA  
TATEPEDSNDNTVAVEDDIQEASGSAAEPTVPAENTLSEANSGLASPSAPSLETTRGRL  
MAATWCLQLLLVLVA  
>comp7797\_c0\_seq1; 676 1 2536 LEN=2590; translated  
XRVPVSRPPFWQTRVVKMSNTVATVPESPSSTALNRFEEIPEEATIFSPAPLPSAVLALP  
GNANAIEIGKASRVIIPDRNALLVGRQVSSCDIRIGHKSLSRRHALLYH SARLWVLDLKT  
KAGTFVNEKKIISGTPVELNDGDTIQFGKAKPIFTVRWDKNSALNEVDDQDSGKANAANS  
SIQEGASKSDEQGGQDPHNNRSSRNTDADNNVSSKGAITKNGNESGEPSPLEGLTGRER  
RRAEIAAMMASLDETPTYEKYVPTATSNAGTQPPQESHRTPSDDNCFGEEQASLERKKT  
RVLEKHRIPITDCTDMAVLDTSHVSTSAMDPTGARFAIGSMDSLLKLYDFAGYNIIDPVP  
FQHFIVEDGYPVRSMAYSDDGSSILIGTGSAPRVFSRDGSELVKFVRGDIYVRDP SKTI  
GHTAPVTSVGHWPLEASTVFTSRDGLRCWNIDKGLSFGMLNCSVDVIGIKHLRTGRMT  
IPTCLAISPNTLAVGTECGSLQIFKYPFVSKLRPQQSVQVSLPNTTEKTKKDADPIVSLV  
YSLDATKIAVRTKKEVTLWNAASKLSTSTQPMKYDNLPLHDDDTGADSSTPTMAFSPNG  
KILCVATNTKVDGSGKDYRSRLELFLLPKESKPKRDKKYTSPVFSMPI SDGKDDAGFVMS  
LSWHPKLNQLLVTTQKGFQVFFSTEWSKNGILLTSGRRKKRKSVEESLQDLYAARAPPPG  
TAIRQEEIITPNLPLFSGDKQRAKSKQRAEEDHQDSVARHIPQQPSKGVFNTGVNMF  
QMIMDDRSSHQKKIAGMDPREALAEYSEGKSF IGKAYEGNVERILTEKTMEQEQEEMNGK  
AQKK  
>comp7798\_c0\_seq2; 490 1 2044 LEN=2179; translated  
EELVGYIDNLAFDHANETANIAEAARTPAMNNSFFSGEDHPPFASRPRERTSGGKNVFRD  
RTNRFGATTSQATTGNKLGSLKVVGTALDRSSSSVRLVASVAEQPITADPVGTPLTRQ  
EPAGSPPPQAEASLYFHDESLSLILSDSEDTNDGIFDRSRPESEAPKRGRCTKDTERSPL  
LSALQHDGFVSTPRAKTI SFRAVSKDPTPSKPAPSTSVLDTMGNGTLDLRESSNIFDS  
EESPDPF SAARHSDLKARRGTPHPRRVFDRLGRESLDRKGNWWRARPVPAENTAARSI  
SFLPDAKDFEFAAEENGSKSLHWGADVTTPLPHRRDTPVKGTPHPFGRRSDSSDADEHLGE  
NDNYMQKSGLQRTVPETPLANPNTLKNLVLTSPESARKLLKEAITALKEAREERDAAREW  
ASNTKESVLKWAENQRQLIRTESALSNSTPISSEFAQQQYQTFETLIDNLRSEIEASKS  
STEAQLETRMLKQDVKIQELSRQLSDVKDKLYRSTEGKEIAGCNECKQSQKTTKYTNVDA  
PGSIHKTPQNNTAGLTRTASRSERSSGSSRGSHRTRRATPNGGHLIDYGNVTKIHPDG  
TTVTRFKNGDVETRFPPNSSTASSPSASAMMAYHCTEEVLKITLRDGSVLYEYATGQVE  
RHCASGVKIIIRFPDGTKTIV  
>comp7799\_c0\_seq1; 491 194 1915 LEN=2260; translated  
MSVERERRYRNAGLIHRTIVLVLSLYWSVALVSVSARDCHTSFRRAWRDLSQEQDDDFL  
DAIQVKDSGDYDHFIDVHLNVAPLTHGPAEFMPWHRWFIWNFEKLLQOTTGKCIYIPYW

DWERDSQWERESDVLHPATFGSWGATNGAGCTMNGITEYHAPFRWSPGVNNGPAGCVTRD  
FLDGF SFSGEAQVLAMIANYNQFSDTTGNARGNTQDNVPTGTTNGFRFEFENGHMLVH  
GVIAGHMGSNWSPADPLFYLLHANNVDR IWTMWQDYHDHDTCSVDEYLSPW HFDSEWALDR  
ALPFQHAERVS NWDFRMTY PDGSQAYPTVRDIMNNDGETLSVRYQNSYLNLSLMPDYVANP  
RLFQVATDGV PVKCDRDEWEWARKKRKLEQERKPEDEHEHQDLRKNLSLVGASANSTSTLL  
FSNHQHVFPN AFRSSIRGKDAQEIEDHPELYFRKPGDGRVKNDLEGNGINTRYRSSDVV  
GVTSEECGKPPV FSLQEDRDEWDRLCRVLPKDTPIVERLALLAKSNCGRRGNPRSDAPEI  
RERLTMTIMGAFDAPSSAYECFHRPGDPADEV P

>comp7799\_c0\_seq2; 419 1 1667 LEN=2012; translated  
XAVASVRSAIRRVYSIRFGFGLGLGFCGIRPVNLLTVFFSRWSNHISFLPIHPFGSKKIL  
GITDCAVHLIF TNAVDYCRWF IWNFEKLLQOTTGKCIYIPYWDWERDSQWERESDVLHPA  
TFGSWGATNGAGCTMNGITEYHAPFRWSPGVNNGPAGCVTRDFLDGFSFSGEAQVLAMIA  
NYNQFSDTTGNARGNTQDNVPTGTTNGFRFEFENGHMLVHGVIAGHMGSNWSPADPLF  
YLHANNVDR IWTMWQDYHDHDTCSVDEYLSPW HFDSEWALDRALPFQHAERVS NWDFRMT  
YPDGSQAYPTVRDIMNNDGETLSVRYQNSYLNLSLMPDYVANPRLFQVATDGV PVKCDRDE  
WEWARKKRKLEQERKPEDEHEHQDLRKNLSLVGASANSTSTLLFSNHQHVFPN AFRSSIR  
GKDAQEIEDHPELYFRKPGDGRVKNDLEGNGINTRYRSSDVVGV TSEECGKPPV FSLQED  
RDEWDRLCRVLPKDTPIVERLALLAKSNCGRRGNPRSDAPEIRERLTMTIMGAFDAPSSA  
YECFHRPGDPADEV P

>comp7800\_c0\_seq1; 351 378 1142 LEN=1187; translated  
MVEKHAHGDAHSSSSDLLVPLGGSLEECDGSDVSSSKEFDHDSNPTVFGKILRGELIPSR  
VFFESNRLLVFEDIKPRAPLHALVIPKQHIPSLVDL DITAF T TACNNRNGNSSNNNNHPA  
PSAAVALLEEMNVAGQDLV R TTYKDAYERGDYILCFHIPPFTSVDHLHLHLV LAPASSMHW  
IYRNGKYNVGKTSNSETGGFSVRWCIGIDEVLARVKTGLAPT PYRKGD SLSTACFDALAS  
LGSILSSSFWGGQA

>comp7801\_c0\_seq1; 1099 508 2880 LEN=3051; translated  
MRKVVFWKTKKGSLLAAA AFSLAVLFSSGDQISSYTPSGATPPAEINVLSSRGGGNGGS  
SAAVAQTSPLKVDTKKSRSEQAKTAVATAADQTSRTLKDAIDDLGKFMGSKRSDTLLLLL  
ATAVITPLCKMMGTSPILGLFASGMLLGPNGFGLINDLHTTEVLAELGIVFFLFEMGIEL  
SIERLLSMKRDVFLGFSQFLCSALAIAGVGKVLGLPANALVVLGGGLALSSSAFVLQLL  
KDKNQLASRF GKASFGVLLFQDLAVVPLL VVTP ILAGGSGLAAALGSAVLKAGIALGSI  
AVAGRYV VNP LFKKVA AQSQEAFLGVILLTVLSMSFMTEGLGLSNTLGAFLAGVLLSET  
KYRYQVEADIAPFRGILLGLFFVTVGFEIDLALIFSR LPAVSAIVLGIMI IKTAVLTLLS  
VAFGLSLSVSQQTGLILSQQGEFAFVAFGLARSLGILDTP TTKLLLSVSLTMA LTPAMA  
AVGDRVSKALEEKSDFTHYLGQDREATEIKESDDFAVVIGYGA VGKVVCDLMDRKLVKYV  
GIEIDPKKAI EARNAGLPVFYGDIGRQEVADAFNVGKAKAVVVCISDRDQANRAVIALRR  
FYPDVKIFSRARDKDHADRLQKTLNVAAMVPI LPEDNLLLTLPFGGAVL KALGGSPEEVN  
AILETKRKEVMSGKSLVESEEDMALVQLGIEPEVRSEKKKKDKSKDSEEGEGEMMTDKSAA  
ASRIEIEIKEKSPFVAEVI GDAFPEAEKDGAANPDIIDVVVDEVNKDIDVGILPDKNTTGL  
EAEAVPTSDP

>comp7802\_c0\_seq1; 389 1 1423 LEN=1466; translated  
XVESTTRRMMLPIQYYFNDEIFDNESAYEHIFKIPGLGSFGIINLSISFWIHSFVFLSLQ  
SVANLCVA AFVYKFI L VVRPATSLQTTKTSFHRSYLI GYGLVCPTLLLAPLYIVTHCVHL  
NNVTLMVCLCGAFP NLLLLRVVEAIHG FVPSAFLLVDD DATADTSIHENGKEVVRPGLQK  
GSKNGLARFLLYAATLQVKIDERTNQVPVFTRQIMI SKLMGFFSTFLQTSIMYSL LQSF  
DYALAPSR RPIQSFVDLYYWGNI LNAVAMAALTSLLLEGGASGLGLITSFC SGLTMEDFS  
LSPMTQSSSPDFWGNRWDRPVASALRRGAYRPLLQAGYSRKFAAITTFLISGFIHEYIL  
LLMAQRK RTPNDRQALHPEEDGSYQPEFGNHFLFFAWNGIVLCLERLFMSTEKGRAFSI  
WMQSNVPKPIRTALVLLTVLP IAHLFTDEYVKGRFYDAAHAFPRIIYLGQPDS

>comp7804\_c0\_seq1; 622 65 1282 LEN=1463; translated  
MGKHPERSQSI P P P P P P L P E D G N L D E M Y G D I A N N S Y S N N Y I A D D Q S V E A Q H V V Y T F N E D G  
DKKSAKAATKKRWIYLMVTVFSLLTII LALGIVYGKQVQARKKATKESSFAEANA AEETV  
TNI AVDTEESDIEIDEDIVLESTIVDNEDVYETASPPPEGDSESESEAI VLTNEETEVTNE  
VIDEVVDEVVDEVLP AQATPGPTNWWQNQNTQAPTDPWWWNTPAPTDGATDGATGNAGDA  
TTNPGAGAEATDAPNALADATSPPVAGAEGEATTPPDATANPFGANTPVPTS SWWGTFPP  
RTSAPTGGATAGGTAAGTLRGTAAGTGPFAGTTNPDAVAGDND ETMSPSVLAGAVNAAGA  
AVAVEEVI EDEFVELPEAELPEAGAEDAPATSDKDDTSSDKDDKA

>comp7805\_c0\_seq1; 520 375 1656 LEN=1656; minus strand; translated  
MVTHQINGIRCHESAKPPTASDVDGASSSTTRSCSKALPRQRNNSMTLSSWVLVYELNKD  
GCCALLQGDYDEANRLFELALQKHKDMMMKWSTKTHEEELPYDSSQSFHYSNRSCNDNCM

DEEEADLGSNFADCTISSPQHVLRLAPDPVQPLPAISMSSCPMVRTFSYSGQNNSNYDA  
TYHTVYALPILMSKYEWQAASNTDRSFAIIFNTAVCNHLYGMQQRKQOETEOKANGNSH  
HPRHISWTQSFQIAKLLYRLALETKVSSTAFVGI ECYPAIFNNISHLCKALEGYHSEEAH  
RYDVLKLLSVYWMMDLLGSDKIRNSNARRESIDSTTPRTTNSSTATPGNNDNPAYETLI  
DNFLGDVLRVVDDEPMEGEAEQNKQQQQTNAIEPPLSYHAIVRDARDYDEMMDAFLENV  
FYLVSSPX

>comp7807\_c0\_seq1; 337 1 475 LEN=575; translated  
XASASASASAEAPSAMDGLSEEEALLQQALAMSMNENEPPAAAASAPASEGAGGGGEED  
DDDEAAAAMQLALQMSLAQAGQDETPGGSGSGSTDQARFQDPGFVNQLLGLSLPGVNPNDPA  
IQSALQNMAKDGENENENDKDESETKKKGGDDGAKKE

>comp7807\_c0\_seq2; 432 105 1045 LEN=1045; translated  
MPLESCMIIVDNSEFMRNGDYVPTRELAQQDAANLLVGAKTQSHPESTVGVSAAGTELLVS  
PTEDVGLKLLGAVHGLSIGSKSQNFHQHQPPSGGSSVTASLQVSLALKHRKNKNGSQRIV  
LFVGSPLDGLSRALAKAGRQLKKNVNSIDVVAMGELEANEAKLRDLVDAANGRNAGDGA  
ERTCHLVITPPGVLPSDVLASSPVVHGGTGGSAFAAAAAAAGVTSPSGHGGGGGSADA  
FAEFGGVDPNMDPELAMALRVSMEERARQERLAAQQAREQQEGARPEADADAPAPGGDA  
EMPDAGAAGSSGAS

>comp7808\_c0\_seq1; 421 297 1289 LEN=1679; translated  
MGGDSSVSAPTDKTGLPDSVKLLIGAGGIYAAFLYYSGLQEDVFRYVSPDGNFSFKQAWFL  
QVMEALANVIVGFLGMQLTGPTKGIPLRMFGISGAAQVSAKACTSLALANGLSFPVATLA  
KSGKMAPVMAGSLLLGGATYSIREYLQVAIIIGGTAVSMGKKKGGDNSLMGVFYIVL  
SLVLDGVTAGFQKRLKTETAKVGVKPKPYDFMFWTNLFMCLTAVVIAGLCGEIATGGAF  
LANPEIMSKIARFALCSAVGQSFIFYTIANFDPLILSTVTTTRKIFSVLLSIFLKGHSLS  
LTGWSGIGLSVSGILSELQAKTASKKSKSK

>comp7808\_c0\_seq2; 419 1 1279 LEN=1669; translated  
AKIASFQHQLHRETEKKKNASQIIDNRSARSNQINQSNLVEARSARSAASLLYTSSASI  
AAPTSTGTSTILPSTVEAQGSPVSVETPSNTVTAIMGGDSSVSAPTDKTGLPDSVKLLIG  
AGGIYAAFLYYSGLQEDVFRYVSPDGNFSFKQAWFLQVMEALANVIVGFLGMQLTGPTKGI  
PLRMFGISGAAQVSAKACTSLALANGLSFPVATLAKSGKMAPVMAGSLLLGGATYSIREY  
LQVAIIIGGTAVSMGKKKGGDNSLMGVFYIVLSLVLDGVTAGFQKRLKTETAKVGVK  
PKPYDFMFWTNLFMCLTAVVIAGLCGEIATGGAFLLANPEIMSKIARFALCSAVGQSFIF  
YTIANFDPLILSTVTTTRKIFSVLLSIFLKGHSLSLTGWSGIGLSVSGILSELQAKTASK  
KSKSK

>comp7808\_c0\_seq3; 513 237 1487 LEN=1877; translated  
MSLPTSTRFRSIIISFLLLLLSGSQSNQSNLVEARSARSAASLLYTSSASIAAPTSTGTG  
TILPSTVEAQGSPVSVETPSNTVTAIMGGDSSVSAPTDKTGLPDSVKLLIGAGGIYAAFL  
YYGSLQEDVFRYVSPDGNFSFKQAWFLQVMEALANVIVGFLGMQLTGPTKGIPLRMFGISG  
AAQVSAKACTSLALANGLSFPVATLAKSGKMAPVMAGSLLLGGATYSIREYLQVAIIIGG  
TAIVSMGKKKGGDNSLMGVFYIVLSLVLDGVTAGFQKRLKTETAKVGVKPKPYDFMFW  
TNLFMCLTAVVIAGLCGEIATGGAFLLANPEIMSKIARFALCSAVGQSFIFYTIANFDPL  
ILSTVTTTRKIFSVLLSIFLKGHSLSLTGWSGIGLSVSGILSELQAKTASKKSKSK

>comp7809\_c0\_seq4; 247 239 1111 LEN=1393; translated  
MTSKSNILYVNLIVRNSEAVKSHVTNKLERSKVI PNVVVAQAHTASEFASPKHVTQKM  
SDQICKQIPEELKKKGI ESQMEEVFRENTFAVLQLRLTYVDP IILASASESVWTGAGLSC  
FLDCIGSSNRKYFEEDYLPKTVARLLTTVIPRTLGENLSDKKIDAETKVNKASEQSIYFY  
STLNKIRASQLDGKRGNRNP INKLRKRMSSQSSLSGGSHRRAGSLTSLGNI SFKRINSQS  
SMGNGSQRSLASMYSMDAVDDDKTIDTSGSRSSRSGSRSSKSGSRSSSMW

>comp7810\_c0\_seq1; 294 119 1702 LEN=1819; translated  
MPGVTKRLNRTMGFTSGKIGIVLAAFLFGCIVTTTIIILNFVTLTNAPFQTAEGGPIISSL  
EVPKALPDASPTDATVATKNPLVQQRILIAIAAFDFSQIPHLEEVLDAYQDL CVTGASKV  
DVVVHATIAYPVTLIDMLNSRLLPACQGIFSIITIVLKSKNLRLHLVDVHRELFDYDIDY  
DLFIYTEDDIRVPPRVVGGAYLSETKQVQDIVGLERSSNYNVGIVRYEYVNFPGNVAVDDKT  
RHATQNVTRVYWEHGQYPVFDKAVYKAKDKDLGDSYXNDGEHTPGNVYGHKLSPKSLEGT  
RELLISHCEQSAEQERRKKPAGNRNTKSLDEFQAPVRPQIRLQCNAGSPHPAVRNPDRSA  
PAEQKLPAGRSFPKQVRTSSCSFVAVFRVFLFSFVSSCVVSCSAGVGLDYRASIPLTFV  
AAGLVLLALYYCSAAAPQDFSDGTETDFGSESLSEMKLHIEMRKHTTQVPTLPYAGIR  
MLDEVKGGRRVRTPLLERRMGEYQAYVDRGGILSEKDMTKTALVEER

>comp7810\_c0\_seq2; 154 65 472 LEN=589; translated  
MSSKHLVDRRYGCNVMQVLPTRQFGTTLTVLHLPKNYRRVGHFRNRTFSDGTETDFDFGSE  
SLSEMKLHIEMRKHTTQVPTLPYAGIRMLDEVKGGRRVRTPLLERRMGEYQAYVDRGGI

LSEKDMTKTALVEER

>comp7810\_c0\_seq3; 256 119 1513 LEN=1630; translated  
MPGVTKRLNRTMGFTSGKIGIVLAAFLFGCIVTTTTIILNFVTLTNAPFQTAEGGPIISSL  
EVPKALPDASPTDATVATKNPLVGQRILIAIAAFDFSQIPHLEEVLDAYQDLCVTGASKV  
DVVVHATIAYPVTLIDMLNSRLLPACQGFISITIVLKSKNLRLHLVDVHRELFYDKIDY  
DLFIYTEDDIRVPPRVVGGAYLSETKQVQDIVGLERSNNYVNGIVRYEYVFPGNVAVDDKT  
RHATQNVTRVYWEHGQYPVFDKAVYKAKDKDLGDSYVTMENIHQGMFMATSFLKAWKVR  
ENC SFHIASNRPSKKGERNQPAIGTQRVWMSKHLDRRYGCNVMQVLPTRFGLTLVLH  
LPNKNYRRVGHFRNRTFSDGTETFDGSESLSEMKLHIEMRKHTTQVPTLPYAGIRMLD  
EVKGGRRVRTPLLERRMGEYQAYVDRGGILSEKDMTKTALVEER

>comp7810\_c0\_seq4; 171 449 661 LEN=778; translated  
MKLHIEMRKHTTQVPTLPYAGIRMLDEVKGGRRVRTPLLERRMGEYQAYVDRGGILSEK  
MTKTALVEER

>comp7811\_c0\_seq1; 413 1 1597 LEN=1597; minus strand; translated  
XGKGVTVFEDPRETGNIIEIVELEPQEPSAKENNGDGGDDDDDDYTVSIVVGGNEINMVS LG  
RYHGDKDEQLKEDICLSSLFINVVETFHKTNSTVSSGNESLTPTRRIVCKTYPLLNPF SY  
GFEVTRTNGKRFDFGIGRGVVVKGQQAIPINNIASDTTEKKGDGGLSLHLARPQMEGF  
GQLIGLVLAPREDTAETKAATNVTSKKNVVDTTLRGDVSTFDFSIIEGAVIDINGDI IAL  
AGVNICYAADGDLVANADILRYAIEIPKENNVHGTSMIFNIVASVRPSVAVTIGSVSSL  
CFPGAFELRNVENIQARLLGETWTFQTNLSLDSLLTPEFEVEGDDLEGLSTASNLMPV F  
PVSCNIRIRLVKDQDEETEVIITDCELMNPKPIECSTELAGFVKSMESKLVNVSINI  
YMDIPTATQEVDIRNFALSNDMAISGGYSTHDWIKTFSVSKRPRSKKSKANDNKQK  
QYLNIPYASVAPLKIRITYNAMSVM SIKETAFLVRAYKGNENTTVKSLIDFYT

>comp7812\_c0\_seq1; 229 1 1149 LEN=1242; translated  
HRGTSSYCSISKSKTKFQQQSGINHNDRDTHRRRMSASAAVMPNTNHLSGDGTGSPSTVA  
AALPLTTNMTASSLTSGGNSCLDEQIERLKRCEYLREGEVKALCLRAREILVDES NVQRV  
DAPVTICGDIHQGFYDLVELFKVGGCEPKNYLFLGDFVDRGYYSVETFLLLLALKVRYP  
DRITLIRGNHESRQITQVYGFYDECLRKYGSVNVWRYCTEIFDYLSLSAIIEDKIFTVHG  
GLSPSINTLDQIRVIDRKQEVPHDGAMCDLMWSDPEEIDGWGLSPRGAGYLFGGDIVSMF  
NERNDLDLIARAHQLVMEGHRSMFNDALVTVWSAPNYCYRCGNVAAILLELDENLDRSFKI  
FDAAPQEARGVPIKNPPPDYFL

>comp7813\_c0\_seq2; 563 1 1521 LEN=1950; translated  
REQRNLSSHLISSVFHTRTNKASNALRISLTPKTKQEPQHFDFDGLKIEDTTSKIDARIP  
STSLPKMTEGSGSNDSDAPSGCLLDFLPRELLAGSILARFLDGRALANFWCATMSKREM  
LVRSSPRKLRSKRNSPLSMVEEILQVARYRRAKLTEDGAGGNDEDENENQTD SHRFRLR  
SRVFMFAFEAAETKATGNDADRCGSGEKLGVSERDTEHFFNLAEFLRLSRRTFASLSA  
MDYCEVAQNLIWTVVVTIRGVDHRKTTIWAFLVVDVWVRWSMKEIRLWRNASTSRASACS  
TSAAQTGPPAIEARVVPFNFLPVGPNRGRVLGVTEADRIALGRISADLSEGLVARFSCV  
TTNTGAALTGNAITDTNSDHRNANS GGQFTVKLMAFDQAQEKLDTVFRRGREPGGIPLSD  
EKKGMSLDLDRHRKKALGGAKQQRYPQVDTNNSCIDYGSDELNLNHDHSLCCWSHEFLW  
EESRNFAVETSHALRYLANDYAALEW

>comp7814\_c0\_seq1; 200 234 929 LEN=1429; translated  
MTPQGVGSGFQRRVIANSRRIE SIVRGDSIENGNGGREGESNNDVEYSNNYKRGYPMEYGP  
IYYAAATILLDCSKRKGFTAPKAMRLVGFSDQEDCKSR SIRKRVGRVDRMEKRRVAARTA  
RQKRLKLYEKMRPVLASLSNEEGQGDAGGDDSDTNHETKKNNGGENTAAPVPELARE  
KVRVYCERMQLGQAGNAEAE GILKEWEERLADSERRRSPRLLSQPRATTK

>comp7815\_c0\_seq1; 404 118 1070 LEN=1211; translated  
MMKNCAFIFAALVSSVLAAPAI VWHKSEIDNANGRVLHSSDLSASDLMKNVLSEAPEAP  
LSAVVFLVAKGEDGSEQLSELASSGKLPETFSKYNDASGVYHSVSGLESPGAMVRETGRY  
TGDKNRVLEVSLSEFNKVESL GATVEVEIDSNGTPKASTNKSINKRARALAHADVYVN  
VSAKADASEIDTSINSAIENXNVGSVVLAVRSIEEVKHERFLLSKRRMLKMEEDGNKYM  
EARGRRRLEQEADGDANEDGGDDL SGVYVHMTPNIFSGLLFTLMFIVVTFTGISCMGDI  
QGGDVFDKYHSIGREA

>comp7816\_c0\_seq1; 981 452 3901 LEN=4048; translated  
MSPVHSLHDCEGTMTACSF SNLTNTVRI SRPEKQISVLSDDGENSVGYDPRRNGHRPSP  
GSHGSGNRQSSHNSHI SQPDGKNGELNLHESDSEASRAVIIGRGVVFVILVVAGVFGF  
MAYYVLNVAEENLAAKQYVSFTSGALQSVRDLAENKLVHGTQIMAKHVGWTPNAGEDWP  
FVWVPSYWDIMEDVLPTSVWSGVNLAPIVQPEQVAAFE EFAYGKFDENFGENTTMGGTSH  
FGRGIWVQDPLRVNTSDHRYHDTTGVP LYEYSPYNYLAPKIQDGLVHTPYTMMNVHGFEL  
QGLSLDAVMNC SIARKENATRDG LLGADDAPRVTSQPQGCDDSEGVACAPNPQKQFRCSAL

SGMLPPKNIKEEHGIAGFIATPIYPANDPYELVGFIFGIVYWVEVMIDIFPMHTVGDICV  
FEDPDYQYTYTIRNNTSTLICEGDCHDETYNSYRMSTKIVDSNLLSEGSVVYTMTCYPND  
EFFQAYHTNPNITASIGAILIIMLTSVLFFLYDYFVRQEFSAKKDLFEAKRKFVRFVSHE  
VRTPMNSVCMGLNVLQEEAAIALGYETPDGIRKTKTTDGIQNPQLGRQOIEHWFDLANE  
ISVNAQASVEVLDDFLNYDKIASGELSLEYTIVPAWNLI EDTVAEFKLPMTKKNITLHFM  
LPTANDFQKTVAENRKKERNNSIMSQSSERWSLRSGLDGS DRTRPLDNRGHSTKNLDD  
LEAGCGGTTDDWYSQVQNMKLIGDSIRITQVIRNLVSNAIKFSREGGDIRISTKFQAVEKV  
KKPKTFELKSEETLTCSQTGDLVFTITDTGAGLTQSQLKNLKFAGVQFDVNNLQAGKGS  
LGLYISKGII EQHGKLSANSKGLSGTTFVALPIFNVPEKVWYTTQQLMRKNSRRSTRF  
SIDSSLKTAKTAACSVTVLGGDDEGRNLNIEEKENTDGHSEDEVLSEDESLSELKILLVD  
DSKSNRKLDRLLTMRGHKCEHAEDGHIGVEMTLRAEGFAQPYDIVLMDYEMPTLNGPAA  
VKEIRDYGCDFVIVGVTGNMAEDVKYFKDCGANLVLPKPFVKVKEFQALIQENLEHDSRG  
RIVEKIPGGLEFITLGLSQRCDGNMSSSTLGNWNESSSHFDTSLKSISSVLDREESGKVS  
FSLPPTETQ

>comp7817\_c0\_seq1; 801 1 3276 LEN=4052; translated  
NRFP TKRLALSPRAVPRSQRSSAGEPPREASASAPDRGARRGTGSXGKGSAAASGASGGPP  
LSVPPSLSKSLSNPLSNPLSNPF EKSSASSPSLGGVDDAIARRRAELRRLQOKAKARSGK  
TTSSASSSSAASSAAPP CPPKGGAPPHKRSSDLFPTV PKSKSNAKPKPQLDSQPEEGAED  
RANSNSNAGARTVGT KASVPP LNAVDTKTNTKMNTKTNPHSNTARSNPANPNLPPQT  
PSAGAVPPTPAVGRRLEFP SGTEPTAADSAAAFAPATETVPGPPVAAPPLRRARSKSPFV  
RGSSESLSSKGLSHTPKEPSGSATTSATTSASVSAVQRNRAKSAPRRRPPGPPPGPPRS  
SAGSSAGSKGA AVPGTKKTRSSRRPAPIAPSSLLKVGKETNNQPGPANEKENQKADQKAN  
QSGNAGSSKTRSNSVDETTLNTTEKTHSSPARD SNSNRNGSNTEKTNTKGPSDMHISGL  
VETESKSKIESSFAPPPQLVTEAETPKQATASRIGTDANANANANTDMHTGAGAGTGTNG  
SHTNNGIKTPSSSGSTARRQKLQLMREQAAAASDILSKPSETTSRPDVPNHRDAHVNNNN  
KKNKAVFGIDVTA VSNAPPATEDFARAVGLVPDPNATSAPPIGNRAAKDKRQESTTRTDE  
KQNQEQEQKQKQPAPSLLDGTRTG PLASSPSTSTSLRSAAQSRLEDAYRKAKEKETAALL  
KIKQLEDQLSQKAKEGIQRASSSTNNSDSHSHSHSNMNMQHLLSIAETQGPDAALQWAK  
SISTSSSTGHKGPNSRSLRPAAQMGFHTGMGSSTPRNNGKGRVPSLGLMNAESPMRRAR  
IASRTLTPHRGLYFASDTTNSNDPYANETPEQTERRLIRSFREAAKYVPFEFSSELATY  
TVRRPYGLPTNPGLFVIAKILEEALLVREQYCGTLTSTALGLENRPPPIPEVKTL PSEKKE  
AEKGTTKREGSSTGPQGQRQQHQIHPPTQELDDSTGASSDVLVFFGMLASLLFRFVWGA  
VVGVPFRILRTLVLVLA VAILQALHGYLADDDYTAWALREMNADTAATGTSFSSMLASDL  
VYYSNRRPGIL

>comp7817\_c0\_seq2; 993 1 3557 LEN=4333; translated  
NRFP TKRLALSPRAVPRSQRSSAGEPPREASASAPDRGARRGTGSXGKGSAAASGASGGPP  
LSVPPSLSKSLSNPLSNPLSNPF EKSSASSPSLGGVDDAIARRRAELRRLQOKAKARSGK  
TTSSASSSSAASSAAPP CPPKGGAPPHKRSSDLFPTV PKSKSNAKPKPQLDSQPEEGAED  
RANSNSNAGARTVGT KASVPP LNAVDTKTNTKMNTKTNPHSNTARSNPANPNLPPQT  
PSAGAVPPTPAVGRRLEFP SGTEPTAADSAAAFAPATETVPGPPVAAPPLRRARSKSPFV  
RGSSESLSSKGLSHTPKEPSGSATTSATTSASVSAVQRNRAKSAPRRRPPGPPPGPPRS  
SAGSSAGSKGA AVPGTKKTRSSRRPAPIAPSSLLKVGKETNNQPGPANEKENQKADQKAN  
QSGNAGSSKTRSNSVDETTLNTTEKTHSSPARD SNSNRNGSNTEKTNTKGPSDMHISGL  
VETESKSKIESSFAPPPQLVTEAETPKQATASRIGTDANANANANTDMHTGAGAGTGTNG  
SHTNNGIKTPSSSGSTARRQKLQLMREQAAAASDILSKPSETTSRPDVPNHRDAHVNNNN  
KKNKAVFGIDVTA VSNAPPATEDFARAVGLVPDPNATSAPPIGNRAAKDKRQESTTRTDE  
KQNQEQEQKQKQPAPSLLDGTRTG PLASSPSTSTSLRSAAQSRLEDAYRKAKEKETAALL  
KIKQLEDQLSQKAKEGIQRASSSTNNSDSHSHSHSNMNMQHLLSIAETQGPDAALQWAK  
SISTSSSTGHKGPNSRSLRPAAQMGFHTGMGSSTPRNNGKGRVPSLGLMNAESPMRRAR  
IASRTLTPHRGLYFASDTTNSNDPYANETPEQTERRLIRSFREAAKYVPFEFSSELATY  
TVRRPYGLPTNPGLFDHCPSPGDDHPSVYAKRAHVSDKTTLEVAVVVKADQKPCLVFAAA  
GIRYPTTSATSSSSTDTTGNWKHFDNVDALDRPLGHVITYIDARANEKEYSMDEILEEALL  
VREQYCGTLTSTALGLENRPPPIPEVKTL PSEKKEAEKGTTKREGSSTGPQGQRQQHQIHP  
PTQELDDSTGASSDVLVFFGMLASLLFRFVWGA VVGVPFRILRTLVLVLA VAILQALH  
GYLADDDYTAWALREMNADTAATGTSFSSMLASDLVYYSNRRPGIL

>comp7818\_c0\_seq1; 368 59 1003 LEN=1247; translated  
MIFGMVPLSLFASGLLVAARITSSHAWNFCTAQAGKKNCS SPSPCRLEYTAEDTSATQSI  
AYDNSRCSISLSLRRKLF SVIPHQAF AASSLCLVALGSPTSPAFARNMPVSN GANTANV  
GTVPALVPLVALRYNLVSLRELMEENQRKRDDGGILNII TKTKAALSFRKLGIDSGTVPV  
TIPTREEEFKRLFDAYSQVSYKQKFLDQNAFLVYYTNGYDGPGRDSLEKDPVNERQTLQ



FGARNEAWIFWDDFLSECDFYESSIRKTGASSSDDADESFDVMMKYLSNTIQALDSYLKL  
SPPEDLKAAEKEVS

>comp7820\_c0\_seq1; 189 1 1055 LEN=1310; translated  
XTRKRSKVNRMKLCYLQLLVSFFLCERYWAFVEVSTYRSNKKDPTALRTLNALTERQQQF  
WEDVEDGLDGIESFYKEKGENIDRIRRRFGMRARGEIPLESYGFDFHQPSEEHIIEGLTAKP  
FWETSDFPWAKSLEQNSHIIQKEFESKVTGDTNLFSGDSSLQNSVMGGGWSAIRLQRLGA  
WNLENCKEFPKTYELLKELDIPLAVRGVCFARQAPGSGVKPHSDGRNFILTSHLGLKIPE  
GCWIENAKERTSWKENRLTTLDTSFVHSTGNPTHEVDYVLIIDFWHPELTERAGLEFL  
YDLRNKFESGLIPIRKPRGKIFKKETPVGAGIGEWWDNIIGGIQNQKGITT

>comp7820\_c0\_seq2; 164 325 1211 LEN=1466; translated  
MXRGWPTSXDYRIGKKGTRNSNDSHETLYHLCNLRARGEIPLESYGFDFHQPSEEHIIEGL  
TAKPFWETSDFPWAKSLEQNSHIIQKEFESKVTGDTNLFSGDSSLQNSVMGGGWSAIRLQ  
RLGAWNLENCKEFPKTYELLKELDIPLAVRGVCFARQAPGSGVKPHSDGRNFILTSHLGL  
KIPEGCWIENAKERTSWKENRLTTLDTSFVHSTGNPTHEVDYVLIIDFWHPELTERAG  
LEFLYDLRNKFESGLIPIRKPRGKIFKKETPVGAGIGEWWDNIIGGIQNQKGITT

>comp7823\_c0\_seq1; 420 1 933 LEN=1002; translated  
QFRELQLSQFSFHNSTQSSRSKMKFSFLPFAALAGLSTTDAFQRSTFIGAGRGQLMADNL  
CARASETALCMKTIIVFGASGLTGSEAVFQALNEGDKVIGLTRNPSNLKVPAGSGGDSAG  
NPLTNEENLTMIAAGDVTKKSDVDKVFEGDVGVIIVALGGKTSEVGETMLTDGTNNIIAAMK  
EKGVKRVAVVTSIGAGDSENQAPFFFVKVLMWTAMKKIFLDKNNQEAATMNSGLECYIVRP  
GGLTVDAPTGVINVIDGEAGSIPRADVAQFCLDAVRVEDFPYIGQAPCISSVGGTSSWTKD  
RSKAARGEME

>comp7824\_c0\_seq1; 524 107 1756 LEN=2164; translated  
MKTAAAPDDIAVPLVSSAGEDTILSATSIDDDSSSQMASNRMSLRSSQFSRRTSLAALI  
EDCPICLDAMGSVDVEHILQCEHRCGFNMCKNCIDSLITSSKDDFQMASDGNMHVKVYLH  
CPNCRSDLSSHIRHTLLLRKVDELELLTCPESEWTNSQVRLKRALHTTEVLKAIKHARIV  
EAEYYGRDLNDSFNDSDDSETDSQIEQYVEQWGVVVDLTNGTHNSFVTPRPPAVVFPPEEA  
IRIDPTLFLAGLDSFLSEDEQKEVTKLMTGGKPSLLVEAANILYDTLQKLYNPEPSATGKN  
LLNRKNSRRKSLARKSSVFQLIAEAEVAEGKRDKARKTAEEMQALQNPRFAQQRQLERD  
LRIRANFQKRFPPIVVRMPKAVKLDLSLFPDMELVDYNWGGTVMDDAYSKISIGFGSKVTQR  
RPNNINVTIIGSERSVVKSAAVGCAIGLCMSRDDDYGDAANDIYIAPGQARVVVSNITG  
HIGKLGAVRGDVLTHIDGESITGKKVAEVLDIINAKKCGSTLLTLNAEFSVADALRRRA  
MAISEIEM

>comp7824\_c0\_seq2; 483 107 1851 LEN=2259; translated  
MKTAAAPDDIAVPLVSSAGEDTILSATSIDDDSSSQMASNRMSLRSSQFSRRTSLAALI  
EDCPICLDAMGSVDVEHILQCEHRCGFNMCKNCIDSLITSSKDDFQMASDGNMHVKVYLH  
CPNCRSDLSSHIRHTLLLRKVDELELLTCPESEWTNSQVRLKRALHTTEVLKAIKHARIV  
EAEYYGRDLNDSFNDSDDSETDSQIEQYVEQWGVVVDLTNGTHNSFVTPRPPAVVFPPEEA  
IRIDPTLFLAGLDSFLSEDEQKEVTKLMTGGKPSLLVEAANILYDTLQKLYNPEPSATGKN  
LLNRKNSRRKSLARKSSVFQLIAEAEVAEGKRDKARKTAEEMQALQNPRFAQQRQLERD  
LRIRANFQKRFPPIVVRMPKAVKLDLSLFPDMELVDYNWGGXVFSENEQSCVLSLIEVARL  
NLFVTIELFSIGTVMDDAYSKISIGFGSKVTQRRPNNINVTIIGSERSVVKSAAVGCAIG  
LCMSRDDDYGDAANDIYIAPGQARVVVSNITGHIGKLGAVRGDVLTHIDGESITGKKVAE  
VLDIINAKKCGSTLLTLNAEFSVADALRRRAMAISEIEM

>comp7825\_c0\_seq2; 285 406 939 LEN=1337; translated  
MTEGDFEYPEFYSPFPFFFTIQPVEATRQKQLALWRELILKYHTQNKLKTLVVHECPWKN  
DSIGRKLDETAVRTVCSLDLVDSGHGEWLDEEETACRILWRKPELATDVYEWASQTGNVG  
GGICTLYELHSGEDVNGASFEGIDEELLRRALAILEDEGKCTVFQGETSSEDGIKFH

>comp7826\_c0\_seq1; 311 112 1362 LEN=1778; translated  
MVLRFMHNRRVGVPLKVFLISSSLAVFTVLRVPGKFDNIIIQQTSLSFSDSLDSFKY  
DRDASSAWEKVPTHROKGTLPDFSNGGVVVFYHVYKTGGSTVGKLLHEIAKKDQDNFKEE  
VEQDKDERKPKLNIYQRALKSPAKMFFTMIRKHVDWERDCLKTLDLASQNKLLLELHV  
EDPAPDFPSLVELSSTIDRWRAEADRRGVGFFSFTLVREPVVAHALSFFNFFHVGNNGR  
PPSRNDHDAWNPFKPLSSTESNFLKSYANNRQCRMLSSDPQSTRAAPQVLVWRKDLING  
EDLAESRQPCAIDEVHNSLFSMDDWVGTTEKLSNETLPLLTQIVLNDPRVGRDNKPKV  
DNNPNHNVGMKAHDLNETMAAILERTELDRVLYADVGRHFKLSNLGWDYHSPLYG

>comp7827\_c0\_seq1; 944 551 3019 LEN=3121; translated  
MVVALALPSFVSKRIPFATGLLTTTRISIPSTATKARIGRTSTEALQLAVDSRELRFSSG  
SRNSSNNVLGDYVANQEWVATATSGRTSQQNVLALAEGLDAVSGIESQYNSNKNFD  
PTNSDSSSNANGENLDNKAAPVTGIEDKLSPFYFQSKKNPPKRGYGPYINLSPEERELFR

LLRRAKDDGKLSSTTLRVAGGWVRDKLLATPEFSRSGSDFKRPTRRTPQRLTSKYRAPSSL  
SVSTSSLT'TTVPASGRQGSKVIIGGKAKKNGGKNDPTLLRFQQQAPVDIDIALDDMLGRE  
FAEHLNKYLTEMGEKTHGVGVVVLKNPEKSKHLETATMKVGTFWIDFVNLRAEYTEDSRI  
PDLMRIGSPAEDAFRRDLTINSLFYVNVNGQVEDWTGRGFNDLRRCVIATPLAPLTTLLD  
DPLRRTLRSVRFARLHFTMDESLEKAAMDDRVRKALAEKVSRRERIGCEVDLMLRSPDPVG  
AMRLLINLKLAKTVFPIEKHVGDARDGENGDLLERGLRLLSVTYDQLEESKLYTPVWCDK  
SYRGSYTHGAEDVALIENVEALRYMWAYASFLKPFYDHSVPGAPDTKKKTRKLNRSVVS  
KLLVDDLKRPTREAEAVEKIMKGANGFKALMDSGCDYSAMSIILLSDIRVHGETVINDGND  
ETKLRCSMNGQKVFTATENDPVWQHAMEFRLSCKVIRKVGPLWRAALFLAMSEHITEAL  
NGDPEFVIEGDFVDESQEDLRQREIERDYDTFATAMQRIGLVGIWQKPLLDGGDVKKVLP  
NVPHGPVFRDIMEEQEKWSTLHPCASADILARHLAQTFPDYV  
>comp7828\_c0\_seq1; 253 263 898 LEN=1334; translated  
MMNTSLMNSARRSIGKCLKPEETLFLLCIDIQDRFRPITWRGETIIRTANYMTSVAKALDIP  
VVVTQQYTKVFGNTVEDTFADKEHFLSCKVFEKKRFSMCTEEVKRHLSDLNKKSIIVLFGI  
EAHVCVQQTCLDLLEEGTDVHLIADGISSQQPYDREIALQRMSQAGAFVTTAQSTAFMLM  
QSAEHKNFKAVSKLTVEHMKLPNEFNEAFTA  
>comp7828\_c0\_seq2; 253 351 986 LEN=1422; translated  
MMNTSLMNSARRSIGKCLKPEETLFLLCIDIQDRFRPITWRGETIIRTANYMTSVAKALDIP  
VVVTQQYTKVFGNTVEDTFADKEHFLSCKVFEKKRFSMCTEEVKRHLSDLNKKSIIVLFGI  
EAHVCVQQTCLDLLEEGTDVHLIADGISSQQPYDREIALQRMSQAGAFVTTAQSTAFMLM  
QSAEHKNFKAVSKLTVEHMKLPNEFNEAFTA  
>comp7828\_c0\_seq3; 253 153 788 LEN=1224; translated  
MMNTSLMNSARRSIGKCLKPEETLFLLCIDIQDRFRPITWRGETIIRTANYMTSVAKALDIP  
VVVTQQYTKVFGNTVEDTFADKEHFLSCKVFEKKRFSMCTEEVKRHLSDLNKKSIIVLFGI  
EAHVCVQQTCLDLLEEGTDVHLIADGISSQQPYDREIALQRMSQAGAFVTTAQSTAFMLM  
QSAEHKNFKAVSKLTVEHMKLPNEFNEAFTA  
>comp7831\_c0\_seq1; 233 1 793 LEN=793; translated  
KKKKKKKKKKGDVSOQKLEQTNESDGDDESDTMFRDSTSCVTDTTTTTTTENNAAQMAK  
GISPKPKDEETEEEEEFARSRAGRISIVNRDRDDNSSNDEEEVQSLHASRSFSPQRFATK  
KASSRRSNSADFISDMAAASKKGPCKHRVSAVKKKELSGNDSTYPISEKKRAPPASASAD  
KLKEMHSNTPSMRYSKVRSSSADRLEVMHSSSKRIATNRNRNSISPRAPQSRRSFDRDTS  
ASMTRPNEEEGDVDGDEEEDDED  
>comp7832\_c0\_seq1; 307 365 1114 LEN=1289; translated  
MRRSSDRPHRKERSEFPPTLVYPSPKSSPLSRNGRRNSLHDTVKSGGSESGCTSPSELSVE  
TNVSSSRARSSLPNATTSEDVGVHFDVSGMHPSEHRGNE SDPLPDCLALSASEDSTES  
YQRRGIETPLQSTLESPLHDDDDHSFVSIPLDSFPLPVVQNALHKKMGGHKAVKLQWSM  
PPPQKQQLVTLADVIAQVLRVIFSVVAMKNSLLGNGTKEKDNLHAGFEERSSTIGKPAD  
GTQCRTSIH  
>comp7833\_c0\_seq1; 466 290 1533 LEN=1787; translated  
MAIDNYVDDDEYALMGEQHSWSSNILGNLCCLOAFNFDGGGEVLEGSADFVIVVEGEDGK  
FHQNSDFLVSFKGANEADGNNTHNIVMEVNHAGTKAWFPIIRQHSPNDNNEPDTDEDK  
ESNTFDEERFWGCCHPSAGNIQPGMLSFKFKDGAVESNDDPSSTLKAFLKPGRNP IRYLLL  
DDQQVVGIAHAHIYLWKHDDSVVISDIDGTITKSNARGVLGTIITQRYDKVCHAGICQIL  
SKLSLSSQVVYLTSRPIGLANQTRKFLSTLQGNETLPIGPLLGFGGKLPQLLIMEIVTK  
STQKFKAXKLWNVVQPFKATNNDPKSPSFVAGFGNNFMDMQSYHAIGLDDLDRIFKINK  
KSQIVTFDKENITSQNSNGDFSFPFHQWYKDRIGTKFDGYTDSELVDRICPELT  
>comp7834\_c0\_seq1; 1015 166 2547 LEN=2681; translated  
MASSEGGTSLWKHIGLHGHSVGTFACTDAGIQWKS SLYGREDTGGLSASTRNVPKDSIEK  
AGWSVFGKSGHLRLNMEPKEGSSNTQHEMRFDFPVSAYETMKDIFQASYGIELLKLNMS  
SAGTQYGRSKISGKLVFRHCVLEDADEEGEEFEVVDGDEMMSLDLTEVSQCVPNGNRRN  
EVELQFPESDAVEANNDQLVSVRFFIPDPDEVPDSDKTIKSSAELLQQRIMQMANIRKTT  
GDVIVEFDLEKGSFLTTPRGRYSIELYERFFRMRGQKYDYKIKYDDISRLFLLPKPDDVHM  
AFVIALDKPIRQGGQRYQYLVLQTNKDPDEVRVNLDEDTLKKEYGDDLQPIMRGSLSNLV  
AKTFKIIAKKKVFI PGKFSNANQQPCVKALRANEGLLYPLEKQFVFIHKPPVLIREFNEV  
ESVEFQRYAGGQSTRNFDLCVSLKPNAPSAGNQEQYVFSGVDRSDYAGLYNFLSTKKIR  
IKNLQEIGGVQEAVPVYNEDEIYGGPDHEMEESEDEDEYDEAAAAEDAANDSDSDMDSE  
DDDDFGSEIDDDLDSDLEEARGGSGSKSRKSNDDDLIEDDLPKKKKGKKVETKPVSK  
KLKDPNPKPKQVTTAFMIFSNTRERFRTENPDNLNFGDLAKLIGKKYKELSKHEELAELEK  
KVEKDKLRYEREMKNYTPSEEELEDSEPKGKRKVTKKKKDPNAPKRATSAFFFFYSTKMRPI  
IKEEEPDIKFTDMGKRIGEKWRELSSEDKKEFEAMAELDKERYKKEMAKYEAKKQEEEDG

MDEDQDDSDDDSD

>comp7836\_c0\_seq1; 265 104 1120 LEN=1319; translated  
MRALLSVLAFLSVSVSLAEAWVSPGLSAGNKKPSTRLKDVVDGNMQWYSGTSSSPGRAYSS  
RTSPTVTQDAINRKLNLAAERFMKFQSGYFSPMPNPNVNNVNMNNYNNNYDYNRNMNYGRY  
GNDYGGYYDNNNNFIPIYNDPSSILADDFVFRGPVIGPLNKWDYMDVLAYFKVYEAFPDIN  
PNCYGFSDVVDVNPVKVRFVVKATGTYQRPLGGFMGKVGITILNKPDGREYVVGSTEAWSITF  
NDLDRMQVKHISAGYVVDRFEDRGTLCCTTDGKGLIMGVLNTIGIDFLPSQPESTSLKMMQ  
WAAGRFSKNGVDPDALFPKVFSSSKELPPWWRDKRKGAK

>comp7837\_c0\_seq1; 434 244 1752 LEN=1799; translated  
MMTGILLLLWSSRLAFHAVHAFVSHATRQHLASTKSRFHQIPKPV AHLFSAVDNTPAL  
ASAAGGERSAVDEALVKEQRARRKREKAAAAARRRKKFIGLAKAVDRGQFKTTYRPGGS  
DGATFVARSGLPEGHDSRPFVTLGIESSCDDTGAAVLRSDGVILGESLASQAHIHHEEWGG  
VVPGLAKSAHEENIDRVIDDALSKAQTTMEDIDAIGVTVGPGLLCLRVGSQKACQLATE  
YNKPFVGVHLEAHILMARIENQEELRFPFLALLVSGGHCQLLKLCLGIGRYSVIGGTLDD  
SLGECYDKTARLLGLPIGGGGGPALEALAKDGNATAIPLTIPLQKRQDCDFSYAGLKTNI  
RRAAEQLAKERGADSVPELSHQDKADLAASFQNIKIHLEQRLERAMKAMEDEKIDTLAV  
VGGVAANQELRRRLQSKCDDREWMTMVPPRLCTDQGAMASWAAIERLRLGSSDDPSTQD  
IYARYPFSSSYSSAPEGDSEGK

>comp7838\_c0\_seq1; 250 211 1272 LEN=1272; translated  
MTEAPAVHNDAAEGGDAVIPNGGGAVHAASHEEADAPTADPPEPVSGESDDVRI GTISSA  
RFNILSTMVGGGCLSLPMAFQQSGNLLVGPLMLLLLTGVVTEFCFKTLVATAVHKGRPHPT  
RPGRDTFESITSEAFGTRAYVFSMGLVVL MCFFGTVGYAVLLRDMMEPLNHAIAPRLGLS  
GGWLGRNLTMF AIVLLVTPFCTLRRLTALKDCGLASMLSLLILGSCVVF RSVQCNCGTSG  
GDPWYANLALFPESWRDLDALPLFISCFVCHYNILPVHNELEDPSPARVGGWWRSTTWF  
AVALYVMGMFAGSAYAPCTPTGTISGSSSGRRRGTHFSASHGKAWNRKAWCRKA

>comp7838\_c0\_seq2; 172 1 831 LEN=1202; translated  
XTHTLTLPRFLVLF CNAPRTPDATDILLDFDENDPLLMVGRMCLAVTITLAF PMLVIPGR  
DIVVRSLILPRLRSIPQAVGGTVDEELREPLEDDPPEPGETSESTAASDGGLSHDLSS  
ASAAVLLCTSV AIFWSAATLASVSSIDVVDLLGSSLSILLSYLI PAGTYLVVTVTRPGA  
EGGGGRLSRALCWL LWFVPLMVASTANAVANXVLLSTGKEKAVGGQPHRGEARQGEPT  
RRDHTVCVDAGAVASAVPALVAHARRDTGGILRGAIK

>comp7838\_c0\_seq3; 474 211 1949 LEN=2320; translated  
MTEAPAVHNDAAEGGDAVIPNGGGAVHAASHEEADAPTADPPEPVSGESDDVRI GTISSA  
RFNILSTMVGGGCLSLPMAFQQSGNLLVGPLMLLLLTGVVTEFCFKTLVATAVHKGRPHPT  
RPGRDTFESITSEAFGTRAYVFSMGLVVL MCFFGTVGYAVLLRDMMEPLNHAIAPRLGLS  
GGWLGRNLTMF AIVLLVTPFCTLRRLTALKDCGLASMLSLLILGSCVVF RSVQCNCGTSG  
GDPWYANLALFPESWRDLDALPLFISCFVCHYNILPVHNELEDPSPARVGGWWRSTTWF  
AVALYVMGMFAGSAYAPCTPTGTISGNILLDFDENDPLLMVGRMCLAVTITLAF PMLVIP  
GRDIVVRSLILPRLRSIPQAVGGTVDEELREPLEDDPPEPGETSESTAASDGGLSHDL  
SSASAAVLLCTSV AIFWSAATLASVSSIDVVDLLGSSLSILLSYLI PAGTYLVVTVTRP  
GAEGGGGRLSRALCWL LWFVPLMVASTANAVANXVLLSTGKEKAVGGQPHRGEARQGE  
PTRRDHTVCVDAGAVASAVPALVAHARRDTGGILRGAIK

>comp7840\_c0\_seq1; 327 148 1185 LEN=1402; translated  
MAFVHLECGRNQLQRQHVMHSTAMP T NIVGPRVP INEGFPGLKKIYANPDIFVIENFLD  
DSYQCQLIDKASEKKLVRSVPVAYAGWTEDFKDLVELSSKGP IAWIALLSSWFQVKNSSGG  
QVDLVVHALQNYAVV FVVTI LIGGFTYSRAEGLKALRTSTSTTLDDMSNPSSGAREFVR  
QASKLFHSNEDFDTSIVSEALFEAPT V IRYEPDQILAPHYDANRSAETEDANRGGQTLA  
TLLVYLNDVERGGLTRFGKLS SAAIGDVRDRITSADEDKLI IQPKRGDALLFFPADRN  
GQFDPRTEHEGMPAIDEKWIAR IWKHQRRVPAPFGLSEASLSDLG

>comp7841\_c0\_seq1; 568 887 2365 LEN=3807; minus strand; translated  
MRNSNDNNKHNGNSHSTSTLEDRHFLSDPRPVRDLKLP TWEVDI HREGVDMPIMTLRVDS  
TVLPPRKNKKKVLWKL PDNIDTAPKFGEQDKRRVLELFLREKKKELKKLKNKQRAYRRAS  
SMESMNSSGAGSIDLSTHAGGGKDDLNSNAEGLPPEANGKDKQHENQKQCQPTGTNEKN  
NGNNSNPDAIVASDGLNPSSSKTIEERGRRGALSPPGFGNPPRPTSPLKLAPPGLPSK  
NNEHLAENCKAANGHSSSLSPATS NSTSSQPPLPSQNGHHPQQHLHHGAQHSLTPPPPP  
PPGLQNIHDLNQGIRAPKAIPPQQPPMAIGPCFVLPNAPPGMSIGKFVTETYYSLRN  
GLVRELDAYYYQNGGERSGADVAKVCKAVTVGGAHAFCTNQQDRMLQLNTFSGTEMRIK  
VQEQLTVGNGVLV LITGVSIRFSAPNGSSPQQLPFCHTLILAPVSTRPTADSSTIGYQI  
LNDNLVILTAE

>comp7841\_c0\_seq2; 184 887 1364 LEN=1364; minus strand; translated

MRNSNDNNKHNGNSHSTSTLEDRHFLSDPRPVRDLKLPPTWEVDIHREGVDMPIMTLRVDS  
TVLPPRKNKKKVLWKLDPNIDTAPKFGEQDKRRVLELRFREKKKELKLLKNKQRAYRRAS  
SMESMNSSGAGSIDLSTHAGGGKDDLNSNAEGTTTTTXX  
>comp7842\_c0\_seq2; 146 260 622 LEN=764; translated  
MFAKAFCSRIGAAQLFRMNNGLVQTRSLSSSEGIAAVDKLKGALQYRVENYAQCIPTRFK  
KDI IHAAKETETEQVALEGLQKVIANIGASNKVS RKDIELIFSENGVSGRMSTEQMLKLL  
>comp7843\_c0\_seq1; 706 259 2409 LEN=2687; translated  
MADGRENGQGRTPYRSLPPDIWAECLHYLLPEELSKASQLLPHTNVAVEGDSA EKAAWMA  
VRSMAGIARTHWHENLAIASNGVGATLDEQHGESIDEKAI AVQSVVQQDKGPIGNVLRVGR  
STSIGGGDNPNDKRNDRNSASTTTKQQQLVRFQDETWQGLYGLLYGILSEVVATETAG  
EPSDRVPESEQSDLNVDESDARDEDANAPLVGVVEEQGADEV DATDNKAYDPEYIALAIGL  
LFDAPSMPLMLTLQRREKLEKLA VATERSSNARTKSVPSDTRSCLLSLRLGNAGLWDV  
AADILSLSSSLDDGEYSETNERTDEQRVLAIDRAIYSSKFLIDRLYSQTYVRPGMDVPEL  
RSAIECARKAVKSAGPRYQIFLTMQMRSTTFVEDKGW WIEENDETNQQRKRPPIRSLF  
ANDALRYIHAKLALTRALTLTGQHLGLRACTIGDLEVFPLEFTEEDLLLAASGEPSSFTK  
ASLLFFKESMDQCLGLDVLVFNQWL VMEETEEALVAIAKKG VARTAMP SVYRSTRHRTI  
PLLGA KMAAVGELNYCMSSVFSRIGSERGNELGLISIAHLSEAFRVVMNEALQSGGSGGR  
GPCRVLEDETTLEVLVYCAKDLGKACGFLQRF DADLSELD SLVAGDPSLVLDFA YVFSIYL  
HGSSSHPTVENIGRLCEGYRAESGRSPSGASLRDSYHRVAKWIV EEFVSSPPTPN  
>comp7844\_c0\_seq1; 352 232 1812 LEN=1847; translated  
MDPTDLEI IKS LPGNDKCFDCGEPSTQWASVSYGTLFCIDCSGKRRALGVH VDFVRS LTL  
DSWKPEHVAVMKAGGNDRCFRAFRAVKIPMAVTDGGGRNSLENNVEDFRERYHHPGAKDY  
KRELLHEATKTCGEGGNNEGIDARELDSSELERIDTLARMDPEIPWHL PVPFVYKLLLLL  
SIRVIFGIPFLLLALFFCLLRFILCPDNTLVQGLGWMGLVLP AIGAVLFG RKLCLDFTRG  
RIPPFKSAQNLLADKMKEGRAIRTPGYDVFLPPRTNTKDDGDDAGDNPNNNKR VGLMLYP  
GWLINHTAYAPIASKLSDCGILVVVVSMEPF RASVNSTKMETQRALHIMYELLTEITPDW  
PVSEWALGGHSAGAH LAIKVAGATSPGTSKLVLWGCGARPIDYRSCSLADNTSIEVLALK  
GSEDASINMLSFSQKMEFRN ILPQTTVYRTIEGGNHNGFGHYEKPKNKKRDGVRKITLDE  
QQDTAVNETV RFLVEGGKAAVADICPKNTVPVTSSAPSTEPSKKNK  
>comp7844\_c0\_seq2; 244 676 2046 LEN=2081; translated  
MKAGGNDRCFRAFRAVKIPMAVTDGGGRNSLENNVEDFRERYHHPGAKDYKRELLHEATK  
TCGEGGNNEGIDARELDSSELERIDTLARMDPEIPWHL PVPFVYKLLLLLSIRVIFGIPF  
LLLALFFCLLRFILCPDNTLVQGLGWMGLVLP AIGAVLFG RKLCLDFTRGRIPPFKSAQN  
LLADKMKEGRAIRTPGYDVFLPPRTNTKDDGDDAGDNPNNNKR VGLMLYPGWLINHTAYA  
PIASKLSDCGILVVVVSMEPF RASVNSTKMETQRALHIMYELLTEITPDWPVSEWALGGH  
SAGAH LAIKVAGATSPGTSKLVLWGCGARPIDYRSCSLADNTSIEVLALKGSEDASINML  
SFSQKMEFRN ILPQTTVYRTIEGGNHNGFGHYEKPKNKKRDGVRKITLDEQQDTAVNETV  
RFLVEGGKAAVADICPKNTVPVTSSAPSTEPSKKNK  
>comp7845\_c0\_seq1; 393 60 512 LEN=994; translated  
MPDTKELTEEEVADLKEAFAMFDINGDGTIELTEIRQVMRKL GQNPT EELKEMISTVDE  
NDDHEIDFEFLVLMKSR C IVDDEPEKEMRDAFAVFD TDGNGSIDR KELKRLMKKLGQALT  
EAEVDAMMEQVDANGDGEISYEEFKSMMES  
>comp7846\_c0\_seq1; 601 171 1172 LEN=1358; translated  
MSEGTAVDATPTTLDADDNDGFRIYLGDERKNLLCRFYENKYPEIESVVMVNVNRNIADMG  
AYVSLLEYDNIEGMILLSELSRRRIRSIHKLIRVNRNEVVMVLRVDKEKGYIDL SKRRVS  
PEDVQACEERFNKAKTVHGVLRHLAERRKYFLEDLYEKIGWPLYK KYGHAYDAFKLAISE  
EKDAGDPFAELDVPQDLKDELKSYILRRLAPQPIKIRSDIEVSCFTYEGIDAIREALFAG  
MTLGTEQNP I KIKLIAPPIYVLS TTTLEKEVIGL LNQAIEVIKEKITAKGGKIDVKMAP  
KAVSVKEESELQEMMDRLALENEEVDGDAPEDA  
>comp7847\_c0\_seq1; 268 96 869 LEN=958; translated  
MSCCGEKEKEDDNFDDGLTRCCGGTGGQRCMCLPYDDPWPISAQILAVVAVLFSWIWVVT  
LIISGVAMIVLQIIWCCRQNKFGFLASIIV TALA AFMNLFTSIWIFIVWRRAEWCYPFEW  
YVDYRDDDYFNAIYFGEEDDRFEYDVVESNYWDDCPEVIWGSVA AVSTAIWIASFACLLH  
FVCSGRHAKWEKRHRNGNRSKRSVGEDAAVDDDPETGTPAEPEATGAEDSAKDAEKGD  
EVGADTVMPAETA EEDA  
>comp7850\_c0\_seq1; 602 60 2276 LEN=2367; translated  
MKSFRKRRRERS SFAAAATGLGPPP GGIGALENPRTKRRTGALASSRIGSDDGDSAVEY  
GGLASLFLCRGPLPGRLRPGDSWTA FDRNRV E WEGELVRKRAFGVSSRRPPAPELVHR  
KPENIREGSSYINCQFLDPHDRV LGVDISGNL D LIRLADLRSQTNDRGATDRARSKASHE  
KIATDFEFGAALGQKNYFYSAHVQVLAHGS AVAFGFVDNTLCLLDLEGRNTNYAYRDHSAK

NDGGGLDRVPLPVPAPSSSTLPSSSFRAWRAQQLRRKYYRDRRNPSLSIHELCDRDTQNR  
NVGGYTGSICETHSVISNLLAIDYSNGRKRIASPVRFVPGYPTPEGPRWDILEVRPGCHP  
MNSLLYVARVDPDYDSFWTQVLDSDRVGVGTGTTTPKTDGHGRNATTVLIDGTTDRDHPGKS  
EEHVTTCAMVTDICMATGHVYCGNYGATSASDFFDQGLSYPGCPGMSSCVKLWDLRMARK  
KRKPRMMKDSLIPYTIALLSSPGSGIFEHANIVVAEPSATIHTRLTSKEGSLAFSEATFA  
SESGVCGGAGNHETEIPDAGSDFVVRNLSASRDSYNGVSNNGSTRCGSLMVTCSRFSQNSS  
HVEHCKLDLSGKTRTVRKVRESNSITRPQPLWAVDP SHKFLAICNNDHHSRSHGPSTRL  
YLYDLKEGTLPTLSAEVGNRTYFCPQQREDSTFRFRTDASLTDYDMKTELSIAVNSNA  
TALLGASSDGDLFVVRGI  
>comp7852\_c0\_seq1; 102 1 238 LEN=2257; minus strand; translated  
XALSSLYFAAPLVGIDDEAWIKETPHCNWGAVECTRGDISKLEKSSLAGTISSAIGLL  
TSLREFNMSEFFRRGEGFKW  
>comp7853\_c0\_seq1; 224 207 833 LEN=1751; translated  
MGCCSCDGDGDKAIKESSEVERETPQQTINVAMSNPSIQVTNHLCVTGSGLALIGTAL  
EQDAAYWEYHVTLTPARKHVDTILFGVSSKKDRKFYKEIDGKGGEGEKEGVPSENGT  
CVEGLQNGDIVGIAMQQSDLPVQFFHNGEPLYDIAVNRFRGTVYPSVCLPMSIDIELKI  
TVVVAENKFQHMSPAAKFGPIIEARSIV  
>comp7853\_c1\_seq3; 234 219 701 LEN=787; translated  
MSGLIPVDVAVLGLGAFFGALSRYQAGKIAADFIATDPKRYGKLAGWHTAGLNISGSFLL  
GAIYGMPTVLDLKINEFKSCIAKEQHKAQGLTPRAKMLMLGVGFCGSFTTFSTFSFVVT  
WISEGRTRALAYVATNNICISIAAGFGMMIVKKVLVKA  
>comp7853\_c1\_seq4; 173 219 359 LEN=922; translated  
MSGLIPVDVAVLGLGAFFGALSRYQAGKIAADFIATDPKRYGKLAGW  
>comp7854\_c0\_seq1; 124 141 341 LEN=630; translated  
MSSDRPTGCCHKACGLCCAYIIPPVGVFWQYGCSEFLLSIILTICGYVPGVIYACCVIA  
SDKGEN  
>comp7855\_c0\_seq1; 306 224 1162 LEN=1162; minus strand; translated  
MDYFWDACYSLGLTNRPSLASIPVFPEYQORDLYQYYDVSP EIIQGSGFYVRRVKLLPN  
ATINKIDNDGVDSSSKDAALHNCYYACKTI PKSNHHNRSLFLQEVYNLNRQKAASTGLY  
NNEDNSNFVIRLVDVIEDRS AIHIITELCQGGELYDYVVKEHRRRTGRGLRGKALSPSSSH  
GDNCGDDDDDELRCATVIFQILTA FETIHERACVCHRDMKASN FVVRKPSFIPNSLNL  
VIDFGLSKFVGKEPEKEKRVQKNDNERKQDDPSTILPERKSPSLNANGVSEITASCEIED  
DNPNTYSKQFRYM  
>comp7856\_c0\_seq2; 262 642 1307 LEN=1487; translated  
MSLLCLKLDYQHDNIQWRMIVCP IVMVLSIASASLIYIVYGHQVGYQLTESQLTAGNLY  
SLAALLSIVLVVIGEIIPLNRHVDIATAIFV VAMAPIVVVLVGMGAWVVS RNEFGRLLL  
YGGQAQVHPRRLRFDAKGWTSVQGS GVKNIIPMFGEVSFRPLHQGNQNNIELCKCCTFYPR  
EEHEEGIAQHIDDISHHPYLAPVSSESTPYTQMGETEPAV  
>comp7856\_c0\_seq3; 300 392 1873 LEN=2053; translated  
MNGSLADDPAPDSTSF SANISNNQNNQPTSSYTQIRDEGAR SVGGNSTASYQNSMGE  
RSLHSLRRSHRSLGRDEL GASAGE SVGNSSPLEIPEE IYRVRRSALQVLKPLTRTWLI  
VSI GFALT VLLGMARWINLLSNLPYWFILLPSWLSHLGLFWCHISSAKALSSFIAEANES  
RQRPDSSDHLDRTEYLP LLQRSLKFKLKTGLISFGIFLFEILFYLRRLANGKFSMTYCF  
LP  
IWVMV FVGIIDGII CRTQHVLRLISWILIFVAMSLCLKLDYQHDNIQWRMIVCP IVMV  
L  
SIASASLIYIVYGHQVGYQLTESQLTAGNLYSLAALLSIVLVVIGEIIPLNRHVDIAT  
AIFV VAMAPIVVVLVGMGAWVVS RNEFGRLLLYGGQAQVHPRRLRFDAKGWTSVQGS  
GVK  
NIPMFGEVSFRPLHQGNQNNIELCKCCTFYPREEHEEGIAQHIDDISHHPYLAPVSSE  
STPYTQMGETEPAV  
>comp7857\_c0\_seq1; 374 194 1258 LEN=1402; translated  
MPSPSGSVALTILRFCLSTLPFLAVLSYLLYMAVQRGYDADADAGVDDGNADAETDALF  
SLMDTTIVFLSFHVAWTFATYLLVFPKRRYLLDRYLREGEP TLGDVIAESASNKKMR  
LFSFRNYGLVYGHPTKLDPPVLVRKSVRVFQPWTRERVTILRLPNRPLSGAKTDIEID  
LSQMRSERDTTLCYISTLSIFWVLFSLGGA AFCVYQMGEIGDDYLV DNEDANLARRIFL  
FVVGINPFFAFV VNGIRYAMY NWMVHWGASVEDENEARNIKTNNWCMYNNDEEASF  
DGS  
QIGYSILGEDRSYAGTVPSHTRSLAPVRPGETHLTVSSVEEDGTALRVLPWTNA  
>comp7858\_c0\_seq1; 557 1 1749 LEN=1932; translated  
XPNTNAAPGKYNFEIILKKE LFRREYLLXII LDECSISNNVANNSRPRFLDES  
WVPKGQD  
TDIEIVEEYVEEIIEDSESYEDVSVQ EADGDKSQNKADRQDVF LALDEAERAEES  
KMPK  
QTQGNES SSGKQTCI ILLLLFVTCGAI VAILLPFFIEYPQLLQSTTNGAP  
PPGTPLQT  
VVPTVSP TMTPTTLRWGQFMKTF LIPISGEEVFQNEASPQYRAAKFVLD  
DPYTDDELTTSE

QLEERYASAVFYFSTNGGDWDSCSLNDNECKSGRWLVGDVCGWYAVTCNGYGMVTSFDFA  
DADGNGLVGS LPAEMYLF SELTDLI IVNNTITGTLPEAFGMNATSMRSLLLPDNELKGS I  
PENYLSNSPLEFVHLGGNSFSGPVKPNIGDASYLQQLDLSSNAITGFLPENYSRYTALEA  
LSFAHNELKGTIPEDIYGMANLKFHLHNGNELDGTISTSVGDLSSLKELRVGQSNLSGNI  
PDELYFLT NLVELDISGAQFDGRLSLGLLNLGNLEKLI VNNNNLVGTVPN SFGR IKTLTD  
VSLQGNNLSGSVPESVCW LREENLEVLTADCEELICNCCSACF  
>comp7858\_c0\_seq2; 465 1 1874 LEN=2057; translated  
XPNTNAAPGKYNF E I I L K K E L F R R E Y L L X I I L D E C S I S N N V A N N S R P R F L D E S W V P K G Q D  
T D I E I V E E Y V E E I I E D S E S Y E D V S V Q E A D G D K S Q N K A D R D Q D V F L A L D E A E R A E E S K M P K  
Q T Q G K N E S S G K Q T C I I L L L L F V T C G A I V A I L L P F F I E Y P Q L L Q S T T N G A P Q P P G T P L Q T  
V V P T V S P T M T P T T L R W G Q F M K T F L I P I S G E E V F Q N E A S P Q Y R A A K F V L D D P Y T D E L T T S E  
Q L E E R Y A S A V F Y F S T N G G D W D S C S L N D N E C K S G R W L V G D V C G W Y A V T C N G Y G M V T S F D F G  
T V Y F S I Y D L N R S G G F S H F F Q I S R I T L T F Y C I V Y V I I L S F P L A D A D G N G L V G S L P A E M Y L F  
S E L T D L I I V N N T I T G T L P E A F G M N A T S M R S L L L P D N E L K G S I P E N Y L S N S P L E F V H L G G N  
S F S G P V P K N I G D A S Y L Q Q L D L S S N A I T G F L P E N Y S R Y T A L E A L S F A H N E L K G T I P E D I Y G  
M A N L K F L H L N G N E L D G T I S T S V G D L S S L K E L R V G Q S N L S G N I P D E L Y F L T N L V E L D I S G A  
Q F D G R L S L G L L N L G N L E K L I V N N N N L V G T V P N S F G R I K T L T D V S L Q G N N L S G S V P E S V C W  
L R E E N L E V L T A D C E E L I C N C C S A C F  
>comp7858\_c0\_seq3; 655 270 2122 LEN=2305; translated  
M L S G T L K D R L A Q Y K T L K E E E E R K A A S A A G T S P P D P P N T N A A P D E S W V P K G Q D T D I E I V E E  
Y V E E I I E D S E S Y E D V S V Q E A D G D K S Q N K A D R D Q D V F L A L D E A E R A E E S K M P K Q T Q G K N E S  
S S G K Q T C I I L L L L F V T C G A I V A I L L P F F I E Y P Q L L Q S T T N G A P Q P P G T P L Q T V V P T V S P T  
M T P T T L R W G Q F M K T F L I P I S G E E V F Q N E A S P Q Y R A A K F V L D D P Y T D E L T T S E Q L E E R Y A S  
A V F Y F S T N G G D W D S C S L N D N E C K S G R W L V G D V C G W Y A V T C N G Y G M V T S F D F G T V Y F S I Y D  
L N R S G G F S H F F Q I S R I T L T F Y C I V Y V I I L S F P L A D A D G N G L V G S L P A E M Y L F S E L T D L I I  
V N N T I T G T L P E A F G M N A T S M R S L L L P D N E L K G S I P E N Y L S N S P L E F V H L G G N S F S G P V P K  
N I G D A S Y L Q Q L D L S S N A I T G F L P E N Y S R Y T A L E A L S F A H N E L K G T I P E D I Y G M A N L K F L H  
L N G N E L D G T I S T S V G D L S S L K E L R V G Q S N L S G N I P D E L Y F L T N L V E L D I S G A Q F D G R L S L  
G L L N L G N L E K L I V N N N N L V G T V P N S F G R I K T L T D V S L Q G N N L S G S V P E S V C W L R E E N L E V  
L T A D C E E L I C N C C S A C F  
>comp7858\_c0\_seq4; 747 270 1997 LEN=2180; translated  
M L S G T L K D R L A Q Y K T L K E E E E R K A A S A A G T S P P D P P N T N A A P D E S W V P K G Q D T D I E I V E E  
Y V E E I I E D S E S Y E D V S V Q E A D G D K S Q N K A D R D Q D V F L A L D E A E R A E E S K M P K Q T Q G K N E S  
S S G K Q T C I I L L L L F V T C G A I V A I L L P F F I E Y P Q L L Q S T T N G A P Q P P G T P L Q T V V P T V S P T  
M T P T T L R W G Q F M K T F L I P I S G E E V F Q N E A S P Q Y R A A K F V L D D P Y T D E L T T S E Q L E E R Y A S  
A V F Y F S T N G G D W D S C S L N D N E C K S G R W L V G D V C G W Y A V T C N G Y G M V T S F D F A D A D G N G L V  
G S L P A E M Y L F S E L T D L I I V N N T I T G T L P E A F G M N A T S M R S L L L P D N E L K G S I P E N Y L S N S  
P L E F V H L G G N S F S G P V P K N I G D A S Y L Q Q L D L S S N A I T G F L P E N Y S R Y T A L E A L S F A H N E L  
K G T I P E D I Y G M A N L K F L H L N G N E L D G T I S T S V G D L S S L K E L R V G Q S N L S G N I P D E L Y F L T  
N L V E L D I S G A Q F D G R L S L G L L N L G N L E K L I V N N N N L V G T V P N S F G R I K T L T D V S L Q G N N L  
S G S V P E S V C W L R E E N L E V L T A D C E E L I C N C C S A C F  
>comp7859\_c0\_seq1; 572 186 1308 LEN=1308; translated  
M T K P E T S T A A T G R K N T R S S N R G A D V A A K S A A S K K T S G R G Q T P P V A F E A P S H V L F S G I I P P  
R A T V S E P L A L P S T A N L K P P P K L R F T I D P R I E K D Y V S K R K R A Y D G I D L S T G A S L S D S S V S T  
A T N P W E G V A R V E R D L V S C C E P L G R D Y F L R Q R D N H D S D E E E D S D D D G A K D E N D A G P H P H T A  
E Q H S H L H E L S A F A V G G D P E D L G G V L A R E K E I A F A A I L S R S C H T M T S K S L A L A I L E R T L G A  
Y L A E E A S T G N Q N Q N S Q K D N N A N D E T R D S E N R K D T A A A G A N T D T N S P A G A G K E D A T E Q S E Q  
S T R Y Q N R R K R R R L L D G S K E E S G G G N D I V S G N A T T T A S G D G E N N G K N G D G G D A S L S R Q V A D  
S S A N S K N N D D D D N N X  
>comp7860\_c0\_seq1; 340 171 1316 LEN=1354; translated  
M T K N P E S P R V L S H P E L V E R I E G L V R E E K H L E A V R L I R S I G D P S L V S E F H Q K L L N K A R I E  
H A V A E L L S P Q E E W I K Q G E S H G R Y D F T I Y Y K V E D G A R L T C R I E S P V P C S L L V P L L S V L N E  
S D L Y S T W I P S W Q T P I K L G V H E S N Q L L H D S R G H Q V I Q V V A S V P W P M K P R E A L F S V Q A V D D I  
D T N G F I V A T M T T I D D S E E G E T V K K T L P N D F D V P G P S L G T V R C D F N G S L L F R S C P L D H P N Y  
D A T R R K F P Q D D L I L L Q F I M H I D A K M T M V P Q T M I N F V T R T A L G I I W S M L L R V A E E V R D G G R  
E E H R R V I S E K A D F Y R W V E E R C D Y M L H T I N T S S D A D R N N D A T R G K A Q R R Q D H Q E E N H S V K  
S Q N I E R E K K P W T L Q D V L R M N M  
>comp7861\_c0\_seq1; 342 127 771 LEN=824; translated  
M H D I L E V K A G C S G Y D H T E L P S A A G R S K S K D G K R K T E N R Q G S L F I T L T A T P T P M A A T R S Y I  
L R F K S R S A R N E F L N G M R C V M A D M Q I H E G V S I S G L Q T S T E A D G Y S D E E V M V P L G A V H K V M

NREREAYDRILLLLQLGHEDIKEREDELLKLRKKLENVMEESA EKDRVQANDSRLIMQLS  
KKLETLLMDNEDLRDQNDRLNTRLIAAECEKMNS

>comp7861\_c0\_seq2; 1754 347 5044 LEN=5097; translated  
MEAGTYVWC SADAKGDEAWILA EVIKKGDT EIELQQVDK KENVFTRELD AKDEDSGAVKF  
KGVELANAPLSEEEERAAGADNDLIALPHLHEPAILHAVSERF SHGSIYTTWTGPV IIAVNP  
FQRLPLYTDEIREHYRTEGLFRSQMGSDGELEPHPF AVADKSYRQMMSEGRK SQAILIS  
GESGAGKTETTKIVMSYLTTLGAMGSHEEEKKGDEL SVMERVLQTNPVLEAFGNARTLRN  
DNSSRF GKFIELGFNRAGQLMGAKVETYLLEKVRVTFHATGERNYHMFYQLLRGADQE QK  
EKYGLLEGDTGGFELANCFHYTKQGGAPELREYTD EATFAYTIKAMRALGWAEELIDSVL  
ALIAGLLHLGEIALIAKTADSGLDVAAIEDMDSLTRTANLLGVDVEKIAFALTQRVVVAR  
GEEIKTELTLEKAIDARDALGKTIYGSFLWVVVQV NKSILWENDSDIRSSIGVLDIFGF  
ECFKINSFEQLCINYTNEALQQQFNKFIKFLQE EYEAEGIQWAFISFPDNQDCLDTIQQ  
KKTGILAILDDECLPRGSDRNFCKRLLDQWLPEKGQTVSENTRI HSSKMQQGKSMFCVR  
HFAGLVEYSAETSFMEKNKDEIPLAAQNL FETAPSDLIKNCY EIQKKATEEKKPEDASKR  
RGPQKQTVGMQFKQQLLGLIDNVEKTDPHYIRCLKPNDAAKPNLLTRKRLTEQLRYGGV  
LEAVRVARAGYPVRLVHSAFFQRFRLMLLPHIPEEQIPWSLEGEEAQELCTKLI VTCLEEG  
KKAKGKGLDPNEAGISRFEKIRRMQRQPDPMDFPQSDVQLGKTKVFMRKPPHDALESHR  
VFHQASVTLIQCWVRGLEQRKKYLIAQDALLTIQR CYRGYKGRARWTS LRASASLLLT  
NHFRMQISRRRFARAKKGTTFQATFRGVQTRRL LAAIKVETYFRKCRANRAFKMLRRAS  
IALQCKIRVSMAKKVVAGLKGEQKNIGKLQENNERLKM EMNSLKAMLAQAQAKEGASNAAH  
SNELKQEEITKLENRIAELEAQLSEQKALVVKLEVDMQKQREQA AHDLANAAHRRQRS  
AGPHSPKHSAATVDPGATPQMPLPPSDYVSPDVLAKHKKKLSKLEKNLRAEKKLRQ EAD  
GEIKLRAALNGVQLSEAEIKDLLSKKQEETKTTV RTGETPEIAGAEPEQPKSS LARAME  
GISSTFGGGEKPKPKMSMDYLLPKIRRGSKAQESNEDTVVVGWKADVKSRKQREEVLR  
DDVHRFESHMKG FVHSLLEDGVDVTMWQMN RGEKNAEPAEFALKASHVTVRIHRKGMWVQ  
AMVNF TMRGGYLSKAIGRNRGANKTALEPLSMHDILEVKAGCSGYDHTELPSAAGR SKSK  
DGKRKTENRQGSFLITLTATPTPMAATRSYILRFKSR SARNEFLNGMRCVMADMQIHEGV  
SISGLQTSTEADGYDSDEEVMVPLGAVHKVMNREREAYDRILLLLQLGHEDIKEREDELL  
KLRKKLENVMEESA EKDRVQANDSRLIMQLSKKLETLLMDNEDLRDQNDRLNTRLIAAECE  
EKMNS

>comp7861\_c0\_seq3; 1301 347 3949 LEN=4243; translated  
MEAGTYVWC SADAKGDEAWILA EVIKKGDT EIELQQVDK KENVFTRELD AKDEDSGAVKF  
KGVELANAPLSEEEERAAGADNDLIALPHLHEPAILHAVSERF SHGSIYTTWTGPV IIAVNP  
FQRLPLYTDEIREHYRTEGLFRSQMGSDGELEPHPF AVADKSYRQMMSEGRK SQAILIS  
GESGAGKTETTKIVMSYLTTLGAMGSHEEEKKGDEL SVMERVLQTNPVLEAFGNARTLRN  
DNSSRF GKFIELGFNRAGQLMGAKVETYLLEKVRVTFHATGERNYHMFYQLLRGADQE QK  
EKYGLLEGDTGGFELANCFHYTKQGGAPELREYTD EATFAYTIKAMRALGWAEELIDSVL  
ALIAGLLHLGEIALIAKTADSGLDVAAIEDMDSLTRTANLLGVDVEKIAFALTQRVVVAR  
GEEIKTELTLEKAIDARDALGKTIYGSFLWVVVQV NKSILWENDSDIRSSIGVLDIFGF  
ECFKINSFEQLCINYTNEALQQQFNKFIKFLQE EYEAEGIQWAFISFPDNQDCLDTIQQ  
KKTGILAILDDECLPRGSDRNFCKRLLDQWLPEKGQTVSENTRI HSSKMQQGKSMFCVR  
HFAGLVEYSAETSFMEKNKDEIPLAAQNL FETAPSDLIKNCY EIQKKATEEKKPEDASKR  
RGPQKQTVGMQFKQQLLGLIDNVEKTDPHYIRCLKPNDAAKPNLLTRKRLTEQLRYGGV  
LEAVRVARAGYPVRLVHSAFFQRFRLMLLPHIPEEQIPWSLEGEEAQELCTKLI VTCLEEG  
KKAKGKGLDPNEAGISRFEKIRRMQRQPDPMDFPQSDVQLGKTKVFMRKPPHDALESHR  
VFHQASVTLIQCWVRGLEQRKKYLIAQDALLTIQR CYRGYKGRARWTS LRASASLLLT  
NHFRMQISRRRFARAKKGTTFQATFRGVQTRRL LAAIKVETYFRKCRANRAFKMLRRAS  
IALQCKIRVSMAKKVVAGLKGEQKNIGKLQENNERLKM EMNSLKAMLAQAQAKEGASNAAH  
SNELKQEEITKLENRIAELEAQLSEQKALVVKLEVDMQKQREQA AHDLANAAHRRQRS  
AGPHSPKHSAATVDPGATPQMPLPPSDYVSPDVLAKHKKKLSKLEKNLRAEKKLRQ EAD  
GEIKLRAALNGVQLSEAEIKDLLSKKQEETKTTVRYVAAKQSAIAYRIAYAMTGRILFV

>comp7862\_c0\_seq1; 1360 470 3628 LEN=3812; translated  
MAGRFPFDSSGSHSGNPLNINIPQVRAALGIDEAVYVQRQQEMREIQLRQLLFQDRIDQF  
NQQRLESQNILVQEQQKALGDHLQEYPELQHYSRILLNEQLQRNEERSVTDRLRLQA  
EEELRRRQALAHQQQLEQRQQQQLQQQQQLQQQQQLQ QKHANMAIPKNNDGVP SQIVISD  
LPSAVSSSDSWMLLSPDRSDDIMKTINNNDL DAAARDSRLMSDQHNGAHGQNSQWVPATK  
QKLVVENQENIETEERAYGDAKPMKAGQEKANTKSNIGIPQMIDTVQNGQNIPECYSDLT  
VDFRKSTKSGKDKTTSNVPTVKTQFSGDEILGRDKALFQRNGAKKASIDAPEVMFEEGG E  
MMAEILGPDDEPLRSNMDAPGVAAENGREEESEEEKQMEAWEHKAVKLEEEERRRLE EET  
RAAEEAEVERMIEEQRKQQAEEKARLEADAKRRAEEERHEQEME EKREKKEEERRRQIEAE

ERLEEEKKRIEAGEKAKEAKRLEEEERERMEAKAKAARLKLVEERKKMEAEVRKKYEEKK  
KQDAEAKAKEEALQKFEEERKRMEAKAKAGKLVARREAKEKERFEIENKDDASDRASL  
YKMQGFDDYCKGLSDNNRVDTIDHGTTVRKKSPLSDNDMADADYDGFDEIQASLCDEPEI  
VSEDSSSSHESRSLSSGEEEEESLRSRSDDERSTPSHSTHASMSDEESDMFSDSSSFFVEDS  
DEDSASRSEYSETDSVPELMTKNTCTRSVNFAPNAQQGGAKDGAIRGKKSLSFSSSSSYA  
SEMPIAIVATMSTLRTFDLGSVHSAQRSLGRFLPCDESVVSTTSYSQQTVMsAKPIPTSG  
AASRLQKKKADEEVGLRSSILGSTISLLVRLMFSIIIVFVFMWTKHLLTMLWRKRRRAKIDC  
TPTKFALQPDQSIREEIQDRSMDNFIHRANTRRHGRSPYLLHEEPHREHYTTTMMVMKPT  
ASSAYLPDDSDEVTGCAESIVPETHCPSTSDGKMPWKINPASTELSSLSSPPSSSFRL  
KKAYSTLSSKKVGEKSNWIDHETIDDEMSYYD

>comp7863\_c0\_seq1; 436 80 1441 LEN=1748; translated  
MRAFVPLPLVVSIAAEILGSSKLDLSKQLRGDNESLVRPNPSEVTAKAQKDICPFVISS  
LVETVRSSEILSVRADAAEVLHLCTTRNAANRMDIGLADNGQIFESLKDVIHSGMKAIKS  
IEKMNPESDLHIIAIGSEAGNAIAHASESIWILSYNNEHNQKGFEEAGIVEELIDSIKY  
CPVFFDRDGFCSAANMWSFAALQNLAAASYCDTETGYCDWQRNDETRALTLPKGVKMKSTV  
DKEIRSKIMDQIKEKDARSFRNLLNYFICGGPVNSPHDETYSWPGRATYPNSISHPEIVP  
WAAIGLLKSLVIDESTRRYLSEKNEENGELFMCLCDVFKNTPDWLEENKATIATYRMGWD  
DYCPDVHDCRVKKEGWVESETGKTCSDESERLCADMGMKLGGGIPANEACCVCGGGTQI  
ESQGMTTGTMRDFQRILQTTGGDNGGKNQNCGK

>comp7864\_c0\_seq1; 179 56 808 LEN=1077; translated  
MKVATHSISTIFVLFAVSAAVICCSAKKNRNAPHIHKGLLKPYEAGPFRAIELTDGHEKI  
LDNGKPIMTQISEGDGLEGTSCVQDVEAPKEAVWSQILDLDAYKGVKPKVSKCENYVAK  
LNEDGTSTMKTEMAVKVIPGYGYSFYDHTYDPSKGSMTWRLDYDKTSDFDVAGHWHVE  
DHPTKPNCSRVPFYACDIKLGKSVPGPVMNFVSKSALKAAATGWVKKSEKNPTAEVGLAFV  
DKGKMTAEVE

>comp7864\_c0\_seq2; 157 56 1004 LEN=1273; translated  
MKVATHSISTIFVLFAVSAAVICCSAKKNRNAPHIHKGLLKPYEAGPFRAIELTDGHEKI  
LDNGKPIMTQISEGDGLEGTSCVQDVEAPKEAVWSQILDLDAYKGVKPKVSKCENYVAK  
LNEDGTSTMKTEMAVKVIPGYGVSILSVIHTKANIDFPALIGSLIEPAILRSRLIAMTYH  
LGNFLTPTRHLSLCLIPNDTAIVVYLKYTSFYDHTYDPSKGSMTWRLDYDKTSDFDVAG  
HWHVEDHPTKPNCSRVPFYACDIKLGKSVPGPVMNFVSKSALKAAATGWVKKSEKNPTAEV  
GLAFVVDKGKMTAEVE

>comp7866\_c0\_seq1; 467 359 1327 LEN=1343; minus strand; translated  
MRYFNANVIKFLFLVQSAQGFAPTKSASQSPQTSLYSAPPMEDSVLPGAADITFKPDTVV  
PKDVTSMQIWATISCNDSGLTLDGLKKGDKVEIQSLSGIGSFTAKPLSRVEGIIGLIQG  
VVVKVNAAKALFDKDTQKKREVQFNKDSKIKKNSPANGNKQRDGYGMKIGKQKFARDEG  
GIIMCMPKAKGPIYASSKKKYRLGKSVDPDKGRQORYCPAHI VNANSWFPVRQDAGHIMSK  
VCEEDGVLNCLAFDDKFGDNGGAYTVKLVITRPRMTGNSHEECRQLLNDVDSDEMLIEK  
AESLFANGELDDDDDDDEEEEE

>comp7867\_c0\_seq1; 281 908 1471 LEN=1566; translated  
MVRYSVEPEVPEKVSARGSHLRHRYKHCRIAHFTKGMKANKALKHLDDVLQYKAIIPF  
VKYTGIGRKGMAKQVNPAGDKGRWPVKATAVYRDLNANAMANAESKGLDVDSCVLDHAQ  
VNRAPAGRRRTYRAHGRIGKYASQPAHIEIMLKEVAEGVEKADDAAPVKITKKMAAKRR  
FVKVGA

>comp7869\_c0\_seq1; 440 261 1448 LEN=1609; translated  
MQKRNNNIQHDEAPEDGPEYRSVAIQALSSPIMPRPLAPLRKRSSSPMKTSIHACHDTAE  
ELDGPDPPLSFRWRVQELPELSPDYTLRLTNVYVKDSSAQVANRICDVLRASSISYDLI  
ISEQGNYLEVETRQGTLSIRLFGDNDMVVEVRRMLMGCTFDFRDASRTILRASKGVQQG  
ERSFPFRFSIPPTIPKRSRESHKCIINDDFQSAYTMLQSEKCDIQILAIESMEKMMKSC  
GAQDVVAKLILWNCDCQLVLSLLESCDGEDQSGLETGHSSILRRKILGVVASSFEAISE  
SDLTEVLSMEGNDLIARPFLLSLLSCVQEAISKPHDAFEAVRCLRYLLTSKDVEAAMMEM  
SAMDLISSARSAGINCHQGLELESNKLMAQLQNVY

>comp7870\_c0\_seq1; 614 89 1336 LEN=1722; translated  
MSQDGGDRSSHSQNLNQDTEALSKPPSNKLLCIAFTSFQSFALQLAAAIWAGSEAML  
TDSIAMMIDSLAYLFNMVAERQKEVYATKLQQQYTSNSTGLTSFRQSKMVLEYRKYTYQ  
LELVPPPLVSITLLVLTLILVLKESIETLILDFEGDSSRPEPNVTLMALFSFINLILDAV  
NVGCFASANHALGYNTHRGNDDDIVNVTQTEKNRTRVMSGPTADGIPNKGNYCDNVDVIN  
IDNVDKIEAETKKCEAHSLSQENPLLEPCSCPTLLATESTSYGSNDSSEDRFIGGVS  
DDSIYGRFLDDKDDSDATNLNMC SAYTHVFADTLRSLCVIAASLSAKFSDNVTPEIADAS  
AAVVVSIFIFLSIFPLLSGMIQTFKSLREVNQSLEMKEQEEGEEDQVELLGFHA



>comp7873\_c1\_seq1; 506 1 1169 LEN=1212; translated  
XTTTTTTAAAATDRGSELQEGIVSWVRSKGGSFSEKIEIRRVDPSDPSSYWGCVFVRENES  
IEKGEDLFRVPRECYLDVFGAEPMGYENMDAAEEAYHRNLCKLSKKLGREMEAGEASDY  
APYLAYLASQRPGQLPANWSPQKDLLRKIATPGSHMVDWIDRNFVDKGCIAQGGDGSSS  
NSNERSETTTIGFERHMVEMTVQRCFDTALIPIDWDMVNHNDGRINTENDTMHAPGGLAVR  
AAKGLAGGEELFATYDGCVDGCFVDEYWGTP EILKDFGFVENYPHRWVFDQDIWF E IWE  
AEEGKVVYGGEEESDDEVLPYGQE QMDFL ENERMRL EAARKTLLQTQGA VPDHEWEV VLR  
YHAAASEDLRTVLLSQKNKYERWGLEREL

>comp7877\_c0\_seq2; 420 451 1566 LEN=1767; translated  
MAAAVASGEKTFRPGFDMNVHPSNIHAVLVSTSR YWFNYRHAINALGMYELFRKNGIPD  
ENIILMIADEFPINARNPFKNRMHGEGIEVTGWYNNRTEIDYRGS DVTVQNF L DSILGFA  
PKSLQSLNEESNLLIYFTGHGGNQFFKFQDEEELTAQDIANLMDRLQDEKKFKKALLIAD  
TCQAFTIFDKLTTPNVLALGTSLIDENAYAHRTDKDLGLGAIERWTHHF IKNYRSSETDL  
ETTLHQVMVAPFDKRSILMARVGITNQSKFKSIKVSEFFGIKGVIDDGVVDDAGTFVEIA  
PEALLKLPQNVDRDFTLAQSSPVAKGVTANVCFTTEEKDDPLQLTGGGVCLFFCVVLLTLVL  
VQKLEKHLMEI

>comp7877\_c0\_seq3; 198 451 1005 LEN=1078; translated  
MAAAVASGEKTFRPGFDMNVHPSNIHAVLVSTSR YWFNYRHAINALGMYELFRKNGIPD  
ENIILMIADEFPINARNPFKNRMHGEGIEVTGWYNNRTEIDYRGS DVTVQNF L DSILGFA  
PKSLQSLNEESNLLIYFTGHGGNQFFKFQDEEELTAQDIANLMDRLQDEKKFKKALLIGK  
LDRK

>comp7877\_c0\_seq4; 287 1 779 LEN=980; translated  
XFSNSKMRYVAFEHRKRKQDSVVFVFFSVSNLLTKILSMQEELTAQDIANLMDRLQDEKKF  
KKALLIADTCQAFTIFDKLTTPNVLALGTSLIDENAYAHRTDKDLGLGAIERWTHHF IKN  
YRSSETDLETTLHQVMVAPFDKRSILMARVGITNQSKFKSIKVSEFFGIKGVIDDGVVDD  
AGTFVEI APEALLKLPQNVDRDFTLAQSSPVAKGVTANVCFTTEEKDDPLQLTGGGVCLFFC  
VVLLTLVLVQKLEKHLMEI

>comp7878\_c0\_seq1; 240 1 1001 LEN=1512; translated  
XKMKRIISGRRRQKRIICLVSILVLAIVSHVGVIFAPT FALMPLTGASCQSRTTKKFCK  
SQDEENDGDCGAPENESDPRSESNFIDGSGTELMNDSNNGNGSLRSGVVS NVHQPPNPF  
LEDPIEFVQAILGTFFQQTNRNND SAALCLLRSSTPSWRLLLLKSVGAPPDATIDQVAPT  
LQNALERSNNQFAILTKKIQEEIEFEGDDEDPSLR IASIQKCNWFPTDPVIFEGDDNED  
DIEGNRIVVDKCIWIESRLRSPKEDELLAVVGWLSLQRRRPRLQERQPDQHIDDVHVDSNE  
LINCWLLDGVWDQDFREDFRPGIGREEWERICG

>comp7879\_c0\_seq1; 317 559 1794 LEN=1923; translated  
MWEKNRKAILDAAAIHKRTFAFCRSLLLFKKTSAPRLKRRLSYSPAGNIEEQASMLDMDH  
VYMTFFDFFWCWMFIRPCTILLAMTGTITFFVRDFIDKIMRRGSKERLDLAKVVASLVLE  
SGLAIHYSCTTDEYEAAFFYEDFPFVDQNGDPHCADLFAVYIDLKTKTMTKASIDGQSLS  
PSQAMTLCVWILVGLHVKLHSHYANWAVNTNSLVKDKHSFYHRNSITTVFYNYMGFAGFC  
SLVPPFAKFGFVHKNWDXHANGGALMYCFRKGIESGVCQHPHINELVPHSRVAFVVRAR  
GIFFSEFEKHKDLLPGADCEALFIGTVLHSLDHSNLTEIVDP IWL DREDPRYGV MASLAA  
IVRSGFTSDLPWISFHKKFKGSGHPFYEA VYQKCSKIDKAHADNMDSCIIK

>comp7879\_c0\_seq2; 317 579 1814 LEN=1943; translated  
MWEKNRKAILDAAAIHKRTFAFCRSLLLFKKTSAPRLKRRLSYSPAGNIEEQASMLDMDH  
VYMTFFDFFWCWMFIRPCTILLAMTGTITFFVRDFIDKIMRRGSKERLDLAKVVASLVLE  
SGLAIHYSCTTDEYEAAFFYEDFPFVDQNGDPHCADLFAVYIDLKTKTMTKASIDGQSLS  
PSQAMTLCVWILVGLHVKLHSHYANWAVNTNSLVKDKHSFYHRNSITTVFYNYMGFAGFC  
SLVPPFAKFGFVHKNWDXHANGGALMYCFRKGIESGVCQHPHINELVPHSRVAFVVRAR  
GIFFSEFEKHKDLLPGADCEALFIGTVLHSLDHSNLTEIVDP IWL DREDPRYGV MASLAA  
IVRSGFTSDLPWISFHKKFKGSGHPFYEA VYQKCSKIDKAHADNMDSCIIK

>comp7883\_c0\_seq1; 396 315 1549 LEN=1738; translated  
MALTTSRALVESRIQTPLEQMHGTE SRVCIGKRSRRHRS LCLTLNSANNEGDAETLDN  
DRATSCERKTPAII PGWTVGRAIDECIRRL EAKNVTEPDYSALYLVA AALKLPW ERGIRD  
LQVGGGRSVSNANLRSKPLTSEQASDLEGLMKRREAHEPIQYVLGKWDFLDYTIARRPL  
LCPRPETEELVAEISGEIAKERSKTNQPLRILDVCGGTGVIGISLADLLPDAVVEAIDV  
EPVAVAVSAENA EHVLGSSAADRYQAKLCPAADFQPNQSF DVVVS NPPYIPRADMETLTD  
DVWKYESDRALCGGDDGLDVVRTIIEKLP EXVQPSGCVLDGGRSHPPDDRGT SVARGRR  
IGEGAGEKGLFRILIQGHVWEIPVRKAEGGVGRMDGRMEPIGCCISTALLV

>comp7884\_c0\_seq1; 208 1 751 LEN=1202; translated  
XSDGLECLVCVPPFFLRRTTNPMHRTWISFALLFLLRFYSSQLLSLPRSRYTWTGTDIKHG

FNGVYLGDLERLQDIQNKRDKTNRNWQRIILYNIKALEIATSTEAGASGSAKGSTAEN  
TGEAEDDGKNVEAEVPPNNEPFPKPNLNRKFVLETRQLWFKLHEKMQSPEYGNMLLLVLRMR  
DELEHRMYQRKQRYLTFACYEELVNKLHLDAEGHVVEPFVALSDRQDREERQRLHIESIA  
QDLEAECLIK

>comp7884\_c0\_seq2; 267 236 2276 LEN=2727; translated  
MIRLFPNAATAAVATRASKRSSARMSNLFRLLQGGAGNPAGTTSTNANANTNAYTRTAVR  
HFQIGNKGDNNSSSSKSGSKKTGGPVVIGRSSRSKRLRGKGPMMRSRKNKDKSNNNQDSM  
ISHIISGGTPLDPAPPPFELANFGEDSVHTLVLLRHGESEWNKLNQYTGWCDVNLTDGE  
LEARAAGRLLFENGIEIDQAFTSVLKRAFSCNMALNHAXPALGPGHEIIVAIERASLWSV  
SSHXVVVVVVVIEFCGFVSGERGTEMDVMRVLPLCLFDYTPGAFWCNCFRCGIPGTSVK  
DASSRNSFVGGKSTLSCPVPYFXLFFSSSLQGYHKDGAYKELGLDQELVMQMRRSYDVRP  
PRMEDDHPYWHGNYRRYRKLKSKEQLESSRTESLKDAADRIMPFYNSVIAPSLRSGNKCLI  
VSHANTIRTLIKNIDGISEDIKGMSIPTGIPLLYRLDKDLQVPCPVSELEFRFMVEPKG  
YTWGTDIKHGFNGVYLGDLERLQDIQNKRDKTNRNWQRIILYNIKALEIATSTEAGAS  
GSAKGSTAENTGEAEDDGKNVEAEVPPNNEPFPKPNLNRKFVLETRQLWFKLHEKMQSPEY  
GNMLLLVLRMRDELEHRMYQRKQRYLTFACYEELVNKLHLDAEGHVVEPFVALSDRQDRE  
ERQRLHIESIAQDLEAECLIK

>comp7884\_c0\_seq3; 411 236 2008 LEN=2459; translated  
MIRLFPNAATAAVATRASKRSSARMSNLFRLLQGGAGNPAGTTSTNANANTNAYTRTAVR  
HFQIGNKGDNNSSSSKSGSKKTGGPVVIGRSSRSKRLRGKGPMMRSRKNKDKSNNNQDSM  
ISHIISGGTPLDPAPPPFELANFGEDSVHTLVLLRHGESEWNKLNQYTGWCDVNLTDGE  
LEARAAGRLLFENGIEIDQAFTSVLKRAFSCNMALNHANQHWVPVTKSWRLNERHYGAL  
QGYHKDGAYKELGLDQELVMQMRRSYDVRPPRMEDDHPYWHGNYRRYRKLKSKEQLESSRT  
ESLKDAADRIMPFYNSVIAPSLRSGNKCLIVSHANTIRTLIKNIDGISEDIKGMSIPTG  
IPLLYRLDKDLQVPCPVSELEFRFMVEPKGYTWGTDIKHGFNGVYLGDLERLQDIQNKRD  
KTNRNWQRIILYNIKALEIATSTEAGASGSAKGSTAENTGEAEDDGKNVEAEVPPNNE  
PFPKPNLNRKFVLETRQLWFKLHEKMQSPEYGNMLLLVLRMRDELEHRMYQRKQRYLTFACY  
EELVNKLHLDAEGHVVEPFVALSDRQDREERQRLHIESIAQDLEAECLIK

>comp7885\_c0\_seq1; 256 725 1141 LEN=1311; translated  
MSLKDIYSLHPEFSEYHYNKFSSRLSSLRKTIKSSNQRANADQEAFFELFLENNPISYLSH  
KGYIQWQGSEQRLLKKDIEDGIVHDFGRRKKELWESRDEYQAFPLHVFRDKIKQEIGTE  
KYLYTLKARGKDATYKYA

>comp7885\_c0\_seq2; 256 527 943 LEN=1113; translated  
MSLKDIYSLHPEFSEYHYNKFSSRLSSLRKTIKSSNQRANADQEAFFELFLENNPISYLSH  
KGYIQWQGSEQRLLKKDIEDGIVHDFGRRKKELWESRDEYQAFPLHVFRDKIKQEIGTE  
KYLYTLKARGKDATYKYA

>comp7885\_c0\_seq3; 256 587 1003 LEN=1173; translated  
MSLKDIYSLHPEFSEYHYNKFSSRLSSLRKTIKSSNQRANADQEAFFELFLENNPISYLSH  
KGYIQWQGSEQRLLKKDIEDGIVHDFGRRKKELWESRDEYQAFPLHVFRDKIKQEIGTE  
KYLYTLKARGKDATYKYA

>comp7886\_c0\_seq1; 96 1 370 LEN=2251; translated  
XGLDNDDRQRASDRGESAGPQRNGLGHNLRADRRHSDRGLDNDDRLLPSSLLQSGGKLV  
TGGKHGFGSLHGKSAEGSLPMSLVLALALFLFCFVSLRVRNKASRSRIGGFRRRSTKG  
RTL

>comp7886\_c0\_seq2; 167 1093 1662 LEN=3543; translated  
MLRGIDGTVKDKHKKEGNDPKTAAEEEEERMEHEILLAVLKEGRGERDERGEREESQ  
VGWHRKENVGVLKRQRASDRGESAGPQRNGLGHNLRADRRHSDRGLDNDDRLLPSSLLQ  
SGKLVETGGKHGFGSLHGKSAEGSLPMSLVLALALFLFCFVSLRVRNKASRSRIGGF  
RRSTKGRTL

>comp7887\_c0\_seq1; 520 1 1513 LEN=2131; translated  
XPKTAAEPGPAAGENESGPQAIGSDPETSOGGGDGTETTVPPPEPSAQNAPASDGTSETA  
ATIPPPSPPTIGPNPSDGNNGGGEPAATTTTTTEPAEPTGEEARDPPHNNASGKLP  
ALSQAQLSQAARKFAETHCDLTNLKDGQWYPSGGEDSWKQRAPYLIVAGVWNAGVNPLAR  
ALLRHPQVSSKQEGFFLPKQFQYIDVVPASGNQONATASESRFRVKVFAARERMYAQ  
VYSKSSFQEKAGSGEEAPPAAGDANDNNNDGDDGSKRVAMDVSPGLIFYAHKTAHSILC  
TAPWVKVVVLRNPIDRLYQQWVYSTERLGLKLPLEDWMALEMKVLQKVGLINRGDEAND  
AVSEKEAWRNYQSVHNMAGVIGRSLYVFQLEEWIEAFVAAGKNPSEEIVVLTTEEIEEDP  
SGNYSELMRFLGLSAFDGAVQGGDVATELQKSLLRPNDTALPPMKEETRNMLKQFFQP  
YNERLAKLLRSNGFEGDWDTRWKQ

>comp7889\_c0\_seq1; 730 1 1974 LEN=2006; translated

IEVPHERMLSKFPRRSIFAIAAAVVGKSLQTGHSLTVFGNRATIGRRQHQTNFHTALSASS  
NLRLSEPEESEENLDESLTRWEEMYQQGEQARKEQILGMTSSGDSSSIGSDMKVEDSGSH  
KSIAPVRVITFDLNTLWKTSETISAANDALAAYLSTKKNDNGMELKIPKRIEKVMGDLF  
EADRRLYSPLLGATIPSPDRGNDDFNDVVKQTVKSPVSLTQLRIDAICYVLETENDFTP  
DRALAFAKDAFDVWTKARHRAIVDHMAPLVTETLSYIRTSIMSNDNPVLLGAVTDGNSDP  
RNIDALAPYFDFCVNAESVGVSKPDKRIYLRAIRRAIEVRPDLFSDLLPSGSASNDNFHE  
TIDNETLEDVGPYWCHIGDDFLKDIVAADLKMRTIFAVGLVKEKLLASAETQEENKMD  
MAEFIKKVSSETVITLIGIGADDYLAESLHGFEVDVAEADFSEIGKILVEWHSADADVSTST  
NQAARETKEMQRDPIQTSTSANNEKDKDEENFLEVI EPSSTAGGDEFKAPFANRNRQG  
EMNFLPRAFRIIRDGCSVDIPAPLRKRDEITMKDVMGMAQKEKSSGVFAFDPDVAALN  
KGKRVLMIRIDDTDLKFSRETFSNMSVEEVLTLTDENPVLSLSLYMAEAFDKPSYDLF  
>comp7891\_c0\_seq1; 225 289 1152 LEN=1571; translated  
MSDSRRRSSRRGKKLESYSANDLVQIPHNSTTIIGRLLYKLT EQPSVRWLVAFFDDVPSRK  
DEEIPPEEAIGPVVGRLEAAPKAPDSTS NRNASNLVTPMDDSNVASTITNNESVTTRS  
RKSNSGNSSSSSSDSITKTKKKGNSLPASIPKEETDSRSEIAQEIPQLSPKISGRERRS  
RRRQGLVDEETQQGTLLPSSNAPIATTGAKVAPNAKTASVPPEKTKTAQGNSSGKSRND  
DAPRTKKGKFGPSHVRGNDEV LKVQFLTGTLYLYRGPKRHVEFIPKY  
>comp7891\_c0\_seq2; 180 653 1222 LEN=1641; translated  
MDDSNVASTITNNESVTTRSRRKSNSGNSSSSSSDSITKTKKKGNSLPASIPKEETDS  
RSEIAQEIPQLSPKISGRERRSRRRQGLVDEETQQGTLLPSSNAPIATTGAKVAPNAKTA  
SVPPEKTKTAQGNSSGKSRNDDAPRTKKGKFGPSHVRGNDEV LKVQFLTGTLYLYRGP  
KHVEFIPKY  
>comp7891\_c0\_seq3; 225 183 1046 LEN=1465; translated  
MSDSRRRSSRRGKKLESYSANDLVQIPHNSTTIIGRLLYKLT EQPSVRWLVAFFDDVPSRK  
DEEIPPEEAIGPVVGRLEAAPKAPDSTS NRNASNLVTPMDDSNVASTITNNESVTTRS  
RKSNSGNSSSSSSDSITKTKKKGNSLPASIPKEETDSRSEIAQEIPQLSPKISGRERRS  
RRRQGLVDEETQQGTLLPSSNAPIATTGAKVAPNAKTASVPPEKTKTAQGNSSGKSRND  
DAPRTKKGKFGPSHVRGNDEV LKVQFLTGTLYLYRGPKRHVEFIPKY  
>comp7891\_c0\_seq4; 180 759 1328 LEN=1747; translated  
MDDSNVASTITNNESVTTRSRRKSNSGNSSSSSSDSITKTKKKGNSLPASIPKEETDS  
RSEIAQEIPQLSPKISGRERRSRRRQGLVDEETQQGTLLPSSNAPIATTGAKVAPNAKTA  
SVPPEKTKTAQGNSSGKSRNDDAPRTKKGKFGPSHVRGNDEV LKVQFLTGTLYLYRGP  
KHVEFIPKY  
>comp7892\_c0\_seq2; 181 49 489 LEN=1388; translated  
MNP ISTPTPPSEGTNESLDQPQHYEGNVQLMEARFLQLCSSIRALYRSVQELRVHITEQR  
VGNGDNENDDTLVFLQAI CENQQVLKQRIELCAIVEGMQRLNADTNLPDDIRIMVFDVD  
EENQREQHHDASEGERNSRGGTGLYL  
>comp7893\_c0\_seq1; 293 186 593 LEN=1930; minus strand; translated  
MATVPLLPTKHTINADMLHLLKPGMLLINSSRGLVDTKAVLKGIQDGIIAGYGADVYE  
NESDYFFQDWSAKAVPDPTLVALMGSNNVLLTAHQAFFTQEAVDAIVNTTLSNVKLFTEG  
KTMYPHPNNFLPRRN  
>comp7893\_c0\_seq2; 293 186 593 LEN=2124; minus strand; translated  
MATVPLLPTKHTINADMLHLLKPGMLLINSSRGLVDTKAVLKGIQDGIIAGYGADVYE  
NESDYFFQDWSAKAVPDPTLVALMGSNNVLLTAHQAFFTQEAVDAIVNTTLSNVKLFTEG  
KTMYPHPNNFLPRRN  
>comp7896\_c0\_seq1; 203 1 506 LEN=506; translated  
XTDSLMTAVTND CAGL CRKDASAELEVR FCHKIRSAGGASRYLGS AKSCAIRFDVDG EK  
PRSNKR VSSAANKVATVDSTIVLKG V GAGDATREEQAILAKAFVSAYNDVN WGANHYLTG  
AEIPFAAATSPEGFLCRHCPDDDDSMGGAAPARDTNTLVLDIVSPVEAFX  
>comp7896\_c0\_seq2; 361 1 637 LEN=881; translated  
XTDSLMTAVTND CAGL CRKDASAELEVR FCHKIRSAGGASRYLGS AKSCAIRFDVDG EK  
PRSNKR VSSAANKVATVDSTIVLKG V GAGDATREEQAILAKAFVSAYNDVN WGANHYLTG  
AEIPFAAATSPEGFLCRHCPDDDDAMGSQFDVRS LHTGPADKKAIEVAFCKKLQNSVSKKL  
ASAKSCSIAVESVAAAADASVDAKNNAKGALW  
>comp7897\_c0\_seq1; 870 254 1907 LEN=1907; translated  
MTRTTSNSGSTGRMVSSGACRKELPPLAGACGKHHHRHDPHEHPEDDAVLSSIRAVREI  
VVAEFRLGETERRAMVAQLAAMKQRSSSASTKQPETKIPRSVSEEEQKDDGDCVCEGSL  
DSDGEAKSQSKANKQLLQYWKDKCLRLEEKQKQEQERNEKSGLPAPGVDEEKEVLVSTL  
LAQQQQAEQLKARLSESR TNAEALGQTVKKVVATMEEEEKQSIARERDVAFSLLEESRQQL  
LQQQLQHAEQQAQQHQKQEQEHAKAVLNN SRELESQALRIEKLETVNARLAAENDELEATA

IRSSALEELLARDEAFRGIASKHNTNDHGIIEIETTTTSLQQKLKALETSLLEKDARTI  
RSLLELQIQALEKQQKEHPSSDSATSTPASSLEQRLASKKKQLRDSRNLRTNSLDVVGDT  
ILLQLRRLVEIHRHTHATAAAAVVANSGEPCGSGRSRLSPAVASADGPARSHSGDHPRC  
STTTGEWESTLRKLSERERMLALLEEDADGAAARAANGSESDNVPLPAHTGAHCHSRGG  
KRRSSGEEAIX

>comp7897\_c0\_seq2; 399 1 977 LEN=977; translated  
XFLVLLGLLFRVQQLLQQQLQHAEQQAQQHQKQQEHAKAVLNNSRELESQALRIEKLET  
NARLAAENDELEATAIRSSALEELLARDEAFRGIASKHNTNDHGIIEIETTTTSLQQKL  
KALETSLLEKDARTIRSLLELQIQALEKQQKEHPSSDSATSTPASSLEQRLASKKKQLRDS  
RNLRTNSLDVVGDTILLQLRRLVEIHRHTHATAAAAVVANSGEPCGSGRSRLSPAVAS  
ADGPARSHSGDHPRCSTTTGEWESTLRKLSERERMLALLEEDADGAAARAANGSESDNV  
PLPAHTGAHCHSRGGKRRSSGEEAIX

>comp7898\_c0\_seq1; 135 1 842 LEN=1519; minus strand; translated  
XRANSCSMLGNSNGNGNGNDNGNDHQPSVYDAKLRELFRRICCGSTLPVYECEANAK  
AAVFSSGTGYDTATPPQSERFQVLEVGVDIWIYYLVGIDEEAGSANVHMLGLTWTQD  
LAWAITTSACTDRISVWAGNGELSEIWIPFNLLNRRRTGLEAIPTRATVDYKGTVMVL  
QGNMDFCNFRGLANIPYDTLGCQFLFGITEGDPTGAAWYSVDFLDGSTTQFASFLNAS  
YNEWLPIPELAEMGKVPQGQEVLYFDLYFERAEAHLYRTF

>comp7898\_c0\_seq2; 293 1 835 LEN=922; minus strand; translated  
XRANSCSMLGNSNGNGNGNDNGNDHQPSVYDAKLRELFRRICCGSTLPVYECEANAK  
AAVFSSGTGYDTATPPQSERFQVLEVGVDIWIYYLVGIDEEAGSANVHMLGLTWTQD  
LAWAITTSACTDRISVWAGNGELSEIWIPFNLLNRRRTGLEAIPTRATVDYKGTVMVL  
QGNMDFCNFRGLANIPYDTLGCQFLFGITEGDPTGAAWYSVDFLDGSTTQFASFLNAS  
YNEWLPIPELAEMGKVPQGQEVLYFDLSFFTFLLDVRIG

>comp7899\_c0\_seq1; 367 129 785 LEN=1047; translated  
MSDSNARGAGNLAPLAKYKLVFLGDQSVGKTSIITRFMYDNFDRHYQATIGIDFLSKTMY  
LEDRTVRLQLWDTAGQERFRSLIPSYIRDSSAVVVYDVSNRASFTNTSKWVEDVRAERG  
NDVVICLVGNKTDLGNDRKQVSTEEGEERAKKDGLMFMESAKAGYNVKSFLRKLATSLP  
GSNDGGASAKNAGNGSGLIDIKVSSAPANLDDAKSCGC

>comp7900\_c0\_seq1; 392 158 1390 LEN=2455; translated  
MSVLILAVVGYSMYKQKRDEVEFKDFPVDLDVRSFFDTQDGTQDGTKDRAKTKTKRAFVN  
FLPAEIKMCRYANSLTTITFYEGDYRKIRKDLERRVNNVLEANPWLGGRLAVKPGDDQLR  
LWYDPTGVDLPPDIYTCYEPGIIPKRTTQYAQYKDCADHDVVPVRSHELVGKNRPLWQ  
VTVPDIVEQNERFAIVVSQSQMIGDAYTYQIFHMLFNSRNNTMEVLVNTAPVEKLNPI  
RRADVQHVEEHMGLQEASVYVKSNSNVIDEVYDMVSFHKKQAMMFTVSESWLKTRTEKC  
IADKREKSEFIKFCFAADGNHDGNITPEPRRRTSFLSTRMKSSRSFSEVLDPDKTGDG  
KEEPSAMATRKAAMAWEISSINDRDRFDDIDPTDVLVLSWVFCISNADIGL

>comp7900\_c0\_seq2; 358 158 2023 LEN=2341; translated  
MSVLILAVVGYSMYKQKRDEVEFKDFPVDLDVRSFFDTQDGTQDGTKDRAKTKTKRAFVN  
FLPAEIKMCRYANSLTTITFYEGDYRKIRKDLERRVNNVLEANPWLGGRLAVKPGDDQLR  
LWYDPTGVDLPPDIYTCYEPGIIPKRTTQYAQYKDCADHDVVPVRSHELVGKNRPLWQ  
VTVPDIVEQNERFAIVVSQSQMIGDAYTYQIFHMLFNSRNNTMEVLVNTAPVEKLNPI  
RRADVQHVEEHMGLQEASVYVKSNSNVIDEVYDMVSFHKKQAMMFTVSESWLKTRTEKC  
IADKREKSEFIKFCFAADGNHDGNITPEPRRRTSFLSTRMKSSRSFSEVLDPDKTGDG  
KEEPSAMATRKAAMAWEISSINDRDRFDDIDPTDVLVLSWVFCISNADIGLYPHHLRKS  
VLSDDTDAGNYNTPIPFRKADYQTPHQIHESINTGKRVGSEQSQRPLPRITTHYSFAMGVD  
WDKLYSDLMPRGSQTGDQTEPSNPGGNEGDSIDGNSDGFVQDLHVPLFTDIDINAMPARK  
DACLI FTARAGKDHPGGRTIGMFLVASRAVCERVSACGIVDRGASSSTMAGITESGRGGP  
VVDFGPGTSPRKVGVSASDRQ

>comp7904\_c0\_seq1; 238 180 602 LEN=648; translated  
MFGGRKKNDDSQLSSVMSPENAPASKGKGGNVMGFDEGLERAAKAARELDASRNAAS  
AIELIKTQEVTKQHEASAKRAEMEAYTVQQRSQNIERAEAEARKTLDAQTQHERHRAEYM  
DELERKRQVDMLNAQKYMQE

>comp7904\_c0\_seq2; 706 180 1904 LEN=2472; translated  
MFGGRKKNDDSQLSSVMSPENAPASKGKGGNVMGFDEGLERAAKAARELDASRNAAS  
AIELIKTQEVTKQHEASAKRAEMEAYTVQQRSQNIERAEAEARKTLDAQTQHERHRAEYM  
DELERKRQVDMLNAQKYMQEEQLKKQEMVARQEMRRKTAHEHAALKTKMELAKAQAQA  
DGRIRQERENHDLILEKLLQEAEEKRDTVLKGIQDAGKMI GEGLQSYLDDTTKLRNTALT  
VTGIAIGVYTARTSIGIGGRFIEARLGKPSLVRETSRFSFGQLAKQPVTTKRFLFGVGTQ  
EKDALKGIVLKPQLDSQLTKIAVSTANTKKNKAPFRHLLHLAGAPGTGKTMFARGLAHHSG

LDFAILLTGDIAPLGRDAVTElhklFDWAKTSRKGLLLFIDEADAFLQnRETTKISEDQR  
NALNAFLFRtGTESNQFMmVYASnQPNQFDpALLDRVDEMVEFDLPGIEERREMIAMYID  
KYLlKPPGYAKTVVTDGIGPAEIEKAVKMTDGFSGRSISKLAIAWQAAAYGTEGAVLDKd  
TFFKtVEHHKSSMSTKdQWLLeSEERARLLTTDA

>comp7905\_c0\_seq1; 960 42 2141 LEN=2285; translated  
MKFHfTAAfSLLLLNASASSFAANSPrSVQRGWSSVGNRIpFVSGGAISeSTKLNSsVD  
STSSStAIGAISeNLdLLSERGRKAILTLVEHDVDGFQSHVYADWPAAGTDDDgKKRLA  
EQlADLDGSYPGGLAAyTSKARALLKESADGTNPfEEFEAVVSEGETLSfDGEgTMSfSE  
AEKIGMEGIAGAAfVLVAGGLGERLgYSGIKLSLETNLCTEECYLeVYIKYIQAAQNLAR  
KKTGNDDIRLPLVIMTSgDtdQPTRdLLKANDYfGMDEdMVTIVMQDKVPALNNNNAALA  
LDDDDRWtVQTKPHGHGDVHLLYREGLVDQWEKEGRThVvFLQDTNELVINSVIpVLGV  
SISKGFDMNSICIPRLAGEAAGAIARLeHKSDPSKSLVINVEYNQLDPLLRsQGdCKGDV  
ADPDtGYSYPGNANNLVIALGAYAKTLRGeDQGVVLEfVNPkYKDETRtdfKkPTrLEC  
MMQDIpKLFQkELGSDVNIGfTMLDRWfTFSPAKNSLESgVEAAEKGSTAPGTmSSAESD  
KYIQnQRKLKYAGVDLPVTSVPDDLPVAGIPVTAPGPRIVLAPSFaISREELLEKVRGE  
SNTVSARSSMVLegHHLTIENLELDGALVIKCGDEThVTVDGLKVENKGWELVENEAGTD  
YPENVSIRGYTMakHETREYILNEPGNFVIGEDGEVKKI

>comp7906\_c0\_seq1; 249 444 1075 LEN=1075; translated  
MARStASSSSSLPFQKAPAVAEVKKSKSKNVGNDDSGMTEEDENILFGHdMLEERHPP  
YpNRHRPKDRSGNVLEdPTLKLNELDHSSTdPLINKLRTIRdSKLDSCPQLWTElASVNP  
DGIALIDDHLCDKLKISLTFKQMNsvvNQAALAFGRMGLKKGQHVAILAENSPGGYXVDH  
GIQRAGGVSaVRGADAPLDELRYIYEHSDSA

>comp7906\_c0\_seq2; 438 1 1874 LEN=2074; translated  
XRWLQVDHGIQRAGGVSaVRGADAPLDELRYIYEHSDSAGIVALQGPRLLNKLLKdAKNA  
SNESCLGLSNESHGpVRHVILMHREKtQADLESIMESCDNEIKISfWDDLLEQEEsAAS  
SIRVSDfPKVTKNDLSTIVYtSGTTGRPKGVMLTHGNLLHQTSHRLAPSKPYEESEPLPG  
ETMVSLLPvWHITERSfELWMLSRGCKVvYSSIRHFkNDMAKHkPEWLVLVPRVLEKIAT  
GVQDKfSSGSAPVKILSKfFFtATGIRAKNAALAKGLAVGNSNDPSGLQRIVSKAAVTAV  
APLNAVGDKLVWskVKEGFgGNLkTIISSGSALAGNLEQfYETAGfKVVVGYGLTECAPL  
LAYRRLDENLVtAGCCGkPCYdTEVRVVDPEskATASSDRPSLPDGEVGVVIGRGPQIMK  
GYYKNPKATAEAIdEYGWfDSGDlGRINPATGDlILTGRVKDTIVLSNGENIEPTPLEDA  
IMGGTNGLVEQVMLTGQDGRRLVAIAVLSPTELANANFLDKNEAKRLQeANEQVNDPKCE  
PEVCAVASELLRAASLKLRSNADLQKSLEALVKsATKEGFRAyEQVSAVYLtMPEfAMVN  
GQLTQsYKVKRDSVfSRYGSELpQ

>comp7907\_c1\_seq1; 445 131 1318 LEN=1562; translated  
MEGFVETIDSalQTADYgSLAAVfSYGpSSWHSLGQGEQRSLASyLIETAVGSPTfLPRA  
FSSTQVRNVfLETlKHLpATpVEGAADNKLRQMLFDYnVNEEGDYsAAAGVLSGMRMHDD  
RDSVYYfSAAEKCDVYVKIAECfLEEDMIAESDAAVGRAGSVVESIENADQHAALILRYK  
STYARVLDSNRKfLQAASRYHDLSQSSGDlIRAEDLLTMLGRAATCAILAPSGPQRHRVL  
GHISRDPRLDQLRGLSDFETHATILTKMYGGQILRKEELVGFEASLQPHQRAIMGDGLTI  
MERGVVEHNMLAVSGIYRSIYVDELALVLGVGNEKAeKIVATMILDGSLEGSIDQVENLV  
LFHSNDSPNGAWDRAISSfCMELNRVTDGVRsIET

>comp7907\_c1\_seq2; 430 131 1545 LEN=1789; translated  
MEGFVETIDSalQTADYgSLAAVfSYGpSSWHSLGQGEQRSLASyLIETAVGSPTfLPRA  
FSSTQVRNVfLETlKHLpATpVEGAADNKLRQMLFDYnVNEEGDYsAAAGVLSGMRMHDD  
RDSVYYfSAAEKCDGKKCLfCFRCRRVESVPIPVVfFRAPVGSgHRNELVPXRNHerna  
PRSLDSVSNPNTPLVRANSNHTTPVAPTAPVYVKIAECfLEEDMIAESDAAVGRAGSVVE  
SIENADQHAALILRYKSTYARVLDSNRKfLQAASRYHDLSQSSGDlIRAEDLLTMLGRAA  
TCAILAPSGPQRHRVLGHISRDPRLDQLRGLSDFETHATILTKMYGGQILRKEELVGFEA  
SLQPHQRAIMGDGLTImERGvVEHNMLAVSGIYRSIYVDELALVLGVGNEKAeKIVATMI  
LDGSLEGSIDQVENLVLFHSNDSPNGAWDRAISSfCMELNRVTDGVRsIET

>comp7908\_c0\_seq1; 418 423 1481 LEN=1967; translated  
MVKTLKLDASSIEYAILPthVKDDVPDRISIMLIQeENEYSCFDYLAANEATLKQVAKpV  
DEDcRVKCEWcYQVVDfCKFRRETvGIGMSYVDryMCSSKGGKALGDRKEYQLVAMTCL  
YIAIKLHEPLEMETSLLADLSRGcYTEMEfANMEQDILEAIDWRVSGPTPLAFVLHYLAF  
LPEIVPSSVVEAIFDYARYQTElGIADHCFVKSKPSVVGMAALLNALEGMdTDLLPERVQ  
DLLIRtIViYtSIDLEeVEKvQIRLSTILLtSLDESdACKYERLVEDTDADeESISLSEE  
DYADDVESEdSEdEETSDEdCDDDEGEKRIPpPSTSHRSPTsVMKKSrTRT

>comp7910\_c0\_seq1; 439 99 2243 LEN=2470; translated  
MVGfGEHLKANIASEfGADAYLNYKELDELiQQLSATAPSGPDlQNRQVSMTVPPQTDAR

GLAVHSNGVTEEEFLRRMDEELAKVEKFTLKQVDSLRRKIEAVENSNTPGMNAADEIANY  
FLQLEKYVNINFMGFHKILKKHDKNLPNVPCAFYVSRMHAQAWVRGDYSDLVVRLSHIY  
ASLRDDHVVDENNDQOSFLRQTTKYVWKTEDVSRVKYYILRHLPVFLQKTSTGESDSQFT  
NSVYLDNDQLELYHGRLEKSPGAIARLRWYGNPNKLVFVERKTHNDKWTGEVSVKERF  
TVDESEVHQVMTNTYPIEEKRKEMLAKGKSEKECDEWETLVREITQVVFVSKQLVPTCRTQ  
CMRTAFQIPFDATVRIISLDTNLCMISERGYELNGMKTWHRNPDWILQPNEITRFPHAVLE  
IKLELKGGNLTPPKWVRDLQNSGLIYECHKYKSKYCHGTAVLLPEDVRAVPYVWDDVTLRE  
SIIASGGGRILMEPGEEAAPGANAIYDHLLPFGDQEKDRSQTAVGRTHASTAASKGITGE  
NYTKSNIQTGFDTNYSEEDPFLDDDDDDGACGWCFFPFCSTRYNEYAEQVVAPTSIQKVEP  
KLFFANERTFLHWHLYAVVLSIGSAVISLSDSDVDDWRQSYALALLPISLAFIYALHV  
FLWRQDQIKQRI PARWDDPMGPILLGSTVVLVVIQFFSHLYEIAKAGIEEGQI  
>comp7910\_c0\_seq2; 138 1 1161 LEN=1388; translated  
XVRVAVPCLHSVQLVAALGNHAQVSVQGNPNVHANCLPDPIDATVRIISLDTNLCMISER  
GYELNGMKTWHRNPDWILQPNEITRFPHAVLEIKLELKGGNLTPPKWVRDLQNSGLIYEC  
HKYKSKYCHGTAVLLPEDVRAVPYVWDDVTLRESIIASGGGRILMEPGEEAAPGANAIYDH  
LLPFGDQEKDRSQTAVGRTHASTAASKGITGENYTKSNIQTGFDTNYSEEDPFLDDDDDD  
DGACGWCFFPFCSTRYNEYAEQVVAPTSIQKVEPKLFFANERTFLHWHLYAVVLSIGSAVI  
SLSDSDVDDWRQSYALALLPISLAFIYALHVFLWRQDQIKQRI PARWDDPMGPILLGST  
VVLVVIQFFSHLYEIAKAGIEEGQI  
>comp7911\_c0\_seq1; 411 123 1338 LEN=1617; translated  
MHRIPSWMPICLALAAFLAFEAPPFANDRILYRTNRQDRFDDSPSGKSLRSLMDEKVRSN  
SRKNDHNIVAEIVDSNFEEAGKKAHVTDKSEGNTDESETRYNSSDLEKQRKKYRRTDIL  
VIATRGEIDIYDENLGRVVL CNGR LALHFGCILRRYAVQLEEDYQRQLHQHFEDPDAENQ  
DNELQRIRIMSRQERRKAVEELLSSEKQVDIECGNADKNTLIKPECDCKSIGNAVDTPK  
KSGTPSPLDTSFASDEGPVCSICLAEYKSTDSIFRSKSCPHMFHGECLLSWLERNNTE  
CPICRVTLVSDDDIWEVVQMRKERRKELLKENGMYRVLVGVWIKSIRGGNQQPSQENDRL  
GSFTSSSSGSDGNTMGGETSSTLTIGVDASVDLNDGDNVAENEN  
>comp7911\_c0\_seq2; 429 123 1415 LEN=1694; translated  
MHRIPSWMPICLALAAFLAFEAPPFANDRILYRTNRQDRFDDSPSGKSLRSLMDEKVRSN  
SRKNDHNIVAEIVDSNFEEAGKKAHVTDKSEGNTDESETRYNSSDLEKQRKKYRRTDIL  
VVCFFVAGIWLILATIYSIILLVLLRLQARGELDIYDENLGRVVL CNGR LALHFGCILR  
RYAVQLEEDYQRQLHQHFEDPDAENQDNELQRIRIMSRQERRKAVEELLSSEKQVDIEC  
GNADKNTLIKPECDCKSIGNAVDTPKKSGTPSPLDTSFASDEGPVCSICLAEYKSTDSI  
FRSKSCPHMFHGECLLSWLERNNTECPICRVTLVSDDDIWEVVQMRKERRKELLKENG  
MYRVLVGVWIKSIRGGNQQPSQENDRLGSFTSSSSGSDGNTMGGETSSTLTIGVDASVDLN  
DGDNVAENEN  
>comp7912\_c0\_seq1; 430 1 1600 LEN=2127; translated  
XLISRTGRGASHHDSLDESENCFRKEFYCNFRRTIPYSSSVPPRIGQQAIIIPYDRIDI  
NNNIVDRNAVSKMRLSADNNMTTSTTDASHARRTYDSSSLTSKKVMIDVASWWCYVILNG  
ENLHLYDEFENILELSGPIPLNSTLHVLRRCIAIWQDLLKELNAPGNNGSGKHRFESI QDK  
LILLHKDSFPKTRAKKEYNEVLRMLQTHNVLSKMYEYFKTVNNHEKTNKSGIWHETNKN  
NEVLDQCNADFKNLYLRLLDDGMPTSLDDLVDKKNGWDA SDRMDHITQIAYYETSPLTHEK  
LKSNIQSLLLHWFHEHIFD TDETGKPIVTELLEKRYRGIGFGGTSNGNERTPSSPVAV  
RDAAAELVADVSTDVYLP TGI GSPSSRQRRTKTRRASMSPGNRRQNPKKQKAQY PKQK  
LDVSFDTNEDEDENGYNLLSNDEYEEQQNRLKARHKRKRKILSIVRRNIYGVTTMYKSD  
ENWSQE QDDALI QGMKWN YGNWSTILSEQD LLSKGEIELRSRANILLKRR  
>comp7913\_c0\_seq2; 443 1 1261 LEN=1350; translated  
XHTVPNDCKEIVLTEGEYDAMAVHQATGLAAVSLPNGCRSLPVQVLP LLERFDKIVLWMD  
DDAPGREGAEKFAKGLIDRTHIVAGRGDAKDANDALLRGDIDLEERIEQAALVPHDRIV  
TFGDLRNDVLKELLEPELYSGTPITSLPKFTQLIKGFRRGEMTVLTGPTGCGKTTFLGQV  
SLDLAEQGENVLWGSFEIKNTRLLHKLKQFSRDSLPI NTDKNARENFEALADRFE TLP  
YFMKFHGGSDVDEVLDAMEYAVYVNDVEHII LDNMQFMITRHSQKSSWDKFEVQDVAIEK  
FRKFATEHNVHVTLVVHPRKEDESSKLSISSFFGSAKATQEADTVII IQNDANRRKYLDV  
KKNRFDGTLGYTP IYFQNKSGRYVEDEGSAGNRP AQKQQPQGDMSMHLGPHNNYSSDRA  
>comp7914\_c0\_seq1; 481 1 1198 LEN=1448; translated  
XPTLPPTLPPTLPPTLPPTPPPTDLPTPIPTPADGEPTRPTPKSPTHAPTQNPTDF  
PSTSPSVPTETPSSFSANAAFSEGT TSEQVVTACTSVQTNKVSNGRMLNSMVSEVVEI  
HVEVFLRSCDFEAPTSIEGKTCFEIVTTITAPPSTGISPSLVTGSI ESDIQSGDFAVQLE  
AEGLEGAVVSLPPSEEPSSQPSAPPSVSVMPVLP SFKPSLEPTV FSSLNPTAGPSVPDA  
DCINDDSFRLNGKMNRGCTWVAKRKT RRRCKKKDRISKRRVKEFCPRVCKKKCQSCGRDT

INFGNGDISKDCLWVSNPLNRCEREDTISKKKAKEFCLSACDLRCSCLNTMGTFVLNG  
RAKKNQIRMNCTKEAIGQSGEIKTVEEFPCPKKCRACY  
>comp7916\_c0\_seq2; 293 1 726 LEN=1223; translated  
GRGGRLVEQSGRPHRTAFAHYNTGITELEYFGHGRYLVMTTNVTPHIPPERYAALRSGGT  
LRDGWAFVTPPLPDITVEKEVVHGDDCAKSTIEHDHVQEQTALRALYLSSSSSNDET  
QETSDANDAVRFVVKRGFQVLA VATYSQRSGLTDVAIRPTANVSVVLLLEAIKEHARSID  
SGSQSCLSVRPTGDDRKSFERMGFLDQKSCGDKQPPRSIMKLDVDPVPEKFPGAEKLSN  
L  
>comp7917\_c0\_seq1; 677 121 1341 LEN=1372; translated  
MSILSFVGSCLLATIAPTYTTGFLLSQQQHAMKNSKPMFQFETGKLSTTNLHQSSRPE  
DLYAAVHRKEYEMRGVKQQHKSSADPVRMAMSYAQETQSSMKLAKALRRVHDDPFRNNEE  
ELSEEEMARKQKLMNGLGEMTMRRACFCVDVCRKSLSRPGEKPFRCFDNAAMVCEAMVR  
LGADVVFVNVDYPAYGGDISSELKSAVNAVRKASDTAAVVMKDIVVDEIQLGLAKEAGCDG  
ILLIASVLGPALDNFLDLATTIGLETIVECHTNNEVQRALDAMATNILVSNYDRVAQQMY  
PEQAIKLAGLFPGSGGPIICLAGGGIETPEQMKRHLAVGYDGVIVGKAVMGSAKAPEFIR  
VVRDRSLLPAELSQWGLEDFVFLNGQPMGPKQDIPNPYDDDVYQ  
>comp7920\_c0\_seq1; 769 96 2843 LEN=3086; translated  
MASQVGGSTNAASTTTDGYQEPDVLKRLFLPPTPSLVLSGDSRWLISTEPPPLPSIEL  
LSKPEEKLAGLRFDPVLLAPSRQYFGLKAQYLSLQPAATSTSEQVESPSQVAQEIPLP  
SDSEGIRYIRFNPNPPEYAQQQFVFAKKNENVLELYVCNLVAKNEQENVRWTVHPVSA  
LNERRLNFNVCAYQFSSDGRFLLCKVVPPEGHPSEAPISESPAGVGPSIQTVTEGARKAP  
GRTYQDLLKNKHDEEKFRYYLTTELVSLELEKSATSYSAAVVTQSRGGFIPCSMETSPC  
GRYLLVESITELSYSVPPFRFGRKEVSVWDLKQNTTATNDSILTVASIPVDDEIPLSYDAC  
SRHKRGFRFHPCLPHTLIYAHALDEGDPANNPMACEDGSFRDAVYTQDIVPNKSPEDDGA  
SVLKEPALSQEPVTLCRLEWRYDDIDFTESGIILVDEYRWDRMERKWGLHPKPTSPGS  
NSGTTKHATDTTKTLLWERSWEDRYSSPGTVPVTRTRGRNGKYFVREAKNTPGTIFLRGMG  
ASPLGDRPFLDRMELATGARERLWRCKAPREGEIPKNMNDAPSEVGGRTAPDERDDVY  
ETFVIMEDQDSILISRESKTTPRNYLTSLSKPGTESTVTAFFHPQPDIGVSKELVQY  
KRKDGVDLTANLYLPADYDGTPRPTLFWAYPREYKNSKAAGQIKGSKHKFVSAHWASPIH  
WTAKGWAVMDDFSMPVIGEGDAQPNDTFIEQIVAGATAGVEYAVQRGVCDPDRCAVGGHS  
YGSFMTAHLLSHTSLFAAGIGRSGAFNRLLTPMSFQSEDRSIWEAPDTYITMSPLMHAKK  
YSEQDRVGKMLLIHGAEDENSGTYPLQSERYFAALKAFGIKSRLCVLPYERHSYRAKESI  
LHMAWEQEEWLRSL  
>comp7921\_c0\_seq1; 422 166 2205 LEN=2806; translated  
MNMVMSKSSSHSGGTRKQEKVENDAGVHYSLGQHAQYLQLASEVVAQSGNRYWFCDWTPN  
FVSLSHQNRMLTNVVKKEYCQPLRQHDLEDQFIGTATLSPMRREPPAVRTVTIRLRPDCDH  
IKVYGALNEAFVLPKHHITILKNSDNCFQAIAGDGNTPLLLSAQLVTNRDPTRLERCLL  
LRFHVEQVHLFEELKKGIVKMKMTALKEVQTPLNKLGACAMLQNLNRKEELVRI  
ENEQETLVAEARKRRRMSDRMTNATNGIESSVLYDIPSPKNSTRESSRYFMENLTPSPS  
VKDANFQKVAVFPVSLSDADYDVLQETWPLLERIWESELELAKCTFNLTLDVETSFRGMRPCQ  
PSLDKDYCIQLFQVVSQQRMLEGLRDELDKSENHLHDNLGDYSEFEQQLSRILIKTYGIPL  
DKNLFDRRDHTSDSLDLGQTPVSLPQRHMGEFPWEFDKIKLALQDVTHTITSVCMEQYD  
PVTHSLQICKRSVEHVFTTIEEANTSDQRNLFLEKRNQAMIRVTQKLYLKDVLVQNRLSN  
APRVWGELPKLEDAVRRWREIAAQASNKDEARLGSNWGAGNSGGGGLKKAFFIPLLEFAT  
KFGTVCVTQNTLILLSEMPFFESVKAFQINKVELVATPNHPLHKVSI MRHGKRLGLSPT  
SMDPCYVVKFAMILKDLQK  
>comp7922\_c0\_seq1; 223 231 1073 LEN=1740; translated  
MHFTRLPTIISVFFWLGVSVVVSEGFVPSRASVPSGNVPLFLSSAPTVPGLSLPTQRR  
RSTRNKSSMLNLVRSIPSGGAASKTSLFASSGEAVECPFTKSMAAFGSVWGSFGVVYIL  
AKAIARVLPALPEPFGSALAFSPVHWSLYAASCLFFAYAEGYKGFHLKFAPLCVKRSE  
TLIIGTPGNNPLHYLFAPLYSMGLFQATRKLAVSWGVSLGVAIVAVVKKLPAVPRCI  
LDAGVVGLTLGSASIIYHYMRSILTGLPSTDACLPTAK  
>comp7923\_c0\_seq1; 621 75 1826 LEN=1901; translated  
MSSKPSFSSAHSNSDKKRSASAVWMEERCTKYDTIVDEQDWARTIVSVPSSTGNIIEDL  
QDEGVSVFSITTDGGEHGSISNEVDLGDLDLDDIFDPTKETSTIADQIKVDFTDSDPLH  
NNALVVLGDDYDANMTTGDKNRTPNLVTNTPMRRPKTSKINPMSGQKALTDDKQEWNRD  
ILSSFARIVTPNKRKRKEKPTLKRKYKIKSTMEDKRSPIEKPTYSLRRGSITNNNANE  
YLTNPLFQSSGSTSGHRKRRLLQEIESFNPSLKLNGAGSVSVHAKPMFGNQQTLRKT  
GNTKSALSRPLATGAVAVLNTKYL MRGTMSSTKRVS KAKPKKETS KNKARNSCSNQNRD  
TTTNMSIRIAKNFRFKPQGCGRTKWKTYFGTVVSKRGVQKTKSYVWTLYHVYDDGDEE

DFNSRELKQALDLYEASKELDGETKCEPSLEPEDERKNPQNTTEEIHQLPQLSNKRIEVL  
HNHGQSTTKQGSSSLQKDLTPANSFTRNSEAAKNMKLQKRECTGCAQVQIDISKRRKHLNQ  
RQERQKCQRCYYDLTQSREVVVDSKEQASDDDSVQVLDLIDLS  
>comp7924\_c0\_seq1; 315 85 1068 LEN=1381; translated  
MSAGYASRLSEYPNKGVVGLPESYDSQRTLALKLKHLQRAMEASDYTIVLTGAGISTASG  
IPDFRGPNGIWTKEEEKRRMKKESPSKSRKRKLSTTVSESSVVGNSDDMFRFAEPTLT  
HHAITRLTTDGIKFCVTVQNVVDGLHRRSGLSRNYHSTVHGCVFTEKCAKCGCEYFRDKEL  
QGLSFQPTGNSCDECGDGGMDRDLDDWEDPVLDMERVKAECKADLILCLGTSLRIEPV  
GSLPLLAKKFFIVNLQSTPKDKNAVHVIRAKVDDVMEMLMLKLGKGDWKSESPPIERK  
WKPDQAKQEDWALLISNLAKENQKEY  
>comp7927\_c0\_seq1; 472 107 1074 LEN=1194; translated  
MFGSSNNGAVFLTIATGFFVCTFAPVDAFAPNSLQHPQTATLLWSSTTSGTAPVLKSQL  
KKPSKVLTVGVEYKSDSSDDSDNLEVFMSMKLRQQAQVSVFVACGDLDAIRLLATEQETAK  
GNFFGPLPIVYYCSGGEASASDVAEAGASALVVLGAGEGAKNVSEADAAGLETIWSV  
SSAGEAEFVLSQTEGRADVFWLEGSEGDNEIVSVLPKSSMAIGVSDPMQTDGAEIEEG  
KSLKASGCASVVKEACIGDAEDXRDAFVVGGLTSKASSEFKFSGLTGSTNGHFGGIQS  
NSSVRWERQKRKEEAENSDDDE  
>comp7928\_c0\_seq1; 699 71 1759 LEN=2071; translated  
MISEPANDALEHRKSDYKKTVDAGEGRRRRADTTLRIRKQKKEQQLKKRADAVVASADT  
ISNLQPDNICPNRPESKPTINDAPRLKAILTNPSTSEQALVEATKGFRRILSVEKNIPA  
QELVDCGIVPYLVRNLSSSSTALVFESAWALTNIASTECTIDVVKAGCVKPLVQLLLHTD  
ANIREQSAWCLGNIAGEGPNFRDIVLQEQALSLLMNVANAHTMSLLENVVWTISNLCRG  
TPSPPKETTAPVIFPLVSLLDKPIISDGAKVDILWALSYSLSDGDEQKIELVLGSGVTLLKLA  
HLLQNDLSLKVRCMTPIVRILGNFVSGSDNQTQVVIDSGI IDRLPFLGSRSKTIRKESW  
LASNIACGNHKQITMLMKNTKALTQIITNAKNDTWEVRKEALWALAHVCTSGTSKHTESL  
VESGGLEPLISVLAENMDPSLLVAILDIAIRKVLEVDEASPFKRYDQIIDECNGIEYLE  
ELQTHPSETVYEVVSLIEDYFGVDDEGDENLAPELNESGTFGFGGLASPKQLFTNFANA  
VSSSPNASFPFGSVSTNTFFYPV  
>comp7929\_c0\_seq1; 380 42 1235 LEN=1292; translated  
MNKLYLSRLPSAATVASWSRPRLTNTKAQVQSLSRWSEKKRSMTTAYCYQQRFCRNLDV  
KADVAKSSMISVRNFHSSGPTYSEKICDNDSPASDAQTPGSKAFVLESDDLALVDLFFK  
FAIPGHPRLDREGLRKALNAVGETPDDETLEQIYQDADLDGNGVIDLEEFLLTSADTILG  
GAPAGMVLVGGPGSGKMLSKRLIEECGVVHISSGDLLEEVESDTELGREVKEIMVRG  
DLVSSAVIVKLMRKKMRKPENAGKRILLDGFPRSQONAVDLVELCGQPELALNLVCDDTV  
LIERILKRKEESKEGETRDDDNIHTALKRLRTHYHKLHVTIDWLRENRPVVNLDCDCPP  
DQVWEQLLSVGRLVRPATAIDREDLSLLPGYNNNNEK  
>comp7930\_c0\_seq1; 928 111 2690 LEN=2909; translated  
MEAIETLAHRCRVASPRDTSVSHSECAF SFHNPSTDEGILVNMNTFIGTVPELAFAAADS  
SQERDIFLRIVKTRKCKINDDDATENNGEDKLP TTLGIGVEGGFSTSDSKYETVTKHSIL  
VMDNSKNIIEIPFDVEDDDASAKLPEMVVKSAKSIIHHVGLAIQQLTAWKDDEEIPIS  
KYCNELPFVDNGVKISDPDKSWKCEKSGDTENIWLNLSDGFIGGGRKNWDGSGGSNGALD  
HYEETGQQYPLVVKLGITSTEGSVSADCYSYAKDEDGPVKIPNLGELLRARGIEVMGLQ  
KTEKSTAELEVELNANYAFDAITESGSKLISVTGPGLQGLVNLGNTCYCNSAMQALVALP  
EIASRYGTPGGDVFFHRRFFEGISPSSAPNELLVQTSKLISALTSGTYAIP EEELEAEGP  
TNPKYRVTPRMFKHLIGKDHVDFRTGQQQDAAQFLLYFLEQIDRAELKNDRDI IPTSNLF  
SFKIESRIVCSADKKIKYKDSAAETMWSLRLPMEKAKVIPAQEPEPKKQKQEGEENTEVP  
TVTFSSQLDSWSAETALENIRWPHLDNAAHADATETSRFKNFPRYLWVQIQRYELGPDWQP  
IKLEVNLDIPESIDLTSYKAVGPQETESLVPEEEGRGPASAAATQPEISEAALGQLMDMG  
FTMNGCKRALMAVGGSDAEAAAMNWI FEHNMDPDFNDPIPETNPAFTAASSSGDVDDTVVM  
SLVENLGMFTIDQVRVALKQTINGAADRAADWLF SHMDDLGAIANLQGGSTSSSTGDGTG  
PKVDLEDGEGKYSMLGISHIGKNTGSGHYVAHIKRKEDGKWWIFNDEKVALSENPPIQH  
AYLYLFQRTDTIGSPSPRY  
>comp7931\_c0\_seq1; 740 57 3065 LEN=3424; translated  
MVHVAEDHGINSMENTDYDDPVHRLVGAIVSGADDGNNEHVIALAKRVLSSQIGTNSND  
DPHGGANVLDLSTWRRISRKARHPGAREEIEENLYLRYNKESCANGNPDLPPKVLMTLTK  
LIGKRLPMVKNPLVSTASTTLMVEKQVPTRLSQRQHVKLAPKENIMKEMAQSPVIKSA  
DEMYIHRQPQEHQSMSQSRQSMQSEACESSPRVLRQSTRQNAHPKQLQRPQTQPLQSDT  
YESSPQVQSKCQNTLKKKELQREEGKLLRECLYSLQGIEGERVRYCREPRDYSIPDVS  
NCEGIRIQSSALSQNILYAGQISETRLGSGAMDALKVCGEAGWLYTQITSYIHRVQQDRT  
KGVVARAFAETLLEQLRDYHSLLTYYETKLPGFTRQMLVELRGP IFRKALAMLVDGMK



ELTGGHLLSALHKHSIHGNTIHVDIVQSILRKVSRPWFEILYAWTTKGILSDPWNEFFV  
ENKDAEDRYLWNKKYSVNWDKVPKGI LAQEYVKPSFNVGKGINFIRRCLLDGQWMTQLRS  
GITHLPTSIAPEKGNKIGDTLGYRYESNEYGKEENPVLKKTTLAATGSVHSHILRAVKEE  
NHLMEHLFALKQFLLLGQDFYSTLMDGLYNEFNQNRVQFSGGIYKHSLLVIVD GALRSS  
NAKYMPPYIVERLEVKLIIDPGEEMHDVLMGPAGLGGNTSEDRRTIYDMFVFDYHAPDP  
VLPVHVSAMDQYKTLFALLFRLRIEYVLNFTWRQSATLSHALQNSAQYIGIDTASSE  
YYRATFLLRKISIVRQSMTHLIVNLKSYLMFEVIEGDWQRLES AIHDASTLDEAIEAHS  
YLANIIDKAMVRVSDCRESSRQLAKQVHIVLTIIESEFCDLQENLNFNQSLEEAIEITAQKRI  
QAENRLKQGQWGFNSQKDIEEQESFFGLAKSSVIDLVSRISKNYNYQAMGLLKALSERVD  
GDRSDSTAKNGSYWENDDLHPQRFLVAQLDHNFFYTNQGAWQ

>comp7932\_c0\_seq1; 463 146 2020 LEN=2442; translated  
MTMDATDRTPDEEHSESSDTTKPAGVVLAI DVGSSSVRCTAYDCLATTHRRGHETVATV  
PIPGCFASIQRPGEVPLSGAVRTIDLMDAIDGSVDEVLT KLKGKHFEGKRGRFRVEAVGFS  
TFVMNLVAVDANGKLVTFGDGDDQKGDNSNEDAEAVHHGTPSTTVSISYACNATRVNEE  
CRRLRRDLGQEAVDKLYEGTGAPLHSAYALPQLRVLYNSLCPERKRKIHSWQSVAGYCLS  
QWIGTPHLPVSYSEASWTGLLNVS DCTYDES AVGLLPPECRRALPQLADFTDGLCGLPRL  
VRGRSEGTGNPYWEKWPDLRDARFFLGIGDGACANVGSKCTGSSRFVAVTIGTSAAAARVCL  
RREAGGGPAFFSIP ECRGLFCYRVDRHHVLI GGALTDGGSVVEWASRFLNLDPRAFRECL  
GEARALVEAECERARSAGR HREQDGLFVAPFLGGERSTGYRDGATGAVLGLTRETTPAH  
FLKASLEGVSLRLKAVLDLLRLVREGPAGPLGIAGDPVIVASGRAMEANHLWRQMVS DA  
SGLSVLDEDAEAGTSRGLARLVALSLQRDAGSEETPLP VSEHEEDLNPYLTSRPTPAAT  
ALYARKFRAQEVFIDCVSPLFSSA

>comp7933\_c0\_seq1; 247 115 1109 LEN=1526; translated  
MPLGKIPAA TRFACVAAKSTKVLRSRGISSSSFFSSMGGEGRNAAATSCKKFRTHNPQP  
PQNHPGRNYSAMQQRQLQNHPRRRVPTEPRAIGPNAFH AISVSSSPIVHHSVSKRWHG  
GPHVDRDHADSVHVT FVDSEQTP IAENVDAYVGESLLQVAQRNDIELEGACEGVCACSTC  
HVIFFDEDTFYNLLEEASEDEEDMLDMAYXADGNEPAELPDPRDFRDGRNDDRDSKGDPE  
FLRGRTRSATALAQLCSGAVGSFCGLATNAWTKRGVIASLFPAALEEMISTKYECCLQEK  
MSMDAMPCHAMQNN SVLAFFNTMSKKLRQVT

>comp7934\_c0\_seq1; 439 97 1071 LEN=1281; translated  
MSDDWCTIESDPGVFTELLTDLGCTSVQLEELWSLDDESLEALNNTAEIYGLIFL FQWQS  
KSDSEALSASEDKNEPLSEEQIP PGLFFAHQVTTNACATQA ILSVILNQRDDVELGSTLK  
EFKDF TASFPPLGKVAISSSEAIK KSHNAFGRTDAFLNDGKYVSRQNSQEDVFHFVAYI  
PHSDGNVYELDGLQSGPIVVGKYSDEEQKDNTAKSTKWLPVAREAIQKRMQGD AIKFNL  
AVTKDKRGLGLKEIEKNPTDGLSIHRLNMEEEKR KQWALENQRRRHNFVPLCVSILKELA  
RANCLPELVEQAKDRKRQKIVGKK

>comp7934\_c0\_seq2; 412 97 1259 LEN=1469; translated  
MSDDWCTIESDPGVFTELLTDLGCTSVQLEELWSLDDESLEALNNTAEIYGLIFL FQWQS  
KSDSEALSASEDKNEPLSEEQIP PGLFFAHQVTTNACAVRFL LLRSSARQHTVGCVALRT  
TQLEQSHNFS DTRSYSVAHNAPFLFMLVVLFSVSSFP ILLDSSHVFGHLKPEDDVELGST  
LKEFKDF TASFPPLGKVAISSSEAIK KSHNAFGRTDAFLNDGKYVSRQNSQEDVFHFVVA  
YIPHS DGNVYELDGLQSGPIVVGKYSDEEQKDNTAKSTKWLPVAREAIQKRMQGD AIKFN  
LMAVTKDKRGLGLKEIEKNPTDGLSIHRLNMEEEKR KQWALENQRRRHNFVPLCVSILKE  
LARANCLPELVEQAKDRKRQKIVGKK

>comp7935\_c0\_seq1; 299 126 813 LEN=813; translated  
MAATTPKTI RLSSETKALEPGDLERLRRHATS VFERLEEEESASDSLSPVPPSWVDGVRSDS  
EQSVGKKPCSSSFRKRHFDSNGFFVARRFC DPDEARTLKAAMSESVRKHWPYKGTTPGT  
KHGNEDEKEDDEQVATTFGTDAESNEARGDPFLES AATVAYFAEPTALDSETGALKPEF  
RDENCCRNGETFPKENRKL LALCKAGHGLHLP SFRRGISNYDNDNDNDX

>comp7935\_c0\_seq2; 299 139 826 LEN=826; translated  
MAATTPKTI RLSSETKALEPGDLERLRRHATS VFERLEEEESASDSLSPVPPSWVDGVRSDS  
EQSVGKKPCSSSFRKRHFDSNGFFVARRFC DPDEARTLKAAMSESVRKHWPYKGTTPGT  
KHGNEDEKEDDEQVATTFGTDAESNEARGDPFLES AATVAYFAEPTALDSETGALKPEF  
RDENCCRNGETFPKENRKL LALCKAGHGLHLP SFRRGISNYDNDNDNDX

>comp7936\_c0\_seq1; 341 91 978 LEN=1406; translated  
MSSWDEHQENY GELDEYDGP IASDGFGRVENKALGTGITNSVSAPRGGSR TSSLSHF  
SELSMDFGELQEDMETKRYASGSMFPKNRKKKSPNTT PDRPLR TKSFSPSEASIDLNELG  
DAIGAGEDLSNRRV VAGSMNKNGRKTSLSDGTRSFSSWHQPPAYSNNLIEDDEDSSGCG  
NYLSFGEDCGDSTVRFDQVPLDLSTVIENDGSECSISIEGMTRNLSSLNNSNGSTGGSSV  
RRRVKFEISTRLENILEFDKPAEDFHLLYTAHELQK MIDNNRAKEKRGQDDVR

>comp7937\_c0\_seq2; 627 104 1840 LEN=2282; translated  
MGR IARLNRRK N LKDISL KSTSRPKHGLQNL R ATKRS LPSVTNNMRLSTNGSCLSMNSK  
TIEKLN SAIRVNC D TSLIIQKEVMDLLQSSSNQSCSALS MATALLKSQA CLDNH S FNHEQ  
TNSKTMATRTQRTGSISSKLHSIFSRKTETEEMKSR YELMGAFARIEKNPSSRDKIVSSW  
KEAKIVLEEE L SFPSTIVPSEV NNSDQDFASLQKQPLSSTA EKHANMLES DLK N VQEGFS  
ALWLSSTKWKQIKSYPDQKR LLETAKKGD TTEDAEDLVTSIERESIEKADLYFNARIPNA  
EALYKHVQRDRRITEL EERMKAKEAEERASSLMQTLNDDDRQIVEDAIHG HGGDDQIIA  
QVGADSVRRASMR TLKPGMWLNDEI IHYFYLMLAKRDEGLWKNDPSLKRSHFFK SFFITK  
LLNEGSAICDGKYEYRNVKRWSK KVP GKDIFNLDKILFPINMGNMHWICAAIFM KKKRIE  
IFDSMGSSGNRYLNALFKYIQDEHMDKKKTPLPDADAWELVPTQGDTPRQRNGHDCGVFT  
CMFADFLSKNTALVFNQDHINQCRERIALS IMKGEAIM

>comp7938\_c0\_seq1; 194 1 588 LEN=714; translated  
PTNQPTQHASVLKTEY GEMASSVLWGMNTHAPVNNLQAAITYALLGSLAAVSARWYADVL  
YGRFGYGP I EKQREVR SRGDAEWFSLYSSTAASALALFGCYEFFQIPIGRYIQGTL SGGV  
EMCFGSSRFDA CLQTFIDTNSPGPTPEAQFRALVTNLYAVYVRLQDIAGDTSWDDVVVLV  
RAWSVSFASYLANLQ

>comp7938\_c0\_seq2; 508 1 1651 LEN=1777; translated  
XKANAKANANANANESTTTITTTGFLPVCDAFVLP TTKTNR FVRPERRNPKPRRNHRTQHH  
AGVQSHRAHVFP I AASPAPRTGTTLWLN SPTGSNKATPRGRRNDEV TGLVLA V FIVLSLA  
GMTGSGAGVAGDGVSDVTSSSYAVVTKVVENTVP TTTSTEVVA VTLGESIGGVIGAVFSVA  
INFVLRGGKTDDPN ESSPDPTGSGTAGRSKPASLLSQGLSDSDFFIANSASYSILEAAGV  
PESIAKYGSIFIAAVPSQLVKIGSSISKQKRAKEERLLYELLLSEERQRRRSRYRFDKLF  
SFWKQRSQATRQRFVDPKDLEPVT AAGEAAATGSALAAETVGT P SVFVVD FVEVFADVTR  
WLEYDVLKTEY GEMASSVLWGMNTHAPVNNLQAAITYALLGSLAAVSARWYADVLYGRFG  
YGP I EKQREVR SRGDAEWFSLYSSTAASALALFGCYEFFQIPIGRYIQGTL SGGVEMCFG  
SSRFDA CLQTFIDTNSPGPTPEAQFRALVTNLYAVYVRLQDIAGDTSWDDVVVLVRAWSV  
SFASYLANLQ

>comp7938\_c0\_seq3; 375 1 1096 LEN=1215; translated  
XKANAKANANANANESTTTITTTGFLPVCDAFVLP TTKTNR FVRPERRNPKPRRNHRTQHH  
AGVQSHRAHVFP I AASPAPRTGTTLWLN SPTGSNKATPRGRRNDEV TGLVLA V FIVLSLA  
GMTGSGAGVAGDGVSDVTSSSYAVVTKVVENTVP TTTSTEVVA VTLGESIGGVIGAVFSVA  
INFVLRGGKTDDPN ESSPDPTGSGTAGRSKPASLLSQGLSDSDFFIANSASYSILEAAGV  
PESIAKYGSIFIAAVPSQLVKIGSSISKQKRAKEERLLYELLLSEERQRRRSRYRFDKLF  
SFWKQRSQATRQRFVDPKDLEPVT AAGEAAATGSALAAETVGT P SVFVVD FVEVFADVTR  
WLEYE

>comp7940\_c0\_seq1; 294 1 1593 LEN=1634; translated  
NTNTNTNINTKICLAASTAALPKKKKKDTA I ERGREFVARHSPGRSRRRGAKQTMGNHPS  
TTPVP SKVTCQNHDRQIPGSASSD VLLWGCKTREEDRFKRALLLQILRPLKGGEGLAAGG  
LEYRPVALSTNATQRTRKATTPMHA EVFDAASAPHARIPVSRKKKKRI P M PLTPESVLV  
VNSDNITDRERAQDTAGVVLXNHETMSR L FHRESNTMITAENRKEFIADGPMYDIVCRLA  
MEYAQEVMMRDAQLEWVTVPEETRSDGSQPPPPSSNTQPIRVLVSTRLVKDESRIDEEP  
TLLVATGNGRVRAGVFSRQHLLTSGLE C STAVPFVVRQAYTRNINLVLDPNARGDKLGMA  
TFEKSMERVFRRWEQGMRCGGPTPRNLLVLSHSQSGSQFVRYLLDKSHCYLPRIRATAF  
TDSTHNIQWAKRRNRLRELERHLES D NCVYFKRADET D ASSGAGCGLGPLSSVGRAVD TND  
FWKHRFGTIKTL CAGTPEHSLTNWFVRHHIWNHFD RSIAAAETNRAVCQC

>comp7941\_c0\_seq1; 529 300 1476 LEN=1476; translated  
MKFTSRIGRTGLLFLAAILVCDPLNWGFVSAEEENPXAYPTTDSITNQVPHIRSHQEPNT  
CTNEGSDEGANQGTNQGANKGNETTYGRSYPKAHQKANEESNKETNKETVE  
ETHEKAHSAEQETHQEAHSAHKEAHKQAHDAKTNPVAPT PAVPGTPATTPAPT IAPT  
AAPP SVTVSVLIAVPAATPPSVVEEQVEQAVQDILEASSVGT PANYPVTSPDGNAATEAP  
DGNVTTTAPVSNNTI GLRHLQQSKQQNNNNNNNADLPNNCFLEPTLTGSTTDADCESLGN  
GSFAYVCGTNAVADLFVVKGTVELKSTFRAAKEENAREAPKSQEEAVQEAQAVALAAVQEV  
LVAPEAQAAPEAAALVAVQEGLVAPEVALVAV

>comp7942\_c0\_seq1; 432 844 1917 LEN=2427; translated  
MGLQQVNANNTANTNRDHNKRKKKTKSNTAVGKSSGLPDISLRTQLNYARNGHAVLRNF  
ITDNKDSFSSGSSKKKNSRLSNLREDILDAMDQELKAWVQKVQVAAGKDIADSCHTIDD  
CKKALQANGVTANLPFLQYFNTWRKLPVKDLAFELGKAASILLDVPTVRLYQDAVFWKR  
SQDGP TPWHVDARMAPFD TSHMITFWIPLQDVSPENGGTALIFCSKSHADYALPYWNPL  
PQANGDTSDDDNLSPSGWDR LGDRYPKKEIEYMPMSLGDVTVHSGWTLHCSNGNELAGSK  
DRVALAITFVDGAAEIRPDWQSIGDDEDQCSYQEW C INVKPRTKFTHELVPITWPPS

>comp7944\_c1\_seq1; 419 1 1197 LEN=1500; translated  
GRGSKKRAAPEGLVRAKKRSPGKASSATGGPAPSSSAKNGSAYIHLPHVGDPPKKARWRAA  
HFLYYQREDPDQPPPSQPQSGSNHNSNNSNSGNHPASRESGGGNGGKKQGGDGDDEPHG  
GSRSKPRYVVYEGEMVDGKREGRGICLFSDDTLYEGEWKRNKEHGYGTLTTSDRTRTIYE  
GEWERGRMQGKGVYYYYSSDPQNPGRPYAGEFRENLYRYSGTYFLPDGSVYDQWRDGM  
NGHGLFTWPDQSLYDGAWKDGKRHGQGLLKKADGFLYDQWVNNNTMEGRGSVYVNGQKY  
EGSFHKGRREGRGTIVFTNGAVYEGFRDDAVDQGTMMKARTIVVPREKGRSGGSENE  
PRSPATATSGGTGEKQDFMIPISFQSDMTRILTKTGFM

>comp7944\_c1\_seq2; 347 202 1353 LEN=2408; translated  
MSLLAGTTGSISASSSPMIAAHAHNSLNLRKRWTLKRRPTGVFDPALDAEFVEQTQSPKLD  
TEVLVPEPQVLSVDAFLRTMMEEGAYHGMLPIGATIPALGYGTVEAGPKASHKVGRVAG  
MLAASDRVVVDSRAVVRVSVNFPLPPTAALGLLGLTCGLTAYCGVFYVASRPPRKGTVV  
VTGAAGAVGSIATQLARSTGARVVGAVGGPRKAYLKDITLGCDAVIDYKSRKESLHDQIA  
RACPEGIDFVYDNGGIEILNALLYRINPRGRVVCGAISQYSGKLHNGTKNEGCCGADGP  
SNYLKLAERGAEMVGFVNMQHIRKLPFMLVGMFWLWARGKVVMEHEIEEGLEHFPHALQK  
LFTGENIGKTLVRVGPDDKAASR

>comp7945\_c0\_seq1; 104 447 857 LEN=1141; translated  
MQWLVNYSDFFSVAGSSINVGWVFEFTDGVCDIEEMYSDDDWAVALARSSLTSLMICGL  
ASTALVVFEWLLCELPCASCIEGAAFVGAWGCGLGAYALYLIEACGDLNDQLGDDMIAQF  
GTTVIPDGIPTGQQCEW

>comp7945\_c0\_seq2; 104 228 638 LEN=922; translated  
MQWLVNYSDFFSVAGSSINVGWVFEFTDGVCDIEEMYSDDDWAVALARSSLTSLMICGL  
ASTALVVFEWLLCELPCASCIEGAAFVGAWGCGLGAYALYLIEACGDLNDQLGDDMIAQF  
GTTVIPDGIPTGQQCEW

>comp7947\_c0\_seq1; 588 36 1016 LEN=2023; translated  
MAAPAKENSPSPAKLAMLVVAWYAGNTFYNVFNKKATNMIHAHWVAVACAQLVVGIVWSLV  
MWGTGMRKKPNLTSKDIANCIPIGMCACLGHAGSVLASAVGAVSFAQIVKACEPAFAAVV  
GLLVRPVDIKPMLAYAMLIPVGGVGLACVKEGKIDINVTAFMWASMANIAAFKGLG  
SGVTKEKGNPEKNMDSANVYAVMNIISFLCTVPFVVVQELPTLDVEWNKAVEEHGFQPL  
VMNIALSGLFFYIYNEFAFAFTAAVGAVTSSVLNTAKRVIIIVVSTIVFQEPMERNTVLG  
SAIAIGGTFGYSLASKKKSAPKAKKE

>comp7947\_c0\_seq2; 588 36 1016 LEN=1766; translated  
MAAPAKENSPSPAKLAMLVVAWYAGNTFYNVFNKKATNMIHAHWVAVACAQLVVGIVWSLV  
MWGTGMRKKPNLTSKDIANCIPIGMCACLGHAGSVLASAVGAVSFAQIVKACEPAFAAVV  
GLLVRPVDIKPMLAYAMLIPVGGVGLACVKEGKIDINVTAFMWASMANIAAFKGLG  
SGVTKEKGNPEKNMDSANVYAVMNIISFLCTVPFVVVQELPTLDVEWNKAVEEHGFQPL  
VMNIALSGLFFYIYNEFAFAFTAAVGAVTSSVLNTAKRVIIIVVSTIVFQEPMERNTVLG  
SAIAIGGTFGYSLASKKKSAPKAKKE

>comp7949\_c0\_seq1; 547 65 1360 LEN=1491; translated  
MKLFLSTLLASLSSANGQGAQLLARWDMNEPTTSFEADTNTFVFDYVGTSPDNVGGTGV  
QHVMYSYDCKDDGTFTAQVPVTEVVVTDGVEITEQLSTTTPAHPQLRIKITPKTLANN  
LIYDVLTDQDLTAYKAANNNDENPPYTSVSGYGFASSEDLGKGLAHMCLRYGIGKTVTGF  
YEINFIEETLIEVKYDLTAGFSVDGFSVAPKNREVVTEIKSDYTLAYLCPASTDTPEDF  
NGNTYVWPTADPQAAGTAFNQALIKICIKPIGQTRIDGLYLEGITSYTWKLYDEPGTSE  
ITGVTQGIIDDGLSYMSCFDVNGSDSGNGPFDYCTIESILYADFYKVAGTVKGSGEATLDF  
GAVPAARLLKAANSEEEARKLQEAPSAEFVSVSVSNDAEGPGALKTAGGISLNASAFAT  
LAALLSAIMLA

>comp7951\_c0\_seq1; 408 1 1192 LEN=1192; translated  
RDSGADYRTAEAEHPHPHQAAARHETAQPETTPPAVSVPHAMTPGDEARPKDAGNRGGP  
GGGRGRGKGRGPRGGRGRGRGRGRSSGRGRTKNADGSANTNHQSKKANPNLEDGVQNM  
IKNAHDNNKEDSGSQDPDSKGNKNNNRKGNPGRGGRGAGRGGRGAGRGKQATKN  
KNGTTPGEADGKNKGQQAESKDNKVGDDTKNANKKNAPKKGKANEGEAQATDNXEND  
GNKHGKKTDEKKGKPGNQKTKNDSGDPKRKDKGNKNTNNKKGHPGPGVSKPSIPPNQ  
PQQTSDINYKGETIVVLHVGEKPSIAEAIKGLCKGERTVNRVMPHTFTNPGFPKAP  
HAKKVMHKVTSVAGHVFSVDFPQEYQSWESVDPGELFX

>comp7952\_c0\_seq1; 290 195 716 LEN=1177; translated  
MGTQMNSIIYNDGIPSCCFQGTDEFLHSITDEAIDEAFPPSAQEAAELEAVEVVFEMMA  
TLAHLLEEKEEMTRFSEDHKGGLRRWKARRELEGGKPRPAKHTVEKVIHYQRPSVPDIADLV  
PFDAEKHNHPSLKDHRMRHREIERIARMTTPHLKMKKIRQKKQMPIQQPRKQN

>comp7953\_c0\_seq1; 740 45 1910 LEN=2131; translated

MADCSAAGTTIDRAARAVLGGAGASSVSTVTKHAGAVLGHASMLAGTNMNVAAASMPLESP  
DHLVMPGAALNSSNPVTIPPAQNVRSIQQHEPMLADASQQHHLHHPAASITPSNMTAPL  
YQQQLHHHHQQQQQMKMKMQMQMIQLQQQQVMTMMLHQQQQQQLKIQQQKQQQQLKID  
QSEEAATEHQPATENEWFDDLEDDFQREGGDIIDSLNDEAVHAITGGAGIDELAAAWA  
EAEAEYDSVLLDHELQEKSQEVEVLVDDDYANLWQGENSNLQPLTSEPRPYEFINPVSLD  
GGNTTATNSSTSNKSNYMEEGMKQFREGNIKEAIRSFEMELQNQNMDNATAWRMLGNCHA  
ENDQDPEAIQCFEAAVERDPFCPEALLALGVSYVNELNHERALENMKAWFTHNPKYAGLE  
FDALPETNTAPGDDIYGAAERNTADDVTGSHRSKESAFDEAKRMLLALEYDPTDAGD  
LHEALGVIYSVIKDYDSAVIDSFRKALETTRPDDYQLWNLKLGATLANGSQPDQALPMYARSL  
KLKPKYARAWLNMAISHSNLQDHDEAARSYLQTLNPGATHCWYLRMSLSSNERWDL  
PLVFERNLEGFQEHDFVLYS

>comp7955\_c0\_seq1; 1741 326 7282 LEN=7475; translated  
MPLVGAATKKHKRTEQNRTEHNRTHSSGMAAASNTNALVSI VVPRLLLLFLQLGALALPAA  
GDFADVNSILRDVAVRLPDVPTMGGSGYSIDLTEVVCTDIYIEDAHLASRSVGLLPSGG  
SSAGVASSGVELQWSIEGLAFNCQAKYKYKGLLGIVNRGDVYLYSRDNKVVSTATVRSLL  
TGSPSPTEISMNSCLPTVEIVDVDFDNGGFVGVWVLD AIEGLLR TAMELVASDKICEELQ  
AFLEVNTKDLLEYIAGENGLEPYLLPGAAALSRDPEQLEEDFVERLKLTPSIATDSSTTK  
ATGATELPATTELLSFSKQDTSSGRWMNELIQKGVFASNEMVSIESDNDAVGPATEKDEL  
QVNQWLREFVLEEDGAMVLTASSVGPDPGPRDGVLYDAEDVVTHTTIVLDRVKLLGLDTL  
THFSPFEVAGNYTLETYLAWKYLALEVDVTATVRPSTRPDSVIEETEGTSTQVKIVEQVKL  
MLGVDGLTAGASLMAALNQTALENNVRLGSLLRNTAAIDCLLSTVVDFEFSTLSVEVTN  
DVLTPSIEGLVSPGLDRFLFSEAMDASFLMYERVLMEAAPVYFQNELRPMLTQRILHEYLL  
QRPPTTGERGTVGSVTQNSNSRTCIPWTSNEVDDDKPIDFRDLLLLTAEDATDLGGSGSAA  
YGNLFSMIMPYINEEVLDPTFNTQWIRKMTKEQSGKEGVLEFKDVYRYLNVSSSTSPLY  
DKLDFRISKITVSNIDTIAAPLEFMQPTNQGNVLSNQLAMHSVTDDAGRFRFLNVTLQVY  
MGIEGDKSPLQMTNVVDFSISVPASTFSVEILADLKERSLLEFPLKDLVNPCHWLAAFGS  
DREDDEVEAESLKSIEIESLSFNILTFYLD SVCISATSPGCGSISDVIYELEDAAFATSF  
RKP IDLVEDVVLSDLWDALDVSELIKQAHKFCPHSDKFEASAPEPTVEMPNLSGVSRNSS  
QTILALGIVGLQTAIVSAKNHLLLADNKPLVPNDQSPSAKSETMPFPEGSEIIDWNNLS  
DLGSWVDIAFDEFNRNLSKSVVASTESSNEVLSRDLASDMTLQINTMLREYILDKSRSL  
YELKDLFSMAFGVTITISKVRIRGLDTVTAIEPLVVLD SQMNTKQLQDDLSFVFECRVT  
RMDETWTDEIDL VYKAKDVQLDMTRIALNVTEIGKVQLGSLFDISQATNCMLRGVQAFE  
ISRDLFTMGKVETPLIDRSFSPDLQVALSGILDSL RKNYQDEILQAI PSIVGSTFREIVN  
ALIPSIESTASKCLPPPEYPIDGLIDFRDLFLSASESQQLGGSNISRYGNVFQIAYDVL  
DKEVMQTGASNRPVINDWLKKTQKQSNNTGMVEIAGTALDTE SVVQIAGLQADFKIKIS  
DVVLENLDSVGDPLYFFRPVSGYANVLDNKL SFGVDEKPLRFQGTVSI SLDDGAEMKIHN  
EIFVSFLIEDVTVQTSILLRVLENSISAFPLEDLTDSFCWASTILPTS GEGESFQGLQLF  
DQSYSTGEFDIEISCKSCTSPDFDKLLLSLYEPQDITAAVREQTSSLMESGFLQTFLNDI  
VAESKKRCPHRPEFDPSYESINKSDSALFTDAAF GFVRSEEKQNP MYFSIANSVVASCLI  
IFGLYGLKLLLARRNKKWTQSLSNENGRFFLD CQQEKERAI EDWLDANTSSLFRSTSIPKSV  
RWSVPI LIMLVGLYLGGHFGILSVVNL DVTLAQQSFTIQNFLEFRFLSSTWNTYKNGGA  
EMIVLIWAFAGIWPYIKLFLSLVIWMVPPKYLGVKRRGTVLLWLDALARLSVIDIFTLII  
GFAIFLVF IGGRDTPNNGDDVYYALKAI VLPKAGCYCMI VAQRMSRVSSQF LLEYHEKAV  
NKAVSIRQDIEGNVLSLQIVTEQESTGNDPLSSDGPLIEIADRMSDESQAASKSTWKFL  
SKI PCNASDIKPKSWGMYRWGQLGAILGGVTILLV FIVGCI FVP AIAFDVTSFGGIALES  
DYTYNEAVSEYGVFLV I SGILLKARFVMKTKADY IGLGLVLF AAGISISSTFLIKAFHF I  
RKKIKQRRKRTNNPEQVPSYGHEGCGLPSYFRLYKQWHEIYFISVCIGVWQLGSIISYS  
IHL YCLIMTGIFD LLSMGI VEPTAAQCNR IQAALPGNVIITLGSFLILMVTFFYLQAFGQ  
YKKNL MKASEFVDEQDVPTLSLAWSKDKSKNRLYSHLADSLSTTTTYNGD TTSRTERTS  
LATPPNSPFSRSGRFLDSRASSLSTRYSLRSPSHDTIDEDPNEDDRLSIPAALDEL SRC  
SDRSSLIDATCELATPSINAPRRNGMSQGFQNSQNRLF

>comp7956\_c0\_seq1; 227 1 553 LEN=828; translated  
XQIIDNDSGQSALNRLAQVQSTLYQDIKEKRXVYVMKTFIQITLALVTLVAVDAFAPTTV  
NSSTRQSSCPNTPLMAVVDINGEAAFDKTISSSGDSL VVDYSTTWCGPCKVIAPKFAEF  
SEKYPDAVFLKVVGDASPDASKLMKREGVRSVPSFHYFKDGEKVDVVNGANAEAEI EAGIT  
KHL

>comp7957\_c0\_seq1; 222 212 1176 LEN=1176; translated  
MILSRRIHSGCVVRNAGRLYGRPRQPEMPVLGHRGTRRDGEFCHRLHSTKQQHETDGNKA  
PSSNHGDEHRHRVPADHEILSTIPFMGRGVEIGQYGTVTRTYTSEEVESFARLIRDFNPL  
HSSLASTDDFENGSDLREALAAQERSLEAAGLVRPGSTGTSRVPLVHGALVSTVFSVFA

HLAPGCVYLHQTVGYVSPVFAGETTVCVVRVESIRDWNRGKRPRARGGVVARCSTLVYAL  
GAPEPGCANARAGPVPATLAVRGHADVWVWPMGHRSEPTRNAPRREGRNPGFDGRTAEHKG  
VQRTSILRNKRKRKHNSSTTAX

>comp7962\_c0\_seq1; 821 734 4195 LEN=4315; translated  
MAFSAADLQNSFGNYSFRGSSSSNAHMEDHQIIVVAPHQGS�CRVEGRDETTYVLEILL  
GNDESAFSESEESSPSTHELVLFRKDFEFLRFLHIMDTESSGLIVKATVEEFMALRCPV  
FWRREDELDQHGGGRATDSSVNRGGTPSSPTFEEVWNAVCCSTSQCAPDGGEPMLGVEGWM  
VFRCRFIALAQYLEAKRRFSGRHLQQTMRHRNAPRGSELVVVNVPPVAPP IRLTARELAKY  
ERDTQTRLPLPELDDLHSLLAHDVLRRRRKQTHGEYAVGDRVKIELFGQSPLLLSSNAS  
SSSSKGLEFCLTLLRSRDRREGMILEDEATTVRRSVTDIKWLHDTFVSHKALGGTLCGRI  
LPPFPGNQLEDETSVFPTTTGGAAIAATHAGKEFAHAGVIAAAGVGMLTEGFRSLWSGY  
GSTADGLLLSSSTSSKKHPTESLSKTKSNPASIRNTMKTYYNPNSPIGKARHLERYLNY  
LLEHPALSTSFPLNTILKASQSGLDAAKQSLEEHTRAAREINEQTPKMDDGKTSTFWSLQ  
GQGGSMPPNLTWVRTAAQAAVALQLHGVLLETTGLSSASARLQHASLPTFNNSRNPGWAE  
TETDRNLARNNSDENPEQMEGDSFEEGVLHVGDDELASSKDDNCIVDQEDGDGYDLLPLP  
VPAPERQILNVGESTKRQHSTGSKKEARFRYGAPPIQEGLVVDGTEDDHRVYLGEMAIDE  
NIDKLREVIQSVNTLSRCSASSCGIERSRRERFALNLDILRGLDSWEGLRGKFVSQRAL  
LKGLSGMEQSREVFEEEDLTLIDVSWQSALAHSAVSAEEDVRSTVRAARTGSNAKLAAV  
KAAHAAKSLCEKGFANVHEARAAQTRASIAQSHAIHAAVVEHEAKTVKRRATLALAHV  
KCWNVHRKREVLKICLDYAKSQHEGTRRAVDASCLRDGYVGSTIIPSTQHWKASTIPER  
NPVSEEPVKTTIYNHGGSTGEGRKSIVAVEHRNLKLP IESLASKKEPKKIEDTSSSSK  
EEDQIVSLAFATPIPEETEEIPDDGDKLSLAPGGIILQPSEVDSNTDHEQSEDDQSRKS  
TLVIQSSASSDRESSEETAYETENNEALTNMQSLVDGLMNWGGIDVEDNFALPTGMAAS  
IALEESIAFGNSP

>comp7962\_c0\_seq2; 759 734 4290 LEN=4410; translated  
MAFSAADLQNSFGNYSFRGSSSSNAHMEDHQIIVVAPHQGS�CRVEGRDETTYVLEILL  
GNDESAFSESEESSPSTHELVLFRKDFEFLRFLHIMDTESSGLIVKATVEEFMALRCPV  
FWRREDELDQHGGGRATDSSVNRGGTPSSPTFEEVWNAVCCSTSQCAPDGGEPMLGVEGWM  
VFRCRFIALAQYLEAKRRFSGRHLQQTMRHRNAPRGSELVVVNVPPVAPP IRLTARELAKY  
ERDTQTRLPLPELDDLHSLLAHDVLRRRRKQTHGEYAVGDRVKIELFGQSPLLLSSNAS  
SSSSKGLEFCLTLLRSRDRREGMILEDEATTVRRSVTDIKWLHDTFVSHKALGGTLCGRI  
LPPFPGNQLEDETSVFPTTTGGAAIAATHAGKEFAHAGVIAAAGVGMLTEGFRSLWSGY  
GSTADGLLLSSSTSSKKHPTESLSKTKSNPASIRNTMKTYYNPNSPIGKARHLERYLNY  
LLEHPALSTSFPLNTILKASQSGLDAAKQSLEEHTRAAREINEQTPKMDDGKTSTFWSLQ  
GQGGSMPPNLTWVRTAAQAAVALQLHGVLLETTGLSSASARLQHASLPTFNNSRNPGWAE  
TETDRNLARNNSDENPEQMEGDSFEEGVLHVGDDELASSKDDNCIVDQEDGDGYDLLPLP  
VPAPERQILNVGESTKRQHSTGSKKEARFRYGAPPIQEGLVVDGTEDDHRVYLGEMAIDE  
NIDKLREVIQSVNTLSRCSASSCGIERSRRERFALNLDILRGLDSWEGLRGKFVSQRAL  
LKGLSGMEQSREVFEEEDLTLIDGTPAFSGXVLGSIDIVPCLFGISHVHCFCFLADVSWQ  
SALAHSAVSAEEDVRSTVRAARTGSNAKLAAVKAAHAAKSLCEKGFANVHEARAAQTRA  
SIAQSHAIHAAVVEHEAKTVKRRATLALAHVCKCWNVHRKREVLKICLDYAKSQHEGTRR  
AVDAWASCLRDGYVGSTIIPSTQHWKASTIPERNPVSEEPVKTTIYNHGGSTGEGRKSIV  
AVEHRNLKLP IESLASKKEPKKIEDTSSSSKKEEDQIVSLAFATPIPEETEEIPDDGDK  
LSLAPGGIILQPSEVDSNTDHEQSEDDQSRKSTLVIQSSASSDRESSEETAYETENNEAL  
TNMQSLVDGLMNWGGIDVEDNFALPTGMAASIALEESIAFGNSP

>comp7963\_c0\_seq1; 718 190 1821 LEN=2074; translated  
MKINILQKNTASLVSILLVQLSSSFVIKSDKTAFTNGRNNIALGVLADVDDKVSVDVAD  
AGDDTSNVSVLVDVNLKRLKGGEGSLTDADTNAAITASDSSLVHLGELKNSVESTEYSQS  
DLHTAARKMDVDTVSKMLDAGLEMDAITD TAFWAVVKAVDQAEAQDLPLSANVTQMLHH  
VFDADVQKLLSREKIGTNI TCMQPDDTGGIAGSAKKMSYIFDSSAHKDLPLMEGRKCEGG  
TCCDACSRNIFPTFASEAESSLVTFPELSSLTFNDLEKVSASTIIQFVRLIERVRRITISH  
EYGLPLKNILPLQAYSRYVAGSTQKGGGGGEGDFVILHTDEATHDGYHYSVLYLSTQG  
VDFEGGDFVFNDAEIVQEISSSTSKEDTEEDKVEDLGLLQLLRGELPDVDVEVTDDDED  
EGEGEDLGDLEQQIRNDGRKLT PPHKRGAAVIFSSGWENMHEVEKITSVRYAVPCFFT  
TCPVPDIAYDQMNVGKPKTDEDIADDWLHLLL AHRKEEPIESVGRVKELLMKWHYICTPL  
SEH

>comp7964\_c0\_seq1; 739 1 2480 LEN=2480; translated  
XGHSWEQFASNFSHNADVEDSPLRESNAHQVNNNLSNVKDKNKLELNQSPLTSNKD TD  
KREETNSDWHNENSQDFLLMKEFSSAGQVGGIAFVETNNRCVPHVGERVLPENQLERK  
NRVSGKFHDEDIVARDELETKF SNLNLHSISSIRNPANIASEERKGSNIYRRDERASADD

KGRFHYAQGLSSESDVIELSSEKDNCIKLEDSNSIRDHRQGIRDFLENRGNLRGEHFGRS  
QHRSEFTQVVEVQDNKPTGGSDPLDSQNTIQHQEIRNFQKQKRDLSLQHHLEQSQHLLNK  
QSQAENLDWEEALSEKLDQYEAHANRHQESIDFQHMEDLSDRESAQPQDLNEVPRRDSI  
ERKDSPSELHDFEALNAYLAEYERGGKQPKDSSERNNGMGHSCQTTHTTDQHNHFEDIL  
GDYNRDQESKSTSVLSDTHLVEVTVIENGEAGNRYSHDVSWPNTNTEDSRRVPEQIGRD  
MGDEALNDFVMPGNDYAHSNLYNNDSEEGVDTTTTYNHNSGVLDSTGHLQHQQDQNYIHD  
RRHVVRILDRSLLDLDEDGDEDECLDAIEVERQNTYCSNDRDPDADTPCASNRMDPPDPL  
PAHRYPEGRRLSTPIPTPNDLAEAEPEGATKEEIDLLNRFIDVASSDFGGQILAPESEARV  
RSAALKVGLTPKFVDQLLNTTMKPSENHEKNLAFVAPPELQEQQPSLYDGKNNYHNNDYS  
YSHQFDGDYGGDNETYNTADYSRSYAKQSRSSGYEDGNCNTNIWEFLGQNLVHLANVTAK  
TCGVNYHRNDRRNNRRYRDDGDSIVSAISWDGDHARSSSTSRRDRSRX

>comp7964\_c0\_seq2; 778 1 2665 LEN=3084; translated

XGHSWEQFASNFNSHNADVEDSPLRESNAHQVNNNLSNVKDKNKLELNQSPLTSNKD  
KREETTNSDWHNENSQDFLLMKEFSSAGQVGGIAFVETNNRCVPHVGERVLPENQLERK  
NRVSGKFHDEDIVARDELETKFSNLNLHSISSIRNPANIASSEERKGSNIYRRDERASADD  
KGRFHYAQGLSSESDVIELSSEKDNCIKLEDSNSIRDHRQGIRDFLENRGNLRGEHFGRS  
QHRSEFTQVVEVQDNKPTGGSDPLDSQNTIQHQEIRNFQKQKRDLSLQHHLEQSQHLLNK  
QSQAENLDWEEALSEKLDQYEAHANRHQESIDFQHMEDLSDRESAQPQDLNEVPRRDSI  
ERKDSPSELHDFEALNAYLAEYERGGKQPKDSSERNNGMGHSCQTTHTTDQHNHFEDIL  
GDYNRDQESKSTSVLSDTHLVEVTVIENGEAGNRYSHDVSWPNTNTEDSRRVPEQIGRD  
MGDEALNDFVMPGNDYAHSNLYNNDSEEGVDTTTTYNHNSGVLDSTGHLQHQQDQNYIHD  
RRHVVRILDRSLLDLDEDGDEDECLDAIEVERQNTYCSNDRDPDADTPCASNRMDPPDPL  
PAHRYPEGRRLSTPIPTPNDLAEAEPEGATKEEIDLLNRFIDVASSDFGGQILAPESEARV  
RSAALKVGLTPKFVDQLLNTTMKPSENHEKNLAFVAPPELQEQQPSLYDGKNNYHNNDYS  
YSHQFDGDYGGDNETYNTADYSRSYAKQSRSSGYEDGNCNTNIWEFLGQNLVHLANVTAK  
TCGVNYHRNDRRNNRRYRDDGDSIVSAISWDGDHARSSSTSRRDRSRRSREADDWEAAD  
LVPEENSDCRQKEERTRHVTFEDHVDEQSYNPVVRNESPPREKITQLV

>comp7965\_c0\_seq1; 169 177 668 LEN=668; minus strand; translated

MKLLNSSASMTMMVGSLLRSVAVGFGPARFSAVGAANTTTQRSLFNRLFGSAPSSEYPI  
MTGEETMCQKGGHGTSEKPVQKDLRWNCYETADRICNFRNRHYAEYAGYWESTAFLKSVKD  
EDLPIKFYDSVTGAHLFTAPIGRSVEDFVKESRAHGWPSPFRDQE

>comp7966\_c0\_seq1; 216 97 588 LEN=962; translated

MGTTKNTQKTAKAELDQKLLARPTRQILEDLAIACAKSPSEDNTFQYAFCLSKSSERSE  
LRYAIQILDGLVKEGYEHQVDCMYGSACALYLLGEYDKARFRAENILRSHPE SRLAREIH  
LSSIEAIEQEDKKKIKEAAIGGVTVA AVGVAAGIASLLLTKR

>comp7968\_c0\_seq1; 275 213 713 LEN=1025; translated

MTDYGTELLRRQLADLCKNPIDLVSGLADDSNLYEWEILIMGPDGTLFEGGFFKARLTF  
PADFPNMPPTMTFISEMWHPNVYEDGKVCISILHPPGEDAMNSQELAIERWRPILGVEQI  
LISVISMLSDPNDESPANLDAAVQWRNDRPAFKKKVRQIVRKSQEE

>comp7968\_c0\_seq2; 217 611 988 LEN=1300; translated

MGPDGTLFEGGFFKARLTFPADFPNMPPTMTFISEMWHPNVYEDGKVCISILHPPGEDAM  
NSQELAIERWRPILGVEQILISVISMLSDPNDESPANLDAAVQWRNDRPAFKKKVRQIVR  
KSQEE

>comp7969\_c0\_seq1; 382 184 1704 LEN=1990; translated

MRSSSKESLQSLLLLLSASLTLVSAEGAAQFKRNRLGSNAFLEMGGAAKNRAVASP  
TSSRRRTAVGRNKIVANGNREDGASIAATSVFNLANVAGAGILTLAAGKASGTGWIPSIGI  
CLTLAMVSSHTFSLVGLSCALTGLNSFKDLWAYAFSDNKS AWIVDTMVVFVQCFFVSIY  
TGLLGDVFSALFRGTLGIEQWWTTRTSVICIAASMILFPLNLRDLSSLGFTSILGLIAV  
LYTVGFMVVRALDGSYGIGSAGTSGRFVSEGLLPKIPSFTKSSLWNVDLNSLVLTSNLGL  
AFISHYNAPS YWKS LGKSASAKFSTISRRAYLILASIVYTTMVAGYATFGDESMGNILL  
NYSSSDVLATFGRLATGLSIFGFPLISNGCREGFKNAASALDVFPRLRDPQHHTQLVLS  
LLLVTTSLSIVAEDVGLVAGFTGALMGSALVYICPTLLYSKIVERKLGANSDDYVLAKRN  
LFFIPFGLFTASMGVTMTLKNAFGRS

>comp7970\_c0\_seq1; 334 149 1387 LEN=2130; translated

MVSAGFSSLRFFSVAVCLWARRPARGLLLPAGARARGHRRPLAARGVAGGGMP SAEEGS  
GDGVEWWRGTSPTGAPYQLAYRHVAPAADLSGGSCGSSNNNNGGETDPHREHTRQRP  
TILFCNGFRSEMSGGKVLALAEHCVARGWGFCAFDYRGHGLSNERGAVAEQQQDEDDDG  
GPVLTDWISDAAAVLEGVVLPRA GSHPSVVLVGS SMGAWIAVHLAMRYHNGAKSGNSDH  
ERKNKTKRKRESKPSDGPVVVSGILGIASAPDVFSDLWDSASQEQRRREWRAAGMARL  
ASSHAPGGGYAVPLALIEDAREHWDLLGEHGSKGLAVSCPVGLLHGKRDREVPWTRSLA

LAEALEQNGSGSGSGSVDLRWIEDGDHRLSRPGDVRAILDALDALVAEACG  
>comp7971\_c0\_seq1; 557 1 1057 LEN=1057; translated  
XEFFTSTSRFLRKIKPKPPGNKHTPKHSNRKDGTRRRKQGESGESTRRGRIRRALFDE  
AVLSGESSHRDESGKKRSEDAKGDKNIPAKRSTESKSKSSPLHSKENLEKKS KDHG  
SKGKSEKQYEHDSKAKGKEPHGCSHGKAKGKGGYSKGGKSKSKEGDTSKERKSNSKE  
GGGSKGIKWKADGGSSKEGKWKDGGSSKGDKSKGKTSKAFVPE SITTEVGSRLLLKKS  
GDGVSKGKDRRDDLEGGKKNKGTGVGFQNETGNSNDDANDEEDLCLPEPDSDDNYPES  
KGKNSKGGSKNDKSEKNKSKHYDSPSISPVNVPISKGKGD SKGDKSKKSKSK  
>comp7972\_c0\_seq1; 192 153 426 LEN=426; translated  
MAEPETSGSGLPQSSGSSSSNPGVAGGKMSRPVSNSSSKSDDNEEGSNRRNGREGE  
DERDSSTQSLQNGSKHHERSKHHERGRTSGX  
>comp7972\_c0\_seq2; 294 153 993 LEN=993; translated  
MAEPETSGSGLPQSSGSSSSNPGVAGGKMSRPVSNSSSKSDDNEEGSNRRNGREGE  
DERDSSTQSLQNGSKHHERSKRATGAGRPLAFGGVEGINQHQLRLLSAARD CPLSRTKR  
PLAAGGKLLKRNQWWCNLSSSESSSGSSPGRNQKSRSCSSHPLNADRDDKRSRDCDL  
ISGPSNDNNGNQNNDNTGTERDPRAASECIGMEILTTNQDSIPRLETTLTNSYNEKPLHHR  
EKGP IESTPNRQLLKRPPAHSLSPTESKKRTPEVPGLEKQX  
>comp7973\_c0\_seq1; 340 348 1384 LEN=1384; minus strand; translated  
MAWHGMARHG TARQQWQVVASRRVCCPSGRAPDRIKEQHSVVLALLSAPLGP T TALRFV  
SHSVSHRFPHATMHADCFPRANNPRGVGSLPRRVFAYGVCRSVYPLETGEEDAAATDESS  
LLEELRAVEKEAAA AVTEFRRAALLRAFAAVPLPAPGDDXGPKEDRPAVLQVLLGGKP  
LQGV LHDRSGVRVLE DAPLVEGGFRRLRVGLEQVVG VVHHYQPEDVAARRLYEGVVR  
VDDHGRDDRHDALLVKKLAEGGRPAPWCVSVAGVVA AAAEHAGQEPHAVFLDGHRAVQS  
HDREDQLDSAXLTQARRAASAARGTEVANANAVAIAIAAAAARLRPPX  
>comp7974\_c0\_seq1; 285 44 844 LEN=1027; translated  
MATDNKDIPLSKKKTSEKMLQRTRSQEMVDELHNHIVDEDPLLISQSLTYVTDDGSVLH  
SFRSAPFSWGFKARFVILESLFILLCVCAPVPGAHGTVVAVTVANLLAVAWFWYNHVRTV  
DVTADGSLRFWIGNIEVEVPFEKIIAIRRVSTANAPCGFMQLSSVWPYRGFLSNTEEGVA  
VVTTVSSMPFWLWPRSAGKPERSWCFGILYCPKLT VVFSPIGGGQNFINDVEREMLNFQN  
MTGKRRGTSTINGNAGTRPDADLLDV  
>comp7974\_c0\_seq2; 161 402 641 LEN=824; translated  
MPFWLWPRSAGKPERSWCFGILYCPKLT VVFSPIGGGQNFINDVEREMLNFQNMTGKRRG  
TSTINGNAGTRPDADLLDV  
>comp7977\_c0\_seq1; 290 1 1043 LEN=1842; translated  
XVVGKRGAVGPAGLLDQAAAPAAPDVAPHQALEHHGHEIPVPDRQHGAPPAQGPGESVVL  
VLELLPRKQKAHVEQVAVVVAVAGLVGIPVAIAVHEAIEIIGQPQTILRGSGFRIDSLV  
ARATVPSFVGMVKPHEFQRHNFVDVGLADWHRVVALAAAF TTAATEQVAEETVADVFRAH  
AGLGNPFVVASLDLVVMGNHHHVYLLPKAGTPAARGLARGDHQSLQGRSDGQORPQHRAA  
QDSNRARRLAVEQGRVEILACQGVRLDPERAQVGIRPAVGIHVPTKALAVVVVGSVAIQ  
AFGISVNLVVAVFGVPDHVEGDGGFAPALVLP SRHLDALYWVLIVL  
>comp7979\_c0\_seq1; 273 1 871 LEN=871; minus strand; translated  
XNQSSSQGNSIPLVSSVGTAFITKLLTGLLQNVRIDSNSSSTEIYPICKDILNGTVIGLI  
GSDEGDTKNQSERLGNLKNVILCAWTIHLKNRCEFVWGKNQSELPDEENAVIPSAIRCV  
LKDATNSSADHAKHHGEGDQDLFQALKFLACQRIQQLHGECYEQK LAYASDADQYSTAS  
ESAEAQKLVGFILRDCILTSSYSGFVEKARDQWMALAESIAAWAPYADQHDIDSFLNQLL  
EAMAI SGKSHLQSRYQMMSLLNDTSFYEVSNV SERLGANIISFVARNVQKI  
>comp7980\_c0\_seq1; 954 1 2188 LEN=2344; translated  
XQKFTQDIFRSVQVEYEQEGIELEEITYDDNTDVL DLVEGRMGLLAFLNEECVRPKGSD  
KTFVYKAQTMNKDNRCFFRDKQADDFEFGIHHYAGRVLYDATNFVKKNTDTLP SDLLNCA  
KLSSNAIIANELNNEEMMNPLHKS GALAAGSGATKKKKRPKAAAARGPPGRQLKRRTSNI  
VAETVWTKFKNQLSRLMDTLGETKTRYIRCIKPN TLKAPLIMEHASTVEQLRCAGVVAV  
TISRSAFNRLEHISILDRFKSLWPKGDHIAV LQNDNLDMDERCKKATDILLTLALKEME  
FEKNGSRFRAFVMGKTRAYFRAGALEFLEAERMKHLGSYAVTMQTAIRGFTIWSMYQRYR  
VALVALQANYRRMLRRRIYLRWRNAAVRVECWYRVV FASRRVYHLRRCMKAIMIQTQWRM  
LRDRRILREAVGATVVIQCMVRGCLQRPKYKQALFEKKEEAKLENQLHALQRKLEEA EAK  
RLAAEKEAEGRMAAAMEEFKEKEAARLAEDAASVALAESEAKQA AEDSFETAGEEDHAQA  
LTAEQQHLMDESGKMLEHLRKEVFR LRQGNQQLKTD FDLKDNQRLMDANASAGASF AA  
LNQHAKQLSKQNTKLAGEVQTYKTQVHKLNLQAEAREELRLKSATYVAEVQSRLQYQKA  
LQNI TDI IQEKCRDHRLVESILTI ADEVDMDFIPGSHELPI DPNETDSEGMDDTGND SRG  
GLLGYFFS

>comp7982\_c0\_seq1; 990 90 1745 LEN=4309; translated  
MTITNNPLDNDRLKGLLSEVHKVQSEKTYNAWSKTFLEFYTTDLDPDGILNARDNYCRV  
LKQFKKLSEKLALVETLLNENGHIRSSNSNDGATTITIRGRRMLTNLSEEVATTEQKVKD  
FMPKTNADERFGYDKFELAAVLLQDDFYAYDRMKETTHSLDRIRNNLGVDEDINSENSP  
SNTDRIVDENFQKPLQNYIEAVESFIEVMEDLGLFTLMKRCLDVVDRGEERDEPKTLSAP  
ECSTSKGDGYMVDNNDNEIDGKFEIKGFDAQHHFPDASNQNRDSSGGAKETKKKKKKKDEC  
SSSLSKKKREKQNRKGGKKTCKGSATDPTSRKNDLISLHSTTSSSDQSPASNAMQSSFS  
EEKKSIEDKEKNEDDPPAEGEGVEEEAEFIIYFDPKTNITIGRINRQECCTKSQLIIDAT  
KDGDEAYQDIIEDKKEKQOIILLKKLEKQRPVEKSWLEAIKDEKAAKNEKSGDNRRKK  
KKKKPSKSTELISKRGKMKSKRSSKTTSDVEGGSHNSFRDGSSTLKKKKKAMVADYQGIY  
RKSAAKPNPTGW

>comp7983\_c0\_seq1; 840 1538 4657 LEN=4694; translated  
MWKLAQQSLSQGLRRPVPLRYGFLSGITSKGNIEQSSRNHTTSPGSRKRQHQRHSHKHS  
INHENAKKFIESSRAFVEKSSSPDKDWTVEQLALANKILNTWSRQTIPTTEMQSSWIPIAE  
KLLSTSLDQYQTIASIKQESTTALMPSSETFCSIITMYSKSNLPNAAERADYWLKRMIVT  
SELHPDLVASPRATIFANVLSAWEKSRLPGTESRAQRLWTHLTSTRGLTPTSSAYLYIS  
LWSKSDLPEASETAEKILREMLQNGKRNQIVPSCPFI FVNVISSWRRKKESGYTTAHLRAQ  
LVLDLLVKEYNRRLKLPQEWRFISINDIPFNATIQAWTNSSLAPRLVEERVNHILKTMQEQ  
LEISPTMVTAWSTLPMYCFDEGLDQSKAIDVPTKLLKLLDFSMSNEGGGKPNMIRNQIF  
AKSLEICSSFRGTISEGSITAGEAAEELVNKYFKRPRGERRVETTVGGFEHAIKAWRYD  
NNHDREHKTQRIVELIKKLEKEVEHIYEHTHKKNPSAANLYASLAKVWVIGYYPNESLGR  
AEINIDHMLACFRDQPELKNPFCFLDIEEAANENLSSKIADDFVTKLYMKLLANDSQFY  
RLMNTFETSLLTGCDSSSVKQFLDGVLDTLGSAEVDSSGRRAESVLLKQOELYEAGISSQ  
PTFDTFKKVLRCSNSQDNSAPDRMENMLLLAQSLYDAGDTRLRPFDFGYLTVISAWSTS  
LNPDAADKIQSHLKKLNERKMEGDQTFRIDSRVYAALIRAYANSRDDVQIMTDAIFQSA  
SDDLKDTKVYNALIEAQGGDSNRAEQLLQVMQLSYSEGNDIVKPNTEFTFNAVIQSWLRSG  
SPMAAWRVDGIFKRMEELSSSGKLHVKNPNSRTFDLIISTLAQDWGAELAKVDIYLELLKE  
HYRAGDFLPTTTSYTEAIRAWASKDDDPRAILRAHALLEEMHELAREGVATVRPNRSTYE  
VYLEGLFQSSVENRTDLVSDVLFKMRENKFDIDHAMRSSIQRCLLPVGSRAHTWIIDVDD  
FVVPQNEWMHKTVDATSIQ

>comp7983\_c0\_seq2; 840 1892 5011 LEN=5048; translated  
MWKLAQQSLSQGLRRPVPLRYGFLSGITSKGNIEQSSRNHTTSPGSRKRQHQRHSHKHS  
INHENAKKFIESSRAFVEKSSSPDKDWTVEQLALANKILNTWSRQTIPTTEMQSSWIPIAE  
KLLSTSLDQYQTIASIKQESTTALMPSSETFCSIITMYSKSNLPNAAERADYWLKRMIVT  
SELHPDLVASPRATIFANVLSAWEKSRLPGTESRAQRLWTHLTSTRGLTPTSSAYLYIS  
LWSKSDLPEASETAEKILREMLQNGKRNQIVPSCPFI FVNVISSWRRKKESGYTTAHLRAQ  
LVLDLLVKEYNRRLKLPQEWRFISINDIPFNATIQAWTNSSLAPRLVEERVNHILKTMQEQ  
LEISPTMVTAWSTLPMYCFDEGLDQSKAIDVPTKLLKLLDFSMSNEGGGKPNMIRNQIF  
AKSLEICSSFRGTISEGSITAGEAAEELVNKYFKRPRGERRVETTVGGFEHAIKAWRYD  
NNHDREHKTQRIVELIKKLEKEVEHIYEHTHKKNPSAANLYASLAKVWVIGYYPNESLGR  
AEINIDHMLACFRDQPELKNPFCFLDIEEAANENLSSKIADDFVTKLYMKLLANDSQFY  
RLMNTFETSLLTGCDSSSVKQFLDGVLDTLGSAEVDSSGRRAESVLLKQOELYEAGISSQ  
PTFDTFKKVLRCSNSQDNSAPDRMENMLLLAQSLYDAGDTRLRPFDFGYLTVISAWSTS  
LNPDAADKIQSHLKKLNERKMEGDQTFRIDSRVYAALIRAYANSRDDVQIMTDAIFQSA  
SDDLKDTKVYNALIEAQGGDSNRAEQLLQVMQLSYSEGNDIVKPNTEFTFNAVIQSWLRSG  
SPMAAWRVDGIFKRMEELSSSGKLHVKNPNSRTFDLIISTLAQDWGAELAKVDIYLELLKE  
HYRAGDFLPTTTSYTEAIRAWASKDDDPRAILRAHALLEEMHELAREGVATVRPNRSTYE  
VYLEGLFQSSVENRTDLVSDVLFKMRENKFDIDHAMRSSIQRCLLPVGSRAHTWIIDVDD  
FVVPQNEWMHKTVDATSIQ

>comp7984\_c0\_seq1; 733 139 2839 LEN=2922; translated  
MSIIRQKNPRSCVSGSYDEQNQDDMVDEIIETLSNVLEFSCIIVRSSETNDGSSDYFN  
DDPWARLSRSLKGLIVSFGKLQKLVSSDDTAGTDIKVTASTLTNQLLLDIENITHQIRGN  
IESVSAMLTGKVSTQLATCRKLESIGSRNTSLALPTQLIPMGKALASAIHRQKAVWIQSQ  
QIIEDFVDRIYTNQYNPVEIIDNLQIVYKRVNRRCIDPDSSPWKEALSLECVASSETAQ  
IFSDTTKATTMDSHIGCRNAVIVNAPVRKPMWLPPSLRHFSSLNCASSQLQSIVNIFHE  
SQENNHECANTLSILVVSQGSKTHLLDNIQCSLASVDIDIHPMLPFDAIGNTVGA  
AEDNLISMICYAKTQERNCILLLDDIDSICGKMEESSMMNGGIPGGQREPHQTARLRNLF  
LSLLDMIQIGHYGHSGRMVLI CSAKEEFQDIDRFDKILHLLHPDKEERKQIISDYAGG  
NNFVDNLVDC TAGFSRAEISHHCRQALSALHARGLEDSETSDFATYLKEKLSSTPESLK  
TGTNADFVDMRVFSARDLRKLYPIRDAKRPDADLPLFGEGAWAAWEELRRLIVLPVCRGD





GKAKPKERNKVYHPTMDPFDDAGSLSEEDRARSREEHAEAMAS IEMSSFP IGLAAPEFVP  
PNVPSGELEVPETLVTTLDNGIRVVSQETYSQMCTIGVLSSVGSRHEEVEGTMHLLLETMA  
FGSTEKYQGPEITQMLQDWGATRFVSHSREQSLHCVDILRPNVEKGMELLSQVVLEPLIT  
GAPQEVEYAKEVMAFQAQEQIPELVLGEALQVAAYGADQQLGKAHFATAES IPLLEARGV  
EDFYGKNIKGNPGGIVVAGAGISHDELVGMAEEHFSTMEQSHSPATLPSTYRGGHSIVEK  
PATESVYQPMLPEEDQCRVALAFPVGGWHSMTMTACVLQTLGGGSSFSAGGPGKGMYS  
RMYQQVLNRYGWMESAEAF TTF ADEGGFLFGVSASTAVPSKVPELVAILADQLASVAIHPV  
GDLELSRARNMLRCNVLAQLESRLILFEDMGRQVLT YGRREDAAKTCAKIEAVTAGDIQA  
LAVDMLRNHPPTLVATGSHADRAPDYGEVSRWFR

>comp7996\_c0\_seq2; 522 1 1721 LEN=2187; translated  
XSRCRFHDGSQAPLFGAALFSSGPHPSASGEAQP AFSSYEYPTRTEAPEITTTLASETET  
GKAKPKERNKVYHPTMDPFDDAGSLSEEDRARSREEHAEAMAS IEMSSFP IGLAAPEFVP  
PNVPSGELEVPETLVTTLDNGIRVVSQETYSQMCTIGVLSSVGSRHEEVEGTMHLLLETMA  
FGSTEKYQGPEITQMLQDWGATRFVSHSREQSLHCVDILRPNVEKGMELLSQVVLEPLIT  
GAPQEVEYAKEVMAFQAQEQIPELVLGEALQVAAYGADQQLGKAHFATAES IPLLEARGV  
EDFYGKNIKGNPGGIVVAGAGISHDELVGMAEEHFSTMEQSHSPATLPSTYRGGHSIVEK  
PATESVYQPMLPEEDQCRVALAFPVGGWHSMTMTACVLQTLGGGSSFSAGGPGKGMYS  
RMYQQVLNRYGWMESAEAF TTF ADEGGFLFGVSASTAVPSKVPELVAILADQLASVAIHPV  
GDLELSRARNMLRCNVLAQLESRLILFEDMGRQVLT YGRREDAAKTCAKIEAVTAGDIQA  
LAVDMLRNHPPTLV AAGGCLHGEHSTV VLLYVQW

>comp7997\_c0\_seq1; 195 160 1164 LEN=1265; translated  
MSVILATAGFDHRIRFWEAPSGICQRTLKYPDSQVNKLEITPDKQFLAAGGNPHIRLYEI  
ANPDQQQPALTLEIGHTSSVTS LGFQRDGHYLYSGSEDGTVKLWDLRNPTYSRSFDVKAPV  
RSVTLRGDRDEIYSGDAAGKVTLWDLGGNGRSNENYMRGNSNKKGDNGFIHQVQPGKGSTG  
GCLIQTSIQAVDISEDSTRFAVVSNHGTVYVWDPTSQNTGSFLQHRPITK FRAHPSGSYC  
LHAKISPDCRHLCTTGSDGSARLFDVTWELAHNLQAHSKWVWDA AFCADSSYLVTASSD  
STARLWNLRTGDVVRQYHGHQGA VTCVALNDSSL

>comp7998\_c0\_seq1; 302 83 580 LEN=842; translated  
MNRVFLFLAILQLTSAFVVPVSNFGARSVALFAGEGDQEGGAAIAKPKIKTDQKTKTVQK  
QKSKQSQEAKTHDPI SRREEIFEEAPMYKLMLLGDDSYDVEHVVERLCAIVDDMDEDQAQ  
SVLLMAGPSGEAMCGKYPMEKAELYKEQLIRSDPMIYSDIRNENE

>comp7999\_c0\_seq1; 719 210 2141 LEN=2293; translated  
MEELLVRPENNVREYDAYGHNMKNVGSRIDVHHNISHNHYHONSAGKTTPRYCCELEPE  
GESDPEPPLSRFGSTALS YRTLRAALVVGCLVYASVDGYHRYRQQHQNRQKHPQNSNAPA  
GNAAAYVGSNVRKQGRVTMELTGDFETKTLIHKPEIELDPSTKGNHGGSGDENANENPNVG  
IPIESYKATYHYTSPKAPPVAVASSENEHSTDVLOGQRQYFLKESVASKLNHRVRASSSS  
SASDSQPEPLFD PQIAWLASF P NSGTSFTLT MVARATNTTFATNYGIEANYGSKDEP SMP  
IYPRHPEGPFMPNSETS FHHRS LPYGKYVITKTHCGGYCFQCNPADYAYGYREGSRDQAG  
EDPSGTTTSRSYSSIHPAVSFLQDCASGHA VDTKGNLVDVA YPPERVSRVIHL YRNPLHN  
VIARFHLERKHHGDANTTQDQEWLENHPDDRVLQRF CASQNKHREERETAFFASDFFAQ  
KDGNDDEPTLSYARRNGDHLASTKSGIPTAQSQPQPSMQASSWNDLVANVPCKAEFFRYI  
QWHNLLHEALDYVPHKLPVLT VYVYEDYGGGEESYRATTASVLEFLELEPIAGDKRGNVKW  
TEFRSRTDYDGGFFSDDDRSTIASFLRTLASF RVWGEIEHYFAE

>comp8000\_c1\_seq1; 769 1 2257 LEN=2363; translated  
XTTTTTTGAMISRILAKQARKGRTSGRTIGRIGGPRRSKSTVSLQLDYYMSPQFAGIACA  
MVDGLYNDAGIDLRFLP ICPVGLELERVRQRDAHPTDDAVVGSVEQNI FAPLLHERPEL  
GVKAVAAMFRTPCLASVRDADR GSEQSSVVGAGEDTVSLLNRILAGEGNQRGNASVVA  
SPRASKITD LLEGRLD AIQAYATTEVPTLERRLSAGTVTSTPLEGWNGTKLGYSQVLF A  
PSEDLPAE ESSGKREVLQSF LDATFRGWGA AVRDTEHAARSVEEARAMLGLDDENNDHWD  
PSFEYTIQNVGLCGDYAKETFQGD RYGVINPNRNWNEATDWLLGENTVEPGFLD ATVWQP  
PAELLAGNELARTTLEDAKESATAFYAKHGRKPSLVVITVGQLSRYTHGDRRIKIYSNKR  
NSWFSKTSTGENHGFDVREIDLPESTTTDELLESEIYKSKDVDGIQLMWPLPEHIDSQAQY  
NAIRVDQDVG AHYIGELEKDPGSSPLPPVTPAATIALMDRYGIDPKGKNVLVIGRSRIV  
GSPVAHMLRAKDAVVTVAHSGVSRDNLES LVSADIVVSCVGDPGIFEARWLKEGAEVIN  
VGTTFSEEKDRLLSDFEGDFLAKAKRFS PVPGGIGPIPVSQLYKNVARAAWERA AKTGEV  
DATWEKKSGLNRSIHFKDYDSALEFVSKVNDMSSEMDDHANI SFTHKCVDGV DVNMEYF  
SFEANDVTDKDYEAARRVNGILSEEVRTDPN

>comp8000\_c1\_seq2; 1359 1 3523 LEN=3547; translated  
XTTTTTTGAMISRILAKQARKGRTSGRTIGRIGGPRRSKSTVSLQLDYYMSPQFAGIACA  
MVDGLYNDAGIDLRFLP ICPVGLELERVRQRDAHPTDDAVVGSVEQNI FAPLLHERPEL

GVKAVAAMFRTSPLCLASVRDADRGEQSSVVG AHEDTVSLLNRILAGEGNQRGNASVVA  
SPRASKITDLLEGRLDAIQAYATTEVPTLERRLGSAGTVTSTPLEGWNGTKLGYSQVLF  
PSEDLPAEESGKREVLQSF LDATFRGWGA AVRDT EHAARSVEEARAMLGLDDENNDHWD  
PSFEYTIQNVGLCGDYAKETFQGD RYGVINPNRWNEATDWLLGENTVEPGFGLDATVWQP  
PAELLAGNELARTTLEDAKESATAFYAKHGRKPSLVVITV GQLSRYTHGDRRIKIYSNKR  
NSWFSKTSTGENHGFDVREIDLPESTTTDELLSEIYKSKDVDGIQLMWPLPEHIDSAQAY  
NAIRVDQDVG AHYIGELEKDPGSSPLPPVTPAATIALMDRYGIDPKGKNVLVIGRSRIV  
GSPVAHMLRAKDAVVTVAHSGVSRDNLES LVGSADIVVSCVGD PGI FEARWLKEGAEVIN  
VGTTFSEEKDRLLSDFEGDFLAKAKRFSPVPGGIGPIPVSQLYKNVARAAWERA AKTGEV  
DATWEKKSGLNRSIHFKDYDSALEFVSKVNDMSSEMDDHANISFTHKCVDGVDVNMEYF  
SFEANDVTDKDYEAARRVNGILSEEIADEDSKHQKIKMSDFTYDLRDDAI AKYPADPRGS  
SRLLNVDSEGNVNYFDNFSDSILPLENSHLVFNESKVVNARLSVNSAEDPNKVETEMMV  
LDLGDVLQKPCQDTALTVMIRKEGVQVGD L FHVHGE GSI SFRVEMVKGPWIEDEKSNNG  
TECVVRCSTKDDSIANMSE LFRSVGSVPIPPYLNREAEASDENAYNNVYASGEGSVAAPT  
AGLHFTDPLLAEIGQDNISYLSLHV GAGTFKPVVVEDARDHAMHGESFVVS V GELQRIIE  
SLESQKRLVVVGTTSRTLES LYWCGVKMILEEKMGDD DATVLGQHDWKHLEAIMERKGI  
KITSADALAAVIGDKSSEDTVTGRTSLMIVPGYDFKVVSNLITNFHAPDSTLMLLVSAFL  
GDGKKVRRLYESAQDRGYKFLSYGDACFFSRPKK

>comp8001\_c0\_seq1; 739 1 3353 LEN=3353; translated

XNGNGNASDSNNNDSDNNEALGSGLATFFGDFFPSQKDVNGRPIGFSTNLSLLPTNTETQ  
DANDLTD SMVGVKYIHGGLTHEQGIASQNNYVANYVKRRLCPLSLQHDEESSSESSFEDG  
GDVGETMEPE SQPVMETQEPVDLFS PRSGDVTSAKKRTRKRRRRPIVPSIEDCLHDVTKL  
KYIDL YTRTLTLNLSRIDGIWKL RDTNRSGAFANSNIAKPAFELFGTTSGTRRPSDQLPR  
KFAFEYGEEDGPLATIYQQVFHLELEQLQIDPSIGVGGVIGGPNEMNQPRQRIKVFFYN  
SYATTVSEWIKAQQQKEKAKQKVNHTEVLNTNGTSVPSTTTSTTSASTGIAMSLSNVPAI  
CIFPRNTDPRNWRERQEVIDYCLCIGDRSTGPNQIRFDSNEMEIRLMPVIGELATTRTTT  
AAGCTITNDAREYLNASSELVLSRRALTKEFLSSDDGTTDSRERVAQEATTTGEITNPLQ  
ESWAVYTNHRSIRTCTNKTNNGLVVPQPGTTLTAPENIEAGIASQHFSSRSENDPNEPSL  
GERNQRQEVPPRSHSPRHNRNGNSEGEMIFKGI AQRI SDSPHVCYPPLAEFLD TVRSSM  
TSGRGCNLKVNLYASIVGTTPPKMTKRGDWMI SANLIDESHQTPPV TINIFCKDKKSLPE  
LVWMGDVIRIHRASVEVWNGKIQLTGLKPTQYV VIRKNGSNWEAHPTALHQFSFSVSDIN  
RSQALWRWARECLKEHQSIKPEHCFTLSDLQKVKKEDDEATFRNRDITVMVIEKLRYPKPS  
DVNPQGLLRVWDGTGNPPSDPLFKQSOLLTPESEKQRGKAYARALDQVIRTSQQLQASVD  
NMGVPI SLCGCF SNVVWEKAHWDLIDRHIPVGTFLRLRNVMIPQEWQENQSR SIFMCDK  
SWMIALPTDNFEVSSLLREHYWRVRGSESM DYNWEF IGGTSVL SHLPGPGFVGNLSRF  
QSQGTAGPVVVLFTGAVHVHLCSGKPNDDERLRMATVTD RSGTVRVALTERVRRFLWRDS  
GADGSHDRCPDNSGTQATAPRYLV TIRMFVLDGDGGEVGT RRFVLTNLAPLDDPPDAYD  
RTLRSNTTQHTNDRASHTPRNEHKIGIRSKSSTLAFPP

>comp8002\_c0\_seq1; 222 224 1408 LEN=1454; translated

MASGCRYQFRGDDYEFDWYQASDAAINGTAKSKFEVIFPRPDGSKDYNLVKGTKTSF DAF  
SFYLMGDTPYRGWQEARLTLQISEMKEYVKGHPERNLAF TVHVGD IQKVNRTKCAESSYN  
RTSAILTEGVSDSEAMFWWQLIGSNANLPVTCFCTHDCSPLPTLVVPGDNDWYDCPNRTE  
SFNFFLKYFGAFETRWHKKDYMSLGIERSKENKELFV FYKEGILFIGLHLINAPLDHEDI  
ESWDARMKINKEWMAKNIESYFQKSEIRGVVLLGHCLRSRTRPFFLTVADYFVNI THRE  
NLPVVYLHGDGHKWDVDTKLSHQ LHWKHFRDIQVDQGG LADPIIVDVASQKRKGLNVLK K  
RSDLELVIGKGMFRIDRQRGKYENPK EVVAGKYI

>comp8002\_c0\_seq2; 270 224 1319 LEN=1365; translated

MASGCRYQFRGDDYEFDWYQASDAAINGTAKSKFEVIFPRPDGSKDYNLVKGTKTSF DAF  
SFYLMGDTPYRGWQEARLTLQISEMKEYVKGHPERNLAF TVHVGD IQKVNRTKCAESSYN  
RTSAILTEGLPTLVVPGDNDWYDCPNRTE SFNFFLKYFGAFETRWHKKDYMSLGIERSK  
ENKELFV FYKEGILFIGLHLINAPLDHEDIESWDARMKINKEWMAKNIESYFQKSEIRGV  
VLLGHCLRSRTRPFFLTVADYFVNI THRENLPVVYLHGDGHKWDVDTKLSHQ LHWKHFR  
DIQVDQGG LADPIIVDVASQKRKGLNVLK KRS DLELVIGKGMFRIDRQRGKYENPK EVVA  
GKYI

>comp8006\_c0\_seq1; 325 179 1432 LEN=2442; translated

MHQTVTSSIALVALLLCIAHTGLVMAQELSHVDS P VCGYDPFTDNQVSGVNIPDNERGNF  
LRTYEVLC DHTSKIGLSVMVEEAPTFV FVCLILNPNVNADILQFVATGRNLHTLFAPTDE  
AFFSIPGFAVTAADNDGNPTAINLSNQRQRGILGAHILPSFARVLLNLRCDGFYRTYFDY  
FPEAAGNGSYSSRQSTKTKCLNGGTTAQ IGRGNPSYRLPVIGSPSNVFEGLFLRLQPPS  
YTFSYSSEGDLSRDVVVCNGVLQVIDNVILPVSSGGQSGRKS GKGKGFYGGSKHTKMOK

YGKDTKKQKYGKDRAQLSFYDPVVDEVIDEELISEASVSGASVLDTSMTLDEYHKQYFGI  
GGGNRRDLLFLNYTKKEDESGYGDGRKLSDRNEERKRRTKRLELLGKAEPEEQSN  
>comp8007\_c0\_seq1; 245 265 1191 LEN=1344; translated  
MPPTTTRREPFASGVVALESGRRLAYSEHGKADGVPVVFVSGAGFGRSYVPTPFPDLLEQ  
KGVLLVTVDRPGYGSDDPHPGRTYEDWVADVALLDHLGLEKARFVAHSAGTPHLLAAVCK  
ASPERVVAASFVCPVAPITGSPVDRPAEGILRGCGRFCLLYCGGILDGLFGSVFRKWQA  
DPDAYVKDTMARIVA EKDASFMREHPGFFGETYAADF GDAVRAPNGADAMLQDMFHLNRL  
PWFGFYLDLAGGRKPPVEVWWDADDTAPHGEWICGQLGIRGRRVEGAGHGLVHSEFGPI  
LDELLRAG  
>comp8007\_c0\_seq3; 116 265 790 LEN=958; translated  
MPPTTTRREPFASGVVALESGRRLAYSEHGKADGVPVVFVSGAGFGRSYVPTPFPDLLEQ  
KGVLLVTVDRPGYGSDDPHPGRTYEDWVADVALLDHLGLEKARFVAHSAGTPHLLAAVCK  
ASPERVVAASFVCPVAPTPGARRSTGRPRGFFGAAAGSVCSTAGESSTASLVRW  
>comp8008\_c0\_seq1; 217 213 632 LEN=1269; translated  
MGSELSSKKYPILDEMTDFDQDVWRD TVAVPPNGRTRI WVQYKNYTGKTVLHCHFLAHED  
TGMMATLFIGPPEEFGAEGSIPGLLLGSGMGLLVGAAFLALAGLLWGGMGPSHRPYGHYL  
YSRAAMNELKASAASKTLD  
>comp8008\_c0\_seq2; 731 225 2282 LEN=2919; translated  
MRKTLNRPGTALACAAALLLLLSATATTVSAYADPRSSSGSRKTTDFIDCNDPCNGGD  
VNYELVASVQTIKLAFGNHTFRGRTFARPDPTTNRVREGGNNHMGPTLTVKPGQSMHIKF  
RNELFPEETEGLLPKNVTLYDYWSRLITPGEKIKYEYKYPVDAPELMEVDWSNIPGNFD  
WTNLHLHGLDVQVHMFDPVGTHTDPRAPHVAIGPGSCYCYRFDVPEDHPDGLYWHPHLHG  
SSAVQLWGGMMGLVKVEGKLMEDLERYNVRDSRDFVIWDPALQSVKDAKPDADHDVEVDE  
FLAGQTTL SKIHPFLVNGEITPVFGGVGVGEVLHLRLVLCGTIENENTFIVYKKAPPGEV  
DYATYDWEHAVPFYVVASDGVTHGGQPRRREVLVLAGGQREELLLVFDEPEGYVVSQQG  
IQGMQFFDMYGHPHDQLLAEIHVEERPGGDRLPVPGEMVFAPGYRPEETIESHQISRT  
ETIVFSMGTNRDTAPFPQYYINGKAFSPDRDLDFRADPGEAVEYILVNANHNYPFHIVN  
RFQVKQMGSELSSKKYPILDEMTDFDQDVWRD TVAVPPNGRTRI WVQYKNYTGKTVLHCH  
FLAHEDTGMMATLFIGPPEEFGAEGSIPGLLLGSGMGLLVGAAFLALAGLLWGGMGPSHR  
PYGHYLSRAAMNELKASAASKTLD  
>comp8011\_c0\_seq1; 263 236 1072 LEN=1329; translated  
MDDGVDGVDHSRHFPELADSVVANDLNKMTAEQRNIVFDDIHGVRKLRPEETSPPIMLES  
LERMNIAIQGIESKRAFDEASRLNSQYVLRDKQFRVRFLRADEYDVFRAAQRFVNYLDVS  
YEYFGVAALMRPIYIDDLGKEQALLREGCQQLPCRDRMGRRIMSRIGNIGGGGSQTP  
ACMRINLYFLQEMSNDETTQQFGVVWILLGGFAPGETTFLKEPNVPKTIKFLGCFPLKF  
TAIHLCFPKNATYQFASAAISLIAPTFRMRVRVRTHFGT  
>comp8011\_c0\_seq2; 270 236 1729 LEN=2055; translated  
MDDGVDGVDHSRHFPELADSVVANDLNKMTAEQRNIVFDDIHGVRKLRPEETSPPIMLES  
LERMNIAIQGIESKRAFDEASRLNSQYVLRDKQFRVRFLRADEYDVFRAAQRFVNYLDVS  
YEYFGVAALMRPIYIDDLGKEQALLREGCQQLPCRDRMGRRIMSRIGNIGGGGSQTP  
ACMRINLYFLQEMSNDETTQQFGVVWILLGGFAPGETTFLKEPNVPKTIKFLGCFPLKF  
TAIHLCFPKNATYQFASAAISLIAPTFRMRVRVRTHFGSQTEWKYSLMAYGIPADQLPMTA  
SGGIKTANHVRWMKTQREREISIKMGLPPFEGVDCPRVMDILIGNNAGQCFRNPNPNTVY  
REVMESYFEKYWSASDTQEKTRITWMVLEELSRAGGRILVRSRRGWWSVANPDKAREKIS  
QDFRETRKRLLATKKRSQMETSTSAFTGLDGKRTRLGSGVESIVDGAGCRRKKEEKHELTTG  
GCINLCSNTAVLSKKPV  
>comp8011\_c0\_seq3; 299 236 961 LEN=1056; translated  
MDDGVDGVDHSRHFPELADSVVANDLNKMTAEQRNIVFDDIHGVRKLRPEETSPPIMLES  
LERMNIAIQGIESKRAFDEASRLNSQYVLRDKQFRVRFLRADEYDVFRAAQRFVNYLDVS  
YEYFGVAALMRPIYIDDLGKEQALLREGCQQLPCRDRMGRRIMSRIGNIGGGGSQTP  
AVSLFVSFVGFVFCVLCWYGLLMDDDFIGSVLAIVSNSGPRNRGFPVAGLTPKQNSIFP  
>comp8015\_c0\_seq1; 411 178 2106 LEN=2273; translated  
METILHKSEPDGASQTRNSVADTVSNGIGFVAFSPPTPNAHNGVHHYPTKESIEQLLRDV  
TTSIRGQKRYGVDDDDNYFIYENNNRSSRSNSNDYTLFEGKDDCEEAGEAWADGLVRI  
RANDPKLTTLALRKTPWQAGVTVDVGNQVRSITCDPLERRALPWSPLRRLLEITRNTIP  
RLTEALQTNHTIRSI SCRYDWKYPKPAHSSHPRLLEDEHEFDGSGEVDIDIDNKNSDGS  
NNNNDNNFTRPATINSIVAYKLQERRFFEACVCLPRLESISLTGGNRWKVSHLLTILEAA  
KGLRRLTVHDVVHSSSELHGFRVLLGRTRTTHRGDRYDAEEDTPRLSIPLEAIELTIE  
DQTRDRCEPYWRDATSSPSGDDDDGGGDEELSPFDELLQALAVSGNLRTIKISKISLSR  
IRLRRTPVLDSTTTTLRILAGFQSL SRLILSGLSVQNGAVAAMCEALMENNGHLAHLFEFSG

CAFHQTVGQSGWNALFRLVLRHDPDIHIRASSLVYNHRNQPRRRPGSESDAIHSGYSDEPL  
RARSRLFVQHAREDVFSRLDRKGVDRHFRNRGLDIEFMLREAGLFRLREQETNGNANA  
ASDWIDVMTKVKDDVIALFCILRENPSLCNRSRVAANVILKQ  
>comp8016\_c0\_seq1; 114 1 488 LEN=749; translated  
XSTAAIAAPAALSAEAATTTVSLSTLGLVHTVRRGGATDAAINFSRESLALQGLSTYGTIS  
ALVMNASLRLFTSTNFRKEQTKVVSNTFYTSTALCIMSGAFTAILFQLLIIYSKSALGMS  
NDDGYRAFKAVTRGYRILGFRCFLLEMISFVVAFTARLYNTLW  
>comp8017\_c0\_seq1; 197 207 1070 LEN=1956; translated  
MVAAAMMTSTRAQNFDCHECKLSFSSAVSSPNDHTRNMLLATSASTRSSRLLSTTASKHER  
IDNDILQQPAIKIVEVSPRDGLQNEPPIVSVKDKIEFISKLDNAGCSNIEVGALVSPRL  
VPQMSGSSDILKALREKEHEKELLDTKVSRPTYSVLVFNLEGLQHALVSGRGVIDEIAI  
FSATSDEFTKRINATIDESIERFQVVIDHIQQDFDNGSNKPPVVRGYVSTVIACPYQGM  
IEPKQVAHVVERMLDLGCHEVSLGDTTGVGTPLSTRRMLDEVLVSTA  
>comp8017\_c0\_seq2; 341 207 1370 LEN=1681; translated  
MVAAAMMTSTRAQNFDCHECKLSFSSAVSSPNDHTRNMLLATSASTRSSRLLSTTASKHER  
IDNDILQQPAIKIVEVSPRDGLQNEPPIVSVKDKIEFISKLDNAGCSNIEVGALVSPRL  
VPQMSGSSDILKALREKEHEKELLDTKVSRPTYSVLVFNLEGLQHALVSGRGVIDEIAI  
FSATSDEFTKRINATIDESIERFQVVIDHIQQDFDNGSNKPPVVRGYVSTVIACPYQGM  
IEPKQVAHVVERMLDLGCHEVSLGDTTGVGTPLSTRRMLDEVLNVAQPFQLAMHCHDITYG  
QALANILVGLEKEIYITIDSSVAGLGGCPYAKGASGNVATEDLLYMLHGMGLSTGIDLNKL  
LEAGKFCINALNNRPTQSKVARALDCK  
>comp8018\_c0\_seq1; 225 221 1575 LEN=1928; minus strand; translated  
MYRNGSNPFQQSATSIEKDSMRAGGDXTQAALFLFAIVVPPVRETRGLSPQPTNQPIILCP  
FRAVLLRRRHQLGPALQQVVPQVGVGRSGLGRRPPGGALPSPRGSRQDGRPQPKGQARLD  
RNAAVGPVQRQVVVDLFPQEDPLVVRGLVAAAVVAAAAGVVRGDDPELLQHDVPRPQGLQD  
RPQVVVPLPVDDQLAQGVKVPPEALGEGAAAADHVSQSTSHRELILVLACSFESVAVAA  
ALAVEWLEAREKKXRQMDRPVVSVDGIVGEYQALEAPVAPQSFFQQRLQTRPVHVVPGEVQ  
GLERVREGGDRFRQPGGVLRSNVAVDQPQRPEVFAPAEGRKEPPEFGGRRQGDPELDG  
LRASPPGGDPLEDRQEEAGLVEGTAPVREDHAVHLEGTEARDGATGALQGLSQHPGALQ  
VEAAPLDRQFFDPRADGVSLRVGLHQKIAV  
>comp8020\_c0\_seq1; 403 1 908 LEN=1099; translated  
XALVLYLYVDLLERDIAVVRDELFGNHQKVLDPVLVLLQATVVASGPSVETVSATLDGA  
KKLLDEAEGAGSNMSAASKAMNQKMAKLMKNFSRLESTMKEVAKKEAEINTLLQRANAL  
QMKSLVERLQETLERERKLRALKKEKKKQEELFDDKGSKKISPVANVDADIVVEITSDIL  
EKRLDIDAIVNESEIEMRKWVLTVMKEELDVFEKNILSKNPQVNIKEDSGNDKTNECPS  
INTIITKIQQALNNNAQDGIKVDHAQGGSVVHWLTSDTYSPPTPSQTLGSVWWSQFIP  
QDW  
>comp8020\_c0\_seq2; 490 1 1535 LEN=1937; translated  
XALVLYLYVDLLERDIAVVRDELFGNHQKVLDPVLVLLQATVVASGPSVETVSATLDGA  
KKLLDEAEGAGSNMSAASKAMNQKMAKLMKNFSRLESTMKEVAKKEAEINTLLQRANAL  
QMKSLVERLQETLERERKLRALKKEKKKQEELFDDKGSKKISPVANVDADIVVEITSDIL  
EKRLDIDAIVNESEIEMRKWVLTVMKEELDVFEKNILSKNPQVNIKEDSGNDKTNECPS  
INTIITKIQQALNNNAQDGIKVDHAQGGSVVHWLTSDTYSPPTPSQTLGSVWWSQFIP  
QDWERLFPAGWEKTQATIPSYIYHSLGFLSGDVAPPEAILQKNTLPGSCWPMKGSQGVV  
VKLPYPVVIESVSIHVSEEIVPEGRNTVPTRMKIVGYPPCDELDDVCETVGFDDDDPV  
SIADINYDLEGRSVQTFESYTKAIENLPKEPEPTLGEKDEESGSCSVKTSCSAPPRI  
AAVEVNVLENGGNEFTCLYRLRVHGEPKYS  
>comp8022\_c0\_seq1; 316 93 1202 LEN=1704; translated  
MNMEYAEFEVNPLLTSSGPRRRAPIPQGAPIQNLVSSSASGEDFSKRDRKRPLIQRCTT  
CTGYACARPELDSNGMYEEDTYNDEPWDCTFGTSSSENGVWVNFQDQVGTCTMGSMVILII  
YSVLTISLLAQNKLPNGVAMLYSTISALALACHAKTTFDTPGSIPQEAVPREALFRKGI  
TTHMCSHCQTYKPPLSHHCRICNRCVSRMDHHCWPMNNCVGANNFKHFILFLCYTWIGC  
AFALIVFGLNYFFCNSEECTFDSILISLVRVMTVIAVATLLFVSSMIMNVTYGIMTGVGT  
IDRLKKKANDMVGEGEEPLKLSIFGIQGYWTWILPIDPVFEDHDLVLGYSIPSRLMRE  
KQREVNNTV  
>comp8022\_c0\_seq2; 326 93 1336 LEN=1838; translated  
MNMEYAEFEVNPLLTSSGPRRRAPIPQGAPIQNLVSSSASGEDFSKRDRKRPLIQRCTT  
CTGYACARPELDSNGMYEEDTYNDEPWDCTFGTSSSENGVWVNFQDQVGTCTMGSMVILII  
YSVLTISLLAQNKLPNGVAMLYSTISALALACHAKTTFDTPGSIPQEAVPREALFRKGI  
TTHMCSHCQTYKPPLSHHCRICNRCVSRMDHHCWPMNNCVGANNFSXVFDVDDQKVYSA

KLLEKQKWNNGSHLAASPDNYSVPYSSRLHEFSEHFILFLCYTWIGCAFALIVFGLNYFFCN  
SEECTFDSILISLVRVMTVIAVATLLFVSSMIMNVTYGIMTGVTIDRLKKKANDMVGEG  
EEEPLKLSIFGIQGYWTWILPIDPVFEDHDLVGLYSIPSRMLREKQREVNNTV  
>comp8023\_c0\_seq1; 819 1 2371 LEN=2523; translated  
XTFGIMCGTGAKGSIVNQSQVSCALGQQALEGRRVPRLASGRTLPSFAPYDVNPRADGFV  
MDRFLTGTIRPQEEYFHC MAGREGLVDTAVKTSRSGYLQRCLVKHLEELKVNYDYTVRNGE  
GGVVQFLYGEDALDPTKASYLDCSDKSFTFMARNHASLKKGRPPLPDTSLKIAARDAQRS  
EQLKRNPEQPLQVGFVHARKIRVGSKWVRGAICEGWFDATVVKRHKNNFTDIKYMKGDK  
KVKNVPLEVEF SRNKACSNCTCVLKP AISPVLNIAKGTQRIGSSGACVSERIAEKASTI  
MRENEELKKAMKSYNISNHEFDSLVAAKFSSALVDPGEAVGAAQAQSIGEPSTQMTLNTF  
HLAGAGANVTLGIPRLREIIMTASRELKPTMSVPLHKEVTDSETTRLTRTFTKLTNL  
IAAERGVTRETLMRSDSGEWQRAYFVTLKLHPAERIKTAFGLTLQDVAKVVAKTFVPL  
SYQMKLELRRSSSDYDGLTVEGGESSNFTQVEKKEEFDNKSKRDSLFEDDDDDNDADD  
AVDEEDGVKASRIQSDNYDEDDNDNLSSESDDDEEDDTPPTQVSFLGDSVKIDTKNTI  
QLQPLRVDPSSRPLLMIGLVEKAASKTLVRSKKNIDQAFVNEEEGGRGRCLQTAGINFTE  
MWKLDNVDSRLMSNDIWA VRCSYGVAAARNTIVDQIRSVFVGYGIEVDPRHLSLIADYM  
TFGGEYTPMNRGTGMRESSSPFLQMSFETTAQFMTQAALTLGSDKMNSPSANIVAGRPIRH  
GTGSFSLLVK  
>comp8025\_c0\_seq1; 485 1 1626 LEN=2232; translated  
QREELIPKEVVSSTVNTMYAPFAEMGDLLRVGIALSVTVSLCTGLVESLSDGLKPQVRPI  
RKVAVIGSGIAGLGVAAHALTSLSHDEDDMEISLFDARSGLNSQDGAGIQLNGGLMALGKI  
SRNLQTKVMEAGLPAKKVESRAKAWKDPSSSTTYDTLLQLNLEDLVKNAGGAVTEGLVQDG  
EVLWYSIMRGALQEVLDNLP TSCP VQFEKKLSDIVPSEDTGTGVICKFSDDSI SGPFDLV  
VGCDGIKSAVKKYIDTGKITEGADSGIYSGIRIKFAVQDGDPTLDSNPTTAGLTQYFGDG  
GYGLSGVYGNKGSAPTKCAFMVSLDDDIIGPFKKKGNSTEAADENVAWTQDARQSI EE  
GKSNMLNQVRCRDLPDFELGPTITNADRFFELGVYFHNPFSLKGSKELPDGSAVLAGD  
AAHAMP PFLGQGANQALQDAVSLASKICHYNDIAQGRWTPPEIAEGEEEEEPKSLKILLK  
EYEQRRWFPTTSITVKSALIGYLETGGFDGFYSKFRDVFRTMGIIGVAKKVLLDAATPK  
L  
>comp8026\_c0\_seq1; 333 107 607 LEN=864; translated  
MKLSTIILALSLAFGAEAFSPQANKAANKPVLVDLKAAMNTVAAIAIGSSVLSTPVVAD  
AMDMQPVFSTTNIVARTETREGLYQDYQVEVEEQTLDDARSTFKSAKETKSKKGYTAIL  
AILVVG SFIIPMAQYFWYVRDDSSDRFFQAEIPEPEPPKKKGFV  
>comp8026\_c0\_seq2; 246 107 565 LEN=591; translated  
MKLSTIILALSLAFGAEAFSPQANKAANKPVLVDLKAAMNTVAAIAIGSSVLSTPVVAD  
AMDMQPVFSTTNIVARTETREGLYQDYQVEVEEQTLDDARSTFKSAKETKSKKGFRTAL  
YRSSSRMSFCSTTWQVDLAGLSTNCVISIPHS  
>comp8027\_c0\_seq1; 175 1 681 LEN=1473; translated  
PGGARMVAI LPKHGEKLLTTFIIFSVLVVLQSRALSVDNHASAKLARKLSSTRQEGNR  
NEFSRRDFLVGVCSASSSTLLLT KPAGAADGIPKSDGDTRDALLCHPSKEQMERLSETR  
AQIDMAVQASSVQAFQSAFELVNDPLLDASALSSLENLSCENNP SLKRFAEKGI ISEF  
LLTVAKMQETLGS GSKLT TEDAMTV MRYGTSARSTLDSFFSLYPP  
>comp8029\_c0\_seq1; 262 241 618 LEN=790; translated  
MAEAMASLARGKPLNALEFTANEESTEAVSLSGLKVWTTLP IWN GTDLETFCPGSPKIE  
IRIVSEAE EQGLQPN SGLPTYGIALIVVFALLAVGVSLFLFRVVKEMNGDPMFSPIVKE  
GGASA  
>comp8029\_c0\_seq2; 629 416 1849 LEN=2021; translated  
MVNLKIPPLFFLFSTAKAVMPV GITNCHYSQWFDKPPERVAVASSGAVEIMLAMGLSDK  
IVSSAWVKEVWEPLTEDFNKFHYDKYPSAKELMDSEPDMIYATYSSAFEDPTDPGRV  
GDRLNFTEALGLKEPCNVLI PSNSYGENKTYCRDEIHEAGINTYLASSYCEYADYRPGEV  
SVDALYQEVWDLGII FDAIDNAREMVDGIEAHFEQALAI SQALGSDANPIRVF WLDGFQ  
KSKPDEKRPFV GACCGGPQIVLEKAGAVNVFSEQGLEDRRIWDRVEWDEVVKS DPLIVL  
IDLSTESA EKLYNL CADPVLREMKAVQERQFLVMPFAASN VGVRLGAAAYNMAEAMASL  
ARGKPLNALEFTANEESTEAVSLSGLKVWTTLP IWN GTDLETFCPGSPKIEIRIVSEAE  
EQGLQPN SGLPTYGIALIVVFALLAVGVSLFLFRVVKEMNGDPMFSPIVKEGGASA  
>comp8029\_c0\_seq3; 569 211 1648 LEN=1820; translated  
MTGRRDVKPYGPSTDLKLLVMYPV GITNCHYSQWFDKPPERVAVASSGAVEIMLAMGLSD  
KIVSSAWVKEVWEPLTEDFNKFHYDKYPSAKELMDSEPDMIYATYSSAFEDPTDPGRV  
NGDRLNFTEALGLKEPCNVLI PSNSYGENKTYCRDEIHEAGINTYLASSYCEYADYRPG  
VSDALYQEVWDLGII FDAIDNAREMVDGIEAHFEQALAI SQALGSDANPIRVF WLDGFQ

SKSKPDEKRPFVGGACCGPQIVLEKAGAVNVFSEQGLEDRRIWDRVEWDEVVKSDPDLIV  
LIDLSTESAAEKLYNLCADPVLREMKAVQERQFLVMPFAASNVGVR LGAAAYNMAEAMAS  
LARGKPLNALEFTANEESTEAVSLSGLKVWTTLP IWNGTDL ETCFPGSPKKIEIRIVSEA  
EEQGLQPN SGLPTYGIALIVVFALLAVGVSLFLFRVVKEMNGDPMFSPIVKEGGASA  
>comp8030\_c1\_seq1; 140 302 616 LEN=616; minus strand; translated  
MRSPTIWM DPLRSRPLQFRLLKRM AKVLVRFGETYFLSTSSQVSPSSSGDAKHVAWMGII  
LVTNLELGAALLESPASMSDMI ALTAAMGSQGGGSEGGRPGGPPP  
>comp8031\_c0\_seq1; 663 179 2057 LEN=2147; translated  
MLPPPFPLYSPDSIILV LGGVDIGNPLFFDL SPLCSLPLPAIFLSLLSGGAFGNSTGLPI  
TLLTVIHSNFGASSALGSVDPTLFLSVYLVLYPV LQWIGGVLLAPPE SNDRKMAGSGRE  
QSGDRSKNKGLPMSTPPSTRMIESGEYNGGGGSM AHQQGPTQQQETQQYIYQHTPLTER  
QLSFKSTIKKSIKDAGQKTKQTLANNV VHNNTTEMPETYRITHRGLESTDASMYWSVQENL  
NRWGKPLWAEGRKGSFYQFGGSGGSSNDHGVYSNSDSGCNIGMDLSGRESIPEEEGHSAN  
DGEVYGVGMDLSGQDSIPEEDDDNENIVTTTTFENC DIPPYQAASETTSLLGTTHADATPQF  
ASNSDGTGGEPGSTPLTRSASESSTSSGNSSSQQLLDTFLTVAKRCLQPPVVAALLGLL  
FASLPAIRGVFVDIVDRNGTAPLQWFFDGLYEAGKAAV PINMIILGCNLSASYMLETAKK  
GGGCGSGGGANREKRHGFSTRTLLVVF GKMVAMPVVGMLSTLALDQIYDVPHDIAGGL  
YLVLLIVFLCPTANNVMVMVELSGGSGIGNTSGGGSMKESMAKVIAYEYALAPIVLSMTV  
TGAVLMASYMASRAEAQAAEAGILG  
>comp8031\_c0\_seq2; 812 375 2498 LEN=2588; translated  
MNNNSDIYGTVVATFLASVKS VGTACTLASVGIY LHQRGFVVGNGKRTLALISQQVTIPL  
LFFTKILYCNQD WSEDPCPDVTSSLRD VWILAVWPLWVCTMGICVGHCVVRLAAVDSNTD  
SLHQ RNSILAAVAFGNSTGLPI TLLTVIHSNFGASSALGSVDPTLFLSVYLVLYPV LQW  
IGGVLLAPPE SNDRKMAGSGREQSGDRSKNKGLPMSTPPSTRMIESGEYNGGGGSM AHQ  
QGPTQQQETQQYIYQHTPLTERQLSFKSTIKKSIKDAGQKTKQTLANNV VHNNTTEMPETY  
RITHRGLESTDASMYWSVQENLNRWGKPLWAEGRKGSFYQFGGSGGSSNDHGVYSNSDSG  
CNIGMDLSGRESIPEEEGHSANDGEVYGVGMDLSGQDSIPEEDDDNENIVTTTTFENC DIPP  
YQAASETTSLLGTTHADATPQFASNSDGTGGEPGSTPLTRSASESSTSSGNSSSQQLL  
TFLTVAKRCLQPPVVAALLGLL FASLPAIRGVFVDIVDRNGTAPLQWFFDGLYEAGKAAV  
PINMIILGCNLSASYMLETAKKGGGCGSGGGANREKRHGFSTRTLLVVF GKMVAMPV  
GMLSTLALDQIYDVPHDIAGGLYLVLLIVFLCPTANNVMVMVELSGGSGIGNTSGGGSMK  
ESMAKVIAYEYALAPIVLSMTVTGAVLMASYMASRAEAQAAEAGILG  
>comp8032\_c0\_seq1; 735 1 2247 LEN=2442; translated  
KNPNNPFATEDDSAP EDEGNDEPSSIPV PENPNPNPFATEDDEVPQDEETSLDACKAVNN  
NGESLSIPVPIEDGEKPEGSNSSLCSTTFPPKNAEDRSTKSSEHEHENC DTEGSNDCKST  
TTDEASNTKSGISSRRSSPRRSPRAATAP TLTETASEDRIFVKPRVATVKLQRMGKHK  
FDALITDWEELVTQASEGRIPDGLLKAPLLTTREPSDEF GMPSDGHI FTDKETDLLESKS  
VETIVTKAKNATNPATASASTSGDGSLSLLDN RVANS LPEHVWKDDGSVLSL GASRDGV  
VAREKPNKFQLAEENC SYDGPDS SRGMKV FENLELYFESFVFPKSAPDLPIDVLEEM EED  
EDDWQLVTMCHPRIQLWPDDRRLLEKTPMAALMENAR IANRERFCRVWEEEVVPCGRPA  
LRLP PNRIRLGFHGDRLFEDANVVDAYSECRRVLLCLSSKALYVMPDRDEV TANHQQL  
ANKKGRFP LPLDRDRFRDAPWPHAVARHSFGDLEAICIGFEFQRLTLFRNPG LPGSDP  
FVYVLLS GEKRATVRILSEIQK LAKD WSENRSMAIGRSPATNLERPSVSIENDADVMDG  
LGGVLEKGRAIGTILHFQILRQQWKHGDRGT VRRVLVITETMLLLLD EYVSDGHDLSEV  
SPSSSSASAGERRTSATADAGYRLVDDAGLSLVSEVLAAGSDPRAITIVIKPPSKLSRTR  
RWRLVCRDREGAEKLVEDARKALERFEA  
>comp8033\_c0\_seq1; 881 232 1797 LEN=1797; translated  
MRIHPSALASFLAVASVVPTVAFVGPLTGKQIKPSVSN DSTKHGILKKLKSIVARAS PAT  
ARLHMGENDEGEYGYGYDRDYDHGYDHYDYDGHEHSYNNEYLAADATGYNDNFE GSVY  
QEEAWTPPSFTLADADTSQQAPEITSP PQQESGSSPETTTASLTPTSETGAGVESILST  
ISASPSLLAQASIGTAAFGLAAARNVLSQRQKLDDEKRTLEEQQKRIETETAKLNAET  
SQNNILLSTAGSIAVGTVLTAGGVVEEFSGSAIKSLEGI GANTNLENGIKD TVKGGGFKT  
TAGTVAERPVLKQQELPYLEEKIEKEATKQQATNVLNRNRD KLSVKQNELEAMA AKREAA  
IAEEEEARLKAIADEEERLRVEEQ LRRKVLAEQNEATRLKKEAEAEIARQKKAEEAEAE  
ARIKAAEEEEAARIKAAEEEEARLQRAAEAEAEARIKAAEEEEARLQRAAEETE AARIKAA  
EEEEARIQRAAEAEAEARIKAAEEEEARQRAAEAEAEARIKAA  
>comp8035\_c0\_seq1; 613 1 2107 LEN=2228; translated  
XGTMEDFN RKENGDDKQYDGIWIGIDLGTSNSTCAVWDS SRGGAKWVRLPDITESTSSKA  
GRIMPSIVRFPNGCDDPLVGF PALLKTSVAENSGDSTKCGKSSVLR SVKRLLGKRYDDL  
PSWLETLD FVDRNPSEYGDNDDRDQSLQLIPRVGKSFES ETIAITPQDVLAL ELKAIRTA

CQSYLDKYRLSKSLKVPGGGEDETTNYTVDNVVGVPAPHFHRHIGLVKEACREAGFHGY  
VGTCLRESTAAAIAYGLTLQERKGTWTPGSDSSASMKINSTNRKGGPTFMVVDMMGGTTDI  
TIAIRREKLQOYAKSSPSLDEDEGASSENPNSSSFRVLVTEGDDGLGGDDIDEAIMEYYL  
GQVVSKEKRSNDNQNKREMNKTRSDSLKLACRKAKEKSLCSLEDSPSVTVGTEGQVEISR  
EVFDTIILEPWLRRARDLIMKALDCLKKAPTMPGVTVDEVILVGGTTRIRAIRHMIQNI  
PQIELSLSLNPMSVVSQGLAIQAAILSKQIPIHELKSAMMLDCVPHAIGVQLQPNGGFVE  
IIPRNALLPAVGSATFVLADKYQAGVSIRAVEEVGPDYELMSKEDFSFVLRKLSSAQFE  
NISERKIQVGMKLDNDGRFIVSIFDENDPEQVRKRDRFERIQQGEEIVGELDYIKDMILA  
DSDGITNEQITLVVALISVFVLYVAVKMAFADPLEHGNAILG  
>comp8036\_c0\_seq1; 197 68 781 LEN=891; translated  
MNVTVDYRDGSHWEKRTKTNASRNGNDPTNAGDKEQDGDGGSETIYEWFRDTKVCYSRFS  
DNFKNPPRLEENRGMPPGTTAERRRFAELLEEGDFCDVWREQHPNGEGGILGRGTHGNE  
KGGPPASPWDLPNYTWRGALSRDPAGVARYQGRGMLDYFLLSPSRLGARAFRGGGASCS  
IRHGSLREGLFCGSDHCAVELLLGRGRTSGGPRDEPPHARGGTDDDRPELDGALLV  
>comp8039\_c0\_seq2; 418 1 1612 LEN=1864; translated  
YEQMIYTTQFRGLQGLIPNVPNLSNSRDPPIIYGDESQGFHVLNHCFLRKSFLASQISNS  
LALRHDTGYRFFTLERMDTTISAVVPSLLMSKSSSKTINVGPLAVKMLECIKAVHETKNV  
IRDVKTENFMLTLDKGATGSTPEEKLASRIRLIDLAIATQWTTMYCETDEGGDLIGTPLY  
SSLNVHSGKTSFRDDLESGLYVIAEILMQLYSGDQSKQLPWSSGKSDEDIGSMKQSLVG  
DKESFYRQLGNTKTTEVFLEYVSVVRGYSFKKLPDYDDLRSILSKLTVPRKAMNSTTKK  
TAATKRTRNNKSPTNEDYVSPPKIARRSNRRKAASMIIEDEEGCPKNEIDDETVYADAHQ  
ELHDMWEHCVDENEYPVEDSKPRTRSRAGRDPAPRRERTTKSSKAATKNVIDNDGKGRE  
RMPPRELKRRGVRIVCTEGPHKGYIYEMEAAGVNEIITIGSKPTSKVGELCSLKNKLNKLG  
THVRLDLDMMNRRLIAVKVTDKSNKTYVNRDAVKSTKAFINDVITIGETSLAIKAL  
>comp8039\_c0\_seq3; 444 1 1521 LEN=1773; translated  
YEQMIYTTQFRGLQGLIPNVPNLSNSRDPPIIYGDESGYRFFTLERMDTTISAVVPSLLM  
SKSSSKTINVGPLAVKMLECIKAVHETKNVIRDVKTENFMLTLDKGATGSTPEEKLASRI  
RLIDLAIATQWTTMYCETDEGGDLIGTPLYSSLNVHSGKTSFRDDLESGLYVIAEILMQ  
LYSGDQSKQLPWSSGKSDEDIGSMKQSLVGDKESFYRQLGNTKTTEVFLEYVSVVRGYS  
FKKLPDYDDLRSILSKLTVPRKAMNSTTKKTAATKRTRNNKSPTNEDYVSPPKIARRSNR  
RKAASMIIEDEEGCPKNEIDDETVYADAHQELHDMWEHCVDENEYPVEDSKPRTRSRAG  
RDPAPRRERTTKSSKAATKNVIDNDGKGRERMPPRELKRRGVRIVCTEGPHKGYIYEMEA  
GVNEIITIGSKPTSKVGELCSLKNKLNKLGTHVRLDLDMMNRRLIAVKVTDKSNKTYVNR  
DAVKSTKAFINDVITIGETSLAIKAL  
>comp8040\_c0\_seq1; 223 1 716 LEN=1307; translated  
XDDGAREVVRETFHLVPTETEMDVVRIVEAGAPASPDGPCNEPKNTEPQPPVHSETTNTG  
AGDGALPSPVHPAPLRDRRSFPAHRSGDLPARTCLVVDKLRRLPWSLAKHCGSFVHVP  
ANYQARDTGGSMLEASVSIVFHELLGCETPRRGYSGEDSWASGGAGDPSSSSPSSSGY  
EGQKYNVERVYKGGDPGDERARQKRKEREKLELQTEAEPRPSLFGADTNDGDY  
>comp8041\_c0\_seq1; 157 226 771 LEN=860; translated  
MIGGIFDAFFGGGTDAEITDVTYFDLTIDGADAGRVMGLYGSTVPKTVENFKQLCCKTK  
KGDGYKSSFHRIIPGFMCQGGDF'TNGNGTGGKSIYGRTFEDENFDLNHGGVGTLSMANA  
GPNTNGSQFFICTAQTPLWNGKHVVFVKVTKGLELIKKEVAYGTDSGRPKATITIIDCGS  
L  
>comp8041\_c0\_seq2; 116 226 618 LEN=1408; translated  
MIGGIFDAFFGGGTDAEITDVTYFDLTIDGADAGRVMGLYGSTVPKTVENFKQLCCKTK  
KGDGYKSSFHRIIPGFMCQGGDF'TNGNGTGGKSIYGRTFEDENFDLNHGGVGTLSMANA  
GPNTNGSVRL  
>comp8041\_c0\_seq3; 116 226 618 LEN=1102; translated  
MIGGIFDAFFGGGTDAEITDVTYFDLTIDGADAGRVMGLYGSTVPKTVENFKQLCCKTK  
KGDGYKSSFHRIIPGFMCQGGDF'TNGNGTGGKSIYGRTFEDENFDLNHGGVGTLSMANA  
GPNTNGSVRL  
>comp8043\_c0\_seq1; 119 85 309 LEN=1028; translated  
MPWQSMASLGVIIITMFNVVPALNAGVQYLGYGKKKELGLTSNEWNRYMSKRDAAYEQHAA  
RVRAEMDKLRVQKS  
>comp8044\_c0\_seq1; 281 100 894 LEN=1919; translated  
MNSFTNREEEHSVRSRQESPISTNRVTRLTIEIPNDIAALQGVILAKFRDATLPFYVVV  
TELLYFIRFLASDDNQTALLEFSIGILLFWILSSNAENIISLFMDAFLIFSEIQEVPI  
PSSASKITKIYDVFALASLNGVGNHSHGNNSTFFNGRNRGIIYREEYGSDLSSSSPLES  
DYMHSMLPSLISPTAFMVIGPFAVIALTCVMADNKYHLFATTFAPSVDVSVLGRARSFLSP



FSSSQEDSQHRRIPNDDDETSEGLW

>comp8045\_c0\_seq1; 772 130 2184 LEN=2570; translated  
MEEGRQQFPGSDTHGSDVVRVPSDGKRPSQHGNNEGGRRIPSYQSDQKDRHEIYRERLGD  
SGGHGGRREEPSNRGYRTKEPPLRSLSSRRETPSASHQRGNEGGEERRPRNNDGCHDSR  
RANPAVNARRSWGDDHRRHYRDHSGDYNHNGGDTNRYDSRRRYDRHGDGEHEHADDRYRR  
DSVGRGRRITGDGRDQRYGDRYDEFGRRRGRGRS IDDDDFCYGDKGDRRKRSDSGYCSDEPF  
ERSRRDGRRTSAGRRDGERPRRSRSDYKTDGDYDYDRDRDSSDNDNCEETS SKKREPKEK  
EREWPPSFQKDGSAFTFDTRSAMFYEPLSDFFYDPKSKLYYGNKKSAYFRYDVAEDPPFV  
QVKKMTAEVEEQHRGDGGGFSQEKLAVSDRASAVVSKPKIAIKLTKKVKSSKATANTE  
GSNHQPAGTIVSRAKQEQIANIGKWTEKQAEKQTEPGADTSRTAPPAPRQEGTDTASP  
KVRTTAKGEPICLLCKRKFPLAKLRLHERASELHKKNLQKFKREKKRQONDASAKRKP  
GSEASAAGTNAAPVANETVYTDRAKKRRQLHGVELCASANGLPSLGRGTGERKEPPPDLPS  
PAQAPGSDLFQESNVGKQMLQKLGKFDVPPGNSNPPQQEQEQQTMVSDASTKPRTTNEH  
LRKEWDRIEALAAAKSKSRYPKSH

>comp8045\_c0\_seq2; 718 130 2327 LEN=2713; translated  
MEEGRQQFPGSDTHGSDVVRVPSDGKRPSQHGNNEGGRRIPSYQSDQKDRHEIYRERLGD  
SGGHGGRREEPSNRGYRTKEPPLGRCRDGLLLQATREATKAAPKNEDPETTTAATTLG  
EQTQQVAAKITKQEHTSFIFLQSLVSSNESHSLSLRFIXIAPVTQLSVCFLCDKKNARRSW  
GGDHRHRYRDHSGDYNHNGGDTNRYDSRRRYDRHGDGEHEHADDRYRRDSVGRGRRITGD  
RDQRYGDRYDEFGRRRGRGRS IDDDDFCYGDKGDRRKRSDSGYCSDEPFERSRRDGRRTSA  
GRRDGERPRRSRSDYKTDGDYDYDRDRDSSDNDNCEETS SKKREPKEKEREWPPSFQKDG  
SAFTFDTRSAMFYEPLSDFFYDPKSKLYYGNKKSAYFRYDVAEDPPFVQVKKMTAEVEE  
QHRGDGGGFSQEKLAVSDRASAVVSKPKIAIKLTKKVKSSKATANTEGSNHQPAGTIVS  
RAKQEQIANIGKWTEKQAEKQTEPGADTSRTAPPAPRQEGTDTASPKVRTTAKGEPIC  
LLCKRKFPLAKLRLHERASELHKKNLQKFKREKKRQONDASAKRKPPEGSEASAAGTNA  
PVANETVYTDRAKKRRQLHGVELCASANGLPSLGRGTGERKEPPPDLPSPAQAPGSDLFQ  
SNVGKQMLQKLGKFDVPPGNSNPPQQEQEQQTMVSDASTKPRTTNEHLRKEWDRIEAL  
AAKSKSRYPKSH

>comp8050\_c0\_seq1; 359 99 1030 LEN=1344; translated  
MDLIALIEDSTDDDDSEIKSYSDTGDGNQNDQTTNGEHNASSKIRRKRTDKVSHEGRAKV  
IRRGLIDVSSSKARDSRVFSRSIPHRRGHWAGHVKIPILMASSPSENDLEPLRKTTR  
NVAALQNFLERRGISGTMIHEDNLHLSLSKHFSLQIANIEPFARRLGELLQNEPSTSLHV  
ETMVEPCHESNLVHGEFVGEI IDDXSAAKRRKDKVVFLLIGNIEESLNKTKGEYVHSRLD  
VDSERYFQSPSNVVGASII GSKNERGVGDDDDDDDDSEQTVYILPVHHECTLGTKEY  
IIPLRITCHPF

>comp8050\_c0\_seq2; 389 99 1151 LEN=1465; translated  
MDLIALIEDSTDDDDSEIKSYSDTGDGNQNDQTTNGEHNASSKIRRKRTDKVSHEGRAKV  
IRRGLIDVSSSKARDSRVFSRSIPHRRGHWAGHVKIPILMASSPSENDLEPLRKTTR  
NVAALQNFLERRGISGTMIHEDNLHLSLSKHFSLQIANIEPFARRLGELLQNEPSTSLHV  
ETMVEPCHESNLVHGEFVGEI IDDIVLLNEEKTRSFFCWRVRPNVTLRIVAHVDAILKR  
YNQPVYYQPAHFHISFASFAGNIEESLNKTKGEYVHSRLD VDSERYFQSPSNVVGASII  
GSKNERGVGDDDDDDDDSEQTVYILPVHHECTLGTKEYIIPLRITCHPF

>comp8052\_c0\_seq1; 244 479 1288 LEN=1793; translated  
MIQDPSISEAVNLTFGFPSADSSTSLKQACKLLLAHSSSSKHSKNNNSNNSNKESTNAAD  
AIDGVNDEAKGTNLNNNSITNSRTRLDLFLPIVMPEDMRVLACITYTNILEHLVTHFRET  
RRLFDDSIYDLKIGTYHEHLVKVGPDESARALELMHEHELSALPVVDVATDRLIGVYSR  
SDITFLTRATDAEDAVANLDTLSDVLEQQRTDVTTTPDAMHSCSTAHTLQSI FEYFAQLR  
FNRLFVLEDESERLVGVVSARDLVEYFMID

>comp8052\_c0\_seq2; 244 479 1288 LEN=1772; translated  
MIQDPSISEAVNLTFGFPSADSSTSLKQACKLLLAHSSSSKHSKNNNSNNSNKESTNAAD  
AIDGVNDEAKGTNLNNNSITNSRTRLDLFLPIVMPEDMRVLACITYTNILEHLVTHFRET  
RRLFDDSIYDLKIGTYHEHLVKVGPDESARALELMHEHELSALPVVDVATDRLIGVYSR  
SDITFLTRATDAEDAVANLDTLSDVLEQQRTDVTTTPDAMHSCSTAHTLQSI FEYFAQLR  
FNRLFVLEDESERLVGVVSARDLVEYFMID

>comp8052\_c0\_seq3; 298 339 1538 LEN=2022; translated  
MDLHHQQQHLQHNAITGADNLPVGP SLQLANESEVVRKAGRQAI SAFLDSHNCFSVLRAS  
GKVVFVDTRIPIQALAFYALVEHDMQAAPLWDPTQCRFVGLLKVTDFIDILRHFKRTNGDV  
GSLATRSIANMIQDPSISEAVNLTFGFPSADSSTSLKQACKLLLAHSSSSKHSKNNNSNNS  
SNKESTNAADAIDGVNDEAKGTNLNNNSITNSRTRLDLFLPIVMPEDMRVLACITYTNIL  
EHLVTHFRETRRLFDDSIYDLKIGTYHEHLVKVGPDESARALELMHEHELSALPVVDVA

TDRLIGVYSRSDITFLTRATDAEDAVANLDLTLSDVLEQQRTDVTTPDAMHSCSTAHTLQ  
SIFEYFAQLRFNRLFVLDSESLVGVVSARDLVEYFMID  
>comp8052\_c0\_seq4; 298 339 1538 LEN=2043; translated  
MDLHHQQQHLQHNALTGADNLPVGPSTLANESEVVRKAGRQAI SAFLDSHNCFSVLRAS  
GKVVVFDTRIPIQLAFYALVEHDMQAAPLWDPTQCRFVGLLKVTDFIDILRHFKRTNGDV  
GSLATRSIANMIQDPSISEAVNLTGFGFSPADSSTSLKQACKLLLHSSSSKHSKNNNSNS  
SNKESTNAADAIDGVNDEAKGTNLNNNNNSITNSRTRLDLFLPIVMPEDMRVLACITYTNIL  
EHLVTHFRETRRLFDDSIYDLKIGTYHEHLVKVGPDES LARALELMHEHELSALPVVDVA  
TDRLIGVYSRSDITFLTRATDAEDAVANLDLTLSDVLEQQRTDVTTPDAMHSCSTAHTLQ  
SIFEYFAQLRFNRLFVLDSESLVGVVSARDLVEYFMID  
>comp8054\_c0\_seq1; 576 1 2161 LEN=2389; translated  
XVRCLLPALWVPQSDPIHRAPTRTDPYESSSWKGTTPPILPSRRAANSSASPNPWARRKQ  
RKRRIIPVVPVRLAGGGEHECERQHEHSTXSPPPTPSARPTARTPLLATLLAVVVLV  
IRSTTTTTAFPTPLRPRAFGRSHPPNSGWEPNGHWSLPRTKRFLAGPGAEDVREKEKPP  
PPATESTPAPDSEHQHGERDPGGFSPDSIGGDLFFFASPAEQHTNTGTTDRSLSRD  
AFRYGAVLAGAAWATGVAYTQTAELEAPPKRP SLIPEPVLPIAGNSNNNNNNSSNNNKA  
PEAKQPRQEPKATTAAPASAPAPSGDPLSVKSPSQSTVATGRLESVNLTVASETNIN  
VTMNCCKMCLSDSSNFTFTKVEKPKVPSWLP SFLAPKSQVVKKYSNAELLVAATAAGSV  
CEMGRTSLLYPLSTIKTRLQADRHD TASDLRPGQSFWEQVQTLAANVKEKAESGNLYAGI  
SPTLLVSVPATGIYYGARDVTKRMLYFANTPLDATSIALIGALVGDVVSLCFRTPSNALA  
IRLQARSEAAPGDWLGESLERLPVILITDLPYLLSKIVLNKLFIQGSLVDPYAGYAVLA  
AVLAALLTTPFDVAQTRILLEPRPVPQGERAPGAASATEESTGGAAGLEATLDAIAPGRP  
DRGLVQTMVRIANEGDGGVRNLFSGWLERVVYLGIGRAWLEPIQLVEYIGIRDAVLEWF  
>comp8055\_c0\_seq1; 349 281 1879 LEN=2017; translated  
METRGALRRAAQQQQAEEELTQDWLQRQGPYAVAAMAQIQQNRIDIRNSETGHNESEPRL  
VARATDSTFAGLSPFHGASDTNIREGNQHNRQRSKSLLSFDDNHLKRSVHPNSQASLS  
SSEIPVVRQRRMTRARARELQDHAVANLFQTVIELVVFESRYLNWFEFIQLRVNRSCLAF  
WYRKREVAGPWKEILKEINSWNGTNKCHRCEQVLLQSHRSLCVHKMCDTIHRKTEDKNL  
GNGATTNSTSIDTNHQKIAKQQNRVWDQECARPKPDFVSCIDILMSNGVLSWRERGGIR  
RICKATYKVYKRYCTCKHPVDCSTSLPFVNIDPRYRTGYDYSWTDYERCEAMILYTIRLK  
NNLHAFYNFVKVTNPD SLPYGLARWDWFDIQMVTLQSNCPKRYALIMHIASLFIQAELR  
RRPPVWYADAFVKGQHHPYTTSYVDSLATIISEHCLPATDEVICHFLRTRCYPSSDSQNL  
LGPLSKQLSIFSPFFDMVPLDKNQPTSLPKSLEILNEELIDSMSMNILCSMM  
>comp8055\_c0\_seq2; 319 281 1818 LEN=2173; translated  
METRGALRRAAQQQQAEEELTQDWLQRQGPYAVAAMAQIQQNRIDIRNSETGHNESEPRL  
VARATDSTFAGLSPFHGASDTNIREGNQHNRQRSKSLLSFDDNHLKRSVHPNSQASLS  
SSEIPVVRQRRMTRARARELQDHAVANLFQTVIELVVFESRYLNWFEFIQLRVNRSCLAF  
WYRKREVAGPWKEILKEINSWNGTNKCHRCEQVLLQSHRSLCVHKMCDTIHRKTEDKNL  
GNGATTNSTSIDTNHQKIAKQQNRVWDQECARPKPDFVSCIDILMSNGVLSWRERGGIR  
RICKATYKVYKRYCTCKHPVDCSTSLPFVNIDPRYRTGYDYSWTDYERCEAMILYTIRLK  
NNLHAFYNFVKVTNPD SLPYGLARWDWFDIQMVTLQSNCPKRYALIMHIASLFIQAELR  
RRPPVWYADAFVKGQHHPYTTSYVDSLATIISEHCLPGKKFXVPMFGTFKLVGSNKSPSV  
LFLKRLLFYDVC PASFVRSNFV SIFDPNSNG  
>comp8056\_c0\_seq1; 947 148 2517 LEN=2851; translated  
MQRNVAMNIAVLSLGLSLFFGAAVDVHGFVQPPRVCGTSGCGSKKWEPEPDRSYRPLHQ  
STTSVDTSDVDVGEGRGDAKGAALQLVDVA VSRGGQTLLSNIDWRVEPKAKWGLVGN  
GCGKSTLLKAILNDLGEYEKDDVLNDYLDVDG SVTIGTKQEVGYLKQTAVSGSTLTVFDE  
AASAMKEVVAARTNLRQAEAKLEASSENAP EELDRDLKALDIARDRYERVGGYVQE QEVA  
TLLKGLGFNTLTQTCDELSGGWQMRV SFAKLLLSKPSLAMLDEPSNHLDRSARAWLANYM  
KNYDAGAMILVTHDVELLNACEHIAEITSGGSLQIYK SCTYDQYLQQRERAYAAAATEYE  
RNMEKAAKQLAFVDKYGASATKASAAQSRVKQIEKMRAQGLLDPPTDNAVSEIERFKPRM  
TLPPPPRPQGGAMDGRGSGNDVGDGVL LSLCDDAAVGYYPDAGGEDDGTQEA VSLISNI  
ELNIQQGMKILIRGPNAGAKTTL LDTLRGKLP LLKGRVEDSNLKLGVFTQDLAQELDPT  
RRAVDLVEHARSGDDGDLYITDEEARNV LGGGLGQDKALRLVGQLSGGEKARVALAMF  
ALKPSNLYLLDEVSNHL DVECEALSEVLSDWGDGKGSIVVISHDKAF CQQVGFTHVLT I  
TDEGTLKMEQRNTNDSWDSSVATFQKSRDDATDSSNEGGE SAVVDKELDAKRRKMAYNA  
PKRISKIETLVEQKEEKMAVLDEEMMANGSDVGKLV DLSKEKETLEEEVMELMEEWEELE  
TLIAEMGR  
>comp8057\_c0\_seq1; 334 1 864 LEN=864; translated  
SLAPSVSPSVPSDGPLAPSSKPPMASVEAGLESDEPAPAETAEP RKPSPDEPEPCTIT

EIVCDSDFSFTHLCAAFSATGGLDKFFGKPSGNITLFAPTDEAFEKLG PVALDYLM EESNK  
DLLTNILMFHTIGDQILYSFDLECKEVIQMDNGRDSRTVCKDRNIYQKGSNSRSDLPQI  
IESDIETCNGLIHVVDEVILYKTPTKLGI PPRDATFPPTAS PPLSTLAPIAAPTDAPVAE  
IDVVSPTPAPVVPPTSAPVVEAETIEPEECKSIGKISIDVLLTLQICN  
>comp8057\_c0\_seq2; 508 1 1263 LEN=1570; translated  
SLAPSVSPSVYPSDGP SLAPSSKPPMASVEAGLESDEPAPAETAEP PRKSPDEPEPCTIT  
EIVCDSDFSFTHLCAAFSATGGLDKFFGKPSGNITLFAPTDEAFEKLG PVALDYLM EESNK  
DLLTNILMFHTIGDQILYSFDLECKEVIQMDNGRDSRTVCKDRNIYQKGSNSRSDLPQI  
IESDIETCNGLIHVVDEVILYKTPTKLGI PPRDATFPPTAS PPLSTLAPIAAPTDAPVAE  
IDVVSPTPAPVVPPTSAPVVEAETIEPEECKSIDELVCSLPDFSILCDALARTGV ESSLK  
SGEWTVFAPNNEAFLKLP TSDVEKLAYNEISLTQLLVFHV VAGK TLYKDDL PCEAGYNLI  
EMASGKDSR T LCV DGIPTYQKGYNPDS DIPEFVNFDMKACNGVV HELDKV MLFRP ISEL  
>comp8058\_c0\_seq1; 282 16 711 LEN=1494; translated  
MAITRPTLFSSGREDPLEQLD TYCRAKYESGENSSDAVDSDELLSVAEFIFGHKTLSSAL  
AIVDSHGSLVTKLVAPSGRFVHAIRSSMATPPTGSS FQLSGKEARNDD EYFCLLSPSQ  
SSRSIPPLRYCSCR SFLEKSTKKASASIPDQTGSDTGVD RHNYSNDENHQD GPPICKHLL  
AIFLLPHLVLTSTSNDFVKIQNNRKQSCFHCPEIKSVSEENFASLILNKIL  
>comp8059\_c0\_seq1; 1048 80 2665 LEN=2915; translated  
MSSAAALSSSRAGDESDH VILPPPTALNPIPSLPAALRIDNKERFLELLLKHPCSDGV DI  
PSAVEYGT TADASFRQLLVFGKDSLRTLLMRQVLQDPHTRTFGKTGGAKGSAAASKNKNW  
DDSTSFPLPRSLQTNVVGTKVLMKQKTTSTNANDHANANDYTALRQPRSR TTWLGAEELS  
ANASGAVSNSQKDEDLFRHPDEL FQHVDV I SYFLRPWDIDQTM AVIGRIKGCALNAVAVA  
SEGTNDGTGLTRTHKQHHRIVYVPQITALCAQVLK DHRVYNPSSPKGSSSVSVCSLQLDL  
FPLETDLISLEYEDTLKEAGNVGGTPSGMIETT SRALRKLQDAVGRI P RIQSLGIWGE EV  
LAKLLNETVDERYADEKEENGEEKISEDEENDGDE DADHDFENDDNGTAMMLLDRRLDMV  
TPMVTPLTYEGLLDEL VGIDCGF IGIAEQI INPSEDEEESGDGKKK KEDNKKSNPFETD  
SSPTTSSNPFDD DAPDAIEDTKIVTLGVHAGDSLFAEVRDQHVEQFGSFLQNAVALKES  
HANFTSRET KDLNEIHTFVKQIPIFTQSLRSLTNHIHLAELIKATTEDVAFRDQWNSER  
AMIEGESC YDILEERIFENYPPYKLLRLLCLQSLTSGGIKANRYDQLKQYIVQVYGYEFL  
SILHDLETMGWIKKMEGNLATNFVMSANRSLFQNIKRNLIL IHAEVNTVKPDDVSYVSS  
GYAPLTVRLIQS AMQGWHTPDKEDILRDLFQMMASNNSGSGGNRLLDVRQTYPPRDLPT  
TLRKQRQSKSSSRLEPLGAYGKRTNSKKKPTLIVVYLGGITFMEIAALRFLSNRETFPY  
HIVVVTTRVLNGSKLIQQMG  
>comp8059\_c0\_seq2; 1048 80 2665 LEN=2968; translated  
MSSAAALSSSRAGDESDH VILPPPTALNPIPSLPAALRIDNKERFLELLLKHPCSDGV DI  
PSAVEYGT TADASFRQLLVFGKDSLRTLLMRQVLQDPHTRTFGKTGGAKGSAAASKNKNW  
DDSTSFPLPRSLQTNVVGTKVLMKQKTTSTNANDHANANDYTALRQPRSR TTWLGAEELS  
ANASGAVSNSQKDEDLFRHPDEL FQHVDV I SYFLRPWDIDQTM AVIGRIKGCALNAVAVA  
SEGTNDGTGLTRTHKQHHRIVYVPQITALCAQVLK DHRVYNPSSPKGSSSVSVCSLQLDL  
FPLETDLISLEYEDTLKEAGNVGGTPSGMIETT SRALRKLQDAVGRI P RIQSLGIWGE EV  
LAKLLNETVDERYADEKEENGEEKISEDEENDGDE DADHDFENDDNGTAMMLLDRRLDMV  
TPMVTPLTYEGLLDEL VGIDCGF IGIAEQI INPSEDEEESGDGKKK KEDNKKSNPFETD  
SSPTTSSNPFDD DAPDAIEDTKIVTLGVHAGDSLFAEVRDQHVEQFGSFLQNAVALKES  
HANFTSRET KDLNEIHTFVKQIPIFTQSLRSLTNHIHLAELIKATTEDVAFRDQWNSER  
AMIEGESC YDILEERIFENYPPYKLLRLLCLQSLTSGGIKANRYDQLKQYIVQVYGYEFL  
SILHDLETMGWIKKMEGNLATNFVMSANRSLFQNIKRNLIL IHAEVNTVKPDDVSYVSS  
GYAPLTVRLIQS AMQGWHTPDKEDILRDLFQMMASNNSGSGGNRLLDVRQTYPPRDLPT  
TLRKQRQSKSSSRLEPLGAYGKRTNSKKKPTLIVVYLGGITFMEIAALRFLSNRETFPY  
HIVVVTTRVLNGSKLIQQMG  
>comp8060\_c0\_seq1; 182 43 240 LEN=501; translated  
MVQH PKQEHEK KTHGV PETTGTKAGSSSRNIQRKHDHVHGKEKKQGGGIGGKGDWNPL  
DDGSL  
>comp8060\_c0\_seq2; 217 8 220 LEN=481; translated  
MTTFMGEFIDQIQNSSHEGSSPINPSCISCRNIQFILPILIFETNSKEKKQGGGIGGK  
DWNPLDDGSL  
>comp8062\_c0\_seq1; 713 193 2544 LEN=3095; translated  
MNGDSTKMVEEYFSGPTISSMATSETLNVIRPYGYSVSKCGYCKGSRSHLLQTPEPIPVL  
QTSNHASSSPTPTS KSKMTSKSYSVLADSVSPALYEDLINKGWRRSGVHLYKPNFSSC  
CPTLTTRLLTREFKPTKSQRKVLKMKMNILRPSLREKETTATALPMMIRSTLASKKQKKL  
HGQKQKLRNAKAVFAPSNSDDSDHPELET SKTSSSYSSSLVEQIEENNILRKLEEAATKA

IEKHLSCSLPNYSNENFKQQRQIGKFKTSYRILASSKQERRQLRIRIASRICAQISGYR  
ISRDLAQVQVQLMKEDDVL SILHSTNSQSKRAIP SINCSCFSFASLEAHLPSGQI ICTI  
EGKSHEQRTEIKRRVDTEEDNTIASDTEMKDSKEKGSFSFKHSTGADSGKLSRWYKKTG  
KDIHIESNQYCITIDTLP AHRSA LDPDVHRLYIHYQHAVHNDPNPFS DNPNDVNINTDDS  
NSDEDEEELKLDSDDPSEL DWGHAPTYFTDKISSMLTPYIQSLQSKESRRAVLSNYYSFY  
QFLVEAPFPLQDVSTTRHNYPKSDDNVTQQPHHSWFKENWNLP CGLYHQHYRLGGELLI  
AVGVIDVLP TGLSSVYLFYLP SFSQELVALGKYAILKEIEFARDVLKVPYYYLGYIESC  
QKMRKYAEYKPTQMLCPKYHDWVDATIAIEKLQRTPRHVCPLIEATPKTEEKSKNANEIR  
NQKATSLDINGSLRNLQMDIGAGMNV TIDMLQSSGVEVVKPILKEFILEFSPELCOQCIL  
KLT

>comp8062\_c0\_seq2; 670 193 2163 LEN=3197; translated  
MNGDSTKMVEEYFSGPTISSMATSETLNVIRPYGYSVSKCGYCKGSRSHLLQTPEPIPVL  
QTSNHASSSPTPTSKSSKMTSKSYSVLADSVSPALYEDLINKGWRRSGVHLYKPNFSSC  
CPTLTTRLLTREFKPTKSQRKVLKMKNILRPSLREKETTATALPMMIRSTLASKKQKKL  
HGQKQKLRNAKAVFAPSNSDDSDHPELETSKTSSSSYSSSLVEQIEENNILRKL EEAATKA  
IEKHLSCSLPNYSNENFKQQRQIGKFKTSYRILASSKQERRQLRIRIASRICAQISGYR  
ISRDLAQVQVQLMKEDDVL SILHSTNSQSKRAIP SINCSCFSFASLEAHLPSGQI ICTI  
EGKSHEQRTEIKRRVDTEEDNTIASDTEMKDSKEKGSFSFKHSTGADSGKLSRWYKKTG  
KDIHIESNQYCITIDTLP AHRSA LDPDVHRLYIHYQHAVHNDPNPFS DNPNDVNINTDDS  
NSDEDEEELKLDSDDPSEL DWGHAPTYFTDKISSMLTPYIQSLQSKESRRAVLSNYYSFY  
QFLVEAPFPLQDVSTTRHNYPKSDDNVTQQPHHSWFKENWNLP CGLYHQHYRLGGELLI  
AVGVIDVLP TGLSSVYLFYLP SFSQELVALGKYAILKEIEFARDVLKVPYYYLGY

>comp8063\_c0\_seq1; 385 505 2103 LEN=2510; translated  
MTMTTTTTSSNKPSREGDKRCHDHDEHKILRNYPYLWASVGISHGFLSAIIFGWASLVPV  
LRDEERKASDSNGKDPWGGTGRNLAESEYTPS QLSQIFAAGVVGNYLLTLPFGMILDSYG  
PKTTGILASLVYGLGLFLCGIDDSKFYLFWIGFGLVGAARPGIQLPTIHLANLFAYHGSR  
TKGTGGEALYMSCQAAAFDAGTAIFALFHYCHF GFGWKSSIMFRWYLLVPLYTLVTAIFV  
WPNEVLQKPV DHTSHEAESSSSSPLSPTSSFSAGDQKHKS NARLLGNKSLQQHSQVNAPF  
SVVLRKSAFYALATWVGIIHFQ LNFVVATINDQLERWHGPKGTERLIQIFGTILPFGFLV  
LP IVARILHTDPTVALQVVNLI GLLFGAIMALLPGSYWLQILVVFPAVAVSRQM VYSTLF  
HTIGRVFGYKHYGVIFGLTNMVASL FQLLQTPMVEWSENSV VAGDP SHGNYGPSN FLLWI  
ATFPLFVTAMYCDPTRPESK WSSMQSCFKKAERN NDSNGGDRVHETTSLLR

>comp8063\_c0\_seq2; 358 1019 2278 LEN=2685; translated  
MILDSYGPKTTGILASLVYGLGLFLCGIDDSKFYLFWIGFGLVGAARPGIQLPTIHLANL  
FAYHGSR TKGTGGEALYMSCQAAAFDAGTAIFALFHYCHF GFGWKSSIMFRWYLLVPLYT  
LVTAIFVWPNEVLQKPV DHTSHEAESSSSSPLSPTSSFSAGDQKHKS NARLLGNKSLQQH  
SQVNAPFSVVLRKSAFYALATWVGIIHFQ LNFVVATINDQLERWHGPKGTERLIQIFGTI  
LPFGFLVLP IVARILHTDPTVALQVVNLI GLLFGAIMALLPGSYWLQILVVFPAVAVSRQ  
MVYSTLFHTIGRVFGYKHYGVIFGLTNMVASL FQLLQTPMVEWSENSV VAGDP SHGNYGP  
SNFLLWIATFPLFVTAMYCDPTRPESK WSSMQSCFKKAERN NDSNGGDRVHETTSLLR

>comp8064\_c0\_seq1; 574 124 1878 LEN=2217; translated  
MRRRSPLPMSLSLSLWCWALSFS DTGRGPGSCFAFSPSPSLPFGLIQPTRTAAKTTVNS  
GADSNKSKRIRAASSSSTALHLADEIKDYRRGLSQIHS DTTQAHGVPSSDGPTSCVFKF  
GGSS LADAERIDHVS KLVDQIETHGYRPRAVVCSAMGKTNNLLGAGEFALEGRV SIDA  
IRTLHHNAMDKFGFAEDCHTRS DVDALLDECEQMLTG VKMLKELSPRSLDQLVSYGERCS  
VRIVATRNLNQLGVPAQSFDAWDVGVI TDDNFGDALLLPEHEEAVRKA FHRIDPGVAVVT  
GFI GHDPDGRITTLGRGGS DLTATAIGAALNLDEVQVWKD VDGILSTDPRVVPNAVALDR  
VSFE EASELAYFGA QVLP HPIAMQPARKHGVPVRVKNSYNPGAVGTIITEEASSKERLVTA  
ITYKKGVTVLDICSTQMLGAYGFLARVFGAF EKHKLSVDV LASSEVSVSLTLDKKQESSQ  
ISALIEDLEDCSNLVRKDDYSILTLITDVHKSSQVLATVFRVFS DQNIQVEMMSQGASKV  
NISFIIQSNRLEQAIGQLHSCFFEGKCVVDEKSGGNDTQDSEAP

>comp8064\_c0\_seq3; 404 1231 2421 LEN=2760; translated  
MDKFGFAEDCHTRS DVDALLDECEQMLTG VKMLKELSPRSLDQLVSYGERCSVRIVATRNL  
NQLGVPAQSFDAWDVGVI TDDNFGDALLLPEHEEAVRKA FHRIDPGVAVVTGFI GHDPD  
GRITTLGRGGS DLTATAIGAALNLDEVQVWKD VDGILSTDPRVVPNAVALDRVSFE EASE  
LAYFGA QVLP HPIAMQPARKHGVPVRVKNSYNPGAVGTIITEEASSKERLVTAITYKKGV  
VLDICSTQMLGAYGFLARVFGAF EKHKLSVDV LASSEVSVSLTLDKKQESSQISALIEDL  
EDCSNLVRKDDYSILTLITDVHKSSQVLATVFRVFS DQNIQVEMMSQGASKVNISFIIQS  
NRLEQAIGQLHSCFFEGKCVVDEKSGGNDTQDSEAP

>comp8065\_c0\_seq1; 856 221 2794 LEN=2953; translated

MTSELSSLFVENITSNSCCYYNEDKDATGRKRRRPQPNDPVHDLPKHGDSATRDKPRTIE  
RHRRSALREHLVPVVLWVALLFACYQKDQHKYQIPQADAMKSPGITKRKTHLRQKRVLNL  
ATTNLIKIDYLDLPETLWIREDESDQFLQGNVVRVSPFDESILYATSKAGDLRVLSASNG  
MPLDRVRPAPRTITTEGGTTSTWSLYSNSGMAFGTFRDAEDISTETHTNGDDDNGYNDYLQ  
FLLNNGIEHDGKKEELDFLVYSVVDAPSDSRFLPKTRVVCVSIPEHKILWMSAGLPGTP  
NGSPLVYYADDVGSAASSLSSREANEEVNDNGMYIVLTHNSVLIRPDNTTRTTGHLTVL  
DSVTGHVKWTQSEWSRDEVPKGYGPPQVAHNPPVRGGEYSGGSRDNKNDVVVWTSDDDEGR  
GRLGNIYSFQMKSSDAEAEELKNKNSNNEEDVTSYTYTPFQVFLRKVRWNSIARPTMNQ  
AGTNLYVGVGTGNVARGWNGVGFNGTADWATRLVPFNSGTNASSLPYSEDVVIPTAPVLS  
ADEERLFVVSARNETICLDAKDGRMWSVTTRESSPLLGEPKASPDNKRLYMMSGNGRV  
NGIDQTDGKILWSFGCDKKTAAAGECQDPPVSANFDLSSDGHVLYFGTADGRIVALNLGQ  
RIDTKDNDLPISTGSSTITIGLDDDDGPLEFDENSIGTFDEDELAKEGKTSVKGKILGSI  
FAILLSLVAVAVSLMYVAKAKGYSSINWNTNYRFPRSFGEKRRHSSVSRVVRVQSQELDG  
PDKYEDRIIATLSEDEKSIDEQFNTLWIDPHTSNPKPTRTNEDDIPTADRLAVMLGTSN  
KIAPISESFGYGQAVLL

>comp8066\_c0\_seq1; 188 1 817 LEN=832; translated  
XARMALGDNAGALQDARTASFLGDGKAVNLYGKLMREVPSSDFSSLVNGHSNPLLPEASA  
SSSLQPSPHSALLESLSKTGEAAPGPGFPLNPASLLMGGSGGGPGSLLGALGQGGGAG  
GGMVGLASGLVRKLDDEATQETICGFLRGTSKEQLAGLASMAGLDALGDQQLDRLARF  
CKGVTPKGIIRRTVRGTKALVYLARLARARVQRYKGLIVALGVLQWAKSAVLRPLPVN  
ARAAKKAARLAAKAASKEALGEALKATRAGWF

>comp8067\_c0\_seq1; 361 74 1156 LEN=1455; translated  
METDLWPPVLTDEPFQELVEIGQHLPNGRKNLLKWEQQMVKERKEVAILLSEIGSYSDA  
QTSASAKRQKSSTGKRRNPIEVETSAPVGNPLTTTESFPAKWLVSDDDDDDISDRSLRKR  
DPFGVSSRRKKSCECSCRKRKRPVFGSSDGKVEQQQQQHWNEERRILQSIPTNPSGII  
GVMGRRIDMNRVDEGDAGLYSMLRAWVRDDPHNPEHEYPANARRKTLQYVKMEKNDKN  
NEIKGEGEENKKNKDKNDKNGKDEDEDNDSNGEAGGTTTTNGIASPLELSQTATEMGA  
NFVEWLGHPTDQRLSLPYPTQKEMREHRERREAKRAAKSERKERLVIIEKELKKKGIIL

>comp8068\_c0\_seq1; 624 205 1303 LEN=1303; translated  
MARNTNTSTLLALTLAAILAINPSSAFHILRAPSSRSLPTTIATAPATISIRTRRMSMFA  
APLNSGQTSSDEISTTSATATATATTPYTLRRLHNLKCFQYNNNNNNNNIDSNGID  
GCRQQRNRKATKILAAASLAASAGIVAPSPSLARTFADNVIDGTQTYSLRPGVSKEQAE  
KLSSGVMPEEVRDREGAASVSAPSGGSSKASPTKAESKKKADDLYGYDDEDDDFEDDE  
LEFGSEKLAATQKRQSSFGSSDGAGASIASATDASKVAKSSFTGISKPSKAKSTMV  
YIKASLGVAIPIFSFLGGRNYIQHRREAKQVEYSLKVMDEKRAELFGIDKDGKNITKTED  
DEDEDEX

>comp8070\_c0\_seq1; 475 1 947 LEN=1209; translated  
XLVHLGYNQLTYNSRVAQEQTQKQKMTPRRLVAASLLLVS�KTAPLSAWVPMATPNNDP  
TTTALYAKEQAPPKRRFAQARTTKQPYATDSKLGSMHKERIKTAGRKGTKKFVDPCKVVF  
GNLPFDVDKNDLAQFVLDTMGQNRMILHSFKVIEDWKTGKSKGYGFIETDPIFATVCMD  
VCDGKMLNGRPVKISQGKKRDQVFNKRRKKAETDEDKAISSALDEAEDDTEELEID  
DDGVAIFDDINDDDIELDAMLFGLDLDDDDQDDGVFLERGSKYEYDDDENLNREQRDA  
ARRRKKKKLPSKGF

>comp8071\_c0\_seq1; 866 79 1776 LEN=2011; translated  
MSTEELELAELAAKSTGGVMLNGPAPPVQNNLYRRHRIRIKELLANDGAAHLNQTVTVAG  
WARTTRNANKGQLLFVELNDGSTGESIQCVLDAEKTEGFAECKASGGTGASFMVGTLP  
SQGAGQAVEVAVTTGKLLGAVYGGNQQGTEVGGAFYAMSKAHTLEHMRDHAHLRPRGRV  
HAAAMRIRHSMAYATHTFHNGFLYIHTPILTGADCEGAGEQFGVTTMLGSDHLATDIE  
LSKIEPPPVEDLSKLSKSELKRAKAEKEKAKIDPTKPVVEHVVGAVDYSKDFFGKRVN  
LTVSGQLNVETHACALSVDYTFGPTFRAENSHTGRHLAEFWMIPEICFADLADDINLAE  
LYLKYCVRFALENCAEDLEFFENSHPHGEVGLRDRLKNVLDNPFKRLTYTEAIEVLQKAVK  
EDGVEFEFEPPVWGIDLPSSEHERYLCEKVYKPPVLMYDPKDIKAFYMKLNDDEKTVAAD  
ILVPKIGEIIIGGSQREHRMDVLRKRCCEEMGLDPRQVWVYLDLRRYGTVPHAGFGLGFERL  
ILFVTGLQNIRDVIPFPYPQNAEF

>comp8071\_c0\_seq2; 378 139 1125 LEN=1360; translated  
MAPNQCKPIEQVEDLSKLSKSELKRAKAEKEKAKIDPTKPVVEHVVGAVDYSKDFFGK  
RVNLTVSGQLNVETHACALSVDYTFGPTFRAENSHTGRHLAEFWMIPEICFADLADDIN  
LAEDYLKYCVRFALENCAEDLEFFENSHPHGEVGLRDRLKNVLDNPFKRLTYTEAIEVLQK  
AVKEDGVEFEFEPPVWGIDLPSSEHERYLCEKVYKPPVLMYDPKDIKAFYMKLNDDEKTVA  
AADILVPKIGEIIIGGSQREHRMDVLRKRCCEEMGLDPRQVWVYLDLRRYGTVPHAGFGLGF

ERLILFVTGLQNIRDVIPFPRYPQNAEF

>comp8072\_c0\_seq1; 609 138 2314 LEN=2337; translated  
MFEFVASVAPFLAVVIACQVVSAASSSVHHFVRKGERGGKYLPPKTECVLYLKQIQWED  
GHDTRSWHCEFPGLQAAEYTGGMEMVEIKGISSKEIERMGPVSGESLMIVDEKTYISEID  
TTDNGSYENENGSYNRSADQATTLYIPPKSDYKIESMDWEIDTRHARNRRARRQRQRNLA  
SSEIRILDTLVIRVIDGEKVGPAADAKQLTNDVFTGEFCLKSQYAACSHDQVIVNVPVQEH  
GTTIDGLYYPGIVNVGVSINVATQGNPNIEAEATVITTTMFGGGDSLGNLFDIVMFCLPG  
GTGNWVAYAYINDWRSYYNDFWCQRVSTQMHEVGHNLNLGHSGLPGNSEYADTSGMMGYS  
HDELNGPKQCFNPAKSYQLGWYSSQVKSIDPLDLLIGRDSPLQYTLNGVADYAKDGSNGD  
ALVSLRLENDGLLGLLDYYIGYNRAVGANVTGDVPNLVTIHAKENSQNDYGRDGHGKS  
IRLARLRSGSSYVLENFKGTNFDTITVAKSINGKDAIVEISTVSNVQPTAAPSKMYCDGG  
KTFRVILQTDGEETIMMLKNIDIDKEIERTEGYLGDITLYGFPSSGSAFCLQPGCYEFK  
IFDKEDDGICCNNGYKGFVEDTQIFEGAQFRTTMAHEFCIENQLSLTPRPTQTPSAF  
TSPTPTQIGGIFNEPIEETTPPVDEPXTDAYIVNLSTSNSTNSTRLISTTNHAANEYTD  
RIAL

>comp8072\_c0\_seq2; 610 138 2372 LEN=2372; translated  
MFEFVASVAPFLAVVIACQVVSAASSSVHHFVRKGERGGKYLPPKTECVLYLKQIQWED  
GHDTRSWHCEFPGLQAAEYTGGMEMVEIKGISSKEIERMGPVSGESLMIVDEKTYISEID  
TTDNGSYENENGSYNRSADQATTLYIPPKSDYKIESMDWEIDTRHARNRRARRQRQRNLA  
SSEIRILDTLVIRVIDGEKVGPAADAKQLTNDVFTGEFCLKSQYAACSHDQVIVNVPVQEH  
GTTIDGLYYPGIVNVGVSINVATQGNPNIEAEATVITTTMFGGGDSLGNLFDIVMFCLPG  
GTGNWVAYAYINDWRSYYNDFWCQRVSTQMHEVGHNLNLGHSGLPGNSEYADTSGMMGYS  
HDELNGPKQCFNPAKSYQLGWYSSQVKSIDPLDLLIGRDSPLQYTLNGVADYAKDGSNGD  
ALVSLRLENDGLLGLLDYYIGYNRAVGANVTGDVPNLVTIHAKENSQNDYGRDGHGKS  
IRLARLRSGSSYVLENFKGTNFDTITVAKSINGKDAIVEISTVSNVQPTAAPSKMYCDGG  
KTFRVILQTDGEETIMMLKNIDIDKEIERTEGYLGDITLYGFPSSGSAFCLQPGCYEFK  
IFDKEDDGICCNNGYKGFVEDTQIFEGAQFRTTMAHEFCIENQLSLTPRPTQTPSAF  
TSPTPTQIGGIFNEPIEETTPPVDEPTLTPTLSIFPPLIQPTQRPVLFPPQPTTQPTNT  
TALPSKIASDPPSSLPTLKTSDVP

>comp8076\_c0\_seq1; 105 385 564 LEN=1417; minus strand; translated  
MSHQDAETFIQFLWRELALAFWHRATHHIPFARWPFKTSRPNWGPVLVDTTTCRRSVRTG

>comp8076\_c0\_seq2; 286 177 1610 LEN=2100; translated  
MKPLRPRTIYGGAILLGVFFAARSANAFSRALQLVAKNHAMKSGRETHTHVHHGIGRRHP  
KPVTRTKNDAPRTVSALVVDPFSSSTETLSVLGDSLRLMGRDQAEQLAGPFFGASLFPYLA  
FLWLLARDENECPKGVTVGFATCLLFVFLTIPAAIAAQVLYGVSLADSDWLHGSAESLLT  
VTNLVTVVAFRQALESKEKDVAMPSSATSWSPMVWLVVALTALVSVTALVPAVSDPLVHT  
RYLGGFMDLPLNGFFDSLGNPEPENALSITTWIIHVSSLVEFLVAMGFAWRWATVVDNPT  
WKGLTWGLLPLHSSGITACTYHIFYNRIPILVPLQAF LTCVGNTTAALATYRIARSNGWK  
PEGINEQWILFADSLTNAPTTEDGDASSVSAEAGEAETLVGFEDLDALAGDNDYSFLIKL  
FAGCAVASYVIKYGEIYDFDFYEAADLWAGLAFIFIPSGLNAYKWYRRGQDPSFEGWF

>comp8077\_c0\_seq1; 167 142 360 LEN=626; translated  
MSTTALADIKRGSTVRIKRKESYWFNQCGNVAATDKPGSARYPVTVRFNSVNYAGVNTNN  
FAHEELEVVEDK

>comp8078\_c0\_seq1; 212 718 1675 LEN=1675; translated  
MAPGAFAAASSATASDTLVGSSKDAMKASGNAIQSSSYALSSTYNEFAPYSSVRQYKSIKL  
LKNMGKVLVSDKRARQSSAALTINGAGQFSDPTYLNGLAHLMEHMLVSSKAGSSWSNQG  
DFQEWLDGDYAEFGSNGFTAYEKVCFHFQCETGAFAEALDRFSTLFLDKVIAQTCQNKDT  
IRREIRRVSSELDKNDLFSRELYLTKSLINPKHPYSRVTLGSIETLETLPALADINVSNE  
LYDFYKNNYRPDQAILVVVSSSLSLENMVQPFSGTMLQEKKEEGSSVGSSTDEKQHQE  
QNEHIVGKQQKQQQQQQX

>comp8079\_c0\_seq1; 304 1 638 LEN=852; translated  
XNAADIRTSTTSSTPQTNTNTNTNSNTSTTMSSTNIDNEDLEVAAYTQEDAGSTTFLC  
FGVCDMRIATLAANGFNIAATLVGILVAGFKSYLFWKALGGALAAGIPGLALSavgIYGA  
KEFDLRAMYAASAGFGLLLIDICMFQWVGILINLLVVPQTVFTFELSNGFLTKENYAE  
QEYMSEQGRDFVDRVHSQYIAPMAVSPTSSAQ

>comp8080\_c0\_seq1; 279 503 1696 LEN=1714; minus strand; translated  
MTLQEYTPDERENTSSTASTLMPLSFSSTADAINVAKKPSLGQWIVPIIGILLAVVAYFL  
TKGTQNGYISYDGKNTNSEYLELLEIPEYDEEEALRHIFYSKAAFCTERAIASWSCGEIC  
DNAPVVGNDKIRYIPEGQRFVQGYVAQIPGNNDLVRSNVLFDDNPSNENGRNDDIKCM  
VSFRGSLKPANWYADFLMLRPWPLNDLSGVDWCQGCKAHHGFAQAYDEIRTDVHRAIED

LNCTRLVLAGHSLGGAIATIASFDLRAAIGYHVEATWTFGKPRIGNAEFVISFVAAATAQ  
GISPPIWRVIHYHDPPIPRAPPHLPGVHPVAHGPLEIYYTNRASSEFTVCPQHGATENQSK  
SCMAGWPLYLSLNLHDIDYLNQSFQAFKNFPDECKATE  
>comp8080\_c0\_seq2; 279 346 1539 LEN=1557; minus strand; translated  
MTLQEYTPDERENTSSTASTLMPLSFSSTADAINVAKKPSLGQWIVPIIGILLAVVAYFL  
TKGTQNGYISYDGKNTNSEYLELLEIPEYDEEEALRHIFYSKAAFCTERAIASWSCGEIC  
DNAPVVGNDKIRYIPEGQRFQVQGYVAQIPGNNDLVRSNVLFDDNPSNENGRNDDIKCM  
VSFRGSLK PANWYADFLMLRPWPLNDLSGVDWCQGCKAHHGFAQAYDEIRTDVHRAIED  
LNCTRLVLAGHSLGGAIATIASFDLRAAIGYHVEATWTFGKPRIGNAEFVISFVAAATAQ  
GISPPIWRVIHYHDPPIPRAPPHLPGVHPVAHGPLEIYYTNRASSEFTVCPQHGATENQSK  
SCMAGWPLYLSLNLHDIDYLNQSFQAFKNFPDECKATE  
>comp8081\_c0\_seq1; 678 237 2045 LEN=2149; translated  
MTSSAKKRTKDTSSYKKEEIKKEKAGKRKLYLSLVKLAEEELKRIRKDTGRLEEHAERYNQL  
WYEGGLWRAPQVLPEIQRNVTDTQRTRQRDAISLSDMFLNLVIVTAFTRVGLVITSDRGV  
TLEHLLYFAVFWTIWEKETSATRFDTTDLAQLKTLTLCFAVLFAVSLVSLPMDSEGGV  
RIMMMAAFCTSTHFCLMVRVLWYMDAQRDNSVEYNVKQYAFNVIMNFTEATTWILGIF  
VVSPSYRWVFLVGVVMAALRVPRLLISNDFYAANSQRGVLFILLGGFMLQSVVVVATDFF  
EFDNPDWQQYAFIGSTCLLLFCIKLLYCDANTLASDHAMLVNRATAAFFSVGQFALLFS  
TTILGSGLNLLTHHYLAATAALPGNDKAMVCAGFAGTCCRVPVSLFVSHRTMFCAPERQSNLD  
VCYGFFFLCCVRAAVLLSLMFTKSMHIKRVPIEPKDRALFVGAYVLQTLATIAVVGITIA  
IIYGRGGYIQTTLVQSDGLMGVLCGLAVLLVLLSWLDEGLELALQEGEGIDGKAASNFLVS  
PFGFWWCLHPEVTPPEEILAEVAAANASQSLASQRNRSSGVRLSEFSPLLESVAHMKV  
DV  
>comp8081\_c0\_seq2; 685 237 1931 LEN=2035; translated  
MTSSAKKRTKDTSSYKKEEIKKEKAGKRKLYLSLVKLAEEELKRIRKDTGRLEEHAERYNQL  
WYEGGLWRAPQVLPEIQRNVTDTQRTRQRDAISLSDMFLNLVIVTAFTRVGLVITSDRGV  
TLEHLLYFAVFWTIWEKETSATRFDTTDLAQLKTLTLCFAVLFAVSLVSLPMDSEGGV  
RIMMMAAFCTSTHFCLMVRVLWYMDAQRDNSVEYNVKQYAFNVIMNFTEATTWILGIF  
VVSPSYRWVFLVGVVMAALRVPRLLISNDFYAANSQRGVLFILLGGFMLQSVVVVATDFF  
EFDNPDWQQYAFIGSTCLLLFCIKLLYCDANTLASDHAMLVNRATAAFFSVGQFALLFS  
TTILGSGLNLLTHHYLAATAALPGNDKAMVCAGFAAVLLSLMFTKSMHIKRVPIEPKDR  
LFVGAYVLQTLATIAVVGITIAIIYGRGGYIQTTLVQSDGLMGVLCGLAVLLVLLSWLDE  
GLELALQEGEGIDGKAASNFLVSPFGFWWCLHPEVTPPEEILAEVAAANASQSLASQRNR  
SSGVRLSEFSPLLESVAHMKVDV  
>comp8082\_c0\_seq1; 66 1 1030 LEN=1030; minus strand; translated  
PAVFSLSFVPAGVAVAVALTVAALAAPARAIEPFRGNGDQPPRPPLVPRRGPGRAPLDA  
VPTGVLPGRELPCGRAASIVLARRPPAPCDRPRDVPEGLPPGPGQHGKGLVHLGRL  
RLSRRGRATAARAGGRSPPGSGGLQSAQAGPRI PDGVDGFQEGPPGSALPPPAGGVRGED  
VDVRPDRAEVPAPVHHAQLRAAGWGCVCACACGCACGCTAAVVLSSHQFLDLQDGDSS  
PQPRAVGPAPHLQDARPSAGAGTTDHTAAIGAADRLCAIAAATAAAAIGRKVHSINVT  
MPLIPSI PVVDRGAATAGLMQARKYSYRYGERDEDGCKSNMPM  
>comp8084\_c0\_seq1; 360 219 1604 LEN=1990; translated  
MLSLEDIAENQDIFQRHLLPYLPIVEVRLQRVSTRFGSLINDESCWKILSERDFEVDNK  
AAPEYNPHTKSFNDLTDQENFKKSYQQWAEWRQOTCF AIEPRHMIQSIGLWSRCKAVLRK  
QNLDKIVESLMPPPSREFFFEVAAETTLPSLLAFYAIHAGQSQLT PRSSDDDDFFAGLFGS  
YSCYNSFFSMRFLFHVSEAAVASISNSI WVGLNLGMPRTFLVLDLSNVDEGLEGSMYFGY  
QGMNHAHLVCQGGILSYFETYVERLESSMYTSCI IHPDSPTSLGLSLFPETGDTVSVAVS  
HGVEVRASARWFPERTYDGP MNFGYSIRITLAESDSDSGEVSCQLVGRNWEFRYEDGTVN  
RVQGEICIGKQPLFFRNDRDGTSGYIDLGPAGTGEANLNSTFRYQSQSGPVPPTSSNNVAK  
TTNCRVKGTF SFRPGSIEEPNGSLFFVTVGEFPLRVPMPFY  
>comp8085\_c0\_seq1; 571 1 1222 LEN=1356; translated  
XEPDSDEPSSGSSSSSSSSSSPSLPLPISGEKREGEENALPINELVHTTETSSDRRDSSC  
EGRKQVFFVEPSVSVDSKSKVTKQLEVRSLASAQVTAISNSAKNLKLNDELVVPPRSPG  
DCNDESSL SLSLSSSSSVSSSPSSPSSSSSSSSSSSSSSSSSSNDDGNGSDGGISADDST  
QKRSRNEQHREKTIEIDASHILDASSTVSSLDTKQQTGNKEENPGSDTERDGTSTRKRL  
SKSRLKQGVLAAILAMERLKNLVKEKNPSPPSGLQRMWSSSRLIDMYNASDDETDEEDDDR  
DGETSVWSDDDDDENSESSHGGKVKNCPCVQDIVKHTEQRKIILLRQMLCKKCFPTHYL  
NLQKGNQKDSDRTKASSRIVKKSEHLQLNTGRDVKILKSFKKRSTEK  
>comp8088\_c0\_seq1; 433 1 1698 LEN=2795; minus strand; translated  
EEMILVSSSMDRSIFIWSVTDDGVWTPISR VGSPCGILGGPVGASLLGYLNIQIEPHFGR

WIMGHAYGGALHFFSCERNTEDRNLNVESSEQSHMSIEERAALVKWKAQPCITGHFDEVT  
DLCW EAIKGEYLITVSN DATCRQWAPITKLLDAWIEI SRPQVHG YTLSAVTSLSTP DHEY  
QLVTGADEKELRAF DGT KSF LRMLRLI SEARGETNCGATRNDI SRVD RAYMPSLGLSNKD  
SAADGADEDTAGASTTSTLLPIEKDLGSTSLWPEVRKLYGHNSEIARLTSTLSARTCLST  
QYSTSYFNQVLVASTTKARDVNTAAIRLWDINANRCLQNLQGGHRSTVTALSFS PDGTYL  
ASSGKDRRLCVWKRRTDDNTSAQNELFFLASAVNSSHKRIVWSVHF CPHNPTTLASGSRD  
GTIKLWKITEGAGQGDQNTTVVEYSKFVPSVDVDTGHASKDKPEAVTSLAFSPCKFNNQN  
NGVIAIGLENGFIQLWSVPIIPSLDGNVVERPSTLALF DAHFCHIGAIWKLAWRPRRDE  
IGPFVLASCSSDNGCRIFSVWLHNE

>comp8089\_c0\_seq2; 453 1 1521 LEN=1884; translated  
RIPGMRWFFARDILICQIYEALSIYREGDVKSNELVYLCLLLHRRKIDADRSDSDGDDGPG  
LFDSDSEDDNNTKNPAAQAGSAKPAAKKKKILSKRERMEALRAKKRQVVSSVPGSQNENK  
GDDDEDSYNSAEYVRTKEDLDFIDTEGDDADAVAELYAEQNFEDEREAMEDPNDGKKKKK  
TKGTGSSTYRGRSERAILEAEAEDEDDPI LQAVNKLK KKKK VQKKYSELEEEAKPFLANME  
KAAADDEESISQKRPALKKLMIDEVCETLARRDMQRPLLDQDLLVTCRRWIQPLPNGQL  
GNITVRHRLIDAVALMTGENGITASDLKRSDFGKVMSLYMHKSETKAMKKKHRSLIDQW  
SRPIFHKSGNMRLERLQHSRQDGGLSQISR AHMEEQSRERALKAPVMRGHRGGKDQDL  
NSLIQSGAKGKSESGINRVRIPYSRGFQYSVRPENRTMGDIDKRRDTSGPSQDSRGKLSK  
RMLEKGRAKSKNQRSANISIEGRGTK

>comp8089\_c0\_seq3; 485 1 1437 LEN=1800; translated  
KKKKVLKKGSGNKRKRIPDADRSDSDGDDGPG LFDSDSEDDNNTKNPAAQAGSAKPAAKK  
KKILSKRERMEALRAKKRQVVSSVPGSQNENK GDDDEDSYNSAEYVRTKEDLDFIDTEGD  
DADAVAELYAEQNFEDEREAMEDPNDGKKKKKTKGTGSSTYRGRSERAILEAEAEDEDDPI  
LQAVNKLK KKKK VQKKYSELEEEAKPFLANMEKAAADDEESISQKRPALKKLMIDEVCET  
TLARRDMQRPLLDQDLLVTCRRWIQPLPNGQLGNITVRHRLIDAVALMTGENGITASDLK  
RSDFGKVMSLYMHKSETKAMKKKHRSLIDQWSRPIFHKSGNMRLERLQHSRQDGGLSQ  
ISR AHMEEQSRERALKAPVMRGHRGGKDQDLNSLIQSGAKGKSESGINRVRIPYSRGFQ  
YSVRPENRTMGDIDKRRDTSGPSQDSRGKLSKRMLEKGRAKSKNQRSANISIEGRGTK

>comp8090\_c0\_seq1; 580 90 2078 LEN=2507; translated  
MDSFRDAKKKESDDEYCSSSSDYSSSDEESYFSESSSSVSPMHRATREGDGSVFSRLSS  
SMRHR RANGVMRLKEHGDEYKHEY EYEH DGGYNSSSDASSSKTRRRKRGRGGTTGT SFHW  
SSRLLAVSLFVWFGVQITTTTEYAQQLSLQIDTDNIHNSQGTHHYRHNI GFDNLHRPIRN  
DDRKKGPPRPHRPLPKQH KDKELKPGCELDPEWQTPNSNSRLLSCQLLHELDISEALST  
KSSGRRRHLSPSAHLGNLWRDVKIPDGNPNTTNTSYVVLKTMKLEHDVIDRNLERHR  
REAA TMNRLTSSPYVADLYAYCGNSILTEFASQDLRYALNPSEKHDDHDSRNQQIKRIKE  
ANRERRAQEFRESEHVRSNNTTEHRKTHGHGNHRKHDRDVSQSLPSSGSQKDSLLSSSK  
LPLVTRLELALQASKAVAE LHQSDVIHADITANQFLVIGTTGASNPIEGDYDGGNDYGIR  
IKINDFNRCRFVPPQQRNNSTATDLVSDGSEGRVLHEGAKKCTIRISSPGTYRSPEEYSD  
RELTTQMDVFLGHVLYE IWTGGQRPWQDVVGGQRIKNMVKDGELPIELKKIENWGSSDK  
PGTRGTVAATKNQDADDLAFGR IIRDCYWVDPNRRINANGLVRELT KLLDSVREKNGSDK  
TD

>comp8091\_c0\_seq1; 422 1 1095 LEN=1168; translated  
TSLVMEGNENPNVDVRKDEELNWFYFETNNEIIRDEIEDN NENKDHTGRGRD VDWREIIEE  
NNVGDDASEEDYESDERHGNYEMGINDQIGEDESEEKRVHDELRLAVSALWKTGLEIFIH  
QLLYHRRVYPKDTFSSARFAGVACKINRNPRVLVYI SEALRSILPSLFDEEEKGIILNEGH  
GQHRRSKELQVEIYDREKGI THEQYSLFFSHEGLEDRDADV TSAALSHSFS LPLTL DNE  
RSDLANSIMGEVEKDLRDLVCSTARLEGLRFCAWDDSVSFKVLLVMNTTANVMKPTIASD  
SVLDETKWFRRTETKTLSDNQNRNTRVICNLANSACQFSYKVVKNQGRQQQTGNKSESSIK  
GRQA

>comp8092\_c0\_seq1; 263 1025 1795 LEN=1954; translated  
MSYRRHEL LPSVYNQRYKLF RNN SKLTPGHHHPGVRGDVRI PSFPEVLSTLIEEDIS  
VRSYDAWSKFFPVSI FNTHQEGDLVTNFVCQVVTGARQLCRIFADDSNEASNTSINKSTS  
YLDWDILGVFAHEQGLVH ELDNRYKLAKAIGAYIRSNLRLPLACPTKETIDQLYRTSMK  
IELWATSFSGPKPLTNFQTSWEETLQKMKLC SVNASSALEQEVWKNFFQORMSSIDFRET  
NATAELLNLSNITHQ

>comp8093\_c0\_seq1; 545 43 1455 LEN=1498; translated  
MSSGKEEVTGARGGLFAGGRFKGGTDPI MEKFNESLWFDKRMWAQDIRGSVAYAKAIGK  
VGIITQEEVN LIVEGLGVHKEWEEGKFETKPGDEDIHTANERRLTEIIGPTGGKLHTGR  
SRNDQVATDTRLWAVEAERDVLKDMGILL SAAANFSKEYIDVLMAGYTHLQPAQP IIRFSH  
WLMSHVTP LVRDAERLKEIIPRTNRCPLGSGALAGNAFGVDREYLAKELGFEGVTANSLD



SVCDRDFVVEFLMWHALMLTHISQFAEDVIINNLLKCIDMDDAYATGSSSLMPQKKNPDAL  
ELLRGKAGVALGKAVGLTATLKGPRAYNKDLQEDKLLLFAMMDTVKDC LAIATGVIVTM  
KPNPDKLIQALSPEMLATDLADYLVRKGVPPRETHHISGACVRLAEKKVSIDTLSLEEL  
KEIDARFEADVTKVWDYEVSVVERKSSIGGTAKASVLKQIEDVLAFKATLE  
>comp8094\_c0\_seq1; 368 501 1628 LEN=1896; translated  
MAQGDQASLPEGPIVPDKTIDEIRAEPYKMPSPGFESTLDIMDAEQREELYDLLAKNYVE  
DDDCMFRFDYSKEFLEWALTPPGYSNDLLLGVRRASSSKKLVAFISAVPANVKVQSKSNLD  
VVEINFLCVHKKLRSKRLAPVLIKEITRRVNQKGVFQAVYTAGVVLPVPVASARYYHRSL  
NPKKLVKVGFSRINPRMTMARMIKLYKVADVPKHNLVEMTEDHVDGVHKLNTNYLDSKFK  
LHVNFTEEIAHWLLPRNAVNTYVVVDVDDNSKVTDMVSFYHLPSTILNQNETLYAAYS  
FYNVATSMSTLDMKDALVLANATGTDVFNALTLMENEFFLTDLKF GIGDGNLQYYVYNW  
SSPSMKASEVGLVLL  
>comp8094\_c0\_seq2; 393 263 1513 LEN=1781; translated  
MSPNDEEKNKTSNQVLQMLRENGVSTEGLEEKSHAFWDTQPMQGDQASLPEGPIVPDKT  
IDEIRAEPYKMPSPGFESTLDIMDAEQREELYDLLAKNYVEDDDCMFRFDYSKEFLEWAL  
TPPGYSNDLLLGVRRASSSKKLVAFISAVPANVKVQSKSNLDVVEINFLCVHKKLRSKRLA  
PVLIKEITRRVNQKGVFQAVYTAGVVLPVPVASARYYHRSLNPKKLVKVGFSRINPRMTM  
ARMIKLYKVADVPKHNLVEMTEDHVDGVHKLNTNYLDSKFKLHVNFTEEIAHWLLPRNA  
VVNTYVVVDVDDNSKVTDMVSFYHLPSTILNQNETLYAAYSFYNVATSMSTLDMKDALV  
LANATGTDVFNALTLMENEFFLTDLKF GIGDGNLQYYVYNWSSPSMKASEVGLVLL  
>comp8095\_c0\_seq1; 1414 138 3770 LEN=3811; translated  
MATDPRRRNLVKTEPVASETAPGIDATLMNANHNASGNP IPPKNEFILFSGVDDAMDEDE  
DLFDDSEPLQDEPQQQAVPSSSSGAAPTGVGAAGGGSASYSSGVEANYQYGYGNQGSVV  
VPHRDVDLLSTVISPSPFAHHSVGGAGSSRYRNALTRIAADPRSDVEAWGALLAEASACW  
KSLHNSSADNGDGGIGGTGNSARSQVHVNIARTSAETQLQLDWIESCYGAFLKYFP  
YSCGHIRSVGDILFVQSARVGEEGPTTDYQGEAPGTMSRSQQAQWKLETILRKALGVDL  
EGNNAAVAPLPRSGEKDTTDGTATTTKQHSPAIVGGTCTPSVDLWLLYIKTRIRHTRRK  
HGNSKTMEAGKAIMEDSRKAYELALGFSGFTCHDNHLLWKAYLDFCKASVPPIVSEREQN  
AASLIMTPQQHMMWLREVVYQKLIHPMTGLDQLWQEYESFEKNQSEALAAALVQEWQPKY  
QHARNIYLERNKVFNPQALHWKTRLAVPPVSTSWVDQMDADHGTPGIGATGAGGKSSDS  
KKKLDK DASGGATTEELREHNEKLQEEFDYTLWKKRVAYERTNPERLTNTQELAHRV  
RQAYKEMVCVLTLYPEVWHMSTWEEVVTSSAAASDDTSAANPAAVFGNRSIAVLELGO  
EHIPDSTLLVHAQAQLEEIHFLSKASSAAGTTKTASPGDNPALRVFEKYIERAPTSLGFC  
LYQRLVRRYRKGDAARQTFARARRILSHGYDAGNSGLSFNAGEKLDRAEAEPASEDSTA  
TKVNGKRWMVTNRLDPSIGSKSVSRKASQVANDQEDTSSSIQVAPGITWHLYACHATI  
EHRLNKSP EIAGRVYELGLRKHSSFLT KPSYVLKYAKLLELQDTVNLRALLTRALACA  
DSKKSQVEALWDMTLECEELWSILEPENIEVAVAIERKRRALLGPDIEDVSTGSRVGL  
SDNRTTIGVQKSTLAEQLLRTDGYDTSSLI VNLGRTVNVLDIMGLWGDGASRKQHSGL  
NNTDDGADELIPGGKSDRSYQNRQLQFAHKVAAGVSLIPGTMGGSEAPGSKLLSARERLSQ  
QQGAGPGFQNTPIQLAIQQQPEWLRGMLLMLPASRLRSPIVPKAPPHLVVQALTSLRQN  
KLPEERPNDNEGKNSSSSQSGKRSALDANGGDSSEDTGPTGTGGYGTQFRARQRARM  
RMNGIEAGSS  
>comp8097\_c0\_seq1; 281 1 873 LEN=922; translated  
ASLYQKILILCFVLSNPFPRLPKVTSQWGEPLITAFDVG YGTEKEDFSSTKPKESQLCNA  
DVAIEKRDGFLFDCVDLCIEEGSQT CILGPGTSTSYLMKILAKKLAPTEGTVHHSSGLTI  
GYCDCRELKDKISSIGPAMTALKYLSTRYPKKNETDLRSHLAAFGLSQT SQAKTSLSCLS  
GGESFRFVLA EIMLENPPI LFLEHPTSHLDAESVQAFAYSLREWNGTLIMLCQDASFLRS  
LERVKCLVIMPEEGKIRRIIDDDRGGMRGMDAYLKTLSRSIDKSRFYNQC  
>comp8097\_c0\_seq2; 718 229 2417 LEN=2466; translated  
MMSMLEVGIEINIETTQYGSKNTESSNPNNFVAVKSLQEMPASEDVTQAQLSSLDLDDTDCY  
ASVWEQILAEQRDEESSQSARSYNLWGGKKGGRGLARKTIQPHNVVVEDVRLKYLLGDT  
CLEGATIKLLHNHVYCLVGRNGCGKSTLLKMHQS TIPGWSVRWSSLYLPPTLPPGYLQL  
TPMQVVTKYLEECKKDSRLATESQISELEDRIDCLDLENEQEKMEILCEELSSLEDKLN  
EDSLKQKRDLEELGIDEIKLCEELQPVQKEVLLCAACICCPFNLLMDEPTNDLD  
VHGLIRLRQLIVDNFAHSTTVLIVSHDIXLINDVATDIIDMCAQKLWYFPGNYDSYRLMK  
DQKESHFLKQSQAMERKNSELHSTLQHLKDKVPKRRGGAKKAKSVQSHRKKIEKHVKD  
MQILESSADIPMDRGLSLTQRLKLEITKTAPDKAVHFALPKVTSQWGEPLITAFDVG  
YGTEKEDFSSTKPKESQLCNA DVAIEKRDGFLFDCVDLCIEEGSQT CILGPGTSTSYLMKIL  
AKKLAPTEGTVHHSSGLTIGYCDCRELKDKISSIGPAMTALKYLSTRYPKKNETDLRSHL  
AAFGLSQT SQAKTSLSCLSGGESFRFVLA EIMLENPPI LFLEHPTSHLDAESVQAFAYSL

REWNGTLIMLCQDASFLRSLERVKCLVIMPEEGKIRRIIDDDRGGMRGMDAYLKTLSRSI  
DKSRFYNQC  
>comp8098\_c0\_seq1; 311 306 1379 LEN=1508; translated  
MAPDLKQKALAPVEGAISKYMSQMVLEKEDNPEMPDYVLHEYSPLDSDADLGPADWVTI  
AKDIESNYFKFDGFFVLTGTDTMAYIATALSFMLENLNKPVIFFTGSQIPLCMPQNDARRN  
LIMAMIFASRDSINEVCIFFHDRLLRANRTTKVNTKLLAFDSDPNMDPLATIGISIDENE  
HVLLPPAKGPLRVHLRMDTRLLTIRLVPGFDDSMIRRLIESNMEEQQLRALVLQLYGTGN  
LPSVKESFIKLLADATEQGIMVIASSTQCFTGSVLLGHYATGRALLEAGAVSAGDMTLEAI  
ACKCAYLFGRRGFTNQNEELMGISLRGELTPPELLVPPPTGASGSFEQCIKARKRS  
>comp8101\_c0\_seq1; 177 1 467 LEN=1122; translated  
XFRRGWIGTFPDPDPAFSPPRIVLCLGPFSPARTATDLHMLGAFRQPIGIPDLLLLP  
DAWRKTASDEKADEVPETQNDIWCRSVESDYHSGASREEENKENGDDGIPGTTTTDDDDYV  
YDNDNDDDDSVQLPEPVTNRLHRRRIQRIIRGT  
>comp8101\_c0\_seq2; 463 314 1393 LEN=2048; translated  
MGRDLKPPYGGQQLLLNYCFGHPDTNGVLCYPIGIGINYINHDKTRANVEVRWGQDGVAGH  
FDKFLDVPLANITDYSTKVAFDYVATRDIAEGEEIFLDYGDWEEKWNALRDEWQTFEDR  
SHLDNYVSAAQFNEIHEHDYLLVPKELEAKEEYPYPNNLSLRCHHVLNDYSTTFDGSLED  
FEDWSNWDYDNTGYLCEILERSDDNLSYVVHYIIDDRDRDRAEPITISNVPREAMKFFDN  
PYTTDLHMLGAFRQPIGIPDLLLLPAWRKTASDEKADEVPETQNDIWCRSVESDYHSGAS  
REEENKENGDDGIPGTTTTDDDDYVDNDNDDDDSVQLPEPVTNRLHRRRIQRIIRGT  
>comp8101\_c0\_seq3; 698 193 2244 LEN=2896; translated  
MPTAFALADNSVPLLECELYLADSTIPGAGIGIFSGVSKSQGDYIGNGDKAIPLVDYWH  
NGYLGSSFFNPTADYVWDGTSMGMRLELFDENDVSAFWPGIDAMVNCCHSGLLNVEKASPV  
YDEGGIHRSRHHGAGGVSPYDAGETGSYVCRDIPVGGELFKSYGDQWFLGREQLGPIPIVI  
QNYEEAIRLMQMLTNEKDSATLGIPIVSEVYEMLVKPFKEIWNRSRTLNAFYDFSWEVEKKA  
AAAGDIGIHLQGNATRSDIWLNENKCLDHIHVKRSTVDGAGAGAFKRDLPQGTVVVTGT  
PLLLFPDKKWFDMYDFKYCSDGTMGRDLKPPYGGQQLLLNYCFGHPDTNGVLCYPIGIGIN  
YINHDKTRANVEVRWGQDGVAGHFDKFLDVPLANITDYSTKVAFDYVATRDIAEGEEIFL  
DYGDWEEKWNALRDEWQTFEDRSHLDNYVSAAQFNEIHEHDYLLVPKELEAKEEYPYPN  
NLSLRCHHVLNDYSTTFDGSLEDFEDWSNWDYDNTGYLCEILERSDDNLSYVVHYIIDDR  
DRDRAEPITISNVPREAMKFFDNPYTTDLHMLGAFRQPIGIPDLLLLPAWRKTASDEKAD  
EVPETQNDIWCRSVESDYHSGASREEENKENGDDGIPGTTTTDDDDYVDNDNDDDDSVQ  
LPEPVTNRLHRRRIQRIIRGT  
>comp8103\_c0\_seq1; 573 1 1630 LEN=2674; translated  
XNSNSNSTNKTKEKYDPYFWLPSQPPSDADQQLTRNRREDHTLCEGTTIEQSMSHDST  
IISIKSSTEDGDDVIKRTNTLPNPRSSSSSTILNTVEVSSLTLDKSKHRQPTVMTPNKDA  
SPYDMILGSWPFQSSKAEGKEAKMRVQTQATTSPAPKLALVDHSLDQESLASVASTIFS  
TSQRAQKSLFRPISPTPEATELANSDFVTTEPLSDENFELESRISEIESIDLAELENPF  
RREKKDPSSSDKSGIQKVASTDSSDSSGCKGFKNKKINLFRLSRMNRIRGSNSIEKEAKS  
SREKTKTKSRKNASTRASIFSKSSAEEDVFEGVEDISSVEQEQQFSMHEKWDLSRVENIS  
IKGSASHVSDLSESVYSSSQKGTEDVEVEEESVQLKTKNIKPFPIPTNESPATVTLSPSI  
TTSSVMSESTKKS LVNSTTARSEGSTAGFSSYESTTTTRDGTNSVNSLELENSGVETTGF  
FDYFAAYATAVMTECANLAAASGAAEYQEFMTIFSGGASVNNALRHQTSRDVPSEHTR  
STL  
>comp8103\_c0\_seq2; 573 1 1630 LEN=2615; translated  
XNSNSNSTNKTKEKYDPYFWLPSQPPSDADQQLTRNRREDHTLCEGTTIEQSMSHDST  
IISIKSSTEDGDDVIKRTNTLPNPRSSSSSTILNTVEVSSLTLDKSKHRQPTVMTPNKDA  
SPYDMILGSWPFQSSKAEGKEAKMRVQTQATTSPAPKLALVDHSLDQESLASVASTIFS  
TSQRAQKSLFRPISPTPEATELANSDFVTTEPLSDENFELESRISEIESIDLAELENPF  
RREKKDPSSSDKSGIQKVASTDSSDSSGCKGFKNKKINLFRLSRMNRIRGSNSIEKEAKS  
SREKTKTKSRKNASTRASIFSKSSAEEDVFEGVEDISSVEQEQQFSMHEKWDLSRVENIS  
IKGSASHVSDLSESVYSSSQKGTEDVEVEEESVQLKTKNIKPFPIPTNESPATVTLSPSI  
TTSSVMSESTKKS LVNSTTARSEGSTAGFSSYESTTTTRDGTNSVNSLELENSGVETTGF  
FDYFAAYATAVMTECANLAAASGAAEYQEFMTIFSGGASVNNALRHQTSRDVPSEHTR  
STL  
>comp8103\_c0\_seq3; 573 1 1630 LEN=2874; translated  
XNSNSNSTNKTKEKYDPYFWLPSQPPSDADQQLTRNRREDHTLCEGTTIEQSMSHDST  
IISIKSSTEDGDDVIKRTNTLPNPRSSSSSTILNTVEVSSLTLDKSKHRQPTVMTPNKDA  
SPYDMILGSWPFQSSKAEGKEAKMRVQTQATTSPAPKLALVDHSLDQESLASVASTIFS  
TSQRAQKSLFRPISPTPEATELANSDFVTTEPLSDENFELESRISEIESIDLAELENPF

RREKKDPSSSDKSGIQKVASTDSSDSSGCKGFKNKKINLFRLSRMNRIRGSNSIEKEAKS  
SREKTKTKSRKNASTRASIFSKSSAEEDVFEGVEDISSVEQEQQFSMHEKWDLSLRVENIS  
IKGSASHVSDLSESVYSSSQKGTEDVEVEEESVQLKTKNI IKPFPIPTNESPATVTLSPSI  
TTSSVMSESTKKS LVNSTTARSEGSTAGFSSYESTTTTRDGTNSVNSLELENSGVETTGF  
FDYFAAYATAVMTECANLAAASGAAEYQQEFMTIFSGGASVNNALRHQTSRDVPSEHTR  
STL

>comp8104\_c0\_seq1; 447 302 1549 LEN=1734; translated  
MPHPSARNAAAVFSRRISVLVWMLVFAGRQLRIPAARAFATGSVSNRRRAASASASALL  
ETPKATATSPPLATATATRLRSTLAMETGNATTTEAPEKREYPIEMSDDEKYLFDLNGY  
LIVRGLVLTPEEVDEANAAIDRHADEMIERSDADLRNAKRGTKYSGQGPGRMDLGRCLEWG  
ETDSRVFRSILAHPRLLVPVFGILGKGYRMDHLPVLAQNKGSEGFQLHGGTIDCNSGAY  
NPFLLAYHCSNGAITTALLGCNVILRDHNPGDGGFCIVPGSHKSNFRMPKGMVDGEREYEF  
VVQPATKAGDVFILFSEGTVHGAKPWTSDQRRRTALFRFSPATNVYGRSYFGHEGGGWPSA  
MYEGLTPAQKAVLEPPYANRLDRPNILDDAESVEITTRNARKKQHDRDVFGTKYF

>comp8104\_c0\_seq2; 195 234 547 LEN=732; translated  
MAYAESLPVIXPWTSDQRRRTALFRFSPATNVYGRSYFGHEGGGWPSAMYEGLTPAQKA  
VLEPPYANRLDRPNILDDAESVEITTRNARKKQHDRDVFGTKYF

>comp8105\_c0\_seq1; 300 76 588 LEN=710; translated  
MLSRSSSTVAKTLLSRTRGVAARSFSSSEATEAATSVSLNFSVPYESIYEGASVESVIIPGT  
EGEYGV TANHV PVAQMKPGILT VQFDATSEQYFVAGGYAVTHANSVTDVVCVEAVKVD  
DL DASAVSANYEAAKSAASAASGSQEEAEAQIDMEVNKTMGAALGLTLG

>comp8106\_c0\_seq1; 1663 239 3625 LEN=3625; translated  
MPSSPRSDLEQMEEQAALARRLKT VGDYKHGSIKRIKLRKFLTYSAAEFSPGPRLNMMVVG  
PNGTGKSSILCAICLGLGGEPRLLGRADQVTSFIQNGETEARIELEV VNEHGENVIVTRT  
IHGSGDGSSGSNRRANSNKSSFTWNGEIVSGKKVQERASKDFQIQLDNLCTFLPQEKVG  
NFSGINSKDLLLETEKTLSDNKDLYEKHLKLIEMQTELRGGFSKVDNLNEKAAFLAEVA  
KYKADVDRMEERRKAEQADLLRKKLMWLKLDGVRETCLALKAQKEEAKQKVENLEDELE  
PLLQARDQAKEWLEKARNVDVDAFEKKIKNEEKMAKQKHKFDNHDDQIEETLAEELATVDN  
TRAKYENDARLLRDKVGGLOEALDEEPPMEDLEEAFASARREQDAIKPRYND SKTALLEL  
NHEMSSVKDERNNVQRKLARLQNEKEQRRENVFRYFEDVRNAYHWINNNRGLFRKEVIGP  
VACEISPKNDSAAFLEQHVANSVLKSFVVQDKSDYDLLYNKVRREQNIPININVFDRIS  
QGEPRMFSEQKMAVLKRDHGMGYLDESFDAPDIVVQVLKTN SAIHKVLVGS DR TQD SLD  
GRDLGRILSESEHHHGKLSYCFASKDGDSFKYTSQVSRYSKGKPSLRVDDVRVARFLSR  
GASDDAKQRTVTKLREVKDRENEIQPKIEQCAREQEDLLLQVQQAQORSKEIKAKIQTIK  
KLVQKLQNSKRKLREAEERLETDDDEEKRNLRKLRLEASLKAMNAYSESNNKMVELT  
VEVAGFKVDKEFALVRARLSEKAGDAETAIDTMRDEFKAKQQFAQEK SRYKELAQRAS  
EQAPLADENGEETDLKRKLEVDLAQFDREDLAQNAL EEA EAKINSIQRDDSALRVYEEKT  
RELEEVRESLDDLKDRKERGQSELERMRVPWHSTLKEI IETVDKRFTKYMSELGCIGSVS  
LKDGDNDEDFLFEDYAVEIKVSFREGVKPTVLSRVQSGGERSVSTIMYLMAMQDMMVSP  
FRCVDEINQGLDDRNERLVFKRIVENSTQAPGPNPPTDHCGQYWLITPKLLPNLTDMEVA  
AMNVVICIFNGAYNFKNPTDWCTRELIAIRKRRHEEIGDHDIGDDDDDDDD

>comp8106\_c0\_seq2; 1695 239 3721 LEN=3721; translated  
MPSSPRSDLEQMEEQAALARRLKT VGDYKHGSIKRIKLRKFLTYSAAEFSPGPRLNMMVVG  
PNGTGKSSILCAICLGLGGEPRLLGRADQVTSFIQNGETEARIELEV VNEHGENVIVTRT  
IHGSGDGSSGSNRRANSNKSSFTWNGEIVSGKKVQERASKDFQIQLDNLCTFLPQEKVG  
NFSGINSKDLLLETEKTLSDNKDLYEKHLKLIEMQTELRGGFSKVDNLNEKAAFLAEVA  
KYKADVDRMEERRKAEQADLLRKKLMWLKLDGVRETCLALKAQKEEAKQKVENLEDELE  
PLLQARDQAKEWLEKARNVDVDAFEKKIKNEEKMAKQKHKFDNHDDQIEETLAEELATVDN  
TRAKYENDARLLRDKVGGLOEALDEEPPMEDLEEAFASARREQDAIKPRYND SKTALLEL  
NHEMSSVKDERNNVQRKLARLQNEKEQRRENVFRYFEDVRNAYHWINNNRGLFRKEVIGP  
VACEISPKNDSAAFLEQHVANSVLKSFVVQDKSDYDLLYNKVRREQNIPININVFDRIS  
QGEPRMFSEQKMAVLKRDHGMGYLDESFDAPDIVVQVLKTN SAIHKVLVGS DR TQD SLD  
GRDLGRILSESEHHHGKLSYCFASKDGDSFKYTSQVSRYSKGKPSLRVDDVRVARFLSR  
GASDDAKQRTVTKLREVKDRENEIQPKIEQCAREQEDLLLQVQQAQORSKEIKAKIQTIK  
KLVQKLQNSKRKLREAEERLETDDDEEKRNLRKLRLEASLKAMNAYSESNNKMVELT  
VEVAGFKVDKEFALVRARLSEKAGDAETAIDTMRDEFKAKQQFAQEK SRYKELAQRAS  
EQAPLADENGEETDLKRKLEVDLAQFDREDLAQNAL EEA EAKINSIQRDDSALRVYEEKT  
RELEEVRESLDDLKDRKERGQSELERMRVPWHSTLKEI IETVDKRFTKYMSELGCIGSVS  
LKDGDNDEDFLFEDYAVEIKVSFREGVKPTVLSRVQSGGERSVSTIMYLMAMQDMMVSP  
FRCVDEINQGLDDRNERLVFKRIVENSTQAPGPNPPTDHCGQYWLITPKLLPNLTDMEVA

AMNVVCI FNGEWNKTKRFSLLALRFRNFFELLTVVIFFLPKGAYNFKNPTDWCTRELIAI  
RKRRHEEIGDHDIGDDDDDDDD  
>comp8107\_c0\_seq1; 61 159 509 LEN=1621; translated  
MAKPAVDDIDPSTGRAIRDKIRSDMNPGLAHNHGKPARAPYASKSGSADPRDQPATYL  
TSCSKENKASLQCIERNYQNRAACNEFFQAYKDCRREENEQRAANAEGSSGGWFW  
>comp8108\_c0\_seq1; 743 245 2149 LEN=2514; translated  
MATGNNGSPRPRNVSKCPFKMNVASSSFQNTLPWTSDANNDPVHHTPAERKPPQNQLLERV  
TAPITASNPRGPQLKNSASHPGTETTGNIPVTAVTPSTKSENNDSDRMSDSFAMSDIDD  
SNDTWRNHGKSFRANIVLADESNGGDFALS DTCGIERYR VADRVLEQFLSSNITERNE  
LIDSYL VGNRLF KFLSVVLP THQQYFSLEPRLEELRHRSES QLMELLE YVEELELMIDEM  
EYNRYILNDLTPTEIYRAGGGDETSSTTNEISIDEGDDVKSDFRDGESLNKSNNNSDTI  
QIDNPQREFRGGSVKVAVQAI EASHQKQRQSN DVLSQDEIFKERVAAVLTARNNAELSIN  
AGQLARLVSN GNTK LKPISSRNTNTKRLDPSFEKHKKDTNGKIPEILSHDGELIDNQGVI  
QCVESTSNASQVVKKAI EQNQCEEETRYR SSSNSFLSWDVDFSQFN VFSPE SKDFIGPEQ  
KKT HIDL LLMEDL P SPKRNHVESSKLI PKIKEPPSCYPRSVRVHAQAQAQLSSSFEKSI I  
NTKDHEPDLSQGLSECSSDIFHCPENPRSDERAPVKTKIEKRMERAMVSKRSHYDKQVDM  
SFNIAHDEGSSMVEAQSQRNLLNQFRGCIKSLLD  
>comp8108\_c0\_seq2; 653 245 2265 LEN=2630; translated  
MATGNNGSPRPRNVSKCPFKMNVASSSFQNTLPWTSDANNDPVHHTPAERKPPQNQLLERV  
TAPITASNPRGPQLKNSASHPGTETTGNIPVTAVTPSTKSENNDSDRMSDSFAMSDIDD  
SNDTWRNHGKSFRANIVLADESNGGDFALS DTCGIERYR VADRVLEQFLSSNITERNE  
LIDSYL VGNRLF KFLSVVLP THQQYFSLEPRLEELRHRSES QLMELLE YVEELELMIDEM  
EYNRYILNDLTPTEIYRAGGGDETSSTTNEISIDEGDDVKSDFRDGESLNKSNNNSDTI  
QIDNPQREFRGGSVKVAVQAI EASHQKQRQSN DVLSQDEIFKERVAAVLTARNNAELSIN  
AGQLARLVSN GNTK LKPISSRNTNTKRLDPSFEKHKKDTNGKIPEILSHDGELIDNQGVI  
QCVESTSNASQVVKKAI EQNQCEEETRYR SSSNSFLSWDVDFSQFN VFSPE SKDFIGPEQ  
KKT HIDL LLMEDL P SPKRNHVESSKLI PKIKEPPSCYPRSVRVHAQAQAQLSSSFEKSI I  
NTKDHEPDLSQGLSECSSDIFHCPENPRSDERAPVKTKIEKRMERAMVSKRSHYDKQVDM  
SFNIAHDEGSSMVEAQSQRNLLNQFRGCIKSLLD  
>comp8109\_c0\_seq1; 705 289 2157 LEN=2287; translated  
MSPSTISMTSSSLSP TIVTFLLGLLAALPAANAFQTA EKT VSTPLTNKKKDIRLAEIPT  
PVQWPLIGNLPDFLSRGGVDGYAEVHESMYR DYGEVYGSNLGGNTMLVVADPNVYDQVL  
RREGTLPRGGAEMVTTFTDYKENELELPLKSI SAGPGWREWR SALNPDLYVLWDTYLP A  
IAKSCSEISSVAGTEMSRKNLSFHTFVSRAAFDMFSAVLFGESPRTTDTSNARPE DVEFV  
KATQTAFEATGKLM TNPM EKYSWFPSEGDNLYE I FVKNMDLVFNIGKDRCTKFANDALS L  
QQEAAKAKESEANGSGIGSETGSLASEASNGCPVTALKSTIQSAKPRMSLGRNKVVPTSF  
GETNP SLIERLVDRGVFGDENDETATKRIDTIGDVAAPLLMAGVDTTAYVMGW FYLNLAS  
NPDVQTR LAIELRET LGGADVVTVEQLES LTYLKACFRESHRLTPSNPLLT KKLKEDIDL  
VVTNGNNGSPDKAYRAPAGENICLNLRGIPMDPKYVENPMVFS PERFLPEAVSARKGTPS  
EVIDHPYFSDPFGRGKRRCIGANVAVAEMLVLAARLVQDWEIRLVDPSEATTSP TKKWK  
KQKMLLADPYPDMVLVPRTKA  
>comp8110\_c0\_seq1; 438 192 1511 LEN=1628; translated  
MVFGRRAI FVYFLSFFSATLLGDCAAKTKDPTRSPTRTPTASPSAEPTISPAPTAEPSK  
APTLFPTATPTKRPTRSPTRKPTIVTTSSPTVATPSPTGFPSTTPTISPTEDPGVLLPII  
AFDVILSNGEDVSDQIQSYFVTFLEGVLEESSENYRFD FSHLDSNGLISVFN DTKSLGT  
EYLIQMDGVAYYKDEGPSIDALAQSLNVYFSFWGAADLEDYLG SVKFENAEVIVSVIDGE  
PVSFVSS TKHEEENQE QNVAPVYENIFYNDEGELSKPVVISIYSSVAVAVIVALIVFRH  
RIGKRRLARKAETQTD ETGSDGGDVENGRSKII EATETSP TIREVRAQKI QVTNSGKMK  
SRTSKTSNRKPVSTDDHPSPNHFTTERNKNTNTDEGHDESTTQDQVSRPLQDNPVKKEE  
GTSDEAETDKNESNSTRPV  
>comp8111\_c0\_seq1; 307 194 628 LEN=939; translated  
MNPTRSVLPR SAGVALA AVLVL LAATASEAFVPVAPGAAATLSSASALWSDPSQGGQQQP  
TGRLERIEFKIYPDGRVEETVLGVQGESCLEVTRSINEKLG NVI STTPTEEMYQE EVQID  
QTLYNSNTEGSGDSGASWEGSSSW  
>comp8112\_c0\_seq1; 368 445 1503 LEN=1625; translated  
MTISARLLSFLAALAAPPGLAFSPQRPMHVRAGASGRPLPNESLAPKALPADD DPGAR  
VLSAETGEAPSLPA STRAHAEVFGRFASREHGQKFVADDGALYHILKGLDIEASEEDA  
AIVFRYLDSDGDRLEFEDEF LPWYLEAVGAATGVSAGFRSLLVGRRTVEAFDETPVDDA  
VLERA VQCAIAAPNRS GSEPWRFRKVGRET VRKLAALHKARDGSSESTGYTDWESVAPGW

CVVTRTVSAARGEKDGHETESGGLRSEAQQDFKSVCCSIQNFMLSMWSEGIGTKWTTGPL  
QTTTEFATICGIDTELEAVVGI IWYGYATGGTRYADPKRRKLGVDVLGYLP  
>comp8113\_c0\_seq1; 550 356 3098 LEN=3098; translated  
MTVKAVDNGNKHKGIGEGEIDF SIDLAPANATSGQELHHVHFRGD XEGKGNNDREKNESF  
SSVGKSGKNNRTDLETGSCSGKKGKMLRERFSSTSGELMPVIREDTVKSRRHSGNMSEYTA  
SDVEWEEIRNTLGSAADEFECQDSTSLQLELEAVDHFLLSSLNPNVNFVGVKKEQSI PMKS  
NGNNTSARSNHTQRF SMAQRSDDTLVTCPADCYSLILNGPNRKPSFFLFGVFAFSLQFA  
LLMCAILSVLHPVMNTLGEVDNPGESGVSFLPSNVSNLVRITQILAVITYIFFADSSLR  
DVITAVETFPTRSKTTPNESYGC MVCSVLRFITGIMTVVAVFLLIITKTDVMDIILDFM  
AMSFVSNIAKLG FELALWGKYGPAL EHEANELLHRPMPKCMIRKNNFVRYMKTILLLFST  
ILLIMFIIIGQEKT TWASTSLRVQFVDKTSNFLKGYNGCYNMANHTIPSLNHAKRIVY  
EGHPSNNKQANFAYNHNSRHWELLDTS LNETEGEIVLLAHSSDTLSFDISTSFDEPWYSA  
SGTPLDVYFFEKFD EEQRLSSCDSFLNNGICDEIFNTEYKFD FGDCCASTCTNSRCGVG  
GLLNAFGEEIIYGDGFPFCKDPDMVPITILFN DIFASYNATNKLTNDMMAPLSSDTIEPM  
MLLDCDDVNI FTIPVNGKMFNQSETFMVRD GANCTIRINNSTSTVQAEGRPIWLVDYTVF  
HGDQTSILNDDSI VILREQSSNNEFAMFQRIPDCYFEKLSNHLDTSTIYMGDESHHRAIK  
WLRATSETSKNSRCEDDNFLERYALS VLNFAAPITPPLPSEDNTNTTTDQPPFATSNI TM  
VDGVPSPIDLTTGNPASSVPLPDLAQKGGVVNGFSSEKLWINENRQCIWRSVECNRSVE  
CLYLQQRDLKGTIPS  
>comp8113\_c0\_seq2; 339 177 1825 LEN=1825; translated  
MYTYCQGFELALWGKYGPAL EHEANELLHRPMPKCMIRKNNFVRYMKTILLLFSTILLIIM  
FIIIGQEKT TWASTSLRVQFVDKTSNFLKGYNGCYNMANHTIPSLNHAKRIVYEGHPS  
NNKQANFAYNHNSRHWELLDTS LNETEGEIVLLAHSSDTLSFDISTSFDEPWYSA  
SGTPLDVYFFEKFD EEQRLSSCDSFLNNGICDEIFNTEYKFD FGDCCASTCTNSRCGVG  
GLLNAFGEEIIYGDGFPFCKDPDMVPITILFN DIFASYNATNKLTNDMMAPLSSDTIEPM  
MLLDCDDVNI FTIPVNGKMFNQSETFMVRD GANCTIRINNSTSTVQAEGRPIWLVDYTVF  
HGDQTSILNDDSI VILREQSSNNEFAMFQRIPDCYFEKLSNHLDTSTIYMGDESHHRAIK  
WLRATSETSKNSRCEDDNFLERYALS VLNFAAPITPPLPSEDNTNTTTDQPPFATSNI TM  
VDGVPSPIDLTTGNPASSVPLPDLAQKGGVVNGFSSEKLWINENRQCIWRSVECNRSVE  
CLYLQQRDLKGTIPS  
>comp8116\_c0\_seq1; 67 1 704 LEN=1427; translated  
XIYPQEYEVVVLVFEWRYSGICLLGYSKQEKLTPLHHRVSAKTEKQIQIQQOEHSND  
CPKTKPIEIVSSAVAAIGTGTASAYDWT CNLYCYNKGVCRHGHGKFGAYAGIDSEID  
DLPEQELHENGMYCTCPKGYTGLQCEIKFVTCGRDSHTCFNGSACVKERSTDTGEAFYR  
CACDAE GSIMDAPYAGKYCEHIATVFC DGGGDGFEHGSACVCTNGGRCRQQQTDDP  
DLDFDA  
>comp8116\_c0\_seq2; 65 1 731 LEN=1262; translated  
XIYPQEYEVVVLVFEWRYSGICLLGYSKQEKLTPLHHRVSAKTEKQIQIQQOEHSND  
CPKTKPIEIVSSAVAAIGTGTASAYDWT CNLYCYNKGVCRHGHGKFGAYAGIDSEID  
DLPEQELHENGMYCTCPKGYTGLQCEIKFVTCGRDSHTCFNGSACVKERSTDTGEAFYR  
CACDAE GSIMDAPYAGKYCEHIATVFC DGGGDGFEHGSACVCTNGGRCRQQQTDDP  
DLDFANS GCDC PEGW  
>comp8117\_c0\_seq1; 215 110 625 LEN=862; translated  
MKGALSFTTIVLGM SAASAFVGF EIQHTGSRTRV PKQIGLQRMASAAPAESDIPDSVME  
EVWRYVKKPLISVGGK GATNKHGNSLRQLLNDHTAVKVKVNTKSFGTLENAYESLRDLAI  
ESGASQDIELIQMREKDR IIMFGLPGTLENVKDGSFPPQEEEDDDGEDDVM  
>comp8118\_c0\_seq1; 257 158 673 LEN=839; translated  
MLLKNFWIFGVLLLSFAVFG EGLGPRSSANDFPFSLGVRDSL MIAHSFHGHPSFGPAGG  
MHGATYTC DVFLAEELHPETN WVIDIGKALDILSKVLSRYNLKNLDEVFPDKTMTTTEF  
MCKQIHDDIRELLETECKEFKGA VRIKLWESHKAWATYTGPTIPESSSEL  
>comp8119\_c0\_seq1; 791 86 1606 LEN=1841; translated  
MTKSKDVTSGEQSPRKQTDVTKETQLATRDISSDIVDEGRAMIADAIPTALVQTAFALNN  
LIYAGCENIECAGFIDSLIDSDQS FSDSLEGT FESQS FESKTAETESFDTRSFD TQSCAD  
ARSVATDVSSVVPKKN EKD VVNIT IADSSSHTRALGGMMLHVPPLPSISESATEQE GKS  
YLPKGLASEGAIASEKSIPNSK PATILEETPATDSTTCSPKTGLVESQDKPSKRRGLKKL  
IRSKKEKDADPLSKQPVNTKATEAKFVSLRAKFDGDDQKYTTATTPSNVTSSNSSSSTKQ  
HSSDSSEKSRKSDMPSALRRHNSLLDGNKSVKSARSYTRFFMGRSVAGSEFSSETRK L  
DNPFSGFSARNRSGKSRPKRDNKPSFMKRLRSGVKEQPVDVSTNETPIKVEGTSKIVVD  
TTYKTQSIIPSSHSTASHSEDDSQQSSSQKPYVLLAPSDKGQEIALQDDNYLNDHAA  
VHSLLTLP TFDGNAGNECNKGVEVSL  
>comp8120\_c0\_seq1; 283 30 977 LEN=1106; translated

MVPIDNIKHLFSPLPTAIAAVIFSCWLFAGRIDSHTPNF'PDQRQKSAVLITGASRGIGK  
AAALHLSSLGYTVFGNVRSSQSSYDKLIASNSERTAAATGKI IPIKFDVAQDQDMGTAVTE  
IEKTCESGLDFVGI INNAGINPEGDAIAKSYMEDAKGPNKLDATATVTRVMETNVVG  
CFRVTRSFPLILAKEKGRVILIGSYFGTLAGPIGLSHVAYESSKHALEGLADGLRRGLKK  
EGIRVSLIKPGNIDTDMNPLGDKVSPDEVSKDILAALEAKNPRARYYPGTVKGIPTRLLC  
AVFGLLPAFVTDKLL

>comp8120\_c0\_seq2; 283 30 977 LEN=1127; translated  
MVPIDNIKHLFSPLPTAIAAVIFSCWLFAGRIDSHTPNF'PDQRQKSAVLITGASRGIGK  
AAALHLSSLGYTVFGNVRSSQSSYDKLIASNSERTAAATGKI IPIKFDVAQDQDMGTAVTE  
IEKTCESGLDFVGI INNAGINPEGDAIAKSYMEDAKGPNKLDATATVTRVMETNVVG  
CFRVTRSFPLILAKEKGRVILIGSYFGTLAGPIGLSHVAYESSKHALEGLADGLRRGLKK  
EGIRVSLIKPGNIDTDMNPLGDKVSPDEVSKDILAALEAKNPRARYYPGTVKGIPTRLLC  
AVFGLLPAFVTDKLL

>comp8122\_c1\_seq1; 291 1 1182 LEN=1651; translated  
REFLVSETKRIGETRFAPLRTRNADPVRSLAAPMAAPGSGSFGSGVSAAVFAPFLMVLGF  
MIWDDHWTKKDGSAFSLNMFKCNLAAAWFLVVVATHCAGEENKNPSLLFSSQNPRNGTL  
AGGVLEAIGAKIDPFRNDDVWYLYASSAVGILIGDWTWIEGLKHLGARRVIVMDSLKPFL  
ASFAGWLF'FGETFRDPILASIGLVLTVAGVALVGFEMETEKEREHDPEDGGPMDATAQTT  
EDGRRRAAARASHRYGIFVAMSNVVLHTMGASLTKNFGAGMTTWEINLVRFGFSGLCMLA  
LSVSLGLRDRFVRSARGPPLRHRGFLRSDPAAPPPGPAYGSPVPAETKAVAPLRSPARPR  
ADRGARWYELPELSRDSWVRVSLGVAFVSFLFP

>comp8123\_c0\_seq2; 135 1 269 LEN=269; translated  
XQQQQQQQLQQPAKRRNSLSYQSSPVTVTEFN'AAKNPFDDVICAAGTGRSSFRQQPPLD  
PQTGQQHYHHHQQQHQQHQQQVVRAPH

>comp8124\_c0\_seq1; 317 126 1073 LEN=1414; translated  
MGKNSDNPKSATKKTGPKTGHSRSYPRGVGLDFRKLPLGLTLVSYIDHHGVKVRPEAPP  
SELAVAVARHFEQMEVNEEDVIGGFLELERLEQGPTVATEYSRKTQRYPVKLPGNVVGNGKT  
PTKGGKKGDKGKDSKMN'IHQNAASMNSSRVSNRKRTKWAAR'PGEQVAAKVTRTDENGSWI  
LASVQRFYVDNETYDVQDEDDT'SKLIRLPWSHVMRLSTGAEGCFLKGADCMAIFPETTSF  
YKSKVAKSPVWKL'EHGVPCVKEI'VVQFEDDEDAVTGKTPKRRVPSRYV'IPVPSAYFYDEH  
EDVDLSPQIMTNR'AK

>comp8124\_c0\_seq2; 176 944 1672 LEN=2013; translated  
MEVNEEDVIGGFLELERLEQGPTVATEYSRKTQRYPVKLPGNVVGNGKTPTKGGKKGDKGKD  
SKMN'IHQNAASMNSSRVSNRKRTKWAAR'PGEQVAAKVTRTDENGSWILASVQRFYVDNET  
YDVQDEDDT'SKLIRLPWSHVMRLSTGAEGCFLKGADCMAIFPETTSFYKSKVAKSPVWKL  
EHGVPCVKEI'VVQFEDDEDAVTGKTPKRRVPSRYV'IPVPSAYFYDEHEDVDLSPQIMTNR  
AK

>comp8126\_c0\_seq1; 962 1 3234 LEN=3265; translated  
XRTLEMSGEPSSNFKAAYLNSPVSLVFQKKEL'FGQHMVDFEVAIDASASSSESSVMKT  
GTTAQRRPRSLI'IVEGYMDAIALWQAGVKETVASMGTAL'TQEQLLAAASVARQSGGRIVL  
CLDNDNAGVA'AVVRLCIGSDP'ILLSVTEKSNVEFFVANLPESVKDPADFL'EEHRGLEGLD  
EKFRVDVIDEAI'EW'QWHMNSMVAAYNPSAGDGEDGSFGEI'FDRLASFLSVFEDVDDRMK  
KAAF'IAPKLADL'VDRNQKNEKSDINRVEASST'RLQLASNLVERASNVAHSRAMNAQMKY  
ELSSGSTEKGPI'ISKSLEISQDIALADGMKNKVNVRNRSQTPRHF'EP'TTTTDDDP'SKWRQQQS  
PMQRQRAQ'INHRNAAKR'LPRPMTNHIAGIGGNQFDEEWL'GVT'KDKHTNERI'PLRYELTYI  
AGNQKYVGP'ESSVRFNKNYHGTW'TTPDATAAGYVATSSSKGLDFLEKGTSSLI'ESNKAV  
RSLFVEDFLLSILV'RF'AEARTSLNDSIRVTKASGFGGHI'QWSAPEKEWLFKCLIEE'IDI  
PEGIVGIDDL'PAMRSYLSKR'PD'AFPGAFSSIAKQDDHSYKVN'DKMKSSSTKLC'CDMKQKNQ  
FEKKMETILKMLL'HEGDMEF'PF'EQVTRPLD'SPMITKIPKIPV'IPAIGE'EWSDSAQIEGYA  
AGDMPDFGD'DAMYLNGFDDSFMDSIGPIKSL'ESLDGEALTEKISP'DENATENT'STDDSA  
LAIAI'PTLEHAKGNSSIEGSENVLQKAALSDENR'KSEIMDVNFVVAE'EGTIVKEGTLDRL  
FMNRLETYDI'FSKFYADEDTMTIGSNENKAKWASQDLYTIL'QFTSVLKRVEAGRKYMEEN  
GLVHFNDTISEGSESSI'ISKNSTIPETVNRD'LL'EYCSSRAFDRGLRRDL'QRLR'LTLEKSN  
QATNRI'LAMMGADFTDRSAEIRGYSWLG'NVLKFNEVKMVEWNDI'IESKENFRPSHEGLE  
LKDII'YSDWNE'LSDPDEMYE'FDKSVDLNHRSHF'THLVIDR'PDSESTKDFTERVEDEWDLQ  
SWDQEHDKQQDIEGGDFERYDDKDNLLSNDSTEVNGDGKYH'DHSYSEDFTAGNGY

>comp8127\_c0\_seq2; 54 645 1059 LEN=1059; minus strand; translated  
MPIPSQNTASSQCIQKR'FADGYIT'TQHGSAGVVELNVEQLAHLQDVAPDGGRTAVRALQ  
FAGCPNIRKCAQAGSVAQERQ'RGDEIGCGPPQKYKRR'DGKATTEHRHHPNGIRGDRVPGA  
QKGPECGWKGSP'PQETS'V

>comp8128\_c0\_seq1; 665 1 3159 LEN=3210; translated  
XGTTNYYVGSXSRPQQKATTYAAVQITSTIQYQMVKTTRRPMFLSVLIVLFFVIGSLSNNR  
FFVSALIDCTFGDPVLGNQQCVQAYRSGSVCNENGFCSNPFRRSGCLRQVLSSDESFFVRLR  
ACNSDDDPGAEDRGECVAGDYEEIRMLSQDWEAPMMTSWIMQIILSEVLGVPTTLETSSQP  
NSEASMNFDYDPDLRFYSYNDTYDYDAIRTSIEHGSCADIRKKNEKQGWYRSCADVMPEAW  
NGQNSNIEEYVKDGIIEPSTGSGKEFCPHVEIMKVSXGKXHRVVLQLVIAIADDDDDND  
NDDEDMISQFAHFVMDPRKTSTGGVAKFSWYIPKFAAEKHFYVLSHYGMKEGTDLEVRRR  
LAELFLRPRKWKFFCDEVSPDNCASPFYDEEGRLIAARAPEDESEEGLEFFKAGLYHGHS  
ASEENDCDANPTTCTGHIASPPCTWTNYYVVPQLHYLGIIPVWSSGTSTAAGNYKYGEMVGI  
YHAANYTRSNVLLYWYTPDPTVQEYMGTDAEFTPIFLPQATVECTENRITEKQRCCKNP  
DWIGEEAGSCDSESAVQKLVVSNMYNRTYGNDKASRSPAYRFIKGFRLSDLQLEFIYRR  
WYAKGIDRWNYDNREAVCSWVGDNDIDILKDFIPDTFPRSIRKSEYGSPIILITASAVAAIA  
IVLVVTTSLMTFHYRHKRVMVYAQPVFLYMLLFGALSLSIGAFSSLPPSAATCILEEFW  
VMVGYSFVLVPLIVKVAAINVLFQSAAKFKRVQIAHKKLYKTIGAIIGLVVVFLTIWSIV  
DPFTKTSRKYLGTGETNTHGGEIVEMYFTCSSKPIWQIILFVYVFLIIAATVLAVQTRK  
VKQEFNESIRLGHVVYTHFLIELLLVLVWILGPDHLRRTLANDAAAISYLLSANILIIIL  
AVYFYPKLVSAKQDDYRGSISSISGADFGSFMQQPRSSLRFDFFRASSCESAGFIRGSSD  
GLHGGSSSNRSSEMFRNDADKKILAI PNGREVIVDDHDHGHGVDENDKDNENPDAPSNA  
KAQRRSSIRVGEKAGTNGFSNTDRTVLSQGAE

>comp8128\_c0\_seq2; 658 1 2979 LEN=3030; translated  
XGTTNYYVGSXSRPQQKATTYAAVQITSTIQYQMVKTTRRPMFLSVLIVLFFVIGSLSNNR  
FFVSALIDCTFGDPVLGNQQCVQAYRSGSVCNENGFCSNPFRRSGCLRQVLSSDESFFVRLR  
ACNSDDDPGAEDRGECVAGDYEEIRMLSQDWEAPMMTSWIMQIILSEVLGVPTTLETSSQP  
NSEASMNFDYDPDLRFYSYNDTYDYDAIRTSIEHGSCADIRKKNEKQGWYRSCADVMPEAW  
NGQNSNIEEYVKDGIIEPSTGSGGVAKFSWYIPKFAAEKHFYVLSHYGMKEGTDLEVRRR  
LAELFLRPRKWKFFCDEVSPDNCASPFYDEEGRLIAARAPEDESEEGLEFFKAGLYHGHS  
ASEENDCDANPTTCTGHIASPPCTWTNYYVVPQLHYLGIIPVWSSGTSTAAGNYKYGEMVGI  
YHAANYTRSNVLLYWYTPDPTVQEYMGTDAEFTPIFLPQATVECTENRITEKQRCCKNP  
DWIGEEAGSCDSESAVQKLVVSNMYNRTYGNDKASRSPAYRFIKGFRLSDLQLEFIYRR  
WYAKGIDRWNYDNREAVCSWVGDNDIDILKDFIPDTFPRSIRKSEYGSPIILITASAVAAIA  
IVLVVTTSLMTFHYRHKRVMVYAQPVFLYMLLFGALSLSIGAFSSLPPSAATCILEEFW  
VMVGYSFVLVPLIVKVAAINVLFQSAAKFKRVQIAHKKLYKTIGAIIGLVVVFLTIWSIV  
DPFTKTSRKYLGTGETNTHGGEIVEMYFTCSSKPIWQIILFVYVFLIIAATVLAVQTRK  
VKQEFNESIRLGHVVYTHFLIELLLVLVWILGPDHLRRTLANDAAAISYLLSANILIIIL  
AVYFYPKLVSAKQDDYRGSISSISGADFGSFMQQPRSSLRFDFFRASSCESAGFIRGSSD  
GLHGGSSSNRSSEMFRNDADKKILAI PNGREVIVDDHDHGHGVDENDKDNENPDAPSNA  
KAQRRSSIRVGEKAGTNGFSNTDRTVLSQGAE

>comp8130\_c0\_seq1; 481 1 1375 LEN=1858; translated  
XTLLFYPFVSFFTKHPQGHNLGLDHSQADENNIRNEYLDKSGMMGISYKGNKNSPRMICYN  
AAKSYQLEWYKRQRLSIDPTAEVETKNDNVPNGAEQTKKRTRTFVMNGVADYKRNKGP  
RLVSLRLVQSSGTTTSSKRKSKPRTDYVGYNRAVGNADTKEDANAITVLEALRAGGSGA  
RAKKSWKLASLSYKQRFLLRDFGRSSAFVEVRLLSGNLSSGPRDAEIAITSYHKAATGS  
ECGVGGTATDHKGRNTRKNGTGFFELEGKTDYGYETWWQLRLDDGTDGNGSDSGSDSES  
DDEGYVDFGSGYGPSESAFGATHLLCPGECYVFSIHDLYGDGISEDSSGGYYRLSLAGVDL  
FWSGSSSNNTNNTNFGFSXVPPVLCATAGDPRRGVQGPRAAPVQERSDQKLRLGRRAGTE  
EDEEAVQKEMEGKDPGGVPPPHVRGLLRRRRKRPLEARW

>comp8130\_c0\_seq2; 528 1 1527 LEN=2010; translated  
XNHRPVLGRAETAEARLGPLGEQFDLVLFICIPSGTGHWAETIGRFDSYYNDEWCGY  
ISAQMHEVGHNLGLDHSQADENNIRNEYLDKSGMMGISYKGNKNSPRMICYNAKSYQLEW  
YKRQRLSIDPTAEVETKNDNVPNGAEQTKKRTRTFVMNGVADYKRNKGP  
SSGTTTSSKRKSKPRTDYVGYNRAVGNADTKEDANAITVLEALRAGGSGARAKKSWKLA  
SLSYKQRFLLRDFGRSSAFVEVRLLSGNLSSGPRDAEIAITSYHKAATGSECGVGGTAT  
DHKGRNTRKNGTGFFELEGKTDYGYETWWQLRLDDGTDGNGSDSGSDSESDDEGYVDF  
GSGYGPSESAFGATHLLCPGECYVFSIHDLYGDGISEDSSGGYYRLSLAGVDLFWSGSSSN  
TNTNNTNFGFSXVPPVLCATAGDPRRGVQGPRAAPVQERSDQKLRLGRRAGTEEDEEAVQK  
MEGKDPGGVPPPHVRGLLRRRRKRPLEARW

>comp8132\_c0\_seq1; 580 199 1377 LEN=1573; translated  
MQKQEKISWKDNTLALIGSDLDHKVKAAAAQGEDAWKIGTKAGLTVWRIEKFRVEPWPE  
DQYQGFQFQKGSYIVLRSTGNPPNLQHDLHIWIGSESTQDEYGTAAKYMVEADEVLGGA  
VQHRQVEGLEADDFVSCFDRLEYLEGGISSGFVKVEPTKEKPLFFRYGPRENRKEGELVQV

PMDVSSMDSRSGFILLADKATVWVWHGKEMKIMDKIACTQRGEELCTLGTVTVLDQGD  
DDEEFWNYLYHGGSDKAVGSRSIGTCPTGAKPRTSLASGLKEFQPKIFVVPEDPSAPLEH  
VGLGELIKKAVLKRPMGFLKRSSSTLDEDNVYLLDTGWKMFVWIGKNANPGEKVAALGAA  
DRYAAIEPRARELPVTVLKSQERDGFERSFFK

>comp8132\_c0\_seq2; 531 1 1216 LEN=1412; translated  
XASPRLASPCQNTTQHESLRPAVVLRRRLTVGSDLDHKVKEAAAQGEDAWKIGITKAGLTV  
WRIEKFRVEPWPEQYQGFQKDSYIVLRSTGNPPNLQHDHLHIWIGSESTQDEYGTAAAYK  
MVEADEVLGGAAVQHRQVEGLEADDFVSCFDRLEYLEGGISSGFVKVEPTKEKPLFFRYG  
PRENRKEGELVQVPMDVSSMDSRSGFILLADKATVWVWHGKEMKIMDKIACTQRGEELCT  
LGTVTVLDQGDDEEFWNYLYHGGSDKAVGSRSIGTCPTGAKPRTSLASGLKEFQPKI  
FVVPEDPSAPLEHVGLGELIKKAVLKRPMGFLKRSSSTLDEDNVYLLDTGWKMFVWIGKN  
ANPGEKVAALGAADRYAAIEPRARELPVTVLKSQERDGFERSFFK

>comp8132\_c0\_seq4; 532 1 1438 LEN=1634; translated  
XASPRLASPCQNTTQHESLRPAVVLRRRLTVGSDLDHKVKEAAAQGEDAWKIGITKAGLTV  
WRIEKFRVEPWPEQYQGFQKDSYIVLRSTGNPPNLQHDHLHIWIGSESTQDEYGTAAAYK  
MVEADEVLGGAAVQHRQVEGLEADDFVSCFDRLEYLEGGISSGFVKVEPTKEKPLFFRYG  
PRENRKEGELVQVPMDVSSMDSRSGFILLADKATVWVWHGKEVGTTRDLRDLRGLCVCVCV  
VYVVCARSVDWESAVDAFLDRRMLVCLFLLSILFWCPGKPELTRLSSKHEMPFAQMKIM  
DKIACTQRGEELCTLGTVTVLDQGDDEEFWNYLYHGGSDKAVGSRSIGTCPTGAKPR  
TSLASGLKEFQPKIFVVPEDPSAPLEHVGLGELIKKAVLKRPMGFLKRSSSTLDEDNVYLL  
LDTGWKMFVWIGKNANPGEKVAALGAADRYAAIEPRARELPVTVLKSQERDGFERSFFK

>comp8132\_c0\_seq5; 581 199 1599 LEN=1795; translated  
MQKQEKISWKDTNLALIGSDLDHKVKEAAAQGEDAWKIGITKAGLTVWRIEKFRVEPWPE  
DQYQGFQKDSYIVLRSTGNPPNLQHDHLHIWIGSESTQDEYGTAAAYKMVEADEVLGGAAV  
QHRQVEGLEADDFVSCFDRLEYLEGGISSGFVKVEPTKEKPLFFRYGPRENRKEGELVQV  
PMDVSSMDSRSGFILLADKATVWVWHGKEVGTTRDLRDLRGLCVCVCVYVVCARSVDWE  
SAVDAFLDRRMLVCLFLLSILFWCPGKPELTRLSSKHEMPFAQMKIMDKIACTQRGEELC  
TLGTVTVLDQGDDEEFWNYLYHGGSDKAVGSRSIGTCPTGAKPRTSLASGLKEFQPKI  
FVVPEDPSAPLEHVGLGELIKKAVLKRPMGFLKRSSSTLDEDNVYLLDTGWKMFVWIGK  
NANPGEKVAALGAADRYAAIEPRARELPVTVLKSQERDGFERSFFK

>comp8133\_c0\_seq1; 305 199 1896 LEN=2497; translated  
MLEYNSDIHRSHEQAGEVAATSNAVKNNGNPVGGASNQTKDSLEGSVHKKRRRLTDGTDN  
FFVVDDEVQGPIGGLSLTPKIRRTTEGGNRWERLHWSKSPNLEDTKYADWKIHVRLDSNVD  
DDKRRQTVDHKNSIVTTDATATTETRTTNTVTYSVHRSCLGIHSEYFEKIFLGGFSEHIK  
GESTVELESPTITLEHFEMVLEYCYTKTVELNPSNAIPIILSLSDYFGMETLQNLARNFIR  
NDMHRICRHDSKVSLEKSSRLAVYESSRSMGMQDLEDGILYVCSKEPQILGKGSALAN  
MADADFWCRLWDFRKMHPVPAAHATASVKTWSENLAYFFETHRALVDTKLFRTLTHNDAL  
PIISEKVAILLMEQEEHHCLESIKNNPYIVNSSLGEALSCLQTRCIDALYNTKKGGWQFY  
TDSKALRGRRLKLSPIVMETILLKTI EFERSGQNPVPPVSGAGLEFVNGVYTMMSGWFQ  
AMKFSKRGVYEGKLRTLILYRYEEEWVISIVPEDAEPEGRDGDVDIYRVSPSNEWDDCPL  
PPLNGWVVAQGVQPAPRIHMLSNVD

>comp8134\_c0\_seq1; 290 1 1438 LEN=1614; translated  
XKEVEKACNKKMGVQPLIVPLYLALFAVVSYHAQSFQPDQKRVAPNGGIIFHKKFVDGK  
TSAPLQSSSSLPASAVPDETTISDNPWYSHSDIGRDRSHVQKHYNKLSDFKRYPEEQD  
ELCADDRKDGNEENLAVDISNGSKFLLVSPNGMWFLLKSSSCRALPLYLTASQLEDVFS  
LSEVSSNNFDDENNVLHLLAWVGKYDNQDYWVIYLNKANTGDHAKVLSRLTEVFSNESRES  
SSMLDCKPLREFGDSLEFSDAGILATANGLEVFEHFIHLFCSLGGATEPTKAGGSRTCT  
VVSCRRSVYPRIDSAAIMLITSPCENYAVLGRKRSWPPGRYSTLAGFCEVGETLEECV  
ETFEESGAVVDPKSLKFFVASQPWPFPRSLMVGFRGKVMASNLVPESGTASISLPEIVD  
TDEMEDIWFVAKDFVKKRSLSGSTALSFEFNEMEKEFHIPGKASLARYIITEWANEIR

>comp8135\_c0\_seq1; 139 102 518 LEN=518; translated  
MARFSVATTALCLALGAPSSQAFTGIQFRPLTTSSPVAANGSSSVLHMNLFDRFARVAKS  
NLNDLANKLEDPEKIMQAIEMQVSFFRFFVFNILFLPWDPGXFAGAVRSPLSAFFIDI  
DSNIMHHTVTDAPLREQNDX

>comp8135\_c0\_seq2; 488 102 1010 LEN=1247; translated  
MARFSVATTALCLALGAPSSQAFTGIQFRPLTTSSPVAANGSSSVLHMNLFDRFARVAKS  
NLNDLANKLEDPEKIMQAIEMQNDLVKIRQSYAEVTATQRLLKQKEQCDAMAQDWYK  
RAQLALEKGNDELAKREALTRRQQQAEAAASLQSQIDGQADSLDKLFEGMKMLETKISENK  
AKKDQMIARARTAQSTQKVNMI SGVTGKASTDAFARMEEKVEALEASAESAEMGSITG  
NALPGSSGASMEAQFKALEAASEVDNELAKMKGLLAAESSSESSKSDVDDELEKLRDA



GL

>comp8136\_c0\_seq1; 1238 269 2527 LEN=2644; translated  
MTADAKSAVDVGADPYVWLEDVESEESLNFAKASNEKCLEALGDPKAGPTYDRVLEVLES  
EDRIAYASCHGRDPDRDDQRMVFNFWKDKEHPKGIWRKTTTEDEYSKDKPAWETVLDVDAL  
AEKDGISWVYKGSALLPRGRDPTNGKIVTRGLLKL SRGSDAVHVKEFDLNTNEFVGEED  
GGFVVGEAKTRISYKGRDVVLVGSDFGEGSLTDSGYPRTVREWTRGTPLEDAPTVEFE  
GEA TDVAVNGYLADERIWGGSIWQVHSRSITFYTSKYWFAKLTEDHLLKPEDRPADLPEPEFK  
EMDIQDDAGLDYMGNNLLFIELRSDWTPKDDGVTYKQGSVIYCDFEKFWSGGKAAVDYSIL  
FEPTEKTAYEYFTVTKNYLILSSTDTVKSKLQFYKLGDNNSITLVSGGNTTEAKIRDANC  
RTIDAKESDEFWFTTSGYTTPTSTMYADLSKIEEEGASDKEDAFIIEKLSLPSQYNSDD  
LVVEQKFATSKDGTETIPYFMIRKDIELNGKNPTLLYGYGGFEISLTPRYGATTGLAWLE  
RGGVYVEANIRGGGEFGPGWHQAALKENRNKAYEDFIAVGEHLIETGICKPKTLAARGGS  
NGGLLMGNMYVMPDLWGAIHCAVPLLDMKRFHTLLAGASWMAEYGNPENDWDDFLHQYS  
PYHNIDADRASYPPILVTTSTRDDRPHGPHARKFVKKLWDMGEGKDWPVHYHENIEGGHG  
GAADAKQSAFMTSLAFDFMFETLSENAKNMD

>comp8137\_c0\_seq1; 1400 247 4902 LEN=5025; translated  
MNRFFLSIAAASLALVSADVNFKEMHERKLAMEEDHRVMEEYLSKSGTKSGTESGRQLD  
ASFFQTPSPSASPSPKVPQTTPSASPTTSEPSKQPTTSPSAEPSSIPSRLSEEYGGPLWPS  
ASPTNFYEPAPKCGTIETKDGSERLLGLPLDENYYCNGDSYAWYRRTFTTHYDYEFELSQY  
CEYKFSSPETGSSVIMRDVNHWFQAATSLKGWDDVGYKASPDLYVFSGYAVPEYDDIEY  
EGDIGDAECPENYCIKITGSPVGLNTNEELSDGSAEPYLLYAFSSWEGYSNFEGFLSSTM  
YSWNAHHIFMTNHYLKCACPSFCIDEYYVQDFKPLATCYVEDICGVKTFQIAYSDDYPE  
TQRVSWENTGTHVMEWFSECANVMHGCPQLASDFSPARFSGVGHFSSIRGPEVYTYDEY  
ESATNVYGFGGWRGFGWDYGEPAALLWQCPSPEHLERLVEFGEMISDYSFFRHDSVDTSI  
PDTCEPEPLIEPEDPIVDFDEGPPCTEVENEGFLFCFELKHATCYIRDSHKCFEFVIEG  
VLDGAEGMRVTTDVEVWDSWCHFDGIGCDIPSYWDEQPPYTYENSPWAFVSWSDYQNWQL  
EFQSGSSGRPSAIGGGNSYRLWNCDDATQAYLARDFTDAVAASSSGDLYQVPLDCTESP  
TASPSMGPTSSTQPSNSPTMSPTVCGESYLNSESLNIDLALDLSYSTYLFLFSSEVDIGD  
VNGDGKANTILDAQVQAI EELLIAILESETLGNRNCEINLISFHTDATNHGTFLLPLSEDE  
SSINTRLMHYIKTELRAPTSDLEVQLTNDGFTNFDAALDLAGDYFEYEATPDRLNLLVFL  
SDGEPNVRGDGDDDEGYCADTVGVWNSNPTNGFPAEVQCADLNLEAGVRHTFCRADDPECV  
PRNPYQECVRGMTKCI NSPAVTQYSEINRLTEL RVERLAIGVG DASNVAEGSALWMIDN  
NPGKDLGVLPIQALDLEALSNAKSLC ILNTDPPTAEP SHQPSDQPTSSTAPSVIPTDVP  
SSEPTDVPSSSPTTEPEFTIETPSPTKSPTQTPTKTPTKTPTSSPSQEPSTSEPTGSPTA  
FPTRLPSASPTSEPTTAEPSAAPSQYPSGSFYPSAPTESPTESPAPSQSPTDAPTTSP  
VSPTVSP TLSPTASPTKSPTASPTSSPTNKPTFEFTTSP TDSPTSSVAPTFL LPECYDYP  
KLVKKDSSDTGICFFSEDMIFIEQQNTTEVGLRINNVWSKTLPQDVILF SHSNGVNSVRG  
GNGFECDS EDGNAIDL AGSDEIMVQCHSEGDGEPYLA VVDLMIIDSNI PVNDVNHP CNPN  
EVIPNACSWRMVIPCEEDVMCTPEPTDSPSIAPTDVPTFGESTESPTTLTTFHSESPTTG  
TTFHEKTESPTHDLDRHTNDDESNDIVYESECPEDIVLLEQEGVTEFPEGGLYVVGREDG  
TVTVKLTQFTFDATVDSL FYQYQIGRFSNKCFEDKDVPTDSVDITILCTEHSKIALLEL  
WVVDAL EHNLLSESDNSV VPECCHP THPEGTPATKYLF EIKCLTV CADAVE

>comp8137\_c0\_seq2; 775 285 2207 LEN=2330; translated  
MTCINS PAVTQYSEINRLTEL RVERLAIGVG DASNVAEGSALWMIDN NPGKDLGVLPI  
QALDLEALSNAKSLC ILNTDPPTAEP SHQPSDQPTSSTAPSVIPTDVPSSSEPTDVPSS  
PTEPEFTIETPSPTKSPTQTPTKTPTKTPTSSPSQEPSTSEPTGSPTAFPTRLPSASPT  
SEPTTAEPSAAPSQYPSGSFYPSAPTESPTESPAPSQSPTDAPTTSP TVSP TVSP T LSP  
TASPTKSPTASPTSSPTNKPTFEFTTSP TDSPTSSVAPTFL LPECYDYPKLVKKDSSDTG  
ICFFSEDMIFIEQQNTTEVGLRINNVWSKTLPQDVILF SHSNGVNSVRGGNGFECDS EDG  
NAIDL AGSDEIMVQCHSEGDGEPYLA VVDLMIIDSNI PVNDVNHP CNPNEVIPNACSWRM  
VIPCEEDVMCTPEPTDSPSIAPTDVPTFGESTESPTTLTTFHSESPTTG TTFHEKTESPT  
HDLDRHTNDDESNDIVYESECPEDIVLLEQEGVTEFPEGGLYVVGREDGTVT VKLTQFTF  
DATVDSL FYQYQIGRFSNKCFEDKDVPTDSVDITILCTEHSKIALLELWVVDAL EHNLL  
SESDNSV VPECCHP THPEGTPATKYLF EIKCLTV CADAVE

>comp8138\_c2\_seq1; 158 1 1005 LEN=1149; minus strand; translated  
XAMRCDLTRFDSILLVSSRLESNRFDYFSNRGVPTRCAAPPGELIPRGVPLPTDRCVFST  
RRGSTRFGLVSDALRVPAGVPRGSLPPGVRPPVPEKVPAPGSHDRSAAPPRVAAGLAERV  
APSACSRWGEGRALALAVATALVLALVLVLASPSAPGSGGPKAPVAEGAPSARCLGSSP  
XEA AAAVAVAIAGRRGDP PGPVHDADGLSLGADPXFPPAGWTAAPGAAAQGPVGRPSPPAA  
VAFAGAVAAFAVAGAGAPAGFGSGSGAIRRQPRRPLPPPTAALAAAAPPRDATGWSALRR

CLLVWSIDRRGECNALVSMRCDAKRAGPATGLGFV  
>comp8139\_c0\_seq1; 283 137 1007 LEN=1451; translated  
MRIYFLIKLILVAGTPSTNAFVVRQNRPPSSSTSLDVASVGIFYGTSTGSTEDVADQIKE  
VFGDEADGPFVETLEGSVKDNFEKNTNWNTGADTERSGTWDEIYYTSMSELSIEGKHV  
AVFGLGDQCSYAENFADGTGELHDFVQNLGAKLFGYTSTEGYEHEDSKSIRGDKFCGLLC  
DAVNQEELTSDRVRNWVEQLKAEGFVEGSSSLEVIAADTIPESVAEPVEKVFQDIDEYSGL  
LLEDETIKQHANTNTGFKAYYNEKTRSTMFVSLDGRSCYYTSDPSDIISP  
>comp8139\_c0\_seq2; 331 137 1027 LEN=1471; translated  
MRIYFLIKLILVAGTPSTNAFVVRQNRPPSSSTSLDVASVGIFYGTSTGSTEDVADQIKE  
VFGDEADGPFVETLEGSVKDNFEKYDSIICGTPTWNTGADTERSGTWDEIYYTSMSEL  
SIEGKHVAVFGLGDQCSYAENFADGTGELHDFVQNLGAKLFGYTSTEGYEHEDSKSIRGD  
KFCGLLCDAVNQEELTSDRVRNWVEQLKAEGFVEGSSSLEVIAADTIPESVAEPVEKVFQ  
DIDEYSGLLEDETIKQHANTNTGFKAYYNEKTRSTMFVSLDGRSCYYTSDPSDIISP  
>comp8139\_c0\_seq3; 272 137 1119 LEN=1563; translated  
MRIYFLIKLILVAGTPSTNAFVVRQNRPPSSSTSLDVASVGIFYGTSTGSTEDVADQIKE  
VFGDEADGPFVETLEGSVKDNFEKYDSIICGKXNKIPKKVNLGLIQTENSPHQKISP  
TLGTPTWNTGADTERSGTWDEIYYTSMSELSIEGKHVAVFGLGDQCSYAENFADGTGEL  
HDFVQNLGAKLFGYTSTEGYEHEDSKSIRGDKFCGLLCDAVNQEELTSDRVRNWVEQLKA  
EGFVEGSSSLEVIAADTIPESVAEPVEKVFQDIDEYSGLLEDETIKQHANTNTGFKAYYNE  
KTRSTMFVSLDGRSCYYTSDPSDIISP  
>comp8141\_c0\_seq1; 518 289 2751 LEN=2845; minus strand; translated  
MNEVCDESKCRSAGGFLNVTNRFQCYAKSPEEPLLCADGYEGRIIDSEDKKAVTTEYPYT  
SYPVTLLSYYTCCPKGFKSDIAIARHCSDPAQAIIVNNEEERSSTKLGNETTNNNYLYL  
SMPCRDDSKRYPRMLTNSPFYSKYICCFDILSIDDADASNDSVEANLIEIDGEEIFMY  
DNGIATTSTIADRTCDENKCRSTFVVTGKPACLGIGPNTYWPLSCSDGWEGRIIDSEYPV  
WGTFQSSSINRFLHYTCCPPSPYKESPVHRQCSDPIIIDDTGHRNASCKNMYSHLL  
RQQKHVHFYDTNNGDLQDSFLCCYENDDNSVVDNEEVGNSLVDINDLECIACRDYISI  
NDEEPPGSLNLFQDGNPHCIPSCRDFHSPCIAWNTYGRMLPMTCTNPNFQYPNIVYTEVFAS  
HDGKGTFNRTWECCNKKSTGPFIKDRAFRVTVWPQIIVAFIAAVFSIILISLSVSLVK  
QRRQNQNPCHSRGSHFPLAEPASRPVNAWAKGTEQHLVEPSPEPPELQDSRRGRWQK  
ARGNTKRNKRAIRQGFNGFNFYLLALLPDLFSSFCGRYLYGNVQYFNADRPYVIFL  
MRMADSKNDYYTLEPAVMWGC'TANLYMNAVIVYEVFTLLKVSHRGARVSPPTIRRALI  
QGALVYTTWAATAFCLHLFLNTE SIRGNMFPFLVPINVTIVIGVPTAYLCYVCFVIWYRCLV  
PSMGPLAGRLRELAFYFFRIIVYILAWIPAITLLAKSSFGWVLTPEYFDELKSKNDNL  
RAQYSIGLLLCMQPIVSALMALTKT DVRKAVFDLLKCSNW  
>comp8144\_c0\_seq1; 304 50 571 LEN=791; translated  
MSATDHLVRKEKTQAKLYDVESMEMKGESEANGYVILLKGSPPSPPESSSKKKAKKKKDDN  
LPLAFMSLTSGNVIDACFGVVNP SRNGDTPARRSARDAKALLECDVTD AFRQTA VNAVYR  
EGFEAVIRYEKEMGKLNLCITRCFRSSSIRRKA EEDIHKAFASLVTAVGESKPE  
>comp8145\_c0\_seq1; 553 294 1691 LEN=1841; translated  
MMHSVTRNIAVAAILAAVLLQSGSEAYLPAGSSHTAAFRRTLMISTSSSLGQSTTTTDD  
FSSFADSLESDDLDDGSSNPARTSASPRTTVSVEKPWQAKLDDLLDPSTNLADRQILLSE  
LLTSNDKIRDDVLDALTNRKIDPLLTPAQKKLQEGTRAVVRQLANDILPQISTSSTSASS  
SSRRTPPLPFLPPVDPADVQSIGNRLFSAVSSQIQKNLEDLQEDLTDPIPKIPARLEKQR  
EEVLQEARNVFLEKPEGLEEPSYTVVEESDLYEIRQYDAYSVASTGVMTELDGIAAGSA  
FNALASYVFGENDEGKVMEMTTPVTTTSTGEMRFYLNNTDRIPQNTKEGEDNDVEIVKI  
PAALLAIRKFPGFATDGEVARQKDTLLQALEMDGVELDVAHGAVVPHVVFQYNPPYTLPM  
VRYNDIGVPVRSKVGVEPVVSLKEEWSVDEEVEDGDDISPSDVE  
>comp8146\_c0\_seq1; 620 37 1863 LEN=2281; translated  
MASAEIITAQITELGDKIKQAKADKQPKELWDEHLQKMLQLKIQFKELTGKDFGPPPKPK  
KEKNVGAITEASDNKEKRAKKA EKA AKA AKA KEQQRLEERAAREKAKADKLAGVGADNFG  
DLPLIRSQVVTDKIWTETIQDLTPSLQGKSVLIRGFLQVSRVSGKGVFVKIRSTMFTVQGV  
CFQDDKKGISQAMIKYIAGLP IESIVDLKGTVTVPEQPVD SCTQKMVELQITTFKCVTKS  
IQAMPFQMEDAMPDEGKESDVGAYE ANDELIQKRSDGMATVGLETRL DHRWIDL RTPAN  
QGIFRIESMVGVLFRELLVKKGFIELHSPKMLRGSSEGGADVFTLDYFGQTASLAMSPQL  
QKQQACACAGFEKVFVTGPVFRAENSNTRRHLCEFTGF DLEMVIKEHYDEVLDLSELF I  
HIFDGLNKHCKRELEAVREQHPFEDLRYCNPTLKLTYAEGCALLREAGVEQGDYEDLSTE  
NEKLLGDLVAEKYGTDFFFMDKYPLDVRPFYTMPDPQNPKLSNSYDFFIRGQEILSGAQR  
IHTVDLLEERAKAWGIELEESYVDSFKNGALPHGGGIGLERVVMLFLGLPNIRKASWFP  
RDPKRLAP

>comp8146\_c0\_seq3; 575 37 1774 LEN=1774; translated  
MASAEIITAQITELGDKIKQAKADKQPKELWDEHLQKMLQLKIQFKELTGKDFGPPPKPK  
KEKNVGAI TEASDNKEKRAKAAEKA AKA AKEQQRLERAAREKAKADKLAGVGADNFG  
DLPLIRSQVVTDKIWI TEIQDLTPSLQKSVLIRGFLQVSR SVGKGVFVKIRSTMFTVQGV  
CFQDDKKGISQAMIKYIAGLP IESIVDLKGTVTVP EQPVD SCTQKMVELQITTFKCVTKS  
IQAMPFQMEDAMPDEGKESDVGAYEANDEL IQKRS DGMATVGLETRL DHRWIDL RTPAN  
QGIFRIESMVGVLFRELLVKKGFIELHSPKMLRGSSEGGADVF TLDYFGQTASLAMPQL  
QKQQACACAGFEKVFVTGPVFRAENSNTRRHLCEFTGF DLEMVIKEHYDEVLDLFS ELFI  
HIFDGLNKHCKRELEAVREQHPFEDLRYCNPTLKLTYAEGCALLREAGVEQGDYEDLSTE  
NEKLLGDLVAEKYGTDFFFMDKYPLDVRPFYTMPDPQNPKLSNSYDFFIRGQEILSGAQR  
IHTVDLLEERAKAWGIELEESYVDSFKNGALPHCGGGIGX

>comp8147\_c0\_seq2; 118 1 250 LEN=943; translated  
XQQQQQHYNHPIHPQHSAGLGQQQQPEMTRLPPSSQPTSGQTAPSTPDGPDDELGVVKLEQ  
GEVTNNSAGANDITDKQDEDITM

>comp8147\_c0\_seq3; 118 1 250 LEN=877; translated  
XQQQQQHYNHPIHPQHSAGLGQQQQPEMTRLPPSSQPTSGQTAPSTPDGPDDELGVVKLEQ  
GEVTNNSAGANDITDKQDEDITM

>comp8148\_c0\_seq1; 356 426 3122 LEN=3198; translated  
MAFEQPNSNRNSDPNLVKKRRIGSGAHHHGHRDWREAPSFLDATSSVAVSTFGARRLPEL  
ONLYHCYLGDGASSV DATLDIVHETPTLLSGGGKTSSRHLRRRTTAVKSRKHRHRYPRS  
HRHRNEQGT VQNPPEYRGTTRKSRKKRSL LIRERQKWL TNIAHND DQNE DNTKDDKHGK  
KKWLVT HLWHAKRFHTLSTAPTRAKNGGKSGDDMEENDVFGGWTGIPLVHTNRGPRAAL  
RLSREQPF TAAATSPSVLIRDVTWEEQPTIFRAEISTSGSADSNGNPK EFSWSGVFQRIS  
RICPCLV SLLQNGHEEQAAFCESLAVDGF LHELDAFPAGAIGPTTWRLLFPNYQHNN  
NNRTAVFIEVRCHPSIHTELIRIAEQ LIQTSGDCALQLCRVSSY GASIRTLTPMSPKICF  
RLYGMESTTVLDRVLKPKSDSLSLRSL LKPEHGEGRTPFSEPLNGTVVRIEQAEISSS  
GTIATNGVTLIYRAPRPLDCSANRAISGWSVYCS DGVFASALW LALVT FDDGASTHRLEL  
QETSTTVR DIDSSNCEL LDQSQPQIKIRGCCAIGLVEDSHLRLECEPPLL VFP RDNVDTK  
ESQRYWTKSSSLSPWDIRQLYEGGWGRLPINKACRLDKLSIIDFRVLANTVDCNKNG  
IGTGS EDGFTTDHVVVVVRGVFGKPF LNAIQCCGRYVPNTLVAMGKEKEEDHDHRRNR  
RKTRAGNQVIVPPPMSRDDR T SFGEMCRGLSSSLSLPAVLMVHIRAMGKGTIRSGMQIVC  
AGICDSESDVSLGTITTTGGFSTSRGV DHGIGVVGATRLLEYLDRSTGTLSKGLDADGNNN  
NCTGDNHNSNRRI FNCGRVVPMTNGIQSLQLLVRVKN GHPSGGSKTMGCDACL SAIL

>comp8149\_c0\_seq1; 262 117 869 LEN=1092; translated  
MTAATNHRSRKFSLLKSKRWIFLAFATALSWILTESNSIALGAEVATPAASDEPEKLGL  
EPIELTSKDFAGIVGIGDMVWLI EFYTPSCKYCVQFEP SYKAI AQQFHSDPDKNIRVAR  
VNCNAEKALSTRFGIHQYPSFFIVTGWDVYELDGAYS VTS LIEAAKGGYEKKKPI SFMNS  
PMGPLGLLQ GALIFGGS RAMEFLEHLNETYNI SPMFAGV IICVLGVSCGMIS IILLALVS  
IPRGGREKID

>comp8150\_c0\_seq1; 1008 276 2765 LEN=2853; translated  
MHR S I TTRGSSILRAASQKRAIGRTC VIEQALPVVGNFNGYSTGLMSGQNVNDSSS INNR  
IIDSIFSSNKILPNNYTKRHSAPKTAFSPTAHGRRLFSTAATD TDS DSDDEHHDSSSPT  
VRLRSGVRNVAIIAHVDHGKTTLV DQLLRSAGSSSGDPTSN DGGGDTDRLLDCGDLEKER  
GITITSKVTRIDGYTPSISPTGN ESTMILNLVDTPGHADFCGEVDRVLSLVDGVCLVDA  
GEGPMAQTKYVLSRALQADLP I VVVLNKVDRRVS FDKVVEGDTEISLEELMEQLGASQEQ  
IRFSL ENAIFYASARDGWVTQDL DVLTEIVEQKVGSTDVNTSMTLLLDKLEL IPEPSV  
KVHNEATAFRQPNKSSMKGEDFVDDRFLAAAVTVGYDSYLGR TCTGRITSGHVTANDTV  
TVLRRKNPDHHEQEONQKNEPTVAPTLLKGLFVNKGISRVPLESEAAYAGDIVTLAGV  
PDSICVGDVTVTGVNGNSDGV ERQVLEAIDTPPLVPPTLSMEFAANNGLAGTEGTEVPTPT  
KLRNRLIAETDNVTLTVESSARDSERTNVYARGELQLGILIEQMRREGFEMVISPPSIV  
TTVDEGTGALMEPFEEVTIDVDSEYAGYIVSALTADRKGILLEMNESTDSKTRVLVLEVPS  
RGLLGFPESEAASATRGSAVNVHVIYIEDRKHVGPLDGLERGLISSDRGKATTYALASLA  
ARGTLFVEPGDVVYPGMIIGENAKQGDLEVNVPRAKQASNMRTQNKDEKVYLAPPKMTV  
EEMIGYMSPDEMI E VTPSTLRLR KSELDP TERKKAARVKKQQRDARKQK

>comp8151\_c0\_seq1; 397 1 1810 LEN=1959; translated  
XLVGTMNEKRTNTPTNRIKFSPLDMEDRFVDGDHSHDEF SYKSQ LQGGNDASPTSIGRNP  
TAASSVDPHAHGLGGDLKSAVVGIIKGMVGPAILYLPHGFAKAGWVIAVPMLFASTALYL  
ASSASLLECWRVESTNRKLSFERIGNVVGTE DGRQTVLEMKELRRSSSGRSSVGECLSEN  
VSGEEFENEFL EELVAEKDNNTKHIPASTTPALTTPSY PDLAKKAFGSNGQNLVKIGIAA  
MQSGVCLTYLIFVPQNMRS SCHYLF GMDVSTSVFLALMVIVQIPLSWIQEIRHLTVTNAL



YTDAAPLLVSCGYWDNTVKVHSTDAWKLEASNHGGHRGAI RCLAMGEDAGLLVTGGEDCT  
CRVWVVDHPEMAAVLSDGYLQTALGRPPNDNHILT CCHVLLGHESPVSCVALSSEL DIAV  
SGSVGGRICIHKLRTGEFVRSFRPLAPSGSATAPPASGRRD AVPVTKLILEEHGRMVVQM  
GNHRLTTYTVNGVCLCSSNAEEQI HDMKINGEVLVTGGETGRVYIRNLSTLKI LSGMNL S  
KHGPIRCVSFTPADQNP IPQFLFIGSDDGMIRSSSKTFDDGVTDTAAPNKRHETA EFLDA  
PDVILYYL

>comp8158\_c0\_seq1; 284 177 1320 LEN=1320; translated  
MLEQLSPYEKMRLERIKRNEERMRELGLDKYPLLF SSKKKQTTPPNKKKQPARVVTPGQE  
RRSQRNQKRKKPIESQNDHFSDDDEVEDDEVDVRRPYRKRLLLLDPVDYRLSSADRAAL  
EGAADENFMGKFQEFLEFHDKISPANVKNVMRQARKLASGEGIRYESPRYGWAPGRYFQK  
GTPITPMSDFVGLMAKQCECEDKWGRDHGNGWLI SHPLKLLLLFQQFVLQHPDFLASDLR  
LKEYCAEEKQRGSVRSGARCAACRRRKDKGSGLVLP RAPMAKIGSCWQYGDKTCNCPKSV  
VRHSQQIAKYRGEIYNNTENNSAYYAPVGE GTEYLSLI INYNRTRRAAMARIVSSWWSRD  
KNCKCYSQQYDVTNKS HFVMV

>comp8158\_c0\_seq2; 284 165 1308 LEN=1308; translated  
MLEQLSPYEKMRLERIKRNEERMRELGLDKYPLLF SSKKKQTTPPNKKKQPARVVTPGQE  
RRSQRNQKRKKPIESQNDHFSDDDEVEDDEVDVRRPYRKRLLLLDPVDYRLSSADRAAL  
EGAADENFMGKFQEFLEFHDKISPANVKNVMRQARKLASGEGIRYESPRYGWAPGRYFQK  
GTPITPMSDFVGLMAKQCECEDKWGRDHGNGWLI SHPLKLLLLFQQFVLQHPDFLASDLR  
LKEYCAEEKQRGSVRSGARCAACRRRKDKGSGLVLP RAPMAKIGSCWQYGDKTCNCPKSV  
VRHSQQIAKYRGEIYNNTENNSAYYAPVGE GTEYLSLI INYNRTRRAAMARIVSSWWSRD  
KNCKCYSQQYDVTNKS HFVMV

>comp8159\_c0\_seq1; 320 184 1605 LEN=1744; translated  
MSANKNQTGEGRNELQEVTLTRPSSKNDNSKNKST DVVLWITYINIVLYALCYQLQRPVE  
PYLIESLVAKKEEGHLLSSTTSSVNQTYGNLQS FFSFCQMFSGPLVGILLDRIGIRKTSC  
VVFVASALSYAILAWASDLKLLFVSKIPTVFQAAFLVAQATAATTTGDNATARAAALGRM  
TTAYTVGATIGPALGGYLAGQGDFYVGAKLAVAGSLLSAVLSLSFLPNHSALQQEQTKSE  
KDLPKIRKRSSFLE DARHSAKIMCRPNIWPLLFVKVIGGVCSSIHSTALPLVLTQLLHFE  
PQQLGLVMSCGMFAVAFFGAF FMAPLTKMLGSYGMNAGMVSRSVLGIAFSGIVTIYSSL  
LSRGNSTSSMISSDFVLIQVIVISILHALSQHV L ATGLTTQT TGNVEKEEQGALLGLEHS  
LFSLARIGGPAIGTALLGIGGVLPVEMTCGSIDVLTTFVFLYVNLPPSSKQKGP

>comp8160\_c0\_seq1; 537 184 1692 LEN=1784; translated  
MSSKKNRNRSRKDVARNHGGGSESDNEKNNRGADPPPASTRPP TTRQRPNQEGDGD DFCR  
PTKPPARNDSSSGRRLGLAPTKSSRRSRRNSTSD LKKVPAATSDATDKKSAASEAISK T  
EAKASPKNPSAEPTVHRQAKNSPDRDDAKLPQKQGSTK KGIARSQNVAKNSGTEKGM EK  
TRVTPSAFRSVSTSGPNSGNTNNHAGRNSFN DDDG SQADQTLSTAPGPPSLRIRNHYS LR  
PGAYRITTTGGVARFVDANDDLNDTALDI IDDNVTTLDPTLPFGSNFAQDDYMP LPPPMR  
PTTSDGSSFYDFHSNRIGGSQESHGQLTYGSRGGSNGDQNTGGAVSTVPTAETTRSSGER  
SSSRTRSKRKKSSRRDIPSVNKTVNKTESTEISSTRPRFTTRFLLL MGCLVILLLVCVS  
VTVVYARAGNLRSKEDQEKNGVIMISEDSEDEDDDDDDGDNSFYFKIREDQEDFGPEAN  
SIVEQMOMNSIAPVPVENPAEP

>comp8161\_c0\_seq1; 223 185 607 LEN=662; translated  
MFDIQEYANAKGIPVESIPADVFDKAQ GKSYAIREAKDPMADTFKEICTKSQELLAACT S  
ESGSSDGSSFP AACANEAVKHMECLINKRDTAYQLAVKLAGKDECEKVFPYYEDNKKKAL  
DMIGIYKHS AEGEKASTFWG

>comp8163\_c0\_seq1; 726 234 2255 LEN=2652; translated  
MSKNKGRRRRRKNKSKTEDRDDANVANDDDNNA AHKEHRHLHSPHLFSTDYDAISSKKKDR  
SSKSSCNKNNDKIGNHKSKNSSFAKQRELQRKASADKQRHTSSYHLTDNKCGISGVGNHK  
KVHSSKNVIFGNALAFPSGF EKSCQVATTSSKQLLSISDGLPSSSNRIGDRQSSSFRFV  
DAGMGDGKTVLDYLCFGRHG NKYCNQHRNQHYPHHRNNEQEKRILED S IGEYQSTMARV  
LETTNFGGCIARCYLSPSDLIRPIGSNDESSVTSNTDKQWTPYNSFPFQTFGCENNI EYY  
GNNGSPLVYFVVGFGPDFDSEIAATLIKRESENAEQQPQHSLVNRLAQIVQEHDNDVVGL  
FADLDYSNACRKQDGPPDSFHSCCDSY SNSNDHESCRQLQLQLR LRYTLKAAAKLDCPVQI  
RILPGFNKDRCDGGNANSKHSSNNRSRTDGVEAETGEALDAYLQAI RDLATVLL EHS CYC  
SSENNDMNQSCNATSIPPYSSRPWKVHISCWNGKA EHMMLLKAFFPATMTIPI SSTSRIN  
KSNQNSNLLYFGFDGHVTF SKATHLHECAFEVPLDRLLL ETGGPSAIPSAVAKHVGRGAF  
CHPGHIPFVAEAVAKQATKNPRTCQ NAYQYLYGKSGNIVLSTGEGDPPMTEVTAQVVAQY  
ASKNIRELYGIAP

>comp8163\_c0\_seq2; 277 1 803 LEN=1200; translated  
XALPISKLDPCPVQIRILPGFNKDRCDGGNANSKHSSNNRSRTDGVEAETGEALDAYLQAI



DDIARPAHEKLLPDWSQVGGCCRGRGRG  
>comp8175\_c0\_seq2; 491 1 1477 LEN=1592; translated  
XNNNNNNKNCHNSSIGSKYSTQEEVQEEEGXTDEHETKAMASSHPRFWMSLSSRFGRAGK  
PRSETLMRRFSDSPLPARAQPRAASILRPKAPVTASERLALRAARKERAAEFLAREGAAG  
GPSPSSSSPSSRRSMANKYFWYASVLVPSGILVWGFDPDSPPAKLSRWIGLTGFLEGYI  
DDIARPAHEKLLPDWSQMPNVPHDIPHPHTLVLDLENTLVSSSWDRKRGWRHAKRPGVDK  
FLLDMAQYIEIVLYSPSIDGIADPVVNELDKQGCIMHRIYRDGTYYHNGVHVKDLKLNLR  
NINRMIVIDDDLAEVQFHPENVVRVKPYTDPNDRDNTLARITPFLIEIARENHSNIPEL  
LGQYRGMDEIADQDRRVLYYREAREAEEMSHGLGLARMARRATADMEPELEAQDPAF  
RPQLPGGSGQLSSRDIVGAGPPQARASSGLVGFLLNRREEEKMEAQQRKFEHWNEVMLRK  
QKEKEARAKANA  
>comp8176\_c0\_seq1; 455 158 1266 LEN=1602; translated  
MDPTNGSDIRNVPTIDLSTISEEDAAEKVSKACSEFGFFQIINHSVSNELIESYLKCCRE  
YFAASFGEIASVERNEGARGFFNDELTTQQRDWEALDVGVPGSRDWSTGDDIPENKCL  
DGWNQFPTEDVLPNFRRIIVSKYFQELSLLADEIAVIMAKGLGQDESSPLIQELREKHSSY  
MRANYPLCNETRDDGSKPLGISPHRDAGFLTILLQDADCHSLQVLKNDKWIITHPAGKF  
SFTINTGDMAEVWSNGRYKAPLHRVLSNQTTRYSTPFFYNPSYETIVKPLKDGEPEPS  
LFNDVLWGYFRAVRFAGDLTDLGVEIQVSHFLKENEDCAHQKQEIFGKEVNFNVPFNVK  
EYSALLLQR  
>comp8177\_c0\_seq1; 333 70 1853 LEN=1987; translated  
MTNPAKTNKNSSTNSDQTNQSTETIAELRVTQTELTSGNQTKGVFARLSDGAVALRVTR  
SAAEADVAXAAEARATKGRSVRIGVRYIGLVVYLPSTYPLLTRSKEPKQSKRLGAKQER  
QEEASAYCLIQKGRKMPVTLFGFVLEILVVVVVLTAGESLALSASSPPPQNPRILPCLEF  
DGTTPVPSQPSTADGADCPDFDPGFCGGRVCRKCYRDDYEIGAWERLSSLERGFALDAA  
DRARQAAGSEPRADSAPAVELELMAAAWMSLAGRETTAKPEPAPAVPKGSRDGACDVGAG  
DVLGRQTPSISLTSVPVIGISAAGSHQGGNILATADSGSTRVALPTTKAVAGNESPSGGNP  
TTEAAPEPSGGEGVLTAMPHGLPPPTPCTRICRYNRDCYGGKVCIGCFRETHEIASWSGM  
SPAEEKCSLEDAADRSDLSGRPGASPPRYGGGIAEDELRRQAVLWALDXDLLVTDSVE  
RLAGVGVNRPTSWIVFCRAFFWPGGADNRTEEVLVQRKHGPCNDPQLMVLFLIGVLAVHC  
TDQASLRIVLAPNCPIGPTSCDGAARDGEKYRFATKVVSTAIYVSVNSSNMLS  
>comp8179\_c0\_seq1; 414 287 1581 LEN=1796; translated  
MRLSAAANTIARRLKPFSSSKLPMTMASRSLSTAPKESLNDMQVVIDRYNPADTAANRL  
PNDALDRNALYETEETREMGESLLPFTATGXKQIEAIEYDLPFHELMYRASTVHRMYWDP  
SEVQQCTLLSIKTGGCTEDCSYCSQSTRHKTFVKPTPTMKVQEVLEAAARAKEAGSTRFC  
MGAAWRELGNKNAFRHILEMVEGVNGMGLEVCCTLGMLTAEQAKQLKQAGLSAYNHNL  
TSPEHYPNVITTRSYEDRLQTIANVRDAGIQVCCGGILGLGEEDNDRVGLLHVLAATLPEH  
PESVPINALVSVEGTPLGEDDDIGKVDADFDMARMIATARVVMPTLVRLSAGRMSFSEAE  
QFLMFQAGANSIFNGDKLLTTANPEFDADQAMFERFVGFKGPAAHKGPLMAPSESSGQVHI  
THVTANEQQYA  
>comp8181\_c0\_seq1; 238 65 400 LEN=527; translated  
MSSNPIFPASRAELKALHPVIEITCADSKSEYDEVKSRYGHPVVADTAGAEYRARVTESY  
MAVRSGEENGLFEDLIACNGNNIYDYAKQCKQVRDSLQMCIAIKNKLGLGELSK  
>comp8185\_c0\_seq1; 498 305 1375 LEN=1472; translated  
MPQTFLSAFNGLISLMSETTRSQFIDSLEQGI IQEEVLSQASAGPMVMLSFLFHELQNPFL  
AKNNFDANQFLEGVSPALENFHNVSAALENELHAVSRKSQEKKTGEEENAKEKGETSEN  
ISTEVGAVTKEEKDYLLSALQITTESDDSQSKQQRKNAEAILDYEWMNEARDRPDSLQ  
LSRMVTKELFQINQLSSKTAFLLQNQSRNVLFREGSCQVDNVALLSARAFLFKEKEIPGS  
SDEDNDNKPEYIEIIDYNFGDEYVEAGTAVGAQVEVLYDVTQEFQFAIGKSGDKRKDDISSE  
SKASDQSENEYDTSTTIVSVATLEGWLRGGPEGGELRWKLASYRPPYEFPGIDHAY  
>comp8185\_c0\_seq2; 498 260 1330 LEN=1427; translated  
MPQTFLSAFNGLISLMSETTRSQFIDSLEQGI IQEEVLSQASAGPMVMLSFLFHELQNPFL  
AKNNFDANQFLEGVSPALENFHNVSAALENELHAVSRKSQEKKTGEEENAKEKGETSEN  
ISTEVGAVTKEEKDYLLSALQITTESDDSQSKQQRKNAEAILDYEWMNEARDRPDSLQ  
LSRMVTKELFQINQLSSKTAFLLQNQSRNVLFREGSCQVDNVALLSARAFLFKEKEIPGS  
SDEDNDNKPEYIEIIDYNFGDEYVEAGTAVGAQVEVLYDVTQEFQFAIGKSGDKRKDDISSE  
SKASDQSENEYDTSTTIVSVATLEGWLRGGPEGGELRWKLASYRPPYEFPGIDHAY  
>comp8186\_c0\_seq1; 456 147 845 LEN=1098; translated  
MDRETAPIFRPLFAILCIAATAGAFSPVTRNGRVNIHASASALSGNGARSGVELCAVRPR  
GNDNVQGRGDFLARLAGAVVATSSAALGAEPAEATVPLYYDPSSSLYLSEEIKTFDMSMP  
SYSAINTLKADEKALGIEGAEAEAPVKGAKKAPKKAESSGGDSMLSSVLPMSMNKSGPKK

SSADGSKKKKAPKPKPEKQAPETKAEFFETMDFSLPSYSKETTAKKDFFSI  
>comp8186\_c0\_seq2; 287 147 1102 LEN=1355; translated  
MDRETAPIFRPLFAILCIAATAGAFSPVTRNGRVNIHASASALSGNGARSGVELCAVRPR  
GNDNVQGRGDFLARLAGAVVATSSAALGAEPAEATVPLYDPLSLAVSGPGRLLSSNRASS  
SGVVSSRDASSFSTRPKPIDARNDDRIDLRLTNPCLIFLPLFACLSVFRMVVSLALLCGF  
ALVLSPPASSLYLSEEIKTFDMSMPSYSAINTLKADEKALGIEGAEAPVKGAKKAPKKK  
AESSGGDSMLSSVLPMSNKS GPKKKSSADGSKKKKAPKPKPEKQAPETKAEFFETMDFSL  
PSYSKETTAKKDFFSI  
>comp8187\_c0\_seq1; 386 1 1330 LEN=2169; translated  
XSASACEPTAVPHHSRQSAQRLPIPDRPTNTRNQHSTAFQPRQTAAQRAPPNPTQPNHLR  
QKPTGSTAGCRTNTPHPPSRFGAFPMSSSSSSSAAPSADPVIRNRDMLALKNYITAKD  
SNPRQGLSETLLIDLTHSNLVQKHIEIRFDKHDRLRDVREKIHQKTGTAPHFQTLKLC  
SGQTLFEIDATDES YDRHKLGF FFGDPYANCGLVHCIDTNPLSGSRNGQYEDVSLVEKY  
RMSDEEYDKRKGTLRDWAKVQLEKDESFTLARHAREHREKVEALREFKLGNSPLPYGYVV  
DSTGKDIVKGDPEPDYDDLVEQRKLSQRKQACDHGSNETSVEGIFVGDRCVMPGSRGRV  
SYVGPVRELD DRPDSFVWGVTFDEPVGKT DGA AIDPRTGARRSYFEAPPGYAS FVRGKNV  
EVGDFPELDLFGDDDDSSDEDEL  
>comp8188\_c0\_seq2; 93 193 885 LEN=1216; translated  
MGCASSTETTNNHVTGETKTTSKLGGSYPGNRRQAHNPYTPPASQFSNGQAVSHFVSYGG  
GNALVLKEGGIAQPQIGAGTAKQPEYIQVTLPPQGVHGGQTIHVAAPDGRLNEIIVPQGF  
PGSTFTVEFADPNEAQPTKTQGSYGSPPATAAPAQPVPQASDYDDGFATGFNNPNFVQP  
ATASSVGANDYSHYPSATDAQPIYAAEAQPVSNNTPNYTPNYTPYVTKP  
>comp8190\_c0\_seq1; 532 299 1270 LEN=2158; translated  
MTIAAEDNKAKCTSTFDLFCAKQMITQLDAEGYDDTVHLVSFGGWNGPHLPDELSDVDMY  
NSWKELVGGTFHGVWDWLEGHDTLDNPTNVFSIECLEMGRFSMLAKRDGFIVGMAPPQS  
YLDIEESRFSRYVNF TDPDRGW HGEFHYFGHNVYAYLLSKYGDYIDFVSVQFYESYSRAA  
LEVFNHNVAPETYLERVYVDDLVSNKEESFFVDFNQDPSLEYPSQMVKLP LSKLVFGFPNG  
WGAYDDAKDDNEKHCFDPTRIGIAYNALVDSRRAPRGFMFWVIDEEGTDKDVYFSRALND  
VLKIRTKKENQNVFETKKTDSIA  
>comp8190\_c0\_seq2; 494 299 1153 LEN=2235; translated  
MTIAAEDNKAKCTSTFDLFCAKQMITQLDAEGYDDTVHLVSFGGWNGPHLPDELSDVDMY  
NSWKELVGGTFHGVWDWLEGHDTLDNPTNVFSIECLEMGRFSMLAKRDGFIVGMAPPQS  
YLDIEESRFSRYVNF TDPDRGW HGEFHYFGHNVYAYLLSKYGDYIDFVSVQFYESYSRAA  
LEVFNHNVAPETYLERVYVDDLVSNKEESFFVDFNQDPSLEYPSQMVKLP LSKLVFGFPNG  
WGAYDDAKDDNEKHCFDPTRIGIAYNALVDSRRAPRGFMFWVM  
>comp8192\_c0\_seq1; 654 1 1950 LEN=2280; translated  
QNGSNKVQSDKIETKIEENTDDKIDAVGTSSFKQKKKISRSIYVPPMESIVEETNEDES  
SLGSSKASKSTITRKEKERLREIQILASEQARFEIEAFEQKMSKEEKAHLERARIERIKF  
LAHEQLVLHTTKRRKSTAAHCIMEA INNGEHGDDNIMLMDAKERTMANIVSQLOKRHSEN  
WIAKYGLMNEVDSKVATVYTGDDHIVETKSVNTDASNEKKKDDGGDTLVTKFETQDNEV  
VAFDEGEKEEPMYLSKGMKWKQLEARRAANGAPPKQKAANENMKYSVSKVREQDMKL  
IEEEESKEPEKPIFVTSPKDLPAGLRRRISDFTINHDSFDSILNKKTGNLLTMGNDDDQS  
VWTEFIIGDEKGRELYRNEIKRRRPSYVSVEESVVSRRDDKSVMEYTI VGD ETL YDEET  
ICDEETVISNWQPSIAPAPVAKHSSDDQSYMDFTFDNSVAISYIEDD VDIAPDRPQKE  
KREPEEGEHSILHIFANRNSKIDDDMTQITMDYALMFQQGRDRDLLCQMKDSQRVPVH  
AIATKKPTVVGDDSTTSRKRIREILWNDLYSCNRVTVSLALETLSRIESESESRKNVVR  
MGGIVAILGTMEEYFEEEAIQYLSCVIIELLASVEPEARKIINEMEGSK  
>comp8193\_c0\_seq1; 305 247 864 LEN=1050; translated  
MLMTNSLAQTASDEGCATRPREDLLDSKIRDFPGRQVSSIKHNIRKPTVTFSSKNDVFE  
IPRPTNEEKKYMHMSSEDQRKTIVEIADALRRLESYERKQNEASYADETQHDDKMI EEL  
GLERIVEQQRSRDLDRVKS AIFVILQRQRQSKILQSSKLNIDEQWLKEHYRPFSELA  
LARSRGLRDEEMAPSLFPRILIVMAR  
>comp8194\_c0\_seq1; 933 102 2891 LEN=4111; translated  
MTNVNPTQREKRNRSVND FGSQNALRGALSRMDARPGADTNSTWDPLSRRLSLLQSERKA  
DEKTIGAIGSDLRTTDDIQMLQSV AQEAGKEVVDGMDIDMDDEERLREAMETESRRLAVL  
KSYRVVGSGRNAAYERLVSLASRIFKAPISYITIDLASSHILAARGLGAMAENEGERRS  
SICARTITTSKEEHLVIPDL SQDEQFKDHKNVGLPHLRFYAAASLISPEGYRLGTICVLD  
TVTRPDGMSLDMMQNLREIAGVMVMVEERERKNFEYRQPSRMIATTSNDLMAPLLGIV  
KGLSSIREDEGLLSLSSQEEIFNTAFACSSVMSRICKNSLDSFNKDRRKHTVVAAKEE  
SKEEDEKDNLLVIRDLVKHLHVMDPFPKKVPLVITTD DAVPPVIVADELKVFRSVVNYL



TNACSKTETGSGVHLKIYKDETEGIEEGSEPRQSVIFLVEDTGCGVDVEQYQHLFKPIIL  
STEEEDNSCTLATFGGRDATPVIKRTSLGLYSVATQISSIGGRYGFRPREFSESGSRLCD  
SNGNELRGSIFWLSVPLALPYDKKESPGKPEVAILGSKTGENESDLTDEQMVEDDWADSN  
TQKRSYKSIEEPPSSKVRQKRALIIEDSMSTRRVLRSMLKKGFDVQSVNGMEGLKELQ  
ANLFDLVLCDFLMPVMDGTDCVQQYRQFEVSHRPWFDQYIVGISAHACDADIERGMMKVG  
NDYRPKPVMTMRHLEEILEGQEQYQVTSRLDSIAVHLEEEANAADTAKRSKPEKPVKAPQ  
NEEAMKVLVVEEGKIIISTVAEKVSENMGWKSVVVHNGEALRLLKMRNWDVAVLLDEELP  
GVTSCKVIENFRLWESKNRVNRQKNVFQVNSSFIPITGLECSAGVSSLSSSLVQLPSGFD  
GALGKPLSANILKNFLQSSSEGSASHLLM

>comp8195\_c0\_seq1; 80 1 458 LEN=1004; translated  
XKNGWINDNKRIPOSYFDSSTNRSRTPARYRTEPYRQLTSRSPILATEDNEFVAVQNH  
VSAVPSKNPRPGVNDGPSALLGGPGDGPKKFGDEEVAASVRLTTYQGTPFPWIAAKDNKS  
IAKTFMFTDFNQAWSFMSRSALLAEKLDHHPPEW

>comp8195\_c0\_seq2; 229 150 620 LEN=738; translated  
MNSLLCKTIRSPFRPRIRVPASTTALRHSSGGPGDGPKKFGDEEVAASVRLTTYQGTPF  
PWIAAKDNKSIKTFMFTDFNQAWSFMSRSALLAEKLDHHPPEWMNVYNRVEVTLTTHDCD  
GVSQKDIDMARAMETYASDLMPDGSKSYLSPKPTE

>comp8195\_c0\_seq3; 126 1 811 LEN=929; translated  
XKNGWINDNKRIPOSYFDSSTNRSRTPARYRTEPYRQLTSRSPILATEDNEFVAVQNH  
VSAVPSKNPRPGVNDGPSALLRRTGRRQKVWGRGSRGIGAVAHVPGNALSVDGRGLVAA  
QTAKQNRDTPSGPPGRVHSEVFLHHQPSRSSRETGTNPCSGFLPVLVDSLFPWMNNXAK  
DNKSIKTFMFTDFNQAWSFMSRSALLAEKLDHHPPEWMNVYNRVEVTLTTHDCDGV  
SQKIDMARAMETYASDLMPDGSKSYLSPKPTE

>comp8195\_c0\_seq4; 70 1 457 LEN=1195; translated  
XKNGWINDNKRIPOSYFDSSTNRSRTPARYRTEPYRQLTSRSPILATEDNEFVAVQNH  
VSAVPSKNPRPGVNDGPSALLRRTGRRQKVWGRGSRGIGAVAHVPGNALSVDGRGLVAA  
QTAKQNRDTPSGPPGRVHSEVFLFAPSTISFVP

>comp8196\_c0\_seq1; 614 84 1178 LEN=1447; translated  
MVLSSKDSNRVLLFLLGAGAIGVQSFSPNSALVSGTRGTQQPKQFRLLRQGTAAETFG  
TELAALKSSGEGGKKRRRKRKKTAPKAEDPSPSTDSVVASQTAVPEAAPGSMDAAGADD  
ADVMDIKDVASFSGGKSPIDAAPQQIPEEAVAAPPAELSSPVQEVGDGSIPLPDIKDTMR  
RKQAEVQKGPAKDEDSIMPKTKIDRGDRQALLKLEQDPYADGDDSFQEEETTVSALL  
GERAKPFLGIPIGPLQVGHITIGALVILMAFIEYPGFPLTNLPTPIRDALQGGGTIYGI  
NALLAVVASFKAGERGQPAPLWMAKFTFTVGGALDQLTQLPTTAQIEAAKARKGKRALKN  
MKRK

>comp8196\_c0\_seq2; 533 84 1467 LEN=1736; translated  
MVLSSKDSNRVLLFLLGAGAIGVQSFSPNSALVSGTRGTQQPKQFRLLRQGTAAETFG  
TELAALKSSGEGGKKRRRKRKKTAPKAEDPSPSTDSVVASQTAVPEAAPGSMDAAGADD  
ADVMDIKDVASFSGGKSPIDAAPQQIPEEAVAAPPAELSSPVQEVGDGSIPLPDIKDTMR  
RKQAEVQKGPAKDEDSIMPKTKIDRGDRQALLKVRVVCSSMPMQSKTKESRATHLDES  
RQNESREXWTPFLFRSFRNTNRIECLASIVVLLPASHFFTLVPNSPHPHETKRNNQM  
KRNADYKNQLEQDPYADGDDSFQEEETTVSALLGERAKPFLGIPIGPLQVGHITIGAL  
VILMAFIEYPGFPLTNLPTPIRDALQGGGTIYGINALLAVVASFKAGERGQPAPLWMA  
KFTFTVGGALDQLTQLPTTAQIEAAKARKGKRALKNMKRK

>comp8197\_c0\_seq1; 959 448 2929 LEN=3421; translated  
MANITEIPPWEFGALLVFTTTPHNLDIVGDYNEYWAGNLLARAQVTSADCYDDLNRSDRDG  
DDRVNAAEYVEFFRRRLGRRRSDEGYSYETSEFTSFEGLPFAFQSNFFTLACFCRFRFD  
DNDDDRASCCIGDKAHISVVNADSAFGEETKERNYINLVCRSDGAIDSITSTLDTIQL  
SPTISPTVLPSPNSPIATKKPTDPTSLPTS SPSPTPKPTLDFVTPSILPSTSPAPSLESS  
SLSSTSMPTTIEPTLMVRI TVESLYSILVREDGSENQLLQQQPMRMEQPQESEEPKQKN  
TVKNNLITAMNLSRKVAFDLWFRGASTQTVFFEKLRVQQPTSIDSIVDIGFTAAPKLMK  
INDTNDNSSHNI FVGGPCPLEMRKSQPENVKANTDTKQIQYFCQEV TASIVLQLPMDPD  
YTDGTIYSPGNVHELYSQALEMAILNGELGELMESVAHDSRVS IASGQTI SAMTPKPTVG  
IVGIIVASLVGSIFLTMII VHFVIRSNRSDQPLKGLGDEWEDSNKILE SASGDKNTVDE  
DDIESRVIDLSMEKEIAIDPKKGAMVIRQCTSTEQATGMMEVSATTNSTKGTGIPDYTDS  
SMMANSIPYFPTSPGSNSNTDDARSTGGISQESDSGWSEAYTSSVGSVGGDDDCESFPEIP  
SSGPGALPSVAKEPPSPPAVDKSTGDHFDEELSTKDSEEVSVDESFTPQSPSSPTAPETM  
KLEETMSDDSDGLL IHEDESSDNDDDDVSDDDIKDDHHERKSEKPLSAEEFRSKLLD  
MIKRIVPEEIDQIDDMIAEFKHREDELITLSMMEKRLLSQKQSDQ

>comp8199\_c0\_seq1; 351 101 715 LEN=1546; translated

MAPLIQDFDLSTTSHDDFIDQPKTLIAPLHETS IARSRRV SFGAMVATYEV MNRDDYTL  
EEMEASWFRDDMRMKENAKSDAKLVQSGLLVQGS DVSIRGLESRTRDGVKRRRNRMN  
AYTAVFFEIDCQDEEGYFDEELIADAYFAQSEHCAMTAQMIGKRDAMEAMNILQNKKADF  
FGRKFCETIVDIPTTEGSLVSSAA

>comp8201\_c0\_seq1; 332 416 1789 LEN=1933; translated  
MGNFRRKAWQEISNRPIEF LSVPCVAAFV GILTNWGMVKMLFY PVEYRGLDWKRWDKTPY  
GLFGWQGVVPTKTDLMARRLVK IITDKLLSLEEAFGR LDPNELGQLLLPGIEDAVDSALA  
GSDRMGGNLYAWGVKKILPWLMPHIVTSLKQEIDQVLDLETIVLSAFVVRDKATLVDLFQK  
VGRVELDFLVNSGFGLGFI LGLGQMVFWAAHPVAWTLPAAGAFVGYVTNWIAIRMI FEPA  
EPVEIVGGLFEIQGMFESRQIEVSDEF GDFMQKRVLTAGDLLKDL SLGGEDGELFKFLRR  
HLPYP IPSEILSAAVDGVANIAADPIKYADVHKYVNERLDISDTLARRLKVLSPTFEFEDL  
LHPVFQEDEITLIATGGVVLGAAGGLQTQLGWGGANAVPRAIGTIVFTLFS SLLFFFLEQE  
YELDHDEPLVSTERPQLRRRET VVRRRTQIPEDRSN

>comp8202\_c0\_seq1; 447 77 1384 LEN=1887; translated  
MKADSAIVNLT VSTAELHGDPLLQLVTKAASPLQLTVKTSKKASLSLELLSGFKLTQRNS  
IIRCLCGMGLHNALDGSPYLLGGHASTSKASPYSATALASLTAWMSLAGEVRNGGQTEG  
LLEQIDSHLQTRAF LIDSPSLTVADVLDLAVALVRSKAGASLVGEIPSYSNVHRWIVG IQE  
SLKLFKFEIDL SAKTPIPAISNSHGPPIFFYGNETNVVIPKAPISKAKAAKPVGGNNQQQQ  
GQNQSKESKKEAKAATKGQQKQKQQQQAAATFDVSALDIRVGKIVKAWHHPDSEKLFCE  
EIDLGEEAPRQIASGLRAF YKTEELEGRRLV LVCNLKSRKLVGFPSHGMVLCASNADHTA  
VECMPEPPDAPIGTRIMFEGYDGEPEPENKIAKKKIFEKVAPDLKTDANGVCVWKGAACT  
PSIKASKGMPNAQVS

>comp8205\_c0\_seq1; 494 150 863 LEN=1020; translated  
MADDMDFFQGEAPAVETASPGEDGGFTLLGEPESMGPAPGDMAAFVGDVQESSPADMGFA  
ASPEEMGFAAAPVDVDESASAPILLGAPPPAIEENTVILGEAPLPPSEAPAVVEAE EEEAP  
SAMKKFH EEWQATLEARRAEEDASKAAMEASAREALEAFQARAQAKREAKMAKNREDEQA  
KLEAIEADLENDNSWQRVSKMVDLTQDGADNAESTKMRDIFIMLKNEPGLAAKVGA

>comp8207\_c0\_seq1; 379 1 1955 LEN=2084; translated  
TPLTHQYIAMREFPCFL LICCWIVLSLSFSVRVSVSFSLSPTGRTRYR DGSVVLAAFSNH  
EIEGFREKMRTESDSPPHRYKWL VVGGGIHGVS IASRLIGEGIIDGNTNGNNSLLIVDE  
QQELLYSWKERTRATGMTFLRS AVGFHLDIPA EGLRAFASGYGHNGNKQKQKQKPLSKKA  
KRQSKNNQHRSKHGLGTSNGYPNAENPD TTTVGRDYQRPSLKMFDHCDNVIDKYKLMDF  
HFRGRVESIDVCEDEGGNKPMPLRVVVRNSSGVDADANASGGVRESPPPGTTIVSADNIV  
LAVGNDDPAVPEWVTHLTSENNGYNYDKS IYHLLQLPNGDPPDAKTNP LYKANTDPNWDD  
FDRHEPRHVAIIGGGISAVHKALQ IASKNSRDEKKALVHIVSRHRVREQQFDTHQDWM MT  
QQLAQLSLDHGGKGLTKRQRKFGMVESPAERRRI IAGERIPGTVP SYMTRAGTNSLEKAM  
GEGSISWYVASVARASRNNEATGGAQTASG STYTLELTNGETVGPLDEIILATGLGKKVP  
GNRILSPLAASASLPLGPCGYPLVDES LLWKPRMGSTTTSTNIFVAGGLAELELGPSARN  
IAGARMGAEERIA XSSKKKNCFEVTKQPSFGAEHNKKREAKKGNANSHGFEL

>comp8212\_c0\_seq1; 266 116 1048 LEN=1361; translated  
MRLLCRFFSRKTL LGLVASLSLSTYIAEAKTAVLFGATGAVGNSVLR AILRNNSFFTKII  
IVGRRFP PKVTDLLPASRQQLPEVVRVELPDLGNVDQNEELLAMGPADACFIATGSGFPH  
LYDFRSLHFVEVDMVASMARLCEKLVQSLTSFSSVDPEEHPTPYTREELES GDDGTPIG  
WWGLLTMTMNVNMLKEVALTENS GSIPFVRIFQPCNIITEEIRYGLWDWTIFRIHPWIDP  
IIPTKYHSVDVALLGMAMVRDAINLISVSFANNDADRNP KRLTYGDFAEISGKEFM EWKE  
QQMTMKEIEL

>comp8213\_c0\_seq1; 326 205 945 LEN=1133; translated  
MTEDEKHVQQPQQQLRSSL SLLSSIAMMISEDHKDRK DSTDVDGQVVLALGLNKKRRKL  
SPKLTRSNTSFVSLNLLTSFPKTEQEHHKSNSSPFS SMEATSTAAAQEKKIESRLFATT  
SQDGTDEI STATSDSKGSKGPLETASLAVAGRSKSAPKMSTGININPSNENIGNVYRSYE  
MELPESSAGFILSTYTTTRTGNGTKIDDYNN DITDCLPLQDPPRLPNPRESFFIARARE  
ERKNWGW

>comp8215\_c0\_seq1; 376 210 1127 LEN=1661; translated  
MFFSRQGARFISRN VVASCKNRLPTSVLGN EFNRLSSSSSSSLKESYDNIIVEK PQEENG  
KVAVIKLHRPKAMNALND DLFRIIHATTVL DDKDPDIKCMVLTGSTPRCFAAGADISEMK  
DRGFEDVYQTD MFSEWQDVSR LGGTPIIAAVSGYCLGGNELAMMCDIILCAKGA KFGQP  
EINLGIIPGAGGTQRLTRAIGKSKAMHMLTGMIGSEEAYASGLVAKVYDEESLLDESI  
KMATNIASKGSASLRAAKEAVNAADELSLQEGLRFERRLFHALFATDDQKEGMAAFLEKR  
PANFK

>comp8215\_c0\_seq2; 176 281 583 LEN=1117; translated

MHMCLTGD MIGSEEAYASGLVAKVYDEESLLDES IKMATNIASKGSASLRAAKEAVNAAD  
ELSLQEGLRFERRLFHALFATDDQKEGMAAFLEKRPANFK  
>comp8216\_c0\_seq1; 242 1 841 LEN=936; translated  
XGVPPVKDTGKTPLEQPSRRDGIPTAKDLEATRLQQVNEDGITPGEATPPPPFRDGTTPV  
QAPFVQTQASKSKRHGNDRENYQETNVRPAAEDGSEQEPRFRADAPPSLFHDVTRSVSNK  
GEIDIEHHRRTSRKGNRSPVENQQTERSPYQVARKTTP IYHSVTRDIRREGTRKIDNEKE  
DEIRTKQSNNGSRKSPIHNDETNRNRPRFEEQTKTKQSPYVRVRPTAPIYHTVTRDVRGK  
KQPVILPMHESGGGETGSMFRPRPKRGNATIAIEVPPTGKP  
>comp8219\_c0\_seq1; 872 537 3731 LEN=3968; translated  
MAESKKETGGEGTVIEGVCNSISPRTPDYCPFSVEIEPSNSQGLEHLRLSTVNKTWTLAM  
KTTVPFSLSQKGSILSHDSEYELSTAAEEFPLNKMDHALVDLDVQQALSNEQHAPHGLV  
PVSSDSESSSRDESLDAVDDQEEDEGNANECMSLSLHRSPDSSEAPCVLSARLSRTPTRKD  
KYSNDQCNDTPGAVPLNPLNHLQVLNPGVPQGHRTQQRHHLKTPQRNHRSLQNQPQAQPA  
NGNSTTITTTNSSGVATASAAACIYECFAIEDFTQFFCPSTPKSGTLDTTTTTTGACPSLP  
TSASAAPSGMGCLPPYNYDFDNPVPSKVAFPSIQSFWLSHPSLPRSRGESAFDANLPRN  
RSYGPRKKRVRKLLDVWHGVPVNRNYAIQRSLDDASLDCRRQSRRKRAYASKWCYSDPEN  
EVI GRRQRRRAALLLTDNCQSSAQALQHQLSNAEDSHPLEDKLQPRYRKFPRSPFTHLTD  
EESCTESDVEETSYESAGCSDSDSQQDPPPPPPRTPRNSDPKISFLFQGDMDSEVDGDI  
DDGVHTNSNCKTKEVDEDSKIVAFDFGKTSKKLCSVPSGHRNTSSTSLSTTGHSRFTI  
RRSAEDAQEECSSESSTESLFLAGSAGTRSNPKLSEVREHLLPQYFKSHPTHWTEFHL  
FSRNVDEDSVKSHVHEL SNVKFPLVWHPAADSGSYNRTTKAASSTGKSSGSTIPSTTISC  
PTAKKIASLSSNGDDTGNKCGKNNTKFPIAVDGAFEVGSHEHMMVVQPKFTWTPLAQP  
HLEEEEDAHDPTYCKNSRELFLSEAPPQVELLSIIRV NKACAYNHWRNRYPYARLDRT  
CVVSTNDKNHSTIVLEARCPQERDWL VFSKLIVARLASIIITRDEDMLHEFFSPYSALM  
QLEDEDEAQQGDEGVRSTQLEHQEGCSDSVIPRKADATQCAVSPMGGEPCSGNAVSVIDD  
GSGSYVYTHPHEQIVGGEESGSVLEDSGDIITFDDDDDAISNESDENDDGGFFQDRDDQD  
QEDSVRARN SGAYAILRRSLTATGALVDHEENHHEDEMVRTLSY  
>comp8220\_c0\_seq1; 338 1 1032 LEN=1101; translated  
RMVPRNQIPALFFFSPPLANPFACLSPPFVASYSVRFIFWRSFPHTDDTICPEFSILCS  
WIESLGLSESLVSGSDVSLFAPTDA AISRVFGASDTPDNDLVRDILRYHIVTGSVIELTD  
VDCDSGAPVTIPNGQGV EISCRDGTFLFLAGDGNADALPRITDPGIRACNGIVHAIDGLI  
LGEAEDIDVGPQCQTFDELVCSKENLSALCQLSGLIEADSEGAELFNTLNNGAFTIFAPN  
NEAALDLQGIDVSSTEAILNVLRRH HAVPDVVL SASDLVCDERLAMANGGFTTTRCEGDAV  
FQAGEGNTGPLPQIVEADLAACTGVVHVVDKIIILPEQCESVCT  
>comp8220\_c0\_seq2; 903 1 2096 LEN=2165; translated  
XDDDDGSDGETSSEDDSESDNYVDEYGNESDSSEAPPPFEGVGYDPSKSDDEVFSNETD  
VEQARKVPFRERLAGEFSGNPQKKT LAIVLAVACLVLVLAIGLGAGLAVRSRSNSGKET  
DNKDGNNSEGLEDDVGSILLAPPTDAPARMPVSLPPIDGDADNAVLDVEVVLPSYADTTV  
YRDGTLSSSSNGDEATMLVQNGSPGNPELPSAYSLVQFWNDAVDGDDVVGATATFCLEHV  
PTDGASDRVVTYSVCVLAGGPGGASADVESLTGDTANYRMPDDCLEQKLVFEGVVRPADT  
EVCMDVSPLVFGSGKRKAGARHHQRALRGWEGHSGGLQRARGLQAPGAAAADDDDDTIIT  
MMIDNLVPSDEPGDRFVTSNGDPDQKPILSITGKQLVECQSIYDTICPEFSILCSWIESL  
GLEESLVSGSDVSLFAPTDA AISRVFGASDTPDNDLVRDILRYHIVTGSVIELTDVDCDS  
GAPVTIPNGQGV EISCRDGTFLFLAGDGNADALPRITDPGIRACNGIVHAIDGLILGEAE  
DIDVGPQCQTFDELVCSKENLSALCQLSGLIEADSEGAELFNTLNNGAFTIFAPNNEAAL  
DLQGIDVSSTEAILNVLRRH HAVPDVVL SASDLVCDERLAMANGGFTTTRCEGDAVFQAGE  
GNTGPLPQIVEADLAACTGVVHVVDKIIILPEQCESVCT  
>comp8222\_c0\_seq1; 978 1 2052 LEN=2136; translated  
AEAQARKLVEEEAARRAEVAKAAAEQAQKLEAEAAAAQKAKEEAEAKVAEEEEARKEAE  
EAAASAKKAKEEAEAKA APEIEARKI AVEVAVAETKVKTEAEAAASKAKAEAEAEAKKIAE  
EIAVAKAKEEAEAREKAE EEAKEAKAKMKAEEEAATAKAKKESEAKAKKAE EEAIAE  
AKKIAEEAAAANAKKAADAREKEEAAI IAKIKAE EEAATAKRAEAEAKEKTREEIAR  
MKA EAEADAERKAKEELAE AQAKRAFLRTKQPAEVNRMSELERLEQEFGLGDPATEVLEK  
NGSYFSASENTDQYGLNEPSKDLEENG SYFSASERSDQSLDYQERISTAEVQDDFESLNI  
IREKHDNIEKEQSEVTARLAE LGSIRELEAERQRQKEQTRAKDLLFLQEITGDSNGQ MRE  
VEETATSLEENRLDDEAYELADKLTKADEQYKPTDQVLGSTTLLMREVAGLSLKDYNSKE  
RFFSERDAMVHAGNTLSVPVRVSSPGTIVEFVSVEKKS YDFGFGITAFMDEGKVEKIKEMT  
SFRKKT ESESIVVPAGCAPCTMQFKFANNYKTLLEKVR LGYEIRVIPPSEETIKLGRKR  
AKSALELLESKLSSQREILKTSNARVADLERQAI ELEKEIEKSSKLESIQADEERLKKY  
LESERSQPSTRRIDS NKYFNDFN





KHIMPEILPALAWIVGEYSDDLPEAMTMSDAVYIYDENSEGPSHSLLOAVTAPINSNKL  
AASTQSVFLQASLKIFAASCANSQVSDSELEACVHTIFFNLGVYMESTDSEVRERANTLN  
GVLVALELTSGLRGLGPPGLTALDDGEGESDDDDSPDDHTPSDGNLLNMPAIIASAKVKETS  
ASKKLDPFENMVGKSEGLALRCRNASSTLNLLKPSPMKPTGAKAQRKKQAALTGVDVD  
LNVPIDASVFSFVIIIEEKAHRQSSRLSMEAVSFTQOKPMTLSKPTSNVSADAVPSIDAQS  
SFTNDVMSNSFSNNNEPSMTSGLLSPGQSQDNVRQNPTKTANDPFYLNSTATATDLRNE  
NSKTNLPTFRFGNIQLGDDDDDDTDVKKKKKKKKKQKETTNASQLGFQNMAYIESDDDD  
DVIQFKPSMRAGGRKNGSELNGLANVDLSEPLREDEVFLERKHRVPERQPEPVSMMAT  
EAERSKSKKKKKKSKKSKKSDSNQQMNEPPTKEFDLLDLFNATTQAPPSQQTAPTQTF  
YSSNGMQNHNLVNNAFDGIILGLPNPAQGFSAAGPQNSITDLYGVTTQNSKAISSSKVGT  
SGKKPYLLATIKPSSASGSPVDWSRVQLSYRVSRSQMESSMGVSLVIRIQNDTNAATLS  
GLVLQLKNHGDIQIGDVPANSTVSESKVGFPSYPSLDVALEVKGKLATRDSNVSVKLTLP  
VSVHMSPSGDGMTMERSVASELASSQWASHSTKIAHNSTMAPEKIKQKVCTFLRMTEVDPT  
NPSYGTLAGTSASGVPVRVLIKVKTDTVKLDIKSGNIDLKAIASELKKLII  
>comp8238\_c0\_seq1; 124 896 2026 LEN=2126; translated  
MSSCEISGHPAGEPDAAGAGCKPKAESECGATAVSTDSRFSCNICFEEVVEPVVTRCGH  
LYCWPCLFQWLEPGMRGERETLIGLPPSALYGNTRIGDSSRRVCPVCKSECPLSSIIP  
VYVRAKTFRAGTPYSVFRSTPATKEHAYNPSSSNNLEEPRTTEGIQTPEETGSQVNGTE  
NDSEIANRGTNAETGLRQRRIQHNPEDDAGHLHRGTVPVPNRPSVRRIPPEQQQQEPPSS  
PSLSSRISPRESRATPSNPYRVGGLDIAPRSPNGHNASLTHGILSSSFQRAAADYYRIST  
TSNGSRDGGQPDGTRSIPSLHDLRNGGGRSGTGGYYGSEGDGTSPIDVNSETTQYLSR  
LLIMFTSFVMFCFLLV  
>comp8239\_c0\_seq1; 490 187 1455 LEN=1633; translated  
MTPRFDESQRGKTLHLPKLPQQRKIVPKNEGVDHGVSDETPKNHDRNKGSGNPIDDRITAS  
TAASVLPKVSHSFVICADTQYGMITDNRNWDDEIEYSRKAIHFMMNGMHPRAPFCVCGDL  
TMDRSFEVSKGARSFRFTMEECDEVQLQQRKDFKVVWSELHEDIALVCLCGNHVDVGNRPT  
KRSMELYRKEFGDDYLAFWSAPNVYINVLNTTFLSASSGEETIEEMARDQFQWMEERLKE  
VRSASFSSPHHNLKGEQPTSGQTTIMSSKNDTSNEQNNEAIIFFVGHHPWFLYDENEPP  
ATMSGFCEWNNRIPDSYFVIPKERRLPHLDLFRKYGVAASFSGHFHQLNVSETSFGMKM  
IVTGPLSAMLESTGKIEKKAQRHAEGVLVLEDPDTLGVRLVEVLDDGFSRHEFISIVEGEK  
CK  
>comp8241\_c0\_seq1; 340 48 974 LEN=1076; translated  
MGTIFYPDLFPYEEPNLWPADGERPDRSTLNPYGFWNGKYVKDDEPLCRYTMPLYLCSLC  
GDNTSPDPTGIEKWSVIAHWGPFPIGIFALWCVYVRFDLLKERIYSPFLLLVSIFNLGV  
GSMAEADSHYFTMNWNACYDSAETFALYFYIFIGSGFAIQCLSLRKAGVPLIRTPSGAC  
DWFFFVLDDLLIFFTILTPVWALIAQKPATTMFIVTQSIACCIPRVYSNLGPSTIHL  
VGGILCQVIADVGAIPVDWLTFTGNQYIHVLLAFTFVLNEGGIFYLVYIMVDPKKAEEAG  
RGENAPLI  
>comp8242\_c0\_seq1; 1583 1 3170 LEN=3170; translated  
QLKTWSRINREKFFFEVELDVVSDVGFQNTGLSTSLSTTELKIGPEPKLTVSNYQTSSCAN  
KNCERNPSFQDITIAMSDEIKALQDEVRRRAEKEKHLTDTQARIKKREQELAEESLLKQQ  
ERGRELEAKFKAEKEEEEASKLAEMQRRRERQEEIDREWEVKEREEDRRETEFQKVKEE  
EARIISEKKAQEDKEKKQKESKERIEQLEEEELRKKSEAEKREAEETATAERLAQEQIAR  
EERERKEAEQKEREKARLEEEKRRREIEEHNEIIKAKEAAQLKVVAEQQRVSMKLNLA  
KKNTEQRAQELAESEKQRQIEEKLQEAERIQNEKTERERKEAEIRELKEAERLKQWE  
EENRKEEEMEARRLENMAMANKVLKEREAEALAEKAKEMEDAKNRARERAAQLKKESEAK  
AKGLKEQAEVEKQERKKKEAAQKAEERLETEKLANKERIARELKEKRQQUEENARQVE  
EAERKAMEHKLNKQEQRLKMEAMRQKAEQKKKEMEERLAKKTAEIEAKMKEEARLREEK  
KLAEAAEKERILEEKNAQKEKILKEQEEKRTAKEELERQRGEYLKEVALAREEKLKQVE  
EAKLEREARIQELKAKADAKTKARERALEEEREKERQEREKAEEDLKREQERAAKRER  
EEEIAERKRLEKEAEERKERQDIANAFDLLQEEEQEQRKRQAARATAKAKQIEKEAR  
KRQEIREEQLAAEAARSRKSEAELDKQVAERARRFAEEELKLQEIILKGKELREKEAMEAE  
EARKLASKRAKLNKTQIEELKRAEALAMAKLRAEEKAFLLGEQAKQKEQKILMQATKDRL  
KREKKEKELEEKTKLQEEALNMQSQLEKMAEKTKEQEYITPTYKLTKDSEEEEDDDD  
SSVDEVFGATQPKRVSLLSASSKSLGIDKDFDTSIKIDFDDHMTFEDFLDAEEKRLEIEE  
MLAKENAENANKKFDVSDGTLFRDGDGNDVHDRIAAWKEREKVRAREKEAKKQAKKE  
KEKKKKKEEKEKDKKDKKEKAKKDKKDKKDKRDKKX  
>comp8244\_c0\_seq1; 323 1 698 LEN=1157; translated  
XQQHPSPHAAHKQHHQIQDGLPGQLFGGAHPSQPRHPPESQQQQQHFVQHGLSGLVDG  
GTASILNQISATEHYLPRPATTTTTTTTTVPTTTTAAAAAPPPTTLEHDRHLQQQYQPPQML

PQTTQQQQQIMNAFLPQVQTQQQLQPMVQHPQSLHPQQQPKQMDPGARPGFSAIGGV  
SASTYPYATHPTGRDNDGKDNAENTDWAAEAGIPAPFHGHRDKKDTSGTKAA  
>comp8245\_c0\_seq1; 552 225 1346 LEN=1393; translated  
MMSLHRISFILLFVCGLFKSSVCLVPAKRVKGSQPPMQVLNRRARQLIQTPPVAFGSTLST  
TAIFASDSTDDDIASMRAGVIKKELESYGI STAALFEKSELVQALQKARADGLKPKETAS  
SSTESAASAGSTKKKKRRRDVVDVDEEDSRPREERLAELEKCKGMKVGELKKELEGIG  
ISTKSF FEKTD FVKALADARVDGVGKKEKEGYAEYTNVEVLTDDASGPRPKRSESDSQQQ  
GGGSPFGGGASPFDMGGMGGMGGMGGMGGMGGMGGMGGMGIADMLKNMGGMGGGAAGGANP  
FGMGGMGGMGDQMGKAQELMKNPKVMELMMKAQGNPKIMKAMQECMSNPAFAKYQNDP  
EVSELIKELQKVM  
>comp8247\_c0\_seq1; 332 163 1068 LEN=1483; translated  
MSRTPNPAFLLSNTKLVLVLSLLEVSALHCNHPHRLAARPVSIGGTTTRAFVSSSTHQ  
SRNANTQTHSSSRLSAWLSEKFLPRTDAVGPKRRCRCRDDDEDESQAESHVVASL  
ESRREAI FAAMGSLWAAASLPAFSAASATAGVDANMAFPDVMAGLNDNRNTKQCLVESL  
NRECLVYKETDPDKLLYKIGIDS AKLVERIEKATGALARIPPLVETKKWNEVTGILTGPMG  
ELSSTLTL LAGTDAPKTKLARKVKEDLFAMGTATTQRQPDVIMRYHAKAIEDLANFLAAA  
L  
>comp8249\_c0\_seq1; 133 279 1441 LEN=1639; translated  
MQTGFFFNIGSIRNSVCNYANKDTXEQATATRLVKKNVRGNCYRHGTSGSIQKLKRSL  
AIATLVLATASSNDHFFVDGSNAASAAMGALKNDYRYFVAGGTCAAFSHGITTPIDVV  
KTKLQADPEKFEKGLVAATLQICRDKNSGSAALLNGLGPTVLGYGIEGAMKFGAYEVT  
KPLFLTLLGERRKVTAFVLSIVAGSIAAVLLVPMESLRIKQVTTDDSYKDDTILSGIPRI  
IRDDGFLVMMSGVWAMLAKQVPYTFGKQVSFDLVAKFLYSVTETLSVLTKTQLKWI  
VLSL SAFCASIAACLCSQPGDMILTDYSSSRSKPGSFGTVVRGIYKGGLPGFFRGTQARLVH  
VGMIITSQLMVYDLVKQLLGLPATGSH  
>comp8249\_c0\_seq2; 155 1701 2351 LEN=2549; translated  
MKFGAYEVTKPLFLTLLGERRKVTAFVLSIVAGSIAAVLLVPMESLRIKQVTTDDSYKDD  
TILSGIPRIIRDDGFLVMMSGVWAMLAKQVPYTFGKQVSFDLVAKFLYSVTETLSVLT  
KTQLKWI  
VLSL SAFCASIAACLCSQPGDMILTDYSSSRSKPGSFGTVVRGIYKGGLPGFFRGTQARLVH  
VGMIITSQLMVYDLVKQLLGLPATGSH  
>comp8250\_c0\_seq1; 714 84 2078 LEN=2225; translated  
MASGTRLCARAAYTVRLCGAGIWRNRQSRVEDRLHQSVHRRKASTRNDKSGSRNDLICPE  
NPEFSWNQVFLQWALGVYFSTPLIAILQGSLLLNDYRVNHSADAPRPVMPARGVAVAIDED  
RTKSISSWILHPFSSSSNHTPGNERPLRLLVVGDSLAAAGVGMKSGVPILPESIARSLK  
EMGGRAVYWTGVTGVSAAQLVKDIEEIEPYDHPKGRQLERIVKEFQNRRRRWLERHA  
NNDIEYLDPAVPDSEVNDVQQQPQNPILKWWKRMREKEKFDSEIIPNNPQGVLEWWSNV  
RLMFRKRKQLVEEDLSA IKDIVLKLPLQLDDDEDDYYDYFRENLPEDILANERDVGSV  
NKDDNHKSERIPLIHKGTFRRTSVVSKAAEYDIAVVL TGLNDVKEAFMPHMKSSGQ  
GPTKLNNSLRQVLEALKEKMHGNLDLEHTNRKRNSQDQEKSTNTFLPSDGLQKASNVQ  
QS SENPKNMRHPLVVVPELVPAPLQFFRLVPLCWF LIP IFRAMENNRFLASCFFPDNVV  
FVH QPDLEWWTDEEMGIGSIRKNIKNEQLLLRVTDSVRSVRERIEEVMKNYYGPK  
EEESLSSE SKSKSDHDQSCSISSLAGNNSNASPDNKGNI GEGRDFVSVDGIHPNDE  
GYELWGRHIAAA IIDHW  
>comp8251\_c0\_seq1; 703 1 1641 LEN=1782; translated  
VNLSETVLSRRRFARHFRRSILMQEHPDPSKPHSGDAPWKNPWLVTLPILDVLEQKQYRP  
DSSLRSAEGGRRRLDRDGI LDPYPKQQRDVLCHVHEQITRLCHELQACGVYELERSA  
EQNRSILVASLTDIVGYDHDHGGENGEHETGKTSAVRILAKEKHALSRLQDHL  
SRRVRSLL AGFCFSSGATTKGNDDGGSHEDDNNKQILFDDRASSSSTVIRTGKGNANGNE  
HEHHNED NKKLAEKSTNDKSSDTNIVDGDSDDESSLMSLEEAMTPLELICEKLFAGAGSSK  
PMAS PLEIETEDSTKRSM AETRSGISQRGSDEQRRQTQQQEQTTKISRNTNELNSSNP  
DRVS AMATASVEASQRTAGAAAVMMALATDPK PATASPWREPPKSMRNEALGSSGNNS  
SVPRNR FDGTNPKKPGNDDG SFVEDPPPSDAEDYKEVKHGK KENSESPKKKGATKGT  
MGIFDVV DVFTPSSPSEQQPEEPPGRGDDEVRQGHGGPDRTE DHLSLSSQSQTAAEAL  
TRMVQG NSFRYH  
>comp8251\_c0\_seq2; 200 1 796 LEN=796; translated  
VNLSETVLSRRRFARHFRRSILMQEHPDPSKPHSGDAPWKNPWLVTLPILDVLEQKQYRP  
DSSLRSAEGGRRRLDRDGI LDPYPKQQRDVLCHVHEQITRLCHELQACGVYELERSA  
EQNRSILVASLTDIVGYDHDHGGENGEHETGKTSAVRILAKEKHALSRLQDHL  
SRRVRSLL AGFCFSSGATTKGNDDGGSHEDDNNKQILFDDRASSSSTVIRTGKGNANGNE  
HEHHNED NKKLAEKSTNDKSSDTNIANGENEHEX

>comp8253\_c0\_seq1; 519 14 2080 LEN=2080; translated  
MKEVMNRSAYFLAASVFLSSARTHAFQGGKSLFTTSHQKPSNPQKQRILQQPLFSTVEN  
DTSTPTSTTEATPDADLDKRFWEIGPTLNNPNQPPLESSELEALENGTHPTEDQSDLGRG  
VFLTRDWRKAWHTYQSPDPFSLIDPKTGYAEYKIDENTMIEGTIPEDLVGCLYRNGPGK  
FGVGGERVQHALDADGLVIQVTFPPRDEAGNRNFKFLSRFVETDQMKAEKKAFLYRGT  
FGTGPTGYAEPKRLNEDPWEVPLLSKIAGNVFKTDIKNSANTQVIFSFGGKVLALFEAG  
LPHRLDPNTLKNMGEDTLGGVLLKGTTPVKLGPSVPEEFTPDFIGGSAHTAHPNICPNTGN  
LVGWHWSQLPAEKSLAETITEWSPDDFSPVASKTFVLKNCCELAPHDMALTKHCVILKVN  
LKMNSAKFLSGIEGPAASLEMDGRSNVVHVMPRPTNAAEKQFEPYVVEVPACFSIHFSH  
AYEDETGTGYIRMFSSGWPPSDEKDFLGAWGGFAPEFNRIPKTCLWELVIDPVTKKCVKHG  
IAPGAANACAEHPLVHPNFATKRAKYVYAAGSNVVGDSAPCGFVKINVEEGDEETLPEG  
TKNEAIDAWWFGTRASAGEPLIVPKEGGDPNDETSAYLLGMVYDAVIDKTGVAIFDLQRE  
LKEGPVATLWLKSAIPHGLHGCFKDATG

>comp8254\_c0\_seq1; 421 109 1344 LEN=1634; translated  
MAAFLLKSFMIPLHLVLI VPAFSLLYFALSLSADALAAARASFDCSI SDTWQRNSLHIQEE  
PSLQRRRYTAVNLATVNGSGDGANHSNDLNNENDGVEVAGSSSAVSTNNSGVTPASNVG  
SFDDAVHNRYACTRYKRYDGIYDGSRNPSPSDPSALKLAGEALDLACRAPTGFNVQPYKL  
LIVTSPAAKERLSRFCIGRNKDRVLDSDCSVVFLADREAMRTWKDYRSMLVAAGEGGSS  
GADGGRRSSNKSRLGWLKLRVLVALFSSGLPLPKVLGGPVFFVRLAMRMVSVWTRSRV  
VPTLSSPECWSQKNTMLVAATYMLACSARGLDTTPEGYLSWGIRQSLGIPRRYTIPLVV  
STGTAIPLGAGDGKNGAAAESSDAGMGHGNTPETKTPRFSREATIYENAFP

>comp8255\_c0\_seq1; 664 115 2282 LEN=2293; translated  
MPLIQLNLKNQGDEDEDSSDRPAAAEPAEAPT SKGSSSLPRLDRMQGEFSVEASDLVRL  
ILGFLTSQGLHESARVLRKESGVGFTNGMIRKEAVAAAIRQGDWGSVMRSTVLLAEDNRH  
DNFYSVEENG DVRRKGNDDGGSVFGRISEQVILELAEDKNLNLAYSLLKVHRDALDRI  
AEDQEEKIDTDGDDNTIGESRNEKRKRSKSSKSAKSSSSQLTKARSLEQKLAEIAANPTKF  
SNNATERFIALYGSRRSKQERREDLAERVEDQREIPLNRLPTLIQQAMKWQSHTGQLPWI  
KEAYYDEYSPSGEQSGERNKRRKRKRYDLVLGVAAGDYELSVGDTWRGGKNVHDEDEDV  
LAEIPQDILAKVKFGKSAVCEALFFSRGLITGSSDSMIEIWDPKCSYKDLNTTDYPYQQ  
DHVMGHSDSAVLSMAVSNDEGILVSGDSAGKVKVWKLATGKCLRQYQAHDTSVTALSLSR  
DASRVLTGSASGICREFGIVTQTVLQVYEGHASYIHSCNYVLNWTANANKPDTATAEGW  
VVTSSADGTVRVWKKGLTIRILQPPSDYVKAQKNSFSLVVDPTLVRTECPAHTALQ  
VPGEESRILLVPRSSTAFLVSMEGTALQLFHSESPAXILAASITSTVYLASSTGNCLV  
FSLLTGKLLQSINDFSLDSTSKTNTDRRVAEISALIHHPFKPVMAAFSNDKTQKKGQLTI  
WK

>comp8256\_c0\_seq1; 45 650 1431 LEN=1431; minus strand; translated  
MSFRTLMALAXLDRPEQVALFDVPALLPDRQEGRVVDDLLEVGPGKAGGFLGQVVPVDRG  
ETAARLGGVDLQDLCPALPVRKGDHDLVPEAPQDXPGLGPRAGGGDDHDVDVPFVPATS  
GSRGVAPPEETVHFRQQLVQRLVPLVVCVDPDAVRSRPGHRIELVDEDNRRRPGDAAPG  
PAAALPTSEGPGPPGVSAAGPQRRPPGFPEERPDAGPPPDPVHFVAKVAPAADAKGVAAGL  
PGNGPGDHRLSDPRAPVQEDA

>comp8257\_c0\_seq1; 347 523 1604 LEN=1604; translated  
MANSIYDDQIEEEI PGTFYIFSLINSEYKETNPVLSEPD EYDIPESSLRGKPSGGLCA  
YALLNVLKENGNGASSTISWGGALDVMQEEIQNERGYKTYVPMLSTSRPIAVRDQPMQIA  
SSRRRGVKRALLIGIHYIAHYDEDAMLSSCQDDVRKIREYLIHEAGFQKNNVLVVMDDGG  
RHHEPSKQFILDCLKRLCAISKPGDTIFVHFSGHGGRVNLNDEEYAEDENTIPHELLAPSD  
YHQQGVIEDDEFYASFIRLVPSGVHMAVIDTCHPSPSSCALELPYVCIAGEDEVHDAGG  
FRSGRAIIASAVAAAKAAVLAAKIEKERQERERQERQERQERQEKEREKEREKERE  
X

>comp8257\_c0\_seq2; 367 523 1736 LEN=1736; translated  
MANSIYDDQIEEEI PGTFYIFSLINSEYKETNPVLSEPD EYDIPESSLRGKPSGGLCA  
YALLNVLKENGNGASSTISWGGALDVMQEEIQNERGYKTYVPMLSTSRPIAVRDQPMQIA  
SSRRRGVKRALLIGIHYIAHYDEDAMLSSCQDDVRKIREYLIHEAGFQKNNVLVVMDDGG  
RHHEPSKQFILDCLKRLCAISKPGDTIFVHFSGEYDLGGPACLLHRKSIRRLGSSIVLIT  
SISLSSLPNTFQNLGHGGRVNLNDEEYAEDENTIPHELLAPSDYHQQGVIEDDEFYASF  
IRLVPSGVHMAVIDTCHPSPSSCALELPYVCIAGEDEVHDAGGFRSGRAIIASAVAAK  
AAVLAAKIEKERQERERQERQERQERQEKEREKEREKEREKEREKEREKEREKEREKERE  
X

>comp8258\_c0\_seq1; 135 1412 2126 LEN=2126; translated  
MRFTLGFATAALFATFFSLSGAETRALQKDIGSEL CYCAPNAYEFTLDFSLTCPPVNITLG  
DAVAATTTCMVSPFGSPEVADLVPVSVT SIDILELNQNLQVMVQENIEPKDSYLDGDTFSY



ISYAAIPGEIVNSDDLPRAIQLNIVGKNKFGEDI INVYLITFTNSCGAYPVLQEGQFAGW  
TRFSDLGPPNPELCPAAPAPATEPPVSMMSMDLGMDSDLESFLEESYGKFPNCPGTQX  
>comp8258\_c0\_seq2; 199 2160 2540 LEN=2684; translated  
MDSDESLEESYVAKSSKGDGKRKNGKDGKGDGKSGKGDGKFNKGKSGVPPKVNKS  
KDGEKAANKLEKSKSGSKSGSKDGSKAGSKSGSKSGSKSGSKDGSKSGSKGEDSRK  
KRRLRI  
>comp8258\_c0\_seq3; 268 1412 2437 LEN=2581; translated  
MRFTLGFATAALFATFFSLSGAETRALQKDIGSEL CYCAPNAYEFTLDFSLT CPPVNITLG  
DAVAATTCMVSPFGSPEVADLVPVSVTSIDILELNQNLQVMVQENIEPKDSYLDGDTFSY  
ISYAAIPGEIVNSDDLPRAIQLNIVGKNKFGEDI INVYLITFTNSCGAYPVLQEGQFAGW  
TRFSDLGPPNPELCPAAPAPATEPPVSMMSMDLGMDSDLESFLEESYVAKSSKGDGKR  
NKGKDGKGDGKSGKGDGKFNKGKSGVPPKVNKSKDGEKAANKLEKSKSGSKSGSKDG  
KAGSKSGSKSGSKSGSKDGSKSGSKGEDSRKRRRLRI  
>comp8258\_c0\_seq4; 173 1412 1951 LEN=2229; translated  
MRFTLGFATAALFATFFSLSGAETRALQKDIGSEL CYCAPNAYEFTLDFSLT CPPVNITLG  
DAVAATTCMVSPFGSPEVADLVPVSVTSIDILELNQNLQVMVQENIEPKDSYLDGDTFSY  
ISYAAIPGEIVNSDDLPRAIQLNIVGKNKFGEDI INVYLITFTNSCGAYPVLQEGQFAGW  
>comp8259\_c0\_seq1; 371 1 2157 LEN=2893; translated  
XDTLGLQOREHCTGEDSFQPNREPSKLRSKHHGLFVPGKPEQQKASHLFWRTGGIPTVK  
ASGLDRPPSIACDAVCRFGSNKYDIPQIDDRNGNQELRQSNGATPLVSPPATTKDSNNSS  
SDKKS GGTRGAAAGAGTPKQGQDVSEEIQQKPPNSKRKRKQKSCRTSCPILPAGVLDQCI  
ELCRSESGHCCGNRLNGEDPETGSGRMSCANGCEMAFYVPDVESCKRQCREGNSNEGCDF  
EPAFLKAI GVKKFSQCGRCWDPTCAQYHERPSGEQDCLDGCDDHAATLGHFYKAYPAELPA  
PRTDDEGEEEDFSCDGSTPDIPRFLFAGQSNMAGISGQAKESLFREIIGAIDERRFATFS  
GTMEERKAQRLENKTRLIDALVDACNGAQARKETSENMARILYNLAGRYHRAFHKDTIG  
EQHPTNVCSYTDPSVTAELGCEKAVSPTACGMDGTNFGPELVFAHLFPKFRDTMYHRQAI  
GITKVS VGGSEISHWLKRKSKRPKDVPNYWKALKQAIRADHGTIEGFVWFQGESDQVRQV  
PMSMEEYLDHLTRLVRDVRIEILDAYQRKRDRDRKKGIVLEQAKFNKAEDIPVVIMELGS  
WVGDNVAGRYGDLPGSII SAQRKFVYEVDPNAVLVNTGTNTDPNKRLSEFYHFDAASQLI  
MGANLASKLPETVRLSSEMVCVKSATLHRSRSFIPNQSLLMTHVFFSLVRSSSINNST  
>comp8259\_c0\_seq2; 381 1 2085 LEN=2718; translated  
XDTLGLQOREHCTGEDSFQPNREPSKLRSKHHGLFVPGKPEQQKASHLFWRTGGIPTVK  
ASGLDRPPSIACDAVCRFGSNKYDIPQIDDRNGNQELRQSNGATPLVSPPATTKDSNNSS  
SDKKS GGTRGAAAGAGTPKQGQDVSEEIQQKPPNSKRKRKQKSCRTSCPILPAGVLDQCI  
ELCRSESGHCCGNRLNGEDPETGSGRMSCANGCEMAFYVPDVESCKRQCREGNSNEGCDF  
EPAFLKAI GVKKFSQCGRCWDPTCAQYHERPSGEQDCLDGCDDHAATLGHFYKAYPAELPA  
PRTDDEGEEEDFSCDGSTPDIPRFLFAGQSNMAGISGQAKESLFREIIGAIDERRFATFS  
GTMEERKAQRLENKTRLIDALVDACNGAQARKETSENMARILYNLAGRYHRAFHKDTIG  
EQHPTNVCSYTDPSVTAELGCEKAVSPTACGMDGTNFGPELVFAHLFPKFRDTMYHRQAI  
GITKVS VGGSEISHWLKRKSKRPKDVPNYWKALKQAIRADHGTIEGFVWFQGESDQVRQV  
PMSMEEYLDHLTRLVRDVRIEILDAYQRKRDRDRKKGIVLEQAKFNKAEDIPVVIMELGS  
WVGDNVAGRYGDLPGSII SAQRKFVYEVDPNAVLVNTGTNTDPNKRLSEFYHFDAASQLI  
MGANLASAFADHLSSMKLRSAAEASTVKPTS VGV  
>comp8260\_c0\_seq1; 320 55 942 LEN=1227; translated  
MTKSNACAI FAFVLLAYGALSSAFQTMHMGRI PSKTTAYGDYSLIRTAATTGDSEQPLP  
PVAPKIPDNVLSNNALAEAGYPAILSPFPDAADPAYAATAPVGGNEFCVSRLLGGPVEK  
ELTNDNLVQIVYRRSNVTDIEVNTLAWKCLGYRFDEESSEWTAKEVFPKWKERYPEPPDM  
IGMQR IYTKAIDGELIKNNQRLTVSVPLECKNLLKQNMOPYGFTGYKVSELTPNLTRAQ  
IVNWLLYYREELFGYTV EELREKRRLKKEKEAEQKREERNEE EYP RPPLKEVY  
>comp8261\_c0\_seq1; 552 104 1783 LEN=2080; translated  
MKYIVVTGGVVSGLGKGVTISSMGRLLQACGLRVTAIKIDPYLNV DAGTMSPF EHGVEFV  
LNDGGETDLDLGN YERFLNLQLTQDHNITTKVYRHVILKERRGDYLGKTVQVVP HITNE  
IQDWIERTAKIPTDDSGEVADVCLIEVGGTVGDI ESSVFL EALRQFQFRVGTENFLLSFV  
SLVPILSDEQKT KPTQHGVKDLRSLGLSPSVIFCRCKAELEIATRQKISNFC HVPADHVL  
SVHDVKNVYQVPLLLQH QKLHKMIYQHLNLESPCEPDLGEWERVANCMESWTDTVQICLI  
GKYNGLQDSYLSIIKALRHAASCEHKLDLQWVEATDLEENQDTMTGEAWEKVKNCQGVI  
VPGGFNGRFGNGKVLAAKYCRENGKPYLGVCLGFQAVVVEYARNVLGLEGANSTEFDEES  
PHPVVFMP EIDKETMGMNRLGSRVTKFTHPVLDPSTGATSILQKLYGGADMIHERHRH  
RYEVNPDYVDKI HDSGLKLVGRDETGTRMEVAEISGHPYVGVQYHPEFKSRPLIPSPPF  
RGLLLAACGQLESHLAKQS

>comp8262\_c0\_seq1; 160 1 658 LEN=1220; translated  
HPNLSTQADSFCFSGAIYNLQVQSADSFQSIIPDPLCSKAKNSFLEISIKIYTMHRYQG  
IVILLAAIASVNGFGNVGRSGVTLGAI SRRGTEISPINDQKVA AAKFDAHSLKRHRCFPA  
SKGPFATTTKAWTTTMMKKVTVGNHQLAKLYSTSSPIDTSHAGAKTTAAYALILISILSF  
VGDNNVCPSSGQCI STTGTGNGGNLSPLSFVTVTGR T

>comp8263\_c0\_seq1; 385 258 1525 LEN=1525; translated  
MSAKTVAVGIDLGSYNSRVATFDDHSNHPVCAHNSDGNRTTRVVLPAEESGDGNGFSSNK  
NTVPVTAENLDRIYTEKLMPLAYDAAHTKDL SVIVSIPNDERIPQE WLSALKQSGRGVIT  
EAAAVCLAYDLEEK TENS KASKRILVVDGGASALKVALLQVTT SGLLCLESTQKTDTVHG  
EALVETL GQAVAQQFEIKHRFP RGEVWQSKKARGKLRACENGLTTLQINNTLTIHVESL  
YEGIDCQVTISEAKWDYLSGKLVKNAKDFLNMTKAESSDIDTILLSGNMHAWLKPLVKEI  
FPGKLLSSGIDPSEAI AIGCTKQANWNL SHPDESISSTIPTTL DVPMSPIAIAIVQKENV  
VIEQGAPLPAFVKYELLSSEESSSEETPTAAVEIWQVQPT EKHLATLSDLATNSTVCLL  
LTX

>comp8264\_c0\_seq1; 165 139 1372 LEN=1544; translated  
MPVYGK VCAKHS LRYWSVSFLSFCSSNDRENNSTVRFP MWAQPHKLPPPKTERPLSSFV  
DGICGNSASGLERAVSLPVCDCRVAARVLAPSKGPGIHLGERALEADRCPTNEGSHRINS  
DLYSERIKHTFEEDGIDYEVWRYPELESRDNGSDKEQQAKIQWIKDRIHRINERTDIDGA  
LVFYPIYPFGPKGPYKNKLMGVYK TQDDHIRDLLLP GK DVEGLCRNKWFKIRDSKQKNS  
PATY PCTALS VLKILEEYHMGR RNNQPND CWKDTIC IINRSEIMGRPLAVMLAKKGATV  
YSIDIDSILQFRPDGKRLRRCNPATTSLESCTRESNVVAGVPQASFRIPISSIREGATI  
VNVAEVPNVCEATLFRERPDVRYIPQVGKVTVATLSLNLMLNKVNRPGSS

>comp8266\_c0\_seq1; 314 2350 3406 LEN=3481; translated  
MLQETYLVLSATGRQGS AVVDALIAKNANIFC SSRQPESLKKKEVSSIFGLDFQIIVLGT  
LYYCKNSSPFKILRTIFTGLITVYECDKGDAVS VLRADMNDTASIVAALDASKATR VWF T  
TDFWLSL SKPTRAKEAKL GYNVVD AIKQRSNQVKHVVYNSGAGADAAPT KMQEFWSKVDVE  
RYMEKELG PLKITWSVLRPVAFL ENLDDQKNGNPLKKGK IKMLTKPNIAVEYI SCKDIGK  
GSAELLMHPELYAGQKIDAATCEHTGPELADILSEVSGTTCTYSMSVPRVILYL FVRQLY  
YLVTWIEQGGYDETDIDAFKKVVPDCQDAKAWFS AKGKWADGEK FVSKSIE

>comp8266\_c0\_seq2; 314 2180 3236 LEN=3311; translated  
MLQETYLVLSATGRQGS AVVDALIAKNANIFC SSRQPESLKKKEVSSIFGLDFQIIVLGT  
LYYCKNSSPFKILRTIFTGLITVYECDKGDAVS VLRADMNDTASIVAALDASKATR VWF T  
TDFWLSL SKPTRAKEAKL GYNVVD AIKQRSNQVKHVVYNSGAGADAAPT KMQEFWSKVDVE  
RYMEKELG PLKITWSVLRPVAFL ENLDDQKNGNPLKKGK IKMLTKPNIAVEYI SCKDIGK  
GSAELLMHPELYAGQKIDAATCEHTGPELADILSEVSGTTCTYSMSVPRVILYL FVRQLY  
YLVTWIEQGGYDETDIDAFKKVVPDCQDAKAWFS AKGKWADGEK FVSKSIE

>comp8266\_c0\_seq3; 361 2180 3103 LEN=3178; translated  
MLQETYLVLSATGRQGS AVVDALIAKNANIFC SSRQPESLKKKRGDAVS VLRADMNDTAS  
IVAALDASKATR VWF TDFWLSL SKPTRAKEAKL GYNVVD AIKQRSNQVKHVVYNSGAGAD  
AAPT KMQEFWSKVDVERYMEKELG PLKITWSVLRPVAFL ENLDDQKNGNPLKKGK IKMLT  
KPNIAVEYI SCKDIGK GSAELLMHPELYAGQKIDAATCEHTGPELADILSEVSGTTCTYS  
MSVPRVILYL FVRQLY YLVTWIEQGGYDETDIDAFKKVVPDCQDAKAWFS AKGKWADGEK  
FVSKSIE

>comp8266\_c0\_seq5; 361 2350 3273 LEN=3348; translated  
MLQETYLVLSATGRQGS AVVDALIAKNANIFC SSRQPESLKKKRGDAVS VLRADMNDTAS  
IVAALDASKATR VWF TDFWLSL SKPTRAKEAKL GYNVVD AIKQRSNQVKHVVYNSGAGAD  
AAPT KMQEFWSKVDVERYMEKELG PLKITWSVLRPVAFL ENLDDQKNGNPLKKGK IKMLT  
KPNIAVEYI SCKDIGK GSAELLMHPELYAGQKIDAATCEHTGPELADILSEVSGTTCTYS  
MSVPRVILYL FVRQLY YLVTWIEQGGYDETDIDAFKKVVPDCQDAKAWFS AKGKWADGEK  
FVSKSIE

>comp8267\_c0\_seq1; 227 1 1223 LEN=1223; translated  
QVQAQQQAQHRAQYQAQHQAQHRAQQQVEAQQHPQRQTQVLTNKQETTTATSRENKAPRR  
KRKTARFDVDDCGAAMGIDRFVEIEEEKTKRALFRWMMGTYSFDTSTAGNHLVRSVSP  
LLSPLFVDFCRTLNP SFELPNPRVMKSMEYTAHEKLV EKIRSF LSPWSEEHRDSSSKNNT  
YV SIVHRIRVVRTLEPGFN DQDQDGGRGQTTPMTVARTPTSLTPALASHAWNGNSNN  
IRKEPYARQSLAPLQWTDGANAASRVSDKGTICTTTREPVAGPAVDGYVETALPRHATA  
ISEHEYDLTSACSRPTAMTTMVTGADERDSLERYLPPLHSNMSGISEHEFDLESMHSHR  
TTASETSEPTGRAAVNRILPPLDQNM TGSSEHEQDLASMHSHRTTATT

>comp8268\_c0\_seq1; 175 1 690 LEN=1141; translated  
XIDPRCRAVLNPT EIHVRAHL PDLTACGAGKSTRILNLQHSITTTERNIRQTAADLIEIA

SDTHKTEPECCPPHRELLPGLFEPDXAVFGGSTLVNKRSYHENIVEHYENPRNVGSMDKN  
EESVGTGLVGAPACGDVVKLQIRVDDDDGNIVESKFKTFGCGSAIAASSVATEWVKGNVD  
EALAVKNSDIAAHLKLPVVKLHCSMLAEDAIIKAAVKDWKAKQDDKKTAAA  
>comp8268\_c0\_seq2; 195 759 1040 LEN=1491; translated  
MKLQIRVDDDDGNIVESKFKTFGCGSAIAASSVATEWVKGNVDEALAVKNSDIAAHLKLP  
PVVKLHCSMLAEDAIIKAAVKDWKAKQDDKKTAAA  
>comp8271\_c0\_seq1; 273 504 1349 LEN=1744; translated  
MVAAAAVVSSLVKTTRIQAIAARVTLNNTKNRNALSRAMLQQIQETLGVIDADPEIRVII  
LNASGPVFSSGHDLKEIRANAANLKNENKNASLMELCASVMQTIVRLDKPVIAQVNGV  
ATAAGCQLVASCDLAYASSSATFATPGVDLGLFCSTPAVALGRSIIHRKHAMQMLLTGDAI  
SAEEAERIGLVNAVIDNDENLEKTVIEIASRIASKSPRAMATGKALFYEQLELPLDAAAYR  
LASDAMADCMNHDEEAREGIDAFLTRKRKPTWGSLOPTSKDL  
>comp8272\_c0\_seq1; 224 62 454 LEN=1096; translated  
MSEKHKTGAKPEPLPEEQSAPIATMITKAFQNAADESKDEAIKVGFLWDEWARCIGSGY  
QWDSLYRHGRDSCGKQWRDLKLAEEARLTQWRDPKRAKELLDSTYYQKRRTTISPTAGAI  
WELKERPGWD  
>comp8273\_c0\_seq1; 731 163 1866 LEN=2672; translated  
MSALTEDQMLHGGESGKNRDGDSEGETEASDIENQALIPADERRGESRDTNDASACATDE  
SIGKNRAGGDLETAHQALISSDEKRDEVIDDVKIINESLHFINDLLRNMLDMQRAGSNQI  
PIEIKPTDIMNDIFKPV EAMMHLREV PFEVVLECGSGNSENKIDEDDQLVIMTDPLRLKQ  
VVVNLTSNASRFVEKGFIRCSAKVNATTGFVELYVDDSGPGIPEEKRRVFGKFFQQLDS  
LQOQGTGIGLSLCKKLIDLMGGNLYIDDDYHSGIEGCPGTRFVIQLGKPPQLQENAILDEQ  
LPPRDRAKLRRRLLNCDRPSAEDGVGPQPQAPPHSVDFAAEQPKTKTSVSSHSTVSTLAT  
SENTGNESATRPSAGAI GARKEPATPPPVPSSSPVAVSPDPGEAPA EKAGVPASERRDGQ  
GLLTELPLNLSVLFVDDDTILRKLFSRTLKKNPTWSLREASSGEIAIELITSQEAGSGE  
TQTPSGFDLIFMDQYMASTQKQLLGTETVRAIRARGFHEPIICGLSANDVEDAFFNAGCD  
AFMFKPFPCCKEELTKELLRIINTRRS  
>comp8273\_c0\_seq2; 686 1 1831 LEN=2637; translated  
XEATGMIVENARRAARNERDLNDFIAHEVRNPLAAALSACAFVMSALTEDQMLHGGESGK  
NRDGDSEGETEASDIENQALIPADERRGESRDTNDASACATDESIGKNRAGGDLETAHQ  
ALISSDEKRDEVIDDVKIINESLHFINDLLRNMLDMQRAGSNQIPIEIKPTDIMNDIFKPV  
EAMMHLREV PFEVVLECGSGNSENKIDEDDQLVIMTDPLRLKQVVVNLTSNASRFVEKGF  
IRCSAKVNATTGFVELYVDDSGPGIPEEKRRVFGKFFQQLDSLQOQGTGIGLSLCKKLID  
LMGGNLYIDDDYHSGIEGCPGTRFVIQLGKPPQLQENAILDEQLPPRDRAKLRRRLLNCD  
RPSAEDGVGPQPQAPPHSVDFAAEQPKTKTSVSSHSTVSTLATSSENTGNESATRPSAGAI  
GARKEPATPPPVPSSSPVAVSPDPGEAPA EKAGVPASERRDGQGLLTELPLNLSVLFVDD  
DTILRKLFSRTLKKNPTWSLREASSGEIAIELITSQEAGSGETQTPSGFDLIFMDQYMA  
STQKQLLGTETVRAIRARGFHEPIICGLSANDVEDAFFNAGCDAFMFKPFPCCKEELTKE  
LLRIINTRRS  
>comp8274\_c0\_seq1; 366 1 1082 LEN=1136; translated  
XVGGDSGGQEPLVIESLEALMRAAGEPMPENPDTITEDTKMVEANIAFSVMTKDQYEQKI  
PELREEHEEERRRQLEVF LGKRNI FQDDESAECVEGAVDGDARETGEEDDEDDDDADA  
MMELLLGSDMENSDDDDDRGPPPEPEVRAFSLWNALVNWMTHETVWVKALRETQSGG  
NDNDTATTTNHSVDTEWTPMVDRSDVGASRCAGVMAMVRLYLGRMEELSHPPGSKRAE  
KRLNDLMRTFDYSRENPRLS PAHWRAMVCVLLLEVVLGAGPGGAGGAVLPPSIAGVGMKRE  
EFEYLSRKAVLALGEKVPGGPAEPVTV AEMPWSRRAAIWSMVGRRTIYVLRKSSQDNARL  
>comp8275\_c0\_seq1; 166 153 1259 LEN=1431; translated  
MPSLKNILRKVSSKNLSRLNKKVTEDEKKSTEEYDGKSLYTFPESQSRKSSCEDGKSL  
YILPESQNRMMKDDDELYDEFEASLHIEKTFRNRPFQGIQGGDGNKDNRSSSIDLDDDDST  
DGQDFERATVRLDGI EYVAIVSALTCATSISCFDNFQPTDFRTIIRERAFFTL CSELICY  
LSGAI GMMTGLHATLIFSLVTMYGR TALGIDRDDAFNDFGNTGAARFNGFFSFKLSLYC  
FMAQLTFLITQKFIVEPLRPLVMVLTGYYSYKTM YMDAENVLSAAAVIYSSTPTTNATIS  
TKDGSVSSSESTNGEANSVRLVRRNSGVLTPAPNNRRTVARRSSVKKSHSISTRNFVDT  
RQSYMST  
>comp8276\_c0\_seq1; 317 90 575 LEN=652; translated  
MPHSYGVRRARTRHMF AKKFRQHGP IHL SQYLMNVKVG DYVDIFANPSIHKGMPHKGYHGR  
TGIVFNVTKASVGRVNVKLVNGRIIEKRIHVR IEHVRH SKCQKEILARKVSNEAAKAEAQ  
KTGVKVNLRKTRPKLPKEGYFLKSPGDTELTTIQPLPFDLV  
>comp8277\_c0\_seq1; 634 128 1123 LEN=1438; translated  
MVKKEGDYSNTSRRSTVILFFVGAIVVPFAAAIVPMVMRPNKLVSEQQRNQNLSLFFLAVG

VSAALGLALYLYHDKKQQTVVDDNNGDKDRDDGISAPKQPTAAAKPKDIWKVGANNQNVL  
KKPKAAAYNEKPFSSYYYAHNDANTTGGYKDGLKMEDYRMNGPRLLSVNGLSVSDDDQDQ  
GDNNGEANEVAVAVENTVPAKKRITAQDPNMKNITKYLWDDSGNGKGIATIRVDVLPD  
KLGEFVDWKDVKDVTATLPGEGLLAKIIVGENDMPTYQLRIDKLYGDAADVVKVIKPK  
RLLIKVYKKKHGFLSKNDNNLAAWPQPHRKI  
>comp8279\_c0\_seq1; 224 368 1114 LEN=2198; translated  
MGHCCPLLCLTESTKSTIASGVAMTMLSEKSTRTKLWSRRRSCSKLLPGPLRFDSCLCFA  
AFLLLAVGLVSFPTLPVAEAVPSGSSGGDIELLPDSGMTYFDAAGLQRWDSNPQRRRRAR  
ELQHFAVEGEHPHNGEHRQLEGGADNELGRPEISASPDYGCTVPDGKCTECTFSEQKTYD  
ACKATGKWQKFEICILVEGEGETRRTEQETPLADPAAPKHEMKSKYTEFDEGFAMVRCVA  
FNCTDLSY  
>comp8279\_c0\_seq2; 259 368 1333 LEN=1953; translated  
MGHCCPLLCLTESTKSTIASGVAMTMLSEKSTRTKLWSRRRSCSKLLPGPLRFDSCLCFA  
AFLLLAVGLVSFPTLPVAEAVPSGSSGGDIELLPDSGMTYFDAAGLQRWDSNPQRRRRAR  
ELQHFAVEGEHPHNGEHRQLEGGADNELGRPEISASPDYGCTVPDGKCTECTFSEQKTYD  
ACKATGKWQKFEICILVEGEGETRRTEQETPLADPAAPKHEMKSKYTEFDEGFAMFELEV  
FCLLIGCLAFVSVRKQKRLSSSMFDRRQKQGPKARSRVGNGKRISDHIPGNGDEIEFTPM  
TNQEKERVPLIDIEAEHMDVI  
>comp8280\_c0\_seq2; 258 1 1183 LEN=1399; translated  
XPISSYGMQRNITKMASTTTANLAAAPSTNQSDANSEKLEYNQRWFGYFTVIFFFSAINFA  
SISNVDPNRDAQFGNTICVAFVGLTFVIAASLVLIQDRSQKLLDIFHYTKSRDGYIEGSVL  
IFMVVWVWIVGVAVITTPGGIAYQASNIYSSWGALFSCCYTLNLWSTEKDILSVAEITGV  
SCTLKSWWILFLSACVVFACSINLHVRIGTTSHKDDANTPYAIVLGLGSIIVSTFWITVH  
LNFFNNWGIHEGGWFELFSTFSLIFLWIVGLSVFTTDGGIAAKMEGDECKSDIATRVDI  
KTNCTVSLFIEDSAGKISNHIVNCDQLVTGEEFPGSNLYACWSCMLASIAIAFKWKASQ  
ALRFAQAQAEQQQRYDQDAEEMFADHEEQNDSGL  
>comp8282\_c0\_seq1; 451 1 1295 LEN=1543; translated  
XDDDDDAAMAAAQCLECIATVLKGCIDQPAMMRNLEPLLIPLVLKIMGNDGEYIEYLECA  
LDILTFLTYFPDTISPELWQAFPLIYIAFDQWAYDYLNMMVPCQAYIQKAPDMFLAGQA  
QLPEGNVPYIDLIVSMVAKTVTNERSSESECRHALSLFMGVLHNCQKVDGYISTINEIV  
LGKLGQVINSVDQLTRISIIYQVLGSAIYYPQLQLAELEKREVTQQVFQKWMADAEMKDM  
TDRWLPRKLTVLGLASLFHIPAATLPAPIQSSPALIDSLIRITISLQKDEGGDRVTQD  
DNFSGDSEESIGDQVDFGEGEDVTNEVDESYRKALSGVTSWDDDMKFLGGDWDSE  
DIDEDFTSPLDQVHELIFLNDTLKGAQREPEVYQQVQSAMSPEAVANCQKVFLAADQIR  
AQAAQQTQQS  
>comp8283\_c0\_seq1; 94 1 1177 LEN=1177; minus strand; translated  
XVIQGRINGLMQLWVAEVDNDDSNVIRLEQLKWAEPAYSIGMGYNENYNASSILVNYESL  
VSNPYDWKQEFDFLSLQFCVRAFLTXTLSSCKTTPLOVYVQVLDREPSNNDKRIIVMTKPT  
PNYESDRYVCDRITVTSRDGKTEIPVSLVYLKSTMEQAILPQSYVPLHLYAYGAYGESIE  
DTFSSVRMTLVNRGIYIAIAHVRGGGELGRQWYENGKFLMKTNTFNDFIDVGRHFVETKS  
WTPSLMSECEGRSAGGLTIGSVLNQAPDLFRVALLGVPPFDLVATMTDASIPLTAGEWEE  
WGNPNEEYFFQYMMDYSPMNNIQAGVEYPSCLIKAGLYDPRVAYWEPLKYTASLRHGVS  
NDDENRPICLQTDMAAGHFSASDRYKHIRSTAFDX  
>comp8284\_c0\_seq2; 168 673 1000 LEN=1140; translated  
MENADTEHTDMEHTDMEHTDTEXHLYVEETLIQSTLVILCRGGDADTEKPAADAAEYTD  
TSXVEEALIRRNTLILSMLLGVTNMEEDTVDIEDIDAEELSFKIMKFNI  
>comp8285\_c0\_seq1; 344 437 2242 LEN=2539; translated  
MDSQPKNDGYPHTLRSVFWTKSSYAHFARSFHPYHKHDLNALAHVFTTGLGVWGTVQLAG  
VLDPELAAISVWAYAAIVAATTPVVTAFHHTAFVYGCLRISIEDAAKLCISIPLEAVPGG  
ALGACALAAAGYGLQDLAHWLCAEKTLMSSYIRTSPSTLLVHTFWLMPLVIDSVLMRHC  
FIPKLFVNRNRNIFCQVASKKAVEDLREWINQEVPEKPDTHVWPHEQEGETDDAVTQLEN  
DASIMAAFRTIFASHHFDIRPVIEMNEIYVTAVGAIKEITSDAVFYTPHTDGPFWWLPGA  
SLYRILVGVTPNKMVRTNFNLQHASEDKTVDMYDCLGFDYNRELHWIDHVPQGQTNERRS  
LIKLFVYVYPKGWHKYGRLCAYLNLSTNTWARKNFLRTLRLPVTMLEQLNAWWIFITWTN  
AMFELHVGWPNLTYILAAYWLGETPFLVLTFRHYFVYISTFAYRTPPVAHGFLMRDCKL  
YKTLALMHLKSKRLPLVALPRDIPGIAMSLVGFSTITLATMQLGMVRTYFGSELGFVKPS  
WIDGFPYNIIPHPMIVGMVGFSSILYWKDQIPEETAALLGVHMSFYTVHMVQEMLTSS  
Y  
>comp8285\_c0\_seq2; 161 237 833 LEN=1130; translated  
MLEQLNAWWIFITWTNAMFELHVGWPNLTYILAAYWLGETPFLVLTFRHYFVYISTFA



KKEGTSTPSRRWEPTREIPNGTVKGRMSTLFGQSKPTGGKLTLVSKSTPLNTSTPHNDKS  
KNVGVLDVDGNGEDQWIIPERNKANTQVSANDWGEAVVSAKSAESDDWETPAKEWIRSGD  
SQTESLSNRATRTLSQOKSNLATQKPSETDELIGDTPVADTGSARGCKSTESDDWVLP  
EGWTSKSSQTEPLSFI SVSKATSNKKSTLQTNVVF EADKRNKDNNGRDFTPGKTKVTTMLP  
PPPKDANAYHHQTQLQPSTNVSSRSGSKNDSVTSDFSAPQAFESVFKMDSVEEMKFGASFP  
TRDSNEVFQPSDADADAFGFPLSSVREPVGNTIGELIGGDEFDASVSLGSDRPAIDNE  
KFGFHPSLASTTNSDRNEIEDNDDNNEFHSGKGEAKKKRKGFFKGLFGRKAKDKESKFK  
ESRIGEKKVQIRNEPHPSSTYFSDVSMSASGVNTQSSINGKAQASRSMNQNGRQPGLPA  
STPPDYSIVRNNVDVTVGGKVQGFSDGKGNFTVDGFSEADGGEKSETKTPVTSSSRSKL  
MHDDVFDLLEPDILPSPSNATKENGDKFFDPKLDHLDMEMNSEDESNTTDTDLKSHIL  
DSSLLAQGKQRTSRQVSRSEEEESGPGKRRLKGVPKESRQDTKAMLRNGVSQDKTSRKNS  
EIFFDEETSNSRNTTHDLSINPVRSTMKKKSATQKVNIMASRTRIRGTNTGRITDTGLA  
GKDSQETQGVRASAPARSIFSNQARSHSRESKSPVQRKPSVRELKVS NVLNQSRKYPGV  
EAKGRGTKARVSGTDESQVKDL SRNSVPPSRVHSSMHSQKLSMVRNNSNSGDTSLSGSRF  
RKKSVVHKLNRNDQTSDLQRKIGIGRHNDRFRPGSIGYQNSNQVLARADPHSESIMVGGKN  
KMKFSKASKAYHTIAKKNSSSEDEPEDEKGYLTIHSASTGASDASCSSSTYENYQKRLAESL  
RKSNNVTRNKYEYISLQPRNSLDDTSIESDIRVLRILRRPRLHYNNVVIKASRQIEGF  
PTYDINSATDPMQVRGLRLLSSAIIPIQTEVRRFLAMRHALTRMWALIVVQTYARRFLAQ  
KRYHRAQNSIITMQAAMRGHFARNDIIDKHICAIIEIQRFVRYLATMEVYEEIYKVTLVQ  
SLVRMKIAMDHAAAYRMSLI IQLQAIARGFLVRQRAHLDKFATVIQSSWRFCYFNRLTYQF  
DLLDIIIVQSLWRRKLMRAAARKVEEKRSAAATAIQACWRAYDCRMDILCYLSARVIQS  
AVRMYFVGMIMLSTKQLKLSQLVGCIYAGPTTWNMRLKQSNQSEECIYVDVNTWSTKQ  
RKQSNQLEGICADMTMSSIKQLAKSKAHYECTFVDFATFCSTRLQELSKQHGDAMTIEW  
>comp8294\_c0\_seq1; 419 20 778 LEN=1146; translated  
MKFALLSLLAAGASAFAPSTHNFHNLARMSEEAEEAEVEEAPVEEESAAPAPVVNQK  
VPLVGESPFLLGGKSFLLGETEWDLLTMKWGSAETGKFI RAAELKHGRSAMIATVGYAFHK  
LGLTFDKISPHEYLSVTKDIKFADLAAMNPVDAMKSLPAESWGMFAFCTILEIYELTHS  
GGKLAYDETVAPGLQPGGLTGDLDGWNPLQINVDRRRTVELQNGRAAMFAISAWIAAETI  
PGSMPLPLLWSN  
>comp8295\_c0\_seq1; 290 1 1002 LEN=1351; translated  
XPCSSLLRHCSGTKEKGRHDEIRPTGVKPVAGNVFNGEGYNEGYNESCYSLDEPTTKAAI  
GVSAAAASATELGAARGSGAVGGDSSGPDGDRAMRELAYHP I VIEGMGYDPRDPAVVA  
GNICENLGAHFASRGGQSDGPYLVVVQGDPLTERGISAITPRVAECLGLKRGVLVCLDEDI  
DPTHSQNADRENVVLEVSYSRLAGILSRLPYEGGGEGSSEKSVLRAMEESIDALVRQKNL  
EREAIGKPPMKEYFKQYALLQEVTKASLHRLCGRLTIAHTSADINPYSVTSFYRVGLDL  
GLYHEDANMVAYRNLSSEHKSQEVLDFAIDTR  
>comp8297\_c0\_seq1; 715 100 1395 LEN=1517; translated  
MTTQSSATSPEPRKRPRVEVIADANDTPVASDTGSRTEEKPTPSYGSKEYWEDRYKKNSI  
ADETGGEEDPEPYHAWYFKFDDLAPLLMPLILGGDVGDDNDDNDEVNKSKTVDVDIENKNT  
KKETHNNTDDEKGAESLGGNDADLSSQQMNDERHQKKNSHLEHAKNSDDSGDESDDFEVI  
EMEDYDDDDDEDPVVRVGLAKNGPISILEVGCGDAPLGRDLALS IQEYGTSTIEQDSASIV  
EKVVCSDYSKNVIEEMKKEQLKAELDRDAKESVQVHYEVADARQLSYPDGSFEMILEKG  
TLDAMLSDEGGGQENCRKIVAECARVLKVSYIIIIISHLNARVESGLQWLN NVIVPGLR  
AAGDFHWLVEVHGSDVEVPSDDDDDAEEKPIESP GPAVYFIEKVGATSPAKSSDGSEES  
LPTIPLKFFSY  
>comp8301\_c0\_seq1; 619 73 1607 LEN=1814; translated  
MGKPESIGVQVLTAGGAANPGKSGKGRAPRRRNE SRNKENTTPDRLNPDATIGNVDQQDE  
DGRKNSQLLQTKISTETF SLEYEDPEAEVDDHETESNGADAGTG VVKKTPKDGFPENELV  
TPVNI EELYQEESQSSKKSDFWLFVCFIGIMASFV CYGLILEYTTSGGRKLHEL SFLFV  
TSGLYTLTAAAGRYVRGEEKSTIPPSRFVAVLGLTSMGSTFTSVRSLRFVIYPIQVLAKSC  
KPVVMLMGTLMGKRYPLSKYINVMIVIGVALFMGGGDNNKGDDEEKSTG SQMIGIIL  
LFFSLCFDGGTGAYEDKLSVHSVQPFDLMYNIQLGKTI LAGVSLLVLNQLHIFIQMCQE  
MGMLLVALGLSGAMQVFI FVIAKFGALTCSI IGLSRKIT TLLASIFYGHHLNGIQVS  
GLV ISVTAMVMNFMGKSKKGGHGHSEAQNTKEHDKHEHEDEEMQKMLSEYQDTDEEGDI  
ELLGEISSMMIVVQVMPAMSSGLQAIN DAS  
>comp8301\_c0\_seq3; 461 73 1128 LEN=1327; translated  
MGKPESIGVQVLTAGGAANPGKSGKGRAPRRRNE SRNKENTTPDRLNPDATIGNVDQQDE  
DGRKNSQLLQTKISTETF SLEYEDPEAEVDDHETESNGADAGTG VVKKTPKDGFPENELV  
TPVNI EELYQEESQSSKKSDFWLFVCFIGIMASFV CYGLILEYTTSGGRKLHEL SFLFV  
TSGLYTLTAAAGRYVRGEEKSTIPPSRFVAVLGLTSMGSTFTSVRSLRFVIYPIQVLAKSC

KPVPVMLMGTLMGKRYPLSKYINVVMIVIGVALFMGGDNNKGKDDEEKSTGSQMIGIIL  
LFFSLCFDGGTGAYEDKLMSVHSVQPFDLMYNIQLGKTILAGVSLVSENI  
>comp8303\_c0\_seq1; 193 191 376 LEN=2038; minus strand; translated  
MSSDLTDEDDIGGTEVVAEALSREILDGDSVGDNVVGAYVGASVGLCDGNAVCAITCCG  
S  
>comp8303\_c0\_seq2; 294 704 1838 LEN=1897; translated  
MSYIHMKRYAFFATISFHILLQSITSAEISLTSEGDNFVETDTRRMLRAHGSNAQRVGKT  
RSRESNLI FENTYI SSSRRRERIRKKERPIAIVLEAWDVP SKNNNDNDRRDGSQGEQP  
ASSHTKETVGLGIDLTEASINEKIPNQISETLPYFTEHPSEKIAATSTPTFSPTTYSPTY  
SPTTLPSSSSVDDEANDEEGRFLSQRNRCATFSNRRKCKNTNGCSWTPKGCVNTPTLKC  
LKWSNKKRKC RNKGRWNTLALICTGIDDIPKAQDPQHVAQTAFPSQSPTDAPTYAPTT  
LSPTESPSKISRYESASATTSVPPMSSSSSVKSEDILVDDSFSESVDKRHQFVGVGFQADK  
EDRKTRATNPVLNNFVW  
>comp8304\_c0\_seq1; 363 1 1366 LEN=1717; translated  
XALHPRTALEADPEKARGYNGERDSPSGLPHGSVSRSGEEGAPGVWRGVDRPKGAGARA  
SGTDASSPKEQLQLQPF EAGTDAIHLFYPELVAFWFC SYPKAHKLLSANAGADKAGMNLSD  
KCEGLLECSGLLDPRSDAKGEQSATVSPSTGRRLRFWWSVSCSLLPLRILALTTAGRGGG  
TAVGQRCVDVLCGPWVLARLAEVYRRLVLEESQGD LAEPEPGDGGFAGAILRRYLQRGGLA  
GGEKDSTGGGDESGHRVSSRDRAVVRLTTMVRQLVILVDARDSESKRGDDKEDRRRGES  
HEIDRGVEEAILEMNLALGQVEAWTRRWIERNPLMSAESAASSFGTELSISKPANFRRR  
ILDNLPRGARELYQAMEGSLSIERDDWFRSFDGTTEDFAVGVWTLQKCGLVRPRTKTVA  
TVMAS TVQKAGAKKRGGTKRRREVVSYEKVAVVWC  
>comp8305\_c0\_seq1; 437 147 1055 LEN=1558; translated  
MDRRAQIEFGRQDRSVSRMGGGQNL RQQQLA QGSASKKQSAKSIPRDCATSHYKRLIHD  
ALTWRFLQDTYIETVDNRGYSVRRDDLPSYSGFAVQVEIRDDGHRGRSVYAAEPIKKGTK  
VWKSTHLVSFSTPNELQSFLGELDHDLC DALLWAYVEKGEYVSLALDPASFVNHGETE  
EDINLDGDCYALRDIRMGEELLENYTHFIGFEEEGVEWYNHIRGLAWQEGDLGSRTAES  
TNEYNLLGAPKMGIGGVVDAAGEYAPGRNPAAWMAGLLLLLVLLRRAGSLPFFSGKKEKE  
GL  
>comp8306\_c0\_seq1; 313 207 854 LEN=1068; translated  
MDSSSSSPLERLNDASRAVELVDRFARTEPPQHEESDNRNTDINDKKNPWKNPQSIEEE  
LIAARTSLAEAWRDLQAEHQRERLCLSENKDDAEQNHGELSEEEFRSMYMDTITDAFAD  
VLEEMQTETHQGSSNASVVDVEVLVDCLQSGIELLEDDQRCKRSYFESLTKLSEDEDANM  
EDERGNDGSLNVS IHEKKKRS LGWLP LVERSAV  
>comp8306\_c0\_seq2; 313 207 854 LEN=1453; translated  
MDSSSSSPLERLNDASRAVELVDRFARTEPPQHEESDNRNTDINDKKNPWKNPQSIEEE  
LIAARTSLAEAWRDLQAEHQRERLCLSENKDDAEQNHGELSEEEFRSMYMDTITDAFAD  
VLEEMQTETHQGSSNASVVDVEVLVDCLQSGIELLEDDQRCKRSYFESLTKLSEDEDANM  
EDERGNDGSLNVS IHEKKKRS LGWLP LVERSAV  
>comp8307\_c0\_seq1; 437 171 947 LEN=1244; translated  
MNFSTRFLIALAVAVATTSVSSFSTVSPVLRSTTTTIPSIRNVGLIRASTAAGNSDGA  
V TNKI IKQLERDEAKMIKKREAMEKLNKVEASLNQLQSKKQEYLNKSKLDSTPAANFSET  
TGRSAVKALMWRVIAGSVTFITSFKFSGSVATALSIVGSDFLSKSFTMFIGERLMNKSQA  
GRKSGADGAGRSLMKALVWRLFAICNTLTMAIFIAKDISIASKIAGSDAIFKTALMFVYE  
RVWAKIEWGKEYQVEYNL  
>comp8308\_c0\_seq1; 536 156 1244 LEN=1877; translated  
MADLNDIDDTDLPEPSLKNIDQKSLQWVFGGKGGVGT TTTSCCLGVQLAKTRKKVLIV  
STDPAHNLSDAFCQKIGREPTPIEGFDNLSAMEIDANNDMEEMQRTIAEQGADDEKDGGL  
SSMMSEL TNSIPGIDEAMSFSELMKQVQNLDFDVVVFDTAPTGH TLRLLSFPTILEKALG  
KVMELKDRFGGLIGQATAMMGGQNP GATQDAIVGRLEETR VVINKVNDAFQDPALTTFV  
CVCIPFLSIYETERLVQELSKFGIDAHNIVVNQVLFPEKDAEELA EWYEGNKDSL PSEA  
KEICAKMLARKRMQDKYIGQCFDLYGDDFNVTLMPLLDYEV RGSEK LKDFSEFLTNPIDM  
EE  
>comp8308\_c0\_seq2; 121 1 562 LEN=1195; translated  
RSDNLCKCSSVALRRVRLTNEEHRREGELVDSPLLWHLFPLVLSFCVVCPRFRIDNLAG  
AVQVCVCIPEFLSIYETERLVQELSKFGIDAHNIVVNQVLFPEKDAEELA EWYEGNKDSL  
PSEAKEICAKMLARKRMQDKYIGQCFDLYGDDFNVTLMPLLDYEV RGSEK LKDFSEFLTNP  
IDMEE  
>comp8308\_c0\_seq3; 407 461 1276 LEN=1909; translated  
MEIDANNDMEEMQRTIAEQGADDEKDGGLSSMMSEL TNSIPGIDEAMSFSELMKQVQNL

FDVVVFDTAPTGHTRLRLLSFPTILEKALGKVMELKDRFGGLIGQATAMMGGGQNPATQD  
AIVGRLEETRUVINKVNDADFQDPALTTFVVCVCIPEFLSIYETERLVQELSKFGIDAHNIV  
VNQVLFPEKDAEELAWEYEGNKDSLPEAKEICAKMLARKRMQDKYIGQCFDLYGDDFNV  
TLMPLLDYEVRGSEKLDKDFSEFLTNPIDMEE

>comp8309\_c0\_seq1; 495 110 1846 LEN=2038; translated  
MGQPPYETSDNPTSENRTSCRDRATATMANECLSVENVTRAAARGTLFTLVLRLLISFV  
CTQLTIRALDPSTLGTSLQLELILTTILFISREGFRLALTQNVVQVAVLTIPTVVT  
ISGTTMIWHLFATSSDEVATDYRIAGVLYCIASWVEGSGEPVAVLFFLRKLEVPVPRVEAE  
GIATVAKTVATAVGIQFLPSSWTITAFGLAQLVYATIYTFYLYGRALSTPDWNEAGSPPS  
SLSVFLSGLDNTCYTTFFVYTIQGFVKHMLTEADKIVLTAMSDSYNQGVYAMGASYGGMA  
ARILLQPLEENARLLWSRLASESDKHNTVHQNDLFRSYTTLVKLVLYVGLVFGCFVAVHYT  
GLLLNLAGRTWGSNIEASNILAGFCVYTSFLALNGMTEAFVYAVGGGDTAATEMKTGLL  
VHTATGVAFASTAYLFVGRYGTGLGIVIANCVAMFIRSLYSLHFVAVYFSKSKQTGERSPLL  
LDLCPHPVLAALAFALAWLATRLSLENLAANGFHLRLEIRNSDWLVQGTGWHVVTGIVFLAG  
IVLLVGTFFERRFIKSLKNMVQNRKSNKSKDQKATRQKQD

>comp8310\_c0\_seq1; 417 92 937 LEN=1310; translated  
MVEQTVNVDPDGSTTFEGEGAEAGDTAGEGFEIIIEMDEVTVGVDPAIYLLVAFVVGAILYL  
LYLKKSRSNEDDYFSSYEKFNKLPKAEVDEYYSVKEKCMKAGWEPGKPPPTDKNPNPGRV  
MAQALMKRAIGDIPVTFIQKESAGMNKLYSQSMCSVSQWRAYQNAETMVSTEVDEVRAE  
ADEIEPGWSQVIWRQAMQYHGMKQKHEQEQRAAAETAACKKEIENKVNAAKAQIKSKED  
EKAAAERIARELVEAEEREKNSKKSFSGGMKKGFFLEKKKK

>comp8311\_c0\_seq1; 222 98 945 LEN=956; translated  
MMDYEQNGTEEQSAPLHMELTAASTTIDASVIQSRIRQSASIQKEDAAMMEDGDQPIFPK  
LSAAQASGNKIEYRRVRCPPHRYTPLREHWEQILTPLVEYLKLVRFNTKTRSVEMKTSP  
HTLDVGGGLQKADVFSAFMMGFVQDAVALLRLDDLYVESFNVTDVKILKGDHLSRAVGR  
VAGQDGKTRFAIENXDADSNRRGRPKDSHAGFLRQSPSGEKRDLRPGSWSSAGKSLQQA  
QRGEANERTILESREMPRTLGDGRRTTMSYRGNAMLASSSV

>comp8313\_c0\_seq1; 945 91 2619 LEN=3448; translated  
MKFSTQSLALALAAASCTPALASEESPSAGLNSGLPNNHPPMHTLAKFSSQFRCPYAKE  
WLAKGAHKAADLGLTNPKSVDASLLKQPQPPHRSRVLQASGASAKGSCSFTNPWSGPTC  
MEFRGEGWTEENMAERCSSEADSALSPGEGCPTATELAGFCVSESAAGSSEATVMIEA  
TSMMSIGASDCGKNMACETFFVGGSWEAADSCGGSGPAAGAPTMGGSMMGGGGFDYANMA  
PSGSSGDGTCLLAPGAI GAHQAGFSNGYSAACPGTPAEGSPYMWPMAWATDFDTQSMF  
GSDDVWRSQGRTFYRLDKNWKRSDTTFNSGILRTIGQGPCDDIDEESKNGVVGNCNKT  
DFSKGDLTTMIHRGSKMYFITWKNSTEVKIGETDPSLIEECNHNMLMVGNIRPDWFLD  
NRGDDTDVQYLGQHVYYADGNIPRLVKQWRKKDFASQYFTMSVTGNPKSNPKRNRKLMV  
QNATTSDDDAIHWPILNIPGEGFGDDMLQVYTNHEMLSDEDDDLFMLIENLEASGGSCP  
LIQSANGDDGEPSTVGPPQLEVHVP SNLEVDNSWFSNVYTFSPVWQPPMKANLPVDVPA  
GDTGVALTEEGRVRESCYDPSQS SVKLSVEWLDVTP IPTKGAQLPWVSLGYRPTVCA  
MNP IDGSDSKIVMVTQGPNETAPKAYAGSLAAGAKRLDQDALGSIYDSFWPLDETLGYSN  
VQLSLPSEAIKIERQSMASQD TVKLSFHQSFESKPNAMHLMYAIGMSPQLGVHISRGL  
EVVEFTPCTAASDGSSATKSSGQAGSPSMATQQDSSESISSSSTVSASALAGVAAVLPALI  
MV

>comp8314\_c0\_seq1; 803 70 1473 LEN=1678; translated  
MGESKCKDHLKQDASTLDPTKLTALTPEVISRQATINIGTIGHVAHGKSTVVKAISGV  
QTVRFKNELERNITIKLGYANAKIYKDPKGEKGGFYTSRGSNHSDEFVDSVTGVNFRLR  
RHVSFVDCPGHDILMATMLNGAAVMDAAFLLVAGNETCPQPQTSEHLAAVEIMRLKEILI  
LQNKVDLVKPDAAVAQQEQIRKRVAGTVADSAPIIPISAVLKYNIDVVCEYIVRKIPLPV  
RDFTSVPQLIVIRSFVDVNRPGQDVEDLQGGVAGGSILKGVKLGDEIEVVRPGIVTKQEGE  
DGQTMVCSPIYSKISSLAADDNALEYAVPGGLIGVGTIDPTLTRADRLVGQVLGLRGK  
LPDVFCIEIISYLLRRLLVGKTS DGGKQAKVQKLSKGEILMVNIGSTATGGRVIAVKGE  
LSKIALTQPVCTTEGEKIALSRRVDKHWRLIGWGQIRKGVKIEVAEN

>comp8315\_c0\_seq1; 1052 334 2967 LEN=4205; translated  
MSSQASASHRGLRGSSGGKKKATANPSLISLFCDGVDAPPNRASQKLNLSNILASRHRNL  
NNSRRRRDRSGSLNLLPEIDNVRKIGVPEEGEKDATPQELYAIGAVFDHLYRGGSLMSC  
VRVFRKEVNRPSINFGCGLNFGMMGHDDDEEDNTIYNNSTYNDDETLPMTDDGSYARERSF  
NTFFDDGTYDPSLFSRDSTLESSIDTDRVRGFKNRIDEKTNRPWDEQTERYPPTSRRKQS  
RIRSTNSSRNYRRDKSKNNRGHKQAPDEETMSNLWDGVTEGNSPPEPKGSDDLSSPP  
RLRSVLDDFEQPSGCHGFSSAASSKVKTEAEEAIVRLKTTWTDVLI AAKENGPKVAAAA  
SAAANAAGATAFRKEESSSSSTDDDESDDSTDRNDPEDVTNLVHMMRNTEDTKDSPTALKA



ALMRTFSSNLSPFLLKAYQKTEDGDGEEGKEDEGKDSDDSSYNGNGSPPLNSLAMRMQNMA  
YKEPTRTFVAVSEQNQLTPERMREKLNKIKKADSVVPSKQVAPLPSSSATVGSSTSPQS  
GGQRKQAVGSPVRGDAPSVSQRSVRSSGKGVAAASVAGSWNTETIGSHRGDTSSVNTSS  
ITSVNEIPSTIRLDPVRQHSSPLSTRQRDAASSPLARSLRSLGIALDTSPPSGMSRKSS  
TASVSLPRRRSLFRRRSSPDNQDKPLADNSGGQQEPSTPRRKGNLPPVPPNSSTTPSSR  
KHRTIGGGSVASVSTSGSSGTNNNTPPQSGESDADEATVATPPKEISKSESQTLKKRFP  
FRKRGSTKKEHPSSNSPRSAMDLKFDNAAQFQLGPSTEFYHDGSVIDIDDESNIQAVDNY  
VLGKLDKEVCETSSTDGLLAMNDNSEHNGFEVQSVEI

>comp8318\_c0\_seq1; 559 215 2563 LEN=3414; translated  
MTNYGNAEFSNGADGGLDNSYSDERTPHIFFLSFSAILVIVLFLSRILEDSPRLRTFISE  
PAMTLLVGMFFSLIVRLMNESDYEEYQNHYSQSEHDAADQYDDDYDGQYQNAQDFDESK  
YASKYLRLALPNFFLLFPSKIFFLVLLPPILFNSGYQLQRELFYRHFSAIALFSIVGTALS  
AFGAGSFLWFLSTRGWLGNSFEPTPLELLTFGALIAATDTVSVVGVLRKRVDPHLFLSLV  
FGESAMNDAVALVLFKTLSDFLRQNAMSNDGNGTKTDIYKNIGKYLLDLLIQCAVSPIL  
GLIFASLMGLAFKHGKMKNHMMLELSLYILPVYMPFMLAEELLELSGMITIFFTGIFARRY  
MEPNISDETRDYARILFRLLAFLAEICIFLELGLSVCGMHKGHFSLPFVSWAFLAALLGR  
ALGVYPLSLFYNLSLTRPVLSAKAKTMAVEMMAKGECSCTEMDSSEETTDCCDVGGDQC  
KSNEETILMDVDTPQRSNRPSTSYVSVDEELNGVIKSRNHCDIVVATTPTSPAKGESASS  
IGGESTSSSNLSSADLSVITNSYLEMMPTVVSKRETPERKRDKVIPLKFMHLLWFAGLRG  
AVAYACAREFPDQVYGRDDFIAATMVIIVITIVLMGGATEMLMDRLNVRMNVNDDEYMRA  
WHQQRRLKGRILHFYHWIYRFVVKDQSIQLMDESCGYIEQVDDQTARDEMIGGFVPGRD  
LGAALTAQRNKDALRSNSMRKFRTRSRRWRESSPQEDIGFNSRFPTEERARKISLFDLN  
NK

>comp8318\_c0\_seq2; 499 215 2035 LEN=3509; translated  
MTNYGNAEFSNGADGGLDNSYSDERTPHIFFLSFSAILVIVLFLSRILEDSPRLRTFISE  
PAMTLLVGMFFSLIVRLMNESDYEEYQNHYSQSEHDAADQYDDDYDGQYQNAQDFDESK  
YASKYLRLALPNFFLLFPSKIFFLVLLPPILFNSGYQLQRELFYRHFSAIALFSIVGTALS  
AFGAGSFLWFLSTRGWLGNSFEPTPLELLTFGALIAATDTVSVVGVLRKRVDPHLFLSLV  
FGESAMNDAVALVLFKTLSDFLRQNAMSNDGNGTKTDIYKNIGKYLLDLLIQCAVSPIL  
GLIFASLMGLAFKHGKMKNHMMLELSLYILPVYMPFMLAEELLELSGMITIFFTGIFARRY  
MEPNISDETRDYARILFRLLAFLAEICIFLELGLSVCGMHKGHFSLPFVSWAFLAALLGR  
ALGVYPLSLFYNLSLTRPVLSAKAKTMAVEMMAKGECSCTEMDSSEETTDCCDVGGDQC  
KSNEETILMDVDTPQRSNRPSTSYVSVDEELNGVIKSRNHCDIVVATTPTSPAKGESASS  
IGGESTSSSNLSSADLSVITNSYLEMMPTVVSKRETPERKRDKVIPLKFMHLVSRERWNM  
MVQRIS

>comp8322\_c0\_seq1; 471 1 1840 LEN=1904; translated  
XPLRLSTVFHLIIYPAIREDCNYRIDTNRSSLLCDTSGTDIVRAMKGLPFLAYLFSIAIN  
SSSNNGSGDNILGSTYKSNKNGGFFSSSNNDPMSIKGNGVCLVEVARVEWNPIQPWQRSP  
QSKSSGTAFFVIEGEQLLTNAHVVKSADIRVRPHGSTRRFPQVVCYAPDVLDLALLELVG  
ESEKADFFGHPSAGEADGDEEEERIAKRRRTTKSLEFATELPLGLQETVHVVGFPPTGGRTI  
CVTEGVVSRIDLNRIVAIQVDSAINPGNSGGPAFNSKQVTVGVAFRKRISTKSQKVDNI  
GYLIPAVLVRAFLGRVDREKGTQYLSGTIPYRCHSLENHSLRLAHGVPDFVHGILITSVA  
DAVTESTEDGTSAAESPLQLQPGDILTKIDDSPVADDGQVVLRGDELIIHHAYLMRIKQKD  
ESVIFTVYRGGKHIVCDPYFLKDIQPIIPRWGGVDYMPNYLILGSLVLLPLFLELKNFKQ  
CGHLLKADCIQSYWRWPREWEGKEGLVVLTEIFAHELFSFSYRPPRRRVVSYNGEKIKSLG  
HLQKLWNASCSTVTTTSVEQKEAERTLTFVRLELENDDDIVFEVEAAMKAQEVMATHAIS  
KPYNILPRNPNI

>comp8322\_c0\_seq2; 206 1 850 LEN=1190; translated  
XPLRLSTVFHLIIYPAIREDCNYRIDTNRSSLLCDTSGTDIVRAMKGLPFLAYLFSIAIN  
SSSNNGSGDNILGSTYKSNKNGGFFSSSNNDPMSIKGNGVCLVEVARVEWNPIQPWQRSP  
QSKSSGTAFFVIEGEQLLTNAHVVKSADIRVRPHGSTRRFPQVVCYAPDVLDLALLELVG  
ESEKADFFGHPSAGEADGDEEEERIAKRRRTTKSLEFATELPLGLQETVHVVGFPPTGGRTI  
CVTEGVVSRIDLNRIVAIQVDSAINPGNSGGPAFNSKQVTVG

>comp8323\_c0\_seq1; 547 114 1091 LEN=1235; translated  
MATNTEAPSFYEDVENLKKLCNFLTSEGPVREALLMEKRVTYLKGEKLVNFLAEPKRG  
TKWPKDLPRFESRQDAIAVCKELCKLQFILRCDKQKGELESMVRNREFDESGYFAWIYEG  
NKTMSHFMTAALVIGFFCCVCFQIWPPTFLKVFVWYMSVTLFFFIFFLISARAFIFLCVWI  
IGYDLWIWPNLFDEQLGFWDSFKPFISFKPTGPGQLLYRLGVGVGFFSFCYWAITQPSEF  
DGFVAAQGDFLKDLIEGNLLSDMSQEDKENIDKPKMQSLEDLLKDLDASEEEDNLKMEEL  
SEEEKLDSMFDTLMDEEEDIDEDEF

>comp8325\_c0\_seq1; 381 1 1360 LEN=1360; translated  
XGCVSPQSLYVTPSGDVKLWNFSLVTPVGPNTSTASAGPDGHFLEFEAVCCPDSYRSPER  
TEQRWEAVSNTGGVHAMDSYSLGVLIGDYWYRTPPTNANRVPQTLQKALQRLTTANIKMR  
PRLQPLLKCPVFDTQYKQLQKSLEQITIQPVEQKIYLWQNLGNQLQQQTGVIPEDVAKYK  
ILPLIISTILTTCGNESMLAQDMYRREILAMLVPLFYIEEHYQDPDKAGKELAPLVAKLF  
IVPDRGVRSVLLNRVGFANTLDKNALNASVFEPLCSGFNDSSPVLRELTLKATQTLVPS  
LTAPNLEKFSRYLVRLQSDAESSLRKAVMFIANIAPHLSEVSRQKMLLPAYGRSISKDPF  
PACRLSALQSLMKSKSLFSKQDLAIKVMPVMPVPLLLDPMTNVRQEAFRVVRNLLLEEIQQE  
SNLMTERGDPPIVGAAGSQPAGAPAAAAAAPKPA

>comp8325\_c1\_seq1; 497 116 1181 LEN=1181; translated  
MADDNNSDDENDNELYDEFNGYIGPELSDSSDDSSDESEGGNDHGIGDEGSVVSVMDDDD  
ETNAIVVADESASLAKQTADPANAIVLHEDKEHYPSEAEDTFGEGVRTAVLDEDEDAMDLDQP  
IVEPVVTKSHHLGGGDDDDDDDESGEGRRGKRKQSVSYLYSDEFLLTSNLLSNETTATRIG  
IALVGQFHHGKTSLVDTLMEPTLKPSSDRWDPLDSSSEDPTEHTTSKSETLRYTDITQSE  
RDRRMSLQSCPITLALPDTRGKSYAVTLVDCPGHVQFHDESVAALRSVDGAVLVCVDALEG  
IAMHTELLARQIVSEGLPVCLVITKVDRLVTELRLPPRDAYFKLLSIVEATNRLIX

>comp8325\_c1\_seq2; 666 116 844 LEN=908; translated  
MADDNNSDDENDNELYDEFNGYIGPELSDSSDDSSDESEGGNDHGIGDEGSVVSVMDDDD  
ETNAIVVADESASLAKQTADPANAIVLHEDKEHYPSEAEDTFGEGVRTAVLDEDEDAMDLDQP  
IVEPVVTKSHHLGGGDDDDDDGWGDDDDIDENAMAFSSIGGGATNQTHPPSSVNTSASS  
MGGFGGGTDDDDPFASLGMKTASSVAKPRLGAKKGLVLPKKAPPKLTMSNEMSDGWD  
DF

>comp8325\_c1\_seq3; 415 1 559 LEN=623; translated  
XAAKPAAPASGSSTSASSGYLSGLSSWMSTSTAATPAAAPAAAPTVPVPPKPAPQAPVQQ  
FAAASLNPPQAAAIAEDGWGDDDDDDGWGDDDDIDENAMAFSSIGGGATNQTHPPSSVNT  
SASSMGGFGGGTDDDDPFASLGMKTASSVAKPRLGAKKGLVLPKKAPPKLTMSNEMSDGWD  
DF

>comp8326\_c0\_seq1; 342 136 1277 LEN=1316; translated  
MTTIAKPSETKGFDFKDQQFEQNEVADKVVEQYDEKHARVIFYKYVMGGGGFDIHYGIFRKA  
SDTVYEASKATNERLLTCLDWTQPVTKDSFVLDLGSFGGGISARGMWLESDCCVDPESEFC  
FGILPFFDLKLLKRLSSFNXKIDLVVLLLIQFFLSSLDISIGNTNYVHIYVHILIAE  
KYGCKVMGANISPEQNKMNLDDEAEKLGVGELVDVTLNCFNDGLPFDDNSFSHIIISCEVLC  
HAADKVTLFKELKRVLPKGGAFVFTDIMGADGADEKILKDFTRDNATTKMARPSEYFTLL  
TEAGLSEPSFLNFSPLVHYFQSMVDQIVKNKAAMMEEGCSEAYLAKWMESESLTSRVNIQR  
DHKVFAWGIFARLEGDVY

>comp8326\_c0\_seq2; 291 817 1368 LEN=1407; translated  
MNLDEAEKLGVGELVDVTLNCFNDGLPFDDNSFSHIIISCEVLCHAADKVTLFKELKRVLP  
PGGAFVFTDIMGADGADEKILKDFTRDNATTKMARPSEYFTLLTEAGLSEPSFLNFSPL  
VHYFQSMVDQIVKNKAAMMEEGCSEAYLAKWMESESLTSRVNIQRDHKVFAWGIFARLEGD  
VY

>comp8326\_c0\_seq3; 420 136 1059 LEN=1098; translated  
MTTIAKPSETKGFDFKDQQFEQNEVADKVVEQYDEKHARVIFYKYVMGGGGFDIHYGIFRKA  
SDTVYEASKATNERLLTCLDWTQPVTKDSFVLDLGSFGGGISHEIAEKYGCKVMGANISP  
EQNKMNLDDEAEKLGVGELVDVTLNCFNDGLPFDDNSFSHIIISCEVLCHAADKVTLFKELK  
RVLPKGGAFVFTDIMGADGADEKILKDFTRDNATTKMARPSEYFTLLTEAGLSEPSFLNFS  
PLVHYFQSMVDQIVKNKAAMMEEGCSEAYLAKWMESESLTSRVNIQRDHKVFAWGIFAR  
LEGDVY

>comp8326\_c0\_seq4; 301 136 1150 LEN=1189; translated  
MTTIAKPSETKGFDFKDQQFEQNEVADKVVEQYDEKHARVIFYKYVMXVSSFNVRQNRFC  
PSRILRLMVDVIVIRIFRGGGFDIHYGIFRKASDTVYEASKATNERLLTCLDWTQPVTKDS  
FVLDLGSFGGGISHEIAEKYGCKVMGANISPEQNKMNLDDEAEKLGVGELVDVTLNCFNDG  
LPFDDNSFSHIIISCEVLCHAADKVTLFKELKRVLPKGGAFVFTDIMGADGADEKILKDF  
TRDNATTKMARPSEYFTLLTEAGLSEPSFLNFSPLVHYFQSMVDQIVKNKAAMMEEGCSE  
AYLAKWMESESLTSRVNIQRDHKVFAWGIFARLEGDVY

>comp8327\_c0\_seq1; 598 152 1657 LEN=2155; translated  
MSDSNNDVTSALDDLMVYLAPTQKRADVKYEAVKVVSXGMADRSQALGLIEAGVLKPIILR  
IASGASQAMESARDEDQDKSNNTNLLLELASSTLALQTLTYATSAADEIVNAVVDKLLDL  
KAVGRIVLVLVLDLPSDASSLSKSSKKIINTTLAILANVTRTEKGAMELVGTTLPPEEAVYN  
TDEEAEPFRFEELPEDGEDEGEEAYQARKNDENDKHVRIKASMELELDRFVRNVPENNTS  
VDLTVLEPSEWDAALCLMDPYQHFAALLMNATQVKGGRKFVTKIPRSSTSKSDENQNQPQ

SVLERLIPILREKAKTANPFRRRGIAGMVRNCCLDSKENAWWLLNICVLTPLLMPLMGP  
EELDFEKKGMDFDLWLDGPDQVRDLDEATRLYCVEAVLALLATGRASRKTIRVARTYTV  
LKTCDLAESEEVSDKISECVNFLRRDEEGSKEGSSDRQVYGEDDEEDDDANNKGNVAGL  
LEASPSAKIAPISDEDFDGV

>comp8328\_c0\_seq1; 262 132 671 LEN=809; translated  
MKSFLPRMVLAAASMLLSSSDGFSFLEIGSKTPCDARETITKSGPSSPAIDRENDSQWQS  
RRDSFASIMGAATIAGAAVLGSPAPASAEPDCFKDCLKNCLIIAPQDKTYCTDTCTSYCA  
QTDRTDGLSGSVSAENGEVILGGSFGQGTVPKGEDKPPSIKLPGLDFSSGNGKKLIGY

>comp8328\_c0\_seq2; 262 132 671 LEN=775; translated  
MKSFLPRMVLAAASMLLSSSDGFSFLEIGSKTPCDARETITKSGPSSPAIDRENDSQWQS  
RRDSFASIMGAATIAGAAVLGSPAPASAEPDCFKDCLKNCLIIAPQDKTYCTDTCTSYCA  
QTDRTDGLSGSVSAENGEVILGGSFGQGTVPKGEDKPPSIKLPGLDFSSGNGKKLIGY

>comp8329\_c0\_seq1; 140 26 340 LEN=1058; translated  
MTVKRRNHGRNKHGRGHVQRVRCVSTGKAIKPKDKAIKRFIVRNIVDASSLRDIKEASAYQ  
EYQLPKLYLKMFCVEAAVHQVVRGRSREGRVRTPPPRFGR

>comp8330\_c0\_seq1; 1164 251 3655 LEN=3751; translated  
MKTFFNKSDDLCLHGEQLEDDPFSSLNFKETIGFEDDVNVEENVEFEETITYDDDLDFDET  
LEVFEAREGTGITLQCSNEKGFHGRWSSKKEKLSGCSYNYCVLDSIRRRERLLVLYLII  
GLTLIVAFFTLLVTKRTSESSTISSTNEMRKNVGSFRFIRGEGGGAGNLGFVHLSNSKN  
AFANDDVIIPPFSTFDPTEDLDRFGFDRPSSSSPSARLSHLKRAVPTNAWYQNMRLRDVN  
EETAAHRVYTVPYVLDAAAGDFAGIRLHATRFEATPTQMRIATDEPYALTLGAMSDVND  
LMTTELDKGYSVHEANDLGLTLQWNSFMKTTLVRGSPYVTMIYNMVDHATTQGFLEPMHW  
RLDTSELPVVDGNRKNVCESEPVFTVQRDIELAFLNSGQRWLIFFSKPVQLQCKNSQGSP  
TILQVLKGGQDFYDDHTLVIRGAVVIESSNPASDAEAFSDMYANQLRASANVYPGDQTAVT  
HSFHKHKRKRARISFNWDPRKMRLENSVVVGEESTDIRDTYEMIMFALPHHLEVLQGNVF  
QTLCTSSLLGPICLVEGNVWNMYEELPGVSFQAERYPEPKYVPLLAELLEDIRYQVPSN  
FFSGAGDITYFSGKTFAKLARILLINEEIKMMCTSALQFRNSQYWDACDGLVLPDSDEEDEN  
ALNQLRAGVTVWVKTNSETPFVYDNAWGLISCGCIYQNEKCVNQFPDCAFTDQGLNFG  
NGFYNDHHFHYGYHYVYAAAVLAHFDSWAIDHYEDVTLVLDYANASEEDTAFVFRNKD  
WYRGHSWASGLTEPMFGNIMNQESSEAVMAYEAIALFGKTMATIFHHAGDTEQAHTANM  
MHKIGLTLTATEIRSTQHYVYVQVQKSRISESYGASVVGIFWETFAEFTTWFGNAPYLIYG  
IQLMPLTAISEARDSVQWAREIVQPLMESCDAAACVSEGSVQLHAIQATIGRVQEAIDGI  
LQIPGSAYKHAGNGHSHKSNLWYASTRPPVTNPVLGNEDESEQIVGGDDAVDKVEVNDY  
GDAGLDLYVDDDDADSFDFDPHEGFVYGDGDDGDDDDDDPHSVDDDDDFSAFDPVRCFHRE  
ECASVLDNKAGPYSCRDRIKYLRDVLQREELDACRQVAVFEYPTCEGLCGPHNR

>comp8331\_c0\_seq1; 194 177 572 LEN=1539; translated  
MPLRSVSRFQSMVAPAALLVSLLLLSPFAVLPVASDDQAAEEVSSGWGGCVNPETGYEPV  
TIGKPTTVCLVVSNNGDWTDVVTYMLRNFAPFIADQYSRHFVPEFSQVLVGDQPQLGEIFTG  
NITVHAEAQTA

>comp8331\_c0\_seq2; 447 177 1022 LEN=1199; translated  
MPLRSVSRFQSMVAPAALLVSLLLLSPFAVLPVASDDQAAEEVSSGWGGCVNPETGYEPV  
TIGKPTTVCLVVSNNGDWTDVVTYMLRNFAPFIADQYSRHFVPEFSQVLVGDQPQLGEIFTG  
NITVHAEAQTALSFOKLYNSERQVFPFLTAIISVDEGSVTGITWDNACVFCGSKQCVDN  
TYGYDGEIQTEEGAKQPVGACFNTVEACKESTTAECDLMLYVVTGTDANGRDFRSSANR  
FSAFPAQSWADRINLSLPDVGGWFDNINPFNKGDEETESN

>comp8333\_c0\_seq1; 159 1 911 LEN=1020; translated  
XPIRSRPLDSAMDRNRTKPKKRPDQPPRGFHRIPGGGSSAVLGLLAAVVACGNRNHHGP  
LFGGVAEAFSAPPPAPVPPPPQFRALFLASGSDDP SHGDRPAPKKKTKKSRRLVLP  
NLDRDLFAKGGVATITPDGVVVAEEAGRPRSSKLGVPKPRKPKKSGSGKSLSAKARR  
LRNQRTAGGTIDSSASEGRKGLSSIARKEDEPVRIATARRGSKTVMVQGMGASTPPEER  
KALLKLLKARVGGGGTLVDGVLEVQGSHAETVLGVLSAGYAKASIVGGGGSGQRKKT  
KTK

>comp8334\_c0\_seq1; 396 121 1245 LEN=1440; translated  
MSEKEKTKSDHSFLPESSMWAIRPYDPIDTSLIEADGGKWIRLDDGRVVEYFVSGSSS  
PDARVLVDCPGGCTGRLFSAPVPAHVGAEEELNYKVVSVPVPGFYSSIQPGRIKDWPI  
TDLLPVLLKKEKVEFLVTGTSFGTCHALATAWQFAEEKETGGKHESGVSCIGMLRVPYL  
GSESKQLELENHLSIGYTSTANTSLIGTVIARLFTSFASRPGDAFEKPGRLMSAFVNL  
LNPALAKLERLMTDHHHLMKTCKVDMERCVAHSDQGILYNYATDILLDHGFLVTEIWKD  
LPVVVWYAEDDEDPPSHGKIANKHADNTDKDEPNHFTNVSSRVFAEFGHIGTAFLNHD  
EFLRELHGHVTAQD

>comp8335\_c0\_seq1; 250 284 982 LEN=1244; translated  
MTIIPVFMPLFNKYEPLEEGTLKTRIHLAGRIQYPLKCLFVMDGSKRSSHNSAFMFGF  
GSNKRIVLFDTLLEQVSNNEILAILGHELGHWKLGHHTLTNFVVTQVYFGVAFYFFSQCYT  
SKDLYAAFQFDSTTSGVPTIIALLLFFQTLWAPVDKVLVSVLTVFSRHCEFAADRFSVDL  
GMSQDLQSGLCKIHLENLGAMCPDGLYSAYHYSHPPLVERLSAMMALEKKKD  
>comp8335\_c0\_seq3; 438 169 1692 LEN=1954; translated  
MDLPWKPIYTSAGEFDWEGGISAASDSTDDGSYSPFAYWSLAGTVGFTVLYVYMEGHL  
ARQKAYQITEFPNELEATVSKIDSQAKHSEKEDDAKNSKGSDDNSDDKDAIDMDKPLL  
EQLQAKFKSSQSYGMDKINFGMVAGTYETFESIAILLGFTPFLLWDQSVRLGETYLG  
DEEIKITLVFLLLQTLIDTVKSLPFELYKTFMIEKKHGFNKQTYGLFFSDKIKSLIL  
IGGPFVALLLKTIKYGENFYIYLWAFMFFFSIFMMTIIPVFMPLFNKYEPLEEGTLKT  
RIHELARIQYPLKCLFVMDGSKRSSHNSAFMFGFSGNKRIVLFDTLLEQVSNNEILAIL  
GHELGHWKLGHHTLTNFVVTQVYFGVAFYFFSQCYTSKDLYAAFQFDSTTSGVPTIIALLL  
FFQTLWAPVDKVLVSVLTVFSRHCEFAADRFSVDLGMQDLQSGLCKIHLENLGAMCPD  
LYSAYHYSHPPLVERLSAMMALEKKKD  
>comp8335\_c0\_seq4; 351 169 1200 LEN=2080; translated  
MDLPWKPIYTSAGEFDWEGGISAASDSTDDGSYSPFAYWSLAGTVGFTVLYVYMEGHL  
ARQKAYQITEFPNELEATVSKIDSQAKHSEKEDDAKNSKGSDDNSDDKDAIDMDKPLL  
EQLQAKFKSSQSYGMDKINFGMVAGTYETFESIAILLGFTPFLLWDQSVRLGETYLG  
DEEIKITLVFLLLQTLIDTVKSLPFELYKTFMIEKKHGFNKQTYGLFFSDKIKSLIL  
IGGPFVALLLKTIKYGENFYIYLWAFMFFFSIFMMTIIPVFMPLFNKYEPLEEGTLKT  
RIHELARIQYPLKCLFVMDGSKRSSHNSAFMFGFSGNKRIE  
>comp8336\_c0\_seq1; 169 253 524 LEN=524; translated  
MIRRGESNGNGNGKHHDEEEMVSFLGTGAASKNGPARTSTESGSSRTIGIVPVSVL  
CGIVFLATGLSFGALDSKPTSSNSNISSX  
>comp8338\_c0\_seq1; 345 248 1456 LEN=2009; translated  
MTNANDCGNHECAICQDTLKNPITLPCNHRYSDCDLDWRCRHFVDFKQKTCPECRSKIPV  
TKSMVAQLESFRRLRSDLENKLNKRPCPLPALPGTADYNYTKGFYGNIGDSEIVRIRNLS  
PELQQRTLRSILETAHVHFDQCIRDLEEQISDGIIVLEEYNTQTEDYDELNEIGVACENN  
NVEMVLEWLGDPPIPSRRINAKNSKSNEMTLHATKGNRINLVRFLQNGADINSPTAM  
GLSSFLASCTCKRYESIAMLFLWGWADKDATAPGPPGVDVTAMDIARGFAENDELVEVL  
KSPLGRRQCIVGLKHGAADIDGRTCIVGKYFEATEEYAVTIGDSDLRDGDARTKIKSRN  
LKRRDRTTQSPGFVLEFHGREAGSNAIKWKAKNVSKQDLDP  
>comp8340\_c0\_seq1; 705 1 1912 LEN=2107; translated  
XKKLHPPPKAGPKETTESNEQPPSPMSKQSLTAPSESEKATGGTEGEAQEPPPPPE  
LLVRRNDIGGTTSRSFVELTIRGETVGALETTPEPPARRSLLWQAFSCNLFANRKS  
SSQELTEKLQQEVDLSLASSNSWDRNPSGVPYAKIGGPQSSSLPPPQFLHQEEMPPPS  
FLHQEQNPNRQPQNHPRAFGSEIRMNSFSRNEATSPLQSDYPLHSRENSFNHRGVDYR  
GASAGADRNDPSNASKHKPPDTEPTEPTRWQEFTELKSLLDLKYGKAKTWKKKI  
LTAVLFFVSVLVFYDLFFGKQDFIVTWLHAFVLMWTTQASAVFAFVGIFFVSLTAFVPP  
TLVFGAGYAFTVAMDSALAGVTAAVLSSFLGSCIGAVLAFIRSRYMMRDLVKLFANRYP  
LVRAIDQALKVRHGFRMLLLRFCPVIYPYNALNYCCGITGVTLYDFTLVSLVILPFQIFT  
IVLGATAGTVELKNLNEYTRGEMGAFVGLVIGIAFGLVAVVYAWRLVKWEIKRELGLS  
TEEFYMIQPPPAEGHDRGLGTGSSERSGSSSPGSYHLQDDGEGSFRDPSAGRSTGNANA  
SASAIATSGTTPARGVTPPARGTTPFQEEGEEFWFWWA  
>comp8342\_c0\_seq1; 530 65 1102 LEN=1448; translated  
MFSVSRSTISAVVKGQSAISKRFASLGSVSTLKGEHFVSDQLSNDELKGLLDVSHHY  
KEVYSDKSKSLPKPLDGHSLSMIFQKRSTRTRVSTETGMAMLGHALFLGPSDIQLGVNE  
SMRDTASVLSRFNDLILARVYAHDDITELAKYSDVPIINALSDLHHPLQTLADLMALQQH  
FGKDLGKTVAVVGDGNNVLDLMLGSLKMGMNQIATPTGYEPDADIMAKSKVLAEENG  
ASLTTTVADEAVNGADVVTDTWVSMGQEDEYEKRVKEFDGYQVNTLMGKANDGAVFL  
HCLPRHVEEVTDEVIYSDASLVFPEAENRMWTVMAVMAAQLGKVE  
>comp8344\_c0\_seq2; 405 313 2037 LEN=2192; translated  
MEFTTPSISRGAISGCKTSPRYTNTPPDRAAPPLPSNCGFRLQPRKNIPNLASPSGRS  
FSSSGSRGRKAQTMVSTFGDSSLVPAKLFVSTLDDTSTNASILLSRPNGQSLESP  
ISMHRAMKFMISKSPGLSTPLSQSTFREKEKTSPIVFSPLKPNPYSSAQRSLPRAGS  
SCSMDSTKAPHSMVSSPRLPNAYTSRKKTSGISINNGELVSTPRSCSQTANLSKTPA  
TPGVSRTLPSRATPLPRSMRLTPRSRRGRDSSCDTIFLSPNENLHQSTPGKLGPIVIL  
FEGEPQSLKHKASYAPSPYSCSRSSVAPRTVIEKTPATEARKESPEGCVRVETRSLG  
QDSSRFISDLIVSANARSAAFDCDGLSDDSEGEHFVLANPTALAQRDALNMPPPRPSR

RRRTSSACESEMQSNDSTPYRDASSQSTTPNQIIVPENKEWVLNCDPIISRP IIVPMKSLGT  
RCGRKDCRLEPIESSSSLAGLACLTAAANSERPQTPTTISNELTHSLPLSPSSRSSTSTV  
RISRSDANNVHLTIASMAAVHQHHSPSLMTCSS

>comp8346\_c0\_seq1; 546 1 2451 LEN=2653; translated  
GSGGASSLSYSSPYDSCNNDGDDGDALEDLQQGFPRKPAPHDRDRTPSKALFGDR  
HNHYDHGNSDSTDDDRSRRRLGRTMASGSSGLPLRNPREKHSRRTSSARRSGSHRSP  
EGSGEAPEGTPVSVRRRPSQPQGSSSSSHKRRSSLLRPLPHHFRSASDHSSQECSSGSSP  
DSSPTRGFVEEPTGRHHRVPSLGGASRSGSVSPTSGNRPYQSFLGASGASVSKSPSANKL  
GGPKQRFPGSAPKSLCLLATLAGMVLLSVSGMVALTYRAVPTFDRAEDFVPTLPDRADDS  
GLRGKKVLGRMWDTSNLYETANATSPLSSGGTLPNQTGSGKHRKGARAKREGRPR  
DGATVLPKRLQMRMPPSLSEQPEPGFDRVDPRLYPDSLGPNTGASQDFPRIVVVDPRIAQ  
PRAARTIETYPADVTDNTQLYGILPSSDERLSKMERRDPYRTDECVPMQDWTAYQPSCN  
GMHELALQTLGASPRGDGEAQKPN TGKRGDASLFGTKGFWR YAWKLV IDHYDGGEAEED  
TVVFKNLKYGHDFEDAHFEHDR IDAIAMERLTSSPHVINIFGFCGHSVLTEYADGKRLGE  
LADKSKKKPLKRLEIARDIANGLADVHGIDGDGNATFVHLDVNPANVSVRGTLKLNDFN  
IGIVRRWNTTSNEACGFPAQYPNPQWRSPPEARNEQHLTEKVDIFSLGHIFFR LICGHEP  
WNKLEPGGRPSKEEVNEKVQRGDLPFIPEDVVRSDNPEVVAIRDAMLQCYRFDPKKRPSA  
RDIANGLDRNLKELQOKYAKSLANRKKKPKTKKKPK

>comp8346\_c0\_seq2; 285 1 890 LEN=1092; translated  
FLVLVLAGLAPRVPCPDACGILFLVSAXYGHDFEDAHFEHDR IDAIAMERLTSSPHVINI  
FGFCGHSVLTEYADGKRLGELADKSKKKPLKRLEIARDIANGLADVHGIDGDGNATFVHL  
DVNPANVSVRGTLKLNDFNIGIVRRWNTTSNEACGFPAQYPNPQWRSPPEARNEQHLTE  
KVDIFSLGHIFFR LICGHEPWNKLEPGGRPSKEEVNEKVQRGDLPFIPEDVVRSDNPEV  
AIRDAMLQCYRFDPKKRPSARDIANGLDRNLKELQOKYAKSLANRKKKPKTKKKPK

>comp8350\_c0\_seq1; 466 1 1264 LEN=1369; translated  
XVLALLCGEHLESYPSIEDYLFGR LWFALMDREN PVARIEEIGASVRKYGPSYFTADGCG  
EWNVYVPLMVSQQFETALS YLGQAGGPTGLLQAVHLGIVFAQAGVPVADLGDASSSSRGS  
SPRDVV TALLVNYAGLAEREP SARVLASLDYLLNIPSK EESHQVASLILRAP PDEKEVL  
IGVLD SVGNR KDS ELDKRMGE GEVSGILEAAAELCKKQASDRSRAEMSAKLFMLGYKHSK  
LVQLLNEQLAPVDAFDDDKRYWTEQSELFY GAYLSKR TKVLDSIEREGKLAL IETNRSLL  
ELRSFLAAYQQRNFQEA FGIVSRTG LLLPMAQDDLNETSS LFRDLDPILKGELPTVLTAAV  
GCVCEL FHGLRAKSKGLPPAVTDRLRELQFQARLLFIYGG LVNMPSTCKNDIARMRANMI  
L

>comp8350\_c0\_seq2; 466 1 1264 LEN=1378; translated  
XVLALLCGEHLESYPSIEDYLFGR LWFALMDREN PVARIEEIGASVRKYGPSYFTADGCG  
EWNVYVPLMVSQQFETALS YLGQAGGPTGLLQAVHLGIVFAQAGVPVADLGDASSSSRGS  
SPRDVV TALLVNYAGLAEREP SARVLASLDYLLNIPSK EESHQVASLILRAP PDEKEVL  
IGVLD SVGNR KDS ELDKRMGE GEVSGILEAAAELCKKQASDRSRAEMSAKLFMLGYKHSK  
LVQLLNEQLAPVDAFDDDKRYWTEQSELFY GAYLSKR TKVLDSIEREGKLAL IETNRSLL  
ELRSFLAAYQQRNFQEA FGIVSRTG LLLPMAQDDLNETSS LFRDLDPILKGELPTVLTAAV  
GCVCEL FHGLRAKSKGLPPAVTDRLRELQFQARLLFIYGG LVNMPSTCKNDIARMRANMI  
L

>comp8352\_c0\_seq1; 496 125 1087 LEN=1368; translated  
MEKALLQEMIRDREIAIQFLEKKIAVKDDRAERLKQLQVETNESK LKKRQEHRAELMTLW  
KDYDAVLCRYQDAKDLLDMRQKQQQQSNDTDGQQEQNQGGSDAEIYNEIMNDVVEQVDRD  
LANGGAADSSSYVVRMQSELCKAMHGMGIMETQRQMTKGQME LAQKKAKDVFP EIREEK  
SHVELKMNLSLILAAD EKREVEGKSRQQHEIFYKEKNDLMEK IERQIDEA INNAEGNDGN  
NTENDAEEEEAKEELQGILQEGRAEMERIEKLIK EKQAKVEELKISAAMAQQQDVVDDIV  
TSIAEEFADGNESGDEGSEY

>comp8352\_c0\_seq2; 496 260 1222 LEN=1503; translated  
MEKALLQEMIRDREIAIQFLEKKIAVKDDRAERLKQLQVETNESK LKKRQEHRAELMTLW  
KDYDAVLCRYQDAKDLLDMRQKQQQQSNDTDGQQEQNQGGSDAEIYNEIMNDVVEQVDRD  
LANGGAADSSSYVVRMQSELCKAMHGMGIMETQRQMTKGQME LAQKKAKDVFP EIREEK  
SHVELKMNLSLILAAD EKREVEGKSRQQHEIFYKEKNDLMEK IERQIDEA INNAEGNDGN  
NTENDAEEEEAKEELQGILQEGRAEMERIEKLIK EKQAKVEELKISAAMAQQQDVVDDIV  
TSIAEEFADGNESGDEGSEY

>comp8354\_c0\_seq1; 260 1 757 LEN=990; translated  
XKSFEESGTTKACGLALLKHYFLCFFQNPIQPRKMSDDSQSYEDENRDPDENEDGDDDD  
SEDYPEPRTGMHWLSEPEEWSQHR TTVEMRAPSGTDFWRMTGTDVCVDNAPFFLEIEGD  
FEVRCRVKANYESADDQAGIMVREDEDNWKVFGIQLIDDVPHMCATITHDYS DMSMHPLP

HLAEYMWVHAKKIGDGLLEVYISEDSDHWMQIRQGDINPD AIHQIGLYAASPCSEEGLLAK  
FEDFMVKGENDG  
>comp8354\_c0\_seq2; 309 1 999 LEN=1232; translated  
XKSFEESGTKKACGLALLKHYFLCFQNP IQPRKMSDDSQSYEDES NRDPENEDEGDDDD  
SEDYPEPR TGMHWLSEPEEWSQHRTTVEMRAPSGTDFWRMTGTDVCDNAPFFYLEIEGD  
FEVRCRVKANYESADDQAGIMVREDEDNWWKFGIQLIDDVPHMCATITHDYSDMSMHPLP  
VRIAKELQNELESLOTTRMIQSPSFNSLISLVLMIQCFPPEKYPSGVPMEINPFARLETM  
TIYISLILIVSGYTKTYXIMKHLAEYMWVHAKKIGDGLLEVYISEDSDHWMQIRQGDINPD  
AIHQIGLYAASPCSEEGLLAKFEDFMVKGENDG  
>comp8356\_c0\_seq1; 323 295 732 LEN=1024; translated  
MNDIAKTQDDSTLYMPSMYDSEEEEDARDENTCSEIQRSEPRRRHSRYSLMRCLAWSEAE  
DDIEEKKSNGKEDQVDEDQOMFVIQNNVSGCISFNSVHSAHIDS IHRPSGNEIRPVHWI  
QRVSSDNKIDSYLSGKKENDAFSKC  
>comp8361\_c0\_seq1; 448 736 2968 LEN=3091; translated  
MSQQDSIGAAFVRYGVAEGHTIHAINNYFKNRSGVEKYIPTLDDWSSFDGLTNSESHGP  
LKNATHSNFWWSTSPKEVPKWILLAVFDSPFGLSDSVWKNADSFLESCVTYLVIALHAI  
RLGDGSYRFGGMGAVESLLRKRKYVQTLSCSHYHAEQSNERDIFDRYGPNALFQSVQQLK  
GFLKWGADASYFHGESKGEVFTSYIFATQGLDLAIP TAQTYFQYGEKEIDVFGDQAMNQL  
PPLKSCPETKNKNMQFSFNEVSLLRNGEYASIYPYNLFLDFNVI FADYSGXEFVAATLSD  
SESEIYLEEDLWSEGNEEF SFRMNGKTLSESEALCIH HKAGVSRCKTRISNENISKDLIS  
GNTKSPNVLLLLLDPISRSHFDRTMPETNEILRKLDFLRFERYTAVGPNSGPNQSAALYS  
IKLEKRG NLRHSDSADKWLWDR LRIAGYITLKGEDSC IENSNMMQSLAPNTTHGSALQG  
LFCFDFARPN CIGPDLASSLLLDYGEQFISRYEKLRRSSH PNLRWASFMHFVDSHEDTM  
VLSATLDSGLSKFLERIERKGYFENSVIIVTSDHGLHYGPNFPSRQGRREATEPILYIHI  
PSVVRDQIDMNAFTSNRKTWTPFDVHETLLNLTQTSTKNSEMLRRGLTLTEHLPRSRND  
CRKNYDLIPPIFCDFQLNETIEDEACGFC SVHQKKPTIDSFFLDIPPLKRRPLMHIDDDC  
FNRNRTLTDVDFGLCDHKSDSK  
>comp8361\_c0\_seq2; 581 736 2874 LEN=2997; translated  
MSQQDSIGAAFVRYGVAEGHTIHAINNYFKNRSGVEKYIPTLDDWSSFDGLTNSESHGP  
LKNATHSNFWWSTSPKEVPKWILLAVFDSPFGLSDSVWKNADSFLESCVTYLVIALHAI  
RLGDGSYRFGGMGAVESLLRKRKYVQTLSCSHYHAEQSNERDIFDRYGPNALFQSVQQLK  
GFLKWGADASYFHGESKGEVFTSYIFATQGLDLAIP TAQTYFQYGEKEIDVFGDQAMNQL  
PPLKSCPETKNKNMQFSFNENSLRLT LSDSESEIYLEEDLWSEGNEEF SFRMNGKTLSES  
EALCIH HKAGVSRCKTRISNENISKDLISGNTKSPNVLLLLLDPISRSHFDRTMPETNEI  
LRKLDFLRFERYTAVGPNSGPNQSAALYS GIKLEKRG NLRHSDSADKWLWDR LRIAGYIT  
LKGEDSC IENSNMMQSLAPNTTHGSALQGLFCFDFARPN CIGPDLASSLLLDYGEQFIS  
RYEKLRRSSH PNLRWASFMHFVDSHEDTMVLSATLDSGLSKFLERIERKGYFENSVIIVT  
SDHGLHYGPNFPSRQGRREATEPILYIHI PSVVRDQIDMNAFTSNRKTWTPFDVHETLL  
NLTQTSTKNSEMLRRGLTLTEHLPRSRNDCRKNYDLIPPIFCDFQLNETIEDEACGFC SV  
HQKKPTIDSFFLDIPPLKRRPLMHIDDDC FNRNRTLTDVDFGLCDHKSDSK  
>comp8362\_c0\_seq1; 208 608 1297 LEN=1941; translated  
MKSPRLFYHRLHPLSPK GKLAYKGFEGGLASSNQLVQAASQFEDNVVLRNNIYRAATTEA  
QVAQFQKTASELPDLAKWITPDSTIDHGGGNENWEKEYLSCENNVLGILRLSGGSKVVMH  
RSYLNGLWSACKSIGRGKTEWVREDVYEIDNNEWKELLKDFDLVVF SAGSGLFESALLH  
QDDFPINLVRGQSIEMTINNQIPWNA ILCGEYVSPLLERDRILIGKHRI  
>comp8362\_c0\_seq2; 204 368 1201 LEN=1845; translated  
MSIQTFHPLMAHRICII GGGLAGLSTAYHLLK KSPSSDVTIIDRSVPGTGGASAVAGLL  
HPLSPK GKLAYKGFEGGLASSNQLVQAASQFEDNVVLRNNIYRAATTEA QVAQFQKTASEL  
PDLAKWITPDSTIDHGGGNENWEKEYLSCENNVLGILRLSGGSKVVMHRSYLNGLWSACK  
SIGRGKTEWVREDVYEIDNNEWKELLKDFDLVVF SAGSGLFESALLHQDDFPINLVRGQ  
SIEMTINNQIPWNA ILCGEYVSPLLERDRILIGKHRI  
>comp8362\_c0\_seq3; 283 368 1528 LEN=1774; translated  
MSIQTFHPLMAHRICII GGGLAGLSTAYHLLK KSPSSDVTIIDRSVPGTGGASAVAGLL  
HPLSPK GKLAYKGFEGGLASSNQLVQAASQFEDNVVLRNNIYRAATTEA QVAQFQKTASEL  
PDLAKWITPDSTIDHGGGNENWEKEYLSCENNVLGILRLSGGSKVVMHRSYLNGLWSACK  
SIGRGKTEWVREDVYEIDNNEWKELLKDFDLVVF SAGSGLFESALLHQDDFPINLVRGQ  
SIEMTINNQIPWNA ILCGEYVSPLLERDRILIGATHEFKELALTPDEVEVELKQRSYGFA  
SEVWNNGTIDKVT CGFRVQSNRGPRGR LPIVGRFETNYHHNSWVFTGLSGRGMLYHGIYG  
ELLSNLILDVEDESDLKENLEWWRK  
>comp8362\_c0\_seq4; 287 608 1624 LEN=1870; translated

MKSPRLFYHRLHPLSPKGLAYKGFEGGLASSNQLVQAASQFEDNVVLRNNIYRAATTEA  
QVAQFQKTASELPDLAKWITPDSTIDHGGGNENWEKEYLSCENNVLGILRLSGGSKVVMH  
RSYLNGLWSACKSIGRGKTEWVREDVYEIDNNEWKELLKDFDLVVFVFSAGSGLFESALLH  
QDDFPINLVRGQSIEMTINNQIPWNAILCGEYVSPLLERDRILIGATHEFKELALTPDEV  
EVELKQRSYGFASEVWNNGTIDKVTTCGFRVQSNRGRPRRLPIVGRFETNYHHNSWVFTGL  
SGRGMLYHGIYGELLSNLILDVEDESDLKENLEWWRK  
>comp8363\_c0\_seq1; 322 44 505 LEN=615; translated  
MKVIATLFAFLAVANAFAPASTGRANTQLSETLFDKVFGMDFAPVANQNEYGQYKKKGI  
SVGELGAKSYVPDGLTKKQYAKLRADEQKKKEKNYERNAKKAGVFEDYTEFYTKRGTDTK  
QAWKKDPTLGHRMAKTKYSFDTNKDGKTYDGGK  
>comp8365\_c0\_seq1; 425 236 1363 LEN=1592; translated  
MTASTTSTKANAFSADTSYVSPASDAANQVSNPVEYPRQLYPEIDSYQDGYLDVGDGHK  
LYYDVSGNPNNGIPAVFLHGGPGGGVSPRVRFFDPDKYMIVIFDQRGAGKSIPNACDDLE  
ASLVGQNTQKLVADIDALRKHLVVEKGVVLLGGSWGSTLALAYAQQYPEDVDSLRLRGVF  
LFSPEEVDYLFQNGGTYGQNPEAWDNYCRYIRDTSQDWTREQTNLLGAYWNRLTSSNNKDT  
REAAAAAFVGYELSIKTFVDPVAVIEEYLGTPSILIPFAVMEVHYMLNAGFLRRGQLLDN  
VPKISKMMVEICHGRADYVCQPQAARLRTQALRTAGCKSVNCFVSAAGHSDSEPLVDA  
MVRASDKLADALSTK  
>comp8368\_c0\_seq1; 789 1 1861 LEN=1968; translated  
XDDDPYVPLAKRKKLEKEALIGGMTHRRRLGLDDADSSGLGDDGGKSSTTGAEGGGKT  
KTNDGTSNGDEETPKAADPQKVESLLDSATALHDALTEEERAELRKEEEARIMKEASKV  
QTNALQAASELAKGIEYKESMPSTWTCPRYILNQGEDAWEKIRKEWHMECEGVDIPPPCK  
RFVDMKFAPPILVLRKKGKIKKPTPIQMQLTVALAGRDLIGIAFTGSGKTLTFGLPLVT  
VALEEEELRMPLAPGEGPVGIILAPSRELVRQTYEVVMEFCDEISKTPGYPEIRTQLVIGG  
ESVKDQLMTLQAQGIHCVIATPGRRLRDILKRKAMKLDNCRYIALDEADRLLDLGFDEELA  
EIMNSFGHQRLNLLFSATFPKFKQDFARDTLIKPIIVNVGRAGANLDVIOVEVEYKDDV  
KIPYLLQCLQKTAPPAAIFCERKGDVDDIHEYLLLLKGVDAASIHGGKEQEERNEAIKDFK  
AGSKDVLVATDVAAGLDFPQSIQHVINFDMPEIENYVHRIGRTGRCGKTGVATTFINK  
SCEETLLDLKHLKKEARQRIIPPVLMMLDDPRDRNGGAGCSYCGGLGHTVVDCPKIDKNA  
RQMASGRKDALATGDYGGDW  
>comp8370\_c0\_seq1; 163 154 696 LEN=713; translated  
MSFPGQSLQRAWHLVDAKNQTVGRLAGQISQILKKGKHKPTFRPNKDMGDHVVVINAQVQ  
FSGKKWNDKLYRWHSGYPGLKERSARDMMARKPEEILKKAVLGMMLKRNLRHQSIQEPRL  
RIYSGPDHPHTAQLPPGTTTTPLPAHPRSKSGDFHFGFLREYNSQRTIGTVRSGSDTTTKGT  
>comp8370\_c0\_seq2; 123 154 354 LEN=631; translated  
MSFPGQSLQRAWHLVDAKNQTVGRLAGQISQILKKGKHKPTFRPNKDMGDHVVVINAQVQ  
RAEGNY  
>comp8371\_c0\_seq1; 616 171 2039 LEN=2407; translated  
MSGHYLDKRCGKQSPRERYSSKCKHYVADTVVLLVVLTVIEMGKSSFCTIEENQPTSS  
SLFMVDAFQPVAAESTSQRNHQRSIHDRRTRFVAGTSSNGNTEYDMVVVGGGSAGLTAAKF  
ASGTLKKSVLIVDEERLGGDCTWTGCVPSKSLLSRAKASKMARSYAIQQHPQGNDAKLD  
DDHRSQSRANFSKVRDYFQRVQEEIYEEDDSPQALEKFGIETVEGQKAHLTSPTSVSFQK  
TSPTSSTTTTTVEAKEGILLCTGAKPNRPTSAAIPLGSDIDYLTYYEIIWTRKFGGDDSLP  
HHWTVVGGGPIGCELAQALSRLGASVTIVTGSSGRLLPNVDDEEVSVLMKEVFEQDENIR  
VVRGTLMSVPEPSGADASETKPLGHVAYVKTADTKEPVPVEGDAMLLSIGRKPNTAGLGL  
SLEIEIDPKTGGIAVDDTLKTSVDGIYAAGDCTGDKQFTHYAGYQGAVAARNILLPFTDP  
GKLGNDVPTTTYTSPEVATIGYSESAAKEEFGEGSVAVSSRLDQVDRAICDDATKGVIK  
VVYSTKGGKKILGATIMAPVAGELISEISVAMNAGMGFPGLAKAVHPYPSYAFALQAMAA  
EVYYEDVGKFRWVYNILKRLGL  
>comp8374\_c0\_seq2; 189 1 404 LEN=516; translated  
XQRNATRQSEKRGKHAQFLVIYREGSIRDITIGVWKRYSDFQELSKKVTKVQESCVSVIAN  
MSPLAVTEEHDVEHLNPAITSWHLLKRRKRWRCLDSGYLSLKTFLLEFLHDILFESST  
PDLRLDFVGVPPPR  
>comp8374\_c0\_seq3; 375 1 1015 LEN=1127; translated  
XEYLEPILVHERPRDMENEAQAVTAPNYVLEESLSDQLLWKKTAGNRPPQPVEERAFF  
EAVWAENFANSEVDYELPKEVLTATTPFSLSPFSESEFGTAGSGVIGAGVTAKQDVADIV  
SSFVVPGGTAGTHGNGQPGLLAGHHPHPSNNKPRIVRSSSGSGSLTVYAKGDNVFGTT  
VSKSFARPSANGALVSGVDTVNI SVASYRVVESEKRGKHAQFLVIYREGSIRDITIGVWR  
YSDFQELSKKVTKVQESCVSVIANMSPLAVTEEHDVEHLNPAITSWHLLKRRKRWRCLD  
SGYLSLKTFLLEFLHDILFESSTPDLRLDFVGVPPPR

>comp8378\_c0\_seq1; 119 397 594 LEN=594; translated  
MKVKGNIHLLALAITNIPLSMSNDSVVEGNKPQTLLRGGFRDLQVDTTASGTGATTDTT  
ATGTGT

>comp8379\_c0\_seq1; 457 1 1009 LEN=1325; translated  
XEEDDDEDEEMLETQETDHRIPSATQYSQEDNPNVVDKNEAAKLDGFKLRSDLKMRLLS  
RETAQVKKDFEEKRLKVDAAIEGIVPNMKAHGAFSAITEKLGKTDSDYQQAKEKSRKAAA  
EFLKIKKKRTRKFLDAFNHIDKALKTIYDTMTKSSKHPLGGNAYLTLDDTEEPFKGGMKF  
NAMPPMKRFRDMYQLSGGEKTVASLALLFAIHSYHPAPFFVMDEVDAALDNINLRKVCNY  
IQQRSQVDFQCIVISLKDIFYERSQSLVGICKDVGTNSRRTLTLDLTRFDKRKQDEEEER  
AATDGKRRTRKAKSEGQSSSRKRLASDSPGTITTQ

>comp8382\_c0\_seq1; 356 82 648 LEN=769; translated  
MSKSSAAANGQALWAKQPKANAELFALTYGALVMEVVGADAGNVKEINEQLENIGYSIGI  
RCVDEFLAKSDVAVCKSFEETS NVLGTKAFKMF LGANCDVHQHSAKSFSLIMHENPLTVF  
VELPDEYKETLQYTIYVYCGVIRGALEMLNYKVDCTLVKSTLKGDDVDEIKVDLKSVMQDG  
AGDDYHEE

>comp8383\_c0\_seq1; 497 459 1733 LEN=2009; translated  
MTSIQKKPSQQNGSNKKNIIQGTGTYKDGLVEQTKDTRYKTEDVTDTKGREFEDFFLKRE  
LLMGIFEKGFERPSPIQEEAIP IILQDRNVLARAKNGTGKTAAYIIPCLEKTSTESKTIQ  
VLILIPRELALQTS AIVKEMGKHMVQCMVTTGGTSLKDDIMRLYNTVHIIVATPGRIL  
DLASKKVADLSNVKTI VMDEADKLLSPEFQPVLEQIIGFCDKDHQICLFSATFPVTVKDF  
CKQFVNPYSINLMDELTLRGITQFYAYVEERQKVHCLNTLFSKLEINQSIIFCNSVNRV  
ELLAKKITELGYSYYIHAKMQQANRNVFHEFRNGATRHLVTSDLFTRGIDIQSVNVVI  
NFDFPKNSETYLHRIGRSGRFGHLGLAVNLITYEDRHNLRVEQELGTEIRPIPPVIDRS  
LYVG

>comp8383\_c0\_seq2; 345 459 2015 LEN=2291; translated  
MTSIQKKPSQQNGSNKKNIIQGTGTYKDGLVEQTKDTRYKTEDVTDTKGREFEDFFLKRE  
LLMGIFEKGFERPSPIQEEAIP IILQDRNVLARAKNGTGKTAAYIIPCLEKTSTESKTIQ  
GKNIWTKRSDAKIILAETETRTRFLAYDYAYYCGNIQF I LVKVKQLATSPSPHKVLL  
SFLSITFLIIGWHIYLSLPYNFSGTNNACNLRTVLILIPRELALQTS AIVKEMGKHMV  
QCMVTTGGTSLKDDIMRLYNTVHIIVATPGRILD LASKKVADLSNVKTI VMDEADKLLS  
EFQPVLEQIIGFCDKDHQICLFSATFPVTVKDFCKQFVNPYSINLMDELTLRGITQFYA  
YVEERQKVHCLNTLFSKLEINQSIIFCNSVNRVELLAKKITELGYSYYIHAKMQQANR  
RVFHEFRNGATRHLVTSDLFTRGIDIQSVNVVINFDFPKNSETYLHRIGRSGRFGHLGLA  
VNLITYEDRHNLRVEQELGTEIRPIPPVIDRSLYVG

>comp8384\_c0\_seq1; 359 115 1627 LEN=1718; translated  
MAHEDESSPLVGHCYGRKPSQPGQKNIKRVSSIAKELGLGSQKGKASVVNVGINLAKT  
AAGTGILALPYACKQGGLLFLVSGMFFVWVNVSCMKQLCDALEYLVRLAETPLDFNDIS  
SVEDGRKNSLLDIIFRHCKHDRFSIKFRDQPPEGTSSFSKLGWYALGNLGLWSIDIMMLV  
LLSFINIAFEVAILQFAEATPFTTGEKMLDGLILGLVLVPPFCIVDDL SALS KL SRMGLII  
LGLTMSVVAWYGLNEQKAMDNAASTFERGERDTGINNHND SKFNLYPLNGIEGVSKWFGC  
TVFSFGIVPLTFNFRESMADPEKLPQTAMISMSLVGVCYIVIGVSFLYLFPNIENDLLAE  
IPSTGLLATTRIAMILVVMAS TPLLI VPCAEIIEGKIYRSKSGDTRKSKTLMIIIRSSI  
LFFT VSIASKLPGFISVLSFVGCFAVSMVSFVLPPLGHLHWLLLGQLHGDGSGDNDYTLWSR  
TSDITMLMVGLATTIITTWFTGS

>comp8389\_c0\_seq1; 936 1 1899 LEN=2143; translated  
HPPNLA AQTKMKFASGIYTL LLAGGIATADGMSIRGNSRHANKLMAFSRKLEDGSGDGG  
SEDDGSQDNEGSQDNEQSQDNEQSQDNNNSG DENNTNFKDYSIKLLTCIQG  
EQAINYENGETESSTVVFRLCPVDSCASDTLLGCDEGYGDIYVIGIDTFLDVYMESKREEG  
EGENGNPMVAYNQYQEFDASEYMECSEYKAEEMNEEQQQQYNYNSGGNQNQWYANYQD  
SSFYIGPCTEDGTSISLNLTYDEQCSYPAEVNFTEVSPGWQSLPFSEGLVEMNCMSCY  
SQNENYWEI SEMCEQEYTS AVSSCEQYLNTTASGYHYHVTSGCEHIDSMVANFTEAQR  
KSAWSTISTAVSNTASTVGTAVSQTASTVGTAVGNTASTVGTAVSNTATSVGNAAGPTAK  
AASTRFMDTMSTREARAFIAAMVIFSLSALFGATLIGFLCVKRRRQRRRLKKSAGLLDDE  
ESPSGPEDIKRRSSVALVRSTNSVRESVVAANVTKVAVATAIASNVI SDGEKKPNE  
DDDTVRSSDYNMEDPINATVGSF SCTIVPATSEAAPTTEETTEEPDAPMKAAPHEHSVI  
ESEHAPKTKNKFLSKMDKHLKSKMSKKNVADV

>comp8390\_c0\_seq1; 148 339 1333 LEN=1573; translated  
MGSSGSRTKLRPFLLAGSSLLLF GGRPVAAML PVATGRGARSSVRLDSLATR SVSSALP  
AAFFANTHHPQRHSGRARALPWNLHHSRRQORTLGNPFWSSCITPLLASANDSGDEIV  
PTWEYVPYDPSKNNKIKSKGANTRSKNATGRNQKPWTVPKHVRI PDDARIEFSFVRSSGS



GGQNVNKLSTKAELRIDLVRERHAWMPAEVQTRLKDQQSNRISREGILTTLTSQEHRTQGR  
NKTEVLNKLRLALVLQAXAEAKGSEAAHRDLQGRQGPQQGVQKEAERNQAEPEAGRLVSPG  
GEGRLRAGTRGAPAKATKPNQIGVFLDLPAQ  
>comp8390\_c0\_seq2; 148 339 1333 LEN=1615; translated  
MGSSGSRTKLRPFLLAGSSLLLFGGRPVAAMLVATGRGARSSVVRDLATRSVSSALP  
AAFFANTHHPQRHSGRARALPWNLHHSRRRQORTLGNPFWSSCITPLLASANDSGDEIV  
PTWEYVPYDPSKNNKIKSKGANTRSKNATGRNQKPWTVPKHVRI PDDARIEFSFVRSSGS  
GGQNVNKLSTKAELRIDLVRERHAWMPAEVQTRLKDQQSNRISREGILTTLTSQEHRTQGR  
NKTEVLNKLRLALVLQAXAEAKGSEAAHRDLQGRQGPQQGVQKEAERNQAEPEAGRLVSPG  
GEGRLRAGTRGAPAKATKPNQIGVFLDLPAQ  
>comp8391\_c0\_seq1; 159 596 1392 LEN=1544; translated  
MRVVASSPKQVMVHPFSLASGNRRGVEAPTHCNYEENLQQQHVVEEIIAFAAEADPWLDL  
ALLLLCGPPSDRILYQTSATPIGRFRPRPEPVNLTAAXETFSEPEQRDDSSSLTKSARYQL  
GKDMQVLADGINLDGNTRVLLAAYDARTLDDFYLMADIDFLDFLRKARAANNCLPPLQIR  
KVRMLRRWLKDLVDENMSDENEHSRRSRRRRLVPKDWAEQYKHDLPHLKLLELRQQGDSL  
FERFSQFGNALTSVVTGCSTPTGYL  
>comp8392\_c0\_seq1; 310 66 1054 LEN=1054; translated  
MPLLVDATHAIKVGDSIGISGDTSSDSSLGLLFDTFVPLSSILTVSVVVGF'TLPRHEYF  
GLFWLIWWALAVSISLLSVDHGGYITNGNDVKGLFKSSDDRIRGMAILVGLPFAMLLV  
LFVWVKKENSSSSSSAIQRSQERRRRQILPLINPIRGFVLKHVPMWSMVAINIYRLDGLSV  
VIPFWNGHVPKFVGYQTIFLDVIMGITAIPLTYFLYVPRGRRGIGSRRAKPNARPSFLKD  
ALWFWNSLGLYDLC SAYIVFILNAYEMGGPNITQPPLLPKLGKHPLPLLILFQVPLAIAV  
HILMLTNIDELMNEQEKLQKSHDLSLTL  
>comp8393\_c0\_seq1; 476 160 1802 LEN=1802; translated  
MVMPDIDIVIFYLPENDPFAANPEQHNNNDNDRDNDSQEKKPLSTGNRIFQECLEQHL  
AYNHTSGLSQDELVEWQKEIRKQVLETFHQRIHDATANGPLQFPQAPLPTGTQQPQTL  
ATLPKAQFYVHIKQGDTS CFKVCFNRI DEKISRLSGSAXKQKRDPLLQRSTERLAAAA  
SAEEAPASVGGSSDKGNNHGASQGATNGSDSENAEEASVIKNTTNGNSCENNGVNGSDSE  
ASSTQSATARTRGLSHLPVPDIETEHPSVVRIOGDKGDETKHTKAKDIRNTGSSGSHTGE  
SALEPMEITKSPYEGNQS AEIDEEQLDELKLMPEWGPDRCRNPILDKYYGEPLASTIF  
RTRLEIPKTGLLYHASWIRGKIGDSNLGWI PKPQMLLCLMEEKFGSATDSTASSLGGNNT  
VQAVAKKLECSQLVIRAMKEWNLKFEFPELYSNNAEKEFVFRDTLETKTRCYKCEIFVA  
RVYAAVVVLNQEAFQAVKPSLMTKVRACLAIMNEHVQANTTELVRIVAKKQKFRDGIAAA  
GAAAAAAA  
>comp8394\_c0\_seq1; 521 1 1403 LEN=1597; translated  
XGDPQTQLTPRLHCSTREAF CNEPYCNTPDNPERQIAQLKPDDDSVQIASCVRGAAVFP  
PGGIVVDNDAATSTPTPATNPVLPAMSLEDRTDDRGEKEGGVLESEGASSRRRWLGNAGA  
LVAASLGVSTTTILPSHAEQLVSSASVCDATVSVWSKGGRIIYLLGTAHISSTSAALAGQ  
LVRDTPKGVFVELDPKRVSGTGALAQKFKGDADIPAPERESKIIVPQISAAPGDGSMVL  
ESSLTQADSGAPIPTALSSKTKKEMNNPVMKAATAAVGKQIKGLYSRLDSAGFDSGEEFV  
TAVREGKKIGADIVLGD RDVEVTLRRVTEGLAKTDLKAF LSPDSELEQTLOKMVPVDAV  
AERIA GSSSSSDGARDLSDEEFKQELSTFVETMKTENVR LIMGQLKRVAPFLYEALVSR  
DVYMATGLNGLSELESIVAVVGIAHADGIETSLQMNGWKAAPSCPQK  
>comp8396\_c0\_seq1; 462 1 1699 LEN=2408; translated  
XEPTGRAAVNGYVPLDQNGRVVTESDSASMRSHHTIATSTSEPTPAAVNGHVPTLYRN  
GKAIMESDSVSTLSWHRKKSEFLCDWYYPVRITFC DSTFRIQSYVTAVIHHEHDS TVHTR  
SNRGEWKIPYFRAIDKALQMHGIPQESVSNVVI GGMNSRPPCGGHKKRHP SRKVLPPNG  
SRNKGNNALNIKSESNTTKGAKYNSKKEPAVTSTPQSI CLLERLDRIAMESLWSPTLEQ  
ELLFGYTGPTTTSTMEAYDMLAGFLSSREKAEQQHQDQQLSSYKMILDAMKPF RD AIQS  
LSQDAPCTAGLAISILRRIRMVLLQRHPTWVEGIGTSGKSMELRDNSSVFHKRVLEK FVN  
TFSPVLKKHPPYSWTILLDPRLIAMRGLSESERKRAKMLLIEEVAELACVVDEEKT ERMS  
NGNNHSTSHPHHEPTTMDGLFWGEEPVDSPYCDSTYSEPPRKRNAAKKYAESNVHLYCS  
TVTSQSRIHDPLQWKKKHQHQFPELSMLARKWMSASVVFGRPRSHDRDRNNSYDLILRAT  
IPCEADSSSTEEIRRRILLYENLDSI  
>comp8398\_c0\_seq1; 373 217 1515 LEN=1768; translated  
MPPKTVVCNPYAKKSEVTTTSAASAPPANRKDTRPSSFSRNP HSSGTSEGANRRSNRDGA  
QFRVGNHPLKTGDDALLPSSYTLAMRPGTFSQAFDSIDGSENFRRASDSFEDPKKKKQT  
FRLAKVPKEGKRQKLT SKKKAKSSNTE SKKTLPLSSSLNRDGAAGTGGRQEHQTSKSR  
GNDDSEEQSINANAETTGN SNGNKDDL RVHHTMLQPHVLYVSIRQKGN SILPLIRNVP I A  
YSPMVPDYILGPTVCALFLSIKYHKLYPRYIYRRLSELRDDFKLRILLVLVDVDDNSNSL

LQLNTFGVQNQLTLILCWSELEAARYLETYKVVREGKDAGCIQKRESTNPIDQAADFLCAT  
TNGRINKTDAGNLWAQFSTIGGIASATSDELALVPGMGPLKVKRLHEAFHKPFSSKRTRL  
KQKKRLEQLSGN

>comp8399\_c0\_seq1; 569 2975 4984 LEN=5450; translated  
MGNNYSSATEDCKGDRNSILQSATAVSEAMNGCSEYYRAPEQEKDVSTSDATYDNLDA  
EMLDELIESSEQQREPMQEPMENLGESLSSFCPPMHRLSLATDYIQITDVLADVRVKYH  
VNAKELGHGHYGIIVRKCMNRATKQWYAIKSIRKNKVKKIEVLKREIEILKEVKHPHIIEL  
VDVFEDPKYLHLVTELECTGGELFDRIIAKSQSPEGHYSEHDAASIIIRAILDAIAYCHSKT  
IVHRDLKPEVCFGLGPKVWNTCSVSVFARFPRVVGAI DALIXTLFTAPSILLKNPTFHLL  
RNDVTKNFLFLTEAEGSPIKIIDFGLSRHKDENEEMMKTGVGKFRSNCDPGXLKLMLEMI  
VRFFDVLCPICHDFSDIPGTPYYVAPEVLRREYTEACDVWSIGVITYILLCGYPPFYG  
DNDAEIFMSVRAGDFDFPSP EWDDVSSDAKNFVTYLLQQSPELRPTALKAMEHPWIFTHV  
PTAATEDRVKILSNQSI RGTNFQKFLGMQKLLKKAALVTIARNLTHEEVGSLEDVFRKVD  
RGTGDGRVSLTDIHSSVLKEKLS PQIQAELIAMKEELSLSDDD TLNWK SFLDATVDK NLM  
VMREDKIRYAFDHFVHGENKDYLTLNDFESIFHGDTQGREVFQSLDKNGDGRV SFDAFRA  
AMEESIDFDGGDK

>comp8399\_c0\_seq2; 707 2975 4699 LEN=5165; translated  
MGNNYSSATEDCKGDRNSILQSATAVSEAMNGCSEYYRAPEQEKDVSTSDATYDNLDA  
EMLDELIESSEQQREPMQEPMENLGESLSSFCPPMHRLSLATDYIQITDVLADVRVKYH  
VNAKELGHGHYGIIVRKCMNRATKQWYAIKSIRKNKVKKIEVLKREIEILKEVKHPHIIEL  
VDVFEDPKYLHLVTELECTGGELFDRIIAKSQSPEGHYSEHDAASIIIRAILDAIAYCHSKT  
IVHRDLKPENFLFLTEAEGSPIKIIDFGLSRHKDENEEMMKTGVGTPYYVAPEVLRREYT  
EACDVWSIGVITYILLCGYPPFYGDNDAEIFMSVRAGDFDFPSP EWDDVSSDAKNFVTYL  
LQQSPELRPTALKAMEHPWIFTHVPTAATEDRVKILSNQSI RGTNFQKFLGMQKLLKKAAL  
VTIARNLTHEEVGSLEDVFRKVDRTGDGRVSLTDIHSSVLKEKLS PQIQAELIAMKEELS  
LSDDD TLNWK SFLDATVDK NLMVMREDKIRYAFDHFVHGENKDYLTLNDFESIFHGDTQGR  
EVFQSLDKNGDGRV SFDAFRAAMEESIDFDGGDK

>comp8399\_c0\_seq3; 447 2975 5118 LEN=5584; translated  
MGNNYSSATEDCKGDRNSILQSATAVSEAMNGCSEYYRAPEQEKDVSTSDATYDNLDA  
EMLDELIESSEQQREPMQEPMENLGESLSSFCPPMHRLSLATDYIQITDVLADVRVKYH  
VNAKELGHGHYGIIVRKCMNRATKQWYAIKSIRKNKVKKIEVLKREIEILKEVKHPHIIEL  
VDVFEDPKYLHLVTELECTGGELFDRIIAKSQSPEGHYSEHDAASIIIRAILDAIAYCHSKT  
IVHRDLKPEVCFGLGPKVWNTCSVSVFARFPRVVGAI DALIXTLFTAPSILLKNPTFHLL  
RNDVTKNFLFLTEAEGSPIKIIDFGLSRHKDENEEMMKTGVGKFRSNCDPGXLKLMLEMI  
VRFFDVLCPICHDFSDIPGTPYYVAPEVLRREYTEACDVWSIGVITYILLCGYPPFYG  
DNDAEIFMSVRAGDFDFPSP EWDDVSSDAKNFVTYLLQQSPELRPTALKAMEHPWIFTHV  
PTAATEDRVKILSNQSI RGTNFQKFLGMQKLLKKAALVTIARNLTHEEVGSLEDVFRKVD  
RGTGDGRVSLTDIHSSVLKGA VRMRCEKVRPASANGVECCSSVXENGLCFFLTND DNI V  
F SKXKLS PQIQAELIAMKEELSLSDDD TLNWK SFLDATVDK NLMVMREDKIRYAFDHFVHGE  
NKDYLTLNDFESIFHGDTQGREVFQSLDKNGDGRV SFDAFRAAMEESIDFDGGDK

>comp8399\_c0\_seq4; 636 2975 4814 LEN=5280; translated  
MGNNYSSATEDCKGDRNSILQSATAVSEAMNGCSEYYRAPEQEKDVSTSDATYDNLDA  
EMLDELIESSEQQREPMQEPMENLGESLSSFCPPMHRLSLATDYIQITDVLADVRVKYH  
VNAKELGHGHYGIIVRKCMNRATKQWYAIKSIRKNKVKKIEVLKREIEILKEVKHPHIIEL  
VDVFEDPKYLHLVTELECTGGELFDRIIAKSQSPEGHYSEHDAASIIIRAILDAIAYCHSKT  
IVHRDLKPENFLFLTEAEGSPIKIIDFGLSRHKDENEEMMKTGVGKFRSNCDPGXLKLM  
LEMI VRFFDVLCPICHDFSDIPGTPYYVAPEVLRREYTEACDVWSIGVITYILLCGYPP  
FYGDNDAEIFMSVRAGDFDFPSP EWDDVSSDAKNFVTYLLQQSPELRPTALKAMEHPWIF  
THVPTAATEDRVKILSNQSI RGTNFQKFLGMQKLLKKAALVTIARNLTHEEVGSLEDVFRK  
VDRTGDGRVSLTDIHSSVLKEKLS PQIQAELIAMKEELSLSDDD TLNWK SFLDATVDK NLM  
VMREDKIRYAFDHFVHGENKDYLTLNDFESIFHGDTQGREVFQSLDKNGDGRV SFDAFRA  
AMEESIDFDGGDK

>comp8399\_c0\_seq5; 514 2975 4948 LEN=5414; translated  
MGNNYSSATEDCKGDRNSILQSATAVSEAMNGCSEYYRAPEQEKDVSTSDATYDNLDA  
EMLDELIESSEQQREPMQEPMENLGESLSSFCPPMHRLSLATDYIQITDVLADVRVKYH  
VNAKELGHGHYGIIVRKCMNRATKQWYAIKSIRKNKVKKIEVLKREIEILKEVKHPHIIEL  
VDVFEDPKYLHLVTELECTGGELFDRIIAKSQSPEGHYSEHDAASIIIRAILDAIAYCHSKT  
IVHRDLKPENFLFLTEAEGSPIKIIDFGLSRHKDENEEMMKTGVGKFRSNCDPGXLKLM  
LEMI VRFFDVLCPICHDFSDIPGTPYYVAPEVLRREYTEACDVWSIGVITYILLCGYPP  
FYGDNDAEIFMSVRAGDFDFPSP EWDDVSSDAKNFVTYLLQQSPELRPTALKAMEHPWIF

THVPTAATEDRVKILSNQSI RGTNFQKFLGMQKLLKKAALVTIARNLTHEEVGSLEDVFRK  
VDRTGDGRVSLTDIHSVVLK GKAVRMRCEKVRPASANGVECCSSVXENGLCFFLTNDDTN  
IVFSKXKLS PQIQAE LIAMKEELSLSDDDTL NWKSFLDATVDKNLVMREDKIRYAFDHFV  
HGENKDYLT LND FESIFHGDTQGREVFQSLDKNGDGRVSFDAFRAAMEESIDFDGGDK  
>comp8399\_c0\_seq6; 585 2975 4833 LEN=5299; translated  
MGNNYSSATEDCKGDRNSILQSATAVSEAMNGCSEEYRAPEQEKDVSTSDATYDNL DASL  
EMLDELIESSEQQREPMQEP MENLGESLSSFCPPMHRLSLATDYIQITDVLADVRVKYH  
VNAKELGHGHYGI VRKCMNRATKQWYAIKSIRKNKVKKIEVLKREIEILKEVKHPHIIEL  
VDVFEDPKYLHLVTE LCTGGELFDRI IAKSQSPEGHYSEHDAASII RAILDAIAYCHSKT  
IVHRDLK PENFLFLTEAEGSPIKI IDFGLSRHKDENEEMMKT KVGT PYYVAPEVLRREYT  
EACDVWSIGVITYILLCGYPPFYGDNDAEIFMSVRAGDFDFP SPEWDDVSSDAKNFV TYL  
LQQSPELRPTALKAMEHPWIFTHVPTAATEDRVKILSNQSI RGTNFQKFLGMQKLLKKAAL  
VTIARNLTHEEVGSLEDVFRKVDRTGDGRVSLTDIHSVVLK GKAVRMRCEKVRPASANGV  
ECCSSVXENGLCFFLTNDDTNIVFSKXKLS PQIQAE LIAMKEELSLSDDDTL NWKSFLDA  
TVDKNLVMREDKIRYAFDHFVHGENKDYLT LND FESIFHGDTQGREVFQSLDKNGDGRVS  
FDAFRAAMEESIDFDGGDK  
>comp8401\_c0\_seq1; 1580 131 3052 LEN=3094; translated  
MSGWLSSVNNLLENLDGQAE TVAE TVAEQATTAGISSNLRLRNHTLASNASALTSNIAMS  
GGIAAGTKSGSSGGSY TNSDSYDDEDYSYEDNEDNEGFFGDEEGFFGDDSDAESGGSGGA  
EGLGSTSSKNNNNPETSETENENENTPEANSGFGDAPSSGGVDTADLP GSDDGIDGLLQ  
EGSGDAGAAEGPPREEGEPGATVPGNPVPAERETT GPRPPSGDEGGADRGESPTPI PD  
QPKRGGDAGTTATEETNGGSDGTDARGDEGNPTEPGLSKNEETS NKDAGSSVASVRKVG  
SASGATDPSKSTRQH QKSNTSATAAVASVDTDRDDKDDPGVAAKEQKKKPPPPRPPARSV  
VPPPNPNASKPNVARSETPPHATTTINKRKDDIKLKEQKQRF LQQQQQLVSKNKTIQSLQ  
SQVGKMKDELAKGEAKKQEQLEQRTKDLGDKLEASEREVEAQAEELLRAGKEMEQMRTNAR  
EEREDIQDDHDEMEDLQRDHQAALDKMRQEYEQQLAEWKERFESEVTLRQQEGGDSIRD  
LRDANQREKEALKKLA EVAAEKTALQAKLDRVIGHETT LQQQVESSMESAE TVAAERERRA  
REELDEATALHAKQMAQRQAREAELEQTILEMGSAL TMAKQELQQQRMAS SKHGAAPGSS  
PDEEQQEANGSYFKEQLEQVSELETVRVRLT METQRREALQQQLTEVSQERKQELSSTQ  
ARQHQRDRKVADLEATI HRLQDSARALQQKAGHSGSNTGGVGNDSNATHPSSVNGDVQQP  
RGPSELELERAKREIANLSEQLLRQQSVAKNAKSEILALKGRLQANARAEAEKAGHHS  
KTAANPRRSYDI ESRGNHNGTTFSPRRRIKGGSSRGVRSIR SALPCFASGRPAESGAA  
LEQVALTIDAIDSWMVDTGSFMRHEPLARLGLLLYLMV LHLWSFALVVFHTTEVEHGFDFG  
SMDSNPRHWREHT  
>comp8402\_c0\_seq1; 159 1 595 LEN=892; translated  
XTTKGNEMDESPKSPKSPRTSEDDSDENENNENSSVGSARDTPRHNRGFGRPD TWVTA  
KNHGEDEPPRSPWRSPRDDESPPEDAPGGTGPTSPVPAAPAVAVAAAAADPRGGENGKES  
ARGNEPGPRKTGSTTTSERIRKAKEAYEKDRASRITVRYTYRFVYDSGEEDSVRGTPTWEK  
ESLPVAEAPPEIKLWWQS  
>comp8403\_c0\_seq1; 588 169 2295 LEN=2482; translated  
MPPRSIPSPSSVTADKENSSTPPHGSATGTGRRSSFLELNKQSDISIPQIKVSL EDITYM  
PVTASSVSGSSYSRHRKDREDRTVVLDRISTQINPFELTAWMGPSGSGKTS LASVVANLV  
EDPSDICS GTIRVNNEEGRIPKQMVGVVWQDDLLLSNL TVEETIYFAARLKT PSSVSDQE  
VRKLVEETMIELGLLHV RNNP IGSATESGHGSSRISGGERKRVSLAQEI VVRP SLLVCDE  
PTSGLDATTAHSLVKTLKDLASLGH SIALVIHQPRTDIFNMLDRLLLLLSKGRVVYEGNPK  
TVRPPYLECFVDPLPPETGIADWIMDTVIADERRQKSLCIDGNKKSSTASDDGQYVSLADR  
WAANRSKFEQTTKQAE CNDNKK EPMTPSGDHRHENHRRIFSLAQFRKNKQKSMYEASFGR  
ELSMLTRISKQRREK ITRVSFLLTLYVIFT SFMYFRLPDDTANIFERN SLLFFLLIA  
QGMGIVNTSIVVFNRRERALLRRERAKKLYRVLPFFLAKAASDMTNNILLPLLYGIITYWL  
AGLRPSHVAFLKFLLCY YLTLSCAQSMGFFLSILYPNMAIAMILAPPITL FMFISAGFYA  
PISNMHIALKWVSTVSFARYGYSGLLINEFGGREIPCYESSGEEDGDDGTD FKGITVGGG  
ECPLPGEEVYESIGINGVFASYWFNLGIVAI FQTVFLVGAYALLRRSK  
>comp8404\_c0\_seq1; 340 351 1202 LEN=1720; translated  
MVSLP SHPTRRRQLRRDKRNNGAAAAARISPIVLYCF CACCVASFLGVPNNKVD AFSLVP  
PTTPLARFQTTTTERKGASRARHRAFADASTNANASANADSPLTLLMAPRSPQTRQPRRMM  
KKRTPKEGDRRRRRRHASEAGAKASPGGVPRILGKGG SNGRERSRKSAAAAAIRSPQEAT  
QQEYRPLVPSVRRVMGEDY WIDPSDLEKEQKRIEQQQKQRENGAGSSKKG YISQEKLMT  
EVKAPYRQNWIGYFSLMVAVLSILVSQFPELLEPAPTMRFPDL  
>comp8407\_c0\_seq1; 536 1 2203 LEN=2219; translated  
XGDNKISLALQPLRGKESKHQLIMAI SRNASDYPGATLEAFEIGETEYVFESDYKLEKEL

RSGSFGTVYTTTHHRKTREEFAVKVIDRTRKLEKDDIATFREIGIMKDLIGVENIVKLIDV  
YIIPETFYIVQFYAKGGDVFDR LARRVSYSEMDARALSAI LMETMMHMHKRNI CHRDMKP  
ENLLKSSHNSTILVADFGFAKYVPKEGLKTRCGT PAFVAPEILV GKRYNTQVDMWSVG  
CLIYMLLGGYPPFKDETHRGLFRKIRGCNYSFHQAFWSNVSLQAKQLITQLLTVDPNDRL  
NAYESLSAAWFQEDTRRLSARDLSGSIRELQKFNAKRTIKSAVEKVAAAFHVEKISDLLK  
ETDKHVEEQENVEVSLSGT VTPPAIHKLNLSLTKKKTFDQLYEVKDKIHRGSAGVVKK  
CYSNVYMKDFAVKIIERDDETD EQVLEVNIMNQLHHENLVGVVDFEEDYIYVMELM  
AGGDVFDRIIE LNNYTEKDARDLAKMLLEAVRYMHENGVVHRDIKPQNILLETKDSNCVI  
KVGDFGFAKRFYTPKSLVSRCTPSYVAPEILKNQPYDESCDMWSVGVVLYVMLCGYTPF  
MEDTQEEMFKRIIAGDYIFDPEDWSHVSTEAKELIQGCMNTNVDRKRLTAQQALQSRWITG  
VSDNELSSRSLKSTMRLIKDKNFRLTDLTDTFTTAKTEFQNAIENS RKVTEIVGES  
AVSII RPRSKNDVK

>comp8408\_c0\_seq1; 436 1 1692 LEN=2167; translated  
VTRRSSLSVSSQASGDLERQSRRSFARRPSLSSVSSTASTNTRRKREPRASIIYQRRNF  
VRLQSTDALASDAMQEF LFM SLKAESSSDNLSSNQLPACPRNNTDGELGSIFESSFDLT  
EDRLMRLFKLFD TDESGETISYDELKLG LNYQVTELGTAGLGDEAFALLVEHL DADKSGDV  
SFAEFSEGIRLLLLRSTLHRFAQTQAMNEPLVIEIFDYN SGLNRYFLQGVAQRSASKMN  
LPKLRSPFYKSLVNF MQPRAEDVTVRWIDITGKQASDIMKMMALKYK LHP LSLEDALDT  
SSQRSKVDSYDGHNFIMIPVFKLNHSVIAEKVDEKNEKNRTWYDRLLHRGKKDHD TTTST  
VSDNEDRTKMKLIEVHMTSIFITKPYWNTVITFNNENSSEENWSGLRTELEKSYSRLRQY  
DGQILVYSLLDRTVNQIGPLIQTLK KVIKAEKKIAEERYKNMDSIHSLERELSAMSRL  
KPYLRVVLH LIEDDSFGPAASMYIRNVLDLLEIYDEDVKHLISMCESTYQEA EK FQAKQM  
ETTL YTLTVISATFLPAQFLTGKW

>comp8408\_c0\_seq2; 442 1 1818 LEN=2030; translated  
VTRRSSLSVSSQASGDLERQSRRSFARRPSLSSVSSTASTNTRRKREPRASIIYQRRNF  
VRLQSTDALASDAMQEF LFM SLKAESSSDNLSSNQLPACPRNNTDGELGSIFESSFDLT  
EDRLMRLFKLFD TDESGETISYDELKLG LNYQVTELGTAGLGDEAFALLVEHL DADKSGDV  
SFAEFSEGIRLLLLRSTLHRFAQTQAMNEPLVIEIFDYN SGLNRYFLQGVAQRSASKMN  
LPKLRSPFYKSLVNF MQPRAEDVTVRWIDITGKQASDIMKMMALKYK LHP LSLEDALDT  
SSQRSKVDSYDGHNFIMIPVFKLNHSVIAEKVDEKNEKNRTWYDRLLHRGKKDHD TTTST  
VSDNEDRTKMKLIEVHMTSIFITKPYWNTVITFNNENSSEENWSGLRTELEKSYSRLRQY  
DGQILVYSLLDRTVNQIGPLIQTLK KVIKAEKKIAEERYKNMDSIHSLERELSAMSRL  
KPYLRVVLH LIEDDSFGPAASMYIRNVLDLLEIYDEDVKHLISMCESTYQEA EK FQAKQM  
ETTL YTLTVISATFLPAQFLTG VWGQNFANMPELHTTWGYMFWALALGSMVVTISWLN  
GRQSL

>comp8410\_c0\_seq1; 288 354 1382 LEN=1547; translated  
MVDFV VAGFQKCGT TYLQNKIFYP SERLFI PHHETHFLQNDKYAEFIGEFENVTKAANGD  
GKEVLGAYKSPFVLGHHRSLRNLET LFPDIRMIITLRHPISAFQSLYNYKLRQSSEPLPP  
AEFVGLCRELCSEETDMEQMAQSCLNNAHWCTGEMGYHKYLSRLGLTPMNTSEELDLLG  
HHGMSIHD FSGSRKRVMSVVRGVKQHVDEARLFLIEIGQFDHRMNQTMADDVRS DLET  
FLGLDPGDLPRAPHQHGGKRPKIDYKYPG YEEYVLDICLDRYKPMRKILLET SRKASKW  
IMEYLLHPSNRHRVIVSNIDIFQQMLEGWKIDPCLTKDEALE

>comp8411\_c0\_seq1; 155 65 289 LEN=1041; translated  
MEDRNFVCHSNEGKDACEGCGYGAKENYTEAVASFSAPGLSSLPPRNMTVA AKTASTA  
PVSSWDWDYIRDEIW

>comp8412\_c0\_seq1; 92 598 704 LEN=704; translated  
MERFGFEGLD AFDMVNTGKIIRDELSATDPEKAAAX

>comp8412\_c0\_seq2; 328 320 1197 LEN=1441; translated  
MTTGPTL KSENLLFDXEMEKIILARKLQECADDWATPVEDLSPIVRKPAEQWAKGAVSES  
VVQQVLTAWEMERHHS AERHIFPGVIDALKQIKKEHPDVIIGAVTDGKANPQLMTFTLAP  
YFDFCMSWEDEQGRQKFFADLNGVEGTPELTWIIYDAARHKYAILKEAQSGINA AKPSGI  
GSEESA I KPLVWPESYDDL VVHVHGDDLA FVDVGSAAACGAKTILVELPKSMGQTAPFRFD  
TSIEQPTWATT SKSELEARIKMNEAAREHVTV EINTLERLPIAIDQILRDDL

>comp8412\_c0\_seq3; 523 112 1356 LEN=1600; translated  
MKLSVTLFQLITAFSGVTNAFVPRSSNHRQTHAVTISTSTLYAETA VSDASSASKPTVQ  
NIGLLTFDLDDTLYPIDQVNDANAAFVTAMERFGFEGLD AFDMVNTGKIIRDELSATDP  
EKAAAL THTEVRELAIRREMEKIILARKLQECADDWATPVEDLSPIVRKPAEQWAKGAVS  
ESVQQVLTAWEMERHHS AERHIFPGVIDALKQIKKEHPDVIIGAVTDGKANPQLMTFTL  
APYFDFCMSWEDEQGRQKFFADLNGVEGTPELTWIIYDAARHKYAILKEAQSGINA AKPS  
GIGSEESA I KPLVWPESYDDL VVHVHGDDLA FVDVGSAAACGAKTILVELPKSMGQTAPFR

FDTSIEQPTWATTSKSELEARIKMNEAAREHVTVVEINTLERLPIAIDQILRDDL  
>comp8414\_c0\_seq1; 176 140 1239 LEN=1786; translated  
MTQSETSMSSGTTWSSYLFGLTSLVVAWRSLQLVTGVGIVALLGLYFKQNSLLYFPAIGNMP  
KNPAHNPRGYRSPADYNLPFEDVRIVCEDGVSLHAVADFRGGKTSNNEISSIPTILFFHA  
NAGNVGFRLPNAVVMLQRLNVNILMVEYRGRSDNVAPDESGRLRLDQAALEFAQTHPK  
IDPTSIFLFRSLGGAVTFATAKYAQENSRGRGANSIHPKGVIVENTFTSIPDMVDELM  
PLVAKFKGLILAIGWHSLKIVPTLTCPVLYLAGSSDEIVPHSQMLRLHQSTSRSVLNRLH  
VIQRGTHNESWSQGGDAYWDAIRTFLAGAISVAKNSSNEGYVHHASAESSYANRGEIGNN  
LDKKEL  
>comp8415\_c0\_seq1; 25 1 866 LEN=1453; translated  
RTKKDDIVAGNPIADADLYTRVSSRDAPVFKVGRGSNPPSGSLPLFLSSLSQQSKRCLSG  
TTRSHTIKSRLENVHPLSLFRIVQDVDRYKEFLPLCSGSKVFRETIRDGGRSFDDELV  
GYGYGFGSSSLFETRYVSSVKVDPEALRIETSSGTGTLTSDGTSNNDGNESGRMFDLSLTS  
RWELRPAKAERGGGRLAGTVVDFVEMTVSDPVVAAVLNQVQLARVAESQVLAFAFHRGAL  
PPPTEEELGRAERFLANTEARDNPLPTVPKYELVTHTCSEEIQSLRS  
>comp8416\_c0\_seq1; 132 1 614 LEN=1446; minus strand; translated  
XDYLRNSKFMVSYLLYNISSICTKIDAHFANNDSEFRSWTKIKEDLENHPRFKYAIQVEKD  
FDETGSRVCAYPNPNWERNQWDIYYPLYEAGFRAPEGGFQWQFDMGDPTRLHEELCKEV  
YISNCEEHPYSRRLTTSFSTKSRGLQEGSLEEPGDSFVTITIGLSSEVVDIDDSLTPA  
FNVEFSKLLVAVAVTTMVVMAAI  
>comp8418\_c0\_seq1; 526 508 1692 LEN=2100; translated  
MDKKECPASAWFAAMNRKTRDRESNTYILKEPKLTVLILYNDRLLAHQLDWINYSEE  
VLSRIRFVIIDDGSIVGHRAKEFLELNHNKSDNLDNESTTTSIEETNIQRMKSNHNSAD  
EKNHYGSEASNVTSLDIRIYEIDQDIDWNVGGARNLGFVIVSQNYGESFNAETSCHKIKP  
VRNSTSPWVFMNDADVLVPLETMEFVLGLMEKKSNSLSADSASSVSVGAKSHFPESDAYMN  
ETNPVYANFQRIGRKGKLNKYPHPAVMLTTTDSYWAAGGCDEDFVGNYGWTDPHFFYRA  
NESPSLEVVISHKRMDKFSIPPLVEMSKKYEKSCPETLSCLPLPAEHKPKTKKKRKRDRSS  
DKRDNEEKYFTKPKLSKNNTINNELYIHKTTTEGDW  
>comp8419\_c0\_seq1; 103 1 396 LEN=396; translated  
XFRSQQCYWKMSSDQOSTQPYTFDGEHEHPYFSLYSSILTTSYPSSLPVLPSSNPIRYD  
LSDSDSDSGHGETNAEEANDPPSPKRRRTSISDSVASFSSLNQEEATRADESVSQPHLV  
PSLPVDTDTVKEKX  
>comp8419\_c0\_seq2; 86 1 763 LEN=969; translated  
XEPRNLVPSLPVHTDTVKENEPRNKYLEKFNQCWEKYNAYVYAEAFRRNGHTRITSSRRHR  
NWLQTQANANYNERKLSYRIRKLEAIGFVWQGRKKTWNEIMSAPAAVAKWEQLFARLIHY  
KILHGGSTMVSKSYTKDPLASWVSEQREHYKGPKMLENREKRLDMVGFKWRENENDNAP  
PFDPMPPFDEMLGRLASYITKHGSQTPVPKYEEEDVALGVVWQTQRIAKKVNKVPEENIT  
LLNQLNFLCGQKKT  
>comp8420\_c0\_seq2; 403 1 924 LEN=1312; translated  
NWLSSGGVAVVAVEVFFAVATIVVTARAARTNSEVEEENDSGGWDFDLGSKNDAEDLATS  
NAVDSVRLFATEEGIQEPNTSDVLQSVQLETTTEEGVGEPTSDVLESVQLETTQEIASN  
SMDMVVDSGRLETIKDTLDSIQLEATDFVPPEIMENIDQFDIEVDESISIDGFGSVSIEA  
IDNASDTKGPEQYGVSDTDPLYALKFPEAETPTDSTLDPLQRETMQSSSNGYETNEETSD  
YAVNFPDQNNLTSSGIETLYSMPSEAAATEFTAEQDSSARSDAIGEKRDNYSGLQNYDD  
SSDQRRK  
>comp8421\_c0\_seq1; 606 221 1186 LEN=1373; translated  
MKFQDALNPFPTFLAQPGDEPPEEDPTPLTEAFDTRLRLDASSHAAARSQQQQQYVQH  
QDQTSAAENKTNKASAFDANMALKKQKKKGRDGGYDNDISDDEESSNHSGDDGDHDD  
GSDDEDFDYLLDDDDDDAVLQAIRQKRLRELKKAQSMEAEHKANGHGEVRTISQDEFLESE  
CTSSDHVVVHFFHKEFEKCKIMDHHLKAIATNPKHLSCKFVRIDAEPFFGVKLIKTL  
PTLLVFKNGQTVERLLGFEGLVSSSRGPTVDLEDFPTSRGLYWLESTGAIEYDGPESDDE  
DERGTSSTGTRRRHTRVYDEDI  
>comp8425\_c0\_seq1; 222 1 1395 LEN=1532; translated  
RKKKNLITLRYTHCLPLLTASFLLRRDFSESNTTQRNTRQRNTMLFKALAVLSALPAFLVP  
GCLASWDEESSVITNNVQWKDQAGEKVKAGRGSTISEKIDGYWYMGANSKPEIPKCNLD  
GGDIYIYRSKNLGSNSWEEVAKIEGKDARSCAMNKHPSGKIYLHCRRLICISEAKDGPGG  
PYTCDYLDVNPFFPKSDGNTRKVGSSSTFRKGNTGDLYFVTSRAERKKGGRFAFIYKL  
SSDWKIDREVASWEYNGRESYVVEDNNKFVFTSRTARWKYSRTHYKKAADSLKGLETA  
KEFYVDMWPPDNPKIQSMGTQFTYIQKFGDGKWMFGGRRHPPEEDPCNFGEKWSLVMTPF  
EFKGGTPTVYWRNSFDWLGEASITSTYDNHPRDSYQPDCEFDNPKFEMPWGQMKGCPWVQ

RKKTDIRCAKPGVTSECPVTCDAKFCDAFCNPEKWKQKPNCP  
>comp8427\_c0\_seq1; 188 1 1235 LEN=1382; translated  
PIRSISRTEFPFASERANLPGTSPVVLNRTKPNPTKPNQMIASLAGRGAALRCRRCLPLF  
LSGPLPRSQSGSTAKAPPPTTWVTTEYPPGENGAIIVVRMNRGPANALSLELCAELSEAL  
RAIGKASPGRPAAGKTTTAVVLASSVRGIFSAGLDIAGELYEPDPARLPSFWWHVQQLFL  
DVYGRDLSIVAALGGHAPAAGCMLALSCDYRVMVSEGAAPGRPPAIGLNESRLGIVAPP  
WMAKQYTDVLGHRREGELALLEGLTFPPNAALDHGLVDELVPPLPPGGSGESDWGAPEEA  
ALAKARELVAIPQGARAAVKELTRTPLVEDLLANREEDTEHFRCRFVSSDPVQRKIGAYLE  
ALKQKQXGKVTGRRARRGRMEGSQEKSADKPEGRSTMFAASLPATILTV  
>comp8429\_c0\_seq2; 185 97 402 LEN=1006; translated  
MALTLLNHFYWQIPEAKVPFMIADVIVVAMRYVDKALTAERELQEIQQQQAQKTQKMNK  
EEKLAQKQEARHQHKMAHTSKHGGNGGAGKKQNFNIKSD  
>comp8429\_c0\_seq4; 185 97 402 LEN=613; translated  
MALTLLNHFYWQIPEAKVPFMIADVIVVAMRYVDKALTAERELQEIQQQQAQKTQKMNK  
EEKLAQKQEARHQHKMAHTSKHGGNGGAGKKQNFNIKSD  
>comp8430\_c0\_seq1; 110 1 366 LEN=716; translated  
HRLRTNRSITTENGEFLFPPNKCICKTSKNAKMEEPDLIRLSIDERVYVKCRGNRELRG  
RLHAYDQHLNMLIGEVEETVTSTEIDEETDEEIVKKQQRKVGMLFVRGDIVVLVSPPLRT  
T  
>comp8430\_c0\_seq2; 155 554 709 LEN=1059; translated  
MILGEVEETVTSTEIDEETDEEIVKKQQRKVGMLFVRGDIVVLVSPPLRTT  
>comp8431\_c0\_seq1; 262 84 1298 LEN=1986; translated  
MPLRREKRSQTFQIDSSETPFGSISNPRRLEEISSATWVITRRVLKSAWLKVTLVPLFL  
WFLFRVYSAVLGVSDPFDQPFCDASGTCHERPVDVSPRTVYSAWDKKQFDLWWKYGELI  
DRVDAYAKKRQKLYENNKLNHDHRTRPLILLGDSITESWSETGLGIHKHRAEGVASVLE  
TELSASFGLDPIVLGEAGDQTQHLLYRLENGHMKAAELLSSDDSGQTSFYDPSAIFVMI  
GTNNLGSSELPGPTTKGILAVAEYLLRETDEAGCNVLLFGLLPRGDGRKVLKPCPPRCS  
DEATNTPYSSFLPPIRSVNEALSTEVEALAKTYPAAAEAAASPRIRLVDCGSGFLNPSYDN  
ETAYGVGGNYEVLHDLMPDLLHPSVQGHQILAECIRDYIGQIDG  
>comp8432\_c0\_seq1; 284 260 1180 LEN=1221; translated  
MELNFMSQNNEGGTRSREYLSRVAEGSANVDPGSGNFSIEVLRAALFNRYQLELPNVNAEG  
VSDNGDVTKFEGFICNKDAHWF AIRKINGRYWNLNSMKEQPETISHFKLATEIAGFQNSG  
YTVFCVPLGLPPACKTESQRGRGLPEYWWKEDDLVKGKGDATTAATWSNVGSGMRLDGR  
STTSNQNLTDGLTEDEMLDMALKASLESISAPKPEATVTLTDEPPQGTPTDARIQFRLQN  
GTRIRRFLKSDLVSMVYAYVESESTDAQGRLVELRAGYPPEDLQMKQKTIGEANLSGKS  
IQCRFA  
>comp8432\_c0\_seq2; 286 664 1296 LEN=1337; translated  
MKEQPETISHFKLATEIAGFQNSGYTVFCVPLGLPPACKTESQRGRGLPEYWWKEDDLVK  
GKGDATTAATWSNVGSGMRLDGRSTTSNQNLTDGLTEDEMLDMALKASLESISAPKPEA  
TVTLTDEPPQGTPTDARIQFRLQNGTRIRRFLKSDLVSMVYAYVESESTDAQGRLVELRA  
GYPPEDLQMKQKTIGEANLSGKSIQCRFA  
>comp8433\_c0\_seq1; 345 230 2503 LEN=2523; translated  
MPKSKQLKLYPLFRPSEVSSVDHVKNDDTGNADVDSDSDENIPLTSLLLSRPTPSQDS  
NGIERNRKPSPGAKSGLKALKGQKNEKKRLASAVSASAHCDNTENKNPRFNAPATDCKQK  
EIKTRVEESFAPSKKMSKHTKIGRKATVQATITAAIASANDHTKKPAQTKRAADSDNPDG  
EREIKLETLLKSEINKNSAPLSSKTLPTNHCSSEDEKHKNGSRWKVGVPLFSQSTMDFVAS  
EGGDSKEPFRKNIVHTLNRRTTHGGCLVQGPLRRHYSPPSSKARMEQNRSSLPSSSWPT  
KLKIPSWISLEQPLTGNTASSIGGNIDHMAWDAMGVLLAVSSDRTIRIYDWDMLRAADIR  
GRSDRARNTNDHTEFKIPPIVNFQLPHVSVSLVWNPFFEMDELAVGFRVSGQTIYNVDRV  
ARWIAKDPSTRYNRRPLPHSTHQSIVLQRTVTSIGDILFLDADNMLIAVGNTLFRWKRNLE  
KLRRKQRQPNGAFASGILVWRYQPPSPVTSMALIGSNMVI VGTNRGHLLLIDWTKRRTKV  
TLFSFSHEHRPKVLQSWLPHERLKATHEDKGLRNRMGIVKLRVSSNQSCTVGGKKNWGRCR  
VLWVTLSGWLLSTILES AVR ISEPCLVHSASPKVMYTNDSGIPITTDKRSWVSLPYNPIGV  
DMSNQHSACWVGVPVTRKLSHHDKFVLDSPSTVVSRRSLMVHGIGDKIRNIPLPGIV  
KGLPQSI AVHPSFEWILVGEKRLHVMVSGRANTNG  
>comp8433\_c0\_seq2; 295 230 1453 LEN=2637; translated  
MPKSKQLKLYPLFRPSEVSSVDHVKNDDTGNADVDSDSDENIPLTSLLLSRPTPSQDS  
NGIERNRKPSPGAKSGLKALKGQKNEKKRLASAVSASAHCDNTENKNPRFNAPATDCKQK  
EIKTRVEESFAPSKKMSKHTKIGRKATVQATITAAIASANDHTKKPAQTKRAADSDNPDG  
EREIKLETLLKSEINKNSAPLSSKTLPTNHCSSEDEKHKNGSRWKVGVPLFSQSTMDFVAS

EGGDSKEPFRKNIVHTLNRRTTHGGCLVQGPLRRHYSPSSKARMEQNRRSSLPLSSSWPT  
KLKIPSWISLEQPLTGNTASSIGNIDHMAWDAMGVLLAVSSDRITIRIYDWDMLRAADIR  
GRSDRARNTNDHTEFKIPPVNFQLPHVSSLVWNPFFEMDELAVGFR  
>comp8434\_c0\_seq1; 245 159 878 LEN=986; translated  
MGSRCPLTWGLFLGTAALMIRHKRKQAKISATPATPLPPCEVVFVLGAPGTGKGTQCERL  
ENRLVDGELNRTWKHLSAGDLLRAERDAGTGPMADLIRSKIQAGEIVPSSITVKLLENAM  
AAAHQESKGSITHFLIDGFPRSHENMSAWEDAMGAVHTIKFVLNFECPEEVLVGRLLERA  
KESGRSDDKIEVIRKRFKTHVESTVPILDYFGTQGTPLHNIDSAKSIEQVYETVEKLFA  
>comp8439\_c0\_seq1; 196 100 414 LEN=492; translated  
MTEPKKDAPPAPEAGTDDQGTGGKRSDFLKSVLGRPAIVKLNSGIEYRGVLACLDGY  
LNIAMEQTQEYGLDGLKATYGDCFIRGNVLISSQAKRKQGL  
>comp8439\_c0\_seq2; 157 100 213 LEN=756; translated  
MTEPKKDAPPAPEAGTDVSI AAVLACAGPDEVFVQC  
>comp8440\_c0\_seq1; 340 300 836 LEN=1025; translated  
MGDSITEGTIVEVWAQIGQKVEEEDIVALIETDKVTVDIKATKAGVIVQQFGAIDDEVEV  
GADLYEIDTEAEATVEAAPQSTEATPAAPAASTPEPAPVASAPAPVPASSAVAQRIPSIK  
FLGKEGWARALTVEPALVIPASYGRLEFSEEEEMEALWSSGGANLAPELKEYSTGAIFSA  
>comp8440\_c0\_seq2; 246 300 747 LEN=936; translated  
MGDSITEGTIVEVWAQIGQKVEEEDDEVEVGADLYEIDTEAEATVEAAPQSTEATPAAPA  
ASTPEPAPVASAPAPVPASSAVAQRIPSIKFLGKEGWARALTVEPALVIPASYGRLEFSE  
EEMEALWSSGGANLAPELKEYSTGAIFSA  
>comp8440\_c0\_seq3; 279 300 1012 LEN=1201; translated  
MGDSITEVRRMCGVDALSVTHESIVGPIERLRDENCDSRAHVDFLTEKPTPTLGLFLFN  
AVLREGTIVEVWAQIGQKVEEEDIVALIETDKVTVDIKATKAGVIVQQFGAIDDEVEVGA  
DLYEIDTEAEATVEAAPQSTEATPAAPAASTPEPAPVASAPAPVPASSAVAQRIPSIKFL  
GKEGWARALTVEPALVIPASYGRLEFSEEEEMEALWSSGGANLAPELKEYSTGAIFSA  
>comp8440\_c0\_seq4; 161 99 595 LEN=784; translated  
MTTIFVRGDRIVLYSKSAXKSLNIDVPYKLI FLERLLASLSDDDEVEVGADLYEIDTEAEA  
TVEAAPQSTEATPAAPAASTPEPAPVASAPAPVPASSAVAQRIPSIKFLGKEGWARALT  
EPALVIPASYGRLEFSEEEEMEALWSSGGANLAPELKEYSTGAIFSA  
>comp8441\_c0\_seq1; 162 326 502 LEN=631; translated  
MPQNDLSLDVASRICNSYLLSLTDQLV SF AFHESSTVIEASKEAKKLDMLVTTLYLD  
>comp8441\_c0\_seq2; 503 137 1177 LEN=1306; translated  
MAKTRRNGSSRSSECVDTVDTGRLSSRTSSSRSAFKRRLPLASSVTTSLVLLSCIVAFS  
SVTPVRSFSFHPLRSSNARLVGTQRDRQKQAFAPETLAHRNAFVFNAAETDSRDHADE  
NAGGSGEETRTSGVVAASSPSRIKIPRGGSDDG YDGLGEYDPSENLGVESVNVGDPQLR  
VKVKDKSVTDILKELAAIQQQGPQKYC I LGTRHCSYLHQQII ELLAYALVLSGNHVYTS  
APGTNAATVRGALRAEREDLLTVVLPQSLSKQTSSESQELLKKVDDLITMPQNDLSLDVA  
SRICNSYLLSLTDQLV SF AFHESSTVIEASKEAKKLDMLVTTLYLD  
>comp8444\_c0\_seq1; 275 1 925 LEN=1430; translated  
XNSNPDGYDQIFAGCYDPKHARAVYEKELSEEELACVTLVALDVTDQDSVREAAHKVRE  
WIYEHRQKKAAPGETVVGLSALVQFHGVAFNGPSEYMPIEMYTRQLDVNFVGTIRVVQAL  
LPLLKESGGNGYRSRIVLTGTGGGPCSPCPLLTAYMSSKFALEAYAQALRQELYMIG  
SSIDVGVINPGFVKPTMLIAEGTKISEGMWRSCATRLGNSRARDEYGAMLNHFTEYSALQ  
PGTHVSKI VEATEHALLSPVPRSSYKVGIDSKLAPIVGMPTGVREWIARHGIYGLSPA  
GTVPGYRV  
>comp8445\_c0\_seq1; 315 104 1075 LEN=1208; translated  
MITNAKLKGHGA AVLCLDLSSTSSSLPLSGSPLLLSGSEDGTARLWDLRDHRRRACL  
IKVPGGDVLSAVFAPPPVAEALTSMTPTNETTAFGRDCTVYLGVENAVLEYDLRHAES  
PVLLSEPTKNWGEVLQNQDEVNQISLAYYNKHKSNKISGGGGSKKKKNQKKKGGSGGNKK  
NPQQYPSSGCLDTKDSLFLAACDDAGKIRWAESSLSNYNNNTVPVAACAKDSYESSSS  
STILHHDNHGVAVVPACAFRPIHKTGSGVGSAIL ELASGGTDCKIQLWDVLRPKYVGSFV  
AFCVPNTCGIKLLYLRTL VGRKG  
>comp8445\_c0\_seq2; 641 104 1793 LEN=1812; translated  
MITNAKLKGHGA AVLCLDLSSTSSSLPLSGSPLLLSGSEDGTARLWDLRDHRRRACL  
IKVPGGDVLSAVFAPPPVAEALTSMTPTNETTAFGRDCTVYLGVENAVLEYDLRHAES  
PVLLSEPTKNWGEVLQNQDEVNQISLAYYNKHKSNKISGGGGSKKKKNQKKKGGSGGNKK  
NPQQYPSSGCLDTKDSLFLAACDDAGKIRWAESSLSNYNNNTVPVAACAKDSYESSSS  
STILHHDNHGVAVVPACAFRPIHKTGSGVGSAIL ELASGGTDCKIQLWDVLRPKKPISTF  
FINKNANE EERSKPQVCNPPFIYSLAWSNDGTS LAAGLDGTIGIFEINNRKLVQSQLLV

GNECTDGMTMYAHGSSVASVVYPSFSVPTNDRIMCSAGSDGSIVFWDGKTNGELWDEDT  
ETSSCNNKDGSEDAVEHLLPPLLEELRREGSGTYHGSATTASHKPRILFDISHDQKIN  
WITRAAPSNVATECNDTIFVADTSPEITSYTIIPFDNNAFNDNTENTLEMLNNFVYFHIN  
LISYIFWHTVHKGQQLSIDLNE

>comp8448\_c0\_seq2; 893 217 1740 LEN=2028; translated  
MMLKLLSSRSVAQRARGAVARRGIHSRRKMKNPVDLPKALVAHFVVKQTAPGKAENPAS  
EEPLYSSPVTSAHAIDLEKEAVSTLDSAAIDPSGKVVHGRY GELDADAVLGVPLEYLALL  
RHAAEGAAGLSKLGKAGTVLVYGASQANGFAAVQLAQTGSANAVVGVVDGQHSNEDMV  
EYVKGMIPPEGTAVTQEYAI AKKNFIDLVDGISGGDEQLASYTAAECLDFKANLSAYAE  
TYPDTMPAAVNSSQIKFLGMEKDKDQFRANMDAYLSQFNPGSPPVDEGQLQTNFSTDQYE  
VFRNKFWEQTNNVSGDESHFFSPPHIVQDLMKEPESKPAPLSTGAFEKSIPFSSTLQKQ  
EYPTGTEADAGGPVVGAIISVTPDLKIAADAVAKAGSLREKAEALEFLTDAQKDAFAAAT  
SVASQAQKAGAPVVAIGGTLPGIETAEPDADVATALSAMAIQDDGSTNLDFYIQAYRAG  
DFPFYADYAVHRATEPLAGPRQIVVTK

>comp8449\_c0\_seq1; 329 377 763 LEN=840; translated  
MSEEGKEGKPPSSSKSKKRASIADDFDSSLKDKEGSSTAIPTKIAKEKKKKKKATKEVSGA  
AESNPSTLSSSSAAPKIDRNASKKKKKKAAKKQSKTNVLESDIENFDDHSEKQRDIDSST  
KKKKKKKK

>comp8450\_c0\_seq1; 411 810 1652 LEN=2214; translated  
MTDSGEALLCLITGPSGSKTSLALEVQKRLITDERITETELATSVVVIHQDNYFTKPFLL  
PYKDRTDDSYENSSGIDWNRLVADIESHVMLCSQSLRKNADTNGFGTENKTSMKKIIIV  
EGHLLGDAAEILRERFLDDEKILGSPAIGNAYLDARVRVDILAVLLVGCSPATCKQRRLLQ  
RRMDRSDDERIQLAEYIDAYVWPSFLTYGVDATKKMKRELGVGDLSGSDSQSLQHSASSS  
SSFFLEINNSGTSRLSANVGIISKKIEEIIILSDREGGIVR

>comp8451\_c0\_seq1; 76 1 302 LEN=592; translated  
XDFQDSNSTEPDDDSMSYRFIILDSYGDGLCCGQEGSYRGLDAQGNEIFSGGTYFSSKE  
HLFRVFLPFGATRPFVEVLNLES DPLVRTETNDEDTVIDL

>comp8451\_c0\_seq2; 646 157 2446 LEN=2446; translated  
MNEIRVLKQRALLAASILALSVLQHVLCSPLIHLDPGTNTNSNTQRSLRRGSTAAAGAIG  
APQEPRRLRFQEPPEEQQEDGVKGRGTFVPHNANHSVGSNTDDGDFSRNNSRNSRRHLLQD  
TSCNLI LKDI EYAPTA EHPNGYSREEWMCELPSDDSSRIGGIQFIDIADATRLVEESNAA  
AYEQGRTTAHAITPMPPIVSGESTLTFSSAIIDTGGEDGNPKLHVPQDSMVVKVTISKDQ  
DEYEQYQYQSEWDTKKINDNGKREQRKKQRRRRKRARREQRNRNGNGRRLSTSPSAFG  
TLNTLVVRVDRRGIGPDASIEQLYDDVFGDTACLKSQYEACSYGKMSIVPARGGMVMTG  
RGIVIQNGVTELRVNYDVSMPHSNKDALQQAVLDATLVQFGTNLNVSPHYDLVLF C MPPG  
TGDWIA YAFVNHKFSFYNNQWCSSVTSQLHEVGHNLGLDHSGEYEGGGGYVSYADQTGAM  
GFSYDADDMRICFNPAKSYQLGWYADQVKTINPLAPNWDATRQFLNGVSDYQRNPETAL  
IVLRDLQMWKDEDYIIGYNRKHGINDGTFEDPNKVTIVRKEFGKPHEYGLSTKVAALGVG  
ESYVIENFNDEEGKNVEIKYIGHHQVDVTIEIVDL SRTVAVEENAIEVLEELNPVEDTV  
IPECAIVTIEITFDRFPEDITWSIEEANEEDSVSSERMVYASNPVYDKEHDKENTVATHV  
CLPYWNANGNNTWDEFGNNTWDFVDANSTFGFLDTNSTWDYADX

>comp8452\_c1\_seq1; 428 1 814 LEN=1179; translated  
XDDDDDELPGDSPLMKWNLHRSVSTYAEAYGFDDEPWGVVETS VYSNILTFVNHGCNGTA  
NIGYNVPGINEFTLDPLADGPAFRVPEAFRESMVYPYVPHRDRSYTSGATTSAVEHPPIL  
AGQELFDNYMGFGGETYFATQVMELKRDCSGGLGTVELQQLRAKAKADTTTRAKARAEQP  
AAGGYHTIPEGHGLHHHPRPGVAGGDGNGNGNEETDGEEREPTGRVYDDDDDDYAEDKDK  
DDDDDDYVEDDDDYDVGDGKATGGGSPDEL

>comp8453\_c0\_seq1; 227 151 612 LEN=1205; translated  
MAASQFKSLFFFAVFLCSARSNAYTNSHDYRRSFGVKK SAPKHAGSSTSPDVNKNSSDNL  
RKAGLSQAAVNTDAGLAVPSRRQRSSQMGAHAGILSPEIVTRMDDNAVNGRSNPAVDNF  
LLTYKRKGPMSCLEMLSDPDVLPHLTQAMRDI I

>comp8454\_c0\_seq1; 308 712 1638 LEN=2285; translated  
MGTCE TKAKDRLQKAGTNKEMIEDAMDGLVKCSELTISLSKASEELAFESKIRTNMAS  
MMENYTCVDTELNSTEPPVRESRWRGARDRKRGRDVQVLLDRPASKIMFVKDFISQAEC DAM  
AEAAAAPKLHKASVADGKGGSKFSEHRKAMQAGIKVDWEKEHEGNHIAVLSRRVYDF'TNYI  
LNLGIAEHGQEDLMSIQYFGRGLNDTEPDRYTPHCDGDCSGLPHKTGTRMATMVMYCTIP  
EVGGHTNFRNSGVHLKPVKGGAVFFSYIDPETKLMKGFTEHSGCPVLVGEKKIVTQWIR  
LGVDDENPW

>comp8454\_c0\_seq2; 457 150 1556 LEN=2015; translated  
MSRVHFGNTAFWQYHLQLIALVLISLTTAAANEERGIKIVNSSGSRVELYWIHPPTREGS



LMSEPDIMNGADFLNSFVSHEFELREKPSSTGVCKSEDKTCSSAFFAVSENADQVVTV  
HEGLEIEFLDDQVRAQLKARGIMGTCTKAKDRLQKAGTNKEMIEDAMDGLVKCSESELT  
ISLSKASEELAFESKIRTNMAMMENYTCVDTELNSTEPVRESRWRGARDRKGRDVQVLL  
DRPASKIMFVKDFISQAECDAMAEAAAPKLHKASVADGKGGSKFSEHRKAMQAGIKVDWE  
KEHEGNHIAVLSRRVYDFTNYILNLGIAEHGQEDLMSIQYFGRGLNDTEPDRYTPHCDG  
CSGLPHKTGTRMATMVMYCTIPEVGGHTNFRNSGVHLKPKVGGAVFFSYIDPETKLMDKG  
FTEHSGCPVLVGEKKIVTQWIRLGVDDENPWDSFNLTGKIKVSEDDLSD  
>comp8454\_c0\_seq3; 269 712 1365 LEN=2278; translated  
MGTCTKAKDRLQKAGTNKEMIEDAMDGLVKCSESELTISLSKASEELAFESKIRTNMAS  
MMENYTCVDTELNSTEPVRESRWRGARDRKGRDVQVLLDRPASKIMFVKDFISQAECDA  
MAEAAAPKLHKASVADGKGGSKFSEHRKAMQAGIKVDWEKEHEGNHIAVLSRRVYDFTNYI  
LNLGIAEHGQEDLMSIQYFGRGLNDTEPDRYTPHCDG  
>comp8454\_c0\_seq4; 269 712 1365 LEN=2412; translated  
MGTCTKAKDRLQKAGTNKEMIEDAMDGLVKCSESELTISLSKASEELAFESKIRTNMAS  
MMENYTCVDTELNSTEPVRESRWRGARDRKGRDVQVLLDRPASKIMFVKDFISQAECDA  
MAEAAAPKLHKASVADGKGGSKFSEHRKAMQAGIKVDWEKEHEGNHIAVLSRRVYDFTNYI  
LNLGIAEHGQEDLMSIQYFGRGLNDTEPDRYTPHCDG  
>comp8454\_c0\_seq5; 346 712 1692 LEN=2151; translated  
MGTCTKAKDRLQKAGTNKEMIEDAMDGLVKCSESELTISLSKASEELAFESKIRTNMAS  
MMENYTCVDTELNSTEPVRESRWRGARDRKGRDVQVLLDRPASKIMFVKDFISQAECDA  
MAEAAAPKLHKASVADGKGGSKFSEHRKAMQAGIKVDWEKEHEGNHIAVLSRRVYDFTNYI  
LNLGIAEHGQEDLMSIQYFGRGLNDTEPDRYTPHCDGDCSGLPHKTGTRMATMVMYCTI  
PEVGGHTNFRNSGVHLKPKVGGAVFFSYIDPETKLMDKGFTEHSGCPVLVGEKKIVTQWIR  
LGVDDENPWDSFNLTGKIKVSEDDLSD  
>comp8454\_c0\_seq6; 419 150 1502 LEN=2149; translated  
MSRVHFGNTAFWQYHLQLIALVLISLTTAAANEERGIKIVNSSGSRVELYWIHPTTREGS  
LMSEPDIMNGADFLNSFVSHEFELREKPSSTGVCKSEDKTCSSAFFAVSENADQVVTV  
HEGLEIEFLDDQVRAQLKARGIMGTCTKAKDRLQKAGTNKEMIEDAMDGLVKCSESELT  
ISLSKASEELAFESKIRTNMAMMENYTCVDTELNSTEPVRESRWRGARDRKGRDVQVLL  
DRPASKIMFVKDFISQAECDAMAEAAAPKLHKASVADGKGGSKFSEHRKAMQAGIKVDWE  
KEHEGNHIAVLSRRVYDFTNYILNLGIAEHGQEDLMSIQYFGRGLNDTEPDRYTPHCDG  
CSGLPHKTGTRMATMVMYCTIPEVGGHTNFRNSGVHLKPKVGGAVFFSYIDPETKLMDKG  
FTEHSGCPVLVGEKKIVTQWIRLGVDDENPW  
>comp8454\_c0\_seq7; 380 150 1229 LEN=2142; translated  
MSRVHFGNTAFWQYHLQLIALVLISLTTAAANEERGIKIVNSSGSRVELYWIHPTTREGS  
LMSEPDIMNGADFLNSFVSHEFELREKPSSTGVCKSEDKTCSSAFFAVSENADQVVTV  
HEGLEIEFLDDQVRAQLKARGIMGTCTKAKDRLQKAGTNKEMIEDAMDGLVKCSESELT  
ISLSKASEELAFESKIRTNMAMMENYTCVDTELNSTEPVRESRWRGARDRKGRDVQVLL  
DRPASKIMFVKDFISQAECDAMAEAAAPKLHKASVADGKGGSKFSEHRKAMQAGIKVDWE  
KEHEGNHIAVLSRRVYDFTNYILNLGIAEHGQEDLMSIQYFGRGLNDTEPDRYTPHCDG  
>comp8454\_c0\_seq8; 380 150 1229 LEN=2276; translated  
MSRVHFGNTAFWQYHLQLIALVLISLTTAAANEERGIKIVNSSGSRVELYWIHPTTREGS  
LMSEPDIMNGADFLNSFVSHEFELREKPSSTGVCKSEDKTCSSAFFAVSENADQVVTV  
HEGLEIEFLDDQVRAQLKARGIMGTCTKAKDRLQKAGTNKEMIEDAMDGLVKCSESELT  
ISLSKASEELAFESKIRTNMAMMENYTCVDTELNSTEPVRESRWRGARDRKGRDVQVLL  
DRPASKIMFVKDFISQAECDAMAEAAAPKLHKASVADGKGGSKFSEHRKAMQAGIKVDWE  
KEHEGNHIAVLSRRVYDFTNYILNLGIAEHGQEDLMSIQYFGRGLNDTEPDRYTPHCDG  
>comp8455\_c0\_seq1; 952 163 3903 LEN=4076; translated  
MEALVCEILVKGGVDIDLHEISNGKERNRNLSTSSLLSLESWLGFSAEVDVGHEGFFD  
DGEHDCVMMEDAGPFDAEFYRSIENFLIEVWKPHDIPQHKFFGLGSNDGDFGLDGGTETT  
PSLYRSILSVRVTRFLRYWMDLNVGGGTGRAMAVDADEEGNGDYERRSTSLSFHLMKNC  
SFDIKATSALDSSKKLRFYPLIHALYQQIEQLPYLQSQIYAYSQSLSRVEGGNGLNRP  
GVVADPKSRLEQLQRGQRVKERLDQEFANHVLDLEFIVGEWYSLGSVDVRRQARAQLGSV  
WSGFELRATSGGGSSSLSGSGMRSENTSSSGVAMTLRVLHRILLGTAVTKKTGQQEKKQ  
LRKSYEHLHFQHLIPLHRPNMVLWRDQTCLLELYHEPLVKCIAILLRKKPELTGKVI  
EGLLAPDIWKNKAGNTPKLVLLLHEIDTYIGCLPGTKTHDGVTSSELGDSLPLALLRTL  
GSSMASENSRLAQRALPFVKNKTFVRLIEKNMKLTLLEILLPFLFRKEPSWNPTVRKMTY  
TVLTTLQELDPELFFVSIIGNRFFAKNDEHREQKRPLPGPPADSSSGPKANNNHAVRSAP  
RDVESSLPADYTIRESAMAGWTPPARSGNAIGTNDMVMATFPRNRRRGISGSNSNPPV  
SVTVGAPWAMKGPSTSSNPLGITGVAPWAMKGPREDAAKTTTMSGRKHPPMGKSVAPWA  
AKKNKLP

VPRALRSETTGKTAASNDAFGNGSLPKGDGANTEPAPCRVKAYMDMIKPPEEEQGISSW  
SKTQMEESPTLLPTLRFYDLVFGHTLGEFSFGCVRYARRIDRTTTRSHWSEYAVKVVSTE  
KIKEIGYEAPLQRELAVLRVLSHPCIAMISSFRFREGVYFVLEYASGGDLHTLLKTNGS  
LDHESTRFVIGEVTASALASIHEIGLGYFDLKPENIVITESRHVKLTDGFGCRPVTQAAKK  
MIRDSARNAFLQLRDGGWKKTTETKAKSFDMDDENDDDETKTDGFLQDYDPDLDLRIEGTT  
IYLPPEVALGSFPTLAADSWALGCVMYQCLTGRPP IPEADDR IAKQRIVAFDLGGARGES  
GSNGESILFAEPHASSTEEPARDLIRQLLRRFPHERPRMTRVADHFFFGESEGVDFALWR  
QPSPLPKAGDPRASSPPPLDAGWARRQLSKIWAPQPRAYDLSSSLSVSSEDPFRPVVRLP  
MRTSGDAPIREGDEGPFFFSRTSVLRGVRPKPGGIPMPPTREKGS GK

>comp8455\_c0\_seq2; 318 1 1030 LEN=1203; translated  
XAIVPFASSRAVAENDRLHSPPPLSIHQENIVITESRHVKLTDGFGCRPVTQAAKKMIR  
DSARNAFLQLRDGGWKKTTETKAKSFDMDDENDDDETKTDGFLQDYDPDLDLRIEGTTIYL  
PPEVALGSFPTLAADSWALGCVMYQCLTGRPP IPEADDR IAKQRIVAFDLGGARGESGSN  
GESILFAEPHASSTEEPARDLIRQLLRRFPHERPRMTRVADHFFFGESEGVDFALWRQPS  
PLPKAGDPRASSPPPLDAGWARRQLSKIWAPQPRAYDLSSSLSVSSEDPFRPVVRLPMRT  
SGDAPIREGDEGPFFFSRTSVLRGVRPKPGGIPMPPTREKGS GK

>comp8455\_c0\_seq3; 685 163 2979 LEN=3122; translated  
MEALVCEILVKGVDIDLHEISNGKERNRNLSTSSLLSLESWLGFSASEVDVGHEGFFD  
DGEHDCVMMEDAGPFDAEFYRSIENFLIEVWKPHDIPQHKFFGLGSNDGDFGLDGGTETT  
PSLYRSILSVRVTRFLRYWMDLNVGGGGTGRAMAVDADEEGNGDYERRSTSLSFHLMKNC  
SFDIKATSALDSSKLRFYPLIHALYQQIEQLPYLQSQIYAYSQSLSRVEGNGNGLNRPG  
VGVADPKSRLEQLQRGQVRKERLDQEFANHVLDLEFIVGEWYSLGSVDVRRQARAQLGSV  
WSGFELRATSGGGSSSLSGSGMRSENTSSSGVAMTLRVLHRILLGTAVTKKTGQQQEEKQ  
LRKSYEHLLFQHLIPLHRPNSMVLWRDQTCLLELYHEPLVKCIAILLRKKPELTGKVI EG  
LLAPDIWNKGAGNTPKLVLLHEIDTYIGCLPGTKTHDGVTSSELGDSL PALLRTLGS SM  
ASENSRLAQRALPFVKNKTFVRLIEKNMKLLEILLPFLFRKEPSWNPTVRKMTYTVLTT  
LQELDPLEFVSIENRFFAKNDEHREQKRPLPGPPADSSSGPKANNNHAVRSAPRDVESSL  
LPADYTI RSAMAGWTPPARSGNAIGTNDMVMATFPRNRRRGISGSNSNPPVSVTG VAPWA  
MKGPSGTSSNPLGITGVAPWAMKGPREDAAKTTTMSGRKHPPMGKSVAPWAAKKNLPM  
VPRALRSETTGKTAASNDAFGNGSLPKGDGANTEPAPCRVKAYMDMIKPPEEEQGISSW  
SKTQMEESPTLLPTLRFYDLVFGHTLGEFSFGCVRYARRIDRTTTRSHWSEYAVKVVSTE  
KIKEIGYEAPLQRELAVLRVLSHPCIAMISSFRFREGVYFVLEYASGGDLHTLLKTNGS  
LDHESTRFVIGEVTASALASIHEIGLGYFDLKP GKACS

>comp8457\_c0\_seq1; 354 401 2236 LEN=2343; translated  
MFAPEAHVNLNGPTSVTTSNMGLSLFKYGSTKCGESFFGTAYPRTTGRINVCVIGNDEYSF  
GSNKYNPKVYGLDVTDDVNDLATLLTSGRLSPENREIVKGAYLETLANGQSEEGPSREK  
EALINAQQLIALSPEFSTNSLVRKTNERRPSFVEKDPTGVTYKTVVHFMLAGGLDSSH SVL  
IPKSCSGTNEKGTTVDVQYSQVRGVLAYDKNELDMTITPGGEDQPCEEFVHPDLPFIKE  
LYDDGDLFFANTGVVNQNNMNRDNWDAVTKTRFLFGHSAMQKEVKKTDPYDTLP GSGILG  
RMSDLLHDKFNSGVNAIGIQGNSIALAGNPAIEVPTAVVGRDGPITFPKVTRSEEWFDIE  
GYAADLNGEQDAFSGIFGDTWSKVFTSGIDDGERLTEYFDKVSVDESI WATIEDEDKLV R  
SFNTLAKMIKTRTFRKADRDTFTIEFGGFDDHQNKTAGLKEKLP TVNRNLERLVKQLKLD  
GIWDNVVI VVSSEFGRTMSPNSNLGADHWGGNYFILGGGLRGGRVLGKYPHDITSESPL  
NASRNTRSRMLMPTLAWDSVWNGI VEFADGFGSKEITEEDLNYVIPNRNNCINPVEGQGD  
VPHLTKEDIFL

>comp8457\_c0\_seq2; 1417 340 6680 LEN=6787; translated  
MPKPEIQAAENA EKVCTYDYTLVQRVGGTTHNGLPIKILRQAGTVDGTVD FII GNTWKTN  
SPNDSVDAIYAVLNDEDDGSKSCFADTKVESRKSIDSSLQAYCSSAGVALVRLFITDATH  
FANEKDVANVPQECLA EVEDGVGINKNAPGVEYMAILQCNP TCGNNPFVNPDPFEIDVT  
KVPTLAPVPIPTPAPVPLPTLAPIPGDVVM TACPKIADDPVLV LGSSENWSDGTIAEIDVFQ  
GQDVLCTLVEMTIIETSPNGGTTYSNLKPIGRSYNGNDWEAAPGDFATLAFDCAAGSKCR  
VALPTSPQGRSYVLKSYDYGHDLTEEDKTARFLERATFGPNKKEIEAFTSPNEWIAEQFT  
MPRTSHRRFFRERATDWFYPYTRRLGLVHTGPCTSGSRYRNFAMLRNDHKTYLEVRKSPLD  
NNKLLLTAYETVDGVKGQVRTVVDGPMQYGTFKNGELKDPLVTIPI DRQGRFHHIGGIR  
PIEGVGGFRTL SVPTGKGGKTAIQDIFFGGESGNPRVQFDDAHLSHLNKDIVTLPK KKYE  
EVMTQYYYEDISNVLQLTSDVSGSYCNSVKSKVTGFDFPAEVAIASTNVSGNTRYWLHSP  
TFDLVRNDMDAPLFDGGKNAVDLTANPPADIVDDNIRD SLKVKCSNVAKTFLNEESCRLT  
PEDACSYDQADIDGKMMLVCGSPDEVAGVHGLEAGTRGMGGFTMKSGVKNVEPSGAYD  
EQKNTVWAEIALYSKDQLAQRMAYALNQIFVVADETGQKDAENYLSYYDIFVRNAFGNY  
FDILKEVTRHPLMSKMLTYINGQSTAFAYIKDGILQQADENYAREIMQLFTIGLVERNND

GTLKLDGDGNEISTYSNFVISEYAKVYLGFYAQDKRGNIEANSANEVDPLQIFPHYKDHFP  
KLGNSMYVGDGYPLCSDLPEQHFLKKGAMYRILGAKSNADFAYDEYWIQGKSPQRSLN  
FSSTLASIVCNKNAAGVCEPKNTVVLQNDVSCIEGIECEIFEPRITIEVAPGLWYEYIRPPC  
VNHAIFYNDGKSIKLYHGKNDGKGQILCGNPSLLDATTVCCANDGKNRVNSRVELFSGER  
VSFETAERRCELQGLQLCDLVPKMQAFGCGADGAEGPYACDGERGFQWLTSPCSMSAKLS  
PEGNAVAVVHQPSAATGDKADATYSEVSTNTKSFFRADWRPSPDFPRLGDFLDDFVANCES  
TPDCFIDNADGNCQCKVSVVEALLFENESQLTSVDDLLSVATIGAFVPEDASFNPTSIVG  
INTYPSGELTKSTIFEVTDSIGRTHYRKNLESITELGNASLMFRTPVTFWSIPDVTRRDG  
EYELDATLNHYFFNQNLPPFLAWKLAQRFGISNPSPRYINEIATAFKTGTYGDFGSKKYG  
CLEATVAAIILDRESQDHILDADPIQGQLQGPFMRIMKAMRASEYTTSDKFPLVRFQRDL  
IDTIGEEPHHIQTVFSFFGPDYISPGKTLHSTSSMLISTFNILCSNIYRFLCKXGRARD  
ANMFAPAEHVLNGPSTVTTSNGLSLFKYGSTKCGESFFGTAYPTRTGRINVCVIGNDEY  
SFGSNKYNPKVYGLDVTDDVVNDLATLLTSGRLSPENREIVKGAYLETLANGQSEEGPSR  
EKEALINAQQLIALSPEFSTNSLVRKTNERRPSFVEKDPTGVTYKTVVHFMLAGGLDSSH  
VLIKSCSGTNEKGTTVDVQYSQVRGVLAYDKNELDMTITPGGEDQPCEEFVAVHPDLPI  
KELYDDGDLFFANTGVVNQNNMNRDNWDAVTKTRLFGHSAMQKEVKKTDPYDTLPGSGI  
LGRMSDLLHDKFNQSVNAIGIQGNSIALAGNPAIEVPTAVVGRDGPITFPKVTRSEEFW  
IEGYAADLNGEQDAFSGIFGDTWSKVFTSGIDDGERLTEYFDKVSVDSEIWIATIEDEDK  
LRSFNTLAKMIKTRTRFRKADRDTFTIEFGGFDDHQNKTAGLKEKLPVNRNLERLVKQLK  
LDGIWNVVIVVSSEFGRTMSPNSNLGADHWGGNYFILGGGLRGRVVLGKYPHDITSES  
PLNASRNRRLMPTLAWDSVWNGIVEWFADGFSGKEITEEDLNYVIPNRNNCINPVEGQ  
GDVPHLTKEDIFL

>comp8457\_c0\_seq3; 391 144 2147 LEN=2254; translated  
MKAMRASEYTTSDKFPLVRFQRDLIDTIGEEPHHIQTVFSFFGPDYISPGRARDANMFAP  
EAHVLNGPSTVTTSNGLSLFKYGSTKCGESFFGTAYPTRTGRINVCVIGNDEYSFGSNK  
YNPKVYGLDVTDDVVNDLATLLTSGRLSPENREIVKGAYLETLANGQSEEGPSREKEALI  
NAQQLIALSPEFSTNSLVRKTNERRPSFVEKDPTGVTYKTVVHFMLAGGLDSSHVLIKSC  
CSGTNEKGTTVDVQYSQVRGVLAYDKNELDMTITPGGEDQPCEEFVAVHPDLPIKELYDD  
GDLFFANTGVVNQNNMNRDNWDAVTKTRLFGHSAMQKEVKKTDPYDTLPGSGILGRMS  
LLHDKFNQSVNAIGIQGNSIALAGNPAIEVPTAVVGRDGPITFPKVTRSEEFWIEGYAA  
DLNGEQDAFSGIFGDTWSKVFTSGIDDGERLTEYFDKVSVDSEIWIATIEDEDKLRSFNT  
LAKMIKTRTRFRKADRDTFTIEFGGFDDHQNKTAGLKEKLPVNRNLERLVKQLKLDGIW  
NVVIVVSSEFGRTMSPNSNLGADHWGGNYFILGGGLRGRVVLGKYPHDITSESPLNASR  
NTRRLMPTLAWDSVWNGIVEWFADGFSGKEITEEDLNYVIPNRNNCINPVEGQGDVPHL  
TKEDIFL

>comp8457\_c0\_seq4; 1499 340 6591 LEN=6698; translated  
MPKPEIQAAENA EKVCTYDYTLVQRVGGTTHNGLPIKILRQAGTVDGTVDFIIGNTWKTN  
SPNDSVDAIYAVLNDEDDGSKSCFADTKVESRKSIDSSLQAYCSSAGVALVRLFITDATH  
FANEKDVANVPQECLA EVEDGVGINKNAPGVEYMAILQCNPTCGNPFVVPNDPFEIDVT  
KVPTLAPVPIPTPAPVPLPTLAPIPGDVVMTACPKIADDPVLVLSSENWSDGTIAEIDVFQ  
GQDVLCTLVEMTIE TSPNGGTTTYSNLKPIGRSYNGNDWEAAPGDFATLAFDCAAGSKCR  
VALPTPPQGRSYVLKSYDYGHDLTEEDKTARFLERATFGPNKKEIEAFTSPNEWIAEQFT  
MPRTSHRRFFRERATDWFPPYTRRLGLVHTGPCTSGSRYRNFAMLRNDHKTYLEVRKSP  
LDNNKLIILTAYETVDGVKGQVTRTVVDGPMQYGTFKGNELKDPVLTIPIDRQGRFHI  
GGIRPIEGVGRFTLSVPTGKGGKTAIQDIFFGGESGNPRVQFDDAHLSHLNKDIVTL  
PKKKYE EVMTQYYIEDISNVLQLTSDVSGSYCNSVKSVTGFDFPAEVAIASTNVSGN  
TRYWLHSP TFDLVRNDMDAPLFDGGKNAVDLTANPPADIVDDNIRDSLKVKCSNVAKT  
FLNEESCR LTPEDACSYDQADIDGKGMMLVCGSPDEVAGVHGLEAGTRGMGGFTMKSGV  
KNVEPSGAYD EQKNTVWAEIALYSKDQLAQRMAIALNQIFVVADETGQKDAEENYLSY  
YDIFVRNAFGNYFDILKEVTRHPLMSKMLTYINGQSTAFAYIKDGILQQADENYAREIM  
QLFTIGLVERNNDGTLKLDGDGNEISTYSNFVISEYAKVYLGFYAQDKRGNIEANSANE  
VDPLQIFPHYKDHFPKLGNSMYVGDGYPLCSDLPEQHFLKKGAMYRILGAKSNADFAY  
DEYWIQGKSPQRSLNFSSTLASIVCNKNAAGVCEPKNTVVLQNDVSCIEGIECEIFE  
PRITIEVAPGLWYEYIRPPCVNHAIFYNDGKSIKLYHGKNDGKGQILCGNPSLLDATT  
VCCANDGKNRVNSRVELFSGERVSFETAERRCELQGLQLCDLVPKMQAFGCGADGA  
EGPYACDGERGFQWLTSPCSMSAKLSPEGNAVAVVHQPSAATGDKADATYSEVSTNT  
KSFFRADWRPSPDFPRLGDFLDDFVANCESTPDCFIDNADGNCQCKVSVVEALLFEN  
ESQLTSVDDLLSVATIGAFVPEDASFNPTSIVGINTYPSGELTKSTIFEVTDSIGRTH  
YRKNLESITELGNASLMFRTPVTFWSIPDVTRRDGEYELDATLNHYFFNQNLPPFLA  
WKLAQRFGISNPSPRYINEIATAFKTGTYGDFGSKKYGCLEATVAAIILDRESQDHIL  
DADPIQGQLQGPFMRIMKAMRASEYTTSDKFPLVRFQRDL

IDTIGEEPHHIQTVFSFFGPDYISPGRARDANMFAPFAHVLNGP'TSVTT'SNGMLSLFKYG  
STKCGESFFGTAYP'RTTRGRINVCVIGNDEYSFGSNKYNPKVYGLD'TVDDV'VNDL'ATLLTS  
GRLSPENREIVKGAYLETLANGQSEEGPSREKEALINAQQLIALSPEFSTNSLVRKTNER  
RPSFVEKDPTGVTYKTVVHFMLAGGLDSSHVLI'PKSCSGTNEKGT'TVDVQYSQVRGVLAY  
DKNELDMTITPGGEDQPC'EEFAVHPDL'PFIKELYDDGDLLFFANTGVVNQNNMNRDNWDA  
VTKTR'LF'GHSAMQKEVKKTD'PYD'TLPGSGILGRMSDLLHDKFNSGVNAIGIQGNSIALAG  
NPAIEVPTAVVGRDGPIT'FPKVTRSEEFWDIEGYAADLNGEQDAFSGIFGDTWSKVFTSG  
IDDGERL'TEYFDKVS'VDESIWATIEDEDKLVRSFNTLAKMIKTR'TFRKADRDTFTIEFGG  
FDHHQNTKAGLKEKLP'TVNRNLERL'VKQLKLDGIW'DNVVIVVSSEFGRTMSPNSNLGADH  
GWGGNYFILGGGLRGRV'L'GKYPHDITSE'SPLNASRNTSR'LMP'TLAWDSVWNGIV'EWFA  
DGFSGKEITEEDLN'YVIPNRN'NCINPVEGQGDVPHLTKEDIFL

>comp8459\_c0\_seq1; 145 319 546 LEN=851; translated  
MGCNSSKHGLSHVDDSVHVMIKHDKKLSQKHGVPLQGYKERAHPLLKPKTVPAAEGAAA  
SGAPKSNGGPVATEE

>comp8460\_c0\_seq1; 327 437 1288 LEN=1288; translated  
MIAVAQHNEIESVGTTHGEIADNPSVSAVSARLVPQTELKECGERLRS'GGLVAFPTETVY  
GLGCNALDPEAITKVFEAKERPLTDPLITHVTDPNIAFGLWDAVDKAKNTASPEAEALRA  
LCECFWPGPLTLVARA'APKVPPILMAGTGFCA'CRSPGHPLSIALIDAAGVPIAAPSANKF  
GHVSPTRSSHWDDLKHEDVWIV'EEEEPSRGHETEADAKAETN'CKVGV'ESSVAKVEMIGE  
TKTTGRV'TLLRQGA'VSLKDIVDCLK'KAGLA'EVFEV'VAMTNVAPG

>comp8460\_c0\_seq2; 424 437 1708 LEN=1976; translated  
MIAVAQHNEIESVGTTHGEIADNPSVSAVSARLVPQTELKECGERLRS'GGLVAFPTETVY  
GLGCNALDPEAITKVFEAKERPLTDPLITHVTDPNIAFGLWDAVDKAKNTASPEAEALRA  
LCECFWPGPLTLVARA'APKVPPILMAGTGFCA'CRSPGHPLSIALIDAAGVPIAAPSANKF  
GHVSPTRSSHWDDLKHEDVWIV'EEEEPSRGHETEADAKAETN'CKVGV'ESSVAKVEMIGE  
TKTTGRV'TLLRQGA'VSLKDIVDCLK'KAGLA'EVFEV'VAMTKKATKDTVANVAPGQ'TIRHYS  
PDIPSFILSLSLCEALVEPSS'EDRELLGRSVLIDFG'GRLRAWKPFSLAYRDLSPTRDSS  
EATQGVFEALRWAERIEGASQILFPEISGEAEQDNALALAL'KDRLTRAASGVVVDLSL'GEG  
MNR

>comp8461\_c0\_seq1; 509 261 2033 LEN=2882; translated  
MSSQLTGRRAIVNRNKN'TTVASSPTT'NQNSNSVDTSKKNYQPANKQOAKLQMRIWVLA  
ILASLMFGLAVFFQATSGSASSIFSQWGRSHSASSK'KKTGNCEHRTYPDRRYYGLNDRP  
LPDFLDTEYVYGELPII'IPKVESSKLCVDQTEWYDPHNTENGKNNNDAITPPALPFADG  
TNPSILKLVNPRIDPAIRDF'FQAGDSKSSNDPSTAPYYLATICMTNSQCSWNVSP'EEETI  
GFRLSTLTEPATV'RTVLLV'LNQKFETLREATIHTRIDAHFGGRRNKKAPIVKNQLETYAL  
DDARLF'THKGQI'WVS'YREGKLF'GYEKQV'LNRLH'FGLEDGPRDDT'TKLLRASADEQQLT'VT  
LLASEVETLCCGRN'MALIDNVHTNKLQAL'TWVDPVTVVDVDEKTDHQEGEKAKGNRRA  
ASDKKAQNI'ISAAVAHAMSSHRRLAQKDEKKQ'KKKSHMGTNGFMVYLPDDKEYLGI'GHV  
HRPPDRKQNDHARFGH'HYTHVFF'TISD'PPFQLKRLSPE'LLLP'CHKNPYDGEI'IQFWSGL  
ELKNESTLAVAYGINDCEGA'ALELDSVVEGHLRHVPEGKEV'VDFMMP'LK

>comp8462\_c0\_seq1; 348 92 748 LEN=1057; translated  
MKFCLAATLAALASQ'GASAFAPVSKPAVASSPATALGALPSIWSTLGSLEGPSVCWGPEG  
V'IIGHEEIEIKEYDNFTMFLAALKQNNLENK'KAIGPYTLLAPTDSAVQOYKGVLD'EEETL  
SYHII'LDLYSDEFDGEFETLSGHKVT'LRYEFRKSYADNVLVGHV'GQTYGTPYPLNVQCD  
NGLIHAIPDVLTPNWN'PPGAEDQLT'TRRPDMDL'KNGIL

>comp8464\_c0\_seq1; 438 189 1220 LEN=2201; translated  
MSSSSGAI'PSGFPSSFP'SGSPSSVVANITESFIEAEKA'EKDHEFN'AEAAFTLNLTIIAC  
LLLAYAIKKFQIYSLPESAGALLVGVIVGGMARLAVGVQ'RLDLFEFQPEVFFFVLLPPII  
FEAGYSLDRKGFFDNIGAITLFAIFGTFLSTFVVG'YLCFIAAQ'GLVAIDDENPMEALIF  
GALISSVDPVATLSIMGNEDLNVDPLLYSLVFGESV'LNDAVAISL'FKTFFRFYNPEISTP  
DVSYVAISLSFIFVFGCSILVGVGIGLCASWLFKHT'ELRMYPNLETSLLMCF'CYLCYAVA  
EAIGLSGIMALFSEGVCLSHYNAYNLSMVAHVASEQIFSTFAT

>comp8464\_c0\_seq2; 596 189 2030 LEN=2103; translated  
MSSSSGAI'PSGFPSSFP'SGSPSSVVANITESFIEAEKA'EKDHEFN'AEAAFTLNLTIIAC  
LLLAYAIKKFQIYSLPESAGALLVGVIVGGMARLAVGVQ'RLDLFEFQPEVFFFVLLPPII  
FEAGYSLDRKGFFDNIGAITLFAIFGTFLSTFVVG'YLCFIAAQ'GLVAIDDENPMEALIF  
GALISSVDPVATLSIMGNEDLNVDPLLYSLVFGESV'LNDAVAISL'FKTFFRFYNPEISTP  
DVSYVAISLSFIFVFGCSILVGVGIGLCASWLFKHT'ELRMYPNLETSLLMCF'CYLCYAVA  
EAIGLSGIMALFSEGVCLSHYNAYNLSMVAHVASEQIFSTFATLTETIVFIYMGMEVFTG  
GFQNFSLSFLIVAF'TSCLVGRAINIFPLSFLANFCRERSNKITGKMQVVLW'FAGLRGAIA

FALSENMPGPHQDVYKTTTLTICIIITTVFCGGFTERMLTVFGMREEPTPKLGYGTDPEDD  
GLNLNSLTYKPPVAQPRETPMMQRKRRIADGIKGVWYRFDDRILKKHFGGERELSTSHKN  
RTTNDYSHDSFPEKATGRDGSNWPSPSRGNVEMRQMNGTRMGVSSNGNNNSTEMVSLTA  
SFDVELENDDFIA

>comp8465\_c0\_seq1; 574 40 1515 LEN=1644; translated  
MVETLKEGLLKTDMGIVAHYYMDVELQGILQSLKNSHPDLKHRIGIADSLKMGDQAVDMC  
RDHGVTSVVCLGVDFMSESVQAILGKNGFADIPVYRATAKHIGCSLAESAETEYRQWGLQ  
KESKKALDEGCVPLHVIYINTSLETKAVSSSIVPTITCTSSNVVQTMLQAASEIPNLRVL  
YGPDTYMGQNLERLFEVIEESSDWSDERIKSELHPGHTNASLKSCLKDNLRVFPQGNVH  
HMFQNVQVTEVTRTYENEPDITYITAHLEVPGEMFEIGMRKSLNDEGVVSTADILNFI  
SRKVQDAANTATSDKAKDRKLRFILGTEAGMVTSSIVEKVQEILGDASSNSEGRRVEAEI  
IFPVSSEAVMSVEDCETNSINSENELSIVPGVAGGEGCSTAGGCATCFPMKMNVDALQDII  
NYVDEKRQGDERSRGIKHLPPARLQGKFIGMEATELGTEAILFMRKFMLNQSMPPEEL  
VTKVTNFEASN

>comp8465\_c0\_seq2; 664 331 2196 LEN=2325; translated  
MQQVGRRFSSACSSNNNIGICRVGSFCSVPSSPSQQLKKQQTSMTRTKLARLTQQVVA  
TAATQTRSKSSMAMNYDQSGNLATATTANATFDQSVREPFPSIVLGPEKSIIEPKGPF  
FAEAQAQFLDPDMDMVETLKEGLLKTDMGIVAHYYMDVELQGILQSLKNSHPDLKHRIGI  
ADSLKMGDQAVDMCRDHGVTSVVCLGVDFMSESVQAILGKNGFADIPVYRATAKHIGCS  
LAESAETEYRQWGLQKESKKALDEGCVPLHVIYINTSLETKAVSSSIVPTITCTSSNVV  
QTMLQAASEIPNLRVLYGPDTYMGQNLERLFEVIEESSDWSDERIKSELHPGHTNASLKS  
CLKDNLRVFPQGNVHMFQNVQVTEVTRTYENEPDITYITAHLEVPGEMFEIGMRKSLN  
DEGVVSTADILNFI SRKVQDAANTATSDKAKDRKLRFILGTEAGMVTSSIVEKVQEIL  
GDASSNSEGRRVEAEIIFPVSSEAVMSVEDCETNSINSENELSIVPGVAGGEGCSTAGG  
CATCFPMKMNVDALQDII NYVDEKRQGDERSRGIKHLPPARLQGKFIGMEATELGTEA  
ILFMRKFMLNQSMPPEELVTKVTNFEASN

>comp8465\_c0\_seq3; 157 331 744 LEN=941; translated  
MQQVGRRFSSACSSNNNIGICRVGSFCSVPSSPSQQLKKQQTSMTRTKLARLTQQVVA  
TAATQTRSKSSMAMNYDQSGNLATATTANATFDQSVREPFPSIVLGPEKSIIEPKGPF  
FAEAQAQVSHISSVYEKTLKC

>comp8466\_c0\_seq1; 292 249 1669 LEN=2000; translated  
MFPSFITSVFFGENASQRGTRSSEPI TEKTTVRGTIHKEGIESYAFSGMQGWRVTMEDAH  
MVHTSIPVQGRSEPLGSGHALFGVMDGHGGDFTSDYAAKNFLRLFSVSPRLRKYADMSAS  
DQSSVPGIECLRPALTETFGRLDAEIRKQONLRNEQRFGLGQQQQQQKEAAPLSSGHSRV  
RYERSGSTCCVVLVTPSHILCANAGDSRAILRRAGRVLP LSFHDKPNAPELERIHNAGG  
FVRCRVDGLAVSRGLGDFTYKGNEMLPVDQKVI PNPEFVCYPRSKNDEFMVLACDGI  
WDVANNEQCGSFVQSLLEDEGEPDLGLICEEAIDTCLDKNSRDNMTIGLVSFSGCKLQ  
RGG LGLNNAIWQRRTARQARSLOQTAKKAATRAASNVLIVETAAASPSSPAHLAALFL  
NRA GGLPGAPGGGSRTHQRVSRSGIEPNRIESDGT EWNGTMNQFMASLLHKETIT

>comp8467\_c0\_seq1; 280 161 868 LEN=936; translated  
MGDSAYSFSLTTFSTRTGKLLQIEYALNAVANGRTSLGICAKDGVVIATDKKLTSELV  
DIS DVHKVELLTPSCGVCYAGVGPDFRVLVHQARKSSQVYLRQYGEVQPVSQLVKRSAG  
VMQE YTQRGGVRPFGISLLIGGIDGDGTPRLYQVDP SGT YFSWKATAIGKNHVNAK  
NFLEKRYT EDMLEDAIHTALLTLREGFEGEMNSENI EVGVVRNGKFSVLTPEQIQDYL  
DEAN

>comp8468\_c0\_seq1; 536 293 2209 LEN=2740; translated  
MGLFLWLSDLHLDPLYGTTAAASHQSGENCRLAGNETLLHYPLGRVGCDSPPSLDSSLR  
SAAGNAKIYHTGINGSEENRYDRGDKSSIEFIVVTGDFSRHSMEKVRGRDPIAFAESVLS  
SCIGSIASAFPGVPIVPVLGNNDLVPDYLDTTTTIATTDTDYNSTSGEVDDENYLPNS  
NPMLVMVQNGFQESFLSDEEIQTFARGGYFSRVIETASDPPSSILILSLNTIIYSVKHEP  
HEPTLVPESDGEETGDDDDPLGQFDWIESQLEAAAANHSNISAVYVMVGHIAPIGSYRHS  
DLWQQRYIDRYFSILKAYTSRSATTNADSHPPPILGNLYGHVHTEEFRLTYQDEDDDD  
ENSSNSTPALVPLHVAASLTPIYGANPSYRIVEFDNGSGTLLDYTTYLLDLDRFPVES  
PSEGDDSPSAKNVSWTKLPGFAETYGVPDL SADS LERILERLEGE LQASIRAEKAVELG  
REFAAHTKSSRLWDIFLKRQMVYSSTPDDGD DENNGEIDTMIDWLCTLRVSKESYTL  
C VEGKQSAVAAVTTTAPSGVLLFLFAGMAIAISVVLVVLVLFAGKQFRTRPKRRHYRRPSQ  
GELPTDGVVVVPTITGAAAGDPPEVNAGTIGAIERELT

>comp8469\_c0\_seq1; 235 197 784 LEN=1025; translated  
MSLQCLALLGTRNEPLYICASDAVDNSDTEPAFQHEDDPFGFFEDAKTCEQDSTTSGVVK  
RPASVRHEMMIHA AIDRIEDMLGSHRKVSWKRFQRGSHWIGQICPMEEYDIYGYVTSSDV  
KIIALLERDGIIPLKKRKEVDIKIMFTEIHNCYVKHTLNPFSKIKGKIEPPCSEFEASVH

DAMNQYNSTINGVAI

>comp8470\_c0\_seq1; 352 113 1607 LEN=1827; translated  
MSNHYGGGSHRGGGSKQNNSEDPDDAEQKAAERNLIRRCVDFHAPAVMDISNRLYHKA  
CRSAHVNRHYSNHLQPHSAYLRMLGMPISVSACNPSRAFDIFGPRDTREEFYANNVPYW  
TPGRRLLTGNQEGEFTLWDGITFGFELIMSAHDVSRSMASHNRNYLLTSDSGGNIKY  
WSPSIAPVQSIDSNGQAIHALSFSPSDTKFVSCGDDSKVRVWDWATHSEERVLEGHGWD  
VKTTQWHPRSSVIASGSKDNLVKLWDPRAGTCLSTLYGHKNTVTKVAWNNNGNWLVTASR  
DQLIKLYDIRAMKELVSLKGGHKEVTSLAWHPFHESVSLASGAMDGTLFFWNLGAKGSEEP  
AARVPYAHDMAIWDLQWHPAGHMLASGSNDRQTKFWARNRLGSTAGLQDTIDDKKEELQT  
AEIELGNHVGIVIGRRGATIISMQRATGTKMYVDQVRRVLLIQGTEKQIDTVQKRVGALL  
DRVTKDEGRDQHHGMMM

>comp8471\_c0\_seq1; 114 252 572 LEN=1175; translated  
MIRSRNVSGVSPVGGSFSGGTSSQEANRLSNNELQSAYYNNMACNSRLGKVEEAVVNLEKA  
FQSGFDKYDTVRGPDLDPKQSRDYQKMMDTYDPPGFNPFGLFKK

>comp8471\_c0\_seq2; 231 221 841 LEN=1444; translated  
MTSLIRKGAFLIFSTVVVLSLSRSDAFSILSASRAAAAATHRSAESSTTSIAMTNEIDIPD  
PATFREAEVLALLLQEGRHDDAIIAFQKGMKLPGRNPD MIRSRNVSGVSPVGGSFSGGT  
SSQEANRLSNNELQSAYYNNMACNSRLGKVEEAVVNLEKAFQSGFDKYDTVRGPDLDPK  
QSRDYQKMMDTYDPPGFNPFGLFKK

>comp8472\_c0\_seq1; 714 243 1559 LEN=1657; translated  
MNNDGKLNAGNATGTGSAATGKKAVHVWKWAGKTIALGTFPSQEADEKCARAKALTRA  
WRSTMRPKPSREWVMQELERLGVVVSGRLGRKAGEEEEEAPLSKKSSAVPSSSALQNRKD  
SLGMGFADLDNLQQRRTSSSLGSLMLNDDMNRSSIGSIGPSLGLDAGNNGGEPHRPYV  
GGGPGAAFEAARADHYAQKREEQQRASGLGLGGMGGGPNMPQMGLSVNPNQHYEMLKL  
HHMNLLEIQUETTLMMNLYQQQQQLQQQQQLQQHQTNDNAGNSGGNDHMPLMVQQQSGGN  
GGGMDGMYNSGGMNQGGSMGNNMGMGSHQMMQNPGGSNPNQSSADRSGNGPSGAGMS  
SADKGVQDQLLKSQEEQKALEDQLRKLKDDIAKSKKEAKQLKKLASEKSDDDGDTKGVKR  
KVKDEGKNSGAKKSKNDE

>comp8472\_c0\_seq2; 632 629 1753 LEN=1851; translated  
MRPKPSREWVMQELERLGVVVSGRLGRKAGEEEEEAPLSKKSSAVPSSSALQNRKDSLGM  
GFADLDNLQQRRTSSSLGSLMLNDDMNRSSIGSIGPSLGLDAGNNGGEPHRPYVGGGP  
GAAFEAARADHYAQKREEQQRASGLGLGGMGGGPNMPQMGLSVNPNQHYEMLKLHMMN  
LLNEIQUETTLMMNLYQQQQQLQQQQQLQQHQTNDNAGNSGGNDHMPLMVQQQSGGN  
DGMYSNGGMNQGGSMMGNNMGMGSHQMMQNPGGSNPNQSSADRSGNGPSGAGMSADK  
GVQDQLLKSQEEQKALEDQLRKLKDDIAKSKKEAKQLKKLASEKSDDDGDTKGVKRKVKD  
EGKNSGAKKSKNDE

>comp8475\_c0\_seq1; 461 40 1737 LEN=1852; translated  
MSNWMTSGSARLAKQNSSFSRRARQRAAVIAPEAVILQERVPASRLPRKCLRQNEAKKR  
YSSGNPIARRGVVVISGSANIGDQRLTLDQLESDCPSDVMVSKNYLECCAQINRQIPQR  
KRIRDAGARYRRLYSGPVRNIGQNLQSKDVCNSNQRTPPRGHQTSAIQYVGNQYSHHNI  
NTMQGIQNDNSAQDTSNNLLMPHFPAHTADGIYSNNPVQEASDQLVTRKFSGNGIMSPKH  
ISQSSSIENCRVDNFFTHRQLQMDWEHRPEMDESLTSHPCQALFSQERKPKCIGFKRFQ  
PAIDDKDIFLHSEGRDGTGFLRHDEIIGYNGLDDFNVSNNIISDSQRSVEGKGIPLYQRP  
ESKLDLFLEATEANMVCVWDEYDNAISEERKLTSKLKLDTVASQNHLLARRMSDTTNELIS  
LRGPSLRSHGDVGIRRFKRRRKKISYEESYESSSQRQIQPREMPLGRGTRTFSDSHDHQL  
KSSPRALRFFNDENEVDIIGTPLSALKATERELMFDTNEIEHRKKLSVRMETKGHRSVQA  
TNTDGNKLIKHRCSHHHLRPIQIT

>comp8475\_c0\_seq2; 426 132 1688 LEN=1803; translated  
MMHLIALFTAkkrySSGNPIARRGVVVISGSANIGDQRLTLDQLESDCPSDVMVSKNYLE  
CCAQINRQIPQRKRIRDAGARYRRLYSGPVRNIGQNLQSKDVCNSNQRTPPRGHQTSAI  
IQYVGNQYSHHNIINTMQGIQNDNSAQDTSNNLLMPHFPAHTADGIYSNNPVQEASDQLV  
TRKFSGNGIMSPKHISQSSSIENCRVDNFFTHRQLQMDWEHRPEMDESLTSHPCQALFSQ  
ERKPKCIGFKRFQNPaidDKDIFLHSEGRDGTGFLRHDEIIGYNGLDDFNVSNNIISDSQ  
RSVEGKGIPLYQRPESKLDLFLEATEANMVCVWDEYDNAISEERKLTSKLKLDTVASQNH  
LLARRMSDTTNELISLRGPSLRSHGDVGIRRFKRRRKKISYEESYESSSQRQIQPREMPLGR  
GTRTFSDSHDHQLKSSPRALRFFNDENEVDIIGTPLSALKATERELMFDTNEIEHRKKLS  
VRMETKGHRSVQATNTDGNKLIKHRCSHHHLRPIQIT

>comp8477\_c0\_seq1; 456 284 1822 LEN=2247; translated  
MFKIQPFHNNCNGSEKPMSSSQELQVFPDPETVDNLLTRDMDKLSFKARNDIYEEIHGV  
SSLAPEETPALIERSLLAMSSEIDRIKHDIYVAYIEATRGTYNQYVHDMELRLRFLRCELF

NVLKAAVRMMKYLDLTHELFGKSALTRPIELRDLGKLEMEMLRVGDAQPMPFRDRSGRRM  
MVALNNFGLQYPLEVRLRVTLYLHWALGVDEESQKKGLIGIICWPSSKEALSPDKFSVLY  
KPRELPRHIQSSRMFECLPLRIASIHVCLPDKPIYHMMRSGIALSMRAFSSRLKFHCGD  
SIEVQYHLHGYGIPVDQIPITDTGNIKTKNIMQWIRVRKFLESSKNNEAITSSEWSENV  
DAMYLAIIDCPNLNDVIFRGKHAACLSHPGNVMFRGLIEAKYDEHNNATTIDEKVQLTWDIV  
REVESKNGRFLVWDNNGCWREITNRNRTRTKVAGALKDHKRRLKARQNVAMNYSSTYEFER  
QDNENKKRKVDVKHQTSDCCLNLPFVNSDKR

>comp8477\_c0\_seq2; 254 284 922 LEN=1030; translated  
MFKIQPFHNNCNGSEKPMSSSGQELQVPFDPETVDNLLTRDMDKLSFKARNDIYEEIHGV  
SSLAPEETPALIERSLLAMSSEIDRIKHDIYVAYIEATRGTYNQYVHDMELRLRFLRCELF  
NVLKAAVRMMKYLDLTHELFGKSALTRPIELRDLGKLEMEMLRVGDAQPMPFRDRSGRRM  
MVALNNFGLQYPLEVRCILARSAKFLNIDST

>comp8477\_c0\_seq3; 455 284 2001 LEN=2426; translated  
MFKIQPFHNNCNGSEKPMSSSGQELQVPFDPETVDNLLTRDMDKLSFKARNDIYEEIHGV  
SSLAPEETPALIERSLLAMSSEIDRIKHDIYVAYIEATRGTYNQYVHDMELRLRFLRCELF  
NVLKAAVRMMKYLDLTHELFGKSALTRPIELRDLGKLEMEMLRVGDAQPMPFRDRSGRRM  
MVALNNFGLQYPLEVRLRVTLYLHWALGVDEESQKKGLIGIICWPSSKEALSPDKFSVLY  
KPRELPRHIQSSRMFECLPLRIASIHVCLPDKPIYHMMRSGIALSMRAFSSRLKFHCGK  
IQFVNENPVXDFVLSPKAKPIDDYRNIKTARSQFYFLLLPNLAIENYKXHVQIATIGD  
SIEVQYHLHGYGIPVDQIPITDTGNIKTKNIMQWIRVRKFLESSKNNEAITSSEWSENV  
DAMYLAIIDCPNLNDVIFRGKHAACLSHPGNVMFRGLIEAKYDEHNNATTIDEKVQLTWDIV  
REVESKNGRFLVWDNNGCWREITNRNRTRTKVAGALKDHKRRLKARQNVAMNYSSTYEFER  
QDNENKKRKVDVKHQTSDCCLNLPFVNSDKR

>comp8478\_c0\_seq1; 652 321 2393 LEN=2632; translated  
MSPRNFFTRKADRRQSKNLQEPYDRITVTTQSTEQYYGGHNSTSDVDKPSKTDGTGTSFAS  
STASTSSGSDSIASSEASAKGLDPDDLRLHIKGPGRYRNRREPEPKLVQAQIHKSCN  
NDNDDNRNKEKNPVRLSIEVVLDEHRKMKARDQSEAGNRGASRRQSSHGKGMTKDEET  
ALARYTHSPKQDTPSPGFAMGRLKMLNCFMNEEKQONDADCFGSAFPGQPDYDFISN  
DADTYGEGNSLAASVVAEASPSSSKRSTRRRWRRLKKNPRKNNADEIVTGGTKADEDE  
SKASPTQNKENFKLSVTDIQEELERRDTLADLPEKHFLCEQRQQQPVSQSLPSSQTSE  
KEKSSTSPKDVLLTKNESPSSSLKPKELKSLPPSSSSSVISLTMDTDLRRHDDAQLQ  
QQKNKGITQAQLEREHKFRSESTTSTEPVSIITGSNKEGFQQRISSETTSVVQCGTTSWRS  
SQSKTKKSSARRKSKGMNRNLGQHSTDSAAWMIHHILGGSETNAMARRPTRKSFPVNPDD  
YSTATPTSNGTGDYSTAYDKSVLTGNSGTNSVSSNTTSLVNVAEMVARRRQLRKEAEGV  
QIVPRCHFCCGGHWIYNCPHMNAVDERYWCNNLLGDESDTEIDDSTIGTRTTSAGFEIGD  
DDGEVTTQMLMVNPNFRCNTDSALNCFKSE

>comp8482\_c0\_seq1; 356 1 971 LEN=994; translated  
XGDGDGDDGGVGVKQGAAKSLPKRIFAFLTRGGTGFDAFLAASQEVGQVILTLPWVFSLV  
GMKSGILLQVVFATTALYTNLLVNLHTEFRKRLAEDRSDPRSGDPHYVVSYHDIMGGLV  
GPFGRFAFGVVFLSLFGLSTVQIIATGSNMYLLDGSLLPKRTWSLIAGGVFSLAFVFN  
RHYRLLVVLANTATTYTSWYMTITSLKEGPVEDVVYDAPRDASDWFRGMVGLLFCFGGHA  
SNI EVADVMDDHSTYDRAYFYSFLYVFTLTPMNAVSAIYYSYGS IARLNQNAFGLYEQSTA  
RDFGIIMMNINNLVAFGLFGLGPL

>comp8482\_c0\_seq2; 211 1 775 LEN=1032; translated  
XEKERTNDRITERTGDNRQSTIDRNAEAHDGLVVWFS DGPPRANGVPKSHTPNPNEPFSH  
TPQLLLSFVVPVGTSGQAYYSYGS IARLNQNAFGLYEQSTARDFGIIMMNINNLVAFGLF  
LGPLFHIWERFLHIHQKPFWIRALARLPLCGVIVLFAIAFPFYGAINTVLGAFTTSFATY  
ILPMVAFNSVFRSDDLVMGMAKPLPGFARSNFALLRKANYVAIGLLTVCGVGLGGWSSVT  
NFVAQIHKFEYFAECYGC

>comp8482\_c0\_seq5; 486 1 1373 LEN=1630; translated  
XGDGDGDDGGVGVKQGAAKSLPKRIFAFLTRGGTGFDAFLAASQEVGQVILTLPWVFSLV  
GMKSGILLQVVFATTALYTNLLVNLHTEFRKRLAEDRSDPRSGDPHYVVSYHDIMGGLV  
GPFGRFAFGVVFLSLFGLSTVQIIATGSNMYLLDGSLLPKRTWSLIAGGVFSLAFVFN  
RHYRLLVVLANTATTYTSWYMTITSLKEGPVEDVVYDAPRDASDWFRGMVGLLFCFGGHA  
SNI EVADVMDDHSTYDRAYFYSFLYVFTLTPMNAVSAIYYSYGS IARLNQNAFGLYEQSTA  
RDFGIIMMNINNLVAFGLFGLPLFHIWERFLHIHQKPFWIRALARLPLCGVIVLFAIAFP  
FYGAINTVLGAFTTSFATYILPMVAFNSVFRSDDLVMGMAKPLPGFARSNFALLRKANYV  
AIGLLTVCGVGLGGWSSVTNFVAQIHKFEYFAECYGC

>comp8482\_c0\_seq6; 159 1 749 LEN=1006; translated  
XTHPRNILKYVSRRTDRFRGMVGLLFCFGGHASNI EVADVMDDHSTYDRAYFYSFLYVFT

LTMPNAVSAYYSYSGSIARLNQNAFGLYEQSTARDFGIIMMNINNLVAFGLFLGPLFHIWE  
RFLHIHQKPFWIRALARLPLCGVIVLFAIAFPFYGAINTVLGAFTTSFATYILPMVAFNS  
VFRTSDDLVMGAKPLPGFARSNFALLRKANYVAIGLLTVCGVGLGGWSSVTNFVAQIHKF  
EYFAECYGC

>comp8483\_c0\_seq1; 480 742 2373 LEN=2616; translated  
MIFKESFFLLLLLAIPCESFVCQPKILRNPSNSIALKSFKENNDWTSDFDGFVGDGGDNIE  
TDSDFNFSDFLTAGNGNSNLDITGVQTRLFSLGEDLIINDFVGNMGFEVTDWEYYYESED  
DPTDRKVVSPPNPFDAKPKRTRTSSGSVVRVFRGELIGRLGASIRSRGLDQRILIKEYSG  
KFALELAKRDQQTGVGKLQSKLMENKKDASDGGWIQSASSRVLGRTDDKHVGDLLQELRT  
APYLGILGEVNLAELEDEMDPNEFYRALGVSAKPKGAVWIVFEYAGLNTISTYTAMAPEK  
RRAKLPPKKSFFGGFVEPPPPLPSFKERANFIVKGILMKSLALADLHDAGIAHRSIGRNS  
LIITSVTQDKAETSSIFYTRVSGLTIKLSDFGFSGLLEDSAKDEEFISRARSFGLSIRKG  
DTSLVATDFAMAEDLHALGFVFLGLLLVSLSLPSGDTMPATDEDTIQKLLYEIFNQDF  
EAFREYVEAEVWSELVNLDDKESAGWDVLRTLFQARERMAENINSLEVTTARSLLSNR  
FFQ

>comp8483\_c0\_seq2; 310 851 1909 LEN=2004; translated  
MIFKESFFLLLLLAIPCESFVCQPKILRNPSNSIALKSFKENNDWTSDFDGFVGDGGDNIE  
TDSDFNFSDFLTAGNGNSNLDITGVQTRLFSLGEDLIINDFVGNMGFEVTDWEYYYESED  
DPTDRKVVSPPNPFDAKPKRTRTSSGSVVRVFRGELIGRLGASIRSRGLDQRILIKEYSG  
KFALELAKRDQQTGVGKLQSKLMENKKDASDGGWIQSASSRVLGRTDDKHVGDLLQELRT  
APYLGILGEVNLAELEDEMDPNEFYRALGVSAKPKGAVWIVFEYAGLNTISTYTAMAPEK  
RRAKLPPKKSFFGGFVEPPPPLPSFKERANFIVKGILMKSLALAEYVTCESV

>comp8483\_c0\_seq3; 310 742 1800 LEN=1895; translated  
MIFKESFFLLLLLAIPCESFVCQPKILRNPSNSIALKSFKENNDWTSDFDGFVGDGGDNIE  
TDSDFNFSDFLTAGNGNSNLDITGVQTRLFSLGEDLIINDFVGNMGFEVTDWEYYYESED  
DPTDRKVVSPPNPFDAKPKRTRTSSGSVVRVFRGELIGRLGASIRSRGLDQRILIKEYSG  
KFALELAKRDQQTGVGKLQSKLMENKKDASDGGWIQSASSRVLGRTDDKHVGDLLQELRT  
APYLGILGEVNLAELEDEMDPNEFYRALGVSAKPKGAVWIVFEYAGLNTISTYTAMAPEK  
RRAKLPPKKSFFGGFVEPPPPLPSFKERANFIVKGILMKSLALAEYVTCESV

>comp8483\_c0\_seq4; 480 851 2482 LEN=2725; translated  
MIFKESFFLLLLLAIPCESFVCQPKILRNPSNSIALKSFKENNDWTSDFDGFVGDGGDNIE  
TDSDFNFSDFLTAGNGNSNLDITGVQTRLFSLGEDLIINDFVGNMGFEVTDWEYYYESED  
DPTDRKVVSPPNPFDAKPKRTRTSSGSVVRVFRGELIGRLGASIRSRGLDQRILIKEYSG  
KFALELAKRDQQTGVGKLQSKLMENKKDASDGGWIQSASSRVLGRTDDKHVGDLLQELRT  
APYLGILGEVNLAELEDEMDPNEFYRALGVSAKPKGAVWIVFEYAGLNTISTYTAMAPEK  
RRAKLPPKKSFFGGFVEPPPPLPSFKERANFIVKGILMKSLALADLHDAGIAHRSIGRNS  
LIITSVTQDKAETSSIFYTRVSGLTIKLSDFGFSGLLEDSAKDEEFISRARSFGLSIRKG  
DTSLVATDFAMAEDLHALGFVFLGLLLVSLSLPSGDTMPATDEDTIQKLLYEIFNQDF  
EAFREYVEAEVWSELVNLDDKESAGWDVLRTLFQARERMAENINSLEVTTARSLLSNR  
FFQ

>comp8484\_c0\_seq1; 138 1 379 LEN=503; translated  
XPKSQNSNQGDATRHRIPKHITMDHNPESGSLTGTERSIMIKAKTLKSLACEHRLRASE  
LRTLKRETQNRVYLQRKEVLAEEVEKMEDEISSLHKELQKLLSESGSDELNPDGKYRMAK  
KLVVSA

>comp8485\_c0\_seq1; 52 1 467 LEN=733; translated  
XRHVQRLAKEAGRAAACRETATTEPSGSLPCALVGFNIPDGSSYRLLTTGAMDACDPE  
WPPPRHGTEWAPGGAEPMSAYAVHGGEPPDFTNYARIKEQDPFVDTLDYIFLSEAWRVGS  
VKELPHREGSGGPPFNLDRGEPSDHILIAADLELE

>comp8485\_c2\_seq1; 191 70 757 LEN=757; translated  
MAVSPSSKTSVRVASYNVLSHLSGADHFSTLDPEHLLAANRLPVVLEKLDAAEMEKSAIL  
CLQEVSHDWAGSLHAHLANKGYHFVTGLYGKRFNGYMGVGIAPVTKDYEVLGVDISRLAD  
TREGGWPRPPRGSEPGRIRAFASGLLGWGKTSARTFFSLFDLCEAQPRPPVDPWSMAQNR  
FNEMVTVTLGDRATGRSFVIGNYHMPCAFYAPVVMTLHADLAARHVQRLX

>comp8486\_c0\_seq1; 359 1 1709 LEN=1992; translated  
XGVLSTMKYIISATTSKPPSTNVPPSGGGGSLTILDPNGAILSSLRSSADLSGRAGMGISS  
LCSFPQEFKANNVSGGDNTQPVIGYGGNCVKRGDNYGMLISIRSSSSPPIMHWKCRLP  
ETEMSGGLSISPSDIMLSVVVPRVLVWSSIGGELLRTIKAHYRSVTSIAWSDCGRYLVT  
GGADGMVHLFSLMSLVDVASSAKISKQRNVPIHTFSVHHFPVTSLVQLAGGRIASSAE  
DGQVLVLELFSKKVLVNIQFPHGIQCMEHYNGRLYAGSTQGTIFSVLDLDAYAMHETEKL  
AIFANKRRRQEQLDTESTENWTLLEEKVFGKKKTDTIKNSKGDNNNQEQYRTDWIGHDHA



VTSIALLTESEPRKMISGDSFGQIRIWELESRTCLSVVHPWSSAFANASNADDDKKKSPH  
PVTSLRIIAQPDVPPSSGIFHSPAGSSKNLSSFSTLVTPQLKYISDGIENSANSSNACPSI  
AAGTIRVPFLKSNRTAQNMAYWEARPIBREAKIQQQSLKEGGKSEVKEEIASMREQIKKL  
QEQLQAKDSEVKRWQTVNNKLMSKLTQTKS  
>comp8488\_c0\_seq1; 519 315 1718 LEN=2257; translated  
MSAEPLKPTPTRSSEAPPAARSGSSLRGLVKSQWTSRMRKKKSKLSNGEASVTTEDDDAK  
TNNTFLIHEDGASSTNTLAALVEESTGMLDKPTASDVTTKTNNTSNILDLVLLMDPVSH  
RFELLQLEFEDASKARVSDLLVQIPLSVTEDSLKKLVDGILDENYRASASVRGMTVLS  
SSKLIKTFGPDADTKGNHMKMLVAKPTGVSNAECLRLAKPILTNKDVSKMLELSGFDVS  
GWKTTFKPSRAAEKAERMSVSTDPKLETSTRIEKYGAVTPSKKKPQVAPVKNSNSSFVAL  
GLVVTLVGLLQSVLVKPVSPGTLKPGTYKSKCGLFGYVSLFAPGWKETTAELLNSIE  
ENLAPSFLLCEDEFVRVNYDGTATLYDSNRKATMILSGDLCESTNSDESCTDGLLDFEAAT  
LSMGGNRIKQVLVRKEKDRALSPWPIEEEPSKLRKIGSKKVFPTSN  
>comp8489\_c0\_seq1; 477 1 1169 LEN=1754; translated  
XQDSNPQTTHGFPEDGNHKQTLRLLIQHVMTSQNQEETTSIASIRMVIQRYRKASLLID  
EKEVTVVGDGVSADSSAEVLLGRDGSGRGHVGMVLYISFSKTATPVEVQKAARTILNL  
PIQTEGAWGDGSSTKSILQAAGSVVDSNKEKPSAAPVSVMLVPQANLIAKVKKNGKSVQY  
RDQIDKTRGEELYDMFVRTVEGFLEEHQRLTSSASSVGANNKSKAGNSKGNDAVDP  
PPKELFRYRQKQQEEDGSLLYGSFDESTGLPLTLASGEPLTKSASKRVKKLYDAHAKRH  
EKYLSKQQQEPREPQSSGDSSTPAPSAGLVAASPATAQDAPTSATAKAEDKRSGLDPSF  
VRLIAGSFGKRQGLELVSDMGPFFCHVIEL  
>comp8490\_c0\_seq1; 429 58 717 LEN=929; translated  
MKFVLPVVAALASSSIEAFTAKISPRTTTQLKAVRSSSDALVAEALALS NKYGATSKEA  
RLAWEAVEEINASDNSVASMGNLNDECDVEVVSQDCLEYNAALEELQELLQANQPKISAL  
SEDISKTVSNVKSVPNASAAPQSKELQAALAEARRITAEEGTTS PNAAVAWETVEQIAA  
RGNTNAIGAKLTEDECFLEAAQEACAALAEELSRIIESRN  
>comp8491\_c0\_seq1; 207 1 834 LEN=1005; translated  
TTTSTRPTTTEANHEEWRTETLRLAAAMGNCDLASLSTPDRDYFLDSTWSIIPEMNRGML  
APGGPSLGAYRDEFLEAMEHRTAFLEGAVPHMFHSYGGVPEEASVEAMRARTSRNLGLEFG  
YTQVRRQLLLVLTDFVEVLGEDPWALPGLPFLSIREDRDNRHSEDDDDNDNDYDDEV  
RYLSRGRKTAFFWDPAASPLGALLYRTLREGVGDASVELAKNHRGEPGDLRACVQGA  
EVLGAAEDLLGKPRAEIERALGHHGLVRNGGAAAAAS  
>comp8493\_c0\_seq1; 578 177 1280 LEN=1973; translated  
MSTEEMKPFDLDPQEGGKVCVGGGAGFIGSHIAKRLKDAGWYVICVDWKTNEFMKNDFC  
NEFILGDLRKLKLEVACKACEGCTQVYNLAADMGGMGFIVSNESVLSFNNTAISMNMLEAAR  
RNKVKDFFYSSSACVYNEAKQEDPANPGLVESDAWPARPQDMYGLEKLYAEEMALAYGRD  
FDINIRLARFHNIYGPYGTWQGGREKAPAAFCRKAITSTDHFEWGDGKQTRSFTYIDDC  
VEGVLRLMFSDCDVPINMGSTEMVDMIEFANIAMSFEKLPKIKHIDGPMGVRGRNSNNK  
LIREKLGWEPTMKICDGLRKYFWIKGEIEKEGGDATAYSKSEIVQQVDDSLMQLGKEAS  
TAIDESA  
>comp8493\_c0\_seq2; 578 252 1355 LEN=2048; translated  
MSTEEMKPFDLDPQEGGKVCVGGGAGFIGSHIAKRLKDAGWYVICVDWKTNEFMKNDFC  
NEFILGDLRKLKLEVACKACEGCTQVYNLAADMGGMGFIVSNESVLSFNNTAISMNMLEAAR  
RNKVKDFFYSSSACVYNEAKQEDPANPGLVESDAWPARPQDMYGLEKLYAEEMALAYGRD  
FDINIRLARFHNIYGPYGTWQGGREKAPAAFCRKAITSTDHFEWGDGKQTRSFTYIDDC  
VEGVLRLMFSDCDVPINMGSTEMVDMIEFANIAMSFEKLPKIKHIDGPMGVRGRNSNNK  
LIREKLGWEPTMKICDGLRKYFWIKGEIEKEGGDATAYSKSEIVQQVDDSLMQLGKEAS  
TAIDESA  
>comp8494\_c0\_seq1; 183 150 518 LEN=898; translated  
MSAEVAKAFVGHYYQTFDSNVEGLRGLFNDKSMMTFEGNQLMGASPILEKLSFGQTKH  
NAKTMDIQPAIDGASIVIFVTGSIEIGGPGNPLHFSEFFYLVS SGPQYYVHNDIFRLNY  
GL  
>comp8495\_c0\_seq1; 521 1 1518 LEN=1631; translated  
XAPLQQRVAFRSSPNDPHTATARYHNAAQGETETQAPRSACFRPAGPGPGGASKGGFR  
FGGRLRSKASPPVQLPPPAGAEERNHHAEGRPGRPRGKDLRCRLPRDRRRVPAGGHG  
GGGILRERGRGGLRRPGLLPEARDEPGQQQRQRQQQQQRQRQLEQQQMLQTLIVSMK  
KLQHEQALVSQNIQAQLEAQRSTYGLQGLVQQRQALQQQIYLNEVQQQEIMQQQQDLDDL  
LMQQQQQQQDLMQMDHPIGMEHTTILQQQNQQNQYGMVGGGEVQNPMDMGNMLMMQQQQ  
QQASVYGIDQSVRGNGYGFHEIDPQQSHEMNTLSNNDYNDLVTIGQQQFGQNSTVVTGGL  
TVPPPVRIVNPKYDDEDDISSFEGGFYKNSYRGSSKQRPSSSSRSNRNSNSRRSRSRAE

SSSTRKSRGSSRTRNTSSRNGSRSSQRNRSERSRSISRHNMSGRIDSISDNGMDPDGRRS  
PRNINSAAAIVDARIPQVVSTQEM  
>comp8496\_c0\_seq1; 316 802 2139 LEN=2233; translated  
MSCNEDIFRKKEECELRTREKRGMKKGIFRFKLTKTVSNILAPIILFLIISTDEQYFISR  
ICRVGIPILLRTNDGDMFVVKDPDQFASQIIPQYFDHNFSSFARQLNIFYGFRKMQSKPI  
RNSDFDANTAKHVTFYENENFKRGRHDLLKIKRSTRGGGNI SGQDVQREIQQLKEKVASL  
EKTIQGLSSQTENRLKSLELDFLNRIDQTVLLMQQQHQSSQQGQQNQHAHYHNLRVPGNN  
GIGGGAQMSADVHQTAQNHFNMNGMNVTTGGPLKHGIGESLDPLPYGSRGASVGTLSLASH  
LMGNQVSI GMKNGVPGTPGAISGGPTLPPHPKQKQLPTQNF GGSPSMALGPMNGRMDIRN  
FSALSRLSTLSRGLSAESQGGNDYLLSMLSQGTSGNFNPTPMSGNNGASNNRNGTDNNM  
NNNNGMDNSEKGLIASAVGSSSTEM  
>comp8496\_c0\_seq2; 338 103 1482 LEN=1576; translated  
MNPPIVDFSGMVGPKRRRMRSGGNVSTLSNNAPKEGASASALSSGIDDEKIVQTSKCKG  
STTIPIFLKKTYKMI ESSPPEIAAWTNDGDMFVVKDPDQFASQIIPQYFDHNFSSFARQ  
LNIFYGFRKMQSKPIRNSDFDANTAKHVTFYENENFKRGRHDLLKIKRSTRGGGNI SGQDV  
QREIQQLKEKVASLEKTIQGLSSQTENRLKSLELDFLNRIDQTVLLMQQQHQSSQQGQQN  
QHAHYHNLRVPGNNGIGGGAQMSADVHQTAQNHFNMNGMNVTTGGPLKHGIGESLDPLPYG  
SRGASVGTLSLASHLMGNQVSI GMKNGVPGTPGAISGGPTLPPHPKQKQLPTQNF GGSPS  
MALGPMNGRMDIRNFSALSRLSTLSRGLSAESQGGNDYLLSMLSQGTSGNFNPTPMSGN  
NGASNNRNGTDNNMNNNNGMDNSEKGLIASAVGSSSTEM  
>comp8496\_c0\_seq3; 316 647 1984 LEN=2078; translated  
MSCNEDIFRKKEECELRTREKRGMKKGIFRFKLTKTVSNILAPIILFLIISTDEQYFISR  
ICRVGIPILLRTNDGDMFVVKDPDQFASQIIPQYFDHNFSSFARQLNIFYGFRKMQSKPI  
RNSDFDANTAKHVTFYENENFKRGRHDLLKIKRSTRGGGNI SGQDVQREIQQLKEKVASL  
EKTIQGLSSQTENRLKSLELDFLNRIDQTVLLMQQQHQSSQQGQQNQHAHYHNLRVPGNN  
GIGGGAQMSADVHQTAQNHFNMNGMNVTTGGPLKHGIGESLDPLPYGSRGASVGTLSLASH  
LMGNQVSI GMKNGVPGTPGAISGGPTLPPHPKQKQLPTQNF GGSPSMALGPMNGRMDIRN  
FSALSRLSTLSRGLSAESQGGNDYLLSMLSQGTSGNFNPTPMSGNNGASNNRNGTDNNM  
NNNNGMDNSEKGLIASAVGSSSTEM  
>comp8496\_c0\_seq4; 289 477 1637 LEN=1731; translated  
MI ESSPPEIAAWTNDGDMFVVKDPDQFASQIIPQYFDHNFSSFARQLNIFYGFRKMQSKP  
IRNSDFDANTAKHVTFYENENFKRGRHDLLKIKRSTRGGGNI SGQDVQREIQQLKEKVAS  
LEKTIQGLSSQTENRLKSLELDFLNRIDQTVLLMQQQHQSSQQGQQNQHAHYHNLRVPGN  
NGIGGGAQMSADVHQTAQNHFNMNGMNVTTGGPLKHGIGESLDPLPYGSRGASVGTLSLASH  
HLMGNQVSI GMKNGVPGTPGAISGGPTLPPHPKQKQLPTQNF GGSPSMALGPMNGRMDIRN  
NFSALSRLSTLSRGLSAESQGGNDYLLSMLSQGTSGNFNPTPMSGNNGASNNRNGTDNNM  
MNNNNGMDNSEKGLIASAVGSSSTEM  
>comp8498\_c0\_seq1; 313 120 671 LEN=1385; translated  
MASPSYTTNNLEWALRVCESVAFGIHGLLGLTEPWTGCLRTAFGDEHRAVPVWFPAAGA  
MLWTVAACNFSPSGAVVLAQAQYIAAFHTGAYFYHSALGHHPAAGLVPTLFAVLATVVVG  
IRTGSFGLALLGLVACTGIAYLLSKVLVTPPPSLRDDDGSGLRWNLMEDERAATTTNRSY  
QAS  
>comp8499\_c0\_seq2; 108 635 1267 LEN=1422; translated  
MTYARAAIFYLSDWGHDMTKDFGCDEVTSTVIPPVVSTVVQITNQPVVRATVTLQNP  
SYKHPNVWASVKHIYKTSGMSGLWHGTTAGVLKTVPKYCMIAVAVKDYAERTLPKPDSSSPT  
YDRDMLWRSVAVKSTMAGVAGAALTNPLDVIRNEQFKTDLGLWRTTRSLWKELGWRFPATRG  
LGKNMVAVALPVGVTIFCTDTLIHMSQQQS  
>comp8499\_c0\_seq3; 69 325 1182 LEN=1337; translated  
MGNAAAKEYPTQYFLASGLAATGCYPLWRSAAIGQSGFHVGTVKAGGITIPRTLAPYVQ  
GFLPPYKGFATVIGMTYARAAIFYLSDWGHDMTKDFGCDEVTSTVIPPVVSTVVQIT  
NQPVVRATVTLQNP SYKHPNVWASVKHIYKTSGMSGLWHGTTAGVLKTVPKYCMIAVAVK  
DYAERTLPKPDSSSPTYDRDMLWRSVAVKSTMAGVAGAALTNPLDVIRNEQFKTDLGLWRT  
RSLWKELGWRFPATRGLGKNMVAVALPVGVTIFCTDTLIHMSQQQS  
>comp8500\_c0\_seq1; 431 84 1031 LEN=1872; translated  
MASQNLQIDPESELVFSLSNEATPRCMMTLRHGGGTNEHIAFKVKTTPRRYLVRPNQ  
GLIAPGSSETISILLVEKDKQMLLQSYERLQSGLDHSDKDKFLVQSCVTDNSFAAKKSGSQ  
TELYDALTSMWNSVTS SSSSTLQNKKLHVRHVVDSSASGASAANVPSGPPTLESTPHSN  
LTDMSADQISSELNLRKYDELVSFVNLTAEIRDILSNTLEQTKRDYNREMAARSALEN  
KQGGRSSSGSISGKGNNGSSISSLMQLIVVGLACFLSGARIGASGNAPHLVVGNNFFVE  
DVVPTVDAGGVESEM

>comp8501\_c0\_seq1; 335 1 1477 LEN=1477; translated  
XRNIEDRRRNSSRLIKALCLLSIFVAEPREGRMETRRNGSKIVFFRRFSWLYVAMLLVNK  
AVAFSETKAKRPRRRSPKAPSLQVRLQGCFTPASILKDVAVSLTPKNDSSGTLSSVTLV  
RLSKQLVSLNKRNNSEYEDDTKSAGGVFTIYKRDQKLWHKGLTNAVKCLVSSDWEESENS  
LEAAVEGIKAASVISRLLPKCEDSNADGINHTLWVNPLLKKIVQDDLHLATIIQPHQLSA  
LKWSIDCFRLSTNYEDISIESLPVCLQKAYDDLDPFLIRPGFLTNISSSSRNDESDFTL  
SSFVEQVDFKAETIQTTSKRAVVERRQTAWQGDVHVPFVYSGKSMERVPWSPVVASVRD  
RLCQETSHYYDGCLLNLYPDGSGMRYHIDPDQGVYWGFEVTVVVSIGATRRRFGRSLAGN  
NNADGPPSKNNISEKGTSPKPHFTVFLMDGDVTEMVRDCQERFQHTVKTAEFKGETAPPC  
ELGVQENLSKLEK

>comp8502\_c0\_seq1; 295 252 983 LEN=1040; translated  
MLKDFEDAPDGSILLHACAHNPTGCDPTDEQWSKLLDVIKAKGHLIFFDSAYQGFASGD  
AEADAKALRRVVDAGFPVLLAQSFANKFGLYGERCGTLSVAKDAAQKDILMSQLKCIIR  
PMYSSPPKHGSSIVRTVLSDEKLTEQYYDECASMAERINSMRSLVETLAEVGSTHDWSH  
VAEQIGMFAYTGMNSDMCDELTDKYAIYLTRDGRISIAGLNDGNLEYVAKAIHAVTDGKK  
ITQ

>comp8502\_c0\_seq2; 426 1 1379 LEN=1436; translated  
XIVYNKSKIVNKQTSMMGFSSKSTIVLLGTCYSGAVFSATAFSAVDASSSVASASLDTIWN  
EVPEGPPDAILGIAQAFRAAPEEHKVNVCVAYRDTKGLPWVLPVSRKAEEMMLQDDKEN  
KEYLPIDGDQAYVEKALKFAYGANAPLERIAGVQTLSTGTGACRIGGQFLADFYPNKNIYV  
PDPTWGNHKKIFAACGLNVNTYRYYYDRSTNRLNLEGLKDFEDAPDGSILLHACAHNPT  
GCDPTDEQWSKLLDVIKAKGHLIFFDSAYQGFASGDAEADAKALRRVVDAGFPVLLAQSF  
AKNFGLYGERCGTLSVAKDAAQKDILMSQLKCIIRPMYSSPPKHGSSIVRTVLSDEKLT  
EQYYDECASMAERINSMRSLVETLAEVGSTHDWSHVAEQIGMFAYTGMNSDMCDELTDK  
YAIYLTRDGRISIAGLNDGNLEYVAKAIHAVTDGKKITQ

>comp8504\_c0\_seq1; 529 202 1131 LEN=1263; translated  
MRFVVRVIFCYIVATISLPSAIHGLVIPAVQNARNPSTTFGSKKDEIQIDDFKDINIDVVL  
LEAENALKAAKTSLVDSGETVNDSDGLVNLKEAIIVNDDVNKKKIENDDVNLNFKAIR  
ESLLSDKIEEKGSVLATEILSSTIGGIMLGLILGSVGTLLKLSGLDPSLGLVLPFGLAVPI  
IVGVTVGGVAGFTGSSKDDATGIVVRNVLGLPVKSLASAIVNSIQQTARRQLEKTTNDIK  
AIPSNVANSKQKASQKAKEAKIAVEIAVEAAIEQAKKVILVVVGLLSLVFLGMLITNWD  
IPVIFDTTL

>comp8505\_c0\_seq1; 180 204 677 LEN=1021; translated  
MPSGKGSKLLRYVEHRLRVTLHDGRCIIGTFLAFDKHLNLVLSEAEFRTLKRKSGAALLE  
ERTERRSLGLVLRGENVVSLAVEGPPPPSAKSAAGIAVTGRGRGMPGMSGGGPPPRGAP  
MGLGGAPMHGVGAPGMVPPPPGGIPPMGMGRGRGRR

>comp8506\_c0\_seq1; 505 48 983 LEN=1142; translated  
MFLMKGISSLLLLFVSGCRQYQCSQDQCFRGRKSQLSSYGSTVMYSGASGEDTVATIEVCVS  
PGCVADGADEALLKLQALSATSSSEAPPARVVSGVCCSLCNGPVARENAGGKSKNHRKL  
NTNQKLLDLLSLGDEADLEPRQRAVLEGIDLCLGKALSKKKYPEALEKYALGIERGRD  
AAMELQVEIGKEANPNHGDDGAASLQWLQALCNEATAKLETRDFNGAIASAEQAVEASS  
SSSVEALEVLQRAYQETTGTKDSKELVVLESFLALYQAEQPRAKRKKVTPMEANRRRTL  
GFRLAKLKAAA

>comp8507\_c0\_seq1; 173 223 843 LEN=843; translated  
MPSKNMMSDDDLFRISKQHASAAAIQVASGEAFSSQTNPDQLQIAQQYMSLKGKALKKGDH  
PAAIQEMKKALQIRRKVLGKDHDPETGRFFCRWLTTHVNFSSWIQLPLSPFYLMVHKLLES  
HSQHFFQNFSASTYYQLGICYTQAKEYDHALTELKRALTLGRLCWGKTHEDTGCTYYQLG  
IVLNAMGDFDLGLRELKASEIFITIL

>comp8507\_c0\_seq4; 157 223 708 LEN=708; translated  
MPSKNMMSDDDLFRISKQHASAAAIQVASGEAFSSQTNPDQLQIAQQYMSLKGKALKKGDH  
PAAIQEMKKALQIRRKVLGKDHDPETASTYYQLGICYTQAKEYDHALTELKRALTLGRLCW  
GKTHEDTGCTYYQLGIVLNAMGDFDLGLRELKASEIFITIL

>comp8508\_c0\_seq1; 1375 329 4159 LEN=4594; translated  
MMNGNPPSCVVEETSGMQLNDPRKSITSLEKQYAAPLGQRLVMGIQIDAKVLEGGLEAVS  
KRARQERQMQUIQGDSSGNNSNMALAVGASMRSSASSPGVDANGTASVDYNSSTEDSTNGG  
SSDAFSLNDQEVVQQQPPSQGRNRKFGMGFLKVAARTDPTLERGMQGLAVRMDQGKT  
GDLVRVAVYDPSTAELLGVTESLPVPTPGATATQQSDPDAAAGQPKDLRFEVPLWIPGSR  
RHQTLKLVVIQSGATLVLQKANKNYLLGSAMVNCQALSEGVTAVALSMTIPPAPTPTPG  
PPRLILCILPDPKFSPIILTRGWSLTDPMMSGYSSTLNLYPLDQSYVFPKQSNHWLVAH  
ERATESTLPLPIAAAVTQLAANACDKSLAHAQSVARILRNNRHDHKDLLHKATCHLGVLG

VVPGSTTGNSVTSANISVAWRRPDSMFEFIEIAANESIPVVPNGPTPGRMVAIKKVFHPK  
LCSPQNGDHILPGILQAYGCKMPSSGFLGQVYFVAVQTNSSDGFGGASSDNDPFA  
PTSSLNGVDSNSKNSVELWETVLGLEAFVKKTTTSTDPGSMNHRIDTIQVPLRKAEDVG  
HLLQLQEVTLPEGNGNDGSNYMATLPATDGLVSLVGMDFLSDGVKPYLDELPPSAQAPP  
PSIRHQQLNMGYFFTTQYMDQHLSLRQSACEAFKERARRYKLALSQPEKNAPPHTLKTP  
KNFRPSSSRTTTTLLSGIPFNCHIASLNINVMDATRPRLPANSGATAAPEYPGASFHNVT  
GAPADHARGFGNLTNVSNNKNSVGGGLRRLLEAQRRDCAIQQLAQATALIQGVGQYLTEARK  
KGPCHHVPARHVEIQQLRWKVFESVHVLHHVTWMCARRANVFSQALGLAASSFLASLGD  
MHCASGWPAVWAKHGFLVCFEGLLSAAGKELGMIEDASVAIAMLRMANIVLVPDNGQQL  
PAEAVQIPSSPYLKWTKVTSTGGDGSARRFVLHIGIDAAYYAERVPPPLQNNIGVRLYPI  
LFEVGVDIRQWGANTGSNLMKRESSSGGLNSNGSQSSIGGIVDDGDEDDVGI VDDDLV  
ALNYEAMRKMNCYAHALSPOQISPEQVVAAMDKTFADSMNSNNSNLTYSNPKDILPI  
HPSLAALHSHILSSAGRMNHSILDEAATIAQQLGGGLVFCCKSGKDRAMHLYKQCQFA  
SRYRGNDSQSAILRDARLLRLHGTRLPICEKNVQALYAFNSLQVKFMPEALKPPMDCLA  
GFLKGGEIFKGGGIES

>comp8509\_c0\_seq1; 51 455 1033 LEN=1113; translated  
MKLSTTPLALLALTAGTCRGETASNDPAVSCCIQRGGTSGTVVGLTGESGICTYKGRNYE  
ASFFLDTFCGRANFPVVNVQYTQCIQPNQEGFQITCLNCCESNYHNFQARCGSDRSCLSA  
NGSAFNTCEDGCVNQCVGYCFENDTDCVNQCQDTVGVQSDLRQNCFTCTEQAEALCYQQCV  
DQRNNSANSIGA

>comp8509\_c0\_seq2; 356 60 1254 LEN=2460; translated  
MPPHRKLNKQDQRWPQNLRYQSRQQPNPKHGMQLLHDRRSACLLFQSACVAFWPPPYPSP  
AVVPPGVATPNPSPRGSGLSTATATATTRELASFLACSTPREFRGAVRQSGGRFLYRG  
DEAGDDEDDSDSNRDGPKSKSGGIRDARHPGESNTGASVRAGFRSGPPVRARIRAPDPL  
LLPETYGNDLEALVYFERLEERLSSSFPPAFRPLPAARAGVAVVALPSSGHIATSDPL  
EAGKWGRVSVWPLVAVADPQQQQQQEQQQQQRGYASSKTGANTTANDSSPDPNRNFSYAW  
PRDRPTFYSAIDGGIAGSDGVSSSSGTNYHHRKQRRRRDENDRIVVDEQLVDALLAKDG  
REVL FATNAVPSAFLTVPMELDNELRDELERIDYGL

>comp8510\_c0\_seq1; 456 243 2252 LEN=2252; translated  
MAKHSASDGGSDSSAEKRSPSPHKKLKMTIRLPSSISAEKNGYSNFLMSNTASDAASNCI  
ENDTSNNNDPVANNTIRLQLRPKNVFIHDLFDIQKQIGEGGFVKVFLAVRICDGAKVALK  
SIPLNHGSSSEDSIQREVAAMQALSDPGHSHVCRLYHPPLRDINSYTYLAMEYI GGGGTLR  
APVQPGALSEHDAAKFLLQFADGLRYIHSKRYVHSDLKPENLMMGSWQKEEACLKIVDFG  
FSVPDHESIKLPFHGTIAYLPPECLQKGYNGLGGPRHPTAAGDMFAAGVIVYTVLTGTHP  
FDRTNQAPDSVIARAI VGLTSFRAQKIAPVDKSDGPNQQHVEHLERHVFDDRTEGLSS  
SVSLMKRLLHPDSKQRM TASEFCNHPWILGQTAATHCLSHPHHSRLKEFWRRRFRAAILE  
KFWGQAVTNHHHQGVVDGADPGCQSR SARPSFQRHSLSLK DSELVFRSMDLNGDGTVSLD  
ELKRCMMGNTSSSIFGGGDHSSSR IKQYMIDDIFSSIDEDGSGGIDLGEFQORVMGNRLDG  
DHRVRKNGFNDRENSCNTSSSNDNDEQILENSNEQVRGCI FQKF SKKAASREK INEGTAP  
TRDMLRTIFDSMDINKDGV LQLSEAITVLKETPGLDDDMIYIWADKADIDLNGEIDFEF  
CTAMMSNNTSX

>comp8510\_c0\_seq2; 487 243 2354 LEN=2354; translated  
MAKHSASDGGSDSSAEKRSPSPHKKLKMTIRLPSSISAEKNGYSNFLMSNTASDAASNCI  
ENDTSNNNDPVANNTIRLQLRPKNVFIHDLFDIQKQIGEGGFVKVFLAVRICDGAKVALK  
SIPLNHGSSSEDSIQREVAAMQALSDPGHSHVCRLYHPPLRDINSYTYLAMEYI GGGGTLR  
APVQPGALSEHDAAKFLLQFADGLRYIHSKRYVHSDLKPENLMMGSWQKEEACLKIVDFG  
FSVPDHESIKLPFHGTIAYLPPECLQKGYNGLGGPRHPTAAGDMFAAGVIVYTVLTGTHP  
FDRTNQAPDSVIARAI VGLTSFRAQKIAPVDKSDGPNQQHVEHLERHVFDDRTEGLSS  
SVSLMKRLLHPDSKQRM TASEFCNHPWILGQTAATHCLSHPHHSRLKEFWRRRFRAAILE  
KFWGQAVTNHHHQGVVDGADPGCQSR SARPSFQRHSLSLK DSELVFRSMDLNGDGTVSLD  
ELKRCMMGNTSSSIFGGGDHSSSR IKQYMIDDIFSSIDEDGSGGIDLGEFQORVMGNRLDG  
DHRVRKNGFNDRENSCNTSSSNDNDEQILENSNEQVRGCI FQKF SKKAASREK INEGTAP  
TRDMLRTIFDSMDINKDGV LQLSEAITVLKETPGLDDDMIYI WVSTAVAFYVGDCLPSFL  
VLLLTASPPITMTIDVQADKADIDLNGEIDFEFCTAMMSNNTSX

>comp8511\_c0\_seq1; 333 1 890 LEN=1007; translated  
XRVPSSVEIETSIRETTMKAFFSFLALWFGFLVGVSEVIDVSSFFVSPGNLAPVQPARH  
GGVLGGKTHASGRSTTTEAGPLFSSTSTRPLYDGTNYTFPDTRSPAGVAELLEVSFVHAC  
MQLASGYVDVLKMFIA T SIGAYEAGFSIDCILEELEGQNLPNTANRPLMEEEEKTLRWD  
LCVVYLALAAAMDHTPTMPSPLAADVSKKSI PRDIEERYGAYTTAIGDAYKNGSLGSLSVE  
GLVKDAGSTKDLSPIDKAVLMQSLKVASLTPTVVEEAREASGNNSKPPTPIEGAF

>comp8511\_c0\_seq2; 288 1 876 LEN=993; translated  
XRVPSSEVEIETSIRETTMKAFSFSLALWFGFLVGSEVIDVSSFFVSPGNLAPVQPARH  
GGVLGKTHASGRSTTTEAGPLFSSTSTRPLYDGTNYTFPDTRSPAGVAELLEVSFVHAC  
MQLASGYVDVLKMFIAATSIGAYEAGFSIDCILEEKPANTANRPLMEEEEKTLRRDWLVCVY  
LALAAMDHTPTMPSPLAADVSKKSI PRDIEERYGAYTTAIGDAYKNGSLGSLSVEGLVKD  
AGSTKDLSPIDKAVLMQSLKVASLTPPTVVEEAREASGNNNSKPPTPIEGAF  
>comp8512\_c0\_seq1; 209 1169 1629 LEN=1629; minus strand; translated  
MLEENEKAWSTSTTSSQKAQTPDNDAEHVAACSVDGTSICHSFDIYHGLDTASEREPFAI  
QKVDGTDLIFFPRPSSEVPYPNRALIGRKNIGFDAKVRTTGLKNCPLQKQKTDVNSKNVIV  
PPLDVVTKWIAMGVSKENINSTVHVRHQPHCHQX  
>comp8513\_c0\_seq1; 295 145 1578 LEN=1736; translated  
MVEISSPSSFKTLTKTPRSRSDAPEKKPLWLLVIYALFFLVCLNAIWTYKDRKRLVWLELQ  
EREQNDNIEIQYSAGAEQHVVSNNYSSMYGGSIRAAESHKKKKKKKSARKTTLENILPR  
PRDGSKDYIIRKPGNNSDFKAFS FYVMTDTPVRTRIFAVFFILVRVMLLLLLEADATFSE  
ILVHKIGREETSSQMSELRDYIHDNPKNRNLTLGIHLGNTQKVSNSLCAESAYKNHAYLIS  
KGPSPTFVTPGKSDWDFDCPRREEAFDFVVKYMGPDFISEWHREQFENFEIQRSEENPELFT  
TFYIEGILFIGLHMIDSPGNQESSATRNRKVKASMEWFANTIETNMERREIRGVIIMGHA  
GRSESNQQSFTHMAKYFVIGITRENIPVMYLHGNGAKWEVDRSFSQEASWSQFYDVQVDQ  
GGLTEPCIIDVAPQRLGKVTKLEKNENNDMETIIANGLFRLDQKGRYLDPEEVAK  
>comp8513\_c0\_seq2; 373 145 1488 LEN=1646; translated  
MVEISSPSSFKTLTKTPRSRSDAPEKKPLWLLVIYALFFLVCLNAIWTYKDRKRLVWLELQ  
EREQNDNIEIQYSAGAEQHVVSNNYSSMYGGSIRAAESHKKKKKKKSARKTTLENILPR  
PRDGSKDYIIRKPGNNSDFKAFS FYVMTDTPYTKLEEKRLRSQMSELRDYIHDNPKNRNL  
TLGIHLGNTQKVSNSLCAESAYKNHAYLISKGPSPTFVTPGKSDWDFDCPRREEAFDFVVK  
YMGPDFISEWHREQFENFEIQRSEENPELFTFYIEGILFIGLHMIDSPGNQESSATRNRK  
VKASMEWFANTIETNMERREIRGVIIMGHAGRSESNQQSFTHMAKYFVIGITRENIPVMY  
LHGNGAKWEVDRSFSQEASWSQFYDVQVDQGGGLTEPCIIDVAPQRLGKVTKLEKNENND  
METIIANGLFRLDQKGRYLDPEEVAK  
>comp8514\_c0\_seq1; 680 383 2528 LEN=2629; translated  
MALIAGNIYSTNAFNSNYFVGQTQVGRPLPKSASRNLRVFAESQFGNQKDEDGEIYSRDTSD  
NLIMLDWNPEVLLSSDPSMEAMF I PLMNVDAAASAAALARNQNADEGDGKPEDSGTPC  
NAPTILPRKTPVSPVQSLDHDGPLPPSVAPYRMFVREYSRDMGHDGRFTVFTDHNSELPE  
TKGENEETLNRAASLQSDVVF SMDNPLAFIRDLSYNGSPNSKDEEVVVFIPGLHTAHP  
SISREYSNGALPTRNGKPRSSPDRLKYISQVLDGIPMAQIHKGTHIDQGNLDIKLTSV  
SSLLSFGLLSDTFQQNLSLLSMNGNLLLPEETLYRLRATDLDI IYTVLSRARSAGSASLS  
RTLGDKYLGS DSKGLKDTLIRLIDVAVRSVRETKAPSASDAPSSSPSSPGLVLMYTSATS  
SVLMAALSEWKNRVTSSIGESMHSSDDESTKASRRDGI GVGLEDSRSGDDNFHTQIFSE  
EEAEALLLHKALTVVTISGLSKGFVDGPAYIHSV MNDDPLTSALGITKLNSEEGKDAVIL  
QALSPYLIDEDKGDASGETSHRHKSAIYKNDAHNIDSCIIQYLSLVRRINGVTSFREM  
YNLGFADADSKKLDISQSLFAIDYRSVGQLVIPPHIDCELI PAMIRATGGERWLNWPA  
LQLEGGVEGFDSPLPSLEYAQAEIENQLGYNTYDEIVEDVAIDFRMEGKRKASDRLV  
>comp8514\_c0\_seq2; 680 175 2320 LEN=2421; translated  
MALIAGNIYSTNAFNSNYFVGQTQVGRPLPKSASRNLRVFAESQFGNQKDEDGEIYSRDTSD  
NLIMLDWNPEVLLSSDPSMEAMF I PLMNVDAAASAAALARNQNADEGDGKPEDSGTPC  
NAPTILPRKTPVSPVQSLDHDGPLPPSVAPYRMFVREYSRDMGHDGRFTVFTDHNSELPE  
TKGENEETLNRAASLQSDVVF SMDNPLAFIRDLSYNGSPNSKDEEVVVFIPGLHTAHP  
SISREYSNGALPTRNGKPRSSPDRLKYISQVLDGIPMAQIHKGTHIDQGNLDIKLTSV  
SSLLSFGLLSDTFQQNLSLLSMNGNLLLPEETLYRLRATDLDI IYTVLSRARSAGSASLS  
RTLGDKYLGS DSKGLKDTLIRLIDVAVRSVRETKAPSASDAPSSSPSSPGLVLMYTSATS  
SVLMAALSEWKNRVTSSIGESMHSSDDESTKASRRDGI GVGLEDSRSGDDNFHTQIFSE  
EEAEALLLHKALTVVTISGLSKGFVDGPAYIHSV MNDDPLTSALGITKLNSEEGKDAVIL  
QALSPYLIDEDKGDASGETSHRHKSAIYKNDAHNIDSCIIQYLSLVRRINGVTSFREM  
YNLGFADADSKKLDISQSLFAIDYRSVGQLVIPPHIDCELI PAMIRATGGERWLNWPA  
LQLEGGVEGFDSPLPSLEYAQAEIENQLGYNTYDEIVEDVAIDFRMEGKRKASDRLV  
>comp8515\_c0\_seq1; 495 115 1167 LEN=1370; translated  
MPTSGDDEGSAEATTRAGNGGRDRGSRGDDRSASGETDPGEDRGHKRRSRRRDRS  
EKRRRRKHKRGRKRRRRRRRDDDDDEYSSDSSVSFSDSRSCSSSRSSYSDDSGDERK  
RRRKRHRSEKRDKREKKKKRKKDSGSKKKRDRGDDDRSRKKKKKSDRDRDGGSGDER  
DHTGPPVFGKYGLIKLSDLPQKQRSFEVWLEEVKGVGGFNGPKWELHNYFKEYAEDYNTA  
TMPHVKYDYDYDKWEMEEYEKKKRAAEAAAAGEGGTSSARQREALHLQRQOEAAAAKRDE

LGLVLRSTMNAEKIREMKRKKQLQAEMEHAFKTGDRANYLRLKKRLEPEEK  
>comp8515\_c0\_seq2; 495 115 1167 LEN=1338; translated  
MPTSGDDEGSAEATTRAGNGGRDRGSRGDDRRSGSASGGETDPGEDRGHKRRSRSRDRS  
EKRRRRKKHRGKSRRRSRRRDRDDDDDEYSSDSSVSFSDDSRSCSSSSSRSSYSDDSDSGDERK  
RRRKRHRSEKRDKREKKKKRKKDSGSKKKRDRGDDDRSRKKKKKSDRDRDGGSGDER  
DHTGPPVFGKYGLIKLSDLPQKQRSFEVWLEEVKGVGGFNGPKWELHNYFKEYAEDYNATA  
TMPHVKYDYDKWEMEEYEKKKRAAEAAAAGEGGTSSARQREALHLQRQQEAAAARDE  
LGLVLRSTMNAEKIREMKRKKQLQAEMEHAFKTGDRANYLRLKKRLEPEEK  
>comp8516\_c0\_seq1; 568 280 2256 LEN=2723; translated  
MTLTRGEEAIAAEYRQLLRIGLPGKVVIQRMMAAKVPHAIQQSVLNEENSTPSPPIPEDES  
GRESRTTEFTTEVIDDVKFDPSQPLGGPEKSTTSFYEEIVIDDDESEYEEEIVEDESVDG  
RQLNAGENVPTHVYDKSISDGDVEYQYRPTKMPEETQPSPPSSCWYWIVCLVFIGLLGSSA  
GVGYWLTTRDGDVKVSSLESPIYTNPPTPAPSVAVSTRFDPIQGDCNFDVNDSPNPIDQC  
NCLGEISIIESDIRERYFYFNLEAFIPAYFREYDDDISSCSPRNQALVWISSGDDTELSTD  
QRAEKFALA AVFASLGGTQWKKSRNWSYKSVCTWFGVKCDQGQPDYVTQLVLDNLLIG  
VLPSELSLLARLQFLMVAQNKISGP IPVPLFTIKDLGTVDVSNFNAITGVIPPTVGDVAVSL  
NSLNVENNSMSGRLTRNIGRAGNLGYLNLRNRSNGFASELPLELFLNRLRRELDIADNKFTG  
VIPAEVSNLNALTKLTLGPNLFSGTIPSSIGFLGSLKYLISISGVADLSGLIPAEFGFYLS  
SLEEITISGTDISGNIDTSFGRLPSLKSIDFSGNQLRSTIPSELGSLGTLAYLDLGGNFL  
DGSIPETIGNLLALEELRLNDNLLQGGIPVPIGNLISLSTLLTFAYRHNDLATVLFYQ  
>comp8516\_c0\_seq2; 545 280 2073 LEN=2828; translated  
MTLTRGEEAIAAEYRQLLRIGLPGKVVIQRMMAAKVPHAIQQSVLNEENSTPSPPIPEDES  
GRESRTTEFTTEVIDDVKFDPSQPLGGPEKSTTSFYEEIVIDDDESEYEEEIVEDESVDG  
RQLNAGENVPTHVYDKSISDGDVEYQYRPTKMPEETQPSPPSSCWYWIVCLVFIGLLGSSA  
GVGYWLTTRDGDVKVSSLESPIYTNPPTPAPSVAVSTRFDPIQGDCNFDVNDSPNPIDQC  
NCLGEISIIESDIRERYFYFNLEAFIPAYFREYDDDISSCSPRNQALVWISSGDDTELSTD  
QRAEKFALA AVFASLGGTQWKKSRNWSYKSVCTWFGVKCDQGQPDYVTQLVLDNLLIG  
VLPSELSLLARLQFLMVAQNKISGP IPVPLFTIKDLGTVDVSNFNAITGVIPPTVGDVAVSL  
NSLNVENNSMSGRLTRNIGRAGNLGYLNLRNRSNGFASELPLELFLNRLRRELDIADNKFTG  
VIPAEVSNLNALTKLTLGPNLFSGTIPSSIGFLGSLKYLISISGVADLSGLIPAEFGFYLS  
SLEEITISGTDISGNIDTSFGRLPSLKSIDFSGNQLRSTIPSELGSLGTLGKHEQMK  
>comp8516\_c0\_seq3; 601 280 2373 LEN=2557; translated  
MTLTRGEEAIAAEYRQLLRIGLPGKVVIQRMMAAKVPHAIQQSVLNEENSTPSPPIPEDES  
GRESRTTEFTTEVIDDVKFDPSQPLGGPEKSTTSFYEEIVIDDDESEYEEEIVEDESVDG  
RQLNAGENVPTHVYDKSISDGDVEYQYRPTKMPEETQPSPPSSCWYWIVCLVFIGLLGSSA  
GVGYWLTTRDGDVKVSSLESPIYTNPPTPAPSVAVSTRFDPIQGDCNFDVNDSPNPIDQC  
NCLGEISIIESDIRERYFYFNLEAFIPAYFREYDDDISSCSPRNQALVWISSGDDTELSTD  
QRAEKFALA AVFASLGGTQWKKSRNWSYKSVCTWFGVKCDQGQPDYVTQLVLDNLLIG  
VLPSELSLLARLQFLMVAQNKISGP IPVPLFTIKDLGTVDVSNFNAITGVIPPTVGDVAVSL  
NSLNVENNSMSGRLTRNIGRAGNLGYLNLRNRSNGFASELPLELFLNRLRRELDIADNKFTG  
VIPAEVSNLNALTKLTLGPNLFSGTIPSSIGFLGSLKYLISISGVADLSGLIPAEFGFYLS  
SLEEITISGTDISGNIDTSFGRLPSLKSIDFSGNQLRSTIPSELGSLGTLGKHEQMK  
>comp8516\_c0\_seq4; 545 280 2073 LEN=2662; translated  
MTLTRGEEAIAAEYRQLLRIGLPGKVVIQRMMAAKVPHAIQQSVLNEENSTPSPPIPEDES  
GRESRTTEFTTEVIDDVKFDPSQPLGGPEKSTTSFYEEIVIDDDESEYEEEIVEDESVDG  
RQLNAGENVPTHVYDKSISDGDVEYQYRPTKMPEETQPSPPSSCWYWIVCLVFIGLLGSSA  
GVGYWLTTRDGDVKVSSLESPIYTNPPTPAPSVAVSTRFDPIQGDCNFDVNDSPNPIDQC  
NCLGEISIIESDIRERYFYFNLEAFIPAYFREYDDDISSCSPRNQALVWISSGDDTELSTD  
QRAEKFALA AVFASLGGTQWKKSRNWSYKSVCTWFGVKCDQGQPDYVTQLVLDNLLIG  
VLPSELSLLARLQFLMVAQNKISGP IPVPLFTIKDLGTVDVSNFNAITGVIPPTVGDVAVSL  
NSLNVENNSMSGRLTRNIGRAGNLGYLNLRNRSNGFASELPLELFLNRLRRELDIADNKFTG  
VIPAEVSNLNALTKLTLGPNLFSGTIPSSIGFLGSLKYLISISGVADLSGLIPAEFGFYLS  
SLEEITISGTDISGNIDTSFGRLPSLKSIDFSGNQLRSTIPSELGSLGTLGKHEQMK  
>comp8517\_c0\_seq1; 589 324 2054 LEN=2427; translated  
MSINNDTVENAEQKHKDTPAEYAGDDSTDEIDDEQLEEKEMVEDLGTRAEKVKINTLSM  
VAEDYADSSRNAKAIYNI IREPLISTAVHSDRKLPLVYLVDLSILYNVKGFIPLVENDAA  
NWLPSVYQVLSQENRAKLEKIWNLWNSRKIFAQDKLEEIGSFFTSSGAVGNSDLEKAGLS  
IGKDGRLSLVPALRDAMQKILDEMQQDEDEMEKVSLERLAAINVNLLIQIKDMAETSLRN







LASRYWEEVVLALIGGQFPGIPDGEICGLVISIRYSEDILGIWNKTAADRMVDRDLRDAV  
KKVLQLPPAAYASMEYKPHQNAIADRSSFRNASSHWKGRDSHRDSSSNPRPSRSGSWAD  
RDHKPSSRRDSDRAWR

>comp8529\_c0\_seq1; 450 1203 2996 LEN=3185; translated  
MDSSGNIYLDCAAQQRLLEDSEGSADPTMDILQCVSDSYQTIQDDRQENLRSFLLVVCG  
GMIFFMQSGFAMMCAGSVRLKNVQNTMLKNLLDACGAALAFYLVGYAFAGFRDLDTPEPT  
SDRTTFVGTQNFVSVGSSPAFWFFFEFTFSATSVTIVAGTLAERCQMAAYLAYSVVLAGFI  
YPVVAHSVWSEEGFLSRTNENPFMDQGVDFAGAGVVHLNGLIALYATLVLGPRRGRFY  
DAQGDPLEKPLPFPGHVSVALQLLGTMLWFGWFGFNPGSALLLQENERFGNVAANAAVAT  
ALSGASGGICALFTNLWWEERMTGEPKFVIQMAMNGALSGLVAVTSGCAVMRYPYAAIITG  
AIAGWIYMLSSSLIRYRIDDAVNAIPVHMFNGCWGLIATGLFAHPELLEITYNNRPADH  
PGFFYSFANGGADGNLLLCQFCVLFILGWTFITMFPFFIWLNYRGWLRADSLEELVGLD  
VSYHGRSTHDENSGIKKEYIEAYNRYKGTIRQQRSHHHGHNNNSNPDRDQLVFDTPSMED  
TEHRMMSPEEVSHYNETISRCHTREKEDKRTEEETSTKSTTLKDSKEDLNDMDHCK

>comp8529\_c0\_seq2; 367 567 1865 LEN=2054; translated  
MAAYLAYSVVLGFIYPVVAHSVWSEEGFLSRTNENPFMDQGVDFAGAGVVHLNGLIA  
LYATLVLGPRRGRFYDAQGDPLEKPLPFPGHVSVALQLLGTMLWFGWFGFNPGSALLLQ  
NERFGNVAANAAVATALSASGGICALFTNLWWEERMTGEPKFVIQMAMNGALSGLVAVT  
SGCAVMRYPYAAIITGAIAGWIYMLSSSLIRYRIDDAVNAIPVHMFNGCWGLIATGLFAH  
PELLEITYNNRPADHPGFFYSFANGGADGNLLLCQFCVLFILGWTFITMFPFFIWLNYR  
GWLRADSLEELVGLDVSYHGRSTHDENSGIKKEYIEAYNRYKGTIRQQRSHHHGHNNNSNP  
DRDQLVFDTPSMEDTEHRMMSPEEVSHYNETISRCHTREKEDKRTEEETSTKSTTLK  
SKEDLNDMDHCK

>comp8530\_c0\_seq1; 400 1 973 LEN=1335; translated  
XLQSNIHPADESQMIPTNTGTVGGSDSEQRPRKICLFGTSANPPTGKGGHVGLVESIVK  
LQKYDEVRLVPVYQHTFSSKRNLIDYSHRVAMCELAFLGTEAETQQQRQQQDQDKKVT  
GKHNPRTNIVSRAEEDSFRMCLDTMTDEEKASLRVGTADLLEMLIKQEKEKNDHNTT  
EFSFCLGADTFMDLTDWKWKRSDVLLKLLGGRLVVVNRKQQRKAAPIIDGNRRQLQKPEE  
KTTEESLKERVNRLNSTQLANGEILVLDLPLNDDVSSSKVRNCRDKDVAKKLIIPNKVLDY  
IVSHNLYGFGDEDDGEQKDDAMKG

>comp8532\_c0\_seq1; 1398 106 3891 LEN=3948; translated  
MKFSSLASLALGATASLAMAESAEDTHLLEAQAFDQVWSETPDGFITPKLELRREIPGD  
ASTPMGVYATDTIEAGEDIIKVPWSVILEPDDQREPPSQMVCCTVRTVAREMRLGTNSKY  
APYVEYLKSEADAQIPSAWSEAGKAFLEILDNDTIPPVDPHTWIEDEWFKRCRGPND  
VGVKAALMVIQRADDAIMIPAYDNLNHRNGNWTNTNTEIDEFHHTTATKTIPPQAQIYIS  
YNMCEECGGRSKGYGTAEILRDYGFVEYYPQRWHYMEEDFQFDVDEAEDGKLIVTWDKEE  
RPDVGDKLMEQTRVWFRWEIRRLKRIKNIWAI GFEGKDHGIPDYEKETIFKFLDANII  
AMTAALES LGPSPPPGTVTTTKADSHGGVEEEEEEEEEEDDPETCKADEDFGGCMAPIDIA  
P LLENSTHYDNLWEFDDLDYQYPTCANNKHLRFADFDDLEFIKTNYQDLNFMRKESTDD  
TCMDLDNIVQICSNYRPOYHEFSAHAAGR FVKDVKRVIFIGGGDSMLLYEALKYPDLELV  
VGL EIDQTVVRKSFKYFHSTSPYFEDDRVEWVFGDATKSLLLLPEDYWG SFDLVLDLSET  
VMSF SVTAE LDVFDALSLLLNPHGVMVKN EHYHEKFSALFDYSAELNYESPVICNQVMV  
GSNNVDFFRAPVYDHGVKTELYESMSTPETRYELLHG YRKNIAPEEKCNLVIPEEKTQ  
TAAGIVEVMNAENCSVELNESITDTMKMVAEKEGFTLISEPVFDNGVGI VVLKEGFISAR  
IVPDEKYVGFVNLWGMSKIKSLRRALSEAVGSTDVSAKVVVGGMYGSSSWKEDQKIQ  
GPKMKQLRNCEEDVVKEGKLDAKAASAI AIEETIPLTL SKAKGITAVAVCGKEGEECVAY  
DVLKEEKSVKSLTPIYECSNNGDFECETK VLEILAREVLAKRNGGIHLLVMDGSASYGMH  
QIISSILGEDETRRSLLEMHNIVATWMTDSANESFRREFLD RYRKQVHIDPASRAEIVFQ  
AGGKSYEYGVSSHNERAPYDYEKMESRIKERLSTSGVKVELRN IHGALFRYNHEWDPKT  
FKHEDYDSKPGREHFKNQKPLGRQNIYQFVKADGVEEDLDLSMAKI QTYLSETLKVVDLE  
PSLSKQYEDVGDGGVILALSPNGYVTLVWDGREHISVNLFTNDEG VGVPEK FVGRFLNSS  
GQKLKVG LRDDQPRGINHVINFPSDMVSRNSHTGAKKKTAGREPRKM RRLPDGTFEPWDP  
Q

>comp8533\_c0\_seq1; 82 1 274 LEN=473; minus strand; translated  
XFENLGVGFVDVGVHWGYWMFVPLIAEKNSTGF AKLRSPWEYLEKVPPELTERFSSSL  
FVLKLLSPTDVSVCTWRGGNGFIASPKDIIGW

>comp8533\_c0\_seq2; 260 1 933 LEN=1255; translated  
RTRILSNSEAVANVEHLGDGVAAVGNELFLKITTRPIMSWSPKV VHANGSSHTMTIDLPEE  
FVNSRTIVITQQGWQDLYHLVATAVAKNTSESILLFWLSGFLLIIMALILLFGLVKGIGP  
RLGVMVGVLLFTSFCGITHALIRRVRVHNAVRCVEECFYDAEAAANASARNVLADARDI

ERPMQQPEPSQNPPESSANERDITNMSGILDGLQLEEDVANVDGVDISTGGFGQALRQ  
RLKSGDSSTPSRPNRQRLNTGGDSSVSSAMIFDTEPRRNRAVSRDGMVCSWKWENLGM  
DAVVKISWED

>comp8534\_c0\_seq1; 271 1 946 LEN=946; translated  
XLDPNKRELAKQVQTEPSQANHTRTAPHRTAPYSDPRMADAVLSSIIISFLFSPSKRGQTEG  
NPLPLKAVPGLITLLDVALFRSVEAQLTGTITSSHALLACCLDIKRQAQVVLQLYKTKEF  
IGASDGDCCPRETLAWQCLEAACNAIERLSTDRLAAAANLSDPYESTKTSAAANNAQAHH  
NHGGGGIYSNDLFYTTSSGCNVVGVGLQGIRNGILLKEETGRRGQLQRRKDCWESPRLF  
CPDFVWADDVYLACRKWVRSLDKHPLVKISYVLKHQEDPAAADPDHIFRKETHGNKSRD  
AGSKSRAANNRNNSS

>comp8535\_c0\_seq1; 653 97 1374 LEN=1570; translated  
MADNNEDELVDYDEEEVAVGDKAATGEEAKETKKGHYVGIHASGFKDFMLKPELLRAIV  
DAGFEHPSEVQHETIPQAVLGGDIICQAKSGMGKTAVFTLATLQQANVEESKVSVLVICH  
TRELAFQIAHEYERFSKYLPKVKTAVFYGGVAVKQNKELKNDCPHIVVGTGPRILGLAR  
DKDLKLDGKHFVLEDECDRVLESMDMRRDIQEIFRLTPHEKQVMLFSATLSKEVRPVCKK  
FCQDPMEIYIDDETKLTLHGLQLYYCKLAEAEKNRKLNDLLDALEFNQVVI FVSKVARAK  
ELNRLLTECNFPSICIHGGMKQEERISQYKSFKDFNARILVATDLFGRGIDIERVNVVYN  
YDFPDESQFLHRVGRAGRFGTKGIAISFISSETDQEILSKVQSRFEVNIPELPDEIDVS  
TYMSA

>comp8535\_c0\_seq2; 506 1108 2238 LEN=2434; translated  
MLKPELLRAIVDAGFEHPSEVQHETIPQAVLGGDIICQAKSGMGKTAVFTLATLQQANVE  
ESKVSVLVICH TRELAFQIAHEYERFSKYLPKVKTAVFYGGVAVKQNKELKNDCPHIVV  
GTPGRILGLARDKDLKLDGKHFVLEDECDRVLESMDMRRDIQEIFRLTPHEKQVMLFSAT  
LSKEVRPVCKKFCQDPMEIYIDDETKLTLHGLQLYYCKLAEAEKNRKLNDLLDALEFNQV  
VIFVSKVARAKELNRLLTECNFPSICIHGGMKQEERISQYKSFKDFNARILVATDLFGRG  
IDIERVNVVNYDFPDESQFLHRVGRAGRFGTKGIAISFISSETDQEILSKVQSRFEVNI  
PELPDEIDVSTYMSA

>comp8535\_c0\_seq3; 349 242 784 LEN=980; translated  
MEIYIDDETKLTLHGLQLYYCKLAEAEKNRKLNDLLDALEFNQVVI FVSKVARAKELNRL  
LTECNFPSICIHGGMKQEERISQYKSFKDFNARILVATDLFGRGIDIERVNVVNYDFPD  
ESDQFLHRVGRAGRFGTKGIAISFISSETDQEILSKVQSRFEVNIPELPDEIDVSTYMSA

>comp8536\_c0\_seq1; 446 1 1565 LEN=2066; translated  
XRSKLLYNTVPSTTATSIVVVAIDTVIDRADGSSPLWKDQAGKQRSDHDLPTAHAAHAH  
NNAITYRHGHPTEGQEQNKNAVPSLFPVAIVFFDVVFLSVTSSKLRGESHAYQNEPVH  
HHLETRLVGGETWGTNFLRGTTGGTDDNKDNNINDNNDDDTPPPPQVSKRLHKMQEELF  
EKALRAPKGDHAGANGKTNLEPRSVFAETPPDQKVDFQPPVLPVPSVSSAVSSSGSVVLL  
VPSHQGSFVKRQAIRETWMAAAKEHGSGATILFVIAQSSCRDFEADFERTTRGKSATGPT  
CAEAEHNFRLNEQREWGDLEIPMEESYERLSEKMQAYHWLNIPTTRWIAKADDDMF  
VRVNQLEKYLRRFNHEVPVVLGEIVHRSPVARSGKWAEDPSYKPNVYPNWPKGSAGHVLS  
KAAVEYVHHSGSLHRYQGEDTNLGIWLDLDAWKGALEDLALVDARKMFGSSGKANCEFG  
SFLIVGHELTPELDFECQKKTHYGSKAAFLGVSWTERPAPT

>comp8537\_c0\_seq1; 284 177 1220 LEN=1326; translated  
MGLDVDACIDTLKQGETVSRQLRQLCQLVGELLVEESNVQPVASPVTIVGDLHGQFFDL  
LNI FEGVGGWPPETSIFYLFGDFVDRGHNSVETLSLLLCLKLFPAHITLLRGNHESRQIT  
RIYGFYDECLRKYGNASAWRHCVQCFCDFGLAALIDEKVFCVHGGLSPDVRTLQVRAID  
RNQEI PHEGAFTDLVWSDPEDIAGAWQLSARGAGYLFGRVTDDEFHEVNNLEFLARAHQL  
VMEGRKYHFDKRLVTVWSAPNYCYRCGNVAAILEVGGNDSNEYGSSTNENCDEDDGNNA  
QQQMTTSSEHEGYPGSISQRFKFFRETTNSVHGPRGEERAHLVPYFL

>comp8537\_c0\_seq2; 201 177 1361 LEN=1467; translated  
MGLDVDACIDTLKQGETVSRQLRQLCQLVGELLVEESNVQPVASPVTIVGDLHGQFFDL  
LNI FEGVGGWPPETSIFYLFGDFVDRGHNSVETLSLLLCLKLFPAHITLLRGNHEVSFTI  
SRLFFLAHRVPNSILCIGAMACDVTMMLADALXVLM SFRNQSRQITRIYGFYDECLRKY  
GNASAWRHCVQCFCDFGLAALIDEKVFCVHGGLSPDVRTLQVRAIDRNQEI PHEGAFTD  
LVWSDPEDIAGAWQLSARGAGYLFGRVTDDEFHEVNNLEFLARAHQLVMEGRKYHFDKRL  
VTVWSAPNYCYRCGNVAAILEVGGNDSNEYGSSTNENCDEDDGNNAQQQMTTSSEHEGY  
PGSISQRFKFFRETTNSVHGPRGEERAHLVPYFL

>comp8539\_c0\_seq1; 526 108 2603 LEN=2682; translated  
MGRFRPPS FSSLNLRKPPFFCLVLLYQRSCLVDARSWS DILSPSLNDASYDGKHHGHLRN  
KHYPGELSFEIEEDPFYFPPTKTNPNSQKEARRKKNPFINNPKDDEIANAATTTITI  
TQQQLQATKPRIPKEREHEQLFSGNIFVHESNKRKTKEDARAPVENILSKNQGDNNLGS

NRRNKRSSSSISRVFVMNPTESLASVLPTEYREKSLLVDSFTRTGAAAIPFDANDDADR  
DAENDSKHPTVYYDYPEHSVTPLNPLSYFNNDTSSDSRNGPGTLVVSYSTHQNEFVSKY  
GNAWADSYQPPPPVDPNIAVAMANRLSYETNDSNSYSTSYYYWDEFGPEGYGFGPWKGT  
LTGRKLRTKNQCGNVGRQSPIDIRLTGVACLEHHQIRTRKGDFFKQHRPEHSNLKLSIL  
PSKLRVWFQRRPCSDLENPVCSEPPHADFPHGWWGFADVLHVDFKFPAEHTIYGQTFD  
GEMQIYHLHPGRRRLPVVSVLMKVAGDDNGDGNNDGHNEYLQRILDGFQYDYDTNRAKC  
AIAAIDAGHRRRKLQQRQHGEPPARPGGGTPTKGDHRGTQQEHGGEETISFSAEGFDSGTN  
AARFHAKATKVTTPGRTNFGAGHGSKAAKGDKRTKHRNKQHAQRASSSPLFEHDEHDFSNL  
SGLEIRASAAFNGRERLEEYARLLLPNNGTGNDDGHGHEHQSININATTDFTIRREHRR  
RLSTSRWNPHRSLVPSYFYGYDGLTEPPCSEIVSWFVMDGPHMEVSFNQLEQAKAIL  
FTNVDGSSCRETSVHYRNSVARPIQDTGPRDVRVHCTRDNYVPDKERQGMH  
>comp8540\_c0\_seq1; 465 156 2282 LEN=2333; translated  
MDTSPNNRRPTVQEVWQSRLDSELTKYFVEKSNISSPTSQITGDHKVYDKPIATISSPTC  
QVTGDDSVNEISIATASTPTSQMIGNCDTRSYQTKASTSNPTSQMNGELKSHEKKATAST  
SPMSEIKTYDCNSNERNTGASMSKSYEPGHKSQKARAAISNTTSHIYGDYKSMETKPTV  
SNSKSRLPPDDKKPHPTKATKSSLMSTNSDGAHKFKDTISGTSFTLACDYKSHKTKVT  
ISSPTSPTTPDQTFYPVLYTSSSITNGSQHVHSESETGTLASICSAQTKKTATTSTKNITT  
RLKRSKSPSTNRKMELLVKEGIEFYKNEQYANALKSFNTVLKSQMLCSSTERDDDPLIANT  
LANIGCVYLRQNRHQLAVESLQECVQMLRLKASGGIDDDSPTKASLAGVLNNGTAKSL  
QGDHQAGLPYYWALRDAMAVRKRNGENSFTTKNKEIANACYNIGRVSMFQQEYSIAKN  
MLKESLRLEKELYGNQSIETVDTLNLIGFVHYRTKSFNDAVLAFTALSIITAVYGSVHG  
TVAVSLLNVGMVLEKEEDLVGALRCFSTAAEIGTRLGLGRDDRCMRTATESASKIRRDLF  
SPSSPVQTEERSPSNSSNPNDRAEARTPTAEIPVIRSEKRSKSHSNKTPSPRAEINKYD  
SRSKPRAPKSHTRNEYSERFNEEEPTDYREDPFWEADNASIVAERREV  
>comp8541\_c0\_seq1; 254 591 1052 LEN=1546; translated  
MKVLSLLSLFFFVAVCTQTLAFHFSQAPLAASRTSSRSVAMGMAAGLAEAPAVLERPATKK  
SSSLSKQRHREGGETWEVRIYNDGDNTREHVARALVQITGMGEMNAYQTMMAHQNGIAS  
VGMFAFEVAEYVNEGLQKQGIVSDIIPVDEDFQ  
>comp8543\_c0\_seq1; 614 149 1717 LEN=2151; translated  
MDTTRNSNAIATTTKSNRDKGGIGVVVLIGVSAATCIASVGYWYWCCHHHGKATAKRDG  
ANKKKRDRRSNGAIGDWGPKPKSTTSNDGDDSSSSSSPFFELPQHLQRELHKEERRKAS  
VRFLARKTPLYENIEMYAPDGATMLCTIGRKKANWYVRKELAVWLQGRTRGAGGEEKEHE  
NEDKNGNGNETPSIRLLFEPKNHKKKTKDESSPKPASGETGITSCGQNVVSDHHEEQMRK  
YNCTHKLNICVSCGALDATASAEASGTNANKTDGESLSPPPTQNAAAAAATSTSTATTG  
LMRHVVPYAYRRLPTKFKTHMPHDVLLCLDCHIDAEQAAKVLRTDVYEESEFRDPTT  
RPAVIDFEAKAIKSKARALWQHKSCLPQSRIDEYENELKRYLAKRTASKEAIDPSIPPI  
TDNHGKGVGDSSILLSEAVLRHLALALEAETPNPNYVPLASLVMDNLCQTDEDIQEFVVG  
WRNFFVETLQPRYLPTGWRVDSVPRVDVDPEEVEGDEKLES  
>comp8544\_c0\_seq1; 359 98 940 LEN=1261; minus strand; translated  
MIAGDENIPSNSSQIVYPILLVSGATLCLFDLGRGPKSIGTYFRSSGESTESDKDRML  
VEKIGLSVFGGFAYLFLWLGLLVGSILIVNSTGESNLFLDIFELYFRIGSLIFGGGIVVL  
PMLQSELVPRGWITNEQFFQGLGIAQSMGPMFNFAAFLGAVTAGFPGSVTAAGVLFVGP  
VILIFAMLPFWSRFRHLAWFKAVLKLGNASAVGLIVSGCVTLYPKSVHTYADTMVFI  
GLATVYSFQAPYVIFWGCILGALFSSEVLNVGQKLLFATS  
>comp8545\_c0\_seq1; 613 135 1256 LEN=1256; translated  
MPRQHQRRTESDEQKPPNGKKQRKRPRTPSPSKQQQQEQRPDPPPPAPAALVRLKLD  
KKVLDYFKALQLNLAYDVEKWKTRSAHQEELKKTKEERQRENERRASVVRSSKDH  
QVSNDAQSDEGKDSFFDFECSSSSKDENDSGMEGNSNRDGGNDNADIASSTNRKNRSP  
MLTGEATEQDLQSTDTAAPRSFKHFHDSDDDESEENNDGNSEQNAGAASFPRTI  
PENH  
KRNPVVRNGKGEQQWTRERRGDWDPEEAEIETQTSAKHDRFPRTKDETIVVSNRIRV  
GWKL  
LRKAQNCLEEIGIVLAATVAIPENNHNGNNGNAGDENSSACERFQIKIGKSQGDVATEDL  
LGVHDCGDDDDDDX  
>comp8547\_c0\_seq1; 262 476 1435 LEN=1435; translated  
MALSLCADCVQYSWSDNNHQKKKAVYIQLGGSSRFLQTASRRLKAMLESRIAMRDP  
CGGG  
IHPGSPGDATDATAHNPAARHKRHHHRQRQRQQQPDVSEDRVHDCLSRIVHWICNSE  
DLMELLRLTKLPRLLRMNRTVSLVLDGIANLFRLLPEQDHFSTRGYDIGDKNPWHHRA  
VTFFQISNLCKELSSVFEVFPVVLNECTSRISSESTTNSPVLEPAMGLAWSQCVNCSFFI  
CRESRNLLNTAESATRTTTSTTIAESIQTSDSVQVCRRLVQLRASHISSEYSRAEFWID  
RSGVHPYEHDFGQENQRRKY  
>comp8548\_c0\_seq1; 647 1 1734 LEN=1784; translated

KVRRRPLQQAIYLG PQSKLQLFTRVMRNHYRVL LTFSPPLLVSAAFVGNRFSQSSSTAS  
ASSNLIGTYPRLYMASDKNPFSSMIGDVASSLFGAGTKGDQQSASKVDEALGKIGGDGSK  
TWP ELRSQLESQQTTEERNFRANLEKGYGIQGSMPHKIRLFDENKEEDIAVTFYRDSA  
SWCPYCQKVWMTLEAKQIPYRVEKINMRCYGDKPASFLKQLQGGQIPVAIINGKVYQSN  
DILLALEGLPQSKRSLNPPSHLRGEAQQLYGLERQLFSGWGWLTSGWGKDQFIDTLKYV  
DSVLQKADGPFPLGKDFSLVDVQFAPFLERMVASLLFFKGFVIRVPPGERSTA EYPGINA  
WFDAMEQLPAYQLTKSDYYTHAWDLPPQLGGCRPEQGSKPYEDAINGVRS LDGTQGSWEL  
PLQADNGGVEPDWTFIPGGEPEARREAVERISANHDAIVKFACRGAGSKGFPNFGAPLAD  
PNAVPNDALQNTVDKCLRTVCSALLADSVDGHNAEMEAI AKTIVSEGGKEYTGGVVASLA  
YLRDRVGVPRDMRLPAARQLRAHLNWSIGMILDASEN

>comp8549\_c0\_seq1; 676 1 1903 LEN=2003; translated  
XDSKNGNHSPFRILICIKIEREDRKSSEHNYFMVRCNHITIVVIVEAAIREVMKSFYQII  
LLLINLPGQLLLSSHAQIYPSVEDELLFQVGAVASSSFELSLYPTPTKLDNRATAQIQNK  
VENVLLSSSSSSDFDSLKGIKISVERVQFIEGYKQERSTAESNKKVSFINASIFQFKA  
ITYFDVNHEPYSNPSQFTVDNLIVRTFSQPSTKSSFIELVGLTGD PFLVDVEGIGIDVKS  
NERVPTKDKSTQLSRVDIILITSSCFILIGVVLVLF AHSKKEGYEDLQE QKYFKTKNRSK  
VTTDNASQVDGTDENDPIKAQEGQISLSRMSVEKNIIEAGSLESSIDSQSQIAISLTK  
SPEVSVASPSPHFTSGPSSSDMSSLDTSSSDSSSSDSSSCSPSSSAFTYRMDESICKSI  
REQSDSTLDSEPMGSEEINHYSKVHTAATSELALKLLNL TNTATYVSRKKFGSGYSSSVS  
APTILEEAAGQYMNESKVDEKSIKSAQSAGSIESVESDTTLNASNPIFKGLVMFGSTQEF  
HNSWMESRKALEDIEEESIDDV FHV DVQRSVIFNGETEAAKSTWSPSVSEWMKSIRVFN  
SASEMQSSAFSNGKENDSLDLSLESSLATSIVEP

>comp8550\_c0\_seq1; 451 343 1509 LEN=1735; translated  
MLSSVFRSSIGSRASRLACRSKNRQLSRQQKASFWNFFRETSDEASESKSDEKPMVTITG  
LDGFLGPHVGLFELKSGDYRVRATVRKNYADKSKMDA I KEAYGSHFQDL DVVEAELLDED  
SMMRAIEGSTYVAHLASPYLDNKTRDEL VGPVAVRG TLSALKACTESGVKRCVFTSSYAC  
IRWTGEEDAPSNGVYDEM VWSNPDRPGGMSDYAVSKLLA ERAAWDYQRDHPELEVVAICP  
TLLLGPGIGRPNVVSEEFKAI LEDWTPSIK CASNYSDVRDVARAHFRAI AVPGAANHR  
VLVHGEAVTKEEIRTILEELYADQGFSPGVTTLDDAGA QGIVNDNSLSKNLLGMEYTPVQ  
KTLKDMADGMIASGAVGPHGGSDRVA

>comp8550\_c0\_seq2; 451 343 1509 LEN=1847; translated  
MLSSVFRSSIGSRASRLACRSKNRQLSRQQKASFWNFFRETSDEASESKSDEKPMVTITG  
LDGFLGPHVGLFELKSGDYRVRATVRKNYADKSKMDA I KEAYGSHFQDL DVVEAELLDED  
SMMRAIEGSTYVAHLASPYLDNKTRDEL VGPVAVRG TLSALKACTESGVKRCVFTSSYAC  
IRWTGEEDAPSNGVYDEM VWSNPDRPGGMSDYAVSKLLA ERAAWDYQRDHPELEVVAICP  
TLLLGPGIGRPNVVSEEFKAI LEDWTPSIK CASNYSDVRDVARAHFRAI AVPGAANHR  
VLVHGEAVTKEEIRTILEELYADQGFSPGVTTLDDAGA QGIVNDNSLSKNLLGMEYTPVQ  
KTLKDMADGMIASGAVGPHGGSDRVA

>comp8551\_c0\_seq1; 566 190 2324 LEN=2941; translated  
MSSSFPNPSRFSHAPSADDPGRGLGESEGEAQHLGASVSTKYSARNDTRLSPNTSFAEG  
MDLRSSFLGSQKCEAYAKAEEDGDGTCTCTYTDLTF SQSNTFHSCSTLSSSVDFLSITGS  
STPKPDLEDRRSPRGPRPPTRGATEGPHIRTSVSI CQALLNSPSNQRSAPSSHRQGRN  
SAPSNYKSNDFSIDSTAPSSSSLYPTIPEGVIGIT EDHHEWYAGFFPPDDR LQRSQSAD  
CNVAHFETAGGMSQSPPTVTTADEWAPPNSLPTVASELSAFYQAAL EEAATLT EEEEEEL  
LKRQREL VVEQPEFLNQIETA AKEDCCTLGESTAASSKNNPISQFYRAALED SALDEAEV  
LSLQGNRKGKDHGQEDES DLAPAGNSSTQTEDTVSDDSPGSFYQSALEEAACAERELGLG  
SWGLPQDESEDCIFATETRRPSSHVLDRSFTSFGGQSLDNSLSRSALPANRTLGVRSARG  
ETEGLTRTDAPLSPRKEPDSTPVAKHSEVTYEYLD DENDRDLRLAIQLSKLESSKTTK  
APSNLDEKWSCTAVEESQAAPFD TDDAGGIDESVRSQQKAMEEYEQSSTSLDGCPYQKPG  
TPRSFASALPREDHSASSPSLGGSKETAEEA QPFGNTGDDGDQARHLEQFLAHSEVQG  
LPATAPGRSLCTGLLSKMPNHL SGVDKGLANDRPGETPTRGHSM TLRSLI

>comp8551\_c0\_seq2; 182 190 2324 LEN=2782; translated  
MSSSFPNPSRFSHAPSADDPGRGLGESEGEAQHLGASVSTKYSARNDTRLSPNTSFAEG  
MDLRSSFLGSQKCEAYAKAEEDGDGTCTCTYTDLTF SQSNTFHSCSTLSSSVDFLSITGS  
STPKPDLEDRRSPRGPRPPTRGATEGPHIRTSVSI CQALLNSPSNQRSAPSSHRQGRN  
SAPSNYKSNDFSIDSTAPSSSSLYPTIPEGVIGIT EDHHEWYAGFFPPDDR LQRSQSAD  
CNVAHFETAGGMSQSPPTVTTADEWAPPNSLPTVASELSAFYQAAL EEAATLT EEEEEEL  
LKRQREL VVEQPEFLNQIETA AKEDCCTLGESTAASSKNNPISQFYRAALED SALDEAEV  
LSLQGNRKGKDHGQEDES DLAPAGNSSTQTEDTVSDDSPGSFYQSALEEAACAERELGLG  
SWGLPQDESEDCIFATETRRPSSHVLDRSFTSFGGQSLDNSLSRSALPANRTLGVRSARG

ETEGLTRKRTDAPLSRKEPDSTPVAKHSEVTYEYLLDDENDRDLRLAIQLSKLESSSKTTK  
APSNLDEKWSCTAVEESQAAPFDTDAGGIDESVRSQQKAMEEYEQSSTSLDGCOPYQKPG  
TPRSFSASALPREDHSASSPSLSGGSKETAEEAQPFNGTGDGDQARHLEQFLAHSEVQG  
LPATAPGPRSLCTGLLSKMPNHLGVDKGLANDRPGETPTRGHSMTLRLI  
>comp8552\_c0\_seq1; 314 1 1269 LEN=1284; translated  
XVRDGNHRAVAVRLSTGTAAYRCVLLPSETAAAASDCLEGLVSAGDGNNGSDGNSDGDGR  
VLALGRLLLRGDGGSPCGHEKEDEHEDSPRTQNRNRNQHRPPSDGLGLVVFQSEERRRTPG  
RTPEGPDHGDGPDDVFLAIQETVANGMKRSVFRKKMEPTDVLSCYCRFAGKALNRSLEDAE  
RTKEGMLRWKKTAEATLGRVQQETKDTLLANFARLRNRAHERHRAELSELSREHRAPREAD  
SWSAPATTERTDPAVHPADDEAPGPDDDDHDDQALGLGLLALAEGRRLRGEQPRTAVLAP  
GESVDMVGLSRESRAFEDDRKXTEPKARADRRSAVNQRNRCRANPRGAAAAASLAVRDG  
GGDGRTRASGGEGTARTTGTTFSEVPGGRTGDHNEKKEKETAQAIDRSIELPHEFYRILQN  
YSA  
>comp8554\_c0\_seq1; 549 194 1105 LEN=1656; translated  
MPTGSGRKRKTYGFVRDLDEEFLQHQQSDDNDENDTTCNGNGSHSSISVNDDDFVEDESGS  
AIRVEKKRESRVNTQNTKKKDRRGNGNSAQKEREKAETNEQSQKEIKSNDIRITADDEDHF  
ETTATSTRNEKESKTIISLDSFDVVLPPSIIGGGGTYENQCTLLVEVSDTTDAVALGEF  
GGSVGAIGRFESDSNGITLCLKGNQYRGSLLPGPTCMVVGFPSTFGFKKKEGPIAATKQDQ  
QVEEMSPSSAFPTLRVEAITDEYATLVQIADHMKTLDAVVIGNQNSHETNGKNENKDKI  
PK  
>comp8557\_c0\_seq1; 347 464 1563 LEN=1590; minus strand; translated  
MHRQHHLASTICLEGCVARRRCGVAAVFCSSAGRGASPYEDGAGAGAASSGFFRTHVLD  
WIMLTXVSSASASAAAASEAPPPTKSAAAAAVRGLDERRRVVSGVRGRRTSGSRGLGRWS  
GRLSGRRFLATATAPSSAAPPATASEPAAAPSKSATASVRVVVVAVVPVALVVVVVSLT  
LRGSVSTPASAAPSASLVVAPASLLVGITGPPAPGHAAVPAPPAFASVVSAPPSSAPVV  
LPTVAAVAVVPATAPAVAIISLGSSTGQPVKGFVCGSRLSPAASVAAAPAVGIAAVTVIPT  
VVSLGGFVVFVVFVIALFGFLVVQVLVAAALSRGPESTGHGQSVSLFRRARLSFSMNNAK  
QNETRR  
>comp8557\_c0\_seq2; 314 1 1313 LEN=1734; translated  
EDINDFLDYVVMVNNKDVGYMIKELVGMEMEFNCQAVAEKVGEELSGFLAKISGAGNT  
TGDEPSGTIASLKPSSSEKGNALMSGALGASREGGRNKNLDNQKAKQGDNNKNKNKAS  
NETTVGMTVTAAIPTAGAAAATEAAGDSREPHTKPLTGWPVEPSEMATAAGAVAGTTATAA  
TVGRTTGAEEGGAETDDAKAGGAGTAACPGAGGPVMPTRSEAGATTTTRDAEGAAEAGVET  
EPRSVSDTTTTTTRATGTTATTTTRTEAVADLDGAAAGSEAVAGGAAEDGAVAVXEEPST  
GEAAAPATETTASAGAPAADAAHYHPSPLVQASYSGRGGRFGGRGRFRGRGRGGRGGRTHVV  
NMIQSKTWRKKPEDAAPPRPRREMLLYQRNKKKRLPHHTGDGVPRNPRGKSWMPSGV  
GDALRSTIREDEMEDT  
>comp8558\_c0\_seq1; 1057 348 2136 LEN=2136; minus strand; translated  
MGTFEAAQKDSKSEDKQVATTKKPKTKRQRRKDLQNSDKNKWLIQHPKIQSNEKRQQVYI  
KDAGLNETKAEKRQAPIDPKLDLMSPEVKFGRLLAGTDQRKRHAHAVKLLKAYLKARSDIS  
EVVDGDLGESTSGGISELDLLKLWKALWYTYLMADKKAVQEELSKQLVQLLWCVVGTEEE  
DEYAGRAYLEMTEAEEQELEEEDDSDGEEEDDHEVTLEEIENTIKEELDSDDNGEIEE  
EEDEDEAMEEEDPEGSDEIMELNDEEIPHCRGAHLASIFVRTFFRTIRRWDGTMKDYRID  
KFYTLIRLMMHEIYEYMSVRSWNYGIVLLLNDAVFEEILKHPNGLRYHLIDLCLLEELAK  
VNAKAKIQLTEATFLDVLEPFFGLCQTGRNDDTVQERVMEKVMDFLENYSIISDRALKE  
AEDEEDNGTISIIFSNVHVKTIAEFFFTLGSDPATKDHFRKSLYDMHKKYMRRLKKGKDV  
EITDDEDGNEIYEGEEDAVVDDVNINNIDESIRFLEAETGENQEDSEDDDDMGDDGEEP  
VAKVEAEKPKKESKKKKRKSIDPEPESEDNSAPASAEAEAGDKKKKKKKRKSXPX  
>comp8563\_c0\_seq1; 230 1 431 LEN=552; translated  
XAPPVPAQHVPGDAPQVAKELTSFTESIYPPRLTVFRPTTHRSQSTTTMSRGNQRDTR  
AKRQAKEAAKNKGNREGTPAQRNQEDAALQAKLAAKAAKADAANAPEKAPVARKKV  
QKKTETLDDLLNAGLSKGGKGGK  
>comp8565\_c0\_seq1; 321 97 2102 LEN=2367; translated  
MTLQEYTPDERENTSSTASTLMPLSFSSTADAINVAKKPSLGQWIVPIIGILLAVVAYFL  
TKGTQNGYISYDGKNTNSEYLELLEIPEYDEEEALRHIFYSKAAFCTERAITSWSCGEIC  
DNAPVVGNDKIRYIPEGQRFVQGYVAQIPGNNDLVRSNVLFDDNPSNENGRNDDIKCM  
VSFRGSLKPANWYADFLMLRPWPLNDLSGVDWCQGCKAHHGFAQAYDEIRTDVHRAIED  
LNCTRLVLGHSLGGAIATIASFDLRAAIGYHVEATWTFGKPRIGNAEFVTSFVAAATAQ  
GISPPIWRVIHYHDPPIPRAPPHLPGVHPVAHGPLEIYYTNRASSEFTVCPQHGATENQSK  
SCMAGWPLYLSLNLHDIDYLNQSFQAFKNFPDEXQGHMILNDAAGLKNRNDPRCENQTLS

CLYVEGTRSSFKLALGLSGTATFLVLNDPGDTIFRRTSIELKSLEKXKXVSIPPTMVSVKSEERVFKEEKTVTTKTKGRKTKTKTWNERCVECKEFFEKNNHCKIPTNFKENKSLGIWVQEVRRNFKAMMQGKEARRPLTIEQIDQLDEIGFHWGFQRDYNKIAETDASWEKNFAKLNRYSKSCGHFEIPLGEEESKDLRNLGIWTRVQRTQKYRDTKRKCFITKDRIKLSDIGFDWKGEREIKNA

>comp8567\_c0\_seq1; 182 262 726 LEN=877; translated  
MGNTGGNNQVSPHIAGSRNKRKDSRLFSSINGPQLTNVDKEQMEEIIEDYEKGGREASGYVVM DVRENEVAASGKVPNTHTLPLSIVGNMGVVFEMDEDDFERICGFPKPTADETLVFTCAAGIRSKNACAYAAQAGYTQLVNYMGGAYEWFS

>comp8568\_c0\_seq1; 257 48 677 LEN=1318; translated  
MPAETLPLKPLVCLKTADFKNTDQVVEGKNTIIDFWTTKCTRCPDALDRLDEMAQDPKYQDVQFISICCDKLDGARGIIEKDDDLRWQNVNHYFMSKEDKETAKRLLGFQVPPFYVVMDEYGAITQSGSGRQVDFEEVPGVVRPDS DSSVGLVTDSDDEDNESFDDMGLDFELDFGNKLLIEDSESLQSSSSTSSPVEVLDESIFDLDDF

>comp8569\_c0\_seq1; 592 214 1827 LEN=1977; translated  
MGYARKGAGLPSVASVASVSLTMESSLLPFHKSTTQSRCS SSPAIVEGSDSDSDDDDERYMYEINNNPGNQALGDLIRRKSGTSPSPWAVFDAGAGNDVGENHHGQMSSDENFLLSDESVRIPERNECQDTNNEIASETDILKAYDKFLQQRSSVHFGYPYNLMYDHSELFEFMKYSINNLGDPYVTSNYSVHSRQFERAVIDFFARLWKADKDSYWG YVTTSGTEGNLHGILVARECHPDGILYTSNETHYSIFKAARYRMDCRSIPTLPMGEINYDLLEKELSENDRKPAIINVNIGTTVKGAVDNLDRVLDILNRLEIPRERFHIHCDGALFALMMPFIDDAASVSFQKPIDSI AVSGHKMLGCPMPCGVTL SRKENVKVEDHIEYLN SVDTTIMGSRNGQAALYMWYSLRKKGLEGIQK DVEHCIETAKYLRDTLSQAGVSCRLNDLSSSTVVLERPVD DSFIKRWQLACEEDIAHVVMNVTRNKIDLFVHELLNSFQTHGRIKLAHPNSPLKLL ESDAWDIAM

>comp8570\_c0\_seq1; 281 381 926 LEN=961; translated  
MLIASMLHIARAYELSSRAAPLMRSPHHLFRAPFISSPTSGT SILGSKMLTPCFSRSLSSLEMAKPNTIVCDNFYISLSIPTMEMMEEVGALIAILSQPSDVMFLDGD LGAGKTTFSRGF IKCKLGVADDDCDD DENDTQENRTEELRITSPTYLLSNTY EYTEDDDYDEDEDREQKVM E

>comp8570\_c0\_seq2; 335 381 1265 LEN=1308; translated  
MLIASMLHIARAYELSSRAAPLMRSPHHLFRAPFISSPTSGT SILGSKMLTPCFSRSLSSLEMAKPNTIVCDNFYISLSIPTMEMMEEVGALIAILSQPSDVMFLDGD LGAGKTTFSRGF IKCKLGVADDDCDD DENDTQENRTEELRITSPTYLLSNTY EYTEDDDYDEDEDREQKVM EIHMDLYRLSGKSPRDFEPLALDHVFANCISLIEWPSRLQAFPELLPPHETLLKMDIRIPDPTSDKRVMSLISSTNSSWTRRLKYLVD EGMVDDMLICSDRDTDDHTAQVDTD

>comp8572\_c0\_seq1; 507 126 1787 LEN=2063; translated  
MATDDPSSSAEAMSPFSNQFKITFAAILFMTFLECVGYMAVMPSLIFYVRELGGSD EQYGLILASANFSSFLMPLYG SWVDALGNKYRLPLFFGSI FSIIGMILYSVAICFPKPIGVWVLLLSRIIYIGIGASSGSIYFSYIASVVEHDQLTYSTQLISMATYGG LAVGPPFFNSMISNVNTEWNVLGSGWILPLDALNAVGLLIATNDI IALVLMYLYVPEPPKKEKSESEAQTAGAAAADTTGSTDAAWSDFKELKSFRLLLPLITTYVVGANYQLIEASFSPAAMHGLGWGPVQTSAVLGGNTVTLVLF TFI SLYLSTEVKVRDGT MIMVGFMLWFVAGIGMYAFWIYPATAMDYVVPISIGLAGYPLIGPATRSEFSRYIHIRPELEPLQARLQSIIGMANEVASFTTPLFVGACVLRSP EEEVAGKNNHELTPFALYIPVFS AICILGWFYNALLEKDDVDEAEELVTEGTPLVSEGKKPRHSIACINSEFSAKNEVNRLRSASII LGAHMSVVVPFETEPEKKLREKLMEEKKQWENMIREMEQDE

>comp8573\_c0\_seq1; 236 1 1088 LEN=1100; translated  
RHAFDVSSLLGWL SRRQKTYEGGFSGRSNKLV DGCYSYWQGGAI AIASSRSGVLGGEGGT TSGSKASEDPWLERYYREQHRS GGGSGSNTGGRAEPLPFPLLYNVFLLERYILLCAQEITGGLRDKPSKPRDFYHTCYNLCGLSIAQHCGNHHEPGE GAGTAELGEEDTPPDPQKEDFFDPGFGDEHQTLVEATHPCYNIRIDRVAAILDMEWEETTENETNKTKRNERPNLVKERQEGKECQHSRRDGTNPFGGHVVGETMCP LQREPHPSNAGWWV VFSLCHSDAKQWAPGCPRGDTGAKQKQAVRVARNP GRAEGIREGRLAKGWLRF CRDTTIVLRTARGSV PRAATGCEYS GPVPI L

>comp8575\_c0\_seq1; 295 456 1607 LEN=1862; translated  
MPNGGKRKDIFFGTVKRRTTFVRGRRLWRIKYDDDEESLDIFKFHEALDLYEKCKELDFRKNHTRHEFSKQIVCEKENMNAKIHNNLSLHHQFLCGRNERQQKSIGRSIPGQEKCLGKTPKQELHISPTRITHWQKTTHYKKVATR KATSGRYTYTERSDQELHKQTKRISCDQDEMAQTATSHISKKRLLKPLRLRNHFFDEHGELFFEAQYFGKFEKTF SMPFAELKKEEPVMCAKYIREYISESRRGERPLNNWSKIVLKEEGSRVARPSYSAKESHSSISEIQSYNILDNKYISR

RVAKFSCSDSEIFFGTVKSVFEEIKTSSPLWHIIYDDGDEEGMDLMELKHALDLYSRCE  
ILEDTLGGHGCNAKVVDKYREVE  
>comp8576\_c0\_seq1; 187 326 658 LEN=900; translated  
MEAYEVTKEELQSKFPTTDLGKWHAGEDAEWPPYEEPEFPQLRFDVGEKVLCRIGPDAE  
KDWAPGTVTMLWYSEQTWPPGSFAPYKVKLDDGRSIFAPGDLQVIRRAS  
>comp8576\_c0\_seq2; 144 419 979 LEN=1221; translated  
MFNPEALGERNIAEQRRKDAFRNIEKWSLELIPESMREAAQVSGQEIVCGDPDCSPVDTL  
VTINFESGKDGFMFLPMEAYEVTKEELQSKFPTTDLGKWHAGEDAEWPPYEEPEFPQLR  
FDVGEKVLCRIGPDAEKDWAPGTVTMLWYSEQTWPPGSFAPYKVKLDDGRSIFAPGDLQ  
VIRRAS  
>comp8576\_c0\_seq3; 279 287 847 LEN=1089; translated  
MFNPEALGERNIAEQRRKDAFRNIEKWSLELIPESMREAAQVSGQEIVCGDPDCSPVDTL  
VTINFESGKDGFMFLPMEAYEVTKEELQSKFPTTDLGKWHAGEDAEWPPYEEPEFPQLR  
FDVGEKVLCRIGPDAEKDWAPGTVTMLWYSEQTWPPGSFAPYKVKLDDGRSIFAPGDLQ  
VIRRAS  
>comp8578\_c0\_seq1; 122 136 513 LEN=1652; translated  
MGSFDAGYGSTRMARLIGQKRARELWFLCRYMDAKEASSTGLINACYPHDDLEGRTAQWV  
RRIAMNSPTAIACTKAALNADEDGAAGIAQLGGELTRLFYGSKESQEGRDAFLERRPPQF  
LRSKL  
>comp8578\_c0\_seq3; 106 124 1113 LEN=2252; translated  
MKDNNSTEQPNASMDAARNPSRTAPPSKHRDGFELISRRPIRWTNYVRQQKQQQEPK  
FVDITYHISTEDRCARIAFNRPVHLHAFRPQTIREIQQALLLATDDVRISVIVLTSNVE  
SVRTPSFCAGGDQQVRSNDGGYQDGTETEPKLRVLELQVQMRRSPKILCVVDGYAIGGG  
HILHMVSDLTIASTRSVFGQTGPRMGSDAGYSTRMARLIGQKRARELWFLCRYMDAKE  
ASSTGLINACYPHDDLEGRTAQWVRRIAMNSPTAIACTKAALNADEDGAAGIAQLGGELT  
RLFYGSKESQEGRDAFLERRPPQFLRSKL  
>comp8580\_c0\_seq1; 293 86 1459 LEN=2795; translated  
MVLTKDLETTLLQRQNRNKLVTRNPQLLRVQDALEHILVVGAVRHNDRRKEFQRLNQ  
SQSVGDRNNHNGRQRKRKKQTVASVTTIHAEDFRIYGTSDVPRTRDIPTQEWRSER  
TKEQEQRNRIDDSEWNVEHGDSVPPILFRMARLSQEFPSQEQLRFLNDPRSSRMKSLQS  
TNI TVDDR DVPRSLIERCWERAVHAASTAIVTPVANGIVMDPAATARGSGNQNEYLHFDS  
SLPLSQEMCRKKCESLQVDIDSLRQKARPRKQAPSLVASPPEVCPRCTRSFETPNELLH  
YYGNEEAIGCCRALIRPKQLKLVRTLQSHVQSQTDLQLSIILSRAKAEENASEADEHLH  
QPTADRSDGNTINKRKEENRTLEWKDVCQFLEDAVKNPTVIQDHRSEARHPVQOSLETAK  
GADKKKVASAPWPLILNPMVLEAANNRLVDRYANLPR  
>comp8580\_c0\_seq2; 293 86 1459 LEN=2596; translated  
MVLTKDLETTLLQRQNRNKLVTRNPQLLRVQDALEHILVVGAVRHNDRRKEFQRLNQ  
SQSVGDRNNHNGRQRKRKKQTVASVTTIHAEDFRIYGTSDVPRTRDIPTQEWRSER  
TKEQEQRNRIDDSEWNVEHGDSVPPILFRMARLSQEFPSQEQLRFLNDPRSSRMKSLQS  
TNI TVDDR DVPRSLIERCWERAVHAASTAIVTPVANGIVMDPAATARGSGNQNEYLHFDS  
SLPLSQEMCRKKCESLQVDIDSLRQKARPRKQAPSLVASPPEVCPRCTRSFETPNELLH  
YYGNEEAIGCCRALIRPKQLKLVRTLQSHVQSQTDLQLSIILSRAKAEENASEADEHLH  
QPTADRSDGNTINKRKEENRTLEWKDVCQFLEDAVKNPTVIQDHRSEARHPVQOSLETAK  
GADKKKVASAPWPLILNPMVLEAANNRLVDRYANLPR  
>comp8581\_c0\_seq1; 365 1 993 LEN=1108; translated  
XISEAHSGIRKRKILCQKNDGFDQKIATVSLLAIAFCDALTPKSTIGEAQRNEQYKKS  
VSGIKELTFLHTKPETALLGAETRGGAAVDDIASFVPSITFLLSAAALALLAFEIRGS  
SLPKTIGTWSLFWTTIAVGWDNLIIGLGKPFSDAETNKKKYDLLKALSIPRFTAHAVFV  
PFLYVTCGEIGKALNIGWLQGDVQKILVAAAALGII SRVRFVNSPGIELSDTSDSPPN  
AWERDLVWFYVKAFLYVVPAILVLALEIVIGIAALLEGSHRAAAALMVFAVAVLYGN  
AKPSYIMRFTGNIVEVVMLWAVFLAAFIVL  
>comp8581\_c0\_seq2; 442 59 856 LEN=971; translated  
MRASIKKIATPETALLGAETRGGAAVDDIASFVPSITFLLSAAALALLAFEIRGSSLPKT  
IGTWSLFWTTIAVGWDNLIIGLGKPFSDAETNKKKYDLLKALSIPRFTAHAVFVFPFLYV  
TCGEIGKALNIGWLQGDVQKILVAAAALGII SRVRFVNSPGIELSDTSDSPPNAWERD  
LVWFYVKAFLYVVPAILVLALEIVIGIAALLEGSHRAAAALMVFAVAVLYGN  
IMRFTGNIVEVVMLWAVFLAAFIVL  
>comp8582\_c0\_seq1; 886 144 2474 LEN=2831; translated  
MSDSRKRKMLPLRAHVPMDKTVASQTNVLAKAIDEIYNRNASKLSFEELYRNAYNLVLH  
KHGTLLEYGVTEKINSHLTETAEHLNVPDTSLLLEELSTTWSEHLITMIMVRDILMYMDR

TYIQQRPRPVYKLGHLFRLTVWEHPVKKERSIELLMASVRSERNGLLTDDRSLVKQVL  
GMLLELGLSDGSNVYENDFETPFLAQTQEYYRVESQGYLSQNTATDYVAKATKRLEEEKD  
RATALALPLATETPLQSI IETELVERHARTLVDMEHSGFACMLKDDTKLSELRDMYTI FA  
RVPTSDVNLREALAERIKADGKALITDQEKRASDPPAFVKGVLQMRDRYDKIVEFSFRGE  
KRARKRMRESFEDFLNTDARAASCLSVYVDELLRVGLRGATEDQITQELNKVIVVFRYLS  
DKDVFESFYKQHLAKRLLMGRSVSDDAERAMVSQLKAECGYQFTSKLEGMFNDMRI SRDM  
QDSYKTYKRAQAAKQSSGETNGSGRPIDIEVDVLTNGYWPSONIPACTLPTVVQEAIDR  
YTKFYLEKHTGRKLSWQTSAGSAELKATFGSDPNKLRRYELGVSTYQMCILLLFFNNAKTL  
TLGQIRLNTHIPNSELRRHLVSLCTPKHRILRKGSRGRGITSDDDTFTFNPDYTSKLRV  
RIPLVKETSVSKSGDGANAGGAGGAGAAAASAANGAVPMKVEEDRRHLVEAAIVRIMK  
ARKSLGHNELFAEVSRLSVRFTSPQFVKRVESLIEREYLERSEDRHQYSYVA  
>comp8583\_c0\_seq1; 359 234 1592 LEN=1823; translated  
MRQHGTPSSSYAFRLIIDGCNGPIRFREHQLRRVAAPGAEGNRHHPKPEEKQEEEQETYD  
EDADGNPSGASPEGAEHTGSEEDGEILSFLCPESIAEGWKFLQREKRSQTDKKNRSHRG  
KKRAKPKKGRHNTVKTNLGCVGDNKNNDNCWHQMESSNRMDMVPLLHKLLDSSSGDGD  
RSCCFESATVIFDGVSITKRPSVPGAKHGTGEDDNDNDQSEIREERVWNVYSNTSASPRI  
KNGTNGIDKSPLTVEVTGLFDEADNVIVDRIQECAAARAQRCEEAGESSPNRIRNVGA  
CNSRIHIIRRTDRGAGKNRTAFRHLGLLRPDSVACVFDLLCAVDSTGNNGTVASETKEKN  
YSSLSQFHSLALDGDRTLRSLRQNNPGNVFLCIDEPQVEVEDVFAEGSSERIGEIVLPI  
VATDDIFLRQRIVKEGGYVMTFHQLWLLLLDA  
>comp8584\_c0\_seq1; 1297 1 2917 LEN=3049; translated  
XNNMNDNKSSSMATSLNLLGSTAGESNQIPSVAAAMTEQERNEVVALLRSSIECVTN  
GTCDPVLYQAMGALHRYTAACAGLSPPTQKPAFVLREDCGPRTNENDNDPDQEDALAYGW  
LEELSPASLDSYKRAEKAAWNVLALLVQREPTDEPCLWITREVVPTERPYETDDETDDE  
ETPRGNENSPDRRGPALETELHKIPLKRRLLKSCRYQNFYGDHRIIFLKHVLRDQQIIVL  
KCPSAIAAKSWIDCLVQTKKQKLAPGSDDATHDNIEMIEASLSNLPSVSSTEGDDNDG  
NHRGRDRGRTRIINVIDSLDEADGDYLLSGDAPAEATGSPARAKKPLAEQLQEAEDRKRA  
QQLADRNEERKQRMELERLVAIEKGVKIVKIETQKLEERKQEEAPKEPKKAPVTAEE  
LERERLQAQRKLEERLVAIEKGVKIVKIETQKLEERKQEEAPKEPKKAPVTAEE  
KQRLRMERIEAARKRAEADRRRIEIEYEQAKKERAQRRRDLEEQRKKAREEQRKKDLLK  
KKKFLSEQRKEAMKASAMKPPPKASAGIFSAATSATAVSSGAVATPSNPNKVDAHP  
NGKDEKGNLWFLGQMSAFEADEERKQEAQKREEDKEEKKEEDPEQVRMIAEE  
ARQLVQDEAKKIATETEAAKLAAFRQQQELQRKAWASKGGTAPIGSNSPTTNYNQQR  
SHRSLSPNTAPYQHHPQQQPSQSSSPTPPYPASHNASRQPWNQMNPSPYPPQQPQFQHPQ  
QSGVAAGSSLPGYHQPQHPSPQRPPGFSNAMP SHPNHPQTQTHSQHTAQEPTAPRST  
HRQSPPPRPQPTNGESTESTLKRSLVLTWGLQPPAMQVLKPVSQLICSIHTVFPFAFGM  
AAHEYFRGWKPVAASEVEEPKLLKTVRKIRFFLHPDKLPHDLTEEQQFLCKLLWDVINDA  
FEEHKKSKEDLDW  
>comp8585\_c0\_seq1; 588 105 1949 LEN=2009; translated  
MVLQGGDYLRIHHTPRRFHRVYEAWSFPSSNSTAHQTDSPIDESKNGSLPMVIQQRGR  
GYCIDKPLPIPVHSTVDNNVETVASQLLLSLEEEQRQQRNASDHDAVDPPYLVPVQRID  
VNTSGLLVLATSPEFAAYFSELLRRKTATILDQSGNSTGTGKSARQKTNNTTGRSNKGDG  
VPTVGIQKGYKLVCIQPDKSSGESVVEAWRRLSNLQRPKDQSPSKDDNGGSEAAVRGSI  
IRHYLKASDRAPKLFVDTLPEEANGDDDSKWYECLMEITDVGEP IPLFSSDSIQRGGPAD  
GLWPKAAIDGGFQSRIPPNTKAVAEVEVSLITGRTHQIRGQLSKLGYPIVGDEQYGGALQ  
LPEISGISHETGSGFDGGRVESEGPLPPQLLALQCSYVGFPEAEYELTWHKKRRDVLGR  
PSKSGRTIQQTLERAWWTPVLEQLGASEETGEPRFSDIDFEDGPHERTAPIESSVEAQR  
RDAETTSEAMVRPDLPPAVQLSPGRNKYIVARLRDPI TDRLRWFVRSAPLPYHADVALD  
LLEWIGSVPGYTTREVEVTGGRIDYDEALSTVSVYGFYSYRYGKGDHVRVAQLIQDSSFG  
GDNTVSYDLSDALY  
>comp8586\_c1\_seq1; 272 1 581 LEN=866; translated  
XQQQQQQIRSDSHNDAANIRTEDHKNKKTERTSLTKQDLKRRKAEAQTVMDISYWKHFV  
SKQGHLLQVTSKLSMDENFYSPFKQTPEATRAGRAKTPEAAGGNAKGIATFQDCLRER  
HSTNVAIARVQEDLESLEARQHVEGGISMAMANLLEARQALYQAKLSESQKAGYLPRRV  
VRANEAINSEGTK  
>comp8587\_c0\_seq1; 518 97 1713 LEN=2031; translated  
MALQQELARNNPRYEFYDESNPDASAEDAEDAESIYTTVPTKNHERERIPFVYSLGRRY  
HPVYDYDERKQYEASLFWWTYRYGFPQLNSISTDAGWGCMLRSAQMMLSQALRMHFKSRH  
WRPDPSTSVARNDAFVARLLTFADFP SGNESFYSLHNMCAAGMAGYQVLPGDWYGPFTA  
CHVVRDLVGLHRQKQPNLFRVHVSSEGTVYKDLVYRLMTREASAATKRRRREGSDGDND



HDHHDHHDHETAVPAEPLHPLDPSCLSRGPDDEPDGDLEWDAGLLLLVPHRLGKDSIHE  
SFARGVARSFALPQSVGILGGRPRGARWFGAYADGSKVLGALVVLRFIVSRLVACRAFS  
FFRLHDLRCSAHSNIFLVSLREPTARPKTNHAQAXDPHTVQEAPRRKERTGGATTTAIDG  
GFESSIDLTHEYLASVHTPYPDVLDLNRMDPSVALGFYCRDRRDFLDLQEALSRDIPGGT  
HQQLVSFVDKVPDYMLSELQGD CDVDVDGDIDL DGF DGGGFGDPKRDELSDEEDYVLL  
>comp8587\_c0\_seq2; 551 97 1554 LEN=1872; translated  
MALQQELARNNPRYEYFYDESNPDASAEDAEAEDESIYTTVPTKNHERERIPFVYSLGRRY  
HPVYDYDERKQYEASLFWWTYRYGFPQLNSISTDAGWGCMLRSAQMMLSQALRMHFKSRH  
WRPDPSTSVARNDAFVARLLTWFADFP SGNESFYSLHNMCAAGMAGYQVLP GDWYGP GTA  
CHVVRDLVGLHRQKQP NLF RVHVSSEGT VYKDLVYRLMTREASAATKRRRREGSDGDND  
HDHHDHHDHETAVPAEPLHPLDPSCLSRGPDDEPDGDLEWDAGLLLLVPHRLGKDSIHE  
SFARGVARSFALPQSVGILGGRPRGARWFGAYADGSKVLGLDPHTVQEAPRRKERTGGA  
TTTAIDGGFESSIDLTHEYLASVHTPYPDVLDLNRMDPSVALGFYCRDRRDFLDLQEALS  
RDIPGGTHQQLVSFVDKVPDYMLSELQGD CDVDVDGDIDL DGF DGGGFGDPKRDELSDEE  
DYVLL  
>comp8589\_c0\_seq1; 360 30 1136 LEN=1533; translated  
MSKQAERSLTILVMDVSPVTWGKREFIRNRRDKERSEKGGTIGPANLDDL SAVQAFSS  
AYSSLERDSALILVGVAGSEVAVVHPRKDDMEEFNNPESKLD SRKI QSDLLEGV AELVA  
RAAAKQSSGLAGKGGPSSSLAAMASGFSIALCLINRFLVATNAGVSALRDHDSWSRGDGS  
DQGIITALS GTGGGKPAAKARAWSPRIFLIQASDDRPSDYN AFMNCVFAAVKQNVVVDG  
CFVVDPTGKTKTSPYLEQTCDLTGGLLSKPIGSSQSNKALTEILLSVFLPPRSSRPRNL  
PGIDDVDFRPRSFDTRALLKIAFVCNQCLSIFETKPVGTCTCGAEIRLPAAPGGSGSGQ  
AAKKARRG  
>comp8592\_c0\_seq1; 304 157 855 LEN=1793; translated  
MVYFFTAEYESASSTEQYPEFQTFDVYMGKNQSENELLIKYGHPEDVWFHVDNLSSAHVY  
FRMKPGMTMDDVPKEA ILDCATMVKANSIAGCKKSEVTVVYTRWKNLKKTHGTPDGT VGF  
HRPDNVRIRVKKDNFRVKSFEKTRTEQLDKVEEMLSKSKQERRLKEIQRQKKEHNRMEQK  
AKKKAYQAQQIEKHNSYDRIHIDNAHKMTSSREMAATADSTAAEEYEDDF  
>comp8592\_c0\_seq2; 248 157 525 LEN=2159; translated  
MVYFFTAEYESASSTEQYPEFQTFDVYMGKNQSENELLIKYGHPEDVWFHVDNLSSAHVY  
FRMKPGMTMDDVPKEA ILDCATMVKANSIAGCKV SIGSDFLVRECIGAIIVLYLVQNEKR  
FH  
>comp8593\_c0\_seq1; 543 133 1713 LEN=2523; translated  
MMRLKMGKKHKEKNDDSSSNNTSTQPSGKSARSSNATTNKTNNNNASSTAHSKTQPNEG  
IVTNASTSSKRGSSNTKSPSSVNSNELEKVYVQHPGADRSALKELPALRDAPPAKREEL  
FVLKQLCSVIFSFDDPMTDKRGKDMKRQTLLELVYVNTPAGQKIFTESVMGDLMAMVA  
ANVCRALPPATDDFDPEEDEPVL E PAWPHLQVAYEFFLR FIVSSEVNAKA AKKYVDQKFC  
LQVLELFDSEDPRE RDYLKTI LHR IYGKFMSHRSFIRRAISNVFYRFVYETERHNGIGEL  
LEILGSIINGFAIPLKKEHLQFLVRALIPLHKPKCV ALYHQQLSYCIIQYVEKDADTATP  
ILNGFFKCWPWSSSGKQVMFLNELEEILELLGADQLAQVSDMLFTNLARCLDSDHFQVVE  
RALFLWNNEHLVNSGCL SRLNAQAVLP I IYGPLYKNSSGHWNATVEGLAQNVLKMYMEYD  
LVLYDRCTASYFQKEEDAKRKLAALEDRWTAIEKVASTNTPSILVS  
>comp8593\_c0\_seq2; 520 907 2481 LEN=3291; translated  
MSFELNMIQLKNDDSSSNNTSTQPSGKSARSSNATTNKTNNNNASSTAHSKTQPNEGIV  
TNASTSSKRGSSNTKSPSSVNSNELEKVYVQHPGADRSALKELPALRDAPPAKREELFV  
LKLQQLCSVIFSFDDPMTDKRGKDMKRQTLLELVYVNTPAGQKIFTESVMGDLMAMVAAN  
VCRALPPATDDFDPEEDEPVL E PAWPHLQVAYEFFLR FIVSSEVNAKA AKKYVDQKFC  
LQVLELFDSEDPRE RDYLKTI LHR IYGKFMSHRSFIRRAISNVFYRFVYETERHNGIGELLE  
ILGSIINGFAIPLKKEHLQFLVRALIPLHKPKCV ALYHQQLSYCIIQYVEKDADTATPIL  
NGFFKCWPWSSSGKQVMFLNELEEILELLGADQLAQVSDMLFTNLARCLDSDHFQVVERA  
LFLWNNEHLVNSGCL SRLNAQAVLP I IYGPLYKNSSGHWNATVEGLAQNVLKMYMEYDLV  
LYDRCTASYFQKEEDAKRKLAALEDRWTAIEKVASTNTPSILVS  
>comp8594\_c0\_seq1; 324 1 755 LEN=1374; minus strand; translated  
XATSAQEDLDGLSKEQLYERIVPLLGDARES IMQAIQRYGRLAKTKNGKKHRRNHHHHQ  
QKQPPQEAESGNNDNGRATDVAKSHLDDL TGVANALLKGEVNIYDASRHDFRRFP SLS  
TQPGSKPDSGGPAAPLSKNVKWEYQGNEDQLHVVTTEQMIAWVQSGYFVGAQRVRI RTI  
AVQGEKNASKPESAEP SLSTQDDMLADLMDDDSEDEEDSRPAKKARETGSTTTVKGEWMW  
SDEVYKMYML  
>comp8594\_c1\_seq1; 298 148 1091 LEN=1166; translated  
MASETSGEIHIHHARRWFLGGANREADDGDTGPGGVYQFVSFVFWYVAMIAXLPRPDL S

GAPAEAEVERNEQERRRREESGEGTDGGLGGLVVLGGTNGSVLLWTAVDGSGVLTLRVLN  
DSGAPPAADADATGERAKRLGEAMKETTFFVVRASDLLRKPAGRGEDDDDDKNDGGREAS  
FDPETNAVEPNDRNASDADDDDDDEPFAELRLPPGRTVPASCAICLSSYRAGDRVAYAS  
VCRLRAAAPAEGTCPHAFHAGCISEWLAGRDGPVRTVCPCCRRPFCAAVPLSPAGSGSRT  
VPSGDGSTPRTAAI

>comp8597\_c0\_seq1; 409 104 1069 LEN=1336; translated  
MNSTKFASKIVTSVARPSVRSMSSTANVWVDKNTKVICQGFTEGKQGFHSTQAI EYGTNM  
VGGVTPKKGGQEHLGLPVFNTVMEAKDAVQPDASVIYVPPPFCAAAIMDAIEAEIPLVVA  
ITEGVPQQDMAKVKYALRQQSATRLIGPNCPGI IKPGECKIGIMPGYIHTPGKIGVVSRS  
GTLTYEAVHQTTVAGLGQSTCVGIGGDPFNNGTTFIDCLERFTNDPQTEGIIMIGEIGGSA  
EEEEAEWLKEYGDPNKPVVGF IAGTTAPPGRRMGHAGAI VAGGKGTAAAKFEALEAAGVH  
ISRSPAQLGATMLKAMGLESE

>comp8597\_c0\_seq2; 403 256 1044 LEN=1311; translated  
MVGAVTPKKGGQEHLGLPVFNTVMEAKDAVQPDASVIYVPPPFCAAAIMDAIEAEIPLVV  
AITEGVPQQDMAKVKYALRQQSATRLIGPNCPGI IKPGECKIGIMPGYIHTPGKIGVVSRS  
SGTLTYEAVHQTTVAGLGQSTCVGIGGDPFNNGTTFIDCLERFTNDPQTEGIIMIGEIGGSA  
AAAAAEWLKEYGDPNKPVVGF IAGTTAPPGRRMGHAGAI VAGGKGTAAAKFEALEAAGV  
HISRSPAQLGATMLKAMGLESE

>comp8598\_c0\_seq1; 313 163 960 LEN=1157; translated  
MSSNSGDNKNSLVSSCDTKEPAFNPCLPKERLGTSHGSLEAFHQAVGSATRPAAKKTKEYT  
LVVVTETVTVQETQHKHQRI LLGMKNRGGFTGKFN SFGGKFLHDETGDNERESVEECACR  
ELEEEETNLRIPIKEMIESRVGVQRFTEFN DKEMLVHLYFLDLANSFGGEGSAASYEVRA  
CDEITPQWFESFDQVPFDMFADDSLWLTALLSAARSRASNPSAKPSRLEPPLQINGSY  
HFKENCEETNTILHYHMDIQSPKRN

>comp8599\_c0\_seq1; 279 306 1691 LEN=2022; translated  
MTDHNDEGALSSSRAGRAVSLPTYLTDARAVQKYCQSSAPD GALQLSVAENQMLEDLLV  
PALTKFSRARESFADAIYYQPTHGREPLRNAVKDYLDLLELDVATSGGLDPDGLVVG  
GCNAVLENLCVSLAEPGGVMIPLPYAAFEFDLGS RAGLEVVPVPTMEHSGFDSSSGES  
PPPEAYYLTRAALDAARQKSIDENGI EPRILLISHPQNPLGICYPPDVVLEAIDWCREHK  
IHLISDEIYAGSVYEQNHAGFSSALKLASSSSPT EMGLGLGPFVHFVYALS KDYALSGLR  
VGILYSENPEIRLPLQKLNLDLCSVSSQTQCLVEDMMTEVSPSSVHWTKGFLTENQRRIR  
ERKDAWQSCDELGIPHLDATAGLFCWMD FSEFLPETGTPSERERALYLELLTEYGLLFT  
PGDSMKNELPGFFRCVFTAASDHEFELGMERLRNYVNEKRA

>comp8601\_c0\_seq1; 544 17 1123 LEN=1197; translated  
MAMFCSTAACKAILTTIVMSSTITTSFAFAIGEAGKPWGLAEKKEWRDTRVKQRSYFEDVIP  
RVEKLREDRKDAFEVTHYGDLPHYKDSSDAESCEFFPLFAVRTRDWAKDKPSFLITGGVH  
GYETSGVEGALMFLETKAEGYSSHFNI VVAPCVSPWGYERIQRWNA YAVDPNRSFNPDGE  
IVEGRSFNPEAATEESAALIKYLREDMKDLNGNQWICHLDLHETTDTDETEFRPSKAARD  
GETSEPEGIPDG FYLVQDETSMKPEWFTAMIEKVR SVTHIAPADADGNLIGEKISQEGVI  
KIPSNRMLGLCAGVTDAPYRTTTEVYPDSENATPEQC NLAQVACIEGALDYIIKHLSGA  
AATTTAEN

>comp8601\_c0\_seq2; 122 17 661 LEN=1509; translated  
MAMFCSTAACKAILTTIVMSSTITTSFAFAIGEAGKPWGLAEKKEWRDTRVKQRSYFEDVIP  
RVEKLREDRKDAFEVTHYGDLPHYKDSSDAESCEFFPLFAVRTRDWAKDKPSFLITGGVH  
GYETSGVEGALMFLETKAEGYSSHFNI VVAPCVSPWGYERIQRWNA YAVDPNRSFNPDGE  
IVEGRSFNPEAATEESAALIKYLREDMKDLNGNQW

>comp8602\_c0\_seq1; 581 102 2420 LEN=3101; translated  
MDIYNALNSGFQDRDNERGDGCS SDYQSCSEYDIQQRNHKMNGYDNTFNAMSCVDNKN  
AAVLCINDEGDLESIGSSLVNTNENTNYTHNYGDNA AAVDFGGSDKSFRNTNAHPNSL  
GNTMFP TmplHLAPSFQKRQTSVTSIATSCTSN SVTSSNNYEENYQQQRSDSPPALIGMV  
PIEEHTKAEPNGFSSTSSSLMPSRLLSSLREL TSSGPPTNSINMDFLPTPINRNDVRKDK  
SQQLQDTKAVDELLAYELNKL SFKERESINEEIHGIGVRNAGVDETPPELLQSSFRQLETE  
LLNLRSEYAAFDRSQRLYWDTTYLNTEDFRIMFLRCDLFD CRKAATRLCKYATLMQEIYG  
DFALQRRPCLTDMNALELKVLESGVYQILAGRDRAGRRI LINIAYDGP SGFDVQSRLRVS  
TYIVMSVLEDVETQRKGLVGISWYVNSVDDFIIRGKVHKRIDCVPMRMGAMHCCIPSEP  
KSARTSKSKSNINRLSSGMTQIVKAMYVLSVGPEVRPHVRIHSCSVVECIYALQSFGIHS  
DQIPVNSSSEKLTQKQHSKWLELCLRKETCRDNCRRKFD SIIVCPNLTDVLFGRGRPIMR  
HPGNAVLRSVVQSRLEEYINAKTKKETTDVTWSVVRILKGYGARFLKEENIESNGLGWV  
EVSNETARQKVRIFA RDLRTRMTKTNKANVKSSEIHL LNETSNSDGRKSTLQLPDFETS  
GDGNFSQETSSESRSGLQVKEIDSSTSTFLGMDGTNMKRQRLNECFDCGDRE

>comp8602\_c0\_seq2; 488 102 1433 LEN=3209; translated  
MDIYNYALNSGFQDRDNERGDGCSDDYQSCSEYDIQQRNHKMNGYDNTFNAMSCVDNKN  
AAVLCINDEEGLIESIGSSLVNTNENTNYTHNYGDNAAAVDFGGSDKSFRNTNAHPNSL  
GNTMFPMTPLHLAPSFQKRQTSVTSIATSCTNSVTSSNNYEENYQQQRSDSPPALIGMV  
PIEHTKAEPNGFSSTSSSLMPSRLLSSLRELTSSGPPTNSINMDFLPTPINRNDVRKDK  
SQQLQDTKAVDELLAYELNKLKSFKERESINEEIHGIGVRNAGVDETPPELLQSSFRQLETE  
LLNLRSEYAAFDRSQRLYWDTTYLNTEDFRIMFLRCDLDFCRKAATRLCKYATLMQEIYG  
DFALQRRPCLTDMNALELKVLESGVYQILAGRDRAGRRLINIAIDGPGSDFVQSRRLRVS  
TYIVMSVLEDVETQRKGLVGISWW

>comp8603\_c0\_seq1; 743 204 2438 LEN=2618; translated  
MTKEDLIDGDVGVEREYLPSEGQLTLLCLDYLRDLRRTYIDPQDLLDSEGLHADWLTALAI  
YALNRSFSMQGLKIPRGKSKDELNVNQNVTMPVFNDSWMDSHRVLTDASPTQEEMMN  
PTSSPQDFSSLPTLNEMTRQILISKSPGEQQGEEEEKKEEYLDYAKYVYDDAHPNAN  
RFYLLDGLAGSSNGRGPLLLGEVAAAGLSQLRGRARLVAEDEMVKTELFQFVWAVEGKG  
FFQDPEHETPRDDPQQEEERVVLQKAVYDERMGKVVSFRSKLASKIEIANAEDPNQEVK  
TISEMTCLADYHHRMRKRVILARKQKPDQSQRVAPSPKPPASSMPPTAEREEPSVAEAK  
SRAQAERLKSNGTYMOKKKYDDALECYTEALRLSPSGPQSHVYFSNRAAALLSMKKFDK  
AILDSERAIALAPSYGKAHARLGLAHFLLGDYRPAEAYTVALKYEPENKSSKSYLEKAA  
KKLAAMGQPDVPEPGATLSYSGVTEWEKSNKIEKEIGKTSSTRRGQSGKQNRKPDNLGM  
SVEAAEKHKNLGNVQMAKRDYKAASESYSTAIELSPDGPQSHVYYSNRAAALCYLDRYEE  
AVRDSEVAINKPTYGKAYARLGLSKFFMSDYAASIEAYETALKYDPDAAASKSYLAKAR  
IKLERQQKEDDLSSFNVSDEARRLMADDDMMKMAKMLKNGNQSSQTDMLNDPEMKQFA  
KKATKDPMTMEAFRNMHTVNARDF

>comp8605\_c0\_seq1; 409 116 1340 LEN=1411; translated  
MSPLSESRQKGSRYHKVDDDDYDNDCSMEYAQKLNNAAWCIEIGYYERAIQSLQEALKYS  
QKQSDERLVQICRCNECILDGGIDFSADFGIRIGQSRGPKVATRGTQGCNDDESSDEEDDH  
ARNSCDFDEEHIANLTKSISQPKIQKVARGNRSNGFGSGTNASWSIKDEYCDVHLKHKV  
QEIYKRPPIRVFREGHSMGSTLFLVLSFNLAALAHLEAASSYSHSRHPKSACKALLFYELA  
WTDEQRILADPDNCWDSLSSVRFNTILNNLRLQILPILSEKYLTVADLLLSNVSDSIHIG  
TKRLGNRKPSEMSTTRKSSTRRSGTSSREGGKSGSLRSKSTPTSAKNKLQALALGDMSP  
LTPEKGKVKISIGGMPQRRATAATPVVVTSSREAEVAAGTTDSNKLDF

>comp8606\_c0\_seq1; 41 1 883 LEN=883; minus strand; translated  
XSFLFYTSNSFLVSYSAAWSPASVPAGQGGSGVPTRNDAWGSPPLRRAPVAPGLAPPVP  
FRPARIRHPEPPVPPQEVVHAGVGGGRKVDARGADFDPPDRPFPVGRNSDALARTEVLP  
GDEPEPPAGTAPRRRPLAAAVRGPVFGGQWGRGRPCRAADPAKRRLVEVFLEPVHGHDR  
GSQPREGREPVEGRPELQEQAGGFDDRGDASTAAGSDLPVGEAASRSRPFRRSALRHGGF  
HRRGANGGVAVSLRVLGIPALAPCGRRDARKSNLPRGLCPTAHLRGLPFLLHKKX

>comp8607\_c0\_seq1; 778 236 3350 LEN=3473; translated  
MTTLLSTSSSLFTAKGLFLLQLVILCLTKLQKGVIONHIFVNCASNNVVFSGRNRGVTNNG  
GFNYEIEKRVHERVSELMNKPVTMLGLVERFAQTDIFEPVLRPHQKDDFFRILWTIWKE  
FGIDLYYGQEDGLFLGVIKGAGTYQEGRGSNGYLLDEEVASDEEKYMKRLYFNKCLDRET  
GISENCTLKEDEDYVSCVNSCKLAPCPSSVEGEYNNTSNSSSTIYCPTYEILQAPTSGMG  
YIPRYYYCLSNSGRFIENDPPNSVESPSHIRNGLCTHTDGVTLVNGRTSEKQTYAMARR  
NYVFLREYDDGMAENYTSNNGDEAAALLYSDVAIADGQKTDQVFGVGGYHSRRYEPRLRPW  
YIGTRELQNAFWTKPYPFATANDIGITYGKPLYTDPDTSKAVFRGVIAVDYDLEEISRF  
LIDVFLAVEDQSEETSMDNRYSSSSGATVLIVEDDGPHYIGSSTGSKAAKKVRVEDES  
IDCDDDEIWSGDIECKTVRSTPEDFSHNNTSRNQNQNGVTQDAIILALAFKAQKEAGFPKE  
LVVSSPREEGYSYTNADGNSNFYVSQSLIYEQLLEGQNLRRWIIIVMPVAVATNGELLWGD  
PMTAVVLTVALLGFICIVLFYIYFSKRKALHVMSDWRFTSAFILGCAMLNLSTLATLG  
PASDGXVHVDNVVLPGLCTGVRTSTDKSVEDTQASWIGRPGPPVIYHESKSNALYAVSE  
SIAMQLIFVIEILILGLYAANTLHHLFDHVFARPIIMVQVLLLTFLSILDPPVKHSYVDI  
DGSSSYEITMCKPGTKAMFITMVFEGLVVGCVLAYMTRNIGSAFGEAKQLLFAMYNF  
ALGAVFIVLVGFFLNIDRNTMYVIAIGVFWATVVFSCCAFVLPRLQLQVKRDSQTRRSSLD  
NFGKSYSFYASGSKRFTGSAAGVDPVSLVSSSGSGSFALKRRPSSSVTNRRSMNSGFEFE  
VERTGESGGDTVPLPEMADVLRHRCSSDSDFIEFISDVEKKANEGPTSTNDSTNASDDGLQ  
KKEEPRETSCARTEASV

>comp8607\_c0\_seq2; 866 236 3241 LEN=3364; translated  
MTTLLSTSSSLFTAKGLFLLQLVILCLTKLQKGVIONHIFVNCASNNVVFSGRNRGVTNNG  
GFNYEIEKRVHERVSELMNKPVTMLGLVERFAQTDIFEPVLRPHQKDDFFRILWTIWKE  
FGIDLYYGQEDGLFLGVIKGAGTYQEGRGSNGYLLDEEVASDEEKYMKRLYFNKCLDRET

GISENCTLKEDEDEDYVSCVNSCKLAPCPSSVEGEYNNTSNSSSTIYCPTYEILQAPTSGMG  
YIPRYYYCLSNSGRFIENDPPNSVESPSHIRNGLCTHTDGVTLVNGRTSEKQTYAMADRR  
NYVFLREYDDGMAENYTSNNGDEAAALLYSDVAIADGQKTDQVFGVGGYHSRRYEPRLRPW  
YIGTRELQNAFWTKPPYFATANDIGITYGKPLYTDPSTGAKVFRGVIAVDYDLEEISRF  
LIDVFLAVEDQSEEEETSDMNRYSSSSGATVLIVEDDGPYIIGSSTGSKAAKKVRVEDES  
IDCDDDEIWSGDI ECKTVRSTPEDFSHNNTRSNNNQNGVTQDAILALAFKAQKEAGFPKE  
LVVSSPREEGYSYTNADGNSNFYVSQSLIYEQLEGQNLRWRIIVVMPVAVATNGELLWGD  
PMTAVVLTVALLGFGICIVLFYIYFSKRKALHVMSDWRFTSAFILGCAMLNLSTLATLG  
PASDGQCMLIMWSYHLVFLAFAPLLIKVWRIHKLKLVGSADRALRLSITNRKAMLYTLP  
MVQVLLTFLSILDPPVKHSYVDIDGSSSYEITMCKPGTKAMFITEMVFEGLVVVGCVL  
AYMTRNIGSAFGEAKQLLFAMYNFALGAVFIVLVGFFLNIDRNTMYVIQAIQVFWATVFS  
CCAFVLPRLQLVKRDSQTRRSSLDNFGKSYFYASGSKRFTGSAAGVDPVSLVSSSSGGSG  
SFALKRRPSSSVTNRSMNSGEFEVERTGESGGDTVPLPEMADVLHRCSSDSDFIEFISD  
VEKKANEGPTSTNDSTNASDDGLQKKEPRETSCARTEASV

>comp8608\_c0\_seq1; 320 1 807 LEN=868; translated  
HNREAERSGGEDIKIPFSRSASLLFFDLDLPPVSLTALETGEEAKPKYSTMKTVSRIATLM  
ALACVGVIVTEAFQQRPHNKHITASSTSLYGYVPSGFTPEEYKFKKADEAKKAKAKKNLG  
GLGPRGFKSRSMQSFQEAEMERGEATHLMPVFNAKEKVRKGE LRPEDIPYMQRGGNWDNTD  
VKGSKKKRWLKSDDKDYSDGGYKKEQSVSIFGQGGQLDWTGKRGRSGPSETVVGAAAPKFGK  
NYKAPNVSSLLKGGKKDEPKKKKNMFGFF

>comp8610\_c0\_seq1; 422 114 1166 LEN=1505; translated  
MALRSFRLGVASGLLALSLSLSTTKPWASAFVTPVKRSSVGARMGLPQKQLASFPLAMAS  
KKTQTLVCPDECLTEDGDEYEDSIRTSVSTENDNSEALSVVVAATSTTIMGLAALSEAA  
NAVSSIAMPKELTQSFDPNSFVVPVCAASDGFYRVLQSTAQTVVGRENFVEYGPLIASGLL  
RVRLELCVVESEFFNEAVGPFISQNGLSWVLPHEHETVETFLAGTVFALATTFILVGSTKLL  
TVIFTYADFFVGGPLRLFGGFFDRARGKPVILDVGLGPFKTRVIGPKDDGEGDAKKSDF  
DYSVDFNSVNSAELPVVIASGGVKFVGGQSIGFLREVLDAIDLFGKSLILW

>comp8611\_c0\_seq1; 543 41 1808 LEN=1808; translated  
MPEVYDPAITGGNGFRSRRRRRKRKFSVGNNSNSSSNGNGNARSNTNDLRVSNSTDDPLSG  
LHSIPGQKPPSIPKSGCSIKNRQHRDREQHNGTIKTKPKTKPQAQEHTHSALRSDPLEF  
DDCTDGNVSTSSDNTMTRNKAIGASKQRREDARESPFFSPSAMHKAVVTTKQTADRNI  
ATVVNVSEIDAIGTGDGTALADSTTMDGASAAGPSFDHNYAIALDTRYLDSPSGRDDWNH  
LRRGVQEFRLSTFRRRRGSVSHIAWTTSSSTRGTGSDGFCNQATRKTTRIVGNSSGGATR  
ITCEWSPNENELDAILSSKIQGFPRPPINDGNTKNRSFVHLPKGLMANDSWNVFGDLVT  
AICDDCYKRNQSTAAVPPQPNTRNKSERSPSSIRTGAEITSPRIAIFTSDASAFLDNRVPG  
HQRGIDAFWKKIHGQPQQAWRKTRIQSVEIVVVTGETTVRVVQQPNNDVKDTNLPNSQD  
GKDQKSESRVADGSEADNLHNMEGANTNYIYSSSVRDPNDSDESSSACGVDDKRL  
DAIVHTLNRHIENKAEQDFKANRSRIQFDPGFVEHYSRIDIALSIVENSX

>comp8611\_c0\_seq2; 390 41 1096 LEN=2030; translated  
MPEVYDPAITGGNGFRSRRRRRKRKFSVGNNSNSSSNGNGNARSNTNDLRVSNSTDDPLSG  
LHSIPGQKPPSIPKSGCSIKNRQHRDREQHNGTIKTKPKTKPQAQEHTHSALRSDPLEF  
DDCTDGNVSTSSDNTMTRNKAIGASKQRREDARESPFFSPSAMHKAVVTTKQTADRNI  
ATVVNVSEIDAIGTGDGTALADSTTMDGASAAGPSFDHNYAIALDTRYLDSPSGRDDWNH  
LRRGVQEFRLSTFRRRRGSVSHIAWTTSSSTRGTGSDGFCNQATRKTTRIVGNSSGGATR  
ITCEWSPNENELDAILSSKIQGFPRPPINDGNTKNRSFVHLPKGLMANDSW

>comp8612\_c2\_seq1; 136 1 847 LEN=847; translated  
XPGLEAKKRRLRLNRNRRRKRQALAI GCGVLLGGLVYAVVRYSSNHRSIAPPEHGI  
GNRPTTVADGEIPSEPPTARRQEAPLGTGDSRAGKDQHMQDASADSRASASDRPARGLS  
SSSSIGKAERDPTNADAAMKTAAGIILPRVNQRLDPSPPSRDKTALPGAGAGKSPGPRET  
VRSTGPPHGSTAXSTEGGARGQKGTTPQDAAWAGGRERDPPCRAAGIDPREAGNDPPGSP  
HPHEGQGGAVRAQRLEHLSRFCDPLGPGSELAGERMESNRIE

>comp8614\_c0\_seq1; 378 1 1498 LEN=1877; translated  
RRAYRSVRIEIVVVLDKHPKEYYYRHHTTTHHNASNVPAATLAVRGPLAEAI EAPVRG  
GQDVGLSPGGPDDPAEEHRPAQAEPPRGSGAPFAGGGLPAGDRAGKGNKDEYENDDDD  
GPPEQDALALRSDEPGNANAKSNTRHQEQKKEPPGGGILVKSNSNRLKIPTPTWHAPW  
KLSTVLSHLLGWVRSIAMDPTNDFATGSADRTIKLWDLAKASVGASDALKLTLTGHI  
SPVRGLAFSDRHPYLF SAGEDKMKCWDL ETNQVIRHYHGHLSGVFSLKLHPTLDVLTGGR  
DAVARVWDIRTKTQVHVLGHNDNTVASILARSTDPQVVTGSMDSTIKLWDLAAGKCMTTL  
THHQKSVRAMVEPSFENTFVSGAADSLKYWQAKDGRFLKSYTGHNNAVNALAVNDDGVLV  
SGGDDGSLRFWDYKTYNFQSGT SIVQPGSLDAENAI FCTEFDGTGTRLITGEADKTIKI

WKADESASEMTDPIDMVGW

>comp8615\_c0\_seq1; 382 1 996 LEN=996; translated  
XLSQLKSREIAPAPMEPSKQEPESGDTKHEKVGEGVDLGLQAAKMGVCDALCSLANSATT  
LHPTTIRTPAATHLATNSMSVSVPGSQLRMHGFLPPPAMVPAVLPVAVQQPPQLIAPTTTI  
SSGANTTTITASKITSSGTSNGKSSMKEKACPKQHQLPLFLSKTYHMIDRCDPDIATWSP  
TGDNFVVKVNEKFASAVLPMYFKHSNFSSFARQLNFYGFRLKLRSDPILTNDIDPQTAAYV  
RFYHEKFQKGRPELLHLSIKRATKSDQQSKDDVDDLKSQVLKQCVVDMSTQMERKLEI  
NEENTRRMSYLTAHYEKLAALVSHLLQQQQQQX

>comp8615\_c0\_seq2; 280 963 1461 LEN=1461; translated  
MIDRCDPDIATWSPTGDNFVVKVNEKFASAVLPMYFKHSNFSSFARQLNFYGFRLKLRSDP  
ILTNDIDPQTAAYVRFYHEKFQKGRPELLHLSIKRATKSDQQSKDDVDDLKSQVLKQCV  
VDMSTQMERKLEINEENTRRMSYLTAHYEKLAALVSHLLQQQQQQX

>comp8616\_c0\_seq1; 1263 236 2640 LEN=2714; translated  
MDPRKNGRKNRKRNRNICILLFIASHLVVLTIAVSVTATVDGEENDSGILPDEEQEIN  
APVSSHDLGESGGVQGTASNNDDATNLSDLSPNDMTAEVHSSISPNEPDAVHDGDSST  
SNSNTETNPEPSPNTNSEEQHVKSEDEAGSFEKTTAKNVEVEKKNMEGSIRGQSAEDDI  
KPVEDPPPSSKRREVSDVQKKTGMPAKNQEVENKETKDESSESASPSSSEPIVSKPEE  
VQKEATANEEEEEGKSAEVSLEGKSKAVEPETEKEIGGDDSTPVFTDESAGDASSAGDSS  
MKNVGAEDDDHEVSENA TLDDDEADKPVELQGGDQKEEGEEKIETKKVQEKATIDEEGV  
DKPIESPDRQKEEGKEESDTKTETVDSNETPPMVQPKESENTE PGYPVYESGSDSDSDSV  
IDLVDVDPDSEAKNTLPEETKEDQTEESGTDSSSNMVIKDKQDDDDSNNGGNEKVQETSS  
PGTSDPTTDEAPSATAANSYRGE PWGQYRLTRRLPDMELLRLVFENTKNGAGNPGNGDSX  
EPAGLENWQKNPLYDANSAIDTEKRLDEPLIGEEADSEFADYRSRLGENKIAGGVDINS  
GNKNNNEGNTKQKEKIKNGTINQSNDNSNNVDVNAEFVEGLDDIDDDFFEGVDPPELDVG  
YGSSIQDVLMDKGKHI LLKIRGAAQWIRIGWQGVVRNLEERISQFQLPLQKLQGTINSS  
SAAEASNSTPQSEGRGDTGSEGMKEKITSAWKTGKRAFEQMSDWVDGLLDRLDRSQGDS  
ATFDDFNNFDLNLKLSASP

>comp8617\_c0\_seq2; 159 208 540 LEN=1110; translated  
MAMNRR IARNKAVPFFVLHLADARFKALFTVPSGMAETLILHPILCRGGSFDLTIDLVS  
QNDSMQSTSTSF LSTEFSSSYPEETARAIAERIAIRQEDPSPAVSHLFR

>comp8618\_c0\_seq1; 802 163 2712 LEN=3037; translated  
MSKTKSTTAKGRDKSDAEPSSSKYLVLISKRFVLLSLLSCILAAFAVGRTARILLVNPQ  
KVAIQAYNDQVTGQATKKSPAAMKTLDPDPTMRDGKVPPE TLTYTSKAFGSGSTTSSQSRWI  
VTEEGRENCVDLPEHECPAPPSPNVDEGSGDDEIHLPAQOHLMDIENVDGIFLNSEERL  
AHAMLELVGECGLTLLSYHCHKMVP MGVS CAGV LLESHVSFHTWPTEGVITLDLYTCGPN  
SLLPIVPMAMDLFGVPKQVVDGKEFKAPNTVWAHKTRGFPSGDLASFTA EISDMEYFPVG  
KMTDFKTEIAATSTNFQQIRIYDVL RPTQQNLQNYQKSM TNDG SYESRHP ELFEPDRIVY  
LDGVLQSRKSGEAYHETLIHPSMFAHKNPKRVAIIGGEGASLREVLKHK TVEVVYMI E  
IDEMMVNVRKYLPSWSDCSTLAGSAESC FDDPRVVVQYIDAFQWFIDNFPADGPPLVDP  
FDIIVMDALDPQIQKDFVNALYDEGPFLKSI PHALSSDGIFISQVGESSASEDPPEVQTQ  
DLNRWRLIQSLRSLGFSTIRSYVDNSHSGFSFPWQYIAAFKSDDTKAEWLSNP SLTELKI  
RKRAMVTVDGKSPFQFFDGATMQSYYPSPKVELVYCRGHPE SRNCKE GHGFD SNRRNVP  
ISAVAVRQSSIGEKAGRGVFAKIDVPSDSYVGLEKQIHSVEGDAHAYDLILKMNSQFGDK  
WSASVLESCIHDAEISSRS GKESFVIDTTIKSFANHDCDGNSNF GFDVGV SQFTADPKR  
VAQEIMERYDEGDVIYNPASDRQTNFYARSTPLRDINEGEELFDNYLGM SGKNTESWESS  
VSDLRKICE

>comp8618\_c0\_seq2; 470 163 1632 LEN=1750; translated  
MSKTKSTTAKGRDKSDAEPSSSKYLVLISKRFVLLSLLSCILAAFAVGRTARILLVNPQ  
KVAIQAYNDQVTGQATKKSPAAMKTLDPDPTMRDGKVPPE TLTYTSKAFGSGSTTSSQSRWI  
VTEEGRENCVDLPEHECPAPPSPNVDEGSGDDEIHLPAQOHLMDIENVDGIFLNSEERL  
AHAMLELVGECGLTLLSYHCHKMVP MGVS CAGV LLESHVSFHTWPTEGVITLDLYTCGPN  
SLLPIVPMAMDLFGVPKQVVDGKEFKAPNTVWAHKTRGFPSGDLASFTA EISDMEYFPVG  
KMTDFKTEIAATSTNFQQIRIYDVL RPTQQNLQNYQKSM TNDG SYESRHP ELFEPDRIVY  
LDGVLQSRKSGEAYHETLIHPSMFAHKNPKRVAIIGGEGASLREVLKHK TVEVVYMI E  
IDEMMVNVRKYLPSWSDCSTLAGSAESC FDDPRVVVQYIDAFQWFIDNFPADGPPLVDP  
FDIIVMDAL

>comp8619\_c0\_seq1; 317 80 826 LEN=1068; translated  
MTGTEANKTKEPAAAVLTAEETTNPQNPEKQPPVAEQGLATSAPTATANAESRKRKRSTG  
GANALQEAYAKVSFAPLEPTGRPD RPDFFSSSYTVVDSNNGEGTDGQVCAASV SIEVRQ  
IVHNHVNGLCMVTVGELSES LPPSMEVKSIRFLAGEAPP CSNAKRKRQAQMLRGKGTIN

RTTGVEPSTVIAELVVGMKLANDTNDNDTDDIIIVPLRACVWGTILELNTNLLSKPRILL  
DDPLLDG  
>comp8619\_c0\_seq2; 269 80 892 LEN=1289; translated  
MTGTEANKTKEPAAAVLTAEEETNPQNPEKQPPVAEQGLATSAPTATANAESRKRKRSTG  
GANALQEAYAKVSFAPLEPTGRPDRPDFFFSSSYTVVDSNNGEGTDGQVCAASVSIIEVRQ  
IVHNHVNGLCMVTVGELSESLPPSMEVKSIRFLAGEAPPCSNAAKRKRQAQMLRGKGTIN  
RTTGVEPSTVIAELVVGMKLANDTNDNDTDDIIIVPLRACVWGTILELNTNLLSKPRILL  
DDPLLDGYIAIILPSGRFPPLPNYTTSSND  
>comp8622\_c0\_seq1; 848 1 1437 LEN=1453; translated  
FYPVDRPQNSKTSKMGKQPQFNPVRDFISGAIMAATSVPQLIAYAETVGYASYRGLATAGP  
PLMAWGFVTGGPFMAGVTSITALMAKSDLNGEAYMAEHGEEAYVELVAAYSPLYVGIASV  
FLAVVGFGLAAYVPKCVATGFKWGCALGVLVSALPNGLFDRGSKQVKS LVADDAIFGGF  
VSAIKASAPQATGAVNVTGFVYSLTHPTQWAI VPTIMFVIGTWFVVMNGKKILPKALPPGS  
EVI IATAAATMYSMNFYSSGGVGEIPALDPDAGIAVPGTDLKIPVGVLDYSKVLEAPVA  
ERMGGWPALAITSLFAGVNFLSIMGIASGFESNGIPWSAPRELIAQGVACGVASVVG  
APISGSMRSLVSRMTGTTSQLACILTAI IWIVAMPYMNIMSATPKAALS AVIVSAVVK  
VMPKSLMALKGIDFAVWGTA VLTAMTSPTLGFSGGLILYLVT KPLQPKAEKSLKDD  
>comp8623\_c0\_seq1; 399 1 1326 LEN=2392; translated  
NNNNNNRRGTPNSGRGASRWDHLDAPRDGNDRGNRNRNRGRFGFDANSNSNSNPNTNGNR  
SHQEKVASKGNKPTASRWANVNRS AIEAGSSGRSPGRSPPRFGARQNHHSNRHPNNSQH  
VRAVFFGDSFIKLFGLLNDYSDSVLRKPRTIEVHKYKAASAKGLCRDGNENRACIRRVVD  
RLQQHQYPNLERLVFCFGD VDVHMSYYYKFFVVGQALTE TDLEAIACDYVDFVAGLPVPE  
PASLRRLVVG IYPSPLGDGDVGASLKAYGSLDTLEQVEAVNASDDRKM EARQARVQLFND  
ALRERCAHNR IAESQGRDPVLEYHDVQDELLTTTTI SAREDGSPDDSPREVVVVVRDAYR  
DVSDLN IHLIHETT LQLWVEKWPYKALTLPPEERHRRPPP IGFVEYLQKTFDEYRKT  
PWAERTHVAETMGVQLPPSSS  
>comp8623\_c0\_seq2; 399 1 1326 LEN=1982; translated  
NNNNNNRRGTPNSGRGASRWDHLDAPRDGNDRGNRNRNRGRFGFDANSNSNSNPNTNGNR  
SHQEKVASKGNKPTASRWANVNRS AIEAGSSGRSPGRSPPRFGARQNHHSNRHPNNSQH  
VRAVFFGDSFIKLFGLLNDYSDSVLRKPRTIEVHKYKAASAKGLCRDGNENRACIRRVVD  
RLQQHQYPNLERLVFCFGD VDVHMSYYYKFFVVGQALTE TDLEAIACDYVDFVAGLPVPE  
PASLRRLVVG IYPSPLGDGDVGASLKAYGSLDTLEQVEAVNASDDRKM EARQARVQLFND  
ALRERCAHNR IAESQGRDPVLEYHDVQDELLTTTTI SAREDGSPDDSPREVVVVVRDAYR  
DVSDLN IHLIHETT LQLWVEKWPYKALTLPPEERHRRPPP IGFVEYLQKTFDEYRKT  
PWAERTHVAETMGVQLPPSSS  
>comp8623\_c0\_seq3; 399 1 1326 LEN=2250; translated  
NNNNNNRRGTPNSGRGASRWDHLDAPRDGNDRGNRNRNRGRFGFDANSNSNSNPNTNGNR  
SHQEKVASKGNKPTASRWANVNRS AIEAGSSGRSPGRSPPRFGARQNHHSNRHPNNSQH  
VRAVFFGDSFIKLFGLLNDYSDSVLRKPRTIEVHKYKAASAKGLCRDGNENRACIRRVVD  
RLQQHQYPNLERLVFCFGD VDVHMSYYYKFFVVGQALTE TDLEAIACDYVDFVAGLPVPE  
PASLRRLVVG IYPSPLGDGDVGASLKAYGSLDTLEQVEAVNASDDRKM EARQARVQLFND  
ALRERCAHNR IAESQGRDPVLEYHDVQDELLTTTTI SAREDGSPDDSPREVVVVVRDAYR  
DVSDLN IHLIHETT LQLWVEKWPYKALTLPPEERHRRPPP IGFVEYLQKTFDEYRKT  
PWAERTHVAETMGVQLPPSSS  
>comp8624\_c0\_seq1; 90 1 344 LEN=433; translated  
XNSNSKANVENALPESSHGGATIAPVPRQRRHNRRETPEHRHRQRQRRRGK LFFQG  
KAQPAALERLLPCRKGDPPKHRAGGRRTVARYATTPALVPGQPGGTKPVERRS  
>comp8625\_c0\_seq1; 287 466 921 LEN=1645; minus strand; translated  
MKSFRTKVAVGFIAAI ITIADASTILGGMRI LKVGKDKSKDSNYSPSMPRTKYPTM  
SPMTADKSPKTSKSPKKAADSKKYNRSPAPTTQPPGTPPTSAPETPPI PAPGTPPT  
PPTSTPSSDPTSEPTAASSISPT EATSIRST  
>comp8628\_c0\_seq1; 314 375 1788 LEN=2287; translated  
MSSSGGDFRAWVEETEDGGFV GSEQILSHCADDIDENKGRVLIKVTHSSLNYKDALS  
ASGNKGVTRKFPHTPGIDAAGTIVGDPNSNYNASALVTGYDVQLQRAYMKGNGTDALYYV  
YLFQRNRVWVTITGKLAESYSSDSITGKTHHIVFVLLGFDXVLIILMP SLLGYVCTISE  
SSPAIYIAWIRSLPATHIYFATLFFVDRLDQDLGMNTDGGFGEFIRVPEWIVTPNPFAS  
GDETDHEAAAKTSMVYGTAGL TAGLSVQKLLATGKADPSDGKVLVTGATGGVGSIAVEIL  
AKIGFDVVALTGKREETDKLMELGASEVVGREALEPTKKPMLRPLYAHAIDTVGGSP LAE  
ILKQIKHGGSVTACGNVAGMALETNVL PFI LRGVQLLGVD SVEISLEEKQSVWEKLSGEW  
RCFKSEAFAKEIGRDGLDES LKCMLEGNASGKVVLVHRLTADSSTSHSKL

>comp8628\_c0\_seq2; 371 375 1454 LEN=1953; translated  
MSSSSGGDFRAWRVEETEDGGFVGVSEQILSHCADDIDENKGRVLIKVTHSSLNKYDALS  
ASGNKGVTRKFPHTPGIDAAGTIVGDPNSNYNASALVTGYDLGMNTDGGFGEFIRVPPPEW  
IVTPNPFASGDETDHEAAAKTSMVYGTAGLTAGLSVQKLLATGKADPSDGKVLVTGATGG  
VGSIAVEILAKIGFDVVALTGKREETDKLMELGASEVVGREALEPTKKPMLRPLYAHAID  
TVGGSPLAEILKQIKHGGSVTACGNVAGMALETNVLPFILRGVQLLGVDSVEISLEEKQS  
VWEKLSGEWRCFKSEAFAKEIGRDGLDESLKCMLEGNASGKVVLVHRLTADSSTSHSKL  
>comp8628\_c0\_seq3; 286 375 1046 LEN=2205; translated  
MSSSSGGDFRAWRVEETEDGGFVGVSEQILSHCADDIDENKGRVLIKVTHSSLNKYDALS  
ASGNKGVTRKFPHTPGIDAAGTIVGDPNSNYNASALVTGYDLGMNTDGGFGEFIRVPPPEW  
IVTPNPFASGDETDHEAAAKTSMVYGTAGLTAGLSVQKLLATGKADPSDGKVLVTGATGG  
VGSIAVEILAKIGFDVVALTGKREETDKLMELGASEVVVSGAK  
>comp8628\_c0\_seq4; 229 375 1380 LEN=2539; translated  
MSSSSGGDFRAWRVEETEDGGFVGVSEQILSHCADDIDENKGRVLIKVTHSSLNKYDALS  
ASGNKGVTRKFPHTPGIDAAGTIVGDPNSNYNASALVTGYDVQLQRAYMKNGNTDALYYV  
YLFQRNRVWVTTITGKLAESYGSSDSITGKTHHIVFVLLGFDXVLIILMPSLLGYVCTISE  
SSPAIYIAWIRSLPATHIYFATLFFVDRLDQDLGMNTDGGFGEFIRVPPPEWIVTPNPFAS  
GDETDHEAAAKTSMVYGTAGLTAGLSVQKLLATGKADPSDGKVLVTGATGGVGSIAVEIL  
AKIGFDVVALTGKREETDKLMELGASEVVVSGAK  
>comp8629\_c0\_seq1; 159 1 472 LEN=531; translated  
XSSNNNNNKDTCFTTSATDVDLRQFFMSNQSSSLQVTTTNAQSSDLTPLMGQAQEQLT  
RKVSLTQWENGPVAAAVIKSALQAQEVASRQQGSNNSSSIDFGILESMLGKKLRRRCSLG  
FIRTGTSGMSRRGSLLDGDEVCFGNRKFYFTATSEY  
>comp8632\_c0\_seq1; 2116 180 8153 LEN=8362; translated  
MTTPSAFLIGVVFALGCQRRQPVATAQSDGNFWS DAGASSNEYTVNSVIARTDTSSEASR  
KILLDLYSATGGSDWTDSTNWIQQGSTDVCDWKGVSCYDGSYSPSRKGHIEQIDLRDNNL  
GGTLPENIFDLPYLESVNFEFEGNPDLRVDLKGLSDAQFLRFLILSNTQVSNLEGVGNACK  
LEVLHISNMKLDGMIPASLFNLPSLKVHLHANDNLFSGPLPAGIGQLTNLEELTLKNNELT  
GQLPNELGQLSLIQLTLTNNAFAGTLPAQALEQMTSLRRLSIQRIPTVGSMDSVKGP  
AGSIPAFRSHRRLTKLQLENQRLDGSLDSDFLQSPTEAVEVDLRGNVLTGRVPPSLLD  
KRFLSLYLQAGNITNVPRQIYDAPTNTCTGIRDWMSGDVVSFGCQAFCLCPPGTWASQGRA  
TSASRCQTCFNNNSVWGRTOCKSSISTTELERQILVNFYNALDGRHWKVDNRNWMELDEEV  
CEWHGIGCDLSTRRVTSISLRNNGLSGMVPSDLFDLASLKS LNLESNQIEVDFTSVSKAV  
NLESLDLTATGLRFVNTLQDLSSLPNLKFFSLASNLKGAIPFAIFQLTSLEDIDLAYND  
FSGTSSRLGDLTNLRRFACDGAQMTGQLPTQIGLLAKLEEFLESENEFTGTLPKSLNSL  
TNLRSLDLQOVTRNGVIGIGPPLSFTNMEQLQSLHLDNSLGTLPNSFLINSRRLQIGI  
YVGLSDNKFQGTIPDGWSRFDELFLDLTGNKISAISESLCSKPGWMNGAVKNFQCDAILC  
PAGTYSNVGYKTDENSSCIDCPGSASMGATYCGGKGSTDISSELNILLDIYSATGGDQWD  
SADGWENSSSYCDRFHGVCECDGAGRVTVINLSNNNLKGTIPQSVFKNFLRELRLSGNPV  
ELTFESIGEATRLINFLDKINIKTLEGIGNLNLQILNLADNNLDGTVPDDLRYISSLK  
KLDLGYNLFSGALKDVIIGGLKSLES LHLHYHNQFTGRIPATIGDLVNLEELNLAENNFEGT  
IPIELNDLTNLRFLSLQREGGILGTLDIGINQKSSFDGIGLTGPLPAFDKFRIFEMYL  
GVNSLTGSIYPNFLGGVKNKAEQIKIDLTSNVLTGTLPASLTQFDNLSLYAAGNRVSGIA  
DGLCQKSGWMSGDVGSFQCDGILCPIGTYNDVGRKNGDAQICQICATGTNGYLGSFDCLS  
SSEVQEGSDREVLEKLYYAMDGPNWVDNTGWLDPDESICNWTGIQCDSTSAKSVSSIDLS  
YNRLSNQLPSEIYQLPNLQELNLQGNAIMFTFNIRNAANLELLEDLDTGLTSLFGIGQA  
GNLKLRLVDNNNFASFPESEVFDLSRLEVLSLSGNSFSQQQMPSELQSFNSMTYFACSGCG  
FTGTLPGWLGSMQNLQYLKLSQNALSGSLPSDLERITTLKHLDSLQDQTLGWGLGGSLLS  
FSNQTDLTLEYLQHNNEFEIIPATFLSNLRKNDLVTVDLRYNRFQGTLPQLGNIQNLNL  
YVASNNFQSI PQSLCQTVWNNGDVAENGCDAILCPAGTFNAFGRETAGVDCFPDQQLSM  
QKLGNTFCGSVLEHESLKVLYRSFGGPDWTSNNNWLVSDDHCTWEGITCWSSGFEFKGLVK  
RIELPDNNLVGAMPFALIWQLEGLTYVDLQKNDISLPFAMIANAINLETIILSYTSTNSL  
EGIGNAKSLKELHLTSAALTGMIPEELFSLPLLERLFLSHNQFSGTMSSGFGQLKQLKDL  
YLLGNDLEGTIPTELGYLELAQLEHLSIGRNRLEGSIPRQITSLPLLQFLSLEGE SDPSASS  
FASAGGLSGSLPALDGFPRIRELYLQHNSLTGTIPRRFLQGVHDKNVDIVDLSFNNIDG  
SIPTELSNFEKLNLLLVGNEVSSVPEAICKNVGWSGGEVANS CDAILCPPGTFTNDGRQV  
DSMNPCTCTYSGSARKYGSTMCPAGSSDSLDRNSILFDLYDATGGGSWTSSKGWKS  
DKIPYCDWYGVTCATGPSGEIRVSELNLAENNLNGVVP SKIFFLEGLEKLDVRKNPV  
SITFQDIGQASELKELYVDETLIKNMDGLGAKKLRILHAYKNAFGGKKIPDEIFDI  
STLTDINLS DSMLSGPLSKKVGQLTNLQRIALDRNSLSGELPDQLGQLKALKELEISD  
NEWIGTLPTSW

MGMRALEGLFLNNNEKKTAGITGPLISFANLPNLRELQMSNNQLTGTIPSDFM SGIADTN  
KVVRVRLDENHLVGTLP SALQSF SKLNIDVTGNLVTAIADGLCNLSEWNDGNVGRFGCAG  
ILCPAGTF SASGRQTSSNDTCQPCPGEDESSPYLGVTTCLSLNKQREKDILTKFFQATNGK  
DWLKNEGWTDPSDVC SWFGIECKEGSTVESVHLG SNFLVGSVPNEIFDLPNLKSLWLVS  
NPVQISLEGIGNAGKLESLLL GSTKLQSLDGIQNGLSLVDLDVGFNQLSGPISSMENLV  
NLESF GGAVNRFTGTVP GFFALRKIGAIHLGDNRF TGSLSFSRHPNLRSLDL SGNIEG  
SFP SDFLESVDPDEKLFVDLSDNALTGSLPGSLSRVRDLTIYLRDNRIGGIDAALCASEG  
WNGGDVRSFRCDGILCPVGFFAAGHGRASLSGSSCEPCPKNKYYGGSTCGGSAAAAPGPT  
LALAPALAGLLLLVAWVV

>comp8633\_c0\_seq1; 184 420 1364 LEN=1847; translated  
MIQNGTWESRPQSYTRHGTSSYANTQGAESLFRAGGNGNFFFYRTNGPGFGMQTPFPSK  
GVDAPFSMDAFKSIYVQKVRVPLEDLYKGVQSFRFELRDNLFTRYKAAIRGKSMCYSLML  
SFYACVPFIRSSKLLATVVGSIVLHATTPEPDRASYVTS LRKGAKGGHTNVKFS SPGID  
HRPGIEIIFEIEEKEHPVYRRVDNHLHA EVTITSKQA EKGC RVKMNALDRSEKPIEITIP  
PKTYSYEQQKQLKQKVSSSSSKAIYDNVIRIRGRGWPIRNTTHSDDHPDVYLYGDLFVTV  
KVSKE SFKRRGKRG

>comp8634\_c0\_seq1; 403 1 1008 LEN=1172; translated  
QSLTRIVSPGATHLAFAPTPCHSPNRKMLTDDNLLLAGIVSVVALVLGFLFVSMNKKKT  
LPLDDFKPFPPLIRKTVLSHDTAEFVFG LPTPDAVLGLPTGQHISLRFYETDKDTGKKTQV  
MRSYTPVSDNTTLGEVALVVKVYKAGVHPKFPDGGKMSQHLD SLKIGDTIDIKGPKGHME  
YLGNGGNYWMKPIGRPKVTKQCDQF IMIAGGTGITPMLQVANYMFRRSNDNVKVNLLYAN  
QTEDDILVRKELEALAKDFPDQFKLHYTVDRPPTDGSWKYSEGFISKDMIEKHCLFNGSS  
KNTQVLLCGPPMLKFACFPNLEALGFTKNDWFAF

>comp8635\_c0\_seq1; 437 61 1238 LEN=1267; translated  
MTHSMDILQTIASTVPATQTVGYSCMLTNTWSGRRHPEDYPSGMAHWSPPVLI AHNTN  
VWSPGTFASPGVEAVAEGDTSLEGEYCLAEAEAGIAGDIVVGV SQANSLDPPQLLDAIE  
LSPEYPLLSTISMAAPSPDWFSGIYNF SPLDEAQEYWYRSFVIASF PF DAGTEQGEFY  
DNDPEPTHLSILQLTNETVPASGVFLDSTGT EVLPAVYWSCVLDEVEDDEVVPTDSGTR  
RGLLKTEAMTQEKGATTQEKASTDKMGSQIASDKMKEQAPGKDTQPASDTICGGARRRRR  
RNLSKQEATIEASSKGLRGAASQLDNHNS SMKRLQPLLVKRKREDYVSLCLGGTANNLIC  
SSILKYTKYNLVPFKRKHGGVVAYECSQHATM

>comp8637\_c0\_seq1; 255 96 716 LEN=1129; translated  
MFKTFDRSEVSTSSQVKASVQRG IKAGIASANPKITDEELD VLLPKKPLVQYKVGPHMM  
LYCKKGDAEEGATPSDEPVFFQHRDGPILPTLR TIHKYPTLEFTSVTVDKGAIPFILGGA  
NIMCPGLTKTGQSYMPPDGEEQDEQGF DLPLGLSKGDGVVIRAE GKEHAIAIGVMKMSSVD  
IRSKNKGVGIELAHS LGDGLFLTEGL

>comp8638\_c0\_seq1; 215 1 635 LEN=842; translated  
XSSKVFSPLNSFAGSTDSIMKHRTWPLFIFFVAILEKLKSAESSTASVTDTCKSSPDER  
DCKNPDESPHPSKSDVINPKERFRVITQEELASKNGEDDS DIWLSIMGKVYDVTAGKSFY  
AKGRSYGAFSATDCTVCFVSGIFSP EEA AKHTDELSDTMLPGVMEWADFYEAHESYK FVG  
YLIDPRFYDEKGEPTENLIAFRKRISLLQHD

>comp8639\_c0\_seq1; 1015 1 1734 LEN=1734; translated  
AKSKETTKATATKTKEATKEATKATTTKT TKTAKVTKTKSTDKDSDSKDGQSTASKDRKD  
KLKKEKSKLLTTKAKSETNIADKTKAKPKKTLKKAETERLKPVPESDSL DKKV SFDGPKV  
KSASADGASAKPALKKNKSKAKLEKQKSIKKKKTDAASVASAEDEGAKPVHADGEKERPK  
KKSASSRNLLAGGATESKSAKSSRKLASSRNL AGDATKKKASSRKLASSRNL TGDASK  
KKS SRKLTSSGNSTRKKVGTVSDDSDKVKDATSLPEALEP ISEPEKMEPISEANSTERT  
VRTRNLSKSETSAETSEDGKGESNDPGPETSEPDAAID EKIKDEE EPKAE SAETEEAAP  
TDDEEQAVETAETED EPAKEEELPEAQTEEVAKTAQAE EEP AVESAETEEEP AEKKEEPA  
EAEAGEAPGEAATEEIVETA EAE EEP AE EIAETEEEPAKAETEEVAETAKAE EEP AEDAK  
TEEEQAE EGV EPAETETE EEA EAVTQAE EEP E VESA EAEDEASDEKELTEADTEEVAEATH  
VEEPEVESPETEDEQEETRQEEPAEVEETE EATEPKQAE

>comp8640\_c0\_seq1; 121 1 465 LEN=496; translated  
XNNKIDYLYHQRLMSLIDL PFFLLVNPFTGK PFFNEVIFYHKPSKSLLLTTD VYWNYPQKD  
GVPNSHLEGGNDDEGSAPPVQSIPLGTRLWKFGMDKIYLPFYKNLMVSDKQFYEEVIDIV  
LNEWEPDNLIPCHGDIIRGKEKIRDELAKHFNL D

>comp8640\_c0\_seq2; 326 77 1154 LEN=1185; translated  
MTPLTMFGYLIAIFIPIGTLSFSIDPSQTL LQRSSTTIKRGTYILRPLAAELNNDGLQSF  
PTAGLFQNAKYIDESLANGDALEGIARAPGQTGT VLT PAAEGVYTGDRPFYWNKIDVGGR  
MCVIRLDDGDLWVHSPVNLDPKTKTALKKLG NVKYIVSPNYEHLKYAKQWSEEYPEAFMW



GCPGLVEKLPDIEWEGEIPYGLMRPSESKKLNKNCWDFDIIVPLHLNMEVNPFTGKPPFNE  
VIFYHKPSKSLTTDDVYWNYPQKDGVPNSHLEGGNDDEGSAPPVQSIPLGTRLWKFMDK  
IYLPFYKNLMVSDKQFYEEVIDIVLNEWEPDNLIPCHGDIIRGKEKIRDELAKHFNL  
>comp8640\_c0\_seq3; 291 51 864 LEN=895; translated  
MKKFGTVLTPAAEGVYTGDRPFYWNKIDVGGRMCVIRLDDGDLWVHSPVNLDPKTKTALK  
KLGNVKYIVSPNYEHLKYAKQWSEEYPEAFMWGCPGLVEKLPDIEWEGEIPYGLMRPSES  
KKLNKNCWDFDIIVPLHLNMEVNPFTGKPPFNEVIFYHKPSKSLTTDDVYWNYPQKDGVPN  
SHLEGGNDDEGSAPPVQSIPLGTRLWKFMDKIYLPFYKNLMVSDKQFYEEVIDIVLNEW  
EPDNLIPCHGDIIRGKEKIRDELAKHFNL  
>comp8641\_c0\_seq1; 207 81 839 LEN=1377; translated  
MPLRKVPGSEYSPYGRSVVSTSSSFYKEDSSKERDDVGIHSQKIRRQNI FRRQSSQELGK  
QESSSTDHTNLYPTSLHGTDSSSTANTSLSTEHTTFQKTVTFEKTARVKRIKPRHYYTEEQ  
QREIWIYQDNDYVEIKKRAIETVRRMMKGAKSTIGFTDDDDHTARGLECRTRIAATERKEF  
KAYARMLVLDEQEDQNGLGFKNDNRIRKMYLKASLVSSAKAQTMGQKDAEAANDISLNDV  
LKLVRHEQNCSL  
>comp8641\_c0\_seq2; 207 81 839 LEN=1238; translated  
MPLRKVPGSEYSPYGRSVVSTSSSFYKEDSSKERDDVGIHSQKIRRQNI FRRQSSQELGK  
QESSSTDHTNLYPTSLHGTDSSSTANTSLSTEHTTFQKTVTFEKTARVKRIKPRHYYTEEQ  
QREIWIYQDNDYVEIKKRAIETVRRMMKGAKSTIGFTDDDDHTARGLECRTRIAATERKEF  
KAYARMLVLDEQEDQNGLGFKNDNRIRKMYLKASLVSSAKAQTMGQKDAEAANDISLNDV  
LKLVRHEQNCSL  
>comp8642\_c0\_seq1; 785 1 2562 LEN=2803; translated  
KIHAIVRVPIQQDRFIDNSIPRSDSIMPSSSSRASARKKRPSRDLSDSDSDSDDDEL FADA  
FSASRSSIRRSARDAEAKKKRMAQMNALFDDGRIKLQRESRMEIHRNSDLLRDNDLE  
KKQAAADTHSESDGDKPGNEKSDSQEDHQESYYGNLQPVDTKETLCLGSRRTLQLSNVM  
ISSSLGPGNKSRCACTTAWSSFDALDFRLLLLINQQQITTSQFTSLREELLQSR  
VTKSQNLFRMYLKEQLMCKQENADRVKRI PVDILRWLMSLACGPMARGCSIGNSGNSSSS  
SKNNQMNRETGMTKQSSTGRTKKVAEKENSSRTTDEASLRIWSDAKLGCYRRTLNLWS  
HGLGFPLQEEENKEVYLLSLSALSQQLCQWFGSTLPLETRRENKGNENADNRIGNAVSE  
VRPSSSPSTSPATGLVGKNNQGSIRLVNDRDALSHFLELWALALRQQNYNSMIENNVFLV  
DFCYDKNDREGFQRDICTIVAVLWVGLDPAFASSDSAKDDCNRSIQTI IQCLLDRVRWE  
AEAHDQSNCSKDGVNVSYEQCLERLSERICTTWSTKLGRGLKGTDAYDDDQAWLSLART  
VAMLENMDISFEDENDGQHRTISSLKDFQLCLCESILNRAF SYKHDDRKNRNETKTETS  
NTDNWVPSRVKEEMVKLGIPDEARSSQSWKALALACIGLAKLAIFFPEREASKCFATMHI  
CTVCFRLAVVDLQKTIKERCLNETKKEDFEENENVQPSNKS DTDADSSSVTDNNILEKHA  
LYDAFERIESLTQMISSRTRVLIMQNICYPWASHMAETMRTYARLQKGEFTPAFLKDTPL  
KQQA KINAFNNS  
>comp8642\_c0\_seq2; 347 1 1043 LEN=1284; translated  
XFHVSYHFNGSAKDDCNRSIQTI IQCLLDRVRWEAEAHDQSNCSKDGVNVSYEQCLERL  
SERICTTWSTKLGRGLKGTDAYDDDQAWLSLARTVAMLENMDISFEDENDGQHRTISSLK  
DFQLCLCESILNRAF SYKHDDRKNRNETKTETSNTDNWVPSRVKEEMVKLGIPDEARSS  
QSWKALALACIGLAKLAIFFPEREASKCFATMHICTVCFRLAVVDLQKTIKERCLNETKK  
EDFEENENVQPSNKS DTDADSSSVTDNNILEKHALYDAFERIESLTQMISSRTRVLIMQ  
NICYPWASHMAETMRTYARLQKGEFTPAFLKDTPLKQQA KINAFNNS  
>comp8643\_c0\_seq1; 958 493 3282 LEN=4606; translated  
MLVKTAMSLSSFLSLLAFYATVLPPIAADSDAHRDLQLERRIQSLEKLVETQNVAI EGL  
LRRGLETSDDGCLPKRNEQNVCFEKGVEFSYRNSDLVFESSTVRFTGPIQDLNAIGKTG  
MTNQTTYAFSSQVIFDSTDV RVENSNTFTA EHDYKAFQKNETQLRQHYGIVMNNTEMA  
LNSRLVVTGPDPRSVNQSLYDDL SYNLFS SIGFSYNI TVTDSNVAFTKNTPTSETADS  
TVVFNHSKI LYNHSEVKMHASKTSASDSSI SYGKDTYVQWFGSSSTAYFTDGAELSVEDS  
NVRLDQTTLELTGNNGKLVSRVDTDIRGPDSDPIYFTVSRKVDVSYEQYPTMRIQSDVK  
VSDSDVTFDSSSTL KINGLESNDTRFRGQISLDDVLV NVERDLIIDGRNGYENANID  
FRNGVDIRIYNDLVVEKDLEVLGHANLDSL DVLDEATVGGRLRCYK GATISGDSNASSDS  
ITSSFSQLLKVEGSALIQRDLEVDGTLTAESQDFVGDVVISGNARVNSLTVDSTATVSG  
TTTVGTIKATSSGYINGQLTAGTIKAENDIFFQNLDISGKATVNTLDVSGDASVGGKLSA  
VKSTSYFQEI AVTKNAVVGGF IESTNSTVRKFSVVS GNATV VGNLEVG GTFKPQNSQFEN  
IVVTGVADVGLKTS GSASIGGTATVQSLTVDSNVDVGNLNIGGTLSDVAFYNLS ILGT  
ASIGTL SVSSASIGGTTLETLSVGADADVIGT LSVSGKFAPEDTEFNDISVLGTATVT  
SLSAESALISNAATIQTTLTVGADADVAGSLSVVGTFTPSESEFQDITISGTATVGTLSAT  
SASISDSASINRLTVGSDADISGALSIGGIFASKTIECTDITATGFASINSLQVNNASIE

DATAANLNVGLNAEISGDLTVLGTIINSA  
>comp8644\_c0\_seq1; 564 93 1295 LEN=1450; translated  
MSLADIVPAGVVTGDNLMKLMEHARANNYAIPAVNCTSSSTANAVLEAARKAKAPVMIQV  
SNGGGSFLLGKGVKNADGAAAGSIALAMHVRSVAKYYGVPVVLHSDHCAKLLPWFDSML  
KADEDFYNKFGEPLFSSHMLDLSEEPDDENIAICVEYFVKRMAPMKIWLEMEIGITGGED  
GVNNEVDVPEKLYTTPEQVYSVYEALSKIGPMFSIAAAFGNVHGVIKPGNVKLSPERLGN  
HQAYAKMLGCEAEKPIFLVMHGGSGSTDEEIGTAVANGVVKMNIDTDTQWSYWDGLRAY  
EKDKRAYLQGQIGNPDGADKPNKIFYDPRVWLRKAEEISMVKRVMVSMDKLSTTGTIELSE  
DEPAFAQLGELKATPSPAILMTAGAVVGSAAATLLKAITK  
>comp8646\_c0\_seq1; 280 210 935 LEN=1224; translated  
MSNNSMKEGKRQLSAYEQRRIDNIKRNNARLRALGLISSVEERRSNAIASGTSSNIVSGK  
DSCRDPLESDGESSDDGEWQCENNGGKRRKRKVAPKEPREGSRKSRRLNGEQAEFAPD  
AEELLFSKDPTVRKKELEERVKECREVRLRAANAIAACGGEKAAKTNPTATYEHCLMRVK  
TMTEKGLVNRVKAIERAAGKHCVVKMAIFKSCLQDEGRWKLAEVASDALERLKLKALPIPE  
E  
>comp8647\_c0\_seq1; 584 1 1885 LEN=2523; translated  
XDIRQAAETGTSTPTPQGPRTIKNQRQSSIPGTPREDQHNRDITSYSIEQTTAMVSIR  
KAKQTGFQLRRTKGRRGGLYDKEKVGVAAGLCIGFFVMFLYSAAFSDVSIGEIGVIAESV  
RKTSHPVLMETPEDGEADTDAVDPNHPPIQHPPKIVPMGDSMNAIALEVSTLDCPKLL  
KEAEKTMKEVVPDFGMDNDRERRRLQHQHDDGGFADFGGAEKKGEDDSLPEEKWG  
EQAVEGGDAEEEFENYINLSAKHLFCLAATESPPDVIITNEINCDAKKRRRLLDLWSAAR  
SQMPEDLLLKVLDLAHEGREEILGNSYHIWAPSGDDGLYFMVNALNSDQDVDNNGINGLE  
EALGPGKLVVDVGSCLGLTCLAINKKYPGTVKIVSLEPASPSWLLQELNLRNLSKKEFKN  
IKVILAGVGANTDEEDDLMAKLMWRPTSTTSTRSWTPAEESKTSDELELIVRLRKLRSLLA  
EADVLLPNHIDVNLNDCQGCENLIPALSKEEFENIPTVMGNVHWGYINPNKLPSSDRGR  
ITHQRLCGHENIARDTKECCAFDLPVKSGIPGEVLQVGDSSNFPKKESTVSDVIMESMC  
DDFSSWSKERYLNDIPDDFNWFEISSQA  
>comp8647\_c0\_seq2; 270 1 1584 LEN=2035; translated  
TMNNEKWEPLKQCNGSEHENASSKDSLGLDRKRQOKERLRSSSFSDSLDDISSDEDKED  
HRCRRLRRLGRSSPANSNETRAVAVTREVQIPDQIRVSRSLRVPEFGPKILFFSGGTAIK  
ELSACTNYTHNSIHLITPFDSGGSSAEIRRGFNMLSVGDIRNRLALSDRNESTTRNNP  
QVIELFAHRLVKTEGLEAAENEYLSILDGKHPLIRAVELPMRSILQNHLRWFSDRMPNDF  
DLQGASIGNLIITGCFLEHNRDIVTAIFIVTKFLGVKGFRCRPLTAANLHIRTLYADGREV  
VGQHLMNQAPKSPSTMTKSEKQLSSNDSLNSKIMRIDLVQELNPRSGAGRQESQSCHIDI  
LSSDFVSSAADLICFPMGSSFFGSIIVNLLPVGVGKAITERRCPKVYIPNTGFDPEMNGWT  
LVECVSLIINMVRADLRHNYNEKGEPEENVVPIVDDILNFVLLDTTNCEYSVPVDKVAIEK  
LGVTVIDVTLVEDNKCNRVDNAKSHSNGKSKILNPVKVSEVLISLSS  
>comp8648\_c0\_seq1; 411 1 1986 LEN=2142; translated  
EQEQGQEQQFEKQLQRAAPECIINGTDLLLGAACLQGSFSSVFVLAEYNNRRRTKGAGTGVD  
ERPSSLRRRKHKPNPRCSDVVENSRRSTSTTTTRRSRSSRRI GGCLRVSKVENEAEHSGS  
DNCNDNGSHRTDNLAPPVPDGDHDGLRGRSRTKTPEDPVRYQNYWDEPNPNSNMVVKLLQ  
PKLMEKPRFLFANCAAGLIREGLFLAALSHPHILKVHAWTSPTGWNDFAALSGRNGNLYDG  
YVILERLQGGTLKQWIERWSRDHQEGEQCSERAVAEPRETSSAHEPRTRWRRLNFRSTE  
RNKRKSTNKSQHSPLPGDSMALVYNSGNANVIENDRNDNDIENGNSYPSNWPKTQLSDRV  
ALLLQLSDTVKYLHKHRIHRDLKPDNLGVTYVYRVPVDNSSSSNRSRGRFPPTSLSLKI  
DFDVARLVPEKEKPIDEEAVDGSINRSRSDRVSSSKKSVGSDWNSSHSVSSSSEEPVNA  
PKAEQVFNMTGKMSPRYMAPEIARGDPYNLRSEVYTVGLLVHEVLTQLRPFDELIPEEH  
AKLVHSDIPGYRPPIRGSWGWEQLRKILESSWGDIRQRPDMKELHSLVLTALPELLAPT  
SSSVATVITTPSSFPPLQPEQQPKLKARGLIHRQKKRKGDTVLSHSPMHLVSPPLSPTSS  
E  
>comp8648\_c0\_seq2; 423 1 2254 LEN=2410; translated  
EQEQGQEQQFEKQLQRAAPECIINGTDLLLGAACLQGSFSSVFVLAEYNNRRRTKGAGTGVD  
ERPSSLRRRKHKPNPRCSDVVENSRRSTSTTTTRRSRSSRRI GGCLRVSKVENEAEHSGS  
DNCNDNGSHRTDNLAPPVPDGDHDGLRGRSRTKTPEDPVRYQNYWDEPNPNSNMVVKLLQ  
PKLMEKPRFLFANCGTYGSVKKRAMEPKGAEGDETENGNQKLGCIQFLSQTKMLLASQNV  
LLSICFAFFGVPTLLKISSIPHPTCILGAIVGLLTSWTRCTAAGLIREGLFLAALSHPH  
ILKVHAWTSPTGWNDFAALSGRNGNLYDGIVLILERLQGGTLKQWIERWSRDHQEGEQCS  
ERAVAEPRETSSAHEPRTRWRRLNFRSTERNKRKSTNKSQHSPLPGDSMALVYNSGNANVI  
ENDRNDNDIENGNSYPSNWPKTQLSDRVALLLQLSDTVKYLHKHRIHRDLKPDNLGVT  
VYRVPVDNSSSSNRSRGRFPPTSLSLKIIFDFDVARLVPEKEKPIDEEAVDGSINRSRSD

RVSSSKKSVGSDWNSSHSVSSSSSEEPVNAPKAEQVFNMTGKMGSPPRYMAPEIARGDPYNL  
RSEVYTVGLLVHEVLTLQRPFDLIPPEEHAKLVHSDIPGYRPPIRGWSGWPEQLRKILES  
SWGDIRQRPDMKELHSVLKTALPELLAPTSSSVATVITTPSSFPPLQPEQQPKLKARGLI  
HRQKKKRKGDTVLHSPMHLVSPPLSPPTSSE

>comp8649\_c0\_seq1; 312 67 1110 LEN=1188; translated  
MATMILQPIDTNTKINDIYMTNGVVGNEKLTTPPLCIANSTASAENAKRLRVDGLKSHLS  
RTMIEIPNPTPMREQALDSSSTSTRPQHIFPAHGSDDNNKNLFSELAAQLNTTGDKNSTG  
KRIRFAPFPSKYRNDANKNAPNASGGSPRVTDLFTTEERRELWYQSDDELASMKQEAKVII  
SNHRNRSEDPKTPEEREDMVGLERFSRQRAAWKRSAIEYVLRAQQQVRKLRNASTGFGKV  
SANVAEYIRSLSRGTGWARETASTQGFREDYVAVHDALASLFDEQGNRHRNYDELIFG  
EKTSVIRSTETITGDNNKRKISGITESIQRDHAHDGLRRVRQRA

>comp8650\_c0\_seq1; 187 228 1451 LEN=1498; translated  
MITLNSDQEILIRSYVKDCVLPKHTLIDEEDAVTVVSIILVATELVPESTRDPRAVLD  
LKKETKFECLGGVRSKDTETRRRRITKLCIGSWDSYFCHPWELTTNKSQITDLYTRLS  
DLETCLKLERCWFKLFEALRYLRNLRTLDVSCFTTDGTSIRCHDSNGWVPHLNLENLYIS  
RAAVVNSDEDLAYLFDVLPRLPNLRVFRVGCMLQNRMESFRRAAERIRETPWSNDSRC  
RLRKLVCPEPEPDYKTHMQAKKLKRMNDPAEEEEAVATVLTAFRELSVVEGIYGNLDTGD  
IHAAGKTLVPYLFELINHAGRVLVEPRPPSGTDRKNDILPPGVPSTAIPLSVWPRVLER  
GKYGKPTPNRTPRAGDGATGVYLLRKMVAVILQEWRSRSPCGKANQ

>comp8651\_c0\_seq1; 512 123 1178 LEN=1444; translated  
MAIDTKHTGAKAATGIAWLSFFFLALAQQAHSFSMSSNGNNNNNNLGAAMNLMSSDSNNL  
DRFQSSFLVGKESSETAVSQFDGNLWQALYGENNVSGEDEDLWVAVYRSNNNKPSVIVRDE  
FFRAMNDATSDLLDANDNDSTANSNNNISTVSNTASFLSNTMPSMLEIPETKPVAIARL  
QKTESDNVYLLDNLRCSLKEDQDESCDGGSEFLEALSVAVDLTLQQLRLLKDRDDET  
ETDVVFEFTVRTKSTLFSNKLFEERGFREVETLSRDMATHVSSYGACFSQYAERSIEPGM  
APGTRDRALQIVALLGRLDAEVQKVEEDEQNGGNGDDYDPWANMKLYRS

>comp8652\_c0\_seq1; 508 95 973 LEN=1368; translated  
MTTTEKCRNGELPSSFPMPDDGLASDVGGGLDWELEESAEGVILVNNYRNQRASSGWVS  
TDSKRSKGIIRNANDRCGGYRRTSSAKNRDAEHESITDRFTEACRVGSSMLEWISAAIGV  
DICCGKNFSENASHSTPATQSMDSFEKEKFGYLPHTPQSFQQHDNEISLLTDVSVLTDAS  
LMDLVLSKEDEDNIEKEMAPNKGDHCLPLGNDLPAFHKKSKRNHKPSNYADLLVEEGIGAL  
KKKQREEREYLHPRLPFAIVAHDDLNETKTKKKNKKGKASKSQQPLKSRTPTW

>comp8653\_c0\_seq1; 773 135 2780 LEN=2875; translated  
MAKWRSEPMYISIIINEDASHDCLADLGLKLVIOFTDLNPDLPFQRRYVSVYVRCDE  
LERKLRIFTAEIDKFNLOSTAGAIIDDFLEGSPIVSSTGEASNGKLLSLEVELEGEYESQ  
LKELNSYSEKLTVEYNQKVELQEVYKARYFFNTDAPRLASSERRGGRSSERASLLDSAD  
NRPDLDMRFSFLTGVVATEECQRFERMVFRMTRGNCYVRFARIQQDITDPTTGQQLQKSV  
FIVFYKSQAIESKLLKICDAFQAHRYSIPDMDDATSVTSMLENSQELVDSRTVLLKNQD  
MRYRLCCKIAQHRERWSWIVLREKAIYHSLNMFKADVAGMLRGEVWVPSNMALREVVE  
RAHSNMDMGMPSHVDHVPQPWPTPPTHFVTNKFTYAYQEFVNTYGIIPRYREGNPALFTA  
TFPFLFGVMYGDIGHGTFLFLAGAAMCWNERDAEKNLKGQGEAQAFHAMRYMFLMGFF  
AVYAGLIYNDFFSLGLNLFGRWQFDGQYEGTVEEGAVASLDAEYGSNESVYPFGLDPIW  
HVASNELLFNSFKMKMSVIFGICQMFGLGTCIRGLNAIHFGKADLYFEVFPVVFSSLF  
IYMVVLIFFKWTIDWNARMTLATCFDPDGLWQSEWQTCSTSDGNGYCTPWGYSCKDGDK  
TADLCPDLYGGSGDGCQPPGLITTLINIALAPGFVDEPMYPGQPFIQNLLFLALASVPV  
LLLKGPYFIKQQTHTPIQHASEELPLYADEHDHGDHEEHDFSEVIIHQGIETIEFVLMV  
SNTASYLRWLWALSSELAHSELATVFWNKCLLSTLNMSSFIYVYFGFGLFAGITFGVLLMMDV  
LECYLHSLRLHWVEFQSKFYKGDGVRFPYCFKQILHDASQ

>comp8653\_c0\_seq2; 1113 128 2742 LEN=2826; translated  
MAKWRSEPMYISLIMNEDAAHDCLDGLKLVIOFTDLNPDLPFQRRYVSVYVRCDE  
LERKLRIFTSEIGKFNIECDASAGKVDFFLEATPIISSTSAEAPTGVLESLEAELEGET  
QLKELNSYSEKLTVEYNEKIELQEVLEKARRFFITDAPRLAVSELTSQTPSNKTNLLEE  
EARPDLDMRFSITGVVSTEERTNFERMIFRATRGNCFVRFAPIKQPIITDPETGQLTEKS  
VFIIFYKSDSIELKLLKICDAFQAHRYSIPDMDDAESVDNMLTENAQELVDSRTVLLKNQ  
DTRYRLCQMLAKHCERWTWHVLKEKAVYHSLNMFKADVSGMLEEKDGVIAENLDEVKYCI  
EKAHANMDMAMPSLIDHVPQPWPTPPTYFVTNKFTYAYQEFVNTYGIIPRYREANPALFTA  
ATFPFLFGVMYGDIGHGMFLFLNGCMLVWNEKKNKGVKREDELSEGLHVGRYIMLMGFFA  
VYAGFVYNDCFSLGLNLFKSRWEFDGQDEMTVEEGDVAYQTAEYGSNESVYPFGLDPMWH  
VTSNELLFNSFKMKLSVIFGIFQMFVGLKGCNAIYFGEKLDLYLEVLPVVFVFAASLF  
IYMVVLIFMKWSIDWNERMLLATCFDPDGDYWNADWTVCDQSGNGYCTPWGYSCTDYDTT

ADKCPDYGGSGDGCQPPNLTSLINIALAPGDVDEPLYAGQAGVQNFLLLLALGSPVVL  
LLAKPYMLKKQHEQTHHEHIAEMPDGDEEEHGFGEILIHQAIETIEFVLGMVSNNTASYLR  
LWALSLAHSELATVFWEKMLSTLGVNWFATYLGFGFLFAAVTFGVLLMMDVLECFHLALR  
LHWVEFQSKFYKADGIRFSPYSFKQIIIDSA  
>comp8655\_c0\_seq1; 237 124 588 LEN=696; translated  
MGRRAKKAPVQTKKRPTLAKRFKCPFCSNEDVVECKMDHKARVGSLSRCLCGASFAMP IN  
HLHEPVDVDFSEWLDCEATALGKPTGQAAAVAAAQEAHNHRLEYDISDDDDDDIGQPSGL  
SAPSKSKGKNGGAASASNTNIADLGLDDSDSDSD  
>comp8655\_c0\_seq2; 173 706 1062 LEN=1170; translated  
MDHKARVGSLSRCLCGASFAMP INHLHEPVDVDFSEWLDCEATALGKPTGQAAAVAAAQEA  
AHNHRLEYDISDDDDDDIGQPSGLSAPSKSKGKNGGAASASNTNIADLGLDDSDSDSD  
>comp8656\_c0\_seq1; 483 127 1389 LEN=1766; translated  
MKPFSSLTKRVIITYTAFHYISSLRRPSAVSALIVPATRKFSSSYAFQNSNYKQQPRQQFG  
QYTSCPIYSSPVVDPGAEIKAKQNEEEQLIQDMLYRIRECNKTPEDLQSRIVDFQVDGCV  
LGKVDTKVADILCSKKTTVGVSAFEIATVDGKTCLTLSEEGAGTTVESRTQAVGDVMEEL  
KRIGIVTGWREDELYPISDSFYNNPPVFLMERAATDLMGVLGYGVHVNIGILRSDGVSSNTPK  
MWMARRSKTKSKYPGMLDHI VAGGQPAGLGLMENVIKECEEEAGMPPELFDPRPDVDIRPA  
GVVSYEETIRCEIDDENNDT INGTGEDSNFYTISRVLVFNLDLVLPHDFSPKPLDGEVD  
DFFLWDIDQIKESMAPDFEDPIKPNCYLVIIDYLMRMGFVSPETKGYLDVLKELKSGDCQ  
>comp8657\_c0\_seq1; 754 1 2146 LEN=2299; translated  
XPYYGAGGGYPPPPPPGYYPYPPPLPQYYNGHPQQQYHHPSSPFFGYRGNLPRVEPTVP  
NRNHPKHPSQQWISSSTEPNGASTQEEHTHMMMHMGPPQAHQRQGNEDSLDGSTNRSQE  
GSSVSPGHATDSSKPNNEANNPPLGTVYNDPYGNLQSSSPELQQQEKQWHLRQLQILQ  
AQEKYQRKLRLLKQNKALATGLKSFVTFVLRVTLDSFRKVSTCLCLVAVTCYSAVSPRNL  
YIEYNQRFYENLKLVALVVLPTIGYGLVVDWNQVGSMDRGRNRWAAFPQAAAATTTLP  
PAALANESIPDAPATTDRSVVRPSSIGAAVHALIHSFYSSFFVGYLWIFVLEIVWTTLL  
RLAIFLAWEPDMLGAKVPWSPSASVPAPDPSGTEGGSGGNPISVWILPWVLEIKYRPK  
RITLLAADILTSCVACPIIEEFVKLRLQLQWTMPLSKNFSWVKRCSKHHPKKQKKMIAEP  
IESLDEADEVPSAQAPANQPPNGVGNIDGNVTNINPYVAGMVVSLGIKWADAIRRVCY  
TKAEDERKGVYAFRLGIFPVQELCGIMTALRLARRDVLGQKMLWNLLPAVIVHGMANL  
RGTKPVFKWNSSTPWAEMQLSPDLFPGLFSPSTLSSMEESGSIAPLPTTNLEWLGRAFPK  
IMWVILFRVTGYCVKNYFMINRQATKRATTYAGKHAASFSAELETAAKLKTTKDK  
>comp8658\_c0\_seq1; 269 1 1049 LEN=1619; translated  
XEKKTSED TNADSTKELRVPNI IHNIETMHITNKKFLYKLLVAIAFFQAADAFSFOQRLP  
VSTTKLQATAENGEAPAPAVSVSALKKPPTQFQHPVENTSHSSGGNLKDGEPLVLRKA  
VTSGLSLITAATGLPLLGANAASDTEEIGRQEOPFRVLFVQIDPSKPNELSEIEIEVRP  
DWAPLAAARFRKLVELGFYTDRCRFRVLPGYVAQFGIASDPALNKKWLYCGASDEEGRQQ  
CQKPIPEPRLQPNKRGTLSFASSGKNSRTTQIFVNLANNDGPPNFLDPQGFVPFAQIVR  
GMDGATNVPKQLNSEYGGKVNQKAAFYGAEYFQAVFPRLSVIKTATVL  
>comp8659\_c0\_seq1; 280 213 812 LEN=1073; translated  
MDTLGSPEGINAAHAQVGNFIVLMSRQGKIRLSEFFQSYTESEKRRILRDIAADILPRA  
PKMCNIIIEKGPYKFVYRRYASLYFVGVVPGMNELIVLEQIHLFVEALDGYFNVCLELDL  
VFSLHKSLLILFEMFIGMGLCESNKREVLKAINAEELVEELTKPGEDTASQLDDGLSFQ  
EQFQLGRKPGRRQGSQRKM  
>comp8660\_c0\_seq1; 140 248 478 LEN=1563; translated  
MATSKFQKGPDLKRFMDKRLKLSLNGNRKIVGTLRGYDAFLNVVIEDAEGDGGAYLGQLV  
IRGNSIVQFEALERN  
>comp8661\_c0\_seq1; 249 199 1128 LEN=1523; translated  
MCGPTKIASKTTANTRTESGLFLFSLESYNGDGGLPNNKSQFFVTVTGLVLLLVAIELSMR  
QLFNF IKDMHPILEDEISRNILARHIGVDSFGCFIVAFGLKARYVLKDVIDATIGKPN  
AMPASYEGRMFTYLP EGQRVCLFFLAYQLKNTYDSIVWNDGMIFLIHHVLTFTIWGGIQ  
GNAHFYALYFFGISEISTGVLCLLANFDFGVVGLADAFPLVKAALGGIFALMFVIFRV  
LGWSTMSYFCRDVWKALKGSNSRLELPGHRIWFRFTLFSNAILSSLQIIWLAEIVRIGK  
EELKNMGLI  
>comp8662\_c0\_seq2; 190 477 1255 LEN=1255; minus strand; translated  
MQVHQAACQSAVSRAETETNGNTKVENEDSVQPETKKPRLCNAEPGSCGSDGGDGDGGD  
SKSRAPNPSAATGGIGTGTHRNLTLPSTRWLLIPTCDRSGLSLAAALPPSLRSFEKKI  
GRDLDKLRGLLDQHGLRTRISSPREAVSVYKDSCLGGDDEPANSFLKDGTDFFLLVTFGL  
HPQQEELEKYFRRSIQNTYCLLLFCCKMREEYHSLGLSSSESASASKSQHVSEPTNAID  
NEINKQIEMLIGEIEKTTAX

>comp8662\_c0\_seq3; 277 477 1906 LEN=1906; minus strand; translated  
MQVHQAACQS AVSRAETETNGNTKVENEDSVQPETKKPRLCNAEPGSCGGSDGGDGDGGD  
SKSRAPNPSAATGGIGTGTHRNETLPSTRWLLIPTCDRSGLGSLAAALPPSLRSFEEKKI  
GRDLDKLRGLLDQHGLRTRISSPREAVSVYKDSCLGGDDEPANSFLKDGTDFFLLVTFGL  
HPQQEELKEYFRRSIQNTYCLLLFCKKMREEYHSLGLSSSESASASKSQHVSEPIFAPI  
DTRNVYPGHSFQIQSEGAERTDHQYLYDPAIDYRKPGLFSFLPGLRRTVLRGPHELVS  
MIESFWSQVLRNGYFPTAAIQEVLEPQLRSFFLSGLVAADARGTTYLPLPLKASFVPSAP  
LSIYLHGKAGAGKSSLAKVLPALQSTLEEHIDPECMARFVKQNLNKRLETLELEFQLRP  
NNNDMSVMSIIQGRRMAMSQSKPGLVVLNLEELPMDSSLGNDPNQEAVAQLISQRF  
>comp8665\_c0\_seq1; 235 103 1122 LEN=1122; translated  
MAVACAWTERIRGSLRPHRSNPRSGSELAGSKAVVDEPYLFNGTVSILDRGPNHLVVS  
PSVLCRSDWSGSGKKRSKQKRGPPPEVPMQRAREAVGERVNLVHRLDRGASGCLLMSFA  
GSDENGGNATAVLQESMTRSSSSHKTYLALVRGEGILKGRDFRQEGWFEVSRPIKNEAGT  
LKNATSYFRFIAGQGNENGALEDVPRASLVLARIKTGRWHQIRKHLNGLSHPPIIGDSTHG  
NSKTNREWRQKWGLEPERTCLHLLKLELPATPFTPNGISVVDALPPDMTNMLRDHFPEP  
LETAETVLNEEGLTLRIDKRPDIXASQLHDKLNQEGDEPHX  
>comp8666\_c0\_seq2; 72 56 367 LEN=746; translated  
MFRTRAVFRQLKPLADRVLVKRAPKETQLASGLYLPTDSTKDPNEGEVAVGPGQVDVTG  
NLHATTAPGDKVLLPEYGGTKITLGEDEVFMFRESDILGKFD  
>comp8668\_c0\_seq1; 183 1 576 LEN=656; translated  
CGSAWCNVDSVFNLDAYRVVLFQENLS DGTVAPWFWYILFGPVGALGYRVANTLDSRIG  
YRGGRYEWF GKASARFDDL VNLV PARLTTLALVAAAAMVPRCSAKRGFATAWKDCAQCSS  
PNAGWPMGAMAGILGVRLEKKGEYALGKDI PCVNGPSPTDIRNGHRVAQLAGGIAFVAAL  
AACC IKDWITG  
>comp8668\_c0\_seq2; 645 1 2562 LEN=2642; translated  
XSAVSIFGFRASNTIRTVRFPTRRVEQENIHLKRTNSVFAVLGVRDPDFFAIAPTRTHG  
PEHASNKHVPSQSTLQRKCS DQKNEPSPCRPDAXVRVDENRALVELPVGVSRRNSGDVTG  
VPTDGWNSISSAIWNGGLRSFHYGNKIDAGDKVCV LNYKVPSTYDGLNPEPKAFLRSAIG  
KEPNIRHG DENENENQND CDGSRNSNAKHHG SVAGSSDGRHGKGFLLDENTV GIMTAASM  
RSLRTASRSAGGIFVDAIVTAGISNARTAGADADV FALLPE DREEAPP PRGTINTVVVVN  
GAPLSEGATVEAYAI AIEAKCAACAD FRLACAKS LYGNDLAQGTGTDCAVLLGPAVPRSQ  
SPRPPGAPAFRLEYAGKHCLLAELIGQAVXGGDQGGDPVQPGPPVRNGVVVPPPLQDLP  
LGPPAEGIPPLRSPQADGSDAAVAPLGGPARMGDGP SGLLWVRSNRGAATIGDGT DGGRL  
LGSVSRCLECLGIRRFARVFNGLSNHL LSVLLVFEPV VLFQTMQRQHRSCLPEPPLSVH  
PVVLAGTVIS IATKKWIPERVF RSPVLGFFGGV LFLVGM LALFVSGAQLFLAVVQWTEEA  
IKDHPGLGGWVVLQRDVVPFGSWVLEVVLFKTT FSLQLLCTIALQMARFLERSQLQEARD  
QLVWLCSRDPMHLGSEDLAGGTLESLS ENLSDGT VAPWFWYILFGPVGALGYRVANTLDS  
RIGYRGGRYEWF GKASARFDDL VNLV PARLTTLALVAAAAMVPRCSAKRGFATAWKDCAQ  
CSSPNAGWPMGAMAGILGVRLEKKGEYALGKDI PCVNGPSPTDIRNGHRVAQLAGGIAFV  
AALAACC IKDWITG  
>comp8668\_c0\_seq3; 606 1 2422 LEN=2502; translated  
XSAVSIFGFRASNTIRTVRFPTRRVEQENIHLKRTNSVFAVLGVRDPDFFAIAPTRTHG  
PEHASNKHVPSQSTLQRKCS DQKNEPSPCRPDAXVRVDENRALVELPVGVSRRNSGDVTG  
VPTDGWNSISSAIWNGGLRSFHYGNKIDAGDKVCV LNYKVPSTYDGLNPEPKAFLRSAIG  
KEPNIRHG DENENENQND CDGSRNSNAKHHG SVAGSSDGRHGKGFLLDENTV GIMTAASM  
RSLRTASRSAGGIFVDAIVTAGISNARTAGADADV FALLPE DREEAPP PRGTINTVVVVN  
GAPLSEGATVEAYAI AIEAKCAACAD FRLACAKS LYGNDLAQGTGTDCAVLLGPAVPRSQ  
SPRPPGAPAFRLEYAGKHCLLAELIGQAVREATREAIRSNLVHLYGTVWVYHLHRYKTYL  
WGLLLKGSRPCVPPKMPDMPSPSVLLGWAMVLLAYFGFGRIVGLPRSATVLMAAAF  
WDRCLPEPPLSVHPVVLAGTVIS IATKKWIPERVF RSPVLGFFGGV LFLVGM LALFVSGA  
QLFLAVVQWTEEA IKDHPGLGGWVVLQRDVVPFGSWVLEVVLFKTT FSLQLLCTIALQMA  
RFLERSQLQEARDQLVWLCSRDPMHLGSEDLAGGTLESLS ENLSDGT VAPWFWYILFGP  
V GALGYRVANTLDSRIGYRGGRYEWF GKASARFDDL VNLV PARLTTLALVAAAAMVPRCSA  
KRGFATAWKDCAQCSSPNAGWPMGAMAGILGVRLEKKGEYALGKDI PCVNGPSPTDIRNG  
HRVAQLAGGIAFVAALAACC IKDWITG  
>comp8669\_c0\_seq1; 250 172 1146 LEN=1487; translated  
MAPLTFGPPSMRKSQNGMNDDEKAI ELLADNLNGDNRNRTLAKILNGDNNSWSSNNSRYK  
RGRMSNDEERNRDYQPAYQVGCCGHL LILSLPILAMAFTLAFLLVLLVFD RSQIQNMDL  
YGD ETVYEVADIYFGSISQDTISFIMSQYNPYDIIILVSIACGLVSI VTVARNIQIEVY  
HQRTQSNILIKMMNYLSSTVNIASYLGLMVAFAFKSNQEAPTWASKAHYYGAGIFFAGTA

VYAVLHSLLLCSQRHYPTVLKVLFFGLAVTIVTCSLLFVIPLWNDGLSEDGINPVYEWIA  
VFTTAIYVGFYALLFHLDSVDELW  
>comp8670\_c0\_seq1; 652 88 1065 LEN=1643; translated  
MPNPQAEAIKAENGFFKAGKYADAIKYKEATSIDDKVPSYWSNMAACYEKLGEYEKMA  
DAGRSCVKADRTFVKGYFRLAVAYKNLNQLSECIKTLESGLAVQSSNPDLKRMKKEVTEL  
QRGEQVAAYCNKADELQNGDIAGAMKQLDLASRLDAGNSIVEKMMGKVKPKWEAMEKKR  
KANLSPVEVFKERGDASYKNASFEEAIGHYTCVEQLQNEGKSGSDLALKAYANRAACYK  
QISNFDGVISDCTAVLEVDPENVKALIRRAQAFEGVERYRFALQDVKTVMMPYNQVGKA  
NFDLCNMMQHRLQRTVSQLKKNSS  
>comp8670\_c0\_seq2; 532 88 963 LEN=1061; translated  
MPNPQAEAIKAENGFFKAGKYADAIKYKEATSIDDKVPSYWSNMAACYEKLGEYEKMA  
DAGRSCVKADRTFVKGYFRLAVAYKNLNQLSECIKTLESGLAVQSSNPDLKRMKKEVTEL  
QRGEQVAAYCNKADELQNGDIAGAMKQLDLASRLDAGNSIVEKMMGKVKPKWEAMEKKR  
KANLSPVEVFKERGDASYKNASFEEAIGHYTCVEQLQNEGKSGSDLALKAYANRAGEFR  
VVGPCRGRRTIFETGALFFVFLCVA AVRSSSSSIPLPFSLVICFSFLV  
>comp8671\_c0\_seq1; 294 408 992 LEN=1054; minus strand; translated  
MAPATESAKETAVATPPLACFVRVAPEEAGGAGGLAPSATAGRKTGDDWLAPPNACPSSP  
QNKSPISSQVQKSSSRGSLQTATVPFVPRHAQFSSSSRASSPCQTVPLPLPSAGSSGPG  
PSSASTSNVLA VEERSGRLEITSCGGDSGRITGTGPSYSSSSSFLSSLSLTSARTS  
HRYERIDCLVDAPG  
>comp8671\_c0\_seq2; 446 147 785 LEN=1176; translated  
MLFIQQKSIVLLTVIVALLALIGNPESRLVRAEVNDKEDKDDKDDDDDEYEGPVPVIVLPE  
SPPQLVISNLPLDLSSTANTTFEVEAEEGPGPLPAEGNEGNGTVWQGDALLLEENCACL  
GTNGTVAVCSDPRDEDFCTCDEMGLFCGEEGHAFGGANQSSPVFLPAVADGAKPPAPPA  
SSGATRTKQASGGVATAVSLALS VAGAIAALD  
>comp8672\_c0\_seq1; 479 117 1999 LEN=2088; translated  
MAATTTSSSNTISAGTDSTRNFRTTSSLQTKRHTVASLTQAQEGFADTNEARYWTQKLG  
GHSKKYSAPTNDKKYAHVRQLYIPPFQRREIAHQVLFGLLSSKHPPFAVVS GPRVHLY  
GTSTTGSAFVRALYQSAHSGSGDGNIAIRSGQDLDPDRSVQTGGNLALSASFRNDGRLL  
AVGTDAGEARVCDVTMRATLTF SANSFPVRSLLWFRNGQYILAGGDDGVAR IWNLGSTE  
KKRPMVSLVGHGDVIRCTDLWQNTTKQTQRQNTTEFRELAATGSYDHTVRIWNVSNVDN  
KDADEKEEGRCLTTLMHGYPVEAVCF LKSSDESSAPVWLLSAGGTIVKVVNPLSGQCLGT  
FGTHHRKTITSLLLVLRNTNYEDET XNEKVS MRIMTASLDGVVQIHSWNESTGQMGHLYS  
TKLAESITSVATDKSGDRFAFGTVSGHVLFKMKGPSVTNKKRKA VPRAGTYSFFQRGMNA  
DAGTSSNDYTVASKTKKQRKLNKYNHALKQFRYSEALDEV LSTRNPKNIAGVLEELGKRR  
GLTHALS NRDEETLEPLLRYVTRYV KRPEYTSLLVGVVHILIDIYGDVAGESEDIGGLFR  
KLRHQIELECKAQKSLMFLMGQIEASM  
>comp8673\_c0\_seq1; 167 1 366 LEN=1331; translated  
XTDSVEKNSXTEQSEESIKDIIRFFLILHLAMTVVKSEQSVELGNGGEEPPFCSTPTDD  
IHTIQAECSNMVSL LKRLQKEEEDIQCQLEILAKESLLCGFQNDVIEPPIPKKRAKSKG  
KS  
>comp8674\_c0\_seq1; 259 1 1021 LEN=1393; translated  
XAQVVNHQPSLTYEFIKSIKSRMTSVWTPKNRLRFLILLASFVTAHQHGRSCAPIGGS  
HRRNKNGCRKEAERSTRESRTSLFMGKLRNKQAE LQRKAMLARQKAAENAGSSSSEGER  
KLRMTDDQLKEINDRKRFEELLNANSASIGSDSDSLD TYLSQE QEEENIDAYRKGVDKRF  
EGDPAPAEPFEELVSIKSENAIGEAAVKRMPWVRDKSEYVVVLESEP REKSP EFHNTVAD  
LSKALPKDIFSKIIFVNADTPAQNRRLFKKKGISDTGIRLYSDEKREWMQSYTALGENRW  
SMTLFLVLDGRVQRLVREFSQISAANVIQNAIKSSEKRRL  
>comp8675\_c0\_seq1; 43 1 283 LEN=283; minus strand; translated  
XALEVTYPSFSLSHGELDEADTAATSTSAVHRETVQSKASELMSRTIVWKNTANNKRHKH  
QPVQRSYQDNQLPNRVMLESILDSFDQLVEARIRA  
>comp8676\_c0\_seq1; 168 1 1031 LEN=1375; translated  
YTYTYTYTIRTKCKSTKLFPKMVEGIIHGVP LSVVDGNLQRHGERGNGNHNCH EEDDND  
FGVHRVAKKLRFPPTTRGEHRTNPLTKIGNATNDESAKRSFSPPLRWWFSRQHHQEQEQ  
QQQERSLQPVTPDGAPASTPGMVLSEHLGNTADVESLTHDVKNWSLTRL PAPS LANDGV  
AGAPSAEKRNNSAAGRPTGSE RSHDGT SKNSGVFRKGPAPVENGIERRQIGTPCKAVKG  
LDAKLGNTGDAVGMLLGWQAEKSNQSATLVDRTPKSHKIRPSSRQAVGSSSSSLSTTANH  
AYHHR TINEKRMESSAHTLPDYWPTSLERVGRSKNPKGLCPR  
>comp8679\_c0\_seq1; 232 95 868 LEN=868; translated  
MAI PHTVANLVDRASNSASSVAATDRASVAPLSPAPVEAGGARM LACSSSSGGGSASPGPS

VRSLQAKLIQARKRNELLQNIIEKGVDEYGYPLCEFRKGF LDHYKPRGMVISVSRV ESSRV  
VSGRFVCGRLRLAIDGCKRILCSADAPPGFDFLPVLP SLNRTPKCFLLNKRI RFFSLVSS  
VASVLLFPGANGIDGVTSQTIRVALQQSVTILANFMGEQLELDLKR NQRVNEGQITQMEA  
DLEADEWEKVGVSFIFI

>comp8679\_c0\_seq2; 185 950 1501 LEN=1760; translated  
MARRMSSRIEAKSPPGKTETVRDHKLSVTASMTTTTLWANLLPFCADYSLHQALLCYAYF  
RYYSYQRQRLLAASPSEDDDEDTANGASTLITEDDRELARDLGQKSLRLATNRGVGLV  
CSAVGAGVGTVVWPGWGTIVFSALGDATGGMITDDGYFKAKQSLEEKRAKDEARDDSI SR  
QVQ

>comp8679\_c0\_seq3; 223 95 604 LEN=604; translated  
MAIPHTVANLVDRASNSASSVAATDRASVAPLSPAPVEAGGARMLACSSSSGGGSASPGPS  
VRSLQAKLIQARKRNELLQNIIEKGVDEYGYPLCEFRKGF LDHYKPRGMVISTIRVALQQS  
VTILANFMGEQLELDLKR NQRVNEGQITQMEADLEADEWEKVGVSFIFI

>comp8679\_c0\_seq4; 474 95 1288 LEN=1547; translated  
MAIPHTVANLVDRASNSASSVAATDRASVAPLSPAPVEAGGARMLACSSSSGGGSASPGPS  
VRSLQAKLIQARKRNELLQNIIEKGVDEYGYPLCEFRKGF LDHYKPRGMVISTIRVALQQS  
VTILANFMGEQLELDLKR NQRVNEGQITQMEADLEADEWEKLEWDKRWTTTFPNKFV TALV  
KYHSVTLILRFYEYLA AKLVDMHKL NKLTVDPFAMARRMSSRIEAKSPPGKTETVRDHKL  
SVTASMTTTTLWANLLPFCADYSLHQALLCYAYFRYYSYQRQRLLAASPSEDDDEDTA  
NGASTLITEDDRELARDLGQKSLRLATNRGVGLVCSAVGAGVGTVVWPGWGTIVFSALGD  
ATGGMITDDGYFKAKQSLEEKRAKDEARDDSI SRQVQ

>comp8679\_c0\_seq5; 483 95 1552 LEN=1811; translated  
MAIPHTVANLVDRASNSASSVAATDRASVAPLSPAPVEAGGARMLACSSSSGGGSASPGPS  
VRSLQAKLIQARKRNELLQNIIEKGVDEYGYPLCEFRKGF LDHYKPRGMVISVSRV ESSRV  
VSGRFVCGRLRLAIDGCKRILCSADAPPGFDFLPVLP SLNRTPKCFLLNKRI RFFSLVSS  
VASVLLFPGANGIDGVTSQTIRVALQQSVTILANFMGEQLELDLKR NQRVNEGQITQMEA  
DLEADEWEKLEWDKRWTTTFPNKFV TALVKYHSVTLILRFYEYLA AKLVDMHKL NKLTVDP  
FAMARRMSSRIEAKSPPGKTETVRDHKLSVTASMTTTTLWANLLPFCADYSLHQALLCYA  
YFRYYSYQRQRLLAASPSEDDDEDTANGASTLITEDDRELARDLGQKSLRLATNRGVG  
LVCSAVGAGVGTVVWPGWGTIVFSALGDATGGMITDDGYFKAKQSLEEKRAKDEARDDSI  
SRQVQ

>comp8680\_c0\_seq1; 456 137 847 LEN=1211; translated  
MTDFIEEQDAVHAIKKLM SFGFCSPRKGLSAA PSYEEDDAEATNKYAPDLAPQTPSKQGV L  
ETPPATPESEDIAQKEDETEVVPEEKPEEPDQPAPAETEETPPAPTPTDDSEAPKKATEI  
QKARGPENFILKCIFLLVTVLALKKLGFTTSDLDL GALVGGNGSSPSWIEVVDKQESVG  
ETIAKEVPVPESEEEPPVAAEAVEQEEVVATEETYGGSPTEATTDATTEATTEGEL

>comp8681\_c0\_seq1; 286 65 502 LEN=3227; translated  
MAVIKTGKVVIVLAGRHAGKKA VVKTDFDEGNSEKRF SHCLVAGLARNPRKVTKAMSKSK  
VEKRSKCMKPFVKYINVRHIFPTRYVVDMDLKKTVDEADLVDAERRVDVKKNLK KVVLLDR  
YLNQKEITSEKKAQGSNYFFQK LRF

>comp8681\_c0\_seq2; 286 65 502 LEN=2719; translated  
MAVIKTGKVVIVLAGRHAGKKA VVKTDFDEGNSEKRF SHCLVAGLARNPRKVTKAMSKSK  
VEKRSKCMKPFVKYINVRHIFPTRYVVDMDLKKTVDEADLVDAERRVDVKKNLK KVVLLDR  
YLNQKEITSEKKAQGSNYFFQK LRF

>comp8682\_c0\_seq1; 319 1 1423 LEN=1821; translated  
XKEQGYNSTCSTVSNPLSCYYWV TLLAIGFNYAPRSRTTQMLLQHRQPQVEGRSTATRFV  
VYFLTACSAGLLFNSWRLERFR IESLVRNAASKISSSRALPEENHNQDIVGGEVGGNGS  
ELYVPSLDYRIKGISQYSSKLSKEINFDAHVYCKEFENDLIW EWWQPSKENAKPEQIRHL  
RKEDKKHVEKTTKRNTRKRL LIGVSGGYDKYSKLLERAVWSARVYAALWSSGSSKKNNS  
DIVRDTDVTVVTLQGTAFSPHGCKAPSAHSSINKIRLLFEAIDAGNQYDQMLLLDPDTMI  
YDMETDLTTLIGDKEDFV VAGPAILTEEGKDKYMPWKITSGITLWNLEHPSTKAVALDW  
FRYAKNAI IRETYQSDQKYL LKALKNYINTNSKGVVARSSDREGIVKSLMNHQFDDGIGG  
RFVKQFRVQKAKNPHDKQVEARLARMEETAGLICEHYPDACDRVGKPPRYESS

>comp8683\_c0\_seq1; 560 578 2762 LEN=2762; minus strand; translated  
MPI SCGQFSYANIKPTRILGVS GTLEVMSNHQKIVLQKYGVSQYLYVPSVYGQSNF SFDK  
GGEVSI EKSTSDFFQKITDETARVATKQRRAVIVFFNDSKRLNEYVKSAFYRKLGRKKE  
ILTESKNANEKAFIISKAATAGQITICTAVFGRGTDFFSKDDALDNNGGVHV IQAFLSCD  
MSEEVQIQRTARQGGKGSYKL ILLDKDLEDKFGIKCGSFGTWPRGQFYDRLCEARNKAL  
ESDYLTIEMSLSKAKTKDDATHQYFDALLNSNVCKAKSLLKEIYLSM KKKHTGPMSIDLA  
IAIDITGSMAPYAI AIASTIQNLLAGQNPILAKLTSKFPDSKFKLRVAVLGFRDIDDGSR

QFEELWDGVTHFGENVEDTIRYVKSLTSSTSGGSDLAEDHLGAIDRCVKWNSDDWKGM  
IKAILLLTDAPAHGYAPNGDATQNIIDNYSVRHPLGLTMDSVVENVLDKIDIDLFVCSFDPI  
ATQKFEEKMSEAFNRHPSNVDGREVTMVQLVPKTAHVHNKASRMMGDSRKHNIFVLDESGS  
MSNDWSGVVQVYNKYLENRRQRQHSDLI SVVQFSGTARVTC SLAKVASAPRNLGYNGGG  
TCFSPAACADLARKTPQSHQPVVIFMSDGM AEDSHIASSHF LSLNEELKTRSGLDLEL  
HVIGFGGGTDTSQLQEIARASANGRVHTTSDIDSLSRVVFVQISGGGDNVSSVLEAEISKRI  
SDAVTNRX

>comp8683\_c0\_seq2; 479 578 2576 LEN=2576; minus strand; translated  
MPI SCGQFSYANIKPTRILGVS GTLEVMSNHQKIVLQKYGVSQYLYVPSVYGQSNFSFDK  
GGEGVSI EKSTSDFFQKITDETARVATKQRRAVIVFFNDSKRLNEYVKS AFYRKLGRKKE  
ILTESKNANEKAFIISKAA TAGQITICTAVFGRGTDFFSKDDALDNNGGVHVIQAF LSCD  
MSEEVQIQRTARQGGKGSYKLILLDKDLEDKFGIKCGSFGTWPRGQFYDRLCEARNKAL  
ESDYLTIEMSLSKAKTKDDATHQYFDALLNSNVSKFPDSKFKLRVAVLGFRDIDDGSRQF  
EELKLDGVTHFGENVEDTIRYVKSLTSSTSGGSDLAEDHLGAIDRCVKWNSDDWKGM  
IKAILLLTDAPAHGYAPNGDATQNIIDNYSVRHPLGLTMDSVVENVLDKIDIDLFVCSFDPI  
ATQKFEEKMSEAFNRHPSNVDGREVTMVQLVPKTAHVHNKASRMMGDSRKHNIFVLDESGS  
MSNDWSGVVQVYNKYLENRRQRQHSDLI SVVQFSGTARVTC SLAKVASAPRNLGYNGGGT  
CFSPAACADLARKTPQSHQPVVIFMSDGM AEDSHIASSHF LSLNEELKTRSGLDLELHV  
IGFGGGTDTSQLQEIARASANGRVHTTSDIDSLSRVVFVQISGGGDNVSSVLEAEISKRI  
SDAVTNRX

>comp8683\_c0\_seq3; 487 1 2712 LEN=2712; minus strand; translated  
XAKGNIREMTLSLINGNQCV DQKPM SKTTKISNSREADGKDSNTSSKTMKKS FVEEIMLV  
DEV DVFFGSEFYGREYLLSLRYQMTIPSCATNMCDLTGIFSTFFCNDFDGTYNQVAELRE  
PEVATILRTIWEHGKRGGRKLR LADIKALVEYTHLRHKLAGEFLIDNEISLMLDQVRRV  
DDEPMYHLDRVSDRIGYKI QDTISYNVTYGYRTIFAYLKEADNGNLNNPAGTLARVLTMP  
ISCGQFSYANIKPTRILGVS GTLEVMSNHQKIVLQKYGVSQYLYVPSVYGQSNFSFDKGG  
EGVSI EKSTSDFFQKITDETARVATKQRRAVIVFFNDSKRLNEYVKS AFYRKLGRKKEIL  
TESKNANEKAFIISKAA TAGQITICTAVFGRGTDFFSKDDALDNNGGVHVIQAF LSCDMS  
EEVQIQRTARQGGKGSYKLILLDKDLEDKFGIKCGSFGTWPRGQFYDRLCEARNKALES  
DYLTIEMSLSKAKTKDDATHQYFDALLNSNVSKFPDSKFKLRVAVLGFRDIDDGSRQFEE  
KLWDGVTHFGENVEDTIRYVKSLTSSTSGGSDLAEDHLGAIDRCVKWNSDDWKGM  
IKAILLLTDAPAHGYAPNGDATQNIIDNYSVRHPLGLTMDSVVENVLDKIDIDLFVCSFDPI  
ATQKFEEKMSEAFNRHPSNVDGREVTMVQLVPKTAHVHNKASRMMGDSRKHNIFVLDESGS  
MSNDWSGVVQVYNKYLENRRQRQHSDLI SVVQFSGTARVTC SLAKVASAPRNLGYNGGGT  
CFSPAACADLARKTPQSHQPVVIFMSDGM AEDSHIASSHF LSLNEELKTRSGLDLELHV  
IGFGGGTDTSQLQEIARASANGRVHTTSDIDSLSRVVFVQISGGGDNVSSVLEAEISKRI  
SDAVTNRX

>comp8683\_c0\_seq4; 449 1 2508 LEN=2508; minus strand; translated  
XAKGNIREMTLSLINGNQCV DQKPM SKTTKISNSREADGKDSNTSSKTMKKS FVEEIMLV  
DEV DVFFGSEFYGREYLLSLRYQMTIPSCATNMCDLTGIFSTFFCNDFDGTYNQVAELRE  
PEVATILRTIWEHGKRGGRKLR LADIKALVEYTHLRHKLAGEFLIDNEISLMLDQVRRV  
DDEPMYHLDRVSDRIGYKI QDTISYNVTYGYRTIFAYLKEADNGNLNNPAGTLARVLTMP  
ISCGQFSYANIKPTRILGVS GTLEVMSNHQKIVLQKYGVSQYLYVPSVYGQSNESKNANE  
KAFIISKAA TAGQITICTAVFGRGTDFFSKDDALDNNGGVHVIQAF LSCDMSEEVQIQGR  
TARQGGKGSYKLILLDKDLEDKFGIKCGSFGTWPRGQFYDRLCEARNKALES DYLTIEMS  
LSKAKTKDDATHQYFDALLNSNVSKFPDSKFKLRVAVLGFRDIDDGSRQFEEKLWDGVTH  
FGENVEDTIRYVKSLTSSTSGGSDLAEDHLGAIDRCVKWNSDDWKGM  
IKAILLLTDAPAHGYAPNGDATQNIIDNYSVRHPLGLTMDSVVENVLDKIDIDLFVCSFDPI  
ATQKFEEKMSEAFNRHPSNVDGREVTMVQLVPKTAHVHNKASRMMGDSRKHNIFVLDESGS  
MSNDWSGVVQVYNKYLENRRQRQHSDLI SVVQFSGTARVTC SLAKVASAPRNLGYNGGGT  
CFSPAACADLARKTPQSHQPVVIFMSDGM AEDSHIASSHF LSLNEELKTRSGLDLELHV  
IGFGGGTDTSQLQEIARASANGRVHTTSDIDSLSRVVFVQISGGGDNVSSVLEAEISKRI  
SDAVTNRX

>comp8683\_c0\_seq5; 522 578 2558 LEN=2558; minus strand; translated  
MPI SCGQFSYANIKPTRILGVS GTLEVMSNHQKIVLQKYGVSQYLYVPSVYGQSNESKNA  
NEKAFIISKAA TAGQITICTAVFGRGTDFFSKDDALDNNGGVHVIQAF LSCDMSEEVQIQ  
GRTARQGGKGSYKLILLDKDLEDKFGIKCGSFGTWPRGQFYDRLCEARNKALES DYLTIE  
MSLSKAKTKDDATHQYFDALLNSNVCKAKSLLKEIYLSMKKKHTGPMSIDLAI AIDITGS  
MAPYAI AIASTIQNLLAGQNPILAKLTSKFPDSKFKLRVAVLGFRDIDDGSRQFEEKLWD  
GVTHFGENVEDTIRYVKSLTSSTSGGSDLAEDHLGAIDRCVKWNSDDWKGM  
IKAILLLTDAPAHGYAPNGDATQNIIDNYSVRHPLGLTMDSVVENVLDKIDIDLFVCSFDPI  
ATQKFEEK



MSEAFNRHPSNVDGREVTMVQLVPKTAVHNKASRMMGDSRKHNI FVLDESGSMSNDWSGV  
VQVYNKYLENRRQRQHSDLI SVVQFSGTARVTC SLAKVASAPRNLGYNGGGT CFS PAAI  
CACDLARKTPQSHQPVVIFMSDGM AEDSHI ASSHFLSLNEELKTRSGLDLELHVIGFGGG  
TDTSQLQE IARASANGRVHTTSDIDSLSRV FVQISGGGDNVSSVLEAEISKRISDAVTNR  
X

>comp8683\_c0\_seq6; 441 578 2372 LEN=2372; minus strand; translated  
MPI SCGQFSYANIKPTRILGVS GTLEVMSNHQKIVLQKYGVSQYLYVPSVY GQSNE SKNA  
NEKAFI I SKAATAGQITICTAVFGRGTDFFSKDDALDNNGGVHVIQAFLSCDMSEEVQIQ  
GRTARQ GKKG SYKLILLDKDLEDKFGIKCGSFGTWPRGQFYDRLCEARNKALES DYLTIE  
MSLSKAKTKDDATHQYFDALLNSNVSKFPDSKFKLRVAVLGFRDIDDGSRQFEEKLWDGV  
THFGENVEDTIRYVKSLTSSSTSGGSDLAEDHLGAIDRCVKWNSDDWKGMKAILLLTDA  
PAHGYAPNGDATQNI DNYSVRHPLGLTMDSVVENVLDKDIDL FVCSFDPIATQKFEEKMS  
EAFNRHPSNVDGREVTMVQLVPKTAVHNKASRMMGDSRKHNI FVLDESGSMSNDWSGVVQ  
VYNKYLENRRQRQHSDLI SVVQFSGTARVTC SLAKVASAPRNLGYNGGGT CFS PAAI CA  
CDLARKTPQSHQPVVIFMSDGM AEDSHI ASSHFLSLNEELKTRSGLDLELHVIGFGGGTD  
TSQLQE IARASANGRVHTTSDIDSLSRV FVQISGGGDNVSSVLEAEISKRISDAVTNRX

>comp8683\_c0\_seq7; 530 1 2694 LEN=2694; minus strand; translated  
XAKGNIREMTLSL INGNQCVDQKPM SKTTKISNSREADGKDSNTSSKTMKKS FVEEIMLV  
DEV DVFFGSEFYGREYLLSLRYQMTIPSCATNMCDLTGIFSTFFCNDFDGTYNQVAELRE  
PEVATILRTIWEHGKRGGRKLR LADIKALVEYTHLRHKLAGEFLIDNEISLMLDQVRRV  
DDEPMYHLDRVSDRIGYKI QDTISYNTYGYRTIFAYLKEADNGNLN NPAGTLARVLTMP  
ISCGQFSYANIKPTRILGVS GTLEVMSNHQKIVLQKYGVSQYLYVPSVY GQSNE SKNANE  
KAFI I SKAATAGQITICTAVFGRGTDFFSKDDALDNNGGVHVIQAFLSCDMSEEVQIQGR  
TARQ GKKG SYKLILLDKDLEDKFGIKCGSFGTWPRGQFYDRLCEARNKALES DYLTIE MS  
LSKAKTKDDATHQYFDALLNSNVCKAKSLLKEIYLSM KKKHTGPMSIDLAI AIDITG SMA  
PYAIAIASTIQNLLAGQNPILAKLTSKFPDSKFKLRVAVLGFRDIDDGSRQFEEKLWDGV  
THFGENVEDTIRYVKSLTSSSTSGGSDLAEDHLGAIDRCVKWNSDDWKGMKAILLLTDA  
PAHGYAPNGDATQNI DNYSVRHPLGLTMDSVVENVLDKDIDL FVCSFDPIATQKFEEKMS  
EAFNRHPSNVDGREVTMVQLVPKTAVHNKASRMMGDSRKHNI FVLDESGSMSNDWSGVVQ  
VYNKYLENRRQRQHSDLI SVVQFSGTARVTC SLAKVASAPRNLGYNGGGT CFS PAAI CA  
CDLARKTPQSHQPVVIFMSDGM AEDSHI ASSHFLSLNEELKTRSGLDLELHVIGFGGGTD  
TSQLQE IARASANGRVHTTSDIDSLSRV FVQISGGGDNVSSVLEAEISKRISDAVTNRX

>comp8683\_c0\_seq8; 568 1 2898 LEN=2898; minus strand; translated  
XAKGNIREMTLSL INGNQCVDQKPM SKTTKISNSREADGKDSNTSSKTMKKS FVEEIMLV  
DEV DVFFGSEFYGREYLLSLRYQMTIPSCATNMCDLTGIFSTFFCNDFDGTYNQVAELRE  
PEVATILRTIWEHGKRGGRKLR LADIKALVEYTHLRHKLAGEFLIDNEISLMLDQVRRV  
DDEPMYHLDRVSDRIGYKI QDTISYNTYGYRTIFAYLKEADNGNLN NPAGTLARVLTMP  
ISCGQFSYANIKPTRILGVS GTLEVMSNHQKIVLQKYGVSQYLYVPSVY GQSNFSFDKGG  
EGVSI EKSTSDFFQKITDETARVATKQRRAVIVFFNDSKRLNEYVKS AFYRKLGRKKEIL  
TESKNANEKAFI I SKAATAGQITICTAVFGRGTDFFSKDDALDNNGGVHVIQAFLSCDMS  
EEVQIQGRTARQ GKKG SYKLILLDKDLEDKFGIKCGSFGTWPRGQFYDRLCEARNKALES  
DYLTIE MSLSKAKTKDDATHQYFDALLNSNVCKAKSLLKEIYLSM KKKHTGPMSIDLAI A  
IDITGSMAPYAIAIASTIQNLLAGQNPILAKLTSKFPDSKFKLRVAVLGFRDIDDGSRQF  
EEKLWDGVTHFGENVEDTIRYVKSLTSSSTSGGSDLAEDHLGAIDRCVKWNSDDWKGMK  
AILLLTDA PAHGYAPNGDATQNI DNYSVRHPLGLTMDSVVENVLDKDIDL FVCSFDPIAT  
QKFEEKMSEAFNRHPSNVDGREVTMVQLVPKTAVHNKASRMMGDSRKHNI FVLDESGSMS  
NDWSGVVQVYNKYLENRRQRQHSDLI SVVQFSGTARVTC SLAKVASAPRNLGYNGGGT C  
FSPAACDLARKTPQSHQPVVIFMSDGM AEDSHI ASSHFLSLNEELKTRSGLDLELHV  
IGFGGGTDTSQLQE IARASANGRVHTTSDIDSLSRV FVQISGGGDNVSSVLEAEISKRIS  
DAVTNRX

>comp8686\_c0\_seq1; 188 1 432 LEN=670; translated  
EFIVECVFDNDDQSTKSTSELTNLS DVTQFMEDCVKALNDSECSNFPEDQAFPVPGTVSV  
DVNCTGKTLDRDSERVSEAQGTTEPNQEGGKAATLGKRKHNPMEEV DDEF LFDGSLGFV  
YRRCPYGWSLVNDGFYTAQHNTN

>comp8686\_c0\_seq2; 63 1 534 LEN=534; translated  
XLNPEASTAKQNQHMDQPPVSSNSFDELNSVVFARGRDIDNLPGNLAYS LARERAQE  
YKSCP DN RAGNARKREIAKEIMNAFGNRI FVRVRGEFFHLLDEIKATKKIMQTI RDM EVPI  
NGVVQSHDHGDIDHQIPVAEDNNVDPGVVPKNENNRGLDHQQNPGAGGNDLFAEATL

>comp8686\_c0\_seq4; 85 206 360 LEN=360; translated  
MTXGDIDHQIPVAEDNNVDPGVVPKNENNRGLDHQQNPGAGGNDLFAEATL

>comp8688\_c0\_seq1; 673 124 1947 LEN=1976; translated  
MTRKLRSSVSVLLLLPLLLFLSPSEFSISSKDTVRRTGRNRNPLGMTNSADDGGETQQ  
QRRLFAGFDLGTSGCRVSIIEASPTGGFCEVYNDVSVTWKECGKANGADVEEGRYDDPGSW  
WIAIDALLKGCASSTSSSLVDSIASICVSGTSASCLMVDNRNTEVTRNPRMYNYDVVTSS  
SMDDTSGVRAVELLEKHLPPKHRTARSSTGSFAKLKWKWILQSPLKRSEVLCHQSDYISTKL  
MFNAKRRTTQIQPQSDWQNCCLKLYDVRNLCWPLEDWMESCLKDAMVISGDGIETTGDNSE  
EDRVLGILPTKVSPGAPLGCISETAADELGLSRDVTIVGGTTDSNAAFYAAAASGSISC  
SGSGIDDGITIPYGTAVTSLGSTTAKFLSKTYVEDSTLGVYSHRFPAREIFSTTTANEA  
GNQADLDQGGHEEAWLVGGASNVGCAVFRALDFTDDELKRSADIDPSTDSEAYLRYKYY  
PLLPKGVGERFPTADATKKSULEPIPADTSSDSRTEYLKGLFQSITTEVERKGYEVLRLD  
GASPPFTVITTAGGSKNPVWTSRERIMNDGVDSSGSMVAVKKAENSEASYGAALLAA  
AGIRLRK

>comp8689\_c0\_seq1; 659 109 1758 LEN=1875; translated  
MKYHSFCFAVLSSATTINAFAPTSLSRNPNAVQRPASSASRTVLDMSSSIVVVSPPGG  
VGEVAAVKAAACLGSSVRWFVSDPGEDDNSSSGSSVSLAPQALRDIADASGSLELAGAT  
VKDLTKGGESERSAVSRWCGSADGLICTYDGADEGSNGDPKGFRAALRAATMEASKAVAG  
PQVAVLAAEEDLEDNNAENSSNDAEGGGISNLVGSILGGGSASVPSTLPGCISTAKSEDI  
CVVRHGELFGIPESSPEFSPLIGGPRVEPAITEEYTMRTVRVDPFIVSGNVMGSSSQLKS  
CRHSVGESAAALFATKNLSISTSSDSRSPAVISISSQSGTDKWTLEQWKEELERVQELVDS  
GKASTLFSSQDMIVEDTERLADWLASKWAPAVMKTIDIAAIRIGRPVSAMRSGEGRVDI  
TWQELVDFNSVTVGKMLQVNEGDITATRPGPDASKGYGAISTLPLNGEDVLRRLAEAA  
SQAIDKGLAKKVRKKAAKAAVEAPKPVSSQLSAGTVEAKPTPPAEPASAGPRQAGARRST  
PRSRGSKKQ

>comp8690\_c0\_seq1; 309 108 674 LEN=696; translated  
MKARYRVGGYIDEVMGGIAQLDTVRSLLDQAQNDWPSLLARLENMRSTILNENICRDGMV  
LDITGDKVVLEKVPQPSVDQFLTDLPKSDGEKLPNFYKDEHPWVAPIKMLNELVPIKDE  
GFVLPQTQVSYVGKSGLLYDNDEESSGSAQVVSFLKTKGVSISALIVQEFHLVLDQDTIPHT  
YSLMTKFL

>comp8690\_c0\_seq2; 1456 278 3382 LEN=3540; translated  
MKLQMSSVLDGGTDLKEKMI VNH PAYEILQEDFIEEYGAATLYRHKKSGAELLSVSTDD  
DNKVFGITFRTPPEDSTGVPHILEHSVLCGRKTYTTKDPFVQLLAGSLQTFLNAFYTPDR  
TCYVVASQNNKDFYNLISVYADAVFHPRAISDPMVHAQEGWHLELDDKEDPLIYKGVVFN  
EMKGVYSSPDSLLNRESQRSLYPDTTYGVDSGGDPRVIPDLSFEQFADFHKKFYHPTNSR  
IYFSGDDVVKARLEIMDSYLDEFDFSPESKPGSVIEWQKKKYTEPKKETHYPYIGEDQPE  
THMMNINWLLNDEPMSFDELITIGILDHLLMGTSSSILRKS LME SGFGEAITGGGLSDEL  
LQATFSIGMKGVKREDVPKLENLIETLEKVAKEGFEADDIASSMNTIEFSLREFNTGSY  
PKGLSFMLGAMSKWLYDESPTEALKFEKPLAELKEKIADSGSKVFQDMVEKMF IKNSHRT  
TIEMKPSKTYESELLKEEEDKLNKIKESMNDAEIEKVIEETTKLKLQAAEDSPEDRATI  
PALEIEDLKREVTEYPIEETKNENDTGITVLRHEL GSTSGIAYVNLAVDLSALPVDDIPL  
LPLMTRMMMETGAGEYDQVALSRRIGTYTGGLGVTTLTAVHPEGSSQKTVIDGNHLQSK  
LLVRGKATSDNVGELFALMKTVLT DANFDSQSRVVEMLKETKAGMEAGIGAGGHQAINTR  
MKARYRVGGYIDEVMGGIAQLDTVRSLLDQAQNDWPSLLARLENMRSTILNENICRDGMV  
LDITGDKVVLEKVPQPSVDQFLTDLPKSDGEKLPNFYKDEHPWVAPIKMLNELVPIKDE  
GFVLPQTQVSYVGKSGLLYDNDEESSGSAQVVSFLKTKGVLWDHVRVMGGAYGGFCTFSFP  
SGFFSYLSYRDPNLSKTLDIYDAAGDAVLSAAEQMKNDPDMLSQAIIGTIGEIDGSLSPD  
TKGFVSFQRWLVNESPETRQRQRDQIIDTKPEDFEAFGNRLKNMKDASCAVVSSQSGFEA  
AEKDGGKFKILKTIV

>comp8690\_c0\_seq3; 487 108 1052 LEN=1210; translated  
MKARYRVGGYIDEVMGGIAQLDTVRSLLDQAQNDWPSLLARLENMRSTILNENICRDGMV  
LDITGDKVVLEKVPQPSVDQFLTDLPKSDGEKLPNFYKDEHPWVAPIKMLNELVPIKDE  
GFVLPQTQVSYVGKSGLLYDNDEESSGSAQVVSFLKTKGVLWDHVRVMGGAYGGFCTFSFP  
SGFFSYLSYRDPNLSKTLDIYDAAGDAVLSAAEQMKNDPDMLSQAIIGTIGEIDGSLSPD  
TKGFVSFQRWLVNESPETRQRQRDQIIDTKPEDFEAFGNRLKNMKDASCAVVSSQSGFEA  
AEKDGGKFKILKTIV

>comp8690\_c0\_seq4; 1278 278 3004 LEN=3026; translated  
MKLQMSSVLDGGTDLKEKMI VNH PAYEILQEDFIEEYGAATLYRHKKSGAELLSVSTDD  
DNKVFGITFRTPPEDSTGVPHILEHSVLCGRKTYTTKDPFVQLLAGSLQTFLNAFYTPDR  
TCYVVASQNNKDFYNLISVYADAVFHPRAISDPMVHAQEGWHLELDDKEDPLIYKGVVFN  
EMKGVYSSPDSLLNRESQRSLYPDTTYGVDSGGDPRVIPDLSFEQFADFHKKFYHPTNSR  
IYFSGDDVVKARLEIMDSYLDEFDFSPESKPGSVIEWQKKKYTEPKKETHYPYIGEDQPE

THMMNINWLLNDEPMSSFDELITIGILDHLLMGTSSSILRKSLMESGFGEAITGGGLSDEL  
LQATFSIGMKGVKREDVPKLENLI IETLEKVAKEGFEADDIASSMNTIEFSLREFNTGSY  
PKGLSFMGLGAMSKWLYDESPTEALKFEKPLAELKEKIADSGSKVFQDMVEKMF IKNSHRT  
TIEMKPSKTYESELLKEEEDKLNKIKESMNDAEIEKVIETTKKLELQAAEDSPEDRATI  
PALEIEDLKREVTEYPIIETKNENDTGITVLRHELGSTSGIAYVNLAVDLSALPVDDIPL  
LPLMTRMMMETGAGEYDQVALSRRIGTYTGGLGVTTLTAVHPEGSSQKTVIDGNHLQSK  
LLVRGKATSDNVGELFALMKTVLTANFDSQSRVVEMLKETKAGMEAGIGAGGHQAINTR  
MKARYRVGGYIDEVMGGIAQLDTVRSLDDQAQNDWPSLLARLENMRSTILNENICRDGMV  
LDITGDKVVLEKVPQSVQFLTDLPKSDGEKLPNFKDEHPWVAPIKMLMNELVPIKDE  
GFVLPQVSYVKGSGLLYDNDEESSGSAQVVSFKLKTGVSSISALIVQEFHLVQLQDTIPHT  
YSLMTKFL

>comp8691\_c0\_seq1; 129 217 738 LEN=999; translated  
MRPTRPSIDSGSSGCGSSFSFSPASASAATSPTPSTNSTRSLSARQLIPALPSNIFSLSTQR  
ESHQESPTGQHPQQSLSPMPTSPHGCFFAVPGELSRFPKDDSLWGTDANHTVMGTRSHSR  
SHTQSHSHSWPLVKRSTASLITEALDILQEGFPEGFSDCEDHGVYLAUVGNSQ

>comp8692\_c0\_seq1; 225 904 1521 LEN=1645; translated  
MEDQQQQQHQSQSQTAKIRDVTDPSDLKNIRIESIRKELSNLVGSSGIRLTAAGLLSSSIV  
LAWIARIRSIRQELQQERESHQLRQIQLRGQRSNHLANDIADDGRNGILSSAVNMKMI  
PPCPAPLRRSNSKISHRTLNRNIVKSERDVCPLCNEPHIHPTASTGGFVFLCKCILTFLRQ  
NYESCPVTGKLCPE SRLVRLYEPTH

>comp8694\_c0\_seq1; 354 1 1194 LEN=1443; translated  
MASDGNRIAVGLPGSDHPGDASLKIAGGVEVFDLVNGTEWEKALEVFGSGPGAELGTTVA  
LSADGGRLAAGAPSYDLERAGGYVSIYEEESANGEWEMVATIARNNGTEAGAFGDAIGFS  
GDGTIVAIADKHADLQALDDVGVVAVYRETNGTWAGMGNLWGSQERDQFGWAIALSEDG  
TRVAASSLGNSEPGKVRVDFDNGTAWEQIGTDVAGESRRELFVAVELSGDGSILAVGAS  
SYSRGGEEENVGIVRTYRYDRDNGDWLPHGQPLEGDRGLDAFGSSIALSHDGSVLA  
VGGPENGAFCDACGHVRVFRASGGGSADGAGATWEAAGRTDLGRTGIDGGQFGYGV  
SLSGNGD RVAGAAPFTTFDGLVSRVQVLFVDAADGGAGGGGGGE

>comp8695\_c0\_seq1; 306 53 604 LEN=756; translated  
MFLLRVLRFALTYLLFPTVVEGFVSNKLSMDAGKKQIIQMNDKDLSTGAAEPAAASSAC  
P HPFTQLPGDPSLVLTNLDLGTKKLDVMKKVSKAISETTGKPE SYIGVSITDNASVIFGG  
SDKPCALGNLYSIGAISMENNGMQMSKITDILEEFGLKEDRMYINFWDMPRANVGSRR  
T FAG

>comp8696\_c0\_seq1; 663 92 1717 LEN=2234; translated  
MTDSVIPINTNSAAREKVVVTEDEAAPSALQAPAAIGEGSGSVPTPSTTPSATKKKVRRI  
VRKKGSARGKNNKDDSDVNPILLEKVMNESNLPKAYSFEVVKTLKRINQILOGKKEQQ  
RKKGSGETVSSTKSDSPSVHVALQMP EGGLLLYATVLSVQLRVAATNEGPAETATEDQQP  
LLRVSVLGDVTYGACCVDDLGAQALGCDLLVHYGHSCLVPIQHTVVPCLYVVEITIDVK  
HLVECFHKTILENPSLMDGSGRKP HVYLLGTIQFRHALMEARRLLRSEPYEYELSIPQAK  
PLSPG EVLGCTSPALANQRASEESNPNAVVLVADGRFHLESTMISNPHIAKFYRYDPYP  
KTLTEESYDHVRMKSRYEAIQKARLRIQSKKEEQPQGTAVFGIILGTLGRQGNPALLTK  
IQTLRRKNLRSFVILASEITPSKLALFRKKVDWVQIACPRLSVDWGHALSGDASIPVL  
NPYELFVCLDQAHRGGDDQSYPMDYYSQEGGPWSNYHDVDNKGRELTLPPEPVTA  
EVAAG V

>comp8697\_c0\_seq1; 230 288 1499 LEN=2211; translated  
MAPFCWSTRAFFLVLLCSHTKLALSQQSPDLTQKEDDLMLAPEKNPLDALGTEDVAILKS  
SWGLTVNNQCLYEFVYKFEHNPRLP IGDDSFGRKCNFGDLKAPKEPRIAPDGIPYLHPRR  
FYERFPNYVWATMGFNHLSVDWLP CGRRPAGYKTAQYDMSFFRVTP EFRAETMTCKLKEP  
GSMTIVPGE EFC DTEQDDPNGMNFVVPASVTDREPVVNM PKEFTHKDLTDAPLPHIGLR  
SWNKAVVPEQPGGWNDVPAFMSSYAGKTMWQAHI PYKLISGNNRQFRSNADRYEYETTIP  
TMPDTSVSKYDEVDGTIEFTMVGNAQLCRGDFDRAQEAAGGPPVFPVWVDP  
PPGMKPSDD EGKNPREGRDGGDGGTSGSSDDHSFRTMLATLILQSSVFFFAM

>comp8697\_c0\_seq2; 211 956 1651 LEN=2363; translated  
MTCKLKEPGSMTIVPGE EFC DTEQDDPNGMNFVVPASVTDREPVVNM PKEFTHKDLTD  
APLPHIGLRSWNKAVVPEQPGGWNDVPAFMSSYAGKTMWQAHI PYKLISGNNRQFRSNAD  
RYEYETTIP TMPDTSVSKYDEVDGTIEFTMVGNAQLCRGDFDRAQEAAGGPPVFPVWVDP  
PPGMKPSDD EGKNPREGRDGGDGGTSGSSDDHSFRTMLATLILQSSVFFFAM

>comp8698\_c0\_seq1; 588 96 2051 LEN=2051; translated  
MLTSNRDLTSARGSDCDPLRRDPEQKHRRGRRGSLFFVVSFVLVASIQILSFARFHADVD  
ATRFKSADYAQNI SGA EVDHRLG SVLGEDREKPGHVLA VSGIEKRNKIAVHEAGEEEQIV

ATKRKKRENRADAKNEQKKHKYQKKRYKQDASESQKKKDNRRATGPGDPDEGDDTEEKRE  
GGEEKEDMYFRDPNAQVVDWDYFPKHEPRRDVSWTEAENSESSINSMDEEECEKFMKYID  
TSPPKPRKASNKACEGYDGVLHISHFDVGAASGTAFFMFTIGMLAWADQHNYLPWIHIDS  
GYTRPIWDPIVHMNTSSADPVTFRMKHGMGIGWARDPRDGQWHIFPGKPYLDRPLRSSTY  
AVNGTGVWRHYFLPPNDFVPGDTSCRNKPIVQMDNLIIVPGIHSNAPYTPRAWRTTEADY  
LTRDDLSDWDEFEPQRKHGAAVTERYIRFNPMERRARCAFPTPKFSLGMHIRHGDKAIE  
RDI IETSRLFLEFAKAFVNNGGGSIYVATDSIKVVETILQEWPAAHVVEHIVRQSTAVALS  
NETASFALGVSPHRSNIEALTDLLALSCKCTFLLHGLSALSALSEAAFYLNPDVARSINLEDT  
IYQYHPDDFVRDLMLPLGKEVSDCTPERKNIACDALLSTGCPRGKKSIAIAHX  
>comp8698\_c0\_seq2; 540 96 2029 LEN=2029; translated  
MLTSNRDLTSARGSDCDPLRRDPEQKHRRRGRGSLFFVVSFVLVASIQILSFARFHADVD  
ATRFKSADYAQNISGAEVDHRLGSVLGEDREKPGHVLA VSGIEKRNKIAVHEAGEEEEQIV  
ATKRKKRENRADAKNEQKKHKYQKKRYKQDASESQKKKDNRRATGPGDPDEGDDTEEKRE  
GGEEKEDMYFRDPNAQVVDWDYFPKHEPRRDVSWTEAENSESSINSMDEEECEKFMKYID  
TSPPKPRKASNKACEGYDGVLHISHFDVGAASGTAFFMFTIGMLAWADQHNYLPWIHIDS  
GYTRPIWDPIVHMNTSSADPVTFRMKHGMGIGWARDPRDGQWHIFPGKPYLDRPLRSSTY  
AVNGTGVWRHYFLPPNDFVPGDTSCRNKPIVQMDNLIIVPGIHSNAPYTPRAWRTTEADY  
LTRDDLSDWDEFEPQRKHGAAVTERYIRFNPMERRARCAFPTPKFSLGMQSSXDI IETS  
RFLFLEFAKAFVNNGGGSIYVATDSIKVVETILQEWPAAHVVEHIVRQSTAVALS  
RNETASFALGVSPHRSNIEALTDLLALSCKCTFLLHGLSALSALSEAAFYLNPDVARSINLEDT  
IYQYHPDDFVRDLMLPLGKEVSDCTPERKNIACDALLSTGCPRGKKSIAIAHX  
>comp8698\_c0\_seq3; 536 96 2125 LEN=2125; translated  
MLTSNRDLTSARGSDCDPLRRDPEQKHRRRGRGSLFFVVSFVLVASIQILSFARFHADVD  
ATRFKSADYAQNISGAEVDHRLGSVLGEDREKPGHVLA VSGIEKRNKIAVHEAGEEEEQIV  
ATKRKKRENRADAKNEQKKHKYQKKRYKQDASESQKKKDNRRATGPGDPDEGDDTEEKRE  
GGEEKEDMYFRDPNAQVVDWDYFPKHEPRRDVSWTEAENSESSINSMDEEECEKFMKYID  
TSPPKPRKASNKACEGYDGVLHISHFDVGAASGTAFFMFTIGMLAWADQHNYLPWIHIDS  
GYTRPIWDPIVHMNTSSADPVTFRMKHGMGIGWARDPRDGQWHIFPGKPYLDRPLRSSTY  
AVNGTGVWRHYFLPPNDFVPGDTSCRNKPIVQMDNLIIVPGIHSNAPYTPRAWRTTEADY  
LTRDDLSDWDEFEPQRKHGAAVTERYIRFNPMERRARCAFPTPKFSLGMVSLVFFXDV  
NALRCELTKYMFLIQHIRHGDKAIERDI IETSRLFLEFAKAFVNNGGGSIYVATDSIKVVE  
TILQEWPAAHVVEHIVRQSTAVALS  
RNETASFALGVSPHRSNIEALTDLLALSCKCTFLLHGLSALSALSEAAFYLNPDVARSINLEDT  
IYQYHPDDFVRDLMLPLGKEVSDCTPERKNIACDALLSTGCPRGKKSIAIAHX  
>comp8699\_c0\_seq1; 161 1 522 LEN=814; translated  
XRYEYFYSISLTYFELNGNKNFIMIRVQTTSQLVAFSKRVI VSGHQ RCTFLSRKGEQVRR  
DFSDAGKGSDEGSMYVAKAGLPLFLFCGLGVWVVSNGIEGKNRERDAFQGRISKSERQAV  
MDKEHDEMMDKLNHI IKEDFDNTRKIERPDEVLAGDVKSEKPETFGIDGYGGI  
>comp8699\_c0\_seq2; 113 1 344 LEN=487; translated  
XRYEYFYSISLTYFELNGNKNFIMIRVQTTSQLVAFSKRVI VSGHQ RCTFLSRKGEQVRR  
DFSDAGKGSDEGSMYVAKAGLPLFLFCGLGVWVVSNGIEGKNRERDAFQGRISK  
>comp8699\_c0\_seq3; 161 1 522 LEN=705; translated  
XRYEYFYSISLTYFELNGNKNFIMIRVQTTSQLVAFSKRVI VSGHQ RCTFLSRKGEQVRR  
DFSDAGKGSDEGSMYVAKAGLPLFLFCGLGVWVVSNGIEGKNRERDAFQGRISKSERQAV  
MDKEHDEMMDKLNHI IKEDFDNTRKIERPDEVLAGDVKSEKPETFGIDGYGGI  
>comp8700\_c0\_seq1; 265 1 886 LEN=886; minus strand; translated  
XGIEEVYKIAIAREQFLEKHDPKATNGTKHCRVMPRI RIVLRIWVPDGH S QVPLGEKF  
GMRLEIDILVGACLEAGIDHSDIIGISFHCGSGCESVETYLEALEMGR TAMKAIDQNL  
AVSPQSSELPPRCWLLDIGGFPGLDGLDGDVGRFAVGDAE ANCTEIPAGEVTGHPGK  
ESAPQTTVADIAMAVRPMRSLDSETHSNDETNPHTL IAE PGRYFVEGAFALASRIYQ  
KQLLSRTPIDDEVNTE DENKDDKNIRVYRIPHG VQGVFKDVLLCGESFVPQPLQTEA  
>comp8701\_c0\_seq1; 717 47 1243 LEN=1308; translated  
MKFFATALFLASSAISASAFSAVAPKANGAATGSPEPIDKSLKGIDAEGSFD PVEGENAA  
LSRNNNGEVWVQQRKRPRRNRKSPTLRGMVRENI VTPSNFIYPLFIHDEDFNQAI ESMPG  
CERHSLDSMLKEVGESYELGVKTFVLFPPKVPDELKTNLGVEAYNPEGIVPRAIRMIKEAY  
PESVVVTDVALDPYSDQGHGDAVEDGKILNDVTINQLCKQVICQARAGADIVAPSDMMDG  
RVKAIRDALDSEGFTDVSILSYTAKYASAYYGPF RDALD SHPGFGDKKTYQ QDPANGREA  
LIEAALDEAEGADMMMVKPGMPYLDVIRRLK DASA LPIAAYHVS GEYAMIKAACERGWLD  
EKAVVME TLT CFKRAGADI IILTYAKQAAQWIKEDGLY  
>comp8702\_c0\_seq1; 350 140 1341 LEN=1841; translated

MRXVDPTLKIIEEGEDPTLGTGVNEEKDVMDTCAGGSGPRPINGVFSFGRTDFASVDDVN  
GGFCGVEIDRPGIWWWVEGTGDLIKVSSCNKQTNIKVKMSVFSGSCDELECVTGSSEDPDF  
ECTTCDEVNAIGEWKTFATAITFQSELEKNYYVLVQQADEQPGTIWLNFQTP IIPQNDNC  
VDAIGPVPRDMTTIENSNEFASISVMDDYCGGEFVPSRYPGTWQVMGTGGLVSVSACSP  
WNFDGYAFSVYYGDHCDNLECVAGAYEVNIEDPDHCVFVSGNQRAMTRYTFDTIDRSRY  
VYVHWAQTRSEKPTADFRFFVNDGREGDAGTSGAHVIAIEPHTTYDWSGYRDTGRSIR  
TGDEEGNADNEQPSSSSNIQIHRGLSIFVLAISCALHSL  
>comp8702\_c0\_seq2; 410 121 1416 LEN=1916; translated  
MKEVSTAKSVLFFVGVLAFLQLISRSSGQIINEGVDP LTKIIEEGEDPTLGTGVNEEKDV  
MDTCAGGSGPRPINGVFSFGRTDFASVDDVNGGFCGVEIDRPGIWWWVEGTGDLIKVSS  
NKQTNIKVKMSVFSGSCDELECVTGSSEDPDFECTTCDEVNAIGEWKTFATAITFQSELEK  
NYYVLVQQADEQPGTIWLNFQTP IIPQNDNCVDAIGPVPRDMTTIENSNEFASISVMDDY  
CGGEFVPSRYPGTWQVMGTGGLVSVSACSPWNFDGYAFSVYYGDHCDNLECVAGAYEVN  
IEDPDHCVFVSGNQRAMTRYTFDTIDRSRYVYVHWAQTRSEKPTADFRFFVNDGREGDA  
GTSGAHVIAIEPHTTYDWSGYRDTGRSIRGTGDEEGNADNEQPSSSSNIQIHRGLSIFV  
LAISCALHSL  
>comp8703\_c0\_seq1; 231 1 848 LEN=1193; translated  
XTERRTRRVNISMMSHEASPPPGTGLGQRGIGLTGSTASRRPPRRTAGEGQQPGSIGMVL  
GDPSTRAPPARSRSNESGENRKPPSRSHSNDFADFLRKTGLDYKPSRRVVTRMDGSTNNN  
NKNSFESDEEDGDEDNPFVYISK SILTSRSQSDASDPDFDFEGSSGDELELSGKSSRP  
SSSSNREPQRKPVAPT KSGLLAASKDTLSRPRAPKKGTEEEKHPSAGGHSEADAKTER  
AKQRRNEYKSLAAAMAGKQQPSQEPLSLPGKRSAGGRQGR  
>comp8704\_c0\_seq1; 94 75 1187 LEN=1250; translated  
MDDNPKATAMPTATTATAHSSKDLPRRKKLPRQKQPSYWMLAGILQSLTWLWLVIPFVCR  
RYIWDQLFGVLI EAYPSHGFNLSQLLMTVSLPPLVLVLCYTLPMATYAGQYPPFEKYKIH  
QSNMYHDSWPWFHADPNIRKEFWKLSQRSVRLCIFNMAVIVPLLTVLKLWFIDPYVLD  
YSERQKLYHNMFSTSDHEWPSNSENLRGILALTLIHEFGFYATHRLMHAIPFLYRYHKV  
HHEYKTNTVLA AQHNHPVDYVLSIAGPALLSLTLVPASHSVTQFQWILWALCANMDDHLG  
YAFPWSPVRWFFASATEEHEFHSHNKG CYSSKLSVYGSLLGDY GAYHRFYYSYDNKPS  
RASNTINKNQ  
>comp8705\_c0\_seq1; 190 313 1093 LEN=1255; translated  
MAFSEDRSPYDDNVALQMINSQL EAMKILDEKEAQEFGNADKCEHAPGNENGHNYNQSS  
KTS GSKNSSKGPDTFFRRQLEGWRRNHMLESFEAGHLISKEMLEFNLEERNALYEEIHG  
VTCICPDESPPGMIEMALHNLAIELMMVPSALKTAYEQSQQFPVTVYVNTPEFRLRFLRAE  
LFDTKKAALRMIFLENVLFYFGPKALQRP IRLSDFNRKEMKVMNIGRIQLFP IGTDLG  
ELSLGFPKTTVDRKHTSG  
>comp8705\_c0\_seq2; 308 313 1476 LEN=2485; translated  
MAFSEDRSPYDDNVALQMINSQL EAMKILDEKEAQEFGNADKCEHAPGNENGHNYNQSS  
KTS GSKNSSKGPDTFFRRQLEGWRRNHMLESFEAGHLISKEMLEFNLEERNALYEEIHG  
VTCICPDESPPGMIEMALHNLAIELMMVPSALKTAYEQSQQFPVTVYVNTPEFRLRFLRAE  
LFDTKKAALRMIFLENVLFYFGPKALQRP IRLSDFNRKEMKVMNIGRIQLLPYRDRFGR  
RIIVGIPAQDHRHQEAH IRAKIHLYLWVWAGESVESQRKGMVFITIHNPDIADSTTTGST  
SKMDEDGKTTVDGEKEQERTKVP SMTFAKIAIKERDCLPLRMSAFHLCTPDTPFYAILE  
SFTAAMLKGDRCRIKVHHGTWMSSELLR  
>comp8705\_c0\_seq3; 379 313 2052 LEN=2362; translated  
MAFSEDRSPYDDNVALQMINSQL EAMKILDEKEAQEFGNADKCEHAPGNENGHNYNQSS  
KTS GSKNSSKGPDTFFRRQLEGWRRNHMLESFEAGHLISKEMLEFNLEERNALYEEIHG  
VTCICPDESPPGMIEMALHNLAIELMMVPSALKTAYEQSQQFPVTVYVNTPEFRLRFLRAE  
LFDTKKAALRMIFLENVLFYFGPKALQRP IRLSDFNRKEMKVMNIGRIQLLPYRDRFGR  
RIIVGIPAQDHRHQEAH IRAKIHLYLWVWAGESVESQRKGMVFITIHNPDIADSTTTGST  
SKMDEDGKTTVDGEKEQERTKVP SMTFAKIAIKERDCLPLRMSAFHLCTPDTPFYAILE  
SFTAAMLKGDRCRIKVHHGH DVENRYKLN GYGIPLDQLPITDSGTIKTTFFKRWMQFRKT  
LEEPTSDLFEIRESIIECPGLADVIFRPGQSSICHPGNMNFRSLVESKHYESVAATREG  
KVDITKGV LQEIRSMGGKFLVWDHRNFVWELEDEKKIYAKIAIFFRNSKVSVKAKKNCQS  
IRGGTFAFAGDADKRRKIDDDDDTGPCFSPDLCSSTFFL  
>comp8707\_c0\_seq1; 533 1 1435 LEN=1446; translated  
XDDDDDDDDVLDSDVQNSQDAEESSEEDDDSSQE EVASRNYTYKGSNGGLQQLVADKT  
AASNALPHETTASPFVGVGPIRAARSYRDLATTQGGEXMRGGGDDAASIMSRQSLQSI  
VSIKSLPREIELMDDDDDEYARGNKDDGSFFDDNRSLGSRSAASRVSRRLVSGSRIRNR  
KSAVRAGNSV NNRGRKGGKPSRGA VPQEIDL SGELENPDVTHANVSTDTL FVKEKQ

IVDPYGEKGVYTGALSKSTCMPNGKGRLEYEKESRWYEGDWIHGRWTGYGRLSNGDGDY  
EGGLKNDHKHGTGIMRFADGRVFEGEYIRGQMIIEGKMTYQDGSVYGGSWVDGMRHGRGKC  
IFVDGSEYEGEFREGNFHGHGKMSWNDGGWYVGNWSNGEMDGGQKEVVRPDGSLRHDGXV  
RGAATVGLGESPEAAAAASGGRDGGGPAQRMNAPDEGMMRREEQQANATKPNQTM  
>comp8708\_c0\_seq1; 277 1555 2418 LEN=2548; translated  
MMIQRCCSNRILTRRPAWRALSNDKSQRFHLYLFTMQIPKCTVPNDLKPLVLTATKIGF  
VWGHTREHVDKRKSDLNTGNPFKLVKAFPCNDPLTFEYWHMKFKSCHQRGEWFHLS  
QQIHEIETVMEEYHETGTFAGDKLWDSLKKNETKVRNRSAKRMLEGPLSKRSFQLEI  
KGILKEQRQKIQSGAVDSRYSLSDEDQIKVRKALSQHPEADEKIGCGVRKIFAKQSKSEY  
RTYCFVTRTDGSEEFYSKSCFVVKQRLEGSKEEFNLSYGNTRA  
>comp8709\_c0\_seq1; 470 439 1848 LEN=1950; translated  
MGTASEGEVCPTFNELLEGTGVRHIRASFDGFSKSSANNNGPSEAVLTTVCKPVYPEEEQ  
ESGDSIYLSFDAAVVAVGATPQSILASIPGASELAQPFYTKEDAYATRELLFRMDQKVRQ  
GESPRIAVVGGGYGGVELSACVARRLPKARVTMMSRGPPMAGTKAEPLVEQALKKLVDC  
EMNDVLEIQKEGNNKFKIKRSNAEGDNSDNDIDDLWDAVLWTAGSGPSYPIANDVDCELA  
LSSSGRLRVDKSMRCSFKKEKSAEDASKPASFPVWALGDCSEIVPASQPATPRTAQAAM  
QQADVVASNVLANISNRKTDPKTFEFQDLGSMLSLGGPNAAILGPDEDSQIGSLLVPLLD  
TARVGLGVADSI FAGIVNSPQIDKNGDLKPVVENLGLSLGGYGLGVDPETTPGTLSTLS  
GAGRRVYALRMPNTKQRAYAGASAFLLSSALALAKEASDQIEKSSEKRR  
>comp8710\_c0\_seq1; 274 162 539 LEN=707; translated  
MKSVSSSFLFAFLVGAALFCSSCAAFGVANSNTHKPLAETGELSRKTFSSAAKAMGAAV  
LVAAPGAALADEDYVKGSKNDPAVQAKLSVCMYECTKPKGNEQKSRSECLKECKAECITA  
KATAQ  
>comp8711\_c0\_seq1; 196 282 1012 LEN=1044; translated  
MVLQLIHFLLETLYNTGLSQRRERRQHRPPADNCSVGENLSHIMAYLGLCGLLEIAKRTRG  
TKAIAAGKDLVAAEKFWKMDLLVSIWCGDNPKSFREHFRTAITLSPKQRHHGLCSLFYK  
DNDDDRNDDKLHRRNTKQYDEDDTNITPFGEACWKYGRKETIQLIESTIADSSSRET'TM  
ETECTXACADPGRNERKHQLGRRVFLAPNRAESAPWLYYSSSFCKIHTMPLIGYSANTEF  
LGV  
>comp8712\_c0\_seq1; 509 185 1639 LEN=1969; translated  
MNGTKEECNGVENGDSSVKTRKSVVGLVPVVKDYAWGIRGMDSRVARYALENKALDEVDP  
DTPYAEWIGTHPKGPKLKTGELLEEAIGEQLPFLFKVLSAGKALSIQAHDPKENAERL  
NKENPSKYGDDNHKPEMAIALTPFEAMCGFRRLLEEISLLIKKHPEFAACISQEAFLAVFL  
SANTSTQKDAMQKLFSSFMSCDPEVSSKQLDLLLLRLQAEQSNFHVHPHDEPAWERKCSR  
AVLRLAQQFPGDPGAMAPLFLNYLLIAPGESFFMAANEPHAYVAGEIIECMACSDNVVRA  
GLTPKFKVDNLVNLTYSMGGPNIDGGAYSMPNDVIRYSPPCPEFEVMFLTVEPGKQS  
KFKNPGVPVILIILEGSGDLGKVCPRGRSYYWPANTDDLLFTVDSKRGPMKVAMAHKN  
LHLDRPTAINKEDFGGASSAHFLSVPTSPRMPYMGLOGGTPVQPDNRNIVTVGSKDCAEQE  
LPPL  
>comp8712\_c0\_seq2; 420 185 1111 LEN=2079; translated  
MNGTKEECNGVENGDSSVKTRKSVVGLVPVVKDYAWGIRGMDSRVARYALENKALDEVDP  
DTPYAEWIGTHPKGPKLKTGELLEEAIGEQLPFLFKVLSAGKALSIQAHDPKENAERL  
NKENPSKYGDDNHKPEMAIALTPFEAMCGFRRLLEEISLLIKKHPEFAACISQEAFLAVFL  
SANTSTQKDAMQKLFSSFMSCDPEVSSKQLDLLLLRLQAEQSNFHVHPHDEPAWERKCSR  
AVLRLAQQFPGDPGAMAPLFLNYLLIAPGESFFMAANEPHAYVAGEIIECMACSDNVVRL  
YLPQLLYG  
>comp8713\_c0\_seq1; 522 1 2262 LEN=2262; translated  
DVPKSSNNNISTERYRNCKPGRLSLLQRALS IATVHKRENQSDIMEAIMRLSAFALASA  
VGGIVTTSSAADKTNDARNVSTNTAGSNNIIQSSNNHMKTLHAFSPLPKHSLKLVNGG  
EEFAEETKSLSQKIFETCHLLSSSSHNPDGLVLRKTRSCSSNDVDCILPNVIGYDALS  
LSSAYANTDDEILNDDAALGICYPRAKLHSSYWQIDDDGTFHLVDNRNFFHHNSRKENN  
QAFQKIHSRFRDLQVESSVSFCVSEGGQSSSLNNDHRNDEAWDNLPPYSMDRGTYFNEE  
TPTTIDQCESYCDQFGRPLVRLGQDLIDNQNLQIPSTFTELLSLCSDSYIMISWGLS  
SYPWCPIDLSIPMNCWDTSLITDMSEAFAGRKKFNWRLNCWDTSSVTDMSSEMFEYASSF  
NQDIGLWDTSQVTDNMNMFYIASSFHQHSIANWNTSSVTDMSLMFSVARLFDGPIGGWDT  
SRVTDMSNMFFAARSFNHPIGYWDVSSVENLYGIFIQANTFDQDLSSWNTSSVRNTQYTF  
RNAYSFNQPLDSWDVSSVTNMAFMFSGAKAFNQPLETESTKTRTPGFNLVGSSSKDKKDK  
NKDRFWDISSVTNMKHMFSMANSFNQCLGSAASLSSHEDAGEDSTLHMFRRTSCPNHKQ  
NTENDNSSTTPPLADNGTPPFNKGPWCQSNSDGCDVEPYIRSDGNLAFTREAGIPGGTT  
KTMEIKSRKSGKNSKSDKSDKSGKSDKSGKSSKX

>comp8713\_c0\_seq2; 577 136 2249 LEN=2249; translated  
MRLSAFALASAVGGGIVTTSSAADKTNDARNVSTNTAGSNNIIQSSNNHMKTLHAFSPLP  
KHSLKLLVNGGEEFAEETKSLSQKIFETCHLLSSSSHNPDGLVLRKTRSCSSNDDVCI  
LPNVIGYDALSLSSAYANTDDEILNDDAALGICYPRAKLHSSYWQGIIDDGTFHLDVNRN  
FFHHNSRKENNAQAFQKIHSRFRDLQVESSVSFGVSSGGQSSSLNNDHRNNDEAWDNLPY  
SMDRGTYFNEETPTTIDQCESYCQDFGRPLVRLGQDLIDNQQNLTQIPSTFTTELLSLCMD  
SYIMIYSWGLSSYPSPWCPIDLSIPMNCWDTSLITDMSEAFAGRKKFNWRLNCWDTSSVTD  
MSEMFYASSFNQDIDLWDTSQVTDMNQMFYIASSFHQHSIANWNTSSVTDMSLMFVSAR  
LFDGPIGGWDTSRVTDMSNMFFAARSFNHPIGYWDVSSVENLYGIFIQANTFDQDLSSWN  
TSSVRNTQYTFRNAYSFNQPLDSWDVSSVTNMA SMFSGAKAFNQPLESTTKTRTPGFNLV  
GSSSKDKKKDKNDRFDWISSVTNMKMHF SMANSFNQCLGSWAASLSSHEDAGEDSTLHM  
FRRTSCPNHKQNTENDNSSTTPPLADNGTPPFNKGPWCQNSDGCYDVEPYIRSDGNLAF  
TREAGIPGGTTKMEIKSRKSGKNSKSDKSDKSGKSDKSGKSSKX

>comp8714\_c0\_seq1; 811 27 1794 LEN=2026; translated  
MVAALLESVAEISQDDEEEEDNDDYTPAGPAIKNVHVVVSHCDASIQWIWKTYLKDLSPE  
YRIASVTVITKCNKAIKAKDLVLDPMPLIQVVTMPNVGRCDHSYAYWITMVMHKGFLQ  
KGEAEPLVAQSSKRKLLKKREKNQNSKNPFGLVYVNFNDQIFKRIGNDIGPDDLILFLK  
DNMNSYRDHIEKHIQVSDMLQAISP DNQVPIQSSSMLPSYIPIVNSHG VACKSKTNKGI  
RQGRNRSYQVTDWAHRSVLWTFLLGVYSRKNKVKQTKEELEVHKKINEEFQSLHRPMGQW  
INYLATRTKVTKVDDKKKKIKKSIDVDNRNTTIDVPVFS SDYMEHAIGTTNREHG YFN  
FTHEVPYILDASNGKNSRQPSFNSVTKFYQEQDVIPTCFGGVFATQWQQLIADDAPVTP  
HGWSVITNELSRADNIEEGHYMERWWADLLSWSSYTSKRQAKRREELKHQLVPTAAPTEA  
GTSTETTAGTMMGEEKDTATNIWATSYESATEVLDQRDLSSLGQAKQKELLSHKMLHWS  
SPDSYTG LIVDPSSYKQAGDNSAERERNMERKIDPILLVVVAPYAW

>comp8715\_c0\_seq1; 443 1 1003 LEN=1131; translated  
XICSLPIQISDFKFCNQFYVKYPMDSLTFENVSCGIVALAALNLCMKAVSNLYKTFLRP  
AKNFKKYKWA VITGATDGIKAYAFAFKKGMSILLISRTE SKLQDVKKEIEAKNYSV  
EVSYLVC DYSKFDKAAQEKVAKVVKLEVGVLVNNVGVSYRYPMFFHELSDSEVQDLMTM  
NIDSTVWMTRMVI PGMLERKKGAI VNISSASAMYDLPLLA EYSGSKSFI EKFSRALNAEY  
KSKGITCQCQIPFYVATKLAKQRKSLMVPTPPAFVAMA IKWVGYGDCV VSPFLLHAIQGW  
ILDIMPNSLVSKIIMNMHLGIRKRGLKKA AKD

>comp8716\_c0\_seq1; 632 302 2653 LEN=2775; translated  
MESKQDDGRDGEHRSTPEVVIPGENVVVDHWIVSSG SFVRKGEI IARVCKRSDSSTCAT  
SVGATAVVAPKHKRPSRRKKKPKQ GILPEKVGNIQ QPSNDLSTSLQTPKSKAMSLKGLL  
AAKSNQKHEELSTKTKPIENELESASQKTKSVAPLSSNVVAKKENKPIHAPATGILRIF  
SNITQCQEQRRLVIGVIEECQHPTVYDGMCVVCGARRVSTKEDQNPQTLSNSKNSK  
TSQVTVSGGVTMVVSQRESESMALLDSKRLFGQRRLSLVLDL DHTLVHATSDIRARKYLT  
SDPKAEHHGDVRTISLPMFEGADPSKKKGM DPQH AHLRSQH FVKLRPYVKEFLEGVQD  
TYEVSVYTAGTRQYAEI IAMVLCRKL AGSTIDSDELEHLRYNVK I AENELARSLKAENKRTM  
NQVLPVNENTSADIVGDKTKEGPPRKKKVSFQ TSEAVDNKGGSENHQPM TKEKLACMRS  
ELLSAENLEAKAKDLRQKLFGRSIVSR TDVGD LGRDVKSLK RIFPCGGTMTAVVDDREDV  
WANAKDNSDSTIKGEPDNL LVRAYHWQPFVGFADINNAAGADLSGSAPT KSDEQLLWT  
KNILENLHRRYYKQSSEGSQKTPETL KEMRKEVLMGSMNVL SGLVPLHKQSF GASAVRP  
HFIRYAQNLGAKIQDVVGC RVTHVVA AKDGTDKALAA RKP GCKLVKSAWLMCEVWSMTR  
RNATPFLMHTVTPGVAKNIVQPVQKILRESNIDNSSEASTNNSDDDYDVFAAELEKELLN  
ANXW

>comp8717\_c0\_seq1; 796 286 1866 LEN=2494; translated  
MLSMSSNNIDISSASSEENDGEDGESGRQHRLAKAQAEIDRILNNPIDPPDFEKEMKK  
VASISPPLIKEGSAEFQLEEQVSEAE DQLYKAVKAQDYDAAEKKSAEISQTHVDDCGLVL  
QANA AFYRAFSEKDIREMDRLWLKDRSCVCIHPSFKPITGVNDIMKTWKRMFESSAGS  
FQRTWIDPCEIQLTVKATTAVVTCVEDVYARRFVRGKKRSELVNKLTATNIFRKVGRWY  
TYHSSWHADSEAAKRALKSQNRNKKTKSLSSK KISSPDPFDDNPLINLRSKRKKRHEDN  
DDESKSDDRTEIESILGIENFGPI LGDDSEAKQERPTGSSNLD FLKDLGLGGLGGIDGI  
LGMGSTDGTGLPPGSIIRISKVNNDVDNGDDGEEIDDYDDDQDDED FDEEDEEETTTNP  
EELSVFELLDEKRKKNRMKVSGKLSSELQR CIDALRKLANDGRI SPKQKRVLLTDIIS  
SSARGEKSLVHAYKLLCVDPTDEEAAEEDFVDQCQVFAQSFFEIQ

>comp8718\_c0\_seq1; 166 217 629 LEN=629; translated  
MDLSFNNLNATFNISTLLGLDQVENLHMADCSISSSLPDEISTLQSLVTIDFDSNDLSGT  
IPSSLAEILTLENIMFGSNALTGTIPSELGQLDNLTLLELQSNFLTGTIPTELFNITGLM  
FDYTGNNIPDS DVTGSDG

>comp8718\_c0\_seq2; 606 613 2696 LEN=2696; translated  
MESTIPTILSGSEVPTGGISTPSTMPSSLDDNKGTDAPTPASTDVTTDSATNLTTNAPSN  
ATTDAPTDDPVLNITETPTAAPHNFMYTIDDFLAETISHNGALYDVGTPQNKAMEALL  
NTSSALDPNSVNDQIEIIQRYALNTLYFATNGEDWEVNDGWTSEGHPCGFKNENEEAEDN  
WHGILCDDDLIIVEKITLEKNGLRGMVPSSEIKGLVQLVRFVSDNQISGTLTPAIGELED  
LSVLDINTNFFTGTIPTTIGNLTSIKLLDASSNFFSGTLATEVQGKDLVTFHVDSNFLS  
GTLSSSELFSMTDLVSIRMDNNQFSGSFPTEIGQLSKAIFMSFSQNSLTGTIPEELGLNGD  
LEFFNATANFIGRRLPDI FFDLFLYKTFDMALNFLTGSLPETFFANSSVLERLDLHGNTL  
GEELFLQDGLGQMTTLQVLDLSTNLFLGTIPQAIGEMTKLTELRDLKNNLTGAVPANLSQ  
LSDIEILSLSENILTTLPPDLTDLFRLKELQLSTNYFEEIPKEYFNDFPSLEILNVRNE  
FEVDTLDPVFLSKSLKIMDLSFNLNATFNISTLLGLDQVENLHMADCSISSSLPDEIST  
LQSLVTIDFDSNDLSGTIPSSLAIEILTLENIMFGSNALTGTIPSELGQLDNLTLLELQSN  
FLTGTIPELNFITGLMFDYTGNNIPDSVDVTGSDG

>comp8719\_c0\_seq1; 301 1 1498 LEN=1631; translated  
XYHQVSSVVKLVSDCGISLDQHSRSKFLPMSISSVSIFLASTVTSQTHPNQSLIIPRVSQ  
IRRHNFSWSKALLVILWPLATDTFSRVPRFVESFSQVPALKFARMGVTPIGVRSSSKATS  
LTRKNTMDEPPDVQSPWKLFPQYNLLVKKHGADSVKLIYMVRHAEGTHNVRDFKSIE  
QLDARLTPFGIQCRELRDELLLVKNGTTDKRCREEDTASRNGWKYHTQGLDRLMENLK  
ETRSHEKIDGHKNDNTCVVVSPLTRCIQTAMYSFEFFTQVTTTTGKEQDYSSTNDNT  
KVPFLGIEALRETVNYNCDRRRRRISEVANEFPEIDFTHCHSNEDEIWLSYRGREKQDEGR  
ERTFVDGTLLEGAKKNYLESAQLYAVANRGRNAMEFIQSLPQSKIVVCTHSAYLRCILNW  
GQTGGVPMFQRLDDREDPTRQDKLFYCFEQNESIDQSSSESIKDQISQFDQASFEKYM  
REDYGNAELRSFCLLVQQA

>comp8720\_c0\_seq1; 513 222 1052 LEN=1573; translated  
MPNSKNKRNNKGNKSDKQKKLKHKMPASMIRKGNKREVVFDPPEARSHLRGFSERKRQR  
RAYGLAMQKVKDRKSKIEQRASEKKDVLERVEEAEKQKELWMEDEVARMNRNVLDSEFRVDG  
KDLSDEDDDSVSNKDDDEKEDVIDTKIYDDQKTETTWWGGQVTVTTSVVELGDDSSDDDF  
DGSDDRGNRKAQSVDTAQKYAGDVNKFMDDELKGNMPGKKNRDNRGNAKRKKGKDGASEMKG  
VGGSGNLKIASKLLNKS KDRSFARSGNGKKGKRRKR

>comp8722\_c0\_seq1; 141 833 1675 LEN=2670; translated  
MMVLALIYGSMNLSFISLRNISAGMFTIFAQCKILSTAMCSTIMLGRQYSWTKWRALIA  
LMLGVLLFSEPIWGRNDDGESALSTTEGGNAALGTLAVLTVMLSGFASIYFEKVIKLDP  
LQLGIWERNFQLALGSVPVYLLFIAGNGGGTAGFFGGWSWLAFLLSALGAAGLLVALSI  
KYGDSILKTLATTGAIVLTGMLDHALLGGPLTPTMAIAGVQVIAICNYTFDASPAPIDS  
GASKGTSATKSNSMSTLIPSGEADETPPSWSTRDGSVQKR

>comp8722\_c0\_seq2; 189 73 1395 LEN=2390; translated  
MIRKSNSLLQQQAIPECDVEDSNTNTERSDNDEAAGERQAALPLLGTGSVVTVTAPTNNM  
TFWSRASGYMNSTRMLVLLVLCQNSMFTILRRYSQGVLEETYSKYELLVLAELIKIVYS  
TWMISKNIASEGDSLQSSAERTPRKSLRAELVYLVETSRKMMVLALIYGSMNLSFISLR  
NISAGMFTIFAQCKILSTAMCSTIMLGRQYSWTKWRALIALMLGVLLFSEPIWGRNDDGE  
SALSTTEGGNAALGTLAVLTVMLSGFASIYFEKVIKLDPLQLGIWERNFQLALGSVPVY  
LLFIAGNGGGTAGFFGGWSWLAFLLSALGAAGLLVALSIKYGDSILKTLATTGAIVLTG  
MLDHALLGGPLTPTMAIAGVQVIAICNYTFDASPAPIDSGASKGTSATKSNSMSTLIP  
GEADETPPSWSTRDGSVQKR

>comp8723\_c0\_seq1; 101 1213 1493 LEN=1493; translated  
MATVAIAILAIWTASNGGGGRSVVEARVPLHTAHKAAADGDRDRESAAPQVYLKGYHPVG  
RDNENPRGTIALCGTQQRGCLAVPEKGCNSSSSX

>comp8724\_c0\_seq1; 196 1 859 LEN=986; translated  
TFLIIVPVNPYQYGTPNENSDETLDNIASPVLAGSGSSFSFAPAI FHRQQHSSVGESRL  
FQSSIAIPEEKYSQGRSGAGVSKSRSRVRVDPNSNIYAPKSSNATITPHEDTTKDVVD  
AEEQIGILRSKTLKELKLACSRRNIMYKGFSEAEYVQAILEDMEKTLAFSVTGLIQGS  
VTELTGEQLDQEMTRQESLILVDVYATWCGPCRVLQPQLQVAAQKLVEEVRVAKIDADK  
HSDWVGRYQVQGLPTMLLIKEGSVVDRLLEGAFMTNEIIDFVRQHA

>comp8725\_c1\_seq1; 773 244 2232 LEN=2583; translated  
MVNKTNNSASHDDILDSFLTIESKLRGPFSSLDLAKAVSTTALRGSSHIGSSSATDDTQ  
DPAREYLNLSVFGRTNKVIQCRMLIGLLGLNDMRTNKNAGDGENDNKGGSQYLTPPEIL  
RILHETQEGLPHEDWVRTTSGLIEGVMFRDSDPNNGNTRESCRSEASKI IRETGMEVC  
DKVECQIQDVGRPYESSNSKQDVKKEKGTIDEEKVKSNSGSI SAASANKRNRGFTLEKVI  
PSSSQPAIKKEEKIQISIKGEQGTERTKPPPPDLNACFAPYRYSLISTPTLNTI IPEFN  
FSKPKNNNRNGVSDSNCHFQVNPAASILQIDLKLEAQRakeHGSGVPTKAKSSNSNKGNS



PTKTANGGNPTFPFGFRPAKLVPKRAASSSSVGASKPGVRSRSLFMPKKKTSANLFNT  
TTKFRPQPMKTM LRRKGGGAQALVKN GATASGGGAILNKLGGGGIARSGMSAAGRTGRFS  
GNRDVARAGGKVSRIK MIDDV DALTRPQQSTASAAEQ RASKRKRILEGGASSFANPRL  
KKQRARPGIRRMEPVMTKNIRHAAPQQQQQQITDESCQSLLRDRSNRMSAEDRIRVEKFF  
QTNKADRSSLSPSDDGPQYKMKIHEQRGQDPATGEEIKQTFYLELDYNTGDFLESKTK  
RY

>comp8726\_c0\_seq1; 628 46 1813 LEN=1813; translated  
MTKRELSDSPVNVGCLGGGQLGRMMALEAPRLGIQMKFLDPGGNKCPAAAIVPGENI IKG  
SLKDEASIRELAKGVDVLTVEIEHVGVETLLKLEAEGVNVQPSGRVLSIIRDKLLQKDFH  
LSKKIPLPPYQKTSSVDGIKDAARNLGLPLMLKSRTGGYDQGNVAVLSIADEDIGEALK  
KLGCIINGSSSESLDLYAEGWINFESEVAVMVVRSANDVDTDSYPAVNAIQQDSICRVVIA  
PARHVSSDIRSKCEEIARSAIASLNGASGVFVVELFVTKDGDVLLNEVAPRPHNTGHYT  
QDACAVSQFENHLRGVCSLPLGSTMVVEAAAMVNILGAPSGTVEDTLRSSNAAMDMDTA  
VVHWYGKHGCRAGRKMGHINLTGASYGEMDDNLSLLLDIEGIPRSLP PGGSF EKSP LVGV  
IMGSQSDLPSMNA AIDILK KFDIPYEVDIVSAHRTPKLVSYSREAVDRGLRVI IAGAGG  
AAHLPGMVASMTPLPVVGVVKTSTLSGVDSLVSIVQMPRGIPVATVAIGNATNAGLLAV  
RMLCTSRPELRQKMIGYQAEITEMVNGMSSKLVLDLGSDAFLDQMESKNTX

>comp8727\_c0\_seq1; 352 1 1199 LEN=1245; translated  
XINKLNYIPYELGISSLS PYSYLQRISLPRNKPI SIHRREP KESKTF LHDAGSLSRCCYI  
LLLACATEHAMGWVSPHRQGI FGPRVSPAGSTTGLN MGLRSGVRRVRDSILSKERTRKD  
LKIGIAGFYDRSSKLWEDVWGEHMHGYYIPEDRTDHVQAQIDLIDEVLKWADVTEATSV  
VDVGCIGGSSRRIARKFDCKAQGITLSPYQAARGNELAIEQGLADKASFQVADALDQPF  
EDNTFDLAWLESSEHMPDKK FVDELFRVVVPGGRILIVTWCHRDL EEGETSLTKKEER  
ILARINRAYL PKWCSVQDYVDLLEAKGATDVKREDWSYI IAPFWKAVIKSSLNLSIVG  
LAKSGFSTIRGAYAMFLMLRGFNLGVIKFGLITCTKPKN

>comp8728\_c0\_seq1; 176 708 1732 LEN=2693; translated  
MVFVSELGDXLATGINDQVAWSLTLPHKSRTTGGPSLFGFPDHAYLAIASHALDQLNVPN  
DLQICRQWIIQDQGLSAGSMAS SGNPLGHPAAGWTGMGAPFASTSHSVPDEI ICYNAESS  
MGRMIDHYSQFLEPVINCCADEKECAICLDVMSPSSLTDTTNI VCLRKCKHRFHKSCIIG  
MLEQNHTKCPFCRETIAAESQGLSPSGKLTISLDLSIRCQ GSEYDS DGVI VLQYSMP EGI  
QAHYMPNPFMRYAGTSRRAYLPHNESGRALLKRLKYAFTHGLTFRVGTSLTTGKQNQITW  
ASIHHTSLRSGPHGY PDPQYLRNCNDSL DALHVPKGEDCP

>comp8728\_c0\_seq2; 176 708 1732 LEN=3485; translated  
MVFVSELGDXLATGINDQVAWSLTLPHKSRTTGGPSLFGFPDHAYLAIASHALDQLNVPN  
DLQICRQWIIQDQGLSAGSMAS SGNPLGHPAAGWTGMGAPFASTSHSVPDEI ICYNAESS  
MGRMIDHYSQFLEPVINCCADEKECAICLDVMSPSSLTDTTNI VCLRKCKHRFHKSCIIG  
MLEQNHTKCPFCRETIAAESQGLSPSGKLTISLDLSIRCQ GSEYDS DGVI VLQYSMP EGI  
QAHYMPNPFMRYAGTSRRAYLPHNESGRALLKRLKYAFTHGLTFRVGTSLTTGKQNQITW  
ASIHHTSLRSGPHGY PDPQYLRNCNDSL DALHVPKGEDCP

>comp8728\_c0\_seq3; 209 408 1622 LEN=3375; translated  
MTTRAGVGTCTFGYLKIKYVIPATMQKSYHPPHDMHSSIRRIAYLPDTTEGRQILFRFQY  
AFLHGLCFRVGRSLATGINDQVAWSLTLPHKSRTTGGPSLFGFPDHAYLAIASHALDQLN  
VPNDLQICRQWIIQDQGLSAGSMAS SGNPLGHPAAGWTGMGAPFASTSHSVPDEI ICYNA  
ESSMGRMIDHYSQFLEPVINCCADEKECAICLDVMSPSSLTDTTNI VCLRKCKHRFHKSC  
IIGMLEQNHTKCPFCRETIAAESQGLSPSGKLTISLDLSIRCQ GSEYDS DGVI VLQYSMP  
EGIQAHYMPNPFMRYAGTSRRAYLPHNESGRALLKRLKYAFTHGLTFRVGTSLTTGKQNQ  
ITWASIHHTSLRSGPHGY PDPQYLRNCNDSL DALHVPKGEDCP

>comp8728\_c0\_seq4; 209 408 1622 LEN=2583; translated  
MTTRAGVGTCTFGYLKIKYVIPATMQKSYHPPHDMHSSIRRIAYLPDTTEGRQILFRFQY  
AFLHGLCFRVGRSLATGINDQVAWSLTLPHKSRTTGGPSLFGFPDHAYLAIASHALDQLN  
VPNDLQICRQWIIQDQGLSAGSMAS SGNPLGHPAAGWTGMGAPFASTSHSVPDEI ICYNA  
ESSMGRMIDHYSQFLEPVINCCADEKECAICLDVMSPSSLTDTTNI VCLRKCKHRFHKSC  
IIGMLEQNHTKCPFCRETIAAESQGLSPSGKLTISLDLSIRCQ GSEYDS DGVI VLQYSMP  
EGIQAHYMPNPFMRYAGTSRRAYLPHNESGRALLKRLKYAFTHGLTFRVGTSLTTGKQNQ  
ITWASIHHTSLRSGPHGY PDPQYLRNCNDSL DALHVPKGEDCP

>comp8729\_c0\_seq1; 278 96 609 LEN=783; translated  
MTDTLIVMFHIFLFFYSAYGSECGNVGIKLIPTGGLYVTGGLTPKNIKWIEGKDSLFIKS  
FYDKGRVSPLLDNVPLIAVMVEDMGVRGARKSAEIQHEMF EARKAALLNRNPIHPPSSLK  
LDSMAAGSNPVTARLLKLEKDVEETKTLAKMSMALTIGVVAGFALMKNR

>comp8729\_c0\_seq2; 490 1 1374 LEN=1548; translated

VLTFLLITSDESKQKITMSSTVSYLLTGDVGGTNSRMGLYHVGNDTPLGVVYYRNAEHLTK  
REDGIFEKKI IYPFLKHIWDTVPNI PPIELAEI IACFAIAGPVKDNKVIMSNLHGIEICG  
DSIVDGTYDCGEEGNFFLKSICDKI INDFVAQGGFCLTLQPDEVI ELTPGALNKIDPTG  
PKACIGAGTGLGECFLTPDERGNYSFCPSEGGHVDWAPRTDVEIKLLQFLKERFAGKNRV  
SVERVVS GTGLGNCYDFFAREYPKKINKAVHKEI IESGDMKGRAVAMGVEKCELCRSAME  
TMITAYGSECGNVGIKLIPTGGLYVTGGLTPKNIKWIEGKDSLFIKSFYDKGRVSPLLDN  
VPLI AVMVEDMGVVRGARKSAEIQHEMF EARKAALLNRNPIHPPSSLKLD SMAAGSNDPVT  
ARLLKLEKDVEETKTLAKMSMALTIGVVAGFALMKNR

>comp8730\_c0\_seq2; 441 1 871 LEN=1256; translated  
XVLVHFPDLYLPRVNNKEQYRVATHSRIGRDSASCIFWDDNEGREDVERTYFLPKIDPDT  
NHFANLSPMSGLENCRHWFLLIAQAHGAMIQLFCLPLGWKQHNDDFPPDDCDMYDEMDDAD  
DVPFYLT SKLLL PKGGQVLQIGFYGDDGKSSLSGNDSGTGMGRQKIGFIFQKYSPTS  
KELWTTTYDSL SWQAVPFDPM LLNASQVDANCSKKVVQLSVGESCDSDDEDSILLAQSRT  
IAEDSPTDLCELLLCGSRGVGGVVTKSDDLIRVDLIDLEDEDEDEEDSYEE

>comp8730\_c0\_seq3; 1092 84 3119 LEN=3504; translated  
MPASREEITTDIAARQSFSLQSRKFLAAGSRGENDTSVGTERSVLR SATKLCPSMDLIL  
VKSANSSSSSLSPSLVIYRSLSWQKVADVLPPESSLGASAEAVGGGSSNPGGSDKGSLSYC  
WSPNGQCI AVAQDSSVSLYRVE SLVTASGAGGGGTASGSSSATWTISLEERQREFPASG  
SNDDSDNTNNATSSDRESTRVLALHWHVHGKHNPTASSPTPVEEEREVSWRYQSHYIDQ  
STKFLPPSAYYSSDGAGEAGAAGTSGDAESSLTQGS LPECRTPLSVLCISTSDMKHRLY  
LHGRYLLLTLPKSNNGILDAKAISSSGAGSVESPMVVASNDLGYWLTTPSIPDSTGAAA  
SNNFLTLYHTPFLKRDRYALQQIATLHTSITAHLR TIQRSVPIVADSWRTSLRPLDQK LK  
PLIGLLSNY GVEVDLEAKHSDATATRTTLA AVMKEYIMMGHVTHSSSVANAMDQFFTGVQ  
QNDQLVQRMERTLLASMANVESTAIRCLLRPTQALGWQIQELGGLVQFFDNASCDDNND  
SDDSDASMNATEPKRSPNKRMVHELVEAIEK LKWIGVENVMTSIVAGRMLVRDFCGWLR  
HAGSQVKARGTAPNSVQREN AKKRISQAVLERLVTILNESSRNEVLRGKND SHQKGLAE  
SILKLEVSAMLKGT FESVSAPRPES PSSVREILHRAPNVCQSLQQAIDATDCLFSNPLSN  
VPDQIKSKDLYLPRVNNKEQYRVATHSRIGRDSASCIFWDDNEGREDVERTYFLPKIDPD  
TNHFANLSPMSGLENCRHWFLLIAQAHGAMIQLFCLPLGWKQHNDDFPPDDCDMYDEMDDA  
DDVPFYLT SKLLL PKGGQVLQIGFYGDDGKSSLSGNDSGTGMGRQKIGFIFQKYSPTS  
TKELWTTTYDSL SWQAVPFDPM LLNASQVDANCSKKVVQLSVGESCDSDDEDSILLAQSR  
TIAEDSPTDLCELLLCGSRGVGGVVTKSDDLIRVDLIDLEDEDEDEEDSYEE

>comp8730\_c0\_seq4; 874 84 2369 LEN=2369; translated  
MPASREEITTDIAARQSFSLQSRKFLAAGSRGENDTSVGTERSVLR SATKLCPSMDLIL  
VKSANSSSSSLSPSLVIYRSLSWQKVADVLPPESSLGASAEAVGGGSSNPGGSDKGSLSYC  
WSPNGQCI AVAQDSSVSLYRVE SLVTASGAGGGGTASGSSSATWTISLEERQREFPASG  
SNDDSDNTNNATSSDRESTRVLALHWHVHGKHNPTASSPTPVEEEREVSWRYQSHYIDQ  
STKFLPPSAYYSSDGAGEAGAAGTSGDAESSLTQGS LPECRTPLSVLCISTSDMKHRLY  
LHGRYLLLTLPKSNNGILDAKAISSSGAGSVESPMVVASNDLGYWLTTPSIPDSTGAAA  
SNNFLTLYHTPFLKRDRYALQQIATLHTSITAHLR TIQRSVPIVADSWRTSLRPLDQK LK  
PLIGLLSNY GVEVDLEAKHSDATATRTTLA AVMKEYIMMGHVTHSSSVANAMDQFFTGVQ  
QNDQLVQRMERTLLASMANVESTAIRCLLRPTQALGWQIQELGGLVQFFDNASCDDNND  
SDDSDASMNATEPKRSPNKRMVHELVEAIEK LKWIGVENVMTSIVAGRMLVRDFCGWLR  
HAGSQVKARGTAPNSVQREN AKKRISQAVLERLVTILNESSRNEVLRGKND SHQKGLAE  
SILKLEVSAMLKGT FESVSAPRPES PSSVREILHRAPNVCQSLQQAIDATDCLFSNPLSN  
VPDQIKSKGKALPLILSGDEQSDIPCEQSSSHPF SRCVLVHF

>comp8730\_c0\_seq5; 548 153 1181 LEN=1566; translated  
MLKGT FESVSAPRPES PSSVREILHRAPNVCQSLQQAIDATDCLFSNPLSNVPDQIKSKD  
LYLPRVNNKEQYRVATHSRIGRDSASCIFWDDNEGREDVERTYFLPKIDPDTNHFANLSP  
MSGLENCRHWFLLIAQAHGAMIQLFCLPLGWKQHNDDFPPDDCDMYDEMDDADDVPFYLT  
KLLLPKGGQVLQIGFYGDDGKSSLSGNDSGTGMGRQKIGFIFQKYSPTS TKELWTTTY  
DSL SWQAVPFDPM LLNASQVDANCSKKVVQLSVGESCDSDDEDSILLAQSRTIAEDSPTD  
LCELLLCGSRGVGGVVTKSDDLIRVDLIDLEDEDEDEEDSYEE

>comp8733\_c0\_seq1; 423 74 1060 LEN=1203; translated  
MVDAPKKYVKVDGKMKLNPEYKAWMIAEREREDAANSAPAVAVAVATATPVEPEPEPSPS  
GPPGSSTPEHTVGGVNTRAPGKMATVSGHNNVAQALRSVVSGGGNVASGPVSTVAGG  
EQNKATKVRATVSGGAANMATANEATVGGWKN SANNP GATVSGGVQNEANGNVSVVSGG  
KMNNAQARLSTICGGIRNEANGEFSTVVGGRDNSAGGKFAVAVGGDGNDAEGNFSIAMGR  
NAKANHHRSCVIN CALGDYTNKSTCHGEFRVA AKKFVMVIDDVEVVINKDNVRAFKNFAN  
IQQLKEQQEQINKLQRNMRRLNSNADY

>comp8734\_c0\_seq1; 1239 1 2200 LEN=2200; translated  
PPLNLADFNAMLKAQKMDAREQKQTRAMMNTYKGGISKIDKLRLKELRTDPFEGRRKSI  
SKNSPPVIVDTETNQNNMFKKANKHKGTVEKQIMHSDLDTSGTRSEPTLVATSSQAESEI  
KIEATEKAPAETKKKTEEKAVTEGNAEAEAEAGADEAEIQKKAEEVPATDAEPGIPVEKNE  
KTEEEPDKGAPVETKAETADAENE EEEEEAAVETADKAEVASSVLEIAMKDAVVKPAED  
QAITISEQQATDDTVADTKTPEASLAENNLEKATTAEDKSTGVQEDNEGPVIDSEVAKN  
EEDEKAEVVAEADVEENLKDESXLDDVVETAAKVPTESRLETVDPEEEKPDVEPTINASE  
ETKSQTPDAEEQKTDEEPAIEAHTGIKLETREKAGEKVLKAPADPVALAEVVEDETVP  
NDQVDAQASAEAEEDAAMVALEDAAI PAKQAEAEAPVVSVEVEEDI IPEIPVDTKTPA  
EEEDKVDEEAHSTVGTESAEDRVEEEGAPVVAEVEGTKEAAEESPVAPVDAEI  
PINEVEEESASWQDDDKVVEDSAPDASMDTEAPAKAEETAIEAPIDTGELATEAHEEPA  
HEANEDDESTAKEEDEVAAEAVPEAPVDTEAPTVTTEEQPLLTNAGSSVGEEGIVEEETM  
SAAPVNAETPTEDDKVVEGGAPELSLDAEASTEEAEKLAPEAPVDIETPCEEVEKEAT  
PEVPEASLDTEIEA

>comp8735\_c0\_seq1; 774 135 1631 LEN=1666; translated  
MASIVDGKKFEKQDSASASASTSSADPNNDATTDKSTNYSSRGPKEGDLVIRDGFPALY  
IPKCKHADSSDDKTEDPLSFEPVMKGEPIPRHEFWSSSEVDVIQFDGENSDNLELLRDDCA  
TVFTARDKPDGAAYSAGQTFIPANMKPRCALEALALKIFHEHTKDLEPGTFNPTQSGAN  
WWTLMVMDDEADHGNALSAPALTASSASATLASTASTCSTVEGAKSKELQQQEEFDEEGD  
DEVGLHFDADYELEEQTGNILLHPRVATVTYLSHDGAPTLVLDQKSPMDDLKKTTLENG  
INKAWLSHPRLGKHMADFGRFLHGAPALYFPNRSVAHVDKDESKEPAKRQKI IKDKR  
YTLLVNIWLNHWVMDAGLLDDEVCAKMKTPWEDERSNLKSDDEYKPPFVWNKDVDLTKGP  
VGIKKEKLSPSNVDPAGEDEIALCNHNVTVKYNPLMEECHAVSFSGSTIELELEKGAISL  
HVGEELTEDEEEGGDKS

>comp8736\_c0\_seq1; 305 123 1016 LEN=1355; translated  
MSDNNTDVLPRAVTRDLFSAAGSVACCYVGPFDTVKVRMQTSPDQFSSVAGSTSQIL  
RNEGITAFWKALPTSGGMIMENCMAFGVNEALKRAFDPKNDGAIQEGPPSLWKPFAMGA  
ITGCCSATVLLPSEIVKAKTQISTERNITSQQIVRQMIKKQGLRSFFVGFDAQLCRDSSF  
YALFFGGYELSCYFFRFTVFPSPMDELNYFLSGGIAGMGGWLFAMPFDVVKTNVQSRYDTK  
VFGSYFPELIKIAKQRGVGGLYAGLGPTLIRAFPANAALFLGVESGKKVFDNLVWKE

>comp8737\_c0\_seq1; 388 117 1220 LEN=1641; translated  
MGKNKPNKPGGNNHNSKRSGGKGGKSQRSKGGGHRQHVRKLEYDMCEEDVKRRNEEIKN  
DINVGLCQELGGSPPPMKNPLKGLRLRMWDFEQCDPKRCTGARLCRKGIFERMPLKQSF  
RGIVLSPKAKVPVSPADLDILEKSGISLIDCSWARLQEI PFRQLASGHQRLLPFMVAANS  
VNYGRAFKLTCAEACAATLYICGKQDAARKVMEEFVSYGPEFFKINREVL DLYASCQDAEE  
VVAKQNEWLELAQNRSSALGESQSRKHSRQSDYEDEDGNQAAVREHGLPGELPPSDEDED  
DYGYGTEEEAEELLVDKFGNFI SDPAPEPDYDDYGDYDSEEQEA PKLDKFGNFVDDERM  
TTEDPKF

>comp8738\_c0\_seq1; 160 1 946 LEN=1151; translated  
XVRAARLATVALWVFSVAGTAVLAYTQGWSVNSFDGISVVLFDVEGYAKPHVRAQS YLAG  
ILVAFWPRRKT VGGSSGALMLLVLAGL FVLCFVTVTGAYARRACTFGESPLEGDDCGSLW  
SPAANFVYTAFRAGWSVCIALLHLCLGSDSTDGSSGSGSADSPPEANADCGSRCESHR  
PSLTGLVGGVLSWGLWTPLAHLSFGAYLIHPIVIVVWYLG GREKISFRISTYLMFC SIT  
VVTFCLSLLVTVLVEFPFGVLLRPPAPRKRKPELGTPIRHGNDGDTLRSLLGVD TSSP  
SVFATPTQSYGSVPR

>comp8739\_c0\_seq1; 313 1 1531 LEN=1904; translated  
XLLGKDLHYFVLFITATRKLATDIGIFTRNFNSNREMTRVVHYADESVDLDEVNTFLAKQ  
LNKLSVYNRTRIDEEIHGVCCLAPEETPELLEIALQELSSAIDNIHDSQKQAYIQSQELF  
PNNEYVNDHNFRLMFLRCEFFDAEKAAIRLVRHLDFVLEIFDQKTELLGRAIRLDDLAPR  
SMKLLRTGCLQLLPVRDNSGRRVFAVSFAFKEYEVVDRIQLYLYFQTVLSEEVENQRKGV  
VSLALAGERAGNILRPLSRIDRHRLQRFILSAPIRFCALHCCYPDTPLFRMAKAVYALGL  
LTSETTRFRLKAHNRTDMENRYQLRGYGI PEDQLPLTSSGKVKPKQKVHWINIRATIERK  
RMEEGVFTMGQDDTSIIIECPRLNDVAMRPGKSYLCHPGNVRFKELLDKYMHEHAAADRRG  
KDKISWGIIDEIEQWGRFLEWDNVACFWVQNKDRNNVXNQDPGLLSGSQEKYQGETKKR  
KAVIERDGFCLNGCHKSEISRKKEKTFYR

>comp8739\_c0\_seq2; 159 1 749 LEN=2028; translated  
XLLGKDLHYFVLFITATRKLATDIGIFTRNFNSNREMTRVVHYADESVDLDEVNTFLAKQ  
LNKLSVYNRTRIDEEIHGVCCLAPEETPELLEIALQELSSAIDNIHDSQKQAYIQSQELF  
PNNEYVNDHNFRLMFLRCEFFDAEKAAIRLVRHLDFVLEIFDQKTELLGRAIRLDDLAPR  
SMKLLRTGCLQLLPVRDNSGRRVFAVSFAFKEYEVVDRVSVFIHWNFSLRVQSDQYGISD

TTSRTQKEF

>comp8739\_c0\_seq3; 188 292 719 LEN=1092; translated  
MGQDDTSIIIECPRLNDVAMRPGKSYLCHPGNVRFKELLDKYMHEHAAADRRGKDKISWGI  
IDEIEQWGGRFLEWDNVACFWVQNKDRNNVXNQDPGLLSGSQEKYQGETKKRKAVERDG  
FCLNGCHKSSEISRKKEKTFYR

>comp8740\_c0\_seq1; 210 228 1058 LEN=1310; translated  
MEDEIGVTVVSDKDTSNQTVPSDIDVNSRDRECVLASGQVCICSTCEATRTRMLHRLSSK  
ESVSKKRSRGDSIALSEKKKPRNEGEQLEKMQDACKTILECIGEDPSREGLLKTPLRWAK  
ALMFMTKGYAQTCQEVTTNAVFSEDHDEMVVVRNISIHSLCEHHMVPFTGRIHIGYIPNG  
KVIGLSKLARIAEVFARRLQVQERLTSQIADAIVEAVEPLGVAVVVECSHMCMVMRGVQK  
EGTSTATSSVRGCFQSNKTRAEFFSIIHGNAKPKFC

>comp8740\_c0\_seq2; 209 228 1034 LEN=1286; translated  
MEDEIGVTVVSDKDTSNQTVPSDIDVNSRDRECVLASGQVCICSTCEATRTRMLHRLSSK  
ESVSIALSEKKKPRNEGEQLEKMQDACKTILECIGEDPSREGLLKTPLRWAKALMFMTKG  
YATCQEVTTNAVFSEDHDEMVVVRNISIHSLCEHHMVPFTGRIHIGYIPNGKVIGLSKL  
ARIAEVFARRLQVQERLTSQIADAIVEAVEPLGVAVVVECSHMCMVMRGVQKEGTSTATS  
SVRGCFQSNKTRAEFFSIIHGNAKPKFC

>comp8741\_c0\_seq1; 505 360 2638 LEN=3086; translated  
MMSGYTSQQCSKVTRRQAMAVARSSPQSRIDNDAVISSWQGSVPVHTQRQEGGKKHTR  
RTQGWPLAMARFFFWTALGAI SFMVQYHRYVWVDNPASDSFYLSSTPMRRSLLLSAGSF  
ESRYRDVTSKRGPPNGYLPAAAVLRAQKNRQNDNRNDQYQSSDDNSFPSEQPLQQWASI  
VSDHPLVSNRSVLDVPLALYQNTTSPVSDLLRVYVYDFEREHNLESSPSVSTLDQRDMTS  
SSNHSSNAFSLPHSYTDDVFEWLT TXALDSNWI TDLVLRVLFSSFPGRVYDPNEADIFV  
VPYPHAGHCLSSPSGYSVYCKQLNKKKKHKNENASVEQTVLRSLEHYNATTNANRHLFLL  
SDSEFLAQRWLASRPLLKYGPLWEHPASPRRFSGNGKRKTRKPRRYSPPGHILIPPA  
NADLRLQPAFVVSPPALHGSQQQQQPPQHRETLTRDLSLVFVASDTNPRMPESPRVFRF  
LLQALEEWSNKKGNNTIGGLPFVATNNVRLFEKSAFASANGNDSSSTNDTNEATMSVFN  
ISTNKTTHGDLYDLRYSVFCPILPGDSAWQRRFFDAMACGCVPVVISYELKKGKAFRNHL  
KQYHGSTYAKNEADTTTQMQFPNKPVSWYVPEDEGPHNVGDTWSVQESYPPFVDQIDYRSFV  
VECNGNATHPEVAHAELIQTLERMIFLERGMVAVTADRSLQRSGTPAHTSVLNLQKQAAALQ  
RSAASVLYGVGPDARHTDDAFAHLIRALRAYVDGLEAYH

>comp8743\_c0\_seq1; 170 468 1048 LEN=1832; translated  
MMSAWEAQQRAQKEQERKAKMEAAAALQSYRRSGLSEEEMKLAALREQDRMQKQSAAEQL  
RGYRGQLSEEEARLAAQKQEEELRRKQATEEQLRNNGVVSAQDPTARNESILRMKDSGTVS  
ELAAGYTSPOATHVHASSPTASASLGTMRPAQPDFSVATIGREATDDSAXIPDDARISS  
PIQGNVHVWNSYA

>comp8743\_c0\_seq2; 139 468 1355 LEN=1639; translated  
MMSAWEAQQRAQKEQERKAKMEAAAALQSYRRSGLSEEEMKLAALREQDRMQKQSAAEQL  
RGYRGQLSEEEARLAAQKQEEELRRKQATEEQLRNNGVVSAQDPTARNESILRMKDSGTVS  
ELAAGYTSPOATHVHASSPTASASLGTMRPAQPDFSVATIGREATDDSAGYPMTPASPV  
RSKAMFMFGILTRKDVDTASSEERSRLVSRYLARADEIARSVIDISPSYQSIRQSLEYPI  
ASTVVKDRSRIDSHRTTVTVTIPFTAPDQATARSFQSSIQRVRAAIANGSFTRH

>comp8744\_c0\_seq1; 687 1 1741 LEN=2216; translated  
XSAVDTDALKTEKSFMSSEGSADDDTLSSPIQNEPMKSPVSDQSSSKDDGNPSSSEIE  
IQKETHGKNGATETHPAGSIPSQSTPPSDQIEVLQKELHAAHTLIMQLQHHEVVEERPG  
DAVMVELQASLQKEMNRRAEAEKARVAMAQSQRIGEEYKLFKIESKANLDDLTKLES  
TQEKDAFEKELIDIREERDEQARKEMALTTRLNAAKKKEAVKANAAEHYEEQVDQLESSV  
KDYKTQVESLSAERTQLQEELEEWKQYAEKRTQLENNLKDDEKLNDRKRRKMKAFVEAK  
TEEVRLAKTDYLSLQTEMDQNTSHSLKELNQRYSKQLHAQWVQSQTRNRELQRDAMKMKDS  
EKMHKVGDSTLEEARLSAQQSEDHKNKRIHARNELMSVLGQLEAERAVNSRLQESIKLTL  
TPKALSQQQTIREALDEFEGALQKLSVRIGRPLPPMSNSAPGGFSDVQSTDDGSI GRNP  
TSGGTADGEEGSTPSGAVSLSEVNTNRAIQOLENETQRVSNIMDF SAGIERMNNLLNGP  
GTRNCVDVLSQLLSINGTPPP IGEPSRRGVTRGGQRYGQI

>comp8745\_c0\_seq1; 559 136 1536 LEN=1536; translated  
MLAMRSPLLLTLVLSAAAPSALAWNPTPASPLATKTHRHAVAKKAQRTSATFLAASGDGV  
LDFVKGLDSVLGNPTAYSAAEAASNSWASSVGADAAAASASGGGVSMNVPNEVVIGGGVL  
VFATVLGVAFVALSQKEDEADEEEGGRYGNESFGAGDVTPLPKRTETAPATSATESKLEE  
ANTAIQKLTSENGTLIDQLSDAEEDNGRLAGEVESQGGLLAKLKARLSKTTEELETQEK  
LESETALRKETESRLTEATTANEGLTESLETKEKALVEATEKWNWTKTKLEMETQEKESM  
KKELRDVAETNRVLEDKYELEQNALKKAXDPAGLDPVDAGIHAEPHQDPGGADPVPLGA

PGDQGHVPEDLGRPGEPGGRAKVPADPGGQDVEALQAKGLEPRQGRGGPDQAPPAAEAKE  
TEELATSSKGVKRKRLPSGGQATGLPRSHVIYNICDIYTLVHLCMDPTX  
>comp8746\_c0\_seq1; 265 1 722 LEN=722; translated  
XIVYRNHLFRETAAIAHSTSQMFSANENLVLQRHQRRIVDRIEQCMPEEALDMGTTVMVM  
QVSCDKPGCVPLETAVIIVFVKCSDEELVPLPESNGGSYKTKILKPMANITDDDILDN  
LPPAFEGRRMTMERYCLYARDVMIGQITQLFGDGSSDDTESAIKDRIAMATYLLQSCLDQY  
IAAGCKPPPFGEPIYANATSTIGADASNSTVGEEPTQKSLDEELQRPKDSTTPAPT'TTTT  
TX  
>comp8747\_c0\_seq1; 630 224 1705 LEN=1839; translated  
MGYGYKKNKNGVDASFDSSIAATNSTRKSKNGMKKLGSSIKNVFGGKRRRRRKKLAALQR  
EGNANGNVHFDDRSYVSYEYSEAGSDVYSYQEEASVHSRKRSGNSPGRPLTKIHEGD  
NEDASDVEDTASPRRNRGSRGRRGGDDASVSSKSSWMSNRRTKKAQQQTPDPLLLVLLV  
DPSTLRFELLSLEFDLAETAKQARKNRNTHGSHEFNLTVDVNLQITPDALTEEKLRSAS  
SSSGGCRALIDRNGQIHFGTASLETACAARSLRASDRATQLREITRAKRNRSAGAQAPVM  
WECRLGNPTYTGEPHRDVLGGFFVSEDDCDGGKNGKSIEMATDVARVMDLARP IFAD  
PSVVDLMEGNGYDLTGWKSGRLLTDKSGTSPASRAMLMPPTPSKRRSRRLDWNHPVVKLLV  
ALVSMTLATVLAFAFVSVGLHLPALSPGDIGDQDNHGHGHEDDGRHTFEGYARLAFDAV  
RAAVTGGPGDSVEA  
>comp8749\_c0\_seq1; 360 566 1915 LEN=2062; translated  
MATIRIDGSCGEGGGQIIRNASAFASILGKNIKIVNIRAGRKTPGLRPQHLVGLRLLAAA  
SGASLSQGNFVGSTEIVFLANSANAVSNDKREYVGDQTAGSICLLMQTVLPPFALFRGI  
VRNTNFSTRNIDENKEKSLQLQFVLKGGTDTDFAPSVDYFQHVFLPIFNNSFDLAPTESCE  
KSDKDGMTKTQIDLSVIRRGFFPRGGGEVHATIHRIPLKGFPLPPIRLTKRGEIVGITIR  
AFSAGNCPSTARALSSIAQATLSSTPSCREVPISIELFDESLSLPLMSIDRTEGNKSN  
GERRGTRRRHLSGGCIGILI AETNTGCLLAGSSIGSPKIPLEETSKLAAQQVIDAIEGG  
GCVDNFLQDQLILYMALAEGVSELVTSCLTLHTRTSIWLASLMLPSVRFQVTQLEASDDQ  
GERRRPDENENILNRNVAGTIPGGHLIRCW  
>comp8751\_c0\_seq1; 261 49 420 LEN=872; translated  
MSEKAFPLADADLTVALLDLVQQATNYKQTKKGANEATKTLNRGISELI IMAADAEP I E I  
LLHLPLLCEDKNVPYVFPVPSKVALGRACGVSRPVISCSITTNEASQLKSTIDGMKIKIEQ  
LLL  
>comp8752\_c0\_seq1; 408 56 1198 LEN=1675; translated  
MTHNLVVNYGLYRKMEVFRPRLVSPVEMTRYHSDEYVNFVKVITPDNMGEYSRQLQRFNV  
GEDCPVFDGLFDFCQLYTSGSMGGAARLNENAADIVINWAGGFHHGKRAEASGFCYINDC  
VLAILELLKKHERVLYIDIGIHHGDGVEEAFYKTNRMVMTCSFHKFGDFFPGTGDVDRDLGH  
GDGENYSINVPLKEGMDESYSVFRPIVVKIMEVFAPGAVVLQCGADSLSGDRLGCFNL  
SVRGHADCVRFVRSFGIPMLVLGGGGYTLRNVPWCWTYETAVLTGEDIKDELFPNDYWEY  
FGPNYKLHLPVSNMKNANTKESLEQTKGEVLEILSRIEPVPGTQIQTGQVDSQLNPRGMS  
VDRAGEASSNRKEHGSELAA  
>comp8752\_c0\_seq2; 419 89 1327 LEN=1804; translated  
MTDNRRVSYFYDAEYVNYHYGQGHLMKPHRIRMTHNLVVNYGLYRKMEVFRPRLVSPVEM  
TRYHSDEYVNFVKVITPDNMGEYSRQLQRFNVGEDCPVFDGLFDFCQLYTSGSMGGAARL  
NENAADIVINWAGGFHHGKRAEASGFCYINDCVLAILELLKKHERVLYIDIGIHHGDGVE  
EAFYKTNRMVMTCSFHKFGDFFPGTGDVDRDLGHGDGENYSINVPLKEGMDESYSVFRPI  
VVKIMEVFAPGAVVLQCGADSLSGDRLGCFNLSVRGHADCVRFVRSFGIPMLVLGGGGYT  
LRNVPRCWTYETAVLTGEDIKDELFPNDYWEYFGPNYKLHLPVSNMKNANTKESLEQTKG  
EVLEILSRIEPVPGTQIQTGQVDSQLNPRGMSVDRAGEASSNRKEHGSELAA  
>comp8754\_c0\_seq1; 283 908 1858 LEN=2731; translated  
MAMRLSAASNVDSEEVKRKNLEQLDKLRTRDRSSRKIAPSELKIVFEDDHIVCVNKPPGV  
LCVPSEEGIPTLAQTVFETISHQQGSLDRMVHRLGMDTSGLVVFAKTMESLREMNTLFR  
TRK I TRRYEALVCGHLANDTGTIDLPLMRDYVRPPFMRISTDEHQRIILLDDAIVGKLL  
LEAPKASRTEYEVIARETFLDTRLPVTRVLLTSVTGRTHQLNVHMAAIGHPIVGDRIYGV  
DGDAVPNGGLEPWHMENTGGNNQSVSNTGVASKTELEERSIGDKASNMVHAKSLSFQHPM  
QSPEDDPLHFECEAPF  
>comp8756\_c0\_seq1; 396 893 2293 LEN=2459; translated  
MKRRFKRPEEPRTPGADYRWNYHQPPSPRSPGPVPSHARSLPSSPMPSWAGPPPSPYV  
ERHGSFSHHHPTNHYPSPSPYSNHPEHERYRSHSFEYYHGPPGPDPLPPRHHSWSPY  
SSPRRPSDQYQQSHRYHHHHPRTPHHPHHPSPVPRRSSTSPPPHQVSSMSAPFSPRQH  
MYPQDESYSNNPPPEPGEPPSPRRGFRSSYETYTSPPQPYSPPYGEYGPAPRTWTPRP  
GSPGHHDYYYNPHQHGRGLAVPSLGEERRQAKQFSPSLHLAPRSNIQVIGEEETQPIPP

PRSCRDRFRPPTPNSRGYLRSKEDSNYYRCASVEEEKKTADIDKSAKSSIDMSNPSRKRE  
FFSWAEPVKTESRSSPDQEEIERNCIDARFKKEDQVESRASPGGLLQIKKDDQSEEAQA  
VDDIAMSPLPFDREDPVTLDDLDPEDILALPISPCGGPHDGDEQALS

>comp8756\_c0\_seq2; 441 363 2192 LEN=2358; translated  
MGISRSIVQAVRSLDPPGRFLDKDISISGLWHDIGHKKAVEKTSQALRDGAAMLRKQLSAD  
LGDPNFLNAVFNDVNNKTEKGGDLAKKNKDKATIKTNGKENNKEKSTGSPEKMKVIKAK  
NAQKGTGSSRVMSALAGATSKSKMKRRFKRPEEPRTPGADYRWNYHQPPSPRSPGPVPS  
HARSLPSSPMPSWGAGPPSPYVERHGSFSHHHPTNHHYPPSPYSNHPEHERYRSHSFE  
YYHGPPGPDPLPRRHSWSWSPYGSSPRRPSDQYQQSHHRYHHHPRTPHHPHHPHSPVPR  
RSSTSPPHQVSSMSAPFPSRQHMYPQDESYSNNPPPEPGEEPWSPRRGFRSSYETYTSP  
QPYSPPYGEYGERAPTWTTPRPGSPGHHDYYPHGHGDRGLAVPSLGEERRQAKQFSP  
SLHLAPRSNIQVIGEEETQPIPPRSCRDRFRPPTPNSRGYLRSKEDSNYYRCASVEEEK  
KTADIDKSAKSSIDMSNPSRKREFFSWAEPVKTESRSSPDQEEIERNCIDARFKKEDQVE  
SRASPGGLLQIKKDDQSEEAQAVDDIAMSPLPFDREDPVTLDDLDPEDILALPISPCGGP  
HDGDEQALS

>comp8756\_c0\_seq3; 372 1 2316 LEN=2482; translated  
XYDSSGCRTESSKKTNELEASEFSFVEQIDFYSSGTYKSFDMESSAATSSSRPIAVST  
EQSSGDQSSADNPLLLADEQKMIDIEKPHNDVLCGRGVTNRHPGNEFSRSLVGLNKEL  
YVSSTKRQKMGISRSIVQAVRSLDPPGRFLDKDISISGLWHDIGHKKAVEKTSQALRDGAA  
MLRKQLSADLGDPNFLNAVFNDVNNKTEKGGDLAKKNKDKATIKTNGKENNKEKSTGSP  
EKMKVIKEVQSSPNAHEFTLFGDRFLIHVCLCDLXMCYSNRQXNAQKGTGSSRVMSALAG  
ATSKSKMKRRFKRPEEPRTPGADYRWNYHQPPSPRSPGPVPSHARSLPSSPMPSWGAGP  
PPSPYVERHGSFSHHHPTNHHYPPSPYSNHPEHERYRSHSFEYYHGPPGPDPLPRRH  
SWSPYGSSPRRPSDQYQQSHHRYHHHPRTPHHPHHPHSPVPRRSSTSPPHQVSSMSAP  
FPSRQHMYPQDESYSNNPPPEPGEEPWSPRRGFRSSYETYTSPQPYSPPYGEYGERAP  
TWTTPRPGSPGHHDYYPHGHGDRGLAVPSLGEERRQAKQFSPSLHLAPRSNIQVIGEE  
TQPIPPRSCRDRFRPPTPNSRGYLRSKEDSNYYRCASVEEEKKTADIDKSAKSSIDMSN  
PSRKREFFSWAEPVKTESRSSPDQEEIERNCIDARFKKEDQVESRASPGGLLQIKKDDQ  
SEEAQAVDDIAMSPLPFDREDPVTLDDLDPEDILALPISPCGGPHDGDEQALS

>comp8756\_c0\_seq4; 510 1 2215 LEN=2381; translated  
XYDSSGCRTESSKKTNELEASEFSFVEQIDFYSSGTYKSFDMESSAATSSSRPIAVST  
EQSSGDQSSADNPLLLADEQKMIDIEKPHNDVLCGRGVTNRHPGNEFSRSLVGLNKEL  
YVSSTKRQKMGISRSIVQAVRSLDPPGRFLDKDISISGLWHDIGHKKAVEKTSQALRDGAA  
MLRKQLSADLGDPNFLNAVFNDVNNKTEKGGDLAKKNKDKATIKTNGKENNKEKSTGSP  
EKMKVIKAKNAQKGTGSSRVMSALAGATSKSKMKRRFKRPEEPRTPGADYRWNYHQPPS  
PRSPGPVPSHARSLPSSPMPSWGAGPPSPYVERHGSFSHHHPTNHHYPPSPYSNHPEH  
ERYRSHSFEYYHGPPGPDPLPRRHSWSWSPYGSSPRRPSDQYQQSHHRYHHHPRTPHHP  
HHPHSPVPRRSSTSPPHQVSSMSAPFPSRQHMYPQDESYSNNPPPEPGEEPWSPRRGFR  
SSYETYTSPQPYSPPYGEYGERAPTWTTPRPGSPGHHDYYPHGHGDRGLAVPSLGE  
RRQAKQFSPSLHLAPRSNIQVIGEEETQPIPPRSCRDRFRPPTPNSRGYLRSKEDSNYY  
RCASVEEEKKTADIDKSAKSSIDMSNPSRKREFFSWAEPVKTESRSSPDQEEIERNCIDA  
RFKKEDQVESRASPGGLLQIKKDDQSEEAQAVDDIAMSPLPFDREDPVTLDDLDPEDILA  
LPISPCGGPHDGDEQALS

>comp8758\_c0\_seq1; 601 191 1729 LEN=1833; translated  
MADSKTLFILSESAAGYALFEVVAFEEIGSLLEGSMDTVTDIKRFRALKLKAFLPFETA  
QQALENANAISEHAMTEALNDFLEMNLPKKSKEYSLGVIDPALATAISEGLGGISCRSDD  
TVREILRGCRMHLNFTVFKGLEGGAAEKAQLGLGHSYSRSKVKFNPARSDNMI IQSIALLD  
QMDKDLNTFAMRVREWYSWHFPELKEVVDNIMFARAAAAYIQDKSTICGGKSDESEKEDK  
MPGLIEILGDEDTAKAVQAAKTSMGMECSAIDMVNI INFTQRMVKLAEFRKNLSNYLTE  
KMGIVAPNLSALIGDTVAARLISKAGSLTNLAKAPASTVQIILGAEKALFRALKTKGNTPK  
YGLIYHSTFIGRADAKNKRISRILANKCSIATRIDSFSDEPNRLYGEKLRDQVEERLKF  
YETGAAPRRNIDVMQEVAKQLKVDGDSDEEMEEVKTTPSKDKKKKGGKRRKSMDGDSDEEM  
VTPKKSEKKAKKEKKSAAKKEKSEKRRKSMS

>comp8759\_c0\_seq1; 459 1 1808 LEN=1905; translated  
XFISTKKSILTSSLSMNFSSNMVFLKVFVSVLIQSVFSLNHGSFIGVRNNDTDALDGLG  
FGNIGTADFLVPDNLLEFFAPLPLPLPPTKKPSGKPTTRPSKRPTSPVVTPTSPPIPA  
GRFSPVATPTIRPVSTQLPVTAPVPEGRWPEQASGTLSPKPSRITANDERPIPPTFTD  
ARNNQNNQRSPPTFLPQTPPSANVPVPTNHPVSNLQRPIPTPTQVIVPVQPKIDTRIS  
SYTAEWGSTVNQCEHEVPNIFFVCHGGGIIIEINESKNAQCTKVSHDRAQCKQDEFQSDSS  
IEFTCSGIEKVLHMSTATFEKSFGTNCKNGGNAVKVVTLRRQCGDLVDVNQNCDRGMPWK

QEETAYCASPAICDKHGIAGSCDDLLEPVIMSNTNADMSCSRVVADQDMQNHLFDASSL  
ASITLVDWRVSGQSRGCLWESSPLLMRCQDGGILEFMENYPFCVQPDENVGECQSFAPF  
SAEREESVGI FVKCTGQ TENQLILTA EI PSESEMEVECDTRGTVIQSIMLSRGCGEYGTDG  
FTLLNHPSFCNGDEQIFTTDNNHSYCYVGDTCMFDEGCNHLQLAPLIANTRSNVAVKACIN  
VE

>comp8760\_c0\_seq1; 1171 162 4394 LEN=4470; translated  
MEKEMESEPAESASPSMPAAAARGSDADRMEVDDQRDGTKAEAEETAANPNPTQSTEETTA  
ATLATTSGGTEADPQSMESSSTSTDSPLTSPSLSLHDCLSLGEIELGLSNRCGNPSHGND  
GDPDRADADSYKRREQRAWSAEVRRLLPYLLRILSKTRPLASVQTFPASKSKQGTEENDE  
DGSDFVVEDEDIDRVDRLEDAAAIHSVSGGIDVVTNYLAPSVTKQISRLSPLTPSVAKEI  
NQSCPNDANNSGRRDSKSNKWIYDWWYTVKRRKRRET DVSQTKKRKLDGSPMVGNE  
NTDAEAGANKLGASSEDDETNVAMDASADETLSMRARPPLKRRDSILVAAEDSQESTVT  
KTLSELTRLVVASLDDSSNQYFETEGDDDPQQWRGASGGKRAPYMLSLNTDDILSEKAA  
SASTEDGIATDGSDLASTVVAIMHNAPPFKSRHVASALCRASVPRAGNVIDLGANCPAS  
VSSLLQGCIEAYSMAMKHHCTVGFADLFGSAHKNNVSVCTVVAANKSSATALARLSPTES  
VRVRNKLQSCGIMLDVQLKLAMETAARGASGCSIVPVACLLLEHLSFPAATTAADSET  
ATEITRKSANEPSEASEGGRSPGETGAEDCGNDDEVITSYARKCSKGSEPSLLLLYFVENP  
ALYRRTLDFFSRTMAVGASTSLTATGGRVITSK GKWCLLLRSFFMLLLVPLPSIDTSDLG  
VAYENAIKSFVILVKSFDCTKEDKDNTGQKRVKEGDI DLSLCLASSSGVLLLLSKYLASKP  
EQGSAEGGYETRLPIDPLVETVLKSI EKSLERSHLTRPRFRSHMQRDDVWGSFKLILYPL  
ELTTRIEKTYATNAYRCTEVGIRLFWKLAEP LLDVSTIEEKRSVAFDVSSLLNVLRMEPN  
STDDSLVEETEKL LDYLLKGVKEEEAE SLMGNI ECAQFI AKATKFLSKPETLEV PKVLPI  
HLDMAWSKIVPGRASPSKTI DVMCSYLFKFLYAFEF LDTSP LSPFVFDPRSM PKETL  
SMIQTLSKPTRDYLLSEINALILKHCEP FALHRFEQRLDLG PSPA F DAMDRNSLLEALS  
NCIREGLHQGRTEVCKGTIEQLFLQAKSRVCDSEVLC AVTNSFLSSPHAPLPTYSYKTL C  
RDP IVCLKFP LSVWQCRSLRRI ALSVLENLLSNN SITSETSKSSGTALELLVARDAI IV  
RCLLAVLHSGDSKNLAPCSMTTSFIRWLIQSRSGLVALLVKQGLREQDL D WLVENVPETM  
NDSQYLLQIFSERNRLTAAERLVAADTIVRIAVVHGQANEADSSQLILTAVS QLVD SFHV  
ILGPVGLLPVDALFNAESTTSITQISQKAAFRILKALTKIRGARCQIRRD CNMVLQKLVG  
LCKAELQGTVAGRRKQFLKELYDAAVKA EK

>comp8761\_c0\_seq1; 295 236 1090 LEN=1335; translated  
MKLRAVGLCGVDDSVHPKQLVAYAHLYPFVEFGVLF RPDKEGQPRYPTGEWVRRLAEASE  
SLGGTMKLA AHL CGTRVDEV LKGD DAFVARLPRWGFGRVQINATAVNGVDTSVFESGETG  
CDFLSGFLSVAEKHPGLEF ILQKNDETEPLWGGVLA AFEDNKGAF PANVSMLLDESKGTG  
VLPKEGWPP I PPTTPCRVGYAGGIGPHNVGAVVDQIRAANEGSALALSFAEGVWIDMESS  
LRSNKDGRDVF DLDKCFRVMLEVCDEARNELLTSPSPWNAGL G

>comp8762\_c0\_seq1; 330 82 1194 LEN=1319; translated  
MNANTIPLQEVLPWSPDIARNILVCD SIETDGT FVLSTMVAHLFSSPSKMLSSFGPGPNR  
VGRSPSLSRKVLWLSGNSSTEREVASALKKIGCEAAAAYLRNNTNNNNNRNDNQSGNGF  
AIRSLAVEISDLILGKSESKSVSNNEFD AESYLKNTYKDIKAWINDGNDKNREQSGEV  
AESHVSWIIIDDVTALASIVGDSL VYCFVDSLISLVNRKQTS PARQCGLIIRCSGDL DQL  
LHKIKGNEGQDHSGVWGAGGLA HKQATSDAIHRKYVPWERTLEESVDAI V DVLPLLSGFS  
REAHGRLIFSETPNGRGWKNVQSSGNKDSSAHASGFRKSQTNSTSTNWNKLI FNYSIQDS  
GAHAIRLRAG

>comp8763\_c0\_seq1; 995 1 2312 LEN=2534; translated  
XRPLSNHDWLVLVFPGERGINLSGGQKARVSLARAMYSRKTRLLLMDDPLSAVD SHVGEH  
LFSNAIAGDIGKGRTRILVTHHVHLSRCDSVIVMDSGT IKHQGAYQD LLDQGVDFAGAV  
DVSKIKKSEEEGGDATDESNSKIDKKEKSSRQEDEAAQK KAGANLVRQEEREKGDVAID  
AYVQYMKAGGYCVAVLTIFIQGVGRAFEILSTFWLALWADRMQKAEELGQPFTKQETSYY  
VGIFGLLGFLSILGLGFRGIFLAMHRLKASQKLHDGLTDAVLRAPVSFFDVTP IGRV LNR  
FAADMDKIDLELTQTVS QGINTIFQVLGALGAILVATKGT FIVPLIPLSFLYYLVQK WFR  
KTSTELQRVTNIANSPIFADFSQTL SGTSSIRAFVQKGF FNKCKQSFDMNMSY I LVQL  
ASSWLALRLDVMGGIIGMFIGAIAVGTLETNFMPAGWLG LALSYSIEVTSYLKYGVQMV A  
RLEADMSSVERILY YTDNIEPEAPDVIPEKDPREGDWPLKGEIELSHASMR YRDGPVLVK  
DLSFTVKGG EKIGVCGRTGSGKSSLMIALFRIS EIEKDGSISVDGVNIGEIGTAALRMNI  
SII PQDPVMFSNTIRYNLDPFATKSDEELWDVLK KVMGEAIAQLPKGLDDMVAEGGENF  
SQGQRQLLCIARSLLRKPKILVMDEATASIDNETDANI QRMIRENFKDATVLTIAHRLNT  
IMSDRVLVLD DGHIAELDTPENLLAKESGHFKAMVEKSREAHSDVIEDL

>comp8763\_c0\_seq2; 2069 451 4953 LEN=5175; translated  
MCKETQNVVEVKDDESAPGKNITMENENEIEITNDPAT TDSANDKDK EK SQPEHFPWWRG

GGKIAYSKDLGVLEKSLEDRANCFELWWMSSYLNPLLSLGSRKVLDASDVGVPSQDRAE  
RAYMGAKKAWDEQVEACRIKNEPLLQKKKEQEALLQQQKESGEENPQNAPKPIITLKEPSI  
TMSLIYFSGIGRFVMAI IYQILSSLLGFVPVVLILNDLVRYFESYGYNQLVAESGAEDAAL  
VSYQPLFNPWLQVVGLGI IPLVVSLLQTRHNAIMCHCGVVFVRTAVSTMLYRKALTVSAAG  
RAMTSTGQVVNMMSNDTMQLQRFLTFAGFTAIAPIQII IISLALIYKQVGSAMWVGVAYMI  
FLMPINMWVFSVVGKMRKVLKHSRSVKMMNEILTGIRI IKFYAWERPFGKEVERVRAK  
EMDALTKMSYVAVGFSI ILLSTPIVQPIFVFLTYVNIQDEPLTAATAFTTVALFNLMR  
PFAFMPMGLLQFIQSRI SLKRLERYLALPELNPYVVDPPSKDDAEELAKSITGEVLSL  
DMDQSGSITILDGSGVWVNDGPAIKPVQEEQSRKKEKAERAQRASKRASRSRKS DAT  
AESSVDAIQSNLESMSASSATTDES GAEKAPVIALQNVTTYIRPGSLVAVVGSVGS GKSS  
LLSAILGEMESIGDSKVHVPRT EEEKMDMGFASYCTQSPWVNDTLQGNILFGREYDETR  
YQEI LHACALLDDIAVLPAGDQTEIGERGINLSGGQKARVSLARAMYSRKTRLLMDDPL  
SAVDSHVGEHLFSNAIAGDIGGRTRILVTHHVHLSRCD SVIVMDSGTIKHQGAYQDLL  
DQGVDFAVAVDVKIKKSEEEGGDATDESNSKIDKKEKSSRQEDEAAQKKAGANLVRQE  
EREKGDVAIDAYVQYMKAGGYCVAVLTIFIQGVGRAFEILSTFWLALWADRMQKAEELGQ  
PFTKQETSYYVGIFGLLGFSLILGLGFRGIFLAMHRLKASQKLHDGLTDAVLRAPV SFFD  
VTPIGRVLNRF AADMKDIDLELTQTVSQGIN TIFQVLGALGAILVATKGT FIVPLIPLSF  
LYYLVQKWFRTSTELQRVTNIANSPIFADFSQTL SGTSSIRAFGVQKGF FNCKQSF DN  
MNSSYILVQLASSWLALRLDVMGGIIGMFIGAIAVGTLE TNFMPAGWLGLALSYSIEVTS  
YLKYGVQMVARLEADMSSVERILYYTDNIEPEAPDVIPEKDPREGDWPLKGEI ELSHASM  
RYRDGPLVLKDL SFTVKGGEKIGVCGRTGSGKSSLMIALFRISEIEKDGSI SVDGVNIGE  
IGTAALRMNISIIPQDPVMFSNTIRYNLDPFATKSDEELWDVLK KVEGAEIAQLPKGLD  
DMVAEGGENFSQQRQLLCIARSLLRKP KILVMDEATASIDNETDANI QRMIRENFKDAT  
VLTIAHRLNTIMSDRVLVLDGHI AELDTPENLLAKESGHFKAMVEKSREAHSDVIEDL  
>comp8765\_c0\_seq1; 795 462 3512 LEN=3564; translated  
MLLSQMP I PVRVELFLPNRTNKKKKKPPNGAVRANKDDRGLVDRIRLFE EHGITSFNIVN  
KDKTDKDSVVEWIE TIRNASLKASNSTDVHVCSQFSL LHNRPKTRNLRDQRKEH LLET  
KKGYFGAADEILLVSGSGTKPLSSSPCSETPWNTADGIDAVNDYYENRGDNDVCQTTFPH  
ISVSYNPLYSDPHLQDQENSRLERQLATGCLSKIYLPFGTDLRLRTGLEFCADAIHTAK  
RKHQRAGDVSLVGSFVLPTRWMAHQRFRRSSQKRVM LDRPFFKSDENQELTAIVVQVI  
RMYEKHGFGE LLEASPSANTLSCTKDDL SFLFDILKRV SASRDDGLGPNRCNDSERSSS  
MGMNFRNNSNGVDFSSNSKGTKGAESSQSPEILK KSLPSSLRQDWRSRSSSPCILLFG  
SHDVR LQDNKALEAAARSHKLLPVFLWTK EERDGDQWGPCRNTAVAVCLEEALKSLQDS  
LQSFGLPLIYCNCCGSPRHDSREEQLHQQENSHGIRELKHVVEAVGATAVYWNKDPTPE  
GRDRDAYRRRILEQHRLPRRIDVFEAQSSLLYDVSTIELPTGFRGGHFGTLM PFLNHCRK  
QFGVPSRPTPYFETFRI LEESSPEAFDTIFDMHGSTMSTHLRDLKI IDTFKLSHKWDQP  
IRARFPMSEKIAQSTVDSFVRNGMKRYETDRSRADISDATSR LSPHLRIGTMSPNQLYWR  
IEDSELPYKDTKTLGRRLIWRDLAYFQLHCFPSM KKKCIRSHYEAM EWVETIEEDRRFRA  
WKTGTTGYPIVDAAMRELYATGWMTQSIRMVAASFLTEYLRINWTKGA EWFHHTLV DADS  
AINAMMWQNAGRSGIDQWNFVLSPTTASQDPTGAYTRRWVPELAELPTNRLVHCPWEATE  
DLLEEHGVVLGETYPHRIVVDLKKERKKSVENTLAVRRAAQDYNTDRGYDMIDL PNGQKS  
IVFTKKEYRIDRNGNVLP SNKSNGNRRASNRMGNSRTGVVRHKKSSRNPKKAKTST  
>comp8765\_c1\_seq1; 111 1 112 LEN=978; translated  
XXXXXXXXXDDPIV GIEIHNKNRALPYAERVSSIFA I K  
>comp8766\_c0\_seq1; 249 356 1180 LEN=1214; translated  
MATTKSSEIEDQGWKNIHVFYGDNAHMF DATGLSTPYFRANRWF SQFRQDEIVSKLLHGK  
RGGYFIDLAANDPVRI SNTYALETYFGWNGLCMEPNPIYWTGLSYRKCHV VAGIVGNKTM  
EEVSFRFPKAKAPKGGILGNAFDNKSDQWNEGHPRYTVS LLEVFKKFDVPTIIDYISLDI  
EGAEDLVMA SFPSRYR FNIMTVERPSAVLSTILTDNGYVLLKTIKKN TETLWVHNSILA  
AVDKAALEIDSQNYKYND SKGHARITPEGSNLAS  
>comp8768\_c0\_seq2; 246 95 829 LEN=1048; translated  
MALAFLPVPSKVPGYRMPFSLFGSIAERVLET PKWPEEWPYSPADFSRQDESNDGIFYDS  
PRLCYHIDDAAVSALTQYYSENFKEGEDVLDICSSWVSHYPKDFKGGKV VGLGMNEYELS  
QNPQLTDFVVKDLNEEAKLPFEDASFDKVTIVVSVDYLNKPK EIFEEIGRVL RPGGECLI  
SMSNRCFP TKA FRIWLQ TNDLEHIFITGSFFHYSGLFDP PSCSDISP NPGRSDPLYVVKG  
TRKA  
>comp8769\_c0\_seq1; 349 127 1225 LEN=1225; translated  
MVKMCLFYPNPSGHARS DPILSDTCASDH IHTFYGPQN FHP TTSNQDLRNTAPNFSSSPW  
VENQSLYWHPSIYEETQGEDGQKIYTRVSNLDTSPYRWDNSVLPRTQAFPPDFRMIAFS  
DQEGADREGDIGGSL LVECCNFLSEDHEEEECTTTMNTLEFP ELKCDFLGIGFAMPTCWD



ESKGVGIEDPTGHMTYTTNGAVNGPCPEPFTKRLPQIQLFVRINDYRGDIKKYTLNSNSN  
VFHVDFMNGWSRGLGRILEGCDPTGDEEGYNPPCDCTEQFLTPSAEPAKQACDQVDRQH  
ILDEETNIVVGALPRGSCSITPEILKTWDLDPFDTSCQSTENEDEDDNENEDQNEQDE  
NEDENEX

>comp8770\_c0\_seq1; 606 255 1760 LEN=2780; translated  
MMRGVERKTANRKIEAEREEVVEVKVAHHVEETKLPPTSEPADPIAPQSIGYGSAND  
VDLNYSDSYDVFDPKTPENGTSAGYDYQGFNSNINNTTSLMGSNSTNGGNIPEYDYSL  
SDMVWTFPCPVFLLIACSLVQRRNVPSSSEYHRGAMFRRQAERVWAIQAACAERVAIPVDT  
RKHQIREGLRTRMRVSKCPETGHCILSPEETEEPEEASEEHNEDESTTTMADAESTNSL  
DAPDASKEIEAPSELPTTNAASIPSTVSSGTPSKKQNSGKKCPESPGTAERRPLLSNS  
EDSEDSTNYSVASSSIHAAQEPPAQQQPPSSSLCYDFEDEDVCPICLDNFVGDMMV  
WSRNAGKHSCSHVFHEECLLQWLLEQRENECPTCRACFIEMDDKTEENENDESTAPSTGG  
EASQPGANNDGDIIEGIVSGNETNLDNESDNENDEKMASSDGENSEDSSSELEEDP  
EEGNCTFMIVKGSVQRVLLRL

>comp8771\_c0\_seq1; 435 858 2450 LEN=2608; translated  
MIPPQYENVSWTIFTADGQVASPTTAQGNSTSSVETGGYDDGNLDDMVMDEMFETGDGD  
EIQHDDDDSDGEEYRASIRYKACDDPITEEDQMDLQNVIAAGEVEMIDDVGLAQSLGA  
SHLGRSIMLQEETIGINASEQAQQQTIPQGGQLGSAAMTGAGSGGIGSAMKHATSQQIGG  
SFNQVKPESPPRLDAFKMIKVIKGSFGKVFVKEIKTSQMFALKVLKKNIIKRNQVEH  
TKTERSVLGYVKHPFIVGMNMAFQSRDKLFFVLDYACAGGELFFHLGKLGKFPARSFYA  
AEIILAISYVHSLDIYRDLKPENVLDDGSGHIRLTDGLSKEGISSSSSGANSFCGTPE  
YLAPEILNRQGHGRGVDWWSLGLLLEMLTGLPPFYCQDRERLFEKIRKSELHYPASLSS  
TSKHLRGLLTKDPTRRLGSGPKDAEIEKPHPFASIDWERLQRGQIAPPWAPTITGSQD  
TSQFDAEFTSMPIFSPRSMRSTLGTTPLDGNPFEGFTFQETILEGPGTRC

>comp8771\_c0\_seq2; 526 220 2190 LEN=2348; translated  
MSPQNVQQPTGEASIDFSVIAASAPVEDTGGLVHAVTVIQPSQTWTVIRGQDDFVAVAQ  
NLAVQIMDLPALPDVAKHFQASGCQNDLHSIVTVRTHLQHWLETILMYPGARDSPAISNF  
LTYAPNMIPPQYENVSWTIFTADGQVASPTTAQGNSTSSVETGGYDDGNLDDMVMDEMF  
ETGDGDEIQHDDDDSDGEEYRASIRYKACDDPITEEDQMDLQNVIAAGEVEMIDDVGL  
AQSLGASHLGRSIMLQEETIGINASEQAQQQTIPQGGQLGSAAMTGAGSGGIGSAMKHAT  
SQQIGGSFNQVKPESPPRLDAFKMIKVIKGSFGKVFVKEIKTSQMFALKVLKKNIIK  
RNQVEHTKTERSVLGYVKHPFIVGMNMAFQSRDKLFFVLDYACAGGELFFHLGKLGKFP  
ARSFYAAEIIILAISYVHSLDIYRDLKPENVLDDGSGHIRLTDGLSKEGISSSSSGANS  
FCGTPEYLAPEILNRQGHGRGVDWWSLGLLLEMLTGLPPFYCQDRERLFEKIRKSELH  
PASLSSSTSKHLRGLLTKDPTRRLGSGPKDAEIEKPHPFASIDWERLQRGQIAPPWAPT  
ITGSQDTSQFDAEFTSMPIFSPRSMRSTLGTTPLDGNPFEGFTFQETILEGPGTRC

>comp8772\_c0\_seq1; 1053 362 4030 LEN=4061; translated  
MVSNTAPLRRRRSEGGFASGRGGGSADAAANAPGMASASVNSDRGDPTLSSSINNSVNK  
LNASSSGGNIDNDPASTSGKPCHAARLTLCCQNAIRMGARTQLALCPPGRVVKELKAA  
LRSKARSNSNNKRGNSNSTSTRRSSSGQFFVTPDVGGYFGVDMVGSEILEKVYPTQGD  
YLVNSNTFDGESDEEASSGDDDDLIDRQLVLDVDFCSQLQHNSLEEEKKYANLVEPLFTP  
LGDESVMTNSVNGPMSGGAGSLGKLPFNRRKIRYFDSITAQDTMTVTRAYLNKEMQRSKR  
EVLLLAKHLKRSQRLQRRQLKEKRGDIPSSADDLDAPGDDHQLAIASVSKFEQNMTPSL  
AAALVVESELMNKLESIEGMAKCYDGIWAAGIAILEINNDPSPSSSSNSGAGHKRAQI  
MGALTPLLISSLEQPSGDVILSLAKLRRMCGTARYQRRFVQRVAPSLIRPPRGAMWCLKH  
QNDMEPILAAAEMIFDSASDIFSKAWYDRGQLLLADTKRAETLNTVAMQLKNLSSHPDDH  
LTLDLGHGNSWTRSNKYKSGKDTSGGAKEPLAEWEVIEVDRNIRISISNIVSMDWSRVV  
SKEAALSSASFHRSRPTGKRPSVLLQTTTTSGDISPKNHSPAPMSPLRPSPKTQHSPLVFG  
GEMNDVGLHSSNHTANLDAQRETKSPIPSGTSNQTIPLSPPHPNKETEVRVPSDQFAS  
SNIFTPSEQTPPRSPTPKQKDGPSDIASGTVHASVPSLPMSPKRKNVSSSTSSGKESITK  
YSDNITSSSPVHPQFGGERERAPLSPPPVGVNNTSDASSHRPMSSSSSVTSGMTHISGV  
SGSSSQPSHYRMLTSTAERKRTVAACRALRAQITRFEDAFIQLHGRPPKGAERAPLAT  
TYAQYREWKRIRADAACRIQALIRGAI TRWMLLRSNPRMSKVVVKRAGRRGFALQDDT  
ARAQTSVLDEL SIPAEIGDRRPRTPALPNRGNPGLDGTNHTLAPQWGDQIYRPATGNSDFV  
PSSPIPRPASSPVSSSHSRTSSDLASMSLAELQAQKRELKQQLKQYDMSFARRHGRMPVK  
AEKEPIRHLYERYNSLKALISEMEQEGRNSSSPTASPVSSSPIATQRAIVSPVGSDES  
TGRNNISRRSQTSSAASQDLATLKAKEGRLHQMLRSFERDFFREHQRVQVSFADIRPV  
AAQYRRYKEIKRAIAALQRGER

>comp8773\_c0\_seq1; 1367 62 2563 LEN=3206; translated  
MASDASAVKNMMARSQTFMLTKYPKLKKAINARRNLARCFRELDYFYSQIPVTCDRLED

LHNAEWTDTWSSSLREVSREHVELEIFLVEAEAGMKKRIEELKESSGRPLEDDSYHPQG  
RRDYLRQSNHNGMGSSMGATSSTLGRIQNYEEVDNFLHEHVKNVWELGDEIRMRIMSGIG  
GAFELATHNAAGLVALVEAVEIYEAANEYNTVHGEEAGADGNAAANTGDNKNLRF'DMR  
ASALKQMYQDFELRSLEVFREVHEVAQARGVEDDEEEATEYFNAILRAANELTADIAFVQ  
NQMSPCFPNWALEMLWSTCVSHVCSKQILDQIGGTEGHKLPDLT'VTQLLDLVAVIESFR  
STI'EE'TFPNI'GEHI'SKKTYFNKR'PDLLQEDNRQIDMDVAKDSLAWANNMLWEVHDL'SKDE  
FLFRTKEQTHEWLDNVYDADHTKNQ'TSEGRLT'TSLCEDVYALAGVQLRTIRERL'TRRSEA  
LVQAVGVI'FKNLYEKQIACRNNFL'LD'FETCCAASND'FIRMS'ENCEE'ILAEMVAECNLTDE  
AQNQLDEQSGVLLGLYSGDAVFAAQKVHIYVFEPIEESI'EEELF'GEEWLNELTANELT'LT  
LVKTLEDFMGDLELFLDEL'VMGKTL'DALVTATVIFYLKYL'VKKASGHKSNKDPLWSN'VPR  
SLERIRGDIDTMKGYFEDLQDVYPAL'KRAVPEQFEI'LETVHELM'TIASGASQSSDRDFII  
LLQKRIRNIQLTKLLVGD'LWHIMNPSVEKDMYEMMN'VME'TELNAVAPDDAEAFDVALARQ  
TVPGLR'LDVELARLCDESSRN'RP'GYNR'ATAEQGQIMLNKWRK'TWQNLVEVEEA  
>comp8773\_c0\_seq2; 341 1 1325 LEN=1968; translated  
CGFVLFVSVMFCSNRDCEXLGDSALPGTVVHSLSPFRSIFCFFVYSADHTKNQ'TSEGRLT  
TSLCEDVYALAGVQLRTIRERL'TRRSEALVQAVGVI'FKNLYEKQIACRNNFL'LD'FETCCA  
ASND'FIRMS'ENCEE'ILAEMVAECNLTDEAQNQLDEQSGVLLGLYSGDAVFAAQKVHIYVFE  
PIEESI'EEELF'GEEWLNELTANELT'LT'LVKTLEDFMGDLELFLDEL'VMGKTL'DALVTAT  
VIFYLKYL'VKKASGHKSNKDPLWSN'VPRSLERIRGDIDTMKGYFEDLQDVYPAL'KRAVPE  
QFEI'LETVHELM'TIASGASQSSDRDFIILLQKRIRNIQLTKLLVGD'LWHIMNPSVEKDMY  
EMMN'VME'TELNAVAPDDAEAFDVALARQ'TVPGLR'LDVELARLCDESSRN'RP'GYNR'ATAEQ  
GQIMLNKWRK'TWQNLVEVEEA  
>comp8775\_c0\_seq1; 366 122 1201 LEN=1568; translated  
MPALNNGGFRQQGFNHHQSSWFLGAPVTKLLCMLWAAGSFWVINSNEEDFRSSRDYGD'SN  
TSIWGSVVFNGSSNWV'FQSPTEVIVGLSFLAHYLR'LEQELSSRRLIAWL'VFLEVA'YV'FV  
RIVAIATLDDEL'SGVVLGASSSSASAKGPYL'VAGGLLYWYKAFV'PRLYPRFMTSTTL'GIA  
CSEKTFPYLW'GAYVVYMRGTASLLVCTIGGLV'SALYFFLLFASTNGRSGTSS'FLDVPDA  
IVNLLP'WESIGSFFFVDPSPKIYAPFMTMRALMNMNRNGGGGGR'PRRQRAVPAVAQPQR  
QQQQQ'VAEPP'IAVAE'VAPSPEAVAQLTSMGFEEARVKEALQASNNNLEQAANILLMTS  
>comp8776\_c0\_seq1; 397 316 1776 LEN=2034; translated  
MASLNRERREDPSGESAPLLQQPSQQTSHAGLPPVGYPEHSGMHPPPPPYDSNANGGNTM  
APNGSSYFVPPPGHYLPTQQQQQSP'IIHSPNQPSQQMVGPGGMAPPYYPFP'PQQSGGG  
PPQQQHPQYQYPPHLLYPVQQQRQ'NQLLRAGTPSSSAPNHTTTESGGLPPLNDIFNKEA  
SPTGYGSLSTSPKIYDVP'IHRLPPSGRAQQPTSGRTN'NANESSPSSV'PKGRNHRRVHSD  
NPLLRK'NRMHRRVNSGEFLANGHNR'SRTL'SGGNPLGRSRSHRRSGSSSSYHSMGGGSYGG  
ASMADSSMVSMRSNIAKSSMFGGIDQEGR'PLL'YFPYEAIRMVAIPNKETKERATRSKYSS  
LDSSSDEDTAEENYPLTI'GHLYADNPVNMTEYEEYHRVSD'DLEQGVTPQWESLDAHP  
LKS'KKAEGKGFDPNSPEP'LLPPTNYVLAVSDDIYRRMFSEVSSAQTMPCGLFFCGHHED  
VDYPSVW  
>comp8778\_c0\_seq1; 180 1 956 LEN=1048; translated  
XGPRPAMHWTMKVFPNQYECLVLI'ALSLLLSSVSSSSAPRRSGSKDFLTP'IPRWQESWT  
ASQAHGTAMVTSVKDCLVFLRSPSTNVYKHTYFVTE'TTELHGLRLERIERDNQY'ESMQY  
APSWFPIGSHTVVAMTGLALDVEHVCKVLQKIADDDHFIYETSMT'THTMTQRMASVLQNE  
CLRKGSRPF'GVQCLIIGCDDIDQEDGALCIYSIDPTGNWQ'NWGKGTVIGKFAPDARKILA  
QKLG'TSSITEVEDAIECLLGSWSETSKKLGMINPTDKDDYEV'LILQKDP'RNALKSRLFRV  
PDIDIERIKERLESSSST  
>comp8779\_c0\_seq1; 237 152 1261 LEN=1782; translated  
MKLFRSYKGRKTEEDDPVQATIGDIDDES'NYPYEDEVKAAAEMESILGNAVSI'TERNHGS  
LLSLRSRTFD'LSGSQEELSFSDGQLQENDSHSYVSRSSSLQSAASVTT'FVKVDRGDPATL  
TRKFWEAMLAGEQNHGVPDDVEFANDPSASLKKVRSWSKLRQEIKGEERSL'RAT'RTIEG  
KENTALSRMSMGRKGLSSLKKNLKESSRCISKSQKEVSRSLASKMQYR'GEDQDPP'IRT  
RCAKYDVEVSLQEQQSFWNRKSRPREEFRSTRSSRVL'KSKRRQDDGADCNRRNGSGEFA  
NDSCGTPV'TAGATDDLSTDVHEIKYE'VTDQNP'NVVVVPTADVLFESLEVICCHQ'TD'TLDR  
ITAALPPHI  
>comp8780\_c0\_seq1; 282 381 1046 LEN=1786; translated  
MTGNCLGWLAYAYYSHDQFV'LASNIPGILISFWLNTGASKLQYYAQVEETNEADNAS'ENG  
TTTWA'VFTSQDKLLGLVLSFWAAVLVGVGWLEIANGREKEIVGIFVNINLLFFYGAPLQ'T  
IKIVIDEKCSDSIHNL'TMLL'NCTNAGFWGAYGIAMDNIVIYGPNGIGLFLGFSQVILCCI  
FPKSSDRTPGGVDHAPLLDASEDDSN'TDEAIAVVPVSQVI  
>comp8780\_c0\_seq2; 282 220 885 LEN=1670; translated

MTGNCLGWLAYAYYSHDQFVLASNIPGILISFWLNTGASKLQYYAQVEETNEADNASENG  
TTTWAVFTSQDKLLLGVLFWAAVLVGVGWLEIANGREKEIVGIFVNINLLFFYGAPLQT  
IKIVIDEKSDSIHNLTMLLNCTNAGFWGAYGIAMDNIVIYGPNGIGLFLGFSQVILCCI  
FPKSSDRTPGGVDHAPLLDASEDDSNTEAIAVVPVSQVI  
>comp8780\_c0\_seq3; 282 220 885 LEN=1625; translated  
MTGNCLGWLAYAYYSHDQFVLASNIPGILISFWLNTGASKLQYYAQVEETNEADNASENG  
TTTWAVFTSQDKLLLGVLFWAAVLVGVGWLEIANGREKEIVGIFVNINLLFFYGAPLQT  
IKIVIDEKSDSIHNLTMLLNCTNAGFWGAYGIAMDNIVIYGPNGIGLFLGFSQVILCCI  
FPKSSDRTPGGVDHAPLLDASEDDSNTEAIAVVPVSQVI  
>comp8780\_c0\_seq4; 282 381 1046 LEN=1831; translated  
MTGNCLGWLAYAYYSHDQFVLASNIPGILISFWLNTGASKLQYYAQVEETNEADNASENG  
TTTWAVFTSQDKLLLGVLFWAAVLVGVGWLEIANGREKEIVGIFVNINLLFFYGAPLQT  
IKIVIDEKSDSIHNLTMLLNCTNAGFWGAYGIAMDNIVIYGPNGIGLFLGFSQVILCCI  
FPKSSDRTPGGVDHAPLLDASEDDSNTEAIAVVPVSQVI  
>comp8780\_c0\_seq5; 148 1 631 LEN=631; minus strand; translated  
XDRPLPQSSSRVYRKPPPHRKVGNARVSVTDLGSRCTLIPGQQLYGAMIPRPEHEEEIH  
KHQRILAEKRMKSVKDFLRRLNEVEGLSEYETKQLKMDIDTATPMAIGYEVVPPFEECES  
VSSDTESEGSTNKSAALCSLRNFSIKLMSDRLGYVDCREARDLILRSDGVTTYCISENC  
EEEDEGMEVIGTGRFQSFQDYGDEMRSIDSK  
>comp8781\_c0\_seq1; 145 1 531 LEN=636; translated  
QEGFEESECSWKHPSFDEIGCTYEYDPVVCNGAFEFDNMCVATQQEGFRESDCSPKYSEF  
VSCTYEYDPVICNGIFQFANICIAEQEGFKKSECYVPRGCSNEYEPVICDNFYEFDNMC  
FATQKNGFFEHECAPKECKDGNPVICNGYEYNDLCIAKQHHPKHECIPMHPNF  
>comp8784\_c0\_seq2; 278 374 1453 LEN=1918; minus strand; translated  
MPSSWPQPAVLENLLQPPSKAAAAEGESGAKQNGSKSSTSTDDAPVYDHRVLAALYKFKVSP  
RMPKESLPALKTELDALCRKHSARGTLLIAEEGINGTICYPFREQTDERVRDDGDDGDE  
LLSLLQEKFGGTLRIRRSVADRPV FARLKI KIKTEIVTMHWQGDKPQCGNSDSDARDSTT  
ASCLGNDANDGGNGANANTACSMPTSSCAPCRPTERVGEYVRPRDWNKLLLDPETLVI  
DTRNTYEIDVGTFRNALRVLAFGTGTGGIRCEKATNAAMQLVPNDVPVYHLQGGILAYLD  
DVPEAESLFDGDCYVFXPAGGGDLPEPTEHHFSAEMPRLPAPAVERGPGAGGLHPRGLL  
>comp8784\_c0\_seq3; 291 374 1475 LEN=1940; minus strand; translated  
MPSSWPQPAVLENLLQPPSKAAAAEGESGAKQNGSKSSTSTDDAPVYDHRVLAALYKFKVSP  
RMPKESLPALKTELDALCRKHSARGTLLIAEEGINGTICYPFREQTDERVRDDGDDGDE  
LLSLLQEKFGGTLRIRRSVADRPV FARLKI KIKTEIVTMHWQGDKPQCGNSDSDARDSTT  
ASCLGNDANDGGNGANANTACSMPTSSCAPCRPTERVGEYVRPRDWNKLLLDPETLVI  
DTRNTYEIDVGTFRNAVNPHTQSSSCPCALVQAPGGSGXEKATNAAMQLVPNDVPVYHLQ  
GGILAYLDDVPEAESLFDGDCYVFXPAGGGDLPEPTEHHFSAEMPRLPAPAVERGPGAGG  
LHPRGLL  
>comp8785\_c0\_seq1; 205 1 733 LEN=820; translated  
XNNNNNNNDTLTGMGETLCDIDYCREIFEETICVERTEQKSTLASVPLWLQVLLLMILLS  
FSALFSGTLGLMSLDITGLEIVMAGDDPAAAKYAKEYIPLRKRGNLLCTLLLGNTAVN  
SLMSIFSAEIFNGTIGFVTSTFLILIFGEIIPQAFCSRYALRIGSFVAVPVVKVIRALLFV  
LAYPLAKILDWTLGRELATTYSGAEMIELLNHVHVKENIIDQEEAKAMQGALTVSASWGF  
LKLXW  
>comp8785\_c0\_seq2; 497 1 2031 LEN=2117; translated  
XNNNNNNNDTLTGMGETLCDIDYCREIFEETICVERTEQKSTLASVPLWLQVLLLMILLS  
FSALFSGTLGLMSLDITGLEIVMAGDDPAAAKYAKEYIPLRKRGNLLCTLLLGNTAVN  
SLMSIFSAEIFNGTIGFVTSTFLILIFGEIIPQAFCSRYALRIGSFVAVPVVKVIRALLFV  
LAYPLAKILDWTLGRELATTYSGAEMIELLNHVHVKENIIDQEEAKAMQALTYKNIHVS  
DAMTAMEQTFMLEVDEKLSFETIGKIFKTGYSRIPVYEVIRNNVIGLLFVKDLIFLDPEDD  
VSVRSFIQIFGRNVHNVPPDDTLGDVLAELKKGKSHLXYVLLSATKAFNAFLILSPSSDQ  
PAAXPILLSTAVVRDVNNENESLDPVYEVKGIITLEDIVERIIGDSIVDETDAYADSDQR  
IKVERGDAFEWARLRLDITKIVDEMLSASEISAVTAHLKTNHAKVFNSLSESQTLVSLVSG  
TPVTTFTPTATHDLKELPNELLYEKSVPSTFTLILSGRITIFVGSNFERSDLSWTVLGS  
SGALIDSWDIIPDYSAFVSDGPCRCIQIRRAAFIEASDASNERRVAENRIAPALSATSSN  
DAEARSTSSNGVARNRRKVV LARLFHSTNSLVVDKDKDEDEDGNGDTKPRAFLPRAQSS  
SVVQFENRNVI PNGTKK  
>comp8785\_c0\_seq3; 174 1 578 LEN=578; translated  
XNNNNNNNDTLTGMGETLCDIDYCREIFEETICVERTEQKSTLASVPLWLQVLLLMILLS  
FSALFSGTLGLMSLDITGLEIVMAGDDPAAAKYAKEYIPLRKRGNLLCTLLLGNTAVN

SLMSIFSAEIFNGTIGFVTSTFLILIFGEIIPQAFVSASSLNDYRFIKYTEAQSLAQRL  
LLFQPRQLLSSPDX  
>comp8785\_c0\_seq4; 577 1 1933 LEN=2019; translated  
XNNNNNNNDTLTGMGETLCDIDYCREIFEETICVERTEQKSTLASVPLWLQVLLMILLS  
FSALFSGTLGLMSLDITGLEIVMAGDDPAAAKYAKEYIPLRKRGNLLCTLLLGNTAVN  
SLMSIFSAEIFNGTIGFVTSTFLILIFGEIIPQAFCSRYALRIGSFVAVPVVVKVIRALLFV  
LAYPLAKILDWTLGRELATTYSGAEMIELLNHVHVKENIIDQEEAKAMQGALTYKNIHVSD  
AMTAMEQTFMLEVDEKLSFETIGKIFKTGYSRIPVYEIVRNNVIGLLFVKDLIFLDPEDD  
VSVRSFIQIFGRNVHNVPPDDTLGDVLAELKKGKSHLAVVRDNNENESLDPVYEVKGI  
TLEDIVERIIGDSIVDETDAYADSDQRIKVERGDFAFEWARLRLDTKIVDEMLSASEISA  
VTAHLKTNHAKVFNLSLSESQLTSLVSGTPVTTTPTATHDLKELPNELLYEKSVPSTFT  
LILSGRITIFVSGENFRSDLSSWTVLGGALIDSDWIPDYSAFVSDGPCRCIQIRRAFI  
EASDANSFERRVAENRIAPALSATSSNDAEARSTTSSNGVARNRRKVVLARLFHSTNSLV  
VDKDKDEDEDGNGDTKPRAFLPRAQSSSVVQFENRNVIPNGTKK  
>comp8786\_c0\_seq1; 625 114 1475 LEN=1818; translated  
MSTRRKPRKASAATSVPSTPTPVTSTATTGSRNAGKRRKREPVKLAADSDLVLAKCRALKS  
RMRRKSEENDGSDPTSFDSDVPAVGSNNGDQNIIPSDIVEVAELSATEVLEGIIEGVALRI  
TRQVLAKKGFSLIIPRSASNQIYVREWDRIVLGGKRIGRSFTNVRESRKSAILTRVMQL  
LHAVLVKRIHITKRDLFYTDVKLFVDQAESDGVLDVATMIGCTRSNLHVVASDKGLVVG  
RIQFEEDGDFIDCTKMGVGGKAIPPYIDKIENIESDAEFILLVEKEAAYMRMAEDRFYHK  
YPCIVITAKGQPDVASRMFLSRITHELKIPVLGLVDSDPYGLKILSVYMSGSKNMSYDSA  
SLTTPNIMWLGLRPSDLDKYDLPDQCRLDMTESDIKTGKELMTEDFIQKNPMWMELEIM  
VKTKKKAIEIQALSSFGFYITEEYLPRKLKEGDW  
>comp8786\_c0\_seq2; 192 479 778 LEN=1121; translated  
MSYDSASLTTPNIMWLGLRPSDLDKYDLPDQCRLDMTESDIKTGKELMTEDFIQKNPMW  
MELEIMVKTKKKAIEIQALSSFGFYITEEYLPRKLKEGDW  
>comp8787\_c0\_seq1; 972 155 2041 LEN=2090; translated  
MKSFTSFSRKFSLALFLAAAPSTAAGAKAGSTPSRRLQDAQKLGEAILAEQKAAETKAQ  
MEKEDVFSPTLEQIHVITRHGSRSMKSDADSLAEKGGATLTPLGQQQLYDMGEWLQKT  
YGNYLGGDGDLSMHYNPALHRLESTNLERTLSSANSLALGLFPSEFRSTGMHLDPDVT  
DLYASHLEQPPAIPVYTGKQNDVTLRAYRNCPTFTDRLQKLYASSKWKDLEKSHSGLL  
KKLGKMPDEAVGGKIPLLENLWVYDPMVVAKTECESRGDDYEQSCSAFVTDEYLATKK  
LDLSELYKIQVLFEEAEFLKYGGQIDSEGTVTAGNLLGSNLLWKILNRSKGDGDFFLYSA  
HTATLIGFLSTLQASEDFYKATEGDDSIAYGSALIVEIHKSSSEKGNFYFFVLKYKAPHIEN  
AIHVVLKESETGIKCGQDKDEESVNIKLSWCTLDEVIVWASENTLTSEEAWCDACNNKL  
ADVCLTGLGSWDKFGSSSTTTINTISSDDDDTGISRSNTNTDNTPAFQSEHEQIDAWLL  
SEEYMGFDTSNNTMICLFFGGFLAGVLLMGLVWFATCCCNKTKSDAKTVDESPDYPAIG  
VVDNEEPDESNAESDDIPVEPLDDKEIC  
>comp8789\_c0\_seq1; 333 115 726 LEN=791; translated  
MEFQPTASPHASVDQSRRTSLNDRLNTNYVNLGGAEGNSYAAQYTKTVTDFVGEFVTPRQ  
LLVLIRVLKAVTFVFLILTLAANMMYIIFLEVLATREVRNIVGRRDMIIRVYGLFLSGV  
ALAVEVDVAWVVQSFYGFKGF IARSLLLL FVSAITGANPLFIAERNQLLNQDVVYDDDAI  
SNVTSIDLPMSSVVVFQQVTSFFL  
>comp8789\_c0\_seq2; 402 115 873 LEN=1161; translated  
MEFQPTASPHASVDQSRRTSLNDRLNTNYVNLGGAEGNSYAAQYTKTVTDFVGEFVTPRQ  
LLVLIRVLKAVTFVFLILTLAANMMYIIFLEVLATREVRNIVGRRDMIIRVYGLFLSGV  
ALAVEVDVAWVVQSFYGFKGF IARSLLLL FVSAITGANPLFIAERNQLLNQDVVYDDDAI  
SNVTSIDLPMSSVVVFQQVTSFFLGVCAIAYFVSGVLCVLDLDRFTSKAYLSSNDPLVTTAIPP  
PTTVQNQEEQIM  
>comp8790\_c0\_seq1; 538 140 1379 LEN=1523; translated  
MDIGQDIYKMQQKDNLRPSLLHSLKLPASVGRKRKII SFASEGDFVDVEFERSPPMEMEE  
STEVIVPSEEDNNENDLSALLGTSKNLLEVSLETGDPWKEIRIPFFRGTEYIDCKLTFM  
VDLEGQSYGIGIPFDDVVAIVIQEDSEKKKQSEKNKVTETKNISPDDYEHNEEYAELEMEI  
FAGQVQEQLGEQFQLRKTTPKVLTISSGLDKVTKDWQNRVITKPFVEEDLLEMSKEKNKEE  
VNDELDSFFKFMKDELGEEFEKTMNCDGDDYTL EEELKELEEFFSVPGADGTFEGGTKG  
LDELKGIENDVKAGEVKEANEFIPDTENAALKLLGYTFKDSGKSYFLVKPLQPYTLVGR  
HAKDEEDMIRFDLLSPEEEKLIIPKLESMCQEDLKANGLNLDSSNVNGYQTP  
>comp8791\_c0\_seq1; 490 406 2211 LEN=2459; translated  
MTDNFHSDEDDGGGSKPRNKSRRRELPTGAVATLKAWLLSPEHFTHPYPTPQDQVMLMQKT  
GIDKKQLKNWFTNARRRIWKPMLKKQLEQGLATTGTSGGVAVPGVVPGLMVTNMPGQSG

AAPLPQPVQAVQEVQVDQHGNIYQTHPAAPVPAPYSDPGASAYKNISAPSSMIAASSAQ  
LLSKTDSHAVLMELFARDQDLVRQATESTPRKEPAPPQPQIQGVNTQVHTGIPQQQLAQA  
LSNQHPMKNP SHSRLPNVPTLNSWPHFSSVSSLNLTMPGVKSITSLSAADLAKQGPVN  
TVGNLAQVKSVESMGKND SYAFLEVFFGDRSSNNLSSMGGASSGIQRSLKRERDEDNNVG  
LSLEDESPAATAHG IKQEPGSSVTGASTGFASNNPYAADKTATDSSDTLKRAYDDAMAAR  
GLMSVSRSSSEKLTDLVLP AKMQRTLSQNFMRQEEKRQKQSHPAQQYVPYQYTPSPLKPA  
PSIEKESYQYPAQPSAQSDPGGSVAVPSATK CASCHLTNIDTQLRPCGHMFHEKCLKSSL  
QTSMGAKPKCPIQVPIESALLAIPTTEENSNPRQAPSAMHPKASWNNPSGNQGQAVSDTK  
G

>comp8791\_c0\_seq2; 442 406 2370 LEN=2618; translated  
MTDNFHSDEDDGGGSKPRNKSRRRELPTGAVATLKAWLLSPEHFTHPYPTPQDQVMLMOKT  
GIDKKQLKNWFTNARRRIWKPMLKKQLEQGKLATTGTSGGVAVPGVVPGLMVTNMPGQSG  
AAPLPQPVQAVQEVRTTFSLQHTGSIMAVCSGINKMVPGINSPVTSTFILSSLVCLDCFF  
IFSLRRFKLISTGTGYIXTHPAAPVPAPYSDPGASAYKNISAPSSMIAASSAQLLSKTDS  
HAVLMELFARDQDLVRQATESTPRKEPAPPQPQIQGVNTQVHTGIPQQQLAQAALSNQHPM  
KNP SHSRLPNVPTLNSWPHFSSVSSLNLTMPGVKSITSLSAADLAKQGPVNTVGNLAQ  
VKSVE SMGKND SYAFLEVFFGDRSSNNLSSMGGASSGIQRSLKRERDEDNNVGLSLEDES  
PAATAHG IKQEPGSSVTGASTGFASNNPYAADKTATDSSDTLKRAYDDAMAARGLMSVSR  
SSEKLTDLVLP AKMQRTLSQNFMRQEEKRQKQSHPAQQYVPYQYTPSPLKPA  
PSIEKESYQYPAQPSAQSDPGGSVAVPSATK CASCHLTNIDTQLRPCGHMFHEKCLKSSLQTSMGAK  
PKCPIQVPIESALLAIPTTEENSNPRQAPSAMHPKASWNNPSGNQGQAVSDTKG

>comp8791\_c0\_seq3; 490 815 2620 LEN=2868; translated  
MTDNFHSDEDDGGGSKPRNKSRRRELPTGAVATLKAWLLSPEHFTHPYPTPQDQVMLMOKT  
GIDKKQLKNWFTNARRRIWKPMLKKQLEQGKLATTGTSGGVAVPGVVPGLMVTNMPGQSG  
AAPLPQPVQAVQEVQVDQHGNIYQTHPAAPVPAPYSDPGASAYKNISAPSSMIAASSAQ  
LLSKTDSHAVLMELFARDQDLVRQATESTPRKEPAPPQPQIQGVNTQVHTGIPQQQLAQA  
LSNQHPMKNP SHSRLPNVPTLNSWPHFSSVSSLNLTMPGVKSITSLSAADLAKQGPVN  
TVGNLAQVKSVESMGKND SYAFLEVFFGDRSSNNLSSMGGASSGIQRSLKRERDEDNNVG  
LSLEDESPAATAHG IKQEPGSSVTGASTGFASNNPYAADKTATDSSDTLKRAYDDAMAAR  
GLMSVSRSSSEKLTDLVLP AKMQRTLSQNFMRQEEKRQKQSHPAQQYVPYQYTPSPLKPA  
PSIEKESYQYPAQPSAQSDPGGSVAVPSATK CASCHLTNIDTQLRPCGHMFHEKCLKSSL  
QTSMGAKPKCPIQVPIESALLAIPTTEENSNPRQAPSAMHPKASWNNPSGNQGQAVSDTK  
G

>comp8791\_c0\_seq4; 442 815 2779 LEN=3027; translated  
MTDNFHSDEDDGGGSKPRNKSRRRELPTGAVATLKAWLLSPEHFTHPYPTPQDQVMLMOKT  
GIDKKQLKNWFTNARRRIWKPMLKKQLEQGKLATTGTSGGVAVPGVVPGLMVTNMPGQSG  
AAPLPQPVQAVQEVRTTFSLQHTGSIMAVCSGINKMVPGINSPVTSTFILSSLVCLDCFF  
IFSLRRFKLISTGTGYIXTHPAAPVPAPYSDPGASAYKNISAPSSMIAASSAQLLSKTDS  
HAVLMELFARDQDLVRQATESTPRKEPAPPQPQIQGVNTQVHTGIPQQQLAQAALSNQHPM  
KNP SHSRLPNVPTLNSWPHFSSVSSLNLTMPGVKSITSLSAADLAKQGPVNTVGNLAQ  
VKSVE SMGKND SYAFLEVFFGDRSSNNLSSMGGASSGIQRSLKRERDEDNNVGLSLEDES  
PAATAHG IKQEPGSSVTGASTGFASNNPYAADKTATDSSDTLKRAYDDAMAARGLMSVSR  
SSEKLTDLVLP AKMQRTLSQNFMRQEEKRQKQSHPAQQYVPYQYTPSPLKPA  
PSIEKESYQYPAQPSAQSDPGGSVAVPSATK CASCHLTNIDTQLRPCGHMFHEKCLKSSLQTSMGAK  
PKCPIQVPIESALLAIPTTEENSNPRQAPSAMHPKASWNNPSGNQGQAVSDTKG

>comp8792\_c0\_seq1; 520 141 2073 LEN=2073; translated  
MKLSFFFFFALGASPLASANEKYVGPSPFQIGDPTCVVQKEEDCKKLAQSAGRPFKKVNA  
AWGGAYRGCYKHPLNKGPEGVEYHWTGGDANSNGVTLPEKGAINYNYARVYCGENKGS  
KITDYDFPKLKGELVHGLCVQGASPNGVRAFNDKLNLPYNYFPDFNTGTTLFGDKGWTPVN  
KELDADMVCGGIYAQPRQHRTPKSAKITLEAASLEGNSFTVCAFVESTDPKRNGWDDKL  
EREGFTVSDKTIWNGGRNQGT FYCKTMSDPNGPEPTQPPTQAPTLGEVGI VDYRFPDTT  
TGRLVHGLCVKGVSKKDIATDVSSKRPYKYTPVANFREGIKLWDNRNYLGGPLSEG MCK  
DGIYLRPSEAQEI PKDTKVS LTVSSKEPVTICAFIDVNKNADGGWPGKLINQGFTKSKER  
YDWHAKDPRGQNSYFYCKEFAPKGIKTLAPTGAPTGAPTLPTQAPTSAPT KKVPNVGD I  
SYDFPSTTKDLLHGFCVKGATS AAGIDATSSDKGLTYKTIPNFSEKTKLFGDRTYLPVFL  
NKQKCEGGIYVQPRRAVTKKGV AISLKVAAAGGPVTICAFVESNANERDGGWPESLKKDGF  
TASKPFDFAHSVPSKNLATFWCKEYGVGPVTDAPTLAPTASPTAX

>comp8792\_c0\_seq2; 350 141 1570 LEN=1570; translated  
MKLSFFFFFALGASPLASANEKYVGPSPFQIGDPTCVVQKEEDCKKLAQSAGRPFKKVNA  
AWGGAYRGCYKHPLNKGPEGVEYHWTGGDANSNGVTLPEKGAINYNYARVYCGENKGS

KITYDFPKLKGELVHGLCVQGASPNGVRAFNDKLNLPYNYFPDFNTGTTLFGDKGWTPVN  
KELDADMCVGGIYAQPRQHRTPKSAKITLEAASLEGNSFTVCAFVESTDPKRNGWDDKL  
EREGFTVSDKTIGWNGGRNQGTIFYCKTMSDPNGPEPTQPPTQAPTLGEVGIVDYRFPDPT  
TGRLVHGLCVKGVSKKDIATDVSSKRYPKYTPVANFREGIKLWDNRNYLGGPLSEGMCK  
DGIYLRPSEAQEIPKDTKVS�TVSSKEPVTICAFIDVNKNADGGWPGKLINQGFTKSKER  
YDWHAKDPRGQNSYFYCKEFAPKGIKTLPTPTKAPTPTTKIKTKAPTLPATX  
>comp8794\_c0\_seq1; 213 703 1251 LEN=1328; translated  
MKMCGEVENIVLPRIVQMPPNDRNSDFMDINGRRFCVCRPALMDLKLAKGSTYTLAIAIY  
FDRAFERKEFEKVTLCLDVRAGKWPNNHVLQLIPFMKSSLAILLPLFPERLHKALVYPV  
PSAFLSVWNMISKCMDPDTVDKVCILEGKCKIGAPQPEKLRGYFGEEFEQLEASRIGSF  
KN  
>comp8795\_c0\_seq1; 374 250 1002 LEN=2477; translated  
MSKSKSKSKLHSSSKKRRKREDEKPLALTSVGIESNDKQEFDEKGTTTETIADDNNTDK  
SSKRKQKRRKRIEDKEQHCSLKEKNSTDYDTNGVTNRAENSPPSLQOETATDRA  
PSSKRRKRRKNNKISEQNSPGKNKDEDVEHFDNTNYNDVINDEVVLEGAMISELFVLI  
DRKGGKVYSATEQRLNENRQOIGCLDGNNGVVI FQKTEEKDKGTLHTYVSLSLSRRIER  
NSILHVSKPA  
>comp8795\_c0\_seq2; 517 250 1320 LEN=2080; translated  
MSKSKSKSKLHSSSKKRRKREDEKPLALTSVGIESNDKQEFDEKGTTTETIADDNNTDK  
SSKRKQKRRKRIEDKEQHCSLKEKNSTDYDTNGVTNRAENSPPSLQOETATDRA  
PSSKRRKRRKNNKISEQNSPGKNKDEDVEHFDNTNYNDVINDEVVLEGAMISELFVLI  
DRKGGKVYSATEQRLNENRQOIGCLDGNNGVVI FQKTEEKDKDLNSSSNTGGHINGNPS  
TAFPYEVDPDHCESPLEAYEDIVPLLQSYRWRIRKESINELSIYDPYFCDGRVARQLNS  
LGFPEVYNRKEDCYEVWKDPSIYPSYDVFLTNPPYSADHIEMLMKHVTSSKKNQNKPW  
>comp8795\_c0\_seq3; 374 250 1002 LEN=2341; translated  
MSKSKSKSKLHSSSKKRRKREDEKPLALTSVGIESNDKQEFDEKGTTTETIADDNNTDK  
SSKRKQKRRKRIEDKEQHCSLKEKNSTDYDTNGVTNRAENSPPSLQOETATDRA  
PSSKRRKRRKNNKISEQNSPGKNKDEDVEHFDNTNYNDVINDEVVLEGAMISELFVLI  
DRKGGKVYSATEQRLNENRQOIGCLDGNNGVVI FQKTEEKDKGTLHTYVSLSLSRRIER  
NSILHVSKPA  
>comp8795\_c0\_seq4; 541 250 1635 LEN=1944; translated  
MSKSKSKSKLHSSSKKRRKREDEKPLALTSVGIESNDKQEFDEKGTTTETIADDNNTDK  
SSKRKQKRRKRIEDKEQHCSLKEKNSTDYDTNGVTNRAENSPPSLQOETATDRA  
PSSKRRKRRKNNKISEQNSPGKNKDEDVEHFDNTNYNDVINDEVVLEGAMISELFVLI  
DRKGGKVYSATEQRLNENRQOIGCLDGNNGVVI FQKTEEKDKDLNSSSNTGGHINGNPS  
TAFPYEVDPDHCESPLEAYEDIVPLLQSYRWRIRKESINELSIYDPYFCDGRVARQLNS  
LGFPEVYNRKEDCYEVWKDPSIYPSYDVFLTNPPYSADHIEMLMKHVTSSKKNQNKPWMLL  
MPNFVHKDYFQKLTSNAGQLPIYLVRPKRYIYLPNPMREKKASSTHKKSSPFVSMWYL  
WGGSDVNTNEWYRMLREDQNEKFDVARSKSALRDLRRKPKN  
>comp8796\_c0\_seq2; 154 46 317 LEN=1390; translated  
MEVVDSDRKTTVISVRIPDGAEHGDSLTFEANGQNFTEIIPPGSVAGEILQIKLGKAD  
EEDAEMEGAGVEKKPSDDGENITIXDGWE  
>comp8797\_c0\_seq1; 505 221 2092 LEN=2092; translated  
MGAPTFVSMSSSRPPQPQPHRGAEAMGNHTRKTNVPMQRDADLRNLEATYTSLIQEYLQ  
VMCLDNATFLAERMVASCKTTNAYYLLGVCHYRSGAPQRALSVLSNNIHKSSSGGACTKY  
HQSATAYLIAKCCFELQOYSRAEDELLETARVDYKEYKNINRNQGSNYNNKDRNGILSMD  
EWLNETSPCPIPNGAAGLYLLGNICRSSNRRRRAMEYYRMSLQLDPLMWVSYEALCEMGA  
VDIDPITSVFGVPAEIDQLQIQNKQANATREETMPLQEKPLHMTPHHHFTPTPTMGG  
TGIGNTRTMDVVGTPPTSIGPKASLFQTAQKSTRKPGTDTGGGAILPNQLQFDTPNLTPI  
MQHDASFAHPNSAISMHKTRDSFMAGGFVDSRNPHTIRRAKHVAARLYYQPTPETPPYNG  
SNREDESRHYGKTTVGPAGPANSANCYLRGKSALWSIESTISETPLRRGAGRPSDVSTARR  
PRALFLSESRSRHRNLRSIGNADLDQGDQLHAEDEENFRRRNMSGRPPLCEQEEENV  
IMDNQNRGDDSEQNSMMMTTEESGGQSSSFSENEKPTTAMAAVHIEEDEMMEKHDGSIQ  
NILELFLCLMGAGYWRLCQVSTISQ  
>comp8797\_c0\_seq2; 885 221 3025 LEN=3314; translated  
MGAPTFVSMSSSRPPQPQPHRGAEAMGNHTRKTNVPMQRDADLRNLEATYTSLIQEYLQ  
VMCLDNATFLAERMVASCKTTNAYYLLGVCHYRSGAPQRALSVLSNNIHKSSSGGACTKY  
HQSATAYLIAKCCFELQOYSRAEDELLETARVDYKEYKNINRNQGSNYNNKDRNGILSMD  
EWLNETSPCPIPNGAAGLYLLGNICRSSNRRRRAMEYYRMSLQLDPLMWVSYEALCEMGA  
VDIDPITSVFGVPAEIDQLQIQNKQANATREETMPLQEKPLHMTPHHHFTPTPTMGG

TGIGNTRTMDVVGTPTSIGPKASLFQTAQKSTRKPGTDTGGGAILPNQLQFDTPNLTPIP  
MQHDASFAHPNSAISMHKTRDSFMAGGFVDSRNPHTIRRAKHVAARLYYQPTPETPPYNG  
SNREDESRYHGKTTVGPAGAPSANCYRLRGKSALWSIESTISETPLRRGAGRPSDVSTARR  
PRALFLSESRSGRHNLRSINGGADLDQGDQLHAEDEENFRRRNMSGRPPLCEQEEENV  
IMDNQNRGDDSEQNSMMMMTEESGGQSSSFPSENEKPTTAMAAVHIEEDEMMEKHDGSIQ  
NILELFLCLMGAGYWRLCQFRCQEALQLFGVLPVHHTGWVLHQEGRAFFEMAQYQNAQR  
CLETMQGVPEHRMKGLDLLSTVLWQLKKEVELAHLAQQAQVDFDRLSPEAWCVVGNCFSLQ  
KEHETALVFFGRSLQLDPSFTYHTLSGYEYMANEDFEKAMACFRNGIRLDERHYNAWYG  
MGAIYHRQEKYDLAEYHFQRAVKINPQSSVLRNCLGMSQYSNGKPHEALDTLAEAFRLDP  
HNPQARFQRATIYVAQNRPEEALKELEKVRDAAPREATVHFAMGKVLKRLGRPEQAMRCF  
LTALDLDPKDNQLIKSAMDKLEEDVVDEEVAAF

>comp8798\_c0\_seq1; 773 452 2141 LEN=2141; translated  
MATVVWLATTTTLVILVCCCLEITLAFVVVSPSAASTARSTTTIATTPGIVCSTTTTPPSM  
LLSSSRHLVYQDGRKQASFTLEAVAGGGSGEHQNSNKGNPKAERNNNNNANKNNNN  
RSNSRKNSSNNKDSGSPKQNKGGKSNFKRTKKAHVVDSSKQKKREIMDQIKAKIKEE  
GEEKKKKQQQQNSKQPKSKQRPKNQQRQSQKKNQGPTKKMPPTANIEQKLNDDDFEP  
DDASTSSATANKGKRLFMNPFQAGKSFRETLSSSLSTLGRGLPKETKQKYFLDDRLLDGE  
NVSDFLSSTPSSSSPIFANRLLRDFAAAEALEPSTYVPEVLVVGATGEIGRLVVRLLLL  
EGRGRFRVRLVRLDLYSQTLLNLLGTGVSQCQGLSNVESLEYALTDVVKIVCVGAPKPD  
ESDFQRKFRWYLEEQGIDYDDDDNGGSDSDSGNKGRDDQOMNDREWEQLASVLEVRSELAE  
QVDCIGMKNLVSAYQNRHTDYGTSQAAKRSFLKFSEKSGDFDLFALDDGESTPSDGGKD  
EGSNYYQQDYDDEEEERNDDDDX

>comp8799\_c0\_seq1; 782 149 1789 LEN=1943; translated  
MPRKVVNPFKERVPAWMRYGIPGLVGGFLVCWYIFVSPAIEAVEDSAVLSPDPNLHLRQ  
QQPHGLLNDNDANAGIERDDDNDRGAGEPDGSGSRSSDEDKDWDDHQEQKDGASG  
DDYEQGEEEMFPDIDDEEFLDWIRSYNGLEFEDDSTDPVWGKLTPEPLLESALGCD  
YMVHNQKADAGNFNYQYDFVTHELDDDDSPVRQAGALWGISLCLKASILDENDRAPAYQTS  
IEDGIAFFREHVEDGPIEESRMVVYPGFEDESQSGVNALYGLALIEYLSVAREHPAWAER  
MRIDPRALEAELDGLGFLKYLQRGDGHFAQAYDREEGEPSEEYSPYYDGETMLCLVCAA  
RYLGGDYAEDLVPIERTAPILAKAYTVDAWRQDEHSDLTGKGFYQWSSMVFAEYLAEW  
ENYEFYGDCLLVLAHWIVHTHGILKRHRNTGYAFEGILSAYRVAEMRGHEEALSELRTI  
DEGLYELTSWQVGGPLAHTNDFLVTNPTDERTAIGGIMNAVDQAPLRIDTAQHQMHAVM  
ALEILF

>comp8800\_c0\_seq1; 447 1 1941 LEN=2562; translated  
XKTIRSGARTQSNPRGQPMEGTPEQSVAGDDPRCPGAAVASSAKSHGRREPDKGTTTTKT  
RTTGTGTTGAVARGGNEPGETRQQQQSHQASSQSRSTALNGQLRLLLLVLRCLRAAHLA  
QPLLVPYYSRTLGLPTRLVWLGLSLYSTLVTLAELPSGIASDRLGRKKTLLHIAFLGFSGS  
LLLTLASRFAGGRWQTTAGEGATATATGVLACLGLAQCSKAVGSSMYSGTDSAFLYEML  
EHHHRCDERASNSEGNKSNSESKTRALLLAIERSVYTTATEACAAALGGWLCSSSSS  
SYSSGTGSAGDHRGNKGLELEAVVALSAPFLVGFVTLWGLDEPIKEPSSFGGCARARA  
CASAHTS IETDRRKPRSEAEPARTRPETRASHQRRDLADGSARRTSYLTLPSVESVGR  
LFGFFRKGEKDPRTNREQHRSVILLSEYVPERLWTLFVGVVALNCGTYLAATAMNPLL  
WETVGIPVGHFGALHGLCGATAAFGAFLAPTLRKHLSVNNNGSRHKNANANNQTKSNGT  
EALLFLMLGSSAAGYGLLALSTGLHRRRAGEAAATTEVPSSHSVSAIGCAIAAALLLSL  
VRGLAWPVLGSAINASVXAEQIEGHHAVFVLGCGENRNVRATQEWTL

>comp8800\_c0\_seq2; 491 1 2042 LEN=2042; translated  
XKTIRSGARTQSNPRGQPMEGTPEQSVAGDDPRCPGAAVASSAKSHGRREPDKGTTTTKT  
RTTGTGTTGAVARGGNEPGETRQQQQSHQASSQSRSTALNGQLRLLLLVLRCLRAAHLA  
QPLLVPYYSRTLGLPTRLVWLGLSLYSTLVTLAELPSGIASDRLGRKKTLLHIAFLGFSGS  
LLLTLASRFAGGRWQTTAGEGATATATGVLACLGLAQCSKAVGSSMYSGTDSAFLYEML  
EHHHRCDERASNSEGNKSNSESKTRALLLAIERSVYTTATEACAAALGGWLCSSSSS  
SYSSGTGSAGDHRGNKGLELEAVVALSAPFLVGFVTLWGLDEPIKEPSSFGGCARARA  
CASAHTS IETDRRKPRSEAEPARTRPETRASHQRRDLADGSARRTSYLTLPSVESVGR  
LFGFFRKGEKDPRTNREQHRSVILLSEYVPERLWTLFVGVVALNCGTYLAATAMNPLL  
WETVGIPVGHFGALHGLCGATAAFGAFLAPTLRKHLSVNNNGSRHKNANANNQTKSNGT  
EALLFLMLGSSAAGYGLLALSTGLHRRRAGEAAATTEVPSSHSVSAIGCAIAAALLLSL  
VRGLAWPVLGSAINASVERNRSRATTLSLFSGAVKIGMVMGMVGVLFKESSTLDDPTI  
NSVEKGLLHGSLLCGTALLSVX

>comp8802\_c0\_seq1; 571 1 2021 LEN=2155; translated  
XKPQQAITTGPIQKRTNMHRTRSSRRQTLGGGGLGNHNSNRRQSVDPGSHAHGSAKRP

PRGRVSMIPRVGRENMI PPTPSSARQDPKRRVSSAMKSGRRKSSAVDRRQSLMPPSAPAI  
TDPRPISNKAYQQECIKELFSYLQKSGYEHPI SHKSLSRPSGKDFSNIVTFMLRRVDPSPF  
QDGTLMKMEDEIAMNFKAMGYPPFAVSKTALVAAGSPHTWPTLLAALTWLVKRLQCMENLIP  
EEDNNHSGQFESVEELERKTDQYFFSYLSASYVAFLKGDEKLEDEMRLADRLEGDDNI  
LMQEI EQMTDHNAAVVEKMNNLSLGEKDLMLKKRDSYATDLEQFHDLINQMDQHVTKL  
KQRKNDQSSELEETSKKLTAIVSKVEKLKECVNNQELSLADVQKMRNEQKGVEEAIERAF  
ALRDQRRSELWEIESEVENLWSEVESLSDYSSHAGDLKILPMIASKAVDMTATIDKEAV  
LES DPKLLAVDLPGTVQHVLTPCYEYESKLI SDSKWKYQEALDKLEKSEEAFTEALERH  
RIIEHKIDKCEETMEAEREAQDAKLGVRLEAESIETKVASLRDPVALEE QMAKFEQQCT  
ELEALRQQYEEENVARKAAVCEEIERAILAMEEYDRFCLDKISEVRDYKENSRSKYGKLGK  
IPEILQNSKTQAD

>comp8803\_c0\_seq1; 1311 109 2604 LEN=2675; translated  
MSVVGLDIGLQNCVIAAAGRGGVDVILNGNSNRLNPAMVNFDDSRKMGEQVAGSTSIKFK  
KTCIRNMKRLVGLAFDDPRAQKEMKRVPEYCVPIPHASGGPPSVAVKVTNSEGEDTIPII  
EQVLGMIVHHMGMI AAKKASEASGSNVTDVAALFPQDWVIAIPYYTDAQRRAVLNGCKI  
VGIPGVQRLMHENTATALAYGIFKDIRKEFTKEKPTNVMFIDMGASAYTVTIAAFEPGKL  
TIKSCNSDDSVGGRRDFDDVIGNWIAEKFVEKYGKKLSCAPQSKPKVMLKILAAAEEKAKKT  
LSPQGVKEASINLECLMEDLDFNIMFKKTDYEEMSAPLLSKLEAPIKKTLEEAKLTADL  
SSVEIVGGSTRIGFLKKKLQELGIELTSTTMNADES VSRGAALQSAILSPRFKVLPEYI  
VEYGS LVPKLAWDEKDKQGMVAADGTDTPANSVVMFTRGLNFPVRRVTLRRDGEFKVS  
SSYDASATNYGLDAGSTQQICNWSIKAPAGEEKKIRVNVKQDIHGIVQMSSAQMVVEEIEE  
EEAPPAKEEAKAGEEAKAGEEAPAEK KKKVVRTNLDYTETKPLEWTD AEITKFTQTETALR  
NTDRIVQETS DMRNELESYIYDMRDKITMDSSLGAYATQAEKDAFVKKNEDTENWLYEDG  
FDAQKDVLAQKLGELKKGPPVEKRAEEA QARPIAVASLQKNVEKYKKWLADAQANDDFA  
HITEEEFSTCHKKCDEVS NWVYEMLDKQGS LAQNVDPAF TAAEANTKNKGLSNVCSPIVH  
KPKPKPKVEAPKEEPKPAADAPADKSAEPAPMETDEPEGKKEDEKMEVDEA

>comp8806\_c0\_seq1; 50 1 99 LEN=377; translated  
EVYGC GGGMEYSLGSCFPNAADAGRADAADA

>comp8808\_c0\_seq1; 779 168 2081 LEN=2280; translated  
MVDRSTFDEGLSVLDASASKSMNGKYSSIAASVSSPTPTVQQKFTPGSINTTLQHQSRL  
SAFSPIQPVLTPRET PRGTSMGLVLLSPSRTITETLNLALASSTAQQLEDIWDEVGYTPQE  
RASQLSDLLEKFRSQCEHKISEEQTV AETFRQTIADSKMEIKAISNSLKQTV DHRLLRDN  
NGEMTLTDELANLEATLDGLRLDANEARRELQECQEYLIESHSS LGRSLDDCWSDIENDL  
TDKRREAFREKVEEMKQEMATR TAAVIQLLRDCQHLMNDIGIDGHAENASDLDRRISGSL  
VRSKDSSFMMVSKFETDTCTGISAKALEALTSRASELSSEKRRRKDLLQEMGGEIAALWE  
QLSIPVEEQRAFTNSVKGLGMDTIEKGS AELQRLKSLKSEMLGKLIHEARENIQQLWKET  
NGSYEQRKSFEFVVRDEDLFDDKLLDEHEEYIAVLQDRLEKMKPINRIINRREDIRER  
MEYEELQKDSRDLKQGAAMAKQLMEE EK MARRIKKELPKLTKMLQEKLNEWKESHGEDF  
QYQGGIYFDVMEQQDAEWA EYKKNEMQLK LKKKQDHQIHEENRQLGKKIPMGRKKVNARP  
LGNSSRVNTMNSTRGQAVVDKKPLRRANTGQARLRNI

>comp8809\_c0\_seq1; 417 58 1344 LEN=1417; translated  
MTKFPSTIVQALAA SAFFSGTSLSLSPFSSKSSTTSAKTSAITDLMHEAAVAETERLFQ  
FYSSNGNYNTENTENNNYPTKIEASPVITSPPTVWRSSEEAVTYIRDNI DTVLFD CDGVL  
YRTTSLCPGASECIRELMEIHHKRVLFVTNNAGVNRRELREKLSRLLRIDSLTNDQMISS  
SYSSAQYLKSELMAASKELGSTTTASSTPRVHVIGSSGLCEELVAAGFNVTGGPSTSSP  
EHDECCSMSREELAAYDFEQLHPIDALVVGHDTDLNFRKLCIAENLLLRNPEALFVATNK  
DSFDVVDGNNNDLRHIMGNGATVVALEYSSKR TAINVGKPSKELFGLIRNQDSSGAKKPS  
GNVFDDPSRCLFVGDRLD TDIRFGKDNGMKSLLVMTGVTSAKTMEELANGTEEEPLPDFI  
LPHVGMLK

>comp8810\_c0\_seq3; 176 140 664 LEN=1174; minus strand; translated  
MRQGPQLQAADNQWDGRPLHLGPDRFEGR LPTVLHHSKHQDVG VVPERPPDR LVDPLG S  
RSPEVRRQM QNILKDILTRLV PKMAHRSVSKEPGEERPREARSVQF SHRSALRPLCDKVS  
NRVDGGTGCGLRGDWSLAQHS AVRIPVVQGN AEGDFLQRPAPHHAHVNGSHLVQ

>comp8811\_c0\_seq1; 238 1 473 LEN=797; translated  
XNNNNSSNNINGGYGTF LGVNA TNGMNPMLAGA QVPGQAFGQIDMSGFPYNQYNYHLGG  
NTHAMIMAQLRGAPHQYYPGFLPMDQQANLSQLASLAGVQNDATQQQQGQNHMHGSMDQA  
SVSVSENGMDMGNGVRNQTMGNNALNDGSSGSI AF

>comp8811\_c0\_seq2; 174 1 263 LEN=923; translated  
XNNNNSSNNINGGYGTF LGVNA TNGMNPMLAGA QVPGQAFGQIDMSGFPYNQYNYHLGG  
NTHAMIMAQLRGAPHQYYPGFLREFIP



>comp8812\_c0\_seq1; 238 1 1374 LEN=1490; translated  
GNSAQGSSQLLWFEFAILRRTMVKQKKASIMSSKALAIKSGLMVSPEPRTEKNLLRLQ  
SKPVTNAAAKKGPCRVLFGEDEGSREVDVIGASADTSAAVTGTLPDPSGFLIADKKRKARV  
VTPSTITTTATTTSTATQEDNSELVTRSAPPKRLLLFGRYVELVQTAPNVDMVYKIVRKL  
TGNIGNGYSGPIYGELTKHSMQKMIDLMVKNTEFSSSSRFIDVGSIGKPNLHVAQYPG  
VEFSCGVEMEHNRWSLGMTCLKACLNAAVKEREKVAEAAAANENSGSLLLQGNMFLHNNI  
LEAKTFDPFTHVYMF SIGFPPDLWIRLSEMWNESDAGDCQYLICYSGPRDI IDCYQFDVE  
LLVQTP TSMHGSKESHMGYIYGR TNSKKTGSKRRGRSLISTSGPCDPLFRNSYDLVKKGL  
QHLENEVDRQVKEEMGGSRRRTRGSRKKT VFSKSYGE

>comp8813\_c0\_seq1; 499 194 1357 LEN=1508; translated  
MDDLTF TNPDTSAVEEKACIDAAEKMRRIAVPSDNPSGSGVGISYIHWPADKAMKKKVS  
PPLILLHGFDSSCLEYRRMGPKLAALGIDTYAVDILGWGFTQLDDVNSFSADAKIEALKG  
FVKSMFGDESFAFCVAGASLGAASIELAAALSISAKDEGDDLEEPDNDSDGMPSCSGLILI  
DAQGFVDG VGP MAMLPKPLAKIGVGV LKSVPLRNSANQMSYYDTDTFATEDAQVIGRLHC  
LREGWDDAMVSFMQSGGFSPSSKVS KIASPSLVWGRQD GILDGTEFANKFVEELQDAEL  
KWIIECGHVP HLEQPEETS K VILSFMTSDK VRAATAAAAKSYRRKGNSSSSDNNSDAVAP  
SFLIGGGVIGVLSGAFLIEEV MKNLIG

>comp8813\_c0\_seq2; 336 194 949 LEN=963; translated  
MDDLTF TNPDTSAVEEKACIDAAEKMRRIAVPSDNPSGSGVGISYIHWPADKAMKKKVS  
PPLILLHGFDSSCLEYRRMGPKLAALGIDTYAVDILGWGFTQLDDVNSFSADAKIEALKG  
FVKSMFGDESFAFCVAGASLGAASIELAAALSISAKDEGDDLEEPDNDSDGMPSCSGLILI  
DAQGFVDG VGP MAMLPKPLAKIGVGV LKSVPLRNSANQMSYYDTDTFATEDAQVIGRLHC  
LREGWDDAMVR

>comp8814\_c0\_seq1; 692 239 2236 LEN=2265; translated  
MKVKTKTP LLRNEDKKKSPV VTRRSFPV PITFLVLLFLVWLSATALQCASAFEC PG SRT  
PPLVIRGKRFYDSSSDEYFP IKG IAYYPRPN SGLAHGSSSVDFYTDEYSQRWRADISNM  
KELGINAVRIYAVDP SKNHDAFMCAL SEAGIYV MLGLLADCEGCAIGAWVGVDAEPPMCY  
PSSVKERGRFVVR SF SKYPNLMAFSAGNEVTIYADDGSGGPREANIS CQKKFLRDMREYV  
SGCAGSY PNAVL PRAIP IGVVNW DGN TGTFSQNVYYQ CRTDRGDPFENA EWFALNSYRHC  
DGLANTPDEIIGW PDLRET FREANFP GPVFFGEYGC RERGFPTLDGFD TQRTWLQTEALY  
DPDYSDFVAGGFVFEYS AEKTTIDGNLQFWADKLDLDEPESEWPYK KFARANYGIGYFGP  
SDCQHDDG DNDNSDTSSNCESTRY PEWDR LAEALATSEGGIRPQSAGVLPECPTRYQA  
LADFWDPTDREEDPDLDYCLELQRNAASTDSPTDSPTGGNGAAPETDEPTGAFAFRTDT  
PSAFPTSAV SFEFRTQFP TQLPSESRSEEGTQQPTESLSEEATQQQTQSARCS DHDRCAA  
ANLSGFCCPTSDGVVLGCCDI ISEAPSAAGLTFEFADDSGARTPPLAVAVLLAIGTSFAT  
IITII

>comp8815\_c0\_seq1; 196 296 751 LEN=1161; translated  
MVAL LSHHLLDHKPDNLLL RGGRYKLRGVAFLGRPGVALCIGPPKAHTKFKRALESAMP  
QKRFKTKDLEINHPEGEFLAMEGFSRAETLGDFRAILASIGREAEFFELTGIEDPNSSSS  
SPPPPNDQSNEQATGRKGGRRGKNKNRKGRK

>comp8815\_c0\_seq2; 220 56 751 LEN=1255; translated  
MTTATIFRVNLHGLLIGFFSLFCLLP GSSRGVAOQTATGTAAFQPPHERSSWASSARANA  
HTELSAKGSKPKASYNDDDMVAL LSHHLLDHKPDNLLL RGGRYKLRGVAFLGRPGVAL  
CIGPPKAHTKFKRALESAMPQKRFKTKDLEINHPEGEFLAMEGFSRAETLGDFRAILASI  
GREAEFFELTGIEDPNSSSSSPPPPNDQSNEQATGRKGGRRGKNKNRKGRK

>comp8816\_c0\_seq1; 323 327 1004 LEN=1091; translated  
MKFHPLRLLEPNDDLGGVLYPSAPTNI IHHVDHHSALS PSMPLTEGNHGLTLRSVDSAT  
ANREEIICPVCGEFGTYERLMAHLKYQKIVEEQDDYPIQGTHRGFEMPDTTPVTLEQVQ  
RHIESKLSEIVVVVEAIDPQLSGTFQALQSYKYNDIEFGADFERCMFTCGNRFVVDMLKF  
HGIYHDEMYGPHLTNDGPNLNNSGIDRNSSDTDAKSRNSLECEA

>comp8816\_c0\_seq3; 301 1 855 LEN=942; translated  
FFFAIITKCDKRSIQIVFSK KLCVNVVEGKVCINVR CYDLDAANPLVECHARMYLIDHKM  
KFHPLRLLEPNDDLGGVLYPSAPTNI IHHVDHHSALS PSMPLTEGNHGLTLRSVDSATA  
NREEIICPVCGEFGTYERLMAHLKYQKIVEEQDDYPIQGTHRGFEMPDTTPVTLEQVQR  
HIESKLSEIVVVVEAIDPQLSGTFQALQSYKYNDIEFGADFERCMFTCGNRFVVDMLKFH  
GIIYHDEMYGPHLTNDGPNLNNSGIDRNSSDTDAKSRNSLECEA

>comp8817\_c0\_seq1; 1198 341 3745 LEN=6064; translated  
MTLIDRICRSIDSSDGIELTKTELSNRADMWAVEANEILVDDEEVEFNPSDLEDIEHYFK  
EFERDGEKVENRKDFEKIESFILEEQDSGRKQRETARLLAASEEIRLAADVAQLKEYRLK  
QQKSSKDQILYEKIADA EKAYAKRKLVI AKASQLAASDCRKQFKRVRAFFQCLHESRKVK

LRKQYERSLKIQSMLHRMRNTDPRVMALEQNTAERIFRKKESDMTELNMLQNLEEATYLE  
KIIISLLDQVQESKEKAADAYFKMQIRNLKEQMENQKKREKEVTDTKAQNMIEMAELIATY  
VKDEIQDREDLRKTKELVERTERKKDFQASQSKVLLSVSDLYDTILWSVATGSIGLSSSE  
TDSFDSWEDDDEEEDQQHNDIAQNI RSPKSDEFHPAGYGFGEHREVNDASGGVDKSSRDN  
DTSSVQSGSTANSTSMDSADSLSPVGHIFVKELKRKIRAAEKKMEKRHIAERKEERRRFR  
TESRNLKEKHQAMVDTILAKCVVERQKLRDAISRMMVMAEEKQSLSTHTLQEAIEADVRA  
MQGAWVEHERLEEEHKSSF AKAQALISAQVFHEVRNALSSVVAMSEMTSSLQNDPSISSK  
TLVSSVSEMLDQNKKEVVNYSLNMLNNILDVSKIKAGSFETKKGFFDLQDLVNRATTMQLV  
KAQTRGVKMSFSPMPEPQIAYSDEDIVVRIITNFISNAVKFTTAGAVQPFVCSLESIDPV  
KSKTKSKTIPVEPTEKSSPTS RKGGERDNMSSHQFDEDDLSYIDVKYVAVGVADTGP  
LSRELLNIAEAGLFNSDSSSKMNSGAKNSGFGLHLAHLAQLASTLGSEVNLTDLDAFQELC  
NEDMASVLRNVKNSSSPDLLSLPME SLCSDDLLPGKGTVLYITIPVSDVHEAKAMVESAP  
DPKEAFDLSSTQYIFSPQSPYSADGCFRILVADDVPMLRKGLVRSVLDIFTDFCNCPI  
SVTACTAEDALRALESSSYDLFISDNQFAPPGLKRYSPCEEEKRLHVNNCGDKNNLRKS  
VLDFEFENEAF TIVPGDGSLSGLDALLQVAQMKE SKNPTPILVLHSGHQLELPRQLGIIV  
RKPLKRIDFVPLFERNARNLIETGMCIEVERGNDKVVLNKNGAQLFRRRNSEIG  
>comp8817\_c0\_seq2; 1198 341 3745 LEN=5532; translated  
MTLIDRICRSIDSSDGIELTKTELSNRADMWAVEANEILVDDEEVEFNPSDLEDIEHYFK  
EFERDGEKVENRKDFEKIESF ILEEQDSGRKQRETARLLAASEEIRLAADVAQLKEYRLK  
QQKSSKDQILYEKIADA EKAYAKRKLVIKASQLAASDCRKQFKRVRAFFQCLHESRKVK  
LRKQYERSLKIQSMLHRMRNTDPRVMALEQNTAERIFRKKESDMTELNMLQNLEEATYLE  
KIIISLLDQVQESKEKAADAYFKMQIRNLKEQMENQKKREKEVTDTKAQNMIEMAELIATY  
VKDEIQDREDLRKTKELVERTERKKDFQASQSKVLLSVSDLYDTILWSVATGSIGLSSSE  
TDSFDSWEDDDEEEDQQHNDIAQNI RSPKSDEFHPAGYGFGEHREVNDASGGVDKSSRDN  
DTSSVQSGSTANSTSMDSADSLSPVGHIFVKELKRKIRAAEKKMEKRHIAERKEERRRFR  
TESRNLKEKHQAMVDTILAKCVVERQKLRDAISRMMVMAEEKQSLSTHTLQEAIEADVRA  
MQGAWVEHERLEEEHKSSF AKAQALISAQVFHEVRNALSSVVAMSEMTSSLQNDPSISSK  
TLVSSVSEMLDQNKKEVVNYSLNMLNNILDVSKIKAGSFETKKGFFDLQDLVNRATTMQLV  
KAQTRGVKMSFSPMPEPQIAYSDEDIVVRIITNFISNAVKFTTAGAVQPFVCSLESIDPV  
KSKTKSKTIPVEPTEKSSPTS RKGGERDNMSSHQFDEDDLSYIDVKYVAVGVADTGP  
LSRELLNIAEAGLFNSDSSSKMNSGAKNSGFGLHLAHLAQLASTLGSEVNLTDLDAFQELC  
NEDMASVLRNVKNSSSPDLLSLPME SLCSDDLLPGKGTVLYITIPVSDVHEAKAMVESAP  
DPKEAFDLSSTQYIFSPQSPYSADGCFRILVADDVPMLRKGLVRSVLDIFTDFCNCPI  
SVTACTAEDALRALESSSYDLFISDNQFAPPGLKRYSPCEEEKRLHVNNCGDKNNLRKS  
VLDFEFENEAF TIVPGDGSLSGLDALLQVAQMKE SKNPTPILVLHSGHQLELPRQLGIIV  
RKPLKRIDFVPLFERNARNLIETGMCIEVERGNDKVVLNKNGAQLFRRRNSEIG  
>comp8817\_c0\_seq3; 1163 1 3616 LEN=5935; translated  
XFSCPKGMVSRIPKKHETPAMIEDKNMFSKGLTTTIKPI SPRPNSEKPIALNLKGWRSND  
NPTENEKKAKVMTLIDRICRSIDSSDGIELTKTELSNRADMWAVEANEILVDDEEVEFN  
SDLEDIEHYFKEFERDGEKVENRKDFEKIESF ILEEQDSGRKQRETARLLAASEEIRLAA  
DVAQLKEYRLKQQKSSKDQILYEKIADA EKAYAKRKLVIKASQLAASDCRKQFKRVRA  
FQCLHESRKVKLRKQYERSLKIQSMLHRMRNTDPRVMALEQNTAERIFRKKESDMTELNM  
LQNLEEATYLEKIIISLLDQVQESKEKAADAYFKMQIRNLKEQMENQKKREKEVTDTKAQN  
MIEMAELIATYVKDEIQDREDLRKTKELVERTERKKDFQASQSKVLLSVSDLYDTILWSV  
ATGSIGLSSSETDSFDSWEDDDEEEDQQHNDIAQNI RSPKSDEFHPAGYGFGEHREVND  
ASGGVDKSSRDNDTSSVQSGSTANSTSMDSADSLSPVGHIFVKELKRKIRAAEKKMEKRH  
IAERKEERRRFRTESRNLKEKHQAMVDTILAKCVVERQKLRDAISRMMVMAEEKQSLSTHT  
LQEAIEADVRA MQGAWVEHERLEEEHKSSF AKAQALISAQVFHEVRNALSSVVAMSEMTS  
SLQNDPSISSKTLVSSVSEMLDQNKKEVVNYSLNMLNNILDVSKIKAGSFETKKGFFDLQ  
DLVNRATTMQLVKAQTRGVKMSFSPMPEPQIAYSDEDIVVRIITNFISNAVKFTTAGAVQ  
PFVCSLESIDPVKSKTKSKTIPVEPTEKSSPTS RKGGERDNMSSHQFDEDDLSYIDVKY  
VAVGVADTGPGLSRELLNIAEAGLFNSDSSSKMNSGAKNSGFGLHLAHLAQLASTLGSEVN  
LTDLDAFQELCNEDMASVLRNVKNSSSPDLLSLPME SLCSDDLLPGKGTVLYITIPVSDV  
HEAKAMVESAPDPKEAFDLSSTQYIFSPQSPYSADGCFRILVADDVPMLRKGLVRSVLD  
IFTDFCNCPI SVTACTAEDALRALESSSYDLFISDNQFAPPGLKRYSPCEEEKRLHV  
NCGDKNNLRKSVLDFEFENEAF TIVPGDGSLSGLDALLQVAQMKE SKNPTPILVLHSGHQ  
LELPRQLGIIVVRKPLKRIDFVPLFERNARNLIETGMCIEVERGNDKVVLNKNGAQLFRR  
RNSEIG  
>comp8817\_c0\_seq4; 1163 1 3616 LEN=5403; translated  
XFSCPKGMVSRIPKKHETPAMIEDKNMFSKGLTTTIKPI SPRPNSEKPIALNLKGWRSND

NPTENEKAKVMTLIDRICRSIDSSDGIELTKTELSNRADMWAVEANEILVDDEEVEFNP  
SDLEDIEHYFKEFERDGEKVENRKDFEKIESFILEEQDSGRKQRETARLLAASEEIRLAA  
DVAQLKEYRLKQKSSKDQILYEKIADA EKAYAKRKLVIKASQLAASDCRKQFKRVRAF  
FQCLHESRKVKLRKQYERSLKIQSMLHRMRNTDPRVMALEQNTAERIFRKKESDMTELNM  
LQNL EEATYLEKIIISLLDQVQESKEKAADAYFKMQIRNLKEQMENQKKREKEVTDTKAQN  
MIEMAELIATYVKDEIQDREDLRKTKELVERTERKKDFQASQSKVLLSVSDLYDTILWSV  
ATGSIGLSSSETDSFDSWEDDDEEEDQQHNDIAQNI RSPKSDEFHPAGYGFGEHREV NDA  
SGGVDKSSRDNTSSVQSGSTANSTSMDSADSLSPVGHIFVKELKRKIRAAEKKMEKRHI  
AERKEERRRFRTE SRNLKEKHQAMVDTILAKCVVERQKLRDAISRMMVMAEEKQSLSTHT  
LQEAIEADVRAMQGAWVEHERLEEEHKSSFAKAQALISAQVFHEVRNALSSVVMAMSEMTS  
SLQNDPSSISKTLVSSVSEMLDQNK EVVNYSLNMLNINLDVSKIKAGSFETKKGFFDLQD  
LVNRATMQLVKAQTRGVKMSFSPMPEPQIAYSDEDIVVRIITNFISNAVKFTTAGAVQP  
FVCSLESIDPVKSKTKSKTIPVEPTEKSSPTSRKDGGERDNMSSHQFDDDDLSYIDVKY  
VAVGVADTGPGLSRELLNIAEAGLFNSDSSSKSMNSGAKNSGFGLHLAHQLASTLGSEVN  
LTDLDAFQELCNEDMASVLRNVKNSSSPDLLSLPMESLCSDDLPGKGTVLYITIPVSDV  
HEAKAMVESAPDPKEAFDLSSTQYIFSPQSPYSADGCFRILVADDVPMLRKGLVRSVLD  
IFTDFCNCPISVSTACTAEDALRALESSSYDLFISDNQFAPPGLKRYSP ECEEKRLHVN  
NCGDKNNLRKSVLDFEFENEAFTIVPGDGLSGLDALLQVAQM KESKNPTPILVLHSGHQL  
ELPRQLGIIVVRKPLKRIDFVPLFERNARNLIETGMCIEVERGNDKVVLNKNGAQLFRRR  
NSEIG

>comp8818\_c0\_seq1; 226 1 1037 LEN=1243; translated  
VESTPVHGV IQLHDVMNRRIDGRLDNSTEGWLHAATKKPKGCDPLAKPVKDQGYDGVDLF  
EKIATRTRVEIKESQRTNRCLRCWHDKITR CICSFI PVLQENDELPIKIVIVLMHYKEYLS  
AGNDAKMLLALLPDGAEQDEQFQRSQLCIFGRMGDWEKFEAECSLDPHHTLLLWPAEKAL  
TVEGFLSKLPENSPWRQRTKSKPENENENDNINTCNEDSYASLPPLRVVVL DGVYSQARSM  
FKTIKKRFAASGPIPPHVALHPKTL SVYHRAQKNYAKSSAVTVRNSSDPDALHICSVEA  
FALLMKELGESESTTQALVKAVEINNLALVHDVQVRPPLPSKAGQ

>comp8819\_c0\_seq1; 537 199 1950 LEN=2090; translated  
MNQCDRNTSTENLCVSPFFALEENISSPKEYDKYDVFKNFKCDSTSHGSQPEKMCEKLN  
SNQSIQNCSTVTSSLQNSSPFTPPDLVESITTDGTSCCSIPNASDSVVIKSLNSQLQTLS  
PTSPSNMSSSTQTSSFFSATSFKDIVIDSDASKHVS RMDI IYPIESENIGGHSQTFDGP HI  
VISQTEDIGFSELMREADDNIMQLQQSHDTMVSCSERKSNARLSPLENQEWESGALISA  
APNNSPVVVTAVTDRIRKDKQWWHNIPFLGFGQNI DNQDLNAPLLTVATDMNSNGAASNQ  
PDVTRLLSGNTFQRHHINSAFDRAIASVETKIESDDSF EVSFLLGENSRYTVEDVMEIIS  
NTDLLSLWCDPIETLIVTSSSHTASSGF SVGETRN NIESDDFHDESERTREYEGEWVEA  
TTSALQSPSSFSFILDIGQSILESGCTSYGRIVMFAERRRGHVGLKVGPFHGGIYASH  
SIYVSMEDTDSQGGRI RIVDRVRLTHDDDYAEVYSIAKLF GCSVASCLGQCFLPSIKGYL  
GQVTT SMAQLRILLENEENKASSNHPPSYKQPTI IPLCSQRMQ

>comp8820\_c0\_seq1; 674 1 2193 LEN=2242; translated  
XASALGKIRQSLYDKTDGIECTERLNDTDGICTWDEAVGGVVDVPTVLLGIGGSGSSSAE  
PASASPGTSAPAGTDRKFS LWGVLF SNTFSSLVHSLLTSSSFQSVHTKLVSTLRSLTNAP  
PLRGILPHEAYRNTLHIASQLDTALLK VSEDAHELLVHAEERVESERRLRQSLYVQTCEI  
MGR LICELRRMLLD TNHNSNGSSNHSPASEGYDAVKQLIVGR LCHLLKFRLTALSTLLDP  
NSSPAVLHQQSGGMISIAELSSAFELADDKDSGLITFREAMEAVDSAFSGTHFHGAEMVR  
ETLLLPAAGRDRQRTPNPADSGSVVTPGDVTLDEL TLLLARGLRHEASGGHSALGAIQNS  
LDRMVESFRNWAREVLRPC SASLSEQTKRFVVAACSSPEEEFRRLYASSEAAAASPQGAV  
VTNVSPHVS GYLMDISFVLNRSVCP SDSL LPVP SRDYAVAMGVDGASIPRMIDTIRCALL  
REGFEASTSVLTRLHLGPALDGT SAPL LSESGPSGIAQTKNDLSFLQACFFERNQYGFSG  
ASVEDSKGELASIVRKTDLHFRRS CNRTTVQVIGEK RKHLL EAGDLFFSSLFGKDKISSE  
AAPVGGFGFDASSQAGVGVGNTKTPLFHPPLESSCRFP LLP IQADRTL SGVQARGKYKEK  
EENENHSQKLGSGTVRAGFGFFSSMLKKAADPSAAGKRRSDECLCQDSKII FSQILRRLP  
MHTCPIDIKC

>comp8822\_c0\_seq1; 287 1 1086 LEN=2127; minus strand; translated  
AESSKLTGSIVPFAACLNAWAQSFTSESPNRADDLLHRMMDPELQALADIYPNTVSFN TC  
MQAWAKACKFEDSATPEKAEELNLLI ELSKENGNNPHSEKRWELGPDLRSYVIVMNAYA  
LSRHEDSVFHARRLLSDLIEGRGKYFD TGRNDKMNASPFTIILKAAGNTKATDFSSDNSE  
AEEDAFGSLGDTEQQSSLLLD PYSIALKTYTELLKDTYDLGVSADHF AFAEMLAVVEKHT  
AVESIERRQRIEEIFGDACQAGQVSSLVRSVQKACPNDTMLREVL RIRANDSVASIESI  
NTTFPRQWTASVPQEFRRVNSRNEHFRKQSKFFRANKQRRKKNHGKKNRLVRLPEQH NKDY  
R

>comp8822\_c0\_seq2; 504 562 2049 LEN=3090; minus strand; translated  
MNEAAQILYPDKEIKDVNSDAKNRIWMDPDSPLEQRVGRFINQPLGSMHHLDIKLTSIDL  
IKACGKQNSFEGMKNAQEILDRLIEEKKYVNESSDDAWPLVIVPDRPFKMVMYGWSNMCK  
KVKIAPQRIREVLDLMIIEADGSIVPFNACLNAWAQSFTSESPNRADDLLHRMMDPELQA  
LADIYPNTVSFNTCMQAWAKACKFEDSATPEKAEELNLLI ELSKENGNNPHSEKRWELG  
PDLRSYVIVMNAYALSRHEDSVFHARLLSDLIEGRGKYFDTGRNDKMNASPFTIILKAA  
GNTKATDFSSDNSEAEEDAFGSLGDTEQQSSLLLDPYSIALKTYTELLKDTYDLGVSADH  
FAFAEMLAVVEKHTAVESIERRQRIEEIFGDACQAGQVSSLVVRVSVQKACPNDTMLREVL  
RIRANDSVASIESINTFPRQWTASVPQEFRRVNSRNEHFRKQSKFFRANKQRRKKNHGKK  
NRLVRLPEQHKNKYR

>comp8823\_c0\_seq1; 261 1 1183 LEN=1255; translated  
XQPYRDRSFLLFVILKDMQAITYQFITLRNTTVQRVQRDINRFLAPGKSNVELKILCSNV  
DFFLNVGGLEGNQFEIVVRNLKRIKLDRIEENACNGNGMIEPAKECFIECDNEHIDQMVE  
RIREHGFINFYGEQRVGAPGDSNDVGVRAFEIGHSMRLRQDFMGAIKLLMEGTRHHEQDDV  
ARVRKAWKDSNGNPSITLKAFQRADIMPRERAVLRGLNRYPDNPLEAIRFLSYNMRTFYI  
NAYQSLIFNRAASQRIKLYGDKVVKGDLYFEHNDNRRDSVKVVQGNEVPPIGISQVVLPL  
PGYNVRYPQHEIGELYRTLLEEDGVKFEKESVPEATAKGDYRKLIIIRPGNLIANIDASDP  
SSKSMKLSFDLPKGCYATMLLRELMMTTVARSKN

>comp8823\_c0\_seq2; 653 118 2763 LEN=2835; translated  
MVGVRSYSTIGIEGFISSPSDYQPSSHAESHLSPSLPSCIEIVGVIKEIPDDFIVREILPK  
DNEMISKIISRKNTLETTPGDQLRIANMHSMTIVLPSCDNQSKEAKKDHVDRRTGKERR  
QTNGPLDGEMYVSYPTTEESVVATTQGGTSLSPEISLEKTIQRYLEKVATPDYSKSSLLKN  
IEDLNLKSI SRIPISRCDEARATANQVTISTIESNEVWIPPLLPSVTDGTKNSSGASAD  
TNDATTMNVADENAEMRAQKKA FHRAIRIKYPFLQTESITHCHNDHKAPTLOSIDDNKRD  
RSTHHWIRVTVVEECFDDLQYLHSPRNDLTQLLLFRNRGFEGASPRSKSNNRTDVIAGTP  
SVTLQLRPGISKDDRRKVHILATKNKHFESSVRHQGSKDRNSSKSVQSAKQDASENSPP  
EPVESAPIDLIVTWKKQALRKGVRKNNKRKRSDDGRGKTSNYNSNKNLLCVLKKINKEHL  
TAIQILTKKLRQRADIGFAGIKDMQAITYQFITLRNTTVQRVQRDINRFLAPGKSNVEL  
KILCSNVDFFLNVGGLEGNQFEIVVRNLKRIKLDRIEENACNGNGMIEPAKECFIECDNE  
HIDQMVERIREHGFINFYGEQRVGAPGDSNDVGVRAFEIGHSMRLRQDFMGAIKLLMEGTR  
HHEQDDVARVRKAWKDSNGNPSITLKAFQRADIMPRERAVLRGLNRYPDNPLEAIRFLSY  
NMRTFYINAYQSLIFNRAASQRIKLYGDKVVKGDLYFEHNDNRRDSVKVVQGNEVPPIGI  
SQVVLPLPGYNVRYPQHEIGELYRTLLEEDGVKFEKESVPEATAKGDYRKLIIIRPGNLIA  
NIDASDPSSKSMKLSFDLPKGCYATMLLRELMMTTVARSKN

>comp8823\_c0\_seq3; 430 118 1641 LEN=1687; translated  
MVGVRSYSTIGIEGFISSPSDYQPSSHAESHLSPSLPSCIEIVGVIKEIPDDFIVREILPK  
DNEMISKIISRKNTLETTPGDQLRIANMHSMTIVLPSCDNQSKEAKKDHVDRRTGKERR  
QTNGPLDGEMYVSYPTTEESVVATTQGGTSLSPEISLEKTIQRYLEKVATPDYSKSSLLKN  
IEDLNLKSI SRIPISRCDEARATANQVTISTIESNEVWIPPLLPSVTDGTKNSSGASAD  
TNDATTMNVADENAEMRAQKKA FHRAIRIKYPFLQTESITHCHNDHKAPTLOSIDDNKRD  
RSTHHWIRVTVVEECFDDLQYLHSPRNDLTQLLLFRNRGFEGASPRSKSNNRTDVIAGTP  
SVTLQLRPGISKDDRRKVHILATKNKHFESSVRHQGSKDRNSSKSVQSAKQDASENSPP  
EPVESAPIDLIVTWKKQALRKGVRKNNKRKRSDDGRGKTSNYNSNKNLLCVLKKINKEHL  
TAIQILTKKLRQRADIGFAGIKGKRK

>comp8824\_c0\_seq1; 159 1 734 LEN=1128; translated  
XSSDLEDKSNALPSASTLEVVLVLESPPGGSVSEYGLAGQHLLRLRNEPGITLTICVDKVA  
ASGGYMLCCTASPGQLFAAPFALLGSIGVIGTQINVNKLNDWGIEPLEFRGGKDKAPIG  
LLGFPVSKDGKRTTQAMIDQTHRAFKQHVVDPVLPKDTIDEIGSGNVWLGVD AIDVNLVD  
AIKTSDEYIEEKIRSGSRVFKMVRVFRSGFLLGPRIGSLPTAQCKGAVANAEP SVASLEE  
NIENW

>comp8824\_c0\_seq2; 521 124 1970 LEN=2364; translated  
MGNAIAVWVLLVVLVLAANI ELAEAAKAKKPNNPRDLASRFSGGGIDDYDETTAGVTG  
ILEENPDFVPLGEESSDEEHSDDDYSDSDDDDARSDESDDDDDDVKARVSKKLKKTTRIPRP  
GKVLKLLKKNRARTIVLAVFAFRNEIFRALKHLSEHKS KNKVTDLKLLLFVDFMRRM  
QTGGKESSNLKMFIGHASPLLGALLEKTMNYPAYIPPIDQHFTFERKLDRIIRSRVKY  
GVLDWAATLEYLRNHQFLICCDLSLNEYLLKDGMAHKAHTRHDGLKWPSSSATPICPD  
FASSKGSAGRESKAENATVVENDGRMVVLDWTKLDTITSLELLRQQVAFLLSEYRSL  
AMHREAAANATTRGSEDSKNALPSASTLEVVLVLESPPGGSVSEYGLAGQHLLRLRNEPGI  
TLTICVDKVAASGGYMLCCTASPGQLFAAPFALLGSIGVIGTQINVNKLNDWGIEPLEF  
RGGKDKAPIGLLGFPVSKDGKRTTQAMIDQTHRAFKQHVVDPVLPKDTIDEIGSGNVWLG

VDAIDVNLVDAIKTSDEYIEEKIRSGSRVFKMVRVFRSGFLLGPRIGSLPTAQCKGAVAN  
AEPSVASLEENIENW  
>comp8824\_c0\_seq3; 597 124 1857 LEN=2251; translated  
MGNAIAVWVLLVLLVVLAAANIELAEAAKAKKPNPRDLASRFSGGGIDYDETTAGVTG  
ILEENPDFVPLGEESSDEEHSDDDDYSDSDDDARSDESDDDDDDVKARVSKKLLKTRIPRP  
GKVLKLLKKNRARTIVLAVFAFRNEIFRALKHLSEHKSKNKVTDLKLLLFVDFMRRM  
QTGGKESSNLMKFIGHASPLLGALLEKTMNYPAYIPPIDQHFTFESLNEYLLKDGMAH  
KALHTRHDGLKWPSSSATPICPDFASSKGSAGRESKAENATVVENDDGRMVVLDWTKLD  
TSITSLLELLRQQVAFLLSEYRSLAMHREAAANATTRGSEDSKNALPSASTLEVLVLLLESP  
GGSVSEYGLAGQHLLRLRNEPGITLTICVDKVAASGGYMLCCTASPGQLFAAPFALLGSI  
GVIGTQINVNKLNDWGIEPLEFRGGKDKAPIGLLGPVSKDGKRTTQAMIDQTHRAFKQH  
VVDARVPLKDTIDEIGSGNVWLVDAIDVNLVDAIKTSDEYIEEKIRSGSRVFKMVRVFR  
SGFLLGPRIGSLPTAQCKGAVANAEPVASLEENIENW  
>comp8825\_c0\_seq1; 160 230 490 LEN=490; translated  
MKSAAASAGATPEARATAATDGVNCGETANGRSNLSSRRSNGFLGVAAMACGLLVIAATM  
ANKDGENEIGSWFGVARVASNGKSHNNN  
>comp8828\_c0\_seq1; 254 444 815 LEN=1615; translated  
MSEDHRDDFPANSQYQEFVYHDHEEYIGIRNHEDQNAIPPTATIRAIYHGYNHNDPYRR  
YSSSSSSSSSSSSSATIRNANRNSTGLSRKKCVLGDATNTLRRRSNSETDRRRMQRSYQY  
RNA  
>comp8829\_c0\_seq1; 539 284 2536 LEN=2634; translated  
MTPIVLTKQQNPPMTGFPIGTLITEQTEMQNQQEQQHADRSELQGLVPRGLVSHVPVS  
IISVDSRASSSSSLSSSKEGSENGDTLSSNSRLAEINGWKSSNMEITPPAQDSTASA  
EFRKIESTKKRPFKALIDAANMHSHGAFSHSEPQTLLSTSPKKKVRKLSNDSSTQATAR  
VISPPQQQNNQQKPMQSHMLLAREEDEAHLSPHFVVRKQIEVFTATTTELTEPAPGR  
KQPIRLHQVGLRCIHRHLTTNTPQKSRVKRAVCYPSVGRYHSHVSDMKFDHFSLCKEL  
PPDVRNTEFESLKAESKRSNGKNANGSKKEKTKTKSKKGQTFSSSTAQYYRTSASQMGLMDS  
PRGIIYVPLKHNSSSERSTNSPNLVSAAMSMQNLVPPQQPLQALSTKNTFHNHLNQPNPS  
LLASQGICSTNFLPPDISHLVLAKDHSSSIVTEMDHKNLTVAMNSSVLQSLLMNAIILAGA  
NAQKSIDAASKALGGGGYNQQANTTSPLLPSATTPETSTAARQLVPLASPEDAGVLNPL  
HCFVRKHVELFEADAALSAAPAPGRKVRVTLGQVGRVHCACKNAPAKERIKRAVCYPP  
SIDGIYHVSVMKFDHFGICPNLPAEAKAELALRTPASGRRQASKSTKSGSKRSSGSSN  
TNTGHYYRDSIAKGLVNTKEGIRFGVDKTPSRNSTDAASAPATTTTTTSVSDSTTAV  
TGLPNRSASPSYPTGMSVLMMAAASHATRV  
>comp8830\_c0\_seq1; 367 1 1374 LEN=1655; translated  
LAPNSEVQGTNPAQFISIGGVQAYSGYNSGLVSSPRSMSPTPAAAKTTTTLSTRQPRKFGS  
KRTEKRRRVTKSDPDNGLRPPDAVGSSIRGGNGLRPPDAVGSSIRGSNPAVLVDAPLAARS  
TGFFSSPRDISRTLGLKENRSSRINGIRALEQIQEWLANDKATTESSKGVLEHFYFYGGV  
ARTLDFLEDNMDDLDCVMIAAAVLSDFLSFRWNGTVQNRREIAMNIAKTIVQRNGIPLLLL  
ANQEFVVGQRTSSATKHVWIAIGRTINGEETRCILDKKQKLNILSDAIDCIFRLEKTGSE  
DWADGVLQVVLYTIANTIKDASIEKEDLKRDLIVPGCLMILEKESDQNRSDDVITYALGI  
LTMCTKQKLVRRKDFEQLLPILIRCMKQFGGNSQIRSFVLALLAGACEKLPKETMEKAG  
VLEANSTLLKSDGLSEEVKERARSIMRKILNELKHGL  
>comp8831\_c0\_seq1; 382 1 1247 LEN=1441; translated  
XRLSQVFEDEKSTVIPWVGAVAAVPTAFDQRFHLLERNFPLGGKSAEGGTALNLSADT  
TTTSLVDKVQRLKVLQREYISFFDPMQCEYYSDSVSFEDPMTSLAGVDNYKNNVDMLAS  
RTLGLGKFLFQDAGIVLHKVGEVDPVDGSI SNIITRWTLRVTVKAIIPWKPTARFTGISV  
YEVSSGGSEGVVVDHQTDYWDSINIQSGGGYKVDKSI AVNHFLDQLKPGNVNAVAAGLE  
LPYELLRIGKDYELRRYPIYTSATIPYDRRDEGYDVLASLTKGMTPLAPSLMEVPNDSSK  
KSMWPLVYALPGESSPKPIPEEILERSKEPLWDGCDIENIGSKVVAVGTFSDASVAPIV  
RKADRALRESLKRDIAPVSGSDSSVRFAQYDAIFSMGKRRGEVWIELDDDGHPY  
>comp8834\_c0\_seq1; 359 1 1530 LEN=1673; translated  
XRNCQTIKAKDLFPMKLFQWYHGSESSLLVSVSLCFLVLLLNSSNSLGNDAVVDVAF  
SAETPRHRTGPRVARNELTNEQLPMVGATRRDSLVLQSLFLATMLLNTDPCFAMSEGDDA  
DIGDGLRLAKPMGVDNSRPSAPLEYLLPAARVGTIYQTLAIVEEVTKLQOEAVPLEGVS  
TGATTTTVDEKNSDQRTKDTIVARAQDEVNKLDFLTPPPFIKNDPSVSRGDQYKNS  
LPVIGEIGVAAQKQKERRDRAIEVGFAPQFFEVGELVGERRQWTQLQRAERAREGASEVR  
RAFNIYTTNLNFSRTNYQWVGSTQDKSQRIRNDRLPPTTVDVIRSDLDARDLYRNQVQ TAL  
EDARAEMYQRKESGNNRVDFRRLDTTELLEILTQAQVSVDKWFGFVPRDRVLALEVV  
IQEQTEKIDSKGNMIIRKLDLPTMLVALLEVQSREGKLDTMVRALELLQRTKRFLMQHD

TSSQHNMQDCLDNADTMVVNTTRSSPVHG  
>comp8835\_c0\_seq1; 303 1 1245 LEN=1375; translated  
XTDDGRHDDSDWREDLEGLHDVSVLKKQFLSLGTVFLSGVSKEVVNDGSMVDDKLVSCFR  
GHLRSFHVEAMNTIGTMFYREDWQLHSANDLQRETRATLSSPGREGDDKTTHSLRSVLEF  
VFERVLHQGDHSESLCCRSKCNFGSRAIAENPNMMLLAECRNPFIDRARRTAEAKTES  
ITSDVFSRSNDRVEDMIKLEIYIGDDDAGLSKIILRSVFDGVLPMARLLLLIIDKLP  
AEDASHVLIGIVDLYVTTAFRLCAGNERNERILLGIDDLVSTKQDANAQVNRASSPMFD  
FGLRSQGPTRQAPVLSVTAEAEALCALVPGESKNLEPLRDFLLECCQKRMIEGVAKL  
DLVDN WISDPVIAEDTIEEDFAKETARVMERRQGASCNHILVALALLQRLETSRRRATE  
>comp8835\_c0\_seq2; 406 1 1769 LEN=2077; translated  
XTDDGRHDDSDWREDLEGLHDVSVLKKQFLSLGTVFLSGVSKEVVNDGSMVDDKLVSCFR  
GHLRSFHVEAMNTIGTMFYREDWQLHSANDLQRETRATLSSPGREGDDKTTHSLRSVLEF  
VFERVLHQGDHSESLCCRSKCNFGSRAIAENPNMMLLAECRNPFIDRARRTAEAKTES  
ITSDVFSRSNDRVEDMIKLEIYIGDDDAGLSKIILRSVFDGVLPMARLLLLIIDKLP  
AEDASHVLIGIVDLYVTTAFRLCAGNERNERILLGIDDLVSTKQDANAQVNRASSPMFD  
FGLRSQGPTRQAPVLSVTAEAEALCALVPGESKNLEPLRDFLLECCQKRMIEGVAKL  
DLVDN WISDPVIAEDTIEEDFAKETARVMERRQGASCNHILVALALFAATRNI  
PSSCNRVKGYSE QVLRVFP  
LLISLCNRISCMRAIRGRAVLQEI  
VSIGSLWEESKLHEHANDYVDDFC  
GFLAL LWRYL  
YASPGRLPLGILKMLWENLVGG  
GYMILIDGFSKVPYCSTEGRAL  
MSMDVASRSE TSARS  
IANRLRENQHPSCPLPAVIE  
PYRSAAYVDTYVKIFYF  
PSKDALEW  
>comp8838\_c0\_seq1; 329 67 1410 LEN=1635; translated  
MSFLLNCSSLALLRPVRA  
SLRNSTQTLLRPIL  
TIDSPSNNDNESQ  
CREFSSTLPRNG  
DSA TNDIQSP  
FIRRSDRPELRPS  
LYHIRASGESRID  
RASRLCPT  
RDLNYTPEMWAR  
HKAPGRH IQ  
HLFTVFGCAS  
FQRLIFPDLFL  
TASVAAGLTY  
YNVFFGGAD  
PFAFDTTAFT  
S  
CSM  
GISV LAG  
FRLN  
SSYGR  
FNEAR  
RILGQ  
VNNSS  
RNL  
MGQAC  
MFL  
NER  
NMQR  
MKR  
LLK  
AYS  
VAL  
HFH  
LNTK  
GGH  
FRL  
KST  
DPET  
KGV  
NAAY  
RDEM  
REIF  
L  
PAN  
ENL  
SGI  
D  
TKI  
VAD  
ATA  
D  
FDI  
CK  
AYE  
SG  
SH  
V  
P  
L  
L  
L  
S  
S  
F  
M  
R  
K  
I  
I  
D  
H  
E  
S  
D  
N  
D  
P  
R  
Y  
V  
V  
A  
M  
T  
D  
E  
V  
S  
N  
L  
V  
D  
C  
L  
G  
G  
C  
E  
R  
I  
L  
R  
T  
P  
I  
P  
T  
T  
Y  
T  
N  
T  
S  
R  
L  
M  
S  
L  
W  
S  
L  
T  
L  
P  
L  
G  
L  
Y  
P  
L  
T  
G  
P  
E  
W  
T  
L  
P  
L  
S  
V  
V  
L  
S  
Y  
V  
V  
L  
S  
I  
E  
D  
V  
G  
V  
E  
I  
E  
E  
P  
F  
H  
V  
L  
P  
R  
Q  
Y  
T  
E  
G  
T  
A  
D  
S  
L  
D  
A  
I  
E  
K  
A  
Y  
G  
L  
C  
P  
E  
N  
L  
S  
N  
S  
>comp8838\_c0\_seq2; 275 67 1144 LEN=1873; translated  
MSFLLNCSSLALLRPVRA  
SLRNSTQTLLRPIL  
TIDSPSNNDNESQ  
CREFSSTLPRNG  
DSA TNDIQSP  
FIRRSDRPELRPS  
LYHIRASGESRID  
RASRLCPT  
RDLNYTPEMWAR  
HKAPGRH IQ  
HLFTVFGCAS  
FQRLIFPDLFL  
TASVAAGLTY  
YNVFFGGAD  
PFAFDTTAFT  
S  
CSM  
GISV LAG  
FRLN  
SSYGR  
FNEAR  
RILGQ  
VNNSS  
RNL  
MGQAC  
MFL  
NER  
NMQR  
MKR  
LLK  
AYS  
VAL  
HFH  
LNTK  
GGH  
FRL  
KST  
DPET  
KGV  
NAAY  
RDEM  
REIF  
L  
PAN  
ENL  
SGI  
D  
TKI  
VAD  
ATA  
D  
FDI  
CK  
AYE  
SG  
SH  
V  
P  
L  
L  
L  
S  
S  
F  
M  
R  
K  
I  
I  
D  
H  
E  
S  
D  
N  
D  
P  
R  
Y  
V  
V  
A  
M  
T  
D  
E  
V  
S  
N  
L  
V  
D  
C  
L  
G  
G  
C  
E  
A  
Y  
Y  
G  
P  
Q  
S  
L  
>comp8838\_c0\_seq3; 275 67 1144 LEN=1960; translated  
MSFLLNCSSLALLRPVRA  
SLRNSTQTLLRPIL  
TIDSPSNNDNESQ  
CREFSSTLPRNG  
DSA TNDIQSP  
FIRRSDRPELRPS  
LYHIRASGESRID  
RASRLCPT  
RDLNYTPEMWAR  
HKAPGRH IQ  
HLFTVFGCAS  
FQRLIFPDLFL  
TASVAAGLTY  
YNVFFGGAD  
PFAFDTTAFT  
S  
CSM  
GISV LAG  
FRLN  
SSYGR  
FNEAR  
RILGQ  
VNNSS  
RNL  
MGQAC  
MFL  
NER  
NMQR  
MKR  
LLK  
AYS  
VAL  
HFH  
LNTK  
GGH  
FRL  
KST  
DPET  
KGV  
NAAY  
RDEM  
REIF  
L  
PAN  
ENL  
SGI  
D  
TKI  
VAD  
ATA  
D  
FDI  
CK  
AYE  
SG  
SH  
V  
P  
L  
L  
L  
S  
S  
F  
M  
R  
K  
I  
I  
D  
H  
E  
S  
D  
N  
D  
P  
R  
Y  
V  
V  
A  
M  
T  
D  
E  
V  
S  
N  
L  
V  
D  
C  
L  
G  
G  
C  
E  
A  
Y  
Y  
G  
P  
Q  
S  
L  
>comp8838\_c0\_seq4; 271 67 1185 LEN=1854; translated  
MSFLLNCSSLALLRPVRA  
SLRNSTQTLLRPIL  
TIDSPSNNDNESQ  
CREFSSTLPRNG  
DSA TNDIQSP  
FIRRSDRPELRPS  
LYHIRASGESRID  
RASRLCPT  
RDLNYTPEMWAR  
HKAPGRH IQ  
HLFTVFGCAS  
FQRLIFPDLFL  
TASVAAGLTY  
YNVFFGGAD  
PFAFDTTAFT  
S  
CSM  
GISV LAG  
FRLN  
SSYGR  
FNEAR  
RILGQ  
VNNSS  
RNL  
MGQAC  
MFL  
NER  
NMQR  
MKR  
LLK  
AYS  
VAL  
HFH  
LNTK  
GGH  
FRL  
KST  
DPET  
KGV  
NAAY  
RDEM  
REIF  
L  
PAN  
ENL  
SGI  
D  
TKI  
VAD  
ATA  
D  
FDI  
CK  
AYE  
SG  
SH  
V  
P  
L  
L  
L  
S  
S  
F  
M  
R  
K  
I  
I  
D  
H  
E  
S  
D  
N  
D  
P  
R  
Y  
V  
V  
A  
M  
T  
D  
E  
V  
S  
N  
L  
V  
D  
C  
L  
G  
G  
C  
E  
R  
I  
L  
R  
T  
P  
I  
P  
T  
T  
Y  
T  
N  
T  
S  
R  
Q  
V  
P  
L  
S  
>comp8838\_c0\_seq5; 275 67 1144 LEN=1741; translated  
MSFLLNCSSLALLRPVRA  
SLRNSTQTLLRPIL  
TIDSPSNNDNESQ  
CREFSSTLPRNG  
DSA TNDIQSP  
FIRRSDRPELRPS  
LYHIRASGESRID  
RASRLCPT  
RDLNYTPEMWAR  
HKAPGRH IQ  
HLFTVFGCAS  
FQRLIFPDLFL  
TASVAAGLTY  
YNVFFGGAD  
PFAFDTTAFT  
S  
CSM  
GISV LAG  
FRLN  
SSYGR  
FNEAR  
RILGQ  
VNNSS  
RNL  
MGQAC  
MFL  
NER  
NMQR  
MKR  
LLK  
AYS  
VAL  
HFH  
LNTK  
GGH  
FRL  
KST  
DPET  
KGV  
NAAY  
RDEM  
REIF  
L  
PAN  
ENL  
SGI  
D  
TKI  
VAD  
ATA  
D  
FDI  
CK  
AYE  
SG  
SH  
V  
P  
L  
L  
L  
S  
S  
F  
M  
R  
K  
I  
I  
D  
H  
E  
S  
D  
N  
D  
P  
R  
Y  
V  
V  
A  
M  
T  
D  
E  
V  
S  
N  
L  
V  
D  
C  
L  
G  
G  
C  
E  
A  
Y  
Y  
G  
P  
Q  
S  
L  
>comp8838\_c0\_seq6; 275 67 1144 LEN=1828; translated  
MSFLLNCSSLALLRPVRA  
SLRNSTQTLLRPIL  
TIDSPSNNDNESQ  
CREFSSTLPRNG  
DSA

TNDIQSPFIRRSRPELPRPSLYHIRASGESRIDRASRLCPTRDNLNYTPEMWARHKAPGRH  
IQHLFTVFGCASQRLIFPDLFLTASVAAGLTYYNVFFGGADPFAFDTTAFTSCSMGISV  
LAGFRLNSSYGRFNEARRILGQVNNSSRNLMGQACMFLNERNMQRMKRLKAYSVALHFH  
LNTKGGHFRLKSTDPETKGVNAAYRDEMREIFLPANENLSGIDTKIVADATADFDIICK  
AYESGSHVPLLLSSFMRKIIIDHESDNDPRYVAMTDEVSNLVDCLGGCEAYYGPQSL  
>comp8838\_c0\_seq7; 320 67 1383 LEN=1767; translated  
MSFLLNCSSLALLRPVRAASLRNSTQTLLRPILTIDSPSNNDNESQCREFSSTLPRNGDSA  
TNDIQSPFIRRSRPELPRPSLYHIRASGESRIDRASRLCPTRDNLNYTPEMWARHKAPGRH  
IQHLFTVFGCASQRLIFPDLFLTASVAAGLTYYNVFFGGADPFAFDTTAFTSCSMGISV  
LAGFRLNSSYGRFNEARRILGQVNNSSRNLMGQACMFLNERNMQRMKRLKAYSVALHFH  
LNTKGGHFRLKSTDPETKGVNAAYRDEMREIFLPANENLSGIDTKIVADATADFDIICK  
AYESGSHVPLLLSSFMRKIIIDHESDNDPRYVAMTDEVSNLVDCLGGCERILRTPIPTT  
YTTNTRLSLMSLWSTLPLGLYPLTGPEWTLPLSVVLSYVVLSDIEDVGVVEIEEPFHVLPFR  
QYTEGTYCSEYVYILLYL  
>comp8838\_c0\_seq8; 294 67 1497 LEN=1722; translated  
MSFLLNCSSLALLRPVRAASLRNSTQTLLRPILTIDSPSNNDNESQCREFSSTLPRNGDSA  
TNDIQSPFIRRSRPELPRPSLYHIRASGESRIDRASRLCPTRDNLNYTPEMWARHKAPGRH  
IQHLFTVFGCASQRLIFPDLFLTASVAAGLTYYNVFFGGADPFAFDTTAFTSCSMGISV  
LAGFRLNSSYGRFNEARRILGQVNNSSRNLMGQACMFLNERNMQRMKRLKAYSVALHFH  
LNTKGGHFRLKSTDPETKGVNAAYRDEMREIFLPANENLSGIDTKIVADATADFDIICK  
AYESGSHVPLLLSSFMRKIIIDHESDNDPRYVAMTDEVSNLVDCLGGCERILRTPIPTT  
YTTNXPASTSELNPPKYRPFATGTNIFVFIELTMQVNEFMESNSSTWIVPFDGPEWTLPL  
LSVVLSYVVLSDIEDVGVVEIEEPFHVLPFRQYTEGTADSLDAIEKAYGLCPENLSNS  
>comp8839\_c0\_seq1; 585 62 1126 LEN=1400; translated  
MVQLLNSSYAMILLAATSRLSSAFVPTAKSFGRALTKVAASDNDFDDFSSKVAVMFPQGQ  
AQSVGMCSEVVNDVPAKALFDEASEILGYDLLEVCTEGPKEKLDSTVVSQPAIFVASMA  
AVEKQDAGAEAVEEATCAMGLSLGEYSALCFAGAISFADGVKITKARGEAMQAASDAV  
DTGMVSVIGLQSDKVKELCEVASDKSCEKQVIANFLCKGNYAVSGATAACDKLAEIAKPE  
FKARMTVKLAVAGAFHTDFMAPAVSSLEDILKEVEIKKPRIPVISNVDKPHSDPEVIKS  
LLATQVTSVPLWENTMDLMLSKDFEKAYECGPGKVTAGILKRFKTAACENISV  
>comp8840\_c0\_seq1; 44 1 559 LEN=1340; translated  
XVGGDQNRNQTTPRCRGPALSALDAKILSSERGNELWGVADPNPDPSSPERLLRKTEA  
GMAGFLTQPLSSPASDTLADCREAGGRATKLLAGLALPRTARGLRFWAGLLGREDELER  
DPLFASHLAYFSQPYVTPAWAGRELTDLLGNPDADGVHFMPLSNTGDLCALFESLNHVR  
RAGSSE  
>comp8840\_c0\_seq2; 114 1 614 LEN=614; translated  
XLASLAASEQTGDRIEGESEIEIEQHTTEILPPAPDLFSEEQQRPEQRPVPLHRVIPCL  
AILFYSIPFHPMRAFSPAAGKIVSVEWNKSVAEVRSLLLPAAAHFVLPDLPGVSDRDRE  
AFETGTGDDPSSRIHTVAACHHETAESLLAAVDGVHPDARLLVGGDQNRNQTTPRCRGP  
PSALSALDAKILSSERGNELWGVA  
>comp8841\_c0\_seq1; 265 1 1141 LEN=1540; translated  
XAAALCPRSVLTTGVGTTAGLTCAAVREGNGKEFALEAGALVLADKGI CCID EFGCIRN  
EDRTTIEAMEQQTL SIAKAGIVCKLNCRATVIAVMNPRNCIYDNHMSLAHNTGLGTPLL  
SRFDLIFKLVSDSAERDSNVTTYLLNRAIQGTGFECSSSTSAGIAGEDTPWSMEKLRAYI  
AIVKDRFQPSISDEAARLLEAHYEKVRSAQSSSIPVTVRFLESLIRLSQAHARLMYRNTV  
HLEDVAVLRVMECSAHAYGGFDGNVDDPENILYGDPMHMDTCVYAPDEDFVVFYSILK  
RYDMLEYMSNDRNQALALLEGEDDNDAMGFGPTTWNNIANPHDRPGTVGEDHYGRSYFS  
PGPPSQSQTPNTKRRKVM  
>comp8842\_c0\_seq1; 1251 80 3307 LEN=3522; translated  
MSEQIDFGADDPFVVDKTLWLDTVVVFGLSCFVLCMLNLSKVSTSKMGMLYGVVGMICLVA  
GYWADNVYTYGDGRWLI AASMAPGILFGIWSAISVEITGLPELVGAYNGFGGLAAALEGI  
GLYLDPDATYLVRRGNIVKLNDPMLWVQAIALVLSIIIGMMFTTGSMVACLKLHGHTIAS  
KPRIIPFRWGVTVLLFVLMGIFGALAF TGQTWNRGLGITFIAIVTILSGLYGI IAVMA  
IGGDMPVSI SFLNSLSGFSTSMAGFMLS NKALVVAGAFVGC SGI ILLTVMCIAMNRSIS  
NVLIGGF GDGAGKKVAKKVEGTATEVNADDVIELMQDAKSMI IVPGYGMAVAHAQHAVAD  
LTSKLRARGTNVRF AHPVAGRLPGHMNVLLAEAAVPYDITFAMDDINEDFPETDLALIL  
GANDTVNPAAQTDPGSPIAGMPVLEVWKAKKITMKRSLRVGYAGVDNPLFVNDNNVMFL  
GDAKKSLEKLLALLGDAGEGNTNGDIEAVAKKVVKVDFFFTQIPQLLQNTFLKIGVCKE  
IAQDGEKRVSI VPEVAKRLLKSGIQVFVETSAGDGGGFYDSAYTMMGCQILGSAQEVYDM  
VDVVVKIREPEMHPITGIHEIDMLGQKSMISFVGPRTDK GKALMAKAVSAGINLLAVDA

IPRISRAQSLDVLSSQAKIAGYRAVVEAANEYQORFFNGEVTAAAGSFAASKVLLVVGAGVAG  
LSAISTAASMGAIVRAFDTRLECKEQVESLKGEFLVLDVDFSEDGGDSGTGYAKVMSDAFI  
QKEMEMFREQAKECQIIITTAAPGRPAPKLIMKDAVDNMAPGSVIVDLAGATGGNCELT  
RPGETYVYDNRVTIIGTTDLISRMSWQASSMYSNNMANLLDLLCPKPKEEAAQKSLFIDM  
DDPVIRGMTCVHDGSVTWPPASVTKTSAQSGGQNEETQISMTPVAKPSAFSKRVFDLTS  
IGEILGFLMMLFFVVLAFVAPVSVFTQLLYFILAGFLGYLIWAVEPALFSPLMSISNS  
LSGVVILGGILMVSGERGSNSILGCLAISVATINVFGGFAVSYRMLLMFKKEKQ  
>comp8843\_c0\_seq1; 344 269 1388 LEN=1468; translated  
MAMEKNPTSPETNKIDNLASRRGDRLLEKDRRRKTHEEHTNGDENHHAHTSINTTTKTH  
EPGPRETGPKFGARSFDYWDAYNIEQHDSYNNVQONADPYAQTIPVPSSSYSFSPTTST  
TADFTLSLVPSTSVDELNPSTGSPSTSDASPTETPSSRSTLVPSAILLGTEDPTVANITP  
EPTVNSNSNVLSYQDQRGICSGAANGIGCASEDPEEQLSGNPNEIVNCFNVTEFGVELP  
FMIDSVRFWIGSSSPPPDLELNVFAGTKENGPDSNILLYSQQLFGYTTGINTITTTMDV  
MIFLSSFCVGVTSRSDAGLRIQTDDLGIIDDASYLRSPECGIANFTSLGDVGLTNDFCI  
EALVSFGVDLRR  
>comp8844\_c0\_seq1; 230 129 530 LEN=1100; translated  
MTIGVDQEQPHEVVTQLEDEDDVTIVLEDTADEDEVMAGWVDQDSEPMQERRRNLL  
RELQRVQRASFTHFMILCLIPTSLLFIVIATVLEGEDEDCQSIATTCEKEPRTFINAFTTR  
CVCDAITVVRSDP  
>comp8845\_c0\_seq1; 195 1 677 LEN=858; translated  
XCSRAVATATSKTEPFRVPVDWKGMLFDYPTLIKKPMDLGTVKNINSRKYKSIPEAAE  
DIRLVWNTCMYTNQDGSDFYILAKNLSKRFEKYAKLASELQVDARSDSGGGTSSNSSGV  
VTLDEKRSFARSLYTLKEDLGKLIVEVDNKC PAALTKNMGEDEAE LNVDKIPVALFQEL  
KTFVSTVTRPLRQPRKEPRGSRRDANMRSETTCFVISSLGGFDFG  
>comp8845\_c0\_seq2; 283 324 1038 LEN=1219; translated  
MGPPPTDAQWAMSKILQSMIQRSDTEPFRVPVDWKGMLFDYPTLIKKPMDLGTVKNIN  
SRKYKSIPEAAEDIRLVWNTCMYTNQDGSDFYILAKNLSKRFEKYAKLASELQVDARSD  
SGGGTSSNSSGVVTLDEKRSFARSLYTLKEDLGKLIVEVDNKC PAALTKNMGEDEAE LN  
VDKIPVALFQELKTFVSTVTRPLRQPRKEPRGSRRDANMRSETTCFVISSLGGFDFG  
>comp8846\_c0\_seq1; 698 94 1746 LEN=2115; translated  
MSNDTNAVVSPEANVS VATVEYFFLVGDIGGTNSRLALYRHKEEKKRFDVNDNAVS  
DSEVDNRHLLGMYHRPLFTQDYRNEEVLANDEETDTC DTHCNVSSSSSGGSDSSRANK  
NVTKFVEKIIIGPFLEECWEAMVASLSASTNVSANDAIHKSPSNIDKIKSKNLNNEKNHMM  
EISIVCCLA IAGPVDTNLNSGTVLTSQRDSFLTGLNGMILKELMHHPRCRKT SKLRPTF  
KACVIINDFMAQGYGCCLSLSTTSISTESESSSSVVELKRIDSNSSVTRLASKSGPKLCV  
GAGTGFGSCYLVPMTSTSSNIYSCLPSEFGQTEWVPNTANIADQREGKNGDDDQVELWKY  
LLNQKLQRGETARLSVEDVVSGLANAYSCFNSLYPHKVNPAVQEQFNSSSDLRGKIVG  
SNANNCEICKRAMDAV I IAYGTVVGSCAMTFLPSGGLYITGGLLVNLEETNDPSWKMRSA  
NNLEDDENGSLSP TSPILSLFLKSYRSKGRASFLLD SVPLYIVLAKDAGLRGAAVHAEMV  
LQTFPFNSLR  
>comp8847\_c0\_seq1; 497 52 1159 LEN=1159; translated  
MNSALDRWGASPSPLHENDKENLRKASRGND SKKKKKEKKARQPMQPQQQAQGTQNLKPL  
RANAPAGIGKKTSGSTSSGASHDGSSMGSRRQSGPAARALGGAGLSSETEASPPVDSVF  
RDPAAELEMNEVSTMAGDTYAGVEMDARVAEAVPPFGVSGAAAAGPPEMFVTPTRDDTD  
EYGYEDLYGYSED RGKKPEHFRFDERIETISPVSTQPETPEKDGDI EGGNEECVPLCED  
KEFSPKKQRRWRCII CAGCWLAF FLVVGISMLGYTLYAVRNEDKGALSLSFSKEFWVRAGD  
EIQDALFFWQDDEDENEKTMAPTQDFWFDATETSTSFPGTEWPTMPPSTVTRDAIEAVVLS  
AAVDRGIASX  
>comp8848\_c0\_seq2; 216 15 402 LEN=402; translated  
MKFLTSAAIW TALTT SVGAFAPTLNVARTQTSTLSMGVAAASKEEDLMLTLKVIMDHAD  
RSSTVSKEQYIQQVEEAKTEEAAAQEPIDVSI PYDATVQLAYDKSDKSM SDFEFP IYLA  
QAIAEVVAKX  
>comp8849\_c0\_seq1; 553 139 2358 LEN=2516; translated  
MSTNPPRSMAQDVARWYF SKLDPYRSNVSNIQSYLRSPLIALTVKTLQTRPLDIENNRRT  
VNAGVGVNAIGVSENPSKLEEEKKNSADGTTGDWREYLQEEETNEKEQQNIFQSEFSSL  
SRRTKARMEAFIAGCLLTVPGPEEPTKSDRKREFTEAERERSALS LQDGLSGFVPKRM  
PINHRISSLTEQMGRMTMIGETADPNRVKHPQIAWEDLVIRLELYIRILQRRKNLNEECVI  
AMESPKLIRTRARYTTNAFVATATYVRNISPVLTRLLHCLTMEMLAVECVSEDI TKVIHR  
ITSEYEHRTSFASLAF LSTPEVNADSVLTPLVVKFLKHLQADWERLVKECELERMLIRAL  
DPSMRKMFKTVEFQSIGHLLEVCHSYSNKLQSIELPPNLCATAENVGSLCENNAGAVRQAL



RDLRREIITVNGHVLPPVTSRNELVSMNLNQTLSNSTLTASSPRKTKKKRGGRKNGFRDR  
LTKSAPPMQSYQPDPELSSDGASSIERQSNQYPIEPNLQTTDIVNDISENESSILSNSDS  
SLAMDSPVENGRTMKLSSPTRRRRKGLHLAIDILTRRLLIAASRTGNGGDAYFFVKDL  
FGGEDVEVPTSTVAFRDRMVHPGTIDILVRLASVTIKCHQSFDIYPKSLIGETEPLIQF  
HTTTTEIISLQEI RADENDSHAQEYTVDDRTSVDGDNDDAERPPLMVIREHKTDRTGWR  
VISIRPAMYEKIETWNTPS

>comp8849\_c0\_seq2; 467 139 1932 LEN=2623; translated  
MSTNPPRSMAQDVARWYFSKLDPYRSNVSNIQSYLRSPLIALTVKTLQTRPLDIENNNRT  
VNAGGVGVAIGVSENPSKLEEEKNSADGTTGDWREYLQEEETNEKEQQNIFQSEFSSL  
SRRTKARMEAFIAGCLLTPGPEEPTKSDRKREFTEAERERSALSQDGLSGFGVPKRM  
PINHRISLQTEQMGRTMIGETADPNRVKHPQIAWEDLVIRLELYIRILQRRKNLNEECVI  
AMESPKLIRTRARYTTNAFVATATYVRNISPVLTRLLHCLTMEMLAVECVSEDIKVIHR  
ITSEYEHRTSFASLAFLSTPEVNADSVLTPLVVKFLKHLQADWERLVKECELERMLIRAL  
DPSMRKMFKTVEFQSIGHLLEVCHSYSNKLQSIELPPNLCATAENVGSLCENNAGAVRQAL  
RDLRREIITVNGHVLPPVTSRNELVSMNLNQTLSNSTLTASSPRKTKKKRGGRKNGFRDR  
LTKSAPPMQSYQPDPELSSDGASSIERQSNQYPIEPNLQTTDIVNDISENESSILSNSDS  
SLAMDSPVENGRTMKLSSPTRRRRKGLHLAIDILTRRLLIAASRTGNGGDAYFFV

>comp8850\_c0\_seq1; 251 1 1001 LEN=1038; translated  
XGEEAAAAYEQEKKDIAAGKIPVPPPKPKKSKQAPKRKADEKAGSKKGGKDDSEEDPVAS  
GKRKPGRPKNPEDIPTKPPPAKQKATAGKEDIAPILAKSVGKATILAPIPKFADMGDE  
ELMKEAAVRIVAARSVNYCVTEVQLPAPIHVDFRCPVPRRTGLYHQMGCALLVGLDPHLF  
GWDIDSVLAKQYFGSDAERKNASRALAEFFGSDGLNQRFRCLVQGSTTVLGCAGSHTKRV  
YASLGLGSPPIGGPVGRIDCNTGGESRCCGETAACIRYVPTDTGDFQFSALSSDLITMNG  
QRITPEMGSPFLFNEDICTIGSRVVFVLLPSDA

>comp8851\_c0\_seq1; 440 98 1680 LEN=2340; translated  
MEENTLSTMLRSRKSPTHGSASPTDSLCDGMDIEKSSSIARHDKFKRQLFGAHANRKNAS  
CSPLYXIATNFTTFFVYQWVLRSTTKEISQSCPMDMVGAFANWFGNTLDSKRKAADFQDIR  
IDETSGRHRKFFTPVPPQFRKTFYYDGKKISQPIARALRSRGWVRVDDTDNAHLIYTYYN  
EADWATELLPWQRFNYIPGLEKWNKSDFVYYKQYEEATGKPPSVYVPESYMLTENKKE  
VEAFRHVLEKGNKKNYPWVHKL SNVNQKGKITIMAPNSPELLTLPDDSI RTIESILANDK  
KDSSGSEDEDDVEESI IQRYICNEMTWNQRKFDVRMYWVFASLDPLVLYHDGYVRVGN  
AYSETSFDTTSHLTSHTGLGAEGKADFSQLEETLNKHHKKKQKTRPLFPNGNTPVEHVR  
NQFKHALGEMIEIMKDESFAVPLNDEDPDISTENSFOFYCADFILDNDLDVWFIEPQNG  
CGLDEDYFRLEMHASLFNGMVDILEEVGQKQENQEP LLLPLEKSGNW

>comp8851\_c0\_seq2; 443 98 1761 LEN=2144; translated  
MEENTLSTMLRSRKSPTHGSASPTDSLCDGMDIEKSSSIARHDKFKRQLFGAHANRKNAS  
CSPLYXIATNFTTFFVYQWVLRSTTKEISQSCPMDMVGAFANWFGNTLDSKRKAADFQDIR  
IDETSGRHRKFFTPVPPQFRKTFYYDGKKISQPIARALRSRGWVRVDDTDNAHLIYTYYN  
EADWATELLPWQRFNYIPGLEKWNKSDFVYYKQYEEATGKPPSVYVPESYMLTENKKE  
VEAFRHVLEKGNKKNYPWVHKL SNVNQKGKITIMAPNSPELLTLPDDSI RTIESILANDK  
KDSSGSEDEDDVEESI IQRYICNEMTWNQRKFDVRMYWVFASLDPLVLYHDGYVRVGN  
AYSETSFDTTSHLTSHTGLGAEGKADFSQLEETLNKHHKKKQKTRPLFPNGNTPVEHVR  
NQFKHALGEMIEIMKDESFAVPLNDEDPDISTENSFOFYCADFILDNDLDVWFIEPQNG  
CGLDEDYFRLEMHASLFNGMVDILEEVGQKQENQEP LLLPLEKSGNWEI IYADGQVYNYN  
GYERSANKEGCEVQ

>comp8853\_c0\_seq1; 414 409 1323 LEN=1491; translated  
MGMLLGDKEGVSDENALILSDILGTEDALGTMDFKVGADRTGITTFQLDIKCEGLSLQTM  
ERALEQARVGRHLHILDKMDEVLSKSREILPDTVPKLARFTIEPSSIGKVI GPGGQIRAI  
IEDYELSNMNVDDGDNVQISSFKQDKLVEAEFVKKLVAGGGGRDGGGRGGREPRPQYSG  
PDPVEGQVYKGTIKGVHPFGVFLFMPGAEDGSTPGLGLEGLCHVSELAEHVRSCEGYVKS  
VLNTEEFDVVYMGVNKQGKRSLSRKAALAAKRNGTNGAPKEQASVMSDEEFDVIAKAI EG  
VQES

>comp8853\_c0\_seq2; 401 1 1223 LEN=1391; translated  
XKIDKIDGTEEKRYLQYSFPPSCVGETGRTGAPGRREIGHGNLAERALAPTL PSEEEFP  
YTIRVESLITESHGSSMASVCGCLALMDSGVP IKNPVAGIAMGMLLGDKEGVSDENAL  
ILSDILGTEDALGTMDFKVGADRTGITTFQLDIKCEGLSLQTMERALEQARVGRHLHILDK  
MDEVLSKSREILPDTVPKLARFTIEPSSIGKVI GPGGQIRAI IEDYELSNMNVDDGDNV  
QISSFKQDKLVEAEFVKKLVAGGGGRDGGGRGGREPRPQYSGPDVVEGQVYKGTIKGVH  
PFGVFLFMPGAEDGSTPGLGLEGLCHVSELAEHVRSCEGYVKSVLNTEEFDVVYMGVNKQ  
GKRSLSRKAALAAKRNGTNGAPKEQASVMSDEEFDVIAKAI EGVQES

>comp8853\_c0\_seq3; 577 104 1554 LEN=1554; translated  
MYFVGI L VVAFLN S SNGVNGFQARRG PRLT T L N G A K A A I S T A L N E S P Y Y S I E T N N N G P A G  
G E V H R L T I H K L P G Q K E D D E N E N P I V I E T G K I G R Q A S G A V T L Q R G D T V L Y A T A A C D G S P K E  
G L D F L P L S V E H Q E R F S S V G L T S G G Y N K R D G R P A E H E V L T C R L I D R P L R P L I A E G W R H E T Q  
L L S W V M S Y D G L R S A D P L A I V A S S T A L F L S E V P L T K A V A A M V G Y D K E T D T F L L N P T N E E M  
E K S P L Q L I V A G T K D A V L M I E G A A D F L P E E T M V R A V T F G H E A I Q V I C E A V E E F G A L A G K E K  
N F E T L K T A P E A L Q Q V V D D L M T E K V D A A Y A L G G T K T T Q G P V M S E L R K E L V E T L T N S D D E E A  
A E Y A P N D I K S A F K D L L C R R M F V R A Q E T G Q R C D G R A L D E I R H L T M E T G F L P K T H G S A L F T R  
G E T Q A I A T T T L G D S G M R Q K I D K I D G T E E K R F Y L Q Y S F P P S C V G E T G R T G A P G R R E I G H G N  
L A E R

>comp8855\_c0\_seq1; 434 140 1280 LEN=2792; minus strand; translated  
M G T F L K E R F G E V E F G T T E P M K D L D Y T V M D T D D A V D I E F V P S N E T M I A K K K T V I T E D I M V E  
T M E Y D D N G F A L K G F M A K P T S L S S Q K V P A I I V L P D W D G V N G P T G Y E T E R A V M M A K E G G Y I A  
M V A D I Y G V E H T N V E D M Q E R I V L A T K Y R S D P E L F V G R I K A A V D L L V T H P S V D E T H I F V A G Y  
C L G G T G A I D Y A F S S G I F E S V K A V P I H G G L S P L R E I K S D V V K P Y V L I L S G G I D D S H G N P T  
E L E Q H L D G A A T W E I S R Y S S K K H E C N S F A F S H E C V I Q K L T I S L L F D I N D A N H G F T K W G T G  
P F S A Y N E I A D S R S W T S M M S L F K T L A A S T E V E D D T A A P V E E A H D D I K E K E M S E K S S A Y T G  
V T G F S F L A A V A F A S S V A V I W

>comp8856\_c0\_seq1; 442 333 1580 LEN=1611; translated  
M E K L A T L V L G N N D L S G E V H F G G L Q N L E E I N L E N N K F S G P L P R F P D S P G I R S L R V G D N N Y D  
S Q L F P T E F L E M T S L T N L G L N N L Y L T G A I P V G I G T L T S L E I L N L E D N L M N G V I P L P I S D L T  
A L T E L S V R N N Q L S G T I P F E I S Y L T N L E K L S L S N R L D S N I P V A I R H L T A L K T L E L E S N V L  
E G E I P S S I V S L S M L E T L N L A D N A L T G L V P Q S L W S L P S L R E L V L A N N Y L V G R V P E L I G N L K  
K L E V L N L A A N T F H G R I P E S M T S M T N L L S L D L S F N F F G G P I P T D I G G L E N L R E L L L G T N Y D  
E S D K T F G F D G T I P S S I A Y M V K L E R L E L N R N R F S G V L P S H H G F M K A V Q V Y D V S E N D D L A G T  
I P T D F S N M G Q L K G L R I F G T K I E G T I P E E L C K G G M S I E M D C A G A T I T N C G C C I C S P

>comp8856\_c0\_seq2; 646 1 2727 LEN=2758; translated  
E Q Y E Y P K I T H N I T S L F A A V S I F D E T L Y D L A V F T A R L A Q D F S V L I V D K R C S S R H T N F P H V M  
Q W F N S R G G D G D F D R P S V S T N E R R S R A D A N Y D E T D N A N N T P M T A I G D S P E K A F F A S T F D A  
Y E E G S Q V S S R E K F H L Q S G H S N G L S G K A K S L L Y G A T S I C F L I V I V V L I A I G A T Q D L F S S S T  
D K N G A G S N Q N A S S I D F K E G V D E L Y Q Y L I T V G A R G A A S F I N P I S P E S Q A L A W L Q Q E D P L E L  
D P K D P Q Q H Y R I N Q R F A L L T L W F Q S D Y D W N D Q T N W L S E D D E C R W K G V T C V V V S N S N E G S L R  
N G D K I V Q V L N L E K N N L Q G N L P P D L Y L L K Y L T S L N L A G N Q I V G G I P P T L N S M L S L K E I Y L Q  
D N N L S R E I T L D F S R M S Y L T D L N V S N N K L E G T I P N S L F S I A S L S R I Q L E N N N F T V G S S G D V  
R N L I N L N T F T A G N N E L N G T I P T E L G S I E N L E E L S L R N N S F V G K I P V K L S G L S S L R S L D L S  
S N A L K G T V F P L S N M E K L A T L V L G N N D L S G E V H F G G L Q N L E E I N L E N N K F S G P L P R F P D S P  
G I R S L R V G D N N Y D S Q L F P T E F L E M T S L T N L G L N N L Y L T G A I P V G I G T L T S L E I L N L E D N L  
M N G V I P L P I S D L T A L T E L S V R N N Q L S G T I P F E I S Y L T N L E K L S L S N R L D S N I P V A I R H L  
T A L K T L E L E S N V L E G E I P S S I V S L S M L E T L N L A D N A L T G L V P Q S L W S L P S L R E L V L A N N Y  
L V G R V P E L I G N L K K L E V L N L A A N T F H G R I P E S M T S M T N L L S L D L S F N F F G G P I P T D I G G L  
E N L R E L L L G T N Y D E S D K T F G F D G T I P S S I A Y M V K L E R L E L N R N R F S G V L P S H H G F M K A V Q  
V Y D V S E N D D L A G T I P T D F S N M G Q L K G L R I F G T K I E G T I P E E L C K G G M S I E M D C A G A T I T N  
C G C C I C S P

>comp8857\_c0\_seq1; 313 108 914 LEN=1026; translated  
M I D F P Y T V D D E P T E D W K V E Q V L H W W L L R A N A E S E A E Y D R I V E G L S K Q L D D G K K E L W E A H K  
Q V S E I I G E N D T N N R H E N S E N V E N Q S T H S N Y Q N K P A I N I E K K N S K R Q I N Q Q E V K P V K A I  
A V P V A S S R A T R S R K T A P S K E P A A A I T S E S A T A N K R P D T I H I D I I A G P Y E G A F Y D L Q P K S R  
S H A W I G R S S A K F K E R G I S L P Q D L E V S T S H G R F E V K G G K F Y Y T D V A S T N G T R L N G E E C E P  
N V P Y E L S P K G M T I L A G Q T T M K V T L L S L A

>comp8858\_c0\_seq1; 114 1 433 LEN=479; translated  
X K P K P K P T R P D F T T P H N I T L H H I K R N M A T R M A S S T V A A A S C G G A H T A H S L L P H A A S A A A G  
Q L V Q P H Q H R G K A S S P A S A A S T R A H Q V P N R F T V A F A E M K R V C P A S I S S Y A A C V L E A E G S S S  
A I E R G S C S E E F R R V K D C F R K V R G F

>comp8859\_c0\_seq1; 492 694 1535 LEN=1535; minus strand; translated  
M M E F S R N N L S D E E W M A K M S S M N Q S V D Q E F L R R L K A S S A G S S G G A G S N A P S G M G T D G S S  
S M M Q Q N Q Q R N L S Q Q N G G N N T G N G N D A A E E E L L L Q L L Y Q R R R R Q Q M K E G M G G G A G G A P  
G D D G R F G S G V D S S G A S G N P T T H L M R S D E E Q L K K L R D Q Q A T V V S R R N S L M S A T G G G N D R R A  
T M I N G F S D A S G N N L G N A N P L G G N R S P N Q T R G S G S I S P F N A S N G M V G G P G S S L D G V R R S S  
M M G A M G N M G A P A G G M F G G M G G L G G I G A M G A M G M G A M N G M G

>comp8859\_c0\_seq2; 246 1 557 LEN=557; minus strand; translated

XAMNGMGGLGAMNGMGAMNGMGSMLDPFHQDAYGAMGASADYLNQPQRVDLSGSSRLLAL  
QRQQEAGMVGMQAGVFPVHPNMVGSFMDRERLMDLNLYGHTREQLAQQAHTKLLLR  
EQLQHRQLQSSQLQNGVNLKKKRAPARKKTPTNKPRRPLSAYNLFFSEERERILKEIDEK  
AALERGX

>comp8859\_c0\_seq3; 492 583 1424 LEN=1424; minus strand; translated  
MMEFSRNNLSDEEWMAMKSSSMNQSVDQEFRLRLKASSSAGSSGGAGSNAPSGMGTGSS  
SMMQQNQQRNLSQQNGGNTGNGGNDAAEEELLLQLLYQRRRRQQQMKEGMGGGAGGAP  
GDDGRFGSGVDSSGASGNPTTHLMRSDEEQLKCLRQDQATVVSRRNSLMSATGGGNDRRA  
TMINGFSDASGNLGNANPLGGNRSPNQTRGSGSISPFNASNGMVGGPGSSLDGVRSS  
MMGAMGNMGPAGGMFGMGGLGGIGAMGAMGGMGAMNGM

>comp8859\_c0\_seq4; 492 544 1385 LEN=1385; minus strand; translated  
MMEFSRNNLSDEEWMAMKSSSMNQSVDQEFRLRLKASSSAGSSGGAGSNAPSGMGTGSS  
SMMQQNQQRNLSQQNGGNTGNGGNDAAEEELLLQLLYQRRRRQQQMKEGMGGGAGGAP  
GDDGRFGSGVDSSGASGNPTTHLMRSDEEQLKCLRQDQATVVSRRNSLMSATGGGNDRRA  
TMINGFSDASGNLGNANPLGGNRSPNQTRGSGSISPFNASNGMVGGPGSSLDGVRSS  
MMGAMGNMGPAGGMFGMGGLGGIGAMGAMGGMGAMNGM

>comp8860\_c0\_seq1; 469 374 2124 LEN=2243; translated  
MMKALSLFYLVSLSSIAASSSTTTASAATGTGMHMAKNTGTLRAIAIRVIDGNGTAPIAS  
VEEIEEGMFEDDVCLKTQIEACSYGKLEIEPFGITDTGVFVNGVVEVVVDHQIEEDNS  
FTVLR EAATAAATAMLGELKSSSTFDIFMFCMPPTLKDGGQWQTFGIQNGKGSFYNDQY  
CTMTSALFARIGLNMNLAAPSNAIKDGEVKLFQDKTGFMMIDEGGIERMCMYNAAKSYQLG  
WYSDKTDSDIDPLLDGAGAVRRF ILNGVTDYESGNTDALIVLRLDQSAKKAEYYLGYNRKD  
GINRDTTQDFDMVNLVKEDSTTEFGPSNKIASLFPQKQYTIQGFNDDRDVEIRFVGLDN  
GLQDAIEVVDVENDVDADPKPCANYTIEIKTDKYPEDTGWYIIEKEDVGVQEIIVAVSPV  
FTEPSTTTKSIVCLPYNTNYQFVIIDRTGDGLQFGSYRGLDPEGNELFFYKHLKPFARKV  
EPIQVGLDPAPTDSPTQLPSLQPSRIPSQSPTVAPSLSPTRAPVPPPTPFPSAVEGEXLS  
GQEKKVAMEEKENAKMQMDCLEKEMRRGIQGEKDVYSLSKGL

>comp8861\_c0\_seq1; 546 157 1344 LEN=1531; translated  
MTITMLSVSVSVEFINEIIDSVLASANVPSSIVLSRVVTADWKSLSKSSLYLAGTKNDIL  
DNDNHPPYYFGIQVVASSEEQFQTPGQLIGFCTFYIAYSTWDGRMLYVDQMDSEADGSL  
LYHTLAKVATRIGAGRF CWKGERPLWEDAGASPEFLEDWVFLSMNRCAMANFVVGSTPIE  
SPGTVVPPNGGESKRIKPLHRVYVEETIRETLHQQTTPSNIKLRLAGPEDSDTIARLVKLL  
AIYEKEPDAVNMGAKDYLVDGYDSSAEPLFYCILADITSPDEASNGGREIAPSTATTAAM  
GLFYFGYSMVDGRFLYLEDLFCDEKFRGKSVGTTIMKQLALVSTVLDCCQFVWTALDWN  
PALSFYDKIGATVNDDLKITRYCGEDLQAF AISRP

>comp8861\_c0\_seq2; 480 157 1443 LEN=1630; translated  
MTITMLSVSVSVEFINEIIDSVLASANVPSSIVLSRVVTADWKSLSKSSLYLAGTKNDIL  
DNDNHPPYYFGIQVVASSEEQFQTPGQLIGFCTFYIAYSTWDGRMLYVDQMDSEADGSL  
LYHTLAKVATRIGAGRF CWKVRIDFDMNLFRLRTERLGLSFVHDPVSPVLVQQGERPLW  
EDAGASPEFLEDWVFLSMNRCAMANFVVGSTPIESPSTVPPNGGESKRIKPLHRVYVEETI  
RETLHQQTTPSNIKLRLAGPEDSDTIARLVKLLAIYEKEPDAVNMGAKDYLVDGYDSSAE  
PLFYCILADITSPDEASNGGREIAPSTATTAAMGLFYFGYSMVDGRFLYLEDLFCDEKFR  
GKSVGTTIMKQLALVSTVLDCCQFVWTALDWNAPALSFYDKIGATVNDDLKITRYCGEDL  
QAF AISRP

>comp8862\_c0\_seq1; 227 170 919 LEN=1149; translated  
MELGFHALFCCLPHATSASGVVDEPNEYTQSQRPRARGRDRGRSRTPKTNINALFGFSS  
RATLDPSESTLEEDEILEIPTDITLTKNKRRLHKKRRRHRSPRNTGSIKRDTKVYG  
SHSKAEKGTREHNKHGKKRWQKGRRGREEDSGLEGMENPNEENHPVYDITIKRERTND  
NSSVSTTSITSTIDTQEERIEVTIESSELFRGGKHEKLRPPSVLVKSIIFSQKVNIGRT  
HMKNKLRN

>comp8863\_c0\_seq1; 484 325 1959 LEN=1959; translated  
MKQRRRETVSICRFLANIVFVSALLCIIGVSNVAVASLPRRNLAKSIGILNTVAIRVIDGN  
GIAPNASVSELESSIFGINKVCLKSQIEACSYGKLRIQPFSGDTEETNVTITNGVVEVQID  
YEIVEESTLVALKEAATAAFAQLGDLRSSDKFDLIMYCLPPGIVDWTQGVNPKSSFY  
NNEYCSYVSAQLNQIGTNLNLAPSHAIKDGLTKAFGDKTGFMTIFDKDDQSMCYNPAKS  
FQLGWYNDRVDTINPVSDNFGSIRSIIILNGVADYDAKNDTLGNESSLVLRLEQTELEKDF  
YIGYNRKHGINKNTTQDWMITIVRKEGGPTEYGNSTKIASLFPGRSYTIGQFNDDRDV  
EIRFVGTNRNGMRDAVVEIVDVENFNDEEQPEPCANYTIELKTDQYPEDTGWFIKKEED  
GIHETAIVGQTDREKMTTSTTSTCLPYSSNYKFVILDSRGDGLQAGTYRAIDDNGIIVF  
SYDGEFFERRVEYFEVPERDLVPVFPPTTSPSSFPSSYPSGVPSSLDNSSAAPTPE

SPSGV

>comp8864\_c0\_seq1; 322 520 2532 LEN=3060; translated  
MTSRKGP RRK GSSSSNKT D N I S L S S R S D S S S H K S E V A A S L S K I L L D N S E E D D D F L S G A R F  
P K K A P Q R K T T S K S K F P K V K T A I E G D E A S V K S A L P R Q S S R S P K S R R N K S A P S V A G E T P K R R  
V S R N P R T A P G I A L P V H D E H D G T Y G E C T L N D E E K E P S A S P L A L S A Q N I K G S A K K L F D K A V R  
A A S P T S L R R A R S K S A G R Q S N N A N R D S E I A C P K R Q P S P G R L K K H T G E L D T S R G D R S T S S K S  
R S Q S P G R L K K R A E S P G S L R R R A A S P G R F R K W T E G P G A L K K P T E S S E S Q K K R A E S P G K L K K  
Q A E S T G N T K N R T V S P G R L K K R A Q S P G R L R K R S Q S P G R L R K R A E S P G R L N R N A R R M A R K E Q  
S E N S S N C E S G D G K L G A M L D R D A K E K S R K R E T R S I A S G S S R S S S A G P L R K P R S S R S S R S G  
K S K T T E E P G D K I P S K P R Q S H R A P S I S E E D D A P P K A Q P S Y S N M K D E L Q K H K V K R N R S M D P T  
M A L A L Q K Q M I L K S E E E K E Q S E R T R A P V R R A A S M I L T R E M G R R G N Q E S S I D L I Q Y K E E E I H  
S T S Y F A S N H V L I N R E R M K R G L R P L T R N V A M D Q L A R K N A E A M A K S K K C K C L E T T Y V G N V I R  
G E S I R S I H Q S V M L Q K Q G R E R A N I L N P Y F Q D F G V G T S K S E D G E L Y M C Q L F S E R L E L P L T D T  
L E D K T E Q T A P

>comp8866\_c0\_seq1; 628 1 1708 LEN=2138; translated  
X T P L L L L V A T N T I N T R H W L S L G G F L T S S F V S E I L P P T K T T T Q I R G L H S Q R N S A M K R R L A A  
A A A T A R T K N S T H H S G C H P T R R F E L P Q S R W F H G S S W Y D A A N G P L V S C A S K R A A P P P R I E A P  
K N R Y R D R R F V T A K A T D A S A S Q P R R Q K R K K K A L V S S P S T K R I T T K D R L R L S A R P S V G T S S K  
H E T T I D S F I D A I D A N R I V V K S P E E L V D R L N S G L D I A R A A V Q E T Y T S L R N P A A A S A G G S D S  
S S S S G R S F H R N G M V M D A N W W F W N L V L A S S P A V L I A L Y C E L V L K P R M R E A N E E R K N G A T V V  
T L G G G E G G I A T G D E Q G D T R K M S S M R Q R Q E E Q M R G L L Q E Q D G S K E S S S P T P I G S A N N N R S T  
L D E T V S L A S L Y K S V R S L V S L F T A P Q L T S T P S P E H A H D H G G G K G V G V Q S S T N D E L K I S P P T  
Q R H V V D R E Q Q Q T D N R K P Q L E K Q Q R E I I E L Q S R V S L L K K Q I E Q Q Q H R E Q T L R A T E D H A P A  
D P N D N D K R V K S R D D P I P V P A K T K I P D G N F L V S L T K T T V A A T T A G L A A G R N L W G S L Q S W R Q  
G R E R A S H D P M Q R T V D A N K E E E K A P T A S A D

>comp8871\_c0\_seq1; 367 85 894 LEN=1141; translated  
M Y T A T L E R I G D A I I N W F D P E E Q F T G F T K G W W L T D F P S A F S I A L A Y V L F V G I G S R V M Q N Q P  
A I D P Y P I K F F Y N V S Q I M L C A Y M T I E A V F L A Y R N G Y T V T P C V A Y D K E N P P V A N L L W L F Y I S  
K V W D F W D T I F I V L G K K W R Q L S F L H V Y H H T T I F L F Y W L N A N I F Y D G D I Y L T I V L N G F I H T V  
M Y T Y Y F I C M H T K D P Q T G K S L P I W K S Y L T L M Q L I Q F V T M M S Q G S Y L V I T R C D T L N F R V T A  
S Y V V Y I L S L F F L F A H F F V Q S Y M K P K K K K A

>comp8872\_c0\_seq1; 711 85 2628 LEN=3335; translated  
M S S P P V L L S E P T K P S Y R N E G R R D P A I R H S G R A H I R G K I R R V W R P R Y L E L C D S G F I R Y Y E L  
P P L A D V T M P E A A D W Q H V N M V I K D T L I I H H A R I I D V T T L R D L H V G L P R G S Y G F L F R G Q R I G  
N N L N N P I N C D F E G D R N A F V D M Q H D A T G N S C S A Y P G G G E V N P P R E Y F C A V S T L E E A Q S W V I  
A L Q W S V R T C Q K T L Q R L D S L N D N H N E K N N D G D N D H A G T N P K E F G S T K R D G G H D S G G N V H H L  
S P E R A N H T R S R S G R I L V T K V C G F R I I P V A T F F R W E I G Y E V A L L L V E N S K D K V E E R I L L T  
F Q Q L D G M L R Q M A T S M P N H T A F L G D L R R Q I G E I S R F Q F K D G K K G I C C N A Q S I E S S M E K L N G  
I L R A L A M E A T A V N S R S M R H L F G L D M D Q P D T V R V R W W S Q V A T S N K N I V P V L Y R Q V R S I P L A  
H K V D D Y V R E W L A R P P Q Y L S S L D M A S R L Y V H S Q I W I L Q R P L F L V G L L G A I L A L A Y S L S Q S Y  
Q R I M I S V T V R V D V L L L T Y G L A Y W A G Q R K G Q P S K Q R K S R S H P S S Q G H T Q N S K P V S P P R K V V  
D G K I I N R E D I G S I S I C A S S I V T A D E D V I T G E S S D E S V C D G E D L D Y L D E E V E I D E M A N V G K  
L S S P I P K F P E N D G L S C W S E P P D P A I F H V R G R T Y L E D R I K V P S G R A P F T C R G V D L W L S D N P  
Q R H I A R H P S V M G G K L K D E D T F L V N F L L P F G N F V A Y F S V P P I S E F P N K E V A D V W S R F V D G D  
Q Q Y R D A R L K L L P I V M D G P W I V K A A V G N G K S P A L L G K V I P L Q Y F F R K P K G T K K G I Y E V D V I  
I T A S S I A K G I L S V V K G H A K S L S I A F G L I I E A A T Q E E L P E T V L C K F Q I H A L N L D D C P R L P D  
H N L D D L T

>comp8872\_c0\_seq3; 669 118 2460 LEN=3167; translated  
M P E A A D W Q H V N M V I K D T L I I H H A R I I D V T T L R D L H V G L P R G S Y G F L F R G Q R I G N N L N N P I  
N C D F E G D R N A F V D M Q H D A T G N S C S A Y P G G G E V N P P R E Y F C A V S T L E E A Q S W V I A L Q W S V R  
T C Q K T L Q R L D S L N D N H N E K N N D G D N D H A G T N P K E F G S T K R D G G H D S G G N V H H L S P E R A N H  
T R S R S G R I L V T K V C G F R I I P V A T F F R W E I G Y E V A L L L V E N S K D K V E E R I L L T F Q Q L D G M  
L R Q M A T S M P N H T A F L G D L R R Q I G E I S R F Q F K D G K K G I C C N A Q S I E S S M E K L N G I L R A L A M  
E A T A V N S R S M R H L F G L D M D Q P D T V R V R W W S Q V A T S N K N I V P V L Y R Q V R S I P L A H K V D D Y V  
R E W L A R P P Q Y L S S L D M A S R L Y V H S Q I W I L Q R P L F L V G L L G A I L A L A Y S L S Q S Y Q R I M I S V  
T V R V D V L L L T Y G L A Y W A G Q R K G Q P S K Q R K S R S H P S S Q G H T Q N S K P V S P P R K V V D G K I I N R  
E D I G S I S I C A S S I V T A D E D V I T G E S S D E S V C D G E D L D Y L D E E V E I D E M A N V G K L S S P I P K  
F P E N D G L S C W S E P P D P A I F H V R G R T Y L E D R I K V P S G R A P F T C R G V D L W L S D N P Q R H I A R H  
P S V M G G K L K D E D T F L V N F L L P F G N F V A Y F S V P P I S E F P N K E V A D V W S R F V D G D Q Q Y R D A R  
L K L L P I V M D G P W I V K A A V G N G K S P A L L G K V I P L Q Y F F R K P K G T K K G I Y E V D V I I T A S S I A

KGILSVVKGHAKSLSI AFGLIIEAATQEELPETVLCKFQIHALNLDDCPRLPDHNLDDLT  
>comp8873\_c0\_seq1; 415 129 2217 LEN=3221; translated  
MASYTSDKSFLDYLRRTTWGKQDPNEVVEEIAQGKYFPTQAFVLVTAEHL SFQSQSQSQFPQ  
SNGQGKSTGEEYRTALVAAGAVDKILEFLLKSNEDFREALPHAGKDGVIQCPSIWLQII  
GCVSRDGF LKNSSMQNKLQYKVVNHIQGVFLDVSDFEKRKFFGRRDSWIRSLLYFSALLR  
NLITSENPHVADFL LNMPPIKHFLVRTIYMELGGIPKEAIDEIREFEAAGASQNPME TEI  
IGYCQSYCAFAIKTVTEKKA AAAA INRAKRDEKNGVGRDHKDKVDVYALLGEFAITPVVPG  
GGLVLTGLVKLLENSTSDGWYRGGYTSAMILFLKLYDWGGRLSGKFGAECVSSNLV SIC  
RNYLLSHASKRTIQPNHFFENVTTGLVVLTA SIVTPLDKKGRQAPIDFNVSNAINSGLL  
EYCCMCDACTDSRFVGPLTKFLKIVFAMAKFPLTKTSIQLKADEIRAKIERVKDRPPFL  
FACLP EIEKIVEAAVADEETTEEAKGFQ NANSAAKNADDCLLLRKY PAKPSSEVILREG  
KELFAEQLNKIMLQASLKGFSIVYCYVVIDMAEATPIFR TLTEEQFFQSYKILEDDVVEN  
AKETFERNKEDGALT VSLIGFSTEGLYVSVLTFPPDAAPTHGPF GPAVLQAFETDKWTTV  
QRNIAGRSFRTPGDFKKLQGNRELWTASIMKSMKP

>comp8873\_c0\_seq2; 474 129 2312 LEN=3316; translated  
MASYTSDKSFLDYLRRTTWGKQDPNEVVEEIAQGKYFPTQAFVLVTAEHL SFQSQSQSQFPQ  
SNGQGKSTGEEYRTALVAAGAVDKILEFLLKSNEDFREALPHAGKDGVIQCPSIWLQII  
GCVSRDGF LKNSSMQNKLQYKVVNHIQGVFLDVSDFEKRKFFGRRDSWIRSLLYFSALLR  
NLITSENPHVADFL LNMPPIKHFLVRTIYMELGGIPKEAIDEIREFEAAGASQNPME TEI  
IGYCQSYCAFAIKTVTEKKA AAAA INRAKRDEKNGVGRDHKDKVDVYALLGEFAITPVVPG  
GGLVLTGLVKLLENSTSDGWYRGGYTSAMILFLKLYDWGGRLSGKFGAECVSSNLV SIC  
RNYLLSHASKRTIQPNHFFENVTTGLVVLTA SIVTPLDKKGRQAPIDFNVSNAINSGLL  
EYCCMCDACTDSRFVGPLTKFLKIVFAMAKFPLTKTSIQLKADEIRAKIERVKDRPPFL  
FACLP EIEKIVEAAVADEETTEEAKRVKCEFCGEKCGEDKKT KKKCPFKSVVYCSSDC  
LRLNYMLHQDDCLLLRKY PAKPSSEVILREGKELFAEQLNKIMLQASLKGFSIVYCYV V  
IDMAEATPIFR TLTEEQFFQSYKILEDDVVENAKETFERNKEDGALT VSLIGFSTEGLYV  
SVLTFPPDAAPTHGPF GPAVLQAFETDKWTTVQRNIAGRSFRTPGDFKKLQGNRELWTAS  
IMKSMKP

>comp8874\_c0\_seq1; 459 229 1785 LEN=2024; translated  
MALNSKISSSVKSWDDTALKDLAHSYRHRVFLLRDEKSAAATTTADADVNATTGKPLDGI  
VILVTGSTSGIGRSLVLWAFRQGATILAMGRSGTKLEVL RKELGDIQEEQNHEQRLESRF  
FPIVAEMSDLNSVSTAVDVIRSDLSRAGLRTIDIVVCNAGLWLASTDSITPRSTEQGYET  
TFGVNYLSHVLLTEKLMRTRMADGGSD EGDGSNSSHNEYLLSPLTSRVVQVSSSFHLGVDG  
TYLAVSAKQESNVHKTA ADEQPNIYSSPIASHAPNLGRTGFIGFILNSIEFV FQGQRQYA  
NSKLAQILHARESNREFLINLG HEDRAKIQSYSRVYVPFVSACPGWVGTHILRSTVQRES  
WMEKMFHALTHD VDG YGLSSILKSMFLPLLD FDFVEENMKSKDGAVQLKNDFFPNHGGFLF  
WTAHVADSI LATTDTLFAAFFGETFMRHVLTYSRDVVASV GCCVVLVLQRFFKVSASINE  
NPADKWSNFPYKSYSV TYDRELQHGLHQWSLDAINDFL

>comp8875\_c0\_seq1; 354 79 915 LEN=1174; translated  
MILSLFPIFLLLTIGVLISGF EFDRDASPELCEYETTKDPGICTVNSTMWFSCPI SCANV  
LCGNRGTMAEERNEPEQFYELRAKRASVAGSSGDISLEENEGYIT IYATIPMLPGMAQYY  
YNAIEHISHVYRYTLVAMILPCYSPTQE QDEKGASIASTSGSAILRTILDSQND EKVKKR  
GGMAKSIVLEGYDAQKSENAV LKYL LTRKVVAGSLAPGGDVASDNDDDEMLLMTRPNI  
FLVSH TGMFLERLVSPTMKMIERRIKVHEIQMQKDFDL

>comp8876\_c0\_seq1; 312 1 898 LEN=1195; translated  
XNRGQKNIIFSIEVRHKT IKPNKMKT TTTFAATAAGLVCGKILHVSSFAPSLTTFESP NRH  
ATSKDSVFFTPLSMSPSTDGTA EKISFIDTEL RGAAMK LHTRAQAPKEGQAE EKKPREP  
YETTLDDYLAF LVD SQHVYKAI ESVNEREELAVFRNSPLDRVVALD TIDIFMVKEYSLE  
KPSVKGAGQDYADVIRALGKADSIPEFLCHYNYFFAHTAGGRMIGKQMSALLLNKKTLE  
FYKWDGKLP EIKDRVKEEIEDMAALWSPEERKRCTDQTMAAFRGGGAMNAYLSGGQSPH

>comp8877\_c0\_seq1; 391 1 1506 LEN=1740; translated  
XIVVSSASCRNDLHCRRGMLSGRGXFAYLSPWEHSRKS KILGGKLI SDQMLNIVGKRWIL  
RSRCISPLATWYQSEGSTASRLFSSTCRKNGSGMFGGFARSNLGLEHGLVRPVLASIRQL  
PEVDAAVSDQSPSTLTIDGLKRASEVFASFDKGGREHLAVQALLAECQQLGLYDDAIGS  
IEELQHSLHGSESETAHNFKEDTILALAKVYWMRGDFEKSQALCEAIISTYDDLTETFPS  
TKLHMASAMTGKALSQLAAMKTMDDAYSVRDFFGVAIKFLERHPPSENTLPQAVALS NAG  
VAEVIYNLYLQD TNDVSPMTPALKYLFQGLQKTKVNQSTSSKKIVAASHALEASIQANL  
AWGVINYEEDRS DRVKKASEYAKKALAFYDAEGIVGKEGLSWILSVVASCYHQAGNAVTA  
EGLLQSAISKKDMPIDTLSRLQLRDAYREYSKLCMEWDKREKDAENHIKDADDV ESSLPS  
NWQGKSSGIHGSLWFWTPGDFL

>comp8878\_c0\_seq1; 303 73 444 LEN=761; translated  
MSKFLTLLVAVIAIAQAAAFMGPVITSRQCPAQRSGAASMEMRARECDLLGKKANRKAR  
VVTFSHKRIHKVQEVNLQTKRFFSEELDRKVKLRLSTKGIKTVNKLGGIDAAAKKFKVDL  
KKF

>comp8879\_c0\_seq1; 659 269 2581 LEN=3177; translated  
MADPTDYAIVANENYVSPYEPQAFNLVGSALENIVTDRDRGSGDAAPNSILAFVAGDR  
AEQVEYIEGFVIGIFLSCMVSIFLVLVLLKLFQGRDRVGCAGFAFHADSDTQSAKEE  
RKTRGGASGTLFRGDGDASVGAAGVADDSIAMDEPEVRKKKASEIEKQERKSSSGIFAS  
VFGRSRDASGNEPRSESSPQHKGVVATFKGGRNGRNWSVLRDDTTDYPNPPDSNGNNDN  
NDNNDNNGYNDNDENYVPELEEIEELHMELEDDIVHSATRASEKKEQKRRNKGKPSLRS  
LPPKTVVLENSNEDDLSIETKLAERENKACGQTPCCSFDKDVARRRVATRWFVAVFA  
LISLICILLITHMYVPLESAALTSKEVVRETSEIVDELNEVLEIVDEAATVTESSLKNT  
PLEYESLCPGFVAVGNFASQFGFNPKTVIDTVVQYIYINYPITIRGLLDTAKETGASVTDVL  
MDVNSGVNNTNEYLWIIPLIICVTILIFSQLALMAAVVSREQRFKDLQPDAPRGIEDCY  
GWTVLPQLVVLVLSWLLVILCCFGIVITTDSCIPSLGAMESANANIAIDSNTNGRGTPE  
DTIMAIIDQYMEIEERQNDPTFSLIDDLAYQRLSSYITGCRENPLQELIVVQRLQDSL  
YVTTQSSFASNVLGLGFIEHQCPDNQVKLFFENLGVNLGQLSSVNKAMLQAYDAVACPR  
VNALYVEAVHGALCTDFATASTNGLLLLAVISFSGMVLITLRASWRTSVF

>comp8879\_c0\_seq2; 615 586 2877 LEN=3473; translated  
MRKNTALAPNCNCTQPQAFNLVGSALENIVTDRDRGSGDAAPNSILAFVAGDRAEQVEYI  
EGFVIGIFLSCMVSIFLVLVLLKLFQGRDRVGCAGFAFHADSDTQSAKEERKTRGGA  
SGTLFRGDGDASVGAAGVADDSIAMDEPEVRKKKASEIEKQERKSSSGIFASVFGRSRD  
ASGNEPRSESSPQHKGVVATFKGGRNGRNWSVLRDDTTDYPNPPDSNGNNDNNDNNDN  
GYNNDENYVPELEEIEELHMELEDDIVHSATRASEKKEQKRRNKGKPSLRS  
LENSNEDDLSIETKLAERENKACGQTPCCSFDKDVARRRVATRWFVAVFALISLIC  
ILLITHMYVPLESAALTSKEVVRETSEIVDELNEVLEIVDEAATVTESSLKNTPLEYESL  
CPGFVAVGNFASQFGFNPKTVIDTVVQYIYINYPITIRGLLDTAKETGASVTDVLM  
DVNSGVNNTNEYLWIIPLIICVTILIFSQLALMAAVVSREQRFKDLQPDAPRGIEDCY  
GWTVLPQLVVLVLSWLLVILCCFGIVITTDSCIPSLGAMESANANIAIDSNTNGRGTPE  
DTIMAIIDQYMEIEERQNDPTFSLIDDLAYQRLSSYITGCRENPLQELIVVQRLQDSL  
NYVTTQSSFASNVLGLGFIEHQCPDNQVKLFFENLGVNLGQLSSVNKAMLQAYDAVACPR  
VNALYVEAVHGALCTDFATASTNGLLLLAVISFSGMVLITLRASWRTSVF

>comp8880\_c0\_seq1; 368 77 1075 LEN=1108; translated  
MKGAFWNGKRTGLALVLAGVLSVSCSSASPATAAMFGVSPKEISNHALFDIRGGAKKK  
KSRTGSLSKTVTGKKKVGAKKATEKKSESVNNALGDWYKGI PRFTKVYVNMIFLCTFVGL  
ILGEERSQAILALDPMRLMYGLELWRPFTAASFLGKPSISWLMMSGYYLYEYGASLEKAYG  
PAEYIVFLLTQISLLTVFSAMLGIPFFTQSVITGMLHVLSRAMPHQVKVWLVIITVPYWTL  
PYGLMVSVDLQSQSISAAVPHILGILVGHFYQFNRFVWPKTGGEDWLRAPDFLVDKLDP  
DAAVKNAAKESINKALSKRKRKGGKGLGSASA

>comp8881\_c0\_seq1; 480 162 1328 LEN=1461; translated  
MKAMQLLFTPAVASAYTLHHQPRNPSFAVGRDAQRRSRSASSSSQSLYRSDVDTTTLD  
ITTAMGSIKRLPLMQPPSPKTPKPKRSISVREAEAEHGMPPWKSSIDTEVKDDEL  
LYM PFWEWQMDFMEEENLTDLKVVECKNDKDTDFSYNANEKKKARIVNVCFS  
SKEYRKRIRMTYY DAGDNTQVYNAVWYPNPEYNLPVLGIDLLAFNRKKYLAIVDFQP  
IHDNEEDHASRYEHL KPIKDKYDSLKGRMSSKFYDETKHFSQQMLFARFDDEQV  
VSRDLFPAPFKSYVETHLDLIR STEAQPEEVETVLAKTKAYDTSADRDPATGLFA  
AMYGKEWAEDFVHDFLFSMSDRPAEG AAPPANPFMGGPPRGPPQNGQKQVQRP

>comp8882\_c0\_seq1; 293 226 1791 LEN=2613; translated  
MDLSETEKVEGESPRTRAPVPVDGESLNVGPSSGFHWSSSKVSHASSHASLHVSPHKD  
SH VGLHFYESTCSTSDSESGDNLGGESDSPGNRFHEIPSTLEFTREKEEDDHTC  
MSYISPSS LRTEIEMEGGDLPLPFFAREDDGYERKDEVEREIECKIEHEVQREVQ  
HKDEHEYEDVVL HEHEHEHLSQRQRETEREQDDQRSIKQDHPVSVRDYCAS  
SPGITRPVDSKPMGTDRL FGFRRRNFVLLDAGIPNASPEEFPSRSRVLSVPSSV  
PRSRSLRSGPLQRFRCFRGRTSLRF ALVFGTMLFIFLSIHDNMRSSRRYYRELD  
QLLSSDTVGSNRRDEIAFPFVQLRVREPAGG ISHTNEHGSNTNQSSGDGRSRLPK  
FVVSERVEPSLRNKANANANARNAVGGGAHNNLAMA RGKEHSRPLFVPGVPFPT  
GGVHKPLERFVFDERSKPLSHHPQDQHRGLRFLLSLPPRAIW MISLVLVALVLD  
KRWREGRVRRTRGLPLSRTEERRERKNSC

>comp8882\_c0\_seq2; 293 226 1791 LEN=3443; translated  
MDLSETEKVEGESPRTRAPVPVDGESLNVGPSSGFHWSSSKVSHASSHASLHVSPHKD  
SH VGLHFYESTCSTSDSESGDNLGGESDSPGNRFHEIPSTLEFTREKEEDDHTC  
MSYISPSS

LRTEIEMEGGDLPLPFFAREDDGYERKDEVEREIECKIEHEVQREVQHKDEHEYEDVVL  
HEHEHEHLSQRQRETEREQDDQRSIKQDHPPVSVRDY CASSPGITRPVDSKPMGTDRL  
FGFRRRFNVLLDAGIPNASPEEFPSRSRVLSVPSSVPRSRSLRSGPLQRFRCFRGRTSLRF  
ALVFGTMLFIFLSIHDNMRSSRRYYRELDQLLSSDTVGSNRRDEIAFPFVQLRVREPAGG  
ISHTNEHGSDTNQSSGDGRSRLPKFVVSRVEPSLRNKANANANARNNAVGGGAHNNLAMA  
RGKEHSRPLFVPGVFPPTGGVHKPLERFVFEDESRLKPLSHHPQDQHRGLRFLLSLPPRAIW  
MISLVLVALVLDKRWREGRVRRTRGLPLSRTEERRERKNSC

>comp8883\_c0\_seq1; 569 38 911 LEN=911; translated  
MALNSTAFLRVASRRCARSVSARTTASTQRSFWSTTPTAISKEEVQGLFYKWNDALATLD  
SDKVARRYGDNALLLPTVSDPRNDYASIKDYFDNFLQKKPQGEILES FVQIGDCGKWAQ  
DNGIYEFTMGASGDKVKGRYTFVYTKADGDDEWKISHHHSSQMPEEIMPCKQAGAEYVNA  
SETRALFDLWNDALATLDPKKVAARYSKDAILLPTVSDTPRTTPEAIEDYFVHFLKSKPQ  
GVIEEGVTISDEPNWAKDAGVYEFTMGATGDKVKGRYSFVYVFEDGEWKIAX

>comp8883\_c0\_seq2; 601 40 906 LEN=906; translated  
MKFTNSALFAIAVAATSQVSAFAPATPVVSRMSSADVAAPTSATELNMGLRSFFSRKSK  
IAKSTAGADITKDEVRALFSLWNNALATGDSRLVASRYATKSGAVLLPTVSDVPRDFAS  
IKDYFDAFLLKEPQGEILSGDIRIGENWAQDAGIYEFTMGATGDKVKARYSYVYVYENGQ  
WKISHHHSSVMPEGIDIATPIKKEEVQNLFHLWNDALATGDSSLVASRYAKNGVLLPTVS  
DIPRDNAAKITDYFDSFLLKQPQGEILES FVTIGTNWCQDVGIYEFTLG

>comp8885\_c0\_seq1; 554 63 947 LEN=1178; translated  
MKFSSILLLALSSIAPTTAFLPVPQAHPNVQRVPTASSPSSVLEMGSKAASKWESKQKW  
LEGRGLSADA AVGDDSSAGSPVNI I IAGAPASGKGTQCEI I KEEFSVVHLSTGDMLRAAV  
AAGTDVGVKAKKEYMDGGKLVPEVI IGI I RDRLEEDDCKTQGWLLDGFPRTAAQAEALAE  
AGCTADCFLFLDVPDEILVERVVGRRTDPETGKIYHMTFSPPPADDEELIARLEHRSDDT  
EEKVVVRLEQFHTNVA AVKGSYEDIMV SIDGNRAPADVSKDITESINAALAKRA

>comp8885\_c0\_seq2; 350 63 844 LEN=1075; translated  
MKFSSILLLALSSIAPTTAFLPVPQAHPNVQRVPTASSPSSVLEMGSKAASKWESKQKW  
LEGRGLSADA AVGDDSSAGSPVNI I IAGAPASGKGTQCEI I KEEFSVVHLSTGDMLRAAV  
EDDCKTQGWLLDGFPRTAAQAEALAEAGCTADCFLFLDVPDEILVERVVGRRTDPETGKI  
YHMTFSPPPADDEELIARLEHRSDDTTEEKVVVRLEQFHTNVA AVKGSYEDIMV SIDGNRA  
PADVSKDITESINAALAKRA

>comp8886\_c0\_seq1; 273 446 1306 LEN=1401; translated  
MSSIDNSRSGGNNQALCFQNPVLMVQDLPSKEIVTDWHQNVVYVYLKKRQARAIVFEA  
LDKIENNSRIKRDGEDDSNWTVNDTSPQGHKVFHILNQGVWNPMLLSENENGGKETYLDL  
LDLIHNIPGLLNCLFGNVFVSKIYPGTDIEPHCGPTNIRHRLQFLLKLPKSSPVTHSS  
VVEPKNDVLDGETEPALSLSVGRIEKITWNADNDAFVFDSDFIHSVTYRNDSSAKEKLE  
TENFSHEDDFARVVLIVDLWHPNLQSEKMIHQHSYPPFTIDTCKQ

>comp8888\_c0\_seq1; 254 1 950 LEN=950; translated  
XVITLSCASNSRRSNNTTKQSIQQSCVLEIERPVRHISVFKMGKAKRFLAGVVVLTGGV  
ASARGHMLLVKEASNSVSTALRRRHKS SVVESLQASGEKLQDKQQKQGTVWDTAAETS  
SLRIGKRDPGKTEPYPSITASTYTAEVLRQRQKRKSF SFERSATTKSGNGTKS QKSSKKG  
KSSKKGKSGERKEYEYDYPENAFYDSVNEANDVYENSLGGLMSMNSVDTAIPTSLPTTMP  
TDLPTARPTLKGTVKDTIAPTATPTVMLTMTPTAKALAASTPTPTTAIDTTTAQPTTQMI  
APSSTTLEPTPQIVSFEX

>comp8889\_c0\_seq1; 773 1 2827 LEN=2897; translated  
RFAEENRMKSSGRRPRTLNPAAFAAAHGISSNSIDDP LDTKTNDEVRNDGGNSKTGTYS  
SNNSIEIVLKRARDTGKLNASNCAELKNHQNSSSLPNDFFEFPFNL SRYTEELLTVIDF  
SDNEDNLGPDPELDERVLQYKSAQSMRFRNCGWKLP SALSFSLEHLTILDL SGNRLDGS  
LDIGVLLCSPSKTSALVELNLSNLI RELRATWND SKNGDNDQKDG PSSSSPHDSL PKLQ  
SLDVSHNPPLES LFEGDDFSCENLIR FCHHNPNLRFSSYISPSPTSASTNAMDGLPRFL  
RSASTSLEVLEASHNPKLVSAAKTKPRACPIDLSSFTQLQTC SFALNKLDVVP CIPLSVK  
SLDLRSNKLASISGIFPTESKSAASSSVATKSQLINLILADNYLTRL DPLLEQMTQLNR  
LDLASNKLLALPYQLGFLTSLSALNVSGNPVVTKIPP SVISSSSGNPQALLELRNRAP  
VGKEGRATTLAGGGRAKSIDVAASNLLTTALSSKGR TTLDLERKLAQANPTLEVL MREL  
LTTSTNIAREITGVILDSNELDTLPSDLLSRCLPNVETISLVGNKFTELPPSLQTS CSR  
TVKELRLGKNLLTSEALTEAGWFRKASVALSGSWSLNSLTHLDLSSNRLTSFPINTTSE  
VLCFPALKVNLNFNNRIHNVGDWKRLPASLTTLELSENHIEDIEPLAILLAHCRGFQRL  
SLEHNRVKRIPPI LGLLASYSPMSLSNLKGNPQRAVRLDVLDRPCSDILEYLANRMTVD  
QRNAAIDL IQEWQRVEKLVPGTKPMEEHAAVVKDADIDDMPSALPSRSVGEPPASVACV  
QQEDKLPDRTTKLNHESAGIGRAETE KKEENDTNVLKELQESVEKYKAQLENLSLTQAK

KYALKKSLAMERSXADSGGAQIGPTEVVCLEKGTLYTANLDG  
>comp8890\_c0\_seq2; 247 88 420 LEN=1028; translated  
MAGSTENAEAFSSSNDAAGNIPQLMPPDPDSDLPSIRLGETIRFEEYGPIILNTDGTTRRI  
ANWDTLTDHEKEVSWRRISKRNEERRAVLLAQQQEKEAQKANEKDSKEL  
>comp8891\_c0\_seq1; 432 59 1936 LEN=2797; translated  
MKEPTKRGRRCGLSILTVATAISIAASNQPELVANALVARSRTHGQYSHACLPKTSWHCK  
GKGGAGDLALRKYTGSNVASGTRQYNRAQKQPLPSALHSLNNDGDNDPNRKLKSLKESV  
AYGRNLLASFSSLMALWLPFAVWGIPALVSNARSFPPNSPDQYAAVTLIVSNRIYLYA  
LAMTIVGVAAVRGTISGDSKALGQRLTALTEELLVLDRLPLSLKVGTTSTEFKDFDEDEILD  
QGILTLPPATPEPTPPPSFVRKMWDDSGLEESLDGVDSTQALLVPLLVSGLLAASVISL  
PFWSSQDLLSSSNMDELLQQLQTYIRKMFPPFQQLWNAALLTLFTRAE LRRLGYELF  
GIGMKEINGDSENGGFASVPKLGIGVECLMALAITGYGAYYLQYWPACNFVNMVAVILV  
ARALRLDLSLLTVAGALALLTLYDGASVFLIPAAHAASFFVADASAASASAMGSAVAVQKLT  
SAGFQPGLLVTKLDGDKLTGTGLGDAVFPSILASFLKRFDDDDQNERKEAEASASVGPDS  
SAEQPSRSRLFASLVGYAAGCLACEFAPTISTGGVPALVFLLPSMGLATFLAASSTGSL  
GELSIYKGENGRSRSRILLEEPPGNE  
>comp8892\_c0\_seq1; 205 1 720 LEN=1009; translated  
QPNNNHTFMASPKRKRKMVGSSSSSAKKSRRKSKSSMSGAIDEAAAEAIFAELADEEDPT  
VIELDGIATLCEKLDLDPESDIRILVLLWKLGSNEKPAQISKEEFMDGCHNLQQLDSIEKF  
RNLLPALDTGFLDQDEFKSFYKFCFQFNROGTHRTLDKDMVVALWQMVVKDRIPDERLET  
FCEFTETQKSYTRITLDQWTSFLDFCHECEDLSTYDESMSAWPVLIDEYVEYMEEKQKK  
>comp8892\_c0\_seq2; 216 1 696 LEN=985; translated  
QPNNNHTFMASPKRKRKMVGSSSSSAKKSRRKSKSSMSGAIDEAAAEAIFAELADEEDPT  
VIELDGIATLCEKLDLDPESDIRILVLLWKLGSNEKPAQISKEEFMDGCHNLQQLDSIEKF  
RNLLPALDTGFLDQDEFKSFYKGTHTRTLDKDMVVALWQMVVKDRIPDERLETFCFTETQ  
KSYTRITLDQWTSFLDFCHECEDLSTYDESMSAWPVLIDEYVEYMEEKQKK  
>comp8894\_c0\_seq1; 256 1 366 LEN=1188; minus strand; translated  
PAPSEMQTDTPQIEPPSAPAVIDDDLLFNHMEAFRAWQASNRISNDTDDDDNEDGHDS  
SSTTTNNDQDDEETTTGKREGSVEGGTDDDYEVKEGSEIVAPHHIYVEFDDDDLLDGLGLG  
M  
>comp8895\_c0\_seq1; 808 612 2711 LEN=3546; minus strand; translated  
MPSSPGKYANDKNDMPPPHKRQRVSPEATGDGSPDTGSFSLSPRNKKNFTAGNDSTHS  
SAIPFPLSV DAGPIFTEVEDQVDGYASVESVLGVPAYILFRRVGGNDDDIKSNDTGVKNG  
KDHRPRRRRPLLTRQEMEQLRLTLAQEIDVLVNLSETVLSRRRFRHFRRSILMQEHP  
DSKPHSGDAPWKNPWLVTLPILDVLEQKQYRPDSSLSAEGRRRDRLRDGILPDPYPK  
QQGRDVLCHVHEQITRLCHELQACGVYELERSAEQNRSLVASLTDIVGYDHDHGGENGEH  
ETGKTSAVRILAKEKHALSRLQDHLRVRVRSLLAGFCFSSGATTGKNDGGSHEDDNNK  
QILFDDRASSSSTVIRTGKGNANGNEHEHNEHNEDNKKLAEKSTNDKSSDTNIVDGDSDDE  
SSLMSLEEAMTPELICEKLFAGAGSSKPMASPLEIEIETEDSTKRSMAETRSGISQRGS  
DEQRRQTQQQQEQTTKISRNTNELNNSNPDRVSAMATASVEASQRTAGAAVMMALATDP  
KPATASPWREPPKSMRNEALGSSGNSSVPRNRFDTNPKKPGNDDGDFVEDPPPDAE  
DYKEVKHGGKKENSESPKKKGATKGTMGIFDVVDVFTPPSPSEQQPEEPPGRGDDEVRQG  
HDGGPSDRTEDHLSLSSQSQTAAEALTRMVQGNFRYH  
>comp8897\_c0\_seq1; 377 468 1950 LEN=2214; translated  
MGNLDEQLERLRNCQCLSEDEVKELCDKAKEILAEESDVLEVSAPVTVRTVCSSKRLWGV  
MQCYAMRYAMHRRRGRRAPFRPLSGAAGPGGCCVLLCVVAPPEARLGSARTAAASALR  
RDSVRVVRHGIFVFTVCPSVRIEPLSHELQVLRNPAAAPFWFHSGNIAASTHSITYIVA  
NTTHLTYFTNQLHCIGIHLRATLQIVGDIHGQFYDLLELFRVGGCEPDVNYVFLGDFVD  
RGYYSVETWLLLLLALKVRYPKRMTLLRGNHESRQITQVYGFYDECLRKYQSVNVWKHCTE  
VFDYLSLSAVVEQSIFAVHAGLSPSIDTLDQIRDLESRQEI PHEGPICDLLWSDPEEVNG  
WGISPRGAGYLFSGDICSEFHRRNGTDLIARAHQLVMEGYKTMFDNQLVTVWSAPNYCYR  
CGNVASVMEVEEHFSGRDNDSGEGGSLGTGNSITGNGDAMVGNGITKRFNIFDAAPPDAR  
RGPSKARRPDYFL  
>comp8897\_c0\_seq2; 386 468 1475 LEN=1739; translated  
MGNLDEQLERLRNCQCLSEDEVKELCDKAKEILAEESDVLEVSAPVTVRTVCSSKRLWGV  
ELFRVGGCEPDVNYVFLGDFVDRGYYSVETWLLLLLALKVRYPKRMTLLRGNHESRQITQV  
YGFYDECLRKYQSVNVWKHCTE VFDYLSLSAVVEQSIFAVHAGLSPSIDTLDQIRDLESR  
QEI PHEGPICDLLWSDPEEVNGWGISPRGAGYLFSGDICSEFHRRNGTDLIARAHQLVME  
GYKTMFDNQLVTVWSAPNYCYRCGNVASVMEVEEHFSGRDNDSGEGGSLGTGNSITGNGD  
AMVGNGITKRFNIFDAAPPDARRGPSKARRPDYFL



>comp8898\_c0\_seq1; 116 339 1043 LEN=1145; translated  
SVALFSSVDEEENWLDYLKWGGQEPGFVLERAKEFTSEPAFLAFRLRDIPEDYSEDY  
VFRGPPVGPINRRDLVETNAAFLLNEAFPDLQRNPFGHCIDPENPFRVLYFDRWKGNTG  
ELKMFLLPPTNKKSISPVTPFSVTFAPDGKVIYETVTTAVDRFEGNTKGVAVFGLLETA  
GIPLDNSIGNPLLIIFSQKLNRFGLMATAQTQSKAENVPSWWKSRVGAEPNDR  
>comp8900\_c0\_seq1; 205 1359 1964 LEN=2609; translated  
MKPLAPRRFSSTSGSDAPRQEQMPRNDAIDVGENIERLGHTARSDSDSSVTNTSGVASLL  
PTPSKNPRLESGILTKRKAATSIDNAGMYPCSNPRGLLLLSFPLKLHLLLQRCESERIIR  
INNKKRRMGDRRGRSHGACSGVIVDAGKTTDDDIVVGWLP TGGFKIYDQERFVREIMPS  
YFFEVGKKNKASFETFKRNLELW  
>comp8900\_c0\_seq2; 205 1716 2321 LEN=2966; translated  
MKPLAPRRFSSTSGSDAPRQEQMPRNDAIDVGENIERLGHTARSDSDSSVTNTSGVASLL  
PTPSKNPRLESGILTKRKAATSIDNAGMYPCSNPRGLLLLSFPLKLHLLLQRCESERIIR  
INNKKRRMGDRRGRSHGACSGVIVDAGKTTDDDIVVGWLP TGGFKIYDQERFVREIMPS  
YFFEVGKKNKASFETFKRNLELW  
>comp8900\_c0\_seq3; 205 1359 1964 LEN=2418; translated  
MKPLAPRRFSSTSGSDAPRQEQMPRNDAIDVGENIERLGHTARSDSDSSVTNTSGVASLL  
PTPSKNPRLESGILTKRKAATSIDNAGMYPCSNPRGLLLLSFPLKLHLLLQRCESERIIR  
INNKKRRMGDRRGRSHGACSGVIVDAGKTTDDDIVVGWLP TGGFKIYDQERFVREIMPS  
YFFEVGKKNKASFETFKRNLELW  
>comp8900\_c0\_seq4; 205 1716 2321 LEN=2775; translated  
MKPLAPRRFSSTSGSDAPRQEQMPRNDAIDVGENIERLGHTARSDSDSSVTNTSGVASLL  
PTPSKNPRLESGILTKRKAATSIDNAGMYPCSNPRGLLLLSFPLKLHLLLQRCESERIIR  
INNKKRRMGDRRGRSHGACSGVIVDAGKTTDDDIVVGWLP TGGFKIYDQERFVREIMPS  
YFFEVGKKNKASFETFKRNLELW  
>comp8901\_c0\_seq1; 237 284 1024 LEN=1576; translated  
MTKISLNVNKEARKEANLRLKRSVDPSIVDILGGATHVVLVYHFRDDSQSWEKSDVEGPL  
SLAVRNGSINSNKNVLVILNRNSSNYTMDFTSDFQLQKSDPFLIFKNYDGDANNKATIR  
GIWFPNDSERASMNDLLTRVLNLTKEAPPPAPTAVDRNAATASLFAALNIGGSSNSDTT  
AQSAPLQQRPSNNSTPHTGTQQPPTLDKKSLLQALSLIQDERFLDLLHAQYLKVHNR  
TSRND  
>comp8902\_c0\_seq1; 821 777 3153 LEN=5184; minus strand; translated  
MAVVGNMRLSRVRFVARRQVTSMPARVIGDAKMHSFYGLPGGNTAVAVVTRGSSIL  
YMSTASSPSMPSVAIKSIGFVEEAVLEAMNELFDPAEVARGAALSCLNKP KKKKKKKKKK  
QPEADAAPEPPAEPPEMSEEEKQAIGDAAAAAAKPFSSSDTMVTLATKSEFGDYQVNAAMG  
LAKNVGMNPRECAAKIVEKILPKIEGCMEEPEIAGPGFINLRFKKDYLTAAVQAMAEDAA  
GRLAQPKSSKPQKIVVDFSSPNIKEMHVGHLRSTIIGDTLSNMLEFTGHEVVRLNHVGD  
WGTQFGMLVEHLRDEYPAALNIETSQDVDLGNLVELYKAAKRFVDVDFKTRAREGVVK  
LQAGNEEELAANKALCAASRVEYQKIYDVLNIEGLEERGESFYNPYLNQVVENLEEQGLA  
VQSEGATAVFLDGEVRQIATFFLFIIFLRTSVESRTPLVSLGQEKPTKPPISITKANVAL  
SXFLLSLDHHTYEYENKDGSPMLVVRKSDGGFNATTDLAAIRHRVEMDREDGGENADR  
LYVTDAGQSQHFEMVFKAAEKAGYVPESSSLEHVPFGLVQGEDGKFFATRSGDVTKLKDL  
LDESVR IAGDDLRSR PENEGADDETIERVATVVGAVKYADLSMNRESNYKFSYDRMLS  
LNGNTAPYMMYAYARICGIIRKSSQGETTDKIEWPEASEI IITHDAELELIRNLVRLPDV  
LNEVERDLYTNRMCDFL FETSQKFSKFYENC SVNNAESPEIKASRMTICTATAGTIRLLM  
SLLGINLVEKL  
>comp8902\_c0\_seq2; 638 1144 3445 LEN=5476; minus strand; translated  
MAPARVIGDAKMHSFYGLPGGNTAVAVVTRGSSILYMSTASSPSMPSVAIKSIGFVEEAV  
LEAMNELFDPAEVARGAALSCLNKP KKKKKKKKKKQPEADAAPEPPAEPPEMSEEEKQAIG  
DAAAAAAKPFSSSDTMVTLATKSEFGDYQVNAAMGLAKNVGMNPRECAAKIVEKILPKIE  
GCMEEPEIAGPGFINLRFKKDYLTAAVQAMAEDAAGRLA QPKSSKPQKIVVDFSSPNIK  
EMHVGHLRSTIIGDTLSNMLEFTGHEVVRLNHVGDWGTQFGMLVEHLRDEYPAALNIETS  
QDVDLGNLVELYKAAKRFVDVDFKTRAREGVVKLQAGNEEELAANKALCAASRVEYQK  
IYDVLNIEGLEERGESFYNPYLNQVVENLEEQGLAVQSEGATAVFLDGEVRQIATFFLFI  
IFLRTSVESRTPLVSLGQEKPTKPPISITKANVALSXFLLSLDHHTVYENKDGSPMLV  
RKSDGGFNATTDLAAIRHRVEMDREDGGENADR VLYVTDAGQSQHFEMVFKAAEKAGYV  
PESSSLEHVPFGLVQGEDGKFFATRSGDVTKLKDLDESVR IAGDDLRSR PENEGADDE  
TIERVATVVGAVKYADLSMNRESNYKFSYDRMLSLNGNTAPYMMYAYARICGIIRKSSQ  
GETTDKIEWPEASEI IITHDAELELIRNLVRLPDV LNEVERDLYTNRMCDFL FETSQKFS  
KFYENC SVNNAESPEIKASRMTICTATAGTIRLLMSLLGINLVEKL

>comp8902\_c0\_seq3; 821 788 3164 LEN=5195; minus strand; translated  
MAVVGNMRLSRVRGFGVARRQVTSMAPARVIGDAKMHSFYGLPGGNTAVAVVTRGSSIL  
YMSTASSPSMPSVAIKSIGFVEEAVLEAMNELFDPAEVARGAALSKLNKPKKKKKKKKKK  
QPEADAAPEPPAEPPEMSEEEKQAIGDAAAAAAKPFSSSDTMVTLATKSEFGDYQVNAAMG  
LAKNVGMNPRECAAKIVEKILPKIEGCMEEPEIAGPGFINLRFKKDYLTAAVQAMAEDAA  
GRLAQPKSSKPKQIVVDFSSPNIAKEMHVGHRLSTIIGDTLNMLEFTGHEVVRLNHVGD  
WGTQFGMLVEHLRDEYPAALNIETSQDVDLGNLVELYKAAKKRFDVDEDFKTRAREGVVK  
LQAGNEEELAANKALCAASRVEYQKIYDVLNIEGLEERGESFYNPYLNQVVENLEEQGLA  
VQSEGATAVFLDGEVRQIATFFLFIIFLRTSVESRTPLVSLGQEKPTKPPISITKANVAL  
SXFLDSLDDHTEYENKDGSPMLVRKSDGGFNATDLDAAIRHRVEMDREDGGENADRV  
LYVTDAGQSQHFEMVFKAAEKAGYVPESSLEHVFPFGLVQGEDGKKFATRSQDVTVKLKD  
LDESURIAGDDLRSRPNENGADETIERVATVVGAVKYADLSMNRESNYKFSYDRMLS  
LNGNTAPYMMYAYARICGIIRKSSQOETTDKIEWPEASEIITHDAELELIRNLVRLPDV  
LNEVERDLYTNRMCDFLTFETSQKFSKYENCVNNNAESPEIKASRMTICTATAGTIRLLM  
SLLGINLVEKL

>comp8903\_c0\_seq1; 485 1 1361 LEN=1361; translated  
LVSFVTGNVYFMAILPLIGVLGLVFNWYETKVRNTEKLLIDKIHRSEAIVDNLFPEIVR  
DRIMEEGLNMTGSANPASKANVVPFACSKERMCTVEADNEGGDSQFIEHSNSKLVPLP  
PLRKTSPSPQPPRRIPSIASSTFSTFLTDKSSHGDCSHFMESGNSHNHRRYSLSKQHSS  
NSDGSNNSNSHCNFSGIQAGTNPISHSNLVSSPQTAAAISSPLSISSYGSKPIADYFPS  
ATILFADIVGFTSWASIRDPAQVFELLETVYGRFDEIAKKGKGVFKVETIGDCYVAATGLP  
NAMEDHAVVMASFARRCLESMLDFVSSPTTNLPGTDLGMRFGIHSVIGGVLRGAKS  
RYQLFGDTINTASRIESSSEKNKIHLSQETADLIVAAGKRPWIIPREEKIVAKGKQELQT  
YWLTTGPKNLSAKEKLLALPAILKMMAKANIDPG

>comp8903\_c0\_seq2; 616 236 1494 LEN=1652; translated  
MAKANIDPGFIKKKKAIDPIQKRKRLVNYHTNILAGLMKKLTSMRHNSNRKSNAALLEG  
EQIALDEDEQFGSIDPFLSGETMNEIIFPTEHVSFASQGSRGKRNVDRLSDADSHIVDQ  
LRELVS RVANFYREDRPFHSFQHTSHSVLSMTKLFADITNTTKPKDDVTTRAQHEPFV  
AKTKSMLTHPMTQFVFLVFTLVYDGGDDDDADGEQDTKEEKLTPGQKSIQRVWNLWMDP  
AFRDLRLCLCKSQDLDFFRRLAKXMSAMRKRSTSSAVTDNDAETELPSNTNMSCSHYDE  
EASKKTMVIVQLLEASRISHSLQHFFYVFKKWNKLLFKELYIAYKRTADAGEENKDP  
WYETELELFEGRILLAKKLKESGVLNKTIDVYLNNAVANKREWQKQGSILQDYISDRG

>comp8904\_c0\_seq1; 539 76 2873 LEN=3410; translated  
MKCLPCRHLTKATLSLCLAAATHSFLLSFFFPYAGYMAVALIDNNGGDVTLTNVGIYAGM  
LGATFTFGRFVGFPLPWKFVRNLLGGKRALVASLLLTGLASLWVCATTFSGALVARFVQ  
LSNCISGCVKRAAINLQYNAMRKRAASARSIGEDSILTEDETRGNPQALVLSIMWWGTA  
LGPVVGGLSDPRFLRIIFGLESESELGWYGSRPYLLPNLCGAILCWISEMCTAFFVENP  
PPVPASQREDSLLSISSEERPLLPAGSVSTRATMPNLWSSFVWLNWNNRSARYHLDA  
YWSFSFAISCCDEALPLFMIVPKEAGGIGLSQGVAVLSAAGLIVAIGHMALGRIMDV  
ENGSKNGIYRILSISAVLGSAPNVLVPSLVNLNGVEGSTEESLLGVTSQAFVFLVALIVF  
TRGAMDLYFSYIGIATGRTL RVVHKDEAAHIMTLGALFVRSLSLAAGVLSLLWKDTP  
ETLSLRPFWNWITIGLVFGMVASAMTIVLARWAGDGMTRKQREYIAERLKRIGLVGTE  
WDGFHESAKTVFFRWIRSTFRDRAETRKGGAPEAGGGGIDGEPGAQALGQPLPRRRMRW  
SDHVVGPGVDFDSAGFFVLGTHGGDVSTPHVLTPLLHALQKHLRQHSSENFWRYSL  
LRDGATLHALEAKSGLGRFSLAIETLGGDVLGCFMTKXETTTFLSVMRWNAIEYDKPFG  
FCIPWSLVLLIGAPHACCDPIEIMLFQRI SFLGCAFPFLDKQLQTTAAKKTNTAMGPV  
EQPVPALGGVVSLEDDAEARRGEEEGASEPLVEVFPSTGANELS QLVTEDRACGGGV  
VNNKGDGFGILLDGLDQRGSTSSCATYGNPLLLCCEDNGDAAAFEVANVEVWAVTPYLFV  
ADAERSEKELLFLRENSRETPSSASQWSHFL

>comp8904\_c0\_seq2; 532 76 2640 LEN=3177; translated  
MKCLPCRHLTKATLSLCLAAATHSFLLSFFFPYAGYMAVALIDNNGGDVTLTNVGIYAGM  
LGATFTFGRFVGFPLPWKFVRNLLGGKRALVASLLLTGLASLWVCATTFSGALVARFVQ  
LSNCISGCVKRAAINLQYNAMRKRAASARSIGEDSILTEDETRGNPQALVLSIMWWGTA  
LGPVVGGLSDPRFLRIIFGLESESELGWYGSRPYLLPNLCGAILCWISEMCTAFFVENP  
PPVPASQREDSLLSISSEERPLLPAGSVSTRATMPNLWSSFVWLNWNNRSARYHLDA  
YWSFSFAISCCDEALPLFMIVPKEAGGIGLSQGVAVLSAAGLIVAIGHMALGRIMDV  
ENGSKNGIYRILSISAVLGSAPNVLVPSLVNLNGVEGSTEESLLGVTSQAFVFLVALIVF  
TRGAMDLYFSYIGIATGRTL RVVHKDEAAHIMTLGALFVRSLSLAAGVLSLLWKDTP  
ETLSLRPFWNWITIGLVFGMVASAMTIVLARWAGDGMTRKQREYIAERLKRIGLVGTE  
WDGFHESAKTVFFRWIRSTFRDRAETRKGGAPEAGGGGIDGEPGAQALGQPLPRRRMRW

SDHVVGPGVDFDSAGFFVLGTHGGDVSCTPHVLTPPLLHALQKHLRQHRHSESNFWLRYSL  
LRDGATLHALEAKSGLGRFSILAIETLGGDVLGCFMTKPWVPSNNQYRHSGESFLWRMTR  
RRLVGEKEEEGASEPLVEVFPSTGANELSQLVTEDRIACGGGVVNNKGDGFGILLDGDLO  
RGSTSSCATYGNPLLLCCEDNGDAAAFEVANVEVWAVTPYLVFVADAERSEKELLFLRENS  
RETPSSASQWSHFL

>comp8905\_c0\_seq1; 716 324 2820 LEN=3160; translated  
MADGDESESKSDPATPEEGFVLRKSRLVWLTGFEDLRVYDHGGFVEAFTRAIGNGETNEL  
IIPVFAIDPEVHLRSQSASSLKRLHKSLETALEKEIESLSLPSLLSNLVVRMGPASTILPS  
LAKETNAVACHVVEDDVVNSMRTAQOSTCTALDEMGEVHRWSNRLRPSVPWSSEEMPSPF  
FPAYCEIADALPVVAPDNGKIIHDIRAKNAEMGGDSTLIRSEGI PSVGELLSIAESVTPS  
TVLEARSQKYVDTEPFETVITEKWSTRERGAKKALKEYCQTGNDEFTDKYFVASDAANKG  
SQSKKSLYAMSIARLLKSAPSANEALALREGPTRTFSSALNLGVVSARDVVDAARNRSPV  
TPPVLLWDSKIKKKNIGDNNRAGLSPSDSSLWGRSSEGLSDVIEWREWFHLLAERSLAL  
QEIDQPATSGGEKTGMTNENNKDKDPDPRESGTVNYWRWKGQHLVRYLTFPAGKDYDAQD  
EESRDPAILLVHGFAAAEQWERLVYSLRQQRIESTGGKDTTPPVYAVDLLGFGHSEKPG  
LSYTQYLWESQIIDFATEVMEAVPMVMVGNISGGGLSAGAAASLGKKICRGLVLLNTAGL  
LLDPDITYDGYKSPVDSDTDIYIDFSSHTEAAINGNPEEVYNTVPLFGNKALDLFGSAIVG  
LIYPQIEERLSLIYGNRIENADPAVVYAIQQSALHPGSSNVIGSGQKLAPNRPLNEVLMG  
VGEEDGEKGFPTLVVVGLDDRVSSPAANKIRAETFSRLERLNPDVTVLEKIADAGHCPHD  
EAPDKIANAMKWFASSYSGESIAETQMEKNADHGEVNERANNPILGRLK

>comp8906\_c0\_seq1; 272 178 720 LEN=1068; translated  
MVLVYMLFMKAETENIGEIQLRTEDEVSLRIDVRNSLSDWEKREKVVFNPNSETTEEPDDESSR  
EPPRHLSIRWEGSKKASVLRCLAKETATALKKKKYKDGGPRAFTGEDDTDNVWVPLLALE  
CRGLEPYAFHPMKDEFIITSEQGYVFDEEIEFEDGEWADYDAENDCPVSISSLEFKFEAV

>comp8907\_c0\_seq1; 576 1 1604 LEN=2025; translated  
XTTSIFGDNQVKEDGSAADPGILIKGIGSSQASIDSGRPTPTKSDKPIALPRIQRLINKR  
TQANTNPCLICASPSCPSHSSASFRKEGITLCLKCERLFELEFIVDCVVSQSDPVKRSESI  
DYMIDCYDRMLLKYSKQFAKHIAASLEDQKQKQDKIGLASSSVGLSGVLGIAAAAASI  
LTPAGPPLLIASLFFGGGATTVQTGTAEAINYFSEPRKLADRITALHGMALSILRVTSTLR  
DAMLRDHIRTVDVYEAEPGSAHLRNQVMESYEKNKNAVVISNVGRSLTLGGLAGAEAGAV  
GAVAAGAAGEMTVVGTAAAGASAAAGAGAAGARGATAFSRAGTAAARTVRFARFAGGALS  
AAVLVMEANAIHSTLKSINDGSQCDKADRLRQVLAIDSFPSTEELDDECQAYLNAMKAR  
PRPPVEVAVASDDARSNDIPEAECQEVGHELCAPGVVIVDAANPGAELEVELPAAVPVV  
PPVRSSLLGGSSLFQRIQSRREERQSLASSVADEVI AVAVDDARSEEASFSLIL

>comp8908\_c0\_seq1; 389 86 937 LEN=1125; translated  
MVSFKAALSLVLLAGTTSAFTVTPRHHAAGATSSSSLCMGWGPDPISWGSVVEDTQIGNL  
SKECVVNLEVPPEAQEFTIPGQYVQLRPDEETKPIFLAIASPPAEENARFEFLIKKTD  
DNTWLTEGSATNLEISQVLGGGFVKEEFDLSKYDFPCQNVLLFAAGSGISPIRSAIESG  
ELETGTARTARLYYGARTEDDLCFVDRFPLWEKNGVEVVPVLSQPSSEWQGRGTGYVQNAL  
EEDGVPVPRNTGALMCMGMKGMTEAVTDILTAKAGTFEGRILT NF

>comp8909\_c0\_seq1; 127 1 729 LEN=729; translated  
XKRYDYCSQNNDALLEIDQAGSQKFYFMEXEMSFNFVNPTEQLSASVGTETSAACVA  
KEKKRPEKINSSFWWIEQEAASVLSFGSFLQKQHSTIDSIPLIPIGQFQGARTVNDYILRVQ  
EESASFRDRNTDLVPGEYEGGLKVVWECSLDMCRYFRSQNIAIKGHVLELGCGLPPIFI  
LKQAVALSQQKQKPSDCFLTFSDYNEFVINDVTMPNVAANIRNACSEIFDSAEGLQ TEN  
WLRX

>comp8910\_c0\_seq1; 362 47 1306 LEN=1566; translated  
MPDADADTPGAPRAVRCNPRQEPGVPRARCTIPARRHRATPPGPQWISRRLGWAVLAVLA  
PLCASGFAASRSSLWHAGPGGSTPRWRREPTGTVRRSAPGGSDCGDGGSDTKLPEHLVV  
ASSLSYLSSAEGKMQASPLFSGAAEAGTLEPLVQVVDPDSESGATVFRSGIGGSGAAT  
ATTLVVAFRGSATPVNFSTNLRFGLVPLRGEDGFATPGASGSDPSFRVHEGFRDASRGLW  
ELLEPELDALLRREEEETGKGVRLWFTGHSLGSATAQLCAAKHQSRLLCSSSDSDSGNER  
TNPLAGVLTFFGGPRLVNRALANHWNAFLGAEGDPSSSVVVTNYVHHRDPILRQNGPLWD  
SLGFGILGTEVLCEHDRPVAYESRDAGSSASGGAGLPLAWNILDHCRYLGVFVGPRLFG

>comp8912\_c0\_seq1; 449 1 1156 LEN=1340; translated  
XGNSHGVGAAAAXHNRSNLRSFSSGAKRDLYEVLGVPKSAKADIKKAYFKLAKQYHPD  
TNKDDEGAAEKFKETAAYETLSDDQRKMYDQFGHAATDPNFQQQQQQGNPFGGFQD  
GGFHFHSSGGGGEIDPEELFDAFFGGGARRRRGPQRGSDLQMHVRLSFKEAVQGASKNLN  
LRYQVMNRENGQIEIKERDVTVDTPPGIDNGMNLRLSGEGAEGDPGAPRGNLLVQVLVDE  
DDYFVRDGSNVHTEAMISITQAILGGTVDVKTLDEGEVEVKIPKGCQPDAKMLRKGKI QK

LHGASKGDHVHLKIEIPKTITDRQEELLREFDEETRECGHGISGRIAKAAGSAFESIFG  
SNDDGGGGDKGEGKKEGAGQKKEES  
>comp8913\_c0\_seq1; 222 199 576 LEN=707; translated  
MRQKEMIEAENLLSEEASQFGAWRESLSAIPTINQLQERANGFREEELAKATRKLANANL  
TDKEMEAVERLSRGIVNKLHLHGPMHLRKTESIEGKQOTLKELNSMFRLDQDEVGRGRKA  
AGRRR  
>comp8913\_c0\_seq2; 713 278 1852 LEN=1983; translated  
MKYQSAITSLAAVVAASSATSVSSFVPTQSTARVAGVQSRATVQNTQLAVASSEIVDNDT  
EAARPRKTRERLEAASKGLQVHCVGLSIHHADVEVREKLAVAECWNTASNEICNTGDV  
TEAAVLSTCNRFEIYYAASDPRAAMASVTKFLAKRSGLPVSELRKNLFLMFLSGDDAVWHIM  
RVAGGLDSLIVGEGQILSQVRQCHLHSIEEDGCGKVL SRLLNNAVAAGKRVRSSETGISK  
GSVSVSSAAVELTEMLSVPDLNLPFSEARLAVVGAGTMRLLVTHLASRGGLEKITIVNRS  
LPRPQELAEQFPDIDIEIKLMDLWDVVGSRDIVYTATSCVDYVIDQEKMEANGLAGGRP  
MMLVDIAVPRNIGEDCKNVPNAKVYNVDDLKAVVAKNTAMRQKEMIEAENLLSEEASQFG  
AWRESLSAIPTINQLQERANGFREEELAKATRKLANANLTDKEMEAVERLSRGIVNKLHL  
GPMHLRKTESIEGKQOTLKELNSMFRLDQDEVGRGRKAAGRRR  
>comp8914\_c0\_seq1; 631 93 2015 LEN=2174; translated  
MLKGYIILCSFLFRSTQQFSLHLEWKDRRRVDSRGALRASDTSSSNGGDDNSVLQARRLSL  
GRIFNGEREYLFNTKKNVRSYEWTEKEAEDLFESINDIDEKNPLNFDLNLMLLMQSDT  
PDDILVEKGGDIGRNSVVYDVGQQLVTLNLLLAIRDALLNFPDSPRSVAIAKQVA  
NMIFPQDPLFAPVCRIKVRERNGNKWLDLISSGANEEEDVINLLPKERAWRGLGVPKPDQ  
KIICINYFRRLDELSENQIRQLIHHISSDVYVLMSSITSDINVARNFVMSQGGKKSIEP  
VDWYKGTVSFLNENESVQETTMESWEELEDIGRDTLQDACVLLAQQRQGTKIKKNEEIS  
IVEQTFRDTISSIGAETS DKGEALFKYNITPAARALNDFREGIFKLHETDDMEPPSLSFL  
RATAKIATCKEIEMLLDIVSKCNKAIDKSAVPKILKNVETIALWMMVTKPKPKDRFGR  
CLSI IEDQGNASLSYDERSSVVEGLHNF EFGKPAERKKAAILARLNEYVLFKNSQSRLE  
PTNAGRHI EHVLPQHKNLNSWNETWDPTDASTWKDR LGNLALLNRNTNSKIGNGSFETK  
KEHLIDSPYPLTKDIAKSQTWDVHAVRRNHDMCIDLARKVW  
>comp8916\_c0\_seq1; 194 245 655 LEN=2029; translated  
MSPSPSNPTVCPKSTSGSSCNSAGSTGAVFGVPEKKLAKNSAAFNAAGLRGGELHEPKT  
LDEVKSLLLRAGSAGQLVVIDFTATWCGPCQMIAPLFKEMSSTHDDVMFLKVDVDENPDT  
AQQYSVSAMPTFVRSF  
>comp8916\_c0\_seq2; 241 245 727 LEN=1831; translated  
MSPSPSNPTVCPKSTSGSSCNSAGSTGAVFGVPEKKLAKNSAAFNAAGLRGGELHEPKT  
LDEVKSLLLRAGSAGQLVVIDFTATWCGPCQMIAPLFKEMSSTHDDVMFLKVDVDENPDT  
AQQYSVSAMPTFIFIKGLVVERLMGANPSHLESTIVQLK  
>comp8916\_c0\_seq3; 194 552 962 LEN=2336; translated  
MSPSPSNPTVCPKSTSGSSCNSAGSTGAVFGVPEKKLAKNSAAFNAAGLRGGELHEPKT  
LDEVKSLLLRAGSAGQLVVIDFTATWCGPCQMIAPLFKEMSSTHDDVMFLKVDVDENPDT  
AQQYSVSAMPTFVRSF  
>comp8916\_c0\_seq4; 241 552 1034 LEN=2138; translated  
MSPSPSNPTVCPKSTSGSSCNSAGSTGAVFGVPEKKLAKNSAAFNAAGLRGGELHEPKT  
LDEVKSLLLRAGSAGQLVVIDFTATWCGPCQMIAPLFKEMSSTHDDVMFLKVDVDENPDT  
AQQYSVSAMPTFIFIKGLVVERLMGANPSHLESTIVQLK  
>comp8918\_c0\_seq1; 521 1 1419 LEN=2045; translated  
QSHEWMAMQGNHASEKGLFRMQMAFLDASRERLCAPLEYMFGENVTIDDVGNASHLPLL  
PSKYDIQRFDIIRQELAMADPREGGELSTVTMIAENVVMIGRFCARAENAVSKVGED  
GCLSADGSPTEALVHDMKVTKIMYFMSECLRNAPEKVFLEPYRPAVTHQLEEASSIAVQA  
LLPARKEIDRTVDLVLNPLCRALNRSVAAAIGRMHHEGVYLSGGRKSAMDVDPSPSPS  
QKYLGLGLYDAFCKQFLDKLPPPYSLAVGSVAVSIFSVYTFVSTASLIRPMGEDAKMQLTQD  
LADFELIWDQFMTRASDGTGGSQTLATIGNGKAYAE LRAVRQMLFWTGLDDKTRAAGLVAK  
SLSREVVACDIRPSTVCHYLF AFAFDLLTSPHHWKRLRVEDYVGTLSL DGTIDEGESLD  
WMTTMACCD SYKQRESAQSSLPGGSNEGAEGDPRVAAI LMNLGPELLQRRRA  
>comp8919\_c0\_seq1; 658 253 1632 LEN=1921; translated  
MSRDDGKLLATAMGAATAGAALAVMAMK MIDGSKDQSGKGGGESAYNNSGGSVLAYHQGD  
KRPVRTSVIMNDPSDLHESISHGSMNMKREASDAMLFPHNHEEKMRRIATRYTIEEENN  
LGRDSVTVRVPATSANVGPYDCIGIAVDLWSEVTVSRVNGDTVGF EITAE GEGAEAMP  
KDESNYL VVGCKAAAFETANKPLPPLKYHVSRIPYARGLGSSAAI VAGIVAGLVLAGHR  
LPCWGSEALLQIAAGIEGHPDNVAPVIYGGIQLGIHNGTRWLTERISNPPGLQCIIFIPD  
FIGKTS DARGVLDNTVTR EEA FNIGRAAFLVHAFETNNLDNLRWGVQDKLHQ PQRGKGL

YKYLPMIEAAEKAGACCAYLSGAGPTVMALTSGAAGDIFAQREKERTDILVAKAMIQCA  
KDHGVDGKLLVTNVVSEGCVRVTHVDPFSTGEITYRDN I  
>comp8920\_c0\_seq1; 1140 1 4703 LEN=4806; translated  
RNFNEELIYFAYLFLPHGFIWRRNLNTEIQRQDMADKSKDEGTPPKQKFNYTASSLSVA  
NSNSGAGFFSLGESNIAERAKQLKIERRATMEHAKQQIEKKERRASMQHKNNVGNGENGV  
HDTANESKGNKNDSEKKTVNEFDSLISNQVNEIDNVLYKSLAKGFQRFREQRRIASSSS  
SVDGGGAVPSPDKPKYFATVNFIDPTTKAESSESSSSNSPKSKVKNMLQQQKGVLLKIGG  
SSKSIASLTVENVYENLTYIFERDYGSVLRVSVQYKSVRTGETNFI SKLPVRPVI TRNGS  
TVDSTEASTPDNPNTPWGGAALTAMTPVSDPSEWHTGPFCHVYIAACENLDHYKDKIRPA  
LRAF TTQLESTASNTTANQQGHSADYMIYVVPVGDGRNISYQPKPATPTANKTNNNTGR  
MGLLGMARQRFGGGSMSEHGRNDDAISKNISIDSGDDAFFINGDPNADGDGDESCPINVLS  
ALQHL SKTERS LYKKIVTDFPNGKVSVLSTGSLDRSPSEGLSIMVQEWVFNRM LGTV  
VVNGFQDRIRRYTNELKRLDAQRATAATAAKNYESGGAMSSKPQKPNPYAFNL SHFFLVK  
ESLASSYE QMQLPGEALLQYDEFRLYMPDLTDKEESKVRHARRLSKALMEDESSQNLAEL  
ADAGDFLGRKKIKSEYDLTALDVMRRYLFARELSLLFRMQDPVELLLRCQSF IKVMYS  
ILVRGVSELDEKEHHERMSRAASWVQFSWDIYSATSQFLNCQPQKSSERRNTLTDNRAE  
KERDEKVAAKLSEILEVSRFLIELGDDHFGNSEEF SVRPHLPKDLGQPWPWPVCEDE  
AEREAQPALGLEQNPFFGTGTLERQFLLPSNDQMNSLDDFGETYLKL CRAIIDTSHIAK  
HFRLSARIQSEIGEYYVRKGFHSASASFQKIVKVYRIDHWDRAHFWRIFRLAYCQRTTV  
EATAYLKTLCSCFSPRSKSVAPKKALIALFDDLLRVEHPSIGNARYSRLLF IETSLSIS  
TPSESSKMGKMLDQKRVEKRSCSVGEKILIPITIRSHLPGSIQLTSVKLF TLTVD DFTAI  
ITNGDAVQEEDA AKVLSIDVPIELNPGENKFSFEWSPTSAGHYILSTIELVWKQGYFYD  
SMDLQEPMLSVDVLP SKP THSISIEPSTLVPGQDQEIQVAFDAGTDFVNSAKL FVSGTDG  
ILLIPGEDPSTSEWRQDWEIDLKPCQPERLTM TTHVRCGTGFMSQVDSMNSNHGLVAK  
AETSYLHSHTKESDESNOESTKT TLESFAPVQDKTALSVEIETYWLHAKDRFLLSITVT  
SNTPYLSTVKEWGLEMASPIAEATGTDL NENVLEQTVSDGDRLSFAFECTVEKGLSMEPQ  
KSSKLHLKLYADTEKEYSLALPLDLDEFYSSLSQEDSSNAADIPFALELEKSHGLVGEVP  
EMKFVADPGGSYDMEGVRVYSIDCGTSDWL VGKVN GI IELSRSTVLS CVGIPVVS GML  
DRFPTIALERLEASHEKSTSS TLF GVDCHLPDAFRSLPMTEVNGVASXKDLKTHGLSWCN  
KRAGLHV  
>comp8921\_c0\_seq1; 130 1 642 LEN=844; translated  
ATP GTPQVPATPNTQVPATPGTTAAPT KSP TKSPTQSPTRK GATARPTASPTKIPTQR P  
TLPGETRDP TKRPTAAPTAAATAFPTRRPGTPTT PMP TMEVVKVDPETSTNGIVAINNDS  
NNVATVPGTVPATVPGSV PATPPPPPPAPTPSIPLRVPTSSVSQPAQNRPI FVAPGAYTG  
PNPDYNPLNNGGDIQAQVSYVNGYMVRRSYILI  
>comp8922\_c0\_seq2; 100 1 225 LEN=225; translated  
VTAAVTQDGLTLSYASDEMKSQNSFTAVLKYGCWALEYVSDEMKNEDLV TAAVTQDGR  
TLKYAPDEMKNLKV  
>comp8923\_c0\_seq1; 636 583 2025 LEN=2291; translated  
MPTLSYPLKEFTVYPKVPKNSNNDKKEVLLMLKEDGSFQQYSSEEEGIPDKVRFFDNDRT  
KENADEDNDVLD RYCEFGKLGKWNLVGGRLVLAADRPMDDTGQSTSSLKSRSDITDTIL  
EGEVVATTEEGLVDNPVLS DHREDTQAHTSGKDSTSDKSKSSASKHGVPKERSRRRSGRS  
TTVVDTHLSVPKGRVNI GRFTYPTHHP SFFDAPMFNPRAGGKFELKQVLGTLNTQQQQAE  
ELEEKFS P SDFYKNTFLLSTRP IPQFQPKGNKRWSIKYNKFVEDPPP KAKKNEDEELDKP  
LHNIRVLELKF FANNTFATIGMGGSAILRGRFSVIGEKRDHIWMQVMRFGFGRSVSGSV  
FSEGRSLSKDDEKAYWGKIEYLNDQVGEAGEKSDT IMPDGT LGNCGTNNEDGGPKMIVKG  
SVLFGYGLEPMP IGLFVLTETNSAE EYDYEDDEDDDDDDGNNDFEDNPFLLDMDNSFQ  
>comp8923\_c0\_seq2; 597 583 2188 LEN=2454; translated  
MPTLSYPLKEFTVYPKVPKNSNNDKKEVLLMLKEDGSFQQYSSEEEGIPDKVRFFDNDRT  
KENADEDNDVLD RYCEFGKLGKWNLVGGRLVLAADRPMDDTGQSTSSLKSRSDITDTIL  
EGEVVATTEEGLVDNPVLS DHREDTQAHTSGKDSTSDKSKSSASKHGVPKERSRRRSGRS  
TTVVDTHLSVPKGRVNI GRFTYPTHHP SFFDAPMFNPRAGGKFELKQVLGTLNTQQQQAE  
ELEEKFS P SDFYKNTFLLSTRP IPQFQPKGNKRWSIKYNKFVGTFAIVEESNTNSSCYVI  
RLVTCRFDNLYVYNYEELLPVILLSCVIYLLPFETFEDPPP KAKKNEDEELDKPLHNIRV  
LELKF FANNTFATIGMGGSAILRGRFSVIGEKRDHIWMQVMRFGFGRSVSGSVFSEGRS  
LSKDDEKAYWGKIEYLNDQVGEAGEKSDT IMPDGT LGNCGTNNEDGGPKMIVKGSVLFGY  
GLEPMP IGLFVLTETNSAE EYDYEDDEDDDDDDGNNDFEDNPFLLDMDNSFQ  
>comp8924\_c0\_seq1; 459 153 1118 LEN=1630; translated  
MSRQSILEATTETISNAMDAT TGDGTEAPVEKEQCPVDSFDYLNPEFLAVCLASLTVVGS  
IVTFFMQRRARDRVEEKEAERKA EDELDRQQALERVRTQLSTYVGPLHRLYKTQNTILMQY

RKENEMHNNHLFRAMHHKGSFYWSQCFHPETLQAFLEDPFSPGARAYRNMVVRRLKPVYT  
RIRELVLNHAGDLADMPTQGEWLRKYDRESVLSPTNSIHANVIFDITYTAWTFEFDIIE  
SWTTDEDFSLVQPTTRVAWLICNDLVDLLYENAKDKEAKYNKHVKVHKNIIVHEQETSLRE  
SGNLATTLPAVLSQVGIKARQ

>comp8925\_c0\_seq1; 1039 272 2145 LEN=2168; translated  
MTIAMAIVFLVAISTTTTTDNVTPILFVAADGAGDGIPTGRELSLANKDGSPLRRKLEQPA  
TEDSGNGEGGENHIVKPEDLKKVTENEETGKKVEAKENDGDEAGSGAVDQDEATETTSK  
INGDDGENSDADNNDNIKPTQDNDNSPKENESKKTGNEESKSGNDPKGSKDETKGGGGDD  
NEDKAATPGIAHPQNLWDYDDDEGNGGFLFFLVLVIGLVAGVKHKEKVTDAVSKLMDA  
INSADGGGGAGSTAAKTTKYEPVASNEANDEEWGWGDDNENAADNDFGDDDWGDDDDDDW  
DDTNNIEMTTPSFSSSGGYNNTHITQRKPSFSDSKGETXDLSQSINDRLRSPENSETD  
AGLCRVRLKQRKQHQQRKRIRDELDDQQQREGWPGVLSRSSNGSEIGGGSAVSASS  
TLTPPTAPRVPTPAATTTAAMNPSQEI PATIGMKMGITSLGPKKAKPTSVAKPKKKT  
IGADDGDI FASMFGGPPPKKAKTTTASKAAGSSRWAMAHATPPKSAPPVVSSFGSKP  
IAAKPVPPSAVASSKTASGLGPLASKPAAPKVEASIPDGFGDDDLDDLGLDDDDIAGD  
AGLGAGDGDWDDGDLDDLLFD

>comp8927\_c0\_seq1; 142 616 1742 LEN=1970; translated  
MRDPLGHGAALKGRVGRHHFYTGHPRTVTVMPSVVPKGRTRKRLKSIQETWGASARAI  
YVVDHIEEFPVASHAVISESRTPEDPYSYPQLMLVPDGI GAEDGVPRLIHTVQTVFEKVN  
PDFAFFVNDHTYVIPEHLKNYLEHKKPTEDMYHGHALHDGNNAFNNSGAAGYILSRETMRR  
LVDQWNHGKCTGRDASKWIQGNPGLLTAQCLKEDLGITAFDTRQDKKYHRFHAFPLTRAV  
SGKVDGWYINKHKMDKDNFMGFPASYNTLLSGKDCCAQD TVSFHYVEFMESTALFATREA  
LLENPHMTDHEVKSMMMAEWPRGKEVGFYSRELPSNDKEGWXTIAQGSKEDILEINPKR  
MLTSLVSAVLLLLPAL

>comp8927\_c0\_seq2; 185 228 1079 LEN=1925; translated  
MSTGLHVRKKPSNLEEDADPEVPSSPSNGDNGSENKIHGQTSFFRRFVRSEVGC AIEAI  
AGFLIFGLLFGYLILHHQHRKVVLHIMRDPLGHGAALKGRVGRHHFYTGHPRTVTVMPS  
SVVNPKGRTRKRLKSIQETWGASARAIYVVDHIEEFPVASHAVISESRTPEDPYSYPQLML  
VPDGI GAEDGVPRLIHTVQTVFEKVNPDFAFFVNDHTYVIPEHLKNYLEHKKPTEDMYHG  
HALHDGNNAFNNSGAAGYILSRETMRR LVDQWNHGKCTGRDASKW

>comp8927\_c0\_seq4; 245 228 1612 LEN=1840; translated  
MSTGLHVRKKPSNLEEDADPEVPSSPSNGDNGSENKIHGQTSFFRRFVRSEVGC AIEAI  
AGFLIFGLLFGYLILHHQHRKVVLHIMRDPLGHGAALKGRVGRHHFYTGHPRTVTVMPS  
SVVNPKGRTRKRLKSIQETWGASARAIYVVDHIEEFPVASHAVISESRTPEDPYSYPQLML  
VPDGI GAEDGVPRLIHTVQTVFEKVNPDFAFFVNDHTYVIPEHLKNYLEHKKPTEDMYHG  
HALHDGNNAFNNSGAAGYILSRETMRR LVDQWNHGKCTGRDASKWIQGNPGLLTAQCLKED  
LGITAFDTRQDKKYHRFHAFPLTRAVSGKVDGWYINKHKMDKDNFMGFPASYNTLLSGKD  
CCAQD TVSFHYVEFMESTALFATRE ALLENPHMTDHEVKSMMMAEWPRGKEVGFYSRELPS  
SENDKEGWXTIAQGSKEDILEINPKRMLTSLVSAVLLLLPAL

>comp8928\_c0\_seq4; 133 214 552 LEN=890; translated  
MDRTEQSPPRAGNEEGQEGSLTDCLLSQYRLCAAGIGLGTAYS LKFKKGLVPMIAAGAVG  
TTADMVYGYLVECAHLTKSAENNDNPTTKIGTGTNFKDASPTKEINGNESGQ

>comp8930\_c0\_seq1; 311 596 2419 LEN=2445; translated  
MSVSQMNLLMSAEAFMIPFGEIFQCIEDVVLVQIGYAI GRSDKPRTDHLIHVGIAGSIVT  
GTVAGLIGTILALWPSAFALLTNPGRKHDQSLYEGCEWFE GNDYDRWLILPYWMMKSWA  
MVFQQIGMVLSGFFFGAKAIAAGEKSSVTLNDXLFLNSLLGCCNHNVN SHVMLMFQILSLS  
THKPCR YRVDITVFSQDTSI IWF SNVGTWSNPLTLVGIADISGDIVLPVLAISFLASPLA  
SSIRERTGLSLSGSKVIDNLRWQPTNGFAPVVS KKVSDNGEFFSRESTSLIGNRKSEEN  
SAFERSITTNNEAPNGTNTM KLFVEGFKVMFMDVAIQGCTSF TYYVALRQDSEVAYQIT  
ALQSALPQYGYGAVGISI IFKLTGSQLLAKGNKLFVVF AKICIVSVLAMIPAIVAEVL  
EARHTIALEYGSNACS YAQNSNCV PFEAIFGPNANGGGFTLQYTF TALAFGAVTDSVSL  
VLSVLLALLDFDLVNSTICAVGVYI PSMYAATCLDTIYKGQAI SYYVAMNMPQLVLIL  
VLLVRLKYNFRKVL DGEEGPWTE TSP EERSNDEPSSEQISSFSYKEEMGPLINSKRRS  
SLVTVYA

>comp8930\_c0\_seq2; 353 596 2287 LEN=2313; translated  
MSVSQMNLLMSAEAFMIPFGEIFQCIEDVVLVQIGYAI GRSDKPRTDHLIHVGIAGSIVT  
GTVAGLIGTILALWPSAFALLTNPGRKHDQSLYEGCEWFE GNDYDRWLILPYWMMKSWA  
MVFQQIGMVLSGFFFGAKAIAADIGWILLFSLTTLTYIWF SNVGTWSNPLTLVGIADISGD  
IVLPVLAISFLASPLASSIRERTGLSLSGSKVIDNLRWQPTNGFAPVVS KKVSDNGEFF  
SRESTSLIGNRKSEENSAFERSITTNNEAPNGTNTM KLFVEGFKVMFMDVAIQGCTSF T

YYVALRQDSEVAYQITALQSALPQYGYGYAVGISIIIFKLTGSQLLAKGKNKLFVVFACIC  
IVSVLAMIPAIVAEVLARHTIALEYGSNACSYAQNSNCVPPFEAIFGNANGGGFTLQY  
TFTALAFGAVTDSVSLVLRVLLALDFDFLVNSTICAVGVYIPSMYAATCLDTIYKQQA  
ISYYVAMNMPQLVLLILVLLVRLKYNFRKVLVDGEEGPWTETTSPEERSNDEPSSEQISSFS  
YKEEMGPLINSKRRSSLVTVYA

>comp8931\_c0\_seq1; 190 1 1083 LEN=1229; translated  
EEFIMYIVRNSRSTMGNQLPKGHKNMFSIHTVFSILCFLGLVSDVASLSATPKVQPPSKN  
PDVLRSFVFGNDDARCWELLSPEPIEDEEEDEVEYWYPIRTRYFEFSIPPSQSSETLVQ  
STSTTMIRQTSFGCGKLGyelWdSSIALCLHLGRQLPLIEGKRILELGSgcGLPSVVCrd  
LLQADAVLATDFWQEDGDGDFDGLVPTKFHGMNLEYNVVAARGNKRREAQVQLDWHDR  
ASAVSARESFRPDVIGSDLMYYPMDIEPLLNVLETFLVEYGDRDGADGKQATETRVFLV  
SALAPAEREALPEFRSKLPVRFSAHTVTMTKEMALGCEETEgedHKFLLIDIVPKQKTSS

>comp8933\_c0\_seq1; 342 1 879 LEN=1070; translated  
SSSSSSSSSDSDSEHDGDFLDDLNKNSNNDPRFSSAVEDKLVDAQAKRQQQVGSgADDF  
AMPGVTTAMYDTILDAMACATQVSLESQPPTAAASESPSYLQLEPDDLRYVAGAAWKAH  
ELNNLHDTGSFFPATPTMTVYNATLRGIGNLCLAASSGSDERRRVVDQGLAYGFQVY  
NQLTHNDHGLPKRNSASIIYLLNVIKACIPPSRTRGNMTVALWHQASMEGLVTPELIRTL  
KDLHNETNGLEFADFLESLEDCIAQPSGSSGVVITPQRFARFTKKHRHSKFY

>comp8936\_c0\_seq1; 1118 33 3728 LEN=4222; translated  
MALFPKLAKDNGSNNNFSEHIEKKPHEQEhgSTNTGPRMNSERNAGDFWWRVITVLVVAS  
ISIVSWSKYSERASTIRPLRLVEAEGNSQWDPLLLVEEHEGDTETIGTHDYLLDSYAKRQ  
SLHSPPTQSFLATHEQGSSAGFATARTNDPSGSVRKYAASHSFLLPQPGDDPEAPKATTP  
KRVLNiHVVPHTHDDVgWLKTVDQLYNGWNNTIQKASVREIISVVEALTENPSRTFCYV  
EIKFFSMWwAEQTEQMRETVMRLVKEtKQLTFVNGGwCMHDEGStHYTGMIQTTLGHDF  
LKRTFGYVPTVGWQLDPFGHSSTQASLMTYKTGFDAIYFGRIDYQDREKRHATKnceGLW  
NTYTNRDGDDEGGVFWGLTGSYTGNYQAPGGYCLDVNCGPGQKSFIDKNRKEIIAMVED  
FLLAVRQQSDRTKGDHVMLTMGSDFQYQRAAVNFANLDDLIIGTVTNLQKDGTDIDIPemFG  
PEYDAIHMFYSSPEYYTKCKHEEVKQARTNTHATDNEGSPPSSIVSRDHRVLRTPKKDPV  
SSSASGVEWATKRDDFFPYSDCPNCFWTGYFTSRPSLKRFERATAALLGARQVISTVA  
NSRTMKSQPESSCGCEDELLQLEDAVGVMQHHDVAVSGTskQHVAyDYAKILQGGINALL  
PCLIRKlKHLlLGDdSEMylTDLYCQLLNETVCEPSVTATSGIAGDGNdVGSNGGDLYA  
VVYNSLASNRSALIDLpVGTpGRYLVEDVAEGNAETMEALPNYFRPPERLAKSSGPFVLS  
FTADSLPAVGAKVFRIRKHSDAIEKLNQEGALDGGNNAENTGDVvSTPSMADPENTDSD  
GLMEISNGRFSVAVDTDtGAIrrIGtQHVENLSSWgYYISFDREKDTVRPDADENSGAYI  
FRPSTPNQKLRTVSPtNATIVHTLMGTEIRTRYEESWISTKTRIRKDLpyVEIEYQVGPI  
PIGDGRGKEVvTRYNTMVnNDATfYtDSNGREFIKRQRNYRPTWDLTVFEPVAGNYYPIN  
TAIYIEEQEVLHNEKDSEKTAGPAFAVLTDRSQGGGSIVDGTIELMVHRRTIGGDDHKGV  
GEPINETDVGITPCAPYGNATRIGeGLVIRGKHRIlVGNdGERLARSVMDDSFADPLVfV  
GTNPTAEeFFFHAKSfSGITKPLpVnVMLITKRPLYKADStEYLVRlGHQYgERTDvDLS  
LLFPREQIDGFRETTLSGNrDIEDWKRQRFDW

>comp8938\_c0\_seq2; 403 55 1502 LEN=1519; translated  
MALPWYRVHTVVLNDPGRLIAVHLMHTALVAGWAGSMALYELAVFDPSDPVLNPMWRQGM  
FVMPFMTRLGITDSWGGWSITGESVSNPGIWSFEGVALSHIILSGMCFLAAIWHWVYWDL  
ELFRDPRtGEPALDLPKIFGIHLfLSGLACFGfGAFHVTGLFGPGIwVSDAYGITGKVQP  
VAPSWGADGFNPFNPGGIAAHHIAAGIFGIFAGVfHLTVRPPQRlyRALRMGNIETVLSS  
SIAAVFFAAfVtSGTMWYGAAATPIELFGPTRYQWDSGYFQQEIERQVETSvSEGLSESQ  
AWSRIPDKLAFYDYIGNNPAKGLFRAGPMNKGDGVAEAWLGHPiFRDKEGRELTVRRMP  
AFFETFPVILVDKDGIRADIPFRRAESKYSIEQVGVTVDfYGGKLNQTFKDApTVKKF  
ARKAQLGEVFefDRtSLSSDGvFRSSPRGwYTFGHANFALLFFFGHXMAWWSGEVEKkEM  
IK

>comp8938\_c0\_seq3; 478 55 1584 LEN=2438; translated  
MALPWYRVHTVVLNDPGRLIAVHLMHTALVAGWAGSMALYELAVFDPSDPVLNPMWRQGM  
FVMPFMTRLGITDSWGGWSITGESVSNPGIWSFEGVALSHIILSGMCFLAAIWHWVYWDL  
ELFRDPRtGEPALDLPKIFGIHLfLSGLACFGfGAFHVTGLFGPGIwVSDAYGITGKVQP  
VAPSWGADGFNPFNPGGIAAHHIAAGIFGIFAGVfHLTVRPPQRlyRALRMGNIETVLSS  
SIAAVFFAAfVtSGTMWYGAAATPIELFGPTRYQWDSGYFQQEIERQVETSvSEGLSESQ  
AWSRIPDKLAFYDYIGNNPAKGLFRAGPMNKGDGVAEAWLGHPiFRDKEGRELTVRRMP  
AFFETFPVILVDKDGIRADIPFRRAESKYSIEQVGVTVDfYGGKLNQTFKDApTVKKF  
ARKAQLGEVFefDRtSLSSDGvFRSSPRGwYTFGHANFALLFFFGHLWHGgRTIFRDVFT  
GIGAEVTEQVEFGAFQKLGDkSTKkQgAV

>comp8939\_c0\_seq1; 1305 1 3345 LEN=3345; translated  
VSWYLS DGNQIENLDEISSSDYEFKFKKAQGLLTLWGIVKDPSPQQLKQIADSLIYFRNN  
YKPEIFDKFEGDKRDKLKKLERAILDWRAIAAESTKMYSPGEMENIAEEIEGALEWLRAK  
FKENDFPEFTSPEDVYLAEKVKILMDQWDPDPESTVTSKRKTETAKKIKNAIESWRGHG  
KIFDDESFSIHS PDREILLKLRKSMLEWRRMNVSKMSEVEAEHTVKEIISAMNWWKNYGK  
DYVITQSSLSMAPLMMRHKMVTDILSHWYRDQGMSRKQPQNLSLKEAKKAADLQQNI EW  
WDREGKHMNVDKDIKDAKEFEKVKRLAHIWQKVTMPPKHKDQAVKEISDLFRWMRKKNKN  
FDLDAVRNKKVEHIRDIFSVWGGKSRNAKVAREIEEALDWWKRNNYELDEDASSAE  
KMMRLETLAQRWHDIAHPDNI PGTDTNLDWFRKQRVDEIKGTLNVYETAEEKSTGAPK FV  
GVI SDEQRANEMANALDWLRSNDADLDIDDNVSVALS VATFKKIDSLMPKSDDSVGITS  
MKNALDWLRSKTDVDEETVKSFKLIDDVMAKSGVKDSIEESGFGGALEWLKQRQSVKEVI  
SDNESVPSYKPPDALAGKPRTEEEKRAEMANQLDWLRSNNVADDIEDDISLIGISLGSF  
KNIDARSTASAGEALPSALDWLRSQEKKGASRVEEEGDGISFSGIKTKSKEQKKSEKMAN  
ALDWLHQGTTKDHDKNESTSVGIDSLASLTADGAHDKTIDQALNWL RQGHAESPQNVDH  
EKNASGFLQPRKEDQEKLDMNNAIKSLRSNGVDFEEDSPDLTDHVNSFSSIDADR TSGG  
NFKDGSTSLIDLLQKKDPHNVD EPLSKKFGDFRKTKEENQADNMAKALGWL RNNEGISDD  
DKSEFGTDEFELGNIAVKSDAERV RERQDALDWLSKSGGSVDDDDVDDDSK KFRKLAKLI  
PNIEGKSMEAKATEMEDALHWLRSKGVLDLDDTTKIESFDKLG VVPLGLRSMYEKERDLK  
NALRWIRKSKDKKQADNAF SKLDKFPETGGQSDKDRATDLVNAVAWL RGNVRFDYDNEG  
IPSFEIAKADSNVDNSPVDREKDV EKALNWL RKGX

>comp8940\_c0\_seq1; 671 122 2150 LEN=2349; translated  
MGASSADQNRKSQKQODIAYLGDRMPFGDAELLQVYCVYQNLKERLKF SNSTEAE SNDG  
NEIRKKATSFLKDVGVLSAAEGRRSERKTKKTNSVISEEEERFQEAAYLEERLFLLEAVE  
RKILPAGFGNTLYRTCF LGPHDSSSYDGHAIKTL YQGDGEEDEYVRMARLEQFFGGLANG  
TRRDRKTVTRCLIRCCAQQPPPVGAEETVDGNNAIVNDFAYGGANARNFSNGQNER TYIK  
PMELVDLGYRICIAA AFLKEATGGNSKDEDDQDLGRFLPPTDPRELK PGLLALSNSLASL  
ATKRKQRRLRSTVPSDELATLVDEDDVFEWVEQVAPMYGSILPTFLHCIFFPNKAAPPTR  
SSFYDPRISQESTVFP MNSTPLLF SFGCMSPSLGGEVGCINLFFVFLHVRALIGSLFPI  
LLSDNEIPFHVAFFVYQYRLYTSASDGLSFNRLQNAL LGYGGPTLLIVQSGKSTFGAFT  
ASPWKESKDFYGNHDCFLYRLLPETTAVYRPTGGTNKSSTRFMYCNSFARSRGFDQQAHG  
IGFGGSTERPRLFLSESFDDCRAGSDDLTFEKG PLLAGNGDNSAATATANAMFEIDNLEV  
WVGVGTEIVEESLKARSRSRDIRQANINKARKVDKAAFLDDL RSGVIDNKAFAHRAQIQG  
RDGTCELLGDDTDEN

>comp8940\_c0\_seq2; 711 122 2026 LEN=2225; translated  
MGASSADQNRKSQKQODIAYLGDRMPFGDAELLQVYCVYQNLKERLKF SNSTEAE SNDG  
NEIRKKATSFLKDVGVLSAAEGRRSERKTKKTNSVISEEEERFQEAAYLEERLFLLEAVE  
RKILPAGFGNTLYRTCF LGPHDSSSYDGHAIKTL YQGDGEEDEYVRMARLEQFFGGLANG  
TRRDRKTVTRCLIRCCAQQPPPVGAEETVDGNNAIVNDFAYGGANARNFSNGQNER TYIK  
PMELVDLGYRICIAA AFLKEATGGNSKDEDDQDLGRFLPPTDPRELK PGLLALSNSLASL  
ATKRKQRRLRSTVPSDELATLVDEDDVFEWVEQVAPMYGSILPTFLHCIFFPNKAAPPTR  
SSFYDPRISQESTVFP MNSTPLLF SFGCMSPSLGGEYRLYTSASDGLSFNRLQNAL LGY  
GGPTLLIVQSGKSTFGAFTASPWKESKDFYGNHDCFLYRLLPETTAVYRPTGGTNKSSTR  
FMYCNSFARSRGFDQQAHGIGFGGSTERPRLFLSESFDDCRAGSDDLTFEKG PLLAGNGD  
NSAATATANAMFEIDNLEVWVGVGTEIVEESLKARSRSRDIRQANINKARKVDKAAFLDD  
LRSVIDNKAFAHRAQIQGRDGTCELLGDDTDEN

>comp8941\_c0\_seq1; 643 1 2425 LEN=2697; translated  
XDLRPIPPPLLPDL PNSGACRWSFDEATRVL RADFSVGRNQKGRSSVVTLEDSKFLFQ  
MYERDDITVVS RGLLNMSRIE PSLWSLEYLRKCVGREFYHKFRRFDRTVDENGIVSNLEK  
DVLYSMRFEDYVRYCEKRESYLN ERAAGNDNGNDNDNGTAQDEPQFTFCDYQGKTH TIGV  
RTSALY MIDVDMSRLVPL LNDNFLES FELPAVLPGGSHCMMSV TPEARPFMGP NLYVTP  
PASFTHFHQDGHGTVD SGHLCSGYNEVVM LRLRTERHKKHALWILSGSRTDDSHFDGLY  
SMPHGDGLGKKPPWPTKDMLED CRKMGYCP SVLILEPGDLVHINKGR LHAFRKMSTSGLP  
DKDCHF EQRTM VASKGISGEEKMCVSAWDW MYRGISPAGINREVC AILEGSTLNRKNN  
VSSLAIP ELALLQMAKTIPARGATAGNTK SFLDALKKEERQ TNIESSKEDICRGINPGL  
SVVVGQHMKALNVEESTSTEKGERLSIAKIPDTQENPQSCALDPYGS SDFQCKLCSKELS  
NVYFHC DGCEKLLSKDFNICRGCYLQGEFLIKVQMHP SNPKRHATL NHMGDNKFSRESRC  
PCKNGPACNFCGYCLGCS CRCHTFWTRRLCDAEDEE KLLRSVRCTIIPESPEPSVVDG  
GDNKREKGVFGGMEETTQHLVERLKDAGDEEWLSEDRADNVPEQQSSSNEANGVTVVDGN  
SEEMARGENGKGRPGANEDGNAMYS DVRVKVEDSQQTIAEDMKVTGLANGNTGKKLQGAD  
RTDDAEAKKQCEREWVAGSNVKNDDAVV



>comp8941\_c0\_seq2; 193 1 957 LEN=1049; translated  
XDLRPIPPPLLPDL PNSGACRWSFDEATRVL RADFSVGRNQKGRSSVVTLED SKFLFQ  
MYERDDITVVS RGLLNMSRIE PSLWSLEYLRKCVGREFYHKFRFRDRTVDENGIVSNLEK  
DVLYSMRFEDYVRYCEKRESYLN ERAAGNDNGNDNDNGTAQDEPQFTFCDYQ GKHTHTIGV  
RTSALY MIDVDMSRLVPL LNDNFLES FELPAVL PGGSHCMMNSVTPEARPFMGPNLYVTP  
PASFTHFHQDGHGTVD SGHLCISGYNEVVMLRRLTERHKKHALWILSGSRTDDSHFDGLY  
SMPHGDGLVGIXAKGGLLL

>comp8942\_c0\_seq1; 386 318 1229 LEN=1441; translated  
MKQNTTTPSLPPLRVEEFKDHNSLECSPRCVIPQETSRLKVSPPQLSPETR RVCSGSIG  
SSASSSVSTYSSSSSASSLGF GTYDDPDDIAPETNTNDEGDPIISFEALSLETRRIAVSI  
APTSPMALSAEDERTLGRMKPNRLQNCQLSLEALFKE SDGASNRSTQEMLPTLSMIAQRE  
RQQQETCNTDELAATKAAPRDGSILPEVGQRRSIVSKRYTIRKIVATGPSNFSSLHPPHN  
SSRALRPKRQRGGSDFSMPIEGNSSSSISPRDRRKRMRNRNRAMA ADEFDSILSQINTT  
GSL

>comp8943\_c0\_seq1; 527 49 942 LEN=942; translated  
MTFSLAALSVAL LQAPMAVVQGSFFRSALVNDIGSNGKVLASEVILKGATGEP TAEDMEF  
IGKALVASYN NVHVEVGHYMTGSHAVDFKGPDSFLCRHCPDDDSMRGAGAETS VFEVKTP  
IGFLCRHCPDD DAMGTDSLLMAAISED CAGLCEKEASAELEVSLCSKIRSAQDSKYLSSV  
KACVIRFDAEDKKSNNKR ISSATNKVATVDSTIILK GIGAGDVTKEEQAILAKAFVSAY  
NDVHWGTNHYLTDAEIPFTAATESPDGFLCRHCPDDDSMGG AQQTNTLVLDIISPVEA

>comp8943\_c0\_seq2; 239 224 514 LEN=514; translated  
MKFCLAILSLALASARGASLRSAFANSIDSNNGKVL DSEVILKGT VGEPTAEDMEFIGKA  
LVASYNDVHWEAGHYMTGSHAVDFKGPDSFLCRHCPD

>comp8945\_c0\_seq1; 456 86 1615 LEN=1818; translated  
MRDELAQLVQTTPKPKNEYTDIDGFNYRQGGYNERKQQPGVFPWKAVTLVSIIFLVALGF  
YQKNSNPKWMLRKS PKCFCHQSPPKLHHDKSYTIKNVAGLSTGNSVSEEIVVIPMTV  
TYEYELYDGGSLFTVASSELIPNLDFDYAVLGMSTARNINRQTGEPVSLDEVYVHHFSIP  
PINMIGAEVLTRNASMPYMKFPDGYALHVMVDETPHIT TNAHLLSNKNLAPINGSL SRAH  
KECNECFYAPGKGSECTPEASGTFKCCGDSYVCTTGREECACATRTERDTSQTTKYRFEI  
DLLISKDISRFRKRDQWNFAAPACAVNLYGDSVFKQYAPGNFCSNITASQSLTTGGGSLF  
HSVPENNANPYLET KINVIAPAGGKLIWAQSHLHTGAINATLLINGKVV CASSAVYGTDS  
DETANARNEQNHLIQIGSCYDEIEEGGIRFEEGDVFTTESIYGGTDDEHMSAIEAAGEH  
KNVMSMFFTGDIDFGDSDFLTENRTSFNFW

>comp8946\_c0\_seq1; 502 165 1757 LEN=1874; translated  
MASVGQVVTENCL EFLIAQQLVFSNGESRLEYCKLFRELH SRESTLKNLSYGLHNL SKIS  
EFVELMEGARADDQEPCLSEQGS PHNTKPFYKWKPFWDWKA FRGRLTRI QMSMLREDANAT  
VDDIYRHNGDRNNS ENPSIDEARSQSKWYS DNLYRVVDLLTLQEK LAPFRENLESMSWYF  
NDEASEPLPLPNDLVVEYMETLDNLQCRNEALTKDFQKVFRIFL KSDGTD TFRSPATIRG  
LLDDHTKAYSFTLLRN RVDKLIRRWVSDVFQPVTVI GRANPEAAVEESQTDALQRLQ RSR  
ARLRERVEDPMSETVA AATLAQLNKEGKHPSMPSGDEPQDDEHSEKENDRTERSPSNTT  
AVKKYKRRRGMSPITKGRMLDKKRSATRLDFTQSDDEEIEDPEVQDEVLPD VRRPIQVRT  
SPGTPSKKRSQEKSYQRRVWSDIEKQAVKDGIIRFGVGMWARIKNDKGVILRDR TSGQ  
IKDCYRTMKRRGELDNIEEAWPERKKL TEEKEEGKEQEKVDEKGEQEDK

>comp8946\_c0\_seq2; 426 165 1631 LEN=1996; translated  
MASVGQVVTENCL EFLIAQQLVFSNGESRLEYCKLFRELH SRESTLKNLSYGLHNL SKIS  
EFVELMEGARADDQEPCLSEQGS PHNTKPFYKWKPFWDWKA FRGRLTRI QMSMLREDANAT  
VDDIYRHNGDRNNS ENPSIDEARSQSKWYS DNLYRVVDLLTLQEK LAPFRENLESMSWYF  
NDEASEPLPLPNDLVVEYMETLDNLQCRNEALTKDFQKVFRIFL KSDGTD TFRSPATIRG  
LLDDHTKAYSFTLLRN RVDKLIRRWVSDVFQPVTVI GRANPEAAVEESQTDALQRLQ RSR  
ARLRERVEDPMSETVA AATLAQLNKEGKHPSMPSGDEPQDDEHSEKENDRTERSPSNTT  
AVKKYKRRRGMSPITKGRMLDKKRSATRLDFTQSDDEEIEDPEVQDEVLPD VRRPIQVRT  
SPGTPSKKRSQEKSYQRRVWSDIEKQAVKDGIIRFGVGMWARIKNDKGVILRDR TSGQ  
IKVSFESL

>comp8950\_c0\_seq1; 396 129 1394 LEN=1588; translated  
MIPSHLLDPTKKKNERLSRTVLGVAPPPPLPSLCV TGAMSRIGKYRVATGTSSS ANEDQD  
IGIRNDNGNDGKKLMCPAKKYTIHDNGGVPIILSYIIFRPRQLYDQNK PPLLCLHGGPSI  
PSNYLLPIVNGVTDR TIVIFYDQWCGKSSRPQALTEPNSNNKNNAKKKA EYPPFSIPTMV  
EHLRQLIDEHWKLR FHLFGHSFGGILAYEYLLAKTCTLDEELSGGRHASCVS SLLLSST  
PTSASLIQSESERLFRSLTSQEK SNGCSIDGGNGCCEK DITDKTAIASSEQQKQQLRQSM  
MKSEEFQQTHECRLADCP LALMDALGNMG PAPWRGIEA IHGYEAEEVDEFHRIP SLLLRG

EYDFCTESCMAGWRERLDGDNFKSEEVVLSNCSHYAMLEDENQFGAEILRFIRSHDAEDW  
P

>comp8951\_c0\_seq1; 567 284 1917 LEN=2406; translated  
MKNFGVSEIPKEDTPLVSKNIREEEEDFDDDDGSENDGSDHFKTLSGKGPNI IRRQSIAD  
RLSERLLGIDDDDDKLEDKILHEHLHVDMDTPLLTLSENERSFVKVQVSDDETSSINWV  
SSKNFGARFFSMTGLCILAFGLVLAALLIGAGFVPPNPVGPYELIERQVSDGXDLSEG  
NDFFGYTYFYEGADSVGSNGYISYVNEERAGDLSIANITNEVDVLESLFRSQKIKGESEE  
QTSNENQKKPFLYLKTSPTVDGPRESVRLEGKKRFNRGLFIIDVRHMPAGCGTWPFAFWLT  
DEANWPVNGEIDIVEGVNFQAEAKTALHTTKGCSMYDVPLGLMTGIWDTSIGIPDRKTGI  
PDMTYREARNCYVYDRHQWLNQGCVAIDAKGGSLGAPLNEKGGGIFALEWDPIYRHIRTW  
VFTPHTKVPENLVDAIRTASEKAEEDRVMPNPEEWSLPYGYFPIGDSTSCGGTKFRNMRL  
VLNTALCGSVAGNRFMDCKNESKTFKTCNEYIKSRPEALSEAYWKIRGVVYVYQRRWEKA  
WLH

>comp8951\_c0\_seq2; 618 284 1894 LEN=2383; translated  
MKNFGVSEIPKEDTPLVSKNIREEEEDFDDDDGSENDGSDHFKTLSGKGPNI IRRQSIAD  
RLSERLLGIDDDDDKLEDKILHEHLHVDMDTPLLTLSENERSFVKVQVSDDETSSINWV  
SSKNFGARFFSMTGLCILAFGLVLAALLIGAGFVPPNPVGPYELIERQEGNDFFGYTY  
FYEGADSVGSNGYISYVNEERAGDLSIANITNEVDVLESLFRSQKIKGESEEQTSNENQK  
KPFLYLKTSPTVDGPRESVRLEGKKRFNRGLFIIDVRHMPAGCGTWPFAFWLTDEANWPV  
GEIDIVEGVNFQAEAKTALHTTKGCSMYDVPLGLMTGIWDTSIGIPDRKTGIPDMTYREA  
RNCYVYDRHQWLNQGCVAIDAKGGSLGAPLNEKGGGIFALEWDPIYRHIRTWVFTPHTKV  
PENLVDAIRTASEKAEEDRVMPNPEEWSLPYGYFPIGDSTSCGGTKFRNMRLVLNTALCG  
SVAGNRFMDCKNESKTFKTCNEYIKSRPEALSEAYWKIRGVVYVYQRRWEKAWLH

>comp8951\_c0\_seq3; 617 284 1693 LEN=2497; translated  
MKNFGVSEIPKEDTPLVSKNIREEEEDFDDDDGSENDGSDHFKTLSGKGPNI IRRQSIAD  
RLSERLLGIDDDDDKLEDKILHEHLHVDMDTPLLTLSENERSFVKVQVSDDETSSINWV  
SSKNFGARFFSMTGLCILAFGLVLAALLIGAGFVPPNPVGPYELIERQEGNDFFGYTY  
FYEGADSVGSNGYISYVNEERAGDLSIANITNEVDVLESLFRSQKIKGESEEQTSNENQK  
KPFLYLKTSPTVDGPRESVRLEGKKRFNRGLFIIDVRHMPAGCGTWPFAFWLTDEANWPV  
GEIDIVEGVNFQAEAKTALHTTKGCSMYDVPLGLMTGIWDTSIGIPDRKTGIPDMTYREA  
RNCYVYDRHQWLNQGCVAIDAKGGSLGAPLNEKGGGIFALEWDPIYRHIRTWVFTPHTKV  
PENLVDAIRTASEKAEEDRVMPNPEEWSLPYGYFPIGKGASTVLSINDL

>comp8951\_c0\_seq4; 344 284 814 LEN=936; translated  
MKNFGVSEIPKEDTPLVSKNIREEEEDFDDDDGSENDGSDHFKTLSGKGPNI IRRQSIAD  
RLSERLLGIDDDDDKLEDKILHEHLHVDMDTPLLTLSENERSFVKVQVSDDETSSINWV  
SSKNFGARFFSMTGLCILAFGLVLAALLIGAGFVPPNPVGPYELIERQVSDGPI

>comp8951\_c0\_seq5; 566 284 1716 LEN=2520; translated  
MKNFGVSEIPKEDTPLVSKNIREEEEDFDDDDGSENDGSDHFKTLSGKGPNI IRRQSIAD  
RLSERLLGIDDDDDKLEDKILHEHLHVDMDTPLLTLSENERSFVKVQVSDDETSSINWV  
SSKNFGARFFSMTGLCILAFGLVLAALLIGAGFVPPNPVGPYELIERQVSDGXDLSEG  
NDFFGYTYFYEGADSVGSNGYISYVNEERAGDLSIANITNEVDVLESLFRSQKIKGESEE  
QTSNENQKKPFLYLKTSPTVDGPRESVRLEGKKRFNRGLFIIDVRHMPAGCGTWPFAFWLT  
DEANWPVNGEIDIVEGVNFQAEAKTALHTTKGCSMYDVPLGLMTGIWDTSIGIPDRKTGI  
PDMTYREARNCYVYDRHQWLNQGCVAIDAKGGSLGAPLNEKGGGIFALEWDPIYRHIRTW  
VFTPHTKVPENLVDAIRTASEKAEEDRVMPNPEEWSLPYGYFPIGKGASTVLSINDL

>comp8954\_c0\_seq1; 197 444 1346 LEN=1574; translated  
MIARALGVELIEGSRPNRLALERTSDIQVQHFSLPWGAGCQKFPTQVIQNVVLPACSV  
LVYSTSSYTELKECLKMAEAGIQVGYNRLIYPTRYLLDIVSSKEWYKSRGIDQIFII  
VRDHTVSQRARVKHCKNETLLKKEEKTGTDIITRAINKEYILKSRRLSISSLDLFGDISP  
KAMNATNDYHRGHEHRKLSLTAPLQGDNGVVLVSYESLNQLGDVYVKKLLYETLGI  
ESDTMPTIEDGNTKYIKNKSCLKDINRPKGSYGAQAAREKDVLERYKKELEKRRDREKKQISD

>comp8954\_c0\_seq2; 197 415 1317 LEN=1545; translated  
MIARALGVELIEGSRPNRLALERTSDIQVQHFSLPWGAGCQKFPTQVIQNVVLPACSV  
LVYSTSSYTELKECLKMAEAGIQVGYNRLIYPTRYLLDIVSSKEWYKSRGIDQIFII  
VRDHTVSQRARVKHCKNETLLKKEEKTGTDIITRAINKEYILKSRRLSISSLDLFGDISP  
KAMNATNDYHRGHEHRKLSLTAPLQGDNGVVLVSYESLNQLGDVYVKKLLYETLGI  
ESDTMPTIEDGNTKYIKNKSCLKDINRPKGSYGAQAAREKDVLERYKKELEKRRDREKKQISD

>comp8954\_c0\_seq3; 197 531 1433 LEN=1661; translated  
MIARALGVELIEGSRPNRLALERTSDIQVQHFSLPWGAGCQKFPTQVIQNVVLPACSV  
LVYSTSSYTELKECLKMAEAGIQVGYNRLIYPTRYLLDIVSSKEWYKSRGIDQIFII

VRDHTVSRARVKHCKNETLLKKEEKTGTDIITRAINKEYILKSRRLSISSLDSLFGDISP  
KAMNATNDYHRGHEHRKLSLTAPLQGDNGVVLVSYESLNQLGDVYVKLLYETLGIESTM  
PTIEDGNTKYIKNKSKLKDINRPKSGSYGAQAAREKDVLERYKKELEKRKRDRREKKQISD  
>comp8955\_c0\_seq1; 392 1482 2522 LEN=2543; minus strand; translated  
MSQVICVLALSPFVILIVVGSFKVDPSPRWFVLPKTGNSTSIDVFDVDDVDTQGGIISNISW  
GGVFWRPFLNNLFWNLNSFDSGGNMVAELDSTTLFIRPMMVGFLLTVSFYIFPLLIATGA  
SDAEQEDWTDGYLAVINSEVVGPWLGAWTIFAAGISNIALFQAELTSDAYQLMGMADRGY  
LPKIFSKRSRHGTPTYGLILGTAVIVLMGVSDLRLIEMLNFNYSVALLIEYAAFFKLRI  
SRPNIERPYRIPLNTLGCVFFFPVTSATLLVICLADFTTYFVAVGTWLVGYLLYAVKRO  
NDQISFSTALEEGNRGDGYAHVAVESVEGDEMDELVDENTTNGEFS  
>comp8957\_c0\_seq1; 434 138 2178 LEN=2915; translated  
MRKQLQTNRNKRRIISLFCCLGTAVWVTALVSLTFLQVFI LRHNEKLGRRERQDGNASLSSE  
SFYQITEQRIQENQKITQGGHENKINKTGKKPQQLQKKQSIIDGGEQDKLFSMEKKTKM  
SKMRKGQLSWSGGHGTPESCSDTKMRKIQYQLEQNARFRKKNMAKYVMDFRKRQSTYIAQ  
STTSAAGEWEETMGVHARGMQLFVDLSDQKSFVANSSDNESASENDGPWFVLHIGPPKT  
ATTTVQCGLKXSLRLAKTDGYHFLGGGCGMQTKKEYFMPNGEQVTLRLQILVALHSAESR  
SDYEAKRCHEPVSRYVEAIEAEKHRQRFIDRASFLRSKNRSVILSSEQFGSQLSVQREIM  
EQTRSMILSTEDGHGAGFPDPKVRIVLAYRHFVDWLP SFYYQKFFRLNSVMDREWHDFR  
VRPLLEYIDEYLTKEAHQRKVVDKYVARKNATLIHEGHSPLSLLPTNRQSIHPSWWLYTV  
WSAYFPLPNQVQVYDMHSPMNMNRPEDDMVTD FICHMLPSANDTCQNMMDADGKYDKSD  
YDNLDLHSFHSLHLPNRTTDFLNNIGRGNKPGAKRNLKADSNGDNSNSDEKNNGKQTMVV  
RPSSDHHAKRIVEELLGRGDIKPFYEEYGTKYFEKLNEGGIMQDPSDAVTVNGYTMPNL  
LERANEILENHGGIPKPKQ  
>comp8957\_c0\_seq2; 481 138 2756 LEN=2784; translated  
MRKQLQTNRNKRRIISLFCCLGTAVWVTALVSLTFLQVFI LRHNEKLGRRERQDGNASLSSE  
SFYQITEQRIQENQKITQGGHENKINKTGKKPQQLQKKQSIIDGGEQDKLFSMEKKTKM  
SKMRKGQLSWSGGHGTPESCSDTKMRKIQYQLEQNARFRKKNMAKYVMDFRKRQSTYIAQ  
STTSAAGEWEETMGVHARGMQLFVDLSDQKSFVANSSDNESASENDGPWFVLHIGPPKT  
ATTTVQCGLKXSLRLAKTDGYHFLGGGCGMQTKKEYFMPNGEQVTLRLQILVALHSAESR  
SDYEAKRCHEPVSRYVEAIEAEKHRQRFIDRASFLRSKNRSVILSSEQFGSQLSVQREIM  
EQTRSMILSTEDGHGAGFPDPKVRIVLAYRHFVDWLP SFYYQKFFRLNSVMDREWHDFR  
VRPLLEYIDEYLTKEAHQRKVVDKYVARKNATLIHEGHSPLSLLPTNRQSIHPSWWLYTV  
WSAYFPLPNQVQVYDMHSPMNMNRPEDDMVTD FICHMLPSANDTCQNMMDADGKYDKSD  
YDNLDLHSFHSLHLPNRTTDFLNNIGRGNKPGAKRNLKADSNGDNSNSDEKNNGKQTMVV  
RPSSDHHAKRIVEELLGRGDIKPFYEEYGTKYFEKLNEGGIMQDPSDAVTVNGYTMPNL  
LERANEILENHGVYSQTPKVNSTFEERFSEKYFDCITPDLEERLLNASRTFM DLMYKHTP  
MLSQATAATYSASNRLHHSNGSNERDNRQKLAEEEREKRWIQAKAEHERLFAQNKQKGYCEI  
NPDKVFHNRPEVRDELKSLRYKPAYNNFFLWKNLPERQRRRAALSLGFGQNTWERKLIK T  
FSVRWDALSSDKQAAAFQLGYNKVMWDGIVLK  
>comp8958\_c0\_seq1; 599 112 1368 LEN=1485; translated  
MRHGRAKAARKTLRYFERAVNLKSRPYYSVLLDATFLIAMVRMTTGE GAESSGAQC GGST  
IVSRIERVLQVNHQSGGSASSRDDR LGNFHDSNGSNHNNTNADSDRNHSHS PHYHSNHYG  
VRFFVPQEAVEELETIVRTFHDRSETTKKKKKKAQYEA KSRVFRDALDWIHRNGGKKKSS  
SHGHRGGGRCEVLPKLEPLVKTNAKAKKTPQH KPT EATNNTGDETDQAMDPEQEADP IA  
ASEAVRRHIARDDGRED SNGNTIQNNNSVSRTYIVASQEEDLDDLRTLTGTVPILRCANN  
ASVLIILENPSKKGQKHQTLKESKWKGSLQHPAERALVDAAWKA EKARKHGLKTRVLGGS  
GNSEREPARGAGKAKGNPLSCKKRKQSDTASGGVSKSKRRRERAQRNKAAAEGDEHQ  
>comp8959\_c0\_seq1; 231 460 774 LEN=2447; translated  
MTWEYKSR YDIGYEVATPTAGEKDNDNDQEHPI LLLNGFGVGSFHQHRLIAELLKDDEEN  
DSKSGLPKRTVYCLDYLQGRSWPKDCRDGTSEDEKDLQYSANT  
>comp8959\_c0\_seq2; 190 460 1092 LEN=2197; translated  
MTWEYKSR YDIGYEVATPTAGEKDNDNDQEHPI LLLNGFGVGSFHQHRLIAELLKDDEEN  
DSKSGLPKRTVYCLDYLQGRSWPKDCRDGTSEDEKDLQYSANTWCEQI IDFIEQVVEGN  
NKNDVKVHLVGN SVGGHLAAHVAQRRPDLVASICLLNPTPVWGSKLPGWNGHLPAPGTQF  
LFCQQR TLMWCNAVEHGLFFSMLYIYTSTS  
>comp8959\_c0\_seq3; 190 1011 1900 LEN=2004; translated  
MDVGGXEQI IDFIEQVVEGNKNDVKVHLVGN SVGGHLAAHVAQRRPDLVASICLLNPTP  
VWGSKLPGWNGHLPAPAIPKAVGRYLF DQIRDLNTIDKFL EATYSVKEAYTEELMHQIRG  
ATLNGGGHAAFASIMWSPPLQSEGSTDFGDCLRRIPSGMDVFLVFGQDDPWCKPAFARNM  
LRALEERP GSSNNPRQKSVHRYVQITNAGHCPNHEAPKAVGH LVRTWVDAKNDDRREKEL

SFVTGNGKKNIFGVKANSGLSKELSFVEDWAEHTVTELDRDDIPLNLMDRIIITFFL  
>comp8959\_c0\_seq4; 347 460 1650 LEN=1754; translated  
MTWEYKSRDYDIGYEVATPTAGEKDNDNDQEHPIILLNGFGVGSFHQHRLIAELLKDDDEEN  
DSKSGLPKRTVYCLDYLGQGRSWPKDCRDGTSEDEKDLQYSANTWCEQIIDFIEQVVEGN  
NKNDVKVHLVGNVSGGHLAAHVAQRRPDLVASICLLNPTPVWGSKLPGWNGHLPAPAIK  
AVGRYLFQDIRDLNTIDKFLEATYSVKEAYTEELMHQIRGATLGNGGHAAFASIMWSPPL  
QSEGSTDFGDCLRRIPSGMDVFLVFGQDDPWCKPAFARNMLRALEERPGSSNNPRQKSVH  
RYVQITNAGHCPNHEAPKAVGHLVVRTWVDAKNDDRKEKLSFVTGNGKKNIFGVKANSGL  
SKELSFVEDWAEHTVTELDRDDIPLNLMDRIIITFFL  
>comp8960\_c0\_seq1; 439 1 1619 LEN=2212; translated  
XSDMEDGTWVLRKRI SKLKQYTKERKDAGMVNCTQFRNFADASLHRTRFCLLQFYLLILCF  
ANYSVSDAFVFAPTSKSPGAVIFASLNHNHNQAIASSSSTTISVGTSSVIGDDGTLPSS  
SPSPTFSTAAEWHRRDRKAMIEKYGDQILPLERSTSSQNIGLPLLAITNLSLLSLSLFSG  
VNDLEVFEIFGLALFPGSMFSLWQLQILHDCLHGSLFDKNKQQLESSDATVQSSNNGRS  
RKQLQNDVLFWGSMPISIFGYFLYLKYGHLTHSNVGDPPDRASLEKLFDSQSQNFEDGDVL  
FVAHRMCLKGGIGPTFELPFREVPFLPEKITMSISKGGFDQWKIDSMESGNLPWNVAVF  
ASSFLFERFMLLINDFVVAIAGRNFPPNKPDSFHRECTEYARAASLVRATLLLLIGWKT  
LLFLYLSETLWSIPHPASAMFVSNHPSAVDENTGDCVPSMSTYAGLWYSLFTLGTNYHC  
EHHDFPTIPFHKLHELRRIAPEFYRTGTEDDLLDVMKKSFTTEPDYACMDVHKLNTESA  
>comp8961\_c0\_seq1; 215 95 1124 LEN=1124; translated  
MEDSHQRDESPRGGGWYGTDPVVLVLSASTVLLASYFLFLFLFKFRIPKKTAVALEIARMD  
QDEKREYYLYLFRENGGEFELTEDQVVLGKRREEAETE QDTKDS DTEENDSDDASSCSVY  
LSLACLEQPGSGGASQGRKARAGENIEAGLATTKRAEVQKQTQTQTQAPKQTQPLLVGASA  
SSASSPFS PGKSSGSPPEEKRLRPRPLRAGGAAPTSSTRTASWAAWSTAQAGLGRGAAS  
GLPDLPPGILRPAAAPAREKVL SRPLAGGT KRNRARRGGRDASSGVERTNDRDYPLRRKR  
GTGWVGVIGGLVLLARS DARQGKAAQHSATQLNSKAAKQQERA  
>comp8961\_c0\_seq2; 210 95 1136 LEN=1136; translated  
MEDSHQRDESPRGGGWYGTDPVVLVLSASTVLLASYFLFLFLFKFRIPKKTAVALEIARMD  
QDEKREYYLYLFRENGGEFELTEDQVVLGKRREEAETE QDTKDS DTEENDSDDASSCSVY  
LSLACLEQPGSGGASQGRKARAGENIEAGLATTKRAEVQKQTQTQTQAPKQTQPLLVRGQC  
VVCFEFPLPGERVVRSVPGREASASASASASASGGRGCPHFVHKDCLVXLPGPPAQAGLG  
RGAASGLPDLPPGILRPAAAPAREKVL SRPLAGGT KRNRARRGGRDASSGVERTNDRDYPL  
RRKRNGTGWVGVIGGLVLLARS DARQGKAAQHSATQLNSKAAKQQERA  
>comp8964\_c0\_seq1; 718 1 2260 LEN=2814; translated  
XQPIVFRFETRLRGVVAEGFPVAAFERTRPPLSNPAPTRSTRIPGPSLAPSEAGQNAMER  
SESAPGKGGDLPPGLGEMFINSTDTLRHREINQKIPEAWNDRPPLFAIAPPAQRGFVWR  
KQQPSPTAEAPGDSCEDPNLLKGMIRKGI PPSLRCAVWLSNVIQSCRIDQLSEIHKYRT  
LARVRAVDSMYDSLWTDQNGSGGAGESIGGSALRQINEQDVKAMDFGNDVSWARLEEN  
CPGINAVKVVVFALHHSVLGGIVDFAPLVPTLVTLISGFMSEPYVYACREMYHSAWFL  
ATSRSEHIAMQRAFLDVLGRLHPHTLATMKEQGVD AEYTKEIFQNFFTTIFPERMVLRML  
DIYSLEGNKVLFRFGIALAVLYGKEYKEYHYKYSVEPDKWWLGLVEYCRGGRDGHLNFE  
VLVKKAYGVHKGVRKRFRFRPILARIEIEEEKYREETIRRRALQEAGTGGDGED  
EGTDTIDFYLDQIEPLGLVIPPPTDPNRERVVPR LAKSTFIRTKLAEWLPLSLRFTKLD  
LVYSTSHHGRSLENYRCLAKSRHTVFVLEPFERKDNRYLIGMYASDTWHSSSRVYGDGR  
CFLFRIDLEDDWKQKEGNGNEEKEMNGNEKKAIGSKSWKWHPPDMLDFGTASMSFDTDHQ  
ADGLFPDTSRLASARATAVVETFQVSTDDFLGLGGNDEGGAGLRLNEDLTKAESARADGF  
DNEPLLPDSGGMFEVGLVEVYQLVRQMDGVPVR  
>comp8964\_c0\_seq2; 502 255 2087 LEN=2641; translated  
MIRKGI PPSLRCAVWLSNVIQSCRIDQLSEIHKYRTLARVRAVDSMYDSLWTDQNGSG  
GAGESIGGSALRQINEQDVKAMDFGNDVSWARLEEENC PGINAVKVVVFALHHSVLGGIV  
DFAPLVPTLVTLISGFMSEPYVYACREMYHSAWFLATSRSEHIAMQRAFLDVLGRLHP  
HTLATMKEQGVD AEYTKEIFQNFFTTIFPERMVLRMLDIYSLEGNKVLFRFGIALAVLYG  
KEYKEYHYKYSVEPDKWWLGLVEYCRGGRDGHLNFEVLVKKAYGVHKGVRKRFRFRP  
PILARIEIEEEKYREETIRRRALQEAGTGGDGEDEGTDTIDFYLDQIEPLGLVIPP  
PTDPNRERVVPR LAKSTFIRTKLAEWLPLSLRFTKLDLVYSTSHHGRSLENYRCLAKSR  
HTVFVLEPFERKDNRYLIGMYASDTWHSSSRVYGDGR CFLFRIDLEDDWKQKEGNGNEEK  
EMNGNEKKAIGSKSWKWHPPDMLDFGTASMSFDTDHQADGLFPDTSRLASARATAVVETF  
QVSTDDFLGLGGNDEGGAGLRLNEDLTKAESARADGF DNEPLLPDSGGMFEVGLVEVYQL  
VRQMDGVPVR  
>comp8964\_c0\_seq3; 502 556 2388 LEN=2942; translated

MIRKGI PPSLRCAVWLSNVIQSCRIDQDLSEIHKYRTLARVRAVDSMYDSLWTGDQNGSG  
GAGESIGGSALRQINEQDVKAMDFGNDVSWARLEEENCPGINAVKKVVFALHHSVLGGIV  
DFAPLVPPTLVTTILSGFMSEPYVVFYACREMYHSAWFLATSRSEHIAMQRAFLDVLGRLHP  
HTLATMKEQGVDAEYTKEIFQNF'TTIFPERMVLRMLDIYSLEGNKVLFRFGIALAVLYG  
KEYKEHYKYVSVPEPKWWLGLVEYCRGGRDGHLNFEVLVKKAYGVHKGKVRKRFRFRPRR  
PILARIEIEEEEKYREETIRRRALQEAGTGGDGEDEGTDITDFYLDQIEPLGLVIPP  
PTDPNRERVPRALAKSTFIRTKLAEWLPLSLRFTKLDLVYSTSHHGRSLENVYRCLAKSR  
HTVFLPEFERKDNRYLIGMYASDTWHSSSRVYGDGRCFLFRIDLEDDWKQKEGNGNEEK  
EMNGNEKKAIGSKSWKWHPPDMLDFGTASMSFDTDHQADGLFPDTSRLASARATAVVETF  
QVSTDDFLGLGGNDEGGAGLRLNEDLTKAESARADGF'DNEPLLPDSGGMFEVGLVEVYQL  
VRQMDGVPVR

>comp8965\_c0\_seq1; 141 1 954 LEN=1269; translated  
SPKQSSNRSVASTVNNKYPRHISNISEASIEYFTTVRSPNTERKRTSFEIDRMIEEDAS  
RDIINFEMRGVNAFQDKERLNISEDIYSFVACPYWSKEFWFAIYFICTKYICFGILMSN  
ISMDNQYHGCIMVQVVKFFLIPVAISMQEDLITVFYNTACKRYDGLVSRRFVDASLFWKT  
LANSLRFVDGILSLSVNFFLMLCTNTTLNIFLNFAALHFLQFIDDVLYRLAEQGGFFGEM  
EWATVMCKQITFPRAI IHGERYNNFMTHMDTIFL'FMTGFV'CVGIYGYVYKNYNDDDYR  
IETDLHPCDAIPETSDR

>comp8966\_c0\_seq1; 378 1 1414 LEN=1734; translated  
XSHNIQIGGAMGDSGHQKWDHVLRS DPRLQQRRIEWKLYPLYQGMDLNYVKHQRAKILS  
HCQYDRDCESQFHEESVGGHSQASGHTGTSASNSNSNSTNTNTNTNELNDSNSIDLNH  
GDSKQKDGGLLRPIPKDLRNF LDV PKGGYWEIRSGDSSD S KAAVTETRLSSLMYDGVKTS  
RIRKTTTRYGCETATASTSATTKARKTKRGKRGTKRSYSRAETAWKRGNWCF LDDAKEN  
SRTIRSSIHTQPLRNIEIEGSTSSRWHYNRKR TARKSNAL TAAATTSTTASTTASTAAST  
IGSRLQANAVPAIPKRHKPSPPSR'SNGNIQSSPGSTR LQHLAKKAKTSSSAAPNAAMSAL  
ENDAPAATASESSEAVRITLSESKPPALKPRETGDIGNRCVLP'GNSALGTSLAGGPACQT  
QRQTQGQAYEQTEGQTCEQIQRQAKYDALQEAMDRAMEHYGQDWDGETILV

>comp8967\_c0\_seq1; 156 151 600 LEN=869; translated  
MPATGNDNGPGRGSDEAGLAASASAWIRIAGAMGAIGVGTGAFGAHALKKTLEERGSAA  
WQTATVYQLVHAAAVLSLAVSASSSVSRGVP'GKRRHLFAAKLMGIGSLLFSGSIYFLAL  
GIGPKPVLGPATPIGGLCMIGGWA'VVGTS

>comp8968\_c0\_seq1; 175 127 492 LEN=844; translated  
MADASIPLTAGEWEEWGNPNEEYFFQYMMDYSPMNNIQAGVEYPSCLIKAGLYDPRVAYW  
EPLKYTASLRHGVSND DENRPICLQTDMAAGHFSASDRYKHIRSTAFDYSFLLWQLGFTS

>comp8969\_c0\_seq1; 618 306 2993 LEN=3225; translated  
MVDIT'TGSVDDGIATPPSVEEDTAAPKDSTPPVLRSDNSHTNSTKASKKSTGSANSSGSD  
RNGYPSQIVYNSNPV'PNGHGHRIRMQPPPGSPG SYQLNDGTAAGYPPHPMHAYQLSSSPI  
VIT'TQAPSGISFSPSGGNYP'PHMNP HQGGLPPTPPTLPYQQRQDLNSSGNGSRNPNGNL  
GRSTHRRSNSYNGPQ'GSSSFFSPQGS GAPPLRRSGSKAGASTGGRQRANSEDFSPVAEV  
RKL'TGTGAGVRPPVSPGH'RGSGSSRHNRKASEDQMHMSYPGPMFPTSFTGGSSS'PLEQH  
SQRNYSYQ'NQPPQPMIYNRGVYMGDSGDDSI'SGSVRSIRNSKETIGDDGSEGGGEAVFLL  
NKNSSRKASRRGG'SRTKRRHMRQ'HSQAQLFMEEVKGTEQLPSCRDIIFLL'LVFVHLLGIVY  
LGRTY'GNEALLIHDESLEESSESSVTIILMNM'IYLAGLSGVFAMVVSGLTLLLMATIANKI  
VQIAIILSIT'FSFLWGTMGVGLTP'KKIVPITGIIALGLSVAYAFIVWDRIPFAAANLNAG  
LSGILANPGAI'FVSVFIFQILSLGWSVYI'FVGFVYDAIQE'GEIDESFEGAGYVYFCLLG  
ISYYWTLN'VFLNIVQVTVADVIGKWWYTPD'GDTSSRGADLNHAFR'VSVFYSVGSICFGSL  
FVGPV'RILRQFSVFFR'PPEEVHSLMTLHECMH'CIQSCLTNCV'ESLARRFSPWSFTYVGLY  
GYGLIDAGLHSAEL'FDKRGWTTIVSDDL'VPNVLLMTFTITGLT'GVFAHLLQRFESLALT  
ASQEPLVTP'FVVGALVGLV'VSSVLFGIIS'SSVNAVIVL'FATSPVDFEQNHPELSEEMRTA  
WREVWPGCMDV'VDLRVQVAGFLDPTMTGSMR'GQPVYNAGLSSSYRAQAETHPLLR

>comp8969\_c0\_seq2; 589 306 2681 LEN=3339; translated  
MVDIT'TGSVDDGIATPPSVEEDTAAPKDSTPPVLRSDNSHTNSTKASKKSTGSANSSGSD  
RNGYPSQIVYNSNPV'PNGHGHRIRMQPPPGSPG SYQLNDGTAAGYPPHPMHAYQLSSSPI  
VIT'TQAPSGISFSPSGGNYP'PHMNP HQGGLPPTPPTLPYQQRQDLNSSGNGSRNPNGNL  
GRSTHRRSNSYNGPQ'GSSSFFSPQGS GAPPLRRSGSKAGASTGGRQRANSEDFSPVAEV  
RKL'TGTGAGVRPPVSPGH'RGSGSSRHNRKASEDQMHMSYPGPMFPTSFTGGSSS'PLEQH  
SQRNYSYQ'NQPPQPMIYNRGVYMGDSGDDSI'SGSVRSIRNSKETIGDDGSEGGGEAVFLL  
NKNSSRKASRRGG'SRTKRRHMRQ'HSQAQLFMEEVKGTEQLPSCRDIIFLL'LVFVHLLGIVY  
LGRTY'GNEALLIHDESLEESSESSVTIILMNM'IYLAGLSGVFAMVVSGLTLLLMATIANKI  
VQIAIILSIT'FSFLWGTMGVGLTP'KKIVPITGIIALGLSVAYAFIVWDRIPFAAANLNAG

LSGILANPGAIFVFSIFQILSLGWSVYYIFVGFVYDAIQEGEIDESFEGAGYVYFCLLG  
ISYYWTLNVLNIVQVTVADVIGKWWYTPDGDTSRSGADLNHAFRVSFYSVGSICFGSL  
FVGPVRIILRQFSVFFRPPEEVHSLMTLHECMHCIQSCLTNCVESLARRFSPWSFTYVGLY  
GYGLIDAGLHSAELFDKRGWTTIVSDDLVPNVLLMLTFTITGLTGVFAHLLQRFESLALT  
ASQEPLVTPFV

>comp8970\_c0\_seq1; 152 1 1488 LEN=1588; translated  
XSYLSGTASINPXVNSSIYCNGSDLSFRGTLGGYEPSAEWLLAPWTLTRCITVIVVQ  
SVVGDGSYARQHRATEGMEENAIETDRLHVDALLLYINFLDLSLYLSPGLDDPDHNGMP  
LAVQHKQQQQQRPKPRGPVAAVVPSSVGFVHIGKTAGSTLSKLLRNGCHSFVPKPCRVV  
PNETVVSELVESYYHVPDFWRLPASRHGSYVLSVRDAYERTVSALLYNHPENVAHYLSVH  
NLSESVKVQSRSTAYRCFPTLDAFAMLLERGNTTDCDYPRDHSVVDAGNCSELACAVSC  
PRFGIFEKGIQTANADRSIDRSPSLGPASSPPLVLCVFPAGSHQTPVVFVGHASVPQAIH  
HRVRFYRHLFFDYRNIYSKLPKDPKRWYAIRQESLWHDWSGVNAAFGRPVATDQGGPGG  
QLTDERGTGGMDLPVTRDISGEGRRKLCLEGEYAAAYFRILKAAENLGPGDREESRIA  
VRNCPGVESLRTFSFE

>comp8970\_c0\_seq2; 180 1 1309 LEN=1409; translated  
XSYLSGTASINPXVNSSIYCNGSDLSFRGTLGGYEPSAEWLLAPWTLTRCITVIVVQ  
SVVGDGSYARQHRATEGMEENAIETDRLHVDALLLYINFLDLSLYLSPGLDDPDHNGMP  
LAVQHKQQQQQRPKPRGPVAAVVPSSVGFVHIGKTAGSTLSKLLRNGCHSFVPKPCRVV  
PNETVVSELVESYYHVPDFWRLPASRHGSYVLSVRDAYERTVSALLYNHPENVAHYLSVH  
NLSESVKVQSRSTAYRCFPTLDAFAMLLERGNTTDCDYPRDHSVVDAGNCSELACAAIH  
HRVRFYRHLFFDYRNIYSKLPKDPKRWYAIRQESLWHDWSGVNAAFGRPVATDQGGPGG  
QLTDERGTGGMDLPVTRDISGEGRRKLCLEGEYAAAYFRILKAAENLGPGDREESRIA  
VRNCPGVESLRTFSFE

>comp8972\_c0\_seq1; 432 56 1995 LEN=2301; translated  
MAKGSSTRRIAABAAYCCVAVSTSIANAFVIPTSHSTPTLTGPTTSLSRHSATQLPFSRPF  
EASTNDAKLQRSITYRGNMNEAATASLPSSFSSSLSSDQKSVLSVGLWCLTDIAFRRLF  
VKLNLASKFPSSLAGCGVLSVLLSPKPSPPSKEGRLHRLLSPGAALLAKWLPVFFVPS  
LVTLPLVGGIDSLGGPREEVGMHGKHKCIPENAVGLDWIGLLCFCFSFGFCYPIIFLVVLT  
IFTNHVRIAFGMIRMVHGRSNDKNPNACIIAFENTRCSPGGILFYAAYDGGSVLGVGKL  
MGDNQATGNDASKTPEEPPATTTASEEDAASDFASSMPEAPVPVAKPFSDDLKRLRIVA  
IFSGLMALEGASPVFSSAPARLLVKLQTPILSLLLSSTLAGFVYGSRMKPKIKKVHPL  
VTCTTLTWTVMKVFVSKCVDRSFGSMLTSYKVGKGFNGLYGTGPGDVLLFLLGPAVMSLAI  
SMYDKRDLIRDNFAQIATAVSVSSLGGFLGTAWMVRMIGLAQPSLRVALLSRNITSPLAM  
AIAGLLGAGASTVSLAVALVVVTGLFGANFGAASLTAAGIQNPVARGMGIGAAAHLGLTA  
AFVDEKDAFPFAAISMLTATACTCLVSVPVIKKAVLHIALSGLA

>comp8972\_c0\_seq2; 528 56 1774 LEN=2080; translated  
MAKGSSTRRIAABAAYCCVAVSTSIANAFVIPTSHSTPTLTGPTTSLSRHSATQLPFSRPF  
EASTNDAKLQRSITYRGNMNEAATASLPSSFSSSLSSDQKSVLSVGLWCLTDIAFRRLF  
VKLNLASKFPSSLAGCGVLSVLLSPKPSPPSKEGRLHRLLSPGAALLAKWLPVFFVPS  
LVTLPLVGGIDSLGGPRELLKTLAVVLGGFYFTLLTTAGSVLGVGKLMGDNQATGNDASK  
TPEEPPATTTASEEDAASDFASSMPEAPVPVAKPFSDDLKRLRIVAFIFSGLMALEGAS  
PVFSSAPARLLVKLQTPILSLLLSSTLAGFVYGSRMKPKIKKVHPLVTCTTLTWTVMKV  
FSKCVDRSFGSMLTSYKVGKGFNGLYGTGPGDVLLFLLGPAVMSLAI SMYDKRDLIRDNF  
AQIATAVSVSSLGGFLGTAWMVRMIGLAQPSLRVALLSRNITSPLAMAIAGLLGAGASTV  
SLAVALVVVTGLFGANFGAASLTAAGIQNPVARGMGIGAAAHLGLTAAAFVDEKDAFPFAA  
ISMALTATACTCLVSVPVIKKAVLHIALSGLA

>comp8973\_c0\_seq1; 554 306 1850 LEN=1966; translated  
MTAVNVSHGFSSSSISSIRGFSSLLLSQVCRSDTWSVRRWARKVPEFTVDDDDNYDSGS  
SKRRVYAPPDFTIDDDSTDSGLGANKNDKRSPKISVAKNRLDVQKRSANSKTIRRPARRI  
KKVKASEAPSMVGTSMQKNAQFSNEDANVSVEDDNTESPAPRKSNNKFKREIGDTKTFR  
QDFRQTRVFDGIPPGVSWQDLKDFHFEAGNVVFAVSVIDRTTGQSKGHGIVQFETTTMA  
QNAIHIMRDFPLNGSSLFVREDVQQNSNPDARLRSNSRESRAANPPTKWRCANEDNAEHM  
SVDELQAIETLIKRRDSDRKRNYVLSDRLRDDLKSNHGVFIDDRKMWWTSDGKVPQ  
SIQDIKGDGRWNLKWPWRQIPTTPENDACINPDFVEGLLKQRDIARREKDFKTADMLLEQA  
RTSPDGFELRIHDESRTWRAWTETRPPMNRPYEKQRTGMPSPDVEAKRTAARECAAIK  
EHAPEKLEEIVQLKRYPGREFQVLKRLRQOYL

>comp8974\_c0\_seq1; 161 1 581 LEN=968; translated  
XMFYVTDGGTKAEVKICNDSCRNQGKKYFTLMCAEEVSGIDNIVHKYTCGCIDELETELQ  
TTDGTCSGEDPYSAQPVRCLPDRTKDSYDFGYMDWLLSPTYKVEDEDSGRRLTASFST

NSGNPLQRHLQESGNQEDTRGSFGTKVLLSGEDNADAVFGNLAAPAADTGAVPSTAMASA  
AGAVVAAAAASLV

>comp8974\_c0\_seq2; 274 1 1299 LEN=1597; translated  
CCHFNEGQCWSSVGRDPCYNYNFLLEGYEGWKDGAIVYSDPPSDGKWEICEKVTVVFVGA  
VCITQRAYEELAKCNHIVNVFYQLLDNDADGIPDDEEVWTFMLRNRYMLFVPATGEESEE  
LWSKLPDVSFRFVMNARTNEAAPNSCQVPANRGASNTDRSTWQNFVDTYNMDCSLQRDNI  
VEEIFHLIQRAASNLPWPSKWGTNFGSEAGA AVKAANGDCGFGYSNNYIDPSTNECTGQYA  
YWDVTCNEGCTVDEGEVHWASITYIGGLYLTLEKTYWARHNFMLCTPDKNMEVHPKGYPAI  
SLESGSPALYTLVSDTTSEGHKWLPLVMPDGKYQGFLAPVPEFEDDDDPQTETPTFYPTF  
YPTESCEDDTSFKFKNKNKKMCGKKWLQKFTRNLLKGRKRKLIKLCCKKSGKQRVYDFCK  
ATCALVDLGP

>comp8974\_c0\_seq3; 311 1 1320 LEN=1632; translated  
XTHLTPTXESTRNLVHTHKHTQTYTNIHGVPKVSIIYELHPIGYGSDEEGDPKLGAIEN  
DDGSKVKLTLHVEGIFQPGNAHEIELFTNVPHGSECVCGDKLEHNEIKVSSKLVDDKSD  
IDLMTQDGDVKGFEIEVPPYDSEAFVAVNDQNPKIGFFDACARVSYKHNDLYEQEFANDN  
MCHLYDLNYSFVDTHTFSVEFNKEGNFQTFEKESIKVVTPYISMNDEDETPVALEAFLC  
GPDGSGNPNRAYKIGQDFAICVRPVAEAI RNVEADGGFIAVDGDFVLCADSLVSSGEH  
KDLTDVITDVEDDYIRITDQGDLENAGTHAAAFKTVLTPEIFYGSYANGDGVTHDFSCAGV  
ATMGYSDPSTNGRDLRLHLQESGKKEVTKFSFGTKILVSREDEDVDSIFGDLAAPAADTG  
AVSSISIATAAGALAVAALV

>comp8975\_c0\_seq1; 551 70 1932 LEN=2879; translated  
MKTRFSTILLLSLGFRLGDEARKSVASAASKANDLERKKSTRIAVIGGGISGSFLT KYLT  
DFDVHCSIDITVFEPPSPNDGTTNNSGRFNQGSRVSSHTLKDGTVVERGASILFGGNKL  
VNEMIEGSLGDDISDRILKKINPHGSGGKGLGIYDGVHSTSTINHNEGSLFPLWVNTTK  
SETESHMMWRYNLDLWRIHQATQVALKSFEEKIYDLDLDDVDHEDTFFESPDDIWEKVGLSH  
EASVSFDEYLDEIGVSSSMAWRRWFVVESMAKQGLVRSELYTAMNICNNNQLNSQMTGLG  
GLVNSIAGTGELFAIEGGNDKLISSAFRQADRIRDKTCGTESSNKTIRRLPIKIQTLVSA  
DLESQQIELFGEDGKLV DSTPYNI VVATPLQFSGIEFMGKGSVFDEGLLYIPLNEMVD  
SDNSDANIHEHVHSLGGHHHLPSSTKRPTQVATTFVSNAKLQPSYFHLEDESSDGLPR  
SILFTENGRTEGLSSISRITEGVYKVFSSSELSELVEDIFGKDAIVEDTKVWGGRRGG  
ATPAFNGGGESSRSTNFFLYNGGKHKSSRKTNAIYYTNAMESAVSAIEISAIGSKSVAKL  
IARRLGLVDPKRGHTTGDEL

>comp8976\_c0\_seq1; 536 83 1699 LEN=2053; translated  
MTESDILEQSSGLSNYARPOIAILDGFSQYSHLIARRVRELVNVCYCELYSCKVAAEELGKH  
ELVAVILSGGPSSVYDEDAPHVAEGVWKLIEERNLPVLGICYGMQELAHVFGGEVQKGLK  
HEYGKSIVKR VAGCESKIFDGMPEEFQMWMSHGDKLTKTPVGFAPVAGTDNAEFVTIENL  
EKRMWGLQFHPEVTHSPLGKSILENFCVKIAGAKQDWMADYAKEFVREVRQQVGEHVI  
GAVSGVDSTVA AVLMTQAIGDRFHAVMVDNGCLRKDEAKNCLGRMRDECHVNLRVVDAS  
DRFLDKLAGVTEPEKRRKIIGTTFIEIFQEE SAKIEEEMGVKCEYLLQGTLYPDVIESIS  
YKGPSATIKTHHNVGGLPASMSLKLIEPMRELFKDEVRELGMAMGIDEKSVWRHPFPGP  
LAIRILGEVTRERVKILQEADAIVIEELYRSGHYRKIGQAFVLLPCKTVGVMGDSR TYE  
NVASVRCVETTDYMTADFYHLPYDVMGMTMSSRVINEVRGINRLCYDISSKPPATIEWE

>comp8976\_c0\_seq2; 536 360 1976 LEN=2330; translated  
MTESDILEQSSGLSNYARPOIAILDGFSQYSHLIARRVRELVNVCYCELYSCKVAAEELGKH  
ELVAVILSGGPSSVYDEDAPHVAEGVWKLIEERNLPVLGICYGMQELAHVFGGEVQKGLK  
HEYGKSIVKR VAGCESKIFDGMPEEFQMWMSHGDKLTKTPVGFAPVAGTDNAEFVTIENL  
EKRMWGLQFHPEVTHSPLGKSILENFCVKIAGAKQDWMADYAKEFVREVRQQVGEHVI  
GAVSGVDSTVA AVLMTQAIGDRFHAVMVDNGCLRKDEAKNCLGRMRDECHVNLRVVDAS  
DRFLDKLAGVTEPEKRRKIIGTTFIEIFQEE SAKIEEEMGVKCEYLLQGTLYPDVIESIS  
YKGPSATIKTHHNVGGLPASMSLKLIEPMRELFKDEVRELGMAMGIDEKSVWRHPFPGP  
LAIRILGEVTRERVKILQEADAIVIEELYRSGHYRKIGQAFVLLPCKTVGVMGDSR TYE  
NVASVRCVETTDYMTADFYHLPYDVMGMTMSSRVINEVRGINRLCYDISSKPPATIEWE

>comp8977\_c0\_seq1; 161 331 849 LEN=1468; translated  
MAGTEYSDFDPPGEGGGAYSASLPTSNDSLTPREIVSMCMDCLQGGDDNAHATDERAGL  
EICYNFSSDACRTANGGSLESFLQRANNPVFQTMVHCEKWEVENVGPEIMGTNTRGAMQT  
VLVNVVPSAAAGGRRDRRFLWTFVRRERRPPRQGHFLVHECIAVDNAFALTE

>comp8978\_c0\_seq1; 321 1 478 LEN=806; translated  
XVGVGVAETE GEGVAAP IAPMGDDGATAMDVVHDANDHPPAAAVMAASATATATTTTAA  
LVATHPQAAEATAAATGASAVMPTLP IKAETEDDALTAEGEAAVQVVDNALLDETA AVAA  
AVPAPAVGTNPAGASAAMHPAAPPDESMP TDAVVGQIEV

>comp8979\_c0\_seq1; 185 178 729 LEN=926; translated  
MVQGSLEVDPATKPAVSTGRREPRDLRGSTKYNADFKWKHEKSVVGALEVETNPPELDLRA  
EMIRHCVPGYGPQLNAYYEVFKELKLRDEFIKAFESIPPVTTCCGKVTCQDETIKNNAKL  
LNKGWVKATNKKLFKHGFRLSIFVWRWSNVAGKAETVIPMIRFHTLSEQSDSKRRRSPTN  
ADC

>comp8980\_c0\_seq1; 232 218 646 LEN=909; translated  
MMDTNESSMRLAAENLEKTMSMATASVLQKLDSPIIIDVRSKEVQASKGGEPVRSIHV  
PLNVDGQPQGTHTLTKDEFLEKKAAGVDLSPGNSYITHCTAGNTDYIIGRGARAAALLRD  
LGYDKAHNGGSANDIRTALHTE

>comp8981\_c0\_seq2; 510 1 2415 LEN=2443; translated  
QQQQHYQQRPPPQQQRQPHPAAPHPQQQQAIPHGAATPQPSALQPVPAPSQPSGENKR  
RNEAANKVLVTRTPDEETEDGRIRNREAMAKIRDAWVYKQVRERAREFTEYRQSTIFVGT  
WNVNAKGKEESLREWICGDWMRHNLMPDIVVVGFEIIVDLNAVNVAVGNKTEQRTQYWS  
QLLQTLNPSHNQHGQPLAPQYSLVMQSRSLVGLLILCLFVKVQHRPRCKAVASDSVGVGVMG  
MMGNKGGVSVRLQFYDSNICFICSHLAAHRENVAGRANADFLNVLQKTSFEVGGEEVVRETI  
RNGSMSQWALGTSSVSATDHDVFWLGLDLNRYRIDESMPVEKVLLELSIQKRLDPLRPLDQL  
NVERKEGRAFGQFEEGVLFNVPYKYQPGTDVYEQRPEKCLRPAWCDRILWMSPPDPQH  
IQQLTYNRSETPNCSDHKPVYSTLRCTVKDVVVEKREIRYKELLGLLDQFENQSLPMVGL  
DTTELDFGAVRYEQSVTLPIRITNTGKVCAYRFVTKLDENFLCKSWMTITPTYGMLIPG  
ETAATINVTVTIDNKTAQLLNGGREVLDDVLIILRLENGRDYYITVKGTYARSCFGMTLDE  
MVLYKDPDIRTIPLDPIERAGQFPNESDISPSNALCIPKELWRVVDIYKGLQTPPELFST  
AGIPAEVAHIREALDTGSPFSSPYSIHSYVECFKLLSSLSAPVIPPSMFPMVEINSENI  
QMSRKFLEVLTPVHYNVLVYVMSFFREVLLYRDRNGLTAAKIARICCCQCSPTPANVVL  
ETTMVQRQAGMHLILLHLLLETSSI

>comp8982\_c0\_seq1; 189 68 433 LEN=832; translated  
MSPVESSTVSRDECLHLNDILGSKTLSSCYNLKHTLKDREDSFHTNQGISEDDTEHRSSW  
LMPKMARRMTTKSRYHVSNNRPEVKVDDSECAKLRSLLEKMGNIEDAQEHLPAAACKMD  
H

>comp8983\_c0\_seq1; 218 180 910 LEN=910; minus strand; translated  
MKIVAPLVFLFPKCVVLCARTYDHLCAKPAVNGFLRRGPLRPEEDCPTTWFLALSFWET  
TTRPVREEVFLVLEGSRANGFQQALQPWSNAGMLARALGDATKDGESGRCMGLDVGESFFS  
FWSISFFFSLRDTLGMGTSKDSFENFDFRRLPSAVFRKNQDSRPVRSDFDELVGSQDGGP  
VALEGVHLSGRTGWGGLMDHVFGLVAVVIAVCACWVCVIPSSWLRMFRFPMGLCSVGCCH  
EELF

>comp8984\_c0\_seq1; 408 151 1881 LEN=1921; minus strand; translated  
MEVSKAIRANSQKCFMLSTSTAETLSEKLTQANESITFIEDVPRTKRFRKDITPIQEIK  
LSSTSTEANDLVSKGLDKVNKCEPISNLKKTDMQKILAKMTQSNVTQIEKNWALESEGMD  
PNERDEINDEIHCIPSCRILKENPNIITRWSISLRNLIQHNVNQELNNDKSLAPITKQAY  
KIAAFELKNTYYIILSQPFLRLFLRAELFDVEKAALRFFRYLDLLLFFGKGALTKPLQLS  
DLSSNDISCLKKGACQLYPRDRAGRRIILSYIENGSTNYRVLLYMDVCSRDETTQKRGL  
VRLHPPGRMPMRSTSSQARENLVTHPEDEAEYIQNDPMDLKIHKLDEGCPLRVSAIHYC  
FPDAPNYRARKAYTLICMTSDERKKVRFHIGNQIKCEILQSYGISSWNTPVTTSGTIKT  
KVIKNFLVARSAIEKYSTTQMQFVCGEETTMNGPGGECPLNCVLLGGKYFYHYHPANVM  
FRELMMYSNSVRETNILNEMPVSSFQCYIQSLIRTAMSSEYKMRFLKRDKESLLWTEYDN  
NSHELYTKISQMLRDERKRCGRSERGGRQQRKKTCD

>comp8985\_c0\_seq1; 62 1 242 LEN=803; translated  
XSSSEREGVISEEKVVALLEDALVLPNSPEARRIFVRLEELKEERELAAADPGDRSQ  
TSSRGGVTVTRTKGSDSAKQ

>comp8985\_c1\_seq1; 431 1 994 LEN=994; translated  
XPRPRRGCGHSIHPTSMRLARGKHSPSMSSLTAKGDSAQPPILPKTSFSQKRNSVFTQR  
RRTAFNNLVCHRGFSTTDEEQTYSSQLLTMATARQLKGDVPEAIVLASKALLILREKQL  
ADADDGSGGGEEAAAVVEEELADALLFLGKLLQLAGNFADASRSFEARWIFHACCQKRH  
DQEMPTQNPSKRPNPVIGIRKKECSALSHLAFQAQSLGQSPPPPGRTSSEETNDNSDR  
HEQLLCLAEANYKEALEGLEEVGWEDGMTNHTAHELAMLYKQTGRYERGIARLTRTKEK  
LAEVWGPDPKVVQLNGELAEMHRLSSSSSS

>comp8986\_c0\_seq1; 492 36 1346 LEN=1970; translated  
MIHEPIHVLGAGSIGVLWTASIRSFPSPYPIALLLRDHERNRNRVSAAGAANDGGCGDS  
DNDGNTLRGTGVPVIRHSHELEVAWNNRQAPGGKERLFLPVQFLGDGGDAPPQGPKEPERIR  
TLLVATKAHQARKAVESVLDRLVVPPEPQSGDPPPEAAAAPARIVLLCNGALSVRDELA  
DLLPGAADGSGAVRLSLATTTTHGAFFAGPNELVHAGVGTTFLEDPPGATETTERTVRAWN



EAGLRCQALSPREMAVLWNKLAANCVINPLTSIFRCTNGELLMEPSFPQLREEILAEVA  
FVAAKAGTTGANGSDETLRHGSDFPTEAKAKATGGSSSEDDDNRGIPSVDEMRTFVTET  
ILATQHNRSSMYQDIHGGAQPTIDHNLNGYVVRKGRKTGIECPANEDLCARIAALTAGT  
DGSPCSETSGSGSAGG

>comp8987\_c0\_seq1; 574 350 2362 LEN=3080; translated  
MSSWERKGYRPHQASDDVSDDDTVEEVYNAKENKVEEMIRRF SKMNRTEVATPDYQDEYN  
DDDRTMSSMSTMFRKARGDRHVSSEPLDYSTYQFDDDATMDSLSDVFKRQGTVDRRSPTV  
FQFKDDDNSTETVKTATTWKSRRNRNHENGGLEGILRNKTNMHDEEEFGTINLHDQAE LGA  
IENEKGKKNNGNDGNNDDEQEKGSVKEEDLSQTKRAPRKKNAKRSMSNRKFCCI SFAFVA  
VVAISTFVTFQFYKYNWGKSDKFKTSDATPKDDQANLSPAVAPGRNGHSPTTQTNVGHIP  
SQPGNENDFEYVPSSSDVSKPVS RPVTS DVS RPIPVSVFDLLDRPTQK PATDYIGMLMEF  
LQDNQVYFDRDPLSPDFMAVQWLAEAEVRETEENAYGNGLLELTDKLIQRFAVITLDYAL  
NRPNITMLQKQYRAADFNNYKKLHTIAVKDRDECKWHGVHCAKVGLTAGKVEEIRFSHSG  
LTGTIPPEINLLKDLKVLDLSGNRLRGAI PDSLYSIKQLEKLYLYQNQLTGTISENIKNW  
NNITHLHLSHNQLSGTIPASFKSGERIRPIQYMNLYSNQLTGTIPESLFRKLVHADFG R  
NQFSGTL PDDFGLRSVSLRFLYMDHNEFTGTIPYSYTTVGNRVEALAFNHNQLTGWVPG  
YYQHYKLRES

>comp8987\_c0\_seq2; 574 350 2362 LEN=2890; translated  
MSSWERKGYRPHQASDDVSDDDTVEEVYNAKENKVEEMIRRF SKMNRTEVATPDYQDEYN  
DDDRTMSSMSTMFRKARGDRHVSSEPLDYSTYQFDDDATMDSLSDVFKRQGTVDRRSPTV  
FQFKDDDNSTETVKTATTWKSRRNRNHENGGLEGILRNKTNMHDEEEFGTINLHDQAE LGA  
IENEKGKKNNGNDGNNDDEQEKGSVKEEDLSQTKRAPRKKNAKRSMSNRKFCCI SFAFVA  
VVAISTFVTFQFYKYNWGKSDKFKTSDATPKDDQANLSPAVAPGRNGHSPTTQTNVGHIP  
SQPGNENDFEYVPSSSDVSKPVS RPVTS DVS RPIPVSVFDLLDRPTQK PATDYIGMLMEF  
LQDNQVYFDRDPLSPDFMAVQWLAEAEVRETEENAYGNGLLELTDKLIQRFAVITLDYAL  
NRPNITMLQKQYRAADFNNYKKLHTIAVKDRDECKWHGVHCAKVGLTAGKVEEIRFSHSG  
LTGTIPPEINLLKDLKVLDLSGNRLRGAI PDSLYSIKQLEKLYLYQNQLTGTISENIKNW  
NNITHLHLSHNQLSGTIPASFKSGERIRPIQYMNLYSNQLTGTIPESLFRKLVHADFG R  
NQFSGTL PDDFGLRSVSLRFLYMDHNEFTGTIPYSYTTVGNRVEALAFNHNQLTGWVPG  
YYQHYKLRES

>comp8987\_c0\_seq3; 582 350 2503 LEN=2765; translated  
MSSWERKGYRPHQASDDVSDDDTVEEVYNAKENKVEEMIRRF SKMNRTEVATPDYQDEYN  
DDDRTMSSMSTMFRKARGDRHVSSEPLDYSTYQFDDDATMDSLSDVFKRQGTVDRRSPTV  
FQFKDDDNSTETVKTATTWKSRRNRNHENGGLEGILRNKTNMHDEEEFGTINLHDQAE LGA  
IENEKGKKNNGNDGNNDDEQEKGSVKEEDLSQTKRAPRKKNAKRSMSNRKFCCI SFAFVA  
VVAISTFVTFQFYKYNWGKSDKFKTSDATPKDDQANLSPAVAPGRNGHSPTTQTNVGHIP  
SQPGNENDFEYVPSSSDVSKPVS RPVTS DVS RPIPVSVFDLLDRPTQK PATDYIGMLMEF  
LQDNQVYFDRDPLSPDFMAVQWLAEAEVRETEENAYGNGLLELTDKLIQRFAVITLDYAL  
NRPNITMLQKQYRAADFNNYKKLHTIAVKDRDECKWHGVHCAKVGLTAGKVEEIRFSHSG  
LTGTIPPEINLLKDLKVLDLSGNRLRGAI PDSLYSIKQLEKLYLYQNQLTGTISENIKNW  
NNITHLHLSHNQLSGTIPASFKSGERIRPIQYMNLYSNQLTGTIPESLFRKLVHADFG R  
NQFSGTL PDDFGLRSVSLRFLYMDHNEFTGTIPYSYTTVGNRVEALAFNHNQLTGWVPG  
YYQHYKLELNLHNNTFTGVDWETCRQGVFDTGEMVEFTADCDVCICDPYCGKCKNKW

>comp8988\_c0\_seq1; 365 177 1220 LEN=1303; translated  
MASAFVQQAPLTTPLQQHRRRTSHSLGSLGETRRLNSAIWSTVKTDGLADNKDKTFDELLG  
DPSNFAKAI RFFRSHPEDIELTRDRFGKIFDAIEERTFQDDTDNSGQRQQQQPAF'SQSR  
KEMAEMYSLLKEQGHLRLFGAITKENMPASGSHNVRPKMLEAITSLSMSSLTPQPSNTLL  
YAGMGVALLESIASGFLGLDLNAVFFATFGVALCDQVFLNGAVSETCVKMLSPETQPKIT  
RHEAGHFLCSYILGCPVEGYVLSWGALEDPRFRGLGVSAGTSFFDPDLSSQIENSKITR  
SAIDRYSIIVMAGIAAEAVMYGKADGGAGDEQALIGTYMFVHFLVLF

>comp8988\_c0\_seq2; 525 177 1652 LEN=1712; translated  
MASAFVQQAPLTTPLQQHRRRTSHSLGSLGETRRLNSAIWSTVKTDGLADNKDKTFDELLG  
DPSNFAKAI RFFRSHPEDIELTRDRFGKIFDAIEERTFQDDTDNSGQRQQQQPAF'SQSR  
KEMAEMYSLLKEQGHLRLFGAITKENMPASGSHNVRPKMLEAITSLSMSSLTPQPSNTLL  
YAGMGVALLESIASGFLGLDLNAVFFATFGVALCDQVFLNGAVSETCVKMLSPETQPKIT  
RHEAGHFLCSYILGCPVEGYVLSWGALEDPRFRGLGVSAGTSFFDPDLSSQIENSKITR  
SAIDRYSIIVMAGIAAEAVMYGKADGGAGDEQALIAFLSNLNGGPSLSSAPVWNEQTIRN  
QARWGALQSVLILREYKECYDALVDTLERNGLGDCIYAIENAAREHDLQPLRIPLGYIS  
EEGDTEIWNKIVPSQPSDENTVQEAANKTQVSAPEVKKTTADPEESLASL RAYKETITNK  
LRDIDEKLEGL

>comp8988\_c0\_seq3; 472 177 1761 LEN=1821; translated  
MASAFVQQAPLTTPLQOHRRTSHSLGSLGETRRLNSAIWSTVKTDGLADNKDKTFDELLG  
DPSNFAKAIFFRSHPEDIELTRDRFGKIFDAIEERTFQDDTDNSGQRQQQQPAF'SQSR  
KEMAEMYSLLEKEQGHRLRFGAITKENMPASGSHNVRPKMLEAITSLSMSSLTPQPSNTLL  
YAGMGVALLESIASGFLGLDLNAVFFATFVGALCDQVFLNGAVSETCVKMLSPETQPKIT  
RHEAGHF LCSYILGCPVEGYVLSWGALEDPRFRGLGVSAGTSVSLVRNYLHGCISKRLR  
LPLRCLVQRTNSQILHTLQFFDPLSSQIENSKITR SAIDRYSIIVMAGIAAEAVMYGKA  
DGGAGDEQALIAFLSNLNGGPSLSSAPVWNEQTIRNQARWGALQSVLILREYKECYDALV  
DTLERNGLSGDCIYAIENAAREHDLQPLRIPLGYISEEGDTEIWNKIVPSQPSDENTVQE  
AAAKTQVSAPEVKKTTADPEESLASL RAYKETITNKLRDIDEKLEGL

>comp8988\_c0\_seq4; 277 177 971 LEN=1412; translated  
MASAFVQQAPLTTPLQOHRRTSHSLGSLGETRRLNSAIWSTVKTDGLADNKDKTFDELLG  
DPSNFAKAIFFRSHPEDIELTRDRFGKIFDAIEERTFQDDTDNSGQRQQQQPAF'SQSR  
KEMAEMYSLLEKEQGHRLRFGAITKENMPASGSHNVRPKMLEAITSLSMSSLTPQPSNTLL  
YAGMGVALLESIASGFLGLDLNAVFFATFVGALCDQVFLNGAVSETCVKMLSPETQPKIT  
RHEAGHF LCSYILGCPVEGYVLSW

>comp8989\_c0\_seq1; 368 1 2342 LEN=2734; translated  
XEVSLLSNSSPPSPFISSWSAQGRNCGLTKKDKTKEASTESGFSDAVTLDPTVADVSRLSH  
PSTYLSTPRVPGSHWTEHRGSFSGQRNELEKNDTKGASADSDFSDAVTLDPSYAEVSVLT  
TPSPIRSIPSNESDRNSDLSQSLLLGNLEKKFIKENDSATQQLSFEDISNDSETNYEEQP  
RDSAVPGTSSKHKYRKPDLQRQPSLKMNERVPSDCDRPYARRTSESSRSVDKRHTFAH  
SSGHSSSMFASRELIGSSRSQRSICSDRSPARSPIRSKGNSRDLMQSI SRSPRSRAIP  
PVSPESPQNQSSRSHRPSQVDEYSRQATISSEQSCQSTEYSHREIESSASRLVRSMDRDRQ  
AYDSSYRSSRAEGNPHPVVDMNSLRSPGMQGYLGSNNFQSKSSDWLSHNSSPHTLNLALE  
ERYSENQTSSRNPNVANEPAPPDMPSPFDENYAIIMESRHKMLLSRQRTLLSRANRGLQ  
STQQQHQGFIGKFRPNPPRETTSAERSNSHHSRATESLSPSRKETPPRGNLHTAPQP  
GGSSSHSRNATKPSLLPNQEEIPPRGNLHSDPQQGGSKSYHCRRSKPFRAPSRQHHPRS  
PSGTWSGNEAPHAENCRPPIPGLRISPERGPPFAVNHNEATKLPKHKQVAPVLF'TTQPA  
FRYCMALPPNDRHEQQKAVLDRLSAVRAARLRNHNHYGDASGNASCRNLTSQKLEPIHN  
SSVVVSMNPNNSGYRYPHNDVSMFQQMAATTMRNRDDDTSLATNESNAQEYATKFAMD

>comp8990\_c0\_seq1; 935 372 3098 LEN=3098; translated  
MSSVRRRRPPPDHHTPENHSRSDSPPPFTLPPIPPPIRNTATNAETPFPERGIDNYNQYN  
NNTQMERVTFHLHSRVCHFGLDYTTYRFRKVVVEHLLLVAICAGALVMLHRTFVIHNAS  
TASAHMHWSANSNGIVPARTCLDLLKGFDPAAADITHLVILPQNLTLVGNPGGEDVDDTS  
DDGNGNLASATKSRVLWNRKRRTHCNF DNKNKNNKMSDKPSECAATKGSNESFGHALNAL  
GVEAADNNDDETTLAYEQWLDQQLASKTLDVRYSYSTTKAYLMLPRDHPWLWKDDMMLDV  
QYVLVAPDDPECFGEFVQFLLWRSFVGGNTVLLNWIRTFPSYQRQPHDSVVVSGYVFNPR  
TQWLRELDATTLEGTRAASEGDDDNKDPGGETFQSCSRRLARWNRSFWIKAGVFLRTSFL  
FFFCTTLVSFTLRETQERMLEFTQELSRVRQSI SLSDLITTHLAQNLVFPIMLGMFF  
LIEFYNGDKFLAFGISSIVWCVEGFMSVCLRSSQGLSYFPYFFLLFLLFHVYQTAFPDH  
GFVYVALTVVWCFILHSMFFFWHRYELPALVLGAVTIDRPRMNVNMENIGGTINMSNTGN  
HHQDATSSTGVVSSAGSVSSSQHSLSRRFEGRNDDSALEQQDANGSIDRNPQSVFFAATG  
RSGNGTSATFLPSNQSFSLSTASSRRTYGLYQHNQEDDGGSTGSHLYFMGGEVVVHRPTSNS  
ARNNSNPTTIQNVNSDLSLPPPTRSWAITEGGGPRNVVLSRNE SNF SLLSSTSDAYGSGG  
FNGNGDQEDEDHLSAPVAAAADHHSDFGSLPNDTSL ETIPVSNLSTPQKHPRSNGSTH  
DAGTDRINHAASTATVSSSEDYAHESGGLQAI FESKLT'PRVRNTERERASQCVLGMAGQPQ  
LPEQQQQQQ

>comp8991\_c0\_seq1; 561 82 1629 LEN=2306; translated  
MTTKRKGNAKTATTVAALVGTVLQ PASTLRPPCSPTSSMRQRRLTTSASVLASGSVVRTG  
IDAYSTTWGGAVSTSRSRFGTSRSTRLSESPFDNYEYDEDKDITSNNTSVLRDRGAGTAT  
TEMTKTIGSEGRDESGERHDGATAIYDDGDTSGASNPNFEIPLAVVDVDGDSQDNDES  
RLVISSEKLVRFLEQEEAPPISILLLLNLVAVIWGSQHAIIKTVVEDSDPAAFTFLRFGLAS  
LIASPYLPGVKEIFQKTTSPTESNITTRVEEEEDLWKPWRWGIEMGLWMFLGFSLQAI GL  
QSTTAQRSGLLYLVNKFVPPFFAYIILLGRQISKWTWLSAFAAFSGTALLALDGE SLGLNV  
GDIWSIMAAAASAMFILRLEKASSEVTKASELNATSLVVVAMLSGAWLLLGGNGGPQIAS  
EVTRTALEHPLELVYLGA VSTALANFIQAKAQKDVPAERASIIYSLDPVYGAF'FSWIILG  
ESLGGPQAYIGASII FIAAATNSLLEFSKDSASKE

>comp8993\_c0\_seq1; 373 115 1385 LEN=1558; translated  
MGSMKVNVLMLGTGEYTTGYVGGKAADSDKGAGVVALTMFDLRRRQKVDRVGMCGVNGK  
KFPGIRTHXGKKHQDVYKMDMLTCDTFPADDTVDPKAYEAAAQSFQPGDVAVIFTPDDTH

FDIALSCIERGMHVMVTKPIVQTLDDHWWKLAKAAAEEKGVLVGVVEVHKRLDPFFYADARDRV  
RGGGLGNFQYMYAYMSQPKHQLETFKAWAGKSSDISYLLNSHHIDWSEWTLAGVARPVRVT  
ATGSTGVAKGKGMDETSITLTVQWQNINDKTLGCAVYTSWAAPKSDVHSQQRFFFMGT  
KGEITVDQAHRGACVSTDAAGYASMNPLFMKYTPPTNGMFSGQGCYGVKSFENFIDACSNI  
NSGRTPSDYDDGSLATVHTTMQGTAILAAGRKSLDADGRPMDIQYEDDASMEPTGIKPH  
EFA

>comp8994\_c0\_seq1; 432 184 1275 LEN=1668; translated  
MYIFTHLVFFLSICHSSASSFASKECGMASLSRRCQGNGLHAEPTTKEDKVGEESAVETD  
QNDIYLAQPTQGGYTLKQRLREEIDSPFRKVRLAAAFAGSFASALIALYFSALSTVKA  
GGYSDAIPLEALTSDAINFALVVCFFTYREFQNGQKNLEKIARAGKLASLVVEPAAR  
LANSKRQLLEVKSYYRRTNRVLIAGGKGYISALAKSLASDQLKDTNILPEKLEIDFVIV  
PLLENKNGNIVVGDSTRAFWRDGVVATVTENDRNFDINRANDVVAFVQGPNAWIDYLT  
IKTATNQGFVLEKGITITVVKNGKILRRATGLPPFGDLIATVEVADGSKFGMPGDSERY  
GGP

>comp8995\_c0\_seq1; 468 1 1828 LEN=1828; minus strand; translated  
XAGAVVAATESLDTCPPEFVPEKMGAIKISFGRESDSLAAGLIETWDSWDWSRLGNEI  
YNDVSENCDETHQRQMINCSYLDFFEYDEEKDVIDTLWAPFVTCNASCPLEDPLFGV  
DNPDPISRLLENLDIMTVAPFGTDESPVSLQHASSKIPVDRSRFLDRIRALSVEPTNR  
TLFGNPISSNPTIAPSGMPGTLPISAISYNSFKLFLAVPDTWSKSKLEETLMSILSTL  
GSSDSPSVHTWSKSKLEETSMSILSTLSSDSPIVPEFKFMTNEIKCENENRSKTKCY  
ETEIEVIPDISAGRPIQVRSILEKVASGEVGEVLKEEGIVLDAKAILPRDSGVQTNQPS  
HSPSQTPLHPSKQQSIFVSSSLFPHSPSNRPSLFPDLPTSTILPSIVPHSSSSHLDA  
SNEIQSEIPALPQVSAKHSSEPSTIPSWILRPIPSSTFSSQPSLMPNSLSSLTHSSMPT  
SLQSNTPSSLPSAEFLSTQSLTPSSFPPTLMQSSKPSIIPASPSLIPSTVPSSMP  
SLLPSSEPSLSLMPSEMPAMPSSLSLMPAMPAMPVSLMPSAIPSAIPSSSLPSSLP  
SAEPTASPTHDPATVPTSSPTHGPTA

>comp8996\_c0\_seq1; 336 1 699 LEN=841; translated  
GARLLLQRSakeagldernlrnlqdITKpRlFPDYEWSSGRRGHNLPGEPVPPSVSSG  
AGDPSREPTAVATPRRSTKTIHLINKSREIHDRFQNSAFYVQLTQEADVIRHGKER  
QQQQQRADLLVLKQMSKTADPQYVPELRLRDDLDNVYGSDDDTFRKRSLDDLAAE  
ERAERRRRREDDGDDGQFSDAGADPADDEDEEDVDYATNHYESENEESAGGGGD  
DEAIF

>comp8999\_c0\_seq1; 201 1 340 LEN=1626; minus strand; translated  
XIELGIELGIELGFELGFELGIELGSELGIELGFMLGDELGNLLGMELGDAEGSLD  
GIELGVALGNKLGEEELGKELGAAEGIADGARLGASLGTELQELGMELGIAEGITDG

>comp8999\_c0\_seq2; 201 1 340 LEN=1508; minus strand; translated  
XIELGIELGIELGFELGFELGIELGSELGIELGFMLGDELGNLLGMELGDAEGSLD  
GIELGVALGNKLGEEELGKELGAAEGIADGARLGASLGTELQELGMELGIAEGITDG

>comp9000\_c0\_seq1; 1151 668 4784 LEN=4889; translated  
MSNDALLDKNNIIPPEETFGKIIDGETMKKIEPKKDTEDAKEQDNRREVAELFRFVAT  
VEETKIMDKHRATFNKPPYIKPYNRDRNDWTENHFFYKDGKQDDACKVLFTSYQVET  
LMENCSRVDVYSNAMPKVNNDGKDESGGFYVQAQKPCNAVPIPNITPGGVVHKYLD  
RLLKKNVNAEF FEDNCPLEEVLESLSSEENLTVASKGGDHEVASFAKTYRKALVDR  
DLKTMFKPLDDWQGGTLDKTIYELTLGLGHARMIYNKKNSEDQKILNAPLIEVPVEI  
DEESLKVVVPVPGSRLKWNGEAKTALLFAGGRKKKILSDFQTLVVKAAPKDVVLGDP  
QTYLKFVEKASEFCWHGEIKKPTDDSLHEFPQDSGALVLTAGWCLFVRPKRSNSI  
SND AHLIAKTVEATDFNLSLPLRSLVLG SNNEISEKSEPLEDGSGLPVLPLP  
ASKSQLEMIRKVFVSKNNDVTLIRGPPGTGKTQTGLNMA SVVLQRGFDCLVTS  
DNPRALEAFEQKLPEDLKVFCINMSSMQEDGISKLSQTLDRLEAKLVTLDDGKDS  
HEKMMETLEQKIDRMKKDRGDLMAKLEVRSKINRGLMEQNGFSQLVKHGLKGD  
SKVRPVILSILQHHDLDGLKRDIMDLSEKQIEALESISFRCDSDQNI TQDLIHF  
AEKATPAGPKSTGKRRQLSMFPLHSGEKLLDQIESFRLNEDKKDRKPVTPDDW  
SRVVRGLKVRRSQSDFREHVHNSLVNRGFPKTLIYGPDDVTVRQEF IENV  
TGLYESVDGVRKDLDDLQFLEDVSSNRKSQEVLRDFSMRLRELKVELVYATIARNR  
SGFTGLDLGNFSQLKELT LIMKDS EIDA AKASDATKRKA AKFAEKFRKSLG  
CMLLLMTTDQVSRYIPVDHRFRLVIA DEASQSPSSTALTILSRAKQAVVLGDS  
KQALPTDDLTEESKALDKCSGDQKHKLNDFLPGNGNSLYEVCLSRFAGSLGML  
KDNFRSPADSI SWSNTEIYSDQIQACRPNRSRPSRLN VTRNGTEEMAQFLYD  
IVEDTLSSIDNEVPTLGVIMMGQKREAKAFKEVLDTKLIPL ENQYGTEAVGRH  
CIKVATPEEFQGDQRNII LIGCLPENS KVPYETSPDCRRLWNVATTRHKRE  
SII FSSYDLNRIKKGDIKHKIFFMYKHPETRENVRPFKAGKTDIR SMAEDRL  
FDQLASHGYETRRNASEQWKNALSIGLKNLRS DSCQLVSIENYGETADDWRK  
VVHQEGLEELGISC LRVDALALSLNFQAVFEDVIAFLSKAGLPPPTNFVSDK  
SDAASNATTRTSDDNISVSDST

KYFPAHVTENDLQVELQAGMPSDERVTSSLNDFITRYVWNLYHAKDSSPGI  
>comp9001\_c0\_seq1; 266 78 791 LEN=1543; translated  
MFVNYARIGSRLAAPAAFTASVTLYSLQDAHAKEAAVMDKLRRAAIMKVVDVDDAEKRGDG  
TSLAGTYIRLAWHCCGTYKESDNSGGSSNGARMRFAPESKYGNNAGLDRARASLEPIKAQF  
PGISYADLYTYAGVVAVEESGGPKIPYSTGRVDFEDGSTSDENDRLPNADYGGRDKNVES  
IRKVFYRMGFTDGEIVALMGAHAMGRCHTQDSGFWGPWTF AETTF SNEYFRLLVEER  
>comp9001\_c0\_seq3; 249 78 903 LEN=1655; translated  
MFVNYARIGSRLAAPAAFTASVTLYSLQDAHAKEAAVMDKLRRAAIMKVVDVDDAEKRGDG  
TSLAGTYIRLAWHCCGTYKESDNSGGSSNGARMRFAPESKYGNNAGLDRARASLEPIKAQF  
PGISYADLYTYAGVGTSGQTSFARQITGMNKRKNERSVHLTFSLSLSSFTAVAVEESGGP  
KIPYSTGRVDFEDGSTSDENDRLPNADYGGRDKNVESIRKVFYRMGFTDGEIVALMGAHA  
MGRCHTQDSGFWGPWTF AETTF SNEYFRLLVEER  
>comp9001\_c0\_seq4; 364 78 1158 LEN=1509; translated  
MFVNYARIGSRLAAPAAFTASVTLYSLQDAHAKEAAVMDKLRRAAIMKVVDVDDAEKRGDG  
TSLAGTYIRLAWHCCGTYKESDNSGGSSNGARMRFAPESKYGNNAGLDRARASLEPIKAQF  
PGISYADLYTYAGVGTSGQTSFARQITGMNKRKNERSVHLTFSLSLSSFTAVAVEESGGP  
KIPYSTGRVDFEDGSTSDENDRLPNADYGGRDKNVESIRKVFYRMGFTDGEIVALMGAHA  
MGRCHTQDSGFWGPWTF AETTF SNEYFRLLVEERWSPKTMHEGKPWTGPDQFEDSTGKLM  
MLPVDLMLIMEPAFKKYVEVYAKDEDKFFTFDFASAFGKLLALGVPEAAIPIGGKWPYQFW  
>comp9001\_c0\_seq5; 381 78 1046 LEN=1397; translated  
MFVNYARIGSRLAAPAAFTASVTLYSLQDAHAKEAAVMDKLRRAAIMKVVDVDDAEKRGDG  
TSLAGTYIRLAWHCCGTYKESDNSGGSSNGARMRFAPESKYGNNAGLDRARASLEPIKAQF  
PGISYADLYTYAGVVAVEESGGPKIPYSTGRVDFEDGSTSDENDRLPNADYGGRDKNVES  
IRKVFYRMGFTDGEIVALMGAHAMGRCHTQDSGFWGPWTF AETTF SNEYFRLLVEERWSP  
KTMHEGKPWTGPDQFEDSTGKLMMLPVDLMLIMEPAFKKYVEVYAKDEDKFFTFDFASAFG  
KLLALGVPEAAIPIGGKWPYQFW  
>comp9002\_c0\_seq1; 1082 1 2736 LEN=3699; translated  
KILLGQTRKLFIEKQFKSQDYSKTKMAVTGDWTMVKNGEESSESSDANSNTNNDVDGESP  
AAAVRFPCIEQPTRVTLHCNGYYLWGCNRNGKLIARKKRSEKDEWRIENSHCVVGEEN  
SDASNGNSRNQHVVNICNHKFGGRLSLVDIEEKHRKEGGPTKTVCIKDESAKTGTKNSK  
TEDKQNIIGNEASSNDLGLNESIDSEEVDFGDDTEPAALERLPDDEEDPEGGEDGENMD  
GVLDLGSVDQEHQQWCLVRCGDGQSSGLMIQSLTTGDRLAITDDGKITLVPASAPEDSS  
VPSSVSGLVWEMECVTGELCFLSNPALDVRVRCDMAGLLTLPNWKGWEVVRILESSGDG  
YVKLSSWMHSQWLLCSDAEGNVTTC SHADSLLESEGQHGESDFPGDQEPQKQPPFRCSKWA  
IEKYQGSSGPPGVIIRSKTHNRLLSIRDGVLRTFDSLEDISRQASAILEECAEDCETED  
NSGGGDAAEPQSQKIADIVKRSSDEVKDAMKRGSDDEVKRRGSDWWKTSVKNVQKKMSDT  
AIQRNSKNPVDFLRSSMTRSGRDELQAISSSIADISEGETIVWQLEAAHLQTYYFLSSP  
SEVEKKIDACDEEDGDETQTPDASIGKPRSIGAFPVNTENLR TSDKIQLVRNDKEINTIK  
LYLTEKNLYVTCSKGVIFLTENEGDEGSDWIMDQQKDGGSVFRSKAHGLYLSYKETENN  
GTKSDGDEQAAPAEGLDNDGDSSIVDTDNNNNNTKPKSPSARGSVKFNHLQNLQKNN  
TVTELGVSA MEPSALWKLEPCTPRAVSSEKLTFAIGTSIAVGTTIAMPFALAGVAAM  
GAVGAEAGIGFGIVAAGLTGVEAMASVGAIGATAYICFKPAQNSLTDDHQADGSDDEKPW  
SKRPFNSWRNW  
>comp9003\_c0\_seq1; 414 153 1529 LEN=1691; translated  
MEPPSSSPSHPIEHQHQESLGYRRPSIGNGSIAGTNGGSSGRSTSRSVLSREKANSYAQK  
LNNSAVLCIEIGEHERAIKSLGKALKLLERSSSC SSGGSPSYAGDPCCDCTLDGCLSYS  
ETIVDAIVLEREMKENGGTGRSDYVANGPNTKKRRLSPPRSSVPCAPQEQE QDASNNRYF  
WTPPEEDGRLKSSPGSIYRRPIRIPRYILEGSIESTLVSVINFNIALAFQLWSIALG  
TASVTACNTTTTSAASTRKEETKRQRQARFSDIAIRLYTLADPSKHGSSEETGICPCTS  
EEEPSPREGDVCPQQSPRPSSNRHSSKNCGNHIRFHMIVCNNSQLYRSINNVPKHKECL  
QDLLSSIVLLVDQYQRQVQE QHFESSNSYGDQGEAAAALHLDLLQDYCEDEEDVSI LAT  
TTSFARRRRASIGCQYHLHEFAHNTAHIVLRQYCADAA  
>comp9004\_c0\_seq1; 129 131 547 LEN=547; translated  
MKFVSTGIIILFAVATCASDFSLRRRTLSEIPSNEVGDIQQDLSRELNGGIKFRGVGHRP  
NDNDHGGGYSHKSPKTYHDSRGNKPNYYSKGDKSYKDGP H GKS AKRYSHKHNSYKD GK  
PHHSKSQKHSDKYHKGDKS  
>comp9005\_c0\_seq1; 119 213 740 LEN=1077; translated  
MRIEKCYFCSSPCYPGHGITFVRNDSKQFRFCRSKCHRNFNKKRNPRKVAWTKAYRKRTRG  
KEMAVDSTFDKERRNRPVKYDRDLMGKTI LAMRRVESIKKVREQRFFDNRVKDSKAEEK  
QQARVEIEKSI ELLAPAVANREQVMRNVIDSAKQRIAARKKTATRQLANDDGMQE

>comp9006\_c0\_seq2; 352 1 1316 LEN=1400; translated  
XHNFTLTPTVSGQPILQDGCQNSKHQPRGTKCEKKSNDDRRRAGYVENLFEKYDEDKTG  
SLNRVQLSNAIQEITGDDKVENMHVEMLLDEFDTHSGTIDLSEFRVLEKYLRRHRSRGRK  
KSGKETKEKRRSSAISVCIHELAMLMEEDEMCDSKEFSEISIGLTSRTEHSIGLTTTRDA  
TVGSGFNLSRLVDRVVLKAHHDNMLILHDI SHKLYPFKSMCLVQDANLDLTI SHNNSRAL  
DFDALFDDSDSDSDEEESDPDFESQYPPSQMRCLALVSHNGMKKTMREFVTANKNILKK  
FRLTGTNSTMTMLTEVFKDEEPTVMFPGSCASGPLGGDAELVALMVSGKIGGVMMFFQDP  
MDSHPHRADIDCLVRQGLVHNT IMAENPATALMLLD TMRNALMNGKAELIP SFFFSLQSP  
TVEAYKKKQKAVVESHAK

>comp9007\_c0\_seq1; 474 1 1709 LEN=2268; translated  
PSSTSPGLSTMLVYSVETSKMSHHRQSIPSSPSSTSLGNSSSAVSRGVAVVPATSKIFS  
SFKPFLG FVTALMVIALAMLS SVTVLCKDYKPMQMGLATTGPSAPPTS YCSSNTTINRK  
ETEKNKELRRDNGRLKWHEKIPFLKSFASKLKKRRPAQR IKKAGNTNPNEILPSMPQDSS  
GLFLWFGVGI FRISYGSKDSYSFKEVGNDETSSLSLERQQQLQVLEQFPTAFTPEIQNLT  
PRQEALLIRMGN DVLESVDFDFERRSSLVPWGGSSSEVVTGPSFDWYARTTKHRDVSTPLDQ  
INGGNLFSSYL RIMKWPNLGPTEFPFKLCKERKKKTGRNCDASVAIRHTLEFRERYMPW  
LVTPGIKRANARGLVYHRNF SPAHPENKNGHAI VWLRLALKNKTENENERIYFVRS MIRE  
FDRAVAASLIRSNGRLGKFNAVVDGTGFTWNSMPSISSVKALVAILQDHFADRLGVIILV  
NVGSICELLLKIFLPLITEEVRNKIIMVPQDKTEKMETLEKLLGEKNNIPIWLGTTDDYD  
FQVDEYYSNDNMGGDEEALKYLTTMPYHA

>comp9007\_c0\_seq2; 522 56 1734 LEN=2293; translated  
MLVYSVETSKMSHHRQSIPSSPSSTSLGNSSSAVSRGVAVVPATSKIFSSFKPFLG FV  
TALMVIALAMLS SVTVLCKDYKPMQMGLATTGPSAPPTS YCSSNTTINRKETEKNKELRR  
DNGRLKWHEKIPFLKSFASKLKKRRPAQR IKKAGNTNPNEILPSMPQDSSGLFLWFGVGI  
FRISYGSKDSYSFKEVGNDETSSLSLERQQQLQVLEQFPTAFTPEIQNLT PRQEALLIRM  
GNDVLESVDFDFERRSSLVPWGGSSSEVVTGPSFDWYARTTKHRDVSTPLDQINGGNLFSSY  
LRIMKWPNLGPTEFPFKLCKERKKKTGRNCDASVAIRHTLEFRERYMPWLVTPIKRAN  
ARGLVYHRNF SPAHPENKNGHAI VWLRLALKNKTENENERIYFVRS MIREFDRAVAASLI  
RSNGRLGKFNAVVDGTGFTWNSMPSISSVKALVAILQDHFADRLGVIILVNVGSICELLL  
KIFLPLITEEVRNKIIMVPQDKTEKMETLEKLLGEKNNIPIWLGTTDDYDFQVDEYYSND  
NMGGDEEALKYLTTMPYHA

>comp9008\_c0\_seq1; 404 130 1758 LEN=1839; translated  
MCQLLGMNCATPTDFNF SFRGFCKRGGETDIHSHGWGMAIYEGHGLRTFHDSAPAADSKV  
AKFVAENYPIKTLNMMAHIRYATQGEVALENVHPFORELWGINWSFAHNGEVPKYSDKKS  
YAEYPVLGCRQKNGTKTNPRDSIFYHPVGTDDSEATFCAILNALRAEFTTELPTLPLLYET  
LQRLCAQLVEGDEDRTILNLFLLGCGQYTLFAYSWPGRPGSKVWNGLHLYLVRKPPFSTAK  
LTDVDYEVDFSKCTNENDRVATIATSPLTRDEEWKEFERGQLLMFDGGLAFSELCDVHEV  
EQQGRGLFSNVI PRQOICPHYDTPAKLRTL VDEVIETSHMTSQQQHKQTTTWANKAADLG  
CGAGCSGIAFRSCVKHMIGVDLSPAMVDKARQRNCYDELVGNVECVLRRQPKHLERCTN  
PNHGLLASKKFDLIFSCNTFCYIKDLRSVFDDIRQILNDGGVFAFTIEFFEQDRNDSGA  
FDTNDKPYALQSCARYAHKRWYLEEITKESGFETRFRFETSLLERQHNGRDVFAALVVLV  
LVE

>comp9009\_c0\_seq1; 786 1 2331 LEN=2810; translated  
QFFRLSELGNNTNLVQRDSCVTCGSDTVPLKLTSSAVVRRYPMLRFGPLLR LTPERITT  
SRNTTINMSRNP AKRRRIEDVSQEAKNPSGSVHIVDPGDDQSQPSEIEELYSLIN SKKWE  
RASALAKRNPHLVSLSTKEPSMLALSCRSGAPYNCVKQILDAAPSKLRHLLDSRGTP LHE  
AVVCDEIGPSVIAIYLLKLVDEELDLAADGTCNSLRAAMIQDVDGYTPLHLLIRRRFQSHVL  
ADLDDNEKSHFIEILELLVKSCAEAIIVISDRGEYEEPPIVMAIKANVYAPLLPSEETTNA  
RMERHIYDIVNCLQELHCPKAASRVFSGYRGQY TALHSAV FHGRCPTDIE LLLKAEKESPS  
NIDQKACILGNTQGLPLHFCAMRGEPPRTVALLAKAAPEAISQRDASGLTPIHWLWIRF  
VSTLLAIDDGRGNAISVPLTIRTSRRTESNDTDTSRNFTFSSLEQDNFQADLM LLRKID  
PTVDFLRMRHIPTEVEQATEALQWAEHAASVLKSVRDCL ETLSTQEGAENGEDNSEDVV  
MLTRLEAIATLFWIKVVSLKAIATDETKINVNDHEDLSLVRTAFENGCCPPLVGRIVA  
LLFPAEFSQPDGNGRVTLHYAAMRPWHAWEPREDGTS DSASSKLLNLESASLLRNAMSL  
SSVEAAKHKKKGLPIHYMISTYIQACCASGRSCSEDPVEMLEIIGYFVKLNPNSLNI  
CDPRSGLLPYLQASAESAQAINSNP NASSIHDNFPLSIVYLLLRQDPSLVQTASSF

>comp9009\_c0\_seq2; 504 1 2625 LEN=2739; translated  
SGFPCQDLRSLPKETQKKLLLSRPGVTD SAMGMFGFEILKWEKERILRIGRIHRESYAFS  
VGIRTHDIIESISGVRYNHFFGMGDFVPWVLGARNIKVNISSDLNRNDEISTVLSTIKHA  
KINLSPVTFTFVRPLRRTL SRVASSASSDPKPMVRPTTQTDRRQSHPVLLVPKTNVQSNHN

TNLP I RAKGHPFPVGPFFQNL TASLLDGSVTLTRLEVMQKRFHDTYSKRPRVQKEDFYRPA  
KKGF LFSALEVSVFIEACVIRGIWQLGIRLLMPRYEIDTITEHIITLASWDPLLLCQIPVV  
DSSCFKTI LLDLDFERMNSTEYPETGPIVILKDENSGYKYEYRAPIKPLPIDRSIELQLFEE  
ISVQETVHQINQNVQAVPERPMKRI RGGGDDMVATDQQRNHLYLCDVPLIEWKGA VCTF  
VQATGGDFISNGALMVGFVNR FIVSDSSDRKSQHKVEIEAFYVSGMGYVKDMKMYQSDPD  
EVWIVDVSQDSEESRVVVKLR LQKLPEDYREEDQQA VIRK TMSADEHEEKRNPSLSNLQ  
QAQPYEDRKENFQDLLQNGISDDQEELASALEDSRELKGSKIDDSFTDSLHLNFVQTHC  
CTCDEQPVIKSANVTHDCPLCSLPFERYLVCATTKAKTKRNDPMPFTFLHGVGCALMSTRR  
LNGQQFCLEDESIPGFLGEGKSLLLKIARLIPKSIKMP TTYRNEIDPLNSFSVFNSNQNYK  
LWKNFVAESTCTHMLAQAFVTLVASIDRSKLP HWWSDRSSGWSTPYAVLMNTSLSSLYLH  
IYVLDAAALSRMLS VSLKGNL SRSQSDNGLQKLRMEKYWRHAMAQQYTYL YEGEHKEECYH  
CNGGGKVLCCALCPNTQHPECCPKLSVDVKLDLW

>comp9010\_c0\_seq1; 621 131 1792 LEN=1897; translated  
MFSSALRTQCSRHIRLRTSKLLKNGSRSFASVPEIDNQTRTLKTTFNLI DPETIDPRHPL  
TKIVATIGPTSEQA EPLKVV EAGMKIMRLNFSHATTEEVELRLKNLAASQDSYSFDGPI  
NAVQDVRATLLDTRGPEIRSGKLAHDDSGHETIQLEKGD TITLQTSKDYAEASTDKDLFI  
NYEKLHLCMTPGMKVL LDDGAVILTVTELNDSDGSVVC SIDNSGELRSRAGVNLPGAETD  
LPAMSDKDKKDIKYGLEIDVDYVAASF IQTAEAVREIRNYMKQCSEEMGIADRPLPLIIS  
KIESQSALNHFDLILKESD GIMVARGDLGVEIPIQQVTNAQKEMVAACNVVGKPVIVATQ  
MLESMKNRPRPTRA EVSDVTNAVYD GADAVMTSGETAKGKYPDLTIETMNNIILSAEHYS  
ASGSLSGLNNSPNALPYMGDKSDPVTAVAEAEAVVASSANDCRAILVFTEDGRLPSLVAAY  
RPNCP IISFCSTSKVARQ MILTRGIYPVVG LQNVESDAEKIEVALNEIKRMGFVSEGDSI  
VSVSDTSCEVAQV

>comp9011\_c0\_seq1; 883 464 2743 LEN=2788; translated  
MAREAEQEKSRAAIKSREEQIQLHTEARTKNKDRQALKGRVLDFDNDFTAPCHPKSEADA  
AFLDAALGSNFI FSDLSDAERKMLIDAMQEEKAPEGKMIITQGEDGDFFYICQSGKVNFI  
CDGKAVGSCGAGGSFGDLALLYDSPRAASCMAADDTKLWKVDQHTFRHLLARSAKELEGS  
IIEVLSKIDLFKDLDRQTVTKFADVLNTVKYQEGQRIVEKGGQGDV FYIVKSGQVRVHDI  
GLGDASFDDKVHGAGYWFGERALMTGAPRAATVTAMTDVDVFACDRATFESTMGSLESIL  
GKASRKR FVKSVPIFSNSMLTDLEFDRLVSMLKVRKYNGQKLAEAGKVGDNPSLWIVKE  
GKLMI TEKTGKIFFSSSGDYFGDKAVQADGEYVSTATCVVEEDTVCWRLK KSEIESVIGD  
INRLGKPI PFTP KAFDSTIGIADIRKHKMLGMGAFGKVWLATTRGSRKPYALKMITKRQV  
IEAGQVKGV LREKQIMASIEHPFILPLNGSFQDADFLY LLLPVHQGGELFNVVHTNDRDG  
LDNDASQFYGACILEALGYLHARNIVYRDMK PENALIDKDG YCIMVDFGFAKIVVDKTYT  
LCGTPEYLAPEIIMS KGHDKAVDYWSFGVLIYEMLV GQSPFYMYGTDQVSLFKRIVMVKY  
QCPSYVSDDAKDLLKLLTRRQASRFGNLSRGLD IVDHPWFKTLDFAKLNERK LKAPFK  
PKISNPLDTRNFDDFSRVEKEK YRGKALSKKEQALFKDF

>comp9011\_c0\_seq2; 798 464 2341 LEN=2428; translated  
MAREAEQEKSRAAIKSREEQIQLHTEARTKNKDRQALKGRVLDFDNDFTAPCHPKSEADA  
AFLDAALGSNFI FSDLSDAERKMLIDAMQEEKAPEGKMIITQGEDGDFFYICQSGKVNFI  
CDGKAVGSCGAGGSFGDLALLYDSPRAASCMAADDTKLWKVDQHTFRHLLARSAKELEGS  
IIEVLSKIDLFKDLDRQTVTKFADVLNTVKYQEGQRIVEKGGQGDV FYIVKSGQVRVHDI  
GLGDASFDDKVHGAGYWFGERALMTGAPRAATVTAMTDVDVFACDRATFESTMGSLESIL  
GKASRKR FVKSVPIFSNSMLTDLEFDRLVSMLKVRKYNGQKLAEAGKVGDNPSLWIVKE  
GKLMI TEKTGKIFFSSSGDYFGDKAVQADGEYVSTATCVVEEDTVCWRLK KSEIESVIGD  
INRLGKPI PFTP KAFDSTIGIADIRKHKMLGMGAFGKVWLATTRGSRKPYALKMITKRQV  
IEAGQVKGV LREKQIMASIEHPFILPLNGSFQDADFLY LLLPVHQGGELFNVVHTNDRDG  
LDNDASQFYGACILEALGYLHARNIVYRDMK PENALIDKDG YCIMVDFGFAKIVVDKTYT  
LCGTPEYLAPEIIMS KGHDKAVDYW

>comp9011\_c0\_seq3; 895 78 2471 LEN=2516; translated  
MGCDNSKPEVTKKTSVATGQEVADYISNLIDQNKDKRKMAREAEQEKSRAAIKSREEQIQ  
LHTEARTKNKDRQALKGRVLDFDNDFTAPCHPKSEADAAFLDAALGSNFI FSDLSDAERK  
MLIDAMQEEKAPEGKMIITQGEDGDFFYICQSGKVNFI CDGKAVGSCGAGGSFGDLALLY  
DSPRAASCMAADDTKLWKVDQHTFRHLLARSAKELEGS IIEVLSKIDLFKDLDRQTVTKF  
ADVLNTVKYQEGQRIVEKGGQGDV FYIVKSGQVRVHDI GLGDASFDDKVHGAGYWFGERA  
LMTGAPRAATVTAMTDVDVFACDRATFESTMGSLESILGKASRKR FVKSVPIFSNSMLTD  
LEFDRLVSMLKVRKYNGQKLAEAGKVGDNPSLWIVKEGKLMI TEKTGKIFFSSSGDYFG  
DKAVQADGEYVSTATCVVEEDTVCWRLK KSEIESVIGDINRLGKPI PFTP KAFDSTIGIA  
DIRKHKMLGMGAFGKVWLATTRGSRKPYALKMITKRQVIEAGQVKGV LREKQIMASIEHP  
FILPLNGSFQDADFLY LLLPVHQGGELFNVVHTNDRDGLDNDASQFYGACILEALGYLHA

RNIVYRDMKPENALIDKDGYSIMVDFGFQAKIVVDKTYTLCGTPEYLAPEIIMSKGHDKAV  
DYWSFGVLIYEMLVGQSPFYMYGTDQVSLFKRIVMVKYQCPSYVSDDAKDLLKLLTRRQ  
ASRFGNLSRGHLDIVDHPWFKTLDFAKLNERKLLKAPFKPKISNPLDTRNFDDFSRVEKEK  
YRGKALSKKEQALFKDF

>comp9011\_c0\_seq4; 810 78 2069 LEN=2156; translated  
MGCDNSKPEVTKKTSVATGQEVADYISNLIDQNKDKRKMAREAEQEKSRAAIKSREEQIQ  
LHTEARTKNKDRQALKGRVLDNDFTAPCHPKSEADAAFLDAALGSNFI FSDLSDAERK  
MLIDAMQEKAPEGKMIITQGEDGDFFYICQSGKVNFI CDGKAVGSCGAGGSFGDLALLY  
DSPRAASMAADDTKLWKVDQHTFRHLLARSACELEGSII EVLSKIDLFKDLDRQTVTKF  
ADVLNTVKYQEGQRIVEKGGQGDVFIYIVKSGQVRVHDIGLGDASFDDKVVHGAGYWFGERA  
LMTGAPRAATVTAMTDVDFACDRATFESTMGSLESILGKASRKR FVKSVP IFSNSMLTD  
LEFDRLVSMKVRKYKNGQKLAEAGKVGDNPSLWIVKEGKLMITEKTGKIFFSSSGDYFG  
DKAVQADGEYVSTATCVVEEDTVCWRLKKSEIESVIGDINRLGKPI PFTPKAFDSTIGIA  
DIRKHKMLGMGAFGKVWLATTRGSRKPYALKMITKRQVIEAGQVKGVLEKQIMASIEHP  
FILPLNGSFQDADFLYLLLPVHQGGELFNVVHTNDRDGLDNDASQFYGACILEALGYLHA  
RNIVYRDMKPENALIDKDGYSIMVDFGFQAKIVVDKTYTLCGTPEYLAPEIIMSKGHDKAV  
DYW

>comp9011\_c0\_seq5; 806 78 2045 LEN=2132; translated  
MGCDNSKPEVTKKTSVATGQEVADNKDKRKMAREAEQEKSRAAIKSREEQIQ LHTEARTK  
NKDRQALKGRVLDNDFTAPCHPKSEADAAFLDAALGSNFI FSDLSDAERKMLIDAMQE  
EKAPEGKMIITQGEDGDFFYICQSGKVNFI CDGKAVGSCGAGGSFGDLALLYDSPRAASC  
MAADDTKLWKVDQHTFRHLLARSACELEGSII EVLSKIDLFKDLDRQTVTKFADVLNTVK  
YQEGQRIVEKGGQGDVFIYIVKSGQVRVHDIGLGDASFDDKVVHGAGYWFGERALMTGAPRA  
ATVTAMTDVDFACDRATFESTMGSLESILGKASRKR FVKSVP IFSNSMLTDLEFDRLVS  
MLKVRKYKNGQKLAEAGKVGDNPSLWIVKEGKLMITEKTGKIFFSSSGDYFGDKAVQADG  
EYVSTATCVVEEDTVCWRLKKSEIESVIGDINRLGKPI PFTPKAFDSTIGIADIRKHKML  
GMGAFGKVWLATTRGSRKPYALKMITKRQVIEAGQVKGVLEKQIMASIEHPFILPLNGS  
FQDADFLYLLLPVHQGGELFNVVHTNDRDGLDNDASQFYGACILEALGYLHARNIVYRDM  
KPENALIDKDGYSIMVDFGFQAKIVVDKTYTLCGTPEYLAPEIIMSKGHDKAVDYW

>comp9011\_c0\_seq6; 891 78 2447 LEN=2492; translated  
MGCDNSKPEVTKKTSVATGQEVADNKDKRKMAREAEQEKSRAAIKSREEQIQ LHTEARTK  
NKDRQALKGRVLDNDFTAPCHPKSEADAAFLDAALGSNFI FSDLSDAERKMLIDAMQE  
EKAPEGKMIITQGEDGDFFYICQSGKVNFI CDGKAVGSCGAGGSFGDLALLYDSPRAASC  
MAADDTKLWKVDQHTFRHLLARSACELEGSII EVLSKIDLFKDLDRQTVTKFADVLNTVK  
YQEGQRIVEKGGQGDVFIYIVKSGQVRVHDIGLGDASFDDKVVHGAGYWFGERALMTGAPRA  
ATVTAMTDVDFACDRATFESTMGSLESILGKASRKR FVKSVP IFSNSMLTDLEFDRLVS  
MLKVRKYKNGQKLAEAGKVGDNPSLWIVKEGKLMITEKTGKIFFSSSGDYFGDKAVQADG  
EYVSTATCVVEEDTVCWRLKKSEIESVIGDINRLGKPI PFTPKAFDSTIGIADIRKHKML  
GMGAFGKVWLATTRGSRKPYALKMITKRQVIEAGQVKGVLEKQIMASIEHPFILPLNGS  
FQDADFLYLLLPVHQGGELFNVVHTNDRDGLDNDASQFYGACILEALGYLHARNIVYRDM  
KPENALIDKDGYSIMVDFGFQAKIVVDKTYTLCGTPEYLAPEIIMSKGHDKAVDYWSFGVL  
IYEMLVGQSPFYMYGTDQVSLFKRIVMVKYQCPSYVSDDAKDLLKLLTRRQASRFGNLS  
RGHLDIVDHPWFKTLDFAKLNERKLLKAPFKPKISNPLDTRNFDDFSRVEKEKEYRGKALSK  
KEQALFKDF

>comp9012\_c0\_seq1; 360 70 843 LEN=1186; translated  
MKLPVLP SLCGRGMVSSSSWRPLRSFGIPPLARPSVGHSPRGWDRRSFAFSTQTRLGMEN  
TLEAELDWDRIQLDRYTL EEKGWEVRVDWRSTRYGASLFAREDIAKGTILRRGFLGVN  
LKEFASIAIDIEDFCAAGSGSDSPAYTAKLGYVKDYLDWGFHRDADDRGYPSAGDEGDQDA  
RFFGMWVPGNGLNHNETPNTVYKPTDRGIDLVALVDIAADDELFDYRRHGASSPWLKEF  
SRVHNVTNLNFADCNDV

>comp9013\_c0\_seq1; 472 1 1479 LEN=1611; translated  
QDTVDELFE SLQEEAGADEAMSILSRHPEFPRWVERGLEDYLR EAQNERIGTGTGSEGAS  
GGGEEAKAPEEPPEEAPGPAGPEEGTPVFMDCYDASEASPDGSSPGPMVPSILSPLAPHR  
HGGPGKMVEEWELAAHPTTKRILLRDC TSRIAGILASERRGHAQPGPRIYVHGTRGTGKS  
AVLASIVASARKSGCIVMYLPDGDRLRKNGFVTPSTHPDRAGMFDLQDLSREALEQLAD  
SHATDLEGMVAGRETLEQFFKEAQLEKMYDRLSESAESAAGETTGVSLNDLVGYAREHKK  
HAPMCYSAVLCHLTKHQTEKKFVLVMDFNCLFDHGHYFHMAYDEHVREAIPCHRINLF  
EPILAAMNISNQTAEQEEDAAGPADSENACTASVVVGTTESHAVRRATTDALTECAER  
RAAGTADENFHVVEVPRFSSLEADHVLNFEAIGIGKLR LDRGDTLMNPQEV EFLKMASG  
SVGQKLLDASIL

>comp9014\_c0\_seq1; 552 490 2373 LEN=2827; translated  
MYSYLKSYFSTSAEDGDDTKKSAARTNESASENTSLLGNNTNRVDGSAERQNVPPNYSGO  
ENLATDATAATIGNANDDPVHP IPTHPPAPYDLYFSDRNPTVQRYRFRNATPITPIVALH  
KKPGASSNNHNSNAAVVTSGVTGLLRSAVVP SHGTDVSGDWILVSVGGRSGWARKKSPRQ  
HFSGFTLAERFASTEGWMGNHAFACGGKMLGSDAPSLVFTNLLIVMGYVLHFCIVVPRL  
EHMEEIGHNVVPGTGWILSEPWHWHVQPIYWSSVVLGALALIMLWVSALMDPGIIPPVSS  
PVKAPVPEGVPLGGPLGYRYCSTCNIFRPPRSKHCNSCNVCVSKFDQYVYKTTSPFCLRV  
YFVDVAFFVSVGFLPFTILNFSVFLWIIYSHCPWVGNCIGERNHRFFFLFLIGISGMTI  
LTTLCAFEVMLEAFTTTTPSVVLNDDGTIAANLTTFQRLWKVILSEKLTTFMFGSFTLLCAW  
SLTSLLCFHGMIISIAQTTNERVRGVYRFGQAENAADRGCCLRNWYTAACIPYPVSRRLPRD  
MSALVIPDYDNRPEHVWNGDDEGGDGGRAENAVATTPLTTSSTGKFAREANVNAIGNDED  
SKDSEKNSRGKSTPKHEKEVRSKDELV

>comp9014\_c0\_seq2; 546 490 2241 LEN=2695; translated  
MYSYLKSYFSTSAEDGDDTKKSAARTNESASENTSLLGNNTNRVDGSAERQNVPPNYSGO  
ENLATDATAATIGNANDDPVHP IPTHPPAPYDLYFSDRNPTVQRYRFRNATPITPIVALH  
KKPGASSNNHNSNAAVVTSGVTGLLRSAVVP SHGTDVSGDWILVSVGGRSGWARKKSPRQ  
HFSGFTLAERFASTEGWMGNHAFACGGKMLGSDAPSLVFTNLLIVMGYVLHFCIVVPRL  
EHMEEIGHNVVPGTGWILSEPWHWHVQPIYWSSVVLGALALIMLWVSALMDPGIIPPVSS  
PVKAPVPEGVPLGGPLGYRYCSTCNIFRPPRSKHCNSCNVCVSKFDHHCWPVGNCIGERN  
HRFFFLFLIGISGMTILTTLCAFEVMLEAFTTTTPSVVLNDDGTIAANLTTFQRLWKVILS  
EKLTTFMFGSFTLLCAWSLTSLLCFHGMIISIAQTTNERVRGVYRFGQAENAADRGCCLRNW  
YTAACIPYPVSRRLPRDMSALVIPDYDNRPEHVWNGDDEGGDGGRAENAVATTPLTTSSTG  
KFAREANVNAIGNEDSKDSEKNSRGKSTPKHEKEVRSKDELV

>comp9015\_c0\_seq1; 264 172 1557 LEN=1775; translated  
MAAISRHGRPGSKKVVCLSPINLLICFMLVMGLVYVQVSVWMLSGSFSFKSSNSNSGHSP  
NEVHQRRVKDAEELTNSRQHEHVQKQKQQOTLLKQHYSDWRKYAVELAGKFPEDI IQILR  
TEDPFGVRTFEKRLLETESQGRFLTLEELKGLFPCPGNEGERITLPDQRNHDKAQAFRN  
GTEPYFLFFQHLRKAGGTNFCTLATKNFEKKNLPKYCMPDYHWDMPRGGAGYLTRYKN  
SEIQHMKENQHKIAGNEWDPFDHSRFFDLPAAFATSFRRLDRALSQFRFECIENRGCK  
IKNVTKWVNKRRLDLDVYTWTFSDNGIRKMFIGHDKESSEKRELLGTALDVTAKFNLMV  
VMEWLAYAPQHVKDVLGFGQNTATLTERVRPHIGQAKRHDGQEHNSLGAAGIAKASWTPED  
YLPPDLYEIMSRDLALDEILTDAARRIFLERLVCSDVHRFD

>comp9016\_c0\_seq1; 1233 1 5599 LEN=5643; translated  
XDDDENDDEHDNDNDANESDSDDDDDTAKPARKKQKPKKHKGARNPSSAKRARTDSRGS  
INNTEDEDNNDGENGNESDEEKELETEAPNDPEVSLDYGASYLTTVHWDPOSPCKKIGW  
RIRISDDKNGDWKLGRIIRYDPCPTHKHKIKYTDKPRAGDKVDEQNCIWLYLRMEEGVQVS  
TRLVWAHVKGAWWPAMVMESDIQPARGGYTNEFFGSDDEVATLRDHPDCLRPFENGQID  
SVIQKNNKRNNSNAIALAMEEEQTIQKCRNDAAIFMATKAWEMSYKKGNGQLLGSRIIRIW  
RDDVNYPYGDTVAGRVRYSESLNKWLVSYEMSDKVRKKYDSSWVNLQSKHEKLRILQKS  
NPNDLSSHDI LPFVKGFKHVGPKSDDPEEDKHQHIDSLLSKCCSGCSDHFKKNETKITCT  
VCDSSYHLGCCDPPLTKEAYQKYIYGDDKSFVCSKCVTCVGCYQKDL SFGSHRKPVPKAL  
SFPEGKDLNLC SMCTHYEYKQFCPNCAHSWDDERFQQVQRQIRWQQEHRPKRGRKRKT  
EMEDPTSAPDFHSFTSPATIPNEDFPEDATVNPWAYYPETSKWGYTEVDMLTCDSCSLW  
VHAGCAGLSEEEYDLTNSGDHP IYSTEFLCRVCCRERCLEI IYRLQKEDKLLIFADPVT  
QVAPTYLDVIKQPMDLQTMLIKAERDEYKKNYAWVRELFELMVLNALT FNRYHTAVWIEAK  
RFYDACIEGVFTSMGKAAPP SVYHKDILKNFEVAREAKKSEEDRVQEDKTI EKKDLVAGS  
KVVSVELPALRDKPPDLASCLPCHVVVKHKPKDAYFAAWLESCFLCGSSGASDTMIFCVDC  
GEGFHSFCVNAPIHSM DASSVAAWRCPNCKICEISGDSPEDETKMLFCMCDRGFNLDLL  
DPPLSKAPSGI WICGQCVDCRKHNALEPKGSPSRKHWSRDPHLCYRCGGCDGLPELESHV  
KERKCPVCTGIWRDEDTDLAQCTDCNKKVHARCDPKAEAHIQKLGAKNAGEADEGGKGPS  
YHCPGCRKRQTVNKAHGKVT RDHMADFAAKIVAQGLVFDPGSNPMSKRELQEKLMQVDW  
KTRNLWRDEYRKVVLEGVRFMNLVREQFGDPRYLMDFRFQENEDLPAWMGQRATRF LHIA  
NKLQFDSVGF SARRIENCVMISKLAASWLKVACSMMLKTKKKVKGYERVNKL LVAPHAC  
GSVDLTFDSIRCERNRNI INKDDWIKIHEPKIKARVQATVFDVVVPEEKKQSSARVESR  
NGAVKSYKLPQPLCGWNHILGSDTTHKWSDPRECC LCHLCGDDDAGLADDIQERTTDR  
KPTIGRLGRLLPMGDWLWVHSACALWSSETWESPGGRLNALEKARTRGSQLRCFCGRPG  
ATVGC IKQNCNCFHFP CAVACGAVFTSSKQVLC AHRDCAEDIVENPSSSEPME SLIAAQ  
EKGKIATDKD TDSNDSLCPRYGALLVHSLGEIEQDRDGFHTKDYIMPTGYTATRIFWST  
VKAKERTVYVVKIEKSAKGNPIFSITPGDDPLNKIKAPSAAEAYNIVMERVESTNSSEFS  
HDDLYSKLP TERRSNKKYFGLNGPQFFGFGTNEIRKLI EALPGTEAVVTKLTPSSPQYLF



CFMQPSVDNIMDLQRRRAALAAEKKLENASGCARTEGMSAVTRSGGSGRITRALVRNAEN  
EENS DGGALNNSIGGRKRDEIKADRSKIQRMYRGMKAIP IEQRLCPKRSHIHGWGLFTK  
VDLPKDTMIVEYMGEIIRKSVADAREKAYEISGEGSCYMFRLDLNRIVDATKIGCMARFM  
NHCCQP NAYAKVITVDTDYGQENKIVIFSHIDIKAGEEITYDYKFPVEDGSLKCTCGAPN  
CIGRLN

>comp9018\_c0\_seq1; 164 1 1622 LEN=1622; minus strand; translated  
XPKQLQRPQTQPLQSDTYESSPQVQQSKCQNTLKKKELQREEGKLLRECLYSLQGIIEGER  
VRYCREPRDYSIPDVSNCEGIRIQSSALSQNILYAGQISETRLGSGAMDALKVCGEAXV  
ALHSDHFETKLPGFTRQMLVLELRGPIFRLKALAMLVDGMKELTGGHLLSALHKHSIHGN  
TIHVDIVQSILRKVSRPWFEILYAWTTKGILSDPWNEFFVVENKDAEDRYLWNKKYSVNW  
DKVPKGILAQEYVKPPYFFAPEKGNKIGDTLGYRYESNEYGKEENPVLKKTTLTAATGSVH  
SHILRAVKEENHLMELFALKQFLLGQGFYSTLMDGLYNEFNQNRVQFSGGIYKHSLL  
VIVDGALRSSNAKYMPPYIVERLEVKLIIDPGEEMHDVLMGPAGLGGGNTSEDRRTIYDM  
FVFDYHAPDPVLPVIVHSVAMDQYKTLFALLFRLRRIEYVLNFTWRQSATLSHALQNSAQY  
IGIDTASSEGYRATFLLRKISIVRQSMTHLIVNLKSYLMFEVIEGDWQRLES AIHDAST  
LX

>comp9018\_c0\_seq2; 187 1 1714 LEN=1714; minus strand; translated  
XPKQLQRPQTQPLQSDTYESSPQVQQSKCQNTLKKKELQREEGKLLRECLYSLQGIIEGER  
VRYCREPRDYSIPDVSNCEGIRIQSSALSQNILYAGQISETRLGSGAMDALKVCGEAXV  
ALHSDHFETKLPGFTRQMLVLELRGPIFRLKALAMLVDGMKELTGGHLLSALHKHSIHGN  
TIHVDIVQSILRKVSRPWFEILYAWTTKGILSDPWNEFFVVENKDAEDRYLWNKKYSVNW  
DKVPKGILAQEYVKPSFNVGKGINFIRRCLLDGQWMTQLRSGITHLPTSIAPEKGNKIGD  
TLGYRYESNEYGKEENPVLKKTTLTAATGSVHSHILRAVKEENHLMELFALKQFLLGQG  
DFYSTLMDGLYNEFNQNRVQFSGGIYKHSLLVIVDGALRSSNAKYMPPYIVERLEVKLIID  
PGEEMHDVLMGPAGLGGGNTSEDRRTIYDMFVFDYHAPDPVLPVIVHSVAMDQYKTLFAL  
LFRLRRIEYVLNFTWRQSATLSHALQNSAQYIGIDTASSEGYRATFLLRKISIVRQSM  
HLIVNLKSYLMFEVIEGDWQRLES AIHDASTLX

>comp9019\_c0\_seq3; 325 400 1737 LEN=2385; translated  
MDCVSQRAGFKQNSGIDHCLRASSPSRVASSVLWLVQVFLVLMCYRVAEEAIAAPTAGG  
RSSNSNNRDSNSNFVRRRLQDEKENDGGGNQKTTRKEPLRILY TITITLAEYDVGTRATTK  
GFDRLKNLLVPPVVKQGVSSMTKKGYHVDLCIISHYEMTRKDEVVEWLRAVEPDISVIFWD  
NAAPVSYDPMKRPVDGKNKNAKLWENTLGLARQHRFVVKDNLFEYDLFLNFEDDMVLNGD  
MVENYLEMTQTLYKLRETAPETVPSDQLNNFYGTLTQDKQLKRAYPGLMRVEVLLDEDKYG  
TQTELDPVVPV FADKQDIDPRHCCHIEDFAVSENRPKSLGSDKFLWETNIVALGVRHVDE  
LGWVTLLRGPRARQGETGLTISDFWSGTQKYFDSKTRRPPPGSFNHVNNEGGWMGTRQQI  
WEWHTEICLGGFLPPFDSPHYNYVS

>comp9019\_c0\_seq4; 395 400 1983 LEN=2233; translated  
MDCVSQRAGFKQNSGIDHCLRASSPSRVASSVLWLVQVFLVLMCYRVAEEAIAAPTAGG  
RSSNSNNRDSNSNFVRRRLQDEKENDGGGNQKTTRKEPLRILY TITITLAEYDVGTRATTK  
GFDRLKNLLVPPVVKQGVSSMTKKGYHVDLCIISHYEMTRKDEVVEWLRAVEPDISVIFWD  
NAAPVSYDPMKRPVDGKNKNAKLWENTLGLARQHRFVVKDNLFEYDLFLNFEDDMVLNGD  
MVENYLEMTQTLYKLRETAPETVPSDQLNNFYGTLTQDKQLKRAYPGLMRVEVLLDEDKYG  
TQTELDPVVPV FADKQDIDPRHCCHIEDFAVSENRPKSLGSDKFLWETNIVALGVRHVDE  
LGWVTLLRGPRARQGETGLTISDFWSGTQKYFDSKTRRPPPGSFNHVNNEGGWMGTRQQI  
WEWHTEICLGGFLPPFDSPHYNYDGLDPRNVEFWSGGLNLF TARHACNMQRLVSLDPDKF  
SKQLIYHSANNKQRQLHGKRHTFVKINDLYGQLLTVSKDAEEKMDGK

>comp9019\_c0\_seq7; 314 400 1871 LEN=1871; translated  
MDCVSQRAGFKQNSGIDHCLRASSPSRVASSVLWLVQVFLVLMCYRVAEEAIAAPTAGG  
RSSNSNNRDSNSNFVRRRLQDEKENDGGGNQKTTRKEPLRILY TITITLAEYDVGTRATTK  
GFDRLKNLLVPPVVKQGVSSMTKKGYHVDLCIISHYEMTRKDEVVEWLRAVEPDISVIFWD  
NAAPVSYDPMKRPVDGKNKNAKLWENTLGLARQHRFVVKDNLFEYDLFLNFEDDMVLNGD  
MVENYLEMTQTLYKLRETAPETVPSDQLNNFYGTLTQDKQLKRAYPGLMRVEVLLDEDKYG  
TQTELDPVVPV FADKQDIDPRHCCHIEDFAVSENRPKSLGSDKFLWETNIVALGVRHVDE  
LGWVTLLRGPRARQGETGLTISDFWSGTQKYFDSKTRRPPPGSFNHVNNEGGWMGTRQQI  
WEWHTEICLGGKCGICVILDGRIVSAWSL NITKSALTLQFVVGQEHCSANQRRFIFPIFL  
CDINNRI FASA

>comp9020\_c0\_seq1; 462 215 1399 LEN=1734; translated  
MTSLIAHSISAVIADNAPRDTIEKNSAVAWRPWTERQRRRTSLLVNAAFNKDFQSEDSKK  
ESRRKQRWTFGKQYSSNKDCPHYWKEMGDGKEIHNFHKDMDIGVKTESRKKERIGFCHF  
G RIDHSGVSNENTERGTQDQCDTRGDEDDQPLRTNLWDINVNWSLFS PKSKRLSRSGAGQR

GRSLQMELHPEGYCRIIEEDASTDSDRCNKKDNNFLVVGIGRWKKRPWGVTFVLVRPLMLPK  
SSINTAQSDDDRGRYDNVDTAESKNLLVDEDETEFIHARGFHWNFGSSPKLTQGTILF  
QKQTKKDRCSWWKSSSLAYSSVLPVWPEEVALEKAGDCNIATKTKSTYANLMKPSFFLN  
IMRGGKSSDVYINIRRRWFRPVVGTFTAKGIVEK

>comp9022\_c0\_seq1; 328 73 914 LEN=914; translated  
MAPTQAQQKAARAKVLAGGKPAKARTQRYLKSIEPQLREGAKSTLLLKGIKCSQAMGNLL  
KDMRAMQAPNAKLMSKKNQIVAFDDIEGQOSLEFLTTKNDCALFALASTNKKRPNNLVLG  
RTFDHQILDVVELGILRYKSIQNYGGSVPKCRIGSKPLMLFLGDLWQQDSNCKKMQLLI  
DFYRGDVVQKLVVSGIDHLLVVFVASQPQQGDNANPNINNDPKLIYQHTFFCKLKKNPDD  
PTSKVPIPFVPCGPDMTMQIRRTQFAEQDLWNL SLKQPQ

>comp9023\_c0\_seq1; 558 98 1177 LEN=1330; translated  
MADRSQQKMQQMKERREEQVLFQRFQNVATAKLEHLRQLQINEQNTTINGSNDDFTVN  
AITARDDTIKFGEEKRILSNLTGMVKEGIAASVASFIILRRGPKYIGRWIQRNQSQH  
VASSPLSSNTRGSTSSYQLSDPTKFTNKTSNPNFYRAGNGSQNDFPRPRGFISRSIWFV  
FDGILSLMVGANVSMFAFTDKDAIRQQIVDLPLVPERSLVADALCDDIVEELRKRVRQEKNP  
TFERLQKVSRSSESTASDSNVASYLDGIILFCQNCERRRYFERRLREERGLGRTPVEI  
PYPGVPIDGPRVVDGEEKTFDEGGIEDPFLGDQFDDNTSWANDFVSDRNDDDRDLGM

>comp9024\_c0\_seq1; 311 190 1251 LEN=1905; translated  
MTPLSTSSSLRSAANNANNAAGTTWSEDTTARQKALERCVVPLSASSYKSSGRIGVLGG  
SARYTGAPYYAAMASLKCGADLAFCFCAEEATIPLKSYSPELMVAPVYKANEFDNAARRQ  
KQQEFDIFPSEGFDIEELVENMVEEVCMMDKIHVLVLGPGGLGRCPVLEATARIIRK  
AQRHNLPLVIDADGLFLLTLPKYRENLLSNDSPVILTPNAMELKRLLDSGYTTKDLPEQ  
CWIIEKGAVDYIRHASSTSETPIMVCREKGGKRSRGGIGDVLGACCGTLVAWNKILSDRE  
KASSDDLACWTACCFVKRSTKRAFVKHRRSMTAPDILEELGPVIDEMTYVS

>comp9026\_c0\_seq1; 108 157 691 LEN=691; translated  
MNAATAFLTPSQGFNFLVYVRPRFLQYLKTRKSTRESSRKSTGSDIIRVSGLSSTNEVS  
EPVVSADGDTVSRVQAPIAERPSSKRRGSGSHVKFATLNGYGQDGTIQVQVKRIEDSGGK  
LLEVKPSLESEVNKDEKLAKTDKNEDEGTIQIEEKRVDDNGGNLLEVKPSLESEVSED

>comp9026\_c0\_seq2; 201 1 330 LEN=610; translated  
QKLAKTDESKEDGTIQIQVKRVEDNGGNLLEVKPSLESEVSEDKPKAKTEETGEDGTKKK  
QEAAENNIGGEDTNPEESSEILASDIESKRLDEGMDVPSIEPGGNEDV

>comp9026\_c0\_seq3; 294 316 1917 LEN=1917; translated  
MPWSEGEQIAIAILPKFSAFLSVLGSFIVHDIITSHFNVSKKWWKRKSDASQTGSNLEI  
SVASTGSGRSRRFVRKNLMSAYYRLMLCMSISDFIVSIAWFCTTWPIPKAEGLYGNNG  
NNQCTAQAFFIQFGIITPFYNGLLSYYLTIRCEWKEDKFKKYVEYAGHFISIGFGLS  
TAIAGLACKLYANSKVWCWVAPYPSGCGTGEGQVPCERGHNASIMRWILYIPLWVMIFL  
VCISMSLVYAYVKGLDEKMDYIKSYRDRAAENAAEATASVASGTSLGGRASSIMSRMS  
VRLGVDAKRQRMERRHERSRAVATQGLFYAGTFMFVWLFGTITRGLQLANRSVPYGITLA  
FAFLTPSQGFNFLVYVRPRFLQYLKTRKSTRESSRKSTGSDIIRVSGLSSTNEVSEPVV  
SADGDTVSRVQAPIAERPSSKRRGSGSHVKFATLNGYGQDGTIQVQVKRIEDSGGKLLV  
KPSLESEVNKDEKLAKTDKNEDEGTIQIEEKRVDDNGGNLLEVKPSLESEVSED

>comp9029\_c0\_seq1; 467 319 2485 LEN=2656; translated  
MTNCTPIRRDSFPRKLMRFFLFLLIAMATEGKSLRVEEPSAKEVKLPFSPQSRRETQERD  
DDDNVACSLCQGLTLLADKIPQENETCAEMDFYFRQPEFKNLGHAGFAGNGENATNNNPG  
TCRADFLFGIFFEQCCRASIPVYECEQNVHDLILGDLKTNNYNPAVPPIMDYDNPLNVSV  
YLQHEQLEDLKVQGTATIFLSLTLKWMDSRLKWDIEDNNTCTNVIDVYTGHDIEYSQIW  
VPNLDVLRNRIEGVQTMDSKASIFSDGTVHWYLMGGVEVFCAFRGLANIPFDTLGCQLLF  
GSQTRVGSANVYVIEVPEFVYGAFFEGKNGSHLYXVFPIDDSKTRTRRNKLIFFLTKTL  
PCSFVLTYNWQPVPEKAKQGSFDDGVIIVNFYRRATLHYIQNIVVRIAFVCLVVS  
LPKIPSSVSESNITKCTPLPLTNLCLRTCHSTETICSMLLLLNESLDRRNLRYXVPT  
VILTYLSFFTLDLRVTGERLGFMALALVVVAQQIVTSGMTPISDQHLWLDLRFVAYSFY  
WVLFVGIQSACMGFLFYLRREDRQARKERKVLAMTPGQRASMMQRAALEITEGEEEEGL  
LNKINENESQQEEFQDARKDSSSKIVKSEESWKDNLNGIRVEEKDDCAVKEVSEKCCSFI  
LKFFSIRKLDVICLVFALISYTGFIYGLMGLYTGQNGGWPATEPLWFDEEATLEQSINSYPN  
QN

>comp9029\_c0\_seq2; 517 319 2276 LEN=2447; translated  
MTNCTPIRRDSFPRKLMRFFLFLLIAMATEGKSLRVEEPSAKEVKLPFSPQSRRETQERD  
DDDNVACSLCQGLTLLADKIPQENETCAEMDFYFRQPEFKNLGHAGFAGNGENATNNNPG  
TCRADFLFGIFFEQCCRASIPVYECEQNVHDLILGDLKTNNYNPAVPPIMDYDNPLNVSV  
YLQHEQLEDLKVQGTATIFLSLTLKWMDSRLKWDIEDNNTCTNVIDVYTGHDIEYSQIW

VPNLDVLNRIEGVQTM TDSKASIFSDGTVHWYLMGGVEVFCAFRGLANIPFD T LGCQLLF  
GSQTRVGSSAVNYVIEVPEFVYYGAFEGKNGSHLYXVFPIDDSKTRTRRNKLI FLLFKTL  
PCSF LVTYNEWQPVPEKAKQGYSFDDGVI VYNFWYRRATLHYIQNIVVPTVILTYLSFFT  
FLLDL RVGERLGF GMALALVVVAQQIVTSGMTPISDQHLWLD R FVAYSFYWVLF GVIQSA  
CMGFLFYLRDRQARKERK VLEAMTPGQRASMMQRAALEITEGEEEEEGLLNKIENESQQ  
EEFQDARKDSSSKIVKSEESWKD NSLNGIRVEEKDDCAVKEVSEKCCSFILFKFSIRKLD  
FICLVFALISYTG FVIGMLYTGQNGGWPATEPLWFDEEATLEQSINSYPNQN  
>comp9029\_c0\_seq3; 308 1141 1590 LEN=1761; translated  
MTPGQRASMMQRAALEITEGEEEEEGLLNKIENESQQEEFQDARKDSSSKIVKSEESWKD  
NSLNGIRVEEKDDCAVKEVSEKCCSFILFKFSIRKLD FICLVFALISYTG FVIGMLYTGQ  
NGGWPATEPLWFDEEATLEQSINSYPNQN  
>comp9029\_c0\_seq4; 406 189 1381 LEN=1552; translated  
MTDSKASIFSDGTVHWYLMGGVEVFCAFRGLANIPFD T LGCQLLFSGS QTRVGSSAVNYVI  
EVPEFVYYGAFEGKNGSHLYXVFPIDDSKTRTRRNKLI FLLFKTLPCSFLVTYNEWQPV  
EKAKQGYSFDDGVI VYNFWYRRATLHYIQNIVVPTVILTYLSFFTFLLDL RVGERLGF GM  
ALALVVVAQQIVTSGMTPISDQHLWLD R FVAYSFYWVLF GVIQSACMGFLFYLRDRQAR  
KERK VLEAMTPGQRASMMQRAALEITEGEEEEEGLLNKIENESQQEEFQDARKDSSSKIV  
KSEESWKD NSLNGIRVEEKDDCAVKEVSEKCCSFILFKFSIRKLD FICLVFALISYTG FV  
IGMLYTGQNGGWPATEPLWFDEEATLEQSINSYPNQN  
>comp9029\_c0\_seq5; 422 189 1268 LEN=1439; translated  
MTDSKASIFSDGTVHWYLMGGVEVFCAFRGLANIPFD T LGCQLLFSGS QTRVGSSAVNYVI  
EVPEFVYYGAFEVTYNEWQPVPEKAKQGYSFDDGVI VYNFWYRRATLHYIQNIVVPTVIL  
TYLSFFTFLLDL RVGERLGF GMALALVVVAQQIVTSGMTPISDQHLWLD R FVAYSFYWVLF  
FGVIQSACMGFLFYLRDRQARKERK VLEAMTPGQRASMMQRAALEITEGEEEEEGLLNK  
IENESQQEEFQDARKDSSSKIVKSEESWKD NSLNGIRVEEKDDCAVKEVSEKCCSFILFK  
FSIRKLD FICLVFALISYTG FVIGMLYTGQNGGWPATEPLWFDEEATLEQSINSYPNQN  
>comp9029\_c0\_seq6; 533 319 2163 LEN=2334; translated  
MTNCTPIRRDSFPRKLMRFFLFLLIAMATEGKSLRVEEPSAKEVKLPFSPQSRRETQERD  
DDDN YACSLCQGLTLLADKIPQENETCAEMDFYFRQPEFKNLGHAGFAGNGENATNNNPG  
TCRADFLFGIFFEQCCRASIPVYECEQNVHDLILGDLKTNNYNPAVPPIMDYDNPLNVS  
YLQHEQLEDL KVEQGTATIFLSLTLKWMDSRLKWDIEDNNTCTNVIDVYTGHD IETSQIW  
VPNLDVLNRIEGVQTM TDSKASIFSDGTVHWYLMGGVEVFCAFRGLANIPFD T LGCQLLF  
GSQTRVGSSAVNYVIEVPEFVYYGAFEVTYNEWQPVPEKAKQGYSFDDGVI VYNFWYRR  
ATLHYIQNIVVPTVILTYLSFFTFLLDL RVGERLGF GMALALVVVAQQIVTSGMTPISDQ  
HLWLD R FVAYSFYWVLF GVIQSACMGFLFYLRDRQARKERK VLEAMTPGQRASMMQRAAL  
EITEGEEEEEGLLNKIENESQQEEFQDARKDSSSKIVKSEESWKD NSLNGIRVEEKDDCA  
VKEVSEKCCSFILFKFSIRKLD FICLVFALISYTG FVIGMLYTGQNGGWPATEPLWFDEE  
ATLEQSINSYPNQN  
>comp9029\_c0\_seq7; 483 319 2372 LEN=2543; translated  
MTNCTPIRRDSFPRKLMRFFLFLLIAMATEGKSLRVEEPSAKEVKLPFSPQSRRETQERD  
DDDN YACSLCQGLTLLADKIPQENETCAEMDFYFRQPEFKNLGHAGFAGNGENATNNNPG  
TCRADFLFGIFFEQCCRASIPVYECEQNVHDLILGDLKTNNYNPAVPPIMDYDNPLNVS  
YLQHEQLEDL KVEQGTATIFLSLTLKWMDSRLKWDIEDNNTCTNVIDVYTGHD IETSQIW  
VPNLDVLNRIEGVQTM TDSKASIFSDGTVHWYLMGGVEVFCAFRGLANIPFD T LGCQLLF  
GSQTRVGSSAVNYVIEVPEFVYYGAFEVTYNEWQPVPEKAKQGYSFDDGVI VYNFWYRR  
ATLHYIQNIVVRIAFCVGLV VSHLPKIPSSVSESNITSRCTPLPLTNLCLRTCHSTETIC  
SMLLLLNESLDRRSNLR YXVPTVILTYLSFFTFLLDL RVGERLGF GMALALVVVAQQIVT  
SGMTPISDQHLWLD R FVAYSFYWVLF GVIQSACMGFLFYLRDRQARKERK VLEAMTPGQ  
RASMMQRAALEITEGEEEEEGLLNKIENESQQEEFQDARKDSSSKIVKSEESWKD NSLNG  
IRVEEKDDCAVKEVSEKCCSFILFKFSIRKLD FICLVFALISYTG FVIGMLYTGQNGGWP  
ATEPLWFDEEATLEQSINSYPNQN  
>comp9029\_c0\_seq8; 372 189 1477 LEN=1648; translated  
MTDSKASIFSDGTVHWYLMGGVEVFCAFRGLANIPFD T LGCQLLFSGS QTRVGSSAVNYVI  
EVPEFVYYGAFEVTYNEWQPVPEKAKQGYSFDDGVI VYNFWYRRATLHYIQNIVVRIAFC  
VGLV VSHLPKIPSSVSESNITSRCTPLPLTNLCLRTCHSTETICSMLLLLNESLDRRSN  
LRYXVPTVILTYLSFFTFLLDL RVGERLGF GMALALVVVAQQIVTSGMTPISDQHLWLD R  
FVAYSFYWVLF GVIQSACMGFLFYLRDRQARKERK VLEAMTPGQRASMMQRAALEITEG  
EEEEEGLLNKIENESQQEEFQDARKDSSSKIVKSEESWKD NSLNGIRVEEKDDCAVKEV  
SEKCCSFILFKFSIRKLD FICLVFALISYTG FVIGMLYTGQNGGWPATEPLWFDEEATLEQ  
SINSYPNQN

>comp9030\_c0\_seq1; 2532 1 9521 LEN=9606; translated  
XTDLVPLKTKEQRNNSYDAADRLASSNGGDDNEFRCCPLYLVGMSASAHESKIMDEVG  
NKLDREATVVWSQAVETLQEANNYLRI SREARDFVEQYMGQIVSILLEQQPLKVGQMERR  
CVQESLTLAVTIIISNDLEIQIERGRRAPLGPNDVSCR TL DVLACVFCRKKQYYKGSKGNW  
NVNHL SGLPLIRLNLAE TFMQEDGFARLVEY MADRTITDESSSSTGVGDPSGSDTAALPI  
SPASPSRQQQSPPQIEFSATGLSSFPTIDLLHQTLTVLFDVCNANNKKDENHLRALEQAA  
NDVSKATMRYITSCSEEALKKVPMEDLKL LVHDL LCI FDKLIEFRRPDTYEFY SFWRGLV  
LKLITSQSLPLKLFGWQOMETLLEASAAHRPPRSFVAEDAGCRFVNGEYRFKGIETDDG  
YGLRSGKDNEISYMREIPEDEPEGGKTLTLFRCTMRSQQKWWFLSEADKEQPGTDRDID  
YYQHK SKEHEETE PPLTGWLTCRNAGVDPSPKLKRIGLMVPPGEERTLEHQ LAKWAIDN  
KI IDTLVLGDSVHREIVRSVPLIKFLASMCERDFGTRTNIDGDR TAVPEESVDGKVDQD  
TKYCLQSSHLQLAWKTCIRKTDAAVSAQIYQLLVSILPSCPVNLA VLLLKNVRASLDQGS  
QPNNSSSGGISNGMNFNDFL TEVSDFCEALAVSNDNPTYNNNNSNSKVAPVSQLSNDVR  
AEVLDLLWSLLIHPEASSLSYDLLKQYV TRELRVE PGGTEHRKTYLR LCI VALQENSKQ  
LTAGTVDEIRALKMVKFTHFVLEACPRAQA AHLVTANQGR LPLLLFEELTAFLKRKRQGS  
SGGIGIHVPNPPRKSPSLDQDGIQGAISLSERLRILRYVYGVSEQMF MSTPQLHSLWQLC  
SAPPDREEVMAFISSASGTPDRNINSANNAVINQPAMSNQGNKNMAGQTEDILSSAFT  
EDECAKAFVTL L CSPNIGFQLLGVKAYQSFHFMFNKMRLLPSHGPEVRQAALD TLWRICL  
ESGNDVVATSAMNDLLNIYIGYNADTDDIRPNSVEPNTNSSDPMQTESSEDFGKRVFDC  
LSKVKKDLDMKVPSAELAAERCLRILNAAIGQDSSGSSISISTLNMRSSRPVDELSP IA  
KCLPHGMRGQACYRKITIIAKRQQ TQNHQEQQNP NQHAGSIFRFSIDLHPLETLQS IKGK  
VASHCQRPVSFVKPI SASGRVSSSSTRKPNGGDFSHMSPNHL PDDAVVDEMGI VQGSEMV  
FVIQDRHIAQQNVNTSSASNTRK GKARDLSDI FCDTNNF SNLLFD TLLGVLEALPWREP  
GEMSDVSTTSTDT HKLVWDL L LAMP TNPTVSSQVLLT TTKSGIVIENDV VDE DAMEIDSRQ  
PEGWAKLLDLKNFFKSVYVLLAIDAF LK PAREILSSLPVERRNMLAREMIGESAVFRRGF  
IESGGF DAVVGFSSSEDNSEMSQSMTRRGNALVALRILKCC LFGDSDSNGVKDSSSSGLD  
EAGNRLLLSLANAEGLRSLTSMVVADSGISSSTVSDVLKFLC L LFKSPETVKS FVALPD  
RTAEKFLTRLILWEGSSDVAQPGSSVTSISKVRVEMHNLV L ATPLL ANFALPWLKNAIDS  
IDVTSECTAEYFHLLIKLVTESKTVSHRELNSLATTVCAKLAVCPRPSTDTLVVDFSTGV  
LCGCLGLLDSLIIHVGGGILVDGTSILLKEFEVPRWSEMPIYPTRIGPEDLTLMDLMGV L  
FDAFLSPGGATSILAICCDRESRQRGF DVVRSTARRCKDNGNGY MALVHR INGLISAASPF  
LKHRWGQSTGENEGSRNGRNTSKYSGLKNQGCTCYMNSVLQQLFMMPELRKSLCSAPLP  
ASIRASGGVSSRGAELVGRKISMQWESGNSYDAVVEAFDSTTGLHTIRYCPIFTATSLG  
GANHHHLHREEVEKLDRLPPLLKEEFFLSEGRPGKETGVFEVLP SKETKEENNSLSHERS  
DEEIKETQDESSRHLMEEVQRTF IHLEEGSRGRCFDPRALVEACACLKLEFDVWQQNDA  
SEFSTKLLDRLETSLKRWAPDNFRYLDHTFGIKQTKQKICKECGLKTNREEKLLNVDCQI  
RGKADIQEALSTMCE TEIMEGNKVFCDNCKNNTDTVLRSAISELPNMLILSLKRFDLDY  
NTFETVKLNSRCAFQGT LNMKRYTLEGV EAI EQAESEN NHEADAMDVGN EESALSHLPDE  
DYEYKLAGVLVHAGVAQGGHYYSF INDRNPGSEDKWYRFDEDEDVTPFD PASIATECFGGK  
VKKETKWPNQVHVSVESEQFANALMLFYEKVKITEHSSPERTEKEDAHEAALEK IHMSTG  
YDVFE PDVRRSNATHRWQSF LFNADFQTF LRL LHL CRVEKSSPWRKNFIDMLVTFMF DV  
LLYTNERLDLMDWVNAVEEILIDDPEYAQAFTLKIASKTTSVSGNWLRTYLLDCPDQYSR  
IASVRIFTA AIQSSLSIPEEQGLQDWVKAWEMQVSQIDVSNK PVP SRLRGEFVQHENV D  
SPSSSAIGMILSSMNVLIDVLP RCWRQ NQEI FT F IRELSFTDPKR GGLLLREAIIGCLIP  
ARL ICFINRQKSPALVSAFFGASLSLES AEYDSKAESHYMN GNQVMNPPDLN YRGN SG  
MMNFAPISL FETLGLMGI SHLYQAPLLLEKHDQRGRKRGFVLSTEAQAALTKVFEESCS  
GSVQGMGQRDI REYLRHRCGHDN IASQRIIDVIAKYNASSYGGNVSKGMNYLNL TGF LDYY  
KETAQREDGRVRNDLSLHGFRADL TRRSSELRFITIEGREDTLKRCE SIARDVADHFRNN  
KPTVGKLADFGLSAFEFY CPLNANMSEQLAEYVVA AAFYRYKNGSENLIYNTLR AIYTAP  
HGWQGADTTRVALAILSTLASIPDDYQKERIGYIMQCTRVLNTADNHPLGLITASIGFRE  
METS GSYDPNKILDAYER YTGFLKEMMNIQSVYDWMEDNRDAWAQMESDLFETAQHAGHG  
QSRG DYSGRRDNDEVGPHMDH NHQSDSDIATGFHESEDDDEESRYEDVPETNDVSKIKVS  
DAGHAAVNGVYERDGHCGQVEKYSRVCKDRDCKFSIFKCKVSNETFHWYISIVPRDREPG  
TVQD TDFY SASVA AECEILPPSTGWSKCS DGGDPPPTLAFERDGVGPTSVPF

>comp9030\_c0\_seq2; 2478 1 9502 LEN=9587; translated  
XTDLVPLKTKEQRNNSYDAADRLASSNGGDDNEFRCCPLYLVGMSASAHESKIMDEVG  
NKLDREATVVWSQAVETLQEANNYLRI SREARDFVEQYMGQIVSILLEQQPLKVGQMERR  
CVQESLTLAVTIIISNDLEIQIERGRRAPLGPNDVSCR TL DVLACVFCRKKQYYKGSKGNW  
NVNHL SGLPLIRLNLAE TFMQEDGFARLVEY MADRTITDESSSSTGVGDPSGSDTAALPI  
SPASPSRQQQSPPQIEFSATGLSSFPTIDLLHQTLTVLFDVCNANNKKDENHLRALEQAA

NDVSKATMRYITSCSEELKVKPMEDLKLVLHDLICIFDKLIEFRPDTYEFYSFWRGLV  
LKLITSQSLPLKLFQWQOMETLLEASAAHRPPRSFVAEDAGCRFVNGEYRFKGIETDDG  
YGLRSGKDNEISYMREIPEDEPEGGKTLTLFRCTMRSQQKWWFLSEADKEQPGTDRDID  
YYQHSKEHEETEPLTGWLTTCRNAGVDPSPKLRIGLMVPPGEERNTLEHQAKWAI  
KIIDTLVLGDSVHREIVRSVPLIKFLASMCERDFGTRTNIDGDRTAVPESVDGKVDQD  
TKYCLQSSHLQLAWKTCIRKTDAAVSAQIYQLLVSILPSCPVNLAVLLLKNVRASLDQGS  
QPNNSSSGGISNGMNFNDFLTEVSDFCALAVSNDNPTYNNNNSNSKVAPVSQLSNDVR  
AEVLDLLWSLLIHPEASSLSYDLLKQYVTRRELRVEPGTEHRKTYLRLCIVALQENSKQ  
LTAGTVDEIRALKMVKFTHFVLEACPRAQAHLVTANQGRPLLLLFEELTAFLKRKRQGS  
SGGIGXPRAESTSKDGIQGAISLSERLRILRYVYGVSEQMF MSTPQLHSLWQLCSAPPDR  
EEVMAFISSASGTTTPDRNINSANNAVINQPAMSNQGNKMAGQTEDILSSAFTEDCAK  
AFVTLCSPNIGFQLLGVKAYQSFHFMFNKMRLLPSHGPEVRQAALDTLWRI  
CLSGNDV  
VATSAMNDLLNIYIGYNADTDDIRPNSVEPNTNSSDPMQTESSEDFGKRVDFDCLSKVKK  
DLDMKVP  
SAELAAERCLRILNAAIGQDSSGSSISISTLNRMRSRSPVDELSP  
IAKCLPHG  
MRGQACYRKITIIAKRQQTQNHQEQNPQNHAGSIFRFSIDLHPLETLSIKGKVASHCQ  
RPVSFVKPISASGRVSSSSTRKPNGGDFSHMSPNHLPPDDAVVDEMGI  
VQGSEMVFVIQDR  
HIAQQNVNTSSASNTRKKGKARDLSDIFCDDTNNFNNLLFDLTLG  
VLEALPWREP  
GEMSDV  
STTSTDTHKLVWDL  
LLAMPTNPVSSQVLLTTKSGI  
VIENDV  
VEDAMEIDSRQPEGWAK  
LLDLKNFFKSVYVLLAIDAF  
LKPAREILSSLPVERRNMLAREMIGESAVFRRGFIESGGF  
DAVVGGFFSSSEDNSEMSQSMTRRGN  
AVLRILKCLFGDSDSNGVKDSSSSGLDEAGNRL  
LLSLANAEGLLRSLTSMVVADSGISSSTVSDV  
LKFLCLLKFSPETVKSFVALPDR  
TAEKFLTRLILWEGSSDVAQPGSSVTSISKV  
RVEHNLVLA  
TPLLANFALPWLKNAIDSIDVTSECTAEYF  
HLLIKLVTESKTVSHRELNSLATTVCAK  
LAVCPRPSTDTLVVDFSTGVLCGCLGLLDS  
LIHVGGGILVDGTSILLKEFEVPRWSEMP  
IYPTRIGPEDLTLMDLMGVLFDAFLSPGGAT  
SILAI  
CCDRESRQRGFDVVRSTARRCKDNGY  
MALVHRINGLIS  
AASPFLKHRWGQSTGENEGGSRNGRNTS  
KYSGLKNQGC  
TCYMNSVLQQLFMMPELRSKSLCSAPL  
PASIRASGGVSSRGAELVGRKISMQWESG  
NSYDAVVEAFDSTTGLHTIRYCP  
IFTATSLGGANHHHLHREEVEKLDRLP  
PLLKEEFFLSEGRPGKETGVFEVLP  
SKETKEENNSLSHERSDEEIKETQDESS  
RHLMEEVQRTFIHLEEGSRGRCFDPR  
ALVEACAC  
LKLEFDVWQONDASEFSTKLLDRLETS  
LKRWAPDNFRYLDHTFGIKQTKQKIC  
KECGLKTNREEKLLNVDCQIRGKADI  
QEALSTMCETEIMEGNKVFCDNCKNTD  
TVLRS  
AISLPNMLILSLKRFDLDYNTFETV  
KLNSRCAF  
GQTLNMKRYTLEGEVAIEQAESEN  
HEADAMDVGNEESALS  
SHLPDEDEY  
EYKLAGVLVHAGVAQGGHYYSFINDRN  
PGSEDKWYRFDEEDVTPFD  
PASIA  
TECFGGKVKKETKWPNGQVH  
SVESEQFANALMLFYEKVKITEHSS  
PERTEKEDAEAALEKIH  
MSTGYDVFEPDVR  
RSNATHRWQSF  
LNFADQTF  
LRLLLHL  
CRVEKSSPWRKNFIDMLVTFMFDVLLY  
TNERLDLMDWVNAVEEILIDDPEYAQAF  
TLKIASKTTSVSGN  
WLRTYLLDCPDQYSRIASVRI  
FTAAIQSSLSIPEEQK  
LQDWVKA  
WEMQVSQIDVSNK  
PVP  
SRLRGEFVQHENVDS  
PSSS  
AIGMILSSMNVLIDV  
LPRCWRQ  
NQEIFTFIRELSFTDPKRG  
LLLR  
EAIIGCLIPARLIC  
FINRQKSP  
PALVSAFPGASLSLESAEYD  
SKAEHSHYMN  
GNQVMNPPDLN  
YRGN  
SGMMNFAPISL  
FETLGLMG  
ISHLYQAPLLLEKHDQRGRK  
RGFVLS  
TEAQAALTKVFEESCSGSVQGM  
GQRDIREY  
LHRCGH  
DNIASQRI  
IDVIAKYNASSYGGNVSKGM  
NYLNL  
TGFLDYKETAQR  
EDGRV  
RNDLSLHGFRADL  
TRRSSELRFITIEGREDTLK  
RCESIARDVADHFRN  
NKPTVGK  
LADFGLSA  
FIFYCPLNANMSEQLA  
EYVAAAFYRYKNGSEN  
LIYNTLRAIY  
TAPHGWQGA  
DTTRVALA  
ILSTLASIPDDYQKERIGY  
IMQCTRVLNTADNH  
PLGLITASIGF  
REMETS  
SGSYDPNKILD  
AYER  
YTGFLKEMMN  
IQSVYDWMEDNRDAWAQ  
MESDLFETAQHAGHGQSRGDY  
SGRRDND  
EVGPHMDHNHQSDSDIATG  
FHESEDDDEESRYEDV  
PETNDVSKI  
KVS  
DAGHAAVNGVYERD  
GHCGVEKYSRVCKDRDCKFS  
IFKCKVSN  
ETFHWYISIVPRDREP  
GTVQD  
TFYSASVAE  
ECEILPPSTGWSKCS  
DGGDPPPTLAFERD  
GVGPTSVPF

>comp9031\_c0\_seq1; 388 68 907 LEN=1484; translated  
MADSCCCLVCVRTQQVGVEDLGQFKSL  
LDPGLHFILWPLQSI  
VGRMSLR  
IQQLDVVCET  
KTKDNV  
FVQGVAVQYRVLVDGAYDAYR  
LTDPRNQIQSYVFDVVRSTVPRMDL  
DEAFVS  
KDEVGGAVLAQLRDVMKEYGYEINK  
TLVTDLSPDNRVKASMNEINASRRL  
KEAASHKAEA  
DKVKQVKA  
AEAEAEARYLSGLGVARQRKAI  
VNGLQESVGSFSDEVEGATPKD  
VMDILL  
LTQYFDTLAAV  
GANSLIEHDPATVASLRQSVGG  
AFLNSK

>comp9031\_c0\_seq2; 388 68 907 LEN=1652; translated  
MADSCCCLVCVRTQQVGVEDLGQFKSL  
LDPGLHFILWPLQSI  
VGRMSLR  
IQQLDVVCET  
KTKDNV  
FVQGVAVQYRVLVDGAYDAYR  
LTDPRNQIQSYVFDVVRSTVPRMDL  
DEAFVS  
KDEVGGAVLAQLRDVMKEYGYEINK  
TLVTDLSPDNRVKASMNEINASRRL  
KEAASHKAEA  
DKVKQVKA  
AEAEAEARYLSGLGVARQRKAI  
VNGLQESVGSFSDEVEGATPKD  
VMDILL  
LTQYFDTLAAV  
GANSLIEHDPATVASLRQSVGG  
AFLNSK

>comp9031\_c0\_seq3; 278 1 835 LEN=3179; translated  
RQCKRSLDFLSFIDFEIAWCPIDVLES AKVPRITNSITKPTLPRLTFSNLSKRDLGDVFL  
KQQVFVQVGVAVQYRVLVDGAYDAYRRLTDP RNQIQSYVFDVVRSTVPRMDLDEAFVSKD  
EVGGAVLAQLRDVMKEYEGYEINKTLVTDLSPDNRVKASMNEINASRRLKEAASHKAEADK  
VKQVKAAEAEAEARYLSGLGVARQRKAI VNLQESVGSFSDEVEGATPKDVM DILLLTQY  
FDTLAAVGANSLII EHDPATVASLRQSVGG AFLNSKK

>comp9031\_c0\_seq4; 388 68 907 LEN=3251; translated  
MADSCCCLVCVRTQQVGVVEDLGQFKSL LDPGLHFI LWPLQSI VGRMSLR IQQLDVVCET  
KTKDNV FVQVGVAVQYRVLVDGAYDAYRRLTDP RNQIQSYVFDVVRSTVPRMDLDEAFVS  
KDEVGGAVLAQLRDVMKEYEGYEINKTLVTDLSPDNRVKASMNEINASRRLKEAASHKAEA  
DKVKQVKAAEAEAEARYLSGLGVARQRKAI VNLQESVGSFSDEVEGATPKDVM DILLLT  
QYFDTLAAVGANSLII EHDPATVASLRQSVGG AFLNSKK

>comp9031\_c0\_seq5; 278 1 835 LEN=3347; translated  
RQCKRSLDFLSFIDFEIAWCPIDVLES AKVPRITNSITKPTLPRLTFSNLSKRDLGDVFL  
KQQVFVQVGVAVQYRVLVDGAYDAYRRLTDP RNQIQSYVFDVVRSTVPRMDLDEAFVSKD  
EVGGAVLAQLRDVMKEYEGYEINKTLVTDLSPDNRVKASMNEINASRRLKEAASHKAEADK  
VKQVKAAEAEAEARYLSGLGVARQRKAI VNLQESVGSFSDEVEGATPKDVM DILLLTQY  
FDTLAAVGANSLII EHDPATVASLRQSVGG AFLNSKK

>comp9031\_c0\_seq6; 278 1 835 LEN=1412; translated  
RQCKRSLDFLSFIDFEIAWCPIDVLES AKVPRITNSITKPTLPRLTFSNLSKRDLGDVFL  
KQQVFVQVGVAVQYRVLVDGAYDAYRRLTDP RNQIQSYVFDVVRSTVPRMDLDEAFVSKD  
EVGGAVLAQLRDVMKEYEGYEINKTLVTDLSPDNRVKASMNEINASRRLKEAASHKAEADK  
VKQVKAAEAEAEARYLSGLGVARQRKAI VNLQESVGSFSDEVEGATPKDVM DILLLTQY  
FDTLAAVGANSLII EHDPATVASLRQSVGG AFLNSKK

>comp9031\_c0\_seq7; 164 1563 1903 LEN=1903; minus strand; translated  
MVPVPVLVQVLLLLLPLLLFVLS SNATLNQKKTQSSNTQSSWXNNPNFNTLGSNDYAT  
AELNTKGYATKKKSWLTRFVKTVLNTTNPDTITPEDKVMYEMLTKKVPMHDGLT

>comp9031\_c0\_seq8; 388 68 907 LEN=3419; translated  
MADSCCCLVCVRTQQVGVVEDLGQFKSL LDPGLHFI LWPLQSI VGRMSLR IQQLDVVCET  
KTKDNV FVQVGVAVQYRVLVDGAYDAYRRLTDP RNQIQSYVFDVVRSTVPRMDLDEAFVS  
KDEVGGAVLAQLRDVMKEYEGYEINKTLVTDLSPDNRVKASMNEINASRRLKEAASHKAEA  
DKVKQVKAAEAEAEARYLSGLGVARQRKAI VNLQESVGSFSDEVEGATPKDVM DILLLT  
QYFDTLAAVGANSLII EHDPATVASLRQSVGG AFLNSKK

>comp9031\_c0\_seq9; 278 1 835 LEN=1580; translated  
RQCKRSLDFLSFIDFEIAWCPIDVLES AKVPRITNSITKPTLPRLTFSNLSKRDLGDVFL  
KQQVFVQVGVAVQYRVLVDGAYDAYRRLTDP RNQIQSYVFDVVRSTVPRMDLDEAFVSKD  
EVGGAVLAQLRDVMKEYEGYEINKTLVTDLSPDNRVKASMNEINASRRLKEAASHKAEADK  
VKQVKAAEAEAEARYLSGLGVARQRKAI VNLQESVGSFSDEVEGATPKDVM DILLLTQY  
FDTLAAVGANSLII EHDPATVASLRQSVGG AFLNSKK

>comp9032\_c0\_seq1; 532 1 1507 LEN=1711; translated  
ATTTPRQLVLIRDPTIEQAVPICATSDGGDADNSFFGFPVSFLLRSNGSILEAISSGGD  
ASHGSPQGRTVVSVWSR TYGTEGKSGETATKKPPRILSFKISPGFSDGGRIAGDDSGW  
VQVWRLSTGALLWTPVAPAALRNRRTRNPLFQSEKLWVKHLSWSGDGSGCLGAAAGRTAV  
WVDASNHGGDVLSSLESTAGSITGLSARAAPAGAFWLAVASYGVVAVLSSSSSPPLPSE  
ATVPPPLERPGA AVECLSVSPCGEKVAMGFLDKTLRVVSLGKGGGRLPSVGAEGLLDPPP  
TGEGLVDWVGFNAAVKSVRFSPNGKWL AALGGSTILVIGDSL DARTQAPIACRTPGKTS  
GDGGDGTCHKFADMKWSAEQNAEESNGILL AALDATNGAIHIFSGSNSNGNSSTSKNQH  
DAWPHRAFPIRTVFP RFSFDSPLLPMSLSTTVFAFFSTGGLRKDASDQHTDTSNTSIDRFQ  
LEVASSPHSPALYDYLKANL

>comp9033\_c0\_seq1; 788 1 1669 LEN=1669; translated  
XPASAQASSSLRDNAVALLRERDSTIQDLREKGRERDDKLERVEKRLSFYESRVETLQEK  
GSERDAELDRTESLREKEESFRGLEVERRELEEEELRRVRETGAGHGDGERSVSGQVPE  
QRDGAIKRLREERRDREKRLQSTIESLSHRGSWSEDDESQAEAEAEAGDDFSASSSRLPDE  
RDATI QNLRDEAEQREDELARVRGRLSAQAEAREA EKDAELREKDSAIENLREERDGREEE  
LALVRESLSLYEGKETQRDAELAAALSCLREKDTV IENLQEDCTGKEEELRRVKESSLVY  
QEKQAGQDSELVAALSSLREKDS TIEDLLQENDGKEDELRRVRERLSVYEGKETE QGDEL  
AAALSLLQDRDSTIQNLKEESKSKEEELRRVQERLSVYTGEKMEKDEELAAALSLLQVKD  
STIKNLEEEESNRKEKELQQVRDSL SVYEAKETKQGAELAAARSLLQEKDSAIQNLQEEQI  
GKEEELRRVQESISVYESTIESLGERTEKDLELDSTMSAVRERDATI QKLEENKQERD  
ATVALWREQDVAFQKLLK

>comp9034\_c0\_seq1; 231 298 729 LEN=878; translated  
MSADSQQTTTFTRQATILRKNLGEWDMVLHNPRGEDWSKMLGRLNAALSATSTLDNNIEDV  
MEHFVYLPKRATANPQDIPFFLSTKLDSSATDERMPANSSSRKKKdstvqDLLAMGDPVQ  
VLSNYEEQA AKLVQEYEEEMVRF

>comp9034\_c0\_seq2; 231 298 729 LEN=898; translated  
MSADSQQTTTFTRQATILRKNLGEWDMVLHNPRGEDWSKMLGRLNAALSATSTLDNNIEDV  
MEHFVYLPKRATANPQDIPFFLSTKLDSSATDERMPANSSSRKKKdstvqDLLAMGDPVQ  
VLSNYEEQA AKLVQEYEEEMVRF

>comp9035\_c0\_seq1; 685 1 2780 LEN=2900; translated  
XEITLFRIGKIFHADLSVSKMDSKMETPVVIADRHPPGGEFSPLLRSNADDGCDKNTGIGD  
AEFQTPFAHFIADEKVFVVGSTGSWLRLLLFFAACVISGGVLPQNVYNRLFCEAGLFSY  
ACREDTSGGVVDGIADDPVEVFIGDSSCCSAQWLLLANTMNALSSTLALFFFLGGLVFD  
LGGQWTSIVGCLINAAGFFVLSLLLFALEEYDDDDVITITPMMETTIFCFAILVDAGSII  
TNVSFFGFLWHLPRHQGLILSLNCCVNVA AVVPLVLRFILQRYDNWLSLPSTMFFYTAT  
IVGIATPACWVAVPSVENYRKRAMEVLGVPIPRRTVKGFRGAIDSVKSGFRI IKHHARLH  
LFTLATFTFAWTSFFIYITMTDPLGQEVFGTGVGVVDDDMVMGNSDENERLAVLFNQ  
SALVGLFMGPLVGVMLDQYSRPTGEGITDLAVVITISMAIIGVFCPVANWTIQTI VVTSGA  
FGQIATLLFIMRYSVIFALPNRVGAVSGILLALLGGFSMPFFILLSIYIGVTDHYVGP  
TITLSLIGAAVWVAYIVFLKRAKPWPSFPVLLPEDERNISKMFVSGTIEDAAVAGKSLPE  
RRLASSKAVDQ RALLDAAFAPETGDRIMEVARRRSSVEVSKRNSIGSQNSASSAYPRA  
VDGLCKSDDANEYTDALASRYSIPLHLASGNVRGEEYTIQRGSASTALETIEISFNHGG  
GGRNEPSIASLMDSMGPPDDPRRISVMHSMFAPAFHCAEAYGNLLEVRVGDFTVASCAC  
FHPDGLENGSIFQVGS DRYYSLTMSGATPNINRETMGPEALQRFVSFKQDSRWDEL  
RNDYGPV FYVAVLGVHPSYQGRGYGKLLNIVAHWADREGMDCYLECSEANVAIYER  
CGYENIWKVDVEVDGSNDTLTNFGMVR RCKNKE

>comp9036\_c0\_seq1; 299 1 1146 LEN=1488; translated  
VPSATAIETLVSEKEQYTLKFP TLFAPLYGEASRKTIKRSLGRTSGADSNDDIWA  
LEQNLLELGPLQTPLRCTVVR LKDGTLWVHAPLAPTPEFFELVESCGKKVAHV  
VVPVSYALEHKVFVKDCMARWPNADLWTSPEQFSFPFAASEPYIFGKAVAGVLGK  
NGGATPPWSDEIDYATLEGGTFRIGGKPTTLCETAFFHRASRSLIVTDVVARIP  
TTPALNNPEQ LLLISKRSTDDMPEDTPEARLAGWKKTALLVSYFFPEHEELDPT  
KAGVVVWTEGWEDNFDALAGRLVVPVVRTLIYSQNP ARVREWVETIVRDKKWDF  
DRIVPAHFEAPVPATPPDLERAFRFL EDPGADAFPENDLARGLKPIAGLALRL

>comp9037\_c0\_seq1; 205 1 573 LEN=573; translated  
XDIACSDFLVLC SLINQAGLENVLSDSKSNMTLFAPTDAAFNAALKAGLDTSEV  
LLLSETLLYHTVKDEAIKST DIDCDATTDLTMANDEITKV SCKGTKKRIRVE  
GEGNDP DNLPKVVVADIEACNGFIHSIDQVILLGLETGTENPTSEITYVDLCP  
QFSDDCQKCLEND DCLYCRDEPGSCFNRYPNLX

>comp9037\_c0\_seq2; 475 1 1432 LEN=1604; translated  
GTGGGTGGTGVVPPTAPPKAVRYDPAVNTIDVLTIPENCSSFTVETTTGNQ  
CLRVIITVTGTTQASLTVFESKIEEAVEDKTLETQLATFGLTAQTEMV  
PVAVLSTDAPTVAPSTVDRSVRVTRIKFN YVWFLSLLL YLAVWKFHYDSTFHT  
LFFLVSVSNMVHFFPDDIACSDFLVLC SLINQAGLENVLSDSKSNMTLFAPT  
DAAFNAALKAGLDTSEVLLLSETLLYHTVKDEAIKST DIDCDATTDLTMAN  
DEITKV SCKGTKKRIRVEGEGNDP DNLPKVVVADIEACNGFIHSIDQVILL  
GLETGTENPTSEITYVDLCPQFSDDCQKCLEND DCLYCRDEPGSCFNRYPNL  
RAPDETPDQNKSGGKNSRLLFSDDQRFLQECKGILTSTASVCDAPTEAPAG  
SPDKDGD SKDTTSGKSDKTDTKDPDADKDSKSGSDKDSAVSLFSATNAIAI  
GAASTILLYIV

>comp9037\_c0\_seq3; 458 1 1281 LEN=1453; translated  
GTGGGTGGTGVVPPTAPPKAVRYDPAVNTIDVLTIPENCSSFTVETTTGNQ  
CLRVIITVTGTTQASLTVFESKIEEAVEDKTLETQLATFGLTAQTEMV  
PVAVLSTDAPTVAPSTCRSIYDIACSDFLVLC SLINQAGLENVLSDSKSNMT  
LFAPTDAAFNAALKAGLDTSEVLLLSETLLYHTVKDEAIKST DIDCDATTDLT  
MANDEITKV SCKGTKKRIRVEGEGNDP DNLPKVVVADIEACNGFIHSIDQV  
ILLGLETGTENPTSEITYVDLCPQFSDDCQKCLEND DCLYCRDEPGSCFNRY  
PNLRAPDETPDQNKSGGKNSRLLFSDDQRFLQECKGILTSTASVCDAPTEA  
PAGSPDKDGD SKDTTSGKSDKTDTKDPDADKDSKSGSDKDSAVSLFSATNAI  
AIGAASTILLYIV

>comp9038\_c0\_seq1; 365 263 1315 LEN=1798; translated  
MLRVRRERLLPVVSGCLLALSLANPAPVRALLAATLSPPPQSLPVVSLAAAPV  
GASAGGTD AVPGISVSSVKNLRPVVPGSSLYRSATLDDLTQDDAERLLSGS  
AFAGSAVAGEAPKPLAAVIDLRNADEIAKGKSRTEASKRFYDSQGVVFATVP  
VVLGNVDAFWEEAIASMEPGERWMA

TLRTAVVGGALDKAAARHLERGGPLLYSITMKTGGRPLAEALDACLEASASSGGGPVVF  
HCQKGDRTGILSMLLQECLEGGSTDRDMVESYALSGSNIGELPNQTRAGDGGDSSSSSTI  
DWSYFRGSPASAMEDTLAWTRRNYGSVEGYLDSICFGEEKRAQLRKHCLR  
>comp9039\_c0\_seq3; 302 376 1367 LEN=1796; translated  
MARGKQQQQRRRRLSLFASTTGDASASSLAAVTTKVSRRGTRAKLAFLTLRVALPSELLA  
GVFAFFAFPPQLSLWLCSLFADQGVFAVLSQDSSQFVQNFVSVSSLLFSILVQGTYFFLYQ  
QQEMVYFALFDEVTEAKSLLEQVALVSQGRSMYQRLKCMSTYVKSDLKALNQDPAVLLS  
SRPMDPLETIMYLTSVGVPSTVYETVRSRQARAKRLGALQRKLPPIHFAMLWLLAALE  
LVSFPLLGAAGTKLSEXYNILTIEGLLFGVMTTGIVLTLRVVVGELWRPAGGAYQVDSVLNT  
MVKGLEKELDARTKGAIVKAQQENYPSSSK  
>comp9039\_c0\_seq4; 302 376 1367 LEN=1758; translated  
MARGKQQQQRRRRLSLFASTTGDASASSLAAVTTKVSRRGTRAKLAFLTLRVALPSELLA  
GVFAFFAFPPQLSLWLCSLFADQGVFAVLSQDSSQFVQNFVSVSSLLFSILVQGTYFFLYQ  
QQEMVYFALFDEVTEAKSLLEQVALVSQGRSMYQRLKCMSTYVKSDLKALNQDPAVLLS  
SRPMDPLETIMYLTSVGVPSTVYETVRSRQARAKRLGALQRKLPPIHFAMLWLLAALE  
LVSFPLLGAAGTKLSEXYNILTIEGLLFGVMTTGIVLTLRVVVGELWRPAGGAYQVDSVLNT  
MVKGLEKELDARTKGAIVKAQQENYPSSSK  
>comp9040\_c0\_seq1; 871 49 1935 LEN=1995; translated  
MGQRKPRSTPKSRSTAKKVVREEEPEESEDSSVEVTKKTQGKKGNNPVVDAVSSAEEDNDT  
SASSDAETSGDGSSEDEQEPTGKTFSDQNASWLKPKKTLDDSDDDDDDEAGDDFGSDDDD  
ASDDDEMEVERQSRLLDARRLEEKKEEAEYRHTIATNTSVYHLPKDELEKIDRVVPP  
SELKSHIDSILEVLADFKTRREPERSRQEYVDQLGLFIAELYGYLPELIEYFLTMFSPSE  
CLEFVDYSKVRPMVIRTNTLTKTRRKDLALALMKRGVSLDPLASWSKVGLKIMESVPIG  
ATPEYLSGHYMLQSAASMCPLALSPQPKERVLDMSAAPGGKTSYMAQLMRNSGVIFAND  
LRADRQKATVANMHRGIRNVTICMHDGRKLSKLFKQYKFDRIILLDAPCSGLGVISRDPS  
VKVQRTIADVKKTAHLQKELLLAIDVLNHHKSKTGGVMVYSTCSISVAENEEVNYALEK  
RDIRIDTELDFGTAPAFTRYQQKRFHPSVSKTRRFYPHVHMDGFYVAKIQKLSDKKKGE  
EKKKDEVVENEVVAKEEKKDEQKQKAPGKKGKRRKGGKDKDEEVNPARMAKREKISVP  
PKRLNTPKKGKQKNAKMTKPRRPKVE  
>comp9040\_c0\_seq2; 308 1 497 LEN=557; translated  
XLPISENEEVNYALEKRDIRIDTELDFGTAPAFTRYQQKRFHPSVSKTRRFYPHVHMD  
GFYVAKIQKLSDKKKGEEKKDEVVENEVVAKEEKKDEQKQKAPGKKGKRRKGGKDKD  
EEVNPARMAKREKISVPPKRLNTPKKGKQKNAKMTKPRRPKVE  
>comp9041\_c0\_seq1; 492 153 1438 LEN=1714; translated  
MADVVKNIQVPIIDETLSEISRGMVNRNSFVTNSMLVITFQQSKIHNVNFLRXIFSELAIT  
DNKEGTLAKVGKANPWHIQALKLITGSEERAHLPLEDILRDDFGGLILDCELDTSGITKG  
LNFVDTQGYIAHNDELIVVFRCTTSLFDWLTNLNSTTSAWEVEDYELGYSGICSGFSGL  
CFQGPNAKPRVHTGMYNNFLAILPEVKKHVDKYLKDEKPRELYIVGHSLGAGIANLMAT  
YFLLEGYDWNVLPQKLI SVTAGSPRSNGKSMKKVTDEKRLEFGKNVRFHRLVKGDAVSK  
VPPRILGFHEIVDPIVITDDGKILMLKKEDGLKTDLSEAYKVTRQKDAQFSVDKLVKDGE  
DTKKTTEKEGTLQRETSTEKNDEEYAKYQRLVTKIPKGLRDHMPDFYLPKIFNAQGI  
EHASKTKPTK  
>comp9041\_c0\_seq2; 489 153 1463 LEN=1739; translated  
MADVVKNIQVPIIDETLSEISRGMIFSELAITDNKEGTLAKVGKANPWHIQALKLITGSE  
ERAHLPLEDILRDDFGGLILDCELDTSGITKGLNFVDTQGXDRIVLLTGENMGLIEHAKN  
KQQQAHSNFAFGSHLGYIAHNDELIVVFRCTTSLFDWLTNLNSTTSAWEVEDYELGYSG  
ICSGFSGLCFQGPNAKPRVHTGMYNNFLAILPEVKKHVDKYLKDEKPRELYIVGHSLGA  
GIANLMATYFLLEGYDWNVLPQKLI SVTAGSPRSNGKSMKKVTDEKRLEFGKNVRFHRLV  
KGDVAVSKVPPRILGFHEIVDPIVITDDGKILMLKKEDGLKTDLSEAYKVTRQKDAQFSV  
DKLVKDGEDTKKTTEKEGTLQRETSTEKNDEEYAKYQRLVTKIPKGLRDHMPDFYLPKIF  
NAQGI EHASKTKPTK  
>comp9041\_c0\_seq3; 435 568 1546 LEN=1822; translated  
MGLIEHAKNKQQQAHSNFAFGSHLGYIAHNDELIVVFRCTTSLFDWLTNLNSTTSAWEV  
EDYELGYSGICSGFSGLCFQGPNAKPRVHTGMYNNFLAILPEVKKHVDKYLKDEKPREL  
YIVGHSLGAGIANLMATYFLLEGYDWNVLPQKLI SVTAGSPRSNGKSMKKVTDEKRLEFG  
KNVRFHRLVKGDAVSKVPPRILGFHEIVDPIVITDDGKILMLKKEDGLKTDLSEAYKV  
TRQKDAQFSVDKLVKDGEDTKKTTEKEGTLQRETSTEKNDEEYAKYQRLVTKIPKGLRDH  
MPDFYLPKIFNAQGI EHASKTKPTK  
>comp9041\_c0\_seq4; 533 153 1355 LEN=1631; translated  
MADVVKNIQVPIIDETLSEISRGMIFSELAITDNKEGTLAKVGKANPWHIQALKLITGSE



ERAHLPLEDILRDDDFGGLILDCELDTSGITKGLNFVDTQGYIAHNDELIVVSFRCTTSLF  
DWLTNLNSTTSAWEVEDYELGYSGICSGFSGLCFQGPNAKPRVHTGMYNNFLAILPEVKK  
HVDKYLKDEKPRELYIVGHSLGAGIANLMATYFLLLEGYDWNVLPQKLI SVTAGSPRSNG  
KSMKKVTDEKRLEFGKNVRFHRLVKGKDAVSKVPPRILGFEHIVDPIVITDDGKILMLKK  
EDGLKTDLSEAYKVTRQKDAQFSVDKLVKDGEDTKKTTEKEGTLQRETSTEKNDDEEYAK  
YQRLVTKIPKGLRDHMPDFYLPKPIFNAQGIHASKTKPTK  
>comp9042\_c0\_seq1; 940 1 2815 LEN=2909; translated  
XNNKMKFQKNIVNNNCESKRPKPKPKTSTIRDMIIPGNKKKNFNDEKPKPVHQQQRQHPY  
PKQNLPPRNPHRRLLDLQMNSDQDFPALGTSNQSSSTPIPSRSTDVVATRGGWAVPKPPP  
PPTMLQKTGSKFNISNSTTLTAVSTQSLKQKPQKNNTQPQPRIKLCENQLQKGNAGTQ  
KSSKKKALQRDESSLSSSKPNRIPSSSVSFFQPLARASVGGDTACAAGAVGGSSRGM  
DGEEHQLLRLMKERTVYQKKGRQRVAPRKKKFTALKKKVLQERLDQWRALHPEASTGPRQ  
GNHDGGTVRRTTSTIPSKGCKSSLPTCSLCIYNYAVPEELEDDEYEEIMGNLKGMAKIG  
PIDDFVIFRSSVFGDEINQDGAGNDNKQNNKHPSFVKFQKESDAAAALACWSGLVIGNE  
LGVFGVSVPSDDRNVVWSTRALAAETKRRKELDNVESERDSSAIDIILQKILTDDDFEDE  
DCMNESSLDDLNRNIAAQLGAVQNIQASSTKNGDVTLYKCSLVEARKIAENLCRVVVGEP  
LYASVSEELVATSDRAGSPTVVLENILTQDDLDSECLQEESLNDIRELCMRYGDVSDVA  
VKGTGVKVKYNESVHVAKKATSELNGIVLGGIVLKASLQVDKDSGRNDSGLENSINLYNL  
VTEDDLEDEDCEESLSDVRELASRYGEVVGVEVLDKDSNPFVRIIRFGDDISVAADAVKG  
FGNMVIGGQIIDASLSSSDSGTSGSKSVCEQPGDKRKPESATRNPSSDKKARTDDKAPLYS  
GDKLISERFAEMKRVKIPKNGPREYASEIKDERVKPLLSEMLGELMRLQKRAVEDKNAK  
ARRRMVMGLREVARGIRAHKVKMVMANNLDEYGVIDEKLQEIIDLAKSEGVPLFFFEFTK  
RSLGKAIGKSIKIAVVGIIQNADGAHQPFKKNLAIASRI  
>comp9042\_c0\_seq2; 188 72 302 LEN=396; translated  
MVMANNLDEYGVIDEKLQEIIDLAKSEGVPLFFFEFTKRSGLGKAIGKSIKIAVVGIIQNAD  
GAHQPFKKNLAIASRI  
>comp9043\_c0\_seq1; 394 1 1158 LEN=1203; translated  
HPKWQDNGEKFMVRVHSPRSTARCGIVLVSLLASTASSFRSCDRHVQNSRRNCNPKINSE  
WLTSTTPALFKPSPKSTDVVFRLYPTNRPTTLGSRNNDVLLTIDDDTDYLVTDLQVRD  
EDRPSLVEALNNPRDILALLLVVPVAGSVSICNLFGLYTDVYTDLEVLISGLGVVSGLAA  
FLQIATGYNIKNHSRLLVNDNSVNIYAGVYALATSWLALRASNACPEWLASMDTVFPWM  
YFFVFMASAVPAITLNFNGKCLDGTPLSDTELLRARGLLAIGILASVFAPDCLAFLGL  
GSEWDRVSSLHPSQRVLESSTSLFALYANEASMAHRCGKLGVPYRLLVPAFASVCF  
LAILPCIAALYWMGDSVSFFSFYRA  
>comp9044\_c0\_seq1; 193 77 586 LEN=707; translated  
MMIATTHDQNRVFESSMQPMEFQKTSLHQKTVLEEQPLIGLNDENSSNPVLKQVLLDLRD  
AQVRFSAHQKCADAWNALGLIRVHMQRDAEAARKCHEYALTI FRERRLAKETATTLNDL  
GYCFERLNLPNIALQNYQESLRILKSEGLSESHPQLLSTRRAVSRIQRR  
>comp9045\_c0\_seq1; 139 187 720 LEN=1964; translated  
MSEDTSMLAEQQAQAPRASKSSIRKTDDEFKMQPCSWSFHLFFWGFVALLRAAVGYQPHS  
GQDNYHGSLEK GAYGGDFEAQRHWMELTINLPVGDWYWYETGYWGLDYPPLTAYVSWICG  
WASYYIVGPESVALDL SRGI EDLNHKSFM RATVVLVLDLLIYGRAVWYATYEGDRKSLW  
>comp9046\_c0\_seq1; 512 111 1559 LEN=1671; translated  
MNTQNNVGTGDKKPAARPEVIPS GPEFRSVAIQRP TSLAGVRKSAPSDIIDKKS YFQPE  
VSTEKPKDVSFNPQRLWYPTQLRPVPTFYPLERS SRFVEDEVGVVVSRI SEANRLLSIH  
AVYCNETATADLYTAENVEMYL SLWKTSGNQEGIVIEIQRRKGDSIHFHKYSRCILDAAV  
GELNMKELIQKNGDDIDIVYTKIDRLNLETERDAETETDNAVVAVEIAHGLLMKDRMD  
ARQLGLESCLLTDPRKTGNRTALIASHVLLGTAKGMDCN SLEPEEDLIVDETPFQEIR  
ESILSLVQFRRIGEECDYDHEAEACSEDEHITVLHNLALAVLANALDVISKQDSL LDGDS  
SLSSTPEEEVPTNRRRLDTSESISERFLDESLECSGGSEDKEIMKT LISLGKANL KPHN  
ACLSAKCLKSLCRASNKARSRAKELGAKTVVQTALDVGARTH LKLEREC SHVMTELTQT  
NSE  
>comp9046\_c0\_seq2; 406 1109 2140 LEN=2252; translated  
MYLSLWKTSGNQEGIVIEIQRRKGDSIHFHKYSRCILDAAV GELNMKELIQKNGDDIDIV  
YTKKIDRLNLETERDAETETDNAVVAVEIAHGLLMKDRMDARQLGLESCLLTDPRKTG  
NRTALIASHVLLGTAKGMDCN SLEPEEDLIVDETPFQEIRE S ILSLVQFRRIGEECDYD  
HEAEACSEDEHITVLHNLALAVLANALDVISKQDSL LDGDS SLSSTPEEEVPTNRRRLD  
TESISERFLDESLECSGGSEDKEIMKT LISLGKANL KPHNACLSAKCLKSLCRASNKAR  
SRAKELGAKTVVQTALDVGARTH LKLEREC SHVMTELTQTNSE  
>comp9046\_c0\_seq3; 406 992 2023 LEN=2135; translated

MYLSLWKTSGNQEGIVIEIQRRKGDSIHFKYSRCILDAAVGELNMKELIQKNGDDIDIV  
YTKKIDRLNLETERDAETETDNAVVAVEIAHGLLMKDRMDARQLGLESCLLTDPRKTG  
NRTALIASHVLLGTAKGMDCNLEPEEDLIVDETPFQEIRE SILSLVQFRRIGEECDYD  
HEAEACSEDEHITVLHNLALAVLANALDVISKQDSLDDGDSLSSTPEEEVPTNRRRLDT  
SESISERFLDESLECSGGSEDKEIMKTILSELGKANLKPNAACLSAKCLKSLCRASNKAR  
SRAKELGAKTVVQTALDVGARTHKLKLERECSHVMTELQTNSE  
>comp9046\_c0\_seq4; 406 605 1636 LEN=1748; translated  
MYLSLWKTSGNQEGIVIEIQRRKGDSIHFKYSRCILDAAVGELNMKELIQKNGDDIDIV  
YTKKIDRLNLETERDAETETDNAVVAVEIAHGLLMKDRMDARQLGLESCLLTDPRKTG  
NRTALIASHVLLGTAKGMDCNLEPEEDLIVDETPFQEIRE SILSLVQFRRIGEECDYD  
HEAEACSEDEHITVLHNLALAVLANALDVISKQDSLDDGDSLSSTPEEEVPTNRRRLDT  
SESISERFLDESLECSGGSEDKEIMKTILSELGKANLKPNAACLSAKCLKSLCRASNKAR  
SRAKELGAKTVVQTALDVGARTHKLKLERECSHVMTELQTNSE  
>comp9049\_c0\_seq1; 274 193 930 LEN=2000; translated  
MGATNTRGKSTTRSVRPRWSNRHRFGHPSVLA AAVFLAAAALSVPSCHALTGNFFPRAAE  
ASGNTQQGVRIRFCNALTDPSEREALQKCRRTAFDPEKQNMNSERDFVNAQSVLDEKH  
LCVVALDEATNEIVGSADLYPKKGGKPKNTVLNVFVRPDQRGRGIGRRLMVEGIEEVLVP  
LLGGACDAVLSLDVYTQNTPAIELYKKLGYEPASPMHAGTLGLATVTQANLVVTLSTVK  
AGGSS  
>comp9051\_c0\_seq1; 213 1 686 LEN=931; translated  
XRTERCGTGLVVS GENNRMLVLSRISSGVSAIARVAVCFYTGSCLLSNPPAEAQTYD  
ASDNVLRPCPSDKNCVSSNYGEPNRYVSPLSLVKSSDIAFRQAVRDLADQKQQQFFSI  
ANIDPKHRYIHLTTPGTSPGSIDDIELLFSDSSSIVSLRCEAEVTLPPPPFCLQKNCIN  
GNLDQRRRVERVAKVLGLPNTDSTLMKDAKWTPIFFNSDRVPGFDDEV  
>comp9053\_c0\_seq1; 472 1 2415 LEN=2415; minus strand; translated  
GQLLTDVPEGSSSNRGRHTRSSIDAADLRASRNIPPRSISGAXAATDGNNESRGSRK  
KPKLQPRSSNDISERLRERREARERERKEREKKYDLKDLSLSTGSESTQSNRVGNAFEH  
TRVDTTKRPTNHSEMNI AEDCKHDES DTGNSSSVRLCIIISIDL PASVVSNIPLCPVLKM  
GLVELPAGVYKDG GTSVTSTTTKYLF DQGIQAMGSAKIRSTTPKILGKRDSGTIEYHEE  
YRWDNLKQPQTMGLCIELCVQGVRTPLNYMESPPAVFQYDAYASPSGDTLDSAETSLGSS  
PKLHQAPIRRAPP SRTKSF DALRIGIWNRSRTQQDTEMEAAEAAA AVARMLVDESEPE SN  
DMEQGQSSMKISETPNSDYDVTLDCSNGHLNVGPDIGFETGCCGDPFGTASTTSLDSED  
EDGVYDEDEEPLKSSLYQNASFLRRASIKAEMLQWFCFPEGARLWRGTNPPTHSDLNLR  
FSAASPQN LASSIAAFDA CLGCTTSFSWF AIASNSDQY GSSLVKTYGAVIRFYVPAPTGI  
DPTQDDFAQA IMGRKADIPPPGAVKRLWVPIAICFTSNLPIVGIMEALLRLCEEISTIH  
SGLQSGKLVQIQEAVANIVLKYQKPIAGAVNCSVPFLPGDRFLLSLPPREGLPSLPHGRA  
LISVCRL LGADGLNYLLSAVLTECKILLHSE DIAEIAMVAEVITALTYPFAWSLPYIPIL  
PLGMIEFVEAPLAYLLGMPTCNLKMIDPGALEDTVVVDL NKA FSSEYYLEKSKPRTASN  
KHPALLILKKVLLRENS ELLPLRX  
>comp9053\_c0\_seq2; 529 1 2652 LEN=2652; minus strand; translated  
GQLLTDVPEGSSSNRGRHTRSSIDAADLRASRNIPPRSISGAXAATDGNNESRGSRK  
KPKLQPRSSNDISERLRERREARERERKEREKKYDLKDLSLSTGSESTQSNRVGNAFEH  
TRVDTTKRPTNHSEMNI AEDCKHDES DTGNSSSVRLCIIISIDL PASVVSNIPLCPVLKM  
GLVELPAGVYKDG GTSVTSTTTKYLF DQGIQAMGSAKIRSTTPKILGKRDSGTIEYHEE  
YRWDNLKQPQTMGLCIELCVQGVRTPLNYMESPPAVFQYDAYASPSGDTLDSAETSLGSS  
PKLHQAPIRRAPP SRTKSF DALRIGIWNRSRTQQDTEMEAAEAAA AVARMLVDESEPE SN  
DMEQGQSSMKISETPNSDYDVTLDCSNGHLNVGPDIGFETGCCGDPFGTASTTSLDSED  
EDGVYDEDEEPLKSSLYQNASFLRRASIKARCQNGEHK GKKEERKIEDP ILEPGVIDFVA  
VVGCKNIGNQKNDEGMKGWVKATPECVIMEQFPNNEFYMNSGRKAVLPEMLQWFCFPEG  
ARLWRGTNPPTHSDLNLRKRFSAASPQN LASSIAAFDA CLGCTTSFSWF AIASNSDQY GSS  
LVKTYGAVIRFYVPAPTGRIDPTQDDFAQA IMGRKADIPPPGAVKRLWVPIAICFTSNLPI  
VGIMEALLRLCEEISTIH SGLQSGKLVQIQEAVANIVLKYQKPIAGAVNCSVPFLPGDR  
FLLSLPPREGLPSLPHGRALISVCRL LGADGLNYLLSAVLTECKILLHSE DIAEIAMVAE  
VITALTYPFAWSLPYIPILPLGMIEFVEAPLAYLLGMPTCNLKMIDPGALEDTVVVDL NKA  
AFSSEYYLEKSKPRTASNKHPALLILKKVLLRENS ELLPLRX  
>comp9053\_c0\_seq3; 507 1 2527 LEN=2527; minus strand; translated  
GQLLTDVPEGSSSNRGRHTRSSIDAADLRASRNIPPRSISGAXAATDGNNESRGSRK  
KPKLQPRSSNDISERLRERREARERERKEREKKYDLKDLSLSTGSESTQSNRVGNAFEH  
TRVDTTKRPTNHSEMNI AEDCKHDES DTGNSSSVRLCIIISIDL PASVVSNIPLCPVLKM  
GLVELPAGVYKDG GTSVTSTTTKYLF DQGIQAMGSAKIRSTTPKILGKRDSGTIEYHEE

YRWDNLKQPQTMGLCIELCVQGVRTPLNYMESPPAVFQYDAYASPSGDTLDSAETSLGSS  
PKLHQAPIRRAPPSRTKSF DALRIGIWNRSRTQQDTEMEAAEAAA VARMLVDESEPESEN  
DMEQGQSSMKISETPNSDYDVTLDCSNGHLNVGPDIGFETGCCGDPFGTASTTSLDDSED  
EDGVYDEDEEPLKSSLYQNASFLRRASIKAEMLQWFCFPEGARLWRGTNPPTHSDLNLR  
FSAASPQNASSIAAFDAACLCTTSFSWFAIASNSDQYGS SLVKTYGAVIRFYVPAPTGI  
DPTQDDFAQAIMGRKADIPPPGAVKRLWVPIAICFTSNLP I VGIMEALLLRLCEEISTIH  
SGLQSGKLVQIQEAVANIVLKYQKPIAGAVNCSVPFLPGDRFLLSLPPREGLPSLPHGRA  
LISVCRLLGADGLNYLLSAVLTECKILLHSEDAEIAMVAEVITALTYPFAWSLPYIPIL  
PLGMI EFVEAPLAYLLGMPTCNLKMIDPGALEDTVVVDLNKAFSSEEYYLEKSKPRTASN  
KHPALLPASVATKISDAFYKLLREEDEMEERYSGTEFLEHSLPHLEEEESLAEREFRTVA  
IEI

>comp9053\_c0\_seq4; 564 1 2764 LEN=2764; minus strand; translated

GQLLTDVPEGSSSNRGRHTRSSIDAADLRASRNIPPRSISGAXAATDGNNESRGRK  
KPKLQPRSSNDISERLRERREAREREREREREKREKDYDLKDLSTLGSESTQSNRVGNAFEH  
TRVDTTKRPTNHSEMNI AEDCKHDES DTGNSSSVRLCIIISIDLPASVVSNIPLCPVLKM  
GLVELPAGVYKDGGTGSVTSTTTKYLFQDGIQAMGSAKIRSTTPKILGKRDSGTIEYHEE  
YRWDNLKQPQTMGLCIELCVQGVRTPLNYMESPPAVFQYDAYASPSGDTLDSAETSLGSS  
PKLHQAPIRRAPPSRTKSF DALRIGIWNRSRTQQDTEMEAAEAAA VARMLVDESEPESEN  
DMEQGQSSMKISETPNSDYDVTLDCSNGHLNVGPDIGFETGCCGDPFGTASTTSLDDSED  
EDGVYDEDEEPLKSSLYQNASFLRRASIKARCQNGEHK GKKEERKIEDPILEPGVIDFVA  
VVGCKNIGNQKNDEGMKGWVKATPECVIMEQFPNNEFYMNSGRKAVLPEMLQWFCFPEG  
ARLWRGTNPPTHSDLNLRKRFSAASPQNASSIAAFDAACLCTTSFSWFAIASNSDQYGS  
LVKTYGAVIRFYVPAPTGI DPTQDDFAQAIMGRKADIPPPGAVKRLWVPIAICFTSNLP I  
VGIMEALLLRLCEEISTIH SGLQSGKLVQIQEAVANIVLKYQKPIAGAVNCSVPFLPGDR  
FLLSLPPREGLPSLPHGRALISVCRLLGADGLNYLLSAVLTECKILLHSEDAEIAMVAE  
VITALTYPFAWSLPYIPILPLGMI EFVEAPLAYLLGMPTCNLKMIDPGALEDTVVVDLNK  
AFSSEEYYLEKSKPRTASNKHPALLPASVATKISDAFYKLLREEDEMEERYSGTEFLEHS  
LPHLEEEESLAEREFRTVAIEI

>comp9054\_c0\_seq1; 402 59 1207 LEN=1342; translated

MSTEGQPIKCKALVARAPKVP MVEEITVMPPKAGEVRVKVVCNALCHTDIYTLDGHDPE  
GLFPCILGHEAGCVVESVGEVTSVKPGDHVIPCYP TQCCE TTCVFCQSPKTNLCPKIRS  
TQGQGLMPDGT SRFVDSKGEPIFHFMGCSTMSEYTVIAEISCAKISKEADLGKACLF GCG  
VSTGLGAVWNTCKVETNATVAVFGLGAVGLAVIQGAKMAGASRIIAIDINPKDFVIAKKL  
GATDCVDPKTLGDVSVQKHIAGTMTEWGV DYSFDCTGNVDVMRSALCAHRGWGVSCIIG  
VAASGHEISTRPFQLV TGRVWKGTAFFGGFKSRTDVPKLVQRMLIGTLNVDHFITHKFDGV  
GGTNAAVEALHSGECLRAVVNY

>comp9054\_c0\_seq2; 141 59 592 LEN=623; translated

MSTEGQPIKCKALVARAPKVP MVEEITVMPPKAGEVRVKVVCNALCHTDIYTLDGHDPE  
GLFPCILGHEAGCVVESVGEVTSVKPGDHVIPCYP TQCCE TTCVFCQSPKTNLCPKIRS  
TQGQGLMPDGT SRFVDSKGEPIFHFMGYVRV FVRVANFGTDNTRIRLERMLIVFPYF

>comp9054\_c0\_seq3; 319 627 1325 LEN=1460; translated

MSEYTVIAEISCAKISKEADLGKACLF GCGVSTGLGAVWNTCKVETNATVAVFGLGAVGL  
AVIQGAKMAGASRIIAIDINPKDFVIAKKL GATDCVDPKTLGDVSVQKHIAGTMTEWGV D  
YSFDCTGNVDVMRSALCAHRGWGVSCIIGVAASGHEISTRPFQLV TGRVWKGTAFFGGFK  
SRTDVPKLVQRMLIGTLNVDHFITHKFDGVGGTNAAVEALHSGECLRAVVNY

>comp9054\_c0\_seq4; 157 59 256 LEN=741; translated

MSTEGQPIKCKALVARAPKVP MVEEITVMPPKAGEVRVKVVCNALCHTDIYTLDGHDPE  
GELKE

>comp9054\_c0\_seq5; 172 216 440 LEN=583; translated

MKSALDHSNLLPAEYKELRLED SKAAPMSPSSFKESLGPSTLTISLRINLMELEERMQ  
QSKLFTQENAYAPL

>comp9055\_c0\_seq1; 1176 19 3404 LEN=3607; translated

MTQKNLPPQSNARGAKTIDNKSYKKS RGHGSQERLTQKFCNARRDTNEDDDHDNEDEF  
DHQDSVMDAVGPADSSGHLGTVSSLTEKVIDPTGEVTVLSNDSHDQGANRSLLDLAIDQI  
DWLVSNGGEFDRTRIAIQSVDSSEEGEGCLANPNLGIVATDDIRKGDVLRVVPVSLVFS  
ESDTRCDGTMTLLQEGDGGDNQSEYAPYLDYIHGRDSLGP I PSMWSPAGRGLLKT IHGP  
NLAPRDISDVSYL RDCLDDDERTEFAEETIRQKIEFAYATTLRSWDEDLIPLMDMINHS  
SEHNVLKRVVSEETEGDDDDDESEDPGAVEIYATR NIGKGEELFLDYMGRDRD TKHSTP  
ELLRNFGFVEDYPQRWVLPVPQRRSNTDANNVPDEISFDVLEVRDGSRYEVRWIDP SMPL  
IFGFVVEHLQKEQTRIAELEPLVAETTGSLPPGERETVAKYYRSLLVAYEAAVGAIQKAM

DVLPAPPEENPGDQFMACEDFEALYAEEDGWKLTHGSYSSHQVDYYSNEKKKDVCLFLEE  
YLHACISNRPHYHEVVFVHYPAYFLEKVERVLFIGGGDSMVLHEVLKYDELELVVGLLELDQ  
HVVRSSFAHMGTPHFNHNDKVEWWFGDAAVALNALQTEYYGTFDLVVVDILSEVAESLQV  
TDDVTIMEAAMMLMKPNGIIVKNEDEGYVPGSTDTTKFTNHITDVVYYDVPVYCLQTFVM  
GNAVDFSTKQPWDHKLNSFYLGVDVDFQAQFDTWHTSGKATEAEDDEELDGDDPSDESA  
NSPNVIGLVMIIIEAEEISIDLDPSSVQEI IQEQLGAVGFTITITESFDRELLDGFTLVSLLE  
EEGCVTARCFADKFCVIDVQLWKSahrvelvkkkllaalgseehsvyrvitagiygvee  
NDNNPKIGPPEKKSvfgqdsveddatnqreIQTVLEKRKNTTIDFKNATDDYDSTTAL  
EQWESQEPLGLQAINKLELPFEYTREKLMSMVVDLLQRALGELVDEWENDEDEDQIVVDSY  
DVGEGAIVLATWSEGITILCVWDGDSRLDINIFSLAESAPEIFRSVRNNFRMYLQPIEKDQ  
FPRGTGRVINERRTIYGGKHQDGKERPHFPWAPSLDEDEGDDEGDDES

>comp9055\_c0\_seq2; 1077 55 2868 LEN=3071; translated  
MTLLQEGDGGDNQSEYAPYLDYIHGRDSLGPISPMWSPAGRGLLKTIHGPNLAPRDISDV  
SYLRDCLDDDERTEFAEETIRQKIEFAYATTLRSWDEDLIPMDMINHSSEHNVLKRVV  
SEETEGLDDDDDESEDPGAVEIYATRNIKGKEELFLDYMGRDRDTRKHSTPELLRNFGFVE  
DYPQRWVLPVPQRRSNTDANNVPEISFDVLEVRDGSRYEVRWIDPSMPLIFGFVVEHLQ  
KEQTRIAELEPLVAETTGSPLPGERETVAKYRSLLVAYEAAVGAIQKAMDVLPAPPEENP  
GDQFMACEDFEALYAEEDGWKLTHGSYSSHQVDYYSNEKKKDVCLFLEEYLHACISNRP  
HYHEVVFVHYPAYFLEKVERVLFIGGGDSMVLHEVLKYDELELVVGLLELDQHVVVRSSFAH  
GTQPHFNHNDKVEWWFGDAAVALNALQTEYYGTFDLVVVDILSEVAESLQVTDDVTIMEAA  
MMLMKPNGIIVKNEDEGYVPGSTDTTKFTNHITDVVYYDVPVYCLQTFVMGNAVDFSTK  
QPWDHKLNSFYLGVDVDFQAQFDTWHTSGKATEAEDDEELDGDDPSDESANSPNVIGLVM  
IIIEAEEISIDLDPSSVQEI IQEQLGAVGFTITITESFDRELLDGFTLVSLLEEGCVTARCF  
ADEKFCVIDVQLWKSahrvelvkkkllaalgseehsvyrvitagiygveeNDNNPKIGPP  
EKKSvfgqdsveddatnqreIQTVLEKRKNTTIDFKNATDDYDSTTALAEQWESQEPLG  
LQAINKLELPFEYTREKLMSMVVDLLQRALGELVDEWENDEDEDQIVVDSYDVGEGAIVLA  
TWSEGITILCVWDGDSRLDINIFSLAESAPEIFRSVRNNFRMYLQPIEKDQFPRGTGRVIN  
ERRTIYGGKHQDGKERPHFPWAPSLDEDEGDDEGDDES

>comp9056\_c0\_seq1; 329 74 974 LEN=1222; translated  
MKLLHASIGLSLLIGNLPSTEGFSQNSSRRKALAEQTTSGDAFEIKPLSRRGFVVGSTAG  
LALLTGLSAPAAAASGIATASDGNLPDLPSEAVRSYLQYRVGLQVAADYYVFLQDMVGD  
DQWGEVGLFRVNNNKGQGPSKIERDYVNPRIILLLSFPPEVSEDMRDAQFRFEKAANT  
VSKATAGYRRDLPVEVDAKTIASAKAGWEEGRVALNEFFVLLNSAVGLNELTPIPPPGPN  
QNKEYGRSARRYNELQKKIKLCQNRGGPALSQAWGQLMVSGYLQDSCGIPDMDDYFTQK

>comp9056\_c0\_seq2; 156 74 1141 LEN=1389; translated  
MKLLHASIGLSLLIGNLPSTEGFSQNSSRRKALLEQTTSGDAFEIKPLSRRGFVVGSTAG  
LALLTGLSAPAAAASGIATASDGNLPDLPSEAVRSYLQYRVGLQVAADYYVFLQDMVGD  
DQWGEVGLFRVNNNKGQGPSKIGGSVFRKRHERESRRREGEALCAVVVCTAHMYIRFF  
PLEQSTPLVLTFGASYFFVERDYVNPRIILLLSFPPEVSEDMRDAQFRFEKAANTVSKAT  
AGYRRDLPVEVDAKTIASAKAGWEEGRVALNEFFVLLNSAVGLNELTPIPPPGPNQNKEY  
GRSARRYNELQKKIKLCQNRGGPALSQAWGQLMVSGYLQDSCGIPDMDDYFTQK

>comp9057\_c0\_seq2; 479 382 1425 LEN=1598; translated  
MVFVALATTTIGVFSKTKSTANLNSEFGLDLDHPTDSSSQKTIRGSAGVDANNPFFKP  
SFVINDIVCTLYLAESDGLEQVTEETNNVFSQGTQATEDSEEHEHTIVKTNHIEERAWVCG  
DIVSTDSNDENQHQLNSIMFPDLRSADVDIDDFINSQGAIPGESRLLLSAVLTPGAAEL  
FIPKDTTIRVDNLAHSTRKLLPHNGKQIGLMVRVIGSDNKEPNASAKDLFIETFANDEY  
LSMSDQIRACSYDKLDIVPYKNAEEGINGVVDIKIDIP IIEGVTERS SVVTNKASALLRDR  
FDDPLLDKFDMIQFCLPAGTLPSPGGVKEWLGLSLTGNKISFYNDGDGDW

>comp9057\_c0\_seq3; 775 382 2571 LEN=2571; translated  
MVFVALATTTIGVFSKTKSTANLNSEFGLDLDHPTDSSSQKTIRGSAGVDANNPFFKP  
SFVINDIVCTLYLAESDGLEQVTEETNNVFSQGTQATEDSEEHEHTIVKTNHIEERAWVCG  
DIVSTDSNDENQHQLNSIMFPDLRSADVDIDDFINSQGAIPGESRLLLSAVLTPGAAEL  
FIPKDTTIRVDNLAHSTRKLLPHNGKQIGLMVRVIGSDNKEPNASAKDLFIETFANDEY  
LSMSDQIRACSYDKLDIVPYKNAEEGINGVVDIKIDIP IIEGVTERS SVVTNKASALLRDR  
FDDPLLDKFDMIQFCLPAGTLPSPGGVKEWLGLSLTGNKISFYNDGDGDWCRSISLKLHEVG  
HNMNLAHSGEGKILDDRIGAMGLSYTEVGVGFDRICFNHVKGYQLGWYEDQIVDMNPLAE  
ANPVQEFSLVGLHRYTEDKSQVILRLLTPDLPVTGANDYYIGFNEAEGMVSGVKEDFNN  
VIIYQKDIEGPIYGSSTKLTQLGFGQSYIIENYNNEGKEVKISLESIDGVAKIKVSDV  
ERAPPEKGEDESDCPDSKYPVKLELLPDMYPEDI IWSIEDTATGTTVAYGKDYKVKWQAD  
TDVEPDTRLLCLPYGTEMVFIITDLFNDGICCLKSGSYYKAIGPDGETLTFAGGKEAKPPY

TKQYQKEDRRVFTSPPSNAPPTEAPVPVPTTQPDPTANPTATPTATPTATPTVAPVPDPT  
PTPNPPSPTL

>comp9058\_c0\_seq1; 768 173 1966 LEN=2331; translated  
MSSQKTDLYPRRRYSFSSSRKNHGALGAKVTPSLVVAPTAASLPAPPAAPD TDVGYDI  
VEYGASVETKDETLTLHIETQQIETANEETSKCLEKETQTEEQKLDLGHAKTELRLSLN  
QGAMDQLDNAKLFLTLSQLKQEFESTIVKSTMATSVPLSLELQDGRSKASVPPSRPTKP  
QAIDENNNATSTASTLSTKEIFEEKDCRANSILSTFRNEEKELKSIRVETRDRDEKSLRL  
QQSIESHGLEESLKRAREEGKRLESEVVRDDDTAKTRNAEIQQTREACGSKGQECMELTK  
KLAETKKANCDEENTLRRQLQAGMAEVEGLVKEKEEKMLQIEEQKRKNEKISKVIEDYEY  
YEKSKEEYNAKAVRIEKEKELQARYTELKLLKLEQEDLEKASLLRKQTAEVEVKLAETK  
MKETLDKESTVAVPGKTELECLAEKMKLAIQISDTSKILEREQTIERDALAAKADTMSE  
VKKKAELQAEVRVQEEEEINAVIKEQQEFKKPHQDQISHHESI SEKYLAMYETEKKVYDA  
RYEERRKLSGEFLRKLLEDLKSAYESNKFKMEVFEQASRLLEEVGRLELESTGANTN

>comp9059\_c0\_seq1; 644 350 2932 LEN=3067; translated  
MTTRAAGAPEALATVVIPAITMLLPVITYDFPCSYLGNPRPISSSLPSSPMGELLPPGKE  
VQTKASLSDNDGGKRRTRRDVRAQPHNFRVSDSEEKQSGFFSCPYRTIDGIAASKTILESE  
GSVADLRQRILQLWAHNPHNLTTSNQTIIPALAVEVWFSPFRSVGDAAEMEDFLPIVSVV  
APLNDTDSNGRGRNARPSRDPCEGRQLVIGQRGRILELHYRDHYEYLSDDYFDNDDDDDS  
MGYDKQDSPQYACQILRLTQWKLEENKTEQTEYALVTNSISSTTTKELAKLNHLVVAWKE  
SGSILQVFGNGESIASINLLSTGTGGGSERANLNPDLRSLWDQSFRLQVFSDSRRWFETR  
NPGTGETHTKSGDVDEENKTSNTDVRNVFPGTIHNVAIYTQQLDKESVKNLYREGVEMR  
EDPSKAFFEDPENPFEPRLVAVASPIASSTEDPSNSGASVVQGRSALISVGGLDVSNSTTS  
LWDTMVEIVNIPRYGLIGPDNSNVRVGDRIIRLEEGYARTGLIYRHVQKDYFSVPTTSFH  
GTLLPNAKLPRESFSYCLVSVRKGNDHPEFDREQIILGRSKIVRQEVTFHRNHPPTLRG  
VPDEI IQPDRQPTGPGTRPWATLGNHIILSDEADYDIDRVKIDIWTQNGTLTIDLEEQEL  
QTLAKITKCANPSPPRAGGIDWICDGQKDRNMTFLATPSDVSRLSNLIYALYWDQSDS  
IYLRVSDGTGGPCIDDDRRFSLYSLPNITIRDDCFQAISEIHVPAMSIPVGRSSASVWRD  
HSSWWISLLALFLVVLCTCCCAICCFVKFRDRKLNLSVAVAESNSPITLSPASNNDDFA  
SIGISRDDVQVVKFQMESAA

>comp9060\_c0\_seq1; 65 1 266 LEN=266; minus strand; translated  
XGGGGGQDMKEAWFLADYSLKMISCLPNEQSVNYERGEVESSTVIFRLCPKDTCTGSDGS  
DTLGCDSGFGDFAIGINTFVQAYTESVKD

>comp9063\_c0\_seq1; 399 102 1163 LEN=1228; translated  
MSSSELQESFLNYRIAADFLSKRLATAGISLPSVGIICGSGLSELSNALEGDIVSIKYSE  
IPGFPAHCTVAGHKGEIVFGKLSGVPACCFRGRFHSYEGHDMKTVVLPVTVMRCLCVKLV  
IVTNAAGGLNSELAVGDVICVSDHLAIPQLAGNNPLVGPNDHDLGPRFPPTSNAAYNEELR  
KTAKEAAEELGMKFLRTHGTYCFVSGPMYESKAECRFLRTLGGDCVGMSTIPEVVTAHHC  
GIQVLTLSLVTNMVVMGDEGAPVANHAEVLEAVGKRSVQMQLVKKIIEVLNREKLNHQI  
EELPAVNLEQAVNQYRRNKRAVSRIGFENVFIPATLAAIFFSTIALRMARGSA

>comp9063\_c0\_seq2; 231 102 779 LEN=1376; translated  
MSSSELQESFLNYRIAADFLSKRLATAGISLPSVGIICGSGLSELSNALEGDIVSIKYSE  
IPGFPAHCTVAGHKGEIVFGKLSGVPACCFRGRFHSYEGHDMKTVVLPVTVMRCLCVKLV  
IVTNAAGGLNSELAVGDVICVSDHLAIPQLAGNNPLVGPNDHDLGPRFPPTSNAAYNEELR  
KTAKEAAEELGMKFLRTHGTYCFVSGPMYESKAECRFLRTLGGGT

>comp9064\_c0\_seq1; 390 132 2372 LEN=2598; translated  
MSQVICVLALSPFVILIVVGSFKVDPSRWFVLPKGTGNSTSIDVFDDVDVTQGGIISNISW  
GGVFWRPFLNNLFWNLNSFDSGGNMVAELDSTTPFIRPMMVGFLLTVSFYIFPLLIATGA  
SDAEQEDWTDGYLAVINSEVVGWPLGAWTIFAAGISNIALFQAELTSDAYQLMGMDRGY  
LPKIFSKRSRHGTPTYGLILGTAVIVLMGVSDLDRLIEMLNFNYSVALLIEYAAFFKLRIS  
SRPNIERPYRIPLNTLGCVAFFFPPTVSATLLVICLADFTTYFVAVGTWLVGYLLYAVKRQ  
NDQISFSTALEEGNRGDGYAHVAVESVEGDEMGLVDENTTNGEFS

>comp9064\_c0\_seq2; 481 439 2139 LEN=2365; translated  
MHGVRTLGVDSSQRVIEHSQETTSGEFAESSVDVHDLRLSPPTRGNRSDDDLNQIEEEML  
ETHITSHQERLGSASMAILIFYNVSGGPFGIETTVRAGGNLYAILGFSIMPFVWVSLQAL  
MTAELGTTTFPEASGPVAVVEEAFGHGAGWMQGYLSWVSGATDNAIYPVFLFDYLLQIVRH  
ENDDGSDFEFITPAGRFLLASTTIVLAYVNWGRLELVGKMSQVICVLALSPFVILIVV  
SFKVDPSRWFVLPKGTGNSTSIDVFDDVDVTQGGIISNISWGGVFWRPFLNNLFWNLNSF  
SGGNMVAELDSTTPFIRPMMVGFLLTVSFYIFPLLIATGASDAEQEDWTDGYLAVINSEV  
VGPWLGAWTIFAAGISNIALFQAELTSDAYQLMGMDRGYLPKIFSKRSRHGTPTYGLIL  
GTAVIVLMGVSDLDRLIEMLNFNYSVALLIEYAAFFKLRISRPNIERPYPRIPLNTLGCVA

FFFPTVSATLLVICLADFTTYYFAVGTWLVGYLLYAVKRQNDQISFSTALEEGNRGDGYA  
HVAVESVEGDEMDLGVDETTNNGEFS

>comp9065\_c0\_seq1; 405 372 1769 LEN=2472; translated  
MALISAVPTSSSNASSPLKAAAAGTAESVLPKPPASKTTSCASSLPKNPAPISNGTASTK  
MSSRPTQHRRTSMVSESSASTATAGAAAATAAHESAAPGPAAPTNPASAVSPGRSSSQGSGA  
ENISYSAERIIGNGSFGVVFEAKVETNEVVAIKKVLQDKRFKNRELQIMRQLVKDPHTN  
IVALKHCFYSQGEKQDELYLNLVLEYVPEVYSISRRHHKHNIPLPLMFVKLYLYQLSRA  
LAHIHALGICHRDIKPQNLLVNPKNQQLKLCDFGSAKALVRGEPNVSYICSRYYRAPELI  
FGSTDYTTAIDIWSEGCVGAELLLGQPLFPGD SGVDQLVEIIKVLGTPTKEEIRSMNSNY  
IEFKFPQIKGCQWKKIFRNKTPDEAMDFIAKTLAYTPSKRLNPLEGCAHPFFDELRTSGV  
ELPDNGGSLPPLFDWTPHELAAPQEWDKLI PPWTDNSDEKQPAR

>comp9065\_c0\_seq2; 352 372 2105 LEN=3053; translated  
MALISAVPTSSSNASSPLKAAAAGTAESVLPKPPASKTTSCASSLPKNPAPISNGTASTK  
MSSRPTQHRRTSMVSESSASTATAGAAAATAAHESAAPGPAAPTNPASAVSPGRSSSQGSGA  
ENISYSAERIIGNGSFGVVFEAKVETNEVVAIKKVLQDKRFKNRELQIMRQLVKDPHTN  
IVAVEALLL FAGTSMNCMTLTLVTRTPPGTIQSSARPVYSHRCTTCWRRRTSEILSGCTMY  
DFKFVPATNAPIMMSYVEWQFQFAWLI EERRFLWIGPCCNSIVVNPYGCEEYHCRIVVLP  
SVFNTLIQNL SFDFLRNGIKLYQGEKQDELYLNLVLEYVPEVYSISRRHHKHNIPLPLM  
FVKLYLYQLSRALAH IHALGICHRDIKPQNLLVNPKNQQLKLCDFGSAKALVRGEPNVSY  
ICSRYYRAPELIFGSTDYTTAIDIWSEGCVGAELLLGQPLFPGD SGVDQLVEIIKVLGTP  
TKEEIRSMNSNYIEFKFPQIKGCQWKKIFRNKTPDEAMDFIAKTLAYTPSKRLNPLEGCA  
HPFFDELRTSGVELPDNGGSLPPLFDWTPHELAAPQEW

>comp9065\_c0\_seq3; 373 372 2165 LEN=2868; translated  
MALISAVPTSSSNASSPLKAAAAGTAESVLPKPPASKTTSCASSLPKNPAPISNGTASTK  
MSSRPTQHRRTSMVSESSASTATAGAAAATAAHESAAPGPAAPTNPASAVSPGRSSSQGSGA  
ENISYSAERIIGNGSFGVVFEAKVETNEVVAIKKVLQDKRFKNRELQIMRQLVKDPHTN  
IVAVEALLL FAGTSMNCMTLTLVTRTPPGTIQSSARPVYSHRCTTCWRRRTSEILSGCTMY  
DFKFVPATNAPIMMSYVEWQFQFAWLI EERRFLWIGPCCNSIVVNPYGCEEYHCRIVVLP  
SVFNTLIQNL SFDFLRNGIKLYQGEKQDELYLNLVLEYVPEVYSISRRHHKHNIPLPLM  
FVKLYLYQLSRALAH IHALGICHRDIKPQNLLVNPKNQQLKLCDFGSAKALVRGEPNVSY  
ICSRYYRAPELIFGSTDYTTAIDIWSEGCVGAELLLGQPLFPGD SGVDQLVEIIKVLGTP  
TKEEIRSMNSNYIEFKFPQIKGCQWKKIFRNKTPDEAMDFIAKTLAYTPSKRLNPLEGCA  
HPFFDELRTSGVELPDNGGSLPPLFDWTPHELAAPQEWDKLI PPWTDNSDEKQPAR

>comp9065\_c0\_seq4; 384 372 1709 LEN=2657; translated  
MALISAVPTSSSNASSPLKAAAAGTAESVLPKPPASKTTSCASSLPKNPAPISNGTASTK  
MSSRPTQHRRTSMVSESSASTATAGAAAATAAHESAAPGPAAPTNPASAVSPGRSSSQGSGA  
ENISYSAERIIGNGSFGVVFEAKVETNEVVAIKKVLQDKRFKNRELQIMRQLVKDPHTN  
IVALKHCFYSQGEKQDELYLNLVLEYVPEVYSISRRHHKHNIPLPLMFVKLYLYQLSRA  
LAHIHALGICHRDIKPQNLLVNPKNQQLKLCDFGSAKALVRGEPNVSYICSRYYRAPELI  
FGSTDYTTAIDIWSEGCVGAELLLGQPLFPGD SGVDQLVEIIKVLGTPTKEEIRSMNSNY  
IEFKFPQIKGCQWKKIFRNKTPDEAMDFIAKTLAYTPSKRLNPLEGCAHPFFDELRTSGV  
ELPDNGGSLPPLFDWTPHELAAPQEW

>comp9066\_c0\_seq1; 669 106 1650 LEN=2022; translated  
MGFLDNI FKNDEK KKKAGSGSSNNNSNNNPIANIRKNI EKIGQPRFNGAGQSLGGSKPG  
VVIDISLHEPGPLGIRVEKKSNDGSAIVSQVVP GSQAERSGLQRGDVLCFSGSGGQNEI  
PYKMFLDIAQSEQRPIRKYGSFCAWWSNGMELDGTGWAGRVS WLGSAWRDFNAIRSKGA  
MGSLLPPGAGFCNMHDATIIIRHETLKRKESNTRSCAFFFFSNYASLMFLNXMGLDL DARR  
FDESKGTRKDQGSADAEARRRAMIAAVDAREKKYSQTKTIKHVTKSTLLKQQQQQDVN  
NFTEEQLQPQTEASRQAMEAAKQGEAILAAELGYNPYEVIKKTAGQARTATTATQHGAIQ  
APASSGSSNTATLPAVAPPANPTSEAIDSDDERTAGYSVEFEEALAEVVAFGDKEAARNG  
LKIARTLVKNATTKGQQADETKAEKFRKVR LANAKIKAAIVDVPGNLQLLMAVGFQLTED  
SETNESVLFVPPFCSPVWLPQALRSMEKREKAL

>comp9066\_c0\_seq2; 714 106 1356 LEN=1728; translated  
MGFLDNI FKNDEK KKKAGSGSSNNNSNNNPIANIRKNI EKIGQPRFNGAGQSLGGSKPG  
VVIDISLHEPGPLGIRVEKKSNDGSAIVSQVVP GSQAERSGLQRGDVLCFSGSGGQNEI  
PYKMFLDIAQSEQRPIHLDARRFDESKGTRKDQGSADAEARRRAMIAAVDAREKKYSQ  
TKTIKHVTKSTLLKQQQQQDVNFTEEQLQPQTEASRQAMEAAKQGEAILAAELGYNPY  
VIKKTAGQARTATTATQHGAIQAPASSGSSNTATLPAVAPPANPTSEAIDSDDERTAGYS  
VEFEEALAEVVAFGDKEAARNGLKIARTLVKNATTKGQQADETKAEKFRKVR LANAKIK  
AAIVDVPGNLQLLMAVGFQLTEDSETNESVLFVPPFCSPVWLPQALRSMEKREKAL

>comp9066\_c0\_seq3; 838 124 1914 LEN=2286; translated  
MYSLLSFRVTVVLTVTVVAQGIAAQEYDYPAGKTFKTMGCNVCRDTPNPLVAWRNLANRQE  
SFKMEGETWTWTCGYLQDTVQDVNPYNGGGEARWICALAQTFANDYCTCTGPDIGNMNDNVKQ  
INPACDLCQGGQLSYVPSVNSGITANTGVAGNMNCQGLYNAMAQGVLTSNLCPTVIANAG  
PTCCAWEKIDINQVGGFGGSSNNNNNSNNNPIANIRKNIKIEKIGQPRFNGAGQSLGGSKPG  
VVIDISLHEPGPLGIRVEKKSNNNDGSAIVSQVVPGSQAERSGLQRGDVLCFSGSGGQNEI  
PYKMF LDIAQSEQRPIHL DARRFDESKGTRKDQGG SADA EARRRAMIAAVDAREKKYKSQ  
TKTIKHVTKSTLLKQQQQQDVNNFTEEQ LQPQTEASRQAMEAAKQGEAILAAELGYNPYE  
VIKKTAGQARTATTATQHGAIQAPASSGSSNTATLPAVAPPANPTSEAIDSDDERTAGYS  
VEFEEALAEVVAFGDKEAARNGLKIARTLVKNATTKGQQADETKAEKFRKVR LANAKIKA  
AIVDVPGNLQLLMAVGFQLTEDSETNESVLVFPFPCSGPVWLPQALRSMEKREKAL

>comp9066\_c0\_seq4; 793 124 2208 LEN=2580; translated  
MYSLLSFRVTVVLTVTVVAQGIAAQEYDYPAGKTFKTMGCNVCRDTPNPLVAWRNLANRQE  
SFKMEGETWTWTCGYLQDTVQDVNPYNGGGEARWICALAQTFANDYCTCTGPDIGNMNDNVKQ  
INPACDLCQGGQLSYVPSVNSGITANTGVAGNMNCQGLYNAMAQGVLTSNLCPTVIANAG  
PTCCAWEKIDINQVGGFGGSSNNNNNSNNNPIANIRKNIKIEKIGQPRFNGAGQSLGGSKPG  
VVIDISLHEPGPLGIRVEKKSNNNDGSAIVSQVVPGSQAERSGLQRGDVLCFSGSGGQNEI  
PYKMF LDIAQSEQRPIRKYGSFCAWWSNGMELDGTGWAGRVS WLGSARDFNAIRSKGA  
MGS LPPGAGFCNMHDATIIIRHETLKRKESNTRSCAFFFFSNYASLMFLNXMGLDLDARR  
FDESKGTRKDQGG SADA EARRRAMIAAVDAREKKYKSQTKTIKHVTKSTLLKQQQQQDVN  
NFTEEQ LQPQTEASRQAMEAAKQGEAILAAELGYNPYEV I KKTAGQARTATTATQHGAIQ  
APASSGSSNTATLPAVAPPANPTSEAIDSDDERTAGYSVEFEEALAEVVAFGDKEAARNGL  
KIARTLVKNATTKGQQADETKAEKFRKVR LANAKIKAAIVDVPGNLQLLMAVGFQLTED  
SETNESVLVFPFPCSGPVWLPQALRSMEKREKAL

>comp9067\_c0\_seq1; 567 12 1166 LEN=1372; translated  
MTEDEVPTNTTNI VMGNCLGASDEPPAPEPAPRSKSGSGSKPSSGSKSKSKKSSSDGL  
VEGSS TGKHFSEVYKLGKQLGEGAFSVVKEGQNRQSQKSFAIKIVTKAKLSKEDEVALKD  
EIDVLKMEHKHIIRLYDVFEEPHHYLVTEKMGGGELFDRIVQKSYNEKEARDTCLIL  
LSAIIHYCHEKKVAHRDLKPENLLLTSEKDDSSIKIADFGFAKRVKTPKSLTTQCGTPGYV  
AAEILEGQPYDTQADMWSIGVIVYILLGGYPPFIESNQRTLFRKIRKGYEFHEEYWGQV  
SEDAKDLIRSLLTVNPDKRLSATKALS NKWIGADASTLASMDLGTNLEKFKQFNAKRKFK  
AAVSTVMAANKMQSLGINFKQNL D

>comp9067\_c0\_seq2; 239 282 671 LEN=877; translated  
MWSIGVIVYILLGGYPPFIESNQRTLFRKIRKGYEFHEEYWGQVSEDAKDLIRSLLTVN  
PDKRLSATKALS NKWIGADASTLASMDLGTNLEKFKQFNAKRKFKAAVSTVMAANKMQSL  
GINFKQNL D

>comp9068\_c0\_seq1; 526 109 1281 LEN=1299; translated  
MEFLRLRSVILALSVVVASRNRNYCHGFSTRSSSSSTRITRTRRNSHDNNVLI LDHINI  
NHEKGRHDWLKSFYGE EFLGCAWDPRKAKNIETGRKTLWANIGAHQFHLSEGSPDAQVLD  
GLVTVVHPSLET LKERYQAITS DPDAALNDSKFNVEVENDDDGEEALDVTDPWGSVFRI  
VNEQKTIPGERDSRGSQPGDTSEGLAIRDLTVYVPIDANLDGIGRFYRDVLGGELVDES  
RDDENRAVVQIRMGPLQTLTFVPKESIEVNTHVLDREVQDADAKSQGTSTTLGNYGVHIS  
LYVADLPSCYQRASDLGLTYVNTFRSRRAYNLEEAVNDCMFRCLDIVDPENVQDGPILRL  
EHEVRSVLKRDGTYKSCPFEEIPENCVTL

>comp9070\_c0\_seq1; 289 84 1511 LEN=2097; translated  
MTTIGRSLRRCLRRTRTSSFHQTAVAIGPSPTTRIASSTLHSTFP SGIKAIREFGSLTGN  
AAADGTRMFFEWLEKSYGARFEGNPLPMDEPCDGSNTNNNI VVTRDSLELDDLERLFRHE  
ILALRVRGFYPAEAASDLGRELAFEGKTKSAQNWKVSTSRGLESSDVATVGRHPPYNI AV  
SNNSLDQYFREVRNELRDRRGLLLRSNAGAAATASAEGNGASVYANPSDKEHQHTQNRSS  
SQPRLWPLDLLRLELDELWPRGAGLARASDTSSAGDESSSRDANRCMGGGLPRLMVGPT  
RWKRGLVHVDELAPLDDQKGCFSANVYLQLPYGSNSRNGNGRTTTTINTNQDDKKDSDS  
FKKEEQVMEI WPLGIRSKWDWYRNAPTLSHLTSQDPEGQVVLKVLGTEHKQQISVSPG  
DLVLLCQVRPHCAIGFGHEGAGSETSAATGKLQTRVSLQCFLQYNGRDKRLTIDS

>comp9070\_c0\_seq2; 298 84 1256 LEN=2330; translated  
MTTIGRSLRRCLRRTRTSSFHQTAVAIGPSPTTRIASSTLHSTFP SGIKAIREFGSLTGN  
AAADGTRMFFEWLEKSYGARFEGNPLPMDEPCDGSNTNNNI VVTRDSLELDDLERLFRHE  
ILALRVRGFYPAEAASDLGRELAFEGKTKSAQNWKVSTSRGLESSDVATVGRHPPYNI AV  
SNNSLDQYFREVRNELRDRRGLLLRSNAGAAATASAEGNGASVYANPSDKEHQHTQNRSS  
SQPRLWPLDLLRLELDELWPRGAGLARASDTSSAGDESSSRDANRCMGGGLPRLMVGPT  
RWKRGLVHVDELAPLDDQKGCFSANVYLQLPYGSNSRNGNGRTTTTINTNQDDKKDSDS

FKKKEEQPVMEIWPLGIRSKWDWYRVCQLLY

>comp9071\_c0\_seq1; 382 20 637 LEN=871; translated  
MKTFTLLLAGTAAAFAPAAKQGSSTQLAADLDSMAGSIKPIKNFDPLGLADIGSDETLA  
WFRAAELKHGRVAMLAFFSGYVVQSMGFHFPGKLASDVDFSTLSAMKPFDAWDAVPDAGKA  
QILGTIFVAELASESQGTHYMKGGNTPEVVFPPKFDGSGVDADTLKTKQTRELQNGRLAMI  
GIMGFIAANNVPGSVPALAGLEGFN

>comp9072\_c0\_seq1; 512 31 1425 LEN=2286; translated  
MDASSSSSSSFSSFENPCELVRTTCRRWMEEEPPVVEAAGGIGCDETAGWDRTDRHGEGRR  
SVRIRFDRLPALAEEIRTQRRRQETADGATHKDERSDRDRREGEPTAEAEAGESTSGDNDG  
QESWIEWDTEGWHSYSGEGFVGSSEKERRERVALYLLALDAINFCEWPLPEGSGGEEEDRSAR  
SSSHSSRNLLLEYEHLAIALKMAEADHTTPKDPREPRPEYAFSARSLSAATPESMLASL  
RPFLLDPKKYPLPNPEQRAALWREVGEGLKDYGGSALALLDRAGKNAPKLVERIAASFPG  
FRDEAYLPKGGEPNKRNPQRHHQRLVFLKRAQILAGDLNAALKLNLGGIERLTTTFADYR  
VPQILRHRGVLEYAPGLASRVLDGLVELGKGCDEVSIRAATVVAVEELVGLLNQPSKRGD  
GGQPPPAAGGYSDVTVDWYLVQAGEKMHREGAMKPFHKVRTHYY

>comp9074\_c0\_seq1; 470 1 1523 LEN=2294; translated  
XSSDLQYSHDAILDSVCDGNKMDITNEICDLPAAMNAGEGQEHQYCEQQPVRSSSSSRSG  
GPSGVDSVLSDRAIRAIFLLLVGILIPWNAFVSAKPYFTARLCQSGHDVVNFEQWFGLI  
WNLSSVGSGLLIIMGQSVVEYWKRNPHITVDDNQSNSSSSNDSGSTEKKNGSFYNVIVP  
LGLYTVVFFIQALLVTIPDISPTHFLVVTLIGLGLCGTCGAIATAGIVSTAGLFP SHIGI  
NPFSSGQALGGTAVSVANFVAIAMGEDPSDYIDKHCTPAKNHSYVVDFEADDLISSTAIQ  
RRVDEIFHFTEEPQDCSAYHSLDWAVLSYFLVGCIVLFLCLVGYNKIFQHQNMSYRNDYE  
TVRDHLFDPSNRSDSSQPRTEVDDHSPRIGLELNDRVCQRQQMQYNDVELPNSSTRSE  
QLTMISSYHDQLVTNNYDTGNSKAHPMSDPETAQMTGSSSSNDSCLPKMCGASTDDEGGD  
ENQIQTDIFEDEEDVDTGGSGTTSILW

>comp9074\_c0\_seq2; 429 1 1588 LEN=2359; translated  
XSSDLQYSHDAILDSVCDGNKMDITNEICDLPAAMNAGEGQEHQYCEQQPVRSSSSSRSG  
GPSGVDSVLSDRAIRAIFLLLVGILIPWNAFVSAKPYFTARLCQSGHDVVNFEQWFGLI  
WNLSSVGSGLLIIMGQCVAKRGVTVCFQNNVLSLLRKAVVEYWKRNPHITVDDNQSN  
SSSNDSGSTEKKNGSFYNVIVPLGLYTVVFFIQALLVTIPDISPTHFLVVTLIGLGLCGT  
CGAIATAGIVSTAGLFP SHIGINPFSSGQALGGTAVSVANFVAIAMGEDPSDYIDKHCTP  
AKNHSYVVDFEADDLISSTAIQRRVDEIFHFTEEPQDCSAYHSLDWAVLSYFLVGCIVLF  
LCLVGYNKIFQHQNMSYRNDYETVRDHLFDPSNRSDSSQPRTEVDDHSPRIGLELNDRV  
CQRQQMQYNDVELPNSSTRSEQLTMISSYHDQLVTNNYDTGNSKAHPMSDPETAQMTG  
SSSNDSCLPKMCGASTDDEGGDENQIQTDIFEDEEDVDTGGSGTTSILW

>comp9075\_c0\_seq1; 226 312 1094 LEN=3042; translated  
MKLRSSLVLLFGSLQLVGCNSNIYYDEIGSEGVSSQQQEREASLEQMIMEEIAAEELTEEE  
IVRVEAMLAGDNTNYAEVDPAGYEEYDYEYEVVDGEYNEQRQLRPYGYAPRRVRRPGQSS  
NYNQRISAYNPRPLPFSAPPPKKGFPKAKFKKGGPPKKGPPKKGPPKKGPPRPPPPADNFGFQ  
APPGFNQIGIFVGSDDGGNPVIVQARPGNALSSMLGYFRVNINGIPMVLIVEEEEPVGV  
FPGVPTVEPTNRPSATPTKKP

>comp9075\_c0\_seq2; 226 379 1161 LEN=3109; translated  
MKLRSSLVLLFGSLQLVGCNSNIYYDEIGSEGVSSQQQEREASLEQMIMEEIAAEELTEEE  
IVRVEAMLAGDNTNYAEVDPAGYEEYDYEYEVVDGEYNEQRQLRPYGYAPRRVRRPGQSS  
NYNQRISAYNPRPLPFSAPPPKKGFPKAKFKKGGPPKKGPPKKGPPKKGPPRPPPPADNFGFQ  
APPGFNQIGIFVGSDDGGNPVIVQARPGNALSSMLGYFRVNINGIPMVLIVEEEEPVGV  
FPGVPTVEPTNRPSATPTKKP

>comp9076\_c0\_seq1; 951 266 3505 LEN=3757; translated  
MTITPGVHSLMMLRVQLSVLLMMIWKAAAYVSCFAISSQRKDHFRQPLSVQTRGYDNAR  
FQTSNLLSMQSYHSTEQKPHSMLYNNKNGESATVETTGDATNFNLKQLTTDADSLAERS  
SSTKKA FREMKNEKAEGKTPIDRRIFMGSSLVGTSALLASTLGAGNVANAMQLPFGAGSE  
TSSSSLSNNSINGGYFGKLAWESTPVNKRGTITVFDAEKAGYNVRFVTYLSRFLLVFDRD  
CQRWWYNKAAEIPILSTAAEVEAIRLKQFGAFAASVEVGLQDYQSVGEKDTAVDGPRLM  
TSLRLARYCPTIEEIQSERERKGLPPSTEQEEAKDRREIKEAKRQIALLFGLLESTQPV  
EALIKLLSSIDNGSVASVTIQDGGGGYAPGYGPPRVEFFPRPKAGDDYQTATGRAVIQPNGQI  
LRVDLENRFGFYSSPPTVYISAPGEDRGVIVPGTVAATAKASIFKRGVKNKGRMDKILIVN  
PGKGYMEGEKIRVVISPELDAKLGKATATAILEYSVTGIEITSAGNGYVVEKQIPIY  
VEPPPLTARVNMNDPLMARLIDPGKPIPATTIATPKQREKIALNTNSSDPNTFIYRVKQQ  
AFNDGNGGGGGCIGRACYGXVTIKVEDIVTFFNFLQGCYSFIVDTPVIAFATAKAESSSF  
TTFRNENDARKIIEDEEALMKDRAISAASGGQDSQLPIFWNGGPPSSSSGQLLTLLPPGLG



LEFDPELKRFLVSTSSSEYFDINQGSPLFGGSTRPLDPEFGPRGRSPIDREVQLDFPSYLR  
FCLSGAICASGVHLMVTPLDVIKTKIQTDPENYPGPIASFRKIIDEKGATGFFNGWIPTF  
VGGFFWGGFSYSLTEFIRRSLLISSGPQANLEIQIVLVSASVASFFGTFFILVPPFESVRI  
RSVAQPDFGKNIFDVTSRMVKEEGAWSLFSAAPPLLLKEVPFAMAKFSIFTAVTQYLYQE  
FPVAQEDIQLSLLVSLVGGIFGGAMAAIISNPADATISEMKKSVSDMSPLDAAKTVIERG  
GYANLMRGLPIRMCFYPLVVSFQFLIYDAIRIYLGVGADDLKVYLDVLDVGGALQEGGAPA  
>comp9076\_c0\_seq2; 1044 266 3430 LEN=3682; translated  
MTITPGVHSLMMLRVQLSVLLMMIWKAAAYVSCFAISSQRKDHFRQPLSVQTRGYDNAR  
FQTSNLLSMQSYHSTEQKPHSMLYNNKNGESATVETTGDATNFNLKQLTTDADSLLAERS  
SSTKKA FREMKEKAEGKTPIDRRI FMGSSSLVGT SALLASTLGAGNVANAMQLPFGAGSE  
TSSSSLSNNSINGGYFGKLAWESTPVNKRTGITVFD A EKAGYNVRFVTYLSRFLLVFDRD  
CQRWWYNKAAEIPILSTAAEEVEAIRLKQFGAFAASVEVGLQDYQSVGEKDTAVDGPRLM  
TSL LARYCPTIEEIQSERERKGLPPSTEQEEAKDRREIKEAKRQIALLFGLLESTQPVEA  
LIKLLSSIDNGSVASVTIQDGGGGYAPGYGPPRVEFPRPKAGDDYQTATGRAVIQPNGQI  
LRVDLENRFGFYSSPPTVYISAPGEDRGIVIPGTVAATAKASIFKRGV NKGRMDKILIVN  
PGKGYMEGEKIRVVISPELDAKLGGVKATATAILEYSVTGIEITSAGNGYVVEKQIPIY  
VEPPPLTARVNMNDPLMARLIDPGKPIPATTIATPKQREKIALNTNSSDPNTFIYRVKQQ  
AFNDGNGGGGGCIGRACYDTPVIAFATAKAESSSFTTFRNENDARKIIEDEEALMKDRAI  
SAASGGQDSQLPIFWNGGPPSSSSGQLLTLLPPLGLEFDPELKRFLVSTSSSEYFDINQGS  
PLFGGSTRPLDPEFGPRGRSPIDREVQLDFPSYLRFLCLSGAICASGVHLMVTPLDVIKTK  
IQTDPENYPGPIASFRKIIDEKGATGFFNGWIPTFVGGFFWGGFSYSLTEFIRRSLLISS  
GPQANLEIQIVLVSASVASFFGTFFILVPPFESVRI RSVAQPDFGKNIFDVTSRMVKEEGA  
WSLFS AAPPLLLKEVPFAMAKFSIFTAVTQYLYQEFPVAQEDIQLSLLVSLVGGIFGGAM  
AAIISNPADATISEMKKSVSDMSPLDAAKTVI ERGGYANLMRGLPIRMCFYPLVVSFQFL  
IYDAIRIYLGVGADDLKVYLDVLDVGGALQEGGAPA  
>comp9078\_c0\_seq1; 312 163 1395 LEN=1662; translated  
MWASATFFKVVAVLFDGALSSAVTAPVSATPVAVD TDGSGGGNFVVMFGYVKDSLVR  
TVDGTKE MWANHGRCQKQIRVKQKEYREKLQKQWEFEEKGLTPKEMRQLSKVNGGIT YDE  
FVFLVKGKEDRGKLMNMVFLMWGAPRFFPYALMFYPEILPGPFAPLPDASGKESKLQKLS  
RERTHAVIRTM LAIETEARSVPALAKLNI FGKKKQARQMDNMDSLGKTISQIMVTPGGGA  
LAMNTMEDVLYSPGKITRAQERLVKVPKCITNGIMAAIDGPNAFQSFMPQFMKRGQILNH  
IQKLN DIDNFLIDEGVDLDSLSTARLLEACSDRMIGGPGQND EEMREHLKNWLN LGVIQP  
AQRCKETGEFFNYNLAKMALMGFYCVSGARDDRSASYLSRSMYLGQAKLE  
>comp9079\_c0\_seq1; 202 1 206 LEN=446; translated  
XEEDEDEDVDEGDEGVDEEEDINDENEDENEESNSQNDSEGDGNSEENGNSGDEMSVEEN  
ADKDSESD  
>comp9080\_c0\_seq1; 399 1 1785 LEN=1938; translated  
XLVLF LAEGELMPKTS PGPKTSPGSSEQRDTYSARVHQLKTKKRRRLERTSTSAFDDSN TK  
HHSVEQEPLQASLPPPKPPPLPTAAAARIRKPSLPATTMRRIGTAVGRAASPVVEAMDVN  
AILEQVDVNEILQNI DVNALLERIDVNRFLDGV DWRHLDRVDATRHL SRVDYDALVQKS  
NLEEIIARSTSGVMSGFTSMLRTRMAFVDQWQORIFRCYCN CNTKKDRRRRKKLGEDGH  
PKEYLPPRPGRPEDSRDLWKNPSKLD AQSFARTIQFR TSGALNRLAYGIIDSLIMWVTFA  
IGTSIQRLGAAFTDDKDWTKRFPVTQAWWFEYSIYFCANNLYWIFLVGCFGRITGMWTL  
GLLMVSKNGNRV SFCQVVVQAF LTPINLFTFGWAI GFVRRDGAFLSDLIGGVRLVYAWDV  
RHIAADTADIAMSMSDFVDPLTQTEREDLIDDDSSSEDDDGQEDG SYHGRSGAIEISDL  
SRSSYCEGSEHSAYFEAVDVEKXIGTGRDTATTQLEQPPAACREDPPGV RGGXGTVARGE  
EQSGAAACGEDRVVSESELNLER TVFPATMLVEPTDNFAARLQSTYSATQLGT  
>comp9081\_c0\_seq1; 1402 126 3591 LEN=3858; translated  
MRLVLSGAVLALWMAETSNTAEAF TLQRFHSGLSITTMPPSSLHMSTIERPMTAPGSPN  
SSYSGHPFGSYGK PENNDETNYSYGPPGKVDKEIAANN SHIHDNSYARDKTANSFEAYMQ  
GRNNKSNPSSPSDGYAPRQSSNNNF GAPSTSTPTANNNNNNF GAPSTPTSPASNN SFAN  
YAASGSGNSGSHSTLNNNTNNNF GTPPSTPTQGSSANFGAPSS TSNFGAPSTPPPAVPNA  
NSYSPPQSTSNNNNF GAPSTTNNNF GAPSTTNNNF GAPSTTNSSGTSFPPGPNPSSPPPSA  
PQNSNFESYMNNRNSNNDNSNSSPSFPGPSASPSTGGNLSSIAAAADPSAPLPPYMSP  
SLENARSANLPGSANASNGRPDFQPPMPGMGTQPQRSTAS TTTTSTTTSFQQQGNIA  
PPLSAPLARVGT PNQKLDIGLPSEELVGRLDQVLTQQQEF SERLDRVDERIDRTTQENID  
RTQAMLNSFK EENKKTQETF MNRINGDIRGMRSTMDRVLDEQRGLQKQDQTNKFASLE  
QAAPSKQKLLSLEKTT SIRAQNMEENLVQAGEAQAQRIDALERHAASGGNNGPPGSPGVN  
NFELERRQNERMSSFERSQIERMAAFEDEQRQKLESALRDYQQSSGARNNGTSSMDTSSP  
DYMNQNNPQRPMDETERQLQQRLNEA QARKEELLDQLRDMQRQEDLHMKGGRGSHEDPH

SPQGRGDGAPPPPPFASPLDQQMHEYRQQQDRQGSFKSRFNEGSRNEFDGMRQPRFDEVD  
EKQVEVEDEAPRRSMLRDLRGKASEEELYSRNVGAGPRRNLDNENFDDEETDRNMRMDPEE  
ERRMQHERMMRRDPVAPPEAMGPPRRRPGSPAGRYDPRRGGPFGSEQDELAYDISNDSV  
RKGLSNMRSFKGDEQLPNNSIFEGGGGGMGGAVDRRGSPQAQQRERRRVPANQGQMGQQQ  
QQQQRRAGGANERRAGLSEPPPPNPMVDKKEIHFLEKTLKAGPQPHFDKELENLLIVKYS  
PLFSWLKPANVAFLRNVVVTYLQHKGCQVEMDLRSAPPKAAREWDELLNILSFELEQRTG  
EKPRIMEEEDNQGWIYGSKNVRLKISSNGLQQQREQQRRRGGGLSPEQAAQRKRNDKAF  
RVSQDPTDPNTRLL

>comp9082\_c0\_seq1; 162 1 1030 LEN=1779; translated  
XDKKSARFVKLKSHDNSVTKIPIKNLRNIDRVEKCPSHRHSISNAFPKTRNTKMIKGLT  
VKLIISQNTDSDPDQSKDEERIAEKTGGLTKDDENCPPQLYHMEVEPGGKFSRKATWKDL  
ERFCGKEINSETFRDWIVTYQEKCFPNLDLDEPNHIPQKCYIRDENGSTLMKDFGWPVRI  
NLKPGVDVKEKWTKEVCLESFPLDFSTDADKILSLEKCDQEIISSLRKSRLGHPPLAME  
LMETDTEIVTEFKSMNSVTFGVFGNRGSPSERDEESGDEVWVDKTLRSLQLQVVEFPKATG  
NSREAKVSVLAEEESYLKARVYYRGFFNSDVVTDHGGEFRGEPYW

>comp9082\_c0\_seq2; 187 604 1333 LEN=1792; translated  
MLHQDENGSTLMKDFGWPVRIINLKPGEVDVKEKWTKEVCLESFPLDFSTDADKILSLEK  
CDQEIISSLRKSRLGHPPLAMELMETDTEIVTEFKSMNSVTFGVFGNRGSPSERDEESGDE  
VWVDKTLRSLQLQVVEFPKATGNSREAKVSVLAEEESYLKARVYYRGFFNSDVVTDHGGEF  
RGEPEYWKFPKIKYLFQYNDQPNALFVYEDIELRFFSNVRLSMNNKDWEWIKDDEGIWKKQY  
NK

>comp9082\_c0\_seq3; 142 604 1162 LEN=1911; translated  
MLHQDENGSTLMKDFGWPVRIINLKPGEVDVKEKWTKEVCLESFPLDFSTDADKILSLEK  
CDQEIISSLRKSRLGHPPLAMELMETDTEIVTEFKSMNSVTFGVFGNRGSPSERDEESGDE  
VWVDKTLRSLQLQVVEFPKATGNSREAKVSVLAEEESYLKARVYYRGFFNSDVVTDHGGEF  
RGEPEYWKFPKIKYLFQYNDQPNALFVYEDIELRFFSNVRLSMNNKDWEWIKDDEGIWKKQY  
NK

>comp9082\_c0\_seq4; 207 1 1201 LEN=1660; translated  
XDKKSARFVKLKSHDNSVTKIPIKNLRNIDRVEKCPSHRHSISNAFPKTRNTKMIKGLT  
VKLIISQNTDSDPDQSKDEERIAEKTGGLTKDDENCPPQLYHMEVEPGGKFSRKATWKDL  
ERFCGKEINSETFRDWIVTYQEKCFPNLDLDEPNHIPQKCYIRDENGSTLMKDFGWPVRI  
NLKPGVDVKEKWTKEVCLESFPLDFSTDADKILSLEKCDQEIISSLRKSRLGHPPLAME  
LMETDTEIVTEFKSMNSVTFGVFGNRGSPSERDEESGDEVWVDKTLRSLQLQVVEFPKATG  
NSREAKVSVLAEEESYLKARVYYRGFFNSDVVTDHGGEFRGEPYWKFPKIKYLFQYNDQPNAL  
FVYEDIELRFFSNVRLSMNNKDWEWIKDDEGIWKKQY

>comp9083\_c0\_seq1; 263 1 1084 LEN=1156; translated  
XPTGPADPASSSFARARETCRLVAVLSRFQALADSSARDASACTPEAPQTGGAPVVSSAH  
ANVKEFHRAQFVPRHLHRIARESLRALRQQEQAGEESDAGAGAVPSSANASQELLCESLAA  
LRAMAIDNDIVQNMVALGILDVTRDALEVVVEVATAAPVEGAEATRSISKLGATAALGL  
VRNLCANDEVKTTICRSSLHSILRVMQHLYLDEAPGRRTRGHAAALQEHACGILAAAMALRQ  
PQNAHATVEEGGHVLFVFRAMRVFPDTVALQRQGLAVRNIAASRLARADHGEDVAKLLDAG  
AEDVLQTIAGRHPASAEAYALRDLGCNPQMYQMDEHGNTVRSTREVFVAVKSSSFRAVY  
E

>comp9084\_c0\_seq1; 83 67 689 LEN=689; minus strand; translated  
MGGRWHSAMPRSDPAAGEPKPPSGRGPGRIPAVPKLGQDAGDAKEPPHATRLLRHVLLH  
RNGPFLERDAPPRVGLDPGLQVVPVGRGWGGGVRIGPVESHVHAEQEVQLQAVLGGGLAVP  
PPHLGDLHAAAAAARGNPVRFDRHGIPVLSQEEIELAGVKDPRRQRVLLAFSGRGLAR  
KPVRDGPNRSLDAGDGGDRPLGGRRRGX

>comp9084\_c0\_seq2; 145 1 858 LEN=858; translated  
XNNNNNDRGNADSDLLEKARRLREEASLLEDDLASSGGSNRSKSNPTTASPERPVAVP  
TSIEGSVWTVSYRFSCQPPPRESEENDPNRGAAGAKPRIFYSGKLDLLLREDGYSVPIE  
PDGRAGVPAGSSSSSGMEITKVGWWDRETSPEGLLEYLLFSMDVGFDSPPDAPPPST  
RYYLQARIETDAGGGISLKEGTITVKKDVAEKTGGMWGLFRVAGILTXVSVLRGFRGPAR  
GPIGGLGSPAAGSERGIAECQRPPMAQPETWSEARYKLGTTLLSTX

>comp9085\_c0\_seq1; 102 257 1240 LEN=1340; translated  
MGCEAVELDVFKVRRKAGTVESNGEKDDTTLVVFHGGGTDENPGDLLDYCRIDGSILDYN  
YETEIREKLTFFNPDYAEFFCPVEKIRDGEIPTLEDVLLDAKRKNNDPGQTNMHKIELKG  
PDVVEGVLDDLVDLSDVADMCSSYSSFDLQKLERVRKLRPQRCPTGEYLYKTGALFNHIDS  
SGRSLDDDDYYAPPSAFRGSKNMGVAEAGKDWADCDVVERALAVGATEVHLKYDTCTRDV  
ERIHASGLGSMWFRGPIGMGEDTSSKYLDVGNEDLSMYEAVVRTGVQQLCVNKPVDVLE  
LRERLWQSQRTEGARPPEDRIRQLAA

>comp9085\_c0\_seq2; 554 1 1986 LEN=2086; translated  
XEIPARTTSLSDVLQKLQNVGDGDDDDTQSVETYDDTTRELVTFLPQTTALLCYRTLLA  
TVSHQHKPSRRTCPGLSVEEQNFPDPHPPPILOQQSPAGVALPPPALRGSQENKDSXAIQ  
SSYHNKLPGTFASSGNLNCLATIIVGAIMTFSSAHTNVASAFVAPPSAVQPSTRVAVDPS  
FPKIIQQQQKQAGNGVGDALSDTIPPGRSRYDFRDCHSIDITEYTSSSSTSTSTVSDPEE  
QQYSLHRRTVILGGVWLWNTCPFFTASSSVSASTSITSAPEEHQYSLRKRLNVADTPYNP  
TPEELIRNFPKVVGHRGCLYLELENTREGFSRCHDMGCEAVELDVFKVRRKAGTVEESNGE  
KDDTTLVVFHGGGTDENPGDLLDYCRIDGSILDYNYETEIREKLTFFNPDYAEFPCPVEKI  
RDGEIPTLEDVLLDAKRKNNDPGQTNMHIIKIELKGPDVVEGVLDLVDLVDADMCSYSSF  
DLQKLERVRKLRPQRCPOSTGEYLYKTGALFNHIDSSGRSLDDDYAPPFAFRGSKNDGVA  
EAGKDWADCDVVERALAVGATEVHLKYDTCTRDIVERIHASGLGSMWFRGPIGMGEDTS  
SKYLDVGNEDLSMYEAVVRTGVQQLCVKNKPDVLIELRERLWGQSQRTEGARPPEDRIRQL  
AA

>comp9086\_c0\_seq1; 239 1 1015 LEN=1758; translated  
XDKQNIIMMSFSSGKNDHGSRRNNHKVTADS YGNIDARDSGKECWMIRIPPKLAAAWE DCPE  
GAVLGELVFRKGGGRGSNLKRIKPALEVNVDPNVVNIITEGNSGDPTNQQEQHKQQLPLHY  
SLQAMTKKVATLHPFTRHPNGSVKVVHGKVTRTANMQVIQDAKYRALCKTRILATTVHNSR  
YVKPVDKNQIVQQSKSKSANANKNHMVTSSNSTAKQGFDAVHSYGKRLMESQQQAAAA  
YKLALSTGAGRNGNKKVRRFGPDES VKSIIIFQLYEDKPYWTFKDLKAASGRNEAEIKKI  
LGEIAFYHRSGEQKNTWELNKEYQSGNPSGTVEGDRTV

>comp9087\_c0\_seq1; 881 98 2152 LEN=2421; translated  
MSDSAPPEDTATPAGTNEVTKEGRFALKLDKPEERGEWSSRLAFYMATIGAAVGF GNVWR  
FPGLAVKYGGGAFFIPYVMALFLLGIPLAILEIGFGQYFQTGDIGVFGTFHPRLRGVGLA  
SVGCGFMLDTYYVVLIAWVANAFSSWDE DAPWGNPGLSGKEATDYFFQEIIIGMSTVTDS  
GHPTRLVGRNVGF AFLSWFIIFLCVAVGWKWTGRIAYITMGLPVILLFVFLGKALTLEGA  
SDGVKEYIGIWDVSVLTSQGEVWSVAC SQIFFSIGLTFGILTAFGSHCPRSEPAANATV  
VSLANSLFSFISGF AVFAALGHLAFLENKQPTDLEYS GFGLVFGTWPVVFN TLPGGIHWV  
RLIFFNLFLLGIDSAFAFMEAFITV LQDTIFFEKVPRFWIAAGVSIIGFLFSLMYCTDAG  
LSFLDVIDFYINFVMILVGF FEAFGSAWAYDFPGQLERQTPAVVYSFWTANFGAVVLGCI  
LWFSLDPAVAVWAGFVGF GWFYTFVGVTHFYITKVLANDTEGKWTMKS LWWDVYFGN I L  
SLRDRMQEVI GWVPFLWCVLMKHFIPHLLIILFINLATSETNEGEALLGNYGGYANLPYQ  
VLGILVVAFTLVLFAGGLVFPNLYAPLALPQNAEAKMELEKYS GPATDEGISEKDKEEGV  
VVEEQHPENTKEQESDAQSVEKEA

>comp9087\_c0\_seq2; 713 98 2310 LEN=2579; translated  
MSDSAPPEDTATPAGTNEVTKEGRFALKLDKPEERGEWSSRLAFYMATIGAAVGF GNVWR  
FPGLAVKYGGGAFFIPYVMALFLLGIPLAILEIGFGQYFQTGDIGVFGTFHPRLRGVGLA  
SVGCGFMLDTYYVVLIAWVANAFSSWDE DAPWGNPGLSGKEATDYFFQEIIIGMSTVTDS  
GHPTRLVGRNVGF AFLSWFIIFLCVAVGWKWTGRIAYITMGLPVILLFVFLGKALTLEGA  
SDGVKEYIGIWDVSVLTSQGEVWSVAC SQIFFSIGLTFGILTAFGSHCPRSEPAANATV  
VSLANSLFSFISGF AVFAALGHLAFLENKQPTDLEYS GFGLVFGTWPVVFN TLPGGIHWV  
RLIFFNLFLLGIDSAFAFMEAFITV LQDTSTVMRITRETIAIIVIMKLDMCLGTFLRCLY  
LTVDIFLFQHYVSDTMTATANIFFEKVPRFWIAAGVSIIGFLFSLMYCTDAGLSFLDVID  
FYINFVMILVGF FEAFGSAWAYDFPGQLERQTPAVVYSFWTANFGAVVLGCI LWFSLDPA  
VAVWAGFVGF GWFYTFVGVTHFYITKVLANDTEGKWTMKS LWWDVYFGN I LSLRDRMQE  
VIGWVPFLWCVLMKHFIPHLLIILFINLATSETNEGEALLGNYGGYANLPYQVLGILVVA  
FTLVLFAGGLVFPNLYAPLALPQNAEAKMELEKYS GPATDEGISEKDKEEGVVVEEQHPE  
NTKEQESDAQSVEKEA

>comp9087\_c0\_seq3; 829 98 2259 LEN=2528; translated  
MSDSAPPEDTATPAGTNEVTKEGRFALKLDKPEERGEWSSRLAFYMATIGAAVGF GNVWR  
FPGLAVKYGGGAFFIPYVMALFLLGIPLAILEIGFGQYFQTGDIGVFGTFHPRLRGVGR  
RVVQKQLSRDLFPMSVSHSSCSFIHSFVECTIRLASVCGFMLDTYYVVLIAWVANAF  
SSWDE DAPWGNPGLSGKEATDYFFQEIIIGMSTVTDSGHPTRLVGRNVGF AFLSWFIIFLC  
VAWGVKWTGRIAYITMGLPVILLFVFLGKALTLEGASDGVKEYIGIWDVSVLTSQGEVWS  
VAC SQIFFSIGLTFGILTAFGSHCPRSEPAANATVVSLANSLFSFISGF AVFAALGHLA  
FLENKQPTDLEYS GFGLVFGTWPVVFN TLPGGIHWVRLIFFNLFLLGIDSAFAFMEAFIT  
VLQDTIFFEKVPRFWIAAGVSIIGFLFSLMYCTDAGLSFLDVIDFYINFVMILVGF FEAF  
GSAWAYDFPGQLERQTPAVVYSFWTANFGAVVLGCI LWFSLDPAVAVWAGFVGF GWFYTF  
FVGVTHFYITKVLANDTEGKWTMKS LWWDVYFGN I LSLRDRMQEVI GWVPFLWCVLMKHF  
IPHLLIILFINLATSETNEGEALLGNYGGYANLPYQVLGILVVAFTLVLFAGGLVFPNLY  
APLALPQNAEAKMELEKYS GPATDEGISEKDKEEGVVVEEQHPENTKEQESDAQSVEKEA

>comp9087\_c0\_seq4; 661 98 2417 LEN=2686; translated  
MSDSAPPEDTATPAGTNEVTKEGRFALKLKDPEERGEWSSRLAFYMATIGAAVGFVGNVWR  
FPGLAVKYGGGAFFIPYVMALFLLGIPLAILEIGFGQYFQTGDIGVFGTFHPRLRGVGR  
RVVQKQLSRDLFPMSVSHHSSCSFIHSFVECTIRLASVGC GFMLDYYVVLIAWVANAF  
SSWDEDAPWGNPGLSGKEATDYFFQEIIGMSTVTD SGHPTRLVGRNVGFAFLSWFIIFLC  
VAWGVKWTGRIAYITMGLPVILLFVFLGKALTLEGASDVKEYIGIWDVSVLTSQGEVWS  
VACSQIFFSIGLTFGILTAFGSHCPRSEPAANATVVSLANSLFSFISGFVFAALGHLA  
FLENKQPTDLEYSGFGLVFGTWPVVFNTLPGGIHWVRLIFFNFLLLGIDSAFAFMEAFIT  
VLQDTSTVMRITRETIAIVIMKLDMCLGTFLRCLYLTVDIFLFQHYVSDTMTATANIFF  
EKVPRFWIAAGVSIIGFLFSLMYCTDAGLSFLDVIDFYINFVMILVGFEEAFGSWAYDF  
PGQLERQTPAVVYSFWTANFGAVVLGCILWFLSLDPAVAVWAGFVGFVGFVGFVGFVGFV  
ITKVLANDTEGKWTMKSLLWVDVYFGNILSLRDRMQEVIWVFPFLWCVLMKHFIPHLLIIL  
FINLATSETNEGEALLGNYGGYANLPYQVLGILVVAFTLVLFAGGLVFPNLYAPLALPQN  
AEAKMELEKYS GPATDEGISEKDKEEGVVVEEQHPENTKEQESDAQSVEKEA

>comp9087\_c0\_seq5; 881 98 2152 LEN=2433; translated  
MSDSAPPEDTATPAGTNEVTKEGRFALKLKDPEERGEWSSRLAFYMATIGAAVGFVGNVWR  
FPGLAVKYGGGAFFIPYVMALFLLGIPLAILEIGFGQYFQTGDIGVFGTFHPRLRGVGLA  
SVGCGFMLDYYVVLIAWVANAFSSWDEDAPWGNPGLSGKEATDYFFQEIIGMSTVTD  
SHPTRLVGRNVGFAFLSWFIIFLCVAWGVKWTGRIAYITMGLPVILLFVFLGKALTLEGA  
SDGVKEYIGIWDVSVLTSQGEVWSVACSQIFFSIGLTFGILTAFGSHCPRSEPAANATV  
VSLANSLFSFISGFVFAALGHLAFLENKQPTDLEYSGFGLVFGTWPVVFNTLPGGIHW  
RLIFFNFLLLGIDSAFAFMEAFITVLQDTIFFEKVPRFWIAAGVSIIGFLFSLMYCTDAG  
LSFLDVIDFYINFVMILVGFEEAFGSWAYDFPGQLERQTPAVVYSFWTANFGAVVLGC  
LWFLSLDPAVAVWAGFVGFVGFVGFVGFVGFVGFVGFVGFVGFVGFVGFVGFVGFVGFV  
ITKVLANDTEGKWTMKSLLWVDVYFGNILSLRDRMQEVIWVFPFLWCVLMKHFIPHLLIIL  
FINLATSETNEGEALLGNYGGYANLPYQVLGILVVAFTLVLFAGGLVFPNLYAPLALPQN  
AEAKMELEKYS GPATDEGISEKDKEEGVVVEEQHPENTKEQESDAQSVEKEA

>comp9087\_c0\_seq6; 829 98 2259 LEN=2540; translated  
MSDSAPPEDTATPAGTNEVTKEGRFALKLKDPEERGEWSSRLAFYMATIGAAVGFVGNVWR  
FPGLAVKYGGGAFFIPYVMALFLLGIPLAILEIGFGQYFQTGDIGVFGTFHPRLRGVGR  
RVVQKQLSRDLFPMSVSHHSSCSFIHSFVECTIRLASVGC GFMLDYYVVLIAWVANAF  
SSWDEDAPWGNPGLSGKEATDYFFQEIIGMSTVTD SGHPTRLVGRNVGFAFLSWFIIFLC  
VAWGVKWTGRIAYITMGLPVILLFVFLGKALTLEGASDVKEYIGIWDVSVLTSQGEVWS  
VACSQIFFSIGLTFGILTAFGSHCPRSEPAANATVVSLANSLFSFISGFVFAALGHLA  
FLENKQPTDLEYSGFGLVFGTWPVVFNTLPGGIHWVRLIFFNFLLLGIDSAFAFMEAFIT  
VLQDTIFFEKVPRFWIAAGVSIIGFLFSLMYCTDAGLSFLDVIDFYINFVMILVGFEEAF  
GSWAYDFPGQLERQTPAVVYSFWTANFGAVVLGCILWFLSLDPAVAVWAGFVGFVGFVGFV  
FVGVTHFYITKVLANDTEGKWTMKSLLWVDVYFGNILSLRDRMQEVIWVFPFLWCVLMKHF  
IPHLLIILFINLATSETNEGEALLGNYGGYANLPYQVLGILVVAFTLVLFAGGLVFPNLY  
APLALPQNAEAKMELEKYS GPATDEGISEKDKEEGVVVEEQHPENTKEQESDAQSVEKEA

>comp9087\_c0\_seq7; 661 98 2417 LEN=2698; translated  
MSDSAPPEDTATPAGTNEVTKEGRFALKLKDPEERGEWSSRLAFYMATIGAAVGFVGNVWR  
FPGLAVKYGGGAFFIPYVMALFLLGIPLAILEIGFGQYFQTGDIGVFGTFHPRLRGVGR  
RVVQKQLSRDLFPMSVSHHSSCSFIHSFVECTIRLASVGC GFMLDYYVVLIAWVANAF  
SSWDEDAPWGNPGLSGKEATDYFFQEIIGMSTVTD SGHPTRLVGRNVGFAFLSWFIIFLC  
VAWGVKWTGRIAYITMGLPVILLFVFLGKALTLEGASDVKEYIGIWDVSVLTSQGEVWS  
VACSQIFFSIGLTFGILTAFGSHCPRSEPAANATVVSLANSLFSFISGFVFAALGHLA  
FLENKQPTDLEYSGFGLVFGTWPVVFNTLPGGIHWVRLIFFNFLLLGIDSAFAFMEAFIT  
VLQDTSTVMRITRETIAIVIMKLDMCLGTFLRCLYLTVDIFLFQHYVSDTMTATANIFF  
EKVPRFWIAAGVSIIGFLFSLMYCTDAGLSFLDVIDFYINFVMILVGFEEAFGSWAYDF  
PGQLERQTPAVVYSFWTANFGAVVLGCILWFLSLDPAVAVWAGFVGFVGFVGFVGFVGFV  
ITKVLANDTEGKWTMKSLLWVDVYFGNILSLRDRMQEVIWVFPFLWCVLMKHFIPHLLIIL  
FINLATSETNEGEALLGNYGGYANLPYQVLGILVVAFTLVLFAGGLVFPNLYAPLALPQN  
AEAKMELEKYS GPATDEGISEKDKEEGVVVEEQHPENTKEQESDAQSVEKEA

>comp9087\_c0\_seq8; 713 98 2310 LEN=2591; translated  
MSDSAPPEDTATPAGTNEVTKEGRFALKLKDPEERGEWSSRLAFYMATIGAAVGFVGNVWR  
FPGLAVKYGGGAFFIPYVMALFLLGIPLAILEIGFGQYFQTGDIGVFGTFHPRLRGVGLA  
SVGCGFMLDYYVVLIAWVANAFSSWDEDAPWGNPGLSGKEATDYFFQEIIGMSTVTD  
SHPTRLVGRNVGFAFLSWFIIFLCVAWGVKWTGRIAYITMGLPVILLFVFLGKALTLEGA  
SDGVKEYIGIWDVSVLTSQGEVWSVACSQIFFSIGLTFGILTAFGSHCPRSEPAANATV

VSLANSLFSFISGFAVFAALGHLAFLFNKQPTDLEYSGLVFGTWPVVFNTLPGGIHWV  
RLIFFNLFLLGIDSAFAFMEAFITVLQDTSTVMRITRETI AIVIMKLDMCLGTFLRCLY  
LTVDIFLQHYVSDTMTATANIFFEKVPRFWIAAGVSIIGFLFSLMYCTDAGLSFLDVID  
FYINFVMILVGFEEAFGSAWAYDFPGQLERQTPAVVYSFWTANFGAVVLGCILWFSLDP  
VAVWAGFVGFVGFYFTFVGVTHFYITKVLANDTEGKWTMKSLLWVDVYFGNLSLRDRMQE  
VIGWVPFLWCVLMKHFIPHLLIILFINLATSETNEGEALLGNYGGYANLPYQVLGILVVA  
FTLVLFAGGLVFPNLYAPLALPQNAEAKMELEKYSGPATDEGISEKDKEEGVVVEEQHPE  
NTKEQESDAQSVEKEA

>comp9088\_c0\_seq1; 399 1 984 LEN=1195; translated  
VQKPNAMKYLLVAVVTLALVATEILGLTTQSSKNVPILONEIDSQAAGSSRRAFFRESLS  
SAAVPLLI SGLTGASTLAGSPLVVSADDTVDPSPKRTKVLVLGGSGFVGSRVVEKLSQG  
VEVISTSTNGRGGTIAFDATKDGINVVSEIEALSKGCTAVISICISIGTKNDNIVNSATG  
LAAQGAKSAGVERFVYIAVAPEVKEFAEGIDFLKEYMKGKTF SQNAVESNFPKGSVHLIE  
PTFIYGGDSFSVNPPRVAGFYGEFIESLLSSGPIRGITGVSSGFLKIALEPPISVDAVSA  
AAVNAATGKLSSEVLDTYDKIKDASQV

>comp9089\_c0\_seq1; 267 472 1446 LEN=2351; translated  
MAFSRAQYRAASCRSSTTFGSLRSFKTCPPPRFDGFSERLVGGWTTTPYANDDSLVEVEE  
VMRSCGGAVQGIRESISGSDNDNESVSNNSIYLNRRANDGFCFFGDGSGYSMGPLALESG  
SNSGGDSMGEGFLSCLWLPVTENDNHKRRIVIEASHSASLPKAAVRTRGSVGDGESLPLE  
LYRAEGVPKVEQVSKLIRCRMPSESQPWMIQRAKWEELSSGSDNDPEEAVILEKDNDTENS  
DENKNRKNDFRYWVATESEAEFCDRIRIELGDDHDGHCFFVHFGAVCPNTNNLWMVARRY  
RSGSDGGASSLRSILYVEGTATPE

>comp9090\_c0\_seq1; 400 102 1016 LEN=1293; translated  
MSSSSIKTLIVALSSSLACRKAHVADAFGVKEPVSVLLKQYEADISSFKKETKSIVGDDK  
FGQVPYSNDVLYRYCLEDKGIEDLKKTLAWRQEGEKAMCDAATTAYQAATAGGGWDDNDP  
IRAAAPEAGIINDYITQTTTSSSKGDILYICIRAGKIDDNALMERIAVDDLVTFFLYS  
KEI IALAANDRSVKNDKLAYVLTVDLNSGKIGGIDATFR TALGDSSKQANELYPSLGGP  
TLLLNLPKLV SALVKLFTPLFPEKVKREKIKFEQGPLKKVEALS NVAPGGKDRETFLADID  
NIVY

>comp9091\_c0\_seq1; 274 1 1179 LEN=1217; translated  
NEVSQGDGTGQTL SIKRVVDL FVSSTIASIDETDTLTVANMQKIDKVAIELISLFDKLV  
PRTFGKEDSLQLDEGKQWSDILDCRYLKFLLI IAPTILQEANLP IQEYQQTII IVRDLIK  
FLSENHQDLFSPSIKLPVEEYHCEQSFPSKLLSQMKEDSGVNLGSPKSGSKCHESGDGFV  
IRPKDRANLTDYVAIVMSQTVIGIATPDDENRAGQPYIVCRHCLGVAGGRYFYGSYESLS  
TAASSVEKHVMKCAKVDDEIKQEVVKARTYHSHKQRKNLTSGAQSAFYARLYNRMQSMRRP  
YHESELSPGYNTSISSTQEKISATSNSAVDEKEDTYREFD SHLDVMDYIQNAEPWKSQK  
PLADLISKYYNCLYEGGKNFDTERSPFVFSSEW

>comp9092\_c0\_seq1; 965 1 1898 LEN=1992; translated  
XSSTANGQARPGATKNASNKRRGRESSGLFSLGIIDKGGPDNDGFGDGANQLMASTSSSR  
RSSIQNYTTARFAVDVLF AKTTQNGQPQIRHALFFRKALAKWQRNNDQLRYQLAVATGED  
TSTNTYLFQREQPALEYLDNVIQKQLLPVLQKEAVDGTVHALERRDAFDPVLDNRNVYARA  
DSNEPQDVMCKACTALFNFTGPLFLALHRLPKGGMYLPLVAVLEHVILTFISRVKQQV  
SRICNDKTALQLLMDSTGSSVSATGSDGRQIKRSQSFGQVMERRKSFAQLVLAYADGDL  
LDAVNDENTGELAGVPSLPAPTGDTPRGTNLSNKIVGMEDLDFEGGVEREELNLSVELNF  
VRPYLEFAGMEHAQIKVCPDEDLMKAACLAHSLLKLASLLDSRLKVR SRLGIAS TKTLTN  
TRALREAIKTIKANGKMAKFCRADILLQGITRLCKVCNSSTIVARDAVRIPSSINDLGE  
YMTAASDNLREAAGNAVTAAYAFSTLEQYIPLCIIQTVRVLAAGKGVVAKAPLTMNGIEAM  
DRSGSVLYRDLKAGATSFDNSFWDIE LAAVSFERSASF IAMMELEMAELEAYYQENRDDFT  
EEDFKLMFSMNGPRRRGDIIRYNMLVKKMGRK

>comp9093\_c0\_seq1; 271 70 864 LEN=1626; translated  
MVSPSRTLTIVITGASRGLGAGMARTYLERGHKVAGCSRSPPPADLDSSAPDNSKEGQLY  
YQSGVDVCDPQAVQDFLDNTAKKLGTD SIDLWINNAGILEPIKPLRDTNITDFRKNIEVN  
LMGVFHGT KAYINHCRSRARVGAAPSTLVNISSGA AVKGYAGWSAYCSSKGAVDRLTECV  
LAEELADADNSKLC LRAYSIAPGVIDTDMQAMIRGMDKADFP MVDFHEIKANDSFNTPP  
YVAIEIERLALLEGPQALPVVQRI

>comp9095\_c0\_seq1; 432 140 3780 LEN=4032; translated  
MSFDKLESSVYECGISHRINARSVSWNSSGTTLAMAGSDRVTRLYSTSDLISSVQASGS  
GGGNQNSSGSGSNPVRELGTITGHSGVVDRLRFHSTQDSLLATVSVADSTVRLWDLRSST  
SARAVGTIDLVGKAGNNGSTTDISWSPSTKANLLAVTEKNGNAHVVDTRKLGAGGSTKT  
PSTPGKRTAGSAFVKTFCLRPKIVDA CLFSPSGDHLVAATS ENGYGELTVWNWEKNGSDA

ENSHPNKSSSSNQNYVPAHTGPVYSVCFSPDGRRLATGGGDALVGLWDVRSVMCERV  
RCGRFVRSVAVSFDSSVVAIGTEEPWIDLADSSTGDALGKVRFGGGDASGGANRRRAPDA  
EAGADEIAFXPEGPPAGLRPVRFGGLLPADPREDDAGAPIGGGVDPGKCGAXQRTNATHF  
RAAFSTTLREQSSLVRKLNQTYRLVDSLIPCHVALFFQFNNFIAVALSVLQPFVLQAE  
SQDEKQVETVNIIVSFPDVPSSSTSYGTILRAKCGFELNHSKRDSTIPNPKNKEPQLKKIPYI  
KILIRSVQWNSTVSVPRYRQQTRSSKDATAATAQNGRRSQPCPARTYLNTMETHRSPVVK  
TVAVYQHDGSIVQLRIGFSEGVGLQGLRSIESLESLLVAKGCDVREELQAYVIWTRIAV  
YLFHLHRSSTLIITTGFFKNNFHDRLVSENLESIGHRSNEFHAATCMPWIDSAILDRSFS  
HIYPRALQIVDNNAILKEQIFVHKYWNGMEEILKLSILCLETRTGECDLVSSSXVASNSH  
GVHTILHHSVASAGGLVMRSTGIVSTTQKILLWKHVAEDEDLKSCYYELLKIFRSCDVW  
RNVHLSTGFEDAEISHEEEHVREPNEAIGMYNPDGIGMIRHNPEIMVRIYGYLSLGDRIY  
KLSLVDRAFSRDEIRSGIASATYKGFNLHQALLELRLWALEERQSDNIGEELELASPSG  
TGIAYQGPTLKRKRDDDFHTEIRISKISRMLEAAKVTDKEPLLYVRSNLKNTLVTPGKREQ  
WMAQHIQEFRLNENCKLRGHCHQRIQSQSWMDIVRVETFLRRYFFDGRVNRLEQLMQDV  
GFQNDYERYKRSQFLSSNKIFDHEKLIWCLPDLSPGCILLPLGLEDDQAGDAAGNVGCWR  
EHRFMSGCLCEKLGHEHDKSIVVRCRHGHQRSFCKNCYHSLLDPCPGDSNDDTTSGIPVLDP  
VHMFSPKRGAGA

>comp9095\_c0\_seq2; 540 140 3694 LEN=3946; translated  
MSFDKLESSVVEYECGISHRINARSVSWNSSGTTLAMAGSDRVTRLYSTSDLISSVQASGS  
GGGNQNSSGSGSNPVRELGTITGHSGVVDRLRFHSTQDSLLATVSVADSTVRLWDLRSST  
SARAVGTIDLVGKAGNNGSTTDISWSPSTKANLLAVTEKNGNAHVVDTRKLGAGGSTKT  
PSTPGKRTAGSAFVKTFCLRPKIVDACLFSPSGDHLVAATSENGYGELTVWNWEKNGSDA  
ENSHPNKSSSSNQNYVPAHTGPVYSVCFSPDGRRLATGGGDALVGLWDVRSVMCERV  
RCGRFVRSVAVSFDSSVVAIGTEEPWIDLADSSTGDALGKVRFGGGDASGGANRRRAPDA  
EAGADEIAFXPEGPPAGLRPVRFGGLLPADPREDDAGAPIGGGVDPGKCGAXQRTNATHF  
RAAFSTTLREQSSLVRKLNQTYRLVDSLIPCHVALFFQFNNFIAVALSVLQPFVLQAE  
SQDEKQVETVNIIVSFPDVPSSSTSYGTILRAKCGFELNHSKRDSTIPNPKNKEPQLKKIPYI  
KILIRSVQWNSTVSVPRYRQQTRSSKDATAATAQNGRRSQPCPARTYLNTMETHRSPVVK  
TVAVYQHDGSIVQLRIGFSEGVGLQGLRSIESLESLLVAKGCDVREELQAYVIWTRIAV  
YLFHLHRSSTLIITTGFFKNNFHDRLVSENLESIGHRSNEFHAATCMPWIDSAILDRSFS  
HIYPRALQIVDNNAILKEQIFVHKYWNGMEEILKLSIPLLRNENWRTRDAIHRHCSTTQK  
KILLWKHVAEDEDLKSCYYELLKIFRSCDVWRNVHLSTGFEDAEISHEEEHVREPNEAIG  
MYNPDGIGMIRHNPEIMVRIYGYLSLGDRIYKLSLVDRAFSRDEIRSGIASATYKGFNL  
HQALLELRLWALEERQSDNIGEELELASPSGTGIAYQGPTLKRKRDDDFHTEIRISKISRM  
LEAAKVTDKEPLLYVRSNLKNTLVTPGKREQWMAQHIQEFRLNENCKLRGHCHQRIQSQ  
WMDIVRVETFLRRYFFDGRVNRLEQLMQDVGFQNDYERYKRSQFLSSNKIFDHEKLIW  
LPDLSPGCILLPLGLEDDQAGDAAGNVGCWREHRFMSGCLCEKLGHEHDKSIVVRCRHGHQ  
RSFCKNCYHSLLDPCPGDSNDDTTSGIPVLDPVHMFSPKRGAGA

>comp9096\_c0\_seq1; 388 1 1645 LEN=1645; translated  
HRRTLVRITSHDGLQPMVSSMDIRRAVFGQEEASEINLGSPDHDADEQGTPLVSTRIQ  
FERCSYRQMTLEPFDTGLDFRYGIRPMEIANGVVDLALTEEQSLELADTDPDTGYSTI  
KPNIMRYSREVAACKLGNLRQQFDHVLVYCLPETVTGFLATAIINRYNSWYTGDLCTSLP  
VTMHEIGHNLGLEHAGFKEIYDDTTGYMGYSSFEDTVKCFNPANSYKLGWYDKQTVSVD  
IRLSGDYHRFLLRGIVDYEPGEPPEPEKAGTSSNTDYGIGEAPVTIPGSGDRDGREDS  
VVLRLQTKGAQGDYVGYNRRVGMNEGTEGWPDVAVLVVQKLGSAAMGAAQTKLKAALRSPG  
DAYAIQGHNGKAGRPLYIRWESLSADGRDAVVVLSTTETRAPSVAPTALPGPGGDESFR  
YKWDPSLDCGWVARNPDKRCSYRWKGAWSGHWCPAACSGVATGPGSSGHCRKGGDDPSF  
SFNGFGKAVVKDCEWVRAPKPKRCSKQYTKNKNKIQTAFKIVLTRAUFANSRRREDATP  
RHATPQDK

>comp9097\_c0\_seq1; 265 1968 2693 LEN=2939; minus strand; translated  
MDNPGNGENGGGPQRDNRSYNSKSERGRGGEGPMPTRYSGGNNGPFNGSGRGSGRDQR  
DSHYGGGVSRDDGGRRSSSSYQGGGRGRGRARRDTPYRGDPGSSFRGARGDRRPSY  
YGDRDDRGGGRGGQVIMGLDIQALVDRLVRPGCDIYRELGITRESNMAVFQSGKAVTAI  
ISNLARRRNLRIANCVWDWIDHIGIEKNTFHYNAMISACEKVRDYNKALSSFLFYRFFLN  
Y

>comp9097\_c0\_seq2; 265 1659 2384 LEN=2630; minus strand; translated  
MDNPGNGENGGGPQRDNRSYNSKSERGRGGEGPMPTRYSGGNNGPFNGSGRGSGRDQR  
DSHYGGGVSRDDGGRRSSSSYQGGGRGRGRARRDTPYRGDPGSSFRGARGDRRPSY  
YGDRDDRGGGRGGQVIMGLDIQALVDRLVRPGCDIYRELGITRESNMAVFQSGKAVTAI  
ISNLARRRNLRIANCVWDWIDHIGIEKNTFHYNAMISACEKVRDYNKALSSFLFYRFFLN

Y

>comp9097\_c0\_seq3; 265 2112 2837 LEN=3083; minus strand; translated  
MDNPGNGENGGGPPQRDNRSYNSKSERGRGGEGPMPTRYSGGNNGPFNGSGRGSGRDQR  
DSHYGGGVSRDDGGRRSSSSYQGGGRGRGRARRRDTFYRGDPGSSFRGARGDRRPSY  
YGDRDDRGGGRGGQVIMGLDIQALVDRLVRPGCDIYRELGITRESNMAVFQSGKAVTAI  
ISNLARRRNLRIANCVWDWIDHIGIEKNTFHYNAMISACEKVRDYNKALSSFLFYRFFLN  
Y

>comp9098\_c0\_seq1; 196 224 1081 LEN=2845; translated  
MDRFRRLVTFKFTAFALILTKAITTATKVVSSDRQPQSPSIKLLTENNGNIDNDDDDGH  
TSYGSSYISHEGNSTLSATFSIRVTPEHYCIIISWTFLLWTGFAAAVLFGMHQIRLERKWK  
LVTSSRNFSHTNGSLSQGSSSAALRSQSYRRLRKYSVVNQGNPGGERSPQDPELGLGSG  
GGGMRTTSRGGRIVRTSRSGNNINIGSGYSSRMTLSSSTASLNSSNPDSLGLDEQPVSSG  
DLARATVRHIPLRFFGSKELLLFGSAWFLSFGSIQFVRSFVSCV

>comp9098\_c0\_seq2; 204 224 1981 LEN=2562; translated  
MDRFRRLVTFKFTAFALILTKAITTATKVVSSDRQPQSPSIKLLTENNGNIDNDDDDGH  
TSYGSSYISHEGNSTLSATFSIRVTPEHYCIIISWTFLLWTGFAAAVLFGMHQIRLERKWK  
LVTSSRNFSHTNGSLSQGSSSAALRSQSYRRLRKYSVVNQGNPGGERSPQDPELGLGSG  
GGGMRTTSRGGRIVRTSRSGNNINIGSGYSSRMTLSSSTASLNSSNPDSLGLDEQPVSSG  
DLARATFRRLILVAMASRTVAIPIQVYSDPLWVQLIADTFPVMYATAWTWLVSFVQLV  
TVALGSTNSIGVGNASTADISASANTTRSPQSPYRPAAPIDTVIQITAYVVYALLIIAFT  
IFRRIAAVLLYALLCCVYATLLGTALYFCPRLALLLLSGLDGKWHSPVLRLVACSGVS  
LLVFAARTFCFAKKVVQSTKPLGRMSGGPYWWFQYGALELLPGVFLVLLHPKRTAAPNS  
ANTSSGNGSTKSSSSGSSSGRINQYPTVSGFGGERGDPHPSGRRTPPFYSSYQRSDSND  
SKPGTPSPSPTPPVMSQTNVTISINTIGNIKSNPKQETAPLLNYE

>comp9100\_c0\_seq1; 471 287 1316 LEN=1316; translated  
MSNDQAQRIFDSVVATTKPDRGHELRSSLKIDKLAHTSSGRSDESSFRSEAFSNQANIT  
IGPVGMMHLHHQLQLQANANTGNSMNSDSTRCDVNGPVMNAVFAVSDSSTLHQNDPASLL  
AMNNNTNGTILNAQALQQALHQSKKISANTKPAAITSAHVGTSAHNHANSNDYTPWLQH  
MILNQINPLPKNAGNIKSNTSVGTGDSGYHDVGNHQGRSHNDNEQQRSENSLSHSTNTF  
QNQQQHGPSTMQGWPTTVAATSNIPTAIYAQQQLQHRFLPSQSQPQQQQQLQVIQGGQEQQQQ  
LLAANGFVSPQMLPATVHNQEQEQQQQQQLQSQQQQKEQQQQQX

>comp9101\_c0\_seq1; 1630 173 4690 LEN=4729; translated  
MTDKNREELSSFRPGDVVETIYGVGVIVSRPPESIDASDENGVSFLFYRVLLWRAAGRSI  
GSSSTASLRPEALLRKMPAAPGMITTKRESLEVTRAENDEKEQPQKYMVQAYYSDRQVYR  
IVPIGSEKSEKPEDESTSNKGDVDPALNRRLSRLSIVMSASQLDENLAIPEEVSIDELAE  
SAPCAKFYPLLQLIERGNKAASATKNFISDYNRDEVKELKEQVTGVAKQATPYLKEQT  
QKIGLHLDKVKSTATTAVADPETQAQVKVDVSDSSDKIALKVKQTAETEEVQQLMEMLK  
TEDLTVLLEKGERLEQLLNDIPRNTQIALEKAGVRIVLDLDDDERETSMYKKTVVK  
RKAALAMQTVLDQANVNPDDVQAIQKSLSDNFGSMLDSWTEAAKSDRTLSGLLDTVNDQ  
TAAWQEATGRLLNTRSAGIFLDGASRIQARAKNLFKQDQWAGEVGSKFTKAFTEGDA  
VARLKSIELGDSVRDLVSAIEVRSESLGGLDGIAGALTAVNQVVEGIADKVAGGVQKH  
AGPGEDGDHMQMLTNLQSRASSLTADSNETLISVLARQNQYRDVALLKVEQVMCDLDSH  
FGEDLSAEDIAASIAQGEAGTAKLFDPIAKRAAKEIEKQLDSAESSVSDPTILEVLQHV  
IVSGELTVSAVLDEVVNVLDNDKVVAVGENLVKHGKVLDAIEGVNGNKVVDDAMRIA  
AGITKDTVMEGIEAIDVNELLDNAGNAITDEKARQKLLSDATDALTDFILKVLPSMPVPP  
VEGVKDGLVYKISNLSMEGFKVRKENIIVEIAGMRATKRVKKSPIQEVSEDDAPVWLQ  
VAADEASSWAGLRSQSSSDSMDFETTIDENVVNNATELLIIDVSDISALMNDVNWSFEQT  
YMPYLKSGKFDVNMSGGAIRLVFELRKRPKKDKSGEGEWEVPLCLHDRLCSIGSVDFN  
MHGGSKMAVINKVASVFNLLRDYVVRILQIMTEKSGWILSKLNQGLSPFWDVLLRTA  
KLELGDLEVATKESIVEASPEPDSSTLVELVWREHLPLGMNLLLNDESGQLKIVDFPRGSQ  
ARTVCEARKLDPEGFKGATIVAVNGIRYQTEDELFDALRDPSPKTIQFELAESEDAERI  
RKFVEESEARQNPDKSNAQKPTVSADDRDISTREVDFTDDMDLGLFANAPDNVGLVVRK  
FLESEDGLVLAERKKDKIHVGDLLTHVNGKLVIGENGAGRRLALKLIESEGKERPLRLT  
FADPYLHPIVYEQSESLPFVGGPEELVLKEDRENKRIVLDGFKEVDGVSEKGGVLLGDH  
LVFVNGVTVGAGCRWMGERSPTLVEVDRMLRDKSNYPIGLTFARPQRQNEAQARDWTST  
LLGTPTKKEIQMENSDTICVSADSYEQGLDLELKYSDIIVKDLKGIVGPLQLSTQRLR  
DPQNDTYSHLSVDYINGEFVPSFATPHLVKSAMERSWKTEKQVEVIFCDNDMCKFVNLK  
DQDAN

>comp9103\_c0\_seq2; 211 302 1108 LEN=1253; translated  
MFLVLRVRTVFFLDPRVVMGGLNATHRWWIVDTILVSTKQNKTKQAKKQNDKKLQQLKYQ

ASEQAIPESDKHXAXLQAKPNLFQAKPMFRPVLPILTRTAARSGAAAPRAFSTVGTAF  
GDAAEELSGYNKIDFCIDEDASVLEAVKIFVAHNIGCLVTTNKTGDLTGIISERDYISKVD  
LLEARNPEETSVEKIFTPSSKLVTAGRDESVQGCMEKMLGADIRHLPLVDHGELLMISIK  
DLVKTCKIKEQDQTIQVLSDFALGNMKRY

>comp9104\_c0\_seq1; 621 128 1339 LEN=1365; translated  
MPSEKEKFPPEQDPYDLGVSFDASNAEISKAYRKLALKLHPDKQPQGNPALAEVAKKFH  
DIKEARTFLLDEDFQAARRKYDAKRESDRLRKQTEALREKNMSERRKRLREELREKEAAA  
ARRSRGKKEEQRRKKDEDIVNQLRKEGKRKRQEYAERDVQRKEDEEMKVMRENARAKKQ  
QQRDLLEDQRVRLKWRKMRPSPSEDSLATLLSDQFGLVEGIELLGRKGNQALATFADR  
ASCKPCVEFYATSPVMRAKYVGRRRDEEEDRAERERLAEQQREGGDLKGPRESLEDRR  
VRQAAERERLLRQLEDENENDSAAKPGARASDGDRRDGKTTRGREHTPTKASLFLPLPN  
TDGYDGLSPFEVLEKFEQSVLGSIFGGDNDGTEAMDAEGATQ

>comp9106\_c0\_seq1; 107 1 419 LEN=990; translated  
XFSPVQCGAPKKGHVCPYQPKLTRKVGEPLPEMRSAAIQVEMDEFMTLRLNLRIQGFPE  
SYASEPFGEDMVVGEHPQPSAMNAISPLPQHMSQPQQHGGVGLNVVDRNGISQPLPPS  
SGIDPVTGARAEDPIVGTV

>comp9106\_c0\_seq2; 38 1 559 LEN=1130; translated  
CGAPKKGHVCPYQPKLTRKVGEPLPEMRSAAIQVEMDEVSNATQRNXNVVPALCRPYVVE  
TTGAKHDFFRMQPNRLSNVFFLFWANALRTKFMTLRLNLRIQGFPEFYASEPFGEDMVV  
GEPHQPSAMNAISPLPQHMSQPQQHGGVGLNVVDRNGISQPLPPSSGIDPVTGARAED  
PIVGTV

>comp9106\_c0\_seq3; 133 1 838 LEN=1409; translated  
XHPGPHQGPPRSYGNTYPYPPGGPPQMHHGPPQSYGGAPPPSSRSGPSYGAASRAPPAQ  
PRQRPAQEVLLGGGPGGGPGGYGLQASSATAATTGTDAPDFDNLFSRQGGVGTQAGTTPD  
DDGNCVATEGNNSKDKGRGSYKCGRCGAPKKGHVCPYQPKLTRKVGEPLPEMRSAAIQV  
EMDEFMTLRLNLRIQGFPEFYASEPFGEDMVVGEHPQPSAMNAISPLPQHMSQPQQH  
GGVGLNVVDRNGISQPLPPSSGIDPVTGARAEDPIVGTV

>comp9108\_c0\_seq1; 473 1 1570 LEN=1626; translated  
XPSASNMALGKPSPLSPRRAATCKDSKNSIAKTATTGDNNVVLHRGQQRKKARTRR  
KRKLTCLQLGLGMGLVAYVTLTYQVFLVDRRDQNEPHWKMNRRVVRQHRNHRFGRFGMDA  
SAGANENGNADADAHEPAANHTTTDDVPRLYAAPPTLRLPTPIINVGFPKAGTSSIFSF  
HCNGLKAQHHLCCDPQNHPSRTVNRKLMSCMLENLITHRPILEDGCDYDVYTEINGPRN  
FPDYSQRTLLEDGRLLSLKESRSVKLRIFFPQHHLLEIHDQYPNATLILNQRSSAEAWI  
DSVTAWDIGLQYELNEFYGQNSTRFVFGADPGTGRGRRVGATRPLSPFAANNVRDHLGR  
VHDHHLQYVRDWWKDRPSHALVEVDIEDDGAGTRLAEAFGLRDDCWGHYNKNENTGGGG  
SRRRNQQQRNAGKGTQOKMAVSGQPPKAFEPPLATHLAGSGEPLDGTDPDTIQNLKQEKL  
ARILQKMQLEQIEVNITQRLLEARAAEVAARAKEHPERDSEPT

>comp9109\_c0\_seq1; 837 75 1715 LEN=1794; translated  
MAMMGPRPGPGQVMVLNAKTQRQTGREAOGLGNIRAAKSVANIIRTTLGPQSMLKMLLDPM  
GGIVMTNDGNCILREVDVSHPTAKSMIELSRAQDEEVDGTTSVIVLSAQVLAEEPFM  
SRYHPTVICQAYTKALSYALEVCDDLATTIDVQKDKEWISKLVLSSIGTKFSSRWNDQLV  
DMAIQAVTTVVQETPGGKPTVDLKR YAKVEKIPGGQLEDACVLKGIMIQKDTTHSKMRRK  
IENPRILLDSPLEYKKGESQTNVEITDDQDWNAMLRLEEEYVENMCKEIIAAKPDVCT  
EKGVSDLAQHYLQKAGITAFRRRLRKT DNNRVARATGATIVSRTDEIQESDIGTKCLFEM  
RKVGDDWFCYFDECKDPKSC TIVLRGGSKDVLNEIERNLQDAMQVVRNVVYDPKLLPGG  
ATEMALAVAIRQKGQSLGGIGTQQAPFLAVGEALEVIPRTLAQNCVSVIRTVTALRQKH  
ASALESGDKKCAVGVNGITGELADMHELGIWEPYSVKVQTIKSSIENACMILRIDDIVSG  
SKKKGY

>comp9110\_c0\_seq1; 1014 188 3406 LEN=3434; translated  
MIRCAAKRARLGRRLIENAPSGFFGRIEGLCELSEQSHTSAVPENLIHGHRYYSLSSGIY  
DSSKPSHRDGLPSESLTTNGDDDSKEKEPISLFFFEKRKAALKKKLEQQERGSRGDSGN  
PENRNNRPRNRNQNQRKSSNRQHTTSFQQGRGQRQRHEQGSRRGNSTRNHENYGNMRRN  
NNNFNHGDSNQNTRRRQGLSDVLQVMSRNRNRNPNDTRQEHSRRPRQDPHQNNNIRG  
RRSANNDEQGIARFSRRDPTDKGSSYNQSNKPEGTLRLAEMMKLRKDAPSRVQQGRSD  
QSSSGQFSRQNNRDGRASWRQKRFSIPLSGEDGKQRRGNDQRQRGPRPPQAEFFLQGR  
SRTDDSDADELVDATTPERVVTLVSNLTLSDVSSLFRVKVDDIREKLRAMGVRGSDSL  
DIDVLELLAMDFGIETVRSTNEHVVDSEQLLMQORRSDADKDKTTDDSATETYPPRPI  
VTIMGHVDHGKTTLM DALRRRSQEQQGKGGKNTTKSKKKKSKKSKNASRGVTKDIAGTE  
AGGITQIISAFQVALEGGDDKITFLDTPGHAAFRAMRQSGSHAADVIVLVVAADDGISEQ  
TIEIIEFYKSIVKGSSENVISMVAVNKIDKPGIDPTEAQMRIENQLLEHGIVSEGMSSE



GSEYGPVQVIPTSGLSGEGLLDMEGLLLQSEIMDLRADDKARGEIIMDARQEKGLGV  
VADCIVRWGTIEKGNVIVSGDQVSQVRMLKDVNNRMLKNGLPSQPVRIGFKSLPKAGDP  
VMVVESEEIAEEMLEQRRALDLSTNDRPDGARSDVELHITGMRRGDTWRVKKFTNKAAIE  
ESDGSVRIPIIIKADADGSLAAVRESLLNIGNDSKHNVIIDPIMEGIGEVTPSDIQMAKE  
SEATIFSFGSMRVDQITVNLAESENVSICTNNIIYSLLEAKDVLGSYLPLIPQKHTHGR  
AKVKAIIFSIDTEDGEERIAGLNVLDGNMYRAKGPAGGSDTIDLPSHFRVYRNGELISPDD  
ESVTASSLRKFKETVESVKLGEECGLGLSGFSDFEEGDEIECYSVEMKKAKL  
>comp9111\_c0\_seq1; 370 96 935 LEN=1092; translated  
MTASYANATSKTAGKMTNCHSLQGKLRMLMSETRHCSKRNKTTTTSKAVVFTANSSPKTNGG  
DVRKRSYASARDGMGLVGIRNASKRRSDRLKIVSVTAVVDKSKAHGHGEGNIGKASADA  
SAAGATTKTTPTPKNEGEGSSSSAAPPQAAPLSRGESKKEPPSSDAAKNGGGGGPGR  
SNTPGDPENPRDARGSNPAHTTTTTTTTTTMLLHPLDVKEYEEAEERQKEALRRIEGAR  
QQVYKDQVHVWGLYTYGLKHVGLIKDLSDAPDAIMKTM  
>comp9112\_c0\_seq1; 171 1 403 LEN=456; translated  
XKHIKIKMKLAIFATLLASASAFAPVSVSRASTALNLEYGEYDGLWDNDAKKVIYEKF  
DPNAPRSVKNFNPFFETFEENSPDASGYYPGETGYKDPARGDVSYAKMLIEREEIEERLAN  
PKPGYNPGCPGCKN  
>comp9113\_c0\_seq1; 273 323 1114 LEN=1262; translated  
MKKGVGDSSESTSNQSQRKIKYFKVYRWDPEQENQKPYLSTYPVDLNDGPMVLDALLKIK  
NEQDPSLTFRRSCREGICGSCAMNIQGSNTLAFLAYIDDDTKTATKIYPLPHMYVLKDLV  
PDMGNFYEQYRSIEPWLQTDANTPRAEPGKDGNTKLEGEFLQSKQDRAKLDGMYECILCA  
CCSTSCPSYWWNADKYLGPVLMQAYRWIEDSRDGQTKKRLDELDDAFKLYRCHTIMNCT  
KVCPKHLNPGKAIQAQIKKRMAS I  
>comp9113\_c0\_seq2; 273 463 1254 LEN=1402; translated  
MKKGVGDSSESTSNQSQRKIKYFKVYRWDPEQENQKPYLSTYPVDLNDGPMVLDALLKIK  
NEQDPSLTFRRSCREGICGSCAMNIQGSNTLAFLAYIDDDTKTATKIYPLPHMYVLKDLV  
PDMGNFYEQYRSIEPWLQTDANTPRAEPGKDGNTKLEGEFLQSKQDRAKLDGMYECILCA  
CCSTSCPSYWWNADKYLGPVLMQAYRWIEDSRDGQTKKRLDELDDAFKLYRCHTIMNCT  
KVCPKHLNPGKAIQAQIKKRMAS I  
>comp9113\_c0\_seq3; 273 307 1098 LEN=1246; translated  
MKKGVGDSSESTSNQSQRKIKYFKVYRWDPEQENQKPYLSTYPVDLNDGPMVLDALLKIK  
NEQDPSLTFRRSCREGICGSCAMNIQGSNTLAFLAYIDDDTKTATKIYPLPHMYVLKDLV  
PDMGNFYEQYRSIEPWLQTDANTPRAEPGKDGNTKLEGEFLQSKQDRAKLDGMYECILCA  
CCSTSCPSYWWNADKYLGPVLMQAYRWIEDSRDGQTKKRLDELDDAFKLYRCHTIMNCT  
KVCPKHLNPGKAIQAQIKKRMAS I  
>comp9114\_c0\_seq1; 489 96 1527 LEN=1931; translated  
MSHLSFRGDVNLFFFEKGCPSIHKDSSGERSKEPNKDDTIVGKKRESSTSDSIFQQRKK  
QSAKTAGGKFNDLRTLKESDLPVVRKYPFLRSDENAEDKSVKNGEILHVAAIDRNLRGE  
DKGGITSNDRVPTNADAVDQEDKESEEDKQTIKESSEEDSLNKDWNDFVNNMGTSKQNL  
EDYLKTKETRRRATTAYANDIDKFMVELRKLNTILSEIVAPVCNKYSERIEENIEEDIK  
TMVSNNYRRNKLELMNATDIEWRKTHHTLLEDVLDGDEVVKKGYNIGHTFESCIVGIYG  
IINCFSRFAYSKLYQKENCNDVANDQKVLGEDRPGTTQTKTRGGKSPDDKYSHKNEKET  
VVVGQDPDWETLIEHEPSRQRILSFLDQREQVNCTRDNFGEIMDEVHVVIEAEVRSILDT  
VGNLFHQSMACRESEGEIENLIMENYGRQRLREELEKNEREAKERFAALRSRLG  
>comp9114\_c0\_seq2; 532 96 1412 LEN=1816; translated  
MSHLSFRGDVNLFFFEKGCPSIHKDSSGERSKEPNKDDTIVGKKRESSTSDSIFQQRKK  
QSAKTAGGKFNDLRTLKESDLPVVRKYPFLRSDENAEDKSVKNGEILHVAAIDRNLRGE  
DKGGITSNDRVPTNADAVDQEDKESEEDKQTIKESSEEDSLNKDWNDFVNNMGTSKQNL  
EDYLKTKETRRRATTAYANDIDKFMVELRKLNTILSEIVAPVCNKYSERIEENIEEDIK  
TMVSNNYRRNKLELMNATDIEWRKTHHTLLEDVLDGDKENCNDVANDQKVLGEDRPGTT  
QTKTRGGKSPDDKYSHKNEKETVVVGQDPDWETLIEHEPSRQRILSFLDQREQVNCTRDN  
FGEIMDEVHVVIEAEVRSILDTVGNLFHQSMACRESEGEIENLIMENYGRQRLREELE  
KNEREAKERFAALRSRLG  
>comp9116\_c0\_seq1; 245 252 1015 LEN=1015; translated  
MSAITQEMASSLSLSLVPASSAPLQSPISRGDGCPRRRRKQNRNRRRLRNSKAQLRLN  
AIYDDKEDKENDNRGCGSTPRSHGWSCSTASSSFVTHCDNIDVVDADDMDSDIESDST  
SCASPSFLAQARASLRDLDEWLQMASSEESSRSGRDAARNSSQHAKRGTHETVGSSTNS  
DCARSGSLRRHSESALSWLQEIKDDDLQRRRIAEAIATSSLKETSVRSSASSKKSRLG  
ASLKQRSMRLFQHNX  
>comp9117\_c0\_seq1; 803 178 3510 LEN=3714; translated

MPLNSVHQLLTGRKRKAHHIGTIPCTDDSTHRLNTDGCVGKTSASSSRKSVSSFLAPQK  
NENDSRWQMRFRHRYIQRYRRYERFEHQKPRVSIQAFENWSGSDIHHGTSTKEDNSRYDS  
NEDDGMTFYENRRRLRSQQVQKMRGTGRMKNLSKSVDSQDDKCSVHALIETFLDQRHGTRK  
RPSKASIHPCPSSFEDRRILSVLLLGLCALSSLTEWLDKKQEEDILRKSSIVKDMVLWMK  
QREALHIAHTSAAIAHKHRDALTQLAKFHESI EGSHTSLDFLSRHDDNDEERQGSERQT  
KRQKNRSQTPQAQGLFRAFRLPVPNRQNNHNI EDRDINVRNKKICEDLIPKNEDTRN  
EEHSYLLTHQLDLKDHRIIDTDTIIDPNVRVSETNKTEIEISEEKYQTNVYHSSISSSE  
KRRQEKNIQDHQPKKSSVGQSAIEIHPEHDFRSSFQMQVRKESEEVIKKSGKNKSVADIN  
GYNSCDDKKKISQPI SLPSMIHIDPLGITSPSKDDEDYFLMSPATDSPIDIPSSSTAKTSS  
SEMNI GRKKEQRQCLKKEIKESENLPDLLPQRTSRDQSEFDVICISEERTNHEENIFDNS  
NYSVVLPSIQIKENHSSHSSIVGTFLPMLPKEKSEKQVTGVSNMKADTSDLGCPKEFPL  
SRTSAIQPMKSYIRNDCD SAMFSALSGTTTNETAKPYQEQTTKSTDRINSTEDNSVHRTT  
TSCPPKFKLSCLYSEKNSVAEESNHVRFNEDNDRESGQNSP SDDVSEILLSQSQMLPLN  
SRRVTTSPRSFSPSRNYNKVHEHYEHYSKAFMIQDESRYQEAANDSFRKTPKEQKPLGWR  
SHELQTESISR DWTSHCTKRPI SLKQTCILSSTNRWVSNERAKNFVKSQ LSSKTAALVA  
TVKATSSSSHKQEYIKLFTRRDGVDDTAHTLNKTIGQNYKFDRSESKQGVSSKIVAIEVK  
KEKSERKTSTRGFIRSNTSKLEITKAPVFGNMRRTAAVNDRDNDSDGVSISVVDKRGETD  
ELKDNFKYEEVVRGKMAREALKCYECECAAFFDKAVLHGDGADCYNREELLSCSRHRGR  
HTPPSTPQDYWELSFVDEREARLRKHGDDN

>comp9117\_c0\_seq2; 727 268 3419 LEN=3623; translated  
MKMIVVGKCVSAIDTXQRYRRYERFEHQKPRVSIQAFENWSGSDIHHGTSTKEDNSRYDS  
NEDDGMTFYENRRRLRSQQVQKMRGTGRMKNLSKSVDSQDDKCSVHALIETFLDQRHGTRK  
RPSKASIHPCPSSFEDRRILSVLLLGLCALSSLTEWLDKKQEEDILRKSSIVKDMVLWMK  
QREALHIAHTSAAIAHKHRDALTQLAKFHESI EGSHTSLDFLSRHDDNDEERQGSERQT  
KRQKNRSQTPQAQGLFRAFRLPVPNRQNNHNI EDRDINVRNKKICEDLIPKNEDTRN  
EEHSYLLTHQLDLKDHRIIDTDTIIDPNVRVSETNKTEIEISEEKYQTNVYHSSISSSE  
KRRQEKNIQDHQPKKSSVGQSAIEIHPEHDFRSSFQMQVRKESEEVIKKSGKNKSVADIN  
GYNSCDDKKKISQPI SLPSMIHIDPLGITSPSKDDEDYFLMSPATDSPIDIPSSSTAKTSS  
SEMNI GRKKEQRQCLKKEIKESENLPDLLPQRTSRDQSEFDVICISEERTNHEENIFDNS  
NYSVVLPSIQIKENHSSHSSIVGTFLPMLPKEKSEKQVTGVSNMKADTSDLGCPKEFPL  
SRTSAIQPMKSYIRNDCD SAMFSALSGTTTNETAKPYQEQTTKSTDRINSTEDNSVHRTT  
TSCPPKFKLSCLYSEKNSVAEESNHVRFNEDNDRESGQNSP SDDVSEILLSQSQMLPLN  
SRRVTTSPRSFSPSRNYNKVHEHYEHYSKAFMIQDESRYQEAANDSFRKTPKEQKPLGWR  
SHELQTESISR DWTSHCTKRPI SLKQTCILSSTNRWVSNERAKNFVKSQ LSSKTAALVA  
TVKATSSSSHKQEYIKLFTRRDGVDDTAHTLNKTIGQNYKFDRSESKQGVSSKIVAIEVK  
KEKSERKTSTRGFIRSNTSKLEITKAPVFGNMRRTAAVNDRDNDSDGVSISVVDKRGETD  
ELKDNFKYEEVVRGKMAREALKCYECECAAFFDKAVLHGDGADCYNREELLSCSRHRGR  
HTPPSTPQDYWELSFVDEREARLRKHGDDN

>comp9118\_c0\_seq1; 507 122 2004 LEN=2100; translated  
MRCSLAFFLSCLVNL PALVHGFNSNFPDFRSKLQ LLEKGRCIASAKNTNNHWRYYAQSTS  
KPSIHSTGSSLFSSIDGDGKPKRKNRNLNPRKLAVALQKAL THFASSPKRFIVRFKSL  
KKGKTLVMQLLTATMLFGSVGRSAYVRHNQMKNGMVGPP I EISYSNFLDLVENS GKT  
GVTSP TVDNMRISPERIAYRLTKESPNGTGENPSVTQLSCYTNKVAASPELVDTLRESNI  
PFTAANRKR TINTVVVAARTAILGFYMLILWRMYKTFSGQANGSGDVPKGVANKNSLPLAS  
FNDIQGIDDAKQEVME LVDTLRNPGKYAILGARAPTGLLLEGGPGE SRKSSINCKFYLEL  
DNSXLMFLNSIIGTGKTM LARATAAAAGVPLIYASGSD FVEMFVGRGAARVRKLFERANR  
MAPAIFIDELDALGKSRDAGNSMMGNRGNDEAEQTLNQLLACMDGLDSTRRVCVLAATN  
RKEVLDTALIRPGRFDRIVKLQLPDAVGRENILRIHASKLPGFQECQGVDDQRPNSLGLG  
EKVDLSAVA AVTSGFSGAELEFLVNESAIRAVRRVSSSLRRGASDSSITSHVCAEDFEES  
LKNFFATRRPKGTNVNEIFKNVWNASA

>comp9118\_c0\_seq2; 562 122 1921 LEN=2017; translated  
MRCSLAFFLSCLVNL PALVHGFNSNFPDFRSKLQ LLEKGRCIASAKNTNNHWRYYAQSTS  
KPSIHSTGSSLFSSIDGDGKPKRKNRNLNPRKLAVALQKAL THFASSPKRFIVRFKSL  
KKGKTLVMQLLTATMLFGSVGRSAYVRHNQMKNGMVGPP I EISYSNFLDLVENS GKT  
GVTSP TVDNMRISPERIAYRLTKESPNGTGENPSVTQLSCYTNKVAASPELVDTLRESNI  
PFTAANRKR TINTVVVAARTAILGFYMLILWRMYKTFSGQANGSGDVPKGVANKNSLPLAS  
FNDIQGIDDAKQEVME LVDTLRNPGKYAILGARAPTGLLLEGGP GTGKTM LARATAAAAG  
VPLIYASGSD FVEMFVGRGAARVRKLFERANRMAPAIFIDELDALGKSRDAGNSMMGNR  
GNDEAEQTLNQLLACMDGLDSTRRVCVLAATNRKEVLDTALIRPGRFDRIVKLQLPDAVG  
RENILRIHASKLPGFQECQGVDDQRPNSLGLGKVDLSAVA AVTSGFSGAELEFLVNES

IRAVRRVSSSLRRGASDSSITSHVCAEDFEESLKNFFATRRPKGTNVNEIFKNVWNASA  
>comp9119\_c0\_seq1; 630 11 2059 LEN=2363; translated  
MAGRPRSRTAPLVSPKRSGLHVREKDGCHCYNEPTQRRWLARWKS GKMAWLLVVLGAWSI  
RVLRLSEVYSSSSTGGVVTDIPWTRAQTDPSFFPASTASYGERNSSIGIGNENENEKGS  
NDGGSLSGDANERGPFEIGVFNLTSSTNTSSNTSTSDIISNNTNESIQFEIGVFNLSSNG  
SNSSSSSSNNSTNNNTNDESQPERDREMPVPPGMPSSISLNSMSLNFTKASSSNASAQIMPW  
FIANKEGRISSDRAMEHYDALRFAAVAENIDGDRMMVYRACCGLGHRLSREAAAARYSRH  
QGFRLWVEYTKTRISPGSCYTRFKPGSLDLSEYMFPGPPLLLFDEDEDDEQTYASLPTD  
FDSRSMEIRRYAAGDHGEKYERRNHTLIPNNVPDHD SKCFQKLHPSDQRAVGRADERFFR  
QLRSLFRFNHLARDFAEHRFSERIVLGIHIRAGNGEQDDFVKKERGIEDHQGFANNTAK  
TLDELVTKIRSAQIRQAGVHLHALPPLLFVATDDLAMVTKLENATRPYNI SVVSFPQSR  
PDPGTGVSYNKQWKDSERCKRSWADQMVMVLLGASDVLVAARYSSFSMSLPLFALFSDS  
LRYARRTARENLSANDGSGTRYAHRMFCQSGRLGDGLKCFDDYSDWVRGRNPLATPTGK  
VDVVLFPDFDKMIYGRNSTK  
>comp9122\_c0\_seq1; 632 167 2697 LEN=4109; translated  
MSNEEKVPLVSKESDGSYISPEEKPNLGGSSFRASMRLLSFSTTERQHALKELGVGP  
AASMIKDAVLGYQDAPYEGFYDPYANPDSVVRNMVSI VCGRFIAYYWKRLLLAANWALF  
ILSFLEPPHWC RDSDLVI AKGNLNDLSEYGDCLILGAIGTAADGDENQDYPPSSNSML  
LSVSQSKRVELICIFAI AFFNFLKMGDDGFSRPLYFYFPGFKRWMHGSQFVILVCLFAGNV  
VGNTIFNPFRRMILGTHLRNFQREFWIMLKMIPKMGYILTILAI VVIFYAWFGV VIFHG  
TEQGASGFQNLIEAIWTLWICIT TANYPDVMMPSYNENRVAALYFVSFMTISFFYLMNLV  
LAVTVNLYDD SIAERKRNRKDL SRNLEKAYAMLDPENND AVSRETIMAVMFI LNQDVPE  
IRRLSRDEKGI VFAFLDKDGSSDISLVEFLDFSKILLKLTKE SDYKSFVERHLPQVNET  
NWXQLVKFIRSKTFEYFIDAVLVLNAVVA FQDYPILSGQDVVGNPHFEDGHVDTVWEL  
METIFTVVYVLEAALKILIEGWKRYTESMRNLDFDGVTVLVLLVT VYVYYSNGYSSTRII  
QLVIMVRVRLGLR LFFVSQAPFQMFGTITLDILPAATSVFMILLFIGYFYAWVGMSLYGG  
SYFFLFAF XEVITRDPDNPLSYTLLEASDFVDNDYWPNNFNDMFSGMNVLFNLLVNNWT  
ECEIGFEYVTGAKWVRIFFF SFHLMGVIVISNVVTSFVINAYFQQLETLVQRLGSEEIVE  
DGATIKGARGIFDASTVTGKTGTESIYIARINPRHMDVEMDETAVLQRMFTRTRSRTLS  
PTG  
>comp9122\_c0\_seq2; 676 167 2668 LEN=4080; translated  
MSNEEKVPLVSKESDGSYISPEEKPNLGGSSFRASMRLLSFSTTERQHALKELGVGP  
AASMIKDAVLGYQDAPYEGFYDPYANPDSVVRNMVSI VCGRFIAYYWKRLLLAANWALF  
ILSFLEPPHWC RDSDLVI AKGNLNDLSEYGDCLILGAIGTAADGDENQDYPPSSNSML  
LSVSQSKRVELICIFAI AFFNFLKMGDDGFSRPLYFYFPGFKRWMHGSQFVILVCLFAGNV  
VGNTIFNPFRRMILGTHLRNFQREFWIMLKMIPKMGYILTILAI VVIFYAWFGV VIFHG  
TEQGASGFQNLIEAIWTLWICIT TANYPDVMMPSYNENRVAALYFVSFMTISFFYLMNLV  
LAVTVNLYDD SIAERKRNRKDL SRNLEKAYAMLDPENND AVSRETIMAVMFI LNQDVPE  
IRRLSRDEKGI VFAFLDKDGSSDISLVEFLDFSKILLKLTKE SDYKSFVERHLPQVNET  
NWXQLVKFIRSKTFEYFIDAVLVLNAVVA FQDYPILSGQDVVGNPHFEDGHVDTVWEL  
METIFTVVYVLEAALKILIEGWKRYTESMRNLDFDGVTVLVLLVT VYVYYSNGYSSTRII  
QLVIMVRVRLGLR LFFVSQAPFQMFGTITLDILPAATSVFMILLFIGYFYAWVGMSLYGG  
LITRDPDNPLSYTLLEASDFVDNDYWPNNFNDMFSGMNVLFNLLVNNWTECEIGFEYVT  
GAKWVRIFFF SFHLMGVIVISNVVTSFVINAYFQQLETLVQRLGSEEIVEDGATIKGARG  
IFDASTVTGKTGTESIYIARINPRHMDVEMDETAVLQRMFTRTRSRTLSPTG  
>comp9125\_c0\_seq1; 108 245 736 LEN=1002; translated  
MQWSGQQIVTVVRDKPSEHKTMWLIRGPN DPAFRKPNAACEEGTGT PVMCGQI IRLTHLE  
TQKNLHSHNNK SPLSRQQEITGFGQGDGNGDNGDDWKVHC GAAGSRKKYWQRGNDVWF EH  
VDTARYLGASDSVKFNHQNCGHNCAIMNELEAFGRSFQDQYGA W  
>comp9126\_c0\_seq1; 121 1 208 LEN=461; translated  
XPSTGRIDSLTLKSSSTATSKTMCKSDQLKEYTSEEVS KHTSEDDCWMIIGNENNGTSVA  
KQNLYLRRG  
>comp9126\_c0\_seq2; 153 1 466 LEN=925; translated  
XPSTGRIDSLTLKSSSTATSKTMCKSDQLKEYTSEEVS KHTSEDDCWMIIGNENNGGPKV  
YDVSKYLDDHPGGAEVMLDVSGQNADEFFEDIGHSAEARAELK KYLIGTYKMSEEELEKV  
RIAAEKRANQTGGSSVMIIMVALVAIIYAYTQGYF  
>comp9127\_c0\_seq1; 637 172 1461 LEN=1537; translated  
MSDEQANNNDGAAEADANADAPAPAAPAPPAEETQQQREQTEREQVLDDYRAKIREHREV  
EARLKRMRREDVKGLGKRYQKTEDDLSALQSVGQIIGDVLKRLDNERFIVKASSGPRYVVG  
CRTRL SHGKLPKPTRVALDMTTLTIMRVLPREVDPTVFHMQASEEDGGVSFADIGGLNEQ

IRELREVIELPLTNPELFTTRVGIKAPKGVLLYGPPTGKTLARALASNINATFLKVVAS  
AIVDKYIGESARVIREMFGFAKDHSPCVIFMDEIDAIGSRFSEGTSAIREIQRTLLELL  
NQMDGDDTGGQVKMVMATNRPDILDALLRPGRLDRKIEIPEPNETQRLEILKIHAGNI  
TKRGDIDFESVVKLADGLNGADMRNVCTEAGLFAIRSDRDYVLEEDFMKAARKILENKKL  
ESKLDYSKV

>comp9128\_c0\_seq1; 620 35 1120 LEN=1183; translated  
MMFRHSLLLVALSSLVLSSTAFAPSRVSVGRVTVASRSESTYAPSPLFDADEIAKDPDLT  
GKVAFIAGVGDSTGYGWAIAKALADKGIIVGTWPPILKIFQMGLKRGSFDEDSVLSSG  
GKMEIAKVYPLDAVFDTPEDVPDEVKKNRYKGLDGFSEVAKAVEEDYGKIDILVHSL  
ANGPEVTKPLLETSRKGYLAASSASAYSFVSLVQHFGPIMNEGSSALSITYIASENVIPG  
YGGMSSAKAQLSDTRTLAFAEAGRKYGMRINTISAGPLKRAATAIGKEPGKKSFIYA  
VDYSKANAPMAQDLYSDDVGNGLFLCSPMARSVTGVTLVVDNGLHAMGMALDSISMQR  
E

>comp9129\_c0\_seq1; 367 85 1314 LEN=1584; translated  
MSRHVSKVISHIRRGVRIPRMTAVSSSSVPSCLSLFNKTSRNFYSYSSSSSAQEADEYD  
FHETGDNITENNCFGQSKTTSIETKSAVSWVDDNIKHQRIWRPDNKSAADPLYWSENVV  
QSSHDNPHNLVSLLDRIEKQELSGGRMRKQNGVLHEDPAVDMRLLIENYTVNSLASALR  
DREEMLQTASQMASKNDFESLKDFLYNCHPDVVLEKRQRLRKLNLKPLNLASLEIRK  
LMRMPRQVTMAHASKRAGVVIPIVHVDGVPVILFEKRSPSLRAHPDEVCLPGGMVCE  
TADR TIVETCLREMKEEIGGFDFEYHRDKGGTHGVSVLGTLRCNWGEVHHLVGVAVTPV  
VCSFN QDLAEVDLMPNRDEVAEVFTIPLVNLMDKTQVWYKDDHAPIFVGGPYAIW

>comp9129\_c0\_seq2; 292 85 1107 LEN=1668; translated  
MSRHVSKVISHIRRGVRIPRMTAVSSSSVPSCLSLFNKTSRNFYSYSSSSSAQEADEYD  
FHETGDNITENNCFGQSKTTSIETKSAVSWVDDNIKHQRIWRPDNKSAADPLYWSENVV  
QSSHDNPHNLVSLLDRIEKQELSGGRMRKQNGVLHEDPAVDMRLLIENYTVNSLASALR  
DREEMLQTASQMASKNDFESLKDFLYNCHPDVVLEKRQRLRKLNLKPLNLASLEIRK  
LMRMPRQVTMAHASKRAGVVIPIVHVDGVPVILFEKRSPSLRAHPDEVCLPGGMVCE  
TADR TIVETCLREMKEEIGGFDFEYHRDKGGTHGVSVLGTLRCNW

>comp9131\_c0\_seq1; 1609 484 3735 LEN=3735; translated  
MVCVYEATAIEQVYSLYLANQVFGTIIPLPNTNINISGRNAVFPFLTQSGVDRGILRAI  
W TVADPQSFGLTNIQSOFHVLRLVAMAQAGMLNNNDTTIMGSAISQHASRQLPLPVFSNI  
AIPHVNQLMTMYGHLVMNVQSSSEEKIADATNTTSASGGFFSLQPSVLQSKGYQFGGVIQ  
TPQKEQSPNVSTAPSIISTPGMTTTEASITHDNDDDDDGDFGDFGSAPSIPVPPRNTV  
VSSF GGDSFMNQRAQQQQPFVTFDFGRTLSEPISGNNATPVIVPTSMSTLSVSDAFEDL  
GAVQD APLPSLNLGSSNGDGFQPDLEKQMKPEETVVATGTANEEDDFEGEFETGPTF  
HDGGVDA TDHDKDEFENREKKVENSLITSVDFPMVTDLGMTMSEPMVAVAPQMI  
PATSAPSSLSITD AFSDMPVQEDATLPSMQHNMATNTILEDKNLDEVGDVFGNF  
EKVEAAPSEPKRNDQTKD DGSDDEFGDFGGVSSSDRGGNNELSSGSDVMGSDCV  
GINMEGDLPPSMTDIGRTVSEPI RVDETLVPAKGMMGTGHLRSISIDDAF  
GELASTEDRPLPSLEMMTANSNVGCLSASEENK KKRNESNDDFGDFTAVR  
PQPEHLAGISSKSDGDGDEFEDFDAAPLENDERPPEKSHDKS EPFESTGT  
MAVSDADRQIPIFDALGTEDAPLPSLEMLAATPDPNVESKDLVGVVDTH  
NND SFGGFKTADTHPSGSMGTNERNEQGELRYVSDDMKNESTSDDYLLQAST  
VLSTPAITET GPSLSIADPFGNLEVPDAPLPGLMSFGGTSSTRMSASKTTAS  
IVDLYGSSTQNVGDSG DDFTSSSGIERRGTVLSEADDFGDFGSAKLTIPAD  
CNENSPGMAEDEFDFGDFGSAEVVPI DNEIQDGPSEDDDFGDFGSAE  
VTPAEKNHNQINRPEVEDDFGDFGSAEQNIETQSI EHD FGDFRSPDQIK  
SVKESTDLFGDFRAPEDDVPVSHGDGANLQSEVGDFEIANFPPQTQPNTG  
ISPSDSLDFSSFTAPAEPISNHMQQAEDDFGDFGSAMPNEKAEQISDHAQQ  
SGEDDFG AFGS

>comp9131\_c0\_seq2; 494 1 1206 LEN=1382; translated  
KAEQISDHAQQSGEDDFGAFGSAKFTTTPAEQNADHMQEVQEDAFGAFENSEP  
VSRDPIE SNSVKNDVSDFGDFSVLETPQTKSTEQHGDFGDFSSSQNTFPADVQK  
SAQMLSESVKLG DDEDEDDWGFENVTTPSVDSSTEEAGIRDRI  
CLLALQLPKYVLHKSQSTDEIVDLGDR FEAIIGTRTSMTKRNRNRVDRCLYI  
LERLTSKNNCAQVWAQIFGVANAEFDRQLQSLLINEA ESFSSHEWNQIKSPL  
SVMVRGLSEYMRVTRSIVASIGDLLLLEKDAFTADTWSSTWCSL SVLEKAV  
ASETKWELQTDLMKTPLTRIDPPSVEEIRSVSDASHYSKEVSDASFC  
HLTL QPFQEEKNKSTTKQKVVFQKCFMACSANMLANRCRSFEVG

>comp9131\_c0\_seq3; 1609 221 3472 LEN=3472; translated  
MVCVYEATAIEQVYSLYLANQVFGTIIPLPNTNINISGRNAVFPFLTQSGVDRGILRAI  
W TVADPQSFGLTNIQSOFHVLRLVAMAQAGMLNNNDTTIMGSAISQHASRQLPLPVFSNI  
AIPHVNQLMTMYGHLVMNVQSSSEEKIADATNTTSASGGFFSLQPSVLQSKGYQFGGVIQ

TPQKEQSPNVSTAPSI STPGMTTTEASITHDNDDDDDGFGDFGSAPSIPVPPRNTVVSSF  
GGDSFMNQQRQQQPFVDFGRLEPI SGNNATPVIVPTSMSTLSVSDAFEDLGAVQD  
APLPSLNLGSSNGDGFQPDLEKQMKPEETVVATGTANEEDDFGFEFETGPTFFHDGGVDA  
TDHSHKDEFENREKKVENS LITSVDFPMVTDLGMTSEPMVAVAPQMI PATSAPSSLSITD  
AFSDMPVQEDATLPSMQHNMATNTILEDKNLDEVDFGVFGNF EKVEAAPSEPKRNDQTKD  
DGDSDDEFDGFGGVSSSDRGGNNELSSGSDVMGSDCVGINMEGDLPPSMTD IGRVSEPI  
RVDETLVPAKGMMGTGHLRSISIDDAFGE LASTEDRPLPSLEMMTANSNVGCLSASEENK  
KKRNE SNDDFGDFTAVRPQPEHLAGISSKSDDGDFEFEDFDAAPLENDERPPEKSHDKS  
EPFESTGTMAVSDADRQIPIFDALGTEDAPLPSLEMLAATPDPNVESKDLVGVVDTHNND  
SFGGFKTADTHPSGSMGTNERNEQGELRYVSDMKNESTSDDYLLQASTVLSTPAITET  
GPSLSIADPFGNLEVPDAPLPGLMSFGGTS DTRMSASKGTTASIVDLYGSSTTQNVGDSG  
DDFTSSSGIERRGTVLSEADDFGDFGS AKLTI PADCNENSPGMAEDEFDGFSGAEVVPPI  
DNEIQDGPSEDDDFGDFGS AEVTPAEKNHNQINRPEVEDDFGDFGS AEQNIETQSI EEHD  
FGDFRSPDQIKSVKESTDLFGDFRAPEDDVPSHGDGANLQSEVGF EIANFPPQTQPNTG  
ISPSDSLDFSSFTAPAEPISNHMQQA EEDDFGDFGSAMPNEKAEQISDHAQQSGEDDFG  
AFGS

>comp9132\_c0\_seq1; 311 1 480 LEN=557; translated  
KGSKGTGKSGKGDNINGKDDNGKGD AKSNKKDKGKDDRKGGKSGKGGKANKKAKAKEQE  
STVDEEGSKVNDRDQKNN SQDESPV PKSPAADDTTTSVSTGASDKPETGGKDESSAPGH  
KRGANHKGSERDGLLQQDAKDFLAEDERERNLFGDIRRV

>comp9133\_c0\_seq1; 467 71 967 LEN=1162; translated  
MDPFENG SFSAPKTKFQRSVRGLV VPMQKYDQNHSGGSGLLALAWIVSSIVTVLVPLIYR  
TIHKNKYRQEYMN YFWEEYQTYAEQRKQNYEQYGN SYKYGGAYMADNYAQNEYVDVNR  
S WKKLNCFSFFVNRDGEPMADQEWMPAWYSGFSLTEEQRRL EDNLEQPGSLKFVYVWQI  
VLF LALGYG LLLVISQKRNP TGLIVSLLVWSNFAFLTMWMMADGSIVTEGQQVKRTGFY  
G QMSVLIFLTNFWYLLHGLIFVLVFWIRKSIAADEEVK GSEGTVQELGDKGYSAPATTE

>comp9134\_c0\_seq1; 432 1 997 LEN=1716; translated  
CDTIDKRTSKGASYKSTMTDDDEIEGLISISVKT KPRKETGF EVKRRREDGFYYITKVPD  
NCTTIGV GDRVLEINGTSHRSFKNEKHSNDLINF IQLDVVPVDDDSGESESESN EEEYEL  
TRLRQKTKLAAAAAAMPSSKAASAHRNNNAESESDDQDDIDYKDAPGFDRVDIGEGIKI  
RSGGNPRSLDESDDDDRSGSCKDAGDSGYHKKHKDVNHGESDWEVDKPSVDREEKARAA  
ARLNALKR NASTSKDQ GKDDGDWVQSKYNPDDR FMINITKEENV DLGIEIVEFKVKGKGF  
SRNELYVTKVDQGPFRK KVVREAIT YFVSVYL

>comp9134\_c0\_seq2; 523 1 1128 LEN=1579; translated  
CDTIDKRTSKGASYKSTMTDDDEIEGLISISVKT KPRKETGF EVKRRREDGFYYITKVPD  
NCTTIGV GDRVLEINGTSHRSFKNEKHSNDLINF IQLDVVPVDDDSGESESESN EEEYEL  
TRLRQKTKLAAAAAAMPSSKAASAHRNNNAESESDDQDDIDYKDAPGFDRVDIGEGIKI  
RSGGNPRSLDESDDDDRSGSCKDAGDSGYHKKHKDVNHGESDWEVDKPSVDREEKARAA  
ARLNALKR NASTSKDQ GKDDGDWVQSKYNPDDR FMINITKEENV DLGIEIVEFKVKGKGF  
SRNELYVTKVDQGPFRK TALDRGDKILSVNAKKVPDKIKSAEDAMDLLRSKAKIAMLILR  
PSRSDKGYKWVMENT

>comp9134\_c0\_seq3; 389 1 1355 LEN=1806; translated  
CDTIDKRTSKGASYKSTMTDDDEIEGLISISVKT KPRKETGF EVKRRREDGFYYITKVPD  
NCTTIGV GDRVLEINGTSHRSFKNEKHSNDLINF IQLDXVGSVKLFVCD SKVQY EKESWD  
YSFIKLIPTSVNFFRVPVDDDSGESESESN EEEYELTRLRQKTVSHSNILLRIVDALYL  
VVNRWTQP VGSNFGVISFPYXMKKLAAAAAAMPSSKAASAHRNNNAESESDDQDDIDYK  
DAPGFDRVDIGEGIKIRSGGNPRSLDESDDDDRSGSCKDAGDSGYHKKHKDVNHGESDW  
EVDKPSVDREEKARAAARLNALKR NASTSKDQ GKDDGDWVQSKYNPDDR FMINITKEENV  
DLGIEIVEFKVKGKGF SRNELYVTKVDQGPFRK TALDRGDKILSVNAKKVPDKIKSAEDA  
MDLLRSKAKIAMLILRPSRSDKGYKWVMENT

>comp9134\_c0\_seq4; 298 1 1224 LEN=1943; translated  
CDTIDKRTSKGASYKSTMTDDDEIEGLISISVKT KPRKETGF EVKRRREDGFYYITKVPD  
NCTTIGV GDRVLEINGTSHRSFKNEKHSNDLINF IQLDXVGSVKLFVCD SKVQY EKESWD  
YSFIKLIPTSVNFFRVPVDDDSGESESESN EEEYELTRLRQKTVSHSNILLRIVDALYL  
VVNRWTQP VGSNFGVISFPYXMKKLAAAAAAMPSSKAASAHRNNNAESESDDQDDIDYK  
DAPGFDRVDIGEGIKIRSGGNPRSLDESDDDDRSGSCKDAGDSGYHKKHKDVNHGESDW  
EVDKPSVDREEKARAAARLNALKR NASTSKDQ GKDDGDWVQSKYNPDDR FMINITKEENV  
DLGIEIVEFKVKGKGF SRNELYVTKVDQGPFRK KVVREAIT YFVSVYL

>comp9135\_c0\_seq1; 330 137 706 LEN=2085; translated  
MFSRIAPTAARSVARHSAHFRASVAARGFTTVGEVTTAADA AKLSGYSNITFTINQDAMV

IDAVQQFAANNIGCLVVVDNDGGLAGVISERDYISKIALLGRTSKETKVKEIATMSMKLV  
TVKPEESVQICMEKMLASDIRHLPLVEEGKLIGMVS IKDLVKTTIKEKEEA IKVLSDFAL  
GKGGHFGSD

>comp9135\_c0\_seq2; 330 137 706 LEN=2021; translated  
MFSRIAPTAARSVARHSAHFRASVAARGFTTVGEVTTAADA AKLSGYSNITFTINQDAMV  
IDAVQQFAANNIGCLVVVDNDGGLAGVISERDYISKIALLGRTSKETKVKEIATMSMKLV  
TVKPEESVQICMEKMLASDIRHLPLVEEGKLIGMVS IKDLVKTTIKEKEEA IKVLSDFAL  
GKGGHFGSD

>comp9136\_c0\_seq1; 915 44 1877 LEN=2121; translated  
MTPRKIPKLVFGLDLQAHDPDYFTTQINFRQWFH SKTEGILSALRKGIGRAFIGIGHPSN  
YGQVLHQLQLEALLKSTMTRTLLEVECKEDLSNSFLICGHNF TVIGNVLPDRVFFAKFK  
IIEVDKPKGAHEAKLKELENEKFEQLKKDKDQVQKKIEAAMTSGKNTDLGKARDAMAALR  
SKKGMIEEKRAIRAQLDLLKAGDKLVQDKKEARSSVRFNSIEEIDAEIKKLQKLQETT  
SMSLTHEEKLIKEMDGLQASKEKVKDVKSKDASLDGIKKERTAVNESIKAKDKEIDAVTK  
EMDEVGSKIKSLAAKETDKRSTLDALFKERDAFKKEISVVLKEKDALRDEYRENNNAWWN  
AQRVKAQRQIQYEEEEKAREAEKAAYLKKKEEEEEMKKIPYEEEMGLCDYLADYLSRITYL  
NAPPAENKISVKKEEVI AVKDDPFAGMVARCKKNDDEENYFSKGGKGGKQRAPKKIATA  
PFTLSVDSFEQFGS IGLNPPTKLEDEVENSVKELREKKVWYSQQPRGSVP TAKDIRKKNEK  
NAQKLRQTPSKAPTGFKSASDDTFVPLGNGSSTAAGIPSWGAGQKPAPT VSGEEVNNADD  
PTPADAAAQE

>comp9136\_c0\_seq2; 1073 38 1660 LEN=1904; translated  
MAEEAATPVAPPAPAPEEAPKEKKND SKGKNRRKKEDDTPIEELFDLSKPIPRVDKPKG  
AHEAKLKELENEKFEQLKKDKDQVQKKIEAAMTSGKNTDLGKARDAMAALRSKKGKMIEEK  
RAIRAQLDLLKAGDKLVQDKKEARSSVRFNSIEEIDAEIKKLQKLQETT SMSLTHEEKKL  
IKEMDGLQASKEKVKDVKSKDASLDGIKKERTAVNESIKAKDKEIDAVTKEMDEVGSKIK  
SLAAKETDKRSTLDALFKERDAFKKEISVVLKEKDALRDEYRENNNAWWNAQRVKAQRQ  
IQYEEEEKAREAEKAAYLKKKEEEEEMKKIPYEEEMGLCDYLADYLSRITYLNAPPAENKIS  
VKKEEVI AVKDDPFAGMVARCKKNDDEENYFSKGGKGGKQRAPKKIATAPFTLSVDSFE  
QFGS IGLNPPTKLEDEVENSVKELREKKVWYSQQPRGSVP TAKDIRKKNEKNAQKLRQTPS  
KAPTGFKSASDDTFVPLGNGSSTAAGIPSWGAGQKPAPT VSGEEVNNADDPTPADAAAQE

>comp9137\_c0\_seq1; 335 274 1299 LEN=1718; translated  
MYALFTRRSSVVSVLVFVYVLESIEVSAWIPAAKISP KSAALSFQRSSSNSGVCYSTL  
EDKTEPSPQTTQLEPRLSSSIVLSTPKIKYTVPGMKRGWKENGVMDEDEDGPRNGPPQNF  
RQMGDERLYDENMQLVNNLLKLNFTFDGKGLGINTSSSNRLSDMISGMVEKLEKTNSIRIP  
SLNRLILGNWAPIVRGGQVVAASNESKEGKITAVSVPYRFHVQRTGGQKLAHKTPYGQFD  
EHLEPEEELTIRELSSDGNVTSTSSGVVNASGDKYESRLVKGLHNASESDSLYLGAITY  
VTKYLIIMRRFESSQE QEGDKPANGPVTEIWIK VSDSDGSK

>comp9138\_c0\_seq1; 316 364 1692 LEN=1817; translated  
MEVKVSSTPSENDRGGADDHTSNLSEYEKLR LQKIKRNERMKELGLFRTKEALKKKKTG  
TKKEKTSRVSPPELPQRSSSRKRKSVANYSAEQVIPMYSDEEDLES DRPNTDDEDEIEDAK  
DDYEISDNDNDDSDREDEDES YLKPQKQRKRSEVDKPSDSGAAATSKSTSTRDSAID  
TTSFDCVNPKGGLTLEYAKTGRSKCRKCRNPIEKGKPRVGM EAWIVGRNCITWQCPCELL  
DNLCCAYEKSGTGKCKSTHRPFAKGLKVGIRCHTATSYYHVGAVVDVLNNVVDLMVS  
DRNKSYTGFE LSVDSIDGTTKLSPE DRAQLASVLQGVSPNRDGPASKRTATPVGASEKAK  
KNASPRTGAKAKADKGARMGSQPSAGAKTNARGRVEWKF GGRTCYGTL LPSMETKTHCYA  
RTQRGNTKTLAKGKDYWSVLA

>comp9139\_c0\_seq1; 472 1 952 LEN=952; translated  
XEETQLKKPDVQESVQNEAKKNNE SKRKPQKQKRGWGFGLFNFGGDSEEDGSSHDEVK  
DTKTNEIDSAKFDEAHYNELMDRIKMGDLQENDF FELALLERQKQGEILDEKEIEELKTF  
RQAREQNERNEQSEQLSLQNSKGAPDVDDTQILEDL DGQHDLESSNENIREAEPKVAVS  
RDENEKESKDEEQPAESEAKT NLI PNKQDLEPEKEIQTKETSND DDDDKDIEKLLSGD  
EIRTMDTLDENGRDVDEHDNSVGVQKPKSGSDKYRQKVNEKSSCQDVPDKDDFSESKVTD  
NVMGSDDRSTKQMEEFGS

>comp9141\_c0\_seq1; 639 146 1948 LEN=2364; translated  
MSDTKLHDFCKGFGALLSRSKQPSFPEEAARLNDRGNLPLHAACSFQATADVVEVLLRAY  
PGGASQPNGVGNLPIHQAMWQAPVETVEVLLVRHPEGATVRN QYGS LPLHMAASNRAST  
EVVKVLIDAYPDALHLQNDGMPDLDLAMADEAMVNDQVVAMLEGRPLPEMTRRQKTDK  
FNEQADMLERKMASLRNSGANALSPGGGSRNSH SVKLALAAVRKLADRFPHALYSAGM  
DPNELEIAFSDQLDNKDSKNGGALDAETILLEAVRKR SRPHRDARGMTVGHSGPRDRVEE  
LLSSIIGLDHIKSQLRGLRRTAEICDLKESLIPPGGARGRSHPLNMI PPALAEDTGRPRA

DHMVFMGNPGSGKTAVARLLAKAYHELGLRKPFLFLEVERMDLVGRDKTTTVMKTKEVID  
EARGGILFIDEAYNLGIASRRNKSDTGVDSINEIIRSIIESSKKRGDDNFPLIILAGFPV  
EMNTFMVFQOGELRKKFPITFEFPDYSCVELAQIFMDLANAKGFDLADDLKASTIARLLEE  
ETSVQWRGERNGRISEMLLTGCRTEVRKRMRIAQMEDDENFDPQLIIRSDVETVIRADFQ  
>comp9142\_c0\_seq1; 358 143 835 LEN=1282; translated  
MGAFGSKESSTATPGKAARTRGPPPASATDRATLDLKNARDRLQKYKAKLERDDAKIIA  
RAKKAKADGNTKAALNLLKIRKLTREVESVEAQLLNVMQMVQTIDSKQNEVQVLAAMKE  
GKDTLQRMHEEITVDHVLDMDEIQEQHELEKEMNEILVGANVSSLTIEDDAAIEAELEA  
LMGTAPAEQPKVEKLPVAPDTKPLPEAPSTKLPEVASATPVQEKVAVAAL  
>comp9143\_c0\_seq1; 246 189 1151 LEN=1504; translated  
MIFLTAILVMVSATAGSNGGYTTTIQRPMSSMPFGRRRYGYRRRYRRNSYGGPSHPSS  
SETRDYSKHFLDDKNWMTNKKIRVWDPRYATKKRPNQRSWSGRLAIANIACYAIQTFNPN  
FTKWGVKLSERILAGEDLYRLITPVFLHGGLYHLMSNMFSLNNVGPMTEQAYGSGRFLAS  
YLVAGASGNLLSAIKSPNPALGASGAVFGVMASLLVFLGRNDWVMGSQGEAYRSAVTQTL  
LINLVMGAVNPMVDNWGHIGGAIGGATMAWYFGPRLYIAEVPLPEGVGRVIVDKPLVRLP  
YFIESIPTKVKSGVRRLLTRE  
>comp9143\_c0\_seq4; 199 621 821 LEN=900; minus strand; translated  
MDIGRWIVVVYPPLEPAVAETITSMAVRNIIIVRLILPVPVLNDGFVPLNLNIGAFFRSFRY  
AGFLLN  
>comp9144\_c0\_seq1; 378 117 1589 LEN=1695; translated  
MRRKHERNRNSMSSNDADYAAGGIAPLITKAPDSTGGESLITTTSDIEFYEDLISDPVL  
VLGVDISHLSRTGQFVICASGVFFSLLYGYLQELLSVQLCSRQLGLYLAMVQFTGYTVL  
AYILRSYVYRKQNKGKATRARNVASCQLTVPFKLYLGLSLLRAVDLAMTNLAMQYINYP  
AKTLMKSSRVFTMIFGVCITNKRYSDTYTIVLCMVVGLAIFMHADATSSAVFQAPAGVI  
MLTVSLMCDGAITNMSESIMNKYNVQDEFIFRMYSIALIAIVAAAAAKGDIEGMAWIM  
EPGTYEEQQNNVPLDQRLWSSSGKITVIVLFFSSMGFFGSSCAAATKQFGALSMSITSVS  
RKATTLFLSFLFDNECTYQHVVGIIIFISALTAKSVRRRNKRRKQSLASGDWDRRVSTL  
DLEMGGSGSGSNSEKHEKMSRASSYSSNDSYDTIDSADKFLSRRKVSSNHTTIIERSPKV  
SKHRSRYHV  
>comp9145\_c0\_seq1; 209 894 1250 LEN=1974; translated  
MDWQSNEGEENEGMVGNYLNFNGNIGAEHVVNNSHVREDGKVEQDDIFILIAPQSMVGVES  
SIYEPLKAMVDAAGSRPIILLNPDLTDKFSAQGQQNVRGRQVSRKHILIVVPVSESKH  
>comp9145\_c0\_seq2; 433 88 1491 LEN=2215; translated  
MRRQSFLPLGKSILPLALILLVADNGFAFMTTSEPLARHKGASSKAVLTERRISVHESV  
VRSKILSRRVFPFLAATRSTSSSEIERQFLDEKQLDFTLGYLNKHHGKGLTKFSEAFSKL  
GALKAKKNSWSGGSYNILSAKIVSIDTVSFELDVEVQLRNEDPTLERRVAIELDAMPLTKS  
RKLVGTSIDPIPRDLNLLPIDEIVRRLCRLFSIVNEPESTGKLFQGMQLGGSDIGRLKE  
NMYLNQCPHNRYVRKYFYNMVADATLEAAILCSKGRISNRMKITAMFPENPMSMDSYRIG  
TILEMVRTISIKLVEQNLVRVVCVQGSMSGVIFTGVPKQLGGVSKLLQMMDWQSNEGEEN  
EGMVGNYLNFNGNIGAEHVVNNSHVREDGKVEQDDIFILIAPQSMVGVESSIYEPLKAMVD  
AAGSRPIILLNPDLTDKFSAQGQQNVRGRQVSRKHILIVVPVSESKH  
>comp9145\_c0\_seq3; 484 88 1674 LEN=2073; translated  
MRRQSFLPLGKSILPLALILLVADNGFAFMTTSEPLARHKGASSKAVLTERRISVHESV  
VRSKILSRRVFPFLAATRSTSSSEIERQFLDEKQLDFTLGYLNKHHGKGLTKFSEAFSKL  
GALKAKKNSWSGGSYNILSAKIVSIDTVSFELDVEVQLRNEDPTLERRVAIELDAMPLTKS  
RKLVGTSIDPIPRDLNLLPIDEIVRRLCRLFSIVNEPESTGKLFQGMQLGGSDIGRLKE  
NMYLNQCPHNRYVRKYFYNMVADATLEAAILCSKGRISNRMKITAMFPENPMSMDSYRIG  
TILEMVRTISIKLVEQNLVRVVCVQGSMSGVIFTGVPKQLGGVSKLLQMMDWQSNEGEEN  
EGMVGNYLNFNGNIGAEHVVNNSHVREDGKVEQDDIFILIAPQSMVGVESSIYEPLKAMVD  
AAGSRPIILLNPDLTDKFSAQGQQNVRGRQDRDLDFANTFETIWHFNNIYVSGTSYFPILG  
ATFKPGPLNMWAAAYQRRDLAQEEGEMYVPLASEEKPKGDQILASFKN  
>comp9145\_c0\_seq4; 355 273 1337 LEN=1736; translated  
MPLTKSRKLVGTSIDPIPRDLNLLPIDEIVRRLCRLFSIVNEPESTGKLFQGMQLGGSD  
IGRLKENMYLNQCPHNRYVRKYFYNMVADATLEAAILCSKGRISNRMKITAMFPENPMSM  
DSYRIGTILEMVRTISIKLVEQNLVRVVCVQGSMSGVIFTGVPKQLGGVSKLLQMMDWQS  
NEGEENEGMVGNYLNFNGNIGAEHVVNNSHVREDGKVEQDDIFILIAPQSMVGVESSIYEP  
LKAMVDAAGSRPIILLNPDLTDKFSAQGQQNVRGRQDRDLDFANTFETIWHFNNIYVSGTS  
YFPILGATFKPGPLNMWAAAYQRRDLAQEEGEMYVPLASEEKPKGDQILASFKN  
>comp9145\_c0\_seq5; 338 88 1587 LEN=2311; translated  
MRRQSFLPLGKSILPLALILLVADNGFAFMTTSEPLARHKGASSKAVLTERRISVHESV

VRSKILSRRVFPFSLAATRSTSSSEIERQFLDEKQLDFTLGYLNKHHGKGLTKFSEAFSKL  
GALKAKKNSWSGGSYNILSAKIVSIDTVSFELDVEVQLRNEDPTLERRVAIELDAMPLTKS  
RKLVGTSIDPIPRDLNLLPIDEIVRRLCRLFSIVNEPESTGKLFQLGMQLGGSDIGRLKE  
NMYLNQCPHNRYVRKYFYNMVADATLEAAILCSKGRISNRMKITAMFPEMNPMSMDSYRWF  
LYFCGSICSEWMRDIGTNXIVFSNVSFRIRIGTILEMVRTISIKLVEQNLRRVRCVQGS  
GVGIFTGVPKQLGGVSKLLQMMDWQSNEGEENEGMVGNYLNFNGNIGAEHVVN  
SHVREDGT  
KVEQDDIFILIAPQSMVGVSESSIEYPLKAMVDAAGSRPIILLNPDLTDKFS  
AQGGQONVRGRQVSRKHILIVVPVSESKH

>comp9145\_c0\_seq6; 389 88 1770 LEN=2169; translated  
MRRQSFLPLGKSILPLALILLVADNGFAMTTSEPLARHKGASSKAVLTERRISVHESV  
VRSKILSRRVFPFSLAATRSTSSSEIERQFLDEKQLDFTLGYLNKHHGKGLTKFSEAFSKL  
GALKAKKNSWSGGSYNILSAKIVSIDTVSFELDVEVQLRNEDPTLERRVAIELDAMPLTKS  
RKLVGTSIDPIPRDLNLLPIDEIVRRLCRLFSIVNEPESTGKLFQLGMQLGGSDIGRLKE  
NMYLNQCPHNRYVRKYFYNMVADATLEAAILCSKGRISNRMKITAMFPEMNPMSMDSYRWF  
LYFCGSICSEWMRDIGTNXIVFSNVSFRIRIGTILEMVRTISIKLVEQNLRRVRCVQGS  
GVGIFTGVPKQLGGVSKLLQMMDWQSNEGEENEGMVGNYLNFNGNIGAEHVVN  
SHVREDGT  
KVEQDDIFILIAPQSMVGVSESSIEYPLKAMVDAAGSRPIILLNPDLTDKFS  
AQGGQONVRGRQDRDLDFANTFETIWHFNNIYVSGTSYFPILGATFKPGPLNMWAA  
YQRRDLAQEEGEMYPVLASEEKP  
KGDQILASFKN

>comp9145\_c0\_seq7; 304 273 1154 LEN=1878; translated  
MPLTKSRKLVGTSIDPIPRDLNLLPIDEIVRRLCRLFSIVNEPESTGKLFQLGMQLGGSD  
IGRLKENMYLNQCPHNRYVRKYFYNMVADATLEAAILCSKGRISNRMKITAMFPEMNP  
SMDSYRIGTILEMVRTISIKLVEQNLRRVRCVQGS  
MGVGI  
FTGVPKQLGGVSKLLQMMDWQSN  
EGEENEGMVGNYLNFNGNIGAEHVVN  
SHVREDGT  
KVEQDDIFILIAPQSMVGVSESSIEY  
PLKAMVDAAGSRPIILLNPDLTDKFS  
AQGGQONVRGRQVSRKHILIVVPVSESKH

>comp9145\_c0\_seq8; 260 894 1433 LEN=1832; translated  
MDWQSN  
EGEENEGMVGNYLNFNGNIGAEHVVN  
SHVREDGT  
KVEQDDIFILIAPQSMVGVSESSIEY  
PLKAMVDAAGSRPIILLNPDLTDKFS  
AQGGQONVRGRQDRDLDFANTFETI  
WHFNNIYVSGTSYFPILGATFKPGPL  
NMWAA  
YQRRDLAQEEGEMYPVLASEEKP  
KGDQILASFKN

>comp9146\_c0\_seq1; 1221 228 2567 LEN=2647; translated  
MRNTTIGNDHRRRGLKRELS  
PGAKEGASLGP  
EREDRPSKGLARKGRQGRSGSSPLRFSS  
F  
AASWLLLAACLCSSVTRVACSD  
DAYGYGSNDDASNNNNYNNNYGG  
NNNNNNNNNNNNNN  
GNNYGGNYNNNYGNNNNND  
DGGNNYNYGNNNNDDANANAN  
DDANNVDYDYEAPGYD  
DEYNKQWEDD  
NIDLVDVDFD  
GVS  
IAPVSCVNYLTGHF  
IKFELYETENS  
YQCHFGQIGTFV  
VSIAHYMRAYF  
NYQALTYGNAF  
SLPDDVGYLNCI  
PLKMEKYGYG  
DDDDVNGDDAS  
GDDANG  
DDAAEDQDQES  
GDEDE  
NESGQAVLYAK  
VGCLAKETFS  
SNTFQLHL  
YTD  
DKCTEPYDDG  
QT  
DQOHANKGYL  
IDLDTYYDAK  
DGDAAQDDG  
IRYTDYPQD  
KR  
TLLFSTKVS  
FRPSFYTCQS  
CKPPQISQTF  
NKFAGNY  
YDDMFISQY  
GMTQSA  
YNA  
YLEEKAEQ  
EAAAAEC  
NNCQYF  
HYS  
A  
DDSVD  
DFSSVND  
DGSSAN  
DDVQAL  
DDAYNA  
VDDYS  
YQSS  
NNY  
NNGN  
DDGNG  
RRLT  
STTT  
TMTSDEPR  
RLGEVPS  
AVTKEL  
SSALV  
PVQSE  
LEKFE  
SEFW  
TSVDA  
QLEDR  
ERFL  
YENKY  
G  
GVDSW  
NICEQ  
VYKY  
GLYC  
DEEC  
QSLD  
AFKTD  
QW  
SGAN  
IVLLS  
IMCT  
FMG  
AMV  
MLV  
VSKRL  
NAARK  
ARRQK  
SFFD  
AND  
FDM  
SAS  
GIDT  
SSIP  
GLP  
PMAM  
FTM  
FGAV  
MVI  
ITV  
LASH  
LHFV  
NE  
TLVFA  
VCCIL  
LLFI  
YMLK  
ITLFS  
ARKR  
PVLL  
TSP  
NHED  
VFG  
YNN  
ADDD  
FSQ  
SRRR  
GFFS

>comp9147\_c1\_seq1; 828 662 3954 LEN=3954; minus strand; translated  
MVFVVDKTKTCCEEI  
GSHKEQYCH  
KKAKERK  
KRGKTDK  
GKKEE  
HKL  
VSDLC  
PDACG  
VSV  
SQAPT  
PSPLP  
AGSMPT  
DEDAM  
GREL  
RTL  
LADL  
RFNK  
CPP  
IADEN  
RAS  
NSGY  
TMG  
VHTS  
IFP  
LMPK  
DYP  
VSGE  
TATV  
LQEE  
TMAD  
AVVT  
TDDY  
QLV  
QEH  
NDPS  
YWM  
DRM  
RTR  
PFF  
PGD  
PEFW  
DEL  
RDV  
VEAQ  
IARR  
RGD  
APSS  
RKHW  
PST  
WDD  
KVT  
LED  
IAQ  
AV  
AGE  
YPAL  
HQ  
ATA  
IEK  
FYA  
EGL  
EMN  
AGM  
NPF  
RSAN  
DFIS  
RQV  
RLSS  
INAW  
AFE  
IVAP  
VSF  
MMK  
WQIG  
MPR  
PEE  
VW  
LIH  
TGE  
FTPE  
ADG  
VPED  
LVAL  
IRSM  
DLES  
ALS  
FTAY  
GVG  
SPM  
HPS  
FPAM  
HSS  
GST  
LSY  
WLP  
VV  
AEV  
TPE  
QW  
CLAL  
RV  
DYAT  
AMAR  
TTAG  
VHY  
KMD  
NIAG  
LNL  
GQAI  
VQR  
NLPT  
MLHE  
KYG  
YDV  
SALE  
AKLE  
ILS  
FDW  
GGF  
DAY  
NCTI  
GGE  
STAD  
ILAX  
LVNS  
VS  
STS  
SASP  
AVH  
GEI  
KCP  
NSCK  
XVENS  
LVMS  
YFF  
LYS  
FEG  
EGNV  
TLG  
KTS  
DAT  
FPK  
PPV  
TSM  
RIL  
ANAV  
VEL  
DRR  
NALL  
FR  
ILHR  
FLF  
GFR  
SR  
SKPR  
KNAQ  
DCCR  
PAL  
GRF  
RTEL  
DDL  
AGI  
QNV  
VRV  
QGGL  
DPFH  
HAD  
GA  
LPVL  
VPE  
VDF  
D  
SVA  
HPV  
LPG  
AGPP  
GREG  
PPDD  
PFV  
DGK  
DLF  
HVL  
VGF  
VLG  
NGQ  
DAVE  
VPV  
PGV  
SEAG  
ADDP  
RFL  
DVP  
DGL  
VQD  
GGK  
LGER  
DAG  
VGQ  
KGG  
RSL  
SVV  
DRG  
VVE  
VVP  
GRP  
QG  
LSL  
LLP  
GGE  
PEI  
GSP  
ELV  
PGAD  
FLG  
GGDL  
FLQ  
GFL  
RRG  
LEF  
QKE  
GCF  
LLH  
GPG  
IAT  
VAVA  
VAGI  
ERR  
DAGR  
VEQ  
FTPD  
HRN  
LAK  
LEH  
GHR  
VGR  
VRQ  
RFK  
DANG  
GYD  
VVR  
NRM  
QLD  
GHR  
GN  
DPE  
GAL  
GSA  
EHA  
HQV  
VPR  
ARLE  
DPAP  
DPG  
DDG  
PV  
RED  
ALQA  
QEV  
LPH  
GPV  
PDR  
GRPR  
GPG  
GDHP  
PDG  
GVG  
PGV  
HHEL  
HPR  
GPE  
GLV  
ERL  
ARD  
PGAD  
AGD  
GVR  
KGS  
LAA  
ALG  
F  
FA  
VEL  
PR



QDHFRKPGHVQRDRSPGGADVALDGGPCSVRNDGDAVLVAEPEELGNVFDGLRPDDVVG  
REGIVGVALAIVGVVRSVVRVSVVLAQVRSVAVRFPSPVQVLRVVGGNLGRRLRELPVV  
AEALEGGKDGGLADRLGG  
>comp9149\_c0\_seq1; 240 328 807 LEN=1044; translated  
MVLIIIVQLLWLIICASCSSSGRFAVLRRYKNGQDDSRSSFSVVAFHRRRLTHDCSNLKYD  
KPDYICIGDGTERNHKQVEEGRFALECESESLIRSAENAHLRQQESIAFDENDNGNNSMN  
NASHPIKYDSSFGCHDTEYRSREMRSSSFVYPNNDPIFV  
>comp9150\_c0\_seq1; 298 176 1321 LEN=1441; translated  
MSRIEASLASSSKLKDKKSDVSHGSTKDTNSHPSIWLKLAQAFMCVTLLMALILLVNLGGI  
YVLFNPGSSRSKMMIYFLMLYASIRLLTPGGAIHSEKQPEGGVWRAFSEYFFLSSIHR  
YLNLSFAKPLPKELVEAESRSNAQFILAAPFHGCNSDFRVLMDGIINETFPNLLKRNKIR  
ALAASILFWIPVREISLWTCIDASRPVAKAALDQGKSLILPGGAEQIRTVYGREII  
YLKNRKGFIKLALVHGVPVPMYVFGCSDSYTYNWMAQRFRLWLKVLGICITPCSGLW  
GNPFCPLPKTTTTIVMGKPIRFEFVLEQDNLNESCIDTSSISKQTPTKEEVDRAHAVFIREL  
TALFDAHKTALGYGDRTLEIV  
>comp9151\_c0\_seq1; 182 1003 1212 LEN=1326; translated  
MRKDGDESPVSMETIFLDWSKDPAMSSKGGFDIVEALSPDGIYGLIEQGKLYGKIMEDQG  
KFDSLEKLT  
>comp9151\_c0\_seq2; 355 233 1092 LEN=1206; translated  
MFVMENETHSEXKVTLAGSRWDLSSLHTAAIEDSYVEESPSQNNDFVTSRSTTHIVFPGG  
GIFFYYQAGLVCFLREKYDLSTCTFSGASAGALTATLTAAGIDFYEATDLALKLAEDAGV  
WDRKGGGLQGIWGPMEEWLDSLLPASIESLQDRITLLVTPVPTFGKTKISKFRDREDLIR  
CNMASVHLPWFLDGKLTSNFRDRPHIDGSFLSKEDDYMRKDGDESPVSMETIFLDWSKDP  
AMSSKGGFDIVEALSPDGIYGLIEQGKLYGKIMEDQKGFDSLEKLT  
>comp9152\_c0\_seq1; 285 118 1062 LEN=1642; translated  
MVDDSKLRLRARRAFHMEEGHVHNTTTPSNRSSDNLRLNDASVGKIHGRVKRRRRRMVF  
YRACRLLGLLAAAVITATLSIWLPPFSWTQVDYHHQLQHEVQYVYQKLHDNRNRFHSV  
DNFHPNHLLHHTNKNNDNSVKVHPKRRKQNEEDRHYARLEDESPLGDEKEEIVVGPVND  
EVKRHLRRPSTKAPHENTAANKDQADETQNAPEIVTCGDGTGFKNDYCDCLQDGLDE  
PDTSACSHVLAQQAKFVCGRRHQVTNEQDPHDDPAEMNKKAVKWIYASRVNDGILDCPDGS  
DEYDHTTSNHAQDG  
>comp9153\_c0\_seq1; 301 168 895 LEN=895; translated  
MDLGFGAKNQEIGEATAQALIRGAEVQEKGVENDLAQYDRLLEDEDALEDLRQKRIQQMQ  
KQYLQNRKYKELGHGTYTELGSSTQDSRDIAKEFFKASKESDRIVFHFYRPTTRICDIF  
HAHLAKIAEKHLETKFVKVNVGEGCDSTGGGASFLVERLGIVIMPTLVLVKDRKAFHHIR  
GFDELGGHEDFSTNMLAHVLGAHGVTDIRDDEEMSEEFKERGINTIRIRKGAKKGGYSS  
YDX  
>comp9155\_c0\_seq1; 73 101 359 LEN=359; minus strand; translated  
MTTNLKMRLRCWMSLIAVYQQRGAPYRAVGTEGCEHPVGNKGHSGXLVAGGRAGFRAEA  
GERAGHRAGEGAGLRAGVEARFGAETG  
>comp9156\_c0\_seq1; 262 1 659 LEN=784; translated  
XSSNNSNSNHNHSKEKPEDNSLGISASIDKQGRKGVGAFLFRGRRGHPSSPCPSQRKER  
MCTTFEEQRFDDHDIRTVNTTRSSKNGENPLGIGSNTMSIINENHSRTEDRQPASPLNN  
NHINTNNTTDDKDKDLQKRAILGSARVLTMDGLVESFESPNAASKGFEARGTETARAA  
DMETQVVATKIHTTQCRGPSDYSDSDSDSTASGGALAWV  
>comp9157\_c0\_seq1; 1270 1 3725 LEN=3762; translated  
XERGRDNFRSIDFAVSSSHEEFQLQRQQPQQQQPRPSTGTVTNNVGNRTKERGRDNFRS  
MSFIVFPRNKSHEELQPQQPQKPPQLSTGMVSNNGFLSYVQSGELQKAKSPTEGYFFYRR  
GEGNNDTSSNRTIAVDEEGLPGPSISRLLRIEVRASNRDSEKNNNNYYPKNETKEPKSNQ  
NSGICEPQPLWSYQESPKLIKSHYQSDYEHTIWNASAAGISPSGFDYVNANYQALAE  
ARDQVFEFPREVDDDDDDVELQLYTMQMMNRIAVKRTKSPRIYTAACKIQPKVTDK  
LQHFHAMEEFYMCFDYWFEMFATLPGMNTNADRNRANQTAVVPVLIYDRETQLDNLVECFEN  
NSFMKGLNELLTEQLGMTILALDDYDCHFRYHLKGVATTKLQKLYHPLQTIRVYDKPP  
HKGYLMQHVEWNDMMDKLLGKKEKLAVRHTWREEQKKKETWRQHQQKQAWIEHQKK  
QAWMEKRRQKSLIAQKKLSELLKQKRMVKGPEAQPTRAKQKQKIGKSEASQKMTKQMIAN  
LEAPPKAEQLTTNPRIAQLMTKLTANPEAPPKTSQTI FNSDAPRKTCKGKAGGQQAS  
SGTRFHQPTRSEENRIITSELTPSALRLKGERRRRLSTSGNNVDENEDDNKNDNGDENS  
IGDASWYELYTAAQTKQQRQQATDANADHDDGESSQGGLDGADGDVYASGKGSSEEQG  
DTDGTETNSNDNNNDRGIEDGGIGDADSGANI SADDNNNESDSKQGGTDGDANTDDNSV  
TNNGLNADANRITADENDITARSRQQQEEQAMDASVDHYDDDSNSFAGFVDADTNRIAK

NSPRIMVRHIRQQTYPNHNKLSGQDDRNEADTNRRTESKPKVTVQKKREEHFATNAFAD  
HYDNTGEAQLNPTAQNHQEDQAFDAHHSYNDTIAEDIHLNATGQNYPQQQASYGHNGNLK  
DIHLNATADNHQQQQVINPNVTDNFNSDYAYTAASSKEEVTNVDSADNGNDYYSHHVCSR  
PRIGILNRRKRSRILNAEELARDLSDLVYVYGSNDNDNKTAAHVHNLTSVNVVYFENK  
SLEEQVDFFRSNDILVSGHGAQLTGLPFMAGGETTRCRQVLEFFPKNYAIPYYFGSLAVQ  
SGLRHSFVYFDDGRNGGKKKQNNNFPGPYTHEELWQQLLEPSALQQIMPWEIKFGDTVEKR  
REARMFKFCPRTDDMVS YVVQLVMIGTTVTD AEAQAQNETQ

>comp9159\_c0\_seq1; 610 209 1921 LEN=2235; translated  
MSMLTPHMPSNMPGAYSGLSALIQAATSQ LGDFTEIDNSETSALLESPMLSNPPTPTFE  
GRQLLELNVTSSSSWRRGESTIATVTVPLVSCVRHQEPEGTSKCCFPEVLM LLLSNPIYAD  
VVTFFLPDGKYFAIRREEFTNQ LLSKHFGLTFCGDFLEVAKDWGFIRVNGKINEGDDNAGD  
RNSMNNNGNNSDANECTNITAKINSSKAEIYVFRRFHFEQNQPVD TNKVRFKNGDVQNC  
QQLHGSSIDDKDTPKLSKKISRNGKKSKEKRKLS S SPTNGESQNSAQRLRANSKTNSDGI  
NP I PLSAGSCDRPIHQ LRRRSSLELWGMAQAITSSKICTRNGSERVKIDVISNMRHSSVI  
KKSNTSSSPKAPDPIMPPQLERQSTGSSSLVDGGVETATHTIVTDAIEALLFDENHTRETY  
NRHEKELSTSSLPGVVPI SKQLFSASDNNGVSSGTLNMDNNEKCKTMKKIPKSRGKVATT  
KPKPDS SSSWPMYSSIESLEDASKKNANVDPSSPSFLNCGSLRVV I PKDGCEYRQQH KSI  
YGS MVVSPARMEAAAALVSQSRIKNS EDVI

>comp9160\_c0\_seq1; 458 167 1528 LEN=1776; translated  
MQQHKRCVLLALILVLALARILFSALSIRKTIQPQFLFDKNALDFKPTTKFIEEICDPSP  
AKPIKKIESFRNYAFYKNLSELQTTNGHYETPLAVCEFHETMPHFPHVMQELYKCYTYWQ  
DNPGRIPILHPYDKNIVVDLFDQDNPFVNGFLESILSQMNVEILDGDEIQEWLKTNMTKTN  
HNSTFFKGNSTTVNGGKDNTDGTVSKVDFQSVEMNSTSGFV VSHVDKLNELVDH HFAIDS  
EMSEKSANSNPTSCPSRIGILNRKRTRSILNPEHLVDEIIGADIGGNQSQFSTISLSSQ  
QSVSVQYFEGEDFEAQVRFHFGIDLLISPHGAQLTGVPFMANKHCTHLIEFFPHNYLIPY  
YFGTLARDSGIEYSYVYFSQSSDEEILSASEAPSFTAYVNRSSDGDNMLASESSNMLQRV  
FATELDERRQARRKNFCVDPTI IIDAIREFIPKW

>comp9161\_c0\_seq1; 411 350 937 LEN=1068; translated  
MKFALVSVLTAVSTISVTGFAPPVSLGSRDVRLTSKKS GHNLKKTSTTGDL DLEVFTEDM  
LKASTFVYTFRCIRDVVRTHGIGVGDGKKIGSDNEEDQTKKSLWSLLFPKKQVEFYRPEL  
IITDKGAQDANDNRNFKHV VTPDAIKLFVENNRKFFREDGIDIFFEENDRTEPF EF EKAL  
EETMEDNMKI IDYVS

>comp9161\_c0\_seq2; 732 350 1783 LEN=2008; translated  
MKFALVSVLTAVSTISVTGFAPPVSLGSRDVRLTSKKS GHNLKKTSTTGDL DLEVFTEDM  
LKASTFVYTFRCIRDVVRTHGIGVGDGKKIGSDNEEDQTKKSLWSLLFPKKQVEFYRPEL  
IITDKGAQDANDNRNFKHV VTPDAIKLFVENNRKFFREDGIDIFFEENDRTEPF EF EKAL  
EETMEDNMKI IDYDDAFSTKNGGLVYGI VVNLTHKWVSVVFRGTVGLTDILTDRDFR LNE  
EFFFSGGYGPPALGGSPGTHEGFTNYLATPREYDSVDRPLIDRILASVNDVFEKNPDVKG  
KDFNLYFTGHS LGGALANLSAFHAANLKEKGGKSVKHLPNKIEAMTFAAPVVG NKDFNKE  
YQRLERKGI LRHIRVSNQGDVIPTNYIPFPLSLAFKGN TKLYTQNGVNI FLKPRRELEIK  
YRNTKSCSEQLVLGNVNILDNHMPPEYMRRVQTDKNEENFKQTV EELYAAKAGDCTA

>comp9162\_c0\_seq1; 598 157 1986 LEN=2070; translated  
MGKPKNIQYGGQHRVTGEEVTRVYVRK KDARQAKGILKDGGLDDRFRMLPANGDADF D  
PATDTISALVAIPVCGEFSEEGNCFDGI VGSMTASDDKDNSECTDGSRSASHFSSILVGV  
GYQTCPYSTKMLGNSRANRQKLRNSNINSTAVSCTTGIMESLCLSRSVILEDVSENC DQN  
GNISSNSIFDRVLQLDSTVCPGSRRRPLLEVF GDDRTVVVPPDAFEGEEFRSILRDVQRL  
RVQQRKAKQSPSSNGIGDENDNENS NRQENGQSDDIVNLYVDFWRR LALAHNSPRVRRG  
GIDPNSQIRESGHRILWPRPSKSIDSCNNENNTMDGLQSR SWIRVTEQGIKQSFDLTKVM  
FSRGNISEKIRFGKHLVREGDIVLDLYAGIGY YTLPAVIHGKASKVYACEWNRNAVEALR  
FNVRDNKIEDKIEIFVGD CRESVKTHGIVGLVDRVSLG LLLPSSEGGWRAAIRALKVPSGG  
WLHVHANVPASEMASWTLWLCHRLEILVQEEHRPDDWWILCNHVERVKSFAPTVFHYVAD  
VFGSLSS EAAPIGETFVQQRNQVEMAENNTCRAWMRKSSDLTWIPASKEIVVEPSCAL  
SPDGVLSQDW

>comp9162\_c0\_seq2; 611 157 2016 LEN=2100; translated  
MGKPKNIQYGGQHRVTGEEVTRVYVRK KDARQAKGILKDGGLDDRFRMLPATASAIEN  
MNANGDADFDPATDTISALVAIPVCGEFSEEGNCFDGI VGSMTASDDKDNSECTDGSRS  
ASHFSSILVGVGYQTCPYSTKMLGNSRANRQKLRNSNINSTAVSCTTGIMESLCLSRSVIL  
EDVSENC DQNGNIISSNSIFDRVLQLDSTVCPGSRRRPLLEVF GDDRTVVVPPDAFEGEEF  
RSILRDVQRLRVQQRKAKQSPSSNGIGDENDNENS NRQENGQSDDIVNLYVDFWRR LALA  
HNSPRVRRGGIDPNSQIRESGHRILWPRPSKSIDSCNNENNTMDGLQSR SWIRVTEQGI

KQSFDLTKVMFSTRGNISEKIRFGKHLVREGDIVLDLYAGIGYYTLPVAVIHGKASKVYACE  
WNRNAVEALRFNVRDNKIEDKIEIFVGDRESVKTHGIVGLVDRVSLGLLPSSEGGWRAA  
IRALKVPSGGWLHVHANVPASEMASWTLWLCHRLEILVQEEHRPDDWWILCNHVERVKSF  
APTVMFYVADVDFVGLSSEAAIPIGETFVQQRNVEMAENNTCRAWMRKSSDLTWIPASK  
EIVVEPSCALSPDGVLSDQDW

>comp9163\_c0\_seq1; 516 79 2076 LEN=2389; translated  
MTPTNVDWETLCAIYDDGENELNSEETLDEYHEQNSNNNNDDRKVRLKVSEFSKGFCTV  
YMTLSSSKIAFARLVKSDGSYRYFTIDNPPILKLDLIFYSCENADKEDIVPGENDNSNYI  
DHNKNDDWTESENDGPNLRLTWEYYPKEWPLLDKEKYRSSLAKRCHELLRDEGSFSVCQ  
FLEHEAISFYHGNHTGDTNAIATDEEDGDAPVTNASNSWKTYADENHPDYLLVILPPKMD  
QLYYPTIGSLLHPRKEAALLEEAAAKKTADASKKAVGRKTIANKKKPKPKSSSKKPPVAT  
RVCIDNTLDFGRHALLQNWKDLYLTRCPICLEESILYSDGVVFPYCQHYCCRDCFDYSYLR  
FKVQDLKQHRNPFVETCKRELPMTFCKPFLSESDTAAARAWYKDLKNPPAWSLDRCLL  
TRTCGAVGSMRRRKS SVV SIDAASGKTSLQKPTLFSDDLQYL VYCESCKNTWCELCLT  
RVYDDEICTVIGGSGSKNGARKPGAKTRHTVSSHKRLCNPKPILKFCSTRYKAASEEIQEK  
VSSKYPWIESYSQFCQEDGAAL EYVLNHGQRCPCNCQTGVERSEGCFHMKCPTCATHFCYE  
CGTELFPPYYGTHHCWEESSGGGAGEDDDENGEDGGAYNNNNNNHNNFAYYDADEQLAALQ  
WMQY

>comp9164\_c0\_seq1; 198 1 312 LEN=860; translated  
VEAEAEAEATAVEIEPTEETPVEEVEIEAEAEATAVDIEQEPEPEPEPEPEPEPEPVVF  
DQKQQPLPAEKEEEEVAAKYAAIEDVGERAFAILTDLGMFDRKN

>comp9164\_c0\_seq2; 166 1 237 LEN=785; translated  
VEAEAEAEATAVEIEQEPEPEPEPEPEPEPEPEPVVFDQKQQPLPAEKEEEEVAAKYAAIEDV  
GERAFAILTDLGMFDRKN

>comp9165\_c0\_seq1; 1113 122 4624 LEN=4624; translated  
MAVADNDNDGNDINIISDDNKRCDTSKTKGKKEKKIRKEKSTRSNRRNTKLMVSVRTIDA  
QEDDDDTNEGAMNTGLRVPDRTNTKKEKARGSNLQKKNKRYESKRNLHGGSDSGSD  
RTIRKKRKEKSMRKEKRETTT VKTSLKKVKSNSKVCESKKNRKKKKVQKGEDQTPPEI  
ILESIAIKRVSRLMKNPTEVVLVKDDSGIGNEYWIETEMKRILGKLRQDGESEEDKYEAE  
DEFSGSDSGCFPVVCRSICEIPLFYRSSKNANCGDGDSELSSSSTSESVVNTSFYSNG  
CGLRRPPMHVITEALNNLINTLSDSSTYGGTAVWAKWFTEALGLSEVSYLASTGLVPEL  
GVLLDLPGFRKHETDNSSDQNNACTKTEMGTPKPKKPPMTWDWNSPYKFHRSCLA VRDLL  
RAVSESRHPVIMIINNLHQADM TLRLLHFLLTGDQWDQQLFAQPKKIYTD DDKKLSKEH  
TKAIDEASGRQLNQLLGT YDGHKIVSKTLETLEQNFLKQEFDWKEQOEHFQOAMGR  
DLEFEGTFQKQSRFHKICLEPQIEILERM FHEALAGASKDNSEICGESSHVEQDLREFTK  
IVYKWTNCNASFGLQVLEYLKEEGSISLPSHNWNIDEARIESRLCETDPIGLMTFRINR  
LPGVVRFALIITSSIRQTRIGFSTCQLFRLLRSAYSWMTDFPFDSISAFERALATACDLK  
FMKRIICDRNTNNRTCLAFSHTIIRDAAYSLFSEQMKLEIHLRIGTEASALAVSGDLA  
LSSDECSAFKFLAADQLVIAE EILDQDCDSVALLLVETAELCVSKSAFFTAIQYLQIGIE  
LLRRNEGLFTQKNHGTCIRMYLLKARLHSTCDQDKIAIEKSFREIRKNSRNLKDEILLQ  
VEIGILVGQKRYQEA LRKTLR TLDM LGKLPNVRGLPEITSLQFEELVQLTVSKATPKLF  
RPSHCTEKKVCDVMSLLANLLEISQLCPSEGYRELATIRMMHRSLTSGFTRQYSTSFAYY  
GASLMKHL SATGDL SFLREGFRIGKVCEKLARVDDFYGGHSLAVFHFIYI SHWRRPYRLSL  
GQVLSIYNNQIESGDYFHINFVFTYIQYHLTCGHNLTKLDGNLQLFDVLYKNYKMKDDW  
KIKLPQRFVNLMLGETSSPFLFVGCNLEDQKSQISRMKDGGETDTVNFIFYFLMLFTSIF  
HHHALSKSCLEEVTEESVLP IWRPWIIFQCLTDIVFIPYIENPQEKEKFKELVNQKKDR  
LLDWYNEGAINCSVMIALVNAEFTVADPGNKPLTVLR IQKLYDDAIAVSRKQELKHLEGF  
CLERASMRFEIASAHGLSAEYMAKAHQCYIEWNATAKAVDIEEKHATKLFKSKREKMGVGA  
GYVRQNSGLQYDPNQVIGGRPSEIKGINIKDAARKVEKVKDMVFGTRFNSERNVANDIV  
PLSREPSRQSKFHSEHDVTKDITPLSRGASSRQSKFLSERDVTKAIRPLSGGASSRQSK  
F

>comp9165\_c0\_seq2; 773 122 3307 LEN=3324; translated  
MAVADNDNDGNDINIISDDNKRCDTSKTKGKKEKKIRKEKSTRSNRRNTKLMVSVRTIDA  
QEDDDDTNEGAMNTGLRVPDRTNTKKEKARGSNLQKKNKRYESKRNLHGGSDSGSD  
RTIRKKRKEKSMRKEKRETTT VKTSLKKVKSNSKVCESKKNRKKKKVQKGEDQTPPEI  
ILESIAIKRVSRLMKNPTEVVLVKDDSGIGNEYWIETEMKRILGKLRQDGESEEDKYEAE  
DEFSGSDSGCFPVVCRSICEIPLFYRSSKNANCGDGDSELSSSSTSESVVNTSFYSNG  
CGLRRPPMHVITEALNNLINTLSDSSTYGGTAVWAKWFTEALGLSEVSYLASTGLVPEL  
GVLLDLPGFRKHETDNSSDQNNACTKTEMGTPKPKKPPMTWDWNSPYKFHRSCLA VRDLL  
RAVSESRHPVIMIINNLHQADM TLRLLHFLLTGDQWDQQLFAQPKKIYTD DDKKLSKEH

TKAIDEASGRLQNFLLLGTYDGHSKIVSKTLETLEQNFLKKQEFDWKEQQEHFFQQAMGR  
DLEFEGTFQKQSRFHKICLEPQIEILERMFEALAGASKDNSEICGESSHVEQDLREFTK  
IVYKWTNCNASFGLQVLEYLKEEGSISLPSHNWNIDEARIESRLCETDPIGLMTFRINR  
LPGVVRFALIITSSIRQTRIGFSTCQLFRLLRSAYSWMTDFPFDSISAFERALATACDLK  
FMKRIICDRNTNNNRTCLAFSHTIIRDAAYSLSFSEQKMKLEIHLRIGTEASALAVSGDLA  
LSSDECSAFKFLAADQLVIAEEILDQDCDSVALLLVETAELCVSKSAFFTAIQYLQIGIE  
LLRRNEGLFTQKNHGTCIRMYLLKARLHSTCDQDKIAIEKSFREIRKNSRNLKDEILLQQ  
VEIGILVGQKRYQEALRKTLRDLMLGEKLPNVRGLPEITSLQFEELVQLTVSKATPKLF  
RPSHCTEKKVCDVMSLLANLLEISQLCPSEGYRELATIRMMHRSLSGFTROYSTSFAYY  
GASLMKHLSATGDL SFLREGFRIGKVCEKLARVDDFYGKFR

>comp9165\_c0\_seq3; 1002 122 4741 LEN=4741; translated  
MAVADNDNDGNDINIISDDNKRCDTSKTKGKKEKKIRKEKSTRSNRRNTKLMVSVRTIDA  
QEDDDDTNEGAMNTGLRVPDRTNTKKEKARGSNLQKKNKRYESKRNGLHGGSDSGSD  
RTIRKKRKEKSMRKEKRETTT VKTSLKKVKSNSKVCESKKNRKKKKVQKGEDQTPPEI  
ILESIAIKRVSRLMKNPTEVVLVKDDSGIGNEYWIETEMKRILGKLRQDGESEEDKYEAE  
DEFSGSDSGCFPVVCRSICEIPLFYRSSKNANCGDGDSELSSSSSTSESVVNTSFYSNG  
CGLRRPPMHVITEALNNLINTLSDSSTYGGTAVWAKWFTEALGLSEVSYLASTGLVPEL  
GVLLDLPGFRKHETDNSSDQNNACTKTEMGTPKPKKPPMTWDWNSPYKFHRSCLAVRDLL  
RAVSESRHPVIMIINNHLQADMDTLRLLHFLLTGDQWDQQLFAQPKKIYTDKDKLSKEH  
TKAIDEASGRLQNFLLLGTYDGHSKIVSKTLETLEQNFLKKQEFDWKEQQEHFFQQAMGR  
DLEFEGTFQKQSRFHKICLEPQIEILERMFEALAGASKDNSEICGESSHVEQDLREFTK  
IVYKWTNCNASFGLQVLEYLKEEGSISLPSHNWNIDEARIESRLCETDPIGLMTFRINR  
LPGVVRFALIITSSIRQTRIGFSTCQLFRLLRSAYSWMTDFPFDSISAFERALATACDLK  
FMKRIICDRNTNNNRTCLAFSHTIIRDAAYSLSFSEQKMKLEIHLRIGTEASALAVSGDLA  
LSSDECSAFKFLAADQLVIAEEILDQDCDSVALLLVETAELCVSKSAFFTAIQYLQIGIE  
LLRRNEGLFTQKNHGTCIRMYLLKARLHSTCDQDKIAIEKSFREIRKNSRNLKDEILLQQ  
VEIGILVGQKRYQEALRKTLRDLMLGEKLPNVRGLPEITSLQFEELVQLTVSKATPKLF  
RPSHCTEKKVCDVMSLLANLLEISQLCPSEGYRELATIRMMHRSLSGFTROYSTSFAYY  
GASLMKHLSATGDL SFLREGFRIGKVCEKLARVDDFYGGHSLAVFHFYISHWRRPYRLSL  
GQVLSIYNNQIESGDYFHINFVFTYIQYHLTCGHNLTKLDGNLQLFDVLYKNYKMKDDW  
KIKLPQRFVLNMLGETSSPFLFVGCNLEDQKSQISRMKDGGETDVTNFIYFLMLFTSIF  
HHHALSKSCLEEVTEESVLP IWRPWIIFFOCLTDIVFIPYIENPQEKEKFKELVNQKDR  
LLGKIVNIDVLLFAARILSV PANWRMIVFHLHSTCI IKCMKD WYNEGAINCSVMIALVNA  
EFTVADPGNKPLTVLR IQKLYDDAIAVSRKQELKHLEGFCLERASMRFEIASAHGLSAEY  
MAKAHQCYIEWNATAKAVDIEEKHATKLFKSKREKVMGAGYVRQNSGLQYDPNQVIGGRP  
SEIKGINIKDAARKVEKVKDMVFGRTRFNSE RVANDIVPLSREPSSRQSKFHSEHDVTK  
DITPLSRGASSRQSKFLSERDVTKAIRPLSGGASSRQSKF

>comp9166\_c0\_seq1; 545 118 2118 LEN=2810; translated  
MAEIVASSKIAPSTPASASTNNNSNNNYSSKQNKIPNPNGHGEHTKNGGSATAVENYHTK  
SNKKEESGSSTTIVRAFPHLTITVYIPTVCVGLIGKRGYTIKIQRHAVTESSRFYSSE  
GLQQSQPQGGRRDNGGSNKQSSKQKKVSPDSVRI SVVNYPPPAPTAQQHQQNYENYDNPH  
YLVNSEEY PVSAGPQKQPLQQQKQQQHHP SALPHPLS QSALHSSIGDMGVPPTYTELD  
FSNPQWTPIVIRADPIAALHASRAIHEICFPEYVGDRTHLVYIMDVPVPAVETASNNNSN  
TISSPNTNLRHASIVGKKGNKLLQLSADHSCRIMVPPKQLGHNI IQLEAPLQECCLRA  
ISARLQPDNASDFSSGDEQECKEPLSPQNGDANHHKPHP SVALQANTNSNNNYNGQGQN  
QSGQTKNARNRNKIENARSNYQISLIVQPLPSQTKLRNIARKTETKILRKKIPKSQQKQK  
QKQLEEQRQKQEQQPPEDSELLEDVDGDDDAQEQQEDNHPATTGDGSANNSSRD TANNP  
KSSGGSWRLTVVATTEKKATKALDMLKVLVSKGYEVLVEDMGTTTNQNDATQNNKGNKSP  
TEQPYTCTNRDAEVPSEVSANGTESQEAPFESA VDDSKGGSNNHYNNKSGGGRGSRGKKK  
KKYLYK

>comp9167\_c0\_seq1; 111 1 325 LEN=489; translated  
XATVPCWNCLEIGHYKSECPNVGKDGVARGRSSSHNAQQPPTTILDVTNLLQAPNPYASY  
CNVLATAFQKKDLPTIRVRVETSLKHHGAHDEKNWNARRKSIFIVVD

>comp9167\_c0\_seq2; 295 119 933 LEN=1018; translated  
MHSKTEENGGCRKNNSIWKAIDKLEQRKDNFHPETAQVLEILRIWGGKWQGNSTMA  
SLLNKSTLHYEIEETIVAIHYLVEGLARRDERRCHVVDVCAGKGMLSFLLSYFKHPKVAS  
IVMLEKATIDWSHIYESNKTAKDENRPEITIWDNTNLHDYDDVLDRLALPHPVAMCGIH  
LCKQLGPSFCGLFNGLGKKS IYGXLVTVLYASGGHDPEEECEKKDIYVVHTTDGNYRGP  
LCETRLYAPTRTTSAEQFRFDNEKMLNSH

>comp9167\_c0\_seq3; 402 119 1327 LEN=1491; translated

MHSKTEENGGCRKNNWSIWKAIDKLEQRKDNFHPETAQVLEILRIWGGKWQGNSTMA  
SLLNKSTLHYEIEETIVAIHYLVEGLARRDERRCHVVDVCAGKGMFLSFLLSYFKHPKVAS  
IVMLEKATIDWSHIYESNKTAKDENRPEITIWNTNLHDYDDVLDRLRALPHPVAMCGIH  
LCKQLGSPFCGLFNGLGKKS IYGCLSPCCMPRAVTTQKKNKRKTFTLSIQLMETIEDR  
CARRDYMLRRERLRKPLTGPCFYCKSEDHPILRCPALNTLPEEEQISTRRAWHIATVPC  
WNCLEIGHYKSECPNVGKDGVARGRSSSHNAQQPPTTILDVTNLLQAPNPYASVCNVLAT  
AFQKKDLPTIRVRVETSLEKKGHAHDEKNNWARRKSIFIVVD  
>comp9169\_c0\_seq1; 249 328 717 LEN=717; translated  
MDLSVTNAIRRLESGEIELKDLSEELKDNIDVVLAAVSEDGYALEDASRRLRNNARVVEA  
AAQPDGVALRYASDEMKNNEELVTHIVTHNGEALKYASEELKNNQEVVITAVTNDCCALE  
YASDEMKNK  
>comp9169\_c0\_seq3; 370 262 921 LEN=1060; translated  
MERTAQSCLCAVADAIQLVDRNPVALKYLSEEMKGNIGVVLTAVSGEPYALQYASMGLRN  
SRKVIMA AVRQNGYVLHYASDELKNNREVVMTAVTQKGHALVWASDELKNNKEFLMVAVT  
QYGNTFHYASYELKNNKEVVMMAAVTQNGDALQCASDELKNNREVVMAAVTQNVAAFMYAS  
LRLQGDIDIAMTALEDCAGLLKYCTDIFFVGCQQRSLGH  
>comp9169\_c0\_seq4; 345 262 846 LEN=985; translated  
MERTAQSCLCAVADAIQLVDRNPVALKYLSEEMKGNIGVVLTAVSGEPYALQYASMGLRN  
SRKVIMA AVRQNGYVLHYASDELKNNREVVMTAVTQKGHALVWASDELKNNKEVVMMAAVT  
QNGDALQCASDELKNNREVVMAAVTQNVAAFMYASLRLQGDIDIAMTALEDCAGLLKYCT  
DIFFVGCQQRSLGH  
>comp9169\_c0\_seq5; 298 262 794 LEN=794; translated  
MERTAQSCLCAVADAIQLVDRNPVALKYLSEEMKGNIGVVLTAVSGEPYALQYASMGLRN  
SRKVIMA AVRQNGYVLHYASDELKNNREVVMTAVTQKGHALVWASDELKNNKEFLMVAVT  
QYGNTFHYASYELKNNKEVVMMAAVTQYGTALGHASDELQNNKAIVMAAVTQDGYALYX  
>comp9170\_c0\_seq1; 86 1 444 LEN=1467; translated  
XGAKPSTSGGSLVRKDLFLVTPDLLVLLPNPVS DXIALVNLGNTHGTGVTNGESCCKMSH  
LGNPQAQRTIKFITAI ACTGAGIQATFFSNYDHVPGFEGKDHVFSGLQRDARDFLDITVY  
GIDPEIVKQRASRPKQHTAE EHNHKPSK  
>comp9170\_c0\_seq2; 86 1 444 LEN=1105; translated  
XGAKPSTSGGSLVRKDLFLVTPDLLVLLPNPVS DXIALVNLGNTHGTGVTNGESCCKMSH  
LGNPQAQRTIKFITAI ACTGAGIQATFFSNYDHVPGFEGKDHVFSGLQRDARDFLDITVY  
GIDPEIVKQRASRPKQHTAE EHNHKPSK  
>comp9170\_c0\_seq7; 86 1 444 LEN=1730; translated  
XGAKPSTSGGSLVRKDLFLVTPDLLVLLPNPVS DXIALVNLGNTHGTGVTNGESCCKMSH  
LGNPQAQRTIKFITAI ACTGAGIQATFFSNYDHVPGFEGKDHVFSGLQRDARDFLDITVY  
GIDPEIVKQRASRPKQHTAE EHNHKPSK  
>comp9170\_c0\_seq8; 86 1 444 LEN=2093; translated  
XGAKPSTSGGSLVRKDLFLVTPDLLVLLPNPVS DXIALVNLGNTHGTGVTNGESCCKMSH  
LGNPQAQRTIKFITAI ACTGAGIQATFFSNYDHVPGFEGKDHVFSGLQRDARDFLDITVY  
GIDPEIVKQRASRPKQHTAE EHNHKPSK  
>comp9170\_c0\_seq10; 86 1 444 LEN=1731; translated  
XGAKPSTSGGSLVRKDLFLVTPDLLVLLPNPVS DXIALVNLGNTHGTGVTNGESCCKMSH  
LGNPQAQRTIKFITAI ACTGAGIQATFFSNYDHVPGFEGKDHVFSGLQRDARDFLDITVY  
GIDPEIVKQRASRPKQHTAE EHNHKPSK  
>comp9170\_c0\_seq12; 86 1 444 LEN=1368; translated  
XGAKPSTSGGSLVRKDLFLVTPDLLVLLPNPVS DXIALVNLGNTHGTGVTNGESCCKMSH  
LGNPQAQRTIKFITAI ACTGAGIQATFFSNYDHVPGFEGKDHVFSGLQRDARDFLDITVY  
GIDPEIVKQRASRPKQHTAE EHNHKPSK  
>comp9171\_c0\_seq1; 348 240 1124 LEN=1244; translated  
MADPEAPRLVRQDPPPPAEK DARGSKRPRPEPGPSTAAPPGESVVRPVVTPTAEGSSPDAG  
SSSPPSKEAPKQGSSAETEE EIPDLARTLGLLEAGDEIEVQWEIHRDEDQDQDHGEDQGRD  
GGGPEVSVHWRATLMEYD GKT TDSVAVRTL CYEARPD LGFPEPSKEDVVFLGRDVLAA S  
TDANS GDWEANPGAVRRMPYRRVGS GAKASAKPEEEVFYND DQDDQLNDLLLGALERNK  
EAWRAVPAARQAAIAEAIKEKKDKL KAILQAEAKKRDNKVITSETIREILARTF  
>comp9172\_c0\_seq1; 516 204 1541 LEN=1624; translated  
MIPTRRVFMRMKNKLLWSTAVAAAATTTT VLFCS PSSGDLSSRCEQRLV SFASAFTPO  
NGPWGVATGSAAAMRVSSISKALSSAATSAGV FSSNVTECKESDAVEGQDDEESVVVTEI  
PFDESVLTYDHYNGVTINLEKYEENNDGRADDDSLNLSFATKLNNALS IWKA EGRKGIWI  
HTNSQSAKIYIPDCVEAGFQFHKILPKKTSNDSSNPDEGNSSNALVLSRWLPTDTPSRLPH

GPTHQVGVGVILLNPSDPSQMLVVKELSGPAAKYNLWKMP TGLVDPQEYVPEAASRELLE  
ETGIEATMSSILCIRQAHRSNADTSDMFFVCKMTPSKEEIIWQRQEAIEAIEIRWMPVKEY  
CQQDQWQGSPLYETLND CVLKASLQEVERQQRNAEKVDTGKI LNGLIEHRQLEVGFGRTDG  
KSEALFLPEPQQLPSSITTTTGSKL

>comp9173\_c0\_seq1; 235 1 564 LEN=564; translated  
DQTKPNKAQPTGANTPTHTPLPSVKNQAIHGTHIQRSMSSSVTDPATENEALAFRPS  
REEWTLLSQGAEARVWKLEAGPSKGSSSDGNNGDGDGDGPRGFLVCKERFSKAYRHPDL  
DLRLTKSRCRSEAKLLGKCASRSAIRVPRVVRVDP PSLYLEYLAGPSVKSYLQGGQQRKKK  
QQQEQQQQ

>comp9174\_c0\_seq1; 473 197 1600 LEN=1608; translated  
MRTKVQVQRPLKFYLVFFSLIAVLVACFTPSHAQQKNGNGSSGKGFGRKISERAGAGAD  
TTPEGRYLDAFGLKLEDGKNGDRNVRSLVDRSPGEILLAI PSEEIITVERIRSRLTASCE  
TKRDDNRPHEDEEEGLAIGLLRLKYDALDPYVSNVLPK KHFNAWTMSRDLWMETS AVLPR  
CYLETFDATRQVRNRFATETAAAADHKFTVEDALWAF SMVRSRSLAVPELNDDDSGKSDR  
MPLALIPGLDLLNPKFGVGTQLQLVAGEGISESKWLLSTSDSISAGDEVFLSYGDDKDNW  
KLLLTYGFAIPNNPNAVVFWTWSDLLDAAQTVRPTFSDRVCRQLLRHPQLEAYTVPSEH  
RATFSYDAHTGTPRESLSNGLAMLNNLAAQLGKPEADNDALSTEVLEALISRRLEELREG  
LKLLTEQREKRSEATDKQEEYAEWESFFSLLFALKSEEQQQLQTQH

>comp9174\_c0\_seq2; 472 211 1614 LEN=1622; translated  
MRTNVQVQRPLKFYLVFFSLIAVLVACFTPSHAQQKNGNGSSGKGFGRKISERAGAGAD  
TTPEGRYLDAFGLKLEDGKNGDRNVRSLVDRSPGEILLAI PSEEIITVERIRSRLTASCE  
TKRDDNRPHEDEEEGLAIGLLRLKYDALDPYVSNVLPK KHFNAWTMSRDLWMETS AVLPR  
CYLETFDATRQVRNRFATETAAAADHKFTVEDALWAF SMVRSRSLAVPELNDDDSGKSDR  
MPLALIPGLDLLNPKFGVGTQLQLVAGEGISESKWLLSTSDSISAGDEVFLSYGDDKDNW  
KLLLTYGFAIPNNPNAVVFWTWSDLLDAAQTVRPTFSDRVCRQLLRHPQLEAYTVPSEH  
RATFSYDAHTGTPRESLSNGLAMLNNLAAQLGKPEADNDALSTEVLEALISRRLEELREG  
LKLLTEQREKRSEATDKQEEYAEWESFFSLLFALKSEEQQQLQTQH

>comp9175\_c0\_seq1; 245 276 1091 LEN=1562; translated  
MTWQDPVLCFWLFCVGPPLVLLLYIAPYRLFALVGLY WIGPQNYLLRVYRETRPGYQPP  
DFDLVVKKKKIEKAEDFQEMQFFSSDAPGNQQIRFQNI DPTHVKQIVVPSNVLMYNRFYD  
WPPEPEYARVYASSAPKNLIVPGVVDDPDNDGYSTGYESGD ISAFIFDQAARLNPVIKK  
KKKKGFRKVT SRINKGTRGFVKDTVAGTERVVGSTAGL TIDAVRGTAKITTSVVKGTGKQ  
AKSAAKGTGNFLGLRNRKSKAYEESDEDYY

>comp9175\_c0\_seq2; 1048 232 5289 LEN=5760; translated  
MRIRRRGRSKDSSNSHDDNRGGIMRPPFLLHREHRTQRSQNF TDTQHHRGYHSDGAPQNG  
ANDNNVQTRFPRFRGGRRPKTPSQTTTTNRHNNNH SKVGS SIYSDDGCSLDSFVSTNDRY  
YGT SIGTSGVESDPYEFVEFEQNRGRATSGRQRKKKNSLR SRSSNRGDDSIDPFDSDNG  
SIGDPHATSQPASPFEEENRRDSYKNNYKNRAHALSYGGSFDSDDDALFFEESNCDQSHYS  
ESSVGESPKYEPHRNSSMSISRSQHLQLSHTLDDYRGDPYSSAITNNYHDDDSESDSDVS  
FRNRNRHNSLRHSSPRSTPDMVDMNQRFLEHMAKRPSNEGSKRIRKGE GIEDKLFV  
PDYAYRTTTPYMRKQLRAETNSKSAFYHDVRLYKEASQSKTSSKSGKDR LKNFGE LRV  
ILQCYGLPTTSLIKEVSAYAVAVHEDAFAFQTDMI PNIANPMWLSKMRRACMFGVSTMYSQ  
LYIGLFDLEPLIADPDDVVGHIGHPGWLPPDQRARRGSF GFGGRGEGRMSFGGGANGNRE  
GRANFGVREGRLSFGGGSREMHL SNVDQASGRIGRSGS IGSRRGSGNESNKNDTDAEDDD  
DLDDTIKCNDCARAEDFIGHVVIVDCKLRPGT TYDVTLPLRRSKHVFSRDPRGSVRVRL  
HLTWNRSERSAVLSYLPRGLPGGTTGSQLSNKPNT RFTINCVDDRAARNVAHTIHGVHMPG  
KFDPVLVKATMREIHWTRIH LFRYL RQKQIYNLCNWVYPSISGFCFLAWMHAVYNTVRY  
FPGHVVFVFLHLIKNYSYAMDSPLQNGFLGPTLEELYMALMHPPLRKR GKKGTNGYI  
HPLNMQLKEDAWGATASDHLRSSASRNNS SKNSDNMDELYDENGDLVNVSRFSLTEIANA  
MREKLRVQPYRNGLTIFQH SFQGEDAVDFLVNNGYAKTRPEAVGLGRRLESEKGLFADVT  
GEARFEDSTYVYAFRTGYENERFVIKSHVPRGGRFLELLGFYSRSGKQTGEHHVGNKKN  
GKNTDDIAVMVGGADILEAREHVEFPFATGVDHPRFTVKE SLVIHSPEKSKVEKEKQAR  
DVLESAEFGI IPTSLGSSANSNDNQRANNVSGYESETGTKMTGNARISLKR TSSGRLSDG  
FVNGGKKITDSARRGSMIVGEAVKTVATGVATGVVVGANAVAEGLI WGNRQDANPIASTG  
SLEEVAVSEEDIYKLLKDQNNLELDRLIELQRKADAYDPYQYDSNDVGNIQKKRKHV  
IFEKHLKEPRNQEIGGNIHQQQSDMSLARALDSSRRQLHRAF YHMFDDQVYKIDENLFP  
TQLDKDAGKEMKKKKRRLFNRRVSNEEMKLEERQKRMQMPY EKQKEEIDKVLLINEH  
SHWNPMNRI GIVIQPLLEMAQTFLFATRASFNVMTWQDPVLCFWLFCVGPPLVLLLYIA  
PYRLFALVGLY WIGPQNYLLRVYRETRPGYQPPDFDLVVKKKKIEKAEDFQEMQFFSSD  
APGNQQIRFQNI DPTHVKQIVVPSNVLMYNRFYDWPPEPEYARVYASSAPKNLIVPGVVV

DDPDNDGYSTGYESGDISAFIFDQAARLNPNVIKKKKKKGFRKVTSRINKGTRGFVKDTVA  
GTERVVGSTAGLTIDAVRGTAKITTSVVKGTGKQAKSAKGTGNFLGLRNRKSKAYEES  
DEDYY

>comp9176\_c0\_seq1; 864 356 2513 LEN=2513; translated  
MRERARGGISFCDRWLYLLVACAVSVFYFDRSMLRSVEEHVFKFSTEETGSSRITSTAG  
DSSPPVPSSTCIGYREYFPPEHHSGLPYLADAFASFDASTVTFVGINRGKCDEEWKEADS  
FASFHVEQYHRFLCVFRGISDASNDEEVVYVLSDYIESTWPHDPVYLIQCQLPEVFRHLI  
TPGQTLTNLHVDLRSLLEDMEQDKGGSWGNHRRRNPPRSMSDGEDSDSDAGYRSSASLAL  
DVLPSISNIPICHPESVHVSKFSCRNSQHPDDSSHLQPNQFRLVGFPLPITSSYAIDSREG  
AEDSTVWSSSAQRLPEWIDYHRMQGYDHFVIYDNDPLPNGPIYQILINEGHIDSGLVSYR  
WFPLKNCMSSVEHRRMDTAQVSGSMAALHRIGFSTEFFSYHDGDEYLVPLRASKRKSSEP  
SRATILELAEDIFEAKPEIDAI EWVPTVMAPCNGTVVEAGGSVVAKWQCLTDQHYADVKL  
IVRTATIFYFCIHYPVVRKYTKERGDTSPEAYRLDDTTEGYLAHYRAENDPNGSWRDDYA  
GLVSNEWTDRIDYMDGFLASRGVEGFPRTSQSSASGIGEKPKTKPKTKPKPKPKPKPKPKK  
KKNNGSKALGGAATAVLERPPEPEAAVAEEEEPAAAAAVAVEEPEIIQAMEEEITVEAEP  
VEAVEAEEIPEAEEEEETAEKAPATAVVEEAPPSTPEEVVTEEDSEVVAVLAEETPVEEX

>comp9177\_c0\_seq1; 544 233 1702 LEN=1757; translated  
MVVVRNIELYVVRHGERQDEAIRREFRSWQAAKTHHRRSIERGTPALPATDSLDPPLTAR  
GHRQAAAFSRLFGVLRRGDGPRIAVVCSPLRRAVGTALMIGTVGVDAQSGNGEPLLE  
FPRHRSGANSDDGHDGAIPITVLNGLGNSAAAVSKRGGMEELVPKGFIRCAGMGSNDGTDA  
SPLARALSSMPVHRQNEPCAQHSQKPIRFWKRHEDKTGKSWLSSPVSKPLRPVVPDED  
QRGGNDGFSYPSRQSPRGTPLLPKNPLSAVDEAVAMAADRRCNVCIVVAHRETIRDLAA  
ERCGYFGSLSTPYCCVGSFGVSLIAGAEGGRAGVGEDSGATCAKYHFHNWSTETFTGTQA  
IPRHFPSPPTNSSSSSSCSVFLVSGEIGSPHCVCTIRSNLQKGEIGSQQVWLSDAEETLR  
RDLRKRKTEGFCLETKILTGREWEQLLTRQTGGVLKGTGWQLPDGRIKILQLENTM  
IGRPSATIEW

>comp9178\_c0\_seq1; 277 197 1097 LEN=1643; translated  
MPCRTLQSPELAAHVLDYAVNRGDLGSEGQSCDLGCGTGMLLVAAAFVVEEGEFVFGVD  
CDDDALAIKENVEHVDLEDVRFVKARVRMKNPNSVSGSEDKRGHPSRTNKRGGRRGRGG  
RFGGRGGGRVGSQPASLTAKARLIHDGEDGIPLDNCVETVVTNPPFGTKSDNAGIDVQFL  
RTATRLARRAVYSFHKKSTRDFLLKMIREDWGFPESDVVAEMRFDIPKSYKFHKS SKSDV  
EVDLIRIFVGDKTSHDGNADEHKNDPNENEDSVQKKIDDTGEEKDDTTTAKSTQDESIA

>comp9178\_c0\_seq2; 277 197 1097 LEN=1734; translated  
MPCRTLQSPELAAHVLDYAVNRGDLGSEGQSCDLGCGTGMLLVAAAFVVEEGEFVFGVD  
CDDDALAIKENVEHVDLEDVRFVKARVRMKNPNSVSGSEDKRGHPSRTNKRGGRRGRGG  
RFGGRGGGRVGSQPASLTAKARLIHDGEDGIPLDNCVETVVTNPPFGTKSDNAGIDVQFL  
RTATRLARRAVYSFHKKSTRDFLLKMIREDWGFPESDVVAEMRFDIPKSYKFHKS SKSDV  
EVDLIRIFVGDKTSHDGNADEHKNDPNENEDSVQKKIDDTGEEKDDTTTAKSTQDESIA

>comp9178\_c0\_seq3; 337 163 1128 LEN=1674; translated  
MRLKHLEASLSCLQREFPDPKVELEQYPTSPELAAHVLDYAVNRGDLGSEGQSCDLGCG  
TGMLLVAAAFVVEEGEFVFGVDCDDDALAIKENVEHVDLEDVRFVKARVRMKNPNSVGS  
EDKRGHPSRTNKRGGRRGRGRGGRFGGRGGGRVGSQPASLTAKARLIHDGEDGIPLDNCVE  
TVVTNPPFGTKSDNAGIDVQFLRTATRLARRAVYSFHKKSTRDFLLKMIREDWGFPESDV  
VAEMRFDIPKSYKFHKS SKSDVEVDLIRIFVGDKTSHDGNADEHKNDPNENEDSVQKKI  
DDTGEEKDDTTTAKSTQDESIA

>comp9178\_c0\_seq4; 337 163 1128 LEN=1765; translated  
MRLKHLEASLSCLQREFPDPKVELEQYPTSPELAAHVLDYAVNRGDLGSEGQSCDLGCG  
TGMLLVAAAFVVEEGEFVFGVDCDDDALAIKENVEHVDLEDVRFVKARVRMKNPNSVGS  
EDKRGHPSRTNKRGGRRGRGGRFGGRGGGRVGSQPASLTAKARLIHDGEDGIPLDNCVE  
TVVTNPPFGTKSDNAGIDVQFLRTATRLARRAVYSFHKKSTRDFLLKMIREDWGFPESDV  
VAEMRFDIPKSYKFHKS SKSDVEVDLIRIFVGDKTSHDGNADEHKNDPNENEDSVQKKI  
DDTGEEKDDTTTAKSTQDESIA

>comp9179\_c0\_seq1; 253 144 983 LEN=1110; translated  
MSQISTNSTKKAIVSLKALLLIPAILSLFVFLSSKQFAKTSFVVGIDSPSWARFSTVF  
SKSSIPACDNYPWKESENLVGDCAGSLTVFKGDPATVSSVETCATACCESDDCVTWQFRK  
DVGCLHGGDVRIGMEKDGPAWSCDHAPRKWEGQYVMQRAHGQIVKNKEETGACSLDTWN  
PNEQPGQCFLGDLVKKTRKDDKSVLLNSARACMEACCAEEDCGAWQFQSGLGCIFYHARMH  
GCIDTSDPTVFEFVGRKRFRSSREYVDMKGPWSQKLE

>comp9180\_c0\_seq1; 734 67 2473 LEN=2531; translated  
MASQSPSESASASEGNRRGDSGNEVSGSTSAEPSLYFVWYNSYVPPFDPRDGAVEDGRED

RSRWNDNGRDLEQASENAFQGERWNLRSNNTAEPSSIRQQFRTFWAMSKPYFSESEGEGRCLF  
SGLVVLMLLDSAARIAFASYLARDFWSALGDKDADRIFYAVMLEFLVALCLLAPINXLLSVP  
ATATGDQVEAVDDGATSASLFLQSPDLLSIGTKPTGAEPXVTRRGSRRASNHHCVDNPD  
QRLAEDVRSFTQYSLSLFLTIASVSLIDLTAFSVVLTYTIKPVLFSLIVGFATFGTAMTCLL  
GKDLVKLNFQRLSREADFRLVRLRENAESIAFFRGEATEGHELTRRFQNVVQNAAYDLI  
GTQRNLEFFTTSYNYLWTWILPVVVVAPEYMAGAVELGVVQQAAAAGFHVLDLDSLIFNEF  
EGLSEFSASIGRLHQFVTAVKNADPDRRDETDESAPLMGYPPGNDGSNSTANNSSGGDGI  
KTTSTSDANAEAAGALFDTNYTVHRTTQESISLKEPALSGSGVDPTSPALCIRNLNLYT  
PEAAIPSPSENFLSPTARTRELIRSLNLELKWGERLLIIGPSGIGKSSLLRAIAGLWTS  
SGVIERANTSDVYFLPQKPYCPLGSLRDQLLYPIRSSTSSSTVLSSSSENKSINDDNNEIP  
KTPCDQKLEILESVDLGLAKRSGNGDPFRGLDAVVDWSNLSLGEQQRLAFARVLFHE  
PRLVIVDEATSAMDISTEEKMYKLLIAKDLTYVSVGHRPTLLKYHTKRLELHKAEGTSDY  
TFEDIRSTADGVANEEVNLFFR

>comp9181\_c0\_seq1; 401 128 1296 LEN=1374; translated  
MAKIRKANESQEDGKPRKKFKKESPHKKKDKRQKQKQKDGKTDSPAESTEKKWSKSKKKR  
MRKILGKLLKKEQAEGKTSQSAPSATSSTSDASSTNSLAASATTETGKTKKNSIQEAFKARL  
AGSRFRILNEELYTTTSQKSYDKFKENPELFEQYHEGFRHQVESWPENPVDVMVRSILTST  
YHKNAKHQTTGPCVVADFGCGDAQLAKDLLAVKXKIKQKGNIREENSFEVHSFDLVS  
ELVTACDMADVPLKDKSVDVCFCLSLMGTNLADFIREAHRVLKDSGRVKIAEVRSRIEY  
SHGRKGKKNSSNNKESSSSSGNKDADVTSKEKTEGTLEEFDTVLKKGQCVRTDRSNTM  
FLLLDLKKNKPKDKLEFSKPCYKRR

>comp9182\_c0\_seq1; 1069 58 3510 LEN=3988; translated  
MTPSNIAATAHKKCYCGPCRALVYLTMTILAMEVLNASFVGAMGAKNENREAYNQLPKNQ  
TRATASRTNATSGSHHPYPASKPEHQPSDRFPGIYILEYTYHHQSIGNAPLMTALSRTTS  
TRMGVTRPTVLQRLDVLVRECHGSHHIALELDIERNKNADTTSEPALGSNRSPLSGRCE  
GQVLVHSRDEYEEITTMCHRDRMQKHKGLDFDCTIRYNATLTHEWIDPRLRVAALAGTAT  
NSNNGEIQSPLKRLRRTAEKESIAKGRYDTGETTISDFQEEDQRLDDASTSAMHLNTEQP  
PKRAQVYDYKSNMYSTIPEHDCYLDYEGTISWIKDFVKAHASSALLEITWSDIGDSWKK  
KDPNDGYDIFALTITGKAATPDFEESSSSSSSKFEELFGINENGASENQSSSEYENILQK  
NTKKGKAPLLLVSSTHAREYTPPELVRRWDLFVDTVVSGIHSEERTDALSMLEHTVIHW  
IPYLNPDGRVLAETTQPFRRKNLNSEWTLDPRESSVCPEDSYGVDLNRNFPFEWGNNGS  
DEIACSPFSRSGPASEPETIALVEYAKSIFPIAQVGSNAVLHSGGDYRIVHDPNTSVP  
ADTSSTKWRGFDPSFTKGVFVDVHSYGKVIYPWGNTNAQSPNDVFSFRSAMGHIASLTGN  
APLGPDPHYGVASGATDDWAYASLGAFSMTWEIGRNFHEDCGDFETDVVDPQRHFRSFA  
YLAKIAPFPFALGKGPVVSQPSDGLLGVGNEVHIYYQYTGTAATTATNNQFYHRANVHD  
NESNDDEVLDNRNAYTATALNHGSNSTNIEKQVVRVESYPKEAYTVEADLDADETIAIAIE  
VKLPERIPQHFEPIEFETDNDDEEEDDSHSSIPPSSISIRIFYRKNPLVGAKEYGSGVV  
PSLSDGQYYWDLSDSSKDDHDTLYVGYLTKSQLWEAFSGNDEEKLPKRKPPAQTMHTLY  
IQAMDNAGNWGPVTGKLTVVIMEETKDIYEKDTYPYNNHTIDDWELDDFFGPIILGET  
TAGHSVTATTAPAADSQSSASSNDDSDVANHQSSNSDSTFP SAEAKSAPGSEYDVGMDA  
FLHEEQEKQKIDIDNDEKEPEEIGEEKIRSNASGSLSRHYHVS VIRNWQGMKSQSVSS  
LAAVVLILLY

>comp9183\_c0\_seq1; 156 2284 2835 LEN=3051; translated  
MTSKVACKCAIRVTEKQPVTTRVDPKAPHNFGAISYREEMLHTAERPGHFTQNFHSSIIQ  
GWIRHVKSKGITHVLIIMDDNEFDVYDVLKEFYRSGLIVHHIPFRSPNSYENIMALLQ  
NLDARGEKVVAHCSGGKGRGRCGRVACAWMCKKWCLTPLEASQEFIDQAVENGLYRLGDVEK  
LKKW

>comp9183\_c0\_seq2; 281 313 1320 LEN=2943; translated  
MDALVAEEKAAATSEEKVANNEKKEKKIATCREYGGDSSHLIYKSGIPTLRASAHRVKARKK  
NRKHDPKPLDRDGNETGTTWLPPEEVQEEKIFSYNVEQYDIVGAVKGLLRDCDPEIVGSFE  
TTTLEGEKSSEFEKSGTRLEDFRVAVSSVWRVTNNGGTCEEAQKYL SNKVEDVAFLKIFD  
DFVTEVVLPYVKGRLVACGALES DSATCAFYYQRPTLRQLPGPGWAKVRPHNDVEYGHQ  
NGELNMWMLPTDRNLTGVDLWSETFYEEGDYHPKAKIGEVI SWHGSSRKHYVNPNASVN  
TRVSLDFRIGVEGYFDPWRWEMQGTDDHSRRKVEL

>comp9184\_c0\_seq1; 277 1 1062 LEN=1538; translated  
HPLHFHNSLVVKQFEIVMMRTFLLLIIGVLIRHHYLAHILLISTNGVTGFCFRHPRHSSG  
ASTTVSNVMKRSASVSLRTSFSEEIFTNGNSLRTNSRKDDEEIHLEGDDASTEGYPWSKVQ  
EWALRDNLPKYTVRISKRENTGRKKVELSSFVLWRTLRRDIPELCGYPVEILRSRHEKM  
QMAQQSKTHENTDDGHFPSTKSIDGGVTTALGVLPFLQDYEFSTDGGMCGYVYGLDGLSD  
GSR IETSQ LKNVKETLPRGFIQTSDDTCYELGQPLQTDLEGVTKRTNSNTVTKLSLDKLS



EKSTNNDFRSAIDTIEDPDGLLLRLGATTGILLAGATAFNMVSHHLTVNVFWV  
>comp9186\_c0\_seq1; 273 1 1125 LEN=1575; translated  
SSSNYQPATHTKVVSPMSSDTPDSSSGSRTDDNGCGIPVIDLSPDRDETKIASELLDAF  
STIGFCTLIHHGVPSEIFRKAFLASKSFFELPLATKLRKYKSPAANRGYIPYGSEKHDK  
DGEGRFLPADRGETETIAITPDQKETMDIGYDDPSAIPSEKDGVIYANEWPTLSPDVFRG  
ALETYFEEMDNLNLRMLHYIGEALGLPDGGRGLVEQCNAKPQNLRLLLHYPSTVRDQGTGG  
DTVLRGNAHTDFGTLTLAQAQDSVGLKVRADGTWTSVRPVEDSIVVNVGDMLMRWSNDR  
LKATLHKVESPDAAATAEVSPCAIVPERYSIAFFCNANKDVEIKNLFPEDEPAKYEPINA  
HEYLTQRLAATIST  
>comp9186\_c0\_seq2; 804 27 1550 LEN=3033; minus strand; translated  
MSKEELDKQLKAYEESLDGSQLAKETTEAKENNGITILDALAASGLRSIRYWKIPIGVK  
HVTINDMEEAAVERAKDNLNRNNKIEPSVILEDNAERNNGICVNHGDATHEMYSRRPQSL  
VINEVTKLSAKQQPMWDVIDLDPYGSVAPFLDGAVQAAENGGLLCITCTDMAALGGSHPE  
TAYGRYASLPISAKYLQELALRILLHTTAVSAAKYGRITIRPILSVGMNFYVRFVVEIVN  
DKKGVSDLILINGNVYQSTQCSSFVTIPQGQKGGKNNNGYQSSRVEPSKCPETGAPFKIG  
GPLWLGPLHDQTVVKVALERLANKECKAPNMELIATRERLQGLLTSVSEELDTPLYYTLP  
GLCQALRCSCPPLREFKGAAILNAGYKVSQYHKEPSAIKTDAPGHVVDIMRAWVEKNPLK  
KKPAEGSVAEKILAVERSLKEVDWSVPESLKR SAMVDGKKKKKISRFP LNPEKNWGP KRA  
ATGKKEATDDKTGSSETMLEKALQAVV  
>comp9188\_c0\_seq1; 724 1 2923 LEN=2984; translated  
XETKNLTHFETIDELRQSQRPLLLVLRQIPEEALRAAREEMGRLIRGSGFGKIIDGPGGP  
NASPHAEPNQMKNIGVYSGIIRKRWIEAVNLTPRSKKCEPILRVGEKLIWIMTLFVVG  
LEREAERLFELAGSAAAAASPRSQHSQYHSAQDYADA AKSASKVLYDFVKNRMDPSLLI  
PPPQPAPPMGGRGPRGGPMRGRGGRGGRGGRGGRGVP GHPHQAPGLSSDKLLLQIGDVLH  
RMRTFLADPLSPPAAMVRGDLIACLCDILDADTEMKLSDEENFSSTQGGNAGPIADLGAA  
GSLKLIIVLNCPIMRSPCEQISADERDIDKEEMARRFGKKKEEYSSIDYHRMHAGNRFL  
AVVHRLAASRSTSARITACSLGPVLSRLDFPHQLQLRQVITRALHDVEVIVRKSTATVL  
HEIAELVYDSRCVPWLVLMCERAMTDPEPQLRSAAMTLTWHLAEHL PNAFLGDASKGSR  
LRLPSREDPIFADVYLLQCKLLPVATRLAEDRAPHVRLAVAAQCERLCDALGDHWSSVI  
IDVLVALLTDS DERVRGEAVLCV PRLADIVLLSSPPGVVPAGESSVLDALLPAAIKLQKD  
PSSSVRVALATAAGEMLTLLVGLQRAGELPLKDPMGGMGGAISIRYEKRHVDDRLIPLV  
QQLLHDADPEVTSSALRAVTNASRGSSKDARPRFDTKDDDTMSITSMQSQT TASSLDNKP  
VFLPVLSEEQVLRLLPTLSELANSKQWRVRQSAVEIVPALLGCTDKFETRADIARMCIRL  
TKDRVDTV RKTA AECLCLGGTGLGSHGEDASGEWITALVIPQIQACAKDKDYRQRLCLK  
MVEVILINNVCPAKWKNEAANA HGNKNTPLRELLKLTLSLADDNIANVRLNVGRVLTGIN  
VFGEDCRVIKYALLQOMKKEKAMEGRRDRD VNFYANKCLERLRTKPYGETDTSTEATSS  
ESAPKVENENRQMI  
>comp9188\_c0\_seq2; 579 190 1785 LEN=1846; translated  
MTDPEPQLRSAAMTLTWHLAEHL PNAFLGDASKGSRYLRLPSREDPIFADVYLLQCKLL  
PVATRLAEDRAPHVRLAVAAQCERLCDALGDHWSSVIIDVLVALLTDS DERVRGEAVLCV  
PRLADIVLLSSPPGVVPAGESSVLDALLPAAIKLQKDPSSSVRVALATAAGEMLTLLVGL  
QRAGELPLKDPMGGMGGAISIRYEKRHVDDRLIPLVQQLLHDADPEVTSSALRAVTNAS  
RGSSKDARPRFDTKDDDTMSITSMQSQT TASSLDNKPVFLPVLSEEQVLRLLPTLSELAN  
SKQWRVRQSAVEIVPALLGCTDKFETRADIARMCIRLTKDRVDTV RKTA AECLCLGGTGL  
GSHGEDASGEWITALVIPQIQACAKDKDYRQRLCLKMVEVILINNVCPAKWKNEAANA  
HGNKNTPLRELLKLTLSLADDNIANVRLNVGRVLTGINVFGEDCRVIKYALLQOMKKEKA  
MEGRRDRD VNFYANKCLERLRTKPYGETDTSTEATSS ESAPKVENENRQMI  
>comp9189\_c0\_seq1; 405 228 1829 LEN=2155; translated  
MEQASVGGNAYSIGLSRGAQNKRLEDPPSNFAVDNILADELNRLSFKDRQAI EEEELHGV  
RCGAADESPDLLNSSLQEFDLQVNARKLNHRVLRNVVYTTSRPQTPSHVQQFGCYLNNQD  
IRLRF LRSECFVVDKAVQRLIDFLEFTSDLFGDYVAERP IKLSDFNEEEFICLQQSRNQY  
LPFRDRSGRRVLTGVGNCNFHLPVPLRFKILMYLHWVSEDEVETQRKGVVIVAWVFDEAN  
DNTWEQKIRPDMQSNLRSYHKRQNNALPVRVASLQYYNNSPFFKALSSLYVFG LNSQMR  
SIYKAHFGSQTELRYKLSYGVPTDMLPISCTGTVKYSNHLAWLNFLRTKMDWECSKTPL  
KEEIVECPRSVDVIFRKGPTFRNNPGNMYRELIETNSREHSNGKTKREKYEITLRLISA  
IEDRNGRFL EWSRKKEMWILMQDRQMVRLKIAAALKQYKRTRKDQI ENTIMNAVSIFEER  
TLDSESSNLRRYYAMDHHPMKRKRGDCCGGGSKNCSKGD SGLIFGKGFPT E  
>comp9189\_c0\_seq2; 372 228 1941 LEN=2363; translated  
MEQASVGGNAYSIGLSRGAQNKRLEDPPSNFAVDNILADELNRLSFKDRQAI EEEELHGV  
RCGAADESPDLLNSSLQEFDLQVNARKLNHRVLRNVVYTTSRPQTPSHVQQFGCYLNNQD

IRLRFLRSECFVVDKAVQRLIDFLEFTSDLFGDYVAERP IKLSDFNEEEFICLQQSRNQY  
LPFRDRSGRRVLTGVGNCNFHLPVPLRFKILMYLHWVVEDVETQRKGVVIVAWVFDEAN  
DNTWEQKIRPDMQSNLRSYHKRQNNALPVRVASLQQYYNNSPFFKALSSLYVFGLSQMR  
SIYKAHFGTHCMTEGFEXELIDLVDVLDLDRDVVAYTNLCCFFDDXIGSQTELRYKLSYGV  
PTDMLPISCTGTVKYSNHLAWLNFRLTKMDWECSKTPLKEEIVECPRSVDVIFRKGPTFR  
NNPGNMYRELIETNSREHSNGKTKREKYEITLRILSAIEDRNGRFLEWSRKKEMWILMQ  
DRQMVRLKIAAALKQYKRTRKDQIENIMNAVSI FEERTLSDESSESNLRRYYAMDHHPMK  
RKRGDCCGGGSNKCSKGD SGLIFGKGF PTE

>comp9189\_c0\_seq3; 372 228 1941 LEN=2267; translated  
MEQASVGGNAYSIGLSGRGAQNKRLEDPPSNFAVDNILADELNRLSFKDRQAI EEEELHGV  
RCGAADESPDLLNSSLQEFDLQVNARKLNHRVLRNVVYTTSRPQTPSHVQQFGCYLNNQD  
IRLRFLRSECFVVDKAVQRLIDFLEFTSDLFGDYVAERP IKLSDFNEEEFICLQQSRNQY  
LPFRDRSGRRVLTGVGNCNFHLPVPLRFKILMYLHWVVEDVETQRKGVVIVAWVFDEAN  
DNTWEQKIRPDMQSNLRSYHKRQNNALPVRVASLQQYYNNSPFFKALSSLYVFGLSQMR  
SIYKAHFGTHCMTEGFEXELIDLVDVLDLDRDVVAYTNLCCFFDDXIGSQTELRYKLSYGV  
PTDMLPISCTGTVKYSNHLAWLNFRLTKMDWECSKTPLKEEIVECPRSVDVIFRKGPTFR  
NNPGNMYRELIETNSREHSNGKTKREKYEITLRILSAIEDRNGRFLEWSRKKEMWILMQ  
DRQMVRLKIAAALKQYKRTRKDQIENIMNAVSI FEERTLSDESSESNLRRYYAMDHHPMK  
RKRGDCCGGGSNKCSKGD SGLIFGKGF PTE

>comp9189\_c0\_seq4; 405 228 1829 LEN=2251; translated  
MEQASVGGNAYSIGLSGRGAQNKRLEDPPSNFAVDNILADELNRLSFKDRQAI EEEELHGV  
RCGAADESPDLLNSSLQEFDLQVNARKLNHRVLRNVVYTTSRPQTPSHVQQFGCYLNNQD  
IRLRFLRSECFVVDKAVQRLIDFLEFTSDLFGDYVAERP IKLSDFNEEEFICLQQSRNQY  
LPFRDRSGRRVLTGVGNCNFHLPVPLRFKILMYLHWVVEDVETQRKGVVIVAWVFDEAN  
DNTWEQKIRPDMQSNLRSYHKRQNNALPVRVASLQQYYNNSPFFKALSSLYVFGLSQMR  
SIYKAHFGSQTELRYKLSYGVPTDMLPISCTGTVKYSNHLAWLNFRLTKMDWECSKTPL  
KEEIVECPRSVDVIFRKGPTFRNNPGNMYRELIETNSREHSNGKTKREKYEITLRILSA  
IEDRNGRFLEWSRKKEMWILMQDRQMVRLKIAAALKQYKRTRKDQIENIMNAVSI FEER  
TSDSESSESNLRRYYAMDHHPMKRKRGDCCGGGSNKCSKGD SGLIFGKGF PTE

>comp9190\_c0\_seq1; 266 222 1319 LEN=1706; translated  
MLEENQHLESESSGKTEDPEQAPEPVPSGTRENPKQETVVFQYQIDSHKLVVKPEKWRLC  
AYGFFWTLAIFAILLTNLVVLKDGMTPEANRAREQQGCDGDFYSEAFNLEFGAEFPL  
NQSHLVRTFGFNNICIYWDYSPSREIMAMYFPFFEYSLVYLLDFLSTMLSYKRGELPR  
WYWKLMQVITPINIFLAAMFRMIFVCISYKATKQHAAAFGLQIVLVVAVTNALYCMILT  
RQSYKLGRLAINERGVHIFLGIYLTLLISMVKIFGTALAFVFS PKENTTGPDFYKIQVG  
DMKLGQIIDLLWLFNGLMPVLLSYCRLQNEPFTIYKGS DGPAPDGAIPGESPTERP  
LSGYC

>comp9190\_c0\_seq2; 245 118 780 LEN=1023; translated  
MGSSYKEAFIPLPTEDHSQAPNYRPDDPGSHRTFSSGLSIDSGAVSDVGFNLHTDQHILF  
LGI CCDHRKAVIAVNAITIGMQIVGMIVLAVVASVYTKNLDDIEADINDDSTRKGLDEFA  
KGGGIEATETAIDAYATVSI GLHACGIYGALTFKQWGIITAGCAYAFSLFMGVLSFDIGN  
ILISGLFLYPHYFMLKLMKEGVMSDYNH KIASCCGDRQM

>comp9191\_c0\_seq1; 282 258 950 LEN=1567; translated  
MTSSSCQNPYSTSAFRQRRRTNHERMPRYNDR CSTNNRSFLIGLLPAVA AIVFIVSSLS  
TDAFMFAQPATSRGTITTTTARSTGSGLPNGSTQSRRVGNTQLAVAKSGGQMIETEKQFA  
ETVLSKDISRPVLV FYTAPWCGPCRLTIPVVK EILKQYSGELDVVEVCTDDLA EVAEDAG  
VLSIPTIQFYDGVVALETHSIVGCVAKSVLSNAVEKVFEDVAQIRQANSR

>comp9191\_c0\_seq2; 282 258 950 LEN=1297; translated  
MTSSSCQNPYSTSAFRQRRRTNHERMPRYNDR CSTNNRSFLIGLLPAVA AIVFIVSSLS  
TDAFMFAQPATSRGTITTTTARSTGSGLPNGSTQSRRVGNTQLAVAKSGGQMIETEKQFA  
ETVLSKDISRPVLV FYTAPWCGPCRLTIPVVK EILKQYSGELDVVEVCTDDLA EVAEDAG  
VLSIPTIQFYDGVVALETHSIVGCVAKSVLSNAVEKVFEDVAQIRQANSR

>comp9193\_c0\_seq1; 564 156 2699 LEN=2759; translated  
MRSCSSFLQILIAIISMVVCVDSQDDTEYVSVECEM QSTDNTIASLEGFLALEGVEDEWNC  
IDEFDTLYALDGDWERVFYFVQSGVTVLKFDDVIVQPALDQYHGLDTIFVRKSSKIEE  
SQFLNRRRLRVRRI GELEVLVVRVTDDSEEQPRFNAHDI SERVFATNGDNESLKSQYASC  
SGDQLNLYPSTRSDVVNGVLELSIPVNVADYSHGERKDLERVVNNELQSKGYTIRDC KW  
RRTLYWLGI IYFALFLK KYLYNSFSNSLSPLLQNNLVGLVMVMPETT NLGENVLGYAYV  
GGVKS VFKGVPSFQTIMHEVGHNLGLSHSGIEDHPTPFYREYGD XVSQKHDSGLIYTEIS  
LKDDDLHARFNLI PSSLLSIVLEHV KKWVIRXESNQYDYPQKCFNAVKSYDLGWYNQLKVG

HENIDTESSWRGKLVGLHDYFQKQYNADGCEGDRVIAKIGSLYIKFNRAEDFTKHHVEDN  
TVVVTEKVTFEGKEYSRQKSGGILSKDDIGTFETISGEKVTVIVCDISIDDANPGVLDYA  
DIIIFRNDDNESVVKSCDSEQPTNACQDLSPSSSFSPFTSPVASPTVNPTVSLTISPTPS  
PTLSPTSSPVANPTLSPTVRPTAGSTVSPTASPTVSPDSDPTDAPTTSPASPTVKPSVK  
PTVSPTASPTVSPTTSPDRPSTTATEYPSYLRGPTPPECAPSEATLISNDGGTMLHEGI  
PIRITFQNSTFVAFEVVNTFGATLTSMFITYNSGLFGQEECMEENGVQYLSTVDKYLARC  
MGDEPHTYVKIFIEDGEGGILKSGDHARVPKCCHQSQASQELDLPIAMYLFKLSVCNPCT  
VVGTM EQ

>comp9193\_c0\_seq2; 606 156 2581 LEN=2641; translated  
MRSCSSFLQILIAIISMVCVDSQDDTEYVSVECEM QSTDNTIASLEGFLALEGVEDEWNC  
IDEFDTLYALDGDWERVFEYFVVQSGVTVLKFDVIVQPALDQYHGLDTIFVRKSSKIEE  
SQFLNRRRLRVRRIGELEVLVVRVTDDSEEQPRFNAHDISERVFATNGDNESLKSQYASC  
SGDQLNLYPSTRTSDVVNGVLELSIPVNVADYSHGERKDLERVVNNELQSKGYTIRDFGL  
VMVMPETTNLGENVLGYAYVGGVKS SVFKGVPSFQTIMHEVGHNLGLSHSGIEDHPTPFY  
REYGD XVSQKHDSGLIYTEISLKDDDLHARFNLI PSSLLSIVLEHV KKWIRXESNQYDYP  
QKCFNAVKS YDLGWYNQLKVGHENIDTESSWRGKLVGLHDYFQKQYNADGCEGDRVIAKI  
GSLYIKFNRAEDFTKHHVEDNTVVVTEKVTFEGKEYSRQKSGGILSKDDIGTFETISGEK  
VTVIVCDISIDDANPGVLDYADIIIFRNDDNESVVKSCDSEQPTNACQDLSPSSSFSPFT  
SPVASPTVNPTVSLTISPTPSPTLSPTSSPVANPTLSPTVRPTAGSTVSPTASPTVSPD  
SPTDAPTTSPASPTVKPSVKPTVSPTASPTVSPTTSPDRPSTTATEYPSYLRGPTPPE  
CAPSEATLISNDGGTMLHEGIPIRITFQNSTFVAFEVVNTFGATLTSMFITYNSGLFGQEE  
CMEENG VQYLSTVDKYLARCMGDEPHTYVKIFIEDGEGGILKSGDHARVPKCCHQSQAS  
QELDLPIAMYLFKLSVCNPCTVVGTM EQ

>comp9193\_c0\_seq3; 718 156 2468 LEN=2528; translated  
MRSCSSFLQILIAIISMVCVDSQDDTEYVSVECEM QSTDNTIASLEGFLALEGVEDEWNC  
IDEFDTLYALDGDWERVFEYFVVQSGVTVLKFDVIVQPALDQYHGLDTIFVRKSSKIEE  
SQFLNRRRLRVRRIGELEVLVVRVTDDSEEQPRFNAHDISERVFATNGDNESLKSQYASC  
SGDQLNLYPSTRTSDVVNGVLELSIPVNVADYSHGERKDLERVVNNELQSKGYTIRDFGL  
VMVMPETTNLGENVLGYAYVGGVKS SVFKGVPSFQTIMHEVGHNLGLSHSGIEDHPTPFY  
REYGD TTCQMGYSLESNQYDYPQKCFNAVKS YDLGWYNQLKVGHENIDTESSWRGKLVGL  
HDYFQKQYNADGCEGDRVIAKIGSLYIKFNRAEDFTKHHVEDNTVVVTEKVTFEGKEYSR  
QKSGGILSKDDIGTFETISGEKVTVIVCDISIDDANPGVLDYADIIIFRNDDNESVVKSC  
DSEQPTNACQDLSPSSSFSPFTSPVASPTVNPTVSLTISPTPSPTLSPTSSPVANPTLSP  
TVRPTAGSTVSPTASPTVSPDSDPTDAPTTSPASPTVKPSVKPTVSPTASPTVSPTTSP  
SDRPSTTATEYPSYLRGPTPPECAPSEATLISNDGGTMLHEGIPIRITFQNSTFVAFEVV  
NTFGATLTSMFITYNSGLFGQEECMEENG VQYLSTVDKYLARCMGDEPHTYVKIFIEDGE  
GGILKSGDHARVPKCCHQSQASQELDLPIAMYLFKLSVCNPCTVVGTM EQ

>comp9193\_c0\_seq4; 676 156 2586 LEN=2646; translated  
MRSCSSFLQILIAIISMVCVDSQDDTEYVSVECEM QSTDNTIASLEGFLALEGVEDEWNC  
IDEFDTLYALDGDWERVFEYFVVQSGVTVLKFDVIVQPALDQYHGLDTIFVRKSSKIEE  
SQFLNRRRLRVRRIGELEVLVVRVTDDSEEQPRFNAHDISERVFATNGDNESLKSQYASC  
SGDQLNLYPSTRTSDVVNGVLELSIPVNVADYSHGERKDLERVVNNELQSKGYTIRDCKW  
RRTLYWLGIIFYALFLKKYLYNSFSNSLSPLLQNNLVGLVMVMPETTNLGENVLGYAYV  
GGVKS SVFKGVPSFQTIMHEVGHNLGLSHSGIEDHPTPFYREYGD TTCQMGYSLESNQYDY  
PQKCFNAVKS YDLGWYNQLKVGHENIDTESSWRGKLVGLHDYFQKQYNADGCEGDRVIAK  
IGSLYIKFNRAEDFTKHHVEDNTVVVTEKVTFEGKEYSRQKSGGILSKDDIGTFETISGE  
KVTVIVCDISIDDANPGVLDYADIIIFRNDDNESVVKSCDSEQPTNACQDLSPSSSFSPF  
TSPVASPTVNPTVSLTISPTPSPTLSPTSSPVANPTLSPTVRPTAGSTVSPTASPTVSPD  
SDPTDAPTTSPASPTVKPSVKPTVSPTASPTVSPTTSPDRPSTTATEYPSYLRGPTPP  
ECAPSEATLISNDGGTMLHEGIPIRITFQNSTFVAFEVVNTFGATLTSMFITYNSGLFGQ  
EECMEENG VQYLSTVDKYLARCMGDEPHTYVKIFIEDGEGGILKSGDHARVPKCCHQSQA  
SQELDLPIAMYLFKLSVCNPCTVVGTM EQ

>comp9194\_c0\_seq1; 597 1 1630 LEN=1630; translated  
AFRDQKPWTSTIDHASVKGNI EDPSLESSLKDVIC EYALDLEKLSRVLKESTATPTLSA  
KATSSSFVEANHV LKKDQMDTSLTSEPPSKKLKDDSSVTCLSHFSSSKMQPPVSDQIMYE  
KIIILERSIQETTTQIQNHLRIKGVLEHKYLENKEIFFMRQERVLLLEREYRAEEERSPQL  
CLPAENIRMLVLKQNLLESRELMAMQRQRCFIFEQRVALHKKYILEHQADLERQILRNQS  
LKQALERAFPPKEDVKEMLLAEALQNI AEGEYPTKEERFLALLQEQHRYNFEWHRRLFK  
QRKSNEQPTIHQLD TVNAVKEQYFDGIP SVGESEIPKELSGHKSNEGNDDLEDGDSGDTV  
AKKKSIFHKYND SKGAEKVGD PKIPPSKRKCMGDKCNDRNDEEAGDDNIATEATNKHKDK

DNKNGEHKSIENGGGHYLPATLTTSMGERNSERKDEETDGDDVISVEVRKKTMDDGYTDR  
HDKEPIADDEYSVTIKQPTDVKNKESKAEMGSDYSISVEKKESMDHKNEEKDDQNNNEG  
QVVX

>comp9195\_c0\_seq1; 626 199 2064 LEN=2107; translated  
MGKPAAITRRVFGNGRSIWPPFVRSVGTALGFLESAGSKKISRNRSLSSSTIASKKRTS  
SILAGHGVDRLPLAVNNHDVGCRCQGPRRFSSLSRSSSKSNKRFLNLRALPFSISPEEALQ  
SFRKWAEEDQGLRYIMNYNSVKIGAAFVPVWTFDLNIRFKQQRARDRRSSPSPPYSWKPS  
IFEGYDRVGSRRNQDVIHLPGGLAAYAGYSYRRSLINPVHSTTLIFMEDQTQPPFGSWMLK  
NMVLKESGYPIPVIPDAWNSTQGRAFSVVKKEELQGIADWDKQSGLDGDFGDTPPPPEVQTEV  
VGSRRILMPTFVIEYTIIFGLEYYQAFVSGCDTSAPVGGVSHQIFEGNTIIDGLSPEFHRSS  
RKLVLVQLSSGASHLLKTFSLPVLVTVFRPIFISILWFALIRLWTATPIVGVAGGLFAGFRK  
VLQPWMDNRKASADWERQRQHEAEMADEHDAFSKAKMNDFYDATGRARKFFNKNRESIL  
RSLSGDTTHEEGDFDWYSDWQAWAKQQWEQQEKAQQARSHENQQRYQQYYQQEQKQQRRA  
KSTKKDEYKWPFPNPSDPYSVLGIDRNATNTEVSNAFRKEMLQYHPDTQPNATEAQKRRST  
ERSKLITDAYRKIKTERKARK

>comp9195\_c0\_seq2; 493 199 1710 LEN=2258; translated  
MGKPAAITRRVFGNGRSIWPPFVRSVGTALGFLESAGSKKISRNRSLSSSTIASKKRTS  
SILAGHGVDRLPLAVNNHDVGCRCQGPRRFSSLSRSSSKSNKRFLNLRALPFSISPEEALQ  
SFRKWAEEDQGLRYIMNYNSVKIGAAFVPVWTFDLNIRFKQQRARDRRSSPSPPYSWKPS  
IFEGYDRVGSRRNQDVIHLPGGLAAYAGYSYRRSLINPVHSTTLIFMEDQTQPPFGSWMLK  
NMVLKESGYPIPVIPDAWNSTQGRAFSVVKKEELQGIADWDKQSGLDGDFGDTPPPPEVQTEV  
VGSRRILMPTFVIEYTIIFGLEYYQAFVSGCDTSAPVGGVSHQIFEGNTIIDGLSPEFHRSS  
RKLVLVQLSSGASHLLKTFSLPVLVTVFRPIFISILWFALIRLWTATPIVGVAGGLFAGFRK  
VLQPWMDNRKASADWERQRQHEAEMADEHDAFSKAKMNDFYDATGRARKFFNKNRESIL  
RSLSGDTTHEEGDFDWYSDWQGTW

>comp9196\_c0\_seq1; 401 305 1564 LEN=1700; translated  
MAPSNTISNTNTGMPREEIGRRLTGLPMGPYPVGVTTVQIDGDKRGRGLQTEVWYPASE  
ASRASPVTKYSDYLGLDKARDPVAARAAANARTAIGGYRDGISVEELDDPSETTWLTTAV  
RNAGVAEKDPNHGDDPGTGWPLVVF SHGSGAYRASYGFWTEFLASHGYVVAACDHPGSAR  
YTIVDGEVITPGGARSKRERMEKDRPLDVLQVLDGIASNPSSGLPLFGAVDTNNVAITGMS  
FGGYTTAATLELGDPRITAAVMCSSMAMSGTMDYHTPSRKNKSTPVMVMIGTEDTVLGP  
DCNDANRRYVDHHEGDGDAYLLELVRGGHVSFTSCELYDPEYNGINARGRSKSMTPKGET  
YLPWGISDQHAAINHYGLCFLNKYVKKKKGAGGANAVMERDAFDASEVLLTANRDGLVR

>comp9197\_c0\_seq1; 410 1 2421 LEN=2703; translated  
AMRCDAMQHSRSTVPLNASASRLRRLKQWSLLAVGFFLVPLVGTYYHLCKWLAEEGCVL  
HRHSAVFDNNSTRLSGSAPEATLHDHQSLRGLACKGRNGRGGSNNTPYSHGYFIDAGSF  
LRSPPPGIARLVMTMVDARASGLLLQPQNKQLRQLLQQQQQKTSNAAVIVGENSYRFD  
YAEYRSPWPFVLPGFRTSGTPDENDVSVSPSSGKTDGTGYGFRNPDKPTGRMSPSESTA  
PIATYFWMVLNVGLYGYWHNKVEPSGVALDGNLLGDGETGSDFGRLSGNLAHFEIWHV  
GLNTMSLLSLGTMLETTSTGSI GLFLWTASFLALTTVGVVALHGDIDRRLRWRTOQQEQQ  
PRRRFPMSVGFSGILFCWSVASTLSLPDRTOQCP IPVLES LCFETHRWGGASNGTFGFGL  
DFSWAPLVQLAVVQVLLPRVSFTGHLSGLLVGFVAHWGLLPLEWSQPCISYPVLWALGK  
QALYRGHGRGRGDHEWGNP SADDGASGVPGGRVLGGSSNGGGRTGNRWGSSWASEAQT  
SESEDQLLALLKYL CGAACLHGAGMVWAYRGI PDRFVLSSESVLSELLLVGLLVLFARV  
ETSGNRKTNAIHQHHCNPFASVGI LGRAYVAFVVALITDSMTLGGWLATAPLWKPGAPL  
GGPSPLLGHGFDPGPPPAVLLWAARLGLWVASAGGVCFALERAGEFQTERERGTAGIWR  
VLGRTVAEPLASLGRHAAGPHRRLPLVSPASAGVVRGASGRRGDPPPDRREIGARRAKFFS  
ARSKGRTSAPPENAFGGGEAAGVV

>comp9198\_c0\_seq1; 393 51 1970 LEN=2296; translated  
MSSLGNVNHEDLPELVRVFLQQRNGLGTRRNENENRSTSTTFSGSSCWYNTTKGDCHGNV  
TGKDH IHCFDYKAATKLLREKPGQVQYVIYDGTNTNRCQHEHDGSSSSVFGSNKSSVEH  
SGGDNVFN SKCNFLHTPLGWACVETTQEEDAMEFLRTRVDIDPTLFLVQDRHGALPIEGD  
CILNASMPMLRFLLEIYLDYDFFCPNGPKVTEDNFNPLTCLCGSCWEDLQQAHEITSG  
DRIVKGRSVLEDNLGIDDNFWARI ILLAKAFYHKTIDDVHESNSSAGLNYPQLLRISNE  
YGDRTIRFRLHACAGIDWFPPNLLRLLVTAFPD TLLDRDEDGNLPIHVAASGVFDSYKI  
DATWEGDLQANSYQRTTIDIFLEANPNLARVPNEEGKLPLELALACEYEPINDSTSPDD  
AIYSRPTTRPVDGGIQLLQAFPAAGIRSLANRKLPLEIAIENHREWEDGIRDLEAY  
PAATRSCNPF TGKFPLELAI EKEIHFDEGVYGLLEASPAVMTDESGCMRLSRTGSEASPK  
NTDSADSTTTTLP LFAQSAAE GCSVSVIYKLLRTWPQSCRISPRCGTKPKSEQLGARTTR  
RTATTVFCDVPSGKRQKTS PHDRITTDTRDGFQTN DIEHD

>comp9198\_c0\_seq2; 283 633 2482 LEN=2808; translated  
MAWAPEGMKMKIEVVRVLLVVAAVGI IRRRETAMGMLQKTTYTASDYKAATKLLREKPG  
QVQYVIYDGTWNTNRCQHEHDGSSSSVFGSNKSSVEHSGGGNVFNSKCNFLHTPLGWACV  
ETTQEEDAMEFLRTVRDIDPTLFLVQDRHGALPIEGDCILNASMPMLRFLLEIYLDYDFF  
CPNGPKVTEDNFNPLTCLCGSCWEDLQQAHEITSGDRIVKGRSVLEDNLGIDDNFWAR  
I ILLAKAFYHKTIDDVHESNSSAGLNYPPQLLRISNEYGDRTIRFLLHACAGIDWFPFN  
LLRLLVTAFPDPTLLDRDEDGNLPIHVAASGVFDSYKIDATWEGDLQANSQYQRTTIDIFL  
EANPNLARVPNEEGKLPLELALACEYEPINDSTSPDDAIYSRPTTRPWVDGGIQSLLQAF  
PAAAGIRSLANRKLPLEIAIENHREWEDGIRDLEAYPAATRSCNPFTGKFPLELAIEKE  
IHFDEGVYGLLEASPAMVTDESGMRLSRTGSEASPKNTDSADSTTTTLPLFAQSAAEGC  
SVSVIYKLLRTPQSCRISPRCGTKPKSEQLGARTTRRTATTVFCDVPSGKRQKTSPHDR  
TTDTRDGFQTNIDIEHD

>comp9199\_c0\_seq1; 351 593 1789 LEN=2270; minus strand; translated  
MGIKTTLWSSLYGAPVEEELVVDNSGDDHSSIVKDRNDEDDKLRRLTAKLLAAEEALASE  
RKRSNELLQRLQKAVSIDCQLIENETLLSDCRADLSSARRTNRRLTETIAGIRSENEFL  
LKRTAALARRDQIQKAAIASSHAEIAKLSSTIDGFRVRFESLASGVTTTKTTTTTTTKTG  
EGESSARGGTRI IWRHDAETTEAKEIGEKQSVDNQKIGTVERIVLDRSPPPPPSSSIELQ  
MKLRFIDILTKHQSVWELEREGLRGKICGLEQQLLLHQEPREVSGKDDHGEHTVEHDVTN  
RAREGRSTNASEEAHNAAVKPIEPTTTLETAETIEYSLSTTEGYNSDAPKGNVLAVEPS  
TPKKIERTETIETTTTSSSLSEVDGTSASQIEIKGQL

>comp9201\_c0\_seq1; 403 1 1915 LEN=2212; translated  
XPNHIVVAMKTAEEPNDNFNEIVTNI FNDIGGTDRSNNDCCSQSHGSPNSNQSWCDIKSSR  
RDPQMESDSTMRISDNGNGIMDL SLSLDGDMRLGHDCDLNDSLCPDPSQTVDSRDPCK  
QVDDLKSKELMDLSVRDRTSIYEELHGVRSLAIKENDSEINKDIVTKALNDLNHTLEHRI  
PAHKKTAFLKAQSFLYTSGYVNDLTFRLKFLRCKLFDVDAALLLVNYLELVQELYGDI  
CLSCPIRLIDVQTTKEERVAFRSGFIQLLPYGDRAGRRIIMITDALLYSTYIRVKIFLY  
IWTVASNDVATQONGAVLICWDGRKDMKLPSPSEQQLVVRKLFSAIPLRICGIHFCEPDSH  
FYRMAIAIFSLTVGGAEHRNRLRFHIGEEIELKYQLGTFGVPVCQIPITETGNVKTGNFHF  
KWIAMRKIVEEKK SADAASLSHRQS QLQLPFLQTNVMNWN IQMQLQATLMSTQYMINKN  
MSTQNGT NFNPTTSFVEY PGLNDVAFRKGMSLMHHPGNDYFHGLIQSKILEHDAASQSGK  
ARIAWVVDEIRKRKGRFLSWDQQGWWVLEDESKIRLKVAVFFREWKKHRAEQNRQTI  
SRSMKSTYKFQRLQGSRGMK SCLSLSSDSDSDIESINN

>comp9201\_c0\_seq2; 356 1 2037 LEN=2334; translated  
XPNHIVVAMKTAEEPNDNFNEIVTNI FNDIGGTDRSNNDCCSQSHGSPNSNQSWCDIKSSR  
RDPQMESDSTMRISDNGNGIMDL SLSLDGDMRLGHDCDLNDSLCPDPSQTVDSRDPCK  
QVDDLKSKELMDLSVRDRTSIYEELHGVRSLAIKENDSEINKDIVTKALNDLNHTLEHRI  
PAHKKTAFLKAQSFLYTSGYVNDLTFRLKFLRCKLFDVDAALLLVNYLELVQELYGDI  
CLSCPIRLIDVQTTKEERVAFRSGFIQLLPYGDRAGRRIIMITDALLYSTYIRVRTSLR  
YKHTRFLLFMVASDEIAPFISKLSLYFHRAIFTGQNI FVHMDGRFERRCDPTKRCCDL  
LGWTERYETAQPKRTAAREKIVFGDTAQNMNRNSFLFPGFPLSDGTGDFFITVGGAEHRN  
RLRFHIGEEIELKYQLGTFGVPVCQIPITETGNVKTGNFHKWIAMRKIVEEKK SADAASL  
SHRQS QLQLPFLQTNVMNWN IQMQLQATLMSTQYMINKNMSTQNGT NFNPTTSFVEY P  
GLNDVAFRKGMSLMHHPGNDYFHGLIQSKILEHDAASQSGKARIAWVVDEIRKRKGRFLS  
WDQQGWWVLEDESKIRLKVAVFFREWKKHRAEQNRQTI SRSMKSTYKFQRLQGSRGMK  
SCLSLSSDSDSDIESINN

>comp9202\_c0\_seq1; 1280 1 2694 LEN=2745; translated  
SLDLDDL SDEASFRSEKEVTASLASKSKKADARTVAKLRPKKPLISSVGDVLSVTQMLA  
SKRGSASLIVGEEGGLAGIITDIDI TRRLVAKHLDAASTSVSKVMTANPTCVMSDAAMD  
AMTTMVENHFRHL PVVDGNGGVVGLLDIAKCLNDAISKLEKSSNKSDSVAQDALSQAMQS  
QGAQGAQAALKALLGPLMSQAFGNQVSPTLRSLLAGKPTVVRPSTSILDAGTKMAESR  
KAALVVEDGNLVGIFGFKDMMTRVVAKVQVPEETSISAVMTPNPE SVSPEMTVLEALQTM  
HENKFLTLVPCEDDGTVVGLVNVMDVIYCGGADGWRSIFNTTLDLDDLSDTASIGSAKS  
NTIEAAMGRSKASSTRSKGNKTVKNLRPKKPI LASPDDTILAVTMNLARNRRDAAI LVDD  
AGNLSGIIITDIDI TRRVVSKGVDAKSTLVSDVMTPNPKSVNENG SAMDAMMLMIENFRH  
IPVVGQQGVVGTLDIAKCLNDAISKLESSASNKPNAAETLMKKALDSKVGADAAAEEDLL  
YPLLSQAFGTDSGIPSLRTIVRDRACAI VSPETTVS DAATLMAENRKASLIVDGEQLVGI  
FGFKDMMTRVVAELDVSSTTVSMVMT PDPECADPGMSAIEALKMMHDNKFLTLVPCED  
GSVIGIVDVMDLIHACGGADHRSIFEVALQVDDYTVNESINTPKNKNKFTTIKISKDAP  
MVSSHPAIQTIPSNIPSTLEFQDGVNDDFDETTLNDTYKLENGSFFSEGNVTFKI IDPD  
GHTHRLRSEAKVGLRQVLAKLKD RKNAMNITLKFIDEEGDAILISTDEDLAEAVMLAR

GASQGSKLVIKLIAEDSSGNSNGPDPMLLVGVGVAILTIAIGAMMLSPKQARRASRY  
>comp9203\_c0\_seq1; 426 1 921 LEN=1219; translated  
EAPPAPAEAGNSIAMVAASDPDLSFLVDVVTAAGFMDAINLPGFETVFAPTNSAFLEVLPN  
AGQLADVDPAILGTILAYHVVVPLVKASDITDGLILTTTIGETIEFHVKDDVVTVNEEII  
STVDIPASNGIIHKIEGVMPFQSVLEPAPAPDAPAPVPDELSIAELAVGDADLSQFVEMV  
TLAGFSDLVNLPGFETVFAPTNAFAEVLNPNDDLKTIDPMFLIPITAYHVVVPGKYESSD  
ITDGLILTTTQGETIEFHVKGDVVTVNEEVISTTDISGSNGIIHKIDGMMFPQAVLDPEG  
RLVFSV  
>comp9203\_c0\_seq2; 210 1 561 LEN=561; translated  
VDPPEPPADPVDPPAPPADPVDPPAGPGNLIETALSLDDLILVAVVEKTGIANLLPADV  
EFTVFAPSNDAFLEVIESVDDLDDIDTEILLEVLAHYHVVVPGKVASSDITDGLLLDVTQGS  
TIEFHVKDGVPTVNEETFSTTDIPASNGVIHIINGVMFPQSVLAPPPEPEAPPAPPEAPP  
PEAPPAP  
>comp9205\_c0\_seq1; 414 74 1156 LEN=1473; translated  
MTEAHSKNKKWIVALQQRERLPVGRMVGKLIYTKDPGSGDCRDYVVISPTTTADGSYIAEI  
QNI PADFSSFMVGRHVVKDGDLYMINRIDPLFLYLATQTIEQYESTGAAETDIKKPKTKK  
ASWQPYNQFLEQSKLPLEVTKFITEKQLSHICSTFDNEELYFKFSMEKSLNWLKKKQVRV  
LESLITQNEQRRKTNELKYSAAGAENGDSMGGSVSSNFNFGNPVGVVTPPATKGANRQVE  
IKLDTKALKIESLQIICNYLNEAWSKAFVQHMGYTMEQIADNAKAKSNPQTISNDRNPIA  
PAVLTEDDLNATSSKAAAAQKDRKAARTVGNKRLAKVSTKGMKSIGSFFGAAKAKKAKH  
>comp9206\_c0\_seq1; 872 216 2033 LEN=2086; translated  
MALSAAEKNRRKRERKKREKEERRKRELEEKHARELSAAKAE EEGAGEEEIEIEYVAEDL  
SKILNKSTVQEGSDAAPPDTKEVRPDGLPPAPGSEGEKTKEEIATAASIKEQENSIE  
DVLRRFHERAAVVPASAGTSSNNDPGNSNEADQSSIVSDDDSSYSDDDGKPKMSKRKLR  
ELLRPSIAELKRRVQRPDLEAHDVTAADPDFLIALKSIPHTTPVPPHWRKRKYLQGKR  
GLDKVPYQLPDFI IKTGIADVRDTAMEDEAAQSIKQKNRGRVNPKMGMAMDVDYKVLVEAF  
FKYQTKPTGLTSWGDLYYEGKETENSTDIKPGGPFKALRIALGMGDNPSGNI PPPWLWN  
MQRYPGPPAHPKLIKPLNAPLNSACQYGYHPGGWGKPPLDAYGRPLYGGNPLDPPGSG  
TGGADDDGRELVTSDGKTVLKSAGGLPTGGDYPGDGAGEESDSMEDSSSSSEEEESGGE  
SGEDMEESDAEDEGGTESLPPPPPPSSGIDDLRQKQAGDETPAPPPKRLYQVLETGAGAA  
GSGIFQSDVRYVVP GASAAA VPEGAESVLSKAVVPGGDGHGASRKKRKTNTADDGDNELD  
KNFKF  
>comp9207\_c0\_seq1; 851 330 2105 LEN=2192; translated  
MLSSRSKTIATTATAILFRFRFTTTTTTVSGFRLVSPAHRPSLRAFDPQRSPLLLASNPPG  
TRTPSSSSSPIRRYLSSAGQNDGSADSSNSSTARASFVSPDMGTDEKDNDGVTTTDDKY  
TGYEKVRRRLYATNMFHPVKLGLNMLHLLHKLGNPMDDPDRVVVHVAGTNGKGSVCLKI  
ANTLRHQQRKDQNGRPLNVGIFCSPHVSSFRERMQVNGKMITEEVIELLPQIYDLCLPE  
NNDIPATFFEITLALFLFFAKRGADVVLLETGLGGRLDATNVIANPALSIIITSIGLEHT  
RILGDTIELIAVEKGGI IKKDRPVLVGPCHPHDVLTECARQKGAGRYTTPSLVQGTLRDF  
ENPPSEESATSEDPADYDIENQDIAKAAVLLEQSHGDI FGKRLSPEEIDLHTSIRPPCR  
FETIRKDDATVILDVAHNPSAMEYLVYKLTTPGTFPFRFVAGMSSDKDLGQCARALLSA  
TDGSSHNIHLVQAAHPRAASLENI LAEPRLESAAHYDFDRSITKQVLKALELTKENKN  
GELLVVCSSVFLMAETREALGIDEPRDSYITMAGAGIRHGQENFGNTKM  
>comp9208\_c0\_seq2; 207 1 1333 LEN=1416; translated  
LESVSRMRYEKTFFSWQSRDINAQESRHLYGFGYLFQIYVSKVLTRFIIAFLLPNIFCFV  
KKYYILDDADVGTFWYHPRHPLVTR SAYGGAYGMI IVEETVKNYYPEHLENFLTNNKVL  
LQFSSMYNKKLPDSFRSNRVNGQKGLDLSLSPDTPYYFQVSSVVYAESVNYLEFDPDAC  
DVRVVAYDGVYRSEIPGPTS IHKQMMTVSSRGDFAVSCSRDADIHFHQGMSEESNLVRI  
HVPSSLSSSTDKKEASSNFTHVSLEAILPSSPYWDPALKTTWKPRRPYMPNLSPPQIV  
DEYWHVSMDDWFVNGTKGVSVNQHTWDPVAVAIRTFDLGQLVEFPILLSQSHPHYHAHINRM  
QVVEPGCGGLRFEEGEYFDTIVQSKDKKCTVRVKFFDFAGRLVIHCHFRFGHEDQGMWTW  
IDVLGGHGHEIKAAPQTSAAVL  
>comp9208\_c0\_seq3; 532 138 2033 LEN=2116; translated  
MINNNENKYGSLVDADRDTDSYDDDEKDALRMESQRLITHDDESSFLKNKERAPGNAGKE  
KRNKSSVSLVKFFLVIVVGTLCFYFLGSDRFSKDKDISSFVDGLQATISVFPNQEESETIT  
HGNDIDDTIAYSPPFEHVLEWKQLDMADSSQDEDDDDGSSKRSSNHYHASIEFCSDPKRG  
LYAYGPVGNCPGTPAPLIKMKPKHFYHLTLVNNAHIDTNVHTHGLHVS GVSVDVTRV  
AEPGKCLTYEYIILDDADVGTFWYHPRHPLVTR SAYGGAYGMI IVEETVKNYYPEHLEN  
FLTNNKVLQLQFSSMYNKKLPDSFRSNRVNGQKGLDLSLSPDTPYYFQVSSVVYAESVNYL  
EFDPDACDVRVVAYDGVYRSEIPGPTS IHKQMMTVSSRGDFAVSCSRDADIHFHQGKMS



SPARVVSGRGDVAMVAASLPDPSPGKADTMVLVCGRDGFVAHWAGPVGRGPPKPDGSKGPK  
VQGPLLGVLEAGFEADQVFKY  
>comp9215\_c0\_seq1; 318 81 707 LEN=815; translated  
MISSSSKRQMALLGFLYWSSTVQGFVTPNSRHLPAFAANNAAAVIATTRCSSSLAMSDFD  
FPSAMPEKPOQTLDEKLNESADDFIINMDDALVDKSTAPPELEALREARKANAPPDELAI  
KIYSLMIERAMRFVDVDPDTGALTPTGFDPINNLEVPVEVKKEFSHLYSYGMMLMKNKGLLKA  
DVLKEIVIERLIERTGLTPEEFDKWLGY  
>comp9217\_c0\_seq1; 54 1 821 LEN=821; translated  
XFCSTFLSRRDGRSNRPPEVQGEQGNKQLIMVIPCAVSAKAVGTAGSAGATALGIGMGKS  
DMDQSRDLFKQMRQTKRLWTADWAEASVRHGETMMQTAHHHSEAQAMATASYYYQAEKLA  
GQGIKLARDQDSRSYEMAWRSEVRESLRDELNQNRFNMIMLCDTVCLGCVFTIAVETP  
PDGTSLLLLTLYVSGLGLSIMLFSISLWGAVIMVRRRLHDNTAARLERKLFVQSEDLQKAW  
QQQVTKNLPTGAHEIYLVHQAYEKWVSTRVHFAS  
>comp9217\_c0\_seq2; 474 1 2552 LEN=2581; translated  
XFCSTFLSRRDGRSNRPPEVQGEQGNKQLIMVIPCAVSAKAVGTAGSAGATALGIGMGKS  
DMDQSRDLFKQMRQTKRLWTADWAEASVRHGETMMQTAHHHSEAQAMATASYYYQAEKLA  
GQGIKLARDQDSRSYEMAWRSEVRESLRDELNQNRFNMIMLCDTVCLGCVFTIAVETP  
PDGTSLLLLTLYVSGLGLSIMLFSISLWGAVIMVRRRLHDNTAARLERKLFVQSEDLQKAW  
QQQVTKNLPTGAHEIYLVHQAYEKWVVEYIDPIGKMSIELLSFGIIAMFITAGVLIHSTY  
LIEFDNSSFVIHIFWSCVAVTSTVLLLMKSSSEDRKERRKEGVYDGSWQDEISVTTGPYAK  
IDKAAQELSSSTAALGSLERVELFGRQERMERELCTKTESLHHQAESLRKESASRTMMR  
NEVLQLLTAAEELDALPEELISRTNKILHLIDEADVRTADLVTKQPENEDDEEERGNQSF  
RMSKDFHSWGQLFPSSTLHKKMEVHPIDAQRIPVSLGSLRKKLGEISHTTLLRLRNTSYE  
PLRLKSGVQLESGRYIKSINANDPNGNAVCFHLYPGTEIPPRTEVLVTSRCNGSAWFPTS  
GIAGKIMYTNYDGSWTFEVSFRNDLIGNVRRRCRVKAYKTYGNDEVSRTESSQYWEITKDE  
YDGKANNEVLITFDVLGAKASLRRRQSTTVLKNGFLLNKIHFGLGMGLQWHQRWCVLST  
EIIIFSRDQTSEKKDRISLKDVTVEIQNPGVKRENVFQIHTNVENKKRYQLATKSKAERDE  
WITMIQKAIAGTRLALSPLASLASSSTHTSPANSGGGYISDRSLVGDPSDVENSIECVRR  
NENTEVLTNS  
>comp9218\_c0\_seq1; 1081 1 2476 LEN=2816; translated  
XKNTPFAMFRGKALVDTPPTHQDVPQDHRQPQQQPQKQKGFNYRKYTSNSTIDPSSFAK  
YLSSDEDDSLDESGVFDEITTDKNYKKKEDFRMSDRCDSDSLSIGLADDRYASTFEQTT  
VLGDTTFEQTVLEGAATYEQTYVEDKAKRAEKINDDDNETRDRWYVPDGTTIIGGTYTNANN  
TLGGSTAYNNPRLNLPSIDFDESLLQYHTTTFEGTEATYDDETRVDFSCDDSTENSSE  
SDESSNSGSYTDYTRNGGTSLSFSESTYSTVASGDISSERNTSSTKNNKKNKPDRLLPFQ  
RKRPERNSSSTRDNCNENVTGNNNRMQKKKRNRTKKQNSQTCGKNTPEYGDESISKNTV  
FALPPFQKNGKYTNTPPASDAASPVNSTMRRKGLPPLPPTSTTALDPSSEQVSLNTSSKN  
QKIKKPLASATNNNNWDMMTPTTKFLVSAAKATSESMRSAARSIFFSDEDEHEIVFSDFE  
SYSDDCTDGGETCRESLLESEPTILVVSTTKNPGSTVDSASPSKLDTHQTPHPKKEEFE  
IVMGEVAAMGGSSETRKETS SKNCNTVKKTKMPEYADCDEEPEFKPSEKSANAIEMKIAD  
TTGGRKVSTTNNISNKDVVISVPEYADCQEPDARDTTGQEKSSVISIPPIQKVETS  
DPGLLPSCGFFSSMADLTAKTETGSKIESENKIAEVFEYIGGIFSPNVKNDFSVSSSTKN  
LPAVGVDGATDSSYFEVDEIRKSTKEERNITEKVAEGNSAVRDEAPESPIHAEIEWVLS  
KNDSEADGKNRKGKATNNSRGLRSIFSRKNKQKSKASAMT  
>comp9218\_c0\_seq2; 1024 1 2374 LEN=2714; translated  
XKNTPFAMFRGKALVDTPPTHQDVPQDHRQPQQQPQKQKGFNYRKYTSNSTIDPSSFAK  
YLSSDEDDSLDESGVFDEITTDKNYKKKEDFRMSDRCDSDSLSIGLADDRYASTFEQTT  
VLGDTTFEQTVLEGAATYEQTYVEDKAKRAEKINDDDNETRDRWYVPDGTTIIGGTYTNANN  
TLGGSTAYNNPRLNLPSIDFDESLLQYHTTTFEGTEATYDDETRVDFSCDDSTENSSE  
SDESSNSGSYTDYTRNGGTSLSFSESTYSTVASGDISSERNTSSTKNNKKNKPDRLLPFQ  
RKRPERNSSSTRDNCNENVTGNNNRMQKKKRNRTKKQNSQTCASDAASPVNSTMRRKGL  
PPLPPTSTTALDPSSEQVSLNTSSKNQKIKKPLASATNNNNWDMMTPTTKFLVSAAKATS  
ESMRSAARSIFFSDEDEHEIVFSDFESYSDDCTDGGETCRESLLESEPTILVVSTTKNP  
GSTVDSASPSKLDTHQTPHPKKEEFEIVMGEVAAMGGSSETRKETS SKNCNTVKKTKMPE  
YADCDEEPEFKPSEKSANAIEMKIADTTGGRKVSTTNNISNKDVVISVPEYADCQEPDA  
RDDTTGQEKSSVISIPPIQKVETS  
DPGLLPSCGFFSSMADLTAKTETGSKIESENKIA  
EVFEYIGGIFSPNVKNDFSVSSSTKNLPAVGVDGATDSSYFEVDEIRKSTKEERNITEK  
VAEGNSAVRDEAPESPIHAEIEWVLSKNDSEADGKNRKGKATNNSRGLRSIFSRKNK  
QKSKASAMT  
>comp9221\_c0\_seq1; 1162 160 4779 LEN=4864; translated



MKVA STTASRRTRYSSSSIGRGR IWSVSN AVALWSAIALLLAGSSAGEQTCPEGSEEGSC  
AWDSL SALSPEQALVEWIGSMEQGSVASEKFRIERKEYAATRKP SDAVSEDNRSTSNKFE  
IQPRFEFYATEDIPSGTVLMEIPESAIVGNILNPSKTVSRLLLEPKKGTKNHIPTCMLVES  
LVNEREKGADSPVHPYLEYIFGPGNPEGKQPSAWSEKGFVFWGMMGQEGAI FKP NRYND  
KHKHSSICGTYKRYSPVPR TIP ISSHDKVKDNRENLENAAYSIVAKNAWGVDL IPLFDMI  
PHRNGFWKNVEAKFVEVESGETVEVRARDYRFEALVHNRTADGDDPSTKSYKLVVYADR  
IQEGEPLHVSYNQCKHLGCEKLYHYRTAGNFMADGGFVEDYPRRWSLEVDPYESEVDPDS  
LLLIFDIDVDRKTGEKKFSMIQKTSSEDEKLYEVNVI AAAIDRWNALEEEVKHHVVDLDSL  
ERSGIEEFHSAYQEA FKM LWSHRNDPVVNQESNEKQYDDLQDPAGPGVHFRGEYMPCAEG  
EIVDGGNLLP DATVNGFYQVLQYLYEDEIDNTYIKMQGWLHSASN FRAHYHESAIHVPLQ  
YVKDVKRVAYIGGGDNMVEELKYPNIELIVGMELDQQACRSSMKYFGTTPAYYDPRVE  
WYGNAAKTLRIIPDDYFGSFDLVLVLDLNDVSEAIKVAVDLSLLEISPLLMKQDGGVIS  
RNEDYVDRSAASLNMAQRVIAIEYWDVPRLCETSISIGSNSVDFAKGERYNHGVDPKLRLL  
KSFDTMAHDGWSAYHDHSRPLDPEGNETAWTSFDPYVCDKIHRSLPGHKQEIGMGGGHLL  
VIEAENVMTMLDGDNSMSELQTKITDVAKRNL SVVDSFHADSDPSASFLIILDEGYIKAR  
VYPEAQYVAFDLMMWGT SVALDKSNAIQEDLIAALGGGTHEGSTSSFRVTASGMATAEEI  
GETNGLVGVALDYCYSSGSDSTKDDDKVVEDGIQQEETFSESI IITEILGQPFDEDRIPS  
FAVFCGKEDAEECSSYNSIANKDGMNFYPVSSCGSFQDMPACQSATEKRLVDIVSENKLL  
DGVVLDRLSLDMGKI IHKVFNN TLNQDKLLESTFVFLTPVPTGESWRKILLDRFRSEII  
IVSPIMKADIDLTYTEERSEEWSIVWARHNNFHSLETSLATIEEKLGLTTTTTKRVLPGAK  
PLKFDWNPRI INDSYYNPERKEQWLSQRPVGYQYFVQME LATAKAPVEVNEIVYVATRD  
YSAVSDGFKEDFVKATVLEVEDDKYVIEMMTEDMHNGTIRTYKPHNGPVGREMIRKISSN  
EGDRKYTVGDIVLVQKDKDTGKYIPIEFYSAYVTGLTEAGIATRPHNPDADVAMLANVP  
HEFVMVYAESPEFSTDHDVSFSREILEEAFKKS AVVMGLTDEGDAATNTFEIGKGI VVTL  
LSSIGSFAMKWDGLYGIELNIFTHNNFGESLKEIEESQFMEQFKHLAIVAKDSFPRGYGKV  
VNFEHEIERYPHWIDDEPSEVEDGVLYEYLDDEYIEE

>comp9222\_c0\_seq1; 325 133 1207 LEN=1207; translated  
MAQSQSSAMAKLRGRHYDAARARVPSPAGGGSGDPPPAAAAEAKAKPSGAASAAHARRFSR  
FHNTRLGSGGLPPRKASGKDASEGAAPKPPPPSAAPAAAPKPPPPSAAPPAAVAPATPC  
PPPSAASGQEPSTELDLVVAISDRLETGLSPAALRAILDLLKRGEQPD AIVAVVTSLAXA  
AAVAKGLPGGNRHRGAATQRKATQGNATQHNRHRNTRGMVQGRAEQQLRAALQDRCHG  
DSLRF TATSREESRRVAVPVRAARSRRMRNR TAEKPMKKRPNGRETRQT TDERANGVFDG  
YGLVTA AFLRIAQKSTRIVPCSTISSLDRC AQTPTNVP I IKNTSCPTNGSSKIMATSRX

>comp9222\_c0\_seq2; 150 55 504 LEN=888; translated  
MGSDDLQDQLSHYAKFVETVLKPKLSSAESEAGVVRAEIAEYRELKAKADERTKKGLAGE  
PLEALVDLGHGALFCNAVVRDPDRMFVKVGLGFHAEMTLAEASEFASKRISYLRANRLEK  
RESEIKEIQGHIQSASMILDQLHAEMRNS

>comp9223\_c0\_seq1; 75 1 540 LEN=698; translated  
RLGRLEVLDQVA AVRQLTVRGFADPARVGIYGWSYGGYLAAMCLCRAPDV FHVAVAGAPV  
TSWDGYDTHYTERYMGLPSENPSGYRESAVFDHVPNMKGKLLLVHGLIDENVHFRHTARL  
INRLIASGKDYDLLLFPDERHSPRRLRDR IYMEQRISDYFLKHL SAPPAGHSVRTIAGL

>comp9224\_c0\_seq1; 171 260 616 LEN=923; translated  
MATDLRRLFDIDEMAYTVMIPEEHKGPDGKLTPEQLVDAIKKDG MFGEFEYCTTFSDS  
DENEGVVRVLDIGKFSDDFESSAPLPEDCNLTIQGKGNLVHISLTDEIFATMRVVVA

>comp9226\_c0\_seq1; 1327 51 3464 LEN=3704; translated  
MYSVDVLGFGGRAPAEVLDLLSKARQECGIEEII PSRSQSIRSALLEAPYRTF LQESCE  
PKATTSPLVYCLPTTVTEYIASSGEADLVR SRILAGGVVLA YDVAGAALVGGSVEDALSA  
IAGDEKARS AFAGGALAAVSKLDARAVEEAVGPSKRNDVVI VVGSGGREHALAVALARSP  
LVSEVLCCPGNGGTASEENPKIKNKGADQSNKT VIALAKEVGA KMVVVGPEAPLVAGLVD  
ELSV ECPDVLAFGPSKAAAELEASKAF SKDFLQECGIPTAKYRTFTDASEAIKYVESLDD  
NDRQVVKASGLAAGKGVLLPTTKQETIDAVNEIMSDKAFGDAGDTCVIESFMTGPEASC  
ALCDGKTAVLMPAAQDHKRALDNDEGLNTGGMGAYAPAPCVTPDLQKEIEAMCIKTVEKM  
AERGTPYVGLLYAGMMLTPDGP SVLEFNCRFGDPETQVVLPLLETDLYETMAACCTGTLD  
TVDVRFKENISAATVVCAAKGYPLSYPKGMEIKGLGETKSMEGVKVYHAGTKLDENSTTR  
CSGGRVLAVTGLGSDLK SALKTAYKGVDAISF IGDDGAPLMHNRTDIGRKATQKKLRIGV  
LGSTRGTALIPVMEACASGALDAEIVAVI SNKSDAPILEK GKSLGPTVVTKFVSSKGLSR  
AQYDAECTAALVGAGVEYVLLIGYMRILSGSFCKFWAGCCINVHPSLLPKHSGDMDLRVH  
QAVIDAGEDESGCTIHEVTEEVDGGPILIQKKVSVSKDDTAESLKAKVQPLEGPAFVEAI  
ESFTKGK AISYADAGV SIDAGNDLVEMIKPYCKATRRAGCDADLGGFGGLFDLAAAGYDA  
KETV LIGATDGVGTKLR I AQSTKKHASV GIDL VAMCVNDLIVAGGEPLFFLDYFATGHLD

VHEASDVVKGIAEGCRQAGCGLIGGETAEMPSMYAPGDYDLAGFSVGAVARDRILPQNI  
AGDALLGLASSGIHNSNGFSLVRKLIKEGLSYDSSPCPWDSSVETIGDSSLTPTKIYVKAC  
LPLLLKGI IKGMSHITGGGLLENLPRTLPKGIGGEITNHPSLPPVFAWMKTASGLDDNEM  
LRTFNCVGMVIVVDKERASEAKQMLLDAGEDVVYDLGTLVPHPEMEIKMVNPLTSN  
>comp9227\_c0\_seq1; 958 286 2952 LEN=2952; translated  
MTLIVMVIILDATLGFQNNFVRIQNPSLVGKSIPLMTPGGKHSMLMNTVFFNLPSGMEEDP  
LEGDRRQRDRFTYKRYVAHKKKDPEPSPPTTSNQQQPEKPRLVPRNANESTNGNERKA  
TTTTVGGVNMELKDPKERVLRHATASSAYAVDAFKGKKKKI IKPWRSGRKKHKKWQNN  
GGLGREAYGEELRIELKNPKRRLVVAQSGNADAASLISGGSLSAEDVAEERRYRLRK  
ERDPNGKI IYDKDDDEDDYDEFNGYIGDLDDVVDEGNVGVADLEGERYADDNEGIPNLV  
RQKSMVRQPEDEGTESPNLVRSLTSMVRQPKDDKDEPNLVRSSSVVRKSDDESESGR  
NLVRLDSSIVKEPEEKAEGELRFYSRTETVDEENDEGNQRLVRAVPASPSRRNGPKLVR  
PNFMKERDTGPKLTKPNIVRAKARGPKLVKPNLFREKDVGPKLVRPNIQKKKVPERKLV  
PKMQPDVSSNDETSSTGKHRLVSPSSSTVSKNDSP IQDFMYGANAATINPTSALLKVKP  
KESTTSVIHTSTPVNKRPKQNIIEVPNSPNNLENLMYGSQQASISPTS SVGLDDLTSEQT  
IGTQTSTRNSFTGGDVMSKNKTRRFAEAQAISSSSTAIEDLMYGHQRSSSSPTEVIPEMK  
PTAFVRAKTIISADDDGSSQKSSSDKSTTIYPDGDKRKVAEKPRLVRAKQKRYVKPSTS  
IMDSVPDWDAAANPNSITTNPTSVAANSAMSIESKVEVEVQNNKKYVRPSSSVMSDAP  
DWDAQAQSAFATSNPVAVSVESTTSLKYGNESDAXKFQPEVEEAESMKNKKYFQPSLSSMD  
DAPDWDASKSDLTISNPSVVNDGGSNVANEAIDSSKVQNPQKKYVQPSX  
>comp9228\_c0\_seq1; 210 1 979 LEN=1236; translated  
RSYYCNQTKMSGRLIISKKSYCPWNAKNLRRIERDEEEHLEAQKREKREKHADISSRARV  
AALKKGGDGDGHAEHINLFELEEKVYLKRLTCNNRQKKNIQSRKEKVHEMORSILNTHEN  
QERKRAGNKFSQNELGRFSRVNNTSKPFYLLSRPEEEVLGRKEMDRKREMDPMKFFHENA  
EEVDGTSHRNRSYSCVRPDRGNVESISCVDSESKPSKANGSSSTEKKRDRQRFSENYFGGD  
GGEQSTDIPNSHHSERKKRQRKESRSDRRKHSRYTKEKKRRLTHSETSNDDTDSIDQLEK  
NRTKRREERERKRKEHVLTGTNTKGR  
>comp9230\_c0\_seq1; 367 1 1640 LEN=2704; translated  
LQPRVSYSSSYPTLNADTSDPLENFPPNIRALGETQILQFESIAXQKARETRPKEKDS  
RGDSAGLFAMKFIKKKKPSGDEEEVEPKPKKETKSKKEKAKKPKAPKEAEPPSADVEA  
AKPKKSKPKERKEPKKTPSTRGKTSKKNESTKEKPSKESKKEKKEKAPERTARMSLAFASA  
PSDDDHPAPGVGGDLIPDQIAAIKQILGIRTPAQLEKFKALFTPEE IARVKEGLSDPNKR  
KKLKANKSGSDPNVGFAYNGGPQAFGGGLDPSKWRLLQRYRFNGKSKCEVTGELEEVHAPV  
KDGIIHFLTSP IQYLAMMFQSNIMKFDPSRQKYTLHRSPTYQYRPQDTPDPGPEPKGA  
YTLTLLWTVYVQLPPFPNDVLPKFRDKYTDDMTYQGGQLHSDSLPIMPGRGMGIGDAPNL  
CVIRDVDPDVTYQGTVADCWLLGAISSLAEFDGAIKYLFKTKLLHKRPLPGPNMYTITL  
TDLSTWKPVSYEIDERLPVKGDKSGKLLACRLSGYGELWLPALLEKAMAIHCGGWDAIYGT  
FIHNEL  
>comp9230\_c0\_seq2; 476 1 2349 LEN=2525; translated  
LQPRVSYSSSYPTLNADTSDPLENFPPNIRALGETQILQFESIAXQKARETRPKEKDS  
RGDSAGLFAMKFIKKKKPSGDEEEVEPKPKKETKSKKEKAKKPKAPKEAEPPSADVEA  
AKPKKSKPKERKEPKKTPSTRGKTSKKNESTKEKPSKESKKEKKEKAPERTARMSLAFASA  
PSDDDHPAPGVGGDLIPDQIAAIKQILGIRTPAQLEKFKALFTPEE IARVKEGLSDPNKR  
KKLKANKSGSDPNVGFAYNGGPQAFGGGLDPSKWRLLQRYRFNGKSKCEVTGELEEVHAPV  
KDGIIHFLTSP IQYLAMMFQSNIMKFDPSRQKYTLHRSPTYQYRPQDTPDPGPEPKGA  
YTLTLLWTVYVQLPPFPNDVLPKFRDKYTDDMTYQGGQLHSDSLPIMPGRGMGIGDAPNL  
CVIRDVDPDVTYQGTVADCWLLGAISSLAEFDGAIKYLFKTKLLHKRPLPGPNMYTITL  
TDLSTWKPVSYEIDERLPVKGDKSGKLLACRLSGYGELWLPALLEKAMAIHCGGWDAIYGG  
CCTHAWSI LTGCRECYEITRNPKNKGFCLTKFNPSTRKWEKHYNPKEDPGHNLWKS  
PEVGGGSGSNGLYFVLLANHTDCDSI PHTCPILITGNLSHGVCIGSGEITEDDLFERI  
CKWDATNYIMSAATTGAGGRSSIGQDGLVADHAYSVVAAYSDVAGTGRGLVNRNPWGT  
GEIDDEFFDDDGPGWEEYPEIKEELKPVFQDDGAFVWSKDEFFRFYQTFYLCASDMTKFV  
EG  
>comp9230\_c0\_seq3; 527 1 2228 LEN=2404; translated  
LQPRVSYSSSYPTLNADTSDPLENFPPNIRALGETQILQFESIAXQKARETRPKEKDS  
RGDSAGLFAMKFIKKKKPSGDEEEVEPKPKKETKSKKEKAKKPKAPKEAEPPSADVEA  
AKPKKSKPKERKEPKKTPSTRGKTSKKNESTKEKPSKESKKEKKEKAPERTARMSLAFASA  
PSDDDHPAPGVGGDLIPDQIAAIKQILGIRTPAQLEKFKALFTPEE IARVKEGLSDPNKR  
KKLKANKSGSDPNVGFAYNGGPQAFGGGLDPSKWRLLQRYRFNGKSKCEVTGELEEVHAPV  
KDGIIHFLTSP IQYLAMMFQSNIMKFDPSRQKYTLHRSPTYQYRPQDTPDPGPEPKGA

YTLLEWTVYVQLPPFPNDVLPKFRDKYTDDMTYQGGQLHSDDSLPIMPGRGMGIGDAPNL  
CVIRDVDPDVTYQGTVADWCWLLGAISSLAEFDGAIKYLFRKTKLLHHRPLPGPNMYTITL  
TDLSTWKPVSYEIDERLTPVKGDKSGKLLACRLSGYGELWPALLEKAMAIHCGGWDAIYGG  
CCTHAWSIILTGCRECYEITRNPKNKGFCLTKFNPSTRKWEKHYNPKEDPGHNLWKS  
PEVGGGGSGEITEDDLFERICKWDATNYIMSAATTGAGGRSSIGQDSGLVADHAYSVVA  
YSDVAGTGRGLVNRNPWGTGEIDGDFDDDGPGWEEYPEIKEELKPVFQDDGAFWVSKD  
EFFRFYQTFYLCASDMTKFVEG

>comp9230\_c0\_seq4; 435 1 2407 LEN=2583; translated  
LQPRVSYSSSYPTLNADTSDPLENFPPNIRALGETQILQFESIAQKARETRPKKSEN  
RGDSAGLFAMKFIKKKPSGDEEEVEPKPKKTKSKKEKAKKPKAPKEAEEPPSADVEA  
AKPKKSKPKERKEPKTPSTRGKTSKKNSTKEKPSKESKKEKKEKERTARMSLAFASA  
PSDDDHPAPGVGGDLIPDQIAAIKQILGIRTPAQLEKFKALFTPEE IARVKEGLSDPNKR  
KKLKANKSGSDPNVGFAYNGGPQAFGGGLDPSKWRLLQRYRFNGKSKCEVTGELEEVHAPV  
KDGIIHFLTSPIQYLAMMFQSNIMKFDPSRQKYTLLHRSPTYQYRQDTPDGPPEPKGA  
YTLLEWTVYVQLPPFPNDVLPKFRDKYTDDMTYQGGQLHSDDSLPIMPGRGMGIGDAPNL  
CVIRDVDPDVTYQGTVADWCWLLGAISSLAEFDGAIKYLFRKTKLLHHRPLPGPNMYTITL  
TDLSTWKPVSYEIDERLTPVKGDKSGKLLACRLSGYGELWPALLEKAMAIHCGGWDAIYGT  
FIHNIITKYLDSDASESIVYLDHIVKDQTNRDKQFLFRFFDISLLTSLFQPNLYSKVA  
VVPXWSIILTGCRECYEITRNPKNKGFCLTKFNPSTRKWEKHYNPKEDPGHNLWKS  
PEVGGGGSGEITEDDLFERICKWDATNYIMSAATTGAGGRSSIGQDSGLVADHAYSVVA  
YSDVAGTGRGLVNRNPWGTGEIDGDFDDDGPGWEEYPEIKEELKPVFQDDGAFWVSKD  
EFFRFYQTFYLCASDMTKFVEG

>comp9232\_c0\_seq1; 544 158 1117 LEN=1290; translated  
MTRIDTRSYPTNVEFKERRTKSTSSCQTTLSTSTASPLRVPDVSQEQDFFRSIRERAKK  
ASYSLGSNTRAMDPPETKDETGTGNAEAAANRDAAVEAEILKEIARLEAEAEKKRKAELA  
IENAKSVLKEADSDSDSKEAKANNGTVSAIAQMIADQELSVENEAKDDRVSGEEKREG  
NVCEKGDRKQLITIVSPPSIKRQFPAPASDANRITNYFKRNNEGENSRKEEGEAKSDEAD  
EIDQQVEASISMLTTDDADKGTSGLEETLETLESKIAECTYVLSDPNASVEEQTEAAQL  
MVQYARTAKAITKVLQNEK

>comp9232\_c0\_seq2; 544 158 1117 LEN=1279; translated  
MTRIDTRSYPTNVEFKERRTKSTSSCQTTLSTSTASPLRVPDVSQEQDFFRSIRERAKK  
ASYSLGSNTRAMDPPETKDETGTGNAEAAANRDAAVEAEILKEIARLEAEAEKKRKAELA  
IENAKSVLKEADSDSDSKEAKANNGTVSAIAQMIADQELSVENEAKDDRVSGEEKREG  
NVCEKGDRKQLITIVSPPSIKRQFPAPASDANRITNYFKRNNEGENSRKEEGEAKSDEAD  
EIDQQVEASISMLTTDDADKGTSGLEETLETLESKIAECTYVLSDPNASVEEQTEAAQL  
MVQYARTAKAITKVLQNEK

>comp9234\_c0\_seq1; 470 566 1882 LEN=2275; translated  
MKGIQCVLSFDAIDEDSEKELAKITTGCSVVVEGPLVESQGGKQAVEVAATKIRVVGECP  
GDTYPLAKRHSLEYLRLTALHLRPRNTIAAVARVRSQLAGAIHAFFQSGFVYVQTPLI  
TASDCEGAGELFRVTTLDIDNKSSLPLVKTEEGKSTTDIVDSSQDFGKPAYLTVSGQLG  
GETYASAMGDIYTFGPTFRAENSQTTRHLAEFHMVEPEMAFADLDSAMENAEDMLKYVVK  
HVLDSCEEDLAFFGKFDKGLIKRLEKLVSQPFVRSYRDAIKYLQEEIADKPSKWQFPD  
VEFGTDLSTEHERWLAETKFDASAVFVYNYPKEIKAFYMRDNEEDDGETVNAMDLLVPGVG  
ELVGGSQREERLETLLLEKMGDQDLDPEDYWWYLDLRRFSGVPHSGYGLGFERLVTVYVCGI  
ENIREAIAFPRYPGHAEF

>comp9235\_c0\_seq1; 719 311 2938 LEN=3090; translated  
MDQFGPEQLEQAKMEILIRIPPWVEWWEYVGTQSQFFSDTVSEYARSTYSIFIVNQNS  
FLVILSMFLFWPFYAYCFVAVTSASTWIIWLFVSVWIGIQMNFVAYQFFMIALDIFVLT  
LLKTYKVMRSRVAQFIFFFSERIQKSRQKMSRRRSWRKQCDAVKNYSEFLKLPVWEKSS  
SLSVAAMAISSEEDAPSSHDCLLQPPNIRRSKSFSTMKLSKRRQFDTEEDQNDLIAQS  
TSSLNNDHEHLSPGRLSLHKGNSMSRLTALQDEAEAAHKKRKYSDIEKDLGSSSTHLLV  
STTTRLEKEEREKLEEGKESGLEFLLSGVVKRNLHLEHLLTSNARDVEVSGYGFSSATR  
KAIAAYDEVSEGLELLTEVDETCDAHVTRLRERILLFRKMKQNMGRALMLSGGGAQAM  
YHLGTMRALIDSNLYHKIKVISGTSGGSIAAACAMFTPEEISRDI CLSTVSTDFRLTGE  
MKRKNIRWFPPISEMISYWLKHRILIDSEYFLATCDHYWSDTTFEEAFARTGKHVCITVS  
ASRAQSDAAQRLLLNHISTPHVTLASAVAASCALPGVMKPAKLTKNMKGKVEDFEVDGV  
EWIDGSVQADLPFORISTLNFVSNFVVCQTNFHVVPFLNKDEQIRKSSYRKLFTIEWDI  
RSRALKLSGLGLFPKVFVGHDIKVFVKQYHGNTLVPRFTTMQTFGLHVLMPGVKHMEN  
YLHYGQLAAWPYLRVIRYMLRLEISLDEGLERLKS RVQKIGPDYDDTDDLDSIASGSTVN  
AVMTLKLNRSVRFGTSSRQIEGLQKKEIVELENSMLRQEVEDLRLRLAGRSAMNGNKKV

PEDEDDPATVILSEGNVFNLSQDARKFQGNDISD

>comp9236\_c0\_seq1; 1333 1 3841 LEN=3932; translated

XEDGSIDAGTEDGSYEDVGDEGDEVEESMGSDVAEEVEQGFESGSEEGPEEGSFQDDESGD  
DSYESEEDQSHNDSESESSEVSQDSEDEDPFEDEEAGAILNKNLSSGSLMNEPDENEKPKW  
AKLVPAAILAFGIWAAVAFCCCIIFIPLMVIIIPLAVLLPGGNDGAVPFEELGATTNITG  
VMDNTDFLTSIPTASPTIANVITNPTVSPETPQSQPTVLDGADTTIYRDGVLSESAAGN  
EDTMLVQSGVAGNDELPSAYALVQFDGKLNIDGDMTVAEYLNAI PDAVVDFCFNVATDGD  
GGTPGQTFSTCLLAPPTEDI EQLTGANADYRIPESCLNGAVEDFQVTADSKEVCVNVADM  
LRTPPALPEIGDENPPALRGRALQETTLPPDALPEELADAPVARNPEGAGQDVSFLFIID  
AVEEFDGPGTRFYTNADPERGPTLTIPPMDQDDNNGGEGAGAGTGAGDNCLLDYVCGTAE  
LSKLCGFIEQAGLDAVLSVPDPENPFRTIFAPTNSAFDNLDESI SAALADNDALTDVLLY  
HIVNGDASSNLGCGESLKMGTMSNTTTF CGPGDVYYQIGNGVSPGVNTVPKILDADIEA  
CDGVIHTMEEVLIPIGYVWVWLQPAAVYMSGNIRRKNSNIANXRKILFAYFLLLHAQFATL  
LFHSDTSGNLTVCVTEGNQTLIEMICESEDHKTFCESLQSTGLDNVLAEGRFTVFAPTDTS  
FSSETLAPEILTFILLQHVISGSAISSDLSCDQEVMMATGEPGKITCGEESVFLIGGDG  
NVDPDTLPTIIAPDLLACNGI IHSIDQLILPGISETVDEDEDGDDMDDMDDIAGEFAPCGIC  
EPGLQISELVAEVEVPDSVGLVGISGSMSCAAEDLCLGGFCSPETCAEFAGGLSAACGC  
KETASVVAFLGDSPTYSSFLDFLKLSDYASLIFTNSNPITVLAPNNAIEALTAESP  
VAQLATPEWIVHLEDILGYHAIDGALPSTDITDGLVQ TALNEEELTFSLDGADVINSGE  
AKVIDADALPENGVIHTLDSVLLPSWVGQNLDDVAQGI DD LATLMTFAGETNLATLLSEP  
GPYTI FAPSNEAVQELLQMGIDPSLIDIESVLSYHIVPGLYPASTVTDGLALATMHGEDV  
ILNVMGSTATVMGERIVDTDILANNGI IHVIDGILLPSDMELPI PDGLPPPDMSGAQTQ  
SCSICTGVRGDAFTLTNPDAVISIPEGMSIPTFTGTGTEGTCAEIEDLCQIGYCDACLNTF  
AVDGASDTCGCEQEGGKTRR

>comp9236\_c0\_seq2; 644 1 1567 LEN=1567; translated

XEDGSIDAGTEDGSYEDVGDEGDEVEESMGSDVAEEVEQGFESGSEEGPEEGSFQDDESGD  
DSYESEEDQSHNDSESESSEVSQDSEDEDPFEDEEAGAILNKNLSSGSLMNEPDENEKPKW  
AKLVPAAILAFGIWAAVAFCCCIIFIPLMVIIIPLAVLLPGGNDGAVPFEELGATTNITG  
VMDNTDFLTSIPTASPTIANVITNPTVSPETPQSQPTVLDGADTTIYRDGVLSESAAGN  
EDTMLVQSGVAGNDELPSAYALVQFDGKLNIDGDMTVAEYLNAI PDAVVDFCFNVATDGD  
GGTPGQTFSTCLLAPPTEDI EQLTGANADYRIPESCLNGAVEDFQVTADSKEVCVNVADM  
LRTPPALPEIGDENPPALRGRALQETTLPPDALPEELADAPVARNPEGAGQDVSFLFIID  
AVEEFDGPGTRFYTNADPERGPTLTIPPMDQDDNNGGEGAGAGTGAGDNCLRLTLVFDG  
VCLPIALILAIKLYCAKPSLSQYPSVFFLYTDSL PVDYVCGTA

>comp9236\_c0\_seq3; 1400 1 3694 LEN=3785; translated

XEDGSIDAGTEDGSYEDVGDEGDEVEESMGSDVAEEVEQGFESGSEEGPEEGSFQDDESGD  
DSYESEEDQSHNDSESESSEVSQDSEDEDPFEDEEAGAILNKNLSSGSLMNEPDENEKPKW  
AKLVPAAILAFGIWAAVAFCCCIIFIPLMVIIIPLAVLLPGGNDGAVPFEELGATTNITG  
VMDNTDFLTSIPTASPTIANVITNPTVSPETPQSQPTVLDGADTTIYRDGVLSESAAGN  
EDTMLVQSGVAGNDELPSAYALVQFDGKLNIDGDMTVAEYLNAI PDAVVDFCFNVATDGD  
GGTPGQTFSTCLLAPPTEDI EQLTGANADYRIPESCLNGAVEDFQVTADSKEVCVNVADM  
LRTPPALPEIGDENPPALRGRALQETTLPPDALPEELADAPVARNPEGAGQDVSFLFIID  
AVEEFDGPGTRFYTNADPERGPTLTIPPMDQDDNNGGEGAGAGTGAGDNCLLDYVCGTAE  
LSKLCGFIEQAGLDAVLSVPDPENPFRTIFAPTNSAFDNLDESI SAALADNDALTDVLLY  
HIVNGDASSNLGCGESLKMGTMSNTTTF CGPGDVYYQIGNGVSPGVNTVPKILDADIEA  
CDGVIHTMEEVLIPIGDTSGNLTVCVTEGNQTLIEMICESEDHKTFCESLQSTGLDNVLAEG  
RFTVFAPTDTSFSSETLAPEILTFILLQHVISGSAISSDLSCDQEVMMATGEPGKITCG  
EESVFLIGGDGNVDPDTLPTIIAPDLLACNGI IHSIDQLILPGISETVDEDEDGDDMDDMDD  
IAGEFAPCGICEPGLQISELVAEVEVPDSVGLVGISGSMSCAAEDLCLGGFCSPETCAE  
FAGGLSAACGCKETASVVAFLGDSPTYSSFLDFLKLSDYASLIFTNSNPITVLAPNNA  
IEALTAESPVDVAQLATPEWIVHLEDILGYHAIDGALPSTDITDGLVQ TALNEEELTFSL  
DGADVINSGEAKVIDADALPENGVIHTLDSVLLPSWVGQNLDDVAQGI DD LATLMTFAG  
ETNLATLLSEPGPYTI FAPSNEAVQELLQMGIDPSLIDIESVLSYHIVPGLYPASTVTDG  
LALATMHGEDVILNVMGSTATVMGERIVDTDILANNGI IHVIDGILLPSDMELPI PDGLP  
PPPDMSGAQTQSCSICTGVRGDAFTLTNPDAVISIPEGMSIPTFTGTGTEGTCAEIEDLCQI  
GYCDAQLCNTFAVDGASDTCGCEQEGGKTRR

>comp9237\_c0\_seq1; 460 9 761 LEN=943; translated

MKLLTTALLASSAAAFAPSASNSRASVAVQESKADLEVLAKELNPLVGFDFPLALSSDNF  
WEQSNEATIGFLREAEIKHGRIAMFAFVGIVHANGIKFPWAMQMDGTPFPPTVSSAPEAW  
DQISDSAKWQIFAFVGFLEFWNEVTGTHYMRGGKPGDFPDFDAAVIPGGALNLYDPLGWS

KNRSEEAKADGLKKEINNGRLAMIGILGFLAEGKVEGSVPLLKGIIPAYAGEPMAPFTDS  
ILPKLTVFTG

>comp9238\_c0\_seq1; 337 84 1154 LEN=1441; translated  
MSPHETLFRLEATQQLERAVVDHTPLCRFTVWDFPGDYGGDDDEINNSVFEGGGAPTSL  
IFVVDAQDEPYDHVLSFTNAVTKALALNPNIIVIEVFINKVDGELFLSDESKYDCRRDIM  
TQVTDELTDAGVSPDNIHIRYHLTSIYDHSIYEALSRVVQRLIPQLPTLENLLNVLVSTC  
SMEKAYLFDVVSCLYISTDPGPVDMQSVELCSDMIDVVLVDSGIYGLGPSHYEMGNTSEE  
TTSSSIENKQSSDQTQQKQIQNGDELVGTLLIKQAPAEDSEVDMVDPDSAYDCKSASVIRLS  
NGMVLVYLKEVDTMLALVCITRAENFRKKSLINYNIGCLKKALRALVQPASTSKNSH

>comp9238\_c0\_seq2; 202 179 553 LEN=753; translated  
MQSGGYSSAYDDYSDYQQQDALIGRQDDVDADGMLIVEGAGEMGGSSPGQLLGGSQDGF  
GTAENGASSIDFRDPKIASLPRILLMGP RRGGKTSIQVRTVLFALVCRSVGDSTLALYVC  
APHE

>comp9238\_c0\_seq3; 470 179 1558 LEN=1845; translated  
MQSGGYSSAYDDYSDYQQQDALIGRQDDVDADGMLIVEGAGEMGGSSPGQLLGGSQDGF  
GTAENGASSIDFRDPKIASLPRILLMGP RRGGKTSIQRVVFQKMSPHETLFRLEATQQL  
RAVVDHTPLCRFTVWDFPGDYGGDDDEINNSVFEGGGAPTSLIFVVDAQDEPYDHVLS  
FTNAVTKALALNPNIIVIEVFINKVDGELFLSDESKYDCRRDIMTQVTDELTDAGVSPDNI  
HIRYHLTSIYDHSIYEALSRVVQRLIPQLPTLENLLNVLVSTCSMEKAYLFDVVSCLYIS  
TDPGPVDMQSVELCSDMIDVVLVDSGIYGLGPSHYEMGNTSEETTSSSIENKQSSDQTQQK  
QIQNGDELVGTLLIKQAPAEDSEVDMVDPDSAYDCKSASVIRLSNGMVLVYLKEVDTMLALV  
CITRAENFRKKSLINYNIGCLKKALRALVQPASTSKNSH

>comp9238\_c0\_seq4; 312 84 1079 LEN=1580; translated  
MSPHETLFRLEATQQLERAVVDHTPLCRFTVWDFPGDYGGDDDEINNSVFEGGGAPTSL  
IFVVDAQDEPYDHVLSFTNAVTKALALNPNIIVIEVFINKVDGELFLSDESKYDCRRDIM  
TQVTDELTDAGVSPDNIHIRYHLTSIYDHSIYEALSRVVQRLIPQLPTLENLLNVLVSTC  
SMEKAYLFDVVSCLYISTDPGPVDMQSVELCSDMIDVVLVDSGIYGLGPSHYEMGNTSEE  
TTSSSIENKQSSDQTQQKQIQNGDELVGTLLIKQAPAEDSEVDMVDPDSAYDCKSASVIRLS  
NGMVSIIYHDSLAI FLVMGSFLRTWHIVPKIL

>comp9238\_c0\_seq5; 373 179 1483 LEN=1984; translated  
MQSGGYSSAYDDYSDYQQQDALIGRQDDVDADGMLIVEGAGEMGGSSPGQLLGGSQDGF  
GTAENGASSIDFRDPKIASLPRILLMGP RRGGKTSIQRVVFQKMSPHETLFRLEATQQL  
RAVVDHTPLCRFTVWDFPGDYGGDDDEINNSVFEGGGAPTSLIFVVDAQDEPYDHVLS  
FTNAVTKALALNPNIIVIEVFINKVDGELFLSDESKYDCRRDIMTQVTDELTDAGVSPDNI  
HIRYHLTSIYDHSIYEALSRVVQRLIPQLPTLENLLNVLVSTCSMEKAYLFDVVSCLYIS  
TDPGPVDMQSVELCSDMIDVVLVDSGIYGLGPSHYEMGNTSEETTSSSIENKQSSDQTQQK  
QIQNGDELVGTLLIKQAPAEDSEVDMVDPDSAYDCKSASVIRLSNGMVSIIYHDSLAI FLVM  
GSFLRTWHIVPKIL

>comp9239\_c0\_seq1; 929 83 1918 LEN=2052; translated  
MKFATAFTALVASMVAEAGMPKKNRQFKKELNRRMKNQGFDAATLMRGAKPHNEAAKR  
RKLDDDMQVTSANSIQFVSCFSLTTSYEDLFDGDDNDGQLQTLYSQGQVMAMESYAI FRL  
CNNGSCNYYNMEYVIDLNTYVAALVNYLPTQMENYCEGCKENQDSCYNQNYGGNQYDGO  
QYGGQYGGNYNNGNANQNQDENRNENDNAYKYQQYNAYDNNYNGAQVNNVNYSGQYGOY  
NNGNNRKLAELHEFESRVLQGVVRELDCLCVEYSCFEEEGGNNNNNQNDYNFEDASE  
WLTEMSQCVDLEASYNPYGYQNGNNGGGADDNNIFAGLVCNGDGTGVEIGLFMDEDCHLY  
LTNEAYSNYMSYSDQTYAQMTKEIVEFTFSSAVFTCNDEDVVYTTNLQNYANNGYNNNN  
NNGGEDRGEVSEWCEQLFEGDNENEAVPIEMATCGAYAQQYGGNGYDGGQNWQEKYDSYM  
NQNEQNQYMYMDWYRFEISEDDAYDMQAVCKVVRKSGGELHTFYNSANGNIYDYSNGAS  
DNISEFMDDTSNSIFFGSDKLSGGAKFGIVVLIGLISGAGVALYLRFKSTVVDDKNVGLM  
EDVPEQKGEVA

>comp9240\_c0\_seq1; 705 190 2799 LEN=2841; translated  
MSKPSILLMMVAHVHMYLHGVASFVVPTRKWRWTVFSTGQEVHDSTRGTTPAETLEAG  
AVLIEDRNI GSGSYGTVHLLLESKSRDGPVAVYVGRKRPWSYEEMLQKLEKRKEKGS LDKD  
AKERAERCMYWKVEEHVFDKLPHPQLPPFLGTTNQNIRVTPNGDGMPEKVDHNMVVF  
GFVGTMDGETPAPAPSLQDLMLRDLVKESALAKHELRLHTDALGTASYEETLDVII PSLLT  
VLEHVHKHKIVHRDVKPANLLVHDRNMLLMDFGSAADLEPSGSAWNKQRVGLENGNRVAV  
SPVYAAPEIFIDLYEAPESFDVFSAGLIFCQLMFGYLEERVDAGFRQQQLVEEANCDLNVW  
LNNELATKLRPVGLDQALNYLTERPGLWNL LLDLLAKEPRDRLSARKALARWREIKSFKL  
EDEEDIDIDHSYFGMVVEALETCEI PSISRPLHFVATFSRSTPLGLILSEKDTED EDEDE  
DDEF LPMWNEATKDAFPGEVFKGIVPDSQADELGI FEGDRLSGIGELPFVDDGGFERAV

GMLQDQPRATKNVRLHFDRKSVRINEAISMKPTDEVEIEVVDRGAWSSKGRRTTQEDTFV  
LHEIHDADRSLVAGVMDGHGGCAASQIVSEDLPLGLFSEELVIKGRFQSVGDALKNSWN  
VVCERYKQKCTEEGECIADYDPVEGILKAETGSEYLEAGTTCSMLALDETSSELTLNCG  
DSRSLVVSQKGVKVFATLDHTPQSEEARLAQGIRDGLNYSMPKCRLSRWVSLRVGDYEVAV  
GRSLEGVFATSKGIVSDPDVSTLAVQEGEILISATDGLWSVMSNEVAIDLHKMRTVNKM  
SAHDAAKTLCIALRKGTSNDVSAVVVYL

>comp9241\_c0\_seq1; 506 1 1628 LEN=1914; translated  
XQQQQQQPKKWTSLFTHSSSNHSLPVLFPVLSVSMSSRDDHNDNGRYRRKGSERPPPPP  
TVGGVWEGTIERIQPYGAFCAFGLVAGHHHRHHDGQGGQQRRTWQGLVHVSQLSDTR  
VEKVEDVGVDDRVVVKVLEVEPRENGRFRVGLSMKDVSDGTGRDLGREEREAREHAKTQ  
LETNLNSMIGMVARDPMDRLVLKHNRSLGASTKQTFRGGYTLVDDDEGEPEPAQPDPLA  
PDRPDPGTDRNYRRAPMGRGRGATLPAWMTAAEGPVGIANDRKPEASGGGDARDARYDR  
SDEKENENDDRRRRSSSRDERRRKKKRRRRTHSDRDGTDSDGSRRDDGDHSEDEKNH  
RKRHKSSSSSHRRNRREHRKHASKKREKKEENEAAAGAAIPKKGRGAAEDPKAGATKATNP  
VAGAVLLAAVAVVDRWVRVRRPNEHQRTQHRKRAIGIAGGNATVREVSRRMQSKRNE  
RANDMEDGNVIVITVVVEVLVLEVIIRGIPRLTVKEEKIESRYNSFDGGDAKHTVLGVRG  
A

>comp9242\_c0\_seq1; 472 92 1906 LEN=2397; translated  
MGRYSNETVTSPPAILCYRHNDGDPFELRKETGEADSGISTIEADVLDRIIKGKAARTPV  
RGQENKTKEQVFLYPRNDSALLKCLDDAPVENVKTMGITEDNQGTCAEIVCYRAEQNSK  
RQERMHLCPHSEWSRGLLSTVGDNDGDGPSEVSNTKSKSTKIRWIDLRFQEKHNTRT  
DEPFLSTEAGIVQFFRSILTSSHEASWPAAAEPIPTSDAKLSDPDIVVLVNLHDSNSAN  
DITTLNLLKDFRVS DVAPSWFFQSLTVMENLERNVIDFIRQKESQGDFMNCSSQSTLLVYK  
KLRPRSRLSATKPVASSLDLCAEETLGIVGKGLWEELQEEDENGNGDSHCDEEDDNSAV  
RSAMQAGDEKCRYRLVSPPYLNLDEEYPGENLVAKLFSKEAMRIFTEDALSVPQWTPWPE  
TTHYRASSFGNEKPWTFVPLCHCFPANKPENFTWVPATKAFVPRTCQLLEEVLSGNGKS  
YLRTALFSQLAPCSVLHEHTGWADLANHVLRHLIPLVVPKIDANGGNDLDCGTWVDGCV  
ETHAVGRPLLFDSDSKVHRAFNYSEVVRTVLIIVDLARPDRPLPLGTAVSGHTEELDAFIEQM  
STPK

>comp9242\_c0\_seq2; 351 1 1292 LEN=1783; translated  
XSCRTDEPFLSTEAGIVQFFRSILTSSHEASWPAAAEPIPTSDAKLSDPDIVVLVNLH  
DSNSANDITTLNLLKDFRVS DVAPSWFFQSLTVMENLERNVIDFIRQKESQGDFMNCSSQ  
TLLVYKLRPRSRLSATKPVASSLDLCAEETLGIVGKGLWEELQEEDENGNGDSHCDEE  
DDNSAVRSAMQAGDEKCRYRLVSPPYLNLDEEYPGENLVAKLFSKEAMRIFTEDALSVPQ  
WTPWPE TTHYRASSFGNEKPWTFVPLCHCFPANKPENFTWVPATKAFVPRTCQLLEEVLS  
CGNGKSYLRTALFSQLAPCSVLHEHTGWADLANHVLRHLIPLVVPKIDANGGNDLDCGT  
WVDGCVETHAVGRPLLFDSDSKVHRAFNYSEVVRTVLIIVDLARPDRPLPLGTAVSGHTEEL  
DAFIEQMSTPK

>comp9243\_c0\_seq1; 581 160 1872 LEN=2278; translated  
MKRKYDESILTPFQRDMRSQRQQALEGIRDAFQRISPRAVTKEDAIRVSDAVSYCNLS  
VKNRVDTRWSKEEDTGEVVAMGTEDNGACGLLEDPDGARLF EYEPTLLPESKVVFECDKA  
VTAVAAGGLHSAACLARNGEVYTWGTNDEMALGRGNLDDADLLSIKPMVGIKDAIQISAGD  
NHTVVLDCHGKVHTAGVYKSDSGLFKELTSPNDLKIHVQKHKHHEFPVQVLGLGKIVMV  
DAGHSWNAALDENGDLTYWGMHSGELARSKSMGATTTEASYIDSDGKDKGKYEKYDVSK  
NFIGEVRQRPELSDGQPKRDEDTGKIIMADYWQYHLDKIRDKFLTPAPVEWIGGLKCKV  
EHFSCGMIHLLVVARDPGSLETRVFGSGNSGFGQLGHGDTKELHQLTPIKALDNKICKV  
AAGCYHNLALSRDGVNLFAGWKLDEGATGLYNQEKTESYTSGDFEGTPKQVAFPDTLGNS  
VIVDIAAGDTTFAITDGGDVYSWGYNENSQTGHYSVAPGIISQPRLLDVIGSVNTSIEK  
SKKTPIAKKCRVTRVSGGGQHSLMVIKRYR

>comp9243\_c0\_seq3; 489 160 1692 LEN=1692; translated  
MKRKYDESILTPFQRDMRSQRQQALEGIRDAFQRISPRAVTKEDAIRVSDAVSYCNLS  
VKNRVDTRWSKEEDTGEVVAMGTEDNGACGLLEDPDGARLF EYEPTLLPESKVVFECDKA  
VTAVAAGGLHSAACLARNGEVYTWGTNDEMALGRGNLDDADLLSIKPMVGIKDAIQISAGD  
NHTVVLDCHGKVHTAGVYKSDSGLFKELTSPNDLKIHVQKHKHHEFPVQVLGLGKIVMV  
DAGHSWNAALDENGDLTYWGMHSGELARSKSMGATTTEASYIDSDGKDKGKYEKYDVSK  
NFIGEVRQRPELSDGQPKRDEDTGKIIMADYWQYHLDKIRDKFLTPAPVEWIGGLKCKV  
EHFSCGMIHLLVVARDPGSLETRVFGSGNSGFGQLGHGDTKELHQLTPIKALDNKICKV  
AAGCYHNLALSRDGVNLFAGWKLDEGATGLYNQEKTESYTSGDFEGTPKQVAFPDTLGNS  
VIVDIAAGTYRTIQVSYLVLLRFWGRLLWAYH

>comp9244\_c0\_seq1; 389 256 1368 LEN=1974; translated

MIFVENVMKRTFTALVFLPKSHGLSSSLATCGRLGFTSVPSGRKYGCVSEKGGIRSSLF  
STFSAPEPPKSKGVNVFEDVDFSVQGNPSSQSSIRNSDPDAVFLVNGASRGIGLQFVSKL  
LSDTKGRVIAGCRSPDDAPKLQDLLSTLDKKSRRNRVEVIKLDVENQDSIELSAAEIKVQY  
GRVDLLLNVAGILGDGKNTPGPERSVAKIEREWMEKTFQVNVIGPVMLAKELAPLMTQAR  
RTGRRKADSSDETLSEKQRAVGVVANLSARVGSISDNGLGGWYSYRMSKSALNQATRTLA  
NELKRKSVWCIALHPGTTDTLSDKPFQKNVQKDRLPVEFTVDSLMMNVIDSMEEHNSGGL  
YDWAGKAIPIF

>comp9245\_c0\_seq1; 1504 251 4109 LEN=4693; translated  
MDHFLLLETEPDHSAATHATASTADRIDRTLASLRIGPGIEEPGGNDAGDADSSSEFYTY  
QASDVVRLMHRAPRGVGHNTNRMASLLESVKGKNTNANANGTPSFSLANNDYTNGLRLFAG  
FFVLAPFVIWAIVLI AFKCKHCYDVFGRNNADNNPTNNANKTKGQSSATPPTTKSSESQ  
TAITTSNKSESETRSEIDANFTTPWIAGGSVIDMIKLSKAGVQRKHKRRLVQLQSWRIQSL  
FLSASILIPII SVVMMEFGWKPLEEAVRELQDLNGDVETLAYRGWDAMQRLESSEKQELFS  
ENELVRSVVEYSDSKAKGYEPDRKPLTDMNRDGGDTYGSNNDKNNRSLQNKPFQAKQKQ  
KQKETQTVPPPTQLPEIPSDISPWSDMVTSSPTELQIEIYNLEDAPVGGDAWKDKSEYLLK  
TMEKGKALPPTTPQNNGVVDNS SREEEEEINNESVLLLLDDFFLSEPASSTLSTQSLPSS  
SALPVVDTQPQLKGGGLIEEWCPDAPRYIGEEEMAFWASSIDSLSQNTETIDRIFNSLETS  
FPYTEENKETPSSSRSDNGDNPEKQTHGSSAFRWVIEATNAVNEAIEWFFANDWLLKLLV  
VVLNVVNGLLL ANVYFVSKNNI IHAPTRCYVAYFLVPLFAVA AVLVLVAVATSVAVLVS  
ADFCSGGTSGSGSPQGTMEDFVSTLQHRLNQNI EGGPNDPLDLLYDSVDYFWTGCLSEN  
LQFLDDFSDNDVDA AAKLNQITMLLPDTGVATVTASSALQPELIAEGNQTDANSGSYIN  
PFASATLERLNKACDRDMSFLPPAISDLDDHVDGIKTN I HKLSDIMSCGQVSPLLLTVSQ  
GAMCVELPHGLTVLWGC SFGIVALCFALLTVRAALYNSVKYKRRPTKPRRVVEKEFEKEY  
KEYMRQYYGEQTTEKWNIDGESLPPTKLEFDFDIEMESTFDSSSPI SGTLSNSNLEGSSE  
IGGFHEQNNADDGSSYGSYDSEISDDENSIDSQEQGSAIGSLLSDTRS IAMQTMHSL  
RNVTSLLSSTVKKNTSRLRDYSIRSPQHQS SVGSNCYDGF GASPAAKGMGADSNVAPVV  
VPEDDSITEDSLYLPTPVSDCIDPEMTSPCHNRRDQTHE'TTNLLRFDDSYSDEEGTNEE  
EEELQIRSAIRLASDR LKQALTPSNLISTLSPSAPRKSFPFMARTLYNNLEGGRSKT'TNR  
NSTDDEEFTALVQPMQLANLTPFETNENIKAREVRYRADRGAKKIPPSRRQWGHDDGSSG  
GGMSSAFEARKSTEGTNACHRSFA

>comp9245\_c0\_seq2; 1423 251 4241 LEN=4825; translated  
MDHFLLLETEPDHSAATHATASTADRIDRTLASLRIGPGIEEPGGNDAGDADSSSEFYTY  
QASDVVRLMHRAPRGVGHNTNRMASLLESVKGKNTNANANGTPSFSLANNDYTNGLRLFAG  
FFVLAPFVIWAIVLI AFKCKHCYDVFGRNNADNNPTNNANKTKGQSSATPPTTKSSESQ  
TAITTSNKSESETRSEIDANFTTPWIAGGSVIDMIKLSKAGVQRKHKRRLVQLQSWRIQSL  
FLSASILIPII SVVMMEFGWKPLEEAVRELQDLNGDVETLAYRGWDAMQRLESSEKQELFS  
ENELVRSVVEYSDSKAKGYEPDRKPLTDMNRDGGDTYGSNNDKNNRSLQNKPFQAKQKQ  
KQKETQTVPPPTQLPEIPSDISPWSDMVTSSPTELQIEIYNLEDAPVGGDAWKDKSEYLLK  
TMEKGKALPPTTPQNNGVVDNS SREEEEEINNESVLLLLDDFFLSEPASSTLSTQSLPSS  
SALPVVDTQPQLKGGGLIEEWCPDAPRYIGEEEMAFWASSIDSLSQNTETIDRIFNSLETS  
FPYTEENKETPSSSRSDNGDNPEKQTHGSSAFRWVIEATNAVNEAIEWFFANDWLLKLLV  
VVLNVVNGLLL ANVYFVSKNNI IHAPTRCYVAYFLVPLFAVA AVLVLVAVATSVAVLVS  
ADFCSGGTSGSGSPQGTMEDFVSTLQHRLNQNI EGGPNDPLDLLYDSVDYXLDGTWDAAS  
CAGVHQSVLFGSPFLITLVWKSILNGPVLLFARIEFKGCLSENPLQFLDDFSDNDVDA A  
KLNQITMLLPDTGVATVTASSALQPELIAEGNQTDANSGSYINPFASATLERLNKACDR  
DMSFLPPAISDLDDHVDGIKTN I HKLSDIMSCGQVSPLLLTVSQGAMCVELPHGLTVLW  
CSFGIVALCFALLTVRAALYNSVKYKRRPTKPRRVVEKEFEKEYKEYMRQYYGEQTTEK  
WNIDGESLPPTKLEFDFDIEMESTFDSSSPI SGTLSNSNLEGSSEIGGFHEQNNADDGSS  
YGSYDSEISDDENSIDSQEQGSAIGSLLSDTRS IAMQTMHSLRNVTSLLSSTVKKNTS  
RLRDYSIRSPQHQS SVGSNCYDGF GASPAAKGMGADSNVAPVVVPEDDSITEDSLYLPT  
PVSDCIDPEMTSPCHNRRDQTHE'TTNLLRFDDSYSDEEGTNEEEEEELQIRSAIRLASDR  
LKQALTPSNLISTLSPSAPRKSFPFMARTLYNNLEGGRSKT'TNRNSTDDEEFTALVQPMQ  
LANLTPFETNENIKAREVRYRADRGAKKIPPSRRQWGHDDGSSGGGMSSAFEARKSTEGT  
NACHRSFA

>comp9246\_c0\_seq1; 575 1 1327 LEN=2039; translated  
XESNRRTAIKNQARNMPPKAKKKEENEDLGLMKAARFGRVKNTLSMGFVGLPNVGKSTLT  
NLLVGAMHAEAAANYPFCTIDPNVVQCVVPSKDFKYLAECYKPPSVVPAVLKVTDIAGLIK  
GASEGAGLGN AFLSHIAAVDGI FHLVRAFDSDEVIHVDDSDVP I RDLETIQGELCAKDKS  
TLVGVLEREQEKVRKEKGLSKQSTNFKLSETFTSAYEKALALVEANTPIQTGEFKDSEVE  
HIRDWGCITTKPQIYVVNLSQKNYIRKGNKWLQKIADWVKEHGGGQILPVSCEFEQNLFD

LKDYPDEQKAFLAECKETALKAGLKGNAEVRTMIPRLIRAGRQALCLQSFFTAGPKEVR  
AWTIMKGT'TAPQAAGVIHSDFERGF IKAEVCAFADFKTFHKGESSMAKIKEAGKYRQEGK  
NYVMQDGDIVVFMHNTTTGKKK

>comp9246\_c0\_seq2; 478 1 1340 LEN=1340; translated  
XESNR'TTAIKNQARNMPPKAKKKEENEDLGLMKAARFGRVKN'TLSMGFVGLPNVVGKSTLT  
NLLVGMHAEAAANYPFCTIDPNVVQCVVPSKDFKYLAECYKPPSVVPAVLKVT'DIAGLIK  
GASEGAGLGN'AF'LSHIAAVDGI'FHLVRAFDSDEVIHVDDSDP'IRDLETIQGELCAKDKS  
TLVGVLEREQEKVRKEKGLSKQSTNFKLSETFTSAYEKALALVEANTPIQTGEFKDSEVE  
HIRDWGCITTKPQIYVVNLSQKNYIRKGNKWLQKIADWVKEHGGGQILPVSCEFEQNLFD  
LKDYPDEQKAFLAECKETALKAGLKGNAEVRTMIPRLIRAGRQALCLQSFFTAGPKEVR  
AWTIMKGT'TAPQAAGVIHSDFERGF IKAEVCAFADFKTFHKGESSMAKIKEAGKYRQEGK  
NYVMQDGDIVGTYNLLIRFV'RDSY'YLRX

>comp9248\_c0\_seq2; -4 1 207 LEN=207; translated  
XPARSTQHA'AHII'FKISTNAKVPQV'TTVRSPIIDHAD'FCKDPD'WQDHPGRGTVR'HHRQR  
QNQDPGQGRX

>comp9249\_c0\_seq1; 504 1225 4535 LEN=5870; minus strand; translated  
MNNKEDNEIETIEV'VSSSAQSDNRLE'TAAATVGFDDSFASKEKDI'AKSETGTTT'VNSTSE  
IKRARFDEGRNELFESEDTKCKGEDEDDDTNEAYDEQDDNGDNFTEIPAPCASAFMDWYI  
NSKPPHLDDPLPDCNDPDDI'ESSGGMIQQSVYNSGGAAPESVAAIRTFVGP'FNDSLAVKF  
RRRRDRHSEMWRGHVKS'YGSTSYKKL'DSPVCKXMR'EK'KRKTEVVDYAHGHSSV'TMLRGS  
RCSNXVLLNFSFALYALR'PALQLPACESQ'QEVRYWTR'LILILLGLIISAVIFI'IKKLSDF  
LLET'KLKLVTD'PVLFGNTTAHDESLLT'TVANAGK'KPLPVMGYFGWKAFASFLGFN'LFFVT  
IAFMPV'TYRPLSGGSGIAEAKATLNGTYSVKQ'GDSNHFCWELFHGSISNNVLC'QLGPTNP  
AGIILPTCTDLLTALCKAVS'VICAGAASLP'IGLEGPLIFIGLAIGHNAERFV'PESYPVLK  
LDNWKRF'AAVGCACGVAGAF'LTPIGGVLFAMEEGASFWSP'LLAWRSFAAACVTTIALYL  
YIWVWDICEDEYDGVHYDS'FFDIHTLAIYSGL'EGQRQLPPNGVATTSQ'EVVGNQLYFRSV  
PAFRVWDF'FFFFAIIGIVGGIVGALWIEGNYNIAQ'WRRKLGWGRKGFLEIMGLTILASCV  
FWFLPLLYTKCNAASQTDV'EDRAILRQLNCPDGY'YNQLG'TLLN'GPGPVGLNLLYWEPAH  
NWDPVVLILAGFSYHV'VLLLLFGSSISMGVFI'PFLYIGACYGRAFAIWGLADV'GIDNVER  
DPIVSTYTMVCSVAMLAGV'ARVLISITVIMVCSVGT'TYMITPFMVASLFAKVV'GKAFLGR  
PGVYDVILEMKVSPLHAHQ'HLGHEKEKLQTPNTLCSR'FSPFCPSLCTPFSLGHSVSGSRV  
SQQHDHAGPVAQDIMSRA'PLITLPEQPVGQLLEYLEKYPYVVDY'PVVDPNSNGVFLGI  
IQRCDLLALLTKRRLFYDKSK'GSTGHRAVTFETLVREKVKRVPVLD'DDVKAIVTPGDRAR  
KFLNVTPYLAIGHYTVNR'FVTVHRAFELFRSLGLRILV'VTD'AFGRPMGVITRFDLKLLEE  
VGIDEAYYKSRHDSMEGSYSYLD

>comp9249\_c0\_seq2; 230 290 763 LEN=962; translated  
MAAAATKR'PDDYAGVYHLEEIIDETGTPLPLPQGR'GPFELT'LSP'IKR'GPPNP'NLLHLSVK  
VSNAMGATVEFLGCGGDAESCRSIRVGPV'MSTRMMPRDKERQALERYLGTYLEQMATIDL  
TGGGDGENENGLLVLASPEAAGKARIVCKVADESKAR

>comp9249\_c0\_seq3; 553 1225 4710 LEN=6045; minus strand; translated  
MNNKEDNEIETIEV'VSSSAQSDNRLE'TAAATVGFDDSFASKEKDI'AKSETGTTT'VNSTSE  
IKRARFDEGRNELFESEDTKCKGEDEDDDTNEAYDEQDDNGDNFTEIPAPCASAFMDWYI  
NSKPPHLDDPLPDCNDPDDI'ESSGGMIQQSVYNSGGAAPESVAAIRTFVGP'FNDSLAVKF  
RRRRDRHSEMWRGHVKS'YGSTSYKKL'DSPVCKXMR'EK'KRKTEVVDYAHGHSSV'TMLRGS  
RCSNVCCSIFHLLSMPSDQHYSYQLANRYKEERQ'QHEEHLEEMRRRSTIVLPAPPQKRI  
FAGLARWL'VACPSARSKTKNNP'IGTYQ'QEVRYWTR'LILILLGLIISAVIFI'IKKLSDFLL  
ET'KLKLVTD'PVLFGNTTAHDESLLT'TVANAGK'KPLPVMGYFGWKAFASFLGFN'LFFVTIA  
FMPV'TYRPLSGGSGIAEAKATLNGTYSVKQ'GDSNHFCWELFHGSISNNVLC'QLGPTNPAG  
IILPTCTDLLTALCKAVS'VICAGAASLP'IGLEGPLIFIGLAIGHNAERFV'PESYPVLKLD  
NWKRF'AAVGCACGVAGAF'LTPIGGVLFAMEEGASFWSP'LLAWRSFAAACVTTIALYLYI  
WVWDICEDEYDGVHYDS'FFDIHTLAIYSGL'EGQRQLPPNGVATTSQ'EVVGNQLYFRSVPA  
FRVWDF'FFFFAIIGIVGGIVGALWIEGNYNIAQ'WRRKLGWGRKGFLEIMGLTILASCVFW  
FLPLLYTKCNAASQTDV'EDRAILRQLNCPDGY'YNQLG'TLLN'GPGPVGLNLLYWEPAHNW  
DPVVLILAGFSYHV'VLLLLFGSSISMGVFI'PFLYIGACYGRAFAIWGLADV'GIDNVERDP  
IVSTYTMVCSVAMLAGV'ARVLISITVIMVCSVGT'TYMITPFMVASLFAKVV'GKAFLGRPG  
VYDVILEMKVSPLHAHQ'HLGHEKEKLQTPNTLCSR'FSPFCPSLCTPFSLGHSVSGSRVSO  
QHDHAGPVAQDIMSRA'PLITLPEQPVGQLLEYLEKYPYVVDY'PVVDPNSNGVFLGI  
IQRCDLLALLTKRRLFYDKSK'GSTGHRAVTFETLVREKVKRVPVLD'DDVKAIVTPGDRAR  
KFLNVTPYLAIGHYTVNR'FVTVHRAFELFRSLGLRILV'VTD'AFGRPMGVITRFDLKLLEE  
VGVGIDEAYYKSRHDSMEGSYSYLD



>comp9250\_c0\_seq1; 419 157 888 LEN=986; translated  
MKIHSQAAFVGNLGDROHGTRQRQRLPPFSSRTMGAQTDLFLSPAGDYSISSTPTTVP  
ANFDTSSDFEPIVFEPIILNVPALVTFVVSIMAVFSALILRTNQVEDAVQERKRRQEEV  
KAREVGEGETVAPEQIEQTLRLYEDAVRKEERLRNILPGVRIVPPSSSDRREEEAQAIAK  
YLGEDFNIGVPKRYNEKIEDTEGGGGLPGAAIGVLAVVALSQVGLLAFNFGADPMSGNG  
ALM

>comp9251\_c0\_seq1; 341 1 890 LEN=1117; translated  
XFVEANNRNTLLKNKKLPGNIEAHRKESYKQRRKQKEKMPAKNEFGNKTKKKKGRAPH  
QNKFAFKHNPCSKKTEKILNMANIHVCQRCSDKIEWRKKYRKYKPRTPQPGTCNECRKRN  
RAAYHTICERCTTESAKAKEIKEATGIESTEDENTLTKTKQQRQQSCRVCAICVKEMAL  
PDPEEEEDNRDYVDAMSRLKLRERRALERKLAKEEQEAEDAKRRKDEESANDHEDDDQSQ  
GSPLSPLVEEDATDGVDSIPDYGDDEDDPFLQAIIGGAGNLLTGKAYQQKMLQQQKQ

>comp9252\_c0\_seq1; 761 337 1569 LEN=1765; translated  
MPIRGGTVINIAGTTPVDDPEYRYKMPAVYKIEGSGNGIKTAIPNITAVANSLHRAPGE  
VNKFFGCELGAQTTYNETDRAIVNGAHTDDVLQKLIHRYIEGFVICPTCGLPETKYSIK  
SGLIWHRCAACGSKELVDMGHKLTNYILAQDKKAKKEKGNKKEDLKKGRDSDSEGGKKK  
DKKDKKEKKSKEKSKKDKKGS PAEDAGDEEKDYKLEAMFGKKEEDQFGSNSDDDEVAS  
EAGVDDEGALELAVEGTRRYLLDNPDA SAHDIAEVVTNQMASALKAHDKIKIFVRAAIT  
PQFYKNKEIEKYAPVVSEIANGSQI IERHLIASLEFISKDKPTNFPVMIKQFYDEDALEE  
ETIIEWAEDGRSEYTL EAVDEDTRAALRSEAEPPVVWLQEADSDSDSDEE

>comp9253\_c0\_seq1; 333 1 1079 LEN=1126; translated  
XSQQQKDCVRAVKSQYLDFAPTAFGVNGMFRLELARS DHAILCVIDL MHPISVDLFVR  
DAISHQTNLNRPAHKLNRNGISSEDLQEILSDELIPHQETELWLDLRRTAIHPKSAIEQL  
ETQIGVTSFVDRILLS ENVFQNLVDVNDMYLTT SQILYQSSQNN DIFLSSSQGLSTPFGS  
LSLAPSDASMPVEDPIQAIELISTGKWMILGKEEENTDDQVESLRIDTVGNFLDIALSS  
QAGLWDYSQQTNGLLLPKSDISVGS EDNDQOIEIHSTTGGVIVCDTKSALMNLASIIQL  
KKSGETSNSVTESGIILQSS EDTSTAVGTSIVLPFSVDLWQVATLVFGKELYGESDDNFQ

>comp9254\_c0\_seq1; 634 1 1489 LEN=1752; translated  
XLNWNRTVQSWPQEGELKRYLLSCKDDKTMIRVRSNVGVWRVEGLDPEKSTGEDVLA EI  
AKTRPHVVYEKPLSSDPACKQAIDTGATLKSQNLKHGAMIHCRVDSSSCATGDASVPVVG  
ENESASGVAQDSRNMKRIIDKDGQIKLVP SNEVRSSSDDKGFRRGMMPLRDIKMAWTLNE  
FVAMDSQFVFKMKRQEQAIC SQVSLDSPSIQNFQSYLQRFQFARKRFAFLYGYEESDDS  
GTKKTIVEAIYEPPEPDLDAAE GFQELEDPLEDKVEEIAKLLGLKKGWIFGHPPREDG  
IVLTTAEVIMAAELQLEAAEGVEETPFVTIKVGKGDGNVGV EAFQVSQQCMAMVAEEAL  
EIGTNHGVCEVNETFTA IQEGKESKTIDNNFFLTVVPIVQHTSDV FVSQFPRINRDLDDR  
APSKDEMQRQLSKSGTSGWTFVDLLSDFNLLVYMTQYLDITADFPKICQSVTDRDVPLDD  
GYKIIIASMAGLDGAY

>comp9255\_c0\_seq1; 372 112 546 LEN=875; translated  
MTRYATPLFIAAFASVAVVEGFTNVNSKIEVRQHTTELYFGIPTFGKKDEEEEPEDPKLE  
KKKIGMEGLFQLITAGAGAPFLGDFQGVDKETGNFMFSLEANNLVEDEGKSKQTSMPYFE  
SGWVDPKDL EKEEKKKKEGGFRFW

>comp9256\_c0\_seq1; 693 97 2064 LEN=2436; translated  
MSNEETNALGYPKLACSTPVPSPDIEVSQQIVKEVGLLPIRDVGRQVGLTDDEVIPWGI AK  
AKVSLAARENKRDVDPDGNVYVVTGINPTPLGEGKSTTTIGLAQALGAILGKKT IACIRQP  
SQGPTFGIKGGAAGGGYAQVVPMEEFNLHLTGDIHAITAANNLLAAAIDTRMFHEASQSD  
EALFRRLCPAGKGF SKVQKKRLDKLEIPYEGRSPEDFTAEEKSRFARLDLDPDTITWQRV  
VDTCDRHLRNVVVGMAKETVKSKEKEGERVQHNRTSGFDITVASEVMAALALAKSLHDL  
REKLGAMVVGFSRKGEPVTADDLGC GGALTVLMKDAIMPTLMQTVVERTPVLVHAGPFANI  
ATGNSVVADEIALKLVGPDGFCVTEAGFGADIGMEKFFNIKCRYSGLKPKAAVIVATVR  
ALKMHGGGPPVSAGRPLQKEYTEENIELLRKGCANLQKH IENAKKFGVNVVAVNFKFTD  
TDAEIEVVKEAAMAAGAFDAVLSNHWALGGAGAADLASAVDKACKENDES NFKFLYNLDT  
SIKEK IETISKEIYGADGVDT ELANQQIENYEKNGYGS LPICIAKTQYSFSCDPAAGV  
PTGHRITVREIRSCAGAGFVYPCGDIMTIPGLPTRPGFYDVIDDTETGDVIGLF

>comp9256\_c0\_seq2; 156 97 234 LEN=329; translated  
MSNEETNALGYPKLACSTPVPSPDIEVSQQIVKEVGLLPIRDVGRQ

>comp9257\_c0\_seq1; 230 1 1660 LEN=1950; translated  
XGPDAYVHTCPLSSQISNPERTVGSFAMAFYGGRISMQGLGRSGLVTKCFHGSEHAKLR  
RRAPVGGRNVALRSAASVATGETVEAVFVHRHGDRTPGKSLVADEFVEDEASFWRTKI  
PPSDRSYHQMLSERFPMIRPGLSNKKIPTPEQSPFLLFKELQGGNESYGF LTKGMHQMY  
HNGAAMAKRYSLLPHGSFRDHWDI EAFSTNYLR TVKSCQAFLDGLLSDTVSKTTDRVPLD

YKQPTHYEGIDLAEYHRARTTSDYDTTVEIKVQRQAENETLNPFD SAPQLMKNLMEDAKAA  
PDFIERDAGAATLKAQLLEYIPGLSRHSSSTEKTSAPVNVWIDAADYFVCRSSHSVPVHK  
FCVDDGRDNETAETFRSLGRETFSHLLSRFRGYYVHPPLLAEVAGPALDEIRSTMRQVV  
GTTEADIFGVAKKPFHIYSCHDVTLLGLLYAVKDRFLIEDTDRFRSLSSQWPTYASCLTF  
ELVRRRTAKGKSKDDEEFVAVKLWLNAPIPNFCPRPVALLQAPQAEIVHSIGLEDFNKLID  
ELNAEREFYCSGR

>comp9257\_c0\_seq2; 227 1 1118 LEN=1118; translated  
XGPDAYVHTCPLSSSQISNPERTVGSFAMAFYGGRI SMQGLGRSGLVTKCFHGSEHAKLR  
RRAPVGGRNVALR SAASVATGETVEAVFVHRHGDRTPGKSLVADEFVEDEASFWRTKI  
PPSDRSYHQMLSERFPMIRPGLSNKKIPTPEQSPFLLFKELQGGNESYGF LTWKGMHQM  
YHNGAAMAKRYSLLPHGSFRDHWIDIEAFSTNYLRTVKSCQAF LDGLLSDTVSKTTDRVPLD  
YKQPTHYEGIDLAEYHRARTTSDYDTTVEIKVQRQAENETLNPFD SAPQLMKNLMEDAKAA  
PDFIERDAGAATLKAQLLEYIPGLSRHSSSTEKTSAPVNVWVSPKERLVLLLFLSWSLRM  
RASLTANQSVYVRX

>comp9257\_c0\_seq3; 92 1 218 LEN=954; minus strand; translated  
XRICVSGVTKQLYDWTIESEKAI VGDGFTSKRIAWINHDFKHFMESGKLC AFDVEKEIED  
ITWVNF FKNFA

>comp9258\_c0\_seq1; 589 374 1939 LEN=2077; translated  
MDTESSNNPSIFFLIAPTSGHVRPRRSRRSATYDIEERGF MSTSSPVGLSSTISIFLTIM  
ILSVSIEGFPLRSMEFHSKTV DRESLRNKMRTIQ TNGWFRSDNQRGTTPLSKIKDYSRSA  
LAFRNLVSMRSNVDGYSNKDGGEGEEYADDLFEELDNEKVFPLEFDDDEEDDKEYLERGL  
ERLESMEKMLQDIEEYCSIDGM CDEDEDNEEDDDMMMMGDVDNLEDMESLFD FLEETM  
DSDVEEDVDDIFDTREDGEA IQEVSTA EVPTT VTARQDSFFSPIGLEEALLQGVVPVDSG  
VGSGLTLP GDFGDFPFRFADKDYVKEFQYRFLNWLPGGNPNNDPPPKPRPTALVLRDYREA  
EIRHGR LAMLAVI IWPIQEKIDHFVLGTD TAGPLLYGPVTL PYP LPLFMTLVMMLLGYLDI  
YAKDIQEEEGLGDAFLPGDCFW DPLSILQGAPAMMKRNMQERELFN GRVAMLAFAAFVFE  
ELTSHQAI VDI PSNEVLFVPAYQIPVVQE WLD SQFLETYTR

>comp9259\_c0\_seq1; 343 63 389 LEN=522; translated  
MMYFKATVLA AAFMALSANAAI IDESNDSVIGIPQRRLQKGSKSDPTPPPKSSKKGK  
GSTEAPSAAPSAAPSAAPSAAPSGSPTGAPTAATTAATSSSSSSSGSS

>comp9259\_c0\_seq2; 271 63 389 LEN=780; translated  
MMYFKATVLA AAFMALSANAAI IDESNDSVIGIPQRRLQKGSKSDPTPPPKSSKKGK  
GSTEAPSAAPSAAPSAAPSAAPSGSPTGAPTAATTAATSSSSSSSGSS

>comp9260\_c0\_seq1; 394 138 951 LEN=951; translated  
MAPSLSYIPEPHEQAYYLALFQAADVQKNGI ISGAEAVQFFGRSKLPIEVLKNIWTVADQ  
PSTSSLDHKKFAVAVRI IQLTQNGTKGSGPTLAAPPGVQLKPAFFEG LAPPQQQQQPP  
PTPQQPQRAMQPPPQPTNSPPRTMQQQPQVPPSPSRALVGM DPYSLSPQERSRYEGLFPQ  
YAKTEADGAMFVYGSEAVPLFMKSGVDPNSLRDIWNMVD RNPVDNR LDKLEFALAMHLI  
VSVSKKNLPLPKGGTLPSSLQALKVAAGGNAAX

>comp9260\_c0\_seq3; 281 1 814 LEN=814; translated  
XATRLIRFVHDLXQAYYLALFQAADVQKNGI ISGAEAVQFFGRSKLPIEVLKNIWTVAD  
QPSTSSLDHKKFAVAVRI IQLTQNGTKGSGPTLAAPPGVQLKPAFFEG LAPPQQQQQPP  
PPTPQQPQRAMQPPPQPTNSPPRTMQQQPQVPPSPSRALVGM DPYSLSPQERSRYEGLFP  
QYAKTEADGAMFVYGSEAVPLFMKSGVDPNSLRDIWNMVD RNPVDNR LDKLEFALAMHLI  
VCVSKKNLPLPKGGTLPSSLQALKVAAGGNAAX

>comp9261\_c0\_seq1; 513 88 1613 LEN=1654; translated  
MGCQQSIPVDLGSSIDVTKPVLGNE SRQTCIEQKPTGGKTAIASPGASTASLR TARTTTS  
SSTASLALDEVSYVLPKLDYNGHLLMEEIVRRTSSSLYCS SLTIGEESSEFELQYAYRSQ  
RGYNPREPLKSNQEKYGITLNFASEGRGAMMGVFSGHGEEGSR CANFSQRVLPQQ LAKFV  
RQKR VQAYKSLKSAGTKQGAWNPKMWPLLSALEYKQC CERAFRETNKMLHEDKNIDDR  
FSGTSLASVCFHGKHMVYCNV GACNVILGRRCS DNSTRSYKNCSDYNGEE EKCEIEEYAC  
HSDKAEI PCR SVGERLAVXL TNHTVCSLEE QERIKLFGAEVKEVNQTEEDTSSIFDTQ  
EGGSGR KSLRAFLPGKAYPSSRLTRSIGDSALEEIGIVSDPDTISCNLAETDDVVVIAS  
NAVF EFLSNQEVIDLCTASC DPLQASEAVTRAAYKKWIEKKNR CDDITVIVCF LSKNATK  
NSARSEVVNVSTEMDVPAMADFEEDDV

>comp9262\_c0\_seq1; 670 1 2329 LEN=2329; translated  
XRNSTEKKSSTPPPPSSIEAGELFEADSLPIDHETS YWAEDSSHHFAEDPGNDVTGMME  
DSRGMHMMPLTI PRDHS SHSQHKETDNEVDGSDSSTGRAASGQIKNGGGRGQDDGSNGSN  
SGTPSFEENADKDRNHENDSALPPGSNGGSGDDEESSDKTIPMTAEDRGSESDSSSNGSS  
SLTSGVDEPTHYDSTKLTQVTEELHESTKLEIEKASTLPAGPKTSGRRQLPSK KKLFEAG

EIVAENGEGEPIVPNDNSGFVITYDPTKLTQVTEELHESTKEEIKKAASLPAGPRPRGCT  
KKILFAVDDDDGSSKKRPSNDTAKRSTARTKSTRITSLGGVDGNDSPAQEGEETQESSA  
IWTGTIVRVQSRTPWPGVVKPGGVGRIMAINSDGTYNVAVVLGGKESNIDKIFIQKEDQG  
DSESGEPGSGGVQVRRRRRAKENDTADLPEELLRQLAEEGFDVPGQKGGKKRKKNNRTAL  
SDNTNSENGRRNLKPKPKNNNTATRTNTGGGSKRKRSTPSSDSGAIPTNTVQQTARPKR  
KGRSTSRDPPSSTNKASNAKSAKADDLPNTVVKKYKKSVSFAEKESEGNVTRKTSSEGASR  
RATKDQRRESNVSPFDLLRIPNEEAVKLANRRYHLVVFQEAIDNKLITVASSNLKDEDKA  
ILKSLCAKTFEGGVKIKVTEVSVRKTTLCIVPAENKEGDKANIQSGMRTLKIMLSALAGI  
PIVTPDWLRSCYVESKVVVRPQRFVRSMPKTKNAIENCGGTNYGVAKLAASWNTKPKA  
>comp9263\_c0\_seq1; 253 1 727 LEN=1736; translated  
XTSEQKTLHKKIDPQNQTPKDTHTYNPKFLTDHPAADCTRNHARPYPIVSRPPFLTHKT  
LEAKGCDPQRTSSSSSSSSSSASSSQSPGSPRARSSAAPREXLNKHKELRAFLKGDPKRG  
IDGEIRQYSGVTINWIRGKKAVALTIKDDTGSTLEEVKLYNLKTREEMHKLMADKGFEEKS  
RAEKMAEIQAKQVEHQKGMESSVYQTASSLYLVVVFVIAGGKIETGAARRGVADRGPFRP  
AAW  
>comp9263\_c0\_seq2; 255 1 1249 LEN=1463; translated  
XTSEQKTLHKKIDPQNQTPKDTHTYNPKFLTDHPAADCTRNHARPYPIVSRPPFLTHKT  
LEAKGCDPQRTSSSSSSSSSSASSSQSPGSPRARSSAAPREXLNKHKELRAFLKGDPKRG  
IDGEIRQYSGVTINWIRGKKAVALTIKDDTGSTLEEVKLYNLKTREEMHKLMADKGFEEKS  
RAEKMAEIQAKQVEHQKGMESSVYQTASSLYLVVVFVIAGVGGGLFFCTAVDEQNEEWRVP  
AAAAVWCRGCSGXDAQHNPSIAAELRDATHVLLGSKRKSASASAAEPLPAHNERKDQSHR  
AIAVPPRDTGMTALSPPLGHPGLQEGGARPSAVVGRWASVFGTQRATQRTHAPILHSID  
RGLVSAVNDEGPRSRPVLCFATHGDGGRGPESENRAAVETGSERRAGNRWGDGRRR  
>comp9264\_c0\_seq1; 234 1 614 LEN=798; translated  
XWTHEANGWFGSGRAVLDPDITSVKCHSILVANTASKTERGSTTTKPYQAVFFDSNGAIG  
AEGDLEVYPRPDGDSYVNGFANPEGVCLERPGEAAIEEDKISLLRSAMEFVERNRGGGGG  
AFRERDHTQQVCYWPETPDGLPLIGEIPGIGGAYVAAGHSVWGILQGPATGKAVAEIAT  
GRSESIDLAPFRVGRFYGSEEEKE  
>comp9264\_c0\_seq2; 182 1 797 LEN=981; translated  
XWTHEANGWFGSGRAVLDPDITSVKCHSILVANTASKTERGSTTTKPYQAVFFDSNGAIG  
AEGDLEVYPRPDGDSYVNGFANPEGVCLERPGEAAIEEDKISLLRSAMEFVERNRGGGGG  
AFRERDHTQQVCYWPETPDGLPLIGEIPGIGGAYVAGEYGP SLMRLDATRC DAXAMRTR  
IPSILLATGGIRMPRAPVLTNLARCLIRFFLGAIAVAAGHSVWGILQGPATGKAVAEIAT  
TGRSESIDLAPFRVGRFYGSEEEKE  
>comp9266\_c0\_seq1; 269 176 1419 LEN=1419; translated  
MEQRRRREKIAPFWIFSLLSLFFTLNLSWSFLTSSGFGNKQAEKETILPARLSHLKRN  
CNLKAFANIGHGLTENGLRAALCGGVIALGSDWKGTTISSQTKRALTLAFGAPATKKSCR  
QWHEAHWQWTTKEITTKAAVDDARDTMAYFLMHKSFYQSEVGYDARRVSAGLRLFQEKLF  
GACGVEHRLGAKWPPNEQEI EPGGNRTHRRPPKRVVIVKRGVDRILT NAREALEACKMTV  
GGMSCEIFDAETLRRDLDPCTILESFKDAIVVGLGAEELVYPLLIGSQILIVASRADKV  
GLVQQFSRYGELAMENTTGVVERILAPGIVTTKDRRLDHFYIEFALHFGAELSTTVGLWNV  
TEQKRNYTRPVCIRVPRFCDDKAINLTFKTYLEEKKEEYSLAGVGVVDVGADVGA  
>comp9267\_c0\_seq1; 350 675 1679 LEN=1711; translated  
MACGSYPLHVVTGQNLTIKEELLRTLIKANPTVAFKDDVNGDNPISLLWKNTLRFRWAI  
IMEGANFIDYIKDDDYSWMAVITPYRFLKFSLLMASAALDEHETDMLKFRFHSIHHLCR  
IPRCPMLLRLQLSAGYNELFGFDGNAFTFDENGMLPIHYAVQSPPVSYKFPVPSYLQATD  
HKSLVQILLEENPNQVADDQGRPLHYALDSGRLLLEKDV LALVRLYPDSLRI RDPKTG  
LLPFMLVATNTSRTSVHTDMVLSSAFIGDSEQELLQSCLRNDFEKLKRVISRSPVRYQAQ  
WKRDHVMSFLLLLLYPDVIPCQAKMPVIQQSCN  
>comp9269\_c0\_seq1; 179 93 809 LEN=1394; translated  
MSGNPTGSSTIPSRWSLRGRNFVVTGGSKGIGKAVVRSLNHEASGVLFCSLSPCDFDAY  
TSLGLDPAFSYAPGNSDGSPILKHVACDISTEGGRKILVEAAKEVFGTEASVHGLVNNV  
GINVRKPILEQTPEEYHAMMRTNVEGAYFLSRMFSNLFSSSEGSTIVNVSSAAGVQSSGTG  
AVYGMTKAAINQFTRILACEWAGRNIRVNAVTPWMTVSSILYVLCVNVQAKEIESNRL  
>comp9269\_c0\_seq2; 268 93 959 LEN=1150; translated  
MSGNPTGSSTIPSRWSLRGRNFVVTGGSKGIGKAVVRSLNHEASGVLFCSLSPCDFDAY  
TSLGLDPAFSYAPGNSDGSPILKHVACDISTEGGRKILVEAAKEVFGTEASVHGLVNNV  
GINVRKPILEQTPEEYHAMMRTNVEGAYFLSRMFSNLFSSSEGSTIVNVSSAAGVQSSGTG  
AVYGMTKAAINQFTRILACEWAGRNIRVNAVTPWMTMTPMLKEAVAKNPSQLDKVDAWTP  
MGR LATAEEVADPIVFLCLPASSYITGQVLGVDGGLTAQGFGNGPTCET

>comp9269\_c0\_seq3; 998 176 3343 LEN=5154; translated  
MVSLDGTGSSDDGDFALNQPGFESSARFPLHDCCEFEDADVLKNLIFVPVEGDDSDSES  
EGGDYDDGKGHNTGDEEEEDDDSVLDNASASSSSSDENDSSAAAHAAAIGHSPQPI LHGK  
ISKEAPSSTEEEKKNSKSSPANGLNEPPENETRGDKTSKSENQDKSTTHEEGNGETAAD  
DPKNSVGTASDENLGDGDDDDGMDVENDETGTNTATEGDVEKKPQEADYNHHKQSKPVK  
KRRYYCPHNLNERDEDENTPIHVAIHCQKLEHVKLLCKAGASLIKKSDGSPPIHVAI SMG  
AIPKHREFAI ECVRVLYKHEADLAAKDDALHTPLSLACMYNLPEIVSFILSTDVGSSTIN  
ARADRSQGRALHMAAKFDTVIANAKRTAVATKGHARVAHVHHPDGSVVNAMHQIPGFPGK  
QADRSTDVTSSIQNPTQETVTEILLNTPDIETDAQNSVGQTPHVCARGNWNVVRLLLK  
KGASTAIADRRGFTPGQHAHKRGMPIPNDLLKTLGGPPSSGIIPPRDLIVDPDNNTIVI  
THELCGLHRTCPPIRRGSNDPPENVRRLKVLVDKETGILRTGEFGRCKWENEGRAAL  
VDVLKCHEYSYVESISQMCSSIPDHPSAVANLDADTTMSRWSFEALRAAGSVCEAVDKV  
VSGDHQNAFCVVRPPGHHAGPRGIVRCDNDPDGSGSHGFCFLNNVAIGAAYARSMYRNEGI  
QKIAIVDFDVHGHNGTEEIVRQLVPTVEKAAIRTPFAVGELATQRYRPWLDETDIQNVFF  
ASTHGYGARGLEFENTPSCGWFYFASGKSGISDAINNPTVVESPNLTDFFLLSQTWTRMGD  
DAKGNCKKI INCGLSLPSRDAIPGMQRLEVRD TYRKKILPLLREFDPDIIFISAGFDAHK  
KDSMNFYVGMVEDDYEWVTEQLVKLANCCNGRIVSVLEGGYKIHGGIVSPFARSVASH  
VRALVDGGLSRELYDLQDGEWESQFERHLIDERERKRQQKLEKMRMLEAQSRRALYGGDN  
GVDGNGDDTHGRKRKRNSVDYRQLYEQMKKEGFAA

>comp9270\_c0\_seq1; 473 269 2149 LEN=2873; translated  
MKTENQDLGKLAWSRV TAPVLI LELEVRIRNLPKLDLLSQADGFCVLWKVPNGYTGSDA  
DGTPAKEPSKKEEIEGRTEVSRSCINPVFI AKFRLKFI FHKEQTYLLRVYDEDLRYATGL  
SEHDYLGGFIFTLGQVMGAKGCSLAKRLRSNDRSATDA CLIVTGKGVVENREVLEFRFSC  
QDLIQQNIVIDKIDRSKVIDKCRPYFRLERLNMDDQSWEIVWKSEVRKQTLDPVWNEAR  
LPLQLLCNDDQDNPLKISIWDEYKGSIPDIVIGSVETSVA AIVEKSKDGGIPVFI VKREK  
QKLFGRTKLKHVGLLKVLNATVITVPSMLQYVSGGMSLDLMIGIDCSTSNQWGS EDNLH  
FSADNWLNDYQAGIQNLGKIAENFSRGSYSSILGLGAE INGEYRDCYPMKERLCTGKDLL  
KAYNDNI VNNSAFYLGEKISLNPLIKEAIFRTIKLSKMRPCYTVLAI FFIAGDFEDLDET  
DLICRAAEDAPISIVIIGVGN SDFSSVKQLCGQKNWKL RDSRGIPIAREIVTFV SFKQFG  
GNATEVIAEALKEIPEQFVEYQVINGVKPLPPVPAPDFEKMTASSADTPNKRNNRQSSRK  
RNERRSKGSHRTKNSNRDRFSQDSN

>comp9271\_c0\_seq1; 720 212 1810 LEN=2075; translated  
MPHPKPVLLLFVFLAFECIFWSSLGSASAFVGSSTTSSSRIRSKQRVAIHDAVVVVA  
ASAGAPAATEDESDTLQPLPASPASRKPVSKNGSSTGRLRF CYERLSQKPPSDEFLLRTP  
PLEIAGLLRDVLRDRPHSNEIITTKNEDESACGSHSKFLLPEESYIAVL DAYMEAYRDS  
KGQKRRKNTRQDRQKQGD ETNLTRES DQH HFQHARS DPPAMKEVFDGMMATI QIMNEH  
DKNANSCSSEIVSPGEERVPEHRENGADRP PATVRR TVDPYATV LHALLESSLQDPHAPG  
QGGD TDHTDRYYARDRLLPVLASME SDP FVAGRADAAVVRNHKARILQYNKVLKGLASR  
SDSCGHALWLLERMVAADADASRSGNGD GSGGQPGGTAEKKPCGSGERDPSPLPWSPPP  
PLFPFRPGPGIAPDARSFATV LGSEHMGPALLSVPLGAAQ NAGAGNDAGGP AR CASKDFV  
DAYRGS GSGNGADSLVANASFRWYIDASKRLGVFDGYLETFLKRRFLLPDQ

>comp9272\_c0\_seq1; 144 227 487 LEN=487; translated  
MTIKNSGTL SGRISSGPVPSAPMEIAEEVATVTAEPVEDDPYSAESNTNIPYAHATSLEF  
GSLPEPAPLASSFSRQSGNPPPPARTP

>comp9273\_c0\_seq1; 357 243 1472 LEN=1871; translated  
MNDPEITEAFLSSSCVTGVPRSPIH SKSNQFSETKTGDVPLGKPHNETTNAQATNETETS  
ANDDNNCQSGTKNNRDHSNISSNNNTTANRNN SYASLFSDEDERDLLGIGFFTVWEA  
GLALVSGYFGTGIVMSRNIVTGNWSAPVAVGISGVGAGVLVGASARSLVYLIYDYFTLNS  
IIGTDNGGLMFGIGAGASIGSCFSKQIGPGASYITSPKTFQSAGLSSNTGLSRGLGGFFV  
GVSIEGGICKSRDRLNARFYGEDKYNTKLGADILMSGARVEIPDGKNGENKDAKRMMERI  
HRKLI R LCTGGSSSGRIHATRDSGSTSRYGGDLGLDIDQSN SHYDEHAGVSSDSSSHDDD  
CDGDGILVLESVSTATTSLTSSKVP MIEGFGTASPPPSPPKSPPYTVD

>comp9273\_c0\_seq4; 372 210 1484 LEN=1883; translated  
MAGMIYDANESLRWVMNDPEITEAFLSSSCVTGVPRSPIH SKSNQFSETKTGDVPLGKPH  
NETTNAQATNETETSANDDNNCQSGTKNNRDHSNISSNNNTTANRNN SYASLFSDE  
ERDLLGIGFFTVWEAGLALVSGYFGTGIVMSRNIVTGNWSAPVAVGISGVGAGVLVGASA  
RSLVYLIYDYFTLNSIIGTDNGGLMFGIGAGASIGSCFSKQIGPGASYITSPKTFQSAGL  
SSNTGLSRGLGGFFVGVSI EGGICKSRDRLNARFYGEDKYNTKLGADILMSGARVEIPDG  
KNGENKDAKRMMERIHRKLI R LCTGGSSSGRIHATRDSGSTSRYGGDLGLDIDQSN SHYD  
EHAGVSSDSSSHDDDCDGDGILVLESVSTATTSLTSSKVP MIEGFGTASPPPSPPKSP

YTVD

>comp9274\_c0\_seq1; 1009 218 3429 LEN=3482; translated  
MEFRGNDSTTAGSPNRDPFIPGDEGETKHAPTETKPMEMHSEGNSSIHADVDTNAASNDE  
PRQGAFCETRGGDMDEGADAGVDADASTVLSSSSSSYSSSSSTSSSDHEASPTLMERQAR  
NIARNERFLGSLREKYRDKIAPFVAAKGPFGKRTRGAGKGGETNHTDEAESDPSRDTGM  
VMGGTHRLFRSSFGDDLVEAVAATADSTNRPSSVSPASYGCGIRMLHRKYPHRESQIRSL  
SAILSSITSLTATIGRRLVETRRTIAADAGASSDNKRLPSSSSSSINSNTTTTTYVPAPI  
FCIGPSGTGKTSVVCVVEWLARTGSPAPSSSSPSLCSRAEVRVQPAYVDCSIVEPSTID  
RLVYTIYQQLRPVGNGTGSERTSGHGNHTSAKRRKRTKGARRGDSNSNAPRTPSLLGDT  
ANSTGVDSSKPNSETKDESTTTEIDSIRDNASAKTIPNENEVLAETVGGVETQPRVLP  
RAKKAIIHKTLANNATTYDAFRKTKQRQLRKNRPGEDDADDVDENAVETMHSAMLSLGR  
SLQAHYGPYCDSEGNLLNADRSFAREVQHSILVLDRAEELLSLSAAGKKGTLTETGGVG  
QSNALSELLLPKIMKLNVTIVVITKYAILDSTVSDLDRWVDESFEELYCFVSSRCIVTFF  
EGIVLSCHIPETQSLTPIYFTLSSGQTNTNQSKGLNHASALSKGLSNLSNGVHPVVVQFP  
AYKGNQEFREVLSTEENRRLVMGDSLTPSSGSPSAMAMRPSLKENLIRSFWNTVIQFVLD  
STRDVRDFRIRIGRALWPVFGPLSSPSALSALKGVAETLGIPALSKRVLRDPKSYASIE  
EELVRTLGRRFYKRVAAALSSGDENLTLALDENGIVDPETTTAMPNSRQAPLQQQNPYL  
RSCLLLAAFVQCQHNKADQDRKIFSVHGNRRRSKRAKQDIYGGNDEDLAFGSTSVNSSTT  
VRTLHQVEQLRSLRLRSIPLERFVSFVTLVRLNPHTASVADCADDETALETIMDDLGS  
RLYRDLSHLMESGHLHSAKGDHQILCSLAKEEALIAARTGIPLQRYLI

>comp9274\_c0\_seq2; 1064 218 3247 LEN=3300; translated  
MEFRGNDSTTAGSPNRDPFIPGDEGETKHAPTETKPMEMHSEGNSSIHADVDTNAASNDE  
PRQGAFCETRGGDMDEGADAGVDADASTVLSSSSSSYSSSSSTSSSDHEASPTLMERQAR  
NIARNERFLGSLREKYRDKIAPFVAAKGPFGKRTRGAGKGGETNHTDEAESDPSRDTGM  
VMGGTHRLFRSSFGDDLVEAVAATADSTNRPSSVSPASYGCGIRMLHRKYPHRESQIRSL  
SAILSSITSLTATIGRRLVETRRTIAADAGASSDNKRLPSSSSSSINSNTTTTTYVPAPI  
FCIGPSGTGKTSVVCVVEWLARTGSPAPSSSSPSLCSRAEVRVQPAYVDCSIVEPSTID  
RLVYTIYQQLRPVGNGTGSERTSGHGNHTSAKRRKRTKGARRGDSNSNAPRTPSLLGDT  
ANSTGVDSSKPNSETKDESTTTEIDSIRDNASAKTIPNENEVLAETVGGVETQPRVLP  
RAKKAIIHKTLANNATTYDAFRKTKQRQLRKNRPGEDDADDVDENAVETMHSAMLSLGR  
SLQAHYGPYCDSEGNLLNADRSFAREVQHSILVLDRAEELLSLSAAGKKGTLTETGGVG  
QSNALSELLLPKIMKLNVTIVVITKYAILDSTRNLHASALSKGLSNLSNGVHPVVVQFP  
AYKGNQEFREVLSTEENRRLVMGDSLTPSSGSPSAMAMRPSLKENLIRSFWNTVIQFVLD  
STRDVRDFRIRIGRALWPVFGPLSSPSALSALKGVAETLGIPALSKRVLRDPKSYASIE  
EELVRTLGRRFYKRVAAALSSGDENLTLALDENGIVDPETTTAMPNSRQAPLQQQNPYL  
RSCLLLAAFVQCQHNKADQDRKIFSVHGNRRRSKRAKQDIYGGNDEDLAFGSTSVNSSTT  
VRTLHQVEQLRSLRLRSIPLERFVSFVTLVRLNPHTASVADCADDETALETIMDDLGS  
RLYRDLSHLMESGHLHSAKGDHQILCSLAKEEALIAARTGIPLQRYLI

>comp9276\_c0\_seq2; 233 296 1321 LEN=1513; translated  
MQPAINTDQLDSYDLHDEPHQDPRTRDNRIRFLNQPIQPRSSPLGHNTYRRFSGRPSVK  
DTTRWDISQRSLLEGGITPSNDSSSSHSYGRSPNSQKTHSSKDAQDPSNHSHPHISLP  
DDLKDQSDNVQIFFSNILTPSSFIIGVSFSELFNTKYRDDDESIDIQRLLOGICLVCQGVV  
FALNLCVMMSSALVRHLTGNFNPNYATNGYELLFREFHFHFLYVRWCFTALFGFLLAV  
ACKILHDFRFDINGDDFERWHLELGI AVLITLTLHLLAYQNSTLIGWDMAGMTRD  
LMKVLFRHGFYSGNLTEGFSLVIFAAGVFFLILGLIPGSI

>comp9277\_c0\_seq1; 262 323 1453 LEN=2278; translated  
MGQDSEKGTAKPVDIYGPEGLRLWLSALRYSVSRICPKYRVHELKDVSMAPWEGYSRK  
WERYFFNKSVWYERQKGNQNTGSSDYWGAANHRRSEYPPSSDWLTHCETGGTIKPSELY  
GEVEGRDIYPIYDHPLSSDGAPVWEVESGGGDGVRVYAAPMSHGIPCXGVVQEPNRP  
RLRDELVKPICQRNIPALKEAGFRHPMKAMAVIKDLPKGGSF'FPDGTVVVTQEDAVEPAR  
PGRKVVVLGDTNSARSMERLAQNADVVHEATNTFLPALEHKDATFSSVTKDTIFHGHST  
PNMAGDFCKRVGAKRLILNHFSARYTGDQSMDSISIMTRIEEQAIKASGLTRNDVAAAWD  
FMIYVVPKAEGVAEEA

>comp9278\_c0\_seq1; 514 288 1817 LEN=1968; translated  
MNYFVRNENRVSNSHRTRKSRNSPQTHSGKSDRPRRALDQIKSSYVLKEMMGEGSFGT  
VRKLSRQRFREAGLWSFFRPHSVLACKTIPRSTLDDEKLLKECSNLESVRGPHLLEF  
ERTFEDSEEVHILTELEGGELYEAILEMKRQRSSFRNADAAMVRNILDGLSYCHDVTG  
IVHRDLKASNFMFKRNPINITAKNRKGTSESLRGIKIIDYGLSTTIDPETGRVEGCLGTPY  
YVAPEVLTQDSYDARCDVWSAGVIAYLILSKTLPYQGRDEKETVHILMEAEKYPICYTDH  
NWKGVPEPSAIAFCKWLLSVDPEQRPTAREAMAHPWLVRHCCTPPPQRARINPDHSIFLDQ

DEQQEHHIEGISELLSSASTDSFDSVQRTSSSYSQDHEHHPQARSHSSPSSLSAPHKTG  
TALSMEPIPETSGTPKTQKIRKDGALRKWWSRHQHCVPRTQKQASTTPADTATTAAKSAS  
STAVNSRIVRIRQKTQDTLVMNESVDSLH

>comp9280\_c0\_seq1; 309 220 1129 LEN=1129; translated  
MAALAQTIIHKHNGCVAGGPVVRDRIDFHRLRCDGLEEMDSFDVYHQNRDSSSLTETDDGK  
YCNIGHTKINRPVHHIETNAADTVPNLNNAGVMMESFDYDLALDYFWRCLNFLQNCGRP  
FSSTFPVSSARSITVSQVSKSKSILREYDEGMSDCRTPVKMEGHLLALVDSLDKATLIVL  
FNMGILCLRLDVDWEANECSRALPIARAAGLSSPVSVSILRNIGCIGYRNGQLEKATE  
AFKEALQYRDIVADKLEIAAILNSVGLIYFHLPKPNTARALRCYGEAMKIRKHRLTSNHK  
DIAX

>comp9280\_c0\_seq2; 404 1 1445 LEN=1499; translated  
XILNSVGLIYFHLPKPNTARALRCYGEAMKIRKHRLTSNHKDIATVLNNIGRVHFLKEEY  
PRALEKYLDALRIRRKVLGTDHLDVAATVYNAGQTYHKRGDLEKALQYYQEFMRIA  
GQCHRDRVATTLKWMQIYHERRDYSRAISFYEDALNAGRSALGIHPEVASILNKMGNLHY  
ERGDFFKALSKYKEGLNVERAVLHHLHPNITVTLTNIQIAKQTGEYRAALEFYKEALDI  
QSKSFGKTHPDIAITLSNIALIHYQNKSYAKSLEIYQDALRIRRDALFGDCNLDVASSLNS  
IGLVLFKLGMDMSMQSFLESLKTRRSILGNEHRDIAIILYNIATIHMERGEDDEALRCY  
EQTLNIERIALGSDHADLVLTLQYIAQVHQNGNFDRAVNYFTEVLRIQQLGMPASNP  
SIVDTLSNIAAIHMENGSISNMSSMSEATRMAIRSGQDASEMKVNGLRFYDLALNSKSA  
AAA

>comp9281\_c0\_seq1; 190 81 308 LEN=489; translated  
MKFSAVIAFLLPSLTAAPNVQSSRIASSLGATPGEEDLAKTRQVIMSFMDGGDAGEPT  
EEEDVDSSETEESEN

>comp9282\_c0\_seq1; 273 1 1124 LEN=1838; translated  
XFISFEIGLQADKNVDNTSNTADHAQKQTKFGIDIPFPYQVLQPLMMILRDSRRFSST  
LLSLCCCLSAVFWVCPNQRGSLLLVDSAVTDGRHSYSLTTFDPHGKLGQVERAMMAAS  
MGTPIVGVKGNIDILASPQILPSPMLNDDGTSRFAVASPQIILGQSGIASDGRVVVESA  
QRLAIEHSYTYDEPIPIGLFLEELSLLFQAYTMKPGARPFGLTLLVGYLPPPRVRSATQ  
NTDKPRLFKIDCSGAVVELDTIAVINGKFKGDINSRLDFSKLDYKESIGNSNDHLEKDR  
ELISRIHQEGLQHAVTSRNKQTQTKSSRSRGKSSSRNTEDVIKLPRLIISASFDRVNGF  
EVE

>comp9283\_c0\_seq1; 511 1 2715 LEN=2952; translated  
LRYILFLSWFGFRKEPDIESVNLFCAPFRKQIGRMGTFFPAATMLKQLCLVVALWPLSM  
VASRGTLHEEGFIEELVASQRAFTGAFIPNLQGPDTLPPMLLLSMKRGLVHVMRNPDES  
MTEQILDLEHQLCTNGERGFQSI VPHPNFAENHWLYIFYTAYSDECLLEDEVFGPRNLS  
RMLMDPKTLRIRNETEEVLMGAPTHYFFHNGGAIKFGNDGKIYVTTGDGGGDGAGTSQDM  
TNLHGAILRLNDDGSVPTDNPFTFQGGYNGVPCGQTGGVLPDAPSDAVCSEIFSYGFRN  
PFRIVMDPHETEKTRFFVNDVGGSKWEEISEAGTDFAGKNYGWPRYEGPCKFDKTEDCPL  
FDPSSAVANRDSFQNPFFYYYGHVSDREGGCIAGGAFVPEGIWPAKYKYVYADFIHHSIF  
NLVEDADVECQTCIPPIPKYKNETLYTSEKREDQHANYARIVDIFFGPYKDTQALYVFKMG  
NGNNVWRIRYTGSDNIPPVAKIEIDGSTTVDVGEIVAFDGRLSFDPEELGLEYEWDGDD  
SFSREPNIHAYTEPGQYTVRLGVTDSAEHTQTTSDIVVGTTPPALHITSPLEGADFFVG  
EILLLSGTATDADGNLLEDSDQISWEVRKHHADHWHPPFLDEKAGNDIDLFPAPEPEDYLA  
A TNSYLEVIMYATDANGLVSTTSRNIYPRIVELCIDSEPQGLEVYVDEYPVVTPLRITSW  
VNHNLRLRTPINQELNGTNIQRTFTSWSDGVVSDREIRLLPKENTGLVASFCVQDDTCI  
AEAQTRVSGNLLVARCPTTPTPEPTMADTQSPTAKPTASSTDKQTSFPTEEEEVDWPLDE  
DVVRIDDQDSEPGMKDPMSDRDQILDLLDEKNSLDSGASAKIISTRILAVALSLPVAIAL  
LALFVGI

>comp9284\_c0\_seq1; 332 1153 1914 LEN=3089; translated  
MAVELTNLAWKNDTQKQQEF SNLYDDNAMNQHDDFRNTANLIVPDDTDEDNSTGAVQDA  
PQARTGKRSCFELNRDAHPAPPVDRLRSADEQEGTSSRLSKQVSEISFRPPAIVEVCHEE  
QQQQQEHSSKQGVLSPLRDEIPSPPPVAVAGVLGTTVTITANDGHSNAAHATAAITNLE  
MVDQDLNKVSVDPSPFESASAASEERRRSLKERKGGDYSRMAAERASSIVDFALAGDMSP  
ACFSSNYKRLRTE

>comp9284\_c0\_seq2; 507 1 2007 LEN=3182; translated  
XSPHGTFTCVLPYEETASLLHQPTIESSHLFRTLVLPREPSLLTQLNNTSHITTTTNSNQ  
AFTTQLKQPYFLTLTDDTLAGSTVVMSSDNNQTI PINSGEKMSKILSSLGCSWNASDVRGE  
QQEQAVVPKLPQCALEVTYPSFSLSHGELDEADTAATSTSAVHRETQVSKASELMSRTIV  
WKNTANNKRKHQPVQRSYQDNQLPNRVMLSEILDSFDQLVEARIRAYARILSNHVRVLS  
QCHNQKGARIAEYKLTLLLEIASNFTFDSVSTVFREATRQKQATPTVESKGVLPPIELAV

EIKSPRFYQGGSSSTAVASNETGTQSNGLMFRVEGTFRANGILVQHRNDATKSI CSSPTS  
YGNRSRYAGQVTSECQKASNLESCPGAFRCFETVSVEINCETLLSQMMNEASKVVTMAVEL  
TNLAWKNDTQKQQEFSNLYDDNAMNQHDDFRNTANLIVPDDTDEDCNSTGAVQDAPQART  
GKR SFCELRNDAHPAPPVDR LRSAD EQEGTSSRLSKQVSEISFRPPAIVEVCHEEQQQQQ  
EHSSKQGVLSPLRDEIPSPPPVVAVAGVLGTTVTITANDGHSNAAHATAAITNLEMVDQD  
LNKVVSVDP SFESASAASEERRRSLKERKGDYSRMAAERASSIVDFALAGDMSPACFSS  
NYKRLRTE

>comp9288\_c0\_seq2; 392 195 929 LEN=1524; translated  
MSAATETDDANKVEEENLLVSLGDKLDCDATKNMPKLILASQSPRRREILDMMGLREDKQ  
YLVETSPLDESKLQVELGKEELTSIEYTRRLAEAKAIALAEAHVADRKEMGVAYYLGS  
DTIVELDESILEKPKDADDAKRMLNLLSGRQHHVHTGVALYRLDSTNQITLVDSFVDTACVT  
FTDLSADADIDAYIISGEPMDKAGSYGIQIGGQFVKEISGDFFAVMGLPMHRTSKLVAKA  
LQAE

>comp9289\_c0\_seq1; 137 326 851 LEN=851; translated  
MAGMP SRSEAAWKKSRSDGYNFQRTEKEWKSMLTPRQYEILRNGGTERQYSSVLEGEERN  
GIYSCAGCQSPLFASEAKFHSGTGWPSFATALDGVIEIPLNVVQANLGGAE LRCQNCGGH  
LGDVFRDGF LFGVTPAAESGKRFCIDGSALVFKPSGDGEEVIGDEIPSRVQYYYNX

>comp9290\_c0\_seq1; 161 1 1364 LEN=1447; translated  
NVDDKQKTSVQFWKRMLGITKPLQRTMSNPRIFSAHSAEQNPTRLSPCRTVVTSFNPKK  
NSQTNGDYDDGDWVLC LATNEASHRVGCALSNGEVQIYDQNTMHHLLHTYQRDSLVTETT  
FETFDANLLAATANDGSLTLYDIRQPIHPAIAMNMLRPEEEALSLSVGF DGKIAAVGTS  
KGIHFFDIRDKRGILGTYSQAHTNEVTRXAFQSFATQSPGNSFTNRCTTPVLVSGSE  
DGLACVFDTSQTTEDSAITNILTVQSPVREIDFFGPKSDAIYCLTGSESLQLYHKDDAVCRK  
DFGPQFREYLSRQVSGSSQNASLHSLPSIEYLVDCSWDSGQELSLLAGSSKGDGAVFRV  
GEQDLTPIHHLRGGHRGVIRAWSTSPRRSSFLTAGEDARLCEWTTTRTPGISANGHAVTEN  
KIIINRKRQHGGQSPRSGGKLRKPRSRMSASPY

>comp9291\_c0\_seq1; 251 73 474 LEN=701; translated  
MMNKNLFIIAAVALFSTADAHSHLRQLKGLKSEKKTTFAPSAAPVAAPSDPGPIIQKSSK  
AGKTSKKNTKKGSKKGNTTVAPTASTKAPTMSPTMSPSTVPSALPTSSPSDTSTVFTTV  
TSTIATTGEGSNF

>comp9292\_c0\_seq1; 252 1 724 LEN=724; translated  
NNNKNKSKPGYQRLPTAWAPSATPSTV SASASTSASSKSSASP KTLPTQSQISALSSMTM  
AAKNKNHPSLRGSKRGANTDGPTEVAQQLRFPWKLHLLLERCEYEHEQRIANEGQNSLT  
YRDMPISWLPDGKSFVKVHDKERFVKEIMPSFFGTQSFKTFQRNLNLWGFTRVSKGPHKDV  
CSHPLFLKGFPAVCQSMKRIVLKGTRGNRAPLGGVDVSSVQAVVAAAAMQAAQQQQQQ  
QX

>comp9293\_c0\_seq1; 516 1081 2481 LEN=2709; translated  
MSVPQKKYTCAKASVDDEADIFRLGHGMLDIAQFVYTFNTIRDIVRIHDPNVKDSKYEES  
ASGRGFFDFWFGPPPPKQVEFKNPELIIITDSGMQKHPDRNFSYSVTPEAIKFFSLDNEF  
NRKYFKLDGGDIKFDESESLDNTDFEFLRDMQMNIDLKQDVEIIDYDDAFSTSEGGLTCG  
LLVNHTRKWL CVVFRGTIGTKDWGHNLNFDL NHKDMFPDHA AFTGADEDKPATHTGFTDY  
LVTPRPLDPNEKSYLKR LVSSIDWAFDPDDKLDDEATNPKPKITKEYGIYVTGHS LGGGL  
ANLFSYHLADLKS RNDPSAQHIPSQIKAITFAAPLIGNEAFGKKYQELEKKGFLRHIRVS  
NDGDVVPGIVPGWIKWVPIGKHCKLDDAHKFRANGVNLSFAEKGILELGYGASATH TAM  
SQFNINALSIHGLDVYQSRLEEAEKYP SNKTVEQIYKEEAGDFTG

>comp9293\_c0\_seq2; 449 641 2171 LEN=2399; translated  
MSVPQKKYTCAKASVDDEADIFRLGHGMLDIAQFVYTFNTIRDIVRIHDPNVKDSKYEES  
ASGRGFFDFWFGPPPPKQVEFKNPELIIITDSGMQKHPDRNFSYSVTPEAIKFFSLDNEF  
NRKYFKLDGGDIKFDESESLDNTDFEFLRDMQMNIDLKQDVEIIDYVSVWVYRHVFSNMM  
ILFSVGNFLTRNFDTRHYIRYCLSKLFQDDAFSTSEGGLTCGLLVNHTRKWL CVVFRGT  
IGTKDWGHNLNFDL NHKDMFPDHA AFTGADEDKPATHTGFTDYLVTPRPLDPNEKSYLKR  
LVSSIDWAFDPDDKLDDEATNPKPKITKEYGIYVTGHS LGGGLANLFSYHLADLKS RNDP  
SAQHIPSQIKAITFAAPLIGNEAFGKKYQELEKKGFLRHIRVSN DGDVVPGIVPGWIKWV  
PVI GKHCKLDDAHKFRANGVNLSFAEKGILELGYGASATH TAMSQFNINALSIHGLDVYQ  
SRLEEAEKYP SNKTVEQIYKEEAGDFTG

>comp9293\_c0\_seq3; 516 641 2041 LEN=2269; translated  
MSVPQKKYTCAKASVDDEADIFRLGHGMLDIAQFVYTFNTIRDIVRIHDPNVKDSKYEES  
ASGRGFFDFWFGPPPPKQVEFKNPELIIITDSGMQKHPDRNFSYSVTPEAIKFFSLDNEF  
NRKYFKLDGGDIKFDESESLDNTDFEFLRDMQMNIDLKQDVEIIDYDDAFSTSEGGLTCG  
LLVNHTRKWL CVVFRGTIGTKDWGHNLNFDL NHKDMFPDHA AFTGADEDKPATHTGFTDY

LVTPRPLDPNEKSYLKRLVSSIDWAFDPDDKLDDEATNPKPKITKEYGIYVTGHSLLGGGL  
ANLFSYHLADLKSARNPSAQHIPSQIKAITFAAPLIGNEAFGKKYQELEKKGFLRHIRVS  
NDGDVVPVPGIWPVIGKHKCLDDAHKFRANGVNLSFAEKGILELGYGASATHAM  
SQFNINALSIHGLDVYQSRLEEAEEKYPSNKTVEQIYKEEAGDFTG  
>comp9293\_c0\_seq4; 449 1081 2611 LEN=2839; translated  
MSVPQKKYTCASVDDEADIFRLGHGMLDIAQFVYTFNTIRDIVRIHDPNVKDSKYEES  
ASGRGFFDFWFGPPPPKQVEFKNPELIIITDSGMQQKHPDRNFSSVTPAEAIKFFSLDNEF  
NRKYFKLDGGDIKFDESESLDNTDFEFLRDMQMNIDLKQDVEIIDYVSVWYRHFVSNMM  
ILFSVGNFLTRNFDTRHYIRYCCLSKLFQDDAFSTSEGGLTCGLLVNHRKWL CVVFRGT  
IGTKDWGHNLNFDL NHKDMF PDHAAFTGADEDKPATHTGFTDYLVTPRPLDPNEKSYLKR  
LVSSIDWAFDPDDKLDDEATNPKPKITKEYGIYVTGHSLLGGGLANLFSYHLADLKSARNP  
SAQHIPSQIKAITFAAPLIGNEAFGKKYQELEKKGFLRHIRVSNNDGDVVPVPGIWPVIGK  
HKCLDDAHKFRANGVNLSFAEKGILELGYGASATHAM SQFNINALSIHGLDVYQ  
SRLEEAEEKYPSNKTVEQIYKEEAGDFTG  
>comp9295\_c0\_seq1; 453 893 2062 LEN=4720; translated  
MDPTPEEAAEGSVLVKVLAAVLERLVKSNAATARTDPGQVTKFHALKAPGIGVESYLDRI  
QKYASCSNECFILALIYIDRLIEGNNFLLTELNVHRVVI TAILLAAKFFDDAYNNAYYA  
KVGGLVNLNGLVDFLFRINFSLHVQPEEFEKYKAQLVTHSINSGI IPLASPVAPPHQ  
LHNIPETSDSTTTQSKYNQQQATMQVATAVAVSTYDSIMTDRTQVTPSPNNCLQDSTTIG  
NTCGQIQTCSTAAGALVQAPT PRDQRDLHTMTAAKNSIQRTFVLERANSLPPFSSVRCVD  
HAFKLPYSAPAMPTKAPALDQMQYQMMMNQLFPIENTLVHHNHQCPTSTMTAPTNISN  
HHANPTGGLGGHHPGGVLGPMAYEVAWSG  
>comp9295\_c0\_seq2; 453 581 1750 LEN=4408; translated  
MDPTPEEAAEGSVLVKVLAAVLERLVKSNAATARTDPGQVTKFHALKAPGIGVESYLDRI  
QKYASCSNECFILALIYIDRLIEGNNFLLTELNVHRVVI TAILLAAKFFDDAYNNAYYA  
KVGGLVNLNGLVDFLFRINFSLHVQPEEFEKYKAQLVTHSINSGI IPLASPVAPPHQ  
LHNIPETSDSTTTQSKYNQQQATMQVATAVAVSTYDSIMTDRTQVTPSPNNCLQDSTTIG  
NTCGQIQTCSTAAGALVQAPT PRDQRDLHTMTAAKNSIQRTFVLERANSLPPFSSVRCVD  
HAFKLPYSAPAMPTKAPALDQMQYQMMMNQLFPIENTLVHHNHQCPTSTMTAPTNISN  
HHANPTGGLGGHHPGGVLGPMAYEVAWSG  
>comp9298\_c0\_seq1; 715 1 2455 LEN=2909; translated  
XVPGTVPGTVRGTVPSTAGTKTAVWPSADHPPLVLATPTAAHCCTREGFLSRLRSILDDP  
CQRYSHELLCWMPPDRRQRATASLPKEEDHQTHATPFTIVCSKTFAKTGAVYRLFIRKMS  
SFLRRLNQLGFCRIMDPTDPTNLDVFSKPGFGLSVHGRNASCSSSNGEGSAEASLVADGR  
GSSSSSSPSSSCTSWTTCSTPKQDERPSALPAASGNDKTPPRSILFSSSRLGGAKRRFL  
QRCRLANACSSTSNNNKASTDGLALSGSGSMPPSLPPPLSGKDKTTSGDAHGGNKESNDE  
SNSGDQPLAPPVLLRARNETFCESLVSSMPVLQTTVSPTYATPPCQSVVRPLVPPKLS  
LAAEVGTTNPEARGGKTRTDRLPSPTIRRLRVP SLDRSRSSNRRRHHTSDKRPRAVRID  
EDRPPPLEFVAECVRKLMTQQTNEKLCPLSPASTTPTKREER IATGTCRPTAAATKESLR  
RHLRTTQAPQGRNTHQKSGVEETRQDRETTAFTEAPAQAISNFYHDAVHNRDRCSNGNR  
NRDGYDAGRNP RNDPHRYHGRENNHGHVGMKVRPEDFSGILDMAGTEATIAIRI IDTI  
DTNIFI IHTTNTVPGTTIRTRII TATIATIXQQPPPCSFRLIYRESEQQAAQILGQRG  
QNI GLSHRRCDGSVAIKVESGDGSSPV AHDAGKRPEPAAAT IATGKGD FSSPERAREEKD  
PHHAGIVADVELVVRHLQENEAQQQLLLLQPPVAFVETEPPFVRTNSDGSAAAMP GSDS  
VAKDFAKRNGRASAKVFLLEGLLREKNRRLPALRTELH  
>comp9298\_c0\_seq2; 306 146 801 LEN=801; translated  
MILPVSNSCSSFEEVAAPRTIRPEEIGEPLKEQSHKQNKNRNNHGPKSSLEALVDVASTL  
FDQSVAMQRVVQDGHEPAHANPDPPQDTRVLP AQPPRQCPRQNI PPRSMHGEEDEDENE  
DENENEKRMHRLPSPTAETGQESGESREPOKEGRTNESPPAIPTPSPSSAVVSVAVSV  
AVVANDSKTPKQPRSLVDETRSGRADSQKGGTLGIVPGT  
>comp9299\_c0\_seq1; 142 104 273 LEN=273; translated  
MNIYTKLFALTLLALSVVNASGSII IENNRALKAGKKEKSPKAPTDKSVKSTKAPSX  
>comp9300\_c0\_seq1; 487 198 1893 LEN=1936; translated  
MTTLM DPDEIYSDCQSGNGDEDED AKWKCI I SKLVKRDQKDENYTSRI FLVYSAALVFF  
MQAGFAMICAGCVRKKNVGN SMLKNLLDVC GAAIAYYSFGYAFAGDGSNPNVFIGTTNF  
FLIDVDDYAFWMFEYAFSAASATIVAGTLAERCQMTAYLCYSLLLAGFVYPVVS HAIWSP  
HGFLT SNKAKENKLF GSGVDFAGGGVHVLVGGCTALFATMILGPRRGRFH DDEGRKLDK  
PNKFP GHSIALQMLGTFVLWFGWYGFNSGSALISTSVNHGQLVLSLGVNTT LSGMSGLV  
ALFTNLFILERRLGEPIFDLRMAMNGSL SGLVAITAGCGV GELLHYDERVLSVGRGAHYK  
VIEYIFLIHLFFLESVEPWAAVFIGSVSGLLYIAGSSLLERLRLDDAVDAIPVHMINGMW



GLVAVGLVASPRYLNMA YGTTIEHVGFYSLARGNGDARLLAAQIVGILFILSWCLLIMM  
PFFVWLDWKGWFRSDPLEEIVGLDTSYHGGLILASGDDSVNPEYISQFKKQRNELRHRRG  
VKGIPSDDES LDGYNSTTVATSTK

>comp9300\_c0\_seq2; 372 198 1937 LEN=1980; translated  
MTTLMDPDEIYSDCQSGNGDEDED AKWKCIISKLVKRDQKDENYTSRIFLVYSAALVFF  
MQAGFAMICAGCVRKKNVGN SMLKNLLDVCGAAIAYYSFGYAFAFGDGSNPNVFIGTTNF  
FLIDVDDYAFWMFEYAFSAASATIVAGTLAERCQMTAYLCYSLLLAGFVYPVVSHAIWSP  
HGFLTSNKAKENKLF GSGVVDFA GGGVVHLVGGCTALFATMILGPRRGRFHDDEGRKLDK  
PNKFPGH SIALQDEPWRCVPYLLAQ SATGNSD TVFLNSSLQFVMKRQRIAITFFFKLMVV  
QMLGTFVLWFGWYGFNSGSALISTSVNHGQLVLSLGVNTT LSGGMSGLVALFTNLFILER  
RLGEP IFDLRMAMNGSL SGLVAITAGCGVVEPWA AVFIGSVSGLLYIAGSSLLERLR LDD  
AVDAIPVH MINGMWGLVAVGLVASPRYLNMA YGTTIEHVGFYSLARGNGDARLLAAQIV  
GILFILSWCLLIMM PFFVWLDWKGWFRSDPLEEIVGLDTSYHGGLILASGDDSVNPEYIS  
QFKKQRNELRHRRGVKGIPSDDES LDGYNSTTVATSTK

>comp9300\_c0\_seq3; 323 1162 2155 LEN=2198; translated  
MKRQRIAITFFFKLMVVQMLGTFVLWFGWYGFNSGSALISTSVNHGQLVLSLGVNTT LSG  
GMSGLVALFTNLFILERRLGEPIFDLRMAMNGSL SGLVAITAGCGV GELLHYDERVLSVG  
RGAHYKVI EYIFLIHLFFLESVEPWA AVFIGSVSGLLYIAGSSLLERLR LDDAVDAIPVH  
MINGMWGLVAVGLVASPRYLNMA YGTTIEHVGFYSLARGNGDARLLAAQIVGILFILSW  
CLLIMM PFFVWLDWKGWFRSDPLEEIVGLDTSYHGGLILASGDDSVNPEYISQFKKQRNE  
LRHRRGVKGIPSDDES LDGYNSTTVATSTK

>comp9300\_c0\_seq4; 276 198 959 LEN=2086; translated  
MTTLMDPDEIYSDCQSGNGDEDED AKWKCIISKLVKRDQKDENYTSRIFLVYSAALVFF  
MQAGFAMICAGCVRKKNVGN SMLKNLLDVCGAAIAYYSFGYAFAFGDGSNPNVFIGTTNF  
FLIDVDDYAFWMFEYAFSAASATIVAGTLAERCQMTAYLCYSLLLAGFVYPVVSHAIWSP  
HGFLTSNKAKENKLF GSGVVDFA GGGVVHLVGGCTALFATMILGPRRGRFHDDEGRKLDK  
PNKFPGH SIALQV

>comp9300\_c0\_seq5; 505 198 1787 LEN=1830; translated  
MTTLMDPDEIYSDCQSGNGDEDED AKWKCIISKLVKRDQKDENYTSRIFLVYSAALVFF  
MQAGFAMICAGCVRKKNVGN SMLKNLLDVCGAAIAYYSFGYAFAFGDGSNPNVFIGTTNF  
FLIDVDDYAFWMFEYAFSAASATIVAGTLAERCQMTAYLCYSLLLAGFVYPVVSHAIWSP  
HGFLTSNKAKENKLF GSGVVDFA GGGVVHLVGGCTALFATMILGPRRGRFHDDEGRKLDK  
PNKFPGH SIALQMLGTFVLWFGWYGFNSGSALISTSVNHGQLVLSLGVNTT LSGGMSGLV  
ALFTNLFILERRLGEPIFDLRMAMNGSL SGLVAITAGCGVVEPWA AVFIGSVSGLLYIAG  
SSLLERLR LDDAVDAIPVH MINGMWGLVAVGLVASPRYLNMA YGTTIEHVGFYSLARGN  
GDARLLAAQIVGILFILSWCLLIMM PFFVWLDWKGWFRSDPLEEIVGLDTSYHGGLILAS  
GDDSVNPEYISQFKKQRNELRHRRGVKGIPSDDES LDGYNSTTVATSTK

>comp9300\_c0\_seq6; 438 198 1899 LEN=1942; translated  
MTTLMDPDEIYSDCQSGNGDEDED AKWKCIISKLVKRDQKDENYTSRIFLVYSAALVFF  
MQAGFAMICAGCVRKKNVGN SMLKNLLDVVSSRNKSSVLR LDRVHWSYMLLA EKYLSPNF  
AFGSKSSAALRLHTIPSGTAFAFGDGSNPNVFIGTTNF FLIDVDDYAFWMFEYAFSAASA  
TIVAGTLAERCQMTAYLCYSLLLAGFVYPVVSHAIWSPHGFLTSNKAKENKLF GSGVVDFA  
AGGGVVHLVGGCTALFATMILGPRRGRFHDDEGRKLDKPNKFPGH SIALQMLGTFVLWFG  
WYGFNSGSALISTSVNHGQLVLSLGVNTT LSGGMSGLVALFTNLFILERRLGEPIFDLRM  
AMNGSL SGLVAITAGCGVVEPWA AVFIGSVSGLLYIAGSSLLERLR LDDAVDAIPVHMIN  
GMWGLVAVGLVASPRYLNMA YGTTIEHVGFYSLARGNGDARLLAAQIVGILFILSWCLL  
IMM PFFVWLDWKGWFRSDPLEEIVGLDTSYHGGLILASGDDSVNPEYISQFKKQRNELRH  
RRGVKGIPSDDES LDGYNSTTVATSTK

>comp9300\_c0\_seq7; 341 1162 2049 LEN=2092; translated  
MKRQRIAITFFFKLMVVQMLGTFVLWFGWYGFNSGSALISTSVNHGQLVLSLGVNTT LSG  
GMSGLVALFTNLFILERRLGEPIFDLRMAMNGSL SGLVAITAGCGVVEPWA AVFIGSVS  
LLYIAGSSLLERLR LDDAVDAIPVH MINGMWGLVAVGLVASPRYLNMA YGTTIEHVGFY  
SLARGNGDARLLAAQIVGILFILSWCLLIMM PFFVWLDWKGWFRSDPLEEIVGLDTSYHG  
GLILASGDDSVNPEYISQFKKQRNELRHRRGVKGIPSDDES LDGYNSTTVATSTK

>comp9300\_c0\_seq8; 420 198 2005 LEN=2048; translated  
MTTLMDPDEIYSDCQSGNGDEDED AKWKCIISKLVKRDQKDENYTSRIFLVYSAALVFF  
MQAGFAMICAGCVRKKNVGN SMLKNLLDVVSSRNKSSVLR LDRVHWSYMLLA EKYLSPNF  
AFGSKSSAALRLHTIPSGTAFAFGDGSNPNVFIGTTNF FLIDVDDYAFWMFEYAFSAASA  
TIVAGTLAERCQMTAYLCYSLLLAGFVYPVVSHAIWSPHGFLTSNKAKENKLF GSGVVDFA  
AGGGVVHLVGGCTALFATMILGPRRGRFHDDEGRKLDKPNKFPGH SIALQMLGTFVLWFG

WYGFNSGSALISTSVNHGQLVLSLSGVNTTSLGGMSGLVALFTNLFILERRLGEPIFDLRM  
AMNGSLSGLVAITAGCGVVELLHYDERVLSVGRGAHYKVI EYIFLIHLFFLESVEPWA AV  
FIGSVSGLLYIAGSSLLERLRLLDDAVDAIPVHMINGMWGLVAVGLVASPRYLN MAYGTTI  
EHVGFYFSLARGNGDARLLAAQIVGILFILSWCLLIMPPFFVWLDWKGWFRSDPLEEIVG  
LDTSYHGGLILASGDDSVNPEYISQFKKQRNELRHRRGVKGI PSDDESLDGYNSTTVATS  
TK

>comp9303\_c0\_seq1; 216 1 588 LEN=657; translated  
QKQSHGRRHLFRITDLGKSLVNLKLRITIIESTSLSSTTTLQRYRIFLVLFTYSVVTVSAS  
RMFLSSSLRRGLVAGKQHLARPNIQGRFMSVTNISDL DATKKFTAINEKSILYFTATWC  
PPCKI IKPVYEELSEKHENIAFGKVDIDDAYDAATEYQITSVPTFVFFNGNEKHEQFAGA  
NQDKLESAIKDLDEA

>comp9304\_c0\_seq1; 461 1 1177 LEN=1957; minus strand; translated  
XSDKIVYIKKGLSRDATSNDIAPTIRTITPTIATQTKPLLVSSTISDDIQTPI TADAAK  
TKCFVTNDTADKAFAPDKIAVGASADKAHQNISAPASAASAKGHETLQSLVDNGTSKPTD  
LFHTTTCYNSSSSNVCINISINTSTDSQSRTEKNIDDRKIDRSNDPRMSFQTVLEQQRAT  
IERNQQIIEAQONELHKQKQNTQLQQKALELPQKSKTKDQAKGSFVQQIQPTEKCLKHYQF  
AAIKQRATTVVSPMAAPLPTPVKSCIASSVISRENSSDNNSTINETCSSSSNRWKLSPAG  
DTEQKILGNNDCCGNGIGINNSNTSSNEVSDRNRHNAGIPASTKTANVCNHHQHKNVV  
WRDANPQTVAMTNMRTSGNKHNL SMVDLEVR

>comp9306\_c0\_seq1; 381 1 1419 LEN=1869; translated  
LPKASAVEYTSRRMTISHRATAAAVLVLVAGYSKSNRNGEVPRQIPGVLALANPSTTTR  
SMWKVLEDSGTQSSSLSPSAHAWKTIFGQKGERGEYMDGYSPEAMI ER CVEDYHWERETK  
TEPGTEPSPSDDLDAANHSLASRRRAAMMAHLYDNDELWKHTSMVAF AEHYVVTEEHSE SCT  
FSKPYETFRKQRALRPEDEP IFAGVWEDWERQPCVDDHGLLQTRSPKPAVFAEHGIDYV  
RLHCNCGDGEALSDPSQLLGGDERIRTLGRLAGAARECQQHGMVPLVLLQVPWRHPERP  
AGGSTSTEFLENAVRALTKDLMAEGVDCGKLLFETRPPIGVSAADEGAMASSERWALGLN  
TGRTVFRILDQAFGTGGAGQTPAGFCVAGGSTKGAVPTAMQDDTQAAVRRGIRERALAEW  
GYEACFWEMGAKMLQPAVGRLWGTGDRGASSELFRSNAKALAEELVELDGL

>comp9307\_c0\_seq1; 462 271 1032 LEN=1368; translated  
MTTAHRPTWKA AVGKASEGGWGS GGAGSQGLSVLDMPAHTKLFKFRKGDQVVD RQKALKES  
LLKLETAEKATKLLKRPVAVDEKVEEGRLLKLLKQTAEVDERAIQAKYNDADALSSDDD  
SGDGDGWSEADNDLDASSSDEDDSDDDSDDEDEEAALYAE LAKIRAEREA AKQKEEAE  
AARNEEKLEEAALLGNPLLASGNDHDTGRLKRRWNEDVFRNQAKGEPEIKKRFINDTVR  
NDFHKRFLNKFIR

>comp9308\_c0\_seq1; 1315 1 5257 LEN=5372; translated  
XAAA AVATKGD LPRPQTSAFVATTDVF EKILFTGVV KWVDEAE CATARRDFRQKSLPICV  
TYHSQLRRHAVWEIQHP PPPPQQAPLWQMSQQWR SKNARDSHLGVLQDLEDFELADDPV  
DSSHSDIPSRNDALADALGIVRRNTPRSNAGTAAISNATRSYRASSGSAGMSSNRSGKA  
KTPMNSSLLSPLRSHTPTANGSHVLDGFRDGLTNAGFASDSTTRASFTRMGPFASLHPK  
ANLNCIYVDSNSMPPAENIFLASNTSGSGTSLSLCLVCPSSRGGVGPVSDNTKELTVYSLA  
PVVEKGRNFVAVQPEGSVPCVAAQPIEASPIPRNYAPHRNKYKTLTEMATDILLRNHAP  
NESTLSLYRNTQHIVDCTITIPQSP ELPVEMTDLKHSFRNVIDVYVWDSKTMQHQSIRGR  
LSLLLNSDSIGEALIQTVEAAFQTSMTLDVIALKIRADCIRLEQATSGVGA EIAKLVILS  
LFRFDILGIDVNAMEMPCVKEATTIDQTQWEILLEYGNGE PFSVEYEEIFDESPVADGA  
DWISERVKKGTSFVDLCKICSLSTQHLVSSGLIIGTTVFDSLHLFYEELKLNHNSKQEEAL  
SYIGSILCDICSMASCNTMQPRDVTE SYLSYSLDLEDHYQYSIAGDIRSDSGVKKASTR  
LEQFKLSSFSSPPSILSWIEEVICGNMASSQYEA FERADLNTTCRRIQSFLLI FPKLF EK  
DDSSGEDARINGESKDFEVVKLLLEEGFSDPDALRDEL P VGVALP LLELLHRCRTS QIAY  
NSVMDPSVWLLIGREDIEMKKS DSQQNQSHESKPPAPLNGLNSSPSLEEFGNNDKDGITQ  
LESASSMLFPDDNRIREVGRLLRSSKPAYLHVPRAI EVSDHDYERQKQDKLLLLSRIL A  
LPLGRMLTIGNLKPVAEPLPELCLSGRIPPTNTMALDVSECPVDLKVWPEFHNGV  
AAGLRPLQLEAGESVSKITRTWIVYNRPSNNNQADSQNNSNATENNSQNQNHAHGGLLM  
ALGMRGHLTALEMTDIFDYLT HGSVTTT V GCLLGMAANMRGSCDISVSKMLCLHIPSLIP  
QHFSTIDVASTVQAAAVAGAGLLYEGSSHRMMEFLNEIGKRPSNDGNVLDREAYTLAC  
GIALGMVNLC KGTENSVDNGVGLADLKI EERLYRYVVGIDDAEIRRYEETDRLSMPSA  
SSSSNSDKCSCIYEGDSINIDVTAPGATLALGLMYMKSNETIASAIALPQTHFLEYVR  
PDFLMFRVISRALILWDDVQPTNEWIIAQVPRAAYNAYREMKDLAERLQCGGVDAAGND  
EPEYDRQAVRFIYTHVIAAACFSIGLRFAGTGNTDAASLIFERVMELRELRDALDPASTA  
LRPPTPVIEMCLGCAAISLSMVLAGTGNLDALRLFKILRWPCTDDIYHGSHQAFGTAIGL  
LFLGGGTCTLGRDPKDIAALIMAFYPRFSSSTS DNQYHLQALRNLYALAVKKRELKAIDI

DTGECVFAPIELHFRNKELEPMHFTAPCLLLNTDDEPFELRVVSKQHYPLTMSLDSNLGS  
KVFFVKRRGACIYDKSRPHSHTSLLMRSDKLEQRDSDLVASFDDQRILAFANHFCDFC  
EPKVQKHTSSPSMAQFCSRILHECFLRDTRQTLPLYLALRNSIHKVIAGRSARVAHVWDF  
RLVRSYYQNHGLTSRDGNSRRVNLCELVAYLIEMMELALADAKSSNKLLAIFYSYPRECR  
SKKNDTDDMDLT

>comp9309\_c0\_seq1; 110 38 331 LEN=331; translated  
MRLRQGKPNPGVGKIGIRSFVLLAINCVVFIKLGKPYSAIVNIEYTEQKSFDSPTING  
TATMRASSPLRAFDVAAIGHSNATATSASSDVTKNLTD

>comp9311\_c0\_seq1; 1057 240 3791 LEN=3815; translated  
MEQETAKSSRLLSRVSDSNHERSSCHTNDTPSSTYHSFATSDFSTASARSGRTFDLLN  
SADNFGGNQPNNSTSTENVETLVEGLEADISGGDYIRFFNELDHRGTGGTTTTWEVEENV  
VLEAFRLMRYHVIKRQISTPDVLLTGEGWVKTIKSKFTAFENSNAVAISCLLTFLLTSS  
LPGNYKNLIVRRGGVDCAMKTL EYWHDKQACSLACALILSLSLNEKEGLNASYRQIVSL  
VKRMVSLISRGGYGADIALRVVFQFTCHRKKLPDTGKSLSHLVKRTLREKKNITIALFNV  
MMECDVRESTVEAAMSLWLRLSVPKDEFDDDELYPTSDDAMRTIIAAMDSFNISITIREAG  
CGTLANMFIRKGI PAELSQMVFVSMQRFILRSESID EGLATCALHAICNMLEKTIIGSSL  
VLNERII EALIFLMKKYPKSEELIEFACLIGRAARHNQGIKESLMALGAFDQVKCAF EQ  
FVLTREDDPSLDVKDASLCAFATLTGCLSGAQEAINTGLLDIFETLLAVETDRDFAVVLD  
IIISNTRACVTNDGFPTSLEDTLLQQPQIFSKLMENNTNDADATSLIQSLLGVGQTHLES  
AFNTSDGFP SLLSAMARYSDSANFQEYGCALLAEIYFHLPPVKDVGTQQGPWAPQONRE  
ALVI IHKAMSAHLDQVNVQINGCLSILNLLHPVSEPGGSAQDRLAISLVIELPYAVVLD  
LRLHGSNIDLQKSAIPALSVSISVARTKDFKWPATRIVQHLCNMLLQFTGNNPIEALVLD  
ALVITQEAHTSVKSEYSTSDVNTILTLVGSDSSEISGRSSSVLSNLLSNDLEMSRKVMEC  
HGAIEIILSTLGMKREELRIQINIYSILQSLVTCADCGVGI AKLLDQHNGIHKLCMGIT  
SHPQHRMIAITLCRILSSIVCYLDDNAFVRSRDAIKLSLIEGLEHYHVENSDVVSAILDVM  
CTCCDRDDDFKKYLLGENRSRMIINTMQLSLGSVSLQSSGCNLLAMLSIFGTGKEQIGKC  
GGVPTVFNALLAHTDSTEVQRKGLI ALKNMATAPSNPKPKINKMGGETA VVYALWIHYRNP  
EVVSI GLSALNNIAVDSITRTVAKINDPVLMI VIAAMKSFPM DGHVQKNACFYLKTC SYV  
PENVRIMSEKSEDLIPLLLQAGENFPDQCRGRANAVVTKITSY

>comp9314\_c0\_seq1; 328 317 1576 LEN=1789; translated  
MHGKKREEYKAKTRDPKTAAILAKKAEQWYILMKELHNRREKQRSNESGSENECDSETTL  
KLLGKALEVNPDP SNLWNHRRREVILREIRPDDDKNDNQN DKASNILHRRERVLTKALERN  
PKAYGAWFHRKWILQTLRPASEVLQOELALTKRFLSVDERNFHCWNYRRFVACVSGSWD  
GEWTVALSSTQAATTTLMGTQAVVNRAYHTENDEGE GFGSVSVVMPIESMVSEFEFTT  
EKIKQNF SNFSAFHYSQLLDCLCHNGDNGESPTPEEGLCCLVERILEDEFQ LVEDAVC  
TEPDDQTCWYHAILLDKLLLA VSEDGDHKNGRTIADSWKSTLLPRLEE QADLFREILED  
SPGSKWVILGLVRVNLILSSNDGDPDGDNGDEQEQLLRLMEIDPYRSKRYEELRTKKE

>comp9315\_c0\_seq1; 195 516 1113 LEN=1551; translated  
MRTTNDQAGGGGEFVVRNFVGVIRDISVPASTVETDLFPRGALEYTAKNMGWDCTEEDR  
DRWQMDERGG AQGDYREGMPEKIANVVDC LRNEPLSKRAVIPIPYATAGSATIDWRDRGQ  
NKCCRELHFYLEDGK LKCTGIVRMQNANIFVKNVHFFATLIGHVAGELGVEVGEYTHWIT  
NVVWTGRRPRADVFLVAH

>comp9315\_c0\_seq2; 269 82 772 LEN=1210; translated  
MSSSSEGIKCAPSNLNVGYPQFPTAKELHARLVELTSAGGGGEFVVRNFVGVIRDISVP  
ASTVETDLFPRGALEYTAKNMGWDCTEEDRDRWQMDERGG AQGDYREGMPEKIANVVDC  
LRNEPLSKRAVIPIPYATAGSATIDWRDRGQNKCCRELHFYLEDGK LKCTGIVRMQNANI  
FVKNVHFFATLIGHVAGELGVEVGEYTHWITNVVWTGRRPRADVFLVAH

>comp9316\_c0\_seq1; 1259 212 4086 LEN=4086; translated  
MGRDEFEVGTSFSQNRKAEDGLGLSTPHRSKRVNLGTPANYFYKYMNSTKKSATKELSIR  
QDDENEDTGTISIPGFRIGGNLQ TETSFFSMAGSSTGSESGDILNKSTLSDTTEL TAS  
NFVLVTTSKQTMIQQTRDHCTPAKDKENAENRKCDS SRKSVAMNRKDNAVDDKKTIVD  
GNMAETAKEPETSSLTNQTEEMHGVIQQRSVHYTSPSIRSRFSASPTSLRKFHENLKN SR  
IKRQQREEDMKRRLSVEGNNLDSMNAQLQALTNHGALTKRLLPPPFTQLSQQSLSQES  
IVASTDQFSPSESSTDGTVTINMADLDDLGIKTSGRRENQSSITAHQSAVQHALNDENS  
ATSQGRDQTSTLEFLAKYRVNGIVNSSMPSKLSPVTGDSK KINESNIQSNPSSDSELKC  
LSPHNSTVASLKLRSASSNPRKRMTPSKLSSTPQRVVPMSIFSPASNTRS AKKRRKLE  
EQEKNPASVENALVERKEPSPKIGICLFHEASTTGHDS SIDSESSAAATGADHDRGAFE  
SHPAHDGDTASLGDIA DVFMENTTDGISFGEVSVQSNQHARKEKDPLSDGQETASMANI  
DDSIKEGFPLSYESSRDSIQKPQTIADKGRFSQGLPTKERDLRGDQETASISDFDDL  
VKQGFIPSNKFSLRETLDEPDMGTGEISKISQGLSDKESDLQGESQEMTSTSRSNAFKEQ

KSPPRNGTSGRERCEQPHISNDNIIRKSKDSISNSTSESHDNKDSGKDKILVANDVDHSF  
SLIASKSSLVEKEEHEPSSGETDFTFTSGKDPMLEKYDSPTPRSGSDMLCTPPDIQTASFE  
STAIPSRSFDRNSHLMNLFPKSPIQMTPSNHKKPTPSKLABSPRRVMNPMNPNSPARNTR  
SSLKKILPTDGSGLKSIILGGEPRQNCALTREQQDNDGNHGVLRCSKRRQSLCVRPVAEQM  
EESHSSSEQTPFLKPCNGILSSKKKNMLVPKPSTGILSSKKKLFRRSVAFGSPEAAEYNI  
GSPSVSLTPMPKGRKALFTLPATYSSSCSNQVDTCDAGIDGSECAGNKGMDLLVVKIT  
VELMNNPELSPIEKKKIDTDAFQVPSHLMPSSEDSRLLEDKTVESVTEINGQISNNSEEL  
KRRKSLSKRPSSENKENSALTDSENIASISYKCHQYTADLSVPIDAQRLDFNDASESSRN  
NISTKVANEGDSVEIERNMLSSLQDSTEDATLNEDRERDRNDKSELPSYLASTGTTEIKV  
MCQRQYRPRQNLNKFQTSKGISENHTEEGDML

>comp9317\_c0\_seq1; 349 51 1353 LEN=1656; translated  
MKYFSRPSGISLSFFLKRKWEKEEQGKKTQRLQQGPSTSGSDDKEEQPWNKTSKDDNATS  
SDEQSRSESWQPKLRLNQDQELTRDETYELSKRVFTTAELEERIWKTTTAMFDIQRQIHR  
GEEIYYEDTYNHGSIYKGWDAFVDMKDVGISSSSGGGVIQTSTNRRVPTDARWFSTSCAS  
VSRTPPARFPPLVQESLLSTTKLSAIPDQEQEKRSSDYGKTTKPPSLGTSTTNKIA  
ASLPNVPAKNTVTKIESKSETDASSSSSFRTSQRVASSAATIADSTKASTTTKLPTRRLP  
TPGMKAENPASTRKKRSTTAASSVEPHPKKAQVKSFEAKGGFKDPAAGNSQKPTATVMT  
RGSKSEHGSSVIKSEKNQGASPPPASSKLYGDSPGKRETPSKRQNDVETPFLGNEEDLEG  
KREPNRCSLFT

>comp9318\_c0\_seq1; 309 124 729 LEN=1159; translated  
MVFGITSELLIAAVANIALVDGFAPVSRRTASSSSTSHVLSMSIFDDLRLIFSEEGKKNK  
AKYEARECAEQEAAQREILERRRNPEKMQDYEKVANRAKLQEEKEMWGFQGVQDGYD  
PITWKRKLDGKITVGESEMDRPTSSRLGSEGLVDIRTDELPLYIDQGYVDESADVMGG  
IMGLFGGKKKEASDEDEKLAN

>comp9319\_c1\_seq1; 332 125 1030 LEN=1272; translated  
MLSIRLPALFLFLMTAVAVEATDIVMKNQKIKKKQFTYTYDNDVANKCETVLLIGVGT  
AMTTTAYNILSEKTSAGAPVVTVFFDANPGNIVKTGNKKYANFYNAFIENLSEYVPVCEG  
KSPKFIAGHSGSGRAGLQAMMHNGIKPDGYIIGLSPYQASAKKIWIGPGAAPATSIDPN  
RPVLTWGFERQTCGVDPAIAGKSEYKLSGESNRVYRFDNQTDRSVGHCEFTDSGCFVVP  
IPNCPDPKNDDVKDVVAEAIQAFAAVSSGSIDKSNFDFDTANPSVPIISVFNSEPEVPP  
S

>comp9320\_c0\_seq1; 491 229 1425 LEN=1882; translated  
MKLFHATAILIAQAATSSAFLGVPDAARTRGPLAAKARGEYGALENISEMVGNTPMVK  
LSDAMTGTGVTVYAKAEFANPLSSVKDRLLALSIIETAKEKEGKLPKPGDVTIEATSGNTGI  
AVAMMCAQRGYKCVITMAEPPSVERRKLMRMLGAKVIVTPKAGKGTGMVEKAAELAEKHG  
WFLCHQFETEANWKFHEATTGPEILNDLKCIDKGLDYVWTGYGTGGTFHGTGKYLKANS  
DTKIVLAEPAALVDSGIPTERKADGSPDGSHPAFAAHPVQGWTPDFIPLVLEQGLNLE  
TKLMDDYVAIPDGAATAQKLACEGILTGISGGATVYAALETAKNAEAGSTIVCMLPD  
TGERYLSTPLFASIDADMNEEELEIARSTPSFILEPTE

>comp9321\_c0\_seq1; 529 113 958 LEN=1105; translated  
MSTSSKVIIGSALLVAVAAKSFLSKESSSDSRELAEIDDEYEEGLITGEDVCKVFDRL  
FMEMQGVLAQLSQIQQIQMSGQNIQQQLRQILVGEYQRALVAKQKQALEEADMDYDCF  
EEATWEFLEKADEYPKVKTSTVERFQKLWENVSGESVVGMRKGGAKGPTKPEEPIEIMSAE  
KTIEVAEFYFDSLNTAMGELVDDFKKKEKNLRDPRVAQELQLAFSGVANDKGEEALKQLG  
VTQMVFQKSIENASNPRVGRSLAMLQMKQQQALVAMGVPT

>comp9322\_c0\_seq1; 226 144 1820 LEN=1858; translated  
MGKNKSRRSNRDDTSRSDASVTSSVGGDDHRGKNTKSKRSIRINFFFHHLREKRQILWI  
LGCILVGLFGFGFTGWFLGEYGNPSGWRIVLGGKIRSNSIYKRTIARLPTIGISENE  
TIRSVVGTGSILGIPIFSATHDKSRNLDPFSFGAPPVVRRVSSNELKSNPSHPYVYT  
VLREAIAREKGGYVHPDLGIMEPAPCGAARGIGMVRNLYHRCQTKCLPGIAEEKLEAKRK  
LLQEESEQSTEEGEESESRHYRQEEVLIRVPLSYQMTRKVALDTLIPRITSEPIHKTLEL  
DDATLLTLLLAHERGVGQFSRWLPYIASLPQEPSCGYSQGHRPHQLDSINALRDNLGLV  
DGWPGELLRASEYSERIVAQLANDYGI FVKHPKDKSPKANLRWALCQVASRAIGGSQKYG  
ALRMVPLMDMLNHDFHAGGFVELTGKERLENGDFIDATNQETDAGAFVIRSLRHGRKAL  
RVGQELMVNYPHYNSALDWMVSSGFVPPERYQNWQKLDAPLPRIRRDGPFAGIHDKGKE  
KRRRQESTFFAGFTSNA

>comp9323\_c0\_seq1; 262 52 597 LEN=855; translated  
MKLAILSSLVAGTAAAFVGPQKAQTSTALSAQKFKAKLAYVPCISVEDLPAPGSATSGVAG  
GLAICIAVDPKGSVYALGDKCPPVNQPLSFGKVNADGTIQDPVLGTFKSLKTGEVVGKWC  
PSGIGKLIIGAFSPIGVPTYVVKSGKNIDVQVDVNAKFNFEAQYWTGILDAQKSDGKY



ELELARISLALATAAGIATNSTAASSAEQQTTLARVAQSSVGPITSGPLEAATEGI INSN  
ALVADDRSTDLAGMMATARQLRLATISLAEATAAGIATNPTLTSSVEPQSTLAQPVRNRF  
GPIRSSPSESGVVGIPNPNVLESGTTVLTVPVCRFSFPIVVFQEVDRRFLREFECALRQQL  
VIFEAMADVEAYRRNTIKYTDNDNGVSGERRPKSIRISQIGIRCRHCATKGGKSNTQRA  
FWYPTSLNEVDTYSEKIYEEHFRSNCSAIHVSNNLLKDLKMLEDKKNDVSSRKRKPNPFGD  
KYWSVMLSNMGIYEDKVNVMMLRVNRGKKNVTVDSASAVVTSVPVSNITARDIKREQKKK  
RAVSEESNAPRRNISGKAPAVIESSDGEQEEINKGRNSIAKKRNLSRHNEGHRSSLNSSA  
DESSCAKEENTTKKTRSDGNSKSSSVTAKVARVSKHASKRKFNPVSGTSEDDSNANSKS  
KKPKTKGASPKQSLVSSKVSPLYGSKIASSETDGNVHHKVAKGSHRKKMAEQRVKLPNRR  
TKLVPHSETPNRKERAVPKIKQPNPKEKTAPKRKPSTVEQKVLPRKRVQORRAKTVTRIE  
PLSGRKHRLPLESKRTPKSGNNAATRKSTAPQREEDRQSPLLAVTTNDKLDSEFEKALPK  
SVQLALARLAPYNGPGRETDGDNFALSALSAPSSSKRRRRSRRLKG  
>comp9337\_c0\_seq1; 512 109 2489 LEN=2489; minus strand; translated  
MHRRTNSNNSGSGHSRSSSSGNSRQYHQHQHQHNRVPSGNSDMGSVHSLPTVTSRSTIS  
DPSSHARNGGFYNTNNGNYGNSHSRRSHSSSQSRGNTPTDRSPHHLNHNNGSVAEHRDPYG  
ETTHNRKNQYTYQNSDHYHQNSAFRTPMRRPSSTIMIKTTPHKSSNASVSGSHQSRGAA  
SYNSSVGRTTGSSTPLNISTAAPRVSTDKHAIKSTKKVIEGTFYILCHLLMTGLNLLLPN  
HGIFYFLTNAHGYSCMIHISELRKSADHSYPVEKRI IALTNACAEFDHLDDSRHNLELQ  
NGAALVLCKVLAVIVNDIDANLKCSCGYDFDVEHNYDQKSTGSDQSNHYYGVEGKNEHE  
EKNIKENHTTYEEDQRAKSGTARKVITNSNEDDSRDDNDDALRMIATALEMVFRGQAI  
VHSAYDKCGGTPTEHAEGLVGATPPGLVPLLLRLIDRAEGLNCGRRMKRYNADVTLVNTT  
KVLVLYLSRVPPELMLARQEQEALIDVLSRVAKNEIYTNHFENSEFGSSGCTALNREAQIT  
KVRVIANLVNQEENKPLLLNHGLSEESHNSGNDGSRSAIGLLDALLRVAHMDPNMRAREY  
AGLALMDLASSPSNQIPMAKNGRLLGLTVKMILVETNAGMRESAITALQNLAFAKENRIL  
LVSFKHGIVLEALIKALSNSGNGYNEKSRRRAAGALTNLACEESTELMGRHKGLLRSLAI  
VSTKDESPEVQSRAAMALTKLAASVTVKMESHTFAKPEYEINSQENHLPDTSTESEGIYA  
TLLDALVVASLSPX  
>comp9338\_c0\_seq1; 569 1 1336 LEN=2164; translated  
XRHFRNRSAPVLTTPAFSFDADARWDELFPQLEAFYKKGHSHSRVPTSQKTDLARFVVHIR  
CVYRTKKQKMLREAQAVVPATPQASAANGEGHGGASDKANKAASEGEAHPDLTKSKLLTP  
ERMEALKTVNFEFQLWTVEPSQWEQRFQELLAYRTQNGHFHVTNKQONATLSSWCKTQRQR  
YKNTMAIYQGLYGVELTCPQKKAKELYDKAKEKAKEAKAAAAAEEGEGAKSKAAMSTPN  
LSDIGEAKNMDPERICKLNAVGFWELOKDYVESWENRYNQLLKFVNLNGHCRVPKSS  
GDNPQLGQVVKMRKYHGKEDGKSYSTFTDERISRLNELGFWRLLKDTMPKSSVAKAE  
AETTPVIAARVLNNQLNNTVDVPPLOQYPPQAAAAASAATISITIGNGTAGDVVNGGGTP  
GENGQAMNWGWGNAYDGTSSNSATV  
>comp9339\_c0\_seq1; 1791 219 4240 LEN=4386; translated  
MEDADPLRAERDGDVDMGTNNEKEVEEPPRLMITKMTLENFKSYAGIKEIGPFHKCFSA  
VVGPNNGSGKSNVIDAMLFVFGKRAKRLRLNKVSELIHKSDGVKDNPPQFARVSVHFQDII  
DTGSGDEDYRVLDPTEVVVTRIAKKDNTSTYKLNKNSSEFKDIAKFLDSKIDLDNRRFL  
ILQGEVEMISMPKPKGKTESDEGLLEYLEDIIGSSKFVEATNEAAERVDGLSEVRQEKLN  
RVKAVEREKENLEGAKQEAELGKEREIRKQONILYQIHAMRADKDSTKYTQQQEKLSE  
QLEIERERVAQARKRIEIEESGLTEQRKDYDASYQELKRTKDEFSAYERRDIKLRETIKY  
ERTNKKKLQDKIKAEKKETKAENKKAKEESVPELEDEIERLAESKAEEDSKLERIEE  
TKVVVTQNIIRRELEAKAAELAPVKQERAVLQADLDTAETELKLEDSSKRVKERLASSELE  
LEALDATQESKRQKLKEQEVELASTKQRIVDLQKQEDRELSAREGSMGTRHKQLLAQVEDA  
KSALRASGGGKSRKAVQGI LDASKRGGELSKVGVLGRLGDLATINEQYDVAVSTACGML  
DNVVVQTTAGAQRCLEFLRKYNLGRASFIPLDKQKGAHDRVETPENAPRLFDLITPSN  
YAITPALYLAIGNTLVAPDLETASRWAYDYRRWRVVTLDGKLIETAGTMSGGGRNVRRG  
GMRLGNSRRPAITVAPGEDEEEI IENMSHEVNNLGAKIQESKRRLAIKDELRLKLTAKV  
LLETSLPKLTLEIEGCDTREETKLIPELRVXSEVSAEDLEKAKELEARVEECKSNMKS  
CVELADRLEKEVSKLQKNILDAGGPRLLKQKAKCGKILSELDEREKALKSAKVGIVSSEK  
ALAKAKTAKDVLCRQLEKCEELLNEKTTEFKTLES DALAVIQAYDKVKEIEEEKRTLLET  
ATKEAEDLKKSESEVQLIEIDLIGQLDALKKQIAECQKTKAHWEKEISRLNKVEDDFEID  
DANEDGDI EQSDSDVDDDDNHASSADIEMTDAEERSSEKKALTKSPSSTSLVLPYEALE  
KYDREELKETISVLQNERNVLAKNANMGAI AEYRKKESDYLARIDELDQVTEQRNDARKE  
HEELRRQRLEMFMDGFGIITLKLKEMYQMITLGGDAELELVDSLDPFSEGIVFSVRPPKK  
SWKNI SNLSGGEKTLSSLSLVFALHFKPTPLYVMDEIDAALDFKNVSI VANYIKERTKN  
AQFIIISLRNNMFELADRLVGIYKTQNASKSIAINPKCFVSGHKTRSSTTSSTVPLADAS  
NNFPSIHSSSTYKRTNQIDH

>comp9340\_c0\_seq1; 362 295 909 LEN=995; translated  
MEGDWEKLAEDYNGDSNNPESGGLLVAEVDCTDDSVAGGKALCNWFGIESFPPTLRYGER  
THDGRNELQHREFDDYNGKRSYHELVSFKEILLPMLCSPGNPDGCADDAVRDAVNEYNR  
LSVSELKASIKHLKEKLERAEAIYRGEVERLTADYNDAEEAKRTAIDRVASSGGDLFIAR  
QTLFMFKKQQQKTSRQQVKSDEL

>comp9341\_c0\_seq1; 827 93 2225 LEN=2353; translated  
MNLSDIFQLRFLCLLLFAIARSFSPHLRAGKLTSESVPFRENVGRRSTRALLSPRRKS  
QIVCKPHCADQLLSRHAKSRDEYDDDDDI SLDDKDWRAFRAKLVMGEKNP SDVDDDRKS  
SKLGKSSSFENSSDSGDDIYADQENNEPI SDDGDLGIGSIFRDEFVQGSQSDSKGETKM  
EELTPLDPSQWAYDSGDVIEQGAVILGGIEQEFGLRQQYFHKTIVILVLDHSPTFTKGI  
ILNRPTDLTLEDNINPGLKWRVWFGGDVEGLHARHPDI ICLHSLKDERATKASIPVMKDI  
RWTTFDNAKLVKAGIANVSDFWVFGYAGWGP NQLKGELERN SWYMAATDSQTL LKELA  
RQSEGADPRDAGLSTWTLLMNMIGRSETARQYYVQFDDLMLKEWAF SNLLSEAAGGGAGR  
QQRDPEEFNTNPELVEQLTSLLEKRPDPPIEGALVSASGVDRSPFLLQKQYHKSIVLIL  
KEDKLATVGVILNRVSSKIGIDIQVNDLKTGGKVVVTIPMRFGGPYSIQGEESLLWIHRSE  
ALRKASIGHVPVGNESNGIWKCTTEDVMKAVGQGIAPPEDFIVVSGVSIWPKQEGAEQGI  
QGELELGNFRLVSESVRDDMWSTLLKQQVLLKKTNFIESLRLSEEAW SFAESDSAKKKEM  
LSPMSGLGENFDEEDDSL VFKSDYKVSRLSDDALRGWCAVFL LGMTNFEI

>comp9341\_c0\_seq2; 362 93 1044 LEN=1044; translated  
MNLSDIFQLRFLCLLLFAIARSFSPHLRAGKLTSESVPFRENVGRRSTRALLSPRRKS  
QIVCKPHCADQLLSRHAKSRDEYDDDDDI SLDDKDWRAFRAKLVMGEKNP SDVDDDRKS  
SKLGKSSSFENSSDSGDDIYADQENNEPI SDDGDLGIGSIFRDEFVQGSQSDSKGETKM  
EELTPLDPSQWAYDSGDVIEQGAVILGGIEQEFGLRQQYFHKTIVILVLDHSPTFTKGI  
ILNRPTDLTLEDNINPGLKWRVWFGGDVEGLHARHPDI ICLHSLKDERATKASIPVMKDI  
RWTTFDNAKVRNLSKEMX

>comp9341\_c0\_seq3; 503 147 1241 LEN=1369; translated  
MAATDSQTL LKELARQSEGADPRDAGLSTWTLLMNMIGRSETARQYYVQFDDLMLKEWAF  
SNLLSEAAGGGAGRQQRDPEEFNTNPELVEQLTSLLEKRPDPPIEGALVSASGVDRSPFL  
LQKQYHKSIVLILKEDKLATVGVILNRVSSKIGIDIQVNDLKTGGKVVVTIPMRFGGPYS  
IQGEESLLWIHRSEALRKASIGHVPVGNESNGIWKCTTEDVMKAVGQGIAPPEDFIVVSG  
VSIWPKQEGAEQGIQGELELGNFRLVSESVRDDMWSTLLKQQVLLKKTNFIESLRLSEE  
W SFAESDSAKKKEMLSPMSGLGENFDEEDDSL VFKSDYKVSRLSDDALRGWCAVFL LGMT  
NFEI

>comp9343\_c0\_seq1; 484 396 2596 LEN=3080; translated  
MTMFKLKKCFGKRKHQ TICEVAVVPSSPEPHSADDSREASNEIADTSEQECDDDDQCDQAI  
HLSHSTTSSTDASTIDTL DDEENDARTPDCERKPAALSANSSPLLMIGLDSMVNVVSYLD  
PRETLNLLT MPLCKQWRLSYTCDQELWRTICL TEPFSADIPSYASNSSDGSTPRI ISCY  
DDIDNDSSSPLENMNDNVFGEFRLIFTSFVRCMNYLDRVQNINGGGGRKLWSE RSHNRGS  
SHSFPTFGVTD SLKKFLIKRKEHNQLRSVIGNGKGAMSSIPIGISSDGQEI QVSDAHS PF  
NDCDYGCPESSLCHCVILLRNIREL FSSCFGISHYFLCTDSXSSKTETKVKDLEKPKYGN  
SMITSRLFSSHLNLPKSF AIYSIVNWMVAHPNVKGIQIMCIQALPSLLEDEQQRVTGQRV  
GLVEVILSAMRFP ECVELHIAVFHSIVLLARPLGGREGMLFDNSMADSTQSIGLTSRIE  
LADSVSLASRCGGLPSLERKNRG SNTSRSTGLANHRCINVTGTTGV SLLVDSMQRFSSCE  
KLQSMACWALVNVALVPAQKNMFM RIGGIEAILNAMESHEKVF DVQFRALFALINLVVPS  
RPSDF AIDRSMNGMEATRLEKAVL TEFGPKIAQLSVTAMKNFCSSETILNRGCLV VHNLS  
QSPAFMSTLLET PHCFQILEWCVTNHSTDSVLRRSVSSTIARMQNYLDEHPEQQRFAVS  
LEQQNHEVLDLLW

>comp9343\_c0\_seq2; 553 396 2450 LEN=2934; translated  
MTMFKLKKCFGKRKHQ TICEVAVVPSSPEPHSADDSREASNEIADTSEQECDDDDQCDQAI  
HLSHSTTSSTDASTIDTL DDEENDARTPDCERKPAALSANSSPLLMIGLDSMVNVVSYLD  
PRETLNLLT MPLCKQWRLSYTCDQELWRTICL TEPFSADIPSYASNSSDGSTPRI ISCY  
DDIDNDSSSPLENMNDNVFGEFRLIFTSFVRCMNYLDRVQNINGGGGRKLWSE RSHNRGS  
SHSFPTFGVTD SLKKFLIKRKEHNQLRSVIGNGKGAMSSIPIGISSDGQEI QPSSKTETK  
VKDLEKPKYGN SMITSRLFSSHLNLPKSF AIYSIVNWMVAHPNVKGIQIMCIQALPSLLE  
DEQQRVTGQRVGLVEVILSAMRFP ECVELHIAVFHSIVLLARPLGGREGMLFDNSMADS  
TQSIGLTSRIELADSVSLASRCGGLPSLERKNRG SNTSRSTGLANHRCINVTGTTGV SLL  
VDSMQRFSSCEKLQSMACWALVNVALVPAQKNMFM RIGGIEAILNAMESHEKVF DVQFRA  
LFALINLVVPSRPSDF AIDRSMNGMEATRLEKAVL TEFGPKIAQLSVTAMKNFCSSETIL  
NRGCLV VHNLSQSPAFMSTLLET PHCFQILEWCVTNHSTDSVLRRSVSSTIARMQNYLDE  
HPEQQRFAVSLEQQNHEVLDLLW

>comp9344\_c0\_seq1; 365 238 1212 LEN=1577; translated  
MHVFKYFLSYALIATTAQALSDDRSAIESSVALISPLVSLQTSPELLPQLSSILVSASIESEVTDKNPFFPLKVVNDPNTYSALSAPPNSANSESTPLILVLHGAGKNDKIDLLDLADPSGEHSLIPLSLIASHRAPPNLLDNFCVLAPYSFGKPSFYNDNRGKILQFVDWAIRNQNT EELPLRFDPNRIILFGFSDGATVAVELLTTKRFAAGVICSYGYSGKTLPSQALERLSDIP IWFVFSKDDVIFDVRNSDRLVQQLESVNTITKNGSTDGSILKYSRFDKDPENLPSRVRGH SMGITASRSSDLYDWMIQQRLAYP

>comp9345\_c0\_seq1; 171 1 1176 LEN=1176; minus strand; translated  
XYGMHYSTLLLVTNFYRGFPPPGAADPPHRKDGPTTHPRGKRPVSEAPQEEVVVPEVVAA FEPVVRTGGRFGVELVLERVKGGRKVLAAAGVADRPLGPDLRPPLPRRGEQPGVVPQARE VVHLVDDGLAQHPVRLVADRKAAAGLVVLGRQRAAAAVVQRRRRRRRRPRAAAVAHDAGR ADGKDFPPKAPDLSLQOQXAPAEPDHLAGDPPEELPPLRQCLLLALQAALLGPAVEHPGV GHEDRPAVGHGSAEGGDPLEAAQGDPPAQDAPEARRGGGRGGARENSPKAPAAAAPHHEG VPEGEGHRRHSQAEAEELLARAQLAPLLPEIDPPPCCVGAADRRGLGVAPGIALAVARL PLGRGGPLGTVATEVLRVHGARRKDQVLLLLLL

>comp9345\_c0\_seq3; 256 78 1013 LEN=1120; translated  
MADSIGPMDAILDDALDELEEEEDGSSAASQGGNAGIHHRERTDQGRPGAGPLPLSHPGH KHRVFPFDPDRPPAAPPASGRCDRERKSHPLHAPDAGRLLPAAPLDASAGGALGGDDDD DERLLRGLFEGLVAAAGGEAPGEGGLPGGPGASAGTDKGGEGGFSPDDLVDGLLKELLSR DLMYEPKMEVADRFPWLERHKDDKDLPFGEWDRRNOQYECFRNLVGAYEEQAGNDSDAK NDHNNNDES DNTRILELLQQIQEHGPPPAEILRAIAPGLEPDGDGFPDIAGGFPPFPGGG GIPGEDDCRVM

>comp9346\_c0\_seq1; 489 176 1534 LEN=1607; translated  
MPSTSLSPNIRLIARVNKSLSLGTLPSFSASFLSKNNNDQSNYWCSRMLFSSASKADPKQ RPIFVAATKQHVGKTTSSLAVALSGLKRFDTVGFIKPVGQQHVKVETNDETETSIRVDKD VVLIKEHFDDHDIDYKHMSPVIIPSGYTRKFVDGEISTIDQOREVENAFEYISSNSAVTL IEGTGHCVAVGSIVGLNNAKVASILGADMILVANGGLGKAQDQLELNRVLCQNNVRIAGV IINKVIPEKYEQT KHYLAKAMMQTWEIPLGCI PDRPYLGCPALIDLRLFKTKLIIGDS DENRFRHYTMSDINLVTTSLKRFL ENIKSRKPSRTLYICHVTRDDLILGFLDEYQRRQQD PSGSPFEAALLVCGRQD TYILSAEVEARIREMDGDGPSIMLVEGTTHAAMTKIHRFTPKL NIDDRSRVGV AIDHYEPYIDFDLLLERTERE

>comp9346\_c0\_seq2; 261 1303 1734 LEN=1807; translated  
MSDINLVTTSLKRFL ENIKSRKPSRTLYICHVTRDDLILGFLDEYQRRQQDPSGSPFEAA LLVCGRQD TYILSAEVEARIREMDGDGPSIMLVEGTTHAAMTKIHRFTPKLNIDDRSRVG VAIDHYEPYIDFDLLLERTERE

>comp9346\_c0\_seq3; 261 279 710 LEN=783; translated  
MSDINLVTTSLKRFL ENIKSRKPSRTLYICHVTRDDLILGFLDEYQRRQQDPSGSPFEAA LLVCGRQD TYILSAEVEARIREMDGDGPSIMLVEGTTHAAMTKIHRFTPKLNIDDRSRVG VAIDHYEPYIDFDLLLERTERE

>comp9348\_c0\_seq1; 428 1 1435 LEN=1576; translated  
XHHRDP SAAHHSQNIQLLAGASQSTPQIPHNTDRIHSVDLPLLKPNPLRVGGETAGNER YVADCTNSIRVPAGSSGGALPCSVLSISKGGQSLWKDQLPGSTCCAIAASKSWLVVGTSD GCLQIYGTSP TLGWQSASAFRSHPPFVLGRPIVALHLREGGAQTELLVVSSDGRFVYVL EPRLKLLYKGSLLPAMTHVLLSADLQTDLYLPKLARIQLTETNRLLLLLLSLRSASTPGRN SGPDEGRAGRGTNQAPSVGAGGSLQGFVYDLESELWMRVADSRFVLSDFYNSLPSFSSLK KQSTTDGPLSKLDDYVRMGAGSSSLQRSRRARSILGNSVSFQTSTVTTT SRQNDDEANND VDSRSHCEDRMACALALGVSSEFEFEWFSMYVKILALTGNEVLLRLVIDMLMGKYPGASN GEACNSTCWMLSESPMVLTFDRVKLVSTVVIPEMSKNRALQRLTNEIAVEVELLQKK

>comp9349\_c0\_seq1; 566 156 1838 LEN=2611; translated  
MTSKDCDEKAYRTGKWI PKGVNPWSAYKLLSTFP IWEFYTKGKYAKDPKGSIEKYRVIV ARDLERLDSLAAANSLDLRGNGTANRCETGPPSLKKVSAEIVGAIHPSCMEECGAIQFTV LKIVNELDDQRRNGATDNIREEYALCGGFEGDELQMNIALYRLARCLPEATWEEYDGS TNRTLGLDLAERIQRNAEGGGDQKDLPREFLQEWETFLNRF GFDGEDQLFVSCPRYKDRP ELLLQKLR LNAIGSVKDP AVIAKEQLEKRRI VQARHEAAAGSEAEKARSVSPWRPVKRWL ACKRADRKLAKIRKRN EILDHVFWRNAPKLHLTKAFGTIRSWILVVEEGLIEDGMLEQK GDIFHLDMNEVDRALAEQYQRR TQKTVPKTSEQREAKSSSTSITTDWIEIIRPRRAAYDR ALSSKQCPILVDSRCRILRPDPPLASDDPSILVGSPI SPGTATGRVRIVHSVADHSFRPG EVLCAVVTGPAWTP LFASASAVVLQIGGVLQHGALCAREYKPAVSTIDVNSLLADGMV EVNGTTGVVKILENESDGSP

>comp9349\_c0\_seq2; 844 1 2632 LEN=3405; translated



XEMIDPVVAGVAFSANPLNSDRDEMVDSSWGLGESVVDGSSVADRYVLDKLAVEEYGC  
YKHGYKHEYKHERGPAKRPGHRKRPPKLPFGRDLVREASIGEKGIEKRLDRTAGRGVAT  
LPIAPCDPRFRSPSLDAVSI AELAE TVCRVEAAYGRPMDVEWAFVETDTEKDTEKEPPDH  
NGQKTHREKRKLSLFLQARP ITTLYTL DAPFMATAPREARRLYFDTNIA SEATTTKPF S  
RLDMDFWNKATTAMMGVSFGDAEKRVVAIFSEARDAEVLLFNGPTRQYLN LGVALNYASK  
ESMAEFFEMMDPYLASIMTSKDCDEKAYRTGKWI PKGVNPWSAYKLLSTFPIWEFYTKGK  
KYAKDPKGSIEKYRVIVARDLERLDSLAAANSLDLRGNGTANRCETGPPSLKKSVAEIVG  
AIHPSMEECGAIQFTVLKIVNELDDQRRNGATDNIREEY GALCGGFEGDELQMNIALY  
RLARCLPEATWEEYD GSTNR TLGDLAERIQRNAEGGGDGQKDLPREFLQEWETFLNRF GF  
DGEDQLFVSCPRYKDRPELLLQKLR LNAIGSVKDPAVIAKEQLEKRRIVQARHEAAAGSE  
AEKARSVSPWRPVKRWLACRKADRKLAKIRKRNEILDHVFWRNAPKLHLTKAFGTIRSW  
ILVVEGLIEDGMLEQKGDIFH LDMNEVDRALAEQYQRR TQKTVPKTSEQREAKSSSTSI  
TTDWIEIIRPRRAAYDRALS SKQCPILVDSRCRILRPDPPLASDDPSILVGPSPISPGTAT  
GRVRIVHVSADHSFRPGEVLC AVVTGP AWTP LFASASAVVLQIGGVLQH GALCAREY GKP  
AVSTIDVNSLLADGMVVEVNGTTGVVKILENESDGSP

>comp9350\_c0\_seq1; 443 1 1778 LEN=2339; translated  
XQLCETFLFEGNQFVNLKPNKEVLYSYGPFVFLVEGEEIILYVCGEXMMQSDNGEQRLLETTTS  
TTDALPFVDENASPIEAWTGLYSCTLRDYGGKFIANDGDYEDDGGYCIDPRVVADSYNLY  
SDIPDDLPLMNLQFFVSQTEKSTEEKGSSMNLDDAKNYLYGTTMVDHPESTHTHWEI  
LRADLPKSSGTKNDPYKSTSNSDALHFKPYFRTLSATDWN NCFDCCPFND DVDSNGIKA  
DRDYHDGAF LNAYVQVQPRAF AVDHQTDGDI FIVWEGFHKN CNPADMFSAPKMLEWTIGVS  
RLKTQAE DPTCIFA KKEGDES RGYFDVENNFSRCTIPVAIVFKGTRPREVVLPYGGFTVV  
PALQESQEEHKNQYPNREINDSSNPPVRSFLVTIFHVEKGVV KSHIYAMPEGGDVTRNLY  
MRQDVTSTDDVHAFMRMGVWNGGNQKLHYNQOTGRPDHLCHTIFNKGIECMP IATTE DEN  
SVYFNVNGDTEIFL TEAQVTQFCMPGG EVTIDWLN EPMALEKSLVVTGLDVVW NEDHGTP  
ERIFFGCRGEESTGKLG SVDRNGENLRPMMQGDILEM LLYGHANLIQPQRDK

>comp9352\_c0\_seq1; 147 1 1214 LEN=1214; minus strand; translated  
XGLCNAAGLLLLLVELVASHRVATRSFVRSSVLSPARRRSSSPCGLFFSFGPRLAPGGFGL  
AVVFALVLPDPPAARC GP GAHPRRFCASAPAGGPPVQCAPPDDREEDGLDRVGEDP GPQ  
APPEEALPAVRGEDDLDRVPVGVVPGADALLGGLDDPKDVDDR VADYARHQADARVPEE  
AGGHEGLKPLGRRQGVEDDKPGVVADRRADGGGQGPLVEGPD PARPDPPHQGAKALPRVY  
LKDRLAGVNGHEEDPKGPDGERGK DGRHRRRPV PGLRQAGQQCQDPVVGRRDKARQGG L  
QEGKADAPVEAADAPVAVEQGE GVAKAPTVPALVVD RGPQPHEGEHLHDAGGRPRQAS PQ  
GPAPGASEDLGTEGAGETA AEAEEATLPESLPPGSAGGCACGRAX

>comp9352\_c0\_seq2; 124 1 1150 LEN=1150; minus strand; translated  
XGLCNAAGLLLLLVELVASHRVATRSFVRSSVLSPARRRSSSPCGLFFSFGPRLAPGGFGL  
AVVFALVLPDPPAARC GP GAHPRRFCASAPAGGPPVQCAPPDDREEDGLDRVGEDP GPQ  
APPEEALPAVRGEDDLDRVPVGVVPGADALLGGLDDPKDVDDR VADYARHQADARVPEE  
AGGHEGLKPLGRRQGVEDDKPGVVADRLTXGAKALPRVYLKDRLAGVNGHEEDPKGPDGE  
RGKDGRHRRRPV PGLRQAGQQCQDPVVGRRDKARQGG LQEGKADAPVEAADAPVAVEQ G  
EGVAKAPTVPALVVD RGPQPHEGEHLHDAGGRPRQAS PQGPAPGASEDLGTEGAGETA A E  
AAEATLPESLPPGSAGGCACGRAX

>comp9353\_c0\_seq1; 472 1 1009 LEN=1009; translated  
XATTTAATTTAATTTPTPAVKDEPIEPT EAVPPPAPAPVPTRAPPAAASNEPSTPNPAV  
AVKKEPAEVVFSIPRKISHSSSPATNEASTSPNKRSNS SPTSPLSSPIAKKKKPNPGT  
EAAPTIPLVDDARAARFGLPKGTMLPRSVSDDV LNQGRVLDY LKSLGSVSLINDALNEYD  
DAAQLKGNEIRNKGAYLYGVV KRYMNVDRASGGNASDLPMGRDLTPPVHQRLQKLV RDN  
YCTAEELTKNDKVL SKIRMLSEKDAMGAI EELSTVDRNSIRNFVSYFMGILNRYMRGEPQ  
PQSSSSPGTKASGGGASNGN NKSNSNSNQRNKNNNN

>comp9354\_c0\_seq1; 221 203 598 LEN=1249; translated  
MADNKEIEEVPPEPDMAS AIDRAKPI LAKVSFGSIVGYCSGVALKKAGKLA AVVLGAGFV  
ALQTCASYGYLTIDWDKVKGDAIKKVDTS GDGTFDAGDLK VYWAKLKSLLTANLPNNTGF  
SLGFLYGIKQG

>comp9354\_c0\_seq2; 221 203 598 LEN=1361; translated  
MADNKEIEEVPPEPDMAS AIDRAKPI LAKVSFGSIVGYCSGVALKKAGKLA AVVLGAGFV  
ALQTCASYGYLTIDWDKVKGDAIKKVDTS GDGTFDAGDLK VYWAKLKSLLTANLPNNTGF  
SLGFLYGIKQG

>comp9354\_c0\_seq3; 221 203 598 LEN=1510; translated  
MADNKEIEEVPPEPDMAS AIDRAKPI LAKVSFGSIVGYCSGVALKKAGKLA AVVLGAGFV  
ALQTCASYGYLTIDWDKVKGDAIKKVDTS GDGTFDAGDLK VYWAKLKSLLTANLPNNTGF

SLGFLYGIKQG

>comp9354\_c0\_seq4; 157 203 475 LEN=1810; translated  
MADNKEIEEVPPEDPMASAIIDRAKPILAKVSFSGSIVGYCSGVALKKAGKLAAVVLGAGFV  
ALQTCASYGYLTIDWDKVKGDIAIKKVDTVS

>comp9354\_c0\_seq5; 157 203 475 LEN=1959; translated  
MADNKEIEEVPPEDPMASAIIDRAKPILAKVSFSGSIVGYCSGVALKKAGKLAAVVLGAGFV  
ALQTCASYGYLTIDWDKVKGDIAIKKVDTVS

>comp9354\_c0\_seq6; 157 203 475 LEN=2071; translated  
MADNKEIEEVPPEDPMASAIIDRAKPILAKVSFSGSIVGYCSGVALKKAGKLAAVVLGAGFV  
ALQTCASYGYLTIDWDKVKGDIAIKKVDTVS

>comp9354\_c0\_seq7; 157 203 475 LEN=1922; translated  
MADNKEIEEVPPEDPMASAIIDRAKPILAKVSFSGSIVGYCSGVALKKAGKLAAVVLGAGFV  
ALQTCASYGYLTIDWDKVKGDIAIKKVDTVS

>comp9354\_c0\_seq8; 221 203 598 LEN=1398; translated  
MADNKEIEEVPPEDPMASAIIDRAKPILAKVSFSGSIVGYCSGVALKKAGKLAAVVLGAGFV  
ALQTCASYGYLTIDWDKVKGDIAIKKVDTSGDGTFDAGDLKVYWAKLKSLLTANLPNNTGF  
SLGFLYGIKQG

>comp9355\_c0\_seq1; 236 136 654 LEN=951; translated  
MFGSYEGPSAKKKEKKNRPPKGFAQLPEWMDTTPHNTLDIEGDAAKRFSERQQAMIYKD  
LADKADLEEKNGLSNKYRKGENGELIDNATGKTIDPKFDSRFSQDKKGDWFLDGKPIFGA  
QYVVSIAAGNSYGHKDVSWKKPDWMKVKLNATKKAAMKRGSYLEKKSFPVPSA

>comp9355\_c0\_seq2; 176 136 564 LEN=1184; translated  
MFGSYEGPSAKKKEKKNRPPKGFAQLPEWMDTTPHNTLDIEGDAAKRFSERQQAMIYKD  
LADKADLEEKNGLSNKYRKGENGELIDNATGKTIDPKFDSRFSQDKKGDWFLDGKPIFGA  
QYVVSIAAGNSYGHKDVSWKKPDW

>comp9357\_c0\_seq1; 137 139 515 LEN=515; translated  
MAQGGGKLGKTGARKKSAGSQRRKNVRGAKKQNKGGSKVETRNGIVEATKMINKKNERL  
IAAKAHNGHTKFKYLKELTEKGTYPVQRATPTNRMALCSPCRRQSLRLLTAILFLYSSQA  
QTRANX

>comp9357\_c0\_seq3; 216 139 486 LEN=869; translated  
MAQGGGKLGKTGARKKSAGSQRRKNVRGAKKQNKGGSKVETRNGIVEATKMINKKNERL  
IAAKAHNGHTKFKYLKELTEKGTNESQRQVSIRNKKQKPTKLSDRLLQIDKLGR

>comp9358\_c0\_seq2; 155 107 235 LEN=863; translated  
MSDDSKKPAPTFKEIMNKSAAASAIRGGTAGAVAMGANVAALMW

>comp9358\_c0\_seq3; 247 107 979 LEN=1183; translated  
MSDDSKKPAPTFKEIMNKSAAASAIRGGTAGAVAMGANVAALMWMRTTVNYQYRNGGTFGLG  
ALRHLIYADGGIPRFYRGVLPALVQGPMSRFGDTAANTGVLTLLNQIETTKDLPVAAKTVA  
ASAAAAGWRIFLMPVDTVKTTMQVTGKFSAVTDKVKANGPLALYNGALAAASATFVGHYP  
WFFTYNFLSATIPKQDDQLSELGRRAILGFCSAVSDTCSNSIRVCKVYKQSYPEQITYT  
QVVRNVIQESGMSGLFFRGLGTKILANGMQGILFSILWKHFEEALFPKKK

>comp9360\_c0\_seq1; 379 63 662 LEN=960; translated  
MKLTALILAAALPAATSFTFSIAQGLPIRRSVAKFTDDKVPEDAVTKAAEAALMAPNHFL  
SEPTRMYDLGPEAVAKITALNEDKAKMFAGVPGWVFSVKTEHLDENGGISAKLALEDHA  
TVACAAQNFMQSLAEDGVGTKWMTGALGVDPTIEIMKIAGAPEDEKMIIGVIWYGMPAKPLS  
DITAPKRKISVDDALTKVA

>comp9361\_c0\_seq1; 315 323 1411 LEN=1520; translated  
MTENEKITIRYPDDFHHHCRDGPPTASVLKHAYPRFRRLMMPNLKPPVTTIKLALLEYKE  
RIMSALAQNGQDPAYFQPLMTLYLTDNTDPEEIRKAAAMKNSDGTPTIIACKYYPAGATT  
NSAFGVSNVKAIYPVLEAMQEVGMMLCIHSEVTHADIFEREVPVIEEIMKPLVKDFPTLK  
MTMEHISTKEAVEYVMNEAPSNIKASITPQHLYNHNHMLVGGIRPHLYCLPILKAEIHR  
KALVEAATSGLPKFFLGTDSAPHPYAKFSACGCAGVFSAHCAVEIYCQVFDEAGCLDKL  
EDFCSSWGADHYGLPRNTEMTLERKPKWVPVTYEFGRDKVTPLKFGDEVQWTIVSSFDK  
KE

>comp9361\_c0\_seq2; 272 323 1521 LEN=1630; translated  
MTENEKITIRYPDDFHHHCRDGPPTASVLKHAYPRFRRLMMPNLKPPVTTIKLALLEYKE  
RIMSALAQNGQDPAYFQPLMTLYLTDNTDPEEIRKAAAMKNSDGTPTIIACKYYPAGATT  
NSAFGVSNVKAIYPVLEAMQEVGMMLCIHSEVTHADIFEREVPVIEEIMKPLVKDFPTLK  
MTMEHISTKEAVEYVMNEAPSNIKASITPQHLYNHNHMLVGGIRPHLYCLPILKEDNFR  
VGSEDNTGKKEHKQHSCLVCDRLDATTSLQKAEIHRKALVEAATSGLPKFFLGTDSAPHP  
YAKFSACGCAGVFSAHCAVEIYCQVFDEAGCLDKLEDFCSSWGADHYGLPRNTEMTLE

RKPWKVPVTYEFGRDKVTPLKFGDEVQWTIVSSFDDKKE  
>comp9361\_c0\_seq3; 207 323 985 LEN=1809; translated  
MTENEKITIRYPDDFHHHCRDGPPTASVLKHAYPRFRRLMMPNLKPPVTTIKLALLEYKE  
RIMSALAQNGQDPAYFQPLMTLYLTDNTDPEEIRKAAAMKNSDGTPTIIACKYYYPAGATT  
NSAFGVSNVKAIYPVLEAMQEVGMMLCIHSEVTHADIFEREPVFIEEIMKPLVKDFPTLK  
MTMEHISTKEAVEYVMNEAPSNIKASITPQHLYNRNRRY  
>comp9361\_c0\_seq4; 207 323 985 LEN=1919; translated  
MTENEKITIRYPDDFHHHCRDGPPTASVLKHAYPRFRRLMMPNLKPPVTTIKLALLEYKE  
RIMSALAQNGQDPAYFQPLMTLYLTDNTDPEEIRKAAAMKNSDGTPTIIACKYYYPAGATT  
NSAFGVSNVKAIYPVLEAMQEVGMMLCIHSEVTHADIFEREPVFIEEIMKPLVKDFPTLK  
MTMEHISTKEAVEYVMNEAPSNIKASITPQHLYNRNRRY  
>comp9362\_c0\_seq1; 259 312 1229 LEN=1575; translated  
MARSIWPSFTTYIVTIALLVVEAEAFTTAPECRRITNANKNIFGVQQLSMVAQMPTSNVT  
IDDMMLADSVFVDEVNVEDAKYKDEDEEIEDLSTVDTMEIKKRLDLLPRMKGTPPEEYNM  
VESYVNTLEDRTYTPVQTLDFLNLAMSGEWQLLFSTNLGSMRMNFRLESELFQRIEANSLN  
GTVVNEATWSLAEDHTDPTPATSFFAFGKFSIKCSYSINQGARMVMELNDHVIELSKGSK  
VPKDPEKLVGMLYRAIPTELFDPNHAMDTTYLDGDLRIVRMAGPKFESVRDIFIRRSI  
EINPV  
>comp9363\_c0\_seq1; 883 1 2229 LEN=2515; translated  
PTLLNTAPQPPEESMEQEARRISLSQKQRQLSIRKLANASWSTPLPDIQEDECTLSDT  
PQPPEDESMENFSEIQEEGLRTSETIFQDLNEPAENQEEWLAASEVMHQSLDETLGNQDL  
RLGLALKLRPSLPEDVTNEIKRNFVVRKTKQLRERKKLIDGVKKRRELREPLGQLNQNTS  
PPSTTSKTDVSKNHFNYEREAESNDNVTRGTYGSICKTDDAPSSKPNNTNARNKIQKLLG  
EDMEKLEMI IQLQNDLYASKMECARLQMDKRGLRSKMVTDAETSLLRQQVSDLTSETQS  
LREQLSKRKKQSEKQYENHRKDRKFDNSTELIAQAKIGLTKALNDASNLEAKIDDLEIT  
VDDRERRLDDLYETIQRTETIEMMNLKDKDITLLRLSDNERQKLEEEVEALISANDGE  
DTGETLRLRERERETWLWDREQQIEDARRELEDEDNRNLEREKFRHRQELDMLTEYADKK  
KQIEEKQREMKDFVNQQIDDMMDVNHKLQERLANEREDCLEREEQDETIASLELEIDL  
QTQLATQNRDEKELIYLRAAVESTKEELSDALAQNKKLEGIINEHGKIKIGTKKKKTSKGG  
GKKKKSSQKKSSKDKSSKKSSKKNLSKKKSSKKTSSKMTSSKKTSSKKTSSKKTTPQKN  
SKLKKSSKMPKSSDKNRGKKEAKKSKTFSKKKSKKTRKRRGSSDSDSLAVLKSVR  
HVRNDDTWSSQIPVSIICSRMQ  
>comp9364\_c0\_seq1; 390 198 1363 LEN=2600; translated  
MNSHDGCLAEKKGITTLPTSSSPNXVSKDRSGKPVVEILLSVIQTYEKEISQALLGLS  
TMLDAASEAEALARSRKQWNSIKCHGKLFSSKIEQRIQRTASCLEHDEHILKLLGNVSY  
ISALPDGEVYGDDESNDTEPIEEKPSLRTGNGTNYRIPLRNKKVIDESETHSYDSATQI  
WAHLVRDWTSEGRAIRRVIIDWCCQQMEIHCQNSSATVLPVPGSGMGRLAYDLYRRGFIVE  
ANELSPSMAVAASSILRNQVSGFFHPYVLDGMANEVDSKRRFDSISFPDVP IQTIVSTGG  
NSGMPNDCEGCGSLSYTVGDFVGNDDFYRRQRVAQF DAVVTCFFIDTGMLSVDLHMNC  
SLSVFKLSLNF FITCSNQYLRIFGNNT  
>comp9364\_c0\_seq2; 370 198 1396 LEN=2515; translated  
MNSHDGCLAEKKGITTLPTSSSPNXVSKDRSGKPVVEILLSVIQTYEKEISQALLGLS  
TMLDAASEAEALARSRKQWNSIKCHGKLFSSKIEQRIQRTASCLEHDEHILKLLGNVSY  
ISALPDGEVYGDDESNDTEPIEEKPSLRTGNGTNYRIPLRNKKVIDESETHSYDSATQI  
WAHLVRDWTSEGRAIRRVIIDWCCQQMEIHCQNSSATVLPVPGSGMGRLAYDLYRRGFIVE  
ANELSPSMAVAASSILRNQVSGFFHPYVLDGMANEVDSKRRFDSISFPDVP IQTIVSTGG  
NSGMPNDCEGCGSLSYTVGDFVGNDDFYRRQRVAQF DAVVTCFFIDTATNIYEYLETIR  
KLLRPRTGVWVINGPVQWHHNAVLRPSVDELKDLIEAFGW  
>comp9364\_c0\_seq3; 486 198 1421 LEN=2913; translated  
MNSHDGCLAEKKGITTLPTSSSPNRFPRIGNNCNAVFFGT FVPLVFGVLAKLLIFLW  
KGNLFSQRSLINEPPSAPLLPSGPSTVPVFLRDVNSGKPVVEILLSVIQTYEKEISQA  
LLGLSTMLDAASEAEALARSRKQWNSIKCHGKLFSSKIEQRIQRTASCLEHDEHILKLL  
GNVSYISALPDGEVYGDDESNDTEPIEEKPSLRTGNGTNYRIPLRNKKVIDESETHSYD  
SATQIWAHLVRDWTSEGRAIRRVIIDWCCQQMEIHCQNSSATVLPVPGSGMGRLAYDLYRR  
GFIVEANELSPSMAVAASSILRNQVSGFFHPYVLDGMANEVDSKRRFDSISFPDVP IQTI  
VSTGGNSGMPNDCEGCGSLSYTVGDFVGNDDFYRRQRVAQF DAVVS  
>comp9364\_c0\_seq4; 513 198 1559 LEN=2796; translated  
MNSHDGCLAEKKGITTLPTSSSPNRFPRIGNNCNAVFFGT FVPLVFGVLAKLLIFLW  
KGNLFSQRSLINEPPSAPLLPSGPSTVPVFLRDVNSGKPVVEILLSVIQTYEKEISQA  
LLGLSTMLDAASEAEALARSRKQWNSIKCHGKLFSSKIEQRIQRTASCLEHDEHILKLL

GNVSYISALPDGEVYGDESDENDTEPIEEKPSLRTGNGTNYRIPLRNKKVIDESETHSYD  
SATQIWAHLVRDWTSEGRAIRRVIIDWCCQOMEIHCQNSSATVLPVPGSGMGRLAYDLYRR  
GFIVEANELSPSMAVAASSILRNQVSGFFHPYVLDGMANEVDSKRRFDSISFPDVP IQTI  
VSTGGNSGMPNDCEGCGSLSYTVGDFVGNDDFYRRQRVAQF DAVVTCFFIDTGMLSVYD  
LHMNCSLSVFKLKSLNFFITCSNQYLRFIGNNT

>comp9364\_c0\_seq5; 363 198 1225 LEN=2632; translated  
MNSHDGCLAEKKGITTLPTSSSPNXVSKDRSGKKPVEEILLSVIQTYEKEISQALLGLS  
TMLDAASEAEALARSRKQWNSIKCHGKLFSSKIEQRIQRTASCLEHDEHILKLLGNVSY  
ISALPDGEVYGDESDENDTEPIEEKPSLRTGNGTNYRIPLRNKKVIDESETHSYDSATQI  
WAHLVRDWTSEGRAIRRVIIDWCCQOMEIHCQNSSATVLPVPGSGMGRLAYDLYRRGFIVE  
ANELSPSMAVAASSILRNQVSGFFHPYVLDGMANEVDSKRRFDSISFPDVP IQTIVSTGG  
NSGMPNDCEGCGSLSYTVGDFVGNDDFYRRQRVAQF DAVVS

>comp9364\_c0\_seq6; 486 198 1421 LEN=2828; translated  
MNSHDGCLAEKKGITTLPTSSSPNRFPRIGGNNAVFFGTFFVPLVFGVLAKLLIFLRW  
KGNLFSQRSLINEPPSAPLLPSGPSTVPVFLRDVNSGKKPVEEILLSVIQTYEKEISQA  
LLGLSTMLDAASEAEALARSRKQWNSIKCHGKLFSSKIEQRIQRTASCLEHDEHILKLL  
GNVSYISALPDGEVYGDESDENDTEPIEEKPSLRTGNGTNYRIPLRNKKVIDESETHSYD  
SATQIWAHLVRDWTSEGRAIRRVIIDWCCQOMEIHCQNSSATVLPVPGSGMGRLAYDLYRR  
GFIVEANELSPSMAVAASSILRNQVSGFFHPYVLDGMANEVDSKRRFDSISFPDVP IQTI  
VSTGGNSGMPNDCEGCGSLSYTVGDFVGNDDFYRRQRVAQF DAVVS

>comp9364\_c0\_seq7; 493 198 1592 LEN=2711; translated  
MNSHDGCLAEKKGITTLPTSSSPNRFPRIGGNNAVFFGTFFVPLVFGVLAKLLIFLRW  
KGNLFSQRSLINEPPSAPLLPSGPSTVPVFLRDVNSGKKPVEEILLSVIQTYEKEISQA  
LLGLSTMLDAASEAEALARSRKQWNSIKCHGKLFSSKIEQRIQRTASCLEHDEHILKLL  
GNVSYISALPDGEVYGDESDENDTEPIEEKPSLRTGNGTNYRIPLRNKKVIDESETHSYD  
SATQIWAHLVRDWTSEGRAIRRVIIDWCCQOMEIHCQNSSATVLPVPGSGMGRLAYDLYRR  
GFIVEANELSPSMAVAASSILRNQVSGFFHPYVLDGMANEVDSKRRFDSISFPDVP IQTI  
VSTGGNSGMPNDCEGCGSLSYTVGDFVGNDDFYRRQRVAQF DAVVTCFFIDTATNIYEY  
LETIRKLLRPRTGVWINVGPVQWHHNAVLRPSVDELKDLIEAFGW

>comp9364\_c0\_seq8; 363 198 1225 LEN=2717; translated  
MNSHDGCLAEKKGITTLPTSSSPNXVSKDRSGKKPVEEILLSVIQTYEKEISQALLGLS  
TMLDAASEAEALARSRKQWNSIKCHGKLFSSKIEQRIQRTASCLEHDEHILKLLGNVSY  
ISALPDGEVYGDESDENDTEPIEEKPSLRTGNGTNYRIPLRNKKVIDESETHSYDSATQI  
WAHLVRDWTSEGRAIRRVIIDWCCQOMEIHCQNSSATVLPVPGSGMGRLAYDLYRRGFIVE  
ANELSPSMAVAASSILRNQVSGFFHPYVLDGMANEVDSKRRFDSISFPDVP IQTIVSTGG  
NSGMPNDCEGCGSLSYTVGDFVGNDDFYRRQRVAQF DAVVS

>comp9367\_c0\_seq1; 252 1 1418 LEN=1418; minus strand; translated  
XPENQDILELLKKKIATQGLDIRDAKESNQGRSMMGKLGRRARQRLIRDIVEAMDDVNAL  
NFRQIQSSIFFLTGYESYLLAKVVEVLKIALDSFYLGQVARVFDRVVPDLNVSRTKR  
KMKKSRKRELYQILKYAFRNQNVARIVVQNLEFGFDFESHWFDKVCNSRWYDARGQFPMS  
ENITSSHDLVKKFWKRVPNRFAAQNLPAGLNEFISSKRHQFGTHIGRMITNEFRVENRLP  
VDESIVYSFVVSPIPTMINSQVHVLRQLAKHWNVDLAQPFGNWTHHPMEQLDPFRTRMF  
YIPNVCIVLSSLRGRNKWDIDVLGPFIFKQCQLPTSSTAKECLNLAKEMRSKI IHEL CAG  
VISIKNPLSSWLKAIQESCIQIEKDSKAIYEEVTGVEIGLRFGFDLITQVSWKVPPDAEL  
EHAISLHLQKYPGEVVTQRNIRALLSVTPRSSRTMLGLSKLDELGSKPMRV

>comp9368\_c0\_seq1; 398 140 1570 LEN=1718; translated  
MILPSTQTKLFFSSKMDLPGKPLRPLKRRITTVDPDDLIGVDEVQGRTRNTKTKRKRKT  
GAVTPSPSSPIRMKKKSVRWGDRKTVLSSFNPGDLWYTADNYNAFMLDRISSIEAHRSTN  
HSRTILTNDNNSFSRKHCI RGLEAFQENDSNKIYNSRKKLHYSTIFTEQARQKMMGINK  
PERYRSLVALRSDMALRRAQELAAHDEREVYAFRTRSSMSQYSSVDNPSNLRRIRMQELK  
SIPNDRSALS DLTRQEYLN SNGRSTLENGVGSIKTRHNFSPIDIIGSCDSSVISVSTASS  
IKSMESESSADSLFSEKILELQQRNARRLMEIYYPNRYQTGEDDVKKLFRFSNRQRVVG  
DIPSGTRCNP IRAAPSTFAKSTVGVNTPFRSNAMTVGDT SNEITSSAKIIMMEMQRRRRF  
QENFQQQLQEVHEL TNTRPIFINHGSAESNVTRNHQLTTSFFESSTIPATPASNLW

>comp9368\_c0\_seq2; 330 883 1734 LEN=1882; translated  
MALRRAQELAAHDEREVYAFRTRSSMSQYSSVDNPSNLRRIRMQELKSIPNDRSALS DL  
RQEYLN SNGRSTLENGVGSIKTRHNFSPIDIIGSCDSSVISVSTASSIKSMESESSADSL  
FSEKILELQQRNARRLMEIYYPNRYQTGEDDVKKLFRFSNRQRVVGVDIPSGTRCNP IRA  
APSTFAKSTVGVNTPFRSNAMTVGDT SNEITSSAKIIMMEMQRRRRFQENFQQQLQEVHE  
LTNTRPIFINHGSAESNVTRNHQLTTSFFESSTIPATPASNLW

>comp9369\_c0\_seq1; 197 96 971 LEN=1264; translated  
MNI F S I L V V F M C V A H Q S A A F S T G G I P T T G S T R V R Q S N L C S S I G G A N A G E E W N G E V V S S G T  
I R G C I V T Q V G E S V T E W V I Q I D G V E A D L G R F S E A I Y K Q I T N D A K R Q S F Q G F R A G T I P P Q L L  
K T Y R A Y A M D E C A R E T V L E A M Q Q N N I R P F T N A R E E I R I E E V S I P P P K Q K G K K K K K K K K T K I  
S F E E Y E A I T N A I A C H L R A L E E E Q I E K S V G G A I T D Q T Y W T W K Q A S D W Y L E Q V E R D I G D S V E  
Q L D A M R K K V N L V I K R L I E V D R I L V T V G D V P R S K K E E G K T L L A V H P N Y E I S X W  
>comp9371\_c0\_seq1; 1331 279 2765 LEN=3030; translated  
M A Q N S I A S E S L E T A P T V P Q I G K Y G T I L E A A F V D P A Y Q W P S P E G V G K N A I E L Q A S I S M M V D  
D N E S V K T T A S Q K E R M T I P E N P A H A K K K Q T K G G R W W K C C G R S G G S A I L S L A E Y E Q A K K S A  
M K E R K L H Y A H K K A R A R E L R M K E R Y N R V P E G I L I Y R L D T A T Q T I S L M S A T H D K T D Q E T L V R  
E I T L V S A R P S P D K S R R G M V I T G V V K N E N E E G E N A G G N G N D G E G D V K V D V D V D D D A S  
G K S K G T K K K K K K D D V K E I T L V A C E Q R T A I A W L E A I D L M L A N K Q R M G S T F K K S Q K S N G W N  
K K N L S G P E L D Q I E G Q Y L N L A S Y S N K L I R A N K G G K K G G A G S A A G M Y S I E K N T E E G K D E Q Q  
I F E E E A L E S I A K R R A V I K D S W D F Y R M I C S L L R D R R K Y N E V F R K L Q L D P V Y P Y L Q S M T G L N  
D P G E A G Y V N T D K E V I Q R D F D R Y Q Q M T R T Q V A E D L T K Q A E K A L P S L V E I C K A L A G S L G M E E  
V G I G P V K E T Q A A L K K A E K K Y D G D L L K I T D F C R A L L V V K D L P S L L A L L E L A R D S F G P L I R R  
V K L S S L K S D H S P L P G G Y R H C I I N V E L K E H I C E I Q V H L W P M W L V C G V D G F R H Y R H C V E Y N T  
D S F E N A F D A L E G L D R K T M A E L I V M A E E A V A E T P L E S L E W F Q E K F I L D Y F A E V G L F M K H G I  
Y V W A E I T L R T L V R L R T E S P D I G P D H H E T I L L Y T Y L E K V L R S L G Q Q K E A K E I Q K R I L D H D K  
R L R S E K D E A E T S L W D M V M A A P T E A I D M I M D P N K K E R E E E E K L R K E V K A S K R Q W R T I R K E R  
F A F L D A N Q S S G E A T T S G A A S T L G M G S V T T A G Y G R L E E K K L D A D A E D S M  
>comp9371\_c0\_seq2; 468 279 1195 LEN=1195; translated  
M A Q N S I A S E S L E T A P T V P Q I G K Y G T I L E A A F V D P A Y Q W P S P E G V G K N A I E L Q A S I S M M V D  
D N E S V K T T A S Q K E R M T I P E N P A H A K K K Q T K G G R W W K C C G R S G G S A I L S L A E Y E Q A K K S A  
M K E R K L H Y A H K K A R A R E L R M K E R Y N R V P E G I L I Y R L D T A T Q T I S L M S A T H D K T D Q E T L V R  
E I T L V S A R P S P D K S R R G M V I T G V V K N E N E E G E N A G G N G N D G E G D V K V D V D V D D D A S  
G K S K G T K K K K K K D D V K E I T L V A C E Q R T A I A W L E A I D L M L A N K Q R M G S T V S Y T S S E G S F G  
Q Q R F R X  
>comp9371\_c0\_seq3; 840 1 1637 LEN=1902; translated  
X L A C H Q F K K S Q K S N G W N K K N L S G P E L D Q I E G Q Y L N L A S Y S N K L I R A N K G G K K G G A G S A A G  
M Y S I E K N T E E G K D E Q Q I F E E E A L E S I A K R R A V I K D S W D F Y R M I C S L L R D R R K Y N E V F R K  
L Q L D P V Y P Y L Q S M T G L N D P G E A G Y V N T D K E V I Q R D F D R Y Q Q M T R T Q V A E D L T K Q A E K A L P  
S L V E I C K A L A G S L G M E E V G I G P V K E T Q A A L K K A E K K Y D G D L L K I T D F C R A L L V V K D L P S L  
L A L L E L A R D S F G P L I R R V K L S S L K S D H S P L P G G Y R H C I I N V E L K E H I C E I Q V H L W P M W L V  
C G V D G F R H Y R H C V E Y N T D S F E N A F D A L E G L D R K T M A E L I V M A E E A V A E T P L E S L E W F Q E K  
F I L D Y F A E V G L F M K H G I Y V W A E I T L R T L V R L R T E S P D I G P D H H E T I L L Y T Y L E K V L R S L G  
Q Q K E A K E I Q K R I L D H D K R L R S E K D E A E T S L W D M V M A A P T E A I D M I M D P N K K E R E E E E K L R  
K E V K A S K R Q W R T I R K E R F A F L D A N Q S S G E A T T S G A A S T L G M G S V T T A G Y G R L E E K K L D A D  
A E D S M  
>comp9372\_c0\_seq1; 366 493 1488 LEN=2274; translated  
M T V R E A I N E G L D E E M E R D E A V F I M G E E V A Q Y Q G A Y K V T K G L Y Q K Y G E K R V I D T P I T E A G F  
T G M A V G S A L Q D L R P V V E F M T I N F S M Q A I D H I V N S A A K Q Y Y M S G G D L A V P I V F R G P N G Y S A  
G T A A Q H A Q C F A A W F G A I P G L K V V S P Y S S E D A K G L I K A A I R D P N P V M V L E H E L M Y G V S F P M  
S D E A Q S K D F V I E I G K A K I E R E G T D V T I I S Y S K E V G K C L E A A D E L A A K G I S A E V I N L L S I R  
P I D R E T I F A S I K K T G R C V S V E Q G F P Q H G V G A E I A G M I M E T D T F N Y L D A P M E R V T G A D V P T  
P Y A I E L E E Q A F P Q V N D I V A A V E R T T Y R S I A A  
>comp9372\_c0\_seq2; 374 100 1197 LEN=1983; translated  
M F S S S V S R M A L G G R A S A A I A R G K N A F V R G F A T K E M T V R E A I N E G L D E E M E R D E A V F I M G E  
E V A Q Y Q G A Y K V T K G L Y Q K Y G E K R V I D T P I T E A G F T G M A V G S A L Q D L R P V V E F M T I N F S M Q  
A I D H I V N S A A K Q Y Y M S G G D L A V P I V F R G P N G Y S A G T A A Q H A Q C F A A W F G A I P G L K V V S P Y  
S S E D A K G L I K A A I R D P N P V M V L E H E L M Y G V S F P M S D E A Q S K D F V I E I G K A K I E R E G T D V T  
I I S Y S K E V G K C L E A A D E L A A K G I S A E V I N L L S I R P I D R E T I F A S I K K T G R C V S V E Q G F P Q  
H G V G A E I A G M I M E T D T F N Y L D A P M E R V T G A D V P T P Y A I E L E E Q A F P Q V N D I V A A V E R T T Y  
R S I A A  
>comp9373\_c0\_seq1; 220 895 1539 LEN=2094; translated  
M N N K K Q H Q H Q T R S R K K S R G S R K T G S R S A S S P S F W M K M K L P G S R R S L V D Q V P P K V L F S I A  
V S A F C L A V I F L S R F D C F H V H R G V F S N I K D L E Y T G R Q E R V K G Y M D H F F K V Q A K R V L D D E A K  
A L M A A H P H I R L D D L D L D V I L S A E D I G I D G N A L N R M D V A K A G S T G H A D L G G A M T S V G R S A G  
E E L V I Q I T G D M V R S G L A K L A E S M P M P E K K A C S S E  
>comp9373\_c0\_seq2; 220 718 1362 LEN=1917; translated

MNKKQHQRTRSRKSSRGRKTGSRSSASSPSFWMKMKLPGSRRSLVDQVPPKVLFSIA  
VSAFCLAVIFLSRFDFHVRGVFSNIKDLEYTGRQERVKGYMDHFFKVKQAKRVLDDDEAK  
ALMAAHPHIRLDDLDDVILSAEDIGIDGNALNRMDVAKAGSTGHADLGGAMTSVGRSAG  
EELVIQITGDMVRSGLAKLAESMPMPEKKACSSSE  
>comp9374\_c0\_seq1; 342 131 1507 LEN=1680; translated  
MAAAALSTGADGSNQEQESSHAWAENAVQEDADGRIIVAGGDTTADIIRKRRKRL  
EQNDYAQRNRRVVRDMIRYVYVLIDCSRWSRQKDQVLGGTKLDVTMQLLQEFVQYDYQN  
PLSHLGFVILKGGAEVLTNLSSSSKTHKLALKNLSKIGLDGSSGGGFEFSLQNGLEVAGR  
SLGHQPRHGSREIMIVCGALSTCDPGHILTETLPRMAANIRVSTFALAAELHICR KIAE  
VTGGAMGVCLDKGHRDWLLEQCVPPPAIRKELLDGCEMIQMGFPERKKSEIPTLVHAT  
RDTKLLARTAYTCPQCRAMIQELPADCVVCGLKLVLSPHLARSFHHLFPVAPFSELPSPF  
KKKSNETSSSKIAPLPVSSSVLDSKLRSLSTAEATSCFACLRLIGVPSRSNRASGGEDE  
GKEILRFRCPECLNSFCVDCDSYLHDALHNCPGCLQMS  
>comp9374\_c0\_seq2; 271 131 1066 LEN=1786; translated  
MAAAALSTGADGSNQEQESSHAWAENAVQEDADGRIIVAGGDTTADIIRKRRKRL  
EQNDYAQRNRRVVRDMIRYVYVLIDCSRWSRQKDQVLGGTKLDVTMQLLQEFVQYDYQN  
PLSHLGFVILKGGAEVLTNLSSSSKTHKLALKNLSKIGLDGSSGGGFEFSLQNGLEVAGR  
SLGHQPRHGSREIMIVCGALSTCDPGHILTETLPRMAANIRVSTFALAAELHICR KIAE  
VTGGAMGVCLDKGHRDWLLEQCVPPPAIRKELLDGCEMIQMGFPERKKSEIPTLVGQE  
MCACNGGEGNI  
>comp9374\_c0\_seq3; 224 131 1660 LEN=1833; translated  
MAAAALSTGADGSNQEQESSHAWAENAVQEDADGRIIVAGGDTTADIIRKRRKRL  
EQNDYAQRNRRVVRDMIRYVYVLIDCSRWSRQKDQVLGGTKLDVTMQLLQEFVQYDYQN  
PLSHLGFVILKGGAEVLTNLSSSSKTHKLALKNLSKIGLDGSSGGGKYAFREIKLDTDF  
PQKKWKE SMVHRMKNNGRNLNYWCFEMLFMOWNPTRSEFSLQNGLEVAGRSLGHQPRHGS  
REIMIVCGALSTCDPGHILTETLPRMAANIRVSTFALAAELHICR KIAEVTGGAMGVCL  
DKGHRDWLLEQCVPPPAIRKELLDGCEMIQMGFPERKKSEIPTLVHATRDTKLLARTA  
YTCPQCRAMIQELPADCVVCGLKLVLSPHLARSFHHLFPVAPFSELPSPFKKSNETS  
KIAPLPVSSSVLDSKLRSLSTAEATSCFACLRLIGVPSRSNRASGGEDEGKEILRFRC  
ECLNSFCVDCDSYLHDALHNCPGCLQMS  
>comp9374\_c0\_seq4; 173 131 634 LEN=1939; translated  
MAAAALSTGADGSNQEQESSHAWAENAVQEDADGRIIVAGGDTTADIIRKRRKRL  
EQNDYAQRNRRVVRDMIRYVYVLIDCSRWSRQKDQVLGGTKLDVTMQLLQEFVQYDYQN  
PLSHLGFVILKGGAEVLTNLSSSSKTHKLALKNLSKIGLDGSSGGG  
>comp9375\_c0\_seq1; 674 342 2705 LEN=3093; translated  
MPPPIASTPTRRREAGWRDSSHSHGHGRGLSYPGDYDVMSPNPYGSASSMNRGPRPPAPGS  
ASAPYHYDPQGPMPSPRGPPGPPGPDYWYASPPYNSSEHPHPPHPPHANNPPPSNHRGG  
GAHFWGPPPSLHDGYRGGPSHESLRGAPNGHTPHPNQHPHRTPPRRPYPGDQVGLSEPT  
ISPSSSGEHHSLVHHHQKDFSPSPPGATGRQAPGNRGVQVSVSASADSEEATTLGSSS  
AAANTVTPNKGGRNDASDAEDAEMGDGDSGSKQGTDKKGDPLRVLADVSAGMGKKNKNKN  
KSKNKQSNR NAPEPTGETTGATNSREGSDAETAASATSSP SAAASRPSVMPAPTSPLH  
RRFKPSPITPSQTPQVRAVVDKSRTPATTRKHQPIPTSRSHDTASTAETSQPPLQMGW  
EPPPLPHGGSGSSSGEMFPAHPAHEQYSNASQQAGPYRPSAPRRNRPAMHYGGPGEFG  
QPAYPADSPALVERGSFSDSHGDASTYRGASMYPPPSTPNSSRGAYFYDDHPPPPPGYGS  
AGAGPHWENPGQSPYSPSYPPPGRGAGGNPPHPPPHTHSDPYYPAPPHHGPPPEYSY  
PPPPHYGGPEDHDLPHYGGTAPPLHP SYHHRGGPPLPMPGPHHPGMP IPPPHMMGGPPP  
PYHYGHPPRMEKTI LRKKFSWKHYPELERFLIANRDEYLKHSNMNYTAEQKQYNNWLTE  
RLLEVAGQHNYMFDPDDFNFVAIRDRI RCYYSYVQTARKRGLKLPKALKNKIAAATT  
EGSGKKE  
>comp9375\_c0\_seq2; 162 139 390 LEN=778; translated  
MNYTAEQKQYNNWLTERLLEVAGQHNYMFDPDDFNFVAIRDRI RCYYSYVQTARKRGLK  
LPKALKNKIAAATTEGSGKKE  
>comp9376\_c0\_seq1; 331 223 873 LEN=1595; translated  
MSSDEPVADVAVGSANRSSKRSLETDLGETKDSKTGNPSSQDIQAVNKNNGDVEDAENPS  
KRVKVEEHQIASEGATANGDKTSSPAVKDPTTSSPSLPTSHSDKNERGNNGADSGSKND  
TATAVNSESSQREKTSSCGDNDGNTSTTTADADADADADAGTDTAQAQRKQPSPAIT  
RSRSLSTENNRGKEAGDTQEEEDAEDSKPPAKPNERW  
>comp9376\_c0\_seq2; 371 223 1272 LEN=1415; translated  
MSSDEPVADVAVGSANRSSKRSLETDLGETKDSKTGNPSSQDIQAVNKNNGDVEDAENPS  
KRVKVEEHQIASEGATANGDKTSSPAVKDPTTSSPSLPTSHSDKNERGNNGADSGSKND

TATAVNSESSSQREKTSSCGDNDNGTNTSTTADADADADADAGTDTAAQDRKQPSPAIT  
RSRSLSTENNRGKEAGDTQEEEDAEDSKPPAKPNERWRVHQAEDYTTLVGRMMYPVTQF  
NNYGYDPLMRQYPMEKIISLLSFIQSPLRRPTII EKWSPYEIAVFEGLFHYGKEFREVS  
QIGTKTTREVIDFYIWKKTGHYKWKKEQFISDEDLLYDYHVPVKKPKR  
>comp9377\_c0\_seq1; 401 1 1361 LEN=1361; translated  
XQTLRLRTPPLDSAKKRILLSSNNEHSHDCHYTDMASSPSQPKRARKTPRNSDAMNRSNS  
HSSNSQTPKRKRKNKSAASAAGPVPDVI GNKRSAAATVALGVIGIDA AKRIVQEAC LDA  
AVAAAAAPA AVSTAGDRLPPTNVSESRSRKPGRGRNKAERKKTRRRSNGAGNATETEFA  
DFVSLAIAEAELEKAKRTTVHHPPTPRVSVSPDPEEQQQQQQHHWQOREPQRGTGLPVRP  
THGQCLRRSRRENKPPLRKSKVEGLEHAESVLHSMCSLFSSTIETPCVDLELPELCPVRR  
IAAPGRRKGRNLAPVPPRAPSVASVPEPPSGRITAARSRADHHPSTHPSLVPDAGCCRDL  
DIDDYHDDHDSLLPPLGTDEDESSSIDVSTTSDEYDSGSPPPPLSTPSFSPARDKRME  
GGSNTHSNHSVSVTSTLATRGGKGPATATAAAX  
>comp9377\_c1\_seq1; 829 371 2710 LEN=2907; translated  
MSAVKSVSPQLSPSYGGDMTSELSPQGDRSWDAMNGNDTGNHNDNNGVLSLSEDGTLPNV  
GELSLTPERKQKRRVSSSSIPLQPTPEEPPSHQQQHIQPPGVQIPVSPQPNYGAPVPFQL  
SPPPQPTFEPHFHLVDSTFPWAIGSTDGSVAVVRLKDQQQQLLQQQQQQQQQLQNDSSNT  
NEDLVSDGAVIGPADDGQGIQNGNPGVSPAQAAPTAEEAAIGQAVAVINAGRSLYHDKLF  
HNSSSHVEAILSGSCEVMGFDAEMWLRTPGKTHQLTNSHLRPALEDSVRQEVVDVYYG  
ERSNERHKLSPALCKRAKDANDVVVVTGHTPNGAEALKTSLSNVRTAVAVPVCHEVSNT  
NVTIIYFSLRRIILKPAAVEFLIHMSLSAAVTSVNSLDTDGLLDRAEGVRTDQDGRAAVM  
SSSAGHHQLSKTTGGAGRKQKSALSCKYQRANRTSITGARLDLQWRQLHNVEYLTDDGNS  
WIHTAVFDGKPVVVKTLRPECQDSAMALHEIEAEVAVHSRLNHPNIVRVIGAGWTSKKIR  
FIVLERLDGGTTLTQLLGYDTRIRDKRGRFWGKKPKQSYLDVLR CARSLACALQYCNEQAI  
PGSMVLHRDLKPDNIGFTLDGQVKLIDFGLARLVENANPESNETYQMSGETGSLRYMAPE  
VADRLPNHKADVVSFGIILWEMNAGKRPFNGLSRETFFYENVVHGGGERPHLSKRWPPELN  
KLISSCWSTDIDERPSFRQIVDAIDILLTSEKGGILEGKTGKALKSFAKIIDRHSTWFXW  
>comp9377\_c1\_seq2; 751 371 2874 LEN=3071; translated  
MSAVKSVSPQLSPSYGGDMTSELSPQGDRSWDAMNGNDTGNHNDNNGVLSLSEDGTLPNV  
GELSLTPERKQKRRVSSSSIPLQPTPEEPPSHQQQHIQPPGVQIPVSPQPNYGAPVPFQL  
SPPPQPTFEPHFHLVDSTFPWAIGSTDGSVAVVRLKDQQQQLLQQQQQQQQQLQNDSSNT  
NEDLVSDGAVIGPADDGQGIQNGNPGVSPAQAAPTAEEAAIGQAVAVINAGRSLYHDKLF  
HNSSSHVEAILSGSCEVMGFDAEMWLRTPGKTHQLTNSHLRPALEDSVRQEVVDVYYG  
ERSNERHKLSPALCKRAKDANDVVVVTGHTPNGAEALKTSLSNVRTAVAVPVCHEVSNT  
NVTIIYFSLRRIILKPAAVEFLIHMSLSAAVTSVNSLDTDGLLDRAEGVRTDQDGRAAVM  
SSSAGHHQLSKTTGGAGRKQKSALSCKYQRANRTSITGARLDLQWRQLHNVEYLTDDGNS  
WIHTAVFDGKPVVVKTLRPECQDSAMALHEIEAEVGGALS LCCRAGFSYVLPWWIILYYP  
AECSRSLACVAFFSSCSHNLFRFVLILATAVHSRLNHPNIVRVIGAGWTSKKIRFIVLER  
LDGGTTLTQLLGYDTRIRDKRGRFWGKKPKQSYLDVLR CARSLACALQYCNEQAI PGSMVL  
HRDLKPDNIGFTLDGQVKLIDFGLARLVENANPESNETYQMSGETGSLRYMAPEVADRLP  
YNHKADVVSFGIILWEMNAGKRPFNGLSRETFFYENVVHGGGERPHLSKRWPPELNKLISS  
WSTDIDERPSFRQIVDAIDILLTSEKGGILEGKTGKALKSFAKIIDRHSTWFXW  
>comp9377\_c2\_seq1; 211 424 778 LEN=1049; minus strand; translated  
MTKSFVLYRETNYRDALFETNAPWMHADSLVGNPVVTDSSSLFCSVRFSGSFLFCPAVAAD  
RCPVRATIAEQARHGTKGTARKARPAPAFQVHTSIVHPPGGSASADAATTAASGDNG  
>comp9378\_c0\_seq1; 378 57 1725 LEN=2758; translated  
MASYL RPKSRLRHLFGLNKRTSGNEIYENAVKEPGSHGAKSSTNAPSDDQTDTPETTEI  
LSTFSTTSSLVSSNPEEEEEENDPFALALEEDAYADVRDRLEELSRDRYRYANASSCEDSP  
NQQADGGTKAKTLPDERQPKIHAIELPLFAAYTTYFGYAVLIFCGHVRDLFAKILGQGRY  
LRHTDASPYPSSDLLRWYAPLLASWENFYTRRLYHRIQDCFNRIASSPGANIHVLERVSS  
DGNKTM SVLGTQLQELDTDRQRREYTDPNFGNRSRSHFVEATAIDPNGSDHNQTGRAARAC  
LNLGSYNYLGFADDWKETCRDDVLASLKDLPISNSSCRNEFGTTKLHREVEDTVARFLNK  
EDALALNMGFNTNCTTIPALTSRGLLISDELNHTSIVNGARASGAAIRIFRHNDTQHLE  
EILRQAIIMGRPRTRRPWNKIMVIVEGIYSMEGEYCDLANVVTVCKKYGAYVYLDDEHSI  
GAMGPTGRGCAEYCGVDTADIDIMMGTFTKSFGAMGGYIAGSKDVISFLRRRCAGSTFHN  
SLSPA VCQ QESPASG  
>comp9378\_c0\_seq2; 407 57 2087 LEN=2592; translated  
MASYL RPKSRLRHLFGLNKRTSGNEIYENAVKEPGSHGAKSSTNAPSDDQTDTPETTEI  
LSTFSTTSSLVSSNPEEEEEENDPFALALEEDAYADVRDRLEELSRDRYRYANASSCEDSP  
NQQADGGTKAKTLPDERQPKIHAIELPLFAAYTTYFGYAVLIFCGHVRDLFAKILGQGRY

LRHTDASPYPSSDLLRWYAPLLASWENFYTRRLYHRIQDCFNRP IASSPGANIHVLERVSS  
DGNKTM SVLGLTQLQELDTDRQRREYTDPNFGNRSRSHFVEATAIDPNGSDHNQTGRAARAC  
LNLGSYNLGFADDWKETCRDDVLASLKDLPISNSSCRNEFGTTKLRHREVEDTVARFLNK  
EDALALNMGFNTNCTTIPALTSRGDLLISDELNHTSIVNGARASGAAIRIFRHNDTQHLE  
EILRQAIMGRPRTRRPWNKIMVIVEGIYSMEGEYCDLANVVTVCKKYGAYVYLDEAHSI  
GAMGPTGRGCAEYCGVDTADIDIMMGFTTKSFGAMGGYIAGSKDVISFLRRRCAGSTFHN  
SLSPAVCQQVITSFRVVMGEDGTSTGRKKIQALRDNSNYFRMLQTMGLHVLGHYDSPIM  
PVMLYNPTKIAAFSRECFKRGLAVVVVGFPAVPILESRARFCISAGHTREQLDRAL E E I E  
EVADILKLR YARSTFG

>comp9380\_c0\_seq1; 404 89 2060 LEN=2369; translated  
MEKTTIPIVGEFDRHCEEDIGDREDAFRGIRVQEDRCAATKSKSNDWDDTKETESRVRNE  
MNRSKPLPGCRQIQFKLMKRKLSQQAVDDDDVDNLYVHQEPCIFCRILESRTSERLDDY  
LSYKIDQKNSYCHTTNFDIKLSQRRRPRRGRELLYREERAKSGENQTQVVLRLSKTDVMV  
RNIMIPFLSPPERTVLFDIPEWRNIFRLENHFCPKHGNEYKPDCKIFRSAAESAKKKSNG  
SRKTKKRYFDYKIDILEEIIHDGRDPIVFRNKLAYRTQFPFPHMVGNKSVNQPEVSLFEDP  
DYGSYFCKMKKCMACEKEADV RQMGKQGLGKCTFCSRFCDFRKQRRCAKDHC DRILPCSN  
CPETVANKSSYQCNHCLAEFCTDCHETYSCTMCETSICDGCHETSGLDFHKCSLCENTMC  
SKCDATYSCEHCGKCFYHCRDGGAMNCGAAMPSSVTNVCRRNCAIFVGNASVWNAARR  
TTWSVRCAEVALARTAQRSTTARFAINPSATDAETNARPLRTPAAKNARTWSAAATASER  
LRAATAASSPAWCVPGKSNDAARRAAGFRATTAAGRRLVRAATSTTARTAAWNARRPAPTV  
GAACALPATCTLPRRRWGHARAAGIGIASTVASMPVARRVRECFAQSVSLFVRSRR

>comp9381\_c0\_seq1; 396 121 1749 LEN=2358; translated  
MISRQLFDAMHRKSLSDARYGCGDGNSEGETQASLRRLNAIDLVLVYGLGSAVGAGIYI  
LAGIGAKLAGPAISLSFLGCGLSCTLTALAYA E FSSLIPASGSAYIYTYVAFGEVYAFCV  
GWNLILGYGFTASVAARAWADYVGD F MVKATGADWIIPYFTEVLFFPSVLGEDYTCSPLS  
VVIVIVSTIVLLRGAKDSSTFNLICITNLFILALIVVSAVTSGSIEPTDNLTPFAPSGM  
PGILRGAGLVFYAFIGFDMVASLSEEVVHPERNMPIGIVGSLLLSTLIYCGVTLAVVGMT  
PLSFLGETTPLVNAILANACCTHSEQMEVVQSENEVDGVCLKDCPAFEKPM LAFVSRVVS  
GGAGFGLMAACFTSLMGQPRIFYRMALDGLWFLFARVNPETQTMSEGILMTGFVAALIA  
CFVPLEALANLISLGLTMVFTFVDAGVILLRLGNVSEKISQSDVDYENTTANEAGAKSP  
VTANNPQKR VIRLLILFTASVLGASFILSHNLLGSSSSRAPLLFFAGIALLCGVLICYP  
DSW

>comp9381\_c0\_seq2; 179 1 507 LEN=1116; translated  
PATKPPQFYRMALDGLWFLFARVNPETQTMSEGILMTGFVAALIA CFVPLEALANLISL  
GTLMVFTFVDAGVILLRLGNVSEKISQSDVDYENTTANEAGAKSPVTANNPQKR VIRLL  
ILFTASVLGASFILSHNLLGSSSSRAPLLFFAGIALLCGVLICYPDSW

>comp9382\_c0\_seq1; 284 939 2666 LEN=2955; translated  
MTSDFQPGFGALPNHHCVLSSLD FRMAEDTVRDGLVG YD SPGRGAFSYTVGRDFYATREL  
SAGEEIFLNYGH CERERTSGDGD D D NSGDEGDWQSKMYYP SDFREAAIRFRFFEPFGNKP  
WPTKNVTKTLLSMIDSDSDSDAKPKFVLKILSKAFPKRDVILKKLSQYSKADKEYRKEFR  
REMARGVLEPRDTQWIRKNGICLEHLIPKRSTLPNAGLGGFSQYGIRKGEIVVPTPVLQT  
VHKEILTLYQRGVNVREDPEKYKLG TGLLYNYCFGHKSSMLLCPLTSAMLINHCSKRTQ  
ACGPNGPNVVRWSSGWD E T S H E W R T K S L D E I D K K F G R I L S F E I V A T R D I A P G E E V F I D Y  
GEDWENAWQKHLEAWHPPEKIANFVTVQEANHKQEP IPEYLISGDLRKTVEHPYLF LGCQ  
YSTNEEDDYGEKWKYKSETPWRDLTDNEILEKYSDEAGDIGYNDATGYINHAEYSHWPCS  
VLNANDEDGRVITYTVRIHQSP LRSDF TETT VWAKNNVPRILTDYRRENIHFFVKPDSQDH  
MLPGAFRHHVGVDPDGIFPEQWKNLKL AGKAIKETE

>comp9382\_c0\_seq2; 274 800 2629 LEN=2918; translated  
MPQSAERHRWWDNTFGNYVWHRGVGDHARYDHPYMTSDFQPGFGALPNHHCVLSSLD FRM  
AEDTVRDGLVGYD SPGRGAFSYTVGRDFYATREL SAGEEIFLNYGH CERERTSGDGD D D N  
SGDEGDWQSKMYYP SDFREAAIRFRFFEPFGNKPWPTKNVTKTLLSMIDSDSDSDAKPKF  
VLKILSKAFPKRDVILKKLSQYSKADKEYRKEFRREMARGVLEPRDTQWIRKNGICLEHL  
IPKRSTLPNAGLGGFSQYGIRKGEIVVPTPVLQTVHKEILTLYQRGVNVREDPEKYKLG T  
GLLYNYCFGHKSSMLLCPLTSAMLINHCSKRTQACGPNGPNVVRWSSGWD E T S H E W R T  
KSLDEIDKKFGRILSFEIVATRDIAPGEEVFIDYGEDWENAWQKHLEAWHPPEKIANFVT  
VQEANHKQEP IPEYLISGDLRKTVEHPYLF LGCQYSTNEEDDYGEKWKYKSETPWRDLTD  
NEILEKYSDEAGDIGYNDATGYINHAEYSHWPCSVLNANDEDGRVITYTVRIHQSP LRSDF  
TETT VWAKNNVPRILTDYRRENIHFFVKPDSQDHMLPGAFRHHVGVDPDGIFPEQWKNLKL  
AGKAIKETE

>comp9382\_c0\_seq3; 275 481 2508 LEN=2797; translated



MDANPIDNDPRDNDHGQCGIWMAPSSLLPYPGYGIFTRNIHRKESILHAPDAVSIQIRE  
AHRFKKMPQSAERHRWWDNTFGNYVWHRGVGDHARYDHPYMTSDFQPGFGALPNHHCVLS  
SLDFRMAEDTVRDGLVGYDSPGRGAFSYTVGRDFYATRELSAGEEIFLNYGHCCERERTSG  
DGDDDNSGDEGDWQSKMYYP SDFREAAIRFRFFEPFGNKPWPTKNVTKTLLSMIDSDSDS  
DAKPKFVLKILSKAFPKRDVILKCLSQYSKADKEYRKEFRREMARGVLEPRDTQWIRKNG  
ICLEHLIPKRSTLPNAGLGGFSQYGIRKGEIVVPTPVLQTVHKEILTLYQRGVNVREDPE  
KYKLTGGLLYNYCFGHSKSSMLLCPLTSAMLINHC SKRTQACGPNPNAVVRWSSGWDET  
SHEWRTKSLDEIDKKFGRILSFEIVATRDIAPGEEVFIDYGEDWENAWQKHLEAWHPPEK  
IANFVTVQEANHKQEP IPEYLI SGDLRKTVEHPYFLGCGYSTNEEDDYGEKWKYKSETP  
WRDLTDNEILEKYSDEAGDIGYNDATGYINHAEYSHWPCSVLNANDEDGRVTTYTVRIHQ  
PLRSDFTETTVWAKNNVPRILTDYRRENIHFFVKPDSQDHMLPGAFRHHVGVDPDGI FPEQ  
WKNLKLKAGKAIKETE

>comp9382\_c0\_seq4; 248 163 1682 LEN=1971; translated  
MAIANXERTSGDGDDDNSGDEGDWQSKMYYP SDFREAAIRFRFFEPFGNKPWPTKNVTKT  
LLSMIDSDSDSDAKPKFVLKILSKAFPKRDVILKCLSQYSKADKEYRKEFRREMARGVLE  
PRDTQWIRKNGICLEHLIPKRSTLPNAGLGGFSQYGIRKGEIVVPTPVLQTVHKEILTLY  
QRGVNVREDPEKYKLTGGLLYNYCFGHSKSSMLLCPLTSAMLINHC SKRTQACGPNPNA  
VVRWSSGWDETSHEWRTKSLDEIDKKFGRILSFEIVATRDIAPGEEVFIDYGEDWENAWQ  
KHLEAWHPPEKIANFVTVQEANHKQEP IPEYLI SGDLRKTVEHPYFLGCGYSTNEEDDY  
GEKWKYKSETPWRDLTDNEILEKYSDEAGDIGYNDATGYINHAEYSHWPCSVLNANDEDG  
RVTTYTVRIHQSPLRSDFTETTVWAKNNVPRILTDYRRENIHFFVKPDSQDHMLPGAFRHH  
VGVDPDGI FPEQWKNLKLKAGKAIKETE

>comp9382\_c0\_seq5; 284 1060 2787 LEN=3076; translated  
MTSDFQPGFGALPNHHCVLSLDFRMAEDTVRDGLVGYDSPGRGAFSYTVGRDFYATREL  
SAGEEIFLNYGHCCERERTSGDGDDDNSGDEGDWQSKMYYP SDFREAAIRFRFFEPFGNKP  
WPTKNVTKTLLSMIDSDSDSDAKPKFVLKILSKAFPKRDVILKCLSQYSKADKEYRKEFR  
REMARGVLEPRDTQWIRKNGICLEHLIPKRSTLPNAGLGGFSQYGIRKGEIVVPTPVLQ  
TVHKEILTLYQRGVNVREDPEKYKLTGGLLYNYCFGHSKSSMLLCPLTSAMLINHC SKRTQ  
ACGPNPNAVVRWSSGWDETSHEWRTKSLDEIDKKFGRILSFEIVATRDIAPGEEVFIDY  
GEDWENAWQKHLEAWHPPEKIANFVTVQEANHKQEP IPEYLI SGDLRKTVEHPYFLGCG  
YSTNEEDDYGEKWKYKSETPWRDLTDNEILEKYSDEAGDIGYNDATGYINHAEYSHWPC  
VLNANDEDGRVTTYTVRIHQSPLRSDFTETTVWAKNNVPRILTDYRRENIHFFVKPDSQD  
HMLPGAFRHHVGVDPDGI FPEQWKNLKLKAGKAIKETE

>comp9383\_c0\_seq1; 469 329 1453 LEN=1677; translated  
MIAAPFGLNMLAGFFFLMGSIPKRQYWFGATALS DTALISGSTDGIGLTTARNLLTGNN  
DVAKVLIHGRDEARIQNAASHLQKNKGI EKPGKAGVVTTSRNSAVVSLPAADLSSVDGC  
YDLAQAVFERCSDGTSPNDDSNSSADGGTGSIDAPIASNLKILVNNAGVYSEDFVRTEDG  
LELTFAVNVLAPFILTSMLLPMLLANGSNSSRSRIRIVASSVSQSWKLPKNYWDDPQYRK  
RSYSAHGAYSESKLLDAMLT IEMAHLRHLDLGIDTISIVTCNCLDPGTVNTKMLLDGWGPI  
GIPVENALDETWCCTSTELEGTSGQYFVGRSSRRASGCAYDSFHREKLWQTL SALAPRAA  
AEWDRAVDLYSTK

>comp9384\_c0\_seq1; 923 41 3880 LEN=4060; translated  
MPTSEFTVMGRSTEPISNRGYSNGDIASATNSVTDQFRFMHVSGNCD SAQVENLARNFMS  
TLGITNSNDEKYAEQLAALTSQVSQMMNRSEPRGREQNVQNLRSSDGLPSSWSSPQS  
QKPATTKHSPKFQATNKNRGRSPRRHQSRKSPLCRVVDGMRSKSPFRKDRERTRSPMR  
QTSGGTSSMNTGSDIDGEEFFDTRMDSYTVNSPTPKAVPKSTTASESKTERASSTLKT  
SRPPLVSVIMTDVPSNNVNAPTASPAGQSTFKFDKEHDKFHIGSSPPKFGSPGKKVRS  
QHRSKTKTPYLATQGENHNDVSPLSDMGSVSGTTPFHPSTKSKPISTGEHPAAQNTENAA  
PFFSPVPEFHAPHAFVGNSTRRIPSPHNIMQNDPSPEAASRRQTAPPGMASAAAAASQS  
LRNSASINPGTTPDQPGATRVNPNTADTAETF IKKTRNTSTPPIVEAAAGATQQHNLFN  
VDLGSNANQAKGKRRGNTLRKGLKKSASF TTRRTNGVFLDEIKETGTDDTAPTTE  
SPSSGSAMSMDTSPIFSPPTNFGAGISENPAQFNMGVGGSNIRTRSKRKENGARRAQFH  
RSQSEHVIHGPRSSFDANHLKHRSDILDLEKQKHYLAKNYRESTRVYSQAIQRYKV  
DLFAHVPSKDLLAVLLWNRAASLFMVGAYESSATDARIGIHYVTDPRNSNPALISPDANP  
VLRPKLYCRMGRSYLKLKGVEDANRAYEEAIQSATAIQDFHRRQNIIGHYDELEKIKTEA  
TLERSEISRLSII LERISL SKRNEAAEAI SLIKKALVTANGSKDLHILKVKMLAESQRW  
REVTSHERFAASNTKFDGCLNDDL SRLNPFPGVPVAKYLHADYFGDTKDDEMNGAELKL  
KNDAAPEAMLRLYKEMPPYLRALRLEERYCNAEKCLSRLDKYLSDRAVVDGNKVYEDYK  
WLDDERMKHRETETNRGFADNLFANAKYEEAAKIYDVCLHLDSGESTCAGRRLHAILHCN  
RAACFMALKRFRDAMTECTAALKIYPRYLKAILRRARCYSRLDQTRQAENDFKLWLKIVE

QSKKNGNTGFLGANIFHGPDTIKTREVEEIQAELENDMLKAKAREEEAKARDERARKMFRE  
RSQRWDSERSDFTSGSNGSGRANFSRENFYSSSSRRWDSRDQKSRKPNGEKPKNSKN  
QNRHNGRNFRDHKNFYSLGLTNRSTEEVVRKAYKKKALKCHPDKNPDDPNAENFRVK  
EAYETLNDPRLRRQYDAGR

>comp9385\_c0\_seq1; 611 294 2048 LEN=2280; translated  
MQTNAVPRTSWGVSNLTVLIIVLGLSSRAGLASAFSPPAQFSQKYRPRSTISLFLKLNKE  
LYPRATHLVRLNEKKDDGKADEDTASILGTPGTENGVPAEIDYSKMKPQVVPQRWVQLAYL  
SLLALLSDWVCFVAAAPSTFESNFGHTAASIIDIFLFTNVATSFLVTDITISKFGLQRAI  
QGAAVLMTAGCWLRSFGFGLPIDFRIGGVETGNILVDYPLIVAGTVLVGIAQPPFFQCTP  
PLLSAKWFANNERSTSTAIALNFNQIGIATAFLVGGGMATDTVGLENYLGIIACTTTLVT  
IGTLLQFQNEPPYPPSSSELEKLIKGEPPFLESVQKFFATKGFPRAVAAAFICISITN  
VVGTFIDEVMERGGVTGQFQIDLAGAGFELAIVAGGIILGGYVDKTKEYKKVTMYCLAAT  
ALLVLPGLTDHYLGREPFLLVLALLGLGLAAGPIQPINAELAVEVTYPGDETAVESVQQ  
IGGNLVSALLIPLAEAASENDYTLLRGVPGLESDIRGDVLLIAVSFLTFAFYFSGFDAPL  
ARTIADESVDENLDIDVKEEQKKQEGILLESPSAVALPVEQQQ

>comp9385\_c0\_seq2; 535 294 2220 LEN=2452; translated  
MQTNAVPRTSWGVSNLTVLIIVLGLSSRAGLASAFSPPAQFSQKYRPRSTISLFLKLNKE  
LYPRATHLVRLNEKKDDGKADEDTASILGTPGTENGVPAEIDYSKMKPQVVPQRWVQLAYL  
SLLALLSDWVCFVAAAPSTFESNFGHTAASIIDIFLFTNVATSFLVTDITISKFGLQRAI  
QGAAVLMTAGCWLRSFGFGLPIDFRIGGVETGNILVDYPLIVAGTVLVGIAQPPFFQCTP  
PLLSAKWFANNERSTSTAIALNFNQIGIATAFLVGGGMATDTVGLENYLGIIACTTTLVT  
IGTLLQFQNEPPYPPSSSELEKLIKGEPPFLESVQKFFATKGFPRAVAAAFICISITN  
VVGVSFIRVLESNAKTVLSDDASATKRHFVGVXKPKMDFPHQSGFDQDQHPFSTLVHV  
DFHDEVMERGGVTGQFQIDLAGAGFELAIVAGGIILGGYVDKTKEYKKVTMYCLAATALL  
VLPGLTDHYLGREPFLLVLALLGLGLAAGPIQPINAELAVEVTYPGDETAVESVQQIGG  
NLVSALLIPLAEAASENDYTLLRGVPGLESDIRGDVLLIAVSFLTFAFYFSGFDAPLART  
IADESVDENLDIDVKEEQKKQEGILLESPSAVALPVEQQQ

>comp9386\_c0\_seq1; 358 1 1182 LEN=1600; translated  
XNNNDKNSGCSIVERCYAAWNRDMKAAAACFAPSFLYDDGLFLGSLRKDRALLERRFG  
ASAELLPPGSVVVDHLAVCPPTGNTGTTEWHAEDPSGRALPRTRGCSFYTMDPETGLIAS  
GFKVSEMVKPGRELSDRLVAAVAGGAETKTKTPAGASPPPAPSLPVIERYFRAWNRD  
MEAAALACFADDCVYETEDPVFVDRFRGKEALEHHLRKNAEALPPSCQIVLDGVANDPARG  
TAGVRWHLEANGIALPNLRGCSMYTTTTANVGVGVGVANETQSPGTNTTEDPPPLLLKT  
GFDVTEAPVKIPGAAQDXAGFGGAPGLVRIVPVSPFLFAQGSKQSAPGQARASGKSRAED  
SQKTDRPIESICRAGSGLAGEKTRPEERFHLPLG

>comp9386\_c0\_seq2; 358 1 1182 LEN=1606; translated  
XNNNDKNSGCSIVERCYAAWNRDMKAAAACFAPSFLYDDGLFLGSLRKDRALLERRFG  
ASAELLPPGSVVVDHLAVCPPTGNTGTTEWHAEDPSGRALPRTRGCSFYTMDPETGLIAS  
GFKVSEMVKPGRELSDRLVAAVAGGAETKTKTPAGASPPPAPSLPVIERYFRAWNRD  
MEAAALACFADDCVYETEDPVFVDRFRGKEALEHHLRKNAEALPPSCQIVLDGVANDPARG  
TAGVRWHLEANGIALPNLRGCSMYTTTTANVGVGVGVANETQSPGTNTTEDPPPLLLKT  
GFDVTEAPVKIPGAAQDXAGFGGAPGLVRIVPVSPFLFAQGSKQSAPGQARASGKSRAED  
SQKTDRPIESICRAGSGLAGEKTRPEERFHLPLG

>comp9387\_c0\_seq1; 441 1 1701 LEN=1949; translated  
AEKVCMAILRGESCPYGDTCRFSHDLKGFMATRPADICELVDAMGGSCPTFRRTTGFCFYG  
AICRLGSCHITKAGENVRDEAKMAEYQKEKAGKEGALKEPKINSGTILPRDVVVFQLRKK  
TYPFECKRFCEKDKPTPPPDATNTDAGAPTAEEAAPAIKEAKDNTSPTIHTDASPATTT  
AARTNTSASSFTPLDHLKTKKIVDFSNKVYVAPLTTVGNLFPFRRIMKQYGADITCGEMAV  
ATNLLEGKTSSEWALLKRHPSEDVFGIQAIAAHADQFTRVSELIKEYTDVDFVDMNLGCPL  
DLLCNKGAGAALMRENKLYKLAGMSKNLSCSITVKMRTGWNHRPFAHELVPKIQSWK  
IDNLAAIMVHGRSRLQRYKLDADWDYIGKVANAESKDI PRVPLIGNGDI FSFSEYKEKVL  
ARDGLSTTAMLGRGALIKPWLPTI KEKRWDI SASERLDILKDFVKHGLEHWGSDQQGI  
NNTRRFLEWLSFLYRYVPVGLLEVLVLPQKMNHRPPLYLKGRSDLETFLSPHSSDWVKIS  
EMLLGPVPNGFAFKPKHKSAAYESNG

>comp9388\_c0\_seq1; 419 176 835 LEN=1246; translated  
MTGPKQQQQQRKRTAALAAAFAASAMGGAECFSPHTAAGATRVSSSQLGMGLFDRF  
QAGNGRESLDEEFKQQAIIAARRAPKSERDKYFEKVEERRRRADKERQDNWGWQTKQY  
KKGEDPINEWKKRRESGTISDLDDQYGDAAKIGGIPLPMASFGVGGFVGGKVSQSRQG  
NQRVSVTREDCTLQTEDVRLGSDCIASYRIASYSVSKF

>comp9388\_c0\_seq2; 603 176 892 LEN=968; translated

MTGPKQQQQQQRKRTAALAAAAVFAASAMGGAECFSPPHTAAGATRVSSSQLGMGLFDRF  
QAGNGRESLDEEFKQQAIIAARRAPKSERDKYFEKVEERRRRADKERQDNWGWQTKQY  
KKGEDPINEWKKRRESGTISDLDDQYGDAKKIGGIPLPMASFGVGGFEGVGGKYDNGGRF  
DLRLPYADQGYVDEDEDVDMGKLSNFFGGGKKEAEAKATAAAEEAAKKKKKGGWPW  
>comp9389\_c0\_seq1; 277 978 1662 LEN=2041; translated  
MISTLVSLFSFIIWSSLLMWNFCMTIAGSNPWAHEGFPRPGPGGSALTSTVGTLYYHQDMS  
YHGVIPELLGLICLREGEDPDVETTLVSTEKVIKALPNHIRLILQQDRFKITASSQWVDL  
MSVDEDVDKARALLDGTSLHLPVNWENMVGVDPEASQAIVKLRKVLLDARPSGVHLRDGA  
MVLFNKKVHGRTPYQNLKYDGS DRVVVRSYFVKHLNEAERNTRML  
>comp9389\_c0\_seq2; 354 160 1125 LEN=1504; translated  
MSDAAK FALGNKLARLHWTDKD SVLHTKKFIQEAKDILAPFVADNNLQRILSHLVSDDG  
PDSIDAI VFENLPVDPYVPPTPTRETLRSLQKPTFVAEATLLAMGELAGSYTVGYKAETE  
YSNPWAHEGFPRPGPGGSALTSTVGTLYYHQDMSYHGVIPELLGLICLREGEDPDVETTL  
VSTEKVIKALPNHIRLILQQDRFKITASSQWVDLMSVDEDVDKARALLDGTSLHLPVNW  
NMVGVDPEASQAIVKLRKVLLDARPSGVHLRDGAMVLFNKKVHGRTPYQNLKYDGS DRV  
VVRSYFVKHLNEAERNTRML  
>comp9389\_c0\_seq3; 277 617 1301 LEN=1680; translated  
MISTLVSLFSFIIWSSLLMWNFCMTIAGSNPWAHEGFPRPGPGGSALTSTVGTLYYHQDMS  
YHGVIPELLGLICLREGEDPDVETTLVSTEKVIKALPNHIRLILQQDRFKITASSQWVDL  
MSVDEDVDKARALLDGTSLHLPVNWENMVGVDPEASQAIVKLRKVLLDARPSGVHLRDGA  
MVLFNKKVHGRTPYQNLKYDGS DRVVVRSYFVKHLNEAERNTRML  
>comp9389\_c0\_seq4; 454 260 1486 LEN=1865; translated  
MEENS NWRQNSQQW SLITSLQILFFWIVAKGKIRYILGVYTVLLTSLHYGVQNVNQSV  
EFHGSTWERSLQKEEQSDFLANIVYWSMSDAAKFALGNKLARLHWTDKD SVLHTKKFIQE  
AKDILAPFVADNNLQRILSHLVSDDG PDSIDAI VFENLPVDPYVPPTPTRETLRSLQK  
TFVAEATLLAMGELAGSYTVGYKAETEYSNPWAHEGFPRPGPGGSALTSTVGTLYYHQD  
SYHGVIPELLGLICLREGEDPDVETTLVSTEKVIKALPNHIRLILQQDRFKITASSQW  
LMSVDEDVDKARALLDGTSLHLPVNWENMVGVDPEASQAIVKLRKVLLDARPSGVHLR  
AMVLFNKKVHGRTPYQNLKYDGS DRVVVRSYFVKHLNEAERNTRML  
>comp9390\_c0\_seq1; 204 103 343 LEN=1747; translated  
MQADWEEQQQENEPEAQHQGLEDEDDDEEDILDMGEDEPTNDKESLLMRFCPHDSSMLYP  
HEVSKYLFDESECVKDVFD  
>comp9390\_c0\_seq2; 204 103 343 LEN=1725; translated  
MQADWEEQQQENEPEAQHQGLEDEDDDEEDILDMGEDEPTNDKESLLMRFCPHDSSMLYP  
HEVSKYLFDESECVKDVFD  
>comp9390\_c0\_seq3; 242 103 579 LEN=1595; translated  
MQADWEEQQQENEPEAQHQGLEDEDDDEEDILDMGEDEPTNDKESLLMRFCPHDSSMLYP  
HEDKRNRRLLYACRLCRYTETA VDQPLIYRYDLKKEVGNILNTVPGSVSDDPTLARSQNA  
HCANCGHNEAVFFMSDSTQSDSLALIFVCCNCDHKWVN  
>comp9390\_c0\_seq4; 242 103 579 LEN=1573; translated  
MQADWEEQQQENEPEAQHQGLEDEDDDEEDILDMGEDEPTNDKESLLMRFCPHDSSMLYP  
HEDKRNRRLLYACRLCRYTETA VDQPLIYRYDLKKEVGNILNTVPGSVSDDPTLARSQNA  
HCANCGHNEAVFFMSDSTQSDSLALIFVCCNCDHKWVN  
>comp9391\_c0\_seq2; 616 117 2090 LEN=2303; translated  
MKKEKLPGKEGKENAAKSKRRIWGEARKEMIPLSVGAIALVASSSVNQAVPRLMGVLM  
PSKPKSANTSERKFISQILWLSLAGGTASFIRTWLMNRAQDSIAARLRKEVFE SLLTKRE  
LEWFQHTQIESRTENIQKEIERTKSDVSTAASDQEATKDKRQKRRTESLSPSTGVT  
PAAVGVIMKDDVDVANTVTNTLANLLRSLSSCVFGTYNMLCINPQLVGLSIGVAPVVG  
TLAWMTRTYLKKIVAIQQQAIAIKSASFVEERLNHITMVKTSNREHDEVEKFNEIQ  
DECVTLGGAALASGLSMGIMFGLSSTAFCGILLAGRAVKADKMTSGELTSFGTYSF  
MLALGSAGVVRALGEYSKMQCATRLYKLDIDGNDGQKSMQDQIDGSRPLVNTDLVQK  
LSIENVNFSFKADPSKMVLKDLFSISRGEVVAIVGENSGSKSTTASIIAGIYPPQSG  
QIALYDTKATTAEPNCITDLERRDRASLVQVVPQAPALFDMTILDNVRSRPA  
SEEDVRTAMDSAHCDFVSNLDGGLDYQVGRNGIRLSGGQRQIRIGLARAF  
LANPVFLVLDEPSSAMDAEGEASLSDTMAACKSSNRGLLIITHRAKTLE  
LADRILVLKDGQVVEEGKLGALKKRKNGELVALMSDLV  
>comp9392\_c0\_seq1; 428 255 1496 LEN=1663; translated  
MAHAMDAFSSFVLYEERECKQILERHMGAVGALQGGNDDEE IYRVLIN  
NDEDGACCEL LRMFRARSREGKKLAPLLTPERFEEYMLGMCDRRS  
MSRSCRKCTRVNNIMFILTFGTIGQVRHIDKMNPNLQICLYMSTDCP  
STILYYLEEPDVIINGEQLVEYWEETKSVDPDIKTMLLPEQTSRRLLE  
QHHTKFFSFWGSIDSVLYTFGKLYRPVSSVSFSADPGTTLIAGGNEVHA

GPPTTGPRMFAFAVAVGIPGEEEGADYIEGSGTDADWNGGDNDNDGEIQYCPALLHTDLAC  
ILFATMDTEFPDRSEEHDDAKRFLGILRELVADQPQETYERLLSDDRSDLRDWLGRVAR  
ATLEGETYEVNKLLEVALESDSIFYPPDIGGTRTGKKNKKEKRRARRKKNLA  
>comp9394\_c0\_seq1; 412 107 1399 LEN=2050; translated  
MIRKVNNSLVQRHFMPKGGNSRFVSPASWAICDSRTGKDDHHRQQQQQCARMTPFAIGTS  
IPTVYGGVVTTNNSTPQRRFLSTSDSSTSSASSADQGANFEDTMDKIIFTQSQKVAATE  
GDKWFVDEALTQEVWDPKWWNFADHAVSAVTFVNDTSGFGMAASILIVTCSVRALILPLA  
IRGQRASSRMAHLQPELAMLKRYEALGTPSQAEQQAFKMQALFKRYEVTFFAALATP  
LIQAPMFIGMFFGMKKLPDLFPEACANGGLWWFTDLTVPDPTYILPIACGISFIATIESG  
KDQMIDSNPQHGPVIVNAFRAMAVVMI PVITSFPAAMLCYWVPNNFITMVQSITLRNDWV  
KQQFGIWRPKPLPGQENDAGFQDTMEKLVKQVKGEPTTEKEKIERHNKEIETRKRQKA  
SKIARANRRQ  
>comp9395\_c0\_seq1; 246 468 1142 LEN=1217; translated  
MRFVAVGSLAALALGSATNDEDYDWNHEMSTNEELSNSRLGGSETISLSIPLLDVHLMEN  
ETLTHSGVSLRELQNSPTKTAYAPPPYDTPDMGIFDQSAVSGGNKVRFS DTPHSADSVIH  
NYGGASDSIADSIIDCTTACPNERPVI GVSQDFSRIVYSCNATYCMYDLPMNCWDTSGV  
TDMNYAFLGRYIEEDIGCWDVSSVTNMDYMF SRTTFLRNTNIGVW  
>comp9395\_c0\_seq2; 246 1115 1789 LEN=1864; translated  
MRFVAVGSLAALALGSATNDEDYDWNHEMSTNEELSNSRLGGSETISLSIPLLDVHLMEN  
ETLTHSGVSLRELQNSPTKTAYAPPPYDTPDMGIFDQSAVSGGNKVRFS DTPHSADSVIH  
NYGGASDSIADSIIDCTTACPNERPVI GVSQDFSRIVYSCNATYCMYDLPMNCWDTSGV  
TDMNYAFLGRYIEEDIGCWDVSSVTNMDYMF SRTTFLRNTNIGVW  
>comp9397\_c0\_seq1; 348 94 897 LEN=921; translated  
MTSLSVNKKAAPALLAALQSLVFLVVCYSRSSQSFQPVVAPVFRADSSVQKRPFAGFNA  
KQRRPGVATGNMAGSASETDAVSI PFDGSEDRFDRWRFLQEFLEGDHPSSDVVNI VLYR  
VLDGALKYPRPSGGDTFGSEGEIEMKAEVKQRLEKILTEYATNGRVNAVATMGNHEEGL  
EEEEKKALEILEQLEGLLPDPVENEDDNKSLWDTVIELHGRQSVKINESQNPVSM DWKTA  
STVSRVLLHFDFLT LGIVDAPIIKKE  
>comp9398\_c0\_seq2; 138 154 492 LEN=774; translated  
MTRTNKPTGGGIKGFFFTRAATS FQQGFKVSREWSYWLAQKGGTVGLFLASTSMVVMPLI  
FEINREITSVASERLQVAELRNQGHSDRQLAEMGFLEVSIHTPAVAGLNKAV  
>comp9399\_c0\_seq1; 490 1 1564 LEN=1689; translated  
XLAGGHSCGRIDWVIANMGKSESSACKLVAGEEFPSECGNCNPNICSNPYPTGAPIEDI  
DPVGSQPQIRPSPSPSGVLLSTDKALNAWDVYLGLEFMTHVNSQSPPNYALVASGGAAGSG  
NLVVSESQAYALLITGVVLVSWESHAGRVNGANRSDV IIAFEGYYNFWKEMCRNSSSGSA  
NCQSGGHFCKDESTGSSSVCLPDRHLKSGGSESTGPAPDADEDAIVGIILAVKALEGDD  
TKPGWYEEARRWADASATAFFRYNVDSSRGDHRVLKLGACWGGWEGSGNPNPSYHSPGSYR  
VMKDYQATFPDSDRVGYEGIPPGEWKLIATSYEVLHTVQCSGDGALVPNWATIGTDGNG  
NIVNTGERFSGSGTPQSEYGAEEARSTFRVALDAAFYPQMSSEWSPFLSRFNWRLDSDFD  
TSSAWSSDAFPSCRAPGASQDTMFGSWRYNAFIYGPTFSALIASSSDIANAQSMVDAAG  
QRLAESLPESYYPRSWALLSNLMLSGAMESAGETLRGSIVV  
>comp9401\_c0\_seq1; 1354 165 2686 LEN=2686; translated  
MVFGWFGGGQKNNDNNNDENGNNDDENDNTVKPNDDKESHEKPLILTTKPEIKTNTED  
ASPSQLDKSLLPTNSSAASWCSSSPSEPTTPTTKALHPPSPKSLSLKNASSTGSSRRGGE  
KKFHQDQQRIGHNDFAMDNKEQDGGNSLPDELLRQKRREEILQKTAWYEEHIRNCLEM  
EDGDL SALNKDDAVALGLFDSSKKQRNGFWSKGHPEDKYESQLTDELEQLLVLAQQCRR  
AQKDEAEMEMLLERKENNDGDVMDRLYHLELLFRQRKGEILDEEEIEELEIFEQE QKDK  
DDVSELFLSEPLANETDEGRQTQTQNSTTLISDREAQAEISLLRNDDAQLNDRDSDG  
SLELNGSRAAVEESSMVGEVNSMTESEAELLKADFPALPNEDDLNDESKKILDKLDSDEK  
KIPEGLIIYEGENDGGNLSMTKSEAELLKEDFALGSEEDLDDDKSMAEFDKREEGHDIG  
ADEEEIYSMTESEAELLKADFP SHKGEHEDNNKSTNLIDKMKAGTNDGADGEQILGLLDE  
GLNDTDHAVGKTTVTMDPGTHKEEKEKETS SVYSFDEEEFDDLLSRKERGETIDNNRLYE  
LQLLFFQKSGEILTEKESMDLEKFRMQRANKTKDTSGLHTKEDGKQKETT DKNRIQSDSV  
LSFPEDTSLEVFQTQLKKIGLPLEISFSLFRDENDSASFCDNEKSSSMSTISGGDES YIM  
DLVNQKDRRDDRKEELEDAYSRYQRAIREDNAQENEELLQTI FSEVLKEKEEEMRLVD  
KEFDELVEHEVAKHKEKIKGTQSRPFVGTGKAQPQANIDGAKSKTDTEAVIIEETQSKK  
X  
>comp9402\_c0\_seq1; 529 24 2482 LEN=2529; translated  
MKISLSAIGIFLSTVQAAQVSADTHSSIRGNSRRSDNRNRRHLLNPGFECTLYVKTIEF  
EDGHNEETLSCELAPQTMVAMAAHDDQGNPISFPTGVSEIIDIEGVEKERMEQIGAI SGA

TVMRLSEGYIEEGGHPVLVVPSEATVDIEKISDS DERHFNRHRSRQRHRQLAKTTGNLK  
TLVLRVVDGSGTAPELSTAKLRDDLFTDLSLKTQYKACSNRIDIIERGIVDVVKVEIA  
QVTKVMYNGRPLELGNNSELEKQARKIASNRYAGGGDL SAKFDLVIYCLPPGTGRWIA YA  
YINGRDSVFNNKWC GMVSTQMHEVGHNLGLGHSGDDQDQYGDQSAMMGYSYFEDDGPKMC  
FNAAKNFQLGWYKNQEMSYNPLENPGSVK FVLTGV DNAVXWNSNKLVTLRLEEDGISDY  
IGYNRASGINSGTSEAKNRVSI FKKGKGGALGYGKSIRVAALSSDEFYTVKQWNGTNYDV  
RIWVAGKVGGNIKDANIEISVLGLPPPT EAPI SMTQQPDSPCA EENRFRLELGLIDSFGL  
TSWELVESISKTLIGSATKDKYQAGQRYIEPFDTDGSDYCLEESTCYDFIIFDDYGDGV  
CCTNGRDGFFRGILDGNVIFEGGEFDTSDRHTFCTSGDSATGSPTLARTKLPTLARTKSP  
TPAPTRSPTSSPTKSPTSSPTKHQTS DPTKSPTSAPKKKPTSAPTKSPSLAPVKQPV E IN  
EMNNKECKDTSQPFVVKRKRVCRWLRRNKNLIKRNCKRKS DRGDKLSDLCPKTKAKAGV  
ETCWSVNIRDKNQQNKSGNRNSNVKRVRKLRKEVFGS

>comp9403\_c0\_seq1; 266 478 1313 LEN=1467; translated  
MMGASAFRTNPSNVSAQHAI SRKQRKGYDEL RQEWNEKSR SYYSKV TREERRR NAGEID  
GDVLTSEEYRKEFERMARKHYFALQKIKEGRYRHA EILYERI IREILQEEKEGDS CDHAK  
LAVTTLLFALHSQRMGNPNPKTRSVFLNFFRQIVMNEEGRTRTNGNKNDGDAAFDANE  
HHHCACSAKVLGAFALFEMKQGN SVKSLEIARMAVDFDPSLRPMLEWKQFRDTRMRTRKR  
TRVAIGKVAXEPKIVNTVDEDPTTTTMYRNDPIQDTG

>comp9404\_c0\_seq1; 383 40 642 LEN=941; translated  
MKSFAVLAALLGTSSAFVTKNAATKSTALNAEMSKSLPYLTRPQKLGWVGDVGFDP LGF  
SETFDMKWLREAEIKHGRASMLATVGF TMQQFMTIPGYEHVDDSNMAPT VVGASAMLQIV  
FWMGVLEFWTNKGNVTMETMFS DPDPREP GNLGDFPMGLAVGKTEDEMNDMKLKLKNGRL  
AMLAIGGMIHNNVVTGDALF

>comp9405\_c0\_seq1; 428 165 1184 LEN=1415; translated  
MLQTESGSEHSSVDATEVKT TTKAKVSQEIKGTTKMNSSNTTATSSSKSLEWEDVKKARNR  
INSQTRERERSQIKNLEAERARLWLSNDAIKFQNRHFREIIGQIVKINEMKRLRASGSA  
SSSSALFGAAALGGGIPMSMRQDMGGHGGGLDGLDFQSSRISASATKLT KLSADLLAR  
RQVNALEMQKMMRQQAIERLGVGGVGMGGFNMALNGRMGGGSAGGMGVSSGMSINGIN  
LNAQYSDVPDNLRI RQLMLQHSNASGDI EPKRLSSIGNTDAFSSNNGLGGNIGEDSRNT  
NGNGISLGA AIGGIGGIGDLGGISDAEILQMSKRQKFGF

>comp9406\_c0\_seq1; 317 103 822 LEN=1450; translated  
MDTSDSKTVPELTTVSDVAPPSTSPAGVLSAPATSTIDPKSEPIIRDSLGGMWILDKTR  
GEWSMRGYLETNLVPELAIQANEKGENELDTIQTIELTDEKVKITKQSRVNSNLVVELTY  
GVELVEYLPKDSRPKKQLATTEDPGRHLKIVSSLLTVNGMANVTDIKRLVQEEEKSSVLI  
QELTINNPE SNKTHTTTRYFNPHSEPGENGRSGELGAAIAAAETGGTQASNGIMKMDTD

>comp9407\_c0\_seq1; 644 149 2816 LEN=3030; translated  
MLLSVASPHASIATAFGALLVSCR VSSWVLPPTILPAGGRNPGSVALAGSDRPGIFFED  
ELECPNEEECEIDWDSMPGFDDSDGDSENHQDAGVAAGAAIETTADPGDEECPDEEECEI  
DWSKMPGFADDDDDDEQQQQQQQLIWDALERIVWELQPPAEQQQQKGGGGDRHNDRSENGN  
KPARRTSSILGALDSGNWSSLFDP SDWNGDMLGKLQGEQDQTEEKANKHDENDXIKTEQQ  
QQLRISTKVGENAVQNAESLHTMSDEMASLLP IPMPLNTTTTSKNGGTANINLNVNGNATF  
NCNGSANSQQQQQLRHEQNTHQHQHQQRNMQVRS AEKIQGNDKFLITSKLENI SVQEKEK  
ANLDVHGINIYEKEDPVVLEQKLR EMHRHIIAEYCRSTTTVFKEANRNRQPSVTTTTAS  
SALGWT FANHPEYVKQDCIKFLRAVGNYHPKTA AKRMSAYYEVKRLYFGHHHNRSNSSGN  
NYGTNGSRNEDDEILCRDIRLSDLTEEDRSCLPRGPMQLLEEKDRSGRIVTMMFGKLLD  
LPLESLARIIILYGSQIMTKDEANQ MAGYVHIVWAHG MKNMSAPRALLKTKMLQEVKCL  
PIRCVAKHFCYDNP KLDRLVLYGALVHGLDAFQVVRTRFHRGSVTECVYNLMTYGISQESI  
PIVMNTKGLNTYMMASNKCKHNNDGMIIDTEFHVAFMDAVAEYEEKDRWERERSK FVRT  
SQLQQTERISRSKPLPDESFDNTEVSDRPS SKTSETAFSSSNKPTLLANQAPAF TTSPTS  
SFAVLLPGPF DILMGRGCHNRNKP GNLRLKLLLESYREQYDKAVSKSEKTALVQHILMQV  
GDSGSRFLIQEKPLWMTASQQRAHDKVAHDFRNMRGRAKAAANGNKXW

>comp9407\_c0\_seq2; 551 149 2994 LEN=3208; translated  
MLLSVASPHASIATAFGALLVSCR VSSWVLPPTILPAGGRNPGSVALAGSDRPGIFFED  
ELECPNEEECEIDWDSMPGFDDSDGDSENHQDAGVAAGAAIETTADPGDEECPDEEECEI  
DWSKMPGFADDDDDDEQQQQQQQLIWDALERIVWELQPPAEQQQQKGGGGDRHNDRSENGN  
KPARRTSSILGALDSGNWSSLFDP SDWNGDMLGKLQGEQDQTEEKANKHDENDXIKTEQQ  
QQLRISTKVGENAVQNAESLHTMSDEMASLLP IPMPLNTTTTSKNGGTANINLNVNGNATF  
NCNGSANSQQQQQLRHEQNTHQHQHQQRNMQVRS AEKIQGNDKFLITSKLENI SVQEKEK  
ANLDVHGINIYEKEDPVVLEQKLR EMHRHIIAEYCRSTTTVFKEANRNRQPSVTTTTAS  
SALGWT FANHPEYVKQDCIKFLRAVGNYHPKTA AKRMSAYYEVKRLYFGHHHNRSNSSGN

NYGTNGSRNEDDEILCRDIRLSDLTEEDRSCLPRGPMQLLEEKDRSGRIVTMMFGKILLED  
LPLESLVXYPPYLILYPADCTMGLRSWCCVGCIVGCCVAFQVSCFSVVSNLISCSMECS  
FSSSTGPNYPLRKPDPYAKDEANQMAGYVHIVWAHGMKSNMSAPRALLKTKMLQEVKCLP  
IRCVAKHFCYDNPKLDRVLYGALVHGLDAFQVVRTRFHRGSVTECVYNLMTYGISQESIP  
IVMNTKGLNNTYMMASNKCKHNNDGMIIDTEFHVAFMDAVAEYEEKDRWERERSKFFVRTS  
QLQQTERISRKPLPDESFDNTEVSDRPSKTSSETAFSSSNKPTLLANQAPAFSTTSPTSS  
FAVLLPGPFDILMGRGCHNRNKPGNLRLKLLLESYREQYDKAVSKSEKTALVQHILMQVG  
DSGSRFLIQEKPLWTMASQQRAHDKVAHDFRNMRGRAKAAANGNKXW  
>comp9408\_c0\_seq1; 684 81 1277 LEN=1394; translated  
MFATLESEINSALSESQKSSSTTKAKKRISGTPPTRYERAVVGLDKILAQVTKVDPDGV  
DIVCFGGDESPDWYRNKNTKGLSIVNEKPPRGACNMGAMDECMQEAQNKDITTRPV  
AVLVLTAGKPDDAEELNEALTRAVGTCAENFETCPLSVTFVQIGDDSDAEAYMKYLDHNI  
QAECAANGEMFDLVDTIKDEDIKAAMSEIKGTEESGKNGALIGAIAGAALGVGGMYLVNK  
QQAKKRTAGWGGKWKVSYDGEETITLLEVKDDQAGNLVIEGFPSPGEPTTGKYTTEEEHDEE  
FAISFIDPSGDWEIEGTVEDEHAIWSDGTRWDEIPPDNGHWATYAAAGIGGAAAAGATG  
YLLDKKFFNKASKEDQCDYIILLDRSAKMAVVDTGVTN  
>comp9409\_c0\_seq1; 149 309 578 LEN=774; translated  
MAIETPYDHIKTNMMLKKSVEGGARPKTREVWGPMECSMLCDGFEDTTNRPSMADICER  
LRKEISRLSDEDVDVYLDESRRSRLSNAD  
>comp9409\_c0\_seq2; 307 114 1431 LEN=1627; translated  
MVDKIGEHSVSHLLRVAQDVVEKKTEGSVLLDQNAEKRIKPKFQLKELSLGRVLRGGGFCV  
VNEVTNITLLDDDLQQPSVEMGIDENSIHNIVQDRSFMARHTIRQGKDYRYAIKRVQDKS  
KTDAQHYVNSVVDLATEARFLAVIRHANI IKMRAMDDGSFYTDGFFVVLDRLYDIMPTRL  
KKWKKKEGGTLKKAFAKSKDTKKLFWVERLTVAYDLACALSYLHGMRVYVRFCSIATEMND  
XTCDGARDRNTVGHYLLYTNFHYXSLLSVSVIYRDLKPDNIGFDVRGDVKIFDFGLAKE  
IDPRTRLEDGTYKLTGDTGSPRYMAPEVFLSKTYNETADTYSFCVLCWQIMAIETPYDHI  
KTNMMLKKSVEGGARPKTREVWGPMECSMLCDGFEDTTNRPSMADICERLRKEISRLSD  
EDVDVYLDESRRSRLSNAD  
>comp9409\_c0\_seq3; 394 114 1298 LEN=1494; translated  
MVDKIGEHSVSHLLRVAQDVVEKKTEGSVLLDQNAEKRIKPKFQLKELSLGRVLRGGGFCV  
VNEVTNITLLDDDLQQPSVEMGIDENSIHNIVQDRSFMARHTIRQGKDYRYAIKRVQDKS  
KTDAQHYVNSVVDLATEARFLAVIRHANI IKMRAMDDGSFYTDGFFVVLDRLYDIMPTRL  
KKWKKKEGGTLKKAFAKSKDTKKLFWVERLTVAYDLACALSYLHGMSVIYRDLKPDNIGFD  
VRGDVKIFDFGLAKEIDPRTRLEDGTYKLTGDTGSPRYMAPEVFLSKTYNETADTYSFCV  
LCWQIMAIETPYDHIKTNMMLKKSVEGGARPKTREVWGPMECSMLCDGFEDTTNRPSMA  
DICERLRKEISRLSDEDVDVYLDESRRSRLSNAD  
>comp9410\_c0\_seq1; 160 1 931 LEN=1046; minus strand; translated  
XFVLFVFCVSDSGVPCFAPQRPPPLRLLPGSGLGGGPDVLPVQVLEADLRDVVVGDQ  
PGGSPRCQGGFDVPAALLLVLEEAQVVGDEAVPAARAGDDDDAVLVGVLRRELLGGPGV  
ADGAGKDDRQLFAACLGPGEALFGGGGFHFVRGGCDRGPASLPKAPLEGKVRMPWARG  
KGGSAQGARFGPWPVRI SGRAVPPNRAAGTGAASRVHMGRGGERAGSLSARDRXPPTKDA  
EPLRQASLPPSTMLVWAACSVRLGALGGAVLLLVLCLGTNRTRLRGIDCLPACLSALVVG  
VLCVVGAV  
>comp9411\_c0\_seq1; 179 175 813 LEN=1321; translated  
MPAPPTLNADALTEGSVAAKFLALIQTFDDLTGAPEWAQSSRTIGIVTAALLFVVRKILG  
KKYGVNWCSFVHACVVGLMSFVGVWLVNFGAESLTGTTEPLGQILCKGPLTTFHSIVAAI  
TMGYGVFDIAEGMHLAKADFIMHGIATLSIMAYFCEYGVPEIILPMLLMEISTINLVFLG  
ASELSEKGIIVNIVIFTLNFTFRIVACPYLW  
>comp9411\_c0\_seq2; 180 175 930 LEN=1462; translated  
MPAPPTLNADALTEGSVAAKFLALIQTFDDLTGAPEWAQSSRTIGIVTAALLFVVRKILG  
KKYGVNWCSFVHACVVGLMSFVGVWLVNFGAESLTGTTEPLGQILCKGPLTTFHSIVAAI  
TMGYGVFDIAEGMHLAKADFIMHGIATLSIMAYFCEYGVPEIILPMLLMEISTINLVFLG  
ASELSEKGIIVNIVIFTLNFTFRIVACPYLWWEIFSTAWEHKENPFSQACLPHWFAYV  
VFVFGVYQNI  
>comp9412\_c0\_seq1; 504 127 1569 LEN=1961; translated  
MWYYYLAAGLFTFWWFALRPRGGKDSPLVTASTVVRIPLVGVIAEFLSNPNEMMKRCY  
KDYGEVFTVPIFHKRITFLIGPEAQELFFKSGDDVLSQDECYHFMQAVFGPGVVYDATRK  
KRQMQFQTMANGLRTSRMKTYPKIQEETEKYLNEKMGDESGTVLDLYQALSELTILTASR  
CLHGDDVREHMFADLQNLHYDLDEGLTPLTVLWVSHAPTARHKKRDAAREELVKLFGKVIK  
ERRENPERSDGTDILSLFMDMKYKDGTLVTEVETGLLIALLLFAGQHTSCVTSTWTMLLL

LHNPKVLERVMEEQDQFSSKEVLELDDVQQMSLLHNCMREALRMCPTFIMLLRQVMKDTSVTVNGKTHRIPKDDIVAVSPTVSMRLDSTFKDANTFDPDRYLPPREEHKTPYAYLGFGGGMHSCMGQVFAYVQVKTILSIIILKRYELTPEANKLPDIGYNDMVVGPKGNCNVHYKKKASL  
>comp9412\_c0\_seq2; 445 928 1986 LEN=2378; translated  
MANGLRTRSMKTYIPKIQEETEKYLNEKMGDESGETVDLYQALSELTILTASRCLHGDDVREHMFADLQONLYYHDLDEGLTPLTVLWSHAPTARHKKRDAAREELVKLFGKVIKERRENPERSDGTDILSLFMDMKYKDGTLVTEVTEVTGLLIALLFAGQHTSCVTSTWTMLLLLHNPKVLERVMEEQDQFSSKEVLELDDVQQMSLLHNCMREALRMCPTFIMLLRQVMKDTSVTVNGKTHRIPKDDIVAVSPTVSMRLDSTFKDANTFDPDRYLPPREEHKTPYAYLGFGGGMHSCMGQVFAYVQVKTILSIIILKRYELTPEANKLPDIGYNDMVVGPKGNCNVHYKKKASL  
>comp9413\_c0\_seq1; 190 1755 2193 LEN=2193; minus strand; translated  
MLPNESLHRRNCHPKHSFKRVSNVRATTKIDGSHVARSEMVGNDRSITSQCNTSCRKIGKQAIHNNVSSRQQRKDMTVGFEISIIITHSDRTSSCALYDAVLEHNILAPYFYPVETGIDKPAIDELYLVSVYFVSESLFETEVDX  
>comp9413\_c0\_seq2; 182 1755 2193 LEN=2193; minus strand; translated  
MLPNESLHRRNCHPKHSFKRVSNVRATTKIDGSHVARSEMVGNDRSITSQCNTSCRKIGKQAIHNNVSSRQQRKDMTVGFEISIIITHSDRTSSCALYDAVLEHNILAPYFYPVETGIDKPAIDELYLVSVYFVSERIASKSASX  
>comp9414\_c0\_seq1; 419 90 1028 LEN=1249; translated  
MERLHQLMRGMPEGAGGLGAGAGSDSPTPDCAEKVHVSSSLALLKMLKHGRAGVPMVEMGLMLGQFVDDYTINCVDFVAMPQSGTSVSVEAVDPVFQTKMLDMLKQTRPEMVVGVYHSHPGFGCWLSSSTDINTQSSFEALNSRAVALVVDPIQSVKGVVIDCFRLINPQLMMLGQEPRQTTSNIGHLQKPSIQALIHGLNRHYYSIVIDYRKNELQMLMNLHKRNWTNGLSLEKFEHQQSNDLVEKMLKLTDDYNERVKQEEGKTSEQILVDNVGKIDPKRHLETVAELMSSNIIQCLGTMLDTPVVF  
>comp9416\_c0\_seq1; 704 269 2563 LEN=2682; translated  
MERTEMQEYDRQQSCSHTTKLSPKSPSKDDKYSINIGCDSQESYSSSSTADKYSVNISGEMKKHKKPVRKRLGSRMLKDMI TPEEQKISERDDDRQQMSRQQFRPPRRSKPKRRLVFTSPRLISSDEDLFPFDHSVYRESNQRWQQISDQAGCHRQDGTVMNIGKRPSTPTAYRIGMVECAAIRVRSNLNLWDHEKDTLSDWLDMISEVFNLEHLTLTEDIFPGEDDMAVSARMRRLYVLSILPNLKSIDDMAITLKERKMTNPKGYCENKQSKRHFANSSNKSINKGVDHKMSRVVMVPASVGSDEIEVEMLVSELKDMKF IETGTTECTSPTVNSESTISVIDSNDELSENKGRHVRLLDVNNTYTEDLDKCSNNSIIQRVRTALTEHEDTVMVHKQAEDDTGGGYLGSAKKEFLKNDCHIISTNIGNRSTINDDEIREGIARGVRTIHDDSNDTIELISVPSNDVEWVSGVCGVLTFRREKSCAPEIRPPFSSRDVKRRDSTNQAYQTAVANLRKKGREKKKYCLKSCTPVQRQSMVVVPTPQVGCCQILIGGAESTNKFSPARRSQPVTRNMKPIEQSSDCIISANKQLPPSKSLSSPFPMQFRERQKPAANSIVVAQLQVKTSESMDSDESERTQSIGSRDIIDTGTIVGTL SVVSPTASSANGLNQNIKQGNKGELPPKCP SRGLRGQPTDHSSKMRKQKRLHPRKLNEASKETARSMSVMDLDEEDFLEENEENTEVEPMNGSSRILVDAIA  
>comp9417\_c0\_seq1; 122 1 358 LEN=668; translated  
XATATATATNHTVPRARGNESFPPRSLLEVEGNEGAILPKRIGSTKARHRTIGQENQKRKQALENKLPKRIRKKTALRQIVNAKVIDHKVVFIEDLVQPERGGQGTFREILQPSEPKEE  
>comp9419\_c0\_seq1; 405 271 1710 LEN=1923; minus strand; translated  
MTACTKIDLLKFIVVTFAAFIWKAEADECSQSEFATTTSCDNFLEEFRLLIESGNLSLAR RKALEAMHDRTSNRCSENQISTFYVASFQGTYDAIGNDFLTKIQESVSTKNSSYIRAKSDSPNCMKLHIDWNDVNIIEFWDRHCSLLPVRETVPPTLSSPSFAEIPRFQYSSQTPCCEFCAGSSTYLRLPALKEPAIRLNIQHKNWDQKGRSATAESVRTVFDLEQDGYLRPFVAGILWPTGYLLSLCLGDI FRCPIPELHNLVLDYHSEIRSKEALNANEKCLNHS PHAKCKPWVVA TDLAPHALALAIANGKRNLDVLSVSLVDHFNQSSVKEMKSKYFFQEVKKTASMYEKEEQNYARSIGFPLVFGSSQLQGLFQDQDKDCALWKSLEALIDMNNPNALAILVHNRADPLRLPN DANFSFRLVRRISGSSEVFGNMKTRNGDTSEFEIYVFORQITRHSKARSLPTSIGSEEL  
>comp9420\_c0\_seq1; 64 2241 LEN=2386; translated  
MASKKHISRGKKGKDSKYHRHQHQKDRGTGKSKEQESHNGEDDNLGLVVSNSQQGTKFSIWLFFMSSLVAIGAVCYRVYVVKYSSVHVFAFRSTSESKTSLSELDIACERSHKATDNVFA YCNRQFLDIKDETRTIVA AKRFRGTGQKLLQIPRSMQITTTIDALRHPKVRELLMTNPRHPI TGKPLHPKAYLAVHMALEFSRSLSGDEIKSMNDDSTFRLNQVRRAYLDYLPKHQDFAKFH PLVWNNKYMAAERIDDGPASSLTDHLVVRTWRWSMESEYRALCRASLPGEDSFGALVSMED WVAARLVNTRSFSDSDPDISDKELEAYRPFYEEETIHGNNDGEDEEDSFFASCRNTLMRS CMVPLLDALDHHKEPNVQWNFLENDSDASIAQTKQSFVAYAARDVDLGAQLLDSYGSQFP DPTLFAQYGFVNSDRSGSRAALLAAYHRILDTDFEDTTVTDMIREDLQOYLAFQDGYQTC

YNGDASRVTRGEQENEKARLRFQEVKFKALSAKSNLLSSWSISLPPRRDGRLRLEEDDGS  
IYKGIQNAVFTCRLLAMTHRDFGGKATEMLETIASADHPEHYHINVSTDEATRNGLEFRT  
WHVMTRLAEAMRSRILLSLVKLDTRNESKYNTDSIGSDMDWEIEVEISRRLESGAIGDTG  
SPEWARTFVLLGGELEALSILREHSGHMKTMFLAEKQKWSKRVKTTTTISNEQLNEEDFFVR  
QHPCK

>comp9421\_c0\_seq1; 883 1 2638 LEN=2739; translated  
XRKQTTAKPDR LGDDATGECKRSGNNSFSMSEKRIGKQRRYMRLSTSPVPRSLPLASLLG  
LVLLLLSVPWFLATDGVSSFPNPTTHTASPGSPRASRVGRCLRASFFDNESDSSRGGGTG  
NSEDDLNLKKEIRERQLRDAVIEDLFLSQGVRPTNTQSPSSFVSLSLVGQKPLAASMP  
SYDDKEAEKKDDRNEKGRKTSFASVLVLAPRNDNDFPLDKNNLGSDEDSISIRQPLPAL  
FLPLTAPIESRLQLLSKVYEGKPVSSLTSLILWNLNLINRDGSLFDNIPWNQWTKDPDGK  
NRDPAGNFVDEKSRYGKRDAFNRFIGKDSNSKTISESQRRYWEKKLSTLLGEKNNDGDGA  
IDQNVTDEVEDSDSSFSLSFLSKRVLELRIREIRMEIAEVDSQLAVSRNNDISTSNLQEL  
EDTRVELQOTLHEAERNLSDLLSSMSSTLSLSDTEATDDRINLFDRIARFALDISMPFRT  
QKEAPYRGATGYAPRLSDTEDDSDVEFYRSPYDLLNEILSDQLNAEVIGCVLENTSWLGG  
NLALEGAVLRRRTPVVESTLMGETIRAPDRDEDFGNSVKGGEIFVVECDGDEAIGMALS  
CNLPVKIERTIFERSIAGVPSQPTAGSDQKDANGNAPKSKKFGTYKNIKENIPYWKPM  
AGISLHVEGDRTNRDAERLSPLSIPRTTSSLFDSIFEPESNQGEDKTPSSMFPTDNP  
IKSIDQLDRLKDGDKAKTLLEMSNFSGRLPRPRTVRNAPADENPLDNLPLIDEAVRSEYKI  
REAERQGDLDLANELKANKSELQKAREKVDAARRDGKEDLARALEDETAFLKADVTQ  
DDGAYSRFLDRDDWYERDRQKTAARVKKSSFGNLLDGIE

>comp9422\_c0\_seq1; 773 256 2787 LEN=3194; translated  
MSTSLWAARTVSRASLRQRNQLWPLAASAAHPRFREAFFPARSFSAEAGASSPPGDAPP  
FRKVLIANRGEIAIRVARTCRRLGIPTVAVYASNDTSSHVSECDEAVCLGTGGVSSYLD  
TDRIAEAIRSTEADAVHPGYGFLSENAGFAEAVASLGSKGETVAVLGGPPQAIRDMGCKL  
RSKAIAREAGVAIIPGGESEGALDSLEDALEAMRKSGSSLRYPVLLKAAAGGGGKGMRI  
YDDRELIEAYPMARSEGLKFFADDRLLLEQYLEEPHIEFQVVC SKATGNGDGLNADGH  
SSNSQIDVAIFAERECVQRNQRVVEESPCLL TEETRKMMEQTLLCQSVGYEGAGT  
VEWLVVGGESNRDQAQDFYFLEMNTRLQVEHPITEAVSGGLDLVEAMLEVGAGRGLPREW  
YETAEVVEEAGGNRMLVMPWKGHAI EGRIYAEDPLRGYLPSTGPLL P YMEPPRAVRVSD  
GGASSSSWAGTDGVASYLRLDSGVVEGHVVTFFYDPMLSKII SYAPTREEAIDVLSEGL  
DSYVIEGVNHNARLIQAVLRHPSFQKGDTPTSFLETHIPDFGGYSVRNGENETEDPPSL  
TAREEEDLAVAAALIWRERERLLGRPPTGRAVEDENGQRRDFVVRDLGWAGGWGDGAIS  
VALDEGRTEGLAAGRRLAADPSDQLESFSIAIGPGFSIDFENHLASMTLDGTFRTVQVLG  
EQPSGELRVQMLGARYEGCLVQSPREYELSRHVLPPVANDTNTVLS PMPGTLIGFSGGV  
EEGSFVEEGQELCIVEAMKMQNVVRAPRAGI IARLRVDEGAALVTDQVLM EYEAEEGDEP  
TAA

>comp9422\_c0\_seq2; 720 256 2950 LEN=3357; translated  
MSTSLWAARTVSRASLRQRNQLWPLAASAAHPRFREAFFPARSFSAEAGASSPPGDAPP  
FRKVLIANRGEIAIRVARTCRRLGIPTVAVYASNDTSSHVSECDEAVCLGTGGVSSYLD  
TDRIAEAIRSTEADAVHPGYGFLSENAGFAEAVASLGSKGETVAVLGGPPQAIRDMGCKL  
RSKAIAREAGVAIIPGGESEGALDSLEDALEAMRKSGSSLRYPVLLKAAAGGGGKGMRI  
YDDRELIEAYPMARSEGLKFFADDRLLLEQYLEEPHIEFQVVC SKATGNGDGLNADGH  
SSNSQIDVAIFAERECVQRNQRVVEESPCLL TEETRKMMEQTLLCQSVGYEGAGT  
VEWLVVGGESNRDQAQDFYFLEMNTRLQVEHPITEAVSGGLDLVEAMLEVGAGRGLPREW  
YETAEVVEEAGGNRMLVMPWKGHAI EGRIYAEDPLRGYLPSTGPLL P YMEPPRAVRVSD  
GGASSSSWAGTDGVASYLRLDSGVVEGHVSSAVWRSRNARLFRRLACPA SHDVFFLFL  
CLSCCLFSIFLNGVRHGIRCSHTTVPFFYDPMLSKII SYAPTREEAIDVLSEGLDSYVIE  
GVNHNARLIQAVLRHPSFQKGDTPTSFLETHIPDFGGYSVRNGENETEDPPSLTAREEE  
DLAVAAALIWRERERLLGRPPTGRAVEDENGQRRDFVVRDLGWAGGWGDGAISVALDEG  
RTEGLAAGRRLAADPSDQLESFSIAIGPGFSIDFENHLASMTLDGTFRTVQVLGEQPSGE  
LRVQMLGARYEGCLVQSPREYELSRHVLPPVANDTNTVLS PMPGTLIGFSGGVEEGSFV  
EEGQELCIVEAMKMQNVVRAPRAGI IARLRVDEGAALVTDQVLM EYEAEEGDEPTAA

>comp9424\_c0\_seq1; 952 1 6398 LEN=6507; translated  
XEAGYSDCIERQGEDPCRSILQRPALIAAATKSAAGDDETNPDQSLVRAERSWDKAPTID  
VRAAHWEVAHQTAEA VRRFLDRREELRSTAREIESLEASLVLHRKNTDAIQKITEVGGD  
TTMTAAEKIGTIGTYKSSQSSDRVISQLTRKLSDLRSSHESFAMEVDRLESGVNALEQR  
RQTLRLRAFRDPFAPWKGS LAKGSRVGGCFALQTVLGREQGWSRGRLPLSGARSSLP  
RGPNSHFL ECRKNLLSTRLSHAVTINAHMNCVPYCLRFDR TGRYFVTGADDFLLKVFYI  
GAAQSCRKRSGKKNKSRRLRCNYGANFRGAVLVCTLRGHAGVINDIAVSMDCFLATASVDGDV



RVWGLKNGSPVAILRGHKGGANMVSWSALTPYRLVSTGSDGFARAWDIREACLKRYGSIV  
NQRGEYNLRLTEEETKAQDKSRKGRHHQSSEKSKSDDLPLPLPPRGESSPASAPSLPNVP  
TIAPDGTGSAVSREIRPPIGAAAAPSSYSNNYNDNDIDNGIIVPPLPAAVPPLGQGADG  
RNQNPGGFIEGAADGVGPGDFVANDLIDEGVKLLSKYQHGTIQEEHGPGRSRRSAVNV  
CVSRCPGLGHFVTGSDDGIIRIWEDVDDSSVAIVDARLSSDRNLDKLLRNTNDSQRGADK  
QPLLKLMGHVSTITDLAYSHAGDRILSASQKDGVVVRVWNIGMATTKRTGHGIEFKDKRVT  
QIVINLVHPFSNKTSQPTRRRRPGNAARNAGSKVCCDVAVWTHDDSCVVTSQCVLVKENK  
TDIQPGSHFICMWDSESGKCLISISGAHTAQCVLIPHPTDASICTASTDGFLKLWDWS  
KGCIFTHHNKVEFGPTDPNNRSKIGGYLDGSFNPDGSALVLTDDDGFIITVLSISENDN  
PPNTGIGLEWMREQYFSNDYDLAYDRNGYCIKESERPPHLAPKGSRCANHGAPNSEEI  
NETFQKLLGPSPLPEKPCSWQREQIRARTYAKEYIVCSSHQKPTVRVSVREFDPQSTVII  
RGIDHRGADNARLPVSAASAFGSSSHQGGTRNQPSASTRTMSANYRYLDYDDLIRREGNP  
EEAEFDSDEEFQPTAARTHVNRRNVEIESEDEDLDFDDLSTYSESNRRRSRQRNQS  
SSRTTEERRVRAQRRASDQSDTFVEIGSDELIAQFVSSNRTPSGSYVRDYTINGHYWRL  
KSHADAVRVRKWLEREESDSTYFGRNPYTPQMGSIVYIPRAHFETIKECPSLSPPWQS  
WPTGAAPVVRFCVVRGVRFRFPYEDYFRNKQHAKCTSIVAILTLEVTGIPEISDDREFPW  
PRPSFIEPTRPSIFELSVFESSCEYIIPETLYTSRIMALESHIRSRNNGASGLEVDLYY  
EQEQGSDSLKAWPATIEEILPDEGHSDVHLRGSFGVQVCDGSEENRDFVSPWELNTEG  
VNLTRPCISEVEKESVLKALNCLLRKEEIANHLSMPVDQERYCDYDLMIEIPMDLMLIKR  
RLAANFYGSKLAVASDLRLIRDNCIKYNTDENLMSDISIKMCDEFEEKVLSDEERSQMIS  
EVEVDKIQKEQAEGRQVSSLRIRLSARTVQEATQAAGSSGGRYTSLDRTTTQGOSSLES  
PAPENVSTQRQRSRRETNASDVAREVNSRSRGRNDETDLVGMAGLRSESRAPRIDTAA  
SNIGGRTRMQRMENNLSPDIRRSRTRRRQGVTEGGPGDRRSLRIRNDVRQNSDRSAPVY  
REESDDESEEAIVPTRTSRPEGTRRSRNIELRNSSQIRQNGGTDSTSHSVPPSRGSTR  
AAARASRNDSGTRSSYFEKRIEEEESDRKEEQGYESHQKQSDSEADSKYSSAAEEESVSS  
DGDLSVEEGLSPPAKRSRTRCSRVRNASPATPDQEATSRQSSRNAGRQRTKYEEVDSVD  
EYAAESEDDEEETAPVAVPRTSGRLRRTISPRWTGDDSQSDDDEEESDEESLPTKRRSAS  
KRKRQPRKQSPPTTKKVRGSDVDELPELSKWPDIGVGNITRVTRAILTRVLENDELDMFSK  
VVEAYPSIAKEYLSLIKSPMDLRTIEEERLNVDYSIQMLQDDLVLVLMFRNCCTFNPNDF  
GMMARRQWEDVGQIFADVCKKEGVLLPRRWK

>comp9426\_c0\_seq1; 1025 1 3103 LEN=3146; translated  
XERIPCQTIVCNSDKTEILLQFVMSAVPPPPNGQVLSLVSALSQTANHDLHVQAIQARDL  
ALSSSPDSYGNLCLQLAYLMSGSDQPETLLQRIPIASELEIWRQTDPNVTSQIQANPSMWV  
PFGQMAGLILKNALLRPPSPQGGTGTASLQSEVAKHFKEVMYGLSLSHKELRNVISSLI  
ADCSVSPNCIQPFLTIQNWPELMPALLHHLNPTNPNPDHATIGSLLTVQKMMEDDPDQIP  
TPDIDALIPLLLQLFQSPDETKRVGSLKTIVACLNFGLVPSLVLHFSTYLEGLSGLATD  
PSMEVRKWKVCRSINTLLEQHAQYIQPQWGSICQFMLOSTIQQQNSSDGQIEVATEACEFW  
LIFGTLDMLLTTDMLQIVEQLLPQLIPVLLNNMVYSNDQRIDLEAQNEIDMEEQTNATQ  
AMKPVFHKTKNKHENGQNGNGNDDDDDDDDDFMDDNEWNLKRYAGASLDCLANLYGA  
GPILPNLLPSLEGLSSADPWVQEASILALGAIADGCREEMQVHMSKLFPPYLMQLLSTPE  
APQYLPQVKICAWTASRYSEWVNESQTGSTGHLLAQMTVEVFLGRLQDKNRKVQVACGS  
ALGELVETAGDLMAPYLTEIYPMLVAAMSRYQGRSLVIFDITLGIMAHEYCGPEIGENNL  
NVYVPHLLRIWNELLRQDPTNRITLPLMETIACISIGCVNYQPFALETFEISMAVIEQM  
QLMMATADSLAYEDADPMICATDILDALCEALGPNFASLVLSSSTRYGQNFINVLHALCTH  
QHIGVRMSAMALMGDLARNAPSMIEPALPQLLQDALSNLDSIVDDMSGNLHTNAVWAI  
ICVKCGGNSGPEPYAPALMQHLISILMGNNGSGRVSSILGLAENAAACVGRLANVNP  
APDLPRFLLGWTDGLSKISDATEKRDAFTGLCSALYANPQAIQQVQASAPDVIITSIMFAI  
TSWHIPADFPDDINDFLNGDYQFVFPPEEAALGNQLAQLIQNMKTSVGAEAWKAVNSRL  
TANLQRLFREYHV

>comp9427\_c0\_seq1; 386 79 1341 LEN=1640; translated  
MILKIPKADESICTDLKQAIPASPNCCCQVELHLLAESKSVLYSLDIDGNRKTQGGDE  
FYIRYEEYTLVESESENDGTSNGTDNESNLKEIIVQVAFVTECDGSYTLDFCTTPMN  
PLLPERKDERSGQWTLNDEDDNADKEIVRTLTVYFEYTDNIGFVSPVVKQDWMNGGYSHK  
KYSVDLPSRIQRPLMRQFVPPPTDINLGEFDQVFAFGDSTFCQFVRQRPNKKGKYFQPN  
LRIIGEKIRMGLNSKTVGSLLELIRGDDIEKELSNDCINTKKALVVGSLWDILSADDTI  
QGSNFDHYEACKEYVCRLRQRYPGVTIVWKSMAVHIHWVDLKRVEHQRATATLFGIN  
RIKYSASRSLFLYQLQSSLMKELQVPLIDLYEATFLSADLLYPSDGRHYRPDLNRRMLS

W  
>comp9428\_c0\_seq1; 1324 43 2318 LEN=2752; translated  
MSNARKLQTEIDRVMKVDEGVLELDFEIVEKVSAAEQQNQKEKYEMDLKKEIKKLQRLRD

QIKSWIGSSDVKDKPELLDARRLIETKMEAFKYCEKETKTKTYSKEGLAKAEKLTPEEEA  
KKSTCEWINDIIIEKLNQMVEDRDLEVERLAAGKGKKTNKNLIDDCNHFLQMHRFHLTKLE  
GIIRLVNNDVLSVEVVDPIKEDLDYYIDSYEDDDYQQAYDEDDFFYEALGLDDLQVVNVDR  
VTQASAEKEKAKKNDPYSDLASSSSKSGSEKSGKSKSSSTTMIPLTIGRARKGKSKST  
SSSKSSSANTADASGDDSTHGNTPTKRRGGLGGIPTPTTIPAASTVSNLGGSSMAAIL  
KRETEQQEKERAQKAAQALAAEQRLRLQQLQAQQQAALRAQQQQEQRLRLQQQEAQMRMQQV  
EAAAKQKAMQEQQAAQAAQIRQQQEAQIRQQQLQKAQQQQHQQQQSAGGAADANSKGG  
TGSTSSVGTSGSLDIIISGIGMSLGVPTSGGGSGASSVGSRGSQHRRGASNHSSDGGSS  
VNGAVLGSMMGAAPADGSVLQESYATLPSSNEHDRTTSRTNAYTPQNPYANTPASYPSTP  
NPIFENPSVFELGTDALFYIFYKQGTYYLAARELKKQSWRFHKKYMTWFORHEEPK  
VTTDEYEQGTYYVFDWETGWCTRIKQEFRFEYSFLEDTLQDDDSVGLIWSVLINRQPME  
VFADLFLDEFVHGWMDGFVNPYFGDELQPD SIQRKGR

>comp9428\_c0\_seq2; 1324 244 2477 LEN=2911; translated  
MKKVDEGVLEFDEIWEKVYSAEQQNQKEKYEMDLKKEIKKLQRLRDQIKSWIGSSDVKDK  
EPLLDARRLIETKMEAFKYCEKETKTKTYSKEGLAKAEKLTPEEEAKKSTCEWINDIIEK  
LNQMVEDRDLEVERLAAGKGKKTNKNLIDDCNHFLQMHRFHLTKLEGIIRLVNNDVLSVE  
VVDPIKEDLDYYIDSYEDDDYQQAYDEDDFFYEALGLDDLQVVNVDRVTQASAEKEKAKK  
DPYSDLASSSSKSGSEKSGKSKSSSTTMIPLTIGRARKGKSKSTSSSKSSSANTADA  
SGDDSTHGNTPTKRRGGLGGIPTPTTIPAASTVSNLGGSSMAAILKRETEQQEKERAQK  
AAQALAAEQRLRLQQLQAQQQAALRAQQQQEQRLRLQQQEAQMRMQQVEAAAKQKAMQEQQ  
AAQAAQIRQQQEAQIRQQQLQKAQQQQHQQQQSAGGAADANSKGGTGSTSSVGTSGSLD  
IISGIGMSLGVPTSGGGSGASSVGSRGSQHRRGASNHSSDGGSSSVNGAVLGSMMGAAP  
ADGSVLQESYATLPSSNEHDRTTSRTNAYTPQNPYANTPASYPSTPNPFIENPSVFELG  
TDALFYIFYKQGTYYLAARELKKQSWRFHKKYMTWFORHEEPKVTDEYEQGTYYVFD  
WETGWCTRIKQEFRFEYSFLEDTLQDDDSVGLIWSVLINRQPMEVFADLFLDEFVHGW  
MDGFVNPYFGDELQPD SIQRKGR

>comp9429\_c0\_seq1; 281 179 915 LEN=915; translated  
MDDDDFAIDSYEEEEPFDEPKSERRVTRVMTPTPANAKNDRVGDEADMLSWTGSDDLDD  
GNAQNGTTSYEGRDAGYDRRTKSHQSNNHSSIEQRDDVDNDEVMSIHWSGSDDLADAN  
VNKXDDNKIDDSRDEINEFRDITYQEPSERYDKYATDTAHAIMSIRKDILEQIEEIEIDK  
SNSKERQQQKELDDVQNSGNGGPAIRRTRSIDNAFRQTRMIDNAVNYTKSPKIGDNGS  
IAAGSV

>comp9430\_c0\_seq1; 186 194 838 LEN=1426; translated  
MSTNDSKGGPASRPTTVMHGAIPGAIGVHSESIKTIETTKPPGPGGGSDGRAASAGTPAE  
FWVSVVARWKLFASSLYDSTVEFVAGFISDVLSHHVEKAVIDVIVRAINAFLDQEDIGS  
KMDVTARRVIYDREKAKEASRALGKEVLPMTGFVGGVAHSLTPSLMKKKKQSKKDREEA  
FDSCPSGFDISEGDDENSEDDGDGRGFGNSKKT

>comp9431\_c0\_seq1; 582 59 1903 LEN=1903; translated  
MDEMDELAFHETTXKRNTVEQKVCRTKTPVAITSDHKLLPFPTLNPGQFVTKFGVVEV  
VRDDRAIPTAVFPKDIQERHRKFKKSEASKVHKEAGKYVRRSSKLRVRRNAINAVYEKGN  
VHRRSIFEAYFDGDPHEMKSVICANKALVSGSTETILLSEADVTPLATKARDPKPEPESF  
PNRIVECIWIPDERTHVLSQLRNDPVKRDHGQRQTEQRCQKLFLLRRLLTEPYEKAIRVS  
YCSDCGRTFNSASSRRSHCVQKCKIQEAAIKKVKRDAIQSRIEREVCDILRFPERRKFVK  
KRKADDSMIDESGNKRRWKKKKRELSVYPGILIGMGFKLVSKRRINVPVVKQEGNQPLR  
ASLLRGDDDEMDDLLENLKGAFQIQKRKANDQKYGSMYAEVYKALGFKYPGKKKGANVGN  
NIGKKRRKRAVKPKPAPPKPLPPAIDV GALVDEIKSGRYPYIKVFTGEHQDFCIVCKK  
GGTLFCCEYCSNVEHFSCIRTKYTLKEPEPDED FMCHRCIGVILSRRARAERLLKQGM  
NEKKKEEKEKAQAVKSPTEGKEYEYMAAQAREVNELVELLKDSQIRLRSIETTKMNNIR  
RQVISGVYPDGYSPPX

>comp9431\_c0\_seq2; 625 80 2498 LEN=2498; translated  
MPSVNGNETLSPSGRRKSGSKLTRLLRGKPPSRTARSTATPLDEGNRSMERELRSKRPRR  
SIQRPISYTLGEGEHDEDDGVYVSRNEEKEEGDKSAGDVEDKQNNRYAGAGTKRKADEAM  
REQPPSLDKEKTFDCPHCEKAFKNLNGLYHIDKMVCRGEDGSRRKQPRRKS PRATATTK  
SKSAKFRGTVEERTCPHCNRLF TSALGARYHIEQKVCRTKTPVAITSDHKLLPFPTLNPGQ  
QFVTKFGVVEVVRDDRAIPTAVFPKDIQERHRKFKKSEASKVHKEAGKYVRRSSKLRVRR  
NAINAVYEKGNVHRRSIFEAYFDGDPHEMKSVICANKALVSGSTETILLSEADVTPLATK  
ARDPKPEPESFPNRIVECIWIPDERTHVLSQLRNDPVKRDHGQRQTEQRCQKLFLLRRLL  
TEPYEKAIRVSYCSDCGRTFNSASSRRSHCVQKCKIQEAAIKKVKRDAIQSRIEREVCDI  
LRFPERRKFVKKRKADDSMIDESGNKRRWKKKKRELSVYPGILIGMGFKLVSKRRINVP  
EVKQEGNQPLRASLLRGDDDEMDDLLENLKGAFQIQKRKANDQKYGSMYAEVYKALGFKY

PGKKKGANVGNIGKKKRRKRAVKPKPAPPPKPLPPAIDVGALVDEIKSGRYPSIKVFTG  
EHQDFCIVCKGGTLFCCEYCSNVEHFSCIRTKYTLKEPEPDEDFMCHRCIGVILSRRAR  
AEKRRLLKQGMNEKKKEEKAQAVKSPTEGKEYEYMAAQAREVNELVELLKDQSQIRLRR  
SIETTKMNNIRRQVISGVYPDGYSPPX

>comp9433\_c0\_seq1; 608 396 2856 LEN=3663; translated  
MARDLPRAFPCAPTSPAGPSXYLDGALPPGLPQDVVDDVSSLVRHSALNATTLKVLRH  
CELGSLTLNGCRGVTDEWLEPLAPSSTSTSSLSNAHSNSYSTPASSPPLAPVLDKRGDGT  
TMEAMNLDDSEVFYNAKHEASSHEDSGEEIDSSCSTSSFVSASSNPYYLSSSAAASGGG  
WKEDEPMGEENKEMSDAPFAHHPYGGEYSYTEEPQAHNFGVCITSNITLLDLRGSQRLTD  
RGLLQLSDLSSLEIAKLDNCHSIQGRGLVALARSHQLHTLSLASCRRLTDEAITNVSHLV  
SLEALSLDGCRCCLTDRSLAAIGNLVNIKKLDLSQCDLITDDGLEEEHCAGIEELSLGWC  
RTITDQGIETLSNQGRSENLRILSLARIPITNTGVQHLGKLLALEELDNLGCSAIGSFS  
LGNTLEYLTKLSSLDVSYCPGILYVYDVVNEYDSTCVFAQSAQFMLSFFHALPKGDLRKG  
XKIKSLKTLDVCYSAVRDSHIARLTDLPALEEINLDSCPIGDWSISHLADNDVVPNLVSL  
DLADTDLSDLGMVKISKFKKLRSLFYCNLTNSSLRYLSSLSLEVLNLDNRDIDNGL  
LHLKTLKLNKSLDIFSGRITDYGCTHIADIKSLESLELCGGGVTDKRGATLATLGNLETL  
NLSQNERITNRGAAALVSLSKLALNLSNTRVSNALVHLSGLRNKSLALYGCRCLEER  
ESSLLDRLESGLPNLKCIRLNNGSDDDGVIAPPGDTEDELDSETEDLVYRYNNRAASA  
RFQDSDDSDSEMEDNFESGEDDEDDDDLDSDSSFSDEEV

>comp9433\_c0\_seq3; 693 186 2854 LEN=3661; translated  
MGGACSMQRNERRNSGTRKNRNRCLGNNGSASPSKSPNHMCSRHAVVSAVPDDFISNLYP  
VEDNYVQNYDGSRSKSLSELCTDTLCRSLPYLDGALPPGLPQDVVDDVSSLVRHSALN  
ATTLKVLRHCELGSLTLNGCRGVTDEWLEPLAPSSTSTSSLSNAHSNSYSTPASSPPLAP  
VLDKRGDGTTEAMNLDDSEVFYNAKHEASSHEDSGEEIDSSCSTSSFVSASSNPYYLS  
SSAAASGGGWKEDEPMGEENKEMSDAPFAHHPYGGEYSYTEEPQAHNFGVCITSNITLLD  
LRGSQRLTDKRGGLLQLSDLSSLEIAKLDNCHSIQGRGLVALARSHQLHTLSLASCRRLTDE  
AITNVSHLVSLLEALSLDGCRCCLTDRSLAAIGNLVNIKKLDLSQCDLITDDGLEEEHCAG  
IEELSLGWCRTITDQGIETLSNQGRSENLRILSLARIPITNTGVQHLGKLLALEELDNL  
GCSAIGSFSLGNTLEYLTKLSSLDVSYCPGILYVYDVVNEYDSTCVFAQSAQFMLSFFHA  
LPKGDLRKGXKIKSLKTLDVCYSAVRDSHIARLTDLPALEEINLDSCPIGDWSISHLADN  
DVVPNLVSLDLADTDLSDLGMVKISKFKKLRSLFYCNLTNSSLRYLSSLSLEVLNLD  
SRDIDNGLLHLKTLKLNKSLDIFSGRITDYGCTHIADIKSLESLELCGGGVTDKRGATL  
ATLGNLETLNLSQNERITNRGAAALVSLSKLALNLSNTRVSNALVHLSGLRNKSLAL  
YGCRCLEERESSLLDRLESGLPNLKCIRLNNGSDDDGVIAPPGDTEDELDSETEDLVY  
RYNNRAASARFQDSDDSDSEMEDNFESGEDDEDDDDLDSDSSFSDEEV

>comp9433\_c0\_seq4; 589 396 2761 LEN=3568; translated  
MARDLPRAFPCAPTSPAGPSXYLDGALPPGLPQDVVDDVSSLVRHSALNATTLKVLRH  
CELGSLTLNGCRGVTDEWLEPLAPSSTSTSSLSNAHSNSYSTPASSPPLAPVLDKRGDGT  
TMEAMNLDDSEVFYNAKHEASSHEDSGEEIDSSCSTSSFVSASSNPYYLSSSAAASGGG  
WKEDEPMGEENKEMSDAPFAHHPYGGEYSYTEEPQAHNFGVCITSNITLLDLRGSQRLTD  
RGLLQLSDLSSLEIAKLDNCHSIQGRGLVALARSHQLHTLSLASCRRLTDEAITNVSHLV  
SLEALSLDGCRCCLTDRSLAAIGNLVNIKKLDLSQCDLITDDGLEEEHCAGIEELSLGWC  
RTITDQGIETLSNQGRSENLRILSLARIPITNTGVQHLGKLLALEELDNLGCSAIGSFS  
LGNTLEYLTKLSSLDVSYCPGILRSSWQKIKSLKTLDVCYSAVRDSHIARLTDLPALEE  
INLDSCPIGDWSISHLADNDVVPNLVSLDLADTDLSDLGMVKISKFKKLRSLFYCNLT  
NSSLRYLSSLSLEVLNLDNRDIDNGLLHLKTLKLNKSLDIFSGRITDYGCTHIADIKS  
LESLELCGGGVTDKRGATLATLGNLETLNLSQNERITNRGAAALVSLSKLALNLSNTRV  
SNALVHLSGLRNKSLALYGCRCLEERESSLLDRLESGLPNLKCIRLNNGSDDDGVIAP  
PGDTEDELDSETEDLVYRYNNRAASARFQDSDDSDSEMEDNFESGEDDEDDDDLDSD  
SSFSDEEV

>comp9433\_c0\_seq5; 589 577 2942 LEN=3749; translated  
MARDLPRAFPCAPTSPAGPSXYLDGALPPGLPQDVVDDVSSLVRHSALNATTLKVLRH  
CELGSLTLNGCRGVTDEWLEPLAPSSTSTSSLSNAHSNSYSTPASSPPLAPVLDKRGDGT  
TMEAMNLDDSEVFYNAKHEASSHEDSGEEIDSSCSTSSFVSASSNPYYLSSSAAASGGG  
WKEDEPMGEENKEMSDAPFAHHPYGGEYSYTEEPQAHNFGVCITSNITLLDLRGSQRLTD  
RGLLQLSDLSSLEIAKLDNCHSIQGRGLVALARSHQLHTLSLASCRRLTDEAITNVSHLV  
SLEALSLDGCRCCLTDRSLAAIGNLVNIKKLDLSQCDLITDDGLEEEHCAGIEELSLGWC  
RTITDQGIETLSNQGRSENLRILSLARIPITNTGVQHLGKLLALEELDNLGCSAIGSFS  
LGNTLEYLTKLSSLDVSYCPGILRSSWQKIKSLKTLDVCYSAVRDSHIARLTDLPALEE  
INLDSCPIGDWSISHLADNDVVPNLVSLDLADTDLSDLGMVKISKFKKLRSLFYCNLT

NSSLRYLSSLSSEVLNLDSDRDISDNGLLHLKTLKNLKSLEDFSGRITDYGCTHIADIKS  
LESLELCGGGVTDRCATLATLGNLETLNLSQNERITNRGAAALVSLSKLKALNLSNTRV  
SNGALVHLSGLRNLKSLALYGCGRGLEERESSLLDRLESGLPNLKCIRLNNGSDDDGVIAP  
PGGDTDEDELDELDSETEDELVYRYNNRAASARFQSDSDSEMEDNFESGEDDEDDDDLDSD  
SSFSDEEV

>comp9433\_c0\_seq6; 608 577 3037 LEN=3844; translated  
MARDLPRAFPCAPTPSAGPSXYLDGALPPGLPQDVVDDVSSSLVRHSALNATTLKVLRH  
CELGSLTLNGCRGVTDEWLEPLAPSSTSTSSLSNAHSNSYSTPASSPPLAPVLDRGDGT  
TMEAMNLDDSEVFYNAKHEASSHEDSGEEIDSSCSTSSFVSASSNPYYLSSSAAASGGG  
WKEDEPMGEENKEMSDAPFAHHPYGGEYSYTEEPQAHNFGVCITSNITLLDLRGSQRLTD  
RGLLQLSDLSSLEIAKLDNCHSIQGRGLVALARSHQLHTLSLASCRRLTDEAITNVSHLV  
SLEALSLDGCRCCLTDRSLAAIGNLVNIKKLDLSQCCLITDDGLEELEHCAGIEELSLGWC  
RTITDQGIETLSNQRGRSENLRILSLARIPITNTGVQHLGKLLALEELDNLGCSAIGSFS  
LGNTLEYLTKLSSLDVSYCPGILYVYDVVNEYDSTCVFAQSAQFMLSFFHALPKGDLRKG  
XKIKSLKTLDVCYSAVRDSHIARLTDLPAL EEINLDSCPIGDWSISHLADNDVVPNLVSL  
DLADTDLSDLGMVKISKFKLKRSLFYCNLTNSSLRYLSSLSSEVLNLDSDRDISDNGL  
LHLKTLKNLKSLEDFSGRITDYGCTHIADIKSLESLELCGGGVTDRCATLATLGNLETL  
NLSQNERITNRGAAALVSLSKLKALNLSNTRVSNAGALVHLSGLRNLKSLALYGCGRGLEER  
ESSLLDRLESGLPNLKCIRLNNGSDDDGVIAPPGGDTDEDELDELDSETEDELVYRYNNRAASA  
RFQSDSDSEMEDNFESGEDDEDDDDLDSDSSFSDEEV

>comp9433\_c0\_seq7; 674 186 2759 LEN=3566; translated  
MGGACSMQRNERRNSGTRKRNRCCLGNNGSASPSKSPNHMCSRHAVVSAVPDDFISNLYP  
VEDNYVQNYDGRSRPKSLSELCTDTLCRSLPYLDGALPPGLPQDVVDDVSSSLVRHSALN  
ATTLKVLRHCELGSLTLNGCRGVTDEWLEPLAPSSTSTSSLSNAHSNSYSTPASSPPLAP  
VLDRGDGT TMEAMNLDDSEVFYNAKHEASSHEDSGEEIDSSCSTSSFVSASSNPYYLS  
SSAAASGGGWKEDEPMGEENKEMSDAPFAHHPYGGEYSYTEEPQAHNFGVCITSNITLLD  
LRGSQRLTDRGLLQLSDLSSLEIAKLDNCHSIQGRGLVALARSHQLHTLSLASCRRLTDE  
AITNVSHLVSLLEALSLDGCRCCLTDRSLAAIGNLVNIKKLDLSQCCLITDDGLEELEHCAG  
IEELSLGWCRTITDQGIETLSNQRGRSENLRILSLARIPITNTGVQHLGKLLALEELDNL  
GCSAIGSFSLGNTLEYLTKLSSLDVSYCPGILRSSWQGIKSLKTLDVCYSAVRDSHIAR  
LTDLPAL EEINLDSCPIGDWSISHLADNDVVPNLVSLDLADTDLSDLGMVKISKFKLKR  
LSLFYCNLTNSSLRYLSSLSSEVLNLDSDRDISDNGLLHLKTLKNLKSLEDFSGRITDYG  
CTHIADIKSLESLELCGGGVTDRCATLATLGNLETLNLSQNERITNRGAAALVSLSKLK  
ALNLSNTRVSNAGALVHLSGLRNLKSLALYGCGRGLEERESSLLDRLESGLPNLKCIRLNNG  
SDDDGVIAPPGGDTDEDELDELDSETEDELVYRYNNRAASARFQSDSDSEMEDNFESGEDDE  
DDDDLDSDSSFSDEEV

>comp9434\_c0\_seq1; 792 49 2865 LEN=2865; translated  
MNIIVLHTDNNKKGTPNIFLLPPVAKRRPMSMTTSTASRIEMASAANSLSTVLTSA RNKQ  
LSAMEQLSRITVAEALRNYKQQNEQEEMLQKQQHRHLLQLLQEQQHQRHRQHLQNO  
QKKLHNELQQRQLLTAPTQVKVAPLSSDLAQRLWLWELRNQSLEQQLLSKSI EVEKL  
KNLFLAEQRVGT SVLKSEAAQQRLSILKDTIEAQREEIAKLRFLQFAATTA AAAAVTR  
QNAATASISGASGIAAANASALAAATGLASQPMGGYCPVCR TVDHSLVNCGILRMHGYHVN  
LVAPEDQTNHPVATSRNKIDGILQQAVLVDLADLQQR IAVPSPLLNHYLGGQLITEEQK  
STAI PPRDYN SHEQQSEKVIDIL DSETE SDGNGKGDYENGDKNGAASDSV VDDNGDA  
KPRATSPKENGDESDLEDNEENKEADAYSKSDEGDEEESHAAAKADVATSADL L LFQEST  
TELAE INRDRGRKDRPIAIDLRLDASGEESDAPEYSQGFSTTQTGAIKLQDCMQDGGESP  
SSRQGGSEENRTGRHSTVPHCSGILGDFICKEIAETDDDEIKIVGETGKNALSDFAHPRY  
DCVAKPFDKNPTAFCSNICYVCDVKVSECESWIEGDQESDTGNNTTARS DSHCF AHRR  
VPSWKKRRGRLIAKRLRPERALKEIAIFLPDTVPTSLPRKRRTRGIMRYGQDEGYNTRGQ  
GKDETVNGSGSQGNTKSI GLGGYCSDRNSSGKRKKDPPRXPSQEF EKAKPSIAERKHG  
GAMRALLESNHADGPHVTKIKIQELKQNTTSKAFYIASNEELTPIVQRFQQKEKIFVSET  
NTASYNFYIASKTYDERTPTLHSQTLRVTE TRRPF SWKRRQQDARECFERGT AQW INFH  
YQWMI FVILNTRRWQNWQKRNTSDDNSKLVII EYSIX

>comp9436\_c0\_seq1; 153 188 419 LEN=419; translated  
MGTLLPDSVRWPPSSLPSSRFLKWFVALVVVALWGELRSSLSSATSGTSDCKQGLTT  
IAEPMTAASRNNNNNNX

>comp9437\_c0\_seq1; 351 145 672 LEN=825; translated  
MSKSSMNGSGVDPTTNGKKNANEKSISRKQKLEAVNASMRSNEDDLASSKVEVLLFQ  
NRVSSLESTILAGIQEKAKLLAAEETYSKSKSEDKTTDGQKESVQLLELQAKLKTSEADL  
ATNKLELSRLRDRVVSLEYKIIAEIQEKARINLMNEDGDAPEFSIVSPTKRQKKV

>comp9438\_c0\_seq1; 586 144 1373 LEN=1604; translated  
MAREKFERTKPHVNIQTIGHVDHGKTTTLTAAITATLSLEGGSSAMKDYADIDGAPEERARG  
ITINTAHVEYETQNRHYAHVDCPGHADYVKNMITGAAQMDGAILVVSAAADGPMPTREHI  
LLSKQVGVDPDIVVFLNKEDQVDDEELLELEVELEVRELLSAYDFPGDDIPICPGSALQAIE  
AITANPSIKRGDDQVVDKIFALMDAVDEYIPTPERDTEKTFLMAIEDVFSITGRGTVATG  
RIERG VVKVGENVEIVGVSETQTTTITGIEMFQKTLEEGFAGDNV GILLRGTREDIERG  
MVL SQPGTITPHTEFESEVYVLTNDEGGRSTPFFTGYRPFYVRTT DVTGAITAFTADDG  
SAVEMVLPGDRIKMTAELIYPVAIEDGMRFAIREGGRTIGAGVVSKIVK  
>comp9439\_c0\_seq1; 283 1 1821 LEN=1865; translated  
XVVLELARFDADDDLLRRGPLSVPGATPPHAPRMRDHPVPEHGAALAAEGGGDGDRDRDP  
PHRGPFWQGHPGAGAWWPGRHRDRHRHSSNDNDKRRARSRRVLLRMAGHDGEGNDERKD  
RSPGTERREPREASFLDKLVDGALFLDTGKAGANQAPPVSTVVVLLAASVPPLAVLPN  
PTARAWFLGLLGLFSVLSWCFRDPFGGEGGLADEREAEHGGGSFVARWVSLAGLGAFVS  
AGILAPLDSEAPAVAPAAGAVSRTGAPLLVAAAAAGLVLYALFSSGGQGPETNDENDDD  
DDSDGGDVRTNTDLSCLSESQVMASRCDPVGISAKALATRFQSEYGEQGYPCLAHEMDWV  
KDRLPGRVPVVPVQRLIDVLRGGFFDVKRTSEEVWHSESRPAAPGTDEEALVQKTCALL  
EQAGCTDVAPSSIVFGRIGGVEDPVQKKALVRIHRLRLRYHVNEAFLGIQPGDFAGAPSS  
AAGEAETEEARDERLGALALVLMHVAREHPDGNVAMRYMVRHLAGAGEEALGAGGGQGR  
TLRCREVRGEAKQRKTLACDAARVWFAAGDGGLTGWPSIASFGQQA AFRSQQAGSERPHG  
KFDLTS  
>comp9439\_c0\_seq2; 291 1 1445 LEN=1489; translated  
XKMCLSLEGDLRKTLLDADTLPAPNYPSQIQKAFSLRSTKPTSPRTDIVAASPSGHR  
LLLDPTEAGKIYIHGRYVTTWGKDPRIGGAMNCTALFGMDLHSPYWHGRIVDYDKLMIA  
YATLWTEILT DARLISRNI GGRLLSRLISGKDPFLDDDDGSDDSEDDSDENDDDDSDG  
GDVRTNTDLSCLSESQVMASRCDPVGISAKALATRFQSEYGEQGYPCLAHEMDWVKDRLP  
GRVPVVPVQRLIDVLRGGFFDVKRTSEEVWHSESRPAAPGTDEEALVQKTCALLEQAGC  
TDVAPSSIVFGRIGGVEDPVQKKALVRIHRLRLRYHVNEAFLGIQPGDFAGAPSSAAGEA  
ETEEARDERLGALALVLMHVAREHPDGNVAMRYMVRHLAGAGEEALGAGGGQGRTLRCR  
EVRGEAKQRKTLACDAARVWFAAGDGGLTGWPSIASFGQQA AFRSQQAGSERPHGKFDLT  
S  
>comp9440\_c0\_seq1; 712 1 2316 LEN=2585; translated  
RASDREAEGEFEFQRDASPTGMGIADLEASLARLHLGIACNGKDNANANANASGKVCTT  
PEMQAWTTELLPTPEAQEGATSAMNSVLAYAGDLLSGGAVLEDPIDRMLSDAARKCPHSP  
TYDPSASAETETDTGFFAAAGESTLPPYEHVRVGLVFWGSLALGVLVGVVALVSLVVERIV  
RRRNRWLEEDCPEPMRRI LSAKQAEDAREAGLNASTSAMVASPSIPFCVRWGMPVLVL  
GNIALFLSGHLNVGATVAISASLAGDTIAVDEFFSFSIARSTVDIWKAGGKELAILILVF  
SGIWPYTKQALTLWLWFVPPHRLSVSKRGSCLLWIDRLAKWSMVDIFVIVVCI AAFRVSV  
SSPDTLAFLEPGFY SADLLVVP RWGLYANMIAQLVSQVSSH FVIHYHRRIVAEATEAMAE  
RARDPLREEEGPPEPFGSQDEEGGSGARDGIPSPEDKGSRGSVLRFRSFSLYHGS DGEK  
LVVRGWISSAMAAMGLAVLVFVVVGCLLP SFSLEILGMIGIAVESGQEFEPAITNHSIGS  
IVGLLWEEAGFLDSAKAYTGIAVLGALFVSTVSI VPI LQAAGLLYQWFVPLTETKRN RMS  
VCNEILQAWQYIEVYLIALFVASWQLGPISEYMFNTYCGSLDGFFAQMVRYGVIEEEDAQ  
CFTVQAMLEPGSIALVVA AVLLALNSLVTKAAKQVAFDTENERFCLNYARVQCSQNDPT  
DDSGTSGSSHPGGSEEKCGTVAEAKNTNPIRIPVMFTDTYRWLLRSDCE  
>comp9442\_c0\_seq1; 647 369 2469 LEN=2792; translated  
MRIFMIATTTAVWTIAAILTASN SAFAENLRASTRNPTIANGGILSGNGNTAATLNDKTN  
KNNDDEE EPKERTNGDISPPAFDIDGEEKGFYDGLLLEQLSSFDETLPPSNSPQPTM PII  
KVTKPPGNLPTIPPSAAPTITLTDPPPTVPPTGTPKMSPTLRPTTESPSSSPTNPPTRSA  
TGSPTEPTPSKEPTKTPTREPTTEPTEDPSQEPSSVVSEGPTSGPTVSVTTASPTEMPTIG  
SSGPTGLPTTGT LAPTAAAPSTP SPTLAPVITTIPTPSPSLSNPGPTSSLSSASPSVSTT  
QKCNLSQEGRSALINIFLRVVS NPAEVDTPGSPQMLALKWMIDGDPMLCPQDKHLIQR Y  
VMAVFYFSTRGDRWIQCSAPPPEAANDA ESEA EDEQNANALCTIEVDGVDSNSHAWLTS G  
TECGWGVGCNEEGFVVR IEME QNGVGGT LAHEL SRLQNLRLNVLEEGILTGTIPTELGE  
IRSLEQIDLNFNLLQGP IPEELYMLSNLRQLDLNDNELTGSISTSI SDLGKLSFFQIENN  
LFSGTVPQTQMGELLALGTFHGTSSCTISSTRHKT SVFLFFHNSMHDLELVFVCFSLSR  
TFLFCSGIALAAFFLLFCPAINQNSQNATHAEQNDAKPNIHDPSSRSRCVVAXRGRNDG  
QQAQRNRTRVGDGTSPGAAGADGGLPGCTEPPVSPPRGL  
>comp9442\_c0\_seq2; 621 369 2176 LEN=2499; translated  
MRIFMIATTTAVWTIAAILTASN SAFAENLRASTRNPTIANGGILSGNGNTAATLNDKTN  
KNNDDEE EPKERTNGDISPPAFDIDGEEKGFYDGLLLEQLSSFDETLPPSNSPQPTM PII

KVTKPPGNLPTIPPSAAPTITLTTDPPTVPPTGTPKMSPTLRPTTESPSSSPTNPPTRSA  
TGSPTETPSKEPTKTPREPTTEPTEDPSQEPSSVVSEGPTSGPTVSVTTASPTemptig  
SSGPTGLPTTGTLPATAAAPSTPSPTLAPVITTIPTPSPSLSNPGPTSSLSSASPSVSTT  
QKCNLSQEGRSALINIFLRVVSNAEVDTPGSPQMLALKW MIDGDPMQLCPQDKHLIQR  
VMAVFYFSTRGDRWIQCSAPPPEAANDAESEAEDEQNANALCTIEVDGVDSNSHAWLTSG  
TECGWGGVGCNEEGFVVRIEMEONGVGGT LAHEL SRLQNLRLVLEEGILTGTIPTELGE  
IRSLEQIDLNFNLLQGP IPEELYMLSNLRQLDLNDNXADWFNQHKLHLPGQAQFLSDRKQ  
FVLWDGPHADGGTPRSGRNDGQQPAQRNRTVRGDGTSPGAAGADGGLPGCTEPPVSPR  
GL

>comp9442\_c0\_seq3; 647 252 2352 LEN=2675; translated  
MRIFMIATTTAVWTIAAILTASNSAFAENLRASRRNPTIANGGILSGNGNTAATLNDKTN  
KNNDDEEEKERTNGDISPPAFDIDGEEKGFYDGLLLEQLSSFDETLPPSNPQPTMPII  
KVTKPPGNLPTIPPSAAPTITLTTDPPTVPPTGTPKMSPTLRPTTESPSSSPTNPPTRSA  
TGSPTETPSKEPTKTPREPTTEPTEDPSQEPSSVVSEGPTSGPTVSVTTASPTemptig  
SSGPTGLPTTGTLPATAAAPSTPSPTLAPVITTIPTPSPSLSNPGPTSSLSSASPSVSTT  
QKCNLSQEGRSALINIFLRVVSNAEVDTPGSPQMLALKW MIDGDPMQLCPQDKHLIQR  
VMAVFYFSTRGDRWIQCSAPPPEAANDAESEAEDEQNANALCTIEVDGVDSNSHAWLTSG  
TECGWGGVGCNEEGFVVRIEMEONGVGGT LAHEL SRLQNLRLVLEEGILTGTIPTELGE  
IRSLEQIDLNFNLLQGP IPEELYMLSNLRQLDLNDNELTGSISTSI SDLGKLSFFQIENN  
LFSGTVPTQMGELLALGTFHGTSSCTISSTRHKT SVFLFFHNSMHDLELVFSVCFSLSR  
TFLFCSGIALAAFFLLFCPAINQNSQNNATHAEQNDAKPNIHDPSSRSRCVVAXRGRNDG  
QQPAQRNRTVRGDGTSPGAAGADGGLPGCTEPPVSPRGL

>comp9442\_c0\_seq4; 621 252 2059 LEN=2382; translated  
MRIFMIATTTAVWTIAAILTASNSAFAENLRASRRNPTIANGGILSGNGNTAATLNDKTN  
KNNDDEEEKERTNGDISPPAFDIDGEEKGFYDGLLLEQLSSFDETLPPSNPQPTMPII  
KVTKPPGNLPTIPPSAAPTITLTTDPPTVPPTGTPKMSPTLRPTTESPSSSPTNPPTRSA  
TGSPTETPSKEPTKTPREPTTEPTEDPSQEPSSVVSEGPTSGPTVSVTTASPTemptig  
SSGPTGLPTTGTLPATAAAPSTPSPTLAPVITTIPTPSPSLSNPGPTSSLSSASPSVSTT  
QKCNLSQEGRSALINIFLRVVSNAEVDTPGSPQMLALKW MIDGDPMQLCPQDKHLIQR  
VMAVFYFSTRGDRWIQCSAPPPEAANDAESEAEDEQNANALCTIEVDGVDSNSHAWLTSG  
TECGWGGVGCNEEGFVVRIEMEONGVGGT LAHEL SRLQNLRLVLEEGILTGTIPTELGE  
IRSLEQIDLNFNLLQGP IPEELYMLSNLRQLDLNDNXADWFNQHKLHLPGQAQFLSDRKQ  
FVLWDGPHADGGTPRSGRNDGQQPAQRNRTVRGDGTSPGAAGADGGLPGCTEPPVSPR  
GL

>comp9443\_c0\_seq1; 306 1 1103 LEN=1810; translated  
XWTEWCYWTKSAGALLPFHKDHPFTIISYQIKLHEPYNMVRIKHGSKEHRSLCRRPLALY  
LLLAAAIAIFAANMQYPSEVFVTLDSVGLQRNSSPTIATNDASATQQT KPHEQNMSNHHC  
LNEDFKPQNKVGVWMTLNDNMDYVKGAALGVGVRAKTKT PLDLVVMELRSKPLGKDMWD  
VLRLAGFIKCTVESIKSPVKTR EDLKEKFSVLHVWAMEVYETV VFLDADTYVQNSIDDLI  
HMDLKGKALGVTKDIRERK WVE TFNSGVMVLKPNLQEHKRLVELLNSGLEFDFIMSDQGF  
LNEVYKDNWHEIGFVNANLALYRFQREFWDQHKLED INVIHYTMKKPKWCKRNGPYGPI  
CAVWIDA

>comp9444\_c0\_seq1; 448 306 1489 LEN=1527; translated  
MSSTNSEDEDRLNLYLKDRGVEISTPEEREASRRANESSVAPILQQLYGLSLGTDGGDGE  
VKFVWIPADESKAMKTMVPPSFIEANRGDVMFNVPKPFFAADKTRVDAGLLQKQATKQF  
TAGGEGSSIKGKDGKPV DIDMSKISPAALNAVAQAQSVETFCLVHPADTNDYTGVIYLD  
EVGMLKLP SNKRASSIGGACGYNPAPIFYGDVFFVARVTKP SMFNVD FEAGVD TDYGRA  
EWMRRAVSENLAQQAMNEATGKSPKLAQMEQPAHAGTDGSVAQESGFSWTQDGEVEIT  
VPMNAAVNKKEVKVFRPGFVVVSYQGKEVERIDLYESVDVDGCTWTLSSDKTKLIVTCE  
KADPDXNMAQNSILVSKKKRQQRCSLEGTNA

>comp9446\_c0\_seq1; 274 113 796 LEN=1191; translated  
MGKDASGRKRRKENDLTASSGAGRKRAMNTNACSAPTFYQEYCELPFTLSSILVDEFD  
CITPKDLNSQRSLHVLPAKVTVKQVLQHYERKRTSSSGSSGSSEEDKKKQDRIRRFCEG  
FSLLFDDALPVCLLYREERPQYESLQDENLRLKRPCEIYGSTFLLRLLQRLPTILRAEP  
NKEMDELGPLIADLVLLQKNRQACFKDSYREPRKHELFSWERNVCV

>comp9447\_c0\_seq1; 908 183 2549 LEN=2727; translated  
MSNQVAPQVSTSIISRHQRYGQEKMTLENRLSVAVSLSLGKFLCNGQFDQATDAFDSAQ  
RLLTSAPLPIETHDCPIKCNTFSSLVCSSERPMPATHIDTYQEDECVDGARQFAAAIVPD  
DVVGLDDNVLQLIIAYNKAVVYQASKNYQYACILYKLIIVDTVRSCLSSGNTDATLMHLAM  
RSHNNMGQIEYCTGHSEERACVEFESALVYARHYNH SRMHNEIDLLPSNTATI QINAV

TTPPEYQLEIATVLSNWCRTWMMGHHDETMFAALEDVIRIRRTANLESDHLDVAAAHFNI  
GRALFSRGCNQKALKHLLCYMRTAYTRFEEQNISINKSSAVENNKSTAADLDPTLGLIYV  
LQIQNQEKNDISRDVLWGLLSLQDKLKLGP IHTDVASVLNYIGTLLFRRRELNYALCF  
FAQELCVEEQKAQSDSEPFNNEDNVSIVTTCNNIGRILQELERYQEAKYYYQRS LGDD  
ENLLTWSCSGEQKGCNRNKKACDRDILEDLDDALDIPAPAMNLYSTVWYNLGLIHKMGGA  
FNEAIQAFRMSLKLRRAMLGHEHSDVSCLFYNIQVLMQEQNLLSEATESFREALAHRHVS  
GKGQLNDAHVIRTLRKLASMHKSKGNIKGAIAYEDVIAVLNSSNDFETVVRNQKIGIAM  
CDIAELHQAGSLKVALEYAMGSADTLLAMRNSVLENETTMGVDDVNEDLQSYVEVETRA  
LLLVGSLQHELCEPLNAQHAFSKTACVLHSHLSTSMNTNSAAAQKTKSTLFPILLEVSMMLS  
NLSCAPEA

>comp9448\_c0\_seq1; 490 178 1338 LEN=1814; translated  
MTTPKPVQGNSTFTFNIRHGF AEALVRGMRSSFLGDQDYNHLIQ CETLEDVRLNLTETD  
YADAIADFNLSLTPAMLQKAAVEKLVAEFKYLRTQTVEPLSTFLDFITYEYMIENIMLLLK  
GALSGRDINELLEQCHPLGMFKDSTMRSIPTFENSAKGYSDLYTTVLVDTPVGPYFSKFL  
QESAAHRGSSSRNVLEEVEIEIEIKSSLIKFWLEDFYQFCASLGGDTG DIMCDILKVRADT  
NAINITLNSFGTPLNEPGMRTTDRKRLYPVGYLYPAGTTMLTDVADEDEMGRVLELFPT  
YAAIWSIHANGSGDKSIDD AFYERDVQKLELAFENQFHFGCFYAYVKLKEQEVNRNLVWIT  
ECILQQQKDEIDKFVQVFSQNSAWRK

>comp9448\_c0\_seq2; 360 759 1574 LEN=2050; translated  
MLLLKGALSGRDINELLEQCHPLGMFKDSTMRSIPTFENSAKGYSDLYTTVLVDTPVGPY  
FSKFLQESAAHRGSSSRNVLEEVEIEIEIKSSLIKFWLEDFYQFCASLGGDTG DIMCDILK  
VRADTNAINITLNSFGTPLNEPGMRTTDRKRLYPVGYLYPAGTTMLTDVADEDEMGRVL  
ELFPTYAAIWSIHANGSGDKSIDD AFYERDVQKLELAFENQFHFGCFYAYVKLKEQEVNR  
LVWITECILQQQKDEIDKFVQVFSQNSAWRK

>comp9449\_c0\_seq1; 265 528 1647 LEN=1647; translated  
MPPKKKSSKNADKKGDDSLTRIAIVNASKCKPKKCNQECKKSCPVVKLGKLCIEVTPKSK  
LAFIAEPLCIGCGICVKKCPFEAVNIINLPKDLEGNTTHRYGPNSFKLHRLPIPRPGQVL  
GLVGTNGIGKSTALKILAGKAKPNLGRYENPPDWEEILVHFRGSELQNYFTQILEDRMKA  
TMKMQYVD AIPRVLRGTVKDILKDRDDRSEMEGRDVYTWAVKTAEL AHLQ TREIRVLSGG  
ELQRFAIAACAIQTS DVMYMFDEPSSYLDVKQRLTAAHMIREILVNTKNADRRYVIVVEHD  
LAVLDYLSDYVCVLYGTAGAYGVVTPMFFSVRQGINAFLAGFIPTENLFRFRNDSLSFKVCF  
VYIQERHGDPPCPX

>comp9449\_c0\_seq2; 744 528 2498 LEN=2812; translated  
MPPKKKSSKNADKKGDDSLTRIAIVNASKCKPKKCNQECKKSCPVVKLGKLCIEVTPKSK  
LAFIAEPLCIGCGICVKKCPFEAVNIINLPKDLEGNTTHRYGPNSFKLHRLPIPRPGQVL  
GLVGTNGIGKSTALKILAGKAKPNLGRYENPPDWEEILVHFRGSELQNYFTQILEDRMKA  
TMKMQYVD AIPRVLRGTVKDILKDRDDRSEMEGRDVYTWAVKTAEL AHLQ TREIRVLSGG  
ELQRFAIAACAIQTS DVMYMFDEPSSYLDVKQRLTAAHMIREILVNTKNADRRYVIVVEHD  
LAVLDYLSDYVCVLYGTAGAYGVVTPMFFSVRQGINAFLAGFIPTENLFRFRNDSLSFKVSE  
RAEADRKEDLMKSYSYPSMTRTQTRGKDKFILHIEGGEFTDSEIIVLLGENGTGKTTFVR  
MLAGLQKSDEQEKEKDG EYEASQAGVPDLNVSYPKQKISP KFKGTTRQLLHKRIRDAY  
VHPQFVSDVMKPLAMEAIDNGVQALSGGELQRLAITLSLGKPADVYLIDEPSAYLDSEQ  
RINCAKVIKRFIMHSSKTA FVVEHDFIMATYLADRVVYHGRPGIEATATAPQSLLTGMN  
MFLKSLEVTFRDPVNFPRINKHGSQKDQEQKSGNYFFYDPEENDDDDDDFDI

>comp9449\_c0\_seq3; 625 528 2396 LEN=3083; translated  
MPPKKKSSKNADKKGDDSLTRIAIVNASKCKPKKCNQECKKSCPVVKLGKLCIEVTPKSK  
LAFIAEPLCIGCGICVKKCPFEAVNIINLPKDLEGNTTHRYGPNSFKLHRLPIPRPGQVL  
GLVGTNGIGKSTALKILAGKAKPNLGRYENPPDWEEILVHFRGSELQNYFTQILEDRMKA  
TMKMQYVD AIPRVLRGTVKDILKDRDDRSEMEGRDVYTWAVKTAEL AHLQ TREIRVLSGG  
ELQRFAIAACAIQTS DVMYMFDEPSSYLDVKQRLTAAHMIREILVNTKNADRRYVIVVEHD  
LAVLDYLSDYVCVLYGTAGAYGVVTPMFFSVRQGINAFLAGFIPTENLFRFRNDSLSFKVSE  
RAEADRKEDLMKSYSYPSMTRTQTRGKDKFILHIEGGEFTDSEIIVLLGENGTGKTTFVR  
MLAGLQKSDEQEKEKDG EYEASQAGVPDLNVSYPKQKISP KFKGTTRQLLHKRIRDAY  
VHPQFVSDVMKPLAMEAIDNGVQALSGGELQRLAITLSLGKPADVYLIDEPSAYLDSEQ  
RINCAKVIKRFIMHSSKTA FVVEHDFIMATYLADRVVYHGRPGIEATATAPQSLLTGMN  
MFLKSLEVTFRDPVNFPRYVW

>comp9450\_c0\_seq1; 620 51 1307 LEN=1711; translated  
MIGVSKNMLAILSLVL CNPVGQDQRHSTQRRRIAVAERPSSAPPTLGE GDDTESGKG  
MKSEGKGMRS AKGKGMKSEKYADYDEYSMSMSMMLTELKGKMKSSKVEVGKGGESSKGM  
KRDKSVKSSKLLKKEKNGDLGMP SPLIPLAPSTAPPTSADSI SQSKPFEIHYSPTDVP





DRAWYVSALGALSILVIVLYIIVGTSIAVAQGDSETADFDPRPESSGSNDQLYKTMASFG  
DFLFGFGFNAILPDIHASLHEKSAENSRKDMKKTTLTGAYSFAYPAYMVVAMVGYAAFGYK  
VQSNIFLSIDEILPRSAMIVIWALLAIKTATEAAVFNQAAF'TLTRDVLGLTLDEHDVDDH  
PKNWKIDYVIRVIWCILAAVVAIFLPYFSDLTSVTAALSITPTSLIFPIIMWNRKHGDTA  
PKW

>comp9456\_c0\_seq1; 341 130 1302 LEN=1550; translated  
MLKRKPASMRKRSFGGQNGVGIYWRKRAIPTSVGAEGTDETDQKLLQDGTFFPKADTAG  
NSFAAETKEHQGEAKLAISLDDMADEVPIIGWDDDLCRPIYPYRAPPSEDECAMLSNDDDN  
DEQNVGAEEEDLSGRSSSNSTTEDSFLVEENTYTDADVDANESTSTHGEPANGEKNSNALF  
QFPPLTRRRKTFTGSRGKRPRPISLILSQEDRDMDAGESFSSSIDQGPRRVSLESSNSNS  
STDEKDSNIVNESEDESSESGSKDGRTRTFGAGKASAAAADKPGQARRSKKQRADESSLKK  
ARDYFEKLDQTQSLTLDTAQSPTISSRVTRTSHKTNLDSPGINRSYRAYTEAIRGCGESG  
LSPLSIRDYVSSRRIHFENKGMVDGFLDD

>comp9457\_c0\_seq1; 507 46 1022 LEN=1439; translated  
MVQSQQLTFRNALGLAAVVLQAILGGGRISGSYAWATTSPSLRSVRSSSSSSSSSLQAESTV  
APSATGVFPRPSSETAASVGLSPTPGTASFWGGGIPSTQTEKAXILLATRNDALDGIVES  
CPPNRRKDLVFLQNGYLDDFLESKGLSDNTQVLLYLSVSAKGVAPTGDVTAFNPEGLTAS  
TGEWADAFAGRLAALDLKCNVVSQKDYRPAMFEKLMWISTYMLVGAANDCPTVGDAGRHDH  
SSTVEAIVAEVAVSASEGISFPFGTMDRLSSYTDVVADFPCGVKEFEWRNKYFWDLGD  
EAVPTHNGLLRECAAKGILSFELPE

>comp9458\_c0\_seq1; 599 466 1971 LEN=2328; translated  
MDSWTEKQLALMKNNGNKKCNDYLKAKGIQPDTPVKAKYESDAAQLYKEVLKARVEGRPE  
PTTLPPPRNKRAAAPTASSGMGGAGKAPMGSNDPNGLERLTGESDQYIQRQTRLKAEA  
QARMRAKFGNNAGRMGGVGSMSQIGISNPYNPNNGGGYGLSAPDMDNVISSVSGVSSG  
LSLVSSAASAVNDESTRGAVSNLASTATSMGGSFVNSLKT'TVGDVATSVTQPDADGLAAL  
QRDVQANKPKTSKYSGFGSTNTSSSSFNPSSSSMFDNFGSNTGSMGGMGMSQPKPMGGS  
LQEAQGMPEGEDRNGMERLTGESDEQYVLRQTRLRDEAKARMAAKFGSAGLSSAGPSSARP  
MSTPSSGNAFGGGAALQEAQGMPEGEDRNGMERLTGESDEQYVMRQTRLRDEAKARMAAKF  
GSGGLSSAGPSSAPSSGNSFGGSSFGGMASTPATAPSTSTYPTGLSLGAKKATPVKAPSS  
FGNPVKMKPKSSDDFFADFGA

>comp9459\_c0\_seq1; 334 447 920 LEN=1006; translated  
MAAAMPVQNRNEKKARKAMQKLGMPVGGILRVTVKSKNVLFAINKPDVYKSTTADT  
YVIFGEAKSEDSGAAARQQAAAGQFNAPQEAAPPAMPMEETAETADEEAVDETGLDS  
KDIELVMSQAGCNRKAALKALKENDGDLVNSIMSLTK

>comp9459\_c0\_seq2; 500 78 665 LEN=751; translated  
MPEIEEIDESVPELEEIDDVPQLEEGADPNAAAAAAMAAAMPVQNRNEKKARKAMQ  
KLGMPVGGILRVTVKSKNVLFAINKPDVYKSTTADTYVIFGEAKSEDSGAAARQQAAA  
GQFNAPQEAAPPAMPMEETAETADEEAVDETGLDSKDIELVMSQAGCNRKAALKALK  
ENDGDLVNSIMSLTK

>comp9460\_c0\_seq1; 201 76 552 LEN=941; translated  
MGRGVHVPDVPEATNRIVVDLSEGLLRKQDMGFVAVSTSEDEMWKKIYAPSNGIIATVDT  
QLRNSPNSPTGVRTVEGLPSHLHIKNMDVHYKRRQGVANALMELIEHATTKTDAKALT  
LEVLGANQPAVQLYRKFGFEPRENPNKRSANVFMVKEL

>comp9460\_c0\_seq2; 368 75 998 LEN=1387; translated  
MAFSIQSLLFIAASLAATSTDAFVTPSGAALSSRTSTAVYAEAVETSNAADFIVRAVEGGED  
DPTVVDVAAYRNNMVPNQMMVERAQKRDSDLDTTKEAINGLKAGLLYVGPIIGIGTYVST  
SGDNALTAALSNYGLFGGSLGAILAVNNYMGRGVHVPDVPEATNRIVVDLSEGLLRKQDM  
GFVAVSTSEDEMWKKIYAPSNGIIATVDTQLRNSPNSPTGVRTVEGLPSHLHIKNMDVHY  
KRRQGVANALMELIEHATTKTDAKALTLEVLGANQPAVQLYRKFGFEPRENPNKRSAN  
VFMVKEL

>comp9460\_c0\_seq3; 302 75 482 LEN=516; translated  
MAFSIQSLLFIAASLAATSTDAFVTPSGAALSSRTSTAVYAEAVETSNAADFIVRAVEGGED  
DPTVVDVAAYRNNMVPNQMMVERAQKRDSDLDTTKEAINGLKAGLLYVGPIIGIGTYVST  
SGDNALTAALSNYGE

>comp9463\_c0\_seq1; 290 68 625 LEN=972; translated  
MSEGEQATAAAAAAPPPPPASVSASASKNVVHWQEVQD'TVSR'IASHKGVLAVSILNAGGD  
IVTQQVTEAGAARGASLSGGERTAGASGAGYGGPSGGGSLPAVLGNPLELARMMEAGAY  
VASLSGRTGEREHS DSGSGESPGDGAGEDAEAISFVRI RTPSDEVLVAPKLGTYTLVVVLQDP  
SLSSL

>comp9464\_c0\_seq1; 382 178 1990 LEN=1990; translated

MIIVRSNARASKNTTGGVSVAVIGRASKNTAGNVSVAMMGRGQKKWRFSSTIAMGFLMIG  
LSFNLYITFFIAKHQRASSNWKGTSPSYDSKVITSMMGKTSTTEVTLYCKQQKLPNQR  
LQKPKAIVHVGPHKTGSTTLQTNARFLQPMDHVLPPELVPVFNKHSVGEAKNTAHLASCM  
NPNRRSESHLLCTPDIENSVLAAFEIFLHEAHCQSKNILLSEEFDRQKTDIARLKSLE  
PRFDVEIVVNYRPHYHTWIASLHNELFKTAQKQIKDGITEPYPTIVEWVKFSETMSYWEK  
HHTASVYKRFKEHFSTVKVIDMNLKTTGVSLEEAFCNEIPNAPITCEKIRNVTATKSK  
KKRRQNQSESLTVYDLIGQIRQKQYFRKITPPIIEIIONQTAKLLSLEQELPPQDRISLV  
PRSC LH TIHL DALLALS IQKETELNEELEKFRQRSNYGFHFDPP TVDELSEALTE DFFES  
AHELFCPVNSVLVLRWETEKWFQMLLLQEENRKEQARLIAEKERERKEATQKMDWKSIL  
KKAVAAQPFAS TQEEVQQNGVPLKESYPKSGLPAHILPEIPIPKLGPPKAPQNPLPKAPQ  
PKAPX

>comp9466\_c0\_seq1; 770 176 2305 LEN=2326; translated  
MAAAIMVSLSPPTTAFVFGSRRSNNSDWNRIKTRGSRATLQLSSMRNYLDFDNSGESGM  
APTSDTHNNQHPRRLPIVAGNWKLN PSTVQEATTLKLLASNFVHHRSSAANTPEVVVFP  
PTPYLERAVTLLLEG TGIQVGAQTISSESKGAFTGEVSPSMVRS LGCSYVLVGHSE RRTLY  
GESDELVN AKIKLALQEDAGLSVVL CVGETLEEYESLLESVIHFQVTKALNGISSVDAS  
TRLVVAYE PVWAI GTGKVATPQQQAQTAHEVVRGALSELYGPETAQTIRIQYGGSVTPDSV  
SELMAMPD VDGALVGGASLTADGFSRIVDGAATSEEEKNWSHQQQQFPKELTALEVVS  
CKNVLGESPIWSVRDQTLYWISAPEEEVWAWNMIDPPYRRLFGTTIGCIALKAAESSGAG  
GNILVAGESAFLETTMGNNDFSS TIFCDRPEQQETTRPNDGRADREGNLVVGMYNNYHRA  
GASEGQNNCGLYRLCPTTRTVQSLFPPEYKYRVSNCISFSPDGGTMYFC DTPTRKVYAFD  
YPQTTANKNQHQYCTNRRLIWTMPPNLAGGPDGAQVDADGGLWMALSGAGMVVRVHPDRP  
GIVDCV VHL PVSPTSCTFGGPNLDEL FVTTRGPDGGGLYRVKMPFGIRGLPEPEFGGGT  
EAVAVSANLMLGSSRPASMSASQQRDPQHLLPTFGST DSTVRSYLDL

>comp9469\_c0\_seq1; 1166 110 2533 LEN=2855; translated  
MEGFDEVDIDDLFGGGDMLFDGLDIALDDTLGDIISNDAAPAPVAPPSEPAPAPKTKRT  
GGPRTKR TNPMLEKPVAKEETA V TSPGNKRRKTKRKS KAPAAF GDDDEAAVEEQPPPKK  
RKASAKTKLNDASSVSSAKTKRKL TGTASASIVKGS SHLGASNSLLTKSTKSSMVLPN  
SSVAAAGQFGGRLKVKVGTTKV KRKLK KHADGASDSVALAATEVIKPPKPEPTYGGLAPSK  
TLFYPPFLESVPAESTMQKRKTYPVMDRLSSTLTSQMLS AKPDPTNPASLGVIEDNAIFKL  
MLDTYEGNEKDKNFTPEKRVALLRGIFHLR KIIQKADKNSLVRDVFAMCGLLTREYNFL  
KQTLDNMKVWCKNEFDDEKYKETYE PPIEQPKITKWKCHTG VVRV K VACTGFKEAKNSMP  
LYAMPLPAIVFNAVLPKPLQSPSAP TTSKASAAANEPKKGSSAASAAIASPKAAMTILAKK  
KKKEKQADKLT KVI PPNQVP AVPVKSYADSTPIARRQII ERVSQLALELESSQHKE  
KTVDR LDPVPEEQPPLHTTRMWSWLQAAGFYSKAAASKRLVPIKSPKVHSRHPFQTVPTR  
ILGHTENEEEEEVEQISSTSLFDRLQSL LVEEVSDDDTDNDEDDDDDEESLSFLDDDDV  
GAIESKIKAVEGGKLDKHTKFDVADFSELSREERTFVHLSKAGLIKKPLYPTVELLITNG  
ESEENESEGLDHVIGEMCTDLTRM TSINNTRISFIERLTS DSDIYFNKRVEEQAVIVAK  
CQNLMKRTKEKAKKAKQKDES LNLPW

>comp9471\_c0\_seq1; 229 73 513 LEN=674; translated  
MTTPSKDTPPCVEPAARNSG STPSEETTCHMLPCNIDFEGMAKTHLFFKPVHVEDGIFAS  
SFRGRGLLATRKG FHDEDK TGGHHPYLLSLEDNQIEVKASISNMMEWQHEHNLKSIMYKE  
NDSSRLQVAKDWMELSDALHEPLPLE

>comp9471\_c0\_seq2; 229 73 513 LEN=824; translated  
MTTPSKDTPPCVEPAARNSG STPSEETTCHMLPCNIDFEGMAKTHLFFKPVHVEDGIFAS  
SFRGRGLLATRKG FHDEDK TGGHHPYLLSLEDNQIEVKASISNMMEWQHEHNLKSIMYKE  
NDSSRLQVAKDWMELSDALHEPLPLE

>comp9472\_c0\_seq1; 439 214 1890 LEN=2138; translated  
MAEQQQGFSTPLTALQE ECYRLLQSKQYKSC EILTQMELSM AEKEGRDTRVAWAF LGEC  
AQLTHQYNKAI SYRQIQHFGSYK YRLKEAQCLQAKGNIVEASSVLELIPHHERNLT IHM  
TLGQLYIATGRTGSASDCFVRS L MENPMALEAIEWLAVLGT TDKAMVLD AVEKGFKKVSA  
QQQQQQMND EERAGRTFAQV RQLDPTNIDCMDLYGQILARENNLDALNQLASTLLEIDDRR  
PEAWSALALYHEARQDHEKALAFVEKAI SMDQRNFAHRLKGA ILLADNRPEHA AVSFFK  
SNEFKRDVSSYEGLVDSYLLAGKYKEAICAAKEAITAAPRDPRAVTLVGLALQQQVGSN  
SVEGMEKAKRALRKALALDPSALRPLLSLVQLHAQEKDYDTCIDLLRQGI EGTSESKSSL  
QQQDILQTKLGEIYMAAENYKDAIASFHAALALNPMSTEVQHLL EKLEQQVQGVDTSDHT  
DDIVEDSPTS YREG RPSY

>comp9473\_c0\_seq1; 348 79 1796 LEN=1942; translated  
MACISKDNTGPTEKEIAVEGTRLISRTQENKRPVYSWKNIATC IALLFGLAGISFPPTFFR

STNHNLGKKLGEGENSALETISLLQVFPEDFVWGAATSSYQIEGATHEGGRGVTIWDTYC  
EEEGNIFDGS SVDVACDHYHRVEEDVRRMMKDLGLKAYRFSIAWARILPNGKLEGGINRMG  
IAFYNRLIDELLKYDIEPWWTLFHWDLPOALEDEYGGWLNQNIIVGDFGTYSVCFEAFGD  
RVKHWITVNEPWTMAVQGYEDGTPKAPGRTKNPQVEVYLAHHLLLGHARAVRVYREQFLE  
TQHGKIGISNSGDFRYPLDSESSLDRDAAERAMVFQYAWLTDPLVFGGEYPLEMRARLDR  
LPEFTNSQRQEIIGSLDFMGLNHYSTLYASVKKEASIYGGYWTMDMVEFSGDPSWPKNFM  
VSFSKILSCVAKFRSNYCXLTLLIGPKGWNTNPDGCRELLYWISTRYPGIPIVITENGTAE  
DDRDLLEGAKNDEGRRKFFEGYIRACREAIMGMVQLEGYFAWSLMDNFEWEYGYTRRFGIC  
YVDYDTLKRTPKSSALWYKKTIETRGSNIRMA

>comp9473\_c0\_seq2; 448 79 1719 LEN=1865; translated  
MACISKDNTGPTEKEIAVEGTRLISRTQENKRPVYSWKNIATCIALLFGLAGISFPTFFR  
STNHNLGKKLGEGENSALETISLLQVFPEDFVWGAATSSYQIEGATHEGGRGVTIWDTYC  
EEEGNIFDGS SVDVACDHYHRVEEDVRRMMKDLGLKAYRFSIAWARILPNGKLEGGINRMG  
IAFYNRLIDELLKYDIEPWWTLFHWDLPOALEDEYGGWLNQNIIVGDFGTYSVCFEAFGD  
RVKHWITVNEPWTMAVQGYEDGTPKAPGRTKNPQVEVYLAHHLLLGHARAVRVYREQFLE  
TQHGKIGISNSGDFRYPLDSESSLDRDAAERAMVFQYAWLTDPLVFGGEYPLEMRARLDR  
LPEFTNSQRQEIIGSLDFMGLNHYSTLYASVKKEASIYGGYWTMDMVEFSGDPSWPKNFM  
GWNTNPDGCRELLYWISTRYPGIPIVITENGTAEDDRDLLEGAKNDEGRRKFFEGYIRACR  
EAIDMGVQLEGYFAWSLMDNFEWEYGYTRRFGICYVDYDTLKRTPKSSALWYKKTIETRG  
SNIRMA

>comp9474\_c0\_seq1; 525 1 2118 LEN=2167; translated  
XKIENLFDLSIHSLIFNHLNIKYAAITKRGNGVHGSATTPQKKHONSNI FSLMMTGSSG  
KKKRKRNIAGSKQTKSRFVECPVCGNHIVPHEMNKHLDACLSRQEKQKQKFESEQRKL  
APLHSLDTNNVDKGLSCLISTPTATGGKVS KSVPTSTTNVCSPEETGEKKS YIVVEDEREH  
HKHDEAE TEKNTDDITAQKDI FAHMMKRSMKVFSEKEAPTSSPKLLQQMHLHKDGTVSL  
TCYKIKNAVESRDDIAWSATVQVRGKETATPAIELLISSIPSFGSNASTPQIQQRQR  
LVRKHSRLSVPLVLSILQKSIRRRKPLPSVRVASELADKSLGDLRLRPIIILEDSTLHP  
SFPFLVWLMADSKNYHLPLFLLKRVLGIVFEMASCRWQDSLKVHEQQKINHNDSTTDI  
PSELTLACLHNYKT VSKFSDDNALSTQSGTEFCLSNDELIVWSILMRGQYGGMACDIKML  
KGYAALWHQRFFSIQTIPEKTKKILSPHGPCPSITTSDEIVLEEWSQVPVVFVHQSAAKQS  
ASRIDRLLMATPMGFSRPSQKAAQNKNNNFVGLISLGKSDLTVEGVDFHCSSILESAIL  
LSNPKVVEDCCDHL EADRKYGHGNSSTGNDRRTRSLHSSLRGVLKSCMWKYSAGVNLRL  
PLLTAGGSTEDKREGVNDLKQFYENVIKPRTKAFAERYVEDRLSR

>comp9474\_c0\_seq2; 623 1 2254 LEN=2303; translated  
XKIQNTIRRTSAQPPSRFVNIGNEDNINRPKRLTMFEKNSRIMTDSIHSSSDGTIQSSLA  
DRTQSTSSPTPSPNRGNNGVHGSATTPQKKHONSNI FSLMMTGSSGKKKRKRNIAGSKQ  
TKSRFVECPVCGNHIVPHEMNKHLDACLSRQEKQKQKFESEQRKLTA PLHSLDTNNVDK  
SLCISTPTATGGKVS KSVPTSTTNVCSPEETGEKKS YIVVEDEREH HKHDEAE TEKNTD  
DITAQKDI FAHMMKRSMKVFSEKEAPTSSPKLLQQMHLHKDGTVSLTCYKIKNAVESRDD  
IAWSATVQVRGKETATPAIELLISSIPSFGSNASTPQIQQRQRLVRKHSRLSVPLV  
SILQKSIRRRKPLPSVRVASELADKSLGDLRLRPIIILEDSTLHPSFPFLVWLMADSK  
NYHLPLFLLKRVLGIVFEMASCRWQDSLKVHEQQKINHNDSTTDIPSELTLACLHNYKT  
VSKFSDDNALSTQSGTEFCLSNDELIVWSILMRGQYGGMACDIKMLKGYAALWHQRFFSI  
QTIPEKTKKILSPHGPCPSITTSDEIVLEEWSQVPVVFVHQSAAKQSASRIDRLLMATPMG  
FSRPSQKAAQNKNNNFVGLISLGKSDLTVEGVDFHCSSILESAILS NPKVVEDCCDHL  
EAIDRKYGHGNSSTGNDRRTRSLHSSLRGVLKSCMWKYSAGVNLRLPLLTAGGSTEDKRE  
GVNDLKQFYENVIKPRTKAFAERYVEDRLSR

>comp9475\_c0\_seq1; 143 50 325 LEN=1267; translated  
MSVVGNNRVGIPIVVLHDAEGAVVEIETKTGELIRGLLFEAEDQMNL YIKNAI IRDVNGV  
KRKSPQVYVRGTEIVFIVLPDMLKHAPMFNR

>comp9475\_c0\_seq2; 207 50 623 LEN=1076; translated  
MSVVGNNRVGIPIVVLHDAEGAVVEIETKTGELIRGLLFEAEDQMNL YIKNAI IRDVNGV  
KRKSPQVYVRGTEIVFIVLPDMLKHAPMFNR IKHWRKHGGAPPEGVGQAVGQAAAIIRKA  
EEGEEASADASVAAAAGTEAAGGEEASADGAADAETLEAGEAPRRDPLGSAANTGRGEE  
LRGIAIVFAGW

>comp9479\_c0\_seq2; 792 1 2427 LEN=2541; translated  
PPPCTNCNDREDSKTMFFQLFVLSFSTFRSSKIVFKRNVFLAAASTCMLLLCCSKSLQH  
TGNLVTTARAWSALSTATNKRLIQTNRLLLSAA SGGNSDYGEDKVNGNGPKPREGKTGWN  
HNPPKNPDFWNTAEQVEAISKS I KESESKPKFR TGWLHNNE SPTKNGLGSKKKK APEKKS  
NAAGKARRRLEEAMKAQRENHRIVSPGALHACGKDRQIVVTEHRMSVPIVHPEKDNEKTD

DPAFRMAMPKAATDFIDVAFTVVEEVKDDQTRLWYENVFPTLTPKQRAAAYVKRCAMDSA  
KDMLLYLQGGPGFGAPSPVTALSFAGGGGSWGSALDRYSKVLLDQRGTGKSSPLTKQS  
LERRFPNLFAMDEKTEVGATDFVCQETETMNRLENSDPEAFKMFKSGLEEAI AFITQFRAD  
NIVRDAELVKDVL MYTPSVDDEEEDVGDEAIGDESSASRPNPWGCSLGQSFGGFCTM TYL  
SQIQYPPKIALLTGGIAPMLADSATDVYTS LWKKVKERNLLYDMPGDVDVVKTI VRKL  
LQLEKEGSTPRLPSGGKLTARRFLQLGMMLGGTPSSFASMHNLLSSAFLHP IAGKDDSI E  
FSRGLKAVDNEQPFDEYPIYFWLHESIYADRNNMSRLAKEQVEDD TVDCATNWSADRAY  
QTKLNDRSSGA EYDYAVTSNEDSDLPVLFFGEMVFPWMTEDYSECGGLGCTALAHALATK  
KDWGPLYNASQMRAVLKDGRTSAAAVYYDDMYVDFDCSMKVAARGGPLEKCKVCITNDY  
QHSGIRDDGETIFNKLHGMATGSIRTPS

>comp9480\_c0\_seq1; 249 1 719 LEN=744; translated  
PDDAIRARRKIPQWFHDDTKGSGYDLV FQDDGSRTL VYAPYAANTGFYYARNNEATQAF  
FNALLMSGDLIMATF SHQVALVALLSEHVSLYGLRVK VWNRRSEEFPGGYWYHEAHDKMR  
AFVAGELQPYVFHMCWTENKEDKVR YMQQMGQWYLEESCRNTPAGELLGKSGGSVGGGK P  
XASFVLPGGAPREVPLPGQAEHPPV PGLSPDRRRRGVLLVSPFGGLGSTGMVQH HNP SY

>comp9480\_c0\_seq2; 714 8 2214 LEN=2239; translated  
MISSRKQKHADHTSGNGVGN GGGSGHVPPKVPKQKHRKKASPCSSLT VVLA CFLSSVLS  
FYTGIIYIGWKMERPGLATPDASC GCQEPSRAKPGENHHRAPNHI EWAPV VGAARKE LRPG  
ATATGETGEVRDPLLRSAKSKRELAQSIAHNLASAAKNGGGSTESGPGDLAPKTVEESRR  
VSARRQAYLERFEADKNTHVFS PRTEFVDRDEFVARFDSLGV PFDTSEQKSNDRVAIVYG  
DTSALPEREAVVEGSKKLGFGREPNEKRGVLLSVDDATKNCNNLHVLTNFD RRKECVA  
LVGQYESFHLHKL MRASEKPASPKNKSFLIDPSQPLRPVNRNMRDDGGRSIAIPSKDDL  
KRNWRNLVPYLSLEETLEKLRPVAESVASHNGRNTVIVMVCNFGQSELLMNFVCNARAR  
GLGKELSNILLFSTDKETHELATKVLGLTSFYDEKVF GGMPSKAAEEYGDDIFRKL MFAK  
VYCVHVMV SMLGHDL LFQD VDVVWYKDPLS WFHDDTKGSGYDLV FQDDGSRTL VYAPYAA  
NTGFYYARNNEATQAFFNALLMSGDLIMATF SHQVALVALLSEHVSLYGLRVK VWNRRSE  
EFPGGYWYHEAHDKMR AFVAGELQPYVFHMCWTENKEDKVR YMQQMGQWYLEESCRNTPA  
GELLGKSGGSVGGGK PXASFVLPGGAPREVPLPGQAEHPPV PGLSPDRRRRGVLLVSPFG  
GLGSTGMVQH HNP SY

>comp9480\_c0\_seq3; 413 23 1029 LEN=1054; translated  
MSYQTEPHPTLPVVCNARARGLGKELSNILLFSTDKETHELATKVLGLTSFYDEKVF GGM  
PSKAAEEYGDDIFRKL MFAKVYCVHVMV SMLGHDL LFQD VDVVWYKDPLS WFHDDTKGSG  
YDLV FQDDGSRTL VYAPYAANTGFYYARNNEATQAFFNALLMSGDLIMATF SHQVALVAL  
LSEHVSLYGLRVK VWNRRSEEFPGGYWYHEAHDKMR AFVAGELQPYVFHMCWTENKEDK V  
RYMQQMGQWYLEESCRNTPAGELLGKSGGSVGGGK PXASFVLPGGAPREVPLPGQAEHPP  
VPGLSPDRRRRGVLLVSPFGGLGSTGMVQH HNP SY

>comp9482\_c0\_seq1; 306 144 1034 LEN=1373; translated  
MGRKRDLSIFDAIEELDTQDRKADRKRK ETNKERKRAEEVQSQSKIYNHLL ESRI LLQR  
AINKANDGTASSSSSSGSSFRKSCNALLEQ LLLARNRLSGSATDADNCKALLGPSASARAD  
LHDALQEDYEKHREEWKQILNRKHKNLRLHSGMTAKSQFRIMDSSFWQQVEATMEYEEIR  
RGEENTSSAQAGAVVLFDDSKVYQQLLKDFVANSTSNNGTRAGENSAEALRS AKYSNRNS  
KKKD VDRKASKGRKIRYKEIPKLVNFTFPLSRPNSSNLDTEEFQSLFGGAGNSGR

>comp9484\_c0\_seq1; 730 1443 3017 LEN=3227; translated  
MSTLSFASQSRRLRIPRALKRVS AIALPSASPASSVERTSRR IYPVAARHKSSSSAS IAD  
YLF PDSVKESVQESVKTSILEKVTRDESKVWTS GPYSNGNKGLGEGNGNQLHQHQHPNGG  
GSSVDEQISAWHHDDELDDL LNTETTQYWPDLPPGV RMDADPFQLSKGDVDSLSES IRED  
LLGTDHPVLNQAAYFFGDADGGKVRPLMVMLLSRALADTVGGAAAAQNAENKSTESA  
LPLFGNQTN TVFSMPLEWQRQDL PRAQRRLAEISEMIHTASLFHDDVIDGSETRRGVS AV  
HMVFGNKMAILAGDYLLARASISLARLRHVEVECMSTIEHLVRGEVMQMRGTVSSEGD  
QNERMVYYLKKNYKTGSLMANSCKSAALLAECPELVVAAKYGKHVGM AFQLVDDVLD  
FEGDVKSMGK PALADL KAGLSTAPVLF AAEY PQL EAMMDRKF KEDGDVETS RALVLQSR  
GIERTKELARVHAERAMEAILPWEATEHRDALINLAYKV VQRTT

>comp9484\_c1\_seq1; 991 489 3218 LEN=3350; translated  
MPDPSTCTPLSSYPVTT PKTKHDLLCVRGASVLS SDSVIVFSTSSSELFRKVISYDDKDIV  
RNGKPESKASLYSYKDGPEY PGPLSRSLLV LGYADRSLSIIRKIIDAEDDHDEETVVC DG  
LHSC TVAVQLADEPKRYERLEKRHKVNSMSFANYMKKLR EKRLVAILARDKYDRFGILSP  
FEGPQKQNAQTGF GPNDFARVYIGDVKEVMNWL VASSSGSNRNSDWKPTT PPLPSTGW  
KPTT PPLPSTSGNNPW DGN DGDG DGN DDDDDDGPTFRPDDDENNDAGGWRPTT PAA  
PPNGNGDNGGNGMPWETTEESTDGGV GSGMPWENNEESARGGGNTMPWESALNEQTSS  
SMPWETNEDNDTSGNNNGV GASSMPWDTEASSSDPPMPWATDTSNSDAFSSNKRSFS DM

NADNGAEETDGDANNKSFHTNEGAAAADAFYSGLTRDQKTRDKSILYHMKCFNNWVKA  
TQIAELDPSTGSYKQPLRVLDLACGKGGDLTKWTIHKRGIRNYVGDVARGSLKDAERA  
RGLRKRNLTKAVFACADLGSVDPGRKRTSSRGMQKLLTWSLEDEAPFENGDPDFRMVA  
GGGIAPSDSFDIVSIQFAIHMMQTGARARRFFHTVSQLLDIGGNLAFTTIDARVVVDM  
MNLGLNFHFEDGKEPEFSSVVVQTTGGGACRLTFEPHIVKILQCRADGTGGEEEDLFGLEY  
TFTLVEGDDHAAGMGDAVNLPEWLIPIPVLVSLGKEAGLELEYAQNHFHEFYQARSDPGTH  
RAAHALLGNMKVPNRHGTISDDEWSISRMYMAVRFRKVRRESSIVIDADGETVNENYEEEE  
PRVSLGVEETNGAAEEPQRTIELDPIKAKKMYPMAMMKAKRKAGDQWNSFSREEKEDRTQ  
IELLQLASK

>comp9484\_c1\_seq2; 961 489 3386 LEN=3518; translated  
MPDPSTCTPLSSYPVTTPKTKHDLCLVRGASVLSSDSVIVFSTSSSELFKVISYDDKDIV  
RNGKPESKASLYSYKDGPEYPSGLGIGCGPSIDVVITPSTCCVQDGTTLSSALLMPTSL  
SICLFRGSRIRDAETKQAHYPXSLVLVGYADRSLSIIRKIIAEDDHDEETVVCDGLHSC  
TVAVQLADEPKRYERLEKRHKVNSMSFANYMKKLREKRLVAILARDKYDRFGILSPFEGP  
QKQNAQTGFQPNDFARVYIGDVKEVMNWLVAASSSGGNSNRNSDWKPTTTPPLPSTGWKPTT  
PPLPSTSGNPNWDGNGDGDGNGNDGPTFRPDDDENNDAGGWRPTTTPAAPNG  
NGDNGGNGGMPWETTEESTDGGVGS GGMPWENNEESARGGNTMPWESALNEQTSSSMPW  
ETNEDNDTSGNNGVGASSSMPWDEASSSDPPMPWATDTSNSDAFSSNKRSFSDMNADN  
GAEETDGDANNKSFHTNEGAAAADAFYSGLTRDQKTRDKSILYHMKCFNNWVKA  
TQIAELDPSTGSYKQPLRVLDLACGKGGDLTKWTIHKRGIRNYVGDVARGSLKDAERARGLR  
KRNLTKAVFACADLGSVDPGRKRTSSRGMQKLLTWSLEDEAPFENGDPDFRMVAGGGI  
APSDSFDIVSIQFAIHMMQTGARARRFFHTVSQLLDIGGNLAFTTIDARVVVDMNMLG  
LNFHFEDGKEPEFSSVVVQTTGGGACRLTFEPHIVKILQCRADGTGGEEEDLFGLEYTFTL  
VEGDDHAAGMGDAVNLPEWLIPIPVLVSLGKEAGLELEYAQNHFHEFYQARSDPGTHRAAH  
ALLGNMKVPNRHGTISDDEWSISRMYMAVRFRKVRRESSIVIDADGETVNENYEEEEPRVS  
LGVEETNGAAEEPQRTIELDPIKAKKMYPMAMMKAKRKAGDQWNSFSREEKEDRTQIELL  
QLASK

>comp9485\_c0\_seq2; 202 125 652 LEN=721; translated  
MTTLREATMDDLKFNVNLDVLTETYNMQFYHYMSRWPEAFMVAEGPNNGDIMGYVLG  
KAEGEEKLWHGHVSAVTVAPSYRRLGLAKTLMDDFERLCIHTYNAYFVDFVREANNVAQ  
EMYEKFGYSTYRRLVGYSGDSPEDAFDMRKALPRDKNKESAIPLGRDVPHELEW

>comp9486\_c0\_seq1; 328 196 1032 LEN=1832; translated  
MENFNGSRQKNVNEIRPDLQDVIDRQCQDNTQLDIRINVGDEETGFLTIONMVIQLGGP  
YDSEEAKEHVKLPGSDGEYSVSSGGYNMNILSKGEFVNMDGLQHIDCQKGCWEICWMRG  
RPAGTIIFAFNLPRTYSRNKAVLPEGDMWMSFPVWTEEGLKYGQAAKQKVFDEMNFYTRK  
WNEELVKYQLTNNPIMKAIHERNAHIFAEKCDNAWDYSLATIPNNDQCHKLQEDLLLSER  
GLLWTKDGRADVLLGDADFVSPSCRGKTLSSFSNGRLRP

>comp9486\_c0\_seq2; 328 196 1032 LEN=2143; translated  
MENFNGSRQKNVNEIRPDLQDVIDRQCQDNTQLDIRINVGDEETGFLTIONMVIQLGGP  
YDSEEAKEHVKLPGSDGEYSVSSGGYNMNILSKGEFVNMDGLQHIDCQKGCWEICWMRG  
RPAGTIIFAFNLPRTYSRNKAVLPEGDMWMSFPVWTEEGLKYGQAAKQKVFDEMNFYTRK  
WNEELVKYQLTNNPIMKAIHERNAHIFAEKCDNAWDYSLATIPNNDQCHKLQEDLLLSER  
GLLWTKDGRADVLLGDADFVSPSCRGKTLSSFSNGRLRP

>comp9486\_c0\_seq3; 328 196 1032 LEN=1969; translated  
MENFNGSRQKNVNEIRPDLQDVIDRQCQDNTQLDIRINVGDEETGFLTIONMVIQLGGP  
YDSEEAKEHVKLPGSDGEYSVSSGGYNMNILSKGEFVNMDGLQHIDCQKGCWEICWMRG  
RPAGTIIFAFNLPRTYSRNKAVLPEGDMWMSFPVWTEEGLKYGQAAKQKVFDEMNFYTRK  
WNEELVKYQLTNNPIMKAIHERNAHIFAEKCDNAWDYSLATIPNNDQCHKLQEDLLLSER  
GLLWTKDGRADVLLGDADFVSPSCRGKTLSSFSNGRLRP

>comp9487\_c0\_seq1; 497 153 1994 LEN=2189; translated  
MDHREAEDFAIPVEAESASRKTIDNLLCREMMKLSVEQRNDIHEEIHGVRNVAREETPE  
LLEHSLKEFGRAFDKIKERANHEEIQQLTDYDYRESRCQSVSFVKQWAEDSNRGRDSDN  
PTPSSLPSIGTSGVGGIVTVPSTFGPEDKPGMEAGPQGQSTLFHFARPQQKLHRLYVEK  
ESFRAVFLRCELFDAKRAAERYLHFLNTICDLFGTGVLERPLDIDRDLTREEVAWLKKGH  
HQLLPFRDRAGRRIFACVADLGFALSTVRLKIVMYLLCKAAEDIDTQRTGIIMVMFPAP  
TLSGNLQPEEDGDQHKVIAQSNMLACQTIINSMPTRIAAFHMCLPDTKWYRMFPSSLVIY  
NLGSSSNRKRFLHIGKPTLKYVLSYGIPTHEHIPITETGKIKNKHMTSWIRLRQILDK  
DCYHQSKHDARYNSSSDSSVSDLTGKQTIIVDCPGCSVDLFRSGKAAMVHWGNFLLRDMT  
ETVLDRIYVGTFAEKKEIVVKLISGIYSIGGRFLIWDKNGWKKTTTGEQTYKKVTTTFVRN  
YKSRRKAEENLQRHDSSTYAFVVRNGTNRKRKEVAVADTVTRAARHLDFGRLQEQTVA

NCLNPMNAGNTAA

>comp9487\_c0\_seq2; 221 1351 2313 LEN=2508; translated  
MVMFPAPTLSGNLQPEEDGDQHKVIAQSNMLACQTILNSMPTRIAAFHMCLPDTKWYRMF  
PSLLVIYNLSSSNRKRFLHLHIGKPTTELKYVLNSYGIPTHEHIPITETGKIKNKHMTSWIR  
LRQILDKDCYHQSKHDARYNSSSDSSVSSDLTGKQTI VDCPGCSDVLF RSGKAAMVHWN  
FLLRDMTETVLDRIYVGTFAEKKEIVVKLISGIYSIGGRFLIWDKNGWKKTTTGEQTYKK  
VTTFVRNYKSRRKAEENLQRHDSSTYAFVVRNGTNKRKRKEVAVADTVTRAARHLDFGRL  
QEOKTVANCLNPMNAGNTAA

>comp9488\_c0\_seq1; 453 1 1278 LEN=1368; translated  
KKKKKKKKRDDDGNRDGRLSWKSDPERSFSDWTL EISYRERSNREPRVDVYHLHKNIVAF  
GIRKSDRILRDIRALEQNQKTVASDSSADSNSSRPSANDLPRGSTSSYVHYDSEDMNDRG  
DENESKTCLYLSTESQARAVPMVLD FLYHSKEMKHKLTADMACNIFKSAEVLEISTLQKA  
IGEFYMKNLTLKNLG EFLSLATRARADKLLTICKAKIGQMITEQPELSGLVPPKFMADIL  
SISSQQLEEARPLYPEKYTDELIVSQSLYWSKAACICAAANESILTGR LFRRLTSEESLP  
YIDVSATPKLLAIESQFLGGAGVPEEALVEPSGGGGKQDRSTSTSGATNDL TSLQKRCVE  
SIANDFETFQECFDSPEALGESLRRFP TNILTEILLRSRQQPQMGQSQSSPGSHNTKGLH  
SKPGY

>comp9491\_c0\_seq1; 432 221 1699 LEN=1900; translated  
MTSILPSVTLSTSKRMLACTVQLRRTVASTRSIAHLSSSSSAGGIYSSSISRISRLCSAR  
PIVASSVLSQTTSQIMVSPKHKRFRSSSLQQLSQREEEMKDEY GEMTDEGETFTKNDFIL  
ENGTVLPKAE LRYQTYGELNETKDNVIVVCHAL TGNASLHSSWGGLLGDDKAFDTSKYFI  
VCCNILGSCYGSTNPQSTNPR TNARYGKDFPDISVKDTVKLQLNLVKEELGAKSIKCVIG  
GSFGGMQTMFAVQGGISGGEFVSDDGSPYVRSVIP IACGASHTAWQIAISEVQRQAVYA  
DPEWDSNPFNATKGLEVARQMG MISR TAHGYSKFGGRDIRNDDANKSIHYGTNALWQVK  
SYLEYQGIKFIERFDPITYVKMTEQMDSHDVS RGRGSSVAEVLQRVEIPACVLGIDSDVL  
YPLSEQEELVQNMPNSKLEI IHSDEGH DGFLL EQEQVNRCI IDFLASRTAEVFLQQLLPV  
SALFSSHDDNH F

>comp9491\_c0\_seq2; 214 268 892 LEN=1093; translated  
MAIAISEVQRQAVYADPEWDSNPFNATKGLEVARQMG MISR TAHGYSKFGGRDIRNDDA  
NKSIHYGTNALWQVKSYLEYQGIKFIERFDPITYVKMTEQMDSHDVS RGRGSSVAEVLQR  
VEIPACVLGIDSDVLYPLSEQEELVQNMPNSKLEI IHSDEGH DGFLL EQEQVNRCI IDFL  
ASRTAEVFLQQLLPVSALFSSHDDNH F

>comp9492\_c0\_seq1; 715 1 1133 LEN=1594; translated  
XNSSNNMKVEAEADADDHAHAHVDEAENAMDN ETKSGAGNESAMSDDDESEY EYEDDD  
DAAFTGFLVTDNTYGAASSSSGGNESSNGNTGSNDASAGAPARIVEEETPAASAASSPT  
KSALVESEAASSAAPP RKKWREPSRAAVSMSLRAQ QETSGSKRRLAQDL YRIMNQDTEE  
AGFSLAPQTEDSMEKWTIKL FQFDPDSNLAKDMLVVGIDHIKLEMKFPEQY PFEPPFVRV  
VNPRFKRQTGFVMNGALCME LLTKDGWNPINDIESVIVSVR SLLVVG DGR LQAATDLSKT  
RYDTLLATAQEQEKQNGGTGEPEKKKARTDGD EKKKSGIPRSQVGSYTATEAQSAYS HLS  
YHKKKGWDTSGWWARKG

>comp9493\_c0\_seq1; 612 149 1912 LEN=2134; translated  
MPKKSXSNVDSRLEGSTVPSQSRSS EEDFN RHYDLTPLGSKRPKRKDGERSKQ AENTTS  
TLFIDPWEISSPTGNEGVQPNDLGTNQVFFASSNSNDSDSL DGYDERFPSEENVNDD EDH  
RFEGTNTPLRSSFIGPSDIHPRMEEREDDIAQLRLLAGTLNADWGAGDFMAPALARRIRD  
FQFAQEKRRK KYGHEKPWGI LGLYDHLASIRVDVEWAEDA AWR RANGQPYLSWADF DAKK  
KKG VNRPF FTYFLLITCTVALVVSIALNGWEVEQLDINPMIGPSADTLILMGAKDSYLIV  
SENEVWRLLSSAILHAGLVHYVINCLALWFV GKAIETHGT MATAFIFI IISAIGGTILSA  
IFLPEYITVGASGGIFGLIGACLSDIIMNWKHLFSDVV GENGQRNNHLIVVVF L IVDIVL  
NCLIGLTPYVDNFTHLGGMMYGMLCGFSTMERLPDAFFGME ENCFARVKQIATRFLGLII  
SIIILIIITTVLLLEGDGETVPCPNCQWLS CVFPFPWKSQADKWWYCDDCGRVSAEIVDSP  
S LHLQLECPSGTNVAVGLETEQVDREKLENE LPGYCREFCPNFERRY

>comp9494\_c0\_seq1; 687 235 1866 LEN=1948; translated  
MSQIRDVNPNAEIVSRVQARAVNVAAGVGLLNLV LKSNLGPRTGLKLLVGGAGQLKLT KDG  
LVLLKEMQIQHPTAVLIARTATAQDDITGDGTTSTVLLCGELLRQADRHVSEGVHPRIVV  
EGLEKAREAALEYLNEIKTSFEAEAMIQDRDLMTSIAFTSLATKLDNDS SLKLSEALVSS  
VQCIYAGKDSPIDLSRIEIMPMPRSTNDSRFVNGIVLDHGARHPDMPDVL TNCRIMTLNT  
SLEYEKTETQSGFYSSAEEREKLVESERKWLDERCRQIVDFKRSVCKDGESFVI INQKG  
VDPLSLDIFAKEGILCLRRAKRRNMERLTLACGGSP IHSLQDIDESQLGYAGKVSQITLG  
EEKYTFVEDCEKAESCTMLLQGPNEHSLNQA KDAIKDGLRALKNALEDNAV VAGAGAFEV  
ATAWHLQKNVLPKVAGKAKLGVQTFCDALLVIPKTLAENSGLDVIDTLLKLQDEHSESGL

LVGLDVKTGEAILPSDEGIWDNVRVKRQSLYLSTVLAQQLLVDEVMRAGKNMGKQPSPM  
DDN  
>comp9494\_c0\_seq2; 381 238 897 LEN=979; translated  
MERLTLACGGSPIHSLQDIDESQLGYAGKVSQITLGEKTYTFVEDCEKAESCTMLLQGN  
EHSLNQAKDAIKDGLRALKNALEDNAVAVAGAGAFEVATAWHLQKNVLPKVAGKAKLGVQT  
FCDALLVI PKTLAENSGLDVIDTLLKLQDEHSESGLLVGLDVKTGEAILPSDEGIWDNVR  
VKRQSLYLSTVLAQQLLVDEVMRAGKNMGKQPSPMDDN  
>comp9495\_c0\_seq1; 267 55 639 LEN=734; translated  
MKFLITTTFLTFLVLAIAAAAAAAAAVDPDPIFSAMKDNDAAI RTAVENDPSLLEFTGRGGQ  
TPLLKAVLMGSKEAVVALLELGANMMSTEGDGYGVLHAAGFQGRPEILELLELLARFLELKE  
SGGNYLDPESDLHEDGFYPMHRACWGRSPDHAKTVEVFLKHGVPADQLSKDGKTCAEMTK  
NPLTKRFLDSSSEL  
>comp9495\_c0\_seq2; 196 55 485 LEN=881; translated  
MKFLITTTFLTFLVLAIAAAAAAAAAVDPDPIFSAMKDNDAAI RTAVENDPSLLEFTGRGGQ  
TPLLKAVLMGSKEAVVALLELGANMMSTEGDGYGVLHAAGFQGRPEILELLELLARFLELKE  
SGGNYLDPESDLHEDGFYPXACE  
>comp9496\_c0\_seq1; 452 1 3871 LEN=4006; translated  
XTRTRTRTPPVGGSPRTLPTTEKNRGSRRKSKSSSRSRSRNTFDTCTRIGIDPGSDAFLPL  
VFHRATTARPIDLPHHGPLWVRAPDRPPGHVLDLHAGAGGGGLERRRRHPGHRPAVGL  
RDKGLDPQGPVPAEGPGPPLRDGATLLMPGAHENAGVALEEEVPPVNVSLGKAGWIRDGL  
DAYGGKLLATVTNRVHAAA AVESGADALMATGHEAAA HGGDVTSLVLPALAGAFPETPL  
VAAGGFC DGRGLNAALVLGADAVAMGTRMAVTEESPLAGATKEAIVTAGEAETIYGNFD  
GIPARVLATDASAKAMGSRPLPPVVAYRAFCAARGMGIPLWKVLPGLLTQWNKMYAVAQF  
GAATEAIVAATVGGDVAGKGVQFAGQCQLIHDVPGVEDLVRRVVEESLAVQRAQAXAAP  
KVARRDPPRGGLLSVRVSTVSTRAGNETKRTRDPKLSASRRQVCVRLAKRSVVGAAATV  
VVDRVLLFLLQQQSVAAAAAVYTLVLQCSSVFFQSARTGNVYXAVTGFLCHLVVDKSSCL  
XLQDSACSSTSFVEQSDMRDDQYRNSPCQRIDLYHCISPSAVLLQSILSSQIVQIRKKS  
LIYPCDRIFQSRGNLESDASLFSLLSTKQRTKVHRLHRKHGKWKQTNTTQFVSSKILTP  
SLRSFP EESVANHHTAHVTLVLNDRGHPEISVHCANTNRRLPKRSSSSNYNNSNHTMDA  
PRGDGRELRRPLLPRNKNNNANANANTRSDGPGGDEEALILEEWNASVSEFLARDGSEE  
NSRCYCCPSFDGVP EGGSSGDDPSESESSGGGELPRNYLPEAAPSRGALCGTLSRMMRS  
TLLPDCEPTLGSYYVRS GSSDESNNNNENEGELYQRRPRRVVDG VGVVRFKFAGLTLAS  
IALVRCVVVREFPDHRYLRLLWQVFFYEGDSILRDL CVFFV VGRMHLRPGVDCIEWVLA  
LVANVYFECQGYLPWMQHAVTLYEMHCLWPWQLWAFVAVL VACAFVGVVVAHAFVASKPSK  
AIAWIKLAELLVCAGVFLAPVVSSPYFHLHHWFAGWLLGMHANLHDRWWSRATMAYCWGM  
YVNGIAVYGRDPLLTCDYARFLSE DQGCVPAPMAALGMPHRAATEEGAGGGGGRRASLG  
PPAWTVCSPRIGGTAAAPGTIPERAGMARERETSE RRPKGTSLGGXAADGKLPE SRTAIV  
SEKHASNPKTRAQVVWKAPEPGTGFA PLPQRSVRRKTSGRRHASIVLGGERRITKGPDR  
DACCCTAASRASRRTMVWIPMQRAPLPTYL  
>comp9497\_c0\_seq1; 1182 211 3288 LEN=3322; translated  
MMRFLERENQINRNYKTLDDDEFELGSGASENDSGSDSFHSTFDEDDIYDTFDEDDDLF  
DFNDDDDQIYAFGQSTFDEEGFYDDGSGSDFSS TMDCEGDASKPIESNDEDQDREQDPK  
EPKTGHGQS QEEEDTHVGESETLSALTGPSHTSVRRKKRKRKSRRRKPKIDFIYRTGALV  
DRMYKKLMTQSR TDSLRLRRSSRRKNRKPQREPNTKADKSP TLSTLSLFCFPDDFE  
DAPVKPLVSKNLDDPYEQGLQHREGSGTTGTRDSNTVSLADSFSTEGSHPHEKNGTNKV  
IVVTEDASTRDPQAETTHEKPS TIEDASTNGNEAKEEANDATNNSEHIH SKPGRSHHES  
SIFENCLCTEDFIDILPLAATNSFDVLSWKKGTNSEIVKTSSEEVANNAPQEVQNDGEVS  
EEAQDQKNTTVVHEQSVPPSSPPHSTKEEVPE SVDKKLLSKWWKPCTTNVSRCHGCGEA  
AAPAAAYALSRVGLVAAANCGTVSVKVDENVAESDVG TALLQAEAKRISNNAMTIKTPIQ  
KMLSLKENTTIPDVNKEQEHFDVQKTKLSFPRDGDNDNSVFQIRILVEETENKDKNTEN  
GGVPDTLNQDTSNNTVDRAYSLEKSI PCADVRSVLKQDDR LQEEVPAPIVESIANAEEL  
LAKSTYGPSC EATISETACAGETA AVSESQHKKDKTAPGDLDEERPTTAEQGIERTKE  
DLSVVLGSKERERATAGKNSRRPSLIGLMTKNPSQTKAKTPRRSLLRRRRSKE SRKKNPN  
AAALQRIEPSPTGFEIEFSTPPSDQKGNTSNRVKRTSRQQRIVAAQRRHKGIKHAVLVLN  
NKTGAAVLSPTGGIAPERQRTYEDPLIFEASRDPDGP AIDAEPATPPLPPVPERARTL  
EDRSIVELQRDPSSGSAEHRTIDADEHLREEATPEPEPTPLLRVETVVRKPRTAIEAATM  
PASPESGKHSKKTQKKNKSKSERQQSRNSRWYKRLKPPSRNKKLPITLVEDEGCEVFYAKK  
DRAIF  
>comp9498\_c0\_seq1; 815 1 906 LEN=1064; translated  
TMLRTATSRFAKAGVSRASQGARGWAAPATSSFHFSAPRKEEEEKEADAAPVATSGGIDPL

YAI PVGVALAVPVLEFQWFDPAETLLASTFLGFCVVAYTQGGEMMSTMFKDEAKDMLKA  
QNEAEGEVI AKLEESVEYMKLTENIVKDYQDVYDLTEESYAKLNASGVIKPQHKLKAQVE  
KLLGMIATEEANAYEKAKIAMMADATDAVTAEFSSSKELKKAALASAI AKLTGKGGKAKA  
DPVQAEFVKFFQATAQNAKASDDGSEAKEARATMITKMNAVAENESMYFRLDPASGKPV  
LV

>comp9499\_c0\_seq1; 224 186 1289 LEN=1489; translated  
MHHMPTRIRFRNVLVGIIIVILRLPSGPEAFNTISSHVLSRIRVTPATTTTSTKTGKISH  
AKIITAAFADKNNNWNEMNRRSDDYNVIEKIALRPTRLSLLAITFLLAFRKFLTVSGFHAR  
LGQSLVTLKKVWTPGIAVTLFRLVKQYSSLSARYMDLLACSPLWTKTVTTSVLAVAGDS  
IAQYIETHKFSPSVVEGDEGFGKTKDVAVSAF SVGSPFSWLKDYDRRRGISILGENMLIS  
GPLLHFSYNFMEQLIPTNGGGKSAFLAALSHSLIDNFILDTIFLAIMFVTTGIAEGYVQE  
IIPQFKKDFPPTLRTGWIAGICLLPVQFLIFRFLPLSLRVLGVNIIDMFWGAYVSYMVHR  
RRQKPQQ

>comp9499\_c0\_seq2; 193 186 1196 LEN=1388; translated  
MHHMPTRIRFRNVLVGIIIVILRLPSGPEAFNTISSHVLSRIRVTPATTTTSTKTGKISH  
AKIITAAFADKNNNWNEMNRRSDDYNVIEKIALRPTRLSLLAITFLLAFRKFLTVSGFHAR  
LGQSLVTLKKVWTPGIAVTLFRLVKQYSSLSARYMDLLACSPLWTKTVTTSVLAVAGDS  
IAQYIETHKFSPSVVEGDEGFGKTKDVAVSAF SVGSPFSWLKDYDRRRGISILGENMLIS  
GPLLHFSYNFMEQLIPTNGGGRLRSRNTTVQEGFFSDVTDGLDSGNMFASGPVNPISFP  
SAQSSGVRCEHYRHVLGCICQLHGPQKAAETTAVSK

>comp9500\_c0\_seq1; 513 159 1732 LEN=1778; translated  
MKENHSQNRQFSSTRTAIRTRSATNIMVAVSLFLLSPTLNSDVAAFRSNTIGASSHTLS  
QRISSTINTINPSTSLFMAPSSNENSKRRSGPKSKNKTKKKPPADTLLILKELEEKIDSY  
DGRLPSKMPANRETGDINLSDSQHQHRCGFVIGVAPNMGKSTLLNALLKEDLCIATR  
PQTTRHAILGVLSSPTRQCCLLDTPGVLQGDGAYKQLQANMMEAVKALKDSDVLLVVTDM  
FSTPIPNDEIFRRLSLTNKPI LVVVKIDLEGRAQRPLDTASDEKNNDENEEENEKTYT  
VAEAVAKWRNLLPNALAIIPMTAAPDPSTTERASESDVEEHPGIVLLRQLLVGSGKDEED  
DIXGISPSLGRPVPGMFRNGIKCLTNDARNLLPVGPPLYDDDFLSDRSVRFFCSELIRE  
ALLESRYLKKELPYCCEVQITEFKEPRQAKELTRIEATIFVERDGQKAI VVGKNGNVIKQ  
VGI IAREKIERFLDGEKVFLKLVKVDKDRKKDDALTKFGYSR

>comp9501\_c0\_seq1; 384 147 1166 LEN=2361; translated  
MPMLASISRKACASLASRTSWQRLLPAAQIPVGTRRFTDDSKPVIPELLRLKEAPRTGTM  
TKVVCTIGPSTDSPEQMOKLIKNGMHVARLNFSHAGADYTYPETLTKMVRETGHTDSVS  
ISPGKGGMPHNLRVAVLVDTKGPEIRTGILPGDQDVVNI EVDKAVILTVEDVSGEPIPEEG  
DTDRKINIDYQSI CSTVSVDKLVLLDDGLIALKVEEIDPNGKFVVCRALNGGP IKKNKGV  
NLPGMELDLPALTEKDKRDLKWACEMGADYIAASFIRTGANVRSVIAYLNRCVQSLPELD  
GFARVRPLVISKIENKEGVNDFDEILKESDGIMVARGGM

>comp9501\_c0\_seq2; 283 147 1303 LEN=2498; translated  
MPMLASISRKACASLASRTSWQRLLPAAQIPVGTRRFTDDSKPVIPELLRLKEAPRTGTM  
TKVVCTIGPSTDSPEQMOKLIKNGMHVARLNFSHAGADYTYPETLTKMVRETGHTDSVS  
ISPGKGGMPHNLRVAVLVDTKGPGXVLLFLKQKLTNKS AIREACSKLNMSATDSIXISNF  
PHFVYDLQEIRTGILPGDQDVVNI EVDKAVILTVEDVSGEPIPEEGDTDRKINIDYQSI  
STVSVDKLVLLDDGLIALKVEEIDPNGKFVVCRALNGGP IKKNKGVNLPGMELDLPALTE  
KDKRDLKWACEMGADYIAASFIRTGANVRSVIAYLNRCVQSLPELDGFARVRPLVISKIE  
NKEGVNDFDEILKESDGIMVARGGM

>comp9501\_c0\_seq3; 519 147 2021 LEN=2270; translated  
MPMLASISRKACASLASRTSWQRLLPAAQIPVGTRRFTDDSKPVIPELLRLKEAPRTGTM  
TKVVCTIGPSTDSPEQMOKLIKNGMHVARLNFSHAGADYTYPETLTKMVRETGHTDSVS  
ISPGKGGMPHNLRVAVLVDTKGPEIRTGILPGDQDVVNI EVDKAVILTVEDVSGEPIPEEG  
DTDRKINIDYQSI CSTVSVDKLVLLDDGLIALKVEEIDPNGKFVVCRALNGGP IKKNKGV  
NLPGMELDLPALTEKDKRDLKWACEMGADYIAASFIRTGANVRSVIAYLNRCVQSLPELD  
GFARVRPLVISKIENKEGVNDFDEILKESDGIMVARGGXVGVVEFSNSRALFHXLSFEVS  
PPSLDFMFVNPYTLPLLDLGV EIPYSTVFAAQKMMVSKCNEVGKPVIVATQMLDSMIRN  
PRPTRA EVTVDGTA VLDGADSVMLSGETAAGAYPIDALKSMASVLEADHILSNQGS MYW  
NQLHESLTPQE QEMD GVAASC VKAASVMNVTKIIMVSREGKFAKAVARHKPDVPVLAFC  
TDPQVARRLQLHRAITPIMLQTTAPGSDS QITSTGLLRQE AIRTAIEMGFVNKGERVIV  
DQTLGKATHMYEVANNMKVVVTISGA

>comp9501\_c0\_seq4; 443 147 1762 LEN=2378; translated  
MPMLASISRKACASLASRTSWQRLLPAAQIPVGTRRFTDDSKPVIPELLRLKEAPRTGTM  
TKVVCTIGPSTDSPEQMOKLIKNGMHVARLNFSHAGADYTYPETLTKMVRETGHTDSVS



ISPGKGGMPHNLRVAVLVDTKGPGXVLLFLKQKLTNKSAREACSCCKLNMSATDSIXISNF  
PHFVYDLQEIRTGILPGDQDVVNI EVDKAVILTVEDVSGEPIPEEGDTRKINIDYQSIC  
STVSVDKLVLLDDGLIALKVEEIDPNGKFVVCRALNGGPIKKNKGVNLPGMELDLPALTE  
KDKRDLKWACEMGADYIAASFIRTGANVRSVIAYLNRCVQSLPELDGFARVRPLVISKIE  
NKEGVDNFDEILKESDGIMVARGDLGVEIPYSTVFAAQMMVSKCNEVGKPVIVATQMLD  
SMIRNPRPTRA EVT DVGTAVLDGADSVMLSGETAAGAYPIDALKSMASVLVEADHILSNQ  
GSMYWNQSLHESLTPQE QEMDGVAAASCVKAASVMNVTKIIMVSREGKFAKAVSEPNL  
>comp9501\_c0\_seq5; 555 147 2038 LEN=2287; translated  
MPMLASISRKACASLASRTSWQRLLPAAQIPVGTRRFDDSKPVIPELLRLKEAPRTGTM  
TKVVCTIGPSTDSPEQMQLIKNGMHVARLNFSHAGADYTYPETLFKVMRETGHTDSVS  
ISPGKGGMPHNLRVAVLVDTKGPGXVLLFLKQKLTNKSAREACSCCKLNMSATDSIXISNF  
PHFVYDLQEIRTGILPGDQDVVNI EVDKAVILTVEDVSGEPIPEEGDTRKINIDYQSIC  
STVSVDKLVLLDDGLIALKVEEIDPNGKFVVCRALNGGPIKKNKGVNLPGMELDLPALTE  
KDKRDLKWACEMGADYIAASFIRTGANVRSVIAYLNRCVQSLPELDGFARVRPLVISKIE  
NKEGVDNFDEILKESDGIMVARGDLGVEIPYSTVFAAQMMVSKCNEVGKPVIVATQMLD  
SMIRNPRPTRA EVT DVGTAVLDGADSVMLSGETAAGAYPIDALKSMASVLVEADHILSNQ  
GSMYWNQSLHESLTPQE QEMDGVAAASCVKAASVMNVTKIIMVSREGKFAKAVARHKPDVP  
VLAFC TDPQVARRLQLHRAITPIMLQTTAPGSDSQITSTGLLRQE AIRTAIEMGFVNKGE  
RVIVVDQTLGKATHMYEVANMKVVTISGA  
>comp9501\_c0\_seq6; 418 147 2158 LEN=2407; translated  
MPMLASISRKACASLASRTSWQRLLPAAQIPVGTRRFDDSKPVIPELLRLKEAPRTGTM  
TKVVCTIGPSTDSPEQMQLIKNGMHVARLNFSHAGADYTYPETLFKVMRETGHTDSVS  
ISPGKGGMPHNLRVAVLVDTKGPGXVLLFLKQKLTNKSAREACSCCKLNMSATDSIXISNF  
PHFVYDLQEIRTGILPGDQDVVNI EVDKAVILTVEDVSGEPIPEEGDTRKINIDYQSIC  
STVSVDKLVLLDDGLIALKVEEIDPNGKFVVCRALNGGPIKKNKGVNLPGMELDLPALTE  
KDKRDLKWACEMGADYIAASFIRTGANVRSVIAYLNRCVQSLPELDGFARVRPLVISKIE  
NKEGVDNFDEILKESDGIMVARGGXVVGVEFSNSRALFHXLSEVSPPSLDFMFVNPYTL  
LPLLDL GVEIPYSTVFAAQMMVSKCNEVGKPVIVATQMLDSMIRNPRPTRA EVT DVGT  
VLDGADSVMLSGETAAGAYPIDALKSMASVLVEADHILSNQGS MYWNQSLHESLTPQE  
QEMDGVAAASCVKAASVMNVTKIIMVSREGKFAKAVARHKPDVPVLAFC TDPQVARRLQLHRA  
ITPIMLQTTAPGSDSQITSTGLLRQE AIRTAIEMGFVNKGERVIVVDQTLGKATHMYEVA  
NNMKVVTISGA  
>comp9501\_c0\_seq7; 544 147 1625 LEN=2241; translated  
MPMLASISRKACASLASRTSWQRLLPAAQIPVGTRRFDDSKPVIPELLRLKEAPRTGTM  
TKVVCTIGPSTDSPEQMQLIKNGMHVARLNFSHAGADYTYPETLFKVMRETGHTDSVS  
ISPGKGGMPHNLRVAVLVDTKGPEIRTGILPGDQDVVNI EVDKAVILTVEDVSGEPIPEEG  
DTRKINIDYQSICSTVSVDKLVLLDDGLIALKVEEIDPNGKFVVCRALNGGPIKKNKGV  
NLPGMELDLPALTEKDKRDLKWACEMGADYIAASFIRTGANVRSVIAYLNRCVQSLPELD  
GFARVRPLVISKIENKEGVDNFDEILKESDGIMVARGDLGVEIPYSTVFAAQMMVSKCN  
EVGKPVIVATQMLDSMIRNPRPTRA EVT DVGTAVLDGADSVMLSGETAAGAYPIDALKSM  
ASVLVEADHILSNQGS MYWNQSLHESLTPQE QEMDGVAAASCVKAASVMNVTKIIMVSREG  
KFAKAVSEPNL  
>comp9501\_c0\_seq8; 656 147 1901 LEN=2150; translated  
MPMLASISRKACASLASRTSWQRLLPAAQIPVGTRRFDDSKPVIPELLRLKEAPRTGTM  
TKVVCTIGPSTDSPEQMQLIKNGMHVARLNFSHAGADYTYPETLFKVMRETGHTDSVS  
ISPGKGGMPHNLRVAVLVDTKGPEIRTGILPGDQDVVNI EVDKAVILTVEDVSGEPIPEEG  
DTRKINIDYQSICSTVSVDKLVLLDDGLIALKVEEIDPNGKFVVCRALNGGPIKKNKGV  
NLPGMELDLPALTEKDKRDLKWACEMGADYIAASFIRTGANVRSVIAYLNRCVQSLPELD  
GFARVRPLVISKIENKEGVDNFDEILKESDGIMVARGDLGVEIPYSTVFAAQMMVSKCN  
EVGKPVIVATQMLDSMIRNPRPTRA EVT DVGTAVLDGADSVMLSGETAAGAYPIDALKSM  
ASVLVEADHILSNQGS MYWNQSLHESLTPQE QEMDGVAAASCVKAASVMNVTKIIMVSREG  
KFAKAVARHKPDVPVLAFC TDPQVARRLQLHRAITPIMLQTTAPGSDSQITSTGLLRQE  
AIRTAIEMGFVNKGERVIVVDQTLGKATHMYEVANMKVVTISGA  
>comp9502\_c0\_seq2; 452 80 1606 LEN=1704; translated  
MARLNPMVARHNSNTGGAHRSNLPEPSNFHRQDVVHEKGRPNAPIRRRRGSMLRMTVLA  
IVVLSMVI AFINIQLATIANDATIRTD SKRNRKKIPNDNGSAKTTDETMPQQSLPVDKVP  
LERNSTVGTGKGDVNDVVGSNATDSKEDPLEISRTFDDPPIFEAPVVSPTKDFDPSIPG  
VVVTKIQGNPHLPALKQMLCLFTHAYNNRANRDIIVFTTEELEAKDVEELSAIVSPAKLI  
VEVDNPG LHKMVDMSPERKKHLLDRCHVNSTSELSWYSKCEEKTSYWDHKGERIAYAWQ  
AEFRALWLWTHPLLAPYKMMWMSDFTFC TRVWNQDPIATMERHDLALLFDHFPQGSARG

KEFPERTKEAFNKVICDISLVNGTLVPRGGKCI RRKSKISQVHGFFHVSSLD FYRSDAV  
MKWNRALIGDSKFSRVFDDQIGITIPA AVLAGERSRDMRSLGVYTRVFHNYVIDGLMQEW  
RGYFTNWWQKNADTIFPEAKQCVITIKG  
>comp9503\_c0\_seq1; 206 695 1198 LEN=1961; translated  
MDSLKSFVPLLKTAVDDTIGLFGPGLIISVAAGCVEHRKYWSAYVKEFIGTLLMVVFTFS  
AGKWI GADDLIVAWSAHAVGVVLADYIGGGQHVNP AVTVSMWALDKCSYTEAFVRIAGQM  
GGGLVAFPLFH YIAVTL SMT PFGGPEFVKENDVDAFVSEFAATFLLMW  
>comp9503\_c0\_seq2; 292 695 1561 LEN=1802; translated  
MDSLKSFVPLLKTAVDDTIGLFGPGLIISVAAGCVEHRKYWSAYVKEFIGTLLMVVFTFS  
AGKWI GADDLIVAWSAHAVGVVLADYIGGGQHVNP AVTVSMWALDKCSYTEAFVRIAGQM  
GGGLVAFPLFH YIAVTL SMT PFGGPEFVKENDVDAFVSEFAATFLLMWAIYILNWEFNF  
SYHYIIKQTLTAVAIRALIEFFPTAGPAMNPMLATSWYVFGVGT EGSYPEDTVHYFVYWF  
GPFVAGIFAAITYIILDGKDKLFGVVS LPIGPLRSAAPEPKAEKSKKE  
>comp9504\_c0\_seq1; 841 1 1345 LEN=1463; translated  
XEPEVESAEVEDETAEEEEPAEPETEETA EPTQVEEKPQAESAVTEDEAAAAEEEEPT EA  
ETKEVAEATEGAEESAAEADEAAEDEVKSAEAETEEV TETTQDAEELAVESADTADEPAE  
EQEPEEPETE EVKDTDDAKEVPVVDSDVTGDKAADDEEKQAETETEEVQDAADAKEEPT  
GESEKPTETEETEETEETEA TQAEAEPEVESAH TQDEPAETETEEVEDPAEAEPEVKS  
AAEAEEKPAETE QESVAAD EEPVQSAAEAEDESPTAKQDEPAEAETETEEVVEVTQEEKEE  
SKLETTSKEDKA EEPVSK ELEYMVAEYDTLSAENMQLRRQVTYLENQH QSTLASHAVECR  
KLNAIANTALASLKESFSKSI SEEA VLAL EKTVIK LKNTLSEKDDTIKDLKRELDKFRE  
GDLKKLDELSESV EDEAYAI SDRDEEKQ  
>comp9505\_c0\_seq1; 334 82 1649 LEN=2020; translated  
MNSTRDPSTVDPTSIDNMLAQEF LSLSFHDRNKINEEVHGV LCCSPAETPELIAESIEKL  
DKELRLIPGSEKEMYSLSQSRFGRKNSSEEGGSYVNDKEFRLRFLRAELFDARMAASKMV  
AFLHVVCDFLGEYALQRP IRLSDFTEPELHTFRTGNLQ LLLPFRDRSGRRIIAGVEGLAIQ  
FDADLRFKILFYLLWVGGQDLETQLKGFVVI IWPVSDVAIQHMKNRERLVQVQKERLRGT  
PVRTCSFHFCVPDNPLSHMLRMIFTLTLDARKRCRLKFHV GKFSTLLDNIKTLYINAXD  
TVFEKEILLTPTS VSNCFHSTAGHPVELQYL VKGYGIPVDHIPLTETGNVKTQNLK VWMK  
LRSTIEEGRDGAVNII ECPGSNDVLF RPSKLIKGH PGNVKFQSLIEYYHEQGLGVT AASK  
EIVALILKKKGRILVWDKRGWWT KLTDPAQM QFKVSVSYR DYKKKNKGR TQISNSSTFVF  
QQEKKRRRLEEATASPTANKSYCDFFSIDGGIRPAALGWLQE  
>comp9505\_c0\_seq2; 374 82 1524 LEN=1895; translated  
MNSTRDPSTVDPTSIDNMLAQEF LSLSFHDRNKINEEVHGV LCCSPAETPELIAESIEKL  
DKELRLIPGSEKEMYSLSQSRFGRKNSSEEGGSYVNDKEFRLRFLRAELFDARMAASKMV  
AFLHVVCDFLGEYALQRP IRLSDFTEPELHTFRTGNLQ LLLPFRDRSGRRIIAGVEGLAIQ  
FDADLRFKILFYLLWVGGQDLETQLKGFVVI IWPVSDVAIQHMKNRERLVQVQKERLRGT  
PVRTCSFHFCVPDNPLSHMLRMIFTLTLDARKRCRLKFHV GHPVELQYL VKGYGIPVDHI  
PLTETGNVKTQNLK VWMKLRSTIEEGRDGAVNII ECPGSNDVLF RPSKLIKGH PGNVKFQ  
SLIEYYHEQGLGVT AASKEIVALILKKKGRILVWDKRGWWT KLTDPAQM QFKVSVSYR DY  
KKKNKGR TQISNSSTFVFQQEKKRRRLEEATASPTANKSYCDFFSIDGGIRPAALGWLQE  
>comp9505\_c0\_seq3; 316 82 1680 LEN=2051; translated  
MNSTRDPSTVDPTSIDNMLAQEF LSLSFHDRNKINEEVHGV LCCSPAETPELIAESIEKL  
DKELRLIPGSEKEMYSLSQSRFGRKNSSEEGGSYVNDKEFRLRFLRAELFDARMAASKMV  
AFLHVVCDFLGEYALQRP IRLSDFTEPELHTFRTGNLQ LLLPFRDRSGRRIIAGVEGLAIQ  
FDADLXGMLLCYRGILSALRRLSRVQWELFLTY SFLFLNEFSPFLSRLQFRMLGSI EKFK  
ILFYLLWVGGQDLETQLKGFVVI IWPVSDVAIQHMKNRERLVQVQKERLRGT PVRTCSFH  
FCVPDNPLSHMLRMIFTLTLDARKRCRLKFHV GHPVELQYL VKGYGIPVDHIPLTETGNV  
KTQNLK VWMKLRSTIEEGRDGAVNII ECPGSNDVLF RPSKLIKGH PGNVKFQSLIEYYHE  
QGLGVT AASKEIVALILKKKGRILVWDKRGWWT KLTDPAQM QFKVSVSYR DYKKKNKGR T  
QISNSSTFVFQQEKKRRRLEEATASPTANKSYCDFFSIDGGIRPAALGWLQE  
>comp9505\_c0\_seq4; 225 82 714 LEN=2176; translated  
MNSTRDPSTVDPTSIDNMLAQEF LSLSFHDRNKINEEVHGV LCCSPAETPELIAESIEKL  
DKELRLIPGSEKEMYSLSQSRFGRKNSSEEGGSYVNDKEFRLRFLRAELFDARMAASKMV  
AFLHVVCDFLGEYALQRP IRLSDFTEPELHTFRTGNLQ LLLPFRDRSGRRIIAGVEGLAIQ  
FDADLRVCCYVIVVYCLLYVGCLECSGSYF  
>comp9506\_c0\_seq1; 439 108 1055 LEN=1334; translated  
MTGSEEQPNEDARLFQTAVRESLTPYLP PPVVKAVRAIDPILEPLVGPEASVTVFGSLLV  
AWIFYQLLRIAMDFSSGSSASLGRKNSAIQEDDRDKDILPSGAETS RPF DGTVLLCGPSL  
GGKTCLFYELTQPRGSNSNSWTIATVRSIKSNTGFLEPNGSVLRLLDTPGHWGPQKLVE

VVPLREVQRLVVVVDSTQPVAPAADYLYAILTSTIQRSGSGSSHANGNNDPAVLIACHKGD  
HTKAKNPRRIKQLRNLIRLSKLDEAGGGDDTDGGRDWEGILNNIPLCSSSVSDSNVAVR  
EFCETGRAPLASKKR

>comp9507\_c0\_seq1; 718 225 1736 LEN=1883; translated  
MISVLRNKTLVVSALAILLSFAGKSRVTAQTAAACKPSDGGTCASEAGGDRNDKKAASAA  
DAIPSLLYSARQQDNDDEQNARKAKDFSEYFSAYGELHHQKDMLTDAHRMDSYYTAISAN  
AEAAFAGKVVLVDVGTGSGILAVWAAKAGAKKVYAIEYTGMAENARKLAEANGVGDVVTVL  
RGTVEGIRLPLEEDGLLGDDSGGEGASERVVDVIVSEWMGYVLLRESMLDSVLVARDRYL  
RRDTGLMFP SHATVLIAPISDESRRTERLADYEDSMADWHDFVDQTYEDYGGVDYSVLTR  
DFDREQEWYLTQGEWRELGRSHMVAEPQVLKTLDLTTCCTHEDTRGIFSENSGSGSHGNV  
DTNAFDFVIDPKGPYNNSSGGITLAVSGLAVWFTTDFRSRTDPLASREAPVLSTPVKLDT  
GPEQGYTHWGQAFYFKDPVLPVNPDEAGTHTTYRLKGSLEMFRARDNTRMYKCR IKHSGE  
ETENETAEVIGKTRLVEAVYSVP

>comp9508\_c0\_seq1; 1075 161 2842 LEN=2871; translated  
MPANDNPQAGQGRPLPKKENDL FKNVVKHYEQKQYKKA IKSADSILKKFPNHGETLCMKG  
LVLNNLGKKEEAHALVKTGLMQDMRSHVCWHVFGLLHRGDRNYNEAIKCYKQALRIDADN  
LQILRDL SLLQIQMRDLSGFV VTRHNILNLKSNGKINWLAFALAKHLTGD LRGAI SVIDI  
YLGTLNDDAPEKSPGFEASELALYKNQILAEIPNNHKEALDHLNECEKVVDRTSLLVTR  
AIYQYKLGQFAHVKKTVMDIFDRGLIENFRIHSMYMCATLELDDNILEDAMKLGTRSLA  
SMIPLTDDQK KILLEAYKTEIYPNYEKS KAVTRIPMNLVTGDRFRSSLDIFMRKQLVGGV  
PSLCKELSSFLLVEKEGKYEIASDPVDVKQHSTYALICELVDGYISTLKSSNKLKDDDEF  
EPPSTELWALYLRAGLHELAAEYSEGIALLDQCLEHTPTAVDAYELKARLIKAAGDMKL  
AVEVIDAGRDLDRQDRYINNQTTKYMLEAGMEKEALDRISMFTKHDGNPEVNLYEMQCSW  
YELGLAASFATKKEWGKALKKYS AVVKHFDDFHEDQDFHSYCVRKVTLRAYTDV LKFED  
NLWGEDY YYYTAAEGMIKIYLYLHDNPETTKEDAEPDYSKMTAAQRKKAKAIARKKRAQAE  
KKEAAEKKKREQQEAENG DQKNGPKKGARPSFIDEDPDGKELVKLDPMNEAKKYSSILSK  
HCPKRIGTWSLQYDVAIRRKVLLALQALLRMKNLDSYNAEYVSRLVDFALKVPEIEMAG  
AVKNVVTDECSKLLNSKSVGNLVT ELAAEARSDPSTPLLLRIAIAEGLVRTNSEPISQAV  
SLIVDVGTDMRGFDI ESCR SALALLNGFGDEASAATEQWKS FVKEQFP IAKNF

>comp9508\_c0\_seq2; 943 161 2800 LEN=2829; translated  
MPANDNPQAGQGRPLPKKENDL FKNVVKHYEQKQYKKA IKSADSILKKFPNHGETLCMKG  
LVLNNLGKKEEAHALVKTGLMQDXEVRSLIIISLQNHQFLLWHLLNAPSTLTSFYSSYAW  
DLLVCCR FEDPTFAGTFXGLLHRGDRNYNEAIKCYKQALRIDADNLQILRDL SLLQIQMR  
DLSGFV VTRHNILNLKSNGKINWLAFALAKHLTGD LRGAI SVIDIYLGTLNDDAPEKSPG  
FEASELALYKNQILAEIPNNHKEALDHLNECEKVVDRTSLLVTRAIYQYKLGQFAHVKK  
TVMDIFDRGLIENFRIHSMYMCATLELDDNILEDAMKLGTRSLASMIPLTDDQK KILLE  
AYKTEIYPNYEKS KAVTRIPMNLVTGDRFRSSLDIFMRKQLVGGVPSLCKELSSFLLVEK  
EGKYEIASDPVDVKQHSTYALICELVDGYISTLKSSNKLKDDDEF EPPSTELWALYLR  
GLHELAAEYSEGIALLDQCLEHTPTAVDAYELKARLIKAAGDMKLAVEVIDAGRDLDRQD  
RYINNQTTKYMLEAGMEKEALDRISMFTKHDGNPEVNLYEMQCSWYELGLAASFATKKEW  
GKALKKYS AVVKHFDDFHEDQDFHSYCVRKVTLRAYTDV LKFEDNLWGEDY YYYTAAEGM  
IKIYLYLHDNPETTKEDAEPDYSKMTAAQRKKAKAIARKKRAQAEKKEAAEKKKREQQEA  
ENG DQKNGPKKGARXIFRMKNLDSYNAEYVSRLVDFALKVPEIEMAGAVKNVVTDECSK  
LNSKSVGNLVT ELAAEARSDPSTPLLLRIAIAEGLVRTNSEPISQAVSLIVDVGTDMRG  
FDI ESCR SALALLNGFGDEASAATEQWKS FVKEQFP IAKNF

>comp9508\_c0\_seq3; 1030 161 2975 LEN=3004; translated  
MPANDNPQAGQGRPLPKKENDL FKNVVKHYEQKQYKKA IKSADSILKKFPNHGETLCMKG  
LVLNNLGKKEEAHALVKTGLMQDXEVRSLIIISLQNHQFLLWHLLNAPSTLTSFYSSYAW  
DLLVCCR FEDPTFAGTFXGLLHRGDRNYNEAIKCYKQALRIDADNLQILRDL SLLQIQMR  
DLSGFV VTRHNILNLKSNGKINWLAFALAKHLTGD LRGAI SVIDIYLGTLNDDAPEKSPG  
FEASELALYKNQILAEIPNNHKEALDHLNECEKVVDRTSLLVTRAIYQYKLGQFAHVKK  
TVMDIFDRGLIENFRIHSMYMCATLELDDNILEDAMKLGTRSLASMIPLTDDQK KILLE  
AYKTEIYPNYEKS KAVTRIPMNLVTGDRFRSSLDIFMRKQLVGGVPSLCKELSSFLLVEK  
EGKYEIASDPVDVKQHSTYALICELVDGYISTLKSSNKLKDDDEF EPPSTELWALYLR  
GLHELAAEYSEGIALLDQCLEHTPTAVDAYELKARLIKAAGDMKLAVEVIDAGRDLDRQD  
RYINNQTTKYMLEAGMEKEALDRISMFTKHDGNPEVNLYEMQCSWYELGLAASFATKKEW  
GKALKKYS AVVKHFDDFHEDQDFHSYCVRKVTLRAYTDV LKFEDNLWGEDY YYYTAAEGM  
IKIYLYLHDNPETTKEDAEPDYSKMTAAQRKKAKAIARKKRAQAEKKEAAEKKKREQQEA  
ENG DQKNGPKKGARPSFIDEDPDGKELVKLDPMNEAKKYSSILSKHCPKRIGTWSLQYDV  
AIRRKVLLALQALLRMKNLDSYNAEYVSRLVDFALKVPEIEMAGAVKNVVTDECSKLLN

SKSVGNLVTELAEEARSDPSTPLLLRIAIAEGLVRTNSEPISQAVSLIVDVGTDMRGFDI  
EESCRSALALLNGFGDEASAATEQWKS FVKEQFPIAKNF  
>comp9508\_c0\_seq4; 988 161 2667 LEN=2696; translated  
MPANDNPQAGQGRPLPKKENDL FKNVVKHVEQKQYKKAIKSADSILKKFPNHGETLCMKG  
LVLNNLGKKEEAHALVKTGLMQDMRSHVCWHVFGLLHRGDRNYNEAIKCYKQALRIDADN  
LQILRDL SLLQIQMRDL SGFVVTRHNILNLKSNKGINWLAFALAKHLTGDLRGAISVIDI  
YLGTLNDDAPEKSPGF EASELALYKNQILAEIPNNHKEALDHLNECEKVVVDRTSLLVTR  
AIYQYKLGQFAHVKKTVMDIFDRGLIENFRIHSMYMCATLELDDNILEDAMKLGTRSLA  
SMIPLTDDQKILLEAYKTEIYPNYEKSKAVTRIPMNLVTGDRFRSSLDIFMRKQLVGGV  
PSLCKELSSFLLVEKEGKYEIASDPVDVKQHSTYALICELV DGYISTLKSSNKLLKDDF  
EPPSTELWALYLRAGLHELAAEYSEGIALLDQCLEHTPTAVDAYELKARLIKAAGMKL  
AVEVIDAGRDLDRQDRYINNQTTKYMLEAGMEKEALDRISMFTKHDGNPEVNLYEMQCSW  
YELGLAASFATKKEWGKALKKYS AVVKHFDDFHEDQFDFHSYCVRKVTLRAYTDVLKFED  
NLWGEDYYYYTAAEGMIKIYLYLHDNPETTKEDAEPDYSKMTAAQRKKAKAIARKKRAQAE  
KKEAAEKKKREQQEAENGDKNGPKKGARXIFRMKNLDSYNAEYVSRLVDFALKVPEIEM  
AGAVKNVVTDECSKLLNSKSVGNLVTELAEEARSDPSTPLLLRIAIAEGLVRTNSEPISQ  
AVSLIVDVGTDMRGFDIEESCRSALALLNGFGDEASAATEQWKS FVKEQFPIAKNF  
>comp9510\_c0\_seq1; 225 1 989 LEN=1138; translated  
XHDEKFR LACLLLVAPAPTLCLRVLDCMAACFDATIVDAFDEIKFDPARFDSXLTIAVR  
KDFPDFPKHLKQTIDICRRRRRAKIIWVRADYRHKHSPWLSQFERMRGPRNLGEVPCDPSS  
PEFTWEEFATPEGGEV IIAKSSWSSTSNTALVDILKVACIETVLCGLITSVCVQHS AFG  
IFEAGYR TLLVTDACADRGRARHEAALALYGDYMYELVTSDDLESETKGLIPAEPVWVVL  
DEKTNMVRANSFPKQVMAPSASTNTVSTASSNTTAGSSSQGSYYNAGGAAEDEDTTVGS L  
ALGDPPGKPCAAANAVDGLVSVLMVPGQS  
>comp9510\_c0\_seq2; 455 415 1554 LEN=1703; translated  
MTTASHHPPQTRVEQREEAS PAPTIPAKTAKPYEELMIKDGPIYNWAKAASEEYETTF  
SSSSHPDAGVSSDSNGSSSRSTSP LPAESTALLIVDVQPEYWSNCPAVRKDFPDFPKHL  
KQTIDICRRRRRAKIIWVRADYRHKHSPWLSQFERMRGPRNLGEVPCDPSSPEFTWEEFAT  
PEGGEV IIAKSSWSSTSNTALVDILKVACIETVLCGLITSVCVQHS AFGIFEAGYR TLL  
VTDACADRGRARHEAALALYGDYMYELVTSDDLESETKGLIPAEPVWVVLDEKTNMVRAN  
SFPKQVMAPSASTNTVSTASSNTTAGSSSQGSYYNAGGAAEDEDTTVGS LALGDPPGKPC  
AAANAVDGLVSVLMVPGQS  
>comp9510\_c0\_seq3; 221 415 815 LEN=815; translated  
MTTASHHPPQTRVEQREEAS PAPTIPAKTAKPYEELMIKDGPIYNWAKAASEEYETTF  
SSSSHPDAGVSSDSNGSSSRSTSP LPAESTALLIVDVQPEYWSNCPAGGAASFRAGCIA  
LRRIHAAVVVVVAX  
>comp9511\_c0\_seq1; 768 1 2193 LEN=2725; translated  
XSNSNSNSNSNNQRKEGTSNEPFLVSEHHSTASGTGSIIDRFLQSHNNADV FQTYPTSNA  
KEESPVG DENREGSLDTKVEIPNLEWDIFVDPQLVRRVEAVLNAKDRYVQSKKKRRSKT  
AACPGTNAGSDGITGGSTTCCA IHPDDEID DGNQEAAALLADQDNRMNAIAKNLCSNDAK  
AYSDFRHTAREAA DCGNLDPD TDSNEAASDASETEVP IGDDPVLQYLEQELKRRTQVLT  
DRLLIAHGNVLQLIMEQSGVLKDWNYSRVQRTRRTLGGGMYARQWIAVFAESLR LGMNAK  
QTEEPK PSETSCGNNTYCSECPQHHDIDRGIHNFYDDEDDDAVDENAALLPLRQRDEFEE  
GPLLAPTNYTEHKEDPAEDDQG FHCCTSPKCCLDTTI SESVALIERITETKQPIGILLDL  
KSRHVPKRVL SLIVQSLKAAGIRVVG IASFASDIRGVCTSDYYNAYRIADPNTNTTKEI  
LMVHSAGDLQAACDEGLVQPGDHVVFNGGSLILDSARSSMIKSL LGFFFDACVCGYTTF  
DPCVIEEGYRIQSYGYGCSGVETS GCFDNTPYNNLIGSSGSKDKDSNKNLREMDGDNEAI  
IITSSEETDMGVVMRTLADYK KHYGFSMGLYLQEF S IDEKAARLLIDL VNNNPSLYDLGL  
AWGGINGMTVHGIQ PGRFTSTDGYXEPAAARQDMERALQVAIASWQRTEDAFGELGGQHA  
IHRFVVAPDLK  
>comp9511\_c1\_seq1; 375 1 1205 LEN=1205; translated  
XNIENFDNFALPIEIQ LALED TLLGWTHLTSITIGHLLL PCLVFYIVEYASKYVLERTFY  
TLSATPESNRAGGAEADPSVEMAIEAVLVSP THAVIGAVAAIAAFRVIRNRRRVWFRHA  
YGSKEYMSCAEGRRRRAAVMETDKNPSSLLSLSDYGT EETTVSWTSQIVTNYKKKRHKKK  
LKRASDRFERHHSRLSPRNSSSPGCKSPKHS DYESTSIATTEDCYDSSSTGSSENDYAF  
PRRKQPRPRTYQHPGHRPGRRTSIAHDAVSI PRIHNVPIAHGGFFGAAPFFLADKRWVK  
ILRELLPDVYVEISRRI GGGYYTGMYLRTSSTSDASKLIHWAENNPVVAAYGVFMDMQIQ  
RELVQEERERKRRL EGPVAVFGGVDPLYRERMGL LHGSSSS  
>comp9512\_c0\_seq1; 402 1 1874 LEN=2071; translated  
XESNRLPYLASAISDIFDQLIPSEAPLKFRTIDEYVTIAEDNDDIKAFVSRNTL FVVDPM

FHSHHEKNIKYVHDGGDDDEGSNGSHNTSIGTPFVALAPRGGGTADGSKKKGKSKKSKRK  
GKAKKAIVDAMKEKDSAEALGDAIRETVLALFVLLFVRCVCRKXIVFPEIAVQGLYAAL  
IFPFVTTTFEMAMPCNVWPYIVCVCAQSIVRDRADDLRKEQAAESDPLLQSIDGSVASVGR  
AMGASDYDAESTSGGVQASPTSVIANYFLKSHGGAHMLQSASSVLAACGLGCLVMVSRF  
SPSTDAASAGAAIANSKWALALLRRTMIFAFIKHVSGLLASASVAAKAI PKIGISESRKW  
MEEIVREPVAQYVFYFYTALVLLWLPTKGFLLAGPAQDDGTFTTTIATTWWWPKSRWVVS CFL  
MGPILLREIVSNMLIASDVLVLSVGSNNKNGVLERILEVSQSIVNAVMSLLVSPTKWR  
ADAQRQEILAGLVSKFSLFLEAGVGGILVVDLAIGLLRMVFGSAVMGGV RPAWHETLTK  
VVVIRLYIHYLIYIRRKNLSKLATEMRGGALQLPFVWLDLSDPAKALGISLPAKAVKDD  
GEDFSVREMFCVGFGLGTTSSNS

>comp9512\_c0\_seq2; 465 1 1679 LEN=1876; translated  
XESNRLPYLASAISDIFDQLIPSEAPLKFRTIDEYVTIAEDNDDIKAFVSRNTL FVVDP  
FHSHHEKNIKYVHDGGDDDEGSNGSHNTSIGTPFVALAPRGGGTADGSKKKGKSKKSKRK  
GKAKKAIVDAMKEKDSAEALGDAIRDRAADDLRKEQAAESDPLLQSIDGSVASVGRAMGAS  
DYDAESTSGGVQASPTSVIANYFLKSHGGAHMLQSASSVLAACGLGCLVMVSRFSPST  
AASAGAAIANSKWALALLRRTMIFAFIKHVSGLLASASVAAKAI PKIGISESRKWMEEIV  
REPVAQYVFYFYTALVLLWLPTKGFLLAGPAQDDGTFTTTIATTWWWPKSRWVVS CFL  
LREIVSNMLIASDVLVLSVGSNNKNGVLERILEVSQSIVNAVMSLLVSPTKWR SADA  
RQEILAGLVSKFSLFLEAGVGGILVVDLAIGLLRMVFGSAVMGGV RPAWHETLTKVVIR  
LYIHYLIYIRRKNLSKLATEMRGGALQLPFVWLDLSDPAKALGISLPAKAVKDDGEDFS  
VREMFCVGFGLGTTSSNS

>comp9513\_c0\_seq1; 139 1 536 LEN=1175; translated  
XGEEDTAPPKRAHGTVILASPSRKRSTLQRNLLLEKSLEDHAKDSSRNNNHGSPRKAKTER  
QRTTTTTTPATFKAAEPIQAPVPSNLSSSEKLSNVSKKSSLCAVPVATTSTTVEKDQSGA  
TQARSNLNLSDFIPEESEDTPGTVHNSSSSSSSKSNSSSFDDSLGKAKPNPADIHTSYN

>comp9514\_c0\_seq1; 206 176 706 LEN=1485; translated  
MAVIPENQEREERLETVGLQMAPSEKRGSVRGENETVVSYNQGSFSPCGPSLGSSDKAET  
TSASSVVSFSSSSSEEEGFQLYYYTRAEILRHNTETS AWIVAGEDIYDVTDYIEHHPGGK  
YSLMKKVGGAVDCTQDLLFHSRSGQKYWKQFLIGKVTKTPSKNGRPVEKEWKFWE

>comp9516\_c0\_seq1; 335 129 914 LEN=1132; translated  
MKLLLLGVIVCADVADRVAFAFAPTSKSSACATNSLSSSSSLPRRRRVTDVNRNP IGVMP  
VTTSSSTLSVLLDVPDHFLLFYFPMGLILLDLSKKFARFRLEESAWEQRLEEAAREKRLRE  
DPTLLELELRKEASLEWSAYGKPRRQEEEQERAMREEKERGYSRVKVREREYDDDEYS  
SNRTYQMSDEEINQFELEYGLEYPYDDPYSEDEL PDDINFNVDKKYGDRIYDNGEIFY  
KEKESGLFYRQGA KPRNLSFW

>comp9518\_c0\_seq1; 741 1 1495 LEN=1994; translated  
XLDYNLECEENGLRIAEDMSVLP MVVIPKNYPEFTSRRVHVAEWIEGEKLSQSKADDV GAL  
VNLGVITYMTQLLDKGFHADPHPGNMLRRTTDGKLAILDFGLMTEITDNQKYG MVEAIAH  
LINRDYTEIGQDFINLDFIPEGTDTSP IVPALTTVFDVALAGGAKSINFQELAADLAVI  
TYEFPPRIPPYFALVIRAI SVLEGIALVGNPEFAIIDEAYPIARRLMTDDSPRLRAALR  
YMVYGREGEFDAERLIDLLEALEKFKAIRDDGDGTAYKVDGVRGNKV VGSAGDFVGSQVV  
DTSERDIDGGFRVSNNNNNNVGGSNLQDQTEEDQETVREGLRFFFSEEGEPFREFML  
EEIVTVVDASSREATQELIRR VGLSNLPTPSFLRALNPELSDNDKRMVQQITKLVQFLGG  
DYDGAIGGGNNNNLGNNGNATTARLRALIPVIREYRVPLQDFGKLLIARL TEKNLQRGIN  
WASQRLSEGPLAAAARTR

>comp9519\_c0\_seq1; 468 115 1359 LEN=1710; translated  
MMRITPLATRAMAFARAPATRRNVAFTSLRMMSAATPSVAKPTNPEFSSGPCKKRPGYDV  
AKLDARTAGRSHRSKIGKERLAYAIDETKRILGIPEDYLVGIVPASDTGAYEMAMWNLG  
QRNVDFVHWFESFGKGWFGDAVSHLNL RDSVEVNEYTADYGELPDMSQANPDHDICFTFNG  
TTSQVVRVPAGCDFISDDRTGLTLC DATSACFAMNMPWEKLDITTYSWQKVLGGEGAHML  
ILSPKAVERLESYTPENRPLPKIFRMVKKGKIDGAI FKGSTINTPSMLAVEDYIDALEWS  
SSIGLPLGLVAKSESNLAVMEKFVEDNEWVDFLAKDAETR SCTSVCCLTDLTPEQIKKFV  
AVLESEDVAYDIGGYRDAPPSIRIWCGATVEKEDLEALVPWMKWAYEAIKAGDL

>comp9521\_c0\_seq1; 464 250 2136 LEN=2136; translated  
MDLLYSRALPGPEFVLSILLRSDIAGGDATP I PSHVGGGVEPLVLPSPPTTTL CQLSCL  
ALTELHFYINSILKASGSKNQ TNDGNTSTTTKATLGRFLNEDEAF LFPNKSGNDFVTQI  
FRPKKCHGIAMQFHLIRDRKQLSSFLVPLILSSSKLHSSKTNKGVAGL TAGIEAKEVTGV  
IFCVG VGGGSAAFGIGTSPLTYSLSQRMKKCLGILAE TASSNTGSRERSSASGAMAMLS  
SSKSLMTSLLLTDDEDRLVNSVVEGEQRIEINQEDQFARRILT TSSKKRQHQQEMDSSSF  
GKSNPLQENSADHARILVERMAVLSVFDSDSMLRKYENRQAAREAAATGRSGKKRNRKFA

RDADLGGFDFRGEKRSFSAAKPERNASSNSIGKVGVDVSVSARSSTTSGSNLTLKGPT  
KDTASRTPHRSLHGLLASNTKDSTSINRMSRRNAHGRRSSIGIESLEGNTSFVVSQSRTP  
QGSLTSRQLFDFPFGDPKDNIAATNGGPPAKVFNIALNEDLTCFYKVKLSLSSCSVEGVIO  
VQVRSNIDRGIPFSLLIHDPSPNYIQSIQENKKYAEVTNDNTTHKFAVSVPKTEEYFPVIR  
YKCGSDLRPVPIVKFNDNISYQEPSRMNKX

>comp9521\_c0\_seq2; 583 250 2603 LEN=2662; translated  
MDLLYSRALPGPEFVLSILLRSDIAGGDATPIPSHVGGVEPLVLPSPTTTTLCQLSCL  
ALTELHFYINSILKASGKSNKQTNNDGNTSTTTKATLGRFLNEDEAFLLFPNKSGNDFVTQI  
FRPKKCHGIAMQFHLIRDRKQLSSFLVPLILSSSKLHSSKTNKGVAGLTAGIEAKEVTGV  
IFCVGVGGGSAAFGIGTSPLTYSLSQRMKKCLGILAEASSNTGSRERSSASGAMAMLS  
SSKSLMTSLLLTDDEDRLVNSVVEGEQRIEINQEDQFARRILTTSSKKRQHQQEMDSSSF  
GKSNPLQENSADHARILVERMAVLSVFDSDSMLRKYENRQAAREAAATGRSGKRNKFA  
RDADLGGFDFRGEKRSFSAAKPERNASSNSIGKVGVDVSVSARSSTTSGSNLTLKGPT  
KDTASRTPHRSLHGLLASNTKDSTSINRMSRRNAHGRRSSIGIESLEGNTSFVVSQSRTP  
QGSLTSRQLFDFPFGDPKDNIAATNGGPPAKVFNIALNEDLTCFYKVKLSLSSCSVEGVIO  
VQVRSNIDRGIPFSLLIHDPSPNYIQSIQENKKYAEVTNDNTTHKFAVSVPKTEEYFPVIR  
YKCGSDLRPVPIRVQTRVRLERHWRVALQISSNPHNEDTLTDLTIIMGVPPPEVNGESLT  
TSPGGVWNEKRSVIWCVSELGGGEKFLQARFEIGSNDPRELEVEEKPKFPVLVRCQC  
MYAQLSDIELEVRAIPPVLTNDVKMKLASAFPVAVSRTAMSSIRHRIGGDFESLLHSSAV  
EFRI

>comp9522\_c0\_seq1; 241 1 1054 LEN=1054; translated  
LGVSGFWWKLEGSTETPSRGENPGESEKSKRRSFLPDGFGDVRSVWVIDRVLSRAMAS  
EEESVPVDEVLLLEGRDVLVLEGVLLPGAESLVAGCGGKGDNDKTKGETKNETETTSRRRP  
TLALRPRSLLSLVAEPRSGGREEMAAVGLALRACVAYLDLTLSTPDLRLARTRVASGE  
ERVASGSAALGDALRHCHLEHHCGRGPGQGATASASTSIKKLSGVLDYASSVGTAVGVR  
SSTPAGAAVGFLLTVDGVKAAARRGREFRTNKGPSGNDDANGDGDPPPSGAGKGGGS  
ADPVDQKEGYRFGDFSRGVFGSARNGIQAALRRGKEVRMSNRGTGCSLTQQEX

>comp9522\_c0\_seq2; 192 1 412 LEN=412; translated  
QQQQQQQSFQKGDVANPPDRAGSDRSENENYKFGDLTRGIRNSGNQNDARNYAVENRG  
RFAGIAGSSAFGAAGFVLGAPVGLAGSVLGSRVGQKATELHDQELREEQDVLGASVVG  
PPARNATEMHGEEELPQEX

>comp9524\_c0\_seq1; 722 1 2490 LEN=2715; translated  
XLYNDTDPTESSPGDSNEDEDEVTQVTQVARISGENPFLIDEAGQGGDASPPTMLIPTTA  
PTAFFVFRTEDEPSAEPLGPLTPQNADDDDLTFLWTPNSDPDIGGKLDDAVPFGSGIPTSS  
MAPSNSTMPSLQPTMSPTVLEETTMLPTEVQDPTSFPTRWFVKPTPTDPPTGGPTPGPTP  
GPTPQPTRKPTRKPTANPTRAPTEEPTENPTGAPTDEPTASPTFIPTEFPTGEPTAAPTR  
NPTSKPTLRPTRTPTIAPSHDPTPSGTLPEPLSVQPTIAPTYSYQPTDSPTRMPSKRPTN  
RPTLPAYEGKVEATMVLSPLDGS�DTRETISWEDVTSRFVTASLISEADPPMTNLFVTTR  
SVDQYSVAKDATGTAQRLQDEGIEASVVSIVIEFTLTIKYQSVAEYDLDALVASAFDT  
PEKNALYIKQLQRKSEDAFDTVQETEVENVDGGGPINPAAPPNPAPSNNPFPNPFDRPTAS  
PTQTQPKKVDTAVVAGATVGSIAFCVLVALLLLRRKGDSGGGDSQPPKSSQATPSTGKVT  
KVSTEILLVEPQDDVSTLGDVPVFGFGQGGMMNMGGIERDEMTXDVSVLRVVFVVLVLCRVLS  
GFVMCFSLACWLAGLFPGRGFVSLCCRAIVYCSVCASCTMLQRSDFTLTIHLLAYS CWIV  
GCSVGGDDYDYTEKHYRNPRGPLSLSGTTNTRDRITSEDMSRMSSAPSVSMSKLGKMGENL  
FADDASFEEQFLDPEERLDVVAPAGKLG MVIDTPNGGIPVVAIKETSVLVDQVCVGDRL  
LSVDGEDCTGMTAMQVSKLISLKSEKPARVLV FARSSSTSNTPTSNRVNK

>comp9524\_c0\_seq2; 828 1 2249 LEN=2474; translated  
XLYNDTDPTESSPGDSNEDEDEVTQVTQVARISGENPFLIDEAGQGGDASPPTMLIPTTA  
PTAFFVFRTEDEPSAEPLGPLTPQNADDDDLTFLWTPNSDPDIGGKLDDAVPFGSGIPTSS  
MAPSNSTMPSLQPTMSPTVLEETTMLPTEVQDPTSFPTRWFVKPTPTDPPTGGPTPGPTP  
GPTPQPTRKPTRKPTANPTRAPTEEPTENPTGAPTDEPTASPTFIPTEFPTGEPTAAPTR  
NPTSKPTLRPTRTPTIAPSHDPTPSGTLPEPLSVQPTIAPTYSYQPTDSPTRMPSKRPTN  
RPTLPAYEGKVEATMVLSPLDGS�DTRETISWEDVTSRFVTASLISEADPPMTNLFVTTR  
SVDQYSVAKDATGTAQRLQDEGIEASVVSIVIEFTLTIKYQSVAEYDLDALVASAFDT  
PEKNALYIKQLQRKSEDAFDTVQETEVENVDGGGPINPAAPPNPAPSNNPFPNPFDRPTAS  
PTQTQPKKVDTAVVAGATVGSIAFCVLVALLLLRRKGDSGGGDSQPPKSSQATPSTGKVT  
KVSTEILLVEPQDDVSTLGDVPVFGFGQGGMMNMGGIERDEMTATVGGDDYDYTEKHYRNPRGP  
LSLSGTTNTRDRITSEDMSRMSSAPSVSMSKLGKMGENLFADDASFEEQFLDPEERLDV  
VAPAGKLG MVIDTPNGGIPVVAIKETSVLVDQVCVGDRLLSVDGEDCTGMTAMQVSKLI  
SLKSEKPARVLV FARSSSTSNTPTSNRVNK

>comp9525\_c0\_seq1; 196 167 1594 LEN=1955; translated  
MGLSRSTIILGLVLLVATIKAFQGLHYIFELQKKQIEELSLAAALVAPETKPCPIVAPPS  
QGFPKCAINLYGLPRNFGNYVLPSSLKHVVKPNAYGCDYFLHFFDVKAEAAGRSGQGGD  
INSTEVFLLRDAVHKLHKDLDMPLVGVYFSFDVEESFREARKDHLIEVVERYKAENKTNN  
PYVPERFPEQTMVNILKMWHSQTSV FELMIEHGKTMNQDQEPYERVAMLRSDVVFMSF  
IDIFRVTKVPVPRDLTNTKPKQDARTPTSVSVRTPQPASKSVLERWDFQNRPGHYSMKF  
PKPKLLPKDYDSCEKPGSCYHDFGGTGNASAAVPIPGFASWP INDRFIAGPYHAVKVVATE  
RWNLYKDHVRLVLPKVGWTVQYGIHDEKLLALTVVPEIRSVPAVGAPGTVDVVVDDSLYFL  
RVRADGTMLVYDSPYVFDKNKQRVLETTLGRPCNKPYTKLGVSKPMSYLIIECPVL  
>comp9526\_c0\_seq1; 440 259 1845 LEN=1866; translated  
MEMETETASSRRRVSPGKSPVTVAVRASSERRQNALVGQLEHHRNRRLSRNALISDIEA  
RKKRRRMSLIRGDHAHGSDSDGAEDELQDQQHHPGAWRQPFVSVASNQQLQQRNLDGMNGG  
LITDVGLSNCHLVLYSGEITLGSPPNLQFRVDFDTAGSDVWVPSKLCDDGTCLKQHPNWN  
LYDPSKSSSTHELASTDLGRNEFALEYQDGEAIKGEHAKDTLRLGDDDDVRIHQVFAHVTH  
IKDFATCDEEEGILGLANAMTTTHGFHSHVGLNHLHQSQQKNNHLLQHNIFGMYLRAIDD  
YDGIITKNNEKPKQSSELTLGGVNDHYLGLCKWYDLEERENDGSRNYDNYWAVTLDDVK  
VGGATLTKDDSSSPNSDELVAVLDSGSSYIVGPQAPVARLVQLNKAKCFRMEVNSNGSN  
PKEIDCNDAGGFDGAVLNCCEDPFFSVEFIIGGDTYVLEKEDLMVHLETMFGTVCILRIV  
ASQGMKVSTTPGNGKLNSTTKTSVRLARTSFRAEAYHSNIFHVVFSL  
>comp9526\_c0\_seq3; 1180 259 2922 LEN=3512; translated  
MEMETETASSRRRVSPGKSPVTVAVRASSERRQNALVGQLEHHRNRRLSRNALISDIEA  
RKKRRRMSLIRGDHAHGSDSDGAEDELQDQQHHPGAWRQPFVSVASNQQLQQRNLDGMNGG  
LITDVGLSNCHLVLYSGEITLGSPPNLQFRVDFDTAGSDVWVPSKLCDDGTCLKQHPNWN  
LYDPSKSSSTHELASTDLGRNEFALEYQDGEAIKGEHAKDTLRLGDDDDVRIHQVFAHVTH  
IKDFATCDEEEGILGLANAMTTTHGFHSHVGLNHLHQSQQKNNHLLQHNIFGMYLRAIDD  
YDGIITKNNEKPKQSSELTLGGVNDHYLGLCKWYDLEERENDGSRNYDNYWAVTLDDVK  
VGGATLTKDDSSSPNSDELVAVLDSGSSYIVGPQAPVARLVQLNKAKCFRMEVNSNGSN  
PKEIDCNDAGGFDGAVLNCCEDPFFSVEFIIGGDTYVLEKEDLMVHLETMFGTVCILRIV  
ASQGMKGIWLDGAFNLKYYTAFDFENQKLGLALSAAESADDR CERDLMDVTHFWTSIYSD  
EDDYDDDDGFQDTNDVTNGSQETDDNDVDVQPEEVDDEDNEDTQTDGNNDVDEQEQSDND  
GTNSDEEHELPLDSESLDDDFVEGDDANEGGEDNEDTFELPPLPPQDDSGNEDPNTNT  
HGATDGEVDSWVDEVIEKADEM QDPIDQSEQTDDGSGDSVADDF SIAQFPEQEYPP T LSP  
FDEPTPNPTVAPPVHVPSHYEAPKEEQLPDLAGETGTEVTSQLSNTSFLSFGGIAGMIAA  
TFLVLAIVAFMIRRRQKPSKQKQQQMF EKTYNKAERKMVDEHRNLNRYRDHSSSRFQDALE  
DIHYVEEFHDEEGGIGRSGSGSPNKS GNEDQPENEFVLD SNILQRMN  
>comp9527\_c0\_seq1; 445 264 2315 LEN=2692; translated  
MATAAKTTTIVIKMLLFVTGSAAVAASFSRSSIPIAPLNQARNQRILEDTNENISDSGNN  
SSNTSNAACKLCEGIDLFPDISPPKLDGHFSPLRAALFEMIHTNATNNATNQRPSDSNN  
NNHINNNDASTVYRNIADGISTCAEIDSFYRANSCSMLGNNNSNGNGNGNDNGNDHQPS  
VYDAKLRELFFRICCGSTLPVYECEANAKAAVFS SGT YGYDTATPPQSERFQVLEVGVDI  
WYYLVLGIDEEAGSANVHMEGLTWTQRLAWEITTSACTDRISVWAGNGELSEIWIPPF  
NLLNRRTGLEAIPTRATVDYKGTVRMVLQGNMDAFCNFRGLANIPYDTLGCQFLFGITE  
GDPTGAAWYSVDFLDGSTTQFASFGLNASYNEWLPIPELAEMGKVPQGEVLYFDLYFERA  
EAHYVSNILIPTIILTYLSFFTFLLDVRIGERLGF GMALCLVVVAQQIVTAQLIVVSNER  
LWLDKLVGWSFYVLFMTIESAVIGFLYIREDRVAKKENKRISMNLSARRAMMAGEDG  
CVDGNKKEGADECLPLTLQND DALSSKEAIASLDGPGQEGVGNSSERTVRFDASILETTT  
AKKPRSRSPYSYLRCLRSISLRKFDYGCCLVFSFLTYTAF LIGMYATVRGTDLWTSQDPHW  
LSSKQDTTESTFAQVFNVDPEN  
>comp9527\_c0\_seq2; 336 264 1616 LEN=2838; translated  
MATAAKTTTIVIKMLLFVTGSAAVAASFSRSSIPIAPLNQARNQRILEDTNENISDSGNN  
SSNTSNAACKLCEGIDLFPDISPPKLDGHFSPLRAALFEMIHTNATNNATNQRPSDSNN  
NNHINNNDASTVYRNIADGISTCAEIDSFYRANSCSMLGNNNSNGNGNGNDNGNDHQPS  
VYDAKLRELFFRICCGSTLPVYECEANAKAAVFS SGT YGYDTATPPQSERFQVLEVGVDI  
WYYLVLGIDEEAGSANVHMEGLTWTQRLAWEITTSACTDRISVWAGNGELSEIWIPPF  
NLLNRRTGLEAIPTRATVDYKGTVRMVLQGNMDAFCNFRGLANIPYDTLGCQFLFGITE  
GDPTGAAWYSVDFLDGSTTQFASFGLNASYNEWLPIPELAEMGKVPQGEVLYFDLYFERA  
EAHYVSNILIPTIILTYLSFFTFLLDVRIG  
>comp9527\_c0\_seq3; 436 264 2147 LEN=2840; translated  
MATAAKTTTIVIKMLLFVTGSAAVAASFSRSSIPIAPLNQARNQRILEDTNENISDSGNN  
SSNTSNAACKLCEGIDLFPDISPPKLDGHFSPLRAALFEMIHTNATNNATNQRPSDSNN

NNHINNNDASTVYRNIADGISTCAEIDSFYRANSCSMLGNNNSNGNGNGNDNGNDHQPS  
VYDAKLELFFRICCGSTLPVYECEANAKAAVFSSGTGYDTATPPQSERFQVLEVGVDI  
WYYLVLGIDEEAGSANVHMEGLTWTQDLAWIITTSACTDRISVWAGNGELSEIWIPPF  
NLLNRRTGLEAIPTRATVDYKGTVMVQLQGNMDAFCNFRGLANIPYDTLGCQFLFGITE  
GDPTGAAWYSVDFLDGSTTQFASFGLNASYNEWLPIPELAEMGKVPQEVLYFDLYFERA  
EAHYVSNILIPTIILTYLSFFFTFLLDVIRIGERLGFGMALCLVVVAQQIVTAQLIVVSNER  
LWLDKLVGWSFYVWLFMTIESAVIGFLYYIREDRVAKKENKRISMMNLSARRAMMAGEDG  
CVDGNKKEGADECLPLTLQNDALSSKEAIASLDGPGQEGVGNSSERTVRFDASILETTT  
AKKPRSRSPYSYLRCLRSISLRKFDYG

>comp9527\_c0\_seq4; 336 264 1616 LEN=2986; translated  
MATAAKTTTTVIKMLLFVTGSAAVAASFRRSSIPIAPLNQARNQRILEDTNENISDSGNN  
SSNTSNAACKLCEGIDLPDISPKLDGHFSPLRAALFEMIHTNATNNATNQKRPSDSNN  
NNHINNNDASTVYRNIADGISTCAEIDSFYRANSCSMLGNNNSNGNGNGNDNGNDHQPS  
VYDAKLELFFRICCGSTLPVYECEANAKAAVFSSGTGYDTATPPQSERFQVLEVGVDI  
WYYLVLGIDEEAGSANVHMEGLTWTQDLAWIITTSACTDRISVWAGNGELSEIWIPPF  
NLLNRRTGLEAIPTRATVDYKGTVMVQLQGNMDAFCNFRGLANIPYDTLGCQFLFGITE  
GDPTGAAWYSVDFLDGSTTQFASFGLNASYNEWLPIPELAEMGKVPQEVLYFDLYFERA  
EAHYVSNILIPTIILTYLSFFFTFLLDVIRIG

>comp9528\_c0\_seq1; 949 206 2975 LEN=3125; translated  
MAGTTCNPSTTTTAAADWQHQP SRKRMFSDCGHGNGRPTSTIGGLSHRKEPRSFFIAVRTF  
QSSVPLVSLFFVLSGNEHSRADAFQPRRHQPYHYPHSNHLRHRPEHPSTRHNPLFSSKA  
SRLNDNESIGNRNENDSYWNPLQSKPSTRSPTIQNYINRNNIGNERTRETEQNQRISRNK  
QKMKPMPVTGYDARAIEEYDMRPLQVWRLNLTGFPLLFWYCRLLIDNANGVLGLPSVQ  
RQRGKELREAFVQSKSVALIKSGQALSRLPDLIKNKIWAEEELGKLVDAVGSFSDVEAMKI  
IRSELKDVRQRMGSPATWKDSFRKRREASSKLEKIVANDPVLSLFEFDNDNQAVASAS  
IGQVYKARIRKGPQLEAALGPPELAVEWGGKVVAIKVQRPDVASSVSLDMYLIRRTAGWLS  
KMRGGDILGIADQFGIQLFGELDYEREANNCLRFRDLYGSDWNIMVPDVCTALTRKRVLV  
MEWVDGEKGPWDGEEGIQMRHGLKCSVDQLMTTGLFHADPHRGNLLKADDKLAFLDFGM  
MADIDEEDRYGLFGLCIGLQSKDIRLVSDNLLKVSXNVYIQI IDVWNQSGTKLLFSVSL  
XQLGFIDDPKQDELIPRLRSALKNSTGGTGKAADVNFQAKLQAEALDAISRENLEFSTPP  
FFTVIIRSLTILEGVALSVNPRFRLVRGSPYVYVLRSLLOPENDERTPVALQNLIRLLTI  
DGEKKEIDWVRLRDLRLAQAQARSQYNPADDEEEEGENS AKLSRQTIELFYKFLTSKTGL  
FLKRPLVHELAE AIDGMASIGEANLLRATNGLLPSLPGMNGPVNTRVMSEMQLLDTFQS  
ALATDDDDGNTNSSGQARLLAMGQVVEEMGSLTDERLRKDAEPLLEEII SVTRMVAVEV  
LEIRGSRAMRSILQLNPVAPTVS

>comp9528\_c0\_seq2; 1028 206 2890 LEN=3040; translated  
MAGTTCNPSTTTTAAADWQHQP SRKRMFSDCGHGNGRPTSTIGGLSHRKEPRSFFIAVRTF  
QSSVPLVSLFFVLSGNEHSRADAFQPRRHQPYHYPHSNHLRHRPEHPSTRHNPLFSSKA  
SRLNDNESIGNRNENDSYWNPLQSKPSTRSPTIQNYINRNNIGNERTRETEQNQRISRNK  
QKMKPMPVTGYDARAIEEYDMRPLQVWRLNLTGFPLLFWYCRLLIDNANGVLGLPSVQ  
RQRGKELREAFVQSKSVALIKSGQALSRLPDLIKNKIWAEEELGKLVDAVGSFSDVEAMKI  
IRSELKDVRQRMGSPATWKDSFRKRREASSKLEKIVANDPVLSLFEFDNDNQAVASAS  
IGQVYKARIRKGPQLEAALGPPELAVEWGGKVVAIKVQRPDVASSVSLDMYLIRRTAGWLS  
KMRGGDILGIADQFGIQLFGELDYEREANNCLRFRDLYGSDWNIMVPDVCTALTRKRVLV  
MEWVDGEKGPWDGEEGIQMRHGLKCSVDQLMTTGLFHADPHRGNLLKADDKLAFLDFGM  
MADIDEEDRYGLFGLCIGLQSKDIRLVSDNLLKLGFIIDDPKQDELIPRLRSALKNSTGG  
TGKAADVNFQAKLQAEALDAISRENLEFSTPPFFTVIIRSLTILEGVALSVNPRFRLVRGS  
YPYVLRSLLOPENDERTPVALQNLIRLLTIDGEGKEIDWVRLRDLRLAQAQARSQYNPA  
DDEEEEGENS AKLSRQTIELFYKFLTSKTGLFLKRPLVHELAE AIDGMASIGEANLLRAT  
NGLLPSLPGMNGPVNTRVMSEMQLLDTFQSALATDDDDGNTNSSGQARLLAMGQVVEEM  
GSLTDERLRKDAEPLLEEII SVTRMVAVEVLEIRGSRAMRSILQLNPVAPTVS

>comp9530\_c0\_seq1; 365 228 1397 LEN=1713; translated  
MASSLSSSSSSGGTKPASSTAPTAPDTTTTNNKNDTRPLLRDAFLALEASSRSRGVFLLD  
GGTGEELFRRGVPDDRRLWSATALLPAHEAYQSVLGDVHASFLECGSNAVTTNSYGVVPG  
VGLGAGEIEDLADRSGSIARRAVQEHYRDHGHGDPPLPDARFVLGSLGPLVESYRPDLLL  
PRREGVGHYERACLALAPHADAFLAETMSCVEESLQVLGGLAEAAAKRPPPGHGWPLLV  
SYSLGSGGDFRDGEDLSRGLRRLERAGEQRPVVELLAILFNCCGPEAITRALERIHADA  
DLIDALGRDGILLGAYAHTLTDIDPNWTLAGSEGPQPARTDLGEKRYWEDFVRVWIDDFG  
IRIVGGCCGITPEHISYISEELRKRQKL

>comp9530\_c0\_seq2; 263 228 1527 LEN=1843; translated



MASSLSSSSSSGGTKPASSTAPTAPDTTTTNNKNDTRPLLRDAFLALEASSRSRSGVFLLD  
GGTGEELFRRGVPPDRRLWSATALLPAHEAYQSVLGDVHASFLECGSNAVTTNSYGVVPG  
VGLGAGEIEDLADRSGSIARRAVQEYHRDHGHGDPPLPDARFVLGSLGPLVESYRPDLLL  
PRREGVGHYERACLALAPHADAFLAETMSCVEESLQVLGGLAEAAAKRPPPGHGWPLLV  
SYSLGSGGDFRDGEDLSRGLRRLERAGEQRPVGECKTVSCVVTAVIVDSVVVVYVVKGA  
VLDEQHGGFLRSVPDDCPVLAAILFNCCGPEAITRALERIHADADLIDALGRDGILLGAYA  
HTLTDIDPNWTLAGSEGPQPARTDLGKRYWEDFVRVWIDDFGIRIVGGCCGITPEHISY  
ISEELRKRKNQKL  
>comp9531\_c0\_seq1; 513 320 1504 LEN=1552; translated  
MPTGMNDGGEDDSTMFGIPASPGSLMGSSIRSNQVHSFDIESESCSIAGENPGWRLGMPW  
FSNNNNNSRSNNQEQQLKTRNNPADEASRYGGIMKAAGEIDVMSPISTGSNESRHFQS  
SRRNQKRASSFKGSRGSHFGSSKMKHERHYATNRSGAANNTINSNGKASVPIIRTKSSAG  
DSIADFDESEWTPPDSYGAACPVCGFISKVRQMIEMTLITAMIFFLIYLLVTTSMKIA  
EAHRKEGNNNSSTSTVVTNDDVYVEKYSNGDDAVVVDDQYTESIDDAYVDDAYINNNDY  
TADDDGGGGYASDQSYNNDFNYNNQYNNYNNRNRQYNNFNNDDFNGGERDRRQRRLRHR  
DIHDRGRGGVHPNNKILDRIKQLVSDRTASFAIAH  
>comp9533\_c0\_seq1; 182 105 689 LEN=906; translated  
MRILFVQTGGTIDKDYPRTTNGWGFIESEPAVQRLLSERLTPSFSHELAVVCRKDSTEV  
NDADRSELADTILSRVAKPAASSENESHRLDGVVVTHGTDMAETARFLADRFGGSSSS  
SDRELLPPVLLTGAMRPERFSNSDADFHLMGMAVAAAQVLPFGFVVICMHLVLGHDEIGR  
DASTGRFVRRTPGA  
>comp9534\_c0\_seq1; 215 251 523 LEN=883; translated  
MAEQRKAVIKNADMSEGMQQDAVDIASVALSKYNIKDVAAHIKKEFDKKYNPTWHVIVG  
RNFSGSYVTHETKHFIYFYLGQVAVLLFKSG  
>comp9535\_c0\_seq1; 219 1 898 LEN=1317; translated  
XVLELVQHQAQLRNTTTAQHGKARHGPSRQHRMKALPLFLLGLGSTPPGRPPPEAPVETR  
LSPPKGYGVFATGPIANGTVVCGYEGDLLTLAEQEARYPDSWPDYCLRLSPELSIDAERS  
GHWSRFVNHDERPNLVVETSLAPEPSARFRAIRDIAAGEELCFDYGPVYFYARGITPAPG  
TESRTVSLAPRPVDEAAVEEERAWAASGLPDAPATVDEIGRVLSSAAVSEGAKKAALARA  
LDYFGAIEWIDEDAFFLALPLGLAETEKRRVAYSSSAPEELAASLEEVVEHYSAGDKDRQ  
>comp9536\_c0\_seq1; 179 261 1136 LEN=1770; translated  
MWFDPKFKMGGGMTGSAVKRLKHQAPVRASAFHICAPKTLKFRFGRFLVTKSAVLPRIRL  
HLGSPMELLYNLNSFGIPSONLPITNGGQIKTTYIIQWFKTRKIIESGNAESKIVVESP  
SSDVVFKRGGSAVHNAGNSKFRSIIQKKYEEGDFCTCKTQSALVDELQKELTLGGFRIVW  
NEKLSRFFHSTDKKTIQSKVEYSIRSFREKDSQSVNRRRTADMILLEHNKTSGAITRSLDFD  
VSRSRKRFKFDGNMEANGINFCDGSDSDSGREDFCNCTAQNLVKAHFHD  
>comp9536\_c0\_seq2; 168 322 887 LEN=887; translated  
MTSNAYVSNVEAGEILSKELLALTLRDRNEITEEIHGVSSMAVEETPELLIRSLSKLEEE  
LQVMPESKKKYTKALSLPDSYVQKDRFKLRLRFLRTCLFCPKEAAERIVKHLTNIAECFGE  
QCLQRPVCLDDFTKSEQRTMCKXGPAASSISGPGWQANFDLFLSNRPLYGAYTGRPCKLW  
VGLGWVTMT  
>comp9536\_c0\_seq3; 196 322 1245 LEN=2667; translated  
MTSNAYVSNVEAGEILSKELLALTLRDRNEITEEIHGVSSMAVEETPELLIRSLSKLEEE  
LQVMPESKKKYTKALSLPDSYVQKDRFKLRLRFLRTCLFCPKEAAERIVKHLTNIAECFGE  
QCLQRPVCLDDFTKSEQRTMCKGGLQLLPYRDRAGRILISFPTDHISGLTPDVRVKIVL  
YLTSIVTTNGHVEDLETQRKGIIVIMWFDPKFKMGGGMTGSAVKRLKHQAPVRASAFHIC  
APKTLKFRFGRFLVTKSAVLPRIRLHLGSPMELLYNLNSFGIPSONLPITNGGQIKTTYI  
IQWFKTRKIIESGNAESKIVVESPSSDVVFKRGGSAVHNAGNSKFRSIIQKKYEEGDF  
CKTQSALVDELQKELTLGGFRIVWNEKLSRFFHSTDKKTIQSKVEYSIRSFREKDSQSV  
NRRRTADMILLEHNKTSGAITRSLDFDVSRSRKRFKFDGNMEANGINFCDGSDSDSGRE  
FCNCTAQNLVKAHFHD  
>comp9536\_c0\_seq5; 258 322 1812 LEN=2446; translated  
MTSNAYVSNVEAGEILSKELLALTLRDRNEITEEIHGVSSMAVEETPELLIRSLSKLEEE  
LQVMPESKKKYTKALSLPDSYVQKDRFKLRLRFLRTCLFCPKEAAERIVKHLTNIAECFGE  
QCLQRPVCLDDFTKSEQRTMCKGGLQLLPYRDRAGRILISFPTDHISGLTPDVRVKIVL  
YLTSIVTTNGHVEDLETQRKGIIVIMWFDPKFKMGGGMTGSAVKRLKHQAPVRASAFHIC  
APKTLKFRFGRFLVTKSAVLPRIRLHLGSPMELLYNLNSFGIPSONLPITNGGQIKTTYI  
IQWFKTRKIIESGNAESKIVVESPSSDVVFKRGGSAVHNAGNSKFRSIIQKKYEEGDF  
CKTQSALVDELQKELTLGGFRIVWNEKLSRFFHSTDKKTIQSKVEYSIRSFREKDSQSV  
NRRRTADMILLEHNKTSGAITRSLDFDVSRSRKRFKFDGNMEANGINFCDGSDSDSGRE  
FCNCTAQNLVKAHFHD  
>comp9537\_c0\_seq1; 1194 383 4554 LEN=5232; translated  
MMQAAQFAAEAMREAEERNAKAGGSNGVGHNRAGNSNHAGFHGDSDMSMSAMSRLS

MMDGMQINESCSSLMTDVSQMSLLQQQQDYHRYNRDEQQHRYEQEQHQEQHQPYGAGLD  
NNQIILQEMQLMGIDPNDPEFSVQLFLQLLQOREEPWQQPKRPDEHYMTIAQNGMILEAT  
KTITGYSPDSLLMTSAYDKIYEDDLKGLLAVKSHFWDKGHPDVEAYIRRRSKEGEWIWLV  
TKAVSYVEHPPIPGIILVEKRVASSGESNYCKDNDDYETVYVADMEAIYRAKAINSITRISA  
ILIEAINEAQKVPALQVSSSTSQQNPGDRQPNGNKNQKNIDNINSSSNYRSNRNENDQDS  
LSGSSVDSANPIPWVADDAAYQTMLLQQQKHSADADIANDPLQQIMKVAMAGGLSSKSR  
NRMAAKLEQEIMERVNGATKMESFDPFVLEEDVREGVRLDLGMVRLGRGEIYLMQMLLMG  
RMTVDDLILIVFRALTSGVELGAMIELFIMERQQSDAQYGIAMVNLPPPISVVNLSYTYM  
GNSSVDLFCEVIGMDNSHLRTIDVSFCGLGDRGIQALSRALARRRKRSIMPLRGIILSGN  
YISEKIASSELGRALSPDAYEGTSSIDAYYNKEFGLQVLHLGLALQEPLAIKGLLQGLGPL  
CPIKELSLTSNKIGIDGVECIISFLEKGDLEWNTKFPDKTHGLVMPFLVRLDFSNKIGN  
EGLKCLKTKILPKRQNLLELRLSNNGIAHSGIEEMMNKLLHRNLVSLTLDKNGIGDQCQL  
IAASLLSMKCLSRNLNLSFNQIGSRGVNSLMRSLVACDTITYLGLSGNIMKISGAVALAFT  
LAQHPRIEELDVDNCCLSQAAQCHI IAGIISNRWVPLTRMNGFEAGPPMVALGALKVSDQ  
CLSNEECFRIRRRDEQMKTILQWMESNRKSKGRKDPNSAGNSRMESQYLPNPFVQSMNDVE  
GIPSQNAYLRLLSWLSRIPFDEDELISLRKYFYDSDGLSEDRGSDGYVNLKLRGDLAAL  
ESDVADEIRDETPLMVQYDGSVGFIDRIDDESDEKIKSEKSSDPEWDYMMGHKFKDKAARL  
LASDSKIDKGLDDVKHHFRGDDDDSQFSTDDDLAHRKRRIFFPSAEFPESNSRGSPPSPC  
STTSTGNLHSLQSMVNSSSERSNLSSGEKEIKRVALKARITMFPQFEGKLEELKYTATEM  
IESEEDPEQQEIIILTQYAEASLTIILRQLRYHCMNGLDGWRQGSTKRKVLIVDDSLVTRK  
HLRSRVFEKANFIVDSAENGAEGVEKQAIYDIAFMDIDMPVMNGFEATKRLRQWEDNMR  
PGVRQPICALTAHVDDFERSELMKFKEAGLDVFESKPCNIPRLFVVDVSPMFSDSL  
SVIQQERKQA

>comp9538\_c0\_seq1; 491 1 1496 LEN=1714; translated  
XPPSERKDNDDNLTASNTLLCRGGWRVVRVREVVRSIPFPVAIVDEIGDDADEGDSDMFS  
AVGGFENDDENDDDDGLGGMETPELIHQTMNRVQALLSQRLEDAQAQTKLGPLEKS  
ILEAQGGGKETLRLAAIEMAHAEEMSAVWQVFQSSLVDDIEPHQRREAVAIMAAELADLS  
NAVRREILLTRDSEERLRIVLGELEVVGMARARKLASSITDESDESEKDLKVGKPLPP  
WARQIRKGTRIEYFWNEEWEWCPCGVVDDPVTIGDEMLLTIRFDDGEEHKLPLSGDDKLR  
WRPQQAEANDNKTTRHDTTRNRMAEPEIASPGSSAAVVLASEEDKRETKNETTNPISHRDA  
RSEDANEHKAANDSFPSPDFAFVNNGLLRWQAARSEWCSSGGSPASRAPASFSAVQLDVDE  
VIDVLFDPXVEGGSPQDERLDPVPGSPAVPEERPFADDRCPDGPLGGGGAGRVVWCGAV  
EWNTEQKASMITARKMEW

>comp9538\_c0\_seq2; 565 713 2228 LEN=2228; minus strand; translated  
MTSSTSSWTAEKEAGALDAGDPPPEHSLRAAXPPQESWFETNETEAKRGRNQKQEKD  
NPRDPEAQPAESKTAALADCLSSKEKPTDPEPPGKHRFFSDMDLRIASHHVACHSALLH  
SPLLTKASGDGKESFAALCSFASDRASRWEGFVVSFLVSRLLSSEARTTAAEPEGDAIS  
GSAILFRVVS CRVLLSFASALLRPPAELVVAEAGELVLLPVVEADREEHLVPDRDRVH  
HHPGAPLPLLVEVLDPGPLADLPRPGGKLWLADLEVLALVGFVGDGGGQLAGPGHPDD  
LPELPQDDPQPLLAVAGEEDLPANGIGEVEGQLRRHDGHRLPALVGLDVVHQAGLEDLPDG  
GHLLGVGHLDGGEPEGLLPAPLGLLEDGLLERAQLGLLRRVVFQALGEQGLDVPHRLVDELG  
GFHAPAEVVIVLVVVVLESTDGGKHVAVALVGVVVDLVDLDRDRKGDGADLDPHEP  
PSPPAEQRVGRGQVVVVVLLALGRGG

>comp9538\_c0\_seq3; 491 1 1496 LEN=1977; translated  
XPPSERKDNDDNLTASNTLLCRGGWRVVRVREVVRSIPFPVAIVDEIGDDADEGDSDMFS  
AVGGFENDDENDDDDGLGGMETPELIHQTMNRVQALLSQRLEDAQAQTKLGPLEKS  
ILEAQGGGKETLRLAAIEMAHAEEMSAVWQVFQSSLVDDIEPHQRREAVAIMAAELADLS  
NAVRREILLTRDSEERLRIVLGELEVVGMARARKLASSITDESDESEKDLKVGKPLPP  
WARQIRKGTRIEYFWNEEWEWCPCGVVDDPVTIGDEMLLTIRFDDGEEHKLPLSGDDKLR  
WRPQQAEANDNKTTRHDTTRNRMAEPEIASPGSSAAVVLASEEDKRETKNETTNPISHRDA  
RSEDANEHKAANDSFPSPDFAFVNNGLLRWQAARSEWCSSGGSPASRAPASFSAVQLDVDE  
VIDVLFDPXVEGGSPQDERLDPVPGSPAVPEERPFADDRCPDGPLGGGGAGRVVWCGAV  
EWNTEQKASMITARKMEW

>comp9538\_c0\_seq4; 565 450 1965 LEN=1965; minus strand; translated  
MTSSTSSWTAEKEAGALDAGDPPPEHSLRAAXPPQESWFETNETEAKRGRNQKQEKD  
NPRDPEAQPAESKTAALADCLSSKEKPTDPEPPGKHRFFSDMDLRIASHHVACHSALLH  
SPLLTKASGDGKESFAALCSFASDRASRWEGFVVSFLVSRLLSSEARTTAAEPEGDAIS  
GSAILFRVVS CRVLLSFASALLRPPAELVVAEAGELVLLPVVEADREEHLVPDRDRVH  
HHPGAPLPLLVEVLDPGPLADLPRPGGKLWLADLEVLALVGFVGDGGGQLAGPGHPDD  
LPELPQDDPQPLLAVAGEEDLPANGIGEVEGQLRRHDGHRLPALVGLDVVHQAGLEDLPDG

GHL LGVGHLDGGEPEGLLPAPLGLLEDGLLERAQLGLLRRVFQALGEQGLDVPHRLVDELG  
GFHAPEAVVVIVLVVVVVLESTDGGKHVAVALVGVVVDLVDLDRDRKGDGADDLPDHEP  
PSPPAEQVRGRGQVVVVVLALGRGG

>comp9540\_c0\_seq1; 950 237 3827 LEN=4055; translated  
MGTGKGLDAGKVSQPSSSDGNVSGEASNANANGISVPDSSGPNQTDDDDDDSKVSTPLNAD  
STGIRETIGPKQTDNDDSSVAKPPLQETEIEIDFDPIVPFDEEKNLENHYEVPTESTE  
PKSPRSRSSLLETQSIVRNHNVYGSTRAVDDAMTVRKPEKMPKKEIPKKKKHKKSLQD  
EELIRLALHRNPYFTCLDEEQIQRFVDEAELVDDFRPGQAVIVEGPSRPVRRPGKTRLRK  
MKTNMADVHGDDYFDEHDGGRGGSRAIGVGNSPADVDDPWWIEEDDDTEYGNYSNDNEK  
KHYEDAAASRSSYLYIIRKKGADIFYETINPATLGP SRMFEGGGFLFGRNHSASVVAATD  
QLECFRIDRHTFVSKILPSQNMKRLYRKYSSMTSGASTSPSTPTLDTVEFLPDEKKETGI  
ERLVDGNRNMRRKKKTKEEDKDGEKFFVMTMDDFLEFFFKKERDETSTSSSNSSSSSSLSNP  
SLSPIANAYQSILRGTSSYHDEKNHIALEDFFHFLMARPDPEIDIAFILMDRSRSGT  
ITRRDFERYLETSPVPHFAPNSEFLERHFGNGRVIRSHQFSQFLHDLQRELGRQAFLYRAK  
ELAKEKQYLESSKDDSTTVNMADPHIGYLPAEIFIEVLKATSSWRLPDGIIDRLESYCK  
PSIDSAESTALASVRAGTIKGDSPKQVAEYSRRSVLADLERRRNKLGTRNFAYVDFIAFQ  
DLLVQLPAICNLIERSQCQIKKGPISQDDFKVANRVLGIGGRLSRQQVNIIFELFDLDHDG  
YLSNEDAISVCGLEIGSNVLEAVKGRDGKATFAPPNYPQNLSLNDSSGGYGYNDDEKRWE  
NMSTEEMMSHSIQFFLSSIAGGFGIFTVYPLDLIKTRMMNQRAPSVDGKRLYYTSLDCL  
QKVIRYEGFQGLYRGLLPPLLAAGPEKFKITVNDMLRGLVLSKDNGSSTQWLTEIVSGGC  
AGACQLLVTNPLEIVKIRMQLQGETSMIYKRKGFVPRGLGLHYMSFTQIIQDFGTTGLY  
KGAAAACLMRDIPFGAIYFPAYAACMDYLVNRDGSAGASSSSILISGTLAAIPASLLTNPM  
DLVKTRLQVASRPGEEERYSGIGDCIRKVYKTEGPWAFFKGSFPRVARIAPQFGLSLFAYE  
KLSQLIGFRGIAPPTNAPVNPDRDYRTAFSSVSSGIESKAIDAESLIENIGLFKPPR

>comp9541\_c0\_seq1; 919 107 2701 LEN=3152; translated  
MTSFPSKLTPTSSTTTSPITIRVLAASTGVTYRIALHPSELTVANIRNHLAAAVPASDQIL  
LLGPPYKVPDRDSTLQSIETLNSLRGDKEDAEVMNGRRRSGTTEPDNAKEDDDDDFSGRPR  
QQHILSTTERSGARRLFLFSKRALSENAPDPPPCILQPMDVIVPTQPQGSPLDMTQSAV  
ASQPLHQALSAYERQFMYLYLCQGRVLADAAELRLQACKQCVQEQAVIARALRAAVSNLSD  
HFNGAARTRSEFTSLFQSKTAAHASLLQRFESTLTSLSGSVPLHPSLVAIARGSGRIMESL  
LDTVPVERERAWAQCKTSHDRLLVLF AEVDAEFGKIGTAASREEETRQDLMAEEHIQQL  
SDVVQGDVQDLRDRQAQRVERLTADHGKVLQIIMDAMNAEVVEGKEDEVQKAFTPLRQIS  
NDAKDIVPDMEMDDKAMKVLMAKISDAKTEATKRMKVRLREVSLAQSSIQRFSSVNVLK  
AALNQCDNMIHLEHVSELVTSYRDFLSELRRRRRAYGQAVTNSNSTAMMERLAVMRADEVK  
AREKFLRGSGRHLMPPFFEIFVPTLATPPPLFTPQMPALAEELDTLPDIGSAIEDIETDAS  
MQAGGTDGGGGGVSSASSLTFAESNIHVQQEKISSSGATDTVDETI PSADGLAHGHNQQG  
DQLIVSAEENSGNEDTIMNPAGGTEEAERKTLAYENAILRQTLERMGGKAPKAYIEEAQA  
KDVSFSEVEVLRKELEATKLKAVAAEDALAKVQAEATKKVKEEKSSPKKQCDKISHSSFG  
VGDVGLFMPTGRGSGKRTYLAFTSCPHRYLNTDNIENSDFVLGRIIYQEELVAGQMGT  
AANPYGLHVGTTFWVLTVEVLKS

>comp9542\_c0\_seq1; 691 381 1991 LEN=2931; translated  
MKNLQEQQQAPEPTIPAPVCAAPMDTSKYEYEQVAAMATLAVGTSAAVPMTICRSSIAP  
SVASNPLVDSNEPSSASKKAIDANAKESRQFPVVKVYEMLQDADPKKFSHLISWNPAGTG  
FMVHDKDKFTDDIVPLYFNLT KYKSFQRQLSLYGFQRVTVGPNKGLRFHDKLRRGQADLV  
RQMKPVGYKPRNLARLVERQNQRQREQQQQQQQQQQIQHQEFNGGTTNITTTTTTIKMT  
TTSTTSVGNPAPPDISTTDGFGTKPSPDLSTSI LPVVSTGSLMKQEDQETGSTIVGSLQ  
HTDILDQTNDCVHNI SLEAKPRSAI PPPADTGAASSNATADGSILYGMKSPPNYGOQNST  
IVGRSKEGLEKVSFEGMSFHPMVPTRRELTINVKLKLLLEEFNPASSLLQLASKYVTPGYTT  
EPIVSTTPAPSRVPSLPTIDA VDPDRPSLLEPFTDLVSATASAAAASTASAI AALHSASA  
DSAKYNGSISPTSIAHSMPTTITPNVAPLESRCMDALDFHTINLTSAAATQMPE

>comp9542\_c0\_seq2; 919 381 1991 LEN=3065; translated  
MKNLQEQQQAPEPTIPAPVCAAPMDTSKYEYEQVAAMATLAVGTSAAVPMTICRSSIAP  
SVASNPLVDSNEPSSASKKAIDANAKESRQFPVVKVYEMLQDADPKKFSHLISWNPAGTG  
FMVHDKDKFTDDIVPLYFNLT KYKSFQRQLSLYGFQRVTVGPNKGLRFHDKLRRGQADLV  
RQMKPVGYKPRNLARLVERQNQRQREQQQQQQQQQQIQHQEFNGGTTNITTTTTTIKMT  
TTSTTSVGNPAPPDISTTDGFGTKPSPDLSTSI LPVVSTGSLMKQEDQETGSTIVGSLQ  
HTDILDQTNDCVHNI SLEAKPRSAI PPPADTGAASSNATADGSILYGMKSPPNYGOQNST  
IVGRSKEGLEKVSFEGMSFHPMVPTRRELTINVKLKLLLEEFNPASSLLQLASKYVTPGYTT  
EPIVSTTPAPSRVPSLPTIDA VDPDRPSLLEPFTDLVSATASAAAASTASAI AALHSASA  
DSAKYNGSISPTSIAHSMPTTITPNVAPLESRCMDALDFHTINLTSAAATQMPE

>comp9542\_c0\_seq3; 262 381 839 LEN=964; translated  
MKNLQEQQQPAEPTIPAPVCAAPMDTSKYEYEQVAAMATLAVGTSAAVPMTICRSSIIAP  
SVASNPLVDSNEPSSASKKAIDANAKESRQFPFVKVYEMLQDADPKKFSHLISWNPAGTG  
FMVHDKDKFTDDIVPLYFNLTKYKSFQRQVRS

>comp9543\_c0\_seq1; 190 249 685 LEN=685; translated  
MPPPFSGVPQTGHWAGASASAVGRGVFLLSVGFALVGLWHLHGAATSNPSNEVGDAVAVL  
PERRHSELRELSRKVDDEREERQKELSDHYKYSLLKLSRQNLANTTDQRLAIAAEDTAK  
RINDLKEVLEQLLEEKVSAVDQRLSEX

>comp9544\_c0\_seq1; 920 51 2929 LEN=2988; translated  
MPIRSYTYSGPSSGAI AFELLAQIQAQVAVNASPDEKPTVTVVTTNPFVGTSTTSTSDS  
WAGCAKTL SGLIPSLGLWMDHDEILVEWIDSAAAVLEKDSENSAIDFLSKLEDYLGKNGG  
DSYLAGQFSAADICVSVWCSSAISKFDLVSSKRKVSCDWLVKILKALQPYDENGEISKRL  
VALEIGEVS ETVGDLKINSASND AFEDNETVQKLR ELGLEFDVYAHEACMTADDLVANVP  
LPSSKETHTKNLFFKDKKHGLFLVTHATSTMFNTKQLGSKLNLQGVNMR LANSEVLEKH  
LNVKSGSVGPLCIVNDESKEVTLVVDKFLVDGSYDFI HSHPLRNDASLKMKPSVMEEFFK  
KIGIEPVVDFSAEDASGGGPPDGSKKMTSGK GKQKVP PPKKQKVS NQNEKGKTKLALQY  
KKSENFPMWYSNVIVLSEMISYYDISGCYILRPWSYKIWDLMQQWFNKKDGV DSTFVLF  
CFVELDILVVPILLERAIDVFHVS MFLNVPDLKLG VENCYFPLFVSQDRLEKEKDHVEGF  
APEVAWVTKSGDGELAKQIAIRPTSETIMYPAFSDWIKSHRDLPLKLNQWSNVVRWEFKD  
PTPFLRSREFLWQEGHTAHATFEEADEMVAALDLYKQAYQDLLCVPVPIPGFKTEHEKFA  
GGHQT TTV EAYIPI SGRAIQGATSHNLGQNF GKMF DIKFQDET GASKIAWQTSWGLTTRT  
IGVMVMVHGDDKGLVMP PRVSPVQAVIVPILSKLLMEDANPYCVSVLQDLESQGLRAKY  
DDRTMYNPGWKYNHWEQKGVPIRIE VGP TDIEKYQVRAVIRHNGK KIDLPLEGLGVHLRE  
MLEDIHQEMFDKASAERDNHLVQVTEWKDFVPNLEKNNLVLTPWCGPEHEDWEEWVKKTS  
REESLVNLGEEAEDERTATSVAAKTLCIPFDQPEL PKGSKCIASGMPATCWVLWGRSY

>comp9544\_c0\_seq2; 869 51 3036 LEN=3095; translated  
MPIRSYTYSGPSSGAI AFELLAQIQAQVAVNASPDEKPTVTVVTTNPFVGTSTTSTSDS  
WAGCAKTL SGLIPSLGLWMDHDEILVEWIDSAAAVLGMXWDNTAILSFIPIITNIKFILDF  
LLEFMFPTRSEKDSENSAIDFLSKLEDYLGKNGGDSYLAGQFSAADICVSVWCSSAISK  
DLVSSKRKVSCDWLVKILKALQPYDENGEISKRLVALEIGEVS ETVGDLKINSASND AF  
EDNETVQKLR ELGLEFDVYAHEACMTADDLVANVPLPSSKETHTKNLFFKDKKHGLFLVTH  
ATSTMFNTKQLGSKLNLQGVNMR LANSEVLEKHLNVKSGSVGPLCIVNDESKEVTLVVD  
KFLVDGSYDFI HSHPLRNDASLKMKPSVMEEFFK KIGIEPVVDFSAEDASGGGPPDGSK  
KMTSGK GKQKVP PPKKQKVS NQNEKGKTKLALQYKKSENFPMWYSNVIVLSEMISYYDIS  
GCYILRPWSYKIWDLMQQWFNKKILKLG VENCYFPLFVSQDRLEKEKDHVEGF APEVAWV  
TKSGDGELAKQIAIRPTSETIMYPAFSDWIKSHRDLPLKLNQWSNVVRWEFKDPTPFLRS  
REFLWQEGHTAHATFEEADEMVAALDLYKQAYQDLLCVPVPIPGFKTEHEKFAGGHQTTT  
VEAYIPI SGRAIQGATSHNLGQNF GKMF DIKFQDET GASKIAWQTSWGLTTRTIGKFGSL  
TFLDDNISTNHGTDHSTDGVVSSIETT VATDHF SARIGVMVMVHGDDKGLVMP PRVSPVQ  
AVIVPILSKLLMEDANPYCVSVLQDLESQGLRAKYDDRTMYNPGWKYNHWEQKGVPIRI  
E VGP TDIEKYQVRAVIRHNGK KIDLPLEGLGVHLREMLEDIHQEMFDKASAERDNHLVQV  
TEWKDFVPNLEKNNLVLTPWCGPEHEDWEEWVKKTSREESLVNLGEEAEDERTATSVAAK  
TLCIPFDQPEL PKGSKCIASGMPATCWVLWGRSY

>comp9544\_c0\_seq3; 971 51 2804 LEN=2863; translated  
MPIRSYTYSGPSSGAI AFELLAQIQAQVAVNASPDEKPTVTVVTTNPFVGTSTTSTSDS  
WAGCAKTL SGLIPSLGLWMDHDEILVEWIDSAAAVLEKDSENSAIDFLSKLEDYLGKNGG  
DSYLAGQFSAADICVSVWCSSAISKFDLVSSKRKVSCDWLVKILKALQPYDENGEISKRL  
VALEIGEVS ETVGDLKINSASND AFEDNETVQKLR ELGLEFDVYAHEACMTADDLVANVP  
LPSSKETHTKNLFFKDKKHGLFLVTHATSTMFNTKQLGSKLNLQGVNMR LANSEVLEKH  
LNVKSGSVGPLCIVNDESKEVTLVVDKFLVDGSYDFI HSHPLRNDASLKMKPSVMEEFFK  
KIGIEPVVDFSAEDASGGGPPDGSKKMTSGK GKQKVP PPKKQKVS NQNEKGKTKLALQY  
KKSENFPMWYSNVIVLSEMISYYDISGCYILRPWSYKIWDLMQQWFNKKILKLG VENCYF  
PLFVSQDRLEKEKDHVEGF APEVAWVTKSGDGELAKQIAIRPTSETIMYPAFSDWIKSHR  
DLPLKLNQWSNVVRWEFKDPTPFLRSREFLWQEGHTAHATFEEADEMVAALDLYKQAYQ  
DLLCVPVPIPGFKTEHEKFAGGHQTTTVEAYIPI SGRAIQGATSHNLGQNF GKMF DIKFQD  
ETGASKIAWQTSWGLTTRTIGVMVMVHGDDKGLVMP PRVSPVQAVIVPILSKLLMEDAN  
PYCVSVLQDLESQGLRAKYDDRTMYNPGWKYNHWEQKGVPIRIE VGP TDIEKYQVRAVIR  
HNGK KIDLPLEGLGVHLREMLEDIHQEMFDKASAERDNHLVQVTEWKDFVPNLEKNNLVL  
TPWCGPEHEDWEEWVKKTSREESLVNLGEEAEDERTATSVAAKTLCIPFDQPEL PKGSK  
CIASGMPATCWVLWGRSY

>comp9544\_c0\_seq4; 933 51 2905 LEN=2964; translated  
MPIRSYTYSGPSSGAI AFELLAQI EAQVAVNASPDEKPTVTVVTTNPFVGTSTTSTSDS  
WAGCAKTL SGLIPSLGLWMDHDEILVEWIDSAAAVLGMXWDNTAILSFIPIITNIKFILDF  
LLEFMPFTRSEKDSSENSAIDFLSKLEDYLGKNGGDSYLAGQFSAADICVSVWCSSAISKF  
DLVSSKRKVSCDWLVKILKALQPYDENGEISKRLVALEIGEVS ETVGDLKINSASNDAFE  
DNETVQKLRRELGLEFDVYAHEACMTADDLVANVPLPSSKETHTKNLFFKDKKHGLFLVTH  
ATSTMFNTKQLGSKLNLQGVNMRLANSEVLEKHLNVKSGSVGPLCIVNDESKEVTLVVD  
KFLVDGSYDFI HSHPLRNDASLKMKPSVMEEFFKKIGIEPVVDFSAEDASGGGPPDGSK  
KMTSGK GKQKVPKQKQVSNQNEKGKTKLALQYK KSENFP MWYSNVIVLSEMISYYDIS  
GCYILRPWSYKIWDLMQQWFNKKILKLG VENCYFPLFVSQDRLEKEKDHVEGF APEVAWV  
TKSGDGELAKQIAIRPTSETIMYPAFSDWIKSHRDLPLKLNQWSNVVRWEFKDPTPF LRS  
REFLWQEGHTAHATFEEADEMVMAALDLYKQAYQDLLCVPV I PGFKTEHEKFAGGHQTTT  
VEAYIPI SGRAIQGATSHNLGQNF GKMFDIKFQDET GASKIAWQTSWGLTTRTIGVMVMV  
HGDDKGLVMP PRVSPVQAVIVPILSKKLLMEDANPYCVSVLQDLESQGLRAKYDDRTMYN  
PGWKYNHWEQKGVPIRIE VGP TDIEKYQVRAVIRHNGKKIDLPLEGLGVHLREMLEDIHQ  
EMFDKASAERDNHLVQVTEWKDFVPNLEKNNLVLTPWCGPEHEDWEEWVKTSREESLVN  
LGEEAEDERTATSVAAKTLCIPFDQPEL PKGSKCIASGMPATCWVLWGRSY

>comp9544\_c0\_seq5; 907 51 2935 LEN=2994; translated  
MPIRSYTYSGPSSGAI AFELLAQI EAQVAVNASPDEKPTVTVVTTNPFVGTSTTSTSDS  
WAGCAKTL SGLIPSLGLWMDHDEILVEWIDSAAAVLEKDSSENSAIDFLSKLEDYLGKNGG  
DSYLAGQFSAADICVSVWCSSAISKF DLVSSKRKVSCDWLVKILKALQPYDENGEISKRL  
VALEIGEVS ETVGDLKINSASNDAFEDNETVQKLRRELGLEFDVYAHEACMTADDLVANV  
LPSSKETHTKNLFFKDKKHGLFLVTHATSTMFNTKQLGSKLNLQGVNMRLANSEVLEKH  
LNVKSGSVGPLCIVNDESKEVTLVVDKFLVDGSYDFI HSHPLRNDASLKMKPSVMEEFFK  
KIGIEPVVDFSAEDASGGGPPDGSKKMTSGK GKQKVPKQKQVSNQNEKGKTKLALQY  
K KSENFP MWYSNVIVLSEMISYYDISGCYILRPWSYKIWDLMQQWFNKKILKLG VENCYF  
PLFVSQDRLEKEKDHVEGF APEVAWVTKSGDGELAKQIAIRPTSETIMYPAFSDWIKSHR  
DLPLKLNQWSNVVRWEFKDPTPF LRSREFLWQEGHTAHATFEEADEMVMAALDLYKQAYQ  
DLLCVPV I PGFKTEHEKFAGGHQTTTVEAYIPI SGRAIQGATSHNLGQNF GKMFDIKFQD  
ETGASKIAWQTSWGLTTRTIGKFGSLTFLDDNISTNHGTDHSTDG VVSS IETT VATDHF S  
ARIGVMVMVHGDDKGLVMP PRVSPVQAVIVPILSKKLLMEDANPYCVSVLQDLESQGLRA  
KYDDRTMYNPGWKYNHWEQKGVPIRIE VGP TDIEKYQVRAVIRHNGKKIDLPLEGLGVHL  
REMLEDIHQEMFDKASAERDNHLVQVTEWKDFVPNLEKNNLVLTPWCGPEHEDWEEWVK  
TSREESLVNLGEEAEDERTATSVAAKTLCIPFDQPEL PKGSKCIASGMPATCWVLWGRSY

>comp9544\_c0\_seq6; 882 51 3030 LEN=3089; translated  
MPIRSYTYSGPSSGAI AFELLAQI EAQVAVNASPDEKPTVTVVTTNPFVGTSTTSTSDS  
WAGCAKTL SGLIPSLGLWMDHDEILVEWIDSAAAVLGMXWDNTAILSFIPIITNIKFILDF  
LLEFMPFTRSEKDSSENSAIDFLSKLEDYLGKNGGDSYLAGQFSAADICVSVWCSSAISKF  
DLVSSKRKVSCDWLVKILKALQPYDENGEISKRLVALEIGEVS ETVGDLKINSASNDAFE  
DNETVQKLRRELGLEFDVYAHEACMTADDLVANVPLPSSKETHTKNLFFKDKKHGLFLVTH  
ATSTMFNTKQLGSKLNLQGVNMRLANSEVLEKHLNVKSGSVGPLCIVNDESKEVTLVVD  
KFLVDGSYDFI HSHPLRNDASLKMKPSVMEEFFKKIGIEPVVDFSAEDASGGGPPDGSK  
KMTSGK GKQKVPKQKQVSNQNEKGKTKLALQYK KSENFP MWYSNVIVLSEMISYYDIS  
GCYILRPWSYKIWDLMQQWFNKKDGV DSTFVLF TCFVELDILVVPILLERAIDVFHVSMF  
LNVPDLKLG VENCYFPLFVSQDRLEKEKDHVEGF APEVAWVTKSGDGELAKQIAIRPTSE  
TIMYPAFSDWIKSHRDLPLKLNQWSNVVRWEFKDPTPF LRSREFLWQEGHTAHATFEEAD  
EMVMAALDLYKQAYQDLLCVPV I PGFKTEHEKFAGGHQTTTVEAYIPI SGRAIQGATSHN  
LGQNF GKMFDIKFQDET GASKIAWQTSWGLTTRTIGVMVMVHGDDKGLVMP PRVSPVQAV  
IVPILSKKLLMEDANPYCVSVLQDLESQGLRAKYDDRTMYNPGWKYNHWEQKGVPIRIE V  
GPTDIEKYQVRAVIRHNGKKIDLPLEGLGVHLREMLEDIHQEMFDKASAERDNHLVQVTE  
WKDFVPNLEKNNLVLTPWCGPEHEDWEEWVKTSREESLVNLGEEAEDERTATSVAAKTL  
CIPFDQPEL PKGSKCIASGMPATCWVLWGRSY

>comp9544\_c0\_seq7; 818 51 3161 LEN=3220; translated  
MPIRSYTYSGPSSGAI AFELLAQI EAQVAVNASPDEKPTVTVVTTNPFVGTSTTSTSDS  
WAGCAKTL SGLIPSLGLWMDHDEILVEWIDSAAAVLGMXWDNTAILSFIPIITNIKFILDF  
LLEFMPFTRSEKDSSENSAIDFLSKLEDYLGKNGGDSYLAGQFSAADICVSVWCSSAISKF  
DLVSSKRKVSCDWLVKILKALQPYDENGEISKRLVALEIGEVS ETVGDLKINSASNDAFE  
DNETVQKLRRELGLEFDVYAHEACMTADDLVANVPLPSSKETHTKNLFFKDKKHGLFLVTH  
ATSTMFNTKQLGSKLNLQGVNMRLANSEVLEKHLNVKSGSVGPLCIVNDESKEVTLVVD  
KFLVDGSYDFI HSHPLRNDASLKMKPSVMEEFFKKIGIEPVVDFSAEDASGGGPPDGSK

KMTSGKQKQKVPKQKQVSNQNEKGKTKLALQYKKSENFPMWYSNVIVLSEMISYYDIS  
GCYILRPWSYKIWDLMQQWFNKKDGV DSTFVLF TCFVELDILVVPILLERAIDVFHVSMF  
LNV PDLKLG VENCYFPLFVSQDRLEKEKDHVEGFAPEVAWVTKSGDGELAKQIAIRPTSE  
TIMYPAFSDWIKSHRDLPLKLNQWSNVVRWEFKDPTPFLRSREFLWQEGHTAHATFEEAD  
EMVMAALDLYKQAYQDLLCVPVPIPGFKTEHEKFAGGHQTTTVEAYIPIISGRAIQGATSHN  
LGQNF GKMFDIKFQDETGASKIAWQTSWGLTTRTIGKFGSLTFLDDNISTNHGTDHSTDG  
VVSSIETT VATDHF SARIGVMVMVHGDDKGLVMP PRVSPVQAVIVPILSKKLLMEDANPY  
CVSVLQDLESQGLRAKYDDRTMYNPGWKYNHWEQKGVPIRIE VGP TDIEKYQVRAVIRHN  
GKKIDLPLEGLGVHLREMLEDIHQEMFDKASAERDNHLVQVTEWKDFVPNLEKNNLVLT  
WCGPEHEDWEEWVKKTSREESLVNLGEEAEDERTATSVAAKTLCIPFDQPEL PKGSKCIA  
SGMPATCWVLWGRSY

>comp9544\_c0\_seq8; 856 51 3060 LEN=3119; translated  
MPIRSYTYSGPSSGAI AFELLAQIEA QVAVNASPDEKPTVTVVTTNPFVGTSTTSTSDS  
WAGCAKTL SGLIPSLGLWMDHDEILVEWIDSAAVLEKDS ENSAIDFLSKLEDYLGKNGG  
DSYLAGQFSAADICVSVWCSSAISKFDLVSSKRKVSCDWLVKILKALQPYDENGEISKRL  
VALEIGEVS ETVGDLKINSASND AFEDNETVQKLR ELGLEFDVYAHEACMTADDLVANVP  
LPSSKETHTKNLFFKDKKHGLFLVTHATSTMFNTKQLGSKLNLQKVMRLANSEVLEKH  
LNVKSGSVGPLCIVNDESKEVTLVVDKFLVDGSYDFI HSHPLRNDASLKMKPSVMEFFK  
KIGIEPVVDFSAEDASGGGPPDGSKKMTSGKQKQKVPKQKQVSNQNEKGKTKLALQY  
KKSENFPMWYSNVIVLSEMISYYDISGCYILRPWSYKIWDLMQQWFNKKDGV DSTFVLF T  
CFVELDILVVPILLERAIDVFHVSMF LNV PDLKLG VENCYFPLFVSQDRLEKEKDHVEGFA  
PEVAWVTKSGDGELAKQIAIRPTSETIMYPAFSDWIKSHRDLPLKLNQWSNVVRWEFKD  
PTPFLRSREFLWQEGHTAHATFEEADEMVMAALDLYKQAYQDLLCVPVPIPGFKTEHEKFA  
GGHQT TTV EAYIPIISGRAIQGATSHNLGQNF GKMFDIKFQDETGASKIAWQTSWGLTTRT  
IGKFGSLTFLDDNISTNHGTDHSTDGVVSSIETT VATDHF SARIGVMVMVHGDDKGLVMP  
PRVSPVQAVIVPILSKKLLMEDANPYCVSVLQDLESQGLRAKYDDRTMYNPGWKYNHWEQ  
KGVPIRIE VGP TDIEKYQVRAVIRHNGKKIDLPLEGLGVHLREMLEDIHQEMFDKASAER  
DNHLVQVTEWKDFVPNLEKNNLVLTWCGPEHEDWEEWVKKTSREESLVNLGEEAEDERT  
ATSVAAKTLCIPFDQPEL PKGSKCIASGMPATCWVLWGRSY

>comp9545\_c0\_seq1; 407 340 1433 LEN=1471; translated  
MNMNTITNEAYGSVLLSFR AFVIAASSSIENIASVTTTRDLXVQSRFNSFSSTPKRSPY  
AVLELNQSNKNGGIVTKGDIRAAFRR LAKAYHPDLNRHSETARVEVLTKEECEAKMAELV  
EAYHILLDDDDFAARFQVGHSNKVALACELYSLEDELELDRFHDVYALEMDFGSGEGEDK  
SRDNQDEEQDQNGADEKGENHNF SADKEGSSSSSITTKSLVQTSSCKKRILVHAHPEDSV  
SDLKRQLEEDHGVEWGLRQPRHPNSRSADDSLERRKDRDGLSIGWELLVLRESSDDDSIL  
DNIGTSCQDEERGSSSIHARNNGGGSATESTGVQNVLSYHLFLDDYRIQHGETIFVVR  
KHDA

>comp9547\_c0\_seq1; 275 513 1211 LEN=1268; translated  
MKPSLKGNVVVVSDAHMLRRAIADGVV GALLLIVTNINRKLNL DVKAQEHS MVAKRMDAL  
DMSIDLICGECDSLAITMKNEKMEIEEEFMKSVENTNHLSPPTKIMFAFDKLEFAIDVR  
SSTMGKHKNLKLANKTYDII LKRAYSDLGSLLED RVSKPFLPQLHPDTVVSTVIKRLDSL  
FRDFEEQAERGSVTSGMFDRNTSTKWGFDSKREENIRSEIKARDQEEVATSV

>comp9548\_c0\_seq1; 439 1 1166 LEN=1288; translated  
XNTLQARREIILQLKSHNQKMGKPNKQQLQEYNYDEASSGSDSDSDSDDENDD EYSVMSA  
DIDSVSKGEGKSSEGESESEREEASNGNDSSDEEKEEEDPEESSDEDDAPLQERILKES  
KGRAKLASRRQKSRAL EEA TKRLAALKRERKTQVREGTAEDDERPEKSSGNKQSAASK  
TRKKKNKHKPT EVSSKRADFYGRGARRLNE SGLGVDIGAHR YKPM DPRLSNLTGHFDEDR  
FHNYAFLEEMRNKEIGQVRKRIA AHRATGNKGNRLRRKAGITQADGSHSSTLEEDVARL  
KSLTQSRADLERRKIDRAAKQSVKRK IREDVESGKSGAYFLKRKEKKRLELEARFEEIRK  
RKGEKGV EKI LEKKRKNKSRDASFLSR

>comp9549\_c0\_seq1; 331 94 1365 LEN=1365; minus strand; translated  
MATLAIDLQNRGITLVNPNYKEVQEKLVIAIAKKEEEPTKEEQQEEEPDRWDWGSLLPFLV  
RLEQFVVFVFSFRFVLLYGFVLLWFVA AVVSAAFGFAFGFGFATASPRPPLQDQPDLV  
PVVGRVGRQALQGF FERQVGRDHP PGGDRPADAPGQELPGGLLHRHRAGRTGPQEV AHL  
HAGGLPVAPPDGDGDTKATGPWAALLLAQDDAQEGGRGHHDPAAGAAACDPARKKA  
PLHHLGPVPLEDGKHRGHAEP LLLGGGLPGGLLGGGLGGLPLGGLVGGDVPPQLRGGFQ  
QLLREGGGGIVFGFGCVFVFAFALREEPGIAAAAANREKGGSPARSPWGRSESLGNEQGGA  
SQHGNGGGEXATKQPSWQGPCTGPGSAGAGVAWQPLASSESSVSRLSNRLAGQWVEPA  
VLWS

>comp9550\_c0\_seq1; 169 1 503 LEN=978; translated

XDDDDDDGLIREKKKRD LGENGSAPTRYTAKLLD THEENTSINFDC HIYKRF EYIYL  
DIPREGITFVDPKPHSTDHWIEQAFRQPIGLPEEMVPQIWRDKTRSKKRGMRGSKVVPKPQ  
PELSEEEKADEEEYQSSLMRWIDVDSRREKLEETAEKRI LQSPRNDL  
>comp9550\_c0\_seq2; 169 1 503 LEN=1007; translated  
XDDDDDDGLIREKKKRD LGENGSAPTRYTAKLLD THEENTSINFDC HIYKRF EYIYL  
DIPREGITFVDPKPHSTDHWIEQAFRQPIGLPEEMVPQIWRDKTRSKKRGMRGSKVVPKPQ  
PELSEEEKADEEEYQSSLMRWIDVDSRREKLEETAEKRI LQSPRNDL  
>comp9551\_c0\_seq1; 313 533 1540 LEN=2098; translated  
MPPANDQELPLDLAPPI SGLLFVAHGCQHSNTDWF PKSTASSCETCLGLPEERAIVRDAI  
DLGFVVIALSSTNRISKCWNVARDTEPVARVLKEFLNRFATR KQTDSYESSKEELLQQPL  
PIYAFGASSGGKFVSSIAEPLKINHGILLSGFISQISANSNHQQHRRPVESNEDSNDKSS  
DSLQCQVYITMIRDSRTDDAARGIVDECNDSSDQSATNRCKHIQLPALPMIPSYFSDRIP  
DISVAESSDMVRVFRDAGFLDEITNELREDPRQSNWRQTLLMSVH SVAGPSLEFMKRGDS  
LVADGSP ISETMNVAWGFHEMTRDGVKEALEFCME  
>comp9552\_c0\_seq1; 686 221 3081 LEN=3200; translated  
MQFYRSN FLLSVSVAIHFLTIANGAPSND DILYRMISVESTNEFTLR AKDSMVEGSRFAF  
NKEGYEGDGFIDFGGAGTSAFWSTNIQVEGEYDVTIRYASRGNRPVDLLINNNKIGTFQI  
KKAGNDWNTWKEETIRVNI PAGKNQILKLLASANPGPNVDNVALKLVRSPTPPSSSPNDQ  
EEPIDYAVILRENECLPKGSFEES ENKGFDFGLDGVRIVVRNKTTLEILWSLRVQEEEE  
TLLCMERNGLSVTLQVKDSLPLCDTKATGIYERTYSFTFGINNVGKIAVLLDNKHL LWTG  
GLESDQPSVPLTPKPKMLKPTS IATAIPSLAPTTRIP IVSPNAFQPPDEKDLQYKAVLSEN  
EYFGREEFAQSLSGFEFEIGLSKAGSLLVRKTRKTSEV VVWLEDSMGRI IIGDKLYMQNDG  
NLVMRRGDNSAVWTSK SANADGPSQYSFGINNCGRVAVFGASNSTDILWTAGIQNCIDK  
TPSDPQTIPPVSNPMLSPSP IETPSPE SRRPTSVSFSVVLRSNEQLIGRGKFASSPNGQY  
EVGLDSKTGR LIIMRTISNNELWTLRDKSGDEILNISKIYMQSDGNLVMKSSSNEGLWNS  
ETSQNP GGFEFRIDDSGQLSVNFQGTPLWIDGLPRAIYTG PSSSDLI FPVRYGFYYAWYPE  
TWTVGGEQVKYRPNLGTIPEGT YRSRSDP VVVKNHVEALDYAWADLSIVSCKFMVDAXNFS  
STVADFSAPLI IALTKIFSTGWGPSDR LDRARITQLLDE TADQDSSIKWTVYYEDEMNFN  
KSVDQLMADLDYLKEWFAWHESWAHKDGKPVIFIWNESNCEVADRWTVAAKSAGWYLV LK  
LFKNYLDCTNQPD SWHQYGVGRTYLEY PMSFTIGPGFFRADADQPEISRAPIATFC SWVA  
EMNLSNKDWQLVVSFNEWGEGTAVESAVEWQSDSGYGSYLDCLHDPNVLYTRA  
>comp9552\_c0\_seq2; 639 221 2808 LEN=3370; translated  
MQFYRSN FLLSVSVAIHFLTIANGAPSND DILYRMISVESTNEFTLR AKDSMVEGSRFAF  
NKEGYEGDGFIDFGGAGTSAFWSTNIQVEGEYDVTIRYASRGNRPVDLLINNNKIGTFQI  
KKAGNDWNTWKEETIRVNI PAGKNQILKLLASANPGPNVDNVALKLVRSPTPPSSSPNDQ  
EEPIDYAVILRENECLPKGSFEES ENKGFDFGLDGVRIVVRNKTTLEILWSLRVQEEEE  
TLLCMERNGLSVTLQVKDSLPLCDTKATGIYERTYSFTFGINNVGKIAVLLDNKHL LWTG  
GLESDQPSVPLTPKPKMLKPTS IATAIPSLAPTTRIP IVSPNAFQPPDEKDLQYKAVLSEN  
EYFGREEFAQSLSGFEFEIGLSKAGSLLVRKTRKTSEV VVWLEDSMGRI IIGDKLYMQNDG  
NLVMRRGDNSAVWTSK SANADGPSQYSFGINNCGRVAVFGASNSTDILWTAGIQNCIDK  
TPSDPQTIPPVSNPMLSPSP IETPSPE SRRPTSVSFSVVLRSNEQLIGRGKFASSPNGQY  
EVGLDSKTGR LIIMRTISNNELWTLRDKSGDEILNISKIYMQSDGNLVMKSSSNEGLWNS  
ETSQNP GGFEFRIDDSGQLSVNFQGTPLWIDGLPRAIYTG PSSSDLI FPVRYGFYYAWYPE  
TWTVGGEQVKYRPNLGTIPEGT YRSRSDP VVVKNHVEALDYAWADLSIVSCKFMVDAXNFS  
STVADFSAPLI IALTKIFSTGWGPSDR LDRARITQLLDE TADQDSSIKWTVYYEDEMNFN  
KSVDQLMADLDYLKEWFAWHESWAHKDGKPVIFIWNESNCEVADRWTVAAKSAGWYLV LK  
LFKNYLDCTNQPD SWHQYVSTI  
>comp9552\_c0\_seq3; 702 221 2716 LEN=3278; translated  
MQFYRSN FLLSVSVAIHFLTIANGAPSND DILYRMISVESTNEFTLR AKDSMVEGSRFAF  
NKEGYEGDGFIDFGGAGTSAFWSTNIQVEGEYDVTIRYASRGNRPVDLLINNNKIGTFQI  
KKAGNDWNTWKEETIRVNI PAGKNQILKLLASANPGPNVDNVALKLVRSPTPPSSSPNDQ  
EEPIDYAVILRENECLPKGSFEES ENKGFDFGLDGVRIVVRNKTTLEILWSLRVQEEEE  
TLLCMERNGLSVTLQVKDSLPLCDTKATGIYERTYSFTFGINNVGKIAVLLDNKHL LWTG  
GLESDQPSVPLTPKPKMLKPTS IATAIPSLAPTTRIP IVSPNAFQPPDEKDLQYKAVLSEN  
EYFGREEFAQSLSGFEFEIGLSKAGSLLVRKTRKTSEV VVWLEDSMGRI IIGDKLYMQNDG  
NLVMRRGDNSAVWTSK SANADGPSQYSFGINNCGRVAVFGASNSTDILWTAGIQNCIDK  
TPSDPQTIPPVSNPMLSPSP IETPSPE SRRPTSVSFSVVLRSNEQLIGRGKFASSPNGQY  
EVGLDSKTGR LIIMRTISNNELWTLRDKSGDEILNISKIYMQSDGNLVMKSSSNEGLWNS  
ETSQNP GGFEFRIDDSGQLSVNFQGTPLWIDGLPRAIYTG PSSSDLI FPVRYGFYYAWYPE  
TWTVGGEQVKYRPNLGTIPEGT YRSRSDP VVVKNHVEALDYAWADLSIVSWWGPSDR LDR

RITQLLDETADQDSSIKWTVYYEDEMNFNKSVDQLMADLDYLKEWFAWHESWAHKDGKPV  
IFIWNESNCEVADRWTVAAKSAGWYLVLKLKFNKYLDCNQPDSWHQYVSTI  
>comp9552\_c0\_seq4; 749 221 2989 LEN=3108; translated  
MQFYRSNFLSVSVAIHFLTIANGAPSNDDILYRMISVESTNEFTLRKADSMVEGSRFAF  
NKEGYEGDGFIDFGGAGTSAFWSTNIQVEGEYDVTIRYASRGNRPVDLLINNNKIGTFQI  
KKAGNDWNTWKEETIRVNIIPAGKNQILKLLASANPGPNVDNVALKLVRSPTPSSSPNDQ  
EEPIDYAVILRENECLPKGSFEESENGKFDGFLDGVRIVVRNKTTLEILWLSLRVQGEAAA  
TLLCMERNGSLVTLQVKDSLPLCDTKATGIYERTYSFTFGINNVGKIAVLLDNKHLWLTG  
GLESDQPSVPLTPKPMKPTSIAATAIPSLAPTRIPVSPNAFQPPDEKDLQYKAVLSEN  
EYFGREEFAQSLSGEFEIGLSKAGSLLVRKTRKTSEVVWVLEDSMGRIIIGDKLYMQNDG  
NLVMRRGDNSAVWTSKSNADGPSQYSFGINNCGRVAVFGASNSTDILWTAGIQNCIDK  
TPSDPQTIPPVSNPMLSPSPIETPSPESTRPTSVSFSVVLRSNEQLIGRGKFASSPNGQY  
EVGLDSKTGRLLIMRTISNNELWTLRDKSGDEILNISKIYMQSDGNLVMKSSSNEGLWNS  
ETSQNPGGEFRIDDSGQLSVNFQGTPLWIDGLPRAIYTGPSSSDLIFPVRGYFYAWYPE  
TWTVGGEQVKYRPNLGTIPEGTYRSGDPVVVKNHVEALDYAWADLSIVSWWGPDRDLRA  
RITQLLDETADQDSSIKWTVYYEDEMNFNKSVDQLMADLDYLKEWFAWHESWAHKDGKPV  
IFIWNESNCEVADRWTVAAKSAGWYLVLKLKFNKYLDCNQPDSWHQYGVGRTYLEYPMSE  
TIGPGFFRADADQPEISRAPIATFCSWVAEMNLSNKDWQLVVSFNEWGEGTAVESAVEWQ  
SDSGYGSYLDCLHDPNVLYTRA  
>comp9553\_c0\_seq1; 375 1 1188 LEN=1282; translated  
ILEQKRSRMTLSKTLAVSIGFVFHLLLMLVSGTVNPTMQRASSLVRTVAVVGGTHGNEYT  
GVFCVKALERQLSKGNASASYPFQISTLIGNPEAFKANKRFVDQLNRQFSGAAMAAKA  
SLPSALSVEQRAIEIDDLLGPKFGGSGDEGTNKPPAMDFIIDLHTTTSNMHTSLIVGQG  
DPLTTQAAAYVMHKCREKNFNVCIMMHTHKNQEARPNLATIAPHSFTIEIGPVPQGVLRH  
DKVEEMQAALNSALEFLKRHEKEPEKLLDELKECYPTGRIPCYSAAAIRKGEKSAKLWV  
PSDPDNENFPQWLHVHKDVQDQDFKEIKTGDPLFVDLDGEVIPPYDGSHGSPILVMFVNEGG  
YYYASSGTGISIAQRDEFDLATGTLIPKNNSDTK  
>comp9554\_c0\_seq1; 217 1 1127 LEN=1127; translated  
IHLLGAVAMILDSGFLVAVERDWIVVMSIAVCNICKSERKLTKEEEENVQKTWLSDTNVR  
MRQIDLSCILAPAIIGGFIASFDDGKSKNHGYNLREATLLVGTVNVVALIVEYICTAKI  
YHKITELSQKSHNDTSVKLGHKGEESNTDNEKKEVAKEGRTKHAGTINGKRSFKILDDVE  
VYFSQSICWAGFSLSLYLVNVTLSFGNIMTVYLVWRGIGMEVIGIWRGIASVAGLSGTFV  
YHFLANYKKTDLIDIGMMSVAFEFCLCSACYVSLFIEDDSTFTIMLVGGVCLSRVGLWVF  
DITVTQLMQLHIPPIRGLVGGVQQSVNAFFTVTMYLVGLFLSDPSPDFYIYSFTSYIGVF  
LAAMFYGTMVFRKLT  
>comp9555\_c0\_seq1; 610 84 1190 LEN=2034; translated  
MVAAAGDNQCEVVLVCGGAPKRGMGWYHAVQMIKGCPSAKLCYVVEPWFMPGAAGPGG  
PEFGEFQKENEADGIQFFKAMGDLPPVAEGKKRLALISGRTADNPRLLGECIANGCTTIY  
LEKPGAPSVAEALAAMRDEAKAAGVTVLMGYKNVCKYVSKAREYAAANEGSHVTFVSNNA  
YENNAASLGECEFERNREGMLKNMAIHELALLVSFFDVTVETIEKCEADKEFSSCQTLKGP  
SGDDFTDFDKIKFTITTKSGKSVSVQADRCGGDVSWASVANADGKEAFRHSMPDEEDIAN  
VTVLKEEYPGAMPYFFSQDPDYITVKERVASFANGTEATGIATIDVAVETLRVAEYLT  
TLQKQLQA  
>comp9556\_c0\_seq1; 203 433 735 LEN=1167; translated  
MKEQKNPYDIKKFEEVLGESHMMIPDSKNRLEQALFDLASYVDSAEVKELATELADEW  
FLKARELLQKEGLSVGGDNNFSEDIVEETDVSGLQEGEAF  
>comp9556\_c0\_seq2; 186 1 435 LEN=867; translated  
GEELILSGMLRLLPIVCETKTDALSKEVKYYQEVVENESKLNEMKEQKNPYDIKKFEE  
VLGESHMMIPDSKNRLEQALFDLASYVDSAEVKELATELADEWFLKARELLQKEGLSVG  
GDNNFSEDIVEETDVSGLQEGEAF  
>comp9556\_c0\_seq3; 198 1 456 LEN=888; translated  
CIQNSLARMKSKTPPPQRLMIKTKACQRLSKEVKYYQEVVENESKLNEMKEQKNPY  
DIKKFEEVLGESHMMIPDSKNRLEQALFDLASYVDSAEVKELATELADEWFLKARELLQ  
KEGLSVGGDNNFSEDIVEETDVSGLQEGEAF  
>comp9557\_c0\_seq1; 443 602 2230 LEN=2512; translated  
MDEGNENAMLDADSTKPKQIPYCIVSNEFVIQNKHRFQISLFPGRRLAAEASSTINADDS  
KNGNAAAYLQYIPNHPGDEVVGVQLELVDRAPHPGNALAISTSGGLPLSNTTWSAAMT  
FCSEPEALESCGRAADWGSSGWSSESVCVKVLEGNLEARGSIVVYGSRSGETSTRFGGAL  
GAALVSTADAGKAGKSCNKKTENQOQSLHERSFKVGEVIVPMANHPQQDKLEDSFVTAGTD  
YRIMTMAYNGKPIFSTNDVPPKERKNVRLALRPCGWKLQQQLWNQQQKQQQAKRKPMT



GSRPDALPLWPVEVPAGWLSTARSFRNPSAFLPRLSATFRRDSKSVLLGVALALLPLPG  
ALLGRNYVSLYAIPASMDPTLIKGDVLLVEKFPVGDGR IKRGEITLFRPPSALEQIAGK  
AINNGRNGAPPLFVKRVVGLPGDKDIVLDKQTGEVTLNGDRAAVGPDRSLCADEPLRLID  
RFLESGKGAVLEELGEDEFYVLGDCKAVSIDS RVFVGLPREKIEGRTLGR IWPLDRVTR  
QL

>comp9558\_c0\_seq1; 375 1 1927 LEN=2499; translated  
KSKWIIASCKQSVAVYAVPRSKMMKDEDSAYVLYVDHQDHPAPLSLSYHATASRRLTSSL  
DRHPPSSITEVVKYRKQVMGTESVNGGDGIGSIGMSIFIISNHHXSDRVTAASA AVSSGLD  
SAYCPQCLSFHDANTAANLGFCKPPTCRLCPVCRSVASIAVDNSGCFYKCGMCAWNSKGC  
QLQTPLTVNSDGEVSLEAVEKASLELQSQWEKKKEESNKQAEDHFSNMQKTLVRIAKEHV  
QGHRSANRRVFSSGLTLKRRQDDPHGWSIETLEESQRIRNKEMESSINKPIGGKSLQQIP  
LDDEEDEQPLFHSSFEGLSAETILSQESGGNTTGSIESLLPLQIPLRPRKSRRRCRAELAE  
NRPGILVKPKLNPLEGDSSLRTGHGQWKKVRS LQDIDCF LCLCAF XLKVVG FVNAQLPK  
I IPLNCALVFLCFCRIQXAVEVLPVRVRSAAATDGSRHAFLIKVS NPTLGTVRLRLAPSP  
YAGERHWDNNEVTTKRLENIIVDPFKRISLDAVLDVEVANKIEATDMCELEPVEDSFLEL  
GNKTSDNVPEAVSSWEAGNVLSDSKVS KENSATLRKLGQKKSVAWFELVVMESQRDSTA  
HTAVPVSMHLQVGDGSWESSLVQSRGDDDFV SFDLVI VWDKKL

>comp9558\_c0\_seq2; 453 1 1783 LEN=2355; translated  
KSKWIIASCKQSVAVYAVPRSKMMKDEDSAYVLYVDHQDHPAPLSLSYHATASRRLTSSL  
DRHPPSSITEVDSAYCPQCLSFHDANTAANLGFCKPPTCRLCPVCRSVASIAVDNSGCFY  
KCGMCAWNSKGCQLQTPLTVNSDGEVSLEAVEKASLELQSQWEKKKEESNKQAEDHFSNM  
QKTLVRIAKEHVQGHRSANRRVFSSGLTLKRRQDDPHGWSIETLEESQRIRNKEMESSIN  
KPIGGKSLQQIPLDDEEDEQPLFHSSFEGLSAETILSQESGGNTTGSIESLLPLQIPLRP  
RKSRRRCRAELAENRPGILVKPKLNPLEGDSSLRTGHGQWKKVRS LQDIDCF LCLCAF XL  
KVVG FVNAQLPKI IPLNCALVFLCFCRIQXAVEVLPVRVRSAAATDGSRHAFLIKVS NPT  
LGTVRLRLAPSPYAGERHWDNNEVTTKRLENIIVDPFKRISLDAVLDVEVANKIEATDMC  
ELEPVEDSFLELGNKTSDNVPEAVSSWEAGNVLSDSKVS KENSATLRKLGQKKSVAWFEL  
VVMESQRDSTAHTAVPVSMHLQVGDGSWESSLVQSRGDDDFV SFDLVI VWDKKL

>comp9558\_c0\_seq3; 451 1 1794 LEN=2366; translated  
KSKWIIASCKQSVAVYAVPRSKMMKDEDSAYVLYVDHQDHPAPLSLSYHATASRRLTSSL  
DRHPPSSITEVVKYRKQVMGTESVNGGDGIGSIGMSIFIISNHHXSDRVTAASA AVSSGLD  
SAYCPQCLSFHDANTAANLGFCKPPTCRLCPVCRSVASIAVDNSGCFYKCGMCAWNSKGC  
QLQTPLTVNSDGEVSLEAVEKASLELQSQWEKKKEESNKQAEDHFSNMQKTLVRIAKEHV  
QGHRSANRRVFSSGLTLKRRQDDPHGWSIETLEESQRIRNKEMESSINKPIGGKSLQQIP  
LDDEEDEQPLFHSSFEGLSAETILSQESGGNTTGSIESLLPLQIPLRPRKSRRRCRAELAE  
NRPGILVKPKLNPLEGDSSLRTGHGQWKKDSSAVEVLPVRVRSAAATDGSRHAFLIKVS  
NPTLGTVRLRLAPSPYAGERHWDNNEVTTKRLENIIVDPFKRISLDAVLDVEVANKIEAT  
DMCELEPVEDSFLELGNKTSDNVPEAVSSWEAGNVLSDSKVS KENSATLRKLGQKKSVAW  
FELVVMESQRDSTAHTAVPVSMHLQVGDGSWESSLVQSRGDDDFV SFDLVI VWDKKL

>comp9558\_c0\_seq4; 529 1 1650 LEN=2222; translated  
KSKWIIASCKQSVAVYAVPRSKMMKDEDSAYVLYVDHQDHPAPLSLSYHATASRRLTSSL  
DRHPPSSITEVDSAYCPQCLSFHDANTAANLGFCKPPTCRLCPVCRSVASIAVDNSGCFY  
KCGMCAWNSKGCQLQTPLTVNSDGEVSLEAVEKASLELQSQWEKKKEESNKQAEDHFSNM  
QKTLVRIAKEHVQGHRSANRRVFSSGLTLKRRQDDPHGWSIETLEESQRIRNKEMESSIN  
KPIGGKSLQQIPLDDEEDEQPLFHSSFEGLSAETILSQESGGNTTGSIESLLPLQIPLRP  
RKSRRRCRAELAENRPGILVKPKLNPLEGDSSLRTGHGQWKKDSSAVEVLPVRVRSAAAT  
DGSRHAFLIKVS NPTLGTVRLRLAPSPYAGERHWDNNEVTTKRLENIIVDPFKRISLDAV  
LDVEVANKIEATDMCELEPVEDSFLELGNKTSDNVPEAVSSWEAGNVLSDSKVS KENSAT  
LRKLGQKKSVAWFELVVMESQRDSTAHTAVPVSMHLQVGDGSWESSLVQSRGDDDFV SFD  
LVIVWDKKL

>comp9559\_c0\_seq1; 380 151 902 LEN=941; translated  
MAEAEPTTAEQIAEYESQLAGIVELLEASPGDESLLALKRDLEELLELSRAGSTGAGGGA  
PPDPELPLPPPPLPPPPPPAPGPSTASAAGEAAPTVA AAAEPASAAGKERPHKAKKSGSK  
KPKKVRDFVLPDHLVPNDTDTAERNKRRRAAKSLKNKWRLQKKEIESNNRQKSWQSFQK  
KGVSTGSIFATKEGINDRVGVVSKKLTDFGGEKTAQV VPEPLERQPTHGGEETEESRF  
LLTRWFRIAV

>comp9560\_c0\_seq1; 771 1 1510 LEN=1520; translated  
XENENDNDNDGNDEYVSDAEALLACWSFLKRRKKIGQWNEHEERKAQKALS RNYFLTDE  
EVGEELLSEIMFDEDDDDDEEDDDQTSRSDKETDNDEDATDS DVYGGDAFASMATVQDLLS  
ASNPLDEDHGVDIDDYGVSTDLKFLSDLVANKASTEGSGTKTRGGRANDDIDLSHTEF

TSFPTEPSETRLRRVDAMKKRWEDPSYREKWYQTRWGGDRKRKRESQSLRERTAIQRARE  
LPSGFLGSDELASMTEEDIADAIRDRVESTTRKRVANRKETIEGRRDTLEAQMKALLRAAA  
EEAEAGVGNDESELRLGRDALFDTPKELEEAKRKRSEKAKLYATRRKNQEARKNTER  
AEKEEASSLSSLPSPSSQKKTSPRGKGPYPPKQRTPRDAFLRIENDLDRGAAPSEDD  
VRLVLPVPGMKNRKPLLRILRDEFGLRGKCVPIASEDSEEDDNFGDLEFVQRCTIERL  
GAFILCLLKKDKKSGKDNAIVT  
>comp9561\_c0\_seq1; 221 47 616 LEN=824; translated  
MDSSTSTHSHPIELQVYCEPSDFCVEVLTTTAPTGSYGDGGSYDLLKQGLWSATFDTE  
ASFIEYNAGKSQDPHRIHELNDIASYDERECLLWCTDSDPSANSFDHLDEVFCMYPEREW  
TLRIRGIASSGNSVAESLYRRIRNKGENASVKGKLRRLRGKKGRNTGSDSLEVIKAKRV  
GLLFTGIMR  
>comp9563\_c0\_seq1; 394 65 640 LEN=952; translated  
MKFQVLI AALFAASASAFAPAQTGRSVSPLAASSIREEVDTLGNNAIVKNLLEDVEASGL  
LSKVAQSGLLSKAQEAGLSLSKLEPLLAIAAENKEVLVLEAATPELLPLPKVVDIAPG  
ALPLLATAITVPPPAIGAAGIASLAGAAGAILIPDDSLVNVAQAFTAAGALGGVGLASL  
AGSAILGKVLLK  
>comp9564\_c0\_seq1; 399 1 1421 LEN=2010; translated  
XLTHCVASPNQVEMRFVGTESKHGISAVRKRYGLEFLSIVVFSLALLRFGTETSHIVLKN  
YGVLEFRHPAAENNSTNGSIEESAFAEEMIPLERNATISSDIVGMTHIPKEASIVVHLKKN  
RTCDHPQLIGRLSGPVLTTEIWDQHITTAENGNGTGSDNKSNSFNHSTDALKGYTTM  
PGQYFLEVIVTLCVNLEMDTNYKPLCVQDSSFNRITGNSNASIGVTSVDPFLVRSMEQNGS  
SIEIISPEAKASNTKIGFWYNTNSSEPHAPVFTRHQPALCPKGPALGLPQCTVPADLSR  
FDPYNNGFRFANRHSIDLASLLRRQPETTKVCFVGGASHARVLEKTLAIVSGIKNATVEI  
IWKEIRFAQQFAKHQMKSLVDGKCSKVAVAGTGQWDASKFKPPTMFHDFQNHLDAAAMGNMA  
EAFENTSIDFYFRMTHYNPLGNLISSCPPSDWRNPPVVDMYNRIIRESTANTM  
>comp9565\_c0\_seq1; 346 315 1199 LEN=1311; minus strand; translated  
MXNLLLRGRRRFREGVLFPPHVGLLIQFETGVRKRSRQQNQPRDEDEDQAIYCRIPKCNLG  
KASKAIQAKDLGGELEHAHEGNKQAEQVPAGSKGGIDVATPSLDADVDEHDDEGEKEPF  
DGTNGADESIGDNVCHFKGSPSDLVLAGGGDPVVEIELLGHQFRCHRRTDIQDMAHPFRQ  
GTRQGQYANCDVETNPFASLAQNPRKMNDWEHQKEPGDDVHNSCGKVEGTVDTESPLH  
LNVARVEIDILVVEVRPLVLLHVVGDRQSVDPDDEKKGGEQARKAHFTHGERCD  
>comp9566\_c0\_seq1; 119 1 322 LEN=1034; translated  
XTTTTTTTSTDPKGNIVIRKMDNESTVPRRQTNGTTTSIRIRQPPQHERAIQKALNPR  
APGGGNSGSSAISRLFEREHAPGIRKPGCPCCDPDDPSLLADSFMMF  
>comp9568\_c0\_seq1; 223 207 776 LEN=983; translated  
MTNSSSCDVESAVHEQPGAPMHSFSGSNSSNSDMSFAVLWSPLHPITAILPFIGHMGDIAD  
SRGHSDFQGPYNVGTDSRPLPRMAFGRPTRYLKMDIGELPGGTGRWDEAILEADRIYK  
QRMHNICCDNCHSHVARALNIMEYQGRHDWDMVKLCFLVFFKGSFVNFNSVILQFGPFL  
LLVMVLLFT  
>comp9569\_c2\_seq1; 220 1 771 LEN=1125; translated  
QQTTEKRSARDKRNHRDAGGATENAASSNTGGRRRYYNNLFHVVDWFPPTLAEWVGVV  
PRNQSVQDGVSQATALLSALPGGSRGLPPPRTLEFGGYAMCVDHDPGRGTPDWYGP  
HRNWKLVYGSTAGPDASNKFFEGSDSIVPPGEDHHSDDGNKNNHPHGNTTRLPREARYLL  
FDLATDPGETSDLGKYPEVLRDMVEKLRRLYRKSFFVYPQINDDSGCPFPGLVNTSDAGPA  
WIPWCKDLQETILALQ  
>comp9571\_c0\_seq1; 932 410 1816 LEN=2060; translated  
MKFSSTALSVLLLGAGCDAFSPLANANTNTGAKASATALQAAAQGSMSQKKGDRLEFMK  
NPQYHRRGFKDVREKVEETMEEQYKSDLVEDLKSNNFLMEKEGVKMYLAKDFGFCWVER  
SIALAYEAVEHYDPDKKLHITNELIHNPEVNDSLTSMNVNLIIDKESTTGSKDFSPVEEGDV  
VILPAFGASYEEMEMLDKKNVEVDTTCPVWSKVWNAVDQHQRGGLTSI IHGKYAHEETL  
ATTSFCEDYICVKMDMKEAQMVVDYIQKGKENTKEDKEAFMKYFEKAVSEGFPDPTMLDKV  
GLANQTTMYKKEKTAIGQLFKAIMKTYGPAKVEDEHYMEFDTICDATQERQDAVSELVDN  
ASGLGLDFILVGGWDSNSTAHLEIPHKAGVRSFHINRADCIGADNTITHRTVDGEIVT  
EEFLTTLDDTDRDVVLGVTSGASTPDGVSQDALSIIFLLKKMASEKAE  
>comp9573\_c0\_seq1; 793 140 2069 LEN=2191; translated  
MVRG DENRRSQTKRFRQFENSHNDQGLETVDDLVAHAQFAIIPNTDAATFTPLVESVNP  
AKKQEDGNEIDVNDSSNSDVS IADAEGADNSNENDCSSDSDSCSSDDESDDDEDITQAVQ  
RMEQATAAEAEAGLTASNPKTDNEVDGYKVPIKELESQQLIRLTVDEATVKAATNDGSN  
NSTSNQLSLAGRIKNYMSSDRTVVESAIPAHSAGFQQTGVLDEGSLLVVKKTENEGD  
RIPAERTSLIPWEEFLRFGPVSQPLYTIRLPSPPSTSKNKKSSNPRSQECNSEKKASKKE

NELTEFVKQGDNKAVDKNEDDMETIGDNEQGNIPNNAPTIPETSEKANDAVVTNLSSSSC  
TEDYVSGKEKSDTSMNKDSPPNILPDEKTESARVNEASTTVEPTSPDNIDRSPENTAVD  
MWAUNGEYAKFLAENKNIIEVYIEDEAKLIDTSFVMKTSKGKCDASNIYDEEIINSSEAY  
YSDDEKEREAKNKKKGAGRKKNQQRNDRRQQRERQRNNSSTRYPNRAHTGYHGQPPPL  
QGFNYVQGHANLPQGFHQMGQQQYPHGGIYQAHPTYQYPPGSTFHRQVSGAPPPPPPPPP  
SHNQTFPYRGTPQHSQAPNAVSRMAPPPPPPKPNPEPPAYQY  
>comp9574\_c0\_seq1; 943 137 3894 LEN=3957; translated  
MTGSWFAGGENAHSNGTNGYNTMTEAVGALYPRKAGRWAERHKDRSRFSNLLLEHGEKHLQ  
DWAUIAYTCPTLRHHSASSASGSGGRRTTMGSSRKSKNLETTWAANRSTAAASQSLRKQSA  
ATSSSSASSSRAQKKAALDKDFYPSAHLTKIEGRHLCSKSLIFEPSDFARPILRCSFN  
KLESPKEYPNKTEDPSVKSFAMTVEFESSRHVTMKANNAISPESIPVHTRFRFTFLH  
SSPTSFDLCKHLFTINYKSKTGSSSNVRSNNPQSELDELKPMLEDRPFDPANLRDVRE  
RVLTSNIRCNLLTPLQAQPGCMVVTQERMYFQPALGVIGVETSSQAKTWCLQRDLLATAR  
RYFGLKDSALELFWKDGSSTLFGYDRKHEREQVLRLLPTHRGNNSGSIIPCHTDREFIVQ  
ASQEWQRGTITNYDYLLLLNSAAGRTVQDLSRYPVFPWVISDHESTLTLTDEKTFRDLS  
KPIGALNEKRLQYFQQRLEGMADMEDDFLYGTHYSAAGYXLYLVRSMPHEMLCLQNGKF  
DAPDRLFHVSVKCYSCVLSNHADVKELIPEFYSPNDFDFLINAQGLQLGATQNGDRVND  
VTLPPWAKSPRDFLRKNNKALESEICTAMLPRWIDLIFGSKSRGDAAKEANNLFHRSAYL  
GPADLSALPTPEERFQAEHQATEFGIVPDQLFVGRHPLRHETVDDSFVNPDPVGRTFSGTD  
DGKADAWELLESVSDSHDMNHRDGSQNPVPWKEEDEDNPALFSSGIDRINTKGQSKDSK  
PQNPFHVETKGSFGESHHRNRRIPTSGSGDVGDLRTSSFSHLGKDSLPSFAESEKGTAS  
PRSTMGPVSPTKPTPATSAEWDVKFIEKRQVHEDAISGCAMFPAEGDRSMLVTTSLDGGL  
KVHTVSLGLSDSEKKEREGGLTGTLRSFYIAMSARGQNSANEQSKLTEHRTHSSRDPLAC  
LCMAGDGQGGKIAFAGGHDDVVLAYGINSACAVASIYSHRDAVTGLDMLCRPPLTTQSAL  
WPKNATHIMVSGSWDATIKVWSVVANGETV SIDREPLAELFDAESSIVSVSAVACPDEG  
GIIVGAGSADGSFCVWNLHNSGVQVVIHKEPARRGSGSCSVKWSSEGGRLSLFAGFATG  
KVGYSYLIDGTMRKASVASVGVAVQSLVYAEGILLVGCSDGGLRLIPIRDSTYFTSDLSL  
WPSVNNKSSPGLTSVNLISIVGMNCDSGTCICCTGGEDGSI AIFEIKRAASR  
>comp9574\_c0\_seq2; 737 135 2312 LEN=2375; translated  
MPEHMLCLQNGKFDAPDRLFHVSVKCYSCVLSNHADVKELIPEFYSPNDFDFLINAQGL  
QLGATQNGDRVNDVTLPPWAKSPRDFLRKNNKALESEICTAMLPRWIDLIFGSKSRGDAA  
KEANNLFHRSAYLGPADLSALPTPEERFQAEHQATEFGIVPDQLFVGRHPLRHETVDDSF  
VNPDPVGRTFSGTDDGKADAWELLESVSDSHDMNHRDGSQNPVPWKEEDEDNPALFSSGI  
DRINTKGQSKDSKPQNPFHVETKGSFGESHHRNRRIPTSGSGDVGDLRTSSFSHLGKDS  
LPSFAESEKGTASPRSTMGPVSPTKPTPATSAEWDVKFIEKRQVHEDAISGCAMFPAEGD  
RSMLVTTSLDGGLKVHTVSLGLSDSEKKEREGGLTGTLRSFYIAMSARGQNSANEQSKLT  
EHRTHSSRDPLACL M AGDGQGGKIAFAGGHDDVVLAYGINSACAVASIYSHRDAVTGLD  
MLCRPPLTTQSALWPKNATHIMVSGSWDATIKVWSVVANGETV SIDREPLAELFDAESS  
IVSVSAVACPDEGGIIVGAGSADGSFCVWNLHNSGVQVVIHKEPARRGSGSCSVKWSSE  
GGRLSLFAGFATGKVGYSYLIDGTMRKASVASVGVAVQSLVYAEGILLVGCSDGGLRLIPI  
IRDSTYFTSDLSLWPSVNNKSSPGLTSVNLISIVGMNCDSGTCICCTGGEDGSI AIFEIK  
RAASR  
>comp9575\_c0\_seq1; 457 138 1037 LEN=1105; translated  
MSKALQRNLKAKMPKNLDGPEWDSDEEEDAPVAAAKNTKTKKSTKGKKVVKYDSGKSDN  
DSKDGDDDEKNLVLYIGHLPREFEELDLRRFVSQFGKVYNCRVARKIETGRPKGFVFRF  
GDNETTKIVCETLHGYFLDKQRLVCQLRPSHPGMFFNTDEIIAKRTKKIQLEQQQRNKNL  
ASSEKCKVITSRVLVGREKKKRDRKALGIDYDFPGYKSNRADFQEEYEPEETADTTETA  
KETKSPKRRKESMDSTHSEGSASKKSKKKRDSIDSIKEDETKKEKSKSKKKRKS  
>comp9577\_c0\_seq1; 559 82 1449 LEN=1663; translated  
MAQGAASMAATYQYFDTSGASALDAILLNGLIMVTYIGGFTFVIVLLYKFNCMWLLI  
GYMMFASTSLGLFLGGHLWLVAIQLYDLVDFKFTYIMVLWNFAAVGILAIIFYGKGVPKYI  
SQAYLVLT SVILAWHLSFFDDVMAWSLLFMLALYDLCAVLTPCGPLKALVNLMSKDDAPE  
MPGLLYEAEELPPEARPGSSSTSQNYAGVNSSRSNASSVSSRSVSESSRATSATGGELR  
VELPLAVAQVYNLSVLDVPEQSRGLFSTSSSSNGSDQPLLDGSIENQNFEIPENPSKKQL  
KADIIVELPVNGGRIERIRRKGTVMERNRHGDPKRILWDRKGRVFAESSYGEGLD  
EEEDLGRNSIRLGLGDFIFYSVLVAKAAEYSFTTFMVCMLVILAGLGGTLILLSVFHHAL  
PALPISICLGIFFYIVTRFLIEPWIEGIMIKPYV  
>comp9577\_c0\_seq2; 695 144 1868 LEN=2082; translated  
MNRRRGEGEPREPEGDENPSAYKLHTDGNFDDAPATMKDVIDEERVPLSPSHAIVRHPEI  
FRDEPEGGDATDSSYEEREMSLQELLYSSSSFYAIVVPSITMVL SALAVVF INSESIM

AQGAASMAATYQYFDTSGASALDAILLSLLNGLIMVTYIGGFVIVLLYKFNCMWLLIG  
YMMFASTSLLGFLGGHLWLVAIQLYDLPVDKFTYIMVLWNFAAVGILAIIFYGKGVPKYIS  
QAYLVLTSVILAWHLFFFDDVMAWSLLFMLALYDLCAVLTPCGPLKALVNLMSKDDAPEM  
PGLLYEAELPPEARRPGSSSTSQNYAGVNSSRSNASSVSSRSVSESSRATSATGGELRV  
ELPLAVAQVYNLSVLDVPEQSRGLFSTSSSSNGSDQPLLDGSIENQNFEIPENPSKKQLK  
ADIIVELPVNGGRIERIRRKGKTVFMERNRHGDPKRILWVDRKGRVFAESSSYGEGDDE  
EEDLGRNSIRLGLGDFIFYSVLVAKAAEYSFTTFMVCMLVILAGLGGTLILLSVFHHALP  
ALPISICLGIFFYIVTRFLIEPWIEGIMIKPYV  
>comp9579\_c0\_seq1; 416 59 2107 LEN=2107; translated  
MSFLHLRMRNSNKSTFDGNRGRFHSTVNNTSLLGMLLMLPLLIINAEAVNTTALGNELAT  
LGASNAATNASVFRQDFCTPYRAMNKSDFIDIPSALSGSELSVVTFP SKYFIYDYETGI  
DPVYPGIHARMLDYIAEKGNFTWRNSFGVFERGGINNKELLNQKTKNYDVFVIGVFSPE  
RMSLGVSVFDGHADGSILMIRDVPPDDKINWFNWTNPFVTPNVVYALIGIVFMSAFVYQL  
IETIGKGPEDDERSARVWLKDNLYLTFINFTGNYSYEPSTL GARVFGIVFAFWAMLITAA  
YTANLASLLVGREVYGLQINTIQDAVAQNFKICVDEGTF AEDILRQEH PETIPLL VPLPN  
EQLYDSLNRGDCQILIEYLSDWKTTKFQVKENPKCTLKWEGRKIKSIKDG FATRMDPGIL  
CTDLVNQVLSYYVRYMESQGV LKELWDEHVDYYSVDGHCDEEPDPLLDASET PDGSARRF  
LETIGDARGTRRFLSEDSSEDGDSAALTLEDMAGTFALQIVGSVFAIFVSTLSWCERKMR  
KKRTERKRKKSVAEGNASHGVSSTGENGEEEGRVD TNASTRGASVDQQLRELNDRTELLD  
EKLEALS DMMRQLLEDK KPTTRTADCALLPPGERETGNDAGFLRDQQHHQFYRAKRFART  
DETPFRDASPGAKDSAKNLYCT  
>comp9580\_c0\_seq1; 326 43 1320 LEN=1396; translated  
MVSDDDNDTHPIDGTNGSGGETVAAGESDENQTHGDGTGIVHLEIGSCSTVFPYRASHLRY  
IGHLGNKLDSPSSYMGAVTEHLRMSGIYWTY TALSLLVSPSEADAIIGNESSRASDHQPQ  
PPETELPLRLVEWVLR CYDPRSGGFGGNVGHGHLLYTLSALQILVVAKYDLNKLAVRD  
IAAFVVS LQQADGSFAGDEWGEIDTRFGYCAL SALSILGSHCSTVGIHSVDVAKAVDYIA  
SCQNP DGGFGSMRGAESHAGQVFCV GALS IAGSLG VIRHPDLLAWWLSERQCDSGGLNG  
RPEKQADVCYSWWILSVLSILDRLDWISAEKLAGFIARAQDEDDGGIADRPEDMPDIFHT  
FFGIAGLSLLGKLPESYRRIDPVYALPVDVVERCGLSAQIVRRSRCDPENSGGRF SHRYD  
VLERI  
>comp9581\_c0\_seq1; 231 1 588 LEN=1536; translated  
KMQVSLNAKALATLAYVLRHPTLIVPHVSVANVSELNYRAMKECAGIRAILFDKDNLT  
PYDMTVHRDAAKGLKRAKEIFGAENVAIMSNSAGTKDDPGYEDAKMIEEALGIAVIRHDE  
KKPGGLDEV LKHFDVDDPATLCMVGDRLLTDVVFGNLHSM LTIHTLPLCKGAENRQDNT  
SKIIRYIENKGLYGNW  
>comp9583\_c0\_seq2; 472 1 1142 LEN=1142; translated  
HRGCLSIETFTDGMDFYFPDKGKAARFISFLEGAVPTRMKTSKKLIGTDDKSNISNYKYT  
SYVEICPLCKD LLYLPVKMARNLGNISRLVMVKAISNVIHLIDPLSGQMAQLSAEAYWR  
NPIRPVITAARSRMTRYVVLGKEPVFLRRNVSKRAASRKQRTL ANLTLARESDLGVNDR  
QFEHNSM GYLMKAGDVCVGFDLTETQFVDDEAENMRSSGKLPDVVIRKLYGGVANGDV  
DAAKRRKWRRLRLDAKVAESMKSSRAAKKDAEAE DMDEEDFMREVEADREM RDQMYLYKS  
DILKKEETKDKSDEDDDDQEI KLEELLDGLVMDDGPD EEDAP PTEFEFEFL EEGEQAAKDG  
IKYVGRDES RVIKDK EIAVLR  
>comp9584\_c0\_seq1; 386 540 1790 LEN=2077; translated  
MAAQAE TFGSHPSVRSFRKFTESDDHEKHCHKLLSTDSIAFVSRFCRSQHTDHFELMRFR  
SQFASANWLAKKEDRARGWMCAFKRPAESLYKVLKEYASTAIPSTSDYTT FSSSDTGTNR  
ITNSNSSVPMPDYLVLLDADTYLNMDNIAGHDGSLGFLPSMYPFNQTLVIAGCRVRWRVF  
EHNFTFPWGGFGTIFTKRSIERFVHPIQDCNISDANDDPLLDPE TKQSLKTLNYRELTQD  
EFERLACAKLKEDSIGEAFLFQPGMSVADLMYQYVTNWKYVDAEKHWKTTMTKKTADRI  
ENKRTNGGFCLHADWVIGYFVNHYLSNNEFGVDDPFWEDNPEQRVMAYNGSEHYAGILQ  
RKNILARKECSNDYDSNCDPVT AHFCHHISESFMRI LHN YNGTNLKT TNPYK FELM  
>comp9585\_c0\_seq1; 734 1 2896 LEN=3156; translated  
XDDDDDDDDGGDLDAATPTLHASAKDEEAAIPDWARGVLGAENGNDSTAVAKKVDDSHGD  
LETEHNEMDTPRGFREGIDL RPYQKQSLYWMTQREKKS P SGRKELVRL LQRLARESSTH  
RVGIQHDDDEVCLL GPRKGISCDGCPVVVD TNQVEAPCIARGFLHESDKDGNEESEDQELD  
HPLWERRFLCNNHQTKAFSFFVQPSFRNAAPEPPPSPLPCRGGILADSMGKDSTLGPILF  
RCEXVCSVIHSM DILILLKPVLF T P SSSDFVXLGKTVQLLALVQSDKDENSEKEDADTA  
DGEPR TNDSTLVVSP L SLLNQWEDEIKSKTTL TNRVHYNDGKKKQNGNGSKNHVDIVLTT  
YGTLQAE LRTRRKAGVSTGLSLLSKNWKRVILDECHTIKNHSTMVAKACCLLRAERRVWV  
SGTI IQNSLNDVYSLIRFLRHEPFSEHAFWNTT VTKASDF SVALDRVKSILSPIMIRRTK

ETRDKTGKLILTLPLDIDCECVPVQFSPEERQFYEALYRKSFDIFKGFIQAGTASSSWLKI  
FSLQLRQRQTCSHVALTVKSHLDDDEDWTSNITQSSLDGSDKDTSTERPIREKQTTEDT  
IDQSF LADLHKKFKSMQRNRVKAKSNDQQVGDSDNCDSNDAYASSIANMLNQAVQSDSSE  
LNEECPICLDNITMNSAITPCLHIFCQGCLLGALENRKKCSGRPTD SHPTHCGSCPVC  
TEIDTRRILRMNHSNGKIQTTF LHQNPQQEGKENLEVNEADGCARKILQTAIQGASSK  
LAAILKELHLVWEKEPGSKVLIFSQFLGFLDIMEKSFKYSGISYGRLDGKLSLKDRMKVL  
SDFNSGSPRYASSHNSNAGTVLLISMKAGGVGLNLVAAKSVFIVDPWWNAAVEDQCVDR  
HRIGQSAKTIYVRKFFVLNSIEERILELQKRKKEVARAALCDKAATEAEGISRPSIDDFK  
ILFRA

>comp9585\_c0\_seq2; 610 1 2710 LEN=3325; translated  
XDDDDDDDDGGDLDAATPTLHASAKDEEAAIPDWARGVLGAENGNDSTAVAKKVDDSHGD  
LETEHNEMDTPRGFREGIDL RPYQKQSLYWMTQREKKS PGRKELVRLQLRLARESSTH  
RVGIQHDDDEVCLLGP RKGISCD CGPVVVD TNQVEAPCIARGFLHESDKDGNEESEDQELD  
HPLWERRFLC NNHQTKAFSFFVQPSFRNAAPEPPPSPLPCRGGILADSMGKDSTLGPILF  
RSC EXVCSVIHSM DILILLKPVLF T P S S SDFVXLGKT VQ L LALVQSDKDENSEKEDADTA  
DGEPR TNDSTLVV S PLSLLNQWEDEIKSKTTLTNRVHYNDGKKKQNGNGSKNHVDIVLTT  
YGT LQAE LRTRRKAGVSTGLSLLSKNWKRVILDECHTIKNHSTMVAKACCLLRAERRWV  
SGT I I QNSLNDVYSLIRFLRHEPFSEHAFWNTTVTKASDF SVALDRVKSILSPIMIRRTK  
ETRDKTGKLILTLPLDIDCECVPVQFSPEERQFYEALYRKSFDIFKGFIQAGTASSSWLKI  
FSLQLRQRQTCSHVALTVKSHLDDDEDWTSNITQSSLDGSDKDTSTERPIREKQTTEDT  
IDQSF LADLHKKFKSMQRNRVKAKSNDQQVGDSDNCDSNDAYASSIANMLNQAVQSDSSE  
LNEECPICLDNITMNSAITPCLHIFCQGCLLGALENRKKCSGRPTD SHPTHCGSCPVC  
TEIDTRRILRMNHSNGKIQTTF LHQNPQQEGKENLEVNEADGCARKILQTAIQGASSK  
LAAILKELHLVWEKEPGSKVLIFSQFLGFLDIMEKSFKYSGISYGRLDGKLSLKDRMKVL  
SDFNSGSPRYASSHNSNAGTVLLISMKAGGVVRSVYLLNYPLFQKRSLTIPLKFILFLFS  
SGT

>comp9585\_c0\_seq3; 878 1 2768 LEN=3028; translated  
XDDDDDDDDGGDLDAATPTLHASAKDEEAAIPDWARGVLGAENGNDSTAVAKKVDDSHGD  
LETEHNEMDTPRGFREGIDL RPYQKQSLYWMTQREKKS PGRKELVRLQLRLARESSTH  
RVGIQHDDDEVCLLGP RKGISCD CGPVVVD TNQVEAPCIARGFLHESDKDGNEESEDQELD  
HPLWERRFLC NNHQTKAFSFFVQPSFRNAAPEPPPSPLPCRGGILADSMGLGKT VQ L LAL  
VQSDKDENSEKEDADTADGEPR TNDSTLVV S PLSLLNQWEDEIKSKTTLTNRVHYNDGKK  
KQNGNGSKNHVDIVLTTYGT LQAE LRTRRKAGVSTGLSLLSKNWKRVILDECHTIKNHST  
MVAKACCLLRAERRWVSGT I I QNSLNDVYSLIRFLRHEPFSEHAFWNTTVTKASDF SVA  
LDRVKSILSPIMIRRTKETRDKTGKLILTLPLDIDCECVPVQFSPEERQFYEALYRKSFDI  
FKGF IQAGTASSSWLKI FSLQLRQRQTCSHVALTVKSHLDDDEDWTSNITQSSLDGSDKD  
TSTERPIREKQTTEDTIDQSF LADLHKKFKSMQRNRVKAKSNDQQVGDSDNCDSNDAYA  
SSIANMLNQAVQSDSSELNEECPICLDNITMNSAITPCLHIFCQGCLLGALENRKKCSG  
RPTD SHPTHCGSCPVCSTEIDTRRILRMNHSNGKIQTTF LHQNPQQEGKENLEVNEADG  
CARKILQTAIQGASSKLAAILKELHLVWEKEPGSKVLIFSQFLGFLDIMEKSFKYSGIS  
YGRLDGKLSLKDRMKVLSDFNSGSPRYASSHNSNAGTVLLISMKAGGVGLNLVAAKSVFI  
VDPWWNAAVEDQCVDR IHRIGQSAKTIYVRKFFVLNSIEERILELQKRKKEVARAALCDK  
AATEAEGISRPSIDDFKILFRA

>comp9585\_c0\_seq4; 754 1 2582 LEN=3197; translated  
XDDDDDDDDGGDLDAATPTLHASAKDEEAAIPDWARGVLGAENGNDSTAVAKKVDDSHGD  
LETEHNEMDTPRGFREGIDL RPYQKQSLYWMTQREKKS PGRKELVRLQLRLARESSTH  
RVGIQHDDDEVCLLGP RKGISCD CGPVVVD TNQVEAPCIARGFLHESDKDGNEESEDQELD  
HPLWERRFLC NNHQTKAFSFFVQPSFRNAAPEPPPSPLPCRGGILADSMGLGKT VQ L LAL  
VQSDKDENSEKEDADTADGEPR TNDSTLVV S PLSLLNQWEDEIKSKTTLTNRVHYNDGKK  
KQNGNGSKNHVDIVLTTYGT LQAE LRTRRKAGVSTGLSLLSKNWKRVILDECHTIKNHST  
MVAKACCLLRAERRWVSGT I I QNSLNDVYSLIRFLRHEPFSEHAFWNTTVTKASDF SVA  
LDRVKSILSPIMIRRTKETRDKTGKLILTLPLDIDCECVPVQFSPEERQFYEALYRKSFDI  
FKGF IQAGTASSSWLKI FSLQLRQRQTCSHVALTVKSHLDDDEDWTSNITQSSLDGSDKD  
TSTERPIREKQTTEDTIDQSF LADLHKKFKSMQRNRVKAKSNDQQVGDSDNCDSNDAYA  
SSIANMLNQAVQSDSSELNEECPICLDNITMNSAITPCLHIFCQGCLLGALENRKKCSG  
RPTD SHPTHCGSCPVCSTEIDTRRILRMNHSNGKIQTTF LHQNPQQEGKENLEVNEADG  
CARKILQTAIQGASSKLAAILKELHLVWEKEPGSKVLIFSQFLGFLDIMEKSFKYSGIS  
YGRLDGKLSLKDRMKVLSDFNSGSPRYASSHNSNAGTVLLISMKAGGVVRSVYLLNYPLF  
QKRSLTIPLKFILFLFSSGT

>comp9585\_c0\_seq5; 701 1 2987 LEN=3247; translated

XDDDDDDDDGGDLDAATPTLHASAKDEEAAIPDWARGVLGAENGNDSTAVAKKVDDSHGD  
LETEHNEMDTPRGFREGIDLRPYQKQSLYWMTQREKKSPSGRKELVRLQLARESSSTH  
RVGIQHDDEVCLLGPCKGISCDCGPVVVDTNQVEAPCIARGFLHESDKDGNEESEDQELD  
HPLWERRFLCNNHQTKAFSFFVQPSFRNAAPEPPPSPLPCRGGILADSMGKDSTLGPILF  
RSCXVCSVIHSMIDILLLKPVLFTPSSSDVFXLTKTVQLLALVQSDKDENSEKEDADTA  
DGEPRNDSTLVVSPSLLNQWEDEIKSKTTLTNRVHYNDGKKKQNGNGSKNHVDIVLTT  
YGTLQAE LRTRRKAGVSTGLSLLSKNWKRVLDECHTIKNHSTMVAKACCLLRAERRWV  
SGTIIQNSLNDVYSLIRFLRHEPFSEHAFWNTTVTKASDFSVLDRVKSILSPIMIRRTK  
ETRDKTGKLILTLPLDIDCECVPVQFSPEERQFYEALYRKSFDIFKGF IQAGTASSSWLKI  
FSLQLRQRQTCSHVALTVKSHLDEEDWTSNITQSSLDGSDKDTSTERPIREKQTTEDT  
IDQSF LADLHKKFKSMQRNRVKAKSNDQQVGDDSNCDSDNDAYASSIANMLNQA VQSDSSE  
LNEECPICLDNITMNSAITPCLHIFCQGCLLGALENRKKCSGRPTD SHPTHCGSCPVC  
TEIDTRRILRMNHSNGKIQTTF LHQNPQQEGKENLEVNEADGCARKILQTAIQGASSK  
LAAILKELHLVWEKEPGSKVLI FSQFLGFLDIMEKSFKYSGISYGRLDGKLSLKDRMKVL  
SDFNSGSPRYASSHNSNAGTVLLISMKAGGVRSVYLLNYPLFQKRSLTIPLNSFFFSH  
QGLNLVAAKSVFIVDPWWNAAVEDQCVDRIHRIGQSAKTIYVRKFFVLNSIEERILELQK  
RKKEVARAALCDKAATEAEGISRPSIDDFKILFRA

>comp9585\_c0\_seq6; 845 1 2859 LEN=3119; translated

XDDDDDDDDGGDLDAATPTLHASAKDEEAAIPDWARGVLGAENGNDSTAVAKKVDDSHGD  
LETEHNEMDTPRGFREGIDLRPYQKQSLYWMTQREKKSPSGRKELVRLQLARESSSTH  
RVGIQHDDEVCLLGPCKGISCDCGPVVVDTNQVEAPCIARGFLHESDKDGNEESEDQELD  
HPLWERRFLCNNHQTKAFSFFVQPSFRNAAPEPPPSPLPCRGGILADSMGLGKT VQQLAL  
VQSDKDENSEKEDADTADGEPRNDSTLVVSPSLLNQWEDEIKSKTTLTNRVHYNDGKK  
KQNGNGSKNHVDIVLTTYGTLQAE LRTRRKAGVSTGLSLLSKNWKRVLDECHTIKNHST  
MVAKACCLLRAERRWVSGTIIQNSLNDVYSLIRFLRHEPFSEHAFWNTTVTKASDFSV  
LDRVKSILSPIMIRRTKETRDKTGKLILTLPLDIDCECVPVQFSPEERQFYEALYRKSFDI  
FKGF IQAGTASSSWLKI FSLQLRQRQTCSHVALTVKSHLDEEDWTSNITQSSLDGSDKD  
TSTERPIREKQTTEDTIDQSF LADLHKKFKSMQRNRVKAKSNDQQVGDDSNCDSDNDAY  
SSIANMLNQA VQSDSSELNEECPICLDNITMNSAITPCLHIFCQGCLLGALENRKKCSG  
RPTD SHPTHCGSCPVCSTEIDTRRILRMNHSNGKIQTTF LHQNPQQEGKENLEVNEADG  
CARKILQTAIQGASSKLAAILKELHLVWEKEPGSKVLI FSQFLGFLDIMEKSFKYSGIS  
YGRLDGKLSLKDRMKVLSDFNSGSPRYASSHNSNAGTVLLISMKAGGVRSVYLLNYPLF  
QKRSLTIPLNSFFFSHQGLNLVAAKSVFIVDPWWNAAVEDQCVDRIHRIGQSAKTIYVR  
KFFVLNSIEERILELQKRKKEVARAALCDKAATEAEGISRPSIDDFKILFRA

>comp9586\_c0\_seq1; 869 263 3118 LEN=3156; translated

MVKS LAPWRLLVAVMLPA AVAF TTTSPKQNYPTTSRIGGSPLYAAKQATKAAADVTEAV  
SSTPDPAASLSASWNDLTSKLTAGSGTESVSVNPQEA FATIVKALD SLLQQLTKMDALL  
QQINEAFVGLLSSLAKTDGASGGSPLAAL EPLLAKIKEGAAGLGISSE DITKLADLVETS  
AGALNTPETIAATTVISYVVVNALLTWGESPPP GKYPYIGKYDPVGARIYFDRRPLQVAA  
RALTIASKSLAFALALVQDKLRGDETWTSNQEQRGLELAQLLTELGP TFIKIGQSLSIRT  
DLLSPAYIRGLSSLQDRVP AFDTATAK LILEE EWGVPVDQVLEGG LSETASPVAAASLGQ  
VYKAKLKGS KEVAIKVQRPKITNQIALDMHLLREAAP IARRTFNLNTDTEGTVD AWGAG  
FVDEL DYLQEASNGQYFMEQLQNTSLKDVVLAPT VVDEFTSGKVLVTEWIDGERLDRSSQ  
ADV TILCSICMNTYLTMLLEMGLLHCDPHPGNLLRTPDGKLCILDWGMVTSIPPQLQLTL  
IEHMAHLTSRDYAEVPRDLYLLGFVPADKEQVIEDSGVVDVLADIYQWTDGGGMASINA  
NEVLSQMQLASTRGNLFQIPPYFAYIAKSFVLEGI GLSNDAKYSIIEECLPYVSNRLL  
TDQVSMGNALNTFIFGPDKYNIDTRLVDPDRIEQLVSGFGDFASTTASGALSTPTGEKSE  
VGANSTTT SVDQLEQVADQVLDVLLTEETPLQKILIEQVAKILAA NTRSLWTEARLRSG  
VLP SGRTVLGS LVDPLGLFQTSP LVNKNEQDERAVKTTEELVTL LSKIQSKGDNSGIDIQ  
SLNNEELIVLSRVLSTKLWERRTALIKSSNRFVNQMLQLTAIRLESADRVPVGERTPTVG  
VPSETTSESANDASDSDSSSPFSSPSRSQASNPSPRLQQARDRLNSLTSQ

>comp9587\_c0\_seq1; 202 458 781 LEN=1089; translated

MSYSNRPPRQDSILELARMMEARVHVKCLGGRELEGLTKGYDELVNLVLEDC EEFRES  
DAEQITDQKRTLGLVVVRGTQVSLVSPQDGV EIEENPFLVVEAE EED

>comp9589\_c0\_seq1; 588 107 1724 LEN=2041; translated

MAITTTQQDL PENGRNAAIQSNARTQPLSRKATWNAVDCNSPVNPHYVLELRRDATHAEII  
GSYRKLALISSGRKIASIERKRLQFFEILAACYETLMHNEFRRCDSLLKEIDKKECS  
KSKANHKKPGNLVSYNKKVAFFTPGVGKQQLQASNELVARARDPI PGLMSSSDSSSAS  
GKEVQNAAGNSCDSNDTIPRNNCTSLGVGMLICAGDSAALHNP KSSNSVKFAISRNGTKG  
FRSLVDSSLSASQASAEAEIHFSEATVNRLFGGPLASLHRARNFQAFSDPYVVF DKVF

GNQKPIFPRVTLADIDDSAAANGESIYDVTTQDWHGMSGNTMLIRSSITSLMSSNIEIND  
TKKTKNCGDNSNDKVVDSPTIDTKIFVATRNVNKRKITKTETVHVDPLTGIASVNVTVDG  
EFLEPITKSKTSHTSPEGSVADWLLCFGMAQSKIIPPPCTTATESASLLVKPSASASSCC  
PNSKCDDPCPSKHEFSSSCNDFKSLYVQVLQDFYDCNKKFYEECNRYMQCGVENGTVD  
>comp9590\_c0\_seq1; 325 1 1080 LEN=1102; translated  
XTTTTTTTPVSEQGAPEGRATLDAGWELLETYAHDPSSTQGLEVHRAAPNAGEGSCEA  
EGGANTCAPVSFSSSSGEGSSGEDGGRWLVTSTGMYGDSLVRTWDLASGEVVRETSMED  
RFFGEGSTRYTDGRELAVLTYKEQSIYVYDANTLERVETLSPWPLPTTTTEGWGIAF  
DPLERIFVVTDGSAMLHFWDLGFEAIPSRPPIPVRLLEELVDERDRVLVARKPAEARGEDG  
GETAGSEEEAVEGTLGLGHINELEWDPHTRTLLANKWFEDVLRIDPSNXAGDEGLRFHEA  
PSPAEPFQGRRLQRDRDPSVDGREGVARHGKILARGLPDQDRGVTETSRPACEESKRR  
>comp9590\_c1\_seq1; 507 35 1322 LEN=1322; translated  
MTSKPSTKRKQRSRRRIAKPRKRAADPKLQNEGRSKTGEDDTDTNEDDRLLLEMTCREARD  
AGRKQSRSRGGVLLGIGAVAVCLSAALPDSGGGWFAFSAVFRAAAAGAXFDDDDDDDNA  
PAADDDKAPEGDDSVDDDDKFPDRYWECKEYKKAACATAAGCAWCDNKGKGGYGCVD  
TETADGYDDHSVYSCTMPSALGFGSIPAEAPANTSDFGDFACILSAATDQASCEKTSAA  
DGQPCWCSLQGVPLCVSSDQARIAQTVGATCGEVDRAVLDPYDPTCLAVTLQGDDESACR  
ATVDVDGDACEWCSLQGYEFCADADQAEAEQVGSASDRESAAGESVGTALDTPSDPT  
CLFVTLEGDEDAKQTMDAENKPCQWC'TVQGYDFCMNSDQADLAEQVGATCSDGSGEORA  
EQEAGLSDPX  
>comp9591\_c0\_seq1; 344 1 1157 LEN=1276; translated  
XNGNDNGNGLASENTSATTILIFPEAGDPFSWNTTSHYHHHNDGFRHNQSQSFPNSGSCCC  
CSAKAGSEAKAEAPGGGLSIRSEALEPEFLAVVLGILTIIVGSVVAFFVQRSRERRERAE  
ADKKAASDLDRKQALERVNQLGVFVGPLHRLYKTHNTILGQYRLQSGMRSDRMSRALRE  
RGRALWMTVFDASATDKHVAHPHTREAVLYRNMVSRRLRPIYTRIRELVLAHSSDLADMP  
TQDEWLEKHDTGTILSPYVGSINNVNILDTFVSVWSLEFDDIVVSWEEDGDFGRMQPLTEVN  
WLLCNDLVDALYDTAKAKEASYNKHVKVHKNEIQSTTIEEMERNILESLETRNDHQSGAT  
GEAKAKAEGHQGGGSKSLPDSMPRI  
>comp9591\_c0\_seq2; 529 1 1723 LEN=1847; translated  
XQDQRHGTSMFRKLGFGSGGKSRNKRPKKKRLVPQGSSSSGGQAQGQTQPPPSYQYAMNE  
YALTGPPQPGPHSHAHSHANPHPGANINNNINNNNANNTNAHPSQAMNVDDGKIRPA  
YSMTDVPEDRELADYEYPHHHYENGPVLPDPLPDPPOQDRRGQGGQQPEPEEGQVRSSTN  
TRPGQADGTMTTGNVRRHEQQQRQHQQHQQRDGIILGSPSQGDYKDNNDYDYNAGNSNSNGA  
YAPRRRFLSPRADYYSYDEEDTITTTATFGGHYDDNDYSYDDNSTAAGGASAARRQGGGA  
SPLPPGKGHQAHRASEQMMPDATYEEWYGDAYVGGPIRYIYPSGYQSMRPRGSPWKLSIA  
VCLLFTWLSVFIIGHCSDIYAMNQANDNGNNNNYNNNAGGANAGENYDDDLVINEKWCSS  
RLLYWMWVTSMLITGLASAYCGVIGYIKVRDFAVANSRSQPPGIMLVGDYSMSGEAGSSG  
SGGLSTTHNRGNSDYVPIGDAANPRRQHHHQHTHPQNLPQAGSGTAPNYRLQQTHP  
AQYRKTIIYQADGTPQFWGNQIYRPNQAAVHTVSR  
>comp9592\_c0\_seq1; 468 683 2209 LEN=2289; translated  
MSRAEAMLDNKMHWKHEAKRGGADDSTPRVLLRPPAKIERERLLQQQSPKPTHTQKQSG  
DKEVPVHKSLSFQSLQDAFSKAKLTPGQENRHRHVVLKPKKYIVKDRKFEANALCRVFL  
GKRGLHAFTFVLSLYMLGTLWAYTSVFS AVARAFVVFSSGTSDDPHQLIGVFGLIVTTT  
ASAESLNYLCFAILFGCIVVPLSCELEDEQVPLQVFLTGCRFLMFFLMIGTSGMCAEDVS  
AIRAHSGAMTDESSDTSNEVD SVRWAGIANTLPILIFANIFHHSIPGLAHPAADKRSIGH  
VFTATNVFTVTAYLVLGSLGSAFGKGI EQSSNLNWSYFHANTGHLDDQGNVVGAAWTR  
AVSMYIMLFP AIDVVSAYPLNAITLGNLLGAVYGKRIHEVEGQRWLRTGFRCLASIPPI  
LFGILVRNLGVITDYTGTTGFLIGISFPAILYVSSRRIAERRQFAADTFYSGYSSISIA  
RFQFWIGIFMVVVFVATLTLREISENKE  
>comp9592\_c0\_seq2; 564 142 2004 LEN=2084; translated  
MEDRRPLTAISSKEDYSGARADTDVESASSGSYSAASPYWTGPAQSAKRKSGEGFSP  
LVAFCTTINYILGAGFLTIPWAFVQSGLLSSVMLLVSAVGS DIAKNYMLTMSRAEAML  
DNKMHWKHEAKRGGADDSTPRVLLRPPAKIERERLLQQQSPKPTHTQKQSGDKEVPVHK  
SLSFQSLQDAFSKAKLTPGQENRHRHVVLKPKKYIVKDRKFEANALCRVFLGKRGLHAF  
TFVLSLYMLGTLWAYTSVFS AVARAFVVFSSGTSDDPHQLIGVFGLIVTTTASAESLNY  
LCFAILFGCIVVPLSCELEDEQVPLQVFLTGCRFLMFFLMIGTSGMCAEDVSAIRAHSGA  
MTDESSDTSNEVD SVRWAGIANTLPILIFANIFHHSIPGLAHPAADKRSIGHVFTATNVF  
TVTAYLVLGSLGSAFGKGI EQSSNLNWSYFHANTGHLDDQGNVVGAAWTRAVSMYIML  
FP AIDVVSAYPLNAITLGNLLGAVYGKRIHEVEGQRWLRTGFRCLASIPPI LFGILVRN  
LGVITDYTGTTGFLIGISFPAILYVSSRRIAERRQFAADTFYSGYSSISIA RFQFWIGI

FMVVFVFATLTLREISENKE

>comp9593\_c0\_seq1; 988 204 3629 LEN=3655; translated  
MAPPSVVVVHSCCPGRDADLLAAALPRRFRSERSAAGPTLSFVSSSPDSNERILLVPAPS  
HGSASANENENDLELFETVSLATNHHPVSSNNSNTNRRKQNRNKRATTSFACLVLDS  
REELKSMVEIMAGQDALAVEETKIRSGEPGSSSLPLAKCLLPGGCLVTLVAPLWTTQEL  
QHGVVEFMTTEPSATATPRHSGSPSLSSNSARSKSSFYMKRSASMPPEMVPMPVTTNAG  
TDGKNHHLRRKNAVVIPTLETKVLVSYSGQHVAFPLNTQAPVPIETELFKGKLLLI CRPS  
EDPAKTDPYWNERIFSKKKRRVVMQLQGKLYKPTGTVFAGMEISNPMKLGLIANGLCNL  
ILKLIKNOGLHYSFGTKDERAHICFPASAFFDSFVVTKPGEALPAMGGIDIKGESPETVA  
ARKAYMTKIDWNTDDTYTMSFHSMYVDFPWSVSVSLPGGWDVPLQTFWGNLAVVMYEV  
GPDADNGKPKHSANIKYLVSLQLKSLGKDAARLNAALLEQKDDGDETSSEWSEYGGGE  
SISTMGDVALMPAFDEDDTDYEHENSENNGDEIDTTEFYDTIESLPLGETILGDLSSSTSS  
HNILLSAIDAFPCWIEMFSKRKYETLYAFCGTKSTSKALFRSEEMAERFFRGERDEDA  
RVDDRFSHRISTLERTRRILGWKYAEAHATTERDQKDHQERLQKFHKLQCRFDAAFLKRKE  
PSTTKVTGTSGFVARALS DRHWKEERMVLCNNS EDILFHHAEGSKIHFRI SLESVINVS  
TPAKDSELVPLPTYHYLMIESFVHVTYLMFRSKQERDSWLDTLRTILEDRRSTQSFTNEL  
FVYDDPVQEFLLTKSTMWNSQKRKILNCRRC SFRTRRSTTPKETLHLAERALAKVLSLKP  
GASDSDLCEFLDCASALKEADAYS LNEEEKCAFFLNIYHTMIMHSYIIFGPPVSGTEWVS  
YFNNIAYQCSDDIF SIAELEHNVIRAKMSYPSNFLSRFVLPKSQYHFALVRPDFRLNFAL  
NPGSLSIPTSSVPLYKAATLNQQLNKTT E EYLYGTAHV KQKGT DVQITLPRVCQWFAED  
FGPNGSASDVMFAIEPYLSNEKREVLRLIWN SKKKT YDISIFGMKYLSFSYECRFLTASS  
N

>comp9595\_c0\_seq1; 298 152 1660 LEN=1929; translated  
MASSVFSDFDRYDGANADRDRGGLSAIGLEQTSGKIHGERPAKPRRGDTGGTGT SKYNYN  
FTP KFQHSVKNPNMCGICFPQWISILTRRRNQIEWTVYWPRIFFISFMSVLNSAMGLLDH  
LIYGRKVEAAVIHPRPVF ILGHPRTGTTLVHSLALDSEQFCYCSTFCAGFPSCFLWFES  
IGKVLFRGVIDDMPMDNVR LDFDLPQEDELATNVMSAGISPYMPLFFMKQEPEFRPFYA  
FDDASETDAASSSSDERLEDSAMA EVRKAWIDSFLYLLRKLTVRDELQRPLKKSNNNDAT  
NKRGS DSSAHRSGGRRLILKSPVHTARIALLNQLFPEAQYIYIHRNPYDVFRSAAHMADT  
TYWYTYMNTPSNDQITEF ILRQYEILYDRYEQGR TQLLLGEASPAAPSHGGEATGLSPKP  
QRLVEISYDELSQRPIETAQR IYRELGWDLTPGYRQRLEEE LAGHEFKSYKRNSHKVLDP  
SLKEI INERWGPSFERFGYIKE

>comp9596\_c0\_seq1; 833 1 2901 LEN=2901; translated  
XCTSRDITQMSRPEFVEKKQKTNP KLCDFTKSHRFNMLAAAAAVLAVIVSSRND SFAAAH  
PPEKKVVTGENVTQLQLLTTNAEWISQ GAVHFSEERSDVHVNTIKLKSSKDVAKGVASDA  
LTKTGLYDIFITPPYVMGAAL EEDGWTDLTGFMKKDTNEME EWR SFLKEDSNQVEEWSDI  
LPVYKDSFSKFEETIRSLPVDGDMHFMYYRKDVLDHFDLEVPRTWEEYNAV ANATHGKLF  
NNTKLSGSCVGRRLGCSGKYWTNLVLS SMTQTKGMESGSLFDTADMKPLLGEAFEQTLEW  
LEIQSEFGAPYEFENCMPFNKEHMNGTCVLTYNWGD SFTTHMNEGTA FQKGEAELGVAM  
TPGSTRVLD RDTMKLVNCTEELCS DGWINRSPYFAFGGWCAVNNYISP KKKALAAEFCA  
YASSRRVSEKLVLQNA STAVAGLDPFRESHLNVTKWTE NGYDQSSVETYITTIKKAHMSK  
NAVIDIRFPLATEIYSLLD AEFHYLNATRNGA ILES DRQDARKKHA KTLTTS LTKLINE  
YDSKPSTKSPLLYQYQRLRN VADTNSEMNYLKN GVRYYGYFICFLPMVM AVVFATAAYIK  
RSTSVVKASQPLFLILLCAGV FIFSSSIFPMTIDDNHSSQEACSRACMAIPWLICLGW TM  
MFSALEAKLRRINLVVNSKHF RSVKISEKDMMGRI ILLFGVNIILMTLLTILDPLIWK R  
EEIEDKFRESYGGCSVVD TDSLAWQVIIGFLGFTNIGLLIVANVQSYKARNIDTKYGESV  
YIGLIMISFLQVVLVGIPLFYIVHG NANARFFVLSSIVFIMSM AVL LLLIFIPKFVRLYK V  
SKQDPTASTSHVQVYGLKTEKDDDKDIFKESKAVTAAREAYEAVWMKRINDLKDVVNEEG  
FDSKISSWLQTANIVDEKDEIVPVELKKSFLKRLTSGARIQFSDRNS SNGLQNLVLRWHST  
SRIKTSEL

>comp9596\_c0\_seq2; 290 1 1159 LEN=1472; translated  
XCTSRDITQMSRPEFVEKKQKTNP KLCDFTKSHRFNMLAAAAAVLAVIVSSRND SFAAAH  
PPEKKVVTGENVTQLQLLTTNAEWISQ GAVHFSEERSDVHVNTIKLKSSKDVAKGVASDA  
LTKTGLYDIFITPPYVMGAAL EEDGWTDLTGFMKKDTNEME EWR SFLKEDSNQVEEWSDI  
LPVYKDSFSKFEETIRSLPVDGDMHFMYYRKDVLDHFDLEVPRTWEEYNAV ANATHGKLF  
NNTKLSGSCVGRRLGCSGKYWTNLVLS SMTQTKGMESGSLFDTADMKPLLGEAFEQTLEW  
LEIQSEFGAPYEFENCMPFNKEHMNGTCVLTYNWGD SFTTHMNEGTA FQKGEAELGVAM  
TPGSTRVLD RDTMKLVNCTEELCS DGWINRSPYFAFGGWCAVNNYISP KKKALAAEFCA  
YASSRRVSEKLVLQNA STAVAGLDPFRESHLNVTKWTE NGYDQSSVETYITTIKKAHMSK  
NAVIDIRFPLATEIYSLLD AEFHYLNATRNGA ILES DRQDARKKHA KTLTTS LTKLINE  
YDSKPSTKSPLLYQYQRLRN VADTNSEMNYLKN GVRYYGYFICFLPMVM AVVFATAAYIK  
RSTSVVKASQPLFLILLCAGV FIFSSSIFPMTIDDNHSSQEACSRACMAIPWLICLGW TM  
MFSALEAKLRRINLVVNSKHF RSVKISEKDMMGRI ILLFGVNIILMTLLTILDPLIWK R  
EEIEDKFRESYGGCSVVD TDSLAWQVIIGFLGFTNIGLLIVANVQSYKARNIDTKYGESV  
YIGLIMISFLQVVLVGIPLFYIVHG NANARFFVLSSIVFIMSM AVL LLLIFIPKFVRLYK V  
SKQDPTASTSHVQVYGLKTEKDDDKDIFKESKAVTAAREAYEAVWMKRINDLKDVVNEEG  
FDSKISSWLQTANIVDEKDEIVPVELKKSFLKRLTSGARIQFSDRNS SNGLQNLVLRWHST  
SRIKTSEL

>comp9596\_c0\_seq3; 793 1 3006 LEN=3006; translated  
XCTSRDITQMSRPEFVEKKQKTNP KLCDFTKSHRFNMLAAAAAVLAVIVSSRND SFAAAH



PPEKKVVTGENVTQLQLLTTNAEWISQGAVHFSEERSDVHVNTIKLKSSKDVAKGVASDA  
LTKTGLYDIFITPPYVMGAAL EEDGWTDLTGFMKKDTNEMEEWRSFLKEDSNQVEEWSDI  
LPVYKDSFSKFEETIRSLPVDGDMHFMYRKDVLDFHFDLEVPRTWEEYNAVANATHGKLF  
NNTKLSGSCVGRRLGCSGKYWTNLVLS SMTQTKGMESGSLFDTADMKPLLGEAFEQTLEW  
LEIQSEFGAPYEFENCMPFNKEHMNNGT CVLTYNWGDSFTTHMNEGTAFOKGEAELGVAM  
TPGSTRVLD RDTMKLEIAPKNCAVTDGSIVRHTLPLEDGTTLTVIVPSYSFVFLQLKHRP  
IFSTKVFLSFDTGSAAVNNYISP KKKALAAEFCA YASSRRVSEKLVLQNA STAVAGLDP  
FRESHLVNVTKWTEGYDQSSVETYITTIKKAHMSKNAVIDIRFPLATEIYSLLD AEAH  
LNATRNGAILES DRQDARKKHAKTLT TSLTKLINEYDSKPSTKSPLLYQYQRLRN VADTN  
SEMNYLKNVRYGYFICFLPMVM AVVFATAAYIKRSTSVVKASQPLFLILLCAGVFI FS  
SSIFPMTIDDNHSSQEACSRACMAI PWLICLGW TMMFSALEAKLRRINLVVNN SKHFRSV  
KISEKDMGRIILLFGVNIILM TLLTILDPLIWKREEIEDKFRESYGGCSVVD TDSLAWQ  
VIIGFLGFTNIGLLIVANVQSYKARNIDTKYGESVYIGLIMISFLQVVLVGIPLFYIVHG  
NANARFFVLSSIVFIMSM AVLLLIFIPKFVRLYK VSKQDPTASTSHVQVYGLKTEKDDDK  
DIFKESKAVTAAREAYEAVWMKR INDLKDVVNEEGFDSKISSWLQTANIVDEKDEIVPVE  
LKKSFLKRLTSGARIQFSDRNS SNGLQNLVRWHSTSRIKTSEL

>comp9596\_c0\_seq4; 321 1 1225 LEN=1577; translated  
XCTSRDITQMSRPEFVEKKQKTNP KLCDFTKSHRFNMLAAAAVLA VIVSSRND SFAAAAH  
PPEKKVVTGENVTQLQLLTTNAEWISQGAVHFSEERSDVHVNTIKLKSSKDVAKGVASDA  
LTKTGLYDIFITPPYVMGAAL EEDGWTDLTGFMKKDTNEMEEWRSFLKEDSNQVEEWSDI  
LPVYKDSFSKFEETIRSLPVDGDMHFMYRKDVLDFHFDLEVPRTWEEYNAVANATHGKLF  
NNTKLSGSCVGRRLGCSGKYWTNLVLS SMTQTKGMESGSLFDTADMKPLLGEAFEQTLEW  
LEIQSEFGAPYEFENCMPFNKEHMNNGT CVLTYNWGDSFTTHMNEGTAFOKGEAELGVAM  
TPGSTRVLD RDTMKLVNCTEELCS DGINRSPYFAFGGWYAHCD SAI I

>comp9597\_c0\_seq1; 960 196 2619 LEN=2949; translated  
MSAENSRPHRQDWN SLPQRREGETED IISEEFGSYRWEHRQRRQDRPSRRENTDSSEEAV  
PRVLPQRRRKRGMTRSSCLFSALS VSLFLSFTSPA EESLNYP AHATAPEPSRRQWQTTV  
ASRKPKAKKSTAAMRWWW RQQLLLFLLVLLDFR LYFNLGLMRGVVVEAFSADTGKSTT  
RIKQQLQQPQREPKISV LASFIN TTTGPTRTATTT SIFTTTTASAVVPQKAQTRKPTS N  
RPKTNRRNNQNHCLFFS GDEGTFREENKSPV LPAQLR DQRQQEGALDCCYKSFNAAAAA  
AARTTTPIPQPQRYGNPFH NHG IHRHLLPYSR GTRNAPKTR LHM AVGAVMVDHASAES A  
MSFLTSSLPSSCLASASSFL QDLPLRNAVPAVASA ATATGPEGNAMEVVLKDYAPAATSL  
FNMMLKPAAVVTAGMISLGFAT SFPELPRETPDNRDVFP PHIRARCSALKRLHIVVALIA  
VTSELIVMWA AVAVNQLTEKRYPLSTSVWELLQ GDPSCDLAWSAVNSHFVLGIIGFVAM  
LTLRAYVMLLAAEASGALMTA ASTGTGAALCLMISIVNRG VESGGGGTGERYGT TILDLL  
RHYVLLAKNATNEASPGPLQLVAIVLEL TSLVFMANVLI SDNGDGLNASSTFAVSPRAN  
SDADADTDGAGVSSNDDECPVIDVLELELE EPLPPAYVSSSTNGSGSGSNGLVLLDDTR  
NSTVAKTTPSPIAENNSDAGAA TNSKTKSQNTRAA TREERKKLARCLAMEEEQQEAE EK  
RKQQEQEEEEERRRRD SGDFPSVNI V

>comp9598\_c0\_seq1; 310 155 1048 LEN=1210; translated  
MFNSISW GELAVLGGVGMAITGKRDLPRACRFVGHQLGRVVGFLQGGRARLDSFAHQNEL  
KSLQNELRSGLRELD RVKTELAVAASSRGALGRGLGPTTAS ANHTKSATIDSNSSLGMIS  
NQYNKNDI INGEHKTLDAAIQSAIAGSSTSQRERTAEHP PKPLGIEFDVTMVETEPENNT  
MIDNKGNTALSLSQOHLPPAAQSERATMEE EWNKQIGFRARAETGSWNSDATTTSGDET  
RDTTRATGSELLEDLERSCLIFDQYDRV VGEQEAETERRIKRIRDERTDARERDKFQ

>comp9599\_c0\_seq1; 483 327 1775 LEN=2140; translated  
MSSAILFLSVAASACGYSDSKHYKNVSI SGNNTTVDDFAPAKTPQMGWNPWNLFGCNVN  
ESLIEDIATSMVDSGLHKLGYEYINL DDCWQKSRDSEGNILEDPERFP SGIAALSETVHD  
LGLKFGLYSDSGLMTCQRRPGGLGHEAR DAAQYAAWKIDYLYDNC FATGLGRVESRYKR  
MQTALQEATANSTRPIFFSLCEWGYKDPATWGRSVGGNSWR TTGDIRNDWGSMTSILDQN  
DRWHAYAGPGGWNDP DMLQVGTMEGSRSNAGGGAGLTIPEQRAHFTLWCLVKAPLLLAN  
DLRAISSDVWDIIISNKEIIAINQDPLGIQGYKR WSSMGESK PETDGTEPVGDSSEDGPIE  
VWAGDLSGGDVAVVLFNRSKGTQHIVARFEDV VGAQPHRTGGSAYYAAAEIPSDRDVRGR  
LRRNQAQAVGSPRASIRAHVRDLWAHADLGV SIDSIGMVPPHDVMAFRLSNI TTTTAVP  
TV

>comp9601\_c0\_seq1; 681 1 2057 LEN=2602; translated  
XFVFAARVYRRNARAFVTKTAFGIEWTRRIRQPANQPSSFKMSSATKLPSSQLGRDNET  
GATSGIVDSNPKTV DSEFEQILRIAGIESAPMDPSSAAYLR TMIRLELEKADHKKAE ESE  
EDDDVSIVRVEADGTESASAA TQTAYYKVEQTTTTTSVTVRSNKIPPVDSASAPAANTKTI  
PPKPAHLVAAEKLALKINS SREETNAEVSVKQEEMDASESNVSVVSM LKELSDQKRAMD

RQSEILLLLSGHLRELTDTVHHLKNSVEGLQQQQVVDKHDSSPSSHSTLSEGAKDRSATV  
DAPVEIDPPLPNQPPQNDNGANGAVRGNAFRRAHELAAHVAVRVVTFPIRALLFCLKEYEY  
RIWLVLWRLAKRDLLNPFREAGMIFQLGFALMI IYGR IAPALEKAWEEKQANNDNDGDDD  
SYDGEDDYIDMDDPHIQVLGITVAVVGVFVHVGI IGLFYRFFLRDQLHVRIWKDLRAGV  
ELTPTYGLDMDQIDNTEDGRNNNNNVEEQDAANDNRGLPRPQNRPPAVGRNPRGNVRNG  
GFIPNIANAVVNGVNDFFMGHYRRPEQRAAIGGGAAARANTNVNEGPIEEAENDAAGHNP  
GNPLVNFVLDILCLFYSSFFLSILPVWVNYEQQLRDIRDEQDRLARARVQREAEALRNQNNN  
NDVEAEDESQSKSEESDDES SERG

>comp9602\_c0\_seq1; 566 23 1913 LEN=1913; translated  
MKAYGKGRLLPPRNTTISDRAPGDGSGRSVAVKAVRLPESNWKYLLVLTGFVFNVLVWVTQF  
VELDSNHAAMNGAVNMAMNLYHTGGTGSCKTNGPTDEGSDSNYKDNNNNNRRDTEASSN  
LPKTTVTKTESTNAKEEVTTVDDKDKENKDKKENNIADAPEIRYIARAGRRRRRRNHQ  
KKKEDSNRRLTPEEKLKYTYVETAIAPNVSNVYRDIPPEFLVRDPDRFLWDRTYTTAG  
TNGSNGTVVEVPEWMKDYFRWHRKYRSTWNLTWQSERWLISQCLKDQDPKCKGGTADRL  
KPLPTLLRRRAWETKRIYLRWTRPAMLEEFVLPPEGGFDWRVPGELTAVLGEGKRLSTRQ  
MIEKYTSGGMSLVRARYQTDEPHRIYDRYVFGPNRTGDGDDGDVGRQDQPGFERIFAVA  
WKIAFTPSPVQDLLRAKLAELGLVPNQYAASHLRALYGETSRPSP I IQKFTQNALACAT  
ELTAANLGGVDASRTMPIFFASDSKIAIRHALSLSSGGEDPLEGLPRVVASSNPSAVHGE  
SDGSTGTGDSLVHLDLSLVAPVEAFYDTFVDLYLMAMARCVTYGRGGYGHWALLIGGHLDC  
AKRQHIIGRRIKNEATDLCHVPEGAAASGGX

>comp9604\_c0\_seq1; 483 141 2048 LEN=2348; translated  
MIPSIRLLKNCRVGMSTLGSRCRLVHHNQPSDFRRDHRSNIFYQQGRCVSGAAATRRKG  
RGRRRNVIGKGGHDQKKIFFQSLGCPNRFVDTEVMLGYAVSSSEDRGDGGMELASDPS  
EADVVVINTCGFLESARDESMAAIADAQEVILEKNQSNQRQESKLVVTGCMVNLPAQQE  
QIRRFDPGVDAVLSSGNIDSIVETIRTLNENSGSSKSKKTKKGTTPKKHTNTDPPSLS  
SRKQRKSFLEKGETPRFLATPPHYAYLKAIEGCRKRCSFCVIPKLGRLQSKPIQVVEE  
FEAIVQHGTAREVILIAQDLGDYGLDFMPKQKGNLKEPNNDIDDGNINVLSTQTKSTLT  
LLEAILSFMDDNGVGNDDNGGGAIDMNGNTFDDPFWLRLLYLPDEITPDLIDLMEADR  
RIARYVDLPIQSHDDMLKAMRRKTDSTHIKNTIATLRERLPDIYIRTSLMVGFPGETDE  
HFEDLLQFVRDYKLDHVGVIYSNEEMAYSSRLDGQVPEDVKEDRYRRLMEEQWKIVEER  
HRERVDRSECLRVVVEGLKEIEETVEESHSPKSMSPERSPTS SVRIVGRHAGQCPEIDGQVI  
LEGEPRVYPGERYWVEVTGYEGYDLVGRVLEEDS

>comp9606\_c0\_seq1; 162 222 521 LEN=1024; translated  
MAVMKAWAEDQKVGETMIKFYGDPTSAFTRYMDMEMTHPGPVSVGLLGRCKRFALYIDDG  
AVKYQALAEDLDFDPAGDDFPEKVLPPQMMEAIAIKKVQSE

>comp9606\_c0\_seq2; 126 1 411 LEN=914; translated  
PYFTIGIVPCTVQQTNLDSSELKALGIEEVMLYCVNDMAVMKAWAEDQKVGETMIKFYGD  
PTSAFTRYMDMEMTHPGPVSVGLLGRCKRFALYIDDGAVKYQALAEDLDFDPAGDDFPEK  
VLPPQMMEAIAIKKVQSE

>comp9606\_c0\_seq3; 156 155 685 LEN=1188; translated  
MTLKQLSAECQLDSDFCPGGAKVNLLLEYTKGKVVILMGLPGAFTQDPHDXIPDYIKAQD  
ELKALGIEEVMLYCVNDMAVMKAWAEDQKVGETMIKFYGDPTSAFTRYMDMEMTHPGPVS  
VGLLGRCKRFALYIDDGAVKYQALAEDLDFDPAGDDFPEKVLPPQMMEAIAIKKVQSE

>comp9606\_c0\_seq4; 162 763 1062 LEN=1565; translated  
MAVMKAWAEDQKVGETMIKFYGDPTSAFTRYMDMEMTHPGPVSVGLLGRCKRFALYIDDG  
AVKYQALAEDLDFDPAGDDFPEKVLPPQMMEAIAIKKVQSE

>comp9607\_c0\_seq1; 345 139 921 LEN=1401; translated  
MLSSVYRTSVFSIASTASRRVYHSSIRSLKSSVTTKPDASKVKKVATEKTAADVVTKEAS  
SSFAKENPFVFLGVATAKTSAADLVAQVVAEKKSFDEIDWKRNFIFVVFGFAYLGAFQY  
WLMVKNFRQWFPTMDRFAKLPFAEKLKDTAGIMDAKMVVFVDTVHLPIIYFPTYTYVKE  
FVYQSWNPLDWAMNGVSNYAKNAKDDLTAMIKLWGPSDCIQFVLPMHIRLPFRHLVSFF  
WTAYVSFTRGDAEKVETSEE

>comp9607\_c0\_seq2; 159 181 564 LEN=1044; translated  
MDRFAKLPFAEKLKDTAGIMDAKMVVFVDTVHLPIIYFPTYTYVKEFVYQSWNPLDWA  
MNGVSNYAKNAKDDLTAMIKLWGPSDCIQFVLPMHIRLPFRHLVSFFWTAYVSFTRGDAE  
KVETSEE

>comp9608\_c0\_seq1; 267 55 522 LEN=993; translated  
MHKLTNIIALFAILANACVQGFTTIGASNGGIRQIVNHGVQTPVVENASCMSSTALFG  
KKAARAQGNESKSKKTRVKKPKDDVIEVDGVVLES LPNAMFRCAIDNAPDTQEPVLATIS  
GKIRKNFVKILVGDKVLMELESPYDLTRGRITFRYR

>comp9609\_c0\_seq1; 496 61 1563 LEN=2122; translated  
MGIESVWVSPIHVNRSIDFEKVKILLTSMVSSEIEFLEERLCLETTWIGNTPDDDDNNE  
DLMQKREYYQGLIDETVLLQKLRKTSKLLDKESDKNMLRKLKSKQDQYLNEIEEIMNYA  
ESDVLFTVEIEPNELLGEPLETLVEQPGLEGSSLTLLNFSISDFMPSSFQREHENEELH  
PIAENNRPSICAKHHESIGSFASGVSLFTIISTANSNTYNYDVRTLQKRLKKEKLLAAEN  
MACCNNEISQLNAIQVKKLKKKREQYLLALKDKTSNEVLSNQNKVSKDNANDFPYVGE  
LHEIDAGVGKIGDLQVREDGEGRECCVEAKKSHTTEHYHDSTISDRGYSNEIRGVVSHDK  
KTLEKLLKVKKLLIAAANNPEDLKKYKLLKKEYSAAALQALKAKKTEDGESSSSCLHEQHE  
EIIDKQKTPAGRDETLKSSGGSLESTDQDKKERIQLLKLLKQVVKSIKARKENNSKVL  
EKMEKKRLEYQRSLDIEGKI

>comp9611\_c0\_seq1; 344 214 1679 LEN=2674; translated  
MTKINCDVLHEGKENSGLCYEYKECNHIDNIRESYHLDHNEQEWEGEKHDQQRKQHQSI  
RNKVIILSVLTETAERIAFYGFRAVLVLYFNQGLEYSSESTSFSLFASVTGLAYLSPLLGA  
LLADNHWGRYNTIWRFGAVYSIGLSLVALGAYQLDFPFSSMESDSAVSESNLLVARSLF  
TGLIILVCLGTGGIKPCVSAFGADQVVLGSDHLPHESEKETASSSVVIYSHVEKENRSEL  
SSDDGNAFEETTPAKTGLAMSADHCPVEQEDESUREFFNSFYFCINVGALLSFAIIPMI  
RASYGFSAAFFIPTVMIGALGIFLSQRKAYKHRRRGPSEASLFQTLVCSAIVCTKLRCR  
KNRQYSCPAADSIGGQEPVSSAINASSCLEVGGPGGIVRTEGQSVEKLGSHSDQVLRDAE  
QVFAFDASDALLSGILDAIRSAGIGMDVAGNAPRSPRSGTGTIGGTSLTRKQQQMRHMY  
LDLGEELPR

>comp9611\_c0\_seq2; 491 214 2178 LEN=2476; translated  
MTKINCDVLHEGKENSGLCYEYKECNHIDNIRESYHLDHNEQEWEGEKHDQQRKQHQSI  
RNKVIILSVLTETAERIAFYGFRAVLVLYFNQGLEYSSESTSFSLFASVTGLAYLSPLLGA  
LLADNHWGRYNTIWRFGAVYSIGLSLVALGAYQLDFPFSSMESDSAVSESNLLVARSLF  
TGLIILVCLGTGGIKPCVSAFGADQVVLGSDHLPHESEKETASSSVVIYSHVEKENRSEL  
SSDDGNAFEETTPAKTGLAMSADHCPVEQEDESUREFFNSFYFCINVGALLSFAIIPMI  
RASYGFSAAFFIPTVMIGALGIFLSQRKAYKHRRRGPSEASLFQTLVCSAIVCTKLRCR  
KNRQYSCPAADSIGGQEPVSSAINASSCLEVGGPGGIVRTEGQSVEKLGSHSDQVLRDAE  
QVLHMLPLMLFFPVFWMLYDQQGSVWTLQATHLDRHGLEPEQSGFLNPLIMIFIPDFR  
VLYPWLEAKDFNIQPLRRMEYGMFLTAVAFFASTVLEYSIQNSPPNISLAWQIPQITIL  
TVAEIILLNVTGLEFAYSQAPDSMQUALILAVFLFMTAIGDGFSGSVLFATVRELIRSTVTMI  
TCALCMLVNLALFSRVARRWKPSQAIRQDHSREKNIDEEGVELNVLNRNEGGIS

>comp9612\_c0\_seq1; 211 1 971 LEN=971; minus strand; translated  
LVLALALVFLGAAPPGRPGEGVQEPVRLPQVALVPPAGQHRPGQEGKDKEARDLGSRGR  
PGPATSFSGSAGKDRADLQDLLEGLPPEFPRRLEEARQFCGFHGAERGGGVCVFVCFVC  
VCVFCVCFVFCGRPLHLHLRLRLRQLLHGFPKSPGQVFGKVRLLGGLPEEEDVGQRD  
SQEKAHRCHGVQGRVARGEVPPQEHPPGAVFLRSRDQAVGDPRGGPPGKEAPVVAPGIAA  
FAGLERGVSASARASARASGPDSAWRAPVGSPPSSSVAALVVVVVVVAIAFAFAVSPAAA  
FASNDDDEDDDDAANADAMDADX

>comp9613\_c0\_seq1; 350 549 1788 LEN=1788; minus strand; translated  
MKYLRITLLLLLTFIGPAVAQVGGPQTPNGEYTLTGGVCRGPGGVSDKVNMSAIEHTQA  
MCEEACDARKEKDDNGAHCLGYSYASCNGGECILYGPGLDGTCSDPADNQYACEALGR  
CDSPDTATKETECGVC DGKPSALEESACDSVSGTWKKG I WTSAGATWSGAEDPFIGQSH  
SKI IAGTSDEKASDYSCHDIIVDDHLAQCSGDAECSAAFDGIQEDSDRIAENCPNGCVF  
TAKVKGPKNPPVAHAPDIKLPGWDPAQSGACRGGADFSGKVNKGYSNTAGADGGPPTQLE  
CAEGCLAEEENCVGYAHSTAWCVIYGPDVHLGIGTEEGMWTDPNHEEITITGTVKNIAYL  
CVTGPPRDRVGGGKPSVQDDSSNSPSPQDNASDTTLQTDGGAGRAFPPFLTIVX

>comp9615\_c0\_seq1; 541 239 1618 LEN=2735; translated  
MTKTDGIFFTPSSLLKLNLRQTTLGSATENDNNNDESINDETKNSSDDLGEPLPIDLPLND  
LALLNEEDIRNPSLFSSELYSMAYVSAAIIFALADVRSAAAREGIKVSDECSIQNLPTTET  
IIDVFGANEEQLKILKEDDFSLLKLSERTEMLRNKNTPKPNALTMVLECTLDHFGDD  
NVARDCVYLI FKNLDLNKRITLCFRGSITLQDWIKDSKVFVDNI PNPVADRHGQAPTIGVH  
QGFKKEYLYGTSTSSSFGSLMESSKREPDSAPCSVRDADESRTNINSWKFNSIASAFKWK  
KEKYSKSEVDIGGSVNKDIYAKTSDSNDVDDGQRNDHGDMTGKVEKEKYNNDIGDNDEN  
PRNADPSEMPGNTENPNEDVAFPPVHNCRLDKILDELERLRKSYNDYSIYITGHSLGGAL  
GLLTALEAGSRFGEKHLPVTYVGIANPRGGTVRQIFRTI

>comp9615\_c0\_seq2; 650 239 2020 LEN=2652; translated  
MTKTDGIFFTPSSLLKLNLRQTTLGSATENDNNNDESINDETKNSSDDLGEPLPIDLPLND  
LALLNEEDIRNPSLFSSELYSMAYVSAAIIFALADVRSAAAREGIKVSDECSIQNLPTTET  
IIDVFGANEEQLKILKEDDFSLLKLSERTEMLRNKNTPKPNALTMVLECTLDHFGDD

NVARDCVYLIFKNDLNKRITLCFRGSITLQDWIKDSKVFVDNIPNPVADRHGQAPTIGVH  
QGFKEYLYGTSTSSSFGSLMESSKREPDSAPCSVRDADESRTNINSWKFNSIASAFLKW  
KEKVSSEVDIGGSVNKDITYAKTSDSNDVDDGQRNDHGDMTGKVEKEKYNNDIGDNDEN  
PRNADPSEMPGNTENPNEDVAFPPVHNCRLDKILDELERLRKSYNDYSIYITGHSLGGAL  
GLLTALEAGSRFGEKHLPVTVYVGIANPRGGTEGFRDAVSVLEKEGKLRVCVHGVHDIVP  
MIPASSLNRAKRFQCSGIQMLLEKDKLEIRYSPKPDNYNKRVRKALSSAHKIKERHH  
YITYLNLGRGFSKALRELHINDYNNMIYESEIFVPSERKSTPMEIKVNTDCDA  
>comp9615\_c0\_seq3; 539 149 1690 LEN=2322; translated  
MNVNATAIFALADVRSAAREGIKVSDECSIQNLPTTEDIIDVFGANEEQLKLILKEDD  
FSLKLSERTEMLRNKNTPKPNALTMVLECTLDHFDDNVARDCVYLIFKNDLNKRIT  
LCFRGSITLQDWIKDSKVFVDNIPNPVADRHGQAPTIGVHQGFKEYLYGTSTSSSFGSLM  
ESSKREPDSAPCSVRDADESRTNINSWKFNSIASAFLKWKEKVSSEVDIGGSVNKDIT  
YAKTSDSNDVDDGQRNDHGDMTGKVEKEKYNNDIGDNDENPRNADPSEMPGNTENPNEDV  
AFPPVHNCRLDKILDELERLRKSYNDYSIYITGHSLGGALGLLTALEAGSRFGEKHLPV  
TVYVGIANPRGGTEGFRDAVSVLEKEGKLRVCVHGVHDIVPMIPASSLNRAKRFQCSGI  
QMLLEKDKLEIRYSPKPDNYNKRVRKALSSAHKIKERHHYITYLNLGRGFSKALRELHI  
NDYNNMIYESEIFVPSERKSTPMEIKVNTDCDA  
>comp9615\_c0\_seq4; 430 149 1288 LEN=2405; translated  
MNVNATAIFALADVRSAAREGIKVSDECSIQNLPTTEDIIDVFGANEEQLKLILKEDD  
FSLKLSERTEMLRNKNTPKPNALTMVLECTLDHFDDNVARDCVYLIFKNDLNKRIT  
LCFRGSITLQDWIKDSKVFVDNIPNPVADRHGQAPTIGVHQGFKEYLYGTSTSSSFGSLM  
ESSKREPDSAPCSVRDADESRTNINSWKFNSIASAFLKWKEKVSSEVDIGGSVNKDIT  
YAKTSDSNDVDDGQRNDHGDMTGKVEKEKYNNDIGDNDENPRNADPSEMPGNTENPNEDV  
AFPPVHNCRLDKILDELERLRKSYNDYSIYITGHSLGGALGLLTALEAGSRFGEKHLPV  
TVYVGIANPRGGTVRQIFRTI  
>comp9616\_c0\_seq1; 532 302 1619 LEN=1619; translated  
MIRATHDEGDTDYDGFSSVSLRSDRNNVGEADDKFPFDDNGSLLGVIVDRSSFDEDE  
LTVYRDGSPVHNRHLSSLSLSKYHQYIMESAGPLGGVVMKNGKVRKMRWKPRFGKKK  
ASNFSNASVISALTNRSSSTSRSSSTTRSFSLSHFSRKSNTSFHTFHSTETPVATNKANR  
PTAPHTVLRPNYQDSFDTKRNSAHVTKQPKHATIEETEGNYVNYHSRLGGSAQSVVSSSSG  
FPSTRLDSVQESASPYEQSQEEVEVNRSPTLSDSDRVSHNPIPGPATAIEAINVISGGSN  
NSVGARSMRSSTSKGSSQKPPMSTSPKNSKAALQQQSKPRRPPPLFKRRLGKNRNKSSGSN  
SSINSGNSSTIMIPSSDTHSTAALSPLSLERENSGIPILVGDEEDRCVTITSFSSGKNS  
TEKNLTKE SIVEIDEEDRCX  
>comp9616\_c0\_seq2; 994 302 2911 LEN=3463; translated  
MIRATHDEGDTDYDGFSSVSLRSDRNNVGEADDKFPFDDNGSLLGVIVDRSSFDEDE  
LTVYRDGSPVHNRHLSSLSLSKYHQYIMESAGPLGGVVMKNGKVRKMRWKPRFGKKK  
ASNFSNASVISALTNRSSSTSRSSSTTRSFSLSHFSRKSNTSFHTFHSTETPVATNKANR  
PTAPHTVLRPNYQDSFDTKRNSAHVTKQPKHATIEETEGNYVNYHSRLGGSAQSVVSSSSG  
FPSTRLDSVQESASPYEQSQEEVEVNRSPTLSDSDRVSHNPIPGPATAIEAINVISGGSN  
NSVGARSMRSSTSKGSSQKPPMSTSPKNSKAALQQQSKPRRPPPLFKRRLGKNRNKSSGSN  
SSINSGNSSTIMIPSSDTHSTAALSPLSLERENSGIPILVGDEEDRCVTITSFSSGKNS  
TEKNLTKE SIVEIDGEESSLSPVQSSLSGSHSGGGLSVQSGSSAVGNGTSAPESMQKR  
VASTKKKPPPSLASTVVRTNSPNTPLPGGATKIVARKQYNRPLDSTNTTGVTSANSKGL  
LGGPRNKSTSVPCDLDEGAFLAEHNLRAIHEMAAEHLAHGEYEEAADVFEEILRGQQQR  
YGQDHYRVGTALHNLGIVYLKDKDYLAIEICQRAVDVRKDSLVPNHPDVAVSLAQLGVA  
HLESENYHEALAFRDALHIRRNFLGPRHTKCSKILNIGCALYSIEDFAGAKRAFDEAL  
DIQREALRNLPPTEGAESNGAQSNCLLLSMATLLNIGSIRLRWGDFDEAGIALDEALLV  
QQSVLEDNHPIVLNTLDSIDLVDSAKYCAANPQSHHA ILMKKAIAACTDENPADVMTEIL  
GIENIDSFSPKNWFSNCPGPVSDNLQDEE  
>comp9616\_c0\_seq3; 945 302 3044 LEN=3596; translated  
MIRATHDEGDTDYDGFSSVSLRSDRNNVGEADDKFPFDDNGSLLGVIVDRSSFDEDE  
LTVYRDGSPVHNRHLSSLSLSKYHQYIMESAGPLGGVVMKNGKVRKMRWKPRFGKKK  
ASNFSNASVISALTNRSSSTSRSSSTTRSFSLSHFSRKSNTSFHTFHSTETPVATNKANR  
PTAPHTVLRPNYQDSFDTKRNSAHVTKQPKHATIEETEGNYVNYHSRLGGSAQSVVSSSSG  
FPSTRLDSVQESASPYEQSQEEVEVNRSPTLSDSDRVSHNPIPGPATAIEAINVISGGSN  
NSVGARSMRSSTSKGSSQKPPMSTSPKNSKAALQQQSKPRRPPPLFKRRLGKNRNKSSGSN  
SSINSGNSSTIMIPSSDTHSTAALSPLSLERENSGIPILVGDEEDRCVTITSFSSGKNS  
TEKNLTKE SIVEIDGEESSLSPVQSSLSGSHSGGGLSVQSGSSAVGNGTSAPESMQKR  
VASTKKKPPPSLASTVVRTNSPNTPLPGGATKIVARKQYNRPLDSTNTTGVTSANSKGL

LGGPRNKSTSVPCDLDEGAFLEAEHNLRAIHEMAAEHLAHGEYEEAADVFEEILRGQQQR  
YGDHYRVGTALHNLGIVYLKKKDYLAIEICQRAVDVRKDSLVPNHPDVAVSLAQLGVA  
HLESENYHEALAAFRDALHIRRNFLGPRHTKCSKILNNGCALYSIEDFAGAKRAFDEAL  
DIQREALRNLPPTEGAESNGAQSNCLLLSMASSTLLNIGSIRLRWGFDEAGIALDEALLV  
KFCAIALIKTDAVYPIIFEFFYHLLNRSHFIIIPRKQLXDLLSKKVQQSVLEDNHPIVLNT  
LDSIDLVDSAKYCAANPQSHHAILMKKAIAACTDENPADVMTEILGIENIDSFSPPKNWFS  
NPCGPVSDNLQDEE

>comp9617\_c0\_seq1; 491 385 1839 LEN=2130; translated  
MGNFTINGSKRKGETGTKEEDRAAHPPSGGNAGPKGDGIRRRLTRRTARTQDRRQREMLST  
SSSSSVGPKPSRGRPRATPVGRRQRTRNIVAADTASVPTAATVVASNGASSGSDHKSPLA  
FDAESLVAEQTYNMEAPRLDLRATLSSGSLGLRCVTTGISCSSTENRNATATPVLSENPN  
PSANINPNENGTTAPLFEYRSLDDLSSAAGLTETDAMSENLGNSFSLSQKFNADEAFRT  
DLRSAIRLDIFETTPFYAKLPEKAKAVLLLPDSSLEGSWRIPDCSASDSKEEGRDLPPAA  
APRMKHTTRVLNAALEEHRKNEEHGASPHQSCRPWLTGDDLVRIGSICGSPASATHWID  
IHGVQNKKINHSWHLDAGVSPGNRRTVLWGFPPSTSGYEGTGVFVSHLVPLAEPFDELVAPT  
GSGGTPAAAATMDPVLFEFTVDERHVVRPVYAPGKELLVYRDVDVLHSAPDVAYRTSV  
MRFM

>comp9618\_c0\_seq1; 936 137 1717 LEN=1755; translated  
MSAEGTEIDDKSSMSPVILIALLAAVAAAAYFFFFFNKKEAVKKRGKDVEIDETLATNTVG  
LGDITYIISKLSSESDDLAVASTPESISWSTKTLAREKLIARKLEDEKEEEEEKKK  
QPAAKKTNDENMFDLGDWAEDDDDDLLDEAKQKAKLAKAALEKKKLGEVAKASGKIK  
IKIEGMDEGVIGQWVEKSLEKAGAWPFEDLRFKDKTFEYKQVTDALDHPGLRRNLCF  
LAGRINSMALNSHPELLEAASKQLIDPTYFKTAADFRQRCAMLEATLRSVGLRSSPLT  
KAI IQAVSLFKIGIKSCTKKEEWFNTIMEKQYKVLPRK IENNTVENSKDYPEMATEDI  
LMVSFDLTRLHAENFTKTKIETLTKQGIPQIALQQYREGWWFLLTGERLDGETPGSSVE  
IKKEGILEKVDEKDVKRFDEAKFEDRLLTAWPMI IQNVAQKSGKVKIQFKAPAVAGKYKF  
NVAIKSQDFLGADQVVSVEADVVDKSTVTREPLEEEEEKDDEGKKDK

>comp9618\_c0\_seq2; 220 1 454 LEN=492; translated  
XCALPISLTKQGIPQIALQQYREGWWFLLTGERLDGETPGSSVEIKKEGILEKVDEKDV  
KRFDEAKFEDRLLTAWPMI IQNVAQKSGKVKIQFKAPAVAGKYKFNVAIKSQDFLGADQV  
VSVEADVVDKSTVTREPLEEEEEKDDEGKKDK

>comp9619\_c0\_seq1; 1135 145 4098 LEN=4098; translated  
MSFLLQKSTHRRNIQNGGLSRLSVRNYSNSNVANGTFGDNDSRMVAFNRGGQKKSNOHIS  
GNQIMLQGORIAGKTNQFQQRHQEQEDTEKQQQAARQEQGTIGDYTMDEIMQDLVILEQ  
QQREAQMKLVSAQTMKQKRLHQRLNSFLEKKNYSNGALRAKLLQCREFLSVATRDLN  
RKLVTDRLQDGIADFEAKLKRGISSARMVRIKNAKIDSLITVDHKIANITRLKVEAIKI  
NKESRKKYERLEERDKIIRLAIQDALEKSRLVRRKRDFRSVIEKLDHDKMIAQNTQQI  
ELRTRSAHQIKAEEDRHSSAKAILYRDIKVVTRQRTTVAFEIQEGCIALQNLNAMEQTQ  
KEKISRCSKTQGHDFNFQEKESIPFSGQTQFRDLTRLESEATKGEDNLDLNLKQVEDID  
QAI EESRKRRTARNQTEASALITSAEMTTKEEEKRRQMLLEIQTSLEAARAEVSKLDDFR  
EMKENRIAESRAHLKDMSCNDIGIQKQIQVVENLKLKMKLQETSLKTEIRLFEDTEKPRI  
AAKLKQAEENSRKEEKYQDVLKESNDSSIDSKLRIQLKEKFSDEMMEWNVHNQNAIQRF  
SEFAEKFPDLHKIDCSFDDKENRSKQINIALEELKSNCDARTGAFKAAKEKRNQKRELQ  
LQAEALESKIKRKEELKANLKRRLQEQEASKWRVTNTNDDEEKCHRLKSIDDRNLSHENSA  
AVKYRSRRKKGSDFFNP IEDNQDTLYTDSTPSQPRQLISSFLSQSSGQVRWKDDDGGKT  
CVQKELVRDHSKDPMSLDEATITHGREAPNQTKKEKHGSSRKMTNTSTAEEKKPKQLSMSE  
NSFKLEKDSLDDCKRPLKGRRRRLRNSDRSTLQDSYHNKELNRHTSIHILKKTSTSSSS  
PTTLRRNKRVGDVQYEGKDIHMKRKKSDHGGRPVSLFVRDTSSSDHLASTEANREGEKST  
FDEREGGNAPKHRKRSRYVRKGSLEASQTSKDENATVKILKSGGSSSRSSRDEKKQKK  
INDRSSGKENS SVNRYKSESIEAISSKDNKEREKGIATNADGRSHKSWRDESKGISTA  
SSRKR IYKNDKTDGIEMDRDTSSAQAVRKEKLGKSENENSK IHRRETLVRAISKEERDK  
SNEKMALSGRDTREKSNRKAFTTQVSGNENPKKPTKFASTRGTGTSKEKTLIKST  
STTRTTTQQRREKTSEKLTSTRNIDCNSGEKIRKKITSSCTSSGRESHGEATKASKNR  
SSAQGTSGESQEKSSGRSTLFCGSSSRESHEKATKASKDRSLSAEGTIRQSLEKSR

>comp9620\_c0\_seq1; 414 184 2482 LEN=2647; translated  
MPSSGNARTNLSHEDHVSTAHGNQSNRCVLLFDMDCFYAQCERVRLGLPLDVKLCLFQWN  
SVLAVTYPAREHGKRGDSWDDVAAKVKNIPHKNSNSGSKNHARNQIGCYTIHLP IIGK  
ATARSPSESEADCARDGNTGDDGSIETSYRKMFELESREEQRLCQRTENGTRRFHDQKAC  
LERYRIASMRIFGVVLESQKRITQRNGYSFVLERASIDEFYLDLTDYCYCRNRKKECEG  
IEDSLGNRQEDDI INKHDKGDGTGMNKTVVAGQKTEMGEHCSNNGGTCNRLEIALNRACQ

VSHWIREDVWNTLGFTMSAGISINKTMAKLAASYGKPNGQAVLFPYFPSVLSETKITKV  
RNFGGKLGKAVLKVLLDYQTQERQLWHSASESESDMLEALKSTATMADLSQVPLTFLLQS  
KLLSNESARFVFSVQSGIEHEAVKNV GALVKSITAFKSF SATKSHSQIFDRWLAVLATEI  
LERVARDTARNKRYPKSCTLNYTYTTPNGQRPSTTMPGSSTRGQRQSRSLRLRFP SERE  
GTPQEKSTSLLEQARTKLAPVLKDNPIRGVGLSVSNFVESFR TAPGGTGSIQSFFSIPPK  
NYISSSSISQFCAATETKQSTVANISSADESPSFKMHGARGASAARIRDTTMKRSHSDFV  
AGSSFPASSLPASNPLPASARKQATTGRLYL PNNAKSVPVQSDRYPQEITNNEIKTIEDE  
DLEFARKLQASFDRENYALSTANRRRKSTTNMCKTRRIDAFFAKR

>comp9620\_c0\_seq2; 381 184 2401 LEN=2795; translated  
MPSSGNARTNLSHEDHVSTAHGNQSNRCVLLFDMDCFYAQ CERVRLGLPLDVKLCLFQWN  
SVLAVTYPAREHGKIRGDSWDDVAAKVKNIPHKNSNSGSKNHARNQIGCYTIHLPIIGK  
ATARSPSESEADCARDGNTGDDGSIETS YRKMFE LSREEQLRCQRTENGTRRFHDQGKAC  
LERYRIASMRIFGVVLES LQKRITQRNGYSFVLERASIDEFYLDLTDYCYCRNRKKECEG  
IEDSLGNRQEDDI INKHDKGDGTGMNKTVVAGQKTEMGEHCSNNGGTCNRLEIALNRACQ  
VSHWIREDVWNTLGFTMSAGISINKTMAKLAASYGKPNGQAVLFPYFPSVLSETKITKV  
RNFGGKLGKAVLKVLLDYQTQERQLWHSASESESDMLEALKSTATMADLSQVPLTFLLQS  
KLLSNESARFVFSVQSGIEHEAVKNV GALVKSITAFKSF SATKSHSQIFDRWLAVLATEI  
LERVARDTARNKRYPKSCTLNYTYTTPNGQRPSTTMPGSSTRGQRQSRSLRLRFP SERE  
GTPQEKSTSLLEQARTKLAPVLKDNPIRGVGLSVSNFVESFR TAPGGTGSIQSFFSIPPK  
NYISSSSISQFCAATETKQSTVANISSADESPSFKMHGARGASAARIRDTTMKRSHSDFV  
AGSSFPASSLPASNPLPASARKQATTGRLYL PNNAKSVPVQSDRYPQEITNNEIKTIEDE  
DLEFARKLQASFGNFFCF

>comp9621\_c0\_seq1; 283 91 657 LEN=2041; translated  
MTKMNKKTEATMNDKDDQSSSIGNNISIPTLDLGD PDAAQKLA AIGRNVGFFYLEGHGLS  
PDYIDSVFAASKALFDLPLEEKT KLSDHTMSRGYTAMQ EETLDLANQTEGDTKEGYI GR  
DVPVGDPRYDPAKLRGPNQWP ESSLPSFQPI MEDYHSRATAVAMRVVRLFALS LGLEET  
HFDADFE EW

>comp9621\_c0\_seq2; 256 91 1308 LEN=1859; translated  
MTKMNKKTEATMNDKDDQSSSIGNNISIPTLDLGD PDAAQKLA AIGRNVGFFYLEGHGLS  
PDYIDSVFAASKALFDLPLEEKT KLSDHTMSRGYTAMQ EETLDLANQTEGDTKEGYI GR  
DVPVGDPRYDPAKLRGPNQWP ESSLPSFQPI MEDYHSRATAVAMRVVRLFALS LGLEET  
HFDADFE EWYGLLRNMMTCVITQKVIELAGNCSARVIGSTAKIRKRSIPNSHNDALFFSL  
FISVHPWKNAQSVATLRLLLHYSGRPSDPDKGIYACGAHSDYGMATLLLLTDKNPGLQIYYQ  
EEWIDVPPRPHSFVVNLGDLLE VWTNGIYKSTLHRVLT KAPCEDRYSIPFFFDPVYETV  
VELETCTDASNPPKYQPTTAGRYLISKYEGTHADFQODTTPGQP

>comp9621\_c0\_seq3; 324 91 864 LEN=1852; translated  
MTKMNKKTEATMNDKDDQSSSIGNNISIPTLDLGD PDAAQKLA AIGRNVGFFYLEGHGLS  
PDYIDSVFAASKALFDLPLEEKT KLSDHTMSRGYTAMQ EETLDLANQTEGDTKEGYI GR  
DVPVGDPRYDPAKLRGPNQWP ESSLPSFQPI MEDYHSRATAVAMRVVRLFALS LGLEET  
HFDADFE EC VATLRLLLHYSGRPSDPDKGIYACGAHSDYGMATLLLLTDKNPGLQIYYQ EEW  
IDVPPRPHSFVVNLG GK

>comp9621\_c0\_seq4; 347 91 1119 LEN=1670; translated  
MTKMNKKTEATMNDKDDQSSSIGNNISIPTLDLGD PDAAQKLA AIGRNVGFFYLEGHGLS  
PDYIDSVFAASKALFDLPLEEKT KLSDHTMSRGYTAMQ EETLDLANQTEGDTKEGYI GR  
DVPVGDPRYDPAKLRGPNQWP ESSLPSFQPI MEDYHSRATAVAMRVVRLFALS LGLEET  
HFDADFE EC VATLRLLLHYSGRPSDPDKGIYACGAHSDYGMATLLLLTDKNPGLQIYYQ EEW  
IDVPPRPHSFVVNLGDLLE VWTNGIYKSTLHRVLT KAPCEDRYSIPFFFDPVYETV VEC  
LETCTDASNPPKYQPTTAGRYLISKYEGTHADFQODTTPGQP

>comp9622\_c0\_seq1; 720 129 2291 LEN=2398; minus strand; translated  
MAYRVLADKTAAXVEKSRSPSTILSGYLERKRVGVCAFLAASRVLALDHEFEAQPTPPSN  
RRKIDRENFRKRHFLAGRQQEGLLGRNQGLRSIEDRGGFRGTGQKQVPDAGVRRRRLVDG  
KIRVDGLQSLFFVPKADQLQTSERVQERQRLSSAPHAHCHCLEEVSGTKIFAQGTKLDV  
DQLRFVPE SLVDDNRKNVPFVDHAFKKHIVTVKHDDVDRRQTGSIAGDLVDAQKFVLRVV  
SHAQGVVVQEH EFLGDPATSTPLSDGVGERLAGSAVLV LARNVRRYKALGRGRRKADAE  
GASEAVGAVDAVGTAE DVGPGDVGASDRVGA AEAVGATESVGPADLVGRGVVGA AEERE  
GAGEEVGGAESDGLCEAVGLGVA VGPVGVVGA AEEREGAEEDVGGGETEGLAEAEGLAEPV  
GPGVVVGA AEDVGLAVPVGLTDAVGPVGVV GELEREGAVEDVGLAVALGKADEVGPGDVV  
GATDCEGAAEGVALEIVVGPVGVVGALEGE GAAEDVGYDEDEGLDEAVGLAVVVGPGFNV  
GEPGRKGAGVDDGEAKIGRLADAIGLI IAVGPGVNVGAPECEGAAEKEGFPDRVGLVVG I  
EDGLGEGIAVGGRIGGRVSTFVGFSDGAIGAKVGCNVGLFAGVAIGSNVVTMKLSTTSFS

SLSQNFQSSSNASFFFFGALDAEIVCRLPMNRRTWIAEWVERRNLMANTFQLATALFSSD  
>comp9624\_c0\_seq1; 470 1150 2676 LEN=3655; minus strand; translated  
MLPSAASDASATISTLDTATIDATLTMTMSGKNQKDTWAAT'TRRIPSSIVSAGSSNLL  
YLKENLDDASSDNTNRQRRELQQT'TGYVPGFEGYVSIASFVHVPFWQLMLDDLEQERLES  
LVMLFLCSQGVEMVVDPTSLFPVCPFNDIGSDVYKQTATAMKRSATNAVAAGDDDQ  
AEP IIVWNLPKFETATMPFDEEEKVLNMATNKTFGQTLAPHSNEPQQYYTQLNVYTPVYQ  
WGSEDPVAGELQDEFDTSVIDTGTLDLSPWPNAQTAPIGEEPYPVWDAPLPVEPGA  
TTIPSGVGSLLQSLGVSLLVINTLVVVALSIVARIQSKRAELLQKQRKEEYRQRMTGVWS  
NGKDGSGNGEYLDTEAGVSAI LLESSQYALTKSGGYSVGS D TGVEVIGTSMRSLSSSPKE  
KENKLLARAKLQTKPSSYMTTILSTDRASSDSPA WYTGTHSSGNALGNYNEDDEEAENLR  
ADLQILNLSAGTSSGSAGKNGSTFSQTR  
>comp9625\_c0\_seq1; 428 101 844 LEN=1027; translated  
MAKKKQKQEPVEVVEDNEEEEDVDEEEEEEMELLQVDVGMIVKQILDETVAATVLEQ  
IDEDYRFDNFKLILMTVACIFAMIAQFAPLPFPDARIVVGLCCACYFFLSGILQLITTFI  
DQDCILLTKPLPAEGKSNDEEDGGINEDTGKKIFRKDPKDIKSKDLFRYGVVRSQFPFRFS  
EWYTVILEFEKMENTPTVTQKWSVGQFFDKEGMFDEIGLQLEVEKLYRRLLEDADYDSQKS  
ASDKKKD  
>comp9627\_c0\_seq1; 400 249 1577 LEN=1577; translated  
MEDIGEGEGDIDTTVDIDHGVDVSDNVYAVANENEFKNVPGGSGEVDHHTGIAMISDSAA  
LVAAVDVGDSTSTDDLDLKGISGNDHGDTALLPEK KKRKGT KSKKKQKQSKRSKPPDAP  
KRFKSSFIFFSMEKHKEIKEKLAKIEIENKVRRLNPNDFSVSQEPSNTPTNSLLERLLRR  
SCFSLYTQLDLSLLHIXSOLMNPNNRIIAAAFQTKNLDETQTVNITSLVSEAWRTLDP  
LHKFEEMARQDKERYDIEKSNYVPPPGMFLDSKRRRDPNAPKRPM SAYSLSFANKIRGK  
IKAE NPGR TNGEISKILSSMWKGM PAKERKEYKDIEQALWAA YRKKMVEWKKINDGR  
KKEKKTAKGEDLKKKLEQSAIGSIEFPGHAVVDNDAGVDEQLLCLGGVPGIDTNPNT  
DEMMAASALRGVRRGGPQPHVGAGMGDPSNNNNX  
>comp9627\_c0\_seq2; 254 581 1175 LEN=1175; translated  
MARQDKERYDIEKSNYVPPPGMFLDSKRRRDPNAPKRPM SAYSLSFANKIRGKIKAE  
NPGR TNGEISKILSSMWKGM PAKERKEYKDIEQALWAA YRKKMVEWKKINDGR  
KKEKKTAKGEDLKKKLEQSAIGSIEFPGHAVVDNDAGVDEQLLCLGGVPGIDTNPNT  
DEMMAASALRGVRRGGPQPHVGAGMGDPSNNNNX  
>comp9627\_c0\_seq3; 455 249 1365 LEN=1365; translated  
MEDIGEGEGDIDTTVDIDHGVDVSDNVYAVANENEFKNVPGGSGEVDHHTGIAMISDSAA  
LVAAVDVGDSTSTDDLDLKGISGNDHGDTALLPEK KKRKGT KSKKKQKQSKRSKPPDAP  
KRFKSSFIFFSMEKHKEIKEKLAKIEIENKTVNITSLVSEAWRTLDP LERHKFEEMARQ  
DKERYDIEKSNYVPPPGMFLDSKRRRDPNAPKRPM SAYSLSFANKIRGKIKAE NPGR  
TNGEISKILSSMWKGM PAKERKEYKDIEQALWAA YRKKMVEWKKINDGR  
KKEKKTAKGEDLKKKLEQSAIGSIEFPGHAVVDNDAGVDEQLLCLGGVPGIDTNPNT  
DEMMAASALRGVRRGGPQPHVGAGMGDPSNNNNX  
>comp9628\_c0\_seq1; 797 542 2842 LEN=3340; translated  
MLARERFQTETPNVIDPGEESPPLPSRCRNDWGQNGSRNKVSGSSGAEGNGSIYTRNGN  
KGAISKGIKIRCVPNEDIEDSDDDVIVFERISSDSSFS SDDAETKEE PFEDGNPSRG  
KKHKKTKKNRRSRKNHLDRRLSLNEDDEDENGIAQARLFAAAMLNESEKRQRNMRGLMI  
STDYYDRNSMSSQRSSHTPQDPQSKLRQMMQRASSISSIGTSDGNALNRTASLRSLGAR  
QSSARHILDEKHLDN IWLVD DTHGVILKGEEPSM TSFVRNRLIWRIVALLVGIILLIAF  
SVAMESSRSSGGTTAITGDS SAALAIASDARLAEIVAF LSDADISAPGDLYMSSSPQFRA  
AQWMAEEDFEKLPVPKPDALVSFEKGWTSTIPSSPSSGLRAEEATAPFN FVQRYVLAVFY  
FAVGMNDWGETYHFASTDRHECSWYKPV DKEAEFGPGVDDD GSKSNRDNIFNNYDAKYDA  
MGVMCDRLQVREILLPANLRGSIPEIKHLSSLQMIHLGGNSLTGTIPENIRYLSHLT  
ELDLSHNDLTGQMSPYYWLGERLTKLEYLNLSDNRLELLPFFEE LGSSGDHNHSNRQPI  
GGETSLVKLSLGGNRYTSKMRNGQQEEEEEDSSNGRSSMILLPSEFRYLTNLRRELSLANM  
GLGKLP SWLFHELPELRVLDLSQNLTTGTIGENMNQNNLFGESKNQDQHQP SWALSTT  
SLPLQHLNALVLHDNPLTGTLP EFIGLLPALSKSSAAWL VAPVGVV  
>comp9628\_c0\_seq2; 622 542 2044 LEN=2178; translated  
MLARERFQTETPNVIDPGEESPPLPSRCRNDWGQNGSRNKVSGSSGAEGNGSIYTRNGN  
KGAISKGIKIRCVPNEDIEDSDDDVIVFERISSDSSFS SDDAETKEE PFEDGNPSRG  
KKHKKTKKNRRSRKNHLDRRLSLNEDDEDENGIAQARLFAAAMLNESEKRQRNMRGLMI  
STDYYDRNSMSSQRSSHTPQDPQSKLRQMMQRASSISSIGTSDGNALNRTASLRSLGAR  
QSSARHILDEKHLDN IWLVD DTHGVILKGEEPSM TSFVRNRLIWRIVALLVGIILLIAF  
SVAMESSRSSGGTTAITGDS SAALAIASDARLAEIVAF LSDADISAPGDLYMSSSPQFRA

AQWMAEEDFEKLPVVKPDALVSFEKGTSTIPSSPSSGLRAEEATAPFNFVQRYVLAVFY  
FAVGGNDWGETYHFASTDRHECSWYKPVDKAEFGPGVDDDGSKSNRDNIFNNYDAKYDA  
MGVMCDRDLQVREILLRKF

>comp9628\_c0\_seq3; 819 542 3025 LEN=3220; translated  
MLARERFQETETPNVIDPGEESPPLPSRCRNDWGQNGSRNKVSGSSGAENGSIYTRNGN  
KGAISKGIKIRCVPNEDIEDSDDDVIVFERISSSDSSFSDDAETKEEPEDEGNPSRG  
KKHKKTKKNRRSRKNHLDRRLSLNEDDEDENGLAQARLFAAAMLNESEKRQRNMRGLMI  
STDYDRNSMSSQRSSHTPQDPQSKLRQMMQRASSISSIGTSDGNALNRTASLRSLGAR  
QSSARHILDEKHLDNIIWLVDTHGVILKGEEPSMTSFVRNRLIWRIVALLVGIILLIAF  
SVAMESSRSSGGTTAITGDSSAALAIASDARLAEIVAFVLSADISAPGDLYMSSSPQFRA  
AQWMAEEDFEKLPVVKPDALVSFEKGTSTIPSSPSSGLRAEEATAPFNFVQRYVLAVFY  
FAVGGNDWGETYHFASTDRHECSWYKPVDKAEFGPGVDDDGSKSNRDNIFNNYDAKYDA  
MGVMCDRDLQVREILLPANNLRGSIPEIKHLSLQMIHLGGNSLTGTIPENIRYLSHLT  
ELDLSHNDLTGQMSPPYWLGERLTKLEYLNLSNRLELLPFFEEELGSSGDHNSNRQPI  
GGETSLVKLSLGGNRYTSKMRNGQEEEEEDSSNGRSMILLPSEFRYLTLNRELSLANM  
GLGGKLPWLFHELPELRLVLDLSQLNLTGTIGENMNQNNLFGESKNQDQHQKPSWALSTT  
SLPLQHLNALVLHDNPLTGTLPFIFGLLPALTTLSLHHTNITVGTDAANFICWRDESVLE  
SLTTDCGDITCPCCIENCCDGVDCYKDVWDNIGGGGWNTNEQGDHN

>comp9629\_c0\_seq1; 187 239 1304 LEN=1416; translated  
MFFSNYFITGELREDFWSDVSMQAQENPVIFEHAPKRLKILLKVRPRDFSSIFQEHGRF  
GFFFDLGRSPRFMIDLINQVQACGRAFDYATKELKNIEVAMAAVKLDYHGRIFESLPR  
EMKHNKQIVIAGVATSGYVLKQDAPQEMKSSEEVVTAAVKWSGNSLQYASEELRNNTKVVL  
AAVTRNADALKYASEELRNKQVVTAAVTAAVTTDGCALKHASMELRGDAGVCVAALRQA  
RGALEHCSQDFVVAALKALGTSXMKAVSVAMERGTSGSAKNPVRLSKIQDXEVSKPKD  
VSTLVSSQGAQKGESTCSPPKLTDSVCESTESSSETPAIGRSDRITSRQATEMLT

>comp9630\_c0\_seq1; 892 145 1911 LEN=1973; translated  
MGYEGKVKGRRKAPSPNSILDRKALTEALEEAGISVKRMHIDEFYKALHKQRYPPPLPEFV  
ENYANDGRDNARPSQSOLQPQANPNLKKKKTKNKMSPKSLDFIASTRDFVNTTSRV  
KEQFTSADKSTTKLIVELYDGFVVEVLMRYLQKGAGRASLCVSSQCGCAMGCTFCATGT  
MGLSGNLTSGEILEQLVHADRLLAEEENARIEEAKDDEENSSALGNSNENGKKKEKRLES  
VRNVVFMGMGEPLDNYNNVTEACRMTIDRSRWNLAHGRVTVSTVGLISQIRRLTKELPEV  
SLALS LHAANQKDREAI VPTASRYPIEGLIDALDNHMMAYLNQKRERENKTKLVALEDGG  
ASEEQQYPLKTYTAEERMKESRRRAMIEYVMLEGESSSFKCAHELKGLCENRHLVVNLI  
PYNATDVKDKLQCPDQHMLEFRNIVQSYGAFVTIRRTMGADIASACGQLVQKKNKEKDE  
KKAALAYEEDAKAVDIEDVVAENGGDRPSKRKTDAVETVAEESKKRAQAKQSLAREK  
DAPSRLLPQMISDDELYRWSQILTIATSVSATCFLASSVLYLRRK

>comp9631\_c0\_seq1; 913 184 2988 LEN=3094; translated  
MVLAAAALQLSIGCLPFQPPITSRRIQTAVYDYRLEATTSSQQNQSENENERTKIRDKFA  
TSSRRRFLAVAVATGVSTTIPGISTPARAATTEWFDPDLDGDEPIPHLPWKIDPINK  
RSGVTVEDAERAGYSVAFVTYLARFLNFDNTNCQLWWFSSRRIPRGKKNQSLDGFDS  
EQLRYEQFSKFAASVEVGLAQSYANGKEGPTILLEELVQRYGTIEAYRENDNNEKDWERS  
AKAARRHIALLFGLFLEKQPTEALGELLVSLDASIAVELSNNEADSEGSISYNYQLPQ  
RKISRLSLLSGYDSSDPPAIEFGDYRNNE SRVAARGHAVLKP TGRLLRIDVTDSGSVTYS  
KPPIVIVNNLAGDDIAEGVANLDRDGRIKSVAILEPGNFFNNDNGDFEFVVEPFATDAK  
LVKRGTKNSAATTEPSFRVVDNAITKIEITDPSGYSKDKRINVYAVANSQNINRSLQ  
QQQQRILVGTTCPKLVSNFMDFRTKKMDRIEDIQRNFHRKIPYFRYSSLSIADDDFG  
GFQTLFPWTEKGNPGSNCEYMRLLPGGVGLEYSRLKRYVAVDKTFQKTYAPYLPNDGS  
GTTNNSNYSPLWSTFGPRARSP IERDRDLDLSEYARFGLSGAICLSAVCLTLTPLDVLKT  
KQQTNP SKYTSMGRSIQAVMQDEGLSTLFTGWSPTLSGNFLSGGAQYASIEFLRRFTTAM  
AGLDAARLEVP IILLASGIA SAIAGI IYCPFETVRI RTVAQPKFATNAAGTLQRILEEEG  
VASLVNTVPIFLFKYVPYAITKFTVFDI STARLYEAFPAAREELQLSLLVSLAGMLGGT  
AAAI VSNPSCDII SEVKKSK EADVSVFEAIATI QARGGGV LGPFFVGLPLRILRYTTIA  
SLSFVAYDAIRFAFGIGSDDLKLYLDV LGGALQK

>comp9634\_c0\_seq1; 1100 209 3568 LEN=3771; translated  
MSFPGGKIPDHLTDNDVERRIQEELRLRQQEKSMAYMRLMTGDGAGANAYYGAAAAAAH  
QRAAYGQQQAAAFGIDSAGMYARQHQQHAAAAAAYGYAPRGGAGHYGYGHAPTASDI  
YSQQMAMSNI EQHQRAAAAAYGQHQA AAAHQHLLAAA SPQKPP TSATSSVTSPAGTAVP  
SMESTPLQAH LQGSPSLSEIGSAPKSSPASLSGIGSMGIPSTPMTTSSSLTPPRTTSTKK  
KKKIEPHETVELDDLKIEKWSGCVPLGLEDDKYWLSELQVYLRANFAEAFGATEEDIAA  
PMHGRNKP IALGQV GIRC MCKHENPAERGOQATSYP SLISGIYNSVQOMLRRLHLDCQQA



MPPEIRAKIESLVSSSSRGGRKQYWIDSARLGLVDTRHGIHFGRDPLGPLPPLTGPSV  
NSKEGRKKKEAQKKAEP PPPQEEEEQDPPPPVDDRPLVFPEDQDLISDYLYLTLEQMSP  
CVLMEADRVGCYKGRKVGFPGLACKHCVGQAGCGRYFPASEASLSQTTTSQTIMNHVRNC  
RRCPEIRENLELMKRARMGPDGKRLDKPKHGGRKVFRRLLWCRIQGLPLDEPSEGKGGK  
KRYKPGVKAKKKNKKSADDDNGVYSESEDNEAKESVKPAPKKSSTSSGEETETESSEAE  
SDDEGGKSSARSKSTSKSKKKQSPWFDGCVRLTKHDDSNWLSELQCFARSDLVEVFCWHK  
KDGLAGYSGRKEPSDGQVIGRCVFCCKTLPDSEKPSVVFPESELEAIQTKVGEMLRHLFK  
SCPAIPDDKKEAIKSLKNFPGPKVDESGQYWIDSARDIGLSDIPPSSGGWGITFRRDPLQP  
SPCDELQEAETGDAPNLSKLYLIRPEDRGSCTDQVLLMMRQVKVCQFQQSDRRGGPGSR  
GRDRVTDYPGLACKHCANKNNIGRYFPVSAKNTDNTVNSMLSHIATCKRCPIPIRASIA  
YLSHRAIYQKTELSGSWKKAFFFKIWDRLHVERAVVNIKDDPEDAASGTGDDSEDPEDD  
GDESDGEDSGSDRRSDNDEEVGDNMNALIKAAIWLTEQDQSKEASGSGGKSGRGRSLP  
SKRSTNTGSPQGRGKSSGGDDGSSRGGSLTSGKRRRVHF

>comp9634\_c0\_seq2; 1100 108 3467 LEN=3670; translated  
MSFPFGKIPDHLTDNDVERRIQEELRLRQKEKSMAYMRLMTGDGAGANAYYGAAAAAAH  
QRAAYGQQQAAAFGIDSAGMYARQHQQHAAAAAAYGYAPRGGAGHYGYGHAPTASDI  
YSQQMAMSNI EQHQRAAAAYGQHQAAAAHQHLLAAASPQKPPPTSATSSVTSPAGTAVP  
SMESTPLQAHLQGSPLSEIGSAPKSSPASLSGIGSMGIPSTPMTTSSSLTPPRTTSTKK  
KKKIEPHETVELDDDKIEKWYSGCVPLGLEDDKYWLSELQVYLRANFAEAFGATEEDIAA  
PMHGRNKPIALGQVIGRCMHCKHENPAERQQATSYP SLISGIYNSVQQMLRLHLDCQA  
MPPEIRAKIESLVSSSSRGGRKQYWIDSARLGLVDTRHGIHFGRDPLGPLPPLTGPSV  
NSKEGRKKKEAQKKAEP PPPQEEEEQDPPPPVDDRPLVFPEDQDLISDYLYLTLEQMSP  
CVLMEADRVGCYKGRKVGFPGLACKHCVGQAGCGRYFPASEASLSQTTTSQTIMNHVRNC  
RRCPEIRENLELMKRARMGPDGKRLDKPKHGGRKVFRRLLWCRIQGLPLDEPSEGKGGK  
KRYKPGVKAKKKNKKSADDDNGVYSESEDNEAKESVKPAPKKSSTSSGEETETESSEAE  
SDDEGGKSSARSKSTSKSKKKQSPWFDGCVRLTKHDDSNWLSELQCFARSDLVEVFCWHK  
KDGLAGYSGRKEPSDGQVIGRCVFCCKTLPDSEKPSVVFPESELEAIQTKVGEMLRHLFK  
SCPAIPDDKKEAIKSLKNFPGPKVDESGQYWIDSARDIGLSDIPPSSGGWGITFRRDPLQP  
SPCDELQEAETGDAPNLSKLYLIRPEDRGSCTDQVLLMMRQVKVCQFQQSDRRGGPGSR  
GRDRVTDYPGLACKHCANKNNIGRYFPVSAKNTDNTVNSMLSHIATCKRCPIPIRASIA  
YLSHRAIYQKTELSGSWKKAFFFKIWDRLHVERAVVNIKDDPEDAASGTGDDSEDPEDD  
GDESDGEDSGSDRRSDNDEEVGDNMNALIKAAIWLTEQDQSKEASGSGGKSGRGRSLP  
SKRSTNTGSPQGRGKSSGGDDGSSRGGSLTSGKRRRVHF

>comp9635\_c0\_seq1; 505 192 1463 LEN=1625; translated  
MKLSLFFFLSNLLIADAFVVRHHEANPRQSPAGILRPRSLARAARKKAASREEEEGSGT  
TGAEDASRKAALRGVVGQIERTYGRGSVVR LGDASHMAVEATPTGSLTL DVALGGGGYPK  
GRVVEIYGPESGKTTLALHAI AECQKRGGTAAAFVDAEHALDPVYANSLGIDVDDLVSQ  
PDCGEMALDIVDKLVRSAAVDIVVDSVAALVPRAELEGDMSDSQIGLQARLMSKAMRKI  
TGSLALSCTVIFLNQLRSKVGVIYGSPEVTSGGNALKFYSSVRLDTRRKEVLPENAGIR  
VKVKVVKNKVAAPFQIVMLDILFGTGIDSEGCVLDAALDLGIVERRGSWF SYRGENLAQG  
RHNALECLKANAELYSSMEGNVRTSLAGLGEDPETETGASDDLVP GGASGVPPVEISAE  
GFE

>comp9635\_c0\_seq2; 492 192 1758 LEN=1920; translated  
MKLSLFFFLSNLLIADAFVVRHHEANPRQSPAGILRPRSLARAARKKAASREEEEGSGT  
TGAEDASRKAALRGVVGQIERTYGRGSVVR LGDASHMAVEATPTGSLTL DVALGGGGYPK  
GRVVEIYGPESGKTTLALHAI AECQKRGGTAAAFVDAEHALDPVYGXVAIAIAIVLRCVL  
ASIRGVCVALCCIGTAFCSVSR LAWDCMSDXSINISFSTRIKHNSAFVLRNDVRIPTNR  
PTHCRVPRVVVFFPSLSLSLPTANSLGIDVDDLVSQ PDCGEMALDIVDKLVRSAAVD  
VIVVDSVAALVPRAELEGDMSDSQIGLQARLMSKAMRKITGSLALSCTVIFLNQLRSKV  
GVIYGSPEVTSGGNALKFYSSVRLDTRRKEVLPENAGIRVKVKVVKNKVAAPFQIVMLDI  
LFGTGIDSEGCVLDAALDLGIVERRGSWF SYRGENLAQGRHNALECLKANAELYSSMEGN  
VRTSLAGLGEDPETETGASDDLVP GGASGVPPVEISAE GFE

>comp9636\_c0\_seq3; 187 385 702 LEN=875; translated  
MAFRSTSTKLMAGVSRSKNFRLTLEQLRIYKQPKSKVNPCADVMMRLINALEASEGRIN  
GPVYKYVKDVEECCKANAEQQRSGKAGTLYLSQYLDLQKFKKK

>comp9637\_c0\_seq1; 171 1 598 LEN=757; translated  
XLFQSSVSSLKFSKVHPVLP LSSIGVMMKTLIRLLFIAFSGVQAGLLDKWKLEDPNVNF  
LSENNTFKLSFDL NESVTKDNVRVKIF TSGCQNPEDGSQGI EVDGITIGNTDVSGGKGT  
FEFTLDVKTL SKNNDVFLSESPQKASVAICARYMLWTDNGYEVNFIETLLNLFNFDLSGTG  
FRFSGLVSKNSDLGSEVVS

>comp9638\_c0\_seq1; 1337 108 2624 LEN=2665; translated  
MADDAPKGPSKNELKKMAKKAEKAAKAAKGGGAAPPAAPNANAAAANAAGGKPPSSV  
ALPKAPKVVLLYQGAKDDSATLKAVYASLHYGIPLGVAKKKDVPAGFSAAGSKKPALFYGT  
TGDYVLGGGNAMCKAIGLMAGEPLSFEADEWCEVERTTLRDTGKKPLKLDLAAALEGS  
ATGVHLVGEADTIADICVMVTLNHAESIATWPSSVQKYYQCHSAALESAKAAVGHKCPV  
PPIDIKTNPSLVKVLTAIFTEIIEDIAPEFELPKNIKKCDTPKHGDYQCSVTMPAFASL  
KKTGGMPPGVSGPQQLAQVIIDRVGKDHPVIQEMRIQGPFGIMCKISSVYLQSHIETTLK  
NKSLPKPVNDGPQETCLVDFSSPNIAKEMHVGHRLSTIIGEAVCRILEFVGYNVERINHV  
GDWGTQFGMLIQYLKEEYPDFANNMPNITDLTAFYKAAKERFDDADFKKTAQLNVVKLQ  
SGDAECIEIWQLLCDVSRKEFQKVYDRLDVTVKECGESFYNDKIPPVIEEFNDAGILSVE  
EGGAKCVFVENYKIPLMLQKSDGGFGYDSTDMAALKYRLFTVKATRSIYITDYTQGDHFA  
MCFQAAKDIGWLNNGQQLQHIGFGTVQGEDGKRFKTRSGTTVRLVDLLDEAVNRMEGSLR  
DRIASGRAQITEEEVHEVAEAVGYGAVKYFDLRRNPTSNYKFSYDAMLDTKGNTAVYLLY  
CRVRFESIMRKAKAEFDCDVEDLIASGEKIVIEHESERNLALQIQSFADVLDQTLDDLLP  
YHICDYVYQLSIAGSDFVTQCKVLGTPEMKSRLLLCHVTTTSMKQCFDLLGIRHIKRI

>comp9638\_c0\_seq2; 748 108 3094 LEN=3135; translated  
MADDAPKGPSKNELKKMAKKAEKAAKAAKGGGAAPPAAPNANAAAANAAGGKPPSSV  
ALPKAPKVVLLYQGAKDDSATLKAVYASLHYGIPLGVAKKKDVPAGFSAAGSKKPALFYGT  
TGDYVLGGGNAMCKAIGLMAGEPLSFEADEWCEVERTTLRDTGKKPLKLDLAAALEGS  
ATGVHLVGEADTIADICVMVTLNHAESIATWPSKYSFEQHDMTYHGTAQYXLDGAVGQ  
REGSDEVSA LMARGNSVSEDSATHSTYTDPRQTQVLRRRSGWHVTECISDCSRVGNATAK  
ALPLFALEPSLYNVSPDFLSNSFLLSQXLFRFVEPKLTPGVLARRTPYHNKPYDPPNI  
PYNATVTPNPGSVQKYYQCHSAALESAKAAVGHKCPVPPIDIKTNPSLVKVLTAIFTEI  
EDIAPEFELPKNIKKCDTPKHGDYQCSVTMPAFASLKKTGGMPPGVSGPQQLAQVIIDR  
VGKDHPIQEMRIQGPFGIMCKISSVYLQSHIETTLKKNKSLPKPVNDGPQETCLVDFSSP  
NIAKEMHVGHRLSTIIGEAVCRILEFVGYNVERINHVGDWGTQFGMLIQYLKEEYPDFAN  
NMPNITDLTAFYKAAKERFDDADFKKTAQLNVVKLQSGDAECIEIWQLLCDVSRKEFQK  
VYDRLDVTVKECGESFYNDKIPPVIEEFNDAGILSVEEGGAKCVFVENYKIPLMLQKSDG  
GFGYDSTDMAALKYRLFTVKATRSIYITDYTQGDHFA MCFQAAKDIGWLNNGQQLQHIGF  
GTVQGEDGKRFKTRSGTTVRLVDLLDEAVNRMEGSLRDRIASGRAQITEEEVHEVAEAVG  
YGAVKYFDLRRNPTSNYKFSYDAMLDTKGNTAVYLLYCRVRFESIMRKAKAEFDCDVEDL  
IASGEKIVIEHESERNLALQIQSFADVLDQTLDDLLPYHICDYVYQLSIAGSDFVTQCKV  
LGTPEMKSRLLLCHVTTTSMKQCFDLLGIRHIKRI

>comp9640\_c0\_seq1; 208 259 1068 LEN=1068; translated  
MPENVDITDKVFDLDRVARSDGSTYIRDDLDPDTFPPNRVLFQRIAIGLYGKAAPKATQKFL  
SYIDIEKDFDIDNPYSYRSRSTFPALDQGTGLLMGGNISSLKT KD VAGSTALTYGSRILP  
ADLWIENKQGTERLSHSVKGLLTHRNLDPNPFGITTRPQP SL DATHTIFGQIMWSDTL  
KFFRELEDIPTYSVDRPAEYDDFGTGAVAKNVFNAQRDFFRGAATMGDDR VGKLYDGKL  
LRRKKFCWGEWNSNDAIISPRTKKFQLEX

>comp9641\_c0\_seq1; 578 212 2509 LEN=2666; translated  
MWNVALAALLVFAGAISVANAQSLAEKWDIGELTTGFNPETNTFTFTYAVDDSIATVNT  
AGQLYQIGCKEENLELNADEGITDVVTAVSSTGSATLTFMNF GILSNYDTILNREESYM  
DTCVRFMLQTDNQLVEVNFLEATLRIFFDLTAGIVMDFNVAPLEKEVVA AEKNYGAEGFL  
CNAETFEPFEDNVFLPGSVLSVCVKPNEEALNDGLYMEKIEEFAWVRGAIRQEAIVGGGS  
SSNGLTIMTCGDPETGGFCSFSTSYLVADFYRPPPTFPPTFPSSAGGGRGNGAPPCEHCLV  
CHESTGTPEITTEKLVHGFCIYKEANTTMNLNQRSSTTWYYNWGAYTNSIPNFSSETRLF  
EDSNYFPEIMYNGTETEI PPDEEFCEGGYFYRADHYEEEDVKQTLISIKKLG VYDSSSEDV  
GVTFTMVTWTD TARDGGLNDHFMSTYYDPTPGLTFELGANAHTF SGLIGWTVN VAGYNEG  
SDAIYERFVGNQDVHVI VDCPN SFCYSTYQGYFYL PNADKNGYPLT SGLVFR LTV EGGV  
WVYTPRYRLTDTTNAAYQKTYGVFTGETITLAYAPTGYGKYWYREGENAQFNATKNQF  
SINGGDATVDPHDMNVLCYDYTGDMCSYYP SYDEFWDNQLFLEGGGSRFLEEDADNADEP  
NGSFGEDSNTRGLEGLDDADEYALVGGEGTILLDFSRRRNL DGAQGRSLQAAEEPVLRT  
FSLDATVAPGTDEIGSLRTAGNRLQKSMGVLGFLAWATAVAVLVW

>comp9642\_c0\_seq1; 541 1 1066 LEN=1274; translated  
XLSFVNETLLGKNPSAQGGQYDYSFITLANCINTTKMGRGKESKAKRKA AKKEAAAANDD  
RVAGGST EELKDN GAMD DSTS IPLPPGMMAGSKGDDDDSDSSEGS GERND AEELLMIRKK  
KAKQSSCCNDNCAPPKKSASSQGIKTTPLILLVLMVGT SCLPALIYLN DYIGGYLAKN  
NVIGQIGFRLGMGQVPKRVLSFYEKHDPEKINEVPKILGKYGYDYPKLVKRLERKYQDY  
GYFLGWEDEAPMALAKEQLQETYSYLSWINSYWNVYAPQQA KTAARNIRYNLTF LHKKFYK  
LFWKKIWP HLEPVLGVPAGTEKQKRKDRADAQKRRGGQSGSRTSGKKKYRDDVEE

>comp9644\_c1\_seq1; 298 398 1145 LEN=1145; translated  
MKFFTSAFMSMLALIAATFSSDSMNFASAKTVKIKGRSTNEKSSESNNKLSSSASPPSPRFQ  
TPILESPLKAEEKRLVLSGFDPTEPLTKAEATFLEESIRDVFNMYRGEMDLITRSVAIHH  
DLVSSDKKGSRLGASRKLMIWLDYNHCQYQYRGPCKKQYKPGCEFDIDFYRDCYCHDCDN  
DNYYVMTDQPSTSPKDPYKPFWRHMSDDIPNRTRDPSTAPSSSPVPTSVPVTPVPTVPTX  
>comp9645\_c0\_seq1; 402 72 857 LEN=1183; translated  
METLNMNDVHTSGLSTSEIFLRVPRLNEHDIDENLSEIDVETIEEFEDAWQEFLLSSRPGV  
LPPGRKIKKCKQIETQMKIEGKKQNVCLELQRHLDFFAASRDKVEEKYKNAKEDAKLQQ  
KNIKEELEHEIDEIAKADKLLSDVLPWEHFFENLESNTTAVHNGSVASMSAGTSQSQKVK  
PSAEALYLADIRPGEVYFAARRGTSKAHFLRAYRIDNALLKAKAAMLRRRETERLEKVVKS  
EQMLSQILTENDVWGVMAASR  
>comp9646\_c0\_seq1; 433 30 1016 LEN=1707; translated  
MAI IKLSSPLFAILASALISNVAAFTPAFTPAIILPTGSRGSFTAVRMAEEDLDGAQVTSAR  
KELKFDDKTGRFFETDIDLEECIPEEEFCTIDEDTGSKIRLTVAEKERIFLDALQSYA  
TGRQLLSDEDFDLLKEDLQWNGSDVVVNRQETAYLAAMEAYLKGQPIMDDAEFDKLKEE  
LKESGSKFAVDTEPKCYIDSGVCKVTLQEDKFRSNLLYLPAGLTLVSVWLGLAFELIEPF  
IRVNP IILFALGLPLIVDGSKKITEELIFTDKLIAYGPCPSCEYENRIYFGDILGVEGFG  
DEGSVKCPNCKTVFTVQRKTLRASTLPK  
>comp9646\_c0\_seq2; 439 30 1004 LEN=1695; translated  
MAI IKLSSPLFAILASALISNVAAFTPAIILPTGSRGSFTAVRMAEEDLDGAQVTSARKEL  
KFDDKTGRFFETDIDLEECIPEEEFCTIDEDTGSKIRLTVAEKERIFLDALQSYATGRQ  
LLSDEDFDLLKEDLQWNGSDVVVNRQETAYLAAMEAYLKGQPIMDDAEFDKLKEELKES  
GSKFAVDTEPKCYIDSGVCKVTLQEDKFRSNLLYLPAGLTLVSVWLGLAFELIEPFIRVN  
PIILFALGLPLIVDGSKKITEELIFTDKLIAYGPCPSCEYENRIYFGDILGVEGFGDEGS  
VKCPNCKTVFTVQRKTLRASTLPK  
>comp9648\_c0\_seq1; 176 102 794 LEN=923; translated  
MMIDTTHRPDAVFPFMEFSPIVTTKRMPRKRKSVSFFPKVFAQRTLHRIDFTAEEQMNTW  
YSTSELREIKKSSKMLAIKLSVATTTDDGNDETSCLRLGLEGRTLGSLKTRRRRTKAIARN  
AVLREQSRQRKWGLVDADRIADEYECTECSSFAANMVGRLDQAAAKELHNEPAATAPIG  
ASLPP IATSGPGACRRKSMAASALGDSARSIQRIASISSRRLISDAIFAV  
>comp9649\_c1\_seq1; 389 1 1033 LEN=1259; translated  
XRHIVQSLVENVSDPSVVVRECLSGTKSLAEEIFPRTSTTLVEYTEEDTLGQFEREIEKR  
LWDQDENPDALLEYLLSEGVTTSLAPVEGRWPKTVALVRVLLSPIKNIRTHLKDLSKKE  
EEGMDQMVEDTHDSKDYMLVEDAIDKYGRCIQGLLANEAESYGDVTEGGALVLRQAEIV  
GCFNASVLRGLVACFLRRSVVGSTAVARWALGDLGDTSTTGTPAVVPRWVNFASDALQAS  
AISTGGSNESMVDGSAEASALADCRAMLAYAVKRVCSSLTVRNEKRLDPLQVDLLEG  
MKSVALRAKSLDSSGTSTSGLADLCSGFGGAMAVELLKNSLMQL  
>comp9650\_c0\_seq1; 360 161 1384 LEN=1723; translated  
MSTTASGEKECNSANIAVIGAGWWSQGWHLPALNNNPRSNLVAIVDTSAQPKSKLNPDL  
PLSVLAEKYNTVTFTSIEDFLNDSDIENLDGVVVATPHATHYLIGQVLI EVVKKRKT  
SKPLHILMEKPMTTDIEDAMTLYSLVEAESDGESQFWLNHSANYRAQTAMAREAITSGRL  
GSVRHVTASFASPLKWI FLDPENDGWNKPSGNMIGNGFQWAQTS HMLAFLFHILPDLQPE  
SVYCRMTHSKTTGADISHSATIECVDVATNEIVLINLSGTTLLPGDQYADPPVAKLVQID  
VYGNDGSLHYSGNDLDPSSGSLDYRPTNGSIEVLCDFEFEGYDNENYGPESMQNFVELC  
CGGYGETIPTAGATVIDGLRSIQVLDAMYKSDASRRTESIVPIKKEE  
>comp9650\_c0\_seq2; 310 161 1315 LEN=1833; translated  
MSTTASGEKECNSANIAVIGAGWWSQGWHLPALNNNPRSNLVAIVDTSAQPKSKLNPDL  
PLSVLAEKYNTVTFTSIEDFLNDSDIENLDGVVVATPHATHYLIGQVLI EVVKKRKT  
SKPLHILMEKPMTTDIEDAMTLYSLVEAESDGESQFWLNHSANYRAQTAMAREAITSGRL  
GSVRHVTASFASPLKWI FLDPENDGWNKPSGNMIGNGFQWAQTS HMLAFLFHILPDLQPE  
SVYCRMTHSKTTGADISHSATIECVDVATNEIVLINLSGTTLLPGDQYADPPVAKLVQID  
VYGNDGSLHYSGNDLDPSSGSLDYRPTNGSIEVLCDFEFEGYDNENYGPESMQNFVELC  
CGGYGETIPTAGATVIDGLVRAVV  
>comp9650\_c0\_seq3; 306 190 1712 LEN=2230; translated  
MXFSEYRGNRRRLVSHVVLILETKAMLQAHVSPACTQIVQELRIALGSLPVPHDCIGEI  
DPFFLYFCEWGLDGLSEEQRKCHHFTTKMLIYGDKTSTIFEISAFPEHHYNPNFDLEWF  
LFDPERLAQNSQFRSLQLDTSVCAWEGPKAGXLPALNNNPRSNLVAIVDTSAQPKSKLNP  
DLEPLSVLAEKYNTVTFTSIEDFLNDSDIENLDGVVVATPHATHYLIGQVLI EVVKKR  
VTNSKPLHILMEKPMTTDIEDAMTLYSLVEAESDGESQFWLNHSANYRAQTAMAREAIT

GRLGSRHVHTASFASPLKWI FLDPENDGWNKPSGNMIGNFGWAQTS HMLAFLFHILPDL  
QPESVYCRMTHSKTTGADISHSATIECV DVATNEIVLINLSGTTLLPGDQYADPPVAKLV  
QIDVYGNDSGLHYSNGNDLDPSSGSLDYRPTNGSIEVLCDRFEFEGYDNENYGPESMQNFV  
ELCCGGYGETIPTAGATVIDGLVRAVV

>comp9650\_c0\_seq4; 356 190 1781 LEN=2120; translated  
MXFSEYRGNRRRLVSHVVLILETKAMLQAHVSPACTQIVQELRIALGSLPVP HDCIGEI  
DPFPLYFCEWGLDGLSEEQRKCHHFTTKMLIYGDKTSTIFEISAFPEHHYNPNFDLEWF  
LFDPERLAQNSQFRSLQLDTSVCAWEGPKAGXLPALNNNPRSNLVAIVD TSAQPKSKLNP  
DLEPLSVLAEKYNTVTFTSIEDFLNDSDIENLDG VVVATPHATHYLIGQVLI EVVKKRK  
VTNSKPLHILMEKPMTTDIEDAMTLYSLVEAESDGESQFWLNHSANYRAQTAMAREAIT S  
GRLGSRHVHTASFASPLKWI FLDPENDGWNKPSGNMIGNFGWAQTS HMLAFLFHILPDL  
QPESVYCRMTHSKTTGADISHSATIECV DVATNEIVLINLSGTTLLPGDQYADPPVAKLV  
QIDVYGNDSGLHYSNGNDLDPSSGSLDYRPTNGSIEVLCDRFEFEGYDNENYGPESMQNFV  
ELCCGGYGETIPTAGATVIDGLRSIQVLDAMYKSDASRRTESIVPIPKEE

>comp9652\_c0\_seq1; 634 288 2876 LEN=2896; translated  
MMKALMMDGAVLKDIEDHSSYPV LQKSSEMDFDEKIVSIDDEYNKEYRNEEEEDWFDYN  
RWWKELRLYDEKNVFNTRDFGVAPYEV CQYVEDVCRI SGQKGWVYNPHNSHMYPKNQRPV  
VEFYGHRDDQDYENYGGDAMFFKEFG EWNVGYFGTGDKEGKNVSSQHRSPPKCSYMPVTN  
HFVLVADYTHMLGEFYRSRIYSPLIELIHF LVTVSSSTHTWPLVAVPKNWHHKKGWLSKSQ  
KRLIKANETFKGASTTTTANNTAGL TLMKRFQKQSKFYLSGVDNKKKKMLES HHALLGLI  
SDHPASISEKLNKLSMAETLRDHQRNRSRVKHKEQHEESQCACVKR LFFCGYERQTVSP  
NGKEIPPPSPHVPPLWRITNTGQLD GKFDSDGHIQRI IREQVSKHDSIKNL TREYLLLEKKT  
RLIDGCSDDDDDEDVDEENEKDS DGKQDKDNDKKKKKADIEGLEK WIEEYREKKRLMAL  
EGRKTTASASSINWGNKAKAKAE PPTNSGAVNWGD KAKPRNEETS RKRLQLLGGT TTT  
ARRRLTSVEEGIEVPLVTGSDA IATSNTTANVLNVSSIMENVT DDEFVSDWKIVGLTQRS  
DRRTWLNLDGVMNACRERFTNP SDKIVCVQIDVGSREFW NKNLHIAAHSGLSALMGVHG  
AQLAEAVFMPAGSLVVEFLFPV PGGMIFGEWTRWAHDAT PLGKIFSHTDL DHIGLPLTIA  
SAMHLECIASEKASEHFSTK RLYDCLDYDKNPWDRHF TVPVDSIMDI IDK FVANGTPSK  
EEGRPAPSKAAVSGPVQSLPL RYCEDFLNAAGDDYVLYNVN CVPASKSATDSRSPHYYR  
TREWLEEKTHSYMNSSLLFNT

>comp9653\_c0\_seq1; 256 1 589 LEN=653; translated  
XRFQEAVGKARKGARPEPDV PNPNGPCVGSANCFLEPNGYHATGYHAGSGT QQTGKTELKQV  
VVDALRDPSSRVLLNYDRGGIG QGPMGHGHSPLGAYHEETDSFLVMDVAKYKHPMVWVP  
WDDLWGGAAATIDTCSTMVAPADGAPS IDWTKRSFAEIAKAIQ SXMPPEGESRICCGLEDDH  
LVGYQSGGGFKEDAQD

>comp9653\_c0\_seq2; 615 98 1359 LEN=1423; translated  
MAFQEASSEGASLLPVQRSNNGCEVDH QKGNHRRPKEHNKYLLIPAVCAASAGLLVCIAS  
AWQQRGPGSRQGSLLPSVPSAPHYWNDEM VYKWEFFLLSTNHPKNSGF DLSEAAKVSLLA  
PVSSQPLATRAAVDKSKKSP LLYFNESIAFSRLDPI GDDFFRYQSGWEAQITQSLCAVAT  
TAAMLNSLRDVGKDFVLP LDPVYVFPFWATQSNILDADDGLHGACVASALGGRSNAGAVR  
HIGLGTGTLPGFANCFLEPNGYHATGYHAGSGT QQTGKTELKQVVVDALRDPSSRVLLNY  
DRGGIGQGPMGHGHSPLGAYHEETDSFLVMDVAKYKHPMVWVP WDDLWGGAAATIDTCST  
MVAPADGAPSIDWTKRSFAEIAKAIQ SXMPPEGESRICCGLEDDH LVGYQSGGGFKEDAQD

>comp9655\_c0\_seq1; 232 1 952 LEN=1607; translated  
XFWSGLYL VFSHSYVLLILGV SCLYEVAMTLLDYQMKLLGFARFRADGGGAANRLLGGTM  
SFSKFMGHYGVVNLTSLLFSSLLFPFLIKRLGLRRTLLWFPTMLLVVTFLAYGAMPGNL  
AVL FVSLSLKAMTYSIHDP SKELLYIPTSN AVKFRAKFWIDV VGERISKAIGSAFN TLA  
RDVEESLRIGTL PCLLTALGLWTAC YLVGLRFDELLATGKIVGLEHPIDPSTYSRVPGER  
DGGDDCESAGGADAFYGGRGYDCRPRGGFGELEIAFVDG DDEDVSTL DLLADPAAPRGG  
EPLAVRGIEMPSLSRRV

>comp9656\_c0\_seq1; 325 791 1693 LEN=1961; translated  
MAAEIDPMPSPESFKIGIVALEATGGNGKDL DHLRRAVEAYRKALKRSMKASILFNMGVA  
LERLGEIEEAEPILERIQRSEAHTSCLSDSWGYVRWHTRNTDPALLNLHRGTRDMLKLAL  
DAAMPLIEGQRENRS HGLVCEFGVSGSKSMRMTQEILPLDIEMHGFDFTTGLPQAWGSEP  
AGAYSTGGIIPSISSNVFFHKGLFSDTLTPFLEDYGDNAYVAYANIDCDLYTSTVDILEA  
LHGRIVVGTILVFEYVCHPTWRQDEFRAWRESCKRFGWKYEYLGFSLSKQAVRVVTGV

>comp9656\_c0\_seq2; 317 188 928 LEN=993; translated  
MKKLD CRLVLAWTVLAALSTDAFTVDTAACRSTNIYNRGITHPRPTPSSLSL SLAGLIDEP  
TTFNSVIGEADRAFQRGEQLDKSGQ PRLASGAFHEAATLFQCFLELPENFEHV TNLSKDD  
CQAVLAYTTLVRLGFLNVESLSDARS AVRLYSMAAEIDPMPSPESFKIGIVALEATGGNGK

DLDHLRRAVEAYRKALKRSMKASILFNMGVALERLGEIEEAEPILERIQRSEAHTSCLSD  
SWGYYR  
>comp9656\_c0\_seq3; 225 188 643 LEN=1143; translated  
MKKLDCLVLAWTVLAALSTDAFTVDTAACRSTNIYNRGITHPRPTPSSLSLGLIDEP  
TTFNSVIGEADRAFQRGEQLDKSGQPRLASGAFHEAATLFQCFLELPENFEHVNTLSKDD  
CQAVLAYTLVRLGFLNVEESLSDARSARVLYS  
>comp9656\_c0\_seq4; 235 117 650 LEN=918; translated  
MPLIEGQRENRSGLVCEFGVSGKSMRMTQEILPLDIEMHGFDFTFTGLPQAWGSEPAGA  
YSTGGIIPSISSNVFFHKGLFSDTLTPFLEDYGDNAYVAYANIDCDLYTSTVDILEALHG  
RIVVGTILVFDEYVCHPTWRQDEFRAWRESCKRFGWKYEYLGFSLSKQAVRVVTGV  
>comp9656\_c0\_seq5; 440 188 1543 LEN=1811; translated  
MKKLDCLVLAWTVLAALSTDAFTVDTAACRSTNIYNRGITHPRPTPSSLSLGLIDEP  
TTFNSVIGEADRAFQRGEQLDKSGQPRLASGAFHEAATLFQCFLELPENFEHVNTLSKDD  
CQAVLAYTLVRLGFLNVEESLSDARSARVLYSMAAEIDPMPSPESFKGIGVALEATGGNGK  
DLDHLRRAVEAYRKALKRSMKASILFNMGVALERLGEIEEAEPILERIQRSEAHTSCLSD  
SWGYYRWHTRNTDPALLNLHRGTRDMLKLALDAAMPLIEGQRENRSGLVCEFGVSGK  
MRMTQEILPLDIEMHGFDFTFTGLPQAWGSEPAGAYSTGGIIPSISSNVFFHKGLFSDTLT  
PFLEDYGDNAYVAYANIDCDLYTSTVDILEALHGRIVVGTILVFDEYVCHPTWRQDEFRA  
WRESCKRFGWKYEYLGFSLSKQAVRVVTGV  
>comp9657\_c0\_seq1; 626 353 2170 LEN=2250; translated  
MSFSLGRSFATTVVRRAAGFQAAARSARMQVRVAGLPWRTSALASPTSRWMSSASDTGKEK  
EKTEEEKAQIKAAREARKAEKERKKAKEKAKKEAORLAKEAAERIDDVNYLSVEEQDSYE  
PYGDMSRIMSRRTGREFAKVKDLGETHAPGDTIWLRLRHSIRVKGGSCFLVLRQDSF  
HTVQAVFFKDKENPEQSQKMIKYLKSLTEESIIDIETLESADVKSQSVQSMELKIQRIH  
SVAKAQSIPLFVEDASRSEAEVDASQETDRPFRLGQELRLDNRWMDLRAPANNAIMRI  
QSMVCQLFRESLYSQGFVEIHTPKLIAGESESGAGVFTTDYFGETACLAQSPQLFKQMAI  
SSDLTRVFEIGPVFRAENSHTRRHLCEFTGLDLEMAINDHYMETLEVIHEMFKHIFNGLE  
SRLANELAIIREQYASEPVFTTDEPCVLHWPEAMEILTEKGFDIGDGYGLTGAMELALG  
EAVKEKYGTDFMFLDKYPMEIRPFYTMPDAEDPKFSNSYDIFIRGQIEICSGAQRCHDPEL  
LTEILEQKGIPEGALDAYQKSFKDGIFPHAGAGIGLERVFLYLGLDNVRKASMFPRDP  
NRCAP  
>comp9658\_c0\_seq1; 421 1598 2623 LEN=3138; translated  
MAHFEGSQLGMYLKNLKENDRASFDEIMASAKGKYYENKNPNAESIIEKAAQIDEENPTV  
LVGVVSSRSNFDTRVKSIVKTWGDQPNIPEGTLRFFVGGPPEDSESYGKSKDEDEIYLA  
KSAGIKDSSMVVMDGVVDDEYPPVRKNTAMIERMKNIVESFESNTDAPSTFQWIYKVD  
DAYVNFDMGLSFIRTRSTEGYRIYGERGTGRKEDSNGLKRGGLVKPYCTGGPGYIMSRQ  
VNATAPHFKECVEEFDNSEERKYVWHSDTVIGLCIYKATGAGCWDENDYHTRIFRHNK  
NEDPFISTAHLGETIATHPFKDHSLMAKQHSRYIELASALM  
>comp9658\_c0\_seq2; 421 200 1225 LEN=1740; translated  
MAHFEGSQLGMYLKNLKENDRASFDEIMASAKGKYYENKNPNAESIIEKAAQIDEENPTV  
LVGVVSSRSNFDTRVKSIVKTWGDQPNIPEGTLRFFVGGPPEDSESYGKSKDEDEIYLA  
KSAGIKDSSMVVMDGVVDDEYPPVRKNTAMIERMKNIVESFESNTDAPSTFQWIYKVD  
DAYVNFDMGLSFIRTRSTEGYRIYGERGTGRKEDSNGLKRGGLVKPYCTGGPGYIMSRQ  
VNATAPHFKECVEEFDNSEERKYVWHSDTVIGLCIYKATGAGCWDENDYHTRIFRHNK  
NEDPFISTAHLGETIATHPFKDHSLMAKQHSRYIELASALM  
>comp9658\_c0\_seq3; 606 104 2533 LEN=3048; translated  
MKSWRIRLVFHGLVIGLVCMIKVYKRAIRDNSRERSTLANEFHRSQSQQRSIHEIHLG  
GSRDGSVRRSESKTQAQIVVAPWTTLAKNHNTDSSSTGKTKKDDTELRSFVFAEPAKL  
DSEYGVPMTKVDKKELEKIQEASRRLCARSKKASENGKATLRCKENLDLLRCVSCSERD  
GTWYTAVSETGAVFGKVFNETSLNFPNYNDGPFMYQLDIAVPISEGDDKLRRAAKLGA  
SIKKFRSGLFGAKITIRLLITRFPFETPAVGTRGLEKFRKHLAKAAGLLDVADDVVFVPV  
KGVSQFSRAKAVNALHRKAYHEDNSALAVIDVDLSIESKFLRNALTYTFPGASAYFPIMF  
SAYDPKSVELVDKFI PHNNRYRFSDDHGHWRKFSFGMYVVIAGSDAPRLSMNEDFVWGGE  
DNDFFSRVSRKLNIRLRETGLTHVWHPKHCKLGGFVEKKYYQACIGSMAHFEGSQLGMY  
LKNLKENDRASFDEIMASAKGKYYENKNPNAESIIEKAAQIDEENPTV LVGVVSSRSNFD  
TRVKSIVKTWGDQPNIPEGTLRFFVGGPPEDSESYGKSKDEDEIYLA KSAGIKDSSMVV  
VMDGVVDDEYPPVRKNTAMIERMKNIVESFESNTDAPSTFQWIYKVD DAYVNFDMGLSF  
IRTRSTEGYRIYGERGTGRKEDSNGLKRGGLVKPYCTGGPGYIMSRQVNATAPHFKEC  
VEEFDNSEERKYVWHSDTVIGLCIYKATGAGCWDENDYHTRIFRHNK NEDPFISTAHLG  
ETIATHPFKDHSLMAKQHSRYIELASALM

>comp9659\_c0\_seq1; 687 1 2177 LEN=2303; translated  
KQYYLVMDLITGGELFDHLSNDGAYSEADAARLIFEISSALAFMHGVIHCDIKPENLM  
LC SRKRRGGTIKI IDFGCAITQPVGHYDDEPQSGETNHNATAGGDGDAGNRPPGMIETGT  
TGYWPPERFRGQEITPAVDTWALGI ILYIMLMGFHPFDIRCDRSDEEVAEAIQQNPLPPM  
DEAYVGHLSSEAKDLIRRLMEFPDPSRRMRAYELLLHHPWVQGETATTEVIADSDKRLSKFQ  
DLRYKLEASVFAVLVNQGHQDLTMSEARRRNSVSKNNSGVSIMKSAFDVFDGDGKGFITG  
EDIGKVV TERTGEVIQTRDANEF LKVNNDLEVSLSNFSNLFSGMKHKHYPRGHYIFHAG  
DEGRSMYFLSSGKVEVQTRKGQLVAMLRSGDFFGEGSLLDDSKRRFTTAKCATPV DVVEI  
KREDFDRYTRSSIDTKNELKRKWRARSLVYAKNLLRLEQSVKARTLSKGDVVYHEGDKGT  
AMYRVDDTKGGELEVLHGDVPVHRYVEGDSFGESSLLFDKPRSSTVRCISDTCRIHEMSG  
EDFMAVIQSSPDSADSRNMCRKRLFKRAVKQFSLETNRGLTDDDI VAAFHNADEDNSGY  
LSVEDVRRIMHRMDPEFP ISEIHELMKFVDVDEEDGRVDIHEFKQIFRQFEDEKAXNETKR  
SDRNVFSPGEVTLKRGARRRPGRGVVP PGDASTRNPGGWRNTEQDSATQPTFSSARQPSA  
TKRRS

>comp9659\_c0\_seq3; 445 153 1234 LEN=1360; translated  
MYFLSSGKVEVQTRKGQLVAMLRSGDFFGEGSLLDDSKRRFTTAKCATPV DVVEIKREDF  
DRYTRSSIDTKNELKRKWRARSLVYAKNLLRLEQSVKARTLSKGDVVYHEGDKGTAMYRV  
DDTKGGELEVLHGDVPVHRYVEGDSFGESSLLFDKPRSSTVRCISDTCRIHEMSGEDFMA  
VIQSSPDSADSRNMCRKRLFKRAVKQFSLETNRGLTDDDI VAAFHNADEDNSGYLSVED  
VRRIMHRMDPEFP ISEIHELMKFVDVDEEDGRVDIHEFKQIFRQFEDEKAXNETKRSDRNV  
FSPGEVTLKRGARRRPGRGVVP PGDASTRNPGGWRNTEQDSATQPTFSSARQPSATKRRS

>comp9660\_c0\_seq1; 782 1 2874 LEN=2874; minus strand; translated  
XSTQINLGSNIHHSADRENVSVSDDIKLLKSPLFWNLFFWIVLPLLVSIVAIMI IAGVQI  
LTTFFPQWIK EANSTSF DLEKENLQSSATLIVKHIEHVDFEPLLDLHMISRLSGWLLFGAV  
NRSGSFTDIEMEFVVEECKYYENIQECPFEMNTRSPCFCEWNDPWGRLCDIEDGNNLTST  
SDPRYVQRMWYMNQIHAGNESFPVVDYSPESTSWYTNSNRMQGS DKG SNAEGYSTAYDRL  
RVSSALS AIIPIIYNYGSSVRGEGSTNTAMSGYISFEAEGEYYGYDGCNYDVAGYSQFQS  
SEENSAYLVRPDLCP LKFGFYDPRCRSWYAEAKERALDHNASVYITPPYQFANTDEIGNT  
AVSSLIDPKSGEFVGNLIDFSTTDIAKIASKISAKYYAVVIPNAKDGQNLVASSHFSSK  
TTPKPI TDVIMQFDPANSSFVRDFNKVMLDMGSEGKEATCDLYRTNRRGEVEQFCVHEP  
VYYREVRPVQSDDFGRGTEVSTKFLYSVVLFEPTKDLSTEYTTRSHVITRALQNTAILYI  
LMTALITFICIIVTAMVSSIDKANLAKLLLLGVAHTTFAFHVDVDFVVDHKTNDP VVATVK  
QVNAGRIEDDMPPLTGG SREVHRVHTSFAKLYKVVRLSNSAFFLGD LKLAHHTAQDALQL  
FQKIGDSKAI AIANNNMGNLLLAWMVECRHHG SCLTVDDENG SFCCMVA AIKHYDKAVQ  
SGKKDFDNASGDAEKCYAQQLADRHFNRAMCLLYTADDP CASSNAKETALDDLFLTRQY  
DQGVKEYMLH SKTLFKHSDVIFERYLRRLNGLAVLIDIDPDVWNVWDIYDLADQADLMLQ  
AAWNKDDAPIFHNVKQVGR LQELSAVTGVELSAGKGN DALLLATRMLVEDEFILDSAFI  
ETADCLLQYL RNSDTGR TDEDDHGSDDSND SF DAGAAPP RDAPRKGWSETSTAML RQX

>comp9660\_c0\_seq2; 569 1 1816 LEN=1990; minus strand; translated  
XSTQINLGSNIHHSADRENVSVSDDIKLLKSPLFWNLFFWIVLPLLVSIVAIMI IAGVQI  
LTTFFPQWIK EANSTSF DLEKENLQSSATLIVKHIEHVDFEPLLDLHMISRLSGWLLFGAV  
NRSGSFTDIEMEFVVEECKYYENIQECPFEMNTRSPCFCEWNDPWGRLCDIEDGNNLTST  
SDPRYVQRMWYMNQIHAGNESFPVVDYSPESTSWYTNSNRMQGS DKG SNAEGYSTAYDRL  
RVSSALS AIIPIIYNYGSSVRGEGSTNTAMSGYISFEAEGEYYGYDGCNYDVAGYSQFQS  
SEENSAYLVRPDLCP LKFGFYDPRCRSWYAEAKERALDHNASVYITPPYQFANTDEIGNT  
AVSSLIDPKSGEFVGNLIDFSTTDIAKIASKISAKYYAVVIPNAKDGQNLVASSHFSSK  
TTPKPI TDVIMQFDPANSSFVRDFNKVMLDMGSEGKEATCDLYRTNRRGEVEQFCVHEP  
VYYREVRPVQSDDFGRGTEVSTKFLYSVVLFEPTKDLSTEYTTRSHVITRALQNTAILYI  
LMTALITFICIIVTAMVSSIDKANLAKLLLLGVAHTTFAFHVDVDFVVDHKTNDP VVANCQ  
AGERR

>comp9660\_c0\_seq3; 784 1 4714 LEN=4982; translated  
XSDATRDSWRLTIGKAVFDRLTREFIGCIALDLSLIQAEELLEEVNEGVP SDMVLTKPDG  
TVVVGILGSANETESTLTPKLWETS FIDEETYRELTD DLAFWEEI IWDIETAISTYDFSV  
KSNKYTYVFPSPIPPDEYDPNYKPDFLIFGSINADVQDETIDEIAELIDRDVTEFIIVS  
VALGAVGLGCMLSVVAIVAHFLTQPLKWI ESKSWEIVNHS DTRVSDSFRLSLEDDEKSY  
DFFSFIPKTEVQELVSEFRNMI SFGSGEDASRVSVPRHTETKNI VTKWDEFLQFYTLSP T  
LKHKLKEESIRHR SVTRRMS SAKSSISQLDTADFSKFDSDIHEEKHNLSFRSIEWEQK  
PTVVRENSMISITSTQKMSWLDTRSEITSTQINLGSNIHHSADRENVSVSDDIKLLKSP  
LFWNLFFWIVLPLLVSIVAIMI IAGVQILTTFFPQWIK EANSTSF DLEKENLQSSATLIVK  
HIEHVDFEPLLDLHMISRLSGWLLFGAVNRSGSFTDIEMEFVVEECKYYENIQECPFEMN

TRSPCFCEWNDPWGRLCDIEDGNNLTSTSDPRYVQRMWYMNQIHAGNESFPVVDYSPEST  
SWYTNSNRMQGSDDKGSNAEGYSTAYDRLRVSSALSALIIPIINYGSSVRGEGSTNTAMSG  
YISFEAEGEYYGYDGCNYDVAGYSQFQSSEENSAYLVRPDLCPGKFGYDPRCRSWYAEA  
KERALDHNASVYITPPYQFANTDEIGNTAVSSSLIDPKSGEFVGNLIDFSTTDIAK IASK  
ISAKYYAVVIPNAKDGQNLVASSHFSSKTTPKPITDVIMQFDPANSSFVRDFNKVMLDMG  
SEGKEATCDLYRTNRRGEVEQFCCVHEPVYYREVRPVQSDDFGRGTEVSTKFLYSVVLFE  
PTKDLSTEYTTTRSHVITRALQNTAILYILMTALITFICIVTAMISSSITRPMIQLLQTV  
KQVNAGRIEDDMPPLTGGSREVHRVHTSFAKLYKVVRLSNSAFFLGLDLKLAHHTAQDALQ  
LFQKIGDSKAI AIANNNMGNLLLAWMVECRHHGSLCTVDDDENGSFCCMVAAIKHYDKAV  
QSGKKDFDNASGDAEKQYAQQLADRHFNRAMCLLYTADDPACASSNAKETALDDLFTRQ  
YDQGVKEYMLHSKTLFKHSDVIFERYLRRNLGLAVLIDIDPDVWNVWDIYDLADQADLML  
QAAWNKDDAPIFHNVKQVGRLQELESAVTGVELSAGKGNLALLATRMLVEDEFILDSAF  
IETADCLLQYLRNSDTGRTDEDDDHGSDSNDSDAGAAPPRDAPRKGWSETSTAMLRQE  
LKRMRKPGMQRALDTIGRTFVLCIELQGHWNRRSFLADLRNACTSFYEENCRSDDSMGM  
VTFAPSSGDLRRLSPSRSSQNEDSQRAEIEAATTGVACSRFVPALEGAIEMALSAAEASTS  
CDVCLLYVSDGGAYERGAYARLRKTLERGRGKGRRRGRHPPISPCIDLVLGLGADPSSG  
FAENCKGLALATHSRTSFYLDVDVDVREGASQAPSDSEALAEAFREAGAAIHAGTSFAGI  
RLQRALTMQKF

>comp9660\_c0\_seq4; 715 1 3040 LEN=3040; translated  
XSDATRDSWRLTIGKAVFDRLTREFIGICIALDLSLIQAEELLEEVNEGVPSPDMVLTTPDG  
TVVVGILGSANETESTLTPKLWETSFIIDEETYRELTDLLAFWEEIWDIETAISTYDFSV  
KSNGKYYTVFPPSPIPPDEYDPNYKPDFLIFGINSINADVQDETIDEIAELIDRDVTEFIIVS  
VALGAVGLGCMLSVVAIVAHFLTQPLKWIESKSWEIVNHS DTRVSDSFRLSLEDDDEDKSY  
DFFSFI PKTEVQELVSEFRNMISGFGEDASRVSVPRHTETKNIIVTWKDEFLQFYTLSP  
LKHKLKEESIRHRSVTRRMSSSAKSSISQLDADF SKFDDSDIHEEKHNL SFRSIEWEQK  
PTVVRENSMISITSTQKMSWLDTRSEITSTQINLGSNIHHSADRENVSVSDDIKLLKSP  
LFWNLFFWIVLPLLVSI VAIMI IAGVQILTTFPQWIKANSTSF DLEKENLQSSATLIVK  
HIEHVDFEPLLDLHMISRLSGWLLFGAVNRSGSFTDIEMEFVEECKYYENIQECPFEMNN  
TRSPCFCEWNDPWGRLCDIEDGNNLTSTSDPRYVQRMWYMNQIHAGNESFPVVDYSPEST  
SWYTNSNRMQGSDDKGSNAEGYSTAYDRLRVSSALSALIIPIINYGSSVRGEGSTNTAMSG  
YISFEAEGEYYGYDGCNYDVAGYSQFQSSEENSAYLVRPDLCPGKFGYDPRCRSWYAEA  
KERALDHNASVYITPPYQFANTDEIGNTAVSSSLIDPKSGEFVGNLIDFSTTDIAK IASK  
ISAKYYAVVIPNAKDGQNLVASSHFSSKTTPKPITDVIMQFDPANSSFVRDFNKVMLDMG  
SEGKEATCDLYRTNRRGEVEQFCCVHEPVYYREVRPVQSDDFGRGTEVSTKFLYSVVLFE  
PTKDLSTEYTTTRSHVITRALQNTAILYILMTALITFICIVTAMISSSITRPMIQLLQTV  
KQVNAGRIEDDMPPLTGGSREVHRVHTSFAKLYKVVRLSNSAFFLGLDLKLAHHT

>comp9661\_c0\_seq1; 775 61 1901 LEN=2173; translated  
MKACHFGDIRNNSFVLMFLVAFARHGLQGVRSFSLAHRQSGIVQMRNRSRSLSPFN  
SSLRKTQSFQPVASAGHGSTRRLYYTPTAWPENLYREWTLQDELLWSYMRATKKEPI  
EASELAVVLGRGVRGVERRIEKLRDVDSPAYQRLFVKKSTSTAENQNAGAKTAENSSPKR  
TQKLVPSSSEVLRRIEWDYQLDANDFFVLHYDRVDNTVVTSPLTAPNEGINS AETSLVKAL  
PEHRIVAIAYKDRVVWDRRYNRKHDVFFGPPGIVQIVESYGEWKEFRDKQLEEQAALRA  
WKTRWVDLLGSELQRNELLRRTEDILGGTNAV TGSNADVWKNHGFFSFENK DSESETITL  
SKEQQQRVDSYVHGVEYELFRQRAEEETGRDEENSNVGT TDGKSTGVGMMVSLFDELSEWI  
ASSCWSSLGEDSGDTGPRNEASLFREMVL RKTAAATMDKLE GKATKTSV SQQQQQQQP IVR  
KGKGGKAGSAQPEPEAPAPGGGPRGKLCAGVRRRWPKDQQDEQPRVAGPPP DGDQGRVPG  
DEVVPPEPEDRPEAAPREARCAVLSKAERKQKLRQKRRKSR SRNK SRLAAKQERKKQAR  
KQELLEDGGDDL DW

>comp9662\_c0\_seq1; 402 171 1430 LEN=1528; translated  
MPEEKQKQDDVEGRLFPFKVKKFLSGVASAGQAALKEAQRHQ SALDCNSSHDKPPIPG  
RVLPKPKDPSQGRMSGVTESSKVQNLRLRTPPKPTTSNGVSI AVSPEIAADMSKGAHDHD  
WEMLSTGEKASTCSEVFSVSGPRAGSVRSIRSLDHSSNQTTLSIPFKIQR TNSSTIDSQ  
DNVLGSPSGKIGLV DYM EHVVLPDTLQIGICIA YKVSASQLRRANHFSGTLHSAPKLLI  
PLSKQALRTG FIRVQD TDKEYKLHYFQAEFPDISAAEAKGYLELADWELKEAVQSAKED  
REWEIGDGIDDENGQYQAKSLKSGQIGIKLGFSGNIPTFNLMGSGHSSSFKLLMKKSNKS  
YEKKNESHF EKETTIVHSRPPAIASKSVQVEDLFNAADQHNSYGFELKPIPKRND SFTN

>comp9663\_c0\_seq1; 507 249 1657 LEN=2162; translated  
MTRIQEKLLQLKATNPENRSEEVDELEGRIQ NIRADXELGKSNSGKSSSGKSGSGKSN  
SSGSGGSGGSSGSSSNRSSGAGWSAVDGSYCGCMCSNYATFGINTHGLSCDYTV DQNS  
YGYGLRSTNNGNGQOEKYGEFQSF FEWSAWSNWQSVEEDNEYFTNYGYEKQARNGADDTY

IEYEGDDAGNGEDDHNDDEEDDVEDEGIVVSEMDSGYDPYMAFDVGNCEYAHLWTYDLLV  
SCADGDQHCKCTFTEELMRMGLLSCSDEASCPDECGVCSNCIKSVCGQFVPSKLVTAIEIK  
NNSTIILLVIFSMVLLLLLTTFAVIRRRKNNKKGILNESLMDTGDKNWMPVNEADGLPAEK  
GGKSKPVWLAPDVSTVPQVPLFPDLLKDVSEQDAITSPDSDTMPKENEIKTREHQQAVEL  
SPVGTGDCDSPKRQHPGPWLVPSNCSIPSSISNSTDSGKSIGTLEGEI  
>comp9664\_c0\_seq1; 658 1 1851 LEN=2004; translated  
PGWYETVLNLLGEERRQASTVFGPTEAPEIVVRVLREAFRPILPSFQSRLEMAFSSATTA  
TAGGATAMGSLETICSIYESTLRFLSLAYDLVAGTFLLDLVESGANKKGGDTGLELFFKDMQG  
VFLQLASPFALYAQRFPDLEAKHSRVAAGMVSKDIQQTVGTLSSSTSITLQTLQEATNRLK  
DLASFIFPIVDGSLRFEELLNGGYRVRAALRSVDTILSNHLGELVIAVNSLSAAMTV DAN  
KLADFEQHVLCAMEVLKMGVGNFRDRNFEGGTRGRMQALSERMEDHLAQAANLEAPG  
NSFLVPDLSVMEIDSYLTSVFCSDDDTSTDGDEANPSLALQITIGIGQDVLYSAAEEAV  
KRLASSCHSFVFDVCSAVPNKHLNALSEMTAWRESDSASDNFDSYGTLPQQYITQVGEHM  
LSLVQAFEPFASDPATLSLVNEVMDNARDVALQSWSEFAASAGYVGSDSAVSSLMNGKDI  
LGLVLANAALTEEDAALTEEGATEDEIRSA AFCNVWLDAIGLGVTRLLERIMRIPQLTPK  
GCDHLNSDLNLYLVNVSALGVAGHPHPLVTHTA AVAMLSDDDLNAQIRSRNMDSEVEIAL  
RALEARIALRRGISVG  
>comp9664\_c1\_seq1; 339 78 1023 LEN=1023; translated  
MADTAVADGSSASLEAELNALVSSRSFSVASYLNLALSSSSSSVAAPGAAPGPAPDDLQR  
KMAELALQLQIQTSCHEDIGRIGAEQLAILPRCAADVGRVGVGLEGMRVDAETLLETG  
MGGGEDGLSGSLETLSTLHALRANLSGTKEVLTAAATWDSTIGSVAPLLAEQNLTEAVHA  
LAQLETGERALRGMPNREERQRSIQDIREQVQVLLQPQLRHALQNMHTRLAPLQQCVTLY  
SKLGKMDSLRDDYVKQRPGAVHKAWFSYAPPKTAYGGGRNSSGATTTATASGTPEDGAAG  
GMTSSDQAAAARQAGX  
>comp9665\_c0\_seq1; 423 95 697 LEN=775; translated  
MNDLLSKERSLQSGGNATETSTAEGNATAPTEPISSEPIPSPTAPKAPTAVSSPAGSSVP  
APSSVTPVSPGTGFSSTSAEAPSASGGGVFPANGPGSGALAPTYSYNDKTSPAWSSGANT  
SSSSSPVSGSGGFFTPLNILLVAVAVGAVALLVFWKFKAWKLRREKQRLRLQSTRVDMV  
LGDMQVMGMDYDGDPELI  
>comp9666\_c0\_seq1; 208 1 783 LEN=783; translated  
XFLQFEHLSNLTKSLHRAQTAQIMAINTKRIHTASLLLLFCIGFQSWSLVASFESPNAFR  
SRHNGHRLIELSVAPRQPDSSLWSTASDDGDSMRMLLEESWNTSKMGRVPADPEAAAKEA  
HASILRAAGANAADDDLVEESDGMMSGIFFVDLLPAYDISLKQDGVNLYDEVVAVEYCIA  
LANCFKGTETIVVRDDMTVGTVTKVLQAREESEREEQRKAEKREERERLLEEQEKE  
NFAKITDGDVFGQEDSDDDDX  
>comp9667\_c0\_seq1; 380 358 1236 LEN=1690; translated  
MGAEGRYLGIQRFRFYIKCTHCSRTISFLTDPKNADYEMESGGTRNYEVYKDKERTEEE  
MALEKEKDEKEDPMKALENRVLESQREMADLDNLEEIRAMNHKHLKLMSSSGDGGF DAKA  
VLKALDDR IQEEAIHETEELNEHGTT EEEERLIQSIRFGKNRGQIADSTGGEMMYGGSE  
RGNRPASTVLRRLGTDDERREEEKRKDMELILQRQKKVDHGSSNANKTTFIGASVKIKVK  
RKKVVAKADSMKAKTTDSKATSEPPAPTPTVKTNSLASLLGDYGSSES  
>comp9668\_c0\_seq1; 326 186 1414 LEN=1467; translated  
MTAATDTKREADSLETNLEQLQDKLQQGGLYTTRNNNRRDHVHYFSTLFAGVGS GALS  
SFVCAPLDLIRTRMQVWGD IQEQEKLKQVHRQORPGSSSLKLSKPIPTAEAFRVLKKE  
GPRGMFRGLGATLVTVPLFWGVYFPLYDETKHFLQNSRLPQEHFGIDLVDYHPGVVHCM  
SAIFTGAIADLICNPFVVRTRLQTQALHELTSATSAAAGAGTVRVTGERISMLQMASRLY  
SQNGLPVFWRGMTANLIGLSHCAVQFPAYEFLKGYLRERRKGSNNETLGGQSTSSSENTVT  
ELLLASGMAKMSALLSYPHEVLRSRMVDNRSSASPTLSGTAKQIFRNEGVLGFYNXARG  
DAGESHSQLLRHLFVVRDDIEALEGVFREKSMTRIDDKKRCVSKLKDI AW  
>comp9670\_c0\_seq3; 746 88 1983 LEN=2112; translated  
MPATRQRQSQKESVTPDLVASVTLEKGSNRPTRRSTRRTAVKAEESVVDGTD SAAVKEEE  
PEADEGDENDDQENLENSYFLDGQKFTNYQDYVTAKRKRNQAVIMKLGFGSSGNDANKR  
LKIGREANPATQRGLRSNKKKAANKAPPVRSRKSRSISGDGTKLVALDMYANDWALYNTV  
VTKKGEGGND AESDEDEQETFFKGRVNDGSPLSLKEAIE MNEPKWIHDDSEDNAKRL LQK  
LVSCDDSESASDARRSPTS SVSASWETELETDKVEALSIDKEEWICKVTPDRIYGVATHP  
SESKLICCAGDKQGYVGLWDVDGKSAGDEGGEKENNGIVSLFRVHSRPICCLEWMDNEHM  
VTASYDGSVRRNAQTGTFEEIFATYDESDSTYLEDLGFGLDQGYRYWTQSVATDHR YKD  
ACLFVSTSLGDV FHVDLRKKQKMTFHETVSDKKINSVSLHPNGTTLASSGNDGVVQLFDI  
RKFGDSRNSKSPKPLCTQTAGLSVSSSFFSPSGKSLTTSFANRLDLTEDAHLAKGGKK  
IQPTH SIRHNNQTGRWLTTFQARWHPAADIFCCGMNKPRCMEIFDANGRLRLREVTGEAL



GSVMSRTCFHPSTKQLILVGGNSSGRMVAIR

>comp9670\_c0\_seq4; 761 88 2245 LEN=2245; translated  
MPATTRQRSQKESVTPDLVASVTLEKGSNRPTRRSTRRTAVKAEESVVDGTDSDAAVKEEE  
PEADEGDENDDDQENLENSYFLDGQKFTNYQDYVTAKRKRNQAVIMKLGFGSSGNDANKR  
LKIGREANPATQRGLRSNKKKAANKAPPVRSRKSSRISGDGTKLVALDMYANDWALYNTV  
VTKKGEAGNDAESDEDEQETFFKGRVNDGSPLSLKEAIEMNPKWIHDDSEDNAKRLQK  
LVSCDDSESAKSDARRSPTS SVVSASWETELETDKVEALSIDKEEWICKVTPDRIYGVATHP  
SESKLICCAGDKQGYVGLWDVDGKSAGDEGEKENNGIVSLFRVHSRPICCLEWMDNEHM  
VTASYDGSVRRRLNAQTGTFEEIFATYDESDSTYLEDLGFGLDQGYRYWTQSVATDHRYKD  
ACLFVSTSLGDV FHVDLRKKQKMTFHETVSDKKINSVSLHPNGTTLASSGNDGVVQLFDI  
RKFGRSRSKSPKPLCTQTAGLSVSSSFFSPSGKSLTTSFANRLDLTEDAHLAKGGKK  
IQPTHSIRHNNQTGRSNKGINRSPFSFALHWNSQQSFRPHDNVTLRITTTTTTTGHRSL  
VDNFPKMASSGGHFLLRQHEQTPHGNFRCKWPTLAGSDGRSPWLRHEPNVLSPLDQAT  
NSSRWQLEWSNGSHSVDNFECTRWIATNSYRFCFSWKTSIAKRWPLAGSINKYYDLYTAX

>comp9671\_c0\_seq1; 416 1 1395 LEN=1920; translated  
LLLRTLGRPRTKSVGKKYKMETMTLFSALLLLLLLQSATGVAESSMNTGGEEESQIHLGGPS  
SWVFP LLLSCLAGASTCVGASVVF CFRPSAIRRSMAFSLSMAAAVMITISVVSILPEVAR  
GILVAYKEEQTGASNDYGHNAFGLLLLLERLFWFGVGVGAYLLLARLLVLLPEPEHLYLLE  
DPGDDEDHKNRYDLYLSDDGDKDEEASSGLSPLLVRRRRATGNTKGGTKNVALDRALSS  
DTLSSSNHSSSLKALENTTPYPEVVETGEDLSAFSKERRRRSWRVTLMLFASLLIHNFP  
GLCVAASAKESPELGITVAIGIFIHNVPEGIAISVPCIAARPDQPWLAFWLASASGLAEP  
LGAVVALSMLGASSDPPDLENVLSFVAGVMITVALRELYPEALKAAEEASKHSQQHSTRD  
STREALLFRSPRLSRFMLQPQNRSIVWGSVMGTALMVATELYLT

>comp9671\_c0\_seq3; 302 1 849 LEN=2066; translated  
LLLRTLGRPRTKSVGKKYKMETMTLFSALLLLLLLQSATGVAESSMNTGGEEESQIHLGGPS  
SWVFP LLLSCLAGASTCVGASVVF CFRPSAIRRSMAFSLSMAAAVMITISVVSILPEVAR  
GILVAYKEEQTGASNDYGHNAFGLLLLLERLFWFGVGVGAYLLLARLLVLLPEPEHLYLLE  
DPGDDEDHKNRYDLYLSDDGDKDEEASSGLSPLLVRRRRATGNTKGGTKNVALDRALSS  
DTLSSSNHSSSLKALENTTPYPEVVETGEDLSAFSKERRRRSW

>comp9671\_c0\_seq4; 302 1 849 LEN=1266; translated  
LLLRTLGRPRTKSVGKKYKMETMTLFSALLLLLLLQSATGVAESSMNTGGEEESQIHLGGPS  
SWVFP LLLSCLAGASTCVGASVVF CFRPSAIRRSMAFSLSMAAAVMITISVVSILPEVAR  
GILVAYKEEQTGASNDYGHNAFGLLLLLERLFWFGVGVGAYLLLARLLVLLPEPEHLYLLE  
DPGDDEDHKNRYDLYLSDDGDKDEEASSGLSPLLVRRRRATGNTKGGTKNVALDRALSS  
DTLSSSNHSSSLKALENTTPYPEVVETGEDLSAFSKERRRRSW

>comp9672\_c0\_seq1; 292 92 1398 LEN=2042; translated  
MAIALLIAFFSFVPRGSI SNNGSAAQRGPAREFVLSIVSLMVSVLLLGETRDTALALSSP  
SPMGSLDALVSRIQTAQCALQVSVGRIPGTAMPKEWAASGAKLGFLLLEVEFCDEPCADFE  
MTKERLLGLPSAPGTASPSTRPPSGSFKAVEPLNDPTFVTAEGQOTIQVTEGAYGCDLQ  
NFQSQYGLRFFLDLDFPEGAKRNDVELPAERIYFISSCWIKDEVALERARNRHKELMRRLG  
ELRENLSLSSDQOGILGKVMGLRQMTLCVEQIKALEDQLAELEQTYPLQEPEMITSDSP  
QRRREFLEGPKGLLFAKDGVI AVKRYRGAMETREQYHWVGTFSFEFFEDLDGDVXVGGRE  
FKVTTMTFGEERKAESVGVSPANHAKNIRATQPPFVDATMFYRSRQLNLTVEEMDKSI  
LECKKENVTYEIFNM

>comp9673\_c0\_seq1; 287 86 751 LEN=898; translated  
MMLRFLASLALWSNILPFEHVTAFSPLATKGHQKRASIVNGLQMASTASSADTLTVTP  
KSLDGTVTPLPGSKSLSNRCLLLAALSEGETRVDNLLSDDIRYMLEALD TLKVPVEKHSS  
ESVTVSGQAGPINSPIQENIDLFLGNAGTAMRPLAAALCMGQK FVLDGVPRMRERP  
DLIDGLQQLGAEVTCVEETGCPPVTINA EGLKGGEVRFASR

>comp9673\_c0\_seq2; 590 86 1558 LEN=1640; translated  
MMLRFLASLALWSNILPFEHVTAFSPLATKGHQKRASIVNGLQMASTASSADTLTVTP  
KSLDGTVTPLPGSKSLSNRCLLLAALSEGETRVDNLLSDDIRYMLEALD TLKVPVEKHSS  
ESVTVSGQAGPINSPIQENIDLFLGNAGTAMRPLAAALCMGQK FVLDGVPRMRERP  
DLIDGLQQLGAEVTCVEETGCPPVTINA EGLKGGEASISGKMSSQFLSSLLMASPVVDGD  
VVIKIKDELISAPYVALTIGLMKKFGVNVEIEGSMDERPTFKIAKSEKYISPESILVEGD  
ASSASYFIAGAAITGGTVTVRGCSESVQGDVAFADVMEKMGATVTWGPESITVTRDPSV  
QLKGVVDVDCGKIPDAAMTLAVAALFAEGPTTIRNVYSWRLEKETERMKAIVAECTKLGA  
VEEFEDYCI IHPPEGNKINDNVL IETYDDHRMAMTFLAACGGVDVI INDPGCTAKTFPTY  
FDMLESIATH

>comp9674\_c0\_seq1; 727 158 2634 LEN=2717; translated

MSRNSSQNVILTTAVSLTLVALGTFWYRRQGTDDSDAGANPDPEREGRKQERQGQHPRVV  
RRTQRNAAAIEYDDNEEKNEERGRPADGIDATASGGAAPQRASFDAPVLEIQTRPIDTI  
PEDEKEEGKGNRRVRLAPNTITIAHGSVTGTCSKLATDLLACLREKNLDHRTIQMGSLE  
EWDWWDELNSEEEDENAACKSKKNXGGTEPTGAPGALADAPRGFVASHRDVSGIGPPGP  
EKRLLEDKTPPQEQATGRRRHGHGMFGLGDDTMGKPAKEAFIGFRTLGAQVFGKQVRVGGD  
ATGNQDRVLQAWIYHDILPKLIVDDEEDEAEEDERNEEPEVTDMEDLGTIMESSENDNEGE  
VKSSEPREMVTSTQAKSLKKEGYKLIGTHSAVKLCRWTKHQLRGRGGCYKHTFYGITSYQ  
CMEATPSLACANKCVFCWRHHKNPVGKEWRWKTDDPNFIVDEAVKTHVKMIKETRGIPGV  
NVQRWQEAHTVRHCALSLVGEPVMPYPRINELLEDLHNREISTFLVTNGQHPKAIESLIPI  
TQLYVSDAPTPESLIEIDRPLFSDAWERLQEALTLKHKGQRTVARLTVVKGWNSDEVE  
GYAKLIALGKVSLEVKGVTFCGKSDASNLNMSNTPWHHEVVDLVKNLKVLDKLRLEGO  
DVPEYDLACEHKHSVSVLLARVDQFAETAADGRRMWTWINYPKFHELARKKHEDPTFTY  
AVEDYTAETPAWALFGSEEEGFDPVELRHRRKKKPKYRQFDERGVPTHTDDNNEKLSDEE  
YLRLNSMMDEKIKQIGCGSTVTALKGGEKMIQDASLMFRGLVIVK

>comp9675\_c0\_seq1; 386 25 1302 LEN=1399; translated  
MLRPSVFELYALAIFFVSSSSCQSASPFRQKNILSGGNWKNILPKPRTGSAKNILRVTEN  
SVNTVEKQTDATNSSLSSSSFFAWEASIDGPTGVASSNERSGPFSLTTEKFPRWLSRKRK  
TPTKLVLSLQEEQERIHQVVKEEEDQVVEMSREFVETWSEFLCRVPIISLGILRCEKEIGG  
KYKKRFGLPKIRLRRKNMKSPPSSNEACNADSMVSSSSLMARFVFPVKLLLEFGKVVES  
SSPSISSVQMSQKKHNEYDDNNLVVLSGWDIPLKGGTLILQDDVETASDQSTTSSNPDYL  
GKLTFTIAKTKQMEGEVHEDGGDDASPQNSYKIMTGIVDYRPWLAGGGYTSVVEKTDH  
EIWDAKANREATTRKLCHAFYLSQSMVHAYVTWRFHNAWRQKLANVRTTRSRTVENM  
EPRSK

>comp9676\_c0\_seq1; 492 336 1811 LEN=1934; translated  
MYEKGNLPELAVEDCNKILEVYDITHTKARQRKCRILENKMSNYQALVECCALQLQYM  
QHRDQLRMGLPPSAPPPVQQEKLEELVQKLIPEHLDAYDKKILKRMKENPQLPSDYTLSQ  
LLKSYTGFNAWMAKAAKDGEASEMKKKVEELQAKSMTDAAAIGDIASLWLKIGRRHIFDG  
NYALAREAILTGYALVEDDEMIQNVMEGDDFVRLLEWTGMVKHWAYELDGAVTCYRKCAE  
LEPINAEMVVKQAGVLMDATKHEEAELELFDKALAIIDPAVDALLHRANLRMIQADLDSAK  
KDLERCIELRPDYVMARLRLAAVLTSTNDAAGANKQLEAAAKVAPESSDVLSYKGELEFT  
QNDLPGAKEQFEKAMRLEPKNPTPYVNTALAVLNIPPEPGKQLEIANEAETLLEKAI  
EVDQFQAAYVQLGQLKGMATDLNTAREVVELYEKGLNTRCTKEEMKDLGMKLLTQAQVDG  
ATAMKMETFSQ

>comp9676\_c0\_seq2; 523 1 2229 LEN=2352; translated  
ARQRTGNKLSFLAHSCHTAIRSIGQRKHQRTNESAMPSSRSNKTTQLLVASLVAAATI  
SLAIYFASTPATAESKKDDKTSDDGEEKSTNPTTPSANSTSRGSSGEKAAGDDTPKRSN  
VTDEKELHSHKIEELDRKGGALFKNKQYLQAASTFSEALDYIETHTDSTTQSSLNKQIVT  
LINNRSAMYEKGNLPELAVEDCNKILEVYDITHTKARQRKCRILENKMSNYQALVECCA  
LQLQYMQHRDQLRMGLPPSAPPPVQQEKLEELVQKLIPEHLDAYDKKILKRMKENPQLP  
SDYTLSQLLKSYPGFNAWMAKAAKDGEASEMKKKVEELQAKSMTDAAAIGDIASLWLKIG  
RRHIFDGNALAREAILTGYALVEDDEMIQNVMEGDDFVRLLEWTGMVKHWAYELDGAVT  
CYRKCAELEPINVRCMARFMNVLYISHGINAWNERRASCLWHNLKNQTKCDHSIXTIFCR  
IHIQLFLSHPINPATKAEMVVKQAGVLMDATKHEEAELELFDKALAIIDPAVDALLHRANL  
RMIQADLDSAKKDLERCIELRPDYVMARLRLAAVLTSTNDAAGANKQLEAAAKVAPESD  
VLSYKGELEFTQNDLPGAKEQFEKAMRLEPKNPTPYVNTALAVLNIPPEPGKQLEIANEA  
ETLLEKAI EVDQFQAAYVQLGQLKGMATDLNTAREVVELYEKGLNTRCTKEEMKDLGM  
MKLLTQAQVDGATAMKMETFSQ

>comp9676\_c0\_seq3; 429 336 2003 LEN=2126; translated  
MYEKGNLPELAVEDCNKILEVYDITHTKARQRKCRILENKMSNYQALVECCALQLQYM  
QHRDQLRMGLPPSAPPPVQQEKLEELVQKLIPEHLDAYDKKILKRMKENPQLPSDYTLSQ  
LLKSYTGFNAWMAKAAKDGEASEMKKKVEELQAKSMTDAAAIGDIASLWLKIGRRHIFDG  
NYALAREAILTGYALVEDDEMIQNVMEGDDFVRLLEWTGMVKHWAYELDGAVTCYRKCAE  
LEPINVRCMARFMNVLYISHGINAWNERRASCLWHNLKNQTKCDHSIXTIFCRIHIQLFL  
SHPINPATKAEMVVKQAGVLMDATKHEEAELELFDKALAIIDPAVDALLHRANLRMIQADL  
DSAKKDLERCIELRPDYVMARLRLAAVLTSTNDAAGANKQLEAAAKVAPESSDVLSYKGE  
LLEFTQNDLPGAKEQFEKAMRLEPKNPTPYVNTALAVLNIPPEPGKQLEIANEAETLLEKAI  
EVDQFQAAYVQLGQLKGMATDLNTAREVVELYEKGLNTRCTKEEMKDLGMKLLTQAQ  
QVDGATAMKMETFSQ

>comp9676\_c0\_seq4; 815 115 2037 LEN=2160; translated  
MPSRSNKTTQLLVASLVAAATISLAIYFASTPATAESKKDDKTSDDGEEKSTNPTTPSA

NSTSRGSSGEKAAGDDTPKRSNVTDEKELHSKIEELDRKGKALFKNKQYLQAASTFSEAL  
DYIETHTDSTTQGSSSLNKQIVTLINNRSAMYEKGNLPELAVEDCNKILEVYDITHTKARQ  
RKCRILENKMSNYQALVECCALQLQYMQQHRDQLRMGLPPSAPPPVQOEKLEELVQKLI  
PEHLDAYDKKILKRMKENPQLPSDYTLSQLLKSYPGFNAWMAKAAKDGEASEMKKKVEEL  
QAKSMTDAAAIGDIASLWLKIGRRHIFDGNALAREAILTGYALVEDDEMIQNVMEGDDF  
VRLLEWTGMVKHWAYELDGAVTCYRKCAELEPINAEMVKQAGVLMDATKHEEALVFDK  
ALAIIDPDAVDALLHRANLRMIQADLDSAKKDLERCIELRPDYVMARLRLAAVLTSTNDAA  
GANKQLEAAAKVAPESDVL SYKGELLFTQNDLPGAKEQFEKAMRLEPKNPTPYVNTALA  
VLNIPPEPGKQLEIANEACTLLEKAI EVDPPQFAAYVQLGQLKLGMATDLNTAREVVELY  
EKGLNTRCTKEEMKDLGMKLLTQAQVDGATAMKMETFSQ  
>comp9677\_c0\_seq1; 315 265 1541 LEN=2760; translated  
MIQTAVDGPCSADSIQNLPIPDVSLHGNYKPNKNGDTIVLGI EGSANKVGVGVLYKSPSK  
PNQNNKSSSTENVDEEPATYHILSNPRKTYISPIGQGF LPKQTAKHHQNHIVALVRAAL  
TEAFPDEQNPELLISASSEVTINYRVSLLDVRYCRRDHLTLNYIITAVCF TKGPGMGGPL  
QSCAICARTLSLLWNVPLVGVNHCVGHIEMRLATGAPNPVVLVYVSGGNTQIIAYSNQRY  
RIFGETIDIAIGNCLDRFARVIELSNDPSPGYNIEQEAKKGTKYIPLPYVVKGMDVFSFG  
ILTKVEELAKTERKEDLFCFSLQETL FAMLVETTERAMAHTGQTQVLIVGGVGCNKRLQEM  
MRQMV EERGGVVSAMDHRYCIDNGAMIAQAGIFALQFGITTPMEESWCTQRYRTDQMKAI  
WRAP  
>comp9677\_c0\_seq2; 434 265 1446 LEN=2665; translated  
MIQTAVDGPCSADSIQNLPIPDVSLHGNYKPNKNGDTIVLGI EGSANKVGVGVLYKSPSK  
PNQNNKSSSTENVDEEPATYHILSNPRKTYISPIGQGF LPKQTAKHHQNHIVALVRAAL  
TEAFPDEQNPELLISAI CFTKGP MGGPLQSCAICARTLSLLWNVPLVGVNHCVGHIEM  
RLATGAPNPVVLVYVSGGNTQIIAYSNQRYRIFGETIDIAIGNCLDRFARVIELSNDPSPG  
YNI EQEAKKGTKYIPLPYVVKGMDVFSFGILTKVEELAKTERKEDLFCFSLQETL FAMLV  
ETTERAMAHTGQTQVLIVGGVGCNKRLQEMMRQMV EERGGVVSAMDHRYCIDNGAMIAQAG  
IFALQFGITTPMEESWCTQRYRTDQMKAIWRAP  
>comp9678\_c0\_seq1; 355 162 974 LEN=1101; translated  
MTPTTAAPSKPVAAGR LRSFCLLLALLLSAAGVRASAPVPDEAPLAGAATDANAKSATA  
RFVHKTI IIPHDDKKFRGGEDAAS TVDDLLVADGVGGWANRGNVNPGLYSRRLTELITTR  
FSALSPDEKAGVNMRRLLHAANHEAASEHLGSATCTVVRLLDAETLQTLNVGDSTYSIHR  
RKTGSSGLEVVYAAEPGQKGFNFYQLGGDYGDQVDDPGACDGPRTHALEDKDVIVVSD  
GVNDNMDPGDLPSMEDLLEAMGEPAL EAL  
>comp9678\_c0\_seq2; 444 162 1322 LEN=1449; translated  
MTPTTAAPSKPVAAGR LRSFCLLLALLLSAAGVRASAPVPDEAPLAGAATDANAKSATA  
RFVHKTI IIPHDDKKFRGGEDAAS TVDDLLVADGVGGWANRGNVNPGLYSRRLTELITTR  
FSALSPDEKAGVNMRRLLHAANHEAASEHLGSATCTVVRLLDAETLQTLNVGDSTYSIHR  
RKTGSSGLEVVYAAEPGQKGFNFYQLGGDYGDQVDDPGACDGPRTHALEDKDVIVVSD  
GVNDNMDPEEYHACIEAYQWKGE SSKGKPSDLGLELDLVLSFSAVADCIARKAYALGKDR  
NHYS PFARSAATY GKRYRGGKHDDITVTV AQVEPVGRTPPSQKDPHRSESI FLYRDEDGP  
VGAPGDLPSMEDLLEAMGEPAL EAL  
>comp9679\_c0\_seq1; 835 298 3060 LEN=3200; translated  
MASEEVNDGEGLNYLEEMRLAKMVRNLRNGNRSLLMNMNHERSLPDLFAETRGNSSPAIH  
SYRDRRATIASFASCGHAPRNSNRAS FANSTGDPHNQNP TNNNVNRRTSFDPNLP  
SSRSLHRRGPVKDHSGNDS DSGSCNSDVPQPF RKS NRLSAMSDNRSSMMSNASAWKSMSR  
FLNGASESSIDIETGLSPPDNQD GHRHSTVQPFYTKPVQRQLWGHPNLVVHIGWNTLFFD  
LFYVAAA YNLGNLLI SALNH PGNWLRGVVY CAGIFGGIYNI FLRCMMYDSQFEVYDYAHR  
LLEVVRMFLVSI VVLHIKS IDLLMDPRSAEAFALTTAMFMETQVHVLLNLELFCYGRGDT  
VAIKSQSKRELT TSLPSSLVYMAASIVSGVLYFCDD ESDASVYYR DGDTTAFAPVSVDE  
GHRILGAAESTTGS GGHDMLKWTIADVP IALCFVAVVAVAVQGIQAIRLLSPKNPE  
IRSEIVPMNIDFFVHRFGFTMLFFGEAVMGLLIVETTES SYMVAMVGVNLNIVLQAF  
KFESEPHGQGEHCLWRGMKPFVYSLLTQTLCLGLIAFAVSFKVGLNVLV VSEQSTGDG  
YGH DGTSGSGYGDGYDAYGYAGGGD PHRVLAASPPRVSQDVVSILYCSSLTIILVAI  
ELMAYSHKGFVSTYSLFVSTSLRGETRLVRWKRLAGTLFKIGLVGILSTLFLWVEREGLV  
AAF GFVSVVFASSRVAEEVWDIKAEDLKRAMRESLANVFGSSGRAEKWFGSSKSSDGG  
WRRARLARKKQRNATARTDCTTLD SGKTPSRLESENDSEREENKNEEEGCVQATASKGR  
GKRSPSLSSSPSTQSETEMPSPSDSESDGETESGCQAVARERRPASEEHGSPSLIDELK  
QGM E AIDTELASIIRSFDDP  
>comp9681\_c0\_seq1; 796 1 1975 LEN=2046; translated  
XFGIIGLLDIFGFESFVKNRYEQLCINYCNEKLQSKFTEDIFRSVQEEYEREGIPLDEIT

YDDNSDVLKLIESKTGLLAMLNEECVVRPKGSDQAFVQKAIAGNKNSACLIVDKMNRRTGFG  
IHYYAGKVMYDALGFVESNQDTLPVDLAEAAANLSSNEILAKHMTNDSCTNFQSKSSEPVR  
AAPKRAKSSVTGSTIWTKYKAQLSSLMTKLKETNSRYIRCIKPNKPKPVLMHVGTIEQ  
LRCAGVVAAVTLRSAPFNQMANDAIRFKFWQLWDRGTHPSKATDDMSPQEKLKVDCEQI  
LGSALAPLKEINPKTGKPIITIFVTGKTKSYFKMGVLEYLESQRAGGLEEHSILLQKIARG  
FVTRLRLRGSQKARQNAIFIIQRFARAMNAKREALKEVEIMKANQKKWEEKRRKAAEKA  
WLENIERKNKEAEKSAKKEYSKYEDRIEELKVQLKEAQERFEETKAELVERTEGAKSEEE  
EFRTKLEDEILTKGVAPAMEAAAQKSKLEESKMKMIGFLQKENKCLKSSNDKAKKEYKKVK  
ETNDRLVEQNESAGKSFDDLKNNSSKAASGTDEVMKNIDKFKAAANEKLRDDLRRMQQFYN  
AEAQIRLQYQKTLAQIIDVFQDNCKDADLVEDVVVLTLEAESESKALLAAAEAAAPGI  
>comp9682\_c0\_seq1; 376 300 1505 LEN=1532; translated  
MSSRNTKPKSGNTTIKPD DAGSMACLKDVPIKRRLDSMKTASRLPLTPDILKIHLRIKEE  
QVMLAKKKELERNDIAIVNMMNAPASALHSLLEKERNDLSRDL SKLSPSNTPYRATAIPV  
AGQKRALEMTRTSPSSDLLTALHKKNKIANFTRGVSQRRDSGITSFLRGPKEKRLSSQNA  
LELLRDVGMIDL SHSEHSLKEAIGSRLRSASRDSPHSSHPLSGVSTQLPVPHDIDSIRL  
SNLIHSSPAPCNHPEASNLLRMLSKLEEEEEKNQLIATHLNQCNI VATNPNIYGMDIVDN  
RVKKILSTLQNPLETSTALKNGALFNLQDKLRLKQIEQQFLNRLEREREDKALRLAIAE  
RRQRSALLLQQQEAAAILT DQKRQQT LNALLALRSQRAPLL  
>comp9682\_c0\_seq2; 464 114 1646 LEN=1673; translated  
MTETNSSSLAFLPLSQTKKFPFKLHDM LQYAERNGMNNIVGWTPGGKSFVREHEIFCKK  
ILKSTFNHSSYKSF EKQLKNWSFDCEHTGNGKVYSNPNFARGRKSLCIKMSSRNTKPKSG  
NTTIKPD DAGSMACLKDVPIKRRLDSMKTASRLPLTPDILKIHLRIKEEQVMLAKKKELE  
RNDIAIVNMMNAPASALHSLLEKERNDLSRDL SKLSPSNTPYRATAIPVAGQKRALEMTR  
TSPSSDLLTALHKKNKIANFTRGVSQRRDSGITSFLRGPKEKRLSSQNALELLRDVGMID  
LSHSEHSLKEAIGSRLRSASRDSPHSSHPLSGVSTQLPVPHDIDSIRLSNLIHSSPAPC  
NHPEASNLLRMLSKLEEEEEKNQLIATHLNQCNI VATNPNIYGMDIVDNRVKKILSTLQNP  
LETSTALKNGALFNLQDKLRLKQIEQQFLNRLEREREDKALRLAIAEERRQRSALLLQQ  
QEAAAILT DQKRQQT LNALLALRSQRAPLL  
>comp9682\_c0\_seq3; 376 563 1768 LEN=1795; translated  
MSSRNTKPKSGNTTIKPD DAGSMACLKDVPIKRRLDSMKTASRLPLTPDILKIHLRIKEE  
QVMLAKKKELERNDIAIVNMMNAPASALHSLLEKERNDLSRDL SKLSPSNTPYRATAIPV  
AGQKRALEMTRTSPSSDLLTALHKKNKIANFTRGVSQRRDSGITSFLRGPKEKRLSSQNA  
LELLRDVGMIDL SHSEHSLKEAIGSRLRSASRDSPHSSHPLSGVSTQLPVPHDIDSIRL  
SNLIHSSPAPCNHPEASNLLRMLSKLEEEEEKNQLIATHLNQCNI VATNPNIYGMDIVDN  
RVKKILSTLQNPLETSTALKNGALFNLQDKLRLKQIEQQFLNRLEREREDKALRLAIAE  
RRQRSALLLQQQEAAAILT DQKRQQT LNALLALRSQRAPLL  
>comp9683\_c0\_seq1; 230 67 375 LEN=505; translated  
MLNDLGEVSHCCAGYSIVGAI FT LWVGIMLT TQPFFVAGIEDVEVAAQSAYGAFSFMFMFV  
FVISAIGMWYDSNFGKSSSEDEREADYQLAGGQEFPNYGASN  
>comp9684\_c0\_seq1; 317 408 1106 LEN=1237; translated  
MTSSYREILSLLALFCLQSIT IAGAE CACEVQERP DVASKALTARWMVHSLDWGVVSTIS  
TRLGGDAGEG SQVPVFGNIYSFVDGPCDKAPGV PLYGT YMDQSFADAKGNMISLTLSE  
SSLSSVCPNAAVDSCMLGTYGDPE SPMCARLTLTGKFVALEDGSEEHDFAKQAFFERHP  
SMKSWPDGHGWVIAKIDIQDIWLIDYFGGATVVDPEEYFAGNLAEGYEVIKF  
>comp9684\_c0\_seq2; 317 310 1008 LEN=1139; translated  
MTSSYREILSLLALFCLQSIT IAGAE CACEVQERP DVASKALTARWMVHSLDWGVVSTIS  
TRLGGDAGEG SQVPVFGNIYSFVDGPCDKAPGV PLYGT YMDQSFADAKGNMISLTLSE  
SSLSSVCPNAAVDSCMLGTYGDPE SPMCARLTLTGKFVALEDGSEEHDFAKQAFFERHP  
SMKSWPDGHGWVIAKIDIQDIWLIDYFGGATVVDPEEYFAGNLAEGYEVIKF  
>comp9685\_c0\_seq1; 302 401 814 LEN=1364; translated  
MFMSENDLVMFGAGVAVGLASLTVAVVIAIICIRLKDID DYLHDEERTVSSSDHDLSDV  
KAKERSGTVGAAGVAIVVPSTVAVEAGSDDDDNEENNDDADRDSEGKCNERTDRNSRSL  
GTAGADRGEENRASEAV  
>comp9685\_c0\_seq2; 302 401 814 LEN=1389; translated  
MFMSENDLVMFGAGVAVGLASLTVAVVIAIICIRLKDID DYLHDEERTVSSSDHDLSDV  
KAKERSGTVGAAGVAIVVPSTVAVEAGSDDDDNEENNDDADRDSEGKCNERTDRNSRSL  
GTAGADRGEENRASEAV  
>comp9686\_c0\_seq1; 751 1 2498 LEN=2515; translated  
LGNAMSPMGSLVHGASLRSFANRDAML DNPMQQASRLMRNSLNQNTCNNDVLSRSMHS  
DRSGMVRVTS PSSLGNPNLLNHNSMHSRQGLMGDTQSSQRSIRSKNGFLHGLIHCDPK



SVQKACPNDTMLREVLRIRANDSVASIESINTFPRQWTASVPQEFRRVNSRNEHFRKQSK  
FFRANKQRRKKNHGKKNRLVRLPEQHNDYR  
>comp9694\_c0\_seq1; 260 120 1433 LEN=1520; translated  
MTTVMVSLSWVLLFVLFVSVGYNEATALVRPDYGKQVSSVNPENRRGFLAKVASTTAAIA  
TANGVATESVACAVPSGIAAASSQVIADAGLVGASKPGLTLPPIGLGCWAWGDSLFWGYN  
PSQDKDLKEVFKYVMTQTSSPNDTSSKLPSSVLLDTAEVYGLGRSETLIGEFKDLSEAD  
QEKVVVATKFAAVPFRTKPEENVVKAALGSLKRLDRPIDLYQIHFPNAFANDKYWDGLADA  
YEQGLVKNVGVSNYGVVDALRACHKALAKRGVPLTSNQIQYSLLYRFPEQNGLLKACNDLD  
VKVLSYSPLALGLLAGKYRSVDDLKSIKGRPKLFAFADTVDKPEFQKLLLTMETVASNHSG  
ANLAQVAINWCRSKGTIPIPGARNLRQIQSNYAALSWDLSAEIALLDDAATLAYIDPKV  
SPFFRQDKDTGLIMFDS  
>comp9695\_c0\_seq1; 938 142 2959 LEN=2959; translated  
MAPFRPIPASALLVLALAIRHTGTRRISADAFAPKHLHGRADGCISSNRHSHPVPSLSAH  
RCGTEPSTKSANPDGNATPSSIRRQMLRAMLAASAGSTLGAPPATAAAPALEAAPSPPA  
GFPDWSGIKVVVPPSDDRDYRVKVLNGLRVVLCSDPSSNEAGAAMDVHVHGACSDPLEIP  
GLAHFNEHMLFLGTKEYPNENSFEFFLSANGGSSNAYTASENTCYFFTLQAEVDQTLTEG  
LKRFGSFFTSPLFTAATGRELNAI ESENKLNQTDSEFRVYQINKERQNRDHPHSHKFFTG  
NKKTLDDTTKKGIDLRQSLIEFYETHYSADQMTLAVVGPQSLDALGRMAEEAFSGIPNR  
NAGAPEKEWGMVPPYDPSNSVIPSGFNVVKIVPVQDLRQLSISWPITYRDEQERQDALL  
TKQGQYVGHILGHEGPGSLLSYLKGGKGVNSLSAGGGEELSDFETFDVTATLTKSGLEKV  
DQVIESIYSTIGMVRNRAVPSYIFNEVLQLEELGWRFSKGPVGNVQSLSTSLQDYPPS  
LCVAGPRLALRTQDASSTKLLASNAARVSFGSEAELDVTKKLASDFVDNLAVDNAMYTI  
ISKSYKGQTNQKEKWTYDTRVDPVALSTTLQWKNPTSDVGLGITFPRKNVFIPEKGLK  
VRLPPKANAAPRTFEDRMEPVPPTVIRDDGPNRWTVYYKPPDRFGQPKAFVIFELL  
TKEVYSSAKAAALSSMYEVCVSDHLEAYYDAGLAGLTYDVRVIRPGVRLTFGGYNDKLE  
DFAKYVSKQITADMKNILPKDEAEFDYKDLQIRSFEGFNANSPMHTVLYTTLLMKPSG  
FEYDNQELLAATDELTLSDLKSYVSSVWSSGKGLALVQGNLDEKQAQALVSSIDKTLGFK  
PISVEEYPPPELAPLPLPESFSSTKGRTRLVISGKPWVELNS  
>comp9695\_c0\_seq2; 1227 142 3611 LEN=3845; translated  
MAPFRPIPASALLVLALAIRHTGTRRISADAFAPKHLHGRADGCISSNRHSHPVPSLSAH  
RCGTEPSTKSANPDGNATPSSIRRQMLRAMLAASAGSTLGAPPATAAAPALEAAPSPPA  
GFPDWSGIKVVVPPSDDRDYRVKVLNGLRVVLCSDPSSNEAGAAMDVHVHGACSDPLEIP  
GLAHFNEHMLFLGTKEYPNENSFEFFLSANGGSSNAYTASENTCYFFTLQAEVDQTLTEG  
LKRFGSFFTSPLFTAATGRELNAI ESENKLNQTDSEFRVYQINKERQNRDHPHSHKFFTG  
NKKTLDDTTKKGIDLRQSLIEFYETHYSADQMTLAVVGPQSLDALGRMAEEAFSGIPNR  
NAGAPEKEWGMVPPYDPSNSVIPSGFNVVKIVPVQDLRQLSISWPITYRDEQERQDALL  
TKQGQYVGHILGHEGPGSLLSYLKGGKGVNSLSAGGGEELSDFETFDVTATLTKSGLEKV  
DQVIESIYSTIGMVRNRAVPSYIFNEVLQLEELGWRFSKGPVGNVQSLSTSLQDYPPS  
LCVAGPRLALRTQDASSTKLLASNAARVSFGSEAELDVTKKLASDFVDNLAVDNAMYTI  
ISKSYKGQTNQKEKWTYDTRVDPVALSTTLQWKNPTSDVGLGITFPRKNVFIPEKGLK  
VRLPPKANAAPRTFEDRMEPVPPTVIRDDGPNRWTVYYKPPDRFGQPKAFVIFELL  
TKEVYSSAKAAALSSMYEVCVSDHLEAYYDAGLAGLTYDVRVIRPGVRLTFGGYNDKLE  
DFAKYVSKQITADMKNILPKDEAEFDYKDLQIRSFEGFNANSPMHTVLYTTLLMKPSG  
FEYDNQELLAATDELTLSDLKSYVSSVWSSGKGLALVQGNLDEKQAQALVSSIDKTLGFK  
PISVEEYPPPELAPLPLPESFSSTKGRTRLVISEPNAENGNAASYVSIQGLSETPKHEVLME  
LVGAI VGERFYDELTRQQLGYIVSSGVRALGKTKSLGFIVQSSAKNEKLTNEILKYLD  
NIRPAYLDKLNEDFAVYVKSILDRKTEPDKQLATETTRNWAEISSGRMQFDRPQKEVAA  
LLDLTKDDLLEFWDVRYVNDGRRVLITEMVPQVGPASAVAKPPVSTGYTASKDTKTGVVVG  
VGDIASYRSDRSKLLS  
>comp9696\_c0\_seq1; 663 194 1963 LEN=2246; translated  
MKNILIFGSLLLANMVGSESAGAAPGSRKFNPIENMFKPLARAQSESENDATKTDKNFQ  
IPHGPDNPAPTPEEREVERLARRERNRQRAKVANAMKKVRPETSINLEKLSPEEINKISQ  
DHPNEFRKLWGGSGTSSGNMVEYANPGDDYDMWQQAYRMLGGFIDCDHQKSEGSGDGGGG  
SGDGDQACSRWMMWASVDPNYQGYGYDEYFGDEPVGVLDCCHKPDTEWVLLGVYRQEFY  
QFIEQISKHLWAIDEYEVVALAGLAYMTDYDCFYVGNDSGNVLYAGVAPQPLGGYQMG  
LYTDAQCLILDESSGMTYDDFGNQDIDLGSKDATDDDSYSWAYDWWYDTQEYTLTQLNE  
VYEQMYCTSCIDYPTYQDGYVIGDDGMDDDDLINQCWKFYSHDSFTCEADCIALGHAQG  
TILSITVGNKMYGEPLESFYSSVEVESASGGTMAKESKLTRMLANVFVTFVVFVATFL  
AFAVARRSRYRESRSKSRRLDDDRGTNGRSRRSSSRRTSSRRKDEDGLFRSSKDDKSR  
KARSKSSSRKSSSRKPPSRNDYDNP RRSSRSRKRSSSRARQHDEY

>comp9696\_c0\_seq2; 272 194 802 LEN=953; translated  
MKNILIFGSLLLANMVGSESAGAAPGSRSKFNPIENMFKPLARAQSESENDATKTDKNFQ  
IPHGPDNPAPTPEEREVERLARRERNRQRRKAVANAMKKVRPETSINLEKLSPEEINKISQ  
DHPNEFRKLWGGSGTSSGNMVEYANPGDDYDMWQQAYRMLGGFIDCDHQKSESGDGGGG  
SGDGGDDQACSRWMMWASVSADR

>comp9697\_c0\_seq1; 344 1 1102 LEN=2096; translated  
XIIINIDFNHLTLKPYSYKMRLIESIGFQLLSVVLRCGFPLAIDAFVLITPPSSVADPRS  
NGGCIRKDRRSEHRNVVKATIENS DGSFETPPPRWNCPIHEDVCSESGVTLSRYMKEMVR  
ANPDLEEIESIFTSLQVACKTSLNLVKTS AISGLTGLEDGGGS INVQGEEQKKLDVIAND  
ILKRALRWSGELATIASEEDKPVNVMGDAIFSGDILVENSGRYVAVFDPLDGSSNVDAG  
IPVGTIFGIFDSAEC SIEDIDLTDGIDKAEKCLQDTLQPGSNLVAAGYCLYSSATS FVF  
TLGSGVYGF TLD ESIGEFVLTHADMKIPTRGKIYSFN EANRWDWDAPLQKYVTDIQKGLV  
SSTIHSS

>comp9697\_c0\_seq2; 441 1 1733 LEN=2020; translated  
XIIINIDFNHLTLKPYSYKMRLIESIGFQLLSVVLRCGFPLAIDAFVLITPPSSVADPRS  
NGGCIRKDRRSEHRNVVKATIENS DGSFETPPPRWNCPIHEDVCSESGVTLSRYMKEMVR  
ANPDLEEIESIFTSLQVACKTSLNLVKTS AISGLTGLEDGGGS INVQGEEQKKLDVIAND  
ILKRALRWSGELATIASEEDKPVNVMGDAIFSGDILVENSGRYVAVFDPLDGSSNVDAG  
IPVGTIFGIFDSAEC SIEDIDLTDGIDKAEKCLQDTLQPGSNLVAAGYCLYSSATS FVF  
TLGSGVYGF TLD ESIGEFVLTHADMKIPTRGKIYSFN EANRWDWDAPLQKYVTDIQKGLV  
KFNYSQLIEEKSSAHHHCLALLALVEEPRNTSLHTVARSKFLPQTIYHRTIAAFGALTF  
WVTGGHEMSLR YRYIGSMVGDVHRTLQYGGIFGYPADVKNP DGKLRLLYEAPMAFLLEQ  
AGGLALTGKNRIMDIPPTSVHQRVPCILGSREDVLEMRRYYVESNDPELINRCKARLQGA  
RALEENEVEGSSFLGIHNEDKDTNAEEATSGEFGAAQ

>comp9697\_c0\_seq3; 424 157 1564 LEN=1851; translated  
MYLLEKLFVSPQPLLLCQFPQVFTSLQVACKTSLNLVKTS AISGLTGLEDGGGS INVQGE  
EQKKLDVIANDILKRALRWSGELATIASEEDKPVNVMGDAIFSGDILVENSGRYVAVFD  
PLDGSSNVDAGIPVGTIFGIFDSAEC SIEDIDLTDGIDKAEKCLQDTLQPGSNLVAAGY  
CLYSSATS FVF TLD ESIGEFVLTHADMKIPTRGKIYSFN EANRWDWDAPLQ  
KYVTDIQKGLVKFNYSQ LIEEKSSAHHHCLALLALVEEPRNTSLHTVARSKFLPQTIYH  
RTIAAFGALTFWVTGGHEMSLR YRYIGSMVGDVHRTLQYGGIFGYPADVKNP DGKLRLLY  
EAAPMAFLLEQAGGLALTGKNRIMDIPPTSVHQRVPCILGSREDVLEMRRYYVESNDPEL  
INRCKARLQGARALEENEVEGSSFLGIHNEDKDTNAEEATSGEFGAAQ

>comp9697\_c0\_seq4; 482 1 1616 LEN=1903; translated  
XIIINIDFNHLTLKPYSYKMRLIESIGFQLLSVVLRCGFPLAIDAFVLITPPSSVADPRS  
NGGCIRKDRRSEHRNVVKATIENS DGSFETPPPRWNCPIHEDVCSESGVTLSRYMKEMVR  
ANPDLEEIESIFTSLQVACKTSLNLVKTS AISGLTGLEDGGGS INVQGEEQKKLDVIAND  
ILKRALRWSGELATIASEEDKPVNVMGDAIFSGDILVENSGRYVAVFDPLDGSSNVDAG  
IPVGTIFGIFDSAEC SIEDIDLTDGIDKAEKCLQDTLQPGSNLVAAGYCLYSSATS FVF  
TLGSGVYGF TLD ESIGEFVLTHADMKIPTRGKIYSFN EANRWDWDAPLQKYVTDIQKGLG  
DMKCRYASRYIGSMVGDVHRTLQYGGIFGYPADVKNP DGKLRLLYEAPMAFLLEQVRAS  
RFATTPVIEILALIFFCNVLAGGLALTGKNRIMDIPPTSVHQRVPCILGSREDVLEMRR  
YYVESNDPELINRCKARLQGARALEENEVEGSSFLGIHNEDKDTNAEEATSGEFGAAQ

>comp9697\_c0\_seq5; 327 157 933 LEN=1927; translated  
MYLLEKLFVSPQPLLLCQFPQVFTSLQVACKTSLNLVKTS AISGLTGLEDGGGS INVQGE  
EQKKLDVIANDILKRALRWSGELATIASEEDKPVNVMGDAIFSGDILVENSGRYVAVFD  
PLDGSSNVDAGIPVGTIFGIFDSAEC SIEDIDLTDGIDKAEKCLQDTLQPGSNLVAAGY  
CLYSSATS FVF TLD ESIGEFVLTHADMKIPTRGKIYSFN EANRWDWDAPLQ  
KYVTDIQKGLV SSTIHSS

>comp9697\_c0\_seq6; 504 157 1371 LEN=1658; translated  
MYLLEKLFVSPQPLLLCQFPQVFTSLQVACKTSLNLVKTS AISGLTGLEDGGGS INVQGE  
EQKKLDVIANDILKRALRWSGELATIASEEDKPVNVMGDAIFSGDILVENSGRYVAVFD  
PLDGSSNVDAGIPVGTIFGIFDSAEC SIEDIDLTDGIDKAEKCLQDTLQPGSNLVAAGY  
CLYSSATS FVF TLD ESIGEFVLTHADMKIPTRGKIYSFN EANRWDWDAPLQ  
KYVTDIQKGLGDMKCRYASRYIGSMVGDVHRTLQYGGIFGYPADVKNP DGKLRLLYEAP  
MAFLLEQAGGLALTGKNRIMDIPPTSVHQRVPCILGSREDVLEMRRYYVESNDPELINRC  
KARLQGARALEENEVEGSSFLGIHNEDKDTNAEEATSGEFGAAQ

>comp9697\_c0\_seq7; 465 157 1447 LEN=1734; translated  
MYLLEKLFVSPQPLLLCQFPQVFTSLQVACKTSLNLVKTS AISGLTGLEDGGGS INVQGE  
EQKKLDVIANDILKRALRWSGELATIASEEDKPVNVMGDAIFSGDILVENSGRYVAVFD

PLDGSSNVDAGIPVGTIFGIFDSEAECIESIEDIDLTDGIDKAEKCLQDTLQPGSNLVAAGY  
CLYSSATS FVFTL GSGVYGF TLD E SIGEFVL THADMKI PTRGKI YSFNEANRWDWDAPLQ  
KYVTD IQKGLGDMKCRYASRYIGSMVGDVHRTLQYGGIFGYPADVKNPDGKLRLLLYEAAP  
MAFLLEQVRASRFATTPVIEILALIFFCNVLAGGLALTGKNRIMDIPPTSVHQRVPCIL  
GSREDVLEMRRYYVESNDPELINRCKARLQGARALEENEVEGSSFLGIHNEDKDTNAEEA  
TSGEFGAAQ

>comp9697\_c0\_seq8; 521 1 1540 LEN=1827; translated  
XIIINIDFNHLTLKPYSYKMRLESIGFQLLSVVLRCGFPLAIDAFVLITPPSSVADPRS  
NGGCIRKDRRSEHRNVVKATIENS DGSFETPPPRWNCPIHEDVCSESGVTLSRYMKEMVR  
ANPDLEEIESIFTSLQVACKTSLNLVKTS AISGLTGLEDGGGSINVQGEEQKLDVIAND  
ILKRALRWSGELATIASEEDKPVNVMGDAIFSGDILVENSGRYVAVFDPLDGSNVDAG  
IPVGTIFGIFDSEAECIESIEDIDLTDGIDKAEKCLQDTLQPGSNLVAAGYCLYSSATS FVFTL  
GSGVYGF TLD E SIGEFVL THADMKI PTRGKI YSFNEANRWDWDAPLQKYVTD IQKGLG  
DMKCRYASRYIGSMVGDVHRTLQYGGIFGYPADVKNPDGKLRLLLYEAAPMAFLLEQAGGL  
ALTGKNRIMDIPPTSVHQRVPCILGSREDVLEMRRYYVESNDPELINRCKARLQGARALE  
ENEVEGSSFLGIHNEDKDTNAEEATSGEFGAAQ

>comp9698\_c0\_seq1; 278 1 765 LEN=805; translated  
AGSSGVAFLSLSPAQVYASSYVGEAERVVRQAFHLARSTAPCILFFDEIDSIFGNSGGNG  
GDGGNLGGSGRGSSAEARVLSTFLNEMDGVDIAGAGKDGVLVLGATNRPWTMDPALLRPG  
RLGDKIVYLPDPREARRSIFEKQFAGVLPAAEAGSQESEPGWQLDFDVLVELSEGMTGAE  
IVGTCQEAKMHHMREKILRVGPDGDSGTSDNTEAGFTQQDCIVNALMSVKPLLSNPEALE  
EFQVFENRDKKGVF

>comp9699\_c0\_seq1; 388 108 1973 LEN=2074; translated  
MAETQSTLREPFLSPIDTRDDEENQRYQHFFYLSNEEVEHESHCTEDLDSHSSGSGSSI  
YFPPDILRLAKRNVKTLSTLTFSSFLSRSIWSQGVLSSTFVVLVWKDSPA YVGYALAT TGM  
FQI ISSIATRYATRCSDYIANRIETLLQLASII GFFIPAIFFFAVKAQGF PFFLLANALW  
GTLLGVMD SALPIV FSEWGTDPKTTTLKYRMCHNLVRLGNIAGTLLTLALFAALGNTWT  
IENCYTVMVGLGCNLPVLFMLVTLKSITFAWGEDLSSESELEPEDYNVLAQTDEEQYND  
ITEHESQSPSWNEDETDNFI VEGTSIENIFFGAEVGEATEDSSEKTWTAVWRD KIRVP  
ILIHISDMFSSIAGGMSIGYFPVYLMQRSKLEPVSIQFMYLI IPLGQWMTPLLAKALS KA  
IGPCRACVSLQWVYILSLLSMIACQWNGYPVWVCTLYVVFHGLSMNSTSSLSKAMVLQHV  
PAEDQHKWVVENAQMLLWSCAGLLGCCIVDRYGLVNVFVTA VLQFLASAPLAALNYLL  
EPPLD TVRTPTEDEMD ESIDSSYDCDEINTSLCCGSYLQSKASSNSVGGYRIEALSPST  
QATEIDFDSPREITTI SIHVV

>comp9700\_c0\_seq1; 382 293 1739 LEN=2095; translated  
MAGDSSGGVDEQLNGLVTLKLSVGIDGVDPGLLADGQNRSSRSNKKGAGKYKTANNS  
ATSDAQILEI IKK LQAQSDSPEIMEALKNPQLLALASLAAQKQITQTKTSSSKRSKTKS  
KKS VTP TLD DVIDDDDNYPKIGPGYSDEVSCISEISTPTVMTS QKVADEEHYRELKGP GA  
MTPMHLLGAERSGKGRLSKISETETTPESSRPLGTSQAGGKVNMLGQVRPLPSRAI  
PTKSGSVGGAAAQRRLNYQMAMSKLESSGFQQTAPTSSIRSESSNSNNSNEKSKKP  
AGLTTGTRSD ESGSGSRKPRDSSSKKDIADIDWGMTEGNWPTLEEEGEKSKSRD  
LVVDNDGFLSEIRALAKDKSVAVKKSRRKKPERSETSPSRRTGDGSSGSRSKKSSRENG  
ESSSSRKSHRVKRRKKAHLQKEGVRVRESIPHEDDKIEGHHCDSPAGQGFIFKTEQALQ  
S

>comp9701\_c0\_seq1; 386 1 1101 LEN=1399; translated  
VALFWNEDQGTLRSGRCATNAVLTG SWIAGSVDPGFSDSATKIVLFLAVAVLAPATLWIE  
RCWSKRWGGLLPLLLPANAVVATVLCAGVWNRAMDTRVELCHRG CIGSF GGAGSGADD  
INDDDERLPTPGLLVHEVVLHSLSGIFFAENPRNPGSFATGALVLIGVLCSSRVLALAL  
AGGAAASGLGLGRLVFGASGQALDGGDVFVGNPALAAAGILYYYGSRGRNPPRKTGLAV  
LAAFAAVVVQSAFDAILEL LDDPVATSLGFCFTLLPLLSSSSVFQRIPEPELSTPEDH  
GLCLNLCNQKSKEDYDDDDEAGSSLLGDSGRGSGIAKKGSDGSDDDYENIEAPPANEKT  
PLLDSP

>comp9702\_c0\_seq1; 840 369 2675 LEN=3041; translated  
MAPSVPPKSEATGGK KKKKSKRNIIDKIPDIPGHDSNDHLVPY AISPLKTNGLGVEPEG  
TSVCP IYVSDYEDSSEVAIRGDRKINHKL FQTELPSTTKNTNKPTEEKADDNELDHEEAA  
PQKPARSKRNLKKS IKKLSDNKKVENTGKLLTEDNLKEIEKEPLCIDVTAYGDDEDDPV  
LERELEEIALNGRRSGLISGTPDKFAYDTQKGKPKGWRRLT KKT KKKK NKI SPDIENNYN  
EDDERSWHVGTLT KDKDAK KKKMSFEKKIYSVSIIFAVLMAIGCLSYGI IRSNYPKPGDS  
LTAEQKGIHEVLTRVTGEKTLTDTGTPQHS AEWELLYTDEE IWN AEGAEGIIQRFALACF  
YFSTGGNDSKPKK WESNNWMEGPEGDENHEAWIGVNCNSDGEIRALALDAWGLSGTIPP



EIGHLSKLENLILKNNPNLTGWIPPSFSLANLRQLGLYNNHLSGVLPDIFEHTKSLKFI  
NLESNDIYGSIPLEISHLTSLETLVLKGNRFEGIVPFKQLASTSVRYLGLSNNRFAGRIE  
KAIHDVETLEYLYLDHNALRGTIPPHIGNLKQLKSIDLGHNAFTGALPMSIGNLDRLEYF  
SLNDNKLAGSLPRRIGSLTRLNLTNLMASNTFTGTVPDLSTLTNLKSLQLYSNELQGTLPK  
SLQHLQSIIESIFLSSNRFTGTIPEEISLVSRTLTGFYLSDNLLVGSIPHTLCEFIGLEAL  
FLDTNRFDGTIPSCLELEDLQQLYLFKKNLTGTVPPTTFQNLKHLKSKS  
>comp9702\_c0\_seq2; 906 369 2831 LEN=2918; translated  
MAPSVPPKSEATGGKKKKKKSKRNIIDKIPDIPGHDSNDHLVPYAIISPLKTNGLGVEPEG  
TSVCPYVSDYEDSSEVAIRGDRKINHKLFTQTELPSTTKNTNKPTTEEKADDNELDHEEAA  
PQKPASRKKRNLKKSIIKLSDNKKVENTGKLLTEDNLKEIEKEPLCIDVTAYGDDDDPV  
LERELEELIANGRRSGLISGTPDKFAYDTQKGGKPKGWRRLTKKTKKKKKNKISPDENNIN  
EDDERSWHVGTTLTKDKDAKKKKMSFEKKIYSVSIIFAVLMAIGCLSYGIIRSNYPKPGDS  
LTAEQKGIHEVLTRVTGEKTLTDTGTPQHSAWEWLLYTDEEIWNAEGAEGIIQRFALACF  
YFSTGGNDSKPKKWESENWMEGPECGDENHEAWIGVNCNSDGEIRALALDAWGLSGTIPP  
EIGHLSKLENLILKNNPNLTGWIPPSFSLANLRQLGLYNNHLSGVLPDIFEHTKSLKFI  
NLESNDIYGSIPLEISHLTSLETLVLKGNRFEGIVPFKQLASTSVRYLGLSNNRFAGRIE  
KAIHDVETLEYLYLDHNALRGTIPPHIGNLKQLKSIDLGHNAFTGALPMSIGNLDRLEYF  
SLNDNKLAGSLPRRIGSLTRLNLTNLMASNTFTGTVPDLSTLTNLKSLQLYSNELQGTLPK  
SLQHLQSIIESIFLSSNRFTGTIPEEISLVSRTLTGFYLSDNLLVGSIPHTLCEFIGLEAL  
FLDTNRFDGTIPSCLELEDLQQLYLFKKNLTGTVPPTTFQNLKHLTGIGLESNQLVGEVS  
DEVCGLVVHHEVDMWADCGVGETALQCPCCVCCPGDSCV  
>comp9703\_c0\_seq1; 450 31 1482 LEN=1482; minus strand; translated  
MPCRATERTPGGGNTDPRAFSFSFKAGARTGPDYLPAPAPASAAAPAATAAAPSAAAPAG  
RRRPLRPVHPPGGILQELVGGVEAGVLRPALQGGALALLELDPQLAAAKDLVLLQLQEGHR  
LDALGQVDDGGVPGADETPLRPEVGVQGEDPLAVGIRAHVELVDQRVVVREGARQGVLA  
GDLADLFFLVLVVLPASAGVLAGDGPLGQVEAVRAKGGKGGGTDRIQAEKVASLDGA  
LSSRPLLDFAFDGQGVHGFILVVQPGRRPGENEREVAPRYPTPGEGLADVFEGETRPEQ  
QIHAPDVAHKVVKLFLEHLDDGPFDDDLLQVARRNLVALALDVGPDLGKDAQAVDLVVAL  
AQDEAQLVREQAAGLEADVVSFLDVFVDVRGDAGVGPDPVLLHHADQFRLGEEPGAVVIF  
SLTSSEAQTADEETTLTLEDEDSFLFLLKIAMISPFWNSGSRFTSSSSSSSFSASSPYSLC  
NKIX  
>comp9704\_c0\_seq1; 639 127 1821 LEN=1828; translated  
MASITANTKHKVRVPSTKKVVAGRSKAGAKKAVSKRGSIAPLMKPATLATPAKIEELNGL  
DQAEQRIQVTNMCRLAMGEQILIDRSKPHAASSTRDRIGAAADLATAAKELGIKFKVLKEC  
EVMDEMQRMLFPEGITKTFGNDDASVGGLKPSISAVSLASMGSCGTDEMTAFTERTTGT  
SNRGKSTPANAREGSLIIRAFCEIIGKPAEPYVVGAFIAAALDECGSNSNSVREAAEDT  
ATALVKLSNPFVFTSLLSPLLLKAMKSSSEWRVKNALDRLAQCAETAPKQVCSALPALIP  
GVTGQVWDTKAQVNKAAGSCLMAICKTNPNDVKPAIPAVVKAVCKPSETNKAVSELMST  
TFVVTVDAPTLTMLCPVLSRALKEKLAHAKRAACIVINMNSKLVGSPEDVAPFGGLLVE  
LKKVASSVQFEEIRDEALKALASLTKALGDSYKQGEDGAAEAARLEEEKAAVEAEQERI  
RQERDAEKAKEEAFRKKKEEKKRYKEAMDAQRQLNKMAEAKKKEEANKKKEAARLS  
TKAQGGKCQGCGLKKCKKTCPFKK  
>comp9705\_c0\_seq1; 187 58 609 LEN=609; translated  
MSLLISATVGMISRKPLNALGATLVRFSFSSPSPVRRISLRQGPERRRLLFSSLPNRGDPS  
VARNQATALVFDTEETGMVRFDRPPTDEGQPDVQLGFLVDTGSKWIFSKGSFLVRFHK  
GVRIDEGAQRVHGISSGDCASYGIEHETALSIFGDLRRAADVIVGHNIRFDAIVMEAAFH  
HGTP  
>comp9706\_c0\_seq1; 277 339 973 LEN=973; translated  
MLVGTYFYNLGLVTLTLLLVARVSSFGTLKNQQLRYGFSSRLGMFFADELAPPEEKLNP  
TENTGSNEEVAAKENFPPLPVQLVISDSEGFLNAAGAFVDSFWLGSDDHKLKDDVEMST  
DARNLIIIEQAADLQEKYGERMGRSAKACVVGALDEETKELVGLATLKETLMMNTEILE  
PEKAEIAKNAVAALGPKQRREYKNARSEERR  
>comp9706\_c0\_seq2; 473 339 1289 LEN=1402; translated  
MLVGTYFYNLGLVTLTLLLVARVSSFGTLKNQQLRYGFSSRLGMFFADELAPPEEKLNP  
TENTGSNEEVAAKENFPPLPVQLVISDSEGFLNAAGAFVDSFWLGSDDHKLKDDVEMST  
DARNLIIIEQAADLQEKYGERMGRSAKACVVGALDEETKELVGLATLKETLMMNTEILE  
PEKAEIAKNAVAALGPKQRREYKNAPIAKIAEELSPDTKAVCVLSNLAVGKKARRRGV  
AQALCDELDAWDFDEIHLVSESENTAARTLYEKKLGYNLVSTNVAAAALRVDFETG  
AFVQIKQDTLVMKQL  
>comp9707\_c0\_seq1; 752 256 1617 LEN=2185; translated

MSPDKKSNKSNQVMRTPSLKFQILFIVSTVLWVGRSKAVAAFPVPTSTGTPATPRQTDNFNSA  
GTVKTIISVASGLIESRGCLPCGQFYNSNEANKNRRSQRRSTELYSFMGSDGGLLIGITPE  
LFTIILIGYFVLGSPDLYKLVKEIGKFIQNFQSFAAEATSTLETNMESQLQLEEIRKTQQ  
ELNDAFSFRRSINVEEDSDPFAVNVQSPRGEGNSAMSTAESDAQYDLSTTATSGAAVAPK  
KKKMRRIKRKKTPVVDSPVEDEMPKVPSLDAANINQQLANDIPAELDMDEELRMAEEMKAM  
DAVFNGSNEGKLEEKDTSTLAAELREERMERLQRGAAQSQNDNSASSIEQSRFQQQLSG  
DWNQILANNDKLEPLGEVMNLLAVLEEEKLAADLRLKEEFKARESNEERFYQEKRKLLE  
EAAAEIQASAYAGNIPMASAPPTANNETGNII

>comp9708\_c0\_seq2; 258 86 517 LEN=776; translated  
MARVTGIKTTYIICENGDTTTLQNFASNDVSEVRVGLPIGVEPVKPPQPGDEGYSGM  
HDQGPLPEPKEGGPVAFILIGCVKAAKEHSDEFLLTKCIEEEKKKKTQGEQQQSSEIIRTT  
TPVDSPGTVAKKSAELPNKRSKQ

>comp9709\_c0\_seq1; 477 1 1222 LEN=1316; minus strand; translated  
XSEEEERDATPVADYLDRLIVPVSPTSASIKKSYSPFGSTREKSKSPLTSGCDSLDETPAS  
SNNGLPSEGERDTTQVANSSEPPSEVSTSMITDFIFDTPPHDHDALYEEPSTDVAYAAID  
DTTIVNNDTDQETSGEQKDVSNYLQALSHIASPLKSSYSPFGSWKKERFLSSNSALYQP  
PESLMSLDSIQTSRVAEDLKEDTESPNTPSKDAVNGNFLESHGGSVSPFVENSCESSRESL  
PESATNSLYSSLRDVDNTEVTSENRIKKAYMEWCTFYNKESDLRFDIFSAHFKAWE  
KFHKENGAGLMLNEFSDLTEEEYKATTNTNADQSIFESVIDGRIVSAYRQWCDWYQKDYS  
EERLQIFSSNFLILERYHGGEGDPSPLVFNEYSDLTEEEYNELNDTK

>comp9710\_c0\_seq1; 224 50 871 LEN=1352; translated  
MGAVHGVYLYKLVGLSALSFMGYNMLDPDGRSSDGSTISATSPASVEDRATHQALVMGMIP  
RLVLGYSAVINGVIAILFKSERGMRIIGKDQTKGKIPLWSYLVFFPFHLPTILYTHVHTL  
TGKSHNPPVPVATEVQPGWWVGGCYGHELNMDWGGVVDLTVFEPESCRNRTKSYLSAPTW  
DGVPLNPAGLEAAATFAVEARKSGHVMVHCAHGRGRSTTVMCACLVKAGLFDNWKDAFEK  
GIKQPQPVCKLNKRMRENLEAWQKEYVDSKSI

>comp9711\_c0\_seq1; 687 1 2717 LEN=3493; translated  
VNSRTVADMAHSSKSI LRRSKSESSDNNSEIPGPRESAASPPPSACRSSFEDTLASSCKF  
GPSSAENECSPILIVSKLDSVSAERSRNTNDYDLNYIAMEDANSPGAQQHQLHMHTISTV  
GVDYDDEDEDLQNDGRSRSYTCNHRCQHPQYCLTTLLLIASLVLFVSSLVILGISYH  
YYSIVSSPKAVSNNII INSHGGGFDEEREAALKGILSSKASLNNLSNGAVASDHPVCSK  
VGADILSKKGNVDAAVATVLCGLVANPASSGLGGGAFILIRSSKTHFESKQKQOPTRN  
SSSTLLTPVFDARDYTITNNEPNFVTEVVDCRETAPEKASRDMYTGLPRQASFAAGLA  
IPIPGELRGLLAHFRHGRLTWSEVVEPARLLARDGVLVGSLSADIKGLFTRSFPLGE  
YEDNFLAIRKYLSSSNSTEYLRGELLRNPSLAKLLQEVAEQGADAXIQGKNAELLVRDI  
QDSGGIVTVKDLTYRATLRTPIRATVSGYSIVGVPPPSSGGAVIIGIARFLSGYPRPFA  
SASETLSVHRMAEAMKHAFSIRMSMSPAYNGNVTQDAVRDLTNGYMESLRRITSDKTT  
LGLSHYGGPKWSLMRDDDGTKEVVDAHEGDRREIRHLLSDDQQRTPSTLPEIAVGTGGI  
HAKRSIQNRKMSQRFYLEDNGTSHLSVVDKDGNAVAVTTSINGIFGSIVFSESTGIML  
GNTMDDFGVPGAPNHFGLRPSSESNFVAPGKRPLSSMSPTMVFRRTNRSDVITASDNKWE  
LAMVLGGSGGPKIITAVIQVFLNVFVLGMPFLDAIARPRVHDQLLYHESVVTTERAILK  
GGTKSNYTEITIDVPQRTKDALLKRGHKLIDIDYTGCVQSI LVDPTNTLSAVSDVRKGG  
SPAGY

>comp9712\_c0\_seq1; 766 164 3172 LEN=3513; translated  
MWKKKGKDNDS DAGDIEISGVAKNGNSLVEKEKDVAIENDEEENFNDETESERALDAGTW  
PADCYSFIAIHNPKKPIFFGFVFCVWSFQMAFLILLVYVNVNSKSGDNDNPADGVLA  
SFIIPAKVGSVSRATQFFALLSYCIFADESLKDIVTAVETWPKAKKARDGYNIYLMRLSCT  
MRFTQGLASLVVFLVVTTPDVIDIILNFTAVNFISGFGTKLKNNENSPMSHLQIYVVL  
SYPTLFLDDVAFELAQWVGYGPRLEKEANRIEELKAPPCIYRKYQHVRYLWTVLPMGFV  
LLVLLSAVAFSQASPDVWLTNRRLRVQFQDNTSFEGYSGCYDIDPKSINNPVTQGRVIYNS  
FQANDQVATFGYCDGKWFLEYEGDFQKPCDVPDEHKLAFSSKTDADFIDIGTSFEDGWTSS  
GTPLELFFDNEGLTDNQCNSFLGDGVCNDAFNSPGYDFDAGDCCAPTCTGETNCGVGT  
KNVFGVDVAHGDGYQNCIDPKMKDITIRFDNVYLPKFKGEPVITFEPQNPMLILDCDGKN  
LLTLIVDEAMVNNTETVRVDDGANC SLMIKNSTSGSSDIYFVEYTIYHGDEETQKMDPLV  
IARGNSNANEMNYFYRLPDCFMEKLENYTDNTIYTGTPSHQAI DWLARDADGFSSCSRQ  
DFVERYALAAINFAAPVPPPAETENGTAVDHNLWISERQCAWKMTVCVNGRVSELEL  
GRSTLLAGTLATEIGILKDGTPTEIVKLTNLESIDLSTNGFNFTFFFTTEMPSLKFI  
MYTNSFSGSLPDEIGSMSNVEVIRFDGTGLTGTIPSVYGDLELLELGLSYNELSGTIPS  
ELAQLKNVQEFDLKYNQLTGSISQELLDVKPNINNFDIYANQLSGLTPIEGEVICSAEGF  
GDHYCDCTGDCSFAENRCRCSEAQACCAEYFSQFEACVVCKDSGLQNPNFYKDFMTTCE

GAQWYISSSLAEFGNPENCTIAEFVFSVGCRCNGVDLALP

>comp9712\_c0\_seq2; 845 164 3279 LEN=3620; translated

MWKKKGKDNDSDAGDIEISGVAKNGNSLVEKEKDVAIENDEEENFNDETESERALDAGTW  
PADCYSFIAIHNPVKKPIFFGFVWVWFQMAFLILLVVFYVVVNSSKSGDNDNPADGVLA  
SFIPAKVGSVSRATQFFALLSYCIFADESLKDIVTAVETWPKAKKARDGYNIYLMRLSCT  
MRFTQGMLASLVVFLVVTTPDVIDIILNFTAVNFI SGFGTKLKNNENSPMSHLQIYVVL  
SYPTLFLDDVAFELAQWVKYGPRLKEANRIEELKAPPCIYRKYQHVRYLWTVLPMGFV  
LLVLLSAVAFSQASPDVWLTNRLRVQFQDNTSFEGYSGCYDIDPKSINNPVTQGRVIYNS  
FQANDQVATFGYCDGKWFLYEGDFQKPCDVPDEHKLAFSSKTDAFDIGTSFEDGWTSSS  
GTPLELFFFDNEGDLTDNQCNSFLGDGVCNDAFNSPGYDFDAGDCCAPTCTGETNCGVGT  
KNVFGVDVAHGDGYQNCIDPKMKDITIRFDNVYLPEKFGEPVTFEPQNPLMILDCDGKN  
LLTLIVDEAMVNNTETVRVDDGANCSLMIKNSTSGSSDIYFVEYTIYHGDEETQKMDPLV  
IARGNSNANEMNYFYRLPDCFMKLENYTDNTIYTGTGTPSHQAIDWLARDADGFSSCSRQ  
DFVERYALAAINFAPVPPPAETENGTAVDHNLWVISEERQCAWKMTVCVNGRVSELEL  
GRSTLLAGTLATEIGILKDLTKLDMSENMIIGTIPPEIGQMKNLKSIDLKNNQLTGTIPT  
EIVKLTNLESIDLSTNGFNFTFFFTTEMPSLKFI RMYTNSFSGSLPDEIGSMSNVEVIR  
FDGTGLTGTIPSVYGDLELLELGLSYNELSGTIPSELAQLKNVQEFDLKYNQLTGSISQ  
ELLDVKNINNFDIYANQLSGLTPIEGEVICSAEGFGDHYCDCTGDCSFAENRCRCSEAQ  
ACCAEYFSQFEACVCKDSGLQNPNFYKDFMTTCEGAQWYISSSLAEFGNPENCTIAEF  
VFSVGCRCNGVDLALP

>comp9712\_c0\_seq3; 927 164 3190 LEN=3531; translated

MWKKKGKDNDSDAGDIEISGVAKNGNSLVEKEKDVAIENDEEENFNDETESERALDAGTW  
PADCYSFIAIHNPVKKPIFFGFVWVWFQMAFLILLVVFYVVVNSSKSGDNDNPADGVLA  
SFIPAKVGSVSRATQFFALLSYCIFADESLKDIVTAVETWPKAKKARDGYNIYLMRLSCT  
MRFTQGMLASLVVFLVVTTPDVIDIILNFTAVNFI SGFDDVAFELAQWVKYGPRLKEA  
NRIEELKAPPCIYRKYQHVRYLWTVLPMGFVLLVLLSAVAFSQASPDVWLTNRLRVQFQD  
NTSFEGYSGCYDIDPKSINNPVTQGRVIYNSFQANDQVATFGYCDGKWFLYEGDFQKPC  
DVPDEHKLAFSSKTDAFDIGTSFEDGWTSSSGTPLELFFFDNEGDLTDNQCNSFLGDGVC  
NDAFNSPGYDFDAGDCCAPTCTGETNCGVGTGTLKNVFGVDVAHGDGYQNCIDPKMKDITIRF  
DNVYLPEKFGEPVTFEPQNPLMILDCDGKNLLTLIVDEAMVNNTETVRVDDGANCSLMI  
KNSTSGSSDIYFVEYTIYHGDEETQKMDPLVIARGNSNANEMNYFYRLPDCFMKLENYT  
DNTIYTGTGTPSHQAIDWLARDADGFSSCSRQDFVERYALAAINFAPVPPPAETENGT  
VDHNLWVISEERQCAWKMTVCVNGRVSELELGRSTLLAGTLATEIGILKDLTKLDMSENMI  
IGTIPPEIGQMKNLKSIDLKNNQLTGTIPTIIVKLTNLESIDLSTNGFNFTFFFTTEM  
PSLKFIRMYTNSFSGSLPDEIGSMSNVEVIRFDGTGLTGTIPSVYGDLELLELGLSYNE  
LSGTIPSELAQLKNVQEFDLKYNQLTGSISQELLDVKNINNFDIYANQLSGLTPIEGEV  
ICSAEGFGDHYCDCTGDCSFAENRCRCSEAQACCAEYFSQFEACVCKDSGLQNPNFYK  
DFMTTCEGAQWYISSSLAEFGNPENCTIAEFVFSVGCRCNGVDLALP

>comp9712\_c0\_seq4; 371 164 1312 LEN=1331; translated

MWKKKGKDNDSDAGDIEISGVAKNGNSLVEKEKDVAIENDEEENFNDETESERALDAGTW  
PADCYSFIAIHNPVKKPIFFGFVWVWFQMAFLILLVVFYVVVNSSKSGDNDNPADGVLA  
SFIPAKVGSVSRATQFFALLSYCIFADESLKDIVTAVETWPKAKKARDGYNIYLMRLSCT  
MRFTQGMLASLVVFLVVTTPDVIDIILNFTAVNFI SGFDDVAFELAQWVKYGPRLKEA  
NRIEELKAPPCIYRKYQHVRYLWTVLPMGFVLLVLLSAVAFSQASPDVWLTNRLRVQFQD  
NTSFEGYSGCYDIDPKSINNPVTQGRVIYNSFQANDQVATFGYCDGKWFLYEGDFQKPC  
DVPDEHKLAFSSKTDAGTFL

>comp9712\_c0\_seq5; 848 164 3083 LEN=3424; translated

MWKKKGKDNDSDAGDIEISGVAKNGNSLVEKEKDVAIENDEEENFNDETESERALDAGTW  
PADCYSFIAIHNPVKKPIFFGFVWVWFQMAFLILLVVFYVVVNSSKSGDNDNPADGVLA  
SFIPAKVGSVSRATQFFALLSYCIFADESLKDIVTAVETWPKAKKARDGYNIYLMRLSCT  
MRFTQGMLASLVVFLVVTTPDVIDIILNFTAVNFI SGFDDVAFELAQWVKYGPRLKEA  
NRIEELKAPPCIYRKYQHVRYLWTVLPMGFVLLVLLSAVAFSQASPDVWLTNRLRVQFQD  
NTSFEGYSGCYDIDPKSINNPVTQGRVIYNSFQANDQVATFGYCDGKWFLYEGDFQKPC  
DVPDEHKLAFSSKTDAFDIGTSFEDGWTSSSGTPLELFFFDNEGDLTDNQCNSFLGDGVC  
NDAFNSPGYDFDAGDCCAPTCTGETNCGVGTGTLKNVFGVDVAHGDGYQNCIDPKMKDITIRF  
DNVYLPEKFGEPVTFEPQNPLMILDCDGKNLLTLIVDEAMVNNTETVRVDDGANCSLMI  
KNSTSGSSDIYFVEYTIYHGDEETQKMDPLVIARGNSNANEMNYFYRLPDCFMKLENYT  
DNTIYTGTGTPSHQAIDWLARDADGFSSCSRQDFVERYALAAINFAPVPPPAETENGT  
VDHNLWVISEERQCAWKMTVCVNGRVSELELGRSTLLAGTLATEIGILKDGTIPTIIVKLT  
NLESIDLSTNGFNFTFFFTTEMPSLKFI RMYTNSFSGSLPDEIGSMSNVEVIRFDGTG

LTGTIPSVYGDLELLELGLSYNELSGTIPSELAQLKNVQEFDLKYNQLTGSISQELLDV  
KPNINNFDIYANQLSGLTPIEGEVICSAEGFGDHYCDCTGDCSFAENRCRCSEAQACCAE  
YFSQFEACVVCKDSSLQNPNFYKDFMTTCEGAQWYISSSLAEFGNPENCTIAEFVFSV  
GCRNGVDLALP

>comp9712\_c0\_seq6; 286 164 829 LEN=1420; translated  
MWKKKGKDNDSADAGDIEISGVAKNGNSLVEKEKDVAIENDEEENFNDETESERALDAGTW  
PADCYSFIAIHNPVKKPIFFGFVWSFQMAFLILLVYVVVNSSKSGDNDNPADGVLA  
SFIPAKVGSVSRATQFFALLSYCIFADESLKDIVTAVETWPKAKKARDGYNIYLMRLSCT  
MRFTQGMLASLVVFLVVTTPDVIDIILNFTAVNFISGFGT

>comp9713\_c0\_seq1; 577 124 1779 LEN=2145; translated  
MENRFNRDYSFTYSYDPPNRRRPEQDDMAAVRFLQGTESLIRNTQNNRYDSGEQSRF  
YRDGEREDRSSKSSFIGIFPFLIKISAYGLFAIILILISLGEFGVFYKLVMPKLHSSNVL  
YFDYTGTGAANHVSARNLYSVPNDFATTTKTDGTAGHFGVDDEGKDDDICSENLDTTSTT  
DTMSCSPKKPLDELNRKEDYQTSRRSMMTAPVAAVDLFSNHNSWGHYHPDVVPLPKQEKH  
ILAKGAPHYIEVLLDLPESELNLEKIGMFSVLVELHASSISLPNLNETDNYNGTTTTSRDT  
STSTLLASSIRTRIPHESHWISVVRKFVCIIPYVLGAIPESSRVVIPSIRFFVESEAFP  
LRYVTVRLVMSPENQRRGEAVEVGQILQIGEEMRGLQLVLKEWFFTCLVAGTIFLVVFQ  
SVFLLVLQSLWELRRHRLQEREQEGIILEDVSDDLGLNGFDDEAGGNENGDGQDESSVE  
GFHDTRSEHQHQHNTSYDIDDEPGQWEDLPEPDLGSRSTTSNQVDDRNGTQPTADRP  
GAPTEEFQHVIPED

>comp9714\_c0\_seq1; 512 173 2304 LEN=2389; translated  
MCKNSPSVGGKIDNSLGMKRTDMIDRSAAAESYPVKAMEPPESMVAICCGCRPSTKRRNQ  
SYKTTLKNVGWRRIFRLKRRKFRDVPGRDVEWQAFHHYHGSESGKSIKSDYGDDEDDDS  
MFFFDVDFPLGDDDFPIDGYVVGKKGARVVFSTIAHPAPKVSLEDPTSMLRNSEKNG  
SSCGGIGEDDNDYELVPVQNDNRIENYKEPSLRFKIRARSSEALAAELQNFPKPSPTS  
VEDAIGMAGYPGTLTIDELEECQKFLKGLNKLPPAVAEQVYSFRDVEDQPYTICRWLRAT  
KFDADAILARLSENQPLFEQAKEKNFYGNLDDYLGCPVLSVFLSQYPFMSIGRGRNGSPV  
NYFLAGKINPEGIMALCTVDQLASYFWYSFMYKMKEEVRRQRMDFCRCEGINIVDLS  
GLSTASLTSETMEVIKIASKVSDFPETLHMLVNLNAPSFFTFWKLKFNIDPRTASRI  
QLFSSQKQGDALLENLIDKEKEISKDYGGNVSLREAFLECSDPQIVRQEIELIHCKRK  
STKAIPKAWTLGENECIEITITRVSSEADIHISFNNGSAVKTVKSRCKFEGDGRDRKPLP  
NKTVAVYAKFKEFVGPGEVLVEAHDLDSTISKQHSQSRGYFLVVGDIKPISSVASTGTN  
STKQKRKVSFVEDTESSPSRKNYNAAVTMAXSGAKQDTSPRFDLTKDTEA

>comp9714\_c0\_seq2; 177 52 830 LEN=915; translated  
MLVLNAPSFFTFWKLKFNIDPRTASRIQLFSSQKQGDALLENLIDKEKEISKDYGGN  
VSLREAFLECSDPQIVRQEIELIHCKRKSTKAIPKAWTLGENECIEITITRVSSEADI  
HISFNNGSAVKTVKSRCKFEGDGRDRKPLPNTVAVYAKFKEFVGPGEVLVEAHDLDSTIS  
KQHSQSRGYFLVVGDIKPISSVASTGTNSTKQKRKVSFVEDTESSPSRKNYNAAVTMAX  
SGAKQDTSPRFDLTKDTEA

>comp9716\_c0\_seq1; 399 1 1507 LEN=1672; translated  
XANPASPKAVLYLFESSVYVRTGMIVKCRQOIIIVVATIFGALFGCLDFIAVSSLSANAP  
RKIRGDGKSVPGAPPPSSIIITRDWLI SGSASFASALSFQNTIPPASAESTIGGESVSQQP  
RPALAKEYYSNPFVSSPEAGRSYFPALTPPFNDRATYLYDLGRDAWALEQLLTFANVTAT  
IRCNVRLKKTGGLVWVHSPQWPTGEFCSLLDSIGGPVEHVVLPCNAFEHKAPMKAFLEKY  
PNAKVWIAPGQYGLSGCGTSLLEKPRMGYHVDGIFGDERSPPPPWSDEFDIATLYVNL  
KNAGPVSEVAFCHRPSKTLITTDVAVYVSEPSSILSTYFDEDTVIKGDPEFWPKSVLQA  
VFLPLRKGPNNKYPGYEAVVDRLARAPILRAVVDARAPGAVRDWILEQTQTTTSTVANGN  
ERYKKWDYDRVITSHFASPIQATPLDVRASFEYLFTDDLNSNLPPACRDWELLDSINQ  
FIAKYNAGEPAVDFQRCVAD

>comp9717\_c0\_seq1; 436 194 1420 LEN=1506; translated  
MSMSVPAQIFETGTTVNTKTEDKSRKRRQRGRDLSSSEVVSKDVKMTSODFLHVRRIHIAV  
SLNEESKSKLPASATLSSLVFQEQRPSAALFSSFKPVLGVPKSNNDNDRNGIPMLKLR  
PRQPKKGGPFSSQFYSEEDHSLSSAFKIPSSNIFLPPFLSHEISRSQLLNFKKEEARKR  
KQFDPCPLPSETQNLAPPVPLCKTLHTNDSLQVKSRESKRVRSSSISCSPPLLVPSIDF  
AISSATRIGEITPAPSINGTSFTTPSPTLTNSPIENLSSGKWSRINRNTKRLALTVAKPK  
AMRPVSGISSFLHDPTPVITSDTTTSLFQSFQKDNFEATEMPVLNVTSNIAFDKNQPPSA  
LTSSTKYSAFSLGGLSPASVSSSSSSPFSSPIRISTMKIVDNNTF

>comp9718\_c0\_seq1; 448 90 1460 LEN=1724; translated  
MFRLGAFATSLPSAAAAARRTMLRYRPAGIESAAARASASAPAALSTRARESSPTRSIPS  
RRSFSSVPETLAKSSLYTWGTEHGCLLQEESDKIDSKNILWEPQPAAFHNDIGRISDYW

CGHNEIILTTEEGSVVWVAGENKNGQLGLGHKNPVSALTQIKVDGVERFAKGRIGASTGAL  
IAENGDLTYTFGGGSAMRGVGLGHGNEESYPTPKLVESLVYDGCRVQDVTLGESHTTVL  
TTEGEVLTGTGASNYGRLNGGETSEDNLYFDAVEILPNETVSIAGGESFTLALTKEGIIY  
AWGKNAKGQLGTGFGMAIDMYAMEDVPAPIEGDELANRVVAKIAAGANHSACVTSSGELF  
WWGVNLHLEPVRVNEVLHTKIVDVACGLDYTLALSEDGELYSWGFGKTGVLVGVPDVKTL  
HQARRIRALAAEGGESERKVVSMAGSNAACMVSE

>comp9720\_c0\_seq1; 286 381 1316 LEN=1848; translated  
MNKNKGNMNTGNMFMNGVWPWGTSMPLGNSNMLYPAAATMTALNAARANAVNRSNSVRMV  
SNPNSSRKNKLDLFLFNSSNRQPSGQSHVIPTVDDILKYRVDQMPMFGNTNNAGLQSNAGA  
ANFANSSVPMQSSVGINSYQSKFPPSWMTSVGASSAAAGMSANHANNGPSSDTNHGFGVG  
GNPGAPALPTNTMGSFAPSIGILQSLDMKSFDFGYMEQAGVPPTGMAMGTAAAFNMQNANSA  
KTLDMKSLVGSISITTVSASTMGTIMSSMSKNSSSGSGTGTGAFAPPMQSRNKTDWNA  
MYAKALSNPKP

>comp9720\_c0\_seq2; 286 381 1316 LEN=1918; translated  
MNKNKGNMNTGNMFMNGVWPWGTSMPLGNSNMLYPAAATMTALNAARANAVNRSNSVRMV  
SNPNSSRKNKLDLFLFNSSNRQPSGQSHVIPTVDDILKYRVDQMPMFGNTNNAGLQSNAGA  
ANFANSSVPMQSSVGINSYQSKFPPSWMTSVGASSAAAGMSANHANNGPSSDTNHGFGVG  
GNPGAPALPTNTMGSFAPSIGILQSLDMKSFDFGYMEQAGVPPTGMAMGTAAAFNMQNANSA  
KTLDMKSLVGSISITTVSASTMGTIMSSMSKNSSSGSGTGTGAFAPPMQSRNKTDWNA  
MYAKALSNPKP

>comp9720\_c0\_seq3; 513 95 1891 LEN=2423; translated  
MTKFDYAQSNLLKREIGGATSSTGSSPQAPPPPPMKRTSRRQPHLPGRDERPAEGLYP  
SRSMIPHNNYHMSSAAVASADTTAAGAI SAALHAGNQSSAAEKKKLPVTTKKI IHTKH  
KITTRMGFTDAESIANENSEKNQKKGRSRKPRRIIPNEKEYIPEDEQPTARDIVGGRGG  
RSNHHPGNRPYWRILESRAEYTNCRSDLDKSRIANGILMYVKQTLRGRFLNIDSKSRW  
FILPDTVVLDKVKQALRDKYVPYWARDLKI EDKVHSNISPMMATVNAMNKNKGNMNTGN  
MFMNGVWPWGTSMPLGNSNMLYPAAATMTALNAARANAVNRSNSVRMVSNPNSSRKNKLDL  
FLFNSSNRQPSGQSHVIPTVDDILKYRVDQMPMFGNTNNAGLQSNAGANFANSSVPMQSS  
VGINSYQSKFPPSWMTSVGASSAAAGMSANHANNGPSSDTNHGFGVGGNPGAPALPTNTM  
GSFAPSIGILQSLDMKSFDFGYMEQAGVPPTGMAMGTAAAFNMQNANSAKTLDMKSLVGS  
ISITTVSASTMGTIMSSMSKNSSSGSGTGTGAFAPPMQSRNKTDWNAMYAKALSNPKP

>comp9720\_c0\_seq4; 513 95 1891 LEN=2493; translated  
MTKFDYAQSNLLKREIGGATSSTGSSPQAPPPPPMKRTSRRQPHLPGRDERPAEGLYP  
SRSMIPHNNYHMSSAAVASADTTAAGAI SAALHAGNQSSAAEKKKLPVTTKKI IHTKH  
KITTRMGFTDAESIANENSEKNQKKGRSRKPRRIIPNEKEYIPEDEQPTARDIVGGRGG  
RSNHHPGNRPYWRILESRAEYTNCRSDLDKSRIANGILMYVKQTLRGRFLNIDSKSRW  
FILPDTVVLDKVKQALRDKYVPYWARDLKI EDKVHSNISPMMATVNAMNKNKGNMNTGN  
MFMNGVWPWGTSMPLGNSNMLYPAAATMTALNAARANAVNRSNSVRMVSNPNSSRKNKLDL  
FLFNSSNRQPSGQSHVIPTVDDILKYRVDQMPMFGNTNNAGLQSNAGANFANSSVPMQSS  
VGINSYQSKFPPSWMTSVGASSAAAGMSANHANNGPSSDTNHGFGVGGNPGAPALPTNTM  
GSFAPSIGILQSLDMKSFDFGYMEQAGVPPTGMAMGTAAAFNMQNANSAKTLDMKSLVGS  
ISITTVSASTMGTIMSSMSKNSSSGSGTGTGAFAPPMQSRNKTDWNAMYAKALSNPKP

>comp9720\_c0\_seq5; 509 95 2059 LEN=2591; translated  
MTKFDYAQSNLLKREIGGATSSTGSSPQAPPPPPMKRTSRRQPHLPGRDERPAEGLYP  
SRSMIPHNNYHMSSAAVASADTTAAGAI SAALHAGNQSSAAEKKKLPVTTKKI IHTKH  
KITTRMGFTDAESIANENSEKNQKKGRSRKPRRIIPNEKEYIPEDEQPTARDIVGGRGG  
DEIPLSLFVFSPLLFIFPLGFYCRNRFFVVTAYDCFFLSLLKKCACLDXLINNQGRSNH  
HPGNRPYWRILESRAEYTNCRSDLDKSRIANGILMYVKQTLRGRFLNIDSKSRWFILP  
DTVVLDDKVKQALRDKYVPYWARDLKI EDKVHSNISPMMATVNAMNKNKGNMNTGNMFMN  
MFMNGVWPWGTSMPLGNSNMLYPAAATMTALNAARANAVNRSNSVRMVSNPNSSRKNKLDL  
FLFNSSNRQPSGQSHVIPTVDDILKYRVDQMPMFGNTNNAGLQSNAGANFANSSVPMQSSV  
GINSYQSKFPPSWMTSVGASSAAAGMSANHANNGPSSDTNHGFGVGGNPGAPALPTNTM  
GSFAPSIGILQSLDMKSFDFGYMEQAGVPPTGMAMGTAAAFNMQNANSAKTLDMKSLVGS  
ISITTVSASTMGTIMSSMSKNSSSGSGTGTGAFAPPMQSRNKTDWNAMYAKALSNPKP

>comp9720\_c0\_seq6; 509 95 2059 LEN=2661; translated  
MTKFDYAQSNLLKREIGGATSSTGSSPQAPPPPPMKRTSRRQPHLPGRDERPAEGLYP  
SRSMIPHNNYHMSSAAVASADTTAAGAI SAALHAGNQSSAAEKKKLPVTTKKI IHTKH  
KITTRMGFTDAESIANENSEKNQKKGRSRKPRRIIPNEKEYIPEDEQPTARDIVGGRGG  
DEIPLSLFVFSPLLFIFPLGFYCRNRFFVVTAYDCFFLSLLKKCACLDXLINNQGRSNH  
HPGNRPYWRILESRAEYTNCRSDLDKSRIANGILMYVKQTLRGRFLNIDSKSRWFILP

DTVVLDKVKQALRDKYVPYWARDLKI EDKVHSNISPMMATV NAMNKNKGNMNTGNMFMN  
GVPWGTSMPLGNSNMLYP AATMTALNAARANAVNRSNSVRMVSNPNSRRKNKLDLFLNS  
SNRQPSGQSHVIPTVDDILKYRVDQMPMFNGTNNAGLQSNAGAANFANSSVPMQSSVGIN  
SYQSKFPPSWMTSVGASSAAAGMSANHANNGPSSDTNHGFGVGGNPGAPALPTNTMGSFA  
PSIGILQSLDMKSF DG YMEQAGVPPTGMAMGTAAFNMQNANS AKTLDMLKSLV GSSISTT  
VSASTMGTIMSSMSKNSSSGSGTGTGAF AEP MQR SNKTDWNAMYAKALSNPKP  
>comp9721\_c0\_seq1; 183 194 724 LEN=1160; translated  
MVSFFVNLAVVAIAAERVYGTDNADSVGLTDFCNYFLSLKGGCLMWGIALLAAGQSSAIT  
TTYTGQYIMDGFLKIRLPVKVRAVVTRLVAITPCVIVSVFFPRHLNQMINVVNAALGFLL  
PFALLPLIKYNCSELVMGPNNAASKGVEKKMLYGFVGVVWLINAVTLRLVSTTVINCW  
>comp9721\_c0\_seq2; 310 194 925 LEN=1014; translated  
MVSFFVNLAVVAIAAERVYGTDNADSVGLTDFCNYFLSLKGGCLMWGIALLAAGQSSAIT  
TTYTGQYIMDGFLKIRLPVKVRAVVTRLVAITPCVIVSVFFPRHLNQMINVVNAALGFLL  
PFALLPLIKYNCSELVMGPNNAASKGVEKKMLYGFVGVVWLINAVTLSIPGGGFFGDGVR  
MNSWFAKFGWILFELVIQIFYAWWNYSCLFHPLMEHDP SLQADSLPNDEDAAMISLSE  
DNELT  
>comp9721\_c0\_seq4; 376 1 1752 LEN=1841; translated  
XLPNASL MYLCGVRERLPDNIPW WLFDKIEMGFTDNGRDDDNESSIVHDDAQNPLNGENG  
FCGDDDDTDIHR TQASSEMSSLSISPSSEEQALPWEPSGVWWRDMLYFVGPGLVLSIAY  
IDPGNYQADIQAGATTQYLLFSIWWTSILSIYVQVLCVRLGYYSQKTLAEVQAREFRQQ  
QSTWRRYFAWFIAEFSVILTDLPEVIGIGIACNLFFGWPYWIGVIMSLMTTMSFLATMKY  
GMHILEGIMFFFV GIMSIALFVEMTFVGPDPGTEIVKGIYGFVEVTADDMFAIAGILGAV  
VMPHNLYLHTASVQSRKVVRDDVIKAVWYCSVEPILPIMVSFFVNLAVVAIAAERVY  
GTDNADSVGLTDFCNYFLSLKGGCLMWGIALLAAGQSSAITTTYTGQYIMDGFLKIRLP  
VKVRAVVTRLVAITPCVIVSVFFPRHLNQMINVVNAALGFLLPFALLPLIKYNCSEL  
VMGPNNAASKGVEKKMLYGFVGVVWLINAVTLSIPGGGFFGDGVRAMNSWFAKFGW  
ILFELVIQIFYAWWNYSCLFHPLMEHDP SLQADSLPNDEDAAMISLSEDNELT  
>comp9721\_c0\_seq5; 249 1 1551 LEN=1987; translated  
XLPNASL MYLCGVRERLPDNIPW WLFDKIEMGFTDNGRDDDNESSIVHDDAQNPLNGENG  
FCGDDDDTDIHR TQASSEMSSLSISPSSEEQALPWEPSGVWWRDMLYFVGPGLVLSIAY  
IDPGNYQADIQAGATTQYLLFSIWWTSILSIYVQVLCVRLGYYSQKTLAEVQAREFRQQ  
QSTWRRYFAWFIAEFSVILTDLPEVIGIGIACNLFFGWPYWIGVIMSLMTTMSFLATMKY  
GMHILEGIMFFFV GIMSIALFVEMTFVGPDPGTEIVKGIYGFVEVTADDMFAIAGILGAV  
VMPHNLYLHTASVQSRKVVRDDVIKAVWYCSVEPILPIMVSFFVNLAVVAIAAERVY  
GTDNADSVGLTDFCNYFLSLKGGCLMWGIALLAAGQSSAITTTYTGQYIMDGFLKIRLP  
VKVRAVVTRLVAITPCVIVSVFFPRHLNQMINVVNAALGFLLPFALLPLIKYNCSEL  
VMGPNNAASKGVEKKMLYGFVGVVWLINAVTLRLVSTTVINCW  
>comp9722\_c0\_seq1; 123 1 654 LEN=654; translated  
XSSSY PSEVPSEVQKAF LMASPQLISYAFPKTTT DKFLHGLVVKGSIDYGI STFSSNKDL  
TYSFIDDYEGENGVKLWDNREYRSLDLSGNM MYNGGIFLQPNKATEIPPGT AISLEIEAS  
GEEPVVCAWVSDFLPGFGNGWNGWPNTLPPEGFVVS GDFVWIGSGGRAEVGRWYCKEL  
WSDPSLPSDLPSITPSMIPSTIPSTVPSDVTSELPSEIX  
>comp9723\_c0\_seq1; 219 662 994 LEN=1600; translated  
MDHYNDYNWIELPTEVQEAAATTLGYNQNTWDDWDDPELFEGEWSELTHKEKSAAQVLGYS  
EEIWCMEYEGIYSSGTSSPSQDNSSGGSDEASSDASTDATENSSAQKYDA  
>comp9723\_c0\_seq2; 237 82 600 LEN=1206; translated  
MGSDNRMLQTCRARSKSFLTPTRIGLIAALAVVVFV FASLMGTKNR DSELRGGQAAMERA  
QNMDHYNDYNWIELPTEVQEAAATTLGYNQNTWDDWDDPELFEGEWSELTHKEKSAAQVLG  
YSEEIWCMEYEGIYSSGTSSPSQDNSSGGSDEASSDASTDATENSSAQKYDA  
>comp9725\_c0\_seq1; 780 911 3823 LEN=4424; minus strand; translated  
MTSGTTRVSAALLHTT SNLLHQ NYGEASQQRDRGGSKVQ NANTTSLSPFFVNTYNPWSS  
EQKGISDANPPQDANHHHSIDDDNDLSL SVPWGEINIVVTDVH SWIAGNHRDDPRNWP  
LDEHRNRVQDADYGDILSFYQRLGDLVKDHNSN NYGKQRDLFFVMNGDFVDGTGLSENPP  
RHLMP LLLKHMPWDAINVGNHEL YSDKTVQFLVQRDGYDSKMGGNRSTIYPVATPP IWNGR  
YLSNTLLTETMEPMTGKRYTYLVGPNTNITLLAFGF LYDFHENG PATTTL SVEKVIQOD  
WFADVLSGGRNSSTGNDYGHEAWKPFDAVLVLAHMDCLDPLVATILEGIRALLPPDKNI  
PVQFVTGHTRRCHARLDDHSE SFEAGRFLDTIGFVSFDANTRTTQATNGSNNNRQSDSN  
FRHRFLDANKQSL LQTLMRSSHLSHGGNQRGLS FSEGFGTPEGRALTRAIRD TQKDLGLD  
VVLGCSPRTYGIFDYETEPITRAPSSSDANPPRNDWFSESSLWGLYVANVLP RQLLRPML  
ALSQRARDDSSGEEAAEAHPLFLAGTGS LRYTLFEGPVTVNDVIAISP FNNSIVEIVAKR

KGTTDSPGELLWPYGRELSLLLRTNRLYATS AEYGM PAFVASILPQQDFVRENEGFSLP  
AASAI DPDIYRLYTDDYDSWRLISVLAILKFGEGTEDGSVDNNTSFSNDAVDKMLASEP  
LPPITLGRSYETQKACLALGKNDGENENHHNIDRCYYTAELWKEFVRDAMP CDAVATSSS  
GHNIRD PPLVSSNGGGSSSE DGHRIDLLRAQLLQPSFGYSLHAQRPRQEAAPHTGDP  
PPQEASVVDLAGDEKAAAALVGMASIAAIAL LFFFPPRGDNEPPTRGGAPPRARFRQ  
GRCNEGRDHSRRRGNHRTPTAHATTNGNSDSDSDSNRNSVPDEEVQLIPLRRMDTGNL  
SEHSTQS SNYSSY GSI

>comp9726\_c0\_seq1; 158 1 562 LEN=764; translated  
XSPLLI PF SVCQLNPRNIAIMRDGSPKLNDFNIAEFLTYDPDTN QPCGFRSRLHEP  
PWWRAPEEMNTNHTSFVDEKVDIYALGEVLFHIL TTHGPRGKMKKYRMEEVREV  
VRKGI RPD MWE PFASGGRDGKLAQNGVVRAFFRAMDLCFEPDPAKRGTAIQVAR  
VLHRLALAREKEAKRKQQAQGEERR

>comp9726\_c0\_seq2; 505 1 1677 LEN=1879; translated  
RRQLYRGIVVLVAVSCCITVYSTLAVVGNEARGTTSSDEHPMSPDLYLATGRRVSDR  
PRTMVWRPELKRGD SYGSPMVRVPSTLPLHLPPQFVADTADEEAREVFFELPGISN  
ATTEDNHIDGSDSAKDMTAA RNSTSEEGPQSSATTRDGK KCLPMADWMEASFPNCNS  
VHEIDMRTSVSTANGEDETEADLKF LQGWF RATWKYRNYDYDYEEEE SDEEPEGN  
DESLWKPPPPPSAVVLKTLRIEREF LDEYFDLHRRDAVAMERLTFSPYVVNVHGYC  
GQSAINELAE GILGGKI TNLEQLDRRLRGKEEDPQALFLKLQLATGVALGLAHVHN  
VHVSDASGGRSGSVQTLLYEH TDPDSAHS TTGFGRSVPTMAHYDLNPRNIAIMR  
DGSPKLNDFNIAEFLTYDPDTN QPCGFRSRLHEPWWRAPEEMNTNHTSFVDEKVDI  
YALGEVLFHIL TTHGPRGKMKKYRMEEVREVVRKGI RPD MWE PFASGGRDGKLA  
QNGVVRAFFRAMDLCFEPDPAKRGTAIQVARVLHRLALAREKEAKRKQQAQGEERR

>comp9727\_c0\_seq1; 322 262 1587 LEN=2317; translated  
MVLTDQR EDLHAGIYEYLVNRGEAF EAAAKAFVEADPKASQKKTNNV GKTPLLEK  
KWTAIPRLQKKVLELERVVAQSAK IHAHRTGGGDDAKANGGVSRRMLPRLPCSHTLQ  
GHSAAVTCLKVHPVFTVVVSGSE DGSVKVDHESGEYMRSLKGHTNTVNSLAFTPTG  
NYLASCSSDL SIKLWDFSTYNCVRTLRGHDHTISSIVFLPQQNI IPSASEDSSTGMD  
VAAANAKHLLSASRDHTVKLWDMETGFC DHTFTDHTDWRVTLAVRSHDGA IWASAG  
NDPFINVYDANVNTRQK LCELRGHDH VIESLSFVTEESFGKDRAGSNAKHKDTVRD  
YLASGSRDRTVRLWLSLASASC LAVFSAHENWVKAVVIHPSGNYIISGGDDRTIRV  
FDIKAERCLRTLENAHGHFVSSLDMH HTLPIMVSGGIDQLLKTWVLD

>comp9728\_c0\_seq1; 485 240 1248 LEN=1248; minus strand; translated  
MVT P GFSTSHANANDSNKRMRLSAQTEGG SVGMLSGGTD SGGHRRIQHMGRRLVNR  
VTF S ASDSQVMQNN SIQHPAKMTMAQWQSMRSTGTMHSSAAETVDPLAASVYDT  
VRAGATYCGM CIEPRHF PKAGSLRNPFRSNIFSEQQRQQRQQQKVS DSGRFSGMDG  
HEEHQLWQHDASSASQGTWRPSYQQMQLRQPEV GQDKQQQPQMAV PFFPYKPE  
THACSGILEIQDQQQGED TLEEIP TVGLANVCADDEM VYDDRAIIPSPPKDLKAH  
VSDVFTSFFSGDSAPSNNDRNTT TYSSHAENGGDFAAPPLKGLSAQISDLFTSFFG  
KDQX

>comp9729\_c0\_seq1; 533 84 2102 LEN=2191; translated  
MANEKFSTRRKLHWSGSSSTEWSASPLPPGSNSG PLVVHEWDVIEVLESQDAFDG  
GCSSSYRDNRHESKKEPSAWRCRRRKRWKRIIVIFVTFLFLWIVAYFCAKKFTL  
GKYENTRSIE KEDSSLDL DL LAGKAQQDQGK IAVSCGNMPSEKSENTSSKEKQNS  
DL DL YLTGKVEQDH GKTAVSSGNMPSVSTKEDLSTMNTAGAA SYVRDQVPSATN  
MTTKAPNVIIEPKEIVVLYP NEFISAGQFRYSANGRFKVGLAKEHGDLV LIEV  
NSSGEHVIWSSGTSSGLNRNSTGETKC FMQADGNLVL RDINTMMSLWMTKTQGN  
LEARLVLDDSGRIAVRSDDNYSTILWMDGIPRH EFTRPSSGNMTFPIRGAFYYP  
ECDTFATLHGRLHKL SNVFNTHFMSCPFLLHLAGIRQLG XINGHPAHYDTSLG  
MYSSSDPTVANAHVAAMDFGRIQLS IASWWGPNTNLDRARLTL LMD ESIAQGS  
PLKWTVYHEDERDETPSPEEIHNDLGYLEKWF AWHKAWAHIDGKPVIFVYNEA  
GCDVVS RWMQASEGKWFVVLKLF SRFENC PDQPD SWHQYGVGEKDGT VHNPGH  
SFVISP GFWRADTDVPI LKRVNRTQFCRQAQTMVQSKEPWQLIVSFNEAGEGTL  
IEPSPDWESDSGY GDYLDCLHDSYV

>comp9729\_c0\_seq2; 590 84 2003 LEN=2092; translated  
MANEKFSTRRKLHWSGSSSTEWSASPLPPGSNSG PLVVHEWDVIEVLESQDAFDG  
GCSSSYRDNRHESKKEPSAWRCRRRKRWKRIIVIFVTFLFLWIVAYFCAKKFTL  
GKYENTRSIE KEDSSLDL DL LAGKAQQDQGK IAVSCGNMPSEKSENTSSKEKQNS  
DL DL YLTGKVEQDH GKTAVSSGNMPSVSTKEDLSTMNTAGAA SYVRDQVPSATN  
MTTKAPNVIIEPKEIVVLYP NEFISAGQFRYSANGRFKVGLAKEHGDLV LIEV  
NSSGEHVIWSSGTSSGLNRNSTGETKC FMQADGNLVL RDINTMMSLWMTKTQGN  
LEARLVLDDSGRIAVRSDDNYSTILWMDGIPRH EFTRPSSGNMTFPIRGAFYYP  
PWYPSTWHINGHPAHYDTSLGMYSSSDPTVANAHVAAMDF

GRIQLSIASWWGPNTNLDRARLTLMLDESIAQGSPLKWTVYHEDERDETPSP E I HNDLG  
YLEKWF AWHKAWAHIDGKPVIFVYNEAGCDVVSRRWQASEGKWFVVLKLF SRFENC PDQP  
DSWHQYGVGEKDGTVHNPHGSFVISP GFWRADTDVPI LKRVNRTQFCRQAQTMVQSKEPW  
QLIVSFNEAGEGTLIEPSPDWESDSGYGDYLDCLHDSYV

>comp9730\_c0\_seq1; 1063 172 2046 LEN=2215; translated  
MGGNKFQDIFKNLEKKAQQLMDSSEADDEILKEIRKNNPQTIADGEDYE CTFQSSVNPT  
RWEKAVVALHGMVKQVSKVDPDGM DIVCFGGSEDKRGKISLYRKVKNIKDIEAMVTSKLP  
SGPCHMGRAMDFVLKEAFDRGFERPCGILVLTAGIPDDSERLEKTLQVAAEKIAAKGYKE  
SPLSVTFVHVGDDEKAEDYMQHLDKNMKSHKKSRKTRKVV DIVDCIKDSEIKAAMAEIKG  
TKSSGTTGAI V GAFAGAAMVGGM MYMKNQAKKRTEGWNGHW RATYGGCEIATLKVKDD  
LKGNLKIEGFSGGKTVGKYAERQYGYNITFRDADEGWKITGDI EDEHNIFWSDGTKWEEI  
PHKGAKFGHYAGAAAAGAAATGGAVGYLLDKKFFKKAHKKDQADYVILVDRSKQMAVKDRS  
ALTLSGTDDEYDFVEEYKPDVAETEEDDSGGDGDGGLI STATKKFEG LSTEQKVAVGVAG  
AAAVAGVAAAGVVAHAVKAKH SKNDGDDGAPVVQARAVGASG SV PGRAPAGV NQGLTGR  
WRATFEGDELASLVVKDDLDGILTISGFFAGKTIGRYTRNSVQRIVKIH FIDADENWAVH  
GEVKG GDSSEVIIWKDGRWDKIF

>comp9731\_c0\_seq1; 401 1 2464 LEN=2570; translated  
TMVSLPKATRRPLQKRALLSNPYMKNSASNDSGILSKLPPTLPSRTIRPPTQNP IRDSYG  
TTNSNHTIVSTL PNKTSLSSTISSTAMNDPCSMQKTQPNNPVYKTTARNDTI GLTRRNSYG  
KDARNSVSSKETGGNSLIHGKMLRQPQKVP SVVDGIAPVVRGESAMNTTVALPSRMASIR  
PASWQKTTT SANASSRSQPIPTVSTKSVSNHSYGNSSSQNDTTNQPQHRHQKIEDTADWL  
PPELAYS PDEVKPIQDQYRMPLIKNANLSAPLRNGWTLFPHQKKA IIRGLTMRRMILALD  
MGLGKTLIGAVWSKAFKDTFGHNKLVVYICPVTLKEEWKRTAE EKVGLGVEEDQPGRGS  
KSNARKTKKPAKRKKSHQDGCQIEDVDKMHGSDLKMSICSWAKVPKAI EPCVEHFV VCC  
DEAHAMQSTQSQRTKDVLNLVHDKRCVGVLLLTGTPMKNKPGNLFPLLKAVRHPLGRHQ  
KAYEAHFCNGMIKNFGRGPQWDACGASNLDQLRRKVASNLLHMTKEQCLTELP PMTKIFH  
DVPVSSRFQVQYEQSIKNLASIQANSSNMREEAVLGAVQRLRVVCAA AKVDATVEMARSI  
LNKEPAIVIFSSFAQVAKSIH SKLVASKWQCSLLTGETPKKKRQEMVDRFQKGLSAV FVC  
TFGAGGVGLTLTAASTI ILLDRPWTPGETRQAEDRIRRI GQVKDCTSYWIRSF DLDKQID  
GMLESKSQTANAVLDKNGNQSS TTGGGGGKISITQLSINLWFLNQENNEF SKTGIAYFN  
CSSSHETA FNCKSKLVDTCWYAQEGSRVTRKKN TARDPE

>comp9732\_c0\_seq1; 390 2115 3074 LEN=3242; translated  
MMAGHNKWSKIRHKKGANDVKKALILGKASKSLTVASKECQGDRSDMRLQAAIQHAKSVQ  
LPRDRIDEAIEKGT KPKSGGEDDFPLRFDAMMKLEGNRDPGSSDSSVPSVQVACIITA  
LSDNRNR TTQHVRLVTKFGGEFLPTDHLNLYLFDHVGHILVEIAV NKIVDTNSDVEEAML  
ILEEELMECALEAGAINIEPSTDDGEEDDTEIDGPTAATEATARFVVSTEEKELWKV VRA  
LRGEATKDTIEDDNGDSTARWNLLRFEHRYVLKQDYGEVAGVHSESPARDSLDTFLEQL  
DENEDVHKVYHNAALLQLS

>comp9733\_c0\_seq1; 643 179 2323 LEN=2323; translated  
MLGVPSCQHTFQSIE LLNLHSTEAIMIHSIQTIPEETVLRVPDSTPTSSPSSNRSSEPAY  
GRSWKGDIPQQLHVSRLPSGSLSLGPGQVAIVPVTF LPRYPSIDNCGGDEASGFNENND  
EDNARSDDYYSTTVPDGRSPPLSSTSKL DLVLDVGERVLK AIDNKRQYLRHTLDPT YRR  
RNNMNPSSLPKGDEQYEVTTTIVIVDTSRGVVKLPISASSIRDNL YRIPDVITFYHPSVTK  
NDNDKNRTEEDDEFDDYDTTAE TRKKTTSNTEHARLTTMNGVT LFDTIHASDNDGDG  
DEKNNPASLLDTIKPERECFDLYLSNPFDPRELQVMEALISRPEFVSVQFDPVRMAAPDL  
TMLVSGSPSQVLRQWTVDGPLYLPPDSKQYILTICTAFEGEIEPDEGSETYLD EMSKWI  
DSGDPDKNLGFLQIRTD AETL FVGL EHAENVPFLSLQPSTYKNLSSDV SAGSGTDKNRS  
GTSTLLKSF PDR LKFDMI STASRALHTSFGLQNKSPVPIRIMRVTVGIDSSGDEENAREA  
KLIGLKLKIGLKG SNGKVENSSDSDFNALGSLILGAASSLDDVLELKC SLNPDYFSDS  
NKE SFNFMGT VVIRGTMDELSYHQWREETLQNPYRDEHLTLELPFTVT I LNGRVEALIE  
QSSHPYPQLFAAQSWDGSRAISHLFFPMNQYAAVKGTEDVLPQQMYLGANEIRH

>comp9734\_c0\_seq1; 186 1 1086 LEN=1086; translated  
TQHTTAAATMRVLP LRPVALLLLPLLPAPSVCLSQPSRSGWKPSIESLADRVALRQREVR  
TETIGSLGFHHVEFYCGDARTTAH HFCASLGLSVTGTGQATGNDKCVSYGLESGSNGEA  
LRILLTAPYSLATASPASDDPWEGENEDDDAYDAPRPLPGFDAASAHSFFRTHGLAVRAV  
GLEVADAGAAFRASVQRGAIPVLEPTVVRACRAQRQAKGDGKSQAEGPSREMAEVELYGD  
VVLRFVGP TGAGGAVAPSGEMPFLPHLAPTGDGDGNGNPSEGFGIYRIDHAVGNVPDLEE  
AHERIKAFTGFHEFAEFCPEDVGTVD SGLNSVVLASDSEEVLLPLNEPTEGRYVPPRKRN  
RR

>comp9734\_c0\_seq2; 389 1 1548 LEN=1819; translated



TQHTTAAATMRVLP LRPVALL LLLPLLPAPSVCLSQPSRSGWKPSIESLADRVALRQREVR  
TETIGSLGFHHVEFYCGDARTTAHHFCASLGLSVTGTGQATGNDKCVSYGLESNGEA  
LRILLTAPYSLATASPASDDPWEGENEDDDAYDAPRPLPGFDAASAHSFFRTHGLAVRAV  
GLEVADAGAAFRASVQRGAIPVLEPTVVVRACRAQRQAKGDGKSQAEGPSREMAEVELYGD  
VVLRFVGP TGAGGAVAPSGEMPFLPHLAPTGDGDGNGNPSEGFGIYRIDHAVGNVPDLEE  
AHERIKAF TGFHEFAEFCPEDEVGTVD SGLNSVVLASDSEEVLLPLNEPTEGRRKSQIQTY  
LEQNEGAGLQHLALKTRDIFSTIRKMRQSEKDVFGFELMKRPSDEYYRELPDRLGDQLTQ  
DQYEQLEELGILADSDEEGILLQVFTKPIGDRPTFFFEEIQRIGCVVSQQNGSDSEHEEA  
GRGTPIERPGCGFGQGNFRELKFSIEDHEKTLKV

>comp9735\_c0\_seq1; 313 224 1027 LEN=1076; translated  
MVFFSCDGCGEMLKKNKVDAAHAARCRQCASVSCVDCSVSWGDDYRLHTSCISEAERYEK  
SVYSKPKKTKRNPQQEWMDIVETCASSAPPHLSHHFNTMTLDNI PRQEKKFVNFASNSL  
QLRGHNKKIVDEIWSCLKQEREKRIAERDRQQEKEEKKELAEKEKQQQLERAAAARKSE  
EKKFSKNGGDNDLPIDAKQVKKIAKKTLLKKAQGKSMAIKALRKT V GKELGLPKSAKKQLK  
KILLE TAKASKDKIIIDG E IIRLKMNE

>comp9736\_c0\_seq1; 288 475 1411 LEN=1557; translated  
MAVAPFLFQRLF AVPVDEIPKKNMGDGDVNNNAEKKILIPPGYNFFQRSGRRNDGGDSNN  
SAATNSKTSGYVPSGMSRAEYAAIRKMEREREQKMSYGAWGPRFKRTDRPDGDWVMVNL  
WTLGQIGGNNGKQSNVGT DAGNGTGS DNTGLRRRIQSLARRHGPAFILGYVLVDCLYS  
ALAMWKFQQIRDIVMLRNAYGPAYAVYR LFRSVL FALLRITPPQTQHLMAAGQILKPAVT  
KLAETTMAPAIVAYIQIHALKIVLALSQVRLWNL MERANRRWLCSKSRFAITVASAATV  
GLAMFGILLLR

>comp9739\_c0\_seq1; 689 188 1972 LEN=2138; translated  
MAFSSRCTRFHRSQAIRRCIRTISP AVAVQSTGLSNV LIRYSSEKNTLCSQSVP AFRA  
SSTLLSSSASPLTETNADQEEDEPFIEEDTIFALSSGFTGEQATAVAVIRISGPKATSV  
LEGLLKTSP TSKPRLPKYRMAALRKL YHPADHSILDHALVLSFKGPN SFTGEDLVELQCH  
GSRVIVQRL LNEALPSLGCRMAEPGEFTQRAFAEGKLDLVQVEALADILAAETHLQVEQG  
LKHLGDGVSKTYEEWRSQLV SGLAHAEAVIDFGDDEHLLLGDEEEDDDGLSDEALQQQQE  
SVWGEV GAKMIRLKE SMEDNLEDGRRGELIREGIKVAIIGPPNAGKSSLFNVLARRDAAI  
VSP IAGTTRDVLQVSM DLGGVKCTLQDTAGVRS DTTDILELEGMKRAKSVIQEADLVVAM  
IDVTMASHGMEIVRSVLD DCDIGSDDDDERISPQRMLLVRNKNDLLEETAEMDDAQREEQ  
ESKFGDGI FDISCQ NQEGIDTFLDALTQEVVTRTRGSADV GEGAMITRARHRQHVEAAVE  
ALERFAMLSTQGNMAVDMAAEELRLAGSELGRITGAVDVEDVLDVLFSDFCIGK

>comp9739\_c0\_seq2; 226 98 883 LEN=1049; translated  
MAHRTVGP PNAGKSSLFNVLARRDAAIVSPIAGTTRDVLQVSM DLGGVKCTLQDTAGVRS  
DTTDILELEGMKRAKSVIQEADLVVAMIDVTMASHGMEIVRSVLD DCDIGSDDDDERISP  
QRMLLVRNKNDLLEETAEMDDAQREEQESKFGDGI FDISCQ NQEGIDTFLDALTQEVVTR  
TRGSADV GEGAMITRARHRQHVEAAVEALERFAMLSTQGNMAVDMAAEELRLAGSELGRI  
TGAVDVEDVLDVLFSDFCIGK

>comp9740\_c0\_seq1; 218 171 554 LEN=733; translated  
MPTPKTIVK SLLSFSFIPGAFMTIMGLGLVPLDEAMIPVAAPFIDPFGIPMKGFLLVLGP  
CKILGVLALWGIGPMEWIARLGLSLSATCAVYGHHSVGESVVPPLGYLALMGGLYALDS  
QGKGKSE

>comp9740\_c0\_seq3; 218 335 718 LEN=897; translated  
MPTPKTIVK SLLSFSFIPGAFMTIMGLGLVPLDEAMIPVAAPFIDPFGIPMKGFLLVLGP  
CKILGVLALWGIGPMEWIARLGLSLSATCAVYGHHSVGESVVPPLGYLALMGGLYALDS  
QGKGKSE

>comp9741\_c0\_seq1; 379 1 1412 LEN=1612; translated  
XSETEADKANKVLIMEQDYGGSKMLLAKSSVLSKLGDNESH TIENFHGSGKNLIIRVHNK  
ISGSEVPVDIYFENEIQPYETACKDQVRFEVNFVTDAYS SGNVGDWLI SDETKN TVAS  
HPVSDS QLYSMYNKLCIDPEKDYTFTFNARHGIGICCN GGFYSAFLEGE E IFRGGEF  
GSFKFE GDTSPKVYSVSHK FRAEKGSLEQLSSLFVFPFQTPSSCIDNPTYRWKGRAQWDC A  
WVAEEKDKRCSKEINGERVRDHCQRTCDSDCTGVKDPRLTPVTAPT NAPGNVFC LDDPN  
FAWKNTPSWNC DWAAEKEKRCRSKDG VNVKDL CQKTCGTCSGSTKPSADESKIDDPN  
FAWKNTPTWNC DWAAAKNRCGKSKNGVTVNDHCRKTCGTC SAGTNPTSPGVDPPTDE  
DRCIDDPNFTWKNNPNWTCKWVGKARNKRCGKRNKRVK VSDHCRKTCRSC

>comp9741\_c0\_seq2; 327 108 1210 LEN=1210; translated  
MNILSLLLLIQCGIVVASTNLQEPTNVSQRQLRGGNIDINNNVEESRLDISKSRNLLDLG  
PLNTARYLGQKELLVIRIEAKDSSTTASESEVRYDVFESEVNVPKQFEACSRGKLSFRPA  
QGTNIKDG VVTVKLNKVVGKMAFATNGDSVVKDIESMAPTMFGREL RGF DQVIMCMP PGV

TVVNP SGVTTDKFTA FVP GDKPYAFFVSIYND DWCTSL SAGMHEIGHTLGLNHATEVING  
QHA EYEDE TGMGYS AKSKT TPLKCFNPAKAWQLGWYAEQSKRINPLIDAPLRTILTGIT  
RDINDNDQSKN ILIQIPNGDKNIYIGYNHAIQYSETEADKANKV LIMEQDYGGSKMLLAK  
SSVLSKLG

>comp9742\_c0\_seq1; 383 373 1401 LEN=2243; minus strand; translated  
MKYAI V T G A S P S S I G F I A A K K L A S P E F G Y K V I L A C R S D E K G R A A E D L I R S A H P S S Q V A Y V  
H L D L S S F A S I R K F V E D I H A L D G G A I P D A N R P D S S L S I L V N N A G V G W G K D T P F R E T A D G L E  
E I V G V N H F G T F L L T Q L L L E D L E R A E G G A R V T I V S S L H E K N E Y M A K K T T A D R D E A I E I D P  
V K K K L L L P S F P E G L V P S R E N Y D G M K A Y Q V S K L C N L W Y A Y E L Q R R L D G G E A G N S S V R V N A L  
S P G F I P T T G L N R Q A G T L G I F F L R F V L D P F R Y F G M G V T R S P E D G A E T I V L A S T S E A A G K G G  
Q Y F E L P R G A T E I A A I A S S A E S M D D A K A R A L W D L S L K T C Q L E A

>comp9743\_c0\_seq1; 510 1 2422 LEN=2473; translated  
X A E E D Q T F D F D V Y K K I P K R R S S I R P D V N G A I S D S I A K T V N K M N S T I D E T N L F S K I E K R V V  
T R K T K R S T G K E K M A A R E I L N G K I D L L R I L P R Q D C N F L S T V C F I F T L E Q L E W V L N E D Q T V  
K D A S S R Q R V R E K L M L N L K E N P T M I H E S K K L E I E T P N G Q D E K A S G R V F S S E S W H S V A E H S S  
S R A F L A G K K L N V R K S I E T W R Q G D F N T S D N D Q F P L L D G P L S L L F P I G T L Q F L K S I R V K S A  
F D F L C L R R T E S G P V V M F R A W R R Q C G L R D M N L H S L S K H L S R I G T C I E E S L K G K L L G G N E T  
S K R I T G A M G V L S G V A K E F L I D H S K M F S A A Q F I E Q K T T K I A D E F S K W R A T K G L S E L K S S S A  
V A M V S A W K T Q M K E Q L L I Q S S E G R F I S E E R M I E A T D S E I K M I G L D D N R G Q S K Q Q S E T S S S K  
A C S A L D S P E F F S N F F A D E Q K L D M F K S V G I T C A R N F I E T S K G K N S R L L K A L V Q M N S P Q K N G  
E K V I V E S C I T Q L H D W S S Q M K K R I D G I E N T G H D N V Y K V G E I G P N L N D N R T S R S V S K E S P R F  
R K S A S T K D S D R K S R S V S K Q P P R M R K S A S M N P F D A L S S S N K E F L L A S M N I S T A A D F L A T R T  
T D I A K A F M K W R E D R G M P A L K G L G A V A S I S G W K T L V R T K A A S L G E S E L V E L N R A R N A K H I Q  
V V V N S K P G Q A K S G G H K M K N H L E N L G S S K K K A K P I L Q T A S K F Q A K L S V L S S K T R N V F H F E M  
E D R I G P S G K C N T Y I T Y L G N D A A T D L T M E R N V N K K K G C V P I T I D L S G K L E R I N G R K P F D P S  
T C G T I E L S N S I S S N L S S H Q N K P D N G K F

>comp9743\_c0\_seq2; 1006 1 4150 LEN=4150; translated  
X A E E D Q T F D F D V Y K K I P K R R S S I R P D V N G A I S D S I A K T V N K M N S T I D E T N L F S K I E K R V V  
T R K T K R S T G K E K M A A R E I L N G K I D L L R I L P R Q D C N F L S T V C F I F T L E Q L E W V L N E D Q T V  
K D A S S R Q R V R E K L M L N L K E N P T M I H E S K K L E I E T P N G Q D E K A S G R V F S S E S W H S V A E H S S  
S R A F L A G K K L N V R K S I E T W R Q G D F N T S D N D Q F P L L D G P L S L L F P I G T L Q F L K S I R V K S A  
F D F L C L R R T E S G P V V M F R A W R R Q C G L R D M N L H S L S K H L S R I G T C I E E S L K G K L L G G N E T  
S K R I T G A M G V L S G V A K E F L I D H S K M F S A A Q F I E Q K T T K I A D E F S K W R A T K G L S E L K S S S A  
V A M V S A W K T Q M K E Q L L I Q S S E G R F I S E E R M I E A T D S E I K M I G L D D N R G Q S K Q Q S E T S S S K  
A C S A L D S P E F F S N F F A D E Q K L D M F K S V G I T C A R N F I E T S K G K N S R L L K A L V Q M N S P Q K N G  
E K V I V E S C I T Q L H D W S S Q M K K R I D G I E N T G H D N V Y K V G E I G P N L N D N R T S R S V S K E S P R F  
R K S A S T K D S D R K S R S V S K Q P P R M R K S A S M N P F D A L S S S N K E F L L A S M N I S T A A D F L A T R T  
T D I A K A F M K W R E D R G M P A L K G L G A V A S I S G W K T L V R T K A A S L G E S E L V E L N R A R N A K H I Q  
V V V N S K P G Q A K S G G H K M K N H L E N L G S S K K K A K P I L Q T A S K F Q A K L S V L S S K T R N V F H F E M  
E D R I G P S G K C N T Y I T Y L G N D A A T D L T M E R N V N K K K G C V P I T I D L S G K L E R I N G R K P F D P S  
T C G T I E L S N S I S S N L S S H Q N K P D N E L G I T L E E A I K H F V L Q K K S F C E G V E N T N P T Q M V S M V  
H N E I D I I E T K C S R Q K F N M F E V L R N G R K K L I V C L V D P I E K G Q T V K L E L L A L E T F H S S W L A E  
T N A G K I R K W I Q E R L S K L P I T V L I E L L E F V T E D I A V H V F K H L E S A L K S I T P P F C N E K N E P G  
I S S L T S T E L V L A R R R I H W V A V K I F E N L Q S T K T D L T C R H V S A E L Y W T K E F V D K L E D N L E L K  
S I V A E P I R K E I I H E I N H E F V Y R G F S G F A S T K N L W C P M A N K L F H C T L D L F V G L S A E C G E F S  
L G E N L T K K L Q S L V L D C I L E L R E S S V F D S H T N Y E N E L T K F A L V Y K K G C R L D S N I L P S F D D I  
K E T L F I R P Y V N A M E L C N E P V S T L D S V K E I Q I V A V H E E R S S Q G K Q V T C F R D L K N T V A L E G T  
C I D V H W Y V K T Q I L A V V R T A V Q S S L Y T L A L D D V K S S F V T I E S Q I L D A A Q R A L G G T K V K N P S  
L E N F E I D K Q S V H S I Q G S E S K E P L G T T N Q L S P T P S S K P F F F G L V P H L K Q E G W S L I A G D A P  
S E I S F V P P V P V K S Q N I N Y H R K D S L L K K R S N Y A T E S N S F G L G Y V P K L T K R L L I Q C L E Q N N E  
V S Q G

>comp9744\_c0\_seq1; 1003 200 2117 LEN=2210; translated  
M G L S K L D L I A C T S L L F L A V D G F V P S A P R T N S L T I R S M V S V S P P P S S A F V E D D D D D Y G E E  
M V D Y D A Y D E D G T M E T P E S T L P K I S S Q P I R R Y K S L K K E P L V A I L G R P N V G K S A F V N R I C G T  
Q S G G A I V A D E E G I T R D R T Y R N A N F L G E N F Q V V D T G G L V F D D N E K T L F A K E I R E Q A M V A I D  
E S S G V I L V V D G Q V G M T G M D Q Q I A E F L R K E V L S R N L P V I L A V N K C E S E K I G A L N A A E F W N L  
G L G E P I P V S A L H G V G T A E V L E Q L F E G I Q K Q S A A L P E F G T K V E R L K Q A K M R K N S K K Q L P G  
E D E I D F K I K Y N I G D V A Q K I E S E Y E A A L A A L D E M E R P E E I N V A I V G R P N V G K S S L L N A I F G  
D Q R A I V S D M A G T T R D S I D A I M E R P P D E E G D L P T I Y R F V D T A G I R R K G K V E F G P E F F M V N R  
A L R A I R R A D V A L L V M D A T A G V T E Q D R I L A Q K I A D D G R A C A I I C N K W D A V V D K D S S T Y D K S

IKYIRAEMPQIRWAPILFISAETGQRVGKIYNVVDEAIGAHRKRVSTSVLNEVLRDAILW  
QPPPARNGAQAKIYYCNQVSTRPPTIVVFCNDPKLVNDNYRRYLDRKFRESLDGFPEATP  
IRWIFRGRQRDIMRARDMNGDPGSGGAGVSFPFPHAG

>comp9745\_c0\_seq1; 1862 1 3722 LEN=3842; translated  
XMEFFGSSQESTEWTIKEKQKSTCIDKLEGSITLSEESIDADIICELESVTQLRCGLHLT  
DQOQEYELLELLMLLRGETLSEKQKEDFEELKEKRNQINSNDDYMYDLLNRSSSIELVNE  
LRHTIELSHRDLNGEALSEDEQIELELFDRRRDGHPLTEDDLEELDLMRSKRKQQNPCFE  
QPDDLEESKEDDDSLYRRELLSKQGGQRLDKKEFQWLQILMKKSRHEELNEKDI EELE  
IMRNQRNEIEIDIVNTKQLLEEMKKQERRKIKEQRRKEKEERREQRRLKEKEQRQKAKKM  
RRKKKRDDSETGTSGNIPTVQAKHDESNGGGYAGKTEDTIVSPQIQSPVPMKEKKEEKPR  
GWGWGGNNKKKKQQEQLEEAQRIQEELIREQMKALALEAEMEELEREKAMQEQLVQETI  
EKQKADASEDGSSSWETDSEEDFDDFESDSSSWSSSLDSSVVSKNMSEEPKDDTQNKNI  
DESVS KATQVSKASRKDVAKATSGGDHENAGEEKGSTKKSLLDFHFKKTKKRGSKKTKY  
GDEVSLGSLQLAKSQEALARASRNAKLTEAEGTKTYDRPWILDDPEHRRRIANGYSSNAKD  
ILLSPKKKKVTSVESNATLQFNQSFVRKISVIDSEDEADSAGLALSDVEEGDEDESDDDL  
DYTKDSFLDSLQSFASNNNDIEPQDDNGNDDVDVDDENTETRAETIEDKEAEFDTTW  
ETVVADENVIAQINQRLRERKRKVKETSKDKKKVTEETEE SRSLQDVPRLFLFEGEKAQVD  
TKKKRKQKKKNSQKKKDRTLTKFEFRKAMQDVF DANLEDEYKKGKEAEDDRDDSDAIGPN  
FAQKPSNFVYGDNDSDAVSYSENGAHGDPVSDSDSDTFDGGYLKRLQTRSMQH  
DLKKMMSGRVIMPMKQQLSDAVSSASGYDSLEVGRGPKRKKDGEIASDEIDPADIYTQE  
LEKQQIGKKAFTVASLRKEMEDMKNNNSFNVEGRENFGSFDNFSDFDINTNQTSKRRTK  
KKSNTSVDNKTGKGVESFEHNVGFKQSTLSQLPKNRVSLGGLHGMPATIEEEDDED  
DEEAEAILTAGLTSDFGRGKSENSMSSLRLGVSNIKSLKKNSSGKLLKSIRSSFQLRK  
STQLGSDGLLGGDMNDPFGNGRGPALGEGFQNETRMPVLGTEPLPVPEEQHDDDVDRRN  
ILTKMNTLSSSKAMLSKMKKSTSTFGSSYGKRFMLNDDE

>comp9746\_c0\_seq1; 516 64 1191 LEN=1408; translated  
MYSDLFDALGGNPNSSSSNARNNSNDSDEDKPLLSFKAGKVELALQENGKFLATPDTRR  
CQVNLKYNQD SKLIWEWYDRREKKVMDTICITDPVNLERADVPKSQDADCNDRVYYWKL  
SEWRMFWLQDKEEDPELIGKVNAILKEPTKSTEGSEEAADATASADPVSARSPPSSVST  
TTRQVDALSNILENLGMPQGADKSSGAEGSAGAAPAGTGGILT LADLQ SAMGGVQKQQE  
NTNTPGLHEVTPGAISSLLADEAVRNRLQELPEEQRSPEFLESCLRSPQVQQT LRLSLT  
AALLPDDNGSTDGYHSVLANFQLDAADGQKALSEGKSPIQAF LDCVLASVEKEKVD SGKD  
DNKKSEDEDAEMKED

>comp9747\_c0\_seq1; 1073 1 3309 LEN=3362; translated  
XEKAVFRLPTPPSSDSSSGEDEDEGRSQTVCETNHPTTSSGVAVNNEFEFEENKNASGG  
IPQQIAIQAAEESDNLRTTASDTKPVQEE SDNDRGGDPRFSQSNAAGLDTKPEIKAI FR  
LPTPPSSSSSSDEDESDNDTEVELLPQSGTIEGRF SHAAPLVKASTFHEEDMNRGEE  
VQNPIDNLDHNDHTMINLEDKFKRKLRLPARKGQLGGSSPYCEQEKL VSGVSSDKDLALS  
SLKPKPSVAKEDKALTLSSVEKGNHFLGFEGDDVALSTLKKSSITKTMSRNDGYHMDGT  
ACGKDITSDSPLKILEGITLKTSONDVLSLRLKKNERNKPAVENNVSSGKNRYVEGERF  
RNDSEQNKKRKKDAGDDTSDDEDVPLTYFKKTRERSHDAEKSKKDSPDILDTPCDRHDG  
SDKSHNQNSTVAKSERCIRPRLLETPEGSATDSLKESSVPTQSPSQEIVNHLKSGKNRK  
RLRIGTDDSD EENGEERLVTGLSYQTMTPSSSSVNNSTLR TVEDTPKTASDPI SRFLRD  
TPNNADAVGLLTDTPATKNGDIATEIVCQICTSGDTTDKDP IVLCDGCNLGFHKL CYRAE  
VDVESADPWFC DACKHPSRCLSSTTCTFCCQHNGILRKDGATFCHPLCLALSCKMTSANC  
SVC SLFGAVQCNLCSDAAHPHCALDSGWTIVHCAATKGQPMKHSMFCKHSGNADQLSSE  
NTRIIRSKKKTNMNGSQRPKLKRKGKNTYERERTQSEKVFGTNNFREQEIEI LDDTDDD  
EEIKKKEKESLKERRRRGLARFVLDEAEIGSDQDHDDEIENEELRLLLEEEEGTGSQDSFI  
NDNPDLTQHFSQDVLGDVDPDAASTDFVYGACKNRDENDSSGSSNIHRALDARREREHQF  
RTPNFNRSMRAPDSSSPSYTENGCSPSSERGLGRMHFIRSVLEHHRQGGDCDEIESEY  
KRL EASAGAVDATLSQIRSESTPANDRNALIDLRSQTNGTDSPIQLMTDGLRPAISNG  
EVNPIRSSVERLNASSTRGASL CFLGSATDTKTTEAPPSQQFHSPGRVNGTATTLTAEQL  
ARIEANRQAALRRRAQFQANQKA

>comp9748\_c0\_seq1; 360 94 1765 LEN=3824; translated  
MSGSSTMKMLDMAITDLECRGLGKPGQGTGSGKGKQPKAKKNNNNNNNNNDNKNTTGT  
IPSAKTCHKCSNVMCSLAEHRPEAPP GSPTIGGGVANILHTEQPGSGACFSTNHGEQQQL  
QQHGNFVAGQFRGKILNQISFEFSGTPLHDMVRSPGLVRAIDWIDNAWPSREKYKTKNR  
GPKETGSTGSRAPGGRTGTAKGNR KATKGSIDWEYPVVQYYCLTSVSGAYTDFHIDFGG  
SSVWYHVVS GSKIFCVLPPTDTNLEAFQEWLCL EQSSVFLPDLVRDRADGNGDGCSETT  
GRKCYVSGFDRDSFSPDATRDWRHNTAAFRFLLESEGETLILPAGWIHAVYTPRDSL VFG

GNFLHGWDMMQLKVNKLEAHCGVLDYRFRPHFGALQMYAGGAYLGRLEERASAATKCR  
RRKNTKAKPRNRNAEAFVSDQELKELSFLINELDYWWALEQDDRGDGYSNKSSKKKSKST  
HTRKPTKMANAGNNRDKKDGFLPNMVLVTSRASFRKAALCVLRETGCKSVEDFLASLRE  
EQEWATNDRQLQKQNNL

>comp9749\_c0\_seq1; 300 398 1651 LEN=2045; translated  
MEHKQELGHKEPTPHEIQKMEMDQAHHDIHYRNHYHDNPNQQLASRLPSSPLQQDVAVST  
TAPSADTTRTTDDEQEVFFFHDFIAGGVAGSASVIGHPMDTLKVRMQTAKGNPSIASLA  
IGAKYGGPTTLFRGVFAPLSAASAVNAIIFSSYGTSTRLWEQYESSSSNDGTRNAHPHLK  
AFACGSFAGLVQGLVICPMEHVKCRMVQVQETGASGSNPLRRTTLRSILTSGGGSYSISALY  
RGWWTWCWREVPFAGGYFALYDIFKERIEDAFDRRDAKSLETPVAASTTMTQLDGTIYNN  
PADEATPSMLATTTTTEPNTSQHSWIASAIAGGLTGALTWAIIVYFPDVIKTQIQTAPLDT  
PRHKRTILAVTNKIVKEHGKHLVRGLSVTCLRAFPVNGIIFPVYEYTLHLVCKWET

>comp9749\_c0\_seq2; 300 286 1539 LEN=1933; translated  
MEHKQELGHKEPTPHEIQKMEMDQAHHDIHYRNHYHDNPNQQLASRLPSSPLQQDVAVST  
TAPSADTTRTTDDEQEVFFFHDFIAGGVAGSASVIGHPMDTLKVRMQTAKGNPSIASLA  
IGAKYGGPTTLFRGVFAPLSAASAVNAIIFSSYGTSTRLWEQYESSSSNDGTRNAHPHLK  
AFACGSFAGLVQGLVICPMEHVKCRMVQVQETGASGSNPLRRTTLRSILTSGGGSYSISALY  
RGWWTWCWREVPFAGGYFALYDIFKERIEDAFDRRDAKSLETPVAASTTMTQLDGTIYNN  
PADEATPSMLATTTTTEPNTSQHSWIASAIAGGLTGALTWAIIVYFPDVIKTQIQTAPLDT  
PRHKRTILAVTNKIVKEHGKHLVRGLSVTCLRAFPVNGIIFPVYEYTLHLVCKWET

>comp9749\_c0\_seq3; 300 286 1539 LEN=1766; translated  
MEHKQELGHKEPTPHEIQKMEMDQAHHDIHYRNHYHDNPNQQLASRLPSSPLQQDVAVST  
TAPSADTTRTTDDEQEVFFFHDFIAGGVAGSASVIGHPMDTLKVRMQTAKGNPSIASLA  
IGAKYGGPTTLFRGVFAPLSAASAVNAIIFSSYGTSTRLWEQYESSSSNDGTRNAHPHLK  
AFACGSFAGLVQGLVICPMEHVKCRMVQVQETGASGSNPLRRTTLRSILTSGGGSYSISALY  
RGWWTWCWREVPFAGGYFALYDIFKERIEDAFDRRDAKSLETPVAASTTMTQLDGTIYNN  
PADEATPSMLATTTTTEPNTSQHSWIASAIAGGLTGALTWAIIVYFPDVIKTQIQTAPLDT  
PRHKRTILAVTNKIVKEHGKHLVRGLSVTCLRAFPVNGIIFPVYEYTLHLVCKWET

>comp9749\_c0\_seq4; 300 398 1651 LEN=1878; translated  
MEHKQELGHKEPTPHEIQKMEMDQAHHDIHYRNHYHDNPNQQLASRLPSSPLQQDVAVST  
TAPSADTTRTTDDEQEVFFFHDFIAGGVAGSASVIGHPMDTLKVRMQTAKGNPSIASLA  
IGAKYGGPTTLFRGVFAPLSAASAVNAIIFSSYGTSTRLWEQYESSSSNDGTRNAHPHLK  
AFACGSFAGLVQGLVICPMEHVKCRMVQVQETGASGSNPLRRTTLRSILTSGGGSYSISALY  
RGWWTWCWREVPFAGGYFALYDIFKERIEDAFDRRDAKSLETPVAASTTMTQLDGTIYNN  
PADEATPSMLATTTTTEPNTSQHSWIASAIAGGLTGALTWAIIVYFPDVIKTQIQTAPLDT  
PRHKRTILAVTNKIVKEHGKHLVRGLSVTCLRAFPVNGIIFPVYEYTLHLVCKWET

>comp9750\_c0\_seq1; 1466 210 3841 LEN=4015; translated  
MSSASNEASSGVNQRETFSGPEGVGKKNFNGCSTLRHPSGKVGVDHVPPIEIGPRNNGVGP  
SPSALKDNNKILKQSKLVGFIGGSIMTALNNQGAFFVSKKSFDFSEKNGDLATDGI  
NDEDLEAGLSIKSNEMPVQNEKATSISNKEQVSDGNLGAQRQIEAQSPVLQPKHKYWETL  
LISSEQKDIRKNDYKQENDESRSPLSQVPISTQISTHLTPQKKKSKIVNEIYEDKGSPE  
SVEESIVESVVELLSIPGDYSPGGSTLSVKPTPRVTRFTNRGNHSPESLLCNMISTATT  
LETPQVYKSGLGRIEHQNNNSVEQACNSPESFMRNPAGNIFKTPLTNKSSILSIPNQDES  
VEDMYIEKSSPQSLLSIPENAVQENTIPMKEHSRENSPGLMYNMISSATKLETIPVSK  
KGEDVAFMDSTPNESTSMMSSTTTAQTTLVLDNRNIQNGSDCTLGNAGTTVPESGASETIVR  
VNNVGESLDDTPVKSNKSQIFRSLKSNDSLESCEQSEDGSIYTSISNQSLVRSNAPLEW  
IGPDASYRVSMPPPSIGMDKSTSGVDEPLQSTKPYMKLAETGQPSISEHKIKPKTKSTK  
LSNGWIRSSPTSLPSILGTASLNEISDLESPNXNPHLNFKFSDEESTIHSQSIHDGCD  
IQSVPGNDKYQRVLSQSLMTVDTPAGGCPDSDRHLYLVEKSLNGTTNIPQLEASTAAALA  
AGSTMTSKGSGSPHSTITKESFERGFVEKSKSSKWLMLVCIAGMLVAIGGGITVLVVSFS  
DETKQAEPRQPNVDEDWKGGGIDVYDLRRQTDAPSGVSSFSSSLRSLDLPDFNSTDIY  
DPVDFNSSYTYDPTSYPIFNVTSEAIQDENPSPKPTTTSIKTKAPSSRPAPLPKLT  
HAPS  
SKPIVEPKMDVVQSSTTDSPLLQSEPTSKPVQAYEPSMKPTFRPTILTTNANQSSKPTST  
PTSTTTSKPTTKPTTKPALEPTSKPVSLPLPTFTSEKLQELTWDRTIKGEEI  
WREPEGES  
STTPSWYFAADDTPGIHIKIVNAARGDRLNQLKIAVDDYGKSHAVSSLELTTVDYEF  
LCPPEIGQIKVCSGDFGNEWIGSTIFFMRGEYVVSALIRINEHASTPAGDALLQYSL  
CHQL  
GHALGIGHNNGGIISESCMKDFGEDVTVDGNDIQKNTKQLQHPNWGDLKALV  
NLYGLAGTK  
KLQDGRGIAR

>comp9753\_c0\_seq1; 201 1 1496 LEN=1541; translated  
XDDKAEGLPERAVVGPEAEPEPLNGPRPGPIPRDRDQRPPAQGGPRARGNGQLVRDQP

PPVDPVQALVETVREARDGLSLQKLHVSYPCEGLKPAVSAIVCMLTDGATTEKANRIVF  
SARDYINGAMSLGASLEGRIDPSRTHMLLLLRQGFELERDDLVRLESVGTITGAPDFPL  
PKKYLPRFPKYTKTYTKVSAIGLSEYECVMLMDADTLAVGDLTDVMECGTVFRHPNNRVA  
GTIDWYRMGWKLFNTGSILWKT DAREMERVFNLTEDPSFMKRYGSDQDFLNNVYPDRLHN  
TTLNEEIVALDNAEARSAAAASGSKLSPVVPHPGASAGAVVPLSWDYNAQTHAEVQNPGF  
WTSRPTAKILHFTEKKGWQCERTTEEPVPEKMPKKCKKELPICFCREAHLYWRALERA  
EALAATALAAAAGGPGRAGSPGEAQGAPPIGAGXSEPASFPANTWPVRDTHPGGGTEPP  
VAAGAPAPCTRADALSQ

>comp9754\_c0\_seq1; 690 162 2963 LEN=3213; translated  
MMALGRKHSADRNDVTRLLPKNKLSPSLSPKTHHRRKNSDGSLDFERIVNEYSICAKR  
KLLREEDGGKYTSSKQTTTRWVLTACALISGFTTVVIVSASEKLVAVRTQILAYLLTEKM  
HTFWYVFGTYCLASLLADAAAALCLYWPGSPEAVGSGIPEVKAYLNGIRVKNFNWKL  
VAKMAGSVLSIGSSMAVGMGEPVMIGAFAGATLAHCGTSLSLVLKIKGLKNRWEHGRK  
GSNAGLAAHVHSIEEESDPILHHLWVKATSDLSYFANDAERRKLITIGAACGFAASFGAP  
IGGMLFIMDDISTFFDQGMFLRILVANSVGTFCLAYRGNLSYGAISFGSYNGEDDNSI  
RQRFFEIPFWIIMGIGGGILGGGFCKAFGDVKRRSAKQFKTKGMKMLRVSYISLINSVVM  
FLLPTMGWVCHDLPTAAAEEQQFFCQEGETNQMASIFFGSRGKAIVRILSDPDQFYASTLA  
IVGSVFFVLMMLYTNTTIPSGLFTPIVISGASFGGAYGVFLKEYVDNNIDASSFALMGVG  
SIMAGIQRSTVSTCVILVEGTGQMRILLPVMIVVVISNYVAHLIHEDGIYEVLMKRKGY  
YLSHDKDDRYDVFVSGDIMSSSPVTLREKEQAVRLVEILRKTTHNGFPVVDENGVFGLV  
RRKQIVALIEFGIFEEDGPARGDTTKPKGNSKGLMNFAYVIKDDRFEDVTEEVDDDEQNK  
SSKWLKVAALKMTSALKSSNRKRRLLADDLTMIIVDVSLLDNCDLLHETDSDAGIDGGGD  
DIESDDEDGSQAEAKVDAKDKDESADGYLGTANRGSISITSESAEEDSIYFSSSMRAAPM  
MGHARVGRNRRTNVLVISWLNPDNKYDVVDLASVMNRGAFSVPVDFPVSKAYDLFTLLGL  
RWIVVLGGPHGGSVVGILTRESFLRFGNSISAA

>comp9754\_c0\_seq2; 404 181 1272 LEN=1522; translated  
MIVVVISNYVAHLIHEDGIYEVLMKRKGYPYLSHDKDDRYDVFVSGDIMSSSPVTLREKE  
QAVRLVEILRKTTHNGFPVVDENGVFGLVRRKQIVALIEFGIFEEDGPARGDTTKPKGN  
SKGLMNFAYVIKDDRFEDVTEEVDDDEQNKSSKWLKVAALKMTSALKSSNRKRRLLADDL  
TMIIVDVSLLDNCDLLHETDSDAGIDGGGDDIESDDEDGSQAEAKVDAKDKDESADGYL  
GTANRGSISITSESAEEDSIYFSSSMRAAPMMGHARVGRNRRTNVLVISWLNPDNKYDVVD  
LASVMNRGAFSVPVDFPVSKAYDLFTLLGLRWIVVLGGPHGGSVVGILTRESFLRFGNSI  
SAA

>comp9755\_c0\_seq1; 422 126 791 LEN=898; translated  
MLVSTYLNLLVSNATSGVFSGQGRPLIATFLSFGLELPLSIGGVAVYILCFHGDIGVYW  
WGAI AAGIEIVVLYLVITSDWAKCATDARDRQEAAARNDDGGGDQENESDPEGGMIASEA  
DTPDPTGSILSDLGEDDDDDGDDGAGAI EPPTEDTEEV DSEPNNNDGAERTAPASTFDVTAAG  
NEEESRAPAETAPLAPATTTASATNTATRKKGSKKKRKGKR

>comp9755\_c0\_seq2; 978 89 2080 LEN=2187; translated  
MPPQTEDATNLEALTEPLLSQEESGNADDNPNEARRKASRSLAIPDAAAEGGSDPPLSPA  
RDAAPAPVEAFVCRDEIVAMLSLGFPLAVSFFCRMGMMAATDSAFVGHKIDGERTAEVFLS  
AAVLSDMVLGICITPPLAFNQVLNGLVSAIGSNNPRMAGIWLQQSMFWLAITMLPCLVG  
LFFVEPILGGLGFADICSVAGTYAKYNALWVPVNGLYQCMRFYFQARGLPKPAMYNNIV  
FLFVNATLNIWIFVFGGPIPGWKGFFIGAAISLSISRMTQGVICYLYMFVYKHHIDAWP  
EEGWSFCHHTKERTMEFMKQSLPNIGTLLFQSCASQATTILVGRLGELPIAASSALSTVT  
IPWSGTLSATCCTVSGVRVGYHLGRGDGKAAKKSAWLVMHFITAVNAVMAIFFLVPLKN  
KVLISIATNDEGVVALAEKLVPAMLVSTYLNLLVSNATSGVFSGQGRPLIATFLSFGLELP  
LSIGGVAVYILCFHGDIGVYWWGAI AAGIEIVVLYLVITSDWAKCATDARDRQEAAARN  
DDGGGDQENESDPEGGMIASEADTPTDPTGSILSDLGEDDDDDGDDGAGAI EPPTEDTEEVDS  
EPNNNDGAERTAPASTFDVTAAGNEEESRAPAETAPLAPATTTASATNTATRKKGSKKKR  
GKR

>comp9756\_c0\_seq1; 253 146 788 LEN=788; translated  
MPPGFKRSRALWDATRDRGGWRWAAAICYELQPIRLSKANRKHAVETVESLLRNLSSLVL  
GIPPVSKSIVLFAASRSPKQWFLGAVVSYFYFIRWVHETLDAGPAVLILTALTLIFTIG  
LGDDENQGGLSAYSVFNRGFELKMGVSDADNLLAQHVGGGMMNMNMNHRGAEDQAPPRP  
PRHEEQERRQPLANEGEANAEGENDDGNNNNNGNX

>comp9757\_c0\_seq1; 257 313 1260 LEN=1608; translated  
MATLSMVRPDRPGLSFSIVAGVLLAVFLAGSLIPLAGTFDLKSAPIADS VVTRQDQP  
GKQIAGSKTYALSRAIQEKLNTVPVYVATTGGDGS AQMSTDIYMSYSDAKVASDSIPS  
SSVKGTTLDQVNL CVWTNQKSHENIQSPNFFSFLMTKQTNMETHLRMQVSFGIETRKNEN

GPTPRRDEQAEAKIMAGDRSDIFRLVPSKISVEQAKQLDLETSQSDVPLFIADRLAFAS  
TKGAQLPLFLNKDDCITSYKRLREAKSSLPEQPNIRTTTLETLISMEKGRPGVSQLNFY  
ATAGDLLRLTEMYQN

>comp9757\_c0\_seq2; 315 313 1152 LEN=1500; translated  
MATLSMVREPDDRPGLSFSSIVAGVLLAVFLAGSLIPLAGTFDLKSAPIADSVVTRQDQP  
GKQIAGSKTYALSRSIQEKLNTVPVFYVATTGGDGSQMSTDIYMSYSDAKVASDSIPS  
SSVKGTTLDQVMYPLVLKRGRMRMAPPPAEIEQAEAKIMAGDRSDIFRLVPSKISVEQAK  
QLDLETSQSDVPLFIADRLAFAS TKGAQLPLFLNKDDCITSYKRLREAKSSLPEQPNIR  
TTTLETLISMEKGRPGVSQLNFYATAGDLLRLTEMYQN

>comp9757\_c0\_seq3; 298 313 1343 LEN=1691; translated  
MATLSMVREPDDRPGLSFSSIVAGVLLAVFLAGSLIPLAGTFDLKSAPIADSVVTRQDQP  
GKQIAGSKTYALSRSIQEKLNTVPVFYVATTGGDGSQMSTDIYMSYSDAKVASDSIPS  
SSVKGTTLDQVMYVASFVRFYFIYSLGLTSVYWRSN TAVRLDKSKVHENIQSPNFFSF  
LMTKQTNMETHLRMQVSFGIETRKNENGPTPRRDEQAEAKIMAGDRSDIFRLVPSKISVE  
QAKQLDLETSQSDVPLFIADRLAFAS TKGAQLPLFLNKDDCITSYKRLREAKSSLPEQPN  
IRTTTLETLISMEKGRPGVSQLNFYATAGDLLRLTEMYQN

>comp9758\_c0\_seq1; 574 274 2496 LEN=2983; translated  
MSKKLVCWSRAPKSAYDEVPSKEKSPRCGSRRTKKETRKQSMGVSERVPSKRDSDTIAVD  
WWRDHKKEGQIVGNENVVNQRETYGSTQIAPFQKGGVGHNTGTGLDELRSRSPDLSSFMNS  
LEHGLNVPLEATGDVSPQNGMVLPSLLPKDDRHDNIRENNPSLGIFKTKGRSDLEGVN  
MEIFHPQVIKPTSKQQEQHQLHSKFHSQSQSQQI QSPNHGKRGPPIGIGIKTMMQY  
VDERAEAKEVWRENVSNIPQSQT HEDQSRITITQNNPGNGGNPASKKLSLSTFLERNPR  
VSSAKEKVFVGLSSDHLSDVPSDVSLSLRERYLLACQMLKMTMIQKEGALVDIEKEYIM  
SLLDEFENENEGT VVNE DRMAA IERAILHLES DNVPSSPATAVRAHKTRTTGGEKTQKS  
SHHPKSLNSDKNPHTATRKPKNKLME TFSNPCSPLVMARMRQRQKYSSFKEDGVMKNTT  
NLKMOVENDSDDDEDRLVRFDGW S FQNSRECPFLILGAEGNNTNPRVFTPEMMEALRGFMP  
IETSEHNFWRFLRSLVRDGGSLTLLSTIRASKYTMIGVETDHGEVFGSFTGSPWRIGSKW  
YGTSEAFWRLKRSRYTSTKNSRMPDFEREIEIYPCTEDDDLVQYCTEKTIAVGGGGWQL  
NSCPYSNSDQIGIFMVDGDLVGGETSSCGTFANPRLARYTTSSEFAIQNLEVWTTITPCT  
HVENAAHMEMRNLVKEYGIV

>comp9759\_c0\_seq1; 327 1 1488 LEN=1607; translated  
RHGRNILASFFDILLVCPDRNTSGILDS DWIGFGSDRRGMVPGRAVVRPARNTT IATAAA  
RRRAAAAAAPRTRKRPAPRTKGLLALCAALAASTPAAATTTNSRALAFATAKGF PKDQTQ  
RRDPSTVGFPAAGRTRRAGTGCGTTGSATSASATPPMPPGSEGTGRDAPTAFSVATSRL  
ESPSAERNKDP I WGLSSRILRRGNEGNHPWTVLEVAAGAGVHTECFASRWLSSLEHDAD  
KASSEGGDSPPPFVWHATDPEDASLASVRSRVASSPGLKVVAPPELLTLGEGGIEASSL  
VPSFLSRGDEPLDLVLCINXDPHLAVGGDPRAD EAGRGA PAASRRLPLLLRSLPARGQNR  
PFQRVSKVPDRTGGLVRGKRFWPGKAALECAPKRAGGSMGWTDSCAVPCRAVFLSGVCR  
RFAHFGCLLAPPLSSSFVRLGRRNFDRSLKSRNPEWGVRLNDVIDAARKEGLELVECID  
MPSNNNSLIFRRQRA

>comp9759\_c0\_seq2; 356 1 1251 LEN=1370; translated  
RHGRNILASFFDILLVCPDRNTSGILDS DWIGFGSDRRGMVPGRAVVRPARNTT IATAAA  
RRRAAAAAAPRTRKRPAPRTKGLLALCAALAASTPAAATTTNSRALAFATAKGF PKDQTQ  
RRDPSTVGFPAAGRTRRAGTGCGTTGSATSASATPPMPPGSEGTGRDAPTAFSVATSRL  
ESPSAERNKDP I WGLSSRILRRGNEGNHPWTVLEVAAGAGVHTECFASRWLSSLEHDAD  
KASSEGGDSPPPFVWHATDPEDASLASVRSRVASSPGLKVVAPPELLTLGEGGIEASSL  
VPSFLSRGDEPLDLVLCINMIHISPWGATLGLMKLAGERLRLRGGLCYGYPYRHEGRTV  
LSNENFDRSLKSRNPEWGVRLNDVIDAARKEGLELVECIDMPSNNNSLIFRRQRA

>comp9759\_c0\_seq3; 355 1 1230 LEN=1349; translated  
RHGRNILASFFDILLVCPDRNTSGILDS DWIGFGSDRRGMVPGRAVVRPARNTT IATAAA  
AAPRTRKRPAPRTKGLLALCAALAASTPAAATTTNSRALAFATAKGF PKDQTQRRDPSTV  
GFPAAGRTRRAGTGCGTTGSATSASATPPMPPGSEGTGRDAPTAFSVATSRL ESPSAER  
NKDPIWGLSSRILRRGNEGNHPWTVLEVAAGAGVHTECFASRWLSSLEHDADKASSEGG  
DSPPPFVWHATDPEDASLASVRSRVASSPGLKVVAPPELLTLGEGGIEASSL VPSFLSR  
GDEPLDLVLCINMIHISPWGATLGLMKLAGERLRLRGGLCYGYPYRHEGRTVLSNENFD  
RSLKSRNPEWGVRLNDVIDAARKEGLELVECIDMPSNNNSLIFRRQRA

>comp9759\_c0\_seq4; 294 1 1314 LEN=1433; translated  
RHGRNILASFFDILLVCPDRNTSGILDS DWIGFGSDRRGMVPGRAVVRPARNTT IATAAA  
RRRAAAAAAPRTRKRPAPRTKGLLALCAALAASTPAAATTTNSRALAFATAKGF PKDQTQ  
RRDPSTVGFPAAGRTRRAGTGCGTTGSATSASATPPMPPGAGVHTECFASRWLSSLEHD

ADKASSEGGDSPPPFVWHATDPEDASLASVRSRVASSPGLEKVVAPPELLTLGEGGIEAS  
SLVPSFLSRGDEPLDLVLCINXDPHLAVGGDPRADAEAGRGAPAAARRLPLLLRSLPARGQ  
NRPFQVRVSKVPDRTGGLVVRGKRFWPGKAALECAPKRAGGSMDGWTDSCAVPCRAVFLSGV  
CRRFAHFGCLLAPPLSSSFVRLGRRNFDRSLKSRNPEWGVRLNDVIDAARKEGLELVE  
CIDMPSNNNSLIFRRQRA  
>comp9759\_c0\_seq5; 323 1 1077 LEN=1196; translated  
RHGRNILASFFDILLVCPDRNTSGILDSDWIGFGSDRRGMVPGRAVVRPARNTTIATAAA  
RRRAAAAAAPRTRKRPAPRTKGLLALCAALAASTPAAATTTNSRALAFATAKGFPKDQTQ  
RRDPSTVGFPAAGRTRRAGTGCGTTGSATSASATPPMPPGAGVHTECFASRWLSSLEHD  
ADKASSEGGDSPPPFVWHATDPEDASLASVRSRVASSPGLEKVVAPPELLTLGEGGIEAS  
SLVPSFLSRGDEPLDLVLCINMIHISPWGATLGLMKLAGERLRLRGGCLYCYGYPYRHEGR  
TVLSNENFDRSLKSRNPEWGVRLNDVIDAARKEGLELVECIDMPSNNNSLIFRRQRA  
>comp9759\_c0\_seq6; 293 1 1293 LEN=1412; translated  
RHGRNILASFFDILLVCPDRNTSGILDSDWIGFGSDRRGMVPGRAVVRPARNTTIATAAA  
AAPRTRKRPAPRTKGLLALCAALAASTPAAATTTNSRALAFATAKGFPKDQTQRRDPSTV  
GFPAAGRTRRAGTGCGTTGSATSASATPPMPPGAGVHTECFASRWLSSLEHDADKASSE  
GGDSPPPFVWHATDPEDASLASVRSRVASSPGLEKVVAPPELLTLGEGGIEASSLVPSFL  
SRGDEPLDLVLCINXDPHLAVGGDPRADAEAGRGAPAAARRLPLLLRSLPARGQNRPFQVR  
SKVPDRTGGLVVRGKRFWPGKAALECAPKRAGGSMDGWTDSCAVPCRAVFLSGVCRRFAHF  
GCLLAPPLSSSFVRLGRRNFDRSLKSRNPEWGVRLNDVIDAARKEGLELVECIDMPSNN  
NSLIFRRQRA  
>comp9759\_c0\_seq7; 322 1 1056 LEN=1175; translated  
RHGRNILASFFDILLVCPDRNTSGILDSDWIGFGSDRRGMVPGRAVVRPARNTTIATAAA  
AAPRTRKRPAPRTKGLLALCAALAASTPAAATTTNSRALAFATAKGFPKDQTQRRDPSTV  
GFPAAGRTRRAGTGCGTTGSATSASATPPMPPGAGVHTECFASRWLSSLEHDADKASSE  
GGDSPPPFVWHATDPEDASLASVRSRVASSPGLEKVVAPPELLTLGEGGIEASSLVPSFL  
SRGDEPLDLVLCINMIHISPWGATLGLMKLAGERLRLRGGCLYCYGYPYRHEGRTVLSNEN  
FDRSLKSRNPEWGVRLNDVIDAARKEGLELVECIDMPSNNNSLIFRRQRA  
>comp9759\_c0\_seq8; 326 1 1467 LEN=1586; translated  
RHGRNILASFFDILLVCPDRNTSGILDSDWIGFGSDRRGMVPGRAVVRPARNTTIATAAA  
AAPRTRKRPAPRTKGLLALCAALAASTPAAATTTNSRALAFATAKGFPKDQTQRRDPSTV  
GFPAAGRTRRAGTGCGTTGSATSASATPPMPPGSEGTGRDAPAFSVATSRLSPSAER  
NKDPIWGVLSRILRRGNEGNHPWTVLEVAAGAGVHTECFASRWLSSLEHDADKASSEGG  
DSPPPFVWHATDPEDASLASVRSRVASSPGLEKVVAPPELLTLGEGGIEASSLVPSFLSR  
GDEPLDLVLCINXDPHLAVGGDPRADAEAGRGAPAAARRLPLLLRSLPARGQNRPFQVRVSK  
VPDRTGGLVVRGKRFWPGKAALECAPKRAGGSMDGWTDSCAVPCRAVFLSGVCRRFAHFGC  
LLAPPLSSSFVRLGRRNFDRSLKSRNPEWGVRLNDVIDAARKEGLELVECIDMPSNNNS  
LIFRRQRA  
>comp9760\_c0\_seq1; 351 69 455 LEN=813; translated  
MMKFATFLFLLAAVLLSGGASAAQRRQLRARGAADDLTSIDIDASVLNRIKQRYHSSIDHAV  
APATEQRVLAEDDDLMSLSMSMSLSMSMSMMPVRRRMLEEDMSMSMSMSMEDEMSMSM  
SMSMSMSM  
>comp9761\_c0\_seq1; 134 243 717 LEN=1183; translated  
MISRFLFAVDDTNIGSSERARTKSAAHKRYVLPRTSLIAVVRYEYPCAPPLGTTTLWAGD  
HGPGKKPVARSSASKDGTGGRPTSKAAHSMPCPALRHRSACACAPCRATESSRAAKKLVEQ  
PNPWHGVFPEAGAGPQRNATHYPAGLVLCERPPAVLV  
>comp9761\_c0\_seq2; 134 243 717 LEN=1179; translated  
MISRFLFAVDDTNIGSSERARTKSAAHKRYVLPRTSLIAVVRYEYPCAPPLGTTTLWAGD  
HGPGKKPVARSSASKDGTGGRPTSKAAHSMPCPALRHRSACACAPCRATESSRAAKKLVEQ  
PNPWHGVFPEAGAGPQRNATHYPAGLVLCERPPAVLV  
>comp9761\_c0\_seq3; 134 243 717 LEN=1176; translated  
MISRFLFAVDDTNIGSSERARTKSAAHKRYVLPRTSLIAVVRYEYPCAPPLGTTTLWAGD  
HGPGKKPVARSSASKDGTGGRPTSKAAHSMPCPALRHRSACACAPCRATESSRAAKKLVEQ  
PNPWHGVFPEAGAGPQRNATHYPAGLVLCERPPAVLV  
>comp9761\_c0\_seq4; 134 243 717 LEN=1267; translated  
MISRFLFAVDDTNIGSSERARTKSAAHKRYVLPRTSLIAVVRYEYPCAPPLGTTTLWAGD  
HGPGKKPVARSSASKDGTGGRPTSKAAHSMPCPALRHRSACACAPCRATESSRAAKKLVEQ  
PNPWHGVFPEAGAGPQRNATHYPAGLVLCERPPAVLV  
>comp9762\_c0\_seq1; 78 1 175 LEN=1129; translated  
XWYYP SHPLPHNPSSTQQHACLGMMSNAKAGNVIIIDGSLRDGRSRALGTALTNCEG

>comp9764\_c0\_seq1; 820 187 1686 LEN=3007; translated  
MAFCDDIENLSEEASSVCESLGSLSDDGIVTGVDTFFLLFAGALVFLMQAGFAMLCAGS  
VRQKNVKNIMLKNLLDACGGAIGFYTLGYGFAYGSGNTFIGASNFAITEMSSGPDYIGFF  
FQFAFAATAATIVAGTVAERCKMSAYLCYSLFLTAFFVYPIVRSVWSSDGFISAFAAEPL  
RGVGNIDFAGSGVVHMTGGATALVAAIVLGP RRGRFYDDDGNALETPKFPAHSTALQVL  
GTFILWFGWFGFNPGSALAIANEESAATAALCAVTTTTLAAACGCVTSMALDSFMDYSATG  
EVSYDLTMAMNGALGGLVAITAGCSVVYPWAAVIIGIIGGIVYYAFSKFLIKMKIDDAVD  
AIPVHFANGAWGVIAVGLFADKDLQAIAGFSDAHQGFNDFGDANLLLQFLAILWICTW  
VFAVMTFFFMLLNALGMFRVDPLEEEVGLDISHHRGTAYDLEPAKQTDVEELMEVRASRH  
GKVEVPKEVAQAAEVAATD

>comp9764\_c0\_seq2; 274 187 705 LEN=802; translated  
MAFCDDIENLSEEASSVCESLGSLSDDGIVTGVDTFFLLFAGALVFLMQAGFAMLCAGS  
VRQKNVKNIMLKNLLDACGGAIGFYTLGYGFAYGSGNTFIGASNFAITEMSSGPDYIGFF  
FQFAFAATAATIVAGTVAERCKMSAYLCYSLFLTAFFVSV EELLYCCCCSLLF

>comp9764\_c0\_seq3; 820 187 1686 LEN=3114; translated  
MAFCDDIENLSEEASSVCESLGSLSDDGIVTGVDTFFLLFAGALVFLMQAGFAMLCAGS  
VRQKNVKNIMLKNLLDACGGAIGFYTLGYGFAYGSGNTFIGASNFAITEMSSGPDYIGFF  
FQFAFAATAATIVAGTVAERCKMSAYLCYSLFLTAFFVYPIVRSVWSSDGFISAFAAEPL  
RGVGNIDFAGSGVVHMTGGATALVAAIVLGP RRGRFYDDDGNALETPKFPAHSTALQVL  
GTFILWFGWFGFNPGSALAIANEESAATAALCAVTTTTLAAACGCVTSMALDSFMDYSATG  
EVSYDLTMAMNGALGGLVAITAGCSVVYPWAAVIIGIIGGIVYYAFSKFLIKMKIDDAVD  
AIPVHFANGAWGVIAVGLFADKDLQAIAGFSDAHQGFNDFGDANLLLQFLAILWICTW  
VFAVMTFFFMLLNALGMFRVDPLEEEVGLDISHHRGTAYDLEPAKQTDVEELMEVRASRH  
GKVEVPKEVAQAAEVAATD

>comp9764\_c0\_seq4; 820 187 1686 LEN=3021; translated  
MAFCDDIENLSEEASSVCESLGSLSDDGIVTGVDTFFLLFAGALVFLMQAGFAMLCAGS  
VRQKNVKNIMLKNLLDACGGAIGFYTLGYGFAYGSGNTFIGASNFAITEMSSGPDYIGFF  
FQFAFAATAATIVAGTVAERCKMSAYLCYSLFLTAFFVYPIVRSVWSSDGFISAFAAEPL  
RGVGNIDFAGSGVVHMTGGATALVAAIVLGP RRGRFYDDDGNALETPKFPAHSTALQVL  
GTFILWFGWFGFNPGSALAIANEESAATAALCAVTTTTLAAACGCVTSMALDSFMDYSATG  
EVSYDLTMAMNGALGGLVAITAGCSVVYPWAAVIIGIIGGIVYYAFSKFLIKMKIDDAVD  
AIPVHFANGAWGVIAVGLFADKDLQAIAGFSDAHQGFNDFGDANLLLQFLAILWICTW  
VFAVMTFFFMLLNALGMFRVDPLEEEVGLDISHHRGTAYDLEPAKQTDVEELMEVRASRH  
GKVEVPKEVAQAAEVAATD

>comp9766\_c0\_seq1; 208 224 499 LEN=1200; translated  
MTALSNVSENQDEPLHLETDSNRGVATASTRSQDMVRDLEEKARKILAKESEEEERAARK  
KRKESMVEGGNRFYKWFYRRFRKVKQQWEKQ

>comp9767\_c0\_seq1; 230 88 435 LEN=603; translated  
MEVGKLVAVIGDEDTVTFLLAGIGHRTAEGSNFLIVKQDTTLSQVEEAFKSFSTREDIG  
IILINQHIASDIRHVLKDYNTIPTVLEIPSKEHPYDPEQDYIMQRVSMYLGGN

>comp9768\_c0\_seq1; 1155 1 4834 LEN=5268; translated  
XETFMGDSKSGSKQGGAKPRLGEEKSDDDVVLGGAQSTVICELVTQPKIERLYPYRLTRN  
PYATEGRSPDTSQHIAVWFRPLHGSGQAASIGLVAKDGEGQYKLVQLLDSRDVVFPLNAT  
RDDKSGSGIPQALVVSRRNGSVSLWQWKDRAGALGKPWQIVSDAPCRPILGDKKGNSTSE  
DDFVELRQFVPTRFQNKVSLLAIASDSSGRFCVVAGKLVAEKGLDWVSLLPNMKENPVLW  
LDEREQVSLVPLPSEDSIQGGIGIATRRVLISSDLNVMATWDCELPPGSLVPLGSFT  
VAFSSQMDHKIRYLSGLPESFGRSGLIASFPFIPIPSYYTNWLAGIRPDRFVYSSHNGTR  
LVERGSTNTFLLPLATTRPALLEPMIANAIATGAKGTTTQTFLRVLEKFRKVVVTMS  
HGEEDAGINFGAGITPRVFELLEYYNFKSAASWLLTGTIGFDRAANSRLLPSYLPITAKI  
KAAFDADTHLHLIASGDQYFTEYVKSPDINMPSTLPRPSDPTAILCQQFALDAMKQGNFL  
DAIKMLDISGTQPSDAIMQLSMALQLDPAMEGSPLIDSLYQQDSQTEKVP SLVASLAAL  
TTELKAGKTPSPQFNKWLQSLAPSVQRSKYERQRSRLIGESSLSMVMPRDKVQNEVFS  
SEIPESKLVWNEGPNHEKENLLLDNVQEFWRRRPVILGREGAKSAEERGASTLAGILH  
CNDEDSFGGENEDTFKDGWVDGVEGLNDEDKLSAYYRFSEGEEDTSWRDEGIADITKF  
ENTATIVGNPDDFNLQESLSSVDEGESGKVKPIHDLVFGQSGVGQASALVISAMRGGSLD  
LGLMHGPDHVSQRKCTIEFWAWIPESIEKEIILVRRSCGSSAGDFVICQSEKRNLWEL  
GLHKNGELEFRTIAGQSVTTKPNRDNIEDTPSNTVHFSRWNHICIIMKQESMISSAVSL  
LIRGSRKIDSEVLNFSPPDFEVDDFSGASAFDQMLETSHLVFGIDHTKDFRLTELRVWAL  
DRKDDDIKTWMTYELECAEIKRRIKIKIKRKLGGDKGIALSPKKGLLTPPRGLKPPSDVP  
KGGLLAPPGGFQPPTDSKNRSDNKKAGLLAPPKQSKEDGYSSPKNATKLDTFGSSSFSG



ANFGNFKQSPDKGADLSSPASFASDFAGRMSGSTFGSELQGEKLLNENPDSPLKNKGISA  
VTEETIQEDASEEVDISPLWESAIPLSEQVRTSAASALIRGPPATRHFGGNRGGLPDYRE  
LERFGVGAISICGSEKTIVWRDDQVPPGLTYPIGASGAIVSDQMDGDGSEFLCCFMAKDK  
RMVVFELSTRITIVVELQMTTKLNYWRFLPPEAGEDTLCFMLITPVGGFHWMPLESPRPR  
QVWKRPELQGGKIVSYEEGGANGYDGLDMLSKVGMMLLVTNSADATNSGSLEAWLVPICG  
DSKVVCASYEILGACLQPPGLNFEAFMPLVLFVVEENNELIVCVSAVTQEDENSIGLTD  
VMTDALIEQGPYHSFDFEPPALAMGTYPEVLCCSLGTTVVVIIRKGLVVAYELGESGLE  
LIAQENVGHYVVDAMRYNASEGGAEIVLLMSDTENRRDGRVGTFCFRTAC  
>comp9769\_c0\_seq1; 966 261 3650 LEN=4309; translated  
MEDNGNPTRMTKYLFHSSSQAEDVALSSDQAVSDAQEREMNKSTQYLTLRTNSKTTSPS  
SRGRTSAPASQRRLYSGATYTRDKPTAAQSITYEDNEEQLETKSMKLRILYGLSSSSSL  
EKSVRLPSSSSVNSNFNKKTKQVERKGGSQEHELQYHQAVIATATSSTKKFTDGHGRPY  
IDRNSTRNTDSQSSDSRRHRTTQNRCSAETRALRRSEEQRNTKMMLVKPRGDVAESTPNI  
TVESKLLSSTTDSGMLHSFTRGSKLDNKNKIEKKESSMARKKIIDRRSEKSNLGNMNMGD  
EFCWMPALTNPICSDYRYDRPTAESKRKKDPDARDSTGEEKPKSKPFFGTSTLQNDKKS  
KPDVMKYQSQENLVDKIPPVFEVTLTVPLDDSTLGTETGYLDRFPKKNKRSQEKQQRKI  
KTQQNEAIIIEAATDQPKPHAMDSWLPGGVQSTNYEPEIPFKETEKKKRHSQQSSSLRK  
NILEVPGNSDYKHKINIVSSTTKASWNNAIQRDDPPANEYMFYDPKPLYHQVLPQSD  
SVDVDTFHDDSFHYYSSELGNTPETSIAGSHNPQQYVLSARPLTSWVPPSMEGQDAV  
DLNPTRIYVNSIMTKRRSYINSLIAKKRSLPLSHSAVFAQRSSGEPHDNETTDPSQL  
SANFPDEVGGITVSGNSAPPSNPTIHSRSSKSFEDPEISTSEYSQNTSREGSSLSKRSR  
KVHDETEQGWETSQSTDVVMPRPCTTSSSPWSAVKESKGFQSDSYKGRKMIILICLFS  
VLVVAGAIVVVWLKGLILFDDSTSQPEPNEFSTPTSISPTTTSTQAPSMAPVIRDNPSA  
FAPSQNYSSSPINVPLVEESERGTDLFNLVVDAYPQGRAALQAPDSPQKALQWLLESTV  
NGETFIDERVLQRYVLATIIYYSTNGDEWTNNTAWLSELDECEWWSTAEEKVCEDEFGRYRKL  
DLQENNLVGLSELVILSNLMTINVRDNALSGQLPSLLVADLTNLEVLDLSSNAFSGE  
LSPRLFADARKLRLSLFENMLSSFIADLGLKTELYVLDLFGSNKLTSTIPTEVGKLSKLT  
GLSLFNMLSGAIPTEILELQNLNMLYIDSNNFEANVPEEVCLIDLEEFW  
>comp9772\_c0\_seq1; 268 1 778 LEN=1106; translated  
XLKFNAPSDSRRFSFNIAGPNHNFDSILFHFNPRQRQKGGQLVNDKQGGTGWGRAVQLP  
LSQVPLMFGQPSSTLMIQINGDGFDFVENKHVARLEHRVELPSRPCKLWLQFPSCDDSR  
NPENWTVYRAWWGNKEPLAKEDVSGIAGVDAFDSVHPKLFVSGLPKIRTDKQVELRTAE  
LERVFRRFGGARGVSCVVPKNSKYAFVEFETEHEMCDVALQKMPETSFPYKINRARRTKHE  
ALMAERAAKERGESTGGGW  
>comp9773\_c0\_seq1; 150 1 726 LEN=1123; translated  
LRHKASSTKRSNNHRLSERLYLKIMISTLKRLLILLGFLSICSAKDVPTNRNLEGLLEFP  
VSKVFNITTKITLNGEYTTYSRRDGSFVIYDVGPQIHQLDIDSKKFHFPQVKIQLL  
EESMDTPKCLEYAFPGAPKRALKYPLVINPKGTYQYFEPKKGFSIFGLLRNPMVIMMLF  
SAGLMVAMPKMEGLDPEEKARMREQMKNQDPSAMLSQMWGEMTNAGEEEAPRSKKERRR  
VKQN  
>comp9774\_c0\_seq1; 141 1 1130 LEN=1143; translated  
VGDVMADHRLDCLLLDPISWFASFLAHFIRDDIVTSVQLDSRFVVKRGMVSL  
EDVVRLRHDYVKPREQVAQVMSLVCRLELCVLQKHQINDESDGGDGASDQDRPSGVRVYK  
KDSNRFYLFXVPASDGNPERDCQDLAHRGGHPRRPTRCAA  
AVRGLPRAPVFPVRLLSARPLSRA  
PGPVQAPADRGGGLASSHLEELRRPALRQARAGGGPDRSPRGRSGPGRGGGRPHRGG  
PLRRRQGPGRGRLGGAPRADVPAEVL  
SAAGPRRVLVPVVRGMQRSGFRGRGRSVRSVPVLLP  
GGGVPRRAPIREAVSGPRLRGGRVLEPAGRR  
AHDRSHGAANHTRGAVLQQLSPGGAVCA  
PVLGPDISFDPRKETQ  
>comp9775\_c0\_seq1; 156 54 281 LEN=519; translated  
MAIPATLVGTGSIAYLVLGAILL  
GIVQASRGVGLSKDDAATGNVVVV  
ISVFSMWLFWLCA  
WMHQWHPLIAPIYEA  
>comp9776\_c0\_seq1; 785 1 2914 LEN=3095; translated  
XVGFNPENENDKETGEVDKDAVAKEENETTTARE  
SANKQDWVELKDDEGRSYYNEKTE  
ETSWDRPATFATKDDAVVEKEEKASGITKAKAGV  
WTTLQDDEGRNYFNEETNETTWDK  
PAQLDNDDRGTGMSVPRPKSPGMEDDGIPVTAGN  
WTRYKDDSGRYYYNSETQQTVWD  
KPSDFDELVKYRTTGDSVDGDEADGGMKLSVPRP  
QSPDGTSPVPMEEEEPEEEEEVDPAVK  
RLEEAKQALAQVDAIMETGXVQLDQKSENGICYH  
LLLLAAHVHLLMAQLPKGILTDLTEVV  
KSDMGNPKNAIQALSDSAHQTA  
VCGLLSRWLTDLKSQTSASSSTTDDAAHAKRFQ  
KSADGIREMTQEVVNSIVKERFTHKGGNNILALS  
KSEAAFLEDMMDSNRWRKLLIDL  
SASNKDSALLMYCLQSIKRGHREIARRINQSEHF  
PVFNAMLASELAVIGKISVSSCHDHDT  
SISL

NELVGLRRICTSTSYTYLYGFEVLRFQIQKAKNDSLAMEERDRLLYQRVIRKWERLLEV  
LQGD MIDPSKSTGSNPLVRKRRLDVSC TISDLHQRRRIHPDKKDRGNIDSTFTETPNI  
IDGINDDRNRQIESALLTFLRKYCVGTQLDEPLLDRLMFPNESVSQETNFIGNLLVSYPIA  
IEALLGYLYKPGQVRVGSISLRQKCGRLTAIAVLVAEKQSFEEAKKIDPNVLEPESEDEAL  
TQMLFEGSKLCEQLENMVSFIVTTDAIKNGAVE SPGEQICNLAVKCAPVAQGVAMWARE  
ITRGGEFVSSASYVSI SP SIMTLARIVYMHPFTRDDVVEVAFQFLKHSNSEVVYHTMNT  
LKEQSLRLLLFLCTRGEAPVVFSQLMPLLLKDPGRSGLDASLIRYFVSGLEIASPPFSIP  
FVRSLMILLKAPGSVDALKTSYFDKDSKSRLLKSVMNLYLRTRLSGKHLTRPLAKEDISLIN  
SVLSIYSPTSG

>comp9776\_c0\_seq2; 878 1 2818 LEN=2999; translated  
XVGFNPENENDKETGEVDKDAVAKEENETTARE SANKQDWVELKDDEGRSYYNEKTE  
ETSWDRPATFATKDDAVVEKEEKASGITKAKAGGVWTTLQDDEGRNYFNEETNETTWDK  
PAQLDNDDRGTGMSPPVRPKSPGMEDDGIPVTAGNWTYKDDSGRYYYNSETQQTVWD  
KPSDFDELVKYRTTGDSVDGDEADGGMKLSPVRPQSPDGTSPVPMEEEEPEEEVDPVK  
RLEEAKQALAQVDAIMETGILTDLTFVVKSDMGNPKNAIQALSDSAHGQTAVCGLLSRWL  
TDLKSQTSASSSTTDDAAHAKRFQKSADGIREMTQEVVNSIVKERFTHKGGNNILALS  
EAAFLMMDNSNRWRKLLIDL SASNKDSALLMYCLQSI SKRGHREIARRINQSEHFV  
NAMLASELAVIGKISVSSCHDHTSISL NELVGLRRICTSTSYTYLYGFEVLRFQIQK  
KNDSLAMEERDRLLYQRVIRKWERLLEV LQGD MIDPSKSTGSNPLVRKRRLDVSC TISDL  
HQRRRIHPDKKDRGNIDSTFTETPNIIDGINDDRNRQIESALLTFLRKYCVGTQLDEP  
LLDRMLP NESVSQETNFIGNLLVSYPIAIEALLGYLYKPGQVRVGSISLRQKCGRLTAIAV  
LVAEKQSFEEAKKIDPNVLEPESEDEALTQMLFEGSKLCEQLENMVSFIVTTDAIKNGA  
VESPEQICNLAVKCAPVAQGVAMWAREITRGGEFVSSASYVSI SP SIMTLARIVYMHP  
FTRDDVVEVAFQFLKHSNSEVVYHTMNTLKEQSLRLLLFLCTRGEAPVVFSQLMPLLLKDP  
GRSGLDASLIRYFVSGLEIASPPFSIPFVRSLMILLKAPGSVDALKTSYFDKDSKSRLLK  
SVMNLYLRTRLSGKHLTRPLAKEDISLINSVLSIYSPTSG

>comp9777\_c0\_seq1; 254 151 1455 LEN=1753; translated  
MVNVEEKKIDESSTPTAPLPVDREWISKLLKRYPNPNSRRQDKALVVAPMVDASDLPFRL  
LCRRYGANLCYTPMIHSRLVVD SKTYREKFTGTWLETADRPLIAQICGSDPDDLKAARL  
VEPYVDGIDINCGCPQGIARRGDYGAFLLEQEDKLLKLVKHLVANLTVPLSVKVRLLPDP  
ETNPHKLNDP SYKGFDTPAASLALYGLVDAGVHLLTIHGRTRKQKQDMTGADWETIRK  
AVELYGDRIPIFANGSIEHYS DVEECLRTTNC DGMSSSESLLEFPPIFYKTPQSPPSQRT  
IGRLQLAE EYMDLAKKYPNKGQSGGLK CIRIHVHRFLHKDLQEDTEFRQKI IADKSL  
DLEESLELCRQKHTRENH SVGDEALS WYRRHRDAKVQRDIQSERNDAED IDECGDCYTGG  
NMFVADGEEDGDY

>comp9778\_c0\_seq1; 791 1 4234 LEN=4561; translated  
XQQQQQQMPQNQLNTPPQLMLQLHQMOMKMQOQLVISKLNQQAQLIEQQQLQMMPQ  
QGQQGQNAQNQLRLLQQLQMRASQQQIEYRELVLQHKAIQQLQLKIAQQSNQNAVSLPV  
MGAGQQNQLPQQIAANNMNMNNSMNNMNMNMMNMTMNNMNMNMMNNTSNNNIIS  
QNSQSQNLNTSQRSHSNTSNASQQRQQEQQLMNHAKAMDDPSPSKSNKDDEPLVGNLR  
LDQNSNLQDEL DATLDDGQEVLELPEKLGSLDPPLEETPKKDSEENDASEQGSQQ  
TSPKDSSTNKRDRPSDKLPSAGLDENSERSTGSKSKRRRTISSVDKTPRGRGGGKGRRLR  
EIQKINLNSESDSGNAGPIIGIKRAVDVANKNKSNDASPD LASSGASKSGGQQSLPKG  
DVEQHLLMLNKGLHLTSRTITHKCLPIVQQLIDDPYGVVFRDAVDPVLFGLPDYFEVVK  
PMHLLLVK KLEN AVYTDMA SFERDVKLVFENAILYNGEDSDVGTAKTMKGVFETEYKK  
VCEGIECSLDY TAXRILISRI FIMYTHS IHCVFTTYRSIWLVLNDLPRLDPKCALCGVS  
KLKFEPPVLFCSGMGR IKRDSVYYTDSKHRNCWCQRCHSKLPASKQIILDDGVEIK  
KSSLI FDKNDSTPEEDFLECHDCKCRVHKICALHNCRNQKPNELFRCPKCINVHKEINGL  
PHNAPKSAKDLPTCLMSDFIEKGLLES LDNSYRKTAEEDGIPISNIKRADDLSVRVMSHV  
SLKHMVRDEMFKKYSSQGYPSDFPVHTKICIGLFQQIHGVDVLLFVMYVYEGHECPAPNR  
RRVYISYLD SVKYFEPRRYSIAYQSIIVEYLRVFKKRGFHTAHIWSCPPADGDEYVFHC  
HPSHQKVPDEAMLRQWYYDVIDQATREGIVVETTNFYDEYFQFKKLSASPYPEGVNPM  
LPYFEGDYVPEIETILSKLNEELPRKTRSTNNSTVPVADAEPKRQRPGSRRGTRLNSA  
RLGNAIHDKVMSRLGTAIHNMKENLIVRLRNKHFALAVDRGEDVSEWPDDDAYAPHPGE  
SIRSSSSSTNEYAKEYKRTSRRYTPDKIRSTIEEDEFSEMFENRQLFLNYCQGNNC  
QFDEMRRAKHSTIMVLHQLHNP SAPKFVRRCRACQKDIGSEGCYRCKVCPDFDL CMDCHG  
PVTKGLWASRGFRFTHDGTHSFLVRPAPADGEAPAVCRPAGAASPAARAERARALKVYL  
GVLVHAASCGGVSEXL SPEELRQDEGAPLPRGLVPALLGRIDGRRLLQDLRPRPVADHR  
PHPVLPGPGRFLSIAVLQQDPGTEPPPPAAAALYGRSAPAGPERGLLAAEAIAVCCGHNA  
AMAVTDAPQTNKHTLGFVVVPGSFLELLLKE



PDDSDDDVAAEESEEELEERKKTADPNSSIRLTPALLAKYERGAFKSHGVKALRKI  
VNAYKSACHMMDEEKQKDGRRGGQHYSGSSDVFDRMLMVVSLTKCKDEFHYHLLGEGSNAG  
EKKEDSKRAKTRDDDDSDSENEDEDEDIFDPEKPINPKILERGKRWNLDNPILYTFFK  
ATAHILTEAKESQLVVFVLKALFEYIPYMTYPRLAETMLKTLTSLWSAPIDSSEDYQVV  
RLHAFLRIRQLAMTQFPFIEECLKKLYLAYAQRKFATASSVTSALPTLTFMGNCVVEL  
YSLDYHSSYQHAFIYIRQLALHLRTAMQKKTPEAMGAIYCWQFLHCLKLWVAVLTEACQS  
DDSDVLSGNSDQLLRSLIFPLTQVILGTARLIPSTRYLPLRLHCVRLQLQAAAAEIFI  
PTTSLLDVFDLHELSQLPPKVKHKSNIQPMALTLRLRADNPLRSMEELEMCLSEVFVLLN  
REVDLYRSAGFPEFSVRICQRLRKYSKETRNGRWRAYAKGCIELCERNSTYVMNERANG  
TILTDIAPKDVQLEVLRPQSAPSMGQRFKQSLEKEKRLEAASKPVQSRKTKENDVAKGT  
KKNKNKESKNTKTKKQVRKSEVDDALEHGNTSLNEEDEVVEEGINWSDEEE  
>comp9788\_c0\_seq1; 670 582 1944 LEN=1944; minus strand; translated  
MKSFLFGRKKGSKAKEESGKGFYKGF PDTGIPSSDTGIGASGELQLAKTGTGGENSCDNY  
QEGIDQSPSEHSSAYESSYNQYLSKIENDHGVQSFEAMGPGATPASPEAYSGPGAGDPV  
MPQGA IAGVADPLSLSGGTSPSASSGANSNAHSISYVTQTPHEGYVEGCEDDLSTLGDES  
IIRRRQRNRQKQELKERQLKHQEELLLKQKSDLQDISKTRTASTQDMGTSPQSSGLSF  
SFTNVMDVHEKIPISSRLGDDIIEENRLHRDKDVLDLVIGEGPGGDDDDTLLSKRRNES  
CCRRHKWTIIRVMIFLGF FMLISAAVVLVLSILQMKNNAIANSSDASYVDNDGNGGEF  
FNKPIFVMPDPSDSSLPDGIGDTFIVTSLSPVLP IAPETA VPEPVTGKMDAEDADDDTTTP  
SAVTEPPIANNEEVPDENIFTGTDVPTTEVIGDIIX  
>comp9790\_c0\_seq1; 331 152 1153 LEN=1545; translated  
MSGTNKIVNPDCLDGLEILREHNLVFLNTPKVDIFADFCQPGNGVLPANGQQQLRHEES  
KDTFSSTEF LDSWQSEKVRFDQQNGSLVFLDLGGRRLLHKGLPCDPRVFEAFRSLRTL SLA  
GTDLPK DILAIVARVAGSIESLYLGGNLRNIGAEIAASNLLRNGNGKLT KLDLRFNE  
INSAGMIAICNAMIGDGNEEQTSDETTSTSNLQYLYMEGNAIGDEGCKALAKTMSSASSS  
IREIYLGANKIGPAGAKALADSLR TNKTVSKIYLEGNLLGPEGAASFCEVLEELKGD TAL  
RHLYVDNNEVGKEVSNRLARALRSETAIQDVCS  
>comp9792\_c0\_seq1; 143 1 461 LEN=461; minus strand; translated  
XLLSINDLRCDLLASKNFLGDRFGTRHQMDRGIAFLDAVSVDAL IATSTFTADILRFMSN  
SIIRQYLGDFQSKDCLVHEDVQNEGKDESPEDHAQWERLDFRCSHLSVFHYAPFCEGTST  
RLVFLSDNQSHSFVLAVVILFVVFVILFVVFVFLFAX  
>comp9793\_c0\_seq1; 146 303 422 LEN=462; translated  
MANFN YAWVWGRSAKHQPQRCGKEHLLMDEDIVQIVKKV  
>comp9793\_c0\_seq2; 229 404 1534 LEN=1574; translated  
MTIVTFFALYLRFGFLSINSRFSVSVFGLKDLGTLKAKIAKLKSELINGPGGKSAGTKNA  
ERGF DVTKSGDTRIGLVGFPSVGKSTLLTSLTGTTRSEAAAAYEFTTLTCIPGTMKYKGARI  
QVLDLPGIIEGAAGGRGRGRQVISTARTCNLILIVLDSGKPVTHKKIIEQELFGFGIRIN  
QVPPKVKLVKKEQGGIGYQEAVPQTKGMNAEVCRLICKEYKISCAEVILREDITTDQFIDV  
VEGNRSYIPVLYVFNKIDAITIEELDILDQMPNYVPIS SQHKWNLEELMEEVWHRCSMI  
RIYTKPQGQTPDYDGPVILHSKNPTVEEFCNRLHKGIMANFN YAWVWGRSAKHQPQRCGK  
EHL MDEDIVQIVKKV  
>comp9793\_c0\_seq3; 263 155 1282 LEN=1322; translated  
MSDPASIEKKIEELENEMARTQKNKATNYHLGTLKAKIAKLKSELINGPGGKSAGTKNAE  
RGFDVTKSGDTRIGLVGFPSVGKSTLLTSLTGTTRSEAAAAYEFTTLTCIPGTMKYKGARIQ  
VLDLPGIIEGAAGGRGRGRQVISTARTCNLILIVLDSGKPVTHKKIIEQELFGFGIRINQ  
VPPKVKLVKKEQGGIGYQEAVPQTKGMNAEVCRLICKEYKISCAEVILREDITTDQFIDV  
VEGNRSYIPVLYVFNKIDAITIEELDILDQMPNYVPIS SQHKWNLEELMEEVWHRCSMIR  
IYTKPQGQTPDYDGPVILHSKNPTVEEFCNRLHKGIMANFN YAWVWGRSAKHQPQRCGK  
EHL MDEDIVQIVKKV  
>comp9794\_c0\_seq1; 223 81 515 LEN=752; translated  
MTSQRNSMLRGLLLVLCTTTASGFQKSALSSRSPTFAQPAKSNGQSVVFLNTPPNYDD  
NDFDATPSGGFDQQDLPAQSI PKLKI PKPSLSVPEIDFKETLKKIAVLAVTVGAFIAIQ  
KGMILAEFTPELSEEQVRNFVL  
>comp9797\_c0\_seq1; 589 251 2925 LEN=3283; translated  
MVNTNTRIRARNNNVLTSSSTRCEIAPTSRSLSSATTSKGPKSPSLRVQLPAENSSQ  
STNVFWPGKNGKASLWKT PNGESHKDDNSNTSSCTSSRIKQCSVAMSRTESIMVSSAGDV  
IVCRCRSSSTPFPKARDNLNVWDKQFPCDTELLSNIDASWSPEVSETITPQKNRRTS  
ATSVSQISTSTEFSTYEWKSNNGNIKSTSNVLEGGKQKGRKTGNDQPHDFMPEKRTS  
ENDMNYGPTKQEDSSNETKDTNSGEVDTSYPSYLLNDNIGDLLLLSLPSFDYSHIEGHN  
DMVPHTEHKKQEDENSASF RDHNIQQKQNRSSIISSAILEPRTGKAKRAERAYRKNSN

GLIDTDQKIFHGVPLFLSTLSQVRITKVSANPLGAHVLMISKEALLFTYGLNHRGQLGIG  
FQSEIKNNTRGFHTTPTLITPLLENGGKAINCAAGVDHSLVVI STEGRRLQKLQTNPDVA  
HSDFGEESSHRADAPNQSPCDVRQKHINSGEDFEYERSQFNEKSVQYHQVYAFGRNNFMK  
LGLIRPHFNEQDAKGEAEDVVLPRRVGLQCSVWPQKEDTDHESMPSQGVFDIAASTEHS  
AALVRRATGDVEVYMWGNASLGALGLPINMQSQEIRGEIARKPSFKKKNISPLPTLVESL  
CHRRNKDPESPFATQISLGPYCSFVVLSSGKCMSYGFSAEGMLGHGYNTTFSKEPCEVFL  
PLAQNERENSNCIVSVSAGAFXRLALSDDGNVFSWGINSNERLGLGAFDYSSIAPSLSEK  
KENLVVIEWVPQRIDIEEKQVSKRDQKNKNIIPNGVESARRRVSLACAGYDSSFLVTEG  
QVLSFGKRSGRLGMGEISSNINTPQPLYGGLHLFHQRSKEKLVPTTKMKTS  
>comp9798\_c0\_seq1; 889 124 2739 LEN=3244; translated  
MVPRNHGIFPYAVIVITVMGMIGVFLQNEQLAYQPYFEELTHWNSKASANLSPPTTKKT  
TTPHNVGQHMERTNSNANATTKRLGMTRDTTIVAKPDRKTNKNKEEDTRPWLIVHVGPPK  
TATTTIQDGFIRHAIMGRLAVEDNIYYLGMRFGERKDFLVGPNNATAVRTFTMTDIKNQ  
YAFTEKLEHQBKAGHNVLSSSEHYTSKLNVENHWEEFMFSGTFLSSLYRHTKFSKSDGNKSGA  
KRRKKKKAKKQDKTKELSKQDRKRRRLTEESRNGTAPTKSYHHVHPDYPYHYTDMVSDKP  
FDYSSEGEIEPSFGFRVRIVVAYRHFFSWVPSLHYQRYLLAPKQYKNDKMEMKHIPSLIE  
YILDYLDNAENNGNGKEIDI PNKEVESSAKVVTSGRKPDPETYHGLSGSYFAYLKWTSRP  
ELYDRVDIFDMHQPAFRTAAGTGNGNLFDFVCQTLPEATHHTCEYLIEDAADTNSTHNI  
VKRTRQGTKNLMTNQDKHRILEAARRRIPERVDPKQKIKRSVQNNIYRRIEDYFYQDNGI  
INNDNRNDNDLLTNNALGLPTKEVPMVCLDEPNLAKLKKISLDYLRMSSLVKMHSRRLRRK  
QAGKQTSRRKKGDLFSPVDDRDALLSRDYHEDDPDFQSQVAAHDAEFDKYVAKKKF  
CNLDLKDLLADGSFFDFVFPDFGNSTAASPASSIERENEDDDEENTEEDGEETEDYDEN  
DREGSNDDEASTNEDENENEGNEDTDGTTPEQDASSASSTQQKLTHSVSSTSAIDISEA  
DQTTPAVSSTAADKSEADETIEEVVDDDDSKAKLEPQDPADDDDDGTSKPKSTNDYDDD  
DNITKSKPESTNDDDDDDSPATNNIQDDDE  
>comp9798\_c0\_seq2; 783 32 1279 LEN=1784; translated  
MASQASTTNKDGEIIDGDGNGILLQQTLMSHDECFVYKVPPLAVASGGYKANDWNLANP  
LQTCGFRVERRNNQLFLLFTLENHTKLFCLCKIEGNDARLSIEPVTDSRYFVCKIVSNS  
NNSAQKQPRMTLGFGRERDIALDLLGSLQQFKQSIERELKAKELASKTKAIKVLKDGE  
KMHISIPGKTSSGGRKSKSSSSGGGGRNRGGGPFLLRKPPPAGAEQATASAQPPRPQAAPL  
GGTPRNDENRRFSMTDMECPKEMTISTDNDGDNNSEVAVGNRSTAGDLDYSTDDD  
GEANDRGEAGEPGTEGAKSKIEDGDDGFQESVAVGGGASTVDDTDDDDVGHHEHEND  
DSFQFSDLNLDDDDDDNDGSGKGATENRNNNPDDDDDDSPATNNIQDDDE  
>comp9799\_c1\_seq1; 248 257 1184 LEN=1184; translated  
MIYPRIPDKHPALDNNTEDEQLRLNGSTAFSNKLLQLGDFMYGQYTI FAPSDKLLNDE  
GLRLLSMGHSRVTIDESVLLFHVSEFGIYETLLQPSGSHSRCNKAMP MIDQEGDPEKTVT  
LCRGDDIIYQLGPGNHLYDSKAGSLVSMSSGRSDSEIVLGVASTGTAALSKHQ SADNSNG  
NTSGNTNGSKGADEAIPRLSGEKIRACTGVIYPIEDALLLPTLPAVVVAPSPAPDDPSAG  
KGPTLVP IWSPEPAGPGDPNKAPTLPPEPDWVDIVNKISGIEPDGNATADQEGLMEGNA  
TSDQEGGLGT  
>comp9799\_c1\_seq2; 303 1 1008 LEN=1008; translated  
VQTDDFSEIIQTDDFSEIIQTDDFSEIIQTDDFSEIVLGPVDCVPIHEQLRLNGSTAFSN  
KLLQLGDFDFMYGQYTI FAPSDKLLNDEGLRLLSMGHSRVTIDESVLLFHVSEFGIYETLL  
QPSGSHSRCNKAMP MIDQEGDPEKTVTLCRGDDIIYQLGPGNHLYDSKAGSLVSMSSGRS  
DSEIVLGVASTGTAALSKHQ SADNSNGNTSGNTNGSKGADEAIPRLSGEKIRACTGVIYPI  
IEDALLLPTLPAVVVAPSPAPDDPSAGKGPTLVP IWSPEPAGPGDPNKAPTLPPEPDWVD  
IVNKISGIEPDGNATADQEGLMEGNATSDQEGGLGT  
>comp9800\_c0\_seq1; 983 290 2284 LEN=2597; translated  
MKGNGGLEALALCGGRQPTTATTNANPATHTETPSAVHSTAAAANEPSSDSAATAGSST  
HLLTRQTSERNVDSTSSASENNGIVSMGTQQQRHPTATSQLVASIPGAVATGSNFTPQQI  
SQAILAAATSQSGRLDPVLTQSILYPSGLRGPAGNADPAPPAPVSPAPTAPANTGSVFAN  
TMQQLILQQYVAQANAQQQQAQQAQAVAAAAANGAQAASHAALIAMNLAAGKTVQNPHL  
LPGASADTSTLNAKATGSADSSHLGTGHAIATTSLQQQAQALLQQAQQQVNQIQHPQKIH  
QQQYQYAAAGANTIP SILQAATASGGRILPAAGQLSTSSEKAGIVDRGNNAMDVDTGIGS  
KKQQKRAANRRSAQLSRKRKKQFIEELKEENDELRRKEQILRTIPDLIVVFDSSGKLG FV  
SESVGRFLDMSPEKLEGT SFWDLICQDSVRLKKA AFMDSLAAAREADSDMAVLGSGVWELR  
LKNKDEQYMLVTLNGVVHFKGDAPECVCSIRPLGEYDQQQDEQEHSASSKQPKSIGSD  
KDKADGGTSENKSMNRAVSCSDGDASRSSDGSNGTQQSVLNGRHAHAHAHAHGHGRSMS  
SAAQDEVASDAKRNKMFRRVMARANDEGDNGGGSDNNNNVEADGTNNSVRI SDGDSSC  
GLSD

>comp9800\_c0\_seq2; 295 290 1066 LEN=1444; translated  
MKGNQGLEALALCGGRQPTTATTNANPATHTETPSAVHSTAAAANEPSSSDSAATAGSST  
HLLTRQTSERNVDSTSSASENNGIVSMGTQQQRHPTATSQLVASIPGAVATGSNFTPQQI  
SQAILAAATSQSGRLDPVLTQSILYPSGLRGPAGNADPAPPAPVSPAPTAPANTGSVFAN  
TMQQLILQQYVAQANAQQQQAQQRAQAQAVAAAAANGAQSHAALIAMNLAAGKTVQNP  
LPGASADTSTLNAKATGT

>comp9803\_c0\_seq1; 270 395 1444 LEN=1444; minus strand; translated  
MVVSREGFMFFFAVLLGTVWSTTGTTFVFGTDVLPVPPATFGTRTSPSRSRFSLSTVRS  
YGKLLGNLSSRD TD TAVFCLRGGEISLPDDEEEGSGIIATKLRNMIRSILDISDNKIPI  
FSGFLRTCFTLETLTGMSILPEQSKKKDKAKSKPAKNESKKKKKASSEDGVKTKKPSK  
KKGAAASKSSAATQKHLSTSISNPNYRIQKELKSFIKSPPNLSVQVGTNIRIWIIVTL  
KGAKDTIYEGEVFKLRVEFPKDYPTVPPSVYFLKHKMPVHEHVYTNNGDICLSLLGN  
GWRP  
TMSAQSI AVSILSILSSAQSKSLPMDNAQHATAKPGQFQKDWVYHDDAX

>comp9804\_c0\_seq1; 323 217 666 LEN=1104; translated  
MLEVSTSAVAWISVVIVQFLIHYFIFGARRERLRQETEAFLEENLSFSTNDCSMDSDLD  
QISYPDTPTSAPSFASISSLSLLQEVNVTDATSENIPSLWTKRNFETTSSD TD DENTP  
LFLMQTGNEMLKSCSLKNVVAEQIRSV PQ

>comp9806\_c0\_seq1; 311 1422 2111 LEN=4076; translated  
MATNTNTNTYKQYVTLSEKALRKSRLDTRSLVRLAYGDDTAHIGGSDMLEGILNGVLD  
KISNETVLEELDRYGTTSRIVVDEGEQSQQQPQSTNSTSNDEQINRSRMMTPKERLDRID  
SVISDVVEWEGRRDRREELDAESARESLDRNLLPEGVSMQVIAHREFEELRAKKLLLEG  
ELQRIQEEISTLEEKRVMEQTQIREQLEKVESAEQKLEATANLCAMVTT

>comp9807\_c0\_seq1; 533 1 2277 LEN=2645; translated  
ESMREYFLLGSHILRTIAKTVSWGMIGHPTMGTIQLITVWFIGIAATSVVNVAARFPGLG  
ITRKQPNIIVIQPD DFRYFEDWGP PAFEGSFITQFPNSNQLPNI SRLKRDGLTMTSAY  
AAATMCGTSRYSTMTGRYPSRSSLGRAYDRNSGMRDVSNPATKLD D IEGLSDGND CSENN  
IAALLQRNGYRTGISGKWHLTEDDRGRYNYERIQEEVRNCGFDFAEAIYKENMDGNWNGD  
AGHNMEHV TSEAIKFIESAVVEDEKPF FLYFNPTVPHPSSDVIEDLESADCRETIGGTL  
S  
QPPV I PYGMTANFGNCRAYRQSVLARGGND SYLAGAVWDDAVGSLIQTLESLDILENT  
FILFQMDHGQQKGNLYEIGSR I AQFIHYPDRI TAGSTFDNVVSTIDVAPTIADVAGVSFD  
AYPMDGKSWMSDEVNDRCIFVELQFDRSVRCGCYKFISIANLNDGRHMINADSIGASVD  
FNYYNLCNEETGEYIKAPEITSEWRSTITNEAIRNGLQEKLICHMSRTDPTRDPDYSNN  
ECDESMVLPETTLRPTLRPTSPPIPTNNLPTSPWGDSIYQQPVTTSPTNKPTKIPTNNPT  
PRPSP LPSVRPV TDEPTNSLIDSFDEESL NITDIEAFIEYLEDCSDDQNYLYNEIDGQNC  
RWVITNDRCDQDDPETELHIGRNF CQRSCSFC SKYDDDCSDNNYFTWYQEGKNCTWIAE  
NERCDRVRNDFNGTTLVVDHYCPESC GCY CSTE S P Q K

>comp9808\_c0\_seq2; 871 1 1824 LEN=1945; translated  
RAYVSGLILKSFAELAARDNAEPEPPVGASEDLRDATGKREPAAICRSVDTL FANLGDGK  
PGDEAPADPRPYDVIFLPVQTPWEENMNYEHSSGNKNLLYLASQHVSVDTKRSLSRV  
KAA  
FALITAKIQVTSSELVTKDQRFVILRNTGDKGQONQWENMDRNDLAEFAAIFVFEVYLEK  
RIYDETS LGNNVHAGTPVTPVSTQAAMKDLLSPSDANKP SDVPIPHPTTHDVLFG  
RGGMT  
NGHAGNRRFRDIIALHRPDYVRATKMDKPNVARKIVRAIRQGNPPGRFLRKGT  
DNMWRDV  
GDKIAAEKTSQGLRERSNAEKQRORSAMRESLRIGQRDSLGGESADGTPGGK  
KLLDAAA  
AIAMGMGGALNGNIVPITLSAKKSAGAKRKQKGINGTEDEASTESLPPNAVDRD  
GNIIVTDH  
DILCGRGGLTNHHKGNKRFRDIVALHRPDYVRAPKIQKPSVARVIVRAIRNGD  
PPGRFLK  
KDATTGKWFDIGDKAAEKT SQALREKSDEEKEGKVP PGFTSPTLHIVPTATA  
AAAAATN  
V  
DATLTDAAVQAAVAATQAKLGTDTGAEAAIAFAAAAKSEETKGEESKGLAVKQED  
VETAN  
ESHVEV

>comp9808\_c0\_seq3; 615 89 1198 LEN=1319; translated  
MTNGHAGNRRFRDIIALHRPDYVRATKMDKPNVARKIVRAIRQGNPPGRFLRKGT  
DNMWR  
DVGDKIAAEKTSQGLRERSNAEKQRORSAMRESLRIGQRDSLGGESADGTPGGK  
KLLDAA  
AIAMGMGGALNGNIVPITLSAKKSAGAKRKQKGINGTEDEASTESLPPNAVDRD  
GNIIVT  
DHDILCGRGGLTNHHKGNKRFRDIVALHRPDYVRAPKIQKPSVARVIVRAIRNGD  
PPGRF  
LKKDATTGKWFDIGDKAAEKT SQALREKSDEEKEGKVP PGFTSPTLHIVPTATA  
AAAAAT  
NVDATLTDAAVQAAVAATQAKLGTDTGAEAAIAFAAAAKSEETKGEESKGLAVKQ  
EDVETAN  
ESHVEV

>comp9808\_c0\_seq4; 662 89 1339 LEN=1460; translated  
MTNGHAGNRRFRDIIALHRPDYVRATKMDKPNVARKIVRAIRQGNPPGRFLRKGT  
DNMWR  
DVGDKIAAEKTSQGLRERSNAEKQRORSAMRESLRIGQRDSLGGESADGTPGGK  
KLLDAA  
AIAMGMGGALNGNIVPITLSAKKSAGAKRKQKGINGTEDEASTESLPPNAVDRD  
GNIIVT

DHGTFAKKGKPKQRDAIASTSVYQNFSDHGFAGLLCIIFFFFGKTVHLLDILCGRGGLTN  
HHKGNKFRDIVALHRPDYVRAPKIQKPSVARVIVRAIRNGDPPGRFLKKDATTGKWFDI  
GDKKAAEKTSQALREKSDEEKEGKVPFGFTSPTLHIVPTATAAAAATNVDATLTDAAVQA  
AVAATQAKLGTDTGAEAAIAFAAAAKSEETKGEESKGLAVKQEDVETANESHVEV  
>comp9808\_c0\_seq5; 918 1 1965 LEN=2086; translated  
RAYVSGLIILKSFAELAARDNAEPEPPVGASEDLRDATGKREPAAICRSVDTLFANLGDGK  
PGDEAPADPRPYDVIIFLPVQTPWEENMNYEHSSGNKNLLYLASQHVSVDTKRSLSRVAAA  
FALITAKIQVTSSELVTKDQRFVILRNTGDKGQWENMDRNDLAEFAAIFVFEVYLEK  
RIYDETSLGNNVHAGTPVTPVSTQAAMKDLLSPDANKPSDVP I PHPTTHDVLFRGGMT  
NGHAGNRRFRDIIALHRPDYVRATKMDKPNVARKIVRAIRQGNPPGRFLRKGTDNMWRDV  
GDKIAAEKTSQGLRERSNAEKQRORSAMRESLRIGQRDSLGGESADGTPGGKLLKLDAAAI  
AMGMGALNGNIVPITLSAKKSAGAKRQKQKINGTEDEASTESLPPNAVDRDGNIIIVTDH  
GTFKKGKPKQRDAIASTSVYQNFSDHGFAGLLCIIFFFFGKTVHLLDILCGRGGLTNHH  
KGNKFRDIVALHRPDYVRAPKIQKPSVARVIVRAIRNGDPPGRFLKKDATTGKWFDIGD  
KAAAEKTSQALREKSDEEKEGKVPFGFTSPTLHIVPTATAAAAATNVDATLTDAAVQAAV  
AATQAKLGTDTGAEAAIAFAAAAKSEETKGEESKGLAVKQEDVETANESHVEV  
>comp9809\_c0\_seq1; 450 196 1410 LEN=1683; translated  
MGCGASSDAGVVAPTVAQVREDEKIGAAMEEMQRKDELKIKLLLLGAGESGKSTIFKQMR  
IIYGTPTDDDLRMFGVVIRSNCITVTRKLCQLIRLLELEDDLEEEEAEGAEDGMTPEE  
AFELLVSHLIEGTAPPLTPIDLSNDWVGHLAGLGPNNDAQMFLQIWKPIKTLWQSNLM  
REVWQKRSIVNIIIDGHKEFLDSVDRIASPSFKPTQQDLLLARVKTQVNMERYRIDGIDF  
EMYDVGQRSEERRKWIDCFDSVDAVIFVAALSEYDQNLAESKRTRNMVEALELFRSICNN  
RAFANTSVLLFLNKRDI FEEKLQYSDIAAQKPFADYAGPPNDFNNGVIYFIEKFKECLIN  
DEMTDSFIQACTATDTTMEFVLDSTRTIIMTDNLRRSGFLGAG  
>comp9809\_c0\_seq2; 422 196 1344 LEN=1383; translated  
MGCGASSDAGVVAPTVAQVREDEKIGAAMEEMQRKDELKIKLLLLGAGESGKSTIFKQMR  
IIYGTPTDDDLRMFGVVIRSNCITVTRKLCQLIRLLELEDDLEEEEAEGAEDGMTPEE  
AFELLVSHLIEGTAPPLTPIDLSNDWVGHLAGLGPNNDAQMFLQIWKPIKTLWQSNLM  
REVWQKRSIVNIIIDGHKEFLDSVDRIASPSFKPTQQDLLLARVKTQVNMERYRIDGIDF  
EMYDVGQRSEERRKWIDCFDSVDAVIFVAALSEYDQNLAESKRTRNMVEALELFRSICNN  
RAFANTSVLLFLNKRDI FEEKLQYSDIAAQKPFADYAGPPNDFNNGVIYFIEKFKECLIN  
DEMTDSFIQACTATDTTNSKYR  
>comp9810\_c0\_seq1; 193 96 356 LEN=646; translated  
MQIFIKTLTGRKQAMNFEPEPENVIAVKQSLQEKEGIQVDQIRLIHSGKQLADDKTLESYN  
ISAGATIHMVQLRGGADLSFYNNHV  
>comp9812\_c0\_seq1; 507 1 1370 LEN=1761; translated  
RITTDHLKGVGREYHPSLSTTNGTNALLQLSMKSVVERTDPRDQFDQCKGTNLKHFGLX  
KLRRKSNRSTNHKMFVCKILLCGFISSSIHAKLFPSTKTQQLRSSAVESANSELSRRQLL  
LSGVTLTGIGAILLPTNPANAARAKGAAELDFEYIRDVNGNKKEGSISPSTNGPPVPP  
PRTLKGSIIPLLLNKECSPDCIPVQALIEEIEKQDKVAGRTPASKEAIAKDIQYRVNSIR  
EKTSRSFLTAKAPWNEEIESDQYYFDFAYALWKTAEMIDDVQNRDRFMRNIGRLLVDKL  
ESEGILTSSASRQQQLSKNNGVLVSIPLVMELLNVFKTSGYCKNFRIRSSDNADAMGDD  
LPLFDELDDSELSMVGTSNCLVSI FEPAVLGASLQINGENS RFAPDFIGTSLAAIWEKYG  
GIRSTWVDFVDPEYRPNPKDYFPNEQLLQITLNS  
>comp9813\_c0\_seq1; 360 16 801 LEN=917; translated  
MPPLNQNYVVDDL FVNHTVPTTTDGDQSAFYGKEPTIDDLTRQFTDYSEEKKSVSFHPRV  
QVASIPNRCDWSQGERAARWNSRDDYTRFQIDVLTNTVYLLRNDPESIDDTSHTRVGAECR  
DPIATRRRRHTRREAQDVVFERQHIQRQVYDDPNRFVHLVASMYFQASKTSMRLALDAAS  
QDEIDANKIRQEDKIRQEKLQKQKDVDFLDKDWASVFSIDKDNFLGSPPEYSFVDDDEC  
GFCILGETSDFDNSWLRAEII  
>comp9814\_c0\_seq1; 467 1 905 LEN=1126; translated  
XPKNQNHSEQRQHQHSTTRVNLMKMMFYTNRRDSYPYASLHPYGRHTSRHLDPYEQAIAE  
EAAINRYRRMRREDEEREAYARRRREAEEREIYQRQRRAKLMREEELRQRRRWQKQWQEK  
EPNIEESDSEDEDDNDEPEFVIVRGPDRGLYYAKNSSSRTQQSKKQONKKEVPQKKS  
NKKATKEIPETSAYLSEDDQSSDEESSDESSYDQEDDCFSELKQKLIKNTGSRKENG  
SSQTSQNPRKGAKTQKQKRRRLTIIVEDASESENEDDYKSPWRNRRPSPGEWMEPVEMY  
D  
>comp9815\_c0\_seq1; 275 378 1405 LEN=1447; translated  
MANQLYHLFVIFILGFGAGILTLHLQLLTQELEADKAYERSIEATTQHKEVNVDPYPLPPC  
HPNRTSAVYIFYGLPVESQEGITLFSIRSLLKSNFPGTIRVIIDEKVNDTIREAIDPMH

RDLLDKIDIFALPLPDLSGKELIPHSNKIRALQAGALIYGKDTNECTVALDGDYIHPNA  
PWTKLLSTLELYEISVSHDCDVAIEGVPEFLGXVDAKYGGFGTPKHPAGKDDPGGLAGSF  
CALQRNTRGVVHTRDRSVLFPACGKTRRKTMETGQQLLELPVDPNRNKCQHYGVSGPLSN  
RLEQSGGHQCGRFQGRHYLCRVQRMPHTPFTLSSVPIGKQTF

>comp9816\_c0\_seq1; 204 292 936 LEN=1002; translated  
MKVREIEMILAEMGAIDPENPQESLVNLRVVQVDLPEIQEVNTEGVAKKALLAAQLAGG  
PSLIEDTSLEFHALGGMPGPYIKWFQERLQSVGLWRILTAYEDKSATAVCTLAFSPAPHA  
DPVLFRTGKVDGTIVEPVEGRGFWDSEIFVPEEENQPFSCLESTERKNELSHRGDAVRQWVN  
WLYVNKDELIERQKTGRQSIGHKGLDFKSYSPEQ

>comp9817\_c0\_seq1; 1036 1 4333 LEN=4386; translated  
XIFLNYDCDL SAVDLFHRIINTLSRVARTTDAETS DLGATAMTSIISSSGGARMERLRTQ  
HRELRLNAMRALRQVLASLNASIVEPMKESQSLSPTLSREEPRIGEDTHENHRGQAENGH  
ASAGASGSDPKKSLVEIYDDKKRREEDSETVLRFNQKPKAGIAYATKCGHIDSSDPADV  
ARFLHKNKDRFEKTQIGEYLGREPDIYDNGMPLKVLHEVYVHQMDFDGLTFD NAIRYYLSGF  
RLPGEAQKIDRILEKFAERYSEQNPDAFAPSADVAFILSFSIIMLNTDLHNPSIKEERKMT  
KDGFI RNNRGICDQDLPKEMLIDIFDRIKENQISLKEDDDARERAADSATTNALNPAA  
FFTNYHDEVDKTKESNFIKERDQIVRTTESLLKRRRHGTDAGKPGTRRRGRSNHTGKPSHP  
KYVRTDDSGLRDEYVAPMFEVTVWGPALAAFASTAMESANGTVGALLAIATDKELEAAAINA  
AETIEVCLTGFRFAICTAGLVGNDIARES FVFALS RFSQLGTGVLL EPRHVC IQTMLAI  
ARSDGELLGASWEHVFKALSEINRFHQFLQLMARNDRVARAAERRQTRLVAKEKRREAK  
ELRRAKKEESDLSGDASMANSGDSSDSSDSSFDSSSLFDASDDL SLNDDMDTKEIDEANAR  
TVYEAVAEDIIEAIYERSSSLSTA AVKEFILQLCRVSRMEISDYGGFVAGDSNEVSLTSV  
QYRKKHDL LVHSAPKEKEGFFHHHQTNIYNLQKLV E VTHYNMDSRPRLVFNELWTTVSASL  
TSTALHSNPAVAMYAVDSFRQLCIQYLQREELGVFEFQRRFLKPLETVMARSEISTTKEL  
LLRCVERIILMFGSPQEGNDGGKLRSGWRPVLKVLG LAGRDSDEEIAKVGFEMLNTQITV  
CLDQCKEDGEKTAGQGVLLIERFVDLVDALLIYVGGPHEEMGLQSIDDLKLCDFLADES  
TVSPLLKRRGVASNGEAI AENSEKTSNEEELW WPILLGLSR SVGDERKKIRQKSLES  
LTKIVSRHFFPSVENQESLDENSKSKYVQTLQLVYRGIFSPVLEFGDES AFNAKTPTLPS  
DMERFLSAKHGPGESQKLDENHSSSWIDTTFDPFMDDCVHICIRSLKVFD DDTLIEDIFA  
MFNSCFISESGALAAKGLRRLIEFVTSDLPTSSLSNEIWATVSHMLRRLSHVRGLPKRSA  
VAGSKTTEETSKEAPQHKGDDTEVSNPELEQQEMLREFVAEDKMF LDRRFIGSNAIAVIG  
KFMETERFKKSLSLKWRLFLLSGLGRAIKDWEMAAGITENNLGKTNDPNRLNPPSYRETA  
YYGRKWMNRFLQLQIAAMKEIEGTAVEGSKQAAAQDAVKEQTEALVSAFLEKETVINNDAK  
SSSLEIKSFDRLMNLVQDMLAGYAKLTDEHLEQMPWLNPNVLSSCIHTSNEDIRLAIQKLV  
ERLH

>comp9818\_c0\_seq1; 383 302 799 LEN=1076; translated  
MAVSMKSSPAVLLASALLLCLLAARGTEGFATGPVAGTRGTASQTRLSAEQPGGNNNNKG  
NPVFGAISNFFAELDAFVDDATARRLNGAAYYGKRKSSFYGKDDAMKKQDRDVADSEED  
YMVNSGGNYKWITDENGQLRPVSRMKNKSLEKPLEFWGRKDKNEE

>comp9819\_c0\_seq1; 390 31 789 LEN=1059; translated  
MKTTASILLATVATAAAFTSPSTQSASTQLQSAQSDLEALAVDLNPSIKYYDPLRLTTWN  
FWEQGDEATIGFLRHAIEIKHGRVMAAFVGYCVQSNFHWPWAMKLDGTAFPSTDLSPPEQ  
WAALPIESKHQILTVIGFLEIYSELASSVTD PDVYQPHYMKGGKPGAYPKFGAAVPHVP  
FNLYDPFGWSKNRSEEAARGLVAEINNGRLAMLGIFGFLL EQTLPGSIPLLGDIVKPYS  
GDLIAGKAFTFY

>comp9820\_c0\_seq1; 237 52 441 LEN=572; translated  
MVAKLPE TNNKVFD SAEKQHELSPKQLKRLEEQKAREAKKLAKRKAKAEQREL RAMEKE  
FKEAERERLEQEREENSGLNAREMEEQERLAE EKRLFEEYLHRDRVLPVAHVKKSTLES  
NRLGGSHMC

>comp9821\_c0\_seq1; 1393 126 3347 LEN=3440; translated  
MAEEGTPAPAPPAEAPAAEGGEPKLSKNQLKKLAKGKGGKQKKEKPQWGTGKKKEPKKKE  
VKPKEPFVNQTPKGEKKDMSKIPFADAYDPEAVEAAWQDWEASGFYKGDAAAAMGRPAD  
EKFVMVIPPVNTGSLHLGHGLTAAVEDTLTRWHRMKGHSTLYVPGTDHAGIATQSVVEK  
MLMKNEGKNRHD LGREEFVKKIWEWKEEYGNRITSQLRHLGSSVDWSRERFTMDETL SKA  
VIEAFNRFHEKGMLYRANRLGNWSCALKSAISDIEVDHIDLEGRTFLEVKTHKGNPKDPK  
GRYEFGLVTHFAYPVEDSEEFVAVATTRLETMLGDTAVAIHPEDSRYTHLHGK FVIHPFS  
GRKIPIVLDPVLVDMSFGTGAVKITPAHDPNDYECGRHDLEFITVLTDPGAINHHGGEE  
FEGMMRYDARIAIEEALDKKGLLKGKEPNKMRLGLCSRSGDILEPMITPQWYVNCDDMAK  
RSTDAVRNGELKIIPAEHEKTWFQWLDNIRDWCVSRQLWWGHQIPAWFATTKAEGETISK  
NDMANNDRWIVARSEEDAKQKALAKLGCTEEELVLERDEVDLDTWFS SGLFPFVSMGWPD



NTDDMKAFYPTSLLETGLDIIFFVARMVMMGLELTDTLPFHTVFLHAMVRDKEGRKMSK  
SLGNVIDPLEVIGGCSSLQALQDRLDAGNLPKEVQRAKKNNEVEFPDGIPECGSDALRFG  
LLAYTVQKGDINLDVKKRVVGYRNFCKNMWNSTRFALMYLNDFQPTPTLLDDLMSGKMAI  
RDKFMISRLMKGIEGIDTNLKEYTFGNAQQAGYQLWLNDCNVYLELIKPVVQSSDEDKK  
DARWAAQATLWVALETQLRGLHCMMPFITEELWQRLPGRGTLGDSEKPSIMLSEFPVVD  
SFKDEAVEASMTLTLDIVAACRSLRSSYNIAPKNLTHFFIKMTDEKQADAARAQTDIMT  
LGNGSKVDINPPDADIPPTVGTMMVNDSLTVLVDLKGMDVDFKTEIGRLNKNLKGAKGPME  
QLEKKMAASGYQENVPEKLLQANDEKLVGLKCKCADIEEAIANFERLLTLEEK  
>comp9822\_c0\_seq2; 229 399 1604 LEN=2804; translated  
MHTQRREAMQKKT DGEIRSTTAMAGARKRKP SALAPASASAARAPPRFFPRVPASSLLFV  
VLVLAIVRMGAAAPISEASNFRAMHDKILQGAKKEKTVSGAFLAALDQSGGSTPKALESY  
GLSPDEGNYEVGSESMF DAVHQMRTRIMVSPSFRGDSILGAILFEDTMDRTVDGVPTCEY  
LWETKGI VPF LKIDKGLEDPDE RGSVQMLKPIPDLEALLERAVSKGVYGTARSLIILDPN  
HPEQIDALVKQQFDLARRVLEAGLVPIVEPEVHIHQTKADK CACEEILCGALLRELGDLL  
AEDKDHVRMIKITLPETPDQYKDCVDHPCCLRVVALSGGYDQANANARLSQNRGVIASFS  
RALSEGLSHGMTNDEFNRLSESIASIYGASSSSSSSSTVE  
>comp9823\_c0\_seq2; 410 746 2272 LEN=3138; translated  
MPLTRSSRKRLTAGEGGNAIGTANNEPRIKRQKTGSDVAKTSA AAAATAKVRKARALKPVA  
TNAKAQSKSNATHKQHDVATKPVTRGASSYRTAAHRKASKTAKANGVPPSKKAAPPKRG  
RSAKATNQPMKEQEYQEHHFLPYEETASSTTSALPDTEVVRSEPKASEEASSGND CSEA  
KPPAPVNAVEKDDVIRSKDLSTADGIFSNSSYQNGVPDDIDARDAHDPLSVTDYVADMYE  
HFRSKEEMCSVDYMYMGSAVHGKQPNINESMRCILVDWLVIEVHYKFKLPETLYLTVNVL  
DRFLSQTTTELITKRDLQLVGV TALLVS AKYEEMYPPELRDLTYICD GAYTEARILRMEEK  
ILKTLNYNVTVPHTFLIRFLKAAHADTLMAQLACFLLDGTTLSLEKLTCLWRPSQLAA  
AAILLARRHLGRHNWSPTLVSYSYREEDVLPVARALLKNKERLENNRELLALAKKYSKT  
KYGKVS HIEFEPFDDQESSGDESIENSL  
>comp9824\_c0\_seq1; 474 62 1528 LEN=1528; translated  
MTRSYQNNQTRRRRKNFKKISP AEI AALNARIEEETPARGLAHAKNSVVSFASQPLS  
SATLQGLEKNGYTTMTS IQSGSIPHALAGRDILGAAKTGSGKTLAFLIPLLELLFRQRWT  
PQDGVGAI VLSPTRELAGQIFAVLRKIGQQHSFSLGLLMGRHKNKQNIENDFVREQQS  
IPTTNILICTPGRLQLHLEQTPYFNVDLQMLVLDEADRILDMGFRDQLVRILDYLPQGE  
ARQTL LFSATQTKDVKHLATLSINRKTVEYVGVHDEDSAKTPDR LKQAYVLPVEHKLNC  
LYSFIKTHLCKKTIVFFATCSQVRHAWDLFCRLRPGLSVLAIHGKLSQTKRLQVYDKFTT  
TPHSVMFATDVASRGLDFPSVDWVQADAPEDYDMYVHRVGR TARFQQDGOALLLLDPAE  
EEPFRVNNKNEKEQRLKANLQKKSINPTKTMLVTQRAASLVAEHS SLYALAKKAFWSYVR  
SMSLLPKDG  
>comp9825\_c0\_seq1; 464 1 453 LEN=1226; translated  
QQQQQQQTQTQLQTQQQVAQPATGPQQQQQQPPIQLQLPTSLFPNGQYVPQQQPQQQQT  
LVVNQFAAAPADFFQQQQQQHAQMATAPTGMFQQQQQVGPVNPSPSGFVSTADGTNGHAQ  
QQQQQQQNQLLQILLMQQNGLAMTPSSS  
>comp9825\_c0\_seq2; 315 210 1601 LEN=1770; translated  
MVTGEGGDHPVGGNSYSSSSNSNSTGSIKIGTRRTERADGGGGFPTARLSNGVSFFPLVGL  
GAGNLPPEAVQGIVAHGLAADKNVRLIDTARVSQNEFLVARGIVEGAERLASAPDKGADP  
SEVHVVTKVWYTHLGYERTLLSARSSLEALAEARDHPGVDLRVHLLLHWPRCYDEIPWMD  
CAGEEEGLPPDTRAAGPAPHLDPAGAWKGSWRAL EELLADPSNP IASIGVSNFHRRDLEE  
LEAFAAVRPQLLETSAWSLLYDPLLIEFCHKWGIHVVAHNLMEGVLYRASEAPFASHLL  
SVANDLSLTIDAGKATTDPGTGVSAAQVVLAWLVQHSISVIPMTTDLSHLGENSAVALSR  
IPAMDDRQTRVVAESVEALISGDDLTEDAFVTVTFHARSKDVFLYWHDP EFGGEIEVAR I  
DKGTSFEESHPGHEFKIYDVEGGMEFFRVAGNYGEHKHIEL  
>comp9825\_c0\_seq3; 294 228 677 LEN=739; translated  
MSGGGIDDSASVPPSFFGDRALVPAVNPNAAYPGAPPPPQAASYPSAQPAYPGQQPQ  
ASIAPSPFAAPAGYPGQPQQAPAPAF AQQQQAPAPAF AQQQAPAPAF AHQQQQAPAPAF A  
QQPQAGYSQQQQQHGA YPGSSYPVPTQQY  
>comp9825\_c0\_seq4; 932 169 2193 LEN=2255; translated  
MEDPFA SFGIQPPVDNAAPPATPYQQPAPPYQPPQQQQPAPQYQPPQYYQPPAQPAY  
EAQPPAPPQQQLVVA AQSPNYAGMVAPQPTQQQSTPWDAPPSPNPNSSFVAPPPTRSSTA  
SASSFD PFAAIPAQAPPPQQQQQPAYSAPSPA AQDPWSAAPAPQPAPAAQDPWSPA HAP  
QPAPAAQDPWSAAPAPPQPAPAAQDPWSAAPSPAAPRQQSYSQQPYQTQDR TQKSAYS G  
QSYGNINSMKSSDNGSRQMPAPSSIVARGNDARSKNEDGERYKKQNP RNPYSTALAQQ  
VAGSNTSGLPKAELVGKRGFVLSRISFRTIVMKKWKQSFVWQYGGHTMLWFRS QSDFD DDW

LNNPYHNQSQRNFLIKLAINFVHDLYKPNVRGYQVTQCRTPYGNKVVVRQFKLERWMDY  
GPTIAAAFSGSYDPKEVDACREAIVECMKNTPLDNGIRATGAVKEHHDRKQEEEWRRSQEE  
RRLGQKQNGATGSGYQNYSLGAGQTNHTEKDAGRQRTPSFDLLGDMSSGGGGIDDSASVPP  
SFFGDRALVPAVNPNAAYPGAPPPPQAASYPSAQPQAYPGQQPQASIAPSPFAAPAGYP  
GQPQQAPAPAFQAQQQAPAPAFQAQQQAPAPAFAHQQQQAPAPAFQAQQPQAGYSQQQQQH  
AYPGSSYPVPTQQY

>comp9826\_c0\_seq1; 191 25 414 LEN=581; translated  
MTTDIENDKVVETPACGSREPTVPPCDAIYSTDGWCTRSEGGKCKGWSWYNYKAKSCRNGF  
FSAYAINGLFSLAVNTAFSLLTVNGFFSVMSCNCFVSLLSLNSVCSVFSSSGFFAVGCH  
GESFKICY

>comp9827\_c0\_seq1; 1003 631 3443 LEN=3941; translated  
MAAATSTKTNVARTMATARGVVTIGTATIDTDRTTTATVVVVDTDVKEGTTTTAMVPPTT  
NKGTTTAAVAGAPTTNPGEAGAIMVTILATTDVVEEETEVTVTVAEEDEVAVEAAEAE  
ADEEEEEEGGDPDMSGLKSCLSNVMLADVAENFQFFLYSVEVSNEQGEQIESRHRKFLF  
DMGLWNGLFKMDPKKADLQRVVFFQGSFFYSARMIPGLQAKNLPVLTQEAEGDYI  
KVVNVFHYVTPVELLHPKAVSAPKDESEVRLDLRCONNECTKCFGLGSLQHCQSTGHTPVY  
PAADIASADCKPIPCNMEVFNSYINGALQRALGERLARWGAEYIDPQNMKEPVDKQGRPL  
GVRVYEAFFHCQFGFLRNEGEDIPRVGLTVDLRAKIVRTMSVLDNLANEANQDPDRYRPT  
QEEDRARRAFIGEVIISMHDKCYSVTDLVFQHSANSLVVEGLSMSHAIFYAQRKNIQLR  
YDPAKPMVAVLGRRNQTIIYLPPELVAGNELEGRVKQQLPMIASYKPDARNRAIEKIRSYL  
VPGAQKSKNAGGLLPALGIQLAGGRLSQAQVLPMPMLKAAGVSIIPNKGSNWAPFLTKA  
DFKINPSQSNEQLQVIVFHNQRIRGAIQVYNKVRNFVNKNFATYRFGDKPTQMI SAGDMEG  
HWGAVEKCFSDPSLKAENFVLDNFNKPRGATDPAYPVIKQMLTKSGFLSQFVNFNTYDHS  
NPRDQRRSEIILNGVARQILQKTGFRLWWVHIKPSLPTPTVFGVDVVFHAPRIYDVKAKK  
RVAKASCAAIIVQVYRNSGEQKAQQVELFTKTFARESGKEYDLGDALKETVSEAIKELNV  
APTSCIVWRDGGIGESAFNNAQDEITAIQTGLNKTPDGIADRDVPMSYIVAQKRISTKFL  
SEGIAGQPDGKYGAPSGTLVKGIQSYEHETFYLNGRK

>comp9827\_c0\_seq2; 1024 631 3686 LEN=3841; translated  
MAAATSTKTNVARTMATARGVVTIGTATIDTDRTTTATVVVVDTDVKEGTTTTAMVPPTT  
NKGTTTAAVAGAPTTNPGEAGAIMVTILATTDVVEEETEVTVTVAEEDEVAVEAAEAE  
ADEEEEEEGGDPDMSGLKSCLSNVMLADVAENFQFFLYSVEVSNEQGEQIESRHRKFLF  
DMGLWNGLFKMDPKKADLQRVVFFQGSFFYSARMIPGLQAKNLPVLTQEAEGDYI  
KVVNVFHYVTPVELLHPKAVSAPKDESEVRLDLRCONNECTKCFGLGSLQHCQSTGHTPVY  
PAADIASADCKPIPCNMEVFNSYINGALQRALGERLARWGAEYIDPQNMKEPVDKQGRPL  
GVRVYEAFFHCQFGFLRNEGEDIPRVGLTVDLRAKIVRTMSVLDNLANEANQDPDRYRPT  
QEEDRARRAFIGEVIISMHDKCYSVTDLVFQHSANSLVVEGLSMSHAIFYAQRKNIQLR  
YDPAKPMVAVLGRRNQTIIYLPPELVAGNELEGRVKQQLPMIASYKPDARNRAIEKIRSYL  
VPGAQKSKNAGGLLPALGIQLAGGRLSQAQVLPMPMLKAAGVSIIPNKGSNWAPFLTKA  
DFKINPSQSNEQLQVIVFHNQRIRGAIQVYNKVRNFVNKNFATYRFGDKPTQMI SAGDMEG  
HWGAVEKCFSDPSLKAENFVLDNFNKPRGATDPAYPVIKQMLTKSGFLSQFVNFNTYDHS  
NPRDQRRSEIILNGVARQILQKTGFRLWWVHIKPSLPTPTVFGVDVVFHAPRIYDVKAKK  
RVAKASCAAIIVQVYRNSGEQKAQQVELFTKTFARESGKEYDLGDALKETVSEAIKELNV  
APTSCIVWRDGGIGESAFNNAQDEITAIQTGLNKTPDGIADRDVPMSYIVAQKRISTKFL  
SEGIAGQPDGKYGAPSGTLVKGIQSYEHETFYLNGRAPPYSTPKPVRFIVVNKDPRLNQV  
PIEELTWNLSHDYPNWTGPIKVPSTQMAHKLAEELGGSFADCGKNINAKKLNKVVHFL

>comp9828\_c0\_seq1; 489 1 2039 LEN=2158; translated  
DRTNNQGESSTPKLLSTQRLNIMAKTRSSKINSKRTEKITGEKSVSGSQSHSRVFATR  
TRQTRITNCTDACADSSGRIWGLLSKVKCDRRETIIVFVCFPLPTNGDRQLKDYQKTIDELK  
LRAKTRCARLTDLSLEIVEIEGASADPTIPWNNQLFNDDREDLILIIQGRXNQLVYFGRE  
RAGIKDDYYVSKTGKDTALSFLHQINNCSNIEDIVKCGIIPDIYPNQMKISLPNDFHD  
DIIAKTKMGFATIKSPSPFLRAHFLWMADFLNNSITRLHFQKLKSAGSPTIAAVRF  
VRASSALWNIASKRNARPSSLNNTQTSQLYSKPSIVSSKIHLSKNRVAEWTEFLSTFFDM  
TLGIVVCSVLLSVFHQNHQILIRTVYLDAKEIACQKLENQIAWLETFFVGFKLNLVETHN  
MGYGIRSLHYQKQILAATLWDFHGWQDYLIAPAFATLAGLGGWTAFLAALIDFWRFEIFH  
VTLLSVAFRKLQYAEELYLSALFRLFRGKKRNALRYRTDSMQYDAMQLLVGTIAFCVCFV  
LWTTVMVYITFFAIWNLLMHFPLLACSALYLLSQSFPWGSALFRFLEPHWFPVDVFNH  
DESDIKFKNEHNQVCNLETILESPMKIIFDPIAKPLKRLQWYAI SFFQVLFPLGKQTS  
YSFLPLTLLTEDDPKPDFS

>comp9829\_c0\_seq1; 766 1 2123 LEN=2240; translated  
XNEKQKDNATAKSIRTVPKQYCKEPLYKAITTPLHSIHPRVSKESAAAAARSKYATKHQ

QMASQVSQMSASPPGFVNRYVAKYGSRYRGAAEEKNKELSLVREENRLRESLTLVQTEC  
EDLRSESNYNRAKVLELSDLVTLSPKQKAAMKDSLVAKKKEKENAELILTVNKLIEIEL  
YQSELKLEELKDQKSHNKLLEMGVIRALNAVDVDYDPSVSGSSDSESLSPQQLSIRN  
IKLKVEAMKRDREVLKQKCRLEGEYDHSRHSKADAPAAHKFYVVDHNSNSNEDKLT  
PNNIQKKIDALERKIHIVNTSKLEDAATHTTCTTSQTVRTPPHSPYSR SYAAS  
TLTPASMSRDESEFTGDSEQEGSESSAAKIAEQNEEIARCNKELASYMEKEQEHT  
NEIIGLQKTEQEKE TIQRLADQNETASHELASLTKLEKAEGENQEIASKRDELRS  
NLQDIMVHHKELTDEHEA AQQKIRELQSRIDILELRLRVATRREEPAENNEESIE  
EDEELQSLEEDEISVAYRRAKNR IKLELEHLIKAGQLLSARAENKNAGRHYQTT  
IHYSQKMERERDELQTKLKDAMEEMRLA KLEVQKERDASDEARRKLADFSQQRQ  
DDRSVSSGHSRASARKKPAFRPLTLELMEKDFP ESDRCDRTSLFRATAETGLEKE  
ENLGSKSNKPVKAQLISKLAHGMVLW >comp9830\_c0\_seq1; 150 225 368  
LEN=368; translated MDALTKNLANLGTGLKDGATELAEKHDLEGKVAPLVEKAEQ  
FAADHEE >comp9831\_c0\_seq1; 172 1 952 LEN=952; translated  
TYRIDRVRPGTPNHPHPPEGPTTKETDPPPMDDTDASTDPPVAASAAADLSDLLRAM  
TTTTIEPTGKGAAPGVPPGPPGNASMSPLPPGDTAVRPLAASLPTTVNRSYKIYGV  
PETHAF CQVFSDRIVVGVTQLVTKTKTAKDTKGE GAVAAAAAASSGHIGSWVYCQ  
ASQSEVDPKQVD YELSTLLGGSGNARDEKEVYARRIAERLLEKQSVPGGVEQDRP  
AAGDLAPSGAAARRFLR RALQNTRRGGADRDRFGDCPGAVATGRGVARVQTAGAA  
GRACTASPDPSGPHRCFRL QESIEGSGTHTLQTLRIA >comp9831\_c0\_seq2; 118  
1 832 LEN=832; translated PVAASAAADLSDLLRAMTTTTIEPTGKGAAPGV  
PPGVPVPGAPSMSPLPPGDTAVRPLAA SLPTTVNRSYKIYGV PETHAF CQVFS  
DRIVVGVTQLVTKTKTAKDTKGE GAVAAAAAASSGHIGSWVYCQASQSEVDPKQVD  
YELSTLLGGSGNARDEKEVYARRIAERLLEKQSVPGGVEQ DRPAAGDLAPSGAAARR  
FLRRALQNTRRGGADRDRFGDCPGAVATGRGVARVQTAGAA GRACTASPDPSGPHRC  
FRLQESIEGSGTHTLQTLRIA >comp9832\_c0\_seq1; 211 323 1441  
LEN=1658; translated MARNKSGSKGGFSSQVTVMICFALLCQAIWNRPTALEGL  
ASQESAKSVASTIVSESDIINPLSIRKGGQAPNLP SVRVEDKKLEADRKIYGGKGDG  
KHLGGFTNIDMHGISPSVWKHMVE KWTVQSVLDVGCCKGTSTSWFYTHGLRTQCAE  
GSHDAIEQNMVPDKSLLVEHDFSRGPWW PEKTFDAVWSVEFLEHVNLFHFNYVSA  
FRKAAILMVSSSTWGGWHHVEVHKNEWWIRKY ETYGFKYSPELTNEIRAIKAIKE  
KRANTTFPVNGQPFNAQHIFTTLKVFINPVVAALPEHA HLFGEPCGFQDYNKPNRE  
CGTPAYPDRPKSVADASKETHLDPAFRPLVLTEKQDQKWYDI VRANLKHEESKK  
>comp9833\_c0\_seq1; 605 138 1934 LEN=2640; translated MIAYYLLFLG  
VFLATTVTVAIGNDSLDNLQILGEGKGEKTVGALRGGRFGNGKKSVPSSSD TLREDD  
TMKNIRLLSFGGEQIKEANGEATIIDEVKHVMIACKSTENEYSCRNIWD A IPE  
EAQDRFRFTNYLQLPNVHAAEIRGDT SILDNLEGVVDDAPRETMHIKDSIQVHRS  
LQSSG QAIPIYGIEMVKATEVWEKFQTKGENVRICVMDTGVHRDHPDLDSNR LFGYD  
GNELVQPWW RDTDGHGTHVTGTIAASDNTQGVVGVAPGAEIFTARV FSTNGQFFSS  
NIIAALQVCKDGG AKVISISLGGTVSIGYEQQAYEDLEKKFGIVTVAASGNTGGYDF  
LYPAAYDNVISVASVN WNGDRSSFSTRNNKLDVAAPGSSILSTWENG SYATVSGT  
SMACPHVSGVVALM LSVNPSA TPAELISAIQTS AENPSTTGKDSYIGYIVNALAAVE  
AISNNDSNNNDSSNDSVPGNVDE NNSSNSGAGSSTGN DASGCVDL VITLRTDRYAYD  
TYHWLQEGSQT LFYHTNLD SFQTYQ FTSCIDPLQCTIYNIRDKFGDGISGEGLEI  
KYGGEVVYSGGNFGVGGIKYLGSCSQGS >comp9834\_c0\_seq1; 367 477 2966  
LEN=4124; minus strand; translated MGVSDGKGRRSKTVGDGDYEGYFDGND  
GDDEEEKY TSEAWGNVFRXIPPLPLHDAAGNHAD DTGSGRLFYRHSRLPDPGDGAW  
AVHGADSESEFLVRRV LVSAAHQPVGAHAADVIYVENE TQGEQKSGFSLQDRRAK  
IEVVPGRVYIHFLPQWLDNVGYLVVCLPEPIPCGGSFTTVEK GSNACPPVALVVD  
CGEVDVLRSDLIQDFHYKGM PKIQLQAILSTHKHHDHTGGNASLL KHPAGKDI  
THVYGGAVERPCTDLLVDGEKLELPRCKLNDMNALVEIEAIAVPAHTRGS LVYCL  
RTKSGRQAEYMFTGDTMFSGGGVPFEADTGVETDKQLRRSNGHTHVRGNLGAFA  
MERC FSEIISRAKPSNFSTGVGERILVFPGHEYTQELLIRQFQSMVSEHNKWNK  
NFSPKDY FETVSHLYVALHRRSLPHNSGRLLLLIPSTIQRELHINPHMRS LR  
RSADLVVRALSFWNTH FSKAGAGDDRSSPSAYRSSRRLSIREQQPLPRKTPSRFK  
QWNLDAENVNSNAFTTVY TADLDSVIEDLACGKIKKNKA FERIQSLKQKMSKPV  
VNKRAIPGFLPSDKNIYRIGCLA VLGSKPSAMTVSDSRKLMIPPPMDYNSDRIRV  
SMKRLILVLRGLTETSEGDDVSAI IK KLWKEANDYCNPQECGKTYNAIDLES  
RKHCDIEELGV LKWL MYGVSANQPSWFSKLF CMP CGSSKTSMVFP EHPASAM  
DKKSGDMVSHDIVECHLCQ NATGRLQVQRSSAS FDSNSAGSS SARFSLQETES  
DESNLIDDLNHEIEVTTQTILQETPSFTASELAPSFP T

>comp9835\_c0\_seq1; 411 100 1895 LEN=2097; translated  
MTNSSIELSKRTPVASGSGSVVADWFDEEKAAIPLLEEAARENAEDSHQGETYDRVDPSPG  
GGGDFDGGDGGASCYSYSDHSEGIALLRSTLETELVDADDTGTSVSHPLVCSQIASHLCK  
AWTTHWLGPDTEWTLRGHPTTVLLDAAGTKLVKFGFVTGGCLVAVHTYARLVGDKHDPTY  
GLHELLVYDGTSIATDCIVFFVGRMHSESAAVDTLEFVVPVLGAALLQSWGATHLTLNL  
QHSITPKELRCDWTWPMYLLVVGCLPLLAGLVWAHAREAHAKNCGLRRFVEFAGCILVF  
WVLPYGLLAGSTIRSFHLLHHWYAWLFGMHCSASDRWWSRLARNVFWGIYVNGVAIFGR  
DPVLGCALALYRVQSQPACSAPFAAEGRGYGNITLADLGSDLGMVAAAAAGGDAGSPPDI  
CESDVXAVALLIVVAFLGMLRRGCFVTRWDGTGRDATGSNAVRLDATKTKEEVREKPN  
QTKIHREFYSRTRHRVLSFCGIRSKQDGTTRAGQGSFCLRMRSVDGLSNASVGLTERLVL  
WSMRNATIVISSHQITVYVPDFSQWILVFFTLQFVVLRSIFFIFTGDDTDASIGMPLV  
>comp9836\_c0\_seq1; 171 1079 2479 LEN=2638; minus strand; translated  
MLHSLSSIVYRSISPGPVLAWMELIERKHDSIRRRRVLENIARRRSECKNDATTHRRECS  
NTEDDRPALGVLQNVPRNQIPCNAGDRPDRVQAHDFSRVIRPDVDHVDPKAQRTPAGE  
EGTGQQPYCHPWFLGVPEQIETQRGDEAADRVHAPADVHDPDAPGQEAAGNASPHEQPYV  
SAYVRQREGVLAQIQSQVIVDVRGEPSEQDVPVAVIERKMGGINHPQRPVGGQRPQNR  
VCAPPERSAVVRAARRRDQGLFFGRNAVVFVRHARDVADVWEPPQSAQGSKEDKDHPPVP  
TRDANDPRREKEGKNRPEVRSARDDGDEGAPLLGRKPGGGEVQARHNDALPAPHAGPHD  
HQEPDRPRREDRRAIKDGEDDHADPEHGLDPDAGGQVTGGDLRQNVAVKEGGQYDPPICR  
VGKEEGCCDPDVGAIQVADGVCNAEQECDPVPVGFGRQRPRHRS LGHW  
>comp9836\_c0\_seq2; 171 1184 2584 LEN=2743; minus strand; translated  
MLHSLSSIVYRSISPGPVLAWMELIERKHDSIRRRRVLENIARRRSECKNDATTHRRECS  
NTEDDRPALGVLQNVPRNQIPCNAGDRPDRVQAHDFSRVIRPDVDHVDPKAQRTPAGE  
EGTGQQPYCHPWFLGVPEQIETQRGDEAADRVHAPADVHDPDAPGQEAAGNASPHEQPYV  
SAYVRQREGVLAQIQSQVIVDVRGEPSEQDVPVAVIERKMGGINHPQRPVGGQRPQNR  
VCAPPERSAVVRAARRRDQGLFFGRNAVVFVRHARDVADVWEPPQSAQGSKEDKDHPPVP  
TRDANDPRREKEGKNRPEVRSARDDGDEGAPLLGRKPGGGEVQARHNDALPAPHAGPHD  
HQEPDRPRREDRRAIKDGEDDHADPEHGLDPDAGGQVTGGDLRQNVAVKEGGQYDPPICR  
VGKEEGCCDPDVGAIQVADGVCNAEQECDPVPVGFGRQRPRHRS LGHW  
>comp9837\_c0\_seq2; 1649 170 4957 LEN=5131; translated  
MGVPKFYRWISERYTKINEIVSDSALLPEFDHLYLDMNGIIHGCTHPSHMDISDVISERD  
MMLGIMHYLDRIITQIVKPRVSVYMAIDGVAPRAKLNQORSRRFRSAKDMAEATKDLPE  
RDDAGNIKKPDLFDSNCITPGETEFMARVSETIKYFIRKKIKEDPLWRDLKVI FSGHELPG  
EGEHKIMEHIRMMKNEPNYQPNRHC IYQDADLIMLGLVTHEPHFTILREVVDFFGGFS  
NKNALKMVKKQTKADDFQLLHLSVLYLEFCCKDAPPGLDLERTIDDFVFMFTFLVGN  
DFLPHLNTLDIGEGAFDLFQVYRDQRSQWGEGEYLTENGNISDSARLETYLATIGNVET  
ETLENREVTDAQYLKRRRWNKRDLGADAGPSDAELKAADDAKQGNLNMIQNIMGNQENR  
EFVDGWNVPVGPGEKDFKGRYYFEKLLKLPVDVSGHHALRQAYMEGLIWC LAYYYRGCISW  
GWFFPYHYGPMLSDLRNLPEMFEKIKFTVVGKPI LPFQQLMSCLPPASASLVKPYRILMT  
SPESP IKQFYPTDFEVDMMNGKKNPWEGVNL LPIEINLLDITIKKNAPDDMLSDAERNR  
RVGDI FLYTFDATVNDTVEAPHKIGLTDIVKCNRSRVTILPQYDAEGVSFNPKLIEGTQI  
PYPGFPSLNVLPITSAELTPIGVKCFGFPSKYPTMVLDLHQMPDMPVETLADNLLNRSL  
FINWPMHEAKVCAISDEKGEVYLFKGGKLLKKNKMEQDQWARESEEMVQNYLGGINVP  
GSGGIQIQVKIRLRLPLQGMKTNPSNGSRKKFFGKEEAEPVPLQALWQAPAPDPRFVE  
RGPMTLEQRFPCDSSVVL TQGYKGNVGVVGIADGKKVGVKVLTPPEVPFGLALARS I  
NESFVSSDASRILKINPMVFGRITSSLPFIQGNIDLGLNLKSHEGLCVAGYTREKKIDR  
EYKDEKKAWDGSLLLVIGSARALGDSNGKDAKTERIQWEYTPKALRLINEYRQLFPQLF  
SALGKLSSEKKYDANKVFGPNGVEVLPKIREWLNNNESAKLPIPISTQVMPQEAVTAVE  
KTTDIRNLQLRKKGFNPESLIKIPGTALFRENSVSATDVMLASDHNESKAPELGRVNL  
CATGIPFGARGTVVAIHKATTGCV EIVMDEEFVGGTTLQGLCSNFRGKLAVWAHLMRITV  
ENNKEITEKHVTKGSGRANAQKILSGIEAQVMNDPNPAI IKNKYPIGASPRHGSTRIR  
AVSSGKRAESSGRAKQAGWREAVGPPDKGIGFKGKRKKGKSGVNRWRALINGEKKSASK  
GKSNELKAMLGVT PSPAQHLKAMLGVDKAVPPV LQVATPVANDPTASLKAVLVGSSSM  
NPVPPP HGGMSNSFP PPPPPVPPSAADQLLQLMAKQQRPVQMPATASGSSSNFAYTIEG  
EDEPEQPSTKNIPQPPPPQMVPPQGMHMGYPPPPMAMMAPNFYVGPMP IVGHGPMPLST  
MPMMTQQLPNVQPYVPTNGGKSSTSINYAARNHSSNVAVSEEEFPPLGSTTPAKKEQQNS  
VPTPEDSTTPKETPVKPKTAPRSFLVPSNVKAGKK  
>comp9838\_c0\_seq1; 1221 138 3536 LEN=4198; translated  
MDSIGDSAVDYDYDDDDDEIANLFSFGAADTTATLEPPPPYNESPIKPPNQNRKHAAVT  
KPGLSVPTEDCDFGGDNDSHASNSDFIELLENAQKNDLSLLGGFAGMAVAENNAGNNEQS

RKQSTTSGVSDLQDILDWLDLDDDEKGSKLLQRQEEELVFVQPPRPQDSLGSKPAKTVPS  
SSQPREYDSLEQAVRCRDSKQIRRLLEKEKFFVVDRAVRPHLWAKVVCCKTLEETLRSS  
LADSFQKWEQKFWKSGGAGEKSDCPTDATTQKESRNLDDATKSNEQNGSPKKNQEPADS  
TKCTSDTPELSRREQRKWLLEEQSILLSERIVSVVKDGDPEPHRKALLAILVNHFDSSSQ  
SEIQSNSDPVDSFWKDSLPPVLCSSILSSGAPPPVACVMLSQIIPSFMPILALTTKERQE  
ATAILHQQLYLLACYHLPLLVHLKYLDPDWYKSPPSGHLPPQSWLATHLAGENGSMDFMR  
WLLHLWDLVLTSSNSSLRFFLVISMLDLHAERLLLLLTDEDLKKEFHRVTNFSSSFDIDIA  
DPVSGNYSEEEKDDQAAKFVQEWSDKAFSLWEETPVAVIKKLVLEDEAVTDALVARQK  
AKEKRFRLQOEAEAKALQEAAREVEQERKADEARKRLTRARLVAFYRQFNPGKENNIDKIM  
VSYDGRYDVLDAKLMKYGVGFNPALKPKPIMINKSNSKIFASMNTGFGHRRTNSKSNIT  
QNSSSELPRVQKAVVEVGPSEILPVICWSKERNRTKLSKLLKSSKVFNDWNERNPLKFYL  
VDSRPEAAAREQRLPTSVSLSPEKLSDFQTMKEQESMFESLRGSHVICIMGEGYSSLPE  
LYGHKVTNALVELIKEDEERNDACARFFLSKGFPPVSLMEGGFAAAHAYLWREGPKIHLT  
AKNVLTDYNPEVSLFGRFEKLSHMSGGRDQAQRALQNLFDSSMTALTINSSRLETFANGIS  
DEQANQKGGNTTAMKRFFGGKRGNSREMSQDSFDPESFESGNIDTHRRTTSFSQGSSES  
ELKEKSSDSYLEKTPDAVPSPRKGLKPKSPFSRFGSLNIGQNMKRNDNTSGKSNKFAGSL  
NTRFRKNTMARMIPTESRSEDSQYSAKTELKADSNKQDGTANKLVNPLAKV

>comp9841\_c0\_seq1; 722 576 2680 LEN=3221; translated

MSGTGNTPTPTAGEGFRAFSSGRTSSSSDAAKAMKGVGDGTNTPRGREKQRDASSSEL  
PARCINPASEINSRLDTQVEVRVYPCNNSQSGKKKFXNIYDQTRGMFQGARVPLSPKLL  
IQNKLIQKGGKHEEEISDLVYFVVFVLFCLLLRNGSFQFFSRNNLTEQGVIIQGSNRSR  
ATTIDLGTEYGSQVGRKLQRYELSDTRACQLLVTTTHAKSFVWVPAPAEAFSRHSGTCRLLG  
DRKHPPAPHTLQVGDFLRVGSGVGVVVIETHNGEENRVLSEEKIQKIMKDTTNNNTGFQDL  
AETDGGEYKYCDXTFQSKIELLVNDPEMLLTLESSSIFCTENSDDSLDGGVDIANGRSN  
TDGDKPVCYMCFDDEDTDENPLITPCKCIGDTAHVHVECLRWHTAEADNQCIFLSSVDA  
TCSVCKSTFKSDFKLDGRQMKLFKSSLEPPYVSLLVATKHEMAQRLFNTRFQLSFSTLM  
KADKKNATRPLLLGRSSGSDMVLDYRTVSARHASIRFKNGEFVFTDAGSSNGSYLYLRRP  
LELSPSQSVQFRLGRSMISMKVVNKWNRLLRAVRRTGQSGSKENDDDACLDDRSIGSND  
GAVRVTGVTGVVTRISIRRTRESVMRSMPPPGQLSQQSGKHLDLLFALAYPQRVEKDT  
HRSSSMARSKKEAEVDATPSIVEDKNDYDAITENIVAGGSS

>comp9841\_c0\_seq2; 722 362 2466 LEN=3007; translated

MSGTGNTPTPTAGEGFRAFSSGRTSSSSDAAKAMKGVGDGTNTPRGREKQRDASSSEL  
PARCINPASEINSRLDTQVEVRVYPCNNSQSGKKKFXNIYDQTRGMFQGARVPLSPKLL  
IQNKLIQKGGKHEEEISDLVYFVVFVLFCLLLRNGSFQFFSRNNLTEQGVIIQGSNRSR  
ATTIDLGTEYGSQVGRKLQRYELSDTRACQLLVTTTHAKSFVWVPAPAEAFSRHSGTCRLLG  
DRKHPPAPHTLQVGDFLRVGSGVGVVVIETHNGEENRVLSEEKIQKIMKDTTNNNTGFQDL  
AETDGGEYKYCDXTFQSKIELLVNDPEMLLTLESSSIFCTENSDDSLDGGVDIANGRSN  
TDGDKPVCYMCFDDEDTDENPLITPCKCIGDTAHVHVECLRWHTAEADNQCIFLSSVDA  
TCSVCKSTFKSDFKLDGRQMKLFKSSLEPPYVSLLVATKHEMAQRLFNTRFQLSFSTLM  
KADKKNATRPLLLGRSSGSDMVLDYRTVSARHASIRFKNGEFVFTDAGSSNGSYLYLRRP  
LELSPSQSVQFRLGRSMISMKVVNKWNRLLRAVRRTGQSGSKENDDDACLDDRSIGSND  
GAVRVTGVTGVVTRISIRRTRESVMRSMPPPGQLSQQSGKHLDLLFALAYPQRVEKDT  
HRSSSMARSKKEAEVDATPSIVEDKNDYDAITENIVAGGSS

>comp9841\_c0\_seq3; 733 576 2573 LEN=3114; translated

MSGTGNTPTPTAGEGFRAFSSGRTSSSSDAAKAMKGVGDGTNTPRGREKQRDASSSEL  
PARCINPASEINSRLDTQVEVRVYPCNNSQSGKKKFXNIYDQTRGMFQGARVPLSPKLL  
IQNKLIQKGGKHEEEISDLVYFVVFVLFCLLLRNGSFQFFSRNNLTEQGVIIQGSNRSR  
ATTIDLGTEYGSQVGRKLQRYELSDTRACQLLVTTTHAKSFVWVPAPAEAFSRHSGTCRLLG  
DRKHPPAPHTLQVGDFLRVGSGVGVVVIETHNGEENRVLSEEKIQKIMKDTTNNNTGFQDL  
AETDGGENSDSLDGGVDIANGRSNTDGDGPVCYMCFDDEDTDENPLITPCKCIGDTAHVH  
VECLRWHTAEADNQCIFLSSVDATCSVCKSTFKSDFKLDGRQMKLFKSSLEPPYVSL  
VATKHEMAQRLFNTRFQLSFSTLMKADKKNATRPLLLGRSSGSDMVLDYRTVSARHASIR  
FKNGEFVFTDAGSSNGSYLYLRRPLELSPSQSVQFRLGRSMISMKVVNKWNRLLRAVR  
TGQSGSKENDDDACLDDRSIGSNDGAVRVTGVTGVVTRISIRRTRESVMRSMPPPGQLS  
QQSGKHLDLLFALAYPQRVEKDTSHRSSMARSKKEAEVDATPSIVEDKNDYDAITENIV  
AGGSS

>comp9841\_c0\_seq4; 760 576 2491 LEN=3032; translated

MSGTGNTPTPTAGEGFRAFSSGRTSSSSDAAKAMKGVGDGTNTPRGREKQRDASSSEL  
PARCINPASEINSRLDTQVEVRVYPCNNSQSGKKKFTTFTIKPEGVIIQGSNRSR  
ATTIDLGTEYGSQVGRKLQRYELSDTRACQLLVTTTHAKSFVWVPAPAEAFSRHSGTCRLLGDRK

HPPAPHTLQVGDFLRVGSVGVVVIETHNGEENRVLSEEKIQKIMKDTTNNNTGFQDLAET  
DGGEYKYCDXTFQSKIPELLVNDPEMLLTLESSSFICTENSDDSLDGGVDIANGRSNTDG  
DKPVCYMCFDDEDTDENPLITPCKCIGDTAHVHVECLRKWHTAEADNQICFLSSVDATCS  
VCKSTFKSDFKLDGRQMKLFKSSLEPPYVSLLVATKHEMAQRLFNTRFQLSFSTLMKAD  
KKNATRPLLLGRSSGSDMVLDRYRTVSARHASIRFKNGEFVFTDAGSSNGSYLYLRRPLEL  
SPSQSVQFRLGRSMISMKVVNKWNRLLRAVRRGTQSGSKENDDACLDDRSIGSNDGAV  
RVTGVTGVVTRISRRTRRESVMRSMPPPGQLSQQSGKHLDLLFALAYPQRVEKDTSHRS  
SSMARSKKEAEVDATPSIVEDKNDYDAITENIVAGGSS

>comp9841\_c0\_seq5; 733 362 2359 LEN=2900; translated  
MSGTGNTPTPTAGEGFRAFSSGRTSSSSDAAKAMKGVGDGTNTPRGREKQRDASSSEL  
PARCINPASEINSRLDTQVEVRVYPCNNSQSGGKFKFXNIYDQTRGMFQGARVPLSPK  
IQNKLIQKGGKHEEEISDLVYFVVFVFLCLLLRNGSFQFFSRNNLTEQGVIIQGSNRSR  
ATTIDLGTGYGSQVGRKLQRYELSDTRACQLLVTTTHAKSFVWVPAPAEAFSRHSGTCRLLG  
DRKHPPAPHTLQVGDFLRVGSVGVVVIETHNGEENRVLSEEKIQKIMKDTTNNNTGFQDL  
AETDGENSDDSLDGGVDIANGRSNTDGDKPVCYMCFDDEDTDENPLITPCKCIGDTAHVH  
VECLRKWHTAEADNQICFLSSVDATCSVCKSTFKSDFKLDGRQMKLFKSSLEPPYVSL  
VATKHEMAQRLFNTRFQLSFSTLMKADKKNATRPLLLGRSSGSDMVLDRYRTVSARHASIR  
FKNGEFVFTDAGSSNGSYLYLRRPLELSPSQSVQFRLGRSMISMKVVNKWNRLLRAVRR  
TGQSGSKENDDACLDDRSIGSNDGAVRVTGVTGVVTRISRRTRRESVMRSMPPPGQLS  
QQSGKHLDLLFALAYPQRVEKDTSHRSSSMARSKKEAEVDATPSIVEDKNDYDAITENIV  
AGGSS

>comp9841\_c0\_seq6; 771 576 2384 LEN=2925; translated  
MSGTGNTPTPTAGEGFRAFSSGRTSSSSDAAKAMKGVGDGTNTPRGREKQRDASSSEL  
PARCINPASEINSRLDTQVEVRVYPCNNSQSGGKFKFTTFTIKPEGVIIQGSNRSRNATT  
IDLGTGYGSQVGRKLQRYELSDTRACQLLVTTTHAKSFVWVPAPAEAFSRHSGTCRLLGDRK  
HPPAPHTLQVGDFLRVGSVGVVVIETHNGEENRVLSEEKIQKIMKDTTNNNTGFQDLAET  
DGENSDDSLDGGVDIANGRSNTDGDKPVCYMCFDDEDTDENPLITPCKCIGDTAHVHVE  
LRKWHTAEADNQICFLSSVDATCSVCKSTFKSDFKLDGRQMKLFKSSLEPPYVSLLVAT  
KHEMAQRLFNTRFQLSFSTLMKADKKNATRPLLLGRSSGSDMVLDRYRTVSARHASIRFKN  
GEFVFTDAGSSNGSYLYLRRPLELSPSQSVQFRLGRSMISMKVVNKWNRLLRAVRRGTQ  
SGSKENDDACLDDRSIGSNDGAVRVTGVTGVVTRISRRTRRESVMRSMPPPGQLSQQS  
GKHLDLLFALAYPQRVEKDTSHRSSSMARSKKEAEVDATPSIVEDKNDYDAITENIVAGG  
SS

>comp9841\_c0\_seq7; 771 362 2170 LEN=2711; translated  
MSGTGNTPTPTAGEGFRAFSSGRTSSSSDAAKAMKGVGDGTNTPRGREKQRDASSSEL  
PARCINPASEINSRLDTQVEVRVYPCNNSQSGGKFKFTTFTIKPEGVIIQGSNRSRNATT  
IDLGTGYGSQVGRKLQRYELSDTRACQLLVTTTHAKSFVWVPAPAEAFSRHSGTCRLLGDRK  
HPPAPHTLQVGDFLRVGSVGVVVIETHNGEENRVLSEEKIQKIMKDTTNNNTGFQDLAET  
DGENSDDSLDGGVDIANGRSNTDGDKPVCYMCFDDEDTDENPLITPCKCIGDTAHVHVE  
LRKWHTAEADNQICFLSSVDATCSVCKSTFKSDFKLDGRQMKLFKSSLEPPYVSLLVAT  
KHEMAQRLFNTRFQLSFSTLMKADKKNATRPLLLGRSSGSDMVLDRYRTVSARHASIRFKN  
GEFVFTDAGSSNGSYLYLRRPLELSPSQSVQFRLGRSMISMKVVNKWNRLLRAVRRGTQ  
SGSKENDDACLDDRSIGSNDGAVRVTGVTGVVTRISRRTRRESVMRSMPPPGQLSQQS  
GKHLDLLFALAYPQRVEKDTSHRSSSMARSKKEAEVDATPSIVEDKNDYDAITENIVAGG  
SS

>comp9841\_c0\_seq8; 760 362 2277 LEN=2818; translated  
MSGTGNTPTPTAGEGFRAFSSGRTSSSSDAAKAMKGVGDGTNTPRGREKQRDASSSEL  
PARCINPASEINSRLDTQVEVRVYPCNNSQSGGKFKFTTFTIKPEGVIIQGSNRSRNATT  
IDLGTGYGSQVGRKLQRYELSDTRACQLLVTTTHAKSFVWVPAPAEAFSRHSGTCRLLGDRK  
HPPAPHTLQVGDFLRVGSVGVVVIETHNGEENRVLSEEKIQKIMKDTTNNNTGFQDLAET  
DGGEYKYCDXTFQSKIPELLVNDPEMLLTLESSSFICTENSDDSLDGGVDIANGRSNTDG  
DKPVCYMCFDDEDTDENPLITPCKCIGDTAHVHVECLRKWHTAEADNQICFLSSVDATCS  
VCKSTFKSDFKLDGRQMKLFKSSLEPPYVSLLVATKHEMAQRLFNTRFQLSFSTLMKAD  
KKNATRPLLLGRSSGSDMVLDRYRTVSARHASIRFKNGEFVFTDAGSSNGSYLYLRRPLEL  
SPSQSVQFRLGRSMISMKVVNKWNRLLRAVRRGTQSGSKENDDACLDDRSIGSNDGAV  
RVTGVTGVVTRISRRTRRESVMRSMPPPGQLSQQSGKHLDLLFALAYPQRVEKDTSHRS  
SSMARSKKEAEVDATPSIVEDKNDYDAITENIVAGGSS

>comp9843\_c0\_seq1; 285 255 2156 LEN=2397; translated  
MLTEHSTSFYKKGGLDVPLFDPKPSDRTEADISEELLKLSLFDRAVEEEVHGVRCM  
AVQETPKLVTDGLREFDAELIRIKRERERNHSQRRPEERESFGNVLRNVLEPEEKDDYI

YFSCCKNKYEEIRMQHNNCQHPAHPKKKSDCYLNDPSVRLRFLRCDVKKAVDRFVSY  
LDFTQLLFGDFIAHRPCRYSDFQNDFDNTCNHNKDELKSLQSRITYLPFRDRAGRRI  
AVGHSNFKVDPALRLKIIMYMDWIVSEDIETQQKGIWIAWPSGEEVPCAPDKESERDNI  
ECDANANESQGEDIWERYIRPSLSKRDIWFQKRGFESTPLRIASIHFCADTSLYHI  
ISS FYYFGLNQDHHKRYKAQFGNQIEILYKLLQYGI PAHLLPLTHTGAVKTNVHAQW  
MKSQR IEDQREKILLQRKNSFNQEVQSISKVGLVFTSTSETDSHNEEGKAEPKVV  
VECPRSYDVI FRRGNTYSQLHLGNLNYKNLIEKVMEEHFAAKKRQEKIDLTWRV  
VNEIETVWNGRFLNWD ASWKTHVQITDRKEMRSKVARSIKEAARGVRKSKGTSRTI  
GIKSGTTTTGGRSHSPIKRRK TAATSAATNREVTMSLPGCLDFGSASKVGGFF

>comp9843\_c0\_seq2; 285 238 2139 LEN=2380; translated  
MLTEHSTSFEYKKGGLDVPLFDPKPSDRTEADISEELLKLSLFDRAVEEEVHGVR  
CM AVQETPKLVTDGLREFDAELIRIKRERERNHSQRRPEERESFGNVLNRNVLEPEEK  
DDYI YFSCCKNKYEEIRMQHNNCQHPAHPKKKSDCYLNDPSVRLRFLRCDVKKAVDR  
FVSY LDFTQLLFGDFIAHRPCRYSDFQNDFDNTCNHNKDELKSLQSRITYLPFRDRAGR  
RI CC AVGHSNFKVDPALRLKIIMYMDWIVSEDIETQQKGIWIAWPSGEEVPCAPDKES  
ERDNI ECDANANESQGEDIWERYIRPSLSKRDIWFQKRGFESTPLRIASIHFCADTS  
LYHI ISS FYYFGLNQDHHKRYKAQFGNQIEILYKLLQYGI PAHLLPLTHTGAVKTNV  
HAQW MKSQR IEDQREKILLQRKNSFNQEVQSISKVGLVFTSTSETDSHNEEGKAEPK  
VVVECPRSYDVI FRRGNTYSQLHLGNLNYKNLIEKVMEEHFAAKKRQEKIDLTWRV  
VNEIETVWNGRFLNWD ASWKTHVQITDRKEMRSKVARSIKEAARGVRKSKGTSRTI  
GIKSGTTTTGGRSHSPIKRRK TAATSAATNREVTMSLPGCLDFGSASKVGGFF

>comp9843\_c0\_seq3; 198 238 1182 LEN=2514; translated  
MLTEHSTSFEYKKGGLDVPLFDPKPSDRTEADISEELLKLSLFDRAVEEEVHGVR  
CM AVQETPKLVTDGLREFDAELIRIKRERERNHSQRRPEERESFGNVLNRNVLEPEEK  
DDYI YFSCCKNKYEEIRMQHNNCQHPAHPKKKSDCYLNDPSVRLRFLRCDVKKAVDR  
FVSY LDFTQLLFGDFIAHRPCRYSDFQNDFDNTCNHNKDELKSLQSRITYLPFRDRAGR  
RI CC AVGHSNFKVDPALRLKIIMYMDWIVSEDIETQQKGIWIAWPSGEEVPCAPDKES  
ERDNI ECDANANESQGEDIW

>comp9843\_c0\_seq4; 198 255 1199 LEN=2531; translated  
MLTEHSTSFEYKKGGLDVPLFDPKPSDRTEADISEELLKLSLFDRAVEEEVHGVR  
CM AVQETPKLVTDGLREFDAELIRIKRERERNHSQRRPEERESFGNVLNRNVLEPEEK  
DDYI YFSCCKNKYEEIRMQHNNCQHPAHPKKKSDCYLNDPSVRLRFLRCDVKKAVDR  
FVSY LDFTQLLFGDFIAHRPCRYSDFQNDFDNTCNHNKDELKSLQSRITYLPFRDRAGR  
RI CC AVGHSNFKVDPALRLKIIMYMDWIVSEDIETQQKGIWIAWPSGEEVPCAPDKES  
ERDNI ECDANANESQGEDIW

>comp9844\_c0\_seq1; 952 305 3538 LEN=3820; translated  
MEPASELQSSSSSFLPKSRAEETFANAADAIERWLTSPAKTTTTSTGTPSHATRLPK  
T TITDIAIRRRRQLQDEKYQQQSLPTSPQHEEQODKAGNATSVSPRSSLRRSKLLRQ  
R ERQRQSLQRNLPAATVEKTGKNKPPAYCHQTAVMAMRAMDNVSHKHYSHSHFAAKDP  
V T DDTCDGKETKNSTNIARVEDNAFSEFEDTHDVTTATSLESNDEYLQDDNFRKES  
YSR SFC DSSNVNSNPKVSNFLPNTTAKKISPTKTTLSVATTEASDQKKHPTVQHST  
SGVI IASPGIE AIRRRRQRLQQQAELEREMRELEREEQGLIMAIRRAEGASTAAVPH  
DEVDKNHRKGSAT PYSFPEAKQSFDTTPALSPLARLRQTHNIDSNSTTGKRI VSVS  
PTKKIHLKRHDASGG DSPLSKTARPLVGQDVTLVDDPSSTELDSTVGRDTRRQFE  
NAASSELQQLLRQQSSKRI TKYKSEGHEQHLEQQQSFATANGSYLPNPPLRKLHPS  
RDIENEHSPKINEQLIREGQR QPEGEDANSQPDPHRRPRTYNSHHLDHLSQNDKTQ  
IEVSNKSVNTDSFDSKANKNNTMRI KAAVARSRLSRNGSKSNLCDDASGYNLI  
SDDPVLKQHFQSASLSCSSVITATSTVSIAS TGGSSKNNSQYTFESNDGESSID  
SMTEDDTTAMTSITEQDEEKRLQAMKAVANETSIA APSPRDTETSFQSQAETEP  
IGNLSHRPRLAKHHPQHQSVPVTHSGSTNHLNTAPVTMSA DNSGSVLTRSEKI  
IPPIDKNSMVVRLEGKNRNQESSVARYGRSGESAMALIVQSTTGAT GGSSAITRR  
T SERELAKSNWIKLHVYDLVADDTQLDVYGFPLGQVFNAFNSSLHSIGT GAYH  
VGVEIDGVEYAFGANNTKDLTGVTCTPKNSPGYQYRTTIDFGHRLVTKRYGKREE  
AVDGRDVIRGMAREYLGLDYDLRKNCCFARDACIRLCIKEEEIPSWFHNLAEAGAAT  
Q DAANFTLAPIAQLFSGDQVERFTDYLNETPLDKKAIRDAPTEERRMEEPIEHGAYQF

>comp9845\_c0\_seq1; 1089 307 3246 LEN=3555; translated  
MGNQPSSSSKRRSSRPQTAAEHAERAKRVVGDLEGIKNSVKKLDDHPAAQILDHVC  
GTYYHDEDKYRSSRVASYSEEASEDGSRTFQSEDDTTYDGRGRSDRSVDSRSYVTQS  
DYDSDSRRRGRGGSFDTEDSRVTHENEPKLISKPLASSFAKRCYFTKSGIGKTTQHYEG  
LTLTGNNVLMASAMKLGKPTICDEDLRRVEQTYPNQFSRLPDELLSSGWRRISKYCH  
FSNKSIPDGIPIFFHSHKQRLHPSGGYYFLAASVGMIRPIDVEPLTKDTLVLETDY  
PNQC

DATPSILIRDPDQWVVVNKFCFFSGGPINTEEDVYYQADFDGNPIYMLAFLSPSLTPEEL  
YKLTVDGTEHEPGLKSIADVQEVESVYDLTERDFDDLKLYHLGPCRALPQYILQPSAWTK  
VLPPHFLAARQQAMLRAQDYNADHYREQVADQHNDVYDQGLLPIGESNQIHAPSAVPGIA  
EHPFVEAREASAFEEETMNLTAGQTTFVREAEEEEGAFHSMHSGENHAFVINQGESSVPVD  
LSDQLGDRPFEEEEPTIAGFSRMDPPDEPPSLKIGSMEENQHASPRYGTDRHKNDASSP  
SIKPDIDEHGFFTLDPRLNHDQNNIVEEEDSCNQYVSPVSESLNNQDRQFDSAENEETPQ  
GFRFSGGNLYFEDEGMLPSNRHTQEPFQSTNYIDEYQDAAGVGMNHVEGPPRVEDGFEEES  
HEIDDTTEVYQQDMERTSINNNELPYDSRFIDSDLPQVLSNANEKPIQIGKDPVGSDLI  
NSGDVCEEDPEISCASDKPGDEFVDPIDTSFSRQDELDNSALASTSSPAGMSTNSGVDTR  
NHQSPAMRGAAHAILKRNRRRRRAESNRSSTGKVSNNNTMISPAMSEKLTSTKSDT SKDMWD  
ENGTDITGSGVSVSSGVTDKSSRRQLILQMAKARMKNNRDSPPSKSPSGINEDDDGANTIV  
TEGNATFATHDFDLTGDL

>comp9845\_c0\_seq2; 870 307 3446 LEN=3755; translated  
MGNQPSSSSKRRSSRPQTAAEHAERAKRVVGDLOEGIKNSVKKLDDHAAQILDHVC  
GTYYHDEDKYRSSRVASYSEEASEDGSRTFQSEDDTTYDGRGRRRSDRSVDSRSYVTQS  
DYDSDSRRRGRGGSFDTEDESRVTHENEPKLISKPLASSFAKRCYFTKSGIGKTTQHYEG  
LTLTGNVVLMLASAMKLGKPTICDEDLRVEQTYPNQFSRLPDELLLSGGWRRISKYCH  
FSNKSIPDGI PFFRKF I KE IGLNHRKQRSLRMSDXLISHFFNISPLQDSKQRLHPSGGYY  
FLLAASVGMIRPIDVEPLTKD TLV LLET DYPNQCDATPSILIRDPDQWVVVNKFCFFSGG  
PINTEEDVYYQADFDGNPIYMLAFLSPSLTPEELYKLTVDGTEHEPGLKSIADVQEVESV  
YDLTERDFDDLKLYHLGPCRALPQYILQPSAWTKVLPPHFLAARQQAMLRAQDYNADHYR  
EQVADQHNDVYDQGLLPIGESNQIHAPSAVPGIAEHPFVEAREASAFEEETMNLTAGQTT  
FVREAEEXGIPQHAFVSADLDFSYLLCFITLVSGNGLRRLSNFXTFSSGENHAFVINQG  
ESSVPVDLSDQLGDRPFEEEEPTIAGFSRMDPPDEPPSLKIGSMEENQHASPRYGTDRH  
KNDASSPSIKPDIDEHGFFTLDPRLNHDQNNIVEEEDSCNQYVSPVSESLNNQDRQFDSA  
ENEETPQGFRFSGGNLYFEDEGMLPSNRHTQEPFQSTNYIDEYQDAAGVGMNHVEGPPR  
VEDGFEEESHEIDDTTEVYQQDMERTSINNNELPYDSRFIDSDLPQVLSNANEKPIQIGK  
DPVGSDLINSGDVCEEDPEISCASDKPGDEFVDPIDTSFSRQDELDNSALASTSSPAGMST  
NSGVDTRNHQSPAMRGAAHAILKRNRRRRRAESNRSSTGKVSNNNTMISPAMSEKLTSTKSD  
T SKDMWDENGT DITGSGVSVSSGVTDKSSRRQLILQMAKARMKNNRDSPPSKSPSGINEDD  
DGANTIVTEGNATFATHDFDLTGDL

>comp9845\_c0\_seq3; 955 307 3344 LEN=3653; translated  
MGNQPSSSSKRRSSRPQTAAEHAERAKRVVGDLOEGIKNSVKKLDDHAAQILDHVC  
GTYYHDEDKYRSSRVASYSEEASEDGSRTFQSEDDTTYDGRGRRRSDRSVDSRSYVTQS  
DYDSDSRRRGRGGSFDTEDESRVTHENEPKLISKPLASSFAKRCYFTKSGIGKTTQHYEG  
LTLTGNVVLMLASAMKLGKPTICDEDLRVEQTYPNQFSRLPDELLLSGGWRRISKYCH  
FSNKSIPDGI PFFH SKQRLHPSGGYYFLLAASVGMIRPIDVEPLTKD TLV LLET DYPNQ  
CDATPSILIRDPDQWVVVNKFCFFSGGPINTEEDVYYQADFDGNPIYMLAFLSPSLTPEEL  
YKLTVDGTEHEPGLKSIADVQEVESVYDLTERDFDDLKLYHLGPCRALPQYILQPSAWTK  
VLPPHFLAARQQAMLRAQDYNADHYREQVADQHNDVYDQGLLPIGESNQIHAPSAVPGIA  
EHPFVEAREASAFEEETMNLTAGQTTFVREAEEXGIPQHAFVSADLDFSYLLCFITLVS  
GNGLRRLSNFXTFSSGENHAFVINQGESSVPVDLSDQLGDRPFEEEEPTIAGFSRMDPPD  
DEPPSLKIGSMEENQHASPRYGTDRHKNDASSPSIKPDIDEHGFFTLDPRLNHDQNNIVE  
EEDSCNQYVSPVSESLNNQDRQFDSAENEETPQGFRFSGGNLYFEDEGMLPSNRHTQEPF  
QSTNYIDEYQDAAGVGMNHVEGPPRVEDGFEEESHEIDDTTEVYQQDMERTSINNNELPYD  
SRFIDSDLPQVLSNANEKPIQIGKDPVGSDLINSGDVCEEDPEISCASDKPGDEFVDPID  
TSFSRQDELDNSALASTSSPAGMSTNSGVDTRNHQSPAMRGAAHAILKRNRRRRRAESNRS  
STGKVSNNNTMISPAMSEKLTSTKSDT SKDMWDENGT DITGSGVSVSSGVTDKSSRRQLI  
LQMAKARMKNNRDSPPSKSPSGINEDDGANTIVTEGNATFATHDFDLTGDL

>comp9845\_c0\_seq4; 1004 307 3348 LEN=3657; translated  
MGNQPSSSSKRRSSRPQTAAEHAERAKRVVGDLOEGIKNSVKKLDDHAAQILDHVC  
GTYYHDEDKYRSSRVASYSEEASEDGSRTFQSEDDTTYDGRGRRRSDRSVDSRSYVTQS  
DYDSDSRRRGRGGSFDTEDESRVTHENEPKLISKPLASSFAKRCYFTKSGIGKTTQHYEG  
LTLTGNVVLMLASAMKLGKPTICDEDLRVEQTYPNQFSRLPDELLLSGGWRRISKYCH  
FSNKSIPDGI PFFRKF I KE IGLNHRKQRSLRMSDXLISHFFNISPLQDSKQRLHPSGGYY  
FLLAASVGMIRPIDVEPLTKD TLV LLET DYPNQCDATPSILIRDPDQWVVVNKFCFFSGG  
PINTEEDVYYQADFDGNPIYMLAFLSPSLTPEELYKLTVDGTEHEPGLKSIADVQEVESV  
YDLTERDFDDLKLYHLGPCRALPQYILQPSAWTKVLPPHFLAARQQAMLRAQDYNADHYR  
EQVADQHNDVYDQGLLPIGESNQIHAPSAVPGIAEHPFVEAREASAFEEETMNLTAGQTT  
FVREAEEEGAFHSMHSGENHAFVINQGESSVPVDLSDQLGDRPFEEEEPTIAGFSRMDPP



DDEPPSLKIGSMEENQHASPRYGTDRHKNDASSPSIKPDIDEHGFFTLDPRLNHDQNNIV  
EEEDSCNQYVSPVSESLNNQDRQFDSAENEETPQGFRFSGGNLYFEDEGMLPSNRHTQEP  
FQSTNYIDEYQDAAGVGMNHVEGPPRVEDGFEESEIDDTTEVYQQDMERTSINNNELPY  
DSRFIDSDLPQVLSNANEKPIQIGKDPVGSDLINSGDVCEEDPEISCASDKPGDEFVDP  
IDTSFSRQDELNSALASTSSPAGMSTNSGVDTRNHQSPAMRGAHAILKRNRRRRRAESNR  
SSTGKVSNNNTMISPAMSEKLTSTKSDTSKDMWDENGTDTITGSGVSVSSGVTDKSSRQL  
ILQMAKARMKNNRSDSPSKSPSGINEDDDGANTIVTEGNATFATHDFDLTGDL  
>comp9846\_c0\_seq1; 1189 193 5121 LEN=5257; translated  
MSTAADREERQDGSQHAEELEFTVEDHEGTFGRENNGESRRPTLIEIRPSGRFRRSPSP  
MEIPRPTRSGLSSGRSASSGSSSRGSSRSRHSRQPSGISAAAFIDEDAVNPFECDLFTTS  
FASLADDGEKDFYKPLPVADQMGHFARLPPTFNDDLPLELSIERLGTLMGYDDDENDDF  
DVEAQAQHLKIQEMIASLGSDEVDIDIIMDSEKSETSEDSVEANTETIFRTKTREEDDC  
TRDPYRRETAVGERNNIQHNAKRIKRSVLTAGLESLKYLYSLVLLVFCVVLVTGAIFTN  
QTASTANGFSPIVAFCVFWFLIILWLAMMEGGQALVGLQPIDRSRYKESHPRTYINTGLT  
ANGSDGLERFIIIGRQFLVVLVVFVSQVLSSTIPNIYLWGLGDTVKAIFLDSGLALMVVTI  
VLGQLLAQLNAAKMLDFVNNYFMLYFVTYLSLLIEFSGLLHSHVYLQMLFSKIGGSGK  
GSSSRVTVQILFFWARVLFSLAVLGLAFVTLALFRGKTTMWKSVPEAISVVLFGLMC  
FVGMMEGMQIAFFAVLNYPPEEQLAQYRIAQKNCKLTFRGENLQSFLIGRQICVTICTFII  
ARITTLQVKGVTDENIFGVSDGLQTFNTGLLGAIVTTIVSSLAWRIIASSFPLAFLSNP  
LVNIIIRICLVFEASGICSSAWVLARFHKIIARYRTEDEVYLENAEPNASTTISTRDKDID  
RFSTVLRFTISLALFLFSVILISASIFGTQTRIIAGNDDWRYSLLVYVFWFLIILWAMT  
EGSLGCLMGLKTVDKFMVSHQNTYENTEIVHKGDNLQRFIVGRQFLVLAVIFVCTWLT  
EPVVDASVGLPEIVNKIFLSSDIAFIVILIIAGQLTSEVNAAKMLDFVNNCFVLYFVT  
YLSLAI EYSGLLHSVYFFQIALSKISGKIESEEPERSILQKIFFWGRIICSILVLGFSI  
VVTVSVLVYGEATLLWGLSDASFFTIIIVLMCVVGMMEGVQIALFGMSNISERDLASHKM  
AYRNYKLACSEQNLAFLIGRQICVTCFFVLIARMSTLSIDISVDDNVFGVDPGVQMFVN  
SGVPAALVTTILASLVWRLFASSFPVTFMSNPMIYGI IWLCLIVDASGICSAWFMFRWT  
KRVLYGQPDVYLEDAPKEGPKPVTRRDKDVDVTSTVIRYILSSALLCIAIYVTVSLIFM  
KQTELSKTNPWVFLILFGFLLAYLGTMEGGQCLVGLQRVENYKYEDTHRVALKNTKIS  
HDGNNMQRFIVGRQFLVVLVVFVNLCSPLPHSEVFGLPDSMMAIFVDSGVSLILITVI  
LGQLPAQVNAASCMLDFINSYFMLYFVTYVSMALIELSGLLHCVYLVQMVFSNISGTEIQT  
NEPPRTTIQALFFFGRVVLSLAMLAFVAVTLTAMFGGKTTSWESVPSFVSVIIFVLMC  
IAGMMEGMQIALFAVNLPKKEVAQYKMAKASCQLAFRGNNLQAFILGRQIFVTLCTFVI  
ARLTTLDVKGSGENIFGVPTLQEFNLNTGLLGAIVTTVVGSLAWRIIAASFPVAFVLSNP  
LVYLILRLCLVLEASGVCSVAWLVALINKQMGFYQPDNLYLNSKSRKEEDIVDPDKYAT  
QQSLEIEATDSLEQMESQEIDL  
>comp9848\_c0\_seq1; 124 360 819 LEN=819; translated  
MTDPKTPKETIATGSSQAQRTPLWKRLGRRGSKTQLPPMTPPGAPIPLRSTKDEDSLEGE  
SDHKHGTTPKRGKRNRLMRKLKSSFRKTPTS GSAASELVNRDES DAINNESMAVGEGR  
TATPSSPAYSAGSFETIEVGTQIVASAPHGTX  
>comp9848\_c0\_seq2; 729 360 3259 LEN=3355; translated  
MTDPKTPKETIATGSSQAQRTPLWKRLGRRGSKTQLPPMTPPGAPIPLRSTKDEDSLEGE  
SDHKHGTTPKRGKRNRLMRKLKSSFRKTPTS GSAASELVNRDES DAINNESMAVGEGR  
TATPSSPAYSAGSFETIESNLQGEKKESHEWNEVDAERRNRDR IYQKQIKERDGFERR  
VDTYDQVIVVDNKPTYEIGNYLGAGVAGVVEGHRLRPKEEYPVRTGISPQKHRPSKTV  
DQKNRDVSTTPNSDGFASAFFCGTSACGRIDQVIDKSDEIVKPSDKSKEQSSDTPMLLE  
AEEDAVALI EATVSYDETGGVMLDAQDAPSRSKHYTKAAAVPTRLRANSKPLQHGLESDES  
VAIKILNPVGYRILQADALKNVVRQGPMDAGVQKGEKPMEEKHVWLVNPNRNLIT  
LQRYNGKDKNSTVPKGLQIDRGSACKGLRLSLIAAYIDPKNGNLRELTLTRCIEIWGHIP  
FNATDIEFDDMMTAIERINAGYPPAFPTFDDVSGRVRTDKIERTASITNTS SDGDKGL  
PPVVF GKARTGLVRAAF SERKTVNCKELNAFIAIPAVPSKYLRWLRQRRRAATKEIRNMLL  
IGRHKNVHLHFEVLEYIQDSKSTMFVLELVKGGELFDLISNSAGKGRSSEDI EKSEQM  
MRKFFYELSSGINYCHLSGIAHRDLKPENLLVHNTGDGSRILKIADFGLSAVFGPTGNL  
GVLGLQ MENDNMVESIGSPLSQNSADGDGYFGSQADNNLSPSSQSTNSMKGSMDKVIASG  
VSALSFLT CGAMETVLCIPGGDAVDNATPLRRMTSVVGS PHYVAPEIIAQ TDEGGGKKKG  
KGYDGSKADVWSAGVILYAMLF RSLPFGEDLLRCPRFQSYKKWYDEVNSGDSRRSNGNA  
ALSPYINDYDERHYLGPHWFXPRDDIEGVEGPNRYAESIAYGPNVDRSGFTTPLAITGT  
ANLDYF  
>comp9848\_c0\_seq3; 383 360 2012 LEN=2122; translated  
MTDPKTPKETIATGSSQAQRTPLWKRLGRRGSKTQLPPMTPPGAPIPLRSTKDEDSLEGE

SDHKHGTPKRGGKRNSRLMRKLKSSFRKTPPTSGSAASELVNRDESDAINNESMAVGEGR  
TATPSSPAYSAGSFETIESNLQGEKKESHEWNEVDAERRNRDRYQKQOIKERDGFRCRR  
VDTYDGQVIVVDNKPTYEIGNYLGGGVAGVVYEGHRLRPKEEYPVRTGISPQKHRPSKTV  
DQKNRDVSTTPNSDGFASAFFCGTSACGRIDQVIDKSDEIVKPSDKSKEQSSDTPMLLE  
AEEDAVALI EATVSYDETTGGVMLDAQDAPSRSKHYTKAAAVPTRLRANSKGKPLQHGLSDES  
VAIKILNPVGYRILQADALKNCVVVRQGPMDAGVQKGEKPMEEKHVWVWLVNPNRSRLIT  
LQRYNGKDKNSTVPKGLQIDRGSAKKGLRSLIAAYIDPKNGNLRELTLTRCIEIWGHIP  
FNATDIEFDDMMTAIERINAGYPPPAPPTFDDVSGRVRTDKIERTASITNTSSDGDGKGL  
PPVVFVKART

>comp9849\_c0\_seq1; 187 153 440 LEN=440; translated  
MSLRGSSSTVVDGTLGMEQFAENSIVADRTAQTIVDSNHDANTNPTLLKKNRNRRLKLG  
KSSKGNHKSKNENQDLQSGGVEEQAAAEQAAAEQAA

>comp9850\_c0\_seq1; 257 182 1486 LEN=1617; translated  
MLRLTRSKSALLMHRRASSILRWMTSGVRAEPATGLFDKIAFIGTGKMAQAMIDPLITN  
GYQPAEKVCVYDVSTKSMEKMKSVYPDIQTSESIGEAVHDAECIVLAVKPNINVSFWNQ  
FPSLESDSDKGGSGFRVRKDATLLSILAGTPVKDFAPSGISKIVRGMPNTPSMIGGMTV  
WCCTPSLTSCDRQSVSKLLNTFGKAIYVDDEKFVDMSTSISSGSPAYIFMLMEAMIDSGV  
HMGFSRETATTLVHHTLLGTSKKLLLEFXMKSFVSWQNNYMNDKIDDPGRMCLFSFTKI  
FRLNAHFLVLLALGSTLYAMETGEHPAILRNSVTSAPGTTASAIYELEKGGRLPLVNDAI  
WACYRRSLEMGGHNSVGPRIYNMGEKPATTLTTHEIHYMDSDIHTANVPSGEMVDLVD  
SKENGIGGKRGNT

>comp9850\_c0\_seq2; 202 182 814 LEN=1730; translated  
MLRLTRSKSALLMHRRASSILRWMTSGVRAEPATGLFDKIAFIGTGKMAQAMIDPLITN  
GYQPAEKVCVYDVSTKSMEKMKSVYPDIQTSESIGEAVHDAECIVLAVKPNINVSFWNQ  
FPSLESDSDKGGSGFRVRKDATLLSILAGTPVKDFAPSGISKIVRGWVIENAATIPCSLV  
LGGYHSMFACLNIVVLSYDFTRVACQIRLQ

>comp9850\_c0\_seq3; 338 182 1321 LEN=1452; translated  
MLRLTRSKSALLMHRRASSILRWMTSGVRAEPATGLFDKIAFIGTGKMAQAMIDPLITN  
GYQPAEKVCVYDVSTKSMEKMKSVYPDIQTSESIGEAVHDAECIVLAVKPNINVSFWNQ  
FPSLESDSDKGGSGFRVRKDATLLSILAGTPVKDFAPSGISKIVRGMPNTPSMIGGMTV  
WCCTPSLTSCDRQSVSKLLNTFGKAIYVDDEKFVDMSTSISSGSPAYIFMLMEAMIDSGV  
HMGFSRETATTLVHHTLLGSTLYAMETGEHPAILRNSVTSAPGTTASAIYELEKGGRLPL  
VNDAIWACYRRSLEMGGHNSVGPRIYNMGEKPATTLTTHEIHYMDSDIHTANVPSGEM  
VDLVDKENGIGGKRGNT

>comp9850\_c0\_seq4; 295 182 1434 LEN=1565; translated  
MLRLTRSKSALLMHRRASSILRWMTSGVRAEPATGLFDKIAFIGTGKMAQAMIDPLITN  
GYQPAEKVCVYDVSTKSMEKMKSVYPDIQTSESIGEAVHDAECIVLAVKPNINVSFWNQ  
FPSLESDSDKGGSGFRVRKDATLLSILAGTPVKDFAPSGISKIVRGWVIENAATIPCSLV  
LGGYHSMFACLNIVVLSYDFTRVAXPNTPSMIGGMTVWCCTPSLTSCDRQSVSKLLNTF  
GKAIYVDDEKFVDMSTSISSGSPAYIFMLMEAMIDSGVHMGFSRETATTLVHHTLLGSTL  
YAMETGEHPAILRNSVTSAPGTTASAIYELEKGGRLPLVNDAIWACYRRSLEMGGHNSV  
GPRMIYNMGEKPATTLTTHEIHYMDSDIHTANVPSGEMVDLVDKENGIGGKRGNT

>comp9851\_c0\_seq1; 412 477 2861 LEN=3095; translated  
MTSSIRGISTSTSGSTQSRSLFQNSNEDRKKREEATLHKMKEVTRTYLDKMETNSAFFSDE  
TKIAMLRNKCRPIVIRDDDDYGERENGGKHSKCIWNGGVVVRPFEPFIEIELETTLMGM  
EFGTVLRVGSIHLLPRSQPDDDNCKGDRSTRNHKKEERPFSVRSNPSVLVGLPQNGN  
NNELDTIECSSGHPGSIRHSEKRSLSSTTTPMSMSSLTSSSHSGSNTNADPPDATIISK  
RMPPRSPGYPSLWLGINSVDEQKQQAQIQSAIGADRLRQELTESYCRPKRNRHSS  
PAGGSSLARSTAI STNASLLVIKQIRKDLYPKKRIEAAKDLAREAKLLARLQLLYCTEQR  
SDSEADPPSDKDDGVHPFRYRYVAFDNHPNLTIRGIVSNPGAPDFGILLDRHLTLAER  
VTFWGRQNEIIEKTTGRTKRHSYKTSLLASWWSRAAFWPSGLFGCDKREPNTSRSSMS  
PFSQVVGEDASLEGVMYTATTTPVSSPLESLVLLGERVLALFDVAEGMRYLHKHKIVFR  
DLKTENVGGKTTSGDALQRMQIFDFGLARECKSSDKVRQSPLSSRSVDSASRGEATPGFG  
DTNDNYDLNDFYDTHITGMTGTMRIMAPEVIRYSPYGLPADVYSFGICMWEVFTGKKCN  
FLSAAEICDTKNVVRPRPPMRFDPLKGSVGMPLKLRVLMQKCWHEDPNQRPEFVLSHLL  
RSILSELHNQSSHPERPFQPSNAVDNGASSNNENKQRQPFHERSLSDGTSRSSGQAALW  
CRLEAIHASRRQDD

>comp9852\_c0\_seq1; 238 521 1087 LEN=2049; translated  
MPFELARNAHTDWEKGGFLLLGTYYGICLQIVVLAIFDLYNDAAIKLHWSWTVTNA  
VHCLVTTLYLHLWLGSAFDQHGEAAMTLWEQLEGRSQILNVKRSFVVPITILCYAACHF

SNYSFDVCVTNVILWIVQMAGKLPIMNGVRIFGINRTAGIDDDCGGHESRRNGMVSARSR  
RRPGSKQE

>comp9854\_c0\_seq1; 220 215 991 LEN=1237; translated  
MAIATTTNSSSSGGGIGRHGREAPLIPTSGRELLLDLKRSTAQNASAMRSGAAPTLPAYNH  
KLVQACLRLDLHATARELDLQARVHGSQAGDGTETENGSGKPRKPSMPARPSILLHHRITIQ  
RQKQCLLAYHHHRTEILKAIERSRMAANEEAPVGGPGASSHAGEAAFARDYAALRRAYS  
RVFELDALPPTSHMVQVRVVPSSGRTGSGDGLVVLPSGRVVS LAKGARLFLDRSDAR  
DFLRQGIVELCDGEEVDF

>comp9856\_c0\_seq1; 587 195 2006 LEN=2449; translated  
MEVEEIFNLSTNYAGANTNIVDDNKMIYSIDIEVDTYVFPNMDDSSNDEGEDIVNEKDMQI  
TRRSTMSTTVSSASYSASEGLSDEALDIALEDPNIMEKILEREMYEMKPEEREA AINELH  
GVEFGRWGGYSENNIRNLNETTKECEPMTALALRDMQNILDELVPPCSISPMNDEDEAHN  
RRRGNRRYHAYRRGLELKSDFIRTEEYRLKFLRADRFDARKAAIRYCECLDLLLKCFCGEK  
IFRRQLYMSDLTALELKYFRDGNQCQVLP SRDRIGRRVVFVFIGRHDASTYEEYSSAFRLLV  
FLLWTILAEDVTTQVKGAVVLVFP TFEEPSMAKNSAKKMNQIITTI PVRY SALHFCIPNS  
PVFNLCRSLCLMLIGPEGRRVCRVHTGSPVEVDYVLSYGINVKDIPRTYTFMVTKNWA  
RFAKVRTAIDNFRKKT DNEAAGLEGKNEESIEEVCGVECPEVNCILFGNKAMAWDHPGNI  
EFRDLIEEKELERELHPRKFLKGDYNDYIIIEEGLRNFVMEYDKKNLWYTEIVDDDVL  
RHKITQLLTGIRKRRKATRMAQKLRSLAPTEPTPISTNVEETVYQGNRCTFLCAFNSNND  
TVK

>comp9857\_c0\_seq1; 284 534 1286 LEN=1324; translated  
MTMIEDTNILTKPFGNSTVHLTPKANQLKERAKVHSGFNNAVFTHDIWERIYAKTKYLM  
HLHPTYRLWTTGHS LGGANAILTATAFASLNRNRRLSVSFGCPQTGNYYWREYFNDTSP  
LSNNLGIWRVVLGWDLV PRLPEFFHHVGHGTIQIDVKTGESKTYEYHYGNVERGYAGVPNG  
WYAKSHAWLPSALS FHRMTKYVENIAKLEPASWAKHFYPVHSNVYDDDDDDINPLDDWPG  
QDETQFIDTY

>comp9857\_c0\_seq2; 181 1 476 LEN=514; translated  
XFHRKYLI IATRAFPLTYCFAVETKCTVVFVTTLLNGIILSIFVSFYMNVKHFADVGHTIQ  
IDVKTGESKTYEYHYGNVERGYAGVPNGWYAKSHAWLPSALS FHRMTKYVENIAKLEPAS  
WAKHFYPVHSNVYDDDDDDINPLDDWPGQDETQFIDTY

>comp9858\_c0\_seq1; 516 316 1320 LEN=1868; translated  
MLTSNYVFHEPTPAVVDIDDSGDFDFVFIERDLEGRITDDEDDGDSYDYCEDVCSILSNT  
YNEQESNDNASLLSNDSSSPTTDLKESVLTVP SALMKDLDEAHEAAKLIRITDPEESSV  
GAMPVGEESNESVSSDELITPTDIATQDSPQELFTESLEKTPNPAAYNPTAVSTTGR  
IIFLTALPKFEDPSAKQTGSGLLFSKQEDEYSTKDSNKNKHVSNSVSI SRTSNKKRRK  
KMLKKAQAASAAAERMKQOISSSSSSTGKVS NKYTKRAGTASSNKKQLSTTSSRVGSK  
KATNIAVSCAMETMANYRDELSRQQGKQGAPQVFGS

>comp9859\_c0\_seq1; 1059 205 3285 LEN=4161; translated  
MTIEVQENLNGGGSGFRIVEEEGIEIGHVNDVDVETLASLNGTQNGTQNGTKNGTQNGSH  
KNHSEGNRNNNSGFLVKPDDLRSFAKDRNTDALIELLEKIDGRAHILKNQNGKNGGGV  
DIETPSVDYELLSKTIELIRELKKDQADGPYQKYSKDQYEMDVHVEQAVEMLTALVLRSS  
LEKIDSSAEYRRAVFGSNIAIEKPMESFLALCWEAVQDFVLI MLIVLGI IALAVEISD  
KGPCGSCWAEGTAILLTVLLVLLTASIDYAKQFAFORLARS LFESNTKQVIRNGKQMTV  
IDDDIVVDILCVNSHALASVPADCVLIGPAADLKMD ESTLTGSEPVSKKPGDVILSGT  
NAIQSGRMVVI AVGINSVGGKIRAHVYESTDHDELGDDGENSPLYTKLDKIAKQIGIA  
GIVAACFSFVVS CIIIGLVEKDPVRNLLDYLVTAITVLAVAVPEGLPLAVTSLAFSSRR  
MTKEHNLVRKLNACETMGCATTICTDKTGTLTANKMSARALYAGDKDMTVDDHKQTLGNF  
VKENISDERILETIGKVISIDTMNETNLELDQNGAVEGSSGNPTEAALLV FVHDLGFNYD  
QIRNSTRGRSSCGEEAAYLSDGKLYGFSGRKMMSWAVPLDNGRYRIYTKGAQEVILSR  
NQYISAENQIKELKPEDTDFMRYSQIYARRGMRTIALAYGDL PAGTDLEAISSTIKNPD  
GSDAFEAEATNLVAVGLVGI EDPLRHEVPDAIETCYNAGIDVRMVTGDNPSTAAS IAYQAG  
ILRDFHFQEGTKERVASNLKDNVLM TGDVFRMVYRIVTDENGGPCKQEFDQAADFKIWP  
FLRVLARSSPDDKLT LAHGLNQSTVFTNEALCCKLKKESNITIFPDRQVIAMTGDGTNDA  
PALKRADIGFAMGISGTQIAKDAADIILLDDNFASIVTAAKWGRNIYASLQKFLQFQLTV  
NISAVTTAIVGACYSQYSPLAAIQLLWVNILMDSLASLALASEPPVEELLKPPVNRTRH  
MITNHMW

>comp9859\_c0\_seq2; 1079 205 3891 LEN=4145; translated  
MTIEVQENLNGGGSGFRIVEEEGIEIGHVNDVDVETLASLNGTQNGTQNGTKNGTQNGSH  
KNHSEGNRNNNSGFLVKPDDLRSFAKDRNTDALIELLEKIDGRAHILKNQNGKNGGGV  
DIETPSVDYELLSKTIELIRELKKDQADGPYQKYSKDQYEMDVHVEQAVEMLTALVLRSS

LEKGDSSAEYRRAVFGSNAIAEKPMESFLALCWEAVQDFVLIIMLIVLGI IALAVEISD  
KGPCGSCWAEGTAILLTVLLVVLLTASIDYAKQFAFQRLARSLFESNTKQVIRNGKQMTV  
IDDDIVVGDILCVNSHALASVPADCVLIGPAADLKMDDESTLTGESEPVSKKPGDVILSGT  
NAIQSGRMVVIIVGINSVGGKIRAHVYESTDHDELGDDGENSPLYTKLDKIAKQIGIA  
GIVAACFSFVVSCEVKKRIYKLFRALRITHNITFDIPFNLFRRLLXLGVEKDPVRNLLDY  
LVTAITVLAVAVPEGLPLAVTSLAFSSRRMTKEHNLVRKLNACETMGCATTICTDKTGT  
LTANKMSARALYAGDKDMTVDDHKQTLGNFVKENISDERILETIGKVISIDTMNETNLEL  
DQNGAVEGSSGNPTEAALLVVFVHDLGFNYDQIRNSTRGRSSCGEEAAYLSDGKLYGFSSG  
RKMMSWAVPLDNGRYRIYTKGAQEVILSRCNQYISAENQIKELKPEDTDEFMRYSQIYAR  
RGMRTIALAYGDLPGTDLEAISSTIKNPDGSDAFEAEETNLVAVGLVGIEDPLRHEVPDA  
IETCYNAGIDVRMVTGDNPSTAASIAQAGILRDFHFQEGTKERVASNLKDNVLMTGDFV  
RRMVYRIVTDENGGPCKQEFDQAAFDKIWPFLRVLARSSPDDKLTLAHGLNQSTVFTNEA  
LCKKLLKESNITIFPDRQVIAMTGDGTNDAPALKRADIGFAMGISGTQIAKDAADIILLD  
DNFASIVTAAKWGRNIYASLQKFLQFQLTVNISAVTTAIVGACYSQYSPLAAIQLLWVNI  
LMDSLASLALASEPPVEELLKPPVNRTRHMITNHMWANMLGQASYQICVVMTLLFAGPE  
LLDLEPGHVVEDRNENSVHYTLIFNAFVVMQLFNEINCRKLGECNVFKGMLKNPIFCSI  
LLSTSILQVLIQVFGGDALHVADGGLSGEFWGLCLILGAGSLLVQQFINLAYTLGQNTKS  
WRLQQRLKRDSSIRNAYHNAVESHHMQD

>comp9859\_c0\_seq3; 1185 205 3801 LEN=4055; translated  
MTIEVQENLNGGGSGFRIVEEEGIEIGHVNDVDETLASLNGTQNGTQNGTKNGTQNGSH  
KNHSEGNRNNNSGFLVKPDDLRSFAKDRNTDALIELLEKGDGRAHILKNQNGKNGGGVG  
DIETPSVDYELLSKTIELIRELKKDQADGPYQKYSKDQYEMDVHVEQAVEMLTALVLRSS  
LEKGDSSAEYRRAVFGSNAIAEKPMESFLALCWEAVQDFVLIIMLIVLGI IALAVEISD  
KGPCGSCWAEGTAILLTVLLVVLLTASIDYAKQFAFQRLARSLFESNTKQVIRNGKQMTV  
IDDDIVVGDILCVNSHALASVPADCVLIGPAADLKMDDESTLTGESEPVSKKPGDVILSGT  
NAIQSGRMVVIIVGINSVGGKIRAHVYESTDHDELGDDGENSPLYTKLDKIAKQIGIA  
GIVAACFSFVVSCEVKKRIYKLFRALRITHNITFDIPFNLFRRLLXLGVEKDPVRNLLDY  
LVTAITVLAVAVPEGLPLAVTSLAFSSRRMTKEHNLVRKLNACETMGCATTICTDKTGT  
LTANKMSARALYAGDKDMTVDDHKQTLGNFVKENISDERILETIGKVISIDTMNETNLEL  
DQNGAVEGSSGNPTEAALLVVFVHDLGFNYDQIRNSTRGRSSCGEEAAYLSDGKLYGFSSG  
RKMMSWAVPLDNGRYRIYTKGAQEVILSRCNQYISAENQIKELKPEDTDEFMRYSQIYAR  
RGMRTIALAYGDLPGTDLEAISSTIKNPDGSDAFEAEETNLVAVGLVGIEDPLRHEVPDA  
IETCYNAGIDVRMVTGDNPSTAASIAQAGILRDFHFQEGTKERVASNLKDNVLMTGDFV  
RRMVYRIVTDENGGPCKQEFDQAAFDKIWPFLRVLARSSPDDKLTLAHGLNQSTVFTNEA  
LCKKLLKESNITIFPDRQVIAMTGDGTNDAPALKRADIGFAMGISGTQIAKDAADIILLD  
DNFASIVTAAKWGRNIYASLQKFLQFQLTVNISAVTTAIVGACYSQYSPLAAIQLLWVNI  
LMDSLASLALASEPPVEELLKPPVNRTRHMITNHMWANMLGQASYQICVVMTLLFAGPE  
LLDLEPGHVVEDRNENSVHYTLIFNAFVVMQLFNEINCRKLGECNVFKGMLKNPIFCSI  
LLSTSILQVLIQVFGGDALHVADGGLSGEFWGLCLILGAGSLLVQQFINLAYTLGQNTKS  
WRLQQRLKRDSSIRNAYHNAVESHHMQD

>comp9859\_c0\_seq4; 953 205 3375 LEN=4251; translated  
MTIEVQENLNGGGSGFRIVEEEGIEIGHVNDVDETLASLNGTQNGTQNGTKNGTQNGSH  
KNHSEGNRNNNSGFLVKPDDLRSFAKDRNTDALIELLEKGDGRAHILKNQNGKNGGGVG  
DIETPSVDYELLSKTIELIRELKKDQADGPYQKYSKDQYEMDVHVEQAVEMLTALVLRSS  
LEKGDSSAEYRRAVFGSNAIAEKPMESFLALCWEAVQDFVLIIMLIVLGI IALAVEISD  
KGPCGSCWAEGTAILLTVLLVVLLTASIDYAKQFAFQRLARSLFESNTKQVIRNGKQMTV  
IDDDIVVGDILCVNSHALASVPADCVLIGPAADLKMDDESTLTGESEPVSKKPGDVILSGT  
NAIQSGRMVVIIVGINSVGGKIRAHVYESTDHDELGDDGENSPLYTKLDKIAKQIGIA  
GIVAACFSFVVSCEVKKRIYKLFRALRITHNITFDIPFNLFRRLLXLGVEKDPVRNLLDY  
LVTAITVLAVAVPEGLPLAVTSLAFSSRRMTKEHNLVRKLNACETMGCATTICTDKTGT  
LTANKMSARALYAGDKDMTVDDHKQTLGNFVKENISDERILETIGKVISIDTMNETNLEL  
DQNGAVEGSSGNPTEAALLVVFVHDLGFNYDQIRNSTRGRSSCGEEAAYLSDGKLYGFSSG  
RKMMSWAVPLDNGRYRIYTKGAQEVILSRCNQYISAENQIKELKPEDTDEFMRYSQIYAR  
RGMRTIALAYGDLPGTDLEAISSTIKNPDGSDAFEAEETNLVAVGLVGIEDPLRHEVPDA  
IETCYNAGIDVRMVTGDNPSTAASIAQAGILRDFHFQEGTKERVASNLKDNVLMTGDFV  
RRMVYRIVTDENGGPCKQEFDQAAFDKIWPFLRVLARSSPDDKLTLAHGLNQSTVFTNEA  
LCKKLLKESNITIFPDRQVIAMTGDGTNDAPALKRADIGFAMGISGTQIAKDAADIILLD  
DNFASIVTAAKWGRNIYASLQKFLQFQLTVNISAVTTAIVGACYSQYSPLAAIQLLWVNI  
LMDSLASLALASEPPVEELLKPPVNRTRHMITNHMW

>comp9860\_c0\_seq1; 190 88 1101 LEN=2076; translated  
MAAVNKKLVAVIGYTGGVGSCLLTAMKKIGLSPHALVRSSTMTIGSAGEVPVDYGVLSA

YLLQQNGIPVIADVTASSAVQENYEGWLRQGISVVAANKGIFAGPEDKYRALLEAAKSGK  
CRLLEHETTVGAGLPTLGLTQGLKASSHDIVTVEGILSGTLAFVLGQVAGGKASLSQAVRE  
AKELGYTEPDPRDDLNGMDVARKAVILARLAGMKGVDLSAMEVESLVPEALRDCSVEEFL  
AKLPEHDESMAEKVAKVEETGGRLHYAAKVNVAENKVEVGLLSCEASHPFNNAGPDNMVA  
ITTDIFYTRPLVVQGAGAGGDVTATGVLADILQCANQP  
>comp9860\_c0\_seq2; 159 88 1281 LEN=2256; translated  
MAAVNKKLVAVIGYTGCVGSCLLTAMKKIGLSPHALVRSSTMTIGSAGEVPVDYGVLSA  
YLLQQNGIPVIADVTASSAVQENYEGWLRQGISVVAANKGIFAGPEDKYRALLEAAKSGK  
CRLLEHETTVGAGXVTSWVWLLLLLLQSSNTDSFGLALSASMCKSSDRIPLFFNNLPFCAS  
MVGCFNDRDPSGLPTLGLTQGLKASSHDIVTVEGILSGTLAFVLGQVAGGKASLSQAVRE  
AKELGYTEPDPRDDLNGMDVARKAVILARLAGMKGVDLSAMEVESLVPEALRDCSVEEFL  
AKLPEHDESMAEKVAKVEETGGRLHYAAKVNVAENKVEVGLLSCEASHPFNNAGPDNMVA  
ITTDIFYTRPLVVQGAGAGGDVTATGVLADILQCANQP  
>comp9861\_c0\_seq1; 297 209 1042 LEN=1283; translated  
MVEEHGALTVADLCSTSNESSTYTYGSRYESDDHSSTIDCIDDSDFLANNSLCKQHRSSL  
KMLDSLKKEVVMIRSDGKNPYGTPAASPRDVMIDLTKTNAGDFSSPLGSPVNSRRNTKL  
SPGLVTPSLIPSLSENTENTTRCQSLVTNHGQKDDYTFCSMDDSINQEMNVLKEVATELEK  
ELRETNIINTVFEAIERIGESNNPEIKSVLMSERDVIREGIRNELQKEEEFLYAQDSVKP  
FHVHLMFEVSEFEGGSMNIKVLAVAIASFSLIRNWILGW  
>comp9863\_c0\_seq1; 337 1 1589 LEN=1892; translated  
XPDPRKISSLILRYKYEYPTRSAAPVCITIRMVKRMFSQQYDPQMAAGTTTIKSPSPNAG  
RGMPSPVHMRADNRSVSPLTNNESAFGAGGRYYSTANGGEREQPSLSYEAPRNKGFEELEC  
DYDRSVTQLYEMLESSQWENARIRCNTHPHEETHTWVVRDVGNSIRWKLPLHAAVIFKA  
PLSLIENLLTQNPIAAAKRDDQGILPLHLAFRHKADEAIEKLLSQYPSGVLIKDQQRERL  
PLDHGKDMRFSVKLMGLYAETF SKCQHNEAIEISKKEAEITAAFEIRLKKLEEAYEARIDT  
LVKSYEETNEATKLKAEEDARKNRECHRQIEKLESILAREMMADKRSPEVENELQGLSS  
SLADATRELMGLRKVVVEEQKHEKEEFVDNLRMLKQDTTLHERCTKQEQLENAEKLREQ  
LLRNLLQKDDGNTIQVANDICQISDNNMARTEKLLSSVSLTRSRYAIEDHAEPGILPSD  
NQYQNADDLASDTPNPSRTAAWQAEPEKDHGDDISAITENSYLQPPGDR  
>comp9864\_c0\_seq1; 211 296 844 LEN=1328; translated  
MAIQSVASSLFFSALLLADANAFGVRHITERPATSLNLLPDQGSQLVAAYNALSESQRTE  
MARAPISVEKEVEARAVPGSTESEKPHRTWGAGTISASKSLLSRIFQGPSVKHPLEHKD  
VCYYPMVGFRFIKGVNAALPTKSTASCAMPTKSQKEEEVYGWYSSSCKLDFSEDVCHNP  
IN  
>comp9866\_c0\_seq1; 267 120 1109 LEN=1244; translated  
MDLSPQMFRDIPKLVKYHYKEGNFNWPMIYVSLVHAAALAGVARLTQCSTQTLMWAFIL  
WPIISGFGITVGVHRLWHSRYSYEAHFLLRVAVLMLCNSIANQGSYHWARDHRVHHKFSETK  
ADPHDATRGGFFYAHVGLIVKVKDPAVVKAGREMDFSDDLADPLVKWQKLPWFPLYMCF  
VMPAQVAARYWGEDFWNAFFVAGALRYAVVLHFTWCVNSAAHLYGDHPYDVLSPYPAENPF  
VSWCAVGEGWHNWHKYPFDYAASEFGISSQFNPSKLFIDCMAKLGLVWGRKRGTAAWQM  
GRARRIRSDAGVPLPVAPPRPWEVKKMD  
>comp9867\_c0\_seq1; 1282 65 2038 LEN=2087; translated  
MYFAKLAVAALALLASPYTARAEEMMGTVIGIDLGTYSVGVFKNGRVEI IANDQGN  
RITPSYVAFLDNTERLVGDAKNQATINPENTVFDVKRLIGRKFSDKSVQADKLVPEYI  
VSDKDKPMIQVTVGGKSKYAPEEVSAMILQKMKSTAETFLGKDIKNAVVTVPAYFNDAQ  
RQATKDAGTISGMKVERINEPTAAAIAYGMDKTGGESNVLVFDLGGGTFDVTLLTIDSG  
VFEVLATNGDTHLGGEDFDQRMQYFIKMMKKSDIDISGDKRALQKLRKEVERVKRALS  
SQQARLEIEELADGYDLSETLTRARFEELNNDLFKKTMGPVSRVMEADLADLSEIDEIV  
LVGGSTRIPKVQQLISEYFGGKDPKSGINPDEAVAYGAAVQGGILSGEGGDATSEI LLLD  
VTPLSQGIETVGGVMTKLINRGTIIPTKKSQTFSTHQNQSVVMIQVYEGERSMTKDCHN  
LGKFEELTGIPAPRGVPQIEVTFEVDANGILQVSAEDKGTGKAEKITITA EKGRLSDEEIE  
ERMVKEAEDYAEEDKKIKERIDARNGLESYLYNLKNTLEDEKGVADNISAEDKKELQDM  
LDEITLDWMDENPEADKEDYDEKMKVEVEQVANPIMRNVYAGSGGGADEDAGDFGDDEL  
>comp9868\_c0\_seq1; 444 1 1728 LEN=1805; translated  
VLSSAWRIQLSSGPTSATSENKEITTIQYHKATKHHAITFFQRIQHLRTSLLINSK KKKKT  
IAMNTPATTVAVCLSSVLLFALLEPALGFSSAPPCVSTQKNYVGRIGAGSNNIVTPRMQ  
NNVALFSASAADNTEATAAIPSDPAKTTSQFLAGLWRLIAKGNKLVGRGESETTLFPDMVEQ  
MAQPRFLNLVTAHLDSCKDVCDFFGISTTLVPFVEDGKVVGFVTKSFRNPVDPDNFEFE  
YDPLWDDADDWDYEGIDA EYEKEEGGSEEKVEYDPDIVNKVPDKDEEIEQLSKDWVAKICS  
DMGVCPTSGANMAGLPMGPVYTTDRSSSFEDMYAVYWEVVRVEQQPESDLSTLLIT

PEFCMDNVELFETWSTTLTQPLSALGIEESIQLVFFHPHWTFRDGGERGGEGAAANYARR  
SPWPMINILRTNQVRAAQKGIPTGLVYKQNESTLSKIGVQKLETMLRLRDWGEIADVKVD  
RREMEALRVAQDFQQTGVVIKQEDTSFQNDATPAVNKVDSTQVDQGNLVNVIKQALGKRLG  
KDEGSTATKLSGPETSATIMASDFLLAELDKIASK

>comp9869\_c0\_seq1; 751 207 2207 LEN=2275; translated  
MTAANAFDTHAQAFPTHRRLITTDQEKNFQELGFLDAEGMVAFNTLHELQANSSRVFSKN  
ELFGTYDKESKGFNFMTYDEYNQKVNQCRSLLKDLGIREFAKVAIIANNRWEWATIAAAT  
YSLNATLVPMYEAQLPSDWTYILNDSGAQTVFCATQEIFDKVRTEVLPSTPTVKSSFCLD  
SSLGESHGFQTALSLSSEIDNDGTHI IAPTPEDLAGLIYTSGTTGKPKGVELTHLNFSSNV  
KGATRSLVKNPKEFINESDRSLSFLPWAHSYGQTCELWSLMSSGASMGIGRGVPLILEDL  
QLVKPTNLFVPTLYKKVFDGVHNLMETAPPLRRKLMKNALAMGEAKVAADKSTRKQLDP  
FEKIKFAVLDKLVLSKIRGRFGGNLVRGFSGGAACPAEVI GFMDSIGIPICEGYGLTETS  
PIITLNVPEENRTVGSVGRPVGDVTVYIVDKDGNVPPGTEGEICCVGNVMKGYNNAEA  
TNEVISVAPDGKSKMFHTGDMGTLDNSGWVVRTGRIKEQYKLENGKYVVPPIESAINMS  
RFINQVVL CGANRPHNVALLVPEWPAIQAE LGMDDATDIELANNEAVKKLIDDEIRHTCA  
KLKKFEIPKEWAFVAPFTAANNMLTPKMSIRRHKVMDAYEELISTMYNDDAIVTEAADGA  
LREAA

>comp9869\_c0\_seq2; 721 207 2364 LEN=2432; translated  
MTAANAFDTHAQAFPTHRRLITTDQEKNFQELGFLDAEGMVAFNTLHELQANSSRVFSKN  
ELFGTYDKESKGFNFMTYDEYNQKVNQCRSLLKDLGIREFAKVAIIANNRWEWATIAAAT  
YSLNATLVPMYEAQLPSDWTYILNDSGAQTVFCATQEIFDKVRTEVLPSTPTVKSSFCLD  
SSLGESHGFQTALSLSSEIDNDGTHI IAPTPEDLAGLIYTSGTTGKPKGVELTHLNFSSNV  
KGATRSLVKNPKEFINESDRSLSFLPWAHSYGQTCELWSLMSSGASMGIGRGVPLILEDL  
QLVKPTNLFVPTLYKKVFDGVHNLMETAPPLRRKLMKNALAMGEAKVAADKSTRKQLDP  
FEKIKFAVLDKLVLSKIRGRFGGNLVRGFSGGAACPAEVI GFMDSIGIPICEGYGLTETS  
PIITLNVPEENRTVGSVGRPVGDVTVYIVDKDGNVPPGTEGEICCVGNVMKGYNNAEA  
TNEVISVAPDGKSKMEFIELEKKGILSAKHKICLICLETFLQYHVDVTSIHDFCFDFCRC  
ASII LRRFHTGDMGTLDNSGWVVRTGRIKEQYKLENGKYVVPPIESAINMSRFINQVVL  
CGANRPHNVALLVPEWPAIQAE LGMDDATDIELANNEAVKKLIDDEIRHTCAKLKKFEIP  
KEWAFVAPFTAANNMLTPKMSIRRHKVMDAYEELISTMYNDDAIVTEAADGALREAA

>comp9870\_c0\_seq1; 506 1 1285 LEN=1337; translated  
XSPQENPKAGTKPASTPTEDAESKSKSEGENKPPAAGGKQPQPRKRDEGQQPNEICAVAI  
LSEPTDGGDTVLRCAVARNDKSLGVYALNAAEASASKPGSLSPVLHYRTPKRVSCFAFAR  
LP SAEKGETAPLLVSGDVAGDSHAYNILPGKPRGRKLLLGHTASMLTDIALADSGAGDS  
SKSLLTSDRDEKIRISRFPESWIEGHLLGHTAYVTGVAVVARAQGSPPLVVSCGGDRT  
LRLWDLAKQSELCLPTETTEIPTAIAVGCNGGGAAKVAVIFDGSKTLKLYGIATTAGGL  
LESLSIDCPSRPLAIDFSNEKLAVVMKDPDIYALYEV PADGAKAVPAEGNGGRVVEALR  
ELASTEKIAMPDTILEKDDYGNPVLQKENETRGPAAADQPWNRVERVGIAKERERRRKA  
KIMAAAEK

>comp9871\_c0\_seq1; 320 56 412 LEN=1797; translated  
MVKAKKS VVKFVIDCTQPVDKVL DVAMFEKYLHDKIKIGGKTAALAANNVVISRDRTKL  
TIASPAELKFSKRQLKYL SKRYLKKQQLRDYLRVVAASKNSYEMRYFSISGGDDADEE

>comp9871\_c0\_seq3; 271 414 689 LEN=2074; translated  
MFEKYLHDKIKIGGKTAALAANNVVISRDRTKLTIASPAELKFSKRQLKYL SKRYLKKQ  
LRDYLRVVAASKNSYEMRYFSISGGDDADEE

>comp9871\_c0\_seq4; 271 304 579 LEN=1964; translated  
MFEKYLHDKIKIGGKTAALAANNVVISRDRTKLTIASPAELKFSKRQLKYL SKRYLKKQ  
LRDYLRVVAASKNSYEMRYFSISGGDDADEE

>comp9872\_c0\_seq1; 718 1 2108 LEN=2691; translated  
XTTTSPLDNAPLRTAQPAYQSRLASHRSRKR AVFPAQRQPPFLGNAIHEDRHGQGVDFDL  
PRANQDTEARHPGPPDLHPKGRPNRCVPQLRRDRGDEPETERQPVGPPEGAVERPAGIED  
PGLSERIRDPLAEPPGPVQAKDPGKPEENLQPV RPGEPPDGP GAELPQSAEAD EDPDGS  
EPTTAD EYRRL LGANKAPKAGSAMGSKSAMI AKAYAVAVKQYEV MRTDNLSEKEAMEKV  
EELLAKDDLEEKTSRRTKARDLQKTAQEASGTDADDLVQRAQTAFPGAKPKEEILGRRGK  
KEGTTGAKVDYDTSVSMLYSENQRSFEGMINWTKRLQAVPYNRWTVGASVSLDHWIAKRV  
LGLSEETWLALLEGN SPELMGRGRDIVMARHALFPETVVASDFQSAADAEIDGTSDETSS  
GAEDDLLALLATLEGNSSDNSGEESSETTTTPDDDSASSLEEKLTEELQAWRSQHVEQN  
YDNWNLEKQEEFMSWLETFVSSQVPESSLGRVDLEETRKNILESP PQKEDADAFWNSIS  
DETS AELFLQSLLENKIGSEHPFFELDYKTQLERLVNLGTIGEIANEYATEADR SKFLT  
RYGDYLLLEGVQFDHLVPDSSGPI S GSDLGQHLREKYDIDSSDRFALKKIDHGAE GFDSKA

SKNARMLFVAWNQFKAGRAHYEEKLFKKGLLGLSYETSKTKK  
>comp9872\_c0\_seq2; 616 1 1517 LEN=1537; translated  
YNHKPVGQRSAPHRTTRLP IETS IASQPQKSSIPGAETTTXFLEMQSTKIAMGRGSI STS  
HGQIRILKHATPDLTYIQKAVQTGVYRSSDEIEEMNQKLRDPSDLRRVRWNVQRGSKI  
QDYPKEYEILSLNPPAPFKPKIPVKDQKKIYSQYVRENRPDRLAQNYLNRQKQTNRDGS  
EPTTAD EYRRL LGANKAPKAGSAMGSKSAMI AKAYAVAVKQYEV MRTDNLSEKEAMEKV  
EELLAKDDLEEKTSRRTKARDLQKTAQEASGTDADDLVQRAQTAFPGAKPKEEILGRRGK  
KEGTTGAKVDYDTSVSMLYSENQRSFEGMINWTKRLQAVPYNRWTVGASVSLDHWIAKRV  
LGLSEETWLALLEGNPELMGRGRDIVMARHALFPETVVASDFQSAADAEIDGTSDETSS  
GAEDDL DALLATLEGWNSSDNSGEESETTTTTPDDDSASSLEEKLTEELQAWRSQHVEQN  
YDNWNLEKQEEFMVSAIFLEASFDA  
>comp9872\_c0\_seq3; 240 1 696 LEN=1279; translated  
XRTQADQTFVLVAMLLVISKTKSWLETFVSSQVPESSLGRVDLEETRKNILESPQKED  
ADAFWNSISDETS AELFLQSLLENKIGSEHPFFELDYKTQLERLVNLGTIGEIANEYAT  
EADRSKFLTRYGDYLLLEGVQFDHLVDPDSSGPISGSDLGQHLREKYDIDSSDRFALKKIDH  
GAEGFDSKASKNARMLFVAWNQFKAGRAHYEEKLFKKGLLGLSYETSKTKK  
>comp9873\_c0\_seq1; 554 413 1684 LEN=2010; translated  
METGTIASWNMEEGESFGPGDIICSVETDKATVDFEAQDDGVLAKILVQSGSDELEVGTP  
ILITVEEPEDAAAFKDYVLEESAPAAAAPAPAAEAPSAPAPAAPVAAPVAVPPVAAS  
GGKVVASPLAHMISKELGYDISTIPGTGPDGRIIAADVREFVPSAATEAEGLATPAPAQE  
AMAAAAP IAGAGFTDYPLSESSKEVANRLAQSKRNVPHYLLTVDICMDEV LKLRKELSGA  
VDDEEGLGVYEFIIKAAAKSMKAVPAANASWMDSAVRVYDSVDMNVVVGTDGDNLYTPVIR  
DCGSKGLKSI SDELSAAMSAVESGEVTSEFGTVGTFTIMNLGMYGIKSCAPIIREPQACA  
LALGAMENRIVPNDPDSEEIYKESVYLTATMSLDHRVVDGAAGAPWLSAFKSYLQSPSS  
LLL  
>comp9874\_c0\_seq1; 270 42 578 LEN=768; translated  
MKVGT FATVAAILPALASSFVAPSQTRSSTSLMAKGF GAKENKAPKQKSAGQLERERAAAN  
QYDQVAATGGQEYSIFVRKFGSPDDSWLPCGSI AVARGDQVSNAIF SNEENLKTAIVRTF  
PKLKGMEGEFEYGYNMKIYPDEPVEVAVKSNASSGPSLGNWMSNLLSPMDASNVGKSQ  
>comp9877\_c0\_seq1; 405 112 1086 LEN=1834; translated  
MEKWKYNYSRLSSITV GILFLLLSNGEALTTARALKTVLRLSSEVLAEKTELEESSKSSS  
SKTEKFAKPPRLIPEDPSLIPSLYNYDHC PFCVRVRLALGFKNIKHNLVFMANDDVHTPT  
SMVGKKIAPIMRFPSESADEDDLIMMESMDIIEFIENDERFGPTNVL RPASGRTDLKEWQ  
KSVRLLLRLNLRPRYVATGLLPEFQQIDSRHAFIANHPLPPFDKA EWKEMEDFSQQLSIY  
AEAMANDPTCMIEELNAKLVALDDIVYCDTYCTEGGLSLDDIDLWARLRSITIIADVEWP  
DGLRRYMDNLAELADVSLYDELAM  
>comp9878\_c0\_seq1; 203 303 1133 LEN=1320; translated  
MNDTAMMRNNHPLSGCLVRQTAIFLFLLLSMYSQPFLCHSFQLSSSVLLTTRSSNGPSIS  
SAPESSKHSVNRYSSTHFFTDPS SPDVHDQTAPRPSFEQRMREQLKQRQOSASASMSK  
GSAIGKLVDPVRTLNSYKEILDQGTGEDGKLMVFWYSPWCKACKAALPGIRTLAKRHPDV  
QFIQVPVLTENANLHQGLDVPSVPYLHLYVPEAPRLVEELKMTRKRLSGFQKLLADYEKG  
SCSLELTVAMDGEDPENPKKIWSTSCPYSSPTRTSS  
>comp9879\_c0\_seq1; 657 198 2480 LEN=2509; translated  
MGRSSRKENKKTQKGTCLRHPKSKFSVHNINSIRQPLNPPPGSGCPTSIIYGD NATKAR  
KLKKLEKGRKNNKKG FVARKRGKRLF IARFPVVGPGSTKVPWLLGKSLPRGEKKKNQQG  
GKQQTRKILNGAFVCN ESTLNF LNAELEFFSDYVRLSRHEKMAREHMIHQIKK SCKNLFG  
VDDSQCQVFGSFAAQPVCI FDS DIDLAIWGVVEPDDDEEEGDDNNQLKRHLVMKGDKLTA  
EDDPNDKSRKKQERVLKWKALIDDAKNERKDKDLLERVSADLATEKICGEGSAKSPLFV  
LDRTGDTPSKSSDEICDSPLDDTTLRPRFVNNVQND CNSDESFS DSKENHNSDYDSKSES  
TDDDSADKLENYFPHQCHNNPEVETNNLEARS DPVSRENHGHNFDCNDHNKND EEMI HND  
GAVKQRPRGQSLVLSSTTCSVEAKLDESEMEVSFVVEGNKHKMRDKLGP SGRTRTLVV  
RSLFKLTRSLRSLSSQIHVRSKARVPI INMVS NFGFECDI ALGGHNGTDTSSYASTQLSR  
FKSFTTVVFLKVLVLSQQGLDKPFTGGLGSYSLYVLVASHIEHHLAMGGDDTPGEVLYSF  
FFRYGAVKHSNPKISPS CRTPLSQESFIQTEDGGSIDLKFCFQIENCVTIFHECWRTLQK  
RLSKEQKFSILQYIIDALKLEVSRSQRKNQADMKRLDRYSHFTKQYNGNSREQKRGEDD  
NEARELIRGYSQKVEAFLPVTE SPKKKGTKKKRKRQKRT  
>comp9880\_c0\_seq1; 433 152 1963 LEN=2907; translated  
MDGGSHELLASLHADGSEVLVRDDGHENKNGNEKMRFNPLPSGCR TNELPVSNSIVHQE  
SEQEVEEEQNAMDDPRYSSNECDVLMANELNKL SFAERESINDEIHGIGVEREYIRHKVV  
EDDPEMLTDAFQKLTEELEQLRREGSAKAFDLSQKMLEESQSSSGNAATCYLNEHGFR LI

FLRCERFDCAKAAKRMCSYLDAMHGFFGDEVLRIRWSDLNAKEISWMEKGYSQVLPDR  
DRAGRRIYLRFLRNDYDNDNSLSLSDASWMRIGLYLMTLLETDIQAQRSGIIFLFFFHGD  
KINPLTFINRGKLSQALKLCPHLHLAGAHYCFPNNDYSTLSMIMKSVRIAIPKIRVHTGD  
YAECLLALQSGFIPTANIPVDTKTGKILVHNHRRWLDFSRAKDENEIGLSLRECMIECP  
NHNDVLFGRGNDKHPGNMFRNVIAKALPEYCKVQSIKQSVCMNMNIVEILKKAYGARFL  
KEHPLESGGVYWTETTNDVARTKVRICLRDANTRLKRIAAKEEKSKPKPIENEKFTFPIK  
RKSESIDTAAPSMVFPPIYSPVTPFHEPEQQQSFHPFVEDTTPFHNESFLGSFDDKADAA  
EIGW

>comp9881\_c0\_seq1; 273 66 578 LEN=694; translated  
MSVEMETCPASAPFFFGMGVTSALVFANIGAAAYGTAKSGVGISSMGVMNPGLVMRNIIPV  
VMAGVLGIYGLIVAVIIQGSIVAPQNGLSQYSLYTGFAHLAAGLCCGLSGLAAGMAIGIV  
GDAGVRAVGQQEKLFGVMILILIFAEALGLYGLIVALILSQNSFVCEGNN

>comp9881\_c0\_seq2; 266 66 578 LEN=984; translated  
MSVEMETCPASAPFFFGMGVTSALVFANIGAAAYGTAKSGVGISSMGVMNPGLVMRNIIPV  
VMAGVLGIYGLIVAVIIQGSIVAPQNGLSQYSLYTGFAHLAAGLCCGLSGLAAGMAIGIV  
GDAGVRAVGQQEKLFGVMILILIFAEALGLYGLIVALILSQNSFVCEGNN

>comp9882\_c0\_seq1; 213 123 740 LEN=1132; translated  
MKKRIAFRKLNRSAHKWSMLRNMVSSLVEHERIVTTEAKAKELRHLADQMITLAKKGQP  
SVDDKNGKAKTPGELLHRRQASRIVRGEWNVTKLFEVLGPRYKFREGGYTRVMKLARPR  
AGDNAPMAVIEYVDRPGEIRAARPPSIFTATSSNGMNGIEDALRKMGIPTTEELVSDEEQ  
ESIEEELNNETNNSDNDENPTKKK

>comp9883\_c0\_seq1; 265 1398 1868 LEN=2023; translated  
MFANKDFCDFSQEI GLASLGASDEDIEKLARCYWFSVEFGLCREFDPKTGKDQMKAYGAG  
LLSSFGELEYACGEAGNDDEPKPQIEPWDP SRAALKEFPITTYQPLYFLADSLSDAKIKM  
RMHCEGLPRPFFAQYNQQTQTVFIDRQIKRMEIGSQ

>comp9883\_c0\_seq2; 513 140 1743 LEN=1898; translated  
MRLLRPFASRLLGQISNRPFAAAHGCRLKFNSSLAKDEDYDIDSRLFQVESVDSFDISS  
ADWRDNQTKTLRSEEEQNLTSLMELPDRVGLHDVLRFFWKYDLNIRRIESRPSKFGFR  
DFFVDVEGSVDEGDQRLNHLVSLKDFGVKLLTLGKEGETDILVSLIHCNYYLTLEN  
PFLLSIYGCQNTQNFXSALFGKVAWFPRHISELDMVANRVLDAGTDLEADHPGFHDENY  
RQRREELANFAMNHRWDQPIADIDYTENEIKCWTAVWDQMENLWDKYACKEYLHSLDLMI  
KNCNYNRTSIPRQSDISSFLESTTNFKLRPVAGLLSSRDFLNGLAHRTEFFCTQYIRHHSR  
PLYTPEPDICHELLGHAPMFANKDFCDFSQEI GLASLGASDEDIEKLARCYWFSVEFGLC  
REFDPKTGKDQMKAYGAGLLSSFGELEYACGEAGNDDEPKPQIEPWDP SRAALKEFPITT  
YQPLYFLADSLSDAKIKMRMHCEGLPRPFFAQYNQQTQTVFIDRQIKRMEIGSQ

>comp9883\_c0\_seq3; 469 140 1836 LEN=1991; translated  
MRLLRPFASRLLGQISNRPFAAAHGCRLKFNSSLAKDEDYDIDSRLFQVESVDSFDISS  
ADWRDNQTKTLRSEEEQNLTSLMELPDRVGLHDVLRFFWKYDLNIRRIESRPSKFGFR  
DFFVDVEGSVDEGDQRLNHLVSLKDFGVKLLTLGKEGETDILVSLIHCNYYLTLEN  
PFLLSIYGCQNTQNFXSALFGKVAWFPRHISELDMVANRVLDAGTDLEADHPGFHDENY  
RQRREELANFAMNHRWDQPIADIDYTENEIKCWTAVWDQMENLWDKYACKEYLHSLDLMI  
KNCNYNRTSIPRQSDISSFLESTTNFKLRPVAGLLSSRDFLNGLAHRTEFFCTQYIRGVDR  
IDFQKWL LISSNQKSDIYHLYVATRNSIILGLCTPQSPTFAMNFLGMPPMFANKDFCDFS  
QEI GLASLGASDEDIEKLARCYWFSVEFGLCREFDPKTGKDQMKAYGAGLLSSFGELEYA  
CGEAGNDDEPKPQIEPWDP SRAALKEFPITTYQPLYFLADSLSDAKIKMRMHCEGLPRP  
FAQYNQQTQTVFIDRQIKRMEIGSQ

>comp9883\_c0\_seq4; 355 140 889 LEN=1988; translated  
MRLLRPFASRLLGQISNRPFAAAHGCRLKFNSSLAKDEDYDIDSRLFQVESVDSFDISS  
ADWRDNQTKTLRSEEEQNLTSLMELPDRVGLHDVLRFFWKYDLNIRRIESRPSKFGFR  
DFFVDVEGSVDEGDQRLNHLVSLKDFGVKLLTLGKEEVAWFPRHISELDMVANRVLD  
AGTDLEADHPGFHDENYRQRREELANFAMNHRWDQPIADIDYTENEIKCWTAVRSCPSID  
RIVMGFRTL

>comp9883\_c0\_seq5; 355 140 889 LEN=1895; translated  
MRLLRPFASRLLGQISNRPFAAAHGCRLKFNSSLAKDEDYDIDSRLFQVESVDSFDISS  
ADWRDNQTKTLRSEEEQNLTSLMELPDRVGLHDVLRFFWKYDLNIRRIESRPSKFGFR  
DFFVDVEGSVDEGDQRLNHLVSLKDFGVKLLTLGKEEVAWFPRHISELDMVANRVLD  
AGTDLEADHPGFHDENYRQRREELANFAMNHRWDQPIADIDYTENEIKCWTAVRSCPSID  
RIVMGFRTL

>comp9883\_c0\_seq6; 537 140 1615 LEN=1770; translated  
MRLLRPFASRLLGQISNRPFAAAHGCRLKFNSSLAKDEDYDIDSRLFQVESVDSFDISS



ADWRDNQTKTLRSEEEQNLTSLLMELPDRVGVLDVLRFFWKYDLNIRRIESRPSKFGRF  
DFFVDVEGSVVDEGDQRLNHLVSLKDFGVKLLTLGKKEVAWFPRHISELDMVANRVL  
AGTDLEADHPGFHDENYRQRREELANFAMNHRWDQPIADIDYTENEIKCWTAVWDQ  
WDKYACKEYLHSLDLMIKNCNYNRTSIPRQSDISSFLESTTNFKLRPVAGLLSSRDF  
LAHRTFFCTQYIRHHSRPLYTPEPDICHELLGHAPMFANKDFCDFSQEI GLASLGAS  
DEIEKLARCYWFSVEFGLCREFDPKTGKQMKAYGAGLLSSFGELEYACGEAGNDDEPK  
QIEPWDP SRAALKEFPITTYQPLYFLADSLSDAKIKMRMHCEGLPRPFFAQYNQQTQ  
TVFIDRQIKRMEIGSQ

>comp9883\_c0\_seq7; 493 140 1708 LEN=1863; translated  
MRLLRPFASRLGQISNRPF AAAHGCRSLKNFSSSLAKDEYDIDSRLFQVESVDSFDISS  
ADWRDNQTKTLRSEEEQNLTSLLMELPDRVGVLDVLRFFWKYDLNIRRIESRPSKFGRF  
DFFVDVEGSVVDEGDQRLNHLVSLKDFGVKLLTLGKKEVAWFPRHISELDMVANRVL  
AGTDLEADHPGFHDENYRQRREELANFAMNHRWDQPIADIDYTENEIKCWTAVWDQ  
WDKYACKEYLHSLDLMIKNCNYNRTSIPRQSDISSFLESTTNFKLRPVAGLLSSRDF  
LAHRTFFCTQYIRGVDRIDFQKWLIISSNQSDIYHLYVATRNSIILGLCTPQSPTFAM  
N FLGMPMFANKDFCDFSQEI GLASLGASDEIEKLARCYWFSVEFGLCREFDPKTGKQ  
M KAYGAGLLSSFGELEYACGEAGNDDEPKQIEPWDP SRAALKEFPITTYQPLYFLAD  
SLSDAKIKMRMHCEGLPRPFFAQYNQQTQTVFIDRQIKRMEIGSQ

>comp9883\_c0\_seq8; 265 1491 1961 LEN=2116; translated  
MFANKDFCDFSQEI GLASLGASDEIEKLARCYWFSVEFGLCREFDPKTGKQMKAYGAG  
LLSSFGELEYACGEAGNDDEPKQIEPWDP SRAALKEFPITTYQPLYFLADSLSDAKIK  
M RMHCEGLPRPFFAQYNQQTQTVFIDRQIKRMEIGSQ

>comp9884\_c0\_seq1; 507 295 1725 LEN=1835; translated  
MATLQNINGWVRLKPSYGGTEDGESDSLTRGKSCRWQPTNFYYYKLLSWIFFSSRASFF  
GTWICRDCGEDLSEWESCPLLKPRGKCAF EYQGWEDPKPRSASSYDPFTKSSLPVRLI  
TSYGVGKVRKVEYEQPQCLSLSKPCFDMNRCTTHTV GANDTDTKEQSLIKPLPVFAYPG  
Q ARVELKDVFNDELSTLSIRIVKDPGMACLLIVHQDDLK LAKQSPSWNLGTNHVYVYVTK  
PITENLHYDMAALGSVALTEAQIRPGYDIPLPLAAVWKVGYLAGGIHRPRKYLLSFKGSI  
QDTLQPYQHRWLA AEYLNDES DVVIDVQCKHKTLFGDSVTYSLYDNPSQSNFDDLMI  
NS TFAFCPGGSHVTSFRLTEVLSAGAIPIILLPEIIPPFYPEVDWSDCVIRVSQARIV  
DLPRI LRAISPQIQERQONCHLLYQSFFDVSEGGANKTYKGEEKEKPSAPGSLASALQVW

>comp9885\_c0\_seq1; 362 551 1741 LEN=1741; translated  
MVQGDSRTLRRRLNQQKNTHAILDPTTNR SILAPGIKEEQYPQALHEFGNKGNEVHY  
GIGQQHPSRERITEAPLTPPRVATKTVRKS GAKRTENKSNNTVESDND SGLDNDGGGP  
LTVHTFTKQKGASHNYGIGNDLNKQQVFTGFNRQEYKSLPRTRDEPPDFDVMNDGTICQY  
PYECCGIDDCCKNGGDI CVNRNCIDDGHRFTLQWIGDDYDLFVVTDPGAEISYSNPTD  
PASLGKLGEEMVQEIYGHVENIYFPVEGGPTGVYRFYVRPFFTVGTSD EWTITVVL DGE  
VVVTESGFGASDSFYCRKDPSPPTLYPTISPI SLSPTQSPVKTGAPTVALPAPTIVTPVE  
HPNRPPLGQEPVPVPTPKPVVPTKQPEPVSTPKPVP

>comp9886\_c0\_seq1; 396 1134 2318 LEN=2762; translated  
MLISTGHPKFESVVLLIFNTFATVWGAVGTP IWF GFAGLVTEDEFIEVSYKSGIALAIG  
SFILLPLCLTFLVPFVLVKKNATFILLG LLVCVGPSTGIAFVNYEFPALIGGMVGCILTT  
ILIGFDVGLVPLNPEDHPNHNPN EIGTVSDRGIVSDFRAELEQSSTRSTETENDNEAVND  
ESRREKIPVATEQSLNRSKIADGEGEGQNPVGESAINALTTP LTTLEDYVDRVLGPRKP  
FGRAYIMELMSRTFPIWGVVLLLV LTRIPQFH IKPYLILKEPYFEIYLNTYGTFRLSASL  
VLQLNNILTYPNLNWKYELLYTPFVIPFVIVSIATMI IHRKSMGDTKPLGVFRTVASRLV  
NPFIALLGALALVQLLIKQT EAPAYILGTILASW

>comp9886\_c0\_seq2; 396 926 2110 LEN=2554; translated  
MLISTGHPKFESVVLLIFNTFATVWGAVGTP IWF GFAGLVTEDEFIEVSYKSGIALAIG  
SFILLPLCLTFLVPFVLVKKNATFILLG LLVCVGPSTGIAFVNYEFPALIGGMVGCILTT  
ILIGFDVGLVPLNPEDHPNHNPN EIGTVSDRGIVSDFRAELEQSSTRSTETENDNEAVND  
ESRREKIPVATEQSLNRSKIADGEGEGQNPVGESAINALTTP LTTLEDYVDRVLGPRKP  
FGRAYIMELMSRTFPIWGVVLLLV LTRIPQFH IKPYLILKEPYFEIYLNTYGTFRLSASL  
VLQLNNILTYPNLNWKYELLYTPFVIPFVIVSIATMI IHRKSMGDTKPLGVFRTVASRLV  
NPFIALLGALALVQLLIKQT EAPAYILGTILASW

>comp9886\_c0\_seq3; 491 212 1960 LEN=2404; translated  
MAETSTTTQPSIPGFGFEYSCTSEDHITCAEQCVGLEDCESCGCAVLLTEDTGGPWGEVM  
DVALGLLPVFVLVVVTVMKNPWPTTRSLPFAALMMFLIRLMYYS DVTLTCSGSIILGLYE  
AISPISIIAGAMTLFETMEVTNCMPYMMREMKALTNGHP IAECMLIFSFAYMVEGASGFG  
TPVALGAPMLISTGHPKFESVVLLIFNTFATVWGAVGTP IWF GFAGLVTEDEFIEVSYK

SGIALAIGSFILLPLCLTFLVFPVFLVKKNATFILLGLLVCVGPSTGIAFVNYEFPALIGG  
MVGCILTTILIGFDVGLVPLNPEDHPNHNPNEIGTVSDRGIVSDFRAELEQSSTRSTETE  
NDNEAVNDESRRREKIPVVATEQSLNRSKIADGEGEGQNPVGESAINALTTPLTTLEDYVD  
RVLGPRKPFGRAYIMELMSRTFPIWGVVLLLVLTRIPQFHFKPYLILKEPYFEIYLNTY  
GTFRLSASLVLQLNNILTYPNLNWKYELLYTPFVIVSIATMIIHRKSMGDTKPLGVF  
RTVASRLVNPFIALLGALALVQLLIKTQTEAPAYILGTILASW

>comp9886\_c0\_seq4; 407 933 2168 LEN=2612; translated  
MVEGASGFPTVALGAPMLISTGHPKFESVVLLIFNTFATVWVAVGTPPIWFGFAGLVTE  
DEFIEVSYKSGIALAIGSFILLPLCLTFLVFPVFLVKKNATFILLGLLVCVGPSTGIAFV  
NYEFPALIGGMVGCILTTILIGFDVGLVPLNPEDHPNHNPNEIGTVSDRGIVSDFRAELE  
QSSTRSTETENDNEAVNDESRRREKIPVVATEQSLNRSKIADGEGEGQNPVGESAINALTT  
PLTTLEDYVDRVLGPRKPFGRAYIMELMSRTFPIWGVVLLLVLTRIPQFHFKPYLILKE  
PYFEIYLNTYGTFRLSASLVLQLNNILTYPNLNWKYELLYTPFVIVSIATMIIHRKSM  
GDTKPLGVFRTVASRLVNPFIALLGALALVQLLIKTQTEAPAYILGTILASW

>comp9887\_c0\_seq1; 1106 100 3805 LEN=3919; translated  
MTPiENDIEAGSIGHRSLSEYSESNLTTTHAEDDVITEANGQSVKDTRINQLAAKEIKQV  
QRIKYFVLFSLFIMVGVSISAYFLSFNDEMNDFKLQFDQSDKVFVSMGNNLVRTLQAS  
DAFAVSIASLATATNQTWPYVVIPDFAVRAEKIRSLANAVYVTTYNVVQPNERKIWEDFT  
AKTGKVVWNESIGAIEIFGGMDWPILWNYTLWDVIHDYEEFEKENPGEVGVNTPGPWLPQ  
WQTQPTIALEPPYNWDLTSAPPTKEMNTTAAQKIFDTHKVTITDAYLISYSDDVKHIESD  
LEEAEWISSYVQKGEVMEPISDIFYPiIEEANEKIKINVESGTDHSANQQSIVSIFSL  
SIYWRDTIKNIFGERSRGLVIVFENPCNPTFTYQLNGPDAVFLGAGDFHDEKYNHFMVRKN  
ISELTRPAMEESLYSGIELDDEFCPFTISLPSDPTTKKHYYTSTPIFYSLITAVIFVITA  
STFMLYDFWVERRQKVVMTALTTTALVSSLFPAVVMDQMLPDGDDSSSLCDRQPKRLRSY  
LKDGNEDDAVPEPEAEKGLAKPIAELFPDPTVYFADIAGFTAWSSVREPSHVFTLLETL  
YGAFDEIAKQYGIKFKVETIGDSYVAVCGLPDPKRNHAVAMARFAFECVEKMKKEKTELEL  
VLGPGTAELSLRTGLHSGPTIAGSRQILASCFLKKNMGYILIIFTSFCNSGVLGRGEKARF  
QLFGDTVNTAARMESTGEPNKIQVSQKTADLITAAGREKWLIRREELVHAKGKGQLQTYW  
LQRKRKRSTSSLSSENGSYLEDRISTMDFPKESTIDSPKIQRLIDWNVAIFTDLLEDLA  
SHRHSTLSISDLISKRTLKGDPSKAKCVRDEIVETIQMPDYRAATIPTNETFKLQPSV  
IKQLRDIYITQIAQFYHKDNGFHNFEHASHVIMSSVKKLQRIATPDVKKKDCETEQDYFNY  
TFGISSDPVTKFAVVSALIHVDVHQGVSNSQLAKEKDPMTIAYNNKSVLEQHSVDLAW  
SILEESNFTELRECIFTTKDEHERFRQLVNCVMATDIFDQELKNFRDRWEKAFRQSN  
SCQDGITERRDDWNRKATITIECI IQASDVSHTMQHWVYQKWNKCLFNEMYTAYKNGRSDK  
DPSEGWYTGELWFFDNYVIPLASKLRECEVFGVSCDEFDFDAIENRKEWSVKGHDIVAEM  
LNDVQDDAVNKDTNSTKAEKPRSEVSKKCCAPGNK

>comp9887\_c0\_seq2; 1171 100 3720 LEN=3834; translated  
MTPiENDIEAGSIGHRSLSEYSESNLTTTHAEDDVITEANGQSVKDTRINQLAAKEIKQV  
QRIKYFVLFSLFIMVGVSISAYFLSFNDEMNDFKLQFDQSDKVFVSMGNNLVRTLQAS  
DAFAVSIASLATATNQTWPYVVIPDFAVRAEKIRSLANAVYVTTYNVVQPNERKIWEDFT  
AKTGKVVWNESIGAIEIFGGMDWPILWNYTLWDVIHDYEEFEKENPGEVGVNTPGPWLPQ  
WQTQPTIALEPPYNWDLTSAPPTKEMNTTAAQKIFDTHKVTITDAYLISYSDDVKHIESD  
LEEAEWISSYVQKGEVMEPISDIFYPiIEEANEKIKINVESGTDHSANQQSIVSIFSL  
SIYWRDTIKNIFGERSRGLVIVFENPCNPTFTYQLNGPDAVFLGAGDFHDEKYNHFMVRKN  
ISELTRPAMEESLYSGIELDDEFCPFTISLPSDPTTKKHYYTSTPIFYSLITAVIFVITA  
STFMLYDFWVERRQKVVMTALTTTALVSSLFPAVVMDQMLPDGDDSSSLCDRQPKRLRSY  
LKDGNEDDAVPEPEAEKGLAKPIAELFPDPTVYFADIAGFTAWSSVREPSHVFTLLETL  
YGAFDEIAKQYGIKFKVETIGDSYVAVCGLPDPKRNHAVAMARFAFECVEKMKKEKTELEL  
VLGPGTAELSLRTGLHSGPTIAGVLRGEKARFQLFGDTVNTAARMESTGEPNKIQVSQKT  
ADLITAAGREKWLIRREELVHAKGKGQLQTYWVLRKRKRSTSSLSSENGSYLEDRISTM  
DFPKESTIDSPKIQRLIDWNVAIFTDLLEDLASHRHSTLSISDLISKRTLKGDPSKAK  
CVRDEIVETIQMPDYRAATIPTNETFKLQPSVIKQLRDIYITQIAQFYHKDNGFHNFEHAS  
HVIMSSVKKLQRIATPDVKKKDCETEQDYFNYTFGISSDPVTKFAVVSALIHVDVHQGV  
SNSQLAKEKDPMTIAYNNKSVLEQHSVDLAWSSILEESNFTELRECIFTTKDEHERFRQLV  
VNCVMATDIFDQELKNFRDRWEKAFRQSNSCQDGITERRDDWNRKATITIECI IQASDV  
SHTMQHWVYQKWNKCLFNEMYTAYKNGRSDKDPSEGWYTGELWFFDNYVIPLASKLRECE  
VFGVSCDEFDFDAIENRKEWSVKGHDIVAEMLNDVQDDAVNKDTNSTKAEKPRSEVSKK  
CCAPGNK

>comp9888\_c0\_seq1; 512 168 1955 LEN=2645; translated  
MSILSKKIIIAFLASLWLCYDQVAASDIYDVIIIGAGWSGLAAANYLIEAGITQNILILE

ARNRIGGRSYTREDAFKRGHVPVELGSGWIYPGTNVFDLVEKLGISHDTTHYEFDTIGLYK  
NSTGELSEDEKSILVDQDFLKFVYADKNSANEVDWIEIKESYFAENPFMTNLERQ SIN  
ALVHAGXVRNRQFVSLKCGCLTLSTCILKGITIEFGSPLSDTNSETTKEYLERGDWRDIE  
FMAVPGGTGGGYTGALTRGLAQNFAEKIKTNEPVVKVDQQGDILEVYTSNGRVFYARSAI  
VTVPLGVLKSSSIEFVPPLNDEKLEAIDLIGMGNMKNVIMYWDKSIQDVSWWPRGKIELQ  
LITDEDSTSDEWTFYFVDESHNGNEDYHVLTSWCGGDACDRLELLSDQETIDLVLGNLRT  
MLGNNVPAPSERIITRWRSDSFGGAYSADDTGGFDSSSYRKTLFERMGNIFFAGEATD  
SDGWHGTAVAAAYTSGVKAASNVEDSGILELPPPQFFPQCTKMHGDCGGQFDEPCCGGLSC  
VMDSRLSPVPSINGDLKTITKSIRKVCTAAQRGKRDRRLRVGSISMYHRVSRRAGD

>comp9888\_c0\_seq2; 620 168 1883 LEN=2573; translated  
MSILSKKIIIAFLASLWLCYDQVAASDIYDVIIIGAGWSGLAAANYLIEAGITQNILILE  
ARNRIGGRSYTREDAFKRGHVPVELGSGWIYPGTNVFDLVEKLGISHDTTHYEFDTIGLYK  
NSTGELSEDEKSILVDQDFLKFVYADKNSANEVDWIEIKESYFAENPFMTNLERQ SIN  
ALVHAGITIEFGSPLSDTNSETTKEYLERGDWRDIEFMAVPGGTGGGYTGALTRGLAQNFA  
AEKIKTNEPVVKVDQQGDILEVYTSNGRVFYARSAI VTVPLGVLKSSSIEFVPPLNDEKL  
EAIDLIGMGNMKNVIMYWDKSIQDVSWWPRGKIELQLITDEDSTSDEWTFYFVDESHNGN  
EDYHVLTSWCGGDACDRLELLSDQETIDLVLGNLRTMLGNNVPAPSERIITRWRSDSFG  
GAYSADDTGGFDSSSYRKTLFERMGNIFFAGEATDSDGWHGTAVAAAYTSGVKAASNVED  
SGILELPPPQFFPQCTKMHGDCGGQFDEPCCGGLSCVMDSRLSPVPSINGDLKTITKSIR  
KVCTAAQRGKRDRRLRVGSISMYHRVSRRAGD

>comp9889\_c0\_seq1; 1584 344 4346 LEN=4346; translated  
MANDETEEGAKSPIEETQETPDEEEEEEQEKEKAKQQPQQKRFSFYDAQEVGGILGLSRSE  
SPSPPVEEKPNPNRNFNFYDPKLI AEADENAPNTHLNFQVQLQLERGDTKQQQKEILTVPE  
TRDKVEDDNI VDSNIDANTDEILRSLQETEDQRKQILQPAASTLSSSLASSTPPMAATIT  
GVDIAASTGVATAHATTTTDDCGSANHNLNIVNTNPYEDSIRTALDLLRKHKVSPPNSPS  
VGNVIDAVEQVDRYSVNMSDRDRTPKEHDRLLQHRSYDEDDNCVKAVDYVYVQEAkWKSQ  
HKEVIARYANKLEEFKSALSPEQQLQVQLSTSYTQSYDEADGGDRNESPLLLQEQMRGS  
DDDKDTSGRQSQSQSQLPNHIHRHIKASLTEDSTGLVSELSQYSHSNYPQRSYQTNLNSP  
YQQQAIIEEQVQKGVKVLVAILEANKNRSVASGNSSCDGGSHSNGIAAIDNVSTNSGDN  
ANDTLLKVLHELLPSSRSIDGTSINSHDGGVGFSTATITSKHSASVMSQGSYANIPSRK  
SSVVDSELLAEVEDNNGEHVDSATREGKISKSNIGLETIPPGSNVARYWMEGDEKKMTEDR  
GYSDEQEVIEMEPDPIISPTFDESSEDNNLKVTKSADIDTSNEVSDAVDDSLFESETSGE  
CVSRSSDMSDEGDELDTTYDDHDGSEYEDDDVESTHGARVLGPLSREAGGTTGVVLDLESD  
DSPSSTQDERQMGYFSSVANQGSMLMSGGEQQILDNKRKEEILANYDVVGRTTNIHDEE  
ATELMRTLCAHLLPFGVDQHSAGGQSI PVWDESNPNEPGYRIIRLSKSQLRRVECAFDM  
ITKLKHNSLDGEAQFDPNFLRELEEAERLLDDEDNQNTSHVNAGTTVVNVMAKVQQPPL  
LATNKNEPATCPPHPEFPVKSAGNGEMGDLEYFQLPIIFKSHVTGFEP TKDMKLEPGNI  
IAGQYLVECELGSAAFSTAYKCVDFSEEDNDVREEVCLKVIKNTKDFFDQSLDEIKILEL  
LRQTGQCDENYILRVKTFYFYREHLIIVTELLRRNLFEFGKSIIDNDEEYFRTLPRLAYI  
TRQCLIALRFVHNLGLVHSDVKPENILLGYSRAQIKLIDFGSSCYLTDROSSYIQRSY  
RAPEVVLGLPYDGKIDVWVSLGCVVAEMYTGEVTFQNDISVMSLSRIEAYRGSFPRHMVAQ  
GRQSNRFFTKSGLLYEVVGDSDDEEGASGNRIAPAPDDELSDCDSESEHTEFDVFPKST  
RLSSRLGFDELDMDGYGDKNTPIERHIEQMFTDFVARLLTIDPDGRPTAEALNHPYMVY  
AASLTDEIKYPSSX

>comp9892\_c0\_seq1; 698 287 1867 LEN=2831; translated  
MATANATTNVGVTVSSATTASTAARCP SRSLGFQSKAALVATRGFSTLPTDDAGDEEPHN  
ESNDEPSPIEADETATGASNVPSSSELNKNLKPSEIVEALDRHIVGQPEAKKSVAIAMRNR  
WRRRQLPEDLRKEVTPRNVLLVGPTGCGKTEVARRMAMINDAPFLKVEATKFTFVGYHGR  
DVDQIIRDLM DVAMQLAKKQHTETFKEQAETLAEERILDILAGPSSETATRGRESFRDML  
RQGLLDDQEIEIDVPSPKQNHTEIDQTNPQIVAVSDLVQRLAGGGKKAPTERKKLP ISEA  
RGIILEVELERLLENVDLKKSAIQAVEESGVVFIDEIDKICSPKEGISGRSADASAEGVQ  
RDLLPLIEGTTINTKHGNVNTDYILFIASGAFHAVKVSDDLPELQGRLP IRVELSGLTED  
DLYKILTEPVANLVRQVVELIGAEVNLVFEDEALREIARMAAMLNKTVENIGARRLHTV  
LERIMESISFDSAEMEEGSTVTVTKETVEERMQSVTKKMDVSRYIL

>comp9894\_c0\_seq1; 223 1 495 LEN=655; translated  
QQRPFVHRNENTLATFYESNSLHIMNRLVSTIAVLASILASTTAFAPSLPLATRTGTFS  
NTAVNEYQPASLQRQRKSVAVQVQTMGLFGLGAPEIGIVLVAAAFLLGPEKLASLGDAGK  
IAGELKEVPKEFQAGMAEGEASAKAMKEKQQAETAVVEKDTTTE

>comp9895\_c0\_seq1; 232 1 760 LEN=1210; translated  
LQLDICCDGGDAVQESHQMNNYTDVAVHAYGSYVINGGDGNNVLKIRGENLGYDSSFLKRC

NLITTINGDEDSLESAAETRQHGIIQTLFMAFCGSGCPLRIDSDKHLPEKGDVIVDLGCGA  
GHDAI LAGGLAGKSGRVVVIDFTQAMIDQFIKNAETYASEDGGDTSFAPFESVTGSLEDP  
EQLFSSTGLKKGCADIVTSNGVFNLCANKALAFQTAYDLLKPGGKFLLSDVCI VEENLDA  
KISCTVGDEVTS

>comp9896\_c0\_seq1; 294 161 589 LEN=874; translated  
MAGEKQDASLAGNKRSTGETEGDKSGAVGGDDQNEYELDPEKRREARKMRRIMANRRSA  
RESRERRKLLTDLQDSVENLTTDNAVLTKENFSLRRELITLVEQSGGVASLSMIPNIQA  
SLESARAFANLADPTAGVISDD

>comp9896\_c0\_seq2; 290 161 589 LEN=887; translated  
MAGEKQDASLAGNKRSTGETEGDKSGAVGGDDQNEYELDPEKRREARKMRRIMANRRSA  
RESRERRKLLTDLQDSVENLTTDNAVLTKENFSLRRELITLVEQSGGVASLSMIPNIQA  
SLESARAFANLADPTAGVISDN

>comp9897\_c0\_seq1; 662 125 2305 LEN=2514; translated  
MEQAPVQIGQFILGKNLIGAFGKVKLATHVVTGHKVAVKIILNKAKIKQLGMEEKVQREI  
NILHLCTHPHIIRLYEVIDTPTDIFLVNEYVSGGELFDYIVSKGRLSADEARNFFHQIIS  
GVEYCHFQKIVHRDLKPENLLLLDANDNIKIADFGLSNLMRDGDFLRTSCGSPNYAAPEVI  
SGHLYAGPEVDVWSCGVILYALLCGSLPFDDDESIPNLFKKIKSGMYSLPHTLSQLAKNLI  
PRMLEVDPMKRITIP EIRLHPWFQHKLPPYLRHPPPELMEKQERVVDSQVIDEVMKLPFHK  
AYGSLANQNGISNHMNGAAMQQYPTVSRDLIEKAAALEDNRSDTPKLLRDLRCAYELIL  
DHKHTRLRVMEVARAIKEAASATPPAFSPGGSRGATPGGSHYPSGRYGSASGGSYDGRSY  
GSNHSNHSQSPTTLQSPANQAKLAEAEATRALTPGSGQHSHTPSGLSHPPASAAQTPPI  
GVVGVGSHPVVQMTSSIPGNTGMIAQHGHRRTRRWYLG IQSKKDPAHVMTEVYKALMAL  
GCQWLQLSSYRIKCKWRPNQPESALPALQSSHFSGMMPAAGGETADAAFRHTVSLATGS  
MDTDEDVSMGDAKEKQTTAPTKVTDYMKVVAGDDGHEVPVNLSTQNYSIKIGLTLTKVQ  
QNIYLLDFQKKTGDAFSFMTLCANIITELKTL SAASRQQQLLQQQAAAAAAQQQALQAQ  
QRQGH

>comp9897\_c0\_seq2; 632 617 2644 LEN=2853; translated  
MEEKVQREINILHLCTHPHIIRLYEVIDTPTDIFLVNEYVSGGELFDYIVSKGRLSADEA  
RNFFHQIISGVEYCHFQKIVHRDLKPENLLLLDANDNIKIADFGLSNLMRDGDFLRTSCGS  
PNYAAPEVISGHLYAGPEVDVWSCGVILYALLCGSLPFDDDESIPNLFKKIKSGMYSLPTH  
LSQLAKNLIIPRMLEVDPMKRITIP EIRLHPWFQHKLPPYLRHPPPELMEKQERVVDSQVID  
EVMKLPFHKAYGSLANQNGISNHMNGAAMQQYPTVSRDLIEKAAALEDNRSDTPKLLRD  
LRCAYELILDHKHTRLRVMEVARAIKEAASATPPAFSPGGSRGATPGGSHYPSGRYGSAS  
GGSYDGRSYGSNHSNHSQSPTTLQSPANQAKLAEAEATRALTPGSGQHSHTPSGLSHPP  
ASAAQTPPIGVVGVGSHPVVQMTSSIPGNTGMIAQHGHRRTRRWYLG IQSKKDPAHVMTE  
EVYKALMALGCQWLQLSSYRIKCKWRPNQPESALPALQSSHFSGMMPAAGGETADAAFR  
HTVSLATGSM TDEDVSMGDAKEKQTTAPTKVTDYMKVVAGDDGHEVPVNLSTQNYSIK  
IGLTLTKVQQNIYLLDFQKKTGDAFSFMTLCANIITELKTL SAASRQQQLLQQQAAAAAA  
AQQQALQAQQRQGH

>comp9898\_c0\_seq1; 189 1 1059 LEN=1114; translated  
XPTKSSSDVPTLFTSSPSDIPTLFTKGPNTVPSLIPSLISEEPSRRPTKRPTGRPTN  
PPSNMPSISNKCQASLEIRLKTDPKYPSETFWGVIDSNQILIRKDGYLEPLKTYTVRYLL  
MRCAYETHFLPCFTLDRAYHIFNSSDILETISGLCPDVPYTF SIVDRWGDGICCNYGQGS  
YVGYSYGKVLFEFGEFRRAVETFTISSPAPPATVLSPPSSFPSPGSPSSSPSVAPTSQP  
CAGSLFKINLKT DAYGYETKWA FRNKKTNAIIEKGIERYENNKAYEFPGPDDAYCLPRGE  
CYIFQITDLYGDGLCCNYGQKYEGLD GKSIFEGSRFRSIDSKEFCVPSSS

>comp9898\_c0\_seq2; 214 1 1067 LEN=1122; translated  
XPTKSSSDVPTLFTSSPSDIPTLFTKGPNTVPSLIPSLISEEPSRRPTKRPTGRPTN  
PPSNMPSISNKCQASLEIRLKTDPKYPSETFWGVIDSNQILIRKDGYLEPLKTYTETISG  
LCPDVPYTF SIVDRWGGXVLSFHTQIESYLVLVFLVMFQFLTNTVLFSSPLFDGICCNYG  
QGSYVGYSYGKVLFEFGEFRRAVETFTISSPAPPATVLSPPSSFPSPGSPSSSPSVAPT  
SQPCAGSLFKINLKT DAYGYETKWA FRNKKTNAIIEKGIERYENNKAYEFPGPDDAYCLP  
RGECYIFQITDLYGDGLCCNYGQKYEGLD GKSIFEGSRFRSIDSKEFCVPSSS

>comp9898\_c0\_seq3; 235 635 1167 LEN=1222; translated  
MDREVMMWVILKVYFLKVANFDAXAVETFTISSPAPPATVLSPPSSFPSPGSPSSSPSVA  
PTSQPCAGSLFKINLKT DAYGYETKWA FRNKKTNAIIEKGIERYENNKAYEFPGPDDAYC  
LPRGECYIFQITDLYGDGLCCNYGQKYEGLD GKSIFEGSRFRSIDSKEFCVPSSS

>comp9898\_c0\_seq4; 250 1 959 LEN=1014; translated  
XPTKSSSDVPTLFTSSPSDIPTLFTKGPNTVPSLIPSLISEEPSRRPTKRPTGRPTN  
PPSNMPSISNKCQASLEIRLKTDPKYPSETFWGVIDSNQILIRKDGYLEPLKTYTETISG

LCPDVPYTF SIVDRWGDGICCNYGQGSYVGYSEGKVLFE GGEFRRRAVETFTISSPAPPA  
TVLSSSPSSFPSPGSPSSSSPSVAPTSQPCAGSLFKINLKT DAYGYETKWA FRNKKTNAIIE  
KGIERYENKAYEFPGPDDAYCLPRGECYIFQITDLYGDGLCCNYGQGYEGFLDGKSIF  
EGSRFRSIDSKEFCVPSSS

>comp9900\_c0\_seq1; 171 155 757 LEN=1328; translated  
MNEVKTNTNTISSGRQSNQKKAKTVYSYGKSSALKALNAIFTEYLKFIESP HRQDSILK  
AVQYSLWLLSKFYRNTGAKRGVPHRISKSLNLQAEISWARYLYRFFGLPAAINGVDLTK  
NIWTTGSNSKRLGQIMSWTMIAYYPLEHLSYLVWKAPGISWLP CASPTPVPTNDNATSCP  
NQNINGCLYSPTQLASKASAW

>comp9901\_c0\_seq1; 412 245 1352 LEN=1380; translated  
MAGDPAGGGKIRRVESQSSRLFATKESSPVDSSLQGVDFESWFSNVP GSECNPYIKHTSF  
GTLRGLGTQDKGIGSSSESWM TIPRSIVLESDFSQKDWDAQLAQSLWKEVMKES SGNSS  
ISGYVSLLT KSWSSDQLPETPPFTAPDALRHWT EEEKAVLSAHAEGQALVDLQKQ QEKMW  
KDKFDRIKTMSGMTWEQFEWAMEAVHSRAFCGDFGIGGGSSMPLPVAVGTPAL AALAGYF  
YYVQLHGQNDIILLALAAIGAIPSVLNLVNSSPPVAVLLPLIDSANHREDADSSIEYSPL  
TDSFGLTGGSNCLVTEDDGKQQLYISYGKKS DKELLLNYGFLNGVALN NEDNDSTRRKT  
AEQFVANH

>comp9902\_c0\_seq1; 167 690 971 LEN=1334; translated  
MNTSFSTSLM LLAAILACATTAFAPMSIPTKRSEMYMRRGRG SGLKRELD DSSSSSFTGGM  
GKSSSGTNWLN TTKKSVKELPTEEGQVRLVFERDW

>comp9902\_c0\_seq2; 203 344 589 LEN=1139; translated  
MTKAKVLPNDET DNKAPRVACDLCKSTYNMKTGEKVEAAE TTGFFGGMAKAVLGSNDGG  
NLSTYQLGEKNGKIMFTMEGM

>comp9902\_c0\_seq3; 285 690 1322 LEN=1872; translated  
MNTSFSTSLM LLAAILACATTAFAPMSIPTKRSEMYMRRGRG SGLKRELD DSSSSSFTGGM  
GKSSSGTNWLN TTKKSVKELPTEEGQVKLIETGAFLLV NKQTNPGGAASTVKYGGETYCFQ  
ANCPQCQVPMTKAKVLPNDET DNKAPRVACDLCKSTYNMKTGEKVEAAE TTGFFGGMAK  
AVLGSNDGGNLSTYQLGEKNGKIMFTMEGM

>comp9903\_c0\_seq1; 422 100 2242 LEN=2565; translated  
MASGTVSSKNAVFDRCPDRSVSTASTKPTTTTTTLET TTYCRTNWDGVDLPREPSLKL VDD  
DCFFQLIGSYHPNDT GSKRRRYLDFVRGFTNLSACQKRRFVRADLEDGVVAARKKNYRKK  
TSRKHTSVPF SVRKQEI ELVQRGLPRHPSQTHLSKPSFYPLPWSKPSRITSLISGARSR  
RNYNDAKSDSVDFFEDESEFFADYCKRKEEESLDVDP ELDGLQLVFSENIKHIDE EERR  
RRLGFDDENSASTSTSTSPH THEAEESLEAEPAYEPKIGV VSLPTQAMILQAKLEAR  
CRTVPEDHKIKFLGAI AQASALGQFTRRLREHTIEAYGQKIEKYEA AELPSATWVKGSETV  
VLPAPDPAWAQFQIFREAV ALGGIKALKPTIT TNYGQVTRTRDAIEEDHVDVDDASKPK  
YMRTKYLTDLYLHSEQRK WSSDNETNEVEQRVWYQSLDDVELPTDRCPVRRPVATNRTHA  
ELRESISRQVAEKVWERRYRLER PRAQQRITTHCSCKFCNTSSPYQTLAYRKRWL VQQL  
WNEPPPNEEAVCIECVSENGSDSSQSFATEEVEGLQNSFFKMFKLGGEKTGSGGTR LDRP  
TTKLRGKLMDSLLGLSQHSKDRKERLEMVRKGRLEKSRNDRNL IKNKPAMKEDYLGMEC  
APYSATLRTIGERRAINLSSYSKRKGHLSNF EFDMMAKIDVEKFLDFD FIAFRN

>comp9904\_c0\_seq1; 925 107 2839 LEN=3079; translated  
MAGEHGEERKEDDTSRNGIDHEDDDSSSPNLYSILNLSRDATTDEVHRSYRTLSTTFHP  
DKVRLRQQTGQTPATLITQQE TDKIQETF LQFKRAHDV LIDPVLRLAYDCYGEDGV ELIR  
KVQQQRDEKTRREEAAREQE EGKDDNGNANYDDFDEQDDSSDYDDDDCDDDDDAWNL  
YEKLEHLLVVQKDASGAK EELRKFMEQH DYLNLTEDNCVHLNLSMTFPPV VPLKPVLYQ  
GRDYLRVQKMLSSPPVDEEEKQYLQQRILQERRLV DYQISQLRSSQKADVGFTLTSV  
QPSRNKSTHSDSDNNNP IRQQPSKWSMAVGCSTD LIYPGVAELTKMAAIAKDPKKDYQ  
TMAEKHPITMFVNTSYQAAPT TQIFGTANLNDNESHQYSLGSTHTFSNQTACRYGMTIL  
SRSPLPDDDPVIFNLKYRHLQIGTTSVGLSAGSNGRILQWNASWQATLSSFSKLFQSS  
TPQQQHQHQQPFRSHKVLAKASVGM LQGNLSLEFGYKCKFPKKGESRNNEQNSSENLWTWL  
EENFTLPKKAELTTVWGHFSKLNAMVTHEITSLATHPTLAFGLEHDISLGRWAWIWEIQY  
NNSTFRIPIPVLQLGSVTNYQAFYSQKFFYGIYCLCLQSMVADLLEETGGDRKASAPTS  
NNNSTNDANYGISPGVVVSRKGGVFLMVKTKSEAERQLALMKPVAEKKIYREMQRQFGT  
GKGLIVLTATYWHRMSHNS SIVNGSEDNNHSEYDNKDP SLMVHEVVSM DATVQLQFWVLN  
GKLVAPSGIPKSSWMGFYTLATESKFRKNRRRFRGNQKSAARRWLSIGCRRFNHFLNQLS  
TIKTTRKKGN EEDDLRSNDPQEEEGPRLTVRYSYNGNVYEISVGETEGFNLP CEDDDR  
ERLGDAAFLQ

>comp9905\_c0\_seq1; 524 177 2069 LEN=2503; translated  
MAKWTNDRNSNPGSVHDKSNNDKATV LQSGPWAAA IQEATS YAFVVDDPCCDRD VDSNK

SAGVSRRSRHRKKNLALATPLERVDCSLKYLDLSLRVLLLEQQDNWEWVYPYPCNPPSFHPLQ  
ENIIDDQNTTFSASFNKENKEDASHNSPQKITFHSSKSSPHKNQKTKHSVTSGNLSLSQ  
NNWAYSRRNFAGFASDSDDRDEGDDPVEDLEPLNTLMDQDL SAEANSYEP SHDQEHQQQ  
QPLETMDTIRLLIRLKASQSDLYAKKARLMATARYWLPGAEALHSSSVVLTQGLELADAT  
ISKTLSLATSTSTSTVGSKNKKKNDVRLRQLERDADIISVSTSYLIYEKERYLKVVAHSQA  
LKLEHILRPMWERRDQARQRMGQRWNKNPNPSGYFARMRKQYEMELYALEQALKSLEESQ  
ANASSLMDEAGRLRNKLEIKYAQNRHNGKRRSRPNPAAEAIEDNLPVQYMWAFTGSID  
SGEDSVEFEYKWDVSGSPSLTRGATAEITTTGGIGPPSIGNKVEPTDTHGVENSGVGTQEH  
KTCGHLVVLQLDVHATTGAIRTVVEYPADYDDDSGTLIQPTWKMEFYSSSTSIDLELYRR  
VLTDPMSVRNGDGNKTMEETPNPDGKKNK

>comp9905\_c0\_seq2; 152 103 1040 LEN=1452; translated  
MPTVRKVLFLPLLYAVVATQTCISAGFSPAGQPPSTERRGRFGRVVPFPGHARGRIKSRE  
RGVTAIRGGRRDRDEAEDEPLLDCCGTVAGLFGNLRIPASLIAGASLGSALFALPLES  
GPMFGFAKMYSLMLTALGSMMLLVILSTICMNDIAISPARRSKSVFDYINEHYSLEWI  
TVKSNFYGALSFFVGAFAFRAXGVDLVPRVWEGHRRLPDEYDPDFRCKPDRKIGVPRGV  
LDPAAVYQAPERGSRQIENEFGVWGRPCGGILGWLSDLQDSSYLSLFPKTIKSGGAMAT  
DGRRGDPTVWVS

>comp9907\_c0\_seq1; 765 45 2813 LEN=3017; translated  
METLHERSFAYDNDQMLDSADLLKDRLNKVRGAVQKATQEAWKEASGHSPSLSSSLQKEN  
ASFLGMDLFGSGGGGTGLDSSMNRGDNITTTTSGLELAVREKLEQVERDLARIQKESDA  
MPENQSSGFDQTDGDDSLSSNRDLGSIIEKYRRKVAFLKQASLARSCLLEESATLSSSAAS  
MGATATTAATSTTDKGEAPDNLVRSQAQTLRALQEVDKAEHILKESSTIDRQKEIEVAH  
QILFSLRHQIRRRHRVDLIHKAGTVLDSSVEVTATSISVKSSPQLGNAYRVLETLDGAI  
NHQAGRKPKNSALQDTLRGFTTRLYEEAFKPILTNRVPSDNNSDGTRGWTVEETADKRTN  
IIGVSTANKRGTMHVIEWNFMHDGEGDENQISPISEEGTKTFSFAVVNSWQNVLDVLKRI  
LVFVQSKVLLQKEAMCSMVGKRLFGTPDAMP SLVNSALGLESTLLGESDQGVLEAML  
WLREHCLSINYGKDALGAAAPNDLDHVSIMREELMDSTLPCRDLEDLHFLKQDPSRLV  
VFCQSFENFIDHRRVCVCLNQARQILIQNDYHNTVTVGVEESPTPAEYSQEAALAVFRLS  
RCSISDTANKLVALVRQTMDDSVAMVSPQD SPLAILRPILYKTAREMFLSRFSIIPANH  
GREVANVPRTA AVLHNDVFLAHHCLTLGLEIYKFKFPQVDEDDARGKLLKQTCIFVDMVP  
LFRELADTSLNDMLDLQKHQLAEIVGSRITYFGQALRSEESLHEWSEAETALAAGIYHLR  
HLAQAWKSILSKSVFLRSMGYLADVVFALYLNEITSNATVISDSARQFTGALFRKATVDI  
RKLLFDEGKAQVEDPKPYALEWGRFEAFGNFLELEQLVQVEQALSSGVFRNVASQELARL  
VQATYRDSQPORKALLNCMASVV

>comp9908\_c0\_seq1; 574 145 1545 LEN=1680; translated  
MAGMRVLFRRVIDSGVRPRGVGREDNLSKRWRSSAAIPSAFFDGDKDFSFLHSLPWQFL  
RASDSANFDLETSQRKDVLYNHDDGRPESTRIPDLSQKCVSIEKVVAENDKRCKILWNDG  
KWSHDFEKLQYLSWKQIRPEDRILWKNLTEADVRSDDLIAFDKLIADDGSGMSRA  
LKTLYEYGI LLVTKTPVEDNGAGIAALGAALSGGSVKDNPSASLLANYRAGGTDVVLDPG  
TDGPLR TLTYGGVWATSSAGQPDGTSVADSAYGTDALPLHTDSTYLQDPPGLQIFTMVRPA  
TVGGESVFCDGLAVAETLRSLYPDAFDILSKTNRTFHSHKDEVTGWYLKATAPMIQVRHGR  
ITSIRHNDLDRPLDLPNGEIGAEAIDAFYEDLESARHKWDSLIADEFRLVLKLEPGDT  
IVVANQRCFHGRHKFGATANSRPSVMGCYISQGELLSRFRMEGFDV

>comp9909\_c0\_seq1; 394 1 869 LEN=869; translated  
XTIWFICIFWLPFSIGFMSMYLSHIATFYIRLSDRNIRRIERRLRRLQKAKELAE EERAE  
ILRRAYRGQEAIEIEIVAGNDDGDGSDPVWLGKHVERGSELDDSMEHATIPMHHARSVMHR  
KKQEGFNMLPTSDDGANSDDETVLVGVATSENAGMGEVSLGNTGYRRRQRIIENCRVATR  
FAETADDKPSERNGAVDDQSSNNTDRTMKSMRDVIRAVRNTMNAENYGTGLNPNVPGDA  
NASKFMSMQSTQNMIDYSIFRRKKQSKKPSFALRVLVQERFAKIIITIDSM

>comp9909\_c0\_seq2; 565 1 1247 LEN=1426; translated  
XTIWFICIFWLPFSIGFMSMYLSHIATFYIRLSDRNIRRIERRLRRLQKAKELAE EERAE  
ILRRAYRGQEAIEIEIVAGNDDGDGSDPVWLGKHVERGSELDDSMEHATIPMHHARSVMHR  
KKQEGFNMLPTSDDGANSDDETVLVGVATSENAGMGEVSLGNTGYRRRQRIIENCRVATR  
FAETADDKPSERNGAVDDQSSNNTDRTMKSMRDVIRAVRNTMNAENYGTGLNPNVPGDA  
NASKFMSMQSTQNMIDYSIFRRKKQSKKPSFALRVLVQERFAKIIAIEVAGYHSSIEIKE  
HTLSVTIDSMSATAEKWSVPRRARKAFRAVSFEVLYFVGEHGLITRGADALYELTPFEFH  
GLFSALVAAMGDADTMEGWLAKTDTLALVDLQKGVLHRSAP EEEGSARQRI F SFD

>comp9910\_c0\_seq1; 490 263 1711 LEN=1711; translated  
MGGDKSSYVFIRDSQYAWVPAIKTGQNDKFAQVRVPQYPNEQAFVCDGGLSAKRFE EEEV  
PLKEYNRGVLPMQNVNASGALQSYPD MVNLPFLHEAGLLYNLKERHSGKPYTRTGDIVI

AVNPFQWFTELYTEAVRNRYARVLVWDNTEGDPRSTVEPHVYETSSSLCYKGLAFDGRDQS  
ILVSGESGAGKTETVKICMNHMASCOQGPKASGTEMSPIVQRILDSNPLLEAFGNAKTSR  
NDNSSRFGKYIQLFQDMGDKAQQEYRSRTEATCVLAGSKCDAYLLEKNRVIITHDPKERTY  
HIFYQIIAAKEKTKYWSKLAGTTNESFKFVGSDDTDIEGMKDADHFVNTVRTLEKIGVS  
QDQLMTLIQAVIMVLQLGNLTFKGGDDKSEVASTKELSDLCELMCIPTGTLEAALTQRTM  
KTRNETYKVPLNPEKAKEATESFAKEIYGRAFLWLVRAINDATAAELNYKSGTMSEFGIIGLL

>comp9911\_c0\_seq1; 842 120 1610 LEN=2414; translated  
MTDFASMRVWSNEEATRDNPICLDDILADDVHETPKKKKGRKKKNRRRKKYTDEESTVAD  
SVLSSILTDDEEFDNNTTDQVFGKKNLMTLDEDKPSQVNHYENTASMTTNIIDA EKHDR  
KARLEQIKARRNQRKLQREKMPSSDDEDANNGDDL SKNPFCDHFQMAHVVKNDDDL SK  
NPFSDNKESNDNDGLGNPFSNDKESDDIDDDL SKNPFSDKKE SYVVENDDH SKNPF  
DKKVATGKPTADDDL SQNPFSDHAGSDSDESSTIRPPPESTYLEEAKVDSQQKSDTNPF  
DDEANEDDYDQETFQSAVSEEIDSDEEDIIESRRLRLRCVDQRIQYQQQNDEAASLKEQI  
HQMKIQAEAMAEQLRAVETKCDLVLAQNEMERRHEQDLIAKDGELRDLRMYIQDILEQQ  
AQSELNFMNEISSLARTVEADKAKHKEQLDKKDHRI SMLETRIE TMRVSSVRGSSKNAYR  
SRY SNAATKELMPSYE

>comp9912\_c0\_seq1; 624 132 1796 LEN=2162; translated  
MPTVA INSKGLSKSYSEDEKKNALKKQQRSDVIAEYKLDGYSRIVAPRRSVFDLRS  
KEMRTEGEKKQGRLYSTKKS KDVGGLRVDEMIYGVKMAHLSCTDDSEMRLNPNKASANCL  
MALEHLVGGDDPKTTIGLPLSQILEENFGLKLDCHIDESGIRKGRPVDTQGF IASNEDTI  
VLSYRFTTTIMDWMANLTFSSSEWEPVEDEALGHAGWCSSTKGWFTKFCRPNKAKPRVHT  
AYYNNFIYTIPIKKEYIIEPLKKNENAKPKKIYVVGCSLGA AISQIAFCYILEQLYENLMD  
PEFKNVERLVSVTAGCPRVGDKKFRNVMMKMEALRKAGLDRAVINRLVYNKDIVPHAPP  
NVIAFCHLGLKVYITKGGEHVIINPDISKQFTKFNEIKVIYRTVFEVKKEEVKEKKEQVK  
QNI RDRQTVVAGKAKDKLQSVQTKMHMSVESGTKNVEGDDAESGTATATKHTIPLTKSKL  
ELDAEAATEAAAAEGKEKSTKEAFEECKGAMEGIHDHMPYWYLTHLEKLRDEENAKNGG  
AEADAENLDEELSC

>comp9912\_c0\_seq2; 272 132 803 LEN=1178; translated  
MPTVA INSKGLSKSYSEDEKKNALKKQQRSDVIAEYKLDGYSRIVAPRRSVFDLRS  
KEMRTEGEKKQGRLYSTKKS KDVGGLRVDEMIYGVKMAHLSCTDDSEMRLNPNKASANCL  
MALEHLVGGDDPKTTIGLPLSQILEENFGLKLDCHIDESGIRKGRPVDTQGF IASNEDTI  
VLSYRFTTTIMDWMANLTFSSSEWEPVEDEALGHAGWCSSTKGW

>comp9913\_c0\_seq1; 298 725 1303 LEN=1303; translated  
MPDVTNMKAREIRQELESYGINTTTLFDKREFEEALIEARRHYESTINDVMSSNRPKKKK  
VQTRRKTVNYQRGRHKDERIYTSVNTGPOYHQPOQPOQQRRQQQARPNRRRQYQAAP  
DPMGGFHTYPNQRPNNGRGRRRPGNEWFEE DPLFKHEAERNQYHRDQPHQQQHYYEYEV  
GARHSRQQQQQQQ

>comp9914\_c0\_seq1; 233 188 520 LEN=1389; translated  
MSATAEERVAKATELINKDIAEHKVVVYAKTWCPHCQETKKLLQSAEYKEVDVLI RDLDV  
MDDPTGPCLAKALKDKTDQSSVPNIFIDGKHLGGNSDLQQA HASGTLKLV

>comp9915\_c0\_seq1; 550 74 1465 LEN=1635; translated  
MAHLLSKSVKQLVRKAPIGKSFRSVTTLQETLAAQVPEKQKSLAALKKEHGSEVIGEVTI  
DQCIGGARSVKCMLWETS NLDP AEGIRFRGLTIPECQAVLPTYSGVTGDGEPLLESLLWL  
LLTSEVPTKEQVDSLTAELHSRAELPEHAKNLINSLPKDMHPMTQLSIGLNACQTESKFA  
KAYADGAPKTEYHHHALEDILGVI AVLPEIAAMIYRNVYFDGVVTKDTS LDYSGNFCRML  
GYDDPSFDEL MRLYL CIHTDHEGGNASAHATHLVGSTLSDPYLAYAGGLNALAGPLHGLA  
NQEVLKWIQDLKAKFEAEGKPVTAETITEFAWDTLNAKKVIPGYGHAVLRKTDPRYTCQR  
EFALKHMPDDEL FNVTIYEVMPGILKEHGKVANPYPNVDSHSGVLLWHYGFTQFYTT  
VLFVSVRAVGALSQLYWDRALGLPLERPKSVTPEWLWSQVKKD

>comp9916\_c0\_seq1; 854 165 1949 LEN=2466; translated  
MSDTGASLTPTTLAPTVA AVVDSFDVSSTA AWIVLIGVCIFFTLLAIGSMDKLGFLGGLK  
GMCLLNKKGQDALTVDYFLSARDSAGYWSIALSFFASGMGAWVYGTTEMGANPALSWLG  
VLGYSGASAFP AIVICFLGPSIKKISGENAFSTSDFRKRYGRMLQLAISAVSVFYMYFIY  
MVAELT SINSIFALLTGNTNSAFSIGVTCVIGIFTLLYTG IAGLPSSIVTDRFQGLIMAM  
LVII LTVAVCSFDENKVTREEFKLASSWTVVEGFAMAVTLIIAILCAELFNQASWQRVWAA  
ESVPAMRKG FALGSFFVFLMMFFGIMGMIA YANDPASYSDFDKFAFLSFFDLLLLPLGNG  
WHIVVLI FVTALAASSLDSLQNLNSIFYRDALRAGCNAHATASVLVLLMNIPAIWLASK  
GISVIALFLVADLV CATAVFP TFLGLQETDKLGLLPAPTELGAFLGFLSGIATV LVNGA  
INGQNP FQYFWLRNGGICALCGSETMITFIVTPLVAGIMTYVFTHLDL CVRGKENARRSV

INFADFDDDDAAESGDVDIEKPAEEDGEKPPPEEKAVPEKKEAAVETVEMEA  
>comp9917\_c0\_seq1; 464 214 1973 LEN=2247; translated  
MTTTLSE DATAGTSGGIGPGETDVDGAGPSSPTSLSMEPTPTGDSL FNTIAGVMGNVLEW  
YDFALFGFFSDVIAEIFFPPAEEGSYANLIDSFVIFGSAFLMRPIGGLLIGYVGD KHGRK  
EALTKSLFLMAIPTTLMGCLPTYQQVGPASTVLLSLCRLVQGVSVGGQLPASLVYTVEKR  
PRSQWGYVSLHDCIAWHDIASASKRSVAIIDPKWLVLRCKMQLDRHGMECPAPDRVCAVQ  
DSKRLEPLSLAVLGI VVFLIFSLGLLFLS CPVSY SALNGGVLESYSTAAXPMM AANIGT  
LLGNLCGALMRALLTEEQLMAWGWR LPFLSGILIAFVACYLRKYGGEVATPGDKPRH HNP  
IKVALLPENRLALLSTAVVPMLWAAGFYVSFVWMSIYMEDLMEPPVPEAFWVNSLGLLLG  
MTWVLPVAGSISDRVGRIPIMTASGLLLAALGPVCLILISKGNPFVAVASQLVLGTL LSF  
FGGPLCAWLVEFSPEVRMTSASIGYDVSHAIAGGFSPA IATALYTSYGTAATGLVYVIF  
GLLSVAGLYFPKCCGRADKESDTGGTPGGAGEVEMPTPAE GENKIV  
>comp9917\_c0\_seq2; 418 214 1636 LEN=1910; translated  
MTTTLSE DATAGTSGGIGPGETDVDGAGPSSPTSLSMEPTPTGDSL FNTIAGVMGNVLEW  
YDFALFGFFSDVIAEIFFPPAEEGSYANLIDSFVIFGSAFLMRPIGGLLIGYVGD KHGRK  
EALTKSLFLMAIPTTLMGCLPTYQQVGPASTVLLSLCRLVQGVSVGGQLPASLVYTVEKR  
PRSQWGYGSLPMM AANIGTLLGNLCGALMRALLTEEQLMAWGWR LPFLSGILIAFVACY  
LRKYGGEVATPGDKPRH HNP IKVALLPENRLALLSTAVVPMLWAAGFYVSFVWMSIYMED  
LMEPPVPEAFWVNSLGLLLGMTWVLPVAGSISDRVGRIPIMTASGLLLAALGPVCLILIS  
KGNPFVAVASQLVLGTL LSF FGGPLCAWLVEFSPEVRMTSASIGYDATALYTSYGTAAT  
GLVYVIFGLLSVAGLYFPKCCGRADKESDTGGTPGGAGEVEMPTPAE GENKIV  
>comp9917\_c0\_seq3; 328 59 1587 LEN=1861; translated  
MRKRYALVFGLFVIPFVIFGSAFLMRPIGGLLIGYVGD KHGRKEALTKSLFLMAIPTTLM  
GCLPTYQQVGPASTVLLSLCRLVQGVSVGGQLPASLVYTVEKRPRSQWGYVSLHDCIAWH  
DIASASKRSVAIIDPKWLVLRCKMQLDRHGMECPAPDRVCAVQDSKRLEPLSLAVLGI VV  
FLIFSLGLLFLS CPVSY SALNGGVLESYSTAAXPMM AANIGTLLGNLCGALMRALLTEE  
QLMAWGWR LPFLSGILIAFVACYLRKYGGEVATPGDKPRH HNP IKVALLPENRLALLSTA  
VVPMLWAAGFYVSFVWMSIYMEDLMEPPVPEAFWVNSLGLLLGMTWVLPVAGSISDRVGR  
IPIMTASGLLLAALGPVCLILISKGNPFVAVASQLVLGTL LSF FGGPLCAWLVEFSPEV  
RMTSASIGYDVSHAIAGGFSPA IATALYTSYGTAATGLVYVIFGLLSVAGLYFPKCCGRA  
DKESDTGGTPGGAGEVEMPTPAE GENKIV  
>comp9917\_c0\_seq4; 418 214 1935 LEN=2209; translated  
MTTTLSE DATAGTSGGIGPGETDVDGAGPSSPTSLSMEPTPTGDSL FNTIAGVMGNVLEW  
YDFALFGFFSDVIAEIFFPPAEEGSYANLIDSFVIFGSAFLMRPIGGLLIGYVGD KHGRK  
EALTKSLFLMAIPTTLMGCLPTYQQVGPASTVLLSLCRLVQGVSVGGQLPASLVYTVEKR  
PRSQWGYVSLHDCIAWHDIASASKRSVAIIDPKWLVLRCKMQLDRHGMECPAPDRVCAVQ  
DSKRLEPLSLAVLGI VVFLIFSLGLLFLS CPVSY SALNGGVLESYSTAAXPMM AANIGT  
LLGNLCGALMRALLTEEQLMAWGWR LPFLSGILIAFVACYLRKYGGEVATPGDKPRH HNP  
IKVALLPENRLALLSTAVVPMLWAAGFYVSFVWMSIYMEDLMEPPVPEAFWVNSLGLLLG  
MTWVLPVAGSISDRVGRIPIMTASGLLLAALGPVCLILISKGNPFVAVASQLVLGTL LSF  
FGGPLCAWLVEFSPEVRMTSASIGYDATALYTSYGTAATGLVYVIFGLLSVAGLYFPK  
CGRADKESDTGGTPGGAGEVEMPTPAE GENKIV  
>comp9917\_c0\_seq5; 328 59 1288 LEN=1562; translated  
MRKRYALVFGLFVIPFVIFGSAFLMRPIGGLLIGYVGD KHGRKEALTKSLFLMAIPTTLM  
GCLPTYQQVGPASTVLLSLCRLVQGVSVGGQLPASLVYTVEKRPRSQWGYGSLPMM AAN  
IGTLLGNLCGALMRALLTEEQLMAWGWR LPFLSGILIAFVACYLRKYGGEVATPGDKPRH  
HNP IKVALLPENRLALLSTAVVPMLWAAGFYVSFVWMSIYMEDLMEPPVPEAFWVNSLGL  
LLGMTWVLPVAGSISDRVGRIPIMTASGLLLAALGPVCLILISKGNPFVAVASQLVLGTL  
LSFFGGPLCAWLVEFSPEVRMTSASIGYDVSHAIAGGFSPA IATALYTSYGTAATGLVY  
VIFGLLSVAGLYFPKCCGRADKESDTGGTPGGAGEVEMPTPAE GENKIV  
>comp9917\_c0\_seq6; 464 214 1674 LEN=1948; translated  
MTTTLSE DATAGTSGGIGPGETDVDGAGPSSPTSLSMEPTPTGDSL FNTIAGVMGNVLEW  
YDFALFGFFSDVIAEIFFPPAEEGSYANLIDSFVIFGSAFLMRPIGGLLIGYVGD KHGRK  
EALTKSLFLMAIPTTLMGCLPTYQQVGPASTVLLSLCRLVQGVSVGGQLPASLVYTVEKR  
PRSQWGYGSLPMM AANIGTLLGNLCGALMRALLTEEQLMAWGWR LPFLSGILIAFVACY  
LRKYGGEVATPGDKPRH HNP IKVALLPENRLALLSTAVVPMLWAAGFYVSFVWMSIYMED  
LMEPPVPEAFWVNSLGLLLGMTWVLPVAGSISDRVGRIPIMTASGLLLAALGPVCLILIS  
KGNPFVAVASQLVLGTL LSF FGGPLCAWLVEFSPEVRMTSASIGYDVSHAIAGGFSPA I  
ATALYTSYGTAATGLVYVIFGLLSVAGLYFPKCCGRADKESDTGGTPGGAGEVEMPTPAE  
GENKIV



>comp9917\_c0\_seq7; 282 59 1549 LEN=1823; translated  
MRKRYALVFGLFVFPFVIFGSAFLMRPIGGLLIGYVGDGKHGRKEALTKSLFLMAIPTTLM  
GCLPTYQQVGPASTVLLSLCRLVQGVSVGGQLPASLVYTVEKRPRSQWGYVSLHDCIAWH  
DIASASKRSVAIIDPKWLVLRCKMQLDRHGMECPAPDRVCAVQDSKRLEPLSLAVLGIWV  
FLLIIFSLGLLFLSCLPVSYSALNNGVLESYSTAAXPMMANIGTLLGNLCGALMRALLTEE  
QLMAWGWRLPFLSGILIAFVACYLRKYGGEVATPGDKPRHNP IKVALLPENRLALLSTA  
VVPMLWAAGFYVSFVWMSIYMEDLMEPPVPEAFVWNSLGLLLGMTWVLPVAGSISDRVGR  
IPIMTASGLLLAALGPVCLILISKGNPFVAVASQLVLGTLLSFFGGPLCAWLVEFSFSPEV  
RMTSASIGYDATAALYTSYGTAATGLVYVIFGLLSVAGLYFPKCCGRADKESDTGGTPGGA  
GEVEMPTPAEGENKIV

>comp9917\_c0\_seq8; 282 59 1250 LEN=1524; translated  
MRKRYALVFGLFVFPFVIFGSAFLMRPIGGLLIGYVGDGKHGRKEALTKSLFLMAIPTTLM  
GCLPTYQQVGPASTVLLSLCRLVQGVSVGGQLPASLVYTVEKRPRSQWGYVSLPMMAN  
IGTLLGNLCGALMRALLTEEQLMAWGWRLPFLSGILIAFVACYLRKYGGEVATPGDKPRH  
HNP IKVALLPENRLALLSTAVVPMMLWAAGFYVSFVWMSIYMEDLMEPPVPEAFVWNSLGL  
LLGMTWVLPVAGSISDRVGRIPIMTASGLLLAALGPVCLILISKGNPFVAVASQLVLGTL  
LSFFGGPLCAWLVEFSFSPEVRMTSASIGYDATAALYTSYGTAATGLVYVIFGLLSVAGLYF  
PKCCGRADKESDTGGTPGGAGEVEMPTPAEGENKIV

>comp9918\_c0\_seq1; 554 510 1811 LEN=2131; translated  
MEEKPKVGEESPIFPDEDGENPKQDELDDAKFVGDDGMGNASIMKPRKPTRHYRGRDSYY  
GADGTLYGRFDKSDVDDDDTVVEYRNSKWHILSAVIFVASSILYVAMASVMMDAYWFYK  
DVPRHVYFADDDAAWNYFINCTEDGHIPSNVTMADDYTWVDWYNNTAFFEDDYFWQPK  
IANANAPFPESYVSKYMMIYFFAASGFLVTGAIEVVLARKAKFIYRMLYYLMLAAAFGV  
VSACLTKNPLWSNITNCISVNLWALEAIMIVCQRLQGTSEVDDYEEYARIYGISVTAWF  
YLADFSLIGHTVGDVTSYFYVFEYDNWKLGISAVVFAVFWLICSLVYLLVAIHDIYGEFK  
KYYLSLAQEEKMAMENAITDKIVMEVGNAGIDKTPPVQEESENQISANTDIASPAPSAP  
PSSSNGGDNEPVQ

>comp9918\_c0\_seq2; 554 122 1423 LEN=1743; translated  
MEEKPKVGEESPIFPDEDGENPKQDELDDAKFVGDDGMGNASIMKPRKPTRHYRGRDSYY  
GADGTLYGRFDKSDVDDDDTVVEYRNSKWHILSAVIFVASSILYVAMASVMMDAYWFYK  
DVPRHVYFADDDAAWNYFINCTEDGHIPSNVTMADDYTWVDWYNNTAFFEDDYFWQPK  
IANANAPFPESYVSKYMMIYFFAASGFLVTGAIEVVLARKAKFIYRMLYYLMLAAAFGV  
VSACLTKNPLWSNITNCISVNLWALEAIMIVCQRLQGTSEVDDYEEYARIYGISVTAWF  
YLADFSLIGHTVGDVTSYFYVFEYDNWKLGISAVVFAVFWLICSLVYLLVAIHDIYGEFK  
KYYLSLAQEEKMAMENAITDKIVMEVGNAGIDKTPPVQEESENQISANTDIASPAPSAP  
PSSSNGGDNEPVQ

>comp9919\_c0\_seq1; 7 1 226 LEN=1181; minus strand; translated  
XGRYGSSTPKNRLVEAGSDAEFRKLNARTTEAQEAPKNSYKQLYLEREGKGLRISTITA  
GDPVIVGAIFVHRKL

>comp9919\_c0\_seq2; 7 1 226 LEN=1470; minus strand; translated  
XGRYGSSTPKNRLVEAGSDAEFRKLNARTTEAQEAPKNSYKQLYLEREGKGLRISTITA  
GDPVIVGAIFVHRKL

>comp9920\_c0\_seq1; 906 323 2335 LEN=2627; translated  
MMDVEQLHVVLQQSFPDASLRNPAEATIRNLKHLKLGSTALLLQIATEKQVQFEVRQAAS  
IQLKNICRECAERLNFAGYPLSDADGKKTPLDDEDKGVIRPGLVKALLDETEKSIRD  
MAETLHTIIVHDFPERWPDLIPTLLQTVQGGATDPSRALHVNALLALRKRKRYEYKSK  
DQRGPLNEIVAQSFPPLLLPLAQRLLSKDENSLESAMILKQILKIFWSSSTQFYLPGGGANG  
EPSPALQNPQSMQPWLDILRAALEKELPEGGTGLEPRGQPTTVEERNAPWPKVKKWAVQ  
IMSRLFSRYGIPTYAEDDSKLFQAQYFSQHVATAFLEPVCATLNLRPSGQFCTDRVVHLCL  
TYVDLAVELSSSTYKLLKPHLDFLLYQVCFPTMFLVEDDIDVFENDPHEFVQRQNSPLADF  
YDPRMSAITLVTDLVKHRGQDVTQGLLGRMTEILNRYAGAPVESKNHIEKDGALLMFGSL  
AKFLLAKEKYAKEIEGLLVTHVFPDFNSPVGFLRYRACWMVQQFSTVQWSDDGTNLRITLL  
QFMLQRLSDPALPVQIEASKALRFLIEADGADETLPLVLPQLLLEYFRIMNEIGNDEVVS  
ALQVLLDKFGDHI EPHAIQLVTQLTNAFNQYCTAGEDDDDDAATS GGTGNDNGGDAETDK  
AEEDANAMEE

>comp9922\_c0\_seq1; 485 163 873 LEN=1049; translated  
MKNLLSTAAMAHAVLLVSLQVTLASQLREENAQRRRQHHQKQQRNRRLSMGWNRLTAD  
GDDNDSRFQIIDDATRIAPFQDAAVVEVVSAAAEEESPQEDFAKKFLRAAKDGKDKSDK  
KMAKSAKSIKDKKSKKDTPNPVPPTAKPSAAPT KPPTVPTSEPTTFQPTGTTSTSTSA  
TDTGTTSVVDFAALEKNETSVVDSAALEKNGEMQEQQPEAKALGLIYQDLSGLGGD

>comp9923\_c0\_seq1; 141 143 1774 LEN=2484; translated  
MGSDKGEKKSCCQKCFVVTTLAILAAIGVVAWYFAVFAKDVEDATADCGGCYCVDPNST  
SNSCPSPRPPPSFYPAETHLDAWKSQEILDYVVLNCPNFEDGILCDTEPPLDPDFRWRKL  
GETAVCAVHYEAGPADGELPLERGLDGGAGANATVFAFDEGPECGDFPASYRIKTYPSRG  
EAEAAGGFVTHVGNCGVCSTLQDLAVYANTDFVGVVTPSGNFCRRQAASLENGLSCYLGL  
GMTQDCAKIWADTSWNVSTHPVDCRLLSVALPLLLSGDATHTTVSFLAKTAKNCFGKCVL  
GPTLPQFGGENEQDSNSNSNETSSSGKWYNVPANIKKWFNSTSSDENKSKSAIPSNPAP  
DCVLNACIRCNEFSSEIFELFAXEPAAVGPPVDSRETLRLDTEHRPPGVPNHRAAATR  
VRARVDRDTSWQNLQNKKYWSNEFRNLMVVWLARQICESVCLDARFGNGLKSNHSGSN  
LYIHGHASTQAGVPTQDRVGWELESVPRTKMQTNSSSVPLLESENAGPCRNAQHRMLLQRV  
LVR

>comp9923\_c0\_seq2; 158 143 790 LEN=2547; translated  
MGSDKGEKKSCCQKCFVVTTLAILAAIGVVAWYFAVFAKDVEDATADCGGCYCVDPNST  
SNSCPSPRPPPSFYPAETHLDAWKSQEILDYVVLNCPNFEDGILCDTEPPLDPDFRWRKL  
GETAVCAVHYEAGPADGELPLERGLDGGAGANATVFAFDEGPECGDFPASYRIKTYPSRG  
EAEAAGGFVTHVGNCGVCSTLQDLAVYVAHCFGRN

>comp9923\_c0\_seq3; 169 143 1674 LEN=2384; translated  
MGSDKGEKKSCCQKCFVVTTLAILAAIGVVAWYFAVFAKDVEDATADCGGCYCVDPNST  
SNSCPSPRPPPSFYPAETHLDAWKSQEILDYVVLNCPNFEDGILCDTEPPLDPDFRWRKL  
GETAVCAVHYEAGPADGELPLERGLDGGAGANATVFAFDEGPECGDFPASYRIKTYPSRG  
EAEAAGGFVTHVGNCGVCSTLQDLAVYANTDFVGVVTPSGNFCRRQAASLENGLSCYLGL  
GMTQDCAKIWADTSWNTAKNCFGKCVLGPPTLPQFGGENEQDSNSNSNETSSSGKWYNVPA  
NIKKWFNSTSSDENKSKSAIPSNPAPDCVLNACIRCNEFSSEIFELFAXEPAAVGPP  
VDSRETLRLDTEHRPPGVPNHRAAATRVRARVDRDTSWQNLQNKKYWSNEFRNLMVVW  
ARQICESVCLDARFGNGLKSNHSGSNLYIHGHASTQAGVPTQDRVGWELESVPRTKMQT  
NSSSVPLLESENAGPCRNAQHRMLLQRVLVR

>comp9923\_c0\_seq4; 158 143 790 LEN=2647; translated  
MGSDKGEKKSCCQKCFVVTTLAILAAIGVVAWYFAVFAKDVEDATADCGGCYCVDPNST  
SNSCPSPRPPPSFYPAETHLDAWKSQEILDYVVLNCPNFEDGILCDTEPPLDPDFRWRKL  
GETAVCAVHYEAGPADGELPLERGLDGGAGANATVFAFDEGPECGDFPASYRIKTYPSRG  
EAEAAGGFVTHVGNCGVCSTLQDLAVYVAHCFGRN

>comp9924\_c0\_seq1; 639 1 2142 LEN=2246; translated  
PNPEKAKAKTVVFSNPRNAASGILLRKESEDSEDESQSRELRSLRFRFYAYDVTGLQKTE  
SARTVLVTESSPTTDDGIGIREQLSDWGFVALPAAITEIENHEDMVAKTMDAAANEDD  
ESEPALAWDEWFREVILEEQVRPIMEYFSALETHRENLOKNNHLLSPSRRTTSQESKES  
KPTANRRRNKARPPASTEYEWGDFDVGCVHKVVSQARIKSAMGSSMKSPRWATAHKFPAQ  
SAVSRLLDVVVQVGRGTGALTPVAVLEPTEVGGVVVQRATLHNFQHMQEILGSGDSEDACN  
DKNNDVDAADGDNKDLARIPRYESVLLQRAGDVIPOVVRRIPSHAPSSDADVSTGDDEDI  
SSWISLEPPEKCFPCSSPVSYETTGSTASSVGVQVIRCSGPPLLCPRAVTSLKHAFSRDA  
LDLTGLSEARIQQMLDADLLRYPDFEMGDTEWESVASLPGWGQKSCQNLRTDSTRISS  
DGISLGRFIYSLGIRHVGHKHTSELVAESYGSIGAFLEALDSAAEGYREPRGVFDKEGSLK  
EKEVQEEEEETTESPQEDHWHPPFKLGNKNGIGPVVIESLLVFARTEELKNATKNLANAL  
TISEQEVVDETVDASSSSLETNAKANVDPSPKPKWGLRVVFTGSI GGGLTRSGAQDIKR  
LGAKATPGSVSKSTDLVVCGEKGGKLLKQARDLGIPTLEADEFATLARENGLL

>comp9925\_c0\_seq1; 367 193 1029 LEN=1161; translated  
MLFRTTTAAARTAVAAAAARTATTRTTAMRPPFPSSRLRQHRSYTIPVVLES GATGERSFD  
IYSRLLRERIVCVHGEVTDQMASVVTAQLLFLEAEDPDSPLYMYINSPGGSVTAGMAMYD  
TMQYIRPKVHTIAMGQAASMGSLLLAGGSRGRCALPNATIMLHQPSGGAQGMASDIQIR  
AQELLRLRLSRLNDLYVYHTAKGRDHRRKQQQDPDAGAAPVGTTPVELLKEVEAVMDRD  
TFMTADQARDFGIVDEILIKRERNEDDDEEEDDEPPIR

>comp9926\_c0\_seq1; 373 141 1601 LEN=1677; translated  
MDKNRSNDAYVGARRKWWSTDLPPAISLPILVFDIMFAVAQVVPLLQYYKNAGVVSATQ  
RELLSSVFSASQIIGGVLLGALTDAILGKKTLLYLSFGGSALAYLMITYGGFTALILSR  
IIVGLVKQTMVTTSMMTKCTTKENRTKHMGRLESSSTAAWILGPSTGGLLYKYVDQKAP  
ALLASSLFILNMFARIFLNGNLEENACLVEDGAGTQSSGRNSDPTTVDSDKKISGKLET  
KEVSKGKTNGNFWENAKSCFSSKSLASVIACLLIFSWMFRATSYASMGSYEDMYGFEP  
HARGYIQSYQRIWAFVVQSSSIGPVLQRAGGERRAVFFAAILLAGSTFLEARQSFVVFLE  
AICPSIALSTTMI SVLSRLLTQLAPGDAIFSVFAAMDVLRNATAVTPFYRAFLFRFLN  
SFRHQDRVDGASQIAMEGDPDPVTWVICAGLHWVVASVTMLYLLGFGQAHTQSGLEKTLA  
SGKKDL

>comp9927\_c0\_seq1; 774 809 3058 LEN=3571; translated  
MTATVVKKEGGTDTTPPLDPQGENAPTTVPKQEDSGSSMNGSASNTRTHISPSASAPN  
LPAMTAPLRQPSLLAPSGSSASLSAQAMHPSSSSNSLSSAQAAASTTHSQHAPPSLLGGQ  
VLHSSGSLGSQLVHPSNASLSSLHHGSPSSLHPPAILPSSHSLGALSSHGPPPSLGSQP  
AHSSTSI LNPGVPSMDPMDMSSLQSSIRDDMDAKLNELLSRHGKGEENSNGNKSAPDPRD  
QLRAMYLAGFQAAANRQNPLQAPAPLPMHPVNAFHQNSLRESFNRAQNGTANDLDPQQQ  
QHHQQVQVGAQAVTTPPSHPVAAPPPPPAVLVVPVAGMAAGVIKMQPGLSTSPGAGFGT  
SPNLNRSNSMTRSQRNRGRGGSVSPALSATSAGSSSSTGHSNPFPRKLMEMLSKEDANVVC  
WLPKGDAFMVRDPDLFVTDILPRYFRHTKLTSTFQRQLNLYGFRRVTKGPDAGAYRHESFH  
RDHPDRCLQMKRTKQKGSQSPQLKPSRSGPRSANASPLTTPGLSPQASPGSLVLDSPAG  
QPPTNLVLSRQPQSQGEQRQAHFSDAHANPQSANAQPQTGLGILMNNSAGAAAKNATA  
TYATNLTPEQQVRLQTDLADREQQASSLAAAGLVADNTVGYAQPSGQVLKAPPALGMSV  
PSIGPASAVPLSSFAQNDSHATAQRQAVNPNTALSSTNGGVPHMESINWNLDVDSAGA  
MLGSGLDDIDMDFATLFDSEEAALAKETT

>comp9928\_c0\_seq1; 200 218 1066 LEN=1516; translated  
MAYASFAKWYVARLKAQPLLNVNVSAGFLLLSTGDVLAQRVEVRAKESKQKQIEEGTAVAS  
ESSLTSTSILGVSMFLQATDAAYRAVQDEIASFGWDKSRTAKMAAWSILFTPFYVGFIFKM  
YDRYLPKKNLPSIAARVGCFLSSIPINFAYSYGTAVEHTVEWYEKRQQQALQFARLH  
QEPPSDEYSVQTMEDVDPFRFDRLVEKTQLKLEAEFVTTIVTSAKFWIPLNFLSFSVIPA  
HIQPLNLMFFSVFWNCYLSMSQHREVVIEGEKRETEKHEIDVA

>comp9929\_c0\_seq1; 226 517 834 LEN=1047; translated  
MCFGDEGGAMDALTLEKGIKTMWNPPAVNQMMERNDKEALEELGNSYKNAVDNVGFQNL  
APPNAKDTLRQGGTFIFRGSEPIFEYYDSKVGDNADIDSILAAIN

>comp9930\_c0\_seq1; 476 373 2211 LEN=2259; translated  
MPPRNTNNTSNDNCNVESSVDDLTKETIAKLWPTDDHEKSDHRRKNKGEESFVPPDDTKSDH  
TGTNFKEEKAIMKGAKYLGSLAIHNSMEKIWAKELYEMDPKEREQITNEIHGVESSTIK  
ESPENISKNIKKMRVYIDETLEDELDNGDSIVPPITKQAYKRGVSFEPPEGKDGEPVHY  
IRTKSFLKFLRAAHFDIEKAALRYFRCLDLMYNLFGLIALKRPLMLSDLTKQELRYLKT  
GQMQLPSRDRAGRRIIAYSCEMRQFDVREKYRVFMYIYDVCSDDESTQKLGVLQNSP  
KVHPGNKPFGETGMALRMKRHESLGGTEREYHQKFGEGMPLRLSAIHFTGPDFTFIYQIG  
KSLILFLIAKEDRKIVRFHGGSQIECNYSLSYGILSDEVPITNSGEIKTKNIAKFITAR  
RAIEEKRCLYQERQQVQKRKREDDTTSTTTMPPSPGVECPVNCIILGNGAQYNPANLEF  
RDILKSMEIRREEMARCDTDCVSMKDFVNSIIDTAQSPEYGLRFLTIDKATSLYVDIED  
PRDLYNRVSQLRDRQRKRLRVHRLLPSEEKPKGQDHVDQENIFCVGNGSSMIGWEAAKRM  
ERMSGYGFPCQM

>comp9931\_c0\_seq1; 1273 1 3630 LEN=3649; translated  
QDNDNDNGNGEKVESSETKPQETAVPKEEEKDKGEDTKNDNSVADNEKVKTESEEGTVE  
GGDDKDEKPTVAADTVKSSADTTDADATKNSAEPVKVLESSGPVIGKETAHDDFCGDIPE  
APELIRRCLAVLRGLVNSGPAEPFLLPVDPQTNPGYYDVLVRPMMRSAGLKLKAAAKRC  
LKLEGEASEAFVESTVAEFGRNIRLVVSNLTSYANAGPIIVSAGAEMLRVFERLLLDWVL  
APEDKLPALDMLDDDLCEVPHPSVDSTVLLCDACEGNYVMRLNPLYDIPKGDWYCP  
CLSGRWWGDLDPRIGRNVVLQDNNRSIAGKIKKCRYSHPETKKRSLIYDVTSDGETKRY  
TLDEIDEALSKTQPVPRIRCLEAVTESTGYSSGVDNYKRRDLVPVLVNPNISDGAAQVF  
LSSSVFRESVSTAATLMINDCELTASEWLRLLLTLLMMRCSSSDLFQTFAGKMENESNEQ  
MVKEMKLLKEKDASSNLSTFEKALFSLPFETGDDVDSEEVKSDDGDTLEAEESMGASLF  
AKDDGDEAKEMEVEEAKAVAVLSSRDAKNPEPTVVVGENAVQVVATEVDGAPVKTDVAVV  
EATTPLESEEIFKKARTGFLREKSKRQKAREDSIAAFCIKNQLKSTVAAFEEDSVSQAIE  
NSMASKLPGLSFGSTRCRGKICELCGLTDTALGTNLVRMPNQKEWDDLIIQAARSRRTHL  
LADLRDEESSATAQKNSGNKLMKIVTVRVGDDLVSAPDEDSFTGVKDGGMLEFLPRNPD  
GFQQEELLFRYESGLPYVSGSMIAHECCAAAHAHKKARKEKVIETFKKEEAFIAEREAGIRCG  
RSLLELGTDSVGRSYWHFYDDLESYVCEPVDGDSKWKYFSETEAICSIIVLSKDPVQ  
ELKNAFPNAVKLIRDKAWAELLMKRHFKLTTSGDSSMDVDSNESDRRKNDEVHHSFGDE  
ELYEEGEDVLVKSFCGSRLLWNAKIVGVSRAQTNKARIVSYRVSYKSWSSRFDEWVAEDR  
VVDLSENNTVEQAEMLEDAIASHNGLPPLDLDLEAKSYLNSKDRLRGFSPLPPFAEIMAT  
SSHASANEKIFAKMKAALLAIEAALPIGSINNTAKQWRPEFASQWRLNLTLSKGSWDL  
RCVILLEQNINDEWILPDIGNIYTGLPLPMKALEEASPSLALRILLDDKSLIYSRVDDK  
RYKLSKSKK

>comp9932\_c0\_seq1; 262 130 714 LEN=897; translated  
MSSSVRVEVVEEKHLGDVIRIRRDFLNSKHCCCVFPLGDGSEHEVRATYRKHPPELMKVAA  
VASTPEAGAVGFVQLVFHGMHSDIHTAKEDEAYIDMIAVVPEGRGMGVGTALMNWAEDLA

KQRGCTFMALEVLHGNPAIGLYERKGYVVKPRASILYHLSKLPFICFIMSPCVCPSPGSRSY  
CSYGRHLHYMEKQLE  
>comp9932\_c0\_seq2; 262 130 714 LEN=909; translated  
MSSSVRVEVVEEKHLGDVIRIRDFLNSKHCCCVFPLGDGSEHEVRATYRKHPPELMKVAA  
VASTPEAGAVGFVQLVFHGMHSDIHTAKEDEAYIDMIAVVPEGRGMVGTALMNWAEDLA  
KQRGCTFMALEVLHGNPAIGLYERKGYVVKPRASILYHLSKLPFICFIMSPCVCPSPGSRSY  
CSYGRHLHYMEKQLE  
>comp9933\_c0\_seq1; 461 62 1147 LEN=1147; translated  
MAAHPGRLLSLFGILLLSNAVASEIASGPVDVNTTEHNSNDGTGGKKKIADLAWDDYRKY  
NDGDPHATMGLLKLFCNPLYSDIFGVGYQETNIEVSGRVEGLSNAPYSRLPTEEETWKFF  
EEAYYFAVGMEQPTSSTEKETQNQNEFGRWRGMNIPFEVRYDSKIGRALYTTTHIPKGT  
VWDGSYTATFTSPMVQSEGIDSTPTFTPTTYRRFMEYLHDHSSERNKEQAPHDWACDALM  
TYISAPVDEKSLLEIGDGEDFLFNMTHQSLCVAFDHGSFLFNDKGNPHADTLEDAYYSKT  
REESFGLEGYARKSAQDEDDAPLKKISLQSSSECQLGAMQASRDQLQGEELRYDYGIFDND  
DD  
>comp9934\_c0\_seq1; 765 1 1827 LEN=2198; translated  
QVSMESSPLPRLNLRKKTSYFLFSFVLTLLIRIDPLFSFTAESKTTARSKTTSILPLPLS  
SKTKCVSKAKSPIGRSFGFCIDHQHGSASASSTSWLSMTKRARGNRDFDDEDFQTD  
YYYYQDTTGAEAEAVGDYAGVDTDDDDYDDYNNSSSYEDDDNNREEMNRRRTVDYD  
DEYGDERTNGGESDGDGNSNSRGGYYQVSFNVEVDPSETEIDWEICTSNNRDKKTPQALV  
LLPPAAVVRKPAIVHFVGGTVFVGSNPKLWYRGLLESIVRSTSVAIIVVTPIPVTLFQNP  
HVRSLSLALRSSFRNAWQMVLEDEYGPPEALEGIPLCGLGHSGLGARLLTVMTTLDQNE  
EESTRSSVVIIPPYKSLCLVSFTNYGAKVGIPIGVGALLKQSKKREAYNNNNNNRSP  
RSSNNGRRNKNRYDDFYDDEEALDEEWAEMVEDFQETFSAQKNRIQTALTPNSKDLE  
TPDQLWKALEDDRYRVNTTLVVQFDDDPIDQGSKLATLLHSTNSSDVRFARLRGNH  
VSAYGEGSQASESSASAAAPLRPRRRDAALQSLLETAFKGTQKNRRDKVALRDLRLSL  
VSYITDVVAK  
>comp9934\_c0\_seq2; 413 1 1080 LEN=1451; translated  
LLLQVQISQISVFGSNPKLWYRGLLESIVRSTSVAIIVVTPIPVTLFQNPQHVRLSLAL  
SSFRNAWQMVLEDEYGPPEALEGIPLCGLGHSGLGARLLTVMTTLDQNEPLFEEEST  
IPPYKSLCLVSFTNYGAKVGIPIGVGALLKQSKKREAYNNNNNNRSPRSRRGRSSN  
KNRYDDFYDDEEALDEEWAEMVEDFQETFSAQKNRIQTALTPNSKDLEFLPTPDQLW  
ALEDDRYRVNTTLVVQFDDDPIDQGSKLATLLHSTNSSDVRFARLRGNHLPVSA  
YGEQSQASESSASAAAPLRPRRRDAALQSLLETAFKGTQKNRRDKVALRDLRLSLV  
SYITDVVAK  
>comp9935\_c0\_seq1; 335 97 918 LEN=1213; translated  
MHTTTTPTTSASARSQRRTATARSPLLLFCASFLGALHLSDPASAASFGFADAFSTGG  
TPLAIAVQHGGRKTIILSGDANSGLSLCRSTGGLNLFGRDTAEEDGGDAGSDSDGTTSD  
NRFDMAQRIESLKSIVLGLSGGFAVTPVAYLHYVLFASPSSTAQWFEVTDMSLQAA  
AIVYRYAVRANNDNPNMLNQGVVGFVVRVTLNHNHVTDTCSIPLRGAPLGYFDWN  
MIEQAAGGIESAALFGAASLAMELAFRQKWKSKFD  
>comp9936\_c0\_seq1; 750 122 2798 LEN=3125; translated  
MTNGYSHGLEQRKESKDSILELRGSCSCDDECYNRVAEDPSLASVPANQGSSTNPPLSM  
VTMGDGRDDNTARFGSPIDFSARKRSHTGETRSIFLVAALALLLTGSATTTIILLTSNR  
SSDGNVLPQKYLEENMHSLLRVHKWFRGQRVRGTRVLQDVLDTGNDSDPAGV  
PNINVLNTNGTAPPSQATDPPTIIVDELITLAPTNPVSVSHSPTLPMAESEPSA  
APSTYLPTISFAPTISHSPTNYPSTPTAPTGPSPFAPSLQPSRSMAPSFLPTISHEPSISNAPSERI  
EPTMAPTERVDVIVETNITMILKNVPHNLGTNEPEIWEVTSNHVENFYKTVSDEFATHW  
AFSTIDVNTTLVKQETVDESKGPEITDGSQTITENQSTPTTAPIAYNDTITLKIT  
YNQTI SATPNDTLAEQELADMDNLFYIPFSTDSFDYSVDLARALNWTTWIIVEAVDPGERD  
GPSAMTPSVNGLTVNQTIASIASIVMGAVVIVTFLWDRSHKNDGRHVDGNAVDVSIHSSLE  
GKPAQVRSERTSAFGMKWMVPLSKNGGQAHGGESDGSVYDDTTSTRSAPAHLRRA  
YIYKNASKRANLSTDEEGLPLANTSRHSGSGNNSRASSDNPDDSPQQNDFNSSISSFRV  
PKQVPLSNRSTERSIMSSATDRSVSNHGVPPVLPPIPPRSTFGPASSFASTISTHDVARR  
YSGDHLNSNQPSLHFQRPTPGRQAGSYGRRISALSDDSIIRDYSFATDGFVSDRDVH  
DYSSEEQLSPGYNDPCGERCVQQAAILLAFRICRSRRTYLFSSSQSSPHYIPSI  
EPPSEAFTSPLHIPDEEGLSSAVGVGARARSPTSPVPTILGLEPESAILTPSQHGFAMTVQ  
DIE  
>comp9936\_c0\_seq2; 778 122 2707 LEN=3034; translated  
MTNGYSHGLEQRKESKDSILELRGSCSCDDECYNRVAEDPSLASVPANQGSSTNPPLSM  
VTMGDGRDDNTARFGSPIDFSARKRSHTGETRSIFLVAALALLLTGSATTTIILLTSNR  
SSDGNVLPQKYLEENMHSLLRVHKWFRGQRVRGTRVLQDVLDTGNDSDPAGV  
PNIN

VLNTNGTAPPSQNATDPPTIIVDELITLAPTPNPSVSHSPTLPMASEPSPAAPSTYLPTI  
SFAPTISHSPTNYPSTRTPTSAPTGPFSFAPSLQPSRSMAPSFLPTISHEPSISNAPSERI  
EPTMAPTERVDVIVETNITMILKNVPHNLTGNEPEIWQEVTSNHVENFYKTVSDEFATHW  
AFSTIDVNTTLVKQETVDESKGPETDGGSGQITITENQSTPTTAPIAYNDTITLKITYNQTI  
SATPNDTLAEQELADMDNLFYIPFSTDSFDYSVDLARALNWTTWIIVEAVDPGERDGP  
MTPSVNGLTVNQTIASIASIVMGAVVIVTFLLWDRSHKNDGRHVDGNAVVDVSIHSSLE  
GKPAQVSERTSAFGMKWMVPLSKNGGQAHGGESDGSVYDDTTSTRSAPAHLRRAYIYKN  
ASKRANLGSTDEEGPLANTSRHSGSGNNSRASSDNDSPDDSPQQNDFNSSISSFRV  
PKQVPLSNRSTSESIMSSATDRSVSNHGVPPVLPPIPPRSTFGPASSFASTISTHDV  
ARRYSGDHLNSNQPSLHFQRPTPGRQAGSYGRRISALSDDSIIRDYSFATDGFVSDR  
DVHDYSSEEQLSPGYNDCPGESSPHYIPSIIEPPSEAFTSPLHIPDEEGLSSAVGV  
GARARSPTSPVPTILGLEPESAILTPSQHGFAMTVQDIE

>comp9936\_c0\_seq3; 736 122 2762 LEN=3262; translated  
MTNGYSHGLEQRKESKDSILELRGSCSCDDECYNRVAEDPSLASVSPANQGSSTNPPLSMV  
GTMGDGRDDNTARFGSPIDFSARKRSHTGETRSIFLVAALALLLTGSATTTIILLTSNR  
SSDGNVLPQKYLEENMHSLLRVHKWFRGQRVRGTRVLQDVLDTGNDSDPAGV  
PVNINVLNTNGTAPPSQNATDPPTIIVDELITLAPTPNPSVSHSPTLPMASEPSPAAPSTYLPTI  
SFAPTISHSPTNYPSTRTPTSAPTGPFSFAPSLQPSRSMAPSFLPTISHEPSISNAPSERI  
EPTMAPTERVDVIVETNITMILKNVPHNLTGNEPEIWQEVTSNHVENFYKTVSDEFATHW  
AFSTIDVNTTLVKQETVDESKGPETDGGSGQITITENQSTPTTAPIAYNDTITLKITYNQTI  
SATPNDTLAEQELADMDNLFYIPFSTDSFDYSVDLARALNWTTWIIVEAVDPGERDGP  
MTPSVNGLTVNQTIASIASIVMGAVVIVTFLLWDRSHKNDGRHVDGNAVVDVSIHSSLE  
GKPAQVSERTSAFGMKWMVPLSKNGGQAHGGESDGSVYDDTTSTRSAPAHLRRAYIYKN  
ASKRANLGSTDEEGPLANTSRHSGSGNNSRASSDNDSPDDSPQQNDFNSSISSFRV  
PKQVPLSNRSTSESIMSSATDRSVSNHGVPPVLPPIPPRSTFGPASSFASTISTHDV  
ARRYSGDHLNSNQPSLHFQRPTPGRQAGSYGRRISALSDDSIIRDYSFATDGFVSDR  
DVHDYSSEEQLSPGYNDCPGERCVQKQAAILELAFRICRSRRTYLFPSSSQSSPHYIP  
SIIEPPSEAFTSPLHIPDEEGLSSAVGVGARARSPTSPVPTILGLEPESAILTPS

>comp9936\_c0\_seq4; 764 122 2671 LEN=3171; translated  
MTNGYSHGLEQRKESKDSILELRGSCSCDDECYNRVAEDPSLASVSPANQGSSTNPPLSMV  
GTMGDGRDDNTARFGSPIDFSARKRSHTGETRSIFLVAALALLLTGSATTTIILLTSNR  
SSDGNVLPQKYLEENMHSLLRVHKWFRGQRVRGTRVLQDVLDTGNDSDPAGV  
PVNINVLNTNGTAPPSQNATDPPTIIVDELITLAPTPNPSVSHSPTLPMASEPSPAAPSTYLPTI  
SFAPTISHSPTNYPSTRTPTSAPTGPFSFAPSLQPSRSMAPSFLPTISHEPSISNAPSERI  
EPTMAPTERVDVIVETNITMILKNVPHNLTGNEPEIWQEVTSNHVENFYKTVSDEFATHW  
AFSTIDVNTTLVKQETVDESKGPETDGGSGQITITENQSTPTTAPIAYNDTITLKITYNQTI  
SATPNDTLAEQELADMDNLFYIPFSTDSFDYSVDLARALNWTTWIIVEAVDPGERDGP  
MTPSVNGLTVNQTIASIASIVMGAVVIVTFLLWDRSHKNDGRHVDGNAVVDVSIHSSLE  
GKPAQVSERTSAFGMKWMVPLSKNGGQAHGGESDGSVYDDTTSTRSAPAHLRRAYIYKN  
ASKRANLGSTDEEGPLANTSRHSGSGNNSRASSDNDSPDDSPQQNDFNSSISSFRV  
PKQVPLSNRSTSESIMSSATDRSVSNHGVPPVLPPIPPRSTFGPASSFASTISTHDV  
ARRYSGDHLNSNQPSLHFQRPTPGRQAGSYGRRISALSDDSIIRDYSFATDGFVSDR  
DVHDYSSEEQLSPGYNDCPGESSPHYIPSIIEPPSEAFTSPLHIPDEEGLSSAVGV  
GARARSPTSPVPTILGLEPESAILTPS

>comp9937\_c0\_seq1; 88 1 586 LEN=933; translated  
EICVNLLSVPNVYHPFTEWVEITNLSLYLFFDRSAFLRVLSSSSKIAELCSPYYGVLVRK  
EEDERMEHFENLIKGLSEFSKELTKTPGPLFLADGQLSNIDLALVPWAYRYVFEKYRQ  
DYVITPERYPKLQPYFDWYDHVMEMDAVKRTLDPDKKYLEHIGKYADSSARSKVANAVRR  
GVAACHELDDEKDEY

>comp9937\_c0\_seq2; 172 258 1220 LEN=1567; translated  
MASRIVASALSVATKTAARTSTKRFSSSGATAAPSVEHSRPTFRYLTAWFCPF  
AHRATLALEHHGERVDYEWIEALGWEQRADKNNVTGTGQEWYHWKADELKRTNPSGLVPTLIPVDP  
ITGKSDETKPVFESLVTIDFIDEISGACGTERLVSEDPYEAARCRVWADKVNREL  
CSPYYGVLVRKEEDERMEHFENLIKGLSEFSKELTKTPGPLFLADGQLSNIDLALVPWAYRYV  
FEKYRQDYVITPERYPKLQPYFDWYDHVMEMDAVKRTLDPDKKYLEHIGKYADSSARSKV  
ANAVRRGVAACHELDDEKDEY

>comp9938\_c0\_seq1; 984 80 2725 LEN=2822; translated  
MQYNATNVRFTFARYNGFCKGILWPVLHNVTSVYASHAAKDDADACIGDPNQDGEQFSEV  
CRDDVEQGPIHGGRGREKELWSAYNQVNRKFSEVVVQCFNEGDLVWIHGFHLLILPSYLT  
RRISMAKIGIFLHTPFPSSEIFRTLWCREDLLRGMNLADQVGFHLEFYARHFLTCCRLL

GLNYGMIPDASNGGYTLAIDTNGRHVAVTSIHAGIEPPVLNQILRHDRVAREAAAMIRAR  
HPGKTIFCSIDRLES�KGIPLKLLAIELFLKRCPEWIGKIVLIQVGITAWERGDDYVKTR  
NEVTDQVQRINKMWPGTIQFQETPDWRMRLQORMALMKGSDVCLVTPIRDGLNLIPLLEFT  
IAHQEALNPAVRQADGGRRRGLVVLSEFASCTRVMRGALHVNPKI SEIAQAFQQALMT  
EEERLRRVTCASEFVTRVTTQRWALAVMLDLKGVHKSVPVQYSGAGLGLGFRLLGMDVG  
FESLNFKAVAKGYKMASNRLILFDYGGTITSNENLDNLSRFRMVKTRSHHSEPTAEMIQT  
IQDLCSDKKNVTFVVSQKERHSLIKTLGHIPNLGLAAEHGMYISWPEVDSGNSSGGGMF  
SSHGGRLGTTPRGPKKNRHRNKRHWETLVPISDRTWRSLTMSIMEVYASRTHGSYIEETE  
MKVLWQYRDADLEFGYLAQARELEDHLSNVLRSYPVDILHGGVEEGGYVEVRPKGVNKGVF  
AMKAI CNFHKLTA KP DGQVDFALVLGDDHCDEPMLSVMRQIGHRARGGRASDLPKTMRLV  
DVSVCDPNISSDAEIFTCTVGKKPSAAANYLQDVSEVEELLQALVKVSKPNPASKSMLDL  
MMEAPLMDPTPMAYTGGTVAGSLGEFLGGIDDDGVEEDMFF

>comp9938\_c0\_seq2; 1304 1 3804 LEN=3901; translated  
SPTS RNKMIPLYTTATSF PWYSTLQSLAMTVVRPKPLSLGGQASLFGSGAASTNMIDSTN  
RGEFRYRYAIFRAGVFHRWECADDENFVSTSNTE DQITCQNTSSNTNASVSANPNANPNA  
NANAAMEVEPESEPDSPATDGSACASPETNNYHALPLKFLLPGETYVVNDVLGKRKGQK  
PDIYHKRPTTSEWSSSSSSASRYVGVGSGACTGERAGLETGASGEPHKPANPPGGTTP  
KKKTVGFAEMPSPFRRPTQPLSAEAGAAGSPSKERRNRLGEPVQLNATDGLVVVSAFLPV  
VVHRDETSAPKWTADWDYEALLSMQTHLRVTRVGVVWKKGWHGNYRQQQTARSEEDGS  
GHQASEHYGVPIDERHLVEECLRPFHCVPVWIDPLIFGEMYNFCKGILWPVLHNVTSVY  
ASHAAKDDADACIGDPNQDGEQFSEVCRDDVEQGIHGGRGREKELWSAYNQVNRKFSEV  
VVQCFNEGDLVWIHGFLHLLILPSYLTRRISMAKIGIFLHTPFPSSEIFRTLWCREDLRG  
MLNADQVGFHLFEYARHFLTCCRLLGLNYGMIPDASNGGYTLAIDTNGRHVAVTSIHA  
GIEPPVLNQILRHDRVAREAAAMIRARHPGKTIFCSIDRLES�KGIPLKLLAIELFLKRCPE  
WIGKIVLIQVGITAWERGDDYVKTRNEVTDQVQRINKMWPGTIQFQETPDWRMRLQORM  
ALMKGSDVCLVTPIRDGLNLIPLLEFTIAHQEALNPAVRQADGGRRRGLVVLSEFASCTRV  
MRGALHVNPKI SEIAQAFQQALMTTEERLRRVTCASEFVTRVTTQRWALAVMLDLKGV  
HKSVPVQYSGAGLGLGFRLLGMDVGFESLNFKAVAKGYKMASNRLILFDYGGTITSNEN  
LDNLSRFRMVKTRSHHSEPTAEMIQTIQDLCSDKKNVTFVVSQKERHSLIKTLGHIPNLG  
LAAEHGMYISWPEVDSGNSSGGGMFSSHGGRLGTTPRGPKKNRHRNKRHWETLVPISDR  
TWRSLTMSIMEVYASRTHGSYIEETEMKVLWQYRDADLEFGYLAQARELEDHLSNVLRSYP  
VDILHGGVEEGGYVEVRPKGVNKGVFAMKAI CNFHKLTA KP DGQVDFALVLGDDHCDEP  
LSVMRQIGHRARGGRASDLPKTMRLVDVSVCDPNISSDAEIFTCTVGKKPSAAANYLQDV  
SEVEELLQALVKVSKPNPASKSMLDLMMEAPLMDPTPMAYTGGTVAGSLGEFLGGIDDDG  
VEEDMFF

>comp9939\_c0\_seq1; 469 20 1567 LEN=1816; translated  
MNPPSIGVIRFVLLLALLFCWVDAFAGPGLMGKEKKNYSSCCSSNSCMLGRKKSHDMRSF  
TMLFGSGAGSPRSNNDRVKKAGGGVPVIASGDRDSFWDPASEGMRGMEGDFSLEERLAMG  
KDFDFEGSVNGGYGYPANANANANANAYAYAYANPNLTNLAVPEMLHAAQCWLEDSVSS  
SSKTSPVPPFCTAKSPVTATVLGRTP LIESDAPGDIQHIVLRLPEGFYRVEGQISVIP  
PGTDPSTGRPHKPRLYSIASTRYGDLLDGTTVSLCVRRAEYTD PATGKVDPSKAGVCSGF  
LCDAVPGQKVS VAGPVGKTMLLPAFDSNDSDSDKDAHSGSVDLIMVATGTGIAPFRSFL  
HRLFTEHTPANHMFKNGKAWLILGVPTSGSLLYKPEFDAMLR TANQNPTIP SHEWTSV  
QVPEPTPSLRIDYAI SREMTNASGGKLYVQDVLRENAGELMERLENGAVIYFCGLRGMM  
GILEALEEVATASGMDWAETLKKYKANHQWHVEVY

>comp9939\_c0\_seq2; 243 290 1379 LEN=1699; minus strand; translated  
MKNPEKTAKILDQERCGLDLVTA AHLTKHII SDEGFGREPQQKILSVVRDCLRYATCVLC  
HGTLWFARSCIQEHTDPSGDFCQRVPSLLIVSLLVFPVAVPVLVA AVAVAVIVAVAVAR  
IPFPFVRLPAASQA AKAVAGLPGAPGIAASDGLAVGRRRGIEADHQATGDPQGRCEK  
VRDRSLAQRAVVPGTTELGPKPAEADGLAEARPQQLVGRPPP GDSRKHAETAGQKGRPT  
PAQDEAWKQKTRAVFQLESTIPRVTC SGYSVHAPAVDASVLP PPVVTSPGSVALALALSL  
LRLVSQSGSRLPIVALARGLDASDSDES DSDADSCAGSTGSRYESKPSWRTL TGFSLVY  
DG

>comp9940\_c0\_seq1; 330 138 680 LEN=726; translated  
MASHTARFLEKSVVPLLA KHPLQWSPSLRSGQVATASSIGSTRWFSDDGPKKRIVKVKK  
KERKSAADTGRSRDLELLGLFDAPKTKPPPADEEETARRET VRRNYTIGTFRKHNEENH  
EIAACKLKLKHAISMLPKRSNLKERALKVDDKHPPRWRTIPAWTPPIPDFNPSDFMVTEE

>comp9941\_c0\_seq1; 547 355 2010 LEN=2095; translated  
MTFSTKQISLLHWWLLLIIIP SSEGFISPPPLNSNCQNRVARHAFRQNYDKTIVKDQDA  
WASRISTRPSTDASTSQPLFGRRRRAVKGMAGAIASNFILPTLPALASPPSYAVPTPVDSA

FTSWPLGKVAFSLPLAGTSTRATVQTTIIEDSMWTHDQIQGVVNVNVPVRQTVIRLKD  
GGLWVHNPVAPTPOVIEMMKELEKKYGPVKHIVLGTVALEHKATFGPFCQKFPKATVWIQ  
PGQWAFVVDIPIDALGVKQKQRLRELVPVPGPATNSIFRTNSKYGPPEWQDEIDFEVLG  
PITFQSVGAYSETAFYHKASKSLLVTDVVVGVDKNPPAI IQEDPRALLFHARDNITEVVA  
DTPENRERGWRRMVQFGLVFFPSQITVVPAGEALKEASQVDRSMKNLGDGAVPINLYPWT  
WDGNSDEKNFQVISNNGKLFPCPILTKLILDREPQLTLDWVDRVCRRFPDMNRIIPCHLN  
NDIKMTAKDFSDAFDPLRSTPQNLKSQRPLAEDLALLQKASDLLTTLKVVGPSQVCDGES  
ARIVGRFASLR

>comp9942\_c0\_seq1; 453 1 1384 LEN=1776; translated  
RYNSSKGLKKPSVVRENASVRLQKADSSNLLPRFATISPVCGVLCIKDGGHRYRKILFSE  
DVDETSTDFLNPIVASVKPSKTVEIFSLVKEMEAAGETVTSLCVGEPDFLPPKAVLDATA  
AALQSGATKYTAVTGTADLRNAIAEDLRTRKGVDPANIEIVVGNQAKQCVFQGVLATCG  
AGDKVIVPAPYWPSYEMVSLVGATPVIVEAKAENGYLITPETLRSTLEEHPEIKLIILC  
NPSNPTGGVYQLEKLEALAAVLKDYPKVMVLADEIYERLVYEGDCPAFAGVDGMFSRTMT  
VNGFSKSHAMTGMRLGYVAAAPQPLAKAITTIQSQLTSCAGSLSQAAGVAALTQVSEEMQ  
ANVEIMREKRDYVLGELSKIIPGVEVAIPPNGAFYVLPDVSRYFGDDTKLCLLELLKAKKM  
AIVPGSSFGAGPTVRLSYATSMEELGIAISKLEFLAENA

>comp9943\_c0\_seq1; 775 142 2277 LEN=2450; translated  
MIAAKKVAGDGLRTKLIKSALIGAGLKTIDSNVLSKCVALASTLNLSPETMGEVWEAHS  
LNKENLTELTMHQFESYKNELIKASSLAPIIPDVPPSSGSPMGATMASRKSIAIKRESPAA  
ATMVTPTSSTKRQKQSPDDLVTSSVDRVAIDGNAVPSVRSRGTGVATVSSTTKKPINLP  
KYEERTKVGHVVASYPAGSTRSERSDAARCPVLTTSSEGDSDKDDDFGADVTRFNIKAP  
YRYMFTTMEDRADALQRHLVRMKDAIVEDINTETAKKMSTKQDDVAASFEEVNVPRQDPS  
TCIGRICNEAHIGRLNSTSVVLEGSASSCGGARVNVLDLSQMSEQQQQQGYSLFPGQIVA  
IEGMNGTGRKITATKVREGAPLPPASSSCGAIRKCYTDDKHSSPLKLI SACGPFTTANN  
MEYQPFIDLIHVVIDEKPDVVVLMGPFVDVRHEAVKSGRPELDGVIVDYETIFAQNISGV  
IEECFDSADLQTEFVLPALDATAKFFVYQPPQLDRLANGANLLDIPGADVDFGSSGL  
HRLTKPQKNGKIRLRLCLSNPCTFRVNELVFGVTSTDVLFHMSVEETNANLPGSRMRRIS  
QHMIQQQSYYPFPNRSVNLDLKQQDQGWKMPCRPDVLLPSRLTPFCAPIVGSTIAVNP  
GHLTKGTTGGTYAVMEIKPMQKEKLERHAGANDTMIPHDAQDRIQVEIKRI

>comp9943\_c0\_seq2; 687 1 2052 LEN=2225; translated  
KKNVCSAFPVALASTLNLSPETMGEVWEAHSLNKENLTELTMHQFESYKNELIKASSLA  
PIIPDVPPSSGSPMGATMASRKSIAIKRESPAAATMVTPTSSTKRQKQSPDDLVTSSVDR  
VAIDGNAVPSVRSRGTGVATVSSTTKKPINLPKYEERTKVGHVVASYPAGSTRSERSDA  
ARCPVLTTSSEGDSDKDDDFGADVTRFNIKAPYRYMFTTMEDRADALQRHLVRMKDAIVE  
DINTETAKKMSTKQDDVAASFEEVNVPRQDPSTCIGRICNEAHIGRLNSTSVVLEGSASS  
CGGARVNVLDLSQMSEQQQQQGYSLFPGQIVAIEGMNGTGRKITATKVREGAPLPPASS  
CGAIRKCYTDDKHSSPLKLI SACGPFTTANNMEYQPFIDLIHVVIDEKPDVVVLMGPFV  
DVRHEAVKSGRPELDGVIVDYETIFAQNISGVIEECFDSADLQTEFVLPALDATAKFFV  
YQPPQLDRLANGANLLDIPGADVDFGSSGLHRLTKPQKNGKIRLRLCLSNPCTFRVNELV  
FGVTSTDVLFHMSVEETNANLPGSRMRRISQHMIQQQSYYPFPNRSVNLDLKQQDQ  
WKMPCRPDVLLPSRLTPFCAPIVGSTIAVNPGLTKGTTGGTYAVMEIKPMQKEKLERH  
AGANDTMIPHDAQDRIQVEIKRI

>comp9944\_c1\_seq1; 389 301 1242 LEN=2067; translated  
MAASADESFSSSSSSSSSSSSSSSKASAVVPGTAGQAPERGTAAAAPVTPPSEASPSPSPE  
RILSPTDRDVLGCRGKIRFHPGNVLFNKLLREHFSEYGLAPKGSKLEIVKRIVSGIREG  
QAGGPGGFLEHHAGGDERDGSNGNDGGYLDIGDERAMSKTAQAFRDIVVTEEKRLQ  
THRHRWHAATTTTTTTTTTTAGGRGCGNRSVSEDDSAVAPCRPGPFGRQAHTLSLGR  
RPTFRERLAMLDRREGSRGSGSGGDDSGGGDDSESGRSCRSSDRDETGGSEDVSDTETE  
DSFPVYRPKDYGD

>comp9944\_c1\_seq2; 456 301 1425 LEN=2250; translated  
MAASADESFSSSSSSSSSSSSSSSKASAVVPGTAGQAPERGTAAAAPVTPPSEASPSPSPE  
RILSPTDRDVLGCRGKIRFHPGNVLFNKLLREHFSEYGLAPKGSKLEIVKRIVSGIREG  
QAGGPGGFLEHHAGGDERDGSNGNDGGYLDIGDERAMSKTVRYLWVWLWVLAFFG  
SHESWFCFFLFFFLSLSLWTPRCSSRFASQRHRPRRLPKQQRFIQAQAFRDIVVTEEKRL  
QTHRHRWHAATTTTTTTTTTTTAGGRGCGNRSVSEDDSAVAPCRPGPFGRQAHTLSLGR  
RRPTFRERLAMLDRREGSRGSGSGGDDSGGGDDSESGRSCRSSDRDETGGSEDVSDTETE  
EDSFPVYRPKDYGD

>comp9945\_c0\_seq1; 462 34 801 LEN=1038; translated  
MKLAIATMMIASASAFTAPQKTASTTALAGVPPDRPSAALPFAENGCPATLDGSLPGDVG

FDPVGFSTTPMASFFDSKTGAKDSMSDVQWLREAELTHGRIAQLAVVGF IWPSVFGTFPG  
NEWTGVDAYSYKNPIEELEHVPGEAVAQLVLFVSLIEFRVSLIKAQGPDRLPDGLQLGQ  
GPGPRINPNLDYTPPEQFYEKQVQEIKHCRLAMLGAFGLFCQAANGLDIGAQIGGALAT  
PEYRAKAGYFLPEGI

>comp9946\_c0\_seq1; 246 1 343 LEN=670; translated  
XHDLVRIFFQPHNYQPNFIMFRSTILLVIFMAVFANATILVENEARNPNAVRVLKKGKGT  
APTAAPTQRQKGTPTSEEPSAAPSAAPSASPTAAPTSTSSSTTTTFFISTA

>comp9947\_c0\_seq1; 76 1 521 LEN=521; translated  
SGEPSDAPHFPSATPSDSSDPSAVPSSAPSVPVPSERPSLVPSASPSFFPSAAHSESPS  
FVHSSAPSASGEPDAPHFPSAFPSSFPSEPSVLASDPSFPGSSAPSSFPSPGVPSEGP  
SSVPSLSPSKSXNAASDTSSDKASYTSSHTASYSSTHTTSYTSPDHASYTSSDE

>comp9948\_c0\_seq1; 216 1 351 LEN=746; translated  
SQPPTPSGGEAEPGETTLQHHHQQLKDAMDKASSLAGGFFARVKSGVAHKLKKEEENSA  
PAPEATIVDLPPAAVARAPASGGSDGDWTGTDIAAATDGI TNFSIGDDEDDADLLL

>comp9950\_c0\_seq1; 325 161 1195 LEN=1391; translated  
MATTKDTADATMDVGFVVEEDWTIVEGGELRGMKHKDGVLSLSENTRDVRWRKMP  
SL  
EYESLKKLDDLKHSRYIKNLHESVCRLSNLEVLVLRCEKLITLPAQIGNLSNLQELNLT  
DASELSSLPESLGNLSNLRKISIGGHQGSNKVLRPLSTFGNLKSLEILCLDKCKELES  
LPPDIGNLKNLKVLMRECKAVKELPKSIGALSNLVELSISKICIGLSNIPPELGDCGNLE  
DLIMNKCKNITTLDPNICNLRLCMLDLRACKKLIILPSQIGRLTNLKFLLDLRTCKRLET  
LPKSLGELTKLEFLDISACVDLTVPRSLEKFKDMTEGW DENRVQ

>comp9951\_c0\_seq1; 303 228 1772 LEN=1942; translated  
MSEDEDEDGSDNGIASNEYKNGCDDPYEKAKRQLALFFEKESAFPEDLRSFLKGQIELF  
VVHATSRANAWLCDLAVDHRKKEVDYGRHIRAVA EVFPD SLLHRSSSDHSTCPI TAACGH  
HLTVEGPGGECLQRRWVSSCETIRYVPLLARLGQKHHKHLVGGAGGTDRNHNSNGTRPQ  
PVTPERERVRVQGRNKPPRRHSCPLTPLRTALEHLTNCTEEDEQGDSPSHQHAVDV FSA  
RAMERLRESGLSDGDIERCNLVDVCLLRWGVPRTLERLRFVGVHVPGLRAGRRGDLRA  
PSSRATPYTRAEGDTLLHASVKSSLDRTDLGAFRCVLELGEHFAADLGLFHFANPRGAT  
PYRLACAWFGVHKTLSAVRAVVVAGGAVSGESFLRAASDPEIHLDSLQFQLEQCPSLLPQ  
LLGRLPAPPVTQPGTTRKRAQEPATHRAIWKGRCTLGLPPVQRKTFHQAVVPSEWDSR  
KYPRSHEIVTDSFGAVELLPPAPRASRRLSLGRXW

>comp9952\_c0\_seq1; 918 295 3975 LEN=4217; translated  
MEQSGCVESDYPLRLSRLSSSQPGQAQKQTTTTNNTNNDNRQSNPRDKAGRGRREGGHIR  
RSSSSAGESAASSSISRFTFHESEYEENSNSGYRSPTRSDTHSLIKRAAKSALLDEV TPT  
GSTIFSSGDASDDDEPNDENSHPPSLPNMRSLETSPMPAIPDEQDRKRFVGLAAVLSM  
YDYESYELLSKEKRKTNRDNGGDGDTDNDNDVSGFFDFYESDDDDGDYSIEGYESSKQNA  
TDRSRTNNPNRDKINKPGSSVNKNI PVLSSAPTNDTDFNFYSHRCQSFESMGSSVTSTT  
GTPPASSATNNRAIPPLPKTKPTFRQQAANAQKMKPSDTTSDPKANLSRQRYLSRRYELY  
SGLLLSSSELLLLDKSIARAFPLMRSVLVLPQIHKHTHTQVTNDDTSTSCNKTYKKQEQP  
QHKNEGDTDPSTRPPEIHLLDNPDELSPFLDSLTPGAGFRCVSLLLLQHLLTNENGYDA  
RIRHAVKKSILVLRDANEDPFEHILSSRARNKDRDARPSGAENVQTQRKDLR DYERRK  
LLQATRTFEALEQNIARRLILLSSPGTKRNSASKKYDGSKRKTQSANVGF TKEQLVRGV  
KIGGAGILAGTLFAVTGGLAAPGIAAGVA AFAGAAAGTAAVSALTSAAVVTTIFGVGGGG  
LAAVKMQRRTQGVTEFEFCRETKGRPDRRGRPNPENGDGNEEKLEAELFSILCISGWLTD  
PCDYQRPWGLQPTHPRIPDRLEKLERFYSIHSPDHLPKCERILNSWKGELEVELWRVLRK  
YGSDDPNI FPLDCVHDSNGDVVKRQGALTLDQEEILDKLFVELGYHSVAPEQEKAAQNEH  
EHQMSPF EKMRNGWKKRSFNRRSGSNMNEKDENS DSIHG PSSQRILAIQNNP SMSGDSI  
LHKYDSDS SAELEKRKVEE EIPYEP RHLSTVWDWKT TYGGEMYTVKWE SALLTQICDCV  
MDLAVDVVSGATRILKQTVLHTLLSAVIWPTYLLNLAHMIDGDWTIAVERADEAGV VLA  
KTL LYSRAGR RPVTLVQVTSFGARIIY SCLKELARYQEWEHYQELLEESNAATNGQNHHE  
HRLLTRFKQKMKGMREPASIVEDAILLGLPNHLSLSSWKACRQIVAGRLVNCYSNNDLIL  
SLMFQAKRFSGGSGFNMGMSILKPVCGT CPVEQVGVENIDCSDLIMGHQDYCLEVGKILE  
RIGFGEPIKFVDDSKIKDAVTILSDA

>comp9953\_c0\_seq1; 567 157 1701 LEN=2233; translated  
MTKFPMNLPSPRMLRALSKNSLDDLAVMAGEAESAKNIQT TARTEGNSTPSPAFSKTKT  
PGRTPSCSANGICGRAPKQHTPSSVIGRTPNAGKILSPLPLQPRTLHTSTRQKVEIEMGD  
SLFRDVNNATTKISADHDANTGGVFDGSCQNSECDNFYALKMSKTFDEDDENSVQEGD  
SIGGGFALDDFKFIRKLCGGGTADVVEVLDTASCALYALKVQKATEDALCELDLHIPLRH  
KNICQMVDYFYSDTKPFAHEGCDVVSHEKVDASDGNAEVSYLCTILEICDNGDLARALDE  
YEMIPEKLAATYVMDIINALTYLHSRDMIHCDIKPANCLLDGNGKEAIVKLABFGMAVTA



DAKEIVGGSPVYMAPEHLLAWRDMTDFDHTTDDIYSLGVVLYELLLGYLPYEVLEAEQKV  
QQIDESSGDSVESITKSLMAASVTNGDTINNSIDCGYPVLDLRKLNLDASSDKPFYIPPI  
FIEEISDEAQLLRLMEPTASKRITLEEAKDHEW

>comp9954\_c0\_seq1; 258 1 1116 LEN=1372; translated  
LASVGI AVHVEFHSVVAFVRLRQTASRQHNDRMKPSNTAIGRGTALAFLLWFFAGAVAVA  
SGWTTGIATGTTTRASSTPDRHREIGTSSSRTGPLRTSSPGEPEAARPPVEGLATRRELVA  
AAGGCLGAAAVLAARPAPSGAAEPLDAGEAIRRGASNLPGYSSDVFYPPGSFAGSWKMTR  
EVEFPSSPNVLRLSYPVRFVQSIEDGAVVADRGYNQAELEAALARTRSGASGPDGSAPEP  
ASPAVRSYEWVYPNPNVLRVVLSSGTQKEIKVTKRATERTEDTVSSSEFQRVTTQEVAGP  
NGNNNNGVGGIPDISARRVVS KWKRVDSTLEGIEIVYAVGGGDPLSAGLSSSPQAAPR  
ILSKSRLYLVR

>comp9955\_c0\_seq1; 1665 1 4784 LEN=5244; translated  
XQQQQQPQQMGQQGVQYRTVPQQSQQQGIQQQPIAPLQQQQQAPLQQIQQAPMVQGGHQ  
MQQPPPVQQPQGSNSRIVNVAEINPIMSQPTVKTTTHAPVQPAPMHYQPAQPQAPVAAPQ  
VSAPVQGGPQTQNGSGNRQVSDRQQVLRHQQRLLLRHAAKQCQHDDGRCPVTPHCAGMK  
RLWKHIAECKDQKCLVPHCVSSRYVLSHYHRCKDVRCPVCGPVREAIHRSHEKQKQMQUAL  
KQRHQQAVQQNQSEGAPVGVAPVGVPPAQVQHVQVQAPSSVQGVAPPPQQQPLQYPPQPTAP  
KSTMAAEPNKRQRIGVPMQYQQQPVPAPGQPIAPRNMYPGSPVPTSSTTSLPPQPM  
IQPPAVSSFAPKQPPMAPQPGVNPAPVPIAKPAAPPKFFANGQVITPKFTGPKPQEDHTLI  
NCFVSVEQIETHIASLNKGLQLPPAKLKASCLDVLKLNLSHQHGWFVNSPVPDVELGLPDY  
FEVIKQPMDLGTIRKLENGCYHSLDDFHNHVQITFDNAMLNPEGSVVYMANEMKTKF  
IQDFENLMKQLNAEEDAKRRNGEACSLCGCEKLLFEPVVFYCNHNCPSKRIRRNSSYYYV  
GGNNQYHWCHQCFGDLKDGQLLELADASIRKEQLIKKKNDETHEESWVQCDCRERWVHQI  
CALFNTRQNKDQRSEFACPRCTIEERRKTGRLEATSSSTPMAEDLQRTKLSEFIESHVGRK  
MADHLKGLAEKVKQKDGVSIEEAKASVTMGGEITIRQVTSMDRKLEVRERMKKRYAFKKY  
PDEFTYRCKCFVVFQNLGDVVDVILFGLYVYEHDEKNPSPNDRTVYVSYLDSVHYMRPRSM  
RTFIYHEILISYLDYVRRRGFSTAHIWACPLKGGDYILYAKPEDQKTPKDDRLRQWYID  
MLVDCQKRGIVGKLTNMYDLYFSNRENDATIVPYMEGDYFPAEVENI IKDIEEGKVGGKK  
SSGKEGKKKGGKKQKRKSGRGGTRSSGIDEDALKASGVQFPGDDQRSLEEGGRDYVMVK  
LGETIQPMKESFIVAFLAWKGARKEDMVVPKAIQEYREKHNVVVEDGPDDEEYQNMREEKE  
REIAQKKEKSSDVKSGATEDGQSKDVVMKDSVAENVNDGATRVEKSADGKIKETVKDDDN  
VSKDKSKPENESKSEKSEEDVQEKADNAKGGATAVVESENVERAGAEADIKSDGLNET  
SKEGTKDKNAENIESTSQTQQPSEKESQVKSEATTDNSSIKIEKKDDGDGSKPNQMEVD  
STSKSTEGKDALSSAKPATTQNGAGATATAVPTTSAGVEKVEATKSLSMQERSGKFAAMA  
KKRGFSGEEKSDTGDKKKEKSKAKGKEAEAAPVIYVLDKGRVVKVIDDDAEEMDCEFL  
NNRQAFNLNLCQGNHYQFDHLRRAKHSSMMVLWHLHNRDAPKRVQCTTCSREILSGYRFH  
CAVCADFQCKECINPNPIPRPHQLTRIAVSGQOQTELTEAQRKERQRSIQLHMTLLQHA  
ATCKNPCKPSANCTKMKGLLKHGAQCTIKATGGCNVCKRIWALLQIHARQCKATQCPVNP  
CMAIRERVRQLKKQQQAMDDRRRQEMNRAYRGAR

>comp9956\_c0\_seq1; 463 119 2130 LEN=2187; translated  
MPSSLPENLEGLIPDDTQRALLEDLCEELGQAHLLDAYCEGGSVDDDKLRSQCQLVKL  
DGGYPGGLRSYVQKAKKLLQDSKAGVNPLDGWAPSVPPQGESFELGTDKYRETESKGMELL  
EKVGFVLVAGGLGERLGYNGAKVGFWDRLYADFCLKNNILAREKCTPEYXFVTEYLKLN  
SDIXNFMIGLPTESTTGTLYIEYYASYILAAEKKRNDGKFLPLCIMVSNDTKEPTLRLLR  
ENKCFGLKRRQIYIVQQGDGVPALVDNEAHFAVDPDDPYRIITKPHGHGDIHSLLYKEGV  
TKEWQEKLDIEYMLVFQDTNGLAFHTLPLLLGVSKQHGFIMNSLCVPRKANQAIGGITTL  
TNSSTGQERTVNVEYNQLNPLLRSTEEFKDGDVNDESTGYSPFPGNINQLVFLHDSYNKV  
LERTKGVMPDFVNPKYKDNKTKTVFKKPTRLECEMMQEFPTVLSTEESTHVGFQAAAASICF  
SPVKNVADGAVLQAKGTPPGTAATGEADQYAAPRIFLRSGLCDVKDADPVVYNGIEVVP  
GPAIVFGPDFACCRELEAKFPCEKVKISPRSTLVVRGSDVVIESLDDLDTLVVDAGAR  
EAVTIKDLVVKNEGWVQVPTADDSEKEIVRMRGFIIDRKETETIKAHNNKPDGIPDDSSI  
DSDVPEVNF

>comp9956\_c0\_seq2; 240 119 646 LEN=1402; translated  
MPSSLPENLEGLIPDDTQRALLEDLCEELGQAHLLDAYCEGGSVDDDKLRSQCQLVKL  
DGGYPGGLRSYVQKAKKLLQDSKAGVNPLDGWAPSVPPQGESFELGTDKYRETESKGMELL  
EKVGFVLVAGGLGERLGYNGAKVGFWDRLYADFCLKNNILAREKCTPEYVSSLSI

>comp9956\_c0\_seq3; 371 1 1583 LEN=1640; translated  
ESPLNSAPTINIXETESKGMELLEKVGFVLVAGGLGERLGYNGAKIGLPTESTTGTLYIEY  
YASYILAAEKKRNDGKFLPLCIMVSNDTKEPTLRLLRENKCFGLKRRQIYIVQQGDGVP  
ALVDNEAHFAVDPDDPYRIITKPHGHGDIHSLLYKEGVTKEWQEKLDIEYMLVFQDTNGLA

FHTLPLLLGVSKQHGFIMNSLCVPRKANQAIGGITTLTNSSTGQERTVNVEYNQLNPLLR  
STEEFKDGDVNDSTGYSPFPGNINQLVFHLDVSYNKVLERKGVMPDFVNPKYKDNTKTV  
FKKPTRLECMQEFPTVLSTEESTHVGFQAAASICFSPVKNVADGAVLQAKGTPPGTA  
ATGEADQYAAPRIFLRSLGCDVKDADPVVYNGIEVVPGPAIVFGPDFACQRELEAKFPC  
PEKVKISPRSTLVVRGSDVVIESLDLDGTLVVDAGAREAVTIKDLVVKNEGWWQVPTADD  
SEKEIVRMRFIIDRKETETIKAHNNKPDGIPDDSSIDDSVPYEVNF  
>comp9956\_c0\_seq4; 213 1 680 LEN=855; translated  
XESFELGTDKYRETESKGMELLEKVGFLVAVAGGLGERLGYNGAKIGLPTTESTTGTLYIEY  
YASYILAAEKRRNDGKFLPLCIMVSNDTKEPTLRLLRENKCFGLKRRQIYIVQQGDGVPA  
LVDNEAHFAVDPDDPYRIITKPHGHGDIHSLLYKEGVTKEWQEKLDIEYMLVFQDTNGLA  
FHTLPLLLGVSKQHGFIMNSLCVPRKANQAIGGITTLTNSSTGQER  
>comp9958\_c0\_seq1; 553 221 2697 LEN=2750; translated  
MIQSIHSLFLILIAGLTVNDVGANNNAARNLRQLRPMESHVKENTSHGLKKEFIINGQNSD  
FGRYPYHALLMHETGKGYCGGTLIAPDIILTAACHCEIPVWVGVRHFRHTYSDGDELHRI  
LYSYRHPYFFQQTDFDLILLKLRDKSAKPPIRLNDDPKLPDVSEGSAQNVVTVAGFGKT  
HHGYAADIQEVNLMISNDVCEESRDYPYNSVLDFOIGYEGLIIFDNMFLADLSESGKDA  
CSGKLFVDMVEKKNXREVALLDQSIHDEKLLKDEELTRNLYLLFSYHKLGDSSGGPVIMKG  
NSAEEDVQGVVSWGFGCAMPNFPVYSRISHEITWIRSSVCAISDQPPADFECDRYP  
NERGPLIDIIVRIDFNLYPNRISWAFVDATTRESLIHQNSLEYESITPYSQHEQVVS  
LPA GSNVTFTLWSIGNNGLSKFSASYSYTDSEKNEVEIISGYGAGNSIIDSATSDPHV  
LPTVPTS PPT EASTT MPTNSPSSSPTKERSNLSTFEPNVIIIVDENS  
DGINLNADGINLNDDLLPRV DLTGSLNPISATAD  
SISATPTITPINASSAPSTEAESPTPDPTQTSTGSPTKDPTEWPTE  
FP  
TLNPTATPTRIPTSSPSRLPTESPTNKPTQNPTFRPSKRPTENPTANPSNFPTRSPSE  
RPTTALPTFYPTYLTWISTRTKIWPTESSSKVLTDIPTSYPTEFPSRIPSSNPTEISS  
ELSTTPPSQPISARSESVSENSAPIGTSSTGGNDPPSLTFAGR  
DGPTELAGNESTFTFYDETPASSGALTL  
LRNPPFFWEDAFGDVSRDLNTHIHNKSDMRVA  
>comp9958\_c0\_seq2; 585 221 2556 LEN=2609; translated  
MIQSIHSLFLILIAGLTVNDVGANNNAARNLRQLRPMESHVKENTSHGLKKEFIINGQNSD  
FGRYPYHALLMHETGKGYCGGTLIAPDIILTAACHCEIPVWVGVRHFRHTYSDGDELHRI  
LYSYRHPYFFQQTDFDLILLKLRDKSAKPPIRLNDDPKLPDVSEGSAQNVVTVAGFGKT  
HHGYAADIQEVNLMISNDVCEESRDYPYNSVLDFOIGYEGLIIFDNMFLADLSESGKDA  
CSGDSGGPVIMKGN  
SAEEDVQGVVSWGFGCAMPNFPVYSRISHEITWIRSSVCAISDQ  
PPADFECDRYP  
SLNERGPLIDIIVRIDFNLYPNRISWAFVDATTRESLIHQNSLEYESIT  
PYSQHEQVVS  
LPA GSNVTFTLWSIGNNGLSKFSASYSYTDSEKNEVEIISGYGAGNSI  
IDSA TSDPHV  
LPTVPTS PPT EASTT MPTNSPSSSPTKERSNLSTFEPNVIIIVDENS  
DGINLNADGINLNDDLLPRV DLTGSLNPISATAD  
SISATPTITPINASSAPSTEAESPTPDPTQTST  
GSPTKDPTEWPTEFP  
TLNPTATPTRIPTSSPSRLPTESPTNKPTQNPTFRPSKRPTENPT  
ANPSNFPTRSPSERPTTALPTFYPTYLTWISTRTKIWPTESSSKVLTDIPTSYPTEFEP  
SRIPSSNPTEISS  
ELSTTPPSQPISARSESVSENSAPIGTSSTGGNDPPSLTFAGR  
DGPTELAGNESTFTFYDETPASSGALTL  
LRNPPFFWEDAFGDVSRDLNTHIHNKSDMRVA  
>comp9959\_c0\_seq1; 569 164 1702 LEN=1958; translated  
MFAIKSVASVPPAAARLASKSIRLLSSAASSGAYLNKGLKDQDPELLGLIEQEKARQR  
NSLVLIASENFTSKAVLEALGSVLSNKYSEGYPGARYYGGNENIDQVELLCQKRALEAFN  
LNPEEWGVNVQSLSGSPANFQVYTGLETHDRILSLDLPHGHL  
SHGFQTPTKKISAVSR YFESMPYQLDPSTGTIDYDQMEKSAELFRPKLIVAGASAYARLIDYER  
IRTIADGVGAYV LADMAHISGLVAEVI  
PSCFDYADVVTTHKSLRGPRGAMIFYRKGQKGT  
DKKGNPIMY NLEEKINFAVFPGLQGGPHNHTIGALAT  
CLKQANTQEFVEYQKQVLKNSRLATELIDRG  
FELVSGGTDNHLVLDLKSSRQIDGARVERILELACIATNKNTIPGDRSALNPGGIRMG  
T PALTSRGLLEDDFAKVAEFFDRAVAIAVDL  
KNTDEGKKIKGFRQMCTVGPVHPDLVALR  
KEVSEFACQFATVGFEESEMEFEYEVNFVA  
>comp9960\_c0\_seq1; 435 258 812 LEN=993; translated  
MAKFFTALLALALAGSAASFMSMSSTDRRAFVKTAGTAGAAVAAGTILNTPAASADAD  
VAVEVDKDGFI  
TSDSGLKYKVTKEGTGAI PAAGQTVKAHYTGWLDG  
FDSIRKFDSSRDRG RPF  
TF SVGKGQVIRGWDETF  
SQMQIGERRQIIIPRLGYGDRGAGGVIPGGATLYFDV  
EL LGIM  
>comp9961\_c0\_seq1; 1807 626 7014 LEN=7114; translated  
MNEAQDFQSKLEIYKFGAPRDSSTSVTLQ  
SISLTAEAKMQDNPFYHMFRTYFWDLGFNRE  
GEDDGMFDGAPVEVYADTVVQDLFELDVPEI  
ESDATLVLVNVMMAAVNGVFQALAHCKAKD  
TDAGLAALDTS  
AALWIGVQEDGSNEKGHLLYNMAENAGERFDQ  
DNGETHVNTLVIDGLL KMQTALQEGACNTTP  
SSEVYKLR  
TTVQRITGTMTIPLVQNLIIHHTLNTVNEGGSDMVEL

YALGLLPRVATCDPHAFETLLALDVLNLDLKPGEDEDLAVEAIQKAYSCLGVTCEDVGSYMG  
GVVPTCRDDSRETTVTRGGYKAISEGLSKANIDRDILQIDVFLKYNANDLAFDWYSHGW  
NSDVSLQLLATNKFVPELADSQYPYFSLYSDYYGDSFLDERINNILKRGDVFYFSDIEQ  
IRKGVTSLEEVVMFLAIADSMKYAVVECSNGNQEVARKYVDAGAMFYIIGSMEGIDINSS  
RFQNGKSLFAMAHDMCTIFGTCVDNGNDAGSAAVNELIIASF TIAADNIESLDCAEVASL  
VDTTILPAISVPLIQGVLKYASSNENLPVGTDDADLAVGDALSRGILPLVNDVSPKSADT  
IKSQMEYQLTTQPVEKGFESVNVNAFRGETLSLMGIDCFDIGVLATKPIVGAMCGDGVNRP  
PDTPNAIPTELGFGRYNFSDPVAASRDAAFALDVRDMFHATTITAGSLVYTTGGANALAN  
VFGNAVDGTPSLASLSTLASLPMDDPLFSIYKYALYKDSDFEALSGENFAYANDVMEEA  
LKNGEDSKLAAESTVILQVFMVIAHKLYSAVRVCDGVSASEEIDSAVALWIGNNQREGR  
FEDGWMYSIGQSVHKFFGYPEGEAPVNSKVMDFLHAQTAAGKCANSSSDSGKMGRPSHQ  
STKLRYSQQIIRMMTQPLIKSLLFHMINKSNMVELYAVAALPQCAACDPEAYRGLQGA  
LFSGYDRQTSLETVDLHIAATFLRCQEITCDHIRTGSDADEFLVDLAKQLCKRLGEDSDS  
DEPLASYTPQYSVKEEARLDDALEMSIMMQTRAYGAAKDIYVSGHNSNSHGDSTLASFA  
KAPNQKISVDNIVTQTINKTDQYAAVTRTESTEIIKRSLQSMVSLNAVLAQMKSSSLDECN  
NGSVEKAREEWDRAVAYFVGSMEGHLGGKTD SHGVWLYALGNEFCNDFSTCETSGETV  
NQQLMFNFASGRDLSVDGECNHLNLPDAITPKLLVPIIQGVIGSSIKIGDNPDPDVL  
TVHILSQAIIPYIQPINPESAALLKDAFGSFSISSTAPVVSNIVEAFTNVLDGLGIPCDT  
IGNPMGYTLCVTSFNEDTPTNLADNLYVTTTTYVQDRADIALDIKDMAEALSEGTEIELAQL  
IYRKGNSEKFEDEGKFLHTRTIKEFSTTSTADMLDEPEFNMFMYTLLNNQLYAD SXVEEA  
MANSKVGNSEVATEAAIVLNLWMEIVHLMHETLRACKNKQLRDDDGVFLMDAAVAYWIGD  
GQIAGDGDNGHLLYALSERYGETFNIDNGGQSRNTNII LRLFNEAKNEISLPNACSENKT  
TYKRLRGITNRLIPQMAVPLIQGLIASLRENDRERVKIYSHAFIPLLAGCRLNIYESLKD  
KLLSNKDYNVVDVELIIDLIRQSFDCGLKCDDIGVHTLEEDDGAPKCKDPDFDASLAGY  
RPASDVRDYARLDLDMREMDVLLQMEAYGAVDELYTYGKHARGATGVVTSIGQLATTKHR  
SIVPEFDAFTQYYSKDTFADDIVRAALDPLQDHWTGQRRTVVLKASQVLVYFAALQNA  
YEAVTDCDVQSIDSSGSPNSWDRAAAIVIGSLEGTCKKNGTTEGYMLYNLAQEHCI EFGTC  
LDETTNNFINEEIVSLLYTGRGAALSKSCRAIKKADELSSLLIPIIQGALSSSIVLAD  
GENLQIRADAYVYSRALIPLLRRNAANDLNSYLGRTASTDKRHTASKVYAAALATGYPKM  
NIDCEDIGNTNGLDTCGVVYVSDYLWIIIVTLNLLMFMFCGGLYLFLRRRQRNNAKIP  
DQYPKF IHSNGEMNHSMDLLEKAF TSKRSDTFDMRSDDT DGEIEALNRQYIESRSMGIGT  
NTDAFDDEYSDRFDEVEALTSNPSGDII

>comp9962\_c0\_seq1; 355 516 1364 LEN=1546; translated  
MARDGRMRALVMDESITPLLYRVNGLYNAHGISSVVVVGVDWLDV PNNVLLDKYVVF  
DATAKAQISIRQFSYGHVEYAGRGVVHRLQWEKKGTPKLR RPADAFSKRFDSV VVSLLD  
GGYALALYKEHDEESSIDDDDEAGCIDASRLEQLL GKRQLFATGLCVAWILQNSPMHPNL  
GVRELLKMLDSKLEKEGINQVVQELKERDLSLISKSMVQVLESVGF LERPRSFEIGQALA  
RVHGIQFEDMPMEDDPAEEAARLEQEKKKKALAE MWAKRRSK

>comp9962\_c0\_seq2; 588 370 2517 LEN=2699; translated  
MWEIDSVYRDP SILRDGRREKESRDAALS FVVSAHASIASCLGNKPSFLPSFHEGGNGSR  
VALADFASRCFLRCKQKNGTAATIIVNENVDVECGPNEHVS FHMETLDEALLNRRQRKNT  
RSRVYHPYVVERSDFFCRDDKLQVTTR LKFSQKTNDELSEEHAKAIVL KSAQSI FHRVFP  
IDDPAFGQSL LQHVACVVLQQR LRCHLSSIDAIAFICDGSILPRKSGTSAAPMESPPAVP  
FKAPADSRMTT SISI NMGSLREHL PSSLMQRGNESMSTV VLSGLLVTKGVTLICGGGYHG  
KYFIKLD SIKLVLQVRANSSLI FVSYSGKSTLLQAI SVGHFDKIPGDGREMCVSI SDAVS  
IRAEDGRYVNNCNI SAFISNLPTPPGVKATIDTEHFSTRDSSGSTSQAANVAEAI EFGAK  
ALLVDEDI SAANFMARDGRMRALVMDESITPLLYRVNGLYNAHGISSVVVVGVDWLDV  
PNNVLLDKYVVF DATAKAQISIRQFSYGHVEYAGRGVVHRLQWEKKGTPKLR RPADAFS  
KRFDSV VVSLLDGGYALALYKEHDEESSIDDDDEAGCIDASRLEQLL GKRQLFATGLCV  
AWILQNSPMHPNLGVRELLKMLDSKLEKEGINQVVQELKERDLSLISKSMVQVLESVGF L  
ERPRSFEIGQALARVHGIQFEDMPMEDDPAEEAARLEQEKKKKALAE MWAKRRSK

>comp9962\_c0\_seq3; 616 370 2433 LEN=2615; translated  
MWEIDSVYRDP SILRDGRREKESRDAALS FVVSAHASIASCLGNKPSFLPSFHEGGNGSR  
VALADFASRCFLRCKQKNGTAATIIVNENVDVECGPNEHVS FHMETLDEALLNRRQRKNT  
RSRVYHPYVVERSDFFCRDDKLQVTTR LKFSQKTNDELSEEHAKAIVL KSAQSI FHRVFP  
IDDPAFGQSL LQHVACVVLQQR LRCHLSSIDAIAFICDGSILPRKSGTSAAPMESPPAVP  
FKAPADSRMTT SISI NMGSLREHL PSSLMQRGNESMSTV VLSGLLVTKGVTLICGGGYHG  
KSTLLQAI SVGHFDKIPGDGREMCVSI SDAVSIRAEDGRYVNNCNI SAFISNLPTPPGVK  
ATIDTEHFSTRDSSGSTSQAANVAEAI EFGAKALLVDEDI SAANFMARDGRMRALVMDES  
ITPLLYRVNGLYNAHGISSVVVVGVDWLDV PNNVLLDKYVVF DATAKAQISIRQFSY

GHVEYAGRGVVHRLQWEKKGTPKLRRPADAFSKRFSDV VVSLLDGGYALALYKEHDEES  
SIDDDDEAGCIDASRLEQLLQKGRQLFATGLCVAWILQNSPMHPNLGVRELLKMLDSKLEK  
EGINQVVQELKERDLSLISKSMVQVLESVGFLEPRRSFEIGQALARVHGIQFEDMPMEDD  
PAEEAARLEQEKKKKKALAEMWAKRRSK

>comp9962\_c0\_seq4; 540 370 2556 LEN=2738; translated  
MWEIDSVYRDPSILRDGRREKESRDAALS FVVSAHASIASCLGNKPSFLPSFHEGGNGSR  
VALADFA SR CFLRCKQKNGTAATIIVNENVDVECGPNEHVSFHMETLDEALLNRRQRKNT  
RSRVYHPYVVERSDFFCRDDKLQVTTRLKFSQKTNDELSEEHAKAIVLKSAQSI FHRVFP  
IDDPAFGQSLLQHVACVVLQQRRLRCHLSSIDAIAFICDGSILPRKSGTSAAPMESPPAVP  
FKAPADSRMTTISISINMGSLREHLPS SLMQRGNESMSTVVL SGLLVTKGVTLICGGGYHG  
KSTLLQAI SVGHFDKIPGDGREMCVSI SDAVSIRAEDGRYVNNCNI SAFISNLP T PPGVK  
ATIDTEHFSTRDSSGSTSQAANVAEAEIEFGAKALLVDEDIRCVYQTTKSLKKS DSVWSS  
WFDXLTFENMLPFSYVLIYRFCAANFMARDGRMRALVMDESITPLLYRVNGLYNAHGISS  
VVVVGGVGDWLDVPNNVLLDKYVVF DATAKAQSISRQFSYGHVEYAGRGVVHRLQWEKK  
GTPKLRRPADAFSKRFSDV VVSLLDGGYALALYKEHDEESSIDDDDEAGCIDASRLEQL  
LGKRQLFATGLCVAWILQNSPMHPNLGVRELLKMLDSKLEKEGINQVVQELKERDLSLIS  
KSMVQVLESVGFLEPRRSFEIGQALARVHGIQFEDMPMEDDPAEEAARLEQEKKKKKALAE  
MWAKRRSK

>comp9962\_c0\_seq5; 512 370 2640 LEN=2822; translated  
MWEIDSVYRDPSILRDGRREKESRDAALS FVVSAHASIASCLGNKPSFLPSFHEGGNGSR  
VALADFA SR CFLRCKQKNGTAATIIVNENVDVECGPNEHVSFHMETLDEALLNRRQRKNT  
RSRVYHPYVVERSDFFCRDDKLQVTTRLKFSQKTNDELSEEHAKAIVLKSAQSI FHRVFP  
IDDPAFGQSLLQHVACVVLQQRRLRCHLSSIDAIAFICDGSILPRKSGTSAAPMESPPAVP  
FKAPADSRMTTISISINMGSLREHLPS SLMQRGNESMSTVVL SGLLVTKGVTLICGGGYHG  
KYFIKLD SIKLVQVRANSSLI FVSYSKSTLLQAI SVGHFDKIPGDGREMCVSI SDAVS  
IRAEDGRYVNNCNI SAFISNLP T PPGVKATIDTEHFSTRDSSGSTSQAANVAEAEIEFGAK  
ALLVDEDIRCVYQTTKSLKKS DSVWSSWFDXLTFENMLPFSYVLIYRFCAANFMARDGR  
MRALVMDESITPLLYRVNGLYNAHGISSVVVVGGVGDWLDVPNNVLLDKYVVF DATAKA  
QSISRQFSYGHVEYAGRGVVHRLQWEKKGTPKLRRPADAFSKRFSDV VVSLLDGGYALA  
LYKEHDEESSIDDDDEAGCIDASRLEQLLQKGRQLFATGLCVAWILQNSPMHPNLGVRELL  
KMLDSKLEKEGINQVVQELKERDLSLISKSMVQVLESVGFLEPRRSFEIGQALARVHGIQ  
FEDMPMEDDPAEEAARLEQEKKKKKALAEMWAKRRSK

>comp9962\_c0\_seq6; 355 393 1241 LEN=1423; translated  
MARDGRMRALVMDESITPLLYRVNGLYNAHGISSVVVVGGVGDWLDVPNNVLLDKYVVF  
DATAKAQSISRQFSYGHVEYAGRGVVHRLQWEKKGTPKLRRPADAFSKRFSDV VVSLLD  
GGYALALYKEHDEESSIDDDDEAGCIDASRLEQLLQKGRQLFATGLCVAWILQNSPMHPNL  
GVRELLKMLDSKLEKEGINQVVQELKERDLSLISKSMVQVLESVGFLEPRRSFEIGQALA  
RVHGIQFEDMPMEDDPAEEAARLEQEKKKKKALAEMWAKRRSK

>comp9963\_c0\_seq1; 187 1 1180 LEN=1366; translated  
XISEDSTQVGQKVLTYTDHPRIMTGLPHRRFHLVQRRPTKSCIIICILFISYRFTTAIHGF  
SPFVKHSRIQPKQAENVDIIRKSQIDSLVGTKSQRCSVSN TSLRGGFMLPLAENPLFRS  
IGIYAFADFVVGFLISIFTGSHVHLDLIGTG VFAVAALPYLGSSVAHIRWSSAAIFLWGM  
KLALFLFFRATQVKHDIRLMDVLASPKGVQFWFSTFLWNVLVSLPFLGLNSDRDNRLA  
LFSGGALFLLGLTIESVSDAQKYIFKRQ PSTGINQFCNVGLWKYSQHPNWFGNLLLTGTI  
LLMNF PALIEPMSTIAKTENETGASLVMMWLWSLRKLLLLACLGPGLWALFKGQATGNIL  
NSVELANTRYGKNPEYGYI KEVPLIIPKLFW

>comp9964\_c0\_seq1; 1125 471 3920 LEN=4296; translated  
MTTILAAAENS DSSSEQTSSVEIDCLNDGSASSSSSATTATFKSLQKLVDSISNARDAMS  
GDGNSFTCR LIPSVTGNLQKHSREEIASIYYTKGENNATIVEINTLIFRPAAISSDAN  
SVYVAIVPSSKRVDVRAFSEELGQLRHKHEQQDGTNGCSNDSAFYQSWELAPSHLVLD  
LCGYSPGGIPPLLVPPRNSGV DGGNIESYDQRKPWAVVLDSSLLPPRNYSSSATQTNQHN  
QLLLLGGGGNTDYRCLIDAKCLVETVLEANTSDRNVKIASIVRFDGGMTT DVTSTRPTKH  
PSAGPTLRAAAISSAPKPFQIAPPSSM DYAAKAELELQDRPHRPVPVTAIGRLTSVR  
QIAKRLVFADFA PDH VYATWLANKNASSNSNSKLGQPNNYDKGKGVSDPPWRSGEDG  
KDMYVQIIVGKTF CERYDDGTDR LK LKPGALVLVKGAA NVDPMQKNGWRNSAGNWAQKR  
SLDVIVSSFEILNDDDDDENLRMLVEEAQEAEAVAGGDWSSLLPWERKRGYERRAVAGNK  
IANGNNAESSDNNSSTMS SSIHNGAANELTFDRFNSQLRDSPLQIEIVDTDESIRAMSK  
EISEMFSRIEEDGTQKSDFLDYVAGIDCEWRPTGAYAEALLEGPD DNPVALLQICVPSIK  
RVYLV DTHRTLRANLAVTEQMNDSEEILAKTIGSIFGSDEMIKVGYSVAIDFRRLAASFP  
HISAFRDVRSVVELSTLAERLHPKSARPSLGS LQRLTKLVLGYSVAKEQQCSNWEARPLT

SNQVEYAALDCALPPRLLDQMTEGSGTARMKQVLPQVTSWRFQTIDSDQKVAIQLLKAK  
RVVGNTFVVSQNWLQHKDAPDRVSVKPEGGGPFVDKNGIMKMPANMLNVAASGGANAPWKK  
MVGSTVGKSKAKCIDLLVGDITLPGKANLEYNPRSGYVAFKNCLALFVNMPDPNRPSRRMP  
YPNEWLEDGRILTWYIRPKDWDGGTSTKTKLKLGLGNDPDEFENRPRVVLFTTRIGNGEFVC  
CGSCKASAADSGSAGAPKTKLVKLNHLHLEDWNALKNLAVFSQLEETNKSRIINAPDNQEKV  
FYPVVSFRNHLARKILDGDVIGAFGTALNEAKVSTNERSIATGVKCVKNYLSNSDDPVVLQ  
AIEIEGMV

>comp9964\_c0\_seq2; 699 142 2202 LEN=2578; translated  
MQKNGWRNSAGNWAQKRSLDVIIVSSFEILNDDDDDENLRMLVEEAQEEAVAGGDWSSLLP  
WERKRGYERRAVAGNKGIANGNNAESSDNNSSTMSSSIHNAGAANELTFDRFNSQLRDSPL  
QIEIIVDTDESIRAMSKEISEMFSRIEEDGTQKSDFLDYVAGIDCEWRPTGAYAEALLEG  
PDDNPVALLQICVPSIKRVYLVDTHTRTLRLANLAVTEQMNDSEEILAKTIGSIFGSDEMIK  
VGYSAIDFRRLAASFPHISAFRDVRSVVELSTLAERLHPKSARPSLGSQRLTKLVLGYS  
VSAKEQQCSNWEARPLTSNQVEYAALDCALPPRLLDQMTEGSGTARMKQVLPQVTSWRF  
QTIDSDQKVAIQLLKAKRVVGNTFVVSQNWLQHKDAPDRVSVKPEGGGPFVDKNGIMKMP  
ANMLNVAASGGANAPWKKMVGSTVGKSKAKCIDLLVGDITLPGKANLEYNPRSGYVAFKNCL  
ALFVNMPDPNRPSRRMPYPNEWLEDGRILTWYIRPKDWDGGTSTKTKLKLGLGNDPDEFEN  
RPRVVLFTTRIGNGEFVCCGSCKASAADSGSAGAPKTKLVKLNHLHLEDWNALKNLAVFSQ  
LEETNKSRIINAPDNQEKVFYPVVSFRNHLARKILDGDVIGAFGTALNEAKVSTNERSIATG  
V KCVKNYLSNSDDPVVLQAIEIEGMV

>comp9966\_c0\_seq1; 10 1 515 LEN=515; translated  
XFEQMGCTGYQDGVWNFDARPLNIRYEDSVAPSGDFSIYSCYQACRLQGYEYFGFECPGA  
TEVECQCYSNARVWPVVPDSIDCNALGPTICTGNGMRGGYSMGGSWGGSYIRAKPPPAEF  
LSQVPYGCSTRSDRFRTRTVAPWGYKEVIPKNDPLQCEKICKDRGFEEFFGFECPX

>comp9967\_c0\_seq1; 334 438 1862 LEN=2305; translated  
MTLLLVALAAVFTGPVSALPHGRFFEFTGTEEGFGFSLDDENDAAISSRGGSSSHKKRC  
LTIITDLICQNDFFTILCEGLKDTGLDRPLDNKNGQKWTLFAPTDKAFQRLSKHVIEEILS  
SVESLEYILAYHTVRGKELFRKRLKCTLLLEMTNGLDTRTVACAGDKVFQKGSNSDSKPP  
EIEEFNQKACNGVIHVVDRIILPKKMWDYSYKSKRRKPTPYTPKPYTYPTYSPTYKPA  
PPVPYPPPPVAPPEPYPPVAPPVPPYPEPYDEPYEEAYHEPYEPEYHDPYHDPYEEPYH  
EEPNEVYQDFVHDLHADAHIDSGSGCPSIAEIVCNTPGFDLLCEALTITGLLDFLEDGSE  
WTLFAPTNEAIEENLIVSVPHGTLNPEESMTDLLFHLIEDEALPFDSLDCEEVWQMSDGGF  
TYTHCRGFKEYQVGRGNGFQQSLIMLKDSPIILREDIFACNGIVHSVDTVLLPDW

>comp9969\_c0\_seq2; 812 353 2361 LEN=2361; translated  
MTGTDKRCRVRCPETPALSLWLLGSLLLLGLDGWWATRNTKTGKTTTTTAEAVECRDNRC  
IPGCECTDPDQIVCASEFGTMGWIPDDAEEVLDMPPKYEIKYNQLKPTGMRGEANRK  
TGIGAGIGKILNITNTTMEGEIYFEVDPDIMVQITSGFSKRAVAELYGGIDIGLSPCDEG  
IVLGKELINMTGVDDRVDNFYDMVVFDDYNNQRFFETSEDQERERVPVDCHPRSTNGKI  
GAVRFSLEDPFYNETSASIMNIWYPLKGSMPIGGISLLCRAVLCLLLVCVCSKCSFSL  
CTTKNWDLLXASGTSPCFWETHPTNKTTGTLFECVRLSLFEENNSQTVASFLLDTKFKI  
EVTEPTEENNYTRFTDEFSDVKVYSNQMIGPDEDQLEEEVVRGNATEANSTASSGEDEDAV  
PFLPKLVIEAVLCGSPLESDEVGVYNSLRFTFYTGQTFRICVGP SKGYENKYHVLGFDSV  
CRSNKKEIIVEEGGLSSPLTIVENETIGFALANGGSVEYNGVISLDAIVNSDLSSSEE  
FFECEGIVFVKDLSLEGEAEGDPPEGDGDGNGERQERERQRLTSARNNTDNGGNDGNNST  
TNNPNTGRNPSPLQWIERYLYRVLQDETEPEADVDSRNGEGNRKRQRERQRRLTSARNHT  
DNGGNDGAIX

>comp9969\_c0\_seq3; 843 353 2190 LEN=2190; translated  
MTGTDKRCRVRCPETPALSLWLLGSLLLLGLDGWWATRNTKTGKTTTTTAEAVECRDNRC  
IPGCECTDPDQIVCASEFGTMGWIPDDAEEVLDMPPKYEIKYNQLKPTGMRGEANRK  
TGIGAGIGKILNITNTTMEGEIYFEVDPDIMVQITSGFSKRAVAELYGGIDIGLSPCDEG  
IVLGKELINMTGVDDRVDNFYDMVVFDDYNNQRFFETSEDQERERVPVDCHPRSTNGKI  
GAVRFSLEDPFYNETSASIMNIWYPLKGSMPIGTLFECVRLSLFEENNSQTVASFLLDTK  
FKIEVTEPTEENNYTRFTDEFSDVKVYSNQMIGPDEDQLEEEVVRGNATEANSTASSGEDE  
DAVPFLPKLVIEAVLCGSPLESDEVGVYNSLRFTFYTGQTFRICVGP SKGYENKYHVLGF  
SVCRSNKKEIIVEEGGLSSPLTIVENETIGFALANGGSVEYNGVISLDAIVNSDLSS  
SEEFFECEGIVFVKDLSLEGEAEGDPPEGDGDGNGERQERERQRLTSARNNTDNGGNDGN  
NSTTNNPNTGRNPSPLQWIERYLYRVLQDETEPEADVDSRNGEGNRKRQRERQRRLTSAR  
NHTDNGGNDGAIX

>comp9970\_c0\_seq1; 447 179 1534 LEN=1810; translated  
MVKRASFE DRGGGGDKRRKSNDRGRINRSSGGSDGSSVFGNLKYETAWQALKDHMRA

GNVDSANILQAPNGRSKGCIAIVTYQHPREAKRAIQELNESELEGRTIFVQPDNGNPRDNR  
DRTNDSAHSMYGVFVGNLPPFECSWQALKDFFKSCGPIERAEMEDPKTGRKKGFGLVYF  
ATERAMENAINKFNGRDFQGRTELEVRKDKKSSSHTKIDNGTSSEAGGFRI FVGNLDFDCS  
WRDLKDFARQRCGRVEHADIPKRGWGIVTFATHRDGAEAIRRLDGLMFQDRRLEVRWDRD  
SSNREDRPSSSSSSSSKQLYVGNLTYDCTWQNLKDAFKRFKAVSHAEEVCETASGKTTGFG  
IVAFVKPNCAERAMNAMDGTDFQGRKLSVRWDRKPEKLEAEKSGNPNNARREQKRQSAPV  
SQNNENSGNGSDTGMEMEGNPLDRALSSGR

>comp9971\_c0\_seq1; 411 93 1556 LEN=1667; translated  
MENKVGIEADVQNGPSGIDISIIITCPKTLRERNRRKSDIETLASTIDRRKHKRIKVTTWE  
RKMFLGRCLDIKKEGGNLSRFSVKELEEREVEELKEKVDRRSRASGWVDEISKLCGYWNP  
DRSMLRFLFAAGLDYTKNSDEDEFYFRDFSFYYTELASKFRLLRIPGVFITLWLLIYYLGS  
AVLFCGIMKNENVCPTQSGSNHDGWVTSIYFASVTMSTVGYGDVSLYSDGQNKWITFVAI  
LYMLGSMIAIAFTVFTKAAEMTFDEISGNRLMSFFKKRITENPDVPLYRQVRCLVLRIVE  
LVFYFVVLNGVGVGIAKIFLVRSEDEDEHQWNLMTTIYWAVQTTTTIGYGLDMPFNLRWF  
NIFFTTFTGTAFVGSVFGSLASLRDEIHDHRRYYAWSRRELSKMMVNELQTNDKLDQNEF  
VLGSLILLNKVKSNDIKQIMDKFRELAGDKEYISISEMDQDQTTALVESTGRKGGVSKSN  
CDFVDFG

>comp9971\_c0\_seq2; 282 93 1190 LEN=1806; translated  
MENKVGIEADVQNGPSGIDISIIITCPKTLRERNRRKSDIETLASTIDRRKHKRIKVTTWE  
RKMFLGRCLDIKKEGGNLSRFSVKELEEREVEELKEKVDRRSRASGWVDEISKLCGYWNP  
DRSMLRFLFAAGLDYTKNSDEDEFYFRDFSFYYTELASKFRLLRIPGVFITLWLLIYYLGS  
AVLFCGIMKNENVCPTQSGSNHDGWVTSIYFASVTMSTVGYGDVSLYSDGQNKWITFVAI  
LYMLGSMIAIAFTVFTKAAEMTFDEISGNRLMSFFKKRITENPDVPLYRQVRCLVLRIVE  
LVFYFVVLNGVGVGIAKIFLVRSEDEDEHQWNLMTTIYWAVQTTTTIGKHLNLYYGCNQC  
KVIVM

>comp9972\_c0\_seq1; 561 33 1295 LEN=1400; translated  
MTKALEHLDLAGGIGKSHDGIRLRTSSLVQSKEAISTTQQKMDRYQMMPYIQIDHPFHLK  
NDLKFAFTYSDESVSIGSSVCSGLRNSLHSSLSSLSLEYTDLDFSSSESSCEEGSSYAMEE  
TPSWRLSPEENQSDWTITIESVPEGTISRHYVHKKALINNGHKGSDFFARLINETDITET  
KPIKIHEDAARLIENMLDYMAYAIIDELDISSDAIGLRHLSQFFGIKGLARRVNCFINED  
VSLENMESYLETTSAFDDMQTTLLADRCAEEIENISPLSSLVGEMDPSFILSIVSSRKF  
NRRKHSSHMSHIMTYGITQRGAIDGHVFQELTAEYLPYVDQEAALPLLIIEAALVRES  
TDESTPLSSLQLRCIEGILPMFSSANNVSDAEKKSQTAMLKIPKKVLAEILSMLPIK

>comp9973\_c0\_seq1; 414 227 1171 LEN=1337; translated  
MEHFKNQKLIHKRYVARLLLSCCKYFESVSSLTEIEVPTEPPEHDPTTAPRVTVCGDTHG  
QYYDVLNIFEDKNGYPAATNPYVFNDFVDRGSFSVEVILTYLLWKIHDPGCIYLTRGNH  
ETKNMNIYGFEGEVKAKYDDKIFDLFLEVFSFLPLATVIGKKVFIHGGISTDEKFMFLD  
DIRKIKRGCEPPETSLMSDLLWSDPQFPFGKSPSKRGVGFAGPDITSNFLERNLSSLV  
RSHEVKEEGYLLEHGKKTITVFSAPNYCDTMGNKGAFIHFDKTLQPKFTQFESVPHDPVK  
PMAYSAGMSGMLGL

>comp9973\_c0\_seq2; 608 207 1757 LEN=1923; translated  
MSTDDKNI EQDGISANESKALDLKNQNDQLKIGHFLQAIGFYTEALEYSPTNAIILSNR  
AQAYIKVENYGLAMADASAALSDPNYAKAYRRGSSQFALGHLKDAKKDFRTVCVLPNK  
SKDARAKLKACEKAIREEAFRKAIESEMTVPLSDSYDPNSIVISPDAYDGNPVPVSGVTD  
DMELEASLFIPGKLPREFVLAAMEHFKNQKLIHKRYVARLLLSCCKYFESVSSLTEIEVP  
TEPPEHDPTTAPRVTVCGDTHGQYYDVLNIFEDKNGYPAATNPYVFNDFVDRGSFSVEV  
ILTYLLWKIHDPGCIYLTRGNHETKNMNIYGFEGEVKAKYDDKIFDLFLEVFSFLPLAT  
VIGKKVFIHGGISTDEKFMFLDIRKIKRGCEPPETSLMSDLLWSDPQFPFGKSPSKRGV  
GFAGPDITSNFLERNLSSLVRSHEVKEEGYLLEHGKKTITVFSAPNYCDTMGNKGAFI  
HFDKTLQPKFTQFESVPHDPVKPMAYSAGMSGMLGL

>comp9974\_c0\_seq1; 618 158 1845 LEN=2000; translated  
MTNLMTREGLGVFLALMAVFXDHYAASFLLNQATRAYQPAPFDRSVVKTFTSTPFSASSG  
RNNERDNKNNSRKPKKSVTDRSQEEAISLIQDIIRAAVDAGPQAGPVRTLQAYKAFSETA  
REFLPRFGQSPPVFSAPKATRTLFEKLGATYVKLGQFVASSPTIFPKEYVLEFQKLLDKT  
EPVEWRIIKRVIEKDLGPIKTFDFVDEKPLASASIAQVHAARLKTGEDVVIKVKPGID  
ASLKADLSFVVASRVLEFLQPDWERTSLSGVVDIRSSMLEELDFTKEAKNTEEFRRYL  
AQNNLLNKATAPKVYQDFTTKKVFTMERLRGVSMLEETLTKVTKDPEVGQQAIIISALNI  
WTQSVMQMPWFHADVHAGNLLLLDDGRIGFIDFGIVGRVSDKTFKAVNELSTSLALADYK  
GMAQALCNMGATDEEVDVEKFRDIEVVMKRIASVQPDITITEMQDGAIGGTLDFDETEI  
TNLLLLLEVEITEDNGLKLPREFGLLVKQSLYFDRYLKILAPELDVMNDARVSGLGEEALK

TTSMPMVNGSGGNTDESIVIDV

>comp9975\_c0\_seq1; 401 609 1463 LEN=1675; translated  
MTAISTILSCIALPVNLLLYANFNSYNADVISDLWVSVFVALAIVISAITMGLYMSHQCH  
SFKFNMLANKVGNIAAGFLLIVFSATVTNGGDAGSRIWSRHWTIFYVATIAPCVLGLIIASG  
LASLLNLRKPERMTVAVECCYQNVGIATSLALTMFRGNDLNEAMGIPFFYGMVEALFVGS  
YCIGCWKAGWSKAPADASIWKILYVSYEVLEVEMRDIDEIEVSMSESTDGSKPLEKSEG  
NVLTTYFEMIDKNEISPSMPKAPSGQVPSRRQLPRFETCEGTLT

>comp9975\_c0\_seq2; 228 1064 1459 LEN=1671; translated  
MFRGNDLNEAMGIPFFYGMVEALFVGSYCIGCWKAGWSKAPADASIWKILYVSYEVLEVE  
MRDIDEIEVSMSESTDGSKPLEKSEG NVLTTYFEMIDKNEISPSMPKAPSGQVPSRRQL  
PRFETCEGTLT

>comp9975\_c0\_seq3; 457 211 1353 LEN=1479; translated  
MMSLLEVVGNFLLFALVFGMSATVDTECMKQOVKNRKAIMLGIFCQFILLPFLGFVAVNI  
MQLNANLGITLLVVTSSPGGSYSNWWCSLNFADLALSVTMTAISTILSCIALPVNLLLYA  
NFSYNADVISDLWVSVFVALAIVISAITMGLYMSHQCHSFKFNMLANKVGNIAAGFLLIV  
FSATVTNGGDAGSRIWSRHWTIFYVATIAPCVLGLIIASGLASLLNLRKPERMTVAVECCY  
QNVGIATSLALTMFRGNDLNEAMGIPFFYGMVEALFVGSYCIGCWKAGWSKAPADASIWK  
ILYVSYEVLEVEMRDIDEIEVSMSESTDGSKPLEKSEGNLTTYFEMIDKNEISPSMPK  
APSGQVPSRRQLPRFETCEA

>comp9975\_c0\_seq4; 225 1064 1450 LEN=1576; translated  
MFRGNDLNEAMGIPFFYGMVEALFVGSYCIGCWKAGWSKAPADASIWKILYVSYEVLEVE  
MRDIDEIEVSMSESTDGSKPLEKSEGNLTTYFEMIDKNEISPSMPKAPSGQVPSRRQL  
PRFETCEA

>comp9975\_c0\_seq5; 228 1165 1560 LEN=1772; translated  
MFRGNDLNEAMGIPFFYGMVEALFVGSYCIGCWKAGWSKAPADASIWKILYVSYEVLEVE  
MRDIDEIEVSMSESTDGSKPLEKSEGNLTTYFEMIDKNEISPSMPKAPSGQVPSRRQL  
PRFETCEGTLT

>comp9975\_c0\_seq6; 460 211 1362 LEN=1574; translated  
MMSLLEVVGNFLLFALVFGMSATVDTECMKQOVKNRKAIMLGIFCQFILLPFLGFVAVNI  
MQLNANLGITLLVVTSSPGGSYSNWWCSLNFADLALSVTMTAISTILSCIALPVNLLLYA  
NFSYNADVISDLWVSVFVALAIVISAITMGLYMSHQCHSFKFNMLANKVGNIAAGFLLIV  
FSATVTNGGDAGSRIWSRHWTIFYVATIAPCVLGLIIASGLASLLNLRKPERMTVAVECCY  
QNVGIATSLALTMFRGNDLNEAMGIPFFYGMVEALFVGSYCIGCWKAGWSKAPADASIWK  
ILYVSYEVLEVEMRDIDEIEVSMSESTDGSKPLEKSEGNLTTYFEMIDKNEISPSMPK  
APSGQVPSRRQLPRFETCEGTLT

>comp9975\_c0\_seq7; 225 1165 1551 LEN=1677; translated  
MFRGNDLNEAMGIPFFYGMVEALFVGSYCIGCWKAGWSKAPADASIWKILYVSYEVLEVE  
MRDIDEIEVSMSESTDGSKPLEKSEGNLTTYFEMIDKNEISPSMPKAPSGQVPSRRQL  
PRFETCEA

>comp9975\_c0\_seq8; 398 609 1454 LEN=1580; translated  
MTAISTILSCIALPVNLLLYANFNSYNADVISDLWVSVFVALAIVISAITMGLYMSHQCH  
SFKFNMLANKVGNIAAGFLLIVFSATVTNGGDAGSRIWSRHWTIFYVATIAPCVLGLIIASG  
LASLLNLRKPERMTVAVECCYQNVGIATSLALTMFRGNDLNEAMGIPFFYGMVEALFVGS  
YCIGCWKAGWSKAPADASIWKILYVSYEVLEVEMRDIDEIEVSMSESTDGSKPLEKSEG  
NVLTTYFEMIDKNEISPSMPKAPSGQVPSRRQLPRFETCEA

>comp9977\_c0\_seq1; 269 74 814 LEN=1088; translated  
MTTNVEKEEIDDSAVKSLAGRGDSSSLPASDDKTNDDRMNTMEKSFTDESNDDESDDFDD  
MESLLPNSRDVDSGNSSSRTKSKIESFNIDGESDDVDENSILRKSSTCCGLVKSTRVGN  
MRILFPQYLQSSGWGLPHTLGPVFWLLLLVATHGILGGINRHGLGMPSVVVAYLFLG  
VATYRLADVSRDPGICLDQEIPGYETPERASQYRFCRCKIWQPPDGVHCPQCNCVAVG  
YDHHCVW

>comp9978\_c0\_seq1; 551 132 1139 LEN=1219; translated  
MKAAVIREVGDADAMKIETDYPPIPSMGPQVIVKNEYAGINFIDTYHRSGLYARDLPFVG  
GQEGGTVAAVSDEAAAQGIKVGDRVAYSILQTYSEYSAVPAKLLPVPEGVGLDVATSC  
VVQGLTAHYLTASAHADLIKPGEWCLIHVGGGTCQWAAQMAKLQGFKVIQTVAKKADV  
AKDLGCDELIVLDEVPGMSFEDYESVDVVERVMEVTDGVGAKCVIDGIGKSTVDISIGSL  
AQRGIFVSGNASGAVPAFPVLRILIGKSAYVTRPKLLDYTRDREELLWRAEEIFGWLKDG  
KLNVSVDTVFPLDQAAEGHKYLEAGKSKGVLYKI

>comp9979\_c0\_seq1; 301 240 848 LEN=956; translated  
MRLARYALLASTASRPSSAFSPSGSAAPGSLRLREMSSSSSPPPLPCLADAPSIPLRNGM

SHP SIGFGTYKVGFPASASSAVATAGAASASSSPGRTAE ECVGDALALGYRFLECAEFYG  
NEADVGRAIAASGVPREDLFLCSKVWTTTTIEEGPEAVEA QLEQTLSDLGTDYLDL CVGVA  
VVVVAVVVAVVVVVVVVVAVVLW  
>comp9979\_c0\_seq2; 80 568 687 LEN=687; minus strand; translated  
MRALNVFRLLSLTGILATAESTNHISEGLDKVSD ETAGDS  
>comp9979\_c0\_seq3; 114 1 690 LEN=1443; translated  
SVLFC SVLLWGALRPPDPLPLPGRTEHRPPLFCGLRRYLIHWPVPGKHVEAYKKLQELSA  
AGKIRGIGVSNYSWEDYLELKEADGVTDLPLVNQIEINPFLYRRETIDRFLSEG VVLQSY  
RSLRDGKAFDDPTVARIAASRGRTPAQVLGRWCHQRGFVYVPKSVRKDRMAENAGVDFE  
LSPEEMDDLGLTTPEALETFRDLYRKCVNRDTSKDG TLEGVKTDITIG  
>comp9979\_c0\_seq4; 357 240 1343 LEN=2096; translated  
MRLARYALLASTASRPSSAFSPSGSAAPGSLRLLEMS SSSSPPPLPCLADAPSIPLRNGM  
SHP SIGFGTYKVGFPASASSAVATAGAASASSSPGRTAE ECVGDALALGYRFLECAEFYG  
NEADVGRAIAASGVPREDLFLCSKVWTTTTIEEGPEAVEA QLEQTLSDLGTDYLDLYLIHW  
PVPGKHVEAYKKLQELSAAGKIRGIGVSNYSWEDYLELKEADGVTDLPLVNQIEINPFLY  
RRETIDRFLSEG VVLQSYRSLRDGKAFDDPTVARIAASRGRTPAQVLGRWCHQRGFVYVP  
KSVRKDRMAENAGVDFE LSPEEMDDLGLTTPEALETFRDLYRKCVNRDTSKDG TLEGV  
KTDITIG  
>comp9979\_c0\_seq5; 80 704 823 LEN=823; minus strand; translated  
MRALNVFRLLSLTGILATAESTNHISEGLDKVSD ETAGDS  
>comp9980\_c0\_seq1; 763 262 2160 LEN=2251; translated  
MIGVPYKMCVFMFIVLSAFCFNTGLSWDMKRARSSAAGADRGMESYRRNLSYKKVEAF  
RCDEDNQEISTAIYNTTEAPEDEDEKSLLDAAANLLDETFSSKKNSTEPEPLKTLGEVGY  
PIRICFRATSKAESNDVHLLKVDDFTFLKYRTRGDVSAAGPNRQIPKII RQRAVDHGIPL  
SSHLTEVICNPGSDVCAVETTLTG YFFLTAGTIYGRGTVLMQRGKDESSEQDDPLGTRSR  
SLQHIDTFEDVSIELDFIGNNGRGKMPKFRNTI ILMVIIVIVFFLACYTTIFCGGLYCC  
CIDFFAAKKESYEEYITYLDDYEDIEKGVPSQIEIEIEHWMGMKTESEFGADRTE SIHS  
DEISTDDDYFSETESLEDNNYWDVIAAEEEEKYKSMAAREPEIDYDQEYWNEVGDEYEQE  
DDFEDLYERQDGHYDINKDDEQGEHQDGHQDGHQDEHQDQGEHDDDEYQDGHHQYQRE  
HISYFGSDDDNWNNSGDDQDEDRSVII IETKEPRVDPKAKKISSSKKSKKSKSSSTSLK  
STKSDDCDKSDGLSADDTDVPKPKSKSSSSSKKSKSKSKSSKTKPSLGSKNSSMITIDI  
NVDEKSFKKAESKPSKSKSSATKKKSKKSK  
>comp9981\_c0\_seq1; 666 90 1814 LEN=2069; translated  
MGNAESGPVDDAEFSKPPAKATAVGF TKSSILAYPRDSRFSHSPAKTQKESRGFEHTDH  
SRQQQEDTRDQPCEMP KAGMYRDESPNFPTTPYKLPNGKTVHMIQVDKISSQELTAKGSN  
KKGRNAQPSK KDIEANHLLOSILHLDAETTEATAAVYHSLET KCVDDNFSAAGRAHQVVR  
HIKDELKKGNSKPAYRFLETAKTVLPV LREEAGLQLEAGIFSEDEDLAFSAHPPRYTNN  
DDTRSISNETAAIFQYLDTGADNKLPTKDP SGSKNVQNSLGLKDNIFRILEENEENDP IN  
REVYHLVRQNE LLGNNGNLDLHNFNDPNVEDMDLEFVENFDLAYS EFLFLHPKLVVKSP  
DLMNLR IYK LQKFLEYNE ILERKNAEKLD SMNAEKRIAE EAMQRK LKGAMR KKAARQTF  
LQSEVNDVNLKTKQLQTKLRWILKYSEGR AKRQVKLREQFKTIPHARTREDI IQLIPEG  
QFSK KLETAIKASFVAEGSPHPDVLSPRQE QKFREIQVENSMLNSEIEMLNKRLAHLQSD  
ANKLEWVQSTLAELDPV SMLK LKQKIEKKEGITL  
>comp9982\_c0\_seq1; 167 539 1048 LEN=1143; translated  
MDDL FQSSKDQGHVVI GQDFVGGKASIRRVFGPGANAQALLTCGGEELAQNASFDPNYEM  
SKDWIRSRVGPVLSSTLISGLVGALIEASF PQTVPQNASLSFLRPLIVGMEVAASI QV  
ESISESKRDDKTTSGAANGSAEKGYEILLSTRVIRVQDDAVIAEGYSTVW  
>comp9983\_c0\_seq1; 555 112 1275 LEN=1303; translated  
MTRS RPFVVFVFLTGVSMLSTVVVVGFVNPSLSTSASGSSFGAIATTLRYAAETS FQDEQY  
YRSRPNDMKVVDVEVESKSYVYIPQNE MADAMNKA EK SHEEECEDLQKVIDEQQELQR  
LKERNQKAHLAERMQYDHLSEDETVSWDENHDEKMKRTTDR LVFLTSENRR LQAEL EER  
VRFELERGR LQKVEEAREEAEAHHFLCLERSYFETATK LLEVGLERETNNVKALEDRL  
MQTNQQGFHGT PHHHQPYSEDTPHFETLGEPSGAYEQQQGHNHHHHHHHPGFHHYQH HEE  
QFEPRVRPQGYHQENYIEMQH EESFQSHQPQS FhmehdvqTTQQHSGPGSDAIS SHRERV  
TATTTMGASSIGDTVGINHIRDSYR  
>comp9984\_c0\_seq1; 445 372 1751 LEN=2890; translated  
MNAQFQSLFENVCRFCGH TPTSRRGGGLAGEPLEISEG SNDKTS GSKNNKDRKITQVNSQV  
SSHDKRRTNQLKLN DKQYDELFEKAQNASSGRKKSTHKQTASGAQSRSSYGP RPDPGS  
GGNKNRSGN SSSKNNSDIDNETAQALAQAKQAANPPRYRIKRKRSSQTREEIFRHKNGM  
SNGQKPQNSSRKS SSSSSTKGGPATDFSRLLNPSLALCFATPVRGTEEEQEEQDLKSVDCS



DTATLNTNGEDTITSTLYFDSKYAHIQESTPPMELFNEFKLGQAKDEIRTIMATDSHSSV  
RMMQILQQQHFQQNQGREQHRPVEGDVGLSSNSNRQQLHQQERQQQAPGSQQLKTGRS  
SRATSQKTTTQPASSTANTNTTSTKQSSSRMINPEIKTKSNDDTQNNQQLPPGSNNKKQIK  
KQIHNRDEEMQDVVDPVKPLSSSTDSSRFSTTPATROY

>comp9985\_c0\_seq1; 1360 581 5509 LEN=5509; translated  
MSAQQAGAASLGMASENFYSRVRLRRVKKLQFGVVDPNELRQYSVTQAITVNGRQIPAG  
VTKYETQIQGQPVYGGVNDPRLGTLHDKSNPGYFGHLELARPVYHQGYFNTTLKTLRCVC  
FHC SRMKTMDHEKMQVASKIKKRGRKLNFAHDLRLRNVKKCDHCQGSQPKFTKVGLHLEA  
EFLDDDDGGGGAMGGDSKQFLSGAQAVKIFQTMKEEEMKILGLD'TTFARPDWLLVQVLPVP  
PPHVRPSVSVGGGAASEDDLTHQLVNVVKSNIALSNAIQNGEPNIIIVEQFEQALQHNVA  
FMNNELRGMPQVTRSGRPLKTLQQLKQKEGRLRGNLMGKRVDFSARTVITADPNLGIH  
QVGVPRSVAMNLTVPDRVTAFNITELSQLVANGPTTHPGAKHIIRNDGTRIDLRVKNKS  
ELLLAPGWIVERQLRDDDVIILFNRQPSLHKMSIMGHRVKVLDWSTFRLNLSCTSPYNADF  
DGDEMNLHVPQSI AARAEAEMLMSPRVVVSQSNRPVMGIVQDSSLAVQKMTKRNCFIP  
KDLTFNMLMWKWNWRIPPIPAICKPEELWTGKQLLGMILPKINLHAKANTGPPVGGDGK  
RMPNTFNAYDNKVTILEGELIEGIIIDKKTIGKSMDGLIHTSWLDQGHEETARFMNQVQQL  
VNYWVLQSSFSIGACDAVADMKTMEIEATINKAKLQVLDLVRQQLGKQGNLEIQPGR  
MMESFEQLVNKVLNTARDHAGKSAQSSLDETNSVKAMVSAGSKGSFINISQIIACVGGQ  
VEGKRIPYGFKKRTLPHFSKDDLGPESRGFVENSYLRLGLTPQEFFFHAMGGREGLIDTAC  
KTAETGYIQRRLVKAMETVMARYDGTVRTSGGQIVQFLYGEDGMDAVWIERQDFDSLTLA  
KEEFENRYVLNTTASDFGYDEQNVPFLESQVMEQCRTDPEVQILLDKAEATLREDQAVLR  
VVMANREAGRESDESSYAPGNVQRVQNALRQFQIDRGQPSDLHPKTI IAKVGE LLDRLG  
VVVGGDPLSIEAQNNATTLYRILIRGMLASKRVLKQYRLSEALNWVIGEVETRFHKAKV  
NPGEMVGVLAASIGEPATQMTLNTFHYAGVSAKNVTLGVPRLKEIINVAKTPKTPGLTV  
YLAEEFSGDRQVAELVSMLEFTVLKDIVKRTIEWYDPDIKNSVVMQDNEWVKDYDFAE  
KTEDDINRMSSWVLRMELDKDIVFVKIQMSEVVKEVENEYGTDLHVEVSDDNAEDLVVR  
IRIVNDLPYNPNNGAVDEAGNPIEEVEAGDEDDVFLKRLEKSLNNLKLRLGIDHVKKVFM  
RGGAKRTIWDKGFGRTRNEWVLETDGTNLMGVVGVDYIDSARTISNDIVEVVFVSLGIEG  
VRGALLSELRNVISFDGSYVNYRHLASLVDVMTMQGHLMAIDRHGINRVDTGPLLRSFE  
ETVDMMLDAAMHAE EEVKGV TENIMFGQLPRVGTGDMELLLDEDKVVREAVEVVVDDVI  
GDNLMIGSSSSGAATPYASTPFASSPMVGGGEMSPFVGTGQFSPA VGTASFS PAYS PAS  
GSYGS GFASGSYQDDGSSSSPSYNPSSPAYSPTSPAYSPTSPAYSPTSPAYSPTSPAYSPT  
TSPAYSPTSPAYSPTSPAYSPTS

>comp9986\_c0\_seq1; 181 665 1045 LEN=1133; translated  
MAHGFCDDTLSCVVRWDFGHGPRPGKPLLLAPAMNTAMWDHPLTQAQLSAIRGFFGATP  
SQPENFGKGMKRECSGDTLCIVAPQVKT LACGEVNGALASPDEILRVVSTVLGNNARD  
STGSSY

>comp9986\_c0\_seq3; 299 90 893 LEN=981; translated  
MPPDDSSWPLNRRRRRPRILFAVTGSVAAVKGPEIAVRLVRELDSDVRILLTRGGENFWS  
KARDYNLQYWDTLQGLLRSSGSEGENNDGNGKCSEPRISVCYADDEWKEWKKLGDVPLHI  
DLRDWADLLLVAPLSAHTLAKMAHGFCDDTLSCVVRWDFGHGPRPGKPLLLAPAMNTAM  
WDHPLTQAQLSAIRGFFGATPSQPENFGKGMKRECSGDTLCIVAPQVKT LACGEVNGA  
LASPDEILRVVSTVLGNNARDSTGSSY

>comp9987\_c0\_seq2; 188 296 1132 LEN=1957; translated  
MIFSVAAQSRFSPKCKVLLARTYQFHHAPRFPCRHFSSSVPTRLSNSEEKHKSSGVKST  
KDTLFDREVTPKNQFYALVAGGSLGAYIIISKGLLFTFTGFFTHLSPITVAKYSFYTGFGTA  
SVLGGMALVTADNLYIRADPVYKYCKSWVTNDVRIENALGSGLYGGKLRSYRLDPGNFKL  
KGKSMIWRPPRIQMI FDIKASDPPYRTGLVTCEANKAFGFPPRLKTDLLKVDYTI GDEKR  
AIFLVGKEEDMTRVSSRSGLSLEKLAQYVHIEEDRKIL

>comp9987\_c0\_seq3; 131 756 1217 LEN=3106; translated  
MALVTADNLYIRADPVYKYCKSWVTNDVRIENALGSGLYGGKLRSYRLDPGNFKLKGKSM  
IWRPPRIQMI FDIKASDPPYRTGLVTCEANKAFGFPPRLKTDLLKVDYTI GDEKRAIFLV  
GKEEDMTRVSSRSGLSLEKLAQYVHIEEDRKIL

>comp9987\_c0\_seq4; 188 296 1132 LEN=3021; translated  
MIFSVAAQSRFSPKCKVLLARTYQFHHAPRFPCRHFSSSVPTRLSNSEEKHKSSGVKST  
KDTLFDREVTPKNQFYALVAGGSLGAYIIISKGLLFTFTGFFTHLSPITVAKYSFYTGFGTA  
SVLGGMALVTADNLYIRADPVYKYCKSWVTNDVRIENALGSGLYGGKLRSYRLDPGNFKL  
KGKSMIWRPPRIQMI FDIKASDPPYRTGLVTCEANKAFGFPPRLKTDLLKVDYTI GDEKR  
AIFLVGKEEDMTRVSSRSGLSLEKLAQYVHIEEDRKIL

>comp9987\_c0\_seq5; 131 756 1217 LEN=2042; translated

MALVTADNLYIRADPVYKYCKSWVTNDVRIENALGSGLYGGKLRSYRLDPGNFKLKGKSM  
IWRPPRIQIMIFDIKASDPYRTGLVTCEANKAFGFPRLKTDLLKVDYTTIGDEKRAIFLV  
GKEEDMTRVSSRSLGSLKLAQYVHIEEDRKIL  
>comp9988\_c0\_seq2; 491 77 1405 LEN=1732; translated  
MSDKIFFPDISKVEYKGPDSKDPFSFRYYNPDEVILGKPMKEWLRFSVCFWHTFVGGGA  
DPFGTPTYIRDWEGDLEGIALAKRRIDVAFEFFTKLGVFEYCFHDFDVAPEGNTLEESMA  
NLDIITDYLLEKQEETGVKLLWATQNLFSNPRYMNGGMTNPDHVFYAAAQIQKVMIDIN  
HKLGGTNHVFVGGREGYQSLNNTDFKTECDNMGAMYKMAVDYKKRKGYSQFLIEPKPRE  
PTKHQYDYDAQTTLAFLHEYDLIDHFQNLNIEPNHTTLAGHEAVHDIYVASLYGKLGSDS  
NTGDTLLGWDTDNFPMDLAQTTAVMAVLEQDGFVTGGLNFDCKVRRESVEPIDLFLGHI  
GAMDTYAQGLRKAEMKQDGVLSMVAERYLSWQTDPLASKIKKGATLEECVEYAKANG  
EPKKTSGKQELFEMVRNRQLYK  
>comp9989\_c0\_seq1; 166 1 756 LEN=774; translated  
XNSNSNNNKQLPSPSTSPRSLRKSYSYLNQSKKLI V F V A S S K Y Q W P I A V L L L A P L A A L L V  
S I I L F D V Q R Q E E F R N S S R L W I L S W L F I L V V I V Y M A V L P R Q V D V R S N G T V A I K T C L L T F H I  
D G I A R A R F G P G A H G C G L L R P A I R F G T S L D P G A C V V L L R H G D K W D V V V T P T D P Q G F G R A V  
E E M L R T K E E A G R D E A L V S L E G G A R R R R E P A R C S S R L Q G R A P G V P A A R F G A N R P G V L H R V L  
L R L L Q N H S I A V  
>comp9990\_c0\_seq1; 245 1 2110 LEN=2397; translated  
XQHQQHQHPYPLLYGNNNVYSNPNHSMVPVQVRLLPASTNNGPQPQPHQSGSPTSSNY  
QLNGNQTTQALQQLQONLTNVLKSKQQSGEVQGTSTSRQNLQSPEVMASQSGRSQRSQEG  
WNAPLQAKPGQCKNVIDSVNQHQGSFENPSVPRSKKNHTLCNGSDSCPAPSSSTLALLQD  
EIQPLSTNQHVDFRPPTSNSSSILFGELNDDDFATDFMMNDV FHSEI HVRLSERTNQQR  
KHQHEPGSKKSITVEKEEMNESDNDDLKFTFQTRTNLILCVCTCDTHTHTYLSHTLTKS  
TPDLIVTQQKPLVVQHAQQPIHIVSKESGNCSSKNSQVLHHPKLIETPIADTRNQKPTK  
KIIGSKRNASAVSPKPRQRKMSGRKTKLPLSEKEQPIEQQIMKLPSVVFAPSLARIV  
ANDTMRRPANSNTNQYSAPAVFKSIEVCNPTREVDHENDTGPCISPHEAFSAILRDRGL  
GEDNFLKLDAAEYDLVPSPLQLASYGSSLVRAVQSSDTTLLSKLLNCGLSPNPNQFRDS  
VLGDLVCKQGNIP IYHCLVLEFKADIHDFDGLGRTLLHCCWAQKFCRPIVEDILKRDPI  
QIFLKDKQKSSLDYVRTENWGTWNQFLREVADRYWPRDRPLPRLSAFRKNRRDPNGANR  
VPPEPMSIALASDLASGIIPPEAVAAMSCKKTRETYGVKKVTD  
>comp9990\_c0\_seq2; 338 1 1952 LEN=2239; translated  
XQHQQHQHPYPLLYGNNNVYSNPNHSMVPVQVRLLPASTNNGPQPQPHQSGSPTSSNY  
QLNGNQTTQALQQLQONLTNVLKSKQQSGEVQGTSTSRQNLQSPEVMASQSGRSQRSQEG  
WNAPLQAKPGQCKNVIDSVNQHQGSFENPSVPRSKKNHTLCNGSDSCPAPSSSTLALLQD  
EIQPLSTNQHVDFRPPTSNSSSILFGELNDDDFATDFMMNDV FHSEI HVRLSERTNQQR  
KHQHEPGSKKSITVEKQKPLVVQHAQQPIHIVSKESGNCSSKNSQVLHHPKLIETPIAD  
TRNQKPTKKIIGSKRNASAVSPKPRQRKMSGRKTKLPLSEKEQPIEQQIMKLPSVVF  
APSLARIVANDTMRRPANSNTNQYSAPAVFKSIEVCNPTREVDHENDTGPCISPHEAFS  
AILRDRGLGEDNFLKLDAAEYDLVPSPLQLASYGSSLVRAVQSSDTTLLSKLLNCGLSPN  
PCNQFRDSVLGDLVCKQGNIP IYHCLVLEFKADIHDFDGLGRTLLHCCWAQKFCRPIVE  
DILKRDPIQIFLKDKQKSSLDYVRTENWGTWNQFLREVADRYWPRDRPLPRLSAFRKNR  
RDPNGANRVPPEPMSIALASDLASGIIPPEAVAAMSCKKTRETYGVKKVTD  
>comp9990\_c0\_seq3; 344 1 1979 LEN=2266; translated  
XQHQQHQHPYPLLYGNNNVYSNPNHSMVPVQVRLLPASTNNGPQPQPHQSGSPTSSNY  
QLNGNQTTQALQQLQONLTNVLKSKQQSGEVQGTSTSRQNLQSPEVMASQSGRSQRSQEG  
WNAPLQAKPGQCKNVIDSVNQHQGSFENPSVPRSKKNHTLCNGSDSCPAPSSSTLALLQD  
EIQPLSTNQHVDFRPPTSNSSSILFGELNDDDFATDFMMNDV FHSEI HVRLSERTNQQR  
KHQHEPGSKKSITVEKSTPDLIVTQQKPLVVQHAQQPIHIVSKESGNCSSKNSQVLHHP  
KLIETPIADTRNQKPTKKIIGSKRNASAVSPKPRQRKMSGRKTKLPLSEKEQPIEQQI  
MKLPSVVFAPSLARIVANDTMRRPANSNTNQYSAPAVFKSIEVCNPTREVDHENDTG  
PCISPHEAFSAILRDRGLGEDNFLKLDAAEYDLVPSPLQLASYGSSLVRAVQSSDTTLLSK  
LLNCGLSPNPNQFRDSVLGDLVCKQGNIP IYHCLVLEFKADIHDFDGLGRTLLHCCWA  
QKFCRPIVEDILKRDPIQIFLKDKQKSSLDYVRTENWGTWNQFLREVADRYWPRDRPL  
RLSAFRKNRRDPNGANRVPPEPMSIALASDLASGIIPPEAVAAMSCKKTRETYGVKKVTD  
>comp9991\_c1\_seq1; 601 483 2372 LEN=2741; translated  
MPWQQSQLKQMGGRNAWRGTPSLYWFVFLVAGLNVIIVSTVGNAGGTGRGLLGRDDDD  
DRITLLSANIHFAVSSDKESQDSIARMGNESHSNKGEQRNQSLYSLATETVGDRLDRRAI  
KKSFENFSNNQENTVEVTSPLIKYSSVTGMNSKTSELSSSITDAPYFMYGKTAYQNQKFH  
RKKTFQRIDEEEA KP IDASQKVWVLPDPVKIPTRNHESILLEYDTTHPNGNNSSSKNNEQ

ILVNIILGRYSRSVQWMDLKTGEQRAVETNGTDPDQRPLNDLNHVASVVVDSFRPGGENHR  
TRKEVWLPCGFHNDRIGNELSSNYARIVDLETMAVRTGPKLPFSGGACGAAPIEAIPGEP  
TLVCSFGGTNGNHDTGIFLPYVSCYDRVTEKWLHPFGKLPVGMHLSVAVVPKAACHQDD  
PARVLVFNFRTKNYATHASAEILAFDIPKNGWTREELVQISAEIEGEWYTFANHSFTGGE  
DEAYAPRDASGVVMANGGRSIVNFGGINQIRNPRWKKKDRSNGPKVFSTWYPTIRELNV  
SRTWEKVADMGIQTFALMASASTQLNVAFFCGGSMYRQDYNGNTNLCLATKIPGIDFWNH  
RTAAVENFPQGFEGEATVEALVSRVER

>comp9991\_c1\_seq2; 520 483 2493 LEN=2862; translated  
MPWQQSQLKQMGGRNAWRGTPSLYWFVFLVAVAGLNVIIVSTVGNAGGTGRGLLGRDDDN  
DRITLLSANIHFAVSSDKESQDSIARMGNESHSNKGEQRNQSLSLATETVGDRLDRRAI  
KKSFFENFSNNQENTVEVTSPLIKYSSVTGMNSKTSELSSSITDAPYFMYGKTAYQNQKFH  
RKKTFQRIDEEEAAPIDASQKVWVLPDPVKIPTRNHESILLEYDTHPNGNNSSSKNNEQ  
ILVNIILGRYSRSVQWMDLKTGEQRAVETNGTDPDQRPLNDLNHVASVVVDSFRPGGENHR  
TRKEVWLPCGFHNDRIGNELSSNYARIVDLETMAVRTGPKLPFSGGACGAAPIEAIPGEP  
TLVCSFGGTNGNHDTGDEPVXDVGFFQTQESLAEERIPFLTTFSLISPNSIHHPTGIFLP  
YVSCYDRVTEKWLHPFGKLPVGMHLSVAVVPKAACHQDDPARVLVFNFRTKNYATHASA  
EILAFDIPKNGWTREELVQISAEIEGEWYTFANHSFTGGEDEAYAPRDASGVVMANGGRS  
IVNFGGINQIRNPRWKKKDRSNGPKVFSTWYPTIRELNVCSRTWEKVADMGIQTFALMAS  
ASTQLNVAFFCGGSMYRQDYNGNTNLCLATKIPGIDFWNHRRTAAVENFPQGFEGEATV  
EALVSRVER

>comp9992\_c0\_seq1; 133 1 450 LEN=764; translated  
DRCNTTVLVLILAQILEQQINTITLRIMFSLNKNIRAFPLVLCLLLLSIQGIESFEVGSR  
AIKRSPSAARVPSNQLSNRAEPLSILNAKKKKTVEEKTEKEERSGFGLFLVYMPWRPNP  
SIFVYMFGLVLYCLGKYSEAQSIARDAGVL

>comp9993\_c0\_seq1; 466 709 2064 LEN=2084; translated  
MISSTLLASIFAFGFLHSIALAEP SLRNGTKKNEILVLDNVDDMSGWLRNEQAQETETDS  
ISNDVKSDDMASLLRNGEARQSDILRLLENIGDLSSWQQNAEARETETESPDDAYSNDLPS  
MLPKRAAKGNEILQLDSSDDLISLNLEAGFSIKLGNQPSLAPSEFQTVILSIEPSALESN  
GPSLFIAPTVDSDGTTDDEALSNTPTLIEGSKFPIESPSENPTKIPSESPSESPSESPS  
ESPSESPSESPSENPTGIPTTFVPTTFVPTTFVPTTFEPTLGTTFILSTSSSAPSFSILP  
SSSTADSAGTSEENASSPTSSPSLNPTLGGCKITSEERVQMMEVLDVSVGNLSTIDDVST  
PQGMAANWLINQDLRELCPDENIVQRWVIAVFYYSTNGDSWPGCSVTGSDPCGSGRFLSE  
SSECDWVGITCNEDDIVTKIEFEQQGLVGTM

>comp9993\_c0\_seq2; 542 709 2635 LEN=2824; translated  
MISSTLLASIFAFGFLHSIALAEP SLRNGTKKNEILVLDNVDDMSGWLRNEQAQETETDS  
ISNDVKSDDMASLLRNGEARQSDILRLLENIGDLSSWQQNAEARETETESPDDAYSNDLPS  
MLPKRAAKGNEILQLDSSDDLISLNLEAGFSIKLGNQPSLAPSEFQTVILSIEPSALESN  
GPSLFIAPTVDSDGTTDDEALSNTPTLIEGSKFPIESPSENPTKIPSESPSESPSESPS  
ESPSESPSESPSENPTGIPTTFVPTTFVPTTFVPTTFEPTLGTTFILSTSSSAPSFSILP  
SSSTADSAGTSEENASSPTSSPSLNPTLGGCKITSEERVQMMEVLDVSVGNLSTIDDVST  
PQGMAANWLINQDLRELCPDENIVQRWVIAVFYYSTNGDSWPGCSVTGSDPCGSGRFLSE  
SSECDWVGITCNEDDIVTKIEFEQQGLVGTIPMELGLLQDLAVLEMQNEGLVSIIPTEIG  
RLTNLIRLVLDNFNLTGSIPIELYSLTNLETLELNNSLTGDIIDLIGVFSDFLQQLQGS  
FFFLLQVKICSFSDTDGRHFFLFSLLYVGNFTGTVPNDVGDLELKTFFNLHENDFTGTV  
PESVCALRSTRGGNLI SLIADCENGTGAEIECTCCSSCRN

>comp9993\_c0\_seq4; 542 810 2736 LEN=2925; translated  
MISSTLLASIFAFGFLHSIALAEP SLRNGTKKNEILVLDNVDDMSGWLRNEQAQETETDS  
ISNDVKSDDMASLLRNGEARQSDILRLLENIGDLSSWQQNAEARETETESPDDAYSNDLPS  
MLPKRAAKGNEILQLDSSDDLISLNLEAGFSIKLGNQPSLAPSEFQTVILSIEPSALESN  
GPSLFIAPTVDSDGTTDDEALSNTPTLIEGSKFPIESPSENPTKIPSESPSESPSESPS  
ESPSESPSESPSENPTGIPTTFVPTTFVPTTFVPTTFEPTLGTTFILSTSSSAPSFSILP  
SSSTADSAGTSEENASSPTSSPSLNPTLGGCKITSEERVQMMEVLDVSVGNLSTIDDVST  
PQGMAANWLINQDLRELCPDENIVQRWVIAVFYYSTNGDSWPGCSVTGSDPCGSGRFLSE  
SSECDWVGITCNEDDIVTKIEFEQQGLVGTIPMELGLLQDLAVLEMQNEGLVSIIPTEIG  
RLTNLIRLVLDNFNLTGSIPIELYSLTNLETLELNNSLTGDIIDLIGVFSDFLQQLQGS  
FFFLLQVKICSFSDTDGRHFFLFSLLYVGNFTGTVPNDVGDLELKTFFNLHENDFTGTV  
PESVCALRSTRGGNLI SLIADCENGTGAEIECTCCSSCRN

>comp9993\_c0\_seq5; 552 709 2544 LEN=2733; translated  
MISSTLLASIFAFGFLHSIALAEP SLRNGTKKNEILVLDNVDDMSGWLRNEQAQETETDS  
ISNDVKSDDMASLLRNGEARQSDILRLLENIGDLSSWQQNAEARETETESPDDAYSNDLPS

MLPKRAAKGNEILQLDSSDDLISLNLEAGFSIKLGNQPSLAPSEFQTVILSIEPSALESN  
GPSLFIAPTVDSDGTTDDEALSNTPTLIEGSKFPIESPSENPTKIPSESPSESPSESPS  
ESPSESPSESPSENPTGIPTTFVPTTFVPTTFVPTTFEPTLGTTFILSTSSSAPSFSILP  
SSSTADSAGTSEENASSPTSSPSLNPTLGGCKITSEERTVQMMEVLDSVGNLSTIDVST  
PQGMAANWLINQDLRELCPDENIVQRWVIAVFYYSTNGDSWPGCSVTGSDPCGSGRFLSE  
SSECDWVGITCNEDDIVTKIEFEQQGLVGTIPMELGLLQDLAVLEMQNEGLVSIIPTEIG  
RLTNLIRLVLDNFNLTGSIPIELYSLTNLETLELNNSLTGDIDLIGVFSDLFLQLQGN  
EFTGTVPNDVGDLELKTFFNLHENDFTGTVPESVCALRSTRGGNLSLIADCENGTGAE  
LECTCCSSCRN

>comp9993\_c0\_seq6; 552 810 2645 LEN=2834; translated  
MISSTLLASIFAFGFLHSIALAEP SLRNGTKKNEILVLDNVDDMSGWLRNEQAQETETDS  
ISNDVKSDMASLLRNGEARQSDILRLNIGDLSSWQQNAEARETETESPDDAYSNDLPS  
MLPKRAAKGNEILQLDSSDDLISLNLEAGFSIKLGNQPSLAPSEFQTVILSIEPSALESN  
GPSLFIAPTVDSDGTTDDEALSNTPTLIEGSKFPIESPSENPTKIPSESPSESPSESPS  
ESPSESPSESPSENPTGIPTTFVPTTFVPTTFVPTTFEPTLGTTFILSTSSSAPSFSILP  
SSSTADSAGTSEENASSPTSSPSLNPTLGGCKITSEERTVQMMEVLDSVGNLSTIDVST  
PQGMAANWLINQDLRELCPDENIVQRWVIAVFYYSTNGDSWPGCSVTGSDPCGSGRFLSE  
SSECDWVGITCNEDDIVTKIEFEQQGLVGTIPMELGLLQDLAVLEMQNEGLVSIIPTEIG  
RLTNLIRLVLDNFNLTGSIPIELYSLTNLETLELNNSLTGDIDLIGVFSDLFLQLQGN  
EFTGTVPNDVGDLELKTFFNLHENDFTGTVPESVCALRSTRGGNLSLIADCENGTGAE  
LECTCCSSCRN

>comp9993\_c0\_seq7; 466 810 2165 LEN=2185; translated  
MISSTLLASIFAFGFLHSIALAEP SLRNGTKKNEILVLDNVDDMSGWLRNEQAQETETDS  
ISNDVKSDMASLLRNGEARQSDILRLNIGDLSSWQQNAEARETETESPDDAYSNDLPS  
MLPKRAAKGNEILQLDSSDDLISLNLEAGFSIKLGNQPSLAPSEFQTVILSIEPSALESN  
GPSLFIAPTVDSDGTTDDEALSNTPTLIEGSKFPIESPSENPTKIPSESPSESPSESPS  
ESPSESPSESPSENPTGIPTTFVPTTFVPTTFVPTTFEPTLGTTFILSTSSSAPSFSILP  
SSSTADSAGTSEENASSPTSSPSLNPTLGGCKITSEERTVQMMEVLDSVGNLSTIDVST  
PQGMAANWLINQDLRELCPDENIVQRWVIAVFYYSTNGDSWPGCSVTGSDPCGSGRFLSE  
SSECDWVGITCNEDDIVTKIEFEQQGLVGTIPMELGLLQDLAVLEMQNEGLVSIIPTEIG  
RLTNLIRLVLDNFNLTGSIPIELYSLTNLETLELNNSLTGDIDLIGVFSDLFLQLQGN  
EFTGTVPNDVGDLELKTFFNLHENDFTGTVPESVCALRSTRGGNLSLIADCENGTGAE  
LECTCCSSCRN

>comp9994\_c0\_seq1; 483 1 969 LEN=1223; translated  
ITSQFLLNLKTTKMKFVAAATLALASSASAFAPASTASSNTALKMSLKDDLMTAGKAAV  
AGAVVFGAMASPAQALTKAETNSLTYLQVKGTGLANRCPVEIGEDSIKPTSGQKLVEMCI  
EPKAWAVEEEIGKGGKTEKKFVNSKVMTRQTYTLTDGIEGVLEQSGGSIVFKEKEGIDYAA  
TTVQLPGGERVFFLFTVKDLVAKGSSDTFKPGFQMGDFSVPSYRTGLFLDPKGRGGTTG  
YDMAVALPGLQSGEEGDDELFRNNKTFDVTTGRIEME VNKVNKEDQEIGGVFVATQLGD  
TDMGSKIPKKVLTGKIFYARVD

>comp9995\_c0\_seq1; 656 369 2345 LEN=2480; translated  
MPAFSGQQTTLQLRSGSATVATPVL RTPSEYEP AAPSSGNSVPSDLPLPLRNPA PRSV  
TRSSSSSTTVSAGSRTSAGLLSPRTKRQVQRFVDADQPQYLLPLTHEHGTPAEDEPSLNN  
TAKRSVMRAAESGRGHLLPVRSTSTKLT VTSPTYGSRMPARHVPGRSKSHCPTSTTVLPRT  
RQDVDNNTNKGSSSSGSKQSKLAHLRRRTANNSSDDEDPLKESGTRRSYDAESTNGNTS  
DSFYFGRLSAGRRKRQSGTASLGGTSTGTNNNEYSTSREHPGPKHQWGSVVCQQQLIK  
ISRMKLGHLLQMMIVLAVISLVYESHHKALFATHQLTQFKEEESLLLLHLQKIEQQSIQL  
HENLGRLAQAHLGNM VVGRKLDNGNSEDEKHGSDDREVD FDLIHKQTQQLYQMEEELS  
HEVQTLQKRIQLSARNHIIQEFGE GPVMVLELDLGD FDRSSTGSSDANSKATAKTRSP  
DKISILLWHDTPHAAWTWLEQIGNHVWDGAPFHWQGGVIDAIP SDEAVLANQKRRSSGN  
GKIEFVEQSQSHQAWTVGVREHP IHNSNNEPGRSSLGIYINLQDNTDLHKHETCVGKII  
DGFVDLQKLEAARNNGNESGEQRPHQTKGKHNNQSSLVIRKATAMHYVTKKPGMGY

>comp9996\_c0\_seq1; 364 396 2154 LEN=2154; translated  
MDKATPKIFNRKAPPDELPHSTG SYTHYNAPIPNRRNPLEEQ LAKHFRNNSRAATNEGI  
DNEIKQVEDSLDRFRGFTESKKISIASSTSAFTKPDPAVRSIGD TNISHQYHHHKYDD  
QRSSILSNLNTAAIHAKNTLRE EASTVIAPDKFPYRSASP IARMRDNKFQAEFSPTVNI  
KNNKIDSPSGDITRDYSSGIQVKSEHEVRMEKRRKWKKKMKIAQARKRRERRARRDDYTI  
GSSSHFGRNSAIGCVLDNVEGTEFFQRLTQCTGGEYHRGDGCAASEYESEYSGSMSSAT  
GSYSEDYYSDEDMFSFGTDASDIRKGDGKGNLGSQKVSINSPSRESYDLSDVDTTVP EEMT  
ASFLSGDEISTTERSTTTDYARYGRPPSSERMATNLYQESFSDSRFIEKFITGIERKGES  
LLWHQETSGVDPKNIVRLKRGFRTRGTYCAPRLIWDHQNGLNYGFDVFDIQSLERAD  
IMHLRNFPYAMPGRSMLLQK NATSFI FEAGTEGDAERFVRGVRLVVTHLAYNLVVANLG  
VGSDLLNICHVETESTSSDRLESDFRAMDDVTEQLIDNAIASNTQX

>comp9997\_c0\_seq1; 243 1 579 LEN=647; translated  
ICNSNVMAKSSKQKQDDPKPKQKREVKVVKCPSAFP ISTKPKKRPRDEYKNRDEARGNS  
KKEKLIDLHDAAKEIRAYGATAFVGKQKRDEYDEKYYKLTGRHKKKNSCPLPLVRGLKRA  
AARRDAKAREEARQAGLIIPKKKDDSSRKSMTDTEFQKFGPAPNIGFMKSGVYRVSNNGD  
FKSKRNGKGRRR

>comp9998\_c0\_seq1; 815 347 2869 LEN=3087; translated  
METMQWSEVSTTPASPASGGSSQGVIGISGSEAGGNIGAPPAPT IKNHSVTFNHDHLYCF  
GGYDGRRNHNLLLLYSIREHRWIRPHMLEDEFVSSSSSSSNVNNSSIIEPLPDSNGTNG  
SIHNI GDGNRISRNNPDTSESEPM DASREHRIPHRPGPQHRQHQQQQQPPAFHDDHPY  
NSNNALRSNSREGLYPGIGGATGLDARNEDSRYAYTVTGNPPPGRNGHSATLATDEGDSS  
EGYESGEQRGEGVTGRI I I LGGWLGQGPLAASDMHVLEIARGGKRLRWYQPTVKGTPPGP  
CNMHSADYVKDRKEVFVFRGGNGREYLNDVHALHVPTMTWRKVATTGESPQRANHSSCI  
LEETGEIFVFGGWNGTNRNLNDIHFDTKTCNWTCPKVGGVLPHPRAGMTLTALRGRLYLF  
GGSGTSSKCFQDLQILDREEMAWLDVTQYETVPHGNANSGNRNHHHSQMHP SHYHRQNNF  
PLPNSQQYYAHSHQSQQYQQQHHHSFANHQDNGWSNPQLNSNGNYYDYSGRHHHQQYQD  
SHAGVPYSHHQIDNGNNSNAKDHRPGGFTSSRADWTSRELAARPRSMGTGVIASPNPND  
EDTAPT VVLQGLRVPGSRAGHTATAVNRKIYVFGGSCGSDYLNDFYFLDTPPPRAAVTE  
ATSLNLI TRRLPHFFNDEEFSDVTFLVQGRRVYGHKMVLAIVSDCFRAMFTAGFRESSSS  
EIEITGCSYDAFLAVMEYIYTGAIPTMPSQMSDRSPEDSRRRLDKIVDILELADRFFLDN  
LKQVCETQLQCNNLNLHLKQVDQQSNERAETVDYLLEVAEKTNSMQLQVICEHYVRNRNSD

>comp9998\_c0\_seq2; 760 347 2895 LEN=3113; translated  
METMQWSEVSTTPASPASGGSSQGVIGISGSEAGGNIGAPPAPT IKNHSVTFNHDHLYCF  
GGYDGRRNHNLLLLYSIREHRWIRPHMLEDEFVSSSSSSSNVNNSSIIEPLPDSNGTNG  
SIHNI GDGNRISRNNPDTSESEPM DASREHRIPHRPGPQHRQHQQQQQPPAFHDDHPY  
NSNNALRSNSREGLYPGIGGATGLDARNEDSRYAYTVTGNPPPGRNGHSATLATDEGDSS  
EGYESGEQRGEGVTGRI I I LGGWLGQGPLAASDMHVLEIARGGKRLRWYQPTVKGTPPGP  
CNMHSADYXEGQEGGIRLSWRKRPHVHYCLFLGREYLNDVHALHVPTMTWRKVATTGESPQ  
RRANHSSCILEETGEIFVFGGWNGTNRNLNDIHFDTKTCNWTCPKVGGVLPHPRAGMTLT  
ALRGRLYLFGGSGTSSKCFQDLQILDREEMAWLDVTQYETVPHGNANSGNRNHHHSQMHP  
SHYHRQNNFPLPNSQQYYAHSHQSQQYQQQHHHSFANHQDNGWSNPQLNSNGNYYDYSG  
RGHHHQQYQD SHAGVPYSHHQIDNGNNSNAKDHRPGGFTSSRADWTSRELAARPRSMGTG  
VIASPNPNDEDTAPT VVLQGLRVPGSRAGHTATAVNRKIYVFGGSCGSDYLNDFYFLDTP  
PPPRAAVTEATSLNLI TRRLPHFFNDEEFSDVTFLVQGRRVYGHKMVLAIVSDCFRAMFT  
AGFRESSSSSEIEITGCSYDAFLAVMEYIYTGAIPTMPSQMSDRSPEDSRRRLDKIVDILE  
LADRFFLDNLKQVCETQLQCNNLNLHLKQVDQQSNERAETVDYLLEVAEKTNSMQLQVICE  
HYVRNRNSD

>comp9998\_c0\_seq3; 749 347 3033 LEN=3251; translated  
METMQWSEVSTTPASPASGGSSQGVIGISGSEAGGNIGAPPAPT IKNHSVTFNHDHLYCF  
GGYDGRRNHNLLLLYSIREHRWIRPHMLEDEFVSSSSSSSNVNNSSIIEPLPDSNGTNG  
SIHNI GDGNRISRNNPDTSESEPM DASREHRIPHRPGPQHRQHQQQQQPPAFHDDHPY  
NSNNALRSNSREGLYPGIGGATGLDARNEDSRYAYTVTGNPPPGRNGHSATLATDEGDSS  
EGYESGEQRGEGVTGRI I I LGGWLGQGPLAASDMHVLEIARGGKRLRWYQPTVKGTPPGP  
CNMHSADYVKDRKEVFVFRGGNGAFNDLCVVGRTVSQSLGSTAWPFSFGICARIYVLLG  
AFVSD EISP VHYCLFLGREYLNDVHALHVPTMTWRKVATTGESPQRANHSSCILEETGE  
IFVFGGWNGTNRNLNDIHFDTKTCNWTCPKVGGVLPHPRAGMTLTALRGRLYLFGGSGTS  
SKCFQDLQILDREEMAWLDVTQYETVPHGNANSGNRNHHHSQMHP SHYHRQNNFPLPNSQ  
QYYAHSHQSQQYQQQHHHSFANHQDNGWSNPQLNSNGNYYDYSGRHHHQQYQD SHAGVP  
YSHHQIDNGNNSNAKDHRPGGFTSSRADWTSRELAARPRSMGTGVIASPNPNDEDTAPT  
VVLQGLRVPGSRAGHTATAVNRKIYVFGGSCGSDYLNDFYFLDTPPPRAAVTEATSLNLI  
ITRRLPHFFNDEEFSDVTFLVQGRRVYGHKMVLAIVSDCFRAMFTAGFRESSSSSEIEITG  
CSYDAFLAVMEYIYTGAIPTMPSQMSDRSPEDSRRRLDKIVDILELADRFFLDNLKQVCE  
TQLQCNNLNLHLKQVDQQSNERAETVDYLLEVAEKTNSMQLQVICEHYVRNRNSD

>comp9999\_c0\_seq1; 391 17 613 LEN=1549; translated  
MKS AIFASLVVGTAAAFAPAQQASVSTSLAASSTGPN TAFANEPGVVAPLGLFDPF SVLDD  
ADQERFDHLRAVEIKHGRVSM LAVVGYLVTYAGIRLPGLEDPVTGFAAWSALPDEVVQGM  
GMSWIVMEMANRDHTGNAETPGDFRNGLLDFGWDDQTDEWKKKQTIELQNGRAAQMGIL  
GIMVHESMGNLQEILPHY

>comp10000\_c0\_seq1; 941 273 3926 LEN=4082; translated  
MNINNDFGTSSAFDAQVQELSEPPPEFSLAATLQLLDPFETVAATKANDDDESEEMNGN  
LNMVYLMTPSYLQNWLFWAFHQNVKKGESNRLVEALKLAAKRYGLTPPQDATPEDLEDYA

DPGPIDATFLSLNEGNGNDLLLSPNVTLKDGGLDLQSRQQQLQNTLDTEFPPELMRRAESL  
QVVSASKNNTDQKLSNGTVVLIHPNDSIDVDGDKILCCA VPSRFYETLRMSLGVMCDDGF  
AVSYQYPKETESLIHHHHSIENDNTSTLSKNEGVAPTS DPDQLDDNNNDNGNNETFN  
YLSAVSNGLNGVAKGWENRVHNQRQQRRPIEFPRRIIMKAVSPQHDKYGS DLMNDT LSP  
MSKLLKEQERLAPPQMAPSVELYP I K L N Y Q I V D G S T D T N S S S C G Q R T G F V L V S R R T R V Y E  
AMQDLLKVTAPDTSSSCKRVWSFQGHGESRKGSPATKYGDGYEVVDLASLDGKLNSTKII  
DRNSNALKKIPSLLI GEWIRTHQQYRQNKKHDTHCNNEDELI ELNLLVEIKRPNTSWPRQ  
KLELENRVQVGFVDAQDIAGKWYEAIVQEVSR TTVRVHYL GWASKWNGTLRKRHTCNS  
IVDDHDDGKDLAKEVNPRLQPIAPLWTHCRPWREGLTAGAVLEVRDSMSKADRPRWYKGI  
VKRVGSRNGPYKKIEGGAQLELLEDILRNSTTTTSSTEVEGKSSANKRSDVLLLMNRKQQI  
LVEVEQEQLNTNAEDL PFGDVQINDSDSLI SEDPLKPRPPLLRWVNLFGEEICEAGTHMK  
IEADGDLAVVTLRYEYEAGRKPVEVMKSWNGMYGQGMVKE SLRGT PPAPGAVGMHNLGNS  
CYLNSIVQCLNHILPLTEYFLNGNFTNDMNRENPLGSGGHVATAYATLLKEVWSGNYSAL  
APRLLKQTVASFAPQFRNSFQHDSQEFQCFLMDGLHEDCNRVKKKPYVEELEGFGMEDEK  
AAIETWRKHLLRHDSIVVDR CQGMHRSHLTCPSCGRESIKFDV FSTVSLPVVLEDKEGSI  
NTCMRVEHCIEKFLEGEQLDEMNAWYCQGCKKHVCALKMIALWSVPDILILHLKRFQFEN  
CSVSNNILRSKIDDTVKFPVDNLDLSKYVLGPI DDDAPPVYNLFGVSEHVGH TANS GHYT  
ATARNCKDGRWYRYNDAHVGETTGDAAVTGGAYLLFYQRAKGTARWGGMEKTMRDKNVDP  
YGGLETDQDGFTLVSKK

>comp10000\_c0\_seq2; 622 304 3137 LEN=3293; translated  
MKXVAPTS DPDQLDDNNNDNGNNETFN YLSAVSNGLNGVAKGWENRVHNQRQQRRPIEF  
PRRIIMKAVSPQHDKYGS DLMNDT LSPMSKLLKEQERLAPPQMAPSVELYP I K L N Y Q I V D  
GSTDTN SSSCGQRTGFV LVSRRTRVY EAMQDLLKVTAPDTSSSCKRVWSFQGHGESRKG  
PATKYGDGYEVVDLASLDGKLNSTKIIDRNSNALKKIPSLLI GEWIRTHQQYRQNKKHDT  
HCNNEDELI ELNLLVEIKRPNTSWPRQKLELENRVQVGFVDAQDIAGKWYEAIVQEVSR  
TTVRVHYL GWASKWNGTLRKRHTCNSIVDDHDDGKDLAKEVNPRLQPIAPLWTHCRPW  
EGLTAGAVLEVRDSMSKADRPRWYKGI VKRVGSRNGPYKKIEGGAQLELLEDILRNSTTT  
TSSTEVEGKSSANKRSDVLLLMNRKQQILVEVEQEQLNTNAEDL PFGDVQINDSDSLI SED  
PLKPRPPLLRWVNLFGEEICEAGTHMKIEADGDLAVVTLRYEYEAGRKPVEVMKSWNGMY  
GQGMVKE SLRGT PPAPGAVGMHNLGNSCYLNSIVQCLNHILPLTEYFLNGNFTNDMNREN  
PLGSGGHVATAYATLLKEVWSGNYSALAPRLLKQTVASFAPQFRNSFQHDSQEFQCFLMD  
GLHEDCNRVKKKPYVEELEGFGMEDEKAAIETWRKHLLRHDSIVVDR CQGMHRSHLTCPS  
CGRESIKFDV FSTVSLPVVLEDKEGSI NTCMRVEHCIEKFLEGEQLDEMNAWYCQGCKKH  
VCALKMIALWSVPDILILHLKRFQFENC SVSNNILRSKIDDTVKFPVDNLDLSKYVLGPI  
DDDAPPVYNLFGVSEHVGH TANS GHYTATARNCKDGRWYRYNDAHVGETTGDAAVTGGAY  
LLFYQRAKGTARWGGMEKTMRDKNVDPYGGLETDQDGFTLVSKK

>comp10001\_c0\_seq1; 1033 146 2203 LEN=2203; translated  
MGNRVK GKPKQKS IKAASHSKMGSKRKL SRMGKKQKKENAGLEATF IGRSKALKMLQVTI  
KDFRRLC I L K G I Y P R E P R G R V P G K K K G Q T F Y H I K D I R A I A H E P I L E K F R E F R S F M K K I R R  
AAGRNESDEAARKNAVCPTYALHHLVRERYPRFVDALSDLDALTLTYLFAALPSTTAIK  
AKMGGKAKSLAAAWGAYCSTAGCITKSFISVKGVYLEATIRGTPIRWVVPHSFTQFMPED  
VDYKVMATFFEFYETLLNFVLFKLYSDLGVRYPLPEIESGGEVKGSTTFILGANLRS LNN  
AMASSDGAITNVISETLEDDNAAKHESRDKSSAEKKKDR ELMKTVGVALDNI EEDENE  
DDEEGVDIAGPLKVALESMEEDKVRSSIPTGDAELDDDAIKRRRLFAGFTFFF SREVPRG  
YLELISLAYGAKVGWEGPNSPISAKDSSITHHIIDRPKLLGSYDSL PKSREYVQPQWILD  
CSNFMFILPINKYGVGKALPPHLS PWDNEEEGYKPAYAEIEERLKNGETIEEVE MEDDD  
VVAADTTENNESEESEADSEDESEDESEDEVEEKKKGD LKKKKARAKKREQEKEAHEL  
AKSMMGRKAAHLYGRMQHGISKKQARIDDL ESRREPLQNK EKDEDEGKSMLKQKVERLKR  
ERKDLEDRYTNTGGSMKKKKKRRS

>comp10003\_c0\_seq1; 1446 1 3419 LEN=3603; translated  
XLRLSRCDRIGPILLALEDR TSP LQRRESQDNM WASSFN DLAKKAAEMQEQAASITSPA  
ASNFSMGS MFNMDSLQQQEE SDPDKAEDLKKLAHSTMARADAGRVT SAGATFY NPLASV  
TTTAFATPQKQAVPASRLQQTGTTTPSATFKSKQTNH SNGSTRAITPSNMTSALSFGNN  
TATTKTTTTITPVKIQTNKPLLESKVVASVPQPKKQQQQQPATERSKKSGLVIGTKKS  
FTGPNTKIP SASLATPGKPKLVKATLSSATPLPSTTSKLI PPSPPRTCDNLSK PANVHT  
PLAKQPPQSLPTPKPQMAKPKQTHSTLES AVQPKPNTSNETT KTTIKPALNPSTSQATAA  
DEKSTEPQPPKQEAETGVPPGPKSSQKEDKVGAFPPETS DADSQTKDGNSSDKKTEAPTS  
DIAIANISPKKETIPEPTVSSDSSATERKETK DSEP IREEKEQPI SHDNLAATETESQS  
VPPPATGEEEEQNLNPAVSQAARNEALKKQLEVQRRETEERIKQLRDEFTKQLHRLEENH  
KAENTNVSKQYELSLAHLQSEADEREGRLLAQSKEVESQKQAMALKLESVS AKLKQAKEL

IADKDKQSRILQEKHLQQLRGMKEKEFFRSEDDSNALGQEIIVDLKKQLEDSKNETKTALDD  
YNTLKERARGVAGELKKGKRAECRTLTSEINLLKDNTKNLQERITQLEARGIDLNQSSSEET  
QEKLAALQVSLEDKEKELKECKEAEIESERTNGAESLAAYKKAQQSLAMANARSASAVQA  
REEAEMEARAARSTADSAMQRAMDAEMKGRALAEAKQYTDKEMKDEVAEYETVKKKLEDS  
KNELKTTREELETQKDSTERLHCELTSLSGRLEAEQQTMEDLKTSLSNEQSRSNELYEEV  
ERLRREGQRSQDEIRRLSDANKKELSSSADEQAIVRGRSAEAEATIAILQQELQDANRAI  
KDLKETLNATIKENDALHSSSNLNPYAKNGGASTNGHQNGMPLFYAMEKQAEELSQR  
EEIARLASLVGDAESTKQEALEHMHMHRAMEEAQSRLKRQEQKQNPETESVNLEYLKN  
IVLSYLNASTVQEKKALLPVIGTVLCLTHEEQAAATAQLNNSKVSVMDSVASSVLNLKW  
>comp10003\_c0\_seq2; 243 271 834 LEN=1112; translated  
MAIARGRHKDSVRVCPGGGIGVVVVVRRSVCLCQRQRGRKQQQQQQPPRRQESVPLGA  
YRKPFGCRPEIDCFRPKVECSMAKDRGTFGKHVDGNDALLRRTPERRETKTETKTETS  
GSTERRDELRLHFLFAPQRDERLPPGDLRHRGRNGPRKNGDRTPGPM AVRKPPEKGEPRTKA  
IVAGHHP

>comp10004\_c0\_seq1; 228 1 711 LEN=908; translated  
XDNDNDNDNDNGNASDEIEIEIDASVTDETSTPLSAETDTEGHEADHRPRSILVPNTGE  
DAPQQRTRHHHHHHYHHHEPRRNAHGRRKRVSFGSVHVREYERIVGDHPETRVGVPLAIGWA  
FYVDELYGESPPGGVSLDRYEAYRAVRXEP PPPAAELGDAEK PAPARLWRADRRGRPRGRA  
QEP RNEPEAEGRKHEEDRKEAAQGGVSLKGMVYAAQFGLSSGGGGVSSVAAKAVF

>comp10005\_c0\_seq1; 736 151 2609 LEN=2609; translated  
MKNETKPLLDKNVQESNVYNGTKRGTKSWFGFVLAISLVGLGILIGITLNPQSSLDTTS  
SPPPTPPSQDDDDPPSTSRNRPLCRTYGENARFAGILQTSMSGSPSEQWSHIPCFAQPKKTR  
LWAGQESSADAANINGFGAPDAIFKVNFSKPAFPDRQPIIGFGAAFTAAASLNYQSLSLA  
GKRQLMELLFGETGIGYSIGRVHMNSCDFSVESYSFDEVDGDFELVHFDTNVTHDAEKDG  
MIDMIRLAMTVFNKAWGDGNQKTNADTGGVEDGDFNVFASPWSPPSWMKQPSSKKDIKAG  
LDHASGMTGSTTPSCLREGTGKDSKYAKAWALYFSKFI SAYKNHGVP LKAITVQNEPEFP  
APWEACGYTPETEADFGVYHLGPQLERDHPDIRIFMFDHNDHLV TWAKTLLDKNHPSSN  
YITGSAYHWYAGGMDRLLDGAVGSPNMHRMQSELRRLDV PNDHLVFNSEACHCPYTYAG  
GDIDVYWARAERYAHTILADLAAGSNGWVEWNLILDSVGGPNHLHNLCDATILAVPHRAI  
DGSDIPPTMDWETTDSKKTFGPNVGDGRTREELNALGFPAKYLDVGLAVQPMYYMGHIS  
RYVRPGSRPVMGLVDNSSDGFRAFRLPGEDVAGGGVNDLARHGIELTAWPCEGSTRQQFH  
WQHKHRHIQVYGHDWLGNPTQSCVSDNVDESFLGITLED CDGDTGVGLFDMIKDKSSDYI  
KFRLEGLDRCLVLKRL ENEGGAYGPRGGAQVTFGDCDSPSANWIYSETRNEILSDYLPE  
GSVCMTTGWPFLOIGAFETPNGESDKTIVVLNESQDSANX

>comp10005\_c0\_seq2; 425 1 1875 LEN=1875; translated  
XFVTTGRVHMNSCDFSVESYSFDEVDGDFELVHFDTNVTHDAEKDGMIDMIRLAMTVFNK  
AWGDGNQKTNADTGGVEDGDFNVFASPWSPPSWMKQPSSKKDIKAGLDHASGMTGSTTPS  
CLREGTGKDSKYAKAWALYFSKFI SAYKNHGVP LKAITVQNEPEFPAPWEACGYTPETEA  
DFVGYHLGPQLERDHPDIRIFMFDHNDHLV TWAKTLLDKNHPSSNYITGSAYHWYAGGM  
DRLLDGAVGSPNMHRMQSELRRLDV PNDHLVFNSEACHCPYTYAGGDIDVYWARAERYA  
HTILADLAAGSNGWVEWNLILDSVGGPNHLHNLCDATILAVPHRAIDGSDIPPTMDWETT  
DSKKTFGPNVGDGRTREELNALGFPAKYLDVGLAVQPMYYMGHISRYVRPGSRPVMGLV  
DNSSDGFRAFRLPGEDVAGGGVNDLARHGIELTAWPCEGSTRQQFHWQHKHRHIQVYGH  
WLGNPTQSCVSDNVDESFLGITLED CDGDTGVGLFDMIKDKSSDYIKFRLEGLDRCLVL  
KRL ENEGGAYGPRGGAQVTFGDCDSPSANWIYSETRNEILSDYLPEGSVCMTTGWPFLOI  
GAFETPNGESDKTIVVLNESQDSANX

>comp10005\_c0\_seq3; 154 1 714 LEN=714; translated  
XSVPISAVQPMYYMGHISRYVRPGSRPVMGLVDNSSDGFRAFRLPGEDVAGGGVNDLAR  
HGIELTAWPCEGSTRQQFHWQHKHRHIQVYGHDWLGNPTQSCVSDNVDESFLGITLED CD  
GDTGVGLFDMIKDKSSDYIKFRLEGLDRCLVLKRL ENEGGAYGPRGGAQVTFGDCDSPS  
ANWIYSETRNEILSDYLPEGSVCMTTGWPFLOIGAFETPNGESDKTIVVLNESQDSANX

>comp10006\_c0\_seq1; 432 173 1603 LEN=1960; translated  
MSKRQTSATSNGGLDCSSPFLPLEEKRRSSSVTDIEPPIDEIPVDFDEEIDNTPNDPDT  
LSASXIEKDDGDLTVANIPTRRKGNKTDPSKGSNNNSHVKNKGN AIFSAVSSHLSLWRKI  
KLPNAKKVASSIVGFFFAFILWECCFVNAEDRVIKPDFSDKFLMWVQANPTLGLGAIMIV  
IAAAVVSLLPIGTPLTLGCGYIYRGVYGWKLGLFVSTLVSMAGSTLGAVTCFLLGRYLMR  
DTVKRWRVNYPMFDAIDVAVTEQGLKIMAMLYLTPVLPGLVSYMCGTTAMKLNHFVAVAK  
IASLPLYLMYTFMGASAHSFIKGGNGGKNDGDLGKSLAE EANKLEENQYLILCGLILSAV  
MIALISRKIKKELMKVRYCYQKGFKSIDRYRTEIHCYQQIAVVDSSSTCTDMVAMDHPI  
PTRCVLFI SLLILDDQKKEKVD SNGTPLIDKDEADEKTI ELGLTARRKSNLKTGHK

>comp10006\_c0\_seq2; 439 173 1434 LEN=1791; translated  
MSKRQTSATSNGGLDCSSPFLPLEEKRRSSSVTDIEPPIDEIPVDFDEEIDNTPNDPDT  
LSASXIEKDDGLTVANIPTRRKGNKTDPSKGSNNNSHVKNKGNAI FSAVSSHLSLWRKI  
KLPNAKKVASSIVGFFFAFILWECFVNAEDRVIKPDFSDKFLMWVQANPTLGLGAIMIV  
IAAAVVSLLPIGTPLTLGCGYIYRGVYGWKLGLFVSTLVSMAGSTLGAVTCFLLGRYLMR  
DTVKRWRVNYPMFDAIDVAVTEQGLKIMAMLYLTPVLPGLVSYMCGTTAMKLNHFVAVAK  
IASLPLYLMYTFMGASAHSF IKGNGGKNDGDLGKSLAE EANKLEENQYLILCGLILSAV  
MIALISRKIKKELMKILDDQKKEKVDSNGTPLIDKDEADEKTIELGLTARRKSNLKTGHK  
>comp10007\_c0\_seq1; 1064 73 2798 LEN=2798; translated  
MPSHHHRSGPLKQSNKRNRKASKRSATRLAGGKIEGRRAAFKGRFVAHTKADRRHFQQ  
QKRDAKRQELVRRKRGIGVAAPRVVGIISLGDDEATEENLRSLILQQADRTFGFGVDS  
TVTAKFEKHKRDNLTVLTNSTAFRSQYSSEQPNDAAVFSALDLCRVCDLIMFVIDVDGE  
KTESFVGM SIGGSDDKSFSTNKTSSTAQDFDHLISERGDRVLSAMKSHGLPRVVITILAKT  
KAEPFGGEDDDDFDHMTTQSAKSIRANLKRKSDVKRYVSRFATTEFGVDNDKVI E INLK  
KTNDENNM TDDQDGVTVDPEAHSKKILVESLVR SICSISASPPNWVSKLPRS YILSN THE  
YITESQELKLTGYVRGIAPFDVNALIHV PNLGTF SCKGLMETEAPGIRKNKKGDQDMGCN  
NHV VVESDPMKRESLENFAAPDALDGEQNLVGFDEADEEFHDDDDYNAADKDIAEEGGFA  
RPV GWS DYQSAWLDALDDGEGDLDHGELAEELNKKSSATVAGGNAMDLDDANEVSEER  
QALLEERRKQQEHA EFPDE VQVNE DENARDRFARYRYLKSFKKSFWD PKENLPDDYASI  
YHFSSFKSTQRDIMGMDLVKTAEKSDWKFLHASKSVEKPPQDAMEADSEGDEDEEYLE  
GCVPTGSYVTIVLENVKPEDYK KLGANPLLSAATLLPHENKVSVLHMGLSNCRDESLSDV  
PVKSKDVLTFRCGWRTWTGRPIFSQNNLNCDKHKFER YMPQAGSFFAASVYGPV TYTPCP  
VLVFR TMNGTKELVAFGSMIGADADRTIVKRIILTGF PVRVHKRFASVKYMF SNPEDVKW  
FKPAGLTTKHGLNGKIEQSVGEHGTMKCLFNAPIKQHDTVCLCLYKRVYPKFADDSESDR  
EDGTHAIQR  
>comp10008\_c0\_seq1; 222 1 1254 LEN=1330; translated  
XGSPSYL FAPLDSEINLEAEXPTLRTSELSQMLWVDKYRPTTELES LDYHDEISQRLKSLA  
KNPASLPHLFFYGP SGAGKRTRINAF LGALFGPSAHK LKLNQRTFTTPTGRTVEIHMIS  
DYHME LSPGDAGNDRFVIQDVLKEIASSKNIRSSVGVNFQNSAQDGVTRTDDAE EESNN  
GAPVATTAETGIKV VVLNQVDRLTKQAQAALRR TMEKYAVTCRLILCCDSPSKLIAPLRS  
RCLGIRVAAPA EDEIAKILKIVANREDFGLPNSVAVKLARESERNLRKALLMLEAAKVQS  
GGNNAIPENQYIPTADWEVYIRQLATDITKEQSPQTLMIARDKLYELLVNCIPASTILKS  
LTGELLNLDSDSVKLEVIEWAAFYEHRLAMGSKDIFHLEAFVAKFMAIYK KYLNDLFG  
>comp10008\_c0\_seq2; 132 1 673 LEN=749; translated  
RLRKTRYVQQRGAELNKIGEPVHTDYS PCAHXMNILPSLGLAKLTXLIPRPTLPTLLFGK  
IAKILKIVANREDFGLPNSVAVKLARESERNLRKALLMLEAAKVQSGGNNAIPENQYIPT  
ADWEVYIRQLATDITKEQSPQTLMIARDKLYELLVNCIPASTILKSLTGELLNLDSDSVK  
LEVIEWAAFYEHRLAMGSKDIFHLEAFVAKFMAIYK KYLNDLFG  
>comp10009\_c0\_seq1; 754 36 2745 LEN=2998; translated  
MKVSAYHLQSTTTT VGSITTNQITFDASQFSTEEKLSL CGADLWNLRAVPTVHPSVNSS  
QTSICLSDGPHGLRKLPLNDLTLQESH PATCFPSACATACSWNVDLVERMGRALATECFEY  
DVQVLLGPGINLKR NPLGGRNHEYFSEDPLLTGLLAKAYIAGVQESG SVAACIKHFCANN  
QESARFVNAVVDERTLRELYLPAFEMSISCQHGSANNHNAPKLVMAAYNKVNGIYCCEH  
KYL LQ S I LRDEWKFPGVVVSDWGAVSDRVE SLRAGMDLEMPGTLKRGVFDKEVLDHVRKH  
PEESRYIETAIDDSASRIANLIEKLD RGRSNIQKTNRQSTTS DTVKLFDKHDQLARTIAQ  
ECIVMLQNRENLLPLSREKNIALIGDFAKSFPRYQGMGSAHVPTGITCLHTAMESFISE  
NDFGSTMSFARGYDAHAEGDEIDQNLIDEAVEIAQKSSTDVVIICVGVPEIMESEGFDR T  
HIRMPQQHIALVEAVINVHSNVVIALSNGGIVEIPQSFVDGAKSILDGFL LGQAGGHAFV  
DVFFGVVSPSGKLSATIPLRVEDDIPSSAYFP GTTETVEYREGLDVGYRYFDTVNIPVRF  
PFGHGLQYANFQYSNLRIDIQEDTENS KRVVVSLDVKNIGCANTDAASTFSKPVKEVIQ L  
YIRPIQSSVYRPHHELKCF SKLELSLGEKKS AQFTLDERAF SFYDIGLRDWIVEKSV PFE  
IEVGASSRDIRLKETIQFQTGGNSTQIARESYPPIVHKEHASVAGTVSRPKSFVVDDET F  
KTFRKGVVQLRSPTPMSVDLAAKLTNEEPKRKLYLSRNTLLVDAAKSSLIAAIIMRIAMK  
VAASEVKEGPTKKQELRMIRANVENSPLRCLVIFSRGTITFGMLDFLIMIMDGRWQRAD  
TS  
>comp10010\_c0\_seq1; 415 1 1440 LEN=1701; translated  
ILASDSSSSALTL SWARLERSALCIRFWKTSTATKVPAAAAATSTVATYQSNPTGEP SRI  
PKMKFFADIFFLLLLVASCNNRAADGTDSETEPEDHDESYEVVTF LNFSEETIEIHWVD  
TSTPERTKYPAVIAAPYEQASAGTYRGHV FVYEWNGAEHSFEVQASEPRKTDPEHDDEAG  
EDADEEEGEDGMGLWPQIHILGDVQTEDEYLG IETKSVVCGTTTEGDIRIKVKPDVQGS S



SEETTxEVDNRAKIPLCSCIESVGSVSLTPHSLFNRCFSACSTLQAWSPLGAARFLELAK  
AETKYFDGCALNRVVPGLTQFGIGAVYEQRTIYREASIPDDVPLDIQFEPGFMSYAGSG  
KDSRSSEVFIAMPDTPESQLDYFGVNSWETPFYGYVEPEDLEVVARWFSYGDMEPWGKGPD  
PQKIYEEDGYEYLQNEFPRLSYIAGCVILADADVDEEGEPSEKTYHQLIQDEVSDVEL  
>comp10010\_c0\_seq2; 245 1 1137 LEN=1740; translated  
ILASDSSSSALTLNRSWALRSLCIRFWKTSTATKVPAAAAATSTVATYQSNPTGEPRI  
PKMKFFADIFFLLLLLVASCNNRAAADGTDSETEPEDHDESYEVVTFNLNFSEETIEIHWVD  
TSTPERTKYPAVIAAPYEQASAGTYRGHVYVYEWNGAEHSFEVQASEPRKTDPEHDDEAG  
EDADEEEGEDGMGLWPQIHLGDVQTEDEYLGIEYTKSVVCGTTEGDIRIKVKPAWSPLGA  
ARFLELAKAETKYFDGCALNRVVPGLTQFGIGAVYEQRTIYREASIPDDVPLDIQFEPG  
FMSYAGSGKDSRSSEVFIAMPDTPESQLDYFGVNSWETPFYGYVEPEDLEVVARWFSYGDM  
EPVSCVGPCCGLLDRVQLS  
>comp10010\_c0\_seq3; 160 1 1293 LEN=1896; translated  
ILASDSSSSALTLNRSWALRSLCIRFWKTSTATKVPAAAAATSTVATYQSNPTGEPRI  
PKMKFFADIFFLLLLLVASCNNRAAADGTDSETEPEDHDESYEVVTFNLNFSEETIEIHWVD  
TSTPERTKYPAVIAAPYEQASAGTYRGHVYVYEWNGAEHSFEVQASEPRKTDPEHDDEAG  
EDADEEEGEDGMGLWPQIHLGDVQTEDEYLGIEYTKSVVCGTTEGDIRIKVKPDVQSSS  
SEETTxEVDNRAKIPLCSCIESVGSVSLTPHSLFNRCFSACSTLQAWSPLGAARFLELAK  
AETKYFDGCALNRVVPGLTQFGIGAVYEQRTIYREASIPDDVPLDIQFEPGFMSYAGSG  
KDSRSSEVFIAMPDTPESQLDYFGVNSWETPFYGYVEPEDLEVVARWFSYGDMEPVSCVGP  
CGLLDRVQLS  
>comp10010\_c0\_seq4; 489 1 1284 LEN=1545; translated  
ILASDSSSSALTLNRSWALRSLCIRFWKTSTATKVPAAAAATSTVATYQSNPTGEPRI  
PKMKFFADIFFLLLLLVASCNNRAAADGTDSETEPEDHDESYEVVTFNLNFSEETIEIHWVD  
TSTPERTKYPAVIAAPYEQASAGTYRGHVYVYEWNGAEHSFEVQASEPRKTDPEHDDEAG  
EDADEEEGEDGMGLWPQIHLGDVQTEDEYLGIEYTKSVVCGTTEGDIRIKVKPAWSPLGA  
ARFLELAKAETKYFDGCALNRVVPGLTQFGIGAVYEQRTIYREASIPDDVPLDIQFEPG  
FMSYAGSGKDSRSSEVFIAMPDTPESQLDYFGVNSWETPFYGYVEPEDLEVVARWFSYGDM  
EPWKGKDPQKIYEEDGYEYLQNEFPRLSYIAGCVILADADVDEEGEPSEKTYHQLIQD  
EVSDVEL  
>comp10011\_c0\_seq1; 293 258 734 LEN=940; translated  
MFSASRTIARRTAAASARRNQAQTQIKRKMGSMDMPVPSQONAPLWHGHTVKHEGWEEYIY  
FYAAAGLALQAAVLLGAPETSIESWARSEAKARLYLASEEGGAQTEFAFGTHYQDLVKKQ  
HEDLWTKFNEKSIIPGEDDDDDDEDDDEDDDEDEDEE  
>comp10012\_c0\_seq2; 478 190 1935 LEN=2340; translated  
MNPKGRADNDEPPQPPSCGGETPEIPPEIGDHCNVLFRGELRLPAEIIERRPLLASRRL  
LDLRQRPAPQDAKPEDHENENDTKQTNAKTKKRKHQPGSSAESQGSQSQEELSLNFRTE  
GIEYYIHYHNDRRLDEWITSDFVWNTLQRCNTNATNANASAAATDSGSKHGATPKTST  
GSKEPTKTEQSASTEPSAAATPEPSKVGRRLSRKSVGSSAGPRKSSLDNQSQAQVASGR  
QIATTATNSTASTTTGTATGGNWRPTAADGLHELEKEHHEITKVKNIEKIYMGGFVDCW  
YYSPYPASYSPEMLYVCEFCCLKYMRKRKTFCKHRATCPHRTPPGTEIYRELGLSVYEID  
GKDHKVYCQNLCLLAKLFLDHTLYYDVPFVYVYVCHVDDSGAHIYGYFSKEKVVSTEGY  
NLACILTFPQHQQHGYGKFIISLSYELSKREKTGVSPEKPLSDLGKVSYSYWTYVLLKL  
LAERSPRLDDEQTQKQENNHDLTIKDISETETGMKQEDIISTLQYLDMIRSWKGQHVYVQ  
QDTIEEYAKKKQKSWRLCKPQYLDWDP SHYASVKKKGEKK  
>comp10013\_c0\_seq1; 872 76 3060 LEN=3213; translated  
MMNGYSDTGEDSQFGDSSVATPHSPERIEDKYERIKHETLTEGWMLKRNRRNNYQDRYFV  
FQANQFLSYWHKETNKGDKTATYENENDATIAHEDPAATFKISRAGCEIGDIYVEQRS  
TSSISATKTAVPSSGGKTSLYCIDISWTQDADSQLAINTNLNSEEISSPLHQEDDPYNC  
DQGSVNSVNSVKGKKSFLRRRKRVRGRKSNSEGNSSSEKLMESFYARQSDYSYESLEIER  
SNKSVDCDTPFSGTKWKTEDFDASDNVQKTSFDDIERREQEKLHNEFASKQRKKKSVKT  
KRMVGATKAVVAAGAAGVGVVVTAGVGLAAGMIVLGGAAALGGTAGVAEAGFKRTLKKKD  
SLTIATTDYAIARLWKLKLDACLEQEYIKHSTWAQRFAASDGGRAASALIPRDVIMLRTSS  
VDEDEKSKATLNRSTSKSNLFLRDSNILEQGRTKWTPMDCGWGSGSLSRIYKEERIRDD  
ELSMKVSRSANDDSTCIPMKTQLVLNAHVAFMCIMSYARIPSPSVYSDNTMPLTPNSN  
QCASYRLVEKIDHDHMDVLFVCTPVYLSPMWAKPRDFLVNRYWRCEPDGSFIICYESTEH  
ADCPPQPGFVRGTMHQVYTLAPPKSYMCRKGPLTSECMLTAVVQVEPKGWIPTRTICQ  
YSKETYADAFGIAALLQTLDIRDAIESDRFKNLSPDSLQYQQPMPNPSRTPGMMRNGDNI  
ELASFDSRFVDRERCDSFTSEKFPISIGNIPAPLGPERRWAEPDPSFLVRGPNYLEDGKKI  
NAGSSIGQLIAMDCVLVDTPILSGMSMHPTEIRIQLALKREQEMRAKGMTCDTPPFIFVFN

IVIPAAQCFHAVFYAVDDKSTIDGSDGTPSSRLCEKFFFGDSDQFRDETFKLI PRIVEG  
NFLVRKAVGSTPAIMGTRLKQYYVRTDRFMEIVLDCRSSQVAEGVIKLSLGYAKTLVVD  
GFLLEAVEEEHLPERLMGCVRVKYPSFGNELRRV

>comp10014\_c0\_seq1; 481 120 1178 LEN=1907; translated  
MSTRKFFPRKYFAFACTAGILII FVLV FSSSISQVERIGKAFEGTGQKVGIRVNP GTGSG  
GFSSSTSGFSKTNVGGPASSFGIWF GFIEDGTVPDIVAKYGLTVERIHTHIGSGSDPAVW  
QQVASKSLSFCKVWSTVERLNLGGGYKVG RVEGEVTTDLQKIGGPVADAFRDFAKENGRE  
LHLEIEPGTYLVAMSGALVSTIQDKVETTGDGHTFLKLD SGMTDVL RPSLYGAIHPMTI  
LPASGKSEDIGSETEDVIVVGHCCESGDL MTPKPGEPEDLAERTLRKAEIGDLLVMDGSG  
AYCAGMSTKNYNSFPEAPEVLVDFDGKPHIIRKRQPLEE IYKNEMDVPEGIY

>comp10014\_c0\_seq2; 552 88 1533 LEN=2262; translated  
MRFSTAI AFVAAATLSSNAFAFVQQHRRSTLAPLAATVSAPADTSVFLTAETA KACTDL  
AGSPTFAYS LDKLQESADACLAFPNAYGLTVRYAMKACPNSAILKFFSSKGIHIDASSGF  
EVKRAMDAGIPAENISLSTQELPANFADLIKLGVKINAC SISQVERIGKAFEGTGQKVG I  
RVNPGTGS GGFSSSTSGFSKTNVGGPASSFGIWF GFIEDGTVPDIVAKYGLTVERIHTH I  
GSGSDPAVWQQVASKSLSFCKVWSTVERLNLGGGYKVG RVEGEVTTDLQKIGGPVADAFR  
DFAKENGRELHLEIEPGTYLVAMSGALVSTIQDKVETTGDGHTFLKLD SGMTDVL RPSL  
YGAIHPMTILPASGKSEDIGSETEDVIVVGHCCESGDL MTPKPGEPEDLAERTLRKAEIG  
DLLVMDGSGGAYCAGMSTKNYNSFPEAPEVLVDFDGKPHIIRKRQPLEE IYKNEMDVPEGI  
Y

>comp10015\_c0\_seq1; 248 1 1133 LEN=1551; translated  
XRREIKSVAPVTHDRYSVTQT TVKMKTTTKTMYALFLAVLTATASSAWAFPTPRI ING VDA  
GEGEFYPYFALLRILLNGVLMGCGSIIAPDMVL TAAHCLKGVD AVEVLV GINGKNVVKDP  
NDVNVITR TCETWVLHPEYVSDKDSKEFTANDYALCKLSEPLI IDESYIRLELNSDDSF P  
VAGTELI AFGLGVVDHSYSKTDV LQ NATLTSASTETCRKQLFEALMENYLYDLGTTDPED  
KEQISELIDVTFELISDKEADEFFNPKVQLCIDTSNGNESAVCRGDSGGPLVKRIYQNGG  
SFVDIQVGITSTGIDAESSDKLCVAHNTFARVSGQIDWITSTACDTLNSVGTMCQNKK T  
KAPKHTKAPKRTKAPKT

>comp10015\_c0\_seq2; 333 1 981 LEN=981; translated  
VLCLGGW DKKIGEKLQHIICGGSLIAPDVVLSASHCQPDPGYDFRVFFSPLSEEEI SVRT  
CETWISHPDYSGVIPFASYGYALHDYALCKLNETAI IDESYVKLEMNSDSSFPAPETKLL  
ACGLGSSDQDGNTPEVLQNVTLTSLSTEQCIEYRIENEIDNAMFLFDLGP EGLKEREDIP  
LHLREIVLQKLAEGIEDREEF EAWARDGTSSEVKQQIDPKTMLCTHYDLEKDQ TIC HGDS  
GGPLVKRIYQGDGSFVDIQVGVTSFGANNFRHGKTCTNPVFARVSGVMDWIRSTACDTWN  
SVGSMCKTTTTPTPTPKKTKAPKRTKA

>comp10015\_c0\_seq3; 358 1 1019 LEN=1019; translated  
XINGVDAGEGEPYVVLVVGTKKIGEKLQHIICGGSLIAPDVVLSASHCQPDPGYDFRVF  
FSPLSEEEI SVRTCETWISHPDYSGVIPFASYGYALHDYALCKLNETAI IDESYVKLEMN  
SDSSFPAPETKLLACGLGSSDQDGNTPEVLQNVTLTSLSTEQCIEYRIENEIDNAMFLFD  
LGPEGLKEREDIPLHLREIVLQKLAEGIEDREEF EAWARDGTSSEVKQQIDPKTMLCTHY  
DLEKDQ TIC HGDSGGPLVKRIYQGDGSFVDIQVGVTSFGANNFRHGKTCTNPVFARVSGV  
MDWIRSTACDTWNSVGS MCKTTTTPTPTPKKTKAPKRTKA

>comp10016\_c0\_seq1; 222 1 1100 LEN=1472; translated  
XFLPSTGFSP IIFVRHHYIPKMVQHFSYQTNHGNSNDQLMYTSNR SRTDSGSSDSSRGS  
NSGNSGKSRRRSHRPRGCRGGSNRRKQKNAEGGNKQFFKKT YNSDFKNRVH SKFSNSSV  
QINLSDPSEAEFSV NASTKSRGPDGFRGGSYDSNIHRKSCNVILPDYNYNTSGFP GAGPS  
DFQYGGNMQMRNPQSY YGNLASKYMGESSETDYPLLQSTFSESSNETVLEQRDSFASNDGI  
LPPLPSEDLYDTPKEIPSGPNPYALKPSSSGGTMNHNISHVTHSYAAPSPLPPAIVRPVS  
RPQPNLVETSRPTQSLPGILQQVHNNMDLDYRSHRLEKQRQNVVGGSLFVTS PRSFLMGC  
KRSFHE

>comp10017\_c0\_seq1; 1056 1 3012 LEN=3095; translated  
XKDYTCTAAFKRGIASHALRELT SKSVEIEIMMRRFLRKGSNELDPNPIESSNGTSSLNE  
SGPIPD RNGESRMVSGADVSP TKTKTRKTKNVHSLPATPVSASTEREIHAQRLQKVI AK  
TMMDSGEGLKSFYSCIEASDALASTSTSSGRGID DSTGLTDCSVLVSPDGELLIIPQQQQ  
QYSKEGRANDSEESHDK EVDGEGMPAEPKRKEKSHSWFDAHG TASNELGEEYNSAVFLGN  
DLHKEGDKNLNGFSAKGWSTAATSLALKQSADLMGDFAD FMEQLVQTKSPSTAQEKRPID  
KLRSMIGEKQTELTESEVATYQH YLDKNFSAEQEKQRKFLRKKVKDQQQNI VLEVSRDRV  
GPLNSSGGTI PAALQALETYYSRVEESDARLWGNF SKRSGALTKIQNTTKKTEERVNGRQ  
LALQETMMRIKVMEDYLR ECKEDAKNKWDNVHQTEVKITALVEEKMMKHNMKEEQRMQR  
MEEEVERTSSDDGNSAATSSEI WDLVSAATASIEEGSFEPVVDLSNDSLPTVADNESTSD

TNADESQNAFEVSEEMEMEMDTRYEFVQYRLPELRIVALAAEEAVEGAADSLLSVLSNF  
DRTNRSALSAETCLVSCGNTQATCLRSIVATERESLKERLKLLEELNKVDEIDVRADL  
DEYISVDKTKPGGRSSLGEDDDGGVASALNHLRGDLGSENNGNWDQESSIDDDNAGVEDD  
DSEITPQFIEEKLECFRNEPLLLSDARKSDSATTIQEDFEATILELCKIAGGKSQKSTT  
RRSTMCYAMNAKRCNSNPRIPRAQFDGLCRVFAAVLSGCSTKTDGGLSSAILLMSLSEHF  
YAREKDSTAAREDTSSKKVFKSSLVGHPLWEKDEFWDRAFHTIMEKLNIGVMSNFER  
ESEKIVTLENKERSQWTENKKTWYDLTEVERLEAASQVNAAVFAEVSTMSDSMFECGD  
LEKTSFVRRACVKNQLPISQRSTLLRHLIRDSVAASKVVENN  
>comp10019\_c0\_seq1; 401 145 1134 LEN=1225; translated  
MSSRPISDEEAVARADKEMEERANRAKELLSRRFVGLKRQQEAKKGRQVQLERQMIGLTE  
DKKQQLRRHLEHEEMLIQKESRKKITTADFESLAVIGRGAFGEVRLVRSKPKREEPVQIY  
ALKSMKKEMMILKNQVGHVRAEREALAKASSDNRWLTSLYSSFVDDTHLYMVMEFLPGGD  
LMSLLIKEDTFSESVTKFFMAEANAISVHALGYIHRDIKPDNMLLDARGHLKLTDLGL  
CKKVGEVSPHDDPDVVLQMLKEQGILTGGENMNDADETGQGNATSGRHRSPGDAMAMSID  
NGIEERNGTGRPTSMPNGKTRREVRSWIG  
>comp10019\_c0\_seq2; 465 145 1770 LEN=2163; translated  
MSSRPISDEEAVARADKEMEERANRAKELLSRRFVGLKRQQEAKKGRQVQLERQMIGLTE  
DKKQQLRRHLEHEEMLIQKESRKKITTADFESLAVIGRGAFGEVRLVRSKPKREEPVQIY  
ALKSMKKEMMILKNQVGHVRAEREALAKASSDNRWLTSLYSSFVDDTHLYMVMEFLPGGD  
LMSLLIKEDTFSESVTKFFMAEANAISVHALGYIHRDIKPDNMLLDARGHLKLTDLGL  
CKKVGEVSPHDDPDVVLQMLKEQGILTGGENMNDADETGQGNATSGRHRSPGDAMAMSID  
NGIEERNGTGRPTSMPNGKTRREMAYSTVGTDPDYIAPEVLAAQNGASGYSYTTAVDWWSL  
GVIMFECLVGYTPFYAEDPVQTCRKILRWRQCLELPADTESKLSSECIDFLTCLLAGPES  
RIGSSKNGTEFENGFKQVQHPWFKGFDWEGLADREGPLPSGSREFPELLEYLKTCPKD  
DPRFPQLESRVTONFDTFEDFGSNLEQGGRTVLRNQLDQFYDYNRRVRKPRVPLPPLS  
D  
>comp10020\_c0\_seq1; 372 244 2193 LEN=2279; translated  
MSYSGRSGRGGGRGGRGGGRGEYYKNKYGGGGGRGGRGGRGGGGGRGGSGGGDRGHPLP  
SGGGSYDHLQSLVQSLDGKSYPAYHSLDLDLKRGWVDLERGFTLFCERAQSDPFAPPTRC  
RIVVDASKAAFPPLYSNRKIKAVALADFLRNLYSTCKSLGADASMRGSGWKGPKGDIQ  
VLEPCQHVEQSAVRIDPSTGNIVTQITVNLARGRTILGHAETIFANTIPTMIERCLC  
YASHSADQLRQHVEVVEDQVWLREQLESRNIVAFVRNGAILPRKSGADDRPMAKSEAVPF  
ESPSRLTINFTLPSNGVTVKGMGIPKGITLICGGGFHGKSTLLETQLGIYPKIPGDGRE  
FCVTSMSAVKIRAEDGRNIRSVDISNFINNLPFGKNTTCFSSSEDASGSTSQATSIVEALE  
CDAKALLIDEDTCATNFMIRDDKMMQLVAAEKEPITPFVVRTVRSLYDDCQVSSILVIGGT  
GDYFDVADNVLMDSYKCFDATEKAKMIVANSKEASELPHTSSQSVTFRPVERTRHISGN  
AFAPNGKVKTNSQDSISYGETELDLKCMELVTKAQTALSAALQRLPELSKGDQSFKKI  
LYKLDKLDNEGLDILAPGQCHGGMARPRLYEIAGAINRLRRENSITQK  
>comp10021\_c0\_seq1; 92 1 191 LEN=510; translated  
XAAHSPQPEFYARFLLHSADENDLTGQVPCEVKLLIDENPGILNDDQFVQNDGDNLYP  
ACA  
>comp10023\_c0\_seq1; 229 397 1689 LEN=2368; translated  
MCCICPPAIQAIFFCLWVQSGFSQGTVAGALTFPPDPPLYRFERLDKDGNDLPEEDDGDN  
DENQNPENSSLANRNDNAEGVEVVDGAYQAREGQTKKKVRSPAQQFTDQAKALRKRKGL  
RNARDTHDASNGVTYKLVLDPRLSPPRIDNGGTVEAIKIPTGKGISFSEQGKANSTGNEN  
ETTAKSSTTSRSKSSSDNKETHQNRSHCAAIVYRVPSKAHTNSEGRKTMTIYSHGNAT  
DIGAMYPLQVILSNSLECNVVSYDYSYGYGASGGVAMEANTYTDIAAVYEWTLHNVCGGDE  
SRIILYQSVGSGPCCHLARHVDGLAGMVLHSPFMSGMRVLTSPRALACLDIYPNIDRVA  
KTKCPVMVIHGRLEEDVDVGHGIAMHAAVPDHLKRDPPWVPPDRGHNDITEGPGKLAEYVG  
RLREFLASLD  
>comp10024\_c0\_seq1; 362 25 500 LEN=500; translated  
MKLAILSALIASAAAFAPAQQKASSTAVKAFEDELGVQPPLGFFDPLGMLNNASQERFDQ  
LRYTELKHGRISMLAVVGFLIEYAGVRLPGNIDFSGDTFADIPAGAAALSAIPKGGQVQL  
FAFIFVLEFIMRDNSEGEFIFGDFRSGTIDYGWDDFDEX  
>comp10025\_c0\_seq2; 339 123 1098 LEN=1098; translated  
MRSVLYFRLMVISAIALVVLPTSTKAERGQOEHVEREEQLLRVGSRRQRRRVRIGKIDDV  
RARKIDPDGYMKRDSVDKTGLGTLKASMEMTAETAASAMLETMPKKPKKPRKPRKPRK  
RKKPRKPKKPRKVRGRRTSAPVMPPTSETVFAPSSDRRGILSYFSPDGPSIQPSFAPSS  
VPSDGPSSLPSDGPQLQGRFRIKPTDMPSSFPDGPSSLEPSSFPDGPSSLEPSSFPDGP  
PSLEPSSVLLSRSSPSEPVFVFNKIVDSTPTAPETLATESPAPQSEQTGFIVGSTPTAP

QTVATESPTSQSTQTEFIKALDSTPX

>comp10027\_c0\_seq1; 965 140 4030 LEN=4072; translated  
MFDGDFRSRRREVNLSGNNRRAGGRNKRDLLKNAETLRKQRQERVRRDRSAKLVQRVTRG  
HLSRLRTISLCSASNVLSDCPATMNC TDADASSSDGCIHGNTWNVLRPMAALSMCLSHHTL  
LTKFDFTRRELLLGFRYPDSIMAGNSDDKNDNNADFEVDIMGLNNDLRPMEIEGEEGSS  
SWFSQQRMMTHAIEEFDPKYQCAEDSNAEMYQLLNTYRESTRIDDRIFLGLTKCMQRWS  
LFVEGTTKKEGNNNDEKATNYKAMLTRWAMEASDRLENPHSSVLLATILLSTNDRVNTSIA  
GACADGSVRMSDAFNIAPGGEQIEKWFALLADILVKSELKDVTKVSNDTKDLLLQATMKN  
LRNSQVQRLLYNLLDLTKSPKMLLLINHVL RQPQNEKLLKLA VSSLARGDSLVMQOQEEETQ  
DQIKDSGNKYDWDNDDSEDEEEESDQKPSHKKARGGSTYYKRQEILTLAKLDKVYSER  
IQQSIKDHCRVFDALTI EVATKIAKAPWKDWGLYVLGSSKEAGLVRNNNDNHCGEVERFV  
ESLGYLLQASSMRSRARFTPLSPLAFNQSILCSLWNLVREQKGE CGFILSIFSDLFSHY  
LVALSDEDFVLYHCNSSNSNPSTYFENRILAKDIVARYNQELHEVYWTKPVLYSEIHMSS  
ARGRLILSGTKLWNALYERWNR LVSVSFCDESSWFWPHLGSNEGDR AVIPDREVGH DINE  
EDDDDDSSVDMDEGQNPLSTAE AATDALADSF RDPKMARVLTII PQALPFDRRVKLFHSL  
LKANKQKVLQAAQSQRAMAAMRNPFGE EAAAMMWIDG SVREQIKIKRAQLYEDSMEQLNK  
LGANLKHKGAYFMLHHPRIQESVPVGIADVAKEMVHFRKLLTCNPCTSFLFFFSEKFKL  
PSSTNTGRKNPALMAGXVFDNFLSLSLIASSFII IYLIKLTPTDSPTISSLFNVFXTPAC  
SVNRGVFKEFLDDLKDGFAAKSDADKEGGAPRLFSITPKQQQLTMNF DLTEDKSM LVHY  
EFLGRVLGKAVYEA I LVEPQFCLPFLNQLLGKVNTLEDLKNYDEEYNNLNKLRHFTEEE  
IDSLGLTFELTVGGSSPNATPRTVDLVRSGRSIAVSKKNVFQYSQAVANELLNVLGANQT  
RAFLRGFRDLIKVAWIRLFSARELQKLISGDDSVRGIDV SCLKKATHYLGGYHESQPYIQ  
DFWDILENELSPEQQRKFLRFMTSCSRQPLLGFSSLEPFP AIQQIRLQDTERS KNSRLPT  
SSTCMNLLKLPNYQDRALLKEKLI AAVESGAGFELT

>comp10027\_c0\_seq2; 1078 140 3887 LEN=3929; translated  
MFDGDFRSRRREVNLSGNNRRAGGRNKRDLLKNAETLRKQRQERVRRDRSAKLVQRVTRG  
HLSRLRTISLCSASNVLSDCPATMNC TDADASSSDGCIHGNTWNVLRPMAALSMCLSHHTL  
LTKFDFTRRELLLGFRYPDSIMAGNSDDKNDNNADFEVDIMGLNNDLRPMEIEGEEGSS  
SWFSQQRMMTHAIEEFDPKYQCAEDSNAEMYQLLNTYRESTRIDDRIFLGLTKCMQRWS  
LFVEGTTKKEGNNNDEKATNYKAMLTRWAMEASDRLENPHSSVLLATILLSTNDRVNTSIA  
GACADGSVRMSDAFNIAPGGEQIEKWFALLADILVKSELKDVTKVSNDTKDLLLQATMKN  
LRNSQVQRLLYNLLDLTKSPKMLLLINHVL RQPQNEKLLKLA VSSLARGDSLVMQOQEEETQ  
DQIKDSGNKYDWDNDDSEDEEEESDQKPSHKKARGGSTYYKRQEILTLAKLDKVYSER  
IQQSIKDHCRVFDALTI EVATKIAKAPWKDWGLYVLGSSKEAGLVRNNNDNHCGEVERFV  
ESLGYLLQASSMRSRARFTPLSPLAFNQSILCSLWNLVREQKGE CGFILSIFSDLFSHY  
LVALSDEDFVLYHCNSSNSNPSTYFENRILAKDIVARYNQELHEVYWTKPVLYSEIHMSS  
ARGRLILSGTKLWNALYERWNR LVSVSFCDESSWFWPHLGSNEGDR AVIPDREVGH DINE  
EDDDDDSSVDMDEGQNPLSTAE AATDALADSF RDPKMARVLTII PQALPFDRRVKLFHSL  
LKANKQKVLQAAQSQRAMAAMRNPFGE EAAAMMWIDG SVREQIKIKRAQLYEDSMEQLNK  
LGANLKHKGAYFMLHHPRIQESVPVGIADVAKEMVHFRKLLTCNPCTSFLFFFSEIVQV  
TFVNKHGAE EPGIDGGGVFKEFLDDLKDGFAAKSDADKEGGAPRLFSITPKQQQLTMNF  
DLTEDKSM LVHYEFLGRVLGKAVYEA I LVEPQFCLPFLNQLLGKVNTLEDLKNYDEEYNN  
NLNKLRFHFTEEEIDSLGLTFELTVGGSSPNATPRTVDLVRSGRSIAVSKKNVFQYSQAVA  
NELLNVLGANQTRAF LRGFRDLIKVAWIRLFSARELQKLISGDDSVRGIDV SCLKKATHY  
LGGYHESQPYIQDFWDILENELSPEQQRKFLRFMTSCSRQPLLGFSSLEPFP AIQQIRLQ  
DTERS KNSRLPTSSTCMNLLKLPNYQDRALLKEKLI AAVESGAGFELT

>comp10027\_c0\_seq3; 1100 140 3739 LEN=3781; translated  
MFDGDFRSRRREVNLSGNNRRAGGRNKRDLLKNAETLRKQRQERVRRDRSAKLVQRVTRG  
HLSRLRTISLCSASNVLSDCPATMNC TDADASSSDGCIHGNTWNVLRPMAALSMCLSHHTL  
LTKFDFTRRELLLGFRYPDSIMAGNSDDKNDNNADFEVDIMGLNNDLRPMEIEGEEGSS  
SWFSQQRMMTHAIEEFDPKYQCAEDSNAEMYQLLNTYRESTRIDDRIFLGLTKCMQRWS  
LFVEGTTKKEGNNNDEKATNYKAMLTRWAMEASDRLENPHSSVLLATILLSTNDRVNTSIA  
GACADGSVRMSDAFNIAPGGEQIEKWFALLADILVKSELKDVTKVSNDTKDLLLQATMKN  
LRNSQVQRLLYNLLDLTKSPKMLLLINHVL RQPQNEKLLKLA VSSLARGDSLVMQOQEEETQ  
DQIKDSGNKYDWDNDDSEDEEEESDQKPSHKKARGGSTYYKRQEILTLAKLDKVYSER  
IQQSIKDHCRVFDALTI EVATKIAKAPWKDWGLYVLGSSKEAGLVRNNNDNHCGEVERFV  
ESLGYLLQASSMRSRARFTPLSPLAFNQSILCSLWNLVREQKGE CGFILSIFSDLFSHY  
LVALSDEDFVLYHCNSSNSNPSTYFENRILAKDIVARYNQELHEVYWTKPVLYSEIHMSS  
ARGRLILSGTKLWNALYERWNR LVSVSFCDESSWFWPHLGSNEGDR AVIPDREVGH DINE  
EDDDDDSSVDMDEGQNPLSTAE AATDALADSF RDPKMARVLTII PQALPFDRRVKLFHSL

LKANKQKVLQAAQSQRAMAAMRNPFGEAAAMMWIDGSVREQIKIKRAQLYEDSMEQLNK  
LGANLKHVKVQVTFVKNKHGAEEFPGIDGGGVFKEFLDDLKDGFAAKSDADKEGGAPRLFSI  
TPKQQQLTMNFDLTDKSMVLVHYEFLGRVVGKAVYEAILVEPQFCLPFLNQLLKGKVNTE  
DLKNYDEEYNNLNKLRHFTEEEIDSLGLTFELTVGGSSPNATPRTVDLVRSGRSIAVSK  
KNVFQYSQAVANELLNVLGANQTRAFRLGRFDLIKVAWIRLFSARELQKLISGDDSVRGI  
DVSCCLKKATHYLGGYHESQPYIQDFWDILENELSPEQQRKFLRFMTSCSRQPLLGFSSLE  
PFPAIQQIRLQDTERSKNSRLPTSSTCMNLLKLPNYQDRALLKEKLIAAVESGAGFELT  
>comp10027\_c0\_seq4; 987 140 3882 LEN=3924; translated  
MFDGDFRSRRREVNLSGNRRRAGGRNKRDLKNAETLRKQRQERVRRDRSAKLVQRVTRG  
HLSRLRTISLCSASNVLSDCPATMNC TDADASSSDGCIHGNTWNVLRPMAALSMCLSHHTL  
LTKFDFTRRELLGFRRYYPDSIMAGNSDDKNDNADFEVDIMGLNNDLRPMEIEGEEGSS  
SWFSQQRMMTHAIEEFDPKYQCDAEDSNAEMYQLLNTYRESTRIDDRIFLGLTKCMQRWS  
LFVEGTTKKEGNNNDEKATNYKAMLTRWAMEASDRLENPHSSVLLATILLSTNDRVNTSIA  
GACADGSVRMSDAFNIAPGGEQIEKWFALLADILVKSELKDVTKVSNDTKDLLLQATMKN  
LRNSQVQRLLYNLLDLTKSPKMLMLINHVLVLRQPQNEKLLKLAVSLLARGDSLQVQMQQEETQ  
DQIKDSGNKYDWDNDDSEDEEEESDQKPSHKKARGGSTYYKRQEILTAKLDKVYSER  
IQQSIKDHCRVFDALTIIEVATKIAKAPWKDWGLYVLGSSKEAGLVRNNNDNHCGEVERFV  
ESLGYLLQASSMRSRARFTPLSPLAFNQSLCSLWNLVREQKGEFCGFI LSIFSDLFSHY  
LVALSDEDFVLYHCNSSNSNPSTYFENRILAKDIVARYNQELHEVYWTKPPLYSEIHMSS  
ARGRLILSGTKLWNLALYERWNRLLVSVSFCDESSWVWPHLGSNEGDRAVIPDREVGHINE  
EDDDDDSSVDMDEGQNPLSTAEATDALADSRDPKMARVLTIIIPQALPFDRRVKLFHSL  
LKANKQKVLQAAQSQRAMAAMRNPFGEAAAMMWIDGSVREQIKIKRAQLYEDSMEQLNK  
LGANPNTKFKLPSSTNTGRKNPALMAGXVFDNFLSLSLIASSFIIIIYLIKLTPTDSPTIS  
SLFNVFXT PACSVNRGVFKEFLDDLKDGFAAKSDADKEGGAPRLFSITPKQQQLTMNFD  
LTDKSMVLVHYEFLGRVVGKAVYEAILVEPQFCLPFLNQLLKGKVNTELDLKNYDEEYNN  
LNKLRHFTEEEIDSLGLTFELTVGGSSPNATPRTVDLVRSGRSIAVSKKNVFQYSQAVAN  
ELLNVLGANQTRAFRLGRFDLIKVAWIRLFSARELQKLISGDDSVRGIDVSCCLKKATHYL  
GGYHESQPYIQDFWDILENELSPEQQRKFLRFMTSCSRQPLLGFSSLEPFP AIQQIRLQD  
TERSKNSRLPTSSTCMNLLKLPNYQDRALLKEKLIAAVESGAGFELT  
>comp10028\_c0\_seq1; 511 135 1540 LEN=1649; translated  
MRRGRTERFLSTIDVVEKSESSXLVTPFNRRSSGISTFSILQTGFQISTMVFSKALHLLA  
VASTANAFVLKXHLAAVERRALPASSVAPLAASSYVDDEKEEDKADSPMSAPAYDYLED  
SSVKEPESYLDDMASSSDRGVSSKSDDEKSTESRSSGYLNDMAAEDVSTNTSEPEDEPED  
VDTKGESDNTSLVEANEKNLAALLRIAAS TGRGEFADSDQKERAELIASLESNNPTPEP  
TNSPMINGRWELVYSSTQLFRSSPFFMAGRAVCSTQDQADQYDWFCDMHRKALAI SNIGT  
VRQVISPTLMISEFEVKVAVPFLNDFTPFSYSGGLPFTIDGSIVSQADITPTDDGNAWE  
LLMDTVQIKGSNIPGLRTILDNGLQLQSRGLGSFLESNLDGYTNPRPIFETTFLSDTIRI  
SREQDGKVFVYAKESEELDPTDYSVVEADLGLTLNLLGGFNDAITKFYI  
>comp10029\_c0\_seq1; 644 228 1850 LEN=1969; translated  
MLDHRNGPDES LPGYNRRKLLRDAGDGVPTVSNFFPIERYYEASDKVFESEFEMVFNRRQL  
DNAYVYGRRYCTFYVKGISKHDYRSONSEARRNQANKRVDDVLKLELVSDWMDAEELE  
NEKKRMAI IRRQKAERERKQRELEQKRMNDLQKRIENLKRSTVNESIEKVEESALAKLQR  
LKQPGATQQQPKPNEATQQRNKRNTNTHPPAEPDQGLLSQIRLDVGGDLPPPLPPSNGGK  
KQESISPPNYNSVLEQSSYFGP SMDNTISTQERHDP SAPSYDSAITKPKKERPKRQLPIQ  
QRISQIVGTHRQYQOEGKIQVSPLR TYQGRVAGSTNGCTVISACVVSKHMETHGKVDQAQ  
IQSVIDKECVPLLQAIRRKCGLGASLIIPSDVHDYLVDEKLLYQHKFAGVAGGNIADPT  
HLGEFMALLKGEEGKTSHLKAGATLFFREHVVSIVKFPMSVTEAVYDMIDSMPTCNGRGS  
RTRCHSLDALHAHIEYYCTSKFSDSNIKIYIQNRWDDAMADFDPRVVFQSFVWTDLPKPKQ  
>comp10030\_c0\_seq1; 284 108 452 LEN=660; translated  
MVTITEGVEFDTIAREWRCKWSADNDKKS LAELQKVLDETKADIKAVEGVKSVQRIVCGG  
CLDFKVVVALPEPKYGDWEKGGHAP EEFLEKIKKIDGVS AVETQTYTLM PVEL  
>comp10030\_c0\_seq2; 120 1 522 LEN=522; minus strand; translated  
XLEVLVCFVSFDRIGLDWVGFVSVALRCVTLRIGESWIAKTLWFWSEWVIYNQWCTRFDT  
ATGAEAI GADRSTGIRTIRHRPDSSSRSTYFCFLDSGSGDAILVGGWKVSTSDGCGLWVL  
CGASQKKNDENGSRGVCFVFLVSDLPGLVGSWREGRRDPWIVDSCETKCCSLX  
>comp10030\_c0\_seq3; 284 92 436 LEN=644; translated  
MVTITEGVEFDTIAREWRCKWSADNDKKS LAELQKVLDETKADIKAVEGVKSVQRIVCGG  
CLDFKVVVALPEPKYGDWEKGGHAP EEFLEKIKKIDGVS AVETQTYTLM PVEL  
>comp10030\_c0\_seq4; 314 219 608 LEN=816; translated  
MASPEPESKKQKTSSMVTITEGVEFDTIAREWRCKWSADNDKKS LAELQKVLDETKADIK

AVEGVKSVQRIVCGGCLDFKVVALPEPKYGDWEKGGHAPEEAFLEKIKKIDGVS AVETQ  
TYTLMPEL  
>comp10031\_c0\_seq1; 470 67 1029 LEN=1344; translated  
MSSAATGSVLLAPSKYDFSKYTPMFYKLGALSGGICCSITHAALTPVDVVKTRVQLDPAK  
YKGLIGGFRTVVAEEGAGALATGLGATAFGYFVQGWFKFGGVNYIKIQAVQALGEEKAWA  
NKGMIYIGAAAAAEFVADVFLCPLEAVRIRQVSDPSFANGLGDGFVKMFKTEGIGGFYSG  
FLPILAKQIPYTCAKFVVQGTAAADSMYKSMGKTPAELSSTTNLGISLASGVIAGVSAII  
SHPADTLLSKVNKAGAGGDGPLLQRLGNIKEVGFRLNCLVGLLPRCVMIGSLTAGQFGI  
YDTVMGALGASKFHFQDPYN  
>comp10032\_c0\_seq1; 409 263 1963 LEN=1963; translated  
MQMVR IKXQKSTALSISAFDNGATQSEEPSNAPAASASTLFRSPIFGDIRRLRLSEDEKE  
DSFLAAMGVPTFVASLDSTSNENSENTVHLTDDPLLADRKKPRGLEGALNHGPAFVVDNV  
LTRQACEQIISDCERLVFGNFKSGKNNHGAQQIVVDPSTADAIKQLAPHIDVNDLEMIR  
REMATQGKSNIYNDEEFDDIRLYMVGLNRRWRIYRYEASTEESFAPHIDAGFPPSGVSES  
GDCLVWDDSASLKGDEDEEIVSRLTVLMLYLNDDFVGGGETKFFPPKGEDQDPPHLSPVASV  
RPMAGSVLLFPQGVGEDAVEYARKHWPLHEGSPVLSGRPKYVIRSDVLFATHVEKPPFED  
EEILFRHDNTVRQTFIPKPTVWDNILVTSRLTVQSFMGVENLGPLLYSFLRMTKRRRVVE  
IGAGFTTLWILQALKDNDVELQAVRSIQRSGECKLLNIDWTIHPTIEGFDSEPSQLLCID  
NCEHQRETASGAGAVARSLGLDSYLEFQRGDAFDMKLG DSTVDVLWCDFGVGARMKEFIS  
SAWACIRPGGYLLCHSTLTNENTRLWL  
>comp10033\_c0\_seq1; 299 148 627 LEN=903; translated  
MIRTYEVHDLSENDEMVEFDPQVVENLNWWQRCFIPKYPD TVRGNVEGALSNETESQQ  
KGQRDETIERRCRFHSEDTVSTNLTPPGTPNVTKVSSVSSSSQSVSNKTTSSNTSKT  
PSKSNDEVETPLIRKAISAIDEEPEEAERASEEGRATSSS  
>comp10033\_c0\_seq2; 544 674 2257 LEN=2533; translated  
MKNTMWQE QESWSSMSASSL TEVFPVQQRSL ELSDMIVIDDEYFQEDSTGVLISSVIN  
ILLFFLIFGLSATVNLRLRQQLTNKFAILSGITMQFFVMPLLG FISISIFHNFGFSQAM  
GVSLLVVTSSPGGSYNWWSL FNAELALSVAMTSVSSLLSIGLLPANLFLYGLAYGVI  
FVEEGQENINIVSSLDGFAIFITLGVVMGAILGGLFVGYQFNSNQFHKRANYFGSICGI  
TLILFSAFLGSGGASGAETNFWSLPWSFYVGTTFPCIIGMALANLISRSFKLSPPEVVAI  
SIECCYQNTAIGTSVAVTMFSDPNKQAEAVSVPLVYGMVEAVIIGLYCLWAWKSGWTKAP  
ADEKLCVVMIRTYEVHDLSENDEMVEFDPQVVENLNWWQRCFIPKYPD TVRGNVEGAL  
SNETESQQKGQRDETIERRCRFHSEDTVSTNLTPPGTPNVTKVSSVSSSSQSVSNKT  
TSSNTSKTPSKSNDEVETPLIRKAISAIDEEPEEAERASEEGRATSSS  
>comp10034\_c0\_seq1; 283 503 1342 LEN=1854; translated  
MSSSWLQLAHKTCIITGAGSGIGEAVAKSLVSVGCRVVLADHNDNAIERVANDFITDESN  
FHLMKCDVADPKQVRDLIHQADKFASC SNF SHSQQTNPVATLLVNCAGITRDNWVSQME  
MDEWNDVLDVNLKGTFLTCREFLNQRRADQFFPKEYDSNKCGPRSDASIVNIGSVVSEFG  
NLGQVNYAASKGGVLGMSRALAKEVAIRNVRVNSVVPGF IETPMAQAIPAHVKDRVMNQI  
PMKRFGSTSEVANVVSFLLSPRSGYITGESVTVSGMISL  
>comp10034\_c0\_seq2; 240 575 1287 LEN=1799; translated  
MITAIERVANDFITDESNFHLMKCDVADPKQVRDLIHQADKFASC SNF SHSQQTNPVAT  
LLVNCAGITRDNWVSQMEMDEWNDVLDVNLKGTFLTCREFLNQRRADQFFPKEYDSNKCG  
PRSDASIVNIGSVVSEFGNLGQVNYAASKGGVLGMSRALAKEVAIRNVRVNSVVPGF IET  
PMAQAIPAHVKDRVMNQIPMKRFGSTSEVANVVSFLLSPRSGYITGESVTVSGMISL  
>comp10034\_c0\_seq5; 283 328 1167 LEN=1679; translated  
MSSSWLQLAHKTCIITGAGSGIGEAVAKSLVSVGCRVVLADHNDNAIERVANDFITDESN  
FHLMKCDVADPKQVRDLIHQADKFASC SNF SHSQQTNPVATLLVNCAGITRDNWVSQME  
MDEWNDVLDVNLKGTFLTCREFLNQRRADQFFPKEYDSNKCGPRSDASIVNIGSVVSEFG  
NLGQVNYAASKGGVLGMSRALAKEVAIRNVRVNSVVPGF IETPMAQAIPAHVKDRVMNQI  
PMKRFGSTSEVANVVSFLLSPRSGYITGESVTVSGMISL  
>comp10034\_c0\_seq6; 240 750 1462 LEN=1974; translated  
MITAIERVANDFITDESNFHLMKCDVADPKQVRDLIHQADKFASC SNF SHSQQTNPVAT  
LLVNCAGITRDNWVSQMEMDEWNDVLDVNLKGTFLTCREFLNQRRADQFFPKEYDSNKCG  
PRSDASIVNIGSVVSEFGNLGQVNYAASKGGVLGMSRALAKEVAIRNVRVNSVVPGF IET  
PMAQAIPAHVKDRVMNQIPMKRFGSTSEVANVVSFLLSPRSGYITGESVTVSGMISL  
>comp10035\_c0\_seq1; 686 138 1211 LEN=1272; translated  
MVTTRRRSARIKKMQGDDEIGSENVQQQEGPGDDGDDDSGEVEAAANNDVTKHSDGEEE  
AAASSAKKSKARKKKELRRQRKEDLKSATGVGLKISVDSSGSAPVNKKIVFGDYDEDDA  
EKDTKESTSSEEVS AKEDKGGKVEENCEDEDDDDAVEEVQGSAAARDEVMDRMKMEEKQSL

KTKKKRNKARKEKPKKEYGSDDDEMDDEFFAQLNSVRQKEEAQERREEEEKSRAAAKGGH  
TTFVFAQNKDDDDQAPSGPIQIDENIQVVVLKDPSSSVGVASAPATQVSKVALTYSRNRK  
DGSDPSAGATEAKRKRNRSGEEVQPWKRVARPRLAMGRSRMTKGKPAAFFTKKKKK  
>comp10036\_c0\_seq1; 343 90 803 LEN=1144; translated  
MTLRSILALSPLLSVSGFTTILPGRSDSGIATITNANGNFRNTHLADIVSPFDGGDSSSS  
NVATEDKPTLEGPLDLTWDNVEAVLDEMRFHFLIQDGGNVAITEIDGPIVRLELQGACGTC  
PSSTQTMKGLERGLKEKIPEIQEVIQAMPEGPPLDEEQINVVLGDGVRPFLTAVAGGSIEI  
DRIEGEGGLQPTIWLDMQGASASLNSVKLEIAQRLQRHFMMAGLRVDWVGNHNSNGFK  
>comp10037\_c0\_seq2; 263 58 570 LEN=1207; translated  
MFSRIASTTAKRVASLQTARGSQFARTSCAAFSTAEEVVPVGVGAGKTSTGIVGLPADPDAV  
SNIISAYQALLDRMAASDLPENAQYRVLENIISNYRIKIATENPDDPEMVEELCQCQVQE  
ELVQQAELEMSVLEMYLKERLWEEIDYEVDVEVEHNPDPKDGEGGLGDEA  
>comp10038\_c0\_seq1; 577 168 2321 LEN=3792; translated  
MTLHHLRPSLLRFRQSYLLLRPRYSIGTYNAAWRGIRIPRQVAPFSSKADSNDDESNEVE  
GNRRSASLALASTHDNLSRLLLEISRREWPLIGLAASTLMVTSSVTLTLLPYASGSVIDYTI  
ASGGEDGASPLVLASGLFGLSALAGGGVYLRAVWLAKAGNSIVARIKQRLYASMLRQESS  
YLDQQTGDLTSDAQLLQGALTTQAVAGLRATVMSIGAGGMLLYTSPFLAMVSCAT  
LPPVFI LTRHFSRRLKQRQEEVQKLLGEATSLAEQALSNTTQTKQCAAESFEIARFRNSV  
ADAHTMAVSTAHDQGLEMSAHIAANAAILGVLGLGGTMVLEGNITAGDLTGFMVYSLLL  
SGNLSLTSIYGDVVRAMAASRTRVFEIDRPSKIYSSKGMEEENALLSLNEDPLVSI EYS  
VIKDRLQGGDDNDTNTVDVTRTKTAAYSDFDPALGGASIEIENLCFQYPSRPDVPVNLNLS  
LTVPSGSVVALV GASGSKSTIGSLLTRLYDTDKNENNGNSLSSIRINGRSLCDYDPRDL  
RQMISVVAQDPVLFGGTIRDNIYGVWVKVSEETILEAARQAYVLDFAESFPDGLDVLV  
PRGMQLSGGQRQRIAIARMLANVDASIYVLDDEATSALDARSEHFVQSALQKIFQDHSKGT  
IISIAHRLSTIRHATTIAVLQNGSIVQTGTFFEDLSTNEGPFRELMKTQLVGDIDSDT  
>comp10039\_c0\_seq1; 326 576 1543 LEN=1543; translated  
MSMTRAIASFHALWTLFAVCVVLVSSGCHPLPGLLQPLFVMAVDPDYTQTNRPNYGLNDP  
NGADAQREAAEEANKQYESASGAYEFLTRKDEDEKKKRASLTISMRFKSNLEFIVGTVD  
FGHSIDHHRMYMYKGVIAKPPPDTSQLCTLPEELMATYRNDLENIPVALLVELETGGCDV  
LTKASNALRIQKDVTSNLKYVLFYNNDRYDPSIVTSLDDETSRSTSARELAPLTKSPTL  
APSLSSYPSSAPSTSSSNIPAPTSTVAPTNDPAPTLPASTSAPTPLLAPTLSSYPSSASS  
TSSSNITDPTATPASTSDPAPTA  
>comp10039\_c0\_seq2; 285 101 1099 LEN=1099; translated  
MRLQIEPPSPVLGSPNDDVGNDDYLTNKNIGGSNSYSRAPSTFNVLYVLFGLLIIS  
PCLRAFHLWWAGGRIRFRHSEDESNRIVGLQYIIPMDNWFPGYEPVEGERVHGRLTTEQ  
IMALPEI IYQKPNFDHEDDAATEAPTEATDPNHIYHESDDRSETGAEAPDETTGAARSND  
PDGDTVRAPSDTIPCPEPERFALPGSPERVGTETGSLSSSSSSASSSLPSGPREDLPPD  
EEQPAEEAAPLSFRTRQRLRAF'TTTTCTTCSICIDEFEVGEKIRLLPLCGHGFHTECILP  
WLRERQGCCPLCKMEVIEEAGANNRNNNNNSNN  
>comp10039\_c0\_seq3; 119 356 457 LEN=457; minus strand; translated  
MVGKIEDDQVSVGASVVGAYFVGSNDVGDVDA  
>comp10039\_c0\_seq4; 367 1 1414 LEN=1414; translated  
XAPSTSAPTSFEPTKYAPTADAPTETWSSSILPTIWGITDDDFDRNQETIIDVGSNTND  
NVDAALEEDLAEQLTIERERLKTELEGNDSIVFASLPFAVGRILILANIEEQVLRGTYNVG  
DTIASAEFLEPGFEKWRMDMRLQIEPPSPVLGSPNDDVGNDDYLTNKNIGGSNSYSR  
APSTFNVLYVLFGLLIISPCCLRAFHLWWAGGRIRFRHSEDESNRIVGLQYIIPMDNWF  
GPYEPVEGERVHGRLTTEQIMALPEI IYQKPNFDHEDDAATEAPTEATDPNHIYHESDDR  
SETGAEAPDETTGAARSNDPDGDTVRAPSDTIPCPEPERFALPGSPERVGTETGSLSSSS  
SSASSSLPSGPREDLPPDEEQPAEEAAPLSFRTRQRLRAF'TTTTCTTCSICIDEFEVGE  
KIRLLPLCGHGFHTECILPWLRRERQGCCPLCKMEVIEEAGANNRNNNNNSNN  
>comp10041\_c0\_seq1; 218 629 940 LEN=1369; translated  
MAYLEDYKMDPVAAQPLISFSIFDDYAKDKDMTLVRADILNNGIDEGEGGLKVVKSM LDNY  
KDDEEYLNVRVFNVPDSFNLDFFIAQKSKSWNSGSPDDNVNI  
>comp10041\_c0\_seq2; 260 155 817 LEN=1246; translated  
MLAATTRLIGSPNVKRQLFPVNSCERCFSFSFAGPKKLHDILKELVADKTRNEISEMW  
YTYHEGKENVHGLVLGGKETKSLTRAKSSPFYIQPIFRDDGHFMLSQFFEP SHFIMAY  
LEDYKMDPVAAQPLISFSIFDDYAKDKDMTLVRADILNNGIDEGEGGLKVVKSM LDNYKD  
EEYLNVRVFNVPDSFNLDFFIAQKSKSWNSGSPDDNVNI  
>comp10042\_c0\_seq3; 165 465 959 LEN=1235; translated  
MIVSILSSPLVAVVAFMNIAHTTGS LN IYGHKSCSQKGMALTGFMRDGYCVEEEDDEG

SHHICIDLSSTKGGNFCEVTGQSNWCNSSGEGCHGDSSTCPIQNWVCQWAFASYIKQAG  
GCDQIQDIVCGAINMEALYAYGEKRETTEDIEAAFDICERRCFG  
>comp10043\_c0\_seq1; 336 1 1646 LEN=1679; translated  
XGKKLDTDIKEGDS SAHLPSTETTAKAVLQSQQITPETIDEKKGENLDEKEGSRGNP  
SRPKAEKESGVASPSKEIKSHGSSAFCLLLKDDNDILSEWVAYHYHVFRMRRLIVALDPD  
SKTSPYEVLPFAHQSSYKGFHLDFTIWNDEDYTPDFFHGEGKDYSKIPISNVREINFT  
DFKFDKRDHITSAFFNNVTISSSTFLHKNETYNDMDHQDEVKSAYLKVNNHRFRQRNFVSEC  
YRQIKKERDIRRETRMRKGQVVDVNTGIVSWTIHSDSDEFVLPNPWISSYIASSNGTSEQE  
QVDHRYYSQFVNFTGYSPKELETMYPKQPSRNSLWDFQDYRKKEGSNLGECLEFIPRLTY  
GSKEEGNSAYTKAYFDKYDGSTMMASWNHSHKLESLRWKYHEEFSTVNFPKTAVRAGMLNL  
GLNAIFHGPKLVPSIHRTLASCPRNFEKINLYPTKKVAHVPLVAVHYLGSLERYLARADI  
RRSASLHQYNNINSNFAFGDENHEVEKNKQGYGPWWIQGWLDSFVETHGAEAVLSILGEP  
FASVSASQ  
>comp10044\_c0\_seq1; 325 949 1887 LEN=2100; translated  
MNYTPNHRSSGGNASAPFKSPITLCFDRMLGAAAQIATPLPPDRKKATTLGPEQKAATP  
LPPAQKSMRASQLPLRSLNQTAVTFFSYRNGNDNRRLSYPAPSGPTPPPTTIEQNNIDD  
PFVQILRDHGLYKLLILCMALQRQSKESPKEISEPQSRIIGEGFFWKDYPPCEQIILYDSM  
GHYYELSTQQRQSKQQAFNNHLVKRARETAHQHGYQFAECFNDKCLRDRIRCFKTHLQ  
NAKRLVTMQKSHSPEQKAALRVLISKARSMEGFSTPSNPKLMAMTSSTKPRFAVVTQG  
GTEAIRKRRQSS  
>comp10046\_c0\_seq1; 209 1 872 LEN=1402; translated  
XTIKRSLRPLPSNKGVAIVPYSYDSKHSRISCKAASHSNTTAVKRSKMIVYAVICRSSDA  
AILCEFFSSGNTSGNVPQCTAALLEHLRDHPNLLKKGDLKTFRQKSGTRGGPQEDDFLSQF  
IQACTVAVTTAEEMDLGAIDEYFFHLWHHEDVFYCCCLADDKDQRNQQVNFSSFLQTLSHDF  
SGRYTKRRIKNANSYAMDKDFKPVLRSNMHHYNIRRKEI IREDNAQIDHLLGQVEDLKNV  
LGRNLLLLERDEHIESIMDKAVQARQDSMVFKKSVKVKKNLQMKSFKMW  
>comp10047\_c0\_seq1; 1089 1 3591 LEN=4629; translated  
QQQLKQQQQLAAQKAAAAGLKNAGNGGNANGKSIGKSMASLAKAKQAKIESAHQALIAKA  
LKLKMEERGRWRRVHHGIFVVQKGFVAPPNAVSGIVRSKSSQSPLLPVLRTTRKGPFRVS  
RSMRIDASSIQMLRKLQLEAKATNAKTAHGPCDAPPVTPLLDAEKFKRIKLEPKKIGKAL  
DRAVRSSRKSAAADALNKQHKELSKAISSHQEFFFKFKQMKTEAARIARAIRDNANKEAK  
RKEKDGVAEAKARLAALKANDMDAYSKLLLEETKNDRLKFLMDKTESHFSQISTSLQLTRN  
NDTGVRSSTGGAASYASAHKLTEDIQQPSILVGGDLKEYQLAGLQWVSLYNNKLNGLILA  
DEMGLGKTIQAIISLVSYLMEYKNNLGPYLIVPLSTLSNWNVEFQKWLPSAHLICYKGI  
AQRKEIYREKVKNGHFVLLTYYEYI IKDKASLRKITWQYAI VDEGHRMKNAAASKFAKTL  
SSQYDTKYRLLLTGTPLMNDLSELWSLLNLLPSIFNSVDTFDQWFNRPFQAQFGNISKGD  
DDADSNALTNEERMFIIHRLHELLRPFMLRRVKSEVLDQLPEKVEKILRCELSSWQKELY  
KQISKKAVAETNDLGIQNTGPGRGLNNAVMLRKCVCNHPYLFSPQGYHINQNIIRSSAK  
VELLDRMLPKLRAAGHRVLLFTQMTAVMTILEDYFAYRRYLSRLDGGSTPAEEREKRMK  
FNAPDSPYFIFLLSTRAGGLGLNLTSAINTVIFDSDWNPMDLQAQDRAHRIGQRSDVSV  
FRMVTRSPVEEKILSRATEKLNMSSELVVEAGKFDKTSVESDNSLERKRMMEVLLVDFDTN  
ANKNDGDTVIGISKPLEEKPAEPVGSSEGEVDDGDDDDDDNNEASKEDDLNGLLSNEN  
DYQLYKTLDKLAAAAPPLVDTSLFTSEEDVPDWIKYPTGKKDAALDMSVPGSGPRKRKE  
VMYDDGLTEKQFLRMMDKQFDKAEAAKKEAKIAKRGAKSLGASAPIGAPVSVAI PNSELT  
DWTFRKLISCAKAVVNLKEPSTKRRRLCEIFLDKPSPEQFPDYIELIAKPIAINDILRKR  
GKLYANMQEFHDDWKLMLFANAKQFNGEDSWVVEDGKTIKELDRVLKKNGFTEAGVKPK  
TPPKAKKLRILKSLKTIKANNDASGDGKGGSGKPSPEPVKKRKKIKQSKRETS  
>comp10048\_c0\_seq1; 322 213 968 LEN=1081; translated  
MSSTDPSKYQKDDCSDNAPLTTTTSPSTSSNSTWKLEESSVWWISNFI EAGNSSGWINNPG  
NVLLLTSPFFAGAYFGYRMPTEILEDLIQGGTSGYNSGKAASKLQTSKDRAIRAAAAR  
TASKALRIATLGTGTFGFVGAIGFYLSGYNSVDEAVKGTSSQASSWGKSLEHLMGGDQG  
VSKTHPEVLATKHMKADEELRYIYDKYIKEDDYEDNESTSWHDSSTNKEEDKAPTLYAV  
YEKYFMKKDDK  
>comp10049\_c0\_seq1; 465 345 2045 LEN=2205; translated  
MTESSGLSDKKQEGNLYFDLELKVNKCKFYRNPKNPLAVLAGNVVSI PVLSSGENSEVAS  
KPFSAATSQLNETKDDTSAIQSRISHDQEVVVDHPDFEHIRNELQIDTRCLVHVGSSSGQ  
IPYLMKKWASEYREKKKSTNWTIEIAEYRVTFRIDVDLTSITGALEKCRSVPGAWMLRSQR  
GITQICDPPTIKVTMLMDQSKFYPTTLLALLDGVIKDVDRKSMPSTILERNRNLTAGLIEY  
GERCWLHVRTNVL SLLKTLHGESMNGTGSSGGTCQENDNNSSTGWVQLARAIPVVKVVI  
NEDLLVRKANNKGALLLECYEIVDIQNGVSHADQIDSGGRKINVMQSNLARADRKERHR



IFAEWLKTYGADFLSTGSGVLDVAGNGTGLGHELWKLGVSSSTLLDPEPRCNVETVVPFQV  
IDPEPLGNGSELTGEHQSSKNDGTIKTDHKKQKIKYLVETCSMITGMHPDEATEAVIDT  
SLRLGKPFFAILPCCVFRNLNVERKAMRKQTGSVDPFRSYSTFCHYLLRNKAPPGVLFETE  
NLPFEGRNKVIFLKYFLKCHEIIER

>comp10050\_c0\_seq1; 1990 86 5053 LEN=5079; translated  
MTGKIRDVDICITCVTEKAPKLPREELPSLGIELVYNAKGVGAAAAEEERKKEAESNRK  
RKQLEKNKSTIDPPSRSPFSLKARRSAQKEDPPEESPFPKALSYGKYQRKLELRTPIR  
DAASMSSTIETTSTINDASLQNKKEKTKRGLLGLFGKKNASNEPPTSVEFPSSNSVE  
DAALKEVFNTFMSNDGDDVPAKAAF DALPPKSDTKRKENTSVEEEKILFPDLLPGSKSSP  
EQLETESSPETNGSQSEGNQSSSIEQTTISSLGHDSVWKHAIVSDAESFTKRAKDMLQK  
ISAQRERVASPSGSGNIKVKLLKDGLDNQITEIYDLTEVSENGDKNPQQQKIEMRRIEES  
KSRHSFPHSHHQSVADINIGAKDSPYVVDVSDDEESSVPVPLNDNYGYQILDVADIYEEN  
GPGSPLVLSPVQIRRTADASEFSPSSVAIPHFGEEKQNPLPPSYNQTRNDGFVLDLGD  
RDDVIVYRVESQMSPNLRDSNISPIRVDIADPYMAPSKRARKTGMMKPTFDEAVQKYYES  
RGHSPSRLPSTMTPHLNSTIRKCSRDSNDSARVLKVTFSIEDIEERYQKQDFGNQSSSA  
MNSSLATAIVNTERDAIEPISSTLREADEALVESYADQLDQEDDMRTPQQMLLEALSFG  
DPLPFDFEETIHFNPISIASKRLPSLNTFALHAACFRAFPKRFGKDQTCRINDLIDDLTLY  
RKLIEVLVEADPYVCQRVNEGDLPHIMARHLMWEGRWYQKVYDKARNSDEEPPDSGSG  
ITKLYQSMSECINLVLQPISEVDSLCLHSGSVGRILPLHIAAIFTVPYSTLRSLLETCPN  
AASTMCDLGDIKTFVPNDSTPLELHDLRSTDFPKWEIQKVNFBHPDEEMTQAMLDKIYGTM  
NAMRRSDLMFAFSPKLLPYRNEAYRMRMEHMIQKEIKYQDTKGNVMTTRPATFFWIWMC  
EFQGEDDPTDHYAESISRIIDHLPYLAVRYLASVVNEEGKAAIDCAIPICADVIMDRLYR  
ISNTDIPMLVHTVPGEVDTTIGSPKLEFDFKENSRLRFRFHGQGYVGLCRTIFHIQEKSY  
PSSFIILPYKLVQDGKGLGLESPAAAKIAMEFAGHLSRLTSPKNIVSVLDKKLDEFFGH  
DLVDKMNRENRESQKREESFDKFLKLYENGPAYFYFVDDCTGVPVINDTNGVYPLIVND  
AAEVVEKVFPLMLSGMILMRGENALSILADVLLFENIKLVLPHWIEAAKDLVAFSFSPE  
TKLLSKREKLINFIQYGSTENDASEKFKSGDLSSEWVLEVS LIKMMVEMHDVGHNF CGLL  
QETSVTQVLWTRNSQIHTNFPSQINF TTPKLLKVSHSNTDKNATKALRNKLNDRKYDEM  
FAEMSLTESSSDEKEKGSSESEYTDTCSSSEDKVSGMIVTASERNNSQSVASQLTEHRQA  
EHQLSDKMSLKSDESLPPMSLASSDESFDIRTVMKLRFLDEQESKLLKQLRQKISHLDTV  
GGQLVQQEEKITSMIGE IINQKDQMLHNSKDG LTKARALMMRICELEDRVLCREVEVGQ  
LKNDSVFFQLEASVGSERAVDGTSSSRNREVLNPNENMETPDEDINSLAPFSVRRQ  
VPLVDDDESNDGDSTLGNSTMYNSSLDGYPVGM LN

>comp10051\_c0\_seq1; 77 1 154 LEN=626; minus strand; translated  
XPFDQHAILEASLYLRSQNLPLDLIDLKKAEDIPER IAGMVSPGRPHMW

>comp10051\_c0\_seq2; 469 306 1484 LEN=1695; translated  
MSKSSLLRLVALTAILFQCSFANIVNGQLKGEESE TSSRNHPVGTGCEGNVGN GICED  
PSLCCSEWGYCGTSALHCRLCGEGQVGNKCEDPSLCCSQYFCGTGTDYCGGSGPTISP  
LPQPTNPTLQPTPTPTPTPTPTSNHRDEDSRLIAYLGNWQACPSDAQLEQYTHIVIAFAV  
SYQWSSSGNICSQTCEIAMS FVCDNSYDFNLIQEWKSMGKKVILSFGGAGMGGSWEGNKI  
GCWDYCFGRENQVIDRLDTIVREMGVDGVIDIYEY YEDDQNESDFSKGEEAQKFLKDIT  
IGLREKLPEGAELTHAPMDPDLVSGTAYFNLLKEVSSYLDLMPQYYNGNVKPLSNFVGA  
LSHFENLKNEMFGGDAKKLCLDSASMIALTLT

>comp10052\_c0\_seq1; 855 50 2782 LEN=2825; translated  
MSFVDPLWEFVLEDYEEEDNGWGRRRSNRKKKEAARNEGSYFNFFGGSDSQKSRKAYQS  
DDRNDADVSGRRELSKVNLTRNDSRGSASSWGRKSKISSKSSKYSNDGKDFWDVITG  
APPAATIQQNNARKSSPNKSNRVLRRKKNASESIKRSQSNVLGNSQPKPLVRTSSTKSE  
KSKSGFKRFRRNQSTKSSEKNRVSKPEVKQTIIPNKPPQSAKLPDDDGFPYIDFFHHIAD  
SLDPWIVDSSVASSEESSITIDDEDTRCTSSQVQNE DGVVAKSESRSSVRARDEKSN  
YKLESLLDQPLPDSKSAKPKGNTHHQKQSTKEETGVTEIRLRVNP GGNTLSEQVIKANPN  
LYSFPEDGQKFLHKDDVSSKSRPSFDASESDNSSVVSRIKQHLKIKPKQPRVVKDRDRSR  
KIAKGSIRPTSKEMKPPTAVHIQKKPEARDDWEDI EHKKKCQLWKRGCNSERTCKNDST  
NLFGKADETEVFPTSRVVVNGQIHSVMPGSDPFGVTSVSPNRLTNSEGPQSVFAYDYD  
SNENMDVSYKKPNQKPRDSIAVRNLGAPPALSLVGENVVIQVEASTVSETDCIIRQGLWW  
RTQPSFPNTPGVDDVVGKVYSINPSVGKKYGLNPMQSVVSLVRWGGNRRFVTIHPNQLVKV  
PRGLDPAHVAACLPETYLAAQV LHMGPANLRYGKHS LKGSVLIILGCMNTNMGMKAMIEL  
ALNAGVANIYATSKKKHWKTLISYGV MPLSSDPMEYIHRITGTIDLVLAPNGNLR EDVTP  
VHFRALIPRFGRLIISGRRINGNDIPINDWRKAQNAPALACGKNKALQKILGNSATYDVY  
DEWEKNIDLCKRDLYHLFKLLDTKVIKPEVLDRI SLNKVAKAHEL IETKRLPGFLVCEPW  
MKTKKRAVYL

>comp10052\_c0\_seq2; 319 127 1182 LEN=1225; translated  
MSNNLRTPQFISVSHPKFAFILFKASTVSETDCIIRQGLWWRTQPSFPNTPGVDDVVGKVV  
SINPSVGKKYGLNPMQSVVSLVRWGGNRRFVTHIPNQLVKVPRGLDPAHVACLPEPTYLAA  
FQVLHMGQPANLRYGKHSKGLKSVLILGCMNTNNMGKAMIELALNAGVANIYATSKKKHWK  
TLISYGVMPSSDPMEYIHRITGTIDLVLAPNGNLREDVTPVHFRALIPRFGRLIISGRR  
INGNDIPINDWRKAQNAPALACGKNKALQKILGNSATYDVYDEWEKNIDLCKRDLYHLFK  
LLDTKVIKPEVLDRLISLNKVAKAHELIEKRLPGFLVCEPMMKTKKRAVYL  
>comp10053\_c0\_seq1; 382 546 1670 LEN=2221; translated  
MILFCTHRLFLLTAFLIENGLKIETVVEAPTPERNDLLDQIDLTDVKDPSDTLVSCKERA  
TQQLNELDGVLDGGAMMKQIHRELHDCMTVGLAPRIRASNIEVEFERSLRIEASITAENF  
TCADVGLQSSPDVETEELWVSPVDGVTRTVHKKLHRAASRIHVVENFASIDECNAMEAEAE  
DDLHVASTADGKGGSKVSNNRKAMQAGIRPKFTDDGQPLDGNLISILSGRVYEYTNHVLD  
LNITHHGQEPPLMSIQYFGRGKHDVEPDRTYTPHCDGRCNGENHIYGGMATMVIYCTIPEK  
GGFTNFQANVHVKPNVSGDAVFFSYFDPLTNVTDYGLTQHSVGPVYEGEKKIITQWVRFV  
VSKETPHSAFNTRK  
>comp10053\_c0\_seq3; 492 61 1470 LEN=1898; translated  
MRGFIFFFALVLSVATKVKLSFRNQSDDYLSFHWIHPKTGETSPIKTDIAPHSAFSLNS  
FLSHKFEVRQEIDPETGDCGSGDDEECKIAHFQVTEAPVQTFLIENGLKIETVVEAPTPE  
RNDLLDQIDLTDVKDPSDTLVSCKERATQQLNELDGVLDGGAMMKQIHRELHDCMTVGLA  
PRIRASNIEVEFERSLRIEASITAENFTCADVGLQSSPDVETEELWVSPVDGVTRTVHKKL  
HRAASRIHVVENFASIDECNAMEAEAEEDDLHVASTADGKGGSKVSNNRKAMQAGIRPKFT  
DDGQPLDGNLISILSGRVYEYTNHVLDLNITHHGQEPPLMSIQYFGRGKHDVEPDRTYTPH  
DRCNGENHIYGGMATMVIYCTIPEKGGFTNFQANVHVKPNVSGDAVFFSYFDPLTNVTD  
DYGLTQHSVGPVYEGEKKIITQWVRFVSKETPHSAFNTRLNILEEDGE  
>comp10053\_c0\_seq4; 326 546 1299 LEN=1550; translated  
MILFCTHRLFLLTAFLIENGLKIETVVEAPTPERNDLLDQIDLTDVKDPSDTLVSCKERA  
TQQLNELDGVLDGGAMMKQIHRELHDCMTVGLAPRIRASNIEVEFERSLRIEASITAENF  
TCADVGLQSSPDVETEELWVSPVDGVTRTVHKKLHRAASRIHVVENFASIDECNAMEAEAE  
DDLHVASTADGKGGSKVSNNRKAMQAGIRPKFTDDGQPLDGNLISILSGRVYEYTNHVLD  
LNIRIMDKNR  
>comp10053\_c0\_seq5; 468 61 1446 LEN=1997; translated  
MRGFIFFFALVLSVATKVKLSFRNQSDDYLSFHWIHPKTGETSPIKTDIAPHSAFSLNS  
FLSHKFEVRQEIDPETGDCGSGDDEECKIAHFQVTEAPVQTFLIENGLKIETVVEAPTPE  
RNDLLDQIDLTDVKDPSDTLVSCKERATQQLNELDGVLDGGAMMKQIHRELHDCMTVGLA  
PRIRASNIEVEFERSLRIEASITAENFTCADVGLQSSPDVETEELWVSPVDGVTRTVHKKL  
HRAASRIHVVENFASIDECNAMEAEAEEDDLHVASTADGKGGSKVSNNRKAMQAGIRPKFT  
DDGQPLDGNLISILSGRVYEYTNHVLDLNITHHGQEPPLMSIQYFGRGKHDVEPDRTYTPH  
DRCNGENHIYGGMATMVIYCTIPEKGGFTNFQANVHVKPNVSGDAVFFSYFDPLTNVTD  
DYGLTQHSVGPVYEGEKKIITQWVRFVSKETPHSAFNTRK  
>comp10053\_c0\_seq6; 121 314 540 LEN=968; translated  
MPMFMXKPNVSGDAVFFSYFDPLTNVTDYGLTQHSVGPVYEGEKKIITQWVRFVSKETPH  
SAFNTRLNILEEDGE  
>comp10053\_c0\_seq7; 412 61 1075 LEN=1326; translated  
MRGFIFFFALVLSVATKVKLSFRNQSDDYLSFHWIHPKTGETSPIKTDIAPHSAFSLNS  
FLSHKFEVRQEIDPETGDCGSGDDEECKIAHFQVTEAPVQTFLIENGLKIETVVEAPTPE  
RNDLLDQIDLTDVKDPSDTLVSCKERATQQLNELDGVLDGGAMMKQIHRELHDCMTVGLA  
PRIRASNIEVEFERSLRIEASITAENFTCADVGLQSSPDVETEELWVSPVDGVTRTVHKKL  
HRAASRIHVVENFASIDECNAMEAEAEEDDLHVASTADGKGGSKVSNNRKAMQAGIRPKFT  
DDGQPLDGNLISILSGRVYEYTNHVLDLNIRIMDKNR  
>comp10053\_c0\_seq8; 406 546 1694 LEN=2122; translated  
MILFCTHRLFLLTAFLIENGLKIETVVEAPTPERNDLLDQIDLTDVKDPSDTLVSCKERA  
TQQLNELDGVLDGGAMMKQIHRELHDCMTVGLAPRIRASNIEVEFERSLRIEASITAENF  
TCADVGLQSSPDVETEELWVSPVDGVTRTVHKKLHRAASRIHVVENFASIDECNAMEAEAE  
DDLHVASTADGKGGSKVSNNRKAMQAGIRPKFTDDGQPLDGNLISILSGRVYEYTNHVLD  
LNITHHGQEPPLMSIQYFGRGKHDVEPDRTYTPHCDGRCNGENHIYGGMATMVIYCTIPEK  
GGFTNFQANVHVKPNVSGDAVFFSYFDPLTNVTDYGLTQHSVGPVYEGEKKIITQWVRFV  
VSKETPHSAFNTRLNILEEDGE  
>comp10054\_c0\_seq1; 370 73 579 LEN=771; translated  
MKFALVLLLVALAAVNGFAPASQARAGTALNESLFDIAIANMDLFAPKADQNTYGARDKKN  
LKVGEITNKSYVPSGLSAAQYSNIRSTESKKKADNYKRNVAKAGVFEDYTEFYTKRGTD

KQAWAKDVNLGHRMAKTKFDWSGKKVQATTTAAVKAAAPKKGRFGKKK  
>comp10057\_c0\_seq1; 242 406 1077 LEN=1751; translated  
MAKQNFRRITRVKVHCGERIEMLYELMGYIPVALIPTTGTGTGLKTKTFAQWIKTKKMME  
SLKSEGSRILECPGMKDVIFRSAGKSCMLHPGNVVFVFRGIFEKYHDEHVKAGQTGKRDLVW  
KIVQEIESKGGFRFLGWDKRGWVWVLEERSEIRSKVAISLRDYNKQQKAIANEQVCKSFTY  
VFKQLDSAKRRKQGNMCDSDSSDEGVPHFRESCCFKMSLLDE  
>comp10057\_c0\_seq2; 300 285 947 LEN=2606; translated  
MHPGEKSGATLLDDASVGSINPKDVDAMVAKGIGMLSIRDRNAIYEEIHGVSSMAIKETP  
ELIRDSLRFNFEKELENADHAKKFAYDAIMNQEENAVSKDVIITDDAFRLRFLRFVFFDAKA  
AVARMISFLDILHTLYGMEALKKFDDSMDFFINTELKIGLRAGYIQLLPFRDRSGRRII  
VFVTDCLKLESKVRKIFLYITYVAGEDVETQKHGCLMLFW  
>comp10057\_c0\_seq3; 391 285 1772 LEN=2446; translated  
MHPGEKSGATLLDDASVGSINPKDVDAMVAKGIGMLSIRDRNAIYEEIHGVSSMAIKETP  
ELIRDSLRFNFEKELENADHAKKFAYDAIMNQEENAVSKDVIITDDAFRLRFLRFVFFDAKA  
AVARMISFLDILHTLYGMEALKKFDDSMDFFINTELKIGLRAGYIQLLPFRDRSGRRII  
VFVTDCLKLESKVRKIFLYITYVAGEDVETQKHGCLMLFWPGVEEIRPPSSHRSLSVSK  
IINSLPTRFACFHFCFPNTPFFNLIRALLSMTMAKQNFRRITRVKVHCGERIEMLYELMG  
YGIPVALIPTTGTGTGLKTKTFAQWIKTKKMME  
SLKSEGSRILECPGMKDVIFRSAGKSCMLHPGNVVFVFRGIFEKYHDEHVKAGQTGKRDLVW  
KIVQEIESKGGFRFLGWDKRGWVWVLEERSEIRSKVAISLRDYNKQQKAIANEQVCKSFTY  
VFKQLDSAKRRKQGNMCDSDSSDEGVPHFRESCCFKMSLLDE  
>comp10057\_c0\_seq4; 227 629 1237 LEN=1911; translated  
MLYELMGYIPVALIPTTGTGTGLKTKTFAQWIKTKKMME  
SLKSEGSRILECPGMKDVIFRSAGKSCMLHPGNVVFVFRGIFEKYHDEHVKAGQTGKRDLVW  
KIVQEIESKGGFRFLGWDKRGWVWVLEERSEIRSKVAISLRDYNKQQKAIANEQVCKSFTY  
VFKQLDSAKRRKQGNMCDSDSSDEGVPHFRESCCFKMSLLDE  
>comp10058\_c0\_seq5; 92 157 811 LEN=1145; translated  
MSDATNPNVFFDISIGGSPRGRIEIELRADVVPRTAENFRCLCTGEKGVGRSGKLLHYK  
GSTFHRVITSFMCQGGDFTRGDGTGGESIYGEKFADENFKLKHQGPGLTSMANAGPNTNG  
SQFFLCTADTPWLDGKHVVFGKVSQEEVAARRHGRIRNFLTSTNCAFSSFLNKVISGQNV  
LSAIEQVGSDSGATRVKGEFCHSSGLPMGRSIPAECV  
>comp10058\_c0\_seq6; 87 157 781 LEN=968; translated  
MSDATNPNVFFDISIGGSPRGRIEIELRADVVPRTAENFRCLCTGEKGVGRSGKLLHYK  
GSTFHRVITSFMCQGGDFTRGDGTGGESIYGEKFADENFKLKHQGPGLTSMANAGPNTNG  
SQFFLCTADTPWLDGKHVVFGKVSQEEVAARRHGRIRNFLTSTNCAFSSFLNKVISGQNV  
LSAIEQVGSDSGATRVKVTIADSGQLR  
>comp10058\_c0\_seq7; 128 674 874 LEN=1061; translated  
MANAGPNTNGSQFFLCTADTPWLDGKHVVFGKVISGQNVLSAIEQVGSDSGATRVKVTIA  
DSGQLR  
>comp10058\_c0\_seq10; 136 157 687 LEN=874; translated  
MSDATNPNVFFDISIGGSPRGRIEIELRADVVPRTAENFRCLCTGEKGVGRSGKLLHYK  
GSTFHRVITSFMCQGGDFTRGDGTGGESIYGEKFADENFKLKHQGPGLTSMANAGPNTNG  
SQFFLCTADTPWLDGKHVVFGKVISGQNVLSAIEQVGSDSGATRVKVTIADSGQLR  
>comp10058\_c0\_seq11; 128 244 444 LEN=631; translated  
MANAGPNTNGSQFFLCTADTPWLDGKHVVFGKVISGQNVLSAIEQVGSDSGATRVKVTIA  
DSGQLR  
>comp10059\_c0\_seq1; 586 593 3280 LEN=4343; minus strand; translated  
MLFFNNFCFSMWAITALATTTTATEISDLPEFEGNMLSLKTIRRNIAGAKASAALS  
WKGV  
VERGGNWL  
LVVSSASSGLASALAE  
EEAFEITGCLSSGNACSGFLK  
ITPFALDVEQNP  
SFAANV  
VPSVWKANGFDYAGDFPGAIAPLQVTQIRQAFPNLTGEGLKICVMSDSFNMLGGY  
KNDTESMDLPKGIKVLKEAPTLDDEEFDGWYYTDEGRAMMQLIHDIAPGADLVFR  
TAAAGLYDFANGIEELVAYGCDIIVDDV  
GELKDTFHWLQCRYENN  
XMKFLIQSFFLDESXFEGYP  
SETIYQHDAIAQA  
AIRAARDHGVAYFTGAGNYQGLGWSSEFRPTEITLPGQNDIFIVHDF  
GDGNYQRIVISDELSPVV  
FYWDAPSGNFTDDAQPTPR  
FFFWDIAFLVGVFVGGVSP  
TPNLKWIAPLGG  
LQAIDPPNDSAFNPHGNSPHVA  
AVGAASERQRMFRMEVEPFSSSGDP  
IVFDENGVRLEQPFV  
PKQPRFVGPVDSFSNHIDHILLV  
AIFCSLSLTLNLLRVLLWWR  
FEYTLNFMKKGVRIVQIVL  
PNESMTADCVSVSADSSV  
FPLNRTHRASSVPSSENS  
FLGLQDTGMVPETEGFL  
FYGTSAAAPNVA  
AVALLLQANPELNPSQ  
LYKVLEKTAIDMNEP  
GFDHTTGYGFVNAMRA  
VVMAEKLK  
LKKITNKEKRKK  
KLNLRKKNTHKVCYDY  
TDXGNVKLAVPGIDF  
LSDLQVGAWAMNKMFE  
EKTLDYRGEIANKTS  
SEHQMLS  
LPTLFSFKL  
FKITRTTNWLEIL

LSTRIERAVFLRLASGPSWPVFVVRFCVFRGTAFSERREQIMPRDGQCHRRGRNEGPNPDSV  
PRAPGATPQVSDNSGGGFVSGCTGGLVRSGRGFSLPPSLNLRSEVPVGSVVRGW  
>comp10059\_c0\_seq2; 667 593 3372 LEN=4435; minus strand; translated  
MLFFNNFCFSMWAITALATTTTATEISDLPEFEGNMLSLKTIRRNIAGAKASAALSWKG  
GVERGGNWLVDVSSASSGLASALAEFEITGCLSSGNACSGFLKITPFALDVEQNPS  
FAANVVPVSWKANGFDYAGDFPGAIAPLQVTQIRQAFPNLTGEGLKICVMSDSFNMLGGY  
KNDTESMDLPKGIKVLKEAPTLDEEFDGWYYTDEGRAMMQLIHDIAPGADLVFRATAAG  
LYDFANGIEELVAYGCDIIVDDVGELKDTFHWLQCRYENNXMKFLIQSFFLDESXFEGYP  
SETIYQHDAIAQAAIRAARDHGVAYFTGAGNYQGLGWSSEFRPTEITLPGQNDIFIVHDF  
GDGNYKQRIVISDELSPVVYFDAPSGNFTDDAQPTPTVLLLAWDVEGNLLGYVSPNVDG  
TAMIQFGFSKGTYDIAFLVGFVGGVSPTPNLLKWIAPLGGQAIDPPNNSAFNPHGNSP  
HVAAVGAASERQRMFRMEVEPFSSSGGDPVFDENGVRLQPFVVKQPRFVGPVDFVFSNH  
IDHILLVAIFCSLSLTLNLLRVLLWWRFEYTLNFMKKGVRIVQIVLPNESMTADCVSVSAD  
SSVFPNLRTHRASSVPSSENSFLGLQDTGMVPETEGFLFYGTSAAPNVAVALLLLQA  
NPELNPSQLYKVLEKTAIDMNEPFGDHTTGYGFVNAMRAVMAEKLLKKITNKEKRKKK  
LKNLRKKNTHKVCYDYTDXGNVKLAVPGIDFLSDLQVGAWAMNKMFEKTLDYRGEIANK  
TSSEHQMLSLPTLFSFKLFIKTRTTNWLEILLSTRIERAVFLRLASGPSWPVFVVRFCVFR  
GTAFSERREQIMPRDGQCHRRGRNEGPNPDSVPRAPGATPQVSDNSGGGFVSGCTGGLVRS  
GSRGFSLPPSLNLRSEVPVGSVVRGW  
>comp10060\_c0\_seq1; 481 165 1538 LEN=1886; translated  
MQVSAVTRSSCANLQQRVRSGLTAFERSYSRLKNQNQSQKVVWKAKGSQFDLGDSSFHFRS  
TSSISDKGEIMYRQALQLMKEADELEKKREQRSTMMYKAWQKSQETNMNPKSQGVTLVK  
TLAKDVRKARKNDDSDKRGKILELLKHAATKYHPEAAIQVGNILLKEASRGIHKNGTL  
KSEAHVESRAKDLVNQAMELFRQAGNAGSRVGNWYNGHLAWTGFPPPKVVDDESEEEGTH  
SDFVADNMEKNQIIAGDIDEAMNAFNKAIDLGDSDAMYLVGVNQLGQGGGGQYRDAIRLI  
ERAADIGHSGALYYLALLHLNGEPEIELEPCSLEDFMQRLDSAVEAGSIDARFVRANSFY  
HGTEGYQPQNFKKALNDFLQAADEGHADA AVSAGAMLHNGVGVGLKDQRKAFELYQLGGEELG  
SKAGWMNVVDCWQQLGVQKSEETARYIKETILKEIT  
>comp10060\_c0\_seq2; 136 1 480 LEN=828; translated  
VTVYVLELETKVDTLHNSFQHLNGEPEIELEPCSLEDFMQRLDSAVEAGSIDARFVRANS  
FYHGTEGYQPQNFKKALNDFLQAADEGHADA AVSAGAMLHNGVGVGLKDQRKAFELYQLGGE  
LGSKAGWMNVVDCWQQLGVQKSEETARYIKETILKEIT  
>comp10061\_c0\_seq1; 485 679 1887 LEN=1939; translated  
MLETALVMHKQMAAVAGESSSSSSCSCCCANSRDPTISSDYCDDNNMLMYDSDSDLDSD  
EDADSDSDWDEEGDECFNYDGGSECSKRTGTETSFYSTNYNQEHSNTNNIKNERLRMT  
SCSRVRTFSYTGQDQDKLRSARTMDRMMYHQVYSLPIVASQSEWEDATIDDRSFVLI FNSA  
LCNHLWGMQLLSHNMHTQNLHRQRDHRLIYQRSFEIAKVLYELALENVSRSCRPPQQRSN  
DSDTGGGIMGVDRVCFSAVFNNVSHVCKVLGGYNNCEVYKYNLLIKSIYWLIDSNPNIQ  
NNITFHNDTTNRRSNSDNNSNSQHHYSDSATTLDANQNRQLLRSNASSNSNYNPTTAAAS  
SNNSRDYDEHYDESEAEI IDAFLENV FYLGVVPQAI V PAAAA  
>comp10061\_c0\_seq2; 485 464 1672 LEN=1724; translated  
MLETALVMHKQMAAVAGESSSSSSCSCCCANSRDPTISSDYCDDNNMLMYDSDSDLDSD  
EDADSDSDWDEEGDECFNYDGGSECSKRTGTETSFYSTNYNQEHSNTNNIKNERLRMT  
SCSRVRTFSYTGQDQDKLRSARTMDRMMYHQVYSLPIVASQSEWEDATIDDRSFVLI FNSA  
LCNHLWGMQLLSHNMHTQNLHRQRDHRLIYQRSFEIAKVLYELALENVSRSCRPPQQRSN  
DSDTGGGIMGVDRVCFSAVFNNVSHVCKVLGGYNNCEVYKYNLLIKSIYWLIDSNPNIQ  
NNITFHNDTTNRRSNSDNNSNSQHHYSDSATTLDANQNRQLLRSNASSNSNYNPTTAAAS  
SNNSRDYDEHYDESEAEI IDAFLENV FYLGVVPQAI V PAAAA  
>comp10061\_c0\_seq3; 485 775 1983 LEN=2035; translated  
MLETALVMHKQMAAVAGESSSSSSCSCCCANSRDPTISSDYCDDNNMLMYDSDSDLDSD  
EDADSDSDWDEEGDECFNYDGGSECSKRTGTETSFYSTNYNQEHSNTNNIKNERLRMT  
SCSRVRTFSYTGQDQDKLRSARTMDRMMYHQVYSLPIVASQSEWEDATIDDRSFVLI FNSA  
LCNHLWGMQLLSHNMHTQNLHRQRDHRLIYQRSFEIAKVLYELALENVSRSCRPPQQRSN  
DSDTGGGIMGVDRVCFSAVFNNVSHVCKVLGGYNNCEVYKYNLLIKSIYWLIDSNPNIQ  
NNITFHNDTTNRRSNSDNNSNSQHHYSDSATTLDANQNRQLLRSNASSNSNYNPTTAAAS  
SNNSRDYDEHYDESEAEI IDAFLENV FYLGVVPQAI V PAAAA  
>comp10062\_c0\_seq1; 920 218 2292 LEN=2351; translated  
MSDSDSVEISDVELSDDSTLPSDDEDPNASAGAPRGKGRISYVVEDDIDHEEIGDDTA  
LAQIKEDKFYERVNHFMNAQRKVEERMQRIDANDRLKAI E VTNHSGGIKEPDSNTYKTM  
QQQNMNGEPAKNLGEVYETAYGIKQKLRDLLDAMVDKVKGLDYIDARIVDLKPRDAANNK

AREEYLTRTPGPPESWMYDVLIRSTVTCKTMKQVESVNKFLTKKAHIVQVKNRFQIPAFSG  
YRDILYHVLLTWTWTTKQVTFVAEIQVHHKEVANLEKMFGLMNHKYFRPIFAVPDRSD  
VQTLRDIHRFQKAGKINEKLIDKIFNSVDANQLYVYGKLFDLKLENYEFAQHLYSRALKI  
HSASESGPTVKSAAALYQDIGLVQAKLGDYDQALRSLQSCLEHQQEVFGQYNAEVAITRSL  
LGD TIVERGDDSGELLEHRGALQQYKALVIREKCLGEDHLDVAGSYQNIGRSLCKLGDF  
QGALAAAYRESLSILESLGENHADVATAHCYLG NVLHEQGDFQAAMEEYSFGLAIREEVF  
GKGHKATAESHTLIGQLLTD AQDYDEAEARHRQALVLRD TLLGKESPESAESHYWI GYVL  
NQKGDYAAALKEHETAYXDPEQDPAEGTPGHPLSDQHHPDKRKRARTMMVLPGQSTARV  
PGRTESINLPFAWFSEFTVSHGAVVSYLKE

>comp10063\_c0\_seq1; 403 95 1300 LEN=1477; translated  
MPGCLSTISNTILVLCYCFLLNRNGAIVCVQAAGNNNRASFRRHVGLASTRLPKKEL  
TNNGNAYSTTAGGEYINSNDWGVVTSGSPISSTPTAAPTYPSSFSASADNDEHNEWLLQ  
QQYQIEATTFSTESSPSRANTRRRNGKILPSFVSVQNM AATRSFFTAAQAYSRRVY  
GESATTFVSASSIVVFLWNLLPPARSILNQFFLASRLSAKRTFGASLVFSAISHSSFR  
HLLVNLVYVFLSLSPKLSSIKVPSSSWAAKTRKAYAGLSDAALWPFLLGGALAGNGMFLLF  
RPGKSGCLGLSGVTCAMIAVYASAMPDRVLRMLVMGII PVSLRAGTMVQILFAVSLAGSCF  
MPSSPISHLGHGLVFLGLLYQNV MIRSKQMLPKLLFGK

>comp10064\_c0\_seq2; 1230 187 5379 LEN=5455; translated  
MMVFPDGTVPAAQQQGVAPAPIPRPPMPGHQSAPSSGMHQMMNGPYPGMHRNVTGGMP  
GGQPYQMPQSPATRHNNFSMPGGPGPHQGGPPQGGYSSHPPLHSSTQQPMHPNMAPQM  
RNSSSNMGMPPSMSQPPH DGRMMSSSSGRNQYNMGNAMGVNGGSSQNQMNSMNGRSL  
NSSMENSMMNGMNTMNNNSMNGTNSMNA PMNNNINTAMNAPMGGNSMAMNGNSMSGTMN  
NGMNSSRNSMMNSRGGSGSGSSGLNGNWQTD RDTPHRR TMIQHIVKMLKKDKTGSPEWL  
DKLPQMAKQLEVS LYRNARSFEAYVDM TTKQLRQQIAQQVVSQKTRGQDSRRDRQPQSSS  
GMRQGGTSSSYMSNSSANRTDRNSVMNSNGVMSNAGGGM TGAYPRAMNNPSSTNSGVQSA  
PGMSTNGGSGRNNDP EWKVRIRHKQQRLLLLHHS AKCPHEDGLCPITPHCVDMKRLWRH  
MEGCKDNRCNVRHCFSSRAILSHYRKCKDAAC PACGPVRET VTRKSQSNRGSTTIGSNRPS  
SSTGNMPNLSSGPPRMRPN DVGHNHSSNAFSSQPMNAQSSFSQPQQQVPNMAPPSSNNA  
NSGMMYPPPLLDSTKSTQASYSRGGGAMNGVIGSDFTSPGLPTSSGGQSSNYNQ TASSSS  
SSRRNDSEWQKVRHKQQRLLLLRHASKCEHKTNC PVTPHCANMKLWEHIAHCKDQQCNV  
PHCMSSRYVLSHYRRCKDAKCPACGPVRETIRRSVREQGNRAVQTSSLP SFDNAAPPDAA  
PPAKRQKLPTPRKPQAPAVVPSTKPKPVPSV VAPPKVTKAPSPAPPTNKGSEDRSLDSF  
TLEQIETHLASLNRVAELSPAKWKKVCL EVLKGLQTHEHGWFVNSPVD PVELNLT DYFEI  
IKNPMDLGSIQKLEKGEYHAIKDFQSDVNL SFDNAI LYNGKGTVVYDMAKELKKKFEVD  
YSKLVEQLKNGKQNERACILCGCEKRLFEP PVFFCNGMNCASKRIRRN SHFYIGGNQYY  
WCNQCYNDLDPKASIDMIDL SVKKS DLK KKKKND EIVEESWVQCDICERWIHQICGLFNTR  
QNKEHHSEYCCPLCLLDKRKVDKPKP LPRPAGATEL PRTKLSEFIEARVKKKIEGRQQKV  
ASEKSLTQNISMEEAMKETKADGGPVTIRQVTSMDRKL E VFERMRKKYAHKKYPEEFTFR  
CKCLLVFQEIDGVDVFLFALYLYEHGEDNPLPNKRTVYI SYLDNVHYMRPRKIRTFVYHE  
ILISYLDYARQRFATVHIWACPPLKGGDYV FYAKPDDQKTPRDSRLRQWYLDMLTECQN  
RGI V GKVTNMYDLYFANESLDATTVPYHEGDYFPGEAENI IKKLEDDSGKNGSSGK KKK  
QKNQSKSKNRGGTRSTGVDEEALIASGMINAKDLDRDKVMVKLGESILPMKESFLVAF LM  
WSGVKEEDTVVPEEIVKYREEHP EMQAPLAASNKRNV DGLMKEDAPLVDSNGCPIKVIDD  
DAEDLDCEILNNRQAFNLNCKGNHYQFDELRRAKHTSMMVLWHLQNRDAPKYVQQCVACS  
REILSGKRYHCNFCPDYDLCE T CYKDPNTNRGTCTHKL E EVKLSDGQSESSGLTAAERKQ  
RQRNLVLHIQLIEHASQCKSKGCNSKNCAK MKEYLQHAHTCKTKVVGGCRI CKRIWTL LR  
IHAQKCKEAVCPVQCKTIRDKMREL RKQQQAMDDRRRQEMNRHYRRGNE

>comp10065\_c0\_seq1; 378 45 770 LEN=1219; translated  
MSLFFKLLKND SKTQAMELLDSGMASVEEMQNLYS QLFALDKLSEASNAFVGSATTASNEV  
VARAVATTL DQISAQNTLLAKL DLFITLHIPKIEDGGNFVGVQLDLVK KLSSEMKEAANK  
SIETLLAYDNARADALGKLNLP SSTSSTKSSSATT TDGKKEEKSSSESTE EKQTSSASSG  
PVYESRVASVVAVDTLYYSKARVIFSQTIITFVAVMDFIEKNKDKLVEPKGKSGGSNFSM  
Y

>comp10065\_c0\_seq2; 378 45 770 LEN=1244; translated  
MSLFFKLLKND SKTQAMELLDSGMASVEEMQNLYS QLFALDKLSEASNAFVGSATTASNEV  
VARAVATTL DQISAQNTLLAKL DLFITLHIPKIEDGGNFVGVQLDLVK KLSSEMKEAANK  
SIETLLAYDNARADALGKLNLP SSTSSTKSSSATT TDGKKEEKSSSESTE EKQTSSASSG  
PVYESRVASVVAVDTLYYSKARVIFSQTIITFVAVMDFIEKNKDKLVEPKGKSGGSNFSM  
Y

>comp10066\_c0\_seq1; 357 119 664 LEN=1489; translated

MTSILKEAFGSAELDLIEDVHVDKDCSPAQLRRAYYKQARDFHPDKNKSKEAKLKFQAI  
SFAYSLLKDPDKRKDYDKDGIIPFDNEDDEANGQSRKSWKEYFDLIFGKISTDDIDSFAQ  
QYKMSEEEEEKDLQNYIKFKGYAPLVDRFTDTNNGHKTNFLLRVFCDHFDVTGGTNSTK  
Q

>comp10066\_c0\_seq2; 468 119 1060 LEN=1272; translated  
MTSILKEAFGSAELDLIEDVHVDKDCSPAQLRRAYYKQARDFHPDKNKSKEAKLKFQAI  
SFAYSLLKDPDKRKDYDKDGIIPFDNEDDEANGQSRKSWKEYFDLIFGKISTDDIDSFAQ  
QYKMSEEEEEKDLQNYIKFKGNLKKMLEFVLLSDERDVARWIEDYIQPAIEKNEVENFEP  
MLTKTRSQIEKKIPQKTNNKSFQDVYFNDPDETETEDSESDCATRSKITKHSGRSKGQK  
GGNKTVRKAKSTKAKTKSKDRNMEDLIASIRNKNQGQGNPLASIAARYGTSLTEEDPIDNE  
QFEKLRISKYTKKK

>comp10066\_c0\_seq3; 308 1 815 LEN=1027; translated  
XPSLVNHYHSPHIRSRVCILLKLLKDPDKRKDYDKDGIIPFDNEDDEANGQSRKSWKEY  
FDLIFGKISTDDIDSFAQQYKMSEEEEEKDLQNYIKFKGNLKKMLEFVLLSDERDVARWI  
EDYIQPAIEKNEVENFEPMLTKTRSQIEKKIPQKTNNKSFQDVYFNDPDETETEDSESD  
CATRSKITKHSGRSKGQKGGNKTVRKAKSTKAKTKSKDRNMEDLIASIRNKNQGQGNPLAS  
IAARYGTSLTEEDPIDNEQFEKLRISKYTKKK

>comp10066\_c0\_seq4; 197 1 419 LEN=1244; translated  
XPSLVNHYHSPHIRSRVCILLKLLKDPDKRKDYDKDGIIPFDNEDDEANGQSRKSWKEY  
FDLIFGKISTDDIDSFAQQYKMSEEEEEKDLQNYIKFKGYAPLVDRFTDTNNGHKTNFLL  
LRVFCDFHFDVTGGTNSTKQ

>comp10066\_c0\_seq5; 308 1 936 LEN=1148; translated  
XPSLVNHYHSPHIRSRVCILLKLLKDPDKRKDYDKDGIIPFDNEDDEANGQSRKSWKEY  
FDLIFGKISTDDIDSFAQQYKMSEEEEEKDLQNYIKFKGYAPLVDRFTDTNNGHKTTFFF  
YVSSVVISMLPVEQTQRSSNLKKMLEFVLLSDERDVARWIEDYIQPAIEKNEVENFEPML  
TKTRSQIEKKIPQKTNNKSFQDVYFNDPDETETEDSESDCATRSKITKHSGRSKGQKGG  
NKTVRKAKSTKAKTKSKDRNMEDLIASIRNKNQGQGNPLASIAARYGTSLTEEDPIDNEQF  
EKLRISKYTKKK

>comp10066\_c0\_seq6; 327 119 601 LEN=1368; translated  
MTSILKEAFGSAELDLIEDVHVDKDCSPAQLRRAYYKQARDFHPDKNKSKEAKLKFQAI  
SFAYSLLKDPDKRKDYDKDGIIPFDNEDDEANGQSRKSWKEYFDLIFGKISTDDIDSFAQ  
QYKMSEEEEEKDLQNYIKFKGNLKKMLEFVLLSDERDVAR

>comp10066\_c0\_seq7; 468 119 1181 LEN=1393; translated  
MTSILKEAFGSAELDLIEDVHVDKDCSPAQLRRAYYKQARDFHPDKNKSKEAKLKFQAI  
SFAYSLLKDPDKRKDYDKDGIIPFDNEDDEANGQSRKSWKEYFDLIFGKISTDDIDSFAQ  
QYKMSEEEEEKDLQNYIKFKGYAPLVDRFTDTNNGHKTTFFFYVSSVVISMLPVEQTQRS  
SNLKKMLEFVLLSDERDVARWIEDYIQPAIEKNEVENFEPMLTKTRSQIEKKIPQKTNNK  
KSFQDVYFNDPDETETEDSESDCATRSKITKHSGRSKGQKGGNKTVRKAKSTKAKTKSKD  
RNMEDLIASIRNKNQGQGNPLASIAARYGTSLTEEDPIDNEQFEKLRISKYTKKK

>comp10066\_c0\_seq8; 167 1 356 LEN=1123; translated  
XPSLVNHYHSPHIRSRVCILLKLLKDPDKRKDYDKDGIIPFDNEDDEANGQSRKSWKEY  
FDLIFGKISTDDIDSFAQQYKMSEEEEEKDLQNYIKFKGNLKKMLEFVLLSDERDVAR

>comp10067\_c0\_seq1; 421 302 1279 LEN=1279; translated  
MALVTKYTALFALWFMHASAKVAMASDEDFCSSATDIGTELDFNADLAENKLHEGGVH  
YKDVGTVRGNSVDLVSVVHEGTDYHTQAPDANGLDGFNGINLTIKRNSNTYDGEVDF  
CFHDSVTQELTTLDSFHFYSFYDLQGGKKKVTKEMLIIDSSQIENYVYPTMEDSEVKIV  
CDETGEAPTETETPCTGKIQFKSSKHGEGDDNPRDPAELTDEQMARSVLFTFKDANCFVH  
LRHYCEFKKCNWYGGRNFLFAGHTANMLEGGQCVSKTTEEHEYDLDEFDETFEDEDLE  
IEDALEESEDEPESEDEPESES

>comp10067\_c0\_seq2; 402 1 1449 LEN=1684; translated  
EPESEDALEEFDEEETTNDIQVIKELCSETRTITTELNFDFSEVTQSDLTEGGIIHYSKI  
GEANNRDVDLVSVVPGSTYANEKKGDSMNGKYKDTFGNINVQADDGRGDFRFCFYDSET  
QEPATVPSFRWSVFDLQQRKDKKIGERMVDTSQAESFNWVWDPNKSELKISCEFTDHP  
PPCPIGVRTVLTASTHGGLSDNPTDPNELTDQKKRSVVFVETHCWDFSYELYCRYED  
EGCAKNQGGNFLFAGDSKEIVETGECVAPPTVPPVSPRTDPPGTGAPSAAPSGISFTVDP  
PPPPPIGCPEDIEVLRVDGATPFPVGAWEKPSDRAEFPGTMAALEPAVRIVSKDTKTVT  
SLANAWGADLDEIFYAFKPDYDYRCYEEFVDAGEAIDTITACNVLNPQAELEICVRD  
GLVKETLSPLDGAIIPKCCHSGEVTTQDSAVVCYHLAISCSKECREEEVAKRSLRGAAS  
RA

>comp10068\_c0\_seq1; 275 1 782 LEN=1551; translated

XYFYVEADNDLCVPMTMVKDLALTEKRYFINTGIGFSGWIMSREFLGDFIELYGNSTLDR  
KVTKVKPGTNETVTESPEIRPDVLASYLTDKQAWTVTRQYVWSHTTLESLGIASLTVKD  
RRKNATGERMKLKDHLPRCLEPRRGKWKVSRKKPYLDRDRFGWDYFDYEVCPNELLPFC  
GGPDQLKKLVADDLVRANETGALAKWAKMAEQKRRREAAQAACKRAAGEQNPTPKEKAAA  
LRERLRREEEGRQEAKRNKE

>comp10069\_c0\_seq1; 610 181 2246 LEN=2246; translated  
MPPALREHRAMVGGSGTRGLMSPTRRISVGRKVFVKSSSLWVSIASESEACDSHPHSSLP  
GVPFELNCEGNRNSSFDLRREECRDDVDDVTATFNPDWDSYGSKVIKQTRQQQVQEDVF  
DAFRSSGEDFKSRLAAIDAFDHARHLSPPERQELPSNTRTQPKIGSSSGSKWSTRFGRK  
KKNPFKYEVFHNDFDAREDP SHKGRSDSKKKTPIFHSPPEFTIPESQNEELPSVLGSSR  
GWGAGHSSSRERAPSEALSGSTQPKTCRRSFLGEHEKCHHGGRIGIEPFKPTTTSVKNA  
ESTKIKPRTSIENPNGSESGEVPQDPVDQQLSFLPGDDFFLSRNIHENPNSNSDSIISTNN  
TDVKCFDEDQETNTTSQITDQAPKSNSSSLSVVVPVGVDDPADCLSYADSSCSLPHNDRY  
FSKSKEKIPLLKSKYVDCNSCGSPIKSKKKQQLLEKAKRAEIKRKLREEMWDRSQFYWKY  
ESIGGKKDLQSGDELDNLVSRIAHLTPQSQQQLQHNDPLIDSECEELCKQAISVEEATGE  
LPLSIADNNANHHREGVEDFFQMPLGIQLSTIAEGEDEDIVGHNSSSFRSMNRTVLEQPV  
MDALPNNEASCAPGLVDDSKTKKKKSYFHANSRPAYEEFQEHTYFESIQQHRISSVK  
RAVPKELSFNKKSFPLVHEEPREQQQQXX

>comp10070\_c0\_seq1; 459 1 1412 LEN=1596; translated  
XADPDAADVADTDQDAVDVDTNIDTAAQENLGLAPAEEKETPSPLARETAAPLTSAQTE  
ALKAEEETTLISRDTKDPFTEAPTKVPEEEEEAGWETAAPTDEETKFPYTKAPVQEEGE  
TVLPLYDEIKDPVTEPPTDKLPWAEETKDLTYAVPTEASKQEAHPHEMTAETPGSIFPRD  
KRLMETIATRLPESLARLKDSASPQYRALEWLTAHQPDPIEILINPSRLEQKYALAVLYY  
ETGGDQWENNTGWLTHGNECEWFSTSQSPDQSVCDMGRITEIDLSSNNLRGSIPPEIVL  
LSDHLKSI SVDGNSLSGAIPPAIGREMTNLERFDAQRNALTGTIPELTELASLTSKLS  
SNKLVGSI PWQLSDLVNLETLDLSSNQLTGGIPFLGGLTALNELILRNTGISGGIPVEI  
ANLWSLKT LRLEQTDLEGEMPAPFCLWLRPLLESVVDCVACSCCDGC

>comp10072\_c0\_seq1; 407 32 1162 LEN=2084; translated  
MPPSRLKKRVCIVTPLTLVCLLDGTSSFHYSNVCGNLLLLGQANKSFNNQHLCYTHYSYR  
QNAIPTFLDENRIETRRYPWTGDRTDQNPAPFRPDQPYVFRPCQPVKHHYWEELCPSSAK  
MSDVASILYSFLRKSDDNASRPSPLDISVTWAPDENPQNVAKSIIRECLCHLPEYKRKI  
DFEENIVKHLESTLVESLNGYRDFCETHMIRERIVDSNLVLNQKFKCRLVATRGPSGAKC  
PQFHIDNVPCRWIQTMI GPGLDLVNTVDANGYCDKVIWDFNNSPARTETDEHNDDEYD  
HVMWSVEDRNRMLVDLSRADIYQSKKGEAVLIPGSCWDSYCKSSSTTSATKPVVHKSP EIL  
GSDQCRVLFQTQDILFE

>comp10073\_c0\_seq1; 302 1 1159 LEN=1259; translated  
LQPKGNLSTMSSSSRELLKIYSLEDIEKIVSTTEFRNKLINGIKEGFVSLEKGEFFAAPI  
QTLGLPPFPFLEVTDYAAQTCVKSGYFKGRDHYVIKGVVTSRSVEGGKKIRELKRECKKK  
TRLFVELQPQVSIFIFCLHPKVASGGHPMPNSGLMQVYSQKTGKLEALLLDEGILTELRT  
AAVGALAAKLLAPKIEAIGVIGSGVQARYQLDMLSAVTECRNVLVWGRTPTNVDILISEM  
TAKGWNISAATSPDRILLEDVDLIITTTSPREPIIGKSNLSTRNSGLTIIICIGSDAPGKHE  
LSPALVAKADLLVADKCAQSIERGEFQHAVANGLVSKESLVPLGLDIQNEDLHRKDDDDR  
FIIFDSSGVALQDCVVSSLVVGTL P

>comp10073\_c0\_seq2; 323 1 1023 LEN=1123; translated  
LQPKGNLSTMSSSSRELLKIYSLEDIEKIVSTTEFRNKLINGIKEGFVSLEKGEFFAAPI  
QTLGLPPFPFLEVTDYAAQTCVKSGYFKGRDHYVIKVASGGHPMPNSGLMQVYSQKTGKL  
EALLLDEGILTELRTAAVGALAAKLLAPKIEAIGVIGSGVQARYQLDMLSAVTECRNVLV  
WGRTPTNVDILISEMTAKGWNISAATSPDRILLEDVDLIITTTSPREPIIGKSNLSTRNSG  
LTIICIGSDAPGKHELSPALVAKADLLVADKCAQSIERGEFQHAVANGLVSKESLVPLGLD  
LIQNEDLHRKDDDRFIIFDSSGVALQDCVVSSLVVGTL P

>comp10074\_c0\_seq1; 217 126 635 LEN=818; translated  
MALRGYIQELIRDRNAYDIKIVHDVSVSSLPFCGDDDHSM DASELDGSMSSLSLHDLKEC  
NHNSNRSLDFFAQ AIDGDFANGIGERECSSNSGARGDDLGLMLKSFRRHRRLKQTLSP  
VKVYQLSPTISGSQTTPTKNEMKVDNQRSRLAILARSSEICGPPSLTDH

>comp10075\_c0\_seq1; 259 1051 1682 LEN=1682; translated  
MGDGSRGFSMARYGDFNETKRDVIGSQKDTDEDASRTSNSTDGVAGISPGRRTPHEPSI  
DRIIVGTPSTVSTAPSSDDEGILDYKLDESASILPNLLHPLHRRDRRFGEEDVLHINDPQ  
RLHPGSSESTQESNLWSRQSATAISYEEPRRSFDWITQVVPNHGPPLRHHQPQQRVASFR  
NEGNIHHQMNRLAHHSSPKEYYPQQQQQQXX

>comp10075\_c0\_seq2; 259 1050 1681 LEN=1681; translated

MGDGSRGFSMARYGDFNETKRDVIGSQKDTDEDASRTSNSTDGVAGISPGRRTPIHEPSI  
DRIIVGTPSTVSTAPSSDDEGILDYKLDESASILPNLLHPLHRRDRRFGEEDVLHINDPQ  
RLHPGSSESTQESNLWSRQSATAISYEEPRRSFDWITQVVPNHGPPLRHHQPQQRVASFR  
NEGNIHHQMNRLAHHSSPKEYYPQQQQQQX

>comp10077\_c0\_seq1; 783 32 2773 LEN=3074; translated  
MTTSTDQNHFSGSYEQDGESEHYSSVKYAPSDDDNGNVLYDDDLCAEYIESGSDGGLDPGVL  
LAILENAVDQHHGHPTMMAISSSTNPEELPQKREDLEQTWKAIRTYWLWAHETREQRSAAA  
YLRGAADLAPLHLICKLTNNPPTDILNEIVHAAPEVAAWADSNMWIPLHHACINGASTEVE  
LKLLISTYPKSKGCLDGHNRTPHLHYATRGNSDNYNPLTMATNFSLLCSAVTGEDSSSSL  
ENLSVSAAEVRDVAGMIPMHYACAYGTAPSVLQVLEEAYPQSINAKDNNGRTPPLHFVMVN  
AQRTASPGVLRFLLGWQEGENGGLVSRAKSNIQTCSVNVRRDDGHLPLHKLNI GLNGSDL  
EQTPKLDSSAAECLKLYLAAEPSASTDFLAALQALPDLQDVAVVSPHVRNINLKKIIQR  
FPTSILMLDGI MLVIMIVAFELATTRFIDQSVEGITISLEDDLEPLLMLYTTAAAYFFLR  
ELIQVIASLTGFAFTSWLYDTTNWLDVLVITLVTYYSIIMAI DEPQNYANDAKEAEDPFE  
AFRSGTALTKGVLTAVIFFLKSTQVDFAVFLNGVYVHRLVAFLLAILVILISFAQMF  
WVYVLEQPVCRFSCGEDDIQCKVEMEGCAYPHCEFGDSFLKVYTMMMGEIGTETRYDENL  
VAQILYIFYGFFIVILLSNVLIIVTDSYEVVQNDRAAIVFWSNRLDFVAEMDGIASVVR  
RRIFCAERTVLKKSIA SNTHDDQSQDSVPSS E IYDNTDETEEWLRQEWD SVLSLFEPDV  
YGAAAEDIRPIDFWIEILKKT LAVVIPPWLI FGFVTVGILWPPQVREWLFVQVDSVASR  
AEIERRKLEQLQIQHETKLLKDEMRMEMKNSRDEMFRTKAEVDAVQEEVLADLQQVSVL  
VSTLLSDLGGLEG

>comp10078\_c0\_seq1; 371 293 2178 LEN=2199; translated  
MVGVVARTTQRRWKS LAQQVSSSTNQRRDKPLANVQKQLWEFYFSTGRGASAI FEVIDLKE  
KGALEPKQVKEFITEVLKYQENKTVQVDPDRDIMPYAWNILEKREQDGQTYDIRDFKFL  
VAATKMSADTKNSRLMEYLSNPNVGENSYLSDAEEEDPVFTWNEESMSQSLRRMQYAVR  
GEVVMKADQLASQGEIILYTNIGNPHQVQSPITYFRQVLALCDLPADCGVDHPKVYEMF  
PRDVVERAREYRDIIGPSGTGAYSHSQGILGLRKHIAEYIQKRDGYKSFPGNIFLTNGAS  
TAISMVLQGLLASNRDAVMIPPIQYPIYSALISKLGGRQVGYDLDEGMNWA VSREELEKK  
LEKAKTKGLEVKALAMINPGNPSGNVMTHCDIQTLTEFCNTHGIVLLADEVYQTNVYAEH  
AEFVS AKKVAMDCNLKQLV SFHSTSKGLIGECGRRGGY MELHHIDPYVQS QLYKLASA  
DXLLGGRPTDDEFDGP TTRTGEQSYELYQOETNAIYNGLKERADKLV TGLNKIPGISCV  
PAEGAMYAFPSVEVPPKCLEAAKELGTT PDNLYALS LLEMTGICVVPASGFGQKGRVGF  
RTTFLHPD TVKAIDLFAQHHEKFTKEYS

>comp10079\_c0\_seq1; 2207 114 7651 LEN=7834; translated  
MWEAANAPTRDDNPVTTSA AIGVDRGYTHSKHDPGKQHAHSNREHYGHGDGRYRHLIASS  
ETVEAALSRLSKAYTTSMECIGAIHKTNHMILKEQRQTVRSGGTHQTRTVAPT VTTENKA  
LQSIKRVSNVARTTLETA ILLDPLMLPHAPILHQSMIELSNSAPFS DNDELGKDGPSSA  
TAVSNSSRWKAVQDQRPMPTISSAAHKSTLVKLAYLSLVNYSDDLQQGSRS DIKNQKST  
NEYTILDRGVVSRQLSLDKETSAGVNDNEKQCCWSPETPEETQRLAVAALCDASNLDGSD  
PVMWLKLACASRKLESLVAERHNRGKQHECRGITTLERSQHRR LQKHALERGSVALPNHM  
PPNRTILRALEEFCEPEPEDEYYSGGSRSTKKIKVHKKTLGLTRY SWLVLGKMIIRACKG  
EEATTPWEHLSPASLLTKSPLSMFGSPSVVLKLS PMLVLP SQVLGKICQYLENTS IWKFE  
ATCRALS VNVAARAFMEENDSEDDKDEDEAADMLLHKHEQKQREQLKKMEIEKSKDQNE  
LLDAEKKGPELENEVNEEMVNEQSAAINRNNSRDTKTTQPKQSFRA SKRLRSQQISTSK  
KQDRAANRKSFDYCFVAATLSCTKEKHNDLADGLRKKKELAHLFRGVENAGFASNTSGRR  
RTHSSLQENTRQGSKSMEVRERIGDSSLSAFVERWTMNSGPM DVLERYLAHVALFAEDV  
FASDSPTMGLHSCII TSFQLLLMRSGSNQCIVPKFFKPI TKTGSALRSLETTFAMDLLNAE  
LILRQCDRYVPKVVEFD DDANLISLMMPRLVESCNDLKEEINSINTEIKICEKDRKKFHV  
LEIRCYWLTACFYLRWSRIARPIYMSREAEDEGIHF IGMAIECFKSPVLKSTKVIKTPQL  
ASPGREDAFWHEI SASTLSKFRDEIQASSVVS HARQRFQELVAQLDAEENTERLSTESAG  
ALAEIGRKL FERYNSQYGSTESKLV ELVDNVLAESAGDLFLRKITSQSSEQVDETNLDIT  
DFIQLDAYRVEDLKRVS NPTILSMLVICLNMDQSNRLSVAQ LLLRLVLTTRDIHSLLLKQ  
IADYRASRKQTDGYHSDSDSDDDMSDAGPQLSQKDDDEKKARQCGHFVKLLIKCLCIICK  
SYLSDDDRETLVMSDEFHEMINSVLD FSNQWFESTLRFLSITDDTLDQDLVGLIQKLLSE  
SKHFNERSRVPEPELEAVFFHGLVKI IISQOENLKNLCNSHVKRSNR TAIKRLCIQRAQYI  
GIVASKLGAMLSTHLATVNGFVLKSSLFEPHDVDGRNSRKSHTSNEEII FLHAVRWLRE  
FASKDVGESLTGSNNGITSNSFDRPIVKELKIPISLLVIGL CGSAPCSRNSGILGVVSES  
ENHQGYPLSLTEFFDSASINDWQSDSEEDNNERTK KELLRVICHAIQCIVLILDV VDEK  
DTITKFLENDCDTAFG PLLPLVSARVLNFFADTILLNF GDVKACGKNRALLWSEDPYRA  
RYIGELLDTALYKTYRWLYGFALVGEQTYHYTSGNECSHSTNNINEIVEKGFKLESTVAA



GQLYRCIVRAYSGGRKTPPKQALEAVKAALPPHRESEQSKLRRFMFSGENNDLDMNSLL  
NMNEQWDSFVAVRDSMMENKDSLNSANSSLEDEEAAQVRRGLSKQLALGPLPVVASDP  
RSKSDAGACDDRSQTMCEIAIAKKNAILDDLCLSDADNWEWYRAGQCCMMKADTIAD  
RLGLTKGFSRIKGFVQAHRGSTHRSKEIGKLDKDEQEQEERMLKQVSFLGHDYSFYTNHV  
WSSLSALRDFVAKVKKSLERENDKDKILSLAVWNEIDSKFDDGKYLEGQEQACGGLFVSAL  
RNL SIRFLSVALYILQSKAEIKSDTKVLLSEICETLGNTFYSELMASQKYGWPMRVLTSK  
RKRDIAITAKACYVASIMHADDVEEDNSDDHSTWDLQFMVGKCEKIAKTYEQEAFPK  
QTECSPDNSRLYEQHMSEAMSAYSALAEANKLEDSATLLLDSSGGSGHGSTEILYRLHAS  
RLKCLIHVSRRKEEERGQAELEALRLTEKYHFKDHDLLVDAMDKSVHERIWIWVADVDG  
LFNCRKLPYFHRVYRHAQALMWSPVFYDLASSKRSSDIVPATHSYQIKGLDSSKPAAF  
SAESVIGALFDKRVQLCAVWVTNSGTASPFQAINSTVRKYDSLGRKYIGAYLETLRICN  
RRPEVETLMKWLYTSKRDLPSYFQAGAMNYGDKPTTSQTQDPLLAVGSKSSLMANGFLLS  
AKRRGNGVLADVLMHEISKVTTVASSKNSSTDGKNITEFYLKHTYACYLRLNCSIEDLS  
RVRAWKYGSGSLREVEALCQAYLLVADTSKADLASTSDFGDWSSGGGRKSLIFKAAVEKCK  
AMFPLSANAVFGKSKPKKAKSGSNILHDDQDPDELEKGRKSPSESSHEPTEKVSFEVA  
VPLGLNPGDTFLTSVKVGGSSNMKVKLKVPFGSTFFPEIPSORSEVKNESEK  
>comp10080\_c0\_seq1; 544 285 1553 LEN=1750; translated  
MASAMSTDATNVHQAKEEQVQVDMNSMIGRIKPKPVCLDLNLRAQSTPTEGIRKVFVSTG  
DGSPVQTVTKSPLDAGSQELSVVSSGSSTASRENALLDASASGTSNQGIVETKQKVIMPP  
FADGDFSLRKERSEQINLKVKQTQTI SRNGRQTQRYTQDKATNI IHRMTTGCIPILKDGRI  
MFCSASRKAEWIIPKGGWENDEIMEESAIRETFEEGGVFGVIGPKLSEIAYETRKGGKRR  
IEFEEVQRKVKKEIREAQSSGIMAVSPTSNEGTTSPQTASSPKPEVVSATEDANGGSAD  
KEGSSGQPEKLAKVNQPQSSDGDNMSVASETSLAQSHIKMSLFPLYVTEVCDEWPEQGR  
RKVVDIDEAIRITEPRPYFQAALKEKQRLHLQCDFQAEETASSTVSAPSATGPENIKG  
EI  
>comp10080\_c0\_seq2; 544 440 1708 LEN=1905; translated  
MASAMSTDATNVHQAKEEQVQVDMNSMIGRIKPKPVCLDLNLRAQSTPTEGIRKVFVSTG  
DGSPVQTVTKSPLDAGSQELSVVSSGSSTASRENALLDASASGTSNQGIVETKQKVIMPP  
FADGDFSLRKERSEQINLKVKQTQTI SRNGRQTQRYTQDKATNI IHRMTTGCIPILKDGRI  
MFCSASRKAEWIIPKGGWENDEIMEESAIRETFEEGGVFGVIGPKLSEIAYETRKGGKRR  
IEFEEVQRKVKKEIREAQSSGIMAVSPTSNEGTTSPQTASSPKPEVVSATEDANGGSAD  
KEGSSGQPEKLAKVNQPQSSDGDNMSVASETSLAQSHIKMSLFPLYVTEVCDEWPEQGR  
RKVVDIDEAIRITEPRPYFQAALKEKQRLHLQCDFQAEETASSTVSAPSATGPENIKG  
EI  
>comp10081\_c0\_seq1; 243 81 1073 LEN=1428; translated  
MMELTPSQKVVASVIAYSFCSTLVLVNKLTLLHFLPFPPLVVSFQLLVCIALYFAKFA  
ILQVDDLEWKYVKPYLLYIVFFSTGVYANMRSLSNANVETVIVFRALSPMLVAFLDALFL  
GREWPSYRSWAGLLTLTAGAYGYASFDEQFQTQGLSAYLWPTFYCIVIALEMAYGKKIVK  
SVPLKTQSGPVIYTNLIGFIPMLLILANVGNEYQKFWFXYWTVGAGRLPLAATALLFLGSF  
IGTGIGYSSWWCRGLISATSFTLIGVMNKCLTVLLNSLIWDEHAKPGGIFCLFVCIAGGM  
IYQQAPMRSEQKVVLPVNNTAIEREKMIK  
>comp10081\_c0\_seq2; 207 81 917 LEN=1507; translated  
MMELTPSQKVVASVIAYSFCSTLVLVNKLTLLHFLPFPPLVVSFQLLVCIALYFAKFA  
ILQVDDLEWKYVKPYLLYIVFFSTGVYANMRSLSNANVETVIVFRALSPMLVAFLDALFL  
GREWPSYRSWAGLLTLTAGAYGYASFDEQFQTQGLSAYLWPTFYCIVIALEMAYGKKIVK  
SVPLKTQSGPVIYTNLIGFIPMLLILANVGNEYQKFWFXYWTVGAGRLPLAATALLFLGSF  
IGTGIGYSSWWCRGLISATSFTLIGGEYSLSRCYQRHA  
>comp10082\_c0\_seq1; 506 1 1274 LEN=1687; translated  
XQNKKEKVSVDQLRTLALLLARDSADTKYDDLYLTQPFNFMAPKSAGFSDNTMLNVAED  
KEQTSASLVGSDVLRWGRGKVIIEIRDDLMETHAVKLSWRLAGRSSVICYVSRKECQA  
MRPKKIYDMDVFEKIEHANELKELATSKFMTRDYTGSLLELFARALDSVRYVQHKADSTNE  
VRADLIVVMITCSNNAALCSSKKGDWERAFAANALVLEALEEKGNEKIKTVINNDG  
IGDSQLFGTQKVKSLLLIAKSMMERHDTSKTTSTLKKAMEAISVYKKEGDQMYKQLSTQE  
KDIRRRLRLEFSRKTREARIEKKQAKAMFGGNEEHKHVKKNDISNNETTVOQKEKISGEI  
KTEESELKRNTRKEDCVPVGFNGDEDDDYSHSSFIEEHSEALLILSCIAVGWFVVKMV  
TKRK  
>comp10082\_c0\_seq2; 259 1 777 LEN=777; translated  
XQNKKEKVSVDQLRTLALLLARDSADTKYDDLYLTQPFNFMAPKSAGFSDNTMLNVAED  
KEQTSASLVGSDVLRWGRGKVIIEIRDDLMETHAVKLSWRLAGRSSVICYVSRKECQA  
MRPKKIYDMDVFEKIEHANELKELATSKFMTRDYTGSLLELFARALDSVRYVQHKADSTNE

VRADLIVVMITCSNNAALCSSKKGDWERA AKFAANALV LIEALEEKGNESKIKTVINNDG  
IGDSQLFGT WKVKVRLDTKX  
>comp10085\_c0\_seq1; 194 1 729 LEN=1174; translated  
XRSGERNVLAIVIRLYEDNEKQVIIGIESQQPNMVMRSVRLSLSSFGFVLFSLFSIRST  
ISFQISSSSTRTPASFDSIDTKSVNSFSSPPSRKSSIGLYGVVNDAD EDVATTTDDAAD  
RDDGTPGLWDAAGILGTAASIVVLRSEFVLKTTGCGLPAGPFGIVGAIEGISYLGVVATC  
AASVVDLVASEDGASRPKTVAGRVA AAMSFAAVLVGITVLAFLQLTDYGYIPNAVPMEGM  
CE  
>comp10085\_c0\_seq2; 194 1 729 LEN=1196; translated  
XRSGERNVLAIVIRLYEDNEKQVIIGIESQQPNMVMRSVRLSLSSFGFVLFSLFSIRST  
ISFQISSSSTRTPASFDSIDTKSVNSFSSPPSRKSSIGLYGVVNDAD EDVATTTDDAAD  
RDDGTPGLWDAAGILGTAASIVVLRSEFVLKTTGCGLPAGPFGIVGAIEGISYLGVVATC  
AASVVDLVASEDGASRPKTVAGRVA AAMSFAAVLVGITVLAFLQLTDYGYIPNAVPMEGM  
CE  
>comp10086\_c0\_seq1; 157 503 1435 LEN=1857; translated  
MTNGLEEDLETQRKGIVMILWFDPKFGFGGGMKERPASRLRQTTSIRVAALHICTPKTVQ  
SRFSRFFFEAAPVRARIRIHLGSPMELFYTLNSFGIPAEILPITTTGGKIKTT SINQWFKT  
RRVLERNERDCEYIVECPNSTDIVFKRGGKNAVHNAGNTRFRSIIQKKWERGGFMEMTQT  
KLADELQKEFTLGGFRIIRWKENQSRFIRATDEKTIYSKIEYSIRAFREKDSQSINRRVA  
DTLLEKTTSGATTRTLDFDVAGGSRKRKFKFINGSVNGD GNDVCCFQEITDSDSSRADFC  
AYVNGCFGVL  
>comp10086\_c0\_seq2; 136 1038 1718 LEN=2140; translated  
MELFYTLNSFGIPAEILPITTTGGKIKTT SINQWFKTRRVLERNERDCEYIVECPNSTDIV  
FKRGGKNAVHNAGNTRFRSIIQKKWERGGFMEMTQTKLADELQKEFTLGGFRIIRWKENQ  
SRFIRATDEKTIYSKIEYSIRAFREKDSQSINRRVADTLLEKTTSGATTRTLDFDVAGGS  
RKRKFKFINGSVNGD GNDVCCFQEITDSDSSRADFCAYVNGCFGVL  
>comp10086\_c0\_seq3; 318 67 735 LEN=2310; translated  
MVDPKIKKQAVPAVPPAGSAAFMSSEEAGEILSKELLNLSVQDRNEVTEEIHGVASMNT  
ETPELLETSLSKMMNELAKIPSHKKVNYTKALS YTDSYVHTDRFKLRF LRAVFFDAKEAA  
NRLTKFLDILGEAFGGQVLRPVCLDDFTKKEQLI IKKGPLQMLPYRDSAGRRIVICFPT  
DDISGDTPYTRVKISLYYSFIAMTNGLEEDLETQRKGIVMILW  
>comp10086\_c0\_seq4; 136 874 1554 LEN=1976; translated  
MELFYTLNSFGIPAEILPITTTGGKIKTT SINQWFKTRRVLERNERDCEYIVECPNSTDIV  
FKRGGKNAVHNAGNTRFRSIIQKKWERGGFMEMTQTKLADELQKEFTLGGFRIIRWKENQ  
SRFIRATDEKTIYSKIEYSIRAFREKDSQSINRRVADTLLEKTTSGATTRTLDFDVAGGS  
RKRKFKFINGSVNGD GNDVCCFQEITDSDSSRADFCAYVNGCFGVL  
>comp10086\_c0\_seq5; 387 67 1605 LEN=2027; translated  
MVDPKIKKQAVPAVPPAGSAAFMSSEEAGEILSKELLNLSVQDRNEVTEEIHGVASMNT  
ETPELLETSLSKMMNELAKIPSHKKVNYTKALS YTDSYVHTDRFKLRF LRAVFFDAKEAA  
NRLTKFLDILGEAFGGQVLRPVCLDDFTKKEQLI IKKGPLQMLPYRDSAGRRIVICFPT  
DDISGDTPYTRVKISLYYSFIAMTNGLEEDLETQRKGIVMILWFDPKFGFGGGMKERPAS  
RLRQTTSIRVAALHICTPKTVQSRFSRFFFEAAPVRARIRIHLGSPMELFYTLNSFGIPA  
EILPITTTGGKIKTT SINQWFKTRRVLERNERDCEYIVECPNSTDIVFKRGGKNAVHNAGN  
TRFRSIIQKKWERGGFMEMTQTKLADELQKEFTLGGFRIIRWKENQSRFIRATDEKTIYS  
KIEYSIRAFREKDSQSINRRVADTLLEKTTSGATTRTLDFDVAGGSRKRKFKFINGSVNGD  
GNDVCCFQEITDSDSSRADFCAYVNGCFGVL  
>comp10086\_c0\_seq6; 157 339 1271 LEN=1693; translated  
MTNGLEEDLETQRKGIVMILWFDPKFGFGGGMKERPASRLRQTTSIRVAALHICTPKTVQ  
SRFSRFFFEAAPVRARIRIHLGSPMELFYTLNSFGIPAEILPITTTGGKIKTT SINQWFKT  
RRVLERNERDCEYIVECPNSTDIVFKRGGKNAVHNAGNTRFRSIIQKKWERGGFMEMTQT  
KLADELQKEFTLGGFRIIRWKENQSRFIRATDEKTIYSKIEYSIRAFREKDSQSINRRVA  
DTLLEKTTSGATTRTLDFDVAGGSRKRKFKFINGSVNGD GNDVCCFQEITDSDSSRADFC  
AYVNGCFGVL  
>comp10087\_c0\_seq1; 783 109 1800 LEN=1988; translated  
MSKAFGRDEMNALGGPGGGDGPEEMAAFRQSVQHQHPRQSSSKGSREEIDISKLTAETA  
KLLLEKTSKGTGNNRSVYRSQNKKKVLAHQQLLAEELSKQQQQQQEQEQVEKTPVAP  
DALGIKHKNDDEEDSENEFVTERRPTQAAV VIRRSEKERERRRRMRSDSSSSSSD  
GNRKRKVNDRRSRRRRREAESSSDSSSDDECERRNRALASRAQEEPEPVVPEPRAR  
LEEKDQQKEQSSSLEVGRVPSQRDRTRIEPAESESLGRKAKQRRASSSSDSDSESSSGSS  
SSDSSSSSSSSEDEPVRLKPIFVPKHKRNLIQSEEKKWEEELRLKQEKERNQKRKAES

RALVAKELSDAKSSLQNDYGDDVDDECGGANNAPPNDDELDNDKEHNAWELRELERLLK  
AMDKEEKRRKEAEFEYSRRKKLTDAECLKEDIASGRYQAPGANRNQGTSGGSNHLKRYFHR  
GAYYMDQSEWDEGDIRQKAAEYAKADTGEDKIDKSKLPEVMQVKNFGRARQNTKYKGLAS  
EDTTDKSAHILQLRPEQRTKRHL

>comp10087\_c0\_seq2; 592 1 1646 LEN=1834; translated  
XRQLRDVYFFPGSFRQSVQOHPRQSSSKGSREEIDISKLTAAETAKLLLEKTSKSGTGGN  
NSRVYRSQNKKKVLAHHQLLAEELSKQQQQQQEQEQVEKTPVAPDALGIKHKRKNDEED  
SENEFVTERRPTQAAVVIRRRSSEKERERRRRRMRSDSSSSSSDDGNRKRKVVNDRRSRR  
RRREAESSDSSSDDECERRRNRALASRAQEEPEPVPEPRARLEEKDQKQKQSSSLE  
VGRVPSQRDRTRIEPAESESIGRKAQRRAASSSDSDSESSSGSSSSDSSSSSSSEDE  
PVRLKPIFVPKHKRNLIQSEKKWEEELRLKQEKERNQKRKAESRALVAKELSDAKSSL  
QNDYGDDVDDECGGANNAPPNDDELDNDKEHNAWELRELERLLKAMDKEEKRRKEAEFEY  
SRRKKLTDAECLKEDIASGRYQAPGANRNQGTSGGSNHLKRYFHRGAYYMDQSEWDEGDI  
RQKAAEYAKADTGEDKIDKSKLPEVMQVKNFGRARQNTKYKGLASEDTTDKSAHILQLRP  
EQRTKRHL

>comp10088\_c0\_seq1; 814 1 4121 LEN=4253; translated  
VALVKKYIQLIVEEAGMFRKSRRTATTTYRRRLTWDETTTPSVATHDDHDEMNSIILTGK  
VLQKGGKERRLVTPSPNAASTLVQCDEGGRSQHSQSNKSPAIKQLFAKKRLSRNKRTARL  
TDGGTSVSPSPGQSCANDSQNFLFPFSKTDIATSSSTGTQNGGSSIHRKRGSKRMRDRK  
PLHLATKSAASFRKSKSRLRHKYTTGDSLASLVSQMI THPSKRSTPTKSNGERRIQAQRH  
PVHLSKMGDGTTKQEKDMNASKNMKTQCDFEERTSETTKKRCKREKSGKNGTSVPVKFI  
PLLASLATPSIKMARARSTSEILNEFHRRKEDFKLTFSSRRVTRSDRLSYANHNSRKRLP  
RACKNTRNSRKMPLRACKNKRANLQKEFLTHEDIEKELELSDDGDEADDDSEDEEWLK  
ADAELKVPSSIDVTPICVNI SPPE SRLKPRPRKLFSLSSDQNRAGGLTFPVIDNETEMLP  
RSPKKRRCGSDXHLDSLHQDVIDVSKDHRKSSGAMLSERSSGEDINPNQRLVKEKRS  
RVHGGKLQPDDFRELKSYKDSL YRERTDRRFQVHDAGDIGTPKSRISSSGSRTDADALRV  
KDSHLQLVSPSRSSSQRAQRKRHKFSMEEYSVHSSQSRKSEIRPVVDEIQNSPIRP  
SISLEDYNSDARVARKKASNNRESIRKTKHNKLQSDHKFSPSEISIKNNEEAGNMSSRI  
GTSFIGSSPRRHSTEEHITLRQQETNATASKKRVRFDSSTTF SVKIKIKTNLNARGHK  
RGGRSNGQSIALPSSLDES AVQAIANQVTQAACLSQATTNMEPDNCRGFRRGRDIDVNF  
VNNDNLSTSHSSEGTSSNSNQSGNANEQIEEEKRNTYSDSVSEMDPHLVEARSTNCDFSR  
RDSNDARSVTSELTS DWNRP SRFDH HQIYRKSNSDFVASDSHGSQNNFDDDFRGQSDVEN  
IKSTDHDQDYTGTSIPNKKRSPRGVSNYGRNGDMRSCSSTSRQR I WGCSDSLAGSGFES  
KVSGETGSVFSQLPREVSLQNSSLRPKGLFSSNFRSDKRKYASVCNEDDDESMKKEIKS  
SRSDYLLSTPNPRSNSRVVFPAPT YRCGMCKGCRRTLDCQTCVCLQKLQYYGSQLSPTE  
DICSPCLLRRQCRTCRVGCVDSLGLKPSPNSTSANQKEKHCTDKLADTSNMQV FYSKDP  
VATKSSTLAPSPKASRNTKAPWEEGDDWTVDYSYLSEPEYRQSWSIASNNSGRHKVHSS  
TRSLPAHSGWLTSHQKRPMRFGDRVRTSLSSISESIPSKKSKQMPSSSLSTS AKKLGKK  
RGKGRGEKRRDHLHGLALPSTSMGCSVTSWRENKCLRALMEYDEADQDWV

>comp10089\_c0\_seq1; 349 1 1546 LEN=1685; translated  
XMLYRQRHLRKEPLHVIQSVMIRLAKNAHQGKTFYLWRVTVGFVVVFFVFLNLR LAFITE  
FEGPTGHYMLGHDLDTPSAIAVKNEYEHPTESFSACILWMDNHRLEEWLAYHYVVMKLR  
YVVVNVDPKSKTSPKEIFDRWNDHENRYKLNMTIVKMSDSYIPDFSVRMDALEELILSN  
TSDSTKLYGTEKTNYHRFRQRQFYKACSQHLVEQNKSWTSYHDIDEFITFDWVSKINKQV  
NNITDDGIRKMKQPGYFFERINSLKQQFPPEYINSTGLSCLVDRKRYCSKELDPEESG  
ILFSSGGIVPEGFMNSSTHHSTEEERQNI IRRFDTLRYKFLTHGMDGQPKSFIDLSQRNP  
YLYTQNRYYKKS GAH SWETHRPMKDICKKEQQKRDKALQQMIREEKFTLSHYLGSWRSYS  
FRNDARKGGIRS YDVAERANKTKGEYSHVIRPWL RGFVELVGGPEVAAYLLQDAGKFPD  
GYDGTSRINEYKYAYQYYSKKNFRKQQQAVKK

>comp10089\_c0\_seq2; 307 1 1667 LEN=1806; translated  
XMLYRQRHLRKEPLHVIQSVMIRLAKNAHQGKTFYLWRVTVGFVVVFFVFLNLR LAFITE  
FEGPTGHYMLGHDLDTPSAIAVKNEYEHPTESFSACILWMDNHRLEEWLAYHYVVMKLR  
YVVVNVDPKSKTSPKEIFDRWNDHENRYKLNMTIVKMSDSYIPDFSVRMDALEELILSN  
TSDSTKLYGTEKTNYHRFRQRQFYKACSQHLVEQNKSWYGNKSSFCDDTGRYAIYGLT  
SLSLFTQFIVDPSRASFRTSYHDIDEFITFDWVSKINKQVNNITDDGIRKMKQPGYFFER  
INSLKQQFPPEYINSTGLSCLVDRKRYCSKELDPEESGILFSSGGIVPEGFMNSSTHH  
STEEERQNI IRRFDTLRYKFLTHGMDGQPKSFIDLSQRNPYLYTQNRYYKKS GAH SWETH  
RPMKDICKKEQQKRDKALQQMIREEKFTLSHYLGSWRSYSFRNDARKGGIRS YDVAERA  
NKTGEYSHVIRPWL RGFVELVGGPEVAAYLLQDAGKFPDGYDGTSRINEYKYAYQYYSK  
KKNFRKQQQAVKK

>comp10092\_c0\_seq1; 1006 132 1556 LEN=1556; translated  
MKTTTFGRVVTGVALTTSAVVAFVQVHNGRIGGSLKTAAGWGYSKTETTVASAKNTYLNLD  
DDLSSLLQNAKT DYSGAASKASDAAASATSPPPPDVAAAVEPAMRATQEAAMKATQDAAV  
KATQATQDAVNNLV TATQAKVVI PPPPPLEAGKARPLFSFVRASVSGDAASAASGTNWEV  
TKTKSILLRDNIVRLAGKDPAEIDFPKISLPTVAKGQAVAAGSAGIDFSGFNIKALQEYS  
ATLSPNEQGLAALAATGMLLLVLGAANKGNDKPKTETMDIAASSDAIGGLTDELLALQSR  
MEALEANGIDLDSQLKDAKEKLTQKELVISKAKLKAADDSLNLNREINSLNQKIAANKGK  
VKDMDIELAKARQECRALMRELESARVEQEKAQKAEEAKKKLAEKKKNTTEEAKKKAAEAK  
KKAADARKKAADDRKKAEEKKKAVAAKKEAEKAAKEAKLPEASAAAPKKAAPKK  
>comp10092\_c0\_seq2; 233 1 435 LEN=583; translated  
KAAAPKKAAPKKKVAAPKKAAPKKAASPKKTAAPKKAAPAKKAAAPKKAATAPKKA  
KADEPFPAKTKAPAAEAKQEAPAKKTAPAPSTGDLTTLTKSALSRTTVKDFNAFLTSKGI  
STVDKDGKQLKKAEMIKAVNALSN  
>comp10093\_c0\_seq1; 183 2793 4795 LEN=4936; minus strand; translated  
MYATTGAAPRGNRRDRFRRTNASPSGTAVATASSLSSSPTSPVPGVAFSVGSGVSGV  
ESGVAKTVGWVGVSPVGSVGSVGSVAGGMVGI PVGFSVANSV GASVGERVGPVATE  
GAPVGT PVGSRVLGGSVAAEGDPVGVAVGDPVGVATGSTVGAGVGPVGTG VGGSVCGSV  
VGAPVGP SVGSFVCGVGDVAVGDGDGTGGSVAGXVADQKRRGFGLKVASPRNQRPV  
VPPAVHGYHLVPPGAQAVPKATDVLYREFVVGIDRQVYEAALGAVGYRKLPAAGDLPCA  
LARRDPPPYPVGLVEVDVDPQDFCPDIPLVAKGPSALLWGKVGELADLLRDPVARHADA  
GIDRRQPAVAVGPRRDDPHLGVGGQQGPPGVPGAGAHPLVGD RADGRGCVDGIACQPPL  
VPAQLGADGCHPSLLERRGLATKAQHREGLALVGGVAVGVEPDPLVLEPPPELEDRKVVV  
EALRIVQGVGPD LGHPRPGIGRIGPMRRADLGPILSRVAPRAQGDVVVDQRRAAAAPEEK  
EGVRVGGVGS THHAGPGDVDAVDDALRGLCSGLRRAPPAEREAPPVAPAFAGATGGGPV  
IDGGVRKQAFQQADCQHKDYRPPPVAPPARSHLLCLQRPNQSPGVAAVGMGLCAFWFIR  
CLQRVMR  
>comp10093\_c0\_seq2; 183 2886 4888 LEN=5029; minus strand; translated  
MYATTGAAPRGNRRDRFRRTNASPSGTAVATASSLSSSPTSPVPGVAFSVGSGVSGV  
ESGVAKTVGWVGVSPVGSVGSVGSVAGGMVGI PVGFSVANSV GASVGERVGPVATE  
GAPVGT PVGSRVLGGSVAAEGDPVGVAVGDPVGVATGSTVGAGVGPVGTG VGGSVCGSV  
VGAPVGP SVGSFVCGVGDVAVGDGDGTGGSVAGXVADQKRRGFGLKVASPRNQRPV  
VPPAVHGYHLVPPGAQAVPKATDVLYREFVVGIDRQVYEAALGAVGYRKLPAAGDLPCA  
LARRDPPPYPVGLVEVDVDPQDFCPDIPLVAKGPSALLWGKVGELADLLRDPVARHADA  
GIDRRQPAVAVGPRRDDPHLGVGGQQGPPGVPGAGAHPLVGD RADGRGCVDGIACQPPL  
VPAQLGADGCHPSLLERRGLATKAQHREGLALVGGVAVGVEPDPLVLEPPPELEDRKVVV  
EALRIVQGVGPD LGHPRPGIGRIGPMRRADLGPILSRVAPRAQGDVVVDQRRAAAAPEEK  
EGVRVGGVGS THHAGPGDVDAVDDALRGLCSGLRRAPPAEREAPPVAPAFAGATGGGPV  
IDGGVRKQAFQQADCQHKDYRPPPVAPPARSHLLCLQRPNQSPGVAAVGMGLCAFWFIR  
CLQRVMR  
>comp10094\_c0\_seq1; 195 229 738 LEN=788; translated  
MPSFSSWNPLQAIYFKKRGVERIMEKNKSSGAVFSPQFAKETKVRIERQSMMTIRKQDR  
DGETIPSLMDCAIPEEASETTGSI SEFTNYDEDSSIVSIDWSLPGVEDQTKMKNQYDCRD  
TDYCDIEERNRRIAAAKEHKRKKSEGAIEMIGLNVIFL CDAVNWGGCTS  
>comp10095\_c0\_seq1; 271 56 667 LEN=817; translated  
MAETSPTPVAAPT KKL TWDEFY EKSENANKLMDRVWYCIACSEKDVGNQTI FWEHWYWE  
GEDKKDL SKTTVKACNHTLTIDAEGKELDYP IWP LKFTKKS MKMYP AIDLKCCVIAPVAL  
SMQPVAFP TNSRVEFRVDYCE TMGKKMYFIFVLDPNISEEDKKKNFDRLEKENGVLREW  
FHNVQWAKNYKVGSTGDPDINPK  
>comp10096\_c0\_seq1; 355 207 1006 LEN=1650; translated  
MPASAGRVRMPHNNRMCTSDALRTHGIWSKTIGGGNHDNGEEEDTPARKAETA EKVRNVM  
ELARTQNVTDGADREGFTAKLYLGLKRGKVRSSGNLLGGIGGGHGSMDPGLRRLD DDP  
SSSEEEFVEEEEEEDQGE GDGDKKPSAKDRKRSKRRRDEQERRKKRKRKRKRHRRRS  
GGSDSDESSSSSSSDSGESDSDSSXARPAEETKAAEARIVEAKQIREEPEGFLEEKEDQ  
EQEARPGPRFVQRERERLRKQKPEAA  
>comp10097\_c0\_seq1; 242 253 834 LEN=1137; translated  
MKAFSLAVLSACIASIDAFSAITAGSKIPAVDMFYDFGDP SFVHNMAEYTADKKVAIVGL  
PGA FRPPDPTDXVPGYLE SQDALKEAGIDEVIVYCVNDAAVMGAWAKDQGTEDSMIKMFS  
DASGEFTKACGMEMTHPGPISVGIIGRCKRWAMIVDKNIIKAVAVAESELDPAGDDFPEK  
TLAPALIEMASAE  
>comp10099\_c0\_seq1; 92 319 684 LEN=684; minus strand; translated

MIAANSFSLHELKGISSARRHNWNAFFVGFLLAALAAVACGIAVYAAGVVVVKLHDARDMS  
HGKQHPSPFDAPDLKRHNAQHKHEFESAYHMPDRKVLDRVEESLEAEKKEHNQLRAQPAA  
EK

>comp10101\_c0\_seq1; 194 1 545 LEN=1016; translated  
XILSRLFAALEKTSRAPAAAVPSRGSVFLVGLVSLQRHLEDRAQRSSVARAVRGLAAHYTV  
LVVVAVEENKGRSKGGGEGSLVAETQEAHETVVGLLRGNANGNGDGNDDGDETRTSKV  
PESVLPADRILLASSVLGRVALVRQLSSNIGLTVDFDPEARTQLERFGYKVAVVDDWTAV  
L

>comp10102\_c0\_seq1; 362 1 1795 LEN=1795; translated  
XDAPLPERLKERLLERTTKRKEHCGIHFLLLCEVVMFSFIASPQKSEGPQEEQENVGGSR  
GNMFSIESIGATGGNKVLGSNSRNQLGGRDQMGMEGKEESSSTFTNMGPSTSDPTSVMQSG  
SSQDASKVSNGTAGPPSNIVHRLDDSTSLINLDSLQASELESDVSDFKITPKIEGNKTS  
WLKIDSSSTSHGSQGSYAHQVPTLLGPYGSNNNENCKPNGKFLLRHSTDKSPKCPPLD  
KSYSTHNSLDDILGPKGKAI PSNLSSYPAXVDDTAGIQIHDKLDDDDIIGVHGESTIGG  
ASVSASATNSVEDGNAGSVVND SRLGYDDQKGVPRTRSTRTLDDMEAFHRRNTSNIRTA  
EGDASTATCDVAPSESRKAVDNIGQALKDRDRMGNSSYAWSPTNSATQSSIFIEANVGEN  
SAQFRATFETQSDFEVTEGVTRAGSTSQNSQKFAASTFESRETGFTGISQFTKTSQVYTL  
ATSNEETTARWGDASTFANETLSPDNQSSMWESSRFSRSPRSYSQRTDCILSPGASDSGYSC  
SMRGTMTTDYSALNTDYSESEFSPRIRLNQLSTAESTQFTENGGYTPTEHTNFTQFTYDX

>comp10103\_c0\_seq1; 143 128 1039 LEN=1305; translated  
MVTGNLTPLEEGVSFTSSTVPETK GASSEPPISRVERRSRLSSMVAVNVTAEKNVNFVIP  
SRQSMADFALEKHGEDDWRNKVHFLGQKWLQLTSLGLLVADVLIIFAEFLQAEYPSR  
LIERDCEACCSGSGAERWLAGSGHDEVCEAGYEPIGVPGCD SYKWHVHVIEEVLFYTTV  
GILSIFLVENLVEMAVLGVVRKYFQQVFLALDFFVVTISLTMELTLHLMHSQLGQMVAIIV  
IFRLWRFVVRIGHGIMEVASELTHDQYLPLIDYVMDCEDKMRQAGIKIPEKTQKCKKLED  
GHH

>comp10104\_c0\_seq1; 380 203 1500 LEN=2225; translated  
MALENRNQQQHSQVTPFPFRFFSSATGKNEGASEKKEESEETSKEKEANTTDEESLKDT  
VRRMQREKGTGSDDDERVNDLLRQASQFSTASDEIGKTWGE LLRSGDRKDINKKIGRP  
QDTAEGEEYTGVPV SIMVIDESENLTAWERMQRKLTAPVIQGTSLICHAVDEIGNDAIR  
RKQKMDDFENNVPSKISIQVEVVSHVQTPFVYFTDILSRSEDIYEKSGVKKAKQKVDHLT  
EDAREAWETSQNPWVYRVSSVYETMTAETPESIAVAELRKLDP EFTLDDWREDVAEHTLP  
KIMEWLLLEGKINQLKPWLAEGVFKRIAAEITARKQEGVQIDTHVLGIMNSEILAVEPDEV  
EKGSP IIVLHFMCQQINCVRKKDDGTIVEGSEDEIKANSYVAAFQREYNEKKGELNWKIV  
DFRFNGAIAYL

>comp10104\_c0\_seq2; 416 203 1342 LEN=2067; translated  
MALENRNQQQHSQVTPFPFRFFSSATGKNEGASEKKEESEETSKEKEANTTDEESLKDT  
VRRMQREKGTGSDDDERVNDLLRQASQFSTASDEIGKTWGE LLRSGDRKDINKKIGRP  
QDTAEGEEYTGVPV SIMVIDESENLTAWERMQRKLTAPVIQDILSRSEDIYEKSGVKA  
KQKVDHLTEDAREAWETSQNPWVYRVSSVYETMTAETPESIAVAELRKLDP EFTLDDWRE  
DVAEHTLPKIMEWLLLEGKINQLKPWLAEGVFKRIAAEITARKQEGVQIDTHVLGIMNSEI  
LAVEPDEV EKGSP IIVLHFMCQQINCVRKKDDGTIVEGSEDEIKANSYVAAFQREYNEKK  
GELNWKIVDFRFNGAIAYL

>comp10105\_c0\_seq1; 547 199 2121 LEN=2144; translated  
MSVTATDLGSDTDAYVSNRSSVEDLATSVPSTRFESIWLSSPEQGP SERSFVDGPDNNYL  
EENDARFIVPPPKFSDPYDEFQNSAPSIPAIPNRRQGS PVDIDNEGNNGTGSTDIVRE  
KIDDGTDLNSSKSKPIFEDKRDGKRSQQGQNNNVKITHRVRRRSRHRKQQILSETTCT  
DDETSIENYGFVCVMNSNTLQERSQQAWKSRQKNSIARTKHDNGPNTSVGAPNRIHFFE  
TQDQY EYRSKDKEDMSLDRSLNSMYTKTLESEVEDMIKDILF IGSPDKNKPGRRKYRHKP  
DVKRKAKKNGFPTITKDAGARSKARLGVLDETNIETGEDYPSASESTSDVAKTRRGSSN  
VINSTKTTSESRPKHQRHINAGDDKSSLASTISRASSVDSNTVETFLSEKDTMDDPVNA  
IIGLVEGGLSIMSSAIGYALENYTQEGDKESAIDKSKKTQGDYDIFESCGIAMGDQNMIT  
DASQRRIGMGGTSSKKDLTGFPENANLTTAKNKL GSKHSEENPDTDTNAAEEHERSLI  
VGTQNKVNRPLGVERSPEL PKLALHAARSVHRLQGVAYDNSIPIDMYKEVKICPVTLKL  
PLGIIFLENDGKFTKIQTFRCVALT PNLTLDFLKNILHLV

>comp10105\_c0\_seq2; 579 199 2558 LEN=3425; translated  
MSVTATDLGSDTDAYVSNRSSVEDLATSVPSTRFESIWLSSPEQGP SERSFVDGPDNNYL  
EENDARFIVPPPKFSDPYDEFQNSAPSIPAIPNRRQGS PVDIDNEGNNGTGSTDIVRE  
KIDDGTDLNSSKSKPIFEDKRDGKRSQQGQNNNVKITHRVRRRSRHRKQQILSETTCT  
DDETSIENYGFVCVMNSNTLQERSQQAWKSRQKNSIARTKHDNGPNTSVGAPNRIHFFE

TQDQYEYRSKDKEDMSLDRSLNSMYTKTLESEVEDMIKDILFIGSPDKNKPGRRKRYRHKP  
DVKRKAKKNGFPTITKDAGARSKARLGVLDENIETGEDYPSASESTSDVAKTRRGSSN  
VINSTKTTSESRPKHQSRHINAGDDKSSLASTISRASSVDSNTVETFLSEKDTMDDPVNA  
IIGLVEGGLSIMSSAIGYALENYTQEGDKESAIKSKKTQGDYDIFESCGIAMGDQNMIT  
DASGQRRIGMGTSKDLTGFPENANLTTAKNKLKLGSKHSEENPDTDTNAAEEHERSLI  
VGTQNKVNRRLPLGVERSPELPLKALHAARSVHRLQGVAYDNSIPIDMYKEVKICPVTLKL  
PLGSKCLFFIGFLPYFFIFFELPICLLFVFLFIQXIFLENDGGCFVTKVSPDGSAAALSRR  
VELGDQLASINGISSIKMKVDDICDVVRYSPNPSEIKLIFLRYIGPLRPLAKNSKTENKA  
CEIDDVRHYIMNTDREPSPPNKKTSTRVKSHEHETKPKTKKGGFRLFGRGKNNNSDEKGV  
SRGNVN

>comp10105\_c0\_seq3; 495 199 1964 LEN=2236; translated  
MSVTATDLGSDTDAYVSNRSSVEDLATSPVSTRFESIWLSSPEQGPSESRFVVDGPDNNYL  
EENDARFIVPPPFSDFPDEFQNSAPSI PAIPNRRQGSVDIDNEGNGTGSTDDIVRE  
KIDDGTDLNSKDKSIPFEDKRDGKRSQQGQNNVNI THRVRRRSRHRKQQILSETTCT  
DDETSIENYGFGCVMSNTLQERSQQAWKSRQKNSIARTKHDNGPNTSVGAPNRIHFFE  
TQDQYEYRSKDKEDMSLDRSLNSMYTKTLESEVEDMIKDILFIGSPDKNKPGRRKRYRHKP  
DVKRKAKKNGFPTITKDAGARSKARLGVLDENIETGEDYPSASESTSDVAKTRRGSSN  
VINSTKTTSESRPKHQSRHINAGDDKSSLASTISRASSVDSNTVETFLSEKDTMDDPVNA  
IIGLVEGGLSIMSSAIGYALENYTQEGDKESAIKSKKTQGDYDIFESCGIAMGDQNMIT  
DASGQRRIGMGTSKDLTGFPENANLTTAKNKLKLGSKHSEENPDTDTNAAEEHERSLI  
VGTQNKVNRRLPLGVERSPELPLKALHAARSVHRLQGVAYDNSIXDRYV

>comp10105\_c0\_seq4; 616 199 2466 LEN=3333; translated  
MSVTATDLGSDTDAYVSNRSSVEDLATSPVSTRFESIWLSSPEQGPSESRFVVDGPDNNYL  
EENDARFIVPPPFSDFPDEFQNSAPSI PAIPNRRQGSVDIDNEGNGTGSTDDIVRE  
KIDDGTDLNSKDKSIPFEDKRDGKRSQQGQNNVNI THRVRRRSRHRKQQILSETTCT  
DDETSIENYGFGCVMSNTLQERSQQAWKSRQKNSIARTKHDNGPNTSVGAPNRIHFFE  
TQDQYEYRSKDKEDMSLDRSLNSMYTKTLESEVEDMIKDILFIGSPDKNKPGRRKRYRHKP  
DVKRKAKKNGFPTITKDAGARSKARLGVLDENIETGEDYPSASESTSDVAKTRRGSSN  
VINSTKTTSESRPKHQSRHINAGDDKSSLASTISRASSVDSNTVETFLSEKDTMDDPVNA  
IIGLVEGGLSIMSSAIGYALENYTQEGDKESAIKSKKTQGDYDIFESCGIAMGDQNMIT  
DASGQRRIGMGTSKDLTGFPENANLTTAKNKLKLGSKHSEENPDTDTNAAEEHERSLI  
VGTQNKVNRRLPLGVERSPELPLKALHAARSVHRLQGVAYDNSIPIDMYKEVKICPVTLKL  
PLGIIFLENDGGCFVTKVSPDGSAAALSRRVELGDQLASINGISSIKMKVDDICDVVRYSP  
NPSEIKLIFLRYIGPLRPLAKNSKTENKACEIDDVRHYIMNTDREPSPPNKKTSTRVKS  
HETKPKTKKGGFRLFGRGKNNNSDEKGVSRGNVN

>comp10106\_c0\_seq1; 298 431 1187 LEN=1512; translated  
MNDCFRILVPIITCWLNLNAEAVNPSPNFSPSAYSHRHEAGGTGNNHLQEEIDLGTTLVA  
IKYAGGVVVGADTRTSAGGYVSNKFAYKINPIFRPDFEDPTEVDESDEPSRISSSSSSCV  
LCRSGSAADTQWLAGLAKQRFQMRKLERPGYRPSISEVAHFRLYQMRQGGGESQFQASLI  
CAGYDSVTNGGQIFGVTPGSSLWEEDNFCVSGSGSTILLGYLDDALQTAKQNFASEYTEE  
CAIASLRNFCG

>comp10106\_c0\_seq2; 182 207 836 LEN=836; translated  
MWQTTPEQPTIHPHVPSLLAFPDWTPGKDSNAANNKDKHEHEHDRPFLQVVLPGEGNRNMV  
VSNLIGSHCDYIDSNESNRNKKRNWPTRPLCIHYPILVRDTPESIGMEIPRGRTKTKTSS  
KAKNHTDKRKRPESECIKSRNDPFSIRDVAXGGWNRNPSTDDRLLDPEALQRLRRLDDRT  
PAGIPRRRAAARTPPDVGETSSDNNKNNNNX

>comp10106\_c0\_seq3; 182 365 994 LEN=994; translated  
MWQTTPEQPTIHPHVPSLLAFPDWTPGKDSNAANNKDKHEHEHDRPFLQVVLPGEGNRNMV  
VSNLIGSHCDYIDSNESNRNKKRNWPTRPLCIHYPILVRDTPESIGMEIPRGRTKTKTSS  
KAKNHTDKRKRPESECIKSRNDPFSIRDVAXGGWNRNPSTDDRLLDPEALQRLRRLDDRT  
PAGIPRRRAAARTPPDVGETSSDNNKNNNNX

>comp10108\_c0\_seq1; 432 314 829 LEN=963; translated  
MRTDLTDLDDSTSEIFRPQASHDNEGSSSSSFSKLPGLVATGADDNVYNNSSALWKS  
NHTVVEIADDEEEGSVDKDNKGGSEKQRYDEDEEENVSKPPGEKKSTNQKPEKASPNWFQ  
KILGESAEQAKRIAEEKAMAKQNASNWGRDITDDDDDDDDSDGDGDDQN

>comp10108\_c0\_seq2; 1222 287 3517 LEN=3561; translated  
MSIRPISSRFPLSKSVWEETGLPLCAVLTPLEDPGEDEESNEDGRSEKGRGAAADSCAQ  
PIGAVPKCLYCGAPHVTATTHFRPSKLSRLLCYFCGETSSTMLTDQQEVRENETLDPDV  
YDKIPFFNPRDVLNQKDEDEDDVPQVPTETFEFRVPVYVQKMTEVVTTRKGRRIVKEQK  
ETMIPTWQLPAMACPPVWWIVVDGTVGGRNNTLAAARNYWSTVGATLTRTIEAIPPHVHV

GLVTATASRLANWDLASAVPHVKQFPYSYDPMLAIDDGEGEKSMSEEKTAWDLSLVPANG  
HYKANLLAAIRAMVDGAGRGVFMGGDEDDDDDDDDGGHEEKKSEDEQPGNFGGQGLPLAL  
TTEIILEFMEQAHHPGQQVEEDEDDEDDDDDDSTTQLRYAGGKILCLLGNPPLLETATPPSD  
DSMSYFAQPEFGFGVAGTCCVEDDIVEEEQKQASRLQKRSSEMHGEEKEDDEEDVDEPTD  
LTHANIKDYAMPLEPDDLAFAMVGKRCAKAALGVDIFALVPQEDDGLLEGRNRCELYNSNTE  
EIPWYGLPLLRPLSERSGAPGPLMFGTANIGSVEDRGNNTKHSDAFERLHENVLARTPWQ  
NGMVFGVAMGLRLPSGFRVEKSPVDVPNSQLELSRYLYSKGITGSAVACADVEEYKGRKV  
AGFEEDNDIDVWIMGTCDPHTSFTVDLETVGSDELDPDSEMQGFGEVELKPLMQTCTRYT  
CIETDGAEPNPNYYTVCKMRVSNVSMEYTDNAESIFDGLDTEAVSTVLFNKLALAEAYTVG  
LAETQVEAESWLQRILEAVYESAQAEALAYLEEEEEEEEEKSEEDSNFKACDRLLDYEGG  
ELDKTEVLMGAGHSKVKVSVPLLVYALMNCDALRPSNENFKPSMDARLCAIAQLTSMTPKN  
MAKILAPSLSLWLSLRDDRPLVDSLPLRREGILAKLDALDEDSKKTILLLLDSLQRVVFFD  
GVELGGSKGRTNESRSIEVGTQFESRVLSNLRGYRTAPLNSKAVERILDEKGGSLTDVGV  
SRSVLLSMLIEDKATNRGDSNFNKWSRIAKVLREKFEIDEKTTKGRRLRRMMPF  
>comp10109\_c0\_seq1; 270 110 841 LEN=1175; translated  
MPRSKRNRSLTKVSKRATREHKSAYVQEIIRDAVDGHDLSLFLFSYENMRSNKFDIRMH  
FRAKNTSGDDMHDEETSDESAPSRIFLGNKLLQIALGKTPEDYADNLRHVSGEISESV  
GLLFTSRNKEGVEQYFKDLCEPDFARAGFVAPRDVVVTNEMLANQPVSMMEQQFRKQGLP  
VRIDNGKIVLLDGKTEYKLCKEGEVLSPEKCKALTHFGIKLSNFRVKLVICYWSSKTGEFE  
KLD  
>comp10110\_c0\_seq2; 288 434 1360 LEN=1360; minus strand; translated  
MIVKCRQQIIVVATIFGALFGCLDFIAVSSLSANAPRKIRGDGKSVPGAPPPSSIITRRD  
WLISGSFAFASALSFQNTIPPASAEESTIGGESVSQQPRPALAKEEYSNPFVSSPEAGRSYF  
PALTPPFNDRATYLYDLGRDAWALEQLLTFANVTATIRCNVRLKKTGGLVWVHSPQWPTG  
EFCSLDSIGGPVEHVLPVPCNAFEHKAPMKAFLEKYPNAKVWIAPGQYGPLGSCGTSLE  
KPRMGYHVDGIFGDERSPPPWSDEFDIATLYVNLPKNAGPVSEVAFCHRPSKTLITTD  
VVYVPSEPS  
>comp10110\_c0\_seq3; 288 414 1340 LEN=1340; minus strand; translated  
MIVKCRQQIIVVATIFGALFGCLDFIAVSSLSANAPRKIRGDGKSVPGAPPPSSIITRRD  
WLISGSFAFASALSFQNTIPPASAEESTIGGESVSQQPRPALAKEEYSNPFVSSPEAGRSYF  
PALTPPFNDRATYLYDLGRDAWALEQLLTFANVTATIRCNVRLKKTGGLVWVHSPQWPTG  
EFCSLDSIGGPVEHVLPVPCNAFEHKAPMKAFLEKYPNAKVWIAPGQYGPLGSCGTSLE  
KPRMGYHVDGIFGDERSPPPWSDEFDIATLYVNLPKNAGPVSEVAFCHRPSKTLITTD  
VVYVPSEPS  
>comp10111\_c0\_seq1; 636 406 2301 LEN=2652; translated  
MDTNDIEHESIELCPVTKALVDTEVFQRLRNIRQLGNAEFYACANHNRFQHSLGVAFLA  
EKMCKTIKEEQPELGATDKDVLKCVKLAGLLHDIGHGPYSHTYEGFRDHLYLPKFLEANPDL  
KEEYSDCEHLQPIQWSHEQSSLLFIDAALAEELGLMIDMNNLDKPLKQIGNGIDANSRNV  
FKPRKLEDSVLTSRDFVFIKECIFGKPLNGLNSFVGRQQKQLEWLYDIVSNRHNGLDVK  
IDYFARDHTRAMGKRGI FFMKMITDARVALGRCRPEKCPCTCKGKDEPDMHYMICYPEKHI  
VTTMHFFQQLFLHNFVYQHKTTAAVESMICDILCLADPYLRLESHSGEKFPMSRAYIKS  
EFLRLRDDSILTIAHSTDERLTERALCRRFRKRRDFYKCAVDLTLINRSIADIEDLEG  
EELEKAKNSQRDTAVWKMSETEIHSIGILQERMFWIEQNSSDSTAKLEAKDFIVKKFCMH  
GAGSQNPLLRMRFYDKMSEEKIFGP I EELPVAEQVKECKHSSFP I ENQKVGIRVLVREQ  
CKRDIVNQFFHQWYGNRIKNEADAPDQCGDSTCGLEVEDGEDGHDWNGQEPRSNPFWLSQ  
DIDSAEDTDDENYRMRDMSDMSPVVRTRR  
>comp10112\_c0\_seq1; 174 1 593 LEN=865; translated  
HLHRRPNRTHPVDRSAPLSFSAQQQQQQHASTSTPXTHHTTPMSKTTEALVRQSYRSL  
LRLVHRLPEASSPASLCPESLSLRSFAFRTPLAPGESFGDRLEEAESKRSFLKMVTPRE  
RPSSESDAGGAFPSRVVYRNGERLERD GASRVRDKNGRVVSNWDGKNLDPDSVKQHNY  
QLKRMGFRNNAHAKGIF  
>comp10113\_c0\_seq1; 1112 1 4403 LEN=4731; translated  
XKNHTVKYPPKRRSFGSGKIRVMVNHNDQDEDETAALLFKSASSSDPVSIWSYLS  
FSWYTPVLEEIKSKVENGLPNIEEDQGIPLPKENSTVHIDDKFETCWKQELKYHPHDP  
SLTRALTKAFLRPYIVACLLSTGTAAANFVGPMVLQMIIPYLLDPSASLTYGLSLTLALF  
LAQIANSCTRQASYITLQVGIRVRTALVFVFAIFKSLQIDSFFYRDHPIGQISNMMGTDV  
GKIVMLSEYAIQGISAPVTMVLAVFYLWQLLSFASLGGIFFIILSVPLTANITKRMGKLM  
MGLMKVKDDRVCNQEVLTNMKTVKLQAWEDSFRSKTEDLRKLEIDQLWRYKIAGSIFGV  
VSSAIPMMVAVSSFGIYVVTILGHSMDAATAALTSISVFNLLSFPLGIFPFILNLGVEANVC  
LERIQKFLIAPNVERVRRLTDEDRNESAGDACVAIDIMNATFSYHGFSKNGDGSKLSIR

SKLGQKEEELLAKAMLSDVEEHLAKLEGRTSCQYGTANTDGGLSDDFNDGFKNILPLRR  
ISFKCNEGDFIAVVGEVSGKTTLLKSILGEVQKVSSELGVRGTIAYFSQNPFI MNDTVK  
GNILFGKSSSENIDHDLYKVAVKSACLEHDLKLLSAGDQTEIGEKGVNLSGGQKARVAIGR  
AVYRDADISLLDDCLSAVDAHVGRDLFDKCI DVVLLKDR IKRGRKKRTVVVLTNALQYL  
SHPKVDRIVVLKDG LIAESGTYDTLVNTDGSVFRSMLDTFKDSMEQENDTDVDEDELIEE  
EILSDLLHDLNDLEHVEERRRSSILSRSSSSRRVTSRRSSSSCRMSSRRSVEGPKIVGKGT  
TLTTSEAAESQIGKVEWKVYSAWAKAAGGVWVVIPLFLAFIAQQGLDFLQRFWLTQFWGT  
SGAKDMGSQLFYLSVYTTLLYLTGIAVNFLKSIMPVLFGLKASKKFFSALLGSMLTAPMSF  
FDTTPTGRLVNRFSKDINTVDETLVSNFKNFAGTMFSIATSIAVMVSTIPLASII LPFLG  
AYYKQQHTYF SRSNRELKRIDSTSRSPIYSLFGEALNGYGTIRAFEAGPALSSRMSNFID  
RQQHAYYLLRVGTYWLAIRLEFIGTLLIAFGCLGFVLHKKHASTTVDEVFAS MAGLALSYL  
LTTT SNLVYAIRLSSDFEASLVSVERIQQYIEVEKEAPHHNPTDVLLDNEWPSKGSIKFD  
DYRLRYRPGPLPLVLKGLNITIP SQAKVGIVGRTGEFCHLLLAYDFVICLIATHLKFXFLI  
LVGAGKSTLMNGLTRLIEPAGGKILLDGDVITTLGLTTLRSKIAVIPPQDPVLFSGTIRTN  
IDFPNQSDQKLM DILDRLGLRSGDSSFAIKSLEDKIEQDGRNFSAGQRQLLV IARALIG  
RASIVICDEATSSIDA EADSRIQRVFRDEFARSTTLTVAHRLNTIMDSTHILVMADGKAV  
EFDTPSALLAKGGLFKDLVDKWE EEEHE

>comp10113\_c0\_seq2; 1138 1 4317 LEN=4645; translated  
XKNHTVKYPP LKKKRSFGSGKIRVMVNHNDQQDEDETAALLFKSASSSSDPVSIWSYLS  
FSWYTPVLEEIKSKVENGQLPNI EEDQGIPPLPKENSTVHIDDKFETCWKQELKYHPHPD  
SLTRALTKAFLRPYIVACLSTGTAA NFVGPMLQMIIPYLLDPSASLTYGLSLTLALF  
LAQIANSLCTRQASYITLQVGIRVRTALVFAIFKKS LQIDSFFYRDHPIGQISNMMGTDV  
GKIVMLSEYAIQGISAPVTMVLAVFYLWQLLSFASLG GIFFIILSVPLTANITKRMGKLM  
MGLMKVKDDRVCNQEVLTMNKTVKLQAWEDSFRSKTEDLRKLEIDQLWRYK IAGSIFGV  
VSSAIPMMVAVSSFGIYVTILGHSM DAATALTSISVFNLLSFPLGIFPFILNLGVEANVC  
LERIQKFLIAPNVERVRRLTDEDRNESAGDACVAIDIMNATFSYHGFSKNGDGSKKLSIR  
SKLGQKEEELLAKAMLSDVEEHLAKLEGRTSCQYGTANTDGGLSDDFNDGFKNILPLRR  
ISFKCNEGDFIAVVGEVSGKTTLLKSILGEVQKVSSELGVRGTIAYFSQNPFI MNDTVK  
GNILFGKSSSENIDHDLYKVAVKSACLEHDLKLLSAGDQTEIGEKGVNLSGGQKARVAIGR  
AVYRDADISLLDDCLSAVDAHVGRDLFDKCI DVVLLKDR IKRGRKKRTVVVLTNALQYL  
SHPKVDRIVVLKDG LIAESGTYDTLVNTDGSVFRSMLDTFKDSMEQENDTDVDEDELIEE  
EILSDLLHDLNDLEHVEERRRSSILSRSSSSRRVTSRRSSSSCRMSSRRSVEGPKIVGKGT  
TLTTSEAAESQIGKVEWKVYSAWAKAAGGVWVVIPLFLAFIAQQGLDFLQRFWLTQFWGT  
SGAKDMGSQLFYLSVYTTLLYLTGIAVNFLKSIMPVLFGLKASKKFFSALLGSMLTAPMSF  
FDTTPTGRLVNRFSKDINTVDETLVSNFKNFAGTMFSIATSIAVMVSTIPLASII LPFLG  
AYYKQQHTYF SRSNRELKRIDSTSRSPIYSLFGEALNGYGTIRAFEAGPALSSRMSNFID  
RQQHAYYLLRVGTYWLAIRLEFIGTLLIAFGCLGFVLHKKHASTTVDEVFAS MAGLALSYL  
LTTT SNLVYAIRLSSDFEASLVSVERIQQYIEVEKEAPHHNPTDVLLDNEWPSKGSIKFD  
DYRLRYRPGPLPLVLKGLNITIP SQAKVGIVGRTGAGKSTLMNGLTRLIEPAGGKILLDGV  
DITTLGLTTLRSKIAVIPPQDPVLFSGTIRTNIDFPNQSDQKLM DILDRLGLRSGDSSFA  
IKSLEDKIEQDGRNFSAGQRQLLV IARALIGRASIVICDEATSSIDA EADSRIQRVFRDE  
FARSTTLTVAHRLNTIMDSTHILVMADGKAVEFDTPSALLAKGGLFKDLVDKWE EEEHE

>comp10114\_c0\_seq1; 374 576 2134 LEN=2272; translated  
MWPNSXGIDPNKNITLSDANA INLNFAEGNITGAEAVSLLDLFLVERVYDSTPSKESNLYA  
CDVNGLARLSCEEEKSASPRSDGGP IRSVNLVDLLVPDAPWMTNATNAVSYTSKDFRDMK  
AMGLNTVQIAVPTSAFTTENDTGAVAKVILAKALDTLKGQGLQAILSLVATGDEIDSVVS  
ASEYASSHGAVLGIVLPKEMKINVTMIDAVRAKIGPDLPLFVPLVGLGDLVKPMGLNDP  
KVYAALWSHTSTIADIASSSSQEDRSKLFYHETVACTMRSP IEHSACFGNRLPVFWSSG  
FDLSIDDCAWRHKNNNFMDYGCNRFEETIGSEWESHRA SFAARQLFAAERGLGWSYSA  
WKIPENEMNSEPNALDDPVGLLSLKA VSNAGLFPDLNGSSDPAKTA CLNSPTNDFVLGDE  
TLEPTASPPDCGNGWVNF'TTSQCDYWVPPTPAPT KICPVCDDCSTA EVASQGTSTTALI  
MAMFFGAAA AHGCRILKKSIVQNRKRIGYSPVNDTNTV

>comp10114\_c0\_seq2; 470 210 1745 LEN=1927; translated  
MSPSPCKIDRIDILNEQSI ESMDDIALSFFASTCGKNRGAFLVDPDGN TYGCLGLPEDVA  
ELAGIDPNKNITLSDANA INLNFAEGNITGAEAVSLLDLFLVERVYDSTPSKESNLYACDV  
NGLARLSCEEEKSASPRSDGGP IRSVNLVDLLVPDAPWMTNATNAVSYTSKDFRDMKAMG  
LNTVQIAVPTSAFTTENDTGAVAKVILAKALDTLKGQGLQAILSLVATGDEIDSVVSASE  
YASSHGAVLGIVLPKEMKINVTMIDAVRAKIGPDLPLFVPLVGLGDLVKPMGLNDPKVY  
AALEWSHTSTIADIASSSSQEDRSKLFYHETVACTMRSP IEHSACFGNRLPVFWSSGFDL  
SIDDCAWRHKNNNFMDYGCNRFEETIGSEWESHRA SFAARQLFAAERGLGWSYSAWKI



PENEMNSEPNALDDPVGLLSLKAVSNAGLFPDLNGSSDPAKTAACLNSTNDPFLVGLDETLE  
PTASPPDCGNGWNNFTTSQCEFDGRPAGIEW  
>comp10114\_c0\_seq3; 492 210 1940 LEN=2078; translated  
MPSPSCKIDRDILNEQSIEMDDIALSFFASTCGKNRGAFLVLDPPDGNTYGLGLPEDVA  
ELAGIDPNKNITLSDANAINLNFAEGNITGAEAVSLLDLFLVERVYDSTPSKESNLYACDV  
NGLARLSCEEEKSASPRSDGGP IRSVNLVDLLVPDAPWMTNATNAVSYTSKDFRDMKAMG  
LNTVQIAVPTSAFTTENDTGAVAKVILAKALDTLKGQGLQAILSLVATGDEIDSVVSASE  
YASSHGAVLGIVLPKEMKINVETMIDAVRAKIGPDLPLFVPLVGLGDLVKPMGLNDPKVY  
AALEWSHTSTIADIASSSSQEDRSKLFYHETVACTMRSPIEHSACFGNRLPVFWSSGFDL  
SIDDCAWRHKNNNFMDYGCNRFEETIGSEWWEHSHRASFAARQLFAAERGLGWSYSAWKI  
PENEMNSEPNALDDPVGLLSLKAVSNAGLFPDLNGSSDPAKTAACLNSTNDPFLVGLDETLE  
PTASPPDCGNGWNNFTTSQCDYWVPPTPAPTKICPVCCDCSTAEVASQGTSTTALIMAM  
FFGAAAAGHGRILKKSIVQNRKRIGYSPVNDTNTV  
>comp10114\_c0\_seq4; 352 576 1939 LEN=2121; translated  
MWPNSXGIDPNKNITLSDANAINLNFAEGNITGAEAVSLLDLFLVERVYDSTPSKESNLYA  
CDVNGLARLSCEEEKSASPRSDGGP IRSVNLVDLLVPDAPWMTNATNAVSYTSKDFRDMK  
AMGLNTVQIAVPTSAFTTENDTGAVAKVILAKALDTLKGQGLQAILSLVATGDEIDSVVS  
ASEYASSHGAVLGIVLPKEMKINVETMIDAVRAKIGPDLPLFVPLVGLGDLVKPMGLNDP  
KVYAALEWSHTSTIADIASSSSQEDRSKLFYHETVACTMRSPIEHSACFGNRLPVFWSSG  
FDLSIDDCAWRHKNNNFMDYGCNRFEETIGSEWWEHSHRASFAARQLFAAERGLGWSYSA  
WKIPENEMNSEPNALDDPVGLLSLKAVSNAGLFPDLNGSSDPAKTAACLNSTNDPFLVGLDE  
TLEPTASPPDCGNGWNNFTTSQCEFDGRPAGIEW  
>comp10115\_c0\_seq1; 1242 398 4087 LEN=4560; translated  
MYASRVTPVQRMRTSSTAIDTTNSYSGYRRSSSMSTAISPTMSTSTAPCMSPTASSVS  
RTALDAAASASSARRSSSDGAGNRTNTSSVNNTNSRNSNMNGDYHVLKHHVELARSKV  
HAERVDLAEKLDDELGEHHVRRNEYEEAMDAFTEALREKRSVFWNIGNCNVRNLPNSNTTA  
YLSSSGHPTSPRRKKGKHKNSNSNSQDDHTSDNASAFSSSLLSGISTNYGGSMNTVGERDN  
RNDDEEEEDYDHNKSCGENRRNTD TDYAEHIRVHDATIDALVQTLRNI GNVHSLRGEQD  
EAMRYFTEVTTLRAQKLSNESLYESNCQDADDASVETRSFLSGLGGHSAISTEQNNSVVG  
DSASAFSFAFGSTNSAAATNATEEVFKGTGTTGTGTATRTSNTANNSGEENPALMSEI  
NEDVRALDDLFRSISFRQGTAAATLPQGLMLAPGAVASEKRKSRSSSRKSKKHKRGSQTN  
NNIVVNTSSTSGATEAALFVREGATAAPTVAQTGPASPSSASNSGGNLFAMGPVSN  
SSEASQALNKYRSTLDLFIQEDLDSSKLRPHQEKMNSFALRIDLQQTDDCLPSSSKQKT  
NPSETRGDLELALAIYRQVLTACKEVSNLSPSTHKDLNKQISMPLOTSSSGSSCSSKQKQ  
QHHQQGLDQMHGGGNATKNSASQSILSMCSAESSASSVFSSEFSSESSALAEETGNNY  
RQRRRQSKRERRQQLAANIASVVICMGSVYYRLGNRNEELEAYKRAKSVYSKAFGEDHVF  
VAGTRKNIGMVLAEARGQYGLAQKQFEKAMSIYVKASNMRHEQLKLEEKNLHHEVETAGTRS  
SSNDVDSQKNSYSYDASMNRDVASVISCIGNVKNRV GELNAALTKYLQALQIYKSIYERH  
ERSANNGDKYSDHEHIEALRDFATLKVIGMVHAKRGS LDTAMQFFEEAMTLLTAYEKA  
DRSTKDGDSNGCTDAGCKGNDDKSSTANLNKNSANMMLA ISETKASILTRIASIYLKKG  
ALDDAMVSYRRAYDLTVQNRGNTTNHPEIAGILHYIGGIYHKRGEYEEAMSCYQESIRIY  
HTTLGSDHPTVAGTLVMVGS IYHRRHLD SAMMFYREALRLNRDAYGIHHPDVAPILKSI  
GTILTKKGEYHEAYDLFRDVL SVKVTVHGTDHPEVASAYKSLGNVHYKLGELGDAERQYR  
HALSIYRKS KGDHPDTIGAKTTIEHLRYW  
>comp10115\_c0\_seq2; 1175 398 3592 LEN=3647; translated  
MYASRVTPVQRMRTSSTAIDTTNSYSGYRRSSSMSTAISPTMSTSTAPCMSPTASSVS  
RTALDAAASASSARRSSSDGAGNRTNTSSVNNTNSRNSNMNGDYHVLKHHVELARSKV  
HAERVDLAEKLDDELGEHHVRRNEYEEAMDAFTEALREKRSVFWNIGNCNVRNLPNSNTTA  
YLSSSGHPTSPRRKKGKHKNSNSNSQDDHTSDNASAFSSSLLSGISTNYGGSMNTVGERDN  
RNDDEEEEDYDHNKSCGENRRNTD TDYAEHIRVHDATIDALVQTLRNI GNVHSLRGEQD  
EAMRYFTEVTTLRAQKLSNESLYESNCQDADDASVETRSFLSGLGGHSAISTEQNNSVVG  
DSASAFSFAFGSTNSAAATNATEEVFKGTGTTGTGTATRTSNTANNSGEENPALMSEI  
NEDVRALDDLFRSISFRQGTAAATLPQGLMLAPGAVASEKRKSRSSSRKSKKHKRGSQTN  
NNIVVNTSSTSGATEAALFVREGATAAPTVAQTGPASPSSASNSGGNLFAMGPVSN  
SSEASQALNKYRSTLDLFIQEDLDSSKLRPHQEKMNSFALRIDLQQTDDCLPSSSKQKT  
NPSETRGDLELALAIYRQVLTACKEVSNLSPSTHKDLNKQISMPLOTSSSGSSCSSKQKQ  
QHHQQGLDQMHGGGNATKNSASQSILSMCSAESSASSVFSSEFSSESSALAEETGNNY  
RQRRRQSKRERRQQLAANIASVVICMGSVYYRLGNRNEELEAYKRAKSVYSKAFGEDHVF  
VAGTRKNIGMVLAEARGQYGLAQKQFEKAMSIYVKASNMRHEQLKLEEKNLHHEVETAGTRS  
SSNDVDSQKNSYSYDASMNRDVASVISCIGNVKNRV GELNAALTKYLQALQIYKSIYERH

ERSANNGDKYSDHEHIEALRDF'TATLKVIGMVHAKRGLDAMQFFEEAMTLLTAYEEKA  
DRSTKDGDSNGCTDAGKCGKNDKSSSTANLNKNSANNMLAISETKASILTRIASIYLKKG  
ALDDAMVSYRRAYDLTVQNRGNTTNHPEIAGILHYIGGIYHKRG  
>comp10116\_c0\_seq1; 227 29 886 LEN=1043; translated  
MKTELSRSLNTFFPTIVEPMGKKTSGTARVSGGVEYKNDRMFMSILDENAGPMDGERREG  
KGIEQYSAGVKRRIYRRYNRP IYKEPGSKI PRKTCQKKDPNQFVTTTRYEPSTAMPYHST  
ILSRIFGEDHFVHNI SDSVNRNGLDPLVSKPIDRYSVKAANESITIGARQLQGMQKVR  
KSHVSNSTGTDTCGSVISVTDLDNLEAKMLRRKISERDLKLLHREIGLMVSDYVDQRVMS  
QNEERQGWGSGDCTSAGCISYLDRDGGPGMQEFLNDVKAYVYSTS  
>comp10117\_c0\_seq1; 101 2132 3229 LEN=3690; translated  
MNRQDVTTATRAIDRQLSPLEAKTKAIVAKKHEFPEKIRPSIDEALRDNLEPAAFLSSVE  
KRLTELIWANWNVRGDIDESKGLNRDRDTEAQVETALRFFPRVLF'FKHEDHVYPIWAQIA  
TREDKCNIAAFFVPLFAKLGIELGLFEKEKRGGLLSVKHSAPINVLESLSSTGQPNRAYR  
DVKHLRLADETYLDVLRHLRLVGLFRKEDIARYHLIHRNLAYGYGFFEQQFRYLMWDWPT  
SFMSCRWGGCLPIHTATCAYLYQSSGNEKKFRTIFDIGLRHF'PKEMGGFLHGLGSYDMTP  
WNRMDGGHREGLLEAVFSRHGNVNL'LLLESLVYASSEEMVHLDAVFL'LLQRILQIETS'V  
PCIEG  
>comp10117\_c0\_seq3; 101 1498 2595 LEN=3056; translated  
MNRQDVTTATRAIDRQLSPLEAKTKAIVAKKHEFPEKIRPSIDEALRDNLEPAAFLSSVE  
KRLTELIWANWNVRGDIDESKGLNRDRDTEAQVETALRFFPRVLF'FKHEDHVYPIWAQIA  
TREDKCNIAAFFVPLFAKLGIELGLFEKEKRGGLLSVKHSAPINVLESLSSTGQPNRAYR  
DVKHLRLADETYLDVLRHLRLVGLFRKEDIARYHLIHRNLAYGYGFFEQQFRYLMWDWPT  
SFMSCRWGGCLPIHTATCAYLYQSSGNEKKFRTIFDIGLRHF'PKEMGGFLHGLGSYDMTP  
WNRMDGGHREGLLEAVFSRHGNVNL'LLLESLVYASSEEMVHLDAVFL'LLQRILQIETS'V  
PCIEG  
>comp10118\_c0\_seq1; 514 140 1261 LEN=1261; translated  
MKLLSIIPVVTFSNIFEVTSHTTSTSSSTAGLRGLVSTTTSIFPPYSQQCADDAGPPFV  
DDATNYPGATFHTGT'PATAVVDDNDPAC'PAPLAGACATKSKTAAFLEGPIDCGGQWYC  
RILEQPGWPTVNL'LDLNF'GYCNTTAGFN'DPGYDQAGHCHGSDSDDTFYWVWRDHWHRQY  
NGRLRCCCGWIGQVTS'GTIVNRC'DHRLVPPDEDVNECRDANE'EGSTPYNGGCSQSDSPA  
LNEPIDEDDSMCWEVSNFGYPTSS'EDDNDNDNEDENEDENEDDNE'EDNEDEDE  
ENEDENDNEDEDEDDSDCKDDETF'LRW'RGKDGKDCDWIMKKGKFCGKTYGGKKVSKFCP  
ACDACSNDNDNDN  
>comp10118\_c0\_seq2; 477 140 1444 LEN=1444; translated  
MKLLSIIPVVTFSNIFEVTSHTTSTSSSTAGLRGLVSTTTSIFPPYSQQCADDAGPPFV  
DDATNYPGATFHTGT'PATAVVDDNDPAC'PAPLAGACATKSKTAAFLEGPIDCGGQWYC  
RILEQPGWPTVNL'LDLNF'GYCNTTAGFN'DPGYDQAGHCHGSDSDDTFYWVWRXPLAQTI  
CRLKLVLAALCCAIYKKNRTRKLRDC'CAAASKNP'IVLQNL'IHFSFFPFVLS'NAI'PHI  
QNGRLRCCCGWIGQVTS'GTIVNRC'DHRLVPPDEDVNECRDANE'EGSTPYNGGCSQSDSP  
ALNEPIDEDDSMCWEVSNFGYPTSS'EDDNDNDNEDENEDENEDDNE'EDNEDEDE  
DENEDENDNEDEDEDDSDCKDDETF'LRW'RGKDGKDCDWIMKKGKFCGKTYGGKKVSKFCP  
VACDACSNDNDNDN  
>comp10119\_c0\_seq1; 110 85 279 LEN=413; translated  
MDKKAKVNVNTLFSANL'GKGGRAASWAVAVVGVAAYTYWTNRDNGQVFTKEDQSRWNAGK  
EKK  
>comp10120\_c0\_seq1; 355 151 822 LEN=913; translated  
MGKTDTIEVPREERKESTDESKEDQENGANKMDDAFGMKASSNDSSRKSTSLPPDPGMEA  
KIKHGTNSSAIATQKSVFSTNGIGTAKISVAMKRSSKEDISPVKYRKIYSGVAHLPPKER  
NSSSGDSKPTADDGSKQNPPESTAVTEDSKNDGAVSQPPSPQHQELLNLPQSPTQPKNV  
TKNTVNHEGKDSISELWNR'YDLTASVCVASHDTDELKAVERQIW  
>comp10121\_c0\_seq1; 920 114 2732 LEN=2917; translated  
MPFIGYSLMGMILVNILLPIILLENASILVFAAKNSNPLKLSGSNIRGACVFGDFIEGT  
EAQFCKEYRLDAFEDSYDDIISDCKKEYNSTYKRKKSCISFLPDSL'PFAGYCVKRTK'GK  
LLSIPMMITEREDCAYKMLCEDFFSGSFDPLISTGNCEPFASIVLDEPKLPTSTGSSIN  
N'NYAEIAS'EDSTGCIDSLSS'TAVIDCP'SFPSMIVSFGGIKVDCSDKVPLELASIPPVVKV  
RSGVIGDPDG'FYSL'LLVDTT'IIANSYNASNTHPILHYGAVNIPGHSLEDGFSLFNTIGTE  
ADVFS'PYRGP'NPPRSDP'WAPPDVDRIPFVYEFMIQKQDKGQLVGADVQKRLETNTNFDY  
ESFFGSGSNASGLEDLLISSTTFW'SWGCVVNKVGNLKVKKDILMESFEDPKFEWTEVGRK  
SGSKMEIVD'GVMVLTANGSSYEVYDDVKFDSNMTSIDDDEILVSDDKSSSISLMPSVIST  
VSARGDFPDL'SKCDGLKM'VVKSETPMGDESMNSVYSIGLAFQQRHGEP'SFAFTYGASLAW

PSSLTVSSERSIEKTKFSELIIPFKEFTLDWDWNTGKELSSCSENATNCLDQTTLQNMEN  
LTITTSLSNATDGYSELQIHSIYAIGCESTLGNDDAQNDGDRTC SNWNSSFPPLMDEIPI  
ESFLDPTYDWMVTNDPIMGGESYSSMSLEDGAAVFSGEVKDVPFLGVPFGFIKMEANGGRY  
PDVSCCDSIKLTVMTDGDYDGYFYGFGSTFAYKAELNLSLVGEYVDVIIPFDAFSVEWYE  
GTSITKIRVTCADDPDFCQQLKNMESLSIWGEGVEGSINLKT KSI SAVGCSPADV KGLD  
DTGLSSVSSRVKQILPTTVLAMTCLLFPLLF

>comp10121\_c0\_seq2; 849 114 2240 LEN=3034; translated  
MPFIGYSLMGMILVNILLPIILLENASILVFAAKNSNPLKLSGSNIRGACVFGDFIEGT  
EAQFCKEYRLDAFEDWSYYDII SDCKKEYNSTYKRKKSCISFLPDSL PFAGYCVKRTK GK  
LLSIPMMITEREDCAYKMLCEDFFSGSFDPLISTGNCEPFASIVLDEPKLPTSTGSSIN  
NNYAEIASDSTGCIDSLSTAVIDCPSFSPMIVSFGGIKVDCSDKVPLELASIPPVVKV  
RSGVIGDPDGFYSLLLVDTTTIANSYNASNTHPILHYGAVNIPGHSLEDGFSLFNTIGTE  
ADVFSYRGPNP RPSPDPWAPPDVDRIPFVYEFMIQKQDKGQLVGADVQKRLETNTNFDY  
ESFFGSGSNASGLEDLLISSTTFWWSGVCVVKVGNLKVKKDILMESFEDPKFEWTEVGRK  
SGSKMEIVDGMVLTANGSSYEVYDDVKFDSNMTSIDDDEILVSDDKSSSISLMP SVIST  
VSARGDFPDL SKCDGLKMVVKSETPMGDESMSNVYSIGLAFQQRHGEP SFAFTYGASLAW  
PSSLTVSSERSIEKTKFSELIIPFKEFTLDWDWNTGKELSSCSENATNCLDQTTLQNMEN  
LTITTSLSNATDGYSELQIHSIYAIGCESTLGNDDAQNDGDRTC SNWNSSFPPLMDEIPI  
ESFLDPTYDWMVTNDPIMGGESYSSMSLEDGAAVFSGEVKDVPFLGGK

>comp10122\_c0\_seq1; 875 1 2631 LEN=2655; translated  
XASSIGRI IRRNSISKYFYWLNQLSSDDSKERAWANEEDSSSDDEEDAFSALS KKANM KK  
KAKQNNSSNNTASPPNNGTKATTTIRNVNSTLVTVDGTGKFNGQGSSGVLSVSN SQQQ  
QKQRPV KLSVTS SSMKRHHKPSDTRKAKMDALI QELEAEKDQIPKSKRFVPEKKGSFVDP  
GEEHLTTNLFVGNLAPSIAEEDLSNLF SQFGAVFSDGAE TRHLF MIDCALCFIPRIGDVL  
YXKLIWTC TNNIETLGELYSVKIMWPRTLEEKNRGRNTGFVCFMNRDDAE EAMEAYDDTD  
PFNNGRLLTLRWGKSVKQLQRNDKDNERSAEPRRAQNRDEDKKMARPLMSVSTDAVAAK  
MPSNDRSAPMSNNNDKLEAS MAGDAHSFGKHHTTG MKDMLPKIPPYDPDIHAARAIRVEC  
PKEQSRFHFI STTASYVAKDPELEQRLREREKENTLFCFLADFDG DNNDEGQKEKIF YR  
WRVYSYCHGDTYSIWRTEPFLMFYGGRYWI PPPLDKDAVKREKANA AAEKEYRQRQK EKR  
ANRELM TGRQFERRKRRGEFGANHSKLNPEELGRFDRLVRKQLSISRKTICEAMSF CFDN  
CMAAREVSGLLKEALLDES DHVTNDTRIARLYLLSDILFNSQQPGVRNAFMYRTTIEAMA  
IDVFKSLGIIVRTKERSSGRISVNKL RKA VSAVLGAWTEWGVYNAAFVDDLASYFEGREV  
KREAEDAKKDLEQDGAKLEE QKVEDLEDAVIHAPSGDWKTVSDEIESVKDKKRKR SKLA  
ITLAATTL SAQTDAARTAENQ GSEGT SNGNKSPDIIGGEERDGEELDGAELDGV DLDGEE  
LDGEDLDGEELDGEDLDGDILDGDDLDGEEFDGDGIS

>comp10122\_c0\_seq2; 939 1 2498 LEN=2522; translated  
XASSIGRI IRRNSISKYFYWLNQLSSDDSKERAWANEEDSSSDDEEDAFSALS KKANM KK  
KAKQNNSSNNTASPPNNGTKATTTIRNVNSTLVTVDGTGKFNGQGSSGVLSVSN SQQQ  
QKQRPV KLSVTS SSMKRHHKPSDTRKAKMDALI QELEAEKDQIPKSKRFVPEKKGSFVDP  
GEEHLTTNLFVGNLAPSIAEEDLSNLF SQFGELYSVKIMWPRTLEEKNRGRNTGFVCFMN  
RDDAE EAMEAYDDTD PFNNGRLLTLRWGKSVKQLQRNDKDNERSAEPRRAQNRDEDKK  
ARPLMSVSTDAVAAKMP SNDRSAPMSNNNDKLEAS MAGDAHSFGKHHTTG MKDMLPKIPP  
YDPDIHAARAIRVECPKEQSRFHFI STTASYVAKDPELEQRLREREKENTLFCFLADFDG  
DNNDEGQKEKIF YRWRVYSYCHGDTYSIWRTEPFLMFYGGRYWI PPPLDKDAVKREKAN  
AAEKEYRQRQK EKRANRELM TGRQFERRKRRGEFGANHSKLNPEELGRFDRLVRKQLSISRKTICEAMSF CFDN  
CMAAREVSGLLKEALLDES DHVTNDTRIARLYLLSDILFNSQQPGVRNAFMYRTTIEAMA  
IDVFKSLGIIVRTKERSSGRISVNKL RKA VSAVLGAWTEWGVYNAAFVDDLASYFEGREV  
KREAEDAKKDLEQDGAKLEE QKVEDLEDAVIHAPSGDWKTVSDEIESVKDKKRKR SKLA  
ITLAATTL SAQTDAARTAENQ GSEGT SNGNKSPDIIGGEERDGEELDGAELDGV DLDGEE  
LDGAELDGV DLDGEELDGEDLDGEDLDGDILDGDDLDGEEFDGDGIS

>comp10122\_c0\_seq3; 890 1 2613 LEN=2637; translated  
XASSIGRI IRRNSISKYFYWLNQLSSDDSKERAWANEEDSSSDDEEDAFSALS KKANM KK  
KAKQNNSSNNTASPPNNGTKATTTIRNVNSTLVTVDGTGKFNGQGSSGVLSVSN SQQQ  
QKQRPV KLSVTS SSMKRHHKPSDTRKAKMDALI QELEAEKDQIPKSKRFVPEKKGSFVDP  
GEEHLTTNLFVGNLAPSIAEEDLSNLF SQFGELYSVKIMWPRTLEEKNRGRNTGFVCFMN  
RDDAE EAMEAYDDTD PFNNGRLLTLRWGKSVKQLQRNDKDNERSAEPRRAQNRDEDKK  
ARPLMSVSTDAVAAKMP SNDRSAPMSNNNDKLEAS MAGDAHSFGKHHTTG MKDMLPKIPP  
YDPDIHAARAIRVECPKEQSRFHFI STTASYVAKDPELEQRLREREKENTLFCFLADFDG  
DNNDEGQKEKIF YRWRVYSYCHGDTYSIWRTEPV RQISRRSLLVSNF ISSPSDFTGVLT  
FYLCFYFMLYYSVSHVLWGEILDPTAIDKDAVKREKANA AAEKEYRQRQK EKRANRELM T

GRQFERRKRRGEFGANHSKLNPEELGRFDRLVVRKQLSISRKTICEAMSFCDNCMAAREV  
SGLLKEALLDESDHVTNDTRIARLYLLSDILFNSQQPGVRNAFMYRTTIEAMAIDVFKSL  
GIIVRTKERSSGRISVVKLRKAVSAVLGAWTEWGVYNAAFVDDLASYFEGREVKREAEDA  
KKDLEQDGAKLEEQKVEDLEDAVIHAPSGDWKTVSDEIESVKDKKRKRKSLAITLAATT  
LSAQTDARTAENQSGSEGTSSNGNKSPTIIGGEERDGEELDGAELDGVLDLGEELDGEDLD  
GEELDGEDLDGDILDGDDLDGEEFDGDGIS

>comp10122\_c0\_seq4; 826 1 2746 LEN=2770; translated  
XASSIGRIIRRNSISKYFYWLNQLSSDDSKERAWANEEDSSSDDEEDAFSALSKKANMKK  
KAKQNNSSNNTASPPNNGTKATTTIRNVNSTLVTVDTGKFNQGGSSGVLSVSNSSQQQQ  
QKQRPVPLSVTSSMKRHHKPSDTRKAKMDALIQELEAEKDQIPKSKRFVPEKKGSFVDP  
GEEHLTTNLFVGNLAPSAEEDLSNLFSGFVAVSDGAETRHLFMIDCALCFIPRIGDVL  
YXKLIWCTNNIETLGELYSVKIMWPRTLEEKNRGRNTGFVCFMNRDDAEEMEAYDDTD  
PFNNGRLLTLRWGKSVKQLQRNDKDNERSAEPRRAQNRDEDKMMARPLMSVSTDAVAAK  
MPSNDRSAPMSNNNDKLEASMAAGDAHSFGKHHTTGMDMLPKIPPYDPDIHAARAIIVEC  
PKEQSRFHFI STTASYVAKDPELEQRLREREKENTLFCFLADFDGGDNNDEGQKEKIFR  
WRVYSYCHGDTYSIWRTEPVRQISRRSLLVSNFISSPSDFTGVLTFYLCFYFMYLYSVSH  
VLWGEILDPTAIDKDAVKREKANAAEKEYRQRQKEKCRANRELMTGRQFERRKRRGEFGA  
NHSKLNPEELGRFDRLVVRKQLSISRKTICEAMSFCDNCMAAREVSGLLKEALLDESDH  
TNDTRIARLYLLSDILFNSQQPGVRNAFMYRTTIEAMAIDVFKSLGIIVRTKERSSGRIS  
VVKLRKAVSAVLGAWTEWGVYNAAFVDDLASYFEGREVKREAEDAKKDLEQDGAKLEEQK  
VEDLEDAVIHAPSGDWKTVSDEIESVKDKKRKRKSLAITLAATTLAQTDARTAENQ  
SGTSSNGNKSPTIIGGEERDGEELDGAELDGVLDLGEELDGEDLDGEELDGEDLDGDIL  
DGDLDGEEFDGDGIS

>comp10123\_c0\_seq1; 901 753 3548 LEN=4109; translated  
METPFLSALPPRLPSPENDLAGMLGSWIDNCPSSLGLSSSHCRGDLDAIGALRMGIATR  
ELSDSKDDAFENGPSDVTITIDMLHEYYHYLLECEQHGMVLDSSGGRGGSSPSKFLALE  
SGVVTMGPFKIQTSTSLERANI IWNLAALAEARQASTQTLTKLWAKASESLQNAARW  
LVHALALLQEHAKSQOQYQNPQHADMSPFTIRFWQALLLAQAQHC IYESVTGAHIRRPGH  
VLASKLAVATAALYNDVELIFEKDTQLPAPVLLPWSDLAQRWAYFARAWCVQMRCKAEYH  
KSQEDRNKMSYGHELARLQVAHQHASICQALCDEPSISSSTTLAKLSVVVDDTMELLQNR  
IDMIRRENHEQHSQAIPGTHELVEIRGRNVVNAEPLSNLLRQKVTRPIFQENVNIPFDS  
GSVPSIDDDNVKMSATKSKNLSPTSSASITSPFAEMKKPFVQIVAPRVQTYVEVFQSS  
MNEIISQIAKESEKTELARQALNEKNLPHSLTAYQQEISGGGLPNDLWQRVYVIQKEDR  
VVKLKLDLWVLKEEAESARKTYENIKSQDLDFHEETDRKFFREENSEFEGPDPKDIQRIFR  
RLETFGTYLSTAQEGESTLFRLEQLDIEPKYKLLQFSKSQLDHLPAARENTVSSMIFD  
TRKLSALWTELSALFQERDRLTMFRNEFESYDVAALAEARVDSKSGTDQDYLEATKSAQ  
QPFDFGLRYKLQNNFKRQOGLLNSILSLNEAFMNARERTTNSQSADLCIVMIEDAIEEINQ  
LSTHLKEGKNFYSVVPIPNMDKLRKREVGDSLTKLAVDRFDYEDKVRASQEEKDALMAK  
SSQTAAIQVPTAATSSAACRSPSNASTSELQPANQOSVAASASSARAMRNVDDGKVAKL  
VAMGFDAETVVAALAEKHDDNLDNAVNELLS

>comp10123\_c0\_seq2; 901 853 3648 LEN=4209; translated  
METPFLSALPPRLPSPENDLAGMLGSWIDNCPSSLGLSSSHCRGDLDAIGALRMGIATR  
ELSDSKDDAFENGPSDVTITIDMLHEYYHYLLECEQHGMVLDSSGGRGGSSPSKFLALE  
SGVVTMGPFKIQTSTSLERANI IWNLAALAEARQASTQTLTKLWAKASESLQNAARW  
LVHALALLQEHAKSQOQYQNPQHADMSPFTIRFWQALLLAQAQHC IYESVTGAHIRRPGH  
VLASKLAVATAALYNDVELIFEKDTQLPAPVLLPWSDLAQRWAYFARAWCVQMRCKAEYH  
KSQEDRNKMSYGHELARLQVAHQHASICQALCDEPSISSSTTLAKLSVVVDDTMELLQNR  
IDMIRRENHEQHSQAIPGTHELVEIRGRNVVNAEPLSNLLRQKVTRPIFQENVNIPFDS  
GSVPSIDDDNVKMSATKSKNLSPTSSASITSPFAEMKKPFVQIVAPRVQTYVEVFQSS  
MNEIISQIAKESEKTELARQALNEKNLPHSLTAYQQEISGGGLPNDLWQRVYVIQKEDR  
VVKLKLDLWVLKEEAESARKTYENIKSQDLDFHEETDRKFFREENSEFEGPDPKDIQRIFR  
RLETFGTYLSTAQEGESTLFRLEQLDIEPKYKLLQFSKSQLDHLPAARENTVSSMIFD  
TRKLSALWTELSALFQERDRLTMFRNEFESYDVAALAEARVDSKSGTDQDYLEATKSAQ  
QPFDFGLRYKLQNNFKRQOGLLNSILSLNEAFMNARERTTNSQSADLCIVMIEDAIEEINQ  
LSTHLKEGKNFYSVVPIPNMDKLRKREVGDSLTKLAVDRFDYEDKVRASQEEKDALMAK  
SSQTAAIQVPTAATSSAACRSPSNASTSELQPANQOSVAASASSARAMRNVDDGKVAKL  
VAMGFDAETVVAALAEKHDDNLDNAVNELLS

>comp10124\_c0\_seq1; 497 456 2051 LEN=2284; translated  
MVPDGDIDPYHILDNIRGIVANNGNNDGTEKFLNLTLERLNVTANNLTLPIALMGIDSSRY  
PSLSNARKACRQKIALYSTTTTKPSPSSGQFRKGLVGDVHPQDFIARRELYKNIQIN

VSSSPLASTSYNTLGDGFVKSKFQNLPIAYEDDYMAIIVKPAGLLIHPQGKNGSWGRKNN  
VLNALPYFLRRPSAIGSTKANNEEEEEEDRTILDKVPVHRLDFATSGLLVTAKTGASRL  
LSQEFYRKAQKTYTAMVYGI PVDNGYCDNNDSPLELPSFFGPKDQDASAI GNNTTGAIK  
DSIVDNGNTLDDDEGSMEDDDCNWEGWNLGNCLLDAKLATTRWRLGSHNCSVPIQYHHDN  
ETVTTGTASIPISIVEMKPKTGRYHQLRRTMSWLYKTPIVGDP IYGTNFVEKNFLPQNAQ  
LIEQKQMRDYSASLMLCSNEVDVAHPYFNNTAAGRIEWETMDRTNKFRETNSGNKKTCKPP  
TSSSMTSSSLYEATDGVVVAAS TELPKKFTKFINMMERKKKQAAAKGNEE  
>comp10125\_c0\_seq4; 324 95 757 LEN=786; translated  
MTATKITANNVLLFVFNIIIGYSRVASTMAALFLMIAAPEYWF LAINLYLASFVGD LFDGM  
VARHFGQTSSFGGLDMVTDRCSTLGLL FVLGIDYEDVNLRLVFLSLCLLDISSHWCQMY  
STSSSGKHHKSEGGNEGRNFLVRWFYKYFFFGYLCVGA EFTYVLAYV VQFTNDHWIHP I  
LLKAMWAVVPGFCFLKQLVNVMQ L TSACYAVAKQDAENK NK  
>comp10126\_c0\_seq1; 415 361 2202 LEN=3394; translated  
MIAKSLSILVFVFLSESMGFV VADVVS I AMENPIAHQQRCTSR TFSRTEGGAMIVAPLFD  
DKNATDDDET DGVGDWDALY PFCPDGYYCDLSEETDKDGAS FVLG LCRPCSGSFDACEPD  
PALTEGTGSEASTEYFMGQAVAAECKAQC GTETNTCSFTKPCS NGLFCNFENGI EGGRC E  
GCPVHMYFCENENREN LGQNLK NLTDDGVFACQSSCSVNCNPEGALRITEQAPETS DREE  
DTKAIDDVVILFGSPQMTATGP IVNCGLGLEPCEGAAGAVCF IER GKAPFSNKT INCYEG  
GGVAAVIYNVEAKCDNIDGTFNGRET F IPTVTLRHIDGKSILKQVAAMPEGTHLLATVEV  
GGIDRSPGDCWLGCTEGNECEGTDLECNFN DNI EYGDCRAT EFRVDCNQMF TDGLTGHLPC  
TSET EFCDFSKGRRGFCAQCPETDADCF FLDLNGQGATECVAKCFTSPVEQTE LRSAPCK  
FCPRGQFEIGDVG DGYFSTEK DVEVETPCQFCAAKSEATCADVENWDMEY P YRTIEMFPD  
VYVECWA VAEFYRRMNI EADTPECASGRSWNYICGCSDSLGYAGAKTKKKQLM LEWFPRV  
GAILSILVRAPIL  
>comp10126\_c0\_seq2; 415 266 2107 LEN=3299; translated  
MIAKSLSILVFVFLSESMGFV VADVVS I AMENPIAHQQRCTSR TFSRTEGGAMIVAPLFD  
DKNATDDDET DGVGDWDALY PFCPDGYYCDLSEETDKDGAS FVLG LCRPCSGSFDACEPD  
PALTEGTGSEASTEYFMGQAVAAECKAQC GTETNTCSFTKPCS NGLFCNFENGI EGGRC E  
GCPVHMYFCENENREN LGQNLK NLTDDGVFACQSSCSVNCNPEGALRITEQAPETS DREE  
DTKAIDDVVILFGSPQMTATGP IVNCGLGLEPCEGAAGAVCF IER GKAPFSNKT INCYEG  
GGVAAVIYNVEAKCDNIDGTFNGRET F IPTVTLRHIDGKSILKQVAAMPEGTHLLATVEV  
GGIDRSPGDCWLGCTEGNECEGTDLECNFN DNI EYGDCRAT EFRVDCNQMF TDGLTGHLPC  
TSET EFCDFSKGRRGFCAQCPETDADCF FLDLNGQGATECVAKCFTSPVEQTE LRSAPCK  
FCPRGQFEIGDVG DGYFSTEK DVEVETPCQFCAAKSEATCADVENWDMEY P YRTIEMFPD  
VYVECWA VAEFYRRMNI EADTPECASGRSWNYICGCSDSLGYAGAKTKKKQLM LEWFPRV  
GAILSILVRAPIL  
>comp10126\_c0\_seq3; 626 266 2800 LEN=3181; translated  
MIAKSLSILVFVFLSESMGFV VADVVS I AMENPIAHQQRCTSR TFSRTEGGAMIVAPLFD  
DKNATDDDET DGVGDWDALY PFCPDGYYCDLSEETDKDGAS FVLG LCRPCSGSFDACEPD  
PALTEGTGSEASTEYFMGQAVAAECKAQC GTETNTCSFTKPCS NGLFCNFENGI EGGRC E  
GCPVHMYFCENENREN LGQNLK NLTDDGVFACQSSCSVNCNPEGALRITEQAPETS DREE  
DTKAIDDVVILFGSPQMTATGP IVNCGLGLEPCEGAAGAVCF IER GKAPFSNKT INCYEG  
GGVAAVIYNVEAKCDNIDGTFNGRET F IPTVTLRHIDGKSILKQVAAMPEGTHLLATVEV  
GGIDRSPGDCWLGCTEGNECEGTDLECNFN DNI EYGDCRAT EFRVDCNQMF TDGLTGHLPC  
TSET EFCDFSKGRRGFCAQCPETDADCF FLDLNGQGATECVAKCFTSPVEQTE LRSAPCK  
FCPRGQFEIGDVG DGYFSTEK DVEVETPCQFCAAKSEATCADVENWDMEY P YRTIEMFPD  
VYVECWA VAEFYRRMNI EADTPECASGRSWNYICGCSDSLGYAGAKTKKKQLM LEWFPRV  
GAILSILGSSFMIIGVLRDKQKRKR VIGELIIFLCCFDIIGS IAYAF T T LPTPKEDYILH  
SQNEASCI AQFFIQLGTISLYMNVSI AFYLLIIQYSWRENRLRQSWAYSMLFVVPIL  
VGAIFAFAGIPYDNTVLWCNNSRSY WSEIPVMVAIAIATVIMINLCWFVYKSERASRRF  
RRHSENERESLSRAFFFQSMVYLGAFYLTWPAYLSLQLMIGYKAFSSYGQFLFACTALT  
LQGFW  
>comp10126\_c0\_seq4; 626 361 2895 LEN=3276; translated  
MIAKSLSILVFVFLSESMGFV VADVVS I AMENPIAHQQRCTSR TFSRTEGGAMIVAPLFD  
DKNATDDDET DGVGDWDALY PFCPDGYYCDLSEETDKDGAS FVLG LCRPCSGSFDACEPD  
PALTEGTGSEASTEYFMGQAVAAECKAQC GTETNTCSFTKPCS NGLFCNFENGI EGGRC E  
GCPVHMYFCENENREN LGQNLK NLTDDGVFACQSSCSVNCNPEGALRITEQAPETS DREE  
DTKAIDDVVILFGSPQMTATGP IVNCGLGLEPCEGAAGAVCF IER GKAPFSNKT INCYEG  
GGVAAVIYNVEAKCDNIDGTFNGRET F IPTVTLRHIDGKSILKQVAAMPEGTHLLATVEV  
GGIDRSPGDCWLGCTEGNECEGTDLECNFN DNI EYGDCRAT EFRVDCNQMF TDGLTGHLPC

TSETFCDFSKGRRGFCAQCPETDADCFLLDLNGQGATECVAKCFTSPVEQTELRSA  
PCFCPRGQFEIGDVGDFYFSTEKDVETPCQFCAAKSEATCADVENWDMYPTIEMFPD  
VYVECWAVAEFYRRMNI EADTP ECASGRSWNYICGCSDSLGYAGAKTKKKQLMLEW  
FPRV GAILSILGSSFMIIGVLRDKQKRKRVIGELIIFLCCFDIIGSIAYFTTLPTPK  
EDYILH SQGNEASCIAQGGFIQLGTISLYMNVSI AFYLLIIQYSWRENRLRQSWAY  
SMLFVVPIL VGAI FAFAGIPYYDNTVLWCNNSRSYWSEIPVMVAIAIATVIMINL  
CWFVYKSERASRRF RRHSENERESLSRAFFFQSMVYLGAFYLTWPAYLSLQLMIGYK  
AFSSYGF LFACTALT LQGFW

>comp10127\_c0\_seq1; 287 1 1197 LEN=1965; translated  
HTESILSQQERKMDVTVRQETHTSPPRQSILKTNSTPTSDRTLTPWKSFILLLLAME  
VHNYGRMSGEISMMDMCATLSTRYASEPTTALMKSSMTSSPTPTPENKNTNDADY  
SKAH EQSLGFFKNIPSSSEWKLLEKVSAMSPNFDDNMFKTSLSRRKNKIYGYFWQHHY  
EPDFVC QHERRVKGKRGDGGKWI CDPHRIAQKVEAGGRCLISVGSFNKYKFEQGVQK  
DVHEKCEIH TFDPGDYESGAKKAGGDITYHRVGVSTDKVGPKGIYKSLPTLVSELGH  
QNSEIDVFKIDC EGCEFESASNWF EASAKYNVTLRQILVELHGRKEARVFSFFDLMYK  
HGYVIFHKEQNTIA MNMNGTAIEYAFKLDPAFVNAIPRANAYETFRMTTGE

>comp10129\_c0\_seq1; 676 250 3183 LEN=3341; translated  
MLIVRTRSSRLFLVVLHLVVCVSTHLRARNERNRISLNSIFWEEAAASIHSQSQR  
LHTITS IISVAESTSRNELIRDIDDLPEYWLQDAQDQKCFGPMGLFSECGDANLWR  
VIPKSKRHVR RRQWIKWAIEDDDVDQESFQGYALQVFRDISEFYDPSKTNLSGGTAR  
PFPSPSYSDKEF ATEQCMTRRRKDNKLVVPCSEDRAWYWKLN EYGILHFDKPSR  
GFGVGGSRRTSSASRRL LNKRQNL ELCVWRKNLSDTILLSCNGDQPASVNHDST  
SSVDSNEKARLAHVQLVHHDYSR DGNIAQSSPFALDKKTFKSKIEIRVQNKGN  
KEVQKATEQTGETPSSPNGLNLP SQVDIA HSHASVSSNHSEPR LSTLHITSILPH  
QTPEKVSKELEPRFLGNTNPIL IATGRNFTAATSK GSFLKSKERKKPNLGLGVN  
KNAPQSI VHTRDSIPSSLSEKPIVRKIQTNPYIAASDNERW TDPQTGLVFR  
TDL CQYLGHDRKDVGRHTLTGVGQYTKTMLNIKVYGVGFYVSKRDILADS  
SVEPYADMSLEGLRQSEDFFHILRSMKGFTNGSGAAGSFDR TIFLKNMQLSTDT  
MRSSL DADWKMLTPESKELLIGSSMKPRPADPIFLEIAKSPDNPNRCTCAQIAPPE  
YNADPSCCA RGT ELVFTWRKNGDLEVR LNVFMDSFPRPDIAEGIFFEYLR L  
DNPM SYDFLDRVMDGFP SLLAPLSQVKGITTPVTAKQTSTSNPAASGVNPF  
LKLIGGFGGAI SNQAATFAD FVQSGT QELAGSAMDKARSVGSTARNLGE  
EVERRNLIGKHMSAF TDQALSSLVPSNQKSLSTQYP GWITDSELGNLSHDL  
FEQDTSITSEDGTSYTRTISR LIGFEDDSMSASNATQKLF FGLVH LYLL  
LLLIASFPAQWTTTRKLLVVRKTETS AHVAVPTDSENSDSDSDSGASSIET  
LHAGL MTTGEENHIKNGLSFVL

>comp10129\_c0\_seq2; 307 250 1929 LEN=1929; translated  
MLIVRTRSSRLFLVVLHLVVCVSTHLRARNERNRISLNSIFWEEAAASIHSQSQR  
LHTITS IISVAESTSRNELIRDIDDLPEYWLQDAQDQKCFGPMGLFSECGDANLWR  
VIPKSKRHVR RRQWIKWAIEDDDVDQESFQGYALQVFRDISEFYDPSKTNLSGGTAR  
PFPSPSYSDKEF ATEQCMTRRRKDNKLVVPCSEDRAWYWKLN EYGILHFDKPSR  
GFGVGGSRRTSSASRRL LNKRQNL ELCVWRKNLSDTILLSCNGDQPASVNHDST  
SSVDSNEKARLAHVQLVHHDYSR DGNIAQSSPFALDKKTFKSKIEIRVQNKGN  
KEVQKATEQTGETPSSPNGLNLP SQVDIA HSHASVSSNHSEPR LSTLHITSILPH  
QTPEKVSKELEPRFLGNTNPIL IATGRNFTAATSK GSFLKSKERKKPNLGLGVN  
KNAPQSI VHTRDSIPSSLSEKPIVRKIQTNPYIAASDNERW TDPQTGLVFR  
TDL CQYLGHDRKDVGRHTLTGVGQYTKTMLNIKVSADRQHRVGIYLILPS  
TYLTRNLNKL LFFFSKQLW

>comp10130\_c0\_seq1; 210 226 738 LEN=1051; translated  
MIQRNDLATAKLVKTVEDGGFEPTRKPVTLCLGSSSMIAKNATKRQSALKR  
SRSSLPGSF DMGDFLKASVQVEETIAFP AVEWPSLDDIDGDCSCDDNSYSTTQY  
PSLLTRSRDDDED EDCDDFFGYESSRRKRQCRGLTRCNRSNLSSLWKMSATSERH  
GSAGLS

>comp10131\_c0\_seq1; 168 1 643 LEN=1207; translated  
DDDDDDNIYKVFDPDADAHVLMVAAINADVDLVLPAFSVCAIRTVSSIQGAR  
VASAVNEI QSTQPVSTTVVYCCELSLFPGPNKGFSSLLCFSNLNVGFGDCDQ  
TNAIDWSCYGEDCFV DAAHSSDENVTSPSFCHCKYGYFGEHCQHFMTTICLI  
DEVGTDYNAIHEFCLRSGEFCPLP IGHMFPEPFGNLFCANGGTCGDTDNFDL  
FMLRV

>comp10131\_c0\_seq2; 199 1 696 LEN=1001; translated  
DDDDDDNIYKVFDPDADCTCLNGGCDQRCGSGATCIFGLCNQNGLINPGCPG  
GKCSQRN TVNATCFGDCDQ TNAIDWSCYGEDCFV DAAHSSDENVTSPSFCHCK  
YGYFGEHCQHFMTT ICLIDEVGTDYNAIHEFCLRSGEFCPLPIGHMFPEPFG  
NLFCANGGTCGDTDNFDL FMLRV

>comp10131\_c0\_seq3; 211 1 546 LEN=1110; translated

DDDDDDNIYKVFDPDADCTCLNGGCDQRGCGSGATCIFGLCNQNGLINPGCPGGKCSQRN  
TVNATCFGGDCDQTNADWSCYGEDCFVDAAHSSDENVTSPFCHCKYGYFGEHCQHFMTT  
ICLIDVGTDYNAIHEFCLRSGEFCPLPIGHMFPEPFGNLF CANGGT CGDTDNFDLFLMLR  
V

>comp10131\_c0\_seq4; 156 1 793 LEN=1098; translated  
DDDDDDNIYKVFDPDADAHVLMVAAINADVDLVLPAFSVCAIRTVSSIQGARVASAVNEI  
QSTQPVSTTVVYCCLESLLFGNPKGFSSLLCFSNLNVGFGDCDQTNADWSCYGEDCFV  
DAAHSSDENVTSPFCHCKYGYFGEHCQHFMTTICLIDVGTDYNAIHEFCLRSGEFCPLP  
IGHMFPEPFGNLF CANGGT CGDTDNFDLFLMLRVTSGLFRCECQENFWGVHCEIPITEMPS  
SVPTIEPSVSPTPKSSAQLPWTNW

>comp10131\_c1\_seq1; 441 549 1646 LEN=1646; translated  
MPSLIFRKDVDRRQSSHLLLNRRLIYRSSFKKNAVLSPFWSNLCLFLLFGNRFTSAFAQ  
VGAGTLDPKIDDCSLCSPGGKCVDPKVSIFDVPDQYRRDKTSFHCDCEGYSGAFCDQE  
AGMNDDFHYDYSEGSTRDEANNDTDNDNGIDDLILLATEGCPFGCQNEGKCTSVFGGVM  
HICLCPEPFWGSQCEFNLSLDEPCDLNCTISISNESFFSDGGFCVDSQPDLDDGDHTCVHC  
EEI AVENEPVCENEINCVNGGACMVKYLYTDASESDETMVHRPLKCTASTNMDGNYIWEE  
LPPYELYCECPIGYQGEKCEEIDVCGGCQNGGYCISENTPGDFNITAI FSDLFKDDDDDD  
DDDDDD

>comp10132\_c0\_seq1; 482 196 1350 LEN=1689; translated  
MSEIKKEKGEKPTNIESTASPGDAELGKARPPMDRKASVKHAYLTKLFGSDYNLQEVY  
YVLAACVIALNQGFVNGVCMGSLLVTVPPDGRNPERQMIAGFAGAYTNLAHAMLAGDGH  
KYTYNLCMIASYMGGSFIAAMINPHAKPYVIEPRYGPTFIIGGCFLLAASLLAGFEAPSR  
FVFFLATASGGVANGIASIYSANLIRCTLTGATTDVAIVLAQMIHRNNGVAKGVSLSLI  
IFFFWVGGIISFWAVRALTENTLFINAALFFSIGLILIVYLKELGVSVDYDAIFGTWKWK  
NVLQKLHTEDEGELTPDKMMAIFDRIDQGGDNGEIDGDELRLDGLRLAKVKMTDYEIKTLF  
RAADDDGDGVDRQEWADLIKKIL

>comp10133\_c0\_seq1; 462 328 1296 LEN=2112; translated  
MKLTLSTAFFLASLGSARAFAPPKPATTTTVALESSRYDYDDVGIRSSSGARELRRTSAP  
LARAPMQYPESGAMVRSRRGGPSRGYRDMQTENIQGGALKTWSFPDPNVDSVQVFMKTE  
GTPLTANVELWHGPDSTPHKMAVYLEDGDFRPFSAVIATPRFNANSVSI RNTQTLEYP  
AAVEPDYESLDEITRNIGEDVPKIMQGGAIHTVFPFPPSVASVAVLLRTDGRPLNARIELL  
QGPNNKQVVEVYTEDGIEHPFFAVIETPGIGNVIRIVNTGTVEFPITAVVEPYTVERGG  
MYRDARRGRVGRYGDYDGDYSY

>comp10133\_c0\_seq4; 462 328 1296 LEN=2097; translated  
MKLTLSTAFFLASLGSARAFAPPKPATTTTVALESSRYDYDDVGIRSSSGARELRRTSAP  
LARAPMQYPESGAMVRSRRGGPSRGYRDMQTENIQGGALKTWSFPDPNVDSVQVFMKTE  
GTPLTANVELWHGPDSTPHKMAVYLEDGDFRPFSAVIATPRFNANSVSI RNTQTLEYP  
AAVEPDYESLDEITRNIGEDVPKIMQGGAIHTVFPFPPSVASVAVLLRTDGRPLNARIELL  
QGPNNKQVVEVYTEDGIEHPFFAVIETPGIGNVIRIVNTGTVEFPITAVVEPYTVERGG  
MYRDARRGRVGRYGDYDGDYSY

>comp10134\_c0\_seq1; 592 218 1976 LEN=2054; translated  
MGDWLTIDNDGNGASNGNGFELSNASLPVPHPDHSQYNMDGLDSNPNQSLGPPKGGCFGT  
RRSKIYLAVALVLTGGAVGAYLTVAPQSSSVEEAESSSTSTSTSNVAGSAGVGHFAG  
REKLDKDSVGANHIPSPTPE SMQYASVPTASPGPTASNFREIAGVIDEVARDDGKFEKDP  
NSYQSRKQWVLTQNLVDDSSMTMEQQAIQLYALACIYYATFSVRSEWTDVHYGLDLA  
LPGWYSSGGWLGSAKDVCTNWHGLTCDDQGRIFKIQLDTNGLTGAFPPEVALLHETLNTI  
DLYNMMVHNVDGEGNSFFGELTNLEYLYIGTTNFEYKGIPTALGKLTALKELDVSYNLYF  
GELNGATFENLSNLRYLAMDGNAYNSSLPIEITQLSNLEYLYAGFSFLQDNLEFVSSLPK  
IRELWVDDNPGLTGTIPPSIADAGSLASF SASNCELTGSIPTMGSMANMVQLWLNDNNL  
TGQIPSEFGNIVTLQILNLQGNELVGDVDPVFAAGDDPSGVSKNWELIATGQSLATKIAA  
HAAVTSVRVADQRKAAPDGMLTGQNGTALFYNFLMLYGLLINDQNW

>comp10135\_c0\_seq1; 1097 1 3591 LEN=4720; translated  
XNGNGTGSVPSMLSSKTHPEQEAQRETSGLVSLLDPPDATDYAPADCFTPGVSI LPKSN  
VNAIANANRSNSNSNADERRKNRSKNNRTNGNWRVAEMTSRTAGRDTDRASTSRSSNTNT  
NTNQVLNKP SKSGATRKQETAEQKQOREQQERVVAANTMAARELPPPPQQRPNDAANA  
NANANANADANSVDVADANANANADTSYHNNYSHLLSAYEFEHDPSIPPLPPPVVELV  
QSPTDERY CSTTGNNSPNTSYESDIELGRNEDDQGVQKTKTPRGTDPSADPSTSKKKK  
TLLSVFSPTYFRPNDDNDADADADK DENKEGNTPETDTNLSPSNTFEEGSIARGRKLFS  
PEEPGATRSNNNAHRSSDRSFDL YDDESGHKTGESASHRDGDSKAVSKQNQRKRKGN  
PRCLWIWIVFSVLVIGAATGVIAYSMIKKSRAMNAEAELEASSANDVAIDGIANVANVA

IDGGDQSESESESESENTNLGANTPDDPQSQEVLVVLPPVPPPTLRPVTLKDPTGAPSEY  
PTVAPTFPRPTMFPTSTPTVSPPTISPTVAKSATDQLTERLEGLLQSGNYANGGGVGD  
ETEQAQQLPQEPFSDFAQNIASGGMNDPAHKALLYMAREAEATHGLSLSLANANANANS  
NSKDSFVPIIDLASYDNPKLMQRFALLAVRFGATLSSGNAVAEAQTQTQVPTEFATAWIAN  
SPGLAVALPAKRIVVSGGEAGENAGDLEGGEVQPTVGSATAAAVANANSNANVAGGSDTS  
SAIGMVTAPTDDGAPTQANPLPSSLADPDDPMFLVDECYWEGVVCEAENETENSNTATT  
TPRIPAVVSLKWGYLTLSTISPAVGLLSGLTSLDLSHNELVGSIPESLFDLTLRELYL  
YHNNLTGTLSTRIGDLDALERLHLSHNALSGSLPTELKSDAGSVGGIRPLREYRTAHALT  
HSVRASRTVNQVLYWPSRTPTAIFSSPFTRLSPCNVPRRFLLSLSRIFQCLFEQIYGH  
SLRPSMASVHPLRRRNQLTGTLPEDIGEKFVDLRHLYLHDNAFIGTLPSSYNTVGN  
GRLKALAIHDNRLTGEVPGARDHYDNLVQYTLHENLFRSLDQRNCQNHLLEVEFKAD  
CNA NVCTCFGGFEFCERWCGYESGGRGPNNPARNPTFDSNPNLNWQQQQRPPWQRPPQ  
DWSF

>comp10135\_c0\_seq2; 1120 1 3422 LEN=4551; translated  
XNGNGTGSVPSMLSSKTHPEQEAQRETSGSLVSLDDPPDATDYAPADCFTPGVSILPKSN  
VNAIANANRSNSNSNADERRKNR SKNNRTNGNWRVAEMTSRTAGRDTDRASTSRSSNTNT  
NTNQVLNPKPSKSGATRKQETAEQKQREQQERVVAANTMAARELPPPPQQRPNGDAANA  
NANANANADANSVDADANANANANADTSYHNNYSHELLSAYEFEHDP SIPP LPPPVVELV  
QSP TDERYCS TTGNQSPNTSYESDIELGRNEDDQGVQKTKTPRGTDPSADPSTSKKKK  
TLLSVFSPTYFRPNDDNDADADADK DENKEGNTPETDTNLSPSNTFEEGSIARGRKLFS  
PEEPGATRSNNNAHRSSDRSFDLLYDDESGHKTGESASHRDGDSKAVSKQNQRKRKGN  
PRCLWIWIVFVSVLVI GAATGVIAYSMIKKSRAMNAEAELEASSANDVAIDGIANVANVA  
IDGGDQSESESESESENTNLGANTPDDPQSQEVLVVLPPVPPPTLRPVTLKDPTGAPSEY  
PTVAPTFPRPTMFPTSTPTVSPPTISPTVAKSATDQLTERLEGLLQSGNYANGGGVGD  
ETEQAQQLPQEPFSDFAQNIASGGMNDPAHKALLYMAREAEATHGLSLSLANANANANS  
NSKDSFVPIIDLASYDNPKLMQRFALLAVRFGATLSSGNAVAEAQTQTQVPTEFATAWIAN  
SPGLAVALPAKRIVVSGGEAGENAGDLEGGEVQPTVGSATAAAVANANSNANVAGGSDTS  
SAIGMVTAPTDDGAPTQANPLPSSLADPDDPMFLVDECYWEGVVCEAENETENSNTATT  
TPRIPAVVSLKWGYLTLSTISPAVGLLSGLTSLDLSHNELVGSIPESLFDLTLRELYL  
YHNNLTGTLSTRIGDLDALERLHLSHNALSGSLPTELKSDAGSVGGIRPLRYFNVS NK  
FTGTIPSDLRWRQCIHFVGRNQLTGTLPEDIGEKFVDLRHLYLHDNAFIGTLPSSYNTV  
GNR LKALAIHDNRLTGEVPGARDHYDNLVQYTLHENLFRSLDQRNCQNHLLEVEFKAD  
CNA NVCTCFGGFEFCERWCGYESGGRGPNNPARNPTFDSNPNLNWQQQQRPPWQRPPQ  
DWSF

>comp10136\_c0\_seq1; 683 71 1324 LEN=2636; translated  
MKI IKKNISAKDGSIMLRPEIPEDLWHSYNLLRAGDLVRCCTTVRKVVKESSTGTTSS  
KKRLMLTIRLKTIDFPDALQVRLSGVVENQNELVRMGAHHTLTLELHQNF TLEKDCWDK  
IYLDVVEDACNPDRRAELAAVVMHSGLAHVCLVTGALTVTKAR IETNIPKKRTGSSNNAK  
AIARFFEAVYQAILRHVDFATVKAVLLGSPGYVKDDFMAYLKEECFKRDRPFMEAVNKG  
KFVLRASSGHKHALEEVFSDPTVCKRIESTKAMEEVAVLQKFMRTMDVDPDRAYYGFHH  
VRSAADQLAIDKLLVTDQLFRASSPPVRKMYVGLVEDVEANGGTVYVFS SLHVSGQQ LQQ  
VSGVAAILRYPPLDLELELQAE EYELNGGEADPGSDDESENASDERIRQDMELLNF

>comp10137\_c0\_seq1; 411 159 1631 LEN=1821; translated  
MKT LGRHLSRKGAE STYVEVLFLLFCV LVATT PHAVRSFQLLNEVSSSPRAFRRN NVGGE  
ASKKTQWTIASSVMKRPRKTSQTLLSAHFSLTTALESLWEKRIVENLWKKEMKGSRDEEA  
DEYRRLSWLDLED SVSNKQKADAANETHQGN DPTVATLPLYP IHDVYLPSTVNHTLYNVE  
PQNIQMALNLLSKNETAATSPPARFCVVL RARDTGRIASIANILRIVEAEVQRIPGPSET  
EKEEQGENGGDDDISNLRIRLTCQSDGLAEIQSIENSGWKEKRVLSKEYLRASVRQ  
LPEEDQSDSGSWNDSYNAIRKDLQTIKI IYQLQLGGEEFPD TLLRLGNAMRDFPELGQ  
YDGDPNREALLWEMAQEWQSVCM TLRQGT EAWLSADRNEKLVAARAKGGGILKLP IHL  
SELDPEDRKDIQRLDEEAQEKHKEFGMDPVLD FQVLI GLPTTNQRFRFLAQLVNRERRRLE  
DIASSYSSWS

>comp10138\_c0\_seq1; 1149 346 3351 LEN=3587; translated  
MTPQQTNSASSNAIDVMKHMVEKESNESQEQLSSPPPASEELKTFDSETTGTVRNVT SKS  
LAYSSASRNHIRLKMSTGLPVGLRS AKMPSLLQRLPCFSSGGPKSPSASSGSFASAI  
TDSALS VIEKVDDESKDTEKSEDEDISKQLPIATEQSDISTDSKSQEESLLSLNEEDK  
ASIGGMKEDAKNVSPNASQTDVETS KTLVAPPAPQAQLDLD SIDLDDIQIGDLQGLDAAD  
ADFLRAKCLNKL SRKEREHV LQDIHG VADLMEESSRLFVEESLEEF EIEVIREVAWRKKN  
NASDKSIKQKSNKEDVAESQQEENQEQQIPELEEKLGK LQSR LDQLVRCRKNLNHSMNTD  
TDSFPKKQLSAKNHPMFGKMG EIGRGMNLPFGSSSSLKNKDMRENIVK PMLNLS SGLSSP  
FFSPTTDAAFSPAANESQEDAADLISK DATAYEQALAQCRRRSRNSSLFSPSISDGN DIF  
DDDRYIDVDQRGFRLSFLRAERYNTKKA AKRLLDHFEEKRRLFGVGYLTSKIQLKDLDRQ



TKDCLESGQIQLLPERDRAGRAVIVITSKLAINSEDRQYENSVLRAFWILASIALEDKET  
ETKGSVLVNYNIGGSNSDHLGNGVRRRVRQWKNTLNALPLRVASFHWCVENLASKQAT  
YLSALMLGGSNFVVRVCHAGSDNDVQHDLMTFGIPIDLFVSMASEVNLSHHSRFLSKRK  
KSEASVFLNKALALIEAPLLDDSI TMDMKGDEQFLEPAIDPSPGVATGGDTFATAQLLTS  
GNLSSYSNINIQEQEQEQLEKLRNADNFRNTIHNRNAQSALDDSLYFLGNGNSIQGQH  
SSQHQQFQHNQLGMSMGGMVPPQFHQQQQQQLKQPLPNIAKSKSGIAFSTEPVLPVGPGLDI  
LLGRGRGAQNHKGNIIHYRNVVETFRARYEQIPQKGAKTQLIREVVAVIYDNGGRFLKQDR  
FNRWIPVDPEVARDKVSHSFRNQKRLSIGGSNSGKRSRDKD

>comp10140\_c0\_seq1; 192 1 883 LEN=998; translated  
XSNTTGNKSNRGPDSMEQARTRLARSALERVPRHGWTKEAIAVAASEDPKLSLSMSGM  
LSPSDLVGVWFLDDLNRERKREEGDSSSSGEGEPFDSIRWRLEKVLFPVVEGRWHTG  
MAVGLSTPLETRSLHEFIELATPPRHAGNTAYQAALGAIFLATELHLLSDASPGKSTW  
SFLGDRLEDELERGLPEGKSPGLSDLPGVLASLAASAPAPPSPEALANATNSIPVAVGLAV  
ARSLVEGAASLVLPQAAAPRKSPVRSPPGKEADNAAAPAGTRET DYLEGPSR

>comp10141\_c0\_seq1; 698 228 2319 LEN=2843; translated  
MSKHLATFLLLAVTAIETIAFVIPTVHSSGVKNNGILPSPSKPSTYLTLSSSPNNNSGK  
DGFLKARTDIRYFLTQRSLQSFVFLNQCREEHSVRWLEKTLDFTSIDNFHGTGAFNQTK  
FPEWDSVFLDCVDRPEEIMVIQMRSSRRQNRLSGYNAYFESLKQPQTGTDQKPVGSDSDS  
EKSSATEGVEGKTKGKSKGFSVGNLYDSMTAPMSTPPSQEAKKSWRPSKKT SRRLSDASSY  
LEALSSSPALSSKDDTTECFRKDSEKKSADGPGKSTSYLEKLSSAAKSPTSP ISSDDE  
KNEKTEQSTETSKNPYLEEVRDSSKCVCASLASNRYPGXVCDNTERHPLFLSNLILDVNV  
RVPGLPINTLVFKWNQTI TEYELCVDPPAMVRRILSVREQISKEWAEDLDQLARLNDEIV  
EYLEEHNRAVAKEDDEEEDDEDEPEETNEGQAEKDQENIGNDEDSSDMDQLLKTLLASAN  
KETVPDVTSAQSKSDVNEKIDKDEAECKTAFGRNILTAWTQHLWSPNRSSSPFRKANFDL  
LLLLLATQESIHRVLKSYKEDEDVRPETHEWLLLEYKDNVNDYFDGHQSYFRSEDFLEEMI  
KLPRTL IETNNEFIAWVDP AIVVEDIVRERSEVTLDWMRIAETISEEHTDLRRMLFSNMV  
SKPDPDETLADVIIVTAVDISNITASESSSEVFGAFE

>comp10141\_c0\_seq2; 827 228 2147 LEN=2671; translated  
MSKHLATFLLLAVTAIETIAFVIPTVHSSGVKNNGILPSPSKPSTYLTLSSSPNNNSGK  
DGFLKARTDIRYFLTQRSLQSFVFLNQCREEHSVRWLEKTLDFTSIDNFHGTGAFNQTK  
FPEWDSVFLDCVDRPEEIMVIQMRSSRRQNRLSGYNAYFESLKQPQTGTDQKPVGSDSDS  
EKSSATEGVEGKTKGKSKGFSVGNLYDSMTAPMSTPPSQEAKKSWRPSKKT SRRLSDASSY  
LEALSSSPALSSKDDTTECFRKDSEKKSADGPGKSTSYLEKLSSAAKSPTSP ISSDDE  
KNEKTEQSTETSKNPYLEETITEYELCVDPPAMVRRILSVREQISKEWAEDLDQLARLND  
EIVEYLEEHNRAVAKEDDEEEDDEDEPEETNEGQAEKDQENIGNDEDSSDMDQLLKTLLA  
SANKETVPDVTSAQSKSDVNEKIDKDEAECKTAFGRNILTAWTQHLWSPNRSSSPFRKAN  
FDLLLLLATQESIHRVLKSYKEDEDVRPETHEWLLLEYKDNVNDYFDGHQSYFRSEDFLE  
EMIKLPRTL IETNNEFIAWVDP AIVVEDIVRERSEVTLDWMRIAETISEEHTDLRRMLFS  
NMVSKPDPDETLADVIIVTAVDISNITASESSSEVFGAFE

>comp10141\_c0\_seq3; 633 228 2415 LEN=2939; translated  
MSKHLATFLLLAVTAIETIAFVIPTVHSSGVKNNGILPSPSKPSTYLTLSSSPNNNSGK  
DGFLKARTDIRYFLTQRSLQSFVFLNQCREEHSVRWLEKTLDFTSIDNFHGTGAFNQTK  
FPEWDSVFLDCVDRPEEIMVIQMRSSRRQNRLSGYNAYFESLKQPQTGTDQKPVGSDSDS  
EKSSATEGVEGKTKGKSKGFSVGNLYDSMTAPMSTPPSQEAKKSWRPSKKT SRRLSDASSY  
LEALSSSPALSSKDDTTECFRKDSEKKSADGPGKSTSYLEKLSSAAKSPTSP ISSDDE  
KNEKTEQSTETSKNPYLEEVRDSSKCVCASLASNRYPGXVCDNTERHPLFLSNLILDVNV  
RVPGLPINTLVFKWNQTI TEYELCVDPPAMVRRILSVREQISKEWAEDLDQLARLNDEIV  
EYLEEHNRAVAKEDDEEEDDEDEPEETNEGQAEKDQENIGNDEDSSDMDQLLKTLLASAN  
KETVPDVTSAQSKSDVNEKIDKDEAECKTAFGRNILTAWTQHLWSPNRSSSPFRKANFDL  
LLLLLATQESIHRVLKSYKEDEDVRPETHEWLLLEYKDNVNDYFDGHQSYFRSEDFLEEMI  
KLPRTL IETNNEFIAWVDP AIVVEGXVAVDLGFVDVGRHLIERISIFVNDVAPRNIDIVR  
ERSEVTLDWMRIAETISEEHTDLRRMLFSNMVSKPDPDETLADVIIVTAVDISNITASESS  
SEVFGAFE

>comp10141\_c0\_seq4; 762 228 2243 LEN=2767; translated  
MSKHLATFLLLAVTAIETIAFVIPTVHSSGVKNNGILPSPSKPSTYLTLSSSPNNNSGK  
DGFLKARTDIRYFLTQRSLQSFVFLNQCREEHSVRWLEKTLDFTSIDNFHGTGAFNQTK  
FPEWDSVFLDCVDRPEEIMVIQMRSSRRQNRLSGYNAYFESLKQPQTGTDQKPVGSDSDS  
EKSSATEGVEGKTKGKSKGFSVGNLYDSMTAPMSTPPSQEAKKSWRPSKKT SRRLSDASSY  
LEALSSSPALSSKDDTTECFRKDSEKKSADGPGKSTSYLEKLSSAAKSPTSP ISSDDE  
KNEKTEQSTETSKNPYLEETITEYELCVDPPAMVRRILSVREQISKEWAEDLDQLARLND

EIVEYLEEHNRAVAKEDDEDEDEPEETNEGQAEKDQENIGNDESSDMDQLLKTLLA  
SANKETVPDVTSAQSKSDVNEKIDKDEAECKTAFGRNILTAWTQHLWSPNRSSSPFRKAN  
FDLLLLLATQESIHRVLKSYKEDDVRPETHEWLLLEYKDNVNDYFDGHQSYFRSEDFLE  
EMIKLPRTLIIETNNEFIAWVDPVAVVEGXVAAVDLGFDVGRHLIERISIFVNDVAPRNID  
IVRERSEVTLDWMRIAETISEEHTDLRRMLFSNMVSKPDPDETLADVIVTAVDISNITAS  
ESSSEVFGAFE

>comp10141\_c0\_seq5; 618 798 2399 LEN=2923; translated  
MVIQMRSSRRQRNLSGYNAYFESLKQPQTGTQKPVGSDSDSEKSSATEGVEGTKGKSKG  
FSVGNLYDSMTAPMSTPPSQEAKKSWRPSKTSRRLSDASSYLEALSSSPPALSSKDDTT  
ECFRKDSEKKSADGPGKSTSYLEKLSSAAKSPTSPISSDDEKNEKTEQSTETSKNPYLE  
ETITEYELCVDPPAMVRRILSVREQISKEWAEDLDQLARLNDEIVEYLEEHNRAVAKED  
EEDDEDEPEETNEGQAEKDQENIGNDESSDMDQLLKTLLASANKETVPDVTSAQSKSD  
VNEKIDKDEAECKTAFGRNILTAWTQHLWSPNRSSSPFRKANFDLLLLLATQESIHRVLK  
SYKEDDVRPETHEWLLLEYKDNVNDYFDGHQSYFRSEDFLEEMIKLPRTLIIETNNEFIA  
WVDPVAVVEGXVAAVDLGFDVGRHLIERISIFVNDVAPRNIDIVRERSEVTLDWMRIAET  
ISEEHTDLRRMLFSNMVSKPDPDETLADVIVTAVDISNITASESSSEVFGAFE

>comp10141\_c0\_seq6; 519 1552 2475 LEN=2999; translated  
MVRRLILSVREQISKEWAEDLDQLARLNDEIVEYLEEHNRAVAKEDDEDEDEPEETNE  
GQAEKDQENIGNDESSDMDQLLKTLLASANKETVPDVTSAQSKSDVNEKIDKDEAECKT  
AFGRNILTAWTQHLWSPNRSSSPFRKANFDLLLLLATQESIHRVLKSYKEDDVRPETHE  
WLLLEYKDNVNDYFDGHQSYFRSEDFLEEMIKLPRTLIIETNNEFIAWVDPVAVVEDIVRE  
RSEVTLDWMRIAETISEEHTDLRRMLFSNMVSKPDPDETLADVIVTAVDISNITASESS  
EVFGAFE

>comp10141\_c0\_seq7; 454 1552 2571 LEN=3095; translated  
MVRRLILSVREQISKEWAEDLDQLARLNDEIVEYLEEHNRAVAKEDDEDEDEPEETNE  
GQAEKDQENIGNDESSDMDQLLKTLLASANKETVPDVTSAQSKSDVNEKIDKDEAECKT  
AFGRNILTAWTQHLWSPNRSSSPFRKANFDLLLLLATQESIHRVLKSYKEDDVRPETHE  
WLLLEYKDNVNDYFDGHQSYFRSEDFLEEMIKLPRTLIIETNNEFIAWVDPVAVVEGXVAA  
VDLGFVGRHLIERISIFVNDVAPRNIDIVRERSEVTLDWMRIAETISEEHTDLRRMLFS  
NMVSKPDPDETLADVIVTAVDISNITASESSSEVFGAFE

>comp10141\_c0\_seq8; 683 798 2303 LEN=2827; translated  
MVIQMRSSRRQRNLSGYNAYFESLKQPQTGTQKPVGSDSDSEKSSATEGVEGTKGKSKG  
FSVGNLYDSMTAPMSTPPSQEAKKSWRPSKTSRRLSDASSYLEALSSSPPALSSKDDTT  
ECFRKDSEKKSADGPGKSTSYLEKLSSAAKSPTSPISSDDEKNEKTEQSTETSKNPYLE  
ETITEYELCVDPPAMVRRILSVREQISKEWAEDLDQLARLNDEIVEYLEEHNRAVAKED  
EEDDEDEPEETNEGQAEKDQENIGNDESSDMDQLLKTLLASANKETVPDVTSAQSKSD  
VNEKIDKDEAECKTAFGRNILTAWTQHLWSPNRSSSPFRKANFDLLLLLATQESIHRVLK  
SYKEDDVRPETHEWLLLEYKDNVNDYFDGHQSYFRSEDFLEEMIKLPRTLIIETNNEFIA  
WVDPVAVVEDIVRERSEVTLDWMRIAETISEEHTDLRRMLFSNMVSKPDPDETLADVIVT  
AVDISNITASESSSEVFGAFE

>comp10142\_c0\_seq1; 792 1 3488 LEN=4142; translated  
RDHSSRRIRFQKPHPLYDNQTLPIPFHTTDMKEDVRLVIKLEYACRQSLYNGISGTIGD  
TNGGSLSDYEQQRPASNIHLGCVGVALPPAKRQCRNDRVADKARSWDVILAKASNLWSM  
TEYEHGQVSRFAGILLGFFLPQSTGNNFFSLQNVSTRPMTSRQQRQKQSQSTGIQPP  
KNLTHNKGVSDQQIILMSLEERLESSPHRYGNEFGELDDVIVHEHVESAFFSFLKIGLRP  
FLSGRPAHSTQVDVIHLLAMAIIHRPSPDQCIRQTTSRLEEQKSEVWEMTTRLMSSLAHS  
FQINRHRVELVRVLDCLVLPCEGQEAAGIYKNAPLFEAGIPLRASLYAFGMASMSPYD  
SHLSQRGMVSLAIQSGIDHVVKKEWSRLLHRMVDQTNYSHCSDDMTDGQTTATVTTST  
TNQLSDKDFCPTARGELLRSFLIRYNEARHFAEEEFLLQYALSSLTDAIEMQVDCWTKEE  
EAESKDTGVKPNREGNYPVGD SIDMILSSNQPLVLAASLLNSAKDLFHLLPLKNNGRA  
TEGDHGGDEVEYSEDSHHRDMLISCAIQLIHHWDPKIVKEACTLLVLAFSYSDMWEDY  
IGAVFDSTVIALDIAMKRKTDKHASRVAIEGLVSAFSQRSPTFAVNLFRLLLKKGSSDR  
NSLVI FRLIAAIANARPAVVQERIGTVTDYLNEVKDQNAKKHILASILSCRRTHYFANET  
DSLTLNMPKIHSSLLGNWDKYLRSRHALLTGNFVIAKELYRELMKSAATERSFLWLSAME  
NIADGEAQLCRAASGALPESTSKFRRAIGTLRSLEALKYVSTTFQIRILEXKSLIFGSPN  
EHETVDDVSCIIAMVSKDFNVVINFSTVLYGPI SYLREMLIGTETTKKYTRPNIHQKNF  
VKLFRKLSIDYLR IYKQYGLFICQQRSAMRTLHVLC SFVAKAGARVFADSI VLEEEERIN  
KVFAGDGTQIPITMLMKQLDTFALEKLNKFVDVKIRAVTLLFMDRILKTPPIPRSLVC  
PKKLPDShLQLVFPDTHDGDEYPINIRNGTHLSFIASGKVPASLMSLSQIPFNKVLLWY  
EITFTGGSKKSNLSQKLRDIDRSP IATSVS SAGSFSTKVDGNLLLNEGCTLEFRLGCR

DIRGGEWELPMDKTQHYSVKVV

>comp10142\_c0\_seq2; 807 1 3396 LEN=4050; translated  
RDHSSRRIRFQKPHPLYDNQTLPIPFHTTDMKEDVRLVIKDLEYACRQSLYNGISGTIGD  
TNGGSLSDYEQQRPASNIHLGVGVALPPAKRQCRNDRVVADKARSWDVILAKASNLLWSM  
TEYEHGQVSRFAGILLGFFLPQSTGNFFSLQNVSTRPMTSRQQRQKQSQSTGIQPP  
KNLTHNKGVSDQOIILMSLEERLESSPHRYGNEFGELEDDVIVHEHVESAFFSFLKIGLRP  
FLSGRPAHSTQVDVIHLLAMAIHPRPSDQCIRQTTSRLEEKSEVWEMTTRLMSSLAAHS  
FQINRHRVELVRVVLDCVLVPECGQEAGIYKNAPLFEIGAI PHLRASLYAFGMASMSPYD  
SHLSQRGMVSLAIQSGIDHVVKKEWSRLLHRMVDDQTNYSHCSDDMTDGQTTATVTTST  
TNQLSDKDFCPTARGELLRSFLIRYNEARHFAEEEFQYALSSLTDAIEMQVDCWTKEE  
EAESKDTGVKPNREGNYPVGD SIDMILSSNQPLVLASLLNSAKDLFHFLPLKNNGRA  
TEGDHGGDEVEYSEDSHHRDMLISCAIQLIHHWDPKIVKEACTLLVLAFSYSDDMWEDY  
IGAVFDSTVIALDIAMKRKTDKHASRVAIEGLVSAFSQRSPTFVAVNLFRLLLKKGSRSSDR  
NSLVIFRLIAAIANARPAVVQERIGTVTDYLNEVKDQNAKKHILASILSCRRTHYFANET  
DSLTLNMPKIHSLLGNWDKYLRSRHALLTGNFVIAKELYRELMKSAATERSFLWLSAME  
NIADGEAQLCRAASGALPESTSKFRRAIGTLRSLEALKYVSTTFQIRILELRVSFLDLLT  
NMRQLTIEMRLIGTETTKKYTRPNIHQKNFVKLFRKLSIDYLRIYKQYGLFICQQSRSAMR  
TLHVLCSFVAKAGARVFADSIVLEERINKVFAHGDGTQPI TMLMKQLDTFALEKLNKQV  
DVKIRAVTLLFMDRILKTPTP IPRSLVCPKLPDSDLQVDFDPDTHDGDEYPINIRNGT  
HLSF IASGKVPASLMSLSQIPFNKVVLLWYEITFTGGSKKSNLSQKLRDIDRSP IATSVS  
SAGSFSTKVDGNLLNEGCTLEFRLGCRDIRGGEWELPMDKTQHYSVKVV

>comp10143\_c0\_seq1; 159 499 1398 LEN=1515; translated  
MLQNWEMASQLHLQWAVLALDNELEYEELGPSRAIPAKEEFTVSGPQEFKRKGSFQGLTCN  
KVRMALEVASACKMNVVFTDNDVNFQNPFEHDLGRLIRSQRDYVYQPNQPAWAPLEDQ  
CLKGNPRKEANTGFYFNHKSEIYRNIAESMLEVCVRPENKIDQSLFWKEFWKAEKRIT  
SRNQTEGSDASFHHCDSLSEYVNPWSQQNNFSKTSKSGSNKRIFQYCCLDPYFYPIGKHNARD  
GPSNKNPVTYHANYASKYGRKVEKLVHARS DGYGWDMSRPFKDGHGGVLEAPKKGQDKKK

>comp10144\_c0\_seq1; 1376 63 3747 LEN=3880; translated  
MPSSLRIVARAVLRRRSHAAATTHRIATIRAPRRGSPHPRLP SRWHPGPAARFLSDAAKE  
RATEGLVPGVPLHQSSYGLG DATNVFGRSTLHGSQSRTEKININHNINNNHHNINNNHNH  
TAPASWQAKDDADVQRVTSQALIYELTRTTTTNTIERVVPWF LKTMPE SYFRQIPPYLRRD  
HVKALAAVVDADMDLYLNLKSKTTDGR TVYTFVRPTTEPGTLLGMVEELPRCDPDAPSLT  
RLHVFSAADDSFSLNMFIMGETTAKTNPPGGQPQPQAPGPHRTAILDFAARVREGLCLEE  
HPDLDPSEPSFEPKNLEAYLDGCRDNYLR IISEHPERFLKQRL LFSGSVSGTEGCEARIEP  
AVHESPLGKESKQYWL DVAMANWLP RVALEQTCRLLYVQGF DVGRARLDVIPDGENG SV  
TMLRLLIHPVGEYQETS DSGDNGD SGDGTRTDHAARFERLRYNLKR SKWLD DTTQKLVF  
EDEFWLGVRGEILTAMCHLLHPMLSGSGDPDHGSFYSKHNILEALRWQRARHEQDASRS  
WSNLPSTSDLLVFFRLTVRSSVQNLSSQQTVTDRRF IGYAAKIADLFLQRFDPKDP L SDE  
ALFQNSLDGIRTDIASDVQET YVKEL LTKMTEIVEKTLKTN IYMKDRYALSMRLDPSIMG  
VGSVEDSTLPYGVLF IHGRRFNGYHTRFRDI SRGGLRLVAPASSEQLALESARQYDECY G  
LAF AQQLKNKDIPEGGSKAVCLIDTNDILNGTRDYVLRKSVKAMADSI LDLVVDTEETRE  
NIVDYFGKREVLYLGPDENVT PEDINWIIQRAGRRGYDTPAAFMSKPRAGINHKEYGVT  
SEGVNVFLDVALQRALGIDPRKESFTVKMTGGPDGDVGGNEINILIREYGDNVKIVGIAD  
HSGCAEDPDGLNHEELLRLFRQELSIGSF DASRLGPGV LHTCDTEEGTKARNTMHNRLV  
ADAFVPCGGRPNTIDTNNYKQFLLGDGTPSSRLIVEGANL FVNSEARQKLYEDAGVMIVK  
DSSANKGGVITSSYEICAAMLASEDEF FENKEAIVAEVLAKLRGYAKMEAE L LFREAEIY  
GESLPEVSQIISNAINSATDALSGALD SLSPEDQEQLVPLFRGHLPETLADLGF DKVHEK  
VPSQYIKNAIASTLASKMVKEGTRF INALPQARLAETALRYIQQEKEVLKLIETLEKTE  
MSAEKKNILQLLDAGGARTALSLKDV

>comp10144\_c0\_seq2; 1370 63 3611 LEN=3744; translated  
MPSSLRIVARAVLRRRSHAAATTHRIATIRAPRRGSPHPRLP SRWHPGPAARFLSDAAKE  
RATEGLVPGVPLHQSSYGLG DATNVFGRSTLHGSQSRTEKININHNINNNHHNINNNHNH  
TAPASWQAKDDADVQRVTSQALIYELTRTTTTNTIERVVPWF LKTMPE SYFRQIPPYLRRD  
HVKALAAVVDADMDLYLNLKSKTTDGR TVYTFVRPTTEPGTLLGMVEELPRCDPDAPSLT  
RLHVFSAADDSFSLNMFIMGETTAKTNPPGGQPQPQAPGPHRTAILDFAARVREGLCLEE  
HPDLDPSEPSFEPKNLEAYLDGCRDNYLR IISEHPERFLKQRL LFSGSVSGTEGCEARIEP  
AVHESPLGKESKQYWL DVAMANWLP RVALEQTCRLLYVQGF DVGRARLDVIPDGENG SV  
TMLRLLIHPVGEYQETS DSGDNGD SGDGTRTDHAARFERLRYNLKR SKWLD DTTQKLVF  
EDEFWLGVRGEILTAMCHLLHPMLSGSGDPDHGSFYSKHNILQTVTDRRF IGYAAKIAD  
LFLQRFDPKDP L SDEALFQNSLDGIRTDIASDVQET YVKEL LTKMTEIVEKTLKTN IYMK

DRYALSMRLDPSIMGVGSVEDSTLPYGVLFHIGRRFNGYHTRFRDISRGGLRLVAPASSE  
QLALE SARQYDECYGLAFAQQ LKNKDI PEGGSKAVCLIDTNDI LINGTRDYVLRKSVKAMA  
DSILDLVDTEETRENIVDYFGKREVL YLGPDENVT PEDINWIIQRAGRRGYDTPAAFMS  
SKPRAGINHKEYGV TSEGVNVFLDVALQRALGIDPRKESFTVKMTGGPDGDVGGNEINIL  
IREYGDNVKIVGIADHSGCAEDPDGLNHEELLRLFRQELSIGSF DASRLGPGGVLHTCDT  
EEGTKARNTMHNRLVADAFVPCGGRPNTIDTNNYKQFLLGDGTPSSRLIVEGANL FVNSE  
ARQKLYEDAGVMIVK DSSANKGGVITSSYEICAAMLASEDEFFENKEAIVAEVLAKLRGY  
AKMEAELLFREAEIYGESLPEVSQIISNAINSATDALSGALDSLSPEDQEQLVPLFRGHL  
PETLADLGF DFKVHEKVPSQYIKNAI ASTLASKMVYKEGTRFINALPQARLAETALRYIQQ  
EKEVLKLIETLEKTEMSAEKKNILQLLDAGGARTALSLKDV

>comp10145\_c0\_seq1; 207 1554 3095 LEN=3180; translated  
ELKNGSRKTTSLNVATETNEDEAWSPTS WKTKTVAQPPKYEDEKEYDDAIEKLQAC SPLV  
FAGEVRTLHEQLARACSGQGFLLMGGDCAEAFNEFNVDHVRDSFRVLLQMALVLTFGSAM  
PIIKVGRMAGQFAKPRSEPDETRDGVTLPSYRGDIINNEEFTPEARRHKPFNMIQAYHQS  
AQTLNILRAFSTGGYADISRLHAWNLD FVEQTDEGSRYXIIISDLCEPNTTESIEKIXDLN  
FRPSNSKLTVLXFLNTNRYRTFATKVDES LRFMKAIGLDTAAPSFTKTD FYTAHECLLLP  
YEQALTRMDSTTGRWYDCSAHMLWVG ERTRQLDGAHLEFCRGVNNPLGVKISDKCTPEEL  
INI IETMNPSNIPGRLTIVVRMGAEKLRKNLPGLIRAVQREGKSVLWISDPVHGNT RKT  
NGYKTRDFEKIRDELRAFFDVHDEMGSHPGGVHLEMTGEDVTECVGGLSDVTEATLSERY  
NTFCDPRLNGAQALELAFLIAERMRSR SGLPPIE

>comp10145\_c0\_seq2; 374 1314 2915 LEN=3000; translated  
MKLSITAALLCLRINTSEAFAPNAFTRKTTSLNVATETNEDEAWSPTS WKTKTVAQPPKY  
EDEKEYDDAIEKLQAC SPLVFAGEVRTLHEQLARACSGQGFLLMGGDCAEAFNEFNVDHV  
RDSFRVLLQMALVLTFGSAMP IIKVGRMAGQFAKPRSEPDETRDGVTLPSYRGDIINNEE  
FTPEARRHKPFNMIQAYHQAQTLN ILRAFSTGGYADISRLHAWNLD FVEQTDEGSRYXI  
ISDLCEPNTTESIEKIXDLNFRPSNSKLTVLXFLNTNRYRTFATKVDES LRFMKAIGLDT  
AAPSFTKTD FYTAHECLLLPYEQALTRMDSTTGRWYDCSAHMLWVG ERTRQLDGAHLEFC  
RGVNNPLGVKISDKCTPEELINI IETMNPSNIPGRLTIVVRMGAEKLRKNLPGLIRAVQR  
EGKSVLWISDPVHGNT RKTENGYKTRDFEKIRDELRAFFDVHDEMGSHPGGVHLEMTGED  
VTECVGGLSDVTEATLSERYNTFCDPRLNGAQALELAFLIAERMRSR SGLPPIE

>comp10145\_c0\_seq3; 355 1535 2956 LEN=3041; translated  
ELKNGSRKTTSLNVATETNEDEAWSPTS WKTKTVAQPPKYEDEKEYDDAIEKLQAC SPLV  
FAGEVRTLHEQLARACSGQGFLLMGGDCAEAFNEFNVDHVRDSFRVLLQMALVLTFGSAM  
PIIKVGRMAGQFAKPRSEPDETRDGVTLPSYRGDIINNEEFTPEARRHKPFNMIQAYHQS  
AQTLNILRAFSTGGYADISRLHAWNLD FVEQTDEGSRYRTFATKVDES LRFMKAIGLDTA  
APSFTKTD FYTAHECLLLPYEQALTRMDSTTGRWYDCSAHMLWVG ERTRQLDGAHLEFCR  
GVNNPLGVKISDKCTPEELINI IETMNPSNIPGRLTIVVRMGAEKLRKNLPGLIRAVQR  
GKSVLWISDPVHGNT RKTENGYKTRDFEKIRDELRAFFDVHDEMGSHPGGVHLEMTGEDV  
TECVGGLSDVTEATLSERYNTFCDPRLNGAQALELAFLIAERMRSR SGLPPIE

>comp10145\_c0\_seq4; 374 1535 3136 LEN=3221; translated  
MKLSITAALLCLRINTSEAFAPNAFTRKTTSLNVATETNEDEAWSPTS WKTKTVAQPPKY  
EDEKEYDDAIEKLQAC SPLVFAGEVRTLHEQLARACSGQGFLLMGGDCAEAFNEFNVDHV  
RDSFRVLLQMALVLTFGSAMP IIKVGRMAGQFAKPRSEPDETRDGVTLPSYRGDIINNEE  
FTPEARRHKPFNMIQAYHQAQTLN ILRAFSTGGYADISRLHAWNLD FVEQTDEGSRYXI  
ISDLCEPNTTESIEKIXDLNFRPSNSKLTVLXFLNTNRYRTFATKVDES LRFMKAIGLDT  
AAPSFTKTD FYTAHECLLLPYEQALTRMDSTTGRWYDCSAHMLWVG ERTRQLDGAHLEFCR  
GVNNPLGVKISDKCTPEELINI IETMNPSNIPGRLTIVVRMGAEKLRKNLPGLIRAVQR  
EGKSVLWISDPVHGNT RKTENGYKTRDFEKIRDELRAFFDVHDEMGSHPGGVHLEMTGED  
VTECVGGLSDVTEATLSERYNTFCDPRLNGAQALELAFLIAERMRSR SGLPPIE

>comp10145\_c0\_seq5; 355 1554 2975 LEN=3060; translated  
ELKNGSRKTTSLNVATETNEDEAWSPTS WKTKTVAQPPKYEDEKEYDDAIEKLQAC SPLV  
FAGEVRTLHEQLARACSGQGFLLMGGDCAEAFNEFNVDHVRDSFRVLLQMALVLTFGSAM  
PIIKVGRMAGQFAKPRSEPDETRDGVTLPSYRGDIINNEEFTPEARRHKPFNMIQAYHQS  
AQTLNILRAFSTGGYADISRLHAWNLD FVEQTDEGSRYRTFATKVDES LRFMKAIGLDTA  
APSFTKTD FYTAHECLLLPYEQALTRMDSTTGRWYDCSAHMLWVG ERTRQLDGAHLEFCR  
GVNNPLGVKISDKCTPEELINI IETMNPSNIPGRLTIVVRMGAEKLRKNLPGLIRAVQR  
GKSVLWISDPVHGNT RKTENGYKTRDFEKIRDELRAFFDVHDEMGSHPGGVHLEMTGEDV  
TECVGGLSDVTEATLSERYNTFCDPRLNGAQALELAFLIAERMRSR SGLPPIE

>comp10145\_c0\_seq6; 522 1314 2795 LEN=2880; translated  
MKLSITAALLCLRINTSEAFAPNAFTRKTTSLNVATETNEDEAWSPTS WKTKTVAQPPKY

EDEKEYDDAIEKQLQACSPLVFAGEVRTLHEQLARACSGQGFLMGGDCAEAFNEFNVDHV  
RDSFRVLLQMALVLTFGSAMP I IKVGRMAGQFAKPRSEPDETRDGVTLPSYRGDI INNEE  
FTPEARRHKPFNMIQAYHQSAQTLNILRAFSTGGYADISRLHAWNLDVFEQTDEGSRVRT  
FATKVDESRLFMKAIGLDTAAPSFTKTD FYTAHECLLLPYEQALTRMDSTTGRWYDCSAH  
MLWVGERTRQLDGAHLEFCRGNVNNPLGVKISDKCTPEELINI IETMNPSNIPGRLTIVVR  
MGAEKLRKNLPLGLIRAVQREGKSVLWISDPVHGNTKTRTEGYKTRDFEKIRDELRAFFDV  
HDEMGSHPGGVHLEMTGEDVTECVGGLSDVTEATLSERYNTFCDPRLNGAQALELAFLIA  
ERMRSRSGLPPIE

>comp10145\_c0\_seq7; 522 1295 2776 LEN=2861; translated  
MKLSITAALLCLRINTSEAFAPNAFTRKTTSLNVATETNEDEAWSPTSWKTKTVAQPPKY  
EDEKEYDDAIEKQLQACSPLVFAGEVRTLHEQLARACSGQGFLMGGDCAEAFNEFNVDHV  
RDSFRVLLQMALVLTFGSAMP I IKVGRMAGQFAKPRSEPDETRDGVTLPSYRGDI INNEE  
FTPEARRHKPFNMIQAYHQSAQTLNILRAFSTGGYADISRLHAWNLDVFEQTDEGSRVRT  
FATKVDESRLFMKAIGLDTAAPSFTKTD FYTAHECLLLPYEQALTRMDSTTGRWYDCSAH  
MLWVGERTRQLDGAHLEFCRGNVNNPLGVKISDKCTPEELINI IETMNPSNIPGRLTIVVR  
MGAEKLRKNLPLGLIRAVQREGKSVLWISDPVHGNTKTRTEGYKTRDFEKIRDELRAFFDV  
HDEMGSHPGGVHLEMTGEDVTECVGGLSDVTEATLSERYNTFCDPRLNGAQALELAFLIA  
ERMRSRSGLPPIE

>comp10145\_c0\_seq8; 207 1535 3076 LEN=3161; translated  
ELKNGSRKTTSLNVATETNEDEAWSPTSWKTKTVAQPPKYEDEKEYDDAIEKQLQACSPLV  
FAGEVRTLHEQLARACSGQGFLMGGDCAEAFNEFNVDHVRDSFRVLLQMALVLTFGSAM  
P I IKVGRMAGQFAKPRSEPDETRDGVTLPSYRGDI INNEEFTPEARRHKPFNMIQAYHQ  
SAQTLNILRAFSTGGYADISRLHAWNLDVFEQTDEGSRVYXIIISDLCEPNTTESIEKIXDLN  
FRPSNSKLTVLXFLNTRNRYRTFATKVDESRLFMKAIGLDTAAPSFTKTD FYTAHECLLLP  
YEQALTRMDSTTGRWYDCSAHMLWVGERTRQLDGAHLEFCRGNVNNPLGVKISDKCTPEEL  
INI IETMNPSNIPGRLTIVVRMGAEKLRKNLPLGLIRAVQREGKSVLWISDPVHGNTKTRTE  
NGYKTRDFEKIRDELRAFFDVHDEMGSHPGGVHLEMTGEDVTECVGGLSDVTEATLSERY  
NTFCDPRLNGAQALELAFLIAERMRSRSGLPPIE

>comp10145\_c0\_seq9; 374 1295 2896 LEN=2981; translated  
MKLSITAALLCLRINTSEAFAPNAFTRKTTSLNVATETNEDEAWSPTSWKTKTVAQPPKY  
EDEKEYDDAIEKQLQACSPLVFAGEVRTLHEQLARACSGQGFLMGGDCAEAFNEFNVDHV  
RDSFRVLLQMALVLTFGSAMP I IKVGRMAGQFAKPRSEPDETRDGVTLPSYRGDI INNEE  
FTPEARRHKPFNMIQAYHQSAQTLNILRAFSTGGYADISRLHAWNLDVFEQTDEGSRVYX  
IISDLCEPNTTESIEKIXDLNFRPSNSKLTVLXFLNTRNRYRTFATKVDESRLFMKAIGLDT  
AAPSFTKTD FYTAHECLLLPYEQALTRMDSTTGRWYDCSAHMLWVGERTRQLDGAHLEFC  
RGNVNNPLGVKISDKCTPEELINI IETMNPSNIPGRLTIVVRMGAEKLRKNLPLGLIRAVQ  
REGKSVLWISDPVHGNTKTRTEGYKTRDFEKIRDELRAFFDVHDEMGSHPGGVHLEMTGED  
VTECVGGLSDVTEATLSERYNTFCDPRLNGAQALELAFLIAERMRSRSGLPPIE

>comp10145\_c0\_seq10; 355 1775 3196 LEN=3281; translated  
ELKNGSRKTTSLNVATETNEDEAWSPTSWKTKTVAQPPKYEDEKEYDDAIEKQLQACSPLV  
FAGEVRTLHEQLARACSGQGFLMGGDCAEAFNEFNVDHVRDSFRVLLQMALVLTFGSAM  
P I IKVGRMAGQFAKPRSEPDETRDGVTLPSYRGDI INNEEFTPEARRHKPFNMIQAYHQ  
SAQTLNILRAFSTGGYADISRLHAWNLDVFEQTDEGSRVYRTFATKVDESRLFMKAIGLDTA  
APSFTKTD FYTAHECLLLPYEQALTRMDSTTGRWYDCSAHMLWVGERTRQLDGAHLEFCR  
GNVNNPLGVKISDKCTPEELINI IETMNPSNIPGRLTIVVRMGAEKLRKNLPLGLIRAVQ  
REGKSVLWISDPVHGNTKTRTEGYKTRDFEKIRDELRAFFDVHDEMGSHPGGVHLEMTGED  
VTECVGGLSDVTEATLSERYNTFCDPRLNGAQALELAFLIAERMRSRSGLPPIE

>comp10145\_c0\_seq11; 522 1535 3016 LEN=3101; translated  
MKLSITAALLCLRINTSEAFAPNAFTRKTTSLNVATETNEDEAWSPTSWKTKTVAQPPKY  
EDEKEYDDAIEKQLQACSPLVFAGEVRTLHEQLARACSGQGFLMGGDCAEAFNEFNVDHV  
RDSFRVLLQMALVLTFGSAMP I IKVGRMAGQFAKPRSEPDETRDGVTLPSYRGDI INNEE  
FTPEARRHKPFNMIQAYHQSAQTLNILRAFSTGGYADISRLHAWNLDVFEQTDEGSRVRT  
FATKVDESRLFMKAIGLDTAAPSFTKTD FYTAHECLLLPYEQALTRMDSTTGRWYDCSAH  
MLWVGERTRQLDGAHLEFCRGNVNNPLGVKISDKCTPEELINI IETMNPSNIPGRLTIVVR  
MGAEKLRKNLPLGLIRAVQREGKSVLWISDPVHGNTKTRTEGYKTRDFEKIRDELRAFFDV  
HDEMGSHPGGVHLEMTGEDVTECVGGLSDVTEATLSERYNTFCDPRLNGAQALELAFLIA  
ERMRSRSGLPPIE

>comp10145\_c0\_seq12; 207 1775 3316 LEN=3401; translated  
ELKNGSRKTTSLNVATETNEDEAWSPTSWKTKTVAQPPKYEDEKEYDDAIEKQLQACSPLV  
FAGEVRTLHEQLARACSGQGFLMGGDCAEAFNEFNVDHVRDSFRVLLQMALVLTFGSAM

PIIKVGRMAGQFAKPRSEPDETRDGVTLPSYRGDIINNEEFTPEARRHKPFNMIQAYHQSAQTLNILRAFSTGGYADISRLHAWNLDVEQTDDEGSRYXIIISDLCEPNTTESIEKIXDLNFRPSNSKLTVLXFLNTNRYRTFATKVDSESLRFMKAIGLDTAAPSFTKTDFYTAHECLLLPYEQALTRMDSTTGRWYDCSAHMLWVGERTRQLDGAHLEFCRGNVNNPLGVKISDKCTPEELINIIETMNPSPNIPGRLTIVVRMGAEKLRKNLPLGLIRAVQREGKSVLWISDPVHGNTKTENGYKTRDFEKIRDELRAFFDVHDEMGSHPGGVHLEMTGEDVTECVGGLSDVTEATLSERYNTFCDPRLNGAQALELAFLIAERMRSRSGLPPIE

>comp10146\_c0\_seq1; 719 45 1490 LEN=2070; translated  
MEDNTMDHDGSHNDPAEAAMGATDDIVDDVDDFIDMKDAVEVRVDDDLPMEEEDAEDMGIA  
DKEEAAGAGPTEADVPDMSNFRLTSHDTSVYAVAASLENGMLSILSGGGDDKAFQYKLSS  
ENGARSTSTQPLPYAHTDTVSSVAYNTQYVGS DPNKTPKLAAVGSYDGSILINPDTGEQ  
RLKLEGPSDVEWMSFHPKGGTVLLVGS DGTLMWFHVPLNRCMQV FVGHEQAVTAGCFSP  
DGKWALSASSDGTLR IWAPKTGLNKHVFR LGDAGLTCMANN GSDGMLVIAGGEDGVAHV  
CHIGTKKVVASLRHFEFPASTKEPAGDEDNEEEMEYPMSIEAVGFSPSQPNWCATGGVDG  
KLKIWDLAREGQCRQVCSHTHADAADGITRICWHPTLPFV FVSTISGKVRAWDARS GILL  
HTLTGGSSEQINDMVANFLPNGSAVIATASDDNTVRV FELDVAVL TTPQAAPSADASAMQ  
S

>comp10147\_c0\_seq1; 466 139 1422 LEN=1594; translated  
MSSAPKKYIKIKGVMKMNPYKAWKNRQESGAVPIPQAAATSPKDNALPVISNMDDHMQ  
LNEDLGTDPVLA EATNATIEMMQEPDISLEAGMQPDEMDELGAVLGKYEVP MGLMNKLI  
MLSEFDSLEFIIDDSGSMQMISDTINPLTRKPNTRWQEAHQRLKEMIEILAYVPFQQIGI  
EFLNRQDRILLTRQGMAPRDFLTGAYDQIDAQFARGPSGTT PVLEKLQTSLLRGQGH SIA  
RYFFGDGVPNGGQMAVKEIARIVTNRAEPAANPITFLSCTNQDDDV EWMKETE E IAPYCS  
ESDDYGDSEREV LGDQGEALPYTRGFWLICQLVAAMNPDDL DAMDESIPFTKMTLDNLLG  
IVHNEASYKYYFDSFLENQRKRSAYNEMDRLKKNTRWSYHDFLNAAVAKDISQVRDFKQK  
MARMNHH

>comp10148\_c0\_seq1; 322 41 1198 LEN=1658; translated  
MDIVDSFSLPLFTRTWLCLTF AISAAITLDAISAHQVVL DWDVSSSFISARKAMNRYGT  
HDRPELWRLLT SFCYCGGPLNQIPSLFLLYTIYIHGKGYESNPF PAGSGSRTADGIFGSI  
FCVVVILCTHRLPGYFFGRKYSLYPILTRNLTGALLYLW SKRNPRAMIQLNFVPM EGRYL  
PFAHIGISLLMKNRLHELLHGLAVGHLYYFLIAIAPAQMGGRRMLRTPQFLVELIGEGGL  
VPGE EYHRLPPQQRERREFAFGDRDGATPAHIAAKLGN YSELQELVEALTTNAGGHRRL  
LLGARDRNGWQPLHEACRGGHMEIVRYLVVEQE QYVDIYARTNGGQSPLSLSQ EYHGENH  
PVTQLLQEKIGAENEGNDNDNSDQN

>comp10149\_c0\_seq1; 2018 53 3670 LEN=3780; translated  
MAAPAETMAPPAGAVGDTI IPTIAEEAPAAPPVVSGFSFLSDTAAPPTASEGTDPPQ PDL  
PTAIHTRTNSHNSISSALSTPSLSSAPTSPAPVPAMTTAGGIAGAGITFGTSSSKPRIKK  
KKLRSQKIGIGASQSDATTTADAPVPTPAPAPPATEVKSARDEALEATKKA EAFMQSKAM  
EAKSAERKPPPAATTTESVQNLGLEPSASTDEILAAAQEAAEKAKILQYQQTGKSSGGF  
MGTFFKGFRASPSTVGSAPMANS SKHSVSSSNGSASGMDRLAKEQEVAQAIAQRQLLQ  
QQQDAVSKTIKEEDQDDDEVVVTTSVATSVVSTKPEEVATPAEPIKFTPATPSSASGISS  
FVPATIPSPFKPSATTSFKPAAAPNYGGIKVGAAPAPAQP KKRTSNTPKDI FEGYQ EYFS  
QAVDTAMKKVEDARNTKKGLLEERFVALAKDRFATRELEQIEELQQVAIEEEDYEQADEL  
GQMLDAHQREKSEVANMLKSNELALERLEAEKTSLGGI ISSCFQDLASRLEELKNKELAN  
EKQDDNETLTQYAAISKQLSDEHERLQQDLKHLERDEKLVAEERKELEGSINEQTGEIET  
EKEEAGTKLKEVEEEEIEELRKLVESKQKEAANLR TKMFGFEDSIAKVRVKFARQLNRVNN  
KEMTVKQNRREWEIENDQYTKQKEAHDLQVESHSNALLVHEELLNTLESELKLSREFSEF  
TPAQLGFME ESEAEKDSNENGLAQLKANVVKCEGAVDAAKKSLKATTS AIQNLETER  
DGLAAR IPELETQKKA AAAARDFKSAGKFSKEIKDATSRIQECEQELNGDAKAKSA AEE  
TLRQLDLDLLEAKKIADAEEKLSG EKRMATLSKKIEQLTKEKKERC GDASSEGSVKCVG  
ARLLESQIKMLMAEGSELGSKYGGWGLVTSIGLE DAPGGVDSNESEANGGTSETAKEMV  
GSKLSEELQARLAKAKELIAKSAKLEEMVQEAADRDDYEAGELQEEVDKINSEIEEMN  
ITDEECELLAQEETLLGPDP PAK EEEECGLTTEERVAKARELTTKQSELEQQVEAAAEIE  
DFEKAEEHQ TSLDQINSELEELNLTAERELLAKEEEAPASEEEEEPLDEEEGEENVEPSE  
GGACEEEKKECPDEDECKETA EDEEKDQND DDEENEKEPSAESESESEPVVQEEQEV PENA  
VEPSE

>comp10150\_c0\_seq1; 828 344 4381 LEN=4466; translated  
MPPPPPPPPPPPPQ QAGREANPGFGTARAVPQTYFRPPPPPPPKPRPVQYAPASAAAS  
SSSTTSSLMHRPSYGGVSPHSVQEPYGRVQVPSWSNADM SHRSKSTEVLR E SPYGLPETS  
TENGRSTEEPQRSPKGKOPTARYQHNAASLSFLVPALSSILW WHDSIIVLQVFLFVALGL

YALDLMNSRDGMALGAWIAALIMTVASGYGALLQVDDAGAVDVSMAGFLLQLAVEGMLFC  
AWACWITLQFQWLYSDLPLSLARGMEVTLHSLVPPVCAGILTNHLVRLLEDYWGVDVATF  
APLAFAAAFMAAGMISTGCSRSHFGSNKRSSPDGSSFTITTSFSAYMHTIVLLLVPGMHVL  
MFRDRIMNRYASLEDMYDLAIVWTVPYLLQCAVLGMFEKCPYSLPKILFSPRSSTAFLLGA  
FVPPVATLTASIAAQRYLIPVCNRIAYEFNGHNVASTLVVSAYLTSATLSGLFAVWIWG  
RTSSVTNELFFGEYHEDIVQASISLSGMLLGKAFGFPWNLTPLPILAFLLGLSVWITTKMM  
RYLCIFLFLVHATGIVVFGYRFAGINVTIPLPIPGEIEMNLVRFGTAEVFCVLIIGLVAGF  
ATRSEGGVGASLLKRIDVPGIILVVYCLSLTVLETTLIRQPLPETVPTMEVDSDFVEDSD  
VYDHASSLITTCIVGVAAYTRRLDMI SKLMYVAAISVGIGKGI AVFIDASESDSKIRSE  
HSEEHLAQRLLYRALITSALVFI MLVPSALMKPI RMKTGHR YHRTTSAGKLTSS IAPGAI  
RNVAIYCLFVLP SAVISVPTVLSPLIMALS AHYNLGTYYNMALPLSETVGCAMALWGIA  
SLYMLNHYPDGGGESWKKTAALAF LMGMGIALSAPT VPEWIVGEDDLG ISNPYAGISSL  
GTRLTTEGHNRTGGWGIMLASLASLLAIIGPFELRERRHPSGRKDRTFLRLMMFSLMFG  
CGIAWFITIVSMSEQDFWSLAITTLACMVLSFFGTVTCVLGYFIDLDDFDEVGDMAKITF  
GAFVLLLLLVTCAPSFLFPSTSTNLFAPGGCLSTYLIVAAGVNLALTFAVRSRISKSTSSR  
SIGNLGCISCYVLTVINLFGRLGVAGLDAELGLTVFMGVPASLFGTVFISPILLFLEGE  
SVESYSRTISRASGAKKQTKVVGITMNYLNGSNMFVPPVGTMFVYLVGFHTIFLRGS  
PFLKSILESKFWPKSTVETVSN TVRLNKDFLLQLAEKATSKSKAYAISSKLEGS GFWTST  
TLYEPQLHTAGLLATIPSAYFLFSELWYGEKKSKLKI FFALPMNILPLVVCKGTPSIRAV  
SIFLLLRLGLIQLFSSRQKDRSHMKL

>comp10150\_c0\_seq2; 805 344 4527 LEN=4612; translated  
MPPPPPPPPPPPPQAGRREANPGFGTARAVPQTYFRPPPPPPPKPRPVQYAPASAAAS  
SSSTTSSLMHRPSYGGVSPHSVQEPYGRVQVPSWSNADM SHRSKSTEVLRSPYGLPETS  
TENGRSTEEPQRSPKQKOPTARYQHNAASLSFLVPALSSILWWHDSIIVLQVFLFVALGL  
YALDLMNSRDGMALGAWIAALIMTVASGYGALLQVDDAGAVDVSMAGFLLQLAVEGMLFC  
AWVSHLSLAFRNERETPGLDRFASVRLSGMHVRVDPRIFDALSHPIDIDCRLAGSXLQFQ  
WLYSDLPLSLARGMEVTLHSLVPPVCAGILTNHLVRLLEDYWGVDVATFAPLAFAAAFMAA  
GMISTGCSRSHFGSNKRSSPDGSSFTITTSFSAYMHTIVLLLVPGMHVL MFRDRIMNRYA  
SLEDMYDLAIVWTVPYLLQCAVLGMFEKCPYSLPKILFSPRSSTAFLLGAFVPPVATLTAS  
IAAQRYLIPVCNRIAYEFNGHNVASTLVVSAYLTSATLSGLFAVWIWGRTSSVTNELFF  
GEYHEDIVQASISLSGMLLGKAFGFPWNLTPLPILAFLLGLSVWITTKMMRYLCIFLFLVH  
ATGIVVFGYRFAGINVTIPLPIPGEIEMNLVRFGTAEVFCVLIIGLVAGFATRSEGGVGAS  
LLKRIDVPGIILVVYCLSLTVLETTLIRQPLPETVPTMEVDSDFVEDSDVYDHASSLITTC  
CLIVGVAAYTRRLDMI SKLMYVAAISVGIGKGI AVFIDASESDSKIRSEHSEEHLAQRLL  
YRALITSALVFI MLVPSALMKPI RMKTGHR YHRTTSAGKLTSS IAPGAI RNVAIYCLFV  
LPSAVISVPTVLSPLIMALS AHYNLGTYYNMALPLSETVGCAMALWGIASLYMLNHYPD  
GGGESWKKTAALAF LMGMGIALSAPT VPEWIVGEDDLG ISNPYAGISSLGTRLTTEGHN  
RTGGWGIMLASLASLLAIIGPFELRERRHPSGRKDRTFLRLMMFSLMFGCGIAWFITIVS  
MSEQDFWSLAITTLACMVLSFFGTVTCVLGYFIDLDDFDEVGDMAKITFGAFVLLLLLVTC  
APSFLFPSTSTNLFAPGGCLSTYLIVAAGVNLALTFAVRSRISKSTSSRSIGNLGCISCY  
VLTVINLFGRLGVAGLDAELGLTVFMGVPASLFGTVFISPILLFLEGE SVESYSRTISR  
ASGAKKQTKVVGITMNYLNGSNMFVPPVGTMFVYLVGFHTIFLRGSPFLKSILESKF  
WPKSTVETVSN TVRLNKDFLLQLAEKATSKSKAYAISSKLEGS GFWTSTTLYEPQLHTAG  
LLATIPSAYFLFSELWYGEKKSKLKI FFALPMNILPLVVCKGTPSIRAVSIFLLLRLGLIQ  
LFSSRQKDRSHMKL

>comp10151\_c0\_seq1; 614 8 2002 LEN=2173; translated  
MEVACRFCDTFSTGIVAEAGACL GAGAGGRDRKHDNHCGAGAGADGNKSENKNENE EAPA  
VNATNGDGAMAQSEKGTGHALDTKPPKNLLELTRLYVETLYSSTIPWEILESAAGRVA  
RSPTMFWTESGIVLGNEGNECCPLNCTHVYGYTTLLERLFPDLARDMRTSDFVRNFDLST  
KGGCTTRFGGDDPFAIDGGLACVIKTYLVVLQSDPGL EFLKSVWPGVKGMEEVFAKHL  
AKAGVILVPQONTYDTAMEGANTF IGSYLVTALRATSAMATWMDVNF SKKCEKQAEVSR  
AKYEELCWREDLGYVADVDETN CQNSYGP GCFIDQLAAIGLSAACGLGHVFDPDREARA  
RRAIVRNKNSCPPFRDQCHLFQGD SGLRVCTYPNGKLGSGMVYSDLVSSGFAYPVAAG  
CLLDGNWEDATRICRMIRDRQSGVHRSPWNEPECGQYARSMAGWNLLDQACGF SYDSTK  
AAIGFRPGIHATSFSCFTFAGGFGEFRQTGTTTTANGTVLAE GTVRLGVLYGSTK LKTI  
RLNTTARVVKASLDGKSLDASIDATGAVALASEITIGEDSVLTLILSAPSGHETKERTFY  
PNGAATQEPPTKQPSSVSPCTVF APIQTKVAAAILIGAIVAIRFALCSCGGALGFLR  
ASES

>comp10152\_c0\_seq1; 346 125 1369 LEN=1893; translated  
MTESSRVSYFYDAEYVGNHYGQGHMPKPHRVRMTHNLVVNYGLYRKMEVFRPRLISPTAM

TRFHSDDYINFLKVITPDNMQDYNRQLQRFNVGEDCPVFDGIYEFQCQLYTSGSIGGAARL  
NEDAADIVINWAGGLHHAKKAEASGFCYVNDVLAILELLKKHERVLYIDIDIHHGDGVE  
EAFYSTNRVMTCSFHKFGYFPGTGDVFDYGHAEAGKNYSINFPLNDGMDDKAYRSVFRPV  
IGKIMEMFAPGAIVLQCGADSLSGDRLGCFNLVSKGHADCVKYVRSFGVPMLVLGGGGYT  
LRNVPRCWYETSVLTGEEVKDELFPNDYFEYFGPDYRLNLPVSNMENLNSPEYLEKTKV  
QLLDILSKVEPVPSTQIQTGQVESQLNPRGMNEMELDNHGAEVGRKEHPSELVA  
>comp10153\_c0\_seq1; 543 325 1863 LEN=2379; translated  
MGATPGTVLAANAGESEATKRKRLVLVGGGSHLQVIKGLNHASRPKDIDIVLIDVTNRP  
CYSGMVPSAVAGIYSPDETLIDLIPLESEWSKIDFVRDRVVDIDMDEKLVITNGNKKITFD  
AISVDIGSTSRGLIDITGAKEYTIPTRPITELVRRVEEATNFKKKNESNEDGHQCISN  
IVVVGGAAGIELSMAVSRWKAILGETNIAVTVLNSFDLFPDETLLNREALMEQLKER  
GIDVVNNAKVQVDEHSLLLDSGERFEFTYCLWATGADCHFIVSTLRQRGLAISENGWI  
QVNECFQSVSHPFVFAAGDCCSMKIPGSSRSLPKAGVYAVRAGPILINLTLFLDNKVGW  
SKNGREHVGEWNTGTGYTSLKAYKPKDFLKLACGDGKALGFRFGIPFYGKWFELKDA  
IDKSFMELFHRENPELVEGEPYDTSQYDAYSNRSPPIASIEAAILLQRRDDVDFQKAW  
DVLRDMAEDKGYRDEVLKEIIELVSSLESLSV  
>comp10154\_c0\_seq1; 429 247 2533 LEN=2750; translated  
MVLNDSNSDWAFTDDGDSSGFETSLSGIDQGFRRDKRDFAEKNNKDDITVATWMKKPI  
NSDASWAPVIPPPPPANCHLKLKNDNPVIAHKKRPPKAPKSPLPSRDDSNDPVSSESSSS  
SFVGSWSPTRSSSRPRATAPLSIDVSLASHNSNRTKSPSIQRSKRDLRGRSRARDRNGSQ  
HQTDP I IAPIPTRRGRSLSQSRPAARERSSASRKSARSKVTPNTKLRNLSRPPVTSP  
IGANRLPETHRSRNSRNPPrNRSVSRTRSNSRPPNSLQTSRERRNPMHDGRSISGSS  
RHQRRPSNGGVSISRSRRGKDDNSFSSSDPNIGRDISFGRAQSDAMDKTGTESIKKRSP  
MMEKLFGDHVSKDAKAYLPRTNSPPLTLGAWQQPERIHSRILLTATVYHNTASNLWIA  
TINTNQKGVAKNPAKASRYLKAFSFPTEKEARESAIANAPPKMMKFDDNSNCFVCQGFKA  
MFRASHCRNCGVICNSCSTTWPSKAIPEYTNLKKESQVKICKSCNFLSGAFKRALLEG  
DYEEAVALYGTGNINLRTPPFPQFSSKKEEVMYPIHCAVEGGNLDIVQWLMEDHFCPVKLI  
RTGGKKAANQDFPILTSKNRSALTIAMDALHVNVLRVLDVKGVSVEYKDLKGLRALE  
AVLNAIPSSIGEYRSDGFNHRWDEVFDDGTSVASSLGADATFSGSEFDGSASKRTDAEK  
CILCCDNTIDCESLPVDIKYVASSAVKIYQAPAPSAISAANS  
>comp10155\_c0\_seq1; 416 243 1320 LEN=1560; translated  
MKLLSIPALLCLAAATAVPQAAGASPFRATGRAPFLVRGGEGHRLRDAAGKSGLADSVSV  
SVSVSADSVSSVSAIIPRGGACSDSTPALFLKLEIQAAAEEAAGLLGILLAGLKYENALPA  
KVLGEPLVTLASMLLVFGSSIVGAVLDGGLSAASMQUALKPTTEVTGEAGWYSGLDKPWWN  
PPGWAFPIMWLVSFKPTQLCATSRIFKHGLSRNAETGAVEALPLVPLAVYASMLALGDTW  
NKVFFGLECIGSGTVVITLFFAALLASAYLFYIDVWAGWYMVPTCGWVAVATALQYSIY  
FRNREGGAAASAKKNNKRNKIARKKKKPPKQDARAGSCTRAGCSTQADDGVCNCRNE  
>comp10155\_c0\_seq2; 552 199 3323 LEN=3700; translated  
MFQRPGATLSFALHRQLLQTRRCAQHDFCRRGILSEAATPKPNPSLAYGCHRSLAALTRN  
VARHDSKTIILAAGPRLHGGHPQLFPFANALPFSTLSPATMGNSGVRNGAASLSSIRIRIR  
TLQSRQGRSSPMASVVPNTTGLAFFSNQNTPHRPSPNQPRGLGNIAGVMGTGALVLF  
GKTKYVLAALKLTKLAPLGSVMFTIGTYAMFFGLPYATGMVGLILVHEIGHAAVMHARGI  
PFSMPVFPFMGAVIATKELPRDAWEDALVAFGGPVLGSLGAGTVALVGHATDSQLLIAL  
GDFGLMINLFLNLLPLGSMDGGR IAGAVSPYMSVAGVGMGAGLAYTGAIQNPIFYLILLSG  
GYQTFQRFYNP GSMPPNYA ITPVQRAA IGLGYVGLVGG LALAMDVNGRYKKSPEVLRRE  
MELEKTWDTDRGICPSRAAGGAKAAF SNGVSKKGTETPSTAKCRDVAESRLQPPHSVTNVS  
PGPQWASPGNSSSIDETQSAVYRSRHRGGTIEIVAKSWYLSIVFASAYMAPMSLDLSNT  
IVDTTHFNIFPRRLSKIVGSMVEMLVFSCSLSSPYSSSEVPGYDLLLLPLETLVDSTRIDSN  
QTKYRYSIQRDLHAFVAPTFSPSLDCPAFRAPSSRRLGGRLAVQNLANVELVLRVLLPVS  
LLVGVARS DRELGA VVRKAHCRNARRKRRQGGQLLLVLA VPQDHRPVTAARGERVAMP RM  
KGDRVDRIHQTA VGI TVAL EGVFFLLP GHRQHSFVTDLVEKLNPHAALDR TDAETVSLGE  
KPNAAGLELEEEESRSRTDFNSNVFGXLQHPQIVDAVVAPRGCHQNPVSRGIDVHGSEFSG  
KKRPGSSVATVLLPKIPDTELP I PAGRHNVGRSTIVAHGRQTRASIAGFHTGATGNAAA  
VLVAVKSNRSHGGSARVERLDAP IQAPVTTVVAPGTANDSSGPDSMLCESSRGL EDEAEA  
EASFVDSCTLTAPSQLEDANSL LPPSLEDDGRYCSAEIPSGNLSRSLASGGGCVAIFLGQ  
LFD RSNFCLRWVAGVAVAA  
>comp10155\_c0\_seq3; 299 243 974 LEN=1853; translated  
MKLLSIPALLCLAAATAVPQAAGASPFRATGRAPFLVRGGEGHRLRDAAGKSGLADSVSV  
SVSVSADSVSSVSAIIPRGGACSDSTPALFLKLEIQAAAEEAAGLLGILLAGLKYENALPA  
KVLGEPLVTLASMLLVFGSSIVGAVLDGGLSAASMQUALKPTTEVTGEAGWYSGLDKPWWN



PPGWAFPIMWLTVSKPTQLCATSRIFKHGLSRNAETGAVEALPLVPLAVYASMLALGDVRR  
TMP

>comp10156\_c0\_seq1; 181 1 555 LEN=1327; translated  
XESTRTPHLLTDTAKGGQQSIIPISFQISAAVAALRILLLQAPPFSSNVVDHTGRIRGS  
TGWQYAETASSEASSSSVFATIAPSPENKKNATTSMAGMFRIDEPIPPAPRRNYFRHHK  
SEISEQHTRRRVDHGKTSASRTGGTFDDPEASDAINASEELSEEVVRVQKRLQGIKERRAR  
LAGR

>comp10156\_c0\_seq2; 1074 1 3077 LEN=3849; translated  
XVSHPSPNDSSEHGKKNVYKIGVVKGGKLDVSSSSDQLGGNVVLACDAESALTGITSGVT  
SSIGGGVVFPLEGMLLDLYDLVTGGEYEEHHIGDKSAMDPVYTEYTGASGCIERHSSSR  
YACSTDASITPEEDEILRDLQQLLEDERYHGNDLHSLTLQVNGVPVTASMISSMLTTAMQQQ  
NQNLLEEGVEIWIYNAQAGTFFASSNGKDDSSGDDNKDDNGGHETDKSFNESSSDPKKPKSN  
RLRSLWHRRSKVQTQTRTQENRNETTSRGRKERVGHFGKGTQLYGTANQESSSSVHEHEH  
RAETKAAGGCRDLLQPNHVKNPVLVAASQRCSRIVFLVAGFCVVASSFSMTVFGANVLAE  
AVSKSTDALEEIQGLSLEGIEIVDNFFRGLSPLKMLQDSGMQSTLYNVMEEAVSKLLQ  
TTNEACNLSESSVGDHPFGEALERVTDLWNEHLVAQDTFMETNNGGGWILQQLESLEPEG  
LRQVLDPAMNLEVIIVNQWIVPFLRALNALLAALLSLLMTDATMCGQKYRRWIVPLYAA  
LVVLAFAVSWVAFLLGSAAFADVCKDSPDGEALQFLLAEKERVLRNRSTDSASWEGLSSPL  
LYDMAAYYVEKCPFGEEPAEWKIMGISWEFTEALWEVAQILDDPVSHSLLDVCGIDSAV  
LDSATSSIVDSGKDLSDLSCNFSTMMLDVADFFRCENWYPLYKKGVDHALCHSGVSGFMW  
TAITQSIIVVIMSLMLTFRAGYFDVADAI SGSTIGNEEEDLNHHDTTMIMDHCDCEVSP  
EKQHCAPTDDWDEDEALQWNGVIEGDGGADNWKRTDDSSSRNSFRIGIDTHTTQMFEGEL  
DSMVSRTVPSLPTLPRGGMNQSFQSPSRSRLLQLQNCESSSSRPRRSGSSNVVDHTGRIRG  
STGWQYAETASSEASSSSVFATIAPSPENKKNATTSMAGMFRIDEPIPPAPRRNYFRHH  
KSEISEQHTRRRVDHGKTSASRTGGTFDDPEASDAINASEELSEEVVRVQKRLQGIKERRA  
RLAGR

>comp10158\_c0\_seq1; 534 310 1524 LEN=1623; translated  
MASTTSGGDDSTFDDANASNHFVHGESLDYSQIGTADSYNHTDDGASSSVTAGHTYNYMYR  
HQDATASVHEMHLALLYLLSNPEEFKALSHPGATTLDEWNAEIEDEDEESVMTSGL  
PVTALPFIVFADDAEVVLPQAHTASQLFGIEKVEGIELEAAAGIPALSQFLRRLWALMPG  
GDHLNIIDPPGLTVMRIAGGRYRVTAHRVWWTWVNEFANMSFDGGLSEDAPAEESDLQ  
VGDLVTLTIVDVFEEDNQGLLSYCPTFDNRAIRKTNQTSETIKKSSTKLFSILGRARRA  
VAKSEVNKRASEQITKMGLMQHAKNVAENVKHKVDEAVQQMNSPAKGASKKNANEITDSN  
QFEAAISAAEKDTSEAVAKDMYASVVSTDVEDATERSEPDVTRI

>comp10158\_c0\_seq2; 335 310 1746 LEN=1845; translated  
MASTTSGGDDSTFDDANASNHFVHGESLDYSQIGTADSYNHTDDGASSSVTAGHTYNYMYR  
HQDATASVHEMHLALLYLLSNPEEFKALSHPGATTLDEWNAEIEDEDEESVMTSGL  
PVTALPFIVFADDAEVVLPQAHTASQLFGIEKVEGIELEAAAGIPALSQFLRRLWLGXVPE  
GFAGENGCRNMFVNPATSFSIPSNRFETLTLRKSRCMYHIALNRENNXALTELLLYP  
NYFAIDPSTALMPGGDHLNIIDPPGLTVMRIAGGRYRVTAHRVWWTWVNEFANMSFDGG  
LSEDAPAEESDLQVGDLVTLTIVDVFEEDNQGLLSYCPTFDNRAIRKTNQTSETIKKS  
STKLFSILGRARRAVAKSEVNKRASEQITKMGLMQHAKNVAENVKHKVDEAVQQMNSPAK  
GASKKNANEITDSNQFEAAISAAEKDTSEAVAKDMYASVVSTDVEDATERSEPDVTRI

>comp10159\_c0\_seq1; 479 124 1383 LEN=1908; translated  
MSSIEATKIQAKEAFKAGNWAESATAVTEALGEEGIVYSMFHMRARANFEQQDYKAALR  
DAQAMTAIEPSQAEGYLLQAKMFGLLQKYGAQVDFQDGLKAVDPEDENYGLLEQGLHDA  
KKLSKSVLNDPKMMELFVLFDKDNKSSVDFKDVVAIGLYQLTNNMGDAQRQAAALLLMIDV  
DDQRTLIYDRFAKLI IAMSASISGIAFEDLYEQLKSALQENRPVPQRLMSCIQVTQNELDL  
ACENVKDHSDAKKTLICALSYSRSTKLFELWDADSSGTINFEELLAGLRKHQRAVTKNSFK  
ATNDHVAANASKLDDVEKNALMAMAKDKDNNQELDKKEEFAHAMSEYAEIEVDLHELIDF  
MCTVASQSDAEKVSDEYAMYSDVTPSAYKSWTMKKQQQLGGLGTIVDMCEEEEEEDDF

>comp10160\_c0\_seq1; 642 249 2879 LEN=3364; translated  
MTEINDASRQTTMKGTEPSPSSASLSESENTDQSRGAPTTEVSQPGIPHRLPPVSDAATL  
NNTNQTMPFAETQSSMEKPLDGLNSETAVPLSAPEALEPSSGSSFAKLAFAKFKETYM  
NETRAKQIVPPLQEAICGYGEGLARLAQSAHHHLQLPPELHQQPQPHPNPRPPGQFLEP  
IALRRHIHSTPQIRHAPISALSAIHDEDECDSESEDEEDPPPAGLEILDLTRSRSTPLTTS  
ENSAFGTIFRNTSHRVHDASSVAQASGGRSSAFSLRPYAMMKATSRSRSNERTARPVIFN  
PIVHEDEILKIADGDALGEMTSIEVTNVPYLRDATEVSKRSTKKSRAARFLTDVRNLA  
SAVETGANAKGLVAGVVLGMVENPARPASISSDEQSRSSSVASSPTARTNPSIDTKDLVN  
HGVVSSSIAILNHTNGKGRAASVDGNAEKSGSPIPSSKDRVCIQVNENTDFCNRAAYSMS

SPERMTQSFVSPSQDSPESGRFHSSVSNASGRVSOQTSTSNSSNSRSMGSQLSVISETDR  
EVENVNLLQRDRKLQAVGEQIELSLSSDRSIRSRLNCSLSTTTTPESTRARGDGASVRADR  
FFNNSKDSGRFRNLPPFMKRSGATKSPTTGSSGASVNTSSSSGSDEPPKIVSYQYMDRKQ  
VSDLSSLHHRPLSLETSSPRADHDQEVREASPSEQILAQVSEIVFEGAHGAKIDIYDKHR  
SNWSGKAIHTGFSRKNRSLPPRSPVNAKFTSITPPPRGGSPAAGVSPPRHIIGHRVEPMS  
TNVSKPYVVAVPVSSHLTSAPSTELLHAPHQGSQQVVRLSPNCDYYNLKPAARRLSPVYGH  
QVARTYEESIEILKTDSKEDNSIPLVTPDKGTPSS

>comp10161\_c0\_seq2; 143 195 1076 LEN=1517; translated  
MTMIQRAAAAYNIFMTKASTGNGKHPAAVNRAKFLSASTATFVSGTTAGFVSANANPGVAH  
AASSRAPTNSQKFDNSPRYIERDLAMTYGQDKNGNPRSRGILVRKWTGDSTPFQFPVNP  
EFTKVVWPEEWPFRETFDFLRGDSNDDGWFKVPRLVYHIDEPAASLTQYYRRNIRPKSDI  
LDICSSWVSHYPLEFPQTMGRICGTGMNGFELGFNDQLTGGYETKDLNDDPVLPHYEDNSF  
DVVTCVVSIDYLVEPIKVLQEVRRVLRPGGKVIISQSNRCFPKAIAMVSLCI

>comp10161\_c0\_seq3; 210 195 1229 LEN=1320; translated  
MTMIQRAAAAYNIFMTKASTGNGKHPAAVNRAKFLSASTATFVSGTTAGFVSANANPGVAH  
AASSRAPTNSQKFDNSPRYIERDLAMTYGQDKNGNPRSRGILVRKWTGDSTPFQFPVNP  
EFTKVVWPEEWPFRETFDFLRGDSNDDGWFKVPRLVYHIDEPAASLTQYYRRNIRPKSDI  
LDICSSWVSHYPLEFPQTMGRICGTGMNGFELGFNDQLTGGYETKDLNDDPVLPHYEDNSF  
DVVTCVVSIDYLVEPIKVLQEVRRVLRPGGKVIISQSNRCFPKAIAMWLGMTDLQHMEL  
INGYFQYAGGFEPKAFDITATLNNRRNDPMFVLEATKARITL

>comp10162\_c0\_seq1; 404 131 868 LEN=1045; translated  
MSANVAPTRMAQQIYKGGKAAQGGHLLKKKADALKVKFRDYAKSIAETKSGMSSDASS  
AFFSLTQAEYAAGNFQKVAEGTMSARIRVGAGVDNAGVKLPVFTVYDTGAEADNQSLG  
LIGGGKIVAVREKFTILLEKLIKLASLQTSFVTLDEAMKVTNRRVNALENVTIPRIEAI  
LKYIERELDELEREDFTRLKLVQKKEQALLLEAKAKAAMGVNDNGADSGDIMSGFTAED  
DDVVF

>comp10164\_c0\_seq1; 374 508 1713 LEN=2045; translated  
MPWLEKGEKIPFENLLFIHVPRCGGTSLMKSHDIPKKVTTAGAWYRRLFMRIFFTRYELL  
EKNNFPLWTEMNAAEFFIFVIGCFLLQIRETEYKALSIGMIVGSSIVFFMSTYFFVAPTI  
CRLRFIRRMFLCIVHYMICQLIANTEYIMGSNLHGYPHPLTARKIIDYGYVSEDRFEEVS  
TFAIVRNPYARMVSLYMYNRFPGWESFSDFVRTWYDRTIKDYREHGKMEEDWTPCHAIPO  
FEFTHDANGTKQLVHSHVIKQEEKCLKASKTGSDFVNKTRGDVSKDVEVNDENHDDGHT  
VLCSMSSSDSSQKSNVEHTKTNDAAASIRCLPDPVRCALLGMPHENKRKTKTPWYEHYDQ  
ETLNLTYEMYHRDFEIFGYNVVLEQRPDLEPPTPVVRDVCV

>comp10165\_c0\_seq1; 489 1 2708 LEN=4546; translated  
XNLKTPSFHIIHFFIPRALTVRSPEALFPTVLVSIIPFVSFAITTAQDAQGEKKQNSFPDLS  
KDNNPATTATPKHKIIQNSNSNSNSGRKVKKAVRKEKRSMDAAVAAAIQNYAGESENGEN  
SCLRPDSAAGESETANAASAGMDRDAAVAGGSKKRTQASIRKKKTSSSSGSGPGSASGRGK  
QTHRRQKTNGGAAVSVVSSQSQSQTNSQSGKKKKRKKKSSSASVSSSSASSSPQRRHSRT  
NDSDRQAPANASTNLHPRQRSIDRTGAVAIFFPSGTTAPEPTPFSSNIPVASVHLTPRPS  
PAFSPSMMEQDIFGDTSVIHREPPPLQPQFPTPASNGSNGNRNNDPDRSTSTSGTISAPDV  
IVRAQAISSEDDYAEVRRRIREEEYEAARLRIRTQRGNQVVHAVDVVPLPMVDSQDGN  
STITPVTNGGAASATTAAVVTASSTTEMSGKEDASRTSYPWTGNFVFPREGQRRWLWFG  
GGIACLTILVLTVVLTTLVLSNQSSVNSDDFHNNRSDDYDDDDLSPGTILVGKDDDNYSN  
DVIATMNSPVGKLVGSLVLPKSSLESIKANFEGPQFKAFAYLVDNDQYLGLGLGDAGGKDN  
DAEEIYQKLTFFQNKIKTVFSLVTLYHSLDGNKWHTRANWLDPTKDVCDWQGVNCKNEL  
ATQDYAAQNDKAGASTATTKDSLDRKPDGVTGSKEKEGFDYRRELRWQANPQFLQVPPQ  
RLRMLRSTDDSRDGAESSGSRREIMTKERYLEDVSVYAGIGDEESQNDDFDDVLFMFDDAF  
LDEFDNYDKTDPDEYLEDTIPIRSLELNFNNLVGTLPEVGLLSNVYELIDLGGNKISGS  
IPSTFKMLSRLEGLNLSDNILTSILPSDLGYMRFRMRRFDVSGNPGIHHGILPWSFKFWIKI  
GA

>comp10165\_c0\_seq2; 495 1 2927 LEN=4293; translated  
XNLKTPSFHIIHFFIPRALTVRSPEALFPTVLVSIIPFVSFAITTAQDAQGEKKQNSFPDLS  
KDNNPATTATPKHKIIQNSNSNSNSGRKVKKAVRKEKRSMDAAVAAAIQNYAGESENGEN  
SCLRPDSAAGESETANAASAGMDRDAAVAGGSKKRTQASIRKKKTSSSSGSGPGSASGRGK  
QTHRRQKTNGGAAVSVVSSQSQSQTNSQSGKKKKRKKKSSSASVSSSSASSSPQRRHSRT  
NDSDRQAPANASTNLHPRQRSIDRTGAVAIFFPSGTTAPEPTPFSSNIPVASVHLTPRPS  
PAFSPSMMEQDIFGDTSVIHREPPPLQPQFPTPASNGSNGNRNNDPDRSTSTSGTISAPDV  
IVRAQAISSEDDYAEVRRRIREEEYEAARLRIRTQRGNQVVHAVDVVPLPMVDSQDGN  
STITPVTNGGAASATTAAVVTASSTTEMSGKEDASRTSYPWTGNFVFPREGQRRWLWFG  
L

GGGIACLTILVLTVVLTTVLSNQSSVNSDDFHNNRSDDYDDDDLSPGTILVGKDDDNYSN  
DVIATMNSPVGKLVGSVLPKSSLESIKANFEGPQFKAFAYLVDNDQYLGLGLGDAGGKDN  
DAEEIYQKLTFFQONKIKTVFSLVTLYHSLDGNKWHTRANWLDPTKDVCDWQGVNCKNEL  
ATQDYAAQNDKAGASTATTKDSLDRKPDGVTGSKEKEGFDYRRELWQANPQFLQVPPQ  
RLRMLRSTDDSRDGAESSGSRTRIMTKERYLEDSVYAGIGDEESQNDFFDVLFMFDDAF  
LDEFDNYDKTDPDEYLEDTIPIRSLELNFNNLVGTLPEVGLLSNVYELIDLGGNKISGS  
IPSTFKMLSRLEGLNLSDNILTSILPSDLGYMRFMRFFDVSGNPGIHGILPWSFKFWIKI  
DELSIHGTGLSGVVP I EVCDMVQSRKKDTENPLSFRASCPLAIECPCCTECCNKEKESDF  
DYKCKATDPPDPFGF

>comp10165\_c0\_seq3; 495 1 2927 LEN=4340; translated  
XNLKTPSFHIFHFFIPRALTVRSPEALFPTVLVSI PFV SFAITTAQDAQGEKKQNSFPDLS  
KDNNPATTATPKHKI IQNSNSNSNSGRKVKKAVRKEKRSMDAAVAAA IQNYAGESENGEN  
SCLRPDSAAGESETANAASAGMDRDAAVAGGSKKRTQASIRKKKTSSSSGSGPGSASGRGK  
QTHRRQKTNGGAAVSVVSSQSQSQSTNQSGKKKKRKKKSSSASVSSSSASSSPQRRHSRT  
NDSDRQAPANASTNLHPRQRSIDRTGAVAI F P S G T T A P E P T P F S S N I P V A S V H L T P P R P S  
P A F S P S M M E Q D I F G D T S V I H R E P P L Q P Q F P T P A S N G S N G N R N N P D R S T S T S G T I S A P D V  
I V R A Q A I S S E D Y Y A E V R R R I R E E E Y E A A R L R I R T Q R G N Q V V H A V D V V P L P M V D S Q D G N I  
S T I T P V T N G G A A S A T T A A V V T A S S T T E M S G K E D A S R T S Y P W T G N F V P R E G Q R R W L W F G L F  
GGGIACLTILVLTVVLTTVLSNQSSVNSDDFHNNRSDDYDDDDLSPGTILVGKDDDNYSN  
DVIATMNSPVGKLVGSVLPKSSLESIKANFEGPQFKAFAYLVDNDQYLGLGLGDAGGKDN  
DAEEIYQKLTFFQONKIKTVFSLVTLYHSLDGNKWHTRANWLDPTKDVCDWQGVNCKNEL  
ATQDYAAQNDKAGASTATTKDSLDRKPDGVTGSKEKEGFDYRRELWQANPQFLQVPPQ  
RLRMLRSTDDSRDGAESSGSRTRIMTKERYLEDSVYAGIGDEESQNDFFDVLFMFDDAF  
LDEFDNYDKTDPDEYLEDTIPIRSLELNFNNLVGTLPEVGLLSNVYELIDLGGNKISGS  
IPSTFKMLSRLEGLNLSDNILTSILPSDLGYMRFMRFFDVSGNPGIHGILPWSFKFWIKI  
DELSIHGTGLSGVVP I EVCDMVQSRKKDTENPLSFRASCPLAIECPCCTECCNKEKESDF  
DYKCKATDPPDPFGF

>comp10165\_c0\_seq4; 489 1 2708 LEN=4499; translated  
XNLKTPSFHIFHFFIPRALTVRSPEALFPTVLVSI PFV SFAITTAQDAQGEKKQNSFPDLS  
KDNNPATTATPKHKI IQNSNSNSNSGRKVKKAVRKEKRSMDAAVAAA IQNYAGESENGEN  
SCLRPDSAAGESETANAASAGMDRDAAVAGGSKKRTQASIRKKKTSSSSGSGPGSASGRGK  
QTHRRQKTNGGAAVSVVSSQSQSQSTNQSGKKKKRKKKSSSASVSSSSASSSPQRRHSRT  
NDSDRQAPANASTNLHPRQRSIDRTGAVAI F P S G T T A P E P T P F S S N I P V A S V H L T P P R P S  
P A F S P S M M E Q D I F G D T S V I H R E P P L Q P Q F P T P A S N G S N G N R N N P D R S T S T S G T I S A P D V  
I V R A Q A I S S E D Y Y A E V R R R I R E E E Y E A A R L R I R T Q R G N Q V V H A V D V V P L P M V D S Q D G N I  
S T I T P V T N G G A A S A T T A A V V T A S S T T E M S G K E D A S R T S Y P W T G N F V P R E G Q R R W L W F G L F  
GGGIACLTILVLTVVLTTVLSNQSSVNSDDFHNNRSDDYDDDDLSPGTILVGKDDDNYSN  
DVIATMNSPVGKLVGSVLPKSSLESIKANFEGPQFKAFAYLVDNDQYLGLGLGDAGGKDN  
DAEEIYQKLTFFQONKIKTVFSLVTLYHSLDGNKWHTRANWLDPTKDVCDWQGVNCKNEL  
ATQDYAAQNDKAGASTATTKDSLDRKPDGVTGSKEKEGFDYRRELWQANPQFLQVPPQ  
RLRMLRSTDDSRDGAESSGSRTRIMTKERYLEDSVYAGIGDEESQNDFFDVLFMFDDAF  
LDEFDNYDKTDPDEYLEDTIPIRSLELNFNNLVGTLPEVGLLSNVYELIDLGGNKISGS  
IPSTFKMLSRLEGLNLSDNILTSILPSDLGYMRFMRFFDVSGNPGIHGILPWSFKFWIKI  
GA

>comp10166\_c0\_seq1; 702 89 1570 LEN=1676; translated  
MRFSSQTLTFFLVASMAAEVSASSVVAESNTRLPMPLATVISDLEAEGVSEVAPACFLTS  
RGVTESKKAELFGLLEDATATAFGTESGVCMALSTGACSVPEAASTAVACEGSSVYYADE  
DLARGEGLFDSLGAIERILNDSGIIITGSPSLIVVTEPETHKARLEDSATDVLANLVS  
SKKVCSLNDFVFTVYVKTADALDLDLASKDPATVQDTIASTVASDFWQSTGSSPMAF  
ISSSSNMSPKDLAARVKGPAARKALETAIETVKAASDDNQSI V P S Y G D L C K A A S K R A M E  
ELEEVAESPVSSSAVKGQIQANLRDELNGELGDLAEGQLSLLQEACFADFKAKLSKLRI  
SPVLATDMENVAKESVADFVKRAKSMPIGTNDAKSIYQNRLQEFCSERLLAARAGGQFKP  
APRKGVTIGMHWLLPKPFNDYRQEPWMVQATDNLVYIPDKITDVSPEDEVASGDWRSKI  
VPSPGTGNEMIYMQ

>comp10167\_c0\_seq1; 277 183 566 LEN=607; translated  
MNAPERTQSFLLEDDETGELKIVYTADTKVTNAGTFRFNKEDHTVGNLFRMQLLRDPVRF  
AGYLHPHPLVYFIDLKIQTNNSTVAPVEVLSAAIDDLNETDHLMTQFQEACEEWKRTND  
TEVSGNF

>comp10168\_c0\_seq1; 379 1137 3491 LEN=4440; translated  
MKHACGLIYVDSXTAEYWSQALSVPVSGNLKISAAELENREFCGDSEFTKVPTEHISTG

LPDVDLVLYVSGTPSSRFRGTTLAVAVACNFDQFDRPTAGAINVCLDRIDLDEEDGTASD  
AITEDNVDVLKHEVAHVLGHSSNSYRFYWDSETGTERTPRPFESRTVTCVDDVERSILILP  
GEDTMQFYEGNNGQRYAAIVTPKVRAMARNQFDCQSLPGAKLENQPTGSESECTGDHWDEH  
DYYPEALSGVISPTTNIMSHMTLALFEDSGWYRANYTQGRMNPWGLGAGCDFVEEQCVLE  
DTDGSPTIPEYAKGYFCDDASKRGCSPALTHKLACSVIDYFYIQPQTLPEKRFQYFKDEI  
TMGGPRQADYCPPLYGTYGGLEAEQLACTDTANADSLNIYSEVYGSQSDSQCIPTDGGDGR  
YRTACVKDEMVLRLINVRGEWKVCEYDFQKLDVRVAGAGTVMRRNKETTSEPPSIAGHHR  
IKVAVLILAFALPNSVLSHPALGTALPQTLVCPRLSTACPDFLFCPFNCAGRGICNYNAVGA  
NGTVHPTCECFDSSDTSSGCSNSLLPGGDFLDNADGLLDNIEEDFFDPLVSVFVDPDKW  
TTSSWAWGAGLLAVFLVMLLCICSAFWPESKNKRDMEELGGSSPRKRAPSSSPRKS  
STGVRAASPRASSSSAGIPGGLRGTVPAGTAIPPGGGGGPIRGPPPDDGGPSTLPVRRR  
STTATGGAVRPRNTWWKCERPLPAGTVPLPGAPRTGVLFGLIARQWQLQQCARDPSRVV  
QYSN

>comp10168\_c0\_seq2; 562 292 3022 LEN=3971; translated  
MTRAAALSSVLLFCSLAARNACFGEARTSASHTNSGLRARSNDRQSGKDEYSNEKKHQSV  
IRRLYGPENGEVRKHKVMIIEERLERSRTGFLGDPNHEIPYENHPYQKTYDQRRRERERER  
ILQDETEFVNTVEQGVVNTNTAGIGGEDLYKPMRIRFETQALDDTRDAENAAKIDFFKTR  
IFPETAEYWSQALSVPVSGNLKISAAELENREFCGDSEFTKVPTEHISTGLPDVDLVLY  
VSGTPSSRFRGTTLAVAVACNFDQFDRPTAGAINVCLDRIDLDEEDGTASDAITEDNVDV  
LKHEVAHVLGHSSNSYRFYWDSETGTERTPRPFESRTVTCVDDVERSILILPGEDTMQFY  
E  
GNNQRYAAIVTPKVRAMARNQFDCQSLPGAKLENQPTGSESECTGDHWDEHDYYPEALSG  
VISPTTNIMSHMTLALFEDSGWYRANYTQGRMNPWGLGAGCDFVEEQCVLEDTDGSPTIP  
EYAKGYFCDDASKRGCSPALTHKLACSVIDYFYIQPQTLPEKRFQYFKDEITMGGPRQAD  
YCPPLYGTYGGLEAEQLACTDTANADSLNIYSEVYGSQSDSQCIPTDGGDGRCYRTACVKDE  
MVLRLINVRGEWKVCEYDFQKLDVRVAGALPQTLVCPRLSTACPDFLFCPFNCAGRGICNY  
NAVGANGTVHPTCECFDSSDTSSGCSNSLLPGGDFLDNADGLLDNIEEDFFDPLVSVFV  
DHPDKWTTSSWAWGAGLLAVFLVMLLCICSAFWPESKNKRDMEELGGSSPRKRAPSSSPRKS  
SPRRSSTGVRAASPRASSSSAGIPGGLRGTVPAGTAIPPGGGGGPIRGPPPDDGGPSTL  
PVRRRSTTATGGAVRPRNTWWKCERPLPAGTVPLPGAPRTGVLFGLIARQWQLQQCARD  
PSRVVQYSN

>comp10168\_c0\_seq3; 537 292 3160 LEN=4109; translated  
MTRAAALSSVLLFCSLAARNACFGEARTSASHTNSGLRARSNDRQSGKDEYSNEKKHQSV  
IRRLYGPENGEVRKHKVMIIEERLERSRTGFLGDPNHEIPYENHPYQKTYDQRRRERERER  
ILQDETEFVNTVEQGVVNTNTAGIGGEDLYKPMRIRFETQALDDTRDAENAAKIDFFKTR  
IFPETAEYWSQALSVPVSGNLKISAAELENREFCGDSEFTKVPTEHISTGLPDVDLVLY  
VSGTPSSRFRGTTLAVAVACNFDQFDRPTAGAINVCLDRIDLDEEDGTASDAITEDNVDV  
LKHEVAHVLGHSSNSYRFYWDSETGTERTPRPFESRTVTCVDDVERSILILPGEDTMQFY  
E  
GNNQRYAAIVTPKVRAMARNQFDCQSLPGAKLENQPTGSESECTGDHWDEHDYYPEALSG  
VISPTTNIMSHMTLALFEDSGWYRANYTQGRMNPWGLGAGCDFVEEQCVLEDTDGSPTIP  
EYAKGYFCDDASKRGCSPALTHKLACSVIDYFYIQPQTLPEKRFQYFKDEITMGGPRQAD  
YCPPLYGTYGGLEAEQLACTDTANADSLNIYSEVYGSQSDSQCIPTDGGDGRCYRTACVKDE  
MVLRLINVRGEWKVCEYDFQKLDVRVAGAGTVMRRNKETTSEPPSIAGHHRIKVAVLILAF  
ALPNSVLSHPALGTALPQTLVCPRLSTACPDFLFCPFNCAGRGICNYNAVGANGTVHPTCE  
CFDSSDTSSGCSNSLLPGGDFLDNADGLLDNIEEDFFDPLVSVFVDPDKWTTSSWAWGA  
GLLAVFLVMLLCICSAFWPESKNKRDMEELGGSSPRKRAPSSSPRKSSTGVRAASP  
RASSSSAGIPGGLRGTVPAGTAIPPGGGGGPIRGPPPDDGGPSTLPVRRRSTTATGGAV  
RPRNTWWKCERPLPAGTVPLPGAPRTGVLFGLIARQWQLQQCARDPSRVVQYSN

>comp10168\_c0\_seq4; 404 1137 3353 LEN=4302; translated  
MKHACGLIYVDSXTAEYWSQALSVPVSGNLKISAAELENREFCGDSEFTKVPTEHISTG  
LPDVDLVLYVSGTPSSRFRGTTLAVAVACNFDQFDRPTAGAINVCLDRIDLDEEDGTASD  
AITEDNVDVLKHEVAHVLGHSSNSYRFYWDSETGTERTPRPFESRTVTCVDDVERSILILP  
GEDTMQFYEGNNGQRYAAIVTPKVRAMARNQFDCQSLPGAKLENQPTGSESECTGDHWDEH  
DYYPEALSGVISPTTNIMSHMTLALFEDSGWYRANYTQGRMNPWGLGAGCDFVEEQCVLE  
DTDGSPTIPEYAKGYFCDDASKRGCSPALTHKLACSVIDYFYIQPQTLPEKRFQYFKDEI  
TMGGPRQADYCPPLYGTYGGLEAEQLACTDTANADSLNIYSEVYGSQSDSQCIPTDGGDGR  
YRTACVKDEMVLRLINVRGEWKVCEYDFQKLDVRVAGALPQTLVCPRLSTACPDFLFCPF  
NCAGRGICNYNAVGANGTVHPTCECFDSSDTSSGCSNSLLPGGDFLDNADGLLDNIEEDFF  
DPLVSVFVDPDKWTTSSWAWGAGLLAVFLVMLLCICSAFWPESKNKRDMEELGGSSPRK  
RAPSSSPRKSSTGVRAASPRASSSSAGIPGGLRGTVPAGTAIPPGGGGGPIRGPP  
PDGGPSTLPVRRRSTTATGGAVRPRNTWWKCERPLPAGTVPLPGAPRTGVLFGLIARQ

WQLQQCARDPSRVVQYSN

>comp10169\_c0\_seq1; 388 490 1908 LEN=2293; translated  
MATYARDGDPGCDATNWNQKAPNATGPTKDPSTFAPSLNNTTQWFDSITALGANIAVLTA  
KHGCGFLLWPTTAVLPVGDAGNATGSETFVFPYGYHTRFDLLRQFVDSAKASGVGYGFYYS  
IMKNFFLCRSFEGENSCGKAVLDGQHNVSASYHTIVEHHLTELYTSYGPLTEVWIDSRL  
QGFGLLDRLQPTAAGVPSHPRQWCGETESGYPSRDVGPVWQTGTGFRGNASSGRWVDK  
FCDPQLFEDHIWIFYEPGRAIKPLAEMIAIYHDVVGRGMVMEFAIFAIGRDGLVQESH  
RGERYRALGDWVRGCGYGTPLWSVSDRVPERDRGVYTTLELPVPEDAFGGGSDYLDWRSVLSLFDRI  
VLREDVSVGQIRIRNYTVALVGQHHHHRHRYPFEDSEPVELATLVSDGTSVGRKRIHLLD  
QSRHSFPRVGFRRASNASILLTVTHAIAPPHIALFGVYKPCYPHNEPGRSEQS

>comp10169\_c0\_seq2; 464 176 1759 LEN=2144; translated  
MRRMMATIIGIETAFAVLLGDAAVATDGRAIIPVPSAPQFRYQSTDFVALIHFNMATYA  
RDGDPGCDATNWNQKAPNATGPTKDPSTFAPSLNNTTQWFDSITALGANIAVLTA  
KHGCGFLLWPTTAVLPVGDAGNATGSETFVFPYGYHTRFDLLRQFVDSAKASGVGYGFYYS  
IMKNFFLCRSFEGENSCGKAVLDGQHNVSASYHTIVEHHLTELYTSYGPLTEVWIDSRL  
QGFGLLDRLQPTAAGVPSHPRQWCGETESGYPSRDVGPVWQTGTGFRGNASSGRWVDK  
FCDPQLFEDHIWIFYEPGRAIKPLAEMIAIYHDVVGRGMVMEFAIFAIGRDGLVQESH  
RGERYRALGDWVRGCGYGTPLWSVSDRVPERDRGVYTTLELPVPEDAFGGGSDYLDWRSVLSLFDRI  
VLREDVSVGQIRIRNYTVALVGQHHHHRHRYPFEDSEPVELATLVSDGTSVGRKRIHLLD  
QSRHSFPRVGFRRASNASILLTVTHAIAPPHIALFGVYKPCYPHNEPGRSEQS

>comp10170\_c0\_seq1; 126 1 799 LEN=1058; translated  
KDDNNGLRICIIDSSILPCCFLHGNTASLSLLMTSTCRVSLIASIASSNESSHCFFSASHAG  
LQDWESAITDAKECIRLNPEFIKGYRRLATAQLESKQYDAAEATIKQGLGIDANHGQLTR  
LLRNKLNKAAAAPSAPSLPQGSNAARQLDTATMREIHDCLKVQYGATAREYNTVRANLM  
KAAKEEKMYGITLNEVKENPSATGDYRSVGLFMRQTQPEILDHLETNIESQKKKQQL  
SGKSDYLEKRLKSQQMNMKELAQQ

>comp10170\_c0\_seq2; 325 137 913 LEN=1172; translated  
MSEKKTAEYKALGNEAFSKKDFKTAIEFYKAILQEPKNHIFSNRSASHAGLQDWESA  
ITDAKECIRLNPEFIKGYRRLATAQLESKQYDAAEATIKQGLGIDANHGQLTRLLRNKLN  
KAAAAPSAPSLPQGSNAARQLDTATMREIHDCLKVQYGATAREYNTVRANLMKAAKEEK  
MYGITLNEVKENPSATGDYRSVGLFMRQTQPEILDHLETNIESQKKKQQLSGKSDYL  
EKRLKSQQMNMKELAQQ

>comp10171\_c0\_seq1; 180 1 788 LEN=1217; translated  
XNTPQGNQLKIERGQHTRTERVAATTTKTMMMKHIGFRILVAVIGASALVSAGNEDTHEK  
CREWAEMGECEKNPGYMLGSCAASCDAAAAALKEAEELKGISSFFDLSANDIFGESLSF  
SKFEGQVTVVVNVASECGYTD SHYRGLVELWSHAKETDRINILAFPCNQFGHQEPGSSEE  
INEFAVEEYGVFTMMEKINVNGPNASIVYKYLKSQAGPTAIQWNFATYFVVSPDGTINS  
YSGSKPMQLKDTLFLGLLQTDDEL

>comp10171\_c0\_seq2; 180 1 788 LEN=1313; translated  
XNTPQGNQLKIERGQHTRTERVAATTTKTMMMKHIGFRILVAVIGASALVSAGNEDTHEK  
CREWAEMGECEKNPGYMLGSCAASCDAAAAALKEAEELKGISSFFDLSANDIFGESLSF  
SKFEGQVTVVVNVASECGYTD SHYRGLVELWSHAKETDRINILAFPCNQFGHQEPGSSEE  
INEFAVEEYGVFTMMEKINVNGPNASIVYKYLKSQAGPTAIQWNFATYFVVSPDGTINS  
YSGSKPMQLKDTLFLGLLQTDDEL

>comp10173\_c0\_seq1; 435 126 1818 LEN=1928; translated  
MAGGGQPQKQTTMGGNRRRSPSSAVEIIGTILNTIFHNKHILLMNASLIVFLVVMNGQ  
SSYILLPADAPADTFSSSSSSAIRKASTVMDLPKPVIASEPDPDPDPDPDPDPKI IHTNGMS  
GSTTEIKEYNDAEIGKTASVLMATGYSLLDYQRFVGLSLRKTGFEGNII LAVSPNINSEC  
ENYLATKNVILHKVQYVECSHPVKKNVDKNDHEHEKELVTCVHPYPKPKHRWARFPLLRDL  
LMQCGGHEHPEVQCGGVLITDMRDTMFQRNPFGEAPKVVYGLQVFAEHYSIRTTHWLVD  
WPVGDCKGVHYDEPMLCSGTTIGTRQAML DYLEIFHKEMNLWME SPKCCCFDTNGDDQSM  
HNFLFYSGALNSVDGGVQAVKNRNLVNTVGMAGSLIFESHARIKREFLGALKDPDRPVK  
DAHHEPLDMSPEDKVDDEGNSKTMGAQYGLVMDGYFVDYDGSRSFIIHQYDRFGSHFD  
NWKGTGTGNDTITLSSRKRIGAGVAGQALVPVLRWRRSNNKTGTPNGKRFRRRNHGTTVAG  
MCTTYSFGCGSNFMGQSKTRTFD

>comp10174\_c0\_seq1; 713 184 1608 LEN=1742; translated  
MKIFSAFGIHLHASTVCLAFQSSNIWTTKQIKKVEPSTAFVNFVFSNGDSCGLGKSQR  
LASLQMSNNAGDDDDDDTDEYIEDVDLGDWRSFRKTLVDSGISYDTTKDG YLDKDAEKS  
ETSTISNTGSSIERPKSVSKANEELLEKQSEILAKEYKEGVWAHEAAFAEVGGLVVRMPL  
EAEIYRNKDQLIIGKELSARLPTDEQTSKNVLDDEDISPIAAKTLKWyREAQALIQEEMGV

IAGSANEEKGEVDPTGLPAKTEDLLKLYLNNQENWQSVCLVAEKNENDGSAVTTYTLNRPMA  
FSLSENVAKMVLFGAMSNLITDGRVPI SKTNLYSKFLRSFEKECAVYVGGPNKQDKPAVV  
IHGIQDLEGATEIASGTGVYMGGLEAAIDGVLDGRYKPLDFRFFIGCNSYQKGGLDAAIA  
SNKYQPIACTRSLALKQCIQLPKPLWHEVMEMCGGELMEVSRLELQKRSDLNPE  
>comp10175\_c0\_seq1; 507 148 1530 LEN=1716; translated  
MPSVPAVQPDARSTLVSFTEHDHITQLIREAVQVQHHCKRARFHLSDNDKDTKASSIGNVAG  
ASTTSKSKGRVGMRLRRRLHADDINMALQWRGSEKIYATGIVGGGRFVNSSSRDDKKVLE  
DYLKSEMKMPPQEVGLTLHWLAVDGVQPNVSNPPGTGVGGSANANKRKQSAVHLVDDV  
DDEDGSRGVQVTQLLPRLLSEELRLYFSRITEAVERGGATPVTRQQQDTALASLIRDPG  
LQELIPFMINYVTKNLKFHKLGNPEHCRTLIRMAQALLGNPHIHLELYLHQLLPAILTMVV  
AERLSSNPFNDHWILRYEAALCLVQACNLFGEDYATLKARLLKPLSHAIGPDKPLSTRYG  
GLVAITFFGPKAINAFVLPALDYWKQSETLLSTCNNLEQRMEIQMCEQATLNALGVFLG  
PANKDAPEAMGMGWELEEDTFGDRLVMLCTNETEYATCFI  
>comp10175\_c0\_seq2; 434 148 1640 LEN=1826; translated  
MPSVPAVQPDARSTLVSFTEHDHITQLIREAVQVQHHCKRARFHLSDNDKDTKASSIGNVAG  
ASTTSKSKGRVGMRLRRRLHADDINMALQWRGSEKIYATGIVGGGRFVNSSSRDDKKVLE  
DYLKSEMKMPPQEVGLTLHWLAVDGVQPNVSNPPGTGVGGSANANKRKQSAVHLVDDV  
DDEDGSRGVQVTQLLPRLLSEELRLYFSRITEAVERGGATPVTRQQQDTALASLIRDPG  
LQELIPFMINYVTKNLKFHKLGNPEHCRTLIRMAQALLGNPHIHLELYEVETVENFSDQMI  
SGLNYFYKSVESFFSKTRRILFQLHQLLPAILTMVVAERLSSNPFNDHWILRYEAALCLV  
QACNLFGEDYATLKARLLKPLSHAIGPDKPLSTRYGGLVAITFFGPKAINAFVLPALDY  
WKQSETLLSTCNNLEQRMEIQMCEQATLNALGVFLGPANKDAPEAMGMGWELEEDTFGDR  
LVMLCTNETEYATCFI  
>comp10176\_c0\_seq1; 870 121 1674 LEN=1727; translated  
MGKRPNETEEERDARRAKKRAKKEAKKKLDDENEKRDKSDKKKDKKSEKKKKKKEKSD  
AEKRNGSSDVATNATGSVDQESITAITSWDTFEETPFDPKPIKSALSAAGFQNPSPVQAKA  
WPVAISGKDVAVAKTGSCKTLGFLLPIFHRISTRDLPGAEAEVIFGRSHTPSPVGLVV  
SPTRELAMQIHKECVKFGSSIGISSACLYGGTSASEQIQELRKLSPQII IATPGRLCDLL  
DRKPSCLSLKSFHVVLDADRMLDMGFEPQLKQITAALPPI SERQTLFFTTATWPKAVRK  
VAAKFLRDKDETMEIFLGEGTADGELVANKSIKQTFVEAQDDVKDRKLYDLLCSLDLEKA  
SVVIFANTKRRVDYVAKLFWQEGFSTCAVHGDKAQHERDASLRKFVSKECTILVATDVAA  
RGLDIKGVTHVNFDMARDCDSYIHRIGRTGRAGEMGEAVTFWNPDPYDKPCSPALVKIAK  
DAGQEVPAFLQQYEKKGASKQWKVADA AAKAKTLLAGR  
>comp10177\_c0\_seq1; 253 1 1133 LEN=1348; translated  
XFWGDVSVAAAGMLAVLVDGLLAGEHRSGSCVAVGSPRDMAPALGSIGYLFLVHFLVLP  
SSMAEGAECTGERAGGDCHEDRFGAVVRRTFVVCAGI GGGFGVAGYLLFGADTEEIVLMN  
VGGGPVMAVLRFLLCVLDLLTYPVVMRPSIVVLERHCFRHRPPGRRPRGVPEDPGEDGV  
ALVPSGGVSPASSTCGKRNAIASFEIDEGAETVGHVDRIPIRENDDNNDNDEGVGVI  
DWRTHMAVCLALGVVAAAGATLVPFAGLLSGLVGGVSQTF LAFVLPPLVWARQRQSTTIA  
GRSGGTLSPAPAGWLLGVLPWRERGLVACGFGLILWTLRS AWIELADEIAPLGVGLAV  
SAGTPGRKPSAGYGEV  
>comp10178\_c0\_seq1; 329 137 880 LEN=2041; translated  
MVTITPVDDNNKDVFSLESVGEKLLKDVKGNAVPTEDAFKSSNASLIGLYFSASWCPPC  
QRFTPIILTEFYKAAKASNSGLEIVFISSDRSREEFDGYFEKMPWLAIPSVDGSAEIKQNL  
SNMLQVTGIPSIAILDAKTGEFISGGEARDDDVMKANGDAAEIAATVQKWKDAERHP  
ISEAPRLMELGDMGRNPLFKFLSFLAKNPMIIFGLIYFYKWIQNRMIAMGFDDSDATTEP  
VVEV  
SSEDTEF  
>comp10178\_c0\_seq2; 256 171 611 LEN=2116; translated  
MPWLAIPSVDGSAEIKQNL SNMLQVTGIPSIAILDAKTGEFISGGEARDDDVMKANGDAAE  
IAATVQKWKDAERHP ISEAPRLMELGDMGRNPLFKFLSFLAKNPMIIFGLIYFYKWIQNR  
MIAMGFDDSDATTEP VVEV  
SSEDTEF  
>comp10178\_c0\_seq4; 329 137 880 LEN=2385; translated  
MVTITPVDDNNKDVFSLESVGEKLLKDVKGNAVPTEDAFKSSNASLIGLYFSASWCPPC  
QRFTPIILTEFYKAAKASNSGLEIVFISSDRSREEFDGYFEKMPWLAIPSVDGSAEIKQNL  
SNMLQVTGIPSIAILDAKTGEFISGGEARDDDVMKANGDAAEIAATVQKWKDAERHP  
ISEAPRLMELGDMGRNPLFKFLSFLAKNPMIIFGLIYFYKWIQNRMIAMGFDDSDATTEP  
VVEV  
SSEDTEF  
>comp10178\_c0\_seq5; 256 171 611 LEN=1772; translated  
MPWLAIPSVDGSAEIKQNL SNMLQVTGIPSIAILDAKTGEFISGGEARDDDVMKANGDAAE  
IAATVQKWKDAERHP ISEAPRLMELGDMGRNPLFKFLSFLAKNPMIIFGLIYFYKWIQNR

MIAMGFDDSDATTEPVVEVSSSEDEF

>comp10179\_c0\_seq1; 634 202 2499 LEN=3802; translated  
MQMQASSPRNVTRRTQDYEEDDFTGPNFIDHYSLRDPSSVTKFRGARVHVYNTFNEQILL  
EDRRSSKDRNNAGGDFDDDDNGKNRRPNRHSITVKRIPITSFGLRVLRLAYSIALLN  
GYAFALSFQIILFLFVHLANEANIASNGSEDSQRQLFALDVASTLLSIPVFLFGFSSLMA  
IASTFVAEAWSSGGFLIRAVFKAPPVVTELLYFVFFLLIPLSTFFSALYAGLNNPWEIATY  
AWLGCVAVFVCCFGLAVVWCEVSACFKLVSIHYGDDDGTELSSCFKIRCAILLVQTHRY  
SGEKHEQYLVTDTCVPPGGGFTFSDKHDPTYTRKSIYSHIAQLGCFRFMYETIDPPERTY  
SIEEVLLDLRFITRNSWSLEGMMFFSSRRQKIIISVQGPSALTGTQVLSTFACNIFGTILI  
IVTVISIFAWLSTGWASYIVVALISIVCCLFPLIQSQKTMIQMYRDIHKDDLIEEGGENV  
KPEGNEPVAEAMKVRYTSSGEMVSEETMYRLWESSRVVQPKPWVCYFGMLLECLLLILFP  
ATVLFLLTKNITMGVVFIIISFFSFLRYFDP SAILCELGSMNTIEVEPEYENQHKKYARL  
SEERKLVKARLAGTVRNITRSNAVKRWIWWFGTLVLATYFLFNAALASNDGLGERPPIV  
LVDDYTYPAEESLQYPSCSMSKGFKISVDGGEEDTALGDYAYLAALAYETTDVVTGYLLP  
QWFGGGAVIDEDTKVKEYREEANNSIVPVVSFLKRGTCGASSI

>comp10179\_c0\_seq2; 709 202 3198 LEN=3721; translated  
MQMQASSPRNVTRRTQDYEEDDFTGPNFIDHYSLRDPSSVTKFRGARVHVYNTFNEQILL  
EDRRSSKDRNNAGGDFDDDDNGKNRRPNRHSITVKRIPITSFGLRVLRLAYSIALLN  
GYAFALSFQIILFLFVHLANEANIASNGSEDSQRQLFALDVASTLLSIPVFLFGFSSLMA  
IASTFVAEAWSSGGFLIRAVFKAPPVVTELLYFVFFLLIPLSTFFSALYAGLNNPWEIATY  
AWLGCVAVFVCCFGLAVVWCEVSACFKLVSIHYGDDDGTELSSCFKIRCAILLVQTHRY  
SGEKHEQYLVTDTCVPPGGGFTFSDKHDPTYTRKSIYSHIAQLGCFRFMYETIDPPERTY  
SIEEVLLDLRFITRNSWSLEGMMFFSSRRQKIIISVQGPSALTGTQVLSTFACNIFGTILI  
IVTVISIFAWLSTGWASYIVVALISIVCCLFPLIQSQKTMIQMYRDIHKDDLIEEGGENV  
KPEGNEPVAEAMKVRYTSSGEMVSEETMYRLWESSRVVQPKPWVCYFGMLLECLLLILFP  
ATVLFLLTKNITMGVVFIIISFFSFLRYFDP SAILCELGSMNTIEVEPEYENQHKKYARL  
SEERKLVKARLAGTVRNITRSNAVKRWIWWFGTLVLATYFLFNAALASNDGLGERPPIV  
LVDDYTYPAEESLQYPSCSMSKGFKISVDGGEEDTALGDYAYLAALAYETTDVVTGYLLP  
QWFGGGAVIDEDTKVKEYREEANNSIVPVYFKLFTFPYSPDLAVLAIRGSQTSWDWMVNL  
QLWSASGLAQLVKWMIPIYGWLWTPILDDLVRFISFIQSDQLNDVAYYKVTDAVETRES  
FEKIRVTGASLGGGLAITGAQAKAPAIGISGLGVELSRNAVTPKVTMDDINKYVFNMP  
DRDYIARIGGRPRQHQAQCSAKTSNLFCHSMWRSVCEINYRCGSNGRPIICRCHFNF  
YPVPEPIGNTTRSFEAEACYEYEEQAFLNATGSTVTSWW

>comp10179\_c0\_seq3; 670 202 2670 LEN=2759; translated  
MQMQASSPRNVTRRTQDYEEDDFTGPNFIDHYSLRDPSSVTKFRGARVHVYNTFNEQILL  
EDRRSSKDRNNAGGDFDDDDNGKNRRPNRHSITVKRIPITSFGLRVLRLAYSIALLN  
GYAFALSFQIILFLFVHLANEANIASNGSEDSQRQLFALDVASTLLSIPVFLFGFSSLMA  
IASTFVAEAWSSGGFLIRAVFKAPPVVTELLYFVFFLLIPLSTFFSALYAGLNNPWEIATY  
AWLGCVAVFVCCFGLAVVWCEVSACFKLVSIHYGDDDGTELSSCFKIRCAILLVQTHRY  
SGEKHEQYLVTDTCVPPGGGFTFSDKHDPTYTRKSIYSHIAQLGCFRFMYETIDPPERTY  
SIEEVLLDLRFITRNSWSLEGMMFFSSRRQKIIISVQGPSALTGTQVLSTFACNIFGTILI  
IVTVISIFAWLSTGWASYIVVALISIVCCLFPLIQSQKTMIQMYRDIHKDDLIEEGGENV  
KPEGNEPVAEAMKVRYTSSGEMVSEETMYRLWESSRVVQPKPWVCYFGMLLECLLLILFP  
ATVLFLLTKNITMGVVFIIISFFSFLRYFDP SAILCELGSMNTIEVEPEYENQHKKYARL  
SEERKLVKARLAGTVRNITRSNAVKRWIWWFGTLVLATYFLFNAALASNDGLGERPPIV  
LVDDYTYPAEESLQYPSCSMSKGFKISVDGGEEDTALGDYAYLAALAYETTDVVTGYLLP  
QWFGGGAVIDEDTKVKEYREEANNSIVPVYFKLFTFPYSPDLAVLAIRGSQTSWDWMVNL  
QLWSASGLAQLVKWMIPIYGWLWTPILDDVSELVIKCDLWFVD

>comp10179\_c0\_seq4; 634 202 2499 LEN=2840; translated  
MQMQASSPRNVTRRTQDYEEDDFTGPNFIDHYSLRDPSSVTKFRGARVHVYNTFNEQILL  
EDRRSSKDRNNAGGDFDDDDNGKNRRPNRHSITVKRIPITSFGLRVLRLAYSIALLN  
GYAFALSFQIILFLFVHLANEANIASNGSEDSQRQLFALDVASTLLSIPVFLFGFSSLMA  
IASTFVAEAWSSGGFLIRAVFKAPPVVTELLYFVFFLLIPLSTFFSALYAGLNNPWEIATY  
AWLGCVAVFVCCFGLAVVWCEVSACFKLVSIHYGDDDGTELSSCFKIRCAILLVQTHRY  
SGEKHEQYLVTDTCVPPGGGFTFSDKHDPTYTRKSIYSHIAQLGCFRFMYETIDPPERTY  
SIEEVLLDLRFITRNSWSLEGMMFFSSRRQKIIISVQGPSALTGTQVLSTFACNIFGTILI  
IVTVISIFAWLSTGWASYIVVALISIVCCLFPLIQSQKTMIQMYRDIHKDDLIEEGGENV  
KPEGNEPVAEAMKVRYTSSGEMVSEETMYRLWESSRVVQPKPWVCYFGMLLECLLLILFP  
ATVLFLLTKNITMGVVFIIISFFSFLRYFDP SAILCELGSMNTIEVEPEYENQHKKYARL  
SEERKLVKARLAGTVRNITRSNAVKRWIWWFGTLVLATYFLFNAALASNDGLGERPPIV

LVDDYTYPAEESLQYPSCSMKGFKISVDGEEEEEDTALGDYAYLAALAYETTDVVTGYLLP  
QWFGGGAVIDEDTKVKEYREEANNSIVPVVSFLKRGTCGASSI  
>comp10179\_c0\_seq5; 711 202 3012 LEN=3832; translated  
MQMQASSPRNVTRRTQDYEEDDFTGPNFIDHYSLRDPSSVTKFRGARVHVYNTFNEQILL  
EDRRSSKDRNNAGGDFDDDDNGKNRRPNRHSITVKRIPITSFGLRVLRLAYSLIALLN  
GYAFALSFQIILFLFVHLANEANIASNGSEDSQRQLFALDVASTLLSIPVFLFGFSSLMA  
IASTFVAEAWSSGGFLIRAVFKAPPVVTELLYFVFFLLIPLSTFFSALYAGLNNPWEIATY  
AWLGCVAVFVCCFGLAVVWCEVSACFKLVSIHYGDDDGTTELSSCFKIRCAILLVQTHRY  
SGEKHEQYLVTDTCVPPGGGFTFSDKHDPTYTRKSIYSHIAQLGCFRFMYETIDPPERTY  
SIEEVLLDLRFITRNSWSLEGMFFSSRRQKIIISVQGPSALTGTQVLSTFACNIFGTILI  
IVTVISIFAWLSTGWASYIVVALISIVCCLFPLIQSQKTMIQMYRDIHKDDLIEEGGENV  
KPEGNEPVAEAMKVRYTSSGEMVSEETMYRLWESSRVVQPKPWVCYFGMLLECLLLLILFP  
ATVLFLLTKNITMGVVFIIISFFSFLRYFDPSAILCELGSMNTIEVEPEYENQHKKYARL  
SEERKLVKARLAGTVRNITRSNAVKRWIWWFGTLVLAITYFLFNAALASNDGLGERPPIV  
LVDDYTYPAEESLQYPSCSMKGFKISVDGEEEEEDTALGDYAYLAALAYETTDVVTGYLLP  
QWFGGGAVIDEDTKVKEYREEANNSIVPVYFKLFTFPYSPDLAVLAIRGSQTSWDWMVNL  
QLWSASGLAQLVKWMIPIYGWLWTPILDDLVRFISFIQSDQLNDVAYYKVTDDAVETFRES  
FEKIRVTGASLGGGLAITGAQAKAPAIGISGLGVELSRNAVTPKVTMDDINKYVFNFM  
DRDYIARIGGRPRQHQAQCSAKTSNLFCHSMWRR  
>comp10179\_c0\_seq6; 634 202 2499 LEN=4008; translated  
MQMQASSPRNVTRRTQDYEEDDFTGPNFIDHYSLRDPSSVTKFRGARVHVYNTFNEQILL  
EDRRSSKDRNNAGGDFDDDDNGKNRRPNRHSITVKRIPITSFGLRVLRLAYSLIALLN  
GYAFALSFQIILFLFVHLANEANIASNGSEDSQRQLFALDVASTLLSIPVFLFGFSSLMA  
IASTFVAEAWSSGGFLIRAVFKAPPVVTELLYFVFFLLIPLSTFFSALYAGLNNPWEIATY  
AWLGCVAVFVCCFGLAVVWCEVSACFKLVSIHYGDDDGTTELSSCFKIRCAILLVQTHRY  
SGEKHEQYLVTDTCVPPGGGFTFSDKHDPTYTRKSIYSHIAQLGCFRFMYETIDPPERTY  
SIEEVLLDLRFITRNSWSLEGMFFSSRRQKIIISVQGPSALTGTQVLSTFACNIFGTILI  
IVTVISIFAWLSTGWASYIVVALISIVCCLFPLIQSQKTMIQMYRDIHKDDLIEEGGENV  
KPEGNEPVAEAMKVRYTSSGEMVSEETMYRLWESSRVVQPKPWVCYFGMLLECLLLLILFP  
ATVLFLLTKNITMGVVFIIISFFSFLRYFDPSAILCELGSMNTIEVEPEYENQHKKYARL  
SEERKLVKARLAGTVRNITRSNAVKRWIWWFGTLVLAITYFLFNAALASNDGLGERPPIV  
LVDDYTYPAEESLQYPSCSMKGFKISVDGEEEEEDTALGDYAYLAALAYETTDVVTGYLLP  
QWFGGGAVIDEDTKVKEYREEANNSIVPVVSFLKRGTCGASSI  
>comp10179\_c0\_seq7; 711 202 3012 LEN=3927; translated  
MQMQASSPRNVTRRTQDYEEDDFTGPNFIDHYSLRDPSSVTKFRGARVHVYNTFNEQILL  
EDRRSSKDRNNAGGDFDDDDNGKNRRPNRHSITVKRIPITSFGLRVLRLAYSLIALLN  
GYAFALSFQIILFLFVHLANEANIASNGSEDSQRQLFALDVASTLLSIPVFLFGFSSLMA  
IASTFVAEAWSSGGFLIRAVFKAPPVVTELLYFVFFLLIPLSTFFSALYAGLNNPWEIATY  
AWLGCVAVFVCCFGLAVVWCEVSACFKLVSIHYGDDDGTTELSSCFKIRCAILLVQTHRY  
SGEKHEQYLVTDTCVPPGGGFTFSDKHDPTYTRKSIYSHIAQLGCFRFMYETIDPPERTY  
SIEEVLLDLRFITRNSWSLEGMFFSSRRQKIIISVQGPSALTGTQVLSTFACNIFGTILI  
IVTVISIFAWLSTGWASYIVVALISIVCCLFPLIQSQKTMIQMYRDIHKDDLIEEGGENV  
KPEGNEPVAEAMKVRYTSSGEMVSEETMYRLWESSRVVQPKPWVCYFGMLLECLLLLILFP  
ATVLFLLTKNITMGVVFIIISFFSFLRYFDPSAILCELGSMNTIEVEPEYENQHKKYARL  
SEERKLVKARLAGTVRNITRSNAVKRWIWWFGTLVLAITYFLFNAALASNDGLGERPPIV  
LVDDYTYPAEESLQYPSCSMKGFKISVDGEEEEEDTALGDYAYLAALAYETTDVVTGYLLP  
QWFGGGAVIDEDTKVKEYREEANNSIVPVYFKLFTFPYSPDLAVLAIRGSQTSWDWMVNL  
QLWSASGLAQLVKWMIPIYGWLWTPILDDLVRFISFIQSDQLNDVAYYKVTDDAVETFRES  
FEKIRVTGASLGGGLAITGAQAKAPAIGISGLGVELSRNAVTPKVTMDDINKYVFNFM  
DRDYIARIGGRPRQHQAQCSAKTSNLFCHSMWRR  
>comp10179\_c0\_seq8; 634 202 2499 LEN=3913; translated  
MQMQASSPRNVTRRTQDYEEDDFTGPNFIDHYSLRDPSSVTKFRGARVHVYNTFNEQILL  
EDRRSSKDRNNAGGDFDDDDNGKNRRPNRHSITVKRIPITSFGLRVLRLAYSLIALLN  
GYAFALSFQIILFLFVHLANEANIASNGSEDSQRQLFALDVASTLLSIPVFLFGFSSLMA  
IASTFVAEAWSSGGFLIRAVFKAPPVVTELLYFVFFLLIPLSTFFSALYAGLNNPWEIATY  
AWLGCVAVFVCCFGLAVVWCEVSACFKLVSIHYGDDDGTTELSSCFKIRCAILLVQTHRY  
SGEKHEQYLVTDTCVPPGGGFTFSDKHDPTYTRKSIYSHIAQLGCFRFMYETIDPPERTY  
SIEEVLLDLRFITRNSWSLEGMFFSSRRQKIIISVQGPSALTGTQVLSTFACNIFGTILI  
IVTVISIFAWLSTGWASYIVVALISIVCCLFPLIQSQKTMIQMYRDIHKDDLIEEGGENV  
KPEGNEPVAEAMKVRYTSSGEMVSEETMYRLWESSRVVQPKPWVCYFGMLLECLLLLILFP



ATVLF LTKNITMGVVFIIISFFSFLRYFDP SAILCELGSMNTIEVEPEYENQHKKYARL  
SEERKLV LKARLAGTVRNITRSNAVKRWIWF FGTLLV L ATYFLFNAALASNDGLGERPPIV  
LVDDYTYPAEESLQYPSCSMSKGFKISVDG GEEEDTALGDYAYLAALAYETTDVVTGYLLP  
QWFGGAVIDEDTKVKEYREEANNSIVPVVSFLKRGTCGASSSI  
>comp10180\_c0\_seq1; 421 168 1473 LEN=1473; translated  
MAKISSVATVGCILFVAGASAFVPAQCNNNQPSIHSICPSSSSSVGAGPLYAAKHDKTEG  
REGNFGSNIIESIKKSAAVSALALGLTFTTLLGSSPLPALATDSGAIVGCLFSKCQLPLAK  
CIANPKCLANVVCINTCNGKEDEIGCQIKCGDLFENSVVGEFNKCVVSDMACVPPQKPD  
EGLYPVPSPETLVKKFDTKLWNGKWIITSGQNELFDIFPCQVHFFTTETAPGKFFGKLNWRI  
E  
EPDGEFFTRDAIQEFVQDPEQPGHLINHDNEYLHYQDDWYIIDYEYDDNESGTPPFAFVY  
YRGSNDAWVGYGGAVVYTRDAKLPESELLPRLREAACKVGFYDKDFTATDNSCKTNDRGE  
TVLLREQFAGKVLNTEKSVQAQATKFRGNAINSIKAQKIFFSNEGKAAEAFAFERLGNV  
KKFEQDVVEVFRNKN  
>comp10181\_c0\_seq1; 197 704 1810 LEN=2131; translated  
MARVRPLGPNASGCISKTRLC LAATECGDGCSEPSAGRFRRQQYPRYFSSSGAGVKPSNT  
GKGTNLIRLTKRMGELDMFSRREADRLIQDGRVLLDGEVVEVGHKVP PDLQADRIFVDE  
GGSSAGHTNQ RHTTGDVVTA VV LNKPLGYVSGQAEHGNPPAIRLLTKRNRAWGKHDDYDS  
DCGSDTRHWKGFAPAGRLDRLSTGLLVFTSNGVLAKKLI GAASTIEKEYIVDLEPALRPT  
KMERSIDPSYVPPPPTLDAELRKGGRFLLGDEHRPLKPCPQVEWIGGAEGENETRQLRI  
VLTEGRKHHVRRVCRELLGQHVGLRRVRIGPIELMPDDGAAGGESLPVGCWRPLREEL  
EALLRRHG  
>comp10182\_c0\_seq1; 495 147 1631 LEN=1858; translated  
MSEEDQSCPICLEHIFLDPSSSENDGANGNTKYNIGATVPCGHLFHYDCFD SWRASQMHRE  
EVKCP TCNVYTKDFVRLYLDIGSLGGAHCNLAGDDDISLSSIEDEDIGDDGNSDNGDNA  
EEEMKTNASNSLKS DNVDLTAEPLPRRTPSAKQSQCPSGPPCPSLDQEAEDKILKLSRL  
AKKFKRQCLQKTAKYKEQYAEKQKVAERVRVESELKVAKAQNETLDQDRRRELQANDR  
LLNLLRVQRNYDSLTKQYKDLAVEKHTVENQLHSCRSRYEKELEEVRAKTMSVVRQILDD  
HPKVVEENRILKQRLQKLNQRLPISGRSKSKSDITKALRQMDQQIRNRPNGLSSSSSSAS  
SMAMTTQLGVPIDTKTLRKPAPTMR LGDDGTVGRRIEKKIDPAGKPKKMEVKLIRGQYS  
SLASRIVKESSALASQKPKRQRQSAAVRDILSSPASKSIESKKRSSLTSLGISQNKRIK  
QFGGFRKDFFERKR  
>comp10183\_c0\_seq1; 1674 42 6065 LEN=6196; translated  
MVYPLTFVGVKIIDDDNPNNLESLCNRFNVSIVQQSNPGDPYFGFEEIGFIVLKYKFEVK  
GKRGGNQDFLPPRDAHPYLPKQC SLIVVTTPEEAGTYKIPLLI FPGHLEVSLEDSSSVGF  
HKGSEDIIGFNRLLSWCRSSRLGKSFFKNLKS PEDRRKSKGDSDLLSKFLAENSGWDPKL  
KPKLLPFLKVGAVDGGKIAKTHISL TNHNPIPLTVS IDVGEVEGMSIAFSRDASQVAGD  
GNSLHDYLPKQAPPSTVQVGKYEGHPVTGLLNFLKSNKQAHEFN SKFKFRDISPHDLAM  
ERSDVLRLLDHWHKASFHRGPTSSQSNKSTNCE DNVQPPQYKPF SFNNFTQRSSGEG  
LPGAFIVSSNGSGFRPLAECWRRNPDEMSADRNTIKIPPGAMARFEIQVRAPSPEFLEND  
ITHFLMSGLK LSTNLGDVMPVFAIVEALQGLK HASQIESDEHIKHIASKSLMSVPLELIW  
NSVRDGTERRQHADVVTIPPANSTASIRS DTNITYFLGDASLTNGVPLYLRSSF SRNVRLL  
RIDSCHPWFTFVPLTKGVEHPSGNGVLVGLIRSNVDCSSNHTSAEGFP SFYQCMLNWL  
LSLRSKLQSEGCGVRDANPNLRQVEGVQKTIEVGLRRLK KHHETHVHNDPTPLNFRALSFWNE  
TDLSHIKSGRRKNDGLIADF TTYDAMWKAIQIADNFGYNLLSSSLRATVEYDSDPLMSTP  
REGDVSVKQNL SLSINDLNIQSVLKAPK LFDGNDDYFEFQPTTVGSVASVQIPVRNPTGV  
PVRIRIGTSVKGDESFRTPYVQNGKSSVPSNESSSFSWWDGYGAFFIPDEHGNVIQSHNN  
ISVTGGS GTTSISMVNP SLNSQLGLLVGCGKRCGLRDKTSAKIPPI SPVSNSPIGSSAAA  
GIILKGFHFRYNSPERNNVQEEP IILAGGA AVSNTDGPAAFAIPF SALDEIIPPFKGHL  
GPIYFRPPGRYKTVGCQLAKESGAKLDERKEMLCKTQIYDSFLYLENSLTGIEKVR LGR  
SAWENLYFVDPKPEGEDAFGDI EFRNGMPTLIFSGT SNRVGDFSAKATTFRQRIQHL SV  
VKEVVLHNGGDND SYIENVSLWGMNDREENGSCSYGSFKLVNCWTFIPDGINAAVNIHS  
GFVLKPGESRSIFVEHL PDCKRKEYITLRVQLRRDKLPRASKLRRSRSG LKNPFATKE  
KMMFLGYEMSGPVFGRCLPIDTRLMDSL AHLTSTSMNLANYSGRMEFKKSDESKEESPLL  
MFQVFLFSAALILCYALCARFRAILCMLQKI QGATTKNDLNWNAAFRC LARSQPTSMEL  
Q TMSREQMRQDVI SRYKARGNTTSTLNSTNCF SRDRRAAISNTLRHRIGKEASPGNERT  
RPFSDALFH DASTADDS LRAYFPIGLGWRTAYS RGI VKDNSLLSTTFVSRTKVLLNERA  
KVSMARNTKNSKDKSDHEEKGVKSSPAEERKES PSSSLSRAEVTNVIENEETKIVVQ N  
TDMVSKSKQKEIETPSKPKTNHFND SKNIQKINKNQRSERVRSPGNKSAENATTYTRKVI  
PSKHSKTEKQSVKKKELPIQPSKNTPTADLSKRNEKPRNQVPK TNDQENPPKKEKVS KN  
APWGQNP KPKVPAKSQSALLGPLPKSGTPTNAWQP PEREKATSTTASSRTGKKETIQAEKK

SKAKDKSKKKTNKRSPQGGKPDSPNPAIKKKVSEVSDTVSPAKEAQRTPTLNPPPGFG  
NINPSRNDGRLHSVPSTDSQLSLEAMLRPSLAGGPNADIALGAPLQASSSSLSFARAG  
ASASGSDYFYSASLRDPNPTSSPPVHGLGVAEAPGASEPPGGLGHPTDEPWLHPLVADEA  
ELADQPWLPALLNQDDGDNFDMDFLDGILQDGSPPGEEPSAEQESFLPPLTHTGMVPG  
GQGTAAAATMLVSENWARESRAAAYGISFDEEDDNASKTPAMAGGLGNIPLLSPAAIL  
NAEENTKNGGEEDEKVL SFYAGLLDE

>comp10184\_c0\_seq1; 301 1 1337 LEN=2103; translated  
XKQDHNKIITTTLHARVQHYSKLLKLLKDDMGRDDYAPPMVAATAVPLAAAAVPVDSAT  
AAP SARPTGTLKQGRSKRVLMPAPSSKILNQSEISCLKDQGYTGGMINSIARSNMTFPL  
RIWVVDNSGSMNTGDGHRVLSANQSHRVFVSCSRWTEIQETVQYHAQLAALLEAPT VFR  
LLNDPGKMAGPQQFSIGERGSDFIMEDLSIALDTMKKVS P SGVTPLSEHIREIRSNVAM  
KDDL FQNGQKVIVLATDGLPSDATGYSSRSRNEFTNALRSLEGLPVWIVVRLCTDEES  
VVEFYNDLDSQLELSLEVLDDFSGEAEVYEHNKWLN YGLPMHRIREMGSFKLFDLLDE  
RALTKDELREFFLLMFGPDRFDGVPDAHTDWKGFVGH IKTMAESEKKQWNP I HKKMPWV  
DIKKL KRAYGDSGMDVMLRNFGFCG

>comp10185\_c0\_seq1; 244 1 841 LEN=1047; translated  
XQQQGT PDWLQARRARQSGGQNSSAGAPVVVPIHHTPLTADEIQRLLLEAHGGTNI AVV  
PDDPEAPRMGGADGMVFC TAGGSTSGSGSFVDSRTTPYMISSLARVLIDHMKDRGLDEDG  
TAPGAKRNTKNRSATAAAPYGSSASATESWNIVDCGNYVVHILEESTRRDLRLEELWSGF  
DPLWRLDILDEEAVEEYCQHNPVPEGYDGTTGARGSVHEYDGGNESPAFDDVV LKRLERN  
QFGFTRRHKPVVQA IKNKNRRAGRKHRRQK ERAYFGDE

>comp10186\_c0\_seq1; 812 341 3739 LEN=3804; translated  
MEYPYNLHGGQGFRTSLDEAIRLSYSYSEG DGIGRIGLDHDSRSNGIAPSWLQNL SYPQD  
SDKNNSNRI INSAANPADGSLSHKNIPVVDYATFKQKLRNYGRCDKLRRLLED TNTTIA  
TEQLQE QNCGSIGNGKVRDSVFVDDMEAILAELLTINKNNLDSRIITSFENPYVSMGDNE  
QQSSPSNNARKESSNVSNI GSLRSCDLPLWRSDRKRKT IKRRNVLRASNIERDDL TGF  
LAGE SRKIYAYYDSSLRSLQGRVIKWKRRQLLDDNALFSQSSEKRRTMQSAGSTGIGT  
MNNANRNSSAISAHLQETIALGRDLLDLQAF CAMNILVVRQILIRYDAFTRSVEGTPLME  
FYLKQV LHSKNNTRRSIGREAESQNRDSNSDNKYHWELQQILSHHG ISSLCEKFYSQ LLL  
GGKTMGDKNITNIGSNHYEFESDREQQRYDTIISVITERFQSDREQLSRIVLSLSIEKTV  
SLANVELSDTTTHSTRTISLSIPQSPASTSTPSANTNASKTITDTLIEMVQRYSWCGMYM  
EDQIGWTTADRGRTLTEEMRSLSKWKRQSQMVVSKTDADMFVEAVEQANALVAAGEDGQR  
RLGFAACLNL ECDNLAGCGNDNEELRISTAGEGGGAIHLALSSDQDADMDVDTAGSSTID  
DNHSFVTDDGGDEL TGGQKFNLMALGGGFLYCMNY IVEPSSSTMYVNALGAQDAAGAIL  
IGMMP IACFLAAIVYSVWNTTVYRQPFVSCSLMVMGNIVYSSAFNYQSLPMALVGRFMT  
GLGGPKMIVRRYIADTTSSGIRTSVNALFGMVVAAGSALGPCCAILLSNFDFIVVLPGGK  
SEIWFNSMTGPGWFMAFLWGI FSAIFYGFREERIGLKEKLQODNEESLIEGQGENKKP  
KDIVEEGNKDDSLWTELK RACKYLLFPVQICMGLLFGKVFIETLVSCTSALSKNRYGWT  
IHEVGALGCFNGFFVIPISILV GKLSMYQDRYLMVCLLLVGISGLSLLVDVSDLV DGNS  
ERTYNKNTWWSVGPTQYVIGYFVTYVSIQSFEGIIGSALS KL IPTALAQGT FNSGLLATL  
VDTSGRGC GDIFISLMGFLNIRQLMNL LFIPLGFLIVTCLTVVRRNYDVLAV

>comp10187\_c0\_seq1; 1019 218 3577 LEN=3631; translated  
MAMHTKLNPIYAAIDAYQYNRAIKLALALPDSNVLGKALLAHSYTKSGQRRQAL T TLHKI  
LIGDGPTSPSLSTVFFELQSI VDRKNAAMAPSTSASLAQGTKAEQAPS AKK GKRGKKKPV  
QQQQQKQETRQPEKDLIDHLDITPFPV ENIH FVTDEDSSSPSTESMSKTLTDETTLATLA  
VSLKSLNPLTAFQMYARAADASPTENLLTKTFAFGI SALAAPYSWNEDSR TKLETYVLG  
HMQTI SLQLARVAVAGNDNDTLM LATS WACQSALWQLEWLPEDDKRSMILPRLAESMAKK  
LHQQETDRNQSK EIQLLCLRILKHQSKWEEILEILEELPTSENKTENDNCSVRLEKVFV  
VAMTYHQSKLELATALKHLDRYDDARI IYEDLLEQRPD DWSCWKAHLECSVNNSCSVGF  
RTLANKMIKDNEGNL FQRFRSPHMLLELATENFRKDS TDKHLQVLGSAIQQYAEIFAPRA  
NCTIMDLHYLGFILRQNTTAGRNVTALLDFAESLRKNSSIGD TDNDGYCQKEHKKKL  
RAYIFS VKLCHKLI SANDDLAEK YLPNWIEIVKEWQLTFLLSDGMVQEEEQILKELEPGD  
DLALLAVQQLLFTKDSQRDSGDENVMISAIILESAIQNSPGNAYLKFLAIDVFHRLDAGT  
RSWEHYQKVG LKHIQLDSCSFLAFPYLFEGLYNEAIAASNGLMRFQGGAAARDCEGFS AK  
AMGSGTLTKADEFMVFQRKKMNQSLTFLY SKGLVLDAAPLLATEVPRMKH DENPL LKGGI  
GITQGI VGGSDDLERATQM VVESHNQYAALSIVSVRGIVNEDGDDI SDNRDLSIVKQVGS  
LWKPKIQRKQLMVVETLRRGHIHGLLIRACLVDAMKGP KKGKIVKTSALLEKRSQSLLD  
SVTTASEFFDTKLADVYDESKYQNCWRELLQVILSLCRILTVVNAGMPMAENVND S MEQR  
EQQAVDLIQ TETLMKLKEVRNKIYPVNSPKVVGALLPAFLLP IFALFRMCSDVCTAYGWG  
KRKT TTKKVS VAMASVSKEFQALIEDILKPC LGALPSSDAESPLFSKYSLS EEEVENLLGTD

AVSSTKAVLNEAQYRTRMRMEPIIQEMIDYLDEFNTMKN  
>comp10188\_c1\_seq1; 258 149 889 LEN=1068; translated  
MMNDHNQENTPLLPSSNNLRRTERWKNTRIGTDNSNSDDASEERGSAGKQQQRNRRTERG  
TNNNNNTAMMHSMTMIPIGPIIGVSKPIEKWYRGLVVRQSCHNHLASDLLSKDMYLNLTLS  
VALTAITSSAIFTSLSPTAGATTAMQNNPHGDLNNTQAMYNVGGVDQSYYYAPIDLSENTL  
AVIAGVIAALNTVLQGVTRTLYYGQRGERHLRAYKEFSRLRFQLESIVGDKPKYTEHKVD  
REKLKRW  
>comp10188\_c1\_seq2; 331 149 1069 LEN=2029; translated  
MMNDHNQENTPLLPSSNNLRRTERWKNTRIGTDNSNSDDASEERGSAGKQQQRNRRTERG  
TNNNNNTAMMHSMTMIPIGPIIGVSKPIEKWYRGLVVRQSCHNHLASDLLSKDMYLNLTLS  
VALTAITSSAIFTSLSPTAGATTAMQNNPHGDLNNTQAMYNVGGVDQSYYYAPIDLSENTL  
AVIAGVIAALNTVLQGVTRTLYYGQRGERHLRAYKEFSRLRFQLESIVGDKPKYTEHKVD  
REKLKRWIRKYEEALEESPIIPQKTFEHVAKEQGMRSRRWPSDEKELEAIMDEERNLAAV  
KESKMV  
>comp10189\_c0\_seq1; 286 124 708 LEN=757; translated  
MPPQDPSDRATALDSVASGTSGEPRDRMDSCTGGRLLLPGDLERLESRRALGPEGAR  
LLAERRRSFLVEFSEMRGPPQIALLMALLAIGFGSTIGVTPAVMADR FARLHHGYNGTVP  
CDGFASLDGDGEGSNVDADDPVPLFATKPEACFLGGSDAQAAASVSNLVNNTLTFLTSS  
LVGSLDELGRKGG  
>comp10189\_c0\_seq2; 224 1 513 LEN=785; translated  
PGPNQPSFLVREYTHCRNTGTPDASALTLQRATMSFPTISAIKANNVVDSEQGRIQ GAL  
WSVKALASGVGPVFLQWVYSRTKNDGWFPGT MFLVAGGLFLVAVGLALALPNDKTNTSS  
RHGGGGSPASEALVQAGQLDEYRRLAASDSSSFEDDGDEEEEDTSTYGS L  
>comp10189\_c0\_seq3; 533 213 1517 LEN=1789; translated  
MKQPQPQPGPLLIGLVMAMMPSLFLYVILHVPTMSPWYYATSASTGLIPWMAIALSALN  
DVLQPQEFRAAGTGLLFAGFLLGISLSPTLGLLLERKTCLVSVFAVIGVGF LMTAFWIPET  
LPADVAEQARKRRKEADAIDNERDGERLEESLRSPSDGLSRYL RVVYYGSRPARLLRFL  
VRPFLMSIINRNSFFRLISALALFTGMVQSGDQVLLIYYLEDQLDFDQKDV SIMFLIIG  
VCGILVQVFMKPLNDAVGEKVVVISFAAG AIDNFMYGIAHRKSTVFTALV VSSLATMS  
FPTISAIKANNVVDSEQGRIQ GALWSVKALASGVGPVFLQWVYSRTKNDGWFPGT MFLV  
AGGLFLVAVGLALALPNDKTNTSSRHGGGGSPASEALVQAGQLDEYRRLAASDSSSFEDD  
GDEEEEDTSTYGS L  
>comp10189\_c0\_seq4; 714 124 1980 LEN=2252; translated  
MPPQDPSDRATALDSVASGTSGEPRDRMDSCTGGRLLLPGDLERLESRRALGPEGAR  
LLAERRRSFLVEFSEMRGPPQIALLMALLAIGFGSTIGVTPAVMADR FARLHHGYNGTVP  
CDGFASLDGDGEGSNVDADDPVPLFATKPEACFLGGSDAQAAASVSNLVNNTLTFLTSS  
LVGSLDELGRKGPLLIGLVMAMMPSLFLYVILHVPTMSPWYYATSASTGLIPWMAIAL  
SALNDVLQPQEFRAAGTGLLFAGFLLGISLSPTLGLLLERKTCLVSVFAVIGVGF LMTAFW  
IPETLPADVAEQARKRRKEADAIDNERDGERLEESLRSPSDGLSRYL RVVYYGSRPARLL  
RRFLVRPFLMSIINRNSFFRLISALALFTGMVQSGDQVLLIYYLEDQLDFDQKDV SIMF  
LIIGVCGILVQVFMKPLNDAVGEKVVVISFAAG AIDNFMYGIAHRKSTVFTALV VSSL  
ATMSFPTISAIKANNVVDSEQGRIQ GALWSVKALASGVGPVFLQWVYSRTKNDGWFPGT  
MFLVAGGLFLVAVGLALALPNDKTNTSSRHGGGGSPASEALVQAGQLDEYRRLAASDSSS  
FEDDGDEEEEDTSTYGS L  
>comp10190\_c0\_seq1; 1269 653 4630 LEN=4689; translated  
MSSLYLRMFP PPPPPPPAAKLNKPE SRQDDPVRSTPSEDNEATSNNNFRSSRRVSGGIGA  
AAVRRPPPPPPPPPRGSGIHSPPKPPQRIRRRPNPPLPRAPPPPPPPRVASNKVSVPD  
VISSEELASKALDMFHKCLNRSIPTGNLYSGGLGAYYLLLEQSRYNLCIMERQRMHSEAK  
ENNQNENNSTPNVCQFTSHGTVNTPFRCRLLKQALEGAKEATRRFKRGNSIILSNQR  
GCISLLGGEWVGS HALLAVSVCYRRL EEFQEKQE QDATALQGNDTSRDNIRGHQSPAPSDLR  
SPGSVEDHCLSSSVSVSSLIATARTTASMVKKPRSERVVARILRRLKKQHLFCPEEMED  
DGTVRSSATAASET VLPVWNQDVLGGRAGALQTI FWL RNEFGKHSTTLGQDLVVLAVKI  
LREGLSTADSMGFHNLKTLNTIPIVCNSGRSDDN NYNAVLFWVCDSEGLKTYLGAGRGV  
VGILHTLLGLHYEDWELIEEVPNARRILRNTIDAF LPSARVSPASSDNSNGESGVSAKE  
LMQP SLYHRLVYDMKTSTATSVSSPIDASRLPTTGSAFKSAGNLRPTFDASLERD TTAGW  
FHGATGLAMMFLEAAKVYRCKYLL EAHRLCDAVVYPRGLRERTTIGATNFDNDHKY GKK  
GPVGLTG MALCFLQLS SQLCSNDKEEGESKKKNEANKVSLPPNTSLRRLWKS RAMLYAQHA  
HHEWTKYVQSIPTTTGVWNAFSLYEGMGLVSVLWQLSLSMFPDVEETLRTEIDPVVQMP  
LYSASYSCARATKHFTDASFVPILLSPKDVTFVATPDKTMPATSLSKSRRPLPAGLCPQR  
DPAESRRRRAANAETQRRRKVAEEAERKKMEYAKAQRAIMNASRKAELEARRNAQLLAR

KRALEVAQRKEQQETKKNLENAEKKRQEERMKREALLLARKQAKERVDAKRKAKEEAEELA  
MAKEEARMKAIETENKRKAAEQERKKRRAMMEARLRRQAKDAELAKQEEEEKRKAKEAADR  
SRRTAELKQKEELRKKRNAEMRLRQLRALELAKKEERKRLIRVAAERELREKELRRKEEE  
RKQQETERRRRLLELSKQKRRKEEQSLAEKRATEMREREVAHRRAMEAKEKRRRQLRDEHV  
KKQRELHEQRLRDELQRALDKEVEKQREKDRQQAKEARKLLEERDHTVITDTSKTDNP  
PAPQKNVYSPSFANRKKANPAHFSVPTRSSLFWSLQTDNSNIGNSESYKPALVPTE SMPQS  
RREGPSAASHLSSLTSSPGIAHISSVNSNRKDMQDSVLSHRTLSTAPPSTATEKINSFPM  
NAMKN

>comp10190\_c0\_seq2; 1013 1 3271 LEN=3330; translated  
XVCSSDLISLLGGGEWVGSALLAVCYRRLEEFQEKQEQDATA LQGNDSRDNIRGHQSPA  
PSDLRSPGSVEDHCLSSSVSVSSLSIATARTTASMVKKPRSERVVARILRRLKQHLFCP  
EEMEDDGTVRSSATAASET VLPVWNQDVLGGRAGALQTI FWLRFNEFGKHSTTLGQDLVVS  
LAVKILREGLSTADSMGFHNLKTLNTIPIVCNSGRSDDNNYNAVLFWVCDSEGLKTYLG  
AGRGVVGILHTLLGLHYEDWELIEEVPNARRILRNTIDAF LPSARVSPASSDNSNGESG  
VSAKELMQPSLYHRLVYDMKTSTATSVSSPIDASRLPTTGSAFKSAGNLRPTFDASLERD  
TTAGWFHGHATGLAMMFLEAAKVYRCKKYLLAEHRLCDAVVYPRGLRERTTIGATNFNDNH  
KYGKKGPVGLTGMALCFLQLSQLCSNDKEEGESKKNKNEANKVSLPNTSLRRLWKSRAML  
YAQHAHHEWTKYVQSIPTTTGVWNAFSLYEGMGGLVSVLWQLSLSMFPDVEETLRTEIDP  
VVQMPLYSASYS CARATKHFTDASFVPILLSPKDVTFVATPDKTMPATSLSKSRRPLPAG  
LCPQRDPAESRRRAANAETQRRRKVAEEAERKKMEYAKAQRAIMNASRKAELARRNA  
QLLARKRALEVAQRKEQQETKKNLENAEKKRQEERMKREALLLARKQAKERVDAKRKAKE  
EAELAMAKEEARMKAIETENKRKAAEQERKKRRAMMEARLRRQAKDAELAKQEEEEKRKAK  
EAADR SRRTAELKQKEELRKKRNAEMRLRQLRALELAKKEERKRLIRVAAERELREKELR  
RKEEERKQQETERRRRLLELSKQKRRKEEQSLAEKRATEMREREVAHRRAMEAKEKRRRQL  
RDEHVKKQRELHEQRLRDELQRALDKEVEKQREKDRQQAKEARKLLEERDHTVITDTSK  
KTDNPPAPQKNVYSPSFANRKKANPAHFSVPTRSSLFWSLQTDNSNIGNSESYKPALVPTE  
SMPQSRREGPSAASHLSSLTSSPGIAHISSVNSNRKDMQDSVLSHRTLSTAPPSTATEKI  
NSFPMNAMKN

>comp10191\_c0\_seq1; 261 144 1454 LEN=1678; translated  
METIVEIDENERYWVGGGFGRKGLLPSDRGPFSSDGSIVWKSTTEASEDLVLLGRGWKY  
EKEEFKATTQWMYAKDFRPESIKNANPTRGMMHWFRFRRLYR TKIFNPDEFVDRTISEKC  
SQVDSSATNALGQLLLDALTYCSLLHSPKKYS DAVALPLKERILNISIRQPENTNRQTSS  
DAFYQLDQLRINLETFIENEQATTVMNRLF KSVDFSF EKRTGNEDFEKRKAVVRRQCMSE  
MECDTISTLIVK KLDPNYQLHCDRPNCGEDCKFFRVRCSNEGCP LIMSRMYLDEHDKQCP  
YKIIIECECGARFPRHELAVHNAQVCTLR TVECPFKNIGCSKFVRACDMHAHLAEDASAHL  
LLAVNRMMEYQGVINNLNTRVIALEE QNKALKQTVELHLK KSTTDVSELSTKFKRTSKAL  
ANHEATCKKEFIKLSR

>comp10193\_c0\_seq1; 230 304 1443 LEN=1664; translated  
MNTKNTLLGSDNF SMSYHRPRERKLNRRNRGRYYQFQDGNRSNTTPTSLSDVWLCLACA  
LGWSIWL VSTRQPPQQLIFDQQDSSKAMGHVLQVSLGEDILGTGIPVYYALVDFVNGDT  
EDEHIQVRKVFTSKLLLEEGFANVEVLYLKEDPTIAMLMD DILDQKKEQESQVPQSATYF  
VAIYFVSIVLIGASFYGGIRMASRLDNPLYG WISLSVGLLLLLYPAKLLYRAVTYLYSLA  
GPLTERPGVIVHGRRLYWTQCHDTLNPFEILGAKESYKRKDSDSVSVLCELQGRKIRN  
ATPTSTNLLFPNAGCGFGNFVHLPTGRARANS SVSSISASASQNSTEKSRGSHIVRNDT  
SILEKYEMHVTANEKNDKE

>comp10195\_c0\_seq1; 628 17 1672 LEN=1812; translated  
MKAFVAVTDTTLMNNSDRDSIKILSHSEAVRERKAELEQLRRQSLTTGHATRLRDAEAPVE  
SNFNNTTEQQRQFLRNEKNKQKEAKTYLNRFRGDP ELDNFTELQRQSIQNEKNQKKEAKM  
YLNRYRGDLKLDTFTERQRDMQE EKTQKKEAKTYLNRYRGDNSTLLDVIYQKLSMSSIN  
SLARDCSRIERNDSAIITHELAGESE RINGEKARRIYSPQLSDHRNF FESSNLRPKSPVM  
HGSEVEPLREGDASGGDSQPLYSDCDLNSLP GKEIETTDRSFPETSROGDAPIRKRAAF  
STNDHAIATERGNCNEYNSSTCERITNDVPKSNIRPHQDDL NLEDINQRFTDTLLELQSS  
AQFDENDDGNKSMAPNNGNEEGVRNHGYDINSNSDKSKPPNGNNSTMYESESKRVIDEDS  
NHRFVAALLELQSSAYFDKYKDGNEAMNTNHINNENSMRNHQHAIRGKSDTSEFCESNVG  
TIHGSMGKNVIEEDEASNRPPSTSIHSDIPE SPYCDDDTVDSATGGLALQLAVSGKSKQV  
TENNCFACTIM

>comp10196\_c0\_seq1; 208 1 1134 LEN=1151; translated  
XAGFDVAVFTDVSASSGSWHRASAGIPRSFCGR LPPRLRVPLFSCMVALERPIRDKLPFD  
AFVAHSGGTDGGKQGHHPVLWFASCSDAKPGFFPGAGGSSEGESDDKGVSRPECWTLVST  
PAFAVAEIKETTMRDPVTGEFRPQEDAYLNSGPGPRLFEAF CGLVRPYLQPETDGRSES

PPNDPRLSPRAVYLQAQRWGSGLPIDPGRVPLCHREEVCGTWYASDTGGSLVYESGEPEG  
KDDPTPGFVADDQKGLYYAGDFCSSFNPGFEAAALSXVGPGEAHRGPAALSETRGQQCIG  
VFRGRWLKARNGTAAKRQLSDSDTTVAARRKHRVLERNETKHFFERPVSEKPREEKRIGE  
PLERNQSRLFERSQRQL

>comp10197\_c0\_seq1; 400 164 811 LEN=895; translated  
MVR SALLMTLGLATASAFQTAQPAVRQETQLYGGSSGYATTVEGKA EKVEAVKGLLDSSQ  
MVF SVPASFITVAESQSLRRSMPEGTTISVVKNTLMNRAVKDTEFEEAASSLLKGANMWF  
FIEEDIGASIKAWNAFTKETGKKETHGIIGGVVEGNNYDAKGVEAIGKLP SKKELYAKIA  
GGINAVPTKLARVVKAPNSKLARAIKLATVDEQQE

>comp10198\_c0\_seq1; 404 78 1427 LEN=4262; minus strand; translated  
MVDFGKKLLTSRVEKWKENYIDYAALKALIKKAVKTKHQKLEQRHDADDNTLIKNLTTR  
MISPMRRGVKSSTSILVSDAMPDRCSSELEFRLLDHEIQKIVL FVMTREGQLAERLFEL  
SKDGQVLKRRFMLLMQEVSRNL TNRHTIP SLEDGKAKTWSHLE CSTERHRDFAQDLLLL  
VNFMDMNL TGLRKILK KHDKNFPRHQLSGLYLQSN SVGHGDDRVDSEIVKDSHLDKLYH  
FGGLSAL TLT LRRAFDDLH LLELHLLT L SDDSKKPDGQPNHRRNVSTPVIPSTYRSMDVD  
INATLRPAQHNRKLSLQAH SFSSQSLSSFS DNYSLPST SITSQREPILDQINAARGRLR  
QTTKYAELVAAQALIFSDDKDQDGSDDGKTPASEFTAVRRLSSMLNLVSTFLYMTNYIY  
APSVGN YALRLGSDSMSGYVRIEKPVY

>comp10199\_c0\_seq1; 1381 146 3091 LEN=3161; translated  
MDDPPASNNNEKKKAENSGKTGR TSSSSSQLT PPSQALRPVKN DVS VANAENSGKASVK  
KNNNNRRRRNTNKNQK KSPVTDEGGDDVAVNDNAGNKNNNGK GNDNGNKGKKQRQRQR  
GKKKGGEAAHKN S D G K D N A A N A N N E E S N N N K E S Q Q T V N A K K R N R N K N R K A K K K Y P W R R H I  
PEGTVDPITLEDLNTLEYPPFALVADQPYVPVVPVPIQKKQTS GQDDKSGKAEAGPTS  
SEKVEDVEDLNRQLADQWGEFMLPSKETSTTSSVNDKEQVSSAPPSPPLSERPLNLF DG  
RALAFYMVSQ LQFIDPFTRRDLTRPELLNLD RYLD RY GSGDTGFGN N N N Q R S K N K K Q Q R Q  
KIRVTDAYDAKITLSSAGAAAATAQGRADIMQQAQQLLNSL FVGQPSVSTIAAAPATN  
DSFGIGTTNQSTRQ QEDS FSLQEY AALQRQERAAAARGEQQYE QGGFTRNDLDVYNAGD  
FGFGGMNNGGGGYMIIDDDENPELRGRGHSDFP SLAASSPSFGNGPRPGGNGSPFYSAS  
HITGRHGGSNPAAGSGAFPSLPAPASASGNNSRDNTSSSTTNFAKSNSDAGKSLTKNKK  
SKTLSRITRAVKKTAE EKQRQWEAREAAARRKAMMSNLTFGMNPVAADPLPSSH PAATPT  
PAGGSATEEQLVNRFAEALGVK PATQRHYASGWARPTEHLDELEAALYPDELILKARD  
HRMQLLLKIEKKTTF LNDDKAASLP LNRM DRASRKFVHHYAEFWK LKTESFDPEPNRYI  
HCVKLLDTRMPRPLSDVARNWRG PSSL PFPDATRTIASIMNDHTSQQTAGQTS SSSSTG  
LREQLKPPPKLRSATAISSSKGDLVAFGEAAVQNSRSDALRDKERP KMNL PRSVPLELP  
PFEEQLKEQKENAFDIKEDIRKRQLLMEKKRQEQKQIEQRKQKALEDAFASDDEDEVGNL  
SDSDSEWGDKQEALFDGSDED

>comp10200\_c0\_seq1; 651 1 1587 LEN=1587; translated  
XEDSGDDEGA EEDGVFRFEDDGKPEPWDDY GQESKYVDYDRRN VMEVPFPEPGSEFY FDP  
DMPMDEEQ LQEEAEFAEKMKKVKTRSMRLEKAKRSPNALKFFRRKPNEKEG EY EHLWVAA  
VDNVS YMPLIGNLRDYGV E FADNFGDFEDQSANDALLHSIEDMAAWKARQVYEATGLPTI  
ASRSSFEIEPVVPSLNLKDSVTATTNVQAAAASRLSDPRV VSGYKINDIANHVDYLAE  
AMKPLSEPTRVTRFTSCFCFYDGEKEIFAHGILDCMHFCNSQRTNIPLSQAANNLIKIL  
QMTFGL EYQKFLKTRLD DAI FGDYSLPGAASVKLRDRVLKDRVLPNNI IDVSKFMDSRV  
DVDLMDACAQELSQR FVNSKPTKIMTVATTGLVIALPMAKYLQVPVYARKERNVVMADT  
YSAPYSSKTVGKDRQLLVSKSHVHKSDRVLIVDDFLSSGSSQEALLRILSDAGADPVGIG  
VLEKAYDPGRKALS GFDIPIESLCRVASVDGGVIQLVEEEGFDMKDDX

>comp10201\_c0\_seq1; 369 1 1270 LEN=1980; translated  
RFYNNITCNPQDSLRRRTVNLFFTTSSQQEVVPSNDDVDFDEKNPYSSDKDCDRISPVNAL  
PVYERFVAHGRCPPCDPSIRD LGFLSNRIQEATIRSFDFRIRSKSHSMGGRKRFSTLSFL  
FSSGNNNVSSNDVFASVPGWTRKNFLIAGIFLLIPPILLEAYS RIGILSIPSGQRNGN  
DRAPRRIFSYVPPKNTDWSHVEHATIVFHGAGGEDSYTNELMKRLDAAAESSSSGLQNH  
YNHIVDWSQNSANILQASYNQQIGRIAARELLEQATAPNNSLKTIIHFIGISVGAFSADA  
AVNEVKKNFQNSNSIEAPFVQLTLLDPFQQLGIFGVSYGNKTFGKSADYAQQYLNTDDSV  
PSTNKPLQNTVCYDVTNLRPE SVFGHDWPLVYYARS DHCGKIMINDQGKSITSVETGTVV  
VL

>comp10202\_c0\_seq1; 267 127 1139 LEN=1311; translated  
MTPHRRIERN SFRLELKMKGISEPCQRDILCGRGGKTLRYPGNLRYRSLIRENKTMYLLS  
SKEQKSIISRSIVAAIRARSGRFLEQATDKTWYDVGD AKAIEKTAQALREGQAKLRRRII  
DSGLHKEKLGCSRLGAPHITFASLELPFKHEHSRPNQIAYVSDSPSINVHKMND EIFQLR  
QPLDTIITPGRETIIPLDHPQPHYHHQAEIRRNSSPVSSLSNISIPFGNYTANCPHRQNY

STIIPQVNRILTSTVQLNQPIHDVPQPLLFPNNERQEDVEQHKVPDFVGDNDNDENSI  
MTFEMDRDEFLEPNECLDXITIVGLEDTNNKSSQIGA  
>comp10202\_c0\_seq2; 272 104 951 LEN=1123; translated  
MYLLSSKEQKSIIISRSIVAAIRARSGRFLEQATDKTWYDVGDAKAIKTAQALREGQAKL  
RRRIIDSLGHEKLGCSRLGAPHITFASLELFPKHEHSRPNQIAYVSDSPSINVHKMNDE  
IFQLRQPLDTIITPGRETIIPLDHPQPHYHHQAEIRRNSSPVSSLSNISIPFGNYTANCP  
HRQNYSTIIPQVNRILTSTVQLNQPIHDVPQPLLFPNNERQEDVEQHKVPDFVGDNDND  
DENSIIMTFEMDRDEFLEPNECLDXITIVGLEDTNNKSSQIGA  
>comp10203\_c1\_seq1; 464 1 1691 LEN=1702; translated  
XFVEMFLQALMDSFDSMDRHLDISVRILSSVLRTPDVALQRWKAFLQLFDKINTSSTNK  
NDQVRLEVLESLMLGRKDFDVSMDKPRNDGIITDLDTMLLRPWSRNGQRRRLTIYSAFR  
SQDWLQLDRINGRLLDHFQQIVGHCNDSNAKTREAAAKAVGEFCSRYIIIRSAADETLWQ  
TKKETAWIAEKVCVAMLELCRDQNAARSMSIFCLGNLTSALKASNSEELDLTKLQET  
SNAIFDSLNDANDKVVKNAIRSIGHAGNLLAGSMRCNPKDEGVSSSCGLLVAMVEALTQK  
LSNTLHVALNEEQKSAMTWKERSAAKKGWGACHSLGLIFEGLSVELVEGSDSFAAACRG  
AFRRLAVCLRREALNEKVVLAAMAALGQLPGGLLVLAGSRGGSGLGEALAGSMLESLSSQ  
RARDHRNPHEASPRVAAKNQDLLRHLLAAAPVESATEALTGGGGGGVTPRTLNVLYAWMV  
EAPQLEVLPARSFEVVSALALRHQERWPSGVVGLERQFASRAVQKRKLLERPSENINPSG  
STSGIHETRAEGNDEQDEDADEL  
>comp10204\_c0\_seq1; 864 186 1847 LEN=2080; translated  
MPPVLDPENSKVDGLAFLGLSLARNHYWGDIDSEEPQGEETKPQGLGHPDSYTHQTAFDL  
NEVIDREYEFLOSTDDNGWLVGGEAGPPTSYPKLAALDSAHEIMRVGTYRKDWGGLDLE  
ELLAVMNSGSILVLPQIEVLPTDVVANPDTTPELEIRFDMECASEAQLKSLSEGDFDAFMK  
EPELPINWQLRFLHNQFFKTFVFPSPRFCPGAFHSTILRKADFRSDAHTLYFCKCAAAIQ  
KWRERGPALNTVPRHPDGKPLSKEEIAAMYPEPESEGEHDPPLRAPSDAPCKVESQATA  
EPEAETGADTEAGTEAEPEEENSYPSPPTTEETEAMAKLVKKLEDLTPPLPKATTALP  
SVNLEIALDAEEEEEEESTAAEPEETQETTNTAGSTEGGDLPTTDGLYRHTWDDVVRVRL  
DDASKDDAAAGVDVDPATIGSNKSRNCHSGIWLFTDRENITHTFFQPNFLPPYDTPEKKRI  
IFDVLREEWDEKSLGWKPCGQGSMSQEKPEDDTGLLAELQKAENLVSGVLKSVIDNVCS  
PQSPRKLSSAAHF  
>comp10204\_c0\_seq2; 713 214 1685 LEN=1918; translated  
MPFSFAAFSVSGSKPGSSSEEXEAGPPTSYPKLAALDSAHEIMRVGTYRKDWGGLDLELL  
AVMNSGSILVLPQIEVLPTDVVANPDTTPELEIRFDMECASEAQLKSLSEGDFDAFMKEPE  
LPINWQLRFLHNQFFKTFVFPSPRFCPGAFHSTILRKADFRSDAHTLYFCKCAAAIQKWR  
ERGPALNTVPRHPDGKPLSKEEIAAMYPEPESEGEHDPPLRAPSDAPCKVESQATAEPE  
AETGADTEAGTEAEPEEENSYPSPPTTEETEAMAKLVKKLEDLTPPLPKATTALPSVN  
LEIALDAEEEEEEESTAAEPEETQETTNTAGSTEGGDLPTTDGLYRHTWDDVVRVRLDDA  
SKDDAAAGVDVDPATIGSNKSRNCHSGIWLFTDRENITHTFFQPNFLPPYDTPEKKRIIFD  
VLREEWDEKSLGWKPCGQGSMSQEKPEDDTGLLAELQKAENLVSGVLKSVIDNVCS  
PQSPRKLSSAAHF  
>comp10205\_c0\_seq1; 197 1 466 LEN=906; translated  
NDSNSNSSDQNNQDDEQOYYEEDHQOQEEAGQIDGAFARVNGGMLQSGRFENQIVSLVG  
QVVAHDTIRTADGSSVRLVTEHLADDTEDGSGGLIVDPNTVVEIMGQASGPTELTA  
FIRRELGTDMDLGLYNQMITMQQKDKYVQYFSPAPEGQ  
>comp10206\_c0\_seq1; 308 1 1779 LEN=2016; translated  
QIPIVYFANHDVIVHIIHQAMNKATTAVSSFLLKPCRRVLSVTELHSIYPIATGFSFQSKKR  
NNTAAISYRSFSNTTVSYKMSSSNPYAKYASLAEKACEFLTASPDPFYVHNCVAKLEAN  
GYTKLNGSRPFTGQLVPGGKYYYVVDLTTLVAFVCGPKLDVEKEPFGFHIVAGHTDSPNL  
RIKPRSKRSASGCTQLAVETYGGGLWHTWFRDLVSVGRVLLQEPQAVSESGRSIVNTKQ  
RLVNLEDPIARISTLAIHLQSAEERKGFVSNKENHTAPIIATKNTGEEKIGSQSNKQAGK  
VLEQEASDQINALSKWQESQEPLLLKAIADKLETTVESIVDFDLSLYDTQGAALGGISKE  
FLYSARLDNLATVFAGLEGLVSFTSPSTDEGIEALNNSDVSVAFFDHEEVGSTSAQGA  
GSPVMQGAIQRISAALYGGASPSPDVHQACINKSFVLSIDQAHAIHPNYSAKHESNHAPT  
LNGGLVIKTNSNQRYATSGISGFVRELGRDIADIPIDEFVVRNDCGCGSTIGPTISARTG  
IRVVDAGMPQLSMHSCREVMGIADLSHGIDLFRVQYKFRQLDGSICREVTK  
>comp10206\_c0\_seq2; 289 1 1539 LEN=2132; translated  
QIPIVYFANHDVIVHIIHQAMNKATTAVSSFLLKPCRRVLSVTELHSIYPIATGFSFQSKKR  
NNTAAISYRSFSNTTVSYKMSSSNPYAKYASLAEKACEFLTASPDPFYVHNCVAKLEAN  
GYTKLNGSRPFTGQLVPGGKYYYVVDLTTLVAFVCGPKLDVEKEPFGFHIVAGHTDSPNL  
RIKPRSKRSASGCTQLAVETYGGGLWHTWFRDLVSVGRVLLQEPQAVSESGRSIVNTKQ

RLVNLEDPIARISTLAIHLQSAEERKGFSVNKENHTAPI IATKNTGEEKIGSQSNKQAGK  
VLEQEASDQINALSKWQESQEP LLLKAIADKLETTVESIVDFDLSLYDTQGAALGGISKE  
FLYSARLDNLATVFAGLEGLVSFTSPSTDEGIEALNNSDVSVAFFDHEEVGSTSAQGA  
GSPVMQGAIQRISAALYGGASPSPDVHQACINKSFVLSIDQAHAIHPNYSAKHESNHAPT  
LNGGLVIKTNSNQRCVMKGNDRDSFVRNIAVS

>comp10206\_c0\_seq3; 258 1 1907 LEN=2144; translated  
QIPIVYFANHDVIVVHIHQAMNKATTAVSSFLLKPCRRVLSVTELHSIYPIATGSFQSKKR  
NNTAAISYRSFNNTTVSYKMSSSNPYAKYASLAEKACEFLTASPDPFYVHNCVAKLEAN  
GYTKLNLSRPFTGQLVPGGKYYVVDLTTLVAFVCGPKLDVEKEPFVGFHIVAGHTGTSNK  
QNGFSEMDSFRSSLTACFLIRPVSFNLYCIPNRPTXLLDSPNLRIKPRSKRSASGCTQLA  
VETYGGGLWHTWFRDLSVCGRVLLQEPQAVSESGRSIVNTKQRLVNLEDPIARISTLAI  
HLQSAEERKGFSVNKENHTAPI IATKNTGEEKIGSQSNKQAGKVLEQEASDQINALSKWQ  
ESQEP LLLKAIADKLETTVESIVDFDLSLYDTQGAALGGISKEFLYSARLDNLATVFAGL  
EGLVSFTSPSTDEGIEALNNSDVSVAFFDHEEVGSTSAQGAGSPVMQGAIQRISAALY  
GGASPSPDVHQACINKSFVLSIDQAHAIHPNYSAKHESNHAPT LNGGLVIKTNSNQRYAT  
SGISGFVVRELGRDIADIPIDEFVVRNDCGCGSTIGPTISARTGIRVVDAGMPQLSMHSCR  
EVMGIADLSHGIDLFRVYQKFRQLDGSICREVTK

>comp10206\_c0\_seq4; 239 1 1667 LEN=2260; translated  
QIPIVYFANHDVIVVHIHQAMNKATTAVSSFLLKPCRRVLSVTELHSIYPIATGSFQSKKR  
NNTAAISYRSFNNTTVSYKMSSSNPYAKYASLAEKACEFLTASPDPFYVHNCVAKLEAN  
GYTKLNLSRPFTGQLVPGGKYYVVDLTTLVAFVCGPKLDVEKEPFVGFHIVAGHTGTSNK  
QNGFSEMDSFRSSLTACFLIRPVSFNLYCIPNRPTXLLDSPNLRIKPRSKRSASGCTQLA  
VETYGGGLWHTWFRDLSVCGRVLLQEPQAVSESGRSIVNTKQRLVNLEDPIARISTLAI  
HLQSAEERKGFSVNKENHTAPI IATKNTGEEKIGSQSNKQAGKVLEQEASDQINALSKWQ  
ESQEP LLLKAIADKLETTVESIVDFDLSLYDTQGAALGGISKEFLYSARLDNLATVFAGL  
EGLVSFTSPSTDEGIEALNNSDVSVAFFDHEEVGSTSAQGAGSPVMQGAIQRISAALY  
GGASPSPDVHQACINKSFVLSIDQAHAIHPNYSAKHESNHAPT LNGGLVIKTNSNQRCVM  
KGNDRDSFVRNIAVS

>comp10207\_c0\_seq1; 230 1 530 LEN=819; translated  
XQQQQPHQRPPPPQQAPPRAPPPQQQQKQSSGADNKYAQMANQSEDDGQAAITKIKHSI  
LISWALQPPQLQMLRPIAALVTIHTVFPALGVAGHDYFKKWKPIGRELVAGVNGLPED  
SKLKKSVRKIRFFLHPDKLPHDLNEEQKFMVKMLWDVTNDSWEEYQKHKEDLDWVN

>comp10208\_c0\_seq1; 209 1 829 LEN=1004; translated  
XSSRSSNNNNHNNHYGSMGQVCSGTSEEASKSGLLDVPSRGDDHPDPSLPPAPPEPSRGD  
PSEEAASLPGSGTERERASEERAELLEQRKREEEALERKQRELWIVNGAARGMVSVRSTR  
GSTGYDQGFAGLLAQHLEQTTSFPDRLLPLVLPNGSGGSPSPSPGASSSSLPENESGG  
PGEQQEAGGSGCSFYDRLARSPWGGMDLAVEAPRPAATHAPGRLLQGRELAAALS GDPH  
KLMDALAESLLDGPYTVVVARQQLFAGVRPMVETLM

>comp10210\_c0\_seq1; 335 178 1194 LEN=2315; translated  
MSDAPSNADANGGPGQVALSDPVDVIIDKLLSVRGARPGKQVDLSEAEIKMICLRSRDL  
LISQPMLELEAPIKICGDVHGQYYDLLRLEFYGGFPDSDNYIFLGDYVDRGKQSL ETIC  
LLLAYKIKYPENFFVLRGNHECASINRIYGFYDECKRRFGIKLWKTFTDCFNCLPCA AVI  
DEKIFCMHGGLSPELTNLDQVKRIVRPTDVPD TGLLCDLLWSDPDKEIDGWGENDRGVSF  
TFGEDIVAQFLHKHDLDLICRAHQVVEDGYEFFARRQLVTLFSAPNYCGEFDNAGAMMSV  
DETLMCSFQILKPAEKQRFSYQGGNQRP GTPQQAQGR

>comp10210\_c0\_seq2; 301 500 1363 LEN=2484; translated  
MICLRSRDL LISQPMLELEAPIKICGDVHGQYYDLLRLEFYGGFPDSDNYIFLGDYVDR  
GKQSL ETICLLLAYKIKYPENFFVLRGNHECASINRIYGFYDECKRRFGIKLWKTFTDC F  
NCLPCA AVIDEKIFCMHGGLSPELTNLDQVKRIVRPTDVPD TGLLCDLLWSDPDKEIDGW  
GENDRGVSFTFGEDIVAQFLHKHDLDLICRAHQVVEDGYEFFARRQLVTLFSAPNYCGE F  
DNAGAMMSVDETLMCSFQILKPAEKQRFSYQGGNQRP GTPQQAQGR

>comp10211\_c0\_seq1; 677 74 1447 LEN=1556; translated  
MKFCAAALASMLVCQAVAF'TTKASFPAARSASKLHSSAANVLRPSPADAGANGDSPE  
IFDLSISIGCRVHRYKSTSFNTDDTDVNYVMWYHGRSTKQDEDKSLPPLSSGRIGRAVSK  
NGLVWEKDCSGSSDVIDIEGVSFGLNQDSWWGFDTAHVGLGSVLLPMTTPAVMTEGGIYLM  
YYFGNFEETPINDYVEADMPEDLTIKGMKMRIGVAVSQDGETWGRVEGDPTGACMPPY  
EKSNSETKMEDDKSLEIKEELYCGWPEVVVRIDPSNDANS GFFMYYSTMTKDDKQKSL  
GVAVSSDGFRWYKRGICLTPSAGDEDSMDDAGVARCHVVRNAVYNELEETWSDAPGYTMF  
YEGVSSLDKKHRVLMATSDDGEAWTKRGVVLDIGESDNEAWDCDGVGSPNILRMDDGSQR  
MYVVGQKGS DTAIGVAKMAVDSTAWVREQSSFSFVEA

>comp10212\_c0\_seq1; 596 1 2289 LEN=2358; translated  
LEKLELALGNRVRGMRVLSTGNKDQIPSIADKSSYKERSTNLPPTERGE  
IILGIAIDPETSQRVVDGRPPSDQQKEVKTQVFLWGSKAQLRRFKDGAIVQAVVWDDDD  
KDHQNEVRLQGGYINKIVRHIVRLHYTKKIEFALPNLISLVDGINSNNKQDAFTQLCNP  
VLAHQHVMKAFESLSQFLRSQSQSYRQONQVFLDLPLSIDGVEPLSSCLRYSELPFPV  
PHPFLLGSSSTPNKKVSGAIMSDPVLIIQIRFGASSKWPDLKAIGA AKTAMLIQIANAIE  
GVNSRDFDGPVHTPNYLDLGYKGYCFRVLIRADPEIKMLQGLVRPSPVATSLKSLTRA  
HVVAAKHSMIHAVHTLHP SAASVVR LAKRWVANHMLSGLIAPEAIELMVAKVYSDDETP  
LETPTSTVTAGFVRFLHLLAYHDWLGEPLIVDPRGHIESVDCDEIHLQFEKARGKKGEAGH  
PMYIIAPYDKLEIDEEDPMNQNTVKTNETSWQPNTISPEWVCLTRSVALAKRSYSFMMK  
KLLIFGKSNDSWAI FHE SPASFSYSVLLRTNTEFVDMETSSTGKNLNPSPNEHGTLTT  
SYTKSMKARIEGPKGLRRIYKNIQNNASDETILLWQPVQDVISLREKFGAYALFFYNE  
LSPEVIGIVWRPQTIATMAFSAMTA EYARPFDDNEKSWKND SLVVRNAIDL LREMSEYYQ  
YIITTVKI IDESCLGPSSKRRKLLVSDDKSEEKDNEDSLTE

>comp10213\_c0\_seq1; 754 714 3650 LEN=3650; translated  
MTSKWIDSATALASFHYQSEVFEENRPI SFGDQDKDKTKRAPKGGNQR TAGSVGYLSEDI  
LYSFTFYDDEASIDESSAATNSSRPQPVPPLAPPHSLSGSTSSGATTAVSSIGTRGTRGT  
RGGSLVSQKSFVAVHTRQRYRSSKALVENNQDEESESSESIQSKRARSIFQRIFQWEGK  
GKGKSKSKRLSSATAAEASLSPSDAADNNSNKAPAKALVSSLKQSGAIP TGSDRSSSSAP  
NEMFTSAPMVPSFPKQGPCKMRSDPIRSKYARKSVSAEKLSSNSSAHSRHRRLPSTDIP  
VHGVGGSVVKSFKNPSLAWQKRNTIAMPSTGLHPTATARSTTDPDYDIETMLLEEEKE  
RKQETRRRQIEEMRRKFEQTGRRPSLQLLKRPSLIFQQFSDHNSDSNSSNSKI FTSTKSL  
EILKGNNEPTTTTSQPSSAQ TDSNRDKPKNITGFSNLNKKLELFDLPSLHKDSARDTSE  
RTETSNEPELNSEFPSTKPDQYASSPNIAIDPQSSKLFQPPVEKLNKTSFLFQEAHLYS  
LISAVSMASLRNDMEGVSSPLVDYVPGQKFPVNPPEMQIKILVEDGRPEYDTEIEPEFD  
QDIIGNNTKTCSSIRVKRNNNMLNVMFLFGFSRNSRQRTIYNASRPFQVLGGISDAEVE  
MLRKVRGHAAQHALCCLWLKEFITREHLNGSTGKVHPPIVARVYQYISDGSTQYNNCRKT  
ANTDFPFPHAQ LISFFGFVSI FMFPLL FYTYVNDTLLGVILNFFT VSCFFGILEVALELE  
QPFIRYPNDLPLNNYQAQFNEALISSLYSGFHPDSWGEVVDNEGIFGTNNDSSGENRDT  
VRNSSGSI INKSTVHYSSGGLTSSGGIIRTCKTRRKHKPSVVSFAISSGERDQGSRS  
SSLSFAIPDGQSERSTGSAVRFAIPDGQTERSD EGSLLSFALPGDSERSRGSVMVRFSSPD  
GESKRSTGSTVRFVAVPGGE

>comp10214\_c0\_seq1; 728 82 1440 LEN=1828; translated  
MRKISHFLMALCMLAVERSASSSSSPVPASKRNVNDLSRWASEQGVVMHESLRWKQAA  
NEDDDGNDNIGVELTEPVEPGTVLLKVP RSIVFDAGRIRSELEAESPEKVGAALARLRS  
DGFEQHAEGFFIFAKVLRCCLEGE S SAWAPYIQSLPRNFVEFSSAEKSCLPYAKYIADY  
QEEKLASFC EA AFGSLVSEAPGSSEQARFAFC AVSSRFWKTSSTEEGTAALMKGMGDSS  
SSPTTKQPTSELVVPVDMFNHREPPNVAIAHEGDDYVSFVYKNTSGDEDNLDLYITYGQ  
PSNPHRFLGVFGFVPVADMPNLW SHLVYVDNPF TENVEAMTFRTSDGHI PKQVWDAVLYA  
LLEPKHPPGEPPEFTEEQHTKYRSY TADILKGHIEKQLEELATLKKKI QMVEAIGSSNG  
NIGLVRQHNEFLSGVF EKA AKQVGGDPQEERT

>comp10215\_c0\_seq1; 377 232 1677 LEN=1707; translated  
MKFLYLLCTLVLIGLCAVEGRFGANQIGQSLPALNYRTFQSGDRNNPAFWGTARTHGPTN  
RRSHPDDCARTEVRSVARTIQSDVRGGSAAA AKAVRTMTARRMESLKKFRAQAPRQFPFG  
GTWTAIAPRQAHLRRI GVENHFYEMGFFGWPCPGSVEILGGKSPPVSSLTNRLFFXLFA  
SILHDSKRLLSGGMAGTVAACITNPLEVVK TQLQSSNSAKSNPSQIAKKILDADGIPGF  
RGLPPTLVGIIPSR SAYFYAYQKMTFLNPTLPEGSPANAMIAGFSAGIVGNTLTNP IWM  
VRTRMQILVDASAGQKQYAGYADAI RTIFQEEGLGGFYKGITASYWGCFEGATQFI IYEQ  
LKSKLITRQNKRAEQGLRPSQELSKGTYFWAAACSKAIAAVATYPHEVARTRMREQARA  
GVFKYQNGMWGCLSVMAKEEGFNLSYSGMGVHLMKVVPNSALMFLTYEIVRGWLD RYEVV  
G

>comp10215\_c0\_seq2; 418 232 1434 LEN=1464; translated  
MKFLYLLCTLVLIGLCAVEGRFGANQIGQSLPALNYRTFQSGDRNNPAFWGTARTHGPTN  
RRSHPDDCARTEVRSVARTIQSDVRGGSAAA AKAVRTMTARRMESLKKLSSGMAGTVAAC  
ITNPLEVVK TQLQSSNSAKSNPSQIAKKILDADGIPGFWRGLPPTLVGIIPSR SAYFYAY  
QKMTFLNPTLPEGSPANAMIAGFSAGIVGNTLTNP IWMVRTRMQILVDASAGQKQYAGY  
ADAI RTIFQEEGLGGFYKGITASYWGCFEGATQFI IYEQLKSKLITRQNKRAEQGLRPS  
QELSKGTYFWAAACSKAIAAVATYPHEVARTRMREQARAGVFKYQNGMWGCLSVMAKEEG  
FNLSYSGMGVHLMKVVPNSALMFLTYEIVRGWLD RYEVV  
G

>comp10216\_c0\_seq1; 344 188 1084 LEN=1727; translated



MKGLSAPMLMLALLLGSKNYLRAANAFGLGAFDLLQNAPSWTDADAIGSATEAARAHAVS  
FWSSSQSLAAIDFSDTDFGPPSGSSNQVLTEADLWTLRIGSAMATYFGFVAVNDRPRGGL  
ALPLDPSDDECCLRVQQSNVPGAGLGLFANQNLPKGTILGTYPGVLLPLQQHSAASKIRD  
HPECLAYIWRFTDNEFVIDPTLSSDGSLEPYCSGGNPSQPLSVPPFALLRILGVLPKTST  
ALCRINEPPLGGDVNVATEEDLAGRTVTFLLERNVYAGEELYIDYGLTYDRSRYTASR  
>comp10217\_c0\_seq1; 929 148 2757 LEN=3133; translated  
MRTVNIPILALVSSAIPESSEAFVTSRRATTSKNNASPVHLGESRNGASPSPHVQERKLL  
LFASADREDGAIGSLEELSKILGMKVAELKADLKRHQQPISGLKKVLQERLLNFYRVSN  
NEGSEGEVQAESMAAMDGDIDIDSHSENDSDGVEGDEDEEGETIMEAEEEEEDCDRDGDDD  
RNLAWVNSKSRWKKKTFLLMEDVRKLVHSRDARARKKGPCKAKEALRRMQQWISLSPSSL  
NSGDEQEATITFDQRSTLLKAYNLWIHALAKSGYDDAGNQAEIILNEMRRNASSGGPSPN  
DVTIASVMDAHAHSASVSSSSSSGGAKAAEAFRLFRLLEKHEANHNDIPWSDHGGDTLRDTL  
VVTCDTMLNAWAREGTMASAEALTIILVRLLEDYQRQTQRQKKKSRKSIETEPSTKMRKT  
RPISTYSTMNAWANVRTAEAAEKAEATLDNLVLRKADKKAEEKNDIVIQSKLVTIQPDT  
ILFNSVIQCWAASRDIKSGKSLQLLEQMKELAGVGRGDSTDDDEIYFDTHPDIITYNTI  
LSAWSHCGMKNAAPQAEKIVKELVAEQEERRERELGAGGGGPNVSAVVNTVTFNTVLDA  
WSKSKLPGATDRAGKLLNYMIQSQDPHIVPDVFSFTCVMDTLAKSKEPSKASQTRELLDR  
LIQMHQDALQNGGKRKADALRPTQIPYNTVLNACAFSALKTPEQERRDAIRIAVDIYRAM  
SSRIDLASFRKNGSIVARDSVTYGLMLKCIANLMPKKGKVRSQMALQIFRDCLDDGLVG  
FMAWNEVRRAPVSKI IQQEFGFKRQIGQLESKDLPREWTKHCKTNKKFDKQRQREQSARH  
KKTSEPKKKEQPAKAFIERSFATGKDM  
>comp10218\_c0\_seq1; 576 249 1822 LEN=1822; translated  
MGAINIPKKPEEVPEAAQGNPVYEQTRQDMPLFCCKGKNCGRNTRITVFLGLIAVSCSFV  
VCFSSNYFTFVSLRNDTFYDEEKTQPHPFYAVEANVGFFRYEILEVFEYPPPKDQREL  
FDAMHDRELERLAANDETYDFKDEQVSSNSAIVKKIRRIQDEFPPDDFNDQTPSKEHVQ  
LAVSDEQSPNEEESSNSANSNESRRMQNKFPADFYDDDIILSFNQISSFIGDDDFSDNP  
SQNTTDAMGNSTYQKDAMDIVLPKSPTFAPLSGIPIELVPDVIIPGSAVSRPLTSSPTTA  
PTISDPNLKIDVQVGVVLPYPPGSDHFDYSYFQNGQTGAFWAPITALIGLFFGMLEFCCCV  
YKCSWLPTALFLYAAFMLQLMTIMMFLTEDFCDYTQDCVLGTSGYLSVVAVLLYMVCQSL  
ICMTPRPPPLFDPLKLRKSKRKKDKKQHNEWDETQALAENEGGFAGDGPDSFADEDE  
DAFYNPDRVYDDDDHYYERDDNDYGYDDGYDGGYGDDEVYEGX  
>comp10218\_c0\_seq3; 302 265 572 LEN=572; translated  
MTPRPPPLFDPLKLRKSKRKKDKKQHNEWDETQALAENEGGFAGDGPDSFADEDEDA  
FYNPDRVYDDDDHYYERDDNDYGYDDGYDGGYGDDEVYEGX  
>comp10219\_c0\_seq1; 87 336 464 LEN=464; translated  
MRPMRMMNNPNKPKPNPDKPKPKPKPKPKPNPDKPDR  
>comp10219\_c0\_seq3; 87 510 638 LEN=638; translated  
MRPMRMMNNPNKPKPNPDKPKPKPKPKPKPKPNPDKPDR  
>comp10220\_c0\_seq1; 193 1 735 LEN=735; translated  
XRVLFRSAPPSPVAPALGGLGSYNPPSPTVPPVSSSSQPSLRDTPAPTETSFPFSIAPSD  
RPNQSDDGYPTRKPVELTDFPTWSPTTFVPTVSAHPSIDYPFYINHDSSEGRFFRPSGG  
GFFDEDPITPVSSVSSQVGYNRPGSSSSLSGSTPAPASANRNPQNNPGNNQSANRPGSGY  
ALIQDPTSAPIRQPQGNIPATSFERPGSAGSSTGTDGALRTPTLRPTAQSIIVAPRPLPVS  
GVGIPX  
>comp10220\_c0\_seq2; 493 141 2042 LEN=2042; translated  
MLTFRNRKQLLLITITLVALINIPISICCLHMDVDISRDKNNLNXDLEKRRDLKSDKDK  
PKKSKAKSSKESKSSKNGKSKITKEKPKSNNEKESAESKSKENVESRSIVSSTLGARNS  
INRGN SVTFDSIPTAPPVSPGVNAPGVDRGSSPLGGGTPVPTSENRPQNNPANNOFANR  
PGTTFDRPTPAPIRQFNPDLPYLGGSI PRPGSYPATENTSGGVIRAPTLRPTYRRYPT  
TPPADAPVVTIPVGRPGSYLNPNTDSPTGYPSESPSNGPSERPTFRPTGMPTPKSKTPT  
KPPTLKPTRAPITDEPTMNP TVSPGPTVSPTPQPTAYPTRAPTKTPTTAPSSAPTSAPSS  
YAGTLVRPGSGTGTTFGRLTSPPTKAPVPMVVPVAPPSPVAPALGGLGSYNPPSPTV  
PPVSSSSQPSLRDTPAPTETSFPFSIAPSDRPNQSDDGYPTRKPVELTDFPTWSPTTFVP  
TVSAHPSIDYPFYINHDSSEGRFFRPSGGGFFDEDPITPVSSVSSQVGYNRPGSSSSLSGS  
STPAPASANRNPQNNPGNNQSANRPGSGYALI QDPTSAPIRQPQGNIPATSFERPGSAGS  
STGTDGALRTPTLRPTAQSIIVAPRPLPVS GVGIPX  
>comp10220\_c0\_seq3; 182 1 1267 LEN=1322; translated  
DVCSSDXAPPSPVAPALGGLGSYNPPSPTVPPVSSSSQPSLRDTPAPTETSFPFSIAPSD  
RPNQSDDGYPTRKPVELTDFPTWSPTTFVPTVSAHPSIDYPFYINQSEESRYIGRPIGS  
GFSALESLEGT PASKPTGSASSPSEINRGSSTSGSLGGGTQAPTAVNRNPLQNPANNHN

ASRPGTGTGFGTPTPAPIRQYTAAPNSPQTTNLNAVHRPLFDEAEVEEVEGGALRAPTLRP  
TYRHYPTRPPVNAAGVVFVSELDRPDTYLAVGSSAPSNAPSMPPSEAPSEPTQKPTTSKP  
SQKPTGPPTLMPTRAPITPEPTVSPPTVSPAPTKSPSSGPTESPSGAPSTLAPTPEPTAVP  
TFRSTLVRPGTGLGFPTGTPSSLPSDGPSPMLPSDXPDGVI GEGPHLLSHDLSNNLVAN  
DG

>comp10220\_c0\_seq4; 508 141 2629 LEN=2629; translated  
MLTFRNRKQLLLITITALVALINIPISICCLHMDVDISRGDKNLNLDLEKRRDLKSDKKD  
PKKSKAKSSKESKSSKNGKSKITKEKPKSNNEKESAESKSKENVESRSIVSSTLGARNS  
INRGNVTFDSIPTAPPVESPGVNAPGVDRGSSPLGGGTPVPTSENRPQNNPANNQFANR  
PGGTTFDRPTPAPIRQFNNDPLPYLGGSI PRPGSPATENTSGGVIRAPTLRPTYRRYPT  
TPPADAPVVTIPVGRPGSYLNPNTDSPTGYPSESPNGPSEPTFRPTGMPTPKPSKTPT  
KPPTLKPTRAPITDEPTMNPVSPGPTVSPPTQPTAYPTRAPTKTPTTAPSSAPTSAPSS  
YAGTLVRPGGSGTGTGFGRLTSPPTKAPVPMVVPVAPPSPVAPALGGLGSYNPPSPTV  
PPVSSSSQPSLRDTPAPTETSFPSIAPSDRPNQSDDGYPTRKPVELTDFPTWSPTTFVP  
TVSAHPSIDYPFYINQSEESRYIGRPIGSGFSALESLEGTPASKPTGSASSPSEINRGS  
STSGSLGGGTQAPTAVNRNPLQNPANNHNASRPGTGTGFGTPTPAPIRQYTAAPNSPQTT  
NLNAVHRPLFDEAEVEEVEGGALRAPTLRPTYRHYPTRPPVNAAGVVFVSELDRPDTYLAVG  
SSAPSNAPSMPPSEAPSEPTQKPTTSKPSQKPTGPPTLMPTRAPITPEPTVSPPTVSPAP  
TKSPSSGPTESPSGAPSTLAPTPEPTAVPTTFRSTLVRPGTGLGFPTGTPSSLPSDGPSP  
MPSDIPTESLAKDLPTFYPTIYPTTWWPTTAEMGRKEKTGRRISNDDLEX

>comp10221\_c0\_seq1; 346 322 1117 LEN=1447; translated  
MAPNDNAFPCCACSHGRFGLALLIAVSQLLLSTALVAPPALSLVGPAAARNRASTPLRMG  
ADPPLSDGKSTEARQLERAKAALATSRAKMEAQERAGEEADADDGETPKESLPFFAAA  
ALDGGKDRVIKDKNEDGLFTTDGDLMAKLSEEEQWESRPLTQVFQDEIEKSPEAMNIDR  
DIGQSMYNLRKTLQTEDFTTIFDKGTGSSVRHRECEQRTATAMKSGMDVVGTGGSSKSMR  
SLPVDGAVLFFGVCAEAGANVGCH

>comp10222\_c0\_seq1; 82 106 547 LEN=547; minus strand; translated  
MPLGKSSIGPPVRCCRFLRPLLAGLVRSFVCSLLALPERVHQFSRLVQLPDDVQELHDL  
GKAAPGVRREALHEEHGVPADQGRQPVVQGLGSACAGLGFRAAEVPPVQEGSLGGGFLH  
NVEAPHQLAPDVLWVHAWVRHGRTKASX

>comp10222\_c0\_seq2; 128 106 694 LEN=694; minus strand; translated  
MPLGKSSIGPPVRCCRFLRPLLAGLVRSFVCSLLALPERVHQFSRLVQLPDDVQAPDQVP  
VHVELRKGRPVAEFLEPLPDGIVAENVKGVVRDPTAVVLDLDRVQELHDLPGKAAPGVRREA  
LHEEHGVPADQGRQPVVQGLGSACAGLGFRAAEVPPVQEGSLGGGFLHNVEAPHQLAPD  
VLWVHAWVRHGRTKASX

>comp10222\_c0\_seq3; 489 205 1359 LEN=1560; translated  
MSSPPSSLAVVRSAADLGEQCAGSAASA AVLLFGADWHEACPMLLETVLGALAPSYRPDSS  
SSSSGAASMLFGTVDAEAAAADLSESYGVTMVPTVLLLLPSGSGAFGVVSRLEGEDLANP  
SALTLAVQRLAKAASAGGGTGS GGAPPALTETTGS GAALGPGEDLDARLEKLV RMDTVVL  
FMKGTDPKPRCGFSRQAVELLADQKISTYASFDILADEAVRQGLKKYS DWPTYQIYVRG  
ELMGGLDIMKETA AEGSLDDWDLRGPETEAGASASESLNDR LAALVRRHPVMLFMKGLP  
SNPRCGFSRQIVELLDSIQDDGGGISYDSFDILGDDSVRQGLKEFS DWPTFPQLYVNGDL  
IGGLDIVRELHESGELVDTLREGQ

>comp10222\_c0\_seq4; 445 205 1212 LEN=1413; translated  
MSSPPSSLAVVRSAADLGEQCAGSAASA AVLLFGADWHEACPMLLETVLGALAPSYRPDSS  
SSSSGAASMLFGTVDAEAAAADLSESYGVTMVPTVLLLLPSGSGAFGVVSRLEGEDLANP  
SALTLAVQRLAKAASAGGGTGS GGAPPALTETTGS GAALGPGEDLDARLEKLV RMDTVVL  
FMKGTDPKPRCGFSRQAVELLADQKISTYASFDILADEAVRQGLKKYS DWPTYQIYVRG  
ELMGGLDIMKETA AEGSLDDWDLRGPETEAGASASESLNDR LAALVRRHPVMLFMKGLP  
SNPRCGFSRQIVELLDIVRELHESGELVDTLREGQ

>comp10223\_c0\_seq1; 172 266 547 LEN=721; translated  
MLHTAFKQATRLALRNSRHRWASTTTPAFVRAKRASAQKGNFGKTWLSDPATYPIIAVMG  
GALALLLGVSGSCLLYNPDVQINANKRGSILRE

>comp10225\_c0\_seq1; 746 159 2313 LEN=2483; translated  
MRIQASSIAGVLLVLTIAATTKARKTDTDEKGGKQSPDFDDGKNDNEGSCGLYMATSSTS  
IPSDHKWGVYAGKDIPANSPVGFGLAIHTFHLMANNIWLDEEEIHDLDENELANVVD  
WFEQFVWVPHSSGGQFEIEDTEYGAKVVS AVPGIGVVGYNPKLTNADWNHSSAYHREAW  
NEYPGEAHPGRGAYSNYNLEVASTEVI PAGREIFLQFGDNWDEESGEKEKEMLTKKDYE  
KVDQTV EKMIQFFEKHDSNLDEDSRQKIYNFLREDVMVAAAGEDKASQIKNMLPEDSNEL  
KELLENGGSFALKAPGAIRSLEWLETNGLCMDMIKPGPSTIPYAGRGAFANRDIKEGTLV

APVPLIQIPDEAILDMYEVD SILYNSEEVEEDETVEPDYIWHRDSDEKTAIQLLMNYMYG  
HPKSKMLFFPVGAVANYINHAPSKEKINAKMVVSDHPQNQIDWLDEVLPFNAMGRMLIE  
IVATKDIKEGEEGMIEGSILQPFQNVLVCLPRKAQIDVVFVSVLYHNLVFDYDGKEWQDA  
WDRHVEDWNQNKEDSWPTRALDLNQEHTKPFRTIEEEAYPENVMIKCFLMVKKADGEQK  
VDSEGRKTREWSESETGKSNLVSNNLFDCEIIAHRETSTGHSYDILWDSGKSKTVVTSVP  
HKAIVFLDRPGESDQNIWNSFRHYISMGDIFPDLWMNGFYEDDEEENAHDSNDEGEL  
>comp10225\_c0\_seq2; 496 199 1657 LEN=1827; translated  
MLTKKDYEKVDQTVKMIQFFFEKHDSNLDEDSRQKIYNFLREDVMVAAAGEDKASQIKNM  
LPEDSNELKELLENGGSFALKAPGAIRSLEWLETNGLCMDMIKPGPSTIPYAGRGAFANR  
DIKEGTLVAPVPLIQIPDEAILDMYEVD SILYNSEEVEEDETVEPDYIWHRDSDEKTAIQ  
LLMNYMYGHPKSKMLFFPVGAVANYINHAPSKEKINAKMVVSDHPQNQIDWLDEVLPFN  
AMGRMLIEIVATKDIKEGEEGMIEGSILQPFQNVLVCLPRKAQIDVVFVSVLYHNLVFDY  
DGKEWQDAWDRHVEDWNQNKEDSWPTRALDLNQEHTKPFRTIEEEAYPENVMIKCFLMV  
KKADGEQKVDSEGRKTREWSESETGKSNLVSNNLFDCEIIAHRETSTGHSYDILWDSGKS  
KTVVTSVPHKAIVFLDRPGESDQNIWNSFRHYISMGDIFPDLWMNGFYEDDEEENAHDSN  
DEGEL  
>comp10225\_c0\_seq3; 533 199 1548 LEN=1718; translated  
MLTKKDYEKVDQTVKMIQFFFEKHDSNLDEDSRQKIYNFLREDVMVAAAGEDKASQIKNM  
LPEDSNELKELLENGGSFALKAPGAIRSLEWLETNGLCMDMIKPGPSTIPYAGRGAFANR  
DIKEGTLVAPVPLIQIPDEAILDMYEVD SILYNSEEVEEDETVEPDYIWHRDSDEKTAIQ  
LLMNYMYGHPKSKMLFFPVGAVANYINHAPSKEKINAKMVVSDHPQNQIDWLDEVLPFN  
AMGRMLIEIVATKDIKEGEEVFIDYDGKEWQDAWDRHVEDWNQNKEDSWPTRALDLNQEHT  
TKPFRTIEEEAYPENVMIKCFLMVKKADGEQKVDSEGRKTREWSESETGKSNLVSNNLFD  
CEIIAHRETSTGHSYDILWDSGKSKTVVTSVPHKAIVFLDRPGESDQNIWNSFRHYISMG  
DIFPDLWMNGFYEDDEEENAHDSNDEGEL  
>comp10225\_c0\_seq4; 783 159 2204 LEN=2374; translated  
MRIQASSIAGVLLVLTIAATTKARKTDTDKEGGRQKSPDFDDGKNDNEGSCGLYMATSSTS  
IPSDHKWGVYAGKDI PANSVPVGFGLAIHTFHLMANNIWLDEEEEIHDDLDENELANVVD  
WFEQFVWVPHSSGGQFEIEDTEYGAKVVSAPVGI GVVGGYNPKLTNADWNHSSAYHREAW  
NEYPGEAHPGRGAYSNYNLEVASTEVI PAGREIFLQFGDNWDEESGEKEKEMLTKKDYE  
KVDQTVKMIQFFFEKHDSNLDEDSRQKIYNFLREDVMVAAAGEDKASQIKNMLPEDSNEL  
KELLENGGSFALKAPGAIRSLEWLETNGLCMDMIKPGPSTIPYAGRGAFANRDIKEGTLV  
APVPLIQIPDEAILDMYEVD SILYNSEEVEEDETVEPDYIWHRDSDEKTAIQLLMNYMYG  
HPKSKMLFFPVGAVANYINHAPSKEKINAKMVVSDHPQNQIDWLDEVLPFNAMGRMLIE  
IVATKDIKEGEEVFIDYDGKEWQDAWDRHVEDWNQNKEDSWPTRALDLNQEHTKPFRTIE  
EEAYPENVMIKCFLMVKKADGEQKVDSEGRKTREWSESETGKSNLVSNNLFDCEIIAHRE  
TSTGHSYDILWDSGKSKTVVTSVPHKAIVFLDRPGESDQNIWNSFRHYISMGDIFPDLWM  
NGFYEDDEEENAHDSNDEGEL  
>comp10225\_c1\_seq1; 597 134 1885 LEN=1985; translated  
MIAEATGTADSTVIEDHVECKEKGKCDVVAADDETCSLTENHFCTMAVTGSNPTFQAI FL  
CNECLVGPDIADATAPTSVDAQQEQQQSPLCVCQACAEFCHDDGYHDVEYVGMGPSYCD  
CYRMGNCKLYKKSLEEADRLGVIPNDDTYGRSVSSPLLLPSPEHLVREAFDIPILQQNVN  
KSGSATLALLLVEQARELIRHTKETLWIDETVVRKYTPDTLSDENSKPSSQNRLLCLES  
LAWSIYRSHRERYKIDLVNVDGDNAGDDRGAEWVQVKSLSGTIDGSSSDDPAGEFAD  
ASPQFSSSIDLHYDKDEALAESFGIGSFALSTVTYLTASPAKAAPTIVFDHTYQTGED  
EVMSSMFVSRPRIGKHCDFDGRLLHGAPYHPSLLSIAPSLSCGDEQDATLECDAVPQEEK  
PTTMPLFRVTFVLVNIWNHRRPASVHVLDDKIRKSILQLQQSMSVPEDSTGAIRFENDSKL  
TMDPLEIPTVAAYEEADLPEASRDRIELPFVSNLSEEDGEEDGEGSTVVVTFPPGHTDDS  
VLVTFGPGLQAYLDYNYGSQGGVDTESQDGTDLPPPARQSHYV  
>comp10227\_c0\_seq1; 342 308 1336 LEN=1445; translated  
MASRDLTNAYFDRRASALKRRNALGSPTSNGGIGDVGSTSKKRGNRRLTAGVHNDDSHSL  
MLMEEGDGSSDGIQMTSLNKPQQQNEPTWVGVDVQVKSILQEIRRQMEDLQALHASRVGS  
VFGKDLDDMENRIENLTRDITDRFRRAERILKKVGAATTRAGGEEAAIGANVQRSLAKQL  
QELSVSFRQSQRKYLAEVQAQKSGGFDGVTGTTNDHFLGIGDLSTDPSSGGSFFTSQQVQV  
VDDLQEAIESRDQEI SKIAQSI EELGTIFKELAVLVIDQGTILDRIDYNMEAVVESTKTG  
VKQLERAERAQQNARPMKCIACLVVTFIFILLVILVLKHKRWG  
>comp10227\_c0\_seq2; 293 993 1835 LEN=1944; translated  
MQEGDGSSDGIQMTSLNKPQQQNEPTWVGVDVQVKSILQEIRRQMEDLQALHASRVGSV  
GKDLDDMENRIENLTRDITDRFRRAERILKKVGAATTRAGGEEAAIGANVQRSLAKQLQE  
LSVSFRQSQRKYLAEVQAQKSGGFDGVTGTTNDHFLGIGDLSTDPSSGGSFFTSQQVQVVD

DLQEAIESRDQEISKIAQSI EELGTIFKELAVLVIDQGTILDRIDYNMEAVVESTKTGVK  
QLERAERAQQNARPMKCIACLVVTFILLVILVLKHKRWG  
>comp10228\_c0\_seq1; 726 14 2811 LEN=2811; translated  
MSPRTKFCRCIISLFLNFTSLMTTIESFVVVPPPTSDFNKEKRRFIDTVARTKNIISLCS  
RSTGYDDFKPIDLRSIPNRPFDNESKYNVSLVIDHYDSFTYNLVDMLSQTLVDPPTVVA  
KDAFEAAARGDLTSYFETFDGIVLSPGPGTPQEQLLSHLAISENPDLPI LGVCLGHQLM  
SLAYGAMVDRAPVPIHGQDHQIVQEDPWEYDFSRKAAHSKESTHPSLQKLPSSFRVRY  
HSLCAYDLPCDLVVTARSRDNVVQAIQHASNPHYGVQFHPESIGTENGLALLENFVRITE  
KHKVDKQKGI EESSLVRETSKPLQSSLSKAKISDSDTQLSSRFRVMVHRLPSEFSSFSPL  
WVFEEFYAQKSHTIWL DSSSYQTGRGELDILAAPSRVDDIEYHIQENDGNENDILSRLE  
KQLFDTESHDFTSCNNIGWVEFDENSPVLDWVKENEIFLENLPFNRYGGFLGFLGYEVRH  
DTQRYLQELEGGVFNNKGTGRTSKEEQIGPNENENEKRRVPTAAFFLARQSMVYHHPNT  
WYLIGLAEEDSDIEENIAWMKQIDADLKLATDKCSTSTRVSCFSNQSQEIDRPPLEFVFN  
RPKETYKEDVARCHHEYIKKGD SYELCLTNQLETSISGPNVSSFDLYKIIREVNPAPYSSY  
FRWNIASKRRNEWERA VDVPSSTSVVICSSSPERFMSVSRHQPHPEIPPVLQAEAKPIKG  
TCARVMPKNGVCLTNAETREDDRRARSLELSLKNRAENLMIVDLLRNDMSRVCKPGSVHV  
SKLMDIESFATVHQMVSTIRGTLSDSCNSIDLLRASFPGGSMTGAPKMRMEILQDLEEN  
CDRGPYSGSLGYISVNGCMMNIMIRSATITPAKKTEWKISIGAGGAITALSEA EDEYD  
EMLLKARAVKEAVQKWASSIQIDKQIFDTEAAA  
>comp10229\_c0\_seq1; 458 907 2086 LEN=2360; minus strand; translated  
MALPTLPPSPTAPPSPTTPLSPTAAPFATTPPAVSDPPQVQPPFALPTAPPLPSGPTNPP  
VGTFFPAIGSLPALGTFSPATVRPTPAPISPSDSGAVPEEEPTGSPSMAGPTVSVSEAG  
FSDCGLAGNTIELGSPLDNSATPVPLDVSYNVESTSNSTEVFEAELVDNLIR TATLAI FG  
CNPDRGRVSPNTEE IADGKQQAIVFRFFERAERVSSVSSVSCWIASNLMPLFRSFLRFV  
SFAHRRPAATCEPTVDAGNDCFVLQTTFFVWVKGPVETDASAYGAYLAIEEAMESGAYA  
SAIPTVVDVELVSPRPILDPGSGSPSEQIDASDLQREVPVSPWTIGFSVASVMGGFVSL  
LVYARSRKRHRALLDDTTPWVTPENESDAAVL  
>comp10229\_c0\_seq2; 458 965 2144 LEN=2418; minus strand; translated  
MALPTLPPSPTAPPSPTTPLSPTAAPFATTPPAVSDPPQVQPPFALPTAPPLPSGPTNPP  
VGTFFPAIGSLPALGTFSPATVRPTPAPISPSDSGAVPEEEPTGSPSMAGPTVSVSEAG  
FSDCGLAGNTIELGSPLDNSATPVPLDVSYNVESTSNSTEVFEAELVDNLIR TATLAI FG  
CNPDRGRVSPNTEE IADGKQQAIVFRFFERAERVSSVSSVSCWIASNLMPLFRSFLRFV  
SFAHRRPAATCEPTVDAGNDCFVLQTTFFVWVKGPVETDASAYGAYLAIEEAMESGAYA  
SAIPTVVDVELVSPRPILDPGSGSPSEQIDASDLQREVPVSPWTIGFSVASVMGGFVSL  
LVYARSRKRHRALLDDTTPWVTPENESDAAVL  
>comp10229\_c0\_seq3; 458 1076 2255 LEN=2529; minus strand; translated  
MALPTLPPSPTAPPSPTTPLSPTAAPFATTPPAVSDPPQVQPPFALPTAPPLPSGPTNPP  
VGTFFPAIGSLPALGTFSPATVRPTPAPISPSDSGAVPEEEPTGSPSMAGPTVSVSEAG  
FSDCGLAGNTIELGSPLDNSATPVPLDVSYNVESTSNSTEVFEAELVDNLIR TATLAI FG  
CNPDRGRVSPNTEE IADGKQQAIVFRFFERAERVSSVSSVSCWIASNLMPLFRSFLRFV  
SFAHRRPAATCEPTVDAGNDCFVLQTTFFVWVKGPVETDASAYGAYLAIEEAMESGAYA  
SAIPTVVDVELVSPRPILDPGSGSPSEQIDASDLQREVPVSPWTIGFSVASVMGGFVSL  
LVYARSRKRHRALLDDTTPWVTPENESDAAVL  
>comp10230\_c0\_seq1; 111 1 666 LEN=797; translated  
GRVEFRSVRWYGMQAISLIYLVFCSWKQNPKDSGWADFIREHVAAGGTVLGMCGGYQMLG  
RNLKGENTIRKGI GLFPLSFTAKPAECKHLNRMKGQLYPSGLYVEGYELDCGPKQVVVSE  
RKDIADAYRGMAPLLAYDNGKPEGMLLGRVKGTNIHGILRSANVRLELLVPKEDREKWPI  
LSESAGVSI EDPLDHLARWLQVCGLDHDKLREMIVAEDAPQ  
>comp10230\_c0\_seq2; 97 1 471 LEN=892; translated  
GRVEFRSVRWYGMQAISLIYLVFCSWKQNPKDSGWADFIREHVAAGGTVLGMCGGYQMLG  
RNLKGENTIRKGI GLFPLSFTAKPAECKHLNRMKGQLYPSGLYVEGYELDCGPKQVVVSE  
RKDIADAYRGMAPLLAYDNGRFIQDWITTATMKNFN  
>comp10230\_c0\_seq3; 676 1 2847 LEN=2975; translated  
DDDDDDLEEVTVLDDDES YE ETVLGD EEEEEAFGTDHAI SHTEHAI SNHANRNGNVGAAN  
YDTGAFGEEIEEVSF AADDDDEYVYYLEESVWIEEDDLPEFPGPV SPEKHDQDDGI SENA  
SFESYMEFRISKSSSNLDATGSSSLASSXENGLRLL EEEEEERTNVAEWKQQQESIQAR  
KNGNHRRRLPQPQQIQRGPTNTSPEPKDNTEEAGAETGSGGERDFRGATSSSVSATGQ  
SASTAYSQSSRQSSRAPHTHAGENTHASLRVSPGSPSQHPRPNRQRMHSNANDRQGVSG  
KSHYSEEGSLRSGEWSEASGRNTSNLRRHGPPARIRAKPRRRTGTGAARKSPGSSVSTV  
TTASSCEERRY TNSVA I LGTMSGV GKS VIAAGICRVLANGGTNCAPFKAQNTGSGTSPAL

LPDPSRRKDLYGSFAARTGPTDRTEQGAREGKALPQGPPKAPADDQGWGQI STAQAMQAE  
ACKILPRVDMNPLFFKSGERDMERDEALCAMIVMGKQILRETYSAFSTRIRALRNIVLDA  
HRSLATVTGAEVVVVQGAGSCSELHLMGDIVNLP IVRRLKCPWFLVANDENGGVFAQVV  
GTMCLSKRDWDL CVGVIVNKVKGDI EGYSGGLKTLKQ MAGKPLFAIPFLENWHGRKEAG  
INIEDRLSWEKRGDHNQYNDRGETDRVDHYKVAREKPVVVVVAYPHSTISSDLSPLESDG  
RFSIEWRRKRVPKYPATAAVILPGSRLPLPDLKWINDSGWADFIREHVAAGGTVLGMCG  
GYQMLGRNLKGENTIRKIGLFLPLSFTAKPAECKHLNRMKGQLYPSGLYVEGYELDCGPK  
QVVVSRKDIADAYRGMAPLLAYDNGKPEGMLLGRVKGTNIHGILRSANVRLELLVPKED  
REKWPILSESAGVSI EDPLDHLARWLQVCGLDHDHKLREMI VAEDAPQ  
>comp10230\_c0\_seq4; 642 1 2649 LEN=3070; translated  
DDDDDELEEVTVLDDDESYYEVTLGDDEEEAFGTDHAI SHTEHAI SNHANRNGNVGAAN  
YDTGAFGEEIEEVSF AADDDDEYVYYLEESVWIEEDDLPEFPGPV SPEKHDQDDGISENA  
SFESYMEFRISKSSSNLDATGSSSLASSSXENGLRLLLEEEERTNVAEWKQQQESI QAR  
KNGNHRRLRPQPQQIQRGPTNTSPEPKKDNTTEEAGAETGSGGERDFRGATSSSVSSATGQ  
SASTAYSQSSRQSSRAPHTHAGENTHASLRVSPGPSSPQHPRPNRQRMHSNANDRQGVSG  
KSHYSEEGSLRSGEWSEASGRNTNTSNLRRHGPPARIRAKPRRRTGTGAARKSPGSSVSTV  
TTASSCEERRYTNSVAAILGTMSGV GKS VIAAGICRVLANGGTNCA PFKAQNTGSGTSPAL  
LPDPSRRKDLYGSFAARTGPTDRTEQGAREGKALPQGPPKAPADDQGWGQI STAQAMQAE  
ACKILPRVDMNPLFFKSGERDMERDEALCAMIVMGKQILRETYSAFSTRIRALRNIVLDA  
HRSLATVTGAEVVVVQGAGSCSELHLMGDIVNLP IVRRLKCPWFLVANDENGGVFAQVV  
GTMCLSKRDWDL CVGVIVNKVKGDI EGYSGGLKTLKQ MAGKPLFAIPFLENWHGRKEAG  
INIEDRLSWEKRGDHNQYNDRGETDRVDHYKVAREKPVVVVVAYPHSTISSDLSPLESDG  
RFSIEWRRKRVPKYPATAAVILPGSRLPLPDLKWINDSGWADFIREHVAAGGTVLGMCG  
GYQMLGRNLKGENTIRKIGLFLPLSFTAKPAECKHLNRMKGQLYPSGLYVEGYELDCGPK  
QVVVSRKDIADAYRGMAPLLAYDNGRFIQDWITTATMKNFN  
>comp10232\_c0\_seq1; 268 1 1186 LEN=1186; translated  
XRTAPHRIGPHRTVAGSLSPPLGCVLVLVAPAMRLPFP RSPPPPLARS PRVGAFGWIP  
SAATAATATAAATALLLFVRAGTASGLSPHQAAASYAEARRVRALEGPSAAVALYRSLLD  
RYPGDATAAARIAADPYQASKHDR LGRGGS PRERREATRFLQESFGFERESVAGLVFAGP  
VPGDNGNGNGDDNGNGNGKCGHESQGPTLDHRLFRALRSSAPLYLKARGAGTVVPPLPA  
TPLEACVQLFLMGVSLPTETCKELLRFRFVELAETLGLAFTTGGGGAEAEAGAEASGERA  
PDPAGSWFVYAHVFPVSI GDKTLYLATDLHPTVLSSTTVGGSGSTPGGSGGSTEDGAVM  
YIGPDSLALIDHWTSLQQLEGE GILDIGCGSGIQA  
>comp10233\_c0\_seq1; 179 67 933 LEN=1198; translated  
MMFRNTAFLSFLVLA SLTHGQSQPASSESDPSPRRHNEYVILEGHTQRENFHSPHPHTY  
IKEEDLPNNWDWRNVGDGESYTT HALNQHIPQYCGSCWAHGALSSLDRIKIARNGTGDEI  
NLSIQYILNCASATAGSCHGG SHTGVFEFIQKSGLV P YDTCQPYLACSSSESTEGFCEHVD  
TTCSNINTCKTCDTFGGMGGQCTEIDVMPNATIAEYGTYSFLSDPSGIVHKIQSEIYARG  
PVATGVNAEPIVEYTGGRVDDTKFWHMLVNHIVSIVGWETDDETGDVYW  
>comp10233\_c0\_seq4; 254 67 1215 LEN=1308; translated  
MMFRNTAFLSFLVLA SLTHGQSQPASSESDPSPRRHNEYVILEGHTQRENFHSPHPHTY  
IKEEDLPNNWDWRNVGDGESYTT HALNQHIPQYCGSCWAHGALSSLDRIKIARNGTGDEI  
NLSIQYILNCASATAGSCHGG SHTGVFEFIQKSGLV P YDTCQPYLACSSSESTEGFCEHVD  
TTCSNINTCKTCDTFGGMGGQCTEIDVMPNATIAEYGTYSFLSDPSGIVHKIQSEIYARG  
PVATGVNAEPIVEYTGGRVDDTKFWHMLVNHIVSIVGWETDDETGDVYWI VRNSWGQYWG  
EMGYFRILAGHNSLGIEMDVAWATPGQFTVHNFP CYEDGANCNGGVATQYYEDPSKNVEK  
VNERLMREKKRRLTSVRKNVRG  
>comp10233\_c0\_seq5; 226 217 744 LEN=837; translated  
MPNATIAEYGTYSFLSDPSGIVHKIQSEIYARGPVATGVNAEPIVEYTGGRVDDTKFWHM  
LVNHIVSIVGWETDDETGDVYWI VRNSWGQYWGEMGYFRILAGHNSLGIEMDVAWATPGQ  
FTVHNFP CYEDGANCNGGVATQYYEDPSKNVEK VNERLMREKKRRLTSVRKNVRG  
>comp10234\_c0\_seq1; 627 90 2675 LEN=2848; translated  
MPRGARSGSKKGGVTNGPPPSLPAETFREHRKFLIRSLDRNDVEMSALNELNKT LHKARD  
AVLQSCGELVLLDLGSGRLKLVGEQLHEEPEPADSGASKTELEKIDSKQHDLTQAQKQIC  
VDFLLRMNLRRLKSNRLVRRLTRLAYVMDGKDLSPGPPKYGDLRLQIDPKALQLKAEW  
GKKEEAKKRIETAILLDVGS LDRESSNMTKQVESIAEKKEPYKDEASGKSETEETRN  
SPDETSGGASKEIEAMDCSSPTETEKHLEIDCRKAQEGSDISKQY YTLPALANEYNVLKEY  
DTAYDKLLNPSDNSFKYLIANEELSDPQPGKIGVSVLFPEDLKTEYKRWQTNMSRRIP  
QQSSIEEFGLKNRVFHL EERRKRCIEAAAIDGETTCESPVKKIKLEQEKDGESNNQTSPT  
RKEANNDGSENMEIDEDETKGGGNSDSEDEQKQVERIDPILEAMKNKR SISFAPTPSFR



LNDGNVIDYGLSVWAAGNGPLPLTLQLVEKLGDKQSEEQNVARGRLVTDAMWRAKGSNGS  
ILAFGDCSCCTTQGPDPGLPATGQVAAQOGEYLAKLMNKGYDLSPESDSNDGATEIPPARS  
PDYQSTISESIAFSTGTKECAKPFQFLNLGILAYTGGGSALAQVSTAPEAQPIKGTGKV  
GNALWKSVMYISKQVSWRNRLMVINDWARRQIFGRDITRL  
>comp10239\_c0\_seq1; 232 116 601 LEN=882; translated  
MPDDSKSTLDRAKENLIRFLSPNSKPTMETFPELIDCVVWLRFLSLALFFGLWIGNENPSK  
GGTNLMLGLNLIAFVPILYCQTFGLGADQESYGPKLLFSGIVQGLALAVLIWIYCYTDQHP  
EDEAAFVEAYGNPNWAGAAATGAGLSGEAGETPPLAESEF  
>comp10242\_c0\_seq1; 301 1 867 LEN=1238; translated  
XAGDAEASGKEPSKPARSVLALDDLNLQFRMQQTGVVLLLVPTLLWHGEGLFLHATGAAS  
HLATHDFLDLLRRYMLWSVGNGLAFSSYNLASYLLTRISVVHHAALNCTRRIFAIVCTG  
LLFRIPISAQSMTGIGISFAGFMVFSWAKSRKKAEGRTGDRRTGSQRADAHREIPSGNA  
AGSNNNNNSISASSMNGNHPHYGGDRLTHRKKSGKESAGVTLSSLPAPPGEAQASVSX  
ANAPAIRTSHRTTETEVRGATGIGSVPASSAATAAHWTVTDESKRNGT  
>comp10243\_c0\_seq1; 1501 195 2752 LEN=2795; translated  
MKRILGKQKAKQKERDDDDDEDIGGGDADVNAHHDENLESYRSSSETTTDGPEDDADEVYR  
HAETDYDQRERGSDDSDSYGSEFSEPPSSGDEEDDGDSYENEGFDEDYQARYSFAPDGGDYG  
IDPGDASHHVLMDEDEEDMGDSTINHSGNTTLENSKSNNSNSTGSKHRHKPRGGRRKEI  
LQSGDDTIDSKKVDHDQQEQEETPAKKVKKKRGFFGRLFGKKAGKKGTGFSDSKRSLV  
SADSVSRASSKESKAKKKKRKNQREEEEDQHDVPVSPSIADSEGQSYSVMDEWQSQT  
GENQSYAYSVIDDGSQSFDDDGSSSTASQSLYRQKGVKQKQKRYFHQMPGVAEEDEES  
YNPMPGEEGEDDESYSINIADDGSSFTTFTQTMEDQRGLQYPPMETLREETDEDQTVDNS  
ASFHYSNEEDTDIGHDIDSMHRSERVGDPDTEGFDADAEGFDAATFDAAAYDAESFLSN  
LAKKSDLKPSKQKPSSSSSSLKNKPKSSKRSSKRSKKPSNKMPSSISSYALPPLQINAFQ  
HSLGTQSSGNSSPASTDTPFSVVIHDLQTEVDKLMVLSLLVERMELYERQSECLVEAS  
VAHNTKWKATIRKYDRSSKRKASQSSSVARLSTIKGLMEEQGVMDTWIKOLETVQRGYR  
DRLEATTNQLKALRYEQMLTNKQIIELKREKSKARHTSVSKYATVIEVHNKPGSSAAPSS  
SSGDSGNKGAKRDATNRAQQNSLVEDMMSNWQAEQQHTSAALXAPLHRQTYQPEQQLHQQ  
PRGQQLHEQQEQEEEEGQKKEEKEVRGMNKRVDGTFFSIGNKMGLMRGAACIRSAEFEG  
RQWLEVCVLSND  
>comp10243\_c0\_seq2; 1096 195 1750 LEN=1750; translated  
MKRILGKQKAKQKERDDDDDEDIGGGDADVNAHHDENLESYRSSSETTTDGPEDDADEVYR  
HAETDYDQRERGSDDSDSYGSEFSEPPSSGDEEDDGDSYENEGFDEDYQARYSFAPDGGDYG  
IDPGDASHHVLMDEDEEDMGDSTINHSGNTTLENSKSNNSNSTGSKHRHKPRGGRRKEI  
LQSGDDTIDSKKVDHDQQEQEETPAKKVKKKRGFFGRLFGKKAGKKGTGFSDSKRSLV  
SADSVSRASSKESKAKKKKRKNQREEEEDQHDVPVSPSIADSEGQSYSVMDEWQSQT  
GENQSYAYSVIDDGSQSFDDDGSSSTASQSLYRQKGVKQKQKRYFHQMPGVAEEDEES  
YNPMPGEEGEDDESYSINIADDGSSFTTFTQTMEDQRGLQYPPMETLREETDEDQTVDNS  
ASFHYSNEEDTDIGHDIDSMHRSERVGDPDTEGFDADAEGFDAATFDAAAYDAESFLSN  
LAKKSDLKPSKQNKPSKRSKRSKPSFDADAETFDAX  
>comp10244\_c0\_seq1; 799 305 2752 LEN=2774; translated  
MSDFVFNestyTPPRVAVAVGAFRLAPRELGHSAFTHLFSSEREEQRDYIDGLLVVSI  
LSFLFFIWAFLVIVLKCKGQEVGCASGLAFESHPRDYEKSETQEGKTQDDIASTSDSSA  
ESMSVSSNKPLFSKYRGKLAQNSSDAEQDNIHSHKRIWRCVKRRESKAKMNGTNQRERR  
TRAAFIVFASITLICTPLTLFLTFGSLKRALVETTSEEIPDSLFLNIQNTVNDMELSLKA  
INLSDDLQLVDEVPTDLDIICPLVNMTEFESYLGVDINGIETIVDQQYRLKDDIKAQ  
FVVQQSFADRIEIVLTAIESYGDTEKYLMLPGFLLAIGSLVVIAMLGVVLAWRERSSA  
RFQRNMTYIVLPLILSAVTCWIIILMTLALTTIIGTDVCLSSSDGSPDETILEILETVG  
NGTEGTTYQTAFTYINQCHGPDPMQVIEDLKSETQKFVDNIWRQVSKIDAVGRADVLRQK  
GNTQDFQEMLTGARDLAMSALTNRRELSSLSKTMGCNSIHPITYQASHEICTETLSASS  
YGFIMFLFLCVMAMISLRSSWLGNIEEEKVYHDETEVAENMVVDEHEEYLAYISRYKH  
EWQYEGFEEEDGAVSSSPRSEFHDQGRSGYPCDTEYYYDDEEEYSSRVSESDISTMDSR  
IMYIEDEQQKETMPHLLDTLCTEKDEEVSCVSSKIPFTTFSSERMKDSHILTLPPSDLP  
PPMNPELYIDHDESTENTPDNWDYSNVGSSPQKSRKKRTKSFSSSATTAYKAQDEGDDD  
SHHQDHNLDVFPDFDKFLSHDQHSSTGEVEVQLNNI  
>comp10245\_c0\_seq1; 727 100 2061 LEN=2611; translated  
MGASKNIPNGMRGAGTAGTSSNHNDNRGHRRRGSDPPAQGTANVPNSISFGKSNKAA  
GNSKSLRARKRYLEQQHSSYRQQRNDDVTTHTDDCSSLSDEVGRLRSHKHDPQAHHT  
SWSPKPELELNPYREVHQKQNRDPKPKLGLSDRGIEIRDSAAPKKSQHSQDPKNSRR  
IRGDEKHLDEMFGSSGNDWVPSNFYKKTQKSALHQLLAGENSAKGRGSRETGSSYRKK

FHQHQNDITYVSPYPPSQKQIRAAEKKRNEQTEAQRKQQRLYVPILPESINHQTRKQKSR  
KKPTGIAEHNHASEGVEKAYGYSDNSSNKNSLDNHIGNASSGSATLTVREIAKPVSA  
LTI  
IPNAISTPVAEKNIADENDAFLEEFIEDMDDGDGDYEDIEIDDIDLEELGIEGIDEEYT  
VYDESFFKEEKPPKEPLDTEDEIITENEEYTVVEEFCEVEQNPSLSTARSNVP  
SNIHRAL  
NDNAALDQVDTNQNSDAECEKRTIPYTISSRTQKKKQLEPVSVA  
SSSRYP  
PSIQEADGDD  
LSSQTSISYEVVHEEHREGEDEENGFD  
RGIDGNSGESSNSKSNNEQSTLTTQKSS  
LFF  
KVTNDCLDIRCFDKEKFRFRPSCGVYTVVCLILVLVAVWTWLVLRLLREKDG  
E  
>comp10246\_c0\_seq1; 771 82 1254 LEN=1402; translated  
MAEEQPPSKKAKMAVGNLQSMIYTNEGGSTPKLQVLDQLLIPHEKVYIDVPD  
VAMAYTVI  
KTMQIRGAPLIAIIVALLGLSVDMHTNGKSIEELDKLSTDADGLLAWIREK  
MAYLKSSRPT  
AVNLTNALVEVEEKMEKAEIEKNSGETDKKKVLCKAVLDYSEFMLERDVND  
NKAIGKFGAE  
AILKKTGKDKINLVTICNTGSLATAGYGTALGVARSLQEMEKLESISALET  
RPYNQGSRL  
TAFEILEEKMPGGQLICDSSAGALMQTKKVDACVVGADRVCANGDTANKIG  
TYNLSIIAA  
FHKIPFYVAAPITSLDITLESKSIPIEERSSEELISTSKAPAGMPCWNP  
AFDVT  
PDCNI  
SGIITEKGVIEPDADGKFDVKAFVEKHTSA  
>comp10247\_c0\_seq1; 390 136 882 LEN=1483; translated  
MTTIPRPHPGFLLCLLLSLLVAGAGAFCPSSAVAAGPFRSGSPGTTGLAAL  
DPQQAWEAY  
NAALETDPLLKVSATAGVILGAADLAGQAIIEGAKIDADAETDSGGIDAG  
RTARFAFFGFV  
LQAPWNHFYYLFLDGAIPPTADPWTATTAVKTVIDQFVQAPVFTVLIF  
AFLGLLEGKTLQ  
SIRKQLEDDYADTMVANWKLWVPATVVNLA  
FVPLLRVLYLNCVFFFWSIFLSLKL  
NKDG  
SGADGESV  
>comp10248\_c0\_seq1; 179 206 503 LEN=503; translated  
MKISISLLKIFLGLVFI  
VGMSTVVGQTTEAVDDAAEETEAAEPVQSGPLIDLLG  
TKLQSL  
KMVDEQSASVVEHYTNEALAGKKVIGLYFSADWYV  
LMSIX  
>comp10248\_c0\_seq2; 341 206 943 LEN=1091; translated  
MKISISLLKIFLGLVFI  
VGMSTVVGQTTEAVDDAAEETEAAEPVQSGPLIDLLG  
TKLQSL  
KMVDEQSASVVEHYTNEALAGKKVIGLYFSADWCG  
PCRQFTPELASFYDKMNKRRGQKDN  
FEIVLISRCDQNSHYQYFAKMPWLALPLEEAAG  
ERGERQLSDKYGVKGIPTVVLDLGO  
TITTEARNKIPADRAGIGFPWRNPASQLYNALV  
PRSLRMMIKLQIDTIKSKVVQKVLGLV  
GRGKK  
>comp10249\_c0\_seq1; 963 205 3506 LEN=3506; translated  
MIQVTKCRARAFCALLLRSIAVSLAGVLHDGFI  
SEVVSTKAMSGTFLPNPRNGDKPMM  
ILNSKNGQIYVLENPDESPDSIEIMDLSDGSKL  
CNNGERGLHTVIPSPEFTKNRHVFAFF  
TLFREDCLEDPQDGHNVVMRFTMDPETLMLD  
YDEGALIFRGPPMDERLHNGGAMAFGND  
GKLYITMGDAGKRKNADPLDNVHGSII  
RLNEDGSVPDDNPYTKTSGYENSYRCADTEGRV  
PTDAPNDSVCAEVWANGLRNPFRIDMDPNV  
KDKVRFSGVVGQAQHMEALYGGTDYKGTN  
YGWPKYEGVCRPGDMGDCNPLDDDP  
TLTMPFHWEYEHISYNDGGCIGGQAHVPEGI  
WPSQF  
KYLFLDFILLKIYALEENRPDKACWEC  
DPPLAPTHNETFYRSIQKEGDNINEARMVEM  
WF  
GPYKDTQALYVTKYGNLNDNVIRIRYTGIL  
NKPPTPSFDYEIDGDASVTFDASNTTDAEDD  
QLTYTWFDFGDETEVVVVDEKHASHQYSE  
PGEYQVTLAVTDTSGQKQVSKTVKIGTVPS  
V  
SIISSPPPNATFGVGKVLRLKGEAFDFLGN  
LIPDDKLTWEVRQHHANHFHPFLDHTRGNDL  
RLYAAPEPEDFFAATNSFLKVI  
LTAEDEYGLTETVSVDVQPNIMVNVTTQPS  
GLKVVD  
DYDIDAPQLITSWKGFKL  
PVSADQPPYIFKKWSDDRTARTRVFP  
IYQKDGDPMPQVRAI  
FCADLGTQCKINEDCCSGYCSEGVN  
VCAPASMMPPVSEPTPQTFLRPTYVEVP  
DPPPS  
DLEIDVFSPPSDSRIPPLEIDPKPHIAG  
ESSTSENSGISIGLLSDSSTNLDD  
EGSMYST  
ITWVLALLVVLVGMGFGCCVWKR  
YTQIKNKDHVGLATKCKHQKRYDY  
ESEGAGSNTGVD  
EYYDDEDIKVTDTGSTEES  
EDLCNETASPLSQSSQLDQNNISL  
SFLVTEHITSGVNF  
CID  
DVENQASVAIGATVPLVDPST  
SQSYLMPPLSPASSVENSMSNDSSE  
IEKGNIE  
TGQMLKY  
LQFDAASTLQSSLVPPP  
LPDADEQSFKGTQVQSSPALSPASSV  
DNSR  
SNGSGEIEDGNIL  
KTGQMLEYRFDAASTSQSSLA  
>comp10249\_c0\_seq2; 878 80 2859 LEN=2859; translated  
MAFGNDGKLYITMGDAGKRKNADPLDNVHGSII  
RLNEDGSVPDDNPYTKTSGYENSYRCA  
DTEGRVPTDAPNDSVCAEVWANGLRNPFR  
IDMDPNV  
KDKVRFSGVVGQAQHMEALYGGT  
DYKGTNYGWPKYEGVCRPGDMGDCNPLDD  
DP  
TLTMPFHWEYEHISYNDGGCIGGQAHVPE  
GI  
WPSQF  
KYLFLDFILLKIYALEENRPDKACWEC  
DPPLAPTHNETFYRSIQKEGDNINEAR  
MVEMWF  
GPYKDTQALYVTKYGNLNDNVIRIRYTGIL  
NKPPTPSFDYEIDGDASVTFDASNT  
TDAEDDQLTYTWFDFGDETEVVVVDEK  
HASHQYSE  
PGEYQVTLAVTDTSGQKQVSKTVKIGTV  
PSV  
SIISSPPPNATFGVGKVLRLKGEAFDFLGN  
LIPDDKLTWEVRQHHANHFHPFLDH  
TRGNDL  
RLYAAPEPEDFFAATNSFLKVI  
LTAEDEYGLTETVSVDVQPNIMVNVTTQ  
PSG  
LKVVD  
DYDIDAPQLITSWKGFKL  
PVSADQPPYIFKKWSDDRTARTRVFP  
IYQKDGDP



PQVRAIFCADLGTQCKINEDCCSGYCSEGVNNVCAPASMMPFPVSEPTPQTFLRPTYVEV  
PDPFPPSDLEIDVFSPPSDSRIPPLEIDPKPHIAGESSTSENSGISIGLLSDSDSTNLDDE  
GSMYSTITWVLLALLVVLVGMGFCCVWKRYTQIKNKDHVGLATKCKHQKRYDYDYSEGAG  
SNTGVDEYYDDEDIKVTDTGSTEESEDLNETASPLSQSSQLDQNNISLSFLVTEHITSG  
VNFCDIDVENQASVAIGATVPLVDPSTSSQSYLMPPLSPASSVENSMSNDSSEIEKGNIE  
GQMLKYLQFDAASTLQSSLVPPPPLPDADEQSFKGTQVQSSPALS PASSVDNSRSNGSGEI  
EDGNILKTGQMLEYRFDAASTSQSSLA

>comp10249\_c0\_seq3; 200 205 729 LEN=804; translated  
MIQVTKCRARAFCALLLLRSIAVSLAGVLHDGFI SEVVVTSTKAMSGTFLPNPRNGDKPMM  
ILNSKNGQIYVLENPDESPDSIEIMDLSDGSKLCNNGERGLHTVIPSPEFTKNRHVFAFF  
TLFREDCLEDPQDGNVVMRFTMDPETLMLDYDEGALIFRGASGNVICLVQTE

>comp10250\_c0\_seq1; 243 231 914 LEN=1584; translated  
MVNVLTIALGVLAAPAALAFIPVRSVSPAKSNQGMFQLQSSTDEDSVGNVHGQKSCFLP  
LKQLDQDYAPRIVQIAGAYPGLSRTDYDAVTSEGTPPEGQWSYDFSDPDGPQLGTVAIE  
SSNVVACCEDPVVIAEAHTALNVPLPEVLKDPVDIVVLVDRAAKRFAERRFLVLDVPGKG  
LVIGAFPTKQELPQEAIEIIGQVVLCQVPWLPCMKTGTGFLEADYF

>comp10251\_c0\_seq1; 89 245 1480 LEN=1916; translated  
MPPTQFQLGQRMPLYLSLGAALS VFGLLGEYVESYHTLWIPYAVFFFFHMIGLNITYAMMI  
ALIPDQVPTSQTGIANGILAFMLVTGSLAGFSYFHLYSNGIIQEMYGLYICIVVLTILT  
GLYAHDKDVRVFMERREISRSFRRRERADSLAKNHPITRSQRRRRRRRLILGPFVLLKNM  
LYDPIVALDKHTLAATYTDVKNHDFFI VTVSRLFYYCGSSVQTFFLYFVHDIIGVRDN  
PEATVATLAVVSQ MAGALVCYPVGWISDRFCGRRKPFVYVACTLLGTITLVMVFAETIE  
RMTLLCFCFGAANGAYLTMETSLAIDTLPTDYDIGPSGGNAQLLGIWVAAFLGSAIGPM  
VGGPVLYLFGSSTTEADQDYTIEGYAVLLSLSTVYFLLSAISLRWVQKSSV

>comp10251\_c0\_seq2; 2 1 941 LEN=1377; translated  
XQLYLPFPVFCRHKVLTTILTGLYAHDKDVRVFMERREISRSFRRRERADSLAKNHPIT  
RSQRRRRRRRLILGPFVLLKNM LYDPIVALDKHTLAATYTDVKNHDFFI VTVSRLFYY  
CGSSVQTFFLYFVHDIIGVRDNPEATVATLAVVSQ MAGALVCYPVGWISDRFCGRRKPF  
VYVACTLLGTITLVMVFAETIERM TLLCFCFGAANGAYLTMETSLAIDTLPTDYDIGPSG  
GNAQLLGIWVAAFLGSAIGPMVGGPVLYLFGSSTTEADQDYTIEGYAVLLSLSTVYFLL  
SAISLRWVQKSSV

>comp10251\_c0\_seq3; 205 457 2148 LEN=2584; translated  
MPLESNTNESTSLLLDDCIEGGDTPVNSKDS SSGNKNLWYGAGEQAI ESSGEDLDSSDT  
SEENDLLRSCASKEREQELLP IWTIVSILSSAFAYGCIMTTFLITL PVE CERIEAQFP  
SVPKSVSLGCFVAIAGFTQLISPLAGMLSDTYMPPTQFQLGQRMPLYLSLGAALS VFGLL  
EYVESYHTLWIPYAVFFFFHMIGLNITYAMMI ALIPDQVPTSQTGIANGILAFMLVTGSL  
AGFSYFHLYSNGIIQEMYGLYICIVVLTILTGLYAHDKDVRVFMERREISRSFRRRERA  
DSLAKNHPITRSQRRRRRRRLILGPFVLLKNM LYDPIVALDKHTLAATYTDVKNHDFFI  
VTVSRLFYYCGSSVQTFFLYFVHDIIGVRDNPEATVATLAVVSQ MAGALVCYPVGWIS  
RFCGRRKPFVYVACTLLGTITLVMVFAETIERM TLLCFCFGAANGAYLTMETSLAIDTL  
PTDYDIGPSGGNAQLLGIWVAAFLGSAIGPMVGGPVLYLFGSSTTEADQDYTIEGYAVL  
LSLSTVYFLLSAISLRWVQKSSV

>comp10253\_c0\_seq1; 493 65 1551 LEN=1660; translated  
MACICLMLTDFQIPYHXSTIFEDNLKKHILICPRAKEKKRQEKEPYFLENVNCGGYGRLD  
VTEQVTPISQSKLGFEPGTSTWAQRIARRV LRAHQSI FRNDNTCDI SALT CQDIHDAIEV  
KDL SRPEIDAGIEAGFLSHHVKSGGIQHTTQIASLIGHLKQMG LFD RQNEKENSASHSAV  
ATDARDSSPSAQNSPLVILEMGAGRGMFGLAAAGVANVCGANTHFFMLDRAGARSKADK  
AFRNIPKNVCTDKPYLKLGDGIDWCRLCCDVSHVNL PVV LHRDEKFKNAKIVVIAKHL CGA  
GTDLALKAIEPIRQVTGCLFATCCHGVCDWKHYVGRDILRGVMEGEE SNDEASKVPSFG  
PLEFDLLRRWSAATVATRGGKSKGT SNTMESLVVDNDMDHTNPI FENNRNHD AKNMETS I  
SAVVERLDLSCTIQGLGRACQRLIDFGRSKYIDQIIFETKDDKTVVNKLNYYVNSDITPQ  
NAFLQAYRKPQHAE

>comp10253\_c0\_seq2; 467 65 1545 LEN=1783; translated  
MACICLMLTDFQIPYHXSTIFEDNLKKHILICPRAKEKKRQEKEPYFLENVNCGGYGRLD  
VTEQVTPISQSKLGFEPGTSTWAQRIARRV LRAHQSI FRNDNTCDI SALT CQDIHDAIEV  
KDL SRPEIDAGIEAGFLSHHVKSGGIQHTTQIASLIGHLKQMG LFD RQNEKENSASHSAV  
ATDARDSSPSAQNSPLVILEMGAGRGMFGLAAAGVANVCGANTHFFMLDRAGARSKADK  
AFRNIPKNVCTDKPYLKLGDGIDWCRLCCDVSHVNL PVV LHRDEKFKNAKIVVIAKHL CGA  
GTDLALKAIEPIRQVTGCLFATCCHGVCDWKHYVGRDILRGVMEGEE SNDEASKVPSFG  
PLEFDLLRRWSAATVATRGGKSKGT SNTMESLVVDNDMDHTNPI FENNRNHD AKNMETS I

SAVVERLDLSTIQGLGRACQRLIDFGRSKYIDQIIFETKDDKTVVNKLNYVNSDITPQ  
NVSTRVIFVTVKR

>comp10253\_c0\_seq3; 472 1 1750 LEN=1859; translated  
XKSSPIHSAQAPTVTSSSPKMRDITETDGREKKRQKKEGHPEPSGNWDRQCQFYVQRKKRF  
CKQRPADGKKYCGNHQHLEEQDVSCSTVGKKKIRKRIPCPIDPSHTIFEDNLKKHILIC  
PRAKEKKRQEKEPYFLENVNCGGYGRLDVTEQVTPISQSKLGFEPGTSTWAQRIARRVLR  
AHQSIFRNDNTCDISALTCQDIHDAIEVKDLRPEIDAGIEAGFLSHHVKSGGIQHTTQI  
ASLIGHLKQMGLFDRQNEKENSASHSAVATDARDSSPSAQNSPLVILEMGAGRGMFGLA  
AAGVANVCGANTHFFMLDRAGARSKADKAFRNIPKNVCTDKPYLKLGDIDWCRLCCDVSH  
VNLPVVLRDEKFKNAKIVVIAKHLGAGTDLALKAIEPIRQKVTGCLFATCCHGVCDWK  
HYVGRDILRGVMEGEESENDEASKVPSFGPLEFDLLRRWSAATVATRGGKSKGTSNTMESL  
VVDNDMDHTNPIFENNRNHDANKMETSISAVVERLDLSTIQGLGRACQRLIDFGRSKYI  
DQIIFETKDDKTVVNKLNYVNSDITPQNAFLQAYRKPQHAEE

>comp10253\_c0\_seq4; 446 1 1744 LEN=1982; translated  
XKSSPIHSAQAPTVTSSSPKMRDITETDGREKKRQKKEGHPEPSGNWDRQCQFYVQRKKRF  
CKQRPADGKKYCGNHQHLEEQDVSCSTVGKKKIRKRIPCPIDPSHTIFEDNLKKHILIC  
PRAKEKKRQEKEPYFLENVNCGGYGRLDVTEQVTPISQSKLGFEPGTSTWAQRIARRVLR  
AHQSIFRNDNTCDISALTCQDIHDAIEVKDLRPEIDAGIEAGFLSHHVKSGGIQHTTQI  
ASLIGHLKQMGLFDRQNEKENSASHSAVATDARDSSPSAQNSPLVILEMGAGRGMFGLA  
AAGVANVCGANTHFFMLDRAGARSKADKAFRNIPKNVCTDKPYLKLGDIDWCRLCCDVSH  
VNLPVVLRDEKFKNAKIVVIAKHLGAGTDLALKAIEPIRQKVTGCLFATCCHGVCDWK  
HYVGRDILRGVMEGEESENDEASKVPSFGPLEFDLLRRWSAATVATRGGKSKGTSNTMESL  
VVDNDMDHTNPIFENNRNHDANKMETSISAVVERLDLSTIQGLGRACQRLIDFGRSKYI  
DQIIFETKDDKTVVNKLNYVNSDITPQNVSTRVIFVTVKR

>comp10254\_c0\_seq1; 614 428 2113 LEN=2475; translated  
MIRNAKKRVRIASLYVGPATSNKDDCEETEFLGALSEIVNRNHANGGVSGVNSGDENSRV  
SVKILLDENRALRPVPIVHPVDNDQANSKTTTSSAEAVARAIEGDSLSGKASSSSSLHLF  
RVLPPTTIFGRNWLPNPVDEIAGVFHIKIYIVDDQLLLSGANLSREYFCDRMDRYLHLVD  
GANGLVDFYAEVLEILCRHSNKYQLSAVSDDAIQNRRRNNDREIFLREITHHFQDSNPNS  
ASVASTRDLFAREEKKQKIVAVAVPTFQAPAGYFRQKDAKKKSIAREFSVNWSTFWSLFR  
IDQQPADKVNFTDIEATLNLREAGRLNRTNDGCRYSVQLSSAYLNPTTSLLSVVKGEF  
RNVELLTAGKISHGFKPKKDKCEGSGQTDWTIPSVFDKLVDECMRFLRTTIPATGADTK  
PICCTNARLFFWERPNWTFHAKGIWMTEKDREIESESEVAVVVGSNFGYRSFCRDME  
SNLLLVPFPPTIDDGASPNNDKTLRIARISFGDEWKSLLSSSKPEVMDTDKNGAVRSEESA  
EQPPPLPWPILKSIPYIKSFF

>comp10255\_c0\_seq1; 509 1 1592 LEN=1792; translated  
XFLSIFLSLATGRQEHLDSLADHSAPVNLTAVGAI PMREDNTKLGAFALSSPTVADIDGD  
GKAEVLMGTSMGFLYVVDARNLFPRDNFPVQLQYGIESRVLVEDVRGDTNLEIFVADVGG  
NVLCLDHTGKKLWHRDLFSITNNKEKEHRGRSEVIGSSEMVLGDVNGDGILDVFLQQI  
KSEGHGTTQYLYVLSADTGKDLLEGYPINLWTKAANYHRDNVGEDFAHAKLSPPLLVLDHE  
DQSHIADYLNRRNGTRFARPKPSKEQSGKDRGGEDKVPHGTTAGGLHIVQPIDTFLVIVEG  
GSGCTQSIIEGETINSMVQADDVHGTNKLDLVISTASGNVVTLES DAPFHPLNVWNHSEL  
RSRTGSSSHGYSASQGI FVHEMSRRYRDI FGVYVPVTFQIFDNRPNIE NEPKRRYDVEV  
RTGTSGLVVLKTYDAPGIYTERFYIPSGPGHYQVSVLLKTTHGLVYEDAFHIGYNNVYMN  
GFSVLLWLPLTVATICVFLMGAKKHQSWEDDDYE GEGGK GILDGHAGLPD

>comp10255\_c0\_seq2; 540 1 1768 LEN=1968; translated  
XPKLYSNKPGETERLLFLAVSYFDEDEYEGFFSYKRFEHSDHGDETTETQRGMYTASAIM  
VFHFGDSPRWGRQEHLDSLADHSAPVNLTAVGAI PMREDNTKLGAFALSSPTVADIDGDG  
KAEVLMGTSMGFLYVVDARNLFPRDNFPVQLQYGIESRVLVEDVRGDTNLEIFVADVGN  
VLCLDHTGKKLWHRDLFSITNNKEKEHRGRSEVIGSSEMVLGDVNGDGILDVFLQQIK  
SEGHGTTQYLYVLSADTGKDLLEGYPINLWTKAANYHRDNVGEDFAHAKLSPPLLVLDHED  
QSHIADYLNRRNGTRFARPKPSKEQSGKDRGGEDKVPHGTTAGGLHIVQPIDTFLVIVEG  
SGCTQSIIEGETINSMVQADDVHGTNKLDLVISTASGNVVTLES DAPFHPLNVWNHSEL  
SRTGSSSHGYSASQGI FVHEMSRRYRDI FGVYVPVTFQIFDNRPNIE NEPKRRYDVEV  
TGTSGLVVLKTYDAPGIYTERFYIPSGPGHYQVSVLLKTTHGLVYEDAFHIGYNNVYMN  
FSVLLWLPLTVATICVFLMGAKKHQSWEDDDYE GEGGK GILDGHAGLPD

>comp10256\_c0\_seq1; 583 100 2280 LEN=2536; translated  
MASSNNNHGTS SSKRKRGNLSKKEKGNKPRVAHSSLT SKTILQVLCWVILGIGGIVLIV  
QRGSSPVILKAEERWRKEHQKQAFADDVMTPNTRNRNRNNQNSNKKNDKCKSSTEKQ  
FTVSEEHWDPPDPRIAALLSEACKIEIVCHKSLKVVGRTLRATAPIEVDTKLYEIPRSMQ

IWDLDAYRDPFVRKHLFKAGHKISGNRMGTEAFLAAYLSLEIKRAKLNPSNFDPLTLLYF  
DSLPTFEFEHYHPILEDKDLVRDMLGPRSMASHVQGYRNMVRSEYEGFAAGSSEFRNT  
IPEDEYLRARLAVLTRALNVGPPGPEEVMPAAFVGDQDFRDQDLFLDELYSYYDLINVNLT  
EAGGQGCIAMVPIADLFNHHPNNNIGLQYKRMETHAQTKQKSGRSFVSSSNRIIEPYSE  
PMASYGVMADAHLYARYGFVNGDGSAGAIQLGLAFHHEMMKLNISNQYDIIPDTGTTAKFS  
NYQREGLAKYLRYYDDGYPECISGPSTHPGEAELKQLKQLHLSIANEYDRWNVIRPPNP  
KSLPAHSTDIPITKRVPDFPRHLSMLQGFQQLQETCRVISLINEDFDGNAVQVLKENVGN  
LSFRIGNKVSDALEFRSFMCMRSRWFGRFVNMEVQGKIEFEYRRLSALNRNEYGSKNWTL  
YHVRFGEMQALHAASGLLDFRVSLSWESKKKTTEPEYRMRDDTCPEEYLYLFRDDGLVP  
DVLDLR

>comp10257\_c0\_seq1; 338 166 1077 LEN=1154; translated  
MDAHGLAVSPSLLDVHVDTRRDEATQERRTAVTINSTDNDSGGEQISRRQPSRRKLESI  
SPTRLKFRIGSQFLAIGTLLALFVSVHLAPPTTKTLKDVGRDGKARKNRPPPLYALGY  
TTKFTTRKRQAMVNNPFLGQHRTIPAMTSHLQLQSKWRRPNAMTKPKTMPGAASGFALGMG  
KDVPSPSELSTDNNGSSSSSLGYRWKRFVWLLTGSKESLSKPQWLSSSSPNASNAESEGQK  
AKNNLLSKILPPWIFYLRPSVQLMVTLLLYLFHTVVLTQNALPFPVQLIPNDRGNFQSIG  
LDS

>comp10257\_c0\_seq2; 555 166 2297 LEN=2404; translated  
MDAHGLAVSPSLLDVHVDTRRDEATQERRTAVTINSTDNDSGGEQISRRQPSRRKLESI  
SPTRLKFRIGSQFLAIGTLLALFVSVHLAPPTTKTLKDVGRDGKARKNRPPPLYALGY  
TTKFTTRKRQAMVNNPFLGQHRTIPAMTSHLQLQSKWRRPNAMTKPKTMPGAASGFALGMG  
KDVPSPSELSTDNNGSSSSSLGYRWKRFVWLLTGSKESLSKPQWLSSSSPNASNAESEGQK  
AKNNLLSKILPPWIFYLRPSVQLMVTLLLYLFHTVVLTQNALPFPVQLIPNDRGNFQSIG  
LDSLTMGTAFYQYLRRKPSNFFDLEVTQSSQSTTTETEIEQNTPDGIINSSDLTNAS  
ENIMIYRNDTSNVTSTRTVTTTTTTTTTTTTTEIKASYLPDLFSAPHPKNMPWKNIWKSKYS  
RVSSLSALVVLTKAYFLTGSVSLFWEDTLYGMATHLNWMTVGMHRSLSVLLGHLSWIAMG  
ATVLRIFLRPQPFQEPESQWFSSFYKTAPKAPGPKMTRTVLGSNGYIYGNNSTTVTP  
DQLLTSEKENNSASNHPQVWVWAIGGYFVSSWLFVNDLVNSYVFPPLAVLEQAEESSIVA  
KLVNPEGQDILASLVGFIA XVFDGPLVGRDFVPGIPAADPGAVGTTAVLLVCDFSQRDSI  
FDSPPERAGLFAALCAGMDLGDLSLHKVKEPLDNDCDLSLHVELPDLFGQLVW

>comp10258\_c0\_seq1; 319 1 426 LEN=1066; translated  
ITLDVEPSDTIDNVKTKIQDKEGIPPDQQLIFAGKQLEDGRTLSDYNIQKESTLHLVLR  
LRGGMQIFVKTLTGKTITLDVEPSDTIDNVKTKIQDKEGIPPDQQLIFAGKQLEDGRTL  
SDYNIQKESTLHLVLRRLRGGL

>comp10258\_c0\_seq2; 189 128 375 LEN=375; translated  
MQIFVKTLTGKTITLDVEPSDTIDNVKTKIQDKEGIPPDQQLIFAGKQLEDGRTLSDYN  
IQKESTLHLVLRRLRGGMQIFVKT

>comp10259\_c0\_seq1; 159 140 355 LEN=720; translated  
MHELWGVNTYRKQNKYLSTCSIMQAIKELPESDIKTECLELQRKLIKEYERLSAKYHTNK  
VDNEDNSLVLG

>comp10259\_c0\_seq2; 273 245 910 LEN=1275; translated  
MSFDALSRLLEGVEFSKNRPPLEATPEALLKMMKIIENDIIPLTEKGIETGSKMFGAAIL  
DSDFNCIHSDTNAESQCPTFHAEVKCIVSWSEKTPAKDRGPIAQSTIFLATHEPCMMCIS  
SIVWGGWNKCWYFFGYEATSAGQIPHINTMHELWGVNTYRKQNKYLSTCSIMQAIKELP  
ESDIKTECLELQRKLIKEYERLSAKYHTNKVDNEDNSLVLG

>comp10260\_c0\_seq1; 271 989 2044 LEN=2055; translated  
MPSEREDLLRSINFVDPNDARWVKNYQNLHRYQKEHGD TMVPLVDDDESPNYLGQVVAR  
QRRFHHQNVLSRDRTKALNDIDFTWDPDAETWDKYYTQLCDFYQKHNHTRVPKTMGPLWN  
WVDRQRRSYRKRRLGDSQKCDDET VSEGAVKSLITKENVQKLS SIGFEWEDTSPKVEAE  
ERIKRLMNVTFELSIHDENWANHFENLCAFQREFKHFSIPTGSGKYKELHAWVRHTRYLY  
NANKLPPNRIELLDGIGFPWTAGLAKWDRLYEDLVSFHKKHGHTNVPVKKIELHRWTKQQ  
KARCGSMDEDCDLNKLQAEARAARIKRLGTLKKVFSGKEKNTNNNKEHTNT

>comp10261\_c0\_seq1; 329 115 858 LEN=997; translated  
MNCLRNFVSNRRKRQHSAVCNVRRGLVLQHLLLSFLIVALSNFYAVDASYAISIEPQSEE  
CFIFMTPSSINPFSAFSGSFEVLHDDVDSYELAVKVVNNDTGESMHEVPTGTQEGDFELN  
DLKPNISKYSICFQNNAGEDDEENEFDVGFNLRFHNPRLDDAESGPDGERASQLIQKAA  
QIDQEWFTLQDHFDFLRNREGIHFAMNNQIMTRLARWTYVESLLVVAMAVGQVMYWKRF  
EKRRYI

>comp10261\_c0\_seq3; 237 709 1140 LEN=1279; translated  
MHEVPTGTQEGDFELNDLKPNISKYSICFQNNAGEDDEENEFDVGFNLRFHNPRLDDAE

SGPDGERASQLIQKAAQIDQEWFTLQDHFDFLRNREGIHFAMNNQIMTRLARWTYVESLL  
VVAMAVGQVMYWKRFEEKRYYI  
>comp10262\_c1\_seq1; 450 1 1101 LEN=1144; translated  
TSGPSARNTSSANSTTFANSTTFDGSEPFSSRSASSGTTGNDGLFSTATASGPSARNTFGG  
GSELSFSTMASGSFSANSTTTTRGGEPEFGGQSSRKMSPFGRRQFASRQSPVVDKMSPPR  
PRRVLNDNDLPPPTPWQTPARGRGDNDSPPPPVEPPAFRTSARGRGENDSPPPPVEPPA  
FRTSMRRGGNNQMPPEAQQNDLTPSEAEETSPRVQPSAGTDREDNQNAQQSGTTREGNQT  
STYNGMNNVTEVDDNLNALKPPPTPQRSFQTAPRGGMNNNFVDGEGNPNASPPRGKSNFD  
ILLAAAIGESLKKRSEEMIKPEPEASESSRPVTRPAGKKQKCQHNTSDSIANYQHHDVWH  
NNLNGE  
>comp10262\_c1\_seq2; 579 151 1515 LEN=1515; translated  
MTVAIHVKKILAEIEIERSGGLRQYFNSNKSQSLSRFLDQDINNFGSRGTTKRRRAVRDLL  
KSWKFSRKNKYETLLQSYKVLPHYSHRYRDIPADNSDNEENEEDSSASETELP IRTPRRG  
VSFHKKASPPTTSSHKKASPPTTRSASTAKETFEAEKTPQARENSKFIPSFQKVNKLNMA  
RSSVSSMIRVDRHIDVNFQEPQKNGPWLFMLVHNCNVQESGAKMDKVVMTSFFNDGVDF  
AKRYKVRVSDGSIYATSPYHPNFLMTNPAENFANCDSETISAHKSFATKLRDECRRE  
DRVECIAYHLPQGYNVTTQYFNNINGSNLGPPDLGTDGLYVAHVKNFNTHTSWLLPPNHNN  
PIHVLRLKGVPTSHNTLTIHLAITSTIVLVERPDVDGIHSAFQDAFYGLGGASNPPPPPPF  
YRPPPPRPPAPAPPDGPASPSPSTPTSTASTTSSA  
>comp10262\_c1\_seq3; 551 151 1389 LEN=1557; translated  
MTVAIHVKKILAEIEIERSGGLRQYFNSNKSQSLSRFLDQDINNFGSRGTTKRRRAVRDLL  
KSWKFSRKNKYETLLQSYKVLPHYSHRYRDIPADNSDNEENEEDSSASETELP IRTPRRG  
VSFHKKASPPTTSSHKKASPPTTRSASTAKETFEAEKTPQARENSKFIPSFQKVNKLNMA  
RSSVSSMIRVDRHIDVNFQEPQKNGPWLFMLVHNCNVQESGAKMDKVVMTSFFNDGVDF  
AKRYKVRVSDGSIYATSPYHPNFLMTNPAENFANCDSETISAHKSFATKLRDECRRE  
DRVECIAYHLPQGYNVTTQYFNNINGSNLGPPDLGTDGLYVAHVKNFNTHTSWLLPPNHNN  
PIHVLRLKGVPTSHNTLTIHLAITSTIVLVERPDVDGIHSAFQDAFYGLGGTY  
>comp10262\_c1\_seq4; 551 151 1389 LEN=1594; translated  
MTVAIHVKKILAEIEIERSGGLRQYFNSNKSQSLSRFLDQDINNFGSRGTTKRRRAVRDLL  
KSWKFSRKNKYETLLQSYKVLPHYSHRYRDIPADNSDNEENEEDSSASETELP IRTPRRG  
VSFHKKASPPTTSSHKKASPPTTRSASTAKETFEAEKTPQARENSKFIPSFQKVNKLNMA  
RSSVSSMIRVDRHIDVNFQEPQKNGPWLFMLVHNCNVQESGAKMDKVVMTSFFNDGVDF  
AKRYKVRVSDGSIYATSPYHPNFLMTNPAENFANCDSETISAHKSFATKLRDECRRE  
DRVECIAYHLPQGYNVTTQYFNNINGSNLGPPDLGTDGLYVAHVKNFNTHTSWLLPPNHNN  
PIHVLRLKGVPTSHNTLTIHLAITSTIVLVERPDVDGIHSAFQDAFYGLGGTY  
>comp10263\_c0\_seq1; 681 129 1879 LEN=2320; translated  
MISGALNKSVSIDGDAKTTSFIPSKVWLGEKKGFFYFGTGNEGTGYVVDRIQQQESDSVPR  
KRKKTVKIAEDQNEMKLLLEELEKKAEGSSILELSKKGVYAASKALANVYKQNIKRKVEY  
SDQPGNYMDELALYEQITALQALATDTQVYRYIESSNLMATLIQLLAHENTD ICASVVS  
LLEWIDPSLAAEDPSVLPPLGSAAMTMEVWERVVNLDRFRNDEESQDRNLKGVNDTL  
ELMENILELDGLLAPNGVLGEYKSVHTAMVKDSTIVPWL FNTIEHEIEAQTGKEHLKAKC  
LELLSLLSQDINVFSVLPDWSKLEATIKENTI SAKKRKMDQIVQIFPAFLNGQGVELVIR  
CLKEKMHAGGSSLKLLDFFGDDKLFKSGAERLVIAGGLKYLFP IFIGTRIPKPDVRSRS  
AKAKRWLAELKAQIRIFYALSFQLDAQSPKDAMSRFVAKFVEDDLKYCDRLVELLLVY  
DERKRKAEYSFFRSDIEDVLDANQVTLASF EAKLNGGGD ICNRLAAITAFVCANSKRCH  
RISLQLRMQQSGVSLIKDALNEFAASLESGRQKRHIESLSEQI  
>comp10263\_c0\_seq2; 767 129 2003 LEN=2444; translated  
MISGALNKSVSIDGDAKTTSFIPSKVWLGEKKGFFYFGTGNEGTGYVVDRIQQQESDSVPR  
KRKKTVKIAEDQNEMKLLLEELEKKAEGSSILELSKKGVYAASKALANVYKQNIKRKVEY  
SDQPGNYMDELALYEQITALQALATDTQVYRYIESSNLMATLIQLLAHENTD ICASVVS  
LLEWIDPSLAAEDPSVLPPLGSAAMTMEVWERVVNLDRFRNDEESQDRNLKGVNDTL  
ELMENILELDGLLAPNGVLGEYKSVHTAMVKDSTIVPWL FNTIEHEIEAQTGKEHLKAKC  
LELLSLLSQDINVFSVLPDWSKLEATIKENTI SAKKRKMDQIDGVETLMQSI AVYRKKQP  
NSDVDIEIILENSCITLSSCISFSTSNLSAFLNGQGVELVIRCLKEKMHAGGSSLKLLDF  
GDDKLFKSGAERLVIAGGLKYLFP IFIGTRIPKPDVRSRS AKAKRWLAELKAQIRIF  
YALSFQLDAQSPKDAMSRFVAKFVEDDLKYCDRLVELLLVYDERKRKAEYSFFRSDIEDV  
LDANQVTLASF EAKLNGGGD ICNRLAAITAFVCANSKRCHERISLQLRMQQSGVSLIKDA  
LNEFAASLESGRQKRHIESLSEQI  
>comp10264\_c0\_seq1; 348 100 1023 LEN=1610; translated  
MSDNDGDDELALSLERARADMEIIQSCYPDEISSPSSFFDSSSFPFQFTLHLSLSDVDAK

SNSNSNLTCLKLEHGYPVASGVQISNYRTDSLKDKARLEAVVRSVRRVSAECQQEEMEGCI  
ACCAVALETWNDYDCQDEVDGFGNDSTAAGETPPSTIERNHNSDKTRNTKRYEWTGEP  
LYDRKSCFVAHICEVHSEQEVKEALHQLLTSSSKIQRATHNMYAWRIAETVSDGDGTRVV  
IKHDNDDDGESASGSKMAFLLDMRKDENVLVVVSRYGGVHLGPKRFAHIVNVARELLVK  
YTSTNRE

>comp10265\_c0\_seq1; 466 90 2392 LEN=2452; translated  
MSCSASGRKALQHAGTGSILSAESSLLSVGENCARKMIRSRRNYATLPVQSMSWVRPATN  
NALMMITKQYPSPFADHYQEQRQHQSVSFGTSTTEKSSSEDFSRFSMVELKQLATKSLRQY  
QRENESVSPSHRAESILQHILERSTQPLDDGEAEDLSNIQTSLIDTWTTYQSSVIRDIK  
ETIRQGELEAADDEKGSQIQEQLEYKRLRMVRSAAESMTSILESMENPSPHHYVAILKAW  
ANTCKIARTIGKSKAADVVGIPQRAQLILNAMGGSNENDDMISVEAYNEVIKAWAYSSEY  
LRGSMAEHVFRRIKFPTEGSLRMIMRAHAWSKESRSASFQATGHFMRMRLLEAGRADMEP  
SSINDYHILCDAWTVAGDRNSASKVYSVLQIMNNAYQRGHTEICPDLCYRDALITMSRR  
QNVDDVGEVVDKTLRDMREQMIFPDTLCYRSAILAWKHIAMSQDCLHPEQAIQRTQELLQ  
EMTEAYHRTTQILIQPTTEDYNNVLHAMALSKSKQKIVEDAQELFATLKEDASLTGGPDPQ  
SYRYMLGIWRNSRSPNKVAHASQLLQEVKDHYKNNNTWRDSNFSKNLPWMLFQHLSGCAG  
PPQMPQKPKPLNXERTRIMTVLRSLKDAKELDTPNSDTYMALVEACDHLLPVSGPE  
RENVLENIFRRACEEGVNVQNLLEFFKSVASTHLYARVVVSESKVAEDIKIVPEAWTKNI  
EGFREGKKVMPLSIHGNTFTKAAAEYMRKLRRTNQKMLRGGRWK

>comp10266\_c0\_seq1; 398 401 1909 LEN=2043; translated  
MTTNTSTNHNHGRSTGRCFASERARQPPRSHNSNRRLRDRNRSHRTISTLSSGSSFRSDY  
SGDSTSGSCVSFFTSSTTPAVCFHHPEHATKKKSGSRSGQLQQQHASVVCSRWETQAPG  
SDSEGGLKPVKLSQDGFNDRDSSALLIIRDALWALNSTADGSHGGSTNGRDSGAGRGRV  
FHSFDDLEDATEWEAGRPRTSGSASGEAHEHRSPAQETACGGAGAHERPAGTEGRFGAL  
LNQRRRPAEGVRPLARHKTRKARAARIPPPPPARTTPTPIAGEPLLPTXELAVGGLVV  
VSLGLAVGLGLVPREHKTIPRAVPPGGLPSPAAALFLRAAPLPAGRRGGGPERSPGVLP  
PEEPPPLPPCGPGGNQEPPELELEHEHEHEKHELEHKHEHEPSPSLGH PALHSPEAPVSGFA  
RATAETTKNQAGATRRRQPREPQQQQQQKQKQQQQQQKQQQQQQQLOQASFLTNTITK  
TARVSPSTSTEQKERLRGKSWKP

>comp10267\_c0\_seq1; 294 85 783 LEN=943; translated  
MAATKMKSPFWIFQNNLLRVFRMIALVTAVQMSVLRFTFVASLAPPNTTTKDSTACSSRR  
EVLTSIVSSASKRSCAISILVTVSLAQATARAAIDVSGLKVETPNATDVFLGGTYYPDDL  
DREGVDGRISRMKYRIELASSNTASASSASGDFFLYRFIKVKGSTAISSSRDDYIEFP  
GAIFQCTGSSDRDRQGQCVSDFSAIGGPKDAKGFWDESEGGIRFFRDNKVW

>comp10268\_c0\_seq1; 141 1 534 LEN=1043; translated  
HFLTPHRTKSCSLVFSLPSSSRFDSIPSNLFPGMGGGGKSRGRRGANASPNPPVLSRE  
DLDRALRDAAAKASESDKKKGLVVLEFTAEWCTVCQKIAPFWRGLGSDAKVVSADRLVA  
LYTIDVDASPDLTNSFGASGLPLFVFLVDGKKVDSLVAQQTALRKMVLKHASSSNK

>comp10268\_c0\_seq3; 207 1 534 LEN=853; translated  
HFLTPHRTKSCSLVFSLPSSSRFDSIPSNLFPGMGGGGKSRGRRGANASPNPPVLSRE  
DLDRALRDAAAKASESDKKKGLVVLEFTAEWCTVCQKIAPFWRGLGSDAKVVSADRLVA  
LYTIDVDASPDLTNSFGASGLPLFVFLVDGKKVDSLVAQQTALRKMVLKHASSSNK

>comp10269\_c0\_seq1; 743 359 1681 LEN=1722; translated  
MRFTITAFAAFLAATAPPEVRSFTQTTNPTGAYRGPAAHLTPEDLTNYMAKAHEEKIRA  
VTAVEKTKNAEIQTTLKGEVKKLKEAIPKESAVVVSTGPPSSGMDLSSMTKEQLMAKLV  
YQQFMADYIVKAQQQKLVQAAELATAQKYEAKIKLLLGAAGSGAAPATTAETTAPSAA  
TKLYDTRSANVAAAAGKAGKSRWGDKEVAKVQISSKDAVVEVKAEAKANGASVSVPPPTQL  
PGNTLFEGRNEQVAAAGKAGKSRWGDKEVAKVQISSKDAVVEVKAEAKANGASVSVPPPTQL  
AVSNAVIEEADHGLRNDGGVGGPSLADRVNLGQQLFSGSEAVGASDGLATVASAAPSAYD  
LRNARVAAAAAGKSRWGS MENQKAATLAAAAPKITAGTPQKQEI VVTPEVEADHGLRN  
DGGVGGPSLAERVNLGRKIV

>comp10270\_c0\_seq1; 492 1 2387 LEN=2732; translated  
XLGRDGSHEKSKSASSTERLTTRLNHKMQRPTTQLTNRAQKSASRFTGSRLPLIGLVV  
IVIVVQFIVIGTYHLAYVQDTSQFQLVLLNSVYSSKKKLSPLEEDAKLLGYSITGNASIP  
LVHNLHVWDENAFSQUALGPPSGERFESQEQAIFEDGSIPVFNHVGHKNDSSRVLDIVS  
EQMAMMRQEHPVVFQSMGATQLEVPNATVGLHRQSGTEMITLRSWEYCRQNPVEKVV  
YLHSGSSRNTPENASLRLFLTRGALSKECASVNAETCNVCSRRFSPLPHPTSGNMWLA  
RCDYVQHLIDPFDFEERMNEFTTNTCTPKGRES CDGRLRFSAEHWIHSHPKVKPCDLYADP  
KFVWDYDGIKNGIFDIQLAKAPRFDLIAVYKWLQCVNRGILIEHRLDEYWGELYQEKPDE  
SWWGWTSLKRDRWLPTNKKKAALWRRRDVCRGVKSNETEKSRKIPSKTENYVSKENLN

SCPIGSRIEQGPGLSERTIGNNPPSINTKEIKGKKRRVLMMAAVPRNQKHLAVWSQLECF  
FTIGIDHIVLAVPSWAKEVARQFIRVAKASIPSLINNETS IQVEHFTNDRYDVGLWCDVAV  
SSLNVDDFDEFAPVNDVSVFAMRHFSEIFDALSLKNVSLTSLSYSYSPKFFEGDNDPKHFW  
VESVYRGFTREGIDIFRRHSCLPANHPYFCPNQDDKKACIVNNFEHDLAMKYPCKVYGI  
YPSDTPPEEFLKKNRFRRTWARNIPYWRKLVRHGGFPVAKVKEFSYRMILPQLAECTNYLNQ  
EFAEFIDLSLAKSTT

>comp10271\_c0\_seq1; 876 227 2686 LEN=2824; translated  
MLDAGSKEAFAPVEFDEKTIEDQFSDEIDNDGNLFGETDDAALVVRVPYDANDGDGGHNN  
PASGSNNTRKYRPGRRWRWCWGLVVALSIGVLVSAGMLWQGSRKHRLDDDSILDRKSHD  
PSASSIIHSAENSNYGQNGIDMDERNSSHYSYTNKHPLDPWLFSGEGNHDTPNNHNTPNNH  
DSPTTYERGVESRLERERHFANLAVQWSDGVALSWKHSPARMALDWILDDDPMHLPTYGD  
RFVVFQORYIAAVFYFATRQQQTAHEDLHDDSSSSGGSEDSAPFLANTDVCLWANSNGKS  
GIFCDDEGNIVKLNFRDFLAGTLPRELGFSLGTSINLEGNDISGTVPSHYGLLVNLER  
MGLEFNKITGTIPEELSNLALMELDLKHNLTGSLPADLLGLKYIESIEIASSALTGTI  
PTVLSGSIKKLSLGGNNLSGNIPSELGILTKLWFLDFSHNDLTGTVPIELESASKSLEMAF  
LNGNDFAGSIDVVFCSGHRIFEELVSDCKGSAPEVKCSCCTGCCDASGLNLCVLDHDPFSA  
IDTDRPSPTPTRKSVGAQDASTGATASTSSAAQPAGTPSQEPLKELLSAVSERTLLEEK  
HTDQFKAFMWMARMMDPSPVDVATTSRHDIMQKYIMVLFYISTGGKNWRHQNSFLTDVSLC  
DWEGLTCNDEHKIVAIDLEDNHLNGTLASELALGAPSLQDLRLGGNALFGSVPSELGVLP  
SLRRTLDTDNAGISGTIPPSVSLRSLPNLETLELAGTGIEGDLPLFCAAPGGGKGTGTGG  
GVKLSQDVSIIANCLDPSVVICSCCNVCCDAAGENCKSL

>comp10271\_c0\_seq2; 299 1 1330 LEN=1468; translated  
PQFHNVMQTTNKNHLTGSLPADLLGLKYIESIEIASSALTGTIPTVLSGSIKKLSLGGNN  
LSGNIPSELGILTKLWFLDFSHNDLTGTVPIELESASKSLEMAFLNGNDFAGSIDVVFCS  
GHRIFEELVSDCKGSAPEVKCSCCTGCCDASGLNLCVLDHDPFSAIDTDRPSPTPTRKSVGA  
QDASTGATASTSSAAQPAGTPSQEPLKELLSAVSERTLLEEKHTDQFKAFMWMARMMDP  
PVDVATTSRHDIMQKYIMVLFYISTGGKNWRHQNSFLTDVSLCDWEGLTCNDEHKIVAID  
LEDNHLNGTLASELALGAPSLQDLRLGGNALFGSVPSELGVLP SLRRTLDTDNAGISGTI  
PPSVSLRSLPNLETLELAGTGIEGDLPLFCAAPGGGKGTGTGGGVKLSQDVSIIANCLD  
PSVVICSCCNVCCDAAGENCKSL

>comp10271\_c0\_seq3; 356 88 1239 LEN=1377; translated  
MLLFLYRAYYFSLKSRDLRCSGHNDLTGTVPIELESASKSLEMAFLNGNDFAGSIDVVFCS  
SGHRIFEELVSDCKGSAPEVKCSCCTGCCDASGLNLCVLDHDPFSAIDTDRPSPTPTRKSVGA  
AQDASTGATASTSSAAQPAGTPSQEPLKELLSAVSERTLLEEKHTDQFKAFMWMARMMDP  
SPVDVATTSRHDIMQKYIMVLFYISTGGKNWRHQNSFLTDVSLCDWEGLTCNDEHKIVAID  
LEDNHLNGTLASELALGAPSLQDLRLGGNALFGSVPSELGVLP SLRRTLDTDNAGISGTI  
IPPSVSLRSLPNLETLELAGTGIEGDLPLFCAAPGGGKGTGTGGGVKLSQDVSIIANCLD  
PSVVICSCCNVCCDAAGENCKSL

>comp10273\_c0\_seq1; 253 498 1164 LEN=1698; translated  
MDLRPPSAKHMNQLTSSRYPSFSQIERPPLDPSSFELPFHGVQNQDPLPLHHGSPFPDRA  
FHYYNWQMPVVEYVTDIKPNDVLSGRGGATNSHSGNRAFRSLVKQYQSDYKAKKRDKPQ  
VAAVVVDKIRERGGFRLLRRCPRKSEGVFWIEIGDVRAREKTCQALREGAPEIRRRKAASE  
NDDEENVKAVMDHFQLLQHSTGLNPKALKKIKFSTVAEHKY

>comp10273\_c0\_seq2; 253 591 1257 LEN=1791; translated  
MDLRPPSAKHMNQLTSSRYPSFSQIERPPLDPSSFELPFHGVQNQDPLPLHHGSPFPDRA  
FHYYNWQMPVVEYVTDIKPNDVLSGRGGATNSHSGNRAFRSLVKQYQSDYKAKKRDKPQ  
VAAVVVDKIRERGGFRLLRRCPRKSEGVFWIEIGDVRAREKTCQALREGAPEIRRRKAASE  
NDDEENVKAVMDHFQLLQHSTGLNPKALKKIKFSTVAEHKY

>comp10276\_c0\_seq1; 164 1 1056 LEN=1131; translated  
XLDEDLLVRETIAGAGRDREKWDGIRQWASDEHLGSSFDARRPVSPSVRRLLDAYGLDCT  
GCDHSEAVKAINAHAREDRERRRAREKRDALARKVFGTLAAVLVVLAVWHREPLAEALGV  
SGGSPSGGRKDAASTALRRRRAADAASKRAGAPKETHGAAHRPLWLDHERREVWTAQKEK  
QFSAALREFSGVPKKEYRVLVAERVTGKSRIECLTHHRMQEYLERMAQQQEXAAAIATS  
RRTTTTTTTNESTTTQORNATEHNTTQPPRALPHREPLGNENPAVCERAGTGHTTQKACER  
RGCLFFWNSAAFPRSWGLHVPPDGVLRSLRSASLRIDRARCGRRIERQEDPG

>comp10278\_c0\_seq1; 538 439 2800 LEN=2953; translated  
MTQEVDEVLRSLSPESAENDGSNPFPHHHVQWVGISGGGERSNSSNDSGTRGSNVNDGD  
TKKTTGTDEGMSNTSTPRRPSPKQKQKNTIDDNTRPESFDPRFSDLPSAVGAAREGGPH  
FSLLTGMRKDLRARIPLYLGDWKRPDSEFFKVLNATVFAFVVQLIPALIFAELLDKTTEGS  
LSVTETLLSAGIIGIYAVLSGQPLVLVGITGCVSSRKPCACNDFIFLPHKQASKNLRHC

LNFFGLFFALITCCIVMEKARGNLAGKFVSTGRPIPIGVLAFFLVALHLDLDSTLVTAMI  
GLVDVVWTTITPFTTQIFEFFIASTFIFESIRDLFEPLQLSQSTSSLLFDAPDDKTSNDDT  
MQGQLMGSNINYSMQRSAAYAGLVIGIGTFYLCWVLHFADTWLSFNNSFRFLSSYN  
MAISLVIMTGLSYVPGIDQSVAYVQSDGRMETLGGIERVHVAVPWDWQPTVDRSWVNPL  
VGISTEGIFGALFPAVMLYLLFFIDHNISSILTQSPKYNLTKPPAYHWDFILGLTILPC  
GILGLPPGSLIPQAPLHTRALCTRKYETLHGRQHEIFVDCEEQRWSALFQAVLMFAALG  
SMRVISWIPVGCLFGIFLYLGVGAMHGNEIWERITLIVVGRESRPQIPVVKHVQKQKTVV  
AYTTIQVALAAVTFISIAQFVSWGYVFPALIAGFVPIRSFLIVRFLFDETDLKYLDPIHETD  
DDYIAELIEYEESQKPRHVSEFGLGLSEFRIGNVPHDPDEYYERHPEYQVRSERSFGSNHS  
LRSSPF

>comp10278\_c0\_seq2; 532 439 2658 LEN=2811; translated  
MTQEVDEVLRSLSPESAENDGSPFPHHHVQWVGISGGGERSNSSNDSGTRGSNVNDGD  
TKKTTGTDEGMSNTSTPRRPSPKQKQKNTIDDNTRPESFDPRFSDLPSAVGAAAREGGPH  
FSLLTGMRKDLRARIPLYLGDWKRPDSEFFKVLNATVFAFVQVLI PALIFAELLDKTTEGS  
LSVTETLLSAGIIGIYAVLSGQPLVLVGITGPVAILLGNYSYRLADQFQSEYWPFFFWLW  
IWTISILHLVTAMIGLVDVVWTTITPFTTQIFEFFIASTFIFESIRDLFEPLQLSQSTSSLL  
FDAPDDKTSNDDTMQGQLMGSNINYSMQRSAAYAGLVIGIGTFYLCWVLHFADTWLS  
FNNSFRFLSSYNMAISLVIMTGLSYVPGIDQSVAYVQSDGRMETLGGIERVHVAVPWDW  
QPTVDRSWVNPLVVGISTEGIFGALFPAVMLYLLFFIDHNISSILTQSPKYNLTKPPAYH  
WDFILGLTILPCGILGLPPGSLIPQAPLHTRALCTRKYETLHGRQHEIFVDCEEQRWS  
ALFQAVLMFAALGSMRVISWIPVGCLFGIFLYLGVGAMHGNEIWERITLIVVGRESRPQI  
PVVKHVQKQKTVVAYTTIQVALAAVTFISIAQFVSWGYVFPALIAGFVPIRSFLIVRFLFDE  
TDLKYLDPIHETDDDYIAELIEYEESQKPRHVSEFGLGLSEFRIGNVPHDPDEYYERHPE  
YQVRSERSFGSNHS LRSSPF

>comp10279\_c0\_seq1; 1154 540 3407 LEN=3506; translated  
MAFGLCTMLLEKVVTKAIVEDKDGSESKINLDAMQRLVSALEMTKESDSKVPSTSSLSLT  
ESQNAENQIGVESEETETNSSLPNDVESAPTASNAVWNFPALIEIESNLEPLRPSSVP  
KRMKEISEQKIKKQQQASGVEDLPLVPESTVYMKDNSVYTWKPKPSDLIFDSNEAWDLES  
ILTSVVEEEVLNMNQNSDVAQIQSKVIGIEKYPAATTSTNTFDDTQNDVQDHLNLQEE  
QKSQELFRKLLQKRLLEHKTQSRIMEESKEHITAPQQVKAEGSVDTLIEAVLHTSEQS  
FRRLQLLRAKLDIDARAERIQRERSKEQLHRSLKTKLKLQSQKMSRQMSSEIFQRRL  
KARLEIDARSKMIAEERIVSNAEPKTTGLKEVPPFGLVETKISEELFHRSLRERLEQDL  
LNKAKKEEKANENQPSRLKAAGEASPPSVVSEDRKSKKLYHKRLSTTQIEDTEKGDVSKL  
KNQKDP TSERIPDSVSTGVIDCVNTDCKVDNDSEDEPNCSVKGWVSSLPTTSQERYAREA  
KVSHSFVQSEFKPAWWSKNDHFQTIIGTLFRKETMYSRGDQDMSTLLRLAGFDGEATSDD  
LSVSQKLDEFQWDRRTRVETNDGDLFVVDWRDADVPDEEISGKNDENPICLICHGLES  
DSEIARELAIACNEKNIDAACINFRGCADGGEECSLTARAYHLGFTDDLHQINEINSKH  
PTKRIYLSGFSLGGVVTKLLADLGEDAYRYNICGAAVNAVFPDTRQYHTNLNEAGFTKT  
IYGDRL LASMQRRSKQOFDACP GIFFERSEIDKCKTMDLENLLIAPIFGFDDAMDYD  
KVKTIDKLNHCVPPELVVQARDDPFFAGLELPANDPNTPLRIQYTDEGGHCGFIFHQDA  
NEERPSTSWMPTQLARFLAHLEENREPSADIPPAVRHEGNPIEIEDDVFAVASNA

>comp10280\_c0\_seq1; 351 71 655 LEN=1009; translated  
MLSAALLSSASAFAPKAGTRAFSRATSVL MANPKVFFDMEVGGEDVGRITFELREDVAPK  
TVENFRALCTGEKGFYEGSTFHRVIPGFMCQGGDFTNFNGTGGKSIYGEKFEDENFDLP  
HVKGILSMANAGPNTNGSQFFICTVDTPLWDGKHVVFGQVVDGLDVVDKIEAVGSQSGQ  
TAQKVVVKASGELE

>comp10281\_c0\_seq1; 96 1 619 LEN=866; translated  
XDFIAQMDAIASIPWRSRFRILGLRKEAGEEGVNGGAPGYGDQTLARTHGRGSLGKDL  
WNDVLELFDHDSWTEDEGPFSLDFILCAFLRAALVLVPLWILAGALVVGLLWPPQIREKL  
FVSAVTLHSSETEKEETQRKTQIERVRREVGLLREDLLRESARHRTQIIQMKSAIAERKL  
ETTNTLAAIKKNVVLALFEMGQEE

>comp10282\_c0\_seq1; 631 111 1916 LEN=2737; translated  
MANSNANTAREHDVNDVDWAEGNSGFDPQVVNKMLSDELNQLSIGRRQOVLEEIHGVQPG  
GRSPMHFGKNTINQQLQRQOEDIALKKFREELENCFLSDNKYPAYRYAKEHGSSELIRDRD  
FELSFFGYGQGGNCPKRAAARMVNYLEMARETFGTDDVLF RPICLSDFDEDLGAREFMYN  
EGPLQILPVRDPSGRRVVFVHLRDFGPSSCHVKIRQOVGMVYFVQSI SEERDGA VCVLFLHH  
ACDNVYNRDEFQTVNKMMKIIPPKFSAFHLCCPVGPMYDVVKA AVTLLIGKENRQRLRIH  
VGSFQECKYSLRPF GIPVDRLPVDLFSGGSSQRQYQNIKNHLRWLQIRAAKDTAMFAA  
IGRDSNGEIIDGGHQENKDIGESYAGVMAAVRENLSKFVECPRHEDCLFGKGRPAMNHPG  
NIAMRRLVKNKLSQFISNNAKEKSEIVQECIDEIKEWNGRFLKEDSDHAGVFFVIADNETV

FKKIASAFRDLKKKQLREQQREKESVRDDPGNESTGEEVGRPSQSRVKGTRPADQEFQS  
SENGASSISNGNRGVNSAMAMKTYTATNDASLMTNAETDDNGSCFSHLAQRKKTRNRCFY  
D

>comp10283\_c0\_seq1; 533 108 1343 LEN=1613; translated  
MLFRITAVFAFLGGAASAFMPSTDIHGFSSTKLNQLIEDNGINTSTDDRRSFVTKSGSTV  
AAAAFASATGTLGVPTPEPAKAASSQMWKPVLPFSETLYDIDFDTPTHGYLVGARGSAE  
TNDGGETWEARSFNSLDAEEEVTYRFTVSSFTDGEWVWGKPTLMLHTKDAGKTWERIPL  
SPKLPGEPTSITSLGPGKAEMTTSVGAVYVTENAGRNWKAQVKETIDATLNRISSSGVSG  
ASYFTGSIISQIRDDDGLAVSSRGNFFLTWEPGNDFWIPHNRTGTPRRIQNMGFVEGDI  
NKGVWMTLNGGKLLICNSEPDLKSDTFDFKEANIKTGGFGITDVAWRNKKEVWAVGGSNT  
MYVSTDGGENFSFKSANNIPGNLYNVKFFKEFGNKGFALGNSGLLLKYVG

>comp10284\_c0\_seq2; 773 358 2151 LEN=2827; translated  
MVITTPRQRVGGRTSTSNMDPSSEEVIRMLLRGQGRDPMRRRNQSSSSDYTIKSVKHRA  
QQQSKSQQTQQTANQSETKSQTQTSSLLDKWRDYEALRETDLEDEVLRFPPFFESGWERK  
QVIVERFATVLTGLTYKAQADWNQAQLEKQNNASSEVSAAVSGQEEVSLAPPSGDDPAALA  
LCEAIASLGPLAVKLGQTLRQRPDIVGRAACDALKRLQTQNTPFENDLARAVLRESLGYW  
DGPLAGDGESESSQGTGGSKPLFRSLSEEP IASASLGQVYKATTWDGVDVAVKQVQRPDAL  
SILAIDTQCFRIASAFRNTVIDWTEKWNGLVASSSNGEGDVPHSLETGMTEEEVRS LGPE  
GTVASVIDRVARDIKREMDYRIEAENSYKFRDSLEFLGFVDTPEVLLATDKVLATTFVDG  
HHLANLPESDQLALTRMAVEACTASMLTGFVHADPHEGNLMLRNDGRIVFLDFGLMS  
DVDQDVMEAFARGIAALLSEDFVSMTEAFTDTGFIITAPIMHRASTDELWRVDPDFGQDEL  
ALDLEKAMKSTEGGMSRFGALATVNLKKSIPRWLVFTPPYVLLLIRTFLEGTLEGIAGK

>comp10284\_c0\_seq3; 1113 358 3030 LEN=3063; translated  
MVITTPRQRVGGRTSTSNMDPSSEEVIRMLLRGQGRDPMRRRNQSSSSDYTIKSVKHRA  
QQQSKSQQTQQTANQSETKSQTQTSSLLDKWRDYEALRETDLEDEVLRFPPFFESGWERK  
QVIVERFATVLTGLTYKAQADWNQAQLEKQNNASSEVSAAVSGQEEVSLAPPSGDDPAALA  
LCEAIASLGPLAVKLGQTLRQRPDIVGRAACDALKRLQTQNTPFENDLARAVLRESLGYW  
DGPLAGDGESESSQGTGGSKPLFRSLSEEP IASASLGQVYKATTWDGVDVAVKQVQRPDAL  
SILAIDTQCFRIASAFRNTVIDWTEKWNGLVASSSNGEGDVPHSLETGMTEEEVRS LGPE  
GTVASVIDRVARDIKREMDYRIEAENSYKFRDSLEFLGFVDTPEVLLATDKVLATTFVDG  
HHLANLPESDQLALTRMAVEACTASMLTGFVHADPHEGNLMLRNDGRIVFLDFGLMS  
DVDQDVMEAFARGIAALLSEDFVSMTEAFTDTGFIITAPIMHRASTDELWRVDPDFGQDEL  
ALDLEKAMKSTEGGMSRFGALATVNLKKSIPRWLVFTPPYVLLLIRTFLEGTLEGIAAQVDP  
DFNIYEMSPWVVRSLSPSTEKGRKVLRSIMLKPDNTIQWERILELLALQKEATQVQQA  
AAVDTESREPTTSSAATSAAAASAVDHANDGTSTVAAATTQEEKERKQREYAVARQGAMK  
DAIGKLLGSTNGRALRGVLDLTPDLIWKLSREGQP IIVEMGTETILNKYLF SALRRSG  
NNKKERPP IREAETTAGTTPRSVDYRPVSDQCKALKKRQAQRTKQVTRILLKSHLKRCLF  
RIKGIAGMVRLIASTLKVMSLII LRKIIRKVMVSLGGNREASVNSATTVA

>comp10284\_c0\_seq4; 318 152 888 LEN=964; translated  
MLKPDNTIQWERILELLALQKEATQVQQA AAVD TESREPTTSSAATSAAAASAVDHANDG  
TSTVAAATTQEEKERKQREYAVARQGAMKDAIGKLLGSTNGRALRGVLDLTPDLIWKLS  
SREGQP IIVEMGTETILNKYLF SALRRSGNNKKERPP IREAETTAGTTPPLGGLSARLGP  
MQGTQEASGATYETSHADFAQESPQAVSLSHKGD CRDGP FDSVHSEGDAVDHSAENNTG  
DGVLGW

>comp10285\_c0\_seq1; 303 230 1120 LEN=1934; translated  
MVVVVARSLTVTAILGFVTS CNAQPMRRRPLSTVLEVEDLESYPSHLEQAEVDFDVRNSG  
SSRSSRKEQDRRGLGRTWGHGKEEKHSLKLGKTNRSKGDKKS GKR MKFDKVLGGRKSKSGK  
SRDALWDDVIGMSMSPSSPVDNPNANPPSAMP SRETQKPTQRPTPKPTNAPVPRTPSPPT  
RTPGCESLPKEEV LKETLEKVTQTS ILEDSSSTPQGN AFLWMLNRDPAQVDPCTYGTVEQR  
YALATFFYSTNGSGWDNSDGLVSNCAWSG ICKDGNRVIELGADDALGKYYFY

>comp10285\_c0\_seq3; 425 230 1762 LEN=1800; translated  
MVVVVARSLTVTAILGFVTS CNAQPMRRRPLSTVLEVEDLESYPSHLEQAEVDFDVRNSG  
SSRSSRKEQDRRGLGRTWGHGKEEKHSLKLGKTNRSKGDKKS GKR MKFDKVLGGRKSKSGK  
SRDALWDDVIGMSMSPSSPVDNPNANPPSAMP SRETQKPTQRPTPKPTNAPVPRTPSPPT  
RTPGCESLPKEEV LKETLEKVTQTS ILEDSSSTPQGN AFLWMLNRDPAQVDPCTYGTVEQR  
YALATFFYSTNGSGWDNSDGLVSNCAWSG ICKDGNRVIELGADDALVANDLSGVL  
DEIKALKRLEMIQVGANAI GGSIPDVLTDLPNLRHFDVEINSLSGPAFVNLEGLDQLESY  
RISANRFSGRIDPAIGDITSLKELWMADNQLTGPIPETFGNLVNIETLYMYRNNLVGSLP  
DNLGQMGNLQELQIFNNFLSGTIPEGLYSNTELGLMRLDGNKFTGTVSESIGNLIKLGDL  
RINENLFTGTLPGSFFNLSRLGTCLDYIGK



>comp10285\_c0\_seq4; 303 230 1120 LEN=2660; translated  
MVVVVVARSLTVTAILGFVTSNAQPMRRRPLSTVLEVEDLESYPHLEQAEVDFDVRNSG  
SSRSSRKEQDRRGLGRTWGHGKKEEKHSLKGTNRSGDKKSGKRMKFDKVLGGRKSKSGK  
SRDALWDDVIGMSMSMPSSPVDNPNANPPSAMTPSRETQKPTQRPTPKPTNAPVPRTPSPT  
RTPGCESLPKKEEVLKETLEKVTQTSILEDSSSTPQGN AFLWMLNRDPAQVDPCTYGTVEQR  
YALATFFYSTNGSGWDNSDGLVESNECAWSGIKCDGDNRVIELGADDALGKYYFY  
>comp10285\_c0\_seq5; 493 230 2122 LEN=2526; translated  
MVVVVVARSLTVTAILGFVTSNAQPMRRRPLSTVLEVEDLESYPHLEQAEVDFDVRNSG  
SSRSSRKEQDRRGLGRTWGHGKKEEKHSLKGTNRSGDKKSGKRMKFDKVLGGRKSKSGK  
SRDALWDDVIGMSMSMPSSPVDNPNANPPSAMTPSRETQKPTQRPTPKPTNAPVPRTPSPT  
RTPGCESLPKKEEVLKETLEKVTQTSILEDSSSTPQGN AFLWMLNRDPAQVDPCTYGTVEQR  
YALATFFYSTNGSGWDNSDGLVESNECAWSGIKCDGDNRVIELGADDALVANDLSGVLP  
DEIKALKRLEMIQVGANAIGGSIPDVLTDLPNLRHFDVEINSLSGPAFVNLEGLDQLESY  
RISANRFSGRIDPAIGDITSLKELWMADNQLTGPIPETFGNLVNIETLYMYRNNLVGSLP  
DNLGQMGNLKEQLIFNNFLSGTIPEGLYSNTELGMLRLDGNKFTGTVSESIGNLIKLGDL  
RINENLFTGTLPGSFFNLSRLVVLRLNNNNFVGTLRDGFDSWQSLDFADFRNNGFEGTLP  
GTIFDIPTIRILYFSNNNLGGTLPATYSNSPVLRLDLFLSGNQLSGTIPGIQAGQLSVLTE  
LLEDNRF'TGTMAESICNLRASGQGLLEDLW  
>comp10286\_c0\_seq2; 344 1 1370 LEN=1995; translated  
PEPNRIEHN'TTQQRSLSNHRHSNTD'TTMMPLPLRLVLLAALPRSALGWSHPRSPFRRGA  
GGSRCRAPVRGGASPSALWGTEGDGGAAPGTTTKSSSAPIFSEEDVSDFCCKGTNEFWKG  
LVIEPVRNYVEIREGGPDSPTDILSKLVAPPEVPGLSRPVWFTILGSVPTALGWYGYKF  
SVEEELFQHELRTSKNGYVTGCGGYGTLFPFVFGVLLGFPALLHVPGGELLLKAAGAWI  
LTGQVNLVRRVNELCFEDEAVREELLAGLALPGEEAGEPEPPLHPWWALLPPPLDVVGL  
RQVHFLSEYWRIVRGDPYDKDIVAEELFPFIISSKRFTLKQFARKPSNWFWFTKKTKDFDG  
IDFLKDXMDDAVRHSRGMCTRGAAEGGRERCLRPSVARQDALSARNATEPLGSFGFGIAL  
RDCASSAGTMAAATSSNQYAAGSEQPRLLHPVYPE  
>comp10287\_c0\_seq1; 545 1 1537 LEN=2110; translated  
LNEAATKKT'TIAYFWEQDESWLPVLAIGLLVVKNVFYSSIPGFRWDDVAILAKVNTAFYN  
DETET'TTTAPT'TAPT'TAATKRPLQAEPLGEHPFVGAIDPTGEYFGYVHDPTVLRSKSNSK  
NDNDQHKHENNPEWFSIRDETEREGLCAPVGYGPERWNSTVWNERNVGFDSSNAVFGEII  
KVASPPLATGGSDNNNNSDRDIKLFCAIYTHPGNDEQANAI RQTWGRRCDFMAASTVSD  
PWSATVNI PHKVHKKKKFSQQGSYGGIWQVRVSM LAYLYDNFLEDYDFYYLCGDDTYLI  
VENLKAF LKTPAFVEHAGGTGYPLPVYTG VVIHPN WAPSVRKKKDKEDPSFY YMGGGAGY  
VLNRKAVELLVTLAWPKCHDNTFAGEEDVLM AFCLRQYLNVTGYDSRDEEERERFFWDL  
VTEAEVREQSINEERKVLHLAGQFVRKQTRWNAKHHGWT'PRYGP HDRISPTAVAFHKVKP  
AEKMKRYERLFYRTEARNPALHQKDCGLGLG  
>comp10287\_c0\_seq3; 535 1 1525 LEN=2098; translated  
LNEAATKKT'TIAYFWEQDESWLPVLAIGLLVVKNVFYSSIPGFRWDDVAILAKVNTAFYN  
DETET'TTTAPT'TAPT'KRPLQAEPLGEHPFVGAIDPTGEYFGYVHDPTVLRSKSNSKNDND  
QHKHENNPEWFSIRDETEREGLCAPVGYGPERWNSTVWNERNVGFDSSNAVFGEIIKVAS  
PPLATGGSDNNNNSDRDIKLFCAIYTHPGNDEQANAI RQTWGRRCDFMAASTVSDPWSA  
TVNI PHKVHKKKKFSQQGSYGGIWQVRVSM LAYLYDNFLEDYDFYYLCGDDTYLIVENL  
KAF LKTPAFVEHAGGTGYPLPVYTG VVIHPN WAPSVRKKKDKEDPSFY YMGGGAGYVLNR  
KAVELLVTLAWPKCHDNTFAGEEDVLM AFCLRQYLNVTGYDSRDEEERERFFWDLVTEA  
EVREQSINEERKVLHLAGQFVRKQTRWNAKHHGWT'PRYGP HDRISPTAVAFHKVKPAEKM  
KRYERLFYRTEARNPALHQKDCGLGLG  
>comp10288\_c0\_seq1; 812 216 2338 LEN=2338; translated  
MSTPEWMQKYQEIGQKEDEGVTEMGRDGF LKRAESRRNSLLIEQGEDSNEFSETVPLATT  
EKASVEMVRSTRSDPPDSVSGNARDFTYETESKSANDGYDQTSYIDESKYGGSASDAAP I  
SSAQDDNVSSANGTQMSRSTYGGEDIIEEILVDDDGNEIFEEV LVEDEDANDFFAEQRQ  
QLVSDSAAIEDKAQGDVVLAEDEKYQVPPSPIDTASQAQLRSGTQIYDIEEQKRILGIGK  
PGKRSSMSWFIPLLSFCLIIAAIVLVVFFVVLNDRQKFGMKPSMAPTPAVAVPLDPEAS  
SSGSVDAARTTEFDPRFNCCNFEGSLQPNIIDQCICEESVDI IADDVRNRWNKLVKNFIP  
SVYPEWNEAIDSCSPENQALLWLSGINNGGEIDDLHRLQRVYLATVYYAQGGIGWFHSK  
NWLSGRSVCGWEGVECNDSDFVQFLSLDFNNLIGFLSNAPTLLNAIEGYSVVGNSLEGFI  
PYSYFASDTLNLHINFSDNELYGAFPTISSNLSALTYLNI GSNL DGTVSSDVGKLSLKV  
LNIDFNAFSGTLP SVLFR LPLAELS IGGNGFDGMIPEEITDLSALTSLSLGPNSFSGDVP  
TSLSVLTKLEKLSIEGIANLGGRLPAAYGLSLTNLVELGISGTNIDGNI PAQFSMLKCLK  
KLRLSDNDLRGVI PSSIDLLADLGVLSHSSFLNLLFFYFLTPFLSER

>comp10288\_c0\_seq2; 905 216 2450 LEN=2475; translated  
MSTPEWMQKYQEIGQKEDEGVTEMGRDGFLLKRAESRRNSLLIEQGEDSNEFSETVPLATT  
EKASVEMVRSTRSDPPDSVSGNARDFTYETESKSSANDGYDQTSYIDESKYGGSASDAAPI  
SSAQDDNVSSANGTQMSRSTYGGEDYIEEEILVDDDGNEIFEEVVLVDEDANDFFAEQRQ  
QLVSDSAAIEDKAQGDVVLAEDEKYQVPPSPIDTASQAQLRSGTQIYDIEEQKRILGIGK  
PGKRSSMSWFIPLLSFCLIIAAIVLVVFFVVLNDERQKFGMKPSMAPTPAVAVPLDPEAS  
SSGSVDAARTTEFDPPFRNNCFEGSLQPNIIDQCICEESVDI IADDVRNRWNKLVKNFIP  
SVYPEWNEAIDSCSPENQALLWLSSGINNGGEIDDLHRLQRYVLATVYYAQGGIGWFHSK  
NWLSGRSVCGWEGVECNDSFVQFLSLDFNLLIGFLSNAPTLLNAIEGYSVVGNSLEGFI  
PYSYFASDTLNLHINFSDNELYGAFPTISSTNSALTYLNI GSNLDGTVSSDVGKLSLKV  
LNIDFNFAFSGTLPVLFRLPLAELS IGGNGFDGMIPEEITDLSALTSLSLGPNSFSGDVP  
TSLSVLTKLEKLSIEGIANLGGRLPAAYGLSLTNLVELGISGTNIDGNIPAQFSMLKLLK  
KLRLSDNDLRGVIPSSIDLLADLEILHLNGNSFSGTVPSEIAMLSSLEELKLDRNKLIVGS  
IPEEFEEELLEMSKSCHEHVFQCEMQ

>comp10288\_c0\_seq3; 1127 216 3053 LEN=3160; translated  
MSTPEWMQKYQEIGQKEDEGVTEMGRDGFLLKRAESRRNSLLIEQGEDSNEFSETVPLATT  
EKASVEMVRSTRSDPPDSVSGNARDFTYETESKSSANDGYDQTSYIDESKYGGSASDAAPI  
SSAQDDNVSSANGTQMSRSTYGGEDYIEEEILVDDDGNEIFEEVVLVDEDANDFFAEQRQ  
QLVSDSAAIEDKAQGDVVLAEDEKYQVPPSPIDTASQAQLRSGTQIYDIEEQKRILGIGK  
PGKRSSMSWFIPLLSFCLIIAAIVLVVFFVVLNDERQKFGMKPSMAPTPAVAVPLDPEAS  
SSGSVDAARTTEFDPPFRNNCFEGSLQPNIIDQCICEESVDI IADDVRNRWNKLVKNFIP  
SVYPEWNEAIDSCSPENQALLWLSSGINNGGEIDDLHRLQRYVLATVYYAQGGIGWFHSK  
NWLSGRSVCGWEGVECNDSFVQFLSLDFNLLIGFLSNAPTLLNAIEGYSVVGNSLEGFI  
PYSYFASDTLNLHINFSDNELYGAFPTISSTNSALTYLNI GSNLDGTVSSDVGKLSLKV  
LNIDFNFAFSGTLPVLFRLPLAELS IGGNGFDGMIPEEITDLSALTSLSLGPNSFSGDVP  
TSLSVLTKLEKLSIEGIANLGGRLPAAYGLSLTNLVELGISGTNIDGNIPAQFSMLKLLK  
KLRLSDNDLRGVIPSSIDLLADLEILHLNGNSFSGTVPSEIAMLSSLEELKLDRNKLIVGS  
IPEEFEELEMMRTLTNLGNAMDGRAPNGVCALREAELDEFVDCPTLVGESDVYGI ICSI  
PSCCTECFDPTGATGSITEESSETIIGVASEDPELSFLVSLIIEAGLIDPLSSDGPFTLF  
APTNAVVSLLNSLGLDPTTEVIGVDPSSLLYGILTYHVVPGIYSADDISDGLTLETAMGES  
ISFDISEGIGTVNGAIIRTVNIPASNGLIHKIEGVLVPSILDDML

>comp10289\_c0\_seq1; 134 274 625 LEN=625; translated  
MRSVSSSTSISSSATSNVRQIVDWVLDKPLESIIISKEEAI AITRELTSDKALIDSLENA  
VIENWDKIVNKLKRSDDGSRQTLSDLLGKEATQRLLRGMQNLDIYSDSRTVSRSEERRX

>comp10289\_c0\_seq2; 338 274 1185 LEN=1881; translated  
MRSVSSSTSISSSATSNVRQIVDWVLDKPLESIIISKEEAI AITRELTSDKALIDSLENA  
VIENWDKIVNKLKRSDDGSRQTLSDLLGKEATQRLLRGMQNLDIYSDSRTVN AFLQSDAV  
NDLFAQTLYDGIYEFFQTI DVFNGIISNL PVLGPI RNKIRDDLKQQLDRTLGP TLRNFLK  
GYTTIAIGRASSFVLSQNRKAFGAANARLLKSVLERPLEDLLPESSNASITRLRTEFFG  
YLRQLGGDDSSDLEDYAAIVYDLIGDKSLDSVGLNVHKVLDTSPTLESTANRIFDEAINR  
NQS

>comp10291\_c0\_seq1; 462 587 2022 LEN=2135; minus strand; translated  
MKLFFNILLVLAATAVTAFAFD PDAGTDLHRLSKNGDKTTNIDTDLHLDNRFLADPR TNAG  
MDNVIEIDPDTFSGTGGGRRKLSGKLGKSSKKNPSSPLL PAMNPNYHYVLMES SDKD  
TDSFALHLRGYDEERVSADVHNASFDDVKSELVKKHDSGKVLLAVLFRDQIQADKLLDGK  
TLTI ISEGMSGTVAVG VYKGTADKFQMSIGLLESHE TKPDSLEGHVFHLS SNGEVKNHL  
HLFEGETWKEVIPWQAANFQGLDYQMERKLGVEGWQEFHRYTTS GTYHYHNPPLWSCWS  
PKIGKYQYTARFFKLGFDHITGRNYYYVSMELTINH QYMQYSNDQMVADLSCGPYTRSVT  
IGVELGNGXGNNHEWEYTLNPCVKKLFSGDIPPPPEGSATFDSRPTI IWSVDKNSPSTL  
TLFSRFHTNFLNEDKSGGGPFSPSYVKITIPADGTSVSSTVPAEYSPFFVANQPPMCS

>comp10291\_c0\_seq2; 560 587 2179 LEN=2292; minus strand; translated  
MKLFFNILLVLAATAVTAFAFD PDAGTDLHRLSKNGDKTTNIDTDLHLDNRFLADPR TNAG  
MDNVIEIDPDTFSGTGGGRRKLSGKLGKSSKKNPSSPLL PAMNPNYHYVLMES SDKD  
TDSFALHLRGYDEERVSADVHNASFDDVKSELVKKHDSGKVLLAVLFRDQIQADKLLDGK  
TLTI ISEGMSGTVAVG VYKGTADKFQMSIGLLESHE TKPDSLEGHVFHLS SNGEVKNHL  
HLFEGETWKEVIPWQAANFQGLDYQMERKLGVEGWQEFHRYTTS GTYHYHNPPLWSCWS  
PKIGKYQYTARFFKLGFDHITGRNYYYVSMELTINH QYMQYSNDQMVADLSCGPYTRSVT  
IGVELGNGNDYESMPKSTDGSSVSSDIGGSLSDGSDVDTSI SHDYGNKDVQITYNL  
PGNNNHEWEYTLNPCVKKLFSGDIPPPPEGSATFDSRPTI IWSVDKNSPSTLTLFSRFHT  
NFLNEDKSGGGPFSPSYVKITIPADGTSVSSTVPAEYSPFFVANQPPMCS

>comp10292\_c0\_seq1; 598 66 1523 LEN=2193; translated  
MAHPNNTIVSPPLLRLRFWLTAATTISSHLPMLLLCFPNTASSFVATTTLRASTTPTAFEL  
SAAPDIPSWKDLGATGCDNHEQPF CANGADFSSHPDLGNSRPVLYRERHGWCPYSERVW  
LAL EAKGIDYDTIYIDNIYGRPSWYGGNT PQMKWEDGRVQSE SMDLVKAIDERYASDCGV  
ELYPSDIASEVVKSERAFRNIFPKKARPSSRAAFLFRYDGTPLWKNEFEKTLKETDALL  
GENPKGPF FCGDRFTAADVCWAPFLERYAGQLPCLHEGLDPRCESTYPHLHRWYTAMEQM  
VPAYACRVRGDPSSWRKVLT MAGFGNAGAVPPLV SERMDELAEQERSPLSAAEKADQQRV  
WDEYAASRPFVASSPSAEAAA VLVNRNREAIKRDVAKNFCDEDP SVASLYDEAGLDEAMRS  
LAVVLLCNDQEEEGRS LFFDGATVEACEEKCGGSLGSLAAFLDERMCVPRDMGALSAAHF  
KRIIA

>comp10292\_c0\_seq2; 598 66 1523 LEN=2396; translated  
MAHPNNTIVSPPLLRLRFWLTAATTISSHLPMLLLCFPNTASSFVATTTLRASTTPTAFEL  
SAAPDIPSWKDLGATGCDNHEQPF CANGADFSSHPDLGNSRPVLYRERHGWCPYSERVW  
LAL EAKGIDYDTIYIDNIYGRPSWYGGNT PQMKWEDGRVQSE SMDLVKAIDERYASDCGV  
ELYPSDIASEVVKSERAFRNIFPKKARPSSRAAFLFRYDGTPLWKNEFEKTLKETDALL  
GENPKGPF FCGDRFTAADVCWAPFLERYAGQLPCLHEGLDPRCESTYPHLHRWYTAMEQM  
VPAYACRVRGDPSSWRKVLT MAGFGNAGAVPPLV SERMDELAEQERSPLSAAEKADQQRV  
WDEYAASRPFVASSPSAEAAA VLVNRNREAIKRDVAKNFCDEDP SVASLYDEAGLDEAMRS  
LAVVLLCNDQEEEGRS LFFDGATVEACEEKCGGSLGSLAAFLDERMCVPRDMGALSAAHF  
KRIIA

>comp10293\_c0\_seq2; 412 303 1622 LEN=1671; translated  
MIPRAVAFTSTTPTTARKFCRHNVLQRYRQWFSPFYFRDSFSHCTQGMSIAIPPAARPPP  
SVSLG VGRERRVPGQKQQRKTNEHRDKQAQRLIEQEE SARRKRIEQMDQRLQKAARRDVR  
ISILEAKIALEQQEQQNGSSNSNEVAESITEPNNGSSSTSQDIESVTDAERAELAGLLRVR  
EDFEEQYDPSDFSEEHLNFKDLHND AFLKLVQYCERNRGDY EKSKTSETNKEENITKVFF  
LDGPDARTASALIWKGNM DATQCYVANRHESTCVCLRQSGGGLLPDANVVHATASEALSK  
PAFSNDRKQE QHQVGAFAHLDF TGYF DGCNGFAPHIVNMLSSALLRLDQDSSNGQSFQ  
QHP IVVGYSLIGGGHKTQATMVENELFVSRALTTIARTRGM RVIQALDDPTRFGLHPETP  
KVAAKTF TTWLLLEPDDSF

>comp10294\_c0\_seq1; 392 84 1762 LEN=1769; translated  
MEDDGRIDA IPEERTELMKNSD VLLPTGQPTSSDRADENGLSSDEDLFTDEGVPVIGFIS  
RYINLPYADLPMEANGCVIDTYARATINLAYFFVGTALLKLALHQALSNCFSKKSQDDF  
IIEECMTDPKIFGFKPSSLLTNMGALGSFISVVS LPIVGAVVDFTPYRRQVGLCMASGLT  
LIKILEIGIRQRIWFFV VCLQVLSLFFQTEKAAMYAYS AELSHHPTTQSKFQSSLALTL  
FASMFLYLLEVQVLSRVLDDLNDXTHREARSNYR PQLPAVILDR LGPSLSGQAARL DPA  
GGPKH THGGVSEAPPDL SRDFQQLSR PALFGVQ PRLVGGGHC GASDHHHHLHERIPGDE  
LPPDGF GALRGHRRHTGVRDREPCLQALQESRTER TGWPGGVHSEHRRGGFVSAGGLQA  
PDVRVLLCLGDLPLG LAAPT AHDYLCDDFSPGARVGRADGT VSI FVPDTRFP PAVALYGSE  
RNGGAHVDRDNDARPVYFDRTPWPGLHGRLRGRS QPGRVRRR PGLIVEERDVAFPNMEN  
TCNSHKFC SKNFKSVDGQR

>comp10296\_c0\_seq1; 590 179 1678 LEN=1744; translated  
MNLRF AALLLSASLPLASPFSTPSVPLSSSQTN TLLRSPLPFASPTDISTVSPKTTLVN  
NIGNHNKPLNRHVLHMASDAAA VSTEDAGNEGASVTQLIFNLVKGIVGAGVLSLPAGIAA  
FANAPGGVIPAVSLIAIIGSL SAYGFALIGRCCAYTNTKSYRDAWSATVSKSSSWLPASA  
VTFKTVAACLSYSMILGDTFV SLLSTIGIASTKVPVTLGLTGVCLLPLCLMKNLSSSLAPF  
SLVGS LGMIYTALAMVVRYL GKAYSATGAFGADNAVALR PKFGTVGAQGAFTPSAAIFIS  
MLSTAFMAHFNAPK FYNELKDKTLPKYKVVSTSF AISISL FALVASVGFLTFGASSNGL  
ILNNYSTRDSL MNLSRIA VAVSLVFSYPLAFV GARDGVS DLLKIKGTEKTQNVLTVALLS  
AITGIALVLPDVSFVMALAGATLGNGLIYIFPALMYRGA IKKKPDATKGEKREVKFALGS  
AAAGIVMGILGTKMALGSL

>comp10297\_c0\_seq1; 531 1 1272 LEN=1272; minus strand; translated  
XAVDDESSGDEWDADSDSDDDDKFADLDARLEKVVIEDDNVDLIELEKKQE QKRLAELGR  
KRAEQERKEELRLAELKKQADAAERAELLKEQKRQEGKKKREEEKANLAARSPDNL RCP  
ITVIMGHVD TGKTKLLDKIRRTNVQEGEAGGITQQIGATYFEKKTLEAQTQKLNATEKFD  
IKVPGMLI IDTPGHESFANLRSRGS SLCVAILVVDLMHGLEQQTIESLNMLRKKNVFV  
VALNKIDRCYNWKTCKDTPIRDAL KDQEEGTISEFRSRAADAKLQLAEQGVNSNLYWEMG  
DDDWSNSDFIPLVPTSAITGEGVQDILMLLCQMAQRKIWESIMWCANLEATVLEVKAIDG  
LGMTVDVLVNGYLREGDKAVFCTLDGP IIVTEIRGLLTPPPSREMRIKSDYIHHKEIKGA  
IGVKX

>comp10298\_c0\_seq1; 358 1 1340 LEN=1492; translated

XGSSSPLAASWYYRLCLFCVIEWSGAACIKTMQWAGSRPDMFGSDFCAVFSRLQDSTRPHS  
RNHTERAMAEAFGEWGETMRLDSSLGSGCIAQVYKGVVLDVDDPENPGQKVERPVAVKVR  
HPGVEKDIDADLDILRLVVGLLDKIDRGPVKNLRWLNLPGFIEEMALMLKVQLDLRREGE  
HLVRFNENFEGNETVVFPRLVEGYAPTGVLCETFHEGQPLMAFVGVQNKADQKLLTKMCT  
EAVKAVCQMIFLDNFTHGDLHPGNVLTDDYKVFVLLDVGITTVHSEKDHKLLSDVLAAFI  
RKQGRKAGRYMIENSARLERAGDRAVDEERFCDKIEQVTIAASGKDYFMEHLGTYITYI  
CNSASAAHVMLNQAFISSALAVKVQEGIALALDPSIEIWRIAIPILLEGERRHGRVGERA  
REMLGIRGGIADWFAGTKPAAACSGD

>comp10298\_c0\_seq2; 289 1 1451 LEN=1603; translated  
XGSSSPLAASWYYRLCLFCVIEWSGAACIKTMQWAGSRPDMFGSDFCAVFSRLQDSTRPHS  
RNHTERAMAEAFGEWGETMRLDSSLGSGCIAQVYKGVVLDVDDPENPGQKVERPVAVKVR  
HPGVEKDIDADLDILRLVVGLLDKIDRGPVKNLRWLNLPGFIEEMALMLKVQLDLRREGE  
HLVRFNENFEGNETVVFPRLVEGYAPTGVLCETFHEGQPLMAFVGVQNKADQKLLTKMCT  
EAVKAVCQMIFLDNFTHGDLHPGNVLTDDYKVFVLCVIELPRFDSVKPSXLACLTI FVSD  
GILPNMPSSGRLLDVGITTVHSEKDHKLLSDVLAAFIRKQGRKAGRYMIENSARLERAG  
DRAVDEERFCDKIEQVTIAASGKDYFMEHLGTYITYICNSASAAHVMLNQAFISSALAVK  
VQEGIALALDPSIEIWRIAIPILLEGERRHGRVGERAREMLGIRGGIADWFAGTKPAAAC  
SGD

>comp10300\_c0\_seq1; 112 213 968 LEN=1329; translated  
MSTFRPCIRPLVITRGSQDLAVSTRYEDRNDASVVRNYGAMLVLDLCSVIPDGVAFFTSY  
SYMEQLVSEWDATGVLKDLTRTKLVFIETKDVVETTLALDNFRACDSGRGAVFLSVARG  
KVSEGINFDRHYGRAVVMFGVFPFYTLSHVLRARLEFLQTHYQIREADFLNFDALRQTSQ  
CVGRVIRSKTDYGLMILADSRYNRHDKRSLPKWILQFLHEHCLNLSTDQGIQQVQQFLR  
LMGQPIDQKKGK

>comp10300\_c0\_seq2; 604 196 1827 LEN=1836; translated  
MRFDLGLDGLVFFPYDRIYLEQFQYMRSLKQSLDAGGHCLLEMPGTGKTVCLLSLITSYQ  
YANPSVGKLVYCTRTPPEMNHVVEELGTVLLYRAEQLELASMERAGQQEGNKSHADAETE  
TDSTGDTGERSPSNPPSPPKKKRPTIRGVKQGRGRAVSMGPIRTPKGAGGSSELALCLS  
SRRNMCVNERVMAESDREAVDAACRSMTASWVVEHAKTHPGSSIETCSFFDSFQEGEST  
NMPGSGVYDLEELKKWGQARGWCPYYLARQAINHANVLFVNYQYMLDPKVAKMVSKELEAE  
SIVVFDEAHNIDSVCIEALS VK INDRGLEQATRSLGRLSSEVTKIKASDNQRLNQEYQNL  
INGLIDQGLLDAPANDTGLASNVLAPDVLNESVPGNIRRAEHFIRFMKKVVEHLKNR LKS  
ITGPNGGVTSETPLAFLHRMTNGTSLEAKPLRFAYSRLNSLLRTLQVSNMDEFNSLGDVA  
DFSTLLATYSEGVAKF AIMEPNGSNIPGASDPCIQLSCLDSSLAIAPVFKRFSVVIITS  
GSK

>comp10300\_c0\_seq3; 451 196 2643 LEN=3004; translated  
MRFDLGLDGLVFFPYDRIYLEQFQYMRSLKQSLDAGGHCLLEMPGTGKTVCLLSLITSYQ  
YANPSVGKLVYCTRTPPEMNHVVEELGTVLLYRAEQLELASMERAGQQEGNKSHADAETE  
TDSTGDTGERSPSNPPSPPKKKRPTIRGVKQGRGRAVSMGPIRTPKGAGGSSELALCLS  
SRRNMCVNERVMAESDREAVDAACRSMTASWVVEHAKTHPGSSIETCSFFDSFQEGEST  
NMPGSGVYDLEELKKWGQARGWCPYYLARQAINHANVLFVNYQYMLDPKVAKMVSKELEAE  
SIVVFDEAHNIDSVCIEALS VK INDRGLEQATRSLGRLSSEVTKIKASDNQRLNQEYQNL  
INGLIDQGLLDAPANDTGLASNVLAPDVLNESVPGNIRRAEHFIRFMKKVVEHLKNR LKS  
ITGPNGGVTSETPLAFLHRMTNGTSLEAKPLRFAYSRLNSLLRTLQVSNMDEFNSLGDVA  
DFSTLLATYSEGVAKF AIMEPNGSNIPGASDPCIQLSCLDSSLAIAPVFKRFSVVIITS  
GTLSPIDLYPKLLQFEP CISESLNMSTFRPCIRPLVITRGSQDLAVSTRYEDRNDASVVR  
NYGAMLVLDLCSVIPDGVAFFTSY SYMEQLVSEWDATGVLKDLTRTKLVFIETKDVVET  
LALDNFRACDSGRGAVFLSVARGKVSEGINFDRHYGRAVVMFGVFPFYTLSHVLRARLE  
FLQTHYQIREADFLNFDALRQTSQCVGRVIRSKTDYGLMILADSRYNRHDKRSLPKWIL  
QFLHEHCLNLSTDQGIQQVQQFLRLMGQPIDQKKGK

>comp10300\_c0\_seq4; 130 213 1079 LEN=1234; translated  
MSTFRPCIRPLVITRGSQDLAVSTRYEDRNDASVVRNYGAMLVLDLCSVIPDGVAFFTSY  
SYMEQLVSEWDATGVLKDLTRTKLVFIETKDVVETTLALDNFRACDSGRGAVFLSVARG  
KVSEGINFDRHYGRAVVMFGVFPFYTLSHVLRARLEFLQTHYQIREADFLNFDALRQTSQ  
CVGRVIRSKTDYGLMILADSRYNRHDKRSLPKWILQFLHEHCLNLSTDQGIQQVQQFLR  
LMGQPIDQKALQSVLLTVEEAKMNPQMPTTTSSSHGNGSMMFEP RR

>comp10300\_c0\_seq5; 735 196 2754 LEN=2909; translated  
MRFDLGLDGLVFFPYDRIYLEQFQYMRSLKQSLDAGGHCLLEMPGTGKTVCLLSLITSYQ  
YANPSVGKLVYCTRTPPEMNHVVEELGTVLLYRAEQLELASMERAGQQEGNKSHADAETE  
TDSTGDTGERSPSNPPSPPKKKRPTIRGVKQGRGRAVSMGPIRTPKGAGGSSELALCLS

SRRNMCVNERVMAESDREAVDAACRSMTASWVVEHAKTHPGSSIETCSFFDSFQEAGEST  
NMP SGVYDLEELKKWGQARGWCPYYLARQAINHANVLFVNYQYMLDPKVAKMVSKELEAE  
SIVVFDEAHNIDSVCIEALS VK INDRGLEQATRSLGRLSSEVTKIKASDNQRLNQEYQNL  
INGLIDQGLLDAPANDTGLASNVLAPDVLNESVPGNIRRAEHFIRFMKKVVEHLKNRLKS  
ITGPNGGVTSETPLAFLHRMTNGTSLEAKPLRFAYSRLNSLLRRTLQVSNMDEFNSLGDVA  
DFSTLLATYSEGVAKF AI IMEPNGSNI PGASDPCIQLSCLDSSLAIAPVFKRFSSVIITS  
GTLSPIDLYPKLLQFEP CISESLNMSTFRPCIRPLVITRGS DQLAVSTRYEDRNDASVVR  
NYGAMLVDLCSVIPDG VVAFFTSYSYMEQLVSEWDATGVLKDLTRTKLVFIETKDVVETT  
LALDNFRACDSGRGAVFLSVARGKVSEGINFDRHYGRAVVMFGVVPFQYTLSHVLRARLE  
FLQTHYQIREADFLNFDALRQTSQCVGRVIRSKTDYGLMILADSRYNRHKR SKLPKWIL  
QFLHEHCLNLSTDQGIQQVQQFLRLMGQPIDQKALQSVLLTVEEAKMMNPQMPTTTSSSH  
GGNGSMMFEPRR

>comp10301\_c0\_seq1; 400 1 1262 LEN=1313; translated  
SESADTGSNPKRAXAPQVPFSY EYHTSSPAWINRSNGIALRNATPHNEEYRNQNGGFIEM  
ATATTSSKGVVLTGGAGYIGSHTIFCLLEQGYGVVLDNLSNSSVASLDRVAELTGLDE  
AARRERLVFHQVDL CDRDALKRVFETS PRFAACIHFAGLKAVGESTRIPLKYHNNITGT  
LFLLELLDEF GCHSIVFSSSATVYGAADKMPITEETPVGTGITNAYGR TKYMLEEILRDF  
YKSKTLGDDETDWSVALLRYFNPIGAHPSGKIGEDPNGIPNNLMPYVAQVATGRREFLTV  
FGDDYPTPDGTGVRDYLHVMDLAEGHISAIEYMEKKKSGTFTFNLGTGNGCSVIDMVRAM  
SKACGHEIKYKVGPRRPGDIATCYADASLAKNELGWEAKLTLEDMCRDLWSWQSQNPNGY

>comp10302\_c0\_seq1; 262 1 1459 LEN=1459; translated  
RNCKHEPRQYVLYGVLLAKKAF CGSLLLIRKLN ET TAGYDYAPLGTQIEKRIQRSNRVR  
AAMLPPGTIDCFAMAEDQITQGATPGTEQTTPPLFHDSTAPAVTSVPTD TTIFTATPLAP  
APPLANQLLPTPDAKANSVDIGSLPPFFQLQKAQKAPMPMHLPRPLVGANTVLKIAANPH  
SFTRQNQATSTAGRQETVGEREQQQGQICTAMSDCSGRSPMIHRAGKWTTEEEAYANILI  
ELFEEGRVQDFEEYDHPTSPHTIKIKNGMTMRHF LSRKLCCSPMRI SKKFAGRGIGKLVY  
TTQRKNVVVTSQEKQQLLLLRLQVPGFLTTSVANAVVPLPRALFLDRLNRLKQAEEDFFKV  
AFLHGNPVERYKQNNRKS IHQALLKANNQ GELSTFVASRAQDSPINTALATAHCFPIA  
PTSMQNDGKVPTEQAQQSMTDPQEDRGPFLALQKNYSLLPTDNHNVLT PGQVQKQQQLQH  
QQQQQ

>comp10302\_c0\_seq2; 276 1 1650 LEN=1650; translated  
RNCKHEPRQYVLYGVLLAKKAF CGSLLLIRKLN ET TAGYDYAPLGTQIEKRIQRSNRVR  
AAMLPPGTIDCFAMAEDQITQGATPGTEQTTPPLFHDSTAPAVTSVPTD TTIFTATPLAP  
APPLANQLLPTPDAKANSVDIGSLPPFFQLQKAQKAPMPMHLPRPLVGANTVLKIAANPH  
SFTRQNQATSTAGRQETVGEREQQQGQICTAMSDCSGRSPMIHRAGKWTTEEEAYANILI  
ELFEEGRVQDFEEYDHPTSPHTIKIKNGMTMRHF LSRKLCCSPMRI SKKFAGRGIGKLVY  
TTQRKNVVVTSQEKQQLLLLRLQVPGFLTTSVANAVVPLPRALFLDRLNRLKQAEEDFFKV  
AFLHGNPVERVGSKFVA AVILFSPMSVLVHVS LFLPFPFIRCRTSIASDTLDPFVYVYVH  
FVIRFVFMYSFVHQYKQNNRKS IHQALLKANNQ GELSTFVASRAQDSPINTALATAHCF  
PPIAPTSMQNDGKVPTEQAQQSMTDPQEDRGPFLALQKNYSLLPTDNHNVLT PGQVQKQQ  
QLQHQQQQQQ

>comp10303\_c0\_seq1; 488 471 1912 LEN=2211; translated  
MIKYHTKNINSKATRF AIVL INKIGTFXDTYIAKNNQ GALLREKRYQDAACCFQAVKY  
VNERSEFHYPNNELQNTQGLRQDQHRVGLDLHRHTSSRPTTSSANV PPIPNIISSAAMP I  
STTETPRVILRAKVDSFYLLLDDESKSKSNSCNCGLHTCQHAGSNSCDDECRQQCGDAS  
FSDDDRTNCEGSYVFRNP I VVVECDPINTIRTSASNNGVENSFTSSTTALVARARATPTF  
AKDACVKLSLLSVYNLALTYHLAALDNKNHRRMEANNGLDLHYRNDNDSNVQPTKRG S  
PDEVETTS DMSKGT CNRRPSKRQRMAS YMDGINNTSGSATNRMKSMISVTPYGE CANPYH  
NDVDNQNDENI SDSNDDKINR TLLQQALTYE IAYRMLVSEENVLVSQAMVILNNIGHI H  
RLMGSEENAEKEYFQRLLTMMYLQQTSDSRQIKHWDSFFTNVVDLVVPPNLSHKKYAAAA

>comp10303\_c0\_seq2; 512 14 2014 LEN=2313; translated  
MAEEKQLRQLDRENARGWRHDQVSHQEYQQQGH SVRHCPHQDWNIIYDTYIAKNNQ GAL  
LLREKRYQDAACCFQAVKYVNERSEFHYPNNELQNTQGLRQDQHRVGLDLHRHTSSRPT  
TSSANV PPIPNIISSAAMP I STTETPRVILRAKVDSFYLLLDDESKSKSNSCNCGLHTC  
QHAGSNSCDDECRQQCGDASFSDDDRTNCEGSYVFRNP I VVVECDPINTIRTSASNNGVE  
NSFTSSTTALVARARATPTFAKDACVKLSLLSVYNLALTYHLAALDNKNHRRMEANNGL  
DLHYRNDNDSNVQPTKRGSPDEVETTS DMSKGT CNRRPSKRQRMAS YMDGINNTSGSAT  
NRMKSMISVTPYGE CANPYHNDVDNQNDENI SDSNDDKINR TLLQQALTYE IAYRMLVS  
EENVLVSQAMVILNNIGHI HRLMGSEENAEKEYFQRLLTMMYLQQTSDSRQIKHWDSFFT  
NVVDLVVPPNLSHKKYAAAA

>comp10304\_c0\_seq1; 161 122 1678 LEN=2184; translated  
MKNQTVQKSAPPTTTMKRSNKKRTPKPNFGLSAAVMLLVVADLVYFFKLSREALFDTPR  
DLNNAGHHSYPNLFNSGNHLSKLGRLASIRNTNTQDKDTTENEANENKAPTTKENLSRR  
APTAEQSKLIEIAKKRGLTNIDDKGP ILEILTQAGLDLHKEGDVDQETMDQLPTWTQVEQ  
LYGPTPKI IGLERCGEFRDSVDPSTRFLAMAGTFNTGTNLIHAVMKHNCQITERMEVYGA  
KSKGIRWQVPWGKHWMARYRDESHSTKTDADVPRSNTLPLVSIRDPTYTWMQSMCRHGYYA  
KWPHIKSHCPGLIATENDINTMPRLRRLYGHIHNEDEENVEKLI PVNIAYNKNLTHSHLSL  
AHWYSEWYKDYLTADIPRIMVRFEDLLFHGEEVARTMCECGGGVVPVDPNNGRSGKFIHISE  
SAKTGLAAHGPLKDRNTNLV GALIKYGS GAHRIDSMTQADLEAARRYLDPEMMETFGYKHP  
RLPDQQPEDAQEMSANAMENVPTESGRYDDDHSYTPGK

>comp10304\_c0\_seq2; 111 122 1767 LEN=2273; translated  
MKNQTVQKSAPPTTTMKRSNKKRTPKPNFGLSAAVMLLVVADLVYFFKLSREALFDTPR  
DLNNAGHHSYPNLFNSGNHLSKLGRLASIRNTNTQDKDTTENEANENKAPTTKENLSRR  
APTAEQSKLIEIAKKRGLTNIDDKGP ILEILTQAGLDLHKEGDVDQETMDQLPTWTQVEQ  
LYGPTPKI IGLERCGEFRDSVDPSTRFLAMAGTFNTGTNLIHAVMKHNAKSQNEWKYTAQ  
NQKGF DGKVRNKR FQMHEVVTLAHFCLLSASYFVLYAVPWGKHWMARYRDESHSTKTDAD  
VPRSNTLPLVSIRDPTYTWMQSMCRHGYYAAKWPHIKSHCPGLIATENDINTMPRLRRLYGH  
IHNEDEENVEKLI PVNIAYNKNLTHSHLSLAHWYSEWYKDYLTADIPRIMVRFEDLLFHGE  
EVARTMCECGGGVVPVDPNNGRSGKFIHISESAKTGLAAHGPLKDRNTNLV GALIKYGS GAHR  
IDSMTQADLEAARRYLDPEMMETFGYKHPRLPDQQPEDAQEMSANAMENVPTESGRYDDD  
HSYTPGK

>comp10305\_c0\_seq1; 212 1 1655 LEN=1719; translated  
XQFLPPSDTSCITDLVIPSFSGDVVMATENQMLVEMGDIVEEGIANDDWGCNC DY GASDE  
KKEEGDSDALSGGDERVCRNTAEP SAIHEEKTSIPLIRKPISSGENIDDGK KELHIAPM  
LDYSKREFRKLFSILSTRLVVWTD MVVDETV AHSEHLEDIVAPDRNLPNRQVCQIGGNSP  
ELCGKATKVVELIYGYDEVNLNIDCPSDRVSGEREF GAVLMKKIDVAYSVLDSMQASATS  
RPI SIKCRIGVDDDFDFDIATYIERLLPVCRRFY LHARKCVLNGLFSARQNRSIPPINY  
PRVYALCRKFPEVDFWINGGIRNLVQAKRICYGSSEPEHCETHHREIPCSQCRVPHGSCI  
APPYELAPPNLHGCMGAAIDNPAIFADVDRYFYGMELNPCQNRDVL DKYASYLEELY  
PRRCCDLDEVT HIRIPVPSVKRLRPYCSICRDQYRPEEGMENEETFLTDFKQKNKSKIS  
NRLVGRCLKPIRGLFYGLPGGKVF LRLLDSTARDTTIRNCGPGYILRRVIRDMPDELLDQ  
DFVPSSEDSNYS

>comp10306\_c0\_seq1; 389 110 811 LEN=2022; minus strand; translated  
MFTNIFLISLLLLLEFVVSLIPATKTLIRHEVFLNTKKNPDNAQSQHSLAVGTFVEFEKK  
HRAHIGKIEEVEHKSNGGTRYGIKDSGDGHFNIPDKNVHFSVYPPNSPGPAGELYRELII  
AHEASEEELQSKLEISPEILELAWEEALENEDASGEHAVSPEKLI ELVHSHAASAIEKYQ  
AWRLQSDLAHVFFKDLKDHGRITSFKIKGRKAVETAKIAFCNSHEESDLCLI

>comp10306\_c0\_seq2; 389 110 811 LEN=1893; minus strand; translated  
MFTNIFLISLLLLLEFVVSLIPATKTLIRHEVFLNTKKNPDNAQSQHSLAVGTFVEFEKK  
HRAHIGKIEEVEHKSNGGTRYGIKDSGDGHFNIPDKNVHFSVYPPNSPGPAGELYRELII  
AHEASEEELQSKLEISPEILELAWEEALENEDASGEHAVSPEKLI ELVHSHAASAIEKYQ  
AWRLQSDLAHVFFKDLKDHGRITSFKIKGRKAVETAKIAFCNSHEESDLCLI

>comp10306\_c0\_seq3; 389 110 811 LEN=2353; minus strand; translated  
MFTNIFLISLLLLLEFVVSLIPATKTLIRHEVFLNTKKNPDNAQSQHSLAVGTFVEFEKK  
HRAHIGKIEEVEHKSNGGTRYGIKDSGDGHFNIPDKNVHFSVYPPNSPGPAGELYRELII  
AHEASEEELQSKLEISPEILELAWEEALENEDASGEHAVSPEKLI ELVHSHAASAIEKYQ  
AWRLQSDLAHVFFKDLKDHGRITSFKIKGRKAVETAKIAFCNSHEESDLCLI

>comp10306\_c0\_seq4; 389 110 811 LEN=2224; minus strand; translated  
MFTNIFLISLLLLLEFVVSLIPATKTLIRHEVFLNTKKNPDNAQSQHSLAVGTFVEFEKK  
HRAHIGKIEEVEHKSNGGTRYGIKDSGDGHFNIPDKNVHFSVYPPNSPGPAGELYRELII  
AHEASEEELQSKLEISPEILELAWEEALENEDASGEHAVSPEKLI ELVHSHAASAIEKYQ  
AWRLQSDLAHVFFKDLKDHGRITSFKIKGRKAVETAKIAFCNSHEESDLCLI

>comp10307\_c0\_seq1; 491 1 2121 LEN=2173; minus strand; translated  
LLSMGDAHAAQGDSELDTGTVETSVTGNFKLSVIKAKDLNEAQKVQNFPLGETETEWIVH  
GKYERASGAIXFHYQMLFLIFSFVPTPMYIHFRTTETDYLETFAEQPSDIYSNSEIDPAM  
ANAYMQTRKFIMAMYGITEPEANTLITQGVDFGITQVVDGNWGVHAVVPKMI FETYEGDG  
GGIKINDPVIERSAPI SADLPLNSDNVHWGYFSKELDPVLTVNSGDEVVEMATHHACDD  
WDRMIAGDEGXVTHNHAFLAPFFCFDQGPDLPLSXSIVGMEDI FHWSPAKQNEAQRGAT  
SGGDGVHVL TGPIFVQDAEPGDMIAVEILDLSFRPNPEGKTFGSNAAAWWGYQARFPKAD  
GSSFSAGTFTDTPDENDEIITIYEMIDEADGKSYAVPLYQYQWPVLTDPDGTMRDYIAYP

GTCVPHEPHGSTS FVSSDVLDMGWMKDDNITYYDDVFRAKIPVNMHVGC MGLAPGSHSYV  
DSIPPLPTGGNLDNKRIKGGTTMYYPVEVAGLLSMGDAHAAQGDSELDGTG IETSITGK  
FKISLIKAADFDEAMKVQDFPQIXLEDFAPGEE SGVYGDSAIDPAMKNAFTQTRKWMMAK  
YSLSEFEAWTIITQAVNFGMTQLVDGNWGMHALIPKSI FEGVERN PACALSEETVNVESD  
GDNVGGVQVGD LVSSDGA VDTVYESSAGSIRATVFSV FISGLLFFKILY  
>comp10307\_c0\_seq2; 479 1 2271 LEN=2323; minus strand; translated  
LLSMGDAHAAQGDSELDGTGVETS SVTGNFKLSVIKAKDLNEAQKVQNFPLGETETEWIVH  
GKYERASGAIXFHYQMLFLIFSFVPTPMYIHFRTETDYLETFAEQPSDIYSNSEIDPAM  
ANAYMQTRKFIMAMYGITEPEANTLITQGVDFGITQVVDGNWGVHAVVPKMIFETYEGDG  
GGIKINDPVIERSAPISADLPLNSDNVHWGYFSKELDPVLT VNSGDEVVEMATHHACDD  
WDRMIAGDEGXVTHNHAFLAPFFFCFDQGPDLPLSXSIVGMEDI FHWSPAKQNEAQRGAT  
SGGDGVHVL TGPIFVQDAEPGDMIAVEILDLSFRPNPEGKTFGSNAAAWWGYQARFPKAD  
GSSFSAGTFTDTPDENDEIIT IYEMIDEADGKSYAVPLYQYQWPVLTDPDGTMRDYIAYP  
GTCVPHEPHGSTS FVSSDVLDMGWMKDDNITYYDDVFRAKIPVNMHVGC MGLAPGSHSYV  
DSIPPLPTGGNLDNKRIKGGTTMYYPVEVAGLLSMGDAHAAQGDSELDGTG IETSITGK  
FKISLIKAADFDEAMKVQDFPLGETEDQWIIHVSWINIAVLNGLREGLCVLIAHKLMIIL  
VCFWICRLLLTDXDYLED FAPGEE SGVYGDSAIDPAMKNAFTQTRKWMMAK YSLSEFEAWT  
IITQAVNFGMTQLVDGNWGMHALIPKSI FEGVERN PACALSEETVNVESD GDNVGGVQVGD  
LVSSDGA VDTVYESSAGSIRATVFSV FISGLLFFKILY  
>comp10307\_c0\_seq3; 471 1 2051 LEN=2103; minus strand; translated  
LLSMGDAHAAQGDSELDGTGVETS SVTGNFKLSVIKAKDLNEAQKVQNFPLGETETEWIVH  
GKYERASGAIXFHYQMLFLIFSFVPTPMYIHFRTETDYLETFAEQPSDIYSNSEIDPAM  
ANAYMQTRKFIMAMYGITEPEANTLITQGVDFGITQVVDGNWGVHAVVPKMIFETYEGDG  
GGIKINDPVIERSAPISADLPLNSDNVHWGYFSKELDPVLT VNSGDEVVEMATHHACDD  
WDRMIAGDEGXVTHNHAFLAPFFFCFDQGPDLPLSXSIVGMEDI FHWSPAKQNEAQRGAT  
SGGDGVHVL TGPIFVQDAEPGDMIAVEILDLSFRPNPEGKTFGSNAAAWWGYQARFPKAD  
GSSFSAGTFTDTPDENDEIIT IYEMIDEADGKSYAVPLYQYQWPVLTDPDGTMRDYIAYP  
GTCVPHEPHGSTS FVSSDVLDMGWMKDDNITYYDDVFRAKIPVNMHVGC MGLAPGSHSYV  
DSIPPLPTGGNLDNKRIKGGTTMYYPVEVAGLLSMGDAHAAQGDSELDGTGMKRVSTDY  
LED FAPGEE SGVYGDSAIDPAMKNAFTQTRKWMMAK YSLSEFEAWTIITQAVNFGMTQLV  
DGNWGMHALIPKSI FEGVERN PACALSEETVNVESD GDNVGGVQVGD LVSSDGA VDTVYESS  
AGSIRATVFSV FISGLLFFKILY  
>comp10308\_c0\_seq1; 620 150 1541 LEN=1603; translated  
MPSSWGSKLEQKLNGLADTAS KDSVQTL SNWIGFNRKRTSTITILTRDLIDNKNNAKRQ  
WMYWRLIHQVLLNSNEDEGKWKLAELRVALGEALQPAMKQLGSSIAEELGLYLEEWEDK  
NVFGGPSLISQIRRLYQNRNNVATTTNKTAATKTSVPAEDLSIQSSSTKAQLEVSGSSAQ  
IKTESSKDDTTAETNANVG DASIDHSPHNGNTVYPGPDNNEE EATTKEEKEYEAQNGTKM  
SLTEDVPTKSPSPGKRNSFLNQQVDYDFESTGVP SGKVESREFLDPCA IITTLQIARDVR  
TSTAVEISTELTNLPADVLAACEDL KSGKVT ELDTATTNEFSVRIPSNLIDL DIDEETSS  
LNTFQDIVQRKKAREKLIYLL LKSR CQFGSVEAAGEFFKLEALSQK LKKR KELLSDALE  
LEGVDTSEIVVND SKSKREEFEEDLAPLTWYNPSESSKKQKVL  
>comp10310\_c0\_seq1; 618 301 2759 LEN=2928; translated  
MSVKTFGTKILKSNDISTIASEFVSRARLAAGAGASASSIWHILQKELSPSQSFVHQC  
YDKIYEGIDDVKPSWIPSKEDRERTNIFKSMTAKGFSKYEDFYQWSVGSKSRDDFWMEST  
KNIKIDWETEPSSAFNLTDGGAHVNYFPEGRLNISDSCFNKRDPLEPALVYAVESDSRN  
LREMSFKTLDVLSNQIANGITHKLGLKIGDAVGICMPMTPESVVIYLGIVKAGCVVISIA  
DSFSPDEIATRCLSNAKAIFTQDVIFRGEKFLPLFERALEADSILQQSGKDNSCSMNIV  
VLPGLMHAKAYPHASKDANGSTWTDTRDGKQVPLHDSILTL LRQDHDMSWYDLLHLCSE  
QYKSKRGAMDPCNIFSSGTTGEPKAI VWSHSTPIKSAIDGYH QDIKVGDRVAWPTNI  
GMMMGPWL VFLINGATVGLFNGIPSTKSFCEFI DEAEITMLGVVPSLVKSWRASNATEN  
CDWSKIRRFSTGEASDPATALWLSRVQGYAPVIEYCGMXIFMI IARIQKYASSITD  
VLLRQLFLLSSAGTEIGGSFLSSTLMDENVPAMFSTPVLGSKFLLHGSEGF IKGGSFETD  
IDGNSNGELVLIPPAVGMSTVLLNRDHYE EYKGMPS SPDG EVLRRHGDEIEYVRSDDL  
SKKNEDLRTPYRALGRSDDTMNIGGXDKYIASNTGSAIFPYKMAVFCWKGIKIGSVEI  
EYACNLVDNVLETAAGVSETKGGPSNLVIYVVLKNEEKSTKEKGINKESLQAAMQTSIK  
TKLNLPLFGISDVVITDYLPR TTSNKVMRRVLRDQYVAAM  
>comp10310\_c0\_seq2; 702 301 2681 LEN=2850; translated  
MSVKTFGTKILKSNDISTIASEFVSRARLAAGAGASASSIWHILQKELSPSQSFVHQC  
YDKIYEGIDDVKPSWIPSKEDRERTNIFKSMTAKGFSKYEDFYQWSVGSKSRDDFWMEST  
KNIKIDWETEPSSAFNLTDGGAHVNYFPEGRLNISDSCFNKRDPLEPALVYAVESDSRN

LREMSFKTLDVLSNQIANGITHKLGLKIGDAVVICMPMTPESVVIYLGIVKAGCVVISIA  
DSFSPDEIATRCRLSNAKAIFTQDVIFRGEKFLPLFERALEADSILQQSGKDNCSMNIV  
VLPGMLHAKAYPHASKDANGSTWTDTRDGKQVPLHDSILTLLRQDHDMSWYDLLHLCSE  
QYKSKKRGAMDPCNILFSSGTTGEPKAIWVSHSTPIKSAIDGYYHQDIKVGDRVAWPTNI  
GMMMGPWLVFQLINGATVGLFNGIPSTKSFCEFIIDEAEITMLGVVPSLVKSWRASNATEN  
CDWSKIRRFSSSTGEASDPATALWLMSRVQGYAPVIEYCGGMXIFMI IARIQKYASSSITD  
VLLRQLFLLSSAGTEIGGSFLSSTLMDENVPAMFSTPVLGSKFLLHGSEGF IKGGSFETD  
IDGSNSGELVLI PPAVGMSTVLLNRDHYEYKGMPPSSPDGEVLRRHGDEIEYVRSDDL  
SKKNEDLRTPYYRALGRSDDTMNIGGIKIGSVEIEYACNLVDNVLETAAGVSETKGGPS  
NLVIYVVLKNEEKSTKEKGINKESLQAAMQTSIKTKLNPLFGISDVVITDYLPRTTSNKV  
MRRVLRDQYVAAM

>comp10310\_c0\_seq3; 625 301 2661 LEN=2830; translated  
MSVKTFGTKILKSNDISTIASEFVSRARLAAGAGASASSIWHILQKELSPSQSFDVHQC  
YDKIYEGIDDVKPSWIPSKEDRERTNIFKSMTAKGFSKYEDFYQWSVGSKSRDDFWMEST  
KNIKIDWETEPSSAFNLTGGAHVNYFPEGRLNISDSCFNKRDPLEPALVYAVESDSRN  
LREMSFKTLDVLSNQIANGITHKLGLKIGDAVVICMPMTPESVVIYLGIVKAGCVVISIA  
DSFSPDEIATRCRLSNAKAIFTQDVIFRGEKFLPLFERALEADSILQQSGKDNCSMNIV  
VLPGMLHAKAYPHASKDANGSTWTDTRDGKQVPLHDSILTLLRQDHDMSWYDLLHLCSE  
QYKSKKRGAMDPCNILFSSGTTGEPKAIWVSHSTPIKSAIDGYYHQDIKVGDRVAWPTNI  
GMMMGPWLVFQLINGATVGLFNGIPSTKSFCEFIIDEAEITMLGVVPSLVKSWRASNATEN  
CDWSKIRRFSSSTGEASDPATALWLMSRVQGYAPVIEYCGGTEIGGSFLSSTLMDENVPAM  
FSTPVLGSKFLLHGSEGF IKGGSFETDIDGSNSGELVLI PPAVGMSTVLLNRDHYEYK  
GMPSSPDGEVLRRHGDEIEYVRSDDL SKKNEDLRTPYYRALGRSDDTMNIGGXDKYIAS  
NTGSAIIFPYKMAVFCWKGKIGSVEIEYACNLVDNVLETAAGVSETKGGPSNLVIYV  
LKNEEKSTKEKGINKESLQAAMQTSIKTKLNPLFGISDVVITDYLPRTTSNKVMRRVLRD  
QYVAAM

>comp10310\_c0\_seq4; 595 301 2848 LEN=3017; translated  
MSVKTFGTKILKSNDISTIASEFVSRARLAAGAGASASSIWHILQKELSPSQSFDVHQC  
YDKIYEGIDDVKPSWIPSKEDRERTNIFKSMTAKGFSKYEDFYQWSVGSKSRDDFWMEST  
KNIKIDWETEPSSAFNLTGGAHVNYFPEGRLNISDSCFNKRDPLEPALVYAVESDSRN  
LREMSFKTLDVLSNQIANGITHKLGLKIGDAVVICMPMTPESVVIYLGIVKAGCVVISIA  
DSFSPDEIATRCRLSNAKAIFTQDVIFRGEKFLPLFERALEADSILQQSGKDNCSMNIV  
VLPGMLHAKAYPHASKDANGSTWTDTRDGKQVPLHDSILTLLRQDHDMSWYDLLHLCSE  
QYKSKKRGAMDPCNILFSSGTTGEPKAIWVSHSTPIKVRRI LDAICEXKNSMYLWAFFLT  
ATFFCVQSAIDGYYHQDIKVGDRVAWPTNIGMMMGPWLVFQLINGATVGLFNGIPSTKSF  
CEFIIDEAEITMLGVVPSLVKSWRASNATENCDSKIRRFSSSTGEASDPATALWLMSRVQ  
YAPVIEYCGGMXIFMI IARIQKYASSSITDVLLRQLFLLSSAGTEIGGSFLSSTLMDEN  
PAMFSTPVLGSKFLLHGSEGF IKGGSFETDIDGSNSGELVLI PPAVGMSTVLLNRDHYE  
YKGMPPSSPDGEVLRRHGDEIEYVRSDDL SKKNEDLRTPYYRALGRSDDTMNIGGXDKY  
IASNTGSAIIFPYKMAVFCWKGKIGSVEIEYACNLVDNVLETAAGVSETKGGPSNLVI  
YVVLKNEEKSTKEKGINKESLQAAMQTSIKTKLNPLFGISDVVITDYLPRTTSNKVMRRV  
LRDQYVAAM

>comp10310\_c0\_seq5; 679 301 2770 LEN=2939; translated  
MSVKTFGTKILKSNDISTIASEFVSRARLAAGAGASASSIWHILQKELSPSQSFDVHQC  
YDKIYEGIDDVKPSWIPSKEDRERTNIFKSMTAKGFSKYEDFYQWSVGSKSRDDFWMEST  
KNIKIDWETEPSSAFNLTGGAHVNYFPEGRLNISDSCFNKRDPLEPALVYAVESDSRN  
LREMSFKTLDVLSNQIANGITHKLGLKIGDAVVICMPMTPESVVIYLGIVKAGCVVISIA  
DSFSPDEIATRCRLSNAKAIFTQDVIFRGEKFLPLFERALEADSILQQSGKDNCSMNIV  
VLPGMLHAKAYPHASKDANGSTWTDTRDGKQVPLHDSILTLLRQDHDMSWYDLLHLCSE  
QYKSKKRGAMDPCNILFSSGTTGEPKAIWVSHSTPIKVRRI LDAICEXKNSMYLWAFFLT  
ATFFCVQSAIDGYYHQDIKVGDRVAWPTNIGMMMGPWLVFQLINGATVGLFNGIPSTKSF  
CEFIIDEAEITMLGVVPSLVKSWRASNATENCDSKIRRFSSSTGEASDPATALWLMSRVQ  
YAPVIEYCGGMXIFMI IARIQKYASSSITDVLLRQLFLLSSAGTEIGGSFLSSTLMDEN  
PAMFSTPVLGSKFLLHGSEGF IKGGSFETDIDGSNSGELVLI PPAVGMSTVLLNRDHYE  
YKGMPPSSPDGEVLRRHGDEIEYVRSDDL SKKNEDLRTPYYRALGRSDDTMNIGGIKIG  
SVEIEYACNLVDNVLETAAGVSETKGGPSNLVIYVVLKNEEKSTKEKGINKESLQAAMQ  
TSIKTKLNPLFGISDVVITDYLPRTTSNKVMRRVLRDQYVAAM

>comp10310\_c0\_seq6; 602 301 2750 LEN=2919; translated  
MSVKTFGTKILKSNDISTIASEFVSRARLAAGAGASASSIWHILQKELSPSQSFDVHQC  
YDKIYEGIDDVKPSWIPSKEDRERTNIFKSMTAKGFSKYEDFYQWSVGSKSRDDFWMEST



KNIKIDWETEPSSAFNLTGGAHVNYFPEGRLNISDSCFNKRDPLEPALVYAVESDSRN  
LREMSFKTLDVLSNQIANGITHKLGLKIGDAVVICMPMTPESVVIYLGIVKAGCVVISIA  
DSFSPDEIATRCRLSNAKAIFTQDVIFRGEKFLPLFERALEADSILQQSGKDNSCSMNIV  
VLPGLMHAKAYPHASKDANGSTWTDTRDGKQVPLHDSILTLLRQDHDMSWYDLLHLCSE  
QYKSKKRGAMDPCNIFLSSGTTGEPKAIVWSHSTPIKVRRIILDAICEXKNSMYLWAFFLT  
ATFFCVQSAIDGYYHQDIKVGDRVAWPTNIGWMMGPWLVFQLINGATVGLFNGIPSTKSF  
CEFIDEAEITMLGVVPSLVKSWRASNATENCDSKIRRFSSSTGEASDPATALWLMSRVQG  
YAPVIEYCGGTEIGGSFLSSTLMDENVPAMFSTPVLGSKFLLHGSEGFIKGGSFETDIDG  
SNSGELVLIPPAVGMSTVLLNRDHYEYYKGMPPSSPDGEVLRRHGDEIEYVRSDDHLSKK  
NEDLRTPYYRALGRSDDTMNIGGXDKYIASNTGSAIIFPYKMAVFCWKGKIGSVEIEYA  
CNLVDNVLETAAGVSETKGGPSNLVIYVVLKNEEKSTKEKGINKESLQAAMQTSIKTKL  
NPLFGISDVVITDYLPRTTSNKVMRRVLRDQYVAAM

>comp10310\_c0\_seq7; 686 301 2672 LEN=2841; translated  
MSVKTFGTKILKSNDISTIASEFVSRARLAAGAGASASSIWHILQKELSPSQSFDVHQQC  
YDKIYEGIDDVKPSWIPSKEDRERTNIFKSMTAKGFSKYEDFYQWSVGSKSRDDFWMEST  
KNIKIDWETEPSSAFNLTGGAHVNYFPEGRLNISDSCFNKRDPLEPALVYAVESDSRN  
LREMSFKTLDVLSNQIANGITHKLGLKIGDAVVICMPMTPESVVIYLGIVKAGCVVISIA  
DSFSPDEIATRCRLSNAKAIFTQDVIFRGEKFLPLFERALEADSILQQSGKDNSCSMNIV  
VLPGLMHAKAYPHASKDANGSTWTDTRDGKQVPLHDSILTLLRQDHDMSWYDLLHLCSE  
QYKSKKRGAMDPCNIFLSSGTTGEPKAIVWSHSTPIKVRRIILDAICEXKNSMYLWAFFLT  
ATFFCVQSAIDGYYHQDIKVGDRVAWPTNIGWMMGPWLVFQLINGATVGLFNGIPSTKSF  
CEFIDEAEITMLGVVPSLVKSWRASNATENCDSKIRRFSSSTGEASDPATALWLMSRVQG  
YAPVIEYCGGTEIGGSFLSSTLMDENVPAMFSTPVLGSKFLLHGSEGFIKGGSFETDIDG  
SNSGELVLIPPAVGMSTVLLNRDHYEYYKGMPPSSPDGEVLRRHGDEIEYVRSDDHLSKK  
NEDLRTPYYRALGRSDDTMNIGGKIGSVEIEYACNLVDNVLETAAGVSETKGGPSNLV  
IYVVLKNEEKSTKEKGINKESLQAAMQTSIKTKLNPLFGISDVVITDYLPRTTSNKVMRR  
VLRDQYVAAM

>comp10310\_c0\_seq8; 709 301 2583 LEN=2752; translated  
MSVKTFGTKILKSNDISTIASEFVSRARLAAGAGASASSIWHILQKELSPSQSFDVHQQC  
YDKIYEGIDDVKPSWIPSKEDRERTNIFKSMTAKGFSKYEDFYQWSVGSKSRDDFWMEST  
KNIKIDWETEPSSAFNLTGGAHVNYFPEGRLNISDSCFNKRDPLEPALVYAVESDSRN  
LREMSFKTLDVLSNQIANGITHKLGLKIGDAVVICMPMTPESVVIYLGIVKAGCVVISIA  
DSFSPDEIATRCRLSNAKAIFTQDVIFRGEKFLPLFERALEADSILQQSGKDNSCSMNIV  
VLPGLMHAKAYPHASKDANGSTWTDTRDGKQVPLHDSILTLLRQDHDMSWYDLLHLCSE  
QYKSKKRGAMDPCNIFLSSGTTGEPKAIVWSHSTPIKSAIDGYYHQDIKVGDRVAWPTNI  
GWMMGPWLVFQLINGATVGLFNGIPSTKSFCEFIDEAEITMLGVVPSLVKSWRASNATEN  
CDWSKIRRFSSSTGEASDPATALWLMSRVQGYAPVIEYCGGTEIGGSFLSSTLMDENVPAM  
FSTPVLGSKFLLHGSEGFIKGGSFETDIDGSNSGELVLIPPAVGMSTVLLNRDHYEYYK  
GMPSSPDGEVLRRHGDEIEYVRSDDHLSKKNEDLRTPYYRALGRSDDTMNIGGKIGSVE  
IEYACNLVDNVLETAAGVSETKGGPSNLVIYVVLKNEEKSTKEKGINKESLQAAMQTSI  
KTKLNPLFGISDVVITDYLPRTTSNKVMRRVLRDQYVAAM

>comp10313\_c0\_seq1; 587 220 1652 LEN=1652; translated  
MSHVRTLAVIHKVRVFPFRPKQDLGKNLAAEIEIESYKRKIWECIDPEERKQYFDKKQKKT  
ETDIKIEHDKENSNDATSFVRSKPVEAVRVVKKQREVKNQPSATEVELEPKETTKQIPHT  
EPVKEKTQPSLTRTDIELKVVFVKVAQLKKELKRRGKDTAGLKKDLRRLIDAMLEEAQE  
QQTQTIPVPNKNTASVPETIEELKDDVNETSISMEVSKVTEGENEAVTKKSSPPSPQP  
KQDEKKLAVSKEAKCEKESGKTVKTKQKRLPSIEDQKIDSSSSKQVENKSSSTNPMKET  
KQRPEEAKINPKTAKDSSEKNHEACRNVANPFPDESLLKTDISLAPINEMVADSSNGQDK  
CLSLNSNEKKPELLTETKMEESSESQKELGVKEMPAPIPEVSISSKVSGTSVKDMVSKFS  
GFSTNPSSNNGSALSGLQAKKEARQAKIAEMRAKVSSASFLKIYLEYGIFCSQLKLL

>comp10313\_c0\_seq2; 825 220 2292 LEN=2402; translated  
MSHVRTLAVIHKVRVFPFRPKQDLGKNLAAEIEIESYKRKIWECIDPEERKQYFDKKQKKT  
ETDIKIEHDKENSNDATSFVRSKPVEAVRVVKKQREVKNQPSATEVELEPKETTKQIPHT  
EPVKEKTQPSLTRTDIELKVVFVKVAQLKKELKRRGKDTAGLKKDLRRLIDAMLEEAQE  
QQTQTIPVPNKNTASVPETIEELKDDVNETSISMEVSKVTEGENEAVTKKSSPPSPQP  
KQDEKKLAVSKEAKCEKESGKTVKTKQKRLPSIEDQKIDSSSSKQVENKSSSTNPMKET  
KQRPEEAKINPKTAKDSSEKNHEACRNVANPFPDESLLKTDISLAPINEMVADSSNGQDK  
CLSLNSNEKKPELLTETKMEESSESQKELGVKEMPAPIPEVSISSKVSGTSVKDMVSKFS  
GFSTNPSSNNGSALSGLQAKKEARQAKIAEMRAKQSKPVTSTKVALSSKEYTSTLSSL  
NATASTGSATKKNLATQMREKAAARAFQNKITNAASKTTTSSVSNSTNKRHLPLTNNNSH

SNTCVSDPLATTLKQAPLIKKPKVVMSPMDTYEMSDREDSDTDDSDSDSDNERMKNKIP  
TWAQRSNLYSALEEQYNGLIIGKKIDPDEIFPEVHSCDLEAIFGRRKSKNYRSRASSGNW  
ANDQVTAAEKLVYKRQMGFATDHAMDSTGV  
>comp10314\_c0\_seq1; 267 838 1473 LEN=1636; translated  
MAKSLLEQVALVSQGRERLYKEILACIQDYVRNDLTKFNDEPSELISNRPVDDPLEQIL  
YLTSVGEPSLIYQTVRSLRQARSSRLGALQRKLPMLQVLLWTLAAIVLFTFPLLGAGSQ  
TIGGLGILQVQSWYLGFIVLGISITMGVVEELRRPAQVQAYNAQAVLNVMMVKGLEEELGQ  
RLDGTIQMGFSFGSENWSMDPSVSDGYLGPE  
>comp10314\_c0\_seq2; 352 291 1259 LEN=1422; translated  
MANKIHSNADLSNNFEETKSYTNTVSLLRVGIPLFFAFSAKISYPIAIALANAIDDSG  
VFAVVSQDASQYIQNILTTSGLTFSILVGQTYFYMQQEAITYLALFEEVTMAKSLLEQV  
ALVSQGRERLYKEILACIQDYVRNDLTKFNDEPSELISNRPVDDPLEQILYLTSVGEPS  
LIYQTVRSLRQARSSRLGALQRKLPMLQVLLWTLAAIVLFTFPLLGAGSQTIGGLGILQ  
VQSWYLGFIVLGISITMGVVEELRRPAQVQAYNAQAVLNVMMVKGLEEELGQRLDGTIQMG  
SFGSENWSMDPSVSDGYLGPE  
>comp10315\_c0\_seq1; 682 197 1924 LEN=2109; translated  
MNAEGMGSSFLFLEPIPEDVSVAANQHAVNSSIVSAVSSSSEVVDQLHGNNVGGSKTT  
DKVKTWGGGKHHRRRRGGGEESEASNSLGDVGPVGARVEAADNVSEANASLGGAHQDEGDA  
VEIRLDITYSQPVQTVLDHTSKSLFTSLNCKKYSSILLGIIAALAIAGVGMYYIILVKLPE  
DEAKGIAGPTSSPTTNLAFPPIGDQRSFAPIPTNELDKALLGVHGTNEDNLFDLSTPEGK  
SRDWMIHSDDAIDFDNDVEQRAQQRYILCVLYTTNGTFWTNSTDWMSDLSECEWHGVV  
CDGNSFIREIDLSDNNITGPIPYELGSLSSKFLNMSFNLLSNTIPEEFFDLLEGMEKLD  
LQKNRITGSIKRTDSKALTYLNMDNQARGYFPFFSNLRTIKIDSNRIESIDIQYWTS  
SPSLKEFHAYNNKLSGPLPTEWDSPLVHLDLGSNLFGTIPQVLWDLSEKLFLDGCNF  
TGTLPGESRNTKMQLLWLSNLLSGSIPSNFGSNWKSLSLQLQNNLLTGDIDSEMENN  
EKWSTPALNAVAVQDESSLTPQSSKNNHVSSTNKEW  
>comp10316\_c0\_seq1; 415 293 2050 LEN=2280; translated  
MTRREEHLEKVKGKQTGISVAERTDGGVNSRENNDGRQKSLDSVLGLRCLSIIVLSYLEE  
FEGTSLLLCRSQYWTDTILPLLRLPTESTITGTPKLQKRRHRMADRKNKPLVNIPTAFTR  
LDRLNTRRLNTRLRQNRDVCGSNADNLSTLQIAKIEWKETLSSKSGSGGEEGKADDDDDNK  
QDNGNVPRLSRRFRLIMNPPLLRFYDGESPPDSLTCCKEFTTCLASYPRSGNSLLRSL  
ETATGFCTSSDTRPDRNLSVALAEKPPFFCGEGLAPKSTGGLDSESSSAFLPPEASSGRR  
VAPPPICKTHWPERIGCHAYDCQRVLLVRNPFDATDSYWHMCVTNTHTKKVAPSVTEEH  
LDFYRALVRHEILQVWGMFLDYWKECSRHNIPLLLVRYEDLVLSPRELQRILEFSCNT  
NSNDGVDWKKRLEEVTRDTSKDSSTSTDKKRFYQSSSTIGTDSSATASTKESAA  
NNHSISTSSHPSIGRSLRKGGNITPSILQVVDLDDNGWLERLGYHVYRQNFNNLDRLP  
PVPVLECSDKEDARGHARSTLAINVPDVSLELRPRDSPYGRNMTHW  
>comp10317\_c0\_seq1; 1631 1 4165 LEN=4254; translated  
XSSLDSSLDSSSDSSDADGSNAAEKESKDPAASGTAGTAGADRADRSASASPEKEDSLD  
TEAGTATDLPQDDGTGGVSSLAGNVHSNHPADADVDADTGLEPNGQQPTATHSDTEVSPA  
TPGPALHESREKDSEDDGGGGGDGPRDDGIAANEVETKRKQLALDLEERVGLIYTGNIHLC  
IETIGTSEDPPDLATKRALMKAEPRESKQNIELKAQLNDTVSSMNTDHHHVVEVSPGKLS  
KKGKWKSRLLLLKAGKGNKSKVPRDDTKAEDGPIASLPFRATEDPLRETTSYDDDDEDA  
APASDREQLAEASGSWPTDPPIAVGLAEESTEQAASDNEPTSDNEPPREGDTTEDSQVTE  
EQESGAESVDSNIPGAPMDRNKTEGTGANTPAAEESKDGDTTEESKAMGAEEGQVPESTE  
SGSSYLPTAETSVEDAVDKASESGDTEHASANRDNGINNGAEGTPNERKDLDENFRK  
DPEITDDATQENCLRTEENDSKETTLAEAISANDQSTPDAESKPIQSAEELYAELMNSNSD  
PLVDGGDAIGSFADDDHEHQINEMPPDNDNNDISI IQGMPNKGKWKDRLKKKKKNK  
SSKVGAAKNDTNKAQEMVIDSPSSVGTNSVNSENLSGRPSFNRIIDLTEENSHGVPQS  
NEEQNDVHEKAGKQKSNKWNRLKMKTSKQDSSRSLQEDAKSKESDGTSNTEETPADSN  
HLGVSVPPELKPPIPEPSDSNKDDTAAQEAADVSTPVDEIAAPPDSKLSDESPHPAAEKNT  
PSQAAATPDQNESSIKGTEIQRDLRKSFNVFDAFLREDPIDGKQIDDGSIYTELTIQGES  
MLQSGLPGTQVPYEEEEQSYMDFVVEESLQPSYVDETVVSEIAPKDHMMSPFMSNLLSSR  
LQDMNTSMPLNVPQKVEQENSFRQDQSAIDSPANTTKKFTITVGIHDDDEMTOITMG  
SLEDDDVSGNQDDADEPFFDAVASPVSRTPSEKSSNKKSGLSTNSRRSESGISVGSQTS  
PESSKQRIAEMLRKQVWSSDTNTVARALEEVEVEARKGFNFRAQIVRCGGVMTIMKMEM  
NSNCENISILCCSILENLALPQTQIAVCEMEGILIVRSMQDHAHNAKLQESACAALAT  
ICRQQEANTLKDPMKDAEGAVPILLSCMTRYPNNSIIQSKAFGAIASLCTGTHSHDRLTE  
LSKAGGIMTLTALQTPWDNKNDQHEAISYLSILLRGI AELNDNKFSLPTADETSKYMKH  
DGTSHTSNETESMSTRKDDSNETRGNETAEEKPTYESNGEETTNDDDDDMLERSVFEEI

PDLPI MASSNSSSHVEDIPDLGDIPTMVSNLECCQND DPYGLNLVNRTADQLDVSQHGSQNG  
NEEQCIVQ  
>comp10319\_c0\_seq1; 175 246 827 LEN=931; translated  
MSATSQLENPNAPWSYVKFDTSIGTFVVELYHKHAPRSCYNVAALAHAGYYDGTIFHRIV  
RDFMVQGGDPTGTGRGGESVYGGKFEDEITRNLKHTGAGVLSMANS GPNTNGSQFFITLK  
PTPWLNDKHTIFGRIYSGMGVVQRMGMVATDKDDKPKNAITIHKAVPYRGIPPADEGGFP  
NGNGAVLRIEAGR  
>comp10319\_c0\_seq2; 167 609 1001 LEN=1105; translated  
MVQGGDPTGTGRGGESVYGGKFEDEITRNLKHTGAGVLSMANS GPNTNGSQFFITLKPTP  
WLDNKHTIFGRIYSGMGVVQRMGMVATDKDDKPKNAITIHKAVPYRGIPPADEGGFPNGN  
GAVLRIEAGR  
>comp10320\_c0\_seq1; 499 280 1803 LEN=2057; translated  
MTASATQNMPTRKSVVLFGIKKNRKEEDEYTYDIYGVKVKPKRRRPMRRVKKVFKSI  
KKRTLDRLFREIDTNGDGVLSKQEI SEYTYQHGTFLSKEDAQELLYLLRQVKDYNGDGI  
SPDEFDRSLSRFVLQNKEREELHQLEQEYYPQPTYRKPPLYQTPPVHRPLGSFDESS  
INPNHNLNNDGAIDPNHNNHNGTMDQNRNHNNGVIDPNDVNGVEVGSQTHQITSKPM  
DVDSESSVERVMLASNRKTFDLFDADGDGTISEDEFDRAAALSALGEKDDSSDKVARYLG  
ELEPLERQEMRLDGFDPYILVSVLTAESSFDVINDYQSEWNEILSKTSLASLTPEDWIVS  
LLLLTAGTSTFIGIYA AVIFSLTVLYGR TALGMSRDEYFVFLDNTGLQRFRGFQAFSLS  
LALFCVLVLELFEKSPTFLWPPIALASAFFLYVGKSEYTFITEAAAPMFAPRTDNDDYD  
NDEDEDEGDDAGQDDDNEGKDQDGRR  
>comp10321\_c0\_seq1; 348 57 725 LEN=967; translated  
MMKSAAIFALLSASASAFAPAANQQQSLVSLNAAERSKSLPFMNRPALLDGSMAGDVGF  
PLGLSTINGVIDLYWLREAE LKHARVAMLAVAGTLQVELFGPAPGCEMATAPNQMDAFW  
QFVNAHPQYIVASLIFIMFAEAFSGIAATSGRKSGEREPGDFGLDPLGFLNGSPESVARL  
KGQEIANGRLAMWAAAGIIVQGMTDGSATGNLVQALHDNGF  
>comp10322\_c0\_seq1; 365 1 2274 LEN=2274; translated  
XKENVIQPLVSKDSDGYHMNVKIAGECFQGENSPFQYPHPTSLPSIYVSPERISLDGSKQ  
HPWDLGSEGNIFLAQYVECPERTFSTDQEGCSTIELGRYGPFRSDRKTQLHYDIKNFVF  
SNETSEWGF DILEELNGEEQVADVTD DSTGMPHLVAERNISMYVNETGGDPELKQTVWSK  
HVLDRVNYFFKTKKAMKGETIELLISYFGTYDEIRERKGYGERNKTGQARSDDHFPSF  
LERNFVERYDMIEVIYEVDPXDGT YRLSEFLEGIRSNLAEITEAFIRDMQSSSEGIQIPF  
AQQI IALRRLNWMKPYFMAK IENMQKIDKSRHKNAAVAGCHSIVLKQCIANAKSLDWGS  
WPVLMDLLDKPNLVDRRGINLR TKFREEITEDI CYGVNSTLLCPCNETVWCAVAATLTH  
DLCYMIARDSWDYSKAKPSEKLSDDL MQGLEASKAIRSPTSINDLKFDWTVWKRYSLRY  
HGETQKERHGTESVLTLPDDCETPEQR LPVPIILTS DHNTEQASILKTIHQPWYLTRQIV  
FLVNLFAQKYLVEDKSYSFEKLCVIDVPVETTLMFLKRD IKVDRESCLFFGKDFVSIYS  
TGNNLHNGRNGSFASDGENTRPKRNRTNNSSMRGM PVKLI FWNILVKELLKIGWSIER  
GNRPNDWYILPPGVKRGQGFKPRVDFFDSCSLLLQCLNTDPRYCNQASIKFIVHIYKACL  
DEYDKMRSLKAQELKSLNDEDMVTHLRLRLEVEGTSNKSQV  
>comp10323\_c0\_seq1; 423 177 2173 LEN=2215; translated  
MVLTDIKNHVPRTRDCSTTTTAKRRQDTERVNWKNNDESKNLLISRKQDDYTTESLLGSS  
IMQHILPSPRRFSVCRDSSTLDGKDRIEQSRSPDESSLEKGPWGEKKVVRGRPSSHLSL  
ETQTGIVEAQLDRIECIRNEIRGR LTESRDSKAKSVLNGE EFLSAGTNQTWCHPTNRESR  
ELKSYIADVFSQRAGQDQC NARLFHREKFESLRKEFSQFIREIAVKNDVPESLYLDTKN  
KVTFFVRSRPLSEHEITRGDFCVVDIPRESSNTLALYETSVLPDRKTVDCI HVFKF DAV  
LSERASAEDFYNRTMRMNVTHAINGGLGTIIIFGPDEYGLRITILDVEERAAGDLFSDPV  
TSTRSISIKFMGTESRGNKLIDLIDPTHSVVEVVKSDGGEYQTEGALRIDIYSARDFLDT  
LRLARQRFASRIIRQESDATSYLLCEVLIKNKKGKSGRLNLLLCPSGDDIXNKKKSQSL  
TEHNPLAELMTMLQNKSSLDVSRTTSLTRVLAPSILETKQSHVCLVA AVSPSSVDTETS  
LSSMISSMEYMKESTASSTEITSRIKNIEAESQGTNDLMLPRQWSKVQLMDWVKRKNLVD  
HLVEGNLSGKIVMKMSIHQIKECFSSSDSGDRKAKR LFRALRAENDRVARLRVKKRFAL  
QMAEK  
>comp10324\_c0\_seq1; 179 1 773 LEN=1093; translated  
XDTTAIEILQHTSKPEPDTAQQNKTRHDTNRTLPIQDERKMTAIRITTCTVVALACYLS  
FQTQTS LAFTTTAAATKACQKPGVPQQRCDFATVLNSTPEPEGPGDEE EEPQMPTAYVPP  
APARNTPQQVAQRRMDPLMASLTRDTSNAAPDQPTQNV PFFGEIPADGTL LLLVPAVLFA  
SLGFLMSIVIAVQSSDQIVESFSKVGDTVAQTAIERTN RVYDENTCRGFCGSPQQEDVDA  
LQNFMESITRSAREGKQ  
>comp10325\_c0\_seq1; 310 1 912 LEN=1107; translated

LHHNIERKQKIQRIESRRSTSHNTLHHGVKVLQDRDDGGPSESWIMWFRSDTCEEHN  
SEWHRSCAEKGNPTCMYLRASTEPTTEGGVVHWNMTASKAGHSQASVKLAYANLKMLPSRL  
IEFNQDEAERLFEEAIASSNEPDGHYKAMLYLTDTKKSILEQPTNEAKAQAAWEALGSE  
TVKRAIWHLEEAAGGHVFMFNLGIASTYGYGSTDGTDRDFELAIWFEASGMPEGFFAK  
SMYLGMIKGTQEAEFFQKRAATLGYGQPWRKVARERTGSGGSGGVTLNLPWPPLPTGETP  
PEW

>comp10325\_c0\_seq2; 292 104 1033 LEN=1151; translated  
MKVHHGRAERSAASARTIGLSAIFLVLLGAVHQTRLGASATPLCGNGDADGSPGECRVVP  
LRPSDIPPPSVFDSFGANRSVTVPPIDESEDNGESGGTTLVLPGSIKQQGKHLASNETP  
SSDLVVLPGLLPRSVAEMLALLRGHEDADFAVGKTTIVLDADPDSVDGMTSQEFFLDND  
SLRSGGSSKGNPNENMEERRDLRAKLRALTDYAYDTLVPFLEQWYKDTTCGRPGRRCTP  
CYSLIRRYRAGERQSHAPHHDAHSFVTVVVSLLTDYGREYNGGLYVSTKNSERNYVKLNRG  
DAVAHQGCE

>comp10325\_c0\_seq3; 582 104 1867 LEN=2062; translated  
MKVHHGRAERSAASARTIGLSAIFLVLLGAVHQTRLGASATPLCGNGDADGSPGECRVVP  
LRPSDIPPPSVFDSFGANRSVTVPPIDESEDNGESGGTTLVLPGSIKQQGKHLASNETP  
SSDLVVLPGLLPRSVAEMLALLRGHEDADFAVGKTTIVLDADPDSVDGMTSQEFFLDND  
SLRSGGSSKGNPNENMEERRDLRAKLRALTDYAYDTLVPFLEQWYKDTTCGRPGRRCTP  
CYSLIRRYRAGERQSHAPHHDAHSFVTVVVSLLTDYGREYNGGLYVSTKNSERNYVKLNRG  
DAVAHQGYLHHGVKVLQDRDDGGPSESWIMWFRSDTCEEHNSEWHRSCAEKGNPTCM  
YLRASTEPTTEGGVVHWNMTASKAGHSQASVKLAYANLKMLPSRLIEFNQDEAERLFEEAI  
ASSNEPDGHYKAMLYLTDTKKSILEQPTNEAKAQAAWEALGSETVKRAIWHLEEAAGG  
HVFAMFNLGIASTYGYGSTDGTDRDFELAIWFEASGMPEGFFAKSMYLGMIKGTQEAEFF  
QKRAATLGYGQPWRKVARERTGSGGSGGVTLNLPWPPLPTGETPPEW

>comp10326\_c0\_seq1; 958 183 2126 LEN=2246; translated  
MKIAASTLTAACALFSSTAWAFTTMPSTRKTSTSSLFMADDAEEPITNRYSSVLTQPAV  
QGNSQAMLYATGMTEEDMDKPQVGICSVWYEGNPCNMHLLLESEYVKEGVVADCVGMRF  
NTVGVSDGISMGTSGMRFSLQSRDLIADSIETTMSAQWYDGLIALPGCDKNMPCIMAMG  
RLNRPGIMVYGGTIRAGHQPTGESLDIVSAFQSYGQHLYSKISEEERQEI VRHSCPGQG  
ACGGMYTANTMATAIEALGMSLPLFSSSSPADSKEKMDCECRQAGEAMKTLLEMDLKPRDIM  
TKAAFENAIRIVMVTGGSTNAVLHLIAMSRSRTRNPDSYITLEDQFQRI SDVTPFLADLKPS  
GKYVMEDVQNIIGGTPGVIKFMIDNMFDDGDMTQVTGKTWSQNLLEDLHNPGLTPGQEI IRP  
LDDPIKKTGHLLMMYGNLCPGGVAKITGKEGETFTGTARVYDSEPLMMEGLKKNKEIKKG  
DVVIIRYEGPTGGPGLPEMLTPTSAIMGAGLGNVDALLTDGRFSGGTHGFCIGHITPEAQ  
VGGPIALVKNQDPIRIDAQNDKRTIDVLI PDDEWEKRRQEWTPPPLRANAGILFKYIQCV  
ATATEGCVTDELGTMSPAEIAKAAPKTPALAELENKIAELEAKLAEQ

>comp10326\_c0\_seq2; 958 156 2099 LEN=2219; translated  
MKIAASTLTAACALFSSTAWAFTTMPSTRKTSTSSLFMADDAEEPITNRYSSVLTQPAV  
QGNSQAMLYATGMTEEDMDKPQVGICSVWYEGNPCNMHLLLESEYVKEGVVADCVGMRF  
NTVGVSDGISMGTSGMRFSLQSRDLIADSIETTMSAQWYDGLIALPGCDKNMPCIMAMG  
RLNRPGIMVYGGTIRAGHQPTGESLDIVSAFQSYGQHLYSKISEEERQEI VRHSCPGQG  
ACGGMYTANTMATAIEALGMSLPLFSSSSPADSKEKMDCECRQAGEAMKTLLEMDLKPRDIM  
TKAAFENAIRIVMVTGGSTNAVLHLIAMSRSRTRNPDSYITLEDQFQRI SDVTPFLADLKPS  
GKYVMEDVQNIIGGTPGVIKFMIDNMFDDGDMTQVTGKTWSQNLLEDLHNPGLTPGQEI IRP  
LDDPIKKTGHLLMMYGNLCPGGVAKITGKEGETFTGTARVYDSEPLMMEGLKKNKEIKKG  
DVVIIRYEGPTGGPGLPEMLTPTSAIMGAGLGNVDALLTDGRFSGGTHGFCIGHITPEAQ  
VGGPIALVKNQDPIRIDAQNDKRTIDVLI PDDEWEKRRQEWTPPPLRANAGILFKYIQCV  
ATATEGCVTDELGTMSPAEIAKAAPKTPALAELENKIAELEAKLAEQ

>comp10327\_c0\_seq1; 308 1 1102 LEN=1493; translated  
XVVLCPDGAGTKATIVCGRRTCMGCADLAVPGIRSPWLMFVLTWLSFLEQCSGLFPFFSL  
PLTVRCLQPPIHPAVGLSSATIQRPSTPQRVAVRVP SRPLADFXFGSFELQWYYGGIYT  
DLDNLPTGFNDATI QPSDDAFFPLESLGIVSQYFMAVSPRHPLALLALKTAVQHLRKTKN  
TMVNRPKTTGPNALKIAFVLFQREVIGIDTNGYVPAGVYEGALDEKLRKHLESGHRGAAG  
GANDNIHNNNHYSDDTTSGEPAVPAADSKRTIRVVGPNPKSKEYIHRSGLEHSQKIRYME  
KFGMPHYHSDRKRKNGATEKVSCEMHI ERQEERIRALNLTLP TTAAPNDDFWFPYQKANY  
SPDGKLL

>comp10327\_c0\_seq2; 534 68 1618 LEN=2009; translated  
MRKKRHRPKRHRKKTSEPGDNDGSAQQRQQHSVAILFWIGMGLLWTNGRSFVWIESPA  
LEFLQQLPSKGRTRPAPVVSPGNATVVAVDVEAVDASVDASVATATTETTEPFARAATAPN  
GSTTNTSSPRSTTNVLP SLEELVDSITNATHPEKDYPCPDGTLPFVDTPLPPAETR KSI

PTVVHVTARSRCVPPAIYRHLHWRLEGHALYFHDDAAVYRLMKHAILDNAHRGLVPGLE  
AVLSCATAGATLSDLWRYTLLWYYGGIYTDLDNLPTGFNDATIQPSDDAFFPLESLGIVS  
QYFMAVSPRHPLALLALKTAVQHLRKTKNMVRNRPDKTTGPNALKIAFVLFQREVGIDTN  
GYVPAGVYEGALDEKLRKHLESGRGAAGGANDNIHNNNHYSSTTSGEPAVPAADSKRT  
IRVVGPNPKSKEYIHRSGLEHSQKIRYMEKFGMPHYHSDRKRKNGATEKVSCEMHIERQE  
ERIRALNLTLPPTAAPNDWDFPRYQKANYSPDGKLL  
>comp10327\_c0\_seq3; 535 68 1591 LEN=1982; translated  
MRKKRHRPKRHRKKTSEPGDNDGDSAGQQRQOHSVAILFWIGMGLLWTNGRSFVWIESPA  
LEFLQQLPSKGRTRPAPVVSPPGNATVVAVDVEAVDASVDASVATATTETTEPFARAATAPN  
GSTTNALPSLEELVDSITNATHPEKDYPCPDGTLPFVDTPLPAPETRTKSIPTVVHVTAR  
SRCVPPAIYRHLHWRLEGHALYFHDDAAVYRLMKHAILDNAHRGLVPGLEAVLSCATAG  
ATLSDLWRYTLLWYYGGIYTDLDNLPTGFNDATIQPSDDAFFPLESLGIVS  
HPLALLALKTAVQHLRKTKNMVRNRPDKTTGPNALKIAFVLFQREVGIDTNGYVPAGVY  
GALDEKLRKHLESGRGAAGGANDNIHNNNHYSSTTSGEPAVPAADSKRTIRVVGPNPK  
SKEYIHRSGLEHSQKIRYMEKFGMPHYHSDRKRKNGATEKVSCEMHIERQEERIRALNLT  
LPTAAPNDWDFPRYQKANYSPDGKLL  
>comp10328\_c0\_seq1; 356 187 2410 LEN=2887; translated  
MREGNEAWVMLPLSESDKQSRQTWVKSASLVDVKEEVSVMVRHRGKEEIAVEENDNTS  
TTKNLFFKMKIRIDRSRSGSRSGRCGGLCRSCSPGRKTKKNSRERPLSSSASASAS  
LQASVTTDAMQSQLSHKSISEPKKNVLSLKLKAYLEKKSNSRNTDDLQTIHSSGGNSRP  
SRGGLSSSSSLCSQANGVNSSRSLGSGVLSREEVMSIRKRSESKRSLDGSTKSERRRT  
LSNSRTRFDRSASEIDRSRRERRKATRKSSDREMLREDAETKRPTVRDRGRVGTAPLHS  
IQQTRNKSNSKGTVTIAADKRKGSHLKGTVTTVIDNEKRRGRKEESENDKPIQFDISL  
YSTTDIVENYYPEPKVENTYSRRSVSLDPSLSTRKSVTNRIKKVSSGDKTTVVDKGREP  
RMGVLYRDVSRKSKKEKTIEYTQMLNSSDDEDWTEKYDSTDLSKRSSEDTLDPNLLARP  
SIHARVKSITDLFDEYRMEKILARAELLSKRSEDSLDPSSLTSSHTTKVKSIRDLFDDFK  
KEKKAATDTSCLTNTQSTYQKSMGSHNSNNRKTASSSSGSSRVSNKIRKQTKPRSAMPN  
ANERRSRLETPKNATNQVVLKSAKLDKENQNGSLAKHKSRTHRKSGKVHETSDFVEFHK  
DIKKGATGEISIDNLETTHSDETHFVSNKTPMVDITQSSGQGMADSGHPKRALADFMME  
KMFHADALYIDSKVEEIVRE  
>comp10329\_c0\_seq1; 391 181 1767 LEN=2603; translated  
MDTRGGIVCFFFFACVVSFLSVNVVHDLALTEEIDYQLQAKIDAPKEKAVANEQDDNDPG  
SNVTKRAKSPMQIATDALNANSKTENQRRQGAFNKQGERRTHGKKTDPNATIAIGKHKQH  
HQGSTHHQLSGNTTKEFESRSQDRGTGKQYQGSDFLASTWPSLQRAICNDGIPNQKRG  
RLAELFFELGREEAFVYPDLKRTSKHPSQKLSRKFYENGWLVTAYNSSSSSFQTIYVTA  
WKCANQQIRKMEKFLFADKERFDGHYTENVISLEEALKRVGVWKSRRKLESPPCIYTAIR  
DPI SHFLSGYNEVEYRMLIEFPNWNNTGGNRPDAPYHFAVPYTYTSDIGGRVPPKANPPKE  
IDHDLRHLRKRKRFSAFVKDFLREDDAIAKNHEYQHVVYSMTRMLNLLAHFKQRFDTYIPS  
IVNITTTWPAFISGTCPGAPPVDEFNLHVVDGQHDSSRDLLGLYKAAKDVWKEGGPIARA  
LCLLHAFDYACWTKLPEGIPDVCMKVYHEHQARILETSRERSNTRSEA  
>comp10330\_c0\_seq1; 194 1510 2192 LEN=2238; minus strand; translated  
MKYDQPSVAPIFSQGHLESASSTLTPTMSIARLSFVYNLRTXVVVAAAAAVIVVVHQLDG  
LHLPDRREAAGAAAPPFAASPVAGNATRTVVLVVLFPLGEIVPGDAKEDRGRKDRQEP  
RIPVAGRLLSVLPAARQOQERRPEDKQGHGDADADQKIDHRVLELVGDRRRREGQKGGEPQ  
QVVEGGRQLEQKGRRDGRPRGDVQGEGRRRHRLIAPWLVCVACAEV  
>comp10330\_c0\_seq2; 257 101 1171 LEN=2794; translated  
MVTVPASSRDNAFFHDPHRHRYGQGLRVPCPPRSRVVAYALRHFAMVVVFFGGIMVGVT  
SNGTIVDSSAHSTGLLRQDLTAQEPGYRPLLEPTLAVRDHREGWKTMEVFYGSADSDESL  
SPGHKTFFSQARQDEAILSMLRNKTNGFFVDLAANDATMLSNTYALEKHFGWTGLCIEPN  
PKYWYNLTHTRENCQIIGAVVGRSRMEPVHFNFDGLDHGGIAGNGFDNGPRFKRSSTKAY  
TVTLLLEIFQKFRVPKVIDYLSLDVEGAEFFIMSGFPLKEYQIRILTIERPKENLRTYLES  
HGYKQVLRLSRWGETLWIHGAFKESMDLTNIQDFHGKKQYAEQKARQQQQQQQLSS  
>comp10332\_c0\_seq1; 531 252 2150 LEN=2179; translated  
MITSWAKNQLRSKQPKAQLSIARWMVLFVGVISVGLVCLSFVSVWVSLSTLADCGENALSS  
VLASSKVS LGRAWRERPRARRTLGDSNDSNNIPYSVLHTVTTRFMVGQATGDPLRSFSAT  
AKARAKKMPHLLQKTSQYHLTKARAMLFETF CWPTMKFQTWQNFVWIVLVDPGLDANI  
AELKTMLGREHFPAENAFVLTNNTDWASDGVGVENSTSYGVGLQPIAEAFQDGGLEIVT  
GNTDHLRLRALDMMDGTRRVGWEQDKPIMLVETLLDADDGLNNHAVEWIQNTAVAKTKEHW  
TQKREQLAGGVNRTAALAVRPTLNSTWLLCGMDHIEWHNRDIYRLTDEQFSSSGLTSGL  
VGLRQSPLFCTSAGFTRIGITSVISGDSRSGSQPRRSYSHAVFPKEAYSNHALAFYFPPC

TPPMASATLSGNYSGCWHREFPERMFVLKSRITITSDSMDHMNPRKSDDYRDVSWLNETAY  
PLLTNRVEEMWKILGRDFSIDRTSAWETSMYLYENRRLIVRENKNSRCSPPGFPCYNEAKK  
NIFRLEKYWKHGNTWPSRREVRTAEDVKNELAAVTA AAAAHETGEVRPDPNPERAAKPKPE  
IYTSLSVANPKPAAETKRKSKSAKKKVVRLQK

>comp10333\_c0\_seq1; 321 440 1351 LEN=1520; translated  
MSNLAILLNNQGVNLLTKTNKAPCEVDTTTTIGNRYAQHDARNDNRMTATTINPNDLDRAT  
AFFERALALILRSAEVYRIGGGLQYYEPDQGMIOFECDGIGAQLIGGLNLQDTGVRMNG  
IDDETFIHWKAVKIGNDNYVLEENATFLDDSKHDGREYKHLVSVIFHSMICIYNLGLCYQ  
YKGIQTSSRSLLEAAVDHYMQAYELATRFRLQHIDQYTLMTMNNLATTYSFLNEPDRK  
DVCNHYLLSTLMLLTTSEEGQENHREATHSKCTQSRARQHTYQSFMSNVMYLISPQETLA  
PAA

>comp10334\_c0\_seq1; 134 200 445 LEN=1305; minus strand; translated  
MGFRFVGGGRACWYSLGGSNADGHRPRPGGQTVLVRGGKGDRGLSAGKSPLLLPELLLL  
PPGETVLESEKRRHALTLERE

>comp10335\_c0\_seq1; 253 105 613 LEN=2329; translated  
MDSTMGEEMVAKPTSRELVVVDGGEYALVEYNKRAHICCGCDTRNAIFVVDTISICFYG  
LMTVSFALLAGDKLQYDDQVQVVMTTYNTKIGFAIATSVIGMLCSMIGIFGAAQFSTI  
GTTIGGLWVFCESIRCLVFKDVVTAAVAAGFCYPHXGILPRAKKWSDS

>comp10336\_c0\_seq1; 390 204 1214 LEN=1857; translated  
MGRKKRPNNAQHSNPNNEKKARASNETGESYLVKKYRPTKIYSSMDAFVKYTKSHRMLDA  
SYVRWKTGVTPEKPFVSTRVGGVDLGWGRGKTREAAADCACRAAFALVAAGHYNFPLD  
EDCLMEAPRDP PPPPPPPMNPPIPLPPGLPPGAMGLHGMPNHPPLPNGMPPPHS  
LPPGLPRLVQPPPGNHPSLPSADLIPQAQMVSNAPTASSLSSTLGNTSTGVGPSSTAQ  
ISLGTGVDGGNTDVKISTVSMTLNRMNAAGQGSSTSDATGAKKIENGKALKGGLSLVYA  
ADGEGADEMCMEETRALLPYRLKLLSRVHSVHNGSK

>comp10337\_c0\_seq1; 449 236 1609 LEN=1609; translated  
MASSSESGEFDDQEKREDGTANPGGAFNGDSRQQASPEVDSESEEYSSDDSRESGNSSY  
DSRGEIQNRNFRKIGRNSANDTNGKLSMNTATIGEGEESCSSKLSRYSSEDESYYSDDG  
YYSERSEYTDGEPRSKQFSTGHFSFRSVERSSYSNGGSKSNQYNSGNSFHSSEQSSAFDD  
ESQSKYDLANSYHSSERSSYCDDEVSHSKYDSETSFRSSVRSYGSAQSSKSMQPI LGV  
GNSSENSQEMKREEIKDGSNSSMIDVTNYSKIDDRNEMTASDMLELENDQESHIVESEN  
AFDYTFTHNHFAKEEESHNSLQRGSLGESKSKSSETSRNTELSGTENEYFTGAQVENKD  
FTGAQIFEGTSFVDESPYFEHAGSKSFDDRSEASKSENFTKSLKEYADNSITALPISR TN  
MEHSTPDSLNNENNEHSGSISVTDDSRISKPI SAMDGD

>comp10338\_c0\_seq1; 222 104 646 LEN=963; translated  
MLSRTAATLLRRQSAAVATRSFSA AAAAQFRFAPARSPASAASASLAPRRRFS DSGSGSHDD  
FAPQKKA VSDDVDEAIEMIKQHVKENPVMLYMKGNPKMPMCGFSATIVQTL SAEGVDFSS  
VNVLDYPSIREGVKKFASWPTIPQLYINGEFVGGNDIVSEM HASGELKELLAEAKA IEE

>comp10340\_c0\_seq1; 353 74 1233 LEN=1423; translated  
MEXTKKGGLSRDEEVIEYIGLSFPPNRSSTSSWLSRSSSGGNKPSLPRIVLKKLKKDVEV  
DEHNTGATPKLVIPKSR LRGSNGGEQLVIRTEWSDVHVYSLAPWVRQLIVERAKNFKSF  
SIQEGLVPL LISRQYRGKQATFGKSVLASLQTKQSGDDNGGVMASSESDSEDPATTS AAG  
AENIAANKGSGSAESTSSTTNNESENGENSNKAAKSSGLPKAAMDNEPYSVLAVVLP AK  
TVLRANTVPAYLFACKEAVASC GSEEDSDVRI PAGSKRNGKFQTLTLEGSTLGSKINMKS  
STVGRSCTLGAKCRLNNVIMDGVVIGEQC SLQNTIIGYGAKLGNCSLND CQVGP GREI  
PSGTKEKGEAFEAGDIMESDADMIL

>comp10340\_c0\_seq2; 199 256 870 LEN=870; translated  
MTKDRPKHLLPVAGLPSIVRLLLESMSAFS QIVIAVEEGDNKTLPTLLGTDSNTDKAVASL  
VEGPPEQQSLVRTASNNDACPALCWELKSELKRGQRIHLVKLSENCNGSIDALRTIEETK  
LIHPETRLVFPGLDVLKDKTKFFDALIRPASADVACTAMLVDVLEQDEHGLPIKESAK  
VSLLDISLKERNDADAENNITRNRT

>comp10340\_c0\_seq3; 558 256 1947 LEN=2137; translated  
MTKDRPKHLLPVAGLPSIVRLLLESMSAFS QIVIAVEEGDNKTLPTLLGTDSNTDKAVASL  
VEGPPEQQSLVRTASNNDACPALCWELKSELKRGQRIHLVKLSENCNGSIDALRTIEETK  
LIHPETRLVFPGLDVLKDKTKFFDALIRPASADVACTAMLVDVLEQDEHGLPIKESAK  
TKKGGLSRDEEVIEYIGLSFPPNRSSTSSWLSRSSSGGNKPSLPRIVLKKLKKDVEVDEH  
NTGATPKLVIPKSR LRGSNGGEQLVIRTEWSDVHVYSLAPWVRQLIVERAKNFKSFSSIQ  
EGLVPL LISRQYRGKQATFGKSVLASLQTKQSGDDNGGVMASSESDSEDPATTS AAGAEN  
IAANKGSGSAESTSSTTNNESENGENSNKAAKSSGLPKAAMDNEPYSVLAVVLP AKTVL  
RANTVPAYLFACKEAVASC GSEEDSDVRI PAGSKRNGKFQTLTLEGSTLGSKINMKSSTV

GRSCTLGAKCRLNNVVIMDGVVIGEQCSSLQNTIIIGYGAKLGNNCSLNDQCQVGP GREIPSG  
TKEKGEAFEAGDIMESDADMIL  
>comp10341\_c0\_seq1; 506 567 2273 LEN=3715; minus strand; translated  
MEQQQLGRQQQTPCRKYCTRLLFYTFLLTAAASDCDGFNALLSSECARRTVVFVSHNGARVQA  
SQILRQQHLTKQSLVVTNNSRNNAMLRFTAATSESSSEPLDSNQNIIVDRIRSRIRSKQ  
VRKNTEKSTSYQWTKQNLAIALPALMGLLADPLLSIVDTAFVGRSVGG AIDLALGVCTS  
IFHMAFTVFRAS TVATTSLVGSASTPEEKRQTTKISMGFALAMGTLVFLSLRLAGHMLT  
GMAVAPNSDVFRSACS YLYTRS WAAPAVL FVLVAEGA FRNGD SKTPLVAASVA AVVNL I  
LDPLL MFPLRMGMAGAAAATAISQIAAAALYAWRLWKRQLLPQPQDSCGSIKAGKVVKGI  
IGANAAMLSKNF SMLVFYTAATTTATRIGAAHVATHQVCLSLFWLLTMWLD SGGVSAQLL  
LSKSIGEGDSIQKIKSLTKYMKFALVQGLAFSTFVCGIGRYVPAGFTQDPVVSRYIMQC  
IPQLCLQMVLVSLCLVLEGLAIGGKQFRFMASGTAVATAVGLWQMRFATS VVDIWSGAVN  
TFFGLRLLNGIIGVARVHMGLKKKSTTD  
>comp10342\_c0\_seq1; 264 1 1522 LEN=1800; translated  
XANYEVRTYHTPATTPTMLLERWLSSREDQPKMLQTTQKPRATPEPIEREKCEPLSIEEE  
KSCQEMLKECEMFRSLSGNQIKTLANS MNVRSFKRNEI IVDQGSPVTSFYLVKDGEIHRD  
FIDPDSGRRHRVFEFEIKAKSINTMSILGANLAHNTVKCNSNSCKIYEMPRQLLNILINK  
EPEIGVGIAESLSGHVRQVSKKYRTPLEQKQOIIQSMPAVMIAAGIESYRSALNAQVN  
RVLTGVKADLFPNMHIQVPMRVAYIAGFKGLRAYMDRYNELEEPVESIQNNGTSRTITVE  
NETDSTNRNFWRR LGIT IAPGVIMTPLSSVLEASNAGHMNKEPMTTRWMRGITARCGREI  
LFGLGLNQMSDYFQERLHFDNRPMLS NMVGS LMGV VSGYLSHVPHNMSTYKLL EPHRSY  
LDLYRNVFVERSVPFLERYLARQGTGA AVD GGAATIVTYSNSQQAVRFMAATIFPRGLM  
VRTVQIVGSFIILNGTINYFTLLQQS  
>comp10342\_c0\_seq2; 264 1 1522 LEN=1813; translated  
XANYEVRTYHTPATTPTMLLERWLSSREDQPKMLQTTQKPRATPEPIEREKCEPLSIEEE  
KSCQEMLKECEMFRSLSGNQIKTLANS MNVRSFKRNEI IVDQGSPVTSFYLVKDGEIHRD  
FIDPDSGRRHRVFEFEIKAKSINTMSILGANLAHNTVKCNSNSCKIYEMPRQLLNILINK  
EPEIGVGIAESLSGHVRQVSKKYRTPLEQKQOIIQSMPAVMIAAGIESYRSALNAQVN  
RVLTGVKADLFPNMHIQVPMRVAYIAGFKGLRAYMDRYNELEEPVESIQNNGTSRTITVE  
NETDSTNRNFWRR LGIT IAPGVIMTPLSSVLEASNAGHMNKEPMTTRWMRGITARCGREI  
LFGLGLNQMSDYFQERLHFDNRPMLS NMVGS LMGV VSGYLSHVPHNMSTYKLL EPHRSY  
LDLYRNVFVERSVPFLERYLARQGTGA AVD GGAATIVTYSNSQQAVRFMAATIFPRGLM  
VRTVQIVGSFIILNGTINYFTLLQQS  
>comp10343\_c0\_seq2; 305 245 1372 LEN=1592; translated  
MFESKRPD AEIKVIDFGLSKKFASNKMGYMR EGVGTLYSMAPQVLQGVYTSQADMWSVGV  
ITYMLLSSHRPFY NKKRKVMIDRIMRCDYTFEKDYWRPISAEAKDFIDHLLVVDPKVRYR  
AKHAQKHEWMHKEFKAEDRAPTESMTGRVTKNLLAYKNNSNLK LALNFIAHRSTTADII  
NLRKAFDQMDTANNGVITSEEFETALLDKGNYSAEI IREMFESIDINQNGHIMYTEFIAA  
SLEAQGELDEDRIAEAFDRLDVKDTGKISKENMMEFFGDTEMT HDEVERMIEEADTGKTG  
FVSFEFLAMFRSDNESTASNMLGSLKNYDLAHTSDVMESNHDSSAEDVDES NLVGLDTF  
IPGGKYDSENAEQEK  
>comp10343\_c0\_seq3; 511 230 2065 LEN=2285; translated  
MGNCINADADPEGDSFAEGKAANGDVKKSPEANKPTDGNVKTSPKSKSTAATDSNIDKRR  
QNQKSRSTNSGTGGSIHSGLMTEYKVN VYKYTEMEV L GNGSMGHVAKVVLKEGFMAS SR  
GSFSSSIDRPSGTVSSYALKSIIIDRVSKSFIDELKNEIDILKAMDHPNIVRLHEVFSH  
KKQIYMILELCDGGDLYTRLPYTEQESAYIVGKLLSAIKYMHDLI VHRDLK FENIMFES  
KRPDAEIKVIDFGLSKKFASNKMGYMR EGVGTLYSMAPQVLQGVYTSQADMWSVGVITYM  
LLSSHRPFY NKKRKVMIDRIMRCDYTFEKDYWRPISAEAKDFIDHLLVVDPKVRYR AKHA  
QKHEWMHKEFKAEDRAPTESMTGRVTKNLLAYKNNSNLK LALNFIAHRSTTADI INLRK  
AFDQMDTANNGVITSEEFETALLDKGNYSAEI IREMFESIDINQNGHIMYTEFIAASLEA  
QGELDEDRIAEAFDRLDVKDTGKISKENMMEFFGDTEMT HDEVERMIEEADTGKTGFVSF  
EEFLAMFRSDNESTASNMLGSLKNYDLAHTSDVMESNHDSSAEDVDES NLVGLDTFIPGG  
KYDSENAEQEK  
>comp10344\_c0\_seq1; 389 510 1274 LEN=1698; translated  
MAFTQSNIFGTHVLL ECAKNCPTIKRFVHVSTDEVYGE GEDFETDPMTEEHILEPTNPYA  
ATKAGAEFLVKS YFRSFKLPCLITRGNVY GPHQFPEKLIPKFTNQLMRGK KLT L HGDGS  
NTRNFLYVTDVANAFDTILHKGT PGHVYNI GGDNEISNLMVAKTLLKIFGLENEEEKWIN  
YVPDRTFNDLRYTINSSKLHQLGWKELMSWEEGLKTTVEWYKKYTCRYGNIENALVAHPR  
MLDGKQPEGVVTSV  
>comp10344\_c0\_seq2; 497 52 1125 LEN=1549; translated

MADAEDYTPKNIFLTGGAGFIASHVAILLCKKYPQYNIIVYDRLDYCSLENLDEIKDLP  
NFKFIKGDIIATANLVNYAFLEEKIDTVMHFAAQTHVDNSFGNSMAFTQSNIFGTHVLLC  
AKNCPTIKRFVHVSTDEVYGEDEDFTDPMTEEHILEPTNPYAATKAGAEFLVKSYFRSF  
KLPCLITRGNVYVYVPHQFPEKLIKFTNQLMRGKLLTLHGDGSNTRNFLYVTDVANAFDT  
ILHKGTPGHVYNIIGDNEISNLMVAKTLLKIFGLENEEEKWINYVPDRTFNDLRYTINSS  
KLHQLGWKELMSWEEGLKTTVEWYKKYTCRYGNIENALVAHPRMLDQKQPEGVVTSV  
>comp10345\_c0\_seq1; 387 1 1129 LEN=1863; translated  
XEAMGAARQETAIEIMVLQCNALWKLKRYTDLRSREVKRWKFLKQNDVNADPIEWIPWGIHI  
LAGQSLDYSDDTKQQTDDVLCCHLREQIPASERGWLAHLDSALANVYIRRGAWRLAIGALD  
RVVDLVPEATKAEVAAMLEIARSGNDGGSIAIETDAEERITAFLSKTYLSEILSRRGRILL  
QTGGIREASEVFKQARALWTEAESMPLPPVTLLEPFSGRTKVLRVAMPALVDINRGLVG  
FSESRDAAMESFSAAVRGLRAERGVVSSGYRARHWTGPAVAGCQAPSVLYTEAVNNTS  
LCHLYTCNMREAVLALGLELVREDPTLFLTERIAFNLCTLYELGSDSPVATRNNKVKLQLIA  
KRFFLHDVGPESFRAT  
>comp10346\_c0\_seq1; 223 1 713 LEN=862; translated  
XEALATTRARWIYGGSFRLRFCGLCIGVWSAPFFREAFPDHASDYAVAQALITAVASTVS  
GLAGGAAADYLSSAVEADGEKDGEGALDATGIRLWIPVIGSLAAAPAWYLALHSTDSFQ  
AAMLWLTVEYLVAECWFGPTISTLLSTVPSKVGGAQGMFTLTGALANLSPTFLGYLYGQ  
ASLSPPSEGGIEAAQSELLPVLLTTGVCFGYVSSAFCFAMGARTPPPPAAIEAEAN  
>comp10347\_c0\_seq2; 470 319 2058 LEN=2257; translated  
MWQHKWALWSGFLGASASCFVKMGTTGGIDSSPLLRVQTHLSNNGVKSWLTDLDENLLR  
SIHFVLGELMIKHRINMLYWKMIRTNLIEEFAIRLYLFEVDYCELCIMLPIRITCIVAM  
IITNAYMIASFRLGMKESGSVAGTSLSTASNFASSAMYGKLLWDESMNGKWCVGFTCVLG  
GVIILSSVTTTEFSNQINNEQGADVVRREITKTRSPKRTIAKKTPPPPLTIFTKANIHP  
PAVENITSSKVASVRSSFSPKIDSSSKEVGPTVTPSPRQASTPTFSKTVTSKPSSSGKT  
PRLKEKKILKPESALKQFYNFRDKSSPSSQNLISRSFVNECALCEGILFDETTGESRDAI  
ADLSTNTCFHLFHAKCLKQASKSFGHGCPICKTPLAMWTSSKQAAQFPGFWLERVENYLL  
TIDTAPKNDMTGKDVCLPASKIRDHFKEKGLTEAQKLYIEDDPSGLDKGLQAALEWGGY  
IDYNRVPKGRVGFSLALRTKGIWKYDPKDDIWLWEGSIHPRQRCHQCQLIKRPLPVEC  
KECRGSSEAAIYCESECAKRDQQRHQLTCNCWKEHGPKD  
>comp10348\_c0\_seq1; 813 531 3407 LEN=3526; translated  
MQGSSWEVDPRNAQYDQTVDAYTEFERSTSAPPETGLLFRSESRGTRTDGLDSVLGTSI  
LPSARELYSNSTEIPHQQNHRYQHEHQHLHQNQQSVTPGYARNHALSSSSVSNTQLVNI  
GGQISRSQNRQOSIGEQLVRPHSATASFDSRMSVGLPPGFTRQETPHTSNQSNPPATTI  
GNELYFDDLYVDRSQILQLGQQRPASTGVIGDNQRSSSDVLNSLGLGQPTRVKPVRPAK  
TLMDLIREDSPKVPQAIDSDTLYANSTPVFQSDHMSHMLERPRTTSPSSQYTREDPDYY  
NDRVGRNRGGYQRSMDYPTYATANDNLSDPMSRLNLGYGGDSSYRSNTNTARPIPQYPSD  
PIDRMQGEDNVQSSVYAPVAYHPRPTRPQPLNPGQHPPPEGRYGPSQSQPMPAHVQPQVL  
PSGHTIYLNAASPPPAQYSYATIYHQHPHPQRHHIVHQAVPSSVPPPPPNQOYISVVPV  
QGGPPGHVQNVDSRGSYTYWQPPGGHQDGTQTVAIMRPGVVRMKAPETQHQQHKKHKQR  
QGITSQGGRGKDKSGKGRRNSGSRNSGVSNGSGGETKPSATSHHSNSNQTLLEDFKSKK  
NNRDWTVSDVKGHVVEFCQDQNGSRFIQQRLEIGDASEKDIVVTEVLPEVIRLRNDVFGN  
YVVQKLLSFGTNRMKEDLCDTMIGEMVQLSMQMYGCRVVQKAFESVDES DLPKLLSEFQN  
NVLSLIHDQNGNHVIQKCIIEVLSRNAKAAQEEGEETKATFFGEQIDFIVDDVLDNLATLA  
CHPYGCRVLRILEHCIERQKSATLENISKCLRVLFDQYGNVVIQHVLFQGRVQDRDMV  
LEMVGNGLLKLRSRQKFAASNVIEKLLKYGNEDQRKSIVREMLKRVDEKTDTVVEEGEET  
SIVLLMVRDPYANYVVQTTLDVVPESKEKEQLLKEKLNASHLELKNYTFAKHIITKLD  
>comp10348\_c0\_seq2; 788 531 3431 LEN=3642; translated  
MQGSSWEVDPRNAQYDQTVDAYTEFERSTSAPPETGLLFRSESRGTRTDGLDSVLGTSI  
LPSARELYSNSTEIPHQQNHRYQHEHQHLHQNQQSVTPGYARNHALSSSSVSNTQLVNI  
GGQISRSQNRQOSIGEQLVRPHSATASFDSRMSVGLPPGFTRQETPHTSNQSNPPATTI  
GNELYFDDLYVDRSQILQLGQQRPASTGVIGDNQRSSSDVLNSLGLGQPTRVKPVRPAK  
TLMDLIREDSPKVPQAIDSDTLYANSTPVFQSDHMSHMLERPRTTSPSSQYTREDPDYY  
NDRVGRNRGGYQRSMDYPTYATANDNLSDPMSRLNLGYGGDSSYRSNTNTARPIPQYPSD  
PIDRMQGEDNVQSSVYAPVAYHPRPTRPQPLNPGQHPPPEGRYGPSQSQPMPAHVQPQVL  
PSGHTIYLNAASPPPAQYSYATIYHQHPHPQRHHIVHQAVPSSVPPPPPNQOYISVVPV  
QGGPPGHVQNVDSRGSYTYWQPPGGHQDGTQTVAIMRPGVVRMKAPETQHQQHKKHKQR  
QGITSQGGRGKDKSGKGRRNSGSRNSGVSNGSGGETKPSATSHHSNSNQTLLEDFKSKK  
NNRDWTVSDVKGHVVEFCQDQNGSRFIQQRLEIGDASEKDIVVTEVLPEVIRLRNDVFGN  
YVVQKLLSFGTNRMKEDLCDTMIGEMVQLSMQMYGCRVVQKAFESVDES DLPKLLSEFQN



NVLSLIHDQNGNHVIQKCI EVLSRNAKAAQEEGEEKATFFGEQIDFIVDDVLDNLATLACHPYGCRVLQRILEHC IERQKSATLENI SKCLRVLFDQYGNVVIQHVLFQGRVQDRDMVLEMVVGNGLLKLSRQKFASNVIEKLLKYGNEDQRKSI VREMLKRVDEKTDTVVEEGEETSI VLLMVRDPYANYVVQTTLDVVPESKEKEQLLKEKLNASHLELVSTVFRHCGFYTHCVWLIREST

>comp10348\_c0\_seq3; 704 531 3504 LEN=3623; translated  
MQGSSWEVDPRNAQYDQTVDAYTEFERSTSAPPETGLLFRSESRGTRTDGLDSVLGTSLPSARELYSNSTEIPHQQNHRYQHEHQHLHQNQQSVTPGYARNHALSSSSVSNTQLVNI GGQISRSQNRQOSIGEQLVRPHSATASFDSRMSVGLPPGFTRQETPTHSNQSNPPATTI GNELYFDDLYVDRSQILQLGQQRPASTGVIGDNQRSSSDVLSLGLGQPTRVKPVRPAAK TLMDLIREDSPKVPQAIDSDTLYANSTPVFQSDHMSHMLERPRTTSPSSQYTREDPDYY NDRVGRNRGGYQRSMDYPTYATANDNLSDPMSRLNLGYGGDSSYRSNTNTARPIPQYPSD PIDRMQGEDNVQSSVYAPVAYHPRPTRPQPLNPGQHPPEGRYGPSQSQPMPAHVQPQVLP SGHTIYLNAASPPPAQYSYATI QYHQHPHPQRHHIVHQAVPSSVPPPPPNQQYISVVPV QGGGPPGHVQNVDSRGSYTYWQPPGGHQDGTQTVAIMRPGVVRMKAPETQHQQHKKHQR QGITSSQGGRGKDKSGKRRNSGSRNSGVSNGSGGETKPSATSHHSNSNQTTLEDFKSKK NNRDWTVSDVKGHVVEFCQDQNGSRFIQQRLEIGDASEKDIVVTEVLPEVIRLRNDVFGN YVVQKLLSFGTNRMKEDLCDTMIGEMVQLSDANVRVSYLTNRLLISFNVYLSMCTETKKR TTFVLDVXVVQKAFESVDES DLPKLLSEFQNNVLSLIHDQNGNHVIQKCI EVLSRNAK AAQEEGEEKATFFGEQIDFIVDDVLDNLATLACHPYGCRVLQRILEHC IERQKSATLENI SKCLRVLFDQYGNVVIQHVLFQGRVQDRDMVLEMVVGNGLLKLSRQKFASNVIEKLLK YGNEDQRKSI VREMLKRVDEKTDTVVEEGEETSI VLLMVRDPYANYVVQTTLDVVPESK EKEQLLKEKLNASHLELKNYTFAKHIITKLD

>comp10348\_c0\_seq4; 625 531 3612 LEN=3731; translated  
MQGSSWEVDPRNAQYDQTVDAYTEFERSTSAPPETGLLFRSESRGTRTDGLDSVLGTSLPSARELYSNSTEIPHQQNHRYQHEHQHLHQNQQSVTPGYARNHALSSSSVSNTQLVNI GGQISRSQNRQOSIGEQLVRPHSATASFDSRMSVGLPPGFTRQETPTHSNQSNPPATTI GNELYFDDLYVDRSQILQLGQQRPASTGVIGDNQRSSSDVLSLGLGQPTRVKPVRPAAK TLMDLIREDSPKVPQAIDSDTLYANSTPVFQSDHMSHMLERPRTTSPSSQYTREDPDYY NDRVGRNRGGYQRSMDYPTYATANDNLSDPMSRLNLGYGGDSSYRSNTNXSEYATSGRDL QRVNNVVYHIDVLIFFCFFLVGTAGKAIPOYPSPIDRMQGEDNVQSSVYAPVAYHPR PTRPQPLNPGQHPPEGRYGPSQSQPMPAHVQPQVLP SGHTIYLNAASPPPAQYSYATI Q YHQHPHPQRHHIVHQAVPSSVPPPPPNQQYISVVPVQGGGPPGHVQNVDSRGSYTYWQPP GGHQDGTQTVAIMRPGVVRMKAPETQHQQHKKHQRQGITSSQGGRGKDKSGKRRNSGSRNSGVSNGSGGETKPSATSHHSNSNQTTLEDFKSKKNNRDWTVSDVKGHVVEFCQDQNGSRFIQQRLEIGDASEKDIVVTEVLPEVIRLRNDVFGNYVVQKLLSFGTNRMKEDLCDTMIG EMVQLSDANVRVSYLTNRLLISFNVYLSMCTETKKRTTFVLDVXVVQKAFESVDES DLPKLLSEFQNNVLSLIHDQNGNHVIQKCI EVLSRNAKAAQEEGEEKATFFGEQIDFIVDD VLDNLATLACHPYGCRVLQRILEHC IERQKSATLENI SKCLRVLFDQYGNVVIQHVLFQ GRVQDRDMVLEMVVGNGLLKLSRQKFASNVIEKLLKYGNEDQRKSI VREMLKRVDEKTD TTVVEEGEETSI VLLMVRDPYANYVVQTTLDVVPESKEKEQLLKEKLNASHLELKNYTFAKH IITKLD

>comp10348\_c0\_seq5; 679 531 3528 LEN=3739; translated  
MQGSSWEVDPRNAQYDQTVDAYTEFERSTSAPPETGLLFRSESRGTRTDGLDSVLGTSLPSARELYSNSTEIPHQQNHRYQHEHQHLHQNQQSVTPGYARNHALSSSSVSNTQLVNI GGQISRSQNRQOSIGEQLVRPHSATASFDSRMSVGLPPGFTRQETPTHSNQSNPPATTI GNELYFDDLYVDRSQILQLGQQRPASTGVIGDNQRSSSDVLSLGLGQPTRVKPVRPAAK TLMDLIREDSPKVPQAIDSDTLYANSTPVFQSDHMSHMLERPRTTSPSSQYTREDPDYY NDRVGRNRGGYQRSMDYPTYATANDNLSDPMSRLNLGYGGDSSYRSNTNTARPIPQYPSD PIDRMQGEDNVQSSVYAPVAYHPRPTRPQPLNPGQHPPEGRYGPSQSQPMPAHVQPQVLP SGHTIYLNAASPPPAQYSYATI QYHQHPHPQRHHIVHQAVPSSVPPPPPNQQYISVVPV QGGGPPGHVQNVDSRGSYTYWQPPGGHQDGTQTVAIMRPGVVRMKAPETQHQQHKKHQR QGITSSQGGRGKDKSGKRRNSGSRNSGVSNGSGGETKPSATSHHSNSNQTTLEDFKSKK NNRDWTVSDVKGHVVEFCQDQNGSRFIQQRLEIGDASEKDIVVTEVLPEVIRLRNDVFGN YVVQKLLSFGTNRMKEDLCDTMIGEMVQLSDANVRVSYLTNRLLISFNVYLSMCTETKKR TTFVLDVXVVQKAFESVDES DLPKLLSEFQNNVLSLIHDQNGNHVIQKCI EVLSRNAK AAQEEGEEKATFFGEQIDFIVDDVLDNLATLACHPYGCRVLQRILEHC IERQKSATLENI SKCLRVLFDQYGNVVIQHVLFQGRVQDRDMVLEMVVGNGLLKLSRQKFASNVIEKLLK YGNEDQRKSI VREMLKRVDEKTDTVVEEGEETSI VLLMVRDPYANYVVQTTLDVVPESK EKEQLLKEKLNASHLELVSTVFRHCGFYTHCVWLIREST

>comp10348\_c0\_seq6; 600 531 3636 LEN=3847; translated  
MQGSSWEVDPRNAQYDQTVDAYTEFERSTSAPPETGLLFRSESRGTRTDGLDSVLGTSL  
LPSARELYSNSTEIPHQNHHRYPQHEHQHLHQNQSVTPGYARNHALSSSSVSNTQLVNI  
GGQISRSQNRQOSIGEQLVRPHSATASFDSRMSVGLPPGFTRQETPTHNSQSNPPATTI  
GNELYFDDLYVDRSQILQLGQQRPASTGVIGDNQRSSSDVLNSLGLGQPTRVKPVRPAAK  
TLMDLIREDSPKVPQAIDSDTLYANSTPVFQSDHMSHMLERPRTTSPSSQYTREDPDYY  
NDRVGRNRGGYQRSMDYPTYATANDNLSDPMSRLNLGYGGDSSYRSNTNXSEYATSGRDL  
QRVNNVVVYHIDVLIFFCFFLVGTAGKAIPOYPSPIDRMQGEDNVQSSVYAPVAYHPR  
PTRPQPLNPGQHPPEGRYGSQSPMPAHVQPQVLP SGHTIYLNAASPPPAQYSYATI  
YHQHPHPQRHHIVHQAVPSSVPPPPNQQYISVVPVQGGGPPGHVQNVDSRGSYTYWQPP  
GGHQDGTQTVAIMRPGVVRMKAPETQHQQHKKKQRQGITSSQGGRGKDKSGKGRRNSGS  
RNSGVSNGSGGETKPSATSHHSNSNQTLLEDFKSKKNNRDWTVSDVKGHVVEFCQDQNGS  
RFIQQRLEIGDASEKDIVVTEVLEPVIIRLNDVFGNYVVQKLLSFGTNRMKEDLCDTMIG  
EMVQLSDANVRVSYLTNRLLISFNVYLSMCTETTKRRTFFLVIVDXVVQKAFESVDES  
PKLLSEFQNNVLSLIHDQNGNHVIQKCI EVLSRNAKAAQEEGEEKATFFGEQIDFIVDD  
VLDNLATLACHPYGCRVLQRILEHCIERQKSATLENISKCLRVLFDDQYGNVVIQHVLF  
GRVQDRDMVLEMVVGNGLLKLSRQKFASNVIEKLLKYGNEDQRKSIVREMLKRVDEKTD  
VVEEGEETSIVLLMVRDPYANYVVQTTLDVVPESKEKEQLLKEKLNHSLLELVSTVFRHC  
GFYTHCVWLIREST

>comp10348\_c0\_seq7; 734 531 3515 LEN=3634; translated  
MQGSSWEVDPRNAQYDQTVDAYTEFERSTSAPPETGLLFRSESRGTRTDGLDSVLGTSL  
LPSARELYSNSTEIPHQNHHRYPQHEHQHLHQNQSVTPGYARNHALSSSSVSNTQLVNI  
GGQISRSQNRQOSIGEQLVRPHSATASFDSRMSVGLPPGFTRQETPTHNSQSNPPATTI  
GNELYFDDLYVDRSQILQLGQQRPASTGVIGDNQRSSSDVLNSLGLGQPTRVKPVRPAAK  
TLMDLIREDSPKVPQAIDSDTLYANSTPVFQSDHMSHMLERPRTTSPSSQYTREDPDYY  
NDRVGRNRGGYQRSMDYPTYATANDNLSDPMSRLNLGYGGDSSYRSNTNXSEYATSGRDL  
QRVNNVVVYHIDVLIFFCFFLVGTAGKAIPOYPSPIDRMQGEDNVQSSVYAPVAYHPR  
PTRPQPLNPGQHPPEGRYGSQSPMPAHVQPQVLP SGHTIYLNAASPPPAQYSYATI  
YHQHPHPQRHHIVHQAVPSSVPPPPNQQYISVVPVQGGGPPGHVQNVDSRGSYTYWQPP  
GGHQDGTQTVAIMRPGVVRMKAPETQHQQHKKKQRQGITSSQGGRGKDKSGKGRRNSGS  
RNSGVSNGSGGETKPSATSHHSNSNQTLLEDFKSKKNNRDWTVSDVKGHVVEFCQDQNGS  
RFIQQRLEIGDASEKDIVVTEVLEPVIIRLNDVFGNYVVQKLLSFGTNRMKEDLCDTMIG  
EMVQLSMQMYGCRVVQKAFESVDES  
PKLLSEFQNNVLSLIHDQNGNHVIQKCI EVLSRNAKAAQEEGEEKATFFGEQIDFIVDD  
VLDNLATLACHPYGCRVLQRILEHCIERQKSATLENISKCLRVLFDDQYGNVVIQHVLF  
GRVQDRDMVLEMVVGNGLLKLSRQKFASNVIEKLLKYGNEDQRKSIVREMLKRVDEKTD  
VVEEGEETSIVLLMVRDPYANYVVQTTLDVVPESKEKEQLLKEKLNHSLLELVSTVFRHC  
GFYTHCVWLIREST

>comp10348\_c0\_seq8; 709 531 3539 LEN=3750; translated  
MQGSSWEVDPRNAQYDQTVDAYTEFERSTSAPPETGLLFRSESRGTRTDGLDSVLGTSL  
LPSARELYSNSTEIPHQNHHRYPQHEHQHLHQNQSVTPGYARNHALSSSSVSNTQLVNI  
GGQISRSQNRQOSIGEQLVRPHSATASFDSRMSVGLPPGFTRQETPTHNSQSNPPATTI  
GNELYFDDLYVDRSQILQLGQQRPASTGVIGDNQRSSSDVLNSLGLGQPTRVKPVRPAAK  
TLMDLIREDSPKVPQAIDSDTLYANSTPVFQSDHMSHMLERPRTTSPSSQYTREDPDYY  
NDRVGRNRGGYQRSMDYPTYATANDNLSDPMSRLNLGYGGDSSYRSNTNXSEYATSGRDL  
QRVNNVVVYHIDVLIFFCFFLVGTAGKAIPOYPSPIDRMQGEDNVQSSVYAPVAYHPR  
PTRPQPLNPGQHPPEGRYGSQSPMPAHVQPQVLP SGHTIYLNAASPPPAQYSYATI  
YHQHPHPQRHHIVHQAVPSSVPPPPNQQYISVVPVQGGGPPGHVQNVDSRGSYTYWQPP  
GGHQDGTQTVAIMRPGVVRMKAPETQHQQHKKKQRQGITSSQGGRGKDKSGKGRRNSGS  
RNSGVSNGSGGETKPSATSHHSNSNQTLLEDFKSKKNNRDWTVSDVKGHVVEFCQDQNGS  
RFIQQRLEIGDASEKDIVVTEVLEPVIIRLNDVFGNYVVQKLLSFGTNRMKEDLCDTMIG  
EMVQLSMQMYGCRVVQKAFESVDES  
PKLLSEFQNNVLSLIHDQNGNHVIQKCI EVLSRNAKAAQEEGEEKATFFGEQIDFIVDD  
VLDNLATLACHPYGCRVLQRILEHCIERQKSATLENISKCLRVLFDDQYGNVVIQHVLF  
GRVQDRDMVLEMVVGNGLLKLSRQKFASNVIEKLLKYGNEDQRKSIVREMLKRVDEKTD  
VVEEGEETSIVLLMVRDPYANYVVQTTLDVVPESKEKEQLLKEKLNHSLLELVSTVFRHC  
GFYTHCVWLIREST

>comp10349\_c0\_seq1; 389 614 1594 LEN=1616; translated  
MGDDNIDEDEERHLLLENLQRAYMSLEYWEEALQIEAFKCHMYFVEETDEYADSVHAQGF  
YLRQEDFVNSKNLYEEALEYFERTDNSVQRGHVLIISLAGWYFFRNQLDES  
LDCLEQSESLDNPALLYKCLDNQGLIYRLWGEFHVALDKYQQALQVSVDDIDTRSALKMHIAD  
MHLALDESNEALNVYQDLLIELSASTPTSTNPDQORLGMRGVLHLSIATIHADQGEHELALTEF

REALATKQSAGGENNPEVAKTLNSLALHAGVFDEKHVALEYFQQALLIARIHAEDGENA  
VNDPVDANALQNIISIIKQELAGGRQS  
>comp10350\_c0\_seq1; 227 216 398 LEN=728; translated  
MLLGGNLPDSLSQYMYHGHGDGEYDDDEEDSGYEEDYEDLDDKEEAEQQRDKVEDRHRKSI  
>comp10350\_c0\_seq2; 453 127 1203 LEN=1533; translated  
MGKPTIYQTFRQVVGRAFRETGQALDRAGVKGHQMAVTTTRVIGDDPVIYQDHLRHRQOM  
PLLRRGKPVVSPDVAFLAPCATLIGTVHVAGSSVFYKSI LRADNCDNAEAFRENRAAIE  
AASASGRSPPAPAAAASGVVQADDDDDAGGEHRDTGQRHPGEWDLDPQRAARTNSTATGGGI  
FIGEDTNVQDGCIIIDAARDHTRIGNGVTIIGHLASIH SATVVRDHCLIGMGSLLQEGVVVEE  
ESFVAAGANVPRDVTVVGPELWVGNPARKLRDLTPEERERLHYQADAYVEVASALKDNML  
LGGNLPDSLSQYMYHGHGDGEYDDDEEDSGYEEDYEDLDDKEEAEQQRDKVEDRHRKSI  
>comp10351\_c0\_seq1; 1147 363 2912 LEN=3131; translated  
MGCNSSKETNGAVDDRYDEHGNLRLASSGSNIGSKLSRSLSMKRSSEGIDVSRVSVHELL  
KGTKQIRTDSPARLFLLEKALHQERRPTTPGGMDLDALDDLTAERQTLTYAAIDQLQA  
SMGKRNSGQSLSPAQYSHPVTTQTPHLHLACRLVDIDQNQISAKELCRVMDALLRCYPEAL  
EARDQTHVPLHYAIAPNHFSSDRRVDREDEDWRARGIFAQHLLFHSNLRAAHTYQQSDV  
FFDEDLEIGAQSMGRCSPLYRVLQTLPPDFDRSGPTVDYIKVLLQASYWEENSNSGSGE  
IAASNNNNMAGVGNFSDGDKPLGLLYRRFTRQFDISEMFFPGDNSRPEVVQHREKYKYAA  
GNTWKII EALLKPPAQHVQDTLALSPSSTSSKLQHQMSQLSSGSPQGTNDNWGIVHRAVQ  
METPPDLLRYIVETNAQDLTKVDGLGNLPLHYAAMVKPPKPTATSSKQQRHDTTHFPSF  
YSKYVVEDELLYKFEAASMTNADGKFPPLTLAVSSGKQWIGGGIKSLYDAFPKALGQIDLQ  
QKHHTTLRRALSMGGDNEAPPAGADGDEEDPNATAEDEYKEAAPTSD ESSLQLATSMTRE  
ENNGDGI IKDEHDAIMLVQQADVDCREVAIAMWAHEEDAGVQMLGCCAIARLLGESTSE  
TTTTLGTALTATAAVVNAMKAHPNEMIVQE KACAALQLLAPSDGQREVSMVASGAVASVVA  
AMQAHVGDVFGVQREACSAIAAIVKNGGGDRATVVASVSGVTAILNALAAHPTSVRVQVEG  
LRALWQLTDFGASDASMPPELPREQTEPLLTQAAEAFFPEECGELVAKLADRMKQEEEEADD  
GELEAKES  
>comp10353\_c0\_seq1; 352 95 1329 LEN=1487; translated  
MKVPSLQHYLPII MAARYVRSFQSRVAGSRAVFSIKTSPASVLR FQYESRQESLMTTPMS  
SRLFSTRGVDGDGEEKRVVFLGTPEVAATTLRKLTKIALGNM KLCALSRSRSHRSEEDEKXK  
AEPSPVGA VAEELGLPVLCP EKANNKEFLDSLEEEIKPDLFITAA YGQYLPKRFLATPSL  
GTVNIHPSLLPRWRGASPVQRSLEAGDNPVGVTILYTVSKMDAGPIIAQKEETIEDENSE  
DATATKVL PFLFEKGTDL LIESMPDILSGAMSFETARPQDEDDVVQAAMIDSSEAEMKPW  
EETASILHNRLRGFSMWP GAFMYLEVGE GSTPVKYKILETR LIEGTAEGGPTDTIERGPT  
KKDGLRLVCFDGSVLEINRLQ PATKKPVDALSFLNGLQGR TVRYVKTPEDA  
>comp10354\_c0\_seq1; 198 159 548 LEN=654; translated  
MAKSIRSKCKRKNRSEFRQ TIGNEFYQNMKKVQDKLRECAETQTMSVESLERLSNALHT  
TTPEDSTAVEDAMMAGNQASILEKAKEHKGENKAPT KGAHKKS RKGKHKKATIVPEKKEK  
KRPRYFVQF  
>comp10354\_c0\_seq2; 171 193 495 LEN=642; translated  
MKKVQDKLRECAETQTMSVESLERLSNALHTTTPEDSTAVEDAMMAGNQASILEKAKEHK  
GENKAPT KGAHKKS RKGKHKKATIVPEKKEK KRPRYFVQF  
>comp10355\_c0\_seq1; 243 223 1923 LEN=2332; translated  
MEPNFREQENDAIASWCNTPDDWKNTTGIRSTFTMFDSGSKCTATTADDSSTNGYWSSSS  
FSSII SGSTKGQTSVREIDSILMASSTSSRQNCESSTSKLAHDKSNASRQEKQKIEIQVF  
HSNRIVPKTLRDHCAKSEGSYWSEPTSGRRRRRTATSRFGCFASSSSMANEKAAS TGVFSP  
RYTGSLSD EDKGSTTKMIKIAH HKYNQRVTKVYFHEQLYDHKGAETSCTEPKNKRRLLP  
GANQDDITKI PRKNNVVKLAIPSSNNNSNAKNGTPKIKEKGRSSMWCWN DTHCGIES  
ISVDENSKLNTKLT DQIYETFKDDYNRDLTNNRMHLTEPPERQRCCSEQLVAIATKMTKM  
PKIRSKTAHKSNIHTRNTIKIDSVS YIDTNKRMDLHHGEAKVRKDPTGLSEL SGREMKTS  
NNFTTVGCTPI TRDVGYNTKIF YKATEGFKQPIYPYALDLISTVCNHSYVAIDSDQCELK  
RGTKTCHQDHYQVHRILDKPLSGYTAETEPEKERLMRLHLQQLAAATSTGMSP IEF SR  
KLLHFVGGTLGRYETT VVADSGNDFS  
>comp10355\_c0\_seq2; 235 223 1833 LEN=2492; translated  
MEPNFREQENDAIASWCNTPDDWKNTTGIRSTFTMFDSGSKCTATTADDSSTNGYWSSSS  
FSSII SGSTKGQTSVREIDSILMASSTSSRQNCESSTSKLAHDKSNASRQEKQKIEIQVF  
HSNRIVPKTLRDHCAKSEGSYWSEPTSGRRRRRTATSRFGCFASSSSMANEKAAS TGVFSP  
RYTGSLSD EDKGSTTKMIKIAH HKYNQRVTKVYFHEQLYDHKGAETSCTEPKNKRRLLP  
GANQDDITKI PRKNNVVKLAIPSSNNNSNAKNGTPKIKEKGRSSMWCWN DTHCGIES  
ISVDENSKLNTKLT DQIYETFKDDYNRDLTNNRMHLTEPPERQRCCSEQLVAIATKMTKM

PKIRSKTAHKSNIHTRNTIKIDSVSYIDTNKRMDLHHGEAKVRKDPTGLSELSESGREMKTS  
NNFTTVGCTPITRDVGYNTKIFYKATEGFKQPIYPYALDLISTVCNHSYVAIDSDQCELK  
RGTKTCHQDHYQQVHRILDKPLSGYTAETEPEKERLMRLHVSDVALVISVSFECSN  
>comp10356\_c0\_seq1; 418 120 2348 LEN=2784; translated  
MIEVAVIGAGSAGLVTARHLLASGLKCCIFEATSTIGGAWSCPPSPPSITPHDASDGMW  
KGLHTNLSKHTCRFSDFPWPDDTPTFPKEDMDSYLTSYANEFVLVDCNKDKEDKSSDN  
DSSCSLLYDCNVTKISPIVGSPPADDQQYRVEWTDVSVHQTSHSKEFGGVVIATGFFSRPK  
YPSGFLPEILGKMNRNDDSNADRRMKILHSDYGSHELFAFKCEKVVVVVGSSSHSALEIAV  
DVSKSVDKDVPVTVVMPTIPWVVPYVDPAAATSPSFLPIDLAFYRRQNSKEECTFLTPD  
SCRKRHEGLRAILGSRQDSILPVPDRSFGAAPTVAVSDYFLDLVADGRIEVIHGRVEGTT  
DDGEGRLIALADSAGSDASVMLPGVSSVICCTGFLPDLESCGPLEDGSSESEPLSILKT  
VDYDSTNPFAPMTTYLETLPNLTNFAVGMYRGPYMGAVELQARLAAGVLSKVKVISEE  
DFDKGLEISERIRNPEDSSLRPFQFRFDYIGFMDSLTGLSFGSTREQAPWFFPAQYDLT  
DGSMTVPAYYQPDQGIADLARHDLQEIIEKGTNGHHLPRVVTSAALIGSWSFERNILHFSG  
GGRTIAQRQYIHGKVRYSRSKDLGHVLYREDGLFEISESKSLPVFREYEVCSRDEDEGGG  
GALELYFVEGGKRTYIFLSLKFQHQDKDGYWVATNDHLCIKDLYKANFRIKLDGLAATEV  
IITYRVKGPADYESTTVMRPQ  
>comp10357\_c0\_seq2; 1815 319 4269 LEN=5648; translated  
MWNDWVANAKMAADVDRKLNESVGMADGNLIGSSHKTTPKQSDTATIFSVAEQARPF  
ASNTSIGDSAVGSSGAVTKIVEDDDDAWNNDFDFDDDDNDDLDDTAVLASVDTPAKIESVP  
IKAEKLEANPMEQSTPVTPLPSATTSSTTTKTDESLLKKEKSSPPLPATTDTVTKVAETKS  
KETEDILASTTPVATKGLAQTSSSTPSSGEGGFFSMMTQTVSSTEAAVTGMSSILAAVSV  
KSEPTGKETEHEHETVAATDNTDKANDGAIGTDTGKSGDETKSTDTELEQKKDALSSNG  
KEKKDSGWDDVDVDVGVDFDDDDTPDGGSGASTEESGGSAPASTPALGSTRGLLTGDSKNDS  
IPATKESDITPVPASATIPASSSSSGGFFSNLSDLAQNADSLLTAAAKIETDDENANVKN  
DTVVAEESKDNDIDAQPNDCDGSSSLKNDAPLSTDP TAEKSPQNAISEEEKRPSDPVPS  
ATPKIATAGLFSNLTNLAKTPKETTSKGEDLPSNPNTSAIPQKDSAGGLFSNLTNLAQTA  
DSMLTAAVLSGEGDGTVLGSPKPDNSGGWESEDDDMFLGDDDEQDEKEKEKPKMEANKTN  
DKTDGPNDTLKSVDDEEKEESSSSSFVKVSPSSSVSTPETSQKETEMSGKPVVSATDNALSP  
PCVGATPAYINIEDDPYKELQEALRMREEQLVNKGSQNLQSLMESRDEQYKKKIQDT  
KEEAKKRIQRAKERCEAAEAKLRARSSGSDDDLKQQLI IDELMEEGQALAQKQSAMEKA  
VRSANAETRAKEDLLHETEKEQALEKIVGMEDQIKTLKGYLASAREGESKSGKLES  
LATRADAEEKANTILSLQQRVKELMEESRDLKQEINTTRKSAHEAQEKTSMRKEHNDL  
LGDLEQKIRTIEREAGVREDALRHEVSEIRKRWQDAVRRADALSMDIQSSTAPLLRQLES  
MERQSRLRTANAAELESRLRSELEEAMIENERLGRDGSEYKIKLSRLERSMKERDQEIVA  
AKQTIEEQILSIENLTRKEEKLNAEAEKRQREYERVEKLANEGVSRVRSEMTQTVVDSEE  
RYRGQIEKIEAELKVEREKRSQLEEQVQQLLENTTMGVFTSSPQAPLATGIHRGTPKPKL  
HKAEGQAEILAGALGLGGSDSDSDGDDFFDRSDMEGFESNHSNQRQGSLSNFAALEQ  
LSSKLRTAEEVELTALRKSLESNETHQSLVEELGEARHAKELPLFEQVKELTRENREM  
EQE IAGLKEDIADVRELYRTQLNVLLEKTSSSMNNDVGGKNVDPTPQENKTEIGH  
>comp10357\_c0\_seq3; 1815 194 4144 LEN=5523; translated  
MWNDWVANAKMAADVDRKLNESVGMADGNLIGSSHKTTPKQSDTATIFSVAEQARPF  
ASNTSIGDSAVGSSGAVTKIVEDDDDAWNNDFDFDDDDNDDLDDTAVLASVDTPAKIESVP  
IKAEKLEANPMEQSTPVTPLPSATTSSTTTKTDESLLKKEKSSPPLPATTDTVTKVAETKS  
KETEDILASTTPVATKGLAQTSSSTPSSGEGGFFSMMTQTVSSTEAAVTGMSSILAAVSV  
KSEPTGKETEHEHETVAATDNTDKANDGAIGTDTGKSGDETKSTDTELEQKKDALSSNG  
KEKKDSGWDDVDVDVGVDFDDDDTPDGGSGASTEESGGSAPASTPALGSTRGLLTGDSKNDS  
IPATKESDITPVPASATIPASSSSSGGFFSNLSDLAQNADSLLTAAAKIETDDENANVKN  
DTVVAEESKDNDIDAQPNDCDGSSSLKNDAPLSTDP TAEKSPQNAISEEEKRPSDPVPS  
ATPKIATAGLFSNLTNLAKTPKETTSKGEDLPSNPNTSAIPQKDSAGGLFSNLTNLAQTA  
DSMLTAAVLSGEGDGTVLGSPKPDNSGGWESEDDDMFLGDDDEQDEKEKEKPKMEANKTN  
DKTDGPNDTLKSVDDEEKEESSSSSFVKVSPSSSVSTPETSQKETEMSGKPVVSATDNALSP  
PCVGATPAYINIEDDPYKELQEALRMREEQLVNKGSQNLQSLMESRDEQYKKKIQDT  
KEEAKKRIQRAKERCEAAEAKLRARSSGSDDDLKQQLI IDELMEEGQALAQKQSAMEKA  
VRSANAETRAKEDLLHETEKEQALEKIVGMEDQIKTLKGYLASAREGESKSGKLES  
LATRADAEEKANTILSLQQRVKELMEESRDLKQEINTTRKSAHEAQEKTSMRKEHNDL  
LGDLEQKIRTIEREAGVREDALRHEVSEIRKRWQDAVRRADALSMDIQSSTAPLLRQLES  
MERQSRLRTANAAELESRLRSELEEAMIENERLGRDGSEYKIKLSRLERSMKERDQEIVA  
AKQTIEEQILSIENLTRKEEKLNAEAEKRQREYERVEKLANEGVSRVRSEMTQTVVDSEE  
RYRGQIEKIEAELKVEREKRSQLEEQVQQLLENTTMGVFTSSPQAPLATGIHRGTPKPKL

HKAEGQAEILAGALGLGGSDSDSDGDDFFDRSDMEGFESENHSNQRQGSLSNFAALEQ  
LSSKLRTAEVELTALRKSLEKSNETHQSLVEELGEARHAKEKLPFEQKVKELTRENREM  
EQE IAGLKEDIADVRELYRTQLNVLLEEKTSSSMNDVGGKNVDPTPQENKTEIGH  
>comp10358\_c0\_seq1; 140 419 1097 LEN=1097; translated  
MKRDEETGRSSIFQRLLGKVERKSIDSTGMRSIIAFSVIFSFNIAIGNVSLRHVSVNFNQ  
VMRSLVPAVTIILGLFIGKQISSNRIVAVIPVIIIGVAMAVWGDMTFSTLGFFYTCACVLL  
AALKVLASGEILTGSLKLHPVDLLGHMAPLAMVQCIVLSFLTGEVSSISARPEIYNNYYP  
IGVVLMSGIFSFSLNICSLMANKMTSPLTLWYVTLFVSFTLFFPPSX  
>comp10358\_c0\_seq3; 254 419 1327 LEN=1369; translated  
MKRDEETGRSSIFQRLLGKVERKSIDSTGMRSIIAFSVIFSFNIAIGNVSLRHVSVNFNQ  
VMRSLVPAVTIILGLFIGKQISSNRIVAVIPVIIIGVAMAVWGDMTFSTLGFFYTCACVLL  
AALKVLASGEILTGSLKLHPVDLLGHMAPLAMVQCIVLSFLTGEVSSISARPEIYNNYYP  
IGVVLMSGIFSFSLNICSLMANKMTSPLTLCIAANVKQVLMICISTVIFSTKITPMNGFG  
IVVVLMSGARYSYISVLEKQAGQKMSKESGEADIEQSINDNEEEAVDHI SPRKEDIGSFR  
KR  
>comp10359\_c0\_seq1; 540 1 1929 LEN=2052; translated  
KQSFLLVLPESAKAFWLLPQVSGMDSSNDLAVHSSGPAPRLRDVEESSSQPPLPEEENND  
RRPSEATGTESPSPKRPRIEGRETGENAAGTARTTVVETSSQSSSSSLPGGGNSPGGGDG  
NDADPQQQQEEEEEQEPRPSGGTDQAVQRLDSEDLLEDDGNSDDELLFQQILAAARAG  
RIPLEYLAAHGINIEFDDGPVEYPFDEPPTS IKDVANFSDQKNASESWSWRGKSADRYLL  
CCVAFTAFCXLRILPSLANNRTPKCSVMKNTPRAGLIXLTDSEFIHSLRASNHGLPTFLLR  
HDANYHF SRKRRAGMSVASGIPDFRSSNGLYATLDASKLTATPEQVEQIRADPSYSLDQH  
LFMENPLPCLEVNREFILGVRERRWKATLAHRFVEMLRTRVTNKEGGGKLVRLYTQNI DG  
LEDQCEGIGHQRRIAVHGSMDEAEACATCGAAMDFDVF CGRVKTQIKDILGKDP S APLQST  
PIVCE SCGAGTVKPSIVLFRSRLPDVFFQNVPN DIKNIDLLLVLGTSLAVAPANSLVMKI  
PRSSMRVLMNREPVGWHLGLDYESNDRDYFAEGDCETSALDFMEELGWLEDLKPLMDRSE  
FPESSSKLLRERLERVRQQEQQKQVQIPPEDQQRVVEDGKE  
>comp10359\_c0\_seq2; 670 1 1689 LEN=1812; translated  
KQSFLLVLPESAKAFWLLPQVSGMDSSNDLAVHSSGPAPRLRDVEESSSQPPLPEEENND  
RRPSEATGTESPSPKRPRIEGRETGENAAGTARTTVVETSSQSSSSSLPGGGNSPGGGDG  
NDADPQQQQEEEEEQEPRPSGGTDQAVQRLDSEDLLEDDGNSDDELLFQQILAAARAG  
RIPLEYLAAHGINIEFDDGPVEYPFDEPPTS IKDVANFIRSEKQRILVLAGAGMSVASG  
IPDFRSSNGLYATLDASKLTATPEQVEQIRADPSYSLDQH LFMENPLPCLEVNREFILGV  
RERRWKATLAHRFVEMLRTRVTNKEGGGKLVRLYTQNI DGLEDQCEGIGHQRRIAVHGSM  
DEAEACATCGAAMDFDVF CGRVKTQIKDILGKDP S APLQSTPIVCE SCGAGTVKPSIVLFR  
SRLPDVFFQNVPN DIKNIDLLLVLGTSLAVAPANSLVMKI PRSSMRVLMNREPVGWHLGL  
DYESNDRDYFAEGDCETSALDFMEELGWLEDLKPLMDRSEFPESSSKLLRERLERVRQQQ  
EQQKQVQIPPEDQQRVVEDGKE  
>comp10360\_c0\_seq2; 461 1 2424 LEN=2711; translated  
DDDDDDVLVQSPVAKAVDKSLVRELEARIAEQKHEVQAARKPLLAWRRKHRNEVA ILSRN  
TSALQKRLKAICALVRNEYSTKCLQEDFVAGLKEMYRDANEDAPDDRNE NEGPAIPVDGV  
SLPVFCISANDYLKVTGIKPS SDGPANCFSSPVDTQILRLREHVHEATASRAEFTKSFV  
NQASDIVDRVLLANDSKSDGGSTRQKVRCKDLFTAETESFSKNLDP IASAFVSKAEQKI  
AITLKP SLASGARKARASAMPTVDSWGSKCRRTKHECNRHRNGLHFATYGATARRNGVYV  
STSAGAI DLNAELVAPMEAKFTPAWQS IMDVAVLNLI SESEKVMELCNQTD RALLNGFC  
STGIEKERVARMVSI SSTNCKNNVRSCFAAMRNTVVEDQRNLNR SLLPKVQEAMNTSYSA  
ALGVRGGTGTFNRMKDAMHRCSVP TVNEVFDKGMNELLA AAVRSMVEKLGDSIGFLKESIS  
VLSSSVYILWEDQNSRMSTDPVRLQKILACRAACL PVLNQLREQQDEV MKALGIERPVL  
DLEIAGVETWEEKNAKMQAAKQTGDFVDLLDSDGGHDASGTVLLSFMKQEEQSRATTI  
LPVKNEMESRVIESNNGTGTPTPITL DLCDSDNDSYDDANHHYHIRCVIARVGS LGMS  
IEKVMGYFVTGIRQNSQMVGKIFPGDILKSIDGKRMGVLS PGFEFQEYIMRNASKEKRRI  
YVMRPKIAV TAGPGLGILFERADKGFVVTAVQSGSQLE GKVMLGDILTSDVDTGFLCNLD  
TKEALVESLKGSTGRPARRICVLRSLL  
>comp10361\_c0\_seq1; 124 81 455 LEN=455; translated  
MKLSLVVIVIGCFAAVDLGVSLRNKISNRDELGSRKETDRGDERFPRQLIPESPEEATVI  
ESGTLWGELPSELVGDKKASASQGTPTVSPTYMPKESTGTRAKTEYPTYMPKETGTRAK  
TGYPT  
>comp10362\_c0\_seq1; 863 96 1649 LEN=1649; translated  
MSSTTASGADAFKIGIAFVKQYYKTLSSQPDLLLEKFYSQASDAYLSHGEGSEPTRPIPPA  
GTDHKATIWGCSDETMLFEFEDGAIDAQPSANEGILLVVTASVIFTVQTTGAERRRKFV

QTFFLAKTGRVFAVLNDILRFLASVPEEGPSGEPVAGGASASPEAVPEAPVPCAPKEVPEK  
PGSALVVEKKSEAAEEKAAAAEGSAGDSTGDESSAPGGGVEESKEEAPDEEEAPKAAAPS  
DGGKKRSSSKEGKGGKKNKGGKQQQQQQKQPPAALQADPRVLGQPGGVRGKRPNTPSRGA  
VQEKKAAAGATGKGSQKQPLPPSDKKEAGKPKENGESAAGATEEKGPEKDKSSRTPNPN  
ANANTKHANANAASAKDQKPNKVKDNSTGKDQRTKRDPDNTLVIKNLSDSVKEQDIINMFQ  
PFATLTKAKIVGTNVNYHRNLAFVDYDSVAPVLAALKKHKETPFEWNGRVLVDVDQKTQEQ  
RARRKAGGNNQNSNNTNGYRTAGGRGSGGDKFNNNNNNX

>comp10363\_c0\_seq1; 421 221 1594 LEN=2005; translated  
MNNISNQDHSVSGDNEINCDRNQQIDEASDTTVGTTVGTADTTADTTTENDAGNNQSGEEL  
VWYFSYGSNMNPEVFETVRKIKCLDHRVYVPGYVLTFTTEGILPYWEPAFCTCVKRGEIP  
PLRSRNRNQSADASCSPREPERPDHGVAFITRDQFEHLLVTEGGMGFQYRKPDPF  
WNVGGYGVVEVGCIEIDPVFGDENDDGGRTSEGTSQPCDAHRNEPTAGSFEKKAFSAL  
TLVGLMGRQRYDCNASQRYCNLVRVGARSSGLPGFYREYLEREHPAYYCALDDPELPEL  
RSRGIVLAKILFVALSIPCCFFGYMVMKVCWFERFGRFGKRKRNRDGGGGGFSFSGSAT  
NSGDPNTVRRPGRGVKFRGGGRPPWLLMKACHLYQSTVAGRILPAILFDWWGIPCGFHN  
SEREDNTHNHRSTGKDGAAAFVNEHKDNEQSSVVHKP

>comp10364\_c0\_seq1; 341 170 859 LEN=1029; translated  
MTASVSTSILRTTNIEMESSNCPNKIFISFASDKHYESKHPVKDCGDCSNGSVDTNSTSF  
SSGSGSSLQLRVDTKPNINIYINSTRSILRNSRSSKRPLNVFSSENIATVHVVDNLKLS  
LTRKERKRIWGPALGLFDLAEELYEDDEEDKDDDYSMESRLRKFNGNLSSQGDNETDQK  
DKENTKESKGQEHISIPKQSKLRSLSKSHMCLRGIRKTKKIAIDPFRSKN

>comp10365\_c0\_seq1; 122 1 557 LEN=557; translated  
XYVPHTRTPWLWLNAGAPQNEKQGDSDQPVACSGAPNHQRNEMNPIDAFASALNRSID  
AAVAYLKENGVAIAMLLAGVYFFRSRYAGGKASRGHVLSPPSEAAGILENSGNADSRRED  
MRRARERQQELATQRSREAAVLKAEKDAEERDRKNSVARNNATHGGNRLGSGVAVHGGGG  
GGGEGG

>comp10365\_c0\_seq2; 790 150 2525 LEN=2780; translated  
MESGSAKTSDEQKLSLLPGRNQTDVASTSEHEAGVLNKNDIIKNADDNNNNEEEELPN  
DVSRIQDQLSSLPLVCLNQNSKTKKERPLRHVDENGNVSTYALNPMIYSVIFILLVELLER  
FSFYGVNYTMTSFLTAYDDRKKHFLESDRWADMSAVQASSMVSISTAVAYSAPFAGAV  
LADCF LGDYKAMLVGSLCFYIPGLLLIMGSTIPHLWGLETFSHKALCTGLLVLPVGTGI  
VKSIVNVFGAKQFHPLQSSLIESYYVKFYMCINIGALIGGIIVPLVAQSDVTLAYTFPV  
AMLLIGIVLFLSGTSRYVRHPPKGMDFKGVNIKWWRSSRSKKTGTQKKTLSVTSSIDSAT  
STSSVDTVDSVPPAPSSSKSSSKNGSPSASGLTIFKISALIIPFNIAYSQMATTFFIIQG  
TVMKRAFGWIDAASMNADAVSVLVFGHLVGLTHLYPYLNRHDIKISTTNKFALGSLGAL  
AIAWALFLEHKIYSTYELTGNKVSILWQSI SYVLIGAGEIFAVSAAYEVAFTASPEQKV  
LASALNLFVGGIPNLLCLVLYNLFQGWFPSTGNHSSISLEDYVSAEVYKYFMVLFGLIA  
CCGV LINTFPSVHRYVRSVEESAAGAIKTPILRKTPLARRRLQRKYNSGSGSGSGKKSRY  
GRQASDDYSVSTATDETDEEALSLEASPLLRMERHKAYLKYGSGPQLYKSGSMRAGPSL  
SSREGDDVPKKS SVLNKQQVDRLYRSTSTRNGKSKAKKSSNLIMTPEGKPLRAGSFKGRD  
RNFHSERHGM

>comp10365\_c0\_seq3; 682 150 2282 LEN=2406; translated  
MESGSAKTSDEQKLSLLPGRNQTDVASTSEHEAGVLNKNDIIKNADDNNNNEEEELPN  
DVSRIQDQLSSLPLVCLNQNSKTKKERPLRHVDENGNVSTYALNPMIYSVIFILLVELLER  
FSFYGVNYTMTSFLTAYDDRKKHFLESDRWADMSAVQASSMVSISTAVAYSAPFAGAV  
LADCF LGDYKAMLVGSLCFYIPGLLLIMGSTIPHLWGLETFSHKALCTGLLVLPVGTGI  
VKSIVNVFGAKQFHPLQSSLIESYYVKFYMCINIGALIGGIIVPLVAQSDVTLAYTFPV  
AMLLIGIVLFLSGTSRYVRHPPKGMDFKGVNIKWWRSSRSKKTGTQKKTLSVTSSIDSAT  
STSSVDTVDSVPPAPSSSKSSSKNGSPSASGLTIFKISALIIPFNIAYSQMATTFFIIQG  
TVMKRAFGWIDAASMNADAVSVLVFGHLVGLTHLYPYLNRHDIKISTTNKFALGSLGAL  
AIAWALFLEHKIYSTYELTGNKVSILWQSI SYVLIGAGEIFAVSAAYEVAFTASPEQKV  
LASALNLFVGGIPNLLCLVLYNLFQGWFPSTGNHSSISLEDYVSAEVYKYFMVLFGLIA  
CCGV LINTFPSVHRYVRSVEESAAGAIKTPILRKTPLARRRLQRKYNSGSGSGSGGTGPT  
SRGRNPLQPWNSNSSYSRISVRIKTKRDEAGAEVQSVGKRIVIWLERKAMH

>comp10365\_c0\_seq4; 634 150 2210 LEN=3720; translated  
MESGSAKTSDEQKLSLLPGRNQTDVASTSEHEAGVLNKNDIIKNADDNNNNEEEELPN  
DVSRIQDQLSSLPLVCLNQNSKTKKERPLRHVDENGNVSTYALNPMIYSVIFILLVELLER  
FSFYGVNYTMTSFLTAYDDRKKHFLESDRWADMSAVQASSMVSISTAVAYSAPFAGAV  
LADCF LGDYKAMLVGSLCFYIPGLLLIMGSTIPHLWGLETFSHKALCTGLLVLPVGTGI  
VKSIVNVFGAKQFHPLQSSLIESYYVKFYMCINIGALIGGIIVPLVAQSDVTLAYTFPV

AMLLIGIVLFLSGTSRYVRHPPKGMFMKGVNIKWWRSSRSKKTGTQKKTLSVTSSIDSAT  
STSSVDTVDSVPPAPSSSSKSSSKNGSPSASGLGTIFKISALIIPFNIAYSQMATTFFIIQG  
TVMKRAFGWIDAASMNADAVSVLVFGHLVGLTHLYPYLNRHDIKISTTNKFALGSLGAL  
AIAWALFLEHKIYSTYELTGNKVSILWQSI SYVLIGAGEIFAVSAAYEVAFTASPPEQKV  
LASALNLFVGGIPNLLCLVLYNLFQGWFPSTGNHSSISLEDYVSAEVYKYFMVLFGIA  
CCGVLINTFPVHRYVRSVEESAAGAIKTPILRKTPLARRRLQRKYNSGSGSGSGGTGPT  
SRGRNPLQPWNSNSSSYRPARRTPNA

>comp10366\_c0\_seq1; 692 1 1856 LEN=1955; translated  
XFEIAFKMGICHSSLEAETGNGDTCVETIAGADFLAKKNYHRRRQSTKSTPGGKKNLAYD  
LALVSPSEKTAATDALSPSITSPISTEGGDCQSGGEIENEYHLQDIIIEKKFVPEPPSSI  
DSFGKEDTDANDNLMNKFGQQSILQSADHINENESIQSMIQKFISETIDADSDLNLTLM  
SKPDPPLLAPPKDVNVVVISSNTDTSINPVTVANFNKMKLEVKHAQNLEKRRRYEEKIE  
DRRRDIQGYEELWGEYSEIKERVIQQRKIEAESPPKKTGESISLNDSTTWVDFSTLKS  
TNHFYDTLVVNEHNSEHENRQPSSTSSPLIESSLQSRKILQSTTMQRQKILDEHSIHKD  
YAVQPNKLEKQPVNNDICIESINGGKSITVDLDGSIISDLNNGSNSSMSTSDTERGFHND  
YGVLRYSRKSIESTVPTHMDNFFAQVDDADLLDTRAFFSAQTPRKGNSTSVCIPIFSKYL  
EENCLPSVSIENAELGTIRWRKFPNSNCDKVKVSRKIDFSDHNLEAMRERTGVQLNNSEVD  
NDAKVHSDENCKATPEAFTPILLNTITDPEPRARFIESNHDIHEGTDKEGTNLRRLVRKV  
GPQLNDLLTRKDNGLGE

>comp10368\_c0\_seq1; 316 255 1397 LEN=2121; translated  
MSIDHQKVLHVTVLAAIAAFLVCPESPEEILLVSMGYLIPKYISKLSKYGDLPAALHGLA  
VVVACLVDVRETKLVWIGIIFAMSISKIAKVGHPVAFLSLAAASYFLFCLQPLYDGEGLV  
VLLGIIIAIYIQRPEASRERKGDIEGDDECIVRSIEELRQIMPAGLGGNCLEDAKKVIGY  
LDDQMINFIHHSPLIYLATVDNTTKYPFISPKGDKPGFVTVRQNHETKHTLIIPDRPGN  
RLLFGLQNILQRESGTDHETAKVSILFEVPGTGSTLRCGGSAWLSTDPALIRKHVARGC  
PPKVIVLVDVDAHFFHCSKAYMRKSVWDPKSWPSKPLNVTFGRYFAKKGSLASKIDSVD  
DKHYQQIQKAIDGEACEEEK

>comp10369\_c1\_seq1; 419 127 1158 LEN=2060; translated  
MMIALYFKVFSFLAVLSYCESNANPNYDKSSNYQHQQYEQPREQHHPSPSSSNVPRLIGL  
NVNGRMKCLLWGNPPTFSPSALTPLFSSPIAGNEEDNIHADHDCSPSRQVETRFEGIGER  
TSQQNDEKTRSPSSLLPGAVFATTDYRFRKDRWYGVVERIGMIFRWNVPSSLASSNKSNG  
ERQETALCRSRKRIASLLPTTIDVTAQHSLFSPHSSKSTRNHRKNYFAPFADSGNIRVG  
WRENEESEDTEYDDARGCSNNPWIQIGFEQPLYATTTIENDLLSIDHKQGTDEQNPFFHL  
RFFFLIRRRLDLQWTSFWGNGITKDDFGDRDRMGNRQSDDPW

>comp10370\_c0\_seq1; 224 1 1028 LEN=1072; translated  
XLMRCKFWEARKQVTSQEPGNLKRTRTTVLRFTTSWKPSIVVNYDTPSLYFQSFSSKELSC  
AAISAIFFYFHSSSESDTELSRILKELSNGLTASESETMIRRQLNLSTSSGTDPPSSASP  
DEILKSFADIDHTRSSRTGFPEAVFGAGKTANQIAMILDDMARHFNEKVSEGQGVINDSQ  
RAILATRVSPELYESVKSIQLSHGHLVYHPAANIISMIPSLSTEKNIDCENSLPPRKRIV  
VATAGTTDLPVAEEAAVVLEAAHCKVDRIFDVGVAGLHRVVRALPRLQDDEVGCVIVCAG  
MDGALPSVVGGLVSCPVIAPTRYVVLRTFALVVCIIYLLSKI

>comp10370\_c0\_seq2; 291 1 1103 LEN=1193; translated  
XLMRCKFWEARKQVTSQEPGNLKRTRTTVLRFTTSWKPSIVVNYDTPSLYFQSFSSKELSC  
AAISAIFFYFHSSSESDTELSRILKELSNGLTASESETMIRRQLNLSTSSGTDPPSSASP  
DEILKSFADIDHTRSSRTGFPEAVFGAGKTANQIAMILDDMARHFNEKVSEGQGVINDSQ  
RAILATRVSPELYESVKSIQLSHGHLVYHPAANIISMIPSLSTEKNIDCENSLPPRKRIV  
VATAGTTDLPVAEEAAVVLEAAHCKVDRIFDVGVAGLHRVVRALPRLQDDEVGCVIVCAG  
MDGALPSVVGGLVSCPVIAPPTSIGYGVSLGGISAMLTMLNSCAPGVGVVVIDNGFGAAA  
LAYKCVL

>comp10371\_c0\_seq1; 318 111 725 LEN=916; translated  
MASVLSYHIIIVLVIAVTFSMQDSAAFVSPGSKTIKNNPLVVHSDWSDFGVLDDDDDD  
ILVDRREYAKEEDDQEVKAQVGASLDPPSIDDESALYDPLFVPAGSQLELDEETVLRMLQ  
ACRQEIGTLFGYTAENRGVGITGGVDYVELDGPVVVLRRLKGRFWHERTTVLSRVANYLQQ  
RIPEIIDVTVEDEWQLSQEANEAF

>comp10372\_c0\_seq1; 1422 163 2874 LEN=3241; translated  
MAKGRNESGGNSNDRSFFTTQKKGEMHELRMELHATEKHVKVDAVKKVIASMTVGKDV  
MLFTDVLNVCVQTGNIELKLVLYLYLINYAKTQPELTLAVNTFVKDSSDANPLIRALAVR  
TMGCIRVDRITEYLCEPLRKALRDDDYPYRKTAAVCVAKLYDIAPEMVIERGFLDTLHDL  
ISDSNPSVVANAVAALSEIAEASGRDVMKVSAAVLQKLLAALNECTEWGQVFILDSLAKY  
TPADGREAEGLIIRVTPRLQHANSVVMSAVKVILSYMELMGGGANIRSDAIRALTRKLA

PPLVTLNSEPEIQYVALRNINLIVQKRPHILENEIKVFFCKYNDPIYVKMEKLEI I I I KL  
VTEKNIDQVLELLEKEYSTEVDVDFVRKSVSAIGRCAVKLERAAERCIGVLELIIQTKVNY  
VVQESVIVIKDIFRRYPNRYESI IATLCDNLDLDEPLAKASMIWI IGEYAERIDNADEL  
LDTFLETFEEDPAVQLQLLTATVKCFLKNPEDTQDMVQRVLDLATEESDNPDLRDRGFI  
YWRLLSTDPEAAKMVVLGDKPVI EDDTFRLLDPLLNVLIGQIATLSSVYHKPPEAFVRR  
AAGVIDHGDDQGEDDDEGDYGGAAENDGVGDLDMGGMSLGGGKAAGPAGSSYETKAPM  
NKVCGAEKSGGIEI SAGFRQVNGTITMEMQIENVSSPSEVKALAIQLNKNFGLSPATQQ  
I ICNPPIATGQTGTATVELVVTNPMVAPPQGPQSPASPMVQVAIKNMQTGTVFYFAVNCNL  
EALFTESTMERSAFIESWKS IDQNELYGTVDLPPSSTDIDKVINWFKANKMFFVARRP  
VPNAEGQEVVYFFSRTVAQMDFLVELTFKQGV TACKICLKTESSSYGLLAKQAVESMLRS  
NPQ

>comp10373\_c0\_seq1; 748 221 2545 LEN=2636; translated  
MQNDSNDDVGGRRARQAL TSAETSKERLEELYKIPKCKLPPASEMAAIETFVVNAIQSQEP  
RNADTNNKLDPTHSEAYRAIL TALKRPNPPMICKVLLALRTAGHGSILSLLALRDNHAQ  
LLHLVIRFVSTLPTFDETLTGDPGAMLQVYKDYSLCDAHFNLLLAIVSAKSTHVVPVLT  
AVWKL LTNFGPIEDKGV IHR IHSMI FNVLR LVPKMSDVYPI IASKFPFWLKDKESLVWY  
TKQSFKVL DYLP SIRQRV FELLIEKVEIDVNI FIKDNGDVTIDETEQRSAEDEDEY GQK  
NTNKS KVN LNTSVDVLSDKLDALLELLFDNI QSGCQAGVSSTQKIYHEL VQIFESTILTT  
HKSKFVQFCIFLPCGLEAQ IASNNEM IENIEQKSNESPITVSASNSKGVIEHEEEAILYR  
EFASKLLQILVDPYRATTTTRQSCACYLASFVSRAAFIGIDSVCESISALLTWAEAYIGSL  
GIYSVRAADARQQSEHHALFYTV CQAAFYIMSFRGNEAIEYRNAV KYEAAANADGTMNDD  
LGQDNDEPQYPDLECINLDGKRWTS LCGHALQPLRF CLESVRSEFLHMAHFYTLIDEEVL  
NKL VADAKRLSTGRVNKKAASSIKTAATLERRRQTGGVGG LGRGSNPLKSFPPFDPLLLR  
QSHGYIEPLYKYWEGPVEEEDVLVIDEIQRDGDP TFYMDDESIEESDGENENSDDDDDD  
SDIDHSEALSDSEG YDRPSNLLTPDAYKIKLLQKAWTETLKRPRS QSMENGSW

>comp10373\_c0\_seq2; 608 137 1816 LEN=1907; translated  
MSDVYPIIASKFPFWLKDKESLVWYTKQSFKVL DYLP SIRQRV FELLIEKVEIDVNI FIK  
DNGDVTIDETEQRSAEDEDEY GQKNTNKS KVN LNTSVDVLSDKLDALLELLFDNI QSGC  
QAGVSSTQKIYHEL VQIFESTILTT HKSKFVQFCIFLPCGLEAQ IASNNEM IENIEQKSN  
ESPITVSASNSKGVIEHEEEAILYREFASKLLQILVDPYRATTTTRQSCACYLASFVSRAA  
FIGIDSVCESISALLTWAEAYIGSLGIYSVRAADARQQSEHHALFYTV CQAAFYIMSFRG  
NEAIEYRNAV KYEAAANADGTMNDDL GQDNDEPQYPDLECINLDGKRWTS LCGHALQPLR  
FCLESVRSEFLHMAHFYTLIDEEVLNKL VADAKRLSTGRVNKKAASSIKTAATLERRRQT  
GGVGG LGRGSNPLKSFPPFDPLLLRQSHGYIEPLYKYWEGPVEEEDVLVIDEIQRDGDP T  
FYMDDESIEESDGENENSDDDDDDSDIDHSEALSDSEG YDRPSNLLTPDAYKIKLLQK  
AWTETLKRPRS QSMENGSW

>comp10374\_c0\_seq1; 536 115 1575 LEN=1836; translated  
MTKR I KATSVVLYCLLWGGHRVDGFALS NHNPSTSSPLQTWAAQR SKCARSSLLSLLAE  
PRNKVQDDNNNDGLPLPEKSSLSNPKQTTTNV LVVGGSGRVGGSTVRWLKEFSSRDP SM  
DLRIKVGGRSRRSFEKAKQ TGVIPPADPDCVNGNCSNQEIGFVHLDWAGWTDQVIEEAIL  
GCNCGLVVHTAGPFQGRDPTLLRCCAKHGIPYVDVCDEFELAQTAKEGSGEAAATNGVA  
AVVASGIWPGVSALMAAEAVGKLRDDGKEPGSIDFSFFTAGTGNAGPTIVSATFLLLATP  
VIAFRNGAKTLLPEWTEPRETFDGP AVGKKNPWL LDNPDPVTTALSLGVPNVASRFGTDP  
LPWNYLFGAMKAI PRSVLYNRDLMQGFALFSEPI IRFVDKLVGATNAMRVDVVS EDGSET  
VTAQIVHDDLEVCVGLATAAFALEVLKGTGTESETIPPGVWYPAELPKEARANILEAAKEQ  
SITFSV

>comp10375\_c0\_seq1; 165 1 625 LEN=625; translated  
DHIIIVK YLSYHRSLQRVESIELYHCSIVAIIRVAMKSF RNIISSIFLLSTLSVVTFCFVI  
PPI SGAPTTSSSTVCQSSQQEQQMAMKWFQHEL SITAPSRGCHLITSNVQKVISKDISQI  
KIGMCNLFVQHTSASLTVNENADPDVRRDLETALNKIVPASWNHDGTFRHTMEGDDMPG  
HVKTSMLG PSLNIPIRNGRLALGTWQGIX

>comp10375\_c0\_seq2; 218 1 708 LEN=1166; translated  
DHIIIVK YLSYHRSLQRVESIELYHCSIVAIIRVAMKSF RNIISSIFLLSTLSVVTFCFVI  
PPI SGAPTTSSSTVCQSSQQEQQMAMKWFQHEL SITAPSRGCHLITSNVQKVISKDISQI  
KIGMCNLFVQHTSASLTVNENADPDVRRDLETALNKIVPASWNHDGTFRHTMEGDDMPG  
HVKTSMLG PSLNIPIRNGRLALGTWQGIYLNHRDQGGWGGHTRNIIVTLQGGG

>comp10377\_c0\_seq1; 695 1 2501 LEN=2973; translated  
XVKNLFGHDNRRKAASPEIQNANPSKPMYGRINARHQKQIKVETETEKVTTKQQSVSTMQ  
PKNMVKLLKRRMLPRRSSTGNMNCIDISYSTVTTTNSGNSSVITNEMSVTDDFQKERISD  
VHRRAGNGSSQKQQRQQQAKITRNKLTRRPRRRHTMDHIDRDDDDVEHSGDNPM SLGS



LLRFGSENTCGLTENEDYDLVNNYPCPTPPTAFESVTIPSKPLKSTTTTTTTTTTKMRTR  
FHRRSSLARAASSIVTTTFETSRNWFSTISITINSNTATSPKVLQHTENISNVKDENKFAAN  
LQLQFDSEQKQLQHLAREMHREGHFHRAIMYWEKSLAERNRDFSSLSLSTEIRCMLLR  
LHFQESKRLNQEPQNETTDNPRGSPSSCDESLVADLSQHSLSLAEEVNSTSFDFQEKQKR  
QLPASSENGNAATYHRQEAQQYINGIKPVMVQPGWLRDHSMLNFLCEAKAWELALVVAK  
GLSEKSLSDQLTVEEEEEFEKQRPPEPPIVKLVDPHMLAVIHFHVASLKLKRHKQGEAL  
QHLQMTVQRFQEVSAQDRDNTMYINALQLLATEYQAQKSNLALKTFRNLQNHASSEQYA  
RISSRMAEIIYIADGQLDMALKELESTYDQYEKNSNACGDRSNSNPSTKNTIRSQLLQLKG  
DVYCRGRMDESLEVYQQAFFEEAQYPPDKAKLLYIMGRLYNRMGRTHDAISCFEQEMKVT  
QVELGANHVSLCVIYHELAKLYDEGLGLHKIAMKYYKALEIELSVMDLDRSTVVSCNKC  
ADISSNRICDKHANIHSQVQGIRETKNICIRLHYKLGDLKGAMKTGLSSDPF

>comp10379\_c0\_seq1; 289 1 1845 LEN=3209; translated  
KKLKAARHLWQEQPSLKFGLPELATAYSPLQPPQSMSAAPRRPKSRSQQTTPNSHQDQNH  
AHRVGGNAVPSFSISSAPRRKKHRIRSLVVAAVVLVLCAYLLWLGISLVFVLKLSSESR  
NKNNRVHSGISPIISKQRQFTDTSLHKLKQTRADENVKSNAGGKGGDSSPQDAPYKIVHSL  
TTRFMLGQKGQPVLARARYLLFETFCQPTVRYQTALRAKGYDFSWFVFDVPGIDPAVIED  
MRALLTPSTDGEGDPRFPDGNAYLILTDNPSWAADGIGVPGVTSYGAGFQEVAVARDGT  
VELLTGDATRLVETLERDVEGGGGNDQPTMLIETMLDADDGLNNRAIEWIQDLAVGHVR  
KQGGLETARTTTPSLDSTWWLLCGTDHIEWHNRDIFRLTETQYQKHGLSSGIVGLRHAPH  
YCASAGFTRVGLTTKAAAGGNNEAEPPLLSFPQVAYSNNHALATEEFDLCNDGEGGDPKIS  
LAKCFRRDFEGLNYVLKRSRITSDSMDHMDPRNKDYRDLPWESKEEHPLLALDAPEQMWG  
IVRDEFSIDQKKARETSVYLRENLASILKENRDSRCAPGFPCREVADVAFFKMTAHIHRL  
NKFDRAEAAKQNGK

>comp10380\_c0\_seq1; 225 132 785 LEN=1233; translated  
MALFGSERRHGLRWIVSAALTAVLLLVTLESTLAFRSSMPTSISTNRNSRMSSTASSSCL  
SVVPLIADNAAPLAIEAASTVFAAGSSTTLADAVVASGSNQINAGELLGNSDFLVFVAGI  
FPPMWATYEFWRIRMFGESEFGTGTDSIVIIGQDDAPFDSRGRVLTGTALVTAYVLFVCA  
FGTLAVVGYSVATSAPPSSSEDLAAVAAVESVSMLVAP

>comp10380\_c0\_seq2; 364 122 775 LEN=870; translated  
MALFGSERRHGLRWIVSAALTAVLLLVTLESTLAFRSSMPTSISTNRNSRMSSTASSSCL  
SVVPLIADNAAPLAIEAASTVFAAGSSTTLADAVVASGSNQINAGELLGNSDFLVFVAGI  
FPPMWATYEFWRIRMFGESEFGTGTDSIVIIGQDDAPFDSRGRVLTGTALVTAYVLFVCA  
FGTLAVVGYSVATSAPPSSSEDLAAVAAVESVSMLVAP

>comp10381\_c0\_seq1; 745 248 2086 LEN=2642; translated  
MTFEQQSIGRPRRRPSSFRFEKLAIAALALAIIVFVADSMGSAATNIARSMSSSAYEDA  
NSNRVGGDTNQSHGKSNNDIRSNRKRQLLDLSYDSFPIYTLPEPWEETPILELDASLQP  
LGDGPNEDSDNDNYFPPKQSRIVGGEEDSNLDSFVMHLRYVAADNRWKFAGCGGTLISAC  
HILTAACHMTGDRANRTQAVFVNAWRPFKNLDDTTGRTKPYHISRIDSENAVVHPGFDI  
KSNLNDVAVLTMTKCIPANRTESEFEVMEIADDVFWRERYNELVVPYKDWNEWDNVDPETA  
TISDDLADAKTRVAGFGQLDTSAGVPPALQSVDSVSLINRDDCEAKYSSSLRFQSANKTM  
IKPDMYCAAAIDGGKDACLGDSGGPNYITDPVTMORTQLGLVSWGIGCAQEGYPGVYTSV  
AYHYDFIKNAVCGDEGLAAMGDVADPLSPYALKLCLPDELDRPNNDGEGDPTPEKIVLG  
EHLVYVQQQEEEDIIPSGDIENDEGEDVIAGDDQSEEEEDVAAAEKENNEDDDEEEQLPLTC  
SPKNGSCSQDDSECCGKLTCHKKDKVCKKPPRQSKASEEKSEVSAAEAKSNFQYIEDGTWV  
RRRGVRGLRKR

>comp10381\_c0\_seq2; 771 248 2101 LEN=2657; translated  
MTFEQQSIGRPRRRPSSFRFEKLAIAALALAIIVFVADSMGSAATNIARSMSSSAYEDA  
NSNRVGGDTNQSHGKSNNDIRSNRKRQLLDLSYDSFPIYTLPEPWEETPILELDASLQP  
LGDGPNEDSDNDNYFPPKQSRIVGGEEDSNLDSFVMHLRYVAADNRWKFAGCGGTLISAC  
HILTAACHMTGDRANRTQAVFVNAWRPFKNLDDTTGRTKPYHISRIDSENAVVHPGFDI  
KSNLNDVAVLTMTKCIPANRTESEFEVMEIADDVFWRERYNELVVPYKDWNEWDNVDPETA  
TISDDLADAKTRVAGFGQLDTSAGVPPALQSVDSVSLINRDDCEAKYSSSLRFQSANKTM  
IKPDMYCAAAIDGGKDACLGDSGGPNYITDPVTMORTQLGLVSWGIGCAQEGYPGVYTSV  
AYHYDFIKNAVCGDEGLAAMGDVADPLSPYALKLCLPDELDRPNNDGEGDPTPEKIVLG  
EHLVYVQQQEEEDIIPSGDIENDEGEDVIAGDDQSEEEEDVAAAEKENNEDDDEEEVEEEK  
LPLTCSPKNGSCSQDDSECCGKLTCHKKDKVCKKPPRQSKASEEKSEVSAAEAKSNFQYIE  
DGTWVRRRGVRGLRKR

>comp10382\_c0\_seq1; 1382 146 4222 LEN=4381; translated  
MSLKKDGDDVDKRDKSEPYPTNAIVLNFNKDKTFNKHNNENTIEDTRKKIAVDTDNNIDID  
KKNHNYNHNSINMSRNRKRIDDKNIRNHKNLPSIPYESECEHNHTKEQGISRWGEFFD

IASEAVQYYSTTATAMILTTTTTTVTSTKVLKVVRAKEPEQQQYLSIHQFLFNSKIFSFAS  
SSRPSIFEKHNLTSCSEYTSVTMAISQSSSFSLFIDGDDGQKISTLSCSNKNLLAVDRK  
GDECIIFAKEDRSMPLPRILKSSGSLESNKCATMVPTSNSTVSTCPSVIYNWKNKFDSDS  
GSFDDRVDACDNQVDTHKSDNICSSSEHQIEVIELPQEESRKDFSSCTNESDGNFPEGD  
QEIIPPSSWSCSAAMLFANNNDYEDNTKSREKSDVEEKKFVPSEVFDDESGMSWFINTF  
PNYNESNGAILHSETAIKHPKTTVAVTIQGGLDPSSSLPSSSVDLSSKKGRNCNVYGG  
LESLASELSNLMFSIEEEEQEVVFSNEDEKDDKVKGEVKMQSRALEQEYCREESIQQLFET  
LEEKEAEVDEALESII METLEIEGQDNRVIDNEKYDSQHENDLVEIASAIQKYRQEDGMD  
DDMDNKNELLSKVTEFIALPQMLCITPREQQHI IHNDVNLNGVNTNKEDEETVDHQNA  
VDEKDPHRKFFADEFPRANIEVLGSSHSNSYSNELLGKMANTFRSLPQMMGLTQRAQSQ  
GVDDISITCSNGINKSKKCSSELSVDGVRITTIIEPDCVSSSTSNHPNIEVKLQTDING  
SDGRDNIVVVDEVARMLRKNKKKKKEKNLKS KHCCSDAMDLVSLTIMEMEKSSNKNFVN  
EMRAMRVPESSPSSDNFSNSASGSDISRGDPSDSLVRDSNEDLTATTNDLQELKEHSEI  
YDGPNTISPPLSDSFSIDCFPENFSMDEEDVSQTTTPSDTNKTNPEGGKPIVIVVPLQRE  
GNSDKACNEISSVSGSFEFLKSLSSSEERIPSPQFKLPFNNPNASSADTKLDEIHSTDD  
LGTSSALPLSYALNTIDRPSQKNLASMNQFTSLFTRDLSVSPQKLVHTTLLSLSLSLSD  
DCCPIPPSPKHSTKASKEHSFDDALPSNMDSHKSEGETEGSIVVSI SESLQAESMKNPSS  
LSPKKMIATTTKAPKGLLKTINTEGLDKERRQKVFPHLAMNKILFNATKKKNKGLGNNIK  
KHIDIGDIAEDSLRIRRSYPLFSPSQALTRDDLASSGKILGNDTEEQQNHVYPCTKDQ  
NREVPMGVSPKSILKTSLQGDGTSFSSLEESTGITPESQSSKRKVHWNETQLADKIEKGV  
MFQNRHNGRPKRPAYALQQLMCEIADIQDGYGSDMEQLW

>comp10383\_c0\_seq1; 516 1 2214 LEN=2513; translated  
XTPTYEILSNRWYSIPSNNDIWWYCSSIAIANMDRSTEHTAELRSVEALDISPVPSLR  
SRGGLGTTGSRSGAMRLSPARTCSTGSRGAGVGFQIVPATNQPLPRYRTERIAGNRFTR  
LGNRNKEGNDELDDSETSTSTPKETTTARDARTKNPRGQNPISDFLYGANYVHSQYLSIV  
WRYSVVRS LAVTVPIGIAICLDERYGLYDVLFRGLRSVFFVSSAAARLLQLPLEVAQSLL  
LGLWEVSPETAAAIGVLPNAVAVPAVQLGLAAQRALAAVAAIGCESNSATLFSMMLAIL  
VWRPAVEEWQYRSVLDKLLFGPPRWALAWRRKLRADPLEGSSATGRAGRNARSSETPSKM  
VDTDDGRGATKVSSESDSLRTTEEAAPFVNQSMVEVEVEVEDSATNRSLVNKLFFGAPR  
WIRARGRKRELSLPRNVTKDIDPVEDELPLVDETMHSSTKEESSLSTEKATTSKQSSVT  
DEINVDAPTEKRSFVDKVLFGAPSRLRNRNRNELPSLANDTNPEDIIENDGPSSPETMP  
VTTEAEIVETPKKSIAGDSEDSINCNSDGDSDGGDSGYTFFLPDESTRIILLGSLLFATTR  
LGWLSDDPADPVALSNSPYGFTIGFLQSFISLLSGGQASAPEVRHGLQIFILLLAIHQTV  
STFLVAQHVFAGIYRRRGLAASVGAHVSWTVGKGTIVFRLLWKFWENLTAGIWRNTFGSS  
PEEEGMATEGTNSASVD

>comp10384\_c0\_seq1; 762 1 2521 LEN=2981; translated  
WWIDRAGIRHVVTATDLNSMSTILSFHKNHRKLVLTAAIAAILTAGILTTDGRSNLYCD  
AFSTEQKFQGNVDTGLSRSSIDKGIASRKFGGVFFQSGLQPRMNAITAKMASSDENMQT  
ATPTKMEGEHDTTARIEPATTEENLGDGTKEESSDDFFPDMLAWKTYEPLMEDILMQRR  
AIKNADPDTIAKCRAPLLNSKPFLAPLLDVSDIVRSNPNRGRKREALELALTEQSELFRQRF  
DFTEEEYQFINRCLVYMGDACAQKQSKQNRITNRDGNDDNIDPRFPYVVRKIKEMGLL  
IREKSLSSYMYILSSTAKHAIGTDENGPANTNDDFIEDTLLEVVS WHDTIYAPSEKTLTI  
RLKGLVARGKIDEAEEMFAASFNGSDNATSATESQETTESDGNENIQGRLR TYMPLMEHY  
CKVGD LKSTLRLYRQMQKCVGVHFDVESYTI LLSLARFGYFFDAKPQPASHGQNASDDD  
DDDDHYDDDHRRMILRNLFSKETDLFDKLVFESDI IQGPMFNFESGGFQKPS EIIAVYDE  
DDDNFLLPSFSPSCPSAAKVETRDAYSNGATAGNKGNI EKARAIMKHLQYTQEDMNLIG  
ADCLYNFQGVANPHRVAKLQPGERVLDLGCGLGVDSILASKHVASSGVLGVDLAARQVS  
YCRTVAQKKQLKNVEFIQGD AEKLSDSL NKHGLTESQFDVCISNGAFCLIPDKEKAFRQV  
YRALKPGGRMAICTTTIQSPLDEEERSDGGGIEWPVCMRMFAELKSI EPVCEQIGFCDV  
EIVDAESPMEFEFMEIFQEENPERFKIHGKYADQAYLEDMDIDKLCVVTVYGRKPL

>comp10384\_c0\_seq2; 866 1 2445 LEN=2445; translated  
WWIDRAGIRHVVTATDLNSMSTILSFHKNHRKLVLTAAIAAILTAGILTTDGRSNLYCD  
AFSTEQKFQGNVDTGLSRSSIDKGIASRKFGGVFFQSGLQPRMNAITAKMASSDENMQT  
ATPTKMEGEHDTTARIEPATTEENLGDGTKEESSDDFFPDMLAWKTYEPLMEDILMQRR  
AIKNADPDTIAKCRAPLLNSKPFLAPLLDVSDIVRSNPNRGRKREALELALTEQSELFRQRF  
DFTEEEYQFINRCLVYMGDACAQKQSKQNRITNRDGNDDNIDPRFPYVVRKIKEMGLL  
IREKSLSSYMYILSSTAKHAIGTDENGPANTNDDFIEDTLLEVVS WHDTIYAPSEKTLTI  
RLKGLVARGKIDEAEEMFAASFNGSDNATSATESQETTESDGNENIQGRLR TYMPLMEHY  
CKVGD LKSTLRLYRQMQKCVGVHFDVESYTI LLSLARFGYFFDAKPQPASHGQNASDDD  
DDDDHNRNLYGPKLFDLSVDMANDILEL TEATANELAEAFRTGIKEHLGDTLITEEKVE

SGPSAKSVILDRVELPKGNGTCTPITGVKLRLLALDETRQHQVHDTLLEMSKKNTEEFAS  
NIKWQESIKETNPRPDNIQTMTSKMEESYGYQELRKFSEWLDDRKGNLFTTIVDGANVA  
YYGHSNVHYSSLKVVETLESMGERPLVIMPEKYTAKKFYVRPRYYQKLSEKDLQVIDWL  
REKEIIYVVPFVLDYDFWMLASVSNQTNAAQHGLDITIPIGDDQGRFPGMRPLLITNDQM  
RDHKLDDLEPREFRWC SCHIVNYDIGEYDEDEWE

>comp10385\_c0\_seq1; 250 158 1321 LEN=1764; translated  
MNANENREQRQPSVGSASASSRLYQLLAMFVLCGCLSIKQFLGLPGFQHMREIEYDAVAT  
TKPALSSHADENQSTETAGNPGSGTQKTFYMDPAELPLKPPFHLMLQGTIRTGSTFQVTL  
LDAIANLKTQQTGSSPSPEIALT SKYPPEPVDGKIGPFVIKSHVDDLEGIQEMMREHKE  
KFGISIHFLTSHREGDSSNFSDLSSYDQELSNLYNCMCEIDNYAPIFGLTAEDLRILKE  
YMSHFELRQCCGFQQSKYNRYRLHGCNVTELLSNPSPYCYCERHDIEQVETKFAALP  
IDYRSRNSNYNWVKPGDCAKFEKKITDGKDFNGVAFGTCDAFLEKYSPEKLEKNQRQRNK  
ILTAKRKIGPTDSTAKRAKRKSDRF

>comp10386\_c0\_seq1; 577 1 2104 LEN=2104; translated  
XSPTRIPGNVLMMLTSMELLALPHQSQHIQIVLKLATEGDLPFDEVVRACSPAQKNHGDR  
DQSIRLELEECRRLSLTPRSTSDKDDPLAEMAGRKRVSRLKRISKEIFAALPHDPQYP  
VEADQRALSKEGNFMVPPVPSKWQKVPPELLQSEIEKSKLAKGDPTGIMAKVEEERSVKET  
LSEITKTTKRDLHMGDPTMRVSVTAWVQNRFRFQGNVTVFYLVDDMDNQS FQNFQNLQ  
NIMTDSLDRPLCLLHPDALSKNGLHDSNMYQNLIASGSKVRIEGLTVHSDVDKNNKNG  
NEDKGGNEEKQASAPLLWVQSIRLVRSVTRFIRHLLDLEKRIDPSEASEALLIPYE  
EAKQLSLQSDATERQWKANLLAVQLQKELSSNSKTIGRVDPLLEVMKEYRYSKIHPVI  
ATGIDDEITGDDSDNSDRVKRDALEMSLGENVNSKNVQSNGHNNLKRGPMPGSKWQI  
KKKQPLEWMSRQIQMVLESHPDFKKRELTILDIGGGKGLANHLGTLGQHV RVHVVDIC  
QGAVMNGKKKAKRLDLPVDFQFADASNSNLLDAVDADVVALHACGHLSDVALNHAHRR  
AGFVIVPCCFNSNPHLMIPVSKKNTLTQVQDWLGLPPGDWSALKLLAEVQDNIPLASEAI  
GIICAIRAQAAKNKMAEKKDDSNESAASRVVDQDREITIKX

>comp10387\_c0\_seq1; 445 1 1028 LEN=1175; translated  
XLLLLLLQSARGLRISEGFAMGSKPPDAKTDPNYSQNDRTLYHLPPPPRCERHHTERDD  
YDLDALATALETGQVVLDPVYSKEQIEAFREAHSQNF SIVTKLMAGRDRVPIDKPYRHD  
FDTKRYLMPHYSIEDEETGESDEVIEISPGRLDYTFGMNPYWDDEEEEEEEECGDEKN  
PFASLEFRPKILAEMLDRMLRSYKSYAGALPVSAANDNDSDDNESNSNVPRDGPWHRD  
VYLLFDETVDVGLPHPYFTVLIPLVETSAENGATEFLLGSHRQTCGEALQRSGNSFQP  
RIQPGSVVFDGRICHRGRGNNTREDRTVLYMVWTKRWYNDY

>comp10388\_c0\_seq1; 406 1 1152 LEN=1263; translated  
ERYHVAQRHFCRATRLDPHCVEAWIAFGASFAACDESDQALASFRQAQLAPGNHTSLLY  
IAMEYLR TNHLVLAQHFLKAANDSSGGTDLPLVKSETGVLKLNQRKYSQAI SWFLMALGAD  
QEWASSMARLLAAQARETPGGDTLPRYLAALSRLVETVQDPYWEPTLFNLAHAYRKERRF  
DAAVVCLEQCLALRETASAYSALGYCLHLQSTTVSTGHRWAERGKHPFRPDREKDKSNR  
LLHSAIDAYHRSLAKKPEDPFASEM LQKALGDALEQTDFFLGESEEDGEHVARGGVDDPPD  
PSNAYGSGVAGGPRLPPTGAAVQHYYHGAQRPRQNSLESVSTATTGMGDASGALAADQ  
SSLWTEGLSVSADTTNDVDVMT

>comp10390\_c0\_seq1; 597 1 1261 LEN=1386; translated  
XDDDDDDDEEALVPEQNDDADSTVLSTINEISEASDSSSQEPNEKLPTNRDSLET LGDKD  
SDTVVSVIWTWNLAE DSPSEEDAAFIRKFRKNGVVEGQGSDFVLISGQECENIKPRRSEGR  
RSREYRRLMIKMLGKEYVPLALHLLGGIQFGLFAKRSILEEIEDVCVADVT CGIGNVFHN  
KGAIAAFVKVKARNDKQSSTDERRSKSLRMVFTAHAAHVKNADARDSDFWRISSELEA  
QAPEGFLPRKREGENPSGSFLFDSVDRVFFCGDLNYRLDLPRELTEHTLLHKT SQDNP II  
KDLLRHDQLIHSMAGGKSFPFAEGKITFMPTFKYDKESSYDTSKQRI PAWTDRI L FQ  
PSDGIRVLEYQSVPGAQSSDHRPVFGSYRVGMGRVIPPSPKRRKRKRVEKPPSRYHDEY

>comp10391\_c0\_seq3; 236 164 953 LEN=953; translated  
MNKNITFRFANGLSTSKSRRNVEGGSESF PFRSGRRGAMPTRRQQSGPINSKKEQTVV  
ILYNKPPD VITSHESQDLRSTVYEDIQSMRGYLPKINGKSEKRSQPI SFEEATGIRSKLH  
AIGRLDADTTGLLLL TNDGRLVHHITNPNSKTETHEHYDTSTGTTAATISKTYQALIMGH  
HTEESLEPIRRGVDIGKNYITKPLLEESDLQVLEHPNHKSTIVSITIGEGKTDKFXKMFH  
AIGSGVMKLRTRIGDHLTLDG VX

>comp10391\_c1\_seq1; 210 242 1198 LEN=1775; translated  
MSANSNAELDMQIERLRKGNLSENEVKILCEKAKLILSDESNVQAVSAPVTVCGLIHGQ  
FYDLLELFRIGGRCPESNYLLMGDYVDRGYFSLETVTL LIALKVRYRNRITILRGNHESR  
QITQVYGFYDECLRKYGNANVKNFTD TFDYLPMTAVVADRIFCLHGGLSPSIDTL DHAR  
DLDRVQEVPHGPMCDLVWSDPDDRCGWGISPRGAGYTFGQDITEQFCHINGLHFV SRAH

QLVMEGYQWQHNRQVVTVFSAPNYCYRCGNQAAIMEVDDFVDQTTKDTVHCHCKFSQFDP  
APRDENWHKSTRTPDYFL  
>comp10391\_c1\_seq2; 187 242 859 LEN=1938; translated  
MSANSNAELDMQIERLRKGNLSENEVKILCEKAKLILSDESNVQAVSAPVTVCGDIHGQ  
FYDLLELFRIGGRCPESNYLLMGDYVDRGYFSLETVTLIALKVRYNRITILRGNHESR  
QITQVYGFYDECLRKYGNANVWKNFTDTFDYLPMTAVVADRIFCLHGGLSPSIDTLDHAR  
DLDRVQEVPHHEGPMCDLVWSDPDDR  
>comp10391\_c1\_seq4; 210 242 1198 LEN=1694; translated  
MSANSNAELDMQIERLRKGNLSENEVKILCEKAKLILSDESNVQAVSAPVTVCGDIHGQ  
FYDLLELFRIGGRCPESNYLLMGDYVDRGYFSLETVTLIALKVRYNRITILRGNHESR  
QITQVYGFYDECLRKYGNANVWKNFTDTFDYLPMTAVVADRIFCLHGGLSPSIDTLDHAR  
DLDRVQEVPHHEGPMCDLVWSDPDDRCGWGISPRGAGYTFGQDITEQFCHINGLHFVSTRAH  
QLVMEGYQWQHNRQVVTVFSAPNYCYRCGNQAAIMEVDDFVDQTTKDTVHCHCKFSQFDP  
APRDENWHKSTRTPDYFL  
>comp10391\_c1\_seq5; 187 242 859 LEN=1857; translated  
MSANSNAELDMQIERLRKGNLSENEVKILCEKAKLILSDESNVQAVSAPVTVCGDIHGQ  
FYDLLELFRIGGRCPESNYLLMGDYVDRGYFSLETVTLIALKVRYNRITILRGNHESR  
QITQVYGFYDECLRKYGNANVWKNFTDTFDYLPMTAVVADRIFCLHGGLSPSIDTLDHAR  
DLDRVQEVPHHEGPMCDLVWSDPDDR  
>comp10395\_c0\_seq1; 787 101 3392 LEN=3690; translated  
MTKATKKFTTKLAILGCFVLSDDFKQFCDKQSEKRENERENIQGDSIPNSSPIDTLQEGITY  
KLYDNAALAGNPPRYEGITSLARISLQEPPLPIPETKHSGRFEPNTVLLSGELIGSVMV  
NGTKQTSGENDWQDNDKKDEWVIFRCVFRSTSTGWVKIDGHLVCHDGHAFQELANDPI  
RLREGKRYPFRAQITSNDTTSTARSEAPSLEVQWKGADSKRSFLESFGFRSLSTTRTTT  
DLKHDQFYSGKNQNTNEQQQQQTSNQNHGVVWHLNPSLSAPEQRRDDLQSLQGTGWGYWL  
RRDVMISLVKLEPILLDWKICWQQHYGEDKDTDDDTVSRRQPHRRHCLKSAVPDSTGILR  
MDRHAYDRSYASYNITFSPEVVKDENDGTSRSRITLKVESASGKNQEELRVLMTVVDYK  
IPVHNNNGEGEEFVVELTPGYAWFRPGTVAEELNDQGSQSGFSFSSPGLGVVKARLLWEF  
DDKPVTSDFPFTSLRQRQTAKTTHTKSDSSDVSLRSDSSPEEASLVDGLKITITGNGQKI  
AIVAGLDVNERPDEEKRLHSNAPSSTKQTIQREVENFLSTMECKERDRIQQRYNHSREVT  
EVATVIQAAMWSLIYNPIENGPFLPVSRSNDNASFGDRAGAMTPDWTYVIFGKLGTKIF  
GVGSLMPLKHYGYCPLYSTRFGFPLDVFAIQFRQSGDNLFASLLAGLEHKEIAYSNFLQ  
VVKSKTPNGFVFNWSTAGGILQSNDRTEPPVGAKILLELFRKYNETWIVEALWDDLWDN  
DWFMMHRRLDPFGLIALGSYYKASLHPNDFVTYRDGERNDKQAARYESGLDNSPMYSDT  
YDNATHMMQMYDVGMSALVANEAYCLAELADIGKTQEVGNRLRKRGEIQDAILRHLWD  
PERKIFANRYQLPNSSSFVHPITPTSFSYFLLPKTKHNTGSAVQIDVEEVINWLLNPKR  
FCISRNGDFAENDPDVCYWGLPSVSADDPTYMVSGHWNVWRGLSWGPMSQLVYWSLKGQS  
SASEETESISSNVIARARRSLCDQMRALLTNQWRANRHICENYSPYKGASDCTGSFYH  
WGALNGLIGVVEAGFY  
>comp10396\_c0\_seq1; 699 471 2564 LEN=2623; translated  
MDYYPYLTANKIEPKTESISGSLVFYARFLVNHFWKPLKNADVGDTRNVIQRLRLRNR  
KPKTEENMWAKMNEQRKNVMTLAGYTTSFVVPSPFGFLLLGAFMTSIVPSYWGKCIQCVAT  
LTATRAQLAEALIGLVSSVLAGLFTGIRGSLFWIGGCRANYNIRVKLHRSLLLQEAFF  
DTNETGYLLSRLNSDVNKGQVVISYHINVVLRQFAQFVFGSVYLLRISPRLSMYTFSGIL  
LVALLSAIYDGLARDLAEKVQDTFADATAVAETSFTMSETIRAFDGVDIESDKFESAQFS  
ALELEEVQAWAYGSHKFLSDTLQSVLQVALLVACWTVGKAGGLAATDLTTFMFYTGFLV  
SSNEVGDQWAKIQAVGASSSVFDLIRVPAIHDPIMPMDGTNNGADDAVETKSESIGIST  
QRPVIAKDVITLEYDAMDRPALSGVTTNIYSGDRVALVGRSGSGKSSMLRTMLRFYDPSS  
GVIELDGEDLRSLTRSETASHVSLVEQEPHFVPMMLMENVLYGIDKDDIDPETGEAVYNA  
RWRTLVSNCLNLAGLDVSPGNLGLDLDRIGEGGRSLSGGQRQVARIARATIREPQVLL  
LDEPTAALDSESEKVVQSLRTAMKQTKSMVMVTHRLGVIRSLDVNRVIVLDKKGKIVEEG  
HPEDLLKDKSSVYAGLAKEQGITQLDDLEHRVTHASS  
>comp10396\_c0\_seq2; 512 1 1654 LEN=1713; translated  
XTFISHLLLSGCRANYNIRVKLHRSLLLQEAFFDTNETGYLLSRLNSDVNKGQVVISYH  
INVVLRQFAQFVFGSVYLLRISPRLSMYTFSGILLVALLSAIYDGLARDLAEKVQDTFAD  
ATAVAETSFTMSETIRAFDGVDIESDKFESAQFSALELEEVQAWAYGSHKFLSDTLQSVL  
QVALLVACWTVGKAGGLAATDLTTFMFYTGFLVLESSNEVGDQWAKIQAVGASSSVFDLI  
KRVPAIHDPIMPMDGTNNGADDAVETKSESIGISTQRPVIAKDVITLEYDAMDRPALSGVT  
TNIYSGDRVALVGRSGSGKSSMLRTMLRFYDPSSGVIELDGEDLRSLTRSETASHVSLVE  
QEPHFVPMMLMENVLYGIDKDDIDPETGEAVYNARWRTLVSNCLNLAGLDVSPGNLGLD

LDTRIGEGGRSLSGGQRQVVAIARATIREPQVLLLLDEPTAALDSESEKKVVQSLRTAMKQ  
TKSMVMVTHRLGVRSLDVNRVIVLDKGGKIVEEGHPEDLLKDKSSVYAGLAKEQGITQLD  
DLEHRVTHASS

>comp10397\_c0\_seq1; 182 1 787 LEN=956; translated  
XSLVGGSSPRRAPSRRAGPVSAAKTGGSPGSGSPTSVADPFFDRAAGTASLSAEAEAPASGS  
GCHSCLGSPADLSRHFSESLTEIRREVGALCFHRSAAPEPDDSLLSREDGSEGSGNDNG  
DGGGDWIEIEAPPDRPPRAPYPYPVASAAADARAATAAAVPTNSTDEHYFXEDRDAGL  
DMSERGVEPHQGAGKKMQRNAPHSTAKHVVGWEGWTESVVVVVRIASPRKGDPSLRPST  
PSIEAKHVEPNKTTTRRLAFPRH

>comp10398\_c0\_seq1; 313 257 676 LEN=913; translated  
MKKPVTASKAKNAAEPTPVPSEKVVAEPTSPTKTSPVEKDSTKPVRNPAIAAAPAPGVKH  
VRAAYKGGKWAPPQKEWESNKKTAGDKTRIEIEDEWDEDGNLKRRTTKYTTTTPDWKKTTE  
TTVEVFSAEAEAKKMGLGRK

>comp10398\_c0\_seq2; 361 70 597 LEN=834; translated  
MGCCTSSTAATEPRTPVEKKTQQSTTKKEHPPVKKPMKKPVTASKAKNAAEPTPVPSEKV  
VAEPTSPTKTSPVEKDSTKPVRNPAIAAAPAPGVKHVRAAYKGGKWAPPQKEWESNKKTA  
GDKTRIEIEDEWDEDGNLKRRTTKYTTTTPDWKKTTETTVEVFSAEAEAKKMGLGRK

>comp10399\_c0\_seq1; 486 59 2068 LEN=2068; translated  
MTRDTRLAFELEGTLEDELEALNGREISEDSKATKPRSINCLQFAEFLKYHYRCNKRSN  
KAKLILAVAILIGICSVYYSGLFPKSGKNKHPPIARREEDRVIYAGAPPPGWDVQVPRQAV  
DSPHLINPPIAVNDPYGWMRDETRSNPEVLRHLKDNNEYTESKTKHLKLLKESLYNEMK  
SFMLETSHSFPNLIGDYRRYRTIKGKPYPLHVRAPKPLPPSDNENKSEFYANFLKKYL  
TLWDGSQSTPILPNEVVYLDENKLADGFEYFDVGSLEISPSGDLVAYTVDTQGNFYELI  
IQRFDNGDSLRIEDSQNDGSGSPIIISNDIVWGTDDITLFYTKTDEAGRYPYQVFCRTFVN  
EKVSEELIFEELSLYVYGIGKTADENYLLIYNGSFESSEVHYIDISVGSTFSKSPLI  
ADRIPTTYVEHYKGNWLNINSVGTGSDMLWKSQVNDSEWSRLTDPKSGKPLLDGIP  
IEGFDVFEKYLVIQGRINGMLQWVAEVDSDSNVIRLEQLKWNAEPAYSIGMGYNENYNA  
SSILVNYESLTPPLQYVQVDLREPSNNDKRIIVMTKPTPNYESDRYVCDRITVTSRDGKT  
EIPVSLVYLKSTMEQAILPQSYVPLHLYAYGAYGESIEDTFSSVRMTLVNRGIYIAIAHV  
RGGGELGRQW

>comp10401\_c0\_seq1; 184 1 909 LEN=1485; translated  
XATQSSIVINAMLLLLDDTGHAAGICGAVFVGRNIRTNLWHEIIDARHFTTTDAAVAGAP  
QTSSKRKSLSVVCMVGDIAADARADAITVSSNPSLAGNLQPNYWRFSGRANTNGSVRKKGG  
RDLDSHCEQIFHTDSAKMKTGRRRKCDLSLVGEAVATPAGRNIPNAKHVHLHVVPDRIT  
HYDDGVTGDGEDADLLALLRTTYNSVFCAETDAKAELAIIPALGCGIKGWSHRVSARIA  
KEAIEEYFRNKQEQEEQQNEGIDFTTASSLTHIAFVLKTDSSRGIWEEEMSAFPRMLGRTO  
QN

>comp10403\_c0\_seq1; 409 90 1169 LEN=1706; translated  
MKLSIPRAYLGTMTFGWSQTSSYVDESIALEMVKRFIAFDQSLEITEHRLDTARIYAGGK  
TEKIVGKVLQKLDPALLSACLIVGTAKAAPSIIKPEGLSSEGVLGQFQASMDAMGTTSCDEYY  
LHQPDTEHSLLESLSKADSLVKKGKVSRIKMSNYHASEVSRAFQLCKEHLTPPTVYQGL  
YNPLNRLVEEDLLPLLKENGCSFVAYNPLAAGLLTGKHNDVETVVKGRFKNQNYLPRFY  
TPANFAAIQLIQEQCKKDEISMVDATFRWLLCHSSLVADFDGILLGASSLDQDENLAAC  
KQAAQSTSPLSPELLVAFDRAWELTKEGSPYWRYSYSLDMPDRNTLDQGASYQANKVKA

>comp10404\_c0\_seq1; 218 1 343 LEN=858; translated  
XNSSNNVSLLATIGGFKDCVNGISLCPDVGHDGVDGSGTNTMLQNLSTGSDDDDEPKS  
NETGGLGKALLAVAIGSRHFPSETDWENEDPHASLTERINHFGSTQIYSVVAP

>comp10405\_c0\_seq1; 944 118 3261 LEN=3354; translated  
MPKSKKSRASNEVSTGTPSSSRKKPPTTPSSASKPVVISDIISVRLLTSSSSSTGGR  
KSTKYVPTVALHETDANKIDVYAGDKVFIISTVDSNPRRIKVAITRVRIIDSNVDRANT  
SRASLYGNSGKSVKGNHKKNLTPGNCYISPSLSLAESLSCPDETRATCTKLFKTPVSS  
DLHSTSTLPTVPKTPSPKSTPSSSSQKSFSAKGGGGDQLISPPAKPTPSSSKSFSA  
QGGGGDRLISPSPTTQPSTSSSKGRFSFAHGGGGDQLISPKATPSTPSTPSSIKSRAVPE  
RTILQIVPLDSDMGDILASMFCSRSAKTVSVRRHSDTGEPESESPWTIGGPLHQRLVIAHL  
AGEYLAQEALFSVIRGQTIKCKLDAASYEITKKEKALIEAMGKLSIDQDAGISNLAIE  
PPIISLSNELEKSLQSNLAQLNDTQIEKMLLFEISSDTIVVFDKDNVNTSKTTAIVNPNS  
NLPPEMVPKPMVGLDDTIKQVVSALETPLLHPKRFHGSTGSLKAPKGILLHGPSIGKGS  
SVALQVQGSFESSGVYHVERIHCTTLTQTAFVQQAEARLVKLFNSAQKPRPGKKGCLLI  
LDDIHLICPRREGIDLGADRLTSTLLALLDGMKSSEPTPSDKFYPTVILAITTNPALDA  
ALRRPGRLDSEIEVPIPEPSTRKILKFHLES LGTETNFCDSEWLSLARLAKGFTGADL

KLATKEALRKVLMMLSEGKRKITMTVMKKAILSTKPSAIKSVTVEVPSVPWTSIGGMEEVK  
RQLRDAIELPLTHGATFQRLGIRPPRGVLLYGPPGCSKTLMARALATEGHMNF LAVKGP  
LLSKWLGESERALAALFRRARLASP AIIFFDEVDAIASKRGGSSNGGGERLLS QLLTELD  
GIQQSKDASGREGRVIVCATNRPDLLDGALMRPGRIDRMIHVGV PDEKSREKILEIGLK  
KSSAWEIDIASLAKDEISGGLSGAEIIGACRDAALKAMEDFEENEGGSTDPVITTEHVLT  
TLTSMERQITPENLEFYASFQGNPVRH  
>comp10406\_c0\_seq1; 327 237 1367 LEN=1885; translated  
MDYQNSNRSDQEKSKKKKRDKKKKRRTKKDG EWPNQGEANLRDPARGVAGAATPVPLEAS  
AQKPAPELQPPGSHPPVDDSDHCETPLQAYKDLEAVLDRLWIDDG SNQRKKKRPRSEL  
TIYDPYCDGGVKTCLASMGFTNVINRNRDFYRDIESGEIPDYDVLVTNPPYSGMHMERI  
LDFCRQQSECQPNKKKKKCFLLLP HFVYTKDYQRALSSNLIENSKTNPFFYFLVPEIR  
YAYIPPAWVAERSGASKALVKGETTAPFPSFWYCHGPSTSIQQQIHHHDEAWLRETFG  
PSGSFRSKHGPSRLRYARVAEDIPRDFKGEF DATKKRPNPRARKRQRQKQYQQARSLPSP  
AAKAQQQPKKKKKRRY  
>comp10406\_c0\_seq2; 327 237 1367 LEN=2020; translated  
MDYQNSNRSDQEKSKKKKRDKKKKRRTKKDG EWPNQGEANLRDPARGVAGAATPVPLEAS  
AQKPAPELQPPGSHPPVDDSDHCETPLQAYKDLEAVLDRLWIDDG SNQRKKKRPRSEL  
TIYDPYCDGGVKTCLASMGFTNVINRNRDFYRDIESGEIPDYDVLVTNPPYSGMHMERI  
LDFCRQQSECQPNKKKKKCFLLLP HFVYTKDYQRALSSNLIENSKTNPFFYFLVPEIR  
YAYIPPAWVAERSGASKALVKGETTAPFPSFWYCHGPSTSIQQQIHHHDEAWLRETFG  
PSGSFRSKHGPSRLRYARVAEDIPRDFKGEF DATKKRPNPRARKRQRQKQYQQARSLPSP  
AAKAQQQPKKKKKRRY  
>comp10407\_c0\_seq1; 384 199 1801 LEN=2361; minus strand; translated  
MIEPEAAIKRFQEF LRFETVSATGPSTGAYVECAEFLRTQLES IPEHNGETNGTMRAGLL  
QDIHFLPESPDHSPVVARWPGKDPTLPI LLLNSHYDVVPADVEAWTVPPFGAIRSSDGK  
IYGRGTQDMKSVCMQYIEAIRAIHATNPGWKPERDIYLT FVPDEEIGGSGMAAFLDSDLY  
KNQMPGIALALDEGLASTTNIFDVFYGERLPWWVKVTATGR TGHGSRFIENTAVEQLEL  
SQKALAFRKGQLDRLDKHDENCTHAVIAKKKTLGDVTS LNITTLQAGVAVGNTYAYNVV  
PSSASCSDIRISPKMEPKQIKDMLDVWCQEC SRAPEEGSEVTWSSVSDDYENGM SHATT  
DTPRLNPWYAAFCDALHEMGEVSPQVFP AATDSRFLRALGIRALGFSPMRNTEIMLHE  
HDEYILEENFLEGIEIYAGLIAPLVPKTKILIVELVEHSTR ISMAKAKSAVKEGICHQR  
NEEAILSDKPSTIFFIRDKAIHRMLYFVRKPVVSKNWSKLLISRGPIIGNPKH  
>comp10410\_c0\_seq1; 978 1 2059 LEN=2094; translated  
XLEKYSKVGSYEGKLGEEDATLKD TAYRAIADHIRTLSFAIADGAVPNNEGRGYVLRIL  
RRATRYGQQILKAEPGFFQKLI PVVETFG EAYPELVKNQATITEIIAE EEAFASTMLDR  
GIKFFGELEELKADGKSEVPGKAFYLYDTLGFPI DLTELMAEEAGLTLDSKGFANEME  
EQKNRSRAARAAKSGGAPQLELIAEQ TSSSLADNNVLP TDDGFKYKWDVELPATVMSIFG  
ADGFYKEDAEAEAGDFVGI VLDKSSFYAEAGGQ EADIGVLR LVD AEGNSVGSFEVRDVQS  
FGGYLLHTGVVTEGSFQSGAHVDCRVDYERRRLVTPNH SMTHVLNAALREVLGDNVDQRG  
SLCNDEKLRFDFTNKKALSAKQLKKT EEICQVVSDSLPVTATTMPLAEAQAI EGVRAVF  
GEVYPDPVRVQVGD DCSI EFCGGTHVANTAEAEAFV LVEETAVAKGIRRI TAVTRDTAK  
EAI EEGK KIESMVVELEALDDKTEGLDKKAGAARKDVDAAF ISATLKADLRNR IEGVQKK  
ANEVKKAAALAA RVDLVLDKDVRTQVEDALSKDARTLV LNVDINADSKASQV LNAVKKIAP  
DMAFMGLSEEEEGSGGKLMAFAVVPESLVDCGLKADEWVRGTLEVC GGRGGGRPGNAQQG  
AQECSDVDAVVAASESFAAGKVTIEA  
>comp10411\_c0\_seq1; 285 250 1341 LEN=1341; translated  
MDYLP IGDARVDPILSDKCVSDHVHTFYGPQSAVDPRAGILDTLAASTTVGELTGNVEEN  
RSIYWHPTVYKYIRDED TYKRDVIAQTSAYYIFETGKT TAFPKGFRMIGGYDTDKSMAFA  
ECVNPS PCEAGDCYSENEFFPTTKCDELEVSMTPNCWDGVRIDSAPDHTSHVQYADDSA  
FDGECPE SHPVKIPQIKLFFRIMPYDGGWHTFSDLSSVYHSDYVAGWEEGILQNVLDNCE  
NEGEDAMPNFFCEEFLTFRDAPKCTDPEACDFADPQLLEKIKAFQPATPLDIRGTIVAEE  
TEEVVGNLPRSTCNGSLVGDGGGNDTSVPTPAPFAPPTGPPSVSPNVDDDPSSGSPFIW  
SIIW  
>comp10411\_c0\_seq2; 233 250 1460 LEN=1460; translated  
MDYLP IGDARVDPILSDKCVSDHVHTFYGPQSAVDPRAGILDTLAASTTVGELTGNVEEN  
RSIYWHPTVYKYIRDED TYKRDVIAQTSAYYIFETGKT TAFPKGFRMIGGYDTDKSMAFA  
ECVNPS PCEAGDCYSENEFFPTTKCDELEV RVALWGISVRAHLGEMKERKFSNRSELSIV  
YLFYLMAIKVSMTMPNCWDGVRIDSAPDHTSHVQYADDSAFDGECPESHV KIPQIKLFF  
RIMPYDGGWHTFSDLSSVYHSDYVAGWEEGILQNVLDNCE NEGEDAMPNFFCEEFLTFRD  
APKCTDPEACDFADPQLLEKIKAFQPATPLDIRGTIVAEE TEEVVGNLPRSTCNGSLVGD

GGGNDTSVPTPAPFAPPTGPPSVSPNVDDDPSSGSPFIWSIIW  
>comp10411\_c0\_seq3; 359 250 1515 LEN=1515; translated  
MDYLP IGDARVDPILSDKCVSDHVHTFYGPQSAVDPRAGILDTLAASTTVGELTGNVEEN  
RSIYWHPTVYKYIRDEDTYKRDVIAQTSAYYIFETGKTTAFPKGFRMIGGYDTDKSMAFA  
ECVNPSPCEAGDCYSENEFFPTTKCDELEVSMTPNCWDGVRIDSAPDHTSHVQYADDSA  
FDGECPEHPVKIPQIKLFFRIMPYDGGWHTFSDLSSVYHSDYVAGWEEGILQNVLDNCE  
NEGEDAMPNFFCEEFLTFRDAPKCTDPEACDFADPQLEKIKAFQPATPLDIRGTIVAEE  
TEEVVGNLPRSTCNGSLVGDGGGNDTSVPTPAPFAPPTGPPSVSPNVDDDPSSGSPSVSP  
SSPSSGSSGSSGSSHPSSGSSGPLSSPSSGPLSGPSSSPLPGSSSPSSGSSSPL  
PK  
>comp10411\_c0\_seq4; 269 1145 1783 LEN=1783; translated  
MTMPNCWDGVRIDSAPDHTSHVQYADDSAFDGECPESHVPKIPQIKLFFRIMPYDGGWHT  
FSDLSSVYHSDYVAGWEEGILQNVLDNCENEGEDAMPNFFCEEFLTFRDAPKCTDPEACD  
FADPQLEKIKAFQPATPLDIRGTIVAEEETEEVVGNLPRSTCNGSLVGDGGGNDTSVPTP  
APFAPPTGPPSVSPNVDDDPSSGSPSVSPSSSPSSGSSGSSGSSHPSSGSSGPLSSP  
SSGPLSGPSSSPLPGPSSSPSSGSSSPLPK  
>comp10411\_c0\_seq5; 343 1145 1957 LEN=1957; translated  
MTMPNCWDGVRIDSAPDHTSHVQYADDSAFDGECPESHVPKIPQIKLFFRIMPYDGGWHT  
FSDLSSVYHSDYVAGWEEGILQNVLDNCENEGEDAMPNFFCEEFLTFRDAPKCTDPEACD  
FADPQLEKIKAFQPATPLDIRGTIVAEEETEEVVGNLPRSTCNGSLVGDGGGNDTSVPTP  
APFAPPTGPPSVSPNVDDDPSSGSPSVSPSSSPSSGSSGSSGSSHPSSGSSGPLSSP  
SSGPLSGPSSSPLPGPSSSPSSGSSSPLPK  
>comp10411\_c0\_seq6; 293 349 1664 LEN=1664; translated  
MHLKAFYCDTQRRVLGRTGQSSNLVWVSLDTCXDLHRIASPAEWNSLPLVYILLEILM  
LTCFFKPPQILIFLFDSSLP IGDARVDPILSDKCVSDHVHTFYGPQSAVDPRAGILDTLA  
ASTTVGELTGNVEENRSIYWHPTVYKYIRDEDTYKRDVIAQTSAYYIFETGKTTAFPKGF  
RMIGGYDTDKSMAFAECVNPSPCEAGDCYSENEFFPTTKCDELEVSMTPNCWDGVRIDS  
APDHTSHVQYADDSAFDGECPESHVPKIPQIKLFFRIMPYDGGWHTFSDLSSVYHSDYVA  
GWEEGILQNVLDNCENEGEDAMPNFFCEEFLTFRDAPKCTDPEACDFADPQLEKIKAFQ  
PATPLDIRGTIVAEEETEEVVGNLPRSTCNGSLVGDGGGNDTSVPTPAPFAPPTGPPSVSP  
NVDDDPSSGSPFIWSIIW  
>comp10411\_c0\_seq7; 307 250 1634 LEN=1634; translated  
MDYLP IGDARVDPILSDKCVSDHVHTFYGPQSAVDPRAGILDTLAASTTVGELTGNVEEN  
RSIYWHPTVYKYIRDEDTYKRDVIAQTSAYYIFETGKTTAFPKGFRMIGGYDTDKSMAFA  
ECVNPSPCEAGDCYSENEFFPTTKCDELEVRVALWGISVRAHLGEMKERKFSNRSELSIV  
YLFYLMIAIKVSMTMPNCWDGVRIDSAPDHTSHVQYADDSAFDGECPESHVPKIPQIKLFF  
RIMPYDGGWHTFSDLSSVYHSDYVAGWEEGILQNVLDNCENEGEDAMPNFFCEEFLTFRD  
APKCTDPEACDFADPQLEKIKAFQPATPLDIRGTIVAEEETEEVVGNLPRSTCNGSLVGD  
GGGNDTSVPTPAPFAPPTGPPSVSPNVDDDPSSGSPSVSPSSSPSSGSSGSSGSSHP  
SGPSSGPLSSPSSGPLSGPSSSPLPGPSSSPSSGSSSPLPK  
>comp10411\_c0\_seq8; 367 349 1838 LEN=1838; translated  
MHLKAFYCDTQRRVLGRTGQSSNLVWVSLDTCXDLHRIASPAEWNSLPLVYILLEILM  
LTCFFKPPQILIFLFDSSLP IGDARVDPILSDKCVSDHVHTFYGPQSAVDPRAGILDTLA  
ASTTVGELTGNVEENRSIYWHPTVYKYIRDEDTYKRDVIAQTSAYYIFETGKTTAFPKGF  
RMIGGYDTDKSMAFAECVNPSPCEAGDCYSENEFFPTTKCDELEVSMTPNCWDGVRIDS  
APDHTSHVQYADDSAFDGECPESHVPKIPQIKLFFRIMPYDGGWHTFSDLSSVYHSDYVA  
GWEEGILQNVLDNCENEGEDAMPNFFCEEFLTFRDAPKCTDPEACDFADPQLEKIKAFQ  
PATPLDIRGTIVAEEETEEVVGNLPRSTCNGSLVGDGGGNDTSVPTPAPFAPPTGPPSVSP  
NVDDDPSSGSPSVSPSSSPSSGSSGSSGSSHPSSGSSGPLSSPSSGPLSGPSSSPLP  
GPSSSPSSGSSSPLPK  
>comp10413\_c0\_seq1; 625 626 2578 LEN=2895; translated  
MDQELSRILGFVDNLLLASPNTLDRDSILDRISEHETDFRTAEASCLDIEDAATSTTIG  
LSTPPLSFERVGCSPINSSNSDQIEAVQGTGMPHNNDYLSSISPPNSPIASSPDDSY  
FLAIRSTEPVLDAVDAIRSAAEDVWSAESTHSEFSSRFTYQYSGNSEAHVDFGADDD  
SAGAKAVSALNKALHTKIYPMIREAFFPDCQQSVTENEVNDETILFVYDALVIRYNATAA  
AEASYVDASEAETSEISAGQPLHRDLGLVSVNIMLNSDREFEGGTFEFENQLWNPDAEWK  
GREEIDDP SLDTT PLKPLGVGYCLAHSASERHAGAGTKKGV RDILVLFVSAANLKTNTSK  
EHEIATKNTSVRAPAELSSLRLKSCRFCNGNEMIYNKPQNPSPEQEGELDQRKMEIRRH  
QSVLLCRILHQRLAVCSTEEVSNSSEIVGRSLLSTNANYNYDGEALQYLGTALMEYSDFW  
HAIIGDVGGVGDGAACQNTLNDKIDILKTASDCFLAASLMTPCDSRVFNNQGIVIGKI  
RGMIDADQQHSVLLRRYGEDEEERAYRKLKILHGSLNAGCADIDRHLESLLLNYGLFLS

NLDRFEDAVIDLGHFAADATTADVDTTNDTETVRSNAVRLWRYCKLRLAQ  
>comp10414\_c1\_seq1; 578 61 1683 LEN=2021; translated  
MGNLCCSSSSQDTKVIQNSTRSDAKSHSDGTTIRGSKILQSGAYQVDSEGTIFFDAIDRF  
PSQEDMFYPPAHTMRLSLSLNEVDMEQPGTLPILLSNPPLSGSIEEVDGQQPQRRSVAAIS  
KHLSSETPGSQSGYPGELTESDLETCLKFREELKKRDPAFKEMVMSMHPYEHEAFALCR  
YLRARDFVIEDVFAMLTEKNQPQSWSIARDAGFYEDFHNTIPEFNGCPLPVFLTQFPLIH  
SGIGKNGAIVLYFKAGEVNCPGIECIAGDMVNALPVAWNRLYHGARNAMKREVARADPST  
TTVLGEKIIVVDLAGDSALFSSGLDFLKAAPAAGSCFPETVNRITYVLNAPFSFSIAWAVI  
KQLIDPRTVQKIGFFSTIAKATSDFLKYIESEDLLSTYGGTGESFEEILAKRQKELTHKE  
GIARYVVKQLTTAGNEICFGFDLSEETVDSIVVYSRSDNVCEISVVDSSNGNEVVKETEVE  
RRENATNSNTAEDISRNNYAMEIATSEDFAQTPAGSFVNTKSGKKGDHYLVAVTVAEKQ  
>comp10415\_c0\_seq1; 274 168 653 LEN=1775; translated  
MPKILSTTAFRKSALCLIVLWCSEFILPAQSFVVGSRSACTIYPKCQRTTIDSSVGAERD  
TEEKIKEGTDEENAKDDEDPVEVFLAMEEASQRTTRRLMLPRMIMSSIGQTVTYGAYAF  
IFCFGLNLFGYALINDSNGMRIGTLEERAFQIEVEKSMKDK  
>comp10416\_c0\_seq1; 469 420 2264 LEN=2302; translated  
MLVACWSFLFLITGHGASALAPSTGHRVRTTRTEGRLSAIPTIDGLWKSLEERLSDGKRS  
NQOEACTSPGAGFFRAVNDKNIDGAMAYIASSETESTGVDFYFEDTDFPSAFGSPQELERV  
LRLQSEIGNAPIVVIDEDIYDASARKSGVAFHLEDPOKQINTKGAFFELNDDGLIRKAF  
IVKENDKSGESSLKILKLASDVIAATKEGQGGSSSDSVPVPTLANPSASVSLPEQYFAAW  
NQRDMKQAVSVFAQDIEYDDTAFPAFSGKEALENHLDLCAEAMPPSFSFIVDDKIDAGN  
KVMVRWHVESNAEELPYTRGC SHYRIENELIASGTDLKEPAVFKTGGLMLFIDSFSSKLR  
DEPIRMVPTLVWATYMYVVFSDWFYGLPATSLEVRTWEEVRDLSLNFVLPSPILDLPA  
PVVHPGLEGIFNLLLSWAAMFAGFLSDDRKSKPNLFPMLPAVAGMQFLTSAFLLPYLATR  
SVEDNGTESVAIPAEIEITPVIKATDSKILGLAMGLVGTGSIWGLFARFDDFGDISTRYA  
SLIDLIDSIDRVGSSFLVDLAIIFGLFQGWLVEDDAKRRGMDPDSLLAKAAKYVPPFFGLVSY  
LTLRPLVAAEEQR  
>comp10417\_c0\_seq1; 361 1 1554 LEN=2696; minus strand; translated  
ILIMFIIIIIGQEKTWWASTSLRVQFVDKTSNFLKGYNGCYNMANHTIIPSLNHAKRIVY  
EGHPSNNKQANFAYNHNSRHWEELDTSLNETEGEIVLLAHSSTLSFDISTSFDEPWYSA  
SGTPLDVYFFEKFDDEEQRSSCDSFLNNGICDEIFNTEYYKFDGDCCASTCTNSRCGVG  
GLLNAFGEEIIYGDGFPPCKDPMVPITILFNDFASYNATNKLTNDMMAPLSSDTIEPM  
MLLDCDDVNI FTIPVNGKMFNQSETFMVRDGANCTIRINNSTSTVQAEGRPIWLVDYTVF  
HGDQTSILNDDSIIVILREQSSNNEFAMFQRI PD CYFEKLSNHLDTSTIYMGDESHHRAIK  
WLRATSETSKNSRCEDDNFLERYALSVLNFAAPITPPLPSEDNTNTTTDQGPFATSNITM  
VDGVPSPIDLTTGNPASSVPLPDLAQKGGVVNGFSSEKLWINENRQCIWRSVECNRSVE  
CLYLQQRDLKGTIPSSIGLLSKHEEDNVLC SIERAAVW  
>comp10417\_c0\_seq2; 361 1 1554 LEN=2603; minus strand; translated  
ILIMFIIIIIGQEKTWWASTSLRVQFVDKTSNFLKGYNGCYNMANHTIIPSLNHAKRIVY  
EGHPSNNKQANFAYNHNSRHWEELDTSLNETEGEIVLLAHSSTLSFDISTSFDEPWYSA  
SGTPLDVYFFEKFDDEEQRSSCDSFLNNGICDEIFNTEYYKFDGDCCASTCTNSRCGVG  
GLLNAFGEEIIYGDGFPPCKDPMVPITILFNDFASYNATNKLTNDMMAPLSSDTIEPM  
MLLDCDDVNI FTIPVNGKMFNQSETFMVRDGANCTIRINNSTSTVQAEGRPIWLVDYTVF  
HGDQTSILNDDSIIVILREQSSNNEFAMFQRI PD CYFEKLSNHLDTSTIYMGDESHHRAIK  
WLRATSETSKNSRCEDDNFLERYALSVLNFAAPITPPLPSEDNTNTTTDQGPFATSNITM  
VDGVPSPIDLTTGNPASSVPLPDLAQKGGVVNGFSSEKLWINENRQCIWRSVECNRSVE  
CLYLQQRDLKGTIPSSIGLLSKHEEDNVLC SIERAAVW  
>comp10417\_c0\_seq3; 459 1 2224 LEN=2550; minus strand; translated  
ILIMFIIIIIGQEKTWWASTSLRVQFVDKTSNFLKGYNGCYNMANHTIIPSLNHAKRIVY  
EGHPSNNKQANFAYNHNSRHWEELDTSLNETEGEIVLLAHSSTLSFDISTSFDEPWYSA  
SGTPLDVYFFEKFDDEEQRSSCDSFLNNGICDEIFNTEYYKFDGDCCASTCTNSRCGVG  
GLLNAFGEEIIYGDGFPPCKDPMVPITILFNDFASYNATNKLTNDMMAPLSSDTIEPM  
MLLDCDDVNI FTIPVNGKMFNQSETFMVRDGANCTIRINNSTSTVQAEGRPIWLVDYTVF  
HGDQTSILNDDSIIVILREQSSNNEFAMFQRI PD CYFEKLSNHLDTSTIYMGDESHHRAIK  
WLRATSETSKNSRCEDDNFLERYALSVLNFAAPITPPLPSEDNTNTTTDQGPFATSNITM  
VDGVPSPIDLTTGNPASSVPLPDLAQKGGVVNGFSSEKLWINENRQCIWRSVECNRSVE  
CLYLQQRDLKGTIPSSIGLLSKHEEDNVLC SIERAAVWSYFSLIIYSSFDYCFYTKIVDG  
NHLQGTIPTEIGKLESILTLDLREYHPDVFSMRCRPINTLIHEPQPIFLVFPPLPKDPTC  
SSICDMLHTAHLTTYAWVHTLYTNDLNILRQTDKNSLTGSI PSELESLTNLSKIFVGD IQ  
NNHNLDPESLHHKVHMDCDLSEPNACKLVELDDLSIRVSDRNRCTELIGKFEQNKKLMT



IDNCDEMKRKCAICEDDDGD

>comp10418\_c0\_seq1; 282 367 1677 LEN=1677; translated  
MTDRSNYIYLTTETKKHFVQEVIGDSDVRPDSIYSPHYPNRVTYYAHWCPHCLHFKPKY  
MEFSNEVHEMSKLLRVNVEVFAVSCVPHAKICMDNGIHGYPTIMYYPPNSINGTKFTQTD  
LHSEEIFRITTLAMRKETEQVNMQRQSGRSKDGHDKIRQKAYFIQRTKTETFRDAHLSFH  
FAMTTAIFTQPGPLPEKPRKALLAFLNAMKRTIPSNSSMQPVVRDLLKNFDAIVMEPMAL  
NKIMGNHPPPGPI SKWSRASSQHGTGYTAGLWILFHIMSVGLVKWNHLATDDGQMI IPAA  
MADIQRNYVEHFFQCEECRLNFLSDFDACMFDRCNRLITLANGGTLEQFIQYPLWLYETH  
NGVNVRLRNERIEQGIESESFTTQAEISWPPASSCPLCWLSREKDRWDELEVYKVLQSY  
WYVLCVFCDFDETTMA

>comp10418\_c0\_seq3; 356 367 1863 LEN=2749; translated  
MTDRSNYIYLTTETKKHFVQEVIGDSDVRPDSIYSPHYPNRVTYYAHWCPHCLHFKPKY  
MEFSNEVHEMSKLLRVNVEVFAVSCVPHAKICMDNGIHGYPTIMYYPPNSINGTKFTQTD  
LHSEEIFRITTLAMRKETEQVNMQRQSGRSKDGHDKIRQKAYFIQRTKTETFRDAHLSFH  
FAMTTAIFTQPGPLPEKPRKALLAFLNAMKRTIPSNSSMQPVVRDLLKNFDAIVMEPMAL  
NKIMGNHPPPGPI SKWSRASSQHGTGYTAGLWILFHIMSVGLVKWNHLATDDGQMI IPAA  
MADIQRNYVEHFFQCEECRLNFLSDFDACMFDRCNRLITLANGGTLEQFIQYPLWLYETH  
NGVNVRLRNERIEQGIESESFTTQAEISWPPASSCPLCWLSREKDRWDELEVYKVLQSY  
WLEDDDVEVLRMLSESGVAIEEKKMLDHSMAENYSDKLDLYSTVPWCCFVLILALVRYR  
KKKYNLRGIHKKIESDNF

>comp10419\_c0\_seq1; 523 130 1668 LEN=1879; translated  
MKATVLEYEEDPLSPSDSPSSSRLELQPIREYTLQKTISSNNNNNGSATASKRTLSCVLI  
RQNHRYTFRSSIKVLRRLFLPLGYPLSVSDTYLPYQIYDGLQGLCSYWRGVVSAKAVFEA  
AGVGNAEATALSAAWALRDGTGMIGGLAYSMAASYFDSHAKEFRLLLADVINDISLT  
LDMIAPYFGPNSIWIWGLSTLGTICGITAGATKGHITQHFAKDGGNVADLTAKESTQE  
TLVSLIGMLGGVWVAKLLEKHGQSDPFFWTWLFPGILTITIHVWANYKAVALKLTTLNPE  
RTKVLFRNTIDIMATEVHDEQQATTASPDLLKAIRNLESPELLQESLFLSVWSLIFPKIC  
LSGSLVGLRQLDCSILQFDANEIPDGNSSLPYVIGYDSRDIYVWLVKVGATRKDELKAYV  
HALLLQKVLSSSIKKGSKTENADVLRQTYVQVLHLHFENYPIEDPLLKWTDDSCSQKSF  
LMERLDLLGWDLRGRLYLGFSSRRLKTFVKNE

>comp10420\_c0\_seq1; 154 1 414 LEN=478; translated  
LFLPTAFRCRYNTSADMWSLGCMTFELLTGDLLFDPRAGDDYDRDEDHLAMFQELLGRMP  
KRLALEGKYAKQFFDKKGLKHIKSLKFWPIQDVLIIEKYHFSKEDANAVADFMRLPLDFD  
PKTRASALDALRHKWL

>comp10420\_c0\_seq2; 1183 1 2968 LEN=2994; translated  
XDDDDDEVSRRGGSSRNGGYGVVPPSQQSAKRLPNVIHSDDDDEDFDGEYTDASAH  
DDASEDPDDEDEDQSRRSRHTDEDSDDSDEDRNEKHGSDSGEDYDDEDEGEDGYKPGG  
YHRVKIGEYVNRQRYVVIKKGWGHFSTVWVVKDRKAVQNNEGEQFLALKVQKSADHYTDA  
AMDEVELLDCIHKERKKQRSPLQNKDADGVTAGEMSEFSKYSATLHDSFFHTGPNRHM  
CMVFSMLGVNLLSVIKAFNYRGIPIPVVQNMIRGICKGLDFLHRKCHI IHTDLKPEVLL  
SSHEQLGGPNDDTSLVGSMANMSIDTNRELAKSIKLEDELOPNKLSPADRKRLKLLK  
KKRQKARKKFFGSGGSDGEDEDDTDYNADDDDDDDGEDES PNLSDWELARMLNSASSMI  
SPRSADGEVIPATASVKRRLNHGPFITSNFGRHKEQADAMLLGLLQTLIDVRRPSAEELA  
RYLSPKNDTENGVAEIAFMLRAFTPEQELADGVSTALGGIPWELSEDKARRKWRCK  
ITAPTVGRYNSAAGCPSTAFELTQKCRNKLDAGAKQIFSDLALLVGANLGGDGEKEEVLN  
NKNAKRALPYSLFKLRFVPSSTYVVLFSFLESRLHGVVFFAYRRDEGNPPLDSILFGPKGN  
LVCDHPLAMRTKSSSGDNSSSPTNSTCMFGFDLRQVKDFQALPSLKEDGSASLDLSPS  
LDRVLGWWIARNSIKDRMKSFLGFDPTSTLVSALGHRDPANGSDDRFQEGGKPGGSTTN  
NSGNGRNNASAIAAAAPKSSPDLSDPAYLLTTKSVIVDLGNACWTHRHFSEDIQTRQYR  
APEVLIGSKYNTSADMWSLGCMTFELLTGDLLFDPRAGDDYDRDEDHLAMFQELLGRMPK  
RLALEGKYAKQFFDKKGLKHIKSLKFWPIQDVLIIEKYHFSKEDANAVADFMRLPLDFD  
KTRASALDAXAAQMVEMITITITNPFYFN

>comp10420\_c1\_seq1; 193 487 667 LEN=667; translated  
MNI FSAKKKRSSGMAATDEGDGDDYDRHKQQQHDTSAMDILVDSGSDEDEIFDDGDDDD  
X

>comp10421\_c0\_seq1; 354 123 1172 LEN=1226; translated  
MPDFSSSTFKLILLSGMVLQNAITVLVGRYTRSEVRVEDQYSVNHLIVITEFGKLFSLC  
IFEYVSTNGGLVKS IQDNI INRPYDALKITIPALLYLVQNTLLYVALANLTAPIFQVTYQ  
AKLVTTAVVSVIMLNRKYSPQQWVCLVTLVSLGVAVVVLDPEDKDDADLASQSMVAGL  
VAVSVACISSALAGVYFEKVVKNSGSGGKQPPVSVWVRNMQLAFYTTIVIALVQGANADP

EKASLSYFHGFTFWPWVVLVCLQAGGGLLVAAVIKYADNVLKGLATGVSVCFGTAVSFLLF  
GTPITGQFVVGAVMILVSVYFFSNPIQKEKSQGLASPSSATEMKNILPK  
>comp10422\_c0\_seq1; 463 383 1696 LEN=1803; translated  
MIRITVSDPRIEDPDTRHSFASYLVSTPEGNSVRRRYSDFRWLYHRLQTEVPGALVPIIP  
HTRTLLSSKFTPEFLEERRRDLQDFLLAVARHQELCRAPSMTPFMLLPLGKDFDDGKKT  
VEHAVPTTEATKWAEIAGTSEPASKATVAAKGIGKLF SKMRLSSGSQELLTTPDEAEVVA  
LHAYVSEVSEQVKSLARASDALVKSTLKNAAEHHELGI PVGLWRTSYLQQQQHGDQONEDA  
KSAMAGICRFSDEMATLLRQKHKEEESLFGHGIHKLANTVSAFEIALGQRKKAQVAYTHS  
NNSFLEKTAALERAQKAPKPPPEVTDKLASERAELERIEADRNRFCVTRRLLRDAAEQK  
PGLVGMLRDAVLAHARAQVSYTARIHEACQRMIPSLREALGAGSPRRLPSAPAEAESESGP  
PPPSAPPPPPSEDGES  
>comp10423\_c0\_seq1; 989 1 3438 LEN=3662; translated  
XNISPNVNVNMGKPSNNKAQLQQWCEDNLHNLGAFADSALASYLVHIAKAKSASEIER  
VLREGDVKAKTEEAQQSFCRGLYQKFRGSSGGSGGGGSKSSSMTNAQWVDKAKDYSL  
EDDDNTEIDDNGGRQREERKNKKKLSSTMALTRSKRDLKEKKKRYRLYDKDDEDDSS  
LENYDIKRSRGAVREQSIEDRRRKRREKEKQSEINEKGSEVGTETDALNPEERAKLSX  
EKDKRERDEFVQRMILDRDQKTKQKMKVQEADESKEALRARIIEIDRLARGETVVDG  
EEMTLDRLRTESTRVYLKQRQEREVTLKQSLDEDEEELFRNQKLSKAETRIEVSRIK  
MVEKQENQDEHDQDDGFYRLPDEYDEKDTKESQDQARLSSRYTEDKRDKSEQELWEESQT  
RKAETHKKRSQKKEKEYELVFEDQIDFVMQETTKGYDKRGRNRRAKGEKVKQEVSS  
GDSEESLEIKPITEHEKILAGRKKLPVFPYREEFLAAVKDHQILVLVGETGSGKTTQIPQ  
YLHEIGYSELGKIGCTQPRRVAAMSVAARVSQEMNVKLGKEVGYRIFENCTSEATKIQY  
MTDGMLLREILTEPDLASYSMIIDEAHERTLHSDILFGLVKDIVRFRDLDKLISSATM  
DAEKFSKYFDDASIFMIPGRMFVDFYTKSPEADYVDAVVTVLQIHVSQPLGGDILVF  
LTGQEEIETAAEILTQRTKNLGSRLINELMICPVYANLPSEQQAKIFEKTPKRARKVVLAT  
NIAETSLTIDGICYVIDTGFNKQKSFNARSGMESLVVTPVVSQAAANQRAGRAGRTQPGKC  
FRLFTAWSFQHELEPNTVPEILRNLGNVLMKSLGINDLIHFDFMDKPPADALIRALE  
QLYALGALNDLDELTKLGRMAEFPLEPMLSKAVICSEYKCVSEVLSTVAMLSLGASVF  
YRPKEKIMADTARMNFARGGGGDHATLLRCYRDWASTDYSDGWCFFENFVQVRSIRRARD  
IREQLEGLCERVEIDQSIKPPDDNDALLKAITSGFFYNVAKLGRGTGEYQTVKQQRVYIH  
PSSVLAKEEQPPSWLVYFELAF'TTKEFMRQVAPIDPSWLEIAPHYYQQSDVEDSKKKKL  
PKSRRR  
>comp10426\_c0\_seq1; 459 245 1702 LEN=1899; translated  
MFGGSSGSQQNSANGISDLLLLGSAGNFPNAGGSLGNGFGNSAVATDTSSSTSGAATMAPG  
GTASGTTASGNSNNSNSTFDLNDFPSLGGTVVMQGSNNDGSNNNNNSNSGLAAALRDQQ  
RLLAHQQLLQQQGGGNSPQQQANAQQQKQQQQQQQNNLYRLAMQGGSNGNFNFMATEDF  
PALPGAPPQSNNGANGPVGVGGNGDVGTSGSSLLMGSNGGVINSVQGGQSGLGGVGSNV  
GGPSRLAVAGGIPGGNDQDPSSDSVGLLGGGGPGLGVVNLSSQQQQQNSNAQRTKTEATP  
AGTALSGDYGLLGLLVIRMTDADRNALALGSDLTMLGLNLGSSEHIYNTFSGPWSESSG  
NTKEPHYQLPSCYYMQPPALKTGHLQQFQPETLFYIFYAMPKDVLAQYAAQELYTREWR  
HGDLKLVFKRAGPADGIPAQPSNGQQYLYFDINSWEKRLFNGSMNQNVTTGGFLTDEDVRV  
RFVST  
>comp10426\_c0\_seq3; 459 703 2160 LEN=2357; translated  
MFGGSSGSQQNSANGISDLLLLGSAGNFPNAGGSLGNGFGNSAVATDTSSSTSGAATMAPG  
GTASGTTASGNSNNSNSTFDLNDFPSLGGTVVMQGSNNDGSNNNNNSNSGLAAALRDQQ  
RLLAHQQLLQQQGGGNSPQQQANAQQQKQQQQQQQNNLYRLAMQGGSNGNFNFMATEDF  
PALPGAPPQSNNGANGPVGVGGNGDVGTSGSSLLMGSNGGVINSVQGGQSGLGGVGSNV  
GGPSRLAVAGGIPGGNDQDPSSDSVGLLGGGGPGLGVVNLSSQQQQQNSNAQRTKTEATP  
AGTALSGDYGLLGLLVIRMTDADRNALALGSDLTMLGLNLGSSEHIYNTFSGPWSESSG  
NTKEPHYQLPSCYYMQPPALKTGHLQQFQPETLFYIFYAMPKDVLAQYAAQELYTREWR  
HGDLKLVFKRAGPADGIPAQPSNGQQYLYFDINSWEKRLFNGSMNQNVTTGGFLTDEDVRV  
RFVST  
>comp10427\_c0\_seq1; 372 286 1401 LEN=1621; translated  
MTMNSLGRVVICHIQLLTVFQILICSAESGTPLTNNAGAKAPDEVPLNRIGELEPSIGF  
YQSIEMVENSLLFAKQSKYQAEVHQSFFGKMLVLDGVIQLTERDADSYNEMMAHVPMF  
QHPNPKRVLVVGDDGYVLKEVLKHPSEVHVDHVDLDEEVIRTCESYFPQWGDWDKDPRA  
HLHICDGAKYIRDKPDNYDVI IQDSSDPWIAGEDGVMVPLPSGVLYEEHEICEMHRVLK  
PNGILNIQAESFNVPSTLSGIVTWRKTMEACGFKRSRYGNIHTTSYPTGQIGLLGKPNP  
STASKSASVLRRYKEIVNNGAKTTYHPALQRCFDVPLWVHETIYGTEDTSDLLCKNDE  
DKDVADTSTAK

>comp10427\_c0\_seq2; 372 286 1401 LEN=1644; translated  
MTMNSLGRVVICHIQLLTVFQILICSFSAESGTPLTNNAGAKAPDEVPLNRIGELEPSIGF  
YQSIEMVENSLLLFAKQSKYQAI EVHQSKFFGKMLVLDGVIQLTERDADSYNEMMAHVPMF  
QHPNPKRVLVVGGGDGYVLKEVLKHPSEVHVHDVLDDEEVIRTCESYFPQWGDawkDPRA  
HLHICDGAKYIRDKPDNYYDVI IQDSSDPWIAGEDGVMVPLPSGVLYEEEHICEMHRVLK  
PNGILNIQAESFNVPTSLSGIVTWRKTMEACGFKRSRYGNIHTTSYPTGQIGLLLGEKNP  
STASKSASVLRRYKEIVNNGAKTYYHPALQRGCFDVPLWVHETIYGTEDTSDLLCKNDE  
DKDVADTSTAK

>comp10427\_c0\_seq3; 372 286 1401 LEN=1509; translated  
MTMNSLGRVVICHIQLLTVFQILICSFSAESGTPLTNNAGAKAPDEVPLNRIGELEPSIGF  
YQSIEMVENSLLLFAKQSKYQAI EVHQSKFFGKMLVLDGVIQLTERDADSYNEMMAHVPMF  
QHPNPKRVLVVGGGDGYVLKEVLKHPSEVHVHDVLDDEEVIRTCESYFPQWGDawkDPRA  
HLHICDGAKYIRDKPDNYYDVI IQDSSDPWIAGEDGVMVPLPSGVLYEEEHICEMHRVLK  
PNGILNIQAESFNVPTSLSGIVTWRKTMEACGFKRSRYGNIHTTSYPTGQIGLLLGEKNP  
STASKSASVLRRYKEIVNNGAKTYYHPALQRGCFDVPLWVHETIYGTEDTSDLLCKNDE  
DKDVADTSTAK

>comp10428\_c0\_seq1; 166 698 874 LEN=988; minus strand; translated  
MSVAFHEKWTKTHKSKMAMALAKNEKCSVLFETAENDGLDVEDDRAASICPFAMTATVE

>comp10429\_c0\_seq1; 350 277 975 LEN=1048; translated  
MADHDETMDDTDGDDPGAIAAPTVRGGLNPDAARLFRVYRTISNMLSSRGYMPKEMREM  
TPASFRRARFSEHPIRDALTILVEKADDENQQLFVFFAEEEKVGVKPIKVFTDRMRAEGVS  
NAIMVLRVDITPFAKTALSEMSGDFRIEHFKEAELLVDITQHQLVPVHQVLTPTTEKSELL  
KRYRLKETQLPRIQPNDPVARYYGMKRGQVVKIIRPSETAGRYVTYRVCLGG

>comp10430\_c0\_seq1; 147 199 369 LEN=715; translated  
MAETAPLPVNPQLKAQLQCKTVRSADTYCQSREKTANEMIESKSKLPPLPTTESK

>comp10431\_c0\_seq1; 277 88 750 LEN=1188; translated  
MSQRRGGSTKETVAVQNEEIVPFSQALDGPASGGNEVMDRESIEPSQNAHPSNLTSSNKA  
VASSVSLDVMYSAESQQIRTKAWQESYFARGNVHSTWEAEYIELKENGWYGECSKMMDGH  
NSNSVPCGCCSAIVCPMLGASRVGNMAVLKQSNWVTEEVDPDLENGGTKIERSTRPRLDF  
VVGPPVSQKPLHDGTQQRPERFWTDSENEIIFHVFEKRIL

>comp10431\_c0\_seq2; 239 88 957 LEN=1575; translated  
MSQRRGGSTKETVAVQNEEIVPFSQALDGPASGGNEVMDRESIEPSQNAHPSNLTSSNKA  
VASSVSLDVMYSAESQQIRTKAWQESYFARGNVHSTWEAEYIELKENGWYGECSKMMDGH  
NSNSVPCGCCSAIVCPMLGASRVGNMAVLKQSNWVTEEVDPDLENGGTKIERSTRPRLDF  
VVGPPYWPMLCMITYPLILGVSGVTLVTVIPKVNVLVGIAWAICTGGLIFALAMTSFRDPG  
ILPRHRNPPANQEEMGWRWDRALSYPGRGSWYDQDTAVIVEGFDHTCPW

>comp10431\_c0\_seq3; 231 88 930 LEN=1037; translated  
MSQRRGGSTKETVAVQNEEIVPFSQALDGPASGGNEVMDRESIEPSQNAHPSNLTSSNKA  
VASSVSLDVMYSAESQQIRTKAWQESYFARGNVHSTWEAEYIELKENGWYGECSKMMDGH  
NSNSVPCGCCSAIVCPMLGASRVGNMAVLKQSNWVTEEVDPDLENGGTKIERSTRPRLDF  
VVGPPYWPMLCMITYPLILGVSGVTLVTVIPKVNVLVGIAWAICTGGLIFALAMTSFRDPG  
ILPRHRNPPANQEEMGWRWDRALSYPGRGSWYDQGNYSL

>comp10431\_c0\_seq4; 277 88 750 LEN=1726; translated  
MSQRRGGSTKETVAVQNEEIVPFSQALDGPASGGNEVMDRESIEPSQNAHPSNLTSSNKA  
VASSVSLDVMYSAESQQIRTKAWQESYFARGNVHSTWEAEYIELKENGWYGECSKMMDGH  
NSNSVPCGCCSAIVCPMLGASRVGNMAVLKQSNWVTEEVDPDLENGGTKIERSTRPRLDF  
VVGPPVSQKPLHDGTQQRPERFWTDSENEIIFHVFEKRIL

>comp10432\_c0\_seq1; 842 404 2908 LEN=3537; translated  
MKAPLTSLLTFSAALSPPSTLALDEEKMRPALRRGAKATNQRRIESHEVEPGLFSVSVI  
SDADHADTMHRRRAQVVRKLEEIKSCKLFMEDLHFDPNALDSIDKWVCILENYTSESSG  
TPYPYALELSGDTIEELEQLDKTFKEAGVESARSYLWDS PDMIRIDDAANTITLNP NAT  
VSDVEGSDVWIDVEGATEADDRRKLRTTGPLRTLIRIVGGNVQPEPSLSDLQNEIYGGG  
LSLKTQMARCSHGQVTIEPFRGYADGYFQOEISSGIELRITTDPRGQSDKRMENDANEAE  
AAYVLGNLNIQFDLVMFSIPPGTSPFFAAYAYIGTPFSYYSNNSIKDLMVQMHEVGHNLG  
LQHAGEGEDGSIDA EYGDKSGYMGYADADDPAMCYNAANNYQLGWYSEHTVTPPTIGDDFG  
GTFVVISGVAGYDAFDPSKFTVIRLEQPNLPGDYLLGYNWASGMNTGTQEDGDKVIEEKN  
GDVDAVELTWKKAALGVGESYVIQNYDNSGKSLTVRFTEAQLSDAIVDIIPERLPSSEPS  
LAPSGSPSAAPSAAPSTLPSDAPSVPQSATPSEDPSAAPSTAPSAAPSATPSAAPSEAPS  
EAPSEAPT LRDTLNP IYAQLAAYGAVRTSVVDDCDEGYKMEINVKTDLNPWENKWKFKNQ  
NQARWTD RRNFQFPGTKYIDSYCLEYDNCYTFVFFDQGKDGMSVPDYPEADGYAVFLDD

ELEFGRGSGEWNRRREVIRFCTQPQLSNDTGLIFDDDIDLLFTNETDWLLGNDTDWMFNGN  
ETEWICDNETDWLFGNETDIFYGEDSNWRDWLCEEMDWLFDNETYVGNLHL  
>comp10432\_c0\_seq2; 257 1 600 LEN=1229; translated  
XIEVCFQVPDPLTALITVLLSVSLDRVSSQPFSDPFSFFSGSQDSYCLEYDNCYTFVFF  
DQKGDGMSVPDYPEADGYAVFLDDELEFGRGSGEWNRRREVIRFCTQPQLSNDTGLIFD  
DDIDLLFTNETDWLLGNDTDWMFNETEWEICDNETDWLFGNETDIFYGEDSNWRDWLCE  
EMDWLFDNETYVGNLHL  
>comp10432\_c0\_seq3; 306 155 556 LEN=1185; translated  
MSVPDYPEADGYAVFLDDELEFGRGSGEWNRRREVIRFCTQPQLSNDTGLIFDDDIDLL  
FTNETDWLLGNDTDWMFNETEWEICDNETDWLFGNETDIFYGEDSNWRDWLCEEMDWL  
FDNETYVGNLHL  
>comp10434\_c0\_seq1; 328 105 840 LEN=840; translated  
MATAGDRYEERTGNIWSYAHRGDMTGLKAAVVRGVDIDIVNTVGWTPCHAAAAGGQTKAL  
RYMVTKMGADLTIPDRGGNLPVHHAAKNGHVHALRTLRELADVTKVRLSQAQKGAVRDL  
VVEZYKAGKNHLEDGSDGEDEDVSEPVGYARKQSRSTAFWGPRTPISSCAIKKKIKDK  
RKIKKQKQKDIRESDLQAAAFDPEGETTNHEEGTAEPSYAETVQQVKRSRKQKRRQRQNO  
RDNTKX  
>comp10436\_c0\_seq1; 514 102 1445 LEN=1699; translated  
MPSSWPQPAVLENLLQPPSKAAAAGESGAKQNGSKSSTSTDDAPVYDHRVLALYKRVSP  
RMPKESLPALKTELDALCRKHSARGTLLIAEEGINGTICYPFREQTDERVRDDGDDGDE  
LLSLLQEKFGGTLRIRRSVADRPV FARLKI KIKTEIVTMHWQGDKPQCGNSDSDARDSTT  
ASCLGNDDANDGGNGANANTACSMPTSSCAPCRPTERVGEYVPRDWNKLLLDPELVI  
DTRNTYEIDVGTFRNAVNPHTQSFVEFPDWMKRNIAADETTSSKKRALEKPKKIAMFCTG  
GIRCEKATNAAMQLVPNDVPVYHLQGGILAYLDDVPEAESLFDGDCYVFDQRVAVTYRNR  
PSTTFRQKCHACRHPLSNVDLEREDYTHGVSCRYCVGKLTEKQEERFKQRQRMELALEA  
GRKHIHDPKEERQEQPSTKRKKPCLR  
>comp10436\_c0\_seq2; 383 102 1001 LEN=1872; translated  
MPSSWPQPAVLENLLQPPSKAAAAGESGAKQNGSKSSTSTDDAPVYDHRVLALYKRVSP  
RMPKESLPALKTELDALCRKHSARGTLLIAEEGINGTICYPFREQTDERVRDDGDDGDE  
LLSLLQEKFGGTLRIRRSVADRPV FARLKI KIKTEIVTMHWQGDKPQCGNSDSDARDSTT  
ASCLGNDDANDGGNGANANTACSMPTSSCAPCRPTERVGEYVPRDWNKLLLDPELVI  
DTRNTYEIDVGTFRNAVNPHTQSFVEFPDWMKRNIAADETTSSKKRALEKPKKIAMFCE  
>comp10437\_c0\_seq1; 390 105 1338 LEN=1582; translated  
MTRDSSTTGPTTEKKDKTWTDSQIRWLDDKVPGEEDDTNASDDDEEDEMFPDFADPDPT  
EVFRFRFVAKTQKGRKSSAPGTAIEAAGSSDDGTESINLNIHGKYTGSDAVWQSTGLTLW  
KASTYLCYDYMVEHVDELCEGERVLEVKYAIHPGAAPCDMSQSSKVPHCIAGTNDTNPWLRT  
SDRSP TVIGSNLTTWCHSFLWSLDSLXAGLGLNGLLAHRLSAESVITDGDSDAMKELRK  
NIRVNRVAPQTGDKCNDDAHQGGQHEAVSAEQLIWGKESAETFLESIAQTAGSSVSSSQ  
FSV I IASD I IYAAVVIDPLWETVRTLLRYPNGQFWMAFAVRKVPVTIDFVLNKAEEYGF  
YELVDSQVDGHDDSDDIAEGDSETGRVFIYRFSWDETKADRDRICVGVKET  
>comp10437\_c0\_seq2; 477 105 1157 LEN=1401; translated  
MTRDSSTTGPTTEKKDKTWTDSQIRWLDDKVPGEEDDTNASDDDEEDEMFPDFADPDPT  
EVFRFRFVAKTQKGRKSSAPGTAIEAAGSSDDGTESINLNIHGKYTGSDAVWQSTGLTLW  
KASTYLCYDYMVEHVDELCEGERVLELGAGLGLNGLLAHRLSAESVITDGDSDAMKELRKN  
IRVNRVAPQTGDKCNDDAHQGGQHEAVSAEQLIWGKESAETFLESIAQTAGSSVSSSQ  
SV I IASD I IYAAVVIDPLWETVRTLLRYPNGQFWMAFAVRKVPVTIDFVLNKAEEYGF  
ELVDSQVDGHDDSDDIAEGDSETGRVFIYRFSWDETKADRDRICVGVKET  
>comp10438\_c0\_seq1; 273 23 1501 LEN=2037; translated  
MKS YRMKSGRKNRAEPIPNETMTRPALKVLFAGIFTSIGYYLGIQHALLFYGNQLSSVA  
SVDPSLPPLELLSGSKSRHNITKSQNLAPIDSNSAVFRLHEHVHLSLSEDPDLYRKL VHPV  
RKLLEEGEVKGC PKDPVKPYLDILKNIDKNPSFYEDSSIKNNKSDCPVVF LFYFEGGSKV  
ARTFFEFYSNIETKRCLNFIVSSRWKDHEETKEIVKSHGYTIVGAHYPRQDKTISMSLDK  
IKKQYGDVLSVNDLDHLLVWFDEKSKPHRYSSYTD MVRLYAYELLSTEGCSDQNVHEK  
YVAPCTCLMEDNKKYVSTIEKNGVVWSEYGTNRFHPTANFLDRTNESKEEKKSQYAY  
SIGTVFANLRRYERDII THKIGYKSKQFSRAKMAGVIHARSDNMIQSLAKYQHFLQAA  
SLNHFRDNEITIGDAMGCAVVDTRGILRNERTCRKVKEFANILAIGHQKLA CLNAGYSDE  
HCISDMTCCLTY  
>comp10438\_c0\_seq2; 267 23 1153 LEN=2422; translated  
MKS YRMKSGRKNRAEPIPNETMTRPALKVLFAGIFTSIGYYLGIQHALLFYGNQLSSVA  
SVDPSLPPLELLSGSKSRHNITKSQNLAPIDSNSAVFRLHEHVHLSLSEDPDLYRKL VHPV

RKLLLEEVEVKGCPKDPVKPYLDILKNIDKNPSFYEDSSIKNNKSDCPVVFLFYFEGGSKV  
ARTFFFEFYSNIETKRCLNFIVSSRWKDHEETKEIVKSHGYTIVGAHYPRQDKTISMSLDK  
IKKQYGDDVLSVNDLDHLLVWFDEKSKPHRYSSYTDMVRLYAYELLSTEGCSDQNVHEK  
YVAPCTCLMEDNKKYVSTIEKNGVVWSEYGFTNRFHPTANFFLDRTNESKEEKKNSQYAY  
SIGTVFANLRRYEVSS

>comp10438\_c0\_seq3; 267 23 1153 LEN=2232; translated  
MKSRYRMKSGRKKNAEPIPNETTMRPALKVLVFAIGFTSIGYYLGIQHALLFYGNQLSSVA  
SVDPSLPPLELLSGSKSRHNITKSQNLAPIDSNSAVFRLHEHVHLSSEDPDLRKLHVHPPV  
RKLLLEEVEVKGCPKDPVKPYLDILKNIDKNPSFYEDSSIKNNKSDCPVVFLFYFEGGSKV  
ARTFFFEFYSNIETKRCLNFIVSSRWKDHEETKEIVKSHGYTIVGAHYPRQDKTISMSLDK  
IKKQYGDDVLSVNDLDHLLVWFDEKSKPHRYSSYTDMVRLYAYELLSTEGCSDQNVHEK  
YVAPCTCLMEDNKKYVSTIEKNGVVWSEYGFTNRFHPTANFFLDRTNESKEEKKNSQYAY  
SIGTVFANLRRYEVSS

>comp10438\_c0\_seq4; 242 23 1326 LEN=2227; translated  
MKSRYRMKSGRKKNAEPIPNETTMRPALKVLVFAIGFTSIGYYLGIQHALLFYGNQLSSVA  
SVDPSLPPLELLSGSKSRHNITKSQNLAPIDSNSAVFRLHEHVHLSSEDPDLRKLHVHPPV  
RKLLLEEVEVKGCPKDPVKPYLDILKNIDKNPSFYEDSSIKNNKSDCPVVFLFYFEGGSKV  
ARTFFFEFYSNIETKRCLNFIVSSRWKDHEETKEIVKSHGYTIVGAHYPRQDKTISMSLDK  
IKKQYGDDVLSVNDLDHLLVWFDEKSKPHRYSSYTDMVRLYAYELLSTEGCSDQNVHEK  
YVAPCTCLMEDNKKYVSTIEKNGVVWSEYGFTNRFHPTANFFLDRTNESKEEKKNSQYAY  
SIGTVFANLRRYERDIIITHKIGYKSKKQFSRAKMAGVIHAAKRQYDVTVVGKIPTLSPGG  
LFFKPLSGQRNHDRR

>comp10439\_c0\_seq1; 366 1 1822 LEN=2198; translated  
XGRNWMWKSRRQLNQFLFHGNLNSFLANVLVSLRLNTIATSRRCSSPHHLLKQGKK  
PGVLSMAIGPAPSGLSSSSRITLRRKMEMTVMGTGLCSKNARTRSFSLFSEICGPRDDCVR  
FFSARSRFKQIPVHSSILQYIRRVGVGREGKESRRKKRPFQKHKNKNISINIIDNDRREK  
QMGEHYKDTMSRKEERQFLANGRIVHRSDTANSSPSNGNQWQGWQRLSPPPPFGEQQQR  
RKSKPVSRRMTRPNGQKETVSDACISTAMAKQKAPNIRVLPVKMMGRVTSSSPFSSDEGDL  
ESYHFPRPTSGLTEVAIVGRSNVGKSTLVNALLYSQOPTAEQEKSENKRKSTKIVTTQT  
AKLPKGLKAKTSAPGETRSIDFYQLSAEIDEIGSVKPREKENDSRESLNKYSKNSVGRG  
KRKMSLVLDLPGYGFAFGPKKEKNMAHSSGASTSNGFFNLATGSLFSWQSLIETYITYR  
PRSSLKRVLILLIDARHGKQADYHFLASLQKGLLKRKKKKSATYKSNKQHQHVPDELPLQV  
VLTKCDLVSQVDLARRVVQVRQQLSDCILRQPKMLPEMLVSAQIDGQAGVLELQKELASL  
CENNFYR

>comp10440\_c0\_seq1; 561 182 1864 LEN=1878; translated  
MSMGHPTGIRAVELSSDDALACTVSKSTTKIWNVKKRSCVQSLVPSVNNISCYGLCTVF  
LPGNNHLVLGTREGHLLILDIAAGDVVVEENAHDAIWSMDMRRPTAQQPSIAIVTGSA  
DKSVKFWLELETQEDSSAPMLVHSRTLEMSDDVIAVRYSHSTDPTRKRMVSVSLDSTIKVF  
FDDTLKFFLSLYGHKLPALAIASDDVILASSGADKTIKIWGLDFGDTHRTLHGHEHSV  
TDLRFVRRTHNFFTTSKDNTVRYWDGDRFEQILVLHGHFAEVSCLSI SRTGAFVMTGGLD  
RQVRVWERTKDIVFLEERERELEQMFQVGRDEDATGRLLMKGEEKEDDDAEDGDEP  
QSEAAVKRSVLSVAAGDRIMESLERADQEKRDAAALFRKKNPGKEKTPNPLLLGMEPALYF  
LWVLKSVKQAELEQSLLVPLGHVERVLYLILLKSGRGVEICARVSVFLVKIHQNQIM  
ASRSIIVPLRELRLRLRERLSESCDTIGFNLAALRAVARTNADKKESYLNYNNEQTKDIW  
AGMGLGSDLAAALESRKPAR

>comp10441\_c0\_seq1; 541 162 956 LEN=1129; translated  
MKFQTSVLSVLAFFSGYASAFSPAPRGALSTALAAAYGLETKGEAGTESFRLGFTESDKAIS  
PWHDIPLKGETEGTYNMVVEIPKMTKAKMEVATKEESNP IAQDIKKGVLRDYHGPIFWNY  
GCLPQWEDPNVEHPELKCFCGDDDPIDVVEIGGSALAMGTVKEVVKPLGVLAMIDDGELDW  
KVVAVAIIDPLAAEYNDIDDVPAAVKDGIREWFRWYKTPDDKPLNSFGFDEKFLDVAYTK  
EVIEETNAAWKKLKEDGSEKLWLN

>comp10442\_c0\_seq1; 562 167 2101 LEN=2101; translated  
MSQESNRHLHSTWLTITLALVFAKFLVSNCSAWITTPAPSSKISRDLDFAVPTARTNG  
DRIVSGLYTQNSGSMFDQRILRAVESGMTTRTTTRASLRTKLFAAASADGPFSTSTSSST  
STSSSTAAPVLTVEGLSCTHNGGETWQLKEVNYNLQGAKAALIGRNGTGKSTFLKILHES  
YLISNGVGSYSSTDYKYTGNVQVPKTI RISMVEQEPPLPADVTVGDAILGITEATTTI  
GKGESPKNRMDIVRRYRIVSRQAETDTNFDPLFVKASADMDFLGGWDTLTKAEIATKL  
KIHHLQDQPLSLLSGGERKRVALLCAALIEEPDVLILLDEPTNFLSLAGVEWLADLLTDKNS  
NPKLTIIMVTHDRAFLEQVCDQIVELDRGSLYEHPPGSYSAYLEGKQERLAAEDAAIANAR  
NKYKRELEWMRKQPKARESKGKARIDAFYKLEKSTKPRPRDPNLDLVDISSGDTRRIGTK

TVSMKGVTLTFPVNNDKQAGEYNVMLDDFSYDFCNGDRICLAGANGVGKTTFTKLLTG  
ELYPNKGEVEIGETVVVLGVYDQLGLKFDEIAEKQTVLEFVVDKIQSNDSTSHGETPSQAR  
KLLKQFEFSRERWQERISVLSGGERRRLQILSVLSVSTRIQYSG  
>comp10442\_c0\_seq3; 873 167 2653 LEN=2932; translated  
MSQESNRHLHSTWLTALVFAKLFVSNSSCAWITTPAPSSKISRDLDFAVPTARTNG  
DRIVSGLYTQNSGSMFDQRILRAVESGMTTRTTTRASLRTKLFAAASADGPFSTSTSSST  
STSSSTAAPVLTVEGLSCTHNGGETWQLKEVNYNLQRGAKAALIGRNGTGKSTFLKILHES  
YLISNGVGSYSSTDYKYTGQVQPKTIRISMVEQEPPLPADVTVDAILGITEATTTI  
GKGESPKNRMDIVRRYRIVSRQAETDTNFDPDLFVKASADMDFLGGWDTLTKAEEIATKL  
KIHHLQDQPLSLLSGGERKRVALCAALIEEPDVLLEDEPTNFLSLAGVEWLADLLTDKNS  
NPKLTILMVTHDRAFLEQVCDQIVELDRGSLYEHPSYSAYLEGKQERLAAEDAANAR  
NKYKRELEWMRKQPKARESKGKARIDAFYKLEKSTKPRPRDPNLDLVDISSGDTRRIGTK  
TVSMKGVTLTFPVNNDKQAGEYNVMLDDFSYDFCNGDRICLAGANGVGKTTFTKLLTG  
ELYPNKGEVEIGETVVVLGVYDQLGLKFDEIAEKQTVLEFVVDKIQSNDSTSHGETPSQAR  
KLLKQFEFSRERWQERISVLSGGERRRLQILSVLSVKNFLILDEPSVDCDLDTLSALEN  
YLEQFKGVLLVISHDRAFADKVTDLHFLVFEGEGVVKDFQGSLTEYGSCLVELENRKIKNS  
VAGGSDQSDTSTDSKQNTYKEDRAKRNELRNFRVQTKKEMSNLERSLEKLPKATSVQSE  
IDGTSSDAGWTVLAELTDKLNAINDEIEEKELRWLELGELEGLEFKD  
>comp10442\_c0\_seq4; 396 1 915 LEN=1194; translated  
FFIKVGKTTFTKLLTGELYPNKGEVEIGETVVVLGVYDQLGLKFDEIAEKQTVLEFVVDKI  
QSNSTSHGETPSQARKLLKQFEFSRERWQERISVLSGGERRRLQILSVLSVKNFLILD  
EPSVDCDLDTLSALENYLEQFKGVLLVISHDRAFADKVTDLHFLVFEGEGVVKDFQGSLTE  
YGSCLVELENRKIKNSVAGGSDQSDTSTDSKQNTYKEDRAKRNELRNFRVQTKKEMSNLE  
RSLEKLPKATSVQSEIDGTSSDAGWTVLAELTDKLNAINDEIEEKELRWLELGELEGLE  
EFKD  
>comp10445\_c0\_seq1; 383 236 860 LEN=860; translated  
MRMRKRAAVVLLLSALPHLLADEPASSLLSNNDVHSGILVDPIDQLDDENTEHSIDTTA  
SGEFSRQDKPTQKQEPQSRQLQTEQDDEKSLDHEESQLQGDGEDYEEVETIIITPGNEYS  
SSPTTSDADNDAVSTVSDSTVRSPETGMDAVDEQHMPQQYEKEEGSADIENGESATEAVH  
EDGFRLPALSKRIVINVDSDNLDTEDDGX  
>comp10446\_c0\_seq1; 637 135 2036 LEN=2078; translated  
MDRKTQRQLNSKANGSRRGQNGKLTNKSPPSSPAASTGTGRVVKTTNVLTLTSAEEK  
CNLVAELSELVLENPNKAFQVEKEIFNGDGNKEGDNVDVRSVSKVQQLLDLSRVHKNGN  
DDYIASLGLIMSLLAIFKIDILPSYRIRQQTEIERESRISKETKALWDYERALLTHYQQYLQ  
VLEKAWDRGQNHETGPSRLAITAMLSLCELLKSAYHFNFRSNILSIVVRQMNRRKCDQV  
SNACCRVIEFVFEKDTQGEVSMEAARLVAKLVKEYRGALRPGVIRSFACLPLRVHVDVAQ  
AAKLAADANKKKRKKDRELAEIESELKESSTVDKIIILARCQSETLQSVILTYFRVLKST  
DSKTRHDLPAALEGLAKFVSHLVNIDTVVDLLDVLKELLLIVDNLPLEASLNCVLTAFQT  
LEGPQREMIDQKEYIAPLYSQLARVGTTEENSKNTYILLRCLTAAFIKRREYSIVRVAA  
FVKQMFVAMHSPDYTSVPLIALARQILQRYPSVHQLLESESDVITSGTYKPDVADPEHS  
NPFSTSAWELACLKFHVHPQVREQAISAQKMIQLPAEAPDKLRSMLSKNGDEIYIQFR  
RQSKKHPLSGKAGKNQLRFITPRKSKITLFTD  
>comp10447\_c0\_seq1; 66 1 742 LEN=1356; translated  
XKNFRILIPCNYGTEPCPKQSQRKNGHVPSDEDSSVCLFLLAIAGVQSWFSFHGPHRSL  
DTTKLALSSGNTNMDRRQLLHQIVLSTATCAPLLICAGKAGSAAFAAPLIPETTKATATV  
AKDRFGSVLLATQYLSKPKAGDRSLVLGLKDEPTYLIVNNDKSAIEDFALNAECSHLGC  
VPWNEFEKFECPCHGSKYDAMGNVLRGPAPYALSLAHVTTEEDTGRILLSPWTEVDFRT  
NESPWWK  
>comp10448\_c0\_seq1; 150 1461 1845 LEN=1961; minus strand; translated  
MAIVKILLFFLPENIGIWNPTQKLKEAPRTLHILISTQIEALREMYCVAIYHFSDCVWD  
ISFITGILRSDSYSSTLPDGPVLLVDVLRSAIAIVIDFGNVDRLSDYIVVIDGVKNAADV  
NRLSDRD  
>comp10448\_c0\_seq2; 150 1560 1944 LEN=2060; minus strand; translated  
MAIVKILLFFLPENIGIWNPTQKLKEAPRTLHILISTQIEALREMYCVAIYHFSDCVWD  
ISFITGILRSDSYSSTLPDGPVLLVDVLRSAIAIVIDFGNVDRLSDYIVVIDGVKNAADV  
NRLSDRD  
>comp10448\_c0\_seq3; 150 1432 1816 LEN=1932; minus strand; translated  
MAIVKILLFFLPENIGIWNPTQKLKEAPRTLHILISTQIEALREMYCVAIYHFSDCVWD  
ISFITGILRSDSYSSTLPDGPVLLVDVLRSAIAIVIDFGNVDRLSDYIVVIDGVKNAADV  
NRLSDRD

>comp10448\_c0\_seq4; 323 288 1687 LEN=1803; minus strand; translated  
MIPSLQCFVDSNGDGDGMGFDAYLITIVTRASTSLFLNKS NPLGFKEXPLMADCLLHNL  
KRGNRTSIFSGCGHFDVYSEINGPRRLKYHPKFHDRKGYLLDDGTYDFDGPQRIFFPQR  
FRIREIHDSYPNATWILNWRDYDPWIDSVLKWGTGDNLHYQFLNEYIYIQGVIPSVPPPEN  
RTQIKEVLKTIYFQHFDVFRDFVRNHPHALVEVNI TDQSASMLADAFGLDALAFNDHG  
PRARMASFMSFQSVSLYEASFGSFVNVRSLYFNTSQLDRQLSHDLPAAYPPLLLNIIPIN  
MFSRPIYLRDASSXSPSRLACTYYTLGDLRTFSVSKIT TMAIVKILLFFLPENIGIWNPT  
QKLKEAPRTLHILISTQIEALREMVYCVAIYHFSDCVWDISFITGILRSDSYSLTPDGPI  
VLLVDVLRVRSIAIVIDFGNVDRLSDYIVVIDGVKNAADVNRLSDRD  
>comp10449\_c0\_seq1; 397 384 1859 LEN=1859; translated  
MDLLSSVASTRPVASSEATYSC TLTNTWSGATHPVGYEARSSAHWSPPVVVVHNLQYDL  
WRPKFKASEGVKLLAEMGLTDKLVQELKAASQT TGRYVKEWTIGKNQFN SVGIPQVLGDV  
TLTQDFPYLSSITMVPSPDWFSGFPKVSPIENTDGVGFWFESFSMATFPWDAGTEAGEA  
YSTSNPDQDPRAPITQLTAETVPSSGILLDPTGEKVLPMATWSCELRPLPLEQDEDQDEE  
AEGPGDRIDLPEGTGDPQGENEDSESESDGEGEVSPPGQDGTDPQVLDDEEEDDGGDAPP  
ATDGEDPGESEEPDQKPPGVGVGVEDDVENENENTTETGDNEP VNPQPTNPTPPTLDVPTN  
ASGTSSPASPTASAARGAATPGATAAPRSAAGRASGPSASPTRGGSSWGGPPAGPFGA  
RGSSGGPTAAEAGARSSPTLRKPSGKQKPKRKP GDSGAGPSGSTPNRIAPNQSLPHATL  
GSERTTLRTPHX  
>comp10451\_c0\_seq1; 213 328 694 LEN=694; minus strand; translated  
MFSFKTETYSCDES VFDESSDCVCGADEEWRADNGTDGKGI AEA EVVVA AVPDTLLVEAT  
AAAALLCMPAAALVALRRATDDSI VLSIVICRNR SQRWEIIFLDWNDVSAYPLINTTKHL  
LMX  
>comp10451\_c0\_seq2; 492 117 1169 LEN=1221; translated  
MLSSVARRRATSAAAGMHRRAAAAVASTSSVSGTAAT TTSASAMPF PPSVPLSARHSSSAP  
QTQSEDSKTDSSQEYVSVLKLNLMLQQNPGA IKKKRRVGRGIGSSK GKTSGRGHKGTKAR  
AGGSVPLTFEGGQTPLYKLLPKQGFTNKRHKADMVALNVGTIQDYIDMGRLSLENTDDQN  
IPLWNMKDLLDAGMFTTSSVKHG I KLLAEGKERLKT PFKLEISRASESAIRAVEAVGGEV  
TTVHYNRLALRALLKPNKYVATADKEDEGGYGF S NDSHQEDAIVRNNSKTPRLLPKFARP  
PPKWQPYTWNWNRGYLSVQAQMRKLISERPELEEA FSKALEEAGAKGGK  
>comp10452\_c0\_seq1; 306 127 717 LEN=811; translated  
MNTSATPEWLEDNGESSGTAGTGVDPFQGV SLEDKND DAVEKESSRSRVACSGSTIALW  
VFSLGFI GLFAYGAAANANDPDALQWIF YALNAVVPAMFLLYSVCCFP I VVIYFFSAVT  
AIWSIVYIVIASLNLKNAPPEDDTVDNGV FSERSEYIFELAGASLALFSSLYHVCTAKFC  
VTKESVKEEDDAKEAE  
>comp10454\_c0\_seq1; 529 248 1123 LEN=1253; translated  
MARTPKPGSSGSDLPSIQSGSSESVSSASDPQMIAS Y TLPQWLVPERYKDKQSSQNTMQ  
TRVFSIPMPQVPIHTKEAIRAHLIKTNPPQKAGMRD SERKLEKELKQEEKIASSEAKLAKD  
KLAQALLARSEKLKEIRKAHELETTKAMEALETTIRKEWKSEDLKLLKQINEECKLEYER  
KFDEEMIHKRKREQE EDEKEQAEVDLEIKKAKEEKEEALKTQRNPAGEGNVPSTGGNNVQ  
VLEKKQADLKD KVEKLSEKKSEMIWLFKQVIKQEA IQMKAKKLLKAAEAK  
>comp10455\_c0\_seq1; 586 678 2900 LEN=3031; translated  
MFALLYEFRKREGNTIVPSQHVENGEKLG SWLYYQRTLMRKGNLPKEKLEQLES LGVVAT  
ASARQLKWDKMFELL SKYRDREGLDVPQSHKEDGESLGSWLAHQRMKREKKLAKEKVD  
KLERLEVGN AQETIHL SNQHKLETVGVVFG EHTWKDMYQRLVHYQQYGHSSVPQSYKDK  
DGKNLGTWLNTRQSQSKRGTLDQKLQ GKLEAVDGF AWEISPGMYRWDAMFSLLRDYEVE  
GHCNVPKDYTIRV VANIDDVQEKRLGSWLNQQRRSK LKGNLGADRQRRLLES LGVVWDL SI  
IQWEEMFVHLRDFREREGRHSNVPNR YKVETS FPLKNLGAWLQTQRRLKQEGTLDQNRER  
LENLDVQWEIYSKWEKLLHLLVQYQEREGNCLVPQNHLEEGKTLGIWLNQSRKKS GTL  
TKEQCSALEDLGVVWDVAPAQWDSMFNLLVQFQLRTGHCRVPQTHKENGKNLGTWLNVR  
QAKRNGTLDRAKEQLEKIGMVWNVASESWDEMLALVVR YKERE GDCLVPLKHTEDDKTL  
GTWLDLQRRFQKRGTLDPEKERQLTEIGMIWDKLT YKWEVMYSRLLEYKERE GD CSVPAL  
HMEDGQGLGAWLNLQRKLHKGNLDPLRQKRLEDVGVVFN RNKQRWESMFALLVQFRERE  
GHCRVPQNHKEGVKQERLGSWLD SQRQKKKEKLD FALQTRLEKVGVEWSIYTTSDMNDD  
DDWGFEGMDHLFDDNDLMAY  
>comp10456\_c0\_seq1; 522 67 1875 LEN=1875; translated  
MGSFKR FITFAAAFAAANWVQVVVSAHPTGTVENINRRHFLRDNGEGFPVYQKVTQFVS  
GETKSQWCVEIRDVEIPDVMVCSFKGT SKPSKEFIESLQPVSGQSIMKTQGAYLQRSST  
TSDWEMYINEASTRIEKLSENDARNRGQTANNFP GPPFGTKTTLVARVTDGAGVPHTADA  
SKLEDDIFLDTLSLKSQYAAACSKNQLDIQAAP I GNGGVIEISVATVAAGSGDSLESEAK

VALQNQIGDIYNSYHLIIFCQPPGISGGQSGWLAYAYLNNPLSFFNDLWCTSASTLMHE  
IGHNFGLEHSNLGDTEYGDETGIMGFGYLEDDSPRCKCFNAAKNFELGWYSRQASTVNPID  
FADSSRTYVLNGIDKYQTEGTSTKLIIVLKLDDQGGEDYFIGYNEAAGAHIEPQAINQVTI  
IEKPTENIPSRQIGQSWRRGSLLAGNVHAINNFRGTQYGVYIKFVSLNGADATVEVTST  
TPVLACGGTGRFNFEITPDQFLGETSWFLRDSGGVVIQAQAAANQMRVGVVNSFPAAGNYY  
CLQPGSCYQFEIRDSFGDGM LAPANYKGTLDGVEAFSGGQFGSVEVKDFCVP GASAPTLA  
PVP

>comp10457\_c0\_seq1; 316 435 1427 LEN=1609; translated  
MKLRRSDVLSAWRGWRPLAADPHAPPDAPVSRDHVISENPETGVIFIFIAGGKWTTWREMAE  
EVDVDRVAENAPGRCKTLETCLKFGGDGYTKNLSIELIQKYGMSQDVAEHMVR SYGARSWEV  
CDLIEPSGKSWPKFGRLLDVNDYPYIDADVWACREYACTIEDVLSRRLAFLNKAIAIE  
AIPAIADIMAKELGWTEKVKKKQIEAAEIVVSSYGGRISDGSQEKLKAGVYENIKDVFAA  
IDSNQNGFLEEDEVEKAVATILGFNMSTKDL EEAFFHDMDTAKKGRV SFQDFVDWWT KSSNS  
PFRKLLSEELGLKALTPQDLT SIGPGTMFG

>comp10457\_c0\_seq2; 525 1 2627 LEN=2809; translated  
XKESCSKFAFDRRTDQTIPSPPI SLVSSENDSNHNSDRVQIRFHFKDQISLDRVLYYTL  
QVTKRNSSLHAFVTISENKRGGQTLKRTKANGDDVDFVRF SADQDWVSEDNDFIPSHLVV  
RRGNISRSFFWRGQKNSTSHGKQTNNGR TFRSLFSSARRDPGLEITSVLSDPKEVKAPSG  
LPSRAEQIRRLQKALDGESFDVLVIGGGATGAGIALDATMRGLQTACIERGDFASETSSR  
STKLIWAGIKYMATATSILLSRQLVTSPLKTVKDFYSEMKMVFHCHQERQFMMDQQRHLC  
NWPVIAMPFTEWHVSPPPFKHPLFGLFPILAPPVLKIYDSL SYFQCPPSFIMTKKKAREV  
FPQLEDKDLKYCAV FYEAQHNDARTNIAIAMTAAEKGAAIANYVEMMDTIKDPSTGKVI  
VQAIDRMTGNTEFIRAKRVI FAGGPFTDSMREMEVDSEEAREKMPAAVRGASGTHIVLPG  
YYCSNQMGLLDYNTSDGRFLFMLPWEGHTLVGTTDTKGP AETS PRPPEDEIEWLLNECGK  
YLTPDMKLRSDVLSAWRGWRPLAADPHAPPDAPVSRDHVISENPETGVIFIFIAGGKWTW  
REMAEEVDVDRVAENAPGRCKTLETCLKFGGDGYTKNLSIELIQKYGMSQDVAEHMVR SYGA  
RSWEVCDLIEPSGKSWPKFGRLLDVNDYPYIDADVWACREYACTIEDVLSRRLAFLNKA  
DAAIEAIPAIADIMAKELGWTEKVKKKQIEAAEIVVSSYGGRISDGSQEKLKAGVYENIK  
DVFAAIDSNQNGFLEEDEVEKAVATILGFNMSTKDL EEAFFHDMDTAKKGRV SFQDFVDWWT  
KSSNSPFRKLLSEELGLKALTPQDLT SIGPGTMFG

>comp10458\_c0\_seq1; 554 1 1526 LEN=1855; translated  
XDPETAIRPKMDDDATNAIEPKTDDDPETAIQPASAKKKPLMDDDN YEDDNVANTEKEGA  
GTYPPTKIGKAPKPLIPPTPKPVI IKSSKTLKKS GIEKTPKKT VLVYATAKPKPTAEPT  
IAPTTGATTWTTDAPT VNQRP IRKAACLA EKMNDMATMDPERIQKAVRAQRVVRQRAEE  
MKQKESSEEKEDSVLIIASVPVDERHVISLWSLLECF S ASYNHVIISTAYWAKESMQR I  
IQEAKSQIPHFNQNGSVTIEFN SFDNKKYDAGLWCDVLMGAKGRYKSYGLLND SIFAIRDF  
AGMTEPLGKKKEPQNEEA VRMTSLNWHEK GKERGRWFESVYRGFDEKGLEIYMEHSCLPD  
DSPAFCPKELNKARKKRCITNYFELGMSWEFPNIEQQIQGIFPGTVSEEF R ATINKFPTW  
VCNREFWMDVLLPMGFPAAKVNCETMIGKDLRVEPILDT CQAF LDERFLCDLDFSNVRL  
IQYPEMNLKEKEKKAMIKGDANAKVSNL

>comp10459\_c0\_seq1; 178 1 655 LEN=1417; translated  
XRFWWSTYFEELMDERYITLLTDMLIDXSNGKQLEMKRTITDEEPVLDPELERQLRKEIN  
ESNMAGDSLAMSGVTTQKVN LGAGAMVVMGASIIIGLVGLQFPFLFIKNAPFMATPAGKVQ  
NALKFII EHNKNKRAMISSPRSATNLSQSSPRPQQE AHIRASASATPPVFVDLGSGDGQA  
VYEA AKLGYKAVGIEFNWTLWALSSFR RQFFWSSEVKR

>comp10459\_c0\_seq2; 296 1 979 LEN=1091; translated  
XRFWWSTYFEELMDERYITLLTDMLIDXSNGKQLEMKRTITDEEPVLDPELERQLRKEIN  
ESNMAGDSLAMSGVTTQKVN LGAGAMVVMGASIIIGLVGLQFPFLFIKNAPFMATPAGKVQ  
NALKFII EHNKNKRAMISSPRSATNLSQSSPRPQQE AHIRASASATPPVFVDLGSGDGQA  
VYEA AKLGYKAVGIEFNWTLWALSSFR RQFFWSSEVKRRSTFLLQDFAKYDLKDANTIMI  
FAVPRTMPILGKKIQSECSPGTTIMAYRFEMPLAATASKDNEDDEETTKESIGRDAKDHE  
AIGDLRLQAKCIYDQEEMRIYSMGER

>comp10459\_c0\_seq3; 262 1 898 LEN=1010; translated  
XRFWWSTYFEELMDERYITLLTDMLIDXSNGKQLEMKRTITDEEPVLDPELERQLRKEIN  
ESNMAGDSLAMSGVTTQKVN LGAGAMVVMGASIIIGLVGLQFPFLFIKNAPFMATPAGKVQ  
NALKFII EHNKNKRAMISSPRSATNLSQSSPRPQQE AHIRASASATPPVFVDLGSGDGQA  
VYEA AKLGYKAVGIEFNWTLWALSSFR RQFFWSSEVKRTMPILGKKIQSECSPGTTIMAY  
RFEMPLAATASKDNEDDEETTKESIGRDAKDHEAIGDLRLQAKCIYDQEEMRIYSMGER

>comp10460\_c0\_seq1; 399 621 1616 LEN=1763; translated  
MTTPVKKANQRNLSEIRDEIEADGEAVLIANIDGNNFQVDLNQMLGMIVGPREDEDK LQD



SERSD'TTDKMGDTNTTGTSGRKIIPPYLLLEFPSCCFRIFWETQVASHSSDEETVIGT  
SFDRVQEAADRRKIKLNGVREKLANVFSIDFLLPFPLSYSGLIGVIGSLERRENKEMPRD  
PIGSARRCLWSYSQSWKDLVSFDDALENPLAAVNKENAFK'YMMHQFMTRIPNQVALSFIE  
EDNRTMALESYDRRLCTKMQSFENLIDDFWTESSEVGRSNKRRRGKDEQNDADPEPKKVE  
NGCAERYVKLLEGHKRYMISKHELYLLPLRG

>comp10460\_c0\_seq2; 399 621 1616 LEN=1779; translated  
MTTPVKKANQRNLSEIRDEIEADGEAVLIANIDGNFQVDLNQMLGMIVGPREDEDKLQD  
SERSD'TTDKMGDTNTTGTSGRKIIPPYLLLEFPSCCFRIFWETQVASHSSDEETVIGT  
SFDRVQEAADRRKIKLNGVREKLANVFSIDFLLPFPLSYSGLIGVIGSLERRENKEMPRD  
PIGSARRCLWSYSQSWKDLVSFDDALENPLAAVNKENAFK'YMMHQFMTRIPNQVALSFIE  
EDNRTMALESYDRRLCTKMQSFENLIDDFWTESSEVGRSNKRRRGKDEQNDADPEPKKVE  
NGCAERYVKLLEGHKRYMISKHELYLLPLRG

>comp10461\_c0\_seq1; 578 648 2717 LEN=2782; translated  
MRSRNDDEDENDGSKINQRDLRIKVRHIARVRSVKEFPSEHRKDGSNSTQNTYFVIKMKQ  
SADQQGNKFKFLAQSLAERDTIVLAIKSLLDHQGKNSHASRNSRDQNAESKIRSEDVNVN  
AFKALNISEQSKEEIRDQESAYSDEFFDSRDEVCHDREDDSERDTLDRFDPYSMDKKSFT  
RGKSRDDLYDTQNHRTVNRSSCRISTKKDHTDKQDGTTRLLLMEDEMATIDPIHFLDPIPD  
DRSPDPDPPTLERRRTTDRHGKNDVTFYDSLIVIVEDEDMVTLAANCTSKATGMANLAAG  
CSQQTSGPWCTDDVCSATLKDFTDSMTGIFELKHNYNMENGTNEGQRAVAEEYLSGFL  
SNNNSNMGELLSVRDLWKVAAFNKHATGKELKRLHNRARNAEGKARRIKQLRKQMTFEGAD  
ADNTAHLQISSFDDATRKGNSEDDSGRLFYDSDPEDARHCNKKRGPVAAALFEESSE  
SKVQRREVLIDLNSRFLGRKWRVVGQEVLFDIIEATKNEKLTLLWHPHTHEENNMPP  
VCVKLWVESGVYLDAGTFLLPKLTWLPAYESNLNIRQLNVSEKSPGSLELLDVCRVRECE  
SIDRRLHPFGCVDRSFTIQTQNGRYLFETQSKQERARVVNGLKLVIAARLASLLMLRDLRA  
VDEFFGGNSVPGEPAPAWARGETPAQFPTS

>comp10461\_c0\_seq2; 591 296 2602 LEN=2667; translated  
MSSGQSSFSQSAKVNVPVSRDDYEEFRSRQRGHSSREIKSSSILSKKLESGFNLTWINGGV  
KTQKVNLSANSKSYIRIRMSRNDDEDENDGSKINQRDLRIKVRHIARVRSVKEFPSEH  
RKDGSNSTQNTYFVIKMKQSADQQGNKFKFLAQSLAERDTIVLAIKSLLDHQGKNSHASR  
NSRDQNAESKIRSEDVNVNAFKALNISEQSKEEIRDQESAYSDEFFDSRDEVCHDREDD  
ERDTLDRFDPYSMDKKSFTTRGKSRDDLYDTQNHRTVNRSSCRISTKKDHTDKQDGTTRLLL  
MEDEMATIDPIHFLDPIPDLDSPDPDPPTLERRRTTDRHGKNDVTFYDSLIVIVEDEDMV  
TLAANCTSKATGMANLAAGCSQQTSGPWCTDDVCSATLKDFTDSMTGIFELKHNYNMEN  
NGTNEGQRAVAEEYLSGFLSNNNSNMGELLSVRDLWKVAAFNKHATGKELKRLHNRARNAE  
GKARRIKQLRKQMTFEGADADNTAHLQISSFDDATRKGNSEDDSGRLFYDSDPEDARHC  
NKKRGPVAAALFEESSESKVQRREVLIDLNSRFLGRKWRVVGQEVLFDIIEATKNE  
KLTLLWHPHTHEENNMPPVCVKLWVESGVYLDAGTFLLPKLTWLPAYESNLNIRQLNVS  
EKSPGSLELLDVCRVRECESIDRRLHPFGCVDRSFTIQTQNGRYLFETQSKQERARVVNG  
LKLVIARLASLLMLRDLRAVDEFFGGNSVPGEPAPAWARGETPAQFPTS

>comp10462\_c0\_seq1; 286 224 1315 LEN=1452; translated  
MSASVYVSFDDKHVVSAFQSNRNNKIIPLENRRRRTTSRKTERTVVCSSSRNRNGNGSGGK  
PGRARNPSGEDARCEADLLEYSIDSLRGRDYDRAFSEDASSPLPGLSPSETVDAALRSL  
RNLDDPEPFHGAAVLLRFCAELGRGERWGTTITTDQRRREGREGSWKELLRGALPTMLARR  
IRASEEFSGLLDWNGLEITESATDWVAGGMATAPGQQKQFPADADANANRNVAFVDAAL  
FFGGEHASRSTGKQITKTNTTSGGEGGRARGLSPPELYRFRFLAKMLGGVWLIDSVRRRPQ  
GLSSATNSTASPRRKRGRPPGREAPGTKRGGRPVRRKRGDKGKRGGKETKDFTRDDGEQRR  
DKR

>comp10462\_c0\_seq2; 286 224 1315 LEN=1503; translated  
MSASVYVSFDDKHVVSAFQSNRNNKIIPLENRRRRTTSRKTERTVVCSSSRNRNGNGSGGK  
PGRARNPSGEDARCEADLLEYSIDSLRGRDYDRAFSEDASSPLPGLSPSETVDAALRSL  
RNLDDPEPFHGAAVLLRFCAELGRGERWGTTITTDQRRREGREGSWKELLRGALPTMLARR  
IRASEEFSGLLDWNGLEITESATDWVAGGMATAPGQQKQFPADADANANRNVAFVDAAL  
FFGGEHASRSTGKQITKTNTTSGGEGGRARGLSPPELYRFRFLAKMLGGVWLIDSVRRRPQ  
GLSSATNSTASPRRKRGRPPGREAPGTKRGGRPVRRKRGDKGKRGGKETKDFTRDDGEQRR  
DKR

>comp10463\_c0\_seq1; 337 134 1049 LEN=1049; translated  
MVSRKQGGVAVSLPEKEEESGPNINRPNFLATDATKPFDFSIQYGKPATISVNQSA  
DDDTWPGGSLWDIGIILSDFLVQLAGFKSTKKEQSKEKIPERLLQAIPTVKDLTVLELGC  
GTGLTGIVAAAVLGTQLAIVTDLKVVVEKVAAPNIELNSTPSVGGNGKDTPYRLTKAGKR  
GRIIAMPLCWGDEQDENAVYECFRKYTKCAAKSRRKQKGNKQPEKVDMGHPDLIIIGDV



XLSHRSDPFDVREPGEAVEAGLAALKPSVVVYAASASRQGGNCFQVDDEGVEKVARACKN  
LGALFVLVSALAVDRPDSKSYKVTNTLGGNYQGIMDAKNHGEQATRAVVFSSGGEYVIVRP  
GVLLNGKSIDGPAGIELNQDGTVGGGLSRDELAVVVGAIQSRDRGNSSNKAGAGGVTVE  
AYRRSTAQALEKAFPVPSGNELSDAGKVAATPASSRKS LYREL FANAKPDGFAAERSGG  
AGVRRGEGLAVAAGTHATAAAAVTRWPAMPEDGTIGHPTTRPARPAMRCDALRTHPMYK  
YKNNHFYR TKKLKQLRSCCCIEATK

>comp10471\_c0\_seq1; 170 106 801 LEN=1492; translated  
MAGSNRYTDELRAKAGNQWERVIHKKFTKELANGTIDKGRVLKRYLVQDHRFLDSFVILL  
ASIVAHLPTLKDRIPGCQFLAVITGPENTYFERSFEKLGVS GKERN SIPDAEVTKSFCQL  
MRSAAASQNLEEMLAVIVVCEWSYLSWGQAVLEEHKDDGICRKDFVTCEWVDLHTGPAFE  
GVIQYLRLELLDQEGEKLKSQGATEKLAACEQRFLEAVQLEEDFFDYAYRED

>comp10472\_c0\_seq1; 511 103 2349 LEN=2810; translated  
MVSLSTKRPCAANAASNETSPERNSNQAPDGLSPGCVVAHKKQKLDALLETNATSQKETKN  
DADGTDKEDMAWICAECKEAE CGLVGADDGSADFLICDGPCHRIFHIPCAGLTKAPSTDD  
DWLCRECDKKEHACAYCGEYGEDGVGVFPCKEDKCGLFFCEACLKNHVDY EYARKTTSR  
SRGKDSNEKDDNSSADNEAGDEQDEEESRIPVFTCHAHRCWTCTQKDMIQLEKDEKAAEQ  
AKRKGKKNQKSSRKKGKKN TSI FQCKPGR LFRCLYCPMSFHITCIPPTAKFHELAVL CHE  
HATTHKLP ELD MND SIQSKVESKIDQTL MRLHGVRWRGSKGDKQQR SNGWLGRRG TNP F  
LPGLRGDR L DAK EK YLL SHAK ETAMQQIQILGQEKQSAAVAVRPSSTIS MILDG SVPFCL  
PNDIKNEVYSKPPPYSHIQSLKFGDKNNRPKRVPGPPTPEDQEKCKCTGSSCLEDCFN RHI  
MTECTP INCNLGEKDCGNRGM SKRKF AKCQPKRER GKGWGLITLERIPKNKLVQEYVGEV  
IDETEKETRLEVWNREHPNDPNFYVMALSGGYVDARVYANQSRFINHSCAPNCKVMSVN  
VKGRIRNGIYSIRDIEAGEFLSYDYHFDTKQGDRFVCRCGAPNCRGTMQGGKRGDGSSKK  
AATWKELKASYEADKAFLNERK GKDVITLTHGLVPGAENPNELVARGPIQKYR KAAIDGR  
IFLWRNVKLGANFVSRHARLNAASEQRR

>comp10473\_c0\_seq1; 561 56 2017 LEN=2132; translated  
MAKIQKGTKRKFWH TLGSALV LNLATEVVGAI E VVEESRIENAYRLGRNRKPSSGSSLER  
SLTANIAMGDIWGKTSRAARNDIEALRLLHSEDMMSLSLSSSNDRPPQRPPIPAPAPLPS  
PTPKPVPQSTPMP TPVSTPVPTIKPVL TSTPTPDGTIAPESGACEEGKSRAEHIFD LLM  
FTPPELLLDVTT PQGKSYDYLTNNDGGVLD PCTYSTLQQRHALT TFFFSTNGESWVDSSG  
WLREENECSWYGVDCDDSI ESKYVTRFLFPQNNLVGSLTDEIGLLDKLQRFDVYSNSITG  
TIPSSLAALTDLVLLDLETNQFSGPAFPDEL FHLESLSYRVSNNILSGNIPAEISKLN L  
LCQLWAAGNQLTGTIPKEIAASGKME SVLLYENKLEGTLPKELGNLNNLLHLQLYNNTLQ  
FEIPAELFSATQLETLRLDYNFISGVLPT EVGGLTNLKDRLDRNSLYGEIPEEIRSLSN  
LENLVINNNFWSGVFPDV FQDF TSLDFLDISNSAFSGTIPQSLFEVPTIRIAYLSNNTFT  
GTIPEDFSSATLLHDLYLDGNAL TGTIPEISGGQFQSLSEFLVQFNFLTGSMPE SICDLR  
GTGKLKVLFSDCGGVDPEIECEFECCNRCFEGGDA AISQRRLSQSSNLRHGR

>comp10475\_c0\_seq1; 365 322 2607 LEN=4201; minus strand; translated  
MATTVSEMRS AKIQGDDDR CRRIMKSFRRRRERS SFAAAATGLGPPP GGGIGALENPR T  
KRRTGALASSRIGSDDGDSAVEYGG LASLFLCRG PLPGGRLRPGDSWTA FDRNRV E WGE  
GLVRKRAFVGSRRPPAPELVHRK PENIREGSSYINCQFLDPHDRV LGVDISGNLDLIRL  
ADLRSQTNDRGATDRARSKASHEKIATDFEFGAALGQKNYFYSAHVQVLAHGS AVAFGFV  
DNTLCLLDLEGR TNAYARDHSAKNDGGGLDRVLPVPAPSS TLPSSSFRAWRAQQ LRRKY  
YRDRRNP SLSIHELCDRDTQNR SNVGGYTGSICETHSVISNLLAIDYSNGRKR IASPVRF  
VPGYPTPEGPRWDILEVRPGCHPMNSLLYVARVDPDYDSFWTQVLD SRVGVGTGT TTPKT  
DGHGRNATTVLIDGTTDRDHPGKSEEHVTT CAMVTDICMATGHVYCGNYGATSASDFDQ G  
LSYPGCPGMSSCVKLWDLR MARKKRKPRMMKDSL IPTYTIALSSPGSGIFEHANIVVAEP  
SATIHTRLT SKEGSLAFSEATFASESGVCGAGNHETEIPDAGSDFVVRNLSASRDSYNG  
VSNNGSTRCGSLMVTCSR SFQNSHVEHCKLDL SGKTRTVRKVRESNSITRPQPLWAVDPS  
HKFLAICNNDHHSRSHG PSTRLYLYDLKEGTLPTLSAEVGNRTYFCPQQREDSTFRFRT  
DASLTDRYDMKTELSCIAVNSNATALLGASSDGD L FVWRGI

>comp10476\_c0\_seq1; 570 1 1494 LEN=1897; translated  
QQQQQQQNSSRLPLSSASYNKGSVGGATGGDRFIPNRAGMNVKLSQHNL RGETT DSSSHS  
SRSSSSSDIQSTDGGVSEQTENQKVVS DANKDVYSSQLSAALLGVEDKANSRIMSF AKKA  
PIPKGDTVNNLNILYSASASAGQKKTNSKLV SRAIP SAPTRVLDAPDLLDDYYLNLLSWS  
DTNILAVALANTVYLWNAGTGD IQELCTYE EGESVDAHISSVAWVQEGGAHLAVGTSGGK  
TQLWDVQACKQLRSMDGHS DRISMAWNRHILSSGSRDTSIVNHDVRVARHATSTLSAHT  
QEVCGLWASNDGETLASGNDNLLCLWDASASLSSISNRQEPFRMTDHQA AVKALAWSP  
HDRNLLATGGGTADRCIKFWNSKNGALLNSIDTGSQVCALQWNPFEKEILSSHGYARNQI  
CLWKYPSMTKIKELEGHTSRVLHMATSPDGSTVVSAAGDETLRFWEIFAPPSKASASSEI

IGRGGMP SKLKWTTQIR

>comp10477\_c0\_seq1; 713 936 2420 LEN=2653; translated  
MPPNRSETPAAPSSAFELQAKADEWMEVTPTEELLRAELGRLQAAF SKCSHQLESSRLEN  
DLLKDRSAAQEKETS DLKQALEEEKARAKNALSEALAHHKRTRTELEETLEEKKAEEARA  
EASSAALEDRLSQANREKEALEEKLAGATKALSTCTKTITRMQTEAAA AKA AAEKHAETI  
SQRAKQALSRSKEDISIHKNQAVRFAEDLRRVRESHSETKKALSASREETALQTKKRKQA  
EATTQTI AVLAE SLKAKIASLEGLVVEAKRSEKTKQDLEDRCGALS AELKLRRSDLEEL  
GASHEKLRSELTEAEADLRGRSVEAASQKARAEATESCHQGLLERQAELEDDLEEVDEL  
DRAHSDVHSTRAELEETQRQTATLRESTGALLRLHLEDQRKEYEARLHHLHSILGLTFAR  
AVRNEVAGAVPVVLDHLLPREMKQAIPLLLASASSASASKSTVHRTHPAHAKTKATTKAK  
ARAVDPPPSECKQ

>comp10478\_c0\_seq1; 372 218 1068 LEN=1068; translated  
MDKVMRCAMKRLREEANYSVPYYSIHECSRERFASCLTDPGNKCRAMDEAAVMSYCSAL  
KYLDEFGWWHEGNQEHTVKAFTVLRHPVDRVWSMFRFQTKRCYGCTPLKEIYKKLEKGEH  
TGVDKLCDRQLLNHEVNNLLSSEYRVEVAELDVENNRKHGEIRD KMVQEAIDNMKGFFTV  
IGITEELEETS AVLGRVFPWMNASGSEADGTVSECNLGH DNASPRNNRCGEHNSHWDLPA  
TPDQETIDLIVKHNSLDMELYEA AVKYFDLQKRALESIADEINX

>comp10478\_c0\_seq2; 538 1 1198 LEN=1198; translated  
XNNNNNNNRNESQRRRMSGAERLMATEPEPEGDTTKEDALVAKIAKKLDPVPLRFFAPGD  
PNRGESSEPDIVVDSKETRDIETIKA EKKKEEDLKP KLVPHQFLHLHMKTTGGTSM DKV  
MRCAMKRLREEANYSVPYYSIHECSRERFASCLTDPGNKCRAMDEAAVMSYCSALKYLD  
EFGWWHEGNQEHTVKAFTVLRHPVDRVWSMFRFQTKRCYGCTPLKEIYKKLEKGEHTGVD  
KLCDRQLLNHEVNNLLSSEYRVEVAELDVENNRKHGEIRD KMVQEAIDNMKGFFTVIGIT  
EELEETS AVLGRVFPWMNASGSEADGTVSECNLGH DNASPRNNRCGEHNSHWDLPATPDQ  
ETIDLIVKHNSLDMELYEA AVKYFDLQKRALESIADEINX

>comp10479\_c0\_seq1; 239 109 1206 LEN=1482; translated  
MTPKRSKTPMGKKPFLVLTFL LISVLLGYLSLLNQIHTNIRDNTSELSGNNIQRLQDRI  
QYLETKVDSYLA YARDPFLGIKEPAKCKQTQOMKKIACPNLRSCEIDNSIICMDDL PFTI  
ENATEPTKKATKKGRNECVVYDYGIRE SPEWGLTFTKQCDVGLDPSPISLKW WEREGAN  
ITKQHP SYRFLGVGAGGIDGEIVLREYDWGQVSIIEFPTRV VNTSDCNEGGACKYRMYQQ  
HPFKIPVQTLQTTMKNLHN RVHLLKLDVEGSEFAFLEKMIDDLSCRKVDQLTLEWHHFG  
YDVR YGVTSNPQINVIVAL LKERCGLEQFVWHGSHGWPSNSKMYTDMGMTLYYTMS SFR  
TRYMF

>comp10480\_c0\_seq1; 154 115 408 LEN=566; translated  
MNSSARTIGTVAALGTGTAYLAYRSIPTLMTAIMK LQMNPPDEKLGQLIQEMGAPSSDEI  
AALGIVAGKSALVVGTRGVGYGTALALAKITNHHQK

>comp10480\_c0\_seq2; 409 115 1260 LEN=1434; translated  
MNSSARTIGTVAALGTGTAYLAYRSIPTLMTAIMK LQMNPPDEKLGQLIQEMGAPSSDEI  
AALGIVAGKSALVVGTRGVGYGTALALAKSGSAKVTIVGRS IASGDKAVSSIENEL SNE  
FSNSTKIDFLQGDIGT VASTQRLVDELAKGKTRYDYLI VTA AIFPKPKSQNP KPLNEDGI  
EKSFGIGVGRFLLYRNAYKFM EKDDTDPMRVE SPMILNVLAAGGSLPLRFNREL VHS  
LPYIHFKNILNFAIGNELMLHKLVEKDDGNSDGT KFNIP IITHPGFLKTDLHRGQGLFM  
ELQEAFLVHFMGYTEYECGRREV SLLCAVGSKHQEGNDDF SLLSIVDNFGHGRLIGHDME  
QDLKEHGHWLNLLLLTLEADN

>comp10481\_c0\_seq1; 303 191 940 LEN=1249; translated  
MNACRAIR TARNVVVRSTRSDATRSLGSLTNGSNSAHRGIAPQSPNRDWSPPAGAQSAA  
SGVCVSVSAPRRSMVTVTQTKTSEAPLYSAPRTGDDGASS EAPTYVRNEDTTLNVTQ  
GCLDQVERLLRQRRESEGDNSDNDGYFLR TYVDAGGCSGFQYQFEVDNDLDEDEDVVV  
VFALDGGVPRPRVVVDETSMGFLEGSTIDYV VEMIKSAFVVT DNPQSESACGCGSSFAMK  
NFEKFGTGD

>comp10482\_c0\_seq1; 598 125 2567 LEN=2567; translated  
MPAKALGKSKPETVFSGFKGVTKESTNKLFSVYPPR TKSKFQLGRVRASPYGSCLDSIK  
GGEPTVAWE EEWREENLPPLTVPREGYGHIYGQETIDEVDGTDLGDANPEISATGDASLKN  
PHDFGSTKTPDDAPVGLKDKWRLLP HFLKMRSLMRQHIDSFDHFVNVEMKQIVQSP SAR  
EIRSEHDPNFYLR YTD CWLGEPSVEEDSYATSTATPFQCRLRDCTYSAPIYVNVRYTRGR  
QIVVKRKVKIGQMPIMLRSQKCLYEKSEHELAKLKECPYDPGGYFVVKGVEKAILIQEQ  
LSKNRVILEKDAKGEICASITSS THERKSKAYISM KHGRVYLKNNTLGEDIPIATVLKAM  
GVE SDVEAVQLV GSEPIYVNALALSLEESSKMG IHTRLQALKFIGSKIRRNANSYRRPMP  
PEDEAREILDRVVL SHVPVHHFDFRAKAIYVGHITRRVLLVHLGKMSLDDKDYGNKRLE  
LAGNLLSLLFEDLFKIFSKDLKRQADMVLSKPNRAQAYDVVKSIRPDTITNGMIQAIATG

NWVLKRFMRDRAGVTQVLSRSLSYMSAMGMMTKIQSQFEKTRKVS GPRSLQASQWGMLCPA  
DTPEGEACGLVKNLALLAHITDDEDTQPIERLCRDLGVEDVLR LSGHEINSQQAYLVLLN  
GLILGVHTRPISLVKNLRRRLRRRGLAGEFVSFYLNKEQRAVHIATDGGRVCRPLIIVDEK  
NGLPRLKQEHIEGLALGTLNVRDLLERGIVEYVDCNEENNTLIAVTERDLEIARKQGLET  
RKMRYTHLEVDPFITLGVVGGIIPVSYILIIYFKIX

>comp10482\_c0\_seq2; 1002 125 3964 LEN=4179; translated  
MPAKALGKSKPETVFSGFKGVTKESTNKLFSVPYPPRTKSKFQLGRVRASPYGSCLDSIK  
GGEGTVAWEEWREENLPPLTVPREGYGHIYGQETIDEVDGTDLDGDANPEISATGDASLKN  
PHDFGSTKTPDDAPVGSGLKDKWRLPHFLKMRSLMRQHIDSFDFVNVEMKQIVQSPSAR  
EIRSEHDPNFYLRYTDCWLGEPSVEEDSYATSTATPFQCR LRDCTYSAPIYVNVRYTRGR  
QIVVKRKVKIGQMPIMLRSQKCLYEKSEHELAKLKECPYDPGGYFVVKGVEKAILIQEQ  
LSKNRVILEKDAKGEICASITSS THERKSKAYISMKHGRVYLKNNTLGEDIPIATVLKAM  
GVE SDVEAVQLVGSEPIYVNALALSLEESSKMG IHTRLQALKFIGSKIRRNANSYRRPMP  
PEDEAREILDRVVLSHVPVHHDFRAKAIYVGHITRRVLLVHLGKMSLDDKDYGNKRLE  
LAGNLLSLLFEDLFKIFSKDLKRQADMVLSKPNRAQAYDVVKSIRPDTITNGMIQAIATG  
NWVLKRFMRDRAGVTQVLSRSLSYMSAMGMMTKIQSQFEKTRKVS GPRSLQASQWGMLCPA  
DTPEGEACGLVKNLALLAHITDDEDTQPIERLCRDLGVEDVLR LSGHEINSQQAYLVLLN  
GLILGVHTRPISLVKNLRRRLRRRGLAGEFVSFYLNKEQRAVHIATDGGRVCRPLIIVDEK  
NGLPRLKQEHIEGLALGTLNVRDLLERGIVEYVDCNEENNTLIAVTERDLEIARKQGLET  
RKMRYTHLEVDPFITLGVVGGIIPYPHHNQAPRNTYTVAMSKQAMGTIGVNEYERMDGLI  
YTLVYPQKPLVKSRTLDLVGFDKIPGGHNTCIAVMSFSGYDIEDAVILSKASIDRFGFGR  
IILKKHQTSVRRYANGSIDR TC GPPDVSNFADGEDDKRYTKYKAIDDDGICMVGEKMEGG  
SIMVNKESPANTTGDIGGADLGMNMGMSAVM QYKPSALS YRGQVPSHV D KVLITSNEHE  
QFLIKVMLRQIRRPEVGDKFASRHGQKGVCGLIVPQEDLPFNDFGHSPDLIMNPHGFPSR  
MTVGKLELLVGKAGLYEGRQGYSSAFGEEHGSADTAEATAEALLRNLNYTGKDTFYSG  
ASGEPLDAYVFSGPVFYQKLKHMVLDAHARARGPRAVLTRQPTTEGRARDGGLRLGEMER  
DCLIAYGASNLMERLMHSSDAF SANVCLKCGLLQYDNWCQYCRTGEKVTDIRLPYACKL  
LFQELQSMNVLPRLLEDV

>comp10483\_c0\_seq1; 278 119 640 LEN=908; translated  
MNHLLLSLFLCTAFCAATTLGFSTTQSYAAKQPSSVKVNFSSQTSKALFLVKDNEDSDFP  
SDESSDYS GDVDWA EWKVVAKDGKLDGKERPGKDFYKSEAEITA IKAANAATKT VSE  
AGSSVSNMLPDVRSLSGDWRFWIGVLALVSVGLSLLSAPS DINSGLPGDSFYV

>comp10484\_c0\_seq1; 328 1 2351 LEN=2489; translated  
XRLQRLGYVTIHL SALQDTTTSKMNASIPKRRGQSSARVAALIPYTSSENKRKADTDEA  
TPSNKGSNKRSKTSSPYQIRIDLKELSTKASLAAGAVADARCESRDDYIIIVPNQAIGH  
ALERIPGKLEELGCTKVNQLTEEQDRALSEL SQEDVDKFCYSLIVRCTVYNMTKIIIRD  
LEEFHGCIYRKINRWLCEARDFQCSRPRRIYFDKVV PVI FAIARFRRRLLSGDPLKNAM  
IYRTVYNMLGVRKFTDGD LGIVDPYTKKYLRLTFRHIFKDWITEENKHVYVKDRVNI EH  
KTYEETLEKRRKKKYEPSRVASEENDNRMDCSDKTEDQMTRKKAPSKPPPATFKQNVNAV  
CRS IAPGKIAPQKRSVSVRKILVQEKTSQKRVE SKSSPFASNDNMKRMGHSTTSNKAAL  
KKVTPQPSSAALKENDMG TSCSILPLNGSAQKESVRFSDRVAKDAYLPAERNWGWGREP  
SFTPMRYFCCKTRTWRSKTPMAHWMSSQLMRYVTKAGSFHHIFRFSKTNVQLYIQDEEND  
EHCDVIVSGNMDLKNLGLQVAF LTGHTEEYHQSNK GKSMKNAMFTATLKREKMGFADKM  
RAKNMREECGWDGLYDKSVKIVQIFQGYTKGPETGIIQKFRDSPLVELQWIVKLPEKVKS  
YNICCVGIVPNECILGKRPP LPRVVNASVGV TENKKVTMNGK YMYEINEILRGDRKVKKT  
IYQGPVEDLP SDP SLRESFIRKLADKITASPVVNREDECTVPEGEKASDEEIKAFQAYNK  
WLG

>comp10485\_c0\_seq1; 848 201 2573 LEN=2652; translated  
MCGGKGAPSNALIVPFLAIGENDNPTCEEVYSFANESVTLNDDICSLIKSHKDFCGCPG  
AATRPLNACSLCPEGATPMNLNAITPFEDSCSQLD TYLKWIPEDLCLTERVGSIKRADAF  
CGCPGVEAE CYMCGDNNR LSNPNRKVPFYEF LGNSFSSTCQDLADFYTYLTD DDP EIST  
CEFVKMESEYCGCESNDDNAPVNACKLCS DGQAASKNQYIEEIDMTCGELETYLSHVPA  
DQCQMPVWVDFMRFD FYCGCASATAPCPICPDGSINISNPDAIIPYLIIPDNENPTCKQL  
ATLGVIAEPGELVLDNCDVFEAQADFCGCPGASKPEDSCEFCPGGDVPPNPDI VTPFGDT  
CEELSEYLSFLPSDQCD SERIGFIKRQDFLCGCP SATTSCALCVNHNSNDAKY PDRHIPL  
LSLPLNTNPTCKEVFEFMAVNDGDL SAPGCAALQEYQGYCGCPSTVPTNECSFCPHGGSP  
ANPDKVSDVFTCQGLDDFVSFLPGDECGSESSDFKQIQAFAYVCGCPHTEP SCTLCPGG  
GDPPFANRLTLDTDVTT CGEYAEFVGTLTDEQCASQSAEIKSAAFVCGCEGASAPTPAS  
DVGKCSIQQNAELCTKLLDSVEEECDCYAFCD SQFVKCQSGEGLLQNSECAGIPITGC  
NRAGVFSSTTPKQMDDDYIEVEKSSKSSEPPNITLIVAIIVPVLLAALVIVYYYFTRNT

QQRNAKFDEEFSEADDAGAAPVPVAMEGSLSMSDVQMPSSPPNMNAPADNFTIDDTEPP  
LNAHNDNKIV  
>comp10486\_c0\_seq1; 653 100 2052 LEN=2375; translated  
MAPTDSGGTAPMETDHGESSSSNGKSSQNRQEWGQEHMAHTGERYLVLVEFVYRHLNFQ  
MAELESILETFDIALGSEKCRHLPLPIPLEEGSLEIEAKNRAFVILSFPIADAQKWSGLA  
LQTPPEQRKNIRFEPRIEIGASSSSAASKLSIADILYKCTLVKSVELWGYSSSSLEECA  
TRTLEWVQRKQNNIESASDRPSPLAPSFQKEHLWPSVFANPEQPWKFTIHTLGTKVHRDE  
QDKMRQTFRKTLDLCIEGPVRLKDPATAQEFLLIREIQLDGKGSPLWAKTEKTTTTTGTETS  
QPNREFNTDAIAYYFGRVLGGRTRSSDGSRGIDHYSKTRPYLGPTSMDAELSFVMTSLG  
RVTSSSTIVYDPFVGTGSILLSCAMRGAYCIGSDIDIRVLRGKGGDRTIWKNFDYYGLPRP  
EILRTDNALYHRHFRHHTPGDSVEDEDESVAPTYDAILCDPPYGIRAGARQTGSRLN  
PRPILEENRHDHIAQTKPYVVSVMSDLDDVAARTLVVGGRLVYVIPSFRDFDEERDLPR  
HDCLELVHTCYQPFSTELGRRIVAMEKVSVDYDPRKRQTYLSTIWKFGAESAEKCANLREK  
IMEAARLKPGEYEEKAKIRKEKRRANKEAKKQEKRAKRAADQRALEVQNQQ  
>comp10487\_c0\_seq1; 224 288 595 LEN=595; minus strand; translated  
MTFKNQIALLFSFASFCDDVDVAWLKANENLPDASSRRSFFFEESGRFLLLSAVTVAVPFP  
ASAKYGEETSMEIPSYIDYLIEKNTAGDNSNALYKADPATVX  
>comp10488\_c0\_seq1; 548 112 1110 LEN=1435; translated  
MTTEITKEEADKVISDEANDDEFKDAVEEEEEVPDGSFPVSQEELSIIRAELACEFPEDYS  
YLSDAYVTSVASKPYSKDPTVRRPLEYTLKLNHVMHWREAGAPDMINLVDLANGPESA  
PEALEDPERLVKAKAMVYALNYGSLYWHGLTKDGRPVWLRTNRKPWYPDVDAEVNALS  
MADVGIKHPAGVTDVICVSESSSPPPNPTFMIKMLKALVKGYPDRLNVLLSAPVSSIV  
QFVMNLLLPLMPGRLASKVLLDVEGAKPKLAELLLNGEEDI PNFFGGPCNHDEYYPDPS  
QCENRGQGTTLTFDWYGMVERLEKAKREFEAKK  
>comp10489\_c1\_seq1; 166 1 462 LEN=462; translated  
NSNSNSNYQYSYNYSNNSNNDNYNEANYQIIPSPYRSKILTDQSSERQONLLEHMRSND  
FEQMAKNLKESEIEIKRRLESIKNEQQAEANMLRAELQLKAAAIQQQGTKAIHSGGNSSVL  
PTKRREDERTKPDLSLAETAVAVATGVSRRNSX  
>comp10489\_c1\_seq2; 348 1 1249 LEN=1249; translated  
NSNSNSNYQYSYNYSNNSNNDNYNEANYQIIPSPYRSKILTDQSSERQONLLEHMRSND  
FEQMAKNLKESEIEIKRRLESIKNEQQAEANMLRAELQLKAAAIQQQGTKAIHSGGNSSVL  
PTKRREDERTKPDLSLAETAVAVATGVSRRNSIGIGNGNGGNGVGEIGNHAKIGGSGA  
SNERDNQMEQFFERRFSNTGLIGNRIDGLIASRATTTGLMEKTAKPSPRALSNDGITFAS  
STANSATMDALRRESKGPSSQKLHLENTFKRSLEEIPGTNSTVTPSWYQKASSLDSSAAV  
SNEQRLQMLRRNSLPPSTSELVQASSLKRRRLLEQKIKEVRDLGIGDAMEQIRKLDTNMK  
LGALHRPGVPASRPAQLMAKMASAGTNNLYASAPFSLLPQERRSSLASISSLSQERR  
>comp10489\_c1\_seq3; 316 1 936 LEN=1086; translated  
SSLASISSLSQERRSSLASTSSFFLERRPSLASSVASAPAGTGNPGMHNRFGSLASNGL  
RRATVSGRGLDERAIVLHKLNRLLGGGFMPKVAKRASEGSVVGSKNRI FPIEITPEFNK  
DIVDLGSENASKIETDQKEEQIDDRVKYLGKIGGFMPMSLYKNKSVTMDRSRYDDSI PP  
TEVQSYGIRNSISTHIKNTVNNKSASAPRPPALDGYKQIWRDIRVVVGDDPEVDES LRKE  
VFARKLHRGEILGKRDDGIAATGNTNGTSDLQTYRQRLSELSHDSNNDSDLDNSSHIQEH  
PDADLEESIVI  
>comp10490\_c0\_seq1; 311 1 847 LEN=1209; translated  
XLDGRQVVVSTFLDMSFMMLRSTISFILKLFILLMSLSLSSNTKDSKQLLEWNLEEVKS  
SGKQGLLNNQFVLSPGVGNAGDLLQLALGWASLQPVYLANDLYKPQKRHGAPVLHEFFA  
QNPENWNLVSVDYVDLTPAMVSLLVGINFSSFDIMLATVQYGNPNFYRPSMSVTSKVQS  
HVMRDKCLFLNVGKDFGSNFGTTLAYRVLGKFYSIVIHFDGSSVIVLNEYNHMQAGSKE  
IVIEEGAEESINPGGGGTIMTWSKEEDNGGEIEFDFDSPF  
>comp10490\_c0\_seq2; 584 155 1618 LEN=1980; translated  
MDFTSRYCRRRIEGSMTCPASIAVNCCQLACCIPTIPAIDFPI SLHPDWMSNLVQSVPE  
IALGDIVI PGTHDSASYSIPTYQFFSAVGRTQNVSVLEQLHRGTRALDLRIAGSNDVYC  
FRGCMKGCKLSRILEDVHLFCQDFPGEFLVIKVAEYGRAFDPKLKKKALDIIQSSLGDK  
LFGPPTVDKLLLETPLKDLTSGTQACVILHPRIYEDFTVGGTEYNDAYVAKEYSCFNAGD  
WMEDKWYNTKDSKQLLEWNLEEVKSSGKQGLLNNQFVLSPGVGNAGDLLQLALGWASLQ  
PVYLANDLYKPQKRHGAPVLHEFFAQNPNENWNLVSVDYVDLTPAMVSLLVGINFSSFDI  
MLATVQYGNPNFYRPSMSVTSKVQSHVMRDKCLFLNVGKDFGSNFGTTLAYRVLGKFYS  
IVIHFDGSSVIVLNEYNHMQAGSKEIVIEEGAEESINPGGGGTIMTWSKEEDNGGEIEF  
DFDSPF  
>comp10492\_c0\_seq1; 387 1 2190 LEN=2458; translated

FQFTFRCVAKEYSGLKHLHASIEGLILTTKVDQMIIKMKLNKLCFLSLLTINIILVRLVDAA  
SVRVSKNCFDVGGETINVRFINVDGEGIFVGLYANKDVPNKKSLPTLESQELQTWVLTCE  
HDNCDNWP SRGSVELLTDGLEEDDYFIAVSGNRSGLAPQATTRVFRIGGCSAFFS IPTAS  
STTRPITDRPLTFGPVAIASGIQIPTPPVVPVPAPVPVFAQSGADSVLLVSDTINPILRD  
ARIQIENLIRNDEDLTGKVSSTMRKDXMRILVKLERLCHLNLWEKYLILLHPNELFLRL  
VFHDCIGGCDGCVDMANPDNAGLDKPINALQPLVDSFFDRGLTRTDIWLVLAVATETAV  
PAENRDILFDLQWIGRKTCEAMVDCGVDFSGNPTLCTSMRGPVHGQAHAATAGTRSIQAFF  
ENEFSFNPQQVTALMGAHSVKGMSRENSGFTGRWDLSSSTSFDDGGYWIELVGPDPDFVLED  
VNNDLPGIPSRQYRGFVSQDTRVTMLHTDISLVRNLEDMRDGQTNCFNGPNQCSHDT  
PFMPHARRYTQDNRSWLVDVFRDVFNLLIDHGHAKAGFCPPGRICTFGFEPQNTLATEVLP  
PPTQAPSPPIREFGVNGARIFVDKTCYNVGESIVATFDNISAEENTWIGMLPLGVVSDFTD  
LPAGPDSGSELLVEWTLSCGHHECHTWLPSGGLQFPDGLLEEDEYIIVVSGAGGSLEGQA  
ATFFFIGG

>comp10492\_c0\_seq2; 495 1 2076 LEN=2344; translated  
FQFTFRCVAKEYSGLKHLHASIEGLILTTKVDQMIIKMKLNKLCFLSLLTINIILVRLVDAA  
SVRVSKNCFDVGGETINVRFINVDGEGIFVGLYANKDVPNKKSLPTLESQELQTWVLTCE  
HDNCDNWP SRGSVELLTDGLEEDDYFIAVSGNRSGLAPQATTRVFRIGGCSAFFS IPTAS  
STTRPITDRPLTFGPVAIASGIQIPTPPVVPVPAPVPVFAQSGADSVLLVSDTINPILRD  
ARIQIENLIRNDEDLTGKFLRLVFHDCIGGCDGCVDMANPDNAGLDKPINALQPLVDSFF  
DRGLTRTDIWLVLAVATETAVPAENRDILFDLQWIGRKTCEAMVDCGVDFSGNPTLCTS  
MRGPVHGQAHAATAGTRSIQAFFENEFSFNPQQVTALMGAHSVKGMSRENSGFTGRWDLSS  
TSFDDGGYWIELVGPDPDFVLEDVNNDLPGIPSRQYRGFVSQDTRVTMLHTDISLVRNLE  
EDMRDGQTNCFNGPNQCSHDTPFMPHARRYTQDNRSWLVDVFRDVFNLLIDHGHAKAGFC  
PPGRICTFGFEPQNTLATEVLPPTQAPSPPIREFGVNGARIFVDKTCYNVGESIVATFD  
NISAEENTWIGMLPLGVVSDFTDLPAGPDSGSELLVEWTLSCGHHECHTWLPSGGLQFPD  
GLEEYIIVVSGAGGSLEGQAATFFFIGG

>comp10493\_c0\_seq1; 200 164 499 LEN=499; translated  
MRISAIIVFLSASSAVAAAFAPVSTRSASITQLQAENVGRREAIGAFGAFFGAALLFPDSSQ  
AIENPALQTFKGRKRTKGAFFIPGKGLHSNDEFDRLMAITNPALQTFKGAAPT

>comp10494\_c0\_seq1; 988 1 2452 LEN=2587; translated  
XVSVVAKRIVGACLERPVSSLVPHDSSSLAPHGASNIEHRPPTSMSSGNLPPGYNPPLF  
APANGAAPVAAPGGYYPQTDSPPLASASASVSRNGVTGSQSTSHPKSSKAQSVKSGIQ  
KLSKSSSSGGGAKASAGGIGSGSSKSSSKANGGSNKSGASSVSTSRQVPGNTSLEFN  
KQONMLTQCDYVDRTIWATRVLWGGNAVNGFLRATATAQR IKKQRRARQNNSTKMSRAA  
ANASGGGAAAGEDDKKGAAMGSAGLLAAKSNSGIGGSMGAKTKEVFNQKEEELLKKE  
IMNPR TAKKLKGELEAGLTFCATVCNVLRGVLFIDPSPSLPPLPHLNLQHEKSPPAHTF  
LVSPSPPTAGSQHRSSGATGGGTGNTKATKGGSKSKNASGTATSKGGASAKNSAVSKQQP  
QAAAAAPT TTKSAGDPGSSTLRRLRKT SRKNKSQSI AKEPGFANLPPEVDP SNGNKRCT  
KKEYQHRVFQLLRYRDLRQGDYCAARLSSRDWWILAKVLKDYKTTALAPS YTS SPLEFLA  
MSDTRDALLQKERV LLEDVEDQQATAGTQVVRSLVPLPRSSAEANEWASKLIK KGSRV  
YAMY PETTVLYAATVIDGSTYCRGDDDIIVVQFDEEEADLRTGTFPSYHVSAPNYVTGKT  
ERQIDFGTNI VVVVVVVVVVVVVVVVGGGGVDVRSLLSSVALTVXIFNSSPIEIPARFVTLI  
PREFPASQSGRGGSTAKLSSNASSASSSNNKRKSSAASSPSNNKKRSGATNTGAAVGNGL  
LDPLFDGGLGGFDDLDLDFDKPLDAHEQGDQEKFPDF

>comp10494\_c0\_seq2; 1005 1 2266 LEN=2401; translated  
XVSVVAKRIVGACLERPVSSLVPHDSSSLAPHGASNIEHRPPTSMSSGNLPPGYNPPLF  
APANGAAPVAAPGGYYPQTDSPPLASASASVSRNGVTGSQSTSHPKSSKAQSVKSGIQ  
KLSKSSSSGGGAKASAGGIGSGSSKSSSKANGGSNKSGASSVSTSRQVPGNTSLEFN  
KQONMLTQCDYVDRTIWATRVLWGGNAVNGFLRATATAQR IKKQRRARQNNSTKMSRAA  
ANASGGGAAAGEDDKKGAAMGSAGLLAAKSNSGIGGSMGAKTKEVFNQKEEELLKKE  
IMNPR TAKKLKGELEAGLTFCATVCNVLRGVLFIDPSPSLPPLPHLNLQHEKSPPAHTF  
LVSPSPPTAGSQHRSSGATGGGTGNTKATKGGSKSKNASGTATSKGGASAKNSAVSKQQP  
QAAAAAPT TTKSAGDPGSSTLRRLRKT SRKNKSQSI AKEPGFANLPPEVDP SNGNKRCT  
KKEYQHRVFQLLRYRDLRQGDYCAARLSSRDWWILAKVLKDYKTTALAPS YTS SPLEFLA  
MSDTRDALLQKERV LLEDVEDQQATAGTQVVRSLVPLPRSSAEANEWASKLIK KGSRV  
YAMY PETTVLYAATVIDGSTYCRGDDDIIVVQFDEEEADLRTGTFPSYHIPARFVTLIPR  
EFPASQSGRGGSTAKLSSNASSASSSNNKRKSSAASSPSNNKKRSGATNTGAAVGNGL  
PLFDGGLGGFDDLDLDFDKPLDAHEQGDQEKFPDF

>comp10495\_c1\_seq1; 367 226 1356 LEN=1582; translated  
MTMRRGAAEHCLFQRYLYCCLLIMFAVIVQAGCFVPSLPTWTKQRNGRIGLHPRRLATR

PGENADLLPLSSFDRKKLHMKTRGRVIPIIFMAEPLIPGQRLHFRSGDPKFEELIKYIA  
QSEQNYADHGASAAGKIEIGIVAFDPKNKQILTTGVTSPVQTKDFAYSLLTAENQEKAITT  
SFRGTRFLRMLSEPWMDPSGFSFHMAHVEILDGRYDDQKLVQRGKIQSDSDKLFSLIPPMV  
DDWMELMFEAGLATPASLRLSLQDTVATEMQQERLQTDNDPSHRTRRRNNNYALYPPRRQ  
MERAVVWVALLNPIRRYSTRVSEIRPAFLACRNRDRDLALCVEALHTSLGFLFIYVEAK  
RRGGSEKDEDGSGEIG

>comp10496\_c0\_seq1; 664 112 1953 LEN=2250; translated  
MTLGRGAHQNGNLDKAKAFARWEGNPKDIESILLQOCKQQLNPPQVEDLLVKELNKMTHD  
SRERVMEIHGIPNPLSVEEETKLEEMQVELDQLEREASFANKNAITACKSDPLATHTS  
AYQKAKLLKSELIYDRQFRWSFLHRENNHPKKAALRMFRYLDFLMQTFRDNDELLERPIF  
LKDLDPGALEYLQIEGGGISQILPIRDSSGRRILVHLTDAACSLLYQQQIGFYISQCLTE  
DRNGVVVYFLHNTSRKFLDLQQLPMMNQLFRVLPPIRFDAVHLCCPDLPMYEFCKALVTL  
YVGKENRIRRRHLHLSYLECKYSLQQYIGIVDRLPINLETWKWSHSDTKHFRKWLIGRE  
AKEVAIRAAIVEMKNNKNETNKIDLRPNSNSKGNEPSVRGTKQSPLNGTMEIFRAIRKKY  
VECPHHEDCLFGKGNMNHGNAVAMRQLVAGMCQHFHDSKKEKQNLARDIIDRVKAG  
GGRFLKEDVATTGFYVEVDDDLALKKITVAFRDLKKKFSRESIKQNISGLEKREHALSV  
AKHQLPPNKKFMRNSNLDESQYNRMISPLPLVVSSVSAAATTTKGNSSDQLPTYTGSIFD  
AKEKPSSICSCDS

>comp10496\_c0\_seq2; 405 206 1180 LEN=1477; translated  
MYEFCKALVTLVYGKENRIRRRHLHLSYLECKYSLQQYIGIVDRLPINLETWKWSHSDTK  
KHFRKWLIGREAKEVAIRAAIVEMKNNKNETNKIDLRPNSNSKGNEPSVRGTKQSPLNGT  
MEIFRAIRKKYVECPHHEDCLFGKGNMNHGNAVAMRQLVAGMCQHFHDSKKEKQNL  
ARDIIDRVKAGGGRFLKEDVATTGFYVEVDDDLALKKITVAFRDLKKKFSRESIKQNISG  
LEKREHALSVAKHQLPPNKKFMRNSNLDESQYNRMISPLPLVVSSVSAAATTTKGNSSD  
QLPTYTGSIFDAKEKPSSICSCDS

>comp10496\_c0\_seq3; 309 112 846 LEN=987; translated  
MTLGRGAHQNGNLDKAKAFARWEGNPKDIESILLQOCKQQLNPPQVEDLLVKELNKMTHD  
SRERVMEIHGIPNPLSVEEETKLEEMQVELDQLEREASFANKNAITACKSDPLATHTS  
AYQKAKLLKSELIYDRQFRWSFLHRENNHPKKAALRMFRYLDFLMQTFRDNDELLERPIF  
LKDLDPGALEYLQIEGGGISQILPIRDSSGRRILVHLTDAACSLLYQVCYETCQFVLDFF  
RKVL

>comp10498\_c0\_seq1; 263 1 852 LEN=1165; translated  
LSMVQDAILSTLDFKIRIKMWLSLRAAFIVVAVAMANSMTVDGLSSPSSSSQIPPPPI  
SVPVWSFATASTEPCNTITSMNIMTFCTPVSVSSPKLWALSFYHGTLTKDSFLGNDDEDN  
DDDVPSTGILQLLTYDHRHLVPILGKKSGRDIDKSVACGEEGFPWWKIPNPTPPTLSSV  
DETEGFDTGDRIGKFEVLPGCALYLQVECRSSKSLIDAGDHVVAICKVTRTGWVQPEL  
GKIQLWDEFNGGDIDTAMSLPLAAIDESRALYSGRRLRQEGIL

>comp10499\_c0\_seq1; 161 1 881 LEN=1028; translated  
IRFFDWIRSIVPPTERLSRSSMPPQMGTAPGSDAAGASATATGDPVLPWVVRAGSDNGD  
WGEKLEVPWPKDDGGAYRASNGWRGRDLVHDRDSPVRVLDYVAYGGGIRQDHSDEKTL  
YKTFARGGVGTTLTGIVHFTSRAESHKGYCHGGSMCGIMDDVLGWIGFLATGECLPWSGY  
TVQVNSSLQKPVVGSFLRVRAEIVGIERRKVSIEATISDPAAERPGLAEGGRDPSIHAT  
ATGLTILNRGVLCEDRKXVAAETTPLEETKGAAGSVARECNGFLPCNDSSI

>comp10499\_c0\_seq2; 199 77 894 LEN=1041; translated  
MPPQMGTAPGSDAAGASATATGDPVLPWVVRAGSDNGDWGEKLEVPWPKDDGGAYRASN  
GWRGRDLVHDRDSPVRVLDYVAYGGGIRQDHSDEKTLKTFARGGVGTTLTGIVHFTS  
RAESHKGYCHGGSMCGIMDDVLGWIGFLATGECLPWSGYTVQVNSSLQKPVVGSFLRV  
AEIVGIERRKVSIEATISDPAAERPGLAEGGRDPSIHATATGLTILNRGVLCEDRKXVAA  
ETTPLEETKGAAGSVARECNGFLPCNDSSI

>comp10500\_c0\_seq1; 841 985 3563 LEN=3839; translated  
MKNPLDSFDYLLPPIIDTKGAXALLSPIFTKQSPLNNQTHKAFFGSSPGQIKKSELTYKMN  
RLNKMFKKKKSERKSDSHASPRVSGNAPVAAPPPAPVPKVDGAVPMQTD AEDRERQIN  
AHGKARQKQKRAENIFA EKVDL TEKFEV PKYKSDGAVRFIDNSLVDNFI FASLSAQERR  
LLIDAMVMEKVQAGTVI IKQGETGDFYVVDDEGHVTF AVDGNHVGACGRGGSF GELALLY  
NCPRAATCLANTTCRLWKVDQRTFRYMLANNNASQOKDIHDVLRKVPFL SELAENDLLRI  
SDALTSVTFPEGERI INKGDVGEVFYILREGKVKVHDI GFGDSQYVDQVIGPGDWFGERA  
LLTG DARSANITAVTNTTCLSRDTFEKVLGPLQHLIDRAAKKRTLEGVPVFANSEFQP  
FEMTRLTELLTEQTFPAGTILAEEGKEYEPNLYI IREGRIVVSNSKGVNTLMDADYFGA  
LWLKEPIGSPSPITVKIEADTECGVLTRKDIESVIGDIKRLGKPLVMHTVTLNKDIKLN  
LVKFRILGVGTFGKVLVSHKKTSA PYALKQLSKRAIIGHHQVEGVLRKNIMANI QHPF



VVDLVATFQDDRHLMLIALVQGGELFVSIHTETRDGIPNGNSRFYAACILESLSHLHRR  
GIAYRDLKPENILIDSKGYCVLVDLGFVAKIVSDKTYTLCGTPEYLAPEIILSKGHDSGVD  
YWAFGLIYEMLVGRSPFYSGTDQVSLFKRIVQVKYAFPPGGLVTEPAQDLIQRLIVRR  
QANRFGCLARKDMDVRDHYWFNVIDVDKLLRKKIPAPWIPKIKDPLDASHFDSYRHEENQ  
PQSNKPNITAQQQALFKEF

>comp10500\_c0\_seq2; 804 155 2725 LEN=3001; translated  
MGQCMGTGRKQRLATDPTAAISCPPEESQEQHSLHRPRSVEPSARMEKKTTPPSPSTTDPT  
PQKKQKHSTSAEGVKEDADASSAPVAAPPPAPVVKVDDGGVAPMQTDAEDRERQINAHG  
KARQKQKRAENIFAEKVDLTEKFEVPKYPKSDGAVRFIDNSLVDNFIFASLSAQERRLLI  
DAMVMEKVQAGTVIIKQGETGDFYVVDDEGHVTFVAVDGNHVGACGRGGSFGELALLYNCP  
RAATCLANTTCRLWKVDQRTFRYMLANNNASQQKDIHDVLRKVPFLSELAENDLLRISDA  
LTSVTFPEGERIINKGDVGEVFYILREGKVKVHDI GF GDSQYVDQVIGPGDWFGERALLT  
GDARSANITAVTNTTCLSRDTFEKVLGPLQHLIDRAAKKRTLEGVPVFANSEFQPFEM  
TRLTELLTEQTFPAGTILAEEGKEYEPNLYIIREGRIVVSNKQVNTLMDADYFGALWL  
KEPIGSPSPITVKIEADTECGVLTRKDIESVIGDIKRLGKPLVMHTVTLNKDIKLNLDLVK  
FRILGVGTFGKVWLVSHKKTSAFYALKQLSKRAIIGHHQVEGVLEKNIMANIQHPPFVVD  
LVATFQDDRHLMLIALVQGGELFVSIHTETRDGIPNGNSRFYAACILESLSHLHRRGIA  
YRDLKPENILIDSKGYCVLVDLGFVAKIVSDKTYTLCGTPEYLAPEIILSKGHDSGVDYWA  
FGVLIYEMLVGRSPFYSGTDQVSLFKRIVQVKYAFPPGGLVTEPAQDLIQRLIVRRQAN  
RFGCLARKDMDVRDHYWFNVIDVDKLLRKKIPAPWIPKIKDPLDASHFDSYRHEENQPQS  
NKPNITAQQQALFKEF

>comp10500\_c0\_seq3; 746 1543 3997 LEN=4273; translated  
MMHADKSYANHQNKFPRTHGTPHIKSVVQSRQQRQPQTNKISQAPVAAPPPAPVVKVDD  
GGVAPMQTDAEDRERQINAHGKARQKQKRAENIFAEKVDLTEKFEVPKYPKSDGAVRFID  
NSLVDNFIFASLSAQERRLLIDAMVMEKVQAGTVIIKQGETGDFYVVDDEGHVTFVAVDGN  
HVGACGRGGSFGELALLYNCPRAATCLANTTCRLWKVDQRTFRYMLANNNASQQKDIHDV  
LRKVPFLSELAENDLLRISDALTSVTFPEGERIINKGDVGEVFYILREGKVKVHDI GF GDS  
SQYVDQVIGPGDWFGERALLTGDARSANITAVTNTTCLSRDTFEKVLGPLQHLIDRAA  
KKRTLEGVPVFANSEFQPFEMTRLTELLTEQTFPAGTILAEEGKEYEPNLYIIREGRIVV  
SNKQVNTLMDADYFGALWLKEPIGSPSPITVKIEADTECGVLTRKDIESVIGDIKRLG  
KPLVMHTVTLNKDIKLNLDLVKFRILGVGTFGKVWLVSHKKTSAFYALKQLSKRAIIGHHQ  
VEGVLEKNIMANIQHPPFVVDLVATFQDDRHLMLIALVQGGELFVSIHTETRDGIPNGN  
SRFYAACILESLSHLHRRGIAAYRDLKPENILIDSKGYCVLVDLGFVAKIVSDKTYTLCGTP  
EYLAPEIILSKGHDSGVDYWAFGLIYEMLVGRSPFYSGTDQVSLFKRIVQVKYAFPPG  
GLVTEPAQDLIQRLIVRRQANRFGCLARKDMDVRDHYWFNVIDVDKLLRKKIPAPWIPKI  
KDPLDASHFDSYRHEENQPQSNKPNITAQQQALFKEF

>comp10501\_c0\_seq1; 253 321 800 LEN=800; translated  
MPLPPELKTARAGMPRTPHHTPAKASLPDAKDVAHAHGGSFLSKYFLVILFGFAVASMV  
NSNVAHSVHQLEGSNGNNAKRLKDFRVSRSSEKAFKRMEMEEKFAEPTSPGSNVGGAG  
ENQNDGEGGNEDNNASNDHENKENNDGQTSNPNKEEEQ

>comp10503\_c0\_seq1; 397 1 1106 LEN=1696; minus strand; translated  
EETPEETKEPTKEPTKPPTLSPTKDPTREPTTKPTLSPTKEPTKKPTLSPTASPTVRPT  
VEQTAEQTVPTAEQTAETSSSTNPPTSATTGEPTGFPSPLPTGRPSPTTNPACPKSG  
LLKLQATRQATPYPGPPDQPTAVRVVSVSEDTTATVELFQAWGTANANANTVENYFYEY  
QPSLFEHRCVQEQLPPSRPSSGSRSSSNTNDAPIDSVSIRCGITSKTAYLTICLQEV  
SNKKGLLGEQDTAKVPRCCHSDAAPGARAVCYTLSIDCSRDCGGNSDGRSDRNKIHNETS  
DESGQALGVXPQAPRGLTSENLRQEKLLGGPMASPPNGILAGCVSVPATSGTALSTPDGQ  
ETTAKRQQ

>comp10504\_c0\_seq1; 387 222 1574 LEN=1761; translated  
MTEFYHDAYQVYELLDERSYRGCPEPNAMRDLFHRKPSEAKREFLYGQTLHLKAFRFFSDK  
TEIIDILRAYPEALEKTDDDGFLPIHRLLLGRWGDNI DV I SKIVNAYPECLVTPPTTG  
GELPLHLASKRTEREDVIQFLLCFPDACCQYRDFNNGFPLDHALEVTIPNPAIVELLVKQH  
PVLLSFPDESALKIHRMLNKCSLLEKSGYDELIEILAAGCGASLRLQDGFSTPLFLAC  
TQNHLSQIYSLLRKWPQVAPSRSRCIFDSTVFNGEILYPSLISKSTKKSNNVRQWLLGE  
PDARLRQDLHGRLPIHYAVLSKSKGAYDIVRCLLFGQDGDGVTSTVTSQSCIQQLSTKD  
NNGRLPIHMASASPCSPAILKLLIDAYAQSLEHNDNGRLAWHYGECRQDLVFFETTAE  
LFPDMEVDLDPEDIQWDILSVKGHDS

>comp10505\_c0\_seq1; 268 2289 3473 LEN=3527; translated  
MSTVTDPMGFWGFDDFKGYGVGGVILRNTANVNGVEDIFPGPEVFYPSPIERGAKRNTY  
ETETEKN TAKRRKKGRKRKAIRSKLLYP AIRLFRKQRRKVKGIFISYRRSDIKDVEKFSA

VSEVSTITPISTKSTQATSSIVPESIKVKQEPSMIKAEINEAKQESSSITTAFTI IREGV  
LDDIPRTNSNIENTEDSKDLTSQPTIIKAASESVTAVVTQPKGDRWAVASPDV DLSGKWE  
LIVTNEFKEHYDRYLERLGQPKIVRSVALSGPVIQOTMEELIQIDCGRSLLIRGKNIRGT  
WDRTLVASGTTKYEDEYTPLIETIRTVDGEQVKSEAWWESEGTVHISWMRGVTMYGGGSF  
FSRRYFEEMEGETVYVCDSSVFVNDPKEDNSLW  
>comp10505\_c0\_seq2; 268 2179 3363 LEN=3417; translated  
MSTVTDPMGFWGFDFFKGYGVGGVILRNTANVNGVEDIFPGPEVFYFSPDI ERGAKRTNY  
ETETEKNTAKRRKKGRKRKAIRSKLLYP AIRLFRKQRRKVKGIFISYRRSDIKDVEKFSA  
VSEVSTITPISTKSTQATSSIVPESIKVKQEPSMIKAEINEAKQESSSITTAFTI IREGV  
LDDIPRTNSNIENTEDSKDLTSQPTIIKAASESVTAVVTQPKGDRWAVASPDV DLSGKWE  
LIVTNEFKEHYDRYLERLGQPKIVRSVALSGPVIQOTMEELIQIDCGRSLLIRGKNIRGT  
WDRTLVASGTTKYEDEYTPLIETIRTVDGEQVKSEAWWESEGTVHISWMRGVTMYGGGSF  
FSRRYFEEMEGETVYVCDSSVFVNDPKEDNSLW  
>comp10505\_c0\_seq3; 268 2436 3620 LEN=3674; translated  
MSTVTDPMGFWGFDFFKGYGVGGVILRNTANVNGVEDIFPGPEVFYFSPDI ERGAKRTNY  
ETETEKNTAKRRKKGRKRKAIRSKLLYP AIRLFRKQRRKVKGIFISYRRSDIKDVEKFSA  
VSEVSTITPISTKSTQATSSIVPESIKVKQEPSMIKAEINEAKQESSSITTAFTI IREGV  
LDDIPRTNSNIENTEDSKDLTSQPTIIKAASESVTAVVTQPKGDRWAVASPDV DLSGKWE  
LIVTNEFKEHYDRYLERLGQPKIVRSVALSGPVIQOTMEELIQIDCGRSLLIRGKNIRGT  
WDRTLVASGTTKYEDEYTPLIETIRTVDGEQVKSEAWWESEGTVHISWMRGVTMYGGGSF  
FSRRYFEEMEGETVYVCDSSVFVNDPKEDNSLW  
>comp10506\_c0\_seq1; 836 169 1710 LEN=1866; translated  
MPRSTSSKALVALLLVVALASAIRTPESFPQHSIHQSSQLRQRQHQQQPATAAAV VET  
TPRGGKTEAAPKPAILDPAVGTGVVLTVIERIVNKIFVDAGINFPAQLGGCGILFAFLVL  
ADAVVPGLGNSIFEYLTPTGTTLLTKWLPVFFVPGLAMLP LAPS VGSGL E VAKVLLVTGLG  
FIYTLYTVAYTVLFLRKL D GKIAPAVPAKAAKSAAVASGPPAKPFSAEAMSFLMKASIA  
TGIGSLLTEKFMAGAVWESPLKAAFFVATFASYVGCARGPPAITKAVHPLLTSTFV VWG  
LLYAYGAATGSASFADSVRSYKTS S L A W N A A G A G D L L L F C L G P S V V S F A V S M Y S R K K L M L  
ENFKIVVA AFLVSSFGTLFGTAAFTKLIRLGGASGNSLMIRLSMLARNITTALAI PVTM  
LGGDISIAVVVVLTGII GAQYGRKLMDFANIQDPITRGLAVGSAAQGLGVSSMVSEVDA  
FPFAAMAMALTAVAGTII VAVPEVKDAIVGICS  
>comp10506\_c0\_seq2; 291 169 808 LEN=808; translated  
MPRSTSSKALVALLLVVALASAIRTPESFPQHSIHQSSQLRQRQHQQQPATAAAV VET  
TPRGGKTEAAPKPAILDPAVGTGVVLTVIERIVNKIFVDAGINFPAQLGGCGILFAFLVL  
ADAVVPGLGNSIFEYLTPTGTTLLTKWLPVFFVPGLAMLP LAPTLD PDWRYVAQK KSKGYG  
TSECVEWNPVNEFQCKRCFRSLRSNFFCSAFL  
>comp10507\_c0\_seq2; 174 1 1557 LEN=1595; minus strand; translated  
XHNQKNTLSPGQDLDSVLGFTHRENQSTFGIATRSQEKETHDVEIPRVRSS THEDDL SKL  
SNSTTDSSNGIDDPPIKEIVLFDSSIDHSFSKCRSVESELD ELLKREPAANDTTRGKPDF  
AYDISLINYKGDHLTPVKRMKNERSTSRGQSARRKGIAPVSRDSLADLEDY LMDALSVIS  
ERNKVIGDLRQQLTKKDRENGLRRHIEELNRESSRRRQRSRRSRHHSKNASRQDLPKNE  
ISATYGAEARGGVVLQQTNSTHETAFAD ESEIYEDKNRVSENVCSYRDISNFNTDSGERR  
LYSIAWGSNESNGIEPSVESDLRKSQSARPYKSRSTSDAVTGSRSYHDGRNTTKIELHRG  
YFAHTRERSSKQSPKKVHRNNSSKFEQPASSPGRRLERDDETKVAEPSTPIAQTM MVQGI  
PLVEAGALHIHLMVGGKRKSLEMIPEEVATLHAHPSVSVSETTLTEVGEPLGKSQ EIVPEEV  
GILPTQPRNVCESIQTALGTPLRESYGIVLVEVCMLPA  
>comp10508\_c0\_seq1; 377 349 1377 LEN=1576; translated  
MRASILSLVALVSAAMHFQGSGEFVGAIAPRSSLGVP SGSSGPSVFGMPRGGAFAVSTKG  
AKVAPPSS E I A R G G Q Q A S S I K E N I F K R I I K R K I D E L I E S G Q A G W V V S F A L S I I Y L V L F F Q  
DGGASTNACTYSSAGFCVTNFDGADCPIMNSHTWAFVAVDMVFLVACFLVPSDRRTTLYKAA  
LAFGAVGSHGALHALLGIFVNCTSDPFGAETIFGAFGALISFLILFSTTELDNMIKLVI  
SAVSGYLTVLLSEGGAGVSSIFLITQLLASGAGIFDTEGKLTTPLMGYTFIAPCLVSIIE  
LLFCCDPATGGPGLFNQYGGHVYDIALHTSLLTSLLP RKDE  
>comp10509\_c0\_seq1; 535 89 1198 LEN=1321; translated  
MTSIKNTFPAFL LALLSSGAEARKKPEPTIFGLDSC TNDASNGNTFR TYRLLCDDGATF  
SKFCDLLNSGPFVVDGGAPIDIKAYINTGLNLHTIFAPTDSAFDSNPLY SMLVELRNTGT  
PEALALYNKFVAQILQLHILPSTFLMEDLECDGIYDTLNL SALAQDQYQKTKCRNAV TN  
PTQIGGGNTMEAEQPVIQPINVFSASQFPLEATGGLFARRQTVKGEFSTNVVGCNGVIH  
TVDNILIPGDIMVDGKSSKSGKAGKSAKKDKKKQPYPPPPPGGEEVVVVVEEA EVELDF  
TDMVAEAAAYAEPEEPLVEEA VVEEA AVEAETDPEGRK LK VDSRREDLERRRRRLEALLEP

DGKVVEQLN

>comp10511\_c0\_seq1; 294 236 781 LEN=1347; translated  
MMKKPRHVESA AFVSI IIGMQAC LLEVA FFSFQPAGEQLSAIKTSTRQSVSLFAEKCS  
SSS DNAEHKSQHK EEDFFF GSGVDLETS GAFPSDDQISSSLNQKLELEFGIGKRYVIR  
TQQG FLNVHYEPIDPYMLDNVVNQ LSDGQIVTATGPKRGVWIPHDGGGWSVSKFAGFT  
WLEPID E

>comp10511\_c0\_seq2; 168 732 914 LEN=1480; translated  
MCMREQPIDPYMLDNVVNQ LSDGQIVTATGPKRGVWIPHDGGGWSVSKFAGFTWLEPID E

>comp10512\_c0\_seq1; 445 1 2259 LEN=2633; translated  
STGNNRSKNRNS SSVSSASEAFQPADVSDASNP KSSIGNPVDEQLSDNGNEHSTPPTS  
G KRAASSPMFKMPSREEFREIMLERERKKKEKQLKLRQRRIQQLARKNGAASSNPNICGIG  
TEDDATERGTASYRTTIDEGYQWEWEV GSSPSSKAASAPVPYRNK KSENYLKPVPSNFGK  
KLPRSWKEAYHFLRDYRYIEETCEVPSNHPI LGKFVCDLRSEYERFRAHTRKQLRRQKTE  
QQRLQHRWSPNQNHGNGQEGSLSNVKAYRTP TPASPQKDMTRVDRSRIKDLNRLGFDWRI  
EERDCQNETEQPSLPLM LDTFKPGHQSHSPST EKVDPTVANGKSSGDKYSKKIKRKHENKS  
NINDDSETRTESEYEQT DHGNGDSSVDDKRATFADEKMLDDEV TQAKETPKLPKNR LSHA  
GDDAVLIASVMEAQATLNETPLF HDIILSKHAAFP THLYRLLRLATVRQDLGLESIISWT  
EDGGGIFFRDDNRLLEDV VSKASRMKKIVSFWNTM NRYGFLCSQRGLNGNGS QYRVYHH  
SHMQAEDANDSSRLRFYRGAPAE LIGSIKQKGE GTVNKKKNQLTAKSPQEVGAVKKPSKQ  
KQLTKSHKRKHPSWMD EEEYGAA LPKKGNTQPGRSTSSLSVSSSENGRIVHASKKNLQHD  
SSSTWRAHDLNKKKGRNSQNLQGERHQSRQQRVTTSSCPPRITPYEINKSNWGKIERL  
INLNRCKRLGDVRGTMNETS QSPTSSENDVEFV

>comp10513\_c0\_seq2; 658 546 2657 LEN=2791; translated  
MSSLYYQDLQHEQQQQQHRQQQH QHQHQHHYQYHPQHSHPHSHPHPHQEPHHPHYE  
SQNYPSHYHYQHPDHRYPHEP IRSHHSHRTQENAPSPDQDYDPHSHPHQLHSNACSHR  
QTSPHSASSRGSRS SDVSPYLE SREALLDALAAKISLESKNYCLDSYFPPEVDRPGGLP  
RQQNVIHAAWREKICQWSYNVVDHYKLPREIVSISINYFDRFMATLSTAEEDSAMGNING  
NINANSKNKAKDTKT DGTGKSGDLALLASLGLHLATKVHLTNHNDYDPEMGPLESQHYK  
IPTLLSLATLSRQGF GPD SILEMEKQLLGALEWKLHPPTL FALINMLLELIPTTREDPIE  
GIKKSIRDDLFEAAMYLAELSVC DVFFVEHQVPSSTIALAAICTAMDSLSSAMETSMMAG  
FDASHLRGSGCFSDHRRVFL ETCSDRLGLGARNSHDRALFRKTMERLLAIQKGAEDAGH  
LSHMEAEVESDVNSPTNPHDEIQQRCSNSYNPPTSPASIADMSMSTINSCIHSMAETT  
LGDRETASLKRGD SMANSSI PTRNESMVSS IDCQSQSVHTQKSAQGARTASNGGRDTPDC  
GDTSNSSCNSNFRYSPSPKSD DGDGDGFRKNRGEDPRVADFRRRVEASLVVSGSGRSD  
HLHGEIYYHPSGGDSGSQQGREGHF GSNNGAAMMSCSPIVALR

>comp10514\_c0\_seq1; 442 1 1326 LEN=1365; translated  
XDNDRTNNEFHSSLTNYKVPNKDIRNYLELLNIQSAKPV RVASMVASSYNTDDLHPMASK  
ILNENLVVIEDETRASSLPTSP TGSSKPTTPSELVSVPIGDDDKQNGVNKSVSKKRKIEC  
CDSPSEEIDSSFI PALAIETDDIVSVNYDSEHGHGFQHD AEGEENVDDTVGIDCSHGNGN  
KRFKRSYPSDLIVVLDMDECLIHLETEEREQDEKWPFS AFSTDEDEDEEHKDDSKEDAAT  
PHQTKFIYV NENKVFLRPLG LIEFLRFVTTFRDTHIF TAGTKEYADAILDKLCVLVGNTHA  
FSKRWYRED CETVDIWD PCTTFHLDR TYVKPLSKVAEWVGRDANDLRRIVHVDDR IQNFL  
LNHDNGIQVSGWRGDDPNDEDLSKV TNILREMDDVKIVEDVRPHLRSTYSESYLELKGQL  
DMMHYFSFRRTKGIDSQ LFG E

>comp10515\_c0\_seq1; 202 747 1244 LEN=1406; translated  
MKLGDFGLARMYGT PKTRLSPQAITLWYKPE LLLGSY EYSSAADIWSVGCIFAELLLRR  
PFLQGNSDISQLDTIFTVFGTPTD VNWPDHNTLPLCARGLIWDVPAIPFDEIFTAAPK  
DAISLLRSLTLDPNMRFSARQALDHPYFTNNPPPTPKEKLVLEA

>comp10515\_c0\_seq2; 190 1 1087 LEN=1249; translated  
RKIETHKLKNNNVEDHDSIHGGDNGHRGRQNI STDLRVNH YHQALAYLSYFTRIAAMENY  
RVQGALGSGTGWVHKA EQNGTGRVVAIKKIKSERPEEGVNF TAIREIKLLREFKHPNII  
ELVDVFSTPDMAVCLVYELAE TDL EKILN NKQISISLADIKQHLFSL LN AISACHDRWIL  
HRDLKPDNMLFIKDG TMKLGDFGLARMYGT PKTRLSPQAITLWYKPE LLLGSY EYSSAA  
DIWSVGCIFAELLLRRPFLQGNSDISQLDTIFTVFGTPTD VNWPDHNTLPLCARGLIWD  
DVP AIPFDEIFTAAPKDAISLLRSLTLDPNMRFSARQALDHPYFTNNPPPTPKEKLVLE  
A

>comp10516\_c0\_seq1; 779 119 2980 LEN=3052; translated  
MSDLP AHCENAEETTRVRLALEAVFAPQTVTNSSNWWEQRKLADRYLTSFQGS PVAWM  
VCDRLLQANAAPTSPQDATQQQQQRFFAAQTLHTKCRADVFQLPASSLP SLRDSLSFVHLG  
TYSTMGDVALTNRLAMAFSALAVQMGWTTVVTDLLSTVNTDPQKRPIVMQVFKVLAE ECA

SDRLVLLDENERYYYMRDHLVALSTDVFRFIQNWDGAPNTAYEVLFTWIRYVVPVQPNVITE  
SPLLEASFHALLNQDTMELAADLI IETYRMYPSFIRSNHDLVQRMIPLSSQLPFDQALKS  
GDEDILRTYCRIIITEMAESYMSLILSTQFQEASQLVEWVLKCSSIPETEISSITLHFWR  
MVIDLESVEPYEFRQDLIDRYTPYLLQLIDVCSGNLMKYPPDVSDLSEDEKDEISRNRFY  
VSETVEDCCRLVGGHVLDRLGTQLRSGVQSDGTNINLNWQGIESCLMCILSINKFIPGD  
EALILPFCFELIPRLPLDVSLRCTASKIIGKYASWLVGHPQMLQPLMPFLAQGLSIPSC  
SAAAALS IKELCECSNQVAIGEPVLQLYTEITASPGLLALKDELELLEGACRAISRQVQ  
DTKVDGSSFVQKIIQPIGNRLQAKAADPNKPKQDIIPELDRLTVIVQCLTIPSVQTSRA  
SPIVEIIQSVWPILDLSVRFALNSAMAEEKICRLHKHALRSCGAVAYEPMLEPLMKQLIQ  
SYERSRQSAYLYAASICVTEYGRDPKHALNLFNMINAMASVSFSFLNNLEDLTQHPDVVE  
ELFYMMGRMITYCPEPLVLSPLLRSLFQCACVGMQLDHRDANKGTLNFIENSVSYGLSVK  
EKNTRRESLQALESVLADEGQSIVNNLARSLTGDLPAYSVDTGSGSIAGVLWKLHFFSPTM  
MSQWISVALANAPECPRVEFIGILNSGIPRKDFNAAVRGFMSACKRERRLAGR  
>comp10518\_c0\_seq1; 674 1 1924 LEN=2105; translated  
NSNIPSTPTLRRVPEVRVEEEKSTHIDYDPMDDTATEYLAKHGLADIIQKLTSEKPEDPY  
KFLVDSVSALSLDANAAPDSGAGATDAPAAGVSASETGASEQASGENQQKRSKKKKKDKV  
AKKKQGPNGGGVQAKKAEDVPLWYEQVITKSEMMEYYPVKGCYIYRPWAYKTWEIVQGW  
FDGKIKELGVENCYFPMFIPKSYLEKEKDHLDDFAPEIAMVTKCGDRELEEPVAIRPTSE  
TAMYASFKNWIQSHRDLPLRLNQWCSVVRMEVRQTNFFLRHREFLWQEGHTAFASEIEAT  
TEVRQILELYARIYEELMAVPVVRGKTKAETFPGAEYETETVEVFIPTGRALQGATSHH  
LGQRFKMFQIEFQDPKDPTGKSREYAYQNSWGLSTRSMAAPIMIHGDDRGLVLPRIAG  
FQVVIVPVGIKKSSPDELKQEVTKCEEYREKLAAAGLRVKVDQRDNSPGWKFNWEMKG  
VPVRLEVGPKDIEKGSFIMAKRNAADPKTKGVFGSDAQVVEDVQNVLDEIHNELFAKAVA  
ERDESIASATEWKDFNVYLNKGMILIPFCGDPACEDMIKAKSKDEASEAEVMGGLKMG  
KSLCVPMEKDFQACPETCINPNCPSGVKVEKWTFLFRSY  
>comp10520\_c0\_seq1; 212 95 1213 LEN=1611; translated  
MDVGGFFSAISSAGVKIHIRTTPTPEQQSSNAIAPIDHYPNWKLHKNPFWRVKHPSN  
RFRSQATVVPMMSSGQHAMQETALFAYDRSQDIGGVVTLLELAPGKKEHMGIKVQFIGRI  
DMSGVNEGRPHYDFVLSKELAPPGILYQSVVHLPFLFRNIDKEHESYRGRNVSVRYFV  
KVVLERKFLPPLHKEHDVWIQVLGQAPAQNQA IKMEVGIEDCLHIEFEYERRVYHLQDTI  
LGKIHFLLRVRIKIKHMELAVIRRETSGDRVSGGNTPSVPQGGSNNDASAGGNVFTETQTL  
VKYEIMDGAPVKGEVIVKLSMRGIPADLTPTYSSVNNRFSVRYFLNLVLDDEEDRRYFK  
QQEII LRKELG  
>comp10521\_c0\_seq1; 150 95 511 LEN=773; translated  
MAEEQQNVQYFDKYLDPKFPVIVKADPTVDDVVKGMRTSDYLFVSGVMAGTYAYGFLGK  
PVRGPTAVMCASAGFTFAMFHTMQSVRSRFLGYRENDREVRKYGLAPLQPRRMEIYDKRN  
PVRQAMLT KPAINWDTYS  
>comp10522\_c0\_seq1; 410 315 1535 LEN=1720; translated  
MTKATRVFHQLLFWFLLLDGKYLHRFVLVNGHARLECPPPLSGKTGEKAGPCDSSLDD  
GSVPAYPLKANALNTITWLESISHPGAPVRFALSKENDIGGFETCLLLDHVPHDALSRPN  
YRDASTWHRSSITLWIPDIYCERCHLQLISVMSDIQHGV PADTKCIYKGAEEAGIT IARQ  
NSDDKEEIESDEEDMICPAVYHSCAPVSINGSIPRNNIDRCNTTQFEEQLDWPLTPSANA  
DLYQHSVYFNRGDVGLYTETDATLIEIGYPLTDVVCTNALYCDPDVDFDPLFKVPENAFY  
TSLEGSCAAVTKMQVEAYQSGGILPSVPKEGEDVSMVIVKNDDVLNDGGNDGVDNSFNTD  
ANVSNSAPNDGNNAHNDASASAFLLLPSTSTVALALLILVGSAFI  
>comp10523\_c0\_seq1; 512 167 1648 LEN=1840; translated  
MKRRNEERKSRVSWSAEEDDALLKAVAKDQKDREADGGDTEDADDEEDWDEIAKHVPNK  
PVQCLKRYMVINKTNNDKSSPQNTTTSTDTAKGSKPEEDKKVDSREKEKTGEPDPGNK  
EEDDVEKEAKRPRKEGEANTRWPQDDL DLLKLVENYKDSAPRWNEIAANFSNRYTAIDC  
LTKWQTTITNPPVIKGGKSWTAEEDA ILREKRQYGRKWAKIAAHLPGRQKQCRERFVNH  
LDPELKKGEWTDDEEAILIAMHEHGNRWANI SKQLPGRSDNDVKNHWYSTIQRKFQQHG  
KDKLISAALQQVQMMQSMGTMPSSQQPAAQQQWPAGPYNQATSGHPPPPYVHHPSQSTTQ  
PYQHSSPSAGVYPYHPPHQAQRPPNAPPEGAPYMPHQHQP PHQRGGHMPPPHAYYHPH  
YPPPTLPPRHGGAPHSTSPAAQRPQRLSGIAGSDSAGASNKGNQGTGEGSPKDSGEAPSHF  
PIQQEGGNQGEKK  
>comp10524\_c0\_seq1; 876 1 2412 LEN=3021; minus strand; translated  
ADGNKNSIPETNEQVSSLIPQGSIGQASNQGIESGIDMQVRDQLKPCVFKRNKISLS  
DRRKMFEAEGISVENNRKKSIESATCAESPRSLTSSLGDLTVKTVVQKRRIVQSKTKPAQ  
TLLHEARRSSITHDDNDSDNGLDDIDDGIGSNRRKTLVTAKKVLGTYHSSLGKRTSNHSH  
EPDVLVRCKTSRDSDEFKVDSDKVVIQNARKSLESIQKEKKNVTETQOMTVNKVTPTKVG

YSARKNFFENLNQSRVQLSMSRPLVGKDQSSVRDTATLATKHTDERVHDHSPLGDKDLPM  
FVTVEEDFLLKDNISTCLSASENRSVVCVCPDPLLYSVSQKAMALMASKTSKETITNDSNQ  
KKATTQNFILKRQESLRKMSKEGCRREPNASKEVAGSNNERTVTDDKAPQHQLYNRVARK  
KVSSQFHRHSIAQKETDDNKSTEDTSGNEPKPKNESLEKIQRYNNFAKTKDSNGENEEES  
NISNQPSFHRFKYSRFFKIGTKPTSPIEPKREQPSTLRKEGSHNAGAEDKGPLIKPSNE  
NKDDNEVGKAAPHRFKFNRFTKIDVAPTSQTEPKREDVGNTEDEDDKDVSIKASTGNER  
KVAKSKVAPSHRFKYSRFTKNDTALASGVQSIREHPSRSEIVLDEKERADSEALPLSEKK  
ERNQMNKTNDSHRFKYNRFTKNDAPLDQTVPEKKEESELEDDDTAQFNAKQKQNKTDASLQ  
SLGLKCNRFNKKPLNVDSKEIQDGLDRTDDENNEALTETQEAQTSNSAEQPEASSQPMAR  
SMSIRERRKFFESQSKNYQSSRF

>comp10524\_c0\_seq2; 826 1 2205 LEN=2650; minus strand; translated

ADGNKKN SIPETNEQVESSLIPQGGSIGQASNQGIESGIDMQVRDQLKPCVFKRNKISLS  
DRRKMFEAEGISVENNRKKSIESATCAESPRSLTSSLGDLTVKTVVQKRRIVQSKTKPAQ  
TLLHEARRSITHDDDNSDNGLDIDDGIGSNRRKTLVTAKKVLGTYHSSLGKRTSNHSH  
EPDVLVRCKTSRDSDEFKVDSDKVVIQNAKSLESIQKEKKNVTETQQMTVNKVTPTKVG  
YSARKNFFENLNQSRVQLSMSRPLVGKDQSSVRDTATLATKHTDERVHDHSPLGDKDLPM  
FVTVEEDFLLKDNISTCLSASENRSVVCVCPDPLLYSVSQKAMALMASKTSKETITNDSNQ  
KKATTQNFILKRQESLRKMSKEGCRREPNASKEVAGSNNERTVTDDKAPQHQLYNRVARK  
KVSSQFHRHSIAQKETDDNKSTEDTSGNEPKPKNESLEKIQRYNNFAKTKDSNGENEEES  
NISNQPSFHRFKYSRFFKIGTKPTSPIEPKREQPSTLRKEGSHNAGAEDKGPLIKPSNE  
NKDDNEVGKAAPHRFKFNRFTKIDVAPTSQTEPKREDVGNTEDEDDKDVSIKASTGNER  
KVAKSKVAPSHRFKYSRFTKNDTALASGVQSIREHPSRSEIVLDEKERADSEALPLSEKK  
ERNQMNKTNDSHRFKYNRFTKNDAPLDQTVPEKKEESELEDDDTAQFNAKQKQNKTDASLQ  
SLGLKCNRFNKKPM

>comp10526\_c0\_seq1; 500 813 2258 LEN=2749; translated

MGQTTSKDDPLESACKSAPDLRSASTAELSQPEARKEDLHSLPAVLGKMLPKVLLLSHPS  
GSKNHNDGFSRATESTGQLTPPSPLGSSSSSSNLSAAKNHKS HVGHHP IHHYHNC LSD  
TNP NPHAASKATTNANACPHRNLQAEATLLRQRDPDHHHQ RSTMAARVHRPDKRSNPVKF  
RRWQTIGGDHVRPLGYHAHRSCEAAARAFPEASAAAGTDP SAGSKQTPPPDLSYLERMYD  
SRTWEMYRRIITTHREKVEAFHAKNARARREDLKKGNDDRHSANRTTVSEPALRRVARAQ  
SFASGSPCREPPKGS SPASSVSGSFATTASSAIGEQQHHHHQQHQQQCIAQQAHFPACG  
GSSDCHPHSYDHHVDLGNEDDDAHGFGFLHRSTEWRGDDEHNLYDREDHSAPPYHYQHTH  
YCDSGRRYLQHECPQPSGHYVNVANNENYSEWEHMNGEVEDEEGHVNGESSSDPTIFLFD  
F

>comp10527\_c0\_seq1; 290 1 1695 LEN=1875; translated

XSKEKSCITCHCQLSHCRHDLKQQQVYQIATSTRQAKRIDRKTKNIIHAQSIRGREMLRHS  
ALSTAVPSLNGTDGHRDPLRRSDYDNAKSKSSPFTFEIYLVGLCVVSVLVAGGLYNHLIT  
AEVSFSNLLSDIVDGSSSTTTGTLTISSSIDRSLEHAALANVINR TKHYQQHCDSIGLST  
DRGTENLATNNHTVHLPQFGFLDAFRKYQEMDPNDIDKAYPYQCALPPETECEETQFTVI  
FMAYNPDR LQKMLDQIKEMLTGEDFSHIVA EVIVVWNGERHVDETELGAELVELQKTI PV  
RISYPLKAGFPNDLMNRYHPRLEVKTKAIMYYDDDGP FYKYKAVLGGFELWKRNSNAQIG  
AMARKLDWDHAXAEESKKSISGVPNDRFFVVSQCPTDELRYNYFTFANFDARMLVPSGSFLH  
SNYLCFLWHP IFEDVRKYILQHPVHPDDGTVSMLVSQLGGRAPKVYPRINKEKKEKRRR  
LMDGINWDKPGGHAQKMNWALRSVDADSLARYFGSVNSGSLGWCHGTQYHNITKKKENV  
CRPEMAKEGMLP WMKEDHTSRDTC P

>comp10528\_c0\_seq1; 154 230 1117 LEN=1943; translated

MLSPDRISIVLFLVVAVALSWTPLCDAKTKQKAQKPLHEKYKNLCKGLPTIKKKHEAHLK  
KLIATVGEAKIIGQTPQHEAACWMFRQKSYNPQRYALAVTYYSKGAQWEANTNWMTPK  
HECTWQGVTCNLFGTVVELDLGYIELEGLIPRELGMLGSLRDLDLHGNDLQGVLP HRLLD  
GMKKGEFLRLQMNGLFGSIHKEIMRMKNL KELYLFGNFFAGTIPKQSELKKLEVL DLYA  
NQLTG T I P K E L A N L P N L S E Y H T V A S N R S R K L K G S G P I D Q N G R E E H L N G V F R L D L

>comp10528\_c0\_seq2; 103 230 1204 LEN=1711; translated

MLSPDRISIVLFLVVAVALSWTPLCDAKTKQKAQKPLHEKYKNLCKGLPTIKKKHEAHLK  
KLIATVGEAKIIGQTPQHEAACWMFRQKSYNPQRYALAVTYYSKGAQWEANTNWMTPK  
HECTWQGVTCNLFGTVVELDLGYIELEGLIPRELGMLGSLRDLDLHGNDLQGVLP HRLLD  
GMKKGEFLRLQMNGLFGSIHKEIMRMKNL KELYLFGNFFAGTIPKQSELKKLEVL DLYA  
NQLTG T I P K E L A N L P N L K Y L D L H D N N L T G T M P K E I C D K K L D T L V A D C H G S Y P E V R C K C C T  
V C C E G L P V L S C F D P K T G E Q V T R P I

>comp10529\_c0\_seq1; 338 140 1477 LEN=1530; translated

MEMGSAKVEAPT KRTSGVQSLSALCINTVVKDLERYPAAAFGIVDEFQWDCIIKLR YKKT

KPLKGRGGIDGSGRLHPAVTDKFMIEVEEQNHLSKSKIADKLAWKDIVEYKFKKGGLSR  
PKGLLYPWPVLLQRIEDSGNGLSDCIKLVAAEAGESKVAENQKAIASSTLRAIKTLSESPMD  
MNLKNTGIGKVKKFLSKSTRLDFLEPYVYSSGKDIRKTPRTTLEQTLQSWKDLAADS  
GVKMKPGEARSRGNSTASTTASILTAAKCDSSWRSLYHTLR IHDEDRRSRQGEKMRERRR  
RLNTVRPKIVKVHASSRQERILNKSFRDSSPSRNSHPSGSSDKMRQLRKEAQVTSTRRG  
GAVSAASVAAHKRATGFGA AVAFASAGKKPTRVRKTAPVTKTVTLAGGKRLAVPDARTV  
GSVNVQKRLKMLKRGQTSFRSGLNR

>comp10530\_c0\_seq1; 591 126 971 LEN=1355; translated  
MNKLLTVALLAQGANAFAPAGKPLAAVQQQLDVALSMNAPFFASEEPSADAPAAEADG  
ETDFDTMSLEEEVETLANEEITKMKRASNLNRNANGVEYAPWMNITPEAEAEIKTVMKQKA  
EARRKRKQDEAGVSGALLMDSQAQELSGGGLNCKVVSNNVELTWATSSEASTKGFAIKR  
RKARTEDFVTIASYESWGPLASKGVDGGQYSYLDLDTISPGGWVYRITECETS GAENDICQ  
ALVEVQTEDEQRGAVIAAVGIVVLAIGAFAGAAGIMLDPVGGF

>comp10531\_c0\_seq1; 273 1 1232 LEN=1639; translated  
XFISSTIIDLKEKRLPSHLSKSSSTAKRDFS NMVVTSMNFQTRSNIIFCVLRKSRPLNFRH  
SFPVYSTIRPNLSLSSVTNLKFLHGENDNTDDISASGVNEIKHAQIKHEKRRTERVERMV  
DSYQSTASCNAIAPNESIEFTFPWKIHIALDESERQGFEDIISWEGKRAFAIHKPKKFFED  
FLMKEYFIQTNYKSFQRKQLHLHGFERLPVSDAIGGSYTHKLLIRGKPDLCRFIVARRIKM  
EMRRRASSLDVANTLLRSLSMRRSSGGMGLRRSRGNFVLPGLSLMTGFSFDSFRFPDGDG  
IPNFRWETDDFQHKPSIPLLGAPSGFQNAVRASPSPLCGGTETLHGREGDETVKTLAS  
FPFAERDLEMPGRDRAGEDSSAVDSHSHLVRTLDAASLSVLRRLATRQQSCM

>comp10531\_c0\_seq2; 275 1 1353 LEN=1760; translated  
XFISSTIIDLKEKRLPSHLSKSSSTAKRDFS NMVVTSMNFQTRSNIIFCVLRKSRPLNFRH  
SFPVYSTIRPNLSLSSVTNLKFLHGENDNTDDISASGVNEIKHAQIKHEKRRTERVERMV  
DSYQSTASCNAIAPNESIEFTFPWKIHIALDESERQGFEDIISWEGKRAFAIHKPKKFFED  
FLMKEYFIQTNYKSFQRKQRYGTSESDFCYFVELFSTHTLASLWSSLNFYHSTMEIYGSA  
SSWLRAAAGQRRDGGSYTHKLLIRGKPDLCRFIVARRIKMEMRRRASSLDVANTLLRSL  
MRRSSGGMGLRRSRGNFVLPGLSLMTGFSFDSFRFPDGDGIPNFRWETDDFQHKPSIPL  
GAPSGFQNAVRASPSPLCGGTETLHGREGDETVKTLASFPAERDLEMPGRDRAGEDS  
SAVDSHSHLVRTLDAASLSVLRRLATRQQSCM

>comp10532\_c0\_seq1; 609 1 3331 LEN=3331; translated  
XEYLLLFDFNSLRTSSYHQPLCGVLLHGFQPKGGKIMSADYSKSNVVMKSKLLSCKML  
GAADDLAVNEKLEEWVATQKIPTHISPAQTAACHVSSGLLLQRLVRAFEQRLNFSVDDTK  
RMKGSTGNSNGNKTATSSGRGTSTTNGSSPKKINTSKAKSKSKPLAEYMQRKVKVTRLVQ  
QALQYVGSDDLKVLQGLAPSPTVADVANTCLOILRDVNR IKEYFTIFCVASGKDHSATDQ  
SSSIFFGVFALQALQCLRAQAICAYEFAHDFEAIYSACYQDRNFQICVHLLNPAVANSPT  
PATFPPDTEARNICWKIARLLVLTEDFKKNKSDPESKDHRNHILVSATSIILAANMGKSI  
ANNSIRVVGSOVTNEGIIPITEDFVGTVPVPPVSHLLEFIANNTTNDGMTPITSIDIRCH  
FQNACTMINKLSIMKNATTTVVASRGRSHSILAKAFPPANEYFLLQNYRNILQSLVIQIQ  
KSIKINTANSNQGVTVSERTGIVNVLLLPFPMVIGEPWGIHRDAPMITSRMLCTGKHLKP  
SDTEKDSVALVVKLKPMPKEIKRKAENTFPDSVPTDNKKAKTFPQSEDPSTPPKKAHVEA  
IDLVEDDSTPPAPRAPIDMRMGEIEAPVINDATELNEWTLISISQSMVKPSDMLLSYLGE  
NDKINGNNSCLENVIVPIINRGALRIQSALRSLSDLGSEATLISIGRRDQVYVNGRID  
EITQLCASVVGFFYYHCMEAIYDKMERMDFLGFSVSVLQSESFHRALLACCLTCVLKGVG  
TTQKMSSIEKFENATSTVVMNTTECDSTFTFLKVIDGLSRAL IATGDSRTKQSVCSIVAGL  
PAIILRHMRALQTLIDSAIWNSSLGTEKRNESSFVDI IKTMKSLKGAWPPDVLEPLLE  
ENVNME SNSTKAKSSIRCKAPFGSSSEATFLSFVLRILLNYVLKRITAI CAALDLSTEDV  
VRTQILVAFRYLLRHHISIFNDRHVDQLLLCSVYGVCVVMKIRPEVTFGKIDAYFTVRG  
KEQGERICRVIVRHVKLDQPA SKRVGNLIVFYNQVYVPMQKYFIESKSLKENTELYRNK  
RRKAEEEELELQRREQERNKAERQRKEQQRK

>comp10533\_c0\_seq1; 252 171 1197 LEN=1357; minus strand; translated  
MNTKENAVIRFSILAPIQSTGIAQQSGRPGSTNTRAMLRIQPTMPIESTRGCRCRFLCSP  
SLGTLGPRKAPSERGDPFDAGAVRLRMPQNHEGLHCTALRRGVPCAANHALFAPSPPPPLV  
RRTLPRRRPSGPILLVSSLLFRCLGPAHRLDGQPRRRGLLWLLLLLLLPQLLAVVSPRFP  
LELDL RPPVLD RVDLPVLEAERVGVTGEVEDEPKAKVEADEVEENPRPVDHGPAGGPAD  
GPD RVATAGGSSPAPGSSSSVAKGAASRAGGSCRKSALEDALEDP AVTRVPPVDAAPGP  
WDPGAQKAPARAAGESGPGASSVADASARVLARFWSLMVVW

>comp10534\_c0\_seq2; 193 1288 1856 LEN=2240; minus strand; translated  
MKMNL DGIILLKFKMLFKIGIFASLLACGILLPVYTSSVCDPLVVGEREQCRLASLTDF  
ENLTISYVPEVRISTEGLSPSNATNNNNWDEEEEREENDEEDGTDSAKASGSRGLGFLRSK

SSGTAAPTQAF LRNNNNKPQLIDEDGNIIIPPEXHRDAAHRELQVGAGNLVEAPDDRGLV  
GPD LR IHVL  
>comp10534\_c0\_seq3; 193 1113 1681 LEN=2065; minus strand; translated  
MKMNL DGI ILLKFHKMLFKIGIFASLLACGILLPVYTTSSVCDPLVVGEREQCRLASLTDF  
ENLTISYVPEVRISTEGLSPSNATNNNWWDEEEEREENDEDTDSAKASGSRLGLFRSK  
SSGTAAPTQAF LRNNNNKPQLIDEDGNIIIPPEXHRDAAHRELQVGAGNLVEAPDDRGLV  
GPD LR IHVL  
>comp10535\_c0\_seq2; 112 1 487 LEN=1799; translated  
XLFRSSVFVHYYP THGYKETFDNDAKVIAIPPHWTEKPDTEYEIPLKMHGTTMEEPTCEN  
YWCNTNLSRKWSGPGEGHYVLNPDGSKTVLDITNIGGPKKTIRNDSHTKQKKKCEDEHH  
MCAEWAIWDSDECINNAN YMKRVCPKSCGVCTPDAKI QGDEL  
>comp10535\_c0\_seq3; 238 180 1415 LEN=2727; translated  
MTHHTRISCSLLLLGMALLSTLLVTPVGRTEEEERVELYHARNHTWPPEKFPVDPDTPGWRK  
LFEHRLRQVGEIKDRSDRFEGFAQTISAGFLQKNFTEHGFGLARAPDGLMEDLRQAIRKG  
VEEGPRLEAEINAITEPRPWFIDRKDLTQRVLEELQHYPEAWTGFELTPVIA YGFRLYRN  
TSRLHVHVDKTRTHVISFILHIDSSDDAEPWPILIEDLQGTTHEVTLKSGDLLFYESSKC  
FHGRPRPFKGSWYSSVFVHYYP THGYKETFDNDAKVIAIPPHWTEKPDTEYEIPLKMHGT  
TMEEPTCENYWCNTNLSRKWSGPGEGHYVLNPDGSKTVLDITNIGGPKKTIRNDSHTKQ  
KKKCEDEHHMCAEWAIWDSDECINNAN YMKRVCPKSCGVCTPDAKI QGDEL  
>comp10535\_c0\_seq4; 52 1 172 LEN=335; translated  
XLFRSSVFVHYYP THGYKETFDNDAKVIAIPPHWTEKPDTEYEIPLKMHGTTMEEPT  
>comp10535\_c0\_seq5; 174 518 850 LEN=2162; translated  
MEEPTCENYWCNTNLSRKWSGPGEGHYVLNPDGSKTVLDITNIGGPKKTIRNDSHTKQK  
KKCEDEHHMCAEWAIWDSDECINNAN YMKRVCPKSCGVCTPDAKI QGDEL  
>comp10535\_c0\_seq6; 178 180 1100 LEN=1263; translated  
MTHHTRISCSLLLLGMALLSTLLVTPVGRTEEEERVELYHARNHTWPPEKFPVDPDTPGWRK  
LFEHRLRQVGEIKDRSDRFEGFAQTISAGFLQKNFTEHGFGLARAPDGLMEDLRQAIRKG  
VEEGPRLEAEINAITEPRPWFIDRKDLTQRVLEELQHYPEAWTGFELTPVIA YGFRLYRN  
TSRLHVHVDKTRTHVISFILHIDSSDDAEPWPILIEDLQGTTHEVTLKSGDLLFYESSKC  
FHGRPRPFKGSWYSSVFVHYYP THGYKETFDNDAKVIAIPPHWTEKPDTEYEIPLKMHGT  
TMEEPT  
>comp10537\_c0\_seq1; 509 1 1504 LEN=1616; translated  
XFGSRSGDSVPFSDQFDLLPSGQPAPEPNHPRSPVRTAAASKQAELERIERQQARKKLL  
MEQGRFLLKDD EYWDTLSTIASTAKDEKSSDSDEYMDDEVAPPSGPI PGEIT TSSSDVQD  
PIPIDAEASYASLSQSQAHW DSEKQIQANLDEMNDVTDLIDAELLDR LPSNYNHKASGP  
SRPRPEAMVGRPRNADQSYGGDFASAASHIAKKISWGFE EIFEDKNDHSESGYYTSASEG  
TSTFSSSFVREDQPNPELVRRQHFQRPPTRHTKTRTTPMETVEEEDLLTRTLEISKGLLE  
TIMGSQVMKDKELRERQYDDDDDDGHDTESRDESNDRAGGETIGSPA IQNRLELLRLQRA  
EALAKFRQSQGRPSPTLGGATKRDRDR LKH YTVSHGLGKTMTSGPRSGVGGRRVSRSMF  
DPALSEQSSQSGSVSDIDLNYTTSESSAGASDTPSQRARDLRMQIEDAMKASREIQVSN  
ALGNELSSFKQRYYNPVLTEI  
>comp10537\_c0\_seq2; 932 325 4047 LEN=4138; translated  
MPVISSTQMSTVMETDRSDTREAVQKAYNQFNSTSHSRKSTANDDGFQMKVPKSTPSKPS  
LLDMGVS VIASVCEW TALFVYRCLCIAGHAALAVSFLAFVAVCC LGNFHDNYFVTILERA  
RRLDSDLQDEVTY YNRKCGVSDVSTSKHHH IHLGVDPDKHDTLDIFVDP SLFEYDDDDDD  
DSTVNSYSR F YQLADHG GKHYDEWAPKYSIPMHGLYVRSTNKKAVSILVSFDDDFKQEREL  
IFDTTGDAKSFCKLVEKQKRLEAQRQDRRLKVALGGEMVLPQYETITLLVEIVAGYDLPV  
GDYTS SDPYV VAM LGHQEVHRTEVRFR TLNPIWTLKTGSLFLLHIESKRLFIEEGMNFVV  
KDYDNLGKH DVLGVCQVDPK VLYKANGERMEFGLGLPPHKQQLASV GSEPEKRGILVIRC  
RRATEYDQSFMAEYRRNEEKKMDSGVA AEHNAPDATTNVFKTITTKVKKRDREDGIKVG  
SGMEDGVWYTYMSECKIFWIA CLEGGFCFVCKCWFVWFYRIECSAVRCGACHRNPLNFR  
MGDALMLAVDLLLYDXFGLFAEPLQYKIRPGSDPSRPPSDTEWMSDADLQKEVLKTSRQW  
VDMGEGTLGQVFVEILGCDDL PNM DTGGFYGNKTD AFVSCVYEDVHGRTDVVDDCLSPRW  
LPWSNRAFIFNMSHPSSNINIGVFDYDSGPLADHDLIGRVSVDLTNFRSSTEYVLSYNIC  
QSARLAKRKS KGMIRLRMEINDERELAMATLRPPVPTYVNTKKAIDFQVIRQTCFGSI  
DENKYSVTTLKSHIDELFELQH VAFYIEDALMTVLLWRGHFELTVPLWGKTIELPVHSAI  
AFVLAIVLVENPTLFP SYCFGLAWLLI AVGGWRMSENWVVRCHSYFQILNMLLLGDDH  
VEPHRIQP FENFDKAREEEEEWKRVEDSEKRAEELAEAATEAEKERQRELAEIGEADTE  
LGTKV GEGGLAIDPMRAALFP IQITLGI VVKGVRLKHVFTWQEAYFSFWIT TGS LVM SI  
LCLFIPWAWCIKWSRIFAWTIFGPWMKLLDLYYFSLIKPETDEERRRREQA EKLKQKLA

TTEAVMETRILRENLAKTAMKKYMFGEYSVRVPIIKQDRFVDIPLAESFAYPYVENNLS  
LAELAMREAGKGRVRI PGQTLVGD MIPC VKGDGFTVAPV GKAALHTEKLAKDAPGARGKM  
TNMNRITTTVVLAILATYYGTPMIGVLLSEGEKWIVSEL  
>comp10537\_c0\_seq3; 971 325 3786 LEN=3877; translated  
MPVISSTQMSTVMETDRSDTREA VQKAYNQFNSTSHSRKSTANDDGFQMKVPKSTPSKPS  
LLDMGVSVIASVCEWTALFVYRCLCIAGHAALAVSFLAFVAVCCLGNFHDNYFVTILERA  
RRLDSDLQDEVTYYNRKCQVSDVSTSKHHHIHLGVDPDKHDTLDIFVDP SLFEYDDDDDD  
DSTVNSYSRFYQLADHGKHYDEWAPKYSIPMHGLYVRSTNKKAVSILVSFDDFKQEREL  
IFD TTGDAKS FCKLVEKQKRLEAQRQDRRLKVALGGEMVLPQYETITLLVEIVAGYDLPV  
GDYTS SDPYV VAM LGHQEVHRTEVRFR TLNPIWTLKTGSLFLLHIESKRLFIEEGMNFVV  
KDYDNLGKHVDLGVQCQVDPKVLKANGERMEFGLGLPPHKQQLASVGSEPEKRGILVIRC  
RRATEYDQSFMAEYRRNEEKKMDSGVAAEHNAPDATTNVFKTITTKVKKRDREDGIKIKYK  
IRPGSDPSRPPSDTEWMSDADLQKEVLKTSRQWVDMGEGTLGQVFVEILGCDDLPNMDTG  
GFYGNKTD A FVSCVYEDVHGRTDVVDDCLSPRWLPWSNRAFI FNMSHPSSNINIGVFDYD  
SGPLADHDLIGRVSVDLTNFRSSTEYVLSYNICQSARLAKRKS KGKVMIRLRMEINDERE  
LAMATLRPPVPTYVNTKKAIDFQVIRQTCFGSIDENKYSVTTLKSHIDELFELQHVAFYI  
EDALMTVLLWRGHFELTVPLWGKTIELPVHSAIAFVLAIVLVENPTLFP SYCFGTLAWLL  
IAVGGWRMSSENVVVRCHSYFQILNMLLLGDDHVEPHRIQPFENFDKAREEEEEVVKRVE  
DSEKRAEELAEAAATEAEKERQRELA EIGEADTELGTKVGEGLAIDPMRAALFP IQITLG  
IVVKGVRVLKHVFTWQEAYFSFWIT TGS LVM SILCLFIPWAWCIKWSRIFAWTIFGPWM  
KLLDLYYFSLIKPETDEERRRREQAEK LKQKLATTEAVMETRILRENLAKTAMKKYMFGE  
EYSVRVPIIKQDRFVDIPLAESFAYPYVENNLSLAELAMREAGKGRVRI PGQTLVGD MIPC  
CVKGDGFTVAPV GKAALHTEKLAKDAPGARGKMTNMNRITTTVVLAILATYYGTPMIGVL  
LSEGEKWIVSEL  
>comp10538\_c0\_seq1; 163 265 564 LEN=1451; translated  
MIIDAKTIIIVTLIIVAASVYALKLIRRFAL EIAQQNHDAVKAMDEEEEEQORLKKERAAN  
AAADA AFAQVEPMLKISVVDKPKAAPVPAQESSSGD GAI  
>comp10538\_c0\_seq2; 163 265 564 LEN=1418; translated  
MIIDAKTIIIVTLIIVAASVYALKLIRRFAL EIAQQNHDAVKAMDEEEEEQORLKKERAAN  
AAADA AFAQVEPMLKISVVDKPKAAPVPAQESSSGD GAI  
>comp10540\_c0\_seq1; 332 238 1398 LEN=2129; translated  
MNFYCYTAFNPTLRSTVLDSSRGIRSRDFKGVSHPODKYKSSHRMTKGRIEELKGPNGP  
KFSVMVTGAAGFIGMHTAIELKRLGMTPIGYDNVNPYYSVPLKEVRINELKKRDIAFVRG  
DVCDVAKLKSTIKEHNITRFIHLAAQAGVRYSLDHPLEYTRNNVDCTVNILEVMVELGIK  
EEPLVYASSSSVYGNVEIPFRETD RVEDPASLYAATKR SDELIAHTYYNLHNVSSIGLR  
FFT VYGPFRPDMAPWIF TDRISSNQTIRVFNHGKSQRDFTYVGDIVQGI IHALFVNTGQ  
PELVNLGNGSPVVLADFVRIVEEHVGRKAQIDSVGMQKGDVPKTYADITKARYLLGYNPT  
TTVEDGIASFVEWFRDYDASKYKMIS  
>comp10540\_c0\_seq2; 169 124 528 LEN=1259; translated  
MAPWIF TDRISSNQTIRVFNHGKSQRDFTYVGDIVQGI IHALFVNTGQPELVNLGNGSPV  
VLADFVRIVEEHVGRKAQIDSVGMQKGDVPKTYADITKARYLLGYNPTTTVEDGIASFVE  
WFRDYDASKYKMIS  
>comp10541\_c0\_seq1; 577 73 1983 LEN=2246; minus strand; translated  
MDGTIGMILYSMLLIAISPLFP SKESDSMAFLFLFGFGGGYFFSGTYASALTLWFTKLS  
TYSLSFNSQAAAIRNIGVRAMLAVVFQLQMFII EFAMGDEVSTSLDASLVCFLPLVMFLL  
IALAVTSKFI PYPKDEVFVGWPGMVFFKPYARFIMS VVDSLGLLDMGDMAFAKFQKARCAF  
FSPHLKKS RVD RGPSVETGVT LNPMNF KKFLED FNELKTSEQWWFSEANLDCLLPDPYVA  
LET RLKILSDARESIRFITWTFATSN SGNQIADVLIQKSSE GIDVKLIVDAVTLYYLDQE  
SKLDIEGLPKKLEVLQRLLRGGVVRVKMLNKWHKNEWSEYVIGTHRKFMLVDGKWL LTGGR  
NVEDEYFSTEGHHFMSSELVNLGNFYETTA AFFDKSLWDSAMDVAPLFPNLLLAL EEKMD  
NDGSRKPRSSIFRSASIKIQENCNVS L FQLDHKSGDPRGRDIIF SLLFMIETAKERIDL  
IFGYLQLFDELDAALTRAASRGIKIRVVTNSAESNDVPYMNGLFGPALERLLELGA EIYV  
CDKGENNLT LHQVAIADGRAALIGSWNCLGTSV FYDS DYSVMLFDENVTA FESI WQEVE  
EMIKSGRLNRVAKVSGYDVHFFYR LFGPQSIMKRGF  
>comp10542\_c0\_seq1; 176 385 564 LEN=1022; translated  
MRIIQPDNLPLDDDDAKLSKYEELKNDSVYVVFQIAENEWEGVHVEDTDAPMGGEAS  
>comp10542\_c0\_seq2; 235 113 430 LEN=888; translated  
MNDGSIYLRVKRLNQTYFIVCNEDDTVGYLKDQISLATKKETKAECMRIIQPDNLPLDD  
DDAKLSKYEELKNDSVYVVFQIAENEWEGVHVEDTDAPMGGEAS  
>comp10544\_c0\_seq1; 365 1 1323 LEN=1770; translated



XLADDDFNAIVDDELRXTSNLI TKTEMMKALSQLLIACICLSSCSAEKDG DGT CNA AAGG  
TCPSETEAHSETKSHCFPDGSCFDS ILEAGKKYHDPSSISFVPM DVPKPFGESQELNPTD  
PENYTKTLEVL SKTHDYMVDLYQDDTAEVYRSHCKVNNKLCAFWAAIGEC DANPAYMI VN  
CAPVCQTCHKLMFEHRCPYDDNAPSVWGPGLNKMFERLTTEEY YIQKFQPTILSQPPEG  
PWIITLE NVATEEQCKRI IELGSYRGERSTDVGEVKYDGTIEGLKHDTRTSHNTWCLDE  
CYDDEINQAVISN VENITGIPDGNSEYWQLLQYKETQHYADHHDYIPFHLQRFFGARM LT  
VFLYLNDVEEGGETHFGGLDISVKPKTGRAVVWPSVKDSDPRAKEPRTNHEALPVIKGIK  
YAANAWIHQRDFKDVFNKGCS

>comp10544\_c0\_seq2; 298 1 1349 LEN=1971; translated  
XLADDDFNAIVDDELRXTSNLI TKTEMMKALSQLLIACICLSSCSAEKDG DGT CNA AAGG  
TCPSETEAHSETKSHCFPDGSCFDS ILEAGKKYHDPSSISFVPM DVPKPFGESQELNPTD  
PENYTKTLEVL SKTHDYMVDLYQDDTAEVYRSHCKVNNKLCAFWAAIGEC DANPAYMI VN  
CAPVCQTCHKLMFEHRCPYDDNAPSVWGPGLNKMFERLTTEEY YIQKFQPTILSQPPEG  
PWIITLE NVATEEQCKRI IELGSYRGERSTDVGEVKYDGTIEGLKHDTRTSHNTWCLDE  
CYDDEINQAVISN VENITGIPDGNSEYWQLLQYKETQHYADHHDYIPFHLQRFFGARM LT  
GMFCQFYFVNISLLTXNDELHHC HAVFLYLNDVEEGGETHFGGLDISVKPKTGRAVVW P  
SVKSDPRAKEPRTNHEALPVIKGIKYAGK

>comp10544\_c0\_seq3; 315 1 1400 LEN=1847; translated  
XLADDDFNAIVDDELRXTSNLI TKTEMMKALSQLLIACICLSSCSAEKDG DGT CNA AAGG  
TCPSETEAHSETKSHCFPDGSCFDS ILEAGKKYHDPSSISFVPM DVPKPFGESQELNPTD  
PENYTKTLEVL SKTHDYMVDLYQDDTAEVYRSHCKVNNKLCAFWAAIGEC DANPAYMI VN  
CAPVCQTCHKLMFEHRCPYDDNAPSVWGPGLNKMFERLTTEEY YIQKFQPTILSQPPEG  
PWIITLE NVATEEQCKRI IELGSYRGERSTDVGEVKYDGTIEGLKHDTRTSHNTWCLDE  
CYDDEINQAVISN VENITGIPDGNSEYWQLLQYKETQHYADHHDYIPFHLQRFFGARM LT  
GMFCQFYFVNISLLTXNDELHHC HAVFLYLNDVEEGGETHFGGLDISVKPKTGRAVVW P  
SVKSDPRAKEPRTNHEALPVIKGIKYAANAWIHQRDFKDVFNKGCS

>comp10544\_c0\_seq4; 348 1 1272 LEN=1894; translated  
XLADDDFNAIVDDELRXTSNLI TKTEMMKALSQLLIACICLSSCSAEKDG DGT CNA AAGG  
TCPSETEAHSETKSHCFPDGSCFDS ILEAGKKYHDPSSISFVPM DVPKPFGESQELNPTD  
PENYTKTLEVL SKTHDYMVDLYQDDTAEVYRSHCKVNNKLCAFWAAIGEC DANPAYMI VN  
CAPVCQTCHKLMFEHRCPYDDNAPSVWGPGLNKMFERLTTEEY YIQKFQPTILSQPPEG  
PWIITLE NVATEEQCKRI IELGSYRGERSTDVGEVKYDGTIEGLKHDTRTSHNTWCLDE  
CYDDEINQAVISN VENITGIPDGNSEYWQLLQYKETQHYADHHDYIPFHLQRFFGARM LT  
VFLYLNDVEEGGETHFGGLDISVKPKTGRAVVWPSVKDSDPRAKEPRTNHEALPVIKGIK  
YAGK

>comp10545\_c0\_seq1; 161 93 995 LEN=1589; translated  
MAASPPQQPGRPSSSSG PSSLTSLSASPFRS QLF AQEMNNSAASCIEVGLYSRAVTS LTR  
ALSLSRRQQPPRESVCTCHNC SLDGCIVRSRVVGRVSASLGEEDESANEDDSTNDNQEP  
NNYIIGGSYLTRKPIRVECQGHLMGPALYLVITFNLALTNHLMALSTHTTTPERSKRANKA  
LELYKLT YEMQANILHHESEKDPPLASPAFAASIRSIRFEMMILNNTSQVHKKLTRNPVE  
HQQLRRLSLSTMIVVDHHR IATAEGAVPIDPIWQIDMDGFLKNTIYLILGNIYTS GVA

>comp10546\_c0\_seq1; 442 1 912 LEN=2151; minus strand; translated  
LCMTIVEGESVSVDGIPDENLKTAL ES LFEKCGLEKSEIEEDED DDDDDSD ESPLMGYG  
LPDSSDTDNDIVQM KLAIMMSACREGPPKRKSIGPTRRPM TAE EEQALKKMYPENNRKEE  
EDNDEG PLLPGEVRKARGPAMSLEM IKAQA EHRELQLKATASGVPMP TNAGGREEWMIIP  
GEHDFLSGIKSGQA IKS RGFQNK KSRDADKKSQPIHPAVQAEMDSIMQAHQDARGPSLMD  
LHRSKKSQEKE LASRANNGKKEWKWNRDKDL DAGRRVDKDALGMILGGAAGDLKSKFAGG  
FNR

>comp10546\_c0\_seq2; 442 1 912 LEN=2219; minus strand; translated  
LCMTIVEGESVSVDGIPDENLKTAL ES LFEKCGLEKSEIEEDED DDDDDSD ESPLMGYG  
LPDSSDTDNDIVQM KLAIMMSACREGPPKRKSIGPTRRPM TAE EEQALKKMYPENNRKEE  
EDNDEG PLLPGEVRKARGPAMSLEM IKAQA EHRELQLKATASGVPMP TNAGGREEWMIIP  
GEHDFLSGIKSGQA IKS RGFQNK KSRDADKKSQPIHPAVQAEMDSIMQAHQDARGPSLMD  
LHRSKKSQEKE LASRANNGKKEWKWNRDKDL DAGRRVDKDALGMILGGAAGDLKSKFAGG  
FNR

>comp10547\_c0\_seq1; 434 1 1366 LEN=1569; translated  
XVDETRERPWGAEEKAGGRGFDSSNSNNSNNQHYQQQMIFPKESTGSLVWQACIRKEKAS  
DFRTNSFGGASLQADEERMRI EWNGMKS NKS NQIQCEKMDRRRIAVPLVWSIQFQCDAMQ  
CIPRESRFASNPRVSFRAAHKTKPNFQTNQTKSNHGDARKIRSGGVGGCVCCGCCLFSSS  
LACCFPAARLGP SLWLLSPCSLGS SGGDGI EGNRTEKTTQGDKKRRHATQHNGAVAQERVT

EPRTQNAPSVCLFANGTDNGGWRIFFCELDLDDLYTPLFSDFFLHRVRSRSLPRCTALVAGR  
RKPLPHNVHHTPYTIHTTGKGGKNRRRGKGDGEEESKRELEFKEDGQEYSQVVKMLGNGRC  
ECFCFDGVTRLGHIRGKMRKKVWITAGDIVLVAKRDFQDEKVDIVHKYTADEARNLKQYG  
ELPENARINETAVDMAMGNDGDDDDDLGISFDDI

>comp10547\_c0\_seq2; 290 315 740 LEN=943; translated  
MPKPKGKGGKNRRRGKGDGEEESKRELEFKEDGQEYSQVVKMLGNGRCEFCFDGVTRLGH  
IRGKMRKKVWITAGDIVLVAKRDFQDEKVDIVHKYTADEARNLKQYGELPENARINETAV  
DMAMGNDGDDDDDLGISFDDI

>comp10547\_c0\_seq3; 738 1 1756 LEN=1992; translated  
XFDTITILEETQTKPNPTTNPNNPTTKTKMFTAATLLGLASLAAAKDGLRATTSTAASD  
GVQKSNCLDIKSEAECGSTMATGTDTPCVWCKCAAAPPVCVSKEESEGLPPGVFDCGTSS  
SPSNSNGNRVYDFGLESQTVHQLRETVLEKGSSEEGADFCDAASSKISISGYMDLKGSKYDQS  
GDKHLFFWFMFEKRGDTSGETETVKDEEIPLVVWLTGGPGCSSTLALLTENGPCSVNADGKG  
TTVNPNSWTEAAHVWLWDQAPAGVGFSGYDENDSGEEMVGEDAYYFFQAFVQEHPEYAKNP  
LYIIGESYGGHYVPAISHRIWKGNDLDCNCPVPLNFSGLAIGNGLTAPEEQYPWYEMVW  
NNSHGKVVDEGVYAMKEAVSPCTKLIHQCNQGDNTIDSFACQAAFVTCNLGLTSPYQA  
TGLNPDYDIRKKCEVPLCYDFSNVQVWLNLESTKKALGVDETHSHRWEACNFGINAKFRT  
DWMKDFSGYVADLLEAGFPALIIYAGDVDFICNYLGNLAWTKDLNWSHKEDFASAGSHDWG  
SGAGMARTSNGLTFLQVVDGGHMVPSDQPEVSLDMLKTFLSGGTF

>comp10547\_c0\_seq4; 692 1 2059 LEN=2295; translated  
XFDTITILEETQTKPNPTTNPNNPTTKTKMFTAATLLGLASLAAAKDGLRATTSTAASD  
GVQKSNCLDIKSEAECGSTMATGTDTPCVWCKCAAAPPVCVSKEESEGLPPGVFDCGTSS  
SPSNSNGNRVYDFGLESQTVHQLRETVLEKGSSEEGADFCDAASSKISISGYMDLKGSKVKA  
YPSIKITHTVSLREKLSGNNMNCVTVNGKPAPGLWSILQPTSDFELKTALELIVCCMLVLR  
NPSDDDDTLINVQWPAYELVYHNI PKRTPKWPPLTRQYDQSGDKHLFFWFMFEKRGDTSGETE  
TVKDEEIPLVVWLTGGPGCSSTLALLTENGPCSVNADGKGTTVNPHSWTEAAHVWLWDQ  
AGVGFSGYDENDSGEEMVGEDAYYFFQAFVQEHPEYAKNPYIIGESYGGHYVPAISHRI  
WKGNDLDCNCPVPLNFSGLAIGNGLTAPEEQYPWYEMVWNSHGKVVDEGVYAMKEA  
VSPCTKLIHQCNQGDNTIDSFACQAAFVTCNLGLTSPYQATGLNPDYDIRKKCEVPLCYD  
FSNVQVWLNLESTKKALGVDETHSHRWEACNFGINAKFRTDWMKDFSGYVADLLEAGFPA  
LIYAGDVDFICNYLGNLAWTKDLNWSHKEDFASAGSHDWGSGAGMARTSNGLTFLQVVDG  
GHMVPDQPEVSLDMLKTFLSGGTF

>comp10548\_c0\_seq1; 285 412 1134 LEN=1359; translated  
MTRFASSRLDCLGPLVPCTQTLTRLEWLLSHKQTDIDTATGSVDYAPTFITILEKAVETV  
EEQRLEHANDAESLKARRAMIADRVHRNVRPVSKEITETAGSFTHTMNSDDAVVEVCVRA  
SNAGKENPMMFHLRVEELEDVDAFQEQEKAKLLNSPPLVNV EHHWSFMETQLNRIDHEM  
KTITREADFFRERDALYHQQTDDLHKATLFWPMLHCCILALTGFTQANHIISFFKHRRII

>comp10548\_c0\_seq2; 285 119 895 LEN=1120; translated  
MLFPGTTAALFLSTLAGVVHGTPHFFVNSGKPRCFAVEVPRETTIQLHYEAPDIDTATGS  
VDYAPTFITILEKAVETVEEQRLEHANDAESLKARRAMIADRVHRNVRPVSKEITETAGS  
FTHTMNSDDAVVEVCVRASNAGKENPMMFHLRVEELEDVDAFQEQEKAKLLNSPPLVNV  
EHHWSFMETQLNRIDHEMKTITREADFFRERDALYHQQTDDLHKATLFWPMLHCCILALT  
GFTQANHIISFFKHRRII

>comp10549\_c0\_seq1; 530 24 1526 LEN=1729; translated  
MKFHLLIGCATLVVAGTALVALFGSRTQEDGSATRKLRFNRLPVVYVNEWYGDDWSSGD  
DWWGTDDYSKGGDDWWSGDDGFHHGGHGQDDWHNDYTFEYKPVASEFIKVTNGGYGGK  
SGRSLSELRFNKVPPVIEGYNTNAFRYTPSRDYVQGVHTALFPLMPSDYPLTGEKANIVR  
RETMADEVVLSGDIQLHGDSNPTVWLNLRAGVTP IYPSDPAFWDELRPVVEAQIARRSGVS  
PSQMNYWPDSWADKTTLDVAEAVQGEYPLHQSTIEKFFKDGVEMYRDMYPPFRSVVDF  
IGTDIRLAAINTWAFEAVAPINFMLKWHYGVPRPEEVAWMIYKGQYTEADGVPADLVALI  
KSMDMEYATSFTAYVDGSPHPSFPAMHSAGSTCSYWMPAVCDLSPEQYCEALRVDYAVA  
YARTIAGVHYPNNDYAGNLGQRIIEKELPPVLAEKYGYDEAKVARKLEALAFDWHDFDS  
SCTIAGVSAADFLAAAKLN

>comp10551\_c0\_seq1; 245 1388 1795 LEN=1891; minus strand; translated  
MDCAVIQTTLKADPPILQGSEQVEIAFQGFHVTFLFTTKRVIFIDKKLWNAGSIKYL  
WSSFLAFEVHPANFKLFDTKVHLYTELQFYYPGEPKDDDNPVSR'TTKELAVDVKYPPFREL  
T RNVSTLFFHVFRIQI

>comp10551\_c0\_seq2; 245 1486 1893 LEN=1989; minus strand; translated  
MDCAVIQTTLKADPPILQGSEQVEIAFQGFHVTFLFTTKRVIFIDKKLWNAGSIKYL  
WSSFLAFEVHPANFKLFDTKVHLYTELQFYYPGEPKDDDNPVSR'TTKELAVDVKYPPFREL

RNVSTLFHHFVRIQI

>comp10552\_c0\_seq1; 332 336 1037 LEN=1241; translated  
MSISRSANNDEHAAAELLWQLKAIATKEVENVNIPYSCIDSFFDPLESLEGRGRTVSVDE  
TVDLAMNQISPVLSVIPKAFTERNHFLDTSSSSIDHIDHHDWSPTVEKKSRRRPSLIRIG  
EGTRQSKRKRESHVGLTTKSGIIRSTLRKKFSWKQYPELEDYLLKNQEEYFEYSSRNYTA  
EQRKYNNGLTRGLLDLASEEGYIFEEFTFSMVRDRIRCYYKSHSQAQAKKRRR

>comp10552\_c0\_seq2; 279 336 836 LEN=1345; translated  
MSISRSANNDEHAAAELLWQLKAIATKEVENVNIPYSCIDSFFDPLESLEGRGRTVSVDE  
TVDLAMNQISPVLSVIPKAFTERNHFLDTSSSSIDHIDHHDWSPTVEKKSRRRPSLIRIG  
EGTRQSKRKRESHVGLTTKSGIIRSTLRKKVSIALLLSPSTIPPLT

>comp10553\_c0\_seq1; 431 617 2425 LEN=2712; translated  
MVSNNKRTAPLYGSIPVTDDSHDTEATNLLLTGDDSTSSNTDSRRFIPSWITGRRITAAS  
LVVLSVLWIGILSSFEQYGPMSKERTVVSFLDSGNNYSASFLLDDAYDEAALYDDQOV  
DHLHMDDGRYTSQRYKMSRNFGGPGHPILVIMGGEDTLLGLLYPFVYERLASEFGAFVV  
SPEHRFYGESQPVPGRPSVDEMMRYLSPDQALEDALQLIYVRNELGCDPDRTPKGYCP  
VITFGGSYPGFLSAMLRFPPDLIDISYASSAPLQLYSQLVDSDAYFDKVTDVAAELASEG  
CPDAVRSALFAVRDDLYSNYADDESGDNILRAAAATGFCPDTFPGYVSGIEEFVSETIQY  
LVPAIFADFNMEYPPGPDALAKACAIQQPDALASPMKIRQFFDLRDAEAYGVEGDS  
DGS DARCFDLSQELPDGPHSRIRGSDNSGTGGGHVGEIWEFQCCKDLIVRAGYSERSMFL  
PRPFSYEWHEEHCRARFPPIVVEPYRMNQWHFGNNLTATSRIVFANGLNDGWETSSMTN  
ATELEGGPYKELRVLNFNGAHHSLSHTYPNPNETADILEGYDEATAILSGWLDEIRAV  
QK

>comp10554\_c0\_seq1; 1039 273 4034 LEN=4334; translated  
MRNPKTDVLAKTATLKKVIEKCKKSKQCPYCGAVNGTVKKITGAPTLKIVHEKFKGRHSE  
DELDQLMDNLSMAMDHNKDLISVMTGGTTPPFEDLLPNKVLEIFKRIPDEDCEVMWVPLI  
GRPENLILESILVPPVPIRPGVKVEFGGGSNEDDLTVKLQEILDINVALEMALTKGNPPR  
TIMEEWDYLQSQVAQYFNGEMPGLQRPIGAKPMRGLCQRLKKGKQGRFRQNLSGKRVDFA  
RTVISPDPNLLVDQVGVPKRVAMTMTYPERVSRYNKKKLQQRVRNGPHMHPGANLVRTGD  
AKGFDFKSLAFGDREKIARSLREGDIVERHMEDGDIVLFRNQPSLHRVSI MAHRAKVMERW  
TFRFNICVCAPYNADFDGDEMNMHLPQTEEARTEANLLMGVHNNLTTPRNGEPLVAASQD  
FLSASYILTQNDRFYTHEQFCQLVTFYFGDAGEQIDIPPPTIVKPMHLWTGKQVFTAMLQP  
NDKTKIEVSFATKEKNYISNKHFCCKNDGWVDFRNGELISGNI AKKTIGDGSKTGLIFTVL  
RDYGSRESAKLLDRWAKFCGRYMGHIRGFSIGISDVTPSDDLTKMKHKILLEGYRKSESN  
LDLYENGELELRPGCDLLQSLEEILNGILGRRESAGQEAMKQLPWSNAPRIMAACGSKG  
SPLNISQMISCVGQQAVGGMRIQNGFVDRTPHFEVKS LTPSAKGFVANSFYTGLTATEF  
FFHAMGGREGLVDTAVKTAETGYMARRLMKALEDLSM QYDKTVRNSENTVVQFIYGDGGL  
NPNAMENNDRPVDFDRLSMTIRENFPCRDEDTLGPEDLRKIVGLKLRKRFQSLLEPEGAE  
ILKEINDFFCMAKKQKQLINDFKGKAVEISSLTWTSRFTLSQLNKFLDIALEKCTASY  
VEPGEAVGAIGAQSI SEPGTQMTLKTFFHSGISSMNVTLGVPRLKEIINASKLISTPIIT  
VKLEQDDNKIAARVVKAGIEKTTLGQVSKYI KEVIASNACYISIELDMDAIDQLKLNVD  
ESVRNSILRGCGRVTRPATLRLDDVDVKVGRGCNNKLRIVVPSRNRKGS TYFCMQQLKTV  
LPDVIVQGI PSVNRAVINETDKDGKQTYNLLVEGYGLQDVMGSPGIDGNHTWTNHIIEVE  
NVLGVEAARTQISSEISYIMSAYGIGIDSRHLLLSVDMTFKGEVLGITRFGVSKMRESV  
LHLASF EKTTHDLFDAAVHGRTDEIVGVSECIIMGTP IPIGTGLPNMLWKSKT

>comp10555\_c0\_seq1; 332 1 1058 LEN=1129; translated  
NISMPRSVIEALYNISLQEEEEKEDQKLRNEIHEKSEYDQKYLKPAGILSFEEILLP  
AVGLAEKALKQAQSRVQRDAPEYTFAMENCRRLVLRKSIRNAILEVQSSRMTRTRCQQER  
RLEQALERKVRERRHRERLEEDERRAKERALKKEISRAEKRRQLAREYPRNQDLWKEIV  
FLTSSVAQLEREERMVQIEKNMVQLKDKNGKEEELKNRSNHPLDSNLSSSSSDVIVVKA  
DKSPLHLKTEEKVKDIVLASTRIQNGLMILKLLDASEFVQKSLFDEYRKDHAFHGYQGM  
DNPKGIIIRFLSQSDDLDPDNPKGIXSPIESKSMIVPRILRYRELNLLSVEDS

>comp10556\_c0\_seq1; 357 1 1308 LEN=1448; translated  
DTISKRNSVEDSILDVQLKDGNESEKIQPATRRTTAVEDRKANFPSPLAPNAYPCKDTQH  
ELPQHPSTWPQRPLMVRPTPCSSTKIIGIRRAISDNYENFKGCCAGCILPINNGRELEGE  
SLVVDFESTNFVGTFLRIKDVPLERKNGSMNDEENDIKYGQSESIDYFADRKRKFQ  
AIIKGRFKKALAMNRCVTSQSFKRPAKGLPAKWLVSSFIK FVSILAPQLDASLDGNSPRF  
LTPLLATANTVLSQENGIDETGNNSSTTNKNRPLSSEDGSPCLKIDTTVDLEEPSLEP  
SSVLSLLAHESNPSIKIPDTSLYSSIDRTVSRKKVFNLLSAMNSPEPRFDCDRIYTFEF  
YQHLLLELSRYALDMGSVGGMIPLAQATDGQPLKIMAAHRESDESQELDILWSFDIFHESL  
YAYAE LAVDQVYSDS

>comp10557\_c0\_seq1; 401 210 1814 LEN=3227; minus strand; translated  
MPKLGSSSSSRMASATTTAVLLFLLSSVGVVLSSETVDLSFGQWCYPYEEMKMCVLRVFTL  
IGGELLLMDSVRFVLVDECGKRTRHPLPATDEASDDAAATEPVCLPPSIVSRALTSYRLW  
TIVCNLPTNQTNTQNESTNKQQT'TTENENXKGS SAIGFCEDPDPTQVLNPRRFDNSNAG  
GKPI SQCMMYGARSHGWY GDSYAGNVSIGDGGDFVNGLFYSVMEKAFGEVGNACGEVMEG  
SVGLELSPIRGIFGIGNSNTYTYTDSIREKTWDPGNTPVCPKSEPIAAASFVQTVGHSNE  
DLMSISWDGTLGKDSGKLVLGK DASNGIPSTAEPLYLSPKKLASSGSDGFYETNVTDIEL  
NGRAMSTEMIPYVFDTGSPYISLPSNVFESVWSSNTT SKVIFSI LTL DGGDEQIEVTITP  
ELMRSGNVFQSVSNTSVHLFGLHVLRYVETILLGYD'TTSPKR PYMKM VPRDTPITTP TAN  
LTRSGAPAGSITNATLPTEAVDAPAGVPSSGAVGGGFGSGQAAALAAVASATVLW  
>comp10557\_c0\_seq2; 401 335 1939 LEN=3352; minus strand; translated  
MPKLGSSSSSRMASATTTAVLLFLLSSVGVVLSSETVDLSFGQWCYPYEEMKMCVLRVFTL  
IGGELLLMDSVRFVLVDECGKRTRHPLPATDEASDDAAATEPVCLPPSIVSRALTSYRLW  
TIVCNLPTNQTNTQNESTNKQQT'TTENENXKGS SAIGFCEDPDPTQVLNPRRFDNSNAG  
GKPI SQCMMYGARSHGWY GDSYAGNVSIGDGGDFVNGLFYSVMEKAFGEVGNACGEVMEG  
SVGLELSPIRGIFGIGNSNTYTYTDSIREKTWDPGNTPVCPKSEPIAAASFVQTVGHSNE  
DLMSISWDGTLGKDSGKLVLGK DASNGIPSTAEPLYLSPKKLASSGSDGFYETNVTDIEL  
NGRAMSTEMIPYVFDTGSPYISLPSNVFESVWSSNTT SKVIFSI LTL DGGDEQIEVTITP  
ELMRSGNVFQSVSNTSVHLFGLHVLRYVETILLGYD'TTSPKR PYMKM VPRDTPITTP TAN  
LTRSGAPAGSITNATLPTEAVDAPAGVPSSGAVGGGFGSGQAAALAAVASATVLW  
>comp10558\_c0\_seq1; 401 17 622 LEN=788; translated  
MMQENGADLTAVGGDGVKREKDFIDKVC DPCGLLPDNIDEAFGHQQKMNKLKEAE EAAAK  
AEMENNA ADEAVGSVLSNFDCCRNPTLP PAEEMVQDEAQQEFVMKDVVVEDIPEAEPEV  
ATSSYQSRALADIAAKMDDIDLES GGEDI PRGQITEVDGVSLTKPKAREWYKEPLYACLI  
VLSATFSFAIFVMAILLIVRK  
>comp10559\_c0\_seq1; 204 1 601 LEN=601; minus strand; translated  
GIKLGIELELGMVLGIMLGLGLELELGIELGITLGLLELALGIELGITLGT KLKLKLGT ELGI  
ELTLGRELGIKLGIELELGMELGVT LGIELKVGIELGITLGT ELVLGITLGI VLGIELGT  
ELKLG MKLGITL GSELTLGIELGIILGNVLGVMLGFELTLGKELGTTLGI VLELGI ELGD  
RLGLELSLGIELGIELGIELX  
>comp10559\_c0\_seq3; 220 1 570 LEN=570; minus strand; translated  
GIKLGIELELGIELGI ELELGIELGIMLGIALGVELGIEDGIELELGIELGITLGI ELELGI  
ELGVTLGLLESLGT ELGIELELGIKLAITLGLLELTGLVELGIILGIELELGI ELGITLGM  
ELTLGIELGITLGLLELGI TLTGITLGLLELMVGIELGITLGI ELELGIKLG MMLGFELIL  
GIELGIKLG T  
>comp10559\_c0\_seq4; 243 1 696 LEN=696; minus strand; translated  
GIKLGIELELGMVLGIMLGLGLELELGIELGITLGLLELALGIELGITLGT KLKLKLGT ELGI  
ELTLGRELGIKLGIELELGMELGVT LGIELKVGIELGITLGT ELVLGITLGI VLGIELGT  
ELKLG MKLGITL GSELTLGIELGIILGIELELGI ELGITLGMELTLGIELGITLGLLEL  
GITLGITLGLLELMVGIELGITLGI ELELGIKLG MMLGFELILGI ELGIKLG T  
>comp10563\_c0\_seq1; 153 354 689 LEN=802; translated  
MIQTLAFKYRNSNVRVNGVLAGVIHTGALDVMAAKKNQSVESYAALRATAQPLGRNGTPE  
DVANAVTYL ASPASGFTTGELLRVDGGLHLSNWWNKPVMLDQYGNGT KRNK  
>comp10563\_c0\_seq2; 403 144 1022 LEN=1135; translated  
MIPDDSKCVVIGATDPK SIGFEVAWSLLKGGASGVAIVGRDEAKLVRATDLLEEKMKMEG  
LGHTHRNCV LGVLGNLKKPETMAGVTQKVVDAGRIDVLVCCGGNGNSEYLG LDVEDPES  
YRMMQNVAVVSPMFLAEACFPYLSKSPNKHGGTVVMVGSVAANVPWPATAPYNFAMA AKN  
TMIQTLAFKYRNSNVRVNGVLAGVIHTGALDVMAAKKNQSVESYAALRATAQPLGRNGTP  
EDVANAVTYL ASPASGFTTGELLRVDGGLHLSNWWNKPVMLDQYGNGT KRNK  
>comp10563\_c0\_seq3; 403 92 970 LEN=1083; translated  
MIPDDSKCVVIGATDPK SIGFEVAWSLLKGGASGVAIVGRDEAKLVRATDLLEEKMKMEG  
LGHTHRNCV LGVLGNLKKPETMAGVTQKVVDAGRIDVLVCCGGNGNSEYLG LDVEDPES  
YRMMQNVAVVSPMFLAEACFPYLSKSPNKHGGTVVMVGSVAANVPWPATAPYNFAMA AKN  
TMIQTLAFKYRNSNVRVNGVLAGVIHTGALDVMAAKKNQSVESYAALRATAQPLGRNGTP  
EDVANAVTYL ASPASGFTTGELLRVDGGLHLSNWWNKPVMLDQYGNGT KRNK  
>comp10564\_c0\_seq1; 501 1 1799 LEN=2165; translated  
XLRSP LNIRVHPVLSHGTHCIPYGN'TTSDGNPTIPTITTKAPTANN NIMVAFCFRAFL  
ITTGAISLASAVKRPDWLSHV DKKVQLQEYMGVATERHNEAIR TALQTYEVDQPTTLTEEE  
QAKETELRENKLNEYRIKAPGRLPDFHDELGESPVFVTNSETPLFSKEECNDVVG MADA  
YFDSKDEMAKMPSGQYYIQGFWIKDVPDVKKWFVEKCRSRMFPLLKKQFPDFVDDIEDLV

VDSAYLFKYKPEPGLRTEIHTDGGCLSFTFALNPKSEYEGGGTWVEGLTSDDEDPDMGETI  
EMDMGHCTIRPGGVRHCGNPLKSGTRYIIGGFCMNKKRVEHVRQLVNNCPQRTSAKTRE  
ALECAIALNPEFEGPYTPLAQIYENDGTPEKAKQVMEDCLRLANPKSTASSYYLGTFFKYK  
EGDYKEAMRYMKNCLEIDPNDGDALGTLSHCYAQLKDVEKEKETLQKII EAPGVANPVL  
QAYCNLGHIMHAGEGEEELLYYAKSLEAEPSSLPAMHNLGNALARREQWDRVGVFRRVVKD  
LAKTNEEKYTYLKMLYQVSTAKLRADATAKDQADLMSQLAATMGQENLDQLVAFQKTM  
>comp10565\_c0\_seq1; 346 315 698 LEN=1333; translated  
MSQKRKISVSRMILSTVLLVGGGLSSCEAFTTAPQLTRVTSTQNMLPVSSVSDFSSIASAD  
SFSMPSSSFELSAATLDPTTILSDVLGVFIGTPIILLVPIILAALGVAGVLAYGIVAYANP  
EVEDDEI  
>comp10566\_c0\_seq1; 443 317 1996 LEN=2180; translated  
MKRQAQPDHQKSENLESIDI IPTATSDDDMFSTALMKLSFTDRSAIEEELHGVSCMAVK  
ETPELIEDALRCFDVELHKIDHKPGYDRAQEILMENSADVTTFWLARKEFKLRFLRCEFF  
DPQKAAARFVRCLDLLLEVYGEYSLRRPIRLTDMTRDEL SFMKSGYQWL PYRDRSGRRI  
YCI VVNNRNDVPMRVL LKVFYLFWFVASGGSDITNNDIKNLETQRRGAI AIVFPINEHMK  
YEENQHVL SKIKFARTRSGASAI VGDV VPLRVTGIHICLPKSALTQLVPTFAI I LKQWNA  
RTKVHLGNPLELRYQLHSFGIQGELIPCTDTGNIKSVNLKQWLKLRHVEQEEQVWMEKR  
GIPYSSSDV GASTNDSSSVSSEIVECPLSADVFRGKALNQH PGNVGFHDLIEAKIHE  
HTIDPSTTHARRQAIEIEVIEEVRTNGGRFLKWDTEKSWVNM DVNTTDDYTKNEADKQI  
QSKVHYAFRDFRKRMLRAQQEVITNASSTDSFLVQQY GQKRIRPNDVTGGRRESGIGSFC  
EIQNDGCGEFASNQCGHFF  
>comp10566\_c0\_seq2; 298 391 1356 LEN=1540; translated  
MKYEENQHVL SKIKFARTRSGASAI VGDV VPLRVTGIHICLPKSALTQLVPTFAI I LKQW  
NARTKVHLGNPLELRYQLHSFGIQGELIPCTDTGNIKSVNLKQWLKLRHVEQEEQVWME  
KRGIPYSSSDV GASTNDSSSVSSEIVECPLSADVFRGKALNQH PGNVGFHDLIEAKI  
HEHTIDPSTTHARRQAIEIEVIEEVRTNGGRFLKWDTEKSWVNM DVNTTDDYTKNEADK  
QIQSKVHYAFRDFRKRMLRAQQEVITNASSTDSFLVQQY GQKRIRPNDVTGGRRESGIGS  
FCEIQNDGCGEFASNQCGHFF  
>comp10567\_c0\_seq1; 448 478 1542 LEN=1847; translated  
MTTTTAMITNVFFPKSTQLACSLALLSTLSAAVDGECNYFIDLVCNSTDFSTICELISL  
SDATNEAINEGNWTFVPTNAAFEKLNSDLVDNVLNCTTALDDFLGFHSAANGELVKYAD  
LECGGVEMANGDESRTVCQDGKIFQKGLNAEDSMPEIISADIETCEGVLVHVDKVLPP  
QAEFLSVLDECESAFESQAVEEHKSESKTIVDLICEKNEFMFCDLITDFDLAEALS  
TWTVFAPTDDAFDTMVEHVDLTSDEIVSVVRYHLHDGSLFFEDLVCRDLIPMANGRRSR  
TKCQEGIDFEDSFVKYQRGPQVGDMLPEITTKNLGACNGVVHVNVHMIPRLD  
>comp10568\_c0\_seq1; 570 191 2296 LEN=2363; translated  
MEAITHEEPIVAASGAPLRIACLEPSATAICLELGLEEYIVGVTHECEPILTHFFSKSGK  
KRRPLVLTCKGLTVSSQADIHLAVQKTATAAAVASRTVCP IRNEKNESAAPLPQLSTEI  
PSTYPLIEDRMQAARPTVIFTQDLCDVCAPTTADVRRCLLKNSGSSSEDGESCEEERIVSL  
VSLQPTDLHEVADTFVTIAEACGVPERGQRMKHDFLKNL KALQTAIQTNRSNSSSDSSTMP  
TLF ILEWLDPVFDSGHWTYQMM EYACVRSARPKKETHKAVVIEWDDVYAADPDLIVV GCC  
GFDLERNIRD TLMKKEQLQKLRAGQNHRIYASYGDWYIAQPAPFLLQGVALLAQ CAYQNE  
PGVLDAITDLGYETIGWKPVDMETATIDSEKERQRKRLVKDCVIGDMEDIVLDIDHPGF  
AKIHDIACKQGEMTYTDPETGYDVFTRIAHEKRGKCCGSGCRHCPYSHANVKNKAAKIQQ  
PSILYKQSCEETKDGLPMFSTSN S QIKVLFSSGGKDSFLAIRALVRKHYEDGPFGLILL  
TTFDATSRVIAHQEVSIDQVVKQASHLDITLVGIPLRRGSGETYTD RIRCGLKAIQSFIP  
LQSRVSSLVFGDLHL SHVKEWRDKILAHLDCELEYPVWKRSYMDLLEDLEASKVPCEVSG  
STREEEVLGTVFDRKLYNKLINTEIDGFGECEGFHSLAMVW  
>comp10568\_c0\_seq2; 535 191 2317 LEN=2317; translated  
MEAITHEEPIVAASGAPLRIACLEPSATAICLELGLEEYIVGVTHECEPILTHFFSKSGK  
KRRPLVLTCKGLTVSSQADIHLAVQKTATAAAVASRTVCP IRNEKNESAAPLPQLSTEI  
PSTYPLIEDRMQAARPTVIFTQDLCDVCAPTTADVRRCLLKNSGSSSEDGESCEEERIVSL  
VSLQPTDLHEVADTFVTIAEACGVPERGQRMKHDFLKNL KALQTAIQTNRSNSSSDSSTMP  
TLF ILEWLDPVFDSGHWTYQMM EYACVRSARPKKETHKAVVIEWDDVYAADPDLIVV GCC  
GFDLERNIRD TLMKKEQLQKLRAGQNHRIYASYGDWYIAQPAPFLLQGVALLAQ CAYQNE  
PGVLDAITDLGYETIGWKPVDMETATIDSEKERQRKRLVKDCVIGDMEDIVLDIDHPGF  
AKIHDIACKQGEMTYTDPETGYDVFTRIAHEKRGKCCGSGCRHCPYSHANVKNKAAKIQQ  
PSILYKQSCEETKDGLPMFSTSN S QIKVLFSSGGKDSFLAIRALVRKHYEDGPFGLILL  
TTFDATSRVIAHQEVSIDQVVKQASHLDITLVGIPLRRGSGETYTD RIRCGLKAIQSFIP  
LQSRVSSLVFGDLHL SHVKEWRDKILAHLDCELEYPVWKRSYMDLLEDLEASKVPCEVSG

STREEVPLGTVFDRKLYNKLINTEIDGFGECPASNTVQPAYDTSGKK  
>comp10569\_c0\_seq1; 728 35 928 LEN=969; translated  
MYFSSRSLLSLAAALVVSTSDAFVVPVNTAASFGLKASGSSNALRMVADDAKVILVTGSSR  
GLGKSIATDLGKAGQKIVINYVSDGSKDAEATVAEIKEAGGDAIAIQADSSDPDAIKEL  
FAQSVEAFGTVDVLINNAGITRDGLVMRMKQDAWQAVIDTNLSGVFYCTQAFFKIAAKKR  
TGR I INISSVVGQFGNPGQANYAAAKGGVIALTMSNAKEFAARGIKVNCVCPGFIETDMV  
GELDEEYLAKVSEGIPLKRLGKPEIAGMCKFLALDPSVEYITGHTFNVDGGMAIGC  
>comp10570\_c0\_seq1; 425 1 1471 LEN=1882; translated  
XSSDNSRIGSIQVMIKPPTGSASKHVRSRQSCRWWSCRIRYTIKVGIIAGAIYFVSAATT  
VSTFSPHSSLSSISRHRNDDNHKTDLETNAINDSPPFDRMRLIQLQAVVFENYKDDDEHDN  
DLTTMQPNKFLNRRQTMSALFLSSAMLIAPLVAASVEEKDYASTDSGATETAHTISKDE  
IRSFGTSSSSILRTSEPNLSQESISGSISGAALATVKTLVKFPLDTATVRLQMPNSVYSI  
RDPLTLFNGCFNGISLTLLSNIPAGAVFFGVKDAAKVALKNSDGYSTQPRWLTTSLAVSA  
AMIPYWIIRNPSEVIKVRQQTNIIEGYGEGVSIITALQKTVRSEGDTDDDDDENTSDLYTG  
YWENIFYSLPADIKFIAYESI TDGRKNLSPLEGARAGALATAMSQLITTPLDVVRNRLM  
TGKDRSGSPLSDEVKTKGYLESFLDLGRQEGLSGLFAGATPKMGKAILSGAIQFATYEET  
KQSMKAISR  
>comp10571\_c0\_seq1; 215 376 1707 LEN=2026; translated  
MLLLFFIVSQVLVSGFEVSRSKSIANPIKTRQQQRSHPHYFRVTKQEERTCITSAWSTSNG  
SCLTMQAATSSLLTPTYPIRIAVMGGGNFGLAMGTICARQGLPTTILVRDEEIAADAINRE  
HRHPRYMKDIELPTRLRATADPNECLPDATYIIHAVPCQYSRKFLSVKDYIPAQTPILS  
VSKGIETSSMGFMADVIRDVLGEDRPLAFLSGPSFAREIVEGVGATAVVIASEDLDLARD  
LAALISDGQFKCFTSTDVIGVEVGGAVKNVIALGAGMCEGLGLGTNAMSGLVTRGCNEMR  
RLGMTFGAKSSTIAGLSGVGDTFGTFCGPLSRNRKFGYRLGKGETMQEILESTSEVAEGV  
DTALAVVRLIETECKGYRLDLKFPILFGIARILEGKSTPLEGLEGLMNMMPMQMENFDEGR  
TTRFAKVRRRSRKVSQMEECEE  
>comp10572\_c0\_seq1; 649 1 2695 LEN=2868; translated  
XETQTQSETQTQGSCVRPPSIDFTNFPTPIRDGRSHRPQGEQRPCSNEGRKCGSSGRVNIL  
SSPGLFANPIRSSLRVLAPTVMWLALDRLDALSFDRGSWNDHKATVVGGINRSINRSIDP  
SPADGPGVSSPGLSPAATTSPAQQRTAHRRVGVGLGVDGTPTIPTTTKNHQNNHNPAAALG  
VNALRNAPCLPPHRALRAYYDRQAATTAPPRWASMLRDAPCLPRSHLAIRAYYDRHATT  
TPPPRWSLMPWRNAPCLPRSHRGRKATPFVVDNRNGAEAFSERRGGRNNPIVVDPETDPL  
VPPPPGGSSHRNTHKHGRGVIPIDLTRSPPRGDTNTSWKQKPRGKKS GGGGCVVDLSHLSC  
EEDAGEGIALEPLSSSSSRKGS HRKHLAPPKGP PRKHASAGRRAGKTGKATGVRAGADALS  
NEPPAGTAAARATDSKPATAATNATNDSASASASASTEHRNDHRAGEKDPARKASGEPE  
TAKGLEPRGAERKRSKPEGDAVGKTRRRRRRRLTPMAMGTRGGRNHKDI TGASRS GPTR  
SMAKARISPKLVCASLFASLEGRRKRKATRAGRKRKGNSSDWRVRVTTYETCRSATRGDH  
ARNPGNTLGLHRNKSFTRLQWITKERNTADDGLGRTCTVVYAIHKHIVASSKYFHRLVFG  
GYESESHRQSEIELPRQFCESGLVSIQDFESFLDWCYLKVKMTPSNALGIMFLSDYFC  
ADGLKTTTEGYIEQFLVSCRKQTNPKSLGLAQLYQNAK I IGRHDIRDAVVNVCALHPSF  
MSREFKLTETLRDVEFWMAVFTAKSKGRKLR SATETEYWSTIFVDFVRQYPEAVNAESF  
KFLT SKRFLPKISKYASSWLMEQEQLVSGEQSECNSKNEQDGINCLQORCIQALFG  
>comp10573\_c0\_seq1; 310 687 1415 LEN=1559; translated  
MAMLISTPNLMDSLITLSNRQPSPGDSVETVMEI IRAKSIASRTVLNLSWSPKNKVLMSK  
NVALIQALCKIALQREAPYRNSKTMKDILIQARRHSLASLRNISAVPNQNKVALCRYNDG  
KLLDILT DVVLNETDENVV DYSFSAIDNLTIPDTAEAI VERAALVLALKNVLLEDTDES R  
KGNNHHSIKCHCASATILVLERAITPDKPCYENFRELLDTINPSNPTDSTDEPAVPLNAT  
AV  
>comp10573\_c0\_seq2; 310 574 1302 LEN=1446; translated  
MAMLISTPNLMDSLITLSNRQPSPGDSVETVMEI IRAKSIASRTVLNLSWSPKNKVLMSK  
NVALIQALCKIALQREAPYRNSKTMKDILIQARRHSLASLRNISAVPNQNKVALCRYNDG  
KLLDILT DVVLNETDENVV DYSFSAIDNLTIPDTAEAI VERAALVLALKNVLLEDTDES R  
KGNNHHSIKCHCASATILVLERAITPDKPCYENFRELLDTINPSNPTDSTDEPAVPLNAT  
AV  
>comp10573\_c0\_seq3; 388 1 1970 LEN=2114; translated  
XCEQSKTIEHCEASNIGSESDTELSSNNDNXADSIKLA FVHKVMATFGDSFLEMAE  
AMLGKYPGSRSSSAEVLATPRERKR DSSSASENHFLGDKAKEAPSETCPNDRRDGISEK  
REKRSVVIQIPPKRQRMFGNYSVEDIIQSLNRAMSKDERTEALENSIITFDHNNRDLHDT  
EIEAGADIALVKHLVLFLEFKIGFRRDPTSFDMEEITQEIGSVLKSLECVYRASSNAVGKS  
FKRVGMDLLQILVTLINYEIKNKL DSSPSSSVSPQGINDSPPTVTSSTAITVENRSVT

PPHQGSHSHXFAAPEIDENHRSFRKSWSSNTANGKVPGIPHVSMFCFCENTEITKASFL  
VGLFDIVSRCFLIVPVPVDSSILDLCNIRPYSMIPFEARLSCLWTIANLACNTENMAMLI  
STPNLMDSLITLSNRQPSPGDSVETVMEIIRAKSIASRTVLNLSWSPKNKVLMSKNVALI  
QALCKIALQREAPYRNSKTMKDILIQARRHSLASLRNISAVPNQNKVALCRYNDGKLLDI  
LTDVVLNETDENVVVDSFSAIDNLTIPDTAEAIVERAALVLAALKNVLEDTDESARKGNH  
HSIKCHCASATILVLERAITPKPCYENFRELLDTINPSNPTDSTDEPAVPLNATAV  
>comp10573\_c0\_seq4; 392 1 1857 LEN=2001; translated  
XCEQSKKTIIEHCEASNNIGSESDTELSNNDNXADSIKLAFFVHKVMATFGDSFLEMAE  
AMLGKYPGSRSSSAEVLATPRERKRDRSSASENHFLGDKAKEAPSETCPNDRRDGISEDEK  
REKRSVVIQIPPKRQRMFGNYSVEDIIQSLNRAMSKDERTEALENSIITFDHNNRDLHDT  
EIEAGADIALVKHLVFLEFKIGFRDPTSFDMEEITQEIGSVLKSLECVYRASSNAVGKS  
FKRVGMDLLQILVTLINYEIKNKLDSSPSSVSPSPQGINDSPPTVTSSTAITVENRSVT  
PPHQGSHSHNLLLQKSTKIIGHFARVGRATRPMARFPGFLTSILDLCNIRPYSMIPFEA  
RLSCLWTIANLACNTENMAMLISTPNLMDSLITLSNRQPSPGDSVETVMEIIRAKSIASR  
TVLNLSWSPKNKVLMSKNVALI QALCKIALQREAPYRNSKTMKDILIQARRHSLASLRNI  
SAVPNQNKVALCRYNDGKLLDILTVDVVLNETDENVVVDSFSAIDNLTIPDTAEAIVERAA  
LVLAALKNVLEDTDESARKGNHHSIKCHCASATILVLERAITPKPCYENFRELLDTINP  
SNPTDSTDEPAVPLNATAV  
>comp10574\_c0\_seq1; 1106 669 2507 LEN=4670; minus strand; translated  
MYGDNTTSNPKDSFSENNRKLSPAIPRPRPTLGAMASASSLSSSSFRFGNTEADSTTNS  
SRNYSDDSDIPWGDRKPAAKVFPFSDYGN DYQHFMEDIDDDDDDDYAMDLEDYDDPDMD  
LVEYPSKEKFESSIATGSDEEFELNTPTKDGVLLPRNSPSQRIIKRLASSSSVVAKPSPS  
PDKKGEATLKT DSHSHTDDEENGRCDCREDDDGHDDGHDDSSALLAAKNGPRTTKTTVFG  
DGTAINRELLWAASIFFLVVGISVLTAAVLVIKQSSSILDANSEGRIPSTPSASPPFG  
EPPTPPPVVVAPRLSVQNEWKLVYAAIRDNPLTQSLLVSGDGEEVLPADPTFYEGLVEGM  
VFSEDRDWIPAVMPLSDDNDDLVLNLYGMTTDDQQQIAGNNGNSINTNNHSGGQHIGMP  
PSAAKKNMTPNQKATAWLLYHRRKDPNESVWRWALASIYFKMGGHGWTIFRRDQEA  
SSPKWFTDAPLDCWERLEGC SGYFKGNGNRNPQAQTHLHHAHHREL PVDLDFDDSNLSG  
SIATEFSLRLYNTGSDD EDTVLRAITLTDNRLTGRIPGRVFEFLFP SLGKLYLDGNE  
LTTIPYELGGLGE  
>comp10575\_c0\_seq1; 801 171 2801 LEN=2900; translated  
MVDFGKLLTSRVEKWKENYIDYAALKALIKKAVKTKHQKLEQRHDADDNTLIKNLTTR  
MISPMRRGVKSSTSI LVS DAMPDRCSSELEFRRLLDHEIQKIVLFVMTREGQLAERLFEL  
SKDGQVLKRRFMLLMQEVSRNL TNRTHTIP SLEDGKAKTWSHLECSTERHRDFAQDLLLL  
VNFMDMNL TGLRKILK KHDKNFPRHQLSGLYLQSNVGHGDDRVDSEIVKDSHLDKLYH  
FGGLSALTLTLRRAFDDLHLLLELHLLT LSSDSSKPDGQPNHRRNVSTPVI PSTYRSMDVD  
INATLRPAQHNRKLSLQGAHSFSSQSLSSFS DNYSLPSTSI TSQREPILDQINAARGLR  
QTTKYAELVAAQALIFSDDKDQDGSDDGKTPASEFTAVRRLSSMLNLVSTFLYMTNYYIV  
APSVGNALRLGSDSMSGYIIGMTPNAAL IATVLYGFWSNYSYRYSLIFAAISSLCGNI  
LYALALKYNSIKMVL LGRFLVGF GSARSINRRYIADVFSKSDRTAASAD FVSYAALGMAA  
GPAAAFVGVHLLTFDPSHLLWSDVNACSWIMVGAWGIFVVALVALFEEDRSHLYGSPEVD  
SQSRLIEKMEVILNNTNSIGRMKGNEGGENEPLLTRKKRDIENNKSDQSIRSGSLDKEPP  
LWKNVAVMISLWMYFVLKLVLEMLMSSTSTVTKYFYSWDSKQSGLFMACVALLMFPVNFV  
VAKLSQKYEDRELIVAILIVMIVSVLGIIDFHPDSYSVSQYILFGVGIFLSTNGLEGINM  
SLLSKTIPTSWAKGTFNSGF LATEAGTLARSAGDV LISAVAGTFGLDMILDGLFAPMALL  
CAVTLAMVYFCYDKLTDMD EDEDEDETPNTESSDTSG  
>comp10575\_c0\_seq2; 428 260 1414 LEN=1513; translated  
MVLLGRFLVGF GSARSINRRYIADVFSKSDRTAASAD FVSYAALGMAAGPAAAFVGVHLLT  
FDP SHLLWSDVNACSWIMVGAWGIFVVALVALFEEDRSHLYGSPEVDSQSRLIEKMEVI  
LNNTNSIGRMKGNEGGENEPLLTRKKRDIENNKSDQSIRSGSLDKEPP LWKNVAVMISLW  
MYFVLKLVLEMLMSSTSTVTKYFYSWDSKQSGLFMACVALLMFPVNFV VAKLSQKYEDRE  
LIVAILIVMIVSVLGIIDFHPDSYSVSQYILFGVGIFLSTNGLEGINMSLLSKTIPTSWA  
KGTFN SGF LATEAGTLARSAGDV LISAVAGTFGLDMILDGLFAPMALLCAVTLAMVYFCY  
DKLTDMD EDEDEDETPNTESSDTSG  
>comp10576\_c0\_seq1; 490 608 2152 LEN=2264; translated  
MASCAACTATRSALLSSSCRAIHSRTITSSASSSTSSTAGAAAAA AKARGPLRSPSPSPA  
SGSCRALSCAASMPASSGISIVQLHPAASLLTPCQGATANAKASGGTHHHS GAPGFLLA  
STAALLAASSLNIVAASTPSPIGGATVATTTTAAAPVSKPAGDGGGGGAGGGGGGPSTDAS  
AVPAAVAVSTSRAKEDVQRYEDALAKDPYQVSKSAEQGVRWTMEDTYTVANGGHFAAVFD  
GHGSGVSGMLRDHVHRLYSKALYQRHGEETQKSALDGMQVDDDEDESEDASPSAPSVPSI

DTHIASIRAALKRIEREAMRHDHFEYQGSTAVCVLVSVGKDGERTLVSANVGDSRAILCR  
GRKAVNLTRDHKPSDEREKARIRSMGEDVQWDPYGEIYRVKDLSSLRAIGDRFAKPVVSS  
EAEIGCVPVEDEDEFFLLASDGLWDMTSQEVVDFVHEMLECPTQSVKTKKGGKIVLTPEF  
RRRKMARFVAHEALERGSADNVCVILVWLKKEKK  
>comp10576\_c0\_seq2; 411 436 1842 LEN=2412; minus strand; translated  
MAAQYLSTDTQRMKQHERRLTKNSSSSSTGTQPIASASLETTGFANLSPIALDSERSFTRY  
ISSVGIPLDVFSHRSDPGLFPLVAGLVVPGIDRLAAPAQDRAAVADVRRDERPFSVFAD  
AHQDANRRAPLVLEVVVPHRFPLDAFERGADRRDVGIYRWHRGSRRRCVLAVLVVVDLHS  
IERRFLGFLPVPLVQRLGVKPVVPEHAAHATPTVAIEYGSEMPVCNRIGIFHGPPNA  
LLGTLRHLMGSFARASSYRWTSFARDVETATAAGTADASVDGPPPPPPAPPPPPSPAGL  
ETGAAVVVATVAPPMGEGVEAATMLSEDAASRAAVEARRKPGAPEWWWVPEAFAFAVA  
PWQGSREAAVELNDRDEPDEAGIEAAQERARHDPEAGEGGDGRSGPRALAAAAAAPAV  
DDVEDDAEEVIVLLWMARHDDDRSAERVAVHAAHDAILFAGAEPFGLD  
>comp10576\_c0\_seq3; 297 259 1137 LEN=1249; translated  
MEDTYTVANGGHFAAVFDGHGGSGVSGMLRDHVHRLYSKALYQRHGEETQKSALDGMQVD  
DDEDESEDASPSAPSVP SIDTHIASIRAALKRIEREAMRHDHFEYQGSTAVCVLVSVGKDG  
ERTLVSANVGDSRAILCRGRKAVNLTRDHKPSDEREKARIRSMGEDVQWDPYGEIYRVKD  
LSSLRAIGDRFAKPVVSSAEAEIGCVPVEDEDEFFLLASDGLWDMTSQEVVDFVHEMLEC  
PTQSVKTKKGGKIVLTPEFRRRKMARFVAHEALERGSADNVCVILVWLKKEKK  
>comp10576\_c0\_seq4; 82 202 943 LEN=1397; translated  
MVLSREQVSKSAEQGVRWTMEDTYTVANGGHFAAVFDGHGGSGVSGMLRDHVHRLYSKAL  
YQRHGEETQKSALDGMQVDDDEDESEDASPSAPSVP SIDTHIASIRAALKRIEREAMRHDH  
FEYQGSTAVCVLVSVGKDGERTLVSANVGDSRAILCRGRKAVNLTRDHKPSDEREKARIR  
SMGEDVQWDPYGEIYRVKDLSSLRAIGDRFAKPVVSSAEAEIGCVPVEDEDEFFVSSRVV  
SSAVCRW  
>comp10577\_c0\_seq1; 668 1 2431 LEN=2836; translated  
XEHGARLQAFLENRYTFQTLRTLFKRKQKSSLSFCKPAQNSSSQSNDFAVFTSVYLG MWA  
SRLQRSGVLRTSRNDNANLFVSRARRAIADDTSAVRKQPPPNQANRSY EYRQRQGS  
WFGNGQRNRLSAEERNIQVAWYMTAVVVGALGAAVASVPLYKVFCQATGFGGTTQRVNF  
DGEEPSALEKTMRSLVQTIAPKSSAKVHTWTDEEAAQKLASLRPVQANANLVTIRFDSTVN  
DTMPWSFQPIALDVKVVPGETALSFFRVKNHSDKAITGVATYNVYPPKMGLYFQKIQCFC  
FEEQRLLPGETVDMVFFFIDPEMLDDPQVSVYTDVTLSTYFFQTDDEDDDDDDSDNSM  
EGEQNTKTSTSNKDHSITTAQTAGHTVATVATIGTALATFWEHTKAI FDDPDADPELRK  
LIETISR LRAARARQNQSNSRIDKSTLTSIKQOHRVLQRKLGRTAFRYRRDPFAACIRE  
VYRPEILEVVHGRVPEDEEKRTGDDIDLAPEQDAVDKLLDSNFDYGYAPEDEEKDKENA  
SDEEKSSPDDES DGRDNSNR SVEHSSLIPLERLLRAQHNEWMTQNQMDLARKVQKEAIE  
YLSLELLPELKQQQASTNKDDEEQSNHDLDYAMFLTPVGEWKRKIDEAKASNESLREAYK  
AHLAAQEKLLAAYREQCGEENEIDENG SVVQANENGATAISPLPSPVLDEKRKVRPVNWA  
KNLQTSVRSLLAPPKLAPELITDEAGEDTGDVPESIIITGGGETDEEGGESDEKEEAPP  
SPPKIQLSIGRRSTKGVDKGALPGR LSTSK  
>comp10578\_c0\_seq1; 90 814 989 LEN=989; minus strand; translated  
MTTRITVTRSQTQEE SVDEITLNRSTQEE SADEIDTKNTTTTTITEEPPAESPEAD EGX  
>comp10578\_c0\_seq2; 90 736 911 LEN=911; minus strand; translated  
MTTRITVTRSQTQEE SVDEITLNRSTQEE SADEIDTKNTTTTTITEEPPAESPEAD EGX  
>comp10579\_c0\_seq1; 299 602 1324 LEN=1408; translated  
MSAWKSYNNYNKVETSFNNICQRYGCCLKNRISINS GIALASRSQMEDEECEDFKHPTNT  
DGV LKVNKKSNDKAGDAPSI FQRMFDEVFPVHLFYTDGRKKLPPAQIDDFGVMLYDVFLI  
VNL SLSISFWVTHRMDFTYIPYAFNEGCLFSILWIASGLYHGSFLYSAMDGHFPLDDEQG  
RGGPMAAGALAFNTFINAINLR LVAALIGAWIQHRKVGE GSPMEELIPLIIGCGLVLMTL  
W  
>comp10580\_c0\_seq2; 685 189 2300 LEN=2405; translated  
MKTTLVLGLLALSSIVLCAETVAGSKRQQQLRRGK GHRALLNENNDRTDSGTPATIPSK  
SMARRRTEATTSFTEWIESSHTFLTRVVDGSSSDQASIRYPWFARLGNSTDSGYSCGGAL  
IARDLLLTSAGCGVPTEAYIGFAVQIESVANHPDGYDLMIKVKASTPSAADPVRLNFDE  
SYPSIDGELPTVLGFGSSQSAAMELARNHLKAATISYVPPSACKGKDAADHGFC TTSLEG  
GESDA CLGVSGGPIAKSGFFAATGASKTTTAGGDWSTDDLLLAVVSGAPGECGNQNNHRQ  
SVSSHKEWIVDTGCSLSDPPPEWNCSEQKEAGTAPLDNSVYYSGSSTEMTELPTSPPS  
PYPTTAPTSPSPRPTPMPTTEKPNPFIIPYPTY YEREPD TNVPVASYWGDEDDDDDDYY  
KFVCPICDNKYLVSPNGAVVVVPGVQRTCQELFDASLEGKIDKGECDSVLLVASLVC  
SCGPPPTSPSPPTIATPSPTAEPTTNPSPTEETPSPTQSPTTKPPTRSPTPDPSFS



PTPAPTTLPTQSPTPGPTKATASPTQDPTVSPTSPPTKRSLSPPTCKSIKNASHGDYVD  
VSIDVFVQDGSSARSVGVFVSDPGHECFREGVTPGAYVVPTAESTVRLVVRGIDYVFLKV  
DTRQSGNGGPIGSYTVQAEGEVLASNDGHLQNNDATIFTTPL  
>comp10581\_c0\_seq1; 955 89 3256 LEN=3491; translated  
MLRKFNPKKKIVDAVRDQVRDKLRNFIMSVKSMFKSKSGDPESRDILDRLTFLLSMENGF  
FWDDAYASDMLDDVSKNSNFKDVLLKHLGLLCMHPDDVEPKSKEVVRRLTFFFTNSLFMDM  
PDAPSIHDMFSWNVLTPYYSETVTYSKGDLESRSDALGVSTMLYLQTLTYREEWTNYLERT  
GIQDEEKLWTKKHAEDTRRWASIRAQTLRSTVNGMMYYEKALRLLANMERLDEDTTNDLI  
GEKFGYVVSVCQVYGNMKNRQDSKADDIDALMHRHLHLRIAYIDTVRLNRDGAALFYSVLV  
KSDGKGNIVEYRVRLPGNPVIGEGKPENQNHAMIFTRGEFLQTIMNQEGYFEEALKMR  
NCLQEFKREGPLPTTILGLREHIFTGSVSSLANYMALQEISFVTLGQRVLTRPLHIRLH  
YGHDPVFDKLFITRGGVSKSSKGINLSEDI FAGYNNVVRGGVGFKEYLQVVKGRDVG  
SQIYKFEAKLSQGAGEQSLSRDVYRMCHRLDFCRLLSFYGGIGHYFSNVLTVLTVIYIV  
YLTAVLAI FGYEKIGDRTITPMGTIQMMLGGLLQTIPLFATLGVERGWLSSAQEILTV  
FLTGGPLHFMFHIQTAKAFYMTQTILVGGAKYRPTGRGFVTQHTPMDEQYRFFAASHLYLG  
VELAAGLIVMGIFTDAGQYFGRTWLWLASISFLASPFWFNPLTFEWNTVVTDYGLWVRW  
IKGTSGGSTKSWSMWYNEENAYYKGLPFSTKCIFIVKAAIFYLMADGIWRSDLFRSDISL  
ANPALRASDLLIILACLIILSRVVSANERSMPYPVRRTLGILVAVGIVVTIMALFIEDSN  
YLRALAGYYGAGAVCMIGLLYGFKFVKVYLIHVVCAHIIFVPLFILGALQLPSMIQT  
WLLYHNALSTNVVSDILKYARKSKDSGGTGGANEELIDQVNELKKVIHKQEKLLLESMGL  
VQSDAAPSPMQTPATHEYSQPRQQTTTTTTTVNPRSQFVKAKSMTGMEVWGEMALGEG  
SGESLAAQVSRPTQGRQSQSDDFHFSHPDTPMPPR  
>comp10581\_c0\_seq2; 1055 212 3478 LEN=3478; translated  
MSTDDIVFDDDGVMDSISTFLYPASRLALAGLTVWVSAAGSKDARYFSGVLNGLLSGFLI  
YVFLEPLFFPVGLNLAVVVLWILAIMASFVGMGLVLLPTLFPGLCLGVNIALLVGTFLH  
GFSISSPLFFPIAGGVAALIGALLSVRWNAKFI VTCTTILEIGAVAASLVLQSSLRFIMD  
VTRGYPFYPEGVNGAVPVPEDRTGIMFGLVWLAGSLLVASAIAYRDGDFDRLSLGSTSSK  
NASGYQAVPTNGSSPKGKPKMPRRDPPPVPDAFNMFDPADLPPRLAEYANMVYSACEDL  
GNFFGFQDSSVRNQAHELLILLNNRRYMSSHILPPSVQPPSPIHALHAKVFSNYVKWCR  
AMGVPPHF SKMNTSMSAPPAVASRVVDLVLYFCIWGEGCNLRHMAECVWFLYHKMMEEYI  
RSEGFQTQTRSLYAGHFLDNVVEPIYGVLA KSSKSDHFEKKNYDDFNEFFWSRNLRFH  
YSDDDSTSLYDVEGTNFV GALPGESLPLSEGLDNAPKTFLEKRSWLRGILALNRI LEWH  
IVTFYLLSVVAFSRELVWGWVYSVQLASGVFWIFNFLFLFWQLLEVWGTYPGIQLSATEV  
CGSVLIMAGRLLTLVYQSLYLMWAFSPQQGVYMGIEQDTTFWWWQYIWL SLLVMTPYALE  
LIPQIYPSLTKILTSQNDYVQSF LNILYPSRSLYVGKEVHESFGHTVVYLLFFWITLMAW  
KLCFSYVFEVYTMVKPSVQLTDDYVNYPNQSF AKMMFLLILRWLPQFIVYLIDMSIWYAA  
WQAFAGTAVGFS DNLDIRSLDDIRNNFGRAPELFCKKMLSPDAGSRRGSSASFLGTSQN  
SLGESSLLGSNTQRLQSYVNRLLDVRIQKWMFSAAWNEI IDYFREEDIVSNAEMDNLK  
FSQFDGFSQAIYLPVFQTAGAIDDVLS ELERPAEEYTDIKNQYTDETYFKPISEHITMQ  
TAVSEVWELGAFVVKQTFGP IHSADIDAVGGIIQSWAEDGILSSKLELQKTRGAMKSLIE  
SIKLEKGMKRRKPAKPRSNYKKTQGT KRGGGCXAVSAGSLGTL DVSESNPSKDPFGL  
AQYAEVQPX  
>comp10582\_c0\_seq1; 224 368 700 LEN=1269; translated  
MTSSAVGNKDDTFSTDNVIFDADSWKEMSRPESYVFNQKLERKSKSLKSKFNSENAW  
VLIALLVLFVPIFSVEFFFALSRLICASDPMNQSDLSAFLCSPAMPLTE  
>comp10583\_c0\_seq1; 163 170 1228 LEN=1757; translated  
MPILTKRTRRGVFAVTNAMVLLVAVVAQAI VAVGGSSVMKRTHSHSSADLHVTTIKSSS  
ARSTGDRRSRNSNQNKGKGNRSPRASVVNQGQMVSRVDKKEAEPLSEGVYTDKPVLRGKF  
HKWGAIYVPLLGVPLHLRALAAAATPPSAATSTEAFRPDLIRASILFSFAVESIMVVS  
ATLHRYPWKTQRWHQIARKADFTAI FVGIASLYSSMGHLLMGHPTYSGVIEPLVWACAL  
VGLTKWFVPDAPQWVNASVFLVQGWAVFPCIPMLVSSSSTCEAIGLVGGGIFVTLGAIA  
YSLQWPRNTANKAQREIVFGPHEVFHVGT LFMVASFWFTMWNKISSSVTGSV  
>comp10584\_c0\_seq1; 345 269 1037 LEN=1675; translated  
MAPELIDVDCNLLHKDMVTLQKIETSDPWNILKEDAVKDSNIVAMLSPSSTIIIESERGLE  
LLKTHPPPLDIKTTVGVHPYHVNDQSLIISGDGTKITIEEQSKIKHILQADREGTTNQF  
CVAVGECGLDASEGFPPLEDQIPWFEMQIEIAKELGLPLFVHERLAFDKAMELLEKIDPS  
DVPVIIHCFTGTKEECTAYIERGYFISISGYILKQSN SNYSEVVSCL EEGVIPLDKLMIE  
TDAPYMGFDAADSYI  
>comp10585\_c0\_seq1; 746 1 2419 LEN=2582; translated  
XSRNSLVNMHQEELRCVIAVVRHADRTPKKLLNTAEP IILEYFRDHSEGKLT KDLKIK

AKTPMTEFLAAVRKIIVQYEQKEELRKDEQKILWKFNHMRDVLERWKFSGLNRKQLQPKPK  
KITTDEKTKGKTLREVQLILKWGGDLTKLGENQAIQLGQQFRHSIYPDSPGGVLRHLST  
FRHDLKIKTSDEGRVMKTAFAAFKGLLDLEGDIPPIILVSLVHKEKGSMMHMLDPSGDKDVK  
LELDECKEKISQHLQEDIDWRDMTEEDRIRLVGPPEVTSLRDALAKIGNPRKTLQTIYQT  
MGTLIEELEEMLGRGESGDEKASDEGDIQKGDSEADADAQLSGVKLYKGETLLELTERWRF  
IYTRYLYDAETDFTDLRIPDVLNVRFDVLHNPGLGLTSLHKLKLYSLAKDMADTVVPQY  
GTTLAEKRSVGIKVCSSLLEKIRFDLHIARTDNKTDMDRYMINMDYSADLPITTMGRRI  
RTRLYFTSESHLHTLINVLRFAANTDAGGSSFSGTNCSSPVLSPFGFGFLNESKEVCYLTQV  
VIRLFEDTGRMSDPRRYRVEILFSAGATGTPIHQCKSTKETDATRLDTEPLVAVGREGL  
TCQVEVEAFFDSIIAERGQSDGNHDVDAISEHSGPPKTPMGNPIDSDGKNLPTPKTVNTNS  
VASCATESQKITSDEGSEQNQPPKNDGNLSNRNNAVSSPPNPSVRKQNGRNAAEKHTSNR  
EEKVRSADTRDSSSSPPERSESSRIGGARPSRADEDDHNKAVRDHQLFYLTATIATTALVMG  
VGCLVLATGLTGNPRNRHFSHFSQR

>comp10585\_c0\_seq2; 612 281 2116 LEN=2279; translated  
MKTAAAFKGLLDLEGDIPPIILVSLVHKEKGSMMHMLDPSGDKDVKLELDECKEKISQHLQ  
EDIDWRDMTEEDRIRLVGPPEVTSLRDALAKIGNPRKTLQTIYQTMGTLIEELEEMLGRG  
ESGDEKASDEGDIQKGDSEADADAQLSGVKLYKGETLLELTERWRFIYTRYLYDAETDFTDL  
SRIPDVLNVRFDVLHNPGLGLTSLHKLKLYSLAKDMADTVVPQYGTTLAEKRSVGIKVC  
SSLLEKIRFDLHIARTDNKTDMDRYMINMDYSADLPITTMGRRIRTRLYFTSESHLHTLIN  
VLRFAANTDAGGSSFSGTNCSSPVLSPFGFGFLNESKEVCYLTQVVIRLFEDTGRMSDPR  
RRYRVEILFSAGATGTPIHQCKSTKETDATRLDTEPLVAVGREGLTCQVEVEAFFDSIIAE  
RGQSDGNHDVDAISEHSGPPKTPMGNPIDSDGKNLPTPKTVNTNSVASCATESQKITSDE  
GSEQNQPPKNDGNLSNRNNAVSSPPNPSVRKQNGRNAAEKHTSNREEKVRSDATRDSSSS  
PPERSESSRIGGARPSRADEDDHNKAVRDHQLFYLTATIATTALVMGVGCLVLATGLTGNPR  
NRHFSHFSQR

>comp10586\_c0\_seq1; 293 1 702 LEN=866; translated  
LIFPFVLTTAIYNATPSESPVLGPASSNTMSSNPSNEPAQAGQPQARYNGPDPKEMTPKQ  
KEIHDIYILASRPRTGLSGPFGPMAVPEIAEPASKLKGKACRYDTSLSFRESELVILLTGA  
RARSRTEFSIHTGEALKAGIGMEVIEAIPRDDDFSVLAVRERLVPLETDREKAIIVGFAA  
ELLDTSTVSDETYEATKTALDGKDSILVEITSIVGYTTFVSYTLNVFRIPAKA

>comp10586\_c0\_seq2; 321 138 752 LEN=916; translated  
MSSNPSNEPAQAGQPQARYNGPDPKEMTPKQKEIHDIYILASRPRTGLSGPFGPMAVPEI  
AEPASKLKGKACRYDTSLSFRESELVILLTGARARSRTTEFSIHTGEALKAGIGMEVIEAIP  
RDDDFSVLAVRERLVPLETDREKAIIVGFAAELLDTSTVSDETYEATKTALDGKDSILVE  
ITSIVGYTTFVSYTLNVFRIPAKA

>comp10587\_c0\_seq1; 308 147 620 LEN=1003; translated  
MTKLQTIILALS FATQATSFSPQACQQQFVRGQSLPSTPAEGGEEEPKLLVGNIESEMQ  
SVRADSGTEYDFGAIDFLALAKERASAQVESNNVAGEDWKNLAEKKEQFGEIDDWEN  
SMKEAGNADSQILMFTDTSEGEDGEGGDDEPKLLLF

>comp10588\_c0\_seq1; 538 311 1507 LEN=1639; translated  
MSSSSSRSSGPGRSIGPAFTNLKGS HDGVNKNSSNSEEDSKIGRLEELKQOEADLARQLA  
EIRMEKLSALRSKPLTIGVIGFRFGQFISKTFAKHGNIIVTSRSDYTNEADEMGAEYVP  
LSDPQSF LDKNL DVIILATSIVSFESTVKNLTPHLKDYVSKGRKGPLLVDVLSVKEHARD  
ILLKHLPEECDILCTHPMFGPDSGKNGWQNLNFVFEKTRVDGVLFDPSSHIELQNTASND  
RSYNEAYS YIEAMDRIERFLSIWEEGCRMVPLSCKKHDEYAANSQFITHLMGRILGKQG  
LQKTPIDTKGFESVLKLI DSTTADSFDFLYGLYKYNKRNSQSIHQLDAMDVVVNDLKI  
LESEDMKKQELRQAQEQEQRQESATDKKAMGAYLE

>comp10589\_c0\_seq1; 332 104 1141 LEN=1605; translated  
MTIVGNTRSSRDALAF LRSVKPKDGWSIQENDGGTSVRLLRNVPLTEESFRD VHYDPSR  
NAVVGVVSSDASVCRVLVDGATGRPVPKSEGHVSCSGSYGGRRALPESTRDRAGNPGGG  
SGARARASGSSFFDGLSDLFSGGETEPAPAGKRTSSNTNRNTSNNVIRGIRTSGSSSSAS  
NPSEAPPNPLAGLSEEDQQRYLKYAAMGLGAWTALRALSAILSEALWLALFLPGLYWYGV  
QTRPADSSFDKKEVKRVLRGHHL PDDHPQKPQRANPLEWWTAKIAASLATEVGAASGGY  
ALELTPLLGGVATHARVVL PALGLACEWIGCHHTWYHLRTTEASE

>comp10590\_c0\_seq1; 311 278 1759 LEN=2104; translated  
MSRAVTVEELMKTIDPNEIDQTL SQELNKL SFETREPINEEVHGVQCLAPDETVELLSS  
LLNLSTEIEAIFVKPAYNRSQKLALLQPYAYRGAGTYINTADFR LKFLRCELF DAKKAAK  
RLVCF LDLLMFVFN DNDL LRLRISDIGESQMAVLRSGQFQLLPYRDRSGRRLTLTILL  
NAGMNHNFVESLQAVFYLLYVAAESIESQRKGI VMLMLSCTFAGEESSFSALLPGPNDQR  
IAAKLNVAAPIRQSAIHMCFPDTIYHRMFRSVVMLSHMSSNATKFR IKTTHIGHWTELQYQ

LMGFVIPVDALPISQKGLTKTAMLQQWIRLRKLMETPSGQDGASSEEDSSISASDISSAI  
ECPNLNDVIFRMGKSCMCHPGNVMFRSLIESKLEDEHYSATRKGKAKIAWWIVKEVERRGG  
RFLKWNHSHGWTEFENQSEVRYKIPTCFRDFSRNKTKARKNRVKTNATTQHKTQQNGCIDL  
CATNNKEENTSLL

>comp10591\_c0\_seq1; 981 161 4113 LEN=4252; translated  
MVIDNRQHREQISRIKDKIKSRRQSSSLPISSSTLAASVKPKPTDDDPTSCFTYSIRP  
DGMVLGETLWKQRRLENKPFQGFMESSIRELAASLPPSQQRQLCHRATDISLAKIKSLIQ  
NSIVQYKASSLPKDFEHHKPSLTTSSSLPPSIPSNALNDFCPPREQKEQPNNENS  
VHSENTMNQKLNHGQYKPSSETPEHTPSGPGNNLRSSTFASGEAARAPQSTIPVSNNYFG  
DPCEEDEFDGDVDFADFDVDEAIREHNKNSSATNNSPSCGSAASRMTRPKITRSVDLADH  
QNFGRESFSYGNHTDSYDERRANNNDGTNRDQNGYSFEDRHRNSASSYQQQHTSCNDP  
SGYSSSAFDNNFRSDIHFSSGGEKYNHYNGSVTDHQNNSMVDNYGNDGETPRCPGHGLPC  
RLLTANTSANMGREFFKCSLPEGENCDFQWKDGMENWNNNSFAESTCVTASGGTILNMR  
EENRRVFGHRSFRKQEDVIQNAIQKDVFXFDADGVCSNVLSTIVTIGLLNLSLIIASN  
LNHMELLRTGEPNSAVENLYAISYLRGAVPDFXVVVSPLLSLIQDQVQSLLKNGVKSVEFF  
SSAQDYHSEQVDINRQLNETTAHGGVKKLLYLTPKLSHSNQMQSILRRLHNKGLISRFV  
DEAHCLSDWGHDFRDPDYNQLGRRLRDYPGVPLMALTATASEKVVNDAVRALGMRNEYRYK  
SSFNRPNLRYEVRKKDGKVTDAIADIVARRPNDSGVIYCLSRKNCEQLAEKLTQKLREK  
CRNVQVSFYHADLDAQERERRHKQWSVGRINVLCAVAFGMGIDKKLFGGVLAILFVIFL  
VIPNILIYSFLPYISLNMRYMNPFSILGPTFDTSYTIICQKVSHIIXQESGRAGRDE  
DAECILFYSYKDKQVLEKMIKRNSSDDKYNPSIRRKVDQLYRCVQYCENEFRCRRTMQL  
FGEKFDRAKCNQTCNCRAGRIPDERDMTTEALAIIDLFNSASNQTRKGITMLQLSLYR  
GSKSKTITRSYPVNRIEGFGAGSKFKKHDIKITHGMVFERILVETSVENKGGFTSDYVT  
LGEKAALLQRGSEKFFVVEFPKKVTAQRSNPEKQKNQSKKRSRSDIESSKSKKHSSK  
KEREDVNSGGLHFSEIVDDSEDDDDSLQDSTNANSTNTQSVLPPHHTNKIVEMKTLVKR  
WADEEQMMGNHVFYWHILSGGEVKAIASHAPMTVDELKAIGILSEKKLEEYGARIVKPIK  
MYVKKEGLEEQVARKLPATKSLNGKVSRTDANQIIIEIVDDDDDEFANGIDYDAIDL

>comp10591\_c0\_seq2; 1066 161 3997 LEN=4136; translated  
MVIDNRQHREQISRIKDKIKSRRQSSSLPISSSTLAASVKPKPTDDDPTSCFTYSIRP  
DGMVLGETLWKQRRLENKPFQGFMESSIRELAASLPPSQQRQLCHRATDISLAKIKSLIQ  
NSIVQYKASSLPKDFEHHKPSLTTSSSLPPSIPSNALNDFCPPREQKEQPNNENS  
VHSENTMNQKLNHGQYKPSSETPEHTPSGPGNNLRSSTFASGEAARAPQSTIPVSNNYFG  
DPCEEDEFDGDVDFADFDVDEAIREHNKNSSATNNSPSCGSAASRMTRPKITRSVDLADH  
QNFGRESFSYGNHTDSYDERRANNNDGTNRDQNGYSFEDRHRNSASSYQQQHTSCNDP  
SGYSSSAFDNNFRSDIHFSSGGEKYNHYNGSVTDHQNNSMVDNYGNDGETPRCPGHGLPC  
RLLTANTSANMGREFFKCSLPEGENCDFQWKDGMENWNNNSFAESTCVTASGGTILNMR  
EENRRVFGHRSFRKQEDVIQNAIQKDVFLMPTGGGKSLCYQLPAWCCPGLSVVVSPL  
LSLIQDQVQSLLKNGVKSVEFFSSAQDYHSEQVDINRQLNETTAHGGVKKLLYLTPKLSHS  
NQMQSILRRLHNKGLISRFVDEAHCLSDWGHDFRDPDYNQLGRRLRDYPGVPLMALTATA  
SEKVVNDAVRALGMRNEYRYKSSFNRPNLRYEVRKKDGKVTDAIADIVARRPNDSGVIY  
LSRKNCEQLAEKLTQKLREKCRNVQVSFYHADLDAQERERRHKQWSVGRINVLCAVAF  
GMGIDKKLFGGVLAILFVIFLVIPNILIYSFLPYISLNMRYMNPFSILGPTFDTSYTI  
LCQKVSHIIXQESGRAGRDEDAECILFYSYKDKQVLEKMIKRNSSDDKYNPSIRRKVDQL  
YRCVQYCENEFRCRRTMQLLEFFGEKFDRAKCNQTCNCRAGRIPDERDMTTEALAIIDLF  
NSASNQTRKGITMLQLSLYRSGSKTITRSYPVNRIEGFGAGSKFKKHDIKITHGMV  
FERILVETSVENKGGFTSDYVTLGEKAALLQRGSEKFFVVEFPKKVTAQRSNPEKQKNQSK  
KRSRSDIESSKSKKHSSKKEREDVNSGGLHFSEIVDDSEDDDDSLQDSTNANSTNTQ  
SVLPPHHTNKIVEMKTLVKRWADEEQMMGNHVFYWHILSGGEVKAIASHAPMTVDELKA  
IGILSEKKLEEYGARIVKPIKMYVKKEGLEEQVARKLPATKSLNGKVSRTDANQIIIEIV  
DDDEFANGIDYDAIDL

>comp10591\_c0\_seq3; 1137 161 3862 LEN=4001; translated  
MVIDNRQHREQISRIKDKIKSRRQSSSLPISSSTLAASVKPKPTDDDPTSCFTYSIRP  
DGMVLGETLWKQRRLENKPFQGFMESSIRELAASLPPSQQRQLCHRATDISLAKIKSLIQ  
NSIVQYKASSLPKDFEHHKPSLTTSSSLPPSIPSNALNDFCPPREQKEQPNNENS  
VHSENTMNQKLNHGQYKPSSETPEHTPSGPGNNLRSSTFASGEAARAPQSTIPVSNNYFG  
DPCEEDEFDGDVDFADFDVDEAIREHNKNSSATNNSPSCGSAASRMTRPKITRSVDLADH  
QNFGRESFSYGNHTDSYDERRANNNDGTNRDQNGYSFEDRHRNSASSYQQQHTSCNDP  
SGYSSSAFDNNFRSDIHFSSGGEKYNHYNGSVTDHQNNSMVDNYGNDGETPRCPGHGLPC  
RLLTANTSANMGREFFKCSLPEGENCDFQWKDGMENWNNNSFAESTCVTASGGTILNMR  
EENRRVFGHRSFRKQEDVIQNAIQKDVFLMPTGGGKSLCYQLPAWCCPGLSVVVSPL

LSLIQDQVQSLLKNGVKSFFFSSAQDYHSEQVDINRQLNETTAHGGVKLLYLTPPEKLSHS  
NQMQSILRRLHNKGLISRFVVDEAHCLSDWGHDFRDPDYNQLGRLRRDYPGVPLMALTATA  
SEKVVNDAVRALGMRNEYRYKSSFNRPNLRYEVRKKDGVKTDIAIDIVARRPNDSGVIYC  
LSRKNCEQLAEKLTQKLREKGCNRVQVSFYHADLDAQERERRHKQWSVGRINVLCAVAF  
GMGIDKPDVRYVIHYSMPKSLTHYYQESGRAGRGDGEDAECILFYSYKDKQVLEKMI RNGS  
DDKYNPSIRRKVDQLYRCVQYCENEFRCRRTMQLEFFGGEKFDRAKCNQTCDCNCRAGRIPD  
ERDMTTEALAIIDLNFNSASNQTRKGITMLQLSELYRGSKSKTITRSYPVNRIEGFGAGSK  
FKKHDIKITHGMVFERILVETSVENKGGFTSDYVTLGEKAALLQRGSEKFFVVEFPKKVT  
AQRSNPEKQKNQOSKRRSRSKDIESSKSKKKHSSKKKEREDVNSGGLHFSEIVDDSEDD  
DSLQDSTNANSTNTQSVLPPHHTNKIVEMLKTLVKRWADEEQMMGNHVIFYWHILSGGEVK  
AIASHAPMTVDELKAIGILSEKKLEEYGARIVKPIKMYVKKEGLEEQVARKLPATKSLNG  
KVSRTDANQIIIEIVDDDDDEFANGIDYDAIDLG

>comp10591\_c0\_seq4; 1052 161 3978 LEN=4117; translated  
MVIDNRQHREQISRIKDKI IKSRRQSSSLPISSSTLAASVKPKPTDDDDPTSCFTYSIRP  
DGMVLGETLWKQRRLENKPFQFMDESSIRELAASLPPSQQRQLCHRATDISLAKIKSLIQ  
NSIVQYKASSLP IEPKDFEHKHKPSLTSSSLPPSIPSNALNDFCPPREQKEQPNNENS  
VHSKENTMNQKLNHGQYKPSSETPEHTPSGPGNNLRSSTFASGEAARAPQSTIPVSNNYFG  
DPCEEDEFDGDVDFADFDVDEAIREHNKNSSATNNSPSCGSAASRMTRPKITRSVDLADH  
QNFGRESFSYGNHTDSYDERRANNNDGTNRDQNGYSFEDRHRNSASSYQQQOHTSCNDP  
SGYSSSAFNNFRSDIHFSSGGEKYNHYNGSVDTHQNNMSMVDNYGNDGETPRCPGHGLPC  
RLLTANTSANMGREFFKCSLPEGENCDFQWKDGMENWNNNSFAESTCVTASGGTILNMR  
EENRRVFGHRSFRKQEDVIQNAIQKDVFXFDADGVCSNVLSTIVTIGLLNLSLIIASN  
LNHMELLRGTGEPNSAVENLYAISYLRGAVPDFXVVVSPLLSLIQDQVQSLLKNGVKSFFF  
SSAQDYHSEQVDINRQLNETTAHGGVKLLYLTPPEKLSHSNQMQSILRRLHNKGLISRFVV  
DEAHCLSDWGHDFRDPDYNQLGRLRRDYPGVPLMALTATASEKVVNDAVRALGMRNEYRYK  
SSFNRPNLRYEVRKKDGVKTDIAIDIVARRPNDSGVIYCLSRKNCEQLAEKLTQKLREK  
GCNRVQVSFYHADLDAQERERRHKQWSVGRINVLCAVAFGMGIDKPDVRYVIHYSMPKSL  
THYYQESGRAGRGDGEDAECILFYSYKDKQVLEKMI RNGSDDKYNPSIRRKVDQLYRCVQY  
CENEFRCRRTMQLEFFGGEKFDRAKCNQTCDCNCRAGRIPDERDMTTEALAIIDLNFNSASNQ  
TRKGITMLQLSELYRGSKSKTITRSYPVNRIEGFGAGSKFKKHDIKITHGMVFERILVE  
TSVENKGGFTSDYVTLGEKAALLQRGSEKFFVVEFPKKVTAQRSNPEKQKNQOSKRRSRK  
DIESSKSKKKHSSKKKEREDVNSGGLHFSEIVDDSEDDDDSLQDSTNANSTNTQSVLPPH  
HTNKIVEMLKTLVKRWADEEQMMGNHVIFYWHILSGGEVKAASHAPMTVDELKAIGILSE  
KKLEEYGARIVKPIKMYVKKEGLEEQVARKLPATKSLNGKVSRTDANQIIIEIVDDDDDEF  
ANGIDYDAIDLG

>comp10592\_c0\_seq1; 590 152 1755 LEN=2304; translated  
MNTALTASRRMILLSSTRASPAARQFASLRWLAHPAAATSSSSFAGEEAQKNSWTAAAAL  
AVSAFLGAGTIAACDGAPSMKKS NVFDPQTYPTSDETESSPVEPMTVYAKMAIKTELEEQ  
KQORLQATSPTTEERKNARLEEQKAVLSLAADAVPEMTASEWEIEKATKKAKKHSGGIKLF  
SGNGNLALSLEICRHLGINLGKATVGRFADGEANVVVHENVRGKDCYVIQPTCPPVNDNI  
MELLLMVSTLRRASARRITVVIPIYYGYARQDRKMQDQKVLHNVDRFDVLVHCRLKYTLA  
LQSHGIIIRVRFPLARVPI SAADVARLIEAMGVDRVIAVDLHCGQIQGFFGPRVPVDNLD  
GGIVGLDYFGSKDLHNPVVVSPDAGGVYRAKKFKEGLVHKYDMQDIGLAMIVKQARAGL  
VDTMDLVGDVKNDCILVDDMIDTAGTLC AADVLIENGARRVFAFASHGLLSGPGNDRL  
ANSKMEEIVILNTIPTSPQREANEKLTMLSVAPLLAQAI FNIAHAKKSISALFK

>comp10592\_c0\_seq2; 681 152 1636 LEN=2185; translated  
MNTALTASRRMILLSSTRASPAARQFASLRWLAHPAAATSSSSFAGEEAQKNSWTAAAAL  
AVSAFLGAGTIAACDGAPSMKKS NVFDPQTYPTSDETESSPVEPMTVYAKMAIKTELEEQ  
KQORLQATSPTTEERKNARLEEQKAVLSLAADAVPEMTASEWEIEKATKKAKKHSGGIKLF  
SGNGNLALSLEICRHLGINLGKATVGRFADGEANVVVHENVRGKDCYVIQPTCPPVNDNI  
MELLLMVSTLRRASARRITVVIPIYYGYARQDRKMQARVPI SAADVARLIEAMGVDRVIAV  
DLHCGQIQGFFGPRVPVDNLDGGIVGLDYFGSKDLHNPVVVSPDAGGVYRAKKFKEGLVH  
KYDMQDIGLAMIVKQARAGLVDTMDLVGDVKNDCILVDDMIDTAGTLC AADVLIENG  
ARRVFAFASHGLLSGPGNDRLANSKMEEIVILNTIPTSPQREANEKLTMLSVAPLLAQAI  
FNIAHAKKSISALFK

>comp10593\_c0\_seq1; 267 1 744 LEN=2202; translated  
PYRCLAVSGSLLLSQSPQHCHFVTTPGTIMIALSTGTITRALAMLHAFLLLATLHGVA  
DFACTGLQGSCHQPPQSAASASVTPGQNQLSSPPCAFQSSRVVSTSVNHGNHCRRHSTTRS  
RIFLVSEEDVLEAVERAEGLEWEKALAARTEANALIDRAEVEANASAETVKKSENTFMDKT  
KPVSMQLEVEVDKAAKASLEATTLVNEAMKASEEADRLEAEAEAEALKKSEEVLDQHLIDY

PDSALAD

>comp10594\_c0\_seq1; 364 117 1205 LEN=1424; translated  
MTKASTNERTPPFFSILPPAFGSI AKKRDNPKSARNVKS PNSSNQTTQSLARKSSMERMTQA  
FRDSMRCSPDEAESKTSEEDRTNCIDVGKLLSAMDEMCKCMEVFGMQRGPNDLKAHIDRV  
ELLYKATPLEKRDCLSGFMSKPYPTESLVDLSLTKRSISISRTEPSPIPPSPPLAAAA  
ENDAGVPGNSETNREEAPDGVESGGTQTDGGAENAASPSSETTSSEDNDPLESPSPQLLQI  
DRHDRKNAKQSMFWLCYYVRYLYEFHRLVLQRKHDPVDASTMSFMQFLYPYFKEYYDSKD  
AKKFLKVVADYRTEHFLGQGPSVVKQPSRELSFLAILEVVMYLWTPALKEMALKGRLI  
NQ

>comp10595\_c0\_seq1; 364 63 1445 LEN=1589; translated  
MPLPKIGRNNNTTATTKDDVELQHLVSDCSNDAVQKEYCEEKFETVDTTKSTANRYSMGS  
KGLISSLLERLPQQPCLQPVATWLDERCSVKMLLKVWGPFAFVARLLLVATFLDDSVRT  
VSNFSDLANQVGENCFLFQLMMDDNHTSNAPAVLARVALAIGLLSQFLGSLCLLALILAD  
ASTKVLIAWVVLQPVLFQVSNLEFIFESVSVLGGLLLLLRAHTVYLCGHDEQSHATNNNY  
PCVSQCPNQRNGSALFPSSTQTASTHTRNCHRYTQLAGRMLPAMHLYYAGLVLSAITL  
DETSNIGTYLSSLSVVFVVELLALLGIVIGILLISVGLRSRFVALMLALANTLFCYRHPF  
FRFIWIDEATGDWRIASLDDDEADLSHKMWMTSVVDVNLNGSLPESNFEIDPWRIYDLHR  
YYFFLGLSTSGALLLLAQIGPGTIAIDRNEVLLPVTRAQD

>comp10596\_c0\_seq1; 412 190 1374 LEN=1425; translated  
MAMSRIFPLVLTHRRPLPTLMGTGAVLASSGFMMVHSTTTKTQCTETNELLLKPTESPSLL  
IPTAEASLRAMRLISTAFRIILDYQVAKVETHMPFSSLNKEECEIKELEAEIERRELKLE  
ELQIEYSRGTGSNEATRKLVSVEERIELQNKQKTQIQEAAAELA AVEEKWMTREDLSSKSR  
LNRKSAERLLNLCRENGGVYIKVGQHLANLDYLI PREYIEVLSSLFNDAPQSDINDVYSV  
IEEDLGHKAEDLFDFFDPIPIASASLAQVHVAYCKKTKKKLAVKVQHRGLRETSAGDLFA  
VTRVVRIDSFLTDFTFGWIADEMAPLLPKELDFQREGRNSEQAAADVRKSGLACCIPKV  
VWERTSPRVLTMFEFEEGFKSTDIEALKD SGLNKR

>comp10596\_c0\_seq2; 158 1 766 LEN=817; translated  
XHALSSLSLSLSVIFTTLPSPDVAKLVSSVFN SQVFHSGFVHCDPHPGNCLIRRSKNGRP  
EMVLVDHGLYKRLDDFRIKYAE LWRSLMMADLEGIKSACSGMGVNKMYPLFAAMLTARPY  
DEI IERSKTGSL SARTHGGSSHEVGSQADRAVIRGYAKQFLGEIFSL LGVLPPQMLLLLK  
MNDCLR HIDMTLESPTNTLVIAGKYAASAVYREQMRR TSSSNNEFSLAKRSILRFRYWLE  
YTKVMFRIQIH DVGAW

>comp10596\_c0\_seq3; 467 190 2076 LEN=2127; translated  
MAMSRIFPLVLTHRRPLPTLMGTGAVLASSGFMMVHSTTTKTQCTETNELLLKPTESPSLL  
IPTAEASLRAMRLISTAFRIILDYQVAKVETHMPFSSLNKEECEIKELEAEIERRELKLE  
ELQIEYSRGTGSNEATRKLVSVEERIELQNKQKTQIQEAAAELA AVEEKWMTREDLSSKSR  
LNRKSAERLLNLCRENGGVYIKVGQHLANLDYLI PREYIEVLSSLFNDAPQSDINDVYSV  
IEEDLGHKAEDLFDFFDPIPIASASLAQVHVAYCKKTKKKLAVKVQHRGLRETSAGDLFA  
VTRVVRIDSFLTDFTFGWIADEMAPLLPKELDFQREGRNSEQAAADVRKSGLACCIPKV  
VWERTSPRVLTMFEFEEGFKSTDIEALKD SGLNKS DVAKLVSSVFN SQVFHSGFVHCDPH  
GNCLIRRSKNGRP EMVLVDHGLYKRLDDFRIKYAE LWRSLMMADLEGIKSACSGMGVNK  
YPLFAAMLTARPYDEI IERSKTGSL SARTHGGSSHEVGSQADRAVIRGYAKQFLGEIFSL  
LGVLPPQMLLLLKMNDCLR HIDMTLESPTNTLVIAGKYAASAVYREQMRR TSSSNNEFSL  
AKRSILRFRYWLE YTKVMFRIQIH DVGAW

>comp10597\_c0\_seq1; 1002 281 2331 LEN=2331; translated  
MEEPSTIHSSDLRNDQIGDQPIESEISSGTE DKSNSDGSVGGGGGGNDEVTNDEPEQKE  
EPPEEQPPSPGKAGNEATANATNSMAQRTSPGKTRGGLTMYERSMLQKEERERKLKALQET  
LMVDFTFTPSRYGSHRHSGESVSSLGGSPTSTVGGGASTATVGSVFSRLYGTGTAASRA  
QRHRPREKPHNERFGAGAWMSSASQYSQHS AAGGGRSVSSVQTASPRVESLYKAGEEKL  
ARPLSDAEAEAEQLRKRKRVETKALEVPGAYTFRPQTKWNLVAERRRLARIEREREEEEARN  
TARILQAEREKERRKVEESDSKELTFKPNLKWDLIRERRENAPDSPTPEPKHTLTRDQR  
EKLERDRRYEKELEXLHVQPKTKWDFRKKKVKSLFDDEPSESVD SVVESFVEPVVESVP  
PPPSPRPFVSNDFEAEKGDTRVRNIVRRNITSDIEYQSPQWKKKFRQIGQKTDLEKE  
VVAQGGGAQDAVLRGNMLMPKLDLGRIDSEDKDDCPDQGT ELHSTKASKWAKRKKKNS  
KKNLVEDKKANTTTDAAEENDD EDTAGAIEAKADEASKEAEHDAAKAEIEAMRIMEEPP  
AAKEDAEAKRKAEEETKQKEAETEIARKAE EKKQKEAEAKAKRKA EKEAKKKAKEEKKL  
RKEAKAKRKA EKKAEKEAEAKRIA

>comp10598\_c0\_seq1; 151 1 500 LEN=913; minus strand; translated  
XPAVNQIECHPLFPQKELVEYCRKEGIVVQAYSS LGGQDVGKKFWRTLYPPPPKRGESK  
PESVTKLSNTPPVLNLSKEKNRTSAQILLRWALDKNFVIPKTS SKERMLENAGIFDFSL

STYELDKLESELEHALFEVAKAEKKDVDSMARLCWRNDPLRDLLFD  
>comp10599\_c0\_seq1; 184 1 651 LEN=824; minus strand; translated  
LIQSSQYTYKIRCGKDAASTPDSSCASQNTTEGNNAASTVMKSMNASALLDPLKYCKGSGK  
LIANVNNGGRTINGADAARRLSRGGKDFLSAARELDGPPVLDGHGVPPALFQHCADMADA  
LLRYYGPDVVECSFHNYHSTENNTSSSGKTPLHVRVRRRDGTNSCLPPPSISERNRDGKN  
HGIEGREMNRIDWDYNLTLYLTVMVSSLDAANVCKV  
>comp10600\_c0\_seq1; 412 1 1161 LEN=1727; translated  
SSSSSSAYGDGGGASTDWRDYMPNYRKEDDSQYDTGGDSFGQIFSDMLTGAAGAAVSGGI  
GGLGGGIFSEFLDFLEGGAGMTGGPGGSENDPQLEALLRTGTLEDVAEEMDDTEMVVRQ  
LERKARDLDNEVFATDAEAKMAARFSEERLEKEERASELKHARQEVVGGYLARARKRLALQ  
TRYKDLIAYGGQNDGYAEAGRRRSGASSPRGRPSASGSYSAAGGGPSSGSGNGASSSS  
TSSSSSKSTNSKSDDENAWMNEFGSSSGRRGSGRRGSGRRSSSTRGRASTSTEAPAPS  
PSPPPSYSASPRPAPGPERVGRRTAAPSSSITSNGGGTRSNYSSDVPPhRRTRGSSFASR  
QEEDRQRMREVKVDEEFKELKKEGL  
>comp10601\_c0\_seq1; 630 12 1412 LEN=1579; translated  
MAAKTGIKSQKVGVVKKKTATKSPKPSKGAFFANTELDSTLVDKAVEAVLKYQEKVTESS  
SDKLSLLGNDRPVQVQFTLLRAPGESKPKPYQLLVPHPFYRLADTNDNNSDSVEEPEVCL  
IVKDEAKPWCQEMMEKFPDHMGCVKVLTLLESLRKKHKSFDQKRQLLSKYNMFMADDRIL  
PMMSKALGKNFIKAKRLPVPINLTREAAALPFAIQKALSATYMTVNKGTCISIRAGHTGME  
REKLVANIMAIKSAKRIIPRSWANIQMIGVKTADSVSLPVYNKTPEALREIAKLAGIKV  
DSSVQSGEKNETEKTDESNDKETKEKKKDLQSPLLQALKKQKADKDKPEVKKAKKATK  
ETKAEKTKTPEKKTKRSPSEPASSKQKKAEPAEENKEFIATKKFKGSKKGYVFTM  
GRQGLGYYIDKKPKIDKMKLEALLRSCSSGGGRGKNSKQGRRR  
>comp10602\_c0\_seq1; 155 269 622 LEN=1316; translated  
MASDATSAGGDGTPVDEYIKTMTHNYVSRKADIEGAKRVEIKGRSILHEGVKVRGDLQIV  
KIGRYCEIGALTSLEPPEIPFRKDKRVPMIIGSHTHIGKECTIQGAAIGSSKSENR  
>comp10602\_c0\_seq2; 220 269 835 LEN=1132; translated  
MASDATSAGGDGTPVDEYIKTMTHNYVSRKADIEGAKRVEIKGRSILHEGVKVRGDLQIV  
KIGRYCEIGALTSLEPPEIPFRKDKRVPMIIGSHTHIGKECTIQGAAIGSMVSIQDNVKI  
GKRCIIKDNCIIESNVTLGDDTVIPPFTLISQNNPTFYQQLPPSVAVQTQEVSLDRYSEF  
KQKQRAIQ  
>comp10603\_c0\_seq1; 1548 276 4662 LEN=4662; translated  
MASSVSTPAPKSKQGDFVTPYKTPAGPKNAKRAKAVDLVTGKTIVEYFFDPLLIISENN  
NPGNATTSFKTPGKNGKSGSDVDKLLFNCQHLYAPCTIVKSLVDENVNTRSNGNGKGGK  
NKKANIVVGPALVKTRDGTLYKIEDAAKLVPLISPDDYEGLDVHLHTNVTESSLHAI  
RLRYKRDDIYTSAGPILISVNPYKSVTTSQSESLYSEKMMKYRMTENSDDPHLFKVA  
DRAYSAMMDSVHIIPKLEDSNADHCIESPQKRRSGPGQVMNQSIISGEGAGKTEATKY  
IMKYLARITKKGKWTSEESPPFLSPDGKVMMALEDVLSNPLETFGNAQTLRNDNSS  
RFGKFIHINFSTEKGIITGAQISNYLLEKTRITTOIEGERNYHIFYQLFAGAKSDLLTKL  
GLDTGAAAFKYLGNRSSPKTEKDKSDYAETMQCLSNIGLATEEQETVMALAAVHLHGN  
VFEEGENEDHSAIISEGSRPSLQACELLGLEEDAVADAILTKRLNIGGKSIKTPSTVVM  
AEDKRDSLAKMTYSSSLFIWLKVSINQTLGEHEADSEVQNDETPIGFIGVLDIYGFECFEV  
NGYEQLLINFCNEKLRHFNRHVFEVEQKLYSSQGVWDWTYITFNDNQPCLDLIEGGGT  
GILNTLDDSFSGMGSSEKDIKFVSQLHKLFGSVAGAKSTNGGHPYFGTPKFGNDRQFDI  
THYAGEVRYTVDFVEKNMESTSNELKDLGSTSTIPLARDVFSASSNSDERRSSIRGFSV  
ASQFKQSLQSLVDDLEMTQPHYVRCIKPNLKKSSNNFNAGEVLKQLRYSGMMEAIRIRRE  
GYALREDHKSFYNRFSVLLSADDLKEIDIGIDQLVNVLSKRLNVTADWDQIGHTKIFLRRE  
LSDKLERLAKLRVHRAARTLSRFGRFIATKRASSLLVAVAKFRLFMRQKYRENKASTKIA  
ATYKMHKLMELFKKCI GAVVKIQSLQRMVVAKFVANKLRDPYFDMTYKEMKKFLRSEITR  
MEKAVDKDFKTAALIEEKIESLKVAIERKPMTRKRLEEKIETVQKQLDNAIKSKDYKE  
AGPLQDELEKLTDLRTEFPTMDELKNDVKAEEAVASAAKRRDFENAASLQKDVDAKRR  
LEEATEEEDGSEDNSERSENEEVLNITFDGIESRADLENELKDLHKQVDEAISNKDFKLA  
SELQSKINEKEKLSFFPSIEELEEELRNATESLELAIASKNFEEADKLNKELFVLKRI  
EEKEKAETISANAHPITKIIIGIDGKIEIFDSRQALEAEIKSNASLQENEISSKNFKKA  
QEIQAYIDNLETLRNFTADELRTKIATKKNLMDIAISEKRFGDAEELDKEISAFEQNL  
KKELEANTSQTNFKAEMNLVSKSKTSPFIPAKTNKNTIISGNAKTKKRVDSGASLKSRE  
SRKKRDASVTNDSRSVAKLRPKX  
>comp10604\_c0\_seq1; 941 356 3643 LEN=3800; translated  
MLYVRKIALLSALYGGARADDNFYRSTQGDNYGPNVDWNVKRCGNLETCDGWPDKHESIG  
WELEDNQRCWCPETGNQCPQNHMSPVNLVRDRAIEDNPNWKDCPDWHWMNFEDGSCQWE

DMEDSFEISKHALQIHTPMRSNGDINCANSEGERLYPRLDYSKGFDPWWHLDRDIDKTPS  
EHTQH GKRYAAEVTLAHFYELDHWNQIGYVTFMEDIYPNQEPWHYLDKLI CKFRREEEK  
QRKACGLPPAPVYKMCELYRGQERTAEDFEFFFEETVETP TSN DGQMNRPNAI PLENFGEN  
PDAKRFPLQLCQGD CDF SEDCAPGLICHRRDANEPVPGCIGGEDDNTGSDFCVFD PFGAG  
YNVRTEKPTNAPT KTVSPTITPLPPIQAVDFGGDPPADAFPLQRCQGD CSDDDCAQGLI  
CFQRTSNQAI PGCIGGEADSLMTDYCIVDPRGDGYKDQGT PPLKNTVTPVAVPTAS PVA  
SKPPTNIPTTAPT SRAPVPLVPRPTGTPK NLVNRGWEPN FLLDECEGD CDNDS DCLPGLI  
CFSRETAGVAVPGCTGGEDDTLTDYCSYPLDPNDI IEQDIEIVITRSDTESPTNPPTK  
EPTNSPVAATDTEATESDDK PVIQVNGISWSPPKERLPLQLCEGD CDVDDDCG SGLVCFQ  
RFTPRTPVPGCAGGELDTSLMDYCVTDTRNTTTPALVIEAKNPVPAVPSRPAPAPVSI V P  
ISETQLVSSRSDVPPVDCGKYGGVNMNRFCDNDHKDMCKVPRSNSNYCHQNYGIFGDD  
IYSVCHHCLEVRQESYAVGEPNPKPDGLEPYTNEMCSELDNSARICKDESCDPAFANT  
KYCKEQIDENAGNWERI CHYCCHP SKEFSTSRLLLLESAADPELKAITKEEMRLWHKENPK  
DLGPNDVKFNPMDRKLI VREENFVKKGLKDEDAYFRELHSAFQRRQLQTSFKENYEDVHW  
WPYEWLLKVGTEYYRYEGSMTVPPCYTVNHWRVMKDP IRVAKHQITELERLLSWRINGK  
CEASTAGKKNRNDNPDAVNVRPLQELQKGRMVFC ECQDWPSKFPQERAWCEK WQQRDPE  
LRLFENPYNWKQQGF

>comp10605\_c0\_seq1; 112 1 457 LEN=1092; translated  
EERAVANKLILDRIDEFVWTKQDSPNAPIRKQYLFKDG VQSELAQVHREPTIWI VYSMLG  
ADYFKTTGMVYGSYATMGFP TERERKLEAGKIDPAPSTSRRNMRSTLRVLQQQQQQNN  
AQVANTNPPSVP SDEFVTLDIVAADSDVPA

>comp10606\_c0\_seq1; 506 317 1384 LEN=1533; translated  
DDNNYQHNVPKSENQPKALAA SAIAYATNITDLSPLLVPGGPVQAI AHRHVALGVHPMQY  
VVVHEKLM AAIGEILGDI VTP EIASAWSEAVLFLAKAFIDTEEGLYKALEQREGGWSGFA  
EFEVSEINALTDSVKQVSFKPPSGSPLEGKKFDFTGGQYLSLQIDIDGDNLTAPRH YCT  
SPVGADYLQCTIKKIGGGKVSTYVHDNLKVGDKITLSP PVGVFTIPEEAETS AVLLSAGI  
GVTMPVNFQ RVLGDRVKLVVHVDRAEETHPYKAFF EESGAETL FKYTSATGRPKASDLAQ  
ETIDKVGKDHEFFICGPESW MEDVQAELL SRGAKKVVCEVFGS QLATGCPFFASA

>comp10606\_c0\_seq2; 806 348 1700 LEN=1849; translated  
MTESKCPVSGASTTASKCPFSGAAATSY PNAAKAVDGIITNL TNKRSSEGMLPEAMSQE  
TIDMIVATAPAVAPKMLDITKCFYEKILGSHPELLQFFNPAHNVPKSENQPKALAA SAI A  
YATNITDLSPLLVPGGPVQAI AHRHVALGVHPMQYVVVHEKLM AAIGEILGDI VTP EIAS  
AWSEAVLFLAKAFIDTEEGLYKALEQREGGWSGFAEFEVSEINALTDSVKQVSFKPPSGS  
PLEGKKFDFTGGQYLSLQIDIDGDNLTAPRH YCTSPVGADYLQCTIKKIGGGKVSTYVH  
DNLKVGDKITLSP PVGVFTIPEEAETS AVLLSAGI GVTMPVNFQ RVLGDRVKLVVHVDRA  
EETHPYKAFF EESGAETL FKYTSATGRPKASDLAQ ETIDKVGKDHEFFICGPESW MEDVQ  
AELL SRGAKKVVCEVFGS QLATGCPFFASA

>comp10607\_c0\_seq1; 568 450 2048 LEN=2194; translated  
MDCNVGF DIVKEPLNTLYRR TKI ICTIGPASWSEEGIGK LIDSGMNVARFNFSHGSHEEH  
KRSLDR LRKVAASKSSNIAVLLDTKGPEIR TGLFDKSVLTQLELKRGD DFTLIGDYSYKA  
NC SKKLGCSYEQIAESVKPGQQILVADGALVLT VVSSDVPNKEVTCRVENNASIGERKNI  
CLPGIRVDLP TPFSEKDVDDVVNF GIKNGVDCIAASFIR TGQDVLNLRKLLADNGGEAIKI  
ISKIGNQEGMEHFDKILEETDGIMI ARGVLGMDIAPAKVFLAQKYMIRKSNLAGKPVVTA  
TQMLE SMLCNPRPTRAECSDVANAVFDGTD CVMLSGETASSPYFEQAVQIMSRTL TNAEQ  
TRDYNALYQNMRY SIVA EKGPLSKGESVASSAVSAALDVGAKLIVILSDTGKMAGYVSKF  
RPAVSSLVLT PNAAVASTSHGLTSGTHSILVDSLEKAEELMEETMYFLSQTGMMEKGDKI  
IFMAGRAASFKERLMIDVLNEGKSHGRFVNNGGFFNSAHILKSGTYDGMKSF

>comp10607\_c0\_seq2; 568 408 2006 LEN=2152; translated  
MDCNVGF DIVKEPLNTLYRR TKI ICTIGPASWSEEGIGK LIDSGMNVARFNFSHGSHEEH  
KRSLDR LRKVAASKSSNIAVLLDTKGPEIR TGLFDKSVLTQLELKRGD DFTLIGDYSYKA  
NC SKKLGCSYEQIAESVKPGQQILVADGALVLT VVSSDVPNKEVTCRVENNASIGERKNI  
CLPGIRVDLP TPFSEKDVDDVVNF GIKNGVDCIAASFIR TGQDVLNLRKLLADNGGEAIKI  
ISKIGNQEGMEHFDKILEETDGIMI ARGVLGMDIAPAKVFLAQKYMIRKSNLAGKPVVTA  
TQMLE SMLCNPRPTRAECSDVANAVFDGTD CVMLSGETASSPYFEQAVQIMSRTL TNAEQ  
TRDYNALYQNMRY SIVA EKGPLSKGESVASSAVSAALDVGAKLIVILSDTGKMAGYVSKF  
RPAVSSLVLT PNAAVASTSHGLTSGTHSILVDSLEKAEELMEETMYFLSQTGMMEKGDKI  
IFMAGRAASFKERLMIDVLNEGKSHGRFVNNGGFFNSAHILKSGTYDGMKSF

>comp10607\_c0\_seq3; 264 83 631 LEN=777; translated  
MSRTL TNAEQTRDYNALYQNMRY SIVA EKGPLSKGESVASSAVSAALDVGAKLIVILSDT  
GKMAGYVSKFRPAVSSLVLT PNAAVASTSHGLTSGTHSILVDSLEKAEELMEETMYFLSQ

TGMMEKGDKIIFMAGRAASFKERLMIDVLNEGKSHGRFVNNGGFNSAHILKSGTYDGMK  
SF

>comp10609\_c0\_seq1; 945 1 2635 LEN=2690; translated  
XVFDYSSIIDTHEPKVFQRTVVNINSILGFEAPDCWIDPRNEIGDKEKETNASNRTEQIR  
TQRNERKRNAVEDLXDEKLGNDHDFDQQHGSVAVPNRFSPPDRKRWWGHWIFRRKGGWSPFDAA  
IHSNRNGGVSQQTAPTTTPRPDILSCDPCDDRLVQGNASNIRTTMFFTPTAKATNTGTPPP  
SKTAVAESTSSANRRFSRARDRLRGILARGKKKTQGVRSVMASRKPRIDSGLHPGTPRSS  
RRRWLALASMAASLAARPTVALAMGAMGGSSGVPRAPLAKNEQLSLFGLFFGLFAGLAL  
LHAAEIAITTLYPWKVKEFAEEEEKLGKRGTFKILNEDITRVLTTILVASTTCSIFATTV  
FTHLVAGVFGNSGEKYGALALTALTLFFVELLPK SIGVTNAESVARIMVPPINIMTMFVA  
PIGVLSWLSKKTLSILGFKGKESGITDSQLRLIVTGARDSGTIDHGEQEMIQVGLGLQ  
NQRVKEIMKPRVEIIAVPKDMSVASVLGVVRESGYSRIPVYDGEIDNIVGIVLAKNVLDF  
FVNGVLVDEDVVKKIRGEEASNNSNSNSIQSQKENLLVTKDGEPVSSSSSSSPLPSTVEK  
LSSPQLYASQDMPTVQTPKGKENYVKPLTGFELARRMEKSISEAELIENCYFVPETANGW  
SVLQEMRRRRVHMAIVVDEYGGTEGLVSLLEDIVVEVGEIYDEDEDEEFFDFSEDSITLQD  
DGSFVIRGDADLGDCTILNLNLDEDEALKVFATLSGFLCMCAGEIPQVGFVMSRGCWF  
EIMNADDKKILSVKVDRLVGAYEEGFEETEEDDNP IRGLFKRNVANDGDEIDEDTENDMV  
EHPSIALNREMAREVERMVDSGNEKRLQLESELDEKQS

>comp10610\_c0\_seq1; 606 144 1316 LEN=1495; translated  
MPSK ITRSLSKKLNKLLLASSTATDSPAFDHQSGEACTKELPVCSEEPKEAPMVSDTSS  
DESSSSEDEGDGVAKYGYGTAVHTEQVAAALLNASGHSRAKRFAGSSSPVSRQKRSFRIR  
KRPSIHNKEDVHNTLPPFHPQRMQRSSSLKGSRSSQSGANMAAAAAAAAAAAVASDSDSEL  
DEEDLAAVLRAGQMQEAAKADNGADEINVIEVQLPGRRSIKRQRSLRFNEEVNVRNVV  
PAKLLSKDPEKLFQDEEYQSIKRKTRALLSRVDSNGIVDGKRYCTRGLERYMVNQAERD  
GMKYGAWDSVLEQLQRKEGIFCDESI AKLYSYIASKSVQDATQQAFIDANEVASFYEQ  
DETMEEAENTKDKTKPRLPTRLRSFRATVA

>comp10612\_c0\_seq1; 648 324 2528 LEN=2804; translated  
MAAILSILRSTADAFQSPSVGMQTRTCEFVASSKRRKSKGWVASIGTSSLHVLSSPRRRT  
SSTSSSNIPYPIINFQGNPLLDIVQKTAIGWDEPSTLSVSTQAVQIPVVSIIAAALQPL  
IDTEKKKASHYERISGTASTSTLFRANKMHAMVYSPSPSAISKETMDEARTRKRQSVTEVK  
TVEELDRFWPESSDYEKGRGEECSLDDVDDCIDYPNLLRSISVEGDTQRIGSRDHLDFV  
HPVVKLMHERKREGKQGAQVQNRNMNSSSSSSNGKKEKIALVVEGGMRCVCSAGMACAIH  
CLGLSDTIDVYVYSSAGAVISAYFVSKQLPYFGLVYDALTTMDNNHSCKTSLKNAVAQ  
RKESIGENDQVDNSNDRDANDLHTIDRYRNNYFLDPKRMTRSLGLGLCDPRLKDVWTRP  
LHGKPMNLHYMFESVMQKRKPLDYETFERQKIQPLKVVATGLVSEKPFILSQEKGHFD  
TFDDLCHSLHASCLLPGIAGPVMNVLKKKSDCDDDRQKPNFFLRNMQRRSIRNDDYEP  
DAMLSAPIPYDIAHEEGATHVLVIRSSPDGNTLLEIPSI VAWMGSRIYKRFFLKKNHLP  
MYKRSQTEQRHQRTYAKTILELNERANNPQKQDKTMTIALEPGSDEVSHLETTREGIFR  
GVRLGFARAYDTLVEDPELRGKGKEMAMRIFPDEILDYDPNQYASPTQSSFEQYLESSGI  
MPKLWTKEKGPPLM

>comp10613\_c0\_seq1; 198 1198 2124 LEN=2155; minus strand; translated  
MFTDRFLAALAVLATASQAAEF S QIAGDLGEVTEIDISPVCCKGFSQIPNTYWTITPATDV  
AVFTYPANLVEVSSSGGKLSFSFNMSVAETAIDGAGVRIAVPAGQLNNVHVGGGTS AQVL  
DGFEAVSGLHASGASTLTATIT TNGVPTSVQADGASTVTLVSNANVSGGTINGASTV VAK  
TPSYESFTVNGASSLSIDGGIGSGTLNGASTVTATGDVAAGSLTLNGASTANLATCNSV  
TSNGGSSCNSGQSVSVEISELPETATGTGT CVRDILGSIFGGSAGTTIGVNVQMFAPM  
FCALLLSLW

>comp10613\_c0\_seq2; 198 1159 2085 LEN=2116; minus strand; translated  
MFTDRFLAALAVLATASQAAEF S QIAGDLGEVTEIDISPVCCKGFSQIPNTYWTITPATDV  
AVFTYPANLVEVSSSGGKLSFSFNMSVAETAIDGAGVRIAVPAGQLNNVHVGGGTS AQVL  
DGFEAVSGLHASGASTLTATIT TNGVPTSVQADGASTVTLVSNANVSGGTINGASTV VAK  
TPSYESFTVNGASSLSIDGGIGSGTLNGASTVTATGDVAAGSLTLNGASTANLATCNSV  
TSNGGSSCNSGQSVSVEISELPETATGTGT CVRDILGSIFGGSAGTTIGVNVQMFAPM  
FCALLLSLW

>comp10614\_c0\_seq1; 1053 229 3975 LEN=4238; translated  
MTIGPTERSGGLPHSASNHTKETPESTPEMPNVVIPDLEQRLSITTPDQSTVDDELSR  
QRDQNDSPNSVSSSSSRPLHRNNGRLTSIARTAAARATKEQFWDNSNEGIVAAQTAVDRWE  
DAYVWIRNAVVASNRVSVAGIYEASKAGVRGLDQGLLVVPRDYVLLPTFGVAEHAVSETAS  
FLRSAAEERIRTAATKSSDFISWAVPFGMGDSVVLPAVGLGAEAVKTAWDVARYPVPSQ  
KRVRD TVDFWLNGSKHNLAVCGHEI IWYVRRADANIARTLRRTQWTVLGRGPYETLDEAA



RGDVMHVCERYLSIGNGGSDTEEDPTALMVSRYEYMANVRACNPSLFRDLVETGLLRE  
RGGGSTSGDEWLSARPLYRDRSKDLFLLGETGDKGCGDPDHSGGAFALWFRLPYENGQRP  
KRDVPWVSFDHKEGSMLEQRHILKQTSVPAGDETSGGSDSVEITNGSAEQHLPKDEQK  
VDSPWESAKYETQSKWLDPDFDRDILVDQKRHAVRFIRCCPKYRKRHTRDEEEAISRPLS  
ELCSVCHPTEGERQAQSGEGFASGPQGPWGAGRLLAFPPPLLGLYRPTMWRSYGPDERR  
AVWFLDTPQNGPQPYGEDAQAMLEDAYHFLKWIIDSKRTKALS DARDSDDDDESSDDKSD  
ENVLLTVQVLS PDSGEQQLVQFSSLTLATAIGRGLGGAIALFKRRVYRGAYNCSQSDDNE  
PRNDDLNRNVEDDSNVPVDDSRWTTTTEDALERLDLTIDTPESLSRKKIERMEIDL DYK  
ECFKDLEEEQEIKPAINDSVDENEHQFSTLSESYPRLD RPSLAF PVKRIEDNLVNDDAEC  
FKADHLILVIHGIGEMMKAFDLFGLKVP TIVDCCGYLRDNHNEISDVRLAELARTNDSV  
AGSKKPGRVEYLPVEWHEAFSIQSTRRPSVDPVSPNANRRKRKVGINDISLRTIPNLSF  
ANDTLM DILYF MSPVHHDIIIDIVTSELNFIVKRFR TLTGFDGEISIIIGHSLGSIVAWDI  
LDHQKKNDPVQGIEPNLARDDDSYRYPQLDFQ TDSVFLGSPIPVFLMIRNKENPLTTAF  
VLSGCPKVFNIFHPYDPVSYRIEPLLNPMNAEIEPDI IHWNGGFRFQYQTKRLWKKLVD  
QTLRAEENVIHLSLESGIEALGLIDSTFTKDNPREDEKES SHVLQTGSLNGGRRIDYMLQE  
KEIETANEYVAALAAHSCYWLEKDL S LFIANEICLEKERRNRTPPKNF

>comp10615\_c0\_seq1; 999 1 2328 LEN=2328; translated  
PANKGPPRLTDL SRFKL KPLQVVLNPNASSMRER PVMALAVACLTDVDV DLSVTADHRVP  
APMMSADGSGVIVGD LAAARYILDEVSGQGNLLEPSSALQKAEQNAWIEYAQSLTQLDA  
EQAVRGIAMTLEHALSKRTYLCGHSVSLADVALFAALGFPCALED RVRVAASLKDFPVAT  
RWTATMAAHPALKKATQLVVGASGATDAEVRFT EEALEPLVTGMN LLEGAVPGRVVTRFP  
PEPSGYLHVGHAKACLLNDY YARRYKGRMIVRFDDTNPSKEKEEYQQSIVEDLKT LGVKN  
DVLTYTSDYIGAIHKYALRMIENGQAYMDDTPQE QMKEERANRLESKHRNQSPSEARALF  
EDMCSGSEEGRWCLRAKIDMSSDNGTMRDPVLYRQNLIPHHRTGTTFKAYPTYDLACPI  
VDSLEGVTHALRTTEYNDRDEQYQYLLKTLGLR KVR IHAFCRMNFQYTVLSKRKLTWFVE  
EKLVTGWNDARFPTVRGVLRRGVSIPALKKYIYSQGASRRVVMVWNSFWAENK KDL DVK  
ARRFMAVDASANSTLTITNFSDEGETYISTSLHPKDP SMGKRPMKLS SKVLL EEVDAKDC  
VEGENIVLLRWGVVKITTKSEDSKTLEGE LVPDGFK SCKRKF SWMAASGGCASI LTFEFD  
HLVTKEKLEEGDNFADFVNPNNTIAT TSAIGDA CLKTLQEGDVIQLERRGFYRVDRP YLGE  
DKPCVLYMIPDGKTKSMSGMTGKLATIDCDRSAMRGTRVATSLSATYENNKYVPHX

>comp10615\_c0\_seq2; 997 1 2502 LEN=2502; translated  
PANKGPPRLTDL SRFKL KPLQVVLNPNASSMRER PVMALAVACLTDVDV DLSVTADHRVP  
APMMSADGSGVIVGD LAAARYILDEVSGQGNLLEPSSALQKAEQNAWIEYAQSLTQLDA  
EQAVRGIAMTLEHALSKRTYLCGHSVSLADVALFAALGFPCALED RVRVAASLKDFPVAT  
RWTATMAAHPALKKATQLVVGASGATDAEVRFT EEALEPLVTGMN LLEGAVPGRVVTRFP  
PEPSGYLHVGHAKACLLNDY YARRYKGRMIVRFDDTNPSKEKEEYQQSIVEDLKT LGVKN  
DVLTYTSDYIGAIHKYALRMIENGQAYMDDTPQE QMKEERANRLESKHRNQSPSEARALF  
EDMCSGSEEGRWCLRAKIDMSSDNGTMRDPVLYRQNLIPHHRTGTTFKAYPTYDLACPI  
VDSLEGVTHALRTTEYNDRDEQYQYLLKTLGLR KVR IHAFCRMNFQYTVLSKRKLTWFVE  
EKLVTGWNDARYVGFFLDRACVLSFLFLGAAARSL SHQWL VFDNRNLSLRLFLFPSPSFL  
FLLLLLLHQLPNGSGVLRGVSIPALKKYIYSQGASRRVVMVWNSFWAENK KDL DVKAR  
RFMAVDASANSTLTITNFSDEGETYISTSLHPKDP SMGKRPMKLS SKVLL EEVDAKDCVE  
GENIVLLRWGVVKITTKSEDSKTLEGE LVPDGFK SCKRKF SWMAASGGCASI LTFEFDHL  
VTKEKLEEGDNFADFVNPNNTIAT TSAIGDA CLKTLQEGDVIQLERRGFYRVDRP YLGEDK  
PCVLYMIPDGKTKSMSGMTGKLATIDCDRSAMRGTRVATSLSATYENNKYVPHX

>comp10616\_c0\_seq1; 462 352 1578 LEN=1681; translated  
MLLAAKSSTALLSKHAPIGSGRSATNIRRAVIDSLGRRQNSVRALGSGNAIATATKGGIG  
HHFFSAIDGNHRGFRSSATA CRMSIADTPLGKAKEGEQLLDGLDVYTVPSREDGHPLTVY  
GIGGDESEPTCEDHVLLMLHGR TWSSVPVYHLLGGPLNAEKGLESRSLMEALHDKNIRVY  
SMDFRGFGGTPADASGGVEPNRCMEDVESVLDWLAKRHGCKTPEKVS LMGWSQ GALVAQL  
AAQRDKPLFSRLILYGSIFDPMVRFPRDPLYLRNPPEVEPLRNTFDAAIEDFTIEGTIPP  
KAATYFADAALLADPIKAQWKHMYQFN NCDPARVHVPTLVVVG DQDPYAPLHVQSTLFTN  
LGRGTDRTWSILSDADHAVHLL EGRSRFQSIVTSFIMNSK KIGKETVF

>comp10618\_c0\_seq1; 245 252 1194 LEN=1408; translated  
MKRYTTVSDSSDTSSRMKDSDSVSLASSHRRFTAKKRINSELSEPLTGASDV SFGGASSD  
PYFVFRSDLQNKLEAVDEFLADFLRIVHETVCYTAVHXDTFSFENKSR TYSL LTHSVLLQ  
LSFDRILLLAPXEYKDSKKQLKRHLKSAESTLRDVQATVQAVENDRGKFP HIDD SHL FDR  
RSLVETSRSRIQHAKDEMSSDVV KRKVLGDERQKAIKASGDGLLGARTDIERQNTNFVMD  
NQAQSSMLIQEQDETLDELGEAVTRVGELAEHIGEEIGHQNRMLDDLDQDMTNAEEELGL  
VMGKMAKFMGTKDRW

>comp10618\_c0\_seq2; 321 252 1091 LEN=1305; translated  
MKRYTTVSDSDTSSRMKDSDSVSLASSHRRFTAKKRINSELPSTGASDVSFSGASSD  
PYFVFRSDLQNKLEAVDEFLADFLRIVHETNTAISSQYKDSKKQLKRHLKSAESTLRDV  
QATVQAVENDRGKFPHIDDSHLFDRRSLVETSRRIQHAKDEMSSDVVKKRVLGDERQKA  
IKASGDGLLGARTDIERQNTNFVMDNQAQSSMLIQEQDETLDELGEAVTRVGEAEHIGE  
EIGHQNRMLDDLDQDMTNAEEELGLVMGKMAKFMGTKDRW  
>comp10619\_c0\_seq1; 831 83 2908 LEN=3619; translated  
MASKSVVATATRAEEAPKQSSLLSSIPSETTQETMDEKKSRRKPLSTHERSPNSNGKIGR  
NGSQDGEIGSHSRSSFTDKRVLPNRPAHEIARDTKRILEICYGPKQDEGATSIKAVDNELV  
SKVSLKNEGTDDSAKKTTHKGKKRRRRKSENGSTDDTVSESIKRNDAEVRKVENIQG  
AARRSGTTKKRRKKKTTTKTDEIASIVTVDATGKVVRKRRKIKGRHRVVKQEFIKKGD  
AKIELATISEGSDFEDEDIDDESEVENENQSYKPNMKCSDEEGESEKYEDSFDETIDTNS  
ETGNIQDTENEGNEEQDITRLNDINRADGVLPVADQSLASSQTMDHASGASNNERGIKVR  
NENVVEQATDNGVVDATPATIDFDVEAGLADTQQSVASVDSTACTSTAEENRRARKRVP  
FFGNFRNLGFAGLIFLLFVTALTVMVYFVSPKGTNSENPIKSPSSEPTSKSQPEDLTFS  
RPSQPPISAPTSAPTTIYGTSSVSCQQPERKSGVQIQEAEYAPEHFGNTTIGNENNGYCG  
EGYVTNLATSGSGFEFLPFSVSVTGYRVAIRYNNADKTGKYLDLQINDLKEGIFDLIPT  
GNESTWMVQGVNDILLSEGKHVIRVSTESNNSNGLNIDWLSLSFQKSMRFDYLDVLDN  
DSNVTELSQSQSLALQWMSGEDTIDLSTLTNQEIERLALVDVYYSTTGDTWSNNNQWLS  
EFHACSWYGVACSKDKLVTDLMLDNNGLVGRIPTSLSLLPNLILISLDTNSLEDEIPTQI  
GILDNLRLNLYLHANFLTGPPISEFGSLTNLEILDRLANYLNGQIPEELYSMVGLSFALS  
SNDLGGTLSTNIGKLISLLHLDLQNVQLTGPISELGNLILLSSLSLGYNEFSGSIKREL  
GLLSNLSILDLNSNRLTGIPPELNLEDTIIDYYGNDIVL  
>comp10619\_c0\_seq2; 757 83 2350 LEN=3738; translated  
MASKSVVATATRAEEAPKQSSLLSSIPSETTQETMDEKKSRRKPLSTHERSPNSNGKIGR  
NGSQDGEIGSHSRSSFTDKRVLPNRPAHEIARDTKRILEICYGPKQDEGATSIKAVDNELV  
SKVSLKNEGTDDSAKKTTHKGKKRRRRKSENGSTDDTVSESIKRNDAEVRKVENIQG  
AARRSGTTKKRRKKKTTTKTDEIASIVTVDATGKVVRKRRKIKGRHRVVKQEFIKKGD  
AKIELATISEGSDFEDEDIDDESEVENENQSYKPNMKCSDEEGESEKYEDSFDETIDTNS  
ETGNIQDTENEGNEEQDITRLNDINRADGVLPVADQSLASSQTMDHASGASNNERGIKVR  
NENVVEQATDNGVVDATPATIDFDVEAGLADTQQSVASVDSTACTSTAEENRRARKRVP  
FFGNFRNLGFAGLIFLLFVTALTVMVYFVSPKGTNSENPIKSPSSEPTSKSQPEDLTFS  
RPSQPPISAPTSAPTTIYGTSSVSCQQPERKSGVQIQEAEYAPEHFGNTTIGNENNGYCG  
EGYVTNLATSGSGFEFLPFSVSVTGYRVAIRYNNADKTGKYLDLQINDLKEGIFDLIPT  
GNESTWMVQGVNDILLSEGKHVIRVSTESNNSNGLNIDWLSLSFQKSMRFDYLDVLDN  
DSNVTELSQSQSLALQWMSGEDTIDLSTLTNQEIERLALVDVYYSTTGDTWSNNNQWLS  
EFHACSWYGVACSKDKLVTDLMLGKYLHILFGNQNW  
>comp10619\_c0\_seq3; 757 83 2350 LEN=3836; translated  
MASKSVVATATRAEEAPKQSSLLSSIPSETTQETMDEKKSRRKPLSTHERSPNSNGKIGR  
NGSQDGEIGSHSRSSFTDKRVLPNRPAHEIARDTKRILEICYGPKQDEGATSIKAVDNELV  
SKVSLKNEGTDDSAKKTTHKGKKRRRRKSENGSTDDTVSESIKRNDAEVRKVENIQG  
AARRSGTTKKRRKKKTTTKTDEIASIVTVDATGKVVRKRRKIKGRHRVVKQEFIKKGD  
AKIELATISEGSDFEDEDIDDESEVENENQSYKPNMKCSDEEGESEKYEDSFDETIDTNS  
ETGNIQDTENEGNEEQDITRLNDINRADGVLPVADQSLASSQTMDHASGASNNERGIKVR  
NENVVEQATDNGVVDATPATIDFDVEAGLADTQQSVASVDSTACTSTAEENRRARKRVP  
FFGNFRNLGFAGLIFLLFVTALTVMVYFVSPKGTNSENPIKSPSSEPTSKSQPEDLTFS  
RPSQPPISAPTSAPTTIYGTSSVSCQQPERKSGVQIQEAEYAPEHFGNTTIGNENNGYCG  
EGYVTNLATSGSGFEFLPFSVSVTGYRVAIRYNNADKTGKYLDLQINDLKEGIFDLIPT  
GNESTWMVQGVNDILLSEGKHVIRVSTESNNSNGLNIDWLSLSFQKSMRFDYLDVLDN  
DSNVTELSQSQSLALQWMSGEDTIDLSTLTNQEIERLALVDVYYSTTGDTWSNNNQWLS  
EFHACSWYGVACSKDKLVTDLMLGKYLHILFGNQNW  
>comp10619\_c0\_seq4; 828 83 2893 LEN=3717; translated  
MASKSVVATATRAEEAPKQSSLLSSIPSETTQETMDEKKSRRKPLSTHERSPNSNGKIGR  
NGSQDGEIGSHSRSSFTDKRVLPNRPAHEIARDTKRILEICYGPKQDEGATSIKAVDNELV  
SKVSLKNEGTDDSAKKTTHKGKKRRRRKSENGSTDDTVSESIKRNDAEVRKVENIQG  
AARRSGTTKKRRKKKTTTKTDEIASIVTVDATGKVVRKRRKIKGRHRVVKQEFIKKGD  
AKIELATISEGSDFEDEDIDDESEVENENQSYKPNMKCSDEEGESEKYEDSFDETIDTNS  
ETGNIQDTENEGNEEQDITRLNDINRADGVLPVADQSLASSQTMDHASGASNNERGIKVR  
NENVVEQATDNGVVDATPATIDFDVEAGLADTQQSVASVDSTACTSTAEENRRARKRVP  
FFGNFRNLGFAGLIFLLFVTALTVMVYFVSPKGTNSENPIKSPSSEPTSKSQPEDLTFS

RPSQPPISAPTSAPTTIYGTSSVSCQQPERKSGVQIQEAEYAPEHFGNTTIGNENNGYCG  
EGYVTNLATSGSGFEFLPFSVSVTGYRVAIRYNNADKTGKYLDLQINDLKEGIFDLIPT  
GNESTWMVQGVNDILLSEGHVIRVSTESNNSNGLNIDWLSLSFQKSMSRFDYLIDVLDN  
DSNVTELSQSQSLALQWMSGEDTIDLSTLTNQEIIERLALVDVYYSTTGDTWSNMQWLS  
EFHACSWYGVACSKDKLVTDMLDNNGLVGRIP TSLSLLPNLILISLDTNSLEDEIPTQI  
GILDNLRLNLYLHANFLTGPPISEFGSLTNLEILDLRANYLNGQIPEELYSMVGLSFALS  
SNDLGGTSLTNIGKLISSLHLDLQNVQLTGPISELGNLILLSLGLGYNEFSGSI PREL  
GLLSNLSILDLSNRLTGIPPELNLEDTIIDYCK

>comp10619\_c0\_seq5; 807 83 2824 LEN=3825; translated  
MASKSVVATATRAEEAPKQSSLLSSIPSETTQETMDEKKSRRKPLSTHERSPNSNGKIGR  
NGSQDGEIGSHSRSSFTDKRVLPNRP AHEIARDTKRILEICYGPKQDEGATSI AVDNELV  
SKVSLKNEGTDD SARKKTTKHGKKRRRRKSENGSTDDTVSESI RNRDAE VVREKVENIQG  
AARRSGTTKKRRKKT TTKTDE TASI VTV DATGKVVRKRRKIKGRHRVVKQEFIKKGD  
AKIELATISEGSDFEDEDIDDESEVENENQSYKPNMKSDEEGESEKEYEDSFDETIDTNS  
ETGNIQDTENEGNEEQDITRLNDINRADGVL PVADQSLASSQTM DHASGASN NERGI VPR  
NENVVEQATDNGVVDATPATIDFDVEAGLADTQQSVASVDSTACTSTAEENRRARKRVP  
FFGNFRNLGFAGLIFLLFVTAL TVMVVYFVSPKGTNSENPILSPSSEPTSKSQPEDLTF S  
RPSQPPISAPTSAPTTIYGTSSVSCQQPERKSGVQIQEAEYAPEHFGNTTIGNENNGYCG  
EGYVTNLATSGSGFEFLPFSVSVTGYRVAIRYNNADKTGKYLDLQINDLKEGIFDLIPT  
GNESTWMVQGVNDILLSEGHVIRVSTESNNSNGLNIDWLSLSFQKSMSRFDYLIDVLDN  
DSNVTELSQSQSLALQWMSGEDTIDLSTLTNQEIIERLALVDVYYSTTGDTWSNMQWLS  
EFHACSWYGVACSKDKLVTDMLDNNGLVGRIP TSLSLLPNLILISLDTNSLEDEIPTQI  
GILDNLRLNLYLHANFLTGPPISEFGSLTNLEILDLRANYLNGQIPEELYSMVGLSFALS  
SNDLGGTSLTNIGKLISSLHLDLQNVQLTGPISELGNLILLSLGLGYNEFSGSI PREL  
GLLSNLSILDLSK

>comp10619\_c0\_seq6; 757 83 2350 LEN=3944; translated  
MASKSVVATATRAEEAPKQSSLLSSIPSETTQETMDEKKSRRKPLSTHERSPNSNGKIGR  
NGSQDGEIGSHSRSSFTDKRVLPNRP AHEIARDTKRILEICYGPKQDEGATSI AVDNELV  
SKVSLKNEGTDD SARKKTTKHGKKRRRRKSENGSTDDTVSESI RNRDAE VVREKVENIQG  
AARRSGTTKKRRKKT TTKTDE TASI VTV DATGKVVRKRRKIKGRHRVVKQEFIKKGD  
AKIELATISEGSDFEDEDIDDESEVENENQSYKPNMKSDEEGESEKEYEDSFDETIDTNS  
ETGNIQDTENEGNEEQDITRLNDINRADGVL PVADQSLASSQTM DHASGASN NERGI VPR  
NENVVEQATDNGVVDATPATIDFDVEAGLADTQQSVASVDSTACTSTAEENRRARKRVP  
FFGNFRNLGFAGLIFLLFVTAL TVMVVYFVSPKGTNSENPILSPSSEPTSKSQPEDLTF S  
RPSQPPISAPTSAPTTIYGTSSVSCQQPERKSGVQIQEAEYAPEHFGNTTIGNENNGYCG  
EGYVTNLATSGSGFEFLPFSVSVTGYRVAIRYNNADKTGKYLDLQINDLKEGIFDLIPT  
GNESTWMVQGVNDILLSEGHVIRVSTESNNSNGLNIDWLSLSFQKSMSRFDYLIDVLDN  
DSNVTELSQSQSLALQWMSGEDTIDLSTLTNQEIIERLALVDVYYSTTGDTWSNMQWLS  
EFHACSWYGVACSKDKLVTDMLGKYLHILFGNQNW

>comp10620\_c0\_seq1; 588 1 2235 LEN=2374; translated  
ESKAEKDIRIEGKKTNSKHWTITCVPITVEYEGEVEEIPDEIECDRLNDDEWGNSTV  
RFAEDYSEVFDAMRVVSNKNRITFKGRIRKQSGNDVLEINLKQEI EVSKHTNKYAGNRKL  
REGSHTVLVIRVTDKDNHAPMESQQQLSESI FGGLDKVGLATQMEACSGGNLMYKPVDD  
NPDNTNKGGVVELRIPYSVL DYG PYPNDLEDWDRRKL ERDVMTEL VKQFP IYRSWKQYA  
HIMIVLPKETDFRQVGSHTPP IAYAYVGGRRSVYKDPY GSHVWVQIHEVGHNGLGHS  
LKRGH TNSYGDKTCMMGTFNGNDAPQLCYNAAKSWYLGWYEEENGHEEVPWNGYWEGK  
LVAVPDYLEKIKGIGNPNDEYRAIVKISDLYLQFNRRKAPTLD FQPEDVDRVAVVSQLTQ  
VEGTQSWKLGNSLDVGMVESGIWAVKVL SIDTEATIPYAKVAVYNSKHDFDEPMVDEARS  
QMPFPPTAPLPITKRRATKNPTPLPTRPTPIHNTHP IHSP TSPSPNPTKDPTFLPTSN  
PTNGSTPFPPTKDPHTLPTDPPTKVPTSLPTNGPTSSPSVTSSDLVIYEVFPNPKRENDKD  
AEYIKLFPSTVATVSLSEYQVYDSTSNRYSVLTAKPTLGPREF F ILCRNKRWFDDVESV  
IPSGASDGCDDQGHFLHLDRLSTIILQRQEGGEHEDIDSVQTVDARDHGDKIYARLSDNV  
NAETECATCFDWF PAYDGP KAAQG

>comp10620\_c0\_seq2; 436 48 1337 LEN=1476; translated  
MMGTFNGNDAPQLCYNAAKSWYLGWYEEENGHEEVPWNGYWEGKLVAVPDYLEKIKGIG  
NPNDEYRAIVKISDLYLQFNRRKAPTLD FQPEDVDRVAVVSQLTQVEGTQSWKLGNSLDV  
GEMVESGIWAVKVL SIDTEATIPYAKVAVYNSKHDFDEPMVDEARSQMPFPPTAPLPITK  
RATKNPTPLPTRPTPIHNTHP IHSP TSPSPNPTKDPTFLPTSNPTNGSTPFPPTKDPHT  
LPTDPPTKVPTSLPTNGPTSSPSVTSSDLVIYEVFPNPKRENDKDAEYIKLFPSTVATV  
SLSEYQVYDSTSNRYSVLTAKPTLGPREF F ILCRNKRWFDDVESVIPSGASDGCDDQGHF

LLHDLRSTIILQRQEGGEHEDIDSVQTVDARDHGDKIYARLSDNVNAETECATCFDWFPA  
YDGPKAAQG

>comp10621\_c0\_seq1; 397 61 999 LEN=1206; translated  
MNSGPGYGTGQSGPSFGFCPVDRDWSKETSQSDPQTGRDWRAPPNIPSFLDDTDNVMTHLA  
AKKISAFSGIGHGFYFWNFRTELDSPQWDYMRALERGWIPRGNLGEERIEDACRAEDSGV  
FRCTLKRNI PDKPI RDAIHY INDVTNATEDARSVEGLSGKELRTSAEPLIEAFFEEGRKR  
GVTCDFFGGIGVLVEENVTI DDDSVVIWNDDEYYTTVI INEGLSWVWITIYVVVGTIAGSI  
VGFVTAMRMSKFFNKAVRQSAFFQNTIGQNPAIRKSLAVPALRESLEELEYLFEKDENDA  
VDGNKSTKQQYT

>comp10621\_c0\_seq2; 712 260 2443 LEN=2650; translated  
MVSFVNI AVLVMQLAARVAAAEGTGTKFAHFTAYNDTMTCSGDEHSTKFNEAVRGNL  
SYMVLEPWITPSLFYQFLGKKEGEVGMDSYSFCEVLGGEEANRQLKNHWETWVTEELITK  
LKDSGAVNSLRPLIGDFQFIPYGPYLNCGWDGGLEYVDKVLWDWAYSNGLSVLLDVHAMKD  
SQNGFDNSGQTLGFQWTTQIGFEYAPSTTFEHWPMRTANWMGEFDYKTNSYPTINRANVE  
HSLNLVQLI IDRYKNHPAVMGLEPVNEPWEHTPIEELKRYWEGYLVKVKKEAPYWRVYMH  
DSFRPTPDVWGGFMDGCPDRAIDMHIYQAWRDPDSRLGFYRDACNQKRV IADMEREFGP I  
IVGEWSLATDNCVMWLNDFNDNLPGFRLPCKYVKCADPYMGMDVQPNAPVDPTKPMQGP  
YGTGQSGPSFGFCPVDRDWSKETSQSDPQTGRDWRAPPNIPSFLDDTDNVMTHLAAKKIS  
AFSGIGHGFYFWNFRTELDSPQWDYMRALERGWIPRGNLGEERIEDACRAEDSGVFRCTL  
KRNI PDKPI RDAIHY INDVTNATEDARSVEGLSGKELRTSAEPLIEAFFEEGRKR  
GVTCD FGGIGVLVEENVTI DDDSVVIWNDDEYYTTVI INEGLSWVWITIYVVVGTIAGSI  
VGFVT AMRMSKFFNKAVRQSAFFQNTIGQNPAIRKSLAVPALRESLEELEYLFEKDENDA  
VDGNKSTKQQYT

>comp10622\_c0\_seq1; 583 36 1055 LEN=1127; translated  
MKFSLASIAA IASCASVVSFAFTVQGPSRSSSVVLQASRKAQKIASRTAWAESRQFDG  
SVAT ATAPAEAGLMKNDEGLEFVRLVSASGASSEIYLYGGVVTSFKDAEGTEFIAVRP  
DAKMDG SKPISGGLSHCWPQFGPGEIQQHGFARNVNVSVVSQTDTTVELEMLPSDYTK  
EMWDKEFA CRFTVELGDDELKTNSVKNKTSDDAFDFQAALHSYFTVSALENLEITGS  
FEGKEFLNKL AGDGGEMQTEERSSITITEEYDRVYKGVNDPVLKDTGSGKALNVVNE  
AGWEDTVLWNPYG DEG MGFNNFVCVESVKFDPVTL DAGASWDGVLVLKPESL

>comp10623\_c0\_seq1; 277 22 837 LEN=893; translated  
MTSKEKLT TNIVHPEVLQNGGDERIDTLLFDLDGTLYDHACGYEEEIHSNIFKFMVET  
EG GKFDAITNLEEAKHVWQPIFEKYNLTKRGLIGEGYEFDSKHYDEYIRKADKYFSK  
DDAL RSFLESFSPSRMKKIVFTNAPESSANEILTLLGVLDLFDVAVLGTDFLESK  
VCKPEPEAFTR VLRHLFPEDNENTCLSSFAVRNRSICYFEDSFKNLQAGKKLGFRT  
VFIASETLQNEGKST RELEAEKFDAILQKRVNMSLRQLPQLWEDL

>comp10624\_c0\_seq1; 652 297 2207 LEN=2436; translated  
MGCSQSKNSSAVVEQAQYMYVEHANQQGAQQHRRNISTGTLTTTTSRQDSLKWK  
KDLAE SGNLTKAIVKIETSPTKRVEDVYDGVHNGHTLGEGAEGVRRCTHRETGVQ  
FAAKCLNIG LIEDEKIIETLREEIFIMCQSDHPDIIRLEEVYESEDQIYLIMNLLT  
GGDMFDRLEEQSD YHYSEHRCANIVKQMIRSVRYLHANKVIHRDLKLENFLFDDP  
ESDNIRLIDFGLSKHFDH DGCKMKDVVGTPTYTAAPEMILGEYDEKVDVWAIGVI  
TYLLLCGDP PFGMDGEALSEVRD NILDCNLLFEPKYIWDTVSDEAKNFIRLLT  
KNPAQRPSAFEAAHDEWLISSAKADPLHS KPLNTNLIKNLMDFKEYSDLQKIL  
LEIVSFTLVPEQIKGLKQEFEKIDKDGSGDISLDEL KEVMKSRVVTESAGSLTE  
EEIETIFD SLLLNTKETT IHWHEFIAAGLSRCDFFDRNLRLA FNRMSD  
GKGYITLSDLKELVCSKEGVMDEVC TMWKDGLTVECKQDRITFDDFKHFF  
TGHDRSKREIMGDLRSSGTLRNYSHSANPRLVNNRMSSARILTATLGFETYED  
EDEDEDESGKRSSVFLVPTGKQMRSSAILVKSRTSIMPPEE

>comp10624\_c0\_seq2; 567 714 2374 LEN=2603; translated  
MGFTTVTPSVRVPKESFEGVPIXETGVQFAAKCLNIGLIEDEKIIETLREEIF  
IMCQSDHPDIIRLEEVYESEDQIYLIMNLLTGGDMFDRLEEQSDYHYSEHRCAN  
IVKQMIRSVRYLHANKVIHRDLKLENFLFDDPESDNIRLIDFGLSKHFDH  
DGCKMKDVVGTPTYTAAPEMILGEYDEKVDVWAIGVITYLLLCGDP PFGMD  
GEALSEVRD NILDCNLLFEPKYIWDTVSDEAKNFIRLLTKNPAQRPSAFEAAH  
DEWLISSAKADPLHSKPLNTNLIKNLMDFKEYSDLQKILLEIVSFTLVPEQIK  
GLKQEFEKIDKDGSGDISLDELKEVMKSRVVTESAGSLTEEEIETIFD SLL  
NTKETT IHWHEFIAAGLSRCDFFDRNLRLAFNRMSD GKGYITLSDLKELVCS  
KEGVMDEVC TMWKDGLTVECKQDRITFDDFKHFF TGHDRSKREIMGDLR  
SSGTLRNYSHSANPRLVNNRMSSARILTATLGFETYED EDEDEDESGKRSSV  
FLVPTGKQMRSSAILVKSRTSIMPPEE

>comp10625\_c0\_seq1; 320 310 1589 LEN=1589; translated

MKYLRTTLLLLLTFIGPAVAQVGGPQTPNGEYTLTGGVCRGPGGVSDKVNSMSAIEHTQA  
MCEEACDARKEKDDNGAHCLGYSYCASCNGGECILYGPGLDGTCSDPADNQYACEALGR  
CDSPDTATKETECGVCDDGKPSALEESACDSVSGTWKKG I WTSAGATWSGAEDPFIGQSH  
SKI IAGTSDEKASDYSCHDI I VDDHLAQCSGDAAECSAAFDGIQEDSDRIAENCPNGCVF  
TAKVKGPKNPPVAHAPDIKLPGWDPAQSGACRGGADFSGKVNKGYSNTAGADGGPPTQLE  
CAEGCLAEENCVGYAHSTAWCVIYGPDVHLGIGTEEGMWTDPNHEEITITGTKNVNIAYL  
CVTGPPRDVGGKPPSSVQDDSSNSPPSPQDNASDTTLQTDGGAGRAFPFLTTVVVVFXY  
MHSNDVK

>comp10626\_c0\_seq2; 703 99 2072 LEN=2340; translated  
MEAQKKKEPRSEMPYSFEERLLVRSSPSDQGTPASPLPATQTHSVRLES LAQWEEG SWI  
HPFSDIDMNL SASPAPTTSDLHAHYGGKIARVHMSVSSHGTRELFDPDTPNSLDGVPVLP  
WKDDASTDTNNNTDSSDRYCSGPQGFYLSVRTFDGLEPEEEANAVQAVFEELIRRRILVN  
PVTDGVDVLDTAEQPARPASV GASAVPSLSPRLYQLVMPFDAAWSSDALAQSFRTLP  
GVCKGKAGGGGDDDRFFGWSAQEWSDFLVGYRGGGGALGTGKTPSQQHPTFNKIMWWTWT  
ASTKNGSENSDGATNLGLSFGIQYQTMVPAEDTDWLPDAFASEETPRCPIGTRASFVLP  
TEEKAHTGGYRLVPM TASSD SHSEGTSEETPQFAYQVNV DQVLRHHTNRGRFESSIETK  
PLDDAVSSGGNHCR LTYRQVLPDFLAPMWRTLKVVSGESTGANQYNGNQHTSDSRLHASV  
EWNHEDQSSVLYVEAASGTLSDPSALPPNIFVSLEYAPSFLTIDDFPGDPNRGRVLP  
VAVRCDPFFVAGSAPVTPVTVVSNALLLPPVPDL SMPFNVSVGSSVYAYCIGAI V TLLV  
RKAPDKIKYKMPDKKPE SKLIRIKNKLREKIGRAKSKLLGGASSTGSEAAKDESAK

>comp10627\_c0\_seq1; 638 108 1742 LEN=1976; translated  
MTNRNLFHSAVILLILIAETTSANSRDLIGYNQIMDLIPMQGTTSLSSAAPSVPVQM  
AVTEGRIDPSEADLES PVIQ GKPTKFTLPPTFPTRWTPSATPSSAPSVSPRPSVSM  
SPTAPTTSPTEAPSQPPTS NPSSSPTVSPTEASSSRPSASPT EAPSIPPTDGPSNLPSLY  
PSDEPSQEPSTSEPSGSEEPSMRDTNVDTSVEPSVMISTETIEVEGRTDDSEDETIGADK  
T ISETICDEDKAGTWGNLCAALKASNLFQIMGDERGQYTLFAPTNGAFDAGDYTLEALLQ  
DRGALRDLMSIHIVPLALS YDALTCNLNSETLNFDRTYTICMGDTKFQTS DGNLLRNL  
LPV IDQSE DVVTKNGVIHSISNLILPFEF SVGNHIDTESPENDVDITVDINNQNVDNGS  
I ISS DVMSDVVESDAVGEDKNDTDVSDTSSDVVGSEEEVEEDNNDTDVSDTLSNNSM  
DGGDNLAF ECQVCKDQELCAISRSAVMRIPGEGKVSCISVVERQNTGRLNMLPSICNSIQKQ  
FTEYCL IGGN

>comp10628\_c0\_seq1; 1593 157 4032 LEN=4095; translated  
MATIRDGFITEVDDNGVGLIPAPPSPHKSTHTNP SLATSTCNSGAMASSGSSIPSRDSVS  
AAIALVRAKQIAK SVAQRAEDQILQPRSFASDQTSTSLVTDSSSKSKTTNSYASARGENS  
APPSLPSGKSVSSSARGSMSISLQLPRDQSSLGVPSTSTTTSCDGI PVAPSLCSNGSDD  
FDVAVDAKTLDDVNAFLNRLGVGELRSM SVDSNNSNAINA VDSIENLRAASADSLVDEDK  
VSSGEIDQETLAEISAYIDAATKKSEKREEINEQESP IYERLEDVQSCNDPPSMFHTGIS  
GHKDDPPAASPQAEAVYTEQSEKVNPFLLDSYREEEPHKNSQATLVNSIVAE EEEATQEGT  
EEEANDDKSRESHYTETSFAASMRNTLSTVEEVFSAEAE EEEENEVEFSAPEKEVNQ  
MRE FALPAVASYEQESVYGP DGRKEPKGTYEKTGVEVEKLPVSNVGV EQNMMNSDMSV  
ISTDS QNVGKSSQNVGFDDGANSVKSQGLSETD SVPWALRDVASEETMRATGRRRPRFV  
VSGPRP SNKSRNVASLFD DTSIQASEAASEFKNGESFVSEVRSDD SDEKSYEEEDID  
DDEENAVQ TSDSFEGNGCLVDNILYNDYVPEDDYALQRGTS DGI FSSDTEASG  
ISDRVRLNSTESG EAGISEQESIEVVDKYGVCDDDEVGDPTSSQVEDEEDREIAQDP  
SGEMAGFVSSPIKASN VATATD TETNAKAGEHEGKIEQNNSFLRQFEDLDLSEEGE  
TDQSLEPDNSLDHQNH EIVE DDVPDAMSPAALISYFYTIDARIFKGEDEKLVKGF  
KRLMMPVIDGKKPTIIEEAQIRQA ALKADIPLAFVDAFIDHVKDDHPDVAPKKSE  
EDDPDLLSIGWDDIEEVNEDEAIAAFLSS KFGANAEVENTKARKKHKHDKKSKELMGT  
GSRDYDPDDDIVTSAIEPDMFKTKSEDETNY EYNESETIDSDDSKGTHESKENTIG  
NAEQIAIECPDTIPKVVQAIKKQEI EPVDMKILE ACKSIESFDEEVQRRTAMATY  
GWEWQEATWLSPPGGSNLSGVGIDGVAIGKGVSNLLFT KKAFFLARKTCKIPYKRRV  
KPHAGYSIDIVLSLQESAVNGEKNV LKDETPWELRNVRQRF LHERSLTFSRNWF  
GTLVKTSGNDRIKAPVCKPKSMEMP MRNIPDPGDWTP EWYTSWGGTL GSGSDSEYD  
SGESTYTKDTRDGKDDSI RSYSTSSSFSEDEEWEDAPECGTIVNTKLIKIG EHVSRV  
HPDYTSSLRKSRRWKYFPVGTFFY

>comp10628\_c0\_seq2; 1593 146 4021 LEN=4084; translated  
MATIRDGFITEVDDNGVGLIPAPPSPHKSTHTNP SLATSTCNSGAMASSGSSIPSRDSVS  
AAIALVRAKQIAK SVAQRAEDQILQPRSFASDQTSTSLVTDSSSKSKTTNSYASARGENS  
APPSLPSGKSVSSSARGSMSISLQLPRDQSSLGVPSTSTTTSCDGI PVAPSLCSNGSDD  
FDVAVDAKTLDDVNAFLNRLGVGELRSM SVDSNNSNAINA VDSIENLRAASADSLVDEDK  
VSSGEIDQETLAEISAYIDAATKKSEKREEINEQESP IYERLEDVQSCNDPPSMFHTGIS

GHKDDPPAASPQAEAVYTEQSEKVNPFLLDSYREEEPHKNSQATLVNSIVAEEEATQEGT  
EEEANDDKSRESHYTETSFAASMRNTLSTVEEVFSAEAEENEVEFEFSAPEKEVNQMR  
FALPAVASYEQESVYGPDRKEPKGTYEKTGVEVEKLPVSNVQVEQNMNSDMSVISTDS  
QNVGKSSQNVGFDDGANSVKSQGLSETDSVPWALRDVASEETMRATGRRRPRFVVS  
SNKSRNVASLFDSTS IQASEAAEFKNGESFVSEVRSDDSDSEKSYEEEDIDDD  
TSDSFEGNGCLVDNILYNDYVPEDDYALQRGTSDFGIFSSSTDETEASGISDRVRLN  
EAGISEQESI EVVDDKYGVCDDEVGDPTSSQVEDEEDREIAQDPSGEMAGFVSSP  
VATATDTETNAKAGEHEGKIEQNNSFLRQFEDLDLSEEGETDQSLEPDNSLDHQNH  
DDVPDAMSPAALISYFYTIDARIFKGEDEKLVKGFKRLMMPVIDGKKPTIIIEAQ  
ALKADIPLAFVDAFIDHVKDDHPDVAPKKSEEDDPLLSIGWDDIEEVNEDEAIAA  
KFGANAEVENTKARKKHKHDKKSKELMGTGRDYDPDDDIVTSAIEPDFMKTSEDE  
EYNESETIDSDSKGSTHESKENTIGNAEQIAIECPDTIPKVVQAIKKQEIIEPDM  
ACKSIESFDEEVWQRRAMATYGWEWQEATWLSPPGGSNLGSGVIGDVAIGKGVSNL  
KKAFLARKTCKIPYKRRVKPHAGYSIDVLSLQESAVNGEKNVLDKDETPWELRNV  
LHERSLTFSRNWFGLTKVTSGNDRKAPVCKPKSMEMPMRNIPDPGDWTPWYTSW  
GSGSDSEYDSDGESTYTKDTRDGKDDIRSISTSSSFSEDEEWEDAPECGTIVNTK  
EHVSRVHPDYTSSLRKSRWRKYPVGTFFY

>comp10629\_c0\_seq1; 254 289 915 LEN=1085; translated  
MNGSLGSLVAVTSGCALVEPWAAIVIGMISGWIYIGASKLLIRLRIDDAVDAIPVHMFNG  
IWGVLATGLFASPRMEMPYSGSSEYPGLFFARGNENAGNLVGCQVTLVVFILGWVGT  
MPFFIWLNYKGLRADSLEELVGLDISYHGRSPDDSTGDIKVEYIEAFKKQRGSLR  
TRSKVNSSYGDPEFCQAAAAREALEGSN

>comp10629\_c0\_seq2; 237 1 1130 LEN=1300; translated  
AFDCLACPQNI FVXFLKVAHSVWSNNGFLSVSNTENPLLIGSIDFAGSGVVHVTGGAT  
ALLATIILGPRRGRFYDAQGDPLETPNPFPGHSVALQLLGTMLWFGWGFNPGSALI  
IDKAGEVAVAAVSTALS GAAGGITALFTNLVYLFVERFTGEPYF SILHAMNGSL  
SGCALVEPWAAIVIGMISGWIYIGASKLLIRLRIDDAVDAIPVHMFNGI WGV  
PRMEMPYSGSSEYPGLFFARGNENAGNLVGCQVTLVVFILGWVGTMPFFIWLNYK  
LRADSLEELVGLDISYHGRSPDDSTGDIKVEYIEAFKKQRGSLRSRVTRSKVN  
EFCQAAAAREALEGSN

>comp10629\_c0\_seq3; 454 183 1772 LEN=1942; translated  
MESNTSSSVFLYQCADSTLGNTSEILQCISDRFQEDGAAKARDLNEFLLVIAGAMI  
SGFAMLCAGSVRLKNVQNTMLKNLLDACGAALAFYVVGAFYAFGGQEETTATFLG  
ASAGLSPSFWFFEYTF SATSVTIVAGTLAERCQMVAYLCYSVALAGFVYPVVAH  
GFLSVSNNTENPLLIGSIDFAGSGVVHVTGGATALLATIILGPRRGRFYDAQGD  
PFPGHVALQLLGTMLWFGWGFNPGSALILGIDKAGEVAVAAVSTALS GAAGGI  
FTNLVYLFVERFTGEPYF SILHAMNGSLGSLVAVTSGCALVEPWAAIVIGMIS  
LLIRLRIDDAVDAIPVHMFNGI WGVLATGLFASPRMEMPYSGSSEYPGLFFARG  
NLVGCQVTLVVFILGWVGTMPFFIWLNYKGLRADSLEELVGLDISYHGRSPDDST  
IKVEYIEAFKKQRGSLRSRVTRSKVNSSYGDPEFCQAAAAREALEGSN

>comp10630\_c0\_seq1; 883 1 3079 LEN=3079; translated  
VRFIYECVMGMKDYGGQCILADDMGLGKTLQSVTLIYTLTKTGITADKKPTAKR  
PCSLVKNWDNEFVKWLGPGGVKTLAIAEADRKKIEKDLTFKTSIFQILICSYECL  
VGRLTKYPGCCDLLVCDEAHLKNSENQTSRALNSLPVKRRVLLTGTMPQNDLTF  
DFTNRGVLGTQEEFRKNILFPILRGREPDASPRQKQRMMEIQNEMSSTVNEFI  
NAQHLPPKLVQVCCNLTEIQKNMYSHLVT SKAMQHVMGKQVNCLSIQMLMKLCN  
LVAEYDETHGQKQQNGRRRAAAKQVKYTDGDEPSFAAPGADGISKFLPLSSGGG  
GPIHPESWGKMFVLYRLMREMRKPGNGGDKIVIISNYTQTLDLIGRMCRENSW  
SVTMKRRQKMFVDEFNDPTSSLVAFLLSSKAGGCGLNLIGGNRLVLFDPDWXSN  
LKGGRNMLLTNAPRRSVFLLTNSRNPAVDKQAAARCWRDQKKRCFTYRFLATG  
IFQRQLSKEGLQSVVDDKEQVNALSTKDLRNLFLKLRSDTPSDTHDKLKCERCK  
MKEKVLSPKLAACLELVNKMMEHEDAHYFLNPLDPQDHKVTKEHYEKEVKQPID  
KRLMVPEEQNGKGIQSYKSVSNVSKDVNRIFSNVMKVWSPGDDPIADAAGRLH  
QELVPLMTMTPDEKREDGVDEEISTDLMEGC SHLKNERGDDYQEIQIGMPDEEN  
HHHTTDTVDDPIFRAAMRGYDSVSFVFGLEVTWGKIQQRQEEEDRAAMKELEEM  
AEEESGDESKAAQMSDDAKDAGVGEVDDLMAVENAEGTTSMDNDELVEATKEDMA  
DSPQMDRDGNSGTPAQIIESPGSDVSNSSSTVEFLSMCSDENDGPRQRTSPRQK  
GSARWTKCQDES VKHACPIAPGSYRECDRSLATNEYNESRSRPRGWLTEPLFYLE  
FENTAR

>comp10630\_c0\_seq2; 971 1 2974 LEN=2974; translated

VRFIYECVMGMKDYGGQGCILADDMGLGKTLQSVTLIYTLTKTGITADKKPTAKRVVVC  
PCSLVKNWDNEFVKWLGPGGVKTLAIAEADRKKIEKDLETFAKTSIFQILICSYECLRTH  
VGRLTKYPGCCDLLVCDEAHLKNSENQTSRALNSLPVKRRVLLTGTMPQNDLTFEAMT  
DFTNRGVLGTQEEFRKNILFPILRGREPDASPRQKQRMMEIQNEMSSTVNEFILRRINTV  
NAQHLPPKLVQVCCNLTEIQKNMYSHLVTSKAMQHVMDGKQVNCLGSIQMLMKLCNHPS  
LVAEYDETHGQKQQNGRRRAAAKQVKYTDGDEPSFAAPGADGISKFLPLSSGGGGRNQ  
GPIHPEWSGKMFVLYRLMREMRKPGNGGDKIVIIISNYTQTLDLIGRMCRENSWGFCRLDG  
SVTMKKRQKMVDEFNDPTSSLVAFLLSSKAGGCGLNLIIGNRLVLFDPDWNPAVDKQAAA  
RCWRDGGQKRCFTYRFLATGTVEEKIFQRQLSKEGLQSVVDDKEQVNALSTKDLRNLFKL  
RSDTPSDTHDKLKCERCKIIHDDAEMKEKKVLPKKLAACLELVNKMMEHEDAHYFLNPLD  
PQDHKVTKEHYEKEVKQPIDLGSIQKRLMVPEEQNGKGIQSYSVSNVSKDVNRIFSNVM  
KVWSPGDDPIADAAGRLHSHWVGQWQELVPVLMTMTDPDEKREDGVDEEISTDLMEGCSH  
LKNERGDDYQEQIGMPDEENMRSWSHHHTTDTVDDPIFRAAMRGYDSVSFVFGLEVTWGK  
IQQRQQEEEDRAAMKELEEMEELQKAEESGDESKAAQMSDDAKDAGVGEVDDLMAVENA  
EGTTSMDNDELVEATKEDMAASVGDSPQMDRDGNSGTPEAQIIESPGSDVSNSSSTVEF  
LSMCSDENDGPRQRTSPRQKIGRAGSARWTKKQDESVKHACPIAPGSYRECDRSLATN  
EYNESRSRPRGWLTEPLFYLEVSYVFENTAR  
>comp10632\_c0\_seq1; 157 507 971 LEN=1045; translated  
MKNVIPIVMAGVIGIYGLIVGVIIGQSITTPSTERENSYSTFSGLAHLAAGLCTGCSGLG  
AGICIGIVGDYGVRSVGYRASAVTLFPVGAKEGEGYSNIPDSEEAEGMTEDISGSEDQNK  
LFVGMILMIFSEALALYGMIVALIVSQNYACI  
>comp10632\_c0\_seq2; 191 121 698 LEN=852; minus strand; translated  
MPYSXEGLGKNEHDQHPDKELVVLGVPANVLGHSLGGLLAVGDVVRVPLLLGSDGEEGHRR  
GPVADGADPVVADDADADAGAEARAAGAAGGQVQAAKRAVGILSLGRGRCDGLADDDA  
YDQAVDPDDWRRQRQREKPRIPPINQPTKQRGPFHSTAQHSMAELLRRVALGAAFHGIES  
SQSNQLSCANRG  
>comp10632\_c0\_seq3; 252 70 705 LEN=779; translated  
MVDQGPVDAQCPSYAVALGYMGVASAVCLSNWGSAGITWKSQSIITYTGIRHPSSIMKN  
VIPIVMAGVIGIYGLIVGVIIGQSITTPSTERENSYSTFSGLAHLAAGLCTGCSGLGAGI  
CIGIVGDYGVRSVGYRASAVTLFPVGAKEGEGYSNIPDSEEAEGMTEDISGSEDQNKLFV  
GMLMILMIFSEALALYGMIVALIVSQNYACI  
>comp10633\_c0\_seq1; 817 94 1683 LEN=1867; translated  
MNLILLSASSPDGSLAAIKAPSSASSSRHLIRIYQVGDSSTTLQSTLTHASNPLVQLIFA  
GRTSVLGLFGRQEVVWDLDRGVVAATFSASDDQAFLSLAAPSDDEEENENNYALVRHG  
PKLVVHEYLAASNKLRRKIKSGRMNDSGDVDYSEMEKKDAASLIITSSHVIVRAKGC  
IRVMEKDSGKKTGKIKLKESYGEASSMEMSSCIGDQNILAAIEKSGDAVLFDLGSCKEV  
ARLPTDSSPTQKTGLQLVAQQTKEDSFTLFRYDSLIVTEKNRSPYEKISQLSSSNPV  
AVFLRSNDKALALIQQRSSDYRVQVIDFSEDSEELPAVFKLDQEASSKKGNEATSKKKR  
NSSEIKVLGPGQAGSETITSVKKLRVNSCEDEDEMDVEENGDDDDGDETRNLTIGERLQM  
LTDALDEENNDGEENDNDDDKAVTAAIAAAVVGKTKFKPKATTESLKELLTQALQSSDDN  
LLELALSVDHMKIIATTIKEMNEDLLVILLGKLTSLASSPLRAESLSIW  
>comp10634\_c0\_seq1; 804 90 2519 LEN=2826; translated  
MFCAAGGSSPSVALCDLRMTATPAQQRSSGSRVLQYYKPMSEENPVSVSGLDLCDRGK  
ELLVSYESDQIYTFPIFPYSESPRRSATDQLTELLNSETLHSENETIEEDKLYPWGQGR  
ILPELASYG AHLNRYTFLKNARYAGPRDEYICTGSDSGHAWVYEKATGAVVSFWKADEST  
CNGVVPHTLPPIFVSYGIDSTAKLWRSTTPVDSEVDDGAVGRRKHFRMTQERSYKMTPTV  
RSCERVREILEDLNSRDNTDSEIFADQIPCENFVRLVVRVIPLEYSRASSRNPTGRQGIPI  
GNDLHNLDPALKANSASAVIRSLFEDNDVPVESDTEDFKRRVSLIRLRHQADSLGLTWNPN  
LPWLMEGHPTVDRTEKIMDGS AEDRNVDRESELVPEYPSDWIPYDAEMSNDPFHFRDNFCG  
KYNFYNDFYRDRYALDETFGFFSNEGDDTTSGDSDEVGDYNNETTQRDEGNMKTRESIK  
EEESSEGKDELLDERDDDEEGTKDDENSASDNDFTRNSNRI LAETVKTLKDGNAAFKA  
GKLGLAAYRYDKAIQYGFVAFMKSRRRGILRFDSSLKKNLVMTRLNIALVLLNEHFMELOV  
ARKQAKLALAEVSPFCDPQRNENQESLDEALAKAKACFRLGSAQYELGDYHDSIASLEE  
SIKSTSEISKSDNTPDLSVLKRLALAKREYMKQSKRQRKFKFAFGQSTSESPSKLDSE  
SATNSGRQLKKESTCAQELSPTPSQLPVADES LASIEGANLTVPNPMTQAIPNSVTPMN  
SPATGVETGLISSATTTNAPSLPDEERNA  
>comp10634\_c0\_seq2; 1051 249 4223 LEN=4530; translated  
MSSVGSKSIYSCSSDGVVESWRPQLSRRQRRTTLPPELLQLRQTHGLSQQRKIRGYGPLSD  
LNPHHVASTPYLSYRGAWNPTRMQNTILVVGPGTPASTVTRTTRVKAQSGTARNGEEENE  
SDSLSSNSIEGNGEHDGEEEGEDEIDSSEVEAMEDEERMGEEDDDTERDPDDNEDDNEH

DDDSGSEGFYEFRLNNYGNINDEEDLSSDEEPLERRNKCHYRPSMRHSGCINTAAWLTS  
ECGWRLSTVTDEGGAGVIRGIETEELSHQIVTSGDDHLLKVDVSEPMGTSSPLAGGTATL  
TPFSSSYNVEKNFYKCKERWQSMYDARRTCGEEGDACGNDYRAPGTVRLLTTVSTGHRGN  
VFHVTPLRGRPGVFATCAADGFLRLVDVERSGPSASNNSRDLSTVVIHPMYDRNTGGAGA  
IDSENPLAYYLRNSSGMCFSHVMLDGNNGLLCSEKGLLRFDLRLSPREQCTNSLLPVTA  
RSSRSILRTVRACKACAVLPTSSGGDSGNLFGGETSTYVVFAGSSPSVALCDLRMTATPAQ  
QRSSGSRVLQYYKPMSSLSEENPVSVSGLDLCRDGKELLVSYESDQIYTFPIFPYSESPRR  
SATDQLTELLNSETLHSENETIEEDKLYPWGQKRIPELASYG AHLNRYTFLKNARYAG  
PRDEYICTGSDSGHAWVYEKATGAVVSFWKADESTCNGVVPHTLPFVSYGIDSTAKLW  
RSTTPVDSEVDDGAVGRRKHFRMTQERSYKMTPTVRSCEVREILEDLNSRDNTDSEIFA  
DQIPCENFVRLVRVIPLYSRASSRNPTGRQGIKIGNDLHNLDPALKANSSAVIRSLFED  
NDVPVESDTEDFKRRVSLIRLRHQADSLGLTWNPNLPWLMEGHPTVDRTEKIMDGS AEDR  
NVDRSELVPEYPSDWIPYDAEMSNDFHFRDNFCGKYNFYNDFYRDRYYALDETGF SNE  
GGDDTTS GDSDEVDYNNETTQRDEGNMKTRSIKEEESSEGKDELDERDDDEEGTKD  
DENS DASNDFTRNSNRI LAETVKTLKDGGAFAKAGKGLAAYRYDKAIQYGFVAFMKSR  
RRGILRFDSLLKLNLMTRNLIALVLLNEHFMELOVARKQAKLAL EEVSPFCDPQRNENQE  
SLDEALALKAKACFRLGSAQYELGDYHDSIASLEESIKSTSEISKSKDNTPDSLVLKRLA  
LAKREYMKQSKRQRKKFKFAFGQSTSESPSKLDSEATNSGRQLKKESTCAQELSSPTPS  
QLPVADESLASIEGANLTVPNPMTQAI PNSVTPMNSPATGVETGLISSATTNAPS LPE  
ERNA

>comp10635\_c0\_seq1; 428 319 1620 LEN=2729; translated  
MTKSDKFLHDFVGTLTQNMLHPVLQQRVNNDNSNSHDIRNVSSSSTEIVSLQGARNHGL  
NRIGSNDVNTSNTSSMTISAFSPDQNVSFNDDEARSSENTRSSSTTNGEFSFFTGNRN  
LPSSSHPEATQRPPSVTLRSNGTAGVRPRQSHATQRPPPVT PRSNSTSSVRPRQNRDVR  
RPQTTQSRSRNMKGATQSLAKETKLLKHLRDLVLDVFTETVVSVEQSRATKLDLRAERA  
QLLARVRVLEIETVHQAAELEDSELLIEMEERRVLLTKEVTVLKQKCYSLAKDVVILKK  
SLEAYKQHQIPNKMDSAEKDKLIIENKKLAFENKSLKQELSAKESIHELGSKLYQAKM  
NLMNRDDDKENKRTTIVNTKQNI SAGTTS GGNKSKSSSEIATPMGKHTKSHSVTLRGS  
GKKGSPNTGKTRT

>comp10637\_c0\_seq1; 742 107 2968 LEN=3412; translated  
MDGQKYSQVSATGDENEDAIELTGVSLKNRSFDEEDGEDHSLTDQFSDVDYERDDGLEN  
RINNRVFNNGHARLPMELIEEQLLWNVFNWRWEEPSFLSLLVTTFFLIPTLVIWYGA FEF  
VGKWWAIWIIVLHMQLRLSISTWYIKSTSTVGF AHRWSLRKMC SFVTIFEVSMCGIVYPL  
ICKIITDAFFRDVDGAI IAEWTKETRFMVGVVMGWLVALRCCIGLPCIAIRVMKYKDP  
DMYREYRPIYWTPLGEEGSLQDGTNRVLYCIFLYLNFVFGNLNMCILSLISHFGPWPPG  
LSLPENC DGLDATECALPFP SFHMRD ETKSYTGWRVHLKGM PPLRGGVPFHPKFLNDLD  
GFSTMGPILFYIDGLKEAYENQEENEHEIQGPENISLSVTQKSITVLVDISDASLVH HSA  
EIDYLDPNHPVMMYPAEPLKHNTHYAVGVISARDKTGRQLPPTQGMVDMMKAKH SKTRM  
RFVNKVI PAVDLAVPWF SFKKDPQSLQLLDFDVTASEASQLDPVRAARDIALEHVADWNW  
DDHARVVSTEDYDCDGDSPDIARTVHLSLDVPSLLYQESRYSFLDPRKIERRHAVA FGE  
AKAMVEIPCSLMKETLDEGSGKLR AIVEFGHGLFGNREEMKDGFLRRMGNNNGYITMGM  
DWRGMSRVDLP I VIRT LVGNPDLFQAVRDNLIQGFANKICLQHF SQNGMLRLEAFKFGGT  
SIPTLNHRPPTS AFYGISQGGILGGYMSVIGTKLIDRGILGSPGSPFTLV LTRSLDFG  
SYDKLFLKNFYNNRHRVRIALALMQMAWDSTEASGFQARPVLEPVPRLLIQAGLGDAVPT  
IAAESLARAMGASLLPGSPRSVFGLPTE SAADDDKWI GPKVTLS ELLYEQEYSSLPIDND  
YFSAGSHDTLSEN RVHFC LRWDSAMIEQIEEFVNTGRVIDPCRNDHCQRETCS

>comp10637\_c0\_seq2; 719 107 3072 LEN=3516; translated  
MDGQKYSQVSATGDENEDAIELTGVSLKNRSFDEEDGEDHSLTDQFSDVDYERDDGLEN  
RINNRVFNNGHARLPMELIEEQLLWNVFNWRWEEPSFLSLLVTTFFLIPTLVIWYGA FEF  
VGKWWAIWIIVLHMQLRLSISTWYIKSTSTVGF AHRWSLRKMC SFVTIFEVSMCGIVYPL  
ICKIITDAFFRDVDGAI IAEWTKETRFMVGVVMGWLVALRCCIGLPCIAIRVMKYKDP  
DMYREYRPIYWTPLGEEGSLQDGTNRVLYCIFLYLNFVFGNLNMCILSLISHFGPWPPG  
LSLPENC DGLDATECALPFP SFHMRD ETKSYTGWRVHLKGM PPLRGGVPFHPKFLNDLD  
GFSTSKXLVMNQLCTRQKEEQTKSIFSLSTEINLLYSMIVGPILFYIDGLKEAYENQEEN  
EHEIQGPENISLSVTQKSITVLVDISDASLVH HSAEIDYLDPNHPVMMYPAEPLKHNTH  
YAVGVISARDKTGRQLPPTQGMVDMMKAKH SKTRMRFVNKVI PAVDLAVPWF SFKKDPQ  
LQLLDFDVTASEASQLDPVRAARDIALEHVADWNWDDHARVVSTEDYDCDGDSPDIART  
VHLSLDVPSLLYQESRYSFLDPRKIERRHAVA FGEAKAMVEIPCSLMKETLDEGSGKLR  
AIVEFGHGLFGNREEMKDGFLRRMGNNNGYITMGM DWRGMSRVDLP I VIRT LVGNPDLFQ  
AVRDNLIQGFANKICLQHF SQNGMLRLEAFKFGGTSIPTLNHRPPTS AFYGISQGGILGG



GYMSVIGKTKLIDRGILGSPGSPFTLVLRSLDFGSDYDKLFLKNFYNNRHVRIALALMQM  
AWDSTEASGFQARPVLEPVPRLLIQAGLGDAVVPPTIAAESLARAMGASLLPGSPRSVFGL  
PTEAADDKWIQPKVTLSELLYEQYSSLPIDNDYFSAAGSHDTLSENRVHFCLRWDSAM  
IEQIEEFVNTGRVIDPCRNDHCQRETCS

>comp10638\_c1\_seq1; 692 1 2131 LEN=2186; translated  
XSVAAMGPVRSPLARRIRAAVLERGPVLAGIAGLMASHHANAPPVHGGKGTGRSSSGF  
AAGAPVSPLRTGASPPRRRRTRRLSAAASKAIDSRPTKNVVPATQPVLPPSKAGDPTAA  
GRRNRKRRRRRTKTESPLDSVAEKVDCPGLEDARDSDSALMPPPTNRRSRRRSQTTPGAGD  
ELSFSCPSVAKEPLPSRTKPTQPSGGEWGTEDESSVSEALTEETSVMASRISQKVDEL  
ARVCIENSDASYAEKNCPVGGDFFPAGDRPWTTTVCLESITRILTGKELNGKTSCLLEEEA  
SEGTKGGGDESDGADDENGNVYLVTNRLVGVKSGVIPILTTAMSETMAAATKLVFPETV  
WSPENDKSSEPTGEEENLWRYCHIRLQLLASLIDEACFFSDQNRFFCEEDPFSFEDQKK  
GMIYYILVFLHRCSCGDLNRVDQKRSETMSLALRSLTSLTHNNPLAAEQMSNSNDDLCAE  
GINVLANVVFHLEDDSLSSNKRKRTGPTTNLHGKAKDHDHMYDGTIFCLTTLANIIEGS  
GVRRLIEIENIGLQSGANRSWLQWLCQWIVNQTESFRHEILSIGCKSERSSSKGIDTAG  
DEDGELLKHEEMLVAAGNGCVVLACLMEADNDDESSAHIRKLVENEMPLDPGGNSSR  
LALVVNTLKYCNYHISMGMQSFVAVPVKKLIDELEDMINFDESKSID

>comp10639\_c0\_seq1; 306 118 1643 LEN=1853; translated  
MDSARADVAQPITPKAGEQSTKVDFAFLASELNMSVEERNFVFEEIHGVAQHAVEELSI  
QKLNRSLLLLSEALYDIKNKPAYDEAQRIASEEGHSTFVNDRSYRLKFLRAECDFPRKAA  
ERMVRNLDILYRYIGRKGCRPICIGDLDNAVAIMESGSFQLLPFRDRSGRRIGVRIGP  
LGLDFISNEQIVSIHGNNMREFIFILRHNLCLTIHFNGALTLNSKLQWLLNXMMRTILY  
IFHCLSEDLQKRGIVMISFPSINFDPSTISNPKAKRLILECLDSTGIRISANHVCFPD  
TPWFRALGGLYMMASSQYIRVTRRFHYGTIECRYKMSFGIESGQLPISNHGTIKTQNK  
KKWIAAYRKMRLDIEEGEEDSIVATFCPSTNDVLAIGGTHFYKFMGNIRYRDILES  
NLHHDYDNASSVHEKIYITNKVLRTEERGGFRFLAKDNNGWWTPTDKEAARMKISNAFRDLRKS  
MRARENKRMSDTHKFSETRATKFTSCI

>comp10639\_c0\_seq2; 263 118 1635 LEN=1845; translated  
MDSARADVAQPITPKAGEQSTKVDFAFLASELNMSVEERNFVFEEIHGVAQHAVEELSI  
QKLNRSLLLLSEALYDIKNKPAYDEAQRIASEEGHSTFVNDRSYRLKFLRAECDFPRKAA  
ERMVRNLDILYRYIGRKGCRPICIGDLDNAVAIMESGSFQLLPFRDRSGRRIGVRIGP  
LGLDFISNEQIMMRTILYIFHCLSEDLQKRGIVMISFPSINFDPSTISNPKAKRLILE  
CLDSTGIRISANHVCFPDTPWFRALGGLYMMASSQYIRVTRRFHYGKNSSFLYYPISHEI  
LQVISVVELDXNGILSIYNIASFPGTIECRYKMSFGIESGQLPISNHGTIKTQNK  
KWIAAYRKMRLDIEEGEEDSIVATFCPSTNDVLAIGGTHFYKFMGNIRYRDILES  
NLHHDYDNASSVHEKIYITNKVLRTEERGGFRFLAKDNNGWWTPTDKEAARMKISNAFRDLRKS  
MRARENKRMSDTHKFSETRATKFTSCI

>comp10639\_c0\_seq3; 241 1242 1760 LEN=1970; translated  
MMSFGIESGQLPISNHGTIKTQNKKWIAAYRKMRLDIEEGEEDSIVATFCPSTNDVLA  
IGGTHFYKFMGNIRYRDILES NLHHDYDNASSVHEKIYITNKVLRTEERGGFRFLAKD  
NNGWWTPTDKEAARMKISNAFRDLRKS MRARENKRMSDTHKFSETRATKFTSCI

>comp10639\_c0\_seq4; 384 118 1518 LEN=1728; translated  
MDSARADVAQPITPKAGEQSTKVDFAFLASELNMSVEERNFVFEEIHGVAQHAVEELSI  
QKLNRSLLLLSEALYDIKNKPAYDEAQRIASEEGHSTFVNDRSYRLKFLRAECDFPRKAA  
ERMVRNLDILYRYIGRKGCRPICIGDLDNAVAIMESGSFQLLPFRDRSGRRIGVRIGP  
LGLDFISNEQIMMRTILYIFHCLSEDLQKRGIVMISFPSINFDPSTISNPKAKRLILE  
CLDSTGIRISANHVCFPDTPWFRALGGLYMMASSQYIRVTRRFHYGTIECRYKMSFGI  
ESGQLPISNHGTIKTQNKKWIAAYRKMRLDIEEGEEDSIVATFCPSTNDVLAIGGTHFY  
KFMGNIRYRDILES NLHHDYDNASSVHEKIYITNKVLRTEERGGFRFLAKDNNGWWTPTD  
KEAARMKISNAFRDLRKS MRARENKRMSDTHKFSETRATKFTSCI

>comp10639\_c0\_seq5; 268 704 1459 LEN=1669; translated  
MISFPSINFDPSTISNPKAKRLILECLDSTGIRISANHVCFPDTPWFRALGGLYMMASSQ  
YIRVTRRFHYGTIECRYKMSFGIESGQLPISNHGTIKTQNKKWIAAYRKMRLDIEEG  
EEDSIVATFCPSTNDVLAIGGTHFYKFMGNIRYRDILES NLHHDYDNASSVHEKIYITNK  
VLRTEERGGFRFLAKDNNGWWTPTDKEAARMKISNAFRDLRKS MRARENKRMSDTHKFS  
ETRATKFTSCI

>comp10639\_c0\_seq6; 292 63 1334 LEN=1544; translated  
MXEIHGVAQHAVEELSIQKLNRSLLLLSEALYDIKNKPAYDEAQRIASEEGHSTFVNDRS  
YRLKFLRAECDFPRKAAERMVRNLDILYRYIGRKGCRPICIGDLDNAVAIMESGSFQL  
LPFRDRSGRRIGVRIGPLGLDFISNEQIMMRTILYIFHCLSEDLQKRGIVMISFPSIN

FDPSTISNPKAKRLILECLDSTGIRISANHVCFPDPWFRALGGLYMMASSQYIRVRTRF  
HYGTIECRYKMMSFGIESGQLPISNHGTIKTQNQKKWIAYRKMRDRLEEGEEDSIVAT  
FCPSTNDVLAIGGTHFYKFMGNIRYRDILESNLHHDNASSVHEKIYITNKVLRTEERGG  
GRFLAKDNNGWWTPTDKEAARMKISNAFRDLRKS MRARENKRKMNSDTHKFSETRATKFT  
SCI

>comp10639\_c0\_seq7; 241 1058 1576 LEN=1786; translated  
MMSFGIESGQLPISNHGTIKTQNQKKWIAYRKMRDRLEEGEEDSIVATFCPSTNDVLA  
IGGTHFYKFMGNIRYRDILESNLHHDNASSVHEKIYITNKVLRTEERGGGRFLAKDNN  
GWWTPTDKEAARMKISNAFRDLRKS MRARENKRKMNSDTHKFSETRATKFTSCI

>comp10639\_c0\_seq8; 241 933 1451 LEN=1661; translated  
MMSFGIESGQLPISNHGTIKTQNQKKWIAYRKMRDRLEEGEEDSIVATFCPSTNDVLA  
IGGTHFYKFMGNIRYRDILESNLHHDNASSVHEKIYITNKVLRTEERGGGRFLAKDNN  
GWWTPTDKEAARMKISNAFRDLRKS MRARENKRKMNSDTHKFSETRATKFTSCI

>comp10640\_c0\_seq1; 477 1 996 LEN=2117; translated  
QQQQQQQQEQAPPEASAVHEEVLSELLARLATPPVSPRKAGTADDPSTATKTTAGTQESL  
MPSPSSLPVQTTVRPEAPATPPAENDGAEGNEAEHSEALAAEDDDAKGNEALVAPEEDE  
TEVLVIAECEARLSKARQEEFVSKHEHFVDLKVQKEVLVEDIANARANTTPNRTALHIERL  
EGYKEEVETLLAQERERARQIAELDEELDGLAEVCVKLEDPEREFRRKHEEHRRTLSDFG  
KQARCHTERFRKLLGSIERGIEEHRARVLGDSDDADSNADPSRGGAGSNEDGSTDAETI  
QKLEFLLAKQNIELFNAKAKLRLREGPAAKG

>comp10641\_c0\_seq1; 455 169 1269 LEN=1269; translated  
MNFCSSTVAVWLTAAANGSLATGQLRSPIPAIPPTFGPDPTPRAPRFGIQNPVPTPSSE  
LTPFAQLMEGESRSGNNNNPNP INNNNNHLNFNHQNQHWPPTMYPTSYPYGSAN  
VDDRPPPTMYPTGTDPKDEHSSNQHHGNHIFHDGNHGGYPYHPPPPGYQQQQQQYYYP  
YPPYQHPPIERNIPPPPTMYPTTEAPPTPYPTIRQTPSPTDGYPPPPPKYPPPPRYPPPP  
GYRYHPPPPPGYIPYNPPPPPPGFFPVNQVATTQLPTGQPTNGPTFLPTPNPTPLPTGL  
PTRIPTFPPTPNPTSDPTLGPPTLPNVVPIISGNDNNVGGDESEDDNDNNDNDNDKDDK  
DNDKDDD

>comp10642\_c0\_seq1; 253 77 1015 LEN=1647; translated  
MQSSISKYRITKRVGGSGFDIYLGVGANGKVAVKFEKHGARCPLRHEYKVYRELQNA  
PGFAKVHYFGTQDSYNLMVMDLLGPSLEDQFNKCGRRFSLKTVLMVADQMLERVELMHSR  
HLIHRDIK PANFVTDGGRGNFNFIYCIDFGLSKRYRHPRTLQHIPQREGRSLTGTPRYAS  
INNHLGVEQSRDDLESIGYVLVYFLKGGLPWQGLKAKSATKKYKLIMEKKQSITIPALC  
QGCPSQFAEYLAYCRSLKFEAKPNIAYL RGMFRDLFRSQGYTNNHSSLDWDWNRHESGSG  
DRQDQGMEDGRY

>comp10642\_c0\_seq2; 195 1024 1834 LEN=2466; translated  
MPSVAHEYKVYRELQNA PGFAKVHYFGTQDSYNLMVMDLLGPSLEDQFNKCGRRFSLKTV  
LMVADQMLERVELMHSRHLIHRDIK PANFVTDGGRGNFNFIYCIDFGLSKRYRHPRTLQ  
HIPQREGRSLTGTPRYAS INNHLGVEQSRDDLESIGYVLVYFLKGGLPWQGLKAKSATK  
YKLIMEKKQSITIPALCQGCPSQFAEYLAYCRSLKFEAKPNIAYL RGMFRDLFRSQGYT  
NNHSSLDWDWNRHESGSGDRQDQGMEDGRY

>comp10643\_c0\_seq1; 362 1 1560 LEN=1641; translated  
XVKIAIVVVVSAVEIPSTHIKPEPNITSKISKNSLENLMEEIEELRERIKLLEENARLR  
LDRESRLSRDDKRLEEKETVSMIEG IAGASEEGVYQGR LKPDEIKRYSRQLLLTG GFGV  
EGQLKLLKSKVLVVGAGGIGSTGKEREEVACRIRIMTSEAKLKVVAMFWFIFLSFVVVIL  
YLSASGIGNISVVDFDEV DLSNLHRQI IHKSKDVGLNKAESARRAVESLNP SVFFTVVDK  
PLTIDNALGLISSDCVVDATDNPQTRYI INDACV I SGTPLVSGSAMGTEGQLTVYNYKG  
GPCYRCLYPTPNLKEGSKSCADNGVLGPVPLIGILQALEVIKIITETNAVMSERLLMYD  
SLQCSFMRIKPKPKQPLCPSCGTEPTITSMEE SFAASEMARGPSSCSVTKTRPDLPDALS  
LSCEEYSRIRDRGDDHVLVDVRVEEQFELCSLPGAINIPLRSIPQEMEKLSDLAGGVKPI  
YICRRGIASVSATNI IVENVKKYPKICSIKNITGGLAYW

>comp10643\_c0\_seq2; 414 1 1453 LEN=1534; translated  
XVKIAIVVVVSAVEIPSTHIKPEPNITSKISKNSLENLMEEIEELRERIKLLEENARLR  
LDRESRLSRDDKRLEEKETVSMIEG IAGASEEGVYQGR LKPDEIKRYSRQLLLTG GFGV  
EGQLKLLKSKVLVVGAGGIGSTVILYLSASGIGNISVVDFDEV DLSNLHRQI IHKSKDVG  
LNKAESARRAVESLNP SVFFTVVDKPLTIDNALGLISSDCVVDATDNPQTRYI INDACV  
ISGTPLVSGSAMGTEGQLTVYNYKGGPCYRCLYPTPNLKEGSKSCADNGVLGPVPLIGI  
LQALEVIKIITETNAVMSERLLMYDSLQCSFMRIKPKPKQPLCPSCGTEPTITSMEE SFA  
ASEMARGPSSCSVTKTRPDLPDALSLSCEEYSRIRDRGDDHVLVDVRVEEQFELCSLPG  
AINIPLRSIPQEMEKLSDLAGGVKPIYICRRGIASVSATNI IVENVKKYPKICSIKNITG

GLAYW

>comp10645\_c0\_seq1; 101 1 960 LEN=960; translated  
XVYSQIKLNQIEINRTKSNQMALYGKLYWEERYTHSGDVGTYDWYQTYGSLRHLFEAAP  
DTSNGLPDDFPREKCHVLVLCGNSTFGEDMQSDGWLGEIVSIDFSTVVIDQMEEVPEE  
ENERKKGKQQQFFAPGSMRFVCADITEGLPFCDFNEFDLVVCKGTFDAILCSSGSVNHAKR  
LVAECERVLAKGHGCFFLCSYGSPPDNRLVFLHQNPDPSYYWENIGVHPVARKNQNDYVY  
ICRKKETNASENVVSRPLVVVTNEENMELPAGEPVESHKSQGPKPCAVSAPLLEAVTVQR  
KMMNKLINFRPCCWIKNEMX

>comp10646\_c0\_seq1; 979 79 1650 LEN=1674; translated  
METAYLSEGEVEKGANARLSSLIGAMAISDLVKTTLGPKGMDKILQSIDPNDQSI SVTN  
DGATILSKVPLDNAAAKVLVDVAKVQDQEVGDGTTSAVFCGELLREAEQMLLQARIHPQ  
TICAGWRLATKVARETLESMSTDGITDDDLFKIAMTTLSKLVNSEKEYFAKLCVSAVKR  
LEGGNLDHIQIIKLPGGSLRSSYLEEGFLEKSIGVGPQRLEKCNILLANTSMDDTKI  
KIYGSRVQVDSLNVKVAEIEQAEKLMKRKVDKIIAHDCNVFINRQLIYNYPESLFAAAGM  
MAIEHADFDGIERLAAVTGGQVCSTFDNPKVQLGYCDVIEEVMIGETKVIRLGGCKSGA  
ACTIVLRGSSNHIIDEAERSIHDALCILAATLKHPKRIYGGGCTEVAMAQAIDKAAKETP  
GKKAIAMASFALLQLPMTVADNGGYDAAELVTQLRAAHAAGKTSYGLDMNNGTIGDMA  
ELGIMEAFKSKLQVVTSASEAAEMLLRVDDIIKCAPRRREEMM

>comp10647\_c0\_seq1; 254 1 873 LEN=922; translated  
MSQQESHDMSEGGSHDSNQGSHDYSHDGSHEMSRVVTD SYSCSSSSTVSSYDESVVVP  
KVDLKKMREKMRERTRMNACAALLHLSKECTVSEDCAKSTLLLCLVSCSMDVENPIHTK  
CLEILANLTRFPHNRAVVAGFPDLFDTLMANGSSEVDADRCWTMRILQNI SADPSTKSRL  
TDTPLLELLCTSMMPQYQEQQLAAASTVFNI STEP GAVVPLTNTRNVVATLVHIAHSPVS  
VSELRTIACDALATLGLWLQTLGAGTVPEELEAGPLPTYVASGWKRWEK

>comp10647\_c0\_seq2; 1358 357 3326 LEN=3326; translated  
MDSPKQLGRTHVTSPPSSKSMDSGTPNIMTEDEIKTLVRGAIRRARDAKKSFSRSPKRSRSG  
DSGSSPIGSPVRSPMSPSNRSSSAALSPVSPSSTRGRPPMNSP SRASPKRSMIKVPSLG  
NISAANKTEEATNSNKTRTTKTLADLRKEYNRSPSTPKQSSIARSESINTETKSLEMNP  
SSTTNGQSIMSGITDDASSDDI IRRVEEEIANARKAAQEATRRLAGVSADFM TKKRNI  
STTTGRSVDGTRVGLSITTKKSGKSFNGNNDDEELTAGDGATKSSVTTDSDDRFS  
ALSVIGREFNGSKDMDARTFFSQMSGSGKNNAIISTSDSLADNDMVSCMTDERREDANGA  
HDDYLALTFSAESITNTLSAANNLLNECESLLIDAKSFDDMAGDVVDSVKPKPHPATTA  
PAEEQQHKIVSEHSDAMDVADLPSSSESSDLSGEESSDAKQESFGGSRVSEERALDTIDGQ  
LETSSVIKTVISINRSQEVLSMDELEAVLTDERMAFDRDRSLMDVEALSDETESDHNEHE  
AKEEESTSKSDVIVTQTNGSASPTIDDETSTNVVDET VASGENSTAKCHEEVVEKCRKEK  
SEASANDKSKDAVEIKDEAALTVESTSVDTKQNEVPNTADSEESESNDKLEVDSTAQSRD  
TDSMSSDEKRIALVVPTKSPASEDQVTDITSNRVRLTTRLLHNL SLERDENTSLNSDTNI  
DSGESNNKKTTEPEGPSSIFLPKSVGEP IAMIIRRGKKVEFKQQYPEPEEMSEYRQPSEIV  
ADFQIEKPIEKLQVLKPKKDLKALLEAATGSSIQRRSNACGALKVLSTQKNNQVTLVRTH  
GFLDALVFAMSDNYSMADTEAGQAARSRAVNVVNLVNSTKKNRYHVLMLHPGLADALVKIM  
LEDKAEARELACATLGLTAKSQHCREDIAKTENLVDTLATILKGD DPMFETEDKASIEE  
PKTGYSEDDDL SREMSNDGSQDMSNQSHD

>comp10648\_c0\_seq1; 153 1 745 LEN=970; translated  
EQYIIFLIMGHIVGGWDLSCTEISAEQRENLT KSKRISNPGCYPTGFIGLTRPLVDAGII  
PEGTPLTVNAISGYSGGKGMMEFEDESQSTEPWAGYGFGLTHKHLPEMAKYSTLGRKP  
LFQPQIATFAQGMVVSVP LHYDWLKEGTTGATIHETLSKHYEGSNFVSVMPLGEPGVKDA  
GLLERGAFLRPDTLKNNTNMELFVFPNDEAEQVLLCARLDNLGKGASGAAVQNLNIALGL  
DETTGLV

>comp10648\_c0\_seq3; 392 82 1152 LEN=1377; translated  
MKLSIAAILVGAPSTLGFAPISLRSTTTTTTQLLAKHKV FIDGEAGTTGLQVRGRRIESRDD  
LEIISPDLRDLATRKKFINEADVILCLPDAASIEAAGLVDSENDRTVLIDASTAYR  
VDDTWDYGFPEISAEQRENLT KSKRISNPGCYPTGFIGLTRPLVDAGIIEGTPLTVNAI  
SGYSGGKGMMEFEDESQSTEPWAGYGFGLTHKHLPEMAKYSTLGRKPLFQPQIATFAQ  
GMVVSVP LHYDWLKEGTTGATIHETLSKHYEGSNFVSVMPLGEPGVKDA GLLERGAFLRP  
DTLKNNTNMELFVFPNDEAEQVLLCARLDNLGKGASGAAVQNLNIALGLDETTGLV

>comp10648\_c0\_seq4; 235 82 492 LEN=523; translated  
MKLSIAAILVGAPSTLGFAPISLRSTTTTTTQLLAKHKV FIDGEAGTTGLQVRGRRIESRDD  
LEIISPDLRDLATRKKFINEADVILCLPDAASIEAAGLVDSENDRTVLIDASTAYR  
VDDTWDYGFPGKCIAR

>comp10649\_c0\_seq1; 333 142 870 LEN=1220; translated

MTKFQRRGLGFLLFQVALLVLPNLTLSFRTSGPISTRHSLHSASPLTSASRANFVLPTE  
KPVDRRNTDSRLSMDIVGVSPPEIHTAFS FATFGPQPFWLLMILLPNNQLTKKIMGRLD  
LVIFFCLVHFFIVSASIVQPGATAPLLEFNDVFDPAKDSQA AFMNMVTNYPNFVAEEWPH  
VLTWDLFVGRYIWL DGLKRGIFTSHSVLFANLIGPPGLLLHWVTCLVTGKGFGLNEALE  
EE

>comp10650\_c0\_seq1; 641 1 1666 LEN=1731; translated  
XFDRNANSTEFVLGPTLNKEKSDLSAMVKKKGKSKRTTLKDKYKIQRRVAETHRKRKKQ  
AKRDEKNGVVRPNKQKRDPGIPNSWPFKQDLLKDIARARERQQEQQAMKDKRKGELRAL  
RDHQDQGGPCRTVQELMARANEDRQAFAAKQGGGSIAGATAAEKSDGRVAAGQQSRRAYL  
RELKKVVESADVLLQVLDARDP IGSRIHKTLEDVILSKADKRMVLVNLKIDLVPKEVVGQ  
WLNVLRRSHPTIAIKACKNISESEKDAATSSVPVGM DGLLQLLKNYARTGAGGGKSKTT  
IVVGIVGYPNVGKSSIINALKRSRAVGVS PRPGFTTTMQEVVLDNRVRLLDSPGVVFDK  
TALLGNCVDADSIDDPIPPVDALLQRCKPESLMMTYNIPAFPRGNTMI FLAMVAKTYGRV  
LKG GIPDKIGAARSVLKDNQGKIPYYTLPPKDAAPDVAKGGAIVVSSFGAEFDISAFDD  
QVLSLKESEDMDFVELINKDQEETERSKELANYLTNGDEDDNDMEEDSDDDMKDESDF  
RSKVAQADDFDFNAM

>comp10651\_c0\_seq1; 323 335 1048 LEN=1114; translated  
MSECCIMIHNNIGSRSNIRTKRPREQSAATSGPRLAVGMEVASDTN NNNKITSEGEDTMEI  
ESCPNHATDGEQASEASPNVRYNNMNSHKEVTDES GESEDETEKGFKN DGCSSSEGNQIR  
EPQHQQDGGQKLKAANGQQGHRAANEMKDCAE EVTTRKRVGKALEGDQCCSESDIQSLRLP  
QHERIQHVEPLDINRSTPASLKLREVLISRLKLILPTGRIQVVSHLCRNIIIGVL

>comp10651\_c0\_seq2; 820 335 3296 LEN=3556; translated  
MSECCIMIHNNIGSRSNIRTKRPREQSAATSGPRLAVGMEVASDTN NNNKITSEGEDTMEI  
ESCPNHATDGEQASEASPNVRYNNMNSHKEVTDES GESEDETEKGFKN DGCSSSEGNQIR  
EPQHQQDGGQKLKAANGQQGHRAANEMKDCAE EVTTRKRVGKALEGDQCCSESDIQSLRLP  
QHERIQHVEPLDINRSTPASLKLREVLISRLKLILPTGRIQVIDLSRRGLLQDDAELIS  
NALRCNPQIAVLKLGYNFNGDRGASMIASGCAKERKHHQNLTVLDLGFNNIGDAGCTSLS  
MHMVAGNHTLRNLFSLGNHIKNKGAVALASAILHGCSLSRLHLSNNNIGEEGINVLVQSI  
AEA EKRVQQLLHRQGGIKIGYNIKPVTIEEFNIDNVLMS SKCFETLSNMVVANSNLKNIS  
LSNNNLDDSDLSLSKSLSQNKNIPLTSLILSFNKITCVGVECLMNAVWGSSTLKEIKLD  
SNLMQDRGAQLCSVVLG SIRLELLDISFNRI STIGVKAIMKSLSENTSLKCLALCGVPM  
QNASKAVSYALAYNQLSRFNIDSCSVGYSQRHIVAGIVSNRYTKLQRLTGFP LARKFA  
NDVFIKSVRFQPATHDAIFIDNFLIVLAIIMTLGLPQLPEEWGNDRVLSFVRFM WTHWKL  
TKTVEPTKEIDEENDLSRGPAPPSMVASSAKRAFGSLSKSEESRIAFQNELQNQIDDNPI  
VSPDTSVLVRSLSGNNLQVPSWERQPSPTQENVEIEGEVERSEECWSSEMESLDQSSYTG  
SSTLSFQ TAAAI EYERRHKNLTWLRSHLQTLNDIGNLPFDDGDLWQLHQYYFSPAYNGDD  
NATLDMTESIEDHEENGIKEQAPAPAELESSNMGRAQSFRALENAVSEVNSPVQRPNKRS  
SLGEELKFDQGNAKRAKNSRPR IAYYPRVKERLESKPSSKTL SLLRQLKYIENAMLEGRN  
VYSFRDQEDDNFPTTTDVEMVLLDLL

>comp10651\_c0\_seq3; 857 335 3202 LEN=3462; translated  
MSECCIMIHNNIGSRSNIRTKRPREQSAATSGPRLAVGMEVASDTN NNNKITSEGEDTMEI  
ESCPNHATDGEQASEASPNVRYNNMNSHKEVTDES GESEDETEKGFKN DGCSSSEGNQIR  
EPQHQQDGGQKLKAANGQQGHRAANEMKDCAE EVTTRKRVGKALEGDQCCSESDIQSLRLP  
QHERIQHVEPLDINRSTPASLKLREVLISRLKLILPTGRIQVIDLSRRGLLQDDAELIS  
NALRCNPQIAVLKLGYNFNGDRGASMIASGCAKERKHHQNLTVLDLGFNNIGDAGCTSLS  
MHMVAGNHTLRNLFSLGNHIKNKGAVALASAILHGCSLSRLHLSNNNIGEEGINVLVQSI  
AEA EKRVQQLLHRQGGIKIGYNIKPVTIEEFNIDNVLMS SKCFETLSNMVVANSNLKNIS  
LSNNNLDDSDLSLSKSLSQNKNIPLTSLILSFNKITCVGVECLMNAVWGSSTLKEIKLD  
SNLMQDRGAQLCSVVLG SIRLELLDISFNRI STIGVKAIMKSLSENTSLKCLALCGVPM  
QNASKAVSYALAYNQLSRFNIDSCSVGYSQRHIVAGIVSNRYTKLQRLTGFP LAPIIM  
TLGLPQLPEEWGNDRVLSFVRFM WTHWKLTKTVEPTKEIDEENDLSRGPAPPSMVASSAK  
RAFGSLSKSEESRIAFQNELQNQIDDNPIVSPDTSVLVRSLSGNNLQVPSWERQPSPTQE  
NVEIEGEVERSEECWSSEMESLDQSSYTGSSSTLSFQ TAAAI EYERRHKNLTWLRSHLQTL  
NDIGNLPFDDGDLWQLHQYYFSPAYNGDDNATLDMTESIEDHEENGIKEQAPAPAELESS  
NMGRAQSFRALENAVSEVNSPVQRPNKRSSLGEELKFDQGNAKRAKNSRPR IAYYPRVKE  
RLESKPSSKTL SLLRQLKYIENAMLEGRNVYSFRDQEDDNFPTTTDVEMVLLDLL

>comp10652\_c0\_seq1; 557 330 1406 LEN=1624; translated  
MRAQTAAVSAANA AVAAEAGAAKAGNSKKNNSNVFLDHLGKIFLMG IASVIATLVRSSY  
NTSNRNEIRDRIEDFSAMPQELQDFRDANSELTIDVLRKLVSVYYQEFSPMDTAPASSS  
TLDASGGSPVRSSTTYKEFVRKVRTIMASRFPEHGESLTIQMGHFLDRLVVDILQQWAEK

QADSTDDTATTLGATLPEEEEEELPVALFWVALVAAMNGSVTDRIIRILHEIMLADQGGQAH  
GAAAAPGVPLSAVRDVTGYLQETCQLPDPDTQIVPTGHKYPTQHFQRAAPIDLVPEDLCTA  
ENTERSKTAGGDEKPGESIDLVEFAAILRTKSVCAWGECEYMLKPDASEFEEATSPSD  
>comp10653\_c0\_seq1; 239 77 715 LEN=863; translated  
MKLLNSSASMTMMMVGSSLLRSVAVGFGPARFSVAVGAANTTTQRSLFNRLFGSAPSSEYPI  
MTGEETMCQKGHGTSEKPVQKDLRWNCYETADRICNFNRHYAEYAGYWESTAFLKSVKD  
EDLPKIFYDSVTGAHLFTAPIGRSMEDFVKESRAHGWPSPFRDQEVNWEVGGVRCCLANGECI  
SDTGTHLGHNLDPDGSNGRYCINLVSVAGSPEK  
>comp10654\_c1\_seq1; 678 1 1812 LEN=2236; translated  
DQVAGNYWSNPINRMDRPPSGINRRGRRDQRERRFYEDDEYADDDYDDDDNSRSRRRPRRR  
PREEPRRRKPSAPVSSGLGEPPLKLDLYDQLFWYGFADDDTADVGDKTAFGGTKGKFNNG  
FNYILPEQSQESSRSRGASRRPPMDSARRLPPSETGNRGAITRDYDARRRRRAADMDYDD  
DEEEDYESDYSDSSSRKRRPLSPSLYKPPDETSTVRKNRMDDNYEDDYDDDYDDGDDE  
DYERYNGDYRNRTRTSRRRNSARFDGEDDEYMDRRSGRRRRRQYRSSNNEWSPLNMI  
SFLGLDRDEMNYKADMYDAKMGLGKRRRRDGRRRSLPQQRRSPRDDPGRPGYAYRYEAE  
DDDDEVLVDLAYDDVDDVVGSGAEAPSRSAARRRQLQELSDAKAKPKRKTKEQTWEERQI  
AMERVPPANVAVWGPAGELAMSAREKAFLLAQEDIEETARRKLNAMKQKSEAKDEISVLK  
VDAERQRLKLEDAPMDRRSRRLDLEELRQTEMDIDDASRELRRCRARVERAVGVLEEELEQR  
HYAIMSCYNVQASMLVGESLNEISSIPGSEAPTASAAAIGNTAEAEAGSDSSSPSESTS  
ANN  
>comp10655\_c0\_seq1; 330 522 2195 LEN=2412; translated  
MTAPTGSRPWMVVHVGPPKTATTTIKKGLLEVAEKLALDDNVYFVGGIQSSRVVNVGVD  
TEFKVYRNADTFPSNHESAMQSNFEEFSQALEGHLRNGHNVVISNDMYTHADGLDWDKLF  
EGIFLKKNQTTSSANDGFRVKKVVGVDHFLRFLPSMYRDYLYKYPYLFADPDGNPREYANA  
YIPGLIEFIESSLDVQYDHNVEASSEVSNSPATSATVTRNNDNPLYAQVKGTRFKQFKQV  
LNGIHGSVWAYLKFMTPELSDAVDVFVLDLHVEVSAESILDVGHKKSVVTFVVCQALP  
SADKTCMHLMLQDNTNTTETRNFPQEAETFRTSKADRRIITFPDMHRITQHARVVFRT  
KTSLELYQSGRPEWDLYNALDEWFHDPLNPNRAQTFKVCMDSNLAAKYKSVSWKFLVQMA  
LLTKYRHTLNGNTTANDSLFASSMPDRSIFQHEAAKDDTIEQDILLWLAQTKEEHRA  
FDEYVGGTYDNTIKMCQLDVALFEDKEFVEYFYSNIQQRPARHKTKHIKKVAKKSGTLK  
DEKLSKRTKNGTSMFIS  
>comp10657\_c0\_seq1; 229 321 1295 LEN=1348; translated  
MVKLDDIVTIPLIPDIESREGQDHYYMFPNTSSFEQPKGILLYLHSCRQSGLDFFTLPEH  
RILALRAIQGMIVFSPTSQNRTSQCFASEGAEGYLEKVVNGFIRKHQLEHLPRVGLGDS  
SGSLLSFVYRALNLKSI AIFNSPQGYDDEDMGVSAPTIVYLMSTDKSITDRMNSNMLKL  
KNMNVSSYLYKVSPPFTESLCKARPELSGFEFCQHILQTMQSDYSNLLDTHSYVVDGDV  
NSEQWQRCFEKLESYRTIPSTFTSLEDLVPYRKRKGNAMSIDTKSWLRIILEKEIQTC  
HGFHAMTAQFHEEILDVFLVNAKI  
>comp10659\_c0\_seq1; 699 1 1967 LEN=2101; translated  
XAPKNPFGVSASSGVLSSGSSQGTKNLFGGSLSPFSSFSGNKASSFLTTSSENTTSIFG  
TKSLDSSPFSNTTATIDGDTKAKPKGTDSDPKGTDSEDDKDYRTRLTKFYEKYNPSKIDS  
VDANLKKYEGREEEMFRKLEAKYNPAAPAPVSAQFPPAPAGNGPRCYLEFSVEGDGETNEK  
RRRRVVVQLYRDKAPLAADNFRCLCTGEVKTHTARNKPLRYLGSKVHRIVPGFQIAGDF  
TTGDGRGGQSIYPPNSEHGDWAGKFKDEPSGFMNHSRKGLLSMANSKNTNSSQFFFTLK  
AVPYLNGKHVVFGVEVLEGMVLEELSEVEINPKTSRPIRSVAIAACGAIDEETGVDLPSA  
GSNDEKEKLEPESTPSTIPSVFGSTSPFSSKSVFGSRSFSGNSIPTSTTKTSVFGGKALTS  
QATETAKTTPAFGTTATLGSFGSSKSSGSKGFGAFSASADSIPTFGKTPAFGTTATL  
GSGFGSNKASGSKGFGSFAAASGSAPAFGTTANLGSFGGALAAASPSNGTTPSFGSTTT  
VGGGAGGKGFAGFGSSAPTIVGGSPGFGGLAAAAASSKGTPPFGFGSAPKSGNNGSSPFAF  
GESGKTSIFNGSQTTNGSDENDAQGASPFSAFSGGASSPRTGFSSFGFPKTS  
>comp10660\_c0\_seq1; 327 206 1156 LEN=1326; translated  
MSNTSDEIDGNHPGDDNDERSESMSPSHSVDVDRGLNLSASPLTAESDTPRFGNTDAEDVS  
TGVSTSPYDPPPTNNTHIEHLARVRDIEHLTRIRDTFQEIETRAFTRTEQLLASELLDG  
DHEEELDSRESSVATEEDHRDRLRASNVDLSQLDMQIPTASTEDDAETEFEPEYEPYEE  
HLEIEILGRALESRYGSLGGEDETGVTRKIRCPICSAEFSDPGSRGNSPCLDHVRCSH  
GAMLVFTTLDRCSICHEEQIESPNVALGCGHVLCKKDFLLGGATAASGKPDSDNDKDDS  
DDRETDRHTTIATNAL  
>comp10661\_c0\_seq3; 713 75 1702 LEN=1702; translated  
MSSSYITIRDDTGIRLSVNERDFLRSCALKNADPGEEDDNDYEHNSNRDNSNKMLRCDGR  
RGNDVRNVRMQLGRWDNGAECTVQWAGTRVTSLSAELVPPSPDRPNEGIMNFTVDISP

MASSSFKLAPAIISTGPGSGSMSVRSNHSQYQRLLSNRILRCIERIVLIGGALDTEALV  
LQAGKWVWFVVALTVLDAGGNILDACVLATMAALKHYRKPQVDISEDESEGYEPSNVA  
SLPTMIPSIIVKEATPLPLHHTPLSISFGLIPADDAVNSTSSVVAALIDPTDREELVQS  
GSLTIAMNVHSEICLLDYGGGCELTPNKLRGCWKVAETA VKNLCQLELLETALTKADEQAQE  
ERLQRLQINQNGGIPSLPPLPPADRNI PFLQETENEDDMEVDAEVDEAQVQHIDTEAEEA  
YRKNALDYSSGHAPVSVREDGDAVRGAGQKFGNQAGSLLAAMLKSVGQASDATANKVGGD  
NTGNGPSQKDTDGMAEASEGLKKEEKTITTTENSELAAPLNKSFCLQDKNFAGMDLDDDE  
EEX

>comp10662\_c0\_seq1; 482 597 1910 LEN=2056; translated  
MSSHDSFNNTSIIDGSIFTSLSEDFVFTLVNAQLTLLDDFLESSKVSTTETGDGVVADALLS  
IFRIIRCKQIHYGRTSLFLHDLKSCIARANDYTKMTRKTNNMQYISKRHYNHLTWNNAER  
SETNLFWDSTASLVEHEAARLVDRLSLDAVEASQKAAIQIIQIVEYLDIPRELFGRHWE  
EDLTNNEVAKYIVTVFGNYLSDVKDSLVSQYLYHKVVVALVRCTVCFYIKRFILKADRVR  
YSIRQRRNRMKSQEFFSNPRRAQMRMTHDIEVFQKFFLDVSDGSKILQKIVADEFSVLDQ  
LLECSIYALSRCGFENLEEFIIVVYKRS GAHADVTRHLLSDIFLLMNGEDKDRCVRRTI  
QNLNEDLDKIKERIVERRNEHPSVQTAKANAAYFCLEEMLEASYNERIIQENMALCAGVG  
KDIIELRKQITGSKKIH

>comp10662\_c0\_seq2; 514 239 1807 LEN=1953; translated  
MENSKPLDGCSCARRYPIITIGIDSKNDQSSCILSVRGQEPKQMRFESETSIMQSFMIPD  
AENSVMAFLQFRDNGARFVSSAYLMSSHDSFNNTSIIDGSIFTSLSEDFVFTLVNAQLTLL  
DDFLESSKVSTTETGDGVVADALLSIFRIIRCKQIHYGRTSLFLHDLKSCIARANDYTKM  
TRKTNNMQYISKRHYNHLTWNNAERSETNLFWDSTASLVEHEAARLVDRLSLDAVEASQ  
KAAIQIIQIVEYLDIPRELFGRHWEEDLTNNEVAKYIVTVFGNYLSDVKDSLVSQYLYHK  
VVVALVRCTVCFYIKRFILKADRVRYSIRQRRNRMKSQEFFSNPRRAQMRMTHDIEVFQK  
FFLDVSDGSKILQKIVADEFSVLDQLLECSIYALSRCGFENLEEFIIVVYKRS GAHADV  
TRHLLSDIFLLMNGEDKDRCVRRTIQNLNEDLDKIKERIVERRNEHPSVQTAKANAAYFC  
LEEMLEASYNERIIQENMALCAGVGKDIIELRKQITGSKKIH

>comp10663\_c0\_seq1; 316 74 820 LEN=875; translated  
MASLITSVSYTRIAILGIIYSFISLVITILDATTIVGAQTTDIEALRSRLASAIHGLNEDA  
LRGFFDTEDESISYQSKAFHHLSEQVDVDSLNDKIVQYYALYCIYHATNGVANEITNADA  
RFDNIAMPEWLIATNWKDVTVDVPCGTTFITATDVANETSLVTTLSESSGGWYGISCDT  
EGRVVAIEIYENMLTGHPYEVVLLASDGPFFSTGAGNLDKLDLDFQNEFLSNNGDSSWISY  
LGSNISEF

>comp10663\_c0\_seq2; 501 74 1504 LEN=1517; translated  
MASLITSVSYTRIAILGIIYSFISLVITILDATTIVGAQTTDIEALRSRLASAIHGLNEDA  
LRGFFDTEDESISYQSKAFHHLSEQVDVDSLNDKIVQYYALYCIYHATNGVANEITNADA  
RFDNIAMPEWLIATNWKDVTVDVPCGTTFITATDVANETSLVTTLSESSGGWYGISCDT  
EGRVVAIEIYENMLTGHPYEVVLLASDGPFFSTGAGNLDKLDLDFQNEFLSNNGDSSWISY  
LGSNITTTILLEGTTGDIPLLPENLVNFNIGNAFFTGFTDENFMLLSQLNYLNLDGNL  
FNTPDVLSELDPLEYLYLSDTLLTGDLSPLEGSPAIFKFWADGNPSLGGPLFSWLGD  
MTLASLSLAYNNLTGSIPPEIGNLVKMEQMWLQFNNTGTVPTEIGLMTTLRHLELESNA  
FTGFVHASICERTEFPLEILKTLGADCYDDNFCCPCCCTCNLTCVNGVNRALPGF

>comp10663\_c0\_seq3; 496 74 1342 LEN=1625; translated  
MASLITSVSYTRIAILGIIYSFISLVITILDATTIVGAQTTDIEALRSRLASAIHGLNEDA  
LRGFFDTEDESISYQSKAFHHLSEQVDVDSLNDKIVQYYALYCIYHATNGVANEITNADA  
RFDNIAMPEWLIATNWKDVTVDVPCGTTFITATDVANETSLVTTLSESSGGWYGISCDT  
EGRVVAIEIYENMLTGHPYEVVLLASDGPFFSTGAGNLDKLDLDFQNEFLSNNGDSSWISY  
LGSNITTTILLEGTTGDIPLLPENLVNFNIGNAFFTGFTDENFMLLSQLNYLNLDGNL  
FNTPDVLSELDPLEYLYLSDTLLTGDLSPLEGSPAIFKFWADGNPSLGGPLFSWLGD  
MTLASLSLAYNNLTGSIPPEIGNLVKMSVDRYSFNLSFCHILQAKIVYFLIDLCSGSSFLS  
KM

>comp10665\_c0\_seq1; 181 1 636 LEN=679; translated  
XNVRGALVDFCPINTVCIFLCLCAKPKRYKFNSSLSNLILSFSYVPQKGNATAAVNISH  
HFSSKLVS AKKGCIVFTSSVAGFIPTPFGMYGATKAFVSQLACSLHIELQSLGIDVCA  
VHPSPVASNFYNDLDHKIDILESACKQAVPPEDLPDDIFRSIGCCALRDLGAMAWSSRMG  
TFFFLPYNFFTEMFAAAAPFLPDWKTHNKTRS

>comp10665\_c0\_seq2; 197 1 510 LEN=553; translated  
AVGTIATPLRIAMVEGIVSPSIFIRVFWVCAFGVWLLTTFASARSTFPFPLAFKAFVSO  
LACSLHIELQSLGIDVCAVHPSVASNFYNDLDHKIDILESACKQAVPPEDLPDDIFRSI  
GCCALRDLGAMAWSSRMGTFFFLPYNFFTEMFAAAAPFLPDWKTHNKTRS

>comp10665\_c0\_seq3; 487 123 1127 LEN=1170; translated  
MSTTDGTCSSAAALAEAVSDIATPLWKVVILSIFAFPTAFWVVMYLIPQVYMAFRPVPDLK  
KRYDATWSLVTGGGSGIGKALAFKLARQGLNVVVVSLDDDDILKATMKQLKETFPKLEFRS  
VGVSFSPGIDYLKKIEEATKDIEIPIVFNAGFLVTGFFDQAPLGKLLANMECNATAAVN  
ISHHFSSKLVSAKKKGCIVFTSSVAGFIPTPFSGMYGATKAFVSQLACSLHIELQSLGID  
VCAVHPSVASNFYNDLDHKIDILESACKQAVPPEDLPDDIFRSIGCCALRDLGAMAWSS  
RMGTFFFLPYNFFTEMFAAAAPFLPDWKTHNKTRS

>comp10666\_c0\_seq1; 546 202 1719 LEN=1813; translated  
MSGSTRQTIIVTVLFLWSACLAPLSMAAQKQPEEYQQRLLVDWLLLEDPTSFFHPSIRFRRLG  
PDGESGPYAYHATEDIPKGTPLIVLPRKYVIESHQVVEIGRNPGRDCVTVQKMLEEYEK  
VKNSKKDPSTPSSFYEPYLSYLFDDTVGGTSRGLLPTTWSPESEKILELILEPQGDYYTL  
EPEIFEHPFVSTYCPENKLFQFSILQDDGSDNDDDDDKSLPVLTKVLLDGNTTARIPL  
PTPPTIVLVSHDKCRDEKFWYEMGHFYRNTISGIGPDKACFFRERPHQDANDAAAPVFQY  
EPSVMEHAQKFNWVHPWTERPEREFFATHPHQRRKASAAALAPFESVLDEILFLKCTVG  
VDGVFSESVDVAVRALGLACPTAQXASERRSELHKEQRHKHGPLPVLSSGLRNAPPARA  
RNPLFLRARDPGPPGAEVLLRAFPPEPGKGAPAAAGPADPREAALAPPHTAVPAMDRDA  
GEQDHEITDTEPAGGGVPSGNGREVL

>comp10667\_c0\_seq1; 351 1 1161 LEN=1234; translated  
TLQHSFCFVIIASTRVSSTALQTTRKNESTRDMRGYNLGSASLRYQNLVVIKQTAFEEY  
SQLKLRGQAPKALRWKRLEQRYQAHHKCVNDLLSVLQENNVSFNCVNRVDLDRQHLADID  
LMVAVGGDGTVLSAAHFLDHGTIPLLGVNSDPNVSIEDRQVTKKRDERKSHGALCACTA  
LDIKDRLSPILFGEKEDSLSKRTRIRCKVKSTFSETRLVPALNDLLIANPSPGAVSRFRL  
GWLKLDSEEDIDGDVPSVPKDGTRFAGISYDIKHGLNVWSSGMWISTSTGSTAAMAAA  
GGQPMNLDSSNLQFMIREHMIENSNEVIDHGVDNGFVNDEEEMHIRWNSQRGRIYIDGSH  
LTHNLELGDEIMIDNKAPPLPMFMR

>comp10667\_c0\_seq2; 235 1 858 LEN=1366; translated  
TLQHSFCFVIIASTRVSSTALQTTRKNESTRDMRGYNLGSASLRYQNLVVIKQTAFEEY  
SQLKLRGQAPKALRWKRLEQRYQAHHKCVNDLLSVLQENNVSFNCVNRVDLDRQHLADID  
LMVAVGGDGTVLSAAHFLDHGTIPLLGVNSDPNVSIEDRQVTKKRDERKSHGALCACTA  
LDIKDRLSPILFGEKEDSLSKRTRIRCKVKSTFSETRLVPALNDLLIANPSPGAVSRFRL  
GWLKLDSEEDIDGDVPSVPKDGTRFAGISYDIKHGLNVWSSGMW

>comp10667\_c0\_seq3; 198 1325 1597 LEN=1670; translated  
MAAAGGQPMNLDSSNLQFMIREHMIENSNEVIDHGVDNGFVNDEEEMHIRWNSQRGRIYI  
DGSHLTHNLELGDEIMIDNKAPPLPMFMR

>comp10667\_c0\_seq4; 198 1193 1465 LEN=1538; translated  
MAAAGGQPMNLDSSNLQFMIREHMIENSNEVIDHGVDNGFVNDEEEMHIRWNSQRGRIYI  
DGSHLTHNLELGDEIMIDNKAPPLPMFMR

>comp10668\_c0\_seq1; 452 102 1478 LEN=1514; translated  
MKYTSGEKNWYTNLALFGDSSSALFLSFGLLVLSFFISLYMDGNLQSVSWELSSSTERAYR  
KLGPIPNIAAPPRIHFVNDELGDKNLVSEEMQEAFFDRDGVIAVRGLLDPALLSALDDATQM  
IVSRQKEKDKAKSKTKPKVLTGRKKAPKQFFTVNQGTIFSSVDGGNSTSVDSFPVKVAMT  
SKIPQVIAGLIGFDCETCEHANKTLRILRDI FLAKDEEEYVCGWHVDDVGFWPAIVEELG  
EPVGVNAWIALDDMPTEIGGGFALAVGSHSSPWKEEAYRSIGSTHSFPKAGFNSSRDILQ  
NRPGNGTCNIEHTAPHLHRRMEETKRNYNIKAGDIIHFTRWLFHKTI PFSTRDVVSKRAAK  
NEEPIVYRRYSIRYGPSTSIIPPGYGTPEPSVISEEKNGGRSADHVSEHDAAWYPRVWPSI  
IDTEIEEMQLLAKDRLPKALQKSDQRRKVIRPRVKRQY

>comp10669\_c0\_seq1; 197 214 639 LEN=951; translated  
MSQTQEDGPTVVEGTIRGLTPGQRHGIVSVCTYGDVDRDGSSTGNIFNPFKTHGAPSDDA  
ALKMEGDLGNLTADDSGVATIKMDDSKIKIFGPHSVIGRSMVICAGADDEGRGGQENSIS  
TGNAGPRIAFGVIGLANPSPA

>comp10670\_c0\_seq1; 425 1 630 LEN=806; translated  
EDDGEDDLLVVKARHEAGDVAEDLVPLASTKVRKPKKIRIDGGNSSENVHTVFEEDGTVQ  
PKIFEAKHSDSDSDTGSVDDEEIAEALQGANDGYLKQVRQRLEKTKELDKEEERERIRA  
KHKKKRMKEKDGRRTTEEGDGKQLAILATTETTYDSEKNSQSSSTSSNDSTSTASSSDS  
ESDESEGGDNPMVARQEDLALSLIRGGF

>comp10671\_c0\_seq1; 567 83 1465 LEN=1808; translated  
MEDWSPFYCLPRAELTPSGLLQLDTTDHEVLLLRSGVEFRHEGPTPMAPRPRGLPPSER  
WKNTPPFEMVLTITTHRFVLLYKHDRDNDESQGTGRNNSDIDARLVHLSNVRKVEASGG  
PSLMSPNSSYKIVLTTKTYDTLVLVFRNSIMGGNSRSDRDQSLRELTKALERKRWEVAS  
RLEQKKALEASRFSSSTLGTSGHKVGLDRILAKNKARHQENAKLAEALSGDSEHLLTEA

AELLKVIQKYTVLVQKFEGSNSNSDDEEAAIKLKGLLSDMGMTSALSQSKMAGTGPKRYR  
SGAEEQRLNDYHELTARQVADFLVPRLRKS GKGMMSLTDVYCLFNRARGTNLLSPEDLRD  
SCALLNEGLNVGLSQRTPPSGIVVLQDELALSATNYEARRRFIDLCADGKTAL EASHSL  
QLSPLLAEEQLEEAERLGWLCRDATLSTVRFYFNK FVITF  
>comp10671\_c0\_seq2; 335 224 1763 LEN=2106; translated  
MAPRPRGLPPSERWKNTTTPFEMVLTITTHRFVLLYKHDRDNDESQGTGRNNNSDIDARLV  
HLSNVRKVEASGGPSLMSPNSSYKIVLTKTYDTLVLVFRNSIMGGNSSRSDRDQSLREL  
TKALERKRWEVASRLEQKKALEASRFSSSTLGTSGHKVGLDRILAKNKARHQENAKLAE  
ALSGDSEHLLTEAAELLKVIQKYTVLVQKFEGSNSNSDDEEAAIKLKXVSAALALVEVWR  
RLVNGRNLAKHGDTGLHTREITSVMIGQNRVAKRIQCTGSMVCFELLSLLFFSLSYYCF  
XILHAASISREKFKSTIELNSFCNTSRLLSDMGMTSALSQSKMAGTGPKRYRSGAEEQRL  
NDYHELTARQVADFLVPRLRKS GKGMMSLTDVYCLFNRARGTNLLSPEDLRDSCALLNE  
GLNVGLSQRTPPSGIVVLQDELALSATNYEARRRFIDLCADGKTAL EASHSLQLSPLLA  
AEQLEEAERLGWLCRDATLSTVRFYFNK FVITF  
>comp10672\_c0\_seq1; 701 386 2580 LEN=2653; translated  
MKSVESTACKMSTSPSSSSSTAVDQAKGTSMFSPSKISVEPSKLMLEVISSCDDIDTKKAL  
SKETLTETYCVLRRFI IHQSKTNTTTTETDQNTDIADVDRLRPIISSYALIAAEHMCQIA  
NDQGNEQEKMRSRKNKRTWEALQNAAGTLQNSIHQNTETKASELPMASNALAVSMVFGAL  
SLLQQQQSLHNSGDNGSAKAAAASLSTVSRNTALRLAGQPLSALVLRSCVSRAYCDKQE  
SFRFDLTILNHLAKSFHLTND FVEPRVIAKIVRKAVPKA QATYEREDLVKQSTAGAFALS  
CQLRPWSILSPIELMDAATAYDFYHSAEEICRSAHGAANDAGASSLAASVEGDDDDANG  
GGNLPFSALEQENENVRSAVEKLIDTAMASRM YRRADAXGNKPVRHGGSI AVVKARYFHAR  
DTIAKVVARQFP IVD RQIERVDKAVAKIGRCNETEEKSPDGD PASPGADIRRYA IEMLE  
EAGEITAAQRLASLHGMEYVYDEEA ILLAAKARREKYLQYDDLPG EIPPLITETHELRS  
GFDRLVRAEEKASSSSSCNNHQRRKRMGFDAEWDEETKGVALLQLSGAETVLLIDVPALS  
STEDGVNALRET V GKVL DSSD WAVIGFACRQDL SRLRATPCVPVGGNPHWISGAGSVVDV  
QPLVWDAEPALKTTGLSRACEHYLGKPLDKSEQCSLWSSRPLSDRQRSYAALDAWVCVAI  
YAKVSNPDS EN  
>comp10673\_c0\_seq1; 598 104 1585 LEN=1878; translated  
MSSEHQHQHQKTQKKEAHTNDAETEAEETTSHYDRDEEYRLAQQAAASEAVMIGRETLAMA  
VRQGEQLENAETMADDTDYTLDKANRLLRGMTWSGWLANKFSKEVDS PGYKTRNGNGND  
SAGESILGPPRVYERIP EPCRDA A QAVQNYHLNLQVLEHCETE EQRGTCRLICDNMHKQA  
RLHITEVLTGAAAGSSDAAFGGTSGDTGVLADDDQTESFALRLQEEAQKLRERQLVLQH  
RPQEQEGATGTTGDRTELFRGSAGGSSTAKLLSFTDKISVQQDNHLNTMAQRLQELGSL  
AGNLNISLQQQSEVLDSLDSKNDTLQFKANAMNRRTERFLKDKSWGQQKPDFLHYATIQH  
KASGRYLSVAPNNNSTVVL SGLVNERCVFGIYQKKRVLGLQNKFSRRWVGQNL LQGQLACS  
ASAFQRREEWEAEGGDWSDTTLVVSAGWGTGGYLLLDGEGGGTLP IIGGGDMPTKNRAP  
KWCIREFDRTRNA  
>comp10674\_c0\_seq1; 107 1 222 LEN=514; translated  
ESATMGREKMEMLNQLLNASPSGEAASMGRGKMGLNDLLNGKPSEESGTMGRGKIGMLN  
DLLHGSAPRAPPQ  
>comp10676\_c0\_seq1; 523 1 438 LEN=602; translated  
SGDEEDDQEEETGEDEEEANEENGAEAEDEEANEENEQGEDGVDDDKANQTEESGSGDEN  
EEENEEDNQEENQEEANQAEESGSGDDNEAENDEENNEENDAENKEENDEENEEEDNGD  
DEGGEKDI PAGDDGVAHRLLRTRGL  
>comp10676\_c0\_seq2; 289 773 2341 LEN=2341; translated  
MFAHNSVLWDHEFHNMNRMAFFLIFLPLDHVTIRDGFGGLVPRVRLWLNLPNDPEEIHRY  
RQHTLNLSTSWPMWPF RFVQVYTC LVYMGAA LGKFIS SPWIRGDALSWCWYDEGMGRFYP  
DIVIDFLYNRMLPIKLQTWLSLTIEMLCIVTIWPLKTRKITFAAIVILHIGIELALLMHI  
FEYLSVLGWVCFAYPNPDGKSNSDAAMESRLKYKATKAGSHAFRRKMLAETTF AVSILYL  
LIFNTF PSDQME LAMPAPYTSLVET FVYPP EFVSESLYTI TAMTGLFSGPYILFDKPPH  
AQARLTAVIRFELSNGLIDREYDGV TIDAENNVS SVSIVVHKRRGSNEPPSPELGWFEP IPRQ  
WTYESQCRIVFSPGTVDFK GERSLSMESLWDYDDDEELDVQNGCINYN EADNALHQKGQ  
YGEPSFGDDGGGDDGGGDDDSKEANTDDENGNDEKEGQEEDG  
>comp10677\_c0\_seq1; 443 112 1230 LEN=1431; translated  
MATTLASSARRIGRQLSFVARQSNRHYNTSLLLR SRCFVTADVPGSLSRPVEMKSKRAFA  
TKKKKKNASKKDDDESLSYFERKVASKQLRVEAYKHKVERASRIKSRRDNAPKDVKKEEF  
LSWWSGRRAYEEQMDRKARQAGMDWTIQVATVVERLP I VMPDKADFETEFEDLQAYLQAH  
RGKQYPQEF LGTEGGGRPEAYTDEELMALLPENFKPAPRETKADEDGSVNTLDRRLKDRV



YLF IGDSFPTTELKVSANEH DRYGEKCESLLEAALRGIREQTSRGGGKKKGELPLDLYCA  
SETPLGVRLD VYDDEKQKSTGSFGTKTFFMKVQYDDGTLKGGDVAWLDRSEIVDRFQSAS  
KDDEAKFYRYLL

>comp10677\_c0\_seq2; 298 112 974 LEN=974; translated  
MATTLASSARRIGRQLSFVARQSNRHYNTSLLLRSRCFVTADVPGSLSRPVEMKSKRAFA  
TKKKKKKNASKKDDDESLSYFERKVASKQLRVEAYKHKVERASRIKSRRDNAPKDVKKEEF  
LSWWSGRRAYEEQMDRKARQAGMDWTIQVATVVERLPVMPDKADFETEFEDLQAYLQAH  
RGKQYPQEFGLGTEGGGRPEAYTDEELMALLPENFKPAPRETKADEGDSVNTLDRRLKDRV  
YLF IGDSFPTTELKVSANEH DRYGEKCESLLEAALRGIREQTSRGGGT

>comp10678\_c0\_seq1; 407 674 2197 LEN=2358; translated  
MPPASVASLPEGDMTINKIDSLDELHTKPTMENPVKKKARTEKDNDDDDSCRGIPKPEFT  
KMDHIPITHTTNAFVDPVVPVLWSPHPNPEVRGPIISTVRHAAQRNAIGAHQGSYCIYTGL  
AVAAKKLDPDYVPNFKGTSPVFKIGPHPSWADPKKIAALDPFGHVTTEVYGDWLKKGWDI  
RPTMAVTKAHLDLPECREALAAGRLKADGKILMPGSGQSIIVSKAAIEPVWYLPEIARRFET  
TESNLRRSIFRMTNGMYPELITRDPDIKVFLLPPIGGELTIYIWGDPETIPDENIELTCRVHD  
ECNGSDVFGSDICTCRPYLTHAIEECIKTAQKGGCGIVYFRKEGRSLGEVTKYLVYNSR  
KRQEGGDRAERYFECTEQVAGVQDTRFQALMPDPLHFLGVTKIHNFI SMSDMKYDAIVNT  
GIKVVNRVEIPPEMVPADAQVEITAKVFHGYNAGKAYQDQVDADKCLKQTVGREYTLDEEPS  
DDCSSSTGSAEEESPCKNGVCSKNKE

>comp10678\_c0\_seq2; 192 674 1537 LEN=1635; translated  
MPPASVASLPEGDMTINKIDSLDELHTKPTMENPVKKKARTEKDNDDDDSCRGIPKPEFT  
KMDHIPITHTTNAFVDPVVPVLWSPHPNPEVRGPIISTVRHAAQRNAIGAHQGSYCIYTGL  
AVAAKKLDPDYVPNFKGTSPVFKIGPHPSWADPKKIAALDPFGHVTTEVYGDWLKKGWDI  
RPTMAVTKAHLDLPECREALAAGRLKADGKILMPGSGQSIIVSKAAIEPVWYLPEIARRFET  
TESNLRRSIFRMTNGMYPELITRDPDIKVFLLPPIGGELPVVLLCRLAL

>comp10679\_c0\_seq1; 201 115 1068 LEN=1343; translated  
MKLSTTAIILAASNFFYASAQNTTVASCAAKIGVSQSCIRTCGSANATDSGYSNLLLQCL  
DDASGFNIASQLETCCSMSGTCTSSMSDADDCLKAQLADVRSAAANNYLGCITYRRLDFTC  
PWATYCVNLLTGAAGTGASNDFSVASGSKLATMTANATTCDDMSLFGKDACSTVAGCCEP  
CADGIAAVVNAVNTNDILLPAYGGDNAPSSCSGTCADFTSRVRQLESTGEEPVAQAQVVDP  
DQLTRVYDMAQECTDSLATDIAAYNHTVAVENFLPCLYKKMGKIMAETETLEQSSASEFS  
PSVAATAVASAVLAFA

>comp10679\_c0\_seq2; 208 616 1113 LEN=1388; translated  
MTANATTCDDMSLFGKDACSTVAGCCEPCADGIAAVVNAVNTNDILLPAYGGDNAPSSCSG  
TCADFTSRVRQLESTGEEPVAQAQVVDPDQLTRVYDMAQECTDSLATDIAAYNHTVAVEN  
FLPCLYKKMGKIMAETETLEQSSASEFSPSVAATAVASAVLAFA

>comp10680\_c0\_seq1; 211 1 1024 LEN=1082; translated  
XRQFSPNGLRCLAKHSLVSYLDSIYGGIEDLGHNTPSKRMYSSTKQGMAGFDYFEIEFP  
RVFPFISLIISPTSMESYKMLFRHLFFAKHVERRMVAWCDHQVLKLDALRGLLGPFTFL  
LRQRLMHFVQNLNMNYMTFEVVE SNWLEMLSAIDASEDSTPGQTQQTVDLLKIHDFGLXQ  
NNPSVSSPEPTSHQDLKAAEYVPAFSDQMKRFIDSTKIHDDSFNTAIEKRDAVQRNLNE  
RRSFQPVARDQNKLRALVSVKEERAILLQRQTRRVGREICSDSYKKMVRRFDEVFSTDL  
SAFVVQLRNSRAGSGTVANLGMRLDWNFGVSRGVAVRNRSY

>comp10680\_c0\_seq2; 582 1 3181 LEN=3287; translated  
XPHRQPI SPNRYGGSGNQIQLYRSSAISLAPLPEMLEGSAARPNFNANPAQRLESNDTNH  
TEP SDEIHVDPIKQREGRNRPYRKFP RGNREGQDV DVACLHSGDSVMLQSCSLSATLQMG  
NDGILAEFNGPCLGNNAESLRI FRVEDDGV SPLMEGDVVYIELSGAQQHRALGVRKRCND  
TNAMDEIGFFGDGSEESDLWIRSAKAGTELLVGKAAVAGKSTSQDAGMVI PVRSGSSIL  
LMNCSNGLLSIRNGVPVLR TD SYDPNTT PFSGDP SLLGSLGRHDKLEPSVRETFQLLKS  
FIPPCPSWAVPKGMGERLFLNGSYLSKPLRNQENISVKSNLSSDAKENILVDEIIGSFL  
GLEGLYIRLKGSECSLHGNLGSFQLFDS SDVTFDL SLRNLVDKILPLSTSYICVQNFVG  
SHYPGYEYGRVMQAFCEGLDTFLQQFVSFVAQLDQKIRKPPSSGAFTMKNIHF EITPLLH  
SMSILKHTTEVVF GKKGGALINALRSLEKRVYMGDTVAKDLFGTLLDRASAPYAEMLSIW  
LQSGRLVDPYDEFMIEKTSEEKDNASLDGDTWSALFAINEEHVVDIVRNQKYKNMILVT  
GKYWNAVQACTVDTMNSVETQSGPLELKKLQFQSDSSQISSYIDSMYKSASGNLMNILKH  
EYNLRESLQVMKRYFLLDQGDFLVNFLEAAEEELAKPFENVSIGRVQHFLGISVQATESQ  
KNDDFDSSNSFRSKNSRQFSPNGLRCLAKHSLVSYLDSIYGGIEDLGHNTPSKRMYSS  
KQGMAGFDYFEIEFPRVFPFISLIISPTSMESYKMLFRHLFFAKHVERRMVAWCDHQVL  
KLDALRGLLGPFTFLLRQRLMHFVQNLNMNYMTFEVVE SNWLEMLSAIDASEDSTPGQTQQ  
TVDDLLKIHDFGLHKT IQACLLQNPPLIKTLIKLLNTCLLFSQDKRFIDSTKIHDDSFN

TAIEKRDAVQRNLNERRSFQPVARDQNKLRALVSVKEERAILLQRQTRRVGREICSDSY  
KKMVRRFDEVFSTDLSAFVQVQLRNSRAGSGTVANLGMRLDW  
>comp10681\_c0\_seq1; 358 46 867 LEN=965; translated  
MGKTGAIIRRATLSSVSVRCPLAPPKLSPLVRSFSSNTNTRQWPFRIDGPCGSRSSGSFH  
KCVTSSQPLRHQKINSRVSVASFSSSTDDKKEGVIRGWMNDRTARQEKEKYM EQMTRLST  
MDVFTMEKYRDELQMGVDGGMLTKVSFMQTK EIKQAKEVVEVVEKIIIEVVGPDATAEDL  
IKMDRLQRLRVATSANRTLEEISIMVSQITNMDVMQKTLRKRYLEGKPIPPDKETMQSVI  
QKDALAVLSKSKQKEMMRSRQESNARRMARKRRR  
>comp10682\_c0\_seq1; 497 713 3714 LEN=4167; translated  
MTASAVAVLASASSPALASVAEIDKSTGSLYTPKKEMLAGGSAAARGIRIEASRDNNIKL  
KSGQQIQTVYETRFIAYLSRFLINFDDAANGFWISQTQEQGGTNSADSSLADLKFAEFSE  
SVEIGLADYFVGPYGSYSSLSAMKAGINAKYQAKSKRYSEGGEDGNAGSGILRQIAGLL  
SRNKPVDKTLARKKTADRDRFAKQGVNLNLYTLLKARYTTKTAKRQLTILFSFISNPATQP  
TAEIRSLLEIDDASINKIEITRPFARNEVTSRTSCKRGGGYSIGEPPIAIEIEPPPALGS  
AYKCAKARPIMKTTSRVLRINVDGGQGYWKTPEVYVSLPGAGGASSRQCVAQAIIDREG  
HVESIVVLDPGHGYGRSKNKTPPKVI IKPPESRGIAQSRGNRPALAKAELEYEIVEIEIV  
EKGNGYVGTEPPLVTITPPEEEDWYVDVAELAVLADSSSNRQSFSGASVEMRGPKNLA  
YSPGGIRAVPPKFLRRVREDPIELLPVIRPEYNSYGTIVIPVAAVRTYEEKILDNPRF  
RAVDPLFGAIGALPAQKSAMELKPNEYARLALS GAVCTVLVRTALNPLELIKTKLQLEND  
EELLAFARQSLDNSPGTGIDQEGVSKISPASSYRINENKFVPPGNLAIEASPTTTTTLAI  
DEIAAVAPAKISPQDLIGKLIELRGFPAIFQSADITLLASLVFGSLGFGATELFRRSFTE  
YFFNGEGGTGGNEVLLLAATVATIITCAAAPFELLRVRSMGLVESQEWVQVMKDFLKE  
KSQTEEKTNELQSASTDFQEIGEHLIDLKGLEIQGLPAPLGRFWSDDIAGTCLRNSKV  
LAFDI IAKALTGLINSQLGEGALPIQVIGITEGLAISAFSGACAGIAGAFVSHPADLILT  
RLSASKPVASTDDVSASNGSKENKSEATELNWKEIVKELLAKEGGVANLYVGLAPRLVFF  
FLVIGLQFFLYDYVKNILEVGSDDL SLVLDVIFYAVRQGLS  
>comp10683\_c0\_seq1; 629 1 1386 LEN=1883; translated  
EEEQTANPDKATKKPNVDADADAKETTDGYSEQHKIANLNCGAYGGPSDEDAEEMVYWED  
IPTDALHMSPFHAEHPERKQQENQQPQHVSQFLTFEPDAGGWNNIRMAMETVLAMAFAMG  
RTLVLPPHQGMYLIDKGGEHQKNKFSDFHFFHMERISAEHIGLEIISTTEFLERCKKGEI  
VGDDGKPLTPPGGRTDWDGIPNSEQRPLRDWMREQSGENLLHFDPPQKCI VAFPATDTEED  
SNELELLPDKIAESDGGFPNYEKYIGKPNPVDAPALERL KEMSADRKALCLYTPELQKKR  
WLHFPVGMKTNYGDESRLLVHFYAF LFFQDWKQDLWMKRFVRDHVRYIDEIQCAAARVVT  
KLRRERIAARTGQTDKHSTRFDTIHVRRGDFQFKDTRISAKKILIQ LKRVLDQNTTLYIAT  
DERDKAFFQPIVEYFADVAFLDDFVASELKQVNSTYWYREQ  
>comp10683\_c0\_seq2; 537 1 1655 LEN=2152; translated  
EEEQTANPDKATKKPNVDADADAKETTDGYSEQHKIANLNCGAYGGPSDEDAEEMVYWED  
IPTDALHMSPFHAEHPERKQQENQQPQHVSQFLTFEPDAGGWNNIRMAMGSSIVQCSAVQ  
CGATTVKRGLSLHGVEVLDTRGIAATFSSSCFYLRFFTAWMPVPTACEPTKSALFVGFVL  
VXLVQNISYPKKKHNYPSSETVLAMAFAMGRTLVLPPHQGMYLIDKGGEHQKNKFSDFH  
FHMERISAEHIGLEIISTTEFLERCKKGEIVGDDGKPLTPPGGRTDWDGIPNSEQRPLRD  
WMREQSGENLLHFDPPQKCI VAFPATDTEEDSNELELLPDKIAESDGGFPNYEKYIGKPNP  
VDAPALERL KEMSADRKALCLYTPELQKKRWLHFPVGMKTNYGDESRLLVHFYAF LFFQD  
WKQDLWMKRFVRDHVRYIDEIQCAAARVVT KLRRERIAARTGQTDKHSTRFDTIHVRRGDF  
QFKDTRISAKKILIQ LKRVLDQNTTLYIATDERDKAFFQPIVEYFADVAFLDDFVASELK  
QVNSTYWYREQ  
>comp10683\_c0\_seq3; 657 1 1644 LEN=1707; translated  
EEEQTANPDKATKKPNVDADADAKETTDGYSEQHKIANLNCGAYGGPSDEDAEEMVYWED  
IPTDALHMSPFHAEHPERKQQENQQPQHVSQFLTFEPDAGGWNNIRMAMETVLAMAFAMG  
RTLVLPPHQGMYLIDKGGEHQKNKFSDFHFFHMERISAEHIGLEIISTTEFLERCKKGEI  
VGDDGKPLTPPGGRTDWDGIPNSEQRPLRDWMREQSGENLLHFDPPQKCI VAFPATDTEED  
SNELELLPDKIAESDGGFPNYEKYIGKPNPVDAPALERL KEMSADRKALCLYTPELQKKR  
WLHFPVGMKTNYGDESRLLVHFYAF LFFQDWKQDLWMKRFVRDHVRYIDEIQCAAARVVT  
KLRRERIAARTGQTDKHSTRFDTIHVRRGDFQFKDTRISAKKILIQ LKRVLDQNTTLYIAT  
DERDKAFFQPIVEYFADVAFLDDFVASELKQVNTNYFGMIDQLVASRGEVFFGCWFSTFT  
GYINRLRGYHADDHGMPGYEMGIVNSYYYAMPDRFDHMREFWPIKQQFYAREFPASWRLI  
DASVGT  
>comp10683\_c0\_seq4; 565 1 1913 LEN=1976; translated  
EEEQTANPDKATKKPNVDADADAKETTDGYSEQHKIANLNCGAYGGPSDEDAEEMVYWED  
IPTDALHMSPFHAEHPERKQQENQQPQHVSQFLTFEPDAGGWNNIRMAMGSSIVQCSAVQ

CGATTVKRGSLSHGVEVLDTRGIAATFSSSCFYLRFFFTAWMPVPTACEPTKSALFVGFVL  
VXLVQNISYPKKHNYPSSETVLMAMAFAMGRTLVLPPHQMYLIDKGGEHQKNKFSFDHF  
FHMERISAHEIGLEIISTTEFLERCKKGEIVGDDGKPLTPPGGRTDWDGIPNSEQRPLRD  
WMREQSGENLLHFDPQKCIVAFPATDTEEDSNELELLPKIAESDGGFPNYEKYIGKPNP  
VDAPALERLKEMSADRKALCLYTPELQKKRWLHFPVGMKTNYGDESRLLVHFYAFLEFFQD  
WKQDLWMKRFVRDHVRYIDEIQCAAARVVTKLRERIAARTGQTDKHSTRFDTIHVRRGDF  
QFKDTRISAKKILIQLKRVLDQNTTLYIATDERDKAFFQPIVEYFADVAFLDDFVASELK  
QVNTNYFGMIDQLVASRGEVFFGCWFSTFTGYINRLRGYHADDHGMPGYEMGIVNSYYA  
MPDRFDHMFEPWPIKQQFYAREFPASWRLIDASVGT

>comp10684\_c0\_seq1; 388 1 2059 LEN=3003; translated  
XNLSTVNHRTLIPLTPPHRDMNVTGGHPQSYSRGRGIATAAGGRCVPPAAKDDAFVEKE  
ANIPPLYKPPQAAGTIVPVTAMINXYRNPYTSVVL SNVYPDVSASAACVRTNSIVHGLAA  
LGTKKQKKIPRVNTSYMDGPTPSIDGNDCDDREQRTISGTINPNRVYATSVDLQGKDK  
NPFGTNPAIRMMHLPPNQSDRMETLVAAITDEKMKMLVTDADFDDNQTANTQNTSFHLDDD  
DDDDQNDACIENNGDHCKNDKYNINYFDANTTVDRNTVDLVVFDVDFMEEAHSFRFRQQF  
PSAALVLDQMDSLRSRQKIVQEWDKKERQKQLQNRDPFGCLPEVLNCLPSMDKADR  
DHARLIRELASIHRSDLVLVCSPELKLTTVYKVPKQKLCCLASFFVAPPPEESDANINR  
CYFENYLSSPPPPNTIQPRFVFCGGFKHEPNADAVRILIDFVWPRVRKQLPEATLHIYGA  
FCPDHLLQINDRNKSKNKTSSSTRGITVYGFEPDLAKIFGANSRNSILLAPLRFAGIKG  
KIIDAFTGMPVVTTPIGSEGMTMTKREEMAPNSDPLFGGRIASTLEEF CANAIELATDP  
VAREEAKTNGRFLANLFAASQNWECVENRLLLEILQKNSDGGEVLSQRRGDYDQAMLWH  
QSLRSTEFYFSRWELKESIRRTEKES

>comp10685\_c0\_seq2; 261 1 1322 LEN=1410; translated  
XVCSSDLDYASEGRSAFSPRYQISTAKSDQSSVTEDQKYTPTEHTDFTQFTYDTRATQFT  
YNTRATSDSASPNSASGMGSISYDVRATSDVLSPTSANGGGSKDTSRDGAI SNGSQIKQT  
AQSQATNSKEKPLSPRAKKFTESIMARTRSRADPDALLDSASNVEAEENTTRIMININAQ  
EEGGFIQSTGIARKRGRVIQLLIIGLISFLIAFLGGILVLSSCHFVSVAIEAEDGTEFNL  
HFGLWKYSPINSFAFRGHTYCNHYDGD F IRGAPWFGRIASLVALAGGGFSLVVVWLYLVLG  
HCVQKVR I AIFSAALSGVLQLCTLSFLVGPICSEDACTLGPASIIISIVGCFYFVLA FE  
MHYNAPLVNLKDNLEYIHSQEESSHTVGNLEMTDFEYGAKAYVHRIAFGNTNPPYPTVKKV  
QYTNQHKDKGGSYVPPSAIV

>comp10686\_c0\_seq1; 565 121 2312 LEN=2481; translated  
MTILVLDQHEDSDWNEPAAWRDAAAHLGYTKKLW DNDREPSICGKDWKLNLLQOEAA  
RLGYTEELWDDSDDDSCSCSSSESENGAAVLVDNYDDSDWEELPESVRRSATELGYTE  
LLWNNQDEPEICGIDWDKLTLSQIEAATRLGYTRTSWDDDGESDIPGDCCEDENGKHFAP  
YFKSIYEKWTVYCIQLYTETKDYKLQIRDMGMI SMHANRHFVKNEVIVQAPVGP CNHEQL  
FRATPSEDNGLTPERQAFERFLEWHATHRGKDRAGAASTCVYPTLTDFSNLPTTSSDYK  
ILPDAVNPLYKMEIFEHEIVVVEFVPPSPNPTYKLPDRQFEILSFDEGLIGGLGEPNYS  
PEKMKRRPTRCGVEHRDLEVPGHFSNHACGSFSTAYDILHPDDCEHVS RKIVPKQHL SWI  
EDEIRSKQAAYENGE PGDQMRTRRELLPGEIITTDYSRWHWSNGDVLVTGGSQTPVGYF  
FGAELRDGNKDESASERWDWDTLPPRIQWAGRVLYGSKKLWEDAKDPPIFQKRWKHLTPL  
EREAVIRLTGHXKRNVGYETQESKYFETMNEDDASFASSSTVTSIDDLWKE LSEEQQN  
AATFLGYTKRTWDEDADIMDNHNSYFHGIRPEIRDAMAVLGQTEHVWEESDNYDGEYGES  
EPWFYICGSPNCHSSRAKGGFRGVK YFSLEE QM QIAAVCEPWIQQNLLWKIYQLEQDQN  
TEAKEKKMSG

>comp10687\_c0\_seq1; 514 201 1262 LEN=1406; translated  
MNPNIILFAWAASLEKQKQLLEMEEELEQAKIPGEILIPANVKGQPFTKREVL SLMKSI  
EKVVP I ESEQWNEVLATHCKKYPGRITTKSFQRKLDLQEKSISSDDPNC PKEVKMARRIQ  
SMIAEKQNEERDREVEQVKRYRREMEHPDCPEDVRMAKE TWILIEEKKRLRLQQQKE  
KREKVDDAAITSVPTLGGRSRNLQDLTVEHTTTATRPDAEPRTSTKRSYSSMSSTNSDI  
SMIEMKKELDRRMAEYNNELFRMMI EHNKERDRRKAQREARAKMKALIRKFKAEWVG  
SAEDFNLI LFFEFVSLLSGIPLPKEYRLNASDRKKASERLATLIKEFIQKIC

>comp10688\_c0\_seq1; 1028 114 2537 LEN=3051; translated  
MAGPNHPHHQYGGGYGNNTNDSSYSMLFSPAASSLASTPGGGYPMGRNSMNTNATANMP  
PPSAYTPSNHNHNYPQQQQQELNWDPTRVKTELLKASAILSHRCLKLAGKWAAEQVTG  
IPVGTAKSVVPGDGNHGGNGNHAGGNDV DLSFTTHDNLSDGNEHDELFGEEP SNLSMLN  
ELGSM TAEDWHAKSLFEMGEFLHAASVLSSEKPTVSESTKRDNNINSSVRDITQMGPPKE  
NLSPYGFYLRAYALYMAGERRKEEDYSELEAANASAGNPNEGAGGAGKSSAMVLSTSKT  
RAKNPYLAQLVREVSRAYSNNNRQGI VDNAGGKTNNHSSLDAGFLYVYGM L LKAEQKESI  
PCPHPPHMVLAESLLEFPLNWSAWLDLSEVLVSGGNGNHNQPTNNHNNLDGNSRIANMEQ

QVEQALQPTLATHYMYHFFCAHLMMAHHSAAHEEALVLLERLYEPLPDQPLFQSPHVKTQL  
AVVHYHLRELEQALMWFRETSADDPYSLDHRDVYSNILYVKEDRVSLSHLAHEAVVIDKY  
RPETCCIVGNYYSLKQQRHKAVRYFQRALKLDRSFTSAWTLMGHEYVELKQTEQAMESYR  
RAVTVSPKDYRAWYGLGQTYEFLNMYLYALFYRKAATLRPYDPRMWCavgQCFAALHKI  
HDAIRAYERAIAQEDNEGIATQKLAALYRQERREEEAAKCYLRHLELRYMITCAAPEHAG  
NPHAHQQPHKYGTGAPTLDTIVQGVVLESVEAEAMLFLAEYFKSNGAFDTAALLCSRLVE  
YPGPEKEQAKSLLKGLRYMSMGKNQK

>comp10689\_c0\_seq1; 461 137 1396 LEN=1912; translated  
MAPLGTNGGHQVGANANGSSSNGVVGSPSFFQRFIYRPMFGWLGFFFRLLALWPLRRISDV  
LLPLGGEYEGFSENSMEGASKQFVSYLKKTLNNDNAGNDIVKLFSTKSYAEVQREAASSD  
ALIMVYLYSPYHRSTDDVCRRLCSPSMVRFLTENESRVKVISSSTATSQGSMLSYSLSA  
SSFPVLALLQADKSSNRSNAGSINPGPVKLVFKAEGPTLIRLTALQLMSLVTTTFQKHE  
RKVLEEATRRYQREQEAELRRQQDEEYQETLRQDQERERQRNEARLEAEREERKRQEEE  
QKIAEETNRLDRARALVRDEPPKGTGPGCARIRFRLPNGKQLDRRFEGDETIIGSLKAFLLI  
HFASESDKNGAVVVRVALSTNFPKRTYGAEGGESDDDLKILKECDLCPQAVLMVQDLDA

>comp10690\_c0\_seq1; 357 82 1140 LEN=1289; translated  
MVVKA VNGFGRIGRLTFRYAWEDPSLEIVHVN DVCSVESAA YLIQYDSVHGTWDRKVEV  
TEDGSGFTVDGKLVTFCEGDFTNVDWASKNVELMMECTGKFLKVKTLQPYFDECGIKQV  
VVSAPVKEEGALNVVLGCNHELLSKETKLV TNASCTTNCLAPVVKVIREKFGIVHGCIT T  
IHDVTGTQTIVDMPNTKKS DLRARRSGMNTLCPTSTGSATAIIEIYPELKGKLNGLAVRV  
PLLNGSLTDCVFVVKRSVTKEEVNEALREASESGPLKGILGFETKPLVSSDYTNDTRSSI  
VDALSTQVIDGTLVKIYAWYDNEAGYSKRMAELCSITAAMNISGIEPLFKYE

>comp10691\_c0\_seq1; 376 1 2288 LEN=2491; translated  
XEACSFVLSIKGRSRIAHFLGLFAVGFIDGERTTRTTLNCLQSGICVVNARMEQCHSSNY  
HAVFFADPHPRYYSQTVA TTTTHPRLQSATPLRLPDPLARKMQKPMKRKHEHATIESCYVE  
SCLLQLCRAEQWTDVVRCEDEYPEEASLVPMNHRISWKSNEFQSRSRKRYLVKRFGGEDC  
OPTIFRK SALGIVCASKDMGTDEAQTAILALLNANPLQVGASQYVAGHTPLRDAI LNDS  
TLEIFGIMIR TMSRCMGGDISFH LRDINGLLPIDHLTASIQLGSTAHSIAMMEEF LRAKS  
KTARSIENSTSP LIRLLTTGNSNTSLSGSGPPVRFSSRLSPEYKHNL LHSQRVLSAAIL  
LLDDDPSLLH HFSHVTKCTPLHIALRNYGNYEPLIHELLERDQSDMLRARNLYGDLP IH  
VACSVGVPFKVLCLIVERTASISSSESIVEQMSRQSFVKRDRFIWSTNQSGYTPIDLEWI  
RHNELGNDVYTARPFYPVEATGVRNHCFKED EYRGLLKE SVAQMMENHDAACSRQSEL  
SSREAEAKATFGSLLDRISLLIRAAATSGPILDSKGMIRSRLIESCTLGTPYSPSLPLPI  
LQLFLWLRPQEVLEKDRLNMLPIH HALRF SVTLSRNLSTQNAVDDWRSFVFQLLGKSADQ  
CKAKCRDGRPLPHYVLDHSGEDDTNGGNAFPRAKLO SARHAI VEKLI ELYPASVDQRDPI  
SGLYPFMLASVDQNL SIDTVFYLLRHSPSRCPDLRTFTTKKN

>comp10692\_c0\_seq1; 550 101 2149 LEN=2564; translated  
MVKRQKEKQYLSAREQREQGRSRSNLSASSAASTGVVQKSLPFKCCALTLVPFETPVCTI  
VDGTSTNSD GSSNKQNNKYGIVFDNTSLMEFILKHKKDPVTGNPMNSSKI I KLNMDRDSE  
TGEWQCPVLT KAFSDHNTKIVAVISPSGGNEATVYSYEAYHELNAKPKNYVDLTTGLKFS  
PKKDVI LLNDPSNLTFQKNVRDVSTFWHIRNARSKNSGRGASDSIRKSVTATR VMEQIQK  
ARVEKERKQAEAKEKAAEEEAESDGF SYEVPGANLPFRVPTEDVTGVKYSSGEAAGGLTS  
TAGGTVGSEGLR TATPDEILESRCRMASKANKGKKGYVRLIVQIQRRQATSLSSSSRA  
ESTSVVIP LLELHCDMVPRTCSNFLGLCRKQRYNGAVFHRWIADFMIOGGGEKKGQEIG  
KNIDDANGIKPKSNGSDSRDVCLWGPEGFKDEFDDRLTHTGEGVLAMANAGPHTNKQQFY  
ITLKG NRPCPHLDRKH SVFGAVVKGLEDFSRALAENVQTD AKDRPYVERTDLRTGETSRI  
SAAVVILATEVLEDP SKKAQEEEDLRLTGLHEARKALDQKRKRMIGGSSTSNHSSGD KKS  
SKKKRTKGD TMGVGKYLKIFQDKGGNTEDGAFSKTDNRHAIGIDLAPKGSTDL SVLSDIP  
ALGEMVAPAKKKNAKFGDFSSW

>comp10693\_c0\_seq1; 421 399 2183 LEN=4076; minus strand; translated  
MWTARTSALLLDGFLFFVVS VQKASGFVAIPP KPLTGARRGKACIATFLSEHSGTTDAVD  
SQGAAGKWESEAIRWIDDVLDQKSKQSPFAIEEPGD DNTPIVPFEWVVGPPDDRGDSPG  
SSPIRNKKVALRTIGATPL LDAESIASIRNAAENLWDGRGSSGPTSRFTLQFENTNSECH  
LDELVESNAALKEVDNLLTKVYPLARS AFGDSGGGQRLTDGRLCVYDSL VVRYDGDK  
ATDRFGASQPLHRDGGVSVNIALNSHDVAKETRRADRF TGGGTFEFEDLMGREPNEHQSE  
NENEASGGDASPVL RPLAAGHALAHWSTKRHAGAP TTSGTRDILVFFLTQRKATETA AAG  
AVPKSAFSGIERSFHLK LKAQEIPGGLALRCLDLAVEETPFDGQA HFLKGFHLMRGTT P  
KDGRGNTTEDEEQRWRELQQSVFHLVRAAEYAPFDARIQCHLGMAYRQRW MFAKRTNRTR  
DITGSDSSENGEQRELCKAMESLRRALFLH DRYQRHGIASDFDDNVLVARLTLGEVLAQL  
ERYSDAIQCLSKIESHSLDADKPKDKAMAQHIAAVVAHCREQERDKNKAELLVT

>comp10693\_c0\_seq2; 421 399 2183 LEN=3746; minus strand; translated  
MWTARTSALLLDGFLFFVVSVQKASGFVAIPPKPLTGARRGKACIATFLSEHSGTTDAVD  
SQGAAGKWESEAIRWIDDVLDQKSKQSPFAIEEPGDDNTPIVPFWVVGPPDRGDS  
SSPIRNNKVALRTIGATPLLDAESIASIRNAAENLWDGRGSSGPTSRFTLQFENTNSECH  
LDELVESNAALKEVVDNLLTTKVYPLARSFAGDSGGGGQRLTDGRLCVYDSLVRVYDGD  
ATDRFGASQPLHRDGGVSVNIALNSHDVAKETRRADRFTGGGTFEEDLMGREPNEHQSE  
NENEASGGDASPVLRLAAGHALAHWSTKRHAGAPTTSGTRDILVFFLTQRKATETAAG  
AVPKSAFSGIERSFHLKLKAQEI PGGLALRCLDLAVEETPFQAHFLKGFHLMRGGTTP  
KDGRGNTTEDEEQRWRELQQSVFHLVRAAEYAPFDARIQCHLGMAYRQRWMAKRTNRTR  
DITGSDSSENGEQRELCKAMESLRRALFLHRYQRHGIASDFDDNVLVARLTLGEVLAQL  
ERYSDAIQCLSKIESHSLDADKPKDKAMAQHIAAVVAHCREQERDKNKAELLVT  
>comp10694\_c0\_seq1; 157 222 608 LEN=955; translated  
MASAGEETKTADPVVYDDCYVTLTEKTLVLKWWYFFPFATSKTIPLGDIDRIRPGTDP  
ELALTWYKKKTWGQALSVDVWASRCGREFQSDNSTNFVLSVKQEGSGRSGFSVEDPKAFSS  
AEKYIKA  
>comp10696\_c0\_seq1; 358 111 2382 LEN=2382; translated  
MGTPNRDQKRRKRHHNMLLRYFFFAVIVTRVLFALFTQPLKVATDQRLESVWEGFPEVK  
TSTSPDIKEGAASALDGNKLLTAYLEPTESVYTDKNQKLFVRNTSMSSLQLVTFPNVNN  
CSSLMKNFPVDEFPLGDPWLPWIHDYFPSLDGKSLHFVAQNRRCQTGAANEKQMEFWAP  
QISLFGQIPVVEDRNDTKNTPGGTRKKKQKTYRLASSFEEATHNATRFQCRFHVGTKI  
TTLSVFPFDYEYISWRKHKKAMIGPHGGKEQSMVWLSQLLFCPIPEEFQPLLLPLPTIE  
SSKKQSAVNNQPALYVDLIPIRTPVRSNDELSDKLSAMRDIAIGSPYLNDVFGQHNII  
PSMDNAGRWENLPLCRRSSSLHLSPIKSPMQLSTIGAKERNQKPHRLVACTWVSASYQR  
GDIYTVSDSAKRLREWIHFHLMVGMDDHIYVYDNTNRALSGNSSVIYDVTRSFQVQYK  
AWPCKICNNKPGNPSGERSSQYAAESSCLKRYGELSEWMTFLDIDEYLVPMKQTEDGE  
YSWHPVMDMDKLDKSVMKFLSSRGKPRIELTEKLEDQSVCIDPEEIERKRRGLPVEPCV  
GPMRNKTFQVHNCDFIRPPKQRFQRAMKQIYRPSFVLLHFVHYSTVTTAMTQYTNTKL  
DQRNSWGRLLKQEAHELFDDELTOGALVHARSVLPHESTRRSAECLLGSKHDCMTMGFLC  
NDDVQFFDKLHRDNVFNQPKSFCNCWRNKVIEEVLVX  
>comp10697\_c0\_seq1; 217 382 2303 LEN=2442; translated  
MSRTEPFIYRSSRMGRSRLVAAVLCTLNCFQCVSSLSFNTPVFSKLNGETSYSP  
AALTANGESIAENDVTDRLDQDRSPNELSAWSGTAGDTAAPSSPVPGCESFGIYGDVGRK  
HDGDSMLSSLAARVVERIPGSPSSKRRSNKGVFDNSQYNQYKKGNEAPVNTPQRKNTRSK  
VSSNSKRNEQVWAALSNEQDMQLLDNLAGQKPLTALIELIMLSASVTAASSSPWIMGGK  
LTEVLPPTAAAFSAAGIGAEYVGRVAVADGKEVAAATIIICASEAEGFLANAERAKAITP  
LCVGLSATATLSSLVPLLNNTPASSILNEFYLACPLVSVLSAAVAALALQDTKVFCNQ  
ATSVGNRRFAKSGLVGRTWKSTSEQITGKTNNVRIKWRSFIFSVLPAPILGALVPGATLA  
TKSVIVTALAAAQVAYTLAEAEFCLARATDAVAIKARSAVCDTYANQGARSAAILPFTS  
ALSGLCAAATAAIVELPFLETLSASGTVASLTGEMAI VGVLPFLSTLFAAAASVSKARCE  
VDAEAAVQAASTLALAEYSSNEDEDPILRPFQVVAELIRLVSTSTLEPYQRFYRRFRFMS  
RSWNKFKNIFRLFSRRKRGGSDETSNASDSGEEGPVPA  
>comp10697\_c0\_seq2; 209 1282 2511 LEN=2650; translated  
MIILAFVLDYGIQCAGCRFAVSAAGIGAEYVGRVAVADGKEVAAATIIICASEAEGFLAN  
AERAKAITPLCVGLSATATLSSLVPLLNNTPASSILNEFYLACPLVSVLSAAVAALAL  
QDTKVFCNQATSVGNRRFAKSGLVGRTWKSTSEQITGKTNNVRIKWRSFIFSVLPAPILG  
ALVPGATLATKSVIVTALAAAQVAYTLAEAEFCLARATDAVAIKARSAVCDTYANQGARS  
AAAILPFTSALSGLCAAATAAIVELPFLETLSASGTVASLTGEMAI VGVLPFLSTLFAAA  
ASVSKARCEVDAEAAVQAASTLALAEYSSNEDEDPILRPFQVVAELIRLVSTSTLEPYQRF  
YRRFRFMSRSWNKFKNIFRLFSRRKRGGSDETSNASDSGEEGPVPA  
>comp10699\_c0\_seq1; 468 133 1692 LEN=1884; translated  
MVKTEKQIKREAHMREEHPNGFCLVARDTPANRKLFPDGPFGEPDVADTICPSEDNCPHY  
HYTEDADAVAAEETPIHILIASFRDKLCARTLHNAFKHAKNPKRLTFRVIEQTKADSDLE  
DDQGCWDGYCEKYNPNCQEQYKQVRI VPDATQSMGPTWARSRLSAMIHWYVHRDKSDE  
LDFQPVNMQDFCMQTDSDHDFSDNFVDLIDMFHLTKNDYAVLSTYVTDIEENKDPVNV  
PNLCMVQFTSSIRNWATKECNYLKRPKLTNAMWGAGLSFHRCHAELNVPVDPYLDNVFDG  
EEGSRGLRFFTHGYDVYSPHRVLVTHDYHHTQSNPVVHTWGRKRSQGDIESSWKWLDISI  
QAVRDRLTTFGSQRVNMLGFGNYPPESTEETELIRKSRFGIGTKRTLKQAEFFSGINFR  
KKKMDVNRGNIWVPEESPDYGLAETLSRPNTDEEVVFPVVTDPSPFFKDEVISMSE  
TVHIAESDYRFVAGVVLVAIALVLKVRTQKRKDDSHKE  
>comp10700\_c0\_seq1; 578 96 1568 LEN=1746; translated

MNGISRKSIAFTGAVLLVITIALPLVLVVRANETGSNSYLAWNGSETAMRIDGGGESGWD  
EEQWYVQVDGVMGGKSSGDLEFVGVEDASASTETTTTTTTTTTMMMSFKGDINLDGGGFSSVR  
RRINLDLTGFGVGVVTTLEASPVSSPIAPPTGLHLQFGDSSSYDFSSALAVPLGGSGGSP  
TLASVYLPLETFDRGTRFGFSCNNNCAFDPSPRINGMSVYVLFQEGDFDVRIASIEAVTEP  
VSFSPVAAGIDSPGDAIELLRATVRSGGGLYDKSYVELCVTMYWSVLNSLLRFPAAEEEG  
WSLPGPVRAVICEGLERAERELFPTKNAPSDKAAAATLRYTIDAVVADLNGSERVWPSD  
RDSLPTPLEAEAMEATCVGRTSPAPGPPYDPRATEGGPELGGSDSDTGGSENATATDDP  
YDDDDDDGDSLGEATANLTDSGDSLEASAATVRSYGANYATSSSAVSRHSRAMRSVALLAS  
PLLAVLLCAA

>comp10701\_c0\_seq1; 199 270 1537 LEN=1585; translated  
MVTEKEKKAKLLYMAQFQPEKHATKMAKKEAGFLAKEEERRRDHLRSPPDRTQMTPKEIK  
ICERRIEGRRLLPPGKVRELARRSSFSEFSYHLDTGLVVFRGSDPASGSSASIHVYTEDG  
MVATCIWSRRRGHEAGASGNRNRNGNRKAHPSGAWAEGATTNGRTLNLFPVELGGLRAL  
LRNPGIGSQTAFFGEDRCRGAEDFPEPVAWRNNGRGSFSDAAVRWEYVCSATGLSTDRAT  
VDHLAGVCGLWETWRKVGAEALVAVLGVASRMFLGYPVAHHRLDGPFPLPGLVHRGEE  
AAALATAALEALGNRDARIEAMRWCLGRWRDNYFMTGTAIVFPIQTGFSAVDAHAHTAYX  
EARLLGQAAGHERVPADVVRKVAPPAGQQTGTAGARNAGLRPCGFSINPCTRRRNSQVRV  
IQ

>comp10702\_c0\_seq1; 165 283 498 LEN=732; translated  
MVMYNISNELMQDAIKITPGKKSPTITTSLECGTTKAVSALILKKEVSDKMDALHDVGATD  
ILVLDLKNRSM

>comp10702\_c0\_seq2; 309 61 948 LEN=1182; translated  
MSAPNSSPPGNLKAFAIPKKGRLHEKVVEALKGAGIEFRREARLDVAVCNGLPITLIFLSA  
SDIAKFVGEENVLDLGITGQDMVAENQVVVNSILDGLGFGKCRLSVQAPVADKIEDVTALAG  
KRIATSFNLTKKKFFDEYDEKLGVSTSIQYISGSVEAACGLGLADAVVDLVETGTTMRAA  
GLEVVHDILSTQATLISNPNSEHKDLVTKIQRRIEGYITATKYVMVMYNISNELMQDAIK  
ITPGKKSPTITTSLECGTTKAVSALILKKEVSDKMDALHDVGATDILVLDLKNRSM

>comp10703\_c0\_seq1; 505 1 1747 LEN=1747; translated  
XERPSRNSVRRKRKQNHKKNHKPEEGEPALALALAPDYPAAFEVVLARNERGRGRPEKN  
PGKDPGRNSLLVRTLDRVSSNPYFNCGSSSDGYDYDYSYEDFRNVLLSCHRGSYHTGS  
NGRSSASRKTHRLFRCGADTDRSDSEDDAYEYDHEYDHEYQHRHQYHHEHRYGSSARDPK  
HRRPRKGSLYRKTMMTAATANEEGGKAEATATAQQHLQTTAKLARGFADDAGRAIGNLLP  
TASLQNLTARKYTLDPKTVASQVLMYRQLLHTKCRPGLRLSRNYEGTPAQVAVMHMPWWE  
EGIAETKKMVISYDNLQRLWLHGAIEPFEGASANANTSANANASDGDLLSLGDGADPTP  
AAPPEPHTGDNGVPPVPHPFVVDRLGFQQQDPVTDFRSGGVLSLAMVMVMSRPEVCSR  
FFGKTHTASVLPFGITCINVTDMIAKFLMLAKSTDRMDALLSQKPFWKMFADPSAITAVQ  
ELALSMLCDVAEELGEEKRCGGLLAGAGQPGPGETATTEVTVFDFSTILERTEKVRDD  
LLGAGPKTIDELRSIEGRRLRLRYKTQLERRLQRAREQQQQQQX

>comp10703\_c0\_seq2; 527 1 1771 LEN=1771; translated  
XERPSRNSVRRKRKQNHKKNHKPEEGEPALALALAPDYPAAFEVVLARNERGRGRPEKN  
PGKDPGRNSLLVRTLDRVSSNPYFNCGSSSDGYDYDYSYEDFRNVLLSCHRGSYHTGS  
NGRSSASRKTHRLFRCGADTDRSDSEDDAYEYDHEYDHEYQHRHQYHHEHRYGSSARDPK  
HRRPRKGSLYRKTMMTAATANEEGGKAEATAAAPAAATATAQQHLQTTAKLARGFADDAG  
RAIGNLLPTASLQNLTARKYTLDPKTVASQVLMYRQLLHTKCRPGLRLSRNYEGTPAQVA  
VMHMPWWEEGIAETKKMVISYDNLQRLWLHGAIEPFEGASANANTSANANASDGDLLSL  
GDGADPTPAAPPEPHTGDNGVPPVPHPFVVDRLGFQQQDPVTDFRSGGVLSLAMVMVMSR  
PEVCSRFFGKTHTASVLPFGITCINVTDMIAKFLMLAKSTDRMDALLSQKPFWKMFAD  
PSAITAVQELALSMLCDVAEELGEEKRCGGLLAGAGQPGPGETATTEVTVFDFSTILER  
TEKVRDDLLGAGPKTIDELRSIEGRRLRLRYKTQLERRLQRAREQQQQQQX

>comp10704\_c0\_seq1; 497 106 1542 LEN=1631; translated  
MKVVFQVLSALLLSLAWMLPSEAQNGEEACENKGFVDVNECNDVGCCFWDGEQCWSDVQGN  
PCEARPPLLDGYVGWRDNGVWSDPPNLNWNGCEKVTVVFGIPVCITEKAWPEQVKRDHI  
VHVYQQLIDNNADGQDDPKILSEMNGNYLLLLITRDNSELDSFFNDFNIEMKASQPVQT  
SKTFPDSCDFPINRGASPTDRSTWPRSVDTSEMNCQSGRCEAFEEIHHLINVAATILYPS  
KWATTFESEVGALLKEANGNCGWGYEKNWIDPSTNGCSGTAYNDETCDSECLVIEGTYW  
ASITYVGGLYTSERTESISNEWLMGTPDNFMEVYPKGVTVNAVSLLETGSPALYAMVSDTTS  
EGHAWLPEVMTDGHYKGFDDNVPSPPTQAPTRGATPTQAPTSATTSSTTSGCVDDDFR  
KNKKKKSCEKWAKNANKLHKKKFVVRAMKKKCRKKFKNKHVWDYCPKTCALVGLGDCA

>comp10705\_c0\_seq1; 875 1 2607 LEN=2607; translated  
XNNVITPQQPKKKGTSKNQRARMVANVHTSLDRRLSVEKNVDELLLVCGVIGTTTTDGN

DLVPVTDCLNWLQDLQRALRRDDDLRPI SLLLKGKWKIVEQKLLPLVVTCRYDTP IVLTV  
LKILVILTKPPAGNTLRAGQMI IDTSSPKSDPAVVAQQIKLRENALAQAEQRMEYKRIVA  
FHPSHHQNTKKGRNQKKGKTGLLSVFSLLAEPLSRSGASRTDADHLTI ELVLHLIRNLL  
SAQPI LNTSPETSRGAAQLHQDMITL FERELVLDILLVLGQEMELRENAQYNLLVMEILH  
HMVKAQDPTAVARSAQHSSARGEGATDRNASNRTASHRIAGPPGSSGGRFGASSSSSSSA  
LASRLREEKAQQRSLKSVRHGHFSGTWMRKQAGGNRRFVGAATVMQGPASSQSRGIARRT  
NKLAEPFIGSGKTLAHTRSPGGTAGGTSAKRAHRTLHAFCKRFLADCYGPFMKS I KNEF  
RRDSQRLEEKDKVFFKLVWFFSQWSRAASSSRRESNEDNKEAIGRLIITMDVFTFNLVL  
TSTETFYQQKKYTRLAQAVALYAEMMHLHSMYTSRDKTEHEMAMGLIDRLFYHGQDALD  
QLPKLLSRWTPGTYTREYLCDLVETAHVSLKLLLETNTKKGIEFLENKSATTETADKVKTS  
QKIAKMRKDAAEFDVKS YFVRKIVSNQLVSMYGYLLDQYKVNAAVVNHR IITMFTVMRL  
EIAIPDVADAETFVSPGLTTRRVTLPEMLYNLQLILVMERILNDASI QKDKGFESVITFCT  
GLMYKFFCAADQNSMLYVECLFQHASPHRFCESVTNFYINDELMMMAERQSLREDQLREE  
ADDGENRALRSGPEDGDDDDDEGGANTRPX

>comp10706\_c0\_seq1; 740 96 2153 LEN=2587; translated  
MQVSSYNEREFNEGPRICGGAI FLKFMKKGKCGSPLSKKDQISFLTSTSSSLSPTLNDRR  
LQONLYDPTNQCYCMRQIEGASTSTLKEQRDDSKLDFKLRPLERAISSYDRDRNNQGT  
SSAREGPEESICIDDAELSQSVVQFDPNFINDLKT KHLRSMNGRKEMDQNSEFEKSAEPS  
GVDASADEVDVTWNDPQSTRINQKQGHLKSVRVMRKEMSSFRKELDAVKNSLPTQAQTP  
LNEHDYILEDEHWERTNVFASTDRKQGTFTHRSEIDSKESSEQDVWKKIDMFS LNRKNAE  
CRVGDQRQFNSNVSSDQDDVWKESSSTVASQQTQVSALEKSEKYFKSEWDFKFKDQERHSD  
KKTEKNHPDAENSVKSEKQTLKQSEERTGSETTADENLVTKPSEMGSAIN TNDELSANE  
NKTSMKNDALPATTTKSEQHRDTNEIPFDGTKIEEEVENQKESDKRNQSAGISSTMLTK  
SELTELERLEAIHIVLQREKAKCINSDSIDSTHYDEDLKV KLLKYYKTPGKTRVGGPK  
HAHPAIGAPTDAWFHRHAMGSAGMQRKIEKTSGISGNTNRDTSRRQVENEVQNNPVMH  
RKTEKTSNSIGGD TNRDSSRLQRENNEINDSSLRDRSTLRQGSKTGSSQNVNRVRF AISD  
SQPANTDIFNGSSASMGKMSDRIKFW

>comp10707\_c0\_seq1; 142 648 1466 LEN=1466; translated  
MAIWGVRATALKLIQQGFLNIHQIRKGI LTGHISCFDRRQLIGVKCYEDLLED MTRSEV  
ESIFEQILLEARQILPDCEAHIMGSYRRGKNKLGDL DVLIVSKTYKDKVRGNFLAELVNG  
LSRKGHI VYHLNHL SGL ESGFAAKSQEEHFHNKPQH YVPPLSKTFSSENPKSMERTSGAS  
YMGVFLSPTVPGKHRRVDIKLWPYSQKPFASLYFTGGKYFNRSMRQWAKAKFNWKLDDKG  
LFDRI TGERVAIDGCTEKDIFNKLQLVYKAPPD

>comp10708\_c0\_seq1; 339 106 705 LEN=843; translated  
MSKLNDVNVSDIVGSNYEGYHEATEGEDVSSNNTTASISSASFSDDIDGIQTSSPTV  
GNSLDGKSKDLWWIHNGYDLMDFVKDHPGGIEAILLGKGRDCTALVESYHAFSGERVVK  
ILEKHRVQEEHEQTEELAGVSARRATPIKQHPGRVPDFFYEILKERVTKALRSKGIDPV  
RDRGASTIRIAYYILIFGSW

>comp10708\_c0\_seq2; 591 106 1716 LEN=2144; translated  
MSKLNDVNVSDIVGSNYEGYHEATEGEDVSSNNTTASISSASFSDDIDGIQTSSPTV  
GNSLDGKSKDLWWIHNGYDLMDFVKDHPGGIEAILLGKGRDCTALVESYHAFSGERVVK  
ILEKHRVQEEHEQTEELAGVSARRATPIKQHPGRVPDFFYEILKERVTKALRSKGIDPV  
RDRGASTIRIAYYILIFGSWLYTGYLHCSGSTFGSFAFALVWLMGALGHDAGHFAASRR  
AAVNEYGVWAMSNICNPVMWQQQHTYAHHSYTNFDRDPLH HFDLLLRVHKKFNYQPKY  
RWQSSFLYVLFAYMFVVFGTCLWIPWGV LSEGTLYGMVDWHDKDRPMRYYG MWFHLLLYI  
GIIVIVPIFTHESFVKAALATYIH IATIGITFAFFSQINHLNEHSLETDMVSREKQYKKL  
DSNKQDPRLASSWAAAQVETSNNFASQSI FWHVLSNGLNHQIEHHLFPGLNHGHLEYIAP  
VVKQTCEEFGVGYKSYDTWSDLLNATLEWYDKLSVGGDIDDDVAAAVPDIKRIKIS

>comp10709\_c0\_seq1; 436 170 1861 LEN=1895; translated  
MNIDIDSSVSDDDQGNELFTPIRGRRTSLVQYFSP TPRSRSVETDETASETGVPNTLPKL  
QDTSWLGARMSPIPRDGNLLRNHKSSSNKNI SNANNKATVEGDEDNSNSNDTVGVSYR  
SGLTQTSVSGASCGAATEALFLRLDDTDDSNQGH LRYFDRPKVATHNVVGLGSPSSRGY  
VRPRPTLLLHPRTTATTXNPWHQSKPSPTTTI SAKSSPKTIAESVRTSVPPIPKTHKQQ  
EHVLGHGHDGIGSFLYWT SRRVSGLSCHAEGDICFLTQRVCMVAPLDRTERQILTPIRGI  
LPRAPGALLFVVGIFVALLLEIRCLL ICGNFSGRVVGIGMGLDEVPPYLLERIAINSSPW  
QLSWLIVYLLSAFTGQLWMVVF DIGYLSNGSSYGYNDYNPYSSDLSM VPAASGCAGWAT  
AGVLCAVGIQRPNRRFPCFLSAIVLVLLHQ CQSTGSSVGCSSASFFGWAFSGMWSTTASH  
YARGHGRGSYSTTDHQDLLDLDFSHRNVNNTYHEMQVNNDHVGNNSSSSSYNESDYRCNL  
WNGFAAGIVFLLWLLPILFFLYR

>comp10710\_c0\_seq1; 268 555 1433 LEN=1717; translated

MTAPFPSFAGHSQLSATGISLSSLSVSTLTSGYWFWAEDRVVVPVALAIGLPAVAAAARAG  
SHLARRMSGALALFYNGCSVVLIPTHFWIQKRAEARGNRQSREESTEGDGADTTGRRTDA  
TPMRWRAEGSGDSATTPPPTPALSPSLSEFSFESMPSSVLAKHVSFGIVSGILSSLMGVG  
GLPFAMSYLTEATRGDDEDDLPHHLIQGTAICSLLPALIVSAVSRVGATPLGEAGCVALG  
ALVGSYWGAEVALGMPPEKLRTLYVGSFLFGGRSMVGALRNQQIYRKSVR  
>comp10711\_c0\_seq1; 410 1 1486 LEN=1573; translated  
XSRSSSTSSAAFHLTGIHRWALSGTPLQNRVGEVLYSLIRFLRIDPMAHYFCRSKGCDCCKS  
IYYRMEHGKCKNCGHASSQHFSYFNKHVNLVNIQREGYAGDGRRAMMKLKTEVLDKCLLRR  
TKESRAADMNLPVRVVIKPIRLHPREEDFYNALYTQTKSSFDDYIAEGTLLNNYAHIFD  
LLTKMRQAVDHPYLIHVSHKKNHMKLQGGQPAVANGSTTCELGETPTDRVLSTCCGS AFC  
RSCVIDMMTLTDVEQGSTRCPCCRAPFSIDLNQTTCQEVNGLTLTVNKTSGMP SLKEMRN  
VATESILRRIDLAEFSTSTKLEALVQELYEMRQDRPGSKALVFSQFTSMLDLCRWR LSSD  
PCLQDLGLGVRIHGGMSVQSRDEALKSFKEDPSVRVLLMSLKAGGVALNLTVANEAYLL  
DPWWNPAAEMQAIDRTHRLGQYRPIRAVRFIAEGTVEERVLQLQEKKRLVFDGTVGRDAA  
SLKMLNVDDMKALFT  
>comp10711\_c0\_seq2; 1100 157 3034 LEN=3034; translated  
MAHSNSSAFPAGTLVWVEASKVDLSQEEVGVVSPSLLDYEDPETGETNRDGLLVK LKIS  
NTRGVFPTRRLRRFETEKDTGLVDAIDVDRVSASTTSTPPKSVVSRRSQRRSTRTVYRGV  
VTPSPVPCEEVTSTKGIPKGPASPPPSKSPSTHSIGTQISKEFEGIFYSQKVTAYNAKSK  
YFKVKYEDGDEEEMLES DIKRYAVASESDKKKKTTRGSKTDSRKRKPAASKDTKLKKAPA  
ASAASVTKPTPKSATASKKAKRTTSSV PNTTTGAVVNGKDVEEKAVESNDGSP LNLK  
KSSAKKAKSVKSSKKTNAKAAEELLILASLSDSDEKDRPFRVEYASTGRATCKGCD  
EKIAKNSLRIASRPLFRGKPGFVVYRHLQCQTLPEEIEQISDVGGWRRLKEEDKTL LKQ  
IEESKLRIEEESQEMDADELVQTAFAQGPLRDPPLGLGATLLPFQREGVSWMYNQERSDIS  
GGILADEMGMGKTLQTITTI LDNRPKLQHVSPGKHPSTPDLEERIREENAWNEARKGC  
RNDLKMADVPRVLAKQERKGTIGTRGGTLVICPLIALYQWKEEIEKFTEPETLSIC IYH  
GVDRHKSFPQEM LCKYDIVLTTYQVLEADFRKMVSPNKVKCPNCGRAFKIDKLAVHLKYF  
CGETAQRTFAQSRQRSADRHSFGSKRKGSTNKEKKKSFSTKSTKLDNKSQKTKTTV  
HTSRTKGYESDSDLPEGFDMTSKRPSRASAARAATQRLSASSKEWAGENASDSDDF SDE  
SOLTSEDDSSDEQSLPARTTMRMRGCGLAKNTPNSDSSSDETTSEDDSS LTRARKRQK  
LALSRAAKNKTKKFPEEDIQKKKSFGRKSKSTKKSPIESNIDPLRGIDMEALKEKAMEGC  
QMSVLHTLSWWRIVLDEAHVIKSRSSSTSSAAFHLTGIHRWALSGTPLQNRVGEVLYSLIX  
>comp10712\_c0\_seq1; 1426 1 3177 LEN=3302; translated  
CCGSLSIGNLCSTYTFVWSTCNLGF IHYDSDNPIAFFTIQKLINIRAMP RSEPRRRGRN  
KGDDTRDSAGSPSKTSNGSSMSSFRAPLIQWSEEASTWY EYGKDLPRDDVLETMSQTSP  
ALIRRYRSIADSI FANELRLYKQSN TSSSDEQWVENTIRKGT LKDRIAAMSVTLSTDPVH  
KFYALDGLMSVMGCS SSSNEGGKTNSRVAQLTSEALEDLFINTLLPPNRKLLTLAQRPLS  
RYEDKGDGSDLMGHEAGNGK KKKKSKSSKGGKSLSPRI LLLWRFEEMVKEKYELYLRQYMA  
QTLQDGVQLQKIATLRSAGNLLASMP EGEVQLLNMVNKLGDPDKK TAAAAGHQLRLVLQ  
QHSNMQNI VAREVQQLAHRPQLAPKALYN CIVFLNQLQLKRSEP ID DSTNANALQTYSLP  
ASLIKTYFRLFEVAVQONKSSSKTESAGTMKSRLLSALLTG VNRAHPYLP EKDKDMEEH  
VDALYRIVHTAPPACTQALMLLFH LAVGSKVEIESYEEDQKSEDQMGQKLRQKDRFYRA  
LYSTLGRREM VSSGKHLTMYFNVLYKAMKYDSNINRVHSFAKRL LLAVMHAPAPLIAASA  
YLLQEISIAHEGLCQSWEIIPDPESDSYLVLD DSKREP KAGIVNFNDENTGGHRK DTPQG  
EEVLPQGNPPCWEISLLAHHFHPSVSKFVNDIGKIDYGGDPLQDFGLAPFLDKFAYRNPK  
SQEKLKQKRQLTGSRTGNRRSSNLKVRLELPMNDPSFLEKTDVNEQDAFFHHFFMERARR  
DELKGITRNTQSTGAEDSDDDSMDAAQDQAFDTAEVSGGLDSGGKSFEEYEAMWETDDE  
EEAFVDSLAMSLMEDAAGGPADIDDDPVDIDGWGDLYADESDEKGDSEDDSEKGNDRDK  
KGGNNSNRKPLGEDSDEDAFMEEADSDSDSKSDEE EIDIDEALIAGAGAIDEEGDKSHD  
DDEDELG MFLIDDESDEDEEPAPATKSEKRRKKG AADLSIFADADDEAMIDKSFNEL  
KDGAQKELNAIEHKTSENESSPSKNKSKSRKRRKKS F  
>comp10713\_c0\_seq1; 985 1 2086 LEN=2326; translated  
XQQQHQQQQQQQRSLLIKTPPRLLSIDQQDAKNNHAVEGGATNSFHNSYASTLTNTWNL  
DSLVLRLNYMNSQORDNNA SKKTANANANANA EADTNVEADANVQHSEASSSTENPPVHV  
PTDSSKHGDGNDSTPSESLGSKASVANEGEEKVDDQIAEDSKTSMYCKTDESTLESQSE  
LESENQSSDATPTCPQQSFSYFDQEVVEEEDAVYETRYGHPTTVIELDGDDEDDR FHV  
FEGLFAVSQNKNTKQRRERRASHYRRRKRPRDSLCLVTKGASANDSRPCAPDFPVIPE  
CPSDEQDFLQKIKKFRQAI VVSSSPGDSKTDNRSEFDSLQDREVEEDRAFRLPPWKE  
DSGNHGNHKGVSTETERIGDCPEHGVSDSATS SSSSLISGTIGIGSIEIGSNEVVPKP  
EPCASPRLG YDGTREVFRLPNWEDGSNNIAGTASNSYQGSIDDCEDSLAENIAPYAVSG



HPVVSELP IGLKGSSEGY PCTSTSTGLHRT HDGVDDRDCTVVEPPEQTPKTPSDIVTRN  
SQHGGDKELLHPSDLSPARNECV EHD DTYVNAKTMHRQNEGDSTNHKPMKCNIGRNHGD  
EENDIRIQRVSIQPVGLQSRLESMEEDDLTSNSSSAIVENKENV VAMEVDTASSVKGSEE  
SSGN SHNNLAAPLLPPFQRSVLS P S STHSNVNNAN

>comp10714\_c0\_seq1; 263 111 972 LEN=1033; translated  
MGSWEDIIFEYVCPVGGCLLASSVFAAPIRDLNGALRRGSLGSLNTPWAVMTGNCLGWC  
AYAYYTADPFVLASNLPLGLILSLWLNIGACKLQYLAQIDFHGRSSSGRNDTRDETLLSQK  
EGIFDFPTSSQDVLRLRIISLWAVVLCVGVLDGLFRHPLLLYDPHTVVGLLVNINLVF  
FYGAPLQTMKTVLESRS SDTIHTPTVTMNVINALFWMSYGFARNDAI IYGPNGVGLLLGI  
AQCVLCCAYPKRGLMPGDQEVVEFEIVPPCTEDHDLSLREMMGEE

>comp10715\_c0\_seq1; 293 249 1742 LEN=1901; translated  
MKLYRKRND SFVLMRIVLLLLSVTIGICSASVGGWSKGGEFHPWRRGSKKNIGAETKTKTN  
PFAFGLQRALHQSI VGTAKPKPANYASGSNEKDASHAIRNAFID DTEAAKEIKQTTKPHL  
KHVASSQAEDDSTIRATR PVAAVATTQRSL LFWESMVSGAVSRSIAQTMHPANTMKTIM  
QSSRGP SKPKLLDLIKPEMFHRLTCGAGANFVLSLPHGAFNFVLESIRQRMSTLVDSVP  
VLERNKERIGPGLDFLSSSIATICCSV VSTPQMMITDNIMAGNYPNLIAATNGLYSDRGM  
MGFYSGWWPGLVGKIPSYALTWTF FQQIKRVRSSMSDRPAKNYENTIMGCMASATTVCIM  
IPMDTIKTRLVTQTS AKVLEGGQAYKGI VDCGVRIAREEGMKT FYRGLAPRLLSVVPMIGI  
QFGVYEAMKKVMLQRSVSIQDKEKPVYGT EEAIEEAAME TAASQGTSFPAPHFLKYAPKA  
SKKGLRSMFGFGT DSEN

>comp10715\_c0\_seq2; 260 249 1100 LEN=1228; translated  
MKLYRKRND SFVLMRIVLLLLSVTIGICSASVGGWSKGGEFHPWRRGSKKNIGAETKTKTN  
PFAFGLQRALHQSI VGTAKPKPANYASGSNEKDASHAIRNAFID DTEAAKEIKQTTKPHL  
KHVASSQAEDDSTIRATR PVAAVATTQRSL LFWESMVSGAVSRSIAQTMHPANTMKTIM  
QSSRGP SKPKLLDLIKPEMFHRLTCGAGANFVLSLPHGAFNFVLESIRQRMSTLVDSVP  
VLERNKERIGPGLDFLSSSIATICCSV VSTPQMMITDVSIVVS

>comp10716\_c0\_seq1; 806 627 2483 LEN=2585; translated  
MIATASSRIVSFLLVLA AAF CGSSLAFQASTRPTLGIRLPSNGLPDTLPATATSSSLNLS  
FSSFGSTFGNRRTSKNDEVMGK KTSQSKRAVFSKVLRRSAVALVTLTLLTSNPAFAAKKA  
AAAPVEHLHTGQKIANFFIN FGLPKWAVLSVISAMPVVELRGAIPVGVWMLPIQQVFPI  
CVLGNMVP IVP LLFLLKNETLKNLMSPILKRAEKKASGLGVGDIQKQWVSLAA FVG I PLP  
GTGAWTGAMGAFLLGMPTPVALSAIFAGVVSAGC IMTAITLAGKTGGLVALSVLIAFALN  
ELFFKKSEKAQDFLEADPYWDQSTVPVNTFKNKAPFTGKV VSTKRIVGPKATGETCHIVI  
DHNGDFPYWEGQSWGVI PPGTREKDGKPHAVRLYSIASSRYGDDMTGKTGSLCVR R ATYW  
CPELKADDPAKKGICSNFLCDTKTGDEV TMTGPAGKVMLMPEQDPTTDYIMVATGTGIAP  
YRGFIRRLFNEDTPAARAYKGEAWLFLGVANS DALLYDDEFQEA KSRFPDNLRIDYALSR  
EQTNAKGGKMYIQDKVEEYADEVFTKLENGAHIYFCGLKGMMPGIQDMLKGVAEKKGIDY  
DEWLKLLK KAKQWHVEVY

>comp10716\_c0\_seq2; 697 177 1331 LEN=1433; translated  
MANGSKRKAALKT LGKVAGVAGS FALATAGAPGAAHAAKKA VE VETVDNTKKI IAGGAA  
VIGAGLVGMKAMGGNAQDFLEA EPYWDQSTVPVNVYKKNKAPFTGKV VSTKRIVGPKATGE  
TCHIIIDHNGDFPYWEGQSWGVI PPGTREKDGKPHAVRLYSIASSRYGDDMTGKTGSLCV  
RRATYWCPELKADDPAKKGICSNFLCDTNP GDEITMTGPAGKVMLMPEEDPNTDYIMVAT  
GTGIAPYRGFIRRLFNEDTPAARAYKGEAWLFLGVANS DALLYDDEFQEA KSRFPDNLRI  
DYALSREQTNAKGGKMYIQDKVEEYADEVFTKLENGAHIYFCGLKGMMPGIQDMLKGVAE  
KKGIDYDEWLKLLK KAKQWHVEVY

>comp10717\_c0\_seq1; 781 676 2559 LEN=2871; translated  
MTDAETQDPPQEPASTE EQPKQMAVIGRGESIITKTHPKADVEAENSEELAKHEAEEIEG  
IKESQGYWFPKIKLSAWDPEN EKQWEATGQFIAKRNL LASIPNLTCGFGVWL VWSVIATK  
IQKMH DADPNVYQFEDWGS PQQAYRSVLFLLPGVAGLSGGTLRIPNSFLTQVSGGRNVV  
YSTSLLLCIPMI IAGITLSNSDTSFNVLLAAALLSGVGGGAFASMSNI SFFYPKRLQGM  
ALGYNGGIGNLGV SITQLLAPIFMSIGSVAVAPSGISGWPANAGWLWFPLCATSSILAFF  
FMSNQPHHGEKTNLRSLVNFYWM ECVGFLSSFIGVITLVMTRNSKLVKSPGGQVAHKFLL  
VLLTLSCQHFLM LASPKKARDRIKQAVIFKRKHNYIMTWLYIMCFGSFIGYSGSFPKLI  
VDLFGYLSGDGCVMDKI FT LGDQETCEASGGT WETNYDYPNP NAPNGSHVAWLGA FVGS  
LIRPVGGIMSDKFGGAKMTMVAI IWCTIAAFAQGYLVQVCQGMDDPTKY YGWFIFLFLNL  
FLCTGFMNGSTFR TIGVLFPPPEESGTVLGWSSAIASYGAFI IPTMFSIALKAGAPQVTFY  
GLGGYITCGLLNFY YLRPGCEKPGV

>comp10717\_c0\_seq2; 600 1 1551 LEN=1863; translated  
RQHKVIATKI QKMH DADPNVYQFEDWGS PQQAYRSVLFLLPGVAGLSGGTLRIPNSFLT

QVSGGRNVVYSTSLLLCIPMIIAGITLSNSDTSFNVLLAAALLSGVGGGAFASSMSNISF  
FYPKRLQGMALGYNGGIGNLGVSITQLLAPIFMSIGSVAVAPSGISGW PANAGWLWFP LC  
ATSSILAFFFFMSNQPHHGKTNLRSLVNFYWMCECVGFLSSFIGVITLVMTRNSKLVKSPG  
GQVAHKFLLVLLTSLCQHLFMLASPKKARDRVIKQAVIFKRKHNYIMTWLYIMCFGSGFIG  
YSGSFPKLIVDLFGYLSGDGCVMDKIFTLGGDQETCEASGGTWETNYDYPNPAPNGSHV  
AWLGAFVGS LIRPVGGIMSDKFGGAKMTMVAIIWCTIAAFAQGYLVQVCQGMDDPTKYYG  
WFI FLFLNLFLCTGFMNGSTFRITIGVLFPPPEESGTVLWSSAIIASYGAFIIP TMFSIALK  
AGAPQVTFYGLGGYYITCGLLNFYYYLRPGCEKPGV  
>comp10718\_c0\_seq1; 192 1 912 LEN=1475; translated  
CRIAPAHCEAQPRV LALLLVIVIQSCGKPAPPRIPPTATAAMSSMFSALLEGFPEKIE  
SLGPLEKNILVASAMVVYKIAIEAACYLRLNWMDRHPEVPTGLSRNVLQISFSFVLLFW  
PHFDTS DGWSWKL AALLPAVVSGRLVYKGFVRDASDADVQNMSLSGSPADLLFGPLQLA  
GIFVWLTLYQFMTEEA AVVA AVSFGDGCAPLVGS LYGRHFYKTPVSKTKTVEGSVVG VFL  
GTVTACYFNLYAMGLPLPLPLRMILAYGGIAA VAEGTAPGNLDNLVAPIVLHFSVERVKEL  
LPP  
>comp10720\_c0\_seq1; 357 2843 3730 LEN=4328; translated  
MLSSSSNNKNNKHLKTL PDYIT TSTTECLRNPNPSGMVVMGIGGKA EKLLNSD TIRANRLL  
VAKRFSGGGT VVMDGNAIWTTLIAGRKKVATETETPTNGNNKAGEELCKPFPRDIMEWTAK  
AVFGPTFDKLNTRVTASSTGTHRKKNP AFSLQEDDYVLTSADE INGETRKMGGNAQAIS  
GRQGWLHHTSFLWDYDDANMEDYLKLP EKRPA YRS DRSHRDFLVK LKDHYGSEFDAGDSD  
LGSSSLFVESMKHACEESLGIQETDWP SVYEEVFSSDDSKFHAWWLENRTRIQHDL  
>comp10721\_c0\_seq1; 250 81 641 LEN=748; translated  
MVDDRRARL KALAARAGRTKESAPDRGASSASAGANN SNGNDPPRISFRNYAPT DGS LAG  
GSSEGAGPSASKRQRTGQEPAAAPRAAASSSEALKSALSEAREEAAAAGHGGSNSNSNSSA  
NTHAAAGATV TSLAPKKINWDLKRDLSDKLAKLERRTQKAI VEILKERLESEAAEAVDED  
GDSDDL  
>comp10722\_c0\_seq1; 263 210 966 LEN=1259; minus strand; translated  
MSVSNKRSLSSVAGCARDRPRPVIVKAEASRTEAQR AARPLRDDPQHRALDEVQDFVDGG  
LRQAGEGGYEGIGFFYSRVRNDQVHERCYLKAVELQLV PVVGLLPKGRQGV LQVVQLLHQ  
FLVILFLVGHVLES LDVLLRLSVHLVEFLVFGYGLPRTDLEDHRHLCCVERSEVEHV NQV  
ASSRVESKIGEMTEKKKGLELLLFEQKQKQKQETGGSIVIRKKVSL LQSHPYIAFTGQN  
RIVLNGIQSNY  
>comp10722\_c0\_seq2; 282 184 645 LEN=975; translated  
MAESGIEENAAERKFGAHFDDI HILSNAQVAVILQVSAGQAVTKDEELNEVYRKTQKYVE  
RFNQMSNKEKDHQELVEELDNLQDALTTFRKETDDGDELELHGFEVAALMNLVIADTTVE  
EAYALIPSLSRLPEAAIDEILDLIKSTMLRIIS  
>comp10722\_c0\_seq3; 88 1 410 LEN=740; translated  
XDHQGHFVETWPAQRLAVVVS AKATLSIFEEFAPSTPLFPFCLRMTSSAPPAPELVE  
ELDNLQDALTTFRKETDDGDELELHGFEVAALMNLVIADTTVEEAYALIPSLSRLPEAAI  
DEILDLIKSTMLRIIS  
>comp10724\_c0\_seq2; 610 389 2977 LEN=2977; translated  
MAVHEGKDLGQNFVGT EHI LLALIAEPDGVARRTL DKMRVNLPSLRNLV LAYIEETQEEM  
LRPLSQAEKYLLERERRGSQTPTLDEYAENISKEAVD GELDPVIGREKEIDDVIATLARR  
RKNNPVLIGEPGVGKTAVAEGLAQLILTEKGNFLDGS IIMALDLGSILAGTKYRGEFEE  
RLKRIVEEAQNERSVIVVIDEIH TLVGAGAAEGAVDAANILK PALARGKFR CIGATTNEE  
YRKYIERDAALERRFPVRVDEPSVGT TIEILRGLR SKFEQH HALSYHDKALEQAA ILSN  
KYIADRFLPDKAIDVIDEAAAARVLENRRLPKGLQILLTELQDTLKDKEECVKDHD F DAA  
RQLVDHEIEVRTHIRIMKKSAAAQKRLGIVREDDIDIVNENDIANVISNWTGVPV NKL TG  
SESERLMKMEELHKRLIGQDHAVTSVSKAVRRARVGLNDPNRPIASFIFAGPTGVGKTE  
LTKALSDYMFSTDMIRLDMSEFM EKHTVAKLIGSPPGYVGYNEGGLL TEAVRSTPYTVVL  
FDEVEKAHPDVFNL LLQILDDGRLSDSKGRVVDFTNTLIIMTTNLGSKIIERESGIKTKL  
QQGDDRKFVTPDAVLGWEPREPEPATDPKVFGR IKS LVHEELKNFRPEFLNRIDEIIVF  
NHLTRLDLWRICGLMIDQIKKRLAEKELELVITFPVQAF LTDEGYDPLYGARPLRRSISK  
YLEDTLAEQCLSQTLFPNTKIIVRRKRVEDSILTYTNELEVEINFDNVDRRFFEDGAIPE  
AIDATKALTDGSSSTATSDSITPTGESDDD GKE SAWQKAKRKYGERKDKRSKDKKARKFQI  
PRSEGDDKGG LFGTRKKNNGDED  
>comp10725\_c0\_seq1; 584 254 3103 LEN=3438; translated  
MLCDITNKWFPSS LNDGCHRTGEQQSNHRVDYDQLDLNDTIMGMGF EFDESSPPRDLARS  
PRGSEPAEEPVTNSVPKRRRLSELDRPSLVKRS HLP HRYHSRAQDGPSTNAGLSSTSRS  
GGSPGYQNSYRHS HQFTTYNGESRTPSRGNAAHGVYHSGYSPYYSHQSHERSQWDNQSVL

SPGLGTPKVVYPPFESDEQTPSSPSSLGARTSSKAAEASTPEKNVEKRPARSPPFRSPRRD  
LGCSGSEAKNEAFRPSPYLKRPNLSFDIDTPTGTLPDGDYSPMGPSFEGLYEDASTPFKL  
DEFFGGSLMGINRSPSQGNSEGTSSPPSSRRDRRPQRSMPSPDVSELLSFDQSNAIHGD  
PRPSLQYDCNHDISSDRRYHHSKDHKDI IGLGSAEHPKASAVTISDRKGEAPSSRLDPGA  
QPKQLWPSKNRTQGPVRLIEIGGTGPLNTRKTLEGINSMMQQSSTNHNKNSVERNNGSSGY  
GTIHGRIQPPSQHQRSSHHPYGFELATPSKGYSHIRPGHGRGRHSSYPPVGPSPMKPMY  
PRKIDHSNAGVRPPKPIYMSHFPPRDNKSLHHQHNPVPPSIGKENSKKKTAPKRKTCNCK  
KSKCLKLYCECFGAERFCNGCNCLDCRNTPEFEEERKKAIKDTRAKNSKAFQQKIVLKNS  
QGAEASQKVHNSGCKCKKSQCLKKYCECFNAGAFCEGKCKCQECKNHPGSQQLADKRNKM  
KDPVGAQYAMRVSHQWKSSTSSSKPVSQPHRRQPIPSPVVGMPPPHMVHPNQRGYP  
AQSGRGYPLPQHSRVMGPHARMIPHGHHMGYSPMSMSPVPHGYHQP RRMPGEGISH  
RMHHGSHSSRPPSTGNSMPTPKLKSHTKRAAGSPRTPGVRKPFDPATNRKKRKITPGELE  
PTEPYFGHDIPEQPKIAGLAVFSFLSNDDLYHASLVCKSWSKLAMDEELW

>comp10725\_c0\_seq2; 621 318 3599 LEN=3934; translated  
MPTSSRMIDSTIEDQSMGGGSSSSTNNSKCPDTKHNELPQQKGTKGLSNITETSAHISGG  
PSVVDAGTSSKVKEEPLNEVSNTLESEKLGNDHDFSGDTSLQEGDSSKVAATRSPSRA  
PVISRNYLFSPPQLSNHRVDYDQLDLNDTIMGMGFEDFESSPPRDLARSPRGSEPAEEP  
TNSVPPKRRLSELDRPSLVKRSHLPHHRYHSRAQDGPSTNAGLSSTSRSGSPGYQNSYR  
HSHQFTTYNGESRTPSRGNAHHGVYHSGYSPYYSHQSHERSQWDNQSVLSPGLGTPKVVY  
PPFESDEQTPSSPSSLGARTSSKAAEASTPEKNVEKRPARSPPFRSPRRDLGCSGSEAKNE  
AFRPSPYLKRPNLSFDIDTPTGTLPDGDYSPMGPSFEGLYEDASTPFKLDEFFGGSLM  
INRSPSQGNSEGTSSPPSSRRDRRPQRSMPSPDVSELLSFDQSNAIHGDPRPSLQYDCN  
DISSDRRYHHSKDHKDI IGLGSAEHPKASAVTISDRKGEAPSSRLDPGAQPKQLWPSKN  
TQGPVRLIEIGGTGPLNTRKTLEGINSMMQQSSTNHNKNSVERNNGSSGYGTIHGRIQPP  
SQHQRSSHHPYGFELATPSKGYSHIRPGHGRGRHSSYPPVGPSPMKPMYPRKIDHSNAG  
VRPPKPIYMSHFPPRDNKSLHHQHNPVPPSIGKENSKKKTAPKRKTCNCKKSKCLKLYCE  
FGAERFCNGCNCLDCRNTPEFEEERKKAIKDTRAKNSKAFQQKIVLKNSQGAEASQKVH  
NSGCKCKKSQCLKKYCEVCHLFLVLSDFIGSSTSLFGKRSYGSHLFFVIDSVMLVRSVA  
RNVNVKSXKNHPGSQQLADKRNKMKDPVGAQYAMRVSHQWKSSTSSSKPVSQPHRRQ  
PIPSPVVGMPPPHMVHPNQRGYP AQSGRGYPLPQHSRVMGPHARMIPHGHHMGYSP  
MSMSPVPHGYHQP RRMPGEGISHRMHHGSHSSRPPSTGNSMPTPKLKSHTKRAAGSPRT  
PGVRKPFDPATNRKKRKITPGELEPTEPYFGHDIPEQPKIAGLAVFSFLSNDDLYHASLV  
CKSWSKLAMDEELW

>comp10725\_c0\_seq3; 538 254 3208 LEN=3543; translated  
MLCDITNKWFPSSLNDGCHRTEGQQSNHRVDYDQLDLNDTIMGMGFEDFESSPPRDLARS  
PRGSEPAEPTNSVPPKRRLSELDRPSLVKRSHLPHHRYHSRAQDGPSTNAGLSSTSR  
GGSPGYQNSYRHSQFTTYNGESRTPSRGNAHHGVYHSGYSPYYSHQSHERSQWDNQSVL  
SPGLGTPKVVYPPFESDEQTPSSPSSLGARTSSKAAEASTPEKNVEKRPARSPPFRSPRRD  
LGCSGSEAKNEAFRPSPYLKRPNLSFDIDTPTGTLPDGDYSPMGPSFEGLYEDASTPFKL  
DEFFGGSLMGINRSPSQGNSEGTSSPPSSRRDRRPQRSMPSPDVSELLSFDQSNAIHGD  
PRPSLQYDCNHDISSDRRYHHSKDHKDI IGLGSAEHPKASAVTISDRKGEAPSSRLDPGA  
QPKQLWPSKNRTQGPVRLIEIGGTGPLNTRKTLEGINSMMQQSSTNHNKNSVERNNGSSGY  
GTIHGRIQPPSQHQRSSHHPYGFELATPSKGYSHIRPGHGRGRHSSYPPVGPSPMKPMY  
PRKIDHSNAGVRPPKPIYMSHFPPRDNKSLHHQHNPVPPSIGKENSKKKTAPKRKTCNCK  
KSKCLKLYCECFGAERFCNGCNCLDCRNTPEFEEERKKAIKDTRAKNSKAFQQKIVLKNS  
QGAEASQKVHNSGCKCKKSQCLKKYCEVCHLFLVLSDFIGSSTSLFGKRSYGSHLFFVI  
DSVSMVLRSVARNVNVKSXKNHPGSQQLADKRNKMKDPVGAQYAMRVSHQWKSSTSS  
SKPVSQPHRRQPIPSPVVGMPPPHMVHPNQRGYP AQSGRGYPLPQHSRVMGPHARMIP  
HGHHMGYSPMSMSPVPHGYHQP RRMPGEGISHRMHHGSHSSRPPSTGNSMPTPKLKS  
HTKRAAGSPRTPGVRKPFDPATNRKKRKITPGELEPTEPYFGHDIPEQPKIAGLAVFSFL  
SNDDLYHASLVCKSWSKLAMDEELW

>comp10725\_c0\_seq4; 667 318 3494 LEN=3829; translated  
MPTSSRMIDSTIEDQSMGGGSSSSTNNSKCPDTKHNELPQQKGTKGLSNITETSAHISGG  
PSVVDAGTSSKVKEEPLNEVSNTLESEKLGNDHDFSGDTSLQEGDSSKVAATRSPSRA  
PVISRNYLFSPPQLSNHRVDYDQLDLNDTIMGMGFEDFESSPPRDLARSPRGSEPAEEP  
TNSVPPKRRLSELDRPSLVKRSHLPHHRYHSRAQDGPSTNAGLSSTSRSGSPGYQNSYR  
HSHQFTTYNGESRTPSRGNAHHGVYHSGYSPYYSHQSHERSQWDNQSVLSPGLGTPKVVY  
PPFESDEQTPSSPSSLGARTSSKAAEASTPEKNVEKRPARSPPFRSPRRDLGCSGSEAKNE  
AFRPSPYLKRPNLSFDIDTPTGTLPDGDYSPMGPSFEGLYEDASTPFKLDEFFGGSLM  
INRSPSQGNSEGTSSPPSSRRDRRPQRSMPSPDVSELLSFDQSNAIHGDPRPSLQYDCN

DISSDRRYHHSKDHKDI IGLGSAEHPKASAVTI SDRKGEAPSSRLDPGAQPKQLWPSKNR  
TQGPVRL EIGGTGPLNTRKTLEGINSMQSSSTNHNKNSVERNNGSSGYGTIHGRIQPPS  
QHQRSSHPYGFGEELATPSKGYSHIRPGHGRGRHSSYPPVVGPSMKPMYPRKIDHSNAGV  
RPPKPIYMSHFPPRDNKSLHHQHNPVPPSIGKENSKKKTAPKRKTCNCKKSKCLKLYCEC  
FGAERFCNGCNCLDCRNTPEFEERKKAIKDTRAKNSKAFQQKIVLKN SQAEASQKVHN  
SGCKCKKSQCLKKYCECFNAGAFCEKCKCQECKNHPSQQLADKRNMKDPVGAQYAMR  
VSHEQWKS GSSTSSSKPVSQPHRRQPI P SPVVGMPPPHHMVHPNQRGYPAQGSRGYPLPQ  
HSHRVYMGPHARMIPHGHMHMGYSPMSMSVPHGYHQPPRRMPPGEGISHRMHHGSHSSRP  
PSTGNSMPTPKLSHTKRAAGSPRTPGVRKPFDPATNRKKRKITPGELEPTPEPYFGHDIP  
EQPKIAGLAVFSFLSNDDLYHASLVCKSWSK LAMDEELW

>comp10727\_c0\_seq1; 659 396 3134 LEN=4168; translated  
MERTGPIEYGNNGMRRCPDQEESSSTAQDCSGSSTFTRGEQAQSDYRASII RTS LTPQHT  
PNQIPAGERIVESWIQQSLSMPSAINEPNESTSTNHLADRNSLFTTTTSSLTAISGLDGF  
NDASNTTAHHSRQNSLDSYSFLTQGC SNADGPRNNEMGSTLSHPYGEVLWGSNSVMTTAD  
ESFFTSSNSLFLPAVQDPVGEAGATGSVNVNVVSSDIHDAARIGNWETVARLCEEKPE SA  
AYIGGDAWTALHHACNRRCPYPKVVEALINAYPDALLIAEEKGWLPLHYACRFKAPKAVV  
ELLHMYKDKGNLAVSKPDRRGRSPLYAVRYDAPTGVASLLIEKDPSAVLEEDRNADSP  
LALVWNDWAEKSVGKKTQQILVGT EENQNIDFNASFRNWSFGMNAQLNLEDR IKNSKLV  
RQRLE RQPKVLERWNRVNRFLKAAFGRLEEDWELVERLRIDEEKKDTRHERKWRVLHA  
VSAIKCHYTLFLLAFSLHPEQAFELDSNDRRTDRVYNKSKGSSECNPSNLTAHLHAASS  
NCGGEPGRKVITQLLSLNS SAVKRVDSEGSTPLHMI SENKFKSEWIFVDEVYGSNKDAIM  
AIDTNGRLPLHRASKAIAYFNKNIGNDSVVSRSVICNLLREYPDAARIPDHFGLPLHLL  
AQNGGGWDVQAQTLFDANPDAAEHRAGVKCYERFPLHFAAQNVDSDFTMIGKLA EAYPEA  
ARQADRKGFYPLHLACESGHSWKSVELIHDAFRVAVKQTERNRRGWYALHMAASSESSDE  
ELISKLAELHPQAALVADNDGR LPLHLACMANKDWENGLSCLFDANPNSIKCPDKDGM LP  
LHIVAFRCCLKPCSVD DTSPEPANIRSRNLSMTSEALEKERLAI I HAAETKEAKELNDIF  
EIVRADPTALMI

>comp10727\_c0\_seq2; 659 396 3134 LEN=3890; translated  
MERTGPIEYGNNGMRRCPDQEESSSTAQDCSGSSTFTRGEQAQSDYRASII RTS LTPQHT  
PNQIPAGERIVESWIQQSLSMPSAINEPNESTSTNHLADRNSLFTTTTSSLTAISGLDGF  
NDASNTTAHHSRQNSLDSYSFLTQGC SNADGPRNNEMGSTLSHPYGEVLWGSNSVMTTAD  
ESFFTSSNSLFLPAVQDPVGEAGATGSVNVNVVSSDIHDAARIGNWETVARLCEEKPE SA  
AYIGGDAWTALHHACNRRCPYPKVVEALINAYPDALLIAEEKGWLPLHYACRFKAPKAVV  
ELLHMYKDKGNLAVSKPDRRGRSPLYAVRYDAPTGVASLLIEKDPSAVLEEDRNADSP  
LALVWNDWAEKSVGKKTQQILVGT EENQNIDFNASFRNWSFGMNAQLNLEDR IKNSKLV  
RQRLE RQPKVLERWNRVNRFLKAAFGRLEEDWELVERLRIDEEKKDTRHERKWRVLHA  
VSAIKCHYTLFLLAFSLHPEQAFELDSNDRRTDRVYNKSKGSSECNPSNLTAHLHAASS  
NCGGEPGRKVITQLLSLNS SAVKRVDSEGSTPLHMI SENKFKSEWIFVDEVYGSNKDAIM  
AIDTNGRLPLHRASKAIAYFNKNIGNDSVVSRSVICNLLREYPDAARIPDHFGLPLHLL  
AQNGGGWDVQAQTLFDANPDAAEHRAGVKCYERFPLHFAAQNVDSDFTMIGKLA EAYPEA  
ARQADRKGFYPLHLACESGHSWKSVELIHDAFRVAVKQTERNRRGWYALHMAASSESSDE  
ELISKLAELHPQAALVADNDGR LPLHLACMANKDWENGLSCLFDANPNSIKCPDKDGM LP  
LHIVAFRCCLKPCSVD DTSPEPANIRSRNLSMTSEALEKERLAI I HAAETKEAKELNDIF  
EIVRADPTALMI

>comp10728\_c0\_seq1; 542 297 1692 LEN=1802; translated  
MQHQGRREESQNQVLSAYASELVDYDTSSTSAIQTL PDASVMDSFVLPVAMASLMVTG  
NTVGAGMLVMPEVAAGPGPMLTFGVMVGAWMMCLTSGLTIAQVAIQEHEASGSEVPSSFK  
EFAEATLPSASN MVSGTSVFINTLVVAFDVF KAGQIGSTLLPISIQLDGMMLSYIYSGLL  
VALVSTQSLTNLSRVASTLVVGLFATFAGLLLPGLANVPDPVSVLSLPLLP TEDIGDGV  
LHGTGCDFGPGFPDIVPTITRLLDYNR TKVATALTFGSFIPLLMYMAWTITVLGGGITSE  
HSLGTLMTCFSLTTVAGSSLGGMSLSEFEI LLGASTSDDSVEEMGGKNKDGTFS LPSV  
AMPVGTIAMILAQV FSSDITETLQIAGGFGSPMLYGIIPVSMILMQQRQANKNGNFGTEIV  
ISTPTPNDKNSNIIPGGIFGLGTLGLGSI SLIGLELVQTSGGGM

>comp10729\_c0\_seq1; 709 302 1624 LEN=1733; translated  
MWNCEDEVNECGEPIELYLVPVQAPPRKTNTAPQD SHIGGHCFDDNFTPSCDVCDDKMF L  
MAQLRLQNASSGFLEDRFERFICAFS CPKEECFGQLVYQQGFSTKGGHGVFKCIEKRVPL  
ISNENKVKPNIPVAVNKSSWYDNDNDGNDDEWGMGDDDDVNLEN AVAAMESKLDDEGGAL  
VMSRKTAKKPHASLAPSSSEDSLSAFGCFL LKKQNEPRSTKSFLEDEDDVGLSE SDEKI  
RNMLARYMAEEDEDEDILAAI GGTNATGGGSGPTEEDERLSAEDRVL RGFQDRMRRAPRQV  
IRYANGGKPLWSIPDVNHNVPNCPLCGAERTFEMQVLP SILDALGVEKYETKTKREAGDE

PLALGDLLSNGLNFGSIAAYTCSNPACTPEKKEAYLVIQKSVDDLPENGNTKKICGDNLS  
TPTVAVVEDLDDDAEFELDA

>comp10729\_c0\_seq2; 709 522 1844 LEN=1953; translated  
MWNCEDEVNECGEPIELYLVPVQAPPRKTNTAPQDSHIGGHHCFDDNFTPSCDVCDDKMFL  
MAQLRLQNASSGFLEDRFERFICAFSCKPEECFGQLVYQQGFSTKGGHGVFKCIEKRVPL  
ISNENKVKPNIPVAVNKSSWYDDNDGNDDEWGMGDDDDVNLENAVAAMESKLEGGAL  
VMSRKTAKKPHASLAPSSSEDSLSAFGCFLKQNEPRSTKSFLEDEDDVGLSESEDEKI  
RNMLARYMAEEEEDEDILAAIGGTNATGGGSGPTEEDERLSAEDRVLRGFQDRMRRAPRQV  
IRYANGGKPLWSIPDVNHNVPNCPLCGAERTFEMQVLP SILDALGVEKYETKTKREAGDE  
PLALGDLLSNGLNFGSIAAYTCSNPACTPEKKEAYLVIQKSVDDLPENGNTKKICGDNLS  
TPTVAVVEDLDDDAEFELDA

>comp10730\_c0\_seq2; 528 183 1043 LEN=1341; translated  
MMRVNAIRKAGAVASRGMQTAGRASAARASFSSTEGDNRKELEYPRAVSKEEAPSIPKAKE  
TTEEPFLPWRGWMERVFRDKMSPETFDTVKGFYFYPEDPNNLNQLPYPNQKHIYSKDGK  
ESVAIREVSPGSQPFVEIPTKDLDDDPYDSGYFKRDTRRRRYVDPEFPHPDVEQIKLDMLD  
ENDPEVVAAKERLAAGPLSSQNGGIFANGKSETGLSGLRAVMSVTNDELFAELDKHMPD  
HLPTPTWAADDECKEMVQWYKDRGLPIPIGGNFNGVSVKRRIAKW

>comp10731\_c0\_seq1; 73 1 440 LEN=618; minus strand; translated  
XVAAAAACGFATGPLEVGGQKKGKGVRAAPAHTNHRKVLPAVGDQLPDAVHERTEVAPPL  
AVRVPGHVRRARGPAHAGPVRKELPPGKGGSGAVDAPLGPAAAGEAVEIQHRVGPSSGGVV  
LASVAAVGSSMPVQAFSAFAPGNVW

>comp10732\_c0\_seq1; 546 1 1089 LEN=1215; translated  
ATTEKNDDPLGLLSPLQGGKLPKEADTGIDLSGLITQEPTDDVDLDFGLQDDEDEDFGA  
NKDDIIIVDAYLDTDEQDDAKLPAKKTQKEKDTVVDADADEYLDADADEDEDEIDTKNIP  
TGPDDPTSFLFYKLSQQGSREEKLEAILSLSKYSDLRALVKRALPNDTFSNRKKKTYQCALY  
DHFRLAYPTKEEENRKRKSNQNRRSIFSRPVTCSQVKCNASSRKFICAENIDEFQYCS  
TFPERIRDGKPMQTMVVVFDEMI EQPSMIK GKANKDIKNYFRQDEEGNEKPKMYFLVPE  
NFKERIGKVFEQVQKDMQLSSTQYGDGWAFTENVGRFFKYVYGNTSFKSQGINKQKKNR  
RK

>comp10732\_c0\_seq2; 540 95 1274 LEN=1274; translated  
MSLCGDLHGSMVSI IQSVDGFETVSKNIYFAMGNRLSSNDDPMGNWVDQELQONIDGXVSL  
GALPAIASDRISXPFLPPFWWSTEQQKIAAAKAATKQQQQPDRVGGQQQQQELSFEEQ  
RLEYMLNNQFTKSGTRVWHDLRNKRKPPQYKRRQSERLKLQQQQKQETGGGNGSAPNS  
ASKGRRQYPLPMKRKRASNANEEASNPSKPKKPKVTAGKENLSTKRRSQNIDKCNLSSAKK  
ARHSDQDTKTAKNMPTITTSRESDPKNALKPTPTYPPVSQKNKVAKKKASRDEKEKAQEV  
TKKKEEGCDSVGKIQIPATSRDDDPKTGSKPPSYSQTTAKVASKKKIKVRTVENSDDSTT  
TEEDDGPLNLLYSLLGKKPHAEEKTQKEKDTKST

>comp10732\_c0\_seq3; 626 95 1192 LEN=1192; translated  
MSLCGDLHGSMVSI IQSVDGFETVSKNIYFAMGNRLSSNDDPMGNWVDQELQONIDEQQQK  
IAAAKAATKQQQQPDRVGGQQQQQELSFEEQRLEYMLNNQFTKSGTRVWHDLRNKRKPP  
QYKRRQSERLKLQQQQKQETGGGNGSAPNSASKGRRQYPLPMKRKRASNANEEASNPS  
KPKKPKVTAGKENLSTKRRSQNIDKCNLSSAKKARHSDQDTKTAKNMPTITTSRESDPKNAL  
KPTPTYPPVSQKNKVAKKKASRDEKEKAQEVTKKKEEGCDSVGKIQIPATSRDDDPKTGS  
KPPSYSQTTAKVASKKKIKVRTVENSDDSTTTEEDDGPLNLLYSLLGKKPHAEEKTQKE  
KDTKST

>comp10733\_c0\_seq1; 392 184 1593 LEN=1842; translated  
MCGPTVKTISPEAKEARAAPTSKEERTTKILGNEKSRTVPVNSTVAEPEHRGFLYGTLSL  
ALLVTAASVNMGFYQTKRDTLGCVDVQICGTMTSARSTLTLLGSTIIIGKCSKALKMVG  
ARKFFLMLGVAASALDVLLSFRATSIDGLWIGMIPALCQQNF'TVLKALFMEYHDESASA  
AERAGRVLGKGMAGVGLAFMAGPLLSVFFKDHRTASLFAACCLLGSIFFVSLLPNPPKST  
IASREKEANKSSSFGFSFVPLVPAARTRPALFLMVSRCMGLAFHIFQTIWAVALRQR  
FNFQPKDYGRYYSFIGFGFAISQGF'FAKYLLKNFGASDRGRTRLLLACALILGGGRFMVY  
QTHSLVVVYAVFGLIITALGVINTIFTADTSKIADPDELGGLFGVLGSMESLAGIIGPIL  
GGVLANYVHQIWGPLGAVLSLYGFVFTMIYFGYEHTVCKGKT'TETKKNV

>comp10734\_c0\_seq1; 351 79 987 LEN=1399; translated  
MIGANTILNFFAAFLLLCGGDAFSTNYQQNHGIRVGGSSPFPKGQFVPTLKSDFQKSTK  
LKALDVASLSGGAVTAYSSANGLLASLTETGFYQAFSLVVFSEIGDKTFFMAGLLAMKTS  
KFISFLGSMGALFVMTIISVVLIGQTFHVVPAGFGEGFLGGLPLDDVAAVLAF'AFFGFKTL  
QEALTMEEGESVMDEEFAEAEEVEASDTTKQGTIIARILSIFGLVFAAEFGDRSFLSTI  
ALSAAQNPFSVGAGIAAHAIAATGIAVSGGAVLAKYLSERVIGIIGGALFIVFAIT'TALG

IF

>comp10735\_c0\_seq1; 426 160 1257 LEN=1534; translated  
MAPVLDSVAPKLGKMAIGKIDCTKHKAVCKEHKVRGFPTLMYSVDGEVMGEYSSGGRDEL  
DIINFAQKMSEPAVHEIRRLEEAKIFAKKTASEGIVFLGSGKADSSSLWKVFEKVARKMQA  
NAYFLWMEQLESPTDDGKDYSYVDRIEDGVLEPRRWETTAADLTEENFSAFVKDQNIPTL  
TNITPQNFRRISRNGRPLLMAIVDMENDELVSGIRAHMMEFILRAPQEYVEQRYYGFLFDG  
KKWQKFLKQFGVKQKDNPPQYLMIAPLDSPGKETFWRNETYTKFPEFLKAIEDGSIPPRHP  
EKKKLTDDPFGLWTEKFQQFFPYSIIPIFILTGLIVWAITPSIDYEDYEITEDQKMTEE  
TKKNK

>comp10735\_c0\_seq2; 181 1 345 LEN=622; translated  
CSSDLNPQYLMIAPLDSPGKETFWRNETYTKFPEFLKAIEDGSIPPRHPEKKKLTDDPF  
GLWTEKFQQFFPYSIIPIFILTGLIVWAITPSIDYEDYEITEDQKMTEETKKNK

>comp10735\_c0\_seq3; 477 71 1378 LEN=1655; translated  
MKAFPILTATAFCFSSPFLTLAAGEYVGGTLHETPIDLDDDSFQAAIEDSANPFWFLKF  
YAPWCGHCKKMAPVLDSVAPKLGKMAIGKIDCTKHKAVCKEHKVRGFPTLMYSVDGEVM  
GEYSSGGRDELDIINFAQKMSEPAVHEIRRLEEAKIFAKKTASEGIVFLGSGKADSSSLWKV  
FEKVARKMQANAYFLWMEQLESPTDDGKDYSYVDRIEDGVLEPRRWETTAADLTEENFSA  
FVKDQNIPTLTNITPQNFRRISRNGRPLLMAIVDMENDELVSGIRAHMMEFILRAPQEYV  
EQRYYGFLFDGKKWQKFLKQFGVKQKDNPPQYLMIAPLDSPGKETFWRNETYTKFPEFLKAI  
EDGSIPPRHPEKKKLTDDPFGLWTEKFQQFFPYSIIPIFILTGLIVWAITPSIDYEDYE  
ITEDQKMTEETKKNK

>comp10736\_c0\_seq1; 92 1 365 LEN=1393; translated  
XHPQHNAVEREPTLQERRPPQNIETPIRVAYYQLFTMANEAPPQIYRDLTAECQQLMTK  
IADLESDRNEHILVEDALKPLDGSRRAYRLVGDVLRVTVTEVLPSSISQNKENVRVSYGL  
I

>comp10736\_c0\_seq2; 123 1 428 LEN=1095; translated  
XHPQHNAVEREPTLQERRPPQNIETPIRVAYYQLFTMANEAPPQIYRDLTAECQQLMTK  
IADLESDRNEHILVEDALKPLDGSRRAYRLVGDVLRVTVTEVLPSSISQNKENLNATIDA  
LRERLTIRQKKAELKAKHNLQ

>comp10737\_c0\_seq1; 544 143 2170 LEN=2430; translated  
MTXINEEKATETFFFRQNGLLLSGNHGDIFDAPSDRYAFYFGSDSCGGLRVDKEDNADA  
PSNLKSSEVNSLFYDNNVLVGFPGNNRTAKADIPATKNSTNSSYFRDDDNPPPLNLHTI  
TLEELQELVSWGYPKFRGKQIYGWIRDKGVTPNDMNNLPKNLRSTMLEFTSRAGSDDD  
SSEVNDNGGALSALFAFEAKSKDGTVKRAYQLRDGQLIESVLMGPYEDGRYTACISSQAGC  
AMGCVFCATGQMGFARQLSADEILEQVSRFASELKRQNDPSKRLSNIVFMGMGEPLANYR  
NVVKAVKRINSELGIGARKITVSTVGVVPSIKKLYAKDTEMPQVRLAVSLHCADDGERTK  
LLPANERYGGLDELMTTLKEYIDTTGRRVTLEWALIAHQNDGIETARQLGNLVKRYGLRR  
DMVHVNVIPLNPTQGFEGAKPSNVKRVNAFCDCLSKDYGISATPRVRRGIDIDAGCGQLK  
AKIQKQKEDQKRRKEQREQQNALAEFLPEQQTAPMIGVYEDDSDEPIVPQLKHGEVVEFT  
FADDAVDFDSDDFENPEYEESSDMAEALRLMSLVESGAFGTPAATKQLPVTAEENDDDDN  
SPVKGPTTTIVDEDAVRTAKKKRKKLLRNLKQIKNLKDLKASGKISAFSREOLEKISKEE  
AWRNEVEDLEHNLKA

>comp10738\_c0\_seq1; 468 70 1314 LEN=1766; translated  
MTVTAGQILTAETVPAYLKDQWEDLGIGKALDCTTTAEAELEGIVVNAIQGGNVNYAFCI  
ELPALAKKVFLKQAPEFVAIFGPDGFPLTSERMQREMDVYSEWKGLLGDLLGKKYLPEIY  
AFDKKSMVVMEFFDGYELLDHVLVDEKASALDQKGI GEALGDFMGRVHAASYSSKYLA  
ADEGQARVDYLKEHFENREMRDVQLEFVFSKCYKEATDEQRAGLTLSDFLAEVELLKKQ  
YDGKAGDDALVLTHGDLHPGSVMVDPSTSVKVIDPEFTVYGPAGLDVGSLLSGYCLGAI  
HQEYSRNPVAVVEDIVAGAEAIWASYSQALADGGLTSEQIRAI ETVGFTVAEVCRTALE  
FAGGRKWLQFPDDEDTKKKACKAALGLVQKCMVGRHEGGM TLLFTEMKRKHFDQ

>comp10738\_c0\_seq2; 217 961 1827 LEN=2279; translated  
MVVVMEFFDGYELLDHVLVDEKASALDQKGI GEALGDFMGRVHAASYSSKYLA ADEGQA  
RVDYLKEHFENREMRDVQLEFVFSKCYKEATDEQRAGLTLSDFLAEVELLKKQYDGKAG  
DDALVLTHGDLHPGSVMVDPSTSVKVIDPEFTVYGPAGLDVGSLLSGYCLGAIHQEYSR  
NPVAVVEDIVAGAEAIWASYSQALADGGLTSEQIRAI ETVGFTVAEVCRTALEFAGGRK  
WLQFPDDEDTKKKACKAALGLVQKCMVGRHEGGM TLLFTEMKRKHFDQ

>comp10739\_c0\_seq1; 783 413 3048 LEN=3116; translated  
MTPNAVCTSQDFTKTTCNLDYVNATGNESDWCLSVPNTVYVETTFILRCTGDLNRMLFY  
SVRNRPGCYAHVTGSSVSPCYNGYDNSIIESI ELATFDALKDEI STATGDTGREWGDVGO  
GFTGCDQLRFVTEPRGLDGGALTCSEATLEIQSSPSMSDAVADLDEQLGIVVSNNTNG

GRQLREFSNRSLKPLASNDGIIDFGVVSHDISAICRETLEGAYLEINYNISCGGDEFQIL  
SDPLCISAKCGVTDFELESASHATAKWNRISNSDCQVLSTSSNNEAAITWEDFSPSQS  
PTATTSPITSLAPSAQPPSSSPPSASIAPSQNPTAVSCEDESNNLLEVSASENGVETDEM  
KIATELAQVQILMMSGDDNNNDGFAKHCI SVSGEESDNGERKMSPAEADFYCEFNYEDIT  
GTSNTENSIPSLCRRAGTVYVEDSISITCTSEDTSPTTTKVLVQNKPSCRSKKCNADDI  
QGLANIEFQRWIKLTLEKGREETSILLGPQSCVVDENE EGGVSATLVTSSDSSD  
NGPIEPTEQCLMGTGFRKSIVGLFEEIVHSERGFLSYLENDFRQICGSIKPGVLDNCFDW  
SELPFSEDAVKLNCMPNEYTXDHIQDGC GG DGQYIESNFRMTCVKEDSEVTMMNRNVP  
ECVGPSPNQTQSLMADKFSLSKQFEFKFADDNWCTNEVVSPLYPVHFD SFHETHDTE  
CYKNLQFEELDPADVAIRIQETTIGGKDEREQHMADLLAGVDSSTSFSDLIPGGNSSDY  
DDSEYDDSENDPLEVEDDVKESPAAGNAQSLDVPEAKDRPLIERPPVETISGLVGPVRYGR  
LFEPQTKAPVETTSSGSTITLGAIGVLVQMLWSILI

>comp10740\_c0\_seq1; 383 238 1038 LEN=1212; translated  
MKTGSAALFLFLGATSTNVAAFQQPVAYQSSKTAPLKAIGNDENHGNEISRRAFGAFSKAVS  
GALTAASVAGVLNSGGDQSLRPEPANAIGPVKINLLNPTYTAIPCPKDKPIPEKAMKG  
MRGLCVTVNVLDLEESPDRALDKVGVYGYITDKGTGESVLANNPDLSTDAGQFAIIPKIET  
TEKKTQFEFIAAVPREMDMSPFEEGIAPLNFASLRVVSFPGGQQYGAISPCEMNEFSDEC  
DAWEEENGPYKKA EY MVKSNERTKGR

>comp10740\_c0\_seq2; 67 1 238 LEN=412; translated  
XTQRKTRTKQDMSPFEEGIAPLNFASLRVVSFPGGQQYGAISPCEMNEFSDECDAWEEEN  
GPYKKA EY MVKSNERTKGR

>comp10741\_c0\_seq1; 196 549 1417 LEN=1417; translated  
MTFLYTGTNSIATSKDSTSSSEISEMLVGSIRFAALVGAGLSLFLLLSAQSILVPLVGN  
DNVDAELLSAAWRYVAIRALGMPAAAMLGTSQAACLGLQDNRTPFRIIVIAAILNLVLDV  
AFVGRKVTWVGGTAGAALATCLSQYFALYLFRRFTSDKMDLKAQTSREKQKISTKGLLS  
GRSTLIQFIRRPSQKTVDNFKPFVVPVTTTQIGRCSTYIAMGHVVSSTMTTVSMAAQQII  
TSIFYTLPIGSDCSLTAQTYLPAIVSQKPSKERTLAMKTTMKNIFRVAG

>comp10742\_c0\_seq1; 444 128 1294 LEN=1566; translated  
MMQSSGDIPSGNSGNVEEQMIPEKSEGADLAAKRRARRAQRKAEGNERRRVRKKKRDTPA  
DALIKYGALFLLVAQMVLVLLMRMSRTSHVEGQPMYLASTAVFIMEVMKLGICCCVIAY  
QTNGSLFSELKTHVLESPLMAKLSVPSFMYTIQNNLLYFALSNDAAATYQVCYQLKILT  
TAVFSMVLQRKFSAKKWTALILLTIGVSIVEVSNHSDSSKSESEKQSQFFGLIAVLC  
CTSGFSGVYFEKILKGSQTSWLVRNVQMGIPSVVIALITVYAKDAAAVSQGFLGGYTS  
VWTVVTVQAVGGLIVAVVVKYADNVLKVVFATSFIVASCIISAIFFDFHASMSFLIGAF  
VVISTILYSQPEKKRRRKA VLPETVTRK

>comp10743\_c0\_seq1; 857 105 3016 LEN=3016; translated  
MTADDAMAFPEENFAPFEYIEDEIEDENS NHLNTLPKSRKKNDFNFTSLWRKPKLGRRK  
IKTIVKSPGIYERKSPKQSNHKTITIGRYFKDRESFETSGSVPLSEFDEAKDTLPFLNFR  
RFETREAEGIESNPSSRILKDKVALNPKLFLTPAPTQDAKPTIESDRLAHEKSNSNE  
PCADFDPFQTLKSPKPKPEAGADKKKEELVSQNNKQDAFQDWLYNDHGPILSSLSE  
DTIFSDSIRGERFLEDNFEDTIGTGLEGDYKSPNKTRKNINQVTSRLSNPDDKKEGDE  
IETSVRFSDRLLKLFQSKGETKVAQPTSNLSKQQSQISLDNLAESGNCPLKSETVENIEN  
SISKICGSDITSVESNISSENECCALTTNIEDERQDSENTGGKRNSPEMLSFESKQLSLE  
TETNEENCVAMISSQSDHSELKDSSSGKKEGRETIETKEFSAQRTDSWIGSEENRDCSQ  
NISDVSSLTMSNGTARQYASKFGVTLRRNLKSDQDQRTLRSSEYVSHVDTQSRDELEG  
TTINVVGHKPTVSDFMKNTSKREITRDTNYKEHVSEDCGKDKCVEMTKKDQNEQKSLKE  
GDEVDTDPHALQINSSPNSDANKNFAQKSASMFGVTLSTRNRNTNKLSPDISEASVR  
NKVEKIRTSLERESFENKAKRTSGEWNRSRASSWKNADGNKKN SIPETNEQVSSLIPO  
GGSIGQASNLGIESGIDMQVRDQLKPCVFKRNKISLSDRRKMFEAEGISVENNRKKSIES  
ATCAESPRSLTSSLGDLTVKTVVQKRRIVQSKTKPAQTLLEHARRSSITHDDNSDNGLD  
DIDDGIGSNRRKTLVTAKKVLGTYHSSLGKRTSNHSHEPDVLRCKTSRDSDEFKVDSDK  
VVIQNKARKSLESIQKEKKNVTETQQMTVNKVTPTKVGYSARKNFENLNQSRVQLSMSRP  
LVGKDQSSVRX

>comp10744\_c0\_seq1; 566 137 1396 LEN=1635; translated  
MSGGVTWGSNTVHTIGGAPAPASSGFSFGTSPSPAPSAFGAPAPSAFGAPSTAPATGGF  
GFGSTAKPPAAGGLFGTPAPAPAGAFGTASSFGSFGQPKQPQQPGVPQHHPAQAAAMEAK  
ITAERVVEASRIRTKIEKLRHREYSGTCVVPEDGEE SAKFVAVVYNEITPEERQLRMHGM  
ATGQPQEQGMYSQHFDLQQQQPIFAPQRPPQINSRDWKMVVNNPDPNNYVPTPIGAV  
ALQGRVSNQQTRAKAYADNAVAVQKNLEFIRQRAAIARQDLMEKDRQYATLRRRRLLELMM  
RVEVARCLNKPLQPEYRVMQRLTKLLDQVEKLRGAFFKLDQDQAKTQSVSGNNGGVSINT

SVADV DGNLVGSYKEELV GILKEQRRKLEKLN ETAKNDLRDVGLIARRVVVSVPASIPH  
>comp10745\_c0\_seq1; 132 197 1155 LEN=1395; translated  
MKLTF SR TTT LALVIAFCLGVMQFSMAETAVDVSEPRDMTIDDRVDHSIHIEFCV SXRVK  
AKLSPGEGMVG IQLP GAPGESFRRELPHAPHDRALAE TSEHGPI DVHTDRDDGGEF LPDT  
RLSADPPLVRRGSDEKCRADHDRALPDSFYFLNGYV VSGAFEIMLDGDQMI FSKLATGRM  
PNADDLLGPLTKAXFDGHREVERSAHKMFDPARSGTLWFAFP GTTTTVVALSNRRRNGLHG  
VGNDKSSNKKGG RIRNAPCAPIRSPFLLARFSTTASPARTSSSRTTASCIAGSNDGNGWE  
YPQRLPRNDVGDLYTPGNA  
>comp10745\_c0\_seq2; 132 197 1155 LEN=1410; translated  
MKLTF SR TTT LALVIAFCLGVMQFSMAETAVDVSEPRDMTIDDRVDHSIHIEFCV SXRVK  
AKLSPGEGMVG IQLP GAPGESFRRELPHAPHDRALAE TSEHGPI DVHTDRDDGGEF LPDT  
RLSADPPLVRRGSDEKCRADHDRALPDSFYFLNGYV VSGAFEIMLDGDQMI FSKLATGRM  
PNADDLLGPLTKAXFDGHREVERSAHKMFDPARSGTLWFAFP GTTTTVVALSNRRRNGLHG  
VGNDKSSNKKGG RIRNAPCAPIRSPFLLARFSTTASPARTSSSRTTASCIAGSNDGNGWE  
YPQRLPRNDVGDLYTPGNA  
>comp10746\_c0\_seq1; 440 114 1805 LEN=2225; translated  
MSSTQEVGDI FQGQKGS AQAMLRSP TVLILCIGLWGMNIF FRLFGIDFKYVLNYDLIEI  
DKEEKEKRRMRDGYSEAATSEPI TSANNSNHTVSPNNLELVETGASKT SISATTPKTRS  
SSPAKINNNTSSNGTNGISRHKPHLTSSTAPPE SYSVIDPVI AVSWSKLVLF SVVLLFL  
LHFSTHYWMDHLHRSSIGAVAFFYSTMMLYIFFP IKQNEWLRRSFVIVLKRTWALIHPRC  
SCIRLIGTKQIPRRIPFVDV FYADAMCSLSKVFFDWGMLAHQAVHY PYPVPAATHNIVIP  
SMCAALPYLIRARQCLIMHRV GKLQRDPKRYQHMMNAFKYSTSMYPLILSAYIKTF SAAD  
DTSNLERILVLLTVNASYSLYWDIVMDWGMMDPYKVAQTACGVGIPPSTRK GHTDSCH  
HLCLRPRRLRYGLTTLALIVAADSMLRF SWMLKFV PKLFP SNDAFV LCTQFLEVFR RGIWN  
LLRVEWENIKQSKKAPHQPSHQVKAHDSLSDVDPLDEQHRVFLLDVDDGDSNSLGGTVNS  
TAMPGGRQNE DTPEASMEMKILR  
>comp10747\_c0\_seq1; 215 105 569 LEN=815; translated  
MSIYHLFQAQLTRQWRRTPLVPSTSR SISIFGLGTPTPEASSSTFDATSRTSATTTESTT  
KVTSNHINKRKISKEVATTYDMPLAQAERIVTMI FDTIVEGVVDGRQVRVSNFGAFDSYM  
SKATERKNPKTGEIVQIPSKRRIRFKAYDSFKKA  
>comp10750\_c0\_seq1; 424 1 1467 LEN=1722; translated  
DDDDDDDNVNSLVTLDMGPLIGHTTHE SATLWAHYLKPAMYLF EEDYKLVKLYEQQQSE  
TKNGRSSKPTLKLIRTIDEVPPDLTRNNAVFCTIESLQPLTAYYYEMSILGRRVGRGSFR  
TAPVPPFSLQQQSPSQGEDVEEGTPQENDWADP MFSRENMRKPQTI SPDESPLVHKRDG  
NGDYAGVKFDYILASCMDRSEQPVQAVWDEIAYA FFRNHTNGKEQHSYSQHONKKYPDFA  
ILAGDTVYMKENIDVDERNGVNFNRLWERNKAQRTEPHFSDFIRNTPMYATWNNHDYGE  
WSNVYQLGKEHSLHAFRSLWPTPRSGNNHNNNGIYY SFYWGVDVHFIVTDDRWHRDPASGN  
RLGPEQTNWLQSELVHSRGTFKVVVIGSDIMERGWGSDLENIGD TVRLHSIDGVLFHAGD  
IHRNEYKRLNTGGFPYPVTQITSSGI AKVWRRPFVHISVDTTAREDPFLTASFY GASSAT  
MDESSTQW  
>comp10750\_c1\_seq1; 652 382 2049 LEN=2049; translated  
MPPSLLFANHDATSTNDNGDDQSDCSAKSAATESSTVSEFLRRIVPPGKWSIFFPNHAAK  
SEARNKSADGNHNDIGRNAVDMNNEKKINNKSIDMP PSLRIPMGDDRNRQRENKAHHTK  
SRNASPHDPMLLPDNNQLFDNYTFDAVPFNGDMDFPKQRTNP TKTKRQNPKI QNPNPTN  
IKNMTIEIPMGIVVDSIKSRTISNISP IGVSSHV LGLGHRNPNFSSRQNRSGGHPDGDS  
DSSDDLDRILGAIDDIGDAHNQRRRRHASSKTHRSK KCDKKAGYRKKRWIKSSGWCA  
HMKRRSKTDTPKPGSEEKTLNRTLDTGYSSCDENSVEGVDLREKGRNQRQRTPF EESIE  
VEVGALVMEEKRSRGKKNKRATKYTGDRPKNSNSIS IWWWILLGVLLAIVLALTAGLLVP  
WRSKADTVVAGA QKFTDVAADDDSLAPATITGGDTSL SSTAAPSVRSRISEPTPLPTRL  
PESSIPNDSNNNGAPSTLLWKDQPPLWASPVFQPSVSVVNTELP SITKSPSQSPSILEH  
ATDAEPELVFLYDDDD  
>comp10751\_c0\_seq1; 834 317 4066 LEN=4114; translated  
MIIVFIVDTS PSMGKTLVDGSSDRVNGNVNSMSRLDLAKMAVEELTRRLK KRVHEHNSHL  
QQLPPK LQESFRNIGLGTQKDDYLL LSTAAQHTTKPGVAICGAGGRLLVGFADHYAGN  
NNLMAGDNAHGSGGNSGNSAVDPPAASTLQHQHNGIDSFQRELKRLKATEWTPSPAGSN  
QRPKKFPEDGGGAIGLNAALSAGLQMM SRYRLKFKATENFGMGRLPSSAILNPAVGGAST  
HALQPA CLIMITDGA CLRASPEGGGTLK VNSSTLLRDFYQEPFRWDQRI FCLGVGGRES  
TSPTQSIHPHLRALCEVTGGSCMMLRSSTSGSGSVSNVSDLLVNLIAPKLPKQLPVPDPV  
SLI PHTQEHPKQNTLNTFDGGKFVNGGPPVTFQSLEPDVNTGKAGTKHKAGIF YVPI SHG  
DTSMSVSPVSGRSFGDDIPMFQQPVWCIPESFFPTK KLDLTPRPAQPSLLFSRFP SRLG



SKCFEPSSVMKALTRLDQLVVANLKYLSPSGNFANHQARFLKRDVYICEWISLEGKGAHG  
PTHSNLEHYVPLVAGAGRPTLSDGEGNFLSIGILHVPSRIQMMGSSSSTAQFSTLTLPL  
PEPHILLPLLVRAAEAHRALKKNVLMNENNKESAPSGLVQKQATAVSRTVHLDENWRNE  
FRAYLFRLLPPYYQNALKRSLRNVLPSAHSLLNNDNSNEGLVVSQCFSKICLQKIRNAEQM  
AKVTNERLERQEVELRRRGVSTFDVPSRTDHHLQQQHQQQQSSRGNIATIESPKNVIPTI  
KYGRYDPRCPVESYLAALRQMPAPWRIPSATNSTTSSTVRDGEIAAETNKLSENAMDALG  
DLPSSCLMAYYESRRRWIFGSGSVSVRGLHVEGVNNDGSNAQRCLARQDKSKESSLSFAG  
VGVSELNATTTSKMGDYRERLLWSRAPVVGYSNDATGVSATTSQNGAPVWSVDDDAMPI  
AFFDERTGSFVDSVQNRIRSRLFVNFNGPYKDKRANSLIPEQFLSQRPKKGV EEDHPGGP  
LTPPTSPPHDTFSESEGEAEVAFAGKPIKSSPRKSASRSEEIYDDKPQTKRQKISSEKL  
PGKQTDTRSAGIPQVRTKTKDEKQTTAPHPPPPPPPRRQSSANPPPPPKGPPSK  
KVPRPPPPPPSGTNSLKRPPPPPNQGISSLPKPPPTKSAAPPPPAKPSQQTRRPPPAQ  
ETSLDLQTPDVKPNVNLPPGWMCVWSKSQKRWYFFNTQTNKSVWQWPPP

>comp10752\_c0\_seq1; 753 198 1919 LEN=2271; translated  
MASNNGENPGATTGGSNNNPNVSTEDLPLIPGRERHVLQRREELRFEVTFGGSSASSTMS  
NASGTTTFCLQKGCSELYGCELALGKTYTIAHGGVKAALFTWHGCVVDLGAADDGEGSTS  
GVEFFSYTSDETDANVAFVNAHAQLEALRDDAAENFNAKSGSDASSGGSNGQGPRMIV  
GPPECGKTTTLTKTLVAYACKVGRTPMLVDLDPMDNTISVPGALAVAPMHQSAVAVETYAT  
TGLPVNGGGTGGAGTGNSTNGSTPAIHPLVIYHGSTAKLHPDLFRGQVDSLTECIEKRL  
QADELGRSSGIIIVNTNGWIRDEGYDCLLHAAKALKITVLLVVGHDRLYSMLTSHYKKQQK  
HHEEQLA AAAAESGEGSTIPPLPPPPKILKVP RSGGVVSRPSRFVASC RSRAVKRYFYGDL  
VADPNNNSTGDTIDDGAGKPHRLVNQLTPFAIQLPFAEIKIYKVSSMALSNSLLPVNAAH  
QSTDAIQLAEIDIVGDPEAAKGLQHALLAVCHPTAVARYEQTGKGRDLVTAGVAGFCVAD  
KVVTETDQMHL LSPCAGVLP SKTFVVG DITWME

>comp10753\_c0\_seq1; 1218 1 2437 LEN=2437; translated  
XDINLVMPGNDDEVDENGSYNLTELNGKPVRTVIGKNPMEAWSMALTDLGLIDEEIATRA  
RKALDESTKEKAAA EARGKSKK GAGDDEKMDLYLLMEEFERDQEDPKLDSDAEDYTEE  
ELLLKERVAALKA EYARVDREDEDAATSLVDARVALIGPMAINPFPNTETSTNNQASFLA  
VAVRKEKTKMGSTGNKRKIVLPTDLLGKNDTFVNPDI EVLLEGLPGSEYCTDYVYLKRRG  
EKEKETKQAKPSVSSSKSTTKSTAKSSAKAVV SERAKAARLKEQQKKAEREREAEKAKRL  
KQIREAKAREKEMIEREIKRKAQDERDAKKKQRMDEEEKQRKKRAEERMTKLSIQVDDR  
LKKEACFQREKVI LIMAKNLSKEMARRKAAEIVAGQIVSETKSLPPKLPESLPDLPHAL  
GKQYDEDILRIWDYLN VFKKFFVDRDYFQEP SADRLQSAIDVLRGATVKGGPSKADA IK  
FVTE LAVSLCKPLAAGLSRMLFASLIALNPSLQKQFNAAF WTEEGDVKNSENDGELMTAF  
TTEVILPVNEMTWTEIARLAF LNDALGELGYSRQETAHIIRGYRSTGHPNSKEAKRLGKV  
QDM DIALLRQNISDFRQTDGTF SNKIMRLAVPSK PQSDP SDEWFYLN VKSLKSRDTSK  
IRKNLKALELLKKGKDEDAKALFVKPLEKSLSKVTAAGGDKDSL DGKKARELALGILDK  
VTGEVYSRKVIGSIVDRDVGSEGXDYQQPGIDAPEILPAQQNGGAGRTAILKARKKDLAH  
IREDYMEDALKL KEDMKRQELKEAGEYDDDDDDX

>comp10754\_c0\_seq1; 389 103 1266 LEN=1327; translated  
MKKFLVPVLLLAVNAFLLYVPSTSFVVTNERSGCWFPAAPRGCPSSSRGRSATVEDNESP  
APIFPNDENDLRFSGVGR LFTTTPPPSSAASEENHPGGAPEEPQ PREDHLRVVDRMQRSR  
VVVVLGGVGSWAAEALCRSGVGHITLIDLDDICISNTNRQLHALSTSVGQMKIDAMKAR  
LEEINPSVEVTLVHDFVSKENADDVWETIRELSPVPVTA CLDAIDGSDAKTAWIASCARR  
RVP IVTCGGSAGRTDPTKFTCDDLTRAVEDNLLSSCRKNLRKYYGFQEGVSPGAKARDPK  
TGKLRKKLPRKWKIQAVYSTEAPRQLPRGSGTSSLRRCDGALGTACFVTGASGFVAAGKI  
VEMIASDNLPVPKQFSGNQLREKTWGR

>comp10755\_c0\_seq1; 188 73 477 LEN=846; translated  
MPQTRANTHGKSSIEAVGSGNRDEIERESRDESYDDEYDCDCDIFRSRLPLRSHSDLYFC  
HDDPEDFVVQAARVGRGGGTSSRKCKRPNTNAHKKKRSGSGDKNNKWM TVYSTRHIRAK  
ESLRESVRSRSKTA

>comp10755\_c0\_seq2; 129 1 413 LEN=609; minus strand; translated  
XNHDEFAFTSTDNSHATIPIGVKWFRAPQSRYTKVMEEG LAKRDMYNVMCDAYAACPIIE  
DGAWIAASLSKQIKNGSIALLHMPEALGFRGYCLTALEL LLEDLVVRRNFKVVTVSELQR  
ISEQQKASATTTGSSAE

>comp10755\_c0\_seq3; 648 382 3792 LEN=6152; translated  
MNRDGMVTGVIKDSPRTAAAAPLHRKRRLPYRDNDC LIDARITDDNVSSPSQFP SNKCG  
HKRPLPRVGVFGVDARKRINLWNNEVAIVSSTARFSPKGIHRAACFVLGTDLDQLFPPT  
SYRIVPPMLTSTGTTLGHLVDQVLC KGEPILAVNVVAKNTNVNAGTKRPWFKSDAKAKP  
RTFGEQPLFSVDLLPQFDVGNATIEDNVGTIVTGVVLVCTTSTPTIDGSSSKKFTAIRRG

TVSRDSSITLETDCSGSDPDRLLVPKPIEPIYHLPASLLYQQKNPESSPLALVPATKSTE  
GTARMTLPTRTRS DALRHSDISSLLDILDCVVFVDRSGTINEWNQKTAELTGINTNDAI  
GLSLLKDDRIS SVLFRASQSNTKNTNSSQAPLNQMLGPLLSEAYEGRSTPLCHLSVIHRH  
KIPNQSSPMKNRTTCKRLQVNGSEPKSYHKGNQEQEEDHELKHLVASISPRYNQEQKV  
VGAVFLGLD'TTKCFNFRITITTTANELRKLIDTANAPIFGIDQNGNVNEWNEKTAEITGY  
RKEDAFGCPLVDTFIFPDIQDSVRSILREALNNGKGASNYELEFRTKANEIRHLLVNI TP  
QCDMNNAVGVVLLIAQDVTEAVKRDRANMALELRQLIETANAPIFGIDVHGNVNEWNT  
RMSNITGFAKAKAFGIPLVENFIAESEKEKVVQILEAALAGNETSNYEVEVTSSKSGEPVF  
LLVNATTRRDPDANVIGVVGVAQDVTEDRKQAKALREMOTLRASQEAQVETERNMTAYFA  
HELNRNPLGAIDSALEAMPDNLPEQAQSLVSGMQLCTGFMASIMNNLLDVRKMEEGKMRLS  
RAPISIRSILRNVHKMLSPSVRPGVDFRKLINVKGKDWLGDHRIEQVLTNVVSNAIKY  
TVSGHIQISFEWEGDNLKFCEDTGPPIPISEQARLFQRFVQRRGGAPGTGLGLAIAKHIV  
DLTGGSIRFISNPAVKAGTTCIVLMALPLCKIPDTIAKQNT EIIQE AISVLVIDDIKMNR  
SMMKRRIKKAIAPNAI I KEAATGEDALLICGREKFDVVVVDQFMEEAGGVMVGT DVVVFAM  
RRMRIDSVIVGCSGNDIGTQFFDAGADMVWKKPIPSNDAIIRDLRTALTKRSDSVN  
>comp10755\_c0\_seq5; 648 382 3792 LEN=6267; translated  
MNRDGMVTGVIKDSPRTAAAAPLHRKRRLPYRDNDC LIDARITDDNVSSPSQFP SNKCG  
HKRPLPRVGVFGVDARKRINLWNNEVAIVSSTARFSPKGIHRAACFVLGTDLDQLFPPT  
SYRIVPMLTSTGTTLGHLDVQVLCGEPILAVNVVAKNTNVNAGTKRPWFKSDAKAKP  
RTFGEQPLFSVDLLPQFDVGNATIEDNVGTIVTGVVLCVTTSTPTIDGSSSKKFTAIRRG  
TVSRDSSITLETDCSGSDPDRLLVPKPIEPIYHLPASLLYQQKNPESSPLALVPATKSTE  
GTARMTLPTRTRS DALRHSDISSLLDILDCVVFVDRSGTINEWNQKTAELTGINTNDAI  
GLSLLKDDRIS SVLFRASQSNTKNTNSSQAPLNQMLGPLLSEAYEGRSTPLCHLSVIHRH  
KIPNQSSPMKNRTTCKRLQVNGSEPKSYHKGNQEQEEDHELKHLVASISPRYNQEQKV  
VGAVFLGLD'TTKCFNFRITITTTANELRKLIDTANAPIFGIDQNGNVNEWNEKTAEITGY  
RKEDAFGCPLVDTFIFPDIQDSVRSILREALNNGKGASNYELEFRTKANEIRHLLVNI TP  
QCDMNNAVGVVLLIAQDVTEAVKRDRANMALELRQLIETANAPIFGIDVHGNVNEWNT  
RMSNITGFAKAKAFGIPLVENFIAESEKEKVVQILEAALAGNETSNYEVEVTSSKSGEPVF  
LLVNATTRRDPDANVIGVVGVAQDVTEDRKQAKALREMOTLRASQEAQVETERNMTAYFA  
HELNRNPLGAIDSALEAMPDNLPEQAQSLVSGMQLCTGFMASIMNNLLDVRKMEEGKMRLS  
RAPISIRSILRNVHKMLSPSVRPGVDFRKLINVKGKDWLGDHRIEQVLTNVVSNAIKY  
TVSGHIQISFEWEGDNLKFCEDTGPPIPISEQARLFQRFVQRRGGAPGTGLGLAIAKHIV  
DLTGGSIRFISNPAVKAGTTCIVLMALPLCKIPDTIAKQNT EIIQE AISVLVIDDIKMNR  
SMMKRRIKKAIAPNAI I KEAATGEDALLICGREKFDVVVVDQFMEEAGGVMVGT DVVVFAM  
RRMRIDSVIVGCSGNDIGTQFFDAGADMVWKKPIPSNDAIIRDLRTALTKRSDSVN  
>comp10756\_c0\_seq1; 562 1 1724 LEN=1731; translated  
XSRLIAHAVDAMLCYACVVDEM PRADFLCTD'TTLLAGAALGYRNQRE EGRIDPNRDFP  
YDLKDSKMC MRTIAGRTANEIYREHMFQLALTFHGGMEVVAYEWGAPSF LDHFSPDHEAQ  
VQIGGAYSRYGGGWSTSHPYQHGT MNDEVYVVRGGMEDWAYGGSWTP EKVTPCTPK EFGG  
YPREKTVYNNSTLRVFNMLVETSNAKEPKHHLGSSLDV LN GDTAGNGHVSRNIRLSLLAA  
DMVEPYAAIVGVNKLALTD DVVPMAPREPNGCMDTRAVMVAQNAETVDIEWTVGGAVTID  
STQLWYAKWDDVVPKGGDACWTQP DSSLTDVLRIGGDSIGSGSGFFSDRGPQPRPEESA  
TGIRMTNGPLFRATVSLGTFQTGDKIMVMASARVDQSWKDQPENILPLVPPQSHIVNART  
DPNYHHE SNGKQIVGRLDWFVSPITIVVGD FKDSVGT R GADSVDAIEVHSR FVDNRSINH  
GGVKPNSAQTVQLEIAIWHYLVGITLIVTLAYCCIKSCCNRGYHGVEK LKQGDSFDEDDD  
LGLEQNQYSDRIDDEYCEDEDDDESDEGIEIPSIN  
>comp10756\_c0\_seq2; 506 1 1867 LEN=1874; translated  
XKSKPKPKQSSKDLEEAGACREALRNRGVDDVHRKWLARLVATRRIVVAPT TNALGYR  
NQREGRIDPNRDFPYDLKDSKMC MRTIAGRTANEIYREHMFQLALTFHGGMEVVAYEWG  
APSF LDHFSPDHEAQVQIGGAYSRYGGGWSTSHPYQHGT MNDEVYVVRGGME XLYV FVTS  
GEAFRGNYSVPHTPDHSAHGFLSFFLGAYGGSWTP EKVTPCTPK EFGGYPREKTVYNNST  
LRVFNMLVETSNAKEPKHHLGSSLDV LN GDTAGNGHVSRNIRLSLLAADMVEPYAAIVG  
NKLALTD DVVPMAPREPNGCMDTRAVMVAQNAETVDIEWTVGGAVTIDSTQLWYAKWDDV  
VPKGGDACWTQP DSSLTDVLRIGGDSIGSGSGFFSDRGPQPRPEESATGIRMTNGPLFR  
ATVSLGTFQTGDKIMVMASARVDQSWKDQPENILPLVPPQSHIVNARTDPNYHHE SNGKQ  
IVGRLDWFVSPITIVVGD FKDSVGT R GADSVDAIEVHSR FVDNRSINHGGVKPNSAQTVQ  
LEIAIWHYLVGITLIVTLAYCCIKSCCNRGYHGVEK LKQGDSFDEDDD LGLEQNQYSDRI  
DDEYCEDEDDDESDEGIEIPSIN  
>comp10756\_c0\_seq3; 490 1 1823 LEN=1830; translated  
XSRLIAHAVDAMLCYACVVDEM PRADFLCTD'TTLLAGAALGYRNQRE EGRIDPNRDFP

YDLKDSKCMCRTIAGRTANEIYREHMFQLALTFHGGMEVVAWEWGAPSFLDHFSPDHEAQ  
VQIGGAYSRYGGGWSTSHPYQHGTMNDEVYVVRGGMEXLYVFTVSGEAFRGNYSVPHTPD  
HSAHGFLSFFLGAYGGSWTPEKVTCTPKEFGGYPREKTVYNNSTLRVFNMLVETSNAKE  
PKHHLGSSLDVNLNGDTAGNGHVSRIIRLSLLAADMVEPYAAIVGVNKLALTDVVPMAPR  
EPNGCMDTRAVMVAQNAETVDIEWTVGGAVTIDSTQLWYAKWDDVVPKGGDACWTQPDS  
LTDVLQRIGGDSIGSGSGFFSDRGPQPRPEESATGIRMTNGPLFRATVSLGTFQTGDKIM  
VMASARVDQSWKDQPENILPLVPPQSHIVNARTDPNYHHESSNGKQIVGRLDWFVSPITIV  
VGDFKDSVGTTRGADSVDAIEVHSRFDNRNRSINHGKVPNSAQTVQLEIAIWHYLVGITLI  
VTLAYCCIKSCCNRGYHGVEKQKQGDSFDEDDDLGLEQNYSDRIDDEYCEDEDDDESDEG  
IEIPSIN

>comp10756\_c0\_seq4; 578 1 1768 LEN=1775; translated  
XKSKPKPKPQSSKDLLEAGACREALRNRGVDDVHRKWLARLVATRRIVVAPTNALGYR  
NQREEGRIDPNRDFPYDLKDSKCMCRTIAGRTANEIYREHMFQLALTFHGGMEVVAWEW  
APSFLDHFSPDHEAQVQIGGAYSRYGGGWSTSHPYQHGTMNDEVYVVRGGMEDWAYGGSW  
TPEKVTCTPKEFGGYPREKTVYNNSTLRVFNMLVETSNAKEPKHHLGSSLDVNLNGDTAG  
NGHVSRIIRLSLLAADMVEPYAAIVGVNKLALTDVVPMAPREPNGCMDTRAVMVAQNAE  
TVDIEWTVGGAVTIDSTQLWYAKWDDVVPKGGDACWTQPDSLTDVLQRIGGDSIGSGSG  
FFSDRGPQPRPEESATGIRMTNGPLFRATVSLGTFQTGDKIMVMASARVDQSWKDQPENI  
LPLVPPQSHIVNARTDPNYHHESSNGKQIVGRLDWFVSPITIVVGDFKDSVGTTRGADSVDA  
IEVHSRFDNRNRSINHGKVPNSAQTVQLEIAIWHYLVGITLIVTLAYCCIKSCCNRGYHG  
VEKQKQGDSFDEDDDLGLEQNYSDRIDDEYCEDEDDDESDEGIEIPSIN

>comp10759\_c0\_seq1; 386 334 1176 LEN=1236; translated  
MANRISKRSIQRTTSLPLLLILVSFVMSVSKCSLLARRASGGSLFLPAVSAFAGGSHGSR  
AIATATGALWNGINDSEPNRLLTSLFGSPPSKEEVDPGVVEGTDLRIVKYPHPSLRAENA  
EVSLPDEQESITKIAKEMLKVMYAAEGVGLAAPQVGINKRLMVYNPSGDSKKWLEETILV  
NPTIVDYSADKDEEIEGCLSFPMQGEVIRSKWIKVEAFTPKGRKIKKKFKGWEARIFQH  
EYDHLDTVYTDRLSDETKKQVQPRNLNELVEEYEGDDGAL

>comp10760\_c0\_seq1; 2059 272 5947 LEN=6047; translated  
MGKKKKGKGPSSAAKKKTQSSKSSSVTAPSSSDDVGKGPNAAVADRVDAPSTEELATT  
DDARAGIGETNGNGVSIENDETSADKETPSEDIRKRAVAANNHVDANSYMKEDLTENKPS  
AQNTNGNESPARNGQNGKAKNIPLLEDTEKEDMVQDTHIDSAPSTNDISTDDNTSTQNE  
EEKDEGLSIENTTISQKISSSTNEEANTNLTFEPLLSKEPLVSIQNKSENTEKEIS  
NTDALDQTTNNGGNKVANNNDIGNNKLGNYVKTSEETFQDNEQPFAERDVRKNTTEVTS  
DATKNEITSGNDLNLDESSAIYDDEKTEGGHDHNENDDSFNGIASNCNSDDETTTYVDD  
IPLFHYSRIASAGLPRGIANPSVKDTDLMKSTCSELAEIRIDPEDLVVSSNNTISGASTS  
GDSGRAASGNNDNNSVTAAASASSAAAVARNRRKEQMLLLSSDLWRQPHLILATGYDDS  
SQTSEGITFTRVQRSSTKTSSPASSVVFATVSTDIGVGGRATTPSVSSSGNKYSNVSTE  
LYVREERDSGAYRAAHGTSIVDVSFDSGSGVGAIDKGGHCAIWEFKYTTSLQYSSLVFGD  
SSGSSQGGSDSNTPTTPTSTRPPVSTVAAAPSMFSNFMVITGIPPPDES FVGGSTHGF  
NSSSHGTTASPRRGPNNTSNNTQSNLTVPTLTAIEIQYQSRVNYPHKWGPPTCMVIDPAYK  
QKREKSMVGFANGELYLTKRGNFFQRRNDTVLYQAPHAADRGSKNSSDSYRGIETIVWR  
GPLVAWADASGIKLMMDHLTRIAHIDRPAGASPFLYPMIRDVEPSSLFETAQHLLVWG  
DCLMQIYIEEHDDETSASASTVGS DGASGTSKVKKRRSVACTMAWELDCVACDVVPLDK  
DNVAVLGLVSLTNDVDVSHFSDHLEMQILSRKDGTIAHSDSLPLIKGSHVHNSNIDPA  
ISVRNFRMLSSFALPRMDDDEETKVLRALGGTNDMGTGIDVSFDMNQPLFALSNSPSSNT  
SIEFHDPHQWNTKSTIFDGDDEIETAHKVSSDDSSIDSDDYECILRPIETIQPLPPQFT  
MNTAKAGPPPIMVCTDSDAVLSLSTSTIDAVGNSLDKYKCAEALSRLSHKRQLRRYDL  
DELINYL RALLRISAADDVEGDTKDKPAPERLLPSSSLSLRRMQLAVKAMPVLLGDRT  
ELWTNWTKELENIPGALFFLRNYLPVRDPILPSEIYLRILERMIVEVEHLSQVSKKEIPT  
SIDLYMEASRHFLSLLAWGPTKVLKDFISFYKYNRGKRQIMVDKDIRVTEISLQRRYL  
QTAASYLIFPVRDVEEELVSAPKYEVHNVDTEDSLFDVSMVAFAISPRVPLVALPGDLI  
EKGLNEVPTVYASSRNHTCLEAMARLRMMQGEYDQALKCF LAIGACHAKDSLESFENTA  
IRIVNSTDVIYEIPSSIGNRSYDFVMNLIETHVLNQFLFEKNFLLSTDSKLFMPMFALI  
RLVGLRRVGTFLMEHYVAADFYTDTLTKELNNSDYSDPLEQPTRVLRRLGSLPIDKVAEQ  
LENSPAILLWYLHLVFTRRPDFYVNFPTNSLPSKSIDLHRKHFLYVDFAGETRDSSKV  
LSGIESYKVESKTTPLLTFLKVALPLGGILPVDARRVLEVERSKETLNKSGDNDNAQETS  
SPVFALELAYIIEMYSEQTETEALGILNLYLKGAKSLPLSVSYAQRQKQFSSKLWDRLLIS  
HCLEKTSSGALFGELLEAAAALFGADLARLVERIPPGMVVEGLRPRLVAADVRYMKLEIY  
EAALSTGSEEEVLMREIGHRRARGVRYNLEKNQKSFAELIQEKIQNDEEVSGEAGRVKN  
NSDEPTDAVQKISRPKLRDRHKRLVFSLPRR

>comp10761\_c0\_seq1; 335 109 1170 LEN=1366; translated  
MIATFVANAVAVGSAAFALAFATSM DANPSLYLFDKFFVSEQRLNAFFEGKTIWITGASS  
GIGKEIALRTCYGANLILTGRSSERLQLVKDACAPNISNERSISILPLDMTSKEDEFDK  
ALSDLERILGDKTLDFAVLNAGRGQLKTADTTSSSTTTEIFQINALAPIYLSQKLLDRGI  
LKKGRGQQKLVITSSVGAHVGLPLSSSYAASKHAIHG YFN TLRAENPWLYIKLICPGTID  
TSFHSSYVGGNDSRHNVNNESSPDGKEHLAKSKKLMKMSIDRCTR LYISSLLLRSGEQWIAE  
QPTLAGLYINRHFPSIFQRILAKVGPLRIKAWKEGKDLYDPKTWKEIGTRPKK  
>comp10762\_c0\_seq1; 505 90 1226 LEN=1418; translated  
MKETGESSSSDNVAINDTDAAAAADAPGTSKDTVAGSAVTDGEEAISKEDLIELIRAVKF  
KNTDFSQRQVYNEIVTEIPVRFPPQYAASLHPDR LCLNDVKKAWKKAILQQQPSSLNSGA  
NANTNADLAERLRKMTTNPQLYTI GLENSNNEQNNNAAAAARAYVTSFLEETHAKNSSRER  
ELLE DYVHVFLNVPADSSIAKKPHQALINFQAPPGSNVAKPASKKGNKKKKGGKKKVPAA  
ATPQPSAVTLENAPFDDALVVKIQMAAPLDASDSMKHPMLLYDKTRAYKTFVHPEGALTG  
TSNTAVENAKNKHSEND DGYSRLARWIRTKGIGGALGSAGGTKAYFYARLATTAKAKQHN  
QILSIYVKTLAPSEGQDF  
>comp10763\_c0\_seq1; 328 259 1158 LEN=1273; translated  
MAPFSDRRRPHPLSQQFSCIELWVPGSHPHV VVVAMNRVRKRNAISAAMWREIGE VFSA  
LGRTGDDCRAIVLTGAGTKAFTAGIDVTDEAFGLADQSGGASTHDVARQGLRFYQP ILEM  
QRCFTAVEECPVPVIAAIQGSCIGAGVDLASACDIRICSETARFSVREVKIGLAADV GTL  
QRFPKITGND SRVRELCLTGEIFSAGEALRIGFVSRI SKRLMEDALGLAETIARNSPVAV  
VGTKRSLVYSRDHTVADGLVHIATHNTSALMTGDIPASFMAASQKKDVVFPNIPKLSKL  
>comp10764\_c0\_seq1; 514 191 1807 LEN=2374; translated  
MTMLAVFIAMTFHHKSGFVSSLSPPPTPPVPDVYQNI FVSTHDQQQYDSKIPNLTYGFKV  
IDRCSVRTLT TKEKNSGKRKVFKDGQKQCSGDIEIIDALLEWNPNGLI PSKSQAKLSLKF  
GRFLLFNATTTSDSNNDTGPEAWIENEKPASTLRDKENS DIFMSLETLQNHIGNTRSILV  
PNKTVLV LLEPIPSVNRYP LTVTKYMFPI DITICSVPVIYEDDH LAVVNK PENMTTIGST  
SKTGTQTRIDDLQSILGFLLRPSQLDPTYCPRPIHRLDRRTSGLVLI AKTQMSMRKLSQA  
FAARTVCKTYSALVFERDPDLSSQLSGGD TAAKSTQGYEANFTASPKTTDTSTKWLVDY  
PIENRESVSEIRRLTTSVPLSSSSLHADHPLRSEDVSN GHNNKCETDTNCEIFSLVQVRP  
KTGRTHQIRRHLSYCLGMP IVGDSKYDGGARHLRTNGMYLCCHSLKFPHPQC SVATNGED  
CIRKCSDAIVEWIRD ETQNLVSSYQYSSDSDIPENKISISIP LPPKFRYWTRQAEIR  
>comp10765\_c0\_seq1; 563 1 1915 LEN=3183; translated  
XRKTAQRNSFDTAVNFRRTTSPNEG MKTPIMHYHQLDDPHEVFQACLEYKRSSATSLGRS  
SLLPKSSSL SASFYPSLEGLTKECSKYFHSEK PWENSNISMKKKT P S NSQQSKPASLYPS  
LEGLANQFPKAFDPEIQWEGSAVSEKKRAASD SPSSPATTQARMPQACTPEACMPRACMP  
NDKRFAGIADVHDIN YRRG SILSNNSVKASSNTNTTASDRESNVDTFAPFASAARMSRGE  
DFNSYIPREHRTDNDDDEL LVQKLAAYNFENNVDGTRHPGSEARASIIATASTGPEAEAT  
ILD CGTIHPFERESAVQAELVDQ TENARGIYGQDRHHQEQRPSVTNTLCHEATVESQPED  
AANLVSVSGQSINEEIPTEATVIESGDPEKATLDNWEHTTDAVVLQQE SEVNP FQSADD  
SDVKNSYSQDHEETATEYQE QHG NRSSDTIASVNNA AIAACYNINPLEVTNQSVQAEYMG  
SSESTNIPSSNEADRIENAVEI SE TEHATEAMVLD SGPSDKATIDAWSPT EEAHVLRENY  
DEMDESNAKDAEQRVSSCTVSSVASTDLSSNGQAEIRDISEHFHPSEYVSETVATAELVG  
NNPNEACTREISNSMMHPQSDGVP TRESSSRMVENVSY  
>comp10765\_c0\_seq2; 657 1 2614 LEN=3092; translated  
XRKTAQRNSFDTAVNFRRTTSPNEG MKTPIMHYHQLDDPHEVFQACLEYKRSSATSLGRS  
SLLPKSSSL SASFYPSLEGLTKECSKYFHSEK PWENSNISMKKKT P S NSQQSKPASLYPS  
LEGLANQFPKAFDPEIQWEGSAVSEKKRAASD SPSSPATTQARMPQACTPEACMPRACMP  
NDKRFAGIADVHDIN YRRG SILSNNSVKASSNTNTTASDRESNVDTFAPFASAARMSRGE  
DFNSYIPREHRTDNDDDEL LVQKLAAYNFENNVDGTRHPGSEARASIIATASTGPEAEAT  
ILD CGTIHPFERESAVQAELVDQ TENARGIYGQDRHHQEQRPSVTNTLCHEATVESQPED  
AANLVSVSGQSINEEIPTEATVIESGDPEKATLDNWEHTTDAVVLQQE SEVNP FQSADD  
SDVKNSYSQDHEETATEYQE QHG NRSSDTIASVNNA AIAACYNINPLEVTNQSVQAEYMG  
SSESTNIPSSNEADRIENAVEI SE TEHATEAMVLD SGPSDKATIDAWSPT EEAHVLRENY  
DEMDESNAKDAEQRVSSCTVSSVASTDLSSNGQAEIRDISEHFHPSEYVSETVATAELVG  
NNPNEACTREISNSMMHPQSDGVP TRESSSRMVENPSSRIAREAYCGTENQTGETISS TI  
IREKPCSEI ISSNSELMYDSSDQSWKV TAPRHGPNKSQKSMTFSLPAKQQV VSLATVCTP  
PKIVPNSNDSAFR MALMQGDVDG AIRLHETYEVDLMTPFADIDGEVLYPVHCAVEGGSLP  
LLKWLVDENQCELWSISTSDDTN NLTPI L TSDSRSLLSIALAKNSIDIIRYLVEKGMRL  
SDEKDL PVDRL LQTLDSVLAILPAERCDEQS  
>comp10766\_c1\_seq1; 1156 1 3410 LEN=5347; translated

XHPQLRLQLAKTGDGLEERPPGWQPQQLQQRQEQRQEQRERIDSTIDATDNSMDMEPSPVW  
PNEAAAYAIKAREGQRPGSLTNRSMNDDSDDAGGKVNNGNNGVGGDDDDDDSNP I PLQRGF  
HPVPHQQELREFGVKEQGLLPMLEI PPQQQRTLLATDITSPLATNEEGGVAPGRFP  
YKPPPPQQQQQVPQIPANQPQPLPANHSDFSYSPHFSPGQEEPRHRMSLTLHGRESLP  
APQMTTERGSTPIPTSFANHVGVFADDPGPSIFEGGQAAAAATGNPIHFEAIAGEDRYP  
PPRDRFEDPPALRTDRKRPRNHR TDGSGGAAPRKG PASGSSRTIFGAPPEKAQTKWTGGD  
TYVGR IHTMLEEARGNGFAHVVSQPHGRAFKIHKREFFAERILPRYFHTKNMKHFQRWL  
SAWGFARHGEGTDRGAYYHRYFVRGVVVALVKKLTRAEMRRSMKDWLAPGEVVPNFYTEKD  
STPCRSKSSKIGMQPAFEGATGREKDERHHHQEQHAKGNEPGDDKNDEPGISNERVSVVL  
NNNPKYLRGTVLEDDRMLLEDARTQHFEHIVSWLPGGRAFKIHNKKS FQESVCGRYMKT  
KLSHFSDCLRTWGF CRLKEAAGEEQNAYYHRLFRDGKPELCRHL SRAQM LEVMKDFKEEQ  
KRQKEISWSLFPHHRQNF GINGKANDAVANS MKLQPVSK EAARKANLEEFALATATAAER  
PADRAEVENEIKAIGEPLHLVQAAFANPLFQPQDFLTGYLDVHNGNKEDARSATNPHNSN  
AMDMSMRNRFIDNCDLDPTYQSVHPSTATEVFPADARRPLAAPGDPRTASIVCQTPKPTL  
LPSPMARTANLSYAMRIHAMLEEEVEAKGRTDIVSWMPHGRAFKIHDDRAFETKILPQYFK  
ATLPSFTRWLLHWGFVRMITGKDRKWCYHRLFVRGVVELIRDHTRQELFDAMKEWRDQGN  
EPDFYSSGTGEEISEMPLVAKKKHTRSDKENNSIDETESEP IPTIAAREQKTNPRI LRGT  
VVEDLREMLDAAQAEGNAHIVSWLAHGKAFKIHNQDEF EANIMGQYFKASKYRYFTDVL  
SWGFVKLKEGRDKGAYHHKYFAKNDPKLSHNSRAQMKASMGWPKQNAPSFYDEN

>comp10766\_c1\_seq2; 1101 1 3373 LEN=3373; translated

XHPQLRLQLAKTGDGLEERPPGWQPQQLQQRQEQRQEQRERIDSTIDATDNSMDMEPSPVW  
PNEAAAYAIKAREGQRPGSLTNRSMNDDSDDAGGKVNNGNNGVGGDDDDDDSNP I PLQRGF  
HPVPHQQELREFGVKEQGLLPMLEI PPQQQRTLLATDITSPLATNEEGGVAPGRFP  
YKPPPPQQQQQVPQIPANQPQPLPANHSDFSYSPHFSPGQEEPRHRMSLTLHGRESLP  
APQMTTERGSTPIPTSFANHVGVFADDPGPSIFEGGQAAAAATGNPIHFEAIAGEDRYP  
PPRDRFEDPPALRTDRKRPRNHR TDGSGGAAPRKG PASGSSRTIFGAPPEKAQTKWTGGD  
TYVGR IHTMLEEARGNGFAHVVSQPHGRAFKIHKREFFAERILPRYFHTKNMKHFQRWL  
SAWGFARHGEGTDRGAYYHRYFVRGVVVALVKKLTRAEMRRSMKDWLAPGEVVPNFYTEKD  
STPCRSKSSKIGMQPAFEGATGREKDERHHHQEQHAKGNEPGDDKNDEPGISNERVSVVL  
NNNPKYLRGTVLEDDRMLLEDARTQHFEHIVSWLPGGRAFKIHNKKS FQESVCGRYMKT  
KLSHFSDCLRTWGF CRLKEAAGEEQNAYYHRLFRDGKPELCRHL SRAQM LEVMKDFKEEQ  
KRQKEISWSLFPHHRQNF GINGKANDAVANS MKLQPVSK EAARKANLEEFALATATAAER  
PADRAEVENEIKAIGEPLHLVQAAFANPLFQPQDFLTGYLDVHNGNKEDARSATNPHNSN  
AMDMSMRNRFIDNCDLDPTYQSVHPSTATEVFPADARRPLAAPGDPRTASIVCQTPKPTL  
LPSPMARTANLSYAMRIHAMLEEEVEAKGRTDIVSWMPHGRAFKIHDDRAFETKILPQYFK  
ATLPSFTRWLLHWGFVRMITGKDRKWCYHRLFVRGVVELIRDHTRQELFDAMKEWRDQGN  
EPDFYSSGTGEEISEMPLVAKKKHTRSDKENNSIDETESEP IPTIAAREQKTNPRI LRGT  
VVEDLREMLDAAQAEGNAHIVSWLAHGKAFKIHNQDEF EANIMGQYFKASKYRYFTDVL  
SWGFVKLKEGRDKGAYHHKYFAKNDPKLSHNSRAQMKASMGWL

>comp10766\_c1\_seq3; 801 1 3410 LEN=5433; translated

XHPQLRLQLAKTGDGLEERPPGWQPQQLQQRQEQRQEQRERIDSTIDATDNSMDMEPSPVW  
PNEAAAYAIKAREGQRPGSLTNRSMNDDSDDAGGKVNNGNNGVGGDDDDDDSNP I PLQRGF  
HPVPHQQELREFGVKEQGLLPMLEI PPQQQRTLLATDITSPLATNEEGGVAPGRFP  
YKPPPPQQQQQVPQIPANQPQPLPANHSDFSYSPHFSPGQEEPRHRMSLTLHGRESLP  
APQMTTERGSTPIPTSFANHVGVFADDPGPSIFEGGQAAAAATGNPIHFEAIAGEDRYP  
PPRDRFEDPPALRTDRKRPRNHR TDGSGGAAPRKG PASGSSRTIFGAPPEKAQTKWTGGD  
TYVGR IHTMLEEARGNGFAHVVSQPHGRAFKIHKREFFAERILPRYFHTKNMKHFQRWL  
SAWGFARHGEGTDRGAYYHRYFVRGVVVALVKKLTRAEMRRSMKDWLAPGEVVPNFYTEKD  
STPCRSKSSKIGMQPAFEGATGREKDERHHHQEQHAKGNEPGDDKNDEPGISNERVSVVL  
NNNPKYLRGTVLEDDRMLLEDARTQHFEHIVSWLPGGRAFKIHNKKS FQESVCGRYMKT  
KLSHFSDCLRTWGF CRLKEAAGEEQNAYYHRLFRDGKPELCRHL SRAQM LEVMKDFKEEQ  
KRQKEISWSLFPHHRQNF GINGKANDAVANS MKLQPVSK EAARKANLEEFALATATAAER  
PADRAEVENEIKAIGEPLHLVQAAFANPLFQPQDFLTGYLDVHNGNKEDARSATNPHNSN  
AMDMSMRNRFIDNCDLDPTYQSVHPSTATEVFPADARRPLAAPGDPRTASIVCQTPKPTL  
LPSPMARTANLSYAMRIHAMLEEEVEAKGRTDIVSWMPHGRAFKIHDDRAFETKILPQYFK  
ATLPSFTRWLLHWGFVRMITGKDRKWCYHRLFVRGVVELIRDHTRQELFDAMKEWRDQGN  
EPDFYSSGTGEEISEMPLVAKKKHTRSDKENNSIDETESEP IPTIAAREQKTNPRI LRGT  
VVEDLREMLDAAQAEGNAHIVSWLAHGKAFKIHNQDEF EANIMGQYFKASKYRYFTDVL  
SWGFVKLKEGRDKGAYHHKYFAKNDPKLSHNSRAQMKASMGWPKQNAPSFYDEN

>comp10767\_c0\_seq1; 244 1 723 LEN=953; translated

GKALVAIFVLAIVSRPFYSIAFHPQSTILSNHRHYHPVSTTLARHNGSCGKRQFPFDRLA  
TKARTLETKRTVLHVSPPEVLAGAASLVAGFAGWLYIDGTGDRNRRKLREEEAARVKAIQE  
ERAKRAYIEPKEYWTEAELAPYDGSNDEDGPILLAADGLVFNVYKGRNFYLPGCEYHIFA  
GRDATRLLARNKVEEETEEANKPLSIADRAFLATWIYTFKGYDIVGKLEGFDRSTAM  
>comp10768\_c0\_seq1; 539 197 2167 LEN=2460; translated  
MSSLTLNAVEYDFEDYVVLQHGIPETLDPLPYRKAGSVFSNAVENDDPNNSNANETGGASN  
SDLQSGNLTSAKHDPRLRTRVCRHWLRDLCKMKSACEFLHQYDLSKMPLCRHGERCKISD  
CPFRHISEANRLECVFYSQGFCHGPFPCRYKHVRRDRQDLPTVSDFTLGLSQMQAAANQV  
DGEGRKKLHGGQQDARRPAPKPNFEFFKISLCKHFLQGDPCFGENCHFAHGEHELRFQPN  
KKDRSDAMDDGGNNTGDTELNNDNMFNGNSSNFDFYHGGGAAGGKPSPILEPEQASFFI  
MLAATQTDLSISTVQGEWYVQPKHAKILNDAYRTTKNETGNSQVMIFFTVSDSRHIQGA  
VMTSEAVHRENALRQEFFGNAPLESQFSYRFAVEWYRTEMPSTALGAAPDLFLPTSKT  
ELCHQMSTKTGESLMKALWNSPLVALYESWGGDIEENTEYKEPPAPESLLTDFRCPSSE  
VPWPVMPGPGFIFGCSSTMDDECLGRGILGMPMHMGAAQSIVPGSSVFLFNVTDRLLFG  
IFEALTPAIVNIEPTAFSKNPNATSSFPVQIRVRSLECPPLEDTDPILNDILRSRGS  
GRIGSLTFAQTEAIASLLASQCGALQYMMDYQQGMWEGVEVNPPIALPPRKVEVK  
>comp10769\_c0\_seq1; 1487 363 4831 LEN=4865; translated  
MATVAALKDAPIGHAANNPKSSCSATANGGTSSSASGTENPVPSITLSITQDDVKRVLEA  
SEALSKKLVIEIQQEGKNTETLPCDVGSSPIAVESSMPLTTTGIDKTENSHGADDSSSG  
PSLRPAVSTSEDESTKDGTEAATRKTCDGSGSCRRPLHELIYAARECENTMLQSFDRM  
KYSGSSPREINAGVMVFSEMDLNLKIKRIFDILGEGKKCRGSSSEGDIKTNGGDDKDEQ  
GKSLSRDGLSLFRAVIVAIASCIQKNAKMQIEMRDKENGEQPRVKKRKPNTPENDIKM  
SSDKHEVLKNVDSVHSLQTPTVSFDNSTVVPVKEENDVVKTSVHKEFEEIAVYATDRL  
VKFAVKKSGNNSDRVEVTFQIFQSWRRAEGARIAPWLDLNLNRWKTQPRSTEKTSVPS  
QTKNQPKPQTQPIVSRPKPVPEQAKTNPLSVPVKKTSSSSDAVTAVQKTENSTEPKLTES  
AKKAEIVTSNSVAQSRQVSIQAPPYVSKNSSRTVLSFDFSGSIPPEEEGEQPFCTITTEE  
NLKTFRSLVEKTGLINRSCHIEITILLDASKARMHEGIERKIMTIERFHTCLHQLLGSF  
SQRLSKSDKIDFSSCFVDFGCFTPGIPPLESGEAFTHELAVGFCLCAGNKSSKLATGF  
EFLLEDQMGRGLTSKQLVHFLRSYLTMLAGISFLTSSSDGIMRKLNAATRKLMSAVENG  
ASWTLGHFLKDIGLPENDTSEVKHTFEAFASWYSSGGFNTAPWLELLDLKLLSLVDEVY  
PKSPAMTHDALPAFPGLKPSSEFLSPRPRTRQHHTTNRHRHPSNPTVSNNSMYLTSFGH  
SHPPPALQILFNPLANQCSLVVLEKEDATYVRGVVDQLGLLPYPPEEIIWSTLHDLALKQS  
AKKYPKNAGISKTMLINKASFVECMQGTIQKKVKTSRKRSASGHSKSNLDDLNLFRSF  
DLVQIDQVALNELMGGTLTLLCGGKSTKLSFAFSLFDRRQFGSKKAKKNHPALNSLDGEE  
LFLFLRSFLIITFSCCRQSWDLSDDAVNRYIADTANMVTDDVMRYQWRTRKKDRLNFEF  
GRWYNEGGYETAPWLELLDLTKWLVENFDSFEKQCPPTADMPMKRAPPSPGITLG  
SGLPDSDCPPAPPDAEMDGSFFDDDPNNLLPMSIDDEMDLLLIQHTSHDKEDAEISKLV  
KSFPPSPKYSKPKSPKAKNMQQNQNSMALKIYIITDSDHDGYIFSMSQKRISHLRHILME  
CELHKVDCEKASREILAKADREKSSSHLSPYVLTKEGFDSAMRKVIVSRTMSVETQRTLS  
MLLNDIFFAFDYSGVGKANALDIACGFLLCRGKSKDKLEFXIDTLDTEKRGVLRSDVT  
RYLRSFLLVLKASATALDSDFIDDAMTMMNGDKCDCSISNMSKAVEMGCEWATLQAIK  
GSRGLRDDISFDDFAEWYTRIGHGNIGWVELLDLNKWAUKTQVSSNHTR  
>comp10770\_c0\_seq1; 981 238 3119 LEN=3133; translated  
MRIPSFVLALFCWNYIKECDAFSLYLPQKTKELLPRIQGRTHCHRYHPCSNVVVRYAR  
TDDDGEEIRTNESTDTKRSNDIRSEELLSNSSEIEVLRARADELRAEARAMELELRQK  
AAKERQERDAITDELIAITFLPLQYQDPKESKRNTENEDGRLEAGVAASNDTNVIDARV  
LADRLQQGKFSRPQIMAVVDRIYEQHNREIDEIRAFTILKDSQQEEDFEPKNYALYKDY  
FYVLTKAAWLLDESIAANSMLGKENDNSSSATKARKSPPKMASTPPSIASPPSQSKIKS  
SDSSSSSISSSVLFTVTSQGLTKLINNRWTELQRREMEIKRKNAMETNKIASVSPSPSS  
DHTALHFSGMGSNNSTMGFRVWSSSSGETPSFIPLWVPSPIYIPIYILSLDKADQPSRRP  
GNNTNGNNSSTAPFAVITNSSLEAAELNLIKKNVLLDSRFYITSSEFAPGAALFRGNFRTP  
RQTIHSSTTPSVVANNRSTSWFKRQWLARRKQTAAMEYDNTAMVFADIQNRLEREGQLDR  
VQLFVLPDPGLGRPTANSRRPSAAKAAMSTKRLGTERAEPSASSMNPVILALPKAVTPDE  
SKLKKGWIRKLGKGLCYPLAAFTTFVYSFMHYIRNPYLYDALVNQRQLKVLSSCIPLALG  
VIAIQIIEAAHYFVAKRRKMKIGSPVPIPSYYSIMPFSGSITPLRSFPSTKRDLDFDAL  
SGPMTALAASLGLVFSGALLTARATAVDIAXVSIARRRPEIQLPAGLDPVVAADHDHA  
PARAADTDAPVLIGGKLRARDVGPEPAADLPAGRRPRVLCGHGPSVWDGDFPVHGLLDPL  
EPPGPVAGVLARFRGALPVAARDPVPRRVHRRGRQAAVDLAGLVVAVHVDVALQGSVGL  
TEAEAVGATRGLQPCQLRARVGRSTGRTQPKKWQQRKMNALRVLSIQKLGCVIQQITIL  
>comp10770\_c0\_seq2; 340 181 1175 LEN=1189; translated

MHYIRNPYLYDALVNQRQLKVLSSCIPLALGVIAIQIIEHAAHYFVAKRRKMKIGSPVPI  
PSYYSIMPFPGSITPLRSFPSTKRDLDFDFALSGPMTALAASLGLVFSGALLTARATAVDI  
ATYFFLPAGDXEIQLPAGLDPVVAEAEDHDAPARAADTDAPVLIGGKLRRADVGPPEPAAD  
LPAGRRPRVLCGHGSPVWDGDFPVHGLLDPLEPPGPVAGVLARFRGALPVAARDPVPRRV  
HRRGRQAAVDLAGLVVAHVHDSVALQGSVGLTEAEAVGATRGFLQPCQLRARVGRSTGRT  
QPKKWQQRKMNALRVLSIQKLGCVIQQITIL  
>comp10771\_c0\_seq1; 202 126 890 LEN=993; translated  
MKFFTTLSATSLVLIFESLLLQSGAEPVQKLYSKTEYLASDVCEASASDEETCTKTDLFDQ  
LHSCWEWAFGKCFMVEEDICEFGHNNSEESCNKSSGCAWLTPEPGRPGEGECLSYKNINS  
RGCKFSTSSRVYSIKDKLKCNDIKGCAWYSGNGGKKTQVAPSQIECQAIDNKNACKSSG  
CDWKKKGKVCQRWEPKFLHFLVVGKDAEHAKLALRAEYGETYTVHVEEPQLHVPERITLV  
VNDSSVVVETPRFG  
>comp10772\_c0\_seq1; 148 321 695 LEN=1329; translated  
MSPSPSIIPRTPHRDLLGLALDIVMDGNSTRGASSTPSTKHQYRPLLRRQRPLPPSDF  
VTNDVQRDPASVESLLSQSLALLPTRSGRTQTINEYQSLLEEQECNENIGDGDGCGFPKPQ  
HRSQ  
>comp10773\_c0\_seq1; 769 198 2768 LEN=2921; translated  
MSAQVATTSVEDGGPSKADNRIFPSASIDRCDIEGIEGGSRNMKQHSQPDEYQMRQISND  
NDEGVEVVLEGSGKSSVIDSPPHRSQDQNVFRAPHPVVRPKAIRGVGYPSAQHGSGSYGS  
YGHPPPHSHPAAPHGDIRHSYQVPYANSQSFQDQDNGSPYPGAPTTSQFSPHVQYPP  
PGGRRPEDLNVISPNHKLHASHHNGPRRNIHPGGPPHHPPLTPRSTSSRYPPQSSSSS  
YHYPPASPVRSAGNGSSPVRVGYGMRRPEGPYSAQRSRDEGNGSWGYPPTDRPRPPV  
VTESSFDSEHFPPHSSSHPTTPNAPHYGGRRPPHYSQYSDPSPPHYGSSGYPGSFEHGSFF  
DSHHASYGAQSESPRHGRHYDHRDYSYGHSPSSHPPHQSEVSPYSYGYSPGGMNNGYYS  
YSPHSGHYGRPPRSYDEHDHYNHHPYHPPHQQYHHHYQAKKDEKSGILLPKAASEVDFD  
ISDPPLEPSTPASKQPVCEPADVNSYDVLGCRGGGTNSQVGNRRFRKLVQEFQPIYLLA  
RRKEKPLLARTIVLIIRKRGGRFLKKDEETGELYEVGDAKAEAKTSQALREGLDVRATKS  
AASSLMDKSKKSTAKSSPKEKSADKEKEESNAERKNASSNSPDDAPKDDAATLTKSSE  
KIEASTDKAVVSPPGAGQTLKKENDENDRTNTPIKTRVDSPPSLPKLNKCESQASEAGKS  
SEGGSSSKAPPSPEIQFRKRRRMRADGSTEPTTGTGCGITNPFQEDKLFDFCPRADI  
ARAGSPAPRLSENDVPHMAMCGMTPVGHNASKFADDDDIRYEEDTIPGAPRAGCAGIALD  
MVTGAAAGSFCLGPRVW  
>comp10774\_c0\_seq1; 531 344 1300 LEN=1492; translated  
MSGAAARGPLAFLQLSQSQGWLTISLGAMYAFPEQAKMVLGDLGSYALMAKQMSGFPVPS  
LEDRKAIAAPAPPQQIVIHQTLPSVDGKNQYVGLLVKVVVGGTACWVGYFALTNALPEYV  
QEFFPVTRKFFAKTSKFLVASLEKVKETLEEQIGLVSKKQDDLKSKLDGTHDAVQGLHKE  
LGDARDDMERLGE SMSRQESTLNASHKTMSYTSKGVTLVRCVASMLPSNDRTVHDLAEY  
IQDGETIKRQEEKEQRERRLAGVSVRKTPFSSIASPPPKVEAPNLMIRQSRADSDLDLSD  
DVHAVLGIRPGNNLLSVN  
>comp10775\_c0\_seq1; 375 135 992 LEN=1269; translated  
MVTPEKIQLFNEKRFRETHLRRSVVAIDDTDFLMQMR TARRQSIASMQNDNDFQWKGR  
VWNNITESISPAGVSRNDNDNLASIKDR TASTSISECDDDEEGGDRIVADTFLKSSVAS  
LRGSETATEATADESLSSSSLSLHLDKANTTRDSSSLRGSASELQRP AWYTRLAAISK  
WERTQEKAYHDTLDERHEANHSKHKQNHKPHFWQWQRQKGLDFSRDVVLAAGRQESIYA  
FADSLTDLPSADGNENGGDGNHGENDISRNGNMAKTKKCVLDLIM  
>comp10776\_c0\_seq1; 241 194 1102 LEN=1177; translated  
MLSVSSPLLRRPQRSIRRRHRSEGNECGSPSFSRHL L FVGIFLVSACFSTPCSSFQIAL  
QSQRHQHWRQKKNRPAFNDKNAKVQETRTPASSILRSTGKNDES FSLSSAHKDIVSGESL  
QSSSDANTNLSFDDVAESPAPPLNYKKYLTMQKKRVPVTIRYSADSG LKPYLTVAKRVK  
DLYPDVLIERIKIDDGGTEDGGDPKYRETGTFFEVAVDGKLVVRTQRSSHKSIYVSMSEM  
DAAILRARKRRRPPSTVYGENGIAATPVKDQLVKARLEALKQKARELQRTNREDQSEEKAV  
SE  
>comp10776\_c0\_seq2; 194 194 988 LEN=1063; translated  
MLSVSSPLLRRPQRSIRRRHRSEGNECGSPSFSRHL L FVGIFLVSACFSTPCSSFQIAL  
QSQRHQHWRQKKNRPAFNDKNAKVQETRTPASSILRSTGKNDES FSLSSAHKDIKKRVPV  
TIRYSADSG LKPYLTVAKRVK DLYPDVLIERIKIDDGGTEDGGDPKYRETGTFFEVAVD  
GKLVVRTQRSSHKSIYVSMSEM DAAILRARKRRRPPSTVYGENGIAATPVKDQLVKARLEA  
LKQKARELQRTNREDQSEEKAVSE  
>comp10777\_c0\_seq1; 165 273 509 LEN=509; minus strand; translated  
MPPAVKIRALVYGVRALDGNRSVPLFSIRIRDILRLPVVAGEDIAAEEDIAAGEDIAAGV

GIAAGAGIAAGVGTAAAAA

>comp10778\_c0\_seq1; 264 383 1039 LEN=1315; translated  
MRQTQEKLQHRHRPMPYLAPSAVVLQQFSSGSNDSSDNVGFDCGDDRDNDGCIDDLRIPL  
FVKIPMDDRFRMPILSPPSSNGSRANNESVPTSSTSIPEQQQPWAFPPTPPQHGHHEP  
SFSSTRIGPFSEFIRFFFTALYYLVSDFITLILVVCVGLFFDVKVQVVNHRSHRRRGRIS  
LRNNLYRAEDRRYNSSDLLRPLPPEMDERPLLMEDDMV

>comp10779\_c0\_seq1; 960 250 2838 LEN=3056; translated  
MTGVSFRNSLLSRRVYEYICGRNVRRNFRSWDCGFHALGSIDLMIKDPRTLSPLQRWNQL  
GSHGHVRCQDRSRALSSFTSGSSEENLRHNEENHKRQRRRQQQLPPVLDPIEQALAE  
PKGAQIHLDFGEPVTFLEGGGIDHTSDVEAAVASLDGFLIGIVSKGKAFTGGGEEMGI  
NAQAYHSAALAWSELIRYAAVWNNYDSPARPCCPMLIHAAPVLAQSGAAYVHHLDQI  
LEHVDAGVERLEQPI SLIALAEKAVAVLEDEHNHGDDSATALPSLTPREVTHLTALKCLL  
RNDHRRAMMLLYRHVVVCPGDALALLSLLDVCHTLGDSQVALRGASAVASYWNERKGGMI  
RPSIPGYNTVSAIAVGLAVGGRRSEAEPLAEAVREKGEKLAGGMATWALAHVFD AEGRT  
AEGISACANNNGSVHYEACGFLMFDVVLVLAGYGVRFALDREERGRGRSPALRLYDTNYEGI  
LESGSFSRGIHLHDEPHRRAPIGWRRSKFEKSNRAQAFMAEVFGKEQRKAMEEARLKKDAQ  
SNSSAGEIVSQEERVDGNDLEPSDVMNISSSLQTGDWKYSMEDVLTWLPPTPQFLSDATL  
LLLRFRTLNGTLSSSNYRWENLRNAWSVYLEINSRYNKGRKDSGISSALEFYPLACAAASL  
VVNPHVVGELPGAGGRLQDGLHKGELLNLGNVVVPINDDDPNDSARDGNNANYLSTILF  
KEIVADKEPDFWLPVVEETRREEWKTVLKLSSAIDGIYDPTGEDDHDIMKATLSSGFQG  
WEFDVRPFLEHAVVYAACKCGDYESLSIARSICSRGVTLRPNSPPEEWWRYSIVLGLLGD  
KASEDALNASHSFGGGQGTKLD

>comp10780\_c0\_seq1; 347 120 1904 LEN=2048; translated  
MRNLTIVCDVQPDVVKVKGESCRFVDLVDVAIRAARNSRTQNVRIVHTMILFPDITYDSI  
PPSHPKLGVLRKMQAKNMPSISWFTSSELCVPALENETVVSRTTFLPQATDTELLGAF LNS  
TKQTSTGDQHFVAVLGYGPTAQAI CNLLGDVIGAPNVQILRDCVGDSESSERREAFMNHGLL  
FREEVCSLVDFLESMDLLQQRITDFPTS IENKPGSSAQRYVCD CGRGGHLPYMTYLV RD  
HGYMKWPQQPWFQDITNHGKQYFCPLGRRIVELCDEPQFCSSTRFFLKNRKWLDEKDLVL  
KLVPELMPPTFDKLDQAKNYCDHIRISSG DSENLVWFLKKINQNGGRAVHVSLGLPTKAL  
EPDEQLQVHIQRPLLCQYSKIINGQEVFGCHKCHVKTYQWIGCTKDEATNKISWQLYIHD  
LYYLAI ADEPFDP SNVSDEVQITTMRRRRLYADHPWRVQWDLTMKCQTNMETILRRAIEQ  
GKLQCHPPSSEIEGQRTAENAALQFEVMSADWMLDEDGNMFFIECNGTPVLYDPSISQPL  
TTRGLNLYDGLYREDPEGAVVNDSDLLREAI GLALNGKLPKTTLWKHIATIPSP

>comp10780\_c0\_seq2; 279 933 2018 LEN=2162; translated  
MTYLVRDHGYMKWPQQPWFQDITNHGKQYFCPLGRRIVELCDEPQFCSSTRFFLKNRKWL  
DEKDLVLKLVPELMPPTFDKLDQAKNYCDHIRISSG DSENLVWFLKKINQNGGRAVHVSL  
GLPTKALEPDEQLQVHIQRPLLCQYSKIINGQEVFGCHKCHVKTYQWIGCTKDEATNKIS  
WQLYIHDLYYLAI ADEPFDP SNVSDEVQITTMRRRRLYADHPWRVQWDLTMKCQTNMETI  
LRAIEQ GKLQCHPPSSEIEGQRTAENAALQFEVMSADWMLDEDGNMFFIECNGTPVLYD  
PSISQPLTTRGLNLYDGLYREDPEGAVVNDSDLLREAI GLALNGKLPKTTLWKHIATIPSP

>comp10781\_c0\_seq1; 389 188 1318 LEN=1563; translated  
MVHYNGYPHTSHTWRYGADAANAWSPGDGLRRQGISSYDVMRLLLEYLIGSKLHGEDQK  
LSMMRGSTHQEQRESFNFPNLKRIVVAGHSAGGQYVHRWTLSSSNI IWGNDSYDTRSSR  
ENSVTANGRYGKAENRKVEVRAVAANPRSYCYLDNRR I INKGADF SNTGVDHYGGK I IEI  
DKRRNKSVDNNTETSIGVNGSTFDRPDYTF S I PDQKDIQACPTYDQWQWGLQPGGDILSP  
YKDAALERANSNRATAIALRYSKRKVFYLAGEHDKIEQKDRCETYNFQGDTRNERARRYFW  
ALTEYFASNRNDGRSHLNRHVGT SIVETSRD TTVHEFHQVPGSPHDHTLMFQ SAPGLKA  
FFGNIRRYKMENENDVN

>comp10781\_c0\_seq2; 238 291 1182 LEN=1182; translated  
MTLYAHALALFLSLAVFVTEDMAVRAWIQSEEDGGGMCPLATCCPTGIPGVSSCISGT  
KHDPDGGRGECCDEPTNGCPYGYVCARKGGSNSFHAGVDTHGNTNPNYHYHHRQQQQQQ  
EENRSRAICKRREPHPRDLNAKETPQYKLCRLPSSPEVLQLQAFPIDDKFNATYYSSMGS  
ILPPSAIAANNENDNDPSIYMQKFSS I ETVLVIQHSGRNADDYLCAGISVAASAAAGGN  
TTRDNEKILVIA PKFVADVDDDRDRNPNTLYWLEQGADVPLGYVQVCALCAVAYRIX

>comp10781\_c0\_seq3; 606 291 2237 LEN=2482; translated  
MTLYAHALALFLSLAVFVTEDMAVRAWIQSEEDGGGMCPLATCCPTGIPGVSSCISGT  
KHDPDGGRGECCDEPTNGCPYGYVCARKGGSNSFHAGVDTHGNTNPNYHYHHRQQQQQQ  
EENRSRAICKRREPHPRDLNAKETPQYKLCRLPSSPEVLQLQAFPIDDKFNATYYSSMGS  
ILPPSAIAANNENDNDPSIYMQKFSS I ETVLVIQHSGRNADDYLCAGISVAASAAAGGN



TTRDNEKILVIAPKFVADVDDHDDRDRNPNTLYWLEQGADVPLGHTWRYGADAANAWSPGD  
SGLRRQGISSYDVMRLLLEYLIGSKLHGEDQKLSMMRGSTHQEQRESFNFPNLKRIVVAG  
HSAGGQYVHRWTLSSSNI IWGNDSYTRSSRENSVTANGRYGKAENRKVEVRAVANPR  
SYCYLDNRRI INKGADF SNTGVDHYGGKII EIDKRRNKSVDNNTETSIGVNGSTFDRPDY  
TFSIPDQKDIQACPTYDQWQWGLQPGGDILSPYKDAALERANSNRRTAIALRYSKRKVFYL  
AGEHDKIEQKDRCETYNFQGDTRNERARRYFWALTEYFASNRNDGRSHLNRHVGT SIVET  
SRDRTLVEHFHQVPGSPHDHTLMFQSAPGLKAFFGNIRRYKMNENDVN

>comp10784\_c0\_seq1; 287 231 1037 LEN=1245; translated  
MMPLGTITAAASSALIITVASQCARMIQTAGIVSTASKRHEGSATSSSALLDNLDFAPLD  
EPSPNAIGIADRLRKLKRELLRVFAESRAPTQKEVEEFICSGDRDADSPAIWDGVLLDN  
NSWVMDLSSNVMTLHWFGLGIALPWRLVGNRENKGRWKGKAFMKPQLTPAARSAGKGVNR  
FGRRNDHNNDEEGSDFFRHEFDYSIEDSKLMPGSKSLCLVYSGYQSLPVSLWHSMNDEL  
RVLEVVTRAPAGSGGATERERVLI GMGW

>comp10785\_c0\_seq1; 1234 1 2514 LEN=2977; translated  
CRLKSNVRAAKTSSLHYCSANFKSANLQAGSQVDKRSTDTFHSSVIELDEIPIGSSIPPI  
RQMSRLTAITILGLASTAPSGVESFSSLATRKASPALYKSSLGMLNGERISISPRGDGGN  
NGNQSFQSSSRLQMGSDFSHPYSHYYGTSGSTAKQNFQNDQINDIYGYGAGAGPRDPS  
AIEDDPLGDMYDMDYDDYDGDVDRDRMRDRGSRMDDMRGRGMRDGRDRGRSRLDDL  
REGPRGGPRRRGAPNFSKRFVEEERMMEEDRRLRDLEFRRRNNDLAERVEERHVLDRMDE  
LIMEHDRLARLDAMEAKSEELSRESNERADEMLRVVHEEQEATKRMESVLGELQIVQ  
RTLLAVQNEQRRVGFDPDVGAPPSPIGGPDMPGIPPPKGNPNDDGGPRGRGPMDDGGPIG  
GGSGGVETPPPSTPPPNTVGAEVPPPPPTAETPPPPPTMEAPPPPPPPQSPQTGQNYGD  
AKQSGTGPI SPPPPPSQTSVGNPPSGASYSNTGVPPPPPPQGGPGSPPPPQYSQQAPPPPPQ  
YQQPPPPGYQQPPPNFDFDNEDDIRERPPPAKAI INGGVNGTGGGTFTKTPPKMVDPD  
AYGNALGTDEPTNSFQQRKMGLEKPPPERSTEPRKQTLRDRI FQEKGRDENQQHYGEQ  
PRQNQQPPPPPPQQQRGGIIPPQGGPPQAQRGGYGGPPPPPPQQQQQPGQTPFPQTMQPP  
PQQTPPPPPPPQQAPPPPPPPSYDNQDAGSGYPQGGVNTFEPGGQRASNNRRPPPSKSN  
SFGNFGGQGSGRPRGKASGFGGGQSGRGGGRGPKNFGEETGSITFTDSDPDGGRCFLT

>comp10786\_c0\_seq1; 985 496 3537 LEN=3597; translated  
MGRLPFTSSASRLHATASSTVRDVA AVSDDSGTKRELFFAE EPPSPSSKSCEDDKTNAALF  
HGLKSRPVEGGNWDPNASLAWAKDFGRRCPEYDKRCKEGELFTKLPKPGDDGYFDVSDIDA  
GISNATIVRTKEQARIVMEKLMNSDPGIFHACDTEVMDINLKEVGP I GNGYVTCLSIYSG  
PDFDYGLGAPIGSTLWIDNIDDAHGILQEFKPMWEDERFKKIWHNYGDRHVMWNEGIDC  
KGFAGDTMHMARLQDTSRMKNGGGGYSLEALTSELLGLRKRPMKEIFGVPRIRKDGTPGS  
IVDVPPIEVLQRDPRFRENFIAYSCYDAVGTWRLHQRLLVELLKKMDWISTDTNLYDYYWA  
NMRAFGEVLTDMERRGVYVDAKKYLASVETQARQDRADHLRKFQWVAKEIGPDGLAINP  
ASSVQLCTLLFGGSQNIKTKEPTEHIRVFKVPVEEIPEDALEEYQKIEEKKQKQNGDKKN  
GIETDQLDQLKAVQLKALCKEGLKVS GKKADLQQRDRDHLSTPVKEVEDDEFDQMSDD  
EIRQSLIARSLDDSGDRMELLKRLRDDIQYMHDLLETAVPPDASGHVTIIEALEAAAREGG  
VAEELQSIKDKSNAKPKFIDVTVRSLGMEAIKHTAGGAPSVTADVLRKLAGDPFEDPPR  
YGTAFEFFGGGENGHEACVGLYSLCAIGSIDTMIANFLTSLQSLADHQSRVHCSLNLNTE  
TGRLLSSRRPNLQNPALQKDKYKIRQAFQASQGNLIVADYGOLELRLASMTDCKSMID  
AFESGGDFHSRTAMDMFDNVKQKVDDEVLLEWDYAKGEPKPKLLKDEYASERRKAKTLN  
FSIAYGKTAHGLSQDWGVSQQEAQEMLDKWYDARPEVRDQANTKAYARRFGLTRTLMGR  
YRQLPEATGRNKRLLGHAERASINTPIQGAADVAMMAMIKINESEKLRKLGWILLLQVH  
DEVMLEGPEETAEEAFDEVIHCMESPWVLGLSKTSVPLLVLDGWSWKHKNWYDAK

>comp10786\_c0\_seq2; 893 496 3632 LEN=3692; translated  
MGRLPFTSSASRLHATASSTVRDVA AVSDDSGTKRELFFAE EPPSPSSKSCEDDKTNAALF  
HGLKSRPVEGGNWDPNASLAWAKDFGRRCPEYDKRCKEGELFTKLPKPGDDGYFDVSDIDA  
GISNATIVRTKEQARIVMEKLMNSDPGIFHACDTEVMDINLKEVGP I GNGYVTCLSIYSG  
PDFDYGLGAPIGSTLWIDNIDDAHGILQEFKPMWEDERFKKIWHNYGDRHVMWNEGIDC  
KGFAGDTMHMARLQDTSRMKNGGGGYSLEALTSELLGLRKRPMKEIFGVPRIRKDGTPGS  
IVDVPPIEVLQRDPRFRENFIAYSCYDAVGTWRLHQRLLVELLKKMDWISTDTNLYDYYWA  
NMRAFGEVLTDMERRGVYVDAKKYLASVETQARQDRADHLRKFQWVAKEIGPDGLAINP  
ASSVQLCTLLFGGSQNIKTKEPTEHIRVFKVPVEEIPEDALEEYQKIEEKKQKQNGDKKN  
GIETDQLDQLKAVQLKALCKEGLKVS GKKADLQQRDRDHLSTPVKEVEDDEFDQMSDD  
EIRQSLIARSLDDSGDRMELLKRLRDDIQYMHDLLETAVPPDASGHVTIIEALEAAAREGG  
VAEELQSIKDKSNAKPKFIDVTVRSLGMEAIKHTAGGAPSVTADVLRKLAGDPFEDPPR  
YGTTEEKVTGRGPTSLMNITKFSFRIRIFILLSLKAFEFFGGGENGHEACVGLYSLCAIGS  
IDTMIANFLTSLQSLADHQSRVHCSLNLNTE TGRLLSSRRPNLQNPALQKDKYKIRQAFQ

ASQGNLIVADYGQLELRLASMTDCKSMIDAFESGGDFHSRTAMDMFDNVKQKVDDGEV  
LLEWDYAKGEPKPKLLKDEYASERRKAKTLNFSIAYGKTAHGLSQDWGVSQQEAQEMLDK  
WYDARPEVRDWQANTKAYARRFGLTRTLMGRYRQLPEATGRNKRLGHAERASINTPIQG  
GAADVAMMAMIKINESEKLRGWIILLQVHDEVMLEGPEETAEEAFDEVIHCMESPWVL  
GLSKTSVPLLVDGWSWKHKKNWYDAK

>comp10786\_c0\_seq3; 463 41 1749 LEN=1809; translated  
MQENGIETDQLDQLKAVQLKALCKEGLKVSCKKADLQQRRLRDHLLSTPVKEVEDEFDQ  
MSDDEIRQSLIARSLDDSGDRMELLKRLRDDI QYMHDL ETAVPPDASGHVTII EALEAAA  
REGGVAEEILQSIKDKSNAKPKFIDVTVRSLGMEAIKHTAGGAPSVTADVLRKLAGDPFE  
DPPRYGTEEKVTRGGPTSLMNI TKFSFRIRIFILLSLKAFFGGGENGHEACVGLYSLC  
AIGSIDTMIANFLTSLQSLADHQSRVHCSLNLTETGRLSSRRPNLQNPAL EKDKYKIR  
QAFQASQGNLIVADYGQLELRLASMTDCKSMIDAFESGGDFHSRTAMDMFDNVKQKVDD  
DGEVLLLEWDYAKGEPKPKLLKDEYASERRKAKTLNFSIAYGKTAHGLSQDWGVSQQEAQ  
MLDKWYDARPEVRDWQANTKAYARRFGLTRTLMGRYRQLPEATGRNKRLGHAERASINT  
PIQGGADVAMMAMIKINESEKLRGWIILLQVHDEVMLEGPEETAEEAFDEVIHCMES  
PWVLGLSKTSVPLLVDGWSWKHKKNWYDAK

>comp10786\_c0\_seq4; 555 41 1654 LEN=1714; translated  
MQENGIETDQLDQLKAVQLKALCKEGLKVSCKKADLQQRRLRDHLLSTPVKEVEDEFDQ  
MSDDEIRQSLIARSLDDSGDRMELLKRLRDDI QYMHDL ETAVPPDASGHVTII EALEAAA  
REGGVAEEILQSIKDKSNAKPKFIDVTVRSLGMEAIKHTAGGAPSVTADVLRKLAGDPFE  
DPPRYGTAFEGGGGENGHEACVGLYSLCAIGSIDTMIANFLTSLQSLADHQSRVHCSLN  
LNTETGRLSSRRPNLQNPAL EKDKYKIRQAFQASQGNLIVADYGQLELRLASMTDCK  
SMIDAFESGGDFHSRTAMDMFDNVKQKVDDGEVLLLEWDYAKGEPKPKLLKDEYASERRK  
KTLNFSIAYGKTAHGLSQDWGVSQQEAQEMLDKWDARPEVRDWQANTKAYARRFGLTRT  
LMGRYRQLPEATGRNKRLGHAERASINTPIQGGADVAMMAMIKINESEKLRGWIILL  
LQVHDEVMLEGPEETAEEAFDEVIHCMESPWVLGLSKTSVPLLVDGWSWKHKKNWYDAK

>comp10789\_c0\_seq1; 346 94 1641 LEN=1812; translated  
MPWLEKDNPREKASQNLFLVHVPRCGGTSLMKSHNVPKVIENSFFHKLGMKLFRRYK  
LLESANFP IWTGNVCTVMVVLNCLYRFVVLAKDGLKIYKVITSFFIAFFLTLMFGLTF  
VFVAPTARI AVIRHSFLLI VRYVLMGLMENLEYLTGANIHGYLPHLTAHKMLNYGYVTP  
EEMEQVSSLAIVRNPYSRMSIYMYNRFSGESFSHFVKSWYKNMKYYRESGEMEDWYTP  
CHVIPMFETHFEQAQMVQSIKQEEELKYLKNPGDIENAKDSSI HDLPKVVRDALLGMPH  
TNKRKTSKPWYDLYDQETLNLTYEMYGVDFQIFRYPSTISQRPDLHPPTVSNALTESAAI  
SLEDGAYAAAPSSALTKQSVTTATATTSSEEKTEEGTAPLQSPPPAADQPETQQQSP  
ETPQMIRFESFTRDASIVSSDSASERKNRRSSLLKSAQSSSRTSSMMGNASVRSLLYSS  
LSNSELLHLIDDDDKEGESESHANS DNSIRLTKAD

>comp10790\_c0\_seq1; 593 1 2475 LEN=2637; translated  
NAPVVLISYNVLHKKINVDSTFTGIQVSSFKAVENSQRCVYDERDCWGCTTTNKISVSKTL  
QQESTKTNRAMENKRNRRRMNGRLKFLPLLPSAILFVVVFAHVQLLVKQRYSIDDCNHDK  
IVPTTMAFSSSACIGTRESSFPKDDKNFRGKTYDCTWTPSLRSGERRQLLVLLTAGKAS  
LPTANNTRTTTGSKTGIKRPNTQVRTIMSMLEERYDVFLPSDCKDGKMDKTKEWKTRNY  
LYHASRSFQDSNHDENGRGNDIRNFSEQVSVLDFLDERLELPSHVSKRILQESPRILR  
KPVDSFLIPTADFLQLWGRELFLKAVERNALLTSGVGYTTNRKKKSVAVSQSTDAAP  
SDRGDDDDSDTRTENNFNTSTDQNV EILLSRTGLSPSAIRRMKRSTPLAFGLLGSKVH  
SVLDFLDGILQEKESGATTAKTKVTRAQTKAAHEEDSNKRKKVLGKVI SAHPYLLNLSV  
ESNLKPRVQFLAESCGLSPTQLAKVVQTSNGSVLGLSVENNLQPTIDFLLAEIFFEDEND  
KDDPRSMLTKCILTHPQLLGLSIANLKSVDYFDSIWPSLAGRIAKRCPAIYSLNLDQNI  
SPTVHFLARVGMNGGQLLSEETIKKEFYAMLYEYPNIITLSVEANLQPTMMFFNKTG  
YTSLNENWELVSPKSSVASGVDSASDQMNVTVHGKQAASGRIRGRYIAASLYNRLLRWHF  
CLSHTKQKLLSEKSVDAAVSATDPSSVALPMPSTSSPLPQETSPGLSPMTPPLHVLVMAD  
DKAFCEVMGVEVERFLSFKKEAIPRLKFSSQFDTWLKTKPIDL

>comp10791\_c0\_seq1; 276 96 1055 LEN=1231; translated  
MNSVVMFLVALAAASNQSQLVYGQSSSSDLSYREASQLRGGQNRSLKSAKSPKSYKSKS  
AKETKSGKGEQPGAILPETSTTTGPTNNTNAPTTRTPTSTPTTKPTLSPTPKKSGKVGK  
KKEGKSEKAKSDKSDKDKKKKNEDNTLAPTDRIPDPSMYPNQTPPTAPTLVKTRAPT  
NGPTAAPTNSPVAPTAAPSISSVETTVTSSSESSISSVANGMFKRNRSITNPPSSQPS  
SNPSSQPSLSPSTFEFKKQQRARRYNQVRVRRRRRRRKRKEKSEGADDVNEIFVDDVDEI  
TVEDPVFRKIPIDNLDVRQ

>comp10793\_c0\_seq1; 537 314 1985 LEN=2161; translated  
MSQTSTSLSSGIGATEPYQSHTGDETRGSVGLTRSTKIFALCAALNSCNLGYDIGVSTNA

GGLIQDDMGLTDVQRELFVGSLSNFWSIFGSLFSHRISDTYGRRRSFQVAAVIFIIGIGIM  
STANTFAALMVGRSFLGIGVGFGLAIDPLYIAEMTPAKLRGELVTWSEMAINVGIIVLGF  
SGLVIFYEVNNSLEWRLMFAMGAILPIVVIFASQFVMAESPRWLVSKEEAKTVLRKIY  
PEDFDINPVARDIQEGLERERIAEQQIGWKMLVPSPAIRRMLIVGVGIABAQQAVGIDA  
IQYYLLDVLEQSGIESEKQQLGGLIALGFLKLLFVGVGAKLLDNQGRKKMLYISLLGTCW  
WWWVFPSSIVHWSYSSALNRHLTTNVSGMAGASILTSFSFIGNNTSIFAIVGLCLY  
LSFFSVGMGPVAVLIPSEVFPTSIRAKAMSLATLSNRIVATLMASFLLSTANAIGWAPFF  
ILIAAVCLVVFVFLLLPETKGRSLEDMTVHFAEITGDQKILEAEKKILSDRVEHGSVE  
MGNLDGDGAKPTGTMT

>comp10793\_c0\_seq2; 572 912 2018 LEN=2194; translated  
MTPAKLRGELVTWSEMAINVGIIVLGFSLGVLVIFYEVNNSLEWRLMFAMGAILPIVVIFASQ  
FVMAESPRWLVSKEEAKTVLRKIYPEDFDINPVARDIQEGLERERIAEQQIGWKML  
VPSPAIRRMLIVGVGIABAQQAVGIDAIQYYLLDVLEQSGIESEKQQLGGLIALGFLKLL  
FVGVGAKLLDNQGRKKMLYISLLGMAGASILTSFSFIGNNTSIFAIVGLCLYLSFFSVGM  
GPVAVLIPSEVFPTSIRAKAMSLATLSNRIVATLMASFLLSTANAIGWAPFFILIAAVCL  
VVFVFLLLPETKGRSLEDMTVHFAEITGDQKILEAEKKILSDRVEHGSVEMGNLDGDG  
AKPTGTMT

>comp10793\_c0\_seq3; 490 314 2015 LEN=2191; translated  
MSQTSTSLSSGIGATEPYQSHTGDETRGSVGLTRSTKIFALCAALNSCNLGYDIGVSTNA  
GGLIQDDMGLTDVQRELFVGSLSNFWSIFGSLFSHRISDTYGRRRSFQVAAVIFIIGIGIM  
STANTFAALMVGRSFLGIGVGFGLAIDPLYIAEMTPAKLRGELVTWSEMAINVGIIVLGF  
SGLVIFYEVNNSLEWRLMFAMGAILPIVVIFASQFVMAESPRWLVSKEEAKTVLRKIY  
PEGTCLSLSLCLDPGEDSMFRIEPQPNHSSSCGLANPTWSELVFFCADFDINPVARDIQE  
GLERERIAEQQIGWKMLVPSPAIRRMLIVGVGIABAQQAVGIDAIQYYLLDVLEQSGIE  
SEKQQLGGLIALGFLKLLFVGVGAKLLDNQGRKKMLYISLLGMAGASILTSFSFIGNNTS  
IFAIVGLCLYLSFFSVGMGPVAVLIPSEVFPTSIRAKAMSLATLSNRIVATLMASFLLST  
ANAIGWAPFFILIAAVCLVVFVFLLLPETKGRSLEDMTVHFAEITGDQKILEAEKKIL  
SDRVEHGSVEMGNLDGDGAKPTGTMT

>comp10793\_c0\_seq4; 503 912 2260 LEN=2436; translated  
MTPAKLRGELVTWSEMAINVGIIVLGFSLGVLVIFYEVNNSLEWRLMFAMGAILPIVVIFASQ  
FVMAESPRWLVSKEEAKTVLRKIYPEGTCLSLSLCLDPGEDSMFRIEPQPNHSSSCG  
LANPTWSELVFFCADFDINPVARDIQEGLERERIAEQQIGWKMLVPSPAIRRMLIVGVG  
IABAQQAVGIDAIQYYLLDVLEQSGIESEKQQLGGLIALGFLKLLFVGVGAKLLDNQGRK  
KMLYISLLGTCWWWVFPSSIVHWSYSSALNRHLTTNVSGMAGASILTSFSFIGNNTS  
TIFAIVGLCLYLSFFSVGMGPVAVLIPSEVFPTSIRAKAMSLATLSNRIVATLMASFLL  
STANAIGWAPFFILIAAVCLVVFVFLLLPETKGRSLEDMTVHFAEITGDQKILEAEKK  
ILSDRVEHGSVEMGNLDGDGAKPTGTMT

>comp10793\_c0\_seq5; 561 912 2124 LEN=2300; translated  
MTPAKLRGELVTWSEMAINVGIIVLGFSLGVLVIFYEVNNSLEWRLMFAMGAILPIVVIFASQ  
FVMAESPRWLVSKEEAKTVLRKIYPEDFDINPVARDIQEGLERERIAEQQIGWKML  
VPSPAIRRMLIVGVGIABAQQAVGIDAIQYYLLDVLEQSGIESEKQQLGGLIALGFLKLL  
FVGVGAKLLDNQGRKKMLYISLLGTCWWWVFPSSIVHWSYSSALNRHLTTNVSGM  
AGASILTSFSFIGNNTSIFAIVGLCLYLSFFSVGMGPVAVLIPSEVFPTSIRAKAMSLAT  
LSNRIVATLMASFLLSTANAIGWAPFFILIAAVCLVVFVFLLLPETKGRSLEDMTVHFA  
EITGDQKILEAEKKILSDRVEHGSVEMGNLDGDGAKPTGTMT

>comp10793\_c0\_seq6; 465 314 2149 LEN=2325; translated  
MSQTSTSLSSGIGATEPYQSHTGDETRGSVGLTRSTKIFALCAALNSCNLGYDIGVSTNA  
GGLIQDDMGLTDVQRELFVGSLSNFWSIFGSLFSHRISDTYGRRRSFQVAAVIFIIGIGIM  
STANTFAALMVGGTCVAVRGVAVSAGWCLVGCERRPEQNVVCLLDEKKTRAAFASHSPDCF  
VSFPVLQFLSWDGVGFGLAIDPLYIAEMTPAKLRGELVTWSEMAINVGIIVLGFSLGVLV  
EVNNSLEWRLMFAMGAILPIVVIFASQFVMAESPRWLVSKEEAKTVLRKIYPEDFDI  
NPVARDIQEGLERERIAEQQIGWKMLVPSPAIRRMLIVGVGIABAQQAVGIDAIQYYLL  
DVLEQSGIESEKQQLGGLIALGFLKLLFVGVGAKLLDNQGRKKMLYISLLGTCWWWV  
FPSSIVHWSYSSALNRHLTTNVSGMAGASILTSFSFIGNNTSIFAIVGLCLYLSFFSV  
GMGPVAVLIPSEVFPTSIRAKAMSLATLSNRIVATLMASFLLSTANAIGWAPFFILIAAV  
CLVVFVFLLLPETKGRSLEDMTVHFAEITGDQKILEAEKKILSDRVEHGSVEMGNLDG  
DGAKPTGTMT

>comp10793\_c0\_seq7; 479 314 2121 LEN=2297; translated  
MSQTSTSLSSGIGATEPYQSHTGDETRGSVGLTRSTKIFALCAALNSCNLGYDIGVSTNA  
GGLIQDDMGLTDVQRELFVGSLSNFWSIFGSLFSHRISDTYGRRRSFQVAAVIFIIGIGIM

STANTFAALMVGRSFLGIGVGFGLAIDPLYIAEMTPAKLRGELVTWSEMAINVGIVLGF  
SGLVIFYEVNNSLEWRLMFAMGAILPIVVIFASQFVMAESPRWLVSKEEAKTVLRKIY  
PEGTCLSLCLDPGEDSMFRIEPQPNHSSSCGLANPTWSELVFFCADFDINPVARDIQE  
GLERERIAEQQIGWKMILVPSPAIRRMLIVGVGIABAQQAVGIDAIQYYLLDVLEQSGIE  
SEKQQLGGLIALGFLKLLFVGVGAKLLDNQGRKKMLYISLLGTCWWWWWWFPRSSIVHW  
WSYSSALNRHLTTNVSGMAGASILTSFSFIGNNTSIFAIVGLCLYLSFFSVGMGPVAVLI  
PSEVFPTSIRAKAMSLATLSNRIVATLMASTFLSTANAIGWAPFFILIAAVCLVVFVVFV  
LLLPEKGRSLEDMTVHFAEITGDQKILEAEKKILSDRVEHGSVEMGNLDGDGAKPTGTM  
T

>comp10793\_c0\_seq8; 548 314 1879 LEN=2055; translated  
MSQTSTSLSSGIGATEPYQSHTGDETRGSVGLTRSTKIFALCAALNSCNLGYDIGVSTNA  
GGLIQDDMGLTDVQRELFVGS LNFW SIFGSLFSHRISDTYGRRRSFQVAAVIFIIGIGIM  
STANTFAALMVGRSFLGIGVGFGLAIDPLYIAEMTPAKLRGELVTWSEMAINVGIVLGF  
SGLVIFYEVNNSLEWRLMFAMGAILPIVVIFASQFVMAESPRWLVSKEEAKTVLRKIY  
PEDFDINPVARDIQEGLERERIAEQQIGWKMILVPSPAIRRMLIVGVGIABAQQAVGIDA  
IQYYLLDVLEQSGIESEKQQLGGLIALGFLKLLFVGVGAKLLDNQGRKKMLYISLLGMAG  
ASILTSFSFIGNNTSIFAIVGLCLYLSFFSVGMGPVAVLIPSEVFPTSIRAKAMSLATLS  
NRIVATLMASTFLSTANAIGWAPFFILIAAVCLVVFVVFVLLLPEKGRSLEDMTVHFAE  
ITGDQKILEAEKKILSDRVEHGSVEMGNLDGDGAKPTGTM

>comp10793\_c0\_seq9; 407 314 2285 LEN=2461; translated  
MSQTSTSLSSGIGATEPYQSHTGDETRGSVGLTRSTKIFALCAALNSCNLGYDIGVSTNA  
GGLIQDDMGLTDVQRELFVGS LNFW SIFGSLFSHRISDTYGRRRSFQVAAVIFIIGIGIM  
STANTFAALMVGGTCVAWRGVASAGWCLVGCERRPEQNVVCLLDEKKTRAAFASHSPDCF  
VSFPVLQFLSWDGVGFGLAIDPLYIAEMTPAKLRGELVTWSEMAINVGIVLGFSLGLVFI  
EVNNSLEWRLMFAMGAILPIVVIFASQFVMAESPRWLVSKEEAKTVLRKIYPEGTCL  
SLSLCLDPGEDSMFRIEPQPNHSSSCGLANPTWSELVFFCADFDINPVARDIQEGLERER  
IAEQQIGWKMILVPSPAIRRMLIVGVGIABAQQAVGIDAIQYYLLDVLEQSGIESEKQQL  
GGLIALGFLKLLFVGVGAKLLDNQGRKKMLYISLLGTCWWWWWWFPRSSIVHWWSYSSA  
LNRHLTTNVSGMAGASILTSFSFIGNNTSIFAIVGLCLYLSFFSVGMGPVAVLIPSEVFP  
TSIRAKAMSLATLSNRIVATLMASTFLSTANAIGWAPFFILIAAVCLVVFVVFVLLLPEK  
KGRSLEDMTVHFAEITGDQKILEAEKKILSDRVEHGSVEMGNLDGDGAKPTGTM

>comp10793\_c0\_seq10; 476 314 2043 LEN=2219; translated  
MSQTSTSLSSGIGATEPYQSHTGDETRGSVGLTRSTKIFALCAALNSCNLGYDIGVSTNA  
GGLIQDDMGLTDVQRELFVGS LNFW SIFGSLFSHRISDTYGRRRSFQVAAVIFIIGIGIM  
STANTFAALMVGGTCVAWRGVASAGWCLVGCERRPEQNVVCLLDEKKTRAAFASHSPDCF  
VSFPVLQFLSWDGVGFGLAIDPLYIAEMTPAKLRGELVTWSEMAINVGIVLGFSLGLVFI  
EVNNSLEWRLMFAMGAILPIVVIFASQFVMAESPRWLVSKEEAKTVLRKIYPEDFDI  
NPVARDIQEGLERERIAEQQIGWKMILVPSPAIRRMLIVGVGIABAQQAVGIDAIQYYLL  
DVLEQSGIESEKQQLGGLIALGFLKLLFVGVGAKLLDNQGRKKMLYISLLGMAGASILTS  
FSFIGNNTSIFAIVGLCLYLSFFSVGMGPVAVLIPSEVFPTSIRAKAMSLATLSNRIVAT  
LMASTFLSTANAIGWAPFFILIAAVCLVVFVVFVLLLPEKGRSLEDMTVHFAEITGDQK  
ILEAEKKILSDRVEHGSVEMGNLDGDGAKPTGTM

>comp10793\_c0\_seq11; 514 912 2154 LEN=2330; translated  
MTPAKLRGELVTWSEMAINVGIVLGFSLGLVIFYEVNNSLEWRLMFAMGAILPIVVIFASQ  
FVMAESPRWLVSKEEAKTVLRKIYPEGTCLSLCLDPGEDSMFRIEPQPNHSSSCG  
LANPTWSELVFFCADFDINPVARDIQEGLERERIAEQQIGWKMILVPSPAIRRMLIVGV  
IABAQQAVGIDAIQYYLLDVLEQSGIESEKQQLGGLIALGFLKLLFVGVGAKLLDNQGRK  
KMLYISLLGMAGASILTSFSFIGNNTSIFAIVGLCLYLSFFSVGMGPVAVLIPSEVFPTS  
IRAKAMSLATLSNRIVATLMASTFLSTANAIGWAPFFILIAAVCLVVFVVFVLLLPEKGR  
RSLEDMTVHFAEITGDQKILEAEKKILSDRVEHGSVEMGNLDGDGAKPTGTM

>comp10793\_c0\_seq12; 418 314 2179 LEN=2355; translated  
MSQTSTSLSSGIGATEPYQSHTGDETRGSVGLTRSTKIFALCAALNSCNLGYDIGVSTNA  
GGLIQDDMGLTDVQRELFVGS LNFW SIFGSLFSHRISDTYGRRRSFQVAAVIFIIGIGIM  
STANTFAALMVGGTCVAWRGVASAGWCLVGCERRPEQNVVCLLDEKKTRAAFASHSPDCF  
VSFPVLQFLSWDGVGFGLAIDPLYIAEMTPAKLRGELVTWSEMAINVGIVLGFSLGLVFI  
EVNNSLEWRLMFAMGAILPIVVIFASQFVMAESPRWLVSKEEAKTVLRKIYPEGTCL  
SLSLCLDPGEDSMFRIEPQPNHSSSCGLANPTWSELVFFCADFDINPVARDIQEGLERER  
IAEQQIGWKMILVPSPAIRRMLIVGVGIABAQQAVGIDAIQYYLLDVLEQSGIESEKQQL  
GGLIALGFLKLLFVGVGAKLLDNQGRKKMLYISLLGMAGASILTSFSFIGNNTSIFAIVG  
LCLYLSFFSVGMGPVAVLIPSEVFPTSIRAKAMSLATLSNRIVATLMASTFLSTANAIGW

APFFILIAAVCLVVFVFLVLLLPETKGRSLEDMTVHFAEITGDQKILEAEKKILSDRVEH  
GSVEMGNLDGDGAKPTGTMT  
>comp10794\_c0\_seq1; 506 37 1760 LEN=2162; translated  
MRRSEEPSYGSFEDLQTSLLSPSSPLAMAASNGNHNVDNDGRVTAKRWYQNAHQVTAM  
ISNFSTSYNVVNSLVLPILKELHSGSSSDSTALVASSLLAGMIFGQLMGGALGDSWLGR  
MGALRLVMALQIVASLASAFVGMGGVGARGRADVFLWLSGLRFVLGIGCGGVYPLAAVIS  
AEDGNRQPEGGGETNGSETDSSSIQRVVLTFSMQGVGFVSVPLVAVLLLLYSTSNLDVVWR  
TMLGLGALPGIVLMCLQCHQHRYRRTIGAFPMEQMEDADSDGELENNSVLTSTVSNIS  
DDGEQRFMNGGQNVTSSEGDALS IHGGGWLQNLLEHPGLGRKVI GTAGTLVPLDVVYFNT  
IFQPIVVAAAFQTSQNSGTSFEVLRKTSIDSLILTSIALPGYAMAGIIMGKETYCVRQT  
PRYVMLQGFAAMTLLYATIGFNWSYLRKDPAMLVLLYGMTFFFANYGPNTTTFILPSLVF  
EEEHRATWNGVSAAGKMGALTGATLFAPADELGDHVMLICAGVALFAFLLTFFFAVPE  
QKEPEETLEATNSRDHPSSVSLETESAMANEII  
>comp10794\_c0\_seq2; 477 189 1831 LEN=2233; translated  
MAASNGNHNVDNDGRVTAKRWYQNAHQVTAMISNFSTSYNVVNSLVLPILKELHSGS  
SDSDTALVASSLLAGMIFGQLMGGALGDSWLGRMGALRLVMALQIVASLASAFVGMGGVG  
ARGRADVFLWLSGLRFVLGIGCGGVYPLAAVISAEDGNRQPEGGGETNGSETDSSSIQRV  
VLTFSMQGVGFVSVPLVAVLLLLYSTSNLDVVWRTMLGLGALPGIVLMCLQCHQHRYRRT  
IGAFPMEQMEDADSDGELENNSVLTSTVSNISDDGEQRFMNGGQNVTSSEGDALS IHGGG  
WLQNLLEHPGLGRKVI GTAGTLVPLDVVYFNTIFQPIVVAAAFQTSQNSGTSFEVLRK  
TSIDSLILTSIALPGYAMAGIIMGKETYCVRQTPRYVMLQGFAAMTLLYATIGFNWSYLR  
KDPAMLVLLYGMTFFFANYGPNTTTFILPSLVFEEEHRATWNGVSAAGKMGALTGATLF  
APADELGDHVMLICAGVALFAFLLTFFFAVPEQKEPEETLEATNSRDHPSSVSLETES  
AMANEII  
>comp10795\_c0\_seq1; 408 210 1193 LEN=1232; translated  
MWSKKDTKEATDKEEINLDEDNSSNPKPCFWKPKGPRSWWVERVKLENLEIGQELSGHV  
QYNLEAKTGPKLYFECGIGRTDKNGDWSIVNGMLRLDKGKPSVARKRAARFRQKDQVQLF  
VSRVQKGCGRLEVCAKIEQVQKYDEEPIKISVTTLKKSQEVVGVKVKLYPYGAIIDIGANV  
RGLLHITKVARLLDQYVSKEEGLKAGFEKAGKVRRLVESVEKRRLSLDFTDDVKEDARK  
EKEQKQQLIDESNDSQKRDELDAWKEYGNQKYQDDNMLNDGTDDAINDGNEYNKGYNDEY  
DEEYEDDYDDRYDEEMDIESSLGLDMY  
>comp10796\_c0\_seq1; 410 1 951 LEN=1044; translated  
KTSSPFGVPSKQTGPSKASSPFGNPVQKAGSSNPFAGAPPQKSAGTPPTKTSSPFGVPSK  
QGPNGETKKPFSFPGQNSQATKKAMPFSFSSGVPVLPPTSKGKDNGSLDDVYASLDGVQ  
SKNSYKNEGKRESSGTDLNLPNSSVGVSAQPSPTKKEGSKKSFSPYGTNPKRTTSSSDSN  
LKTFSFGASSPKNNSQAQTVKKSFSFPGYGRKPIAKSYDGPIDPSSFSFGAPDTKPSSSG  
GKVDQASTSSFSFGEASNQVSPDVPGEIQAESNKRQNYGAASAPKFAATGFSSDNNYN  
VGPDDKANPLSERDGL  
>comp10797\_c0\_seq1; 210 393 1202 LEN=1478; translated  
METNAALSRRSCLATAAAGLITGAAAGDSGIFGSVVNVKPAFATETSADAVETKESSLQS  
TLLDTRNRLNLLQSIRNNNSEAEILAAIDTLVPLDPSENKATMASDLGDGELLWSAKAE  
AFSPLLKLPKPKPDSFQYLGSAAAQEVGPGRVAQGLTGILGANTQLWLSGVRPSSDD  
ASVLEILPPFRFEVGGRYGSGTPKNRLVEAGSDAEFRKLNARTTEAQEAPKNSYKQLYLE  
REGKSLRISTITAGDPVIVGAI FVHRKL  
>comp10798\_c0\_seq1; 337 195 1049 LEN=1049; translated  
MNLRYHATLGAALVATSSAWTSPSLLSMKRSVHHGINREQPFLIHRGFSTGNGVSTTTTS  
LASALAAPSSSDANTAGQPVATGSIVNVFRGGLVAARIIDDDLKVVNSLEVDIPEVVDP  
SLSVPDEMKS KKKSSDALGGDLTGREVLFGDGTIGIVVHRPPMVVYRDSDDSKVEEP  
SVEGAVTVLDTLYTLNVPKNLQRVDCFGKSVTVGEDGTILNRPIFAPIPQVKDISLINK  
PLITGELFDALAPIGKGQNMILLIGHDLEDMRRYALDMVSIQKSKG  
>comp10798\_c0\_seq2; 285 195 635 LEN=739; translated  
MNLRYHATLGAALVATSSAWTSPSLLSMKRSVHHGINREQPFLIHRGFSTGNGVSTTTTS  
LASALAAPSSSDANTAGQPVATGSIVNVFRGGLVAARIIDDDLKVVNSLEVDIPEVVDP  
SLSVPDEMKS KKKSSDALGMQKNQ  
>comp10798\_c0\_seq3; 544 1 1304 LEN=1497; translated  
XFDALAPIGKGQNMILLIGHDLEDMRRYALDMVSIQKSKGIKCVYASSGDNENQKELKSLM  
ESAGVEEDDIILVSSESNKDNMEDASDAAEGIVTAATAACAIGEAYALEEGVDTLIVDN  
INKHKSFWDITTRSLVDVFGVDAVVKGDRDGGASSEMRAFFSSLVQRSAQYNKSRGGGSV  
TLLLLQKIPAMVDEKDESDFVTPDDFEGSPAKIRERLDLLVKKNIPLTAANLRKIQIPV  
PSTAEGIRRLALQHVDDLISMSDQIWLDERLQNSGRSPPMDFQRSITRIGIGADTQSRA

DAAAMRRVVEGLRMELSSQAESMDGADFDTNASKKQLRNAQAWLLAMHQPTSVARTLSES  
CVALLAASSGALNDSIDNGVLAGESEGSRLIEGLLDHVRKTVPDSLTEIDSTLDFDTDETK  
GLIEEAIKSYVSQN

>comp10799\_c0\_seq1; 571 125 1531 LEN=1626; translated  
MKLSTQLLLATLAAQNTALWAFSVPSISASRSASTELAAKASDEDVRRVVVTGLGVVNGCG  
VGHEDFFESCLEGKSSIDTVKRFDASHMTCQIASEVPDEMFDPKDFFFTNPKNVRSNDRFT  
HFVAAAARQALKDAGVGDTPETLENPETIGVMVGTAFGGMQTFEEQTLKLAKNPERPKVS  
PFTIPALLGNTASGVIGIETGCKGPNYGVTSACASGSHAIGEALGMIRDGKCDRMLAGGT  
EATMTPLCFAGFCAMKAMNSKFNDDPKAGSRPFDANRGGFVMGEGAGVILLESLESAKAR  
GANIYAELVGYGATCDAHHITTPAPEGRGLAAAMEMALDESGIEKTDVSYVNAHGTSTAY  
NDKFETMAIKSVFGDHAKAKDGSFVVSSTKCVTGHTLGAAGGIEAVVACRSIKDNIVPPT  
INYETEDPECDLDYVPNEKREMEVKAAMSTNLGFGGHNAAILFKKYEE

>comp10800\_c0\_seq1; 696 336 2117 LEN=2148; translated  
MTGVRRSKTKRERTATFLVLGGIGLLGNLTNSGVRCFAIGNNEKHHMRHHPNSSTNAPLS  
KRRRQNSI INNSNNLYHKSLSLANPSVVGHTNGHDDGMYP CRGGHALRATRQAGSADGENI  
PDASAMDGAKKPEQGLWPCMDKMDKELIKISLPVIGNYAIGPLIGAVDLFWVNRMGNALA  
VAGQAAANQVFSSAFWFVVSFLPSVTATLVAKQHAKGNKEATQDAICQALFVGGFFIALIGT  
PAMFFRADGALSSVLPKGAPAMAYAKPYLMIRAF AFLPSLISLVGFSAFRGILDTPVK  
ISAFANVFNALLDPIMIFTLAMGVPGAAMATLAAEVISALIYLGLLRKKQLISWGKLVLP  
PSWASLKPLVKGGAALQLRNLSLNLTLAVARVTQSIDQSGVAAAAHAMAIQTFQIGGIV  
LLALSTVAQIMVPNAMVERVDEETKASVGGLMHAKATANRLMGWGFVLGCALGSLQILLL  
PAMFKATPLQEV RDAAKLPAVIASVLQI INGLVFIGEGIMIGTGSFLQLSLSTLTATLGC  
LWALWFFPKVGLTGVWLGFGVFNLIRLAGVYIHQKINGPLSLRKIAAKVKT

>comp10800\_c0\_seq2; 696 353 2134 LEN=2165; translated  
MTGVRRSKTKRERTATFLVLGGIGLLGNLTNSGVRCFAIGNNEKHHMRHHPNSSTNAPLS  
KRRRQNSI INNSNNLYHKSLSLANPSVVGHTNGHDDGMYP CRGGHALRATRQAGSADGENI  
PDASAMDGAKKPEQGLWPCMDKMDKELIKISLPVIGNYAIGPLIGAVDLFWVNRMGNALA  
VAGQAAANQVFSSAFWFVVSFLPSVTATLVAKQHAKGNKEATQDAICQALFVGGFFIALIGT  
PAMFFRADGALSSVLPKGAPAMAYAKPYLMIRAF AFLPSLISLVGFSAFRGILDTPVK  
ISAFANVFNALLDPIMIFTLAMGVPGAAMATLAAEVISALIYLGLLRKKQLISWGKLVLP  
PSWASLKPLVKGGAALQLRNLSLNLTLAVARVTQSIDQSGVAAAAHAMAIQTFQIGGIV  
LLALSTVAQIMVPNAMVERVDEETKASVGGLMHAKATANRLMGWGFVLGCALGSLQILLL  
PAMFKATPLQEV RDAAKLPAVIASVLQI INGLVFIGEGIMIGTGSFLQLSLSTLTATLGC  
LWALWFFPKVGLTGVWLGFGVFNLIRLAGVYIHQKINGPLSLRKIAAKVKT

>comp10801\_c2\_seq1; 123 70 404 LEN=404; translated  
MLASTVSR LHS AALRRCSRFGTNSFRGFSRSCAARSDDLPHYHIVGMPALSPTMETGILS  
EWYVEEGAGFSAGESLAKIETDKASIDFEAQDDGYIGEFVRSFVRLVFWFGX

>comp10801\_c2\_seq2; 334 360 764 LEN=991; translated  
MQAGSGDDIEVGVPIMVTVEEEDVAAFADFVLEEAPAEAAPEPASAPEVAPAPEPVAVA  
APPPAAPAPVVVEEPAAAAAAPGPTEEMAAAVAPVLSTGWGSFAAVNSPIAKTLAKQQS  
EYVALYGTGQVPL

>comp10801\_c2\_seq3; 221 1 650 LEN=1071; translated  
XSSSSSSSGAAGENERASKASGDAPPASP GELVDRIRRDYEEKNYLWTGDLDLGCFREDC  
LFADPTISFVGKDKFVENTQNLVPIVEAVAEDYRSDLISISLGSQRRDGKECSYVETRWN  
MVGSLTASPCLFWKPGIDVIGRTRFWFESDENAGRGGESGKTESETALRVYFYDESWEV  
PAWKALLQILTPAGTFPSTSSSSSSSGGNALDSER

>comp10801\_c2\_seq4; 400 70 774 LEN=1001; translated  
MLASTVSR LHS AALRRCSRFGTNSFRGFSRSCAARSDDLPHYHIVGMPALSPTMETGILS  
EWYVEEGAGFSAGESLAKIETDKASIDFEAQDDGYIAKILMQAGSGDDIEVGVPIMVTVE  
EEDVAAFADFVLEEAPAEAAPEPASAPEVAPAPEPVAVAAPPPAAPAPVVVEEPAAAAA  
AAPGPTEEMAAAVAPVLSTGWGSFAAVNSPIAKTLAKQQSEYVALYGTGQVPL

>comp10802\_c0\_seq1; 244 50 1198 LEN=2886; translated  
MPSFSILVARQVGQRTNALRLRHRPKRIRSTGNSVGVTTAHAVKDEHEEQKLAVLDTID  
AFPVTLRQITIDETREEDAGAF L TIVEGELVRLLYGNEGRGLDCNRDTEEEVETAIYFFPH  
VLCERYWGTHPPIYAQLAYLKSVPFVPLLARLGIELNQFQTEEQGLFYRKWNVLRSLVN  
DDWNNWYDKEDRNLVDEMYFFVMKALQQLGIFQKGDVRRHRLMRALAYSNSFSERWFRCL  
VDLDPNCCKEYGYSTNYGNPHESVYKFAKENGISAFRTIFELGMTHYPTTELGF L FHRH  
CYGRTNFELVCCEFGADTVSRIVEDALRIWDEREFDASGKLVDRRKT MALIHAATNSGHH  
FEAVYFLLRRDPAVIFYSIK

>comp10803\_c0\_seq1; 458 233 2212 LEN=2431; translated

MSARETWESRTAFILAAVGAAGVFGNVWRF PALVYKFGGGAFFIPYVLALVIVGIPLLIH  
EIAMGQHLQKSEIGVQHHLNKHTKGVGVGSILAGMMVATYYVPLVSWCIRAFFESFGKMR  
NDWAGIEGSDAMEYFYHTVIGQYTLDEDEQKPTRIVVANVFYLAFTWAI VGCCLSFGLKWT  
GRVAYVTMGMPILMLFILLIRAL TLP GASNGVHQYFAEWDWSVLVDKPD IWSTAVSQIFF  
SIGIAFGVMTAFGSHCDKNAPAIENSFIIA IANSTFSILSGVCLFSVMGYMTEQENDFRV  
YAGPSLLFGVYPAALSTIPGGLHWVRFLFLNMILLGLDSAFALVEAVGSLITDSQYGHVV  
TKPMVISAICGIGFFGGLLYTTDAGLLFLDTIDFYVNF AVLFLGFGKALSAGWIYGMKRQ  
IENIGNRWNIAYAYFGTTFGSFLFASLVWFGVTGETFWLGFISLVVIY GSGVAYCLHNLK  
ELVDEDEKSVSMRFLRNELLMGNILELRDELSSSVGHIPWIWAF LMKHIIPQILLV LFFNL  
FFSETAYGTIDFGNYNGYETWPYQAVGVTSALAVFGAVLVGVLD SKIFDCLVSDSTDDSN  
NDDSWVDV VEMKEHATSGNNQN NLEEV RVPSPSSEYSIMDDLENPK EATKATAKAILA

>comp10803\_c0\_seq2; 250 233 1795 LEN=2051; translated  
MSARETWESRTAFILAAVGAAGVFGNVWRF PALVYKFGGGAFFIPYVLALVIVGIPLLIH  
EIAMGQHLQKSEIGVQHHLNKHTKGVGVGSILAGMMVATYYVPLVSWCIRAFFESFGKMR  
NDWAGIEGSDAMEYFYHTVIGQYTLDEDEQKPTRIVVANVFYLAFTWAI VGCCLSFGLKWT  
GRVAYVTMGMPILMLFILLIRAL TLP GASNGVHQYFAEWDWSVLVDKPD IWSTAVSQIFF  
SIGIAFGVMTAFGSHCDKNAPAIENSFIIA IANSTFSILSGVCLFSVMGYMTEQENDFRV  
YAGPSLLFGVYPAALSTIPGGLHWVRFLFLNMILLGLDSAFALVEAVGSLITDSQYGHVV  
TKPMVISAICGIGFFGGLLYTTDAGLLFLDTIDFYVNF AVLFLGFGKALSAGWIYGMKRQ  
IENIGNRWNIAYAYFGTTFGSFLFASLVWFGVTGETFWLGFISLVVIY GSGVAYCLHNLK  
ELVDEDEKSVSMRFLRNELLMGNILELRDELSSSVGHIPWIW

>comp10804\_c0\_seq1; 1824 204 5615 LEN=5661; translated  
MSDVELAELGALGEWLS SFPQLEEYVSDKENNLSLLEDDKIFRSNPAIKSAML EAVVEVC  
DITDVSVTGLNVAPEVDVWLT VLSLTRKTPSNRRKSIDPPTQHWKDCNKHTALGNLLTIA  
VSHKDLQLRKAYIERIMMLSPATQRL LMSMIEKRKKMGSRNKKTTTPSTKKNPEPHTPSG  
RYAAGSPASATPSKRSEAEARSHERKR PGRSGLGGSGHSPFQTAEKAATTTMAVRSRTRS  
TSPQTF LRRPTANKETPDPEDTNRRTFRSAFGSPLQQPSAKRIPPPSSERNRNGRHP SRN  
IFSPGLGDTAEYESQVQDLRDENEELS YELKKSREKEAEASTKIEDLEEHRKEILRVER  
QARERDDATAQKHLAQITQVEKKLKE LSEEYTTARKERDELAKIKDEMEVMSRNKKLLED  
TTERLR TYKEKVQOFTDVKDALQRE EEAHSRSVEENLRLQNELKNLQPLKKQLEEYKTRA  
VDAEVR LTECQDEFNKLKEEKIASSE ISTHIEQYVIAQVEVEIKELNRNVQONDEANRESS  
GVGDGISELNPELKLEILSLRNEN ER LRAFADKRQDDAVAKMEQNVEDQNMLAERYKSQF  
LSTKDRLELTGSSLEESQKREAAALRNEVSDKTELGEKYKSQLMAAKEELASTEISLKD SM  
SREAKLHEEISDKTKIGERFKSQFLATK SQLESTQRSLQDSKGRESSLRQEVADSL LKIK  
NTQEEVKEVSDELSKCAEDLKMSIERESKLEELASWTIDAKDLQOKSN NLSLELT KKAN  
ELEYSQK KENTVAAELTELKSELRMVRKRCTSLGDELQHCTLELEQSQFRESNVEERVKE  
WMERAKESKEEAENLSSELMQRTADLKE SKENTARLEKRLSESSALHKEAEREIDKLTEK  
LGETTKSLEKTCKSLDQSMQRYLDLQNNLSDMTNRAEDAEGISAQRMELVQNTREOLEAA  
EQKIVDLVKEKEDLVSSVEALVSQTNEAKNLRENLEDELKKTQDSL RDSGEKLSEAQTSI  
DETARSL EDTKDKLHQAE TVNNHRESEIEILKSENETLNDKISLDKRAIDVLRNDLLEAK  
NMLQLSREAVAEKEAREKLLSESLQIAGDSAMQLENELFQTKESLRF AQDNRKEAEAREV  
SLHEQLNDSETS IQNLTVKLLKTNECLKTSLENIKEIEDRESSMKEQLNDAEDS IASLKN  
ELLDIQGCLESTQQKASKLESRLNLSNGELQEAKHVI SELEDSIAKEVGAQOEMLATLED  
SKAEKEKMKKEFVSREEELS QALNSEKEKGNK LKQEI SQKEELNALQISLSSSQHREKM  
LKHELVKLEDKKGCEEE LAAMKSNMEEIVEQSAKSVASVREIMKAKAEKELEELRQSMN  
DLLENEGKAKLEQDILYKEQINKLNQQYNQELLR LKKEGNSSELQKCTEEKDKEIEAKDKE  
IEGLKREHEEKIKELERTGKEEKEKLMER GKMMRDLKEEKEKEIKDLTDDVNFLEQKII  
GEEEEKMH LGQQFQAKIIEYK KKLQVAAGRINTLSTNNDEFEDRVKLLER EKFKLREEND  
RYRRQLGGRTGSDSALHSQLETLQNEFQNAIDENRQLKRKLQGHNIHSLHSIGEDSRSTP  
YTRNRGNQSTLLQLRVEYEETIESLNDEKRELIMKNSAAITDVQKAEKRAWLVEQDNAIL  
KQDLTSLQLSNERLEKALEDIYRENSVPGHALLSQNN TTESSEDSSIIPSP PSEERKSQFD  
DATMTSDRVKIRSTENSVLQTKSAYTNGSGELMNYDLTSTDYDTKR SIQSTSYDSPYRTW  
SPR

>comp10807\_c0\_seq1; 856 1 2071 LEN=2422; translated  
XKDPATNLAEVVSSETTVQDLMDLEEYVGT LNFKKVSNIWDTFSSKDESPLETTGLAEAE  
SVGEEEEEDPPAAAADASSSVLFR ETYGPPTKPEPNSLVQAAEGILKDTTAKMEYLV EEA  
SPTGNATVSASTTSGGTGLSLQDLVGRASSVLDVESISSEIVSAAQKIAKESGVSDFN VQ  
FAADRAREATEFAVGVATAANAVLDAGYAYGSRSGAAGMTARDNDPNYVLAASAASQTAG  
SVLAAPSGEASDGSNGEGQAHQAPLFGAFAS AQRIEPEYGNV VYQGAEMGSLAGVIYEQ  
HAEGCHGLGHSLVANGTTANVVMVTD SVMPDRLSEAFCHHEDDGDSPGASALPRAGPS

LVRTITIRGFDASDENVDREELLKNICLATPEALDDKTADR VV FHKGLLDIAREIYADTK  
HFIDWVSPDYKIVLNHGSVGGSLSVLMLLLLLTS DRG VGFVRDR IHRVYSHGSPPIAALVD  
SADSEEPSKFGGTQQCPILDAFDLPPSMVYGF IQPYDPVVR LFS DH DVLYPLVDDL GADG  
ITLYASGPIRSLRPITRAIFQAWNGWPQFRDNWKGTC DTQYHSVGIQHLLLPDPLRYLND  
RFISVNVGVPVDAIVRIAPRDLLPALDQTFPLDTFQVSLVPQAVRSFLHHPAYDSSV  
VEYATK LKQEAEPVATKKSRAFKPFLTTKS

>comp10807\_c0\_seq2; 819 1 2300 LEN=2651; translated  
XKDPATNLAEVVSSETTVQDLMDLEEYVGT LNFKKVSN IWDTFSSKDESPLETTGLAEAE  
SVGEEEEEDPPAAAADASSSVLFRETYGPPTKPEPNSLVQAAEGILKDTTAKMEYLVEEA  
SPTGNATVSASTTSGGTGLSLQDLVGRASSVLDVESISSEIVSAAQKIAKESGVSDFNVQ  
FAADRAREATEFAVGVATAANAVLDAGYAYGSRSGAAGMTARDNDPNYVLAASAASQTAG  
SVLAAPS GEASDGSNGEGQA HQAPLFGAFASAQRIE PYEYGNV VYQGAEMGSLAGVIYEQ  
HAEGCHGLGHSLVANGTTANVVMVTD SVMDPDRLSEAFCHHEDDGSPGASALPRAGPS  
LVRTITIRGFDASDENVDREELLKNICLATPEALDDKTADR VV FHKGLLDIAREIYADTK  
HFIDWVSPDYKIVLNHGSVGGSLSVLMLLLLLTS DRG GGSVAGTRCALIALLCRCSCLVG  
NSATASSLLFEDVRVFFLVVWNRALYCIPIRTNGISFDSRFRSLCLALAGVQLALS GTGS  
IGFTHTHEXPIAALVDSADSEEPSKFGGTQQCPILDAFDLPPSMVYGF IQPYDPVVR LFS  
DHDVLYPLVDDL GADGITLYASGPIRSLRPITRAIFQAWNGWPQFRDNWKGTC DTQYHSV  
GIQHLLLPDPLRYLNDRFISVNVGVPVDAIVRIAPRDLLPALDQTFPLDTFQVSLVPQA  
VRSFLHHPAYDSSVVEYATK LKQEAEPVATKKSRAFKPFLTTKS

>comp10808\_c0\_seq1; 700 1 3054 LEN=3327; translated  
XYEHETPNXGKTIKTLSTTQARLKRSFEIYQCQFVECTYYQFVMASKNKKTPIFSIGLKA  
GSDVRKALTKSKDPAETIASYQKTRSLHSMFAKAFGTTTPQYEVDELNNNSSSGSNAANVE  
SLDTSVLKFLGHMGVSQYL VHKRIGDALQKELENE LRKVTSEGALLHLLKNCWSYAVSN  
AEFRPILWAVLKQLGAKTPLAVLKALAEKKTGK LKHIEIFRPLPPLLKRLVWEADWAD  
KVP IARENSADV KSKYLQMVESTLLYETVQPLIDTYT SVPLL VETSGNFFVNSVTERRV  
LTSARRALTNSVSVTTSSNSPNRSGGASSLLNKSSSTTTNNNSKTSESLAQAGKSVSQIR  
NMLS DLSRGAASYRPNLLHAVLSILMAQHGARAS IATTGTLHG LLAGSVHLHCTLVTDIL  
LSTGGPLPKQFVHVHSLARVLD DAVKNGILTDKDLIKVQEALRSIYKAEPTMEKDGENEK  
KVGASGGGSENAPAKNKSAPNKS LIRQLNQIITAGLTEMKSDPQTLFLNPVTD A IAPGY  
SDLIKKPM SIVTMENKIENNQYHDKQWEDDVR LMFRCNVN YNRGPTGQWFRGEAKRQLK  
IFNDEILPKAKNLFKVEQQKRNPEDELAALKRKR EEEEEK NRPKIKPLESGRKKRKINPQ  
EQNL SMVALAS MILADPFVVRILLDRVLR SIRIDTARGSGI PAEHRVIP SVMQLLYLAQW  
SPQFCAYRGRQFIIFDTGLELPKTIDAIESTLPHTSLRQYLP IIVHLLRDADLDKRLAIG  
GDLHTVANSALPRSEPPRVPTGNDNSPLPQIAMALLEGAF INVCLPGNSQDVSL S ISFAK  
FSKTFCTLAHGSVCNETAFFKSLVPVILRHKARLNKAVRDV IISTWLDWLKTPNEDESSE  
VGSMD SAAHEYLAMLLNEWASSFGN ILMPRDLLKVA TDVLEVVNATEA APHRKL SALWE  
KTDGNQETKFGPIKEQYERLLGLLPETHVTQWKE SAGIKTVS NSGD AKDSPK G DPMEM

>comp10809\_c0\_seq1; 46 1 609 LEN=1033; translated  
QETSSFREYDCVKAKSTRHPKTPPQPPLAPEGTEQYINRRATTRHSNDFFTGGNSGCLVS  
ETARDEGS AVPLVSRPNAKTNHPRRDSERVCEHRCPADPRAPAGARAPNPAGLVPTRSCR  
ARSRLAGMRTRHQQPGRPGSGGDNRD A KRSETEIEIQGQPPLLPCGPKTKKKGKGGKEK  
PRPWLVP SLM DRVRYG SVLYDE

>comp10810\_c0\_seq1; 372 256 1110 LEN=1271; translated  
MDHSAWQKLG SWMGKIDEA ITAYDQADSEYGTICNRSQSSMLTTTTTANNENDANIALRW  
EVLEARRKVV EATCEGYVSLIHQSFEDCKSNVRIATDKSRFEEQRRIMFQDAEVRFADAI  
TNHKIRSDRQKANDGNREMKDALDSSAKVVD A VENMKMTVSVDWWMFLQEMDQLIRNR TK  
INVE TDQDGDSTDSFSDPPSNDDDKASAKYMDHFNAYLDNMD FEDDCADMI EHEEPVPLY  
NDYGS ESMIVEWSARVDIAGVDSMYN WYRMHNPTLSPDFGKSC

>comp10811\_c0\_seq1; 654 54 2312 LEN=2730; translated  
MQTKSLMKYRTISS TLLWMAVLPASIEGFGCSPPLICSSRNEPNTLSRSLHTVVALAKVV  
DADVKGVDGSDVPAERFHMDMKRVLES RKNAFDDSSNSSTMLLPMDRRNRPA ILSQDI  
DGANRVASMLRHMVNIGVANEESYQIVLNALCRRGRLRWIDGDSTVVCAADVVEGLIDEL  
WESQIGKISTYTCNLALQAYASCSTPRGDRQYAEKAQALLHDMENEGIEPSVESFSYVIN  
AWAQQGNLRSNGCAKMAENNLERLLEKSPDDETKLQGYDWTLEAWSKSQEDDAPVHADR  
ILREMKLIKRRNGALQSTLPNSQSYTNA I LAWTKSNSAGEAQKLLYECIENFESGNSSPD  
QEP E LFAVNGVISA WARIGR TDKAEV LWKADDIRKKCKSLTLDVCTYNSVLYGYLKD NK  
STDNLEKILRIFDFMDKNKEEQPAVTPDCFTHHCVLRALGASNSEKAAEHAVQ TLETMHT  
LWEEGDES LR PATAYYNI AINKIAKSGKNANPQKALSILN LLELSQFCNADIISYTTVIE  
CFSKSTVQSA AERSLDL FHEAWRIYQEKEDPKMKPNLR TYTMVILSLSKNSTLENI VKAR



DLSQLNVLYNKDKDPELRPNAYPYNLLNSAASCVDAGDKLKAFQIAAQTYNDIRTS  
LISADSYTYAFWFKLCNHLLEPGDLRRKSITYSFEQCKRDGMLSRVLERLLTGT  
PNDILSEILGTEFRASPASYKKIKLSLDLPPTWSRNV

>comp10811\_c0\_seq2; 342 54 1169 LEN=1189; translated  
MQTKSLMKYRTISSSTLLWMAVLPASIEGFGCSPPLICSSRNPNLTLRSLHTVVALAKVV  
DADVKDGDVDSVDAERFHMMDMKRVLESRKNAFDDSSNSSTMLLPMDRRNRPA  
ILSQDI  
DGANRVASMLRHMVNIGVANEESYQIVLNALCRRGRLRWIDGDSTVVCAADVVEGLIDEL  
WESQIGKISTYTCNLALQAYASCSTPRGDRQYAEGAQALLHDMENEGIEPSVESFSYVIN  
AWAQQGNLRSNGCAKMAENLERLLEKSPDDETKLQGYDWTLEAWSKSQEDDAPVHADR  
ILREMKLIKRRNGALQSTLPNSQSYTNAI  
LAWTKSNSAGEAQKLLYECIENFESGNSSPD  
QEPELFAVSKF

>comp10812\_c0\_seq1; 439 188 1297 LEN=1644; translated  
MANNNGRQGGGGSSNNMNEHVEFTVKAEDLYLTGSENTIRRVTAETNYSCLMLKTQRF  
S  
SLFRHYAKYHGLRKDDLEYYFVNPLENEDTPETVQLQQRGDTIMVRKRRKPEPPEAAADDD  
EFFRDMRDLLDDEEHMDAVFLVHPVDAMDADESEAEGGASNVVEIRAHKCILTARTEYFK  
ALFRKNAASSDAKGDKVAFKESGACTINVDYCFSPHEITYMLEFIYTNRIQKIGSISTE  
DLLSILHLSDLWLLRDLKRLVEHELIRHHMYIHTVAKMYGATEEFNAQRLSRACIEFIMA  
NLRQVTGNTTFFEDMKNYPHLCIPVLKAAAEMIPEGPVQVHKRQKTGDS  
SSYKATNSNTTG  
SSPVPDSDP

>comp10813\_c0\_seq1; 780 347 2287 LEN=2551; translated  
MVFREESMGKESNHKEERALEDLLAMTDTDSGRTAISGHIEQSAETVTLETNDMTGSTE  
FVDSNQVMDTADAENTIRKNNMTCGKESAIESSTDGVMNTINGGGDETSARITESTSAM  
KFQPLQPIPEKSLSPGSQQSVHANQSSVVPVSREGGFMMNIQDPVAASKVFKNTQAEND  
EENSPSTQLLSHTPPTSMSTPYETMHFGKRPRSGSLSERLLVSTELEEKGMINRDQK  
GIL  
KDLIISGQDNDIQHALDRYEQGDASMLEGILHNGSLSNKATEEIDLLGQLDFDFLN  
VKER  
EQQNDTNNHFGGKTGSVASD  
GIGDLEFDGGIGNWEQGD  
DNRSRSNSTWSALENRTRANST  
WSALELALQQQQRSRANSAMSIDLENFRSRNSLFSPLIGNQTPDTQANFGRWMES  
SSGS  
AELPVQPEQHQQQLLQQQLQHQQHQQLLTQQKQKQKQKQKSKTKPKTSKPARRKS  
APP  
GTRVPKQPSAAAI  
AKEQMKERQRKERLLKKERKEKEKEKQEKKAMKERAKLERQKKKEGLEQQ  
EKIKEKEIHVPGSGRPRSMSDPNIKSKVGEDGLLEVERPDGWIGAYSPE  
SRKVRIGR  
FLE  
KRNHRVWTKTVKYDVRKNFADSRRLRVKGRFVKKDDELLMRELM  
SLT

>comp10813\_c0\_seq2; 496 1 1338 LEN=1602; translated  
XLSNDLXFAQPFQLSLSERLLVSTELEEKGMINRDQKGIKDLIISGQDNDIQHALDRYE  
QGDASMLEGILHNGSLSNKATEEIDLLGQLDFDFLNVKEREQQNDTNNHFGGKTGS  
VASD  
GIGDLEFDGGIGNWEQGD  
DNRSRSNSTWSALENRTRANSTWSALELALQQQQRSRANSAM  
SIDLENFRSRNSLFSPLIGNQTPDTQANFGRWMES  
SSGS  
SAELPVQPEQHQQQLLQQQLQ  
HQQHQQLLTQQKQKQKQKQKSKTKPKTSKPARRKSAPP  
GTRVPKQPSAAAI  
AKEQMKERQRKERLLKKERKEKEKEKQEKKAMKERAKLERQKKKEGLEQQ  
EKIKEKEIHVPGSGRPRSMS  
DPNIKSKVGEDGLLEVERPDGWIGAYSPE  
SRKVRIGR  
FLE  
KRNHRVWTKTVKYDVRKNFA  
DSRLRVKGRFVKKDDELLMRELM  
SLT

>comp10813\_c0\_seq3; 251 1 489 LEN=753; translated  
EKQEKKAIAKEQMKERQRKERLLKKERKEKEKEKQEKKAMKERAKLERQKKKEGLEQQ  
EKIK  
EKEIHVPGSGRPRSMSDPNIKSKVGEDGLLEVERPDGWIGAYSPE  
SRKVRIGR  
FLE  
KRNHRVWTKTVKYDVRKNFADSRRLRVKGRFVKKDDELLMRELM  
SLT

>comp10814\_c0\_seq1; 1172 150 2999 LEN=3095; translated  
MSNAFFHKPELALRRAMELQGINQSEAALTLLHDVLSRRRHTWSPVYEQIMIAYLNLCL  
KLHRAREAKDGLHQYRNLAQSQA  
PGSLEKVI  
RYLLEKAEDQCNRAKAAADAAA  
SESSTP  
LSVLEDAEDAEGESGIGPQA  
ILLSSMTTDPAKSQRDSLLLVP  
SLKFLWEIYRAILDIL  
RSNSKLEHVYHATS  
VSAFQFCRAYQRRTEFRRLCDLLRMHLGNLQKYGDDSASAKPNSKV  
RGWEGWTS  
DSIELHLQTRFAQLESASYLKLYTEGFRTVEDIYNILQISHHRRKNNPDFAP  
PKAKLMAKY  
YEQLIELFWSENYLFHAFAWYKYVLCKEYNKGMS  
EEVKAQQASAVLLAA  
LCIPSLPSKSDEANALGDSGMKERMGRMATLLGFATSNP  
TRSSLLDEINSQGLFKQVPGY  
LQQLYFLLEEQSDPLVLVGTGKPLLEQIASHQTGTEDAVELKRYVQPLQSVMLLKL  
LWNL  
SSAYHTVKIEFLKGLADGLGMSFENVEKSI  
VLFQT  
HKLAVRIDHRAGCLRF  
GDIQMES  
DVMRSQLT  
TVLGGQLETVCS  
TLVPEDSEAKAKARAEIYQTVRDV  
RVEEHTRL  
LERKSRIE  
RKEEVERKAQEEVRRKQQQAAAEDAARKLEEEKRIQREQV  
LREEKKKKIQ  
QEMENTKKE  
QLLRAMGHNTDAMTTEEVSRMDTDK  
LQKEHQKLQKKKENAERKTKEAAKHL  
DYMVRAVR  
IEELPLIRKAYDSKVKQDREQY  
EKENVERVEKAKKQWESDIQDKAHLT  
SHNVF  
SHMSAFE  
EKAMEGRRRRHEALCDEADRVAEIQ  
AEEDKLN  
RARKRKADEEKRRRDEEERL  
KREEEERK  
AEEERRKKEEARRKREEEEAARKKESDRMANERSRHEDSRGGSRFGSSGGGKYIPPSQR

DRGGSRFDDRGGSSGRYQSRGGNSGGSSYPGGGRYEGRSDRGGNDRWRR  
>comp10815\_c0\_seq1; 212 440 775 LEN=1065; translated  
MSHVGVPKLLYEAEGMKVTAEMKNGEIFRGLLLSAEETMNMTLSDVLRRTARNGQISKLP  
SVYLRGSSIRFIALPDILKSAPVFQKVTAMKRKMEKELQQRQEGGKRKRGD  
>comp10815\_c0\_seq2; 189 440 796 LEN=1168; translated  
MSHVGVPKLLYEAEGMKVTAEMKNGEIFRGLLLSAEETMNMTLSDVLRRTARNGQISKLP  
SVYLRGSSIRFIALPDILKSAPVFQKVTAMKRKMEKELQQRQEGKPRVLCPLQISGLF  
>comp10815\_c0\_seq3; 172 685 903 LEN=1193; translated  
MNMTLSDVLRRTARNGQISKLPVYLRGSSIRFIALPDILKSAPVFQKVTAMKRKMEKELQ  
QRQEGGKRKRGD  
>comp10816\_c0\_seq1; 674 1 2107 LEN=2271; translated  
XESKRPTLGLIAALAAEAALKKQKQKQKEEDDPTSLEGDITALVSHPTIKKSEETKSQANI  
LSPANEISVKKPGNSEGQKSNDFSLVSLLSAVFEEGVVDATSNPRDVSTLYCLHLLAVAL  
QETAKDKLQPKRNERDSLPTNIIAISRLLLRSLVISNQATSIGMIGWLGYGSSSVFDRA  
LDLPEFVLLQQLSCNMAAEKNWAKASDVLCSLFRCEQNLPRCHPRTLGSMLDLGALTEA  
HDINPAKSIVSRTVDLLSRYLSEVESLFFDRRYFELLCEKDPDRVVSFDDRVDVAVGIMQA  
FCKKFQEELSRNFLKLLGRNHRITLLNHSLVADSFVLANCLSAGEEKFHTNELRDLAAS  
TSCGSRLTLETSPRYYSWLAHSQYEISLRGWIRTESLIHPNAASVAFSARCLRELGKRK  
KAIQLMETLASCLEQKVDQIKTTITTMKQATRTKGEESPSSIFMVPLNDAETPLSHAKEK  
GPSFISRRRSRPSASISSMPAPLEKEAVTSYEREHTAVLCLWTMAVLTAEESSPDERGRSR  
ALSLLHTASLALQRMISKSKDCSKLTSGRDRFSSAIDEQTRLASFDLYQIVEGEALDLFE  
PLERIPLAKKYKPPSSGNDASANKASNKPMAAPSWSVLTPMRQKRSQWTSRTRAAAYR  
SAAAAANTVANVDNSSGATASGKLMATNQVKNRNPDTAFLFRV  
>comp10817\_c0\_seq1; 358 294 1717 LEN=2373; translated  
MIXDKIDVSWESRSGEIFRLLAHESSSLTRSTRQYDFVVDGVSIFSFPRLSELNAEAITL  
DHSTSCDRTPPTTVISIDHSASEISDSSVGGSSSVSDCFLHDGNEETRQLPDSGFRLSMAGF  
VPCVPLDETVDLLTSSYFNTNKSGLSLRRAVVTGLIQDSEDMVSRAIINALSEDNKINGNN  
TCDSIFCGEFPSVLI CGAAEISAEIQANILFLTFFEWTKLYTSCAPRPDFEEQKRLFLQKH  
MFAIFVHVHNRRLTEDDAVRTLLDIATLLDIPWPSVQRERDTLIIQDQSKEIYLDTLA  
TMKQFDELCRIGVATNRNFAFCRFASARGPLKAFAAADKGSGLDINGNSPQLSLIQKPLVS  
GRPGTLSRRSISVSEFRERGERNPRPKPIHARRKSHQRNTISIDKLITESPIFHRMINDP  
VLVSPIDVESFQKKNDFGKIYDIKDFRHSSDAIATISVGDGIHDTSNQPQLTFS  
>comp10817\_c0\_seq2; 312 444 1964 LEN=2620; translated  
MIXDKIDVSWESRSGEIFRLLAHESSSLTRSTRQYDFVVDGVSIFSFPRLSELNAEAITL  
DHSTSCDRTPPTTVISIDHSASEISDSSVGGSSSVSDCFLHDGNEETRQLPDSGFRLSMAGF  
VPCVPLDETVDLLTSSYFNTNKSGLSLRRAVVTGLIQDSEDMVSRAIINALSEDNKINGNN  
TCDSIFCGEFPSVLI CGAAEISAEIQANILFLTFFEWTKLYTSCAPRPDFEEQKRLFLQKH  
MFAIFVHVHNRRLTEDDAVRTLLDIATLLDIPWPSVQRERDTLIIQDQSKEIYLDTLA  
TMKQFDELCRIGVATNRNFGKSHQSVDPMSVFRVVLISKSSDISSLFPLFIAFCRFASAR  
GPLKAFAAADKGSGLDINGNSPQLSLIQKPLVSGRPGTLSRRSISVSEFRERGERNPRPKP  
IHARRKSHQRNTISIDKLITESPIFHRMINDPVLVSPIDVESFQKKNDFGKIYDIKDFRH  
SSDAIATISVGDGIHDTSNQPQLTFS  
>comp10817\_c0\_seq3; 312 294 1814 LEN=2470; translated  
MIXDKIDVSWESRSGEIFRLLAHESSSLTRSTRQYDFVVDGVSIFSFPRLSELNAEAITL  
DHSTSCDRTPPTTVISIDHSASEISDSSVGGSSSVSDCFLHDGNEETRQLPDSGFRLSMAGF  
VPCVPLDETVDLLTSSYFNTNKSGLSLRRAVVTGLIQDSEDMVSRAIINALSEDNKINGNN  
TCDSIFCGEFPSVLI CGAAEISAEIQANILFLTFFEWTKLYTSCAPRPDFEEQKRLFLQKH  
MFAIFVHVHNRRLTEDDAVRTLLDIATLLDIPWPSVQRERDTLIIQDQSKEIYLDTLA  
TMKQFDELCRIGVATNRNFGKSHQSVDPMSVFRVVLISKSSDISSLFPLFIAFCRFASAR  
GPLKAFAAADKGSGLDINGNSPQLSLIQKPLVSGRPGTLSRRSISVSEFRERGERNPRPKP  
IHARRKSHQRNTISIDKLITESPIFHRMINDPVLVSPIDVESFQKKNDFGKIYDIKDFRH  
SSDAIATISVGDGIHDTSNQPQLTFS  
>comp10817\_c0\_seq4; 358 444 1867 LEN=2523; translated  
MIXDKIDVSWESRSGEIFRLLAHESSSLTRSTRQYDFVVDGVSIFSFPRLSELNAEAITL  
DHSTSCDRTPPTTVISIDHSASEISDSSVGGSSSVSDCFLHDGNEETRQLPDSGFRLSMAGF  
VPCVPLDETVDLLTSSYFNTNKSGLSLRRAVVTGLIQDSEDMVSRAIINALSEDNKINGNN  
TCDSIFCGEFPSVLI CGAAEISAEIQANILFLTFFEWTKLYTSCAPRPDFEEQKRLFLQKH  
MFAIFVHVHNRRLTEDDAVRTLLDIATLLDIPWPSVQRERDTLIIQDQSKEIYLDTLA  
TMKQFDELCRIGVATNRNFAFCRFASARGPLKAFAAADKGSGLDINGNSPQLSLIQKPLVS  
GRPGTLSRRSISVSEFRERGERNPRPKPIHARRKSHQRNTISIDKLITESPIFHRMINDP

VLVSPIDVESFQKKDNFVKIYDIKDFRHSSDAIATISVGDGIHDTSNQPQLTFS  
>comp10818\_c0\_seq1; 480 66 1169 LEN=1325; translated  
MANITWSSVLQCLFLLSLVNAEDFYKLLGVSRATNKEIKKAYRKKSLFHPDKNKEEGA  
SDKFAAINQAYEALIDEEKRQIYDRYGEGLKQHEKQGGGGGGYDPFDQFFNRGHQRRDQ  
EQRTPNVDIPELLETLLEIYSGATFYVSYIRQVLCFKWEMCMKTAHECVGPGIKVQRVQVA  
PGFVQQVQQYDDQCVARGKKWQRNCSECQSQTEAEKIELTVDVTKGIRPGEAITFEETAD  
EKPGFKAGDLRFIVTEQSDHPVYHREGDNLYMTKTIPLVDALTFGSMTLNKLDGTPFSFK  
IDDIVQCDEVMRIPGKGMPPRRSGRGYGDLFITFEVDFPDELSPDQKKNLRELLGGTSSNK  
AEHGDEL  
>comp10819\_c0\_seq1; 52 1 102 LEN=753; minus strand; translated  
GAEAVDHDLLDEGAAIGRSSMSRLVEVVQESAE  
>comp10819\_c0\_seq2; 708 171 2504 LEN=3264; translated  
MILEHEQWYFGYDQILKDCRPDGDREGSRVLLLCNPVDAMSSARILSYMLRSDGIHYQ  
LLPCTCYSDLENRLSGMVEAGMDDVSSIVLNFNGAARNLTRLYEGDNLLEEGAVKTYVM  
DCRRPIHLANVYSPSNVIFLDSTQKTEDMPSDGDNLSGEESSDSSSSSSDSDSDSDSD  
DISKDAENSDDDEEALFDDIVGEAAKPIEEAEREHEQRRMDGKGDASYDAEDENEGN  
NNDDDSDDDDDDDNDHNSNRKPKRQKTFLDPGEAETATHGPEASQARQPSPATVSPRE  
LHGQRRNRLRKYSDGSFYGSPASFAVYRLAAQHRYGEQGDLLWLACVGVTDAYLHARLD  
LIGYAKLARELSDLGKLYPNVFDRALNTVYAEDLVGSGSRNGDSKTKIALSENGRIFS  
EKDFRFFMLRHSSLLDSMQYSDYICTRMQVYTKKGEQQLMEMLAKMGYPLDECRQPFPFM  
RPSLRRRLKEKLGIAAEYNLDRFEFTSFTRVTGYSSLLSASDTYAITALLECTAPGPTI  
ESGSEHEEKDQVEAFNNAYDALGSHSLEKSGISAEGYDSSNLVNGGNLSSNVGIGAGLRR  
AMALQKNIINTAVGLSERGAIITLLRHFRYAHVASSTMGGETHQLNRRDLIRSSGNNVVG  
SDDKRDHVFSKPLALTRLAHLFMDMRENGKWTGTAKARPLVLIADKPRSSTCLIVGYEYP  
ERAGDFVKNFTFGKNFEETAKSMNGTFRFDRFDSNVVEVDSGDVQRFMEQLHYLLDQI  
>comp10823\_c0\_seq1; 469 321 2330 LEN=2375; translated  
MTSLQYRMNSQRPLPIPTIAGMPEAGVPSIDESGKPLTEETSSCGPEDDSYAFQIYLSA  
KDGLRRLIRKSDGDNSSDRSRTVDALGRIVTRSSSSSEGNALFGYRDYDDDVAACSVSPF  
QCRPLGHAGNTGNAESALALLALQCIAIVTATSASISVGGEGYRMLPNGDNDQPKTCKVA  
SNGSNHIGTGQKQRNHFVRKKFGVTFLATALVSSAALGAYFGIQDPGEEERLSLLSAN  
NDNRTAPFRGNLTGTPFAGGSAHTPHTATGGFGNSENLSGSEETKNARLQFLVVKLSP  
IVSEISELGGYDLLDYISSRRNDDTIVFKGSPQHSALAWLSRAVRCRRRETATATTTTN  
TPFRGGEGRLRPPDYQLRYECETALSRQIVNRYVLATMYFAWNGKLWTDSEGWMSYDS  
FREDSVQPTTRSSNSSSQTITLPPNMASHFHPNDICSWKGITCRLEQTIGGVAPIALDG  
QGSSDNKGSETERETGAERSDENIVELSLPGNNLIGLLPRAKEIRLLSELEVLDSLGNHL  
GGTIPEEIGRLARLRELLLQGNRLSGVLPASAVAGTRLDVARLEDNLLASGLDRLLLSPPC  
EEAPREFSADCAGRKPRVACPCCTLCCGAAPSLENAKETETIVCSEYQYNNPSTSLTSED  
ELRMTQDNI  
>comp10824\_c0\_seq1; 544 68 2128 LEN=2189; translated  
MERQESSSFDSSSDEEPNGVSPQQTFSDDAEESCSDDQFSDSERFEAQRGRSRSIELRR  
LPYEDLPVTQVTCNLFAMEHRIFLRALLGLLNERETTATQIGMNDPNIKCGPLKKASHV  
LSGVWKMKYVEIRRGMLTYFEDTVSGDKNACSLQKNIPLDSNETSCRAVKIHRNGLNMI  
QGAIFELKVGKFGRLWLARSKAERHTWIQAINDAMVGRSVTQDSVNAHGKSGAVNSRSPY  
KDDLKLYLKVKTILKNSKSKKDYIGGMINLTSREHLDIPVRWIMGQADPGNGRMDGNNLD  
GAFVEKSMSSRLEQLWRDLRSRKIRINAELFEGGNHGPEKVLGALTRNIVAVSRSDSKY  
YRYAIPESKAVAYARDILLSINRTRSAGDSYFCIDTLSSNSDLVVLVPSRKPDPPLSIKV  
ELDESEGLADYVNDNKTGWIRTRNKSQKSWRKRFFILSESTLSFYRHATPLPHGFRKQI  
GINDATISVDKAKDQPGYVVSIDPKGSFQERYLYFN SIDKAI SWTHALEYAAKSSSNKG  
IFIKRNL RDSKNSPSIDGRQLIEQAMKNHLTTLGLDSCDIDDLVRLSAKKFSRLRISAH  
ASTDYNVCTNDPQDGGDTWATLTATFLQRFRITSGRIVRGEEIVRVGVSGCSEILQDAE  
NSDDNDKGPSTSSPRRKLGYHRRRRA  
>comp10825\_c0\_seq2; 637 93 2291 LEN=3970; translated  
MLAAEFFDKAYNSGNRGTSIQETSANKCVLNFDDGDPSSIPASLGIVTDRRTEHVEINSF  
PEEKVPTVSSTKENALAKMAGLSLPIGNVNPGRFSPGTKLDSNGIHDLQVTKPGSLYPF  
VQELSTESENYAAIQGKSIPVTSSPSLRWQMYSENGITETDSDRTNVLSYERKIPWLD  
KKINDEDSFSENTNVCLRKRDAKGRYLATDTGYTRDYEDRSMQEKESIQNSRTRRQDIRG  
AVRKKNYEKISRDNFLKKTIVQLEVDILDKDSLSKAHHCINQLGTDKKNHLKASRTN  
SPFLQAPNVSLASNIISNGSDVMPGKLEAVGDETRHESTQCVEGLLRELENSKFKEG  
NSKEKLESQIRLDQTSIYSETMKTALQSANDMYLKVERLKKDIFWIDDNSFDDFTWTR  
KLNMGAPLECARLYEEGAQDESLVKTTPNGGFDEKAHSRTGRKLI PHEEMKMLMIVETDEK

CNDKATHNETENSSFSKINSNTDSGWGSIDGDGSNNSSKRVNHGCVSPKPPKYFGNNETG  
SLDRQASIRLISRDDILHRIDAATEKQRYDVVKTCNSKETESAKLREGNISSHDTGDEA  
PLRSSYPDLSSSSWSGENKQSYLSNSKHTSQSSEENNATKQRAKSTKVPSLSIEENGKTH  
VERSSSSEMINKLMLSKKRLQRADQKLNALVKEAALLNSIPQPEVPRLDNSIEVADNHGD  
SIEVSHLSYTHI

>comp10825\_c0\_seq3; 637 93 2291 LEN=3875; translated  
MLAAEFFDKAYNSGNRGTSIQETSANKCVLNFDDGDPSSIPASLGIVTDRRTEHVEINSF  
PEEKVPTVSSTKENALAKMAGLSLPIGNVNPGRFSPGTKLDSNGIHDLQVTKPGSLYPF  
VQELSTESENYAAIQGKSIPVTSSPSLRWQMYSENGITETDSDRTNVLSYERKIPWDLA  
KKINDEDSFSENTNVCLRKRDAKGRYLATDTGYTRDYEDRSMQEKESI QNSRTRRQDIRG  
AVRKKNYEKISRDNFLKKTIVQLEVDILDLDKDSLKAHHCINQLGTDKKNHLKKAARTN  
SPFLQAPNVSLEASNIISNGSDVMPLGKLEAVGDETRHESTQCVEGLLRELENSKFKEG  
NSKEKLESQIRLDQTSIYSETMKTALQSANDMYLKVERLKKDIFWIDDNSFDDFTWTR  
KLNMGAPLECARLYEEGAQDESLVKTTPNGGFDEKAHSRTGRKLI PHEEMKMLMIVETDEK  
CNDKATHNETENSSFSKINSNTDSGWGSIDGDGSNNSSKRVNHGCVSPKPPKYFGNNETG  
SLDRQASIRLISRDDILHRIDAATEKQRYDVVKTCNSKETESAKLREGNISSHDTGDEA  
PLRSSYPDLSSSSWSGENKQSYLSNSKHTSQSSEENNATKQRAKSTKVPSLSIEENGKTH  
VERSSSSEMINKLMLSKKRLQRADQKLNALVKEAALLNSIPQPEVPRLDNSIEVADNHGD  
SIEVSHLSYTHI

>comp10825\_c0\_seq4; 278 1 1570 LEN=1623; minus strand; translated  
RRIAGSDGRPDLLTPSLDDPDSIATIAGEKKELQKEIQNGSKDRTQPNSMSTKAAEEAAC  
RVSEIIAKAGSGDSFDGETLGVGGLDDVLVQIKRRIWTPLAAPPRLQGXVDRINLVDST  
RVPKRNKHPVTNXLSDRLFRRVGDTSGTWVAPFGKPGCGKSLLASTLGSLSPFRPITVV  
SGPEILDKFVGSSEKNLRDIFDNPPDIYEKFRVNEEDGGDSLASAAIHVVVMDEFDAVAR  
SRGGS DGKGGQDAGVAKCFRCISTLSLEYTSFELCSSCLVGPCKLMTWTPDQPCPLKLV  
SHVVMFLFHSRDSVVNQLLAKMDGVQPLAVPTLVIGLTKRSLIEPALLRPGRFEVQIEIP  
PPRTNEQRF SILKVHTQHMFTAGRLQVNDPPPDS PAAQIEEDEVXSDGFDFFIYGNLAA  
DSHLSLSSFLNANADTSTLLAYEDLLMKLATLTDEFSGAAIAGVARAAASRALERAVSQ  
FSDEIESRETL SIMDCLVTQDDFYEA VNDVRESMGTRDHSED

>comp10825\_c0\_seq5; 400 1 1475 LEN=1528; minus strand; translated  
RRIAGSDGRPDLLTPSLDDPDSIATIAGEKKELQKEIQNGSKDRTQPNSMSTKAAEEAAC  
RVSEIIAKAGSGDSFDGETLGVGGLDDVLVQIKRRIWTPLAAPPRLQELGIHPARGLLL  
YGKPGCGKSLLASTLGSLSPFRPITVVS GPEILDKFVGSSEKNLRDIFDNPPDIYEKFR  
VNEEDGGDSLASAAIHVVVMDEFDAVARSRGGS DGKGGQDAGVAKCFRCISTLSLEYTS  
FELCSSCLVGPCKLMTWTPDQPCPLKLVSHVVMFLFHSRDSVVNQLLAKMDGVQPLAVPTL  
VIGLTKRSLIEPALLRPGRFEVQIEIPPPRTNEQRF SILKVHTQHMFTAGRLQVNDPPP  
DSPAAQIEEDEVXSDGFDFFIYGNLAADSHLSLSSFLNANADTSTLLAYEDLLMKLAT  
LTDEFSGAAIAGVARAAASRALERAVSQFSDEIESRETL SIMDCLVTQDDFYEA VNDVRE  
SMGTRDHSED

>comp10825\_c0\_seq6; 637 93 2291 LEN=3001; translated  
MLAAEFFDKAYNSGNRGTSIQETSANKCVLNFDDGDPSSIPASLGIVTDRRTEHVEINSF  
PEEKVPTVSSTKENALAKMAGLSLPIGNVNPGRFSPGTKLDSNGIHDLQVTKPGSLYPF  
VQELSTESENYAAIQGKSIPVTSSPSLRWQMYSENGITETDSDRTNVLSYERKIPWDLA  
KKINDEDSFSENTNVCLRKRDAKGRYLATDTGYTRDYEDRSMQEKESI QNSRTRRQDIRG  
AVRKKNYEKISRDNFLKKTIVQLEVDILDLDKDSLKAHHCINQLGTDKKNHLKKAARTN  
SPFLQAPNVSLEASNIISNGSDVMPLGKLEAVGDETRHESTQCVEGLLRELENSKFKEG  
NSKEKLESQIRLDQTSIYSETMKTALQSANDMYLKVERLKKDIFWIDDNSFDDFTWTR  
KLNMGAPLECARLYEEGAQDESLVKTTPNGGFDEKAHSRTGRKLI PHEEMKMLMIVETDEK  
CNDKATHNETENSSFSKINSNTDSGWGSIDGDGSNNSSKRVNHGCVSPKPPKYFGNNETG  
SLDRQASIRLISRDDILHRIDAATEKQRYDVVKTCNSKETESAKLREGNISSHDTGDEA  
PLRSSYPDLSSSSWSGENKQSYLSNSKHTSQSSEENNATKQRAKSTKVPSLSIEENGKTH  
VERSSSSEMINKLMLSKKRLQRADQKLNALVKEAALLNSIPQPEVPRLDNSIEVADNHGD  
SIEVSHLSYTHI

>comp10826\_c0\_seq1; 979 1 2865 LEN=3236; translated  
XNLTANERTRTQLSLT SIWRKATNAQQQPEKNPGATMEISGESIFHKGSSRSIHLADDD  
YGEGQNNFNRRNTDENVDPSFPLTSESPLRMRTKLKDRRSLMKKQASSRRRRSSARF  
LRITPDDNTNEMKRQYDASSFTSLGEVYRNAIRMNAENRINASNSWNLNLIDHLDRF  
IAPELRSDIGGESVGRRSQVMNPGSANDTVKTTTNP LGSTIDSTMISGVNFTKASCTLDA  
SVKIYSYRVDVHLTSYKVLANLNRDGTGTQSNNSKNSVSDTVYNDPNVGNDDGELSS  
RSKMPHRKTNAEETLEQNVANINIHKLDAAFDIDPLFHKMSKTFDEGGAKGLLLANLGV

NSGCKIVFDSTLDTEETPAPLISKECLTDQDQDPGIQDEILAPKPTVDVSGLVGKLENLL  
SSAYGSYSNMENIPLVPQLASLRNQYAELREGGF IETGVVFSDRYASSTEEEA EADKSIH  
LEAIERSQASQADLGRSRI SRESTETYGAVEDNDHYTNSFGYGCDDDNLFEDLHDDHRY  
SSSSFQGARASTGDVAANEGSKLSRPTFSQASLLLLDAIASGDI STTQPGNHYEFFNTQAL  
ESLSTGNWWAGAGHWKKIPSKRRYKSSPGI IGGNSSNSSGGIEKNARLDLKKRRGRNTKT  
KSLSPGSKMLVSI SESTKSLEDLLERSKCKHLKNTTNSFQLTKAMQTKYKADNLLPVD  
AGLGIKELGTLFLRPKIGLTDVMKAKQEVEDTMEAVSRTRAVGFGGTETWGVDDDSLYGA  
SDDGVGFDVVDTDGTGKDEVHDKNEFVIPDLEDIRKVNRIKIGYATMARKVDVKRLKKDLW  
TELEQTFVSKTQDDIERNKNSGDLSIKKTASDEKFRGSNSYDEFDDDIRSNAKI QPTNIA  
QSLSFQD TVRDMQANQS QPDVTL PFYFICILHLCNEKGLSLESSGLED FVIHSA  
>comp10826\_c0\_seq2; 702 139 1986 LEN=2357; translated  
MSKTFDEGGAKGLLLANLGVSN S GCKIVFDSTLDTEETPAPLISKECLTDQDQDPGIQDE  
ILAPKPTVDVSGLVGKLENLLSSAYGSYSNMENIPLVPQLASLRNQYAELREGGF IETGV  
VFSDRYASSTEEEA EADKSIHLEAIERSQASQADLGRSRI SRESTETYGAVEDNDHYTNS  
FGYGCDDDNLFEDLHDDHRYSSSSFQGARASTGDVAANEGSKLSRPTFSQASLLLLDAIA  
SGDI STTQPGNHYEFFNTQALESLSTGNWWAGAGHWKKIPSKRRYKSSPGI IGGNSSNSS  
GGIEKNARLDLKKRRGRNTKTKSLLSPGSKMLVSI SESTKSLEDLLERSKCKHLKNTTNS  
FQLTKAMQTKYKADNLLPVDAGLGIKELGTLFLRPKIGLTDVMKAKQEVEDTMEAVSRT  
RAVGFGGTETWGVDDDSLYGASDDGVGFDVVDTDGTGKDEVHDKNEFVIPDLEDIRKVNRI  
KIGYATMARKVDVKRLKKDLWTELEQTFVSKTQDDIERNKNSGDLSIKKTASDEKFRGSN  
SYDEFDDDIRSNAKI QPTNIAQSLSFQD TVRDMQANQS QPDVTL PFYFICILHLCNEKGL  
SLESSGLED FVIHSA  
>comp10827\_c0\_seq2; 245 154 1187 LEN=1434; translated  
MYQRI FDNXARIHHPDKNRGEDSR IAARTFAKINHAYEVL R DDESRRSYDLSQLH SKQGY  
DPNGPRYYDQNQKSNHAKFDGKNHTASNTKKFS DSTRRSTCSPVKPQTQFQTLDRSNTS  
GFRIASVTQVDKVS GVTKRINFKTASDGTKTIDIKSSDRTGSSYFVPRLTEEKRQQLYKL  
FQDNFGTEKANEYFNGKEIECHSANRGP RQKHKSTKSKPVLIRKKDTERS RTEKLFAPSS  
PRTVSVAFDGNAAHTFQTEEEKKKNRVHLSGANKRVMSTTKKYSCIGPGNIDFLEKYEGN  
IQSISTKERVVVNPNSKHKEVLVEITVTMFDGSSETHKERRVR  
>comp10829\_c0\_seq1; 266 1 941 LEN=941; translated  
XDGESGGSSPSWYGVTL DGR TVSTPMGQTLAVPSETLAYMIAAEWDSQTKDLQPSSMPLM  
TLACTALDQA AHHPRFYRDTALKYLPD TTTCFWADPTEDRLLHRRQQQAWKGLHGFCADR  
LGGASPTTAFGM EGM LMSRKR GDEKPTAGLPHPGALVEAADSWTRSLDAWQLVALNSIAT  
QAKSFLIAFAMLEGAGIALGDKGESRAAAPPFADVSDASEASRVEEEFQISVWGLVEGQH  
DYDRLNSSIQLHSASLFAKTILLENAEYAPSGKKRPTANKLP TGPLADGTVLWDGQRQR  
GTNSFAVFRYRVEA  
>comp10830\_c0\_seq1; 508 467 1681 LEN=1923; translated  
MKIVDYARSL SILPSSSSYDDVRPHHLALGYALLGLVSSSKIYKKITGKVFNILSDLTEA  
CIPLVHMGLVPDFVIRFGIRLQLRDHLNILASEGAQQELD KKLKIVEKLTMP IAIATDE  
ANEQHYEVP AKFYDLCLGPRK KYSSGWWPTPTCTFE ESEVAMLEKYCEHAGVVDGMKIVD  
LGCGWGS LTLHLAENYPNAKITGISNSSSQREYILSTAKERGYNVDNITIIITCNVADDKG  
ALDVVGDNDLVMTVEMFEHMKNYEILLGKIHKWLKPTGKLFVHIFTHKNFCYEF EKGWMS  
DNFFTGGT M P SDDL LLYFANEF SIAEHWRVNGQNYEKT SNGWLDYLDKAWRS GELGPVLA  
EAYGAGKEREWYVNRWLF FLACAE LWGYDKGEEWIVSLYLFERR  
>comp10831\_c0\_seq1; 597 36 1991 LEN=2334; translated  
MRLSLLVAAVTALVPHLADAGTSDHTYK KDEHIELWVNKVG P YANPQEAYEY YTL PYCAP  
ETKHHPETSGGSGRWNEWKSLTMGEHLGGHALRHS GHDILFLSKSKGPEKCTTKPLSLRQ  
AEHFSQAIQHRW FYQMYLDDL PVWGMVGEMLPKADQFSLKEKDDLRLDHMT ELKDNEVA  
NLHPYVY TTRNLI ISYNKDQIVKVDLTS DPKSLTQVKEGATLEFALHVQFEPTTDEFHSR  
FDRYLDHDFFKHPIHWF SVFNSFMMVLFMLGLVALILLRTLKKDYARYGLIHDLEDGEVD  
DDEKEAMHDKVEDAGWKVHGDFVRAPSMLPLFAALVGTGSQLVVLTFGVILFAVLGPV  
HGEVHEER GEMM QAILICYAFSTIVSGFVSGRYFKEYYPTVARSGNKS GQGNLWQATMGL  
TVVLLPVVTTLIFLVLNFASLMYGTINSIPFSVILKLF FLYVFSVPLCVVGTLLGRHSS  
KGSASSFPCRVAIPRPIQDVPWY GKPSGLIPLAGLLSFGSIFIELYVLTSLWNYK FY  
HVYGF LFGVYAILTIVVGMTSII VVYFCLNAENYLWQWTAFGSGASTSIYVFLYGVY YI  
FKTQMHGMLQFSFYFGYMALISINLGLL CGTLGHVAASGFVRAIFQNVKVD  
>comp10831\_c0\_seq2; 583 631 2340 LEN=2683; translated  
MGEHLGGHALRHS GHDILFLSKSKGPEKCTTKPLSLRQAEHFSQAIQHRW FYQMYLDDL  
VWGMVGEMLPKADQFSLKEKDDLRLDHMT ELKDNEVANLHPYVY TTRNLI ISYNKDQIV  
KVDLTS DPKSLTQVKEGATLEFALHVQFEPTTDEFHSRFD RYLDHDFFKHPIHWF SVFNS

FMMVLFMLGMLVALILLRRTLKDYARYGLIHDLEDGEVDDDEKEAMMHDKVEDAGWKQVHG  
DVFRAPSMPLPFAALVGTGSQVLVLTFGVILFAVLGPVHGVEHEERGEMMQAILICYAFS  
TIVSGFVSGRYFKEYYPTVARSGNKSQGNLWQATMGLTVVLLPVVTTLIFLVLNFASLM  
YGTINSIPFSVILKLFLLYVFSVPLCVVGTLLGRHSSKGSASSFPCRVAIIPRPIQDV  
PWYGKPSGLIPLAGLLSFGSIFIELYYVLTSLWNYKFYHVYGFVYAILTIVVGMTSI  
IVVYFCLNAENYLWQWTAFGSGASTSIYVFLYGVYYYIFKTQMHGMLQFSFYFGYMALIS  
INLGLLCGTLGHVAASGFVRAIFQNVKVD

>comp10832\_c0\_seq1; 530 513 2210 LEN=2651; translated  
MATMFKKAGYPRVEWHGKWHVVKTPSDYGFEGWQPPDAGNYLAVNDTLGGGTPDNDGRFL  
KDLCNTLEQYHDDNQRKGNNEGQNEPEPFCIVASFVNPHDVYVAQHGPAGKYTRADYKKI  
EVPLPPNLMEDPDKNNKPRSQAQMSMRVYEFKSSHQYVNFYAHLHTVVDAQIGKLLDQL  
DRLGFTDSTLILRTADHGEQGLSHSLVEKFYNCYQESLHIPLVVSNIAPPEPQTTDALS  
SHLDIVPTLAGLLCHKKLESYKGDLTVPLENPQMTTTIAGKNETQETIVGVQSRIFHTY  
DDIPCPGAPSKIRCVHKGHMKYAVYFEPLGRDADWELYDLTVDPLENTNLAGNPEYDQTQ  
KEMEKEYEVMVEMETLPKEFQWPPKATPHSKGFNHPQREEIEESVNEDHNDGKEEKSTL  
GSYTFSEGELVRIFLNVQDVRACSEKDIELKSRERSLSLIVKNYQSEDFMLSFKKLT  
EITHARHEIEENRIVLILTKKDHTVKWNSVLFKDPGIEALLQDPIIQQIMRDFHENPVAA  
NRAMSNPQTREKILQLVHAGVLKVV

>comp10832\_c0\_seq2; 518 113 2101 LEN=2542; translated  
MSVSELFANGKRPNILIITDQERAIQHWPEFSRDLHPSMERLKKHGLDFKHHYTNTCM  
CSPSRSTLLTSQFPKIGVTRTGSPPRALPTDIPNMATMFKKAGYPRVEWHGKWHVVK  
TPSDYGFEGWQPPDAGNYLAVNDTLGGGTPDNDGRFLKDLCNTLEQYHDDNQRKGNNEGQ  
NEPEPFCIVASFVNPHDVYVAQHGPAGKYTRADYKKI EVPLPPNLMEDPDKNNKPRSQAQ  
MSMRVYEFKSSHQYVNFYAHLHTVVDAQIGKLLDQLDRLGFTDSTLILRTADHGEQGLS  
HSLVEKFYNCYQESLHIPLVVSNIAPPEPQTTDALSSHLDIVPTLAGLLCHKKLESYK  
KDLTPVLENPQMTTTIAGKNETQETIVGVQSRIFHTYDDIPCPGAPSKIRCVHKGHMKYA  
VYFEPLGRDADWELYDLTVDPLENTNLAGNPEYDQTQKEMEKEYEVMVEMETLPKEFQW  
PPKATPHSKGFNHPQREEIEESVNEDHNDGKEEKSTLGSYTFSEGELVRIFLNVQDVR  
ACSEKDIELKSRERSLSLIVKNYQSEDFMLSFKKLTSEITHARHEIEENRIVLILTKKD  
HTVKWNSVLFKDPGIEALLQDPIIQQIMRDFHENPVAA NRAMSNPQTREKILQLVHAGVLK  
VV

>comp10833\_c0\_seq1; 576 427 1767 LEN=1767; translated  
MSGGIPTGSGHDESVAMNSSRHNENGAPSAQPLPKFCFNWKYCRVYQKAFREYKHPLYN  
GVVVKLFHENDPVSMAKASIDRTLCEVSGKRNDWKETEEDTRYCRYVVARHHFTEPLM  
KQYLGNNRAWDNDLLDEEDAQRFLYSTDEQYVYSGKDGVDSDDDSDDEGESGKLRYLQ  
SPNVPKEEVRELLKTLKAEHARREFANSTSRTPPEPLPSQRKRGTSONRREQDDRPVLL  
SPKQENEEDNYAATSPHSRKS SVSGSRKSSKRNNGNSNSTSTKTTTKSSLSREEIVIDS  
EDYEDSDEDEYEDNHNSTRKSKNTRNDKTSRNPRKYTTSRSKRRIAKESDDNSSSSQSN  
VREENIKLKEQLDSCQKQISMLQNI VEKLSMHVNLDDDGAGARKRS DGGKSKGHKSSR  
KAKETTKARRKSKMKADYSDDDDDDDD

>comp10834\_c0\_seq1; 257 131 895 LEN=983; translated  
MIARLTSLLFVFALETIAFLAPKTTLSTTIDKHRTFLATTKNGCLNLHTLYASDRHKNF  
AKMLPKAIFDLGCVWAPEMYQLMYGSPFKKDPENIPDMLTCNNQPVRLLDGDIRNIFEE  
LYTQECFDGVKIGISSRTDEPDWARELLSKFEVTVNEKSQPIHLINIFNGPVEIAKDSK  
AHFRRIHAKTGINYEDMLFFDNEFGNCDQIASMGVSVVYCPDGVTRKLLWDMGLHDEFPRS  
DGSVINGDQGLFRW

>comp10835\_c0\_seq1; 327 88 1092 LEN=1183; translated  
MPRLFLLKRSQATSGSGTKSTSTGGSSITNPFRRRRNKKTDRLQDRTPVQGEAVAVES  
QRVNAKTFNYPEVGFETWIENSLLYTMIRESSIFPAETVLTALDEEEYSQYFVLNEKEEV  
KMERSILDDYDDDDDDVDENDLDADQKEPEAAKVSYAQLTALLALAGEEWSSESSEVPQRI  
CNAISKEVIKANKHNLDREREQLKELLDPLIDYAKGRGRKQMFQMLPWFAALTVSTVNPL  
TFYATYVSMLAANSENLNKGRADKNTIDMAQMGNRHANVEKASLLDEDDYDDDDDDGAL  
VSDHSTVGWDTDEPLRRDRDAPAPCPLGYDYCYG

>comp10835\_c1\_seq1; 234 550 1157 LEN=1157; translated  
MIQTTATARNSPTVPTRRAAGATAPPDEGANDLIKLNIGGRIFPQVLRSTLCQAPSDT  
LFRTRIFSKNPGGPPGYPSRSKPLVHYDEEGRIFLDHDPEQMEAIVNFRLMKQIEDPSDPI  
VEPPEVPAHKRRDFRRLHLHFFGLTAAFFFYPTTTVAATATMATAPTAVARSVRSMSIDEDP  
HPHRAPHGLVGVIVSPGDGNENX

>comp10835\_c2\_seq1; 641 459 2202 LEN=2275; translated  
MTSENSIPLIQPIPIILLGGLTALACVFGVTWVLYRKKTDRTSTTRNDDDDDDDDTCEYPP

TPGDRHWLWGHALS LQPSLLGLPDNISHDVLFLAWMKKLKSKTVMFDLPIGRMIVVGDA  
VAKHVLQSKTKSAFPKSPSYKSVHPVVGSTSI VVLEGEKQWQTQRRLYNPGFSPDYLKSTV  
SIIAQKCDRFLTACDEEDIDKDLPTNLLDRSVDLTSDVIAQVAFGEDWGYFSGDEGTNED  
KNTNIQMRKDGLLET LINFRELTLYIGKNQKQFFQRMFNVLRMYRSWRLSVSIDRAFERLV  
RRRLDSVRRSGNIQPTNQKDILSLTLSSFLQESKNNSFSISSDHIKSMTHQLKTFYFAGH  
DTTATTISWAFWLLAQHPKMEKARQEV RDIIGLEWTENVIKNGKNEHNLTYEKLQQCQ  
YLECIARESRLYP AATTRYAIDPDSRFGNLQLGASMIHLNVYAIQRDPDVWGPDANDF  
VPERFLGDEGRNLISSHSYLPFSKGSRDCIGKYFALLEAKIAIAALVTRYDGVPLDKENE  
VYMARITSLPENGCMMKRLAEFFDIFDDAIQYLYFILIVM

>comp10836\_c0\_seq1; 365 194 1108 LEN=1334; translated  
MQSSHTENRRRPIGSGGNLKNQFGTVLALSLALVAPDASILPGADALSSQGVVSRFD  
QDGTHTTEAVLPDSLFTASSGGDRGARGSILGRGDL SRGRRRLVSKSTKSKKSKGGSEAD  
ESPEPTEQTAKSTKSEKTPSKSTKVKSKSLKDSKSGKVSSTKKGKSGNSEKSMKESK  
SEKSKKTDPTDETVTASSAALASGENTGPANLPFTSWAVGLAAVALLVGSGLILFFKM  
RASSYRYGASKPRSPGNNDGGKYRPIDSSGRIEGTSTGETSAEYGEAGSDEDEDGTSAEY  
GDVI

>comp10837\_c0\_seq1; 178 203 760 LEN=1014; translated  
MSATNDQTASPTDAGTPAAPRRSEPTGIAKDPTAGDAGEAVPPQGCSGKTVGTSPRPM  
PLADAETKNGKKRPLASVDAAESPRKKTTEDLAIGTKADRQARAVGRDPFQRNLPPIPFV  
KTHATRNDSDKSNTVP SGRKKKKKRYSSILSGMIQSKKKE TNIMI EREALRKHLGGDYA  
KVDKI

>comp10837\_c0\_seq2; 178 203 760 LEN=1040; translated  
MSATNDQTASPTDAGTPAAPRRSEPTGIAKDPTAGDAGEAVPPQGCSGKTVGTSPRPM  
PLADAETKNGKKRPLASVDAAESPRKKTTEDLAIGTKADRQARAVGRDPFQRNLPPIPFV  
KTHATRNDSDKSNTVP SGRKKKKKRYSSILSGMIQSKKKE TNIMI EREALRKHLGGDYA  
KVDKI

>comp10838\_c0\_seq1; 401 585 1922 LEN=2225; translated  
MSYNDAF SHLTSEEIDHIGRKAWKAASRS AKHMSKYSRIVNPSLEKCI PRFERSEVILGE  
FLGSGGFNDVFEIEAIELVKNLEEAHAKKIASPLQQEHRA FVAKHVFRESSQNCRYAMK  
FLSIDTIVDPGRYITGAADLVVEAKFLASLEHPNIIKLRGMAAAGTSGFARMEERGYFLL  
LDRLQCTLEDKIDVWREYDDDLIDESHSGKDVEPTVREFLAERLHVAFDVCAALDYLHSN  
FIIYRDLKPDNIGFDIRGDVKLFD FGLAKELDESLKSEGCELYELSGNTGSLRYMAPEV  
ARSEPNLSADVYGFGLLLWQIHS LLDLPYDGMNRQDHSELV VYG SERPEIDPTWSNPLRI  
LMKRSWESEPLARPTMDSIYKILRREICALRDGDDTGLEHTKRRSTFVIGRDSASNKSRK  
NSSRIKASLDHEGVEGRHKTPVNEE

>comp10838\_c0\_seq2; 166 110 415 LEN=1448; translated  
MAAAGTSGFARMEERGYFLLLDRLQCTLEDKIDVWREYDDDLIDESHSGKDVEPTVREFL  
AERLHVAFDVCAALDYLHSNFIIYRDLKPDNIGFDIRGECS

>comp10838\_c0\_seq3; 222 585 1370 LEN=2403; translated  
MSYNDAF SHLTSEEIDHIGRKAWKAASRS AKHMSKYSRIVNPSLEKCI PRFERSEVILGE  
FLGSGGFNDVFEIEAIELVKNLEEAHAKKIASPLQQEHRA FVAKHVFRESSQNCRYAMK  
FLSIDTIVDPGRYITGAADLVVEAKFLASLEHPNIIKLRGMAAAGTSGFARMEERGYFLL  
LDRLQCTLEDKIDVWREYDDDLIDESHSGKDVEPTVREFLAERLHVAFDVCAALDYLHSN  
FIIYRDLKPDNIGFDIRGECS

>comp10838\_c0\_seq4; 343 431 1946 LEN=2249; translated  
MSYNDAF SHLTSEEIDHIGRKAWKAASRS AKHMSKYSRIVNPSLEKCI PRFERSEVILGE  
FLGSGGFNDVFEIEAIELVKNLEEAHAKKIASPLQQEHRA FVAKHVFRESSQNCRYAMK  
FLSIDTIVDPGRYITGAADLVVEAKFLASLEHPNIIKLRGMAAAGTSGFARMEERGYFLL  
LDRLQCTLEDKIDVWREYDDDLIDESHSGKDVEPTVREFLAERLHVAFDVCAALDYLHSN  
FIIYRDLKPDNIGFDIRGCVRSVWCNQYLR SALHGRARTKLLFGLR LFSHDI FLGSPLCS  
LWIYFLLFFCRCHFPCGDVKLFD FGLAKELDESLKSEGCELYELSGNTGSLRYMAPEVA  
RSEPNLSADVYGFGLLLWQIHS LLDLPYDGMNRQDHSELV VYG SERPEIDPTWSNPLRI  
MKRSWESEPLARPTMDSIYKILRREICALRDGDDTGLEHTKRRSTFVIGRDSASNKSRK  
NSSRIKASLDHEGVEGRHKTPVNEE

>comp10838\_c0\_seq5; 210 110 967 LEN=1270; translated  
MAAAGTSGFARMEERGYFLLLDRLQCTLEDKIDVWREYDDDLIDESHSGKDVEPTVREFL  
AERLHVAFDVCAALDYLHSNFIIYRDLKPDNIGFDIRGDVKLFD FGLAKELDESLKSEG  
SELYELSGNTGSLRYMAPEVARSEPNLSADVYGFGLLLWQIHS LLDLPYDGMNRQDHSEL  
VYG SERPEIDPTWSNPLRI LMKRSWESEPLARPTMDSIYKILRREICALRDGDDTGLEH  
TKRRSTFVIGRDSASNKSRKNS SRIKASLDHEGVEGRHKTPVNEE

>comp10838\_c0\_seq6; 401 431 1768 LEN=2071; translated  
MSYNDAFSHLTSEEIDHIGRKAWKAASRSASKHMSKYSRIVNPSLEKCI PRFERSEVILGE  
FLGSGGFNDVFEIEAIELVKNLEEAHAKKIASPLQQEHRA FVAKHVFRESSQNCRYAMK  
FLSIDTIVDPGRYITGAADLVVEAKFLASLEHPNIIKLRGMAAAGTSGFARMEERGYFLL  
LDRLQCTLEDKIDVWREYDDDLIDESHSGKDVEPTVREFLAERLHVAFDVCAALDYLSN  
FIIYRDLKPDNIGFDIRGDVKLFDGLAKELDESLKSEGCELYELSGNTGSLRYMAPEV  
ARSEPYNLSADVGFGLLLWQIHSLDLPYDGMNRQDHSELVVYGSERPEIDPTWSNPLRI  
LMKRSWESEPLARPTMDSIYKILRREICALRDGDDTGLEHTKRRSTFVIGRDSASNKSRK  
NSSRIKASLDHEGVEGRHKTPNEE

>comp10839\_c0\_seq1; 1128 475 3423 LEN=3828; translated  
MPNNVSKNNYQEQRQRSKAGARVFKSKKESEQEKLRRLKQLAKASDLEDQLGALMSTNS  
KAQGDDNKPYRLRSHLCEVLSVLISSPKLSLEKDCFQRLWRCCFYNPRIWRQRVSREK  
RKRSPNLTTTQEGFKNFLSEAVTLYDFLILQYLSKLCPSSTQQDCSMTQQSKDTYTTYDR  
SQLEDTQYASQSTTAIIAEPAEQVEGVVHGLYKLYIFMGDLHRYAEAYNKAESNYLNASK  
LGPGLGNPYNQLAVVAFSKETYCV ALYWYARSL LATHERFSTSSNNLERLFASNREFLRE  
HGRNSGVPMVLSQASVASSHKGSGKNKNIKTNSNNKNSMLRAQKVAVSKSCLTHFVDL  
HYDLYLLKQQQSSKNTNLKVLD SNYHDQSRKNIRNVTASLKS LVQASGFSDSLLCKIVVI  
NSFSLERAIDCPD TDALGGTVENLPLELGKELFYSGLGLVLAEHTEGLLAKSLEKASMNKV  
APSVRCLLPLEMMLDFCNRLRIQNGEKLHDDQKPAEIEFWKRVSQVANQVRNVLKG YQVV  
HGGTKDDSKGRIIGGSSTPHWTRIKEYQLLKGYPFSIVNEEYLSNEDGLLDAIEAVDVL  
ELTAPSQSQDTC AASTLSTSGGGGGGAQENVARLFRMIEVCDELASANSLAPLTSENGTY  
NYQQKNSSSSPGESLGSDNNHINQEEIESQEENCGFVGD DDDDEAGDLIIISTENRKETP  
TNGAPPQTMNRDGITIAPLSSTDVIEKPKPPLQPV EEPENGDDVVM AVVEEEKSSNPVIP  
SMLKPPPFGFVAPTQPAPNYSETTVNDKHM TAMTTNPTTNVTGFAYPPVASHGLDALDKV  
MQANATAATSSFLYQMPQQQQRSV EPVPSLMERSLYQNSPYPLETGRSNLPTSVEESTLI  
FGDMRTANPFAMEMPPSSFSVSSNNTRMTRNIHGNPVSSIIPDFAAEVTNAPDDTKWLN  
SNLLNSLFMEDTSKTSNPWASK

>comp10840\_c0\_seq1; 195 1022 1387 LEN=1579; minus strand; translated  
MVGSGTMGERVASGMIPSSLSSTTPAAAFARLSRRAIRRLAGFCLKSLLICVDECFDRTA  
MALIVLVVWWLPSVQFHGDEPTGKTEEDAGVVVDDSSKDCGLCRHARAEISLEDERPIKF  
R

>comp10840\_c0\_seq2; 195 711 1076 LEN=1268; minus strand; translated  
MVGSGTMGERVASGMIPSSLSSTTPAAAFARLSRRAIRRLAGFCLKSLLICVDECFDRTA  
MALIVLVVWWLPSVQFHGDEPTGKTEEDAGVVVDDSSKDCGLCRHARAEISLEDERPIKF  
R

>comp10841\_c0\_seq1; 122 1 802 LEN=1145; translated  
XSF DNNDPENVR AIHCNTIDMDSGEARGIPRGYVLQLSGTTGKTQLALQFAAQAITQLS  
QQSPGSNERIRYCYSTAGHS GSSLAKRLFELLEQTSNSDHGTRMDAARKIDFQPVSTLSQ  
LTTTLAKLEEEWLEHTTAP EHQQQRTQEGHGGGKGPVAMLVFDSLPSMMTEREETERIR  
SLDRWLRIARHYSIWI VVVVTPGGGSSLASASVYGNAMSADIHLGLRKQTPARSILRLLR  
HPAKAVTEQDSITVLHNSKCGITTP EE

>comp10842\_c0\_seq1; 148 159 841 LEN=1142; translated  
MIGIAASPLFAFCFVLALAQ TGVDAAGSHKHRRDKNPAKERGEFCKDVPDHKCDLVAKH  
GDCNKFTP SGDSFQHSVCRSTCKE CGNNVPDEISTENLCY EFGKESINVNFSNSKPD LDD  
WVG IYPITADVTDLGAPVSWFWL CGGXESEVSDQH WVRDVSLATPGIYKAVMSRNRATTG  
PYANYGPYKSYAESKPF EFSRGNM CASRRRRAEGTVALRGTSTGDAA

>comp10844\_c0\_seq2; 178 1 585 LEN=585; translated  
XEA AKESDKVCITWACYF ISSRLLLKLLLDAGAKDFSMVFLHCDEEAHMDALWNRTRCM  
AEQAGLTITEFFALFAPEVTNEGEVTKEDWAFIQANDDWNKI WQHADESERPFQTV DVT  
AKDATVLD SLDAAFGIEDSNRSHLAYDEIVAKVRALDHERDLKSFEAHKASLEDSEENKE  
ELEFAKKEPELCQARR

>comp10845\_c0\_seq1; 917 205 1581 LEN=1627; translated  
MKLTVKTLKGSKFVVDCEPSNTILEVKGIIESTQSDMPASNKLIHSGKVLKDDPTIESC  
GIKPNDFLVVMVTKAKKAAAKAPAPAPTEKAEAPKAAAPAAAAPPDSDAKMSSAGDDKKT  
EESA EAPAVAGDASAGDGLSTETVNSLTGMGFPEAEVRHCLRAANGNPDI AVEFLTNGIP  
PGMQPGEQGASSSSSSPSSASGGGTLAALRNHPQFNALRQLVQSNPAMLQQVMFQIGQQQ  
PELLMEINNNQEAFL EMMNEPITETSTPSSGSSASNAGSETQSSSSSDAATGMPGIPPG  
MMEGMANPAQMAQLIQNMSPEL NQMATMMGLSPDQLRSTAQMLGQIPPEQLQQYMMQAM  
QGGGGGLDGMGGGAGGGGGPQVLR LTEEEMA AVNRLADMGFDRTEAAQAYLACDKNEALA  
ANLLMDSMDSGGFGGGFDGGANDGGNNSGGNDGDDMYD



>comp10845\_c0\_seq2; 909 504 2025 LEN=2071; translated  
MPASNLKLIHSGKVLKDDPTIESKDFAKAKKDDSTDPATPRFGGLRTERATPSGTDATQHN  
AIPDPWHQRHTVAIALFRSSPPAACSPFFRTDALLCLRSIPCLSHPGCGIKPNDFLVVMV  
TKAKKAAAKAPAPAPTEKAEAPKAAAPAAAAPPDSDAKMSSAGDDKKTEESAEAPAVAGD  
ASAGDGLSTETVNSLTGMGFPEAEVRHCLRAANGNPDIAVEFLTNGIPPGMQPGEQGASS  
SSSSPSSASGGGTLAALRNHPQFNALRQLVQSNPAMLQQVMFQIGQQQPELLMEINNNQE  
AFLEMMNEPITETSTPSSGSSASNAGSETQSSSSSSDAATGMPGIPPGMMEGMANPAQMA  
QLIQNMSDELNQMATMMGLSPDQLRSTAQMLGQIPPEQLQQYMMQAMQGGGGGLDGMGG  
GAGGGGGPQVLRRLTEEEEMAAVNRLADMGFDRTEAAQAYLACDKNEALANLLMDSMDSGG  
FGGGFDGGANDGGNNSGGNDGDDMYD

>comp10845\_c0\_seq3; 972 205 1834 LEN=1880; translated  
MKLTVKTLKGSKFVVDCEPSNTILEVKGIIESTQSDMPASNLKLIHSGKVLKDDPTIESK  
DFAKAKKDDSTDPATPRFGGLRTERATPSGTDATQHNAIPDPWHQRHTVAIALFRSSPPAA  
CSPFFRTDALLCLRSIPCLSHPGCGIKPNDFLVVMVTKAKKAAAKAPAPAPTEKAEAPKA  
AAPAAAAPPDSDAKMSSAGDDKKTEESAEAPAVAGDASAGDGLSTETVNSLTGMGFPEAE  
VRHCLRAANGNPDIAVEFLTNGIPPGMQPGEQGASSSSSSPSSASGGGTLAALRNHPQFN  
ALRQLVQSNPAMLQQVMFQIGQQQPELLMEINNNQEAFLLEMMNEPITETSTPSSGSSASN  
AGSETQSSSSSSDAATGMPGIPPGMMEGMANPAQMAQLIQNMSDELNQMATMMGLSPDQ  
LRSTAQMLGQIPPEQLQQYMMQAMQGGGGGLDGMGGGAGGGGGPQVLRRLTEEEEMAAVNRL  
ADMGFDRTEAAQAYLACDKNEALANLLMDSMDSGGFGGGFDGGANDGGNNSGGNDGDDM  
YD

>comp10846\_c0\_seq1; 366 38 542 LEN=542; translated  
MKVSQAILLSVVLGFAVAHAHQDVGNTNVRILKKSCKGKTKAPTMAPTKGTTKMPPTAA  
PTAAPTAAPTAAPTAPPTTTTAPPTVSSTSTSTSTSTTGEFFPSSTPSEFFPSASPSDVPSA  
SPSESPSASPSASPSDSPAAPSASPSAAPSASPSATPSASPSASPSAX

>comp10847\_c0\_seq1; 388 1 1293 LEN=1345; translated  
SDGPSLSPSVAPSPQPIYTSVAGKTIPSPSTNSLMPSDRPSLVPDGPSPVSDGSPSLVP  
SDGPSLMPDGPSPSLSPAAPSFSSLLPSDGPSLAIANPNKIGVRNNYFSQRLPPGIFAK  
RRTSPPTRGPTKNISTVDPPTISGRNEDMCKTASMVDRRKHIFEYISSLSGREALDDPQH  
PVFTASSWIATEDPLEVCPGEANFTQRYILALLYFYTSGDWNKCSKDVNTPCDGERFLS  
DSNECDWGGVTCDSLQRVTNLNLDENNMKGSIPQELRFLYHLEELDLDSNSLVGHLPSWL  
GGMQYLEKLDVDRNILSGPIPEELYSSTTLRFIDIDRNILSGTVSSKIGTMSQLVIFYQAD  
FNQLIGTIPTIEIGNIPNLKYFSVFGNGFNKSVGIPSEMCGLNIIQIYANCEMCKNVGACCT  
VCLPEDESIY

>comp10849\_c0\_seq1; 312 90 956 LEN=969; translated  
MSSVLKGVRCPVAVALVALIVILSSQRCLSFGLGKVFSRFGSSSPSLSVPGIGEKNKITE  
QVQTAKKELIETISNTNNGKESLDTQIRVLGLIDYLETNPVSESLTDTKTESDAIDGV  
WYLQYTQPSEPEGVDMENDIKPWTPEETAITKEFEKSIQVKNSGSVSFLGLLNVDTSKRL  
TTQTIGVEKLLFANAQDFGTIEVKGFFEIDSVPNRIIASFENGLTLTKSGFVIDFSFL  
FALRSYLNGLKAGGWLETTYIDKDIRIGRGNRGSFLILSRDKDTIVP

>comp10850\_c0\_seq1; 262 173 640 LEN=1845; translated  
MGLFDGISNGISKAFTNQDFKTQDQVRASHILIKGDDSDKVLGSIMDLLGEIQARAGEG  
DEPLPQVFADLARRESQCPKQGGDLGMFGKGMVKEFDQALFPDDASLAPPAGNIIGP  
VITDFGAHIIIFITKRDENKDQVEEKLARIDPDAAQ

>comp10851\_c0\_seq1; 182 303 1373 LEN=1822; translated  
MGKSSKDGNDLPPKPKALFLNCTRLDYDKNLNFEGLSAITDFHRHDVDAIPPRGDPDEA  
SEDEIVRLVNEVHAGTEILILKEMQLPQSAVERFSGSVKLICEAGTGYNNIPIETCRGKN  
IAVCNIPYSTDVAQTAITYIMNFAMNVFEQQRMLCKNDRSNFTGPFTLPLMELAGKTL  
GLVGGSGRIGTRVAEIALTLGMKVIISRRGVASLPESHALAGNTRVTVTTDVGELLEASD  
FVSLHAPLNAETEGTFGRSEVSRMKPTAYLINTSRGKVCAGEEELLDCLLEGLIAGAGLDV  
TASEPPAPDSRLWLSLNNVWLSPHIGWRRLETRQRLVNMTLDNVAAYVSGKPINLVG

>comp10851\_c0\_seq2; 182 303 1373 LEN=1794; translated  
MGKSSKDGNDLPPKPKALFLNCTRLDYDKNLNFEGLSAITDFHRHDVDAIPPRGDPDEA  
SEDEIVRLVNEVHAGTEILILKEMQLPQSAVERFSGSVKLICEAGTGYNNIPIETCRGKN  
IAVCNIPYSTDVAQTAITYIMNFAMNVFEQQRMLCKNDRSNFTGPFTLPLMELAGKTL  
GLVGGSGRIGTRVAEIALTLGMKVIISRRGVASLPESHALAGNTRVTVTTDVGELLEASD  
FVSLHAPLNAETEGTFGRSEVSRMKPTAYLINTSRGKVCAGEEELLDCLLEGLIAGAGLDV  
TASEPPAPDSRLWLSLNNVWLSPHIGWRRLETRQRLVNMTLDNVAAYVSGKPINLVG

>comp10852\_c0\_seq1; 259 1 484 LEN=900; translated  
XNNNNNSNNSNKGDEKNRGSDDNSNKRPTGKNRKESEGWETTAMDSKTKNSAQQRNS

SGRAGAGGRDGGKDRGRGNHQQRGGNNSNHGGRGDSRRGSSARNKQNEKKNHDKKQQQAAEE  
KATATAVAAKANNRNNKATESAPKPVAPRNKFALLDDSDSD  
>comp10852\_c0\_seq2; 143 1 331 LEN=747; translated  
XAAQQNRRSSGRAGAGGRDGGKDRGRGNHQQRGGNNSNHGGRGDSRRGSSARNKQNEKKNH  
DKKQQQAAEEKATATAVAAKANNRNNKATESAPKPVAPRNKFALLDDSDSD  
>comp10852\_c0\_seq3; 855 1 3373 LEN=3607; translated  
XANDRNSQSVESHRSQSANPKDAASGRTKAGKFIGGAERARRNAQKRSWKPQKNSRHQKR  
NRQVGGFFGGCEASHPLSRTKLRSTERFFAALLDPANFGAEPEPSEHKRHSAAEAILQKICW  
RLGLGPLPASNNNNNSNANIPHTDDMRQFFSWRAILVMEESRFELSEALRKCRGTRFAA  
SKRHRNPRPSRSSNTAPGLSSSCSWITVKLLDVRDHPRSGFLVLELDKADVSGGSRRFTF  
EELLQQRPGSCFELSAEPVKSSTGSSDINKSNANAKDTDDGHPNHEWATAVKTLGSVGPG  
KRGSTKLVLIYDETSINDLKRLFYQQQSIVLRIRFCTTLISQCRQFEACDFGSTGHR  
KRGSSSSNSSGLLKQIMGQKQATHIRFEYSDDDEESDNEIEKEQKNFSDGEEGAEIIGYI  
IDDNDDEEERFHEAEDFQQSEEGKNQNLDEGEEQKQRRKPSLSLSSFTGLKKNLQTOEFA  
ARDFCTDCGDNDRAPTLVNSNGTKDILLQLVQGGPGTGKTTFFVSVLARLLCSESSSSSK  
RKRPRRILVTAPTNAKAVGVIKRFLEACPGLLEKHGIPVALIGVEDKLFDAKNKTIITAKE  
TKRNASKNTRHCSVESTAKDSSIAGVSFADEQLKRIFCYTWIESLAEDYNELSALLTSA  
QEKISVPVGSYAGDRGVAAWLTNMFPPKSGSYSLMAGSDSDSDTEEEELTEHKGNASET  
PAARKNSACTQNALVARARGLHIRLIRNLPRLSESSGVANLSRKLQSLVGDPCPNQEPKL  
SEARFFLDEILNIIRGENQPNASGVRVDTDESNNDSSENEGRSLEADAIPPELLATARVIFC  
TLSTAGTSLMKQTRRVDDWIVDEAAAATEAELLIPLHLDPKRLAVGDPMLPASVASPL  
AVGWGLGSLHERLTVDLGRSQTMLDVQYRMKPEISEFSPNQFYDGRLTNGDNVRCPNYG  
LLNHAKKHVPVNGNGSQQLLQTPPWCFQVEGKERQSYSGSYFNVEEASAVVAVLKEIRA  
SGNLIKQKTGREESYSWFSSEKVRVITFYSAQVATLQMLRREGMPQDLVHTVDSSQGC  
ADIVILSFVRSRAGFLADDRMNVALTRAKYKLICLCNMRESLW  
>comp10853\_c0\_seq1; 368 269 1708 LEN=2717; translated  
MSSQQHHGGASNQPESSMQLFQQRDLRAIQTVLKENFDADSKTCFLTLKVLNLIKTP  
HNPKVRSLRTQNSAIRSKIIERHGHNVLLACGFVLEKDPAGIGMPEGSGEERLVLHYPGE  
SSSSDGGSPGEDAVLQRLVKARHTLARIGVLELRIPADSLPKFRYQPPPKIRSGASNAAP  
TNMNSFDIYQGRFDGQSASVGTNLGPPANWKSKEEELAEKRRERELEREFALGNASN  
TTNTAAKRKPMVERQWTVVMPGQTASSGNVSSSATASASGDSQLLASHFQRQHAKNKA  
QNRGFTTKAMRDREKLLSTKVYSHTQLAIAFPDACVVRANFGTSETVGAULDGLKQNVLL  
PVEGCEALDLYQTPRVLDPAKTLKELGLLPAARVYVSWKKPSPAGPRAKGWYLRPELL  
SNQGGATAAMPTSVAVAGNGGKNTQKANPNPSVAAKPKTKAEKEAALMKRMLGGKKFF  
>comp10854\_c0\_seq1; 139 1135 1726 LEN=1835; minus strand; translated  
MTRPQSAIKDRTKFDCLSIIRRLTSNASDGGSDIILNTDYRVVGRIQDLRGGHQCDRKRQ  
YCKGSKEKVTCEYWSVAEELGQFVHPVELAEQNREDNYGTEEQPVVYLAKDVHSFRLEV  
HDDIDPGNTQQMVAAMCNKAPRQSTDSIVGWPIAMIGLDRKQLIKTKDPRVAKRFTPNEA  
PQSPISNLGAVIILPV  
>comp10855\_c0\_seq1; 645 252 1743 LEN=1779; translated  
MALTSTTAPGKVFASRAEIANHYKSDWHKYNLKRREAGLPLLEEKEFQVRLEAALALRKE  
KEKKNGTDHIKDVNSKSKKKIEKKNKRKNKNSAEKNNKSSTAADTEMATEEQSEAEATK  
SRIPAALAASQENPEIDPKQSLFDQHVSHSLKENVHYMQQKYGFFIPDKECIADLEXP  
IGLLSRKNQIGSLLSLQPVSGVXVMSSFLSINSDRLFPVDVLLFQVLYVLIERYSI  
RSLFSFLFNQRKPFRTNTRVFPPTWQGCQQHMDKQHCCKLRYEEGFWEELDPFYDFR  
SEDKEFVVDKIQSNNVTDDESDASDMVTDGNDGDDGWDMSDGEEMFDGYEQEIKRFG  
LNVNALGELVFPDGRVVGHRALRRYYDQKVSADTTKSLAIVAACKASGERMYN  
GRVVNIYDHNKLDKVRGAGKILVATGGGDSGTPATFSTLSLYRFRAAIRKQRRGDAK  
WEKIRNKALGKNTNRMDKANRLMNGVSVAAHAAR  
>comp10855\_c0\_seq2; 711 252 1574 LEN=1610; translated  
MALTSTTAPGKVFASRAEIANHYKSDWHKYNLKRREAGLPLLEEKEFQVRLEAALALRKE  
KEKKNGTDHIKDVNSKSKKKIEKKNKRKNKNSAEKNNKSSTAADTEMATEEQSEAEATK  
SRIPAALAASQENPEIDPKQSLFDQHVSHSLKENVHYMQQKYGFFIPDKECIADLEGLL  
GYCHEKIKLGHYCLYCNQVFPPTWQGCQQHMDKQHCCKLRYEEGFWEELDPFYDFR  
SEDKEFVVDKIQSNNVTDDESDASDMVTDGNDGDDGWDMSDGEEMFDGYEQEIKRFG  
LNVNALGELVFPDGRVVGHRALRRYYDQKVSADTTKSLAIVAACKASGERMYN  
GRVVNIYDHNKLDKVRGAGKILVATGGGDSGTPATFSTLSLYRFRAAIRKQRRGDAK  
WEKIRNKALGKNTNRMDKANRLMNGVSVAAHAAR  
>comp10856\_c1\_seq1; 505 1 1729 LEN=1760; translated  
XRLLPDNPWLWHGMGHLELSHGRTDYGVRCYQRAIQEDPSFAHSYHAWGIHEFSE  
GNIK

AMKILKKGIEYCPTNHRLHHALGDLYRGAKLLKDAERCYKRALEEGPAVSHGFALSALAN  
VAYELGNVDEARLWLYQSIIESNNGRHAQGWLALAQLEEAEGSVEQALTVCEAAIIRYEKE  
LIDARKRYKRDSRNSVYYAKTFRDPTRSKEVREGLMESVPKYRSGDKFLSVFRHWARLEG  
RYGTHDGTNRVYERASAAFPASHRISLDWALYHAKLHNVGRARSLFGEACSRASNLDHDP  
YREYASFEMSIGEFEQARIILFRGAQAVTRSPDGGLGDTSGRGLAQLYVTWAVCEWHLGN  
IPRVEVLFDHARLRLTEVGSREGSELRSFILFCIARLEYERDELYLAQHICIGLCLKENSL  
CGGNAPVWKLWAKVARDMGNHHMEDECRGEARRCGRTREGEAGEDTVVDAMDVLKESQNM  
KNLLRQQPWHDKLQTARGSGPVASAAATTTTPPGSIGDFCAGLRIPTRKRRRRRSDRTAAG  
SRVRTGGAEATRNPPLVRLPDDSCHEETKNSTEPNH

>comp10857\_c0\_seq1; 1466 1 4317 LEN=4393; translated  
XQLLLKLATVAVVGSTDMPEPVLNANINNDIDGNLVEDEDDGNVRMEEDEITLVAADATE  
HARDDDEEEEEDEDEDECRVCRGPAEEGRPLLRLPCKCSGSMGLVHQECLISWLEVRET  
GVARYVKHKFKFDPQYAENTPDRLSSHEVILGLSSRFLAKWLPLALRIVFAAILWLVVAP  
YLTNCLYLGIIRPSSVLGRGETIASDTSVGLVMGATIIISFLSLMSFADFLRVLWQGGP  
GAQQPEEEGQPPDEERENDGFAAGENEDEIDEFATDHRILIEWMQKRERMKEATTNDIDAT  
ITIGGALKATEEEIKTQSKAHVVHEVNSEIKDDNLAADFDRIGLTREAEMLRNRATELR  
NLALEREARRKNADDERERVGDGDHGGEGTNGRVAPLGGIAPAAPDNDNDDAVAVLN  
NNDDDEIPEFAPLGGENPDIFGANRDVLEDVEEDAEEEDDSEAELEAWMNDDDEDDDD  
IDDEIDPFPLRPLGDDAEVAFDPLDPVLQDDQVDMEINVALDELLGLRGPIMTVVRNLL  
WLLAFNATYLGIFGFVPKAVGSVIYSSVFNTTACGNLLKSIPIFVASDDTNQTTVSSLLIS  
LEQESDNRNSTFKLSDFATVTLGYLSMACFIVSTRYTIIALQKVGKLVERNRTNTGRNQD  
YAQQQLQRVQRLHNLARDAGEDINDLNEENIGGIGDSIETALDATVAIIKVCILLFMKMF  
LLPLYLGLWLDASTVHLFGHNVAGRLAFAGEDLFSFILLHWVAGITFMLLVTVFLLQLRE  
VAHPEILARLIRPQEPQPDLLGNLMHETVLTHTMKRMTLSLAIYAPLLTLHVTIPAMLFHK  
SGLDSIFTFHLLNFYHLLTPQLQIPELITFHLMSLALLERHKNNIGGLQHYWMKFMCRK  
MGLTEYLLPQHIEAFEFIGRKNVFKPQSSGNLDVEVDPPFIELTTRKDKIDKFLVLSHIEK  
INPSNDISPSIITGEQHLNGERVLCEAVRSISLPGNTEAENGTIHLPTKIGRYSLKIEED  
DESVDSEELKISFYREIQGEEIKRPPPEGWDDLGGAGAYVQGRWAWAKERKSLVEESIAER  
IPFRASSEARSVILITKVAIILVILSWVALISTVVSILSCLPAIGRSFYHLLRIPAKYIH  
DPFAFCIGAGLFFPFVSWLTQNVNDNLSLYQRLRQWFGRFQRPPTPKMLVLIESLLLWT  
VAAPLGLGLSYELVMVKSPKWFAMKEPFLDIKTLAISWLMGTVVLTNWSFLLYCKFFTRR  
FWSNVNGILEPPLNEDGNPNHNARNNAGDDANAIEGLIWQGRGRAGQFFNILRSVILD  
WEWDTVDRKMMIDDFARPTTKEITSALVGSALSQYALHILLAIFKVQKGGFMFPLVGFV  
ETGIFRKGLYQICMTVHVLVQIGSRSRVNIDSWFEAAHEAARDRYLIGELLMNYPNEG

>comp10858\_c0\_seq1; 301 394 1320 LEN=1408; translated  
MILAPLYEQRRVFSSTYVRDDGSDDEDVGYGDSRLGEAMGHAHPPHPPHAFVEMDVVEV  
RFIPLAEYSSKDKHGLWYSPREIRAMRQAARFDIDRKEEMKYNSKKRGKHGAYTCDIR  
GLERLVYDGNLHCLKKRYECLRSILLEQHHQIRGRKANLENDERIRRVCMATGDTVRSQ  
EKARALAREDEADVREYLQQQQADAPREAAPREESERDSFSPDSSDTQQQQHQHQQQPQR  
HHHQHQRVILSPMMGRNRARTASRNHCCWCVEVAEMVGRSLLLNSLLQPFLHLHQTDAFL  
QVEPAAFD

>comp10859\_c0\_seq1; 1274 1 2989 LEN=3372; translated  
XSSFARTKNPRFQRHEITTKNSTEQSSETKKEVLYPLIARTIFSPSRNRMKVFIALLLF  
CATVTSASSDDSDKSDNGPPFFLIDSTDQLCLAGEEFKRCSIDTLFFVVGSPGNYQIRKR  
LADGEDEEEDGTCLALKSCKEVDAGKKMEAKLAKCSHCAGKRWNIVGDSSTGYVLTEGD  
GKTCLLREPQTDKAMTAPCDSTDSPYVPLQLQFASASDIKTMSD GARLIGAA SDGDKKA  
IEDLLKDGTDVNVRDWDELTAIIPAASSGHLDI CKLLVKEGIDVNAKDKDGITALMEASI  
MGHEKIVEFLIENGADVNALASSDVSAMWLAASEGRVGMKLLMENNAEPSNTRVDGISA  
LMTAAVSMNDEFIQYLCIPLMHGFSSFSSETFVGSEVQPLISHFLFSFNNFLKVGHGSGA  
VEILLENGADHTMTDKDGLIPLMSAAENGTVATLKAILDHVDDPDYINLISNTGFSSLI  
AAAHGHVDAVEFLLDNGAKADIVHDNKVTALMYAAAAGHLDMKMLIGKQADLEFKHTN  
GGTALLEASTAGMYDAIVLLVSESGSSVDFMDDDGVNPLMAIAAQGNAKSQKFIIDELKKT  
KSDTALKDYINLFAHSGGSFAFMFAAAGGHVECAKQLMDLGAEINAVARNKDGYLEKLQKM  
IEEGQVKEEDPHVDGVTALHVAASEGGHLEMVNVLLDAGVETSLVHLDDDNRSPVLAVSG  
NHAGVAKALVQAGADPNTPYVDGDGENHNLLFDAIMVENVEFATLLIEKGADIYHSDEKK  
VSTLLQASHRGLTKVVKALLEKHAANGSKGEYVDAASEDGITPLTAASSEGHTCEVKLLV  
EAKANVNAKDKDNTTSLMAASARGHLDVVSIILAAGANVNEQNVDGHTALMFAYNGKNQV  
ETLWERYNQFLEEAKSNGESKEDVDDNETGPIIQESLKNHTDLVDLLIKSGADESIKDKG  
GHVASDFDFHPDTEAEILAKEARTEKVKDESKNEL

>comp10859\_c0\_seq2; 1314 1 2843 LEN=3226; translated

XSSFARTKNPRFQRHEITTKNSTEQSSETKKESVLYPLIARTIFSPSRNRMKVFIALLLF  
CATVTSASSDDDDSKDSNGPPFFLIDSTDQLCLAGEEFKRC SIDTLFFVVGSPGNYQIRKR  
LADGEEDEEEDGTCLALKSCKEVDAGKKMEAKLAKCSHCGAKRWNIVGDSSTGYVLTEGD  
GKTCLLREP GTDKAMTAPCDSTDS PYVPLQLQFASASDIKTMS SDGARLIGAASDGDKKA  
IEDLLKDGTDVNV RDWDELTA LIPAASSGHL DICKLLVKEGIDVNAKDKDGITALMEASI  
MGHEKIVEFLIENGADVNALASSDVSAMWLAASEGRVGVMMKLLMENNAEPSNTRVDGISA  
LMTAAVGGHSGAVEILLENGADHTMTDKDGLIPLMSAAENGT VATLKAILDHVDDPDYIN  
LISNTGFSSLI IAAAAGHVD AVEFLLDNGAKADIVHDNKVTALMYAAAAGHL DVMKMLIG  
KGQADLEFKHTNGGTALLEASTAGMYDAIVLLVESGSSVDFMDDDGVNPLMAIAAQGNAK  
SQKFIIDELKKTSDTALKDYINLFAHSGGS AFMFAAAGGHVECAKQLMDLGAEINAVAR  
NKDGYLEKLQKMIIEEGQVKEEDPHVDGVTALHVASEGGHLEMVNVL LDAGVETSLVHLDD  
DNRSPVLAVSGNHAGVAKALVQAGADPNTPYVDGDGENHNLLFD AIMVENVEFATLLIE  
KGADIYHSDEKKVSTLLQASHRGLTKVVKALLEKHAANGSKGEYVDAASEDGITPLTAAS  
SEGHTECVKLLVEAKANVNAKDKDNTTSLMAASARGHL DVVSIILAAGANVNEQNVDGHT  
ALMFAYNGKNQVETLWERYNQFLEEAKSNGESKEDVDDNETGPIIQESLKNHTDLVDLLI  
KSGADESIKDKGGHVASDFDFHPD TDAEILAKEARTEKVKDESKNEL

>comp10859\_c0\_seq3; 1347 115 2808 LEN=3191; translated  
MKVFIALLLF CATVTSASSDDDDSKDSNGPPFFLIDSTDQLCLAGEEFKRC SIDTLFFVVG  
SPGNYQIRKRLADGEEDEEEDGTCLALKSCKEVDAGKKMEAKLAKCSHCGAKRWNIVGDS  
STGYVLTEGDGKTCLLREP GTDKAMTAPCDSTDS PYVPLQLQFASASDIKTMS SDGARLIGAASDGDKKA  
IEDLLKDGTDVNV RDWDELTA LIPAASSGHL DICKLLVKEGIDVNAKDKDGITALMEASI  
MGHEKIVEFLIENGADVNALASSDVSAMWLAASEGRVGVMMKLLMENNAEPSNTRVDGISA  
LMTAAVGGHSGAVEILLENGADHTMTDKDGLIPLMSAAENGT VATLKAILDHVDDPDYIN  
LISNTGFSSLI IAAAAGHVD AVEFLLDNGAKADIVHDNKVTALMYAAAAGHL DVMKMLIG  
KGQADLEFKHTNGGTALLEASTAGMYDAIVLLVESGSSVDFMDDDGVNPLMAIAAQGNAK  
SQKFIIDELKKTSDTALKDYINLFAHSGGS AFMFAAAGGHVECAKQLMDLGAEINAVAR  
NKDGYLEKLQKMIIEEGQVKEEDPHVDGVTALHVASEGGHLEMVNVL LDAGVETSLVHLDD  
DNRSPVLAVSGNHAGVAKALVQAGADPNTPYVDGDGENHNLLFD AIMVENVEFATLLIE  
KGADIYHSDEKKVSTLLQASHRGLTKVVKALLEKHAANGSKGEYVDAASEDGITPLTAAS  
SEGHTECVKLLVEAKANVNAKDKDNTTSLMAASARGHL DVVSIILAAGANVNEQNVDGHT  
ALMFAYNGKNQVETLWERYNQFLEEAKSNGESKEDVDDNETGPIIQESLKNHTDLVDLLI  
KSGADESIKDKGGHVASDFDFHPD TDAEILAKEARTEKVKDESKNEL

>comp10859\_c0\_seq4; 100 332 526 LEN=526; translated  
MTIPDGFDRDFLLIGFSPDWTL SVNNETNKPGNYQIRKRLADGEEDEEEDGTCLALKSCK  
EVDAG

>comp10859\_c0\_seq5; 100 367 561 LEN=561; translated  
MTIPDGFDRDFLLIGFSPDWTL SVNNETNKPGNYQIRKRLADGEEDEEEDGTCLALKSCK  
EVDAG

>comp10859\_c0\_seq6; 1307 115 2954 LEN=3337; translated  
MKVFIALLLF CATVTSASSDDDDSKDSNGPPFFLIDSTDQLCLAGEEFKRC SIDTLFFVVG  
SPGNYQIRKRLADGEEDEEEDGTCLALKSCKEVDAGKKMEAKLAKCSHCGAKRWNIVGDS  
STGYVLTEGDGKTCLLREP GTDKAMTAPCDSTDS PYVPLQLQFASASDIKTMS SDGARLIGAASDGDKKA  
IEDLLKDGTDVNV RDWDELTA LIPAASSGHL DICKLLVKEGIDVNAKDKDGITALMEASI  
MGHEKIVEFLIENGADVNALASSDVSAMWLAASEGRVGVMMKLLMENNAEPSNTRVDGISA  
LMTAAVSMNDEFIQYLCIPLMHGFS SFSSETFVGVSEVQPLISHFLFSFNN  
FLKVGHSGAVEILLENGADHTMTDKDGLIPLMSAAENGT VATLKAILDHVDDPDYIN  
LISNTGFSSLI IAAAAGHVD AVEFLLDNGAKADIVHDNKVTALMYAAAAGHL DVMKMLIG  
KGQADLEFKHTNGGTALLEASTAGMYDAIVLLVESGSSVDFMDDDGVNPLMAIAAQGNAK  
SQKFIIDELKKTSDTALKDYINLFAHSGGS AFMFAAAGGHVECAKQLMDLGAEINAVAR  
NKDGYLEKLQKMIIEEGQVKEEDPHVDGVTALHVASEGGHLEMVNVL LDAGVETSLVHLDD  
DNRSPVLAVSGNHAGVAKALVQAGADPNTPYVDGDGENHNLLFD AIMVENVEFATLLIE  
KGADIYHSDEKKVSTLLQASHRGLTKVVKALLEKHAANGSKGEYVDAASEDGITPLTAAS  
SEGHTECVKLLVEAKANVNAKDKDNTTSLMAASARGHL DVVSIILAAGANVNEQNVDGHT  
ALMFAYNGKNQVETLWERYNQFLEEAKSNGESKEDVDDNETGPIIQESLKNHTDLVDLLI  
KSGADESIKDKGGHVASDFDFHPD TDAEILAKEARTEKVKDESKNEL

>comp10860\_c0\_seq1; 209 236 1103 LEN=1334; minus strand; translated  
MAKLLFLGGLAKISGQPPFHRAHYGGTDQGRDCQQIPRKEAVFVHYAGRGHQLDDTGAPH  
TVGTVKVPQRAIEAPEDRTHQDLVERVEFCPDPIDQADGSIREQPRCCNRNQQRHKGAD  
E SKTHRMRGGHAVVAGAVDGGQEGYTSIGITLDVQQLLEQLPEHRIADGPHKEGDHESVSL  
VAKGKKDPATSM DVVEPIFVTTPSHIEKVD ELSLLALSFKYDFDIVCSLFRGIGTLDNI

GNGNNRLLFLPPCGREEILVRLTNDVDRKPSTSGTITPEKRTKENKNIW  
>comp10860\_c0\_seq2; 209 220 1087 LEN=1318; minus strand; translated  
MAKLLFLGGLAKISGQPPFHRAHYGGTDQGRDCQQIPRKEAVFVHYAGRGHQLDDTGAPH  
TVGTVKPPQRAIEAPEDRTHQDLVERVEFCPDPIDQADGSIREQPRCCNRNQQRHKGAD  
SKTHMRGGHAVVAGAVDGGQEGYTSIGITLDVQQLLEQLPEHRIADGPHKEGDHESVSL  
VAKGKKKDPATSMDVVEPIFVTTTPSHIEKVDLSLLALSFKYDFDIVCSLFRGIGTLDNI  
GNGNNRLLFLPPCGREEILVRLTNDVDRKPSTSGTITPEKRTKENKNIW  
>comp10862\_c0\_seq1; 946 231 2507 LEN=2541; translated  
MKAHGTKTTKTSTMMASKQNRFGDRLFGARKVLLPCLILVVAVVLASPTKCPFAVEATAV  
DKNASSLRGQSIRRHRRSESIASQTTYSTTNSIPLSNNPSKVRRLKLSKKRYFARYSG  
SVGRASVQRCAKSILEDDDDTDYTVFEVDFEIEVDIDADIGIDEIMQKGLVYDQDFNYD  
ISSGSSSNDDVEGCISLRKMNIDLVEEDRRVSLFQESLVSPPSSSTEGFEEGSEEF  
WNVEAIQADWVPPGSNKVTVCVVDTGIAANHPGFPSTPSSDLDGEGKIYRIKKGDFRNL  
FTGGASGTRLMKWNRDINGHGHVAGVIFKVVDASRYITGTPNNVELFVVSADFNDVGY  
ESDVVRAVRTCVGEAKADVNLVSLGNVYSSFSAAALYASIVEQGGAIMVAAAGNKHEGAE  
DFDFYPASIPSVISVGAVERGGSHFPSSIRNNQVELVGPGEHILSTGVRWNEEKSEMEYV  
YERRSGTSSAAPHVTGAVALKSHYPTCSSRQIRYAMAKTAVRSENKNSNSNSEEKTE  
CDSAEGYGSIQVRDALDWLLFMGGCDSWDVELTSLGGCSTLGGIVQIKPEDESDDGSHE  
QEPEEMSTSFPEEVSADAENANKTEEDSITSLEQQVTIDPEIAEETPGNSTIPSKNLED  
LDENTARPIEESTTSPTKIELSNGGTKEPREDSTKSPDQEFEDDCDHGITETPNQDSTI  
SPVQDESDENIAKESSEPPKEDSALRGWTLPRFDDP  
>comp10864\_c0\_seq1; 358 1 883 LEN=883; translated  
XASTSLSLFACEAYSHKYLIRGKQHLCTMIFRRRGNVVKPKNDRRKQQTCKVTTAVSVPV  
ATGTGLSNLRMTRDNTTNAKSNKELKRKPPPSQSQSQSQSSKSSSSSSSLVEESSKTSS  
PQKDKQQRLPAGNKVKHTIKRCTFKSPSDCPSRGTITGVKKEKCKKLVPIPSPTPSARL  
NRGRCDRKGSSKKRRLSTGNKAEHKIKSCSITTPSDCPSGGTIAGVNKKETKSNEFVVPV  
LATTAPLNRRGRCGRQGSSKGAERSGGEGDEEDCLPDVTTLVKKEDLDIDYDDDX  
>comp10864\_c0\_seq2; 484 185 1359 LEN=1359; translated  
MSDMTDSYESFLSDVHDSAewardQFPMKLYNLLEDVEKSNKGLNRYISWLPGGTSFRVH  
DRSKFEALVLPPEYFERMSSFLSFRITQLNKYGIYQSKTTNTHNPDSKSDGAYSHKYLIRG  
KQHLCTMIFRRRGNVVKPKNDRRKQQTCKVTTAVSVPVATGTGLSNLRMTRDNTTNAKSN  
KELKRKPPPSQSQSQSQSSKSSSSSSSLVEESSKTSSPQKDKQQRLPAGNKVKHTIKRCT  
FKSPSDCPSRGTITGVKKEKCKKLVPIPSPTPSARLNRGRCDRKGSSKKRRLSTGNKAE  
HKIKSCSITTPSDCPSGGTIAGVNKKETKSNEFVVPVPLATTAPLNRRGRCGRQGSSKGA  
RSGGEGDEEDCLPDVTTLVKKEDLDIDYDDDX  
>comp10864\_c0\_seq3; 484 256 1430 LEN=1430; translated  
MSDMTDSYESFLSDVHDSAewardQFPMKLYNLLEDVEKSNKGLNRYISWLPGGTSFRVH  
DRSKFEALVLPPEYFERMSSFLSFRITQLNKYGIYQSKTTNTHNPDSKSDGAYSHKYLIRG  
KQHLCTMIFRRRGNVVKPKNDRRKQQTCKVTTAVSVPVATGTGLSNLRMTRDNTTNAKSN  
KELKRKPPPSQSQSQSQSSKSSSSSSSLVEESSKTSSPQKDKQQRLPAGNKVKHTIKRCT  
FKSPSDCPSRGTITGVKKEKCKKLVPIPSPTPSARLNRGRCDRKGSSKKRRLSTGNKAE  
HKIKSCSITTPSDCPSGGTIAGVNKKETKSNEFVVPVPLATTAPLNRRGRCGRQGSSKGA  
RSGGEGDEEDCLPDVTTLVKKEDLDIDYDDDX  
>comp10865\_c0\_seq1; 414 208 1506 LEN=1739; translated  
MISSCFTRTVVAHTRAASSLLGMTIGRSVIGTKAGILLSGSCSTSNNNNNATLHSHA  
TSALRWKSSGGKRKSFRRAPTGGYYSRLDRSRAAVSFRKPTAGPREPNDVKTPMPR  
IDRSQIRVVDALDEEGSGDDDLTPLGPLMGALRALRKEASGSNLLLGSNTSTSSD  
ESQLRMDFFTSADGSTEDLVGARAAAADAHGDPGEMLRKIDELVDKERFEYMELPTE  
DLFPGNVEGSPVGGDDANAVQIPHNLAHGEWGEMLIRTDRVSKMWRGGRVVSFRALVIG  
GNLRGCAGFGIGKAFEPEDAIVEIACRMAKRNIFFVDYRGRITLRLDLVGRQNSCKVVLRT  
TTNGLRGNPLCCEILKLMGITNVVAKAHGSRNHYNVVRATFKALMTHESLDEVALKRGLR  
LVNLQRAKRLGI  
>comp10865\_c0\_seq2; 63 1 512 LEN=745; translated  
XTSHLKIPIKRGEMLIRTDRVSKMWRGGRVVSFRALVIGGNLRGCAGFGIGKAFEPEDAIVE  
IACRMAKRNIFFVDYRGRITLRLDLVGRQNSCKVVLRTTTNGLRGNPLCCEILKLMGITN  
VVAKAHGSRNHYNVVRATFKALMTHESLDEVALKRGLRVLVNLQRAKRLGI  
>comp10866\_c1\_seq1; 190 1 301 LEN=860; translated  
XQQQQQQRSYPQQAIPQOSTIQILAPSVPPPPPPQALPAPAATPTAAVPETVIRSEVPDPM  
AAAAAATASESIQPPVLANVPPPAVAAPVGGIVMPPGN  
>comp10867\_c0\_seq1; 901 213 3329 LEN=3375; translated

MPMMNCSTRVILLALLGCVVHGQGCNTNCPPIINFGVVVPALCEGDLIDGTSNINGENVQA  
DVNRIYDICYPNDSNTASSFRFDDFRGVNTVTVIANYTGCNAGRRESGVFAHVAQKYD  
IYGPDRVHFIQSVKGGGTCDQWSAIYQEDAEDLFPESDTPNEMPWSVDDSAITLRDEL  
TSPFGHPAYVVLGDGNLRKIKHFIKIGPCCGYERYRDTCTPIARTLDDTLGSLDAILNDEF  
ELIGGTGSESGNDEIPSNQGNSEEQADDNIVDANCEWSDWSACSIRCGPTVGGQIRYKD  
KRCAVANTDIAIERNSPFLELSDLFESRPCQADNSANCNVEDGGLACVPEFGERWQVRTI  
VRDLDSRDLVDFHPTPGYHLGNSTEGRNFTVTPSNSDEAWVINGNNHTISIMPAIDTAYQT  
TFSRTDRGYYHYMINGTAISFNSVADSGRTSDRDTFNYWSICNDNANTYVGSKEPNYFMG  
PTLYNSDPKKRNLVNRLGEGCDTASGSTTKDEPCYFLHSDMLHEAPSCRGIVHDPEIETA  
YGTVYWAFDSTGNRQNGQLVRFDFQPHGPGSMDHSIASVRRYVEIELETAEEAQEQAGV  
HAGMVMHPTRELFVAVPGKNQILRVKADSGRFARTAREEYPIFSNRLPSFEYSIWECVD  
SVVVFSDINQPSGMALSLDGKRLYVAERGTGMIHAYEIEETGAFLHMIPTTFRTIGGMDF  
PNGGELYFVDDNETNSLNSVRVLSECSQDYTPRTSPKYSSELQSARDALDVENPFDLIPEV  
CTVDPVIVPNASLFEQVHDDSGYASDNPVQSEMAGMDAAAALLANRTDCEYDSELNFDAL  
LLGGYFCHTCLPEKERTCGDGGTCTNVQWRGYICDNEFKIVADDESNLPGSYLLQTMNGT  
NVDANELVLKPGVTYRFSMEVEDEEICMTTRVSRKNREDFKVGSVSRNGGTDRERLSSLN  
ANDREGNQLVTLGCATNSVLVLTGKESKMTGPQIYVNVLGDPVFTVQMETLNESSASSEL  
KVGGLGSLVVAILLSLA

>comp10867\_c0\_seq2; 490 186 1283 LEN=1329; translated  
MALSLDGKRLYVAERGTGMIHAYEIEETGAFLHMIPTTFRTIGGMDFSPNGGELYFVDDNET  
NSLNSVRVLSECSQDYTPRTSPKYSSELQSARDALDVENPFDLIPEVCTVDPVIVPNASL  
EQVHDDSGYASDNPVQSEMAGMDAAAALLANRTDCEYDSELNFDALLGGYFCHTCLPE  
KERTCGDGGTCTNVQWRGYICDNEFKIVADDESNLPGSYLLQTMNGTNVDANELVLKPGV  
TYRFSMEVEDEEICMTTRVSRKNREDFKVGSVSRNGGTDRERLSSLNANDREGNQLVTLG  
CATNSVLVLTGKESKMTGPQIYVNVLGDPVFTVQMETLNESSASSELKVGGLGSLVVAI  
LLSLA

>comp10867\_c0\_seq3; 485 213 2027 LEN=2180; translated  
MPMMNCSTRVILLALLGCVVHGQGCNTNCPPIINFGVVVPALCEGDLIDGTSNINGENVQA  
DVNRIYDICYPNDSNTASSFRFDDFRGVNTVTVIANYTGCNAGRRESGVFAHVAQKYD  
IYGPDRVHFIQSVKGGGTCDQWSAIYQEDAEDLFPESDTPNEMPWSVDDSAITLRDEL  
TSPFGHPAYVVLGDGNLRKIKHFIKIGPCCGYERYRDTCTPIARTLDDTLGSLDAILNDEF  
ELIGGTGSESGNDEIPSNQGNSEEQADDNIVDANCEWSDWSACSIRCGPTVGGQIRYKD  
KRCAVANTDIAIERNSPFLELSDLFESRPCQADNSANCNVEDGGLACVPEFGERWQVRTI  
VRDLDSRDLVDFHPTPGYHLGNSTEGRNFTVTPSNSDEAWVINGNNHTISIMPAIDTAYQT  
TFSRTDRGYYHYMINGTAISFNSVADSGRTSDRDTFNYWSICNDNANTYVGSKEPNYFMG  
PTLYNSDPKKRNLVNRLGEGCDTASGSTTKDEPCYFLHSDMLHEAPSCRGIVHDPEIETA  
YGTVYWAFDSTGNRQNGQLVRFDFQPHGPGSMDHSIASVRRYVEIELETAEEAQEQAGV  
HAGE

>comp10867\_c0\_seq4; 503 213 2168 LEN=2190; translated  
MPMMNCSTRVILLALLGCVVHGQGCNTNCPPIINFGVVVPALCEGDLIDGTSNINGENVQA  
DVNRIYDICYPNDSNTASSFRFDDFRGVNTVTVIANYTGCNAGRRESGVFAHVAQKYD  
IYGPDRVHFIQSVKGGGTCDQWSAIYQEDAEDLFPESDTPNEMPWSVDDSAITLRDEL  
TSPFGHPAYVVLGDGNLRKIKHFIKIGPCCGYERYRDTCTPIARTLDDTLGSLDAILNDEF  
ELIGGTGSESGNDEIPSNQGNSEEQADDNIVDANCEWSDWSACSIRCGPTVGGQIRYKD  
KRCAVANTDIAIERNSPFLELSDLFESRPCQADNSANCNVEDGGLACVPEFGERWQVRTI  
VRDLDSRDLVDFHPTPGYHLGNSTEGRNFTVTPSNSDEAWVINGNNHTISIMPAIDTAYQT  
TFSRTDRGYYHYMINGTAISFNSVADSGRTSDRDTFNYWSICNDNANTYVGSKEPNYFMG  
PTLYNSDPKKRNLVNRLGEGCDTASGSTTKDEPCYFLHSDMLHEAPSCRGIVHDPEIETA  
YGTVYWAFDSTGNRQNGQLVRFDFQPHGPGSMDHSIASVRRYVEIELETAEEAQEQAGV  
HAGMVMHPTRELFVAVPGKNQILRVKADSGRFARTGMFRDNFLSESVVKK

>comp10868\_c0\_seq1; 159 233 1070 LEN=1070; translated  
MPEDPSAPTEPPPGPTIRVICAGLGRGTGLSLSEALSTLGYRPHYFIDFSHAEEWAGLAE  
GTS DAGSLLDRIVADGYDAVLENPSCDVFDDLKRFDPARVILTVRDSAEAFEEESWKVLM  
DTMVVTEQPFSAFPSFFGWIPFRRLRVIRRFMGTHLGLEEGALAHGWRDRPSGWLAE  
QYDRHNQHVVDSVPPEQLLVFRAGDGWEPLCSFLGTGVPGGAFPCTTNNKEALRRLRTT  
FLAAVYGWIPVTALAAAGAVAWAGVPAEPPVPGGRAARG

>comp10870\_c0\_seq1; 140 82 444 LEN=570; translated  
MLGYPKLDATGRKGVWRNLIELVPPVPTDPSTGKASEKILSKPRKASRYRDDFSASDYQK  
LAEQFELNGRQIKNSIVLARALARERRTPLNLAVLHRAVVAVAGEGVGSKTEDSSTSGY

>comp10870\_c0\_seq2; 417 1 1565 LEN=1565; translated

XPELAAARAEIEGTQSVSFYPGLGELFGPGAKLVCYPEGMEGSPLGVSCVQSWYAEDHNN  
ATGTTKRRFVFLVIEFLVSVGDELVFMVAMTDVYPEFHDTSRNVPLKDLSHRKLNSHGDDAA  
LLERLQQRGEFYASVATKNHFLEYADSFPPILKGGGWSNAVRPLSKGGRVMVDVKRGI  
LEGHIAVRSGSSGSGSDATSDTVREAIKLFESSKRTGIAVPFRCTCVLPDKFRNTRSACK  
ASDPKHPHTPRAGASDRERLWMSWPMLVGFSTARVWGKLLLGMPKPIVAPKPELPSAP  
LSPGRGLVAQQRPSRRRFVEIAALGGEGRSGNCGYISFQTQAFDQLVLAEDKKELIRAV  
ARNAGGGGFDEDDSDDDSDDEEFENVGIDVVANKGGASIFLLHGPPGCGKTLTAEAI AEL  
LEKPLYIVTAGDLGISASEVEQNLGSVLELCQTDALVLIIDEADVFLARNSTEIARNAL  
GKNRFTNSQLIVMEAKGFVDSMAGLLIHQLVLTCDLSFHLP

>comp10870\_c0\_seq3; 558 1 1909 LEN=2035; translated  
XPELAAARAEIEGTQSVSFYPGLGELFGPGAKLVCYPEGMEGSPLGVSCVQSWYAEDHNN  
ATGTTKRRFVFLVIEFLVSVGDELVFMVAMTDVYPEFHDTSRNVPLKDLSHRKLNSHGDDAA  
LLERLQQRGEFYASVATKNHFLEYADSFPPILKGGGWSNAVRPLSKGGRVMVDVKRGI  
LEGHIAVRSGSSGSGSDATSDTVREAIKLFESSKRTGIAVPFRCTCVLPDKFRNTRSACK  
ASDPKHPHTPRAGASDRERLWMSWPMLVGFSTARVWGKLLLGMPKPIVAPKPELPSAP  
LSPGRGLVAQQRPSRRRFVEIAALGGEGRSGNCGYISFQTQAFDQLVLAEDKKELIRAV  
ARNAGGGGFDEDDSDDDSDDEEFENVGIDVVANKGGASIFLLHGPPGCGKTLTAEAI AEL  
LEKPLYIVTAGDLGISASEVEQNLGSVLELCQTDALVLIIDEADVFLARNSTEIARNAL  
VCVMLRLLLEYSGCLFLSSNRSAGSIDAAIASRITVMLGYPKLDATGRGKVRNLIELVP  
VVPTDPSTGKASEKILSKPRKASRYRDDFSASDYQKLAEQFELNQRQIKNSIVLARALAR  
ERRTPLNLAVLHRAVVAVAGEGVGGSKTEDSSTSGY

>comp10871\_c0\_seq1; 605 158 1741 LEN=1891; translated  
MPRPMSSSVFFVFSFFFSIGLLANVFCEDIDPQDLSPSINPDSEGRSRSLASLQAIATSSP  
NFRARRLHYPVTDPHVCLAFVLSGCCQRTDLLNHTIAGAIRHMEDEPSFLRYEIAWVDNGN  
TAEDTKYIKESYPIEHALTLPKNMGLAYGMNLLVNNLCKAPYILLLEEDWLVLDEIVANQ  
TEERKRSIATSIALLENLKKNNVTAYDERNVIGVFLRHETYDSFLTFFPHADIWERRENS  
LSQILAPPVTSDRCSSNITETDLISDDHNQGNDDDGTVDIDYRIFCADVGAKAGAIWGS  
YTNGAGLYRRSDLQKVGRQFGEFGDAFHDRYVEANYAFRVALKNCHAALRLTKNESCNAI  
YDPECTGAFHHIGGGRGTRPRTAKGTKCMDIAWNFFGTPLYEKFKFAAQTTGETTQKCS  
RKELQELRDQQFRETDSSESYREEVRIQNKVFQKEEERRQSLRDQAELILNMLAKGQAND  
LRGAVPMDGMSNEEIAEKARSFEKLANSPHPMDGFWDLLGRVQHAD

>comp10872\_c0\_seq1; 209 49 737 LEN=850; translated  
MSVAPKAYTAVASSLHWSAASMVGCIGCVLKAQDSPKGEKGPWMYRHKSFGLLTGLIVA  
PRLAYRIANRSSYKLQEMVGPSSIEHALAKVGHYGLYAFMTIMPASGIAMGYGGNYVAG  
TNDPFFLILFPCSISSDEQDXVFLNLVFFLLVLPYIGKGLPFFTTTIPGIVKTEENKST  
GEIAKQSFQIHKQLGIYGYLIPIHAGAAVSHSLRGHAI FSRINPFSRP

>comp10872\_c0\_seq2; 236 49 612 LEN=725; translated  
MSVAPKAYTAVASSLHWSAASMVGCIGCVLKAQDSPKGEKGPWMYRHKSFGLLTGLIVA  
PRLAYRIANRSSYKLQEMVGPSSIEHALAKVGHYGLYAFMTIMPASGIAMGYGGKGLPF  
FTTTIPGIVKTEENKSTGEIAKQSFQIHKQLGIYGYLIPIHAGAAVSHSLRGHAI FSR  
INPFSRP

>comp10873\_c0\_seq1; 150 111 1013 LEN=1077; translated  
MIIWKSGKKIYSWIIGSIWLSYLFWFDRGHTTITPFVDARPVTSFQLATGEWDISMRGS  
YWMNPSFVFPVADLHASPATRPNPGEKQRSIALVKRRPWGSSLDCTLSLASDGTFFLTP  
KQTTSTDEGQRSVSTEAEADKTITNSRPNLFARRKKQAGTIQSRLHVRGTWRVLPNPYC  
VTDRFYDEVSLTAYPRQKVAALGGEETNIDAEQVLRVQLTMNCRIWGRHMHNQRREAG  
GTKPYRMTHGTLVCNDVYTGDNHTRWWRAFFRPVLSFSAVRCSDDPKHEGWIDKERYGY

>comp10874\_c0\_seq1; 1014 249 2519 LEN=2653; translated  
MTTRITVTRSQTQEEESVDEITLNRSTQEESEADEIDTKNTTTTTITEEPPAESPEADEGSE  
ADNVCDADAEKEPETEIEVGTNGDDDHGQEAEMQAEPKEKSEKPAYIPGMFVINNTETA  
AEEEEKSETSPDDVGGEAKSPAEEGGEAKTDSGVETPNVRKEQLLNFNQLFSTRRPKDGW  
AGLGSIGKSVTKGTVAGIASLIAQPMVGAKQGGVAGFFTGLATGVASCVALPATGVCVGA  
YQVGRGVYNSAEAISSSNKGMVWDEKKREWHYHNLDDDVREVEELAEERKRKGEQTFNS  
ADGPERTVKDRYYDLMGVPTNASQGEIKKAYYVKARKCHPDKNPGDPTAANRFQELGHA  
YQVLANDQSRAAYDRDGLSINDKNQKLHMSDIDPYIFFAVMFGADSVKPYIGELWIADK  
AEMFLKDSKMAQELATTMQQNQGDEANAAAAGKTPDVFQAQREERVRLMMEDEDFLQR  
RRKVTIATNMRKRIEPIYITGDEEEDNEEQFVLSQAEAAQICKSAFGHVFCSAIGRALEL  
EATEFVGFVAKSPVIGSWDAHTAGFQKRAMTLKDNRYIFNAGISAVRAGSKAMKHVESIQK  
QAEQSSSLPGGGIGGASPMDDTTQAKETMKKLEDLPTILELAWAVNVRDIAKTLKDVCHK  
LFNDTSVEVEVRMKRAEAVKILGREFYAI GNACESIKHVTDNGDSAEI KLRAEIAAMTT

LAKAQGQEISEEDA EY MIRQQRKMKETERTAGSSPL  
>comp10874\_c0\_seq2; 955 249 2749 LEN=2883; translated  
MTTRITVTRSQTQEE SVDEITLNRSTQEE SADEIDTKNTTTTTITEEPPAESPEADEGSE  
ADNVC DADAEKEPETEIEVGT TNGDDD HGQEAEMQAEPKEKSEKPAYIPGMFVINNTETA  
AEEEEK KSETSPDDVGG EAKSPAEEGG EAKTDSGVETPNVRKV TYMNKHSKFAAMDDNSC  
TTDEVKSNKKKVKGMPRKANKTHSVSQLHYNILFCNXNLP IHV LGPQINSMNPF TSWNIG  
ATPFQSVVQQRRPKD GWAGLGS GIKSVTKGT VAGIASLIAQPMVGAKQGGVAGFF TGLAT  
GVASCVALPATGVCV GAYQVGRGVYNSAEAISSSNKGMVWDEKKREWHYHNLDDDVREVE  
ELAEERKRKGEQTGFNSADGP ERTVKDRTYDYDLMGVPTNASQGEIKKAYYVKARKCHPDK  
NPGDPTAANRFQELGHAYQV LANDQSRAAYDRDGLSINDDKNQKLHMSDIDPYIFFAVMF  
GADSVKPYIGELWIADKAEMFLKDSKMAQELATTMQQQNQGD EANA AAEAGKTPDVFQAQ  
REERVRLMME EDEFLQRRRKVTIATNM RKRIEPIYITGDEEEDNEEQFVLSQAEAAQICK  
SAFGHVFC SAIGRALELEATEFVGF AKSPVIGSWDAHTAGFQKRAMTLKDN YRIFNAGIS  
AVRAGSKAMKHVESIQKQAE EQSSLPGGGIGGASPM DTTQAKETMCKLED TLP TLELAW  
AVNVRDIAKTLKDVCHKLFNDT SVEVEVRMKRAEAVKILGREFYAIGNACESIKHVTDNG  
DSAE EIKLRAEIAAMTT LAKAQGQEISEEDA EY MIRQQRKMKETERTAGSSPL  
>comp10875\_c0\_seq1; 325 631 1704 LEN=2511; translated  
MFAPSVFSRESKTEGH HIVSKQPVTEKEIEESRAAL AACPVAAIRVDKKQEEHAASAEEN  
SSAPSGSVASQLAINPKFN GRPLFPFKLISP NLSDVFFVGH HNSKSFGAAPYLLSSLSNT  
EPTWIMVDTPRYSESAVR AVELTGSIGPSYLVLTHVDDTADHNSWKDKYPNLKRIFHAG  
DLGTHNWIGDETLEDVEILLTARSSDRSLQYFDLKG NPIDNETDGSNH DVVLVHTPGHSP  
GSIALLKRASPSINGSESTKNAHGVLFSGDTYSYTTREGGHMSGFPLYGNDARLQSKILP  
LLLDLDWNILAPGHGHVRDYTLIQESQQQQQLQGT KVFIDSREKEMEA AIEELSRYL  
>comp10876\_c0\_seq1; 323 496 1369 LEN=1624; translated  
MTD TDRREPPASRQGPATPQPGSPRGRRRPQAPVN LLLLGVGVLLLSLCDGFVPALGRT  
APRGPWGAPPTEVSMVNDYDLRDPDMVELMMGGVRYEN VPLPDSMLD TTFVGNLCE FVR  
DEDLSEKFRSVTNLQSLPACVARRPNSQSLRYGFVAFPTVEEKEEAIIRFHGVEFQGRRL  
KVENILDHPSKGRVNVPEKLVTYVLGA AKKTPRGKND FSLRKTSNPSKSKGGITAAEGTP  
RTAATATEKAEATTEKPRVDEKGIANKSEPM SRRGGGGSATEIFSSDNRP  
>comp10876\_c0\_seq3; 209 496 1053 LEN=1098; translated  
MTD TDRREPPASRQGPATPQPGSPRGRRRPQAPVN LLLLGVGVLLLSLCDGFVPALGRT  
APRGPWGAPPTEVSMVNDYDLRDPDMVELMMGGVRYEN VPLPDSMLD TTFVGNLCE FVR  
DEDLSEKFRSVTNLQSLPACVARRPNSQSLRYGFVAFPTVEEKEVRPGAWPRPVHDTMAW  
HG MAR  
>comp10877\_c0\_seq2; 336 323 1564 LEN=1723; translated  
MLRFKWNQNALRGTRNNLLFSSLFQELFARLCDRLKD IAPAVVCGVRTQVN LTPDDMIEL  
ICTGKV LERREIENQKIDEDDGDMSDSTYLDELEIRKREDAD FRELAKV VETGVSSMFR  
PMIGQNKSTVIVDQLSADMKRAHSGIDTVLEFSDSSVGSKSPLLREKSPMALS LPKSPRL  
SEKLALPAQDPHRASGSSYKSRSSALVNMLSPKPIFSRSKTENESSTSP THGSPGT PRSS  
ALNILKNVPVGH LVPNLKQSPPPP GMSLRGINSSFHHAIDVTEIPVEITPLHHVTGGRIV  
EYLGTVSMHFIRESSGLEAAEFNRFVTECNAIARAHVHSLGGNAMLAYRAVPAESGGRVY  
KSQVYNVISLSGSAVKVEYRKEDNAASPKDSSFIRTRRLG SIDRTRSI SFEVC  
>comp10877\_c0\_seq3; 678 1 2719 LEN=2878; translated  
LRLSRGALNGGHRSPGGPGLSGCGYGGWEGKAPPKEPPHHDEGEGREALFLLPRAVPPPA  
GPLYEHEARSLHALWEEMGPGGRPGNLRAPLPADPRPGGLHPGEGVPPFP GGAKQRERC  
AGSQRGPPVPGIRARPATHAQAGLGGKRGV LLEKRSGR RQVPHNIHGHCYRGLLYGNAE  
PTDPRDIPDDAVQDEEDQKLVNLQRQIEKISAKNRQRLSTAAQRHLERVRKRLIKFKQAQ  
LRRSQARAENRRQREERRKNKIRHKGSGTKSRAADIHATAAGGSGNQDLNDEDGASSSS  
ESSSSSSSSSSSSSSSSSSSESESEKETGGSQNSKGRDKFGAATSGSSRGGVDVEDSGSV  
IQDMD FEDAFVSGTDGASVSELD DDIRDEKGHVDPDMEFFDELEADAEAGRHASDKGKG  
LQRRRRRRMYRDDKAPFVLEIDDETD EDILSVLIDKQLPPGIRITTCQYMPDFGCGDGR  
DHES SAGQMLMSMLRFKWNQNALRGTRNNLLFSSLFQELFARLCDRLKD IAPAVVCGVRT  
QVN LTPDDMIELICTGKV LERREIENQKIDEDDGDMSDSTYLDELEIRKREDAD FRELA  
KV VETGVSSMFRPMIGQNKSTVIVDQLSADMKRAHSGIDTVLEFSDSSVGSKSPLLREKS  
PMALS LPKSPRLSEKLALPAQDPHRASGSSYKSRSSALVNMLSPKPIFSRSKTENESST  
PTHGSPGT PRSSALNILKNVPVGH LVPNLKQSPPPP GMSLRGINSSFHHAIDVTEIPVEI  
TPLHHVTGGRIVEYLGTVSMHFIRESSGLEAAEFNRFVTECNAIARAHVHSLGGNAMLAY  
RAVPAESGGRVYKSQVYNVISLSGSAVKVEYRKEDNAASPKDSSFIRTRRLG SIDRTRSI  
SFEVC  
>comp10878\_c0\_seq1; 316 46 1120 LEN=1273; minus strand; translated



MQGHEAPLPFLSAISFGFVRAERSLLLLPYHQPARGVHKKASTSERMVAACLLSLGNTGA  
PHRVLLLATILIVSFPGRFVGFSGFWERLRHLRVHHRGTDHVATASLRAGPEHVHEALDH  
RLVVPVGVKGLHLDLLTSGFLLLEENGHKMSPRFVGPGLRADGIAKLVR SIPVLDLGPQARQ  
LDGIERPRFRCVPVVKQAAALLPQKDV PADLAVTHKVPLVEEKGEDFLQQVLSDAALDNG  
GLALEPGALLPKIGQGWPDEEAAEDKDRDTALDSTDGVS VFSFCPE SPRGACRSWSLATA  
LETSGAASILGSSTNLGATLTA VDSQAGSASAVPTVGAGCARAWNDICAVMCCGFV  
>comp10879\_c0\_seq1; 1313 310 5184 LEN=5237; translated  
MRPQCRNTP IYFTIAGAMLLFLLSAAVGPVSSFGSTADV GSSASSSSSLQRGRQQRNQP  
AVSVLHHRQP PHTTTTTALASSLSWKGR TTA AAAATK SPLFRSGANLQTPSSSSSVTTR  
FSTARQAASVAETEP PTRKRSLRRILW NANPLAGRKDDR WKGGESTSTIASRLLFSYVS  
PLLEV VAGKNNQNR TLTEEDAFSLSHGKR SMDYAVESLTGT YGLARTKAARRLEE QKQQA  
TKNNDVVKNSQSLILLKALVRNQKST LLLTGVLRLVNTLVQAFPSLLVARLLRSIEAGPS  
APIQECLKAAVLLVGV LCLKMITENQFFHNVVN MSTQIRGSVEGLIFDKSLR LPEGGSGV  
LTKSYTAKNSSNKGAK EQGKPKKALGSGGV LNLMQSDAS IIESAAMQVHTLWDG PLQITI  
YTYLLFQCLGSSVAVGLAVLLSVIPANSIVLRISDRLARLE TEARSARTKRTNESITHMK  
LLKVQSWEKVFAEDIK KHRSD ELRRHRMRG VVRANSAI SNAVPALV LVVTTL TAYAKTGK  
PIKASTIFTAISLFNQLRFP LFFYPMLIDSLVIGRNSLRRIAS YLSSEELTPYVQALPPT  
MDGGGQIEIRHGSFLWSTSNQIKDGEVTP PDPSPALCNVNLKVNSGEV VAVVGPVGSKSA  
LVKAILGELTPVPKIVV ESSGADQNDSPVVEDLMNRPEVVMHG NAGYCSQEAWVPK GTL  
REAI VFGREYDEERYREALYDAGLDQDIASG TLSSEM DVGEKGSLSGGQRARVALARAL  
YGDENTKVLVLD DCLAALDARVGS L VFERVTKRAKASNAATILVTNDPSLPRRC DRVVL M  
GPTQKSSSPNGSGCSTIVDSGTYD D LLSRGHALTSFSNE YDSSDDETPIVQVHEDR KVHI  
EHNSMETD TIRVVG GYAIHANETDSSCHADPDVRVDIKN SPDFLADRVI PRETDDESHGI  
DKNLNSTKSSESHPKTRSEEAALVSTDDKMTTQAVPLSTYMGYLR AVGSPVLLIGMVASF  
GVAEGARFFQYTVSKWTEIAGSSSMAGALGGQYLNNLAYA AVVVS VFLWCRSFFTMLVG  
LKASTFYHNRMVGSVFRAPMSFFD ATPSGQILSRFGKELETVDRALPESIASVLYCFLQI  
SSTVLALSGVISPVM MVPITFAGALYLRIMKRFRPAARD MKRSEQRTRSPIFTHFG EALR  
GTEVIRSIPGAKLTWSSRHRKLS DVNLSV FSTVKALDRWLSVNLEAIGNSMVFITAVSSV  
FLSRAGRLQSGSAGWGLTQSLAITGLMAVA VRNLTMLESQMMSVQRVTEITDIEEFQNDK  
ESEKEKPKMPREMDKAGEAFQLPPNLGLRSSP STEHALVKDGPWLG GVSFKNVSMKYNP  
SSPLVLNRVTL SVPPGSTLG VVGR TGSGKSSLLLTFRIVEIESGGAIEIDGIDIRSVSM  
EKLRESLAIIPQDPV LFAGTLASNLDANGKVSPENMWKALEAASPDLVRHF KALGGLT SQ  
ISEGGNLSQGQRQLICLARALIKKSKILVLDEATSSVDAQTDKQVQDTIRREFVEKGV S  
VITVAHRLDTVMGYDKIAV LGQGSVLEYGSPS DLLKIENGEFRSLVDADQANKRKGKLL  
VNVV  
>comp10880\_c0\_seq1; 227 807 1106 LEN=1834; translated  
MYDNFDLEKCVIVEEHYDDT NDEDTEVETASVKFIAEMVLRETGEKTSFMETS SAFEKAQN  
SGAWLYLSGDIEAAPGTEESSDESEGEDLSVEEKLASQL  
>comp10880\_c0\_seq2; 346 131 910 LEN=1638; translated  
MPGTIISWKIWLPI LVAMMLTNDRLFVEVQGFTSSPPAVSHFLSETIT TANGDSALFAAK  
KKKKKGSANNKSGGV SFGGF GGAAMEQCPCGSGETY SNCCSKVHKNVQNFRKATAEQIV  
RARYSAYARKLPEFLMMSTHPNNKAFNPDLRKWKEDIKLNMYDNFDLEKCVIVEEHYDDT  
NDEDTEVETASVKFIAEMVLRETGEKTSFMETS SAFEKAQNSGAWLYLSGDIEAAPGTEES  
SDESEGEDLSVEEKLASQL  
>comp10881\_c1\_seq1; 947 591 3195 LEN=3195; translated  
MELRRQISGLTTDYDPNSFN SLETGDIKDCFPSQQLNDINVRNTMRDSPKEHGKDKRQAN  
PIDKDENAISVETNSLTSDSWMDEEKSVSSQVEQTELGNSSSRDHRQGGVPDRRGFP PDC  
YSFGSFAGNSYATREHGSDEFNRNGRAFPPDSYSFLSLHGPIESPLFFAFGMMGFLFQIAF  
LLLTVLSVLYEKWNTDGDGDNPGTDLIAAFVAANTT PLVRATQILAILSYIVFTESSLMD  
VIIAVETFP SRWDVTNRNMVFS CFLRF SQGVMAMIAALLIITAESVIDIVLNFTAVVSV  
SMNSMTMNSMNDTTNTQDLAIKFDKLP S DILPFSRCQQNFISRLDNVAFNLAMWGKYGP  
KLQEEVRRIIKLP LPSCMSQGK KHRFQCTLITSGLI FLAIMTSIIYAQESEDIWFTKVF  
RVQFHDPDLQQYSGCFSLIDTTPGSKRGIYEGPGGVKIAHCMDTRKWKFFIVGTDPCVHD  
ALELAHSDNSYSF DVSSAFQSGWHS AAGRPLDL CFFTFDRDFEDMCPLVGN GKCDPDLNS  
FEYGF DAGCCSASRIGPRCGEGAMAKGFGMVDLAAAGYGF PQCIDPRMKPITILLGNFT  
KRKEATNSVEIPF PESIGR SNLTLDAKCEKKVLSIEINEGMANSHETIMVTDGARCTVE  
VNNPDHETTVDLTI FQGYGADNDPKILQINSGVDEVS SFSAIPTCMFEQLSIHDNTNTTN  
FYSGSSQVLEAIEWMIEDSTVYSECHTPNFVERFALS VLN YAAPTKSSDNGLWIDKNAPW  
EWDEVEYINGSLSALDLSEASLEGTISTYIGLLTSLSRISMSDNGLTGKLPSEIGLISSL  
ESLEMGNALSGLPSEIGKLTLLTRLSX

>comp10881\_c1\_seq3; 962 591 3405 LEN=3653; translated  
MELRRQISGLTDDYDPNSFNLETGDIKDCFPSQQLNDINVRNTMRDSPKEHGKDKRQAN  
PIDKDENAISVETNSLTSDSWMDEEKSVSSQVEQTELGNSSSRDHRQGGVPPDRRGFPDC  
YSFGSFAGNSYATREHGSDEFNRNGRAFPPDSYSFSLHGP IESPLFFAFGMMGFLFQIAF  
LLLTVLSVLYEKWNTDGDGDNPGTDLIAAFVAANTTPLVRATQILAILSIVFTESLMD  
VIIAVETFPSRWDVTNRNMVFS CFLRF SQVMAMIAALLLIITAESVIDIVLNFTAVVSV  
SMNSMTMNSMNDTTNTQDLAIKFDKLPDILPFSRCQQNFISRLDNVAFNLMWVKYGP  
KLQEEVRRIIKLPSPSCMSQGGKHTRFQCTLITSGLIFLAIMTSIIYAQESEDIWFTKVF  
RVQFHDPDLQQYSGCFSLIDTTPGSKRGIYEGPGGVKIAHCMDTRKWKFFIVGTDPCVHD  
ALELAHSDNSYSFVSSAFQSGWWSAAGRPLDLCFFTFDRDFEDMCPLVGNGKCDPLNS  
FEYGF DAGCCSASRIGPRCGEGAMAKGFGMVDLAAAGYGFQCIDPRMKPITILLGNFT  
KRKEATNSVEIPFPESIGRSNLTLDAKCDEKKVLSIEINEGMANSHETIMVTDGARCTVE  
VNNPDHETTVDLTI FQGYGADNDPKILQINSGVDEVSSFSAIPTCMFEQLSIHDNTNTTN  
FYSGSSQVLEAIEWMIEDSTVYSECHTPNFVERFALSVLNYAAPTKSSDNLWIDKNAPW  
EWDEVEYINGSLSALDLSEASLEGTISTYIGLLTSLSRISMSSTTYDSEHFNQSSGMIH  
TRFLFLFFVGDNGLTGKLPSEIGLISSLESLEMGNALSGSLPSEIGKLTLLTRLSLGN  
SFTGTIPIELIKLKNLPCIEIDNLSLEGLSPPGLAIC

>comp10881\_c1\_seq4; 918 591 3279 LEN=3527; translated  
MELRRQISGLTDDYDPNSFNLETGDIKDCFPSQQLNDINVRNTMRDSPKEHGKDKRQAN  
PIDKDENAISVETNSLTSDSWMDEEKSVSSQVEQTELGNSSSRDHRQGGVPPDRRGFPDC  
YSFGSFAGNSYATREHGSDEFNRNGRAFPPDSYSFSLHGP IESPLFFAFGMMGFLFQIAF  
LLLTVLSVLYEKWNTDGDGDNPGTDLIAAFVAANTTPLVRATQILAILSIVFTESLMD  
VIIAVETFPSRWDVTNRNMVFS CFLRF SQVMAMIAALLLIITAESVIDIVLNFTAVNFI  
SRLDNVAFNLMWVKYGPKLQEEVRRIIKLPSPSCMSQGGKHTRFQCTLITSGLIFLAIM  
TSIIYAQESEDIWFTKVFVQFHDPDLQQYSGCFSLIDTTPGSKRGIYEGPGGVKIAHC  
MDTRKWKFFIVGTDPCVHDALELAHSDNSYSFVSSAFQSGWWSAAGRPLDLCFFTFDRDF  
EDMCPLVGNGKCDPLNSFEYGF DAGCCSASRIGPRCGEGAMAKGFGMVDLAAAGYGF  
QCIDPRMKPITILLGNFTKRKEATNSVEIPFPESIGRSNLTLDAKCDEKKVLSIEINEGM  
ANSHETIMVTDGARCTVEVNNPDHETTVDLTI FQGYGADNDPKILQINSGVDEVSSFSAI  
PTCMFEQLSIHDNTNTTNFYSGSSQVLEAIEWMIEDSTVYSECHTPNFVERFALSVLNYA  
APTSSDNLWIDKNAPWVWDEVEYINGSLSALDLSEASLEGTISTYIGLLTSLSRISMS  
TTYDSEHFNQSSGMIHTRFLFLFFVGDNGLTGKLPSEIGLISSLESLEMGNALSGSL  
PSEIGKLTLLTRLSLGNNSFTGTIPIELIKLKNLPCIEIDNLSLEGLSPPGLAIC

>comp10881\_c1\_seq5; 903 591 3069 LEN=3069; translated  
MELRRQISGLTDDYDPNSFNLETGDIKDCFPSQQLNDINVRNTMRDSPKEHGKDKRQAN  
PIDKDENAISVETNSLTSDSWMDEEKSVSSQVEQTELGNSSSRDHRQGGVPPDRRGFPDC  
YSFGSFAGNSYATREHGSDEFNRNGRAFPPDSYSFSLHGP IESPLFFAFGMMGFLFQIAF  
LLLTVLSVLYEKWNTDGDGDNPGTDLIAAFVAANTTPLVRATQILAILSIVFTESLMD  
VIIAVETFPSRWDVTNRNMVFS CFLRF SQVMAMIAALLLIITAESVIDIVLNFTAVNFI  
SRLDNVAFNLMWVKYGPKLQEEVRRIIKLPSPSCMSQGGKHTRFQCTLITSGLIFLAIM  
TSIIYAQESEDIWFTKVFVQFHDPDLQQYSGCFSLIDTTPGSKRGIYEGPGGVKIAHC  
MDTRKWKFFIVGTDPCVHDALELAHSDNSYSFVSSAFQSGWWSAAGRPLDLCFFTFDRDF  
EDMCPLVGNGKCDPLNSFEYGF DAGCCSASRIGPRCGEGAMAKGFGMVDLAAAGYGF  
QCIDPRMKPITILLGNFTKRKEATNSVEIPFPESIGRSNLTLDAKCDEKKVLSIEINEGM  
ANSHETIMVTDGARCTVEVNNPDHETTVDLTI FQGYGADNDPKILQINSGVDEVSSFSAI  
PTCMFEQLSIHDNTNTTNFYSGSSQVLEAIEWMIEDSTVYSECHTPNFVERFALSVLNYA  
APTSSDNLWIDKNAPWVWDEVEYINGSLSALDLSEASLEGTISTYIGLLTSLSRISMS  
DNGLTGKLPSEIGLISSLESLEMGNALSGSLPSEIGKLTLLTRLSX

>comp10882\_c0\_seq1; 385 53 544 LEN=761; translated  
MKLQIKRPSMPSMPSMPSMPSAKSLSFRKKKSASPEEDEAEVSTTVTKVPRKGVLGKMG  
M KKSITKLSANVAESVQKEDPKPEPVEQTPVEEKPEEAPVAEEAPATEDAPADEPAEK  
EAAEEREEEEAPVEEAAEETPAEEEEVDSREQPEVSTGLLGCY

>comp10882\_c0\_seq2; 385 53 544 LEN=740; translated  
MKLQIKRPSMPSMPSMPSMPSAKSLSFRKKKSASPEEDEAEVSTTVTKVPRKGVLGKMG  
M KKSITKLSANVAESVQKEDPKPEPVEQTPVEEKPEEAPVAEEAPATEDAPADEPAEK  
EAAEEREEEEAPVEEAAEETPAEEEEVDSREQPEVSTGLLGCY

>comp10883\_c0\_seq1; 686 1 2098 LEN=2117; translated  
XTNEANEEFWCLIVTATIIAPQYFTAGISIRKSQLKMTKPFSTRGGVFLLLCSAISFPV  
NSGAFSPTQNSRQFTRTETQTSMDGKREIEYNSERIRNFSIIAHIDHGKSTLADRILES  
TETVATRD MEDQLLDNMDIERERGITIKLQAARVLYKSRVDGEIYTLNLC DTPGHVDFSY

EVSRSLAACEGALLVVDASQGI EAQTLANVYLALENDLEI I PVLNKIDLPAADPDRVAEE  
IEDTIGLDCTEIVHASAKAGIGIDDILESIVQQVPPVADV NKPFRALIFDSYYDSYRGV  
IVFFRVVDGQVKKGDKIRFMNSAAEHEVTEVGVMT PQQVVDEL RAGEVGYICGSIKDV L  
DARVGMTCLSSDYKSGMASGDEIEPLPGYAECTPMVYAGLFPVDASDYETLRDSLGLKLR  
LNDASLSYEPENSGAMGFGRFCGFLGLLHMEI IQERLSREYNLDLIMTAPSVVYKINHNG  
KETTIDAPSKMPDLTRDHETLEPYVRMEILSPSEYNGKIMELCQERRGILMDIKYLTQSR  
STIIYELPLGEVITDFFDQLKSRTQGYASMEYSIIDYRASDLVRLDVKINYELAPAMACI  
VHRDSAQSVGRKLCASLKNLIPRQMFKVP IQACIGVKVIASEHISPMRKDVLAKCYGGDI  
TRKKKLLQKQAKGKAKMKSIGKVNVPQEAFAVLKINSE

>comp10884\_c0\_seq1; 1112 1 2250 LEN=2350; translated  
EEEEDEEEGI ICEEGEDEEDDI ISEEEVLEEALESSIVAEVIEDIFEEEEIISDNEELVKV  
ADI IENEFSDEDFVEEEGQEDLDV SFFEDSIEDEEQEGDSYYHTTPGNALEVEMESANFV  
TRFLVNKGLGQVVI IAILIMEWFHMYVVPFFESVDWIKYKGGQDLLQTVLSSRGGALAS  
SVSDGEDVQGIEEDDEEGDEDGDVLTVEVEPANESVDEEQSDRLTESETDGDEQSETISSA  
PVPADVPAPSRPRVPPNFIFRHLANYGLVGHILIMELVMASEWLQVYVPQITSLASYIAY  
DLLNYKRDFRRGREEPVNKRNSGFVNIGEGSRLGKKPKLKRKKEDQAALDQLKRIGDVNN  
AKCRFLSQKFMERHAIGPFSATISEI ELDLNAVETDFASKKRKRIEEEEEEEAESDSGWI  
LDALEVEEEDAPPLKNPFDTSVGVSLGSGGPKVSVGMFTIGKKRRTKSSSEKLRVLEN  
DTSGSENKIKTPKPHVSDSESGVMGRLLRAAGANSVMGRSILGAYPGDLPPPDEAASPRGV  
IGLARRYGYGDWSDDDDDNDSDNEDDVYGD LFNKDDEEKENDDFFSAYSDD EYQSRPKK  
RSGSAKKRTRKRRSSSHEQPKSGVSV EFGFGTSSKSQASFAASSPTRRRRKSSSLSSST  
VADSVSSSARRRKSRSRLPSSPMEKLGGRASSTSTAKPTSSSTAPEDSYGVPPATTIK  
RKKRPSTLRPAGFSLDEANKKSTGSSKKE

>comp10885\_c0\_seq1; 459 73 1218 LEN=1342; translated  
MRLLVKFLFCVASVAVVAGATVDNRSLQEDST SAPKPDDFEPATESPTKNSGDDQTPESL  
FGDLQDGTKSPSDEKIDSPKESGGFAGGFDGIGTESPKESGGFAGGFDGIGTEDPKE  
GEETPVMPDDFSPILPPMISEGNDTQSPNKEESTRSPSENEGTSQSPKSGSKGDEKGF GG  
IEKEEEDETSAPKANDQDEPAEASGMFGQSPVPKPSKKPTGARSSRAPVASPVAAPT DKN  
KPPTYNDEYKQPSLRPATAPSR LPYVSKGDDPLPTASDDLFGWFTNDSTIEEMEHDKNV  
IIALSSTFAVMFFFAVFVAYQTLNPNNGICASICRITVACWC GILRCICYPCRAVCGCTG  
EPTQKYNIPEDGGFSNDLELS

>comp10886\_c0\_seq1; 314 27 950 LEN=1096; translated  
MIFTGLRQLSRHCSALPTFQLHRVFPTKPLLLL PARTAHEKRTSPATPHARIMSSTTTTT  
DSTLASRSVQDFCDILASKQPTPGGGASAAVGA AVGAGTAAMSGAYTQRKKDEESGAADA  
ARTMISKMDIPSLLSMADDDVEAYKALQSTWKKD SGLSPEQVKDIEANALKVPTVLF EAC  
HGRIVAVQEF LPKCNPNITSDAKVGIHQLAGAALGVPDH SCKLSPRRGEDAVDENS SRNP  
RNRKR IAGALNSRMNTKEESKKG SFAFSTSYFVRQSTSTGVAKFNSVEE INQCQGIQYFR  
RVEPLSS

>comp10887\_c0\_seq1; 788 1 1481 LEN=1521; translated  
XISNNQQSESLIMSTGDYKVADISLADYGRKDI ELAEVEMPGLMACRTEYGP SKPFNGAR  
VSGSLHMTIQTAVLIETVNQLGADVRWCSCNIFSTQDHAAAAIARDESAAVFAWKGETLE  
EYWECTLNALTWQDDDGKGGHPDIIIDGGDM TLLIHEGKKAEDLFLKDGTL PDPSSSTDN  
AEFKIVLTI IKRLLSEGETDKWNKIATRCHGVSEETT TGVHRLYTMKNGALLFPAINVN  
DSVTKSKFDNLYGCKHSLPDGIMRATDVMLAGK KAVICGYGDVKGKCAHAMRANGCVVYV  
TEIDPICALQACMEGYTVTTLEDVLETGDI FIFITTTGNKGILMKDHMAKMKNNAIVGNIGH  
FDNEIDMEGLMKATKRINIKPQVDKVFV FEDNHGVI VLAEGRLNLGCATGHPSFVMSCSF  
TNQVLAQLELYGEKDSGKYERGVYVLPKNLDEK VAKLHLPSLGAKLTLLSKEQSDYVGI  
PIEGPFKPDITYRY

>comp10888\_c0\_seq1; 841 685 2754 LEN=2820; translated  
MSSRWGTLDDSSSTSMAGGIPEGFEIFSGDEDD FETMDDYDVHYDDSSPPKKGNKNKNMMS  
GSDRWKRPVLDPWDEEEASSKKQRNNKFFGEREYDQDDEGYEILGEMEDDDGDEFLEID  
ESISSPYLPRVDHLIAPKPAAGRGSNRNSNKNNDGGG YFFNPDVVNSRKKEDAPLFRKER  
KRDVSEPN SVAPSEEDIRTNKARKRRQSAKPLLNKNGQQRLLTIEEAFNQFQESVDEGM  
MEI IETAEVPILAKHANAKSWDDVGITSTT MLENLRYDMNCPNPLAVQEKTTPAILTGSD  
VLVGTYTGSGKTL SFLVPLVQRLLSIDEDSDGNI INDPGLAVLIVVPGRELASQIVSVA  
RDLLQDTGLSVQLAIGGTTFFKRNL EQIRKRKPNIVGTPGRIAE LVVGKPGKNGKLGIG  
SLQSLVLDEFDALLEYKAHRDPTRAIMQTLKRRHRNSLQ SVMCSATATDIIDS SKVDFL  
RPGFETAMADEDVLTGRKSNASSSVA AQVSRTVLHGV LNVPHKGMALDAVRKILHTDP  
IPQQILIFVENARKVDIVVEKLADRGII AAPLHGGMGSEKMDRAEVS RALREGYVGI VVA  
TELAARGLDAPLLTHVINLDLPTDASHYHRSGRCGRG RGVVINITTSPKERNVPKRF

ANTLGVDMFTAETRGKLVLPSTQTD

>comp10890\_c0\_seq1; 288 31 1332 LEN=1595; translated

MSIIRNRRIPILDIAKYHSNRSVFVEELRVACHTVGGFFLIRHDFGLARTMLNETKAFFD  
RPIEQKLSVSYENSPSFRGFMKFGVENTSGRVDCREQVEYAVEYNTTTTATTTRNECDDD  
RSRKPCKSPFYERLKGKPNPPTDFQPTLEPVTKRYASEVCAVADIIRDSLCLALQLDPKD  
VIHEKFLPPSNDSDSDEVPHWVIKLVSYPPPCLFVSKNTQGNINNTASEPSQHDKDERELE  
QQGVAHTDNTLLTLVLQNNSSGAVGNHTGGLQAYSQGEWIDVDLPVPSSAADENSVDGS  
GSSIGYLICNLGEQAETWSRGYFLATPHRVVTRPSSSPVEPKPRTSVPLFYNPVLSATMG  
PLDKRLLSKDTRWRDRPEEYQTNQHWRRPNNHMNPVSGENTFKSLARSHPEVVFARHHPDL  
ELLEEDGRIILRRE

>comp10891\_c0\_seq1; 1435 101 5078 LEN=5110; translated

MGRSSRSKSPSESNMHAACKLKTAAPLSPSFDNSPFLVIYGEASRPGGYCSNDHESSA  
DMNVAGEEKDGKTMNEADRVFDEMLVFTELSTKTKPKQSNNDNMSAMDIDIGEGTETKPE  
QSKELMDKTVAFLKMYLSETNAAEPVGFVSRNDVARLLLLPWSVRGILQSAYNKKTKNS  
PTIGKQGISMEVLMYWNALEGLAFFFFDRSESKVWSSKNPSTQERNNNNDNNTILTL  
STMHKIMPIALALALDGDALSETKKTEKTTAQDLAKGCYCRVLDHVYRPPFDVICDSLPL  
ILATGTKEIKNPQRIAAARSVTTSTLELMNLRIASANPKKSFQLLVKPKVFLDLAMLHYC  
DQKHVDKRVNASESRGADLPSTKKVFENLIRGGMFSLQHMEGFRSLQLTVPDIDGTTVP  
KATKNTKSSFRGYQEGLFKTLEGLFNAENGVGMSTTDIDVVASILPLLQNIQFLEQVSKIQ  
EQQAASKSQKKNKGANKMGLHQRFFSCLSGYLLKGLLASKATASNKPTQDNGPRLSFFE  
MLGKNLELLLRHNIYQPSLGSSAERSFLDKIGKETIQFVSPCEGEDDNKLEIGEWARNALV  
VLDVLRDLTILHEQLAQVLGMCLTYNSKNQHESSCTFQAPREVTTFLVTIIQTYGK  
LRQLNYFYESLFAVSVLSHRNDTQRLFQLLTLTDHKTISLHLGLVQESPIQQLKQTF  
AIKDPNTNQSSSQNSIPLVSSVGTAFITKLLTGLLQNVRIDSNSSSTEIYPICKDILNG  
TVIGLIGSDEGDTKNQSERLGNLKNVILCAWTIHLKNRCEFVWVGNQSELPEENAVIP  
SAIRCVLKDATNSSADHAKHHGEGDQDLFQALKFLACQRIQQLHGECYKQKLAYASDAI  
NTAASESAEAQKLVGFILRDCILTSSYSGFVEKARDQWMALESIAAWAPYADQHDIDSF  
LNQLEAMAI SGKSHLQSRYQMSLLNDTSFYEVSNVSERLGANII SFVARNVQKILTL  
DGSLSRHEI SCVPLHKKHWRKKSFKIIRDVQKSGIPI SCASTHLPEINKLLQSLRIFET  
INNRNIPVWKDCEEASKIFESLIRIESICVTLNASDEFQFLDTKAHLLSSLRTAASRVLD  
DMKLNSSDQVSGIKEEDYAMLLRCILENSFEI IDNNISSRARHDCFHSCNAVVESLVKKW  
TTNNTKSTKDMVGVLDTMFDRDEVQGGIKYLILTSYANALLKNFGERFRLEFDSEPIKS  
LLCVVQRRLLWVTAQKYCFQPPKADLFYQNKSI VFVAEVLRICSTCPDKDKIPFISGNK  
VVEKLRDFLALDLKNPEVQSLAYLVGCFAMTNPSSGVRDLSCKLLQANLKGYDIFLTPL  
CAVARRMELNEFDEFRLTLTSTIVEVPSTAIKLRVIRMI ILSTTDESQIELVAKHSSLIM  
NNCLQVMTQVAQKSDTRSSSILEVSSLI IEMASKKEIMILRERDIARILARVTSAIRVEE  
DEEGIQVKTEVVQFKSFEACFSLVAFFLQRFQSKQMHSCVPSLVITLTAMLQFTLRESLPR  
DYTSTCGQKFSRLCELMLPHGDVYKHHVICILRFVNSLQGNMNPACKKSLLSGIYCLLD  
IIQEHESLQLNSMLDEECRAILRSIHEGYKKIHVYKGO

>comp10892\_c0\_seq1; 1277 1 4924 LEN=5179; translated

XRAVQEEGSSKYGTEGSRIKQLKRRASRKKCIRLSKSIWKHLKTGLARKDGFTRLGTTQH  
PYEMGWQYEQDEFEYGFGLDVIDRMLAGDESTFKDESADFYTI LNNGIWTLYLVLFVEFV  
RHSVNHAHGRPFPTAVLSMAYSELATLGIVEFGVFLWGKYGYIQKDRKAKFADVHFALF  
FTAI FNAFYGLTISIFSTRKSNKMVVKTEQLELDHYVEIRLEYDRVNKI IENQCRGFFGK  
LDLFCVCRSGLRRQHEKLRVQVKFHELRLHFLEFNLPFSLKVS DYLRKSELSILIGLVHV  
SATTWVLLIALMNLAYFILGMI EIKTSSPGLSTPIMFGILFAIDFIFIALCLALRWKMRR  
IFQQVLKRKVI GTSDEEKGKQKQKQFWFGSPALVIYMIQLMNFYALSF SIVI IYSEYL  
NETHEIWVGIPAEIAFPATTLFCYFVFLSILSALLPEFTLCTSLGYLTNRKELDETVAMH  
RLEEAERQHRRKLI EKATVNDTIFQSHPVDT SINVTASGVGVEQKRLPSDLRDSVGGI  
LSTAEKEEAPLLSDLVKIDTEKLQSRLEESREKLI SRQERRHNRQKSLSDGVSAMRAW  
NQGQSPNSQEKKEITTONRRSRRKAISQPGVIQGWQKLT VSEQRKNMKHSVNASDAKVV  
KESKREKSNSDPRTIKDWKEKVESDELLRSKDDGPIFLRKGGTI INGGSGESIPAWKKER  
LERLAARKRARKKTQSASAI IQSWQDYSIREPPREHSETILNENCKSGDREGSSFDGSR  
GTVLYSTLKATIDSEGKVNQTPYFEKRLSLHTLIEDEAHNEVFLRDGDCGSKSDRNTV  
IDLSDAVI IDGGERDFNKRDDGTVDTGK SIGNSDQVVDIDTTGISSFTERGLQAERDD  
ASSYQGVLRKARLYFIGMPYPYVSHVLGTSIVFYLVGHRVESFRQNQGGESPFSDKAWF  
WLEATMFLCFIVADFI IALFPFWEYTKTERRLVFATIADLLIVTAVTTLFFVAEKRC  
CMDEIAVAQIATVRERNLVIGKDDL VGFVGTCPPEWGVRTYGGIGMIEPFTCLIVLRLFRF  
YFAEVLIRSEEIYLRRRPSNEVKNMHETQQNHNDNARVNQHSRGNVHQSGTALELWERA  
MAEFPDIVEKYGQFSGELLQAMLGLQFAVVAQGTASSTPPNASTIEHEQKRSIDSRQLES

HIMLAGSRHTQLPPRVQALI IAGQLGKPVKPMNPLGHQNPATLVVAAESTSAKAMRPVEF  
EVDFEQMKCQNNVKYEF IAPFARLVRSMRRCRRHLPLLLKGWTSVDVVMTQFEIVYFEAI  
DSLNSIADEETKIHSDACRLALEATKGGKNLRLCDVAQGRVTVGHLLDLADVTEVHVERDD  
TPVSDVSLVENDGGLLDKDQDLAVEHWSNPCSETEANKKYSRIIRWSLQCQESRLRISTKA  
GKLFRLFYSDLALFEANNSGEAKTISNCLTREISFQWAQTVCRICGRSQLEQNLPHFGEN  
NEEELQDYLEVVFHEKEAEQSRNIARTANRMANTDLLFLGAKGSNAARKKVKHKRTKS  
MVDLRGAITADKSNIAFGNTAMNVISSDESTMQARHRDSKRVRVRSRSMVDFISVTGTEQ  
VNEPDISFPFAMELNEAEKHV

>comp10892\_c0\_seq2; 982 1 3967 LEN=4053; translated  
XRAVQEEGSSKYGTEGSRKQKRRASRKKCIRLSKSIWKHLKTGLARKDGFTRLTGTTQH  
PYEMGWQYEQDEFEYGFGLDVIDRMLAGDESTFKDESAFDYTIILNYGIWTLYLVLVFEFV  
RHSVNHAHGRPFPTAVLSMAYSELATLGIVEFGVFLWGKYGYIQKDRKAKFADVHFALF  
FTAIFNAFYGLTISIFSTRKSNKMWVKTEQLELDHYVEIRLEYDRVNKIIENQCRGFFGK  
LDLFCRSGLRRQHEKLRVQVKFHELRLHFLEFNLPFSLKVS DYLKRSELSILIGLVHV  
SATTWVLLIALMNLAYFILGMI EIKTSSPGLSTPIMFGILFAIDFIFIALCLALRWKMRR  
IFQQVLKRKVIIGTSDHEEGIKNQKQLFWFGSPALVIYMIQLMNFYALSFSIVIYSEYL  
NETHEIWVGIPAEIAFPATTLFCYFVFLSILSALLPEFTLCTSLGYLTNRKELDETVAMH  
RLEEAERQHRRKLI EKATVNDT SIFQSHPVDT SINVTAISGVGVEQKRLPSDLRDSVGGI  
LSTAEKEAPLLS DLVKIDTEKLQSRLP EESREKLI SRQERRHNRQKSLSDGVSAMRAW  
NQGQSPNSQEKEITTONRRSRKKAISQPGVIQGWQKLTVSEQRKNMKHSVNASDAKVV  
KESKREKSNSDPRTIKDWKEKVESDELLRSKDDGPIFLRKGGTI INGGSGESIPAWKKER  
LERLAARKRARKKTQSASAI IQSWQDYSIREPPREHSETILNENCKSGDREGSSFDGSR  
GTVLYSTL KATIDSEGKVN DQTPYFEKRLSLHTLIEDEAHNEVFLRDGDICGSKSDRNTV  
IDLSDAVI IDGGERDFNKRDDGTVD TGKSIGNLS DVVDV DIDDTTGISSFTERGLQAERDD  
ASSYQGV LIRKARLYFIGMYPYVSHVLGTSIVFYLVGHRVESFRQNQGGESPFSDKAWF  
WLEATMFLCFIVADFI IALFPFWKEYTKTERRLVFATIADLLIVTAVTTLFFVAEAKRC  
CMDEIAVAQIATVRERNLVIGKDDL VGFGCTCPEWGVRTYGGIGMIEPFTCLIVLRLFRF  
YFAEVLIRSEIYLRRRPSNEVKNMHETQQNH DNARVNQHSHCRGNVHQSGTALELWERA  
MAEFPDIVEKYGQFSGELLQAMLGLQFAVVAQGT SASTPPNASTIEHEQKRSIDSRQLES  
HIMLAGSRHTQLPPRVQALI IAGQLGKPVKPMNPLGHQNPATLVVAAESTSAKAMRPVEF  
EVDFEQMKCQNNVKYEF IAPFARLVRSMRRCRRHLPLLLKGWTSVDVVMTQFEIVVSIHN  
FC

>comp10893\_c0\_seq1; 129 1 936 LEN=936; minus strand; translated  
XLPDQAVFSQLAIVEPGFDALWSVALVAGGTLPLGPFVAEVHQRVQVHQVPQDPPVADQQ  
DGVCAASGVGKMALPSQQVREAPVPPFRGVLVLLHLGGPRFVGLGAQGI E V P V G M P R H Q L  
RFGAPLSVQQVPVDLSEVL DADPRGGA EAGRIVA AFPRYPV GKDQIGRVHRPRQAAGHHQ  
VDSEGIVVVVASFATAASARREVGPPAPFPLPSEVREIGIQRIVLPHQAEFFHRAA  
PLFCGLGAGIVHGLAVANHVQNLRRRTATGRGARETPASGLATDDLVT EEA VRPAIRNLL  
SMGLLRTGKHRSX

>comp10894\_c0\_seq1; 274 167 1003 LEN=1096; translated  
MSSRPLLF SASSAARRALWTRTCAHTSCFPEIKREIDGRRRNYQFAAESLCKVSTHPSIN  
CSLTLLRHSDVTSRSFASRRRANGK K K K T D T G V V S N E E L I A Q L I R N A S V S S A D K V T I R L V  
IDEGPDT P S S V E V I S L S E A I E I S L D R E L D L I G A N I K G D P P V R A T Q L S K L E Y K H K Q A Q K K  
QQQAAANR K E L K A F R F K A G I E S N D L E R K L G R L R G F L S K G H C D F T V F T K M R T L R Q N P N A G  
I E L V N K I R E L L A D V G D I K R E P Q T N E T K S F Y R V Q Y V P K K

>comp10896\_c1\_seq1; 290 95 1102 LEN=1102; translated  
MTRKGLRRDRNVSERATLSPPILFVAAMLICSSSFFADAF LPPASSSTSGICGALEAILG  
SRDQEI PNGCSLSLLEIESPGITEQLSRRKWL SRVPQHLGVTA AATALATSGGVFPAYAM  
TDNIGEVTDKIFVDISGLSASASAE LGQTQRIVLGLFGKDAPLSTQKLRSLHSSAGLAAP  
CKPLKEDFLIQREQL EANKVYRSCTENQDKGVNYDYAQIWRIVKDQRIDFGSLSGKFVAR  
EFPTWGEVSTANSAADYLKLNNSARYLVAVRKGSDSGFGYTI F P V S T A S S N P D F L D N Y L V  
VGKVI EGDDVVSTINEVSVVNSAKNLYMGI VGGGG

>comp10897\_c0\_seq1; 337 926 2917 LEN=3304; translated  
MKPESSVSQQKRDAVLRDAEFSSASRSVDSALEGIDAQVLELLSEDFLYPSVGEDAKPPR  
RRHGSKPYGRPELVPGAMTWASMKKYQQKRDLLNHMVEKTNEPRAATLIKRNLESRLHVS  
SKEVSRKVQSRKQRKFERATRGAFRKTKKDKLPDEITSTQSTTEDSSLTTATKKKATRKN  
RVKKNL PKGRPKKKSSELYFEHDSQDFIGSRARPGRKRQPGANNAGDNNLELRKYAT  
ELLTPEQEYTI GEKIQLMVQCEQVHEGLCIKEMRLPSIAEWAHACGYQEGNALQDPHVGA  
AGNHKQSSDHVVTVELVERQIRPAGYANIFTKIDPNMFVGNGLAQNVGVGRGRGRAKKPPP  
CSITKNVYKLD RKTGKKLGLLSAKPVNRGTVEDFCEMMIGRRRAKQLMIQSNMRLVISIA

KKYSKVGVS LQDLVQEGSLGLSRAAEKFDPSKGFKFSTYASWWIQQAVFRS IAYHSRTIR  
LPVHIHNMNRVRKVRSS LQQGMGRPPTDEEMADALDMPPSKYKRMIKLTKRSISLETPQ  
YQQNPKDHGHEGDDSIGDMISSQNDFDNNLDNENV SPEKSVDRSLFHKDLDEMLDNLNEG  
ERTVIKLR YGLEDGLTRTVTATAAKLKKPPAWVRSQESKGLRRLRRPWYEKKLMEHQQSM  
MNL

>comp10897\_c0\_seq2; 212 926 3042 LEN=3429; translated  
MKPESSVSQQKRD AVL RDAEFSSASRSVDSALEGIDAQVLELLSEDFLYPSVGEDAKPPR  
RRHGSKPYGRPELVPGAMTWASMKKYQQKRDLLNHMVEKTNEPRAATLIKRNLESRLHVS  
SKEVSRKVQSRKQRKFERATRGAFRKTKKDKLPDEITSTQSTTEDSSLTTATKKKATRKN  
RVKKNLPKGRKPKKSSDELYFEHDSQDFIGSRARPGRKRQPGANNAGDNNLELRKYAT  
ELLTPEQEYTI GEKIQLMVQCEQVHEGLCIKEMRLPSIAEWAHACGYQEGNALQDPHVGA  
AGNHKQSSDHVVTELVERQIRPAGYANIFTKIDPNMFVGNGLAQNVGVGRGRGRAKKPPP  
CSITKNVYKLD RKTGKKLGGLSAKPVNRGTVEDFCEMMIGGRRAKQLMIQSNMRLVISIA  
KKYSKVGVS LQDLVQEGSLGLSRAAEKFDPSKGFKFSTYASWYVRVEIFGWVDFDPLYPF  
LFVVFVAFTYRAQLVKSLCFKNLRWIQQAVFRS IAYHSRTIRLPVHIHNMNRVRKVRSS L  
QQGMGRPPTDEEMADALDMPPSKYKRMIKLTKRSISLETPQYQQNPKDHGHEGDDSIGDM  
ISSQNDFDNNLDNENV SPEKSVDRSLFHKDLDEMLDNLNEGERTVIKLR YGLEDGLTRTV  
TATAAKLKKPPAWVRSQESKGLRRLRRPWYEKKLMEHQQSMNL

>comp10899\_c0\_seq1; 212 1 1302 LEN=1643; translated  
XRIKNTVRAFVFGDDAQEKESGGGADCHKQOPGHWIVDS DIANPMSVYEQYRKSRTSWG I  
DAMGSVVVEVELSNGMVGVGISIGGDAACYIVEKHLARFVEGADPNNVELIWDQCWRSTI  
NYGRKGIAIQALSALDLAIWDALGHLRGLPVYALLGGKTKGKMPVYATTARP DFAKDMGF  
HGAKFPLPFGPAQGE EGMRKNIEMVKKWREAVGEDYPLMIDCYMSLTVPYTIELARRCEP  
YNVKWIEETLPPDEYDGYAKIKEKVSTLLTTGEHEYTRWGFRLMLLQKNCCDVLQPDITC  
KXVIQGVLLVNFEDLSHLSTREYRILQSTANTQCGGMTEARRIVALASAFDIPVIPHGS  
SVYSYHLQICFPSCPIAEFLVMSPKADTIVSFFGNLFKNEPLPKNGYVDLTDKPGFGVEL  
NREELNLR RPYP RD

>comp10899\_c0\_seq2; 105 1 334 LEN=580; translated  
XRIKNTVRAFVFGDDAQEKESGGGADCHKQOPGHWIVDS DIANPMSVYEQYRKSRTSWG I  
DAMGSVVVEVELSNGMVGVGISIGGDAACYIVEKHLARFVEGADPNNVELI W

>comp10899\_c0\_seq3; 187 438 1210 LEN=1551; translated  
MGFHGAKFPLPFGPAQGE EGMRKNIEMVKKWREAVGEDYPLMIDCYMSLTVPYTIELARR  
CEPYNVKWIEETLPPDEYDGYAKIKEKVSTLLTTGEHEYTRWGFRLMLLQKNCCDVLQPD  
ITCKXVIQGVLLVNFEDLSHLSTREYRILQSTANTQCGGMTEARRIVALASAFDIPVIP  
HGSSVYSYHLQICFPSCPIAEFLVMSPKADTIVSFFGNLFKNEPLPKNGYVDLTDKPGFG  
VELNREELNLR RPYP RD

>comp10899\_c0\_seq4; 218 438 1109 LEN=1450; translated  
MGFHGAKFPLPFGPAQGE EGMRKNIEMVKKWREAVGEDYPLMIDCYMSLTVPYTIELARR  
CEPYNVKWIEETLPPDEYDGYAKIKEKVSTLLTTGEHEYTRWGFRLMLLQKNCCDVLQPD  
ITWCGMTEARRIVALASAFDIPVIPHGSSVYSYHLQICFPSCPIAEFLVMSPKADTIVS  
FFGNLFKNEPLPKNGYVDLTDKPGFGVELNREELNLR RPYP RD

>comp10899\_c0\_seq5; 243 1 1201 LEN=1542; translated  
XRIKNTVRAFVFGDDAQEKESGGGADCHKQOPGHWIVDS DIANPMSVYEQYRKSRTSWG I  
DAMGSVVVEVELSNGMVGVGISIGGDAACYIVEKHLARFVEGADPNNVELIWDQCWRSTI  
NYGRKGIAIQALSALDLAIWDALGHLRGLPVYALLGGKTKGKMPVYATTARP DFAKDMGF  
HGAKFPLPFGPAQGE EGMRKNIEMVKKWREAVGEDYPLMIDCYMSLTVPYTIELARRCEP  
YNVKWIEETLPPDEYDGYAKIKEKVSTLLTTGEHEYTRWGFRLMLLQKNCCDVLQPDITW  
CGMTEARRIVALASAFDIPVIPHGSSVYSYHLQICFPSCPIAEFLVMSPKADTIVSFFG  
NLFKNEPLPKNGYVDLTDKPGFGVELNREELNLR RPYP RD

>comp10899\_c0\_seq6; 311 179 1429 LEN=1770; translated  
MSLILGPHPVVTPSKNTIVIKHVRAFVFGDDAQEKESGGGADCHKQOPGHWIVDS DIANP  
MSVYEQYRKSRTSWGIDAMGSVVVEVELSNGMVGVGISIGGDAACYIVEKHLARFVEGAD  
PNNVELIWDQCWRSTINYGRKGIAIQALSALDLAIWDALGHLRGLPVYALLGGKTKGKMP  
VYATTARP DFAKDMGFHGAKFPLPFGPAQGE EGMRKNIEMVKKWREAVGEDYPLMIDCYM  
SLTVPYTIELARRCEPYNVKWIEETLPPDEYDGYAKIKEKVSTLLTTGEHEYTRWGFRL  
MLLQKNCCDVLQPDITWCGMTEARRIVALASAFDIPVIPHGSSVYSYHLQICFPSCPIAE  
FLVMSPKADTIVSFFGNLFKNEPLPKNGYVDLTDKPGFGVELNREELNLR RPYP RD

>comp10899\_c0\_seq7; 280 179 1530 LEN=1871; translated  
MSLILGPHPVVTPSKNTIVIKHVRAFVFGDDAQEKESGGGADCHKQOPGHWIVDS DIANP  
MSVYEQYRKSRTSWGIDAMGSVVVEVELSNGMVGVGISIGGDAACYIVEKHLARFVEGAD

PNNVELIWDQCWRSTINYGRKGIQALSALDLAIWDALGHLRGLPVYALLGGKTKGKMP  
VYATTARPDFAKDMGFHGAKFPLPFGPAQGEEMRKNIE MVKKWREAVGEDYPLMIDCYM  
SLTVPYTIELARRCEPYNVKWIEETLPPDEYDGYAKIKEKVSTLLTTGEHEYTRWGFRL  
LLQKNCCDVLQPDITCKXVIQGVLLVNFEDLSHLSTREYRILQSTANTQCGGMTEARRI  
VALASAFDIPVIPHGSSVYSYHLQICFPSCPIAEFLVMSPKADTIVSFFGNLFFKNEPLPK  
NGYVDLTDKPGFVVELNREELNLRPPYPRD

>comp10900\_c0\_seq1; 339 200 1831 LEN=2216; translated  
MADFIELVESSRWLIDRALSSQESDDFLNLETEQYQAAAPAAVANDNILHALVNDESTYT  
SESTSPFLSKSAEAEELLYLLATNFLLYVAMVIITIVAKVYFPDSLKRGSIPIRIRKYSYR  
RTEQKEQRSYADEEEDALESLYSDDDDDSDANRGSSSEYDEDEDHEHQEDPLLSDDMMGESDF  
HHSARVLEFDQEQTSTRAQVIKRLLLCSLMLNLTFTVTWGALQERMLTRRYPRHTGDYFTYT  
YALVFSNRLWTLILSSTLMWYLPKRLSQSTVIYEYSFSPISNMLSSWCQYEALRYVVSFPA  
TTLFKSFKLGPMVLMGKLIGNKHYPAYDYFVALVIGCGIALFMTSTDDLRFSSMDYLG  
AEVASAKWTGVMLLCCFFLFFDSFTSQFQSRLFQRHLDLSELVLMFATSASFSTVLSFITLV  
HTNELSPAFAFVMEHSEIQLHFFVFSICSTIGQLFIFYTIKNGFVFTLIMTTRILLSI  
ALSCVLYGHPVTNVGYLGMALVLFVGLYRIKKKSEGQQLIRWQGMDEKKGKELVHEWHEH  
LDM

>comp10900\_c0\_seq2; 271 200 850 LEN=2335; translated  
MADFIELVESSRWLIDRALSSQESDDFLNLETEQYQAAAPAAVANDNILHALVNDESTYT  
SESTSPFLSKSAEAEELLYLLATNFLLYVAMVIITIVAKVYFPDSLKRGSIPIRIRKYSYR  
RTEQKEQRSYADEEEDALESLYSDDDDDSDANRGSSSEYDEDEDHEHQEDPLLSDDMMGESDF  
HHSARVLEFDQEQTSTRAQVIKRLLLCSLMLNLTFTVTW

>comp10900\_c0\_seq3; 219 200 970 LEN=2455; translated  
MADFIELVESSRWLIDRALSSQESDDFLNLETEQYQAAAPAAVANDNILHALVNDESTYT  
SESTSPFLSKSAEAEELLYLLATNFLVGRGVFFVRFVSSGIDLLELDCAWPLTALTNVHSL  
YEWIALVAMVIITIVAKVYFPDSLKRGSIPIRIRKYSYRRTEQKEQRSYADEEEDALE  
LYSDDDDDSDANRGSSSEYDEDEDHEHQEDPLLSDDMMGESDFHHSARVLEFDQEQTSTRAQVI  
KRLLLCSLMLNLTFTVTW

>comp10900\_c0\_seq4; 287 200 1951 LEN=2336; translated  
MADFIELVESSRWLIDRALSSQESDDFLNLETEQYQAAAPAAVANDNILHALVNDESTYT  
SESTSPFLSKSAEAEELLYLLATNFLVGRGVFFVRFVSSGIDLLELDCAWPLTALTNVHSL  
YEWIALVAMVIITIVAKVYFPDSLKRGSIPIRIRKYSYRRTEQKEQRSYADEEEDALE  
LYSDDDDDSDANRGSSSEYDEDEDHEHQEDPLLSDDMMGESDFHHSARVLEFDQEQTSTRAQVI  
KRLLLCSLMLNLTFTVTWGALQERMLTRRYPRHTGDYFTYTYALVFSNRLWTLILSSTLMW  
YLPKRLSQSTVIYEYSFSPISNMLSSWCQYEALRYVVSFPATTLFKSFKLGPMVLMGKLIG  
NKHYPAYDYFVALVIGCGIALFMTSTDDLRFSSMDYLGNAEASAKWTGVMLLCCFFLFF  
DSFTSQFQSRLFQRHLDLSELVLMFATSASFSTVLSFITLVHTNELSPAFAFVMEHSEIQL  
HFFVFSICSTIGQLFIFYTIKNGFVFTLIMTTRILLSIALSCVLYGHPVTNVGYLGM  
LVLFVGLYRIKKKSEGQQLIRWQGMDEKKGKELVHEWHEHLDM

>comp10901\_c0\_seq1; 617 1 1668 LEN=1881; translated  
PEKSKAQRSHPRYQGGRPKEKRRTNQTPTDTRVGSFRETIASRTMENQYAHRRPGRVGS  
LCRTTRTNASTIGIRSIARSVPSLAIVLAALWASRVRAWNPVAVLGTQRTNFRYRSSAS  
RLFASGSTGEPATASANTKDSSTVVDQNEKLRKRLRDQRNRRPPQIVCCSSTKELVHAV  
NSIVGEDDVVAELGSQLRDVSDAIWERGSPSSVFCVVKRDYPKVAVRSSARKEPLSPNET  
TRINAMRLEDSPGAGAGSGMDFREIEKFSWRSAFFRDRDSSSSSSSCRYDVLVLDVNA  
IVGNDLEWTCCLDLILEFEQMAAMVAKGSRNSSEDDGEDEYEDGDYHGLKYVLVKSGLNS  
VASQLTYTVPWLPNKTNNHNLRCRIVATVGVHDYRQTIIPGVQTLQSHLKAEEKDGDN  
ETSKNFVLEVGCHFGTSTVLLDETFDHVMGVDVGSKI IREAQRKHGPFVFRGTDAWKTAG  
LLRLQQEYEEERSVPSDQRTIGFDVAVYVDVGGLSGADGLLDTIALVKSIIQYALEPQCIVV  
KSLCLQRLAARFVPPYW

>comp10902\_c0\_seq1; 319 1 700 LEN=1274; translated  
XATRKHTNRKEASRVSLTFGREMPHSAATAAEEATRATAARKTRTPKRGVHCRISAA  
LFVAAFAIAAMVPQALFRGAFRCPCLAFSPGALRTPGFAAGMRGNCHRHRNRLLASVTGT  
VYEGGVVVVTLTYTKEGCTLCDKVKDVLAKVNDEEGFAHSLKQVDITDDDQADSFDRYKYD  
IPVLHIGSGDSGAGAYWTKHRLTEDEAREALTEAGTGFEEERTGRPNAAMER

>comp10904\_c0\_seq1; 193 1 662 LEN=1496; translated  
XCHREMNI EPMNELFATEVQMI TRIDNGIDEEVAFLTEAEANLKAEDAKVPLFKFILTG  
GPCGGKTTAIARLSYFLKERGFVIAEAEVYTI LASNMSFDFYSTE GMDTVIQNAVLDI  
QLSLED SLERVLKARGKPAVLLCDRGPMDGKAYLSDEKWKKILDERGVTEADLRDTRYNA  
VFHMVTAADGASSFYTLENNQARSETPEQALDLDLRRSQKCW

>comp10904\_c0\_seq2; 204 1 683 LEN=738; translated  
XCHREMNI EPMNELFATEVQMI TRIDNGIDEEVAFLTEAEANL KAAEDAKVPLFKFILTG  
GPCGGKTTAIARLSYFLKERGF EVIACAEVYTILASNGMSFDFYSTEGMDTVIQNAVLDI  
QLSLED SLERVLKARGKPAVLLCDRGPMDGKAYLSDEKWKKILDERGVTEADLRDTRYNA  
VFHMVTAADGASSFYTLENNQARSETPEQALDLDRRSQKCWLGHPPHM

>comp10904\_c0\_seq3; 327 1 1316 LEN=1399; translated  
XCHREMNI EPMNELFATEVQMI TRIDNGIDEEVAFLTEAEANL KAAEDAKVPLFKFILTG  
GPCGGKTTAIARLSYFLKERGF EVIACAEVYTILASNGMSFDFYSTEGMDTVIQNAVLDI  
QLSLED SLERVLKARGKPAVLLCDRGPMDGKAYLSDEKWKKILDERGVTEADLRDTRYNA  
VFHMVTAADGASSFYTLENNQARSETPEQALDLDRRSQKCWLGHPPHMYVLDNSTDFESKL  
QRLVNI VCVLGLPTNLSRRSTKYLLQKRPNGTSF PKDVFHRFEVEKVYLVVQDDADGG  
AYSFIRKRTTIGEGGKKQGSVYQLTDVAKKDGQVFETKRIISAREYNASYKSRDPSRHIV  
RQERISFLYKTSFTIHNQEYQSPGLCILHAQVESKDNETPIVDLPDFLEIDRLLLEKSDE  
DTYGAYSLSVIRDETKYN

>comp10906\_c0\_seq1; 455 130 1035 LEN=1429; translated  
MKFFTALVAALGGSASAF TTPAKNSATTALFSSQYEAGLATGVGAPVPEERGGEMALTK  
DVWETLSP IKVQGGSLRTWSFTTPSIDSVQVHLKTEGRPLNANVELWQGPDPNTPQKMAVY  
LEDGNLRPFRAVIASPGSQNSIAIRNTASMEYPIAAGVEADIKDGGIENFTDKLSKMATP  
RTVQGGAVFTMPFAPSVASVQVLLKTDGRPLNARIELLQGPNNVKQVMEVYTEDGTERPF  
FAILETPGTGNVVRIVNTATVEFPLGCNLEPFLVEEGSDDMFIVSEEQGTSSSKFFFLD  
K

>comp10907\_c0\_seq1; 365 1 774 LEN=1011; translated  
XNNNNNSGGSDSGSTRDSAGMPHHRPLNTTVVLGGATV IIVA AVVTATITMTTTAITVR  
PIIPFTCTQPEATIAAAAAI LVDPPSMSTTFQAAVDVATVILAVXMRDVHRSTRSGSNSS  
NGDGNDAKHVLLVLLVVAIVMAIVGFFVGVLVVVVAIQRIVARHVHLLQKRQLVQEYRV  
VDLQDYDLDTPVTTAPAEGEAPAGTAGTGSPEGFESTGVEGGAAPPAGTVGHPPSAPVM  
TEEEAEYLWKLGLMDRRR

>comp10908\_c0\_seq1; 538 182 1642 LEN=1718; translated  
MSKLQELKEGLSKIKVLEAELANSKWNEDPSPKSVSDFQNSLLERYQRAKSLYIQRRLS  
FMVENVSSFNENNEFEIPDISSIEETGSSSSDDEL SHRNNDAATRSLDERHAKALAA  
LETAAQ GIRVTLDNMRNSYQTVISRKELEQMVQDLEQDDDND EETDIDEDDETMMDIED  
TDAEREKTELLQQRKRKLQEEYAMLLKEKEERMKTISHSREELATLKAESRILQSGQDP  
TEFKQKIKELKEMKEFYDSL RDVMEELGSVKILDAREDSKSCHLFLTVSVYEKHRVEFEL  
EVYRKTLLKLVNARVWVSKPIVTSISLDDIHHEQFSLPLDPFDDL VQTAKTSMGPPHDLRF  
VVRET CARIRIVQSRVNDLAILRRRVLT KVVGNQVVC SLNEGIVIVMRLYDQWVKVEQV  
IGVSGWDDSATEK IHKVVSKRDESWTPNLVVEFVQKEVERLRAQDGLVLPKTPVLP MRRK  
RQADEK

>comp10909\_c0\_seq1; 646 91 1566 LEN=1628; translated  
MIGKNRSLAALFVALQTASTTDAFTPRALSLASPSTSGFSALQPSTVRLFSSLDDDELYK  
MLGKRSGIRRSKEELPSEDAVDDDDFANDLLDDFDLSD FVPDFKTRKRKPKKKDKD  
EDNDKPTSSRNDDAGFDYLADYDDENDLHIPNRLGVSTRCWGEQKEGFVPSGK LKKKQLR  
EGKFVPGDLQVAYNKLL EEGIFLFETSPAYGKSMAKMDLSSEAILS KLIKENQESEIPPL  
LVSTYDNQIWERTKGLISGLSASCETLDQPVV DVYQAKNIGWLP SGGI IKGMADAVIDE  
GTANFVGVQNVSPLRMRRLNQKLD SVGLSITTNCFEFSLTNRKKEK WIESCKAQGVVPLI  
RNPEGSGLASAQYTASNPSGGVASAGSKYSFKTLEKYQPLHSMLESVAERVRTRLLREGR  
KLKGRTKGPEKKVNTDITTAQVALNYVVAKGAVPLAEVNSPKDAEQLAGCVGWSLTDEEV  
SMLESAAELCS

>comp10911\_c0\_seq2; 219 225 551 LEN=704; translated  
MPTTLAKVCIFLVLPIGAGILGLYSVYLKQFSEPD RKLTIEADFGLPFMLTLLLVVVVGF  
QTNGYNTSKVNPLIRWPVKRTRKF IHKHVVKGQDDDDDEKDAELKKNE

>comp10912\_c0\_seq1; 73 436 770 LEN=770; minus strand; translated  
MRESLRCFPHRAAVLACLFLAWLGAVGETAEALKHNY YTRDRHSLIGPLGFPFGFLDSG  
HYNLTVDFEL SAPKKHRHKNGEHGGSAANDLV LADVLDNVKGAGFLLKX

>comp10913\_c0\_seq1; 930 1738 4403 LEN=4403; minus strand; translated  
MTPKDNRIAKMHKCI VNIIGIYRS GTTTLAKAASHLG MKVYRRFPDIRPEELK KILQDPGG  
AVNEWACSGGVEALIDL VSKYDFVCDGW FAMPLPFLSHSVLDKIDQKARDSNVELRLVATS  
RDIEALVKSELQHWVQNL EHRaelPLEERSRLEENLGERARLHQQRVRNIVRMGRAVLL  
PLSDFGAWPDCLRASTISDI SEFSWASALKEVGCNSSGPLPIEGILLT MRLGSNDIADK  
KITSVERLLDSIEQDHLCRYLIVFGIDADERDTRAEFSLVEKLQCRANVSPQMVSYIIT  
NPTSPTDKQFAICDSWHCMAVKAWEKGADWVVL LGDDVTIDCSYHYRAFFRSFLDIADRL



KLPRDTFFGSPFWNDTSFPGFSPFPCMGKSHFEIFRGLIPNHRNGIFVNQDLDPYLHNL  
LKLDAASPCVTPAKLVNGIGGNIGAGLPRYKRVPAKGWQDFVLEDFRKFVVRPFDPQEGVQED  
ILLDVVVPYSYRVRLDYLSQICYLRVPERIHTNFI I IVDNQKELFRAAKEIKPDAEEDSVA  
HAVKLEENRGRSGNTVVRVCNEENVGASASRNRLDESCAEFVLNLDLDDLTDPDLLEH  
YGKKILEIDDSVVGVLVGLVRFPRSPNLPLRHA AVLMSYLT F MFEIAEHTSYATPAWGVT  
NVLFRRTGSI RFDLAYAKTGGGEDVDYALRITEACGGGKLLALPKARVVHPFWPGSIFGL  
LSHFHNWAIGDGLSFRFPEHCYWSFNLPEMLLVAVVPFCLQIGVVDFRFFVLCFSAD  
VLVDGFGSDWNHRIGVVQIGSDRIATKRSVVFYLLAHILANLYVFGLECGRLRGHISRM  
DLFHGLFRFDGISVDWKEHQRTFDGGKPKSFSFSLPFYLGSAKVD SX

>comp10914\_c0\_seq1; 742 253 3114 LEN=3232; translated  
MRIRNRSYATAFAVSAATIASFSSQQVTDALRSSSSPRLSSPRTTKIRTTRITPRT  
TTRRRVSHVACRASRTETDQNTNTNSNETIRIRRKANGAPVIDSVLLQFISQQNNIPDA  
FREEKVAEGVANILETARIDPGADEFNSDDYEGPPIRAYMNSTDLSSGETKLVRTSEDSK  
ELPPPLTQPEDKKHSLAEENVNYASTTDAIKRKLTDTGGSVAAVDPESSESQDSIAPKT  
ASSWMIQFGSSSVAQMLLKEAGVEDSLAAKTAGDAVERYCVVRTARRRIRRFKERDNLW  
ASTVEDRSSSARAELES LAASDMATSPAASLLLLSSAEHRDKSDNTIRDPSYGFTDVIEV  
LKDYGLTGDDICVLLTHSPNLALRVPRKSFLREGETDHAETLEETLDRSLTGLLLGRLNL  
RRYDARKILRTPGLLSVRGSESAQVLTIMTKLGVSESSLARDKSSLPVLLSRSPAGLF  
RLVAFLSSTAVRMPLEKIGPLLRESGRELMDTLVPVNTSFSKVRSD EAAPTNDQLDE  
EATTSTLFDAAAWSRTRMERQERIERTYANMVKTASLLRAQTGSNDVSRVISAFPSVLL  
LDAEKQILPVARYMMGGLGIWKDDLSSVIKHLPTVLGKSIEELEKTVSYVLAQGV EEDAL  
AGIFRAFPGFLFALEVETMQTVVDYLSIGVRDIGSFITKLPPI LGYSVEKDLKPKWEFLK  
TVCLQPEFELAQFPAYFSYPFGRVIKTRFNYLAYKGISIRFVSMRIDTVLRFGDVDFATK  
VAVDDDGGAFFRRFGKQRESRSANGHARRM ASSKKKNHGRRNDQRKRNFKHNSKNGATS  
RFEKRYINNNNNNNNGSRNSNSNDRRRKEQQSRQTESPLEAAKRLSRDIDNAKDLAELN  
KSFREAMPLRNRRI PPQQKRNTKQPAQKPNII TKQIQEKNDEADDASWPVTA

>comp10915\_c0\_seq1; 410 1 1389 LEN=1389; translated  
XAAASSAAASTASSVAAATLVSQSMAIGAAQGIAGSAISASIAATGMASGAVVGATTGGG  
LIAAVGLTGGGASASAI AASVVGAAVAGSAVYXSTDITSTVSGNLPHENPDIRPGVVRL  
TLNVADILGDRDFFLIPGLHENTGNADEYDGINXSDWEELLASTYNNLTDFGCNEPFERR  
IGNVSLLSAAANTYDEGDGIEGGLLDVEWNVTVSCWEKCPKEPVFGSDLRKLTETTGEE  
EAEDITEKDADYSNRPFGLISEMEFRQQLEKMTKAYSTASQQQKDKDSSTDESQLTENY  
SDVPSVSPSELPSQKASQVPSEEPSQVPSGLPSSIPSQIPSM LPSIGPSLIPSNIPSTFP  
SRIPSEIPSDIPSDIPSEHPSGSPSRVPSNVPSSSPSTRPSNVP SGSPSVVPSVIPSELP  
SSLPSLLPSNLPSIVPSQPPSEIPSTFPSEYPSVIEAPSMTPS

>comp10915\_c0\_seq2; 418 1 1324 LEN=1324; translated  
XAAASSAAASTASSVAAATLVSQSMAIGAAQGIAGSAISASIAATGMASGAVVGATTGGG  
LIAAVGLTGGGASASAI AASVVGAAVAGSAVYXSTDITSTVSGNLPHENPDIRPGVVRL  
TLNVADILGDRDFFLIPGLHENTGNADEYDGINXSDWEELLASTYNNLTDFGCNEPFERR  
IGNVSLLSAAANTYDEGDGIEGGLLDVEWNVTVSCWEKCPKEPVFGSDLRKLTETTGEE  
EAEDITEKDADYSNRPFGLISEMEFRQQLEKMTKAYSTASQQQKDKDSSTDESQLTENY  
SDVPSVSPSELPSQKASQVPSEEPSQVPSGLPSSIPSQIPSM LPSIGPSLIPSNIPSTFP  
SRIPSEIPSDIPSDIPSEHPSGSPSRVPSNVPSSSPSTRPSNVP SGSPSVVPSVGRPSQLP  
SSLPSILPSDIPSNIPSNLPSNX

>comp10915\_c0\_seq3; 36 1 258 LEN=258; translated  
VPSVTPSISPSKQPSGTSPVVPSEVLGSPSVVPSVIPSELPSLPSLLPSNLPSIVPSQ  
PPSEIPSTFPSEYPSVIEAPSMTPS

>comp10916\_c0\_seq1; 575 572 2686 LEN=3120; minus strand; translated  
MATTIGSEQKQHQLPQNSSPTPFVDIDIGIDMGNGENHG DALQPPALHLRWKNITTKVD  
TKPEDRASAILRSSRISRVTPNRHRKDSNSLSKTNTRVILNNVSGEARPGEILALMGPSG  
SGKTSLMNVLSGRAAFQEGAVTLNGMILDKAAMK KELLPRVAYVKQQDVFFETLTVREQL  
TYTARLRFPENLAWEERTKTIQKKVERILEQLKLTNIADSPIGMCSGGEKKRVNIGTELL  
TDPAILLDEPTSGLDSASAVSLLGILSDLARKQGKTILTSIHQPNSATFLNTFDKLMVL  
SDGNAVYFGTPTDSLGYLRRHHLACPEGYNAADHWMDLLVSDSFVRKGGNNGNGCDRDN  
NSTGRSPRFYLQLAWNDVAE QMNLTSILHPQGGTNEG DASALNKATGERRISAGSKYT  
TSWSTQFVTLTHRALAKNKSTLFSPIHILKTIATGVAVGIVYWNQSYTEKDVFN IYAYFF  
FTMLYWVMNGMFEALFAFPQERTIVLKERATASYRLSAYFAATTIADLPLFLFMPFFFLV  
ISYWMAVPSLGFVTFGLGILSIALLSVITGQGMGQLVGAAFDDIKVGQAVATVGVFLMLL  
GGFMAQNI PPWLSWKYLSFYSYASNAALKLIFRNPIPCDGTGAMSPVCTPGNAIGSIDP  
EVIFGQYGVTL SLAANVAACLLVCCIVPRGFAYYFLRKKKAGERE

>comp10918\_c0\_seq1; 595 103 1515 LEN=1613; translated  
MVSLYKREALLAEGKAAALVLLVLHVFAFVVMMSYRLHTQRYYSQA AISKEWVSQLSSES  
EDSGTLPKQKSGTPVNSPLKRFEPEMQQLIRRLEKQGSGVGPKREKTAQLVKTTTRKLTQK  
LKSLESPTEKDAGSDESDHDETSQSALPNWRKLVSVGSLKDIPTKELATIFGNATKEIQ  
EIVGTKREKLMKQFILDTAAGSSIVKEPSKFCVCPDLSTDSGDDDDDLNETKKLLKDA  
YKEDLKDYLEKFD AIFANRVQAKGIEALLPESVKKIETEMEEQLETIFD TIAGFADTLED  
QLEEFESDDSEQTEKKLSSSCINRELVTAVMEAGLNAQITNSDVREALRKTILALDTKTS  
ENDLILDADLKSKGRNLGVSNSGPVIKSINIRSLVDTPLLMK SIGWIDMLVDAIGGYSDE  
LDSYLDLASFHGTTSVGEIVVEKLLDEAGRMGELDAQYLKLLKDVVGK

>comp10920\_c0\_seq1; 2100 273 5159 LEN=5219; translated  
MAFESKDGSNMYDGPLALTKERDAGVGFVANTNEEFGTHKVVQQGLSALTCMEHRGGCG  
GDSISGDGAGIMTEIPWKLLEDFRSDSCPRPGVQIFLPRDEKRRDDVKAVIEKVKCKDNE  
LGWLGWREVPTDPSVLGPLALASMPVSVWFIVKAPERLSGDDEARDGFERTLYLVRRI  
AVELKKAGLEWDDDDGVVYIPSFSSRTIVYKGMVQSEVLSQFYLDLQNPDYTSRFCIYHR  
RFSTNTTPKWPLAQPMRTVGHNGEINTLLGNVNWVKAREKSKSIELGDMVDCDSSDNIVT  
MCNTQDNPSVLEPVVSLDRSDSANLDGVFELMCKSRHTAPCALMAMVPTAYMENPDLKNN  
PEITDFYKFHGGLEAWDGPALLVYSDGK SIGASLDRNGLRPARFSITKDGSVFMMSSETG  
VIPDLDEGEIVEKGRLLGPGQMINVDLMSGEFKDNIAIKSEIAKRHPYGEWIEKQRKDVTK  
MPAVDERMFDDDTATFAQASFGWGLEDIGMQIQDMAGAAKETTYSMGDDAPIAALSERPH  
GLYNYFKQRFQAVTNPPIDPLREGVVM SLGMTLGKKESIKVSESGARLIYLESPVLNSV  
EMEKIADLAQDDQGGFKQKSLSTRYALADGPSGIKTALDALCDAAVEQVKAGVEVLILSD  
KADGQTELETTYIPPLAVGAVHHRLIDEGLRMDTGLVVEETGGAWSTHHFACLVGYGAN  
AVHPYLALETVKQWHGQSRTQKMMDSGKLLKTTLAEAQENYRTAVENGLLKILSKIGISL  
LTSYAGAQIFEAIGLDEVIDRSFKGTTSRIGGLDLEDIASETIMMRPEVVGKLVNYGY  
YKPVPKLGEYHANSADLAKLLHDAIGLDKKVSAAKGRDEL PNDGVK PANVANYE IFFKSL  
EEAPLANIRDLLDFESDRESIPIDEVEPASEIMQRFC TGAMSLGALSREAHETLAI AVNR  
IGGKSNSGEGGEDIIRGKPIADVDERGRSETFPHLAGLKKGDSANSFVHVQVASGRFGVTP  
EFLVTAKQLEIKMAQGA KPGEQQLP GPKVSEYIAGLRASKEGVT LISPPPHHDIYSIED  
LAQLIHDLHAVNEYAGVSVKLVSSIGIGTVACGVAKADADVIQISSGDGGTGASPLSSIK  
HAGGPWELGLAEHSALYENNLDRVLRVDGGIRTGRDILVASLLGAEQYGFGTIAMIA  
EGCVMARVCHLNTCPVGVTSQKEQLRKKFPGTPEHVVNFFEFVAEEVRELMAHLGYKKLD  
DIIGRADLLKSSEEQNGRVAKTKSINVDKFFSGIPSTKDDRSFLKATIEGGAQVPKEEIV  
HVNGFSSELDREL VKKPEIEKVIKDNSGEVAVTVPIINTDRSSGAMLAGNIARAHGNRGF  
KGQINVQFEQSAGQSF GAFTLPGLSLRLVGEENDYVVGKMGHGEIVIVPSPEASVVSADS  
SIIIGNACLYGATGGDFHANGRTGERFCVRNSGAFVAEAGAGDHCC EYMTGGVVVMLGSVG  
RNVGAGMTGGIGYFYD TDGSFNDKVNHEIVKVQRLATPEGEAQLKHM IERHFELTGSERA  
DEILGNWEEKKGKFWQIYPPSESKTAVVSSAEDATSVLRVSASAPDGMCF LPVGAEMSA  
EQTQRCAD

>comp10921\_c0\_seq3; 250 1 1027 LEN=1104; translated  
XDIDIDIDIDIEQEQPQRSQPFVPRKDTSSPSLLSNYRSRRGCYNNMGKHYKYLKRGG  
KERRGSPTELCRSLLLLFVAIGILATAIWSIVRVVFSQNLPEATPGPIFSIISQSNHDKN  
TGFDVPFANRHNHLHFDGILFVTDDEKQE QNETLAPLSFHAYAKTLDPVTELCFSPGESNT  
TKEIILTTSAPELLNEPKVHSDPSAAMASEIAVLSILLQSNGEIWL PONTLERIEVSVET  
GESTSELPLSWVKTGGADVLDLNLGRRITKNIYSGDRFVLRITTN AIALFRNDDRELLG  
LWRNPTNRALMGSWESVPLYAQIWFREPRSSMVAYAQNELL D

>comp10922\_c0\_seq1; 318 150 1040 LEN=1421; translated  
MDLPIIDHRYVIEDMGAVQVEVSPVPLATEQKNEAGVEV TYGQRKNRRLKMP L TWLGIYD  
GHGDKASQFCSDWMSSYVKN EESYPFDLGYAMKNAFTSIDEDFVATGHPDGSTACAATL  
VGGRRIVCANAGDSRAIVVRRDGTVVRLSRDHKPGMPDETRRISELGGRVIYWRWRVEG  
LLAVSRVGDASLKP YVTAEPEVCEYDIGKDDWFLVISSDGVVDVMDNEEAHVVIASSC  
VMEEGRLKIDTNRFKWAARNLCDHAKSCGSTDNFSCVVVDL KSCGNPHAKSGMYS P

>comp10922\_c0\_seq2; 471 570 2240 LEN=2756; translated  
MATIRGRSSRSRGGSGMSTENKLR TSSSSSTNPVVS AWESRRRRNSKGNQSGHN FQSSSD  
YGD DSNEGDLSSNKRRGKRSRKSASNR TDKKKLPDKEHDPYSDPGESYREHCERIQGE  
QSRSC LAMP RFLKDG YFSNKLNQGA AVGNPLKVKVMN SSGDQGHGDDKTGATSPPSPLI  
SEHDMSTPLAPNDPSNPAHQQFQTSRPASLPRDLARVYSLRTS IGDGTDAQPGGSAAMM  
ERREL RPNNVHINVSHWSDFGGRNYMEDRYVIDMGAVQVEVSPVPLATEQKNEAGVEVT  
YGQRKNRRLKMP L TWLGIYDGHGDKASQFCSDWMSSYVKN EESYPFDLGYAMKNAFTSI  
DED FVATGHPDGSTACAATLVGGRRIVCANAGDSRAIVVRRDGTVVRLSRDHKPGMPDET  
RRISELGGRVIYWRWRVEG LLAVSRVGDASLKP YVTAEPEVCEYDIGKDDWFLVISSD

GVWDVMDNEEAHVVIASSVMEEGRCLKIDTNRFKWAARNLCDHAKSCGSTDNFSCVVVD  
LKSCGNPHAKSGMYS

>comp10923\_c0\_seq1; 1477 163 3492 LEN=3823; translated  
MERLTINCKKRLWISSFRMVLCWFCIVLSTLTIRASQAQSQQKHASINYSSNDNDGN  
SNAFLTEDSVVLITGAAGFLGSELALALHRTYSPKRIICVDRMGDHPDTQEELALFEFQR  
QRAFNVMTLGERGQFYRVDFSPMPEYFDMGEVPLDHFRENPDISHVVHLADPFPHS  
ALQAVPREKDVPKAGMMEALLEQLAKHERDARNANKNPDGESDTFVYVPPNFVYASSFEV  
YPHHTSLNLGSDKSKMEAVHILLEEKQTLSTPTSLRGASKMMDEMIKLYYDTKGLYSV  
GLRFFSVYGPWGPVGSPLFEMAERAITGDLGDLREEHEIENFHSGLNGVDIDNDETDPKN  
KNDSHRNDWKKSIHDFVYIDDAVDAMMAAMQFRSDPSPESSADGSHANSPHPIIFNVASG  
EGHSLLEDVLGVMQEHFPPKSKKSDGRRTKSSDVTGTIGSTKRAEAFGLYKQVSLREGI  
TKMLAWHYDRAFPYGGQDKNIDASKAAKLEYVTQQGIVGCLQFDKECLRGPIFFCASE  
CSHQAOCTKSSYDEVIALTQKLTSNCESVLYTVDLDESLGSLPSANPKIQTSKSFKGT  
NVAFVSQQSLLVKSHQNTPAKGDGHLRDGPWVLPVLPNVPSNVAGAIGRDGDNDYSDLINK  
NDVLRLLPKLSPGLFFGSKTKRAIYVDPVIMIENIPKLVQESYAQPYNKDMEGATAMLI  
GRGTPRDYFSDDGDEEEEIILKLDPPNYEHQVLQPKNALVQNAAYRMVKISVSDNLFGDG  
FTELLDSRWIVHGLGSNDGRLFRCDVLGEILQWEVTSDKSALEFVLGLHDMWSRVIKAS  
GIGSWWIGENVVTVPEGRRRRSTGRRRLLEEEGEAPVTEENDDGEGESAAADDEAGVKD  
EGGETAADNDEAEKREEGDETVADDESGGNDRKSETEAEDDGSEEEQNPDDASRDGEE  
SEEVAVVDTAKRNSREKASAPETREGSEKKEEPEEDTADDESEEDSQEQNPEDTSGE  
ANDRGEFVADAVAQEEVTADEEKRGDSSDEIEEAGVGDEKERESGEQEQDFSSYDTW  
MGILSSSNVKYFVRIVPSSEVGIVSIESS

>comp10924\_c0\_seq1; 526 353 1730 LEN=1730; translated  
MVQSLIQRIRENKLDALYLFINESLRDRNNFVFFNDLMVLPNNWSINRVEIGHEFLSR  
TVVADHQQQQVNNDVNNINRNTSGDGNPSKQDHLFQNVCSLESLSLIIISDGYIPRKDHG  
FVDTKALLRNLPRANNLQYLDIQRLKLRITSDSIENNDAMLLAECLNSLRDSLEDLRLTA  
ISFCDTTKTPTPTTPTTSENQHKLCTLHRAQSEEQTRRRYPLDSAIRVCGDMANLQLLAI  
SCATGCGCNCNNGEEQQQDGLAIRDANEASSSSSLSSSSSLPSSTKSSCLISREVLLYL  
CRSSSTLQEFALRRMRIDDDTCKTLAKAFDPPNKKYTTRTSSSSLLQOCNSSDEYDEDN  
DSDSNANSHHSPSFWTSLDLRQNPISIGNEGYEAILSSLERNYDLWCSLMVVS LN DSECSM  
GFHRALAYFLYPFSFFSSHPLYFYRIETLLPKQDNESFX

>comp10924\_c0\_seq2; 606 353 1888 LEN=2424; translated  
MVQSLIQRIRENKLDALYLFINESLRDRNNFVFFNDLMVLPNNWSINRVEIGHEFLSR  
TVVADHQQQQVNNDVNNINRNTSGDGNPSKQDHLFQNVCSLESLSLIIISDGYIPRKDHG  
FVDTKALLRNLPRANNLQYLDIQRLKLRITSDSIENNDAMLLAECLNSLRDSLEDLRLTA  
ISFCDTTKTPTPTTPTTSENQHKLCTLHRAQSEEQTRRRYPLDSAIRVCGDMANLQLLAI  
SCATGCGCNCNNGEEQQQDGLAIRDANEASSSSSLSSSSSLPSSTKSSCLISREVLLYL  
CRSSSTLQEFALRRMRIDDDTCKTLAKAFDPPNKKYTTRTSSSSLLQOCNSSDEYDEDN  
DSDSNANSHHSPSFWTSLDLRQNPISIGNEGYEAILSSLERNYDLWCSLMVDNESFQSKFN  
ALIELNQANRGAALVRSPTPEKLAFLDCLKDNPTALWYFLT IHRDAILLPLLDLFLKWKNG  
IVRKRANAIAEANPQQQGGHHRPLDEAFS

>comp10925\_c0\_seq1; 238 53 493 LEN=1585; translated  
MTNQRIELGITLLLATIIACSAFTTTPLRRTTCTPTVARWLNKPEVFQQQSVRAGRASP  
FLESNGMDCYQRSLPVLSESMGSDDVSSASSEDESLSSAAAVPAWKRTLMFYKYKNDGSL  
KVEEDDGLTFKQKLAKMGLSALLSYG  
>comp10925\_c0\_seq2; 301 53 844 LEN=1210; translated  
MTNQRIELGITLLLATIIACSAFTTTPLRRTTCTPTVARWLNKPEVFQQQSVRAGRASP  
FLESNGMDCYQRSLPVLSESMGSDDVSSASSEDESLSSAAAVPAWKRTLMFYKYKNDGSL  
KVEEDDGLTFKQKLAKMGLSALLSYGFVSNISYCFTVSLAWFGFSKKTGLSPLAPGQWKG  
FLAVYAGFYVFNFI RMPRLAVSIGVTPYFDKAVAAIQRKTKFSKSVSIGIVVFLANVCG  
TTSMLSLGIYIASLAAGVPIFAK

>comp10925\_c0\_seq3; 238 53 535 LEN=1430; translated  
MTNQRIELGITLLLATIIACSAFTTTPLRRTTCTPTVARWLNKPEVFQQQSVRAGRASP  
FLESNGMDCYQRSLPVLSESMGSDDVSSASSEDESLSSAAAVPAWKRTLMFYKYKNDGSL  
KVEEDDGLTFKQKLAKMGLSALLSYGFVSNISYCFTVSLA

>comp10926\_c0\_seq1; 440 124 1263 LEN=1588; translated  
MASAWTAEWINLNLDVGRSIEPPRSGHVAFGLNDKIYVFGGYAEDTTTAERYPTNDLWCF  
CGSDGTGDSKWKLVKPASSSQPQRLAAAAVTFRLDEDTPAGLVGGWDSQKAGTGGVIL  
KDVQVFSSENDGEGGSWDELPTDLEQPTSR LCAVPLGDQILVHNHRCTDHVLLLSVKGSEL  
LKQPTSGTAPSARGLHVAVR LPGTSKVVVFGGAAQSGSMSNEVFVLDTDKWIWEDCSVSE

AEDMPCPRASPCMVVALDEKSCIVFGGATPTSEAGLHGCNDTWLLELEESATDDESSTKTV  
AKWTRLSEDGSADAPPGRNAASLMPLSSMPRVLGKEIESGSDNPQYFLLSGGWYPFRTT  
YRDNFVLKVTKTNTMQDSQ  
>comp10928\_c0\_seq1; 149 247 540 LEN=1289; translated  
MSPPVKATIVKGYKDESLYKTMQECKDVRKSLRKVKDPDVARREKKMLLKKKALRYKIKG  
KDTSDGYLGMTPGSLQHVRRLRHVDQDRTPKNLASE  
>comp10928\_c0\_seq2; 149 247 540 LEN=1081; translated  
MSPPVKATIVKGYKDESLYKTMQECKDVRKSLRKVKDPDVARREKKMLLKKKALRYKIKG  
KDTSDGYLGMTPGSLQHVRRLRHVDQDRTPKNLASE  
>comp10929\_c0\_seq1; 644 74 1225 LEN=1535; translated  
MFRTSRSISFLLL VVWTCLLAVTAFVSTAPRLATTSSSTSLFAVSSLVKAKEAELKKGL  
KENGIPDDVMENYKVIQEALKSDAAAPKEMGPLQDRLTRKGTITVIAEYKRKIADGAN  
GYINVNGGTDDDADDAEKRKQNLAAQNPNLLSSEFREFGAAGIAVLADGRMGGCTYDDIA  
TFVVEEQRRASNEVPGPVPIINSVDVIDEVQIAQTAAVGAKAVVLDWELLGGEEDVVKLAK  
AARALDLEVIVAVRSKEESQGAIDAVGGFSMISVVGKPTCDEKVEVVDGLDIPEDVTITT  
IANILHRSDQGLAEVEECWMCRDKGFNAAWISDALYKAGNSEVEHPGAIIRSMAAKSSVR  
WASPVAKSGRGEGAKEYLGDILM  
>comp10931\_c0\_seq1; 249 118 763 LEN=763; translated  
MDSTSSVTNSEHTASTDVGSYGQPSQVGMIVPTVSEEEQQGVRTNGAHLAYLPRSVRWRI  
QLGLLKDP TLAIPNSDKESRCTLQSLLEHNKEIIAEQEERFKLLVAKHIEETIDEADRVO  
GESNNSDINAVDNDNTRTTP IEIDPLTAMVMEQEAQKTRKAELYLYRKRERARRKRGLS  
TDARVIESESEDEVDQASVSECPKVLDTCCGKGHFTX  
>comp10931\_c0\_seq2; 723 118 2094 LEN=2174; translated  
MDSTSSVTNSEHTASTDVGSYGQPSQVGMIVPTVSEEEQQGVRTNGAHLAYLPRSVRWRI  
QLGLLKDP TLAIPNSDKESRCTLQSLLEHNKEIIAEQEERFKLLVAKHIEETIDEADRVO  
GESNNSDINAVDNDNTRTTP IEIDPLTAMVMEQEAQKTRKAELYLYRKRERARRKRGLS  
TDARVIESESEDEVDQASLIIIEKDLKRLPHPAEPKQPIVGNLSPQSRTPELDARITSLRE  
ILYMYAQENPVMGYRQGMHEIASYLLYVLELEHKEYPDHPLFNPILPICFVLLERTLEQL  
RTAYDASGGKSLQMSIAILGKILQNNPTLYHHLTNNPNIPPPPIYCTRWRMLMFSREVV  
GYENVFKLWDVLF SYNNLMQALEIASAGRILLMSDGLLIPDNNLTDLLMNVPPLADITPL  
TDILEKLMEQRENGRPIQLPSTRSFTGQRHQKQQQNLESVAPRNQQNAHALLRPAQQQR  
SPSSGDSLFSFHNMQRSLNQKSESLRKKIITTTVEWKEAASRRDNNLPFDPLQAVVVA  
HPSSKASISNNGGHDQSPGTQRSYGFDTNRNNDLQTTPAVGTTSPISIPITPKQHHEMWS  
KILQQKIWTVQQFLLDLESKENKGSVPREVWEALADMDRMQRELKNYSLSNMGGGALY  
>comp10932\_c0\_seq1; 337 65 2023 LEN=2438; translated  
MRSLRSNLIRVNIIVACGLVFQDNGFCEAQQIEEANEKKNKTFSSLLAPVSAPSPQDQPA  
VMFVWNNFLADDGYDQNPVPPPTFRPSVYEVPTVYETPTNPPYPEITFYPETAKPTRYP  
TPFPTPQPTLFPTRPTRQPTIPNTMTMPTSPYPTRKPTYFPTPFPTKAPTNPQPTPYPT  
NRPTLKP TAYPTDGPTRKPTAYPTFKPTMQPTHKPTLMPTDEPTNMPTSRPTNRPTMPT  
RMPTMPTNGPTPRPTNMP TERPTLAPSPYSRKPTLKP TQYPTFKPTFMPTPKPSPEPT  
MKPTNKPTPRPSRIPTPMPHYP TFRPTRMPTPYPTFEPTGTPTRKPTPIPTMYPTVEPT  
PYPTYRPTPKPTPYPTFKPTLKP TSYPTRYPTTRPTYKATPYPTDRRPTAYPTRYPTYP  
THAKPTYPTRYPTYKPTQYPTYKPYNYVVSQPYYPPEPLYNQQYFPGRSPLPDRSPVVD  
RSPVVPVGSLLPPPDRSPPLPDRSPPTPHPTERKPTQYPTESWTNPSYRLGRDKTPRPTPN  
PSDRPTPLPTDRPTPLPTDRPTPRPSRPSGDPTPQPTLRPSARPTGGPTETSISEPVSP  
PTDQNGRTIDSTEGRVEGSGDAFFD TDVAKFLAQGFNPHATKKGKPTGGNF  
>comp10933\_c0\_seq1; 489 224 1964 LEN=3685; translated  
MSESINGSESYEDYTDYTLPVSFLLFMILLAFILLGRALHNRPKLSILSEPAMTLIVS  
VFFSFMIKTFFVGEDYASEGSNQDQADDDGYNYDDGHQNDNNSNRNYVGVDQNKLSKYL  
FTFSGEVFWMVFLPPIMFNSGYELKRELFRRHLKPILSFAVFGTALSGIITGLILFGVSN  
LGWTDVPDANLLEFLTFGSLIAATD TVSVLVGNLAKKVNPHLFLSLVFGESALNDAVAIVL  
FQSF SRLVKMGGIGSKEYLVDEVVHFIVTFLLDILGCPIMGIAFSFVAALLFKMVDHGT  
PVLELSLYLLIMYIPFIVA EVMGMSGIVTIFFTGIFARRYIEPNVSNETKHNAEVI FNLV  
AYLAEMCIFINLGLSVFGSGSFHWF IGFAIASLIGRAMSIYPI SFLFNWLSLVERSEG  
PVSPVYNRRATIDVVTNKDVLRNTEAALSSLQTTITDSKDDFVEKNADRLYREKDANVSF  
SDVSIVRHTPEKSLDKVIPAKFMHFLWFAGLRGAVAYACARDFPDVYGNKDEVVAATMVI  
VFFSIIIMGACCESFLIALNIRMGVDNNEYMGSGGTDEA  
>comp10933\_c0\_seq2; 489 224 1964 LEN=3772; translated  
MSESINGSESYEDYTDYTLPVSFLLFMILLAFILLGRALHNRPKLSILSEPAMTLIVS  
VFFSFMIKTFFVGEDYASEGSNQDQADDDGYNYDDGHQNDNNSNRNYVGVDQNKLSKYL

FTFSGEVFWMVFLPPIMFNNGYELKRELFRRHLKPILSFAVFGTALSGIITGLILFGVSN  
LGWTDVPDANLLEFLTFGSLIAATDVTSVLGLVNAKKVNPFLFSLVFGESALNDAVAIVL  
FQSF SRLVKMGIGSKEYLVDEVVHFIVTFLLDILGCPIMGIAFSFVAALLFKMVDFHGT  
PVLELSLYLLIMYIPFIVA EVMGMSGIVTIFFTGIFARRYIEPNVSNETKHNAEVI FNLV  
AYLAEMCIFINLGLSVFGSGSFHWAFIGFALIASLIGRAMSIYPI SFLFNWLSLVERSEG  
PVSPVYNRRATIDVVTNKDVLNRNTEAALSSLQTTITDSKDDFVEKNADRLYREKDNVVSF  
SDVSI VRHTPEKSLDKVIPAKFMHFLWFAGLRGAVAYACARDFPDVYGNKDEVVAATMVI  
VFFSIIIMGACCESFLIALNIRMGVDNNEYMGSGGTDEA

>comp10934\_c0\_seq1; 2092 119 5224 LEN=5365; translated  
MATPLISITRSGGHKRNGKRYTPVGTTVVSPMSSASPVDSRMTPIRRSLFQKRRMTSGKR  
RKDSFMAPINNESRDESIYSENTNTNTSSKKKDGPLSNLRDRFNHIQSGLGSINEERNN  
LVEKARQLDKEKQSIQKQLELREREIFALIRRCASQEEKMRESSKLRSKNKTLQKDLDEI  
TRKLDGIEDKKQDRLSIEKRLQESELDRERLKDRLAQLQREHDSIADTLQECLGKIRVLT  
EEKHAIIEERRRERKRAEIELEKQHLAHVNNNSNCLKEDIQAHQRKIHEMESILQDNMKS  
TALRREKAAMSQQQEEIQGIIKQYEEQLKDMKIRNETNVDNKVHHKVDGEKLNVELTV  
LTEKLESKDARIAELESEFSDQMMELMSKQGSLSDAEKKRLELKVFAFKKVEIEHSAL  
LDFVDILDSNLAELTVTNANLELQKDEMRDETNELRKKVTILQKQLSNLMNNRAKESDF  
RELLNSEKEELRNEVEESLNKARGEILSLQAELEERRNRSIINLETELNRTRKIVIEKEEE  
IVRILNEMENLCSNLGTDLEKARDEVARLEAEVFSKDQKLASIEGHLEGAKEVQELEEKV  
EENLECQLQLTTKDFDDNESLLGSKGTAYISKERNVDIVREITDYDKLEERIRILEKEL  
SEAQLSRSESATNLKKAQETIAELEKQLIGEDARTISLETELYQATTDLSKEESKVLISIE  
NDHLAREQFQMDYEEKIQETSSKVATLEDEISEMRNQSNNLDIKLEESYRENAMKDEVIS  
TLRTELLEGQEEKALFSELDIKNKRIKDLELLLEKQLEFQTTMDDTNSALARKEDIYK  
AIEDRASNNQENAKKLEALLTQAEDDIVLLEEEIQYQEKERETLSEELKKNVQNSRDKYL  
ESEKKMECLLSESYLTNQLEKTNAILTEERESWVAKHNSNEELASLQVKIMELQESLT  
DREKATLENGEEEEENLSSILEGQLEAKNTIVELELEANAKDRKLNLDLEQQINDRESEL  
AVNEIRRVEMEVELTSANEKMKEMKTNICALLELRLVIGIGDELEHKRHEIEEEGKKTSSLQ  
SKCSELENEVQSLNQTLQVQEEKLVKTNDELEIKKTDILKKEKIIETLQASIRSLEKDDAD  
QTRNEVSLQNDAVAILQEAENLKSDFKAETELTEKNKTTLSLEEDVESEKAIRMDLQ  
ELTIAKVKINEYEKMKVLDLQERLEVEKQCKTFEEKLLEAKIALESLESSSGERIAGLEN  
QIAELRGDSTFREQEESTKRKNAEELAALLKKEITTLRNEELQOKSTRKSEKESMVKEIE  
ALKSELEMLLLKNVDLSEQREKEAEMRITSTELFESSIQELKAQLSNLISTIDERDAMIQ  
ELNTKIDALKNKKEEARVQLGSAKANLEAAAAREKELDMKFRNKDSVHKQELESTLKR IQ  
ELESKVEERGGLLGEVVDNRKKESELOKQEQTNRLRLEAAFAEERNILEVNRKDLEKAQE  
DLRRNQRNIESKIKEERSQKEEAQLSLKQLQTSCKESMRTRKRLANDLERENKELKDKIRR  
QEEYLRKRLQKEKAHRSHMTPAKSPISPFQSFARTPLKNMTNSSSKAAPSSAYSRSKLQ  
PPSAIGRSISTRIPTSTNTKRRSTSSVANSRVGISPKSIRSVRTTIVIQTPVKQVSPLSAQD  
ILQFELDDHHSVSSDLSAIFL

>comp10935\_c0\_seq2; 679 92 1678 LEN=1739; translated  
MAGAETFQERSKGDVVRTSNIVA AAVANAVRTSLGPRGMDKLMQLENGEILISNDGATI  
LKNMKVIHPAAKMLVDLSQSQDIEAGDGTTVVVLGALLNACSSLLSKGIHPMAIASSF  
LRAADKAVEFLEEISKPVLDSDRDSLLSAVETCLSSKVVAQNSDLLAPMAVDSVLGVVED  
VETSTNVDLKDRLVTQLGGTVDDTELVKGLVNLKANKTAGGPTEIQNAKIALIQYCLS  
APKTDMDNNVVSDYAAMDRILREERKFILGQCKAIKKSGANVLLIQKSILRDAYNELSL  
HFLAKMGILVVTDIARDDIEFVCRITLGCQPVAHPDQMKADKLGFAENVSDVLMEGGSTKV  
VKFTGVKNPGKTMVLLRGSNQFVLGEAERSLHDAQCVVRSFVKKRYMIAGGGAAETEAS  
LRLHKYSQELSGMDAYCFQAFADALELIPYTLAENAGMKPIEVVTELRKQHAEGIKGAGI  
NVKKGKVIDMYEMNVVQPLLVSASAIQLATECVSMIMKIDDLVVVAHA

>comp10936\_c0\_seq3; 181 1 1237 LEN=1480; translated  
XTNLCDAIVNCQESSSTMDHDPRLPTFPRSCAEVDVKA VDDLLEREMSQLSFHEQYQVCE  
DVKGTNSLALAEPNELVSMGLNALENQLKILGESIKYYRLAEKLSNETIEARAFRLRFAR  
AECFDPAKAAIRMDRYLKMIYENFGEDCLRRPLQLIDLNKAERDLLRSGCIQIFPYRDL  
GRRIIAMLGDLGTQNHTLKNKIKVIAYLMQVI SEDEETQKQGCVFLFWPLEPTSTVIQEV  
NHAFQVSPVRI SASHFLLYDDVQFRKLGWQLLAMTREMRRARTRVHFGSIEHCQQLSEC  
GISSHFLPVTNTGNVKNQNLKWF AFRQAKESAFKQGLYFDGVDCPSVKDILT GKGQV  
SNPANVAYRKMMEKRFIEHRDALTVDKKTSISREIVEEVLRSGGRFLT KDKGW

>comp10940\_c0\_seq1; 391 219 1649 LEN=1824; translated  
MDIDMEDEESDSEIIIEVRIASESDAIERLRDRDGDGEEMVGRRRRAMSHEEEKERRANIK  
AILADCSITPQERRRSIQSLMDGRRSSIGTASIASMSSESADIYGYGDGAPDGYETEMNA  
NTNSSQNKILGDSGNAICIPVSNENTKRAELTRQPCNHYDRNCTMIAPCCGAAFGCRICH

DECPILPPLLI AKRASRRSTRSSSMPGGWTSMD DGNPAPQETHHTIDRF AVKDIICRKY  
TKQSSKTNKCVNSACGIEFG EYHCSICNLWMSNEEKPYHCPDCGFCRVGGAENFKHCHDC  
GMCIDKTL YDNHNCKSGKYKSNCPVCQEF LFSSRSASHEMPCGHAIHWECFRQLAAHDSR  
CPICKKTAETKERMIPTWNAMAQAVAMQPVPAELARVVNISCIDCEQSEDARAWHFLGVQ  
CRNCSSFN TVVDRIVMQGEEANEFLEALQTRIGLENHEEGSERISRRRINRRRSLF  
>comp10940\_c0\_seq2; 281 219 1109 LEN=1109; translated  
MDIDMEDEESDSEIIIEVRIASESDAIERLRDRDGDGEEMVGRRRRAMSHEEEKERRANIK  
AILADCSITPQERRRSIQSLMDGRRSSIGTASIASMSSESADIYGYGDGAPDGYETEMNA  
NTNSSQNKILGDSGNAICIPVSNENTKRAELTRQPCNHYDRNCTMIAPCCGAAFGCRICH  
DECPILPPLLI AKRASRRSTRSSSMPGGWTSMD DGNPAPQETHHTIDRF AVKDIICRKY  
TKQSSKTYVTCAALLCIFEFLSQQDFLARTALGSAMFVLR LIGLLNFSSFP LRLVSN  
>comp10941\_c0\_seq1; 453 105 1529 LEN=1550; translated  
MTIIIEEQTPSES VVTTATPGTNTNPLEAKPLDKANPVTANPHIPSVSASAVLGESSMPE  
GTPICKGV EFDHETNATDGGDGDMLAQIMKAFRHTGFQATNLGLAVEQIEEMRKWR LSHV  
PFKEGVDDPELRSEETRKRRLRARIFLSYTSNQISCGQREVLRFVQHRMVDCIVTTAGGI  
EEDLMKCFEPTFMGDFKLDGRSLRKKGINRIGXVEKPLLPTSPFHYGQKRTYHVAVINF  
AEGNLLVPNKNYCKFEDWVSP IIGKMHDEQDEKMLEWARAVAKLDSTENFPEKFAWTPSK  
FIHRLGVEIDNEDSVLYWAAKNDIPVFCPALTDG SVGDMLYFHSYKRPGFILDINEDIRR  
INDLAVRTYASGMIILGGGLVKHHTCNANLMRNGADWSVYINTGQEFDGSDSGASPDEAI  
SWGKIRITAKPVKVSCDATIAFPLIVSQTF AKNVKQWKEDMIGTACFIDDLKSE  
>comp10941\_c0\_seq2; 543 105 1436 LEN=1457; translated  
MTIIIEEQTPSES VVTTATPGTNTNPLEAKPLDKANPVTANPHIPSVSASAVLGESSMPE  
GTPICKGV EFDHETNATDGGDGDMLAQIMKAFRHTGFQATNLGLAVEQIEEMRKWR LSHV  
PFKEGVDDPELRSEETRKRRLRARIFLSYTSNQISCGQREVLRFVQHRMVDCIVTTAGGI  
EEDLMKCFEPTFMGDFKLDGRSLRKKGINRIGNLLVPNKNYCKFEDWVSP IIGKMHDEQD  
EKMLEWARAVAKLDSTENFPEKFAWTPSKFIHRLGVEIDNEDSVLYWAAKNDIPVFCPAL  
TDG SVGDMLYFHSYKRPGFILDINEDIRRINDLAVRTYASGMIILGGGLVKHHTCNANLM  
RNGADWSVYINTGQEFDGSDSGASPDEAISWGKIRITAKPVKVSCDATIAFPLIVSQTF A  
KNVKQWKEDMIGTACFIDDLKSE  
>comp10943\_c0\_seq1; 279 1 1307 LEN=1725; translated  
LVDGTPPNQKDMVVI VAGVAGVATAYLSVSSGKTPITLLDAAGPAACSSGKAGAFITN  
RPPSFRRGIGKGNVDDKRRFLFEKSFELHEELAKDLSLESFCRVHNYRTIQTKETNADD  
KNDISFDDPEDTLH SWLTSLGENEGAKPLSGAAALLDPAELTNAMLEKVL SQGNCCFRQA  
NISGLELDSSGRFIKGIQLENS EDGSESKPIVIEEDEAVVIALGPWSCRIEDWLGIPMPI  
EGVLSTSLIYQDGI PASDSGTAFFDEDSNGCHLEVFGRKDRSLYVSGCGESQVIGTRCL  
RSTERPSPNVDCPPDALEPPPPGPASKKLDMI IATLLISEGNPQPD TTQA CLRPMTPDNV  
PIVGKLLDNAYIATGGGPWGITWGP LMGQSLASLINDGDGPP IRLGLLSHKRFD TLVYRT  
LLKRSRFP GVSATT  
>comp10945\_c0\_seq1; 224 1 1015 LEN=1072; translated  
XCNKELQILITCIIGTLGKKLQHEGGDMRGRSILVFA GTLLSHFTSKGNLFSDAFSLDP  
LKNKDPTASSSSGFSRRQWFKIPIALGGATIYGKLLSGAVKKVARGDLEYPTAHEDRIKD  
TIRIAA IASIPAFQAXNENDV VTRLERPLRILEVGC GKDCRIIRNLYDDAFFDLASSGI  
TKIELTGVDILSPSTEA IHSKDVLSQRV ESSKLDISFDYVKGSLMTGLDFDDGFFDCVI  
CSLTLC SVDDQV GALTEIKRVL RQKGSFGYVEHVAVNGDEPYRLL E FQQLFDGLQQLV  
ADNCHLHRFTEDNIYRIFGVSEGTSTAIARDRFLVDEM W  
>comp10946\_c0\_seq1; 1041 129 2354 LEN=2397; translated  
MWSTWTEKAKEALEKTSAALENTGEAITQAATKSISKATADAKSEDGTSLERQVEDLQKE  
VQK DSTSTAPSPMIALPNIRQVDKEKMINLWSTV VETTKKAAEETKRAAEDAVVATKDAV  
ETSRSTLERQFQVKKGFYKRDPKLP LDVEALRDAEVVYITDRIITMSHPATASKKIPAIT  
AERKLAAIGHLLDRRH DGRYLCWNLSEVDYDVSI LNDQVLTFSFPGSPSPPLG LLLKLLV  
SMENWMKADERNVAVVHCLTGKGRSTI LA AFLCWMGEAGFDVNEALAYIAKCKQLRPD  
DLTIP SQRRYASYFKNMLDSVRPSQTP LMLKRIIMSEAPKFAKGPLKDKVQVEKNDANET  
SQVDDKQLMGCAPYLQIFKAGKLLHTSAASLHVQQSEEE LPFVQVIDGTVPFNIDQIIHG  
DILIRCRHLTFGKKRVSMFRAAFHTGYVPPNVLRLTKSQLDGACHDKRYPDDFFLDLIFE  
KVDADALARFEEKKANETKNIGTDDEKRKKINGPVIEASEVDSMLKGD SRFDVVISSK  
KQEHVKQANDDAFWGPTVGRRRGDAKKKETANDDD KKT DATTAKGRTQLETFSIGNEFDF  
LPVGECAKTENKPKERDSLMDALNALDEEEGHNVNSTEEIVFDYVDSVSPASNPPKSVF  
EDETNSAIGDAAKDQIKNENAESGGPTRERAEDSV PVEDLLNSEDDMDALLASADMDFGD  
LDLADFEDDNDLDDLENMLKA  
>comp10946\_c0\_seq2; 970 129 2520 LEN=2563; translated

MWSTWTEKAKEALEKTSAALENTGEAITQAATKSI SKATADAKSEDGTSLERQVEDLQKE  
VQKDISTSTAPSPMIALPNIRQVDKEKMINLWSTVVETTKKAAEETKRAAEDAVVATKDAV  
ETSRSSTLERQFQVKKGFYKRDPKLPDVEALRDAEVVYITDRIITMSHPATASKKIPAIT  
AERKLAAIGHLLDRRHDRYLWCWNLSEVDYDVSILNDQVLTFSFPGSPSPPLGLLLKLLV  
SMENWMKADERNVAVVHCLTGGKRTSTILAAFLCWMGEGAGXVEFCINHEGWNHEVYDRL  
FNVFLFVIDQESELEDTLFSCSSIPISPLCTGNXIGFGDVNEALAYIAKCKQLRPDDLTI  
PSQRRYASYFKNMLDSVRPSQTPLMLKRIIMSEAPKFAKGPLKDKVQVEKNDANETSQVD  
DKQLMGCAPYLQIFKAGKLLHTSAASLHVQQSEEEELPFVQVIDGTVPFNIDQIIHGDILI  
RCRHLTFGKKRVSMFRAAFHTGYVPPNVLRRLTKSQLDGACHDKRYPDDFFLDLIFEKVD  
DALARFEEKKANETKNIGDDEKRRKINGPVEASEVDSMLKGDSTRFWDVISSKKQEH  
VKQANDDAFWGPTVGRRRGDAKKKETANDDDKKTATTAKGRTQLETFSIGNEFDLFPVG  
ECAKTENKPKERDSLMDALNALDEEEGHNVNSTEEIVFDYVDSVSPASNPPKSVFEDET  
NSAIGDAAKDQIKNENAESGGPTRERAEDSVPVEDLLNSEDDMDALLASADMDFGDLDLA  
DFEDDNDLDDLENMLKA

>comp10946\_c0\_seq3; 577 1 1272 LEN=1315; translated  
XFATSCFKSELLTIHHDFFSMLFAKGPLKDKVQVEKNDANETSQVDDKQLMGCAPYLQIF  
KAGKLLHTSAASLHVQQSEEEELPFVQVIDGTVPFNIDQIIHGDILIRCRHLTFGKKRVSM  
FRAAFHTGYVPPNVLRRLTKSQLDGACHDKRYPDDFFLDLIFEKVDADALARFEEKKANE  
TKNIGDDEKRRKINGPVEASEVDSMLKGDSTRFWDVISSKKQEHVKQANDDAFWGPTV  
GRRRGDAKKKETANDDDKKTATTAKGRTQLETFSIGNEFDLFPVGCAKTENKPKERDS  
LMDALNALDEEEGHNVNSTEEIVFDYVDSVSPASNPPKSVFEDETNSAIGDAAKDQIKN  
ENAESGGPTRERAEDSVPVEDLLNSEDDMDALLASADMDFGDLDLADDFEDDNDLDDLENM  
LKA

>comp10947\_c0\_seq1; 211 55 705 LEN=917; translated  
MIKVYYYPFKFWRAEVLRAGLFLQNIPFENITDMEQIKAKKPSTPFGAFPPILELSDGQIL  
SQTQAMAAYVGKLGGAEGAPFSRLYPKEEDILGQARCDEIINGCTDVTITIGSSFLPKD  
KVEAKRTELMDPEKGRFLMHLKGLDSSLCRESDFACGKTLTVADICVWRLVAVWFSTGVLD  
YIPTDFVSSNFPNLTKVYTVVPEIDAVKDYVAMYHN

>comp10948\_c0\_seq1; 279 174 1211 LEN=1333; translated  
MNTNGEALKRLLILNPKYTKKRIQLDDGRILSYSECGNLESGMPVFLCGLMTSSLAIMFT  
HHRALRNNLRLLISIDYPGIGESTFQEDRTLGGWADDVSQVLDQLGIRKIRLLGHSLGGLH  
VLALLSHRSFKKRVLRVLLCPWLYIEGESSNPPWMKFTHTLPAIFQSTIIPFVLTGLSS  
SSMKLLTYANPELGEVQALKLVMDYTCLQGQAGNEQMVRLALSKEYETYLPEESGLQSPII  
IFHGENDSLVPPEERILELVEALKLRNCDVKYTSVAGGDHNNILSKTENLINVMAACLVGDS  
DSWAFEIAKSLGVNRIQSMPPKPTPTACPIDAMIRRKCRSLNKK

>comp10948\_c0\_seq2; 162 1 885 LEN=1007; translated  
KVSFSGHAPS AKERTYSSNYTERHFSLYVIITINEDRTLGGWADDVSQVLDQLGIRKIRL  
LGHSLGGLHVLALLSHRSFKKRVLRVLLCPWLYIEGESSNPPWMKFTHTLPAIFQSTIIP  
FVLTGLSSSSMKLLTYANPELGEVQALKLVMDYTCLQGQAGNEQMVRLALSKEYETYLPE  
ESGLQSPIIIFHGENDSLVPPEERILELVEALKLRNCDVKYTSVAGGDHNNILSKTENLIN  
VMAACLVGDSDSWAFEIAKSLGVNRIQSMPPKPTPTACPIDAMIRRKCRSLNKK

>comp10949\_c0\_seq1; 764 193 1989 LEN=2108; translated  
MCGIFSIFSSSLPEADLRKELITCSQKLRHRGPDWSGYKVIKPDANIPLAHGIGHERLAI  
MDPESGSQPLVSRDGNVIVAANGEIYNFKELYSSLKTPYTPMTGSDCECILPLYEEHGPS  
AEMVTNLRGMF SFILYDKKTDYTMVARDHIGITPLYI GWGNDGSVYVASEMKSIVGECNK  
FQNFPPGHIYCSKGPKAGEFQRWYKPNWAPEMPLPGGEMPKEGYQSDVLRHAFERAVTRRM  
MSDVPWGVLLSGGLDSSLVAAICSRHISRRSTSFPKLHSFTVGLGEGSPDLVAAQKVADQL  
GTIHHPTYTLEEGSDAIPDVIRCLETYDVTTVRASTPMYLMSRKIKAMGIKMVISGEGA  
DEVFGGYLYFHKAPNEQEFFDETVDKLSRLHMYDCLRCNKAMSAWGVEPRVFPFLDADFLQ  
VAMNLDPKKEMIRKGEPEISKEDTRIEKWAIRKAFDTPDDPYLPDEILWRQKEQFSDGVGY  
GWVDHLKDIADKEISDQMFANAANRFPHNTPTTKEGYRMI FESFYPGAEEKTVPGGK  
SIACSTERAMKWDA TFALRADPSGRAAGVHDDAYDEKFEADTKLAEDFGEPAAKKPKV

>comp10950\_c0\_seq1; 364 39 818 LEN=1206; translated  
MTKSPSVRRAFFL FATLVAVGKSQESIPKDQECETDDENTAESTCINPVWKTGGIADITE  
FLDCSWESKDIHKEDVWKT FNRYNEVVGPERSTIPPAYESNGFQIPVEIEYSEEVGRGV  
FTKVP IARGELIYESTNNAQFQTGEEYRTFLSKLPTDLACDVI I WAFSRMVSAEKEDEFI  
ACVDLDEGSFVNSSPAWRQCNMELGTETGLLKEGDETKTWYGCNMKFYAKRDIAANEE  
IRAYYGDFAEPHGWEEEMGL

>comp10951\_c0\_seq1; 1499 180 4373 LEN=4452; translated  
MATAVAQSTVKNGEQAQNETINGKPGSPEEKKEDDKRSAPSASTPKKASMPGEGSVLPVNM

PASMMTPNNRPPSRSSLVQVQSGSTGGRTTTSVSRRGGRTRSRSPGTGHIHSYNARPPSTT  
PSVPSEVVPQSPRNPSSAAAAAASFRNPGASSGSHPSMHYQQQNPYGGPSSMRGLP  
PPGSDPYGRQPGGRQDPYSRYPPSQPPQRPSSASSSYPGGPPPGGQSQQRPPSSMSSS  
YRGGPPPGYYDPHNGSRNPSSSHHYQNGRGGPPPPGRGYDSQPPSMGSDGRPHSRNSDS  
QSQQQYGYNSYHRNAPSRGGHPPHSGGREYGGSSNNSRYQSGTSGPGGGPPSNGPIESG  
EYNRQHPGSSGNRHLPPHYHSSGGPPPPGHSSRSRGRTPYPGNNHGHHPYRNGDPNYRGG  
PPPHYPPSSRGGPPPGHPDYHHYHSQYQQQTPKGQGDSTKSTRTVIGTATPLHLNKGQ  
GPMPQVPPKHSSAAQNNSIKAPNSNSHKNINSNSHDSRSGSAASVFRGRPGPPSSQPNA  
SNGASSNPKSILDALETPSNSFEKKCSRSDGKEQELAQQVSKIQEQLSPDDPPKIRN  
NNASNGNGMNFDPQPSPKSHTGGAMSPQLTNSLDMAPSFSLFNQSFDSLGDTAQFFNVG  
GALDSTMLNSSTSFELKPSGSRSPIQTAGSSSDNYLQLSASNGTFKLNASMSGALFGMSP  
SNSFGNGPTSSFSANPPKMTQVLGGNNDHGQSSPSQVLDMYQQSKSGNGGEEVDLRLSAS  
IGSPMIGQSGSYSSSLPFATGVETGPQQPSLVGRSSDRRSHLSRPQRSHAFQSPSSSSQ  
HHHQGYRQRPSSYGPKNKDGTPRFYNFLRKNKDAFVDMTFMLPKLKFVMEAKATMGGN  
IKELSNENTPKRQSRSSRYDREPTPAESQIARRRIVSAVCAFGGSFTGSRVSYPAASP  
ATSGNVADKTKSSSNSSNAQSI FREKSGEPKTVTPNSSSSSSAAAESA VGRASREQSRYD  
GALPTRYYESDNRLSWEFEENPPIGPKVDPGSVMYCRLTNSQDDDDGEEGTPKRRTEG  
ERDAADGSDDEDGTEDEPSGSDSSKKGKGGKGDSPKMRYRCKLCGQPKTNHVCPYQQSLVRN  
IGVMVHPAVNAFAAAEPGKLAPALSEMNNLAI SAARVQAENGTGGHSDTSPSRPTPDRS  
SSRGSNSQIDADGVSSAAQVTPENLRSGASSRNGDLGTPQRSRAGTPGSSSSHRRGGH  
TPASSRKKRSHAKMNGSAGDQTDLLFVEEMELKTSQFRITITPSKVSENPDFAFTYPALPL  
PYAQRKRLSDNLFSLSKEIPQLTDECASVLRERERDLWDLVAELMTQVVVVVHCNDGD  
YCFEGLRRYLLTLGFTC

>comp10952\_c0\_seq1; 382 1 1318 LEN=1383; translated  
PMVVDGTTVVALDPATGGVWEHDPLRVRDGLPAKIGITGTEEEPNTGAGRKRPSLVSL  
AVHHHRCSPPGSSADRLLVGDDRGSVHVEICGPLGNDAEPPVLSQRSYSFRDEDAQGR  
RGENGSNRRYQTSLVWDHVAWDGNRSFAAAAGKLMINGNTLETGKIYGLKFLPEKAS  
ASGDRDTSAGDEPLEQPHQLLAVAIYGGVLVLDAGTMEVRDQAFGIGNSAVLSLAVAGDG  
GSIIGICLDKRLRVYRCTRQETKTPVWKALDWIGFDGKVTQALFSPGHQKLAALGGMLV  
VLDASGSSEWGEAPVVCVSLWPPSQHGRDNGRQGTGSDGSRAAARFGSFAWASENLLVAFV  
AKERVLHVFDVRKTTDAVPKRCHPVVATPFETGFVAVLESSGGNDAEGGELLVWQSQMT  
KMKLDFTDPSHHTVNSLE

>comp10953\_c0\_seq1; 300 209 1269 LEN=1382; translated  
MGMAAVTTAVHRYWFGVWVILWSVLGTDAFRGSRAFPASGRKAGTRIVVGSTQPTNP  
AAGTRASGDEPVGNAAESSIDTPALEGDDDSRLKCRVQGFYFPPTPLPKGPLGWMLKD  
THQAVLVTSVPPPKRAQTPCDSGADPGRNTSRPETTTTTLRMDFMKGGAAHPVWYDDATR  
WKVFFGGTIEGEVRI RVLGTGIHRGGDRNLPSEMERLVRFAESYDTGMNLYSNCRVFA  
ARAEREAERLNHPGGGTHGALAADXALLRADPVGGPTAGDRSAGRRCGAPPMPERVTEP  
VVPNGLPSANHGQTTKETKSLPCGVFVPSLHTNPSPCNTFGTRCVDRMSCANA

>comp10953\_c0\_seq2; 286 209 1287 LEN=1400; translated  
MGMAAVTTAVHRYWFGVWVILWSVLGTDAFRGSRAFPASGRKAGTRIVVGSTQPTNP  
AAGTRASGDEPVGNAAESSIDTPALEGDDDSRLKCRVQGFYFPPTPLPKGPLGWMLKD  
THQAVLVTSVPPPKRAQTPCDSGADPGRNTSRPETTTTTLRMDFMKGGAAHPVWYDDATR  
WKVFFGGTIEGEVRI RVLGTRTGTSTGIHRGGDRNLPSEMERLVRFAESYDTGMNLYSN  
NCRVFAARAEREAERLNHPGGGTHGALAADXALLRADPVGGPTAGDRSAGRRCGAPPMP  
ERVTEPVVPNGLPSANHGQTTKETKSLPCGVFVPSLHTNPSPCNTFGTRCVDRMSCANA

>comp10955\_c0\_seq1; 142 90 320 LEN=847; minus strand; translated  
MTIGVTRSSGRLRFVLLVRARAPARVMIVPTTVVAPYSIVPADTVRGRGTGEASYGMKIFQ  
FLWNHEKIFGTNSKKAW

>comp10955\_c0\_seq2; 142 90 320 LEN=714; minus strand; translated  
MTIGVTRSSGRLRFVLLVRARAPARVMIVPTTVVAPYSIVPADTVRGRGTGEASYGMKIFQ  
FLWNHEKIFGTNSKKAW

>comp10956\_c0\_seq1; 285 149 532 LEN=1064; translated  
MKTAFVLSTLLVGAQSFAPVAPGRASSALAGAVPEDQMSDAQKEIAGIQTKWNEVRHLTR  
EEAKAQLDGEWLEAHTRFYDQYDDDMERMIEIVTKLEKQIEPPRVEKKTGQKRRDAFAR  
KQARAAA

>comp10957\_c0\_seq1; 496 149 1813 LEN=2885; translated  
METGKQEDESSYGGRWVFDKSKQRTVFIVEKHRLQSPPIPTTVIPLPSPSDCGSVFMSD  
GSLTVSNYCGQPNSTFDNDSVLD RSHYTITDESTANETAELS DLEGQNNLSSI IKS KSK  
NKVKNKSKKKVTVVESKGFREGEKGERHRAVAKNRKKIKGDCRRTVLYILFGLSLVAII



VGAGISIMTYFGLISFDNKNFLANNSDNEHNTSFEDSILSEKEATSSPESWTIPDIQTTS  
NEDTDQPAIASTVSVEHKIITDLLSGPFQVTLSDNDQSLPVNQAANWMAEELKSLSSSDQ  
IEDSDNRVSEIILYDDLKFKGQRFALLTMQYSLMGESVFSFDRQQGVDECKWEGVACDDFG  
RVIGIDFSDLELIGNIPSEVGFYKQLQILDLSHNKIAGTIPEEIYELGDLQRVYLYQNKL  
TGTISSRIGELNSLQYLHMSHNSLTGSIPTQLQSWSDVFRPLKYLNLNLDNNLSGTIPRN  
LRLRDLYYFDIGRNFIAAGSIPEDIGTDFVELRYLHVDRNRLTNSIPATIPPMASGRLLISV  
LADHNRLEGTVPDNW  
>comp10957\_c0\_seq2; 167 153 350 LEN=1000; minus strand; translated  
MYESTFNVLYNIGSYVIVDDWFGFPACTACLDFFKVYGIKPNVTAIDSL SAYWKKPEEDL  
QCWTY  
>comp10957\_c0\_seq3; 496 149 1813 LEN=2007; translated  
METGKQEDESSYGGRWVFDKSKQRTVFIVEKHLRQSPPIPTTVIPLPSPSDCGSVFMSD  
GSLTVSNYCGQGNSTFDNDSVLDLDRSHYITDESTANETAELSDLEGQNNLSSIIKSKSK  
NKVKNKSKKKVTVVESKGFREGEKGERHRAVAKNRKKIKGDCRRTVLYILFGLSLVAII  
VGAGISIMTYFGLISFDNKNFLANNSDNEHNTSFEDSILSEKEATSSPESWTIPDIQTTS  
NEDTDQPAIASTVSVEHKIITDLLSGPFQVTLSDNDQSLPVNQAANWMAEELKSLSSSDQ  
IEDSDNRVSEIILYDDLKFKGQRFALLTMQYSLMGESVFSFDRQQGVDECKWEGVACDDFG  
RVIGIDFSDLELIGNIPSEVGFYKQLQILDLSHNKIAGTIPEEIYELGDLQRVYLYQNKL  
TGTISSRIGELNSLQYLHMSHNSLTGSIPTQLQSWSDVFRPLKYLNLNLDNNLSGTIPRN  
LRLRDLYYFDIGRNFIAAGSIPEDIGTDFVELRYLHVDRNRLTNSIPATIPPMASGRLLISV  
LADHNRLEGTVPDNW  
>comp10958\_c0\_seq1; 444 106 1344 LEN=1415; translated  
MHFGGMPFGGMPGGMPGGMPGRNKDVTTKLYEVLGVDKDVDEKSLKKAYRKLCLKHHPD  
KGGDEHVFKEVNAAYEILSDPKKRELYDQYGLEGEVQEGGPGGPGADDLFSMFFGGGRR  
RSSGPRKGPLSLQHLKVS LNLDLYNGKTVKLA INRKVIVGDS SVCSTCRGQGVMMEMRQIG  
PGMITQMQRPCSDCNGKGYLAKTKNERKVI EVHVEKGAANNQKISFQGMAD EIPGRETGD  
VNFIIQEKEHEL FKRKGADLLIMQDVSLNQA VTFGFSFRFDHLDGRDII IKTRPGEVIQSE  
SKDPDTGRSMPYMMKVPGEGMPSRGNPFVKGDLYVAFHIEFPKSLDKDVVDKLRRELLPDA  
NMEEDYDPDEVEEHFMVEADLRHFGKGA EVSGGEYDS DDEGGGQNVQCQS  
>comp10960\_c0\_seq1; 522 1 1580 LEN=2094; translated  
XQQQQHYPPSDNQYNHNTCSKNTRNGPAGGMHYTNDPSFRIVFLRIALWDAHRAALR  
FVSFLDLVYELWGDIALTTKIWTTQACFDDSELRAFRSGNMQVLPGRDRAGRIMGNFAD  
NSSAGLTVLNRLRMSVYVMMHVANDVETQKKGAVGIAMFHNVSIDDIQKRGKCHKKLSQA  
IPLRFS AIHMCLPNEIHSSSPSSASSATFNANILRLIKAMFVMSIGVNPRRYLRVHLGST  
VECLYALQSF GILPEQIPVNTTTGAIK NKQHLKWL ELLLQREVALREKKEFHKIECPSIH  
DVLFRGWPIMKHGPNVFLRSTINAKLEEHTNEKFKRNKTKIAHSVSMVKDLNGGRFLK  
EDSGWWVEVTDEQAHQKVSIAFRDARKTRSMSNSSGSTNNNNLSSSPFAAARVGSANFTA  
AGDPSTSSTTSKRKDGADASSDDGSTPPRQRPH TENEDGGHCHKRDDDDTRTNSKNGNGNQ  
QQNNNSSTSAFLGMDGTTGTRQRCFGTEGFSITNGSDNELRSYYL  
>comp10960\_c0\_seq2; 521 1 1860 LEN=2374; translated  
XQQQQHYPPSDNQYNHNTCSKNTRNGPAGGMHYTNDPSFRIVFLRIALWDAHRAALR  
FVSFLDLVYELWGDIALTTKIWTTQACFDDSELRAFRSGNMQVLPGRDRAGRIMGNFAD  
NSSAGLTVLNRGVETDRNGAESNRIESNRVPSVSGMQRSAAEFRIQYQCMSFAFQIPRF  
LTDSCVLSTVFFFSSFFPFSYNHAF CPRARFLLGSV VAGDPTKQLRMSVYVMMHVANDVE  
TQKKGAVGIAMFHNVSIDDIQKRGKCHKKLSQA IPLRFS AIHMCLPNEIHSSSPSSASSA  
TFNANILRLIKAMFVMSIGVNPRRYLRVHLGSTVECLYALQSF GILPEQIPVNTTTGAIK  
NKQHLKWL ELLLQREVALREKKEFHKIECPSIHDVLFGRGWPIMKHGPNVFLRSTINAKL  
EEHTNEKFKRNKTKIAHSVSMVKDLNGGRFLKEDSGWWVEVTDEQAHQKVSIAFRDARK  
TRSMSNSSGSTNNNNLSSSPFAAARVGSANFTAAGDPSTSSTTSKRKDGADASSDDGSTP  
PRQRPH TENEDGGHCHKRDDDDTRTNSKNGNGNQQQNNNSSTSAFLGMDGTTGTRQRCFG  
TEGFSITNGSDNELRSYYL  
>comp10960\_c0\_seq3; 410 1 1580 LEN=2292; translated  
XQQQQHYPPSDNQYNHNTCSKNTRNGPAGGMHYTNDPSFRIVFLRIALWDAHRAALR  
FVSFLDLVYELWGDIALTTKIWTTQACFDDSELRAFRSGNMQVLPGRDRAGRIMGNFAD  
NSSAGLTVLNRLRMSVYVMMHVANDVETQKKGAVGIAMFHNVSIDDIQKRGKCHKKLSQA  
IPLRFS AIHMCLPNEIHSSSPSSASSATFNANILRLIKAMFVMSIGVNPRRYLRVHLGST  
VECLYALQSF GILPEQIPVNTTTGAIK NKQHLKWL ELLLQREVALREKKEFHKIECPSIH  
DVLFRGWPIMKHGPNVFLRSTINAKLEEHTNEKFKRNKTKIAHSVSMVKDLNGGRFLK  
EDSGWWVEVTDEQAHQKVSIAFRDARKTRSMSNSSGSTNNNNLSSSPFAAARVGSANFTA  
AGDPSTSSTTSKRKDGADASSDDGSTPPRQRPH TENEDGGHCHKRDDDDTRTNSKNGNGNQ

QQNNNSSTSAFLGMDGTTGTRQRCFGTEGFSITNGSDNELRSYYL  
>comp10960\_c0\_seq4; 449 694 1860 LEN=2572; translated  
MMHVANDVETQKKGAVGIAMFHNVSIDDIQKRGKCHKKLSQAIPLRFSAIHMCLPNEIHS  
SSPSSASSATFNANILRLIKAMFVMSIGVNPRLRVHLGSTVECLYALQSFILPEQIP  
VNTTTGAIKNKQHLKWLLELLQREVALREKKEFKIECPSIHDVLFGRGWPIMKHPGNVF  
LRSTINAKLEEHTNEKFKRNKTKIAHSVSMVKDLNGGRFLKEDSGWWVEVTDEQAHQKV  
SIAFRDARKTRSMSNSSGSTNNNNLSSSPFAARVGSANFTAAGDPSTSSTTSKRKDGAD  
ASSDDGSTPPRQRPHTENEDGGHCHKRDDTRTNSKNGNGNQQQNNNSSTSAFLGMDGTT  
GTRQRCFGTEGFSITNGSDNELRSYYL  
>comp10961\_c0\_seq1; 2173 1 4530 LEN=4662; translated  
QEKKVEASGSRIATTRETLFIFGVGLNTKLLFLFGTIGGLGNGMVYPAIAWIFSSAFSE  
LGATSTNGLGPIREIAFWLMGIGGYALCVSTLQTTCCFEVVAYQGAQSMKKQWFYSLLRQD  
SAFFDVHDVSGIATSINPAANRYRRGVGRKFGEGIQFFTTGVGGIVYALYAEWRVALVVL  
SWTPVLAFFATGLVSNQGKSARASEAYSAGGVAYSTVSGIKTVLSLNAMEATMVRQYRE  
ATEEAFLIATKPLIRQGFAGMMLGSFLIMYIILTLYGTFNIYKDVYDTGCDPSGGAPGN  
ETCPSSENVFGAMLGIAFAGQGISQVGTLETFTTARVAAGEAIATINRKPPIPEQKIY  
HVDEEKPDGGGADGNASVSSASSSRHSSYMIESPGRKAIKILPPYEIDAMSTEGTLPDP  
EKVEGRLTFDEVKFSYPTRPDGLVTKGLSIDVPAGKTIAFVGPSSGGKSTVVKLLERFYD  
PLEGSVQVDGIDIKDLNVKHLRSLIGYVQEPALFATTIAKNIAYGNMSASQEDIEEAAK  
LANAHDFISQLPDGYDTHVGDKGSQLSGGQKQRIAIARVLVGDPKILLLDEATSALDSQS  
ELVVQEALEKIIITTKRRTTVIAHRLSTIRNADIIAVVMGGTVVETGTHDELMTESYYK  
KLVDTQGKSAMMRRMSSVPSLNQFGKTESQIGFEKVPERFVMDAAPLIVFRNVSFAYPT  
RPNKTIIDRFKLIKFKGETIGLCGISGGGKSTVMGLIERFYDPEEGSVEYFGQDVRKLN  
KWYRDQIGYVQEPFLFDGTAENIAFGAPGATREEIVEAAKQANAYDFISKFPPEFDTP  
LSGGSGTQLSGGQKQRIAIARALVKKPEILLLDEATSALDNESERVVQEAALDKLMESNER  
TCIVIAHRLSTIRNADRIAFIGDGRVKEIGSHDELMEKPKGRYKRLVESQERGASTLGLP  
MESMSKSNKKKGRGKDLGDDDEGEGEGQIEEEELSAFDLKRARQLASPDKMYLLVGAFGA  
LMAGSIFPAWGLIFADTINLLYYPVFACTPELLGMVSLETCEDEYWEIEGDRLKEESFVLA  
GYWTALVVVCLVGNVLTFWGFGYASERMSRRVRNDAFYALVRQEVSFDFDKRSVGTITSEL  
QEDATRIQTFTGDPISLIIAVSSIVTGLVLSFIYMWEFALAVACVPIMGLATSLEMKQ  
MFGEDGVDKSEEEIISTPGGIIVETLLNMGTVSALTLETQRFQDFEAATKADADDNYLVDG  
FREGALAGLSMFIQQWINALQIFFGGWLLDRFPEKYTLNDFLISNFAILFSLFGLGAAFQ  
DISDRKETEKASRIFYLMRESSIDPLSEDKTLDTSVDRPKPKKQSKRLSTRKSSLK  
SIGETSEAKGKTSESSTEEEEEILEGKPSLGKPKSMKKRRSKKAKAEGQGDEEDVDAEPIK  
PKSSKKKTEKVDVDESAAKPSKPKSSKKKTEKVDGEKADAEPKPKSLKSKKSVTKKKKT  
SKPVEGEDE  
>comp10961\_c0\_seq2; 181 1 421 LEN=421; translated  
XKFEPPTARRWTPPEAARKALNRRDTSSSIIRNRGTGSTGQTQTHRKPSDCKQOEITNE  
CSRVEITMGGGGQVAGSAAENASKEEKEEMEVSKKQEKKVEASGSRIATTRETLFIF  
GVGLNTKLLFLFGTIGGLGNG  
>comp10962\_c0\_seq1; 199 1 607 LEN=644; translated  
XTDFLDYVEALKEEKIVRRSTDARAMRYASGXKKNYPEVVMMAAVSXSQDGIALNPASNE  
MQNKRKIVMEAMNDGRTLQYTSGEFKNLDEVVTSAVSEDLALRYASRETKNNREVVME  
AARNDGCAFPPSLRGNADIALVAVTENRSVLRCCSQEFFVGAAATTADAAVDRPDGAWV  
NRSSPPSNISSQPVAMCNTVVI  
>comp10963\_c0\_seq1; 334 1 1352 LEN=1598; translated  
XSIEDIYFMSTLLIDFYSSSCHKESKSTVSGRENRLYFERTAPSTELGRDSIEKRPLPPP  
LRLIVMTRFRFVSIILFSLKLLAAIVVEMGSTVASINNSLDGYSFACGGQANFVPAGPLY  
GFVGSSEVHCFAPDGMGGGTYKGSYAFSGSSPASLVINGDIWEGA EVTASNLWFGQ  
GGVLVSFQTDLSAVPCIVTGLDWQVIEDNPVSVRFDCPNQNAIPGISYEVNQFILSNTGY  
VWFTSILEPVGTVARSEQTIRRDYHGVFLWERETNRIVMYSGEQAGEDKMALNGTLDPTT  
GELYIDGFSQATNKPLATTATSGFLSSLPFLESYPIPVLLGQONAGNETKSTDNANPSS  
IDGDSNTARDGMDSVSAAYGRATGANERNSDNTIITVIGIGDGRDGRFNAVTHGMYS  
FSSGSSPLRQDNRLKTILLASVALPLLSL  
>comp10964\_c0\_seq1; 212 114 1028 LEN=1316; translated  
MVKNIGQTRSTGIRTNLFQVIAYAILTTMLITNFPRAPYSIQHQSTPIVKQRTTAIPNKC  
DSPSRSDFDEKYRVGGWSQKLSPEYFYGHSQWPPKEIRQRSASGKGSWLGYNTETSLQQ  
IKEILRKYNIKSMVDIPCGDVNWFDSFETDSLFPYVGLDVTSAVIEVNKKRFAHKKNE  
FYFDASHCAVPRFLNGTSGEEETFDLVHVRDVIQHMLDLGVKYFCNVFKSGAKFLTTT  
TFPGNHNFVGDGQFYKNDLSQEPFSFPAAESCVPTHPKTESDETCLYDLRDASWVSDYL

QKKC

>comp10965\_c0\_seq1; 333 151 1584 LEN=1902; translated  
MASMDEEAKAMREEEQGSEDTVAGKGAAVEEGTGGNLSHAGDEGDEAAAGGNSSEEADRQ  
KRRVYVGNLAWEVSWQDLKDLMKTLDEHVVRVDVLQTS DGRSKGCGIVEFATPEGAEEAV  
LTLNDELTELSGRRIFVREDREQASGRETGHNYPYSSSRAGGRYGNPRSRYPGGPAIHHGNH  
QGVSSDPGSQSRRVYVGNLSWDVAWADLKD HMKQAGEVVRADV ICEHNGRSKGC GIVEFE  
TEEGARNAIATLTHSELLGRTIFVREDREGSGSEAKGGQRPKRNGPGAFHQSSNKSVYVW  
NLSYDVSQDLKDHMRRAGNVDQATILTGSDGSTSICGIVVYQSARDAARAIRELQESD  
LKGRPVLREDK IAGRGPRPARGPRSGSDEPRAPPGVVTQLYVGNLSYD TTWRELKEHFL  
QAGEVVRADV KASDSGRSKGFGIVRFASPEDAQNAIATLAGTELDGRPIEVRPDHRA

>comp10965\_c0\_seq2; 251 1 1549 LEN=1867; translated  
XGASRGSALERDEPGFFFFRLSRVSLHRIAPHRTRGSRASLFQDEEAKAMREEEQGSEDTV  
AGKGAAVEEGTGGNLSHAGDEGDEAAAGGNSSEEADRQKRRVYVGNLAWEVSWQDLKDL  
MKTLDHEVVRVDVLQTS DGRSKGCGIVEFATPEGAEEAVLTLNDELTELSGRRIFVREDREQ  
ASGRETGHNYPYSSSRAGGRYGNPRSRYPGGPAIHHGNH QGVSSDPGSQSRRVYVGNLSW  
DVAWADLKD HMKQAGEVVRADV ICEHNGRSKGC GIVEFE TE EGARNAIATLTHSELLGRT  
IFVREDREGSGSEAKGGQRPKRNGPGAFHQSSNKSVYVW NLSYDVSQDLKDHMRRAGN  
DQATILTGSDGSTSICGIVVYQSARDAARAIRELQESDLKGRPVLREDK IAGRGPRPA  
RGPRSGSDEPRAPPGVVTQLYVGNLSYD TTWRELKEHFLQAGEVVRADV KASDSGRSKGF  
GIVRFASPEDAQNAIATLAGTELDGRPIEVRPDHRA

>comp10966\_c0\_seq1; 120 602 829 LEN=1153; translated  
MPPRLDRPGDFDSYAVRTQVSFKVSQDVDSEEFHVPVLP TGSGEAVSKTKGRRGGYRRY  
PISGRSGILWGFSDV

>comp10967\_c0\_seq1; 230 701 1357 LEN=1780; translated  
MTNRVGIERSSSSSTCSQKSIRTNSSKRIMIGNERSMNGGNGILG TKPTLLEVEPALRFL  
IMDAPRQGNLHLYIREMRKHSVTDLVRVCEPTYQTGELQ NAGIATHNMEYPDGHSPPEEV  
IDSWLKVVDFKAFYDGS AEHHERTRPCIAVHCVAGLGRAPVMVAIALIEFANMDPVDVAVTL  
IRRHRRGAIN EKQLLYLEGYRRSYRSKNMAESGCCVIS

>comp10968\_c0\_seq1; 1311 110 4567 LEN=4695; translated  
MSLEAVWDLRSRILGAGKDSSSTGAGDASSTSA AQQLLPYSRVSVCVFSAPSPPAPESGS  
GSTSNSTNPFEDAPSPRGAASISSGSRPIPRAI VFGSEEGSLHYRSYASPEEYGSSESSG  
SKRNTASHTASFGGR TKSPSRPDRNPNAPRALGVTPSGRPPVNLPRS YLPVDLPAKSLP  
GSVVDVIPAVIQNSHATHS INSSHSGRRNAYNSRQRPPQPPSFP LVLGLFLVLVDDNKG  
SNKQGGAFVAALVTLQNGAFTKVNTTTTNNVASA IHPRFQLPSRVSCATYHKKCGYVVCG  
GKRITTI PAWPIEAAA VSSSGKQQRQHASQSNRHSTTTVDFSGTVLPPP GARGGPSS  
LIVTANGHLAVVAVGNAVYAVPGIEVETTS SGPASPTSASSTASAP ECAKVF CFGQSSQI  
HPVILVDVQDRSVSENWSSLLVCNGREAA LVDVHLD SINHFASASPPRNNGSTATTTTAS  
PILSAAASWPFC LLLTSDGLVSVRAASCLAISLKTVEVGTRPNDFFCLESFWGSGSNAGG  
GRYYFHQS QNASMDPYSRNSISNTANPNFDDLDEGDSNHHPYT SFPWVLSLSYSGQAKLL  
RCQADTMQDLADRLMRI SIDAFGANNF PRSQLAEALHASFTATS YAGPEPTAQSRLLLLKQ  
YLESILGLAEFESGAAPGWPTIDVASNRRDGNKNKSMF GGGYSPFRQQNRNQYENELSE  
SPFANEDAGAGSSTGKQKTEFSPSVTASTPNALLTSTAILCLVCMQLSPSPKGLANRAA  
RECA SQMGVLLDDGNNGRISNAAIQVNEMVADRLKEAASNR SLLSGSSSATSGSSGMQ  
RNSGYANANAQASLQMDFVEAATWLLRSCGKHERAIEVLRERLQQHRAPE SAKQPVGFWS  
QIKYESYTAGHLS ELWGTESETARLLVLRSPATIRLLESNPQLGLSVFTVNHPQ NATQWR  
QTADQDDPLAHPKHPSQVVRLLKSIKPSVAYPNYRTKLS SKDNSAYADAQDEIEIENDEG  
SGILPLES GRALAVSFLSSVGI STRPEENEFDLLGKSMEYAQDVVSD FHDDELCFLLLE  
GVI SERGDNSQQQDN PQSDSLSSNSSDGDVTS LGRIYRQKLRFLRWPQAKIRSERLLEA  
LPRSFQEALV LGLGRHEEALKILYCNCKSMTLAL EYCDMLHGRRKTQIEKQARLAA  
DSMLDDRANDELDEKRFQKENAYLPLVRVALES DDPDKKRG IASAIQILAMRRGDIERSAAL  
RLLPNNLPVSAVARPFLIPALVDSESQVRR LKVVSSLLRAKHTALKQQLTDAQLKSQANL  
YVVPQFRAMNIGEPLHSTKPFKARLSSASPTFPD VVIVKHFFPRHLIIQAKITNNSLAI  
DGRALGNLAFVVAESSEDAIQPASIAAQVPIKVL PFHTTGSAWCVLTASPSRMEGTAILT  
CELRYTVLGDVATSGTPLSFGQATTGRTYVEELQDIEVFASHFS

>comp10969\_c0\_seq1; 468 246 1637 LEN=1968; translated  
MTVSGNHDS DANELGAHFRGSGSLLLMARVLDVDRPI PDAFHDPISDSELCKKFDGLK  
YENRTKRRRIFAGSLIADDSWHVIGTQALETYGI FHSITFIESNRTQSFQPRAVRFESNP  
PSHDYKILNSGIYGPNTAIHIDNFVHETKEKRTMLREHMMRERILVKWKELGMTKEDLGI  
IFDMDEIPSRDVLRAIQVCEAPNNNWR TDDKQTCRAPLARVFLSMYEGSPKCMFKAETKR  
SELKAQFHRYSKASVVI GACIEGIGDGDKYKPLRSGKVSTGDIVGVREEGFGLHFDYKK

IPDGNHGHFFPRYNGADFRTLD SGLSISGGAGYHLHNFFESADTIRFKYRYYGHVHEHAY  
SVPLGAMNADMSMLVKCVHGLPDEGNRKKRLKNPIEMATEAHEVPEAFRIEGYIDARHQE  
LLDLVTADEEDYGRADNFDGNHLFKPHMITHPGKKKNTVLVPE

>comp10970\_c0\_seq1; 1154 1 2442 LEN=2923; translated  
IINNGENDRMPSSLMLQAAQSAAEADGVVTQQVTSNGNHNTGINKTAKVKNNVNKTLNNGGT  
TKNALAMAAAQAQLVVQQRQQQRQQQAQQQQQQRKGSSSKKGQQLRRGKWTPEEEAYAN  
RLIQEFKAGLLPLTDGTTLRTFLSKLLNCDPMRISKKFVGSNCIGKQVFRRTADLNRLT  
PEQIQKSRAELSELERRFLERVAQTNRVKNSSSVGGASNSNHQNSHMHHQHRHNQQMVA  
GRNGVVNP SHHNAVVSAAISAAAAANAGPLRGMNMNRAGNAFRNGGSLGHAVAAAANPP  
WMQPPIGYKQGLGEMARDNLAAGQANSRTAAAGRALLEGLNGGRGGSSNKGGNDLQPLS  
ANPPSNSGMMAMAELQRRASMSRFGFHQSAQNILEALSAGSSHSLTQMARNASSGSFGGL  
MKSGLSRDQLSRLLQGGSSSASLANMNLNENGRKNSFDQLMSLEFQSLQSIDNLANLVQTG  
GGGSAGGHGAPSSGKIKNWSSTHASGGMNGSAGRLGSAASLAQRLASQNDFQSIMRGLSSS  
NNMSRTGLNNEG DGYSGGNTNGNTSGSNPFGKSSTANLQSLFQSMNNGGSTSMSSLLGG  
NNASAASLANLLRQDNSSTGLSALRNSDGLNGRNTTSVEDFLSLVTSGDIPHQDPAVLNL  
PLSQLQQQQQLQKLQQQQQNDGNLNTNGRMNAGGNASGNNENENRQRNNINGGNNSSNN  
GDNRSNRNNAAVNLLAQATGNPALANALTSRSFGSNLGSFADF SRNNLSSLGSTAELLQ  
QLSDSGGGSSANLKRKLLDVDGALEAQGVGKR

>comp10970\_c0\_seq3; 1011 212 2641 LEN=3122; translated  
MTEQRMPSLLMLQAAQSAAEADGVVTQQVTSNGNHNTGINKTAKVKNNVNKTLNNGGTTKNA  
LAMAAAQAQLVVQQRQQQRQQQAQQQQQQRKGSSSKKGQQLRRGKWTPEEEAYANRLIQ  
EFKAGLLPLTDGTTLRTFLSKLLNCDPMRISKKFVGSNCIGKQVFRRTADLNRLTPEQI  
QKSRAELSELERRFLERVAQTNRVKNSSSVGGASNSNHQNSHMHHQHRHNQQMVA GRNG  
VVNP SHHNAVVSAAISAAAAANAGPLRGMNMNRAGNAFRNGGSLGHAVAAAANPPWMQP  
PIGYKQGLGEMARDNLAAGQANSRTAAAGRALLEGLNGGRGGSSNKGGNDLQPLSANPP  
SNSGMMAMAELQRRASMSRFGFHQSAQNILEALSAGSSHSLTQMARNASSGSFGGLMKSG  
LSRDQLSRLLQGGSSSASLANMNLNENGRKNSFDQLMSLEFQSLQSIDNLANLVQTGGGGS  
AGGHGAPSSGKIKNWSSTHASGGMNGSAGRLGSAASLAQRLASQNDFQSIMRGLSSSSNMS  
RTGLNNEG DGYSGGNTNGNTSGSNPFGKSSTANLQSLFQSMNNGGSTSMSSLLGGNNAS  
AASLANLLRQDNSSTGLSALRNSDGLNGRNTTSVEDFLSLVTSGDIPHQDPAVLNLPLSQ  
LQQQQQLQKLQQQQQNDGNLNTNGRMNAGGNASGNNENENRQRNNINGGNNSSNNGDNR  
SNRNNAAVNLLAQATGNPALANALTSRSFGSNLGSFADF SRNNLSSLGSTAELLQQLSD  
SGGGSSANLKRKLLDVDGALEAQGVGKR

>comp10972\_c0\_seq1; 689 1 2179 LEN=2471; translated  
XARADEEFEKEQKEEQVQQQIAADKFKRQDMALQKAILMARVEEELQKEQOKERIQQHGO  
QRREQDERSRQAASVKPVLVSFNNTGDL SATEGNIMKNYDNI TAMLRALRSGAGVSDDSKK  
TVAAITSALSISSSLNVQKCPVLVDLQKQLLYFAKQHKHQQNQSCPAQAMTPSSISSLPP  
PVQLELYHRLLAQQQQGFTNATSKSSGARADLTSSVFGKVVR TLHGANNNSNI STNSNR  
ESNSKSI SMNKNTLQAPTTSPTS NSTVAVETKGPDPK PSTVSARS MILSAVTA AKDYQ  
FLNTPQVQQQQEQVMTRNLSQQEAERKSSFD CDASFHDSTS IILPCRARGMPMDHNAKSA  
YFV I PKNIKHGTDL ICSHFGCRNAGVKFRYCSYCKLSAAKRNFSKRHRHSEKIVEVDVPK  
EENS NCHT I SSSSDSNAMNTTHTICTTVKPTS NTEEKRFGLSPNPPKMKMALGETPL  
SASSSSSSLASTSKSASASASATISTTVEAKIEASTAP ISSSTRPTSSLTTS PKRTMPF  
SSNRKVERTNENDPHASENISGAEFRPITKRRRQAWKDLLSRPKSHQDNSQFMI EWIQ  
DVLRVSDLENN SFGDPNPNPNPNPDMHRDEMPHGDKCSKKPKMGEVMHKNKQEERK  
ANPNTPKPFSVEESNHSSVG I KDILPEDNSTSSEDSVDL RVRKKVCSIRKMARTESVLWQ  
EPPCMD

>comp10973\_c0\_seq1; 239 294 926 LEN=1283; translated  
MGAVARTSTRVKS SSSQDRSDECSDDTSSPSSSSSLPAEHTVTLHYEDSSCDILARSDETI  
LSALERNQPYLES LGLPNSMIPSDCRRGNCLTCTGTHASASSQLASGS AVVCDGDGLSPH  
ISRTIREKGYILTCSTRVVGEGLQLNLGQNHRVWKDIYQDRLVEEPTQTEKWAAMARAKR  
QSDERNQVQWKKQTGELLSSAEGPENDGGG

>comp10973\_c0\_seq2; 239 294 926 LEN=1272; translated  
MGAVARTSTRVKS SSSQDRSDECSDDTSSPSSSSSLPAEHTVTLHYEDSSCDILARSDETI  
LSALERNQPYLES LGLPNSMIPSDCRRGNCLTCTGTHASASSQLASGS AVVCDGDGLSPH  
ISRTIREKGYILTCSTRVVGEGLQLNLGQNHRVWKDIYQDRLVEEPTQTEKWAAMARAKR  
QSDERNQVQWKKQTGELLSSAEGPENDGGG

>comp10975\_c0\_seq1; 289 246 1166 LEN=1855; translated  
MAESSRERSLREQSFVTTQSYLETRAADGILAAGGAAGSLTVLQLIQDYLLTNTETPTPI  
VGPFLIASAIKFLNQSPPSLDAFYKDSIAGLLIGSSIHIFLWAENVDDGGAGTIVSGSY

ILYLILFFTILFWKLNTGSIWGSGLSLAYHVAFQSGFWGKNISVKGDFRTLIEDFPLWYI  
LSPYLISHFFLYFCALGVSRIRQQVRIFIMRKLAFSSEKKRLRDDRGIIEELKKDKKELR  
RLFDRMDTSGDGRDLAMELKLALRAAIGADLSLEDCEDFMIKSADSDGDGSDIDFEFFASV  
DQILLL

>comp10976\_c0\_seq1; 281 202 1203 LEN=1297; translated  
MAFRNHFFDDGRIPSWLKEHCLRLKDEGMNLRNLNLNIRRLNLPSILALSEALRDNKTIE  
TVNLTTSLSNTQNDQDANRILMPFAYALRHHVSLKTVHLSYNQLTNATSLGTSLEMNQSS  
LTELHLHDHNRLNNETAFALARALQRNDKLSVLQLNSNNLGDEGGEMIAKALRYNSTLKSL  
GLARNSLESKTASALFETLDFYGNVSLVHLSLNDNPDFPLLSKATIMYLVRANRAGRYLL  
RDNYTKSSDIDSYDTADVYGD SANGLRSVEGKVDLGCFGKHKNRDFVGIKRDRRGL  
WPLVLEGLEPNMMYFFVRENPNLMHFELKEKLS

>comp10977\_c0\_seq1; 269 955 1692 LEN=2137; translated  
MSTTRAAAAATSRDVKQKLVNLLFRENYSRTGPEGHKRLDFSIIYSYEDLRKAYLKRLQVI  
HPDKIHKNVYVGNDDNSDHGRRSHCENDVVFEEKENVHSHKEDLKKEFQELQSTWDRYDEL  
SKSMMKARGDGVAAFTQFGVGCFSFSDTEEERILRQEITDQACRGWFSSGLVSSGLTTET  
SGDENQHAENTKEISFTKQRKPLIDDAMFVSTESCGANDSSDASNRTDKTTYPRRFRRTL  
IPGIN

>comp10978\_c0\_seq1; 258 134 1095 LEN=1280; translated  
MARKSKQPGGHNPLTAHERKKYAKDVYGTTRARLGRDSQYSLGDCGLSLHPARDHPVASP  
SGYIYERSAMLEYLLAKTRELKQRREEHDRALALRAEGSERREEQHRRDRVEDFERTQKV  
ASAKRQKLEENVLKRYSYWLADMQPSKNDHDGDEANPTAPLPKRPPSPNTQRPLRRKDLI  
ELCLLRKHSNKNKSDDGNNPRGDPVLCALISEKEITQQAALALVTRGSSGDEAHPAQVVL  
ESVYRDLKIEDEKTPVCPVTGRKLRKVLKLRGGSSFASEDGRAVEAKQYXADDDIAPNK  
PERGKRQMVFAVARKQRQN

>comp10979\_c0\_seq1; 431 3892 5383 LEN=5666; translated  
MITELVTTRKLLDSSELLPYRYIDTKRTISRNSLAIITFFSPGSSKDILGKQSAILSHS  
DENTLTVMFQRENDVEMKQPPGGRTPSGLRHSWRLWRLCCCRYGWYPLLVAPIVTVGCIF  
SLYSTAGCDFIRVDVGFTPSNTGWNSSTLDLGLFLYQSGEEETNKYYAAFLDGCRLYTDD  
FSEEFIEDDRTWVRAQIMGFVSAGGGVIATIFTWLFVVSPLPARFFWPVVVLPALVASFL  
AEASKFLVYDTSMCRKNVWFPPGTESLPRTAECSLGATAIYGIASGIIYLVCLILVCLKA  
PNKRDLPVNYGMDAENGLVHLPPQGSYYGSKRSGRPINSTEFEATDRDRYSYPNRVEPD  
APELYVFEEDEVESGVTINSRKYDSDGFESSIMGKSNAQREINDEEDLLSQQRSQNNYVG  
DGDSVGKLSMGKPPPTDVTIVRNRSGGKPVLSRSRLETVERMEKNANNSSETTAQMIDD  
LLTDLKSFNDDSYKQ

>comp10979\_c0\_seq2; 282 126 1696 LEN=4659; translated  
MNVGGGENTAGTAGAGEARRCLCHYTEENNGNGVSFSRGERDTTLRCSVCVQNLRRSSV  
QRHRQALQQHAIKKECERELASIPRNRIPELQAESQRLREKSAALRKECGEMAVKIAHV  
ALENDTLRETMAVDSSPLERQRDLERLENGLLSLEQAIETATRQVRFLRFQWAQKVF  
AMHRLQIDPDHIKLTPLQKRHQKTKPGQQLQRRARGIPKISGLPLPNAGPELYGFLPPRE  
LQSALRIVATVTSTVARCLGIVLPHRVLLTFNTSDSSVGDIADTVTEDDLRERNAARSQK  
PQTGYHQGEDTPRHDSYFSNYPNQVRGTSNSGGYRTPVASSSTASLYSMMDTSYFYKK  
AKKALAKATGQRPTSTGSNSNARGRPGTATIERSFDAITVAQRLNHATAAILNDVDTTA  
EAANNKNSASKFALSTKAMHQGDDFAIALQLLQNNVLTLCIRAGXPGFEAVASGSNAE  
LARTRQILPATDDRTILRARDTIYHNSLDFYKEVQLDPIEFQK

>comp10980\_c0\_seq1; 674 446 2146 LEN=2221; translated  
MTISLLRPLLFSIAWLLPAVDICIAWTTKATTANKVASVSSTNASRKGSSSEVWGVLSGRGG  
SNDGNVEKKRQRFVLMDVFCDFHGRYLAEMAGEVYGVCEVHVLSDYMADYITMQKQDQD  
SEENLSLMPRMPSSPEEAIEWRRDLERFLMSEHAKINDYEDIELRGLICESDPGLADAE  
RLSALLNVKNHNGLEARRNKFLTISTLASKKIPTVRQKLCSTIDEAVEFATNEFSSLSA  
TTVVVKPVRGCASDDVFLCNDLESVRSAYETVKGSTILGSPTEKHESVLVQEYAVGQYEA  
IDTVTKNGKLIKIAAVWKYDKRPQPPTIERTHVLGDLDITNEETNEGDEIGEKRRQVYYAT  
MIYDDDDDESSTETSDDLSSIYKYLDECLNALDIRWGITHSSELIITPDGPRLIEVNCRQH  
NMNFVPLTDNAIGYNLYDMLLAAYFGDDANEANGEDILKDAQIDWDLDPDYPSRRMNGA  
MIHLVNDKRGLLKRLENEALYEIQSMQSVLDLEVFPEFLQPGLSVIEPTVDIKTDAGWIQ  
MIHPDREIFERDYQRIMELMPTLFEV

>comp10981\_c0\_seq1; 413 96 1346 LEN=1405; translated  
MPEGQATTKIRQSIDQSSLAKWMVANDELKSVLAFHPAVSYFSDEDALCEAMEIRQFGFG  
QSNPTYLLQIGRSDKDAPSAAPFRAVLRKPSVAHPSAHALHREFQVLRGLQKHNQKKT  
KDEHVPVPHYPAYCKEKSVIGAEFYLMFVPGRIYTDSSMPGMTNTERKRAFESVVTVMA  
NLHGVDVRSVGLGSYGKGGKYVQRQLDRLKAVSRRQAELSGTPAPEIERLARQLGEFAAG

CPNRI SLLHGDFKIDNLV FHPTEPRVIAVL DWELSTVGD SLCDLANLCV MYLMPQSKKAA  
ISGVAGLDRSLAIPTRKELLGMYSRHRIQTDRTTTISLEEVQKWSGFYLA FVTFKNAVI  
VQGV AQRAKAGVASSARANEVAKALPLICMMAQSILDTEVRPLLTGEKNDRVISSL  
>comp10981\_c0\_seq2; 362 96 1210 LEN=1510; translated  
MPEGQATTKIRQSIDQSSLA KWMVANDELKSVLAFHPAVSYFSDEDALCEAMEIRQFGFG  
QSNPTYLLQIGRSDKDAPSAAPFRAVLRKRPSSVAHPSAHALHREFQVLRGLQKHNNQKT  
KDEHVPVPHPYAYCKEKS VIGAEFYLMFVPGRIYTDSSMPGMTNTERKRAFESVVTVMA  
NLHGVDVRSVGLGSYGGKGYVQRQLDRLKAVSRRQAELSGTPAPEIERLARQLGEFAAG  
CPNRI SLLHGDFKIDNLV FHPTEPRVIAVL DWELSTVGD SLCDLANLCV MYLMPQSKKAA  
ISGVAGLDRSLAIPXKGT PWDVLTAPNTNRQNHNDIPRGSPKVERILPGICYVQERGD  
RSGMYLDHSTF  
>comp10982\_c0\_seq1; 214 97 576 LEN=946; translated  
MMKII SFLLLLVGASAFAPAGSFTGSPVCLSERASAPSTQLSMISHRKGFKKLGKPADQR  
KALLRALTTETIRHGRIKTTLVRARAVRKHVDHMIELGKRGD LHARRQAMGWYDKQLVH  
SLFEAAPDRYADRNGGYCRVLR TVARQGDNAKMAIIELV  
>comp10985\_c0\_seq1; 789 121 2397 LEN=2564; translated  
MNSIAADPPNIGVIGCGPAGMFFLRQLEKERERLLDLKKKIAESEPV RKGEGSDNGYEYD  
ADTIDQRLFSLPIVTVFEKEGRCGLWQSKLSSPETNGEESGVAWSQTKGASRKKTNAN  
GIYDGMWINAPKEIFEFEDYTFDEHFGKPMPSFLTRSQVLGYLEGATDDVIDMYTNINST  
IRKSLDDNSSALGTILFNTEVSWIEYSKTDEYFWVETVPTGSIPNASTQEYDPKIVTGHE  
FDKII FATGTENLPNMPQREVRLLTGADADNGAAIFDKPILHSSEVKSLGADITGKRFLF  
IGAAYS AEDLALSFLKRGADHVYVTARRDDAYPVYTPHWPMDKVTVLMRNEIKEVLPGN  
RLRMGRMDLPSPIVEDIAKRFYNASHDDFVLEGIDAVIFCTGYTINENMLPNLRGYKTY  
GGVEYNTELETKVDKDDWPNIYDTELYGSEIPSETFQNSCGTSVDDHSTVVRADPTGHCL  
YQIEGAHNHLLINNP GFFYHHAEFETPLLDLDIHSAYILKVILGDI PSPDTMEEMFRQRS  
LETAEAIRHSQVRFVLYDPVYHEATILKSYEGKLNERSYPSAYQFFKLF SKARRAGHPAG  
NMIVEKNANATTMKG GTTDAIPSCYDLRAIKFTEDDYHQNDSDSNQRAASSPSTAATTWV  
FSERGLVFLKQFLDSMEAHWEMQPGTNMTFRDFRFD SYQSVYTGKPRRF SKLWLEVDDL  
VGDEGDFHRTTSTGNKGRIRRNHDCPTCDTDARSEL  
>comp10986\_c0\_seq1; 443 31 693 LEN=932; translated  
MKFSVAALVSLMAYSASAVDLTEDNYDSLTDGKIVFIKHFAPWCGHCKAMKPDWDKLMEE  
FKDDETKLIADIDCTSDK GKPLCDAHGKGFPTLMYGDASDLQDYQGQRSYDALKTFAET  
ELKPMCGPNNLDL CDDKKA EIKEFFDMSDADLQAKIAVEENKIEVAEAKMKSEIEKLQN  
QYQILVAQNDAVA AAVKADGLGLMKS VQKIKAKTAGSDEL  
>comp10987\_c0\_seq1; 192 1 693 LEN=1490; translated  
TAMKQKEMEQQNTDQPTLKLYYFPIKKGGEAIRL ICAYSGLKLEDYRFSSRDEFTAMKES  
SKLPFGQVPMLEIDGKHAMVQSGS IMRYLGKLSGLYPMTDHVLAQTIDSIMDQAADVFLG  
STVLT YGLRFGVDLTPEATAKSYEHFNQTVLPGHLKRVERFFDTSTTGWIAGTEEPSPAD  
FVWYCSLINMAAKKEISEANKSLSEFPKLFKAFIEKFESLDAIKQYYNGKE  
>comp10988\_c0\_seq1; 652 224 1561 LEN=1944; translated  
MRVPTKHGLDRKFKPWRK GK SANSNKRSSLKQQLRGHERLLSKILKSAENKDGADETR TK  
ELKSKIAALKIEISQKQSMVEKKHA EKAHGQRF LDRQRLTREEKKVRKSN GADQEQQLL  
KLALDKVYVAHHPNDVKYMP LFKHGKRVT DQSRQLFRRAVTRKRILRDINKVTRVNWIGS  
DQYERLPKDEWTIQDEERVFGGSVSR SNKEKTGSVTKTEDSRFAMASNHEELLRAAAEAE  
SDLLQDDHTAKPGTSGSAEPEKGVTEKNDSSSSDDSSDSEDEEVNPLSNTAKTSRNES  
AAQQKAKEENSSSSSDSDSDSDSDDETKTSSSKADTSKRKSASGSSTSDSDSSSDSDS  
DSSDDEGDDKKQSSGANLQTSTTSSEDEEEVDDFLV DATGDHDVFKKPAVKVPAMSAYR  
GDKSKGFDTQSQRPGEYRKKRIRRY  
>comp10988\_c0\_seq2; 652 224 1561 LEN=2041; translated  
MRVPTKHGLDRKFKPWRK GK SANSNKRSSLKQQLRGHERLLSKILKSAENKDGADETR TK  
ELKSKIAALKIEISQKQSMVEKKHA EKAHGQRF LDRQRLTREEKKVRKSN GADQEQQLL  
KLALDKVYVAHHPNDVKYMP LFKHGKRVT DQSRQLFRRAVTRKRILRDINKVTRVNWIGS  
DQYERLPKDEWTIQDEERVFGGSVSR SNKEKTGSVTKTEDSRFAMASNHEELLRAAAEAE  
SDLLQDDHTAKPGTSGSAEPEKGVTEKNDSSSSDDSSDSEDEEVNPLSNTAKTSRNES  
AAQQKAKEENSSSSSDSDSDSDSDDETKTSSSKADTSKRKSASGSSTSDSDSSSDSDS  
DSSDDEGDDKKQSSGANLQTSTTSSEDEEEVDDFLV DATGDHDVFKKPAVKVPAMSAYR  
GDKSKGFDTQSQRPGEYRKKRIRRY  
>comp10989\_c0\_seq1; 115 1 1363 LEN=1731; translated  
XSNFTNQGLSARLWEPFLVGFVATTDQPI SPLHVL CIANVKNHEKSNEHKLKQTPHLR  
LFIMSFRFLNPRLVDEFDPYREDGVCYHGATLDDPDVLCRDIPP NRRLRFLGWYITPERH

FLEWVVFVVTGAFLLILLGPKIGLSPSKPTSSGTNTHSLQLAPRFWMKASSLLFYYPVSY  
TKLSWEGSNYPGRWLLFACMPVGTMWILSALFCCLGSGKNSAERAAPGQGGRSSTNQHQ  
AHSSAMA VARYWLLLEIWL SFLPI LGSDLLLGLFAEAMESIAKAVRTFGATI WGTSTAKD  
GENATICYFFHGLYLVLAPV FVAVGELTMHPAVENGRNNDQCDAISSIPTFRTRGRDAC  
VVLWKLAVECALRQAVGTAIATLYYMGV VTPASIVAGLNVN FLLYDFGETPSFRIYYVLG  
WFRDGLVRFGLGTMEMAVRSATAWLLGTQTKSE  
>comp10989\_c0\_seq2; 153 920 1672 LEN=2040; translated  
MWILSALFCCLGSGKNSAERAAPGQGGRSSTNQHQAHSSAMA VARYWLLLEIWL SFLPI  
LGSDLLLGLFAEAMESIAKAVRTFGATI WGTSTAKDGENATICYFFHGLYLVLAPV FVAV  
VDELTMHPAVENGRNNDQCDAISSIPTFRTRGRDACVVLWKLAVECALRQAVGTAIATLY  
YMGV VTPASIVAGLNVN FLLYDFGETPSFRIYYVLGWFRDGLVRFGLGTMEMAVRSATA  
WLLGTQTKSE  
>comp10989\_c0\_seq3; 153 624 1376 LEN=1744; translated  
MWILSALFCCLGSGKNSAERAAPGQGGRSSTNQHQAHSSAMA VARYWLLLEIWL SFLPI  
LGSDLLLGLFAEAMESIAKAVRTFGATI WGTSTAKDGENATICYFFHGLYLVLAPV FVAV  
VDELTMHPAVENGRNNDQCDAISSIPTFRTRGRDACVVLWKLAVECALRQAVGTAIATLY  
YMGV VTPASIVAGLNVN FLLYDFGETPSFRIYYVLGWFRDGLVRFGLGTMEMAVRSATA  
WLLGTQTKSE  
>comp10990\_c0\_seq1; 121 1654 1823 LEN=1823; translated  
MFLEDNSRVARILEPLAPTKMGKKAKASKKYGKKSEKKEKSTKGSKKLKDTHFP SAA  
>comp10990\_c0\_seq2; 121 1791 1960 LEN=1960; translated  
MFLEDNSRVARILEPLAPTKMGKKAKASKKYGKKSEKKEKSTKGSKKLKDTHFP SAA  
>comp10991\_c0\_seq1; 398 85 1029 LEN=1224; translated  
MILKNLFSTKNGNQMKRWLRFHQAMNKKRWFEPDREKNGPITLFD FSTELDAVDAALVEQ  
NSNMR SVWRTTDDSI IGGYSSAKMQLVRTSEDLKRI INGQESIPPHLWDQNRTTDQKSNE  
IKNDSIDGIQHDNGERGDGREHCDTENDFLPFVVRWKG TIDTRVNKEKKVHRSGFCSILSP  
EFPMAGVDLDGRYNGLEIMCRSDGRPYSLNLKVESFIEDDLFQC FINIPPTNTPGSKVCQ  
ATGGKFDQV VFLFQHFAATAGGRLRARQRKLDNAVKI QSIGITLMDGV DGFDFDL SRIR  
AVNYDENG VIG EAD  
>comp10992\_c0\_seq1; 884 109 2513 LEN=2513; translated  
MENTEKRDDNEIPP KLADDTASVPKICRSISECRFISR FWAHCDRDWAVKGD DDTGGSD  
RENGIEKTEDDVAGVSLCAKTRLILSAQPSHNFGRGRGNL RNRNARFHQDLKTD DDLG M  
VVMFQAKANESIAVVLSSFP SYANYGTDGTGN DTGKEE EEEEEQEE EEPTEEKE  
KEEPKDEQCKEESKEEQKEEIGMTDNVPAQNSDAQ TIAETANGDSNTSTRYEIVLGTNK  
NTATTIRRSV FVDKGDKEPRSSKTKSKFSAAVTI PSRVCRGFGVNTKTS DDEDG GNNACW  
TSYWICLSNSNVYVGMGCI PGKQCFGIMEAQKQGENPAAAGTLLPVRYVGI GNDTRHNG  
DSTEIRNLVVTNVP PCL ESALKEVPPQDELPIVCLPPVACDSSSMDIDEDTETLELKR YM  
EQYKA ECLVRKRAQKYGTQYKEQPMKDFLPWTMAKRL LLSKQOETPATGSNPSDFVAGD  
IDFLDPKEVSKREARLARFATGATAESKTDGGDKAASRTTQNR PVPVTDGLPVEQAW DKE  
TMLRPVRRDPPP YLWKECPSNAETIETFKNPANPFAMYDETTKAATWVEDKIHVSAIDWA  
AFKQIGNDDLKHFGE SYGPVKYIEWLGDVNCNI CYGSKHSAARALVCLANEVPSPPP SR  
TPTDEST EASKNNKDATSPATASSTVIDLGCMTWRF GKKP IRKLSNDRRGRKGT TARYL  
LRMATTEDILVERPNSWPEPPGGFSSDRVLGPKSDFANPKRGRDRPKKQPNPQKQYQAAQ  
QQNRRGSSSKTKRKRQRGNNGX  
>comp10993\_c0\_seq1; 207 256 894 LEN=1117; translated  
MSLFNNPKRRQRQEASQVEADHDIAITSKAFGR TMRSRASAEARAIHLGDCSFS SLSMRT  
IDTCADRSSRRDISAELWSSIDWSAQGGDGV TIDTSNQKNEVWHSSACNLSKTLQTVTYD  
SSLGGNDETSTTHSATTIATTNDRNSTASEMTLEELLQTFLT SDDICNDNDNNASAHSL  
ELQNRIRKTYFLD GILLSDNTAVKSEEMGIDK  
>comp10994\_c0\_seq1; 970 218 4254 LEN=4509; translated  
MPSWLKGVAKRGKRYGRTEEERRDVNDPFS DLEFNNDGNSNLIRSSITESYHDGIAPV V  
IQIDEAIDDEEEQESLLQHRDERQPRVRKREWEQRSHRSIDFAGRTTNGGGRREKQKSSS  
GAYNNNSGSIDSSSSTKPSKAKQSTGTGEPSSGTD CDLEHCCLAEGACLGNAARGETN  
DDVGDERT EELPVASTTAPGVASSFKNADACIQQIRSAKSRPDPTDDCEATAGTQYSQQQ  
LDTIRELGP I RDKNADQKDRHTFMVKRLYVVVAVACL LLLITTI IAVTVAVKRKKANRADL  
SPSARRSQMKESMVSELNKDSDFETEGSAQN LALDWMANDDPAALPATPVTTTELTERFAA  
ATLYFATGGPQEWIDSFGLSGASICEWNSSGDNTLARI GIFCGESGAVREVKLGXDRKL  
KSIFYNISGSVSDPFQLSLFRYLYPKTTNHGKQYXAAENNNLSGSM PKELNYFSELVTLN  
LYFNKLRGTIPDISGLAALEQIDVDGNELTGTVPESIFNMPNIVNLYLLNKNLGTIPE  
IKESSKLEAISLFGCSFVGSIPQSLTSASALRLLQLKDNSIEGTIPSGLFS LPLETLGL

DGNRFVGS IPTIQATGEGSALKSLSVGSNSFEGSLPDSIKELTSLQYLYADDNMLTGSIP  
RSIFELPSLEQLWLHDNKLSGDISNLSFGSNSVSDVYLGNNLSGNLQVMFATAPSSIQ  
RLDVS GNTLFGQYISDDIGKFDLSKYFNASACSLVGTIPSNALTKLTEVGI FSVSNNRLE  
GVIPSTLGSMTSLKNLELSNNFFEGEIPSELANLGSLSFDISGNRNLGGDASSTICQAG  
DLVFAASDCAGNEPVRIKXLLYRLLQSKWPMQSKESVKDEEPRKWLSLEQRLKNILLPF  
VVHYYYYTHHTHTHTYAIGNGRSQSFATFTGRLNYLSSKQLGETAIRKRGAHNNDTTII  
QRRFLQSSKQLSRHLWKQQQHQQRNHVSTNLGRRFRGVI SESRMSRARVYADVNVHRPR  
DYWDYEALTVNWGDQEEYEVIRKIGRGKYSEVFEGVNVVNSTKCVIKILKPVKKKKIKRE  
IKILQNMCGGTNIIQLLDVVRDPQSKTPSLIFEHVNTDFKILYPTLTDYDIRYYIFELL  
KALDYCHSNGVMHRDVKPHNVMIDHEKRQLRLIDWGLAEFYHPGREYNVRVASRYFKGPE  
LLVDLQYDYSLDMWSLGCMFAGMIFRKEPFFHGHNDYDQLVKIAKVLGTEELFHYLDTY  
DLELDPHFDGILGRHSKKSQKFWVTPENRHLVSDEAIDYVSKLLRYDHQERLSAKEAMAH  
AYFAPVREAAMRGGNQSSSSGGYAV

>comp10994\_c0\_seq2; 1038 218 4127 LEN=4382; translated  
MPSWLKGVAKRGKRYGRTEEEERRDVNDPFSDFEFNNDGNSNLIRSSSITESYHDGIAPVV  
IQIDEAIDDEEEQESLLQHRDERQPRVRKREWEQRSHRSIDFAGRTTNGGGRREKQKSSS  
GAYNNNSGSIDSSSSTKPSKAKQSTGTGEPSSGTDCDLEHCCLAEGACLGNAARGETN  
DDVGDERTEELPVASTTAPGVASSFKNADACIQQIRSAKSRPDPTDDCEATAGTQYSQQQ  
LDTIRELGPIRDKNADQKDRHTFMVKRLYVVVAVACLITTI IAVTVAVKRKKANRADL  
SPSARRSQMKESMVSELNKDSDFETEGSAQNALDWMANDDPAALPATPVTTTELTERFAA  
ATLYFATGGPQEWIDSFGLSGASICEWNSSGDNTLARIGIFCGESGAVREVKLENNNLS  
GMPKELNYFSELVTLNLYFNKLRGTIPDISGLAALEQIDVDGNELTGTVPESIFNMPNI  
VNLYLLNNKNLTGTIPEIKESKLEAISLFGCSFVGSIPQSLTSASALRLLQLKDNSIEG  
TIPSGLSLPLETLGLDGNRFVGS IPTIQATGEGSALKSLSVGSNSFEGSLPDSIKELT  
SLQYLYADDNMLTGSIPRSIFELPSLEQLWLHDNKLSGDISNLSFGSNSVSDVYLGNN  
LSGNLQVMFATAPSSIQRLDVS GNTLFGQYISDDIGKFDLSKYFNASACSLVGTIPSNAL  
TKLTEVGI FSVSNNRLEGVIPSTLGSMTSLKNLELSNNFFEGEIPSELANLGSLSFDIS  
GNRNLGGDASSTICQAGDLVFAASDCAGNEPVRIKXLLYRLLQSKWPMQSKESVKDEE  
RKWLSLEQRLKNILLPFVVHYYYYTHHTHTHTYAIGNGRSQSFATFTGRLNYLSSKQLGET  
AIRKRGAHNNDTTII IQRRFLQSSKQLSRHLWKQQQHQQRNHVSTNLGRRFRGVI SES  
RMSRARVYADVNVHRPRDYWDYEALTVNWGDQEEYEVIRKIGRGKYSEVFEGVNVVNSTK  
CVIKILKPVKKKKIKREIKILQNMCGGTNIIQLLDVVRDPQSKTPSLIFEHVNTDFKIL  
YPTLTDYDIRYYIFELLKALDYCHSNGVMHRDVKPHNVMIDHEKRQLRLIDWGLAEFYHP  
GREYNVRVASRYFKGPELLVDLQYDYSLDMWSLGCMFAGMIFRKEPFFHGHNDYDQLVK  
IAKVLGTEELFHYLDTYDLELDPHFDGILGRHSKKSQKFWVTPENRHLVSDEAIDYVSKL  
LRYDHQERLSAKEAMAHAYFAPVREAAMRGGNQSSSSGGYAV

>comp10994\_c0\_seq3; 384 218 1477 LEN=1907; translated  
MPSWLKGVAKRGKRYGRTEEEERRDVNDPFSDFEFNNDGNSNLIRSSSITESYHDGIAPVV  
IQIDEAIDDEEEQESLLQHRDERQPRVRKREWEQRSHRSIDFAGRTTNGGGRREKQKSSS  
GAYNNNSGSIDSSSSTKPSKAKQSTGTGEPSSGTDCDLEHCCLAEGACLGNAARGETN  
DDVGDERTEELPVASTTAPGVASSFKNADACIQQIRSAKSRPDPTDDCEATAGTQYSQQQ  
LDTIRELGPIRDKNADQKDRHTFMVKRLYVVVAVACLITTI IAVTVAVKRKKANRADL  
SPSARRSQMKESMVSELNKDSDFETEGSAQNALDWMANDDPAALPATPVTTTELTERFAA  
ATLYFATGGPQEWIDSFGLSGASICEWNSSGDNTLARIGIFCGESGAVREVKLGKIEN

>comp10994\_c0\_seq4; 293 1 1031 LEN=1286; translated  
XLLFSISVYADVNVHRPRDYWDYEALTVNWGDQEEYEVIRKIGRGKYSEVFEGVNVVNST  
KCVIKILKPVKKKKIKREIKILQNMCGGTNIIQLLDVVRDPQSKTPSLIFEHVNTDFKI  
LYPTLTDYDIRYYIFELLKALDYCHSNGVMHRDVKPHNVMIDHEKRQLRLIDWGLAEFYH  
PGREYNVRVASRYFKGPELLVDLQYDYSLDMWSLGCMFAGMIFRKEPFFHGHNDYDQLV  
KIAKVLGTEELFHYLDTYDLELDPHFDGILGRHSKKSQKFWVTPENRHLVSDEAIDYVSK  
LLRYDHQERLSAKEAMAHAYFAPVREAAMRGGNQSSSSGGYAV

>comp10994\_c0\_seq5; 472 218 1729 LEN=1780; translated  
MPSWLKGVAKRGKRYGRTEEEERRDVNDPFSDFEFNNDGNSNLIRSSSITESYHDGIAPVV  
IQIDEAIDDEEEQESLLQHRDERQPRVRKREWEQRSHRSIDFAGRTTNGGGRREKQKSSS  
GAYNNNSGSIDSSSSTKPSKAKQSTGTGEPSSGTDCDLEHCCLAEGACLGNAARGETN  
DDVGDERTEELPVASTTAPGVASSFKNADACIQQIRSAKSRPDPTDDCEATAGTQYSQQQ  
LDTIRELGPIRDKNADQKDRHTFMVKRLYVVVAVACLITTI IAVTVAVKRKKANRADL  
SPSARRSQMKESMVSELNKDSDFETEGSAQNALDWMANDDPAALPATPVTTTELTERFAA  
ATLYFATGGPQEWIDSFGLSGASICEWNSSGDNTLARIGIFCGESGAVREVKLENNNLS  
GMPKELNYFSELVTLNLYFNKLRGTIPDISGLAALEQIDVDGNELTGTVPESIFNMPNI



GELLFRSFENKYVMALRIQTICT

>comp10995\_c0\_seq1; 462 171 2086 LEN=2551; translated  
MATTTTLDSKPATQSPDVPTQITASIRDLSSTMDGWFHTASDEECEVMTAKLLDYRFEG  
EDFRTEWWGHAEALGFVRVDYHYRLPSPSLGRFYNGEEEEETDVHTAQSLCRNLNTLAIP  
HGKSPDRIGESDRKCGRTILERAFLKNRLRNTAFDKQGILDQWATLREELVFRKFHAAV  
TKDCKSNELEDHTRQONGGKRGRVRKASLPPGRAASGEKRWSSSDAGAELFFRKXEAN  
ESDQVSGKVSGGGNDDNQNTSEEEVIDYPTTVQSYSDCARDHRLAEAAASVRESNIADSLF  
DNWKFLLISTNHSLLLYGTGSKKNLLERFANDDLGDVIEINGFDPSLTVDGLLRLLIDHW  
LGGEPTIRKNDFYVHHETSCEITDKSTAAARRMPFFPRRGDFRLLQTARAVAKRIAEV  
TKTARPVTLIVHSM DAGGLGSLAQEALSVLVSQSRTGCGLNAVRLVASIDHVRGQIVVE  
SLSRHGLHWLQMEVHTRPYVDEVVPELALSERQSSAKKRARVASSARSDRDLQHEGMSE  
DEYLALEHESIFSVLKSLSSTHSESLRQLAWLHLESEQEWISYTDLLKRCR SERIVQADQ  
QLRLYL GELL DHSILERSKNNVTTSYRIPYPEEILSMIW

>comp10996\_c0\_seq1; 526 291 1175 LEN=1321; translated  
MAMKLVAAAKVRRRAQDAVLATRPFSETLQSVFGGLIARLGGEAIDLPLLTQREVKKVTLT  
VVTGDRGLCGGYNF MIRKAENRFKELKDQGIDVDMVLIGQKGIAYFERRNYP IRKTFPC  
GQNPNAKEALAI SEELLNTFLAGETDAIELLYTKFVSLIASTPSVRTLVFPFSASDITQQG  
DEVFQLTSESGDFSVERTELDVAEPQEFPNDMIFEQDPLQIVNSILPLYLNGQVLRTLQE  
SVASELAARMQMSQASDNAGELASKLSLEYNRARQAAVTQEILEIVAGSAALE

>comp10998\_c0\_seq1; 437 77 931 LEN=1236; translated  
MRF IGRGKIGTSFCLVGC FHPKSVASYVPSFAGAVNKDSI IKPFGQRRLSSTSSLP CSQM  
EETQSSIIKPLKVLALHGSGGTAEFPKRLTALNKALAFHDSMINSNVDEQLQLEITAVR  
APFVKNDGFSWWTMPPGVRSFNAKEYTGFEESAKVLKVVWENGDFDLVIGHSQGAILVGA  
LLALKRAPHYPPGGYIMNGVSFPNPYAKQLES LQQSDVDGGKGSNPNILFLLGRKDQIAP  
NATGEKLRDLLQKGGFGVSSCYHTGGHGFQETEDDEAMKTIVEW

>comp10999\_c0\_seq1; 461 1 1270 LEN=1410; translated  
XEQQGRTELLDQIRHSIVCQSSSSSSLSFFRIISPIMKYTFVNTLLLVL SLTSPSGAKER  
LFQEE DGARTESQAQISDDLDEKNPHFFSPIEMEISSASNDELGIGDEGEQITSRTVFQ  
GRTEPSPECGEGISRHYELPCDDNVVSKTTDENSEDPISGRNPPSDSNCVTTDGTFGDISD  
SAALLTVPLDYFYEMKVVAGTSQSTINDEILPPELKAIVDSILQEVY PDKCISTAVGKRH  
LRENRSKRHLEVIGVSMYPPDYVTANTCEQMNSKNPPGDCYVVKGELTIFTQEEHVAEEQ  
ARIENLIKEHMNDGVFNTASDEIIQLYLLNGAPGTSESNINDNEKINGAEGSKKGSNKAL  
TVGLVVGLGALVALIAGVTLRVTRMRNADDDTEIQTS PRDACDVQTCNRQTYLDVDDRP  
SID

>comp11000\_c0\_seq1; 1244 487 3054 LEN=3261; translated  
MDPKQMP LNSGVPI DVSVSASLGT TNP GDNDNEDGYR SSSSTITTAASFVHPSQASASW  
TRLASMDQEDPHDGANLGHQOPHHNRSRQPQQRADGGPHEASLLLPPQRPPGEADGSPFC  
AGSREP KRRFQGATKGGAMDREMDHPSRKIVALV LFFAVAALGSLAYAGVHALLSYRNR  
ASSTWENNDGNHYHRHNGYSHGSEQGRNNDFTSSFS SKYQKVR YFGFQIYTGGAFAFLN  
QHEHHRNTSSTAGEGTETTRVPNPECIITSTSDGSEFSAPNTNKYQVPLDDGINLQCY  
VGNKDPMDVAERLRIMKDAIEAAYDEYQKLLADDSLPSQEPSNEADV LKIFAAP EFFF  
GASGAYDF TDDPKRLDKIFGFNHTDPKSHENGSTDDGDDDEVCSGDS P VCAVLLGLQEMV  
QDERFEDWLF LFGTVVATQRLEVAGGDGEDANGNDGTGNH THHHHPH THDDNYEYLY  
NFAPVYKGFDPAWATFHKNKNGSNDGHHFALGKRFLVPKRYVSTSDFLTPKRVDVDWIDRGS  
EWEELFGDAVDEEESSPTDEIPSGEWVTA FGRKDETESTASEEPKATTVEATKQAI VVD  
NPRS YQH KRYDDDFEAYKVQLYESAGYVQVEYD WLVDGIAFTVEICLDHQLRRALDTF  
QGD LVTGR TTRIPSTKQHSNGLGYAPIPTHQAQIGLVASAGMSPNAESLALTQNGILFLQ  
DGLSNHTARAFVDTEQSQC GPQQGLQYEGGTAVRRR RALVSKTDVRF EYELLSGNGGPC  
GGASKSSAGSGNGASEELACEHKIPVYGAVGQERHPGDSHPERDWKGNLRGIFSTEMYEP  
HLVVYGPFDIPNTGR

>comp11001\_c0\_seq1; 261 1 777 LEN=990; translated  
LGHTYISSYCASYSLLHNI FSIPLLSKSTVPTVLMGMEVLDNLP HDKIRGKIRHKLEQA  
EVSSPINDSKQSQR LREK FVPLSDPLLKRILRLVPSYYTIQKEEVLQPDACWVPTIACGV  
LDHVINQRSNLGLVMADFDWLP PPDLDITTFDEEDDIFLLSKDKKKQIALKETLARGSP  
IVTDMGRDHESYLSAPSHCDILFP TDFQKLASF AKRSLSLTEATAANTPRPSQVVRVEK  
QSQFLERVGF GHVSKTRSW

>comp11001\_c0\_seq2; 381 1 1399 LEN=1612; translated  
XRTVTRGIVSNRVVVVIVEINRFEDERVKITGIFASDSNMLLRKHIGRKLAEYYAQPSHK  
VVGRSLELESARANNNGQLLSSLMGEWHWRVFKIYEERE GHWLT PVELFQPHYSYIL  
GDFCAHFYERMEKNKSTISRNSRNDRHPNLNIETKFEIVELGGGRGTNAKWILSYLQENK

PDVYSALISYTLVDSSRSLHQTQKEQLTEGPHAEKVRFELKDLSDVAEGTIPLLSKSTVP  
TVLMGMEVLDNLPHDKIRGKIRHKLEQAEVSSPINDSKQSQRLEKRVPLSDPLLKRI LR  
LVPSYYTIQKEEVLQPDACWVPTIACGVLDHVINQRSNLGLVMADFDWLPPPDLITTNF  
DEEDDIFLLSKDKKKQIALKETLARGSPIVTDMDGRDHESYLSAPSHCDILFPTDFQKLA  
SFAKRSLSLTEATAANTPRPSQVVRVEKQSQFLERVGFVGHVSKTRSW  
>comp11001\_c0\_seq3; 142 1 691 LEN=828; translated  
XRTVTRGIVSNRVVVVIVEINRFEDERVKITGIFASDSNMLLRKHIGRKLAEYYAQP SHK  
VVGRSLELESARANNNNGQLSSLMGEWHWKRVPQKIYEEREHGLWLPVELFQPHYSYIL  
GDFCAHFYERMEKNKSTISRNSRNDRHPLNIETKFEIVELGGGRGTNAKWILSYLQENK  
PDVYSALISYTLVDSSRSLHQTQKEQLTEGPHAEKVRFELKDLSDVAEGT  
>comp11002\_c0\_seq1; 355 1296 2366 LEN=2657; translated  
MDSAFPVVEAHARMYLLDHLKQMKPLRLTKPDDNLGAMLYPSIPQKITHHIDHHSALAPT  
RADLMPLLTCSKSSSLIPLRSFDSITGDRPEVICPVCGEAFGTYERLEAHVRYERMVERQ  
ENYPVKDSHLGFEMPDTSPILTQEVTDHIEQTMSEIVVVVEGIDPQLSGTFQAIQSYKYE  
DLVFGADHERCTSVTPDNKIAVDMRKFHRVRYNHKNSGINKSTNSIRFIDDERSKQRRNL  
SPSPFSSETDSNGDPLAIPFESSTYSYEESSMSPSTSFQORSVHAMLAAANGYPHRHYP  
LAVNGTVGENSGGKTQSQNNKTLTEEDGVIPVQLNGGPEGYIPESAIEDDAMNV  
>comp11002\_c0\_seq2; 545 255 2147 LEN=2438; translated  
MTDTAARRMDQPHDQIPSLRQRPGSIQQSHRNDKHNHGSNANNPKQHRRTKSWNQRMW  
KKEQRSSEHQNNNVTSQGTQVFLPRMILRNKPYCQSNQCQVINDNLHGGPRYSYSSTGL  
YRLLLLSDWFHVLRLIPMQYSILMLLAAWLGSILVFALVYRKIDTIYENSDCGLGEPPEHI  
TFAAAFAFSLETCTTVGYGLPGNSNAFFESNCGVQAGIFFQMLWSMLFNAFLFAFFYSQ  
LSKSESRSIQLVFSDKLCINISNHRVFATVQCYDMSAFPVVEAHARMYLLDHLKQMKPL  
RLTKPDDNLGAMLYPSIPQKITHHIDHHSALAPTRADLMPLLTCSKSSSLIPLRSFDSIT  
GDRPEVICPVCGEAFGTYERLEAHVRYERMVERQENYPVKDSHLGFEMPDTSPILTQEV  
TDHIEQTMSEIVVVVEGIDPQLSGTFQAIQSYKYEDLVFGADHERCTSVTPDNKIAVDMR  
KFRVRYNHKNSGINKSTNSIRFIDDERSKQRRNLSPSPFSSETDSNGDPLAIPFESSTYS  
SYEESMSPSTSFQORSVHAMLAAANGYPHRHYP LAVNGTVGENSGGKTQSQNNKTLT  
EEDGVIPVQLNGGPEGYIPESAIEDDAMNV  
>comp11003\_c0\_seq1; 73 1 1009 LEN=1332; translated  
XIRSVQSVVGPKICLFVVDASCETILRLEICVQICFLTIDXIDLDTDGLGSPPEVQQ  
ERRIVGIPKDVIPAMRKAFSNLCTSGSGVLFENSLQVGVKHEYVGAQGRISVFFGNLSK  
APLLNFRAIVDEPDHLRIQKQGTQGLLDESEDGGCNVQVRTQAKLLLLVEVTAPFDDAPA  
MRVLFETEDGEVHEYPLRLPIVATCFMEPVTLPEGAFMQRWRSLDGEDRECQEVVKTAA  
APDIDEEYMKRIANIITNGLKFGRCQGCPTPWTVSGAATFRTGSKDSNGNINVGCLVR  
VEANPQAKAFRVTTRTLHPLCSKAVKNVALVSIKLA  
>comp11003\_c0\_seq2; 911 86 3037 LEN=3360; translated  
MATQARGLQNFITDLRNASKEQEQRVDKELANIRKKFTATGKNLGEDGSNTALNSYSR  
KKYVWKLVIHVLYGVDVDFGHAEVLALVRSNKYAEKHVGYTALSLLLLRSDDPMMNSILNT  
IRRDMTPGPNASAKNAPTDTAQALALCSIANINGLELIQTLHSEVQHTLTAKSSSTPCV  
KKKAALCLLRLVRTSPKLVGTGREFAPHMAQLLQDKHLGVLTSASLLYGLASQNPQDYQS  
LIPYAVHILGMLVLKACAREYLYRTPSPWLQIKLLKFLQLYPQAISSGQKNGGDQHI  
QQLVSVVSKILTETDVSDSINKSNADHAILFEAVNLIWTVGPGSPSQLREGAMKLLGKFI  
SVREPNIYRGLLTMARLAQLEGTAESIKKHQATVLVSLKDADISVRRRALDLLFVMDCT  
DNAERIVDELVAHLALADAAIREEMVLKIAILAKEYATDLRWYVDTILKLISISGDHVS  
AIWHRVQIVTNHPQGDQLQAYTAATLLVGASPRRCHETTVRVAAYVLGEFGFLVAERP  
GM SGEQFRILHQHWATSDAKTRGILISTYAKLANLYEECRPLVAPVVFARCKNSVDVEIQQR  
SAEYAAAMREAFSPEAVEDLLREMPPEFEDKKQSALEQRLKEKEGEDSAAVAKAIRPSAAQR  
QRQAQSQAARAAEEVAAQAAEQNAMNDPISPI SDGLGSPEPEVQQERRIVGIPKDVIP  
AMRKAFSNLCTSGSGVLFENSLQVGVKHEYVGAQGRISVFFGNLSKAPLLNFRAIVDEP  
DHLRIQKQGTQGLLDESEDGGCNVQVRTQAKLLLLVEVTAPFDDAPAMRVLFETEDGEV  
HEYPLRLPIVATCFMEPVTLPEGAFMQRWRSLDGEDRECQEVVKTAAAPDIDEEYMKRI  
ANIITNGLKFGRCQGCPTPWTVSGAATFRTGSKDSNGNINVGCLVRVEANPQAKAFRV  
TRTLHPLCSKAVKNVALVSIKLA  
>comp11004\_c0\_seq1; 352 1 1279 LEN=1317; translated  
XGNQTSQLSMVILGHVDAGKSTLMGQILVQTNQVSKRDAKQANLSWLLDENESERARGV  
TMELGTKTLRVPRHDIVVLDAPGHDFIPVMITGAANADVAILVIAAVTGEFEAGFTGGG  
QTKHEIMLARGLVGTQIIVAVNKL DVEGWKEERYQEIQNKVKDFLLKQEFKPKRIKFPVI  
SGLAGENVKARKSPELSKWKYKPTLLEAVNDFFPANRHIEKPLRFIVTDVFAEGKGI VTR  
GRVIQGFVEVGD SLVVLVPGDIVKVS KLEHLQPPSDGSDDPRLSVATAGDTVQLVVTDI

DIMRLSTGNILCFPNARPPPLTRKARARIVVMDDL SVPIIRGAQVIFHMHSLDVPTVLT KL  
VAVLKRDG SVKKERPRALTRGVSASVELNVSDKIVMEAFSECRSLGRFVLRGGETIAIG  
VIDETL

>comp11004\_c0\_seq3; 343 1 1095 LEN=1133; translated  
GGHFPSTSFVVC DLAMDSFVSSALLQHRMITGAANADVAILVIAAVTGEFEAGFTGGGQT  
KEHIMLARG LGVTQIIVAVNKL DVEGWKEERYQEIQNKVKDFLLKQEFKPKRIKFVPI SG  
LAGENVKARKSPELSKWKYKGP TLEAVNDFFPANRHIEKPLRFIVTDVFAEGKGIVTRGR  
VIQGFVEVGD SLVVL PVGDIVK VSKLEHLQPPSDGSDDPRLSVATAGDTVQLVVTDIDI  
MRLSTGNILCFPNARPPPLTRKARARIVVMDDL SVPIIRGAQVIFHMHSLDVPTVLT KLVA  
VLKRDG SVKKERPRALTRGVSASVELNVSDKIVMEAFSECRSLGRFVLRGGETIAIGVI  
DETL

>comp11005\_c0\_seq1; 332 157 921 LEN=1104; translated  
MVSAQQQSLAAVLLSALVLAQCVSPSASFASATAFSRTPSPLLATAEKEAATGTDDLLKP  
PYEIEPIPLRIGHGFDIHRMAPLEEAGQPVVIGGVEIIPHKDQKWTDAEGKYVEKGGIYET  
QLGVVAHSDGDVIYHSVVD AIFGALTLPDIGQVFQDTPR WKGCDSSKFMEHAFEVMDGY  
GYQIGNIDVTLILERP KVASFKPGMKDNIVRL LKTTTPGRVNIKARTHERVDSV GELRSL  
CHVCLTLERVPEKE

>comp11006\_c0\_seq1; 157 125 346 LEN=787; translated  
MIEVLLNDR LGKKVRVKCNEDDTIGDLK LAAAQLGTRPEK LKIQKWYTVYKDHISLEDY  
EIHGMSLELYYQ

>comp11007\_c0\_seq1; 427 101 1845 LEN=2037; translated  
MGPTDFRVLEAIEKGMQKHALVPSSLIATLSSLRHGGTGKILSGLLRDKLLSHDQSCGYD  
GYRITTTGTSTFCMPDXIMFSFLSKTTSFLNTFWLHVPVAGYDILTLYNLKCRKI IAAIGD  
RIGTGKESDIYLAVRPNGDQIVLKFHRLGRTSFRNVKTRDYFVYHQGRNIGAPKTNQA  
NSWLFLSRKSALKEFAFMKALYNVEYPTPEPIAHNRHV VAMTLIRGVPLYQIIRTKLSAE  
QAASIFHQASELALRLAKHGLVHCDLNEFNLI VDVSGIQQKSLSQEHDHYVRHSGMSVAA  
ETNPGMLSARGPWE PDHLQKFQPDHQSDDRENDPAPQPTELLDN GEPKPIVTLIDFPQMV  
STRHPNARELYERDTSCLLKF FTHKLQFQIPESDMENLFLSWDSVLEVLERQQSCSIELE  
DIGEKASAYDSESVCLASKAQLRLDEELKASGYTDVNSGLETPHYYDKESKDISIEG  
DNDSLSSDLVNADKVD DCGLSIGSEGDHVSISMNSTSLSVLYPPEELANLSRHQLQE QAR  
ARVQLQLESQKKNRQRGAFRKRNSNKSYSKGRVYSDNGF

>comp11007\_c0\_seq2; 480 101 1750 LEN=1942; translated  
MGPTDFRVLEAIEKGMQKHALVPSSLIATLSSLRHGGTGKILSGLLRDKLLSHDQSCGYD  
GYRITTAGYDILTLYNLKCRKI IAAIGDRIGTGKESDIYLAVRPNGDQIVLKFHRLGRTS  
FRNVKTRDYFVYHQGRNIGAPKTNQANSWLFLSRKSALKEFAFMKALYNVEYPTPEPI  
AHNRHV VAMTLIRGVPLYQIIRTKLSAEQAASIFHQASELALRLAKHGLVHCDLNEFNLI  
VDVSGIQQKSLSQEHDHYVRHSGMSVAAETNPGMLSARGPWE PDHLQKFQPDHQSDDREN  
DPAPQPTELLDN GEPKPIVTLIDFPQMVSTRHPNARELYERDTSCLLKF FTHKLQFQIPE  
SDMENLFLSWDSVLEVLERQQSCSIELEDIGEKASAYDSESVCLASKAQLRLDEELKASG  
YTDVNSGLETPHYYDKESKDISIEGDNDSLSSDLVNADKVD DCGLSIGSEGDHVSIS  
MNSTSLSVLYPPEELANLSRHQLQE QARARVQLQLESQKKNRQRGAFRKRNSNKSYSK  
KRVYSDNGF

>comp11008\_c0\_seq2; 242 210 956 LEN=1307; translated  
MAAFENGNDPSRETAESQONPNNNRSPPTPTSRRRRRRKKKFAVSTRWEREVAQNGPVK  
DFHRYWCCARRLGNMFVLCERTDGTPIVIAGPCWPFCTFVTLPLILAVSAAVAYFVIIS  
DDSPLP I WVAIYIFPVVGFV LASFVSCQDPGLMERVTDEEAGNGGWFVNEQVGSFRPP  
GALYCRECGVLIQDYDHLCPWTGTGVGRKNMMAFKLFVVG VNVLCYFMSMILVIVALLRGL  
RL EIEEEG

>comp11009\_c0\_seq1; 501 257 1817 LEN=1857; translated  
MSKTI EYSKEKQQLFTKQIMDDFRDWFNSDNMDGTDEKDDANLPKLKNKLTRDFV SIGFP  
AFIQLAAEPLAALVDTAYLGR LGPEVLGGAGVAISAQYAVSKLYNDPLLRTSISLVASTD  
GQARGANNDDGSSLESKESENKKLSIAVSSALLLAF CVGTIQLVVYSVLAGSITRGMGL  
SPSNPMWHS AVSYLRVRALGTPAATLWLVSN GIFRGLGDTTRTPLVYSFFFTALNAILDPL  
FIFTFKFGASGAAAGTAIAQYTALIPLMMALNRKVKIDIFGQLSQLKSSLKAYIKAGSLV  
LFRTLKGLVLA SVCARKAASLGAVAAAAYNLTFQLGFATTQICEAVAVAVQTL LAREIAD  
NQTHSPRVKAKLVRHLINKSLLLGGVASTLSLTTFLQRDSILRGLTTNLAI REASTVIF  
PAVLLTQVFKGLAYPVNGIIMGGLDWIFSMATMWAANFVCIGMLTFWSLNAVTVSLSQIW  
WALAAFMATQVVTGIIRYESKTGIWQVLKGDARKAATPS

>comp11010\_c0\_seq1; 498 355 1863 LEN=1965; translated  
MRYHDSLVTHESETGSASVSSRLDMYNSDRESLAQPSDNGNLPPNINRYQSHQNQIHDED

HQHLNHYQTEQTHASPTMIQSLPRSNPIAIKRNPBGDNKETYDSDIDDDSDIDVEGDAI  
KLKRKYGEKVQTYVQDSTMMHSSNNRMRDKTSVLNAPYLGSLSKSSNQVSSLPPMSLAG  
DDMYLGPEPESTVMGSLRDSHQRRRFMDGPASYRERHSGKICHLDHRLRFHKGQPELNIG  
ERLQQSLLRKKKEESRKLGRGTTMGGEQERKPVASSLTAMMRDAPQSVNTVSLGGADAKE  
GYSSSIGHESLVPPIRKENDHIASTLRKEPPAWNMLSTSLTAFELLKTSNAETISRSSNNF  
TDQSSSVERATESNHQQTAESRYEGGFQPLARSMDPSPCFQSLSLSDNTSSRRVIPNLQ  
TDGFETGMGQAIHQPSRAAEDFVAQFRTELKNYPFVGGYGNERTLSLESQRQVNI FNDT  
SGHRSPQDHPNTEGAFGLDM  
>comp11011\_c0\_seq1; 103 1 188 LEN=581; minus strand; translated  
XPYKQNNAIIVLDDAYDHEVWNETAENRVVLLVDIWHPDVTQAEKEAVVEMFQKAKRDGLW  
KR  
>comp11011\_c0\_seq2; 460 1 2132 LEN=2604; translated  
XRLQILSNHEWKEIMLLLYWEPGVTKRSNSTFIPEGLYESYFDTRNGRNKTMFDASTTSA  
EYSNSIIAEVMDMIMILEKGIKXDKESILSTSLSNYHRENDPIKKKQKATEQNKSMVASSH  
PKVAARDSRAIQRRKIDVRESKDKCPSFDGNASEDDYAIHIPQRITLGKGSNPVLMHIFV  
VGFLVFLNLSIKAGSFWGNIKLSEEEKNNRRLVSPVKRLQQNIERKKNSTVAKLKEFFT  
LEGELRRDIGDCGLYLGGSSIPNSGWGMFAGRDYLOGETIRMEYGYFFSPRSTYHDNVP  
SEGDAARFESKPIKIPPLSFLKPHSVLSNVRWDSISSQEKLSSLTATRDIKLGEEFL  
LSWDDHPYRPSRSDSKSGESAAEEFDYVFAKRLPSLEDFLQADILIRDAQTQYFGVRNAE  
ETNNKKKPYRSSNARWNKIKNKSGRKTSLYKSESEELINNGLQLWQKTVSHYAPLVAR  
LLPTKAQVLLATYHQKSDGQSPYSSLLGSLKNHSMFTITNAQCMSSPQWQSTLGTGVGATH  
SEEVEQSCASSASCTSTYKQTVAKNGFAKGGVTVVPLLVPYPLQAGENNCLALSLSL  
PPSLQVSIPLNGVAEYSNDQSLANVEYRWSNSTLQSIPLMKSWLTKSPLPSFISLSLE  
EKELQRRLLLEEYPLSMSWDLVALRDLEQNEEIVVYQPDSIPFVSELDP  
>comp11011\_c0\_seq3; 447 1 2096 LEN=2129; translated  
XRLQILSNHEWKEIMLLLYWEPGVTKRSNSTFIPEGLYESYFDTRNGRNKTMFDASTTSA  
EYSNSIIAEVMDMIMILEKGIKXDKESILSTSLSNYHRENDPIKKKQKATEQNKSMVASSH  
PKVAARDSRAIQRRKIDVRESKDKCPSFDGNASEDDYAIHIPQRITLGKGSNPVLMHIFV  
VGFLVFLNLSIKAGSFWGNIKLSEEEKNNRRLVSPVKRLQQNIERKKNSTVAKLKEFFT  
LEGELRRDIGDCGLYLGGSSIPNSGWGMFAGRDYLOGETIRMEYGYFFSPRSTYHDNVP  
SEGDAARFESKPIKIPPLSFLKPHSVLSNVRWDSISSQEKLSSLTATRDIKLGEEFL  
LSWDDHPYRPSRSDSKSGESAAEEFDYVFAKRLPSLEDFLQADILIRDAQTQYFGVRNAE  
ETNNKKKPYRSSNARWNKIKNKSGRKTSLYKSESEELINNGLQLWQKTVSHYAPLVAR  
LLPTKAQVLLATYHQKSDGQSPYSSLLGSLKNHSMFTITNAQCMSSPQWQSTLGTGVGATH  
SEEVEQSCASSASCTSTYKQTVAKNGFAKGGVTVVPLLVPYPLQAGENNCLALSLSL  
PPSLQVSIPLNGVAEYSNDQSLANVEYRWSNSTLQSIPLMKSWLTKSPLPSFISLSLE  
EKELQRRLLLEEYPLSMSWDLVALRDLEQNEEVSLLSI  
>comp11013\_c0\_seq1; 816 188 2224 LEN=2559; translated  
MAKRQFISIPLLALIASINQCCEAFYLPGVNPQSFAEGDPVKLVNKMTSSKTLPIEY  
RLPFCEPPGGAKMDNENLGEFLAGDRIESSPYILNMKTEMYCQQVCVSNLGVAEQKGMKK  
NKVVRAIKKEYHNNWIVDNLASAASKVEDDTTITTRYWQGFVPGFIAEESHAFVHNHVNI  
EIMYHPLDIMNGEKQKYRVVRFVTEPFSEIKHEFKGIDGLDDFSSNDDGNPQLQEWATIT  
NPIASCDPSIPIKRPHTTYDMVTATGRKPQPASGQVLFYDVTWIQNDELHWASRWDIY  
LSMDNAIPAKVHWSLIANSLVIVCVLSAMVAAILLRNLRQDLARYNRLATDEEKADLEE  
KGWKL VHADIFRPPTYSPLLSVCCGTGAQLL CMAFWTIIFSAMGFLSPARRGALLMAEL  
LFFVLMGSINGYVTARLYKTFKGKAWQNATLCTALGFPGLAFSLFFILDI IAWGYGSSDA  
VPFATMLVLLVLFVFGISTPLVFGAYFGYKQDAIEYPVKTSNI PRQIPDQPFMSVPFTV  
FVGGLLPFGACFVELYFILASVWMDY YYYVFGFLFLVFLILIIITCAEITLLFNFYQLCNE  
DYHWWRSFGNAGSTAIWVFLYSFVYFQQLEANSFTTYVLYFGYMGLASLGLFLMTGFIG  
VMSSLWFNKTIFGSLKVD  
>comp11013\_c0\_seq2; 753 193 2088 LEN=2423; translated  
MTSSKTLPIEYRPLPFCEPPGGAKMDNENLGEFLAGDRIESSPYILNMKTEMYCQQVCV  
SNLGVAEQKGMKKNKVVRAIKKEYHNNWIVDNLASAASKVEDDTTITTRYWQGFVPGFIAE  
ESHAFVHNHVNIEIMYHPLDIMNGEKQKYRVVRFVTEPFSEIKHEFKGIDGLDDFSSNDD  
GNPQLQEWATITNPIASCDPSIPIKRPHTTYDMVTATGRKPQPASGQVLFYDVTWIQ  
NDELHWASRWDIYLSMDNAIPAKVHWSLIANSLVIVCVLSAMVAAILLRNLRQDLARYN  
LATDEEKADLEEKGWKL VHADIFRPPTYSPLLSVCCGTGAQLL CMAFWTIIFSAMGFL  
SPARRGALLMAEL LFFVLMGSINGYVTARLYKTFKGKAWQNATLCTALGFPGLAFSLFFI  
LDI IAWGYGSSDAVPFATMLVLLVLFVFGISTPLVFGAYFGYKQDAIEYPVKTSNI PRQI  
PDQPFMSVPFTV FVGGLLPFGACFVELYFILASVWMDY YYYVFGFLFLVFLILIIITCAE

ITLLFNYPQLCNEDYHWWRSFGNAGSTAIWVFLYSFVYFQQLEANSFTTYVLYFGYMGL  
ASLGLFLMTGFIGVMSSSLWFNKTIFGSLKVD  
>comp11014\_c0\_seq1; 146 1 417 LEN=893; translated  
CFPSSEGSNSLSGTIPTEFGFLTNLNLYKNSLTGSIPSELESLTNLSKIFVVDIQNN  
HNLDPVPELHHKVMDCDLSEPNACKLVELDDLIRVSDRNRCTELIGKFEQNKKLMTID  
NCDEMCRKCAICEDDDGD  
>comp11014\_c0\_seq3; 149 1 527 LEN=1003; translated  
XGTIPSSIGLLSELTKVDFDGNHLQGTIPTEIGKLESLTILDLRSNSLSGTIPTEFGFLT  
NLEVLNLYKNSLTGSIPSELESLTNLSKIFVVDIQNNHNLDPVPELHHKVMDCDLSEPN  
ACKLVELDDLIRVSDRNRCTELIGKFEQNKKLMTIDNCDEMCRKCAICEDDDGD  
>comp11015\_c0\_seq1; 313 37 894 LEN=1228; translated  
MMNINTFNLRNDKHREDRISIESAVTFASMQREEIYDGDQLMDVFQPTNEQLTSDFDTER  
RDSGSSFDGEKLVKVFQKTPVDTEMTGFFENSRIIMGRPHVEDRNLMKDNTIITAKPQALE  
RERSVWEEEAARRSPLPPSSLPAPKPLQNSTSSKNNSDAEEESTVEYIKETRPYDIICGR  
NNGAHNCVGNRRFRVTIMMNLKRYMDAPSREEKSYVIKSVIDLLEQKVGARFIKKVGN  
GMYVRLKERQVREKVGHAFFREMIALSEKESKKAEGSLHNNHIFR  
>comp11015\_c0\_seq2; 313 37 894 LEN=1272; translated  
MMNINTFNLRNDKHREDRISIESAVTFASMQREEIYDGDQLMDVFQPTNEQLTSDFDTER  
RDSGSSFDGEKLVKVFQKTPVDTEMTGFFENSRIIMGRPHVEDRNLMKDNTIITAKPQALE  
RERSVWEEEAARRSPLPPSSLPAPKPLQNSTSSKNNSDAEEESTVEYIKETRPYDIICGR  
NNGAHNCVGNRRFRVTIMMNLKRYMDAPSREEKSYVIKSVIDLLEQKVGARFIKKVGN  
GMYVRLKERQVREKVGHAFFREMIALSEKESKKAEGSLHNNHIFR  
>comp11016\_c0\_seq1; 535 361 1408 LEN=1473; translated  
MSGAEENVEEMRVRISLVEKYPVSMDETFPGVVAKPVTESYTSYHYKSLKVNVDLLKI  
IQLGLSFSDEKGNLCKECPWQFNFAFDLDGDMFAQDSIDLHVHSGISFTDHATRIGIDPQ  
LFGELLMVSGLVLDLDRVKWVYHAGYDFAYLLKILTTELPADEKGGFELLRIYFPTIYD  
IKYMTSLCDGHRFMGGLQRLADDLGCQRLGAEHQAGSDSLTKDAFFALVKAKFQDKPKS  
GGKKGKAGNSNKSQQAASSADRCWFDDARFANELYGYGNHTVRKGAASHARDISSISS  
GPNXVMPEQQEAGRKDRATEGNPTQPNPPRHHTHESGKCLGLEPTIDE  
>comp11016\_c0\_seq3; 605 482 1818 LEN=1883; translated  
MAAAATKLSSQSPFPNPNRILARDHSQSPIPPPNAYGSRSRSTSPSYSHNNPNRGISTP  
GGVRRRIQYPTNPNTAHSNAVAKHTFEHNGETLEIRNVWAENVEEMRVRISLVEKYPV  
SMDTEFPGVVAKPVTESYTSYHYKSLKVNVDLLKIIQLGLSFSDEKGNLCKECPWQFN  
FAFDLDGDMFAQDSIDLHVHSGISFTDHATRIGIDPQLFGELLMVSGLVLDLDRVKWVYH  
GYDFAYLLKILTTELPADEKGGFELLRIYFPTIYDIKYMTSLCDGHRFMGGLQRLADDL  
GCQRLGAEHQAGSDSLTKDAFFALVKAKFQDKPKSGGKKGKAGNSNKSQQAASSADRC  
WFDDARFANELYGYGNHTVRKGAASHARDISSISSGPNXVMPEQQEAGRKDRATEGNP  
TQPNPPRHHTHESGKCLGLEPTIDE  
>comp11016\_c0\_seq4; 991 251 3172 LEN=3237; translated  
MGQAISMAAVYCCCTAGSSLCQSCFGSVEAGTTGRKRSVLLLAIVIALSLWFQYDVGPSI  
VRDDRDRGWVWTLKWIPLGLGRRVRAWMDPCLSSRDYEPSEELGECAGNAGVYRPTGLA  
TLYFCANAAATKMVPTLNREAWPAKYTLFAFALLLTVFVPSDFLSSVYLWIARLGAAVF  
LIVQQVILIDVAYNWNDDWVEKANQNDRLSFGSGSGLHAIVGVVALYGAACLSWIALLY  
AHYTGDTGSCAGNTWAITLTLGITGVTALQLSSEGGSLTSGVISLYAVYLCFISIVSH  
NPVGRCNPRLEGENDVWGITIGLVLTTVSLAWTGWSSWAEPRLRNAESLQ SARAVDAPTAF  
SPFGEDEGHDHESSTGGSLDLGVPLVDGEEAATAGRVTTDGSAGAAARRESASLAHVWKLN  
AVLALVACYVAMVLTGWGTISSEVDPVRHTAANPTVGRANMAILGVSQWLALLLYAWTLV  
APLLSRTGTSRWRGTFKNEAKQDKTEKNKTNEAKRNEAKRNETKRDSMAAAATKLSSQS  
PPFPNPNRILARDHSQSPIPPPNAYGSRSRSTSPSYSHNNPNRGISTP GGVRRRIQYPTN  
PNTAHSNAVAKHTFEHNGETLEIRNVWAENVEEMRVRISLVEKYPVSMDETFPGVVAK  
PVTESYTSYHYKSLKVNVDLLKIIQLGLSFSDEKGNLCKECPWQFNFAFDLDGDMFAQ  
DSIDLHVHSGISFTDHATRIGIDPQLFGELLMVSGLVLDLDRVKWVYHAGYDFAYLLKILT  
TELPADEKGGFELLRIYFPTIYDIKYMTSLCDGHRFMGGLQRLADDLGCQRLGAEHQAG  
SDSLTKDAFFALVKAKFQDKPKSGGKKGKAGNSNKSQQAASSADRCWFDDARFANELY  
GYGNHTVRKGAASHARDISSISSGPNXVMPEQQEAGRKDRATEGNPTQPNPPRHHTH  
ESGKCLGLEPTIDE  
>comp11017\_c0\_seq1; 270 160 2210 LEN=2289; translated  
MAKMVSMKDSGRSGSSSRKTKNNKSNRGGSLSLRTIASHFLVLLSGIYIGLIMGSHTCPV  
APEPEPSTRLLTAAEWQAQFRGEVQKQRKELEALGSKVKEAAANKSANTRFPEKVKIVY  
DYATVPRDNFNELEIGVPMDDTKRGSEEVVILYTNPKTLPFKGKGEGKNPKHIEGPKEG

MDVEKALENCQTLKVILQEPVKRNKQQCIAIVPQWESFHVHKFMRVPKKGPPVDDSVPLR  
YVVRGYSYENGKDPGVPWEWAHTKPSLDAMADYITHLDDTLKQLRPLVKKSI EDHKNSGEI  
SRAMKRSKVMVVMVCNKGQAHLFHNFCVFNARAKGIDLSRIIMFATDIYTADLSQTLGIPA  
FYNEDIFGEMPENAAARAYGDRTF SKMMMAYVYCVHLVMSLGYDVLVFDVDDVVWYKNPLEY  
LVTKEKEWDMIFQDDGSRQVXVSAVLTEHGIVANSDEFKSHHTESQNKDL DVL SHTGI  
ETAHAWVASRRTVVFVGFVFSREFAYISFSFFSLLFEIGVLF SNESGFYFVRNNDVTKYFF  
NTLIRMGLDVKKTKSHQAAL TALVAEFVSWKGLRVKVVWKKGGETLFPGGFEYHQPSKEYM  
RKFLKGDVKPFIFHMSWTQNKDNKKLYFEQMAEWYTKDESTGCKGLDCCLAEPVITCHYK  
DKPSFIPCKDSPPIDKNGKSFWK

>comp11017\_c0\_seq2; 244 160 1986 LEN=2065; translated  
MAKMVSMPKDSGRSGSSSRKTKNNKSNRGGSLRTIASHFLVLLSGIYIIGLIMGSHTCPV  
APEPEPSTRLLTAAEWQAQFRGEVQKQRKELEALGSKVKEAAANKSANTRFPEKVSIVY  
DYATVPRDNFNELEIEIGVPMDDTKRGSEEVVILYTNPKTLFPFKGKGEGKNPKHIEGPKEG  
MDVEKALENCQTLKVILQEPVKRNKQQCIAIVPQWESFHVHKFMRVPKKGPPVDDSVPLR  
YVVRGYSYENGKDPGVPWEWAHTKPSLDAMADYITHLDDTLKQLRPLVKKSI EDHKNSGEI  
SRAMKRSKVMVVMVCNKGQAHLFHNFCVFNARAKGIDLSRIIMFATDIYTADLSQTLGIPA  
FYNEDIFGEMPENAAARAYGDRTF SKMMMAYVYCVHLVMSLGYDVLVFDVDDVVWYKNPLEY  
LVTKEKEWDMIFQDDGSRQVRYQYSPNTGFYFVRNNDVTKYFFNTLIRMGLDVKKTKS  
HQAAL TALVAEFVSWKGLRVKVVWKKGGETLFPGGFEYHQPSKEYMRKFLKGDVKPFIFHM  
SWTQNKDNKKLYFEQMAEWYTKDESTGCKGLDCCLAEPVITCHYKDKPSFIPCKDSPPID  
KNGKSFWK

>comp11018\_c0\_seq1; 180 81 863 LEN=881; translated  
MFLSHAMQSDQRLPSLCLLFLLLIGMAPVGLSRRQIGGKGDFFIARGATRTQIGPSGSN  
VHFHPDLQRMMASVLERLSLQEDDSNETATEDLIPANGCICEGGTLLPDKVNPQNYIQI  
PPFQNAATCLEWQNEYLPMPFQPDGELCRSDFMYQDLFVSCCTLAIPRYECEQNVHNLATN  
ENYNPAVPPPIVSNNELIVKTDIIFIKAETIDVMTGTATILISASMEWKDPRLAWTIESE  
TTCADYVDMWTGYNNQDTFIW

>comp11018\_c0\_seq2; 477 81 2011 LEN=2236; translated  
MFLSHAMQSDQRLPSLCLLFLLLIGMAPVGLSRRQIGGKGDFFIARGATRTQIGPSGSN  
VHFHPDLQRMMASVLERLSLQEDDSNETATEDLIPANGCICEGGTLLPDKVNPQNYIQI  
PPFQNAATCLEWQNEYLPMPFQPDGELCRSDFMYQDLFVSCCTLAIPRYECEQNVHNLATN  
ENYNPAVPPPIVSNNELIVKTDIIFIKAETIDVMTGTATILISASMEWKDPRLAWTIESE  
TTCADYVDMWTGYNNQDTFIWVPDLDLLNVI EQLQEFSSTLATVSSNGVVSWSVSGLITA  
TCTITGLGSI PFDTLGCQFLFGARSRQANANMVHYQFPTEATINVAQSDAKYNEFTPLPEL  
FEKGYTWSFN TDYPQAMYNFYFKRAEDFYIYNVVFAPSYGLDLLQFRHILTGYACRVCIV  
TNYTRGITSGILYCIYSLSSHSSPLNPKIVIANETLNFNRERLGFVMALALVIAAQIVT  
FDLVPVSSSKLWIDKFVSRSFYVWLTVLLQSVLVAFVSVILREDRKEKKVRQDELIEKASA  
NQAANETENVAGVAGSTEKKNEVEGRELEKEESIVWTFSLRKFDICLAICIVTYSLVFV  
IAMFVSNFNGSWTKEDPEWFTPDNSFGWDEFPNHYNPNTDL

>comp11018\_c0\_seq3; 513 81 1880 LEN=2105; translated  
MFLSHAMQSDQRLPSLCLLFLLLIGMAPVGLSRRQIGGKGDFFIARGATRTQIGPSGSN  
VHFHPDLQRMMASVLERLSLQEDDSNETATEDLIPANGCICEGGTLLPDKVNPQNYIQI  
PPFQNAATCLEWQNEYLPMPFQPDGELCRSDFMYQDLFVSCCTLAIPRYECEQNVHNLATN  
ENYNPAVPPPIVSNNELIVKTDIIFIKAETIDVMTGTATILISASMEWKDPRLAWTIESE  
TTCADYVDMWTGYNNQDTFIWVPDLDLLNVI EQLQEFSSTLATVSSNGVVSWSVSGLITA  
TCTITGLGSI PFDTLGCQFLFGARSRQANANMVHYQFPTEATINVAQSDAKYNEFTPLPEL  
FEKGYTWSFN TDYPQAMYNFYFKRAEDFYIYNVLLPAMVLTYSFGTFLLDMRVGERLG  
FVMALALVIAAQIVTFDLVPVSSSKLWIDKFVSRSFYVWLTVLLQSVLVAFVSVILREDR  
KEKKVRQDELIEKASANQAANETENVAGVAGSTEKKNEVEGRELEKEESIVWTFSLRKFD  
ICLAICIVTYSLVFIAMFVSNFNGSWTKEDPEWFTPDNSFGWDEFPNHYNPNTDL

>comp11019\_c0\_seq1; 679 512 1804 LEN=1961; translated  
MSERMIELQRAKLGPPPTSGTSSMGSPQPGIGKKNLNTNSSLERRATPLEAATATLLS  
EDAQIEKFIDRLQRERKRNANLHHHHHSEPMPTSHGPTVPTALSRRMLQRQGVGYLDDTV  
ASIVSASADRFLATVLLQOSIACRDQRLKGAAMTRDAAKQRKRHMENYEADSDDRKRRREA  
ITKAREDI AVLTI AADAL KKGAGSGKASSDAAGTKKPKKGTCKNAATASKPTGPE  
KPDAAAMEALAMEELEEEYDSIDEEYQENVEVTRERLCLKKTGDNDDEDEDEDSDD  
EDDLLLLRDIRPLEAWNFHLNGKEAIE TDDNDIEGSHKYLQESGNSKADPAVSSSTA  
QQVQPADEKTKSDEASGAGANGAEESKAPSGDKKQSGEPASNGTKNGGTTKPPASSTSSP  
TKNPPASSSS

>comp11021\_c0\_seq1; 317 201 1064 LEN=1245; translated

MKARRSLLMTNVRSVARNGFISPSLLLCVSVLVLTTTRGTNFGDKESCSMSSAVVAFQVSS  
FASPSVRAPTTKRIRSDLFSSHDDKQDALRSIQIDSTKKPRLNTAPPQRRMFLQQAGLAA  
TAFAGLSQLDTEVVNALDMDSKNAAAASAMSGIKVSKNVGGLAQRIRGGLCFKMDELQ  
RDLMQERWDLPPYPAPQLRSYVTVFTTYTDAAFPSPSPDYGLRVALRYEVGRFFASVER  
LKRAIAKQSLEEAYTGELRKQKRAFEAFRPEKSKNEAVLIAFLEPMT  
>comp11021\_c0\_seq2; 151 1 390 LEN=463; translated  
RNATQHNTAYADMSLHLDRLVGVGLYTYYSVVDNEVLFKEYNDALVYSDPSKDPAEVR  
DLVVLNCGPDKGKTGILIGIYPPTEKASNVVVKLDKYRGMREIRVVPRLWAAKRLGEQDP  
DAVFLIPRK  
>comp11021\_c0\_seq3; 430 201 1331 LEN=1404; translated  
MKARRSLLMTNVRSVARNGFISPSLLLCVSVLVLTTTRGTNFGDKESCSMSSAVVAFQVSS  
FASPSVRAPTTKRIRSDLFSSHDDKQDALRSIQIDSTKKPRLNTAPPQRRMFLQQAGLAA  
TAFAGLSQLDTEVVNALDMDSKNAAAASAMSGIKVSKNVGGLAQRIRGGLCFKMDELQ  
RDLMQERWDLPPYPAPQLRSYVTVFTTYTDAAFPSPSPDYGLRVALRYEVGRFFASVER  
LKRAIAKQSLEEAYTAYADMSLHLDRLVGVGLYTYYSVVDNEVLFKEYNDALVYSDPS  
KDPAEVRDLVVLNCGPDKGKTGILIGIYPPTEKASNVVVKLDKYRGMREIRVVPRLWAAK  
RLGEQDPDAVFLIPRK  
>comp11022\_c0\_seq1; 503 172 1254 LEN=1351; translated  
MVCLFASWDKSPSKVKETQNHSDQATIAIAITRAAATTMVGDEPSPISPLLSGSMIVDD  
AKRKGDFLLVQSAGENQTHPSKRPRPAQLTVCDAAEQAEPYATHRPRNKPKQORTHGAKAV  
TFDTERNKTVAVPSHRDYTMEEHSSYYFQRADYSNIRREIQRTIDFVRSSETSSCDGAAC  
RDDQARATDEHCVRGLESVVEGFVKEHKKVKMKASRSVFRFQKRQRRKRQRRQLRERQR  
DPADAARRSDGSDGDHAAAVALALAYRRCTTESEQIARRWGHFDAIDAGIRVPPPPPA  
CPRAGDATGGPPDRSSGESESDSDSNHGSSVEEPSGGEREPLSLDNDLDALPDLRLRRF  
>comp11023\_c0\_seq1; 253 1 961 LEN=1261; translated  
XDDDDDDADNVVSSSRHQLQSRAEANVLTVVIKDHSPKAVKILLEYCYTNRVVALGHDA  
FVQACKTRPTKHNGPVHPNHSSAKRWPNNMGPVVPFVSVALAAIKLAAEAGMHRSLMCEV  
SAALLTSSSNVVEALTMSAMQKSIIGNDLPRLRRAAMVVILRRGPRGVSEIGRSSFFRKA  
LEEERSMIVPTLLQSTQEILTHWEKTKGVKRVSSSELRNLDLDRKDIYNRALERDKRR  
RERRDQHDEDCINEYSADEYAYGEHMASKRALDMLNHDMDVIRDLGQRMVQRMRTSGS  
RKRCRRSSNRSGVIFGNRET  
>comp11024\_c0\_seq1; 829 1 3168 LEN=3433; translated  
EGLKRIEKSSRRQVIGTTFETGTYGERGCLXTNDANDRKNNGESMIPDGLLPSYLATAFG  
DIYDRDGLAIFGSLGWLDMMAAFVRFYADTEEGHLPVQEEKDATGRIKTTKKPLVLV  
LGLRDDEHETLTAMLETWGTPEMMPTIITNESGQKDRMQMYQGGVFCITSRILIVDL  
LDNTLSSKDVDGMLIGHADHVNNDSTEAFIIRIYTSQKRRDQCFIKAFTDNPEYLLSGFA  
KIDKTLKALQVRHLYLYPRFHDSIKKELEQNTPHVQELHQDLSPSMKDIQSAIVAAVQTC  
MKELKSSTPFLEWIGDDLSIENCVTSAFDRAVSRQLEKDWHLKPKQTKQLVQDLRTRLAL  
FASLIQYDCVSFWKLISSIKTMSAASRHPAMWLLTPAADLLFRRAKERIYKVHRPKPTET  
IPNPVGKLIPLVEVNPWKLLKNVLEIKEIESKGEQSSTLREQPATILVVVKDERTVDA  
VKSFLVDGRDRMTLRWHKYLEQCNDRSRSIINGKMAEESRLLLEESRVWRILYGNKGH  
KKKPPQNGKDRARKLNEVPEYLRKRRRIAVEQGRGRDMTGTNEDRERQAILEEAVEETE  
DLEKFRKTAEEELKEEEEEEDIIFNTMFQPSFIEEPRVVIKSLSGIDKSAVGLVLADLNP  
DYVVLVDYDISFVRSVEVFAALNPLKKNRNLKVVYFLMFAASSEQKVFLLKALEREQSAFER  
LIHKKTMPPVPIQVEGTQEMQHALATGSVAGTYSNGSLPLSMDTRRGAGKSKAEKRDIA  
VDVREFRSALPSILHRGGMRIAPVTLVGVDFVLSNVHCVERKSIIDLFGSFASGRLYNQA  
EQMSKYTTCPLLIEFDPAKSFCLQNPNDLGMIDIKIDSVGSRKIEQLSGVTCCRARNYPV  
FDLTFEFLTPIFFPLAKDLLQNGDPYGSLSKTSLSLVEEPPRDPPELFAKALANHEEVDVAK  
AVDVGKKSLESLLKSDKTDEGGDEENEDEINEAGRDMLLQLPGVTIQLARKIMHECDC  
LADLIALNRDQLRALAGPSVGQKLFTEFFHQDIGSL  
>comp11024\_c0\_seq2; 845 1 3053 LEN=3318; translated  
EGLKRIEKSSRRQVIGTTFETGTYGERGCLXTNDANDRKNNGESMIPDGLLPSYLATAFG  
DIYDRDGLAIFGSLGWLDMMAAFVRFYADTEEGHLPVQEEKDATGRIKTTKKPLVLV  
LGLRDDEHETLTAMLETWGTPEMMPTIITNESGQKDRMQMYQGGVFCITSRILIVDL  
LDNTLSSKDVDGMLIGHADHVNNDSTEAFIIRIYTSQKRRDQCFIKAFTDNPEYLLSGFA  
KIDKTLKALQVRHLYLYPRFHDSIKKELEQNTPHVQELHQDLSPSMKDIQSAIVAAVQTC  
MKELKSSTPFLEWIGDDLSIENCVTSAFDRAVSRQLEKDWHLKPKQTKQLVQDLRTRLAL  
FASLIQYDCVSFWKLISSIKTMSAASRHPAMWLLTPAADLLFRRAKERIYKVHRPKPTET  
IPNPVGKLIPLVEVNPWKLLKNVLEIKEIESKGEQSSTLREQPATILVVVKDERTVDA  
VKSFLVDGRDRMTLRWHKYLEQCNDRSRSIINGKMAEESRLLLEESRVWRILYGNKGH

KKKPPQNGKDRARKLNEVPEYLRKRRRIAVEQGRGRDMTGTNEDRERQAILEEAVEETE  
DLEKFRKTAEEELKEEEEEEDIIFNTMFQPSFIEEPRVVIKSLSGIDKSAVGLVLADLNP  
DYVVLYDYDISFVRSVEVFAALNPLKKNRNLKVYFLMFAASSEQKVFLKALEREQSAFER  
LIHHKKTMPPPVIQVEGTQEMQHALATGSVAGTYSNGSLPLSMDTRRGAGKSKAEKRDIA  
VDVREFRSALPSILHRGGMRIAPVTLVGVDFVLSNVHCVERKSI SDLFGSFASGRLYNQA  
EQMSKYTCPCLLIEFDPAKSFCLQNPNDLGMDIKIDSICCKMATLTAHFPKLRILWSRS  
PHETLRLFKALKANHEEVDVAKAVDVGKKSLESLKSDKTDEGGDEENEDEINEAGR  
MLLQLPGVTIQLARKIMHECDLADLIALNRDQLRALAGPSVQKLFTHFHQDIGSL  
>comp11025\_c0\_seq1; 553 63 1610 LEN=2397; translated  
MIDTIVDLEVNIDAIGRKELQRLSKKFGIKANQKSQILREKLRDAISPFRHDTDECLTEI  
GDSNEWKQEGDVGGNKVETTENGRAQQRNNENHVQMKVLNEESGTIDIDQEDGIDKEAS  
VEDNSSIAVVDENQNDSEKKTKEIAKSAVSALELDHVENASVTKGEDDHSVDSTIDFT  
EHYGNEHRNEREINMNERYLDMTILAECDNDEVGDEKEIVTNGGTERHTTDGKQMDLG  
RETAIFNITSNNRKLKDSMDRIERKTAKITPILDFNGIGPIGATNPYFTALSKEVAKDTT  
MDNYESGGYSTVCDEKEPLTSDPFQKQLVVMKGGIIQEKRPKKIVSMKKINPGKRCRQS  
NKPYPHAKFTSRLPVAQEKQKQKQVDSFAANNLSSKDKSKTSTDEKHNGVPLWKIHSKDF  
IRKGEVQLEKIKDKSKQDKRLSRRKEVMRRPFTDRLNHRVDKAKNRETVIKKTTPKPMAMSK  
RNEEHMKKFMERQLVGRQDRDQKEKEKRYVHYVRG  
>comp11026\_c0\_seq1; 446 535 1413 LEN=1525; translated  
MEADMQAIEAFMLGKSKSSAPTSPQKESDDNHQNSNVRKKCYRSILRAFQGRVEEWNDA  
NKQLKGVLSIANLRDRVWESSRLKAFSVGMEGKDMGLNKRHVQKHRQPPWRSSGYRN  
TLFMHRGSCALLKEEDIQLALNHDLQHERMLSALRSTMASMAKTVDDIGRRLDEWMIHN  
LNNENDWMIEDKKTVAARLQETEALAQEVFLMASDLYSKQKMAMKVFDSCHDGVLEV  
VDVHTTSTGLSNDNTLWMSDPRAVIKRASKEFPSSDSSDPTLAAVNQLMNID  
>comp11027\_c0\_seq1; 367 98 1156 LEN=1226; translated  
MAHYVGSLLGRGCRTRGLFDSRRLRGGSSSTSSALFSSLSKLENPGKLVAGLTPPEVEAN  
PEIAEYLRSNFGDEVTNADGEITSGINIPPELLREFGIEDRSSDDNVPEKKYGEPRVDAGL  
GSAEQQLNIRVLKTYVRSEEGSKACRRLRYNNIIPGILFGGDPNLNISSSNHSAKTLVK  
TPWPELQRELDYHRQFESRVYDLTVLENESDTEGTVHRVVPSSVQWHPVQGSIFCANFV  
RYHAGRPLKIPVKYINKEESPALKRDGYIIPVKKHIECFVEEGVPIPDALVEVECTGLQVK  
DIIRMDRVIFPDGVKHTDRLDIKNFVIGPVRGGRGAATGSGGDDESEADPQ  
>comp11029\_c0\_seq1; 496 88 1557 LEN=2173; translated  
MTITTFELGVSSFILSPIQSQNRDPSIAIGWNFHHEKAISSISKKIITRIASSSVSSPD  
GNITAPSQVSPNSNTNELVEIPIIGPLLNHVHPIIVGDSIWLDPPTPLQWKTI EASVEAK  
HGGSIFNWISTTVSNTNEMVMKINLATTDQSPLVAILHNGGKDYATIAAVEGILTKNVG  
SIDTSDSESFRESLASLNSPYSDSSKVRLFAIGRAKISHHQTKFLTGGFEYDDNQIGS  
TDINSFKSEPLLVARMGLLLDSDKEGNKSSPVHALNRISFAQVRVLLHDDRQHIVRGL  
QAAQSRLEIAMEKWADWDGIGSLNANQETDTSTESNSYDLGVLNQFIREYDTERGSL  
IPTHSLPLSPSAARCIELDNYGLGTTSSAYVPLPSMVNIIMERLEKYYSPELQSEEFY  
ECLSWCTLQSLQTYLSSEEIHEALYECTNTCDRLQLLYEGMLRHKTALTELAVAKSTELR  
NCGEECDLF  
>comp11029\_c0\_seq2; 496 88 1557 LEN=2319; translated  
MTITTFELGVSSFILSPIQSQNRDPSIAIGWNFHHEKAISSISKKIITRIASSSVSSPD  
GNITAPSQVSPNSNTNELVEIPIIGPLLNHVHPIIVGDSIWLDPPTPLQWKTI EASVEAK  
HGGSIFNWISTTVSNTNEMVMKINLATTDQSPLVAILHNGGKDYATIAAVEGILTKNVG  
SIDTSDSESFRESLASLNSPYSDSSKVRLFAIGRAKISHHQTKFLTGGFEYDDNQIGS  
TDINSFKSEPLLVARMGLLLDSDKEGNKSSPVHALNRISFAQVRVLLHDDRQHIVRGL  
QAAQSRLEIAMEKWADWDGIGSLNANQETDTSTESNSYDLGVLNQFIREYDTERGSL  
IPTHSLPLSPSAARCIELDNYGLGTTSSAYVPLPSMVNIIMERLEKYYSPELQSEEFY  
ECLSWCTLQSLQTYLSSEEIHEALYECTNTCDRLQLLYEGMLRHKTALTELAVAKSTELR  
NCGEECDLF  
>comp11030\_c0\_seq1; 202 140 490 LEN=1212; translated  
MATYPKRTSTLDKHATTPGEELYLVHLRRLREEEDGHDHLPKRKRSSSVGEELWEIHQRR  
SLGMAEDEETDRDHTGTVEKEPSGKNPGSAPSKALVEAPKGCYPNLRSRASLKKV  
>comp11033\_c0\_seq1; 522 237 1931 LEN=2515; translated  
MVMTFPHFTTTLFAHDLSSIDLSSSTAVSVLNHVNAMQHMIKQEEPSPQPKPALAIQKL  
AANHNVLVHPVAGLDCTEHDGPQEMEDAQEMAYWRDIKADNSWTSPLKDKTRQYLTFEP  
DGGWNNIRMSMETVLTALAMGRVVLVPPSQMYLLGKTTFNFAFFPLQEI AEEHPGL  
EIIISMEQFLEETMGTTTRDFKSGKIVYPPNNKKTAWDGDTRGIKSVLSPWLRISLNPDW  
PEKCI AAFP KST DQK D I D E L Q T M M D E V V L E K E G K F V S R K A F E E F V N K P T P V D A S T K D R L R



EFLAERSKLCIYDKTHQEAAI IHFHGKNAKTQETGGRLLVHFYAFLFFQDWHITDLWMKRF  
VRDHVRYIDNIQCAAARIVHKLRTGFKEPTFDSFHVRRGDFQYKNTRL DADDIVANSKSD  
IPSGRTVYIGTDEREKDFFKPFKEKAGWNILFLDDFKDVI GDNINPNYYGMIDQLVVS  
RGETFFGCWFSTFTGYIMRLRGYHSQLHLDDGNQYADAYKEGRLPNSNYALKEHKEKMH  
DYWGIIKKSFYAREFPSSWRNL DIDVK

>comp11033\_c0\_seq2; 389 894 2129 LEN=2713; translated  
MYLLGKTTFN FADFFPLQEI AEEHPGLEI ISMEQFLEETMGTRDFKSGKIVYPPNNKKT  
AWDGDTRGIKSVLSPWLRSLNPDWDPEKCIAAFP KSTDQKDIDELQTMDEVVLEKEG  
KFVSRKA FEEFVNKPTPVDASTKDRLEFLAERSKLCIYDKTHQEAAI IHFHGKNAKTQE  
TGGRLLVHFYAFLFFQDWHITDLWMKRFVRDHVRYIDNIQCAAARIVHKLRTGFKEPTFDS  
FHVRRGDFQYKNTRL DADDIVANSKSDIPSGRTVYIGTDEREKDFFKPFKEKAGWNILFL  
DDFKDVI GDNINPNYYGMIDQLVVS RGETFFGCWFSTFTGYIMRLRGYHSQLHLDDGNQY  
ADAYKEGRLPNSNYALKEHKEKMH DYWGIIKKSFYAREFPSSWRNL DIDVK

>comp11034\_c0\_seq1; 537 1 1008 LEN=1472; translated  
ATCPLPWYVSLIVLYTKPVAAQC VVFQCLVAFHCFVDRLSIRAVCNPRNLFRQRSSVANL  
LSVRPPACRVTQDKVSVNFGIEITKIVPGYVSTEVDARLSFDTEATVAKARKLIDLYKEQ  
GIDKSRILIKIAATWEGIQAAKILETEGITCNLT LIFSLAQAIACAEAGVTLVSPFVGRIM  
DMFYKAVELKKDPAFAGFAAKDDPGVSVTQIYNYYKKHGYDTIVMGASFRNTDEILELC  
GCDRLTISPGLIEK LQAMGEDPVEKKLDASKAKEMDIPKIDVDEKTFRMMNCSNAMATEK  
LAAGIRGFAADIEKLEAI ISDKIASAAKKRKADEV

>comp11034\_c0\_seq2; 753 126 1118 LEN=1582; translated  
MPSKYNQLEHTIVVADTGDVDIAIKIPQDATTNPSLITKAAVMPEYQKLI EEEAVEYSK  
GDLSLAMDKVSVNFGIEITKIVPGYVSTEVDARLSFDTEATVAKARKLIDLYKEQGIDKS  
RILIKIAATWEGIQAAKILETEGITCNLT LIFSLAQAIACAEAGVTLVSPFVGRIMDMFYK  
AVELKKDPAFAGFAAKDDPGVSVTQIYNYYKKHGYDTIVMGASFRNTDEILELCGCDRL  
TISPGLIEK LQAMGEDPVEKKLDASKAKEMDIPKIDVDEKTFRMMNCSNAMATEKLAAGI  
RGFAADIEKLEAI ISDKIASAAKKRKADEV

>comp11035\_c0\_seq1; 643 629 2419 LEN=2579; translated  
MAVAGEKNWGLNAFNHLIPWNVISENARESDERRQNGEPLSIFDGIPVSIKSNIAEKTLP  
LTAGSAILGHHPIGATKVTGASSPPPCGYDADTT RILLREKGGICIGTTSMD EFGMGS LG  
TNVPPGLPGESP GFVKNPLPFLQHL YFDDVDEDINGMTVGEGRGTGRSGFN DERLAEIIR  
MSPAAISDKHAEAIERYRNMEAEDGSTSYSSAGSSSSGSAASVAHGSSLLSLGTD TGGS  
VRLPAAWCGLVGLKPSYGLLSRHGVVSYASSFDTVGV LANSVDCAASALDILAHRNQDFS  
RDSNFSSYGRNIDGSYKESSDASFAEIGLAQALLSENE NPNYQPLSGIRVGIPSAF SVK  
ECPEEIRTSWSLAADILEDNGAEIIEISTEDIDPGLVQKALSAYYVLVSAEAMSNLSRYD  
GFRYGVAADEEETASETEGNRLTQNTSDDGMTPLERQYSASRSKGFGEVKKRILCGASV  
LSSDKFHSYYEAAAKLRAALADQMTSVLEEKADLLFP TVLSLPPKIGNGTSLEGN GNNT  
AMFANDVMTVPASLAGLPAVSI PVP IEGEDKFLGGIQLVSSRLRESVMLKSARVLQ

>comp11035\_c0\_seq2; 547 1 1687 LEN=1847; translated  
XSSDLLSIFDGIPVSIKSNIAEKTLP LTAGSAILGHHPIGATKVTGASSPPPCGYDADTT  
RILLREKGGICIGTTSMD EFGMGS LGTNPVPPGLPGESP GFVKNPLPFLQHL YFDDVDEDI  
NGMTVGEGRGTGRSGFN DERLAEIIRMS PAAISDKHAEAIERYRNMEAEDGSTSYSSAG  
SSSSGSAASVAHGSSLLSLGTD TGGSVRLPAAWCGLVGLKPSYGLLSRHGVVSYASSFDT  
VGV LANSVDCAASALDILAHRNQDFS RDSNFSSYGRNIDGSYKESSDASFAEIGLAQAL  
LSENE NPNYQPLSGIRVGIPSAF SVKECPEEIRTSWSLAADILEDNGAEIIEISTEDIDP  
GLVQKALSAYYVLVSAEAMSNLSRYD GFRYGVAADEEETASETEGNRLTQNTSDDGMTPL  
ERQYSASRSKGFGEVKKRILCGASV LSSDKFHSYYEAAAKLRAALADQMTSVLEEKADL  
LLFP TVLSLPPKIGNGTSLEGN GNNTAMFANDVMTVPASLAGLPAVSI PVP IEGEDKFLG  
GIQLVSSRLRESVMLKSARVLQ

>comp11036\_c0\_seq1; 208 80 952 LEN=1197; translated  
MANLIHGVRFSVYLYILSNSFFWVLSGDFLLAERTTEENLGHWSH THYFKNVINPIICML  
PLVFRFNQCLRKYADSGDRFPHLANASKYALSQ LVTLTGAFHPLYLEVESGRELVYQVFW  
TFLFFASSIYSFTW DVYMDWGLGRKSYGFLGPRLMYPKKYAYYATIAMD LVLRSMWVLT  
LPPSSGASFALPAYLYSLQVILELFRRTVWGFFRLENEHRSNVNRYRRVDFVPLHFD TG  
DKHMYQKCLERSGASVLRVVLVTLVVVGF CIASIVSAQRANKSSSTDEL

>comp11036\_c0\_seq2; 720 99 2729 LEN=2974; translated  
MVEFGLKLEDNKVSEWSEHYIDYEALKKILKAKKA EKKYEETCQENPNTAKKITKAYRS  
GEYNEMRHLLSTQDINSITPLTRKGS LSTIVSESDAEELRASGDVEIGQASEIRPLL NHA  
DSNDSFISTSI VNVISGMASNMLNSNELNNTFERKIRKSLEEIDFQTSAFDGLFNKQ QKK  
VVCFYYSQLQSLEERLQSI VDWVQRDYAINTHTFDSGGRTDTSMSEGEGEIISPFP SHRR

KKSSIGEHLEELIIQLTESVRSIGNENEDEDETHSDTRPKMRVVSQIRMGKILKENPTNLS  
GVTDEDEDYEDDPDWDHENVVKAETIRRSVLDQYRLAKLLQNYAMNITGFVKIVKKFDKTV  
PSEKGRFENALEHNHMLNDAKAVEILSNKYEKYYANWFCSGDLREAKAQMVLVCRGDGLDM  
DWSQLQLGYRMGMCAILALWVCWDLVWGMVAYGKTTIGARYGFPVFRACGGLLLLQWFWG  
CSVFMWTRYRVNYIFLFDNPRIVRTPKELIREAVDSTLIYLLMLLYKAGAHDI PQVI  
PPGGYPLIILVFTVMWKLVPFLKIRLPMWRTIFKVVITAPCHEPTFFQTYVGDIFTSLVKVL  
VDWNWTFWVLSGDFLLAERTTEENLGHWSHSHYFKNVINPIICMLPLVFRFNQCLRKYA  
DSGDRFPHLANASKYALSQVLTLTGAFHPLYLEVESGRELVYQVFWTFLFFASSIYSFTW  
DVYMDWGLGRKSYGFLGPRLMYPKYYAYATIAMDVLVLRSMWVLTLLPPSSGASFALPAY  
LYSLQVILELFRRTVWGGFFRLENEHRSNVNRYRRVDFVPLHFDTGHDKMHYQKKLERSGA  
SVLREVVLVTLVVVGFCIASIVSAQRANKSSSTDEL

>comp11037\_c0\_seq1; 151 192 666 LEN=1041; translated  
MSIFESDRQHGNQKTYPSRKVVDDILGGAAAWENVDRMATCPSCNHNEAYFMQIQIRSA  
DEPMSVIFYKCVKCNQWENKGREFDLNYRPTVCARCFTHGKHDELQLERRCPHPFQPSG  
KTSKHHHGDRANGDNKIDRGTVHKGANPECRDQLLKT

>comp11038\_c0\_seq1; 774 54 2984 LEN=3510; translated  
MSGVAPTAKYFRLSGHLGQSTSHAKRNFSTTRSDFLSHRGRRRTRAEVSPASSFPSCFY  
SQSVTSRELSALLTPRNSERSPSIATSNNNDNDAPDGGADGPSRNQDSRQEKALERTHFA  
LNPKMVPLGAMQEENWLDISDAIDGWLKGGGGFVDSAEALLERLLSEHAASYSGGKYFH  
SPSYLEKSTSLARLQREVLNSWIQAFHLSGGSSQLALSRAERAMFRLKLERADKKTLLH  
VPPFVEQYIAIVDGYLEADVHRQRPTKAGNLLRRLISYDNFAKDLKDADHFIEIGPLLE  
NCTSQLLGSDPRNLLGTELVKMKVLLKSGTLPDIKIPDVTKRIQVKSSFQRTQDTVTST  
TKEMSPFEIEVTENRLLLEILNSANEVEKDTVDDLLQRLPTLKPRIELIVAILGYIRIKD  
SEASSYWLQELEPSFLVTSYDLVERVLKWLWTEEGSGAPWRADEVFKAVARKIHLYDDKF  
LMSSMSLKLIVENWASSEDPSASRKMIDWYSQLTSRQVKPDESTLVMILQALRSTNTDKP  
LELVSGEIFQQWKSFSSEQKERIATEILELIALKRDNADMILEFVDRLLADNVVPSEVLF  
RSSISAIQNHKNPSDVLVSVVYSFDEASNHTNLTYTSAIDFLFKMNEDAMPQIEALYDH  
VLKEMAASSEFIKREDFSEFLYVVIAMHVNRKLYSQAENFLTAKETLLLPSTAAIVNQSP  
IPLKCYKIIIVRKWYTAKTAPKVEESFENLMKLYHSGYRNLQPDSDLYHAYISARVAAGK  
DAENNLHEMIEQYELVGKEEMKPQASVFNTVLLSLSQGGKPSMLEKKSITLLERMSSLG  
VQPDIKTINLVLKNVIKGYDSAYNTSTMLTNMIEEHGLRPSHTLHLVLDACGSAPAGE  
RNNAIRKCLSTFGDIRTQNFVGPITYGILSKVVYRLVSRDLRADKIGESIFSLCCEDGML  
TSEVRGRKLSMMSRTAW

>comp11039\_c0\_seq1; 1276 1 2723 LEN=2776; translated  
XTLFIHTENSGECFTPRTLNRLASPPFSSPGGNTYTTIKMQKSMENVTVFVRFEPQHK  
VMRHELEDIFSQAGPIKSSWINTKGATAPSGDGENYQRGTTGRSSKGYGFIKYLAQEDA  
VAAQKDLNNSKIOMEKTYTLKVDLASASGAANSKNFKANIRGEKRKEDTGAPASQEGLD  
EAAMLKKSRIILRNLFSYAKENHIRKVMESKYGKVLVHLPKVKSNLHVGFVTFENP  
KDAQKAVESKNVDIQKRAVSMDSWLPKLLHQQQKQQQQQERELNRRKEKELADKKEEED  
DAESVTSNSDDDDGSDSDSNDSDSDGASNEQNSDAMEEDSDEDEDSEEEEEPEVDD  
SVGKCCFLRNLFPDFTTRHDI FQLLYKFGHIKGIYLVKDKNTGMLKGTAFVYTSKPQGA  
QRAMDFAASSSTGTPFVSQRQSAGRSNEGGDDASQIKGSLILKGRKILVDMAVDKETAAT  
FDSKEYKIPQADRRNMYLQAEARVSSSSGNANNTDTWDDLPPQDQRKRQTALKDKTAK  
LQSPIFFINPNRSLFRNMGKHIDEAGLQKLIELATKRGLEKRLVAAADQIAHWRAQGEMS  
TREILAKVQIEIEGKDLVIPPWSYDGDHEMKDEDDGKKRRRKNIKDFIPSVYIDRDFGPS  
GKKTDPASRGFGFAEFTHHTHALACLRELNNNSTYSKEYAAGGKSAALKKKPNRKNKKG  
TNVKPGDYQDEDGRVVRVRLIVDFVVENKVKAKKQAERRLQQQLNQSKLLEKLEKKA  
KELEDEEENKTKRKGRAIQREKKRQKRESGEEERERMLKLQKKAMYEAKKELRKERAE  
KKKKAEEELKRKSVKPPKKSQKLIEDDEEFESIVRSYQSKLESADQKAPKANPREAV  
KSKRWE

>comp11040\_c0\_seq1; 430 308 1449 LEN=1585; translated  
MTELRVPYRNSLEESITALRKKESISLTFKFEDDEFDRSRELQNAIANKTSGKVECLK  
IRNFCIDQKTHNQCFDFYLRCLGEPQNETKIFFYCGFFPLTLTESKRFAAIISSNGNITA  
LSLMGGKQGLFREEGTFECFFDAVLNKGAVKGLQLTLLSFNEIVKRGSSSKLAMNTLKE  
LELNI IQPDVSQRADEGMKELSKVLRVNRGLERIDIGRMMTNEGRRCLLESIRDNVTLT  
KLDTRKLPLLIDPFEIEDKCEREEDVLAQINRHMKNKIYQRCNQNEKSMSLDIYPT  
LLESLANKPCALFLFLRDKNPQLFDTWSTRDKNPRPXQHADIEKASHFKRRISGNHNSQ  
YAITYLASTEKIMTSATTK

>comp11041\_c0\_seq1; 596 104 1021 LEN=1149; translated  
MSDSNEDEARMKALLAQWDDDESDASSDSDDDDEEAPAPATKDLNLQDNVLDHIV

IAAPDFDEAVKEFENMTGIKPSIVGSLRGLGTKSARVGLDNNAYIEIVAPDPKNSGPVGA  
ALAKDLEDGTLIPYHYAIRSSEVEDMKDNQVPNDLWGQPDHISMFGAAPNGAPKKWEMLY  
MYGHKIGGCVPFYIDWGECDHPSASIPVGLSKTFIVRAPAGHKVHDLMLMGVSGIIVEEG  
EPMLEFAFGSPEGTITFSADNPTGIKFPGFEEGETGSGSADFKLPKKVKPIDDDSDVDS  
SVSDSD

>comp11042\_c0\_seq1; 223 115 579 LEN=897; translated  
MTFTRAFIFYIQLFAVVVESFVVVPSWNSASRRQISTTTNLSAYTPPNGSSQYSSWGGSS  
RSNGSSVPSKTACESAVNIEWEPMSELERRIEDGIHYEHIPNYRNEQHMPGCHPKAKRI  
IDAEEDDTPGVRVAVFCAYRYSEEDYNRLKSADV

>comp11043\_c0\_seq1; 446 243 2682 LEN=2784; translated  
MARDDDEAAEKGIISCDLSLFFRYRSVVFVAVTTFFVPGADAIADGYDAVYVPKKRSVNSI  
DADVSSSFDNRNKNEDRPTFFIAKIKVEDTDNESDNKSDRTRENDKNSASKRGSYSEDH  
KNYFSLEEATRDILDSNCTVGNWTQDDCIRVNNIISMWSKRSSGSGKPHPAIQQERLLRR  
VIEEKQAANSFALGLKTRDIYHDIIFSWRSHEPESANRAEELDAMQHAYNSGEDRSLQ  
PAIGAWNSILFAYAHSKSKDASEHAMRVIHKLYGLIAEGKTEVRPNDESAYAFILKAVASA  
GGKDAPQNVLDLLVRMERLSQNGFAIDVSSSCHNVYLSLIVESMKDPRVHAAQNARLAES  
HLHKMKEHPDPSLHPDRKTYNLVLSGWSKSGDRELATKAEALLEEMEASAAGDSSRTAPN  
KYTYNTIIFCYTWSNLPDKGDKALAVLEKMKRLGENNPF CRPDYTTYNAVMMNCITKGNHP  
SAPYQVEELLKEMTEIYQRTGDYSMRPHNRSFNACVNAWARSNSREAPERIKCWISIMQD  
DFESGRTDVMPNKWYNSYLQALAKQRNPSSADKAERILALMEEKSRQFRSNLKPDLVLT  
YTNVLHCIALSESGDAFQRAYAILSKMESGNGDVRPNVYTYNVLINVVAKSKLPKAKIA  
IQLVNRMKEVAIRPIIITYNALNACAYSDEPKDDPREVLQVATMILKEAQETCGANYIS  
YSTYLRVIRYFVDDRLDQWRLIRKTFRRCCEDGQLTLTIMKQIRSALS AHQYGLIEKEAT  
DEQTRWHIDYTKNAKRLKTEPMRRHRSATYR

>comp11044\_c0\_seq1; 119 144 677 LEN=777; translated  
MSSAARNRLAQIASRSGKFHKPKPQLREAAKKTQWNIVRGDTVQVIGRNHPERGKQGIIVK  
KVLRLDLRVIVEGVNMGPRSISGDKDKGIPGKVIQLERTMHYSNVQLVDPIQGIPTRIK  
KVLPSGEKVRISKKSGAIIKPKDILKMRKKPISSVVTESECTSEDHAWETTYVDNRVR

>comp11045\_c0\_seq1; 636 174 1148 LEN=1384; translated  
MADAAFFAKKKKKKTKFKNANTIDASQVTNTVHVDAPALSNTADLVPTTGALPLEKDA  
KVANDDNWDEALAANTMRKGAAVVVPAGVTTKDLVVETKALS LKTNNTGGNEQDDIAEKL  
RVEETKAKLAAAREGMEREAQR IKEEKEKKEKAASSRFGAAAASGGKWPVSRARAAGGG  
LSSIGWGSKMASQQKVDTEDENLFPDLAAADAILEKQKAE LPAKAPTCTPVGGGATWGA  
PAAPKTRPKLNLKKKAVVEETPVTEKA AKTEEAPVTEEASPEPAAEPEAAAPVEAA  
APAPAPIKPKKKKKKDLSTFGKK

>comp11046\_c0\_seq1; 361 1 458 LEN=812; translated  
XSNTNKLWKSSLSNADDDDEEEEDDDDESQHTGDVDAASQAQE QLEMVDVFLFARSKER  
SSLVPTLKLGISEMGMVFHAQSEEELEVLASVHTVAKEPDHHEHDEDIERDFFDVQRKST  
MELALADVSI EKDEELWERIVENLAALEGSEA

>comp11047\_c0\_seq1; 549 215 2551 LEN=2753; translated  
MNDEYSTARKLTQRAAAREKALSNVTSSKGLVPYQSGSDDGIGSLGADFS DMALKPDHVQ  
RPCWTCPDGNIYLEAFHDLVYQAYDFLVAISEPVARPEFVHQYKLT PYSLYAAVATNIET  
ESIINVLERLSKNALPKEVKKFVRDCTSKY GKAKLV LKHNFYVESEFPMLVRELRLDPV  
IAQAR IHDQQADVDEFGFTTHTKAEEMRENLEMLREPGDGDSDDEDDMDGMSSKQKPTV  
VVSFQVDGIKVENVKRQAI ELDYPLMEEYDFRNDTMNPNVPLFDLKPITRIRRYQERSLA  
KMFNGRARS GIIVLP CGAGKTLTGVTAAQT IKKSCVCLATNAVSVLQWKYQFQKWTNIP  
DDRISVFTSDQKDLHPDACVLVTTYTMI SYSGKRSEQS QKVMQITGREWGCLLMDEVH  
VVPAKMFRRVIGSVKAHTRLGLTATLVREDDLISDLNFLIGPKLYEANWMDLTAQGYLAN  
VQCVEVWC PMTGPFMKEYLTASNARLKQLLYVMNPSKLRAVEFLVRFHEQRGDKIIVFSD  
LVYSLKLYAEMLKKPLIYGETPERERQAILGTFRATDALRTICISKVGDTSIDLPEANVI  
VQVSSHFGSRRQEAQRLGRILRPKSYTQTDGNSKSSFN AFFYTLVSSDTQEMFYSAKRQQ  
YLIDQGYTFKIVTNLCEKAAEDAKNLI GTDNSYAFSTAADDRDMLRKVMNSETDLDKER  
AEDAAIRKSNPDGAHMADARTKRTGGMSMSQVSGSGMRYKEMNTSKRHPLFRKRQR

>comp11048\_c0\_seq1; 295 348 980 LEN=1034; translated  
MSDSSDSDSECGPSDTRDHSRSTKPLRNQFRRSMDLDLHNGSKYEITKITESTEPYDFD  
SDEDTFADAASDCEPNQLYLDEMLEDIHPERLNLFDYRKSSQSSRSLTRIKNGMDGSNS  
CLDASLHDSKQDFD DDDGNEIVVGKVISNRDDKETETNPLDEEDTL DCLPKTINNGKG  
RRGSLD TFGSPDITGQGRALLRQPSQKTW

>comp11049\_c0\_seq1; 319 488 940 LEN=1241; translated  
MKSFSTTAFVLAATASLTSAFAPVPAARQAVSSSQLNGSIQFIKGFDEKCVDPVKLTRAK

DGSSGVATFFF DAPNVFDASTTSEGEVTGMFMIDDEGEISTTDVNARFSNGKPKQSIESTY  
VMNSPEAWDRFMRFMKEYGEANGLGFKAAN  
>comp11049\_c0\_seq2; 319 568 1020 LEN=1321; translated  
MKSFSSTTAFVLAATASLTSAFAPVPAARQAVSSSQLNGSIQFIKGFDEKCVDPVKLTRAK  
DGSSGVATFFF DAPNVFDASTTSEGEVTGMFMIDDEGEISTTDVNARFSNGKPKQSIESTY  
VMNSPEAWDRFMRFMKEYGEANGLGFKAAN  
>comp11049\_c0\_seq3; 319 868 1320 LEN=1621; translated  
MKSFSSTTAFVLAATASLTSAFAPVPAARQAVSSSQLNGSIQFIKGFDEKCVDPVKLTRAK  
DGSSGVATFFF DAPNVFDASTTSEGEVTGMFMIDDEGEISTTDVNARFSNGKPKQSIESTY  
VMNSPEAWDRFMRFMKEYGEANGLGFKAAN  
>comp11049\_c0\_seq4; 319 625 1077 LEN=1378; translated  
MKSFSSTTAFVLAATASLTSAFAPVPAARQAVSSSQLNGSIQFIKGFDEKCVDPVKLTRAK  
DGSSGVATFFF DAPNVFDASTTSEGEVTGMFMIDDEGEISTTDVNARFSNGKPKQSIESTY  
VMNSPEAWDRFMRFMKEYGEANGLGFKAAN  
>comp11049\_c0\_seq5; 319 705 1157 LEN=1458; translated  
MKSFSSTTAFVLAATASLTSAFAPVPAARQAVSSSQLNGSIQFIKGFDEKCVDPVKLTRAK  
DGSSGVATFFF DAPNVFDASTTSEGEVTGMFMIDDEGEISTTDVNARFSNGKPKQSIESTY  
VMNSPEAWDRFMRFMKEYGEANGLGFKAAN  
>comp11050\_c0\_seq1; 325 1 1028 LEN=1475; translated  
XGTVRCWSP TAPKFCSSSQVRRKSRPFLVKENPWVTS PRRIKRGYQKPGHKRNAQTI  
EKHEIEMFAAKVTLRHYASFRHQ LRRGVTSS TTGKLF FRDGSIVSKSISTVNDRPMSSVQ  
VMEAEESRFALILGKPGGGKGTISGKILKDFPKFH HISTGDILRSHVREETTLGLEAAK  
FMKEGKLVDPDKLMINLVVEESAPYLEKGESLLLDGFPRTVGQAEALESSIHVDMVVNLDV  
PNETIVERLSDRWIHEPSGRIYSYSYKPPKVQ GIDDETGEPLVQRHDDK PETVQARLELY  
DQATSPLVEYYERNGLKTFRGTQSDVIYPEVKKWLHSCFEE  
>comp11050\_c0\_seq2; 255 651 1244 LEN=1691; translated  
MHPTQDFPKFH HISTGDILRSHVREETTLGLEAAKFMKEGKLVDPDKLMINLVVEESAPYL  
EKGESLLLDGFPRTVGQAEALESSIHVDMVVNLDV PNETIVERLSDRWIHEPSGRIYSYS  
YKPPKVQ GIDDETGEPLVQRHDDK PETVQARLELYDQATSPLVEYYERNGLKTFRGTQS  
DVIYPEVKKWLHSCFEE  
>comp11050\_c0\_seq3; 325 1 1028 LEN=1470; translated  
XGTVRCWSP TAPKFCSSSQVRRKSRPFLVKENPWVTS PRRIKRGYQKPGHKRNAQTI  
EKHEIEMFAAKVTLRHYASFRHQ LRRGVTSS TTGKLF FRDGSIVSKSISTVNDRPMSSVQ  
VMEAEESRFALILGKPGGGKGTISGKILKDFPKFH HISTGDILRSHVREETTLGLEAAK  
FMKEGKLVDPDKLMINLVVEESAPYLEKGESLLLDGFPRTVGQAEALESSIHVDMVVNLDV  
PNETIVERLSDRWIHEPSGRIYSYSYKPPKVQ GIDDETGEPLVQRHDDK PETVQARLELY  
DQATSPLVEYYERNGLKTFRGTQSDVIYPEVKKWLHSCFEE  
>comp11050\_c0\_seq4; 255 651 1244 LEN=1686; translated  
MHPTQDFPKFH HISTGDILRSHVREETTLGLEAAKFMKEGKLVDPDKLMINLVVEESAPYL  
EKGESLLLDGFPRTVGQAEALESSIHVDMVVNLDV PNETIVERLSDRWIHEPSGRIYSYS  
YKPPKVQ GIDDETGEPLVQRHDDK PETVQARLELYDQATSPLVEYYERNGLKTFRGTQS  
DVIYPEVKKWLHSCFEE  
>comp11051\_c0\_seq1; 309 1 1264 LEN=1906; translated  
XRYTSSQIQD TVLVKDLKVRPYTEYCNLIRGKELAQLSRGVPMFASSTQRNPSATNTAT  
SRRHKTTSSMEKNDYNANEGFGPPP TRRKRRTNSNKFCIRRRNLLWATTVVAATTVFFI  
ALGLFSSNVEYYEIKINEAKMKS NLRVGDEEKNIWASQDSQPFNEDGLAVKAQHLMVAG  
HSVTVSDHLRDADSDEKDWFLLSYQKGRGLPQAIHAHIAAGIEEARKDPEALLVFSGET  
RASSGPHTEAQAYYHVADSMNLWPSDPGSSVRARTTTEEFATDSFENFMFSIARFREV TG  
TYPKKITAVSFSFKRRRFETLHAPALRWP SERFVYVGVDP PASTGFDLEQSAEGERKNAA  
APFEQDPY GCHSEVLQEKRKRSRNPFKRTPPYPLSCPDMKYLLGYCGPELVPSDRVPWDT  
P  
>comp11051\_c0\_seq2; 265 1 1393 LEN=2035; translated  
XRYTSSQIQD TVLVKDLKVRPYTEYCNLIRGKELAQLSRGVPMFASSTQRNPSATNTAT  
SRRHKTTSSMEKNDYNANEGFGPPP TRRKRRTNSNKFCIRRRNLLWATTVVAATTVFFI  
ALGLFSSNVEYYEIKINEAKMKS NLRVGDEEKNIWASQDSQPFNEDGLAVKAQHLMVAG  
HSVTVSDHLRDADSDEKDWFLLSYQKGRGLPQAIHAHIAAGIEEARKDPEALLVFSGET  
RASSGPHTEAQAYYHVADSMNLWPSDPGSSVRARTTTEEFATDSFENXVSSSRACFRLSI  
VRNEKDERAPGLKLF AANPICSVSFRRFSGMFSIARFREV TG TYPKKITAVSFSFKRRR  
FETLHAPALRWP SERFVYVGVDP PASTGFDLEQSAEGERKNAAAPFEQDPY GCHSEVLQE  
KRKRSRNPFKRTPPYPLSCPDMKYLLGYCGPELVPSDRVPWDTDP

>comp11052\_c0\_seq1; 859 266 3370 LEN=3594; translated  
MTFMSKLSLIRAALAVSLLMDTCLRAKAFSTQSKHTSLPTSQRFPLGQLQPQEFNTNRNH  
AVRLQMSPSPKSESAADSQNVFGIVSDAVTGIIFNFLHAFDECEIKDSSKNLRVLWVRAL  
LNYRGIQDTVAQELLPKTTRGLVTSEWGASLLDPILKFAEWIQARTEFIDEALENFLSS  
PACTDSDGTKLECNVFLFAGAGYDTRALRYRHRHSEMINFIEVDLPEVVEGKTKLYEQFRR  
TNDPDWDNSAKHNLVFPNLDNDCGGQNPTSLIQVLKEKGNLKENVPTLMVWEAGSRKKKLLK  
MHLKFLESVPTIDLHFHHTIVHEKSXFYVDEDAVRNIMDELFSFARMGGNGSENPRAE  
TMLCFTDSLKPFVDVPPFSNEAMQFFEQNGMKLLQHRSRWGGAVHFALAAASADQAEPKKT  
VSKSDNEVKVDRKIEMETVSKSDSEAEVDRKIKMETEELDRKSGIFHEHIKDKVGGGLTNSY  
IPTASLNAAILKKPSFENAWYAVAFPWQIDGYETPIDAVLGKKDSKKGEQKPFATRLWGE  
PLVIYRDSKQELVALADVCPHRSAPLSMGYVENDELVCQYHGWRFGDAGECVDIPTLHIV  
DDKGETVQGGKILDRVTKSNCGNHRAVVEHQGLVYVWRGNVLEADLSLLPSRRKGDME  
TVPVDTVLDYSVDYSYIVENNLDSPHLFFLHDGSVPPIESIGMLNSNLPKLRLKFFTDCC  
GMGHIGKFGENGRPKKLLRFDPPNVVRHGGVSGFEFFHIVPIAPQRTRVLLRQHLPRGP  
ILSTITSFPGTRLFLTALVNNWNYHIALEDASIMQGGASRIEDWGSPLKVGGLGDDLIM  
QYWKWRNSAHDDLRSKKGEDSPYFSEFAPTGRSGISSGTSFGDSKEVVNRVRSEANLASI  
PLVNDNQQRDPNTGNDVGTWGLSDYVQNTPVASFPPVYNQYAKMLVFDDFVKDLIEPS  
DGEVCDMPKNRVPGAPETRTGDKSNVPVQMAISMALIAGALSMNPVASEATTSMNLLD  
QFLNNCLNLLGYLD

>comp11052\_c0\_seq2; 900 266 3268 LEN=3492; translated  
MTFMSKLSLIRAALAVSLLMDTCLRAKAFSTQSKHTSLPTSQRFPLGQLQPQEFNTNRNH  
AVRLQMSPSPKSESAADSQNVFGIVSDAVTGIIFNFLHAFDECEIKDSSKNLRVLWVRAL  
LNYRGIQDTVAQELLPKTTRGLVTSEWGASLLDPILKFAEWIQARTEFIDEALENFLSS  
PACTDSDGTKLECNVFLFAGAGYDTRALRYRHRHSEMINFIEVDLPEVVEGKTKLYEQFRR  
TNDPDWDNSAKHNLVFPNLDNDCGGQNPTSLIQVLKEKGNLKENVPTLMVWEAVLFYVDED  
AVRNIMDELFSFARMGGNGSENPRAEETMLCFTDSLKPFVDVPPFSNEAMQFFEQNGMKLLQ  
HRSRWGGAVHFALAAASADQAEPKKTVSKSDNEVKVDRKIEMETVSKSDSEAEVDRKIKME  
TEELDRKSGIFHEHIKDKVGGGLTNSYIPTASLNAAILKKPSFENAWYAVAFPWQIDGYET  
PIDAVLGKKDSKKGEQKPFATRLWGEPLVIYRDSKQELVALADVCPHRSAPLSMGYVEND  
ELVCQYHGWRFGDAGECVDIPTLHIVDDKGETVQGGKILDRVTKSNCGNHRAVVEHQG  
LVYVWRGNVLEADLSLLPSRRKGDMEETVPVDTVLDYSVDYSYIVENNLDSPHLFFLHDGS  
VPPIESIGMLNSNLPKLRLKFFTDCCGMGHIGKFGENGRPKKLLRFDPPNVVRHGGVSGF  
EEFFHIVPIAPQRTRVLLRQHLPRGPILSTITSFPGTRLFLTALVNNWNYHIALEDASIM  
QGGASRIEDWGSPLKVGGLGDDLIMQYWKWRNSAHDDLRSKKGEDSPYFSEFAPTGRSG  
ISSGTSFGDSKEVVNRVRSEANLASIPLVNDNQQRDPNTGNDVGTWGLSDYVQNTPVAS  
FPPVYNQYAKMLVFDDFVKDLIEPSDGEVCDMPKNRVPGAPETRTGDKSNVPVQMAI  
SMALIAGALSMNPVASEATTSMNLLDQFLNNCLNLLGYLD

>comp11053\_c0\_seq1; 491 191 1501 LEN=1902; translated  
MIFASACVAVLLANVDSVVLTRSPMTMGTSFGRTFRISTWGESHGSGVGVTLGDCPP  
RIPLSREEIQKDLDRRRPQSRITTPRNEADSVEIMSGLNPEDITLGTPIAMLVRNKDQR  
SQDYLENDMNVAYRPSHADATYDSKYGVRAIAGGRSSARETIGRVAAGAIARKILKMYN  
GIEVLAYVSKVQDIKAENVHDHDTFTMEVDANIVRCPDEASAEKMLARIDEIRKAGNSIG  
GVVTCVARNVPAGLGSVPFDKLEADLAKACMSIPAAGKFESGDGFEGTLLSGKDHNDEFY  
IDPETGATRKTNRSGGIQGGISNGENIVVHVAFKPTSTIGQAQATVTRDGKEVELRGKG  
RHDPVCLPRAIPMVEAMVALTLTDALMMQKAQCELLPNEAPFESQPNPMGSTVEGRGEVG  
LVTAEGDALSQRVDEE

>comp11054\_c0\_seq1; 212 1 1154 LEN=1154; translated  
XQREHDEGQENKNKNNQNHHERGMYSRRARSTRNASAGSGGGTPSNARTTRGRSQAQK  
HPRRGGANPNAARLRASIDRPPVVPVWRVMRKPAGHLRNSFLVEKWVRPSDLKGAERESY  
EKTQRERGEERKLWAEAQRRRERELEKQKEKEKEKEEREKARIAAEEAVEQQPQPPA  
ASETAAASEPTPAIVGASSGATPSATPGATGTGPLAPGAAPGPPNPSATPNGKDGNGPGT  
EPPATATATATATESPAEPPAEAAKEAAEPQGAREPAEHEPARXAASSDNADDRLRGRSS  
PPAAAGAVQTGLPAAIGGAGGEETEDRGSRRRLGSSPALIQRRASIDRGCRCRQARYCA  
AGGFYVYGTRNRRIKKWVECLKIIMLX

>comp11055\_c0\_seq1; 407 1 1432 LEN=1902; translated  
XKTERSZYKARLRHHDVSVGLTSLFSPSTLSRLYSTRNYTKMSSVFRFSFHGIVYSLS  
LAGWLVVMSRYVVPVLSYQLTVMELNGEASRAVRRNGRESGDQRCFRWNGTEDSDDWW  
AMHPDWESSTNEDELCFQMKNEEKAAFFRELHAIQYNESNCDNVFTKYMFSGGYADM  
ENVATGLAHAMVTGRPLQMTTELTDGKWHYAAFKSHLRKNRKPVCPSGDMFCYFLPLGICP  
PAVLNFSNKSTAHDADQYEMYDSNRWFREYATRPQQWLRQVRVLYVSDATANI PKTNG

CAAIHVRRSDIVLHQDFSRKYHPIEDYLRKLNETHRNIKDVWLF'TDDANAI FEAREFHSE  
YNWMYLERKFRGSEGGWENQLPSETPEEEFIALLSTFQIAQMCDVLVHTTNSNFAKVMYD  
SMLSTGKSITDLNIDDGERVVFQDQHTNSEKELRDHLEIKRNPEAVHLLDVGSSSDT  
>comp11055\_c0\_seq2; 407 1 1432 LEN=2057; translated  
XKTERSZYKYGARLRHHDVSGTTLTSLFSPSTLSRLYSCTRNYTKMSSVFRFSFHGIVYSLS  
LAGWLVLVMSRYVVPVLSYQLTVMELNGEASRAVRRNGRESGDQRCFRWNGTEDSDDWW  
AMHPDWESSTTNEDELCFQKMKNEEKAAFFRELHAIQYNESNCDNVFTKYMFSSSGYGADM  
ENVATGLAHAMVTGRPLQMTLGTGDKWHYAAFKSHLRKRNKPVCPSGDMFCYFLPLGICP  
PAVLNFSNKSTAHIDADQYEYMDSNRAWFREYATRPQQWLRQRVLKYVSDATANIPKTNG  
CAAIHVRRSDIVLHQDFSRKYHPIEDYLRKLNETHRNIKDVWLF'TDDANAI FEAREFHSE  
YNWMYLERKFRGSEGGWENQLPSETPEEEFIALLSTFQIAQMCDVLVHTTNSNFAKVMYD  
SMLSTGKSITDLNIDDGERVVFQDQHTNSEKELRDHLEIKRNPEAVHLLDVGSSSDT  
>comp11057\_c0\_seq1; 121 1 260 LEN=1107; translated  
XSFRFFVFFQYLTRVPIWKEERFPSKPAISSSSVYPYNAHPRPVNIVKRIHGQRLTGDMV  
PRREYNYDENYSGSNYNTVGRKEDDG  
>comp11057\_c0\_seq2; 257 1 1366 LEN=2213; translated  
XDHYCVAANDPSDYSAAVYSLGAGSDPQENLFRCSSEELFAGCSDALDSIADAMVTLLLLW  
RGHCPVTLTLPFRDSQRRIEVSFRLPLHSMVAFAWAIALARDFQLVFSFLPFSVWALLA  
TMEEQRRHPSWRRRPSYRELLRVLLFNKSRRFPLRTIRPNERLEETERFDSAASERAGA  
RRQALERWRAKRERELGETGPLAATGEDAALLGQQTRGKVSPESTDATATSGNGEPLVVV  
RLLPLIRAALHRCVLLRISRSIVSWRDSYAAFWIATMGFLGSFVALWIPWGLVVRWGW  
VLLWTLFGPMMKLVLDLCLFRPGEAAKGYEDDPGTATEMEERYERRYDWWLGSKKRRSAQH  
RIHRENTLKTTRDAKRYMFGKYLTRVPIWKEERFPSKPAISSSSVYPYNAHPRPVNIVKRIH  
GQRLTGDMVPRREYNYDENYSGSNYNTVGRKEDDG  
>comp11058\_c0\_seq1; 600 104 1987 LEN=2363; translated  
MAKKKSSGNSNVKSKTKPKNVVSRRSNAKLVSSPAISYDANVKVYFLIGIIAASAAILKK  
YMLVQKLDLRHASTIQDPINLDSSLQSLVHLACQNGNCEEDVLFARNRSLFSGRRLEKQS  
KLFEIHREMQUIWTLDAFRDDFVKNLVGVHRHLKTN AFLSEEAFLAAYIAMLFKRHISKHN  
PFDNERKHTISSIYLENLPTYDDFRQHHPVTFDQIELASLYGSHTHIYFIVSRKKEEIKS  
EYEAFAARSSTEFENFISFHEYVAARLNQVTRAFEVGPISEDEDAPLKEVEWYKQFGVDIK  
GKTRAMVPVLDAFSSNDKKNMKYQYDPESEKFAAFASSTIRKGAELFGTQGDRAADLYPK  
FGFVNGEYSERTSVRLGSHQVIDRIVPEKTYMEAQKYQIITYLQDDGYSECVTGDGDL  
ALRFKRLKRKALLSIVNRYEDWVVSFPALDRSMNSNGKLQISVDSGVSQIISTCRLAL  
HHDYDGDADHVLEAAVQEMESNHDKDT HDKGLLLKSGSDGLE YRALVWVWRLAAYS LNQY  
CGAYEDWVCSKAHSEMEELEKYSKEWYAAVRYQEIVTLETLEKFAQQS QLAYTKKEHF  
DSEADEFFRSTLCPVDTPLKLNLIYE  
>comp11058\_c0\_seq2; 211 179 706 LEN=1082; translated  
MNSNGKLQISVDSGVSQIISTCRLALSHHDYDGDADHVLEAAVQEMESNHDKDT HDKGL  
LLKSGSDGLE YRALVWVWRLAAYS LNQYCGAYEDWVCSKAHSEMEELEKYSKEWYAAV  
RYQEIVTLETLEKFAQQS QLAYTKKEHFDSEADEFFRSTLCPVDTPLKLNLIYE  
>comp11059\_c0\_seq1; 328 229 1302 LEN=2249; translated  
MKMHRHLLGSITASAI VFLASSPSSSFATKQQLRSIASTSTTFRGPNGLSRDLGGKNR  
SIETNHNRGITSEIVESIRETDSRVAEFLDSIPLESFGRSSDSPLPMNYGIFRGTSSLRS  
LSQNQNDLLCRFLAPSNAEKNHPIDHKALALLFVLGEHLEAAHELVLGVTPRELEAAEHA  
ATHPGQTTWARDHPLDATADWIHAI VHRLEGSSKGE GATGYDNAKHWF LGGA AKRLDRP  
DPSHPVRKLLAESAPRIAPLLCEGRLLGPGTASPPYRHNI PGFGTAVEVELGRGEWDDL  
AFVELCRRRESQLRGDRGPLGSENELSDAECLLELVDLQRFELLCLLHHV LQAPN GRG  
>comp11059\_c0\_seq2; 328 216 1289 LEN=2236; translated  
MKMHRHLLGSITASAI VFLASSPSSSFATKQQLRSIASTSTTFRGPNGLSRDLGGKNR  
SIETNHNRGITSEIVESIRETDSRVAEFLDSIPLESFGRSSDSPLPMNYGIFRGTSSLRS  
LSQNQNDLLCRFLAPSNAEKNHPIDHKALALLFVLGEHLEAAHELVLGVTPRELEAAEHA  
ATHPGQTTWARDHPLDATADWIHAI VHRLEGSSKGE GATGYDNAKHWF LGGA AKRLDRP  
DPSHPVRKLLAESAPRIAPLLCEGRLLGPGTASPPYRHNI PGFGTAVEVELGRGEWDDL  
AFVELCRRRESQLRGDRGPLGSENELSDAECLLELVDLQRFELLCLLHHV LQAPN GRG  
>comp11060\_c0\_seq1; 175 124 1095 LEN=1271; translated  
MVRHLYTVFSIFVGM LAVSTALPHTDQTTGDEKGFNGSAGRRNSSRQLRTRIPDKRRERN  
VVPDIVGVKNGSLEEDLQQLKREHSVSFPSRLSGTESAGSLQK'TTPNQNLQICRRVHLN  
FARAANGRDMHGDFVRGEWFHRYGINIYADGHDGTSNLHPMIFDSSNLESNGLVGNKEI  
FALGSPNFDCCGGFGIGHGKKEGAPGENCEPLGNVLI PSRKAGSDSLTSSERLKVSKPSLG  
GVLHFKFSKLT KVENIGLLNISGANQI IAVRNDGGMENIDLVPVQNGTQNVSLDLDQVN

ELFVILHSFGAVSGLDLCLIVFDQ

>comp11061\_c0\_seq1; 884 1 2987 LEN=3167; translated  
XSSNININIGSSTSTEDDDATRDGVALSVATSERGLDKSATSSLTSSSRTGTATAVNAN  
ANSSLGSIPIAVAGSSRRREVLERRRSESSLNLATLWRAHQSGLAVTQSGSRRSLLRRES  
SISSIGSNMGLSILVGNRAHPGASREDFVRSDDGAAPQAKTSDGSGGGFRTPPKPKLPR  
QHQPFFVPRSLPLASRRPQYRRSKSVTLDMI SPQRSLPRIPEPNAVDSKPTHHRSRSTLSS  
SGRRKSVTFHDIDEELFEFDKRETSAVTPIDAVDTAAKKPQNVRRVSDSQIAI PAELQN  
PNQALLMARQRDGLQRETSMSIIPSLHRGAPIRQDSLSSIIPSLHHGHPLQDSVSVMDRQ  
NSTASIPSLHHGQPIRDSVVFQDSVTSFASIRHGNPLAESPSAASIPSIHGNPLRDSLST  
TRQSSVATFGSIRQGNPIRQESTSTLPSLHPARPIHQDSVASSVHVPSGGISMSRQDIAQ  
RFGVSAGVASAWVQLERSEGTLPEDEPKRVSGLSDDGSPSIPHDVTLPTVNTATDAEDE  
LSMRSPTYKPLSKPVLRLQATRNTYEGEGFEVTEMKETPMIDDEATEAQEAPIIDGPLSE  
ADSYYYRYTPDQNVFRNSLAPFPDNGIMRTAGSFDDL S L F S S F G K Q Q H S S E I F R D I R R S L  
SDDNMSTISNLVDHNREFLLQIPTSSDQGSEIIEDDITDGGSTSWEMGYGSPREQRFDWA  
NIIQDEYVNGYGGAGTLGFRIFGTSDVDEASKPQVLSPLMESLQAFLPSSKSGQNFHMK  
YSMIRDGASLQTLRLKVRGIKYSILAIETIDGEVFGSFTGQAWRKSWNYPFGTGESFLWRM  
RHSRLEKSNGLDQAQKESIDVYPYTGENGFIQLCTHDRIAVGGGIPDETYAEKKSEEL  
NSIPPLAMNTHDWGFLALQSDLLQGSSSPCVTFGSPSLCKSEPIGSRFEVMNVELWTTT  
PCMTEEEAERLDLGLKFLGSGNTNVNESLTSNFTY

>comp11062\_c0\_seq3; 353 313 2988 LEN=3526; translated  
MTKQEDQSQRASETSESAVSALVAVPEDSGNDDNRQPTTKNKPLKRSSDIRDKSKVVFQSR  
DVTGKSETSLTIDFGPGKEDGTECQRGDDPHPSLHSLGSI SCLQKQDASQSKQHV SFDTN  
CQTNAGSRRKSGMMTKLSSFTTRAYVSDRDISSGKRTRYAATQKAERFKISRSPTEQKAER  
VEVFFTNHGMGIFLGLILYMLNLLAAATGAYQFTEVGGWTTEDDILRVTLPIARAGGRLV  
TINCAILLLTACKYLWTCVRTHVVPVPIPIAFLTDDIMPKYHRYVALTIIFCGCVIHTLPQ  
IVNYATASITMNEGLRFWTFGDGFATKQLLITGTLTIIIFSTFFLTTLKCFRKT TAGFR  
WFWFFHMGVATAYPLLIVHGSCRGYPLFLYVALLPLLLYLFVLMRRKNVSTVKVIKWQ  
AHDDDGGQITELVTECPKDFKYTPGQYAEKFLPISRSEWHPFITIASAPNYPYEEGPHHT  
FEVDEEQKLVFCIKNVGRWTQALFDYASAYDLTKSINPVTIELRPHGAPAMNYFEYQH  
IVVIGSGVGVTPLLSIWKYLMAGREMSQNGYGIHSIRSSVMEKLNSSIASFQIDGFQSR  
EFSLGLGTSFRGHNSLATWDTEDLAEFSELRMKCLKWEKVLESMTVSLCLFILFILGET  
VIVLQIFRFYMSANALGAILSLIALLVHGTIAIVSTIALGCSWYFRLFKCWLECSIILV  
DTIAFWLSIRGRSTNTAYLVMFGLVVALHGIRVFHIYFMILKPHDHSTSKKEKSGNKRA  
SKKAIMVGFNDADNDSDGENEICSIDGILINRTYASMRFAARCLLPKIMQFGLTDVFSM  
EFYGTREKHENKKSERTLITQMMGSKGDGIDVEASMASKDHSPYFHPGRPDW

>comp11063\_c0\_seq1; 464 206 1729 LEN=1845; translated  
MNPSALPFLVLTLEDDAGSLSSSSSTGFHDSKDLSDGSI SNVECTLMIEDTASTGGTQKIA  
SGDGFFAVSMGDGTEHDQGESGSISSLQKGRVLVLLVAMVYGS LN VSTRLVFSRTDPPDAS  
VSSAIQGWFSVLCFFPLLWGKHRVRHENNGPPRVASDADKARTEGILTPKPNKGTILQPP  
GFWRFAMELALIDFGTQTLTNMGLKTPPGARASFLIQTSVCTPVVSVLLGKQRVHKRW  
FACFVALAGLFI LSQEQQPSLEQQPWDDTCGAECGHPIDL VGNCTRMNVANPYCPRSDL  
FVSSPGFTKGDWSCLFAALCWSLYIYRMSVWADSFDETTIQFVKNSAVTFSYTLWMLVSL  
FYKDEAHADDGDNLRDLSPSWLWKTCKDPVWIIILFYNALGPCTIADVCQQAQAFVPA  
ETNVILSLEPVFATLLGLFLVLGETPRSVNRSGACSLSRHPSSPAVARTSHEHRHLTL LPR  
SRFDDKACFVGRRRKRPGTIINPIPER

>comp11066\_c0\_seq1; 925 1 1911 LEN=2318; translated  
LIHVSPESDDNLQFNRRQDRAPTSRSVQATPSTMKRSVPTIPSKRASLAGSAAMIYLLCV  
VLAQTPTNAFVVVPPATTVHRVPAPTIVRSPKAPYSSSPSOLFSSSMTQSLNEKVMKEL  
PSKKVVDVAVIESKTRISIVASDVATRAGVSI SQARKDLTTLASLSQGDI AVSGDGE LIYEF  
PKDLNGVLSSKSAKYKARQAFKAWPSIFWGLRV SFGVALVASVALVFS AI VVLQSSSSD  
DDRRDDRRGGSMGFGGGFGGFWGSPDFDFYYRYPYGYGYGQTM DGAVRDPEDMGFLE  
SVFSFVFGDGNPNAGLEEKRLSLAAQMIRDNKGAVTAEQLAPYCDAPDPSSESSSSSSSF  
VDESFLVLP IVS QLDGEP RVTEEGDI IYVFPDLQMSATSSSILPQVSE SAMVLKRA GLRS  
ASSRDIQNLLNMNGI STRGAREKSDLVKIILEDVLP EMTPEEEAEVSLMDPSMLQEREYKF  
SLASGTNQFFAGALGVANLGGVLYLGNLFKQYQLYGVKLPGLGLAQTLYPGLVVYAILF  
NLIPVARNFWISRQNAEIQGRNKARRKWRELAASKGSSVLRK LKAAAKFATNRTILKGD  
SLYDTKKTAA DLQSKKDRSDLDEFDKLLNDDKNTFQ

>comp11067\_c0\_seq1; 1079 386 3774 LEN=3774; minus strand; translated  
MCDTDDNTD GARPLRPPRPVIAGKKHMSLAGTDAIIDQMAIEDLRELVRHV LKIATDH  
EYKMIRSEMDYFFQOVVAEDNRTSASEEGTNDTVLTSRTELAADVPIAAAGTVIESITDE

ATPTTAGTAVKPAAAIPTADAATTVESDSEKETRAVTDTDKAPPTECTEASTTALELISE  
YATSVEATKAAPSTPSAQQAANPPATDDAKESISDEATTADTSTKGPTELSAAVPIA  
SKASPIDSTPPDGSADLPLLDEETAALTTESVDPPLLRKSRSHDIDFIEEPTVVLRFSE  
NENATRVATEKIEEEVEVSSEATPLQDNTTPSKRSYDTDAIDEPTAGLRRTQSQEGIEL  
EDASEKTRKAEASKEMDSLADQIRNSQTKSNASSNVMAGINRSNQDKTQLIVLCNRKPAT  
TKECKDQDLAMKLCCKIGVVPRVILSEIPAGKTNIIYNNPAATSQEERLVINSMIVALNQ  
CSESAVQSTAVSYSYPQFFVRFIFEDKNNNASNDMSRSSSNVAVGAIEYKGDYDTMEELH  
RAGMLTKESLFDIIPPACNPMDASNETNDTNSAFSDRDRERLELLIRETTELTRKLNES  
GSGVDGGGENKVTVRDQKTKELRHTHIRLASVKGKSNQPLPSTSSSELPLSSTASTPTAR  
PGMRKSMPHQGANTIALPSGVTVKRETVTTLKPRRQSLQKEPSGANLTTSLTQARGSLQSP  
SSRQQPSTSVLQPVVEQPKRRIMNPYYALQEYGGSERGKETQGTSPSQADHQTEDFSVARL  
PEDPMEIKEDPPELSAPYDQVLDERDRSWEKRFVGAACYLVFNTSDDELNIHYSERPLA  
CAVGVWTSRNI EAFKTSQGLSESELIGTCASNVTNDHKNNYQGWCFAKAAKSMGATVTL  
LEGYGVSVLDLYLDDSGRTIQISAKNAQAVFNTTSDAVACVPRGCDPFMSGIAGKKWKG  
IAKKLGAVAVFKSLSSKSSKINRGDNQALEQPVIKGEASTHISSVESNQNEVVPVVLDEE  
IPSSSIDHEDESSPISEPNGEAEPATELATELRGEPEAEPEPEKLELEPEPEPEPREVE  
ELDPAEPSSSTELSDPERGACYLVYNPDSSSQIVEHYSRTPIDNAIGRX  
>comp11069\_c0\_seq1; 544 254 1426 LEN=1530; translated  
MAPISLRFELPSVSTKSYDKIIPPSIVNLNRNRTISTKASSCTTSDSSATYGSSSSSSSS  
SEAYDTPQVYDSSSTNGSSSTSSYYRFPFHRQDEFQNDNSTLSYDNSSLTTNTSSRTEK  
SDTIQYLPEISEASTTEESLSESHYILVEEVEDIQEVRNEDDEQLVDDTVRSRISITLKW  
NGNSHKLSCWAANDESSYDDDEHELPSGISKSDIMVTVDIDDEARSSRVEALDEEDLDV  
EILNHKRRSSGSNSPRKQRHQQRQDFENSVQKGI LDDLSSVYTATPNTAKLVLCVVISVM  
SDGTLEHTFWSGRVLTELALQWVLFADNLQVFKRGRTVQKRDFGFGPLGLTQTEGQH  
YLTSSLAPWAANDIMRNVGYGVLEDLLVEI  
>comp11070\_c0\_seq1; 310 100 1275 LEN=3017; translated  
MSDTASTTSEGVWPLSSHENDAKSKYGETNERDVVGYGANPVNPHWPKAAKVALNFVINY  
EEGEMCTLHGDGASEHLLSDNGPNTQPYADQRHLNVESMYEYGSRCGFWRLHRLFTSRK  
IPVTVWAVGMALERNMEVVGAIKQQEDWEVSSHGYRWWDYKDVDEALEKEHIERAVKIHK  
TLFGKRPVGLYQGKPSNTNRRLLVVEEGGFLYDSDAYNDDL PYWNFDYSNEE EPHLVIPYT  
LVENDMLFTAPNGWSTPDDFVKHLKRTLDYLVMEGKQGQPKMMTVGLHCRLSRPARVAAL  
AEFVDYAKSYGKDVWITTTRESIANHWYDNHLPRGCGNPILSVGDRRAKKTAKASSKRYSF  
LGNLTVPRDSEEYRQSLQVKKSDSEEVVDVI  
>comp11070\_c0\_seq2; 136 240 572 LEN=2164; translated  
MMTVGLHCRLSRPARVAALAEFVDYAKSYGKDVWITTTRESIANHWYDNHLPRGCGNPILS  
VGDRRAKKTAKASSKRYSF LGNLTVPRDSEEYRQSLQVKKSDSEEVVDVI  
>comp11070\_c0\_seq3; 136 240 572 LEN=2314; translated  
MMTVGLHCRLSRPARVAALAEFVDYAKSYGKDVWITTTRESIANHWYDNHLPRGCGNPILS  
VGDRRAKKTAKASSKRYSF LGNLTVPRDSEEYRQSLQVKKSDSEEVVDVI  
>comp11070\_c0\_seq4; 136 240 572 LEN=1568; translated  
MMTVGLHCRLSRPARVAALAEFVDYAKSYGKDVWITTTRESIANHWYDNHLPRGCGNPILS  
VGDRRAKKTAKASSKRYSF LGNLTVPRDSEEYRQSLQVKKSDSEEVVDVI  
>comp11070\_c0\_seq5; 310 100 1275 LEN=2121; translated  
MSDTASTTSEGVWPLSSHENDAKSKYGETNERDVVGYGANPVNPHWPKAAKVALNFVINY  
EEGEMCTLHGDGASEHLLSDNGPNTQPYADQRHLNVESMYEYGSRCGFWRLHRLFTSRK  
IPVTVWAVGMALERNMEVVGAIKQQEDWEVSSHGYRWWDYKDVDEALEKEHIERAVKIHK  
TLFGKRPVGLYQGKPSNTNRRLLVVEEGGFLYDSDAYNDDL PYWNFDYSNEE EPHLVIPYT  
LVENDMLFTAPNGWSTPDDFVKHLKRTLDYLVMEGKQGQPKMMTVGLHCRLSRPARVAAL  
AEFVDYAKSYGKDVWITTTRESIANHWYDNHLPRGCGNPILSVGDRRAKKTAKASSKRYSF  
LGNLTVPRDSEEYRQSLQVKKSDSEEVVDVI  
>comp11070\_c0\_seq6; 136 240 572 LEN=1418; translated  
MMTVGLHCRLSRPARVAALAEFVDYAKSYGKDVWITTTRESIANHWYDNHLPRGCGNPILS  
VGDRRAKKTAKASSKRYSF LGNLTVPRDSEEYRQSLQVKKSDSEEVVDVI  
>comp11070\_c0\_seq7; 310 100 1275 LEN=2271; translated  
MSDTASTTSEGVWPLSSHENDAKSKYGETNERDVVGYGANPVNPHWPKAAKVALNFVINY  
EEGEMCTLHGDGASEHLLSDNGPNTQPYADQRHLNVESMYEYGSRCGFWRLHRLFTSRK  
IPVTVWAVGMALERNMEVVGAIKQQEDWEVSSHGYRWWDYKDVDEALEKEHIERAVKIHK  
TLFGKRPVGLYQGKPSNTNRRLLVVEEGGFLYDSDAYNDDL PYWNFDYSNEE EPHLVIPYT  
LVENDMLFTAPNGWSTPDDFVKHLKRTLDYLVMEGKQGQPKMMTVGLHCRLSRPARVAAL  
AEFVDYAKSYGKDVWITTTRESIANHWYDNHLPRGCGNPILSVGDRRAKKTAKASSKRYSF



LGNLTVPRDSEEEYRQSLQVKKSDSEEVVDVI  
>comp11070\_c0\_seq8; 310 100 1275 LEN=2867; translated  
MSDTASTTSEGVWPLSSHENDAKSKYGETNERDVVGYGANPVNPHWPKA AKVALNFVINY  
EEGEMCTLHG DGASEHLLSDNGPNTQPYADQRHLNVESMYEYGSRCGFWR LHRLFTSRK  
IPVTVWAVGMALERNMEVVGA IKQ QEDWEVSSHGYRWWDYKDVDEALEKEHIERAVKIHK  
TLFGKR PVGLYQ GK P STNTRRLVVEEGGFLYDS DAYNDDL P YWNFDYSNEEEPHLVI PYT  
LVENDMLFTAPNGWSTPDDFVKHLKRTL DYLVM EGKQ GQPKMMTVGLHCRLSRPARVAAL  
AEFVDYAKSYGKDVWIT TRESIANHWYDNHLPRGCGNPILSVGD RRAKKTAKASSKRYSF  
LGNLTVPRDSEEEYRQSLQVKKSDSEEVVDVI  
>comp11071\_c0\_seq1; 1049 250 3459 LEN=3644; translated  
MASSSTEQQQQASLNSLFPDNTIDSICIGSGRFLRAVLVPALAAAGYHPAVVQTRSRGF  
LDHSLSEVAS ENGNSSWAFSYEVDTVNFDGSIETTNPVPCWGAGTLGSPEGK KDVLELCAS  
GLLLSDEKPLVLGLGVTEAGLSSSSTKVMGDLYDVLGSLATRKAPPKQISVINTDNVSN  
GDVIRGFMEELATNDGSTR AAAMRQFLADSVVFHNTMVD RITSQRPGSDGLVPRAEPTPL  
KALVIEDLRLCLPQSFRET DGELFRRFGVVVRSSHKGQLDADIALKLRVANGHTHTAIAHA  
MALSGLPKTDALVSGTAASKLLVGYLDSFFE HQIRAGVVATDDF DAAPGEAEAVYGDWRK  
RLTHAHFGLSTFFITQNGAAKGGIRIGPTVGDLLGHGLPVACSTAFALAAAILRFLTPAHE  
RGASSGSSGVYRGWLDGGGATPNEEQRAVAYADGLSYDLGEGWYEFRCDCGVELDGEPTP  
LPVALAAAVHSGGPRQPPSYEAVVGAYLRAPKGGNLSAVARSAPGSFSALAGAVAALYAR  
MVAGDAAIDVLGGLDLEASCDCLVDG VGVSHHRFDDSSPLHYKKASIPDDSRMLKTRIGRR  
DRETIPAVVFSEVSSVVAIDLH THLLPPTHGPLCLWGIDELLYHYLVAEYFVTAPPSIT  
PESFYALSKQKQADLIWRALFIDRSPISEACRGVITTCVTLGLATEIENRDLEAIREFYR  
TFRKKGLEGTESF SKLVFELAGVKHAIMTNI PFEPTE TRHWRPTPKEYSSHFRSACRIDP  
FLAGNQKVVEATLAASGYDVTLEGARQFLRDWCDT MKPEYVMAS TPHDFVLPEDRGSSEP  
RGEKTGVNEEAMREPF AFATLAASSRND AECNEGGAVDELPSVIDEDSDFLVDVLMRVCE  
ERDLP IALKIGAHREVNPSLLQAGDGVVAFADAGVLARLCTRFPKVRFLATFLSRTNQHE  
ACVLATKFRNLHLYGCWWFCNNPSI IREMTAMRIEMLGTAFTAQHSDSRVLDQLLYKWP  
SRAVIAAVLASEYQKCVDSGWSMTREELRRDIRRLFGSSYE EFM AKSLV  
>comp11071\_c0\_seq2; 681 250 1953 LEN=2163; translated  
MASSSTEQQQQASLNSLFPDNTIDSICIGSGRFLRAVLVPALAAAGYHPAVVQTRSRGF  
LDHSLSEVAS ENGNSSWAFSYEVDTVNFDGSIETTNPVPCWGAGTLGSPEGK KDVLELCAS  
GLLLSDEKPLVLGLGVTEAGLSSSSTKVMGDLYDVLGSLATRKAPPKQISVINTDNVSN  
GDVIRGFMEELATNDGSTR AAAMRQFLADSVVFHNTMVD RITSQRPGSDGLVPRAEPTPL  
KALVIEDLRLCLPQSFRET DGELFRRFGVVVRSSHKGQLDADIALKLRVANGHTHTAIAHA  
MALSGLPKTDALVSGTAASKLLVGYLDSFFE HQIRAGVVATDDF DAAPGEAEAVYGDWRK  
RLTHAHFGLSTFFITQNGAAKGGIRIGPTVGDLLGHGLPVACSTAFALAAAILRFLTPAHE  
RGASSGSSGVYRGWLDGGGATPNEEQRAVAYADGLSYDLGEGWYEFRCDCGVELDGEPTP  
LPVALAAAVHSGGPRQPPSYEAVVGAYLRAPKGGNLSAVARSAPGSFSALAGAVAALYAR  
MVAGDAAIDVLGGLDLEASCDCLVDGK  
>comp11072\_c0\_seq1; 292 215 682 LEN=2122; translated  
MVTFNESEPPSSSSMMDSETNEYSLQEIDAKYGKPSLEPDFSYKVVGR LSRWEGGNTTPYQ  
VEEKEPETNVQIDHGGTEKMSFC AFIKQFFRPCYDLTEVTIEDISRVKIMHDRFMGDAQF  
SFNYSTLLVIASVIAGVGLGGDSSASVIASMLVSP  
>comp11072\_c0\_seq2; 292 215 682 LEN=2269; translated  
MVTFNESEPPSSSSMMDSETNEYSLQEIDAKYGKPSLEPDFSYKVVGR LSRWEGGNTTPYQ  
VEEKEPETNVQIDHGGTEKMSFC AFIKQFFRPCYDLTEVTIEDISRVKIMHDRFMGDAQF  
SFNYSTLLVIASVIAGVGLGGDSSASVIASMLVSP  
>comp11072\_c0\_seq3; 380 215 1456 LEN=2015; translated  
MVTFNESEPPSSSSMMDSETNEYSLQEIDAKYGKPSLEPDFSYKVVGR LSRWEGGNTTPYQ  
VEEKEPETNVQIDHGGTEKMSFC AFIKQFFRPCYDLTEVTIEDISRVKIMHDRFMGDAQF  
SFNYSTLLVIASVIAGVGLGGDSSASVIASMLVSPLMGPVTAIAYGTSIGDLKMVRIA  
IAI TEAVSLAICILIGCIIISGSMIQFRVGEDWPTNEMSSRTTWENFLCGIPIAFFSGLGVA  
VGLLDSQTNLSLVGVAISASLLPPAVNAGMLWIIIGHAIDDQFRSQGTISLFLTIMNIAV  
IIVA SMLMFRLKETLPIEKSI F WADLGIARKIYHNVAIIPQIQDAPDEKEIRKRVTKFF  
PRAST MMASMP TNFAESSSFD PASQTS SQKKKVEWNVNATPSETPLNTSKMASIVET  
>comp11072\_c0\_seq4; 309 215 1198 LEN=2162; translated  
MVTFNESEPPSSSSMMDSETNEYSLQEIDAKYGKPSLEPDFSYKVVGR LSRWEGGNTTPYQ  
VEEKEPETNVQIDHGGTEKMSFC AFIKQFFRPCYDLTEVTIEDISRVKIMHDRFMGDAQF  
SFNYSTLLVIASVIAGVGLGGDSSASVIASMLVSPLMGPVTAIAYGTSIGDLKMVRIA  
IAI TEAVSLAICILIGCIIISGSMIQFRVGEDWPTNEMSSRTTWENFLCGIPIAFFSGLGVA  
VAVG

LLDSQTNSLVGVAISASLLPPAVNAGMLWIIIGHAIDDQFRSQGTISLFLTIMNIAVIIVA  
SMLMFRLKEVRDFQACTTTLTSFLLPHE  
>comp11073\_c0\_seq1; 321 210 998 LEN=1108; translated  
MTNPTTRAGLCNFFAVLVGLFCLRVTDGFMVNSSHRSSSFREGLSPVSLSSSTHDEQIESYS  
ETIPSTNELTRRRRAGRLAFQSLSTGVLAWGSFRQLALAEDGSASTDFIVGKVVLPTGMDS  
PGGVDNGTETPTTKPALYITARP NRPNRPNVPRAILDGSRGKPPPVLAARYENPGFPPEFQ  
SDKDLTPEGAGIENNGSSSGTFWWSTDDLVSARWDSGIAATRSPEDLVGRNVWKRDET  
TGSFVLP LQGRGSFGKFATKKS  
>comp11074\_c0\_seq1; 314 94 963 LEN=1312; translated  
MVHSRKIMSSICIVVMHSFSFSFVWVFAFPLRNNKTHRPLVQLDFPSQLCAWTSPEdTNI  
SSLTSDATKSDRNPGRREFSADFQSEFEELMHWRRDVRRFQKEKEVDEDILNRALLSAF  
HSAPSVGLSEPWRIVRVNSEESRLAAFTNFQEQNTKALEGYEGDKKQKYASLKL SGMKEA  
PVHLAIYCDDGTIKGSLGAQSMPEMRRYSVVSAITLFWLAARCVGLGVGWVSILDPVRL  
TKDLGVSSDWTLVGYLCVGVWPEEDNSTPELERHEWENRTGINDLVIVSA  
>comp11075\_c0\_seq1; 578 388 2375 LEN=2375; translated  
MNKWLKFFFTYLDRIYVVKHHSPLTLHQAGLRCFRNTVYDEIKEDTTGAIHGLINEEREGR  
IIDKSLVKSVELYESMGMTLDAYNDDLRLPLLTFTREYYARKREDWINDSTPDYLIKA  
EDALDEERKRVEDYLNPSSEAKILKVVEEIELEKVETV LLEKESGCRALLQNDKSEDLQ  
RMFRLFSRLENGLNPMANILQSFITDMGEDI INRRKARLDGGEKDKNDPKFVKSIMALH  
EKYLDVVKKDFQGNLSLFQKALKDAFVEIVNKNVGQFTNAELMSTFCDRILKSGGEKLS  
EVEINLEKIVQLFSYLTDKDMFAE IYRNQLAKRLLSQRSTSDDAEKLMIAKLMQCGTQF  
TSKMEGMLADLAVGSDQRSEFETRMRSDTKLDFSVQVLTTFGWPTYKSPEISLTPEMTK  
CIEVFKEWHDNKHQKRKLGWVFSQGNASVRGVFKKTYDIQVTTLQAVALEAFNDGVTMTF  
EELSRMLNLRDILKPLMHSLSGKYK VIRKNPASNKINATDSFTANRKFVANLRKIRIP  
MASLDSTMNKKRVEEDRSIAIEAAIVRIMKARKTLQHQQ LISEVLAQLNFFNPRARVVK  
CIEKLIEREYLSADNSQVYNVSLRFLDAEMGLNCGGIAHVADSHLIFLSLLSQYSIS  
NPX  
>comp11075\_c0\_seq2; 613 1 2463 LEN=2688; translated  
XRQRMSSVTVLWEQFESTTHDHDPLDPGYKSNFNLYHITSTIQPIFGNIC TAPATGADA  
KKIQPPNQLDSTASNQEASDMASNGGNQSFIPLEQGWNEEIKAKAIDKLEHLLNGQTKSN  
SIFGPKEYVAIYTTCYDMCTQRAPYNWSQQLYQRHGETIEQYLN NNVPALCDKKGQGGT  
ILLMELKHRWQNHQIMNKWLKFFFTYLDRIYVVKHHSPLTLHQAGLRCFRNTVYDEIKEDT  
TGAIHGLINEEREGR IIDKSLVKSVELYESMGMTLDAYNDDLRLPLLTFTREYYARKR  
EDWINDSTPDYLIKAEDALDEERKRVEDYLNPSSEAKILKVVEEIELEKVETV LLEKES  
GCRALLQNDKSEDLQRMFRLFSRLENGLNPMANILQSFITDMGEDI INRRKARLDGGEK  
KNDDPKFVKSIMALHEKYLDVVKKDFQGNLSLFQKALKDAFVEIVNKNVGQFTNAELMSTF  
CDRILKSGGEKLS ESEVEINLEKIVQLFSYLTDKDMFAE IYRNQLAKRLLSQRSTSDDAE  
KLMIAKLMQCGTQFTSKMEGMLADLAVGSDQRSEFETRMRSDTKLDFSVQVLTTFGW  
PTYKSPEISLTPEMTKCIEVFKEWHDNKHQKRKLGWVFSQGNASVRGVFKKTYDIQVTTLQ  
AVALEAFNDGVTMTFEELSRMLNLRDILKPLMHSLSGKYK VIRKNPASNKINATDSFT  
ANRKFVANLRKIRIPMASLDSTMNKKRVEEDRSIAIEAAIVRIMKARKTLQHQQ LISEV  
LAQLNFFNPRARVVKK CIEKLIEREYLSADNSQVYNYLA  
>comp11075\_c0\_seq3; 649 561 2438 LEN=2663; translated  
MNKWLKFFFTYLDRIYVVKHHSPLTLHQAGLRCFRNTVYDEIKEDTTGAIHGLINEEREGR  
IIDKSLVKSVELYESMGMTLDAYNDDLRLPLLTFTREYYARKREDWINDSTPDYLIKA  
EDALDEERKRVEDYLNPSSEAKILKVVEEIELEKVETV LLEKESGCRALLQNDKSEDLQ  
RMFRLFSRLENGLNPMANILQSFITDMGEDI INRRKARLDGGEKDKNDPKFVKSIMALH  
EKYLDVVKKDFQGNLSLFQKALKDAFVEIVNKNVGQFTNAELMSTFCDRILKSGGEKLS  
EVEINLEKIVQLFSYLTDKDMFAE IYRNQLAKRLLSQRSTSDDAEKLMIAKLMQCGTQF  
TSKMEGMLADLAVGSDQRSEFETRMRSDTKLDFSVQVLTTFGWPTYKSPEISLTPEMTK  
CIEVFKEWHDNKHQKRKLGWVFSQGNASVRGVFKKTYDIQVTTLQAVALEAFNDGVTMTF  
EELSRMLNLRDILKPLMHSLSGKYK VIRKNPASNKINATDSFTANRKFVANLRKIRIP  
MASLDSTMNKKRVEEDRSIAIEAAIVRIMKARKTLQHQQ LISEVLAQLNFFNPRARVVK  
CIEKLIEREYLSADNSQVYNYLA  
>comp11075\_c0\_seq4; 578 561 2548 LEN=2548; translated  
MNKWLKFFFTYLDRIYVVKHHSPLTLHQAGLRCFRNTVYDEIKEDTTGAIHGLINEEREGR  
IIDKSLVKSVELYESMGMTLDAYNDDLRLPLLTFTREYYARKREDWINDSTPDYLIKA  
EDALDEERKRVEDYLNPSSEAKILKVVEEIELEKVETV LLEKESGCRALLQNDKSEDLQ  
RMFRLFSRLENGLNPMANILQSFITDMGEDI INRRKARLDGGEKDKNDPKFVKSIMALH  
EKYLDVVKKDFQGNLSLFQKALKDAFVEIVNKNVGQFTNAELMSTFCDRILKSGGEKLS

EVEINLEKIVQLFSYLTDKDMFAEIYRNQLAKRLLSQRSTSDDAEKLMIAKLKMQCQTQF  
TSKMEGMLADLAVGSDQRSEFETRMRSVDTKLDFSVQVLTTFGWPTYKSPEISLTPEMTK  
CIEVFKEWHDNKHQKRKLGWVFSQGNASVRGVFKKTYDIQVTTLQAVALEAFNDGVTMTF  
EELSRMLNLRREDILKPLMHSLSCGKYKVIKRNPNASNKINATDSFTANRKFVANLRKIRIP  
MASLDSTMNKKRVEEDRSIAIEAAIVRIMKARKTLQHQQLISEVLAQLNFFNPRARVVKK  
CIEKLIERYELERSADNSQVYNVSLRFLFDAEMGLNCGGIAHVADSHLIFLSLLSQYSISP  
NPX

>comp11075\_c0\_seq5; 542 1 2573 LEN=2573; translated  
XRQRMSSVTVLWEQFESTTHDHDPLDPGYKSNFNLQYHITSTIQPIFGNICTAPATGADA  
KKIQPPNQLDSTASNQEASDMASNGGNQSFIPLEQGWNEEIKAKAIDKLEHLLNGQTKSN  
SIFGPKKEYVAIYTTTCYDMCTQRAPYNWSQQLYQRHGETIEQYLNNNVLPALCDKKGQGGT  
ILLMELKHRWQNHQIMNKWLKFFTYLDRYYVKHHSPLTLHQAGLRCFRNTVYDEIKEDT  
TGAIHGLINEEREGRIIDKSLVKSVELYESMGMTLDAYNDDLERPLLTFTREYYARKR  
EDWINDSTPDYLIKAEDALDEERKRVEDYLNPSSEAKILKVVEEIELEKVETVLLLEKES  
GCRALLQNDKSEDLQRMFRLFRLLENGLNPMANILQSFITDMGEDIINRRKARLDGGEKD  
KNDDPKFVKSIMALHEKYLDVVKDFQGNLSLFQKALKDAFVEIVNKNVQFTNAELMSTF  
CDRILKSGGEKLESEVEINLEKIVQLFSYLTDKDMFAEIYRNQLAKRLLSQRSTSDDAE  
KLMIAKLKMQCQTQFTSKMEGMLADLAVGSDQRSEFETRMRSVDTKLDFSVQVLTTFGW  
PTYKSPEISLTPEMTKCIEVFKEWHDNKHQKRKLGWVFSQGNASVRGVFKKTYDIQVTTLQ  
AVALEAFNDGVTMTFEELSRMLNLRREDILKPLMHSLSCGKYKVIKRNPNASNKINATDSFT  
ANRKFVANLRKIRIPMASLDSTMNKKRVEEDRSIAIEAAIVRIMKARKTLQHQQLISEVLA  
AQLNFFNPRARVVKKCIKLIERYELERSADNSQVYNVSLRFLFDAEMGLNCGGIAHVAD  
SHLIFLSLLSQYSISPXPX

>comp11075\_c0\_seq6; 649 388 2265 LEN=2490; translated  
MNKWLKFFTYLDRYYVKHHSPLTLHQAGLRCFRNTVYDEIKEDTTGAIHGLINEEREGR  
IIDKSLVKSVELYESMGMTLDAYNDDLERPLLTFTREYYARKREDWINDSTPDYLIKA  
EDALDEERKRVEDYLNPSSEAKILKVVEEIELEKVETVLLLEKESGCRALLQNDKSEDLQ  
RMFRLFRLLENGLNPMANILQSFITDMGEDIINRRKARLDGGEKDKNDDPKFVKSIMALH  
EKYLDVVKDFQGNLSLFQKALKDAFVEIVNKNVQFTNAELMSTFCDRILKSGGEKLES  
EVEINLEKIVQLFSYLTDKDMFAEIYRNQLAKRLLSQRSTSDDAEKLMIAKLKMQCQTQF  
TSKMEGMLADLAVGSDQRSEFETRMRSVDTKLDFSVQVLTTFGWPTYKSPEISLTPEMTK  
CIEVFKEWHDNKHQKRKLGWVFSQGNASVRGVFKKTYDIQVTTLQAVALEAFNDGVTMTF  
EELSRMLNLRREDILKPLMHSLSCGKYKVIKRNPNASNKINATDSFTANRKFVANLRKIRIP  
MASLDSTMNKKRVEEDRSIAIEAAIVRIMKARKTLQHQQLISEVLAQLNFFNPRARVVKK  
CIEKLIERYELERSADNSQVYNLA

>comp11076\_c0\_seq1; 837 159 2201 LEN=2277; translated  
MSNIVALTTISLFLSSVFSCAAWSSTPFPSTQRKIIINRNNFSTLHSTTEEKPNPNSVTDS  
MNDDSSAHPQYSQQELKDALYSLEGGSSDPAHDGRHLFGFEDYDNHELKLSQITATRVL  
DYERYLGSDDKVPEAILEEEMTSFWKEHGPLLDLRSVIEQAPRMALAAEFKRASPSKGN  
IAVHLDAGDQAKSYASAGANVSVLTPRWFQGSLEDLTSARLSTIDKDTGNRAAILRKE  
FTTNKYQITEALAKGADTILLIVAVLPQHLLKELIDHARSFGMEPLVEVHADVELEVALQ  
AGAKVIGVNNRNLHTFQMDLETTEHVADELTKQCSFDHSSKEAASASKYTLCSLSGMSS  
AFDVDYRYSINVMCLIGESLMRAADPKAAIAGLCLDPEDWAKNEENPATASGGAYTRGT  
KLVKVCGITNPEDALVACQIGANLIGVIFVPKSKRCVSPSEQGRAVVDAVRVFGERTARTA  
LQTAEVGSPTSQMVSNARVLEEASKRPLVVGVFQONQSPEYIREMVETCGLDLVQLHGNEG  
MAAASVENCSPAIRVVDIEVDPETGKASDNAVETILGSITTDPLAILLDTSIKGQQAGG  
GTGVTFDHTIAERIQNAGVPVIAAGGLSPENVQESVIATRPWGVVDVSSGVEASPGTKDHD  
KVENFVEGARSAAIEASKGF

>comp11077\_c0\_seq1; 626 1 4086 LEN=4086; translated  
GIHDAQHEAAVENSITAQDRAKRVPTLRPNHRFEXELYQTIIITYTADALLIFGEHRKIRA  
FVSDHNI SRPFNLSLNSQLANAFVNTHANHQLIQKSLMNYIISFVVLIIWSFDILSVVNG  
AVSQQDEGTYLANFNQIMEASYSQVDDTTDQININQPPQELLNRCNKSNGMNPTRRVTATS  
GGGSIASSVQSKCNTDTICIIPEGTTLKMDGNLNVGALVVRGKLEWTSTTQSSMNQYLC  
GGYIVVEINGYFEMDLNSNTKYGWIYIKNNGAVHPELRSRSGFTFKVRHSNENPTMEVRG  
RELARTWSLLSEPLRPGIKTMKLLHDPRLMGWVGDRLGISPTTESTAKGWGDVQIIDIR  
NDGTIALNEI IKSYHRADFKLGNFNGANS SPALLSAEVVNL SRNIIITGDDFQEVSCDPN  
LPEAVPGEQTSVLGCRCAEFRNKCHVGLHTMQKHGGVTKIENVRVEKCGQRGIEGKYCLH  
FHKMGECPECLFKGNAIENSQQRGIIVHGTHNTRVEDNVLYNIRGANLYLEDGNEMWNTL  
AYNVAICPFPFSDTTYHGCTIPGTSNRIADTSDNQSGFFSRAGTNNFVGNRAANHFNGMF  
LAEGSIGRGEAREKVCESAARLGRMDGNTWHGNGRFGTYTLGFNYPKVTDQSTTNNGFNS

NKGLCEPFDATGDTRGLPGAFAVNHDYGNTFVGHYSAGDLQHS GHYSADNNNNMYWKETK  
TFENGCGAHI VNGYYSHGHILLPDQATFII ENTVMGDDTMI EANHHCNVGTTGVL CMPY  
VLHNVRWSNRNRKRKWKVQSQSFQQHGS DQNHGGIFTLS PDDAETVKGSGSIEGSLFPP  
GYVSLVSKKFTYLLSLPSNPCIEST SAYGDLYDNGILCKVELRALKIYTRNLRSGSAPQL  
RVEIWYNSKGGVNHQGS PDATQLIEFHQIGADGTSKKQGY SVPVIPS RNHSYRISL TNGN  
LPNDWVIEFSDPVI GNRWSNDELYLDVAGRNCGNGLITSQH DRKYIWGGDLFSGYLNDK  
AWFEHGACVSGSNQPPVEDQINCDSTS RSELAGVIQATQCPEKCPNGCSNNSYCDCGTES  
CQCKAGHVGSNCETDLCAEADCGEHGSCSATYLGGR LPVTSSDKKICQEGWVGDRCDRN  
PCFDLGMGDVECSGNGTCYALSQTQATCECDEGFSG SRCQERLGDVCEGFCQGGSF PYFG  
CAADV PNKVALGCFRDGGCHYLQGE EYPYDGFCTYKTYGNI ILEV PNDPSPAPPVPRPT  
PSPVSSPVSSPSPTRCGDRCTDIVWNTLAGDYTCGDRINFLRDSASTLISVGITDGPFD  
DEAEACRKVTAEFPKICTDCSSTPNSFAPSAKPAYPPTSPX  
>comp11077\_c0\_seq2; 108 1 212 LEN=347; minus strand; translated  
XGLGVGGYAGLADGANELGVVEEQSHVQILGNSAVTFLHASASSNGPSVMPTLIKVEASES  
LKKFMRS PHV  
>comp11077\_c0\_seq3; 209 149 1804 LEN=1804; translated  
MIXGIFTLS PDDAETVKGSGSIEGSLFPPGYVSLVSKKFTYLLSLPSNPCIEST SAYGD  
LYDNGILCKVELRALKIYTRNLRSGSAPQLRVEIWYNSKGGVNHQGS PDATQLIEFHQIG  
ADGTSKKQGY SVPVIPS RNHSYRISL TNGNLPNDWVIEFSDPVI GNRWSNDELYLDVAGR  
NCGNGLITSQH DRKYIWGGDLFSGYLNDKAWFEHGACVSGSNQPPVEDQINCDSTS RSE  
LAGVIQATQCPEKCPNGCSNNSYCDCGTES CQCKAGHVGSNCETDLCAEADCGEHGSCSA  
TYLGGR LPVTSSDKKICQEGWVGDRCDRNPCFDLGMGDVECSGNGTCYALSQTQATCEC  
DEGFSG SRCQERLGDVCEGFCQGGSF PYFGCAADV PNKVALGCFRDGGCHYLQGE EYPY  
DGFCTYKTYGNI ILEV PNDPSPAPPVPRPTPSPVSSPVSSPSPTRCGDRCTDIVWNTLA  
GDYTCGDRINFLRDSASTLISVGITDGPFDDEAEACRKVTAEFPKICTDCSSTPNSFAP  
SAKPAYPPTSPX  
>comp11077\_c0\_seq4; 439 1 4434 LEN=4434; translated  
GIHDAQHEAAVENSITAQDRAKRVPTLRPNHRFEXELYQTII IYTADALLIFGEHRKIRA  
FVSDHNISRPFNISLSNSQLANAFVNTHANHLIQKSLMNYIISFVVL IWSFDILSVVNG  
AVSQQDEGTYLANFNQIMEASYSQVDDTTDQNI NQPPQELLRCKNSGNMNPTRRV TATS  
GGGSI SASSVQSKCNTDTIC IPEGTTLKMDGNLNVGALVVRGKLEWTSTTQSSMNQYLC  
GGYIVVEINGYFEMDLNSNTKYGWIYIKNNGAVHPELRSR SFGTFKVRHSNENPTMEVRG  
RELARTW SLLSEPLRPGIKTMKLLHDPRLMGWKVGDR LGISPT ESTAKGWGDVQI IDIR  
NDGTIALNEI IKS YHRADFKLGNF GANSSPALLSAEVVNLSRNIIITGDDFQEVSCDPN  
LPEAVPGEQTSVLGCRCAEFRNKCHVGLHTMQKHGGVTKI ENVRVEKCGQRGIEGKYCLH  
FHKMGECPECLFKGNAIENSQQRGI I VHGTHNTRVEDNVLYNIRGANLYLEDGNEMWNTL  
AYNVAICPFPFSDTTYHGCTIPGTSNR IADTSDNQSGFFSRAGTNNFVGNRAANHFNGMF  
LAEGSIGRGEAREKVCESAARLGRMDGNTXAWKWA FRNVSI VLYCTSYSAIRYGXSYIRA  
RSRTLRLGDSIDLDTERRFSMIFHDTVFSNSNFKKS YHTYRTSVCSVFSRRKIFPEELG  
CVRVSRETL SQNLLIFFFCLIDFFFXLTDANSV VXYTLGFNYPKVTDQSTTNNGFNSNKG  
LCEPFDATGDTRGLPGAFAVNHDYGNTFVGHYSAGDLQHS GHYSADNNNNMYWKETKTFE  
NGCGAHI VNGYYSHGHILLPDQATFII ENTVMGDDTMI EANHHCNVGTTGVL CMPYVVLH  
NVRWSNRNRKRKWKVQSQSFQQHGS DQNHGGIFTLS PDDAETVKGSGSIEGSLFPPGYV  
SLVSKKFTYLLSLPSNPCIEST SAYGDLYDNGILCKVELRALKIYTRNLRSGSAPQLRVE  
IWYNSKGGVNHQGS PDATQLIEFHQIGADGTSKKQGY SVPVIPS RNHSYRISL TNGNLPN  
DWVIEFSDPVI GNRWSNDELYLDVAGRNCGNGLITSQH DRKYIWGGDLFSGYLNDKAWF  
EHGACVSGSNQPPVEDQINCDSTS RSELAGVIQATQCPEKCPNGCSNNSYCDCGTES CQC  
KAGHVGSNCETDLCAEADCGEHGSCSATYLGGR LPVTSSDKKICQEGWVGDRCDRNPCF  
DLGMGDVECSGNGTCYALSQTQATCECDEGFSG SRCQERLGDVCEGFCQGGSF PYFGCAA  
DVPNKVALGCFRDGGCHYLQGE EYPYDGFCTYKTYGNI ILEV PNDPSPAPPVPRPTPSP  
VSSPVSSPSPTRCGDRCTDIVWNTLAGDYTCGDRINFLRDSASTLISVGITDGPFD  
EAEACRKVTAEFPKICTDCSSTPNSFAPSAKPAYPPTSPX  
>comp11078\_c0\_seq1; 367 1 1038 LEN=1182; translated  
XAAVAWLRWFPALKHHPDKQTTEESRRKASEIFAKISNAYEILSDPQKRQ EYDNRDRTA  
SGGRSGRRRSSAHDDFFHFGGGDPFRFHDPFEIFNRVFREEFGHQ TAGGTDGGGPGPQF  
RQSAFGASPF SFGMMGSRSPFDDPFFSGMGNPMGSRRQSNMFGFGGGFGGFGDDP  
FAMNGMMNGGNGNTMSSSFTMSSSSLGMGGGVSTSTSTTTTRIVNGRRQSVTETVVR  
KPDGTVERRIETMGAQERXATVRFQNPAA SWNTPVVRSTGDAGTTPRSKTGKEILFRV  
APGWAF CWLAVWVFGMRVTAMVALLLPFAFEHLERVSKHMARCS PH  
>comp11078\_c0\_seq2; 475 141 1231 LEN=1375; translated

MEDGDDAYKVLGVKQDATQSEIKKAYRKLALKHHPDKQTTEESRRKASEIFAKISNAYEI  
LSDPQKRQEYDNRDRITASGGRSGRRSSAHDDFFHFGGGGDPFRFHDPFEIFNRVFREEF  
GHQTAGGTDGGGPGPQFRQSAFGASPF SFGGGMMGGSRSFPDDPFFSGGMGNPMGSRRQ  
SNSMFGFGGGGGFGDDPFAMNNGMMNGGMMNGNTMSSSFTMSSSSLGMGGGGVSTSTSTT  
TRIVNGRRQSVTETVVRKPDGTVERRIETMGGAQERXATVRFQONPAASWNTPVVVRSTGD  
AGTTPRSKTGKEILFRVAPGWAF CWLAVVWFGMRVTAMVALLLPFAFEHLERVSKHMARC  
SPH

>comp11078\_c0\_seq3; 475 223 1313 LEN=1457; translated  
MEDGDDAYKVLGVKQDATQSEIKKAYRKLALKHHPDKQTTEESRRKASEIFAKISNAYEI  
LSDPQKRQEYDNRDRITASGGRSGRRSSAHDDFFHFGGGGDPFRFHDPFEIFNRVFREEF  
GHQTAGGTDGGGPGPQFRQSAFGASPF SFGGGMMGGSRSFPDDPFFSGGMGNPMGSRRQ  
SNSMFGFGGGGGFGDDPFAMNNGMMNGGMMNGNTMSSSFTMSSSSLGMGGGGVSTSTSTT  
TRIVNGRRQSVTETVVRKPDGTVERRIETMGGAQERXATVRFQONPAASWNTPVVVRSTGD  
AGTTPRSKTGKEILFRVAPGWAF CWLAVVWFGMRVTAMVALLLPFAFEHLERVSKHMARC  
SPH

>comp11079\_c0\_seq1; 444 160 954 LEN=993; translated  
MAAASGVGAFTPSAKGFTQAPSGLMVPEQLKNKDGSLWPTNMVAGGAERAVGQEYYEGA  
PIGPPDLPSLLLHNRIYVYIGMPLVPAVTELVI AELLYLNYESDDPITMYINSSGTTTNS  
GEAVGFETEAF AIADVMKYVRPPVHTVALGQAFGAAAMLLANGKRGCRYSLPNATILLNQ  
PKSQARGQASDIAIKARETRNNRQKMCQLIAEACGKPVDTVVKDCSRVKYLQPD EAVEY G  
LVDSVIENDDKMSITPSFMSALQ

>comp11080\_c0\_seq1; 312 174 1358 LEN=2012; translated  
MRF SNPSRI ILLVSLALVGRISAFTTTTTTPASSPRFSVALSVSPNIADIDQPTDLPDSL  
VDAAERAANSCASFAQYAPEQARCRVDFDTNAGDETYPLLKTSTEFMQNFVSFLSYKLV P  
GLQAEKMAEVQRVAEARVALQRILQQEEGGEAVDQDEKQCYIEVLQNNNGKEPGASGSGDD  
DYKGP IVRVYFPDEGNAALAKRDWTQANGVDMPS CVRFGACGGIRSIT EDLSRDVLIFFF  
CPKASESDMVEEILQKTEQAHL EANTGVPLLSVFNPNLVDMGVTFGFMAGRMLRERLLD  
GLEGTYYLRTLQWGALTRSWPRAYTLWEENESAEGGYQLMRTL PYP LPSNPEVEDIYDAVN  
EGKLQVDENGNEVGRKPPSALDQFGDFVQGMRL

>comp11080\_c0\_seq2; 385 1 1092 LEN=1746; translated  
HLNTYNHLALSVSPNIADIDQPTDLPDSLVDAAERAANSCASFAQYAPEQARCRVDFDTN  
AGDETYPLLKTSTEFMQNFVSFLSYKLV PGLQAEKMAEVQRVAEARVALQRILQQEEGGE  
AVDQDEKQCYIEVLQNNNGKEPGASGSGDDDYKGP IVRVYFPDEGNAALAKRDWTQANGVD  
MPSCVRF GACGGIRSIT EDLSRDVLIFFF CPKASESDMVEEILQKTEQAHL EANTGVPLL  
SVFNPNLVDMGVTFGFMAGRMLRERLLD GLEGTYYLRTLQWGALTRSWPRAYTLWEENE  
SAEGGYQLMRTL PYP LPSNPEVEDIYDAVNEGKLQVDENGNEVGRKPPSALDQFGDFVQGM  
MRL

>comp11081\_c0\_seq1; 456 463 1978 LEN=2074; translated  
MENPGVDTAELFERHFGSSDFPSDATRAI AVAPGRVNLIGEHTDYTG GFVLPFAIDYST  
VYGRGKVTIGDGSARERRAKLRFVSALSPDSVESLWCTESS SPPDTTEWTNYVLGT V FQ  
YLPDLPPGAEVGLEFSIAGDVPLGSLSSASLEVAVARFLEAVLGDHAFSSEETAGGFS  
PAKTRALRCQKAENEWCDSPCGIMDQAISSAATAGNLLLIDCQTLDF TATKMAGESLTPG  
DPMPVLVANSNVKHSIGGGEYPVRVAQCKAATEALQKVNPEIALLRDATPEDVEAARES  
MDKVSYLRRARHVSTENERTLRAREELERGDWAEV GALMTASHASMRDDYAVSCDEVDALV  
EIALAYPGVYGSRLTGGGFGGCTVTLVAEDRAAGLMEHLRSEYGAKTGIDCPCFVTRPAR  
GAHLLSVVDRRPLVPEDNNQRSVGRSVGRPTQHNNETMPMTFDGTVRERGTAVLVAAVRL  
AGRDARNLDDGSMILHNTV LVSAD

>comp11081\_c0\_seq3; 277 1 1070 LEN=1439; translated  
XGYFVPPPLPGSETPIKSAVEKKRKN AEHRTPNAF DSPVLD FCEEKVEGTGSRNYGTAQH N  
TIQHNTTQHNTTQHDTTQDAPLLPPARAF LVRKEGCPFPFASGVTHHTTRTTTSGVCGN  
HRFSTLRSSGCRPFGASLSPALGEEDGGGSSAPPFTFSFSQSVRGGDRRRWHSRSRAARS  
AAGSAAPDHASNTATPPAAAAGENQRRPRKGRKKFVPRTA AVRLTEAARTLFRRLLAHQ  
KPPRAGILLDYQQSSSQPRMVFSFRFVASEDELHENDEGVSLEVVEVETRDPDTGESTL  
EMVPKPPAEAAGDGLPKLYVHHNAFLKVLGATVDVDAETMTPRILDKEGFELDANA

>comp11082\_c0\_seq1; 407 120 1421 LEN=1495; translated  
MGTKYLPQYKYICVLILLSTSLVQYARLHTKWKNVLYERIEIVAPINATR SKKEIPEDTT  
QTKNKEHLAAASTAHYNATNDIIGSTISDTESTLIINPDESFMWRGAQSRLCSR IKKKR K  
KWKSPKHLHLYLVTNCGAIDQRNQHGNFMIGLYAMKLAAMAFQADFTFRCKEIQQKHSVI  
WWLQSKDNAPTVEETE EGN YDNSVNNSLFI PALPTPGIACRGMGHVALHYTSEFVRNDFRA  
MATELSSMTAKGMMIDEVGIHLRCGDI INGRISPKNNYGLVKFQAYRKRI PNTVKSIG

IITAPFSERKIRPQDHGSGSKCQILVSELVDYLRSHYPSAEIRVRNDPSESIPEVLSRLV  
LAEYNFCVVRSTFCLLPSLASFGTSFVQEGGVAYFVDSASKAYHHIKLMNEPFLLRARDIKE  
RGFNATLRWLTES

>comp11083\_c0\_seq1; 365 201 1106 LEN=1314; translated  
MQPPPAAAAADDAVPHAADPTEAQQALAFDKTTEKGAEKGLFRACMASIRSAHVSAANRLR  
AALVLSGLFTDRKVYREAIALFYLATDALEKKIAALHETEGDEICGKLLSLGYRFGPLYE  
RDLHLHLYGRGWRAAVEAVAAGATDGAGAYLRAIEDMASGAELAGAAFCLWGALVIGGGAA  
AGPRVESLCCGKACHLFGPVTGPGRGERKKRFVALWDGLAVPCESGSGGNDGAGKDNDND  
NDESFDRIVAASKDCMQGNNELIVSVRRNPWWLKYVASVGVAVVAFGLSCLHRGGGPGAK  
P

>comp11084\_c0\_seq1; 767 152 2017 LEN=2338; translated  
MQQQGNKNQKRPSKKRDRKGSIKSKPSQPAGIPEILLKRSITDQIFQAPPNQSTQALDIS  
SLEKKFELVSGVTKARLWDRQFKQLKTFKLSQASNIRMAKTTLETMTSTKRNRRQHFLQNS  
SKAGTKSSQELAQTLCKITGAKFKIRDALLSLEALRTNTESINFSCLYSWCEEYYPQHASH  
VFPFGSKVKCKDGRRIVPRTRERKQENVDEKTC SNKANGLVPSEIVLNGSSGKRRERSNSS  
VSEIGKKYSKTQASSKRGEKNKQKEKHASQNADADDDSGITLDDLQCSICMIGDSTDCND  
VILCDGKDCHRAFHMKCVHPAVKPEEIEENEDEDWFCPICSNLAELMGEIHDLCVSNEHDE  
DASSNSWDDVHDVFPGSQWFEFETATKYKLGKRNEDTQRLLSMFLGDEIAKNKVQMPIGSD  
SEDENDYSLFDEDSFQERRRQERDEESSDDDSVCSSQATLQEMDDIDLKVGKAELAALSE  
EEQSESEESDDESNTDIRRSRLVKQKEGEEKMPDNGADFDEANIILGKRRRTRVNYRK  
LNDMMFGDLTDHQQGVIDGGDDFDASEIKATKTKPEDESQNDENNSDNESENNSDDQ  
SDSNGSESDNQGDSCDKFGAS

>comp11085\_c0\_seq1; 103 422 586 LEN=586; translated  
MKTSNLLLQFLALSLLAVIDAKLSRSALRGASLEFDGEDINHRHLTSKSKGKGG

>comp11085\_c0\_seq2; 103 462 626 LEN=626; translated  
MKTSNLLLQFLALSLLAVIDAKLSRSALRGASLEFDGEDINHRHLTSKSKGKGG

>comp11085\_c0\_seq3; 103 147 311 LEN=311; translated  
MKTSNLLLQFLALSLLAVIDAKLSRSALRGASLEFDGEDINHRHLTSKSKGKGG

>comp11086\_c0\_seq1; 829 704 2089 LEN=2148; translated  
MAVATGEANSSTLSAVREEHPETLDLKFVRRYPNDEDDVEIDEEDNDDDDDDDDDDDD  
SYEDEEDALSLDTDNAHQPADGESVTEDAAIGVEDGRRKLYNERFEDRVNVYSNMKNGD  
TDDNQTGQALKKNRKKRNGRKGKANGKNKIKKNSGFSEKQCKRLKRKFKQCKKKLKGKGCN  
KLKKKKKKNAVSSAKSIVSKLSKKKDKTTIAKDQPDLSKLSPPVPVEEGEKKSIVLMVN  
EMLKVAGDKEIDDFVSGKSSNPDSRLQQIYEAEAEARTKSDRGDILSAIQKRRSMSITPV  
PDQALSDLRATLSVDTRDDSESGVGRGKKSRAQRWTSKGDPPKPPPLDPTGSKLAKSF  
SKDTDDMSSAKECKDRSRSRIVSRWSSKPQPEISEERADSEIDFQIQEKRRQSVVNRWAS  
KSPVSEATTRDLDEESDIGAFQEMINARRQKALNRWSSKKT

>comp11086\_c0\_seq2; 829 598 1983 LEN=2042; translated  
MAVATGEANSSTLSAVREEHPETLDLKFVRRYPNDEDDVEIDEEDNDDDDDDDDDDDD  
SYEDEEDALSLDTDNAHQPADGESVTEDAAIGVEDGRRKLYNERFEDRVNVYSNMKNGD  
TDDNQTGQALKKNRKKRNGRKGKANGKNKIKKNSGFSEKQCKRLKRKFKQCKKKLKGKGCN  
KLKKKKKKNAVSSAKSIVSKLSKKKDKTTIAKDQPDLSKLSPPVPVEEGEKKSIVLMVN  
EMLKVAGDKEIDDFVSGKSSNPDSRLQQIYEAEAEARTKSDRGDILSAIQKRRSMSITPV  
PDQALSDLRATLSVDTRDDSESGVGRGKKSRAQRWTSKGDPPKPPPLDPTGSKLAKSF  
SKDTDDMSSAKECKDRSRSRIVSRWSSKPQPEISEERADSEIDFQIQEKRRQSVVNRWAS  
KSPVSEATTRDLDEESDIGAFQEMINARRQKALNRWSSKKT

>comp11087\_c0\_seq1; 356 143 823 LEN=1080; translated  
MKLPYAVFAALLLSQDATAFSAHSNHGSKPATETSSSSRAEFLKIASAAAFASVAGVAAS  
PGTASAFEIGGKIVYGEEIMVQKEHGTSAPVQENLGYANNKLADKICNYNRHFAEMG  
GYFQSTSFEEQVMASKGPITFYDSVTGKPLFVAPINRSPQQFVEESKIHWPSFRDEEVV  
WENVRVLRKSGETVSADGTHLGHNLPRDSGNRYCINLVS IAGNPVA

>comp11088\_c0\_seq1; 230 574 1935 LEN=2009; translated  
MLYFDAAKSCITATLSYRLDPFVRYLDRRVQDGSVAVKSPYYYELDGYVRDNLHRLRYQQ  
RLFGGHFVKVAIGALKESDAAQSKLLEEAHLRQLMRRHRPCNLSSNSFSKESASACVAL  
GIEPRSHQGVLEMALEICRLWGLGDHLDVLSIDCMLKTSHFQRQLAVPMAEERVNDCE  
FVVTPLDVGHYTSYGVFRRGNDQPRIFEREHGRLEVEYAVCPVSVLYCQKRYGSQAIPSG  
KCMREINKGGRYFPSLHSSVDFRRSSNRNEKVKPELPTGFSWACEELSFANLELECMDIG  
LREYIGQKINIQRRETEVDVDFQRDYSSFRDEKSTGSSDTPQVFCVKLGWAPTKNGIV  
DISVPHFGVKLHI PRNSMSQVDDVTFTYKGTAVQVLECKSDFTFLVAAYARSLQPYLIARH  
QQIETHRPLLRHEQEYFEEVQKAASLCHLSRTL

>comp11089\_c0\_seq1; 936 329 2173 LEN=2502; translated  
MCKLTSTNIETTNDVDDTNLSDPALGRSESELSSEDTEREVWEFMTMPMHHKSVADKNS  
IFRPTYQATIDALRKTAEEGGYDCILEVGCCTGDIIGEMNNQKAVRTSVNSKTAKAAEAN  
ANAMVTIPCIGVDINKEFIDFCKTQHPHESCEFFVADALKLHEWWIEEGHAERFHKPLVI  
CVNNTLNIMPHELRRGGVVDQMIAVAGSEGLCMVSYWNGNYFSHAIMNYYKKNPQLCGEFE  
VHKHVDWKQONMLVTPNTMTHWQTPLEVQKLLRSYDVPDVAEDDLTKTGSPIRCD  
LAIFFVWFDRTSTSNAGGYDSDDAQNFYSQIWGEDELHVGRYDLLSEDEIKGLSDQEQIR  
RAEELHELELVKKIRKCCLEEDAVSRNHGLRVVDMGCGFGGLIRRFYAEGLVWKATGCD  
ISHRMCAKARSNAELGREDTSTLEVLAECLQMSLGDSEADVVVSVDSLHVGPQR  
LAVAEAARMLRPGGWMIFSDIMQEEVLRSNEDMQPIYDRINLTKMGTVSNYKSALEACGF  
TNI SADLHSENVSEHYGHVLKVTEEKGASIGLSEQYLAKAEAGLKVWKEKSHGNIAWGII  
CAQKTSKVDSLKVH

>comp11090\_c0\_seq1; 483 405 1596 LEN=1618; translated  
MLFSSVVLRRLGSASSRARMGLRPLPAMAASGTASGTTTLPASARVRNYGSTHPSFADSP  
PSTMDTMESGTKMYMSLYPEGSTDGGLRLGNIVPDFSAETHGPIESFHEWKEGKWAIF  
SHPADFTPVCTTEIGRLALKHDELKEMDCLVATLSVDPVKSHEEWLRDVAHCENDIEVN  
FPIIGDSDRSISTAYGMIDPGTSDDQDLPLTIRAVFIINPENKMLTLNYPACVGRNTDE  
IVRCVKALQLSYEKSIATPANWPNNHADIPLSNGERTTEYKGSVFLLPVSKEDADANYP  
DYHTCEVPSEIPLYRLVKTEDVDPLYFLALRRAALYRAAPHRTVAGILRHGLVPPFRPARL  
GEAPFRGGAPSRRSIPRFVATAIGRLAPSLFYFCTK

>comp11090\_c0\_seq2; 291 1 1082 LEN=1104; translated  
RLGNIVPDFSAETHGPIESFHEWKEGKWAIFSHPADFTVSNKTSRCSEEQPRTSAVVA  
SAMPVCILSDRLTNSFFVSFVSCGFRLPPAVCTTEIGRLALKHDELKEMDCLVATLSVD  
PVKSHEEWLRDVAHCENDIEVNFPIIGDSDRSISTAYGMIDPGTSDDQDLPLTIRAVFI  
INPENKMLTLNYPACVGRNTDEIVRCVKALQLSYEKSIATPANWPNNHADIPLSNGERT  
TEYKGSVFLLPVSKEDADANYPDYHTCEVPSEIPLYRLVKTEDVDPLYFLALRRAALYR  
AAPHRTVAGILRHGLVPPFRPARLGEAPFRGGAPSRRSIPRFVATAIGRLAPSLFYFCTK

>comp11091\_c0\_seq1; 709 11 1865 LEN=1952; translated  
MTDLGTVNNPRKKAYQHYIAPDCPQLNTNMPNESPHTPLAYEYDFRASAVLWFLVPA  
LGGFLFGYDIGGTSFVVVQLASMRASSLSLKDSPIKTGWIVSSPSAGALLGTAFLMYLES  
LRDVRDRDATNRRRSKRRWPAPIGRTELRYSGILYAVGGILQYLSAFSPETTKSLFSPF  
FLLSLGRWIYAGIGFAMHGGPTYLAETMPPSVRGMVVGKELAIIVGILVGFVAGNALT  
RVDGEDAGWARVYASTLLASIGVIGLSFTIPESARYLVGRQQEELCANSSESSATDPL  
RGETEQERTTRIVSTQVLES LKFWNPSAALSEHRKLMAIFHRQLQQQQQRHDEEESP  
SLWDPYVRPALRAGLGLVILQQVTGQPSVLSYATPILARVPGLSGNASVILAIKLLATS  
VSVVLVETRGRKTLTVGC SLMFAALLVLTFAFSEQAATGSFDDDPVPSELDARSILTL  
GMFAYIAGYQVGFPIAWLMISEVFPQSVRGKAVLAVLANFALNAIVQFLVPIILRSTLG  
MSRTFFVFGALAAYSVYFVQTSVPETKGLTLEEIEEGLAALASKSVTGAKTDEEERTDEN  
TAHEERVQLLSTSTPV

>comp11092\_c0\_seq1; 467 74 1423 LEN=1554; translated  
MIYQNQIRFWIIVSVVIVGGCQSLALLTSRTLSSVVYHPLPSATSDRTFYHLHSSNPLY  
NDGCEDFGPKHKVVVNPKIAKTTQSFEDNASSTLTAVSIPLINYICVNQITILFMASV  
ALVASFSGDSPLEMSGLHWNNAQDFHSLFDWQPTSFRLTEGIIAAIPLIGLSLIESDN  
RSASKMNFATIDMVISLFGRRKSEMPTASASLQVMFLSALIAISSGVSEEIIFRGYIPT  
VMSSVTNSVLLALFGQAALFSIGHLSQNAHPEENKMNLLIQSVIGLWYGAVYLIAGDIL  
PCVIAHVLYDMHTLCETWTQVNNQIDYTSQENSMKCFIEDEAHAAKLLESETGIKLNTEI  
NFARHFFYAFDNDHVGSLSLSDCQRAVSYAFMNDITPEPEVVCDFRQARDRRQDDDRV  
VDVHDRLSFSEFLHVLVFLRSNSRYSR

>comp11095\_c0\_seq1; 570 96 1859 LEN=1978; translated  
MLSAQGWGSLVIVSVICIVKPVLPFQLGLSRSGALRNTPLNTWQATTGFSTKDDNLRVQ  
LTGASMMGLGVSSQASTYDVLSTASKEVRGRAVFLPHNANEIKSKFGTYSYPSILE  
AAEQLRKANWFSGLIEADVLLPDTKEEFKVRQVLDANVVVAFNMKDDDLSTFITG  
IFNERKSESSGEKEFCQFALDCEGSKSLPSALCGPYDPQSPSISALLPWSNDASGKRL  
EEQMMDLFGRWTSDDFTYALMLFFNQYVAPIDVVKHSIDATWEKGPVRNAQEFYKMSKC  
GDCIGKCVQDENCKECLDALTAVDTSQVASYRTIVSYESELLRDFSYCILQKNNIFGCD  
AKIPTLPEVTPMSTFRGEPLTKEVARQILIGHLDDENAESSLKTDISWKVSAGANVAYD  
QFPSONQIFYNVSDGRSMWYDPVFRVETIDGRNVWAKRHRYVRDGIKPGTFRFVLDNGV  
TSDEFWTLVDVADDLSYVIFHYAGAAAVGQRYLGGLLCTSDGSLPSESEREKIKPKLR  
SAGIDPWELFIVDNSDES DGAIDAGPPPLDFYRKDILEKIQASRFIN

>comp11096\_c0\_seq1; 341 92 1456 LEN=1636; translated

MILSNGFLLAPLYLMLLMTGPSELSPELGRRDIAIQVAAATAGAAVLAVKPSDAKAVG  
EPLPSTISPIVPTENPPPILSVPIPATSAPTSPASPGTKILNI PRVGYSFYKTAPDKAER  
CAALALRS GTTHL D L A T Q Y E S N A E I G K T I R T Y L K S G R K K L A V D E K P E L L D L L D E A H R Y Q T  
TRMELEYGRKRKENARRRRRENLFISHKLSNKEQSTDPDKIRQAISIAIDALGVDYLDMVS  
IHSPLTSSETRLATYKALINLQGGDSLSP L I R S V G V C N Y G V G P L K E I A A A G L P L P A V N Q L  
ELSPFH THSDV V D F C G K N G I A V S C A A W S K L S G A N G P S E Q W D V L S R V A M N K R L T K A Q V M V R  
WALQKGYICVPRSGSGSKLERVAIAENSYGGGLVLRNGKIPISPGGIEDAMLTPEEMKIL  
DGLNLNYKAGKLGRTD GWSEADMTGPNWDPTEIS

>comp11096\_c0\_seq2; 341 92 1456 LEN=1650; translated  
MILSNGFLLAPLYLMLLMTGPSELSPELGRRDIAIQVAAATAGAAVLAVKPSDAKAVG  
EPLPSTISPIVPTENPPPILSVPIPATSAPTSPASPGTKILNI PRVGYSFYKTAPDKAER  
CAALALRS GTTHL D L A T Q Y E S N A E I G K T I R T Y L K S G R K K L A V D E K P E L L D L L D E A H R Y Q T  
TRMELEYGRKRKENARRRRRENLFISHKLSNKEQSTDPDKIRQAISIAIDALGVDYLDMVS  
IHSPLTSSETRLATYKALINLQGGDSLSP L I R S V G V C N Y G V G P L K E I A A A G L P L P A V N Q L  
ELSPFH THSDV V D F C G K N G I A V S C A A W S K L S G A N G P S E Q W D V L S R V A M N K R L T K A Q V M V R  
WALQKGYICVPRSGSGSKLERVAIAENSYGGGLVLRNGKIPISPGGIEDAMLTPEEMKIL  
DGLNLNYKAGKLGRTD GWSEADMTGPNWDPTEIS

>comp11097\_c0\_seq1; 235 1 405 LEN=525; translated  
SPSATPSIAPTLPVTPQAPSHEPSAIP TSSPSEAPSEAPSESPSRSPSGTPTTMVTTWQPT  
TFQPTTVPTEDPTSQPTTFEPTITAQPTTWQPTVLAQARIDGDESADEPDQKKNAFEFDY  
NVDIPKLNRYIDP

>comp11098\_c0\_seq1; 149 1 818 LEN=1212; translated  
QLDNDAPTCRLEQSSPLSSQRFVVSPI SGWRANKGAKFYEVFDVNAAYQIXKEGRKEGRK  
EGSDDHWFARSKTMDNADDVSADDANR FCTGMFMTMSMGGFQSTFFSGGRAGCISFLFTD  
FRLDNSGKFFFAMLC TFFF AVFSEGMSCCQSKVGNYYLLGKPKYFRKTIMALLYGIQQCF  
GWLLMLISM TFSIELFASVVLGICAGKALFPIDTPATGLRRIRRGTDGSQSFGNNTSSNS  
IDRFSEEEESTGSSPSPSAGGSSTGAIRRRR

>comp11098\_c0\_seq2; 172 697 951 LEN=1345; translated  
MTFSIELFASVVLGICAGKALFPIDTPATGLRRIRRGTDGSQSFGNNTSSNSIDRFSEEE  
ESTGSSPSPSAGGSSTGAIRRRR

>comp11099\_c0\_seq1; 348 1 1655 LEN=3008; minus strand; translated  
XNIGTPQSVGQKPLTWPRQVSALVDLPNEVGIDHPKAQELFPADAIARAREIKRGLGGHG  
SGAYSHSKGAACFREDVLSFLRQRDGEVPTDIEDVFLANGASAAISHLLTALVSDPGGE  
SNRAESSRVE SNRRVFSGRRCVPSNRQKNKQPRGLLASNRVRDAAVVSSXPLFFFLFFLS  
CFRFGVGLGVDDAVRNGSIGLSCLVLQCISFFLVVCVCFFLIWIPIRSGIMIPTPQYP  
IYSATIDLLGRRVGYLDERNKWNLNLEELERSLKEAREQGTNVVGVFLINPGNPTGAV  
LSREAVRDVVRFC SRHNLVLLADEVYQENVYDEDAEFYSCKRAAYDVGFLGSEPGTEAIE  
LASFHSTSKGVFGECGRRGGMELTGF DQTIKDQLYKLASASLCSGLNGQCM TALMCRGP  
SPGDESYESHEAEKTAIFESLKKRARI VEEGLDAIPGFSCQPAQGS MYCFPSVELPQGAI  
DRAREEGKTPDTLYALSLLERTGICVVPASGFGQEAGRYGFRTTFLPPEDDMARSVEAMK  
VHHQEF C E R Y S

>comp11099\_c0\_seq2; 668 204 3338 LEN=4410; translated  
MTDLPEANTSNA PFKEDTEQTRKKCCDPYDGNPDAAGYSYLGAGRGLVMSNIFMSQSLL  
FLATTAAGCELGKTCTTSVHGFLPASLITNIASISALASCLFMPICGAFVDFTPYRKPIG  
IATAAVMIAVQAIQIYTVESTWFPMAIMQCVAIVFYQLQIVCIYAYLPDMARDVGESKMN  
GFSKNFQQVQFGSQAIFLVVIAAIRISLKTDFVVTGQISQGLNTFSSLIFFSVGWLK YMT  
PREALRVL PDDHGCLL TEGFRENWKTAKSIQTNYKRGLRWFYAVCFSEASAAAITSVSV  
VYLSDTLTL DSTETAIFYTITLIGTLPGSQFGLVTTKTNPNTSYKLSMGYIFVALMVG  
LVLEPLPTWCAYI WALFVWGWLGWYYPVENLFFSMTLPKGREAEFAGFFVLCTQILAMIP  
PAIFTVMLTYEVPQKYGI IATSSFFVAVLLMCTASWDEIVEEAKTPIAVEPATDEKEG  
VEELEALGWLGLGLNGIGSFI MAYSTYTFVHTYHLPNRTHAKACRHHRYSCIHSNSVI XK  
SKANXTTILLFVAGVNDCSFSLFSFVGGTSGAMLCLFWFSNRRTARTTHSLESCIRQRQ  
PHGSVDHRLACNATEEIDSIPFHPLHPIGALRCRNRPRDRSHQTPPTHPPQTNVAATGRS  
EGLAQLANEPTNEPTNQPAXLARRHRAGAPAHSRVGSILRTVDSFRFASFRFLAKASLAV  
PFAELLVVDLHGLDGRHVVLRRQKGGPESVPAGLLSKAGGRDDADPGPLQOREGVEGVG  
GFPLLP GPVDG PLGELD GREAVHGALGRLAGKPGDGVESLLDDPGALLEAFEDGGLFGLV  
GLVGLVAGGGPPAHEGRHALAVESAAEAGRGELVELVLDGLVKAGELHVAPPAPALPKDP  
LAGRVEGGELDGLG PLG LASEETN VIGGPLAAVELGVLVVDVFLVDLVGEEDEVVPGAEAD  
DVPDGLPGQDRPGGVAGVDEDKADDVRPLFPGLLEGA FQLLEVEVPFVSLVEVVADPPAA  
QEVDRAVDRVLRGGDHDAADRPN



>comp11100\_c0\_seq1; 317 594 926 LEN=948; minus strand; translated  
MPLYDEIEIEDMTYDPETLMYSYPCPCGDRFKIYLQDLWDGDDEAGCESCTLYIEVVYDE  
EDLPLPEDDSDDEDKDENENENTEKASSGKASSLDEGDVCKSLGKLSVTTQ  
>comp11101\_c0\_seq1; 830 207 2246 LEN=2431; translated  
MRSTVSENVLRLLCLTASLGHTFAFSATPSASTNRASSITSSSSSLGVSIGMGPEQSVVEE  
EGEGKKKELVAGVDYEVDPDHEAFRTSRRSKLDEQCDQWFGALLGDETKSGVLGPLADDAR  
ETLLKPVPLINEEELPTDHEEWTPYVATKLPWTPPLTPAFGLEQYGLPIPRRNAETWRHFD  
VSGMINQDYSGSCEDDGEPLKLEEEVATYREKLEKGGSWIADDACQARLVYINGRFAPQ  
LSMENDLAGNLGKIDDSVSDEVKSYLSRLTDGFTDELATPVP IGEDMYC S SYKKLGGADH  
CLGEPFSQFAINTQQGTACFAALNTRLTCGVAYVRVPDGHDAENEERKPVMLNAVTNNG  
GSASGCEGMSFHRSLVVAGENSRLSVVQACVDLDDGSDHIPKLYNGFTQMFVKEGANVT  
HSFLEESGGMVTGVEKNDDSFEDDEPTARSVEAERPAMKDTMHECVDVQCIGDDSSYEG  
TVMSVGGSGRIRIAHSVSLKLPRAHAKVYGFFLSGGAQRDCKTNIHHAGQGTTSSEQIQK  
NMIGGRATGAFRGRIRVEQSAQQTDSQQLTRSILLSKSRAWSVPSLEIIADDVQCTHGA  
TVSDLSEELFYLRSRGLDTSLARLLMYAFAADVNCVNDAMLT SVDSKGLQKRLIER  
LNNVVPQGDRAIQGEFQSV  
>comp11102\_c0\_seq1; 1063 328 2832 LEN=3180; translated  
MLAPRPLLLAASMLAMGRTPTSDAFVPLRSPLETLLPLAGPERTRGFRERAGSLPTALG  
MSSVASDAHETTEERQFNVDTALFCAGLAFDAYVEPDPSRWERGSKGMNVAFVSSAFT  
RNLYTGMVEVTPIECTDLPEDDDTIEKVASGDGVDACL MCAVVEGSLWKEDLTVLDKESN  
HNGIFSLSGSAHVGRSRTAWANVNVNKSNA SKRKTGRGLPYHVPKAF LKPSKAIWPEDER  
PFYLYVQDPANVRLVVTLYDDDVI GDG SVISSTSVDLRELMPKVG GDLVETIKNDVIRSL  
VEKARATGEAPQIDASELNNKIADAI RDTVEQDYKWE GELKMTTKPKLENKNGQMAAGAA  
AGAMVAGPIGAAAGAAF GAFYEGPAKGQAKLRLRYLPVPPSAPPKTD RYEV LGGMPGITW  
GELYEKKLRRERDDNLVSEELKTLGGS DLEFCFFINH DQTGATVGVYRSLEEK RIVVSFRG  
TCQPIDLLTDASIFQVPWVEGDYDEQFLKNVDHENFPMVHVGF RKSMDSISRRLKTLVLG  
SVGEGESISDYEV LVTGHSLGGALATLFTADIAESGIDAGRSLPQKAPSE PWWKGIAS TL  
GGKKNESPLAPPKAPPRPKSLKMYNFGSPRAGNSAF AKQFDGFL EKG YIDESYRIVNSQD  
I IARVPRPTGIMNV DYEHC GKT VLI EEQATDPIWIEGESDFERIDPVRD VRSVTKGILSE  
GMLLDDL VKAANSMTTPGESDGENQADGGESSGGGNSVFSQMKGVADRLK KVDMSDLTS  
LVGIDKSYSTRELELAQSFLKGESLAH HMEDSYLGMGRAVGYNTTVGEEIVRV  
>comp11102\_c0\_seq2; 936 970 3200 LEN=3548; translated  
MMRNPMKSNANEXYKSKGMNVAFVSSAFTRNLYTGMVEVTPIECTDLPEDDDTIEKVASG  
DGVDACL MCAVVEGSLWKEDLTVLDKESNHNGIFSLSGSAHVGRSRTAWANVNVNKSNAS  
KRKTGRGLPYHVPKAF LKPSKAIWPEDERPFYLYVQDPANVRLVVTLYDDDVI GDG SVIS  
STSVDLRELMPKVG GDLVETIKNDVIRSLVEKARATGEAPQIDASELNNKIADAI RDTVE  
QDYKWE GELKMTTKPKLENKNGQMAAGAAAGAMVAGPIGAAAGAAF GAFYEGPAKGQAKL  
RLRYLPVPPSAPPKTD RYEV LGGMPGITW GELYEKKLRRERDDNLVSEELKTLGGS DLEFC  
FFINH DQTGATVGVYRSLEEK RIVVSFRGTCQPIDLLTDASIFQVPWVEGDYDEQFLKNV  
DHENFPMVHVGF RKSMDSISRRLKTLVLG SVGEGESISDYEV LVTGHSLGGALATLFTAD  
IAESGIDAGRSLPQKAPSE PWWKGIAS TLGGKKNESPLAPPKAPPRPKSLKMYNFGSPRA  
GNSAF AKQFDGFL EKG YIDESYRIVNSQDI IARVPRPTGIMNV DYEHC GKT VLI EEQATD  
PIWIEGESDFERIDPVRD VRSVTKGILSEGMLLDDL VKAANSMTTPGESDGENQADGGES  
SGGGNSVFSQMKGVADRLK KVDMSDLTSLVGIDKSYSTRELELAQSFLKGESLAH HMED  
SYLGMGRAVGYNTTVGEEIVRV  
>comp11103\_c0\_seq1; 230 250 861 LEN=1245; translated  
MARPPQRSSVSSMTSSSSSSDRQLHVSDASF EFLMTEVLR YVERSTPPKSESPEDAIFAK  
EMAAAKMERMGYSVGFRLCERLSQNRLFSAGGKDPSSVAAAQLEAVKFLCKEVWIEVFR  
KQIDKLQTNHRGVFVLKDMKLRWLEGLPANRENSRITAIQMLAFPCGIVRGALANLGI PA  
VVSCDFLADGQNMAACSFNVKIK  
>comp11104\_c0\_seq1; 599 1 3248 LEN=3389; translated  
SDIASGAHPDPLDSSKSTSNDIRSGFDGIAFASVSASSIVSSDRTPSALLGSSKSGSGSA  
SRASRSASRSASVSASAPESKSSGITLNDLETNAASPPPVS S SDPTQSATASRSTPES  
LFARSSKSTPDSFFGRSSKSTPDSFFGRSNKSTPDSLFGRRSTATPTIGAVSESTTVETF  
YGRKSNASSSLSDPVSAVAHDSLFSATTRTDAPDHRSDAIHSFSATTRTD RDSTHQHEIS  
TIQDASSERRGTTTTSSSSLSNHTSEAVHDSSKSTRTASRSGXKASVPSSSPSDPLSSSG  
GVGSSKSTIQDISTIPDASSERRFPTSSSSSSKLTDPDIFTMVQDSSSSSENKYLSTST  
SSSNPLSASAVAPDSNESVSGKAVFSSGSP LDSLDRMLS DSDSMSTTLENSSPFKMASRIL  
EDIEEQTAEGRSSEGVDPDTSENTKEGSVSL LHKHQENTGLPSLQRDTQMAFEKV VETI  
ISYVGASGAPPNVSP EQSTVQTRDRSGGTDDRSGLSDLKLFQSNTPGSLNHSATGSR SRS

SESRHRAARGSRPDRYPSDSSTSRSDASIGPETHRDARTLRDRQKIRSQAPSTKRD  
KASEQGS RATPPRPKSKHVDSQRSSRLKPRLQRHSSSGPVTQRQKPHPPRASAPRDP  
RQSGGSKMAKRKPI TRVGDCLSKPSSRRSRPKRLPMEVDATKENKRNNDFRKPARRKSK  
PERSRVELELLRDKNRDELKVLNARQFDKAVDPKSPIAASFHSDRIPDPLYFGKSI  
FLKDCDCGLKAKAKIHSTINNEGYKALVVRAYIKLFEVRPRIRYFLSPAEWLHVHMLLL  
YARILDCELHFYGVIVLPRDFQITIPDVTITFEPIAAVISSIGIEDEDMGVITYIPVPSY  
QGDQVFRPHDKDDVTEFLEWTDYDWNLSWDQVEKGRIERRRMAAEKHIRIPTTDRQFDST  
KLEEWQQLAVEKWLGWDEDLWFSYNQACFVLSRIAHFVPKPIDEQKRGSYAWLLPRHIND  
RGAFVRIKPNITPDSWMIALMLDMCALEHSAMATWYYETNTVDDVQHTIDRFVDAAIKI  
IS

>comp11105\_c0\_seq1; 570 141 1616 LEN=1732; translated  
MDSTPVHQPDSDCIAMTCDLPTDDCCNSIVEADENVELRRFAATDSISPEKSHEISS  
SYDENTEMLSPWSSFRDSDETDSLIFSSGSSWDSYKYTDLRYTMI SNLFFFV GACIQTY  
TSAASLKSTQAEWQLDDSDWDDDDYVPTVADRAWYALYVGPFLYIINACIDIRWNMEY  
LTWATLWSTLCSFTRNSDVS PHNSTAQNLSYQRIEDVEADADGEENNTISTIESSSTS  
SADSSHACWQVVAMIFGTGAVFEFYSTFLDDYYEDQDDGWDDDSYLISMESKRKWFVSN  
YRIGFIGMHLYLLSGLIELISQRNSYRSRCQVGCGRKISCTNGVDESPSRLSSIRVAHY  
LMFLGTILFVCGTILDCTMAYLSDPDIRHYLDPTKEVLWDVNEMTLATSDLISSLLWNVD  
AILYIMADILLFDLHRGDSKGWKLFGNFKRHNYYTDDRIDGVAFLSEFEENRRDDNQGLL  
YGSTTNNYSTI

>comp11106\_c0\_seq1; 51 183 1156 LEN=1156; translated  
MKPDSSNPSAAHPPPLGTPREDPIPPLSWKDAGTLLVPR IAGLALKTALGVTVTLYVLNQ  
SKVLPRPLASIVSKVLFYPTLPITASKRIGRWVTRIDETLV LGGAPLPLLGYPKRLREY  
GVEGVINMCEEWRGPLGEYEKLGIEELYLPTTDHFEP SQEDLIAALSFLERYRARGKSVY  
VHCRAHGHRSGAVAYAWLLARGCPGSLADPKGVNXEAAAGAPGRPGGPLEAAQVGP  
GADQKGKARGPERRVPGGEEGKRQEDELSTTQRSGGAGYDETKGKETNTADAGHSAERSRA  
AQAVPGVVDCEETNKPSRETFVEHAX

>comp11106\_c0\_seq2; 72 183 1172 LEN=1172; translated  
MKPDSSNPSAAHPPPLGTPREDPIPPLSWKDAGTLLVPR IAGLALKTALGVTVTLYVLNQ  
SKVLPRPLASIVSKVLFYPTLPITASKRIGRWVTRIDETLV LGGAPLPLLGYPKRLREY  
GVEGVINMCEEWRGPLGEYEKLGIEELYLPTTDHFEP SQEDLIAALSFLERYRARGKSVY  
VHCRAHGHRSGAVAYAWLLARGCPGSLADPKGVNXEAAAGAPGRPGGPLEAAQVGP  
GADQKGKARGPERRVPGGEEGKRQEDELSTTQRSGGAGYDETKGKERKGGKETKHNETPGTA  
QNGAXAAQAVPGVVDCEETNKPSRETFVEHAX

>comp11107\_c0\_seq1; 493 260 1886 LEN=1908; translated  
MTIINERTRTNRRTDPYNLYSNTDVDDVYGHLDQQRLLAPSRSGFSLTGEEGFFQHIHL  
DLFPSNVEEEDNDDSGENRRKTNNVTFNPNSSSYSEGSRHNRVFRRRVFLFLTEPSSSLF  
SAFFFFCLIFAIALSSMIMIMQMSFFQYTPTKCHFCGSATFDTNYYNDDEISEYNDGSN  
DNYLVECECPPRPSMYLERILNRILQFFAVEWTLRVLSYVPAHPKENVLGNFGDWLKYLA  
SPATLIDALAIWPHFMERLHVPGLISLRLRLFRVQQLRLGSYNSMFVSLTTVLSKSME  
FLKLLIVIVFFGATIFGSLMYWLEQGEWKYWEPTGNFYIRM RIDGETEEISPFTSIPTA  
FWWFVVTATTVGYGGRKNEISIHLSHSLTIVFAFM LSLVALDYPTSVAGMWVGTVAML  
TGVLVVAFPVSVFSEIWSKELKQVHGLQSLFRESNASGSDDENGND SNENFERECKDRGD  
RRRLRDQYQPIYSEPESSRNSTRVIMDSEDLNDILSSIYTIQQEQRHIQKVLKYYVHK  
E

>comp11107\_c0\_seq2; 366 260 1015 LEN=2150; translated  
MTIINERTRTNRRTDPYNLYSNTDVDDVYGHLDQQRLLAPSRSGFSLTGEEGFFQHIHL  
DLFPSNVEEEDNDDSGENRRKTNNVTFNPNSSSYSEGSRHNRVFRRRVFLFLTEPSSSLF  
SAFFFFCLIFAIALSSMIMIMQMSFFQYTPTKCHFCGSATFDTNYYNDDEISEYNDGSN  
DNYLVECECPPRPSMYLERILNRILQFFAVEWTLRVLSYVPAHPKENVLGNFGDWLKYLA  
SPATLIDALAIW

>comp11107\_c0\_seq3; 366 260 1015 LEN=2065; translated  
MTIINERTRTNRRTDPYNLYSNTDVDDVYGHLDQQRLLAPSRSGFSLTGEEGFFQHIHL  
DLFPSNVEEEDNDDSGENRRKTNNVTFNPNSSSYSEGSRHNRVFRRRVFLFLTEPSSSLF  
SAFFFFCLIFAIALSSMIMIMQMSFFQYTPTKCHFCGSATFDTNYYNDDEISEYNDGSN  
DNYLVECECPPRPSMYLERILNRILQFFAVEWTLRVLSYVPAHPKENVLGNFGDWLKYLA  
SPATLIDALAIW

>comp11107\_c0\_seq4; 540 260 1801 LEN=1823; translated  
MTIINERTRTNRRTDPYNLYSNTDVDDVYGHLDQQRLLAPSRSGFSLTGEEGFFQHIHL  
DLFPSNVEEEDNDDSGENRRKTNNVTFNPNSSSYSEGSRHNRVFRRRVFLFLTEPSSSLF

SAFFFFCLIFAIALSSMIMIMQTMSEFFQYTPKCHFCGSATFDTNYYNDDEISEYNDGSN  
DNYLVECECPPRPSMYLERILNRILQFFAVEWTLRVLVSYVPAHPKENVLGNFGDWLKYLA  
SPATLIDALAIWPHFMERLHVPGLISLRLRLFRVVFQLLRLGYSNSMFVSLTTVLSKSME  
FLKLLIVIVFFGATIFGSLMYWLEQGEWKYWEPTGNFYIRMRIDGETEEISPFTSIPTA  
FWWFVVTATTVGYGDIYPTSVAGMWVGTAVMLTGVLVVAFVSVFSEIWSKELKQVHGLQ  
SLFRESNASGSDDENGNDSNENFERECKDRGRRLRDQYQPIYSEPESSSRNSTRVIMD  
SEDLNDILSSIYTIQQEQRHIQKVLKYYVHKE

>comp11108\_c0\_seq1; 273 227 1093 LEN=1171; translated  
MTGRVIDIGIVHMFADDCMASGPCSEKEIRPEMDVSDIHPNGNGEHASDSVKKMNGSFL  
ETSKLSVLALADTTVLAEDI SDCLEDEDESPGIEDEDAERFQVREVPDAKRLSSSDPGKL  
KSDANTANLDGGDRGTMSCKMKDQPAKSSKGRRLGFATLTVREYPRVLGDNVCMIGAPIS  
LAWEHDPENVQIYDLVEYDEAVKSTRRTQTELKMPKSKHREKLLREMGYTGREIQEAVKKS  
NIARNHRKRTVEMLKMQPLHEAFEKLGRFGKVKVSGRKKDDILNYKKS I

>comp11108\_c0\_seq2; 273 117 983 LEN=1061; translated  
MTGRVIDIGIVHMFADDCMASGPCSEKEIRPEMDVSDIHPNGNGEHASDSVKKMNGSFL  
ETSKLSVLALADTTVLAEDI SDCLEDEDESPGIEDEDAERFQVREVPDAKRLSSSDPGKL  
KSDANTANLDGGDRGTMSCKMKDQPAKSSKGRRLGFATLTVREYPRVLGDNVCMIGAPIS  
LAWEHDPENVQIYDLVEYDEAVKSTRRTQTELKMPKSKHREKLLREMGYTGREIQEAVKKS  
NIARNHRKRTVEMLKMQPLHEAFEKLGRFGKVKVSGRKKDDILNYKKS I

>comp11109\_c0\_seq1; 478 1 1255 LEN=1473; translated  
XKTAGNYRSLPDRSTFVYVVTLTLLDQKQIEFETMKRDTIRCTTNVWLAFAIIAICN  
TAVNGFSNPFASNNNVHAIYLSAQSPSTLFMSSFSADGSEYSSKSDSDYDTEDEVEERNWG  
ENNEYGDDQNAETIEMKVPVMSKNAGNRFVALYWDHELEENKKEGEQRESWWLHYDRDD  
LNEDHVMYCRKSNLYNETFNQDSMVDVMRSLPILASDLKRIVGHCMVLESTDLKYVKDLL  
REEPILKSLTDNGERVDEVPYRWRQIRDYTLRQDDGRFGYPCLAVALDDDPENIGNIRS  
ETEKAVLEYLIKSKQVIMGGPLHLPTQFKDDPSSIAVGDLMFNKADREDAINFVENMPS  
SQAGLYKDLRVHFYVQLDVTGKVFSEDPNRDAPGYQMKKEAMEYWGYPTEDDQTPWLNW

>comp11109\_c0\_seq2; 236 1 640 LEN=673; translated  
XKTAGNYRSLPDRSTFVYVVTLTLLDQKQIEFETMKRDTIRCTTNVWLAFAIIAICN  
TAVNGFSNPFASNNNVHAIYLSAQSPSTLFMSSFSADGSEYSSKSDSDYDTEDEVEERNWG  
ENNEYGDDQNAETIEMKVPVMSKNAGNRFVALYWDHELEENKKEGEQRESWWLHYDRDD  
LNEDHVMYCRKSNLYNETFNQDSMVDVMRSLPM

>comp11110\_c0\_seq1; 462 77 1177 LEN=1508; translated  
MTPPSTTSFRAVLAAATSCGLFFFLSSVVVPVGANTIFENLIPMACVNPLLGEAGFCVGN  
NECRDACFGNSKRFQGDASPLSLETSALQDFYIPVDAVECEDEIDPICPAVNCCPGCRDE  
LVALYRCIILEGNYHYLDYLTRTCPMDCKSDKPGNSLVPPAPAPTAPAPTEEPILATGIT  
VVTVESEVDISTIIITVDNVEGDISSSNETDDFFPSNETDIIIDEDEPDIDEIDEVEPET  
TVEINSFAYIAPDWIIPTPVGESEYDPMTVRVGDTLTFAWSGGTHDVYIYPFGGCDRTDKI  
MVGSTRDNPVTVYVFTEADKGTNLNFVCDIGSHCELGMRMQVRVFGAIPVLPQANEALVEE  
IANGMP

>comp11111\_c0\_seq1; 743 113 2590 LEN=2993; translated  
MTLGKHHEETPLLGASELPNGWEPANESDHLFPEDSNDTSHTKINDDYIISLIRRTSGL  
KHQESTLTFDNTTGERKELLVAVVPEPKGTSFGETIHLVKGYIGCGILSLPWAISQLGI  
PLGLLAISIMSLWSSYNCWTVVKLKRYIERTTIADTNGEEEEDEEDEDNSDNDCEEEPT  
SEPDDDEASKISYLASASVASSNVTYPDVGEWAYGRQFQAYVAVCAQQLAICTVFCSEF  
VGENVYATLSFLGVGGPFLTRRAVATGCLPFFVGLSCFLPNLRSMPVFMTLATVLMVSGF  
ATLGWIGLLEWGDRLPGLTIDRSAAMALCGILYSFEGICIIILPVESSMKQSSRRD  
FGPAFGISMAIITMLLCGMAAMGVLAFGVEVSNGSITAFLEKEYKGDRAITVWMLMSNALV  
TLSIAFSYPLQLFPAVELVAPAVLNWRRMWSRRQQRMLRERSGLWNRFWTRFTTRGGSSH  
RRDNCQREENTGNDDNDNDNDGDLEGFEPMRGIPEHSVLSIRSLSSMPDSTYQESNDD  
PQNDAVTVPPPAPTRDDVQSAFYPADPSANGTKGEAQNVATSQGAPQNNNGAMDQETTKT  
EESVYVGGISESTSLLSRLSSNISNHRSIDDSEDDSMNGDNFRNRNTNNNSSAQNEQVPPA  
EESASEWTLPGDSPVLRGALVVGTYLIAMSVPNVQSLVSLVGAVTGSSTALLIPIPLELA  
YLSHKEAMELQRTRPRQSFPPMGDWEGGPSAASKRSLFGYSSVGTIHNKNKNGNPNLQQ  
SARSRKRRNRYFWERTISWCLLILGSI FAVVGSYFSVIDILQSYS

>comp11112\_c0\_seq1; 324 414 1535 LEN=2504; translated  
MRSLLLRKRETTASFGFYGIPRTTYESFEPDATEVIESEEQSGDNQIPLAKRVYDYNF  
ERIGRDVEKWAEEIMRDDDTKKDRNILGAEDQDSWTEIFCAKTFRQKFNMGDRKSTIQTP  
RQWVKWMRDSRGRDADPDDKQKHPCMKLIATIDAPFPVCRYLSEKNRFREYNSLLIDQE  
DVEVLTPHSKICWSQSKLLFIQPRDFVTYCRHRWLKDGTLITNQACDHPNATLNI TGS

NGQNSIRNLSGYRAFSLRGATYVSRCPDFPSKRTKIVMLSHCNCGRDVPEWAVRAAVGVL  
APIKPF EI IHRIDVGI R KARN ELEMAEEKQNANSVMTTDTSRSCRPAQMAQMGYACFWPN  
GGGLVDVNDTINE

>comp11112\_c0\_seq2; 303 414 1554 LEN=2523; translated  
MRSLILRKRETTASFGFYGIPRTTYESFEPDATEVIESEEQSGDNQIPLAKRVYYDNF  
ERIGRDVEKWAEEMRDDD TKKDRN ILGAEDQDSWTEIFCAKTFRQKFNMGDRKSTIQTP  
RQWVKWMRDSRGRDADPDDKQKHPCMKLIATIDAPFPVCRYLSEKNRFREYNSFLINQK  
LLIDQEDVEVLTPH SKICWSQS KLLFIQPRDFV TYCRHRWLKDG TQLITNQACDHPNAT  
LNITG SNGQNSIRNLSGYRAFSLRGATYVSRCPDFPSKRTKIVMLSHCNCGRDVPEWAVR  
AAVGV LAP IKPF EI IHRIDVGI R KARN ELEMAEEKQNANSVMTTDTSRSCRPAQMAQMGY  
ACFWPN GGGLVDVNDTINE

>comp11112\_c0\_seq3; 281 414 1058 LEN=2636; translated  
MRSLILRKRETTASFGFYGIPRTTYESFEPDATEVIESEEQSGDNQIPLAKRVYYDNF  
ERIGRDVEKWAEEMRDDD TKKDRN ILGAEDQDSWTEIFCAKTFRQKFNMGDRKSTIQTP  
RQWVKWMRDSRGRDADPDDKQKHPCMKLIATIDAPFPVCRYLSEKNRFREYNSLLIDQE  
DVEVLTPH SKICWSQS KLLRKS RIVEISIDLSFC

>comp11113\_c0\_seq1; 1026 1 4021 LEN=4439; translated  
XFSIKLYDKLDV LN GHKKDYQMSSRLFFLSSIFMSNGKAYESFFVSCMVINRESQNK SAT  
ATSSAESKEQNLLNYFAALS WGLLPSSDEAPMLPQTIRTL CRQMALNVGNAEKWSMTEG  
LIAHVDDSFVDCLIESFH EESTGNESMFQTIHPID SIRLLLLDFENI IDDERRLVHIFSVL  
EITIQVGGQSMGQLSRSDGNGTQIEDTLHNYSCLHNL LQKAIIDL DLECTRSL LGLLDLI  
ASASLV PDISRSMRKN AFHSDHVF GFDTPLVNTAMSI TKDCLEQLKLSVGFNRNERTSGLL  
CESLRITLLSLLVMLQRRLRETDCFN DLT ECVSVAEAI VSSENEIDSR SIRWTIWTITI  
VQNELEIIADHDRAAILSLWTLALAKKIEPYQPWFQAAAMTAFAKESNVTRMND SVTIAS  
CVVTTAHGSPFWIFEKEFQLCKLRSEALKLDAHAQESFCTQM QVEDIQLELEKSMVEKD  
DDMFV LHTWV LSTAYIVQCDISLVFGCYLTASKTAQMCQRLCQMIMKRASFRVKKSDNWM  
SVIATSTVLTRASQRYIQVLFRRSNLQYRLGDHRKAIAYMRSVLEYL KIDPDSLTLKERH  
DVAPKDLGVSLGLATQIRHFLEVKSWASTNDTTVQELSYIKPKDLKRCYSNDSYQS QLSI  
VHSIQDMIVEAAALIAEKAGNIKEMPLTAPINMQGALGMPVFNKVLRDIRGLLESSHEL  
EKDLKMTIRNLCIHIEESEFSSPEDKAWSLYYLGVLELDNARRSGALHQMWNDHGC GEHS  
CSSSSDDENIRFSRLYLSKALLHSTSGSDIFRRNVLRSLALAQGPKNNDGIGNSAGILVL  
TSIGQSIRRKLSYSFDQDRESHEGESLRNLRDVF SFFDVASESDKERDEKISEFLRELAV  
RTPSNWEYVAPVICPSGELLVIVRKTNLNLKEFVISTKCIFSLRGENAYDNIMKPLDSI  
LARVQEHL SNGVDASLLSKSVDKEAIKRQWNNERNQLDAEMCG LLEYVESLYFASVFD SN  
KRLSNCPG SCTDFEEFP SGNLAARFEAALNDGDDDKNSCYSKKEHQEEVDILK KLTVPKL  
KDRLLSIGAEKSQ LRKLRKLDLIELLIQMEREKCDTKKNKVEAKAQYCEKSDDPGTCLFL  
ILDENLHRFPFEGMPVLEAKTVCRV PCLSFVLATLCEFH GAPDNIPLVDPCNVTYVVDPE  
NNLQATQKRILPALES LASHKWDWDGRVGETPPVSFFSEGLSKKYGLMMYFGHGGAQVC  
FSRRLVEELI AVRSPSLRDQTESNKPCRAAVILMGCSSGKLVSINRKNSSSVEQTPLYE  
PEGVALSYLCAGAPCVVGNLW

>comp11113\_c0\_seq2; 1059 1 4090 LEN=4508; translated  
XFSIKLYDKLDV LN GHKKDYQMSSRLFFLSSIFMSNGKAYESFFVSCMVINRESQNK SAT  
ATSSAESKEQNLLNYFAALS WGLLPSSDEAPMLPQTIRTL CRQMALNVGNAEKWSMTEG  
LIAHVDDSFVDCLIESFH EESTGNESMFQTIHPID SIRLLLLDFENI IDDERRLVHIFSVL  
EITIQVGGQSMGQLSRSDGNGTQIEDTLHNYSCLHNL LQKAIIDL DLECTRSL LGLLDLI  
ASASLV PDISRSMRKN AFHSDHVF GFDTPLVNTAMSI TKDCLEQLKLSVGFNRNERTSGLL  
CESLRITLLSLLVMLQRRLRETDCFN DLT ECVSVAEAI VSSENEIDSR SIRWTIWTITI  
VQNELEIIADHDRAAILSLWTLALAKKIEPYQPWFQAAAMTAFAKESNVTRMND SVTIAS  
CVVTTAHGSPFWIFEKEFQLCKLRSEALKLDAHAQESFCTQM QVEDIQLELEKSMVEKD  
DDMFV LHTWV LSTAYIVQCDISLVFGCYLTASKTAQMCQRLCQMIMKRASFRVKKSDNWM  
SVIATSTVLTRASQRYIQVLFRRSNLQYRLGDHRKAIAYMRSVLEYL KIDPDSLTLKERH  
DVAPKDLGVSLGLATQIRHFLEVKSWASTNDTTVQELSYIKPKDLKRCYSNDSYQS QLSI  
VHSIQDMI VVGDI LYGDSMSIKFQQTFHSFYQEAAALIAEKAGNIKEMPLTAPINMQGAL  
GMPVFNKVLRDIRGLLESSHELEKDLKMTIRNLCIHIEESEFSSPEDKAWSLYYLGVLE  
LDNARRSGALHQMWNDHGC GEHSCSSSSDDENIRFSRLYLSKALLHSTSGSDIFRRNVLR  
SLALAQGPKNNDGIGNSAGILVLTSIGQSIRRKLSYSFDQDRESHEGESLRNLRDVF SFF  
DVASESDKERDEKISEFLRELAVRTPSNWEYVAPVICPSGELLVIVRKTNLNLKEFVIS  
TKCIFSLRGENAYDNIMKPLDSILARVQEHL SNGVDASLLSKSVDKEAIKRQWNNERNQL  
DAEMCG LLEYVESLYFASVFD SNKRLSNCPG SCTDFEEFP SGNLAARFEAALNDGDDDKN  
SCYSKKEHQEEVDILK KLTVPKLKDRLLSIGAEKSQ LRKLRKLDLIELLIQMEREKCDTK

KNKVEAKAQYCEKSDDPGTCLFLILDENLHRFPFEGMPVLEAKTVCRVPCLSFVLATLCE  
FHGAPDNIPLVDPCNVTVVDPENNLQATQKRILPALES LASSHKWDWDGRVGETPPVSF  
FSEGLSKKYGLMMYFGHGGAQVCF SRRLVEELIAVRSPSLRDQTESNKPCRAAVILMGCS  
SGKLV SINRKNSSSVEQTPLYEPEGVALS YLCAGAPCVVGNLW  
>comp11115\_c0\_seq1; 281 82 858 LEN=1231; translated  
MTTTTTTTPAETNAEPNPKPAIENPLANLPNTVVRWTKEIELGYTGAPPRSTVCFGCGKPA  
EKLSRCARCGVAAYCSRECQAGDWKAGRHKMACPSYARVAKTPLDGDTKKAIRNELFARI  
RFYVCPYAVHRTAELGSGFLFLQSDRTLRLDSPYIPKDCTGRAIVRSVLLHFLTLGFEFDS  
EVCKDDFELAMMRTPLKEAVESYDPEKEVVLLCRFRCGNMALGRAVLVPDYPICKQLAKD  
YYTGNTAGALQLNLDDMG  
>comp11116\_c1\_seq1; 131 113 628 LEN=628; translated  
MSTVVNVSVSYGVEAFLCDPSTGTKIVPMRPFAQGSIVSACVRPDAASRS DGLVMDRIEN  
FTWKKE SNGTPAALNFAAEQPVVLEGGSHQDVLSVSECAPDKAYCAVTSILFADFFQYAGP  
VSALGNVYLAFANPQEDALSDSMLIDFVDSIIGSSDKSPEEIPKEIPDEIPD  
>comp11116\_c1\_seq2; 144 113 595 LEN=734; translated  
MSTVVNVSVSYGVEAFLCDPSTGTKIVPMRPFAQGSIVSACVRPDAASRS DGLVMDRIEN  
FTWKKE SNGTPAALNFAAEQPVVLEGGSHQDVLSVSECAPDKAYCAVTSILFADFFQYAGP  
VSALGNVYLAFANPQEDALSDSMLIDFVDSIIGSSGASLR  
>comp11117\_c0\_seq1; 1232 271 3140 LEN=3537; translated  
MKGTLTCLLGMFLSAATAESSIFNTTSLSIGDFVDTEECFSAIKASASEKDG NQKMDPEE  
YVDFVKAYGPDGFLKNTTEFEELPLILTTNFYVLAACLPDLTYDCVESCVGPNTGIETY  
GMQSADNLS DDEKSFLFLVCSQTSMSIDRVMQSI SPSAAPVISPNPSSVSPAPTGIASSP  
PSKAPVDDGPPVEEEVIVSYSIGIKGVDTTFEDYSEELVNAMDSLAPT VLVQEMSRRLRV  
GRSLQTDPTVFLPTSIVDKTLIGCPENLVTPVDRCESVTASV LFFFQPNVSNPGQIAETF  
QDNLSKAI FDGGLQEFLESTVVYIVDKNALKS VVEGGN STAGI AVGVVGLALVVAIAY  
FVTGRQ GKNDREA EELLP AQADHLTLDKNGKNEPSQAKLTLN TKDANIVDSSAVDPAKPK  
GLKTS DNKSGDDMSNVDSGDASSNAGDSGWSSSAGIDSMNTGSADGLDFEKSPIPAIA  
TTLPLISQESSARTEHIDTSDALNLPVTRDDLSAIEAGDWA AVGATAALLAAASDS  
QSYSSKSEQYTGTRSRSGSSVSSLDVARAAELDHLVDAGD WEGXLLAAAKYEGDESKDSL  
PSESVSGSDTRSNADTAGQTADSSVGS SKGLKRQEYKAI VEDLVQRVPEEIQNVDEMML  
QFRGREDELVETLR TMQERAVAQKARSSSQRAAKQQA KLTSAAKIEAESSIPARSSKSI  
GKGQVSAAKATAKSLGTGEIESPLKKS NVKETLSGTGDQKERSKDTQSALEAAIEAGDWD  
AVGEAAA ILTDTNSLT SADTDEINKYADGVSTDGSSAAGSKNLADVADELEELIEAGDWK  
GVVQAASNKKGTSNDNKVESNETRRMRRLKHLQEEQEA LAQAEIWT AIAEQSRQESDTRD  
QGAADAADWAI SRSLNALVEAEISGINDQSTVGTGDGDSLQQA TT KDEDGTESGNEV  
>comp11120\_c0\_seq1; 790 111 2354 LEN=2533; translated  
MVMSETKSLTMVEVSLVEGANAVQKQKSCWF PFKNHMKNRKSITAGPGPGPKMVANNWDV  
DGLDISDNKNRYNTEHNKSQRFHRNNAKTKGSSVSTGTITDTSFQSEESPGGTRSYNSSH  
DSSSRKASSRNTSANFSYQSNNSI LENS HRNEHGDELELEDPYFLDEDFDDDGSIV  
ANDRYANPKKQ QSTEQR LGDALPVPDMDL DLATLETNCSTKEFWVDEMVEGGAFSCLQE  
REKVSNSNDTKLNESEDSGASTNGYPDL SRDSEESNRTITHPLGRIMRFVSQDPEDSND  
GAPLRRVLC SAISLRNGHNPM LCRNREETR RQDEQNPTTTK VVKENQIGTIVNHDEEAP  
NFFVEVEARREHL DGVRELEEIQAE NDEFEE DIAIARTASLVDEDSAFMESSNGGMNRNN  
VLKHAFLPPLGQSDNSETFSLSSKLVKNIISGAKATN NESKNLQSMDSVSVFDNGNIAS  
RLPIMNSDQGNRDFQREKMDRQDKLMSEMVTDRVLAMQVDNGIISDSILRDKDEFMITQT  
ECKLRDESMRSGRSRERQIERKNQSLNDSISIDSPPRIKPSAPVSILNPNINISELTD  
SSFDRVQSKNRTSIVPTKQKNKSRSRKTYLDTTRPGDSVVRKTYWEESDIGYFRRVDSAS  
YRSSNAVFSRCSVHDTGETLHIDNRYDWK HQAGHFPNEFSPTDALRVQSDVNTKFD DNF  
WKEDTDSL NTEAFEIYGSEGGSLFDDL  
>comp11121\_c0\_seq1; 254 1 1034 LEN=1348; translated  
XDSKLIRVIQVITTWALSLSSNVENAVEKQADNDSNDNDAFALLLN VGNTVATLGSSPGEI  
VGLSVSETFPSPRKL LSR RDVIGEV MNMRGGQGGESYQQSEYYPYQQPQYPPGANN GDS  
NGYENGFANYDPQSASGDLYEREPGMFEESVQDRHDKW RSAQMEKYANLTPEQELNPRDE  
QGRMKLLSSVSKGSRALIFFVLMWRDIYLF EVDQSIKGLRKMISRGFLT TVFLGNLAG  
VVT SVTSQGHSAKNRLKAILNLDKVVETLLLLWNLGRITLFP SKYIEREIFVAGILHSVF  
FLIQCAFTRVTDEN VAPVLQQAQHQQQNQHAYGQPYTTVR  
>comp11122\_c0\_seq1; 278 77 1138 LEN=1441; translated  
MPSGSLRKSTASNTSENDVRFNAPRPAVTNRLGKKRTEELIQADGDTWQEYLAVCEKWVP  
KKGNLRERSGGKAPSGRDKSDFLGPILKKA FKSFKKES SNPNRDN NHVYIRS YFLNQR  
TGTKVWDEPPSGASSIIPATEEMRMAEMQLGELCLSKKDDAAGGRPENNSSSSSAGSGSG

MNIRYKQGS SLAGSSARS GASYNDRQLQEAIQLSLVE SGHRDRLVDQSHGESEDEILRRA  
LEESRLEAARMESRRKSEGEPTTRGRIQRKSSTTAKPSPSSHSGHQKQPARNQPKSRPC  
ATTTRQKSEGGSSKGTDFDPYGESRKPPPNNKQRDRRDRKQLSSSSSSASMP SVV  
>comp11123\_c0\_seq1; 492 385 1365 LEN=1431; translated  
MATKRKKKPSMKEKLQRREKAKGGPNPYADMESPKFEKFNKEDEKEEPIKVANPEAAA  
EKAKELLLKAQRDSVNMLTMVKECIMDRLSQSEFQATLQENGFVVEDFLGSGSDNNEDET  
ASPASILSQLQEEGSQMLEKGGMEVDMANLGKGLYIAPVAGGEEQYTTCPRMVEIVVSTT  
KHVPEVFGDESNEAAKPLKLDASACMATLRTFDRKALKASTALLTGSENVDDVLDKVI PF  
SIVADQVDDQRKLSLYYYIVPDNWDKACGGGLEFESGEKIFYAKNDRLIVFYSDVTKQKDI  
AWRGSDDAPEKMIGNVLELHLVLRPRV  
>comp11124\_c0\_seq1; 228 1 642 LEN=1016; translated  
PLKNTIGRRIRDYKETITNNLESNLKMNT PSTLQDSVANENGIFQQSKASKLRRLPFSPR  
QNNIRVVS KGSTSKLNKPIPSLKTIKHGIQKLSMNNETSENMG LPIRMPKGSTHEKTSTI  
LPHEESSLYTSREEP CNDVKPSIFRDMSDYDHREDMMLLKRASPVYDSDDEDYEG LPLK  
KLRTSGETCTLQWGQQLEESSDGFNLMGLLHLK  
>comp11124\_c0\_seq2; 224 608 946 LEN=1320; translated  
MDLP I RMPKGSTHEKTSTILPHEESSLYTSREEP CNDVKPSIFRDMSDYDHREDMMLLKR  
ASPVYDSDDEDYEG LPLK KLRTSGETCTLQWGQQLEESSDGFNLMGLLHLK  
>comp11125\_c0\_seq1; 697 434 4267 LEN=4538; translated  
MIGHESERLHPTV TAAAAKQQQTKVSSTTRKKRMLRAAILFGVASSLR FALLAMIALP  
LERVQGNRNTILYPVSEDDRQQQLRRDQESSSIHTGGMSSSQSDSDRSNDKHKKESAV  
SSPRKRKAGAPSRYLEYEDPDATYDIRLGIHPSISYPDLENFFDTEIRVRYEYRAHKKRG  
RLANDCPRHFLWLSDKAVKDEL DYRLEFGVWSERVLVEKIYFTLFYGGTGLASRYMDSV  
DDFQTDLVGWEIMNRSSNHCDWEGIECENPSLLDGEDP GTGPANNT RPSVVG FQINGFSL  
EGTLPHDL YRLSKLRTL DLHG NRIRGTIPSSLGFLSSLVTIDL RDNRL EGTLP TSLSKWI  
GVERVLLGTNRLGGTVPAPMVASWARHPAADET VGSGGLETL DL SHNGFEGEFPFRALLA  
TATDLEALDLSHNR FVGVLPNDVGGGRAQLLRDRGTNKALVAASEACASGDDESSSGEPE  
GDRKNRCLHRTLAAKDGGEVTTDGMGKKGDLNLSFN TFSGSLPEQWMEAFPGLTSWNLS  
HNKMTGMVPNEIWKLTFLERLDLGHNRLTGEIPSEETISR RGD SARGHDPRPMSGGSWSD  
LVFLKLLDLEHNE LKGTIPHEFLAGLSSSLEQLALGKNLLRGNIPSTIEKMTKLQSLDLH  
GNDLTGNLPTEMRRMQPDLKLNLT DNSLIGTVPKIFCGRGAMSSSLLFRQSGCDAILCPP  
GTFHPNGAASLYSGCRPCPTREGDDPSSAKTLGRLRCGENSSKTT FVHGDLNGDGV LTER  
EILRLLYTYTVGKNWGLQYESWADPAVDKCDLNGIVCAGGKVTRIDLTDASLCATVDRKA  
VPAHECKGIPAEISKLTRLAVLTMNRRQFLRGTMPTEIGALTKLQYLDMSNCPMTGRLP  
SEIGHLTQLKYL NIGGCRFNGTIPEELFELSGLKHLHLSMNAFTGTISTSLRKMTNLKEF  
LLSRTYVNGTIPEGIGQLS LLENFEMYGNQLLGTIPESLGKCKNLKRIGKSGNHLA GVD  
DPHDEFRRNLLTYLSVLNAHRLIVFWSSDLFNNKLTGKIPESLTTIKGIRASLFTTILAF  
GEKVS IYRSEVSVPSFSYFDSIGLFLSPLVALQILHIKLNHLTGTISSGFGRLPALSWFD  
VSTNHLHGTIPGSFGNSETLKDFRLGGGNMIHDPKPSLCSNANINGGLTKTYGCSGVIC  
PLGTYSDPGHATHSDGCKRCPDGRTTIYLGS SRCEL TDDDILTMFYDVMAASSAFVQQ  
TIGPMAGKETCALGMV  
>comp11125\_c0\_seq2; 738 434 4016 LEN=4287; translated  
MIGHESERLHPTV TAAAAKQQQTKVSSTTRKKRMLRAAILFGVASSLR FALLAMIALP  
LERVQGNRNTILYPVSEDDRQQQLRRDQESSSIHTGGMSSSQSDSDRSNDKHKKESAV  
SSPRKRKAGAPSRYLEYEDPDATYDIRLGIHPSISYPDLENFFDTEIRVRYEYRAHKKRG  
RLANDCPRHFLWLSDKAVKDEL DYRLEFGVWSERVLVEKIYFTLFYGGTGLASRYMDSV  
DDFQTDLVGWEIMNRSSNHCDWEGIECENPSLLDGEDP GTGPANNT RPSVVG FQINGFSL  
EGTLPHDL YRLSKLRTL DLHG NRIRGTIPSSLGFLSSLVTIDL RDNRL EGTLP TSLSKWI  
GVERVLLGTNRLGGTVPAPMVASWARHPAADET VGSGGLETL DL SHNGFEGEFPFRALLA  
TATDLEALDLSHNR FVGVLPNDVGGGRAQLLRDRGTNKALVAASEACASGDDESSSGEPE  
GDRKNRCLHRTLAAKDGGEVTTDGMGKKGDLNLSFN TFSGSLPEQWMEAFPGLTSWNLS  
HNKMTGMVPNEIWKLTFLERLDLGHNRLTGEIPSEETISR RGD SARGHDPRPMSGGSWSD  
LVFLKLLDLEHNE LKGTIPHEFLAGLSSSLEQLALGKNLLRGNIPSTIEKMTKLQSLDLH  
GNDLTGNLPTEMRRMQPDLKLNLT DNSLIGTVPKIFCGRGAMSSSLLFRQSGCDAILCPP  
GTFHPNGAASLYSGCRPCPTREGDDPSSAKTLGRLRCGENSSKTT FVHGDLNGDGV LTER  
EILRLLYTYTVGKNWGLQYESWADPAVDKCDLNGIVCAGGKVTRIDLTDASLCATVDRKA  
VPAHECKGIPAEISKLTRLAVLTMNRRQFLRGTMPTEIGALTKLQYLDMSNCPMTGRLP  
SEIGHLTQLKYL NIGGCRFNGTIPEELFELSGLKHLHLSMNAFTGTISTSLRKMTNLKEF  
LLSRTYVNGTIPEGIGQLS LLENFEMYGNQLLGTIPESLGKCKNLKRIDL FNNKLTGKIP  
ESLTTIKALQILHIKLNHLTGTISSGFGRLPALSWFDVSTNHLHGTIPGSFGNSETLKDF

RLGGNMIHDPKSLCSNANINGGLTKTYGCSGVICPLGTYSDPGHATHSDGCKRCPDG  
RTTIYLGSSRCVELTDDDILTMFYDVMAASSAFPVQQTIGPMAGKETCALGMV  
>comp11125\_c0\_seq3; 640 434 2147 LEN=2147; translated  
MIGHESERLHPTVTAATAAKQQQQTKVSSTTRKKRMLRAAILFGVASSLRFALLAMIALP  
LERVQGNRNTILYPVSEDDRQQQLRRDQESSSIHTGGMSSSQSDSDRSNDKHKKESAV  
SSPRKRKAGAPSRYLEYEDPDATYDIRLGIHPSISYPDLENFFDTEIRVRYEYRAHKKRG  
RLANDCPRHFLWLSDKAVKDELDYRLEFGVWSERVLVEKIYFTLFYGGTGLASRYMDSV  
DDFQTDLVGWEIMNRSSNHCDWEGIECENPSLLDGEDPPTGPANNTNRPVSVVGFQINGFSL  
EGLPHDLRYRLSKLRTLDLHGNRIRGTIPSSLGFLSSLVTIDLDRNRLEGLTPTSLKWI  
GVERVLLGTNRLGGTVPAPMVASWARHPAADETIVGSGGLETLDLSHNGFEGEFPFRALLA  
TATDLEALDLSHNRVGVLPNDVGGRAQLLRDRGTNKALVAASEACASGDDESSSGEPE  
GDRKNRCLHRTLAAKDGGEVTTDGMGKKLGDNLNLSFNFTFSGSLPEQWMEAFPGLTSWNLS  
HNKMTGMVPNEIWKLTFLERLDLVSSNNVKT  
>comp11125\_c0\_seq4; 721 434 4137 LEN=4408; translated  
MIGHESERLHPTVTAATAAKQQQQTKVSSTTRKKRMLRAAILFGVASSLRFALLAMIALP  
LERVQGNRNTILYPVSEDDRQQQLRRDQESSSIHTGGMSSSQSDSDRSNDKHKKESAV  
SSPRKRKAGAPSRYLEYEDPDATYDIRLGIHPSISYPDLENFFDTEIRVRYEYRAHKKRG  
RLANDCPRHFLWLSDKAVKDELDYRLEFGVWSERVLVEKIYFTLFYGGTGLASRYMDSV  
DDFQTDLVGWEIMNRSSNHCDWEGIECENPSLLDGEDPPTGPANNTNRPVSVVGFQINGFSL  
EGLPHDLRYRLSKLRTLDLHGNRIRGTIPSSLGFLSSLVTIDLDRNRLEGLTPTSLKWI  
GVERVLLGTNRLGGTVPAPMVASWARHPAADETIVGSGGLETLDLSHNGFEGEFPFRALLA  
TATDLEALDLSHNRVGVLPNDVGGRAQLLRDRGTNKALVAASEACASGDDESSSGEPE  
GDRKNRCLHRTLAAKDGGEVTTDGMGKKLGDNLNLSFNFTFSGSLPEQWMEAFPGLTSWNLS  
HNKMTGMVPNEIWKLTFLERLDLGHNRLTGEIPSEETISRRGDSARGHDPRPMSGGSWSD  
LVFLKLLDLEHNEKGTIPHEFLAGLSSSLEQLALGKNLLRGNIPSTIEKMTKLQSLDLH  
GNDLTGNLPTMRRMQPDLKLNLTDNSLIGTVPKIFCGRGAMSSSLLFRQSGCDAILCPP  
GTFHPNGAASLYSGRCPPTREGDDPSSAKTLGRLRCGENSSKTTFFVHGDNLNGDGVLT  
EILRLLYTYTVGKNWGLQYESWADPAVDKCDLNGIVCAGGKVTRIDLTDASLCATVDRKA  
VPAHECKGIPAEISKLRTRAVLTMNRRQFLRGTMPTIEGALTKLQYLDMSNCPMTGRLP  
SEIGHLTQLKYLNIIGCRFNGTIPEELFELSGLKHLHLSMNAFTGTISTSLRKMTNLKEF  
LLSRTYVNGTIPEGIGQLSLENFEMYGNQLLGTIPESLGKCKNLKRIGKSGNHLGAVDT  
DPHDEFRRNLLTYLSVLNAHRLIVFWSSDLFNNKLTGKIPESLTTIKALQILHIKLNHLT  
GTISSGFRLPALSWFDVSTNHLHGTIPGSFGNSETLKDFRLGGNMIHDPKSLCSNA  
NINGGLTKTYGCSGVICPLGTYSDPGHATHSDGCKRCPDGRTTIYLGSSRCVELTDDDIL  
TMFYDVMAASSAFPVQQTIGPMAGKETCALGMV  
>comp11125\_c0\_seq5; 714 434 4146 LEN=4417; translated  
MIGHESERLHPTVTAATAAKQQQQTKVSSTTRKKRMLRAAILFGVASSLRFALLAMIALP  
LERVQGNRNTILYPVSEDDRQQQLRRDQESSSIHTGGMSSSQSDSDRSNDKHKKESAV  
SSPRKRKAGAPSRYLEYEDPDATYDIRLGIHPSISYPDLENFFDTEIRVRYEYRAHKKRG  
RLANDCPRHFLWLSDKAVKDELDYRLEFGVWSERVLVEKIYFTLFYGGTGLASRYMDSV  
DDFQTDLVGWEIMNRSSNHCDWEGIECENPSLLDGEDPPTGPANNTNRPVSVVGFQINGFSL  
EGLPHDLRYRLSKLRTLDLHGNRIRGTIPSSLGFLSSLVTIDLDRNRLEGLTPTSLKWI  
GVERVLLGTNRLGGTVPAPMVASWARHPAADETIVGSGGLETLDLSHNGFEGEFPFRALLA  
TATDLEALDLSHNRVGVLPNDVGGRAQLLRDRGTNKALVAASEACASGDDESSSGEPE  
GDRKNRCLHRTLAAKDGGEVTTDGMGKKLGDNLNLSFNFTFSGSLPEQWMEAFPGLTSWNLS  
HNKMTGMVPNEIWKLTFLERLDLGHNRLTGEIPSEETISRRGDSARGHDPRPMSGGSWSD  
LVFLKLLDLEHNEKGTIPHEFLAGLSSSLEQLALGKNLLRGNIPSTIEKMTKLQSLDLH  
GNDLTGNLPTMRRMQPDLKLNLTDNSLIGTVPKIFCGRGAMSSSLLFRQSGCDAILCPP  
GTFHPNGAASLYSGRCPPTREGDDPSSAKTLGRLRCGENSSKTTFFVHGDNLNGDGVLT  
EILRLLYTYTVGKNWGLQYESWADPAVDKCDLNGIVCAGGKVTRIDLTDASLCATVDRKA  
VPAHECKGIPAEISKLRTRAVLTMNRRQFLRGTMPTIEGALTKLQYLDMSNCPMTGRLP  
SEIGHLTQLKYLNIIGCRFNGTIPEELFELSGLKHLHLSMNAFTGTISTSLRKMTNLKEF  
LLSRTYVNGTIPEGIGQLSLENFEMYGNQLLGTIPESLGKCKNLKRIDLNNKLTGKIP  
ESLTTIKIRASLTFTILAFGEKVSIRSEVSVPSFSYFDSIGLFLSPLVALQILHIKLN  
HLTGTISSGFRLPALSWFDVSTNHLHGTIPGSFGNSETLKDFRLGGNMIHDPKSLC  
SNANINGGLTKTYGCSGVICPLGTYSDPGHATHSDGCKRCPDGRTTIYLGSSRCVELTDD  
DILTMFYDVMAASSAFPVQQTIGPMAGKETCALGMV  
>comp11125\_c0\_seq6; 776 434 2497 LEN=2668; translated  
MIGHESERLHPTVTAATAAKQQQQTKVSSTTRKKRMLRAAILFGVASSLRFALLAMIALP  
LERVQGNRNTILYPVSEDDRQQQLRRDQESSSIHTGGMSSSQSDSDRSNDKHKKESAV

SSPRKRKAGAPSRYLEYEDPDATYDIRLGIHPSISYPDLENFFDTEIRVRYEYRAHKKRG  
RLLANDCPRHFLWLSDKAVKDELDYRLEFGVWSERVLVEKIYFTLFYGGTGLASRYMDSV  
DDFQTDLVGWEIMNRSNHCDEWEGIECENPSLLDGEDPGTGPANNTNRPSSVVGQINGFSL  
EGTLPDHLRSLKRLTDLHGNRIRGTIPSSLGFLSSLVTIDLDRNRLEGTLPSTLSKWI  
GVERVLLGTNRLGGTVPAPMVASWARHPAADETVGSGGLETLDLSHNGFEGEFPFRALLA  
TATDLEALDLSHNRFVGVLPNDVGGRAQLLRDRGTNKALVAASEACASGDDESSSGEPE  
GDRKNRCLHRTLAAKDGGEVTTDGMGKKGDLNLSFNFTSGSLPEQWMEAFPGLTSWNLS  
HNKMTGMVPNEIWKLTFLERLDLGHNRLTGEIPSEETISRRGDSARGHDPRPMSGGSWS  
LVFLKLLDLEHNEKGTIPHEFLAGLSSSLEQLALGKNLLRGNIPSTIEKMTKLQSLDLH  
GNDLTGNLPTMRRMQPDLKLNLTDNS  
>comp11126\_c0\_seq2; 190 146 415 LEN=588; translated  
MNTTEDTKTDVINSNGSASTNGKTGGESGPVENAKVKNKEAILTGGMGYGRKKRQALDAF  
WSILWPGLEKIGWKRVSNTSSVYKCNVR  
>comp11126\_c0\_seq3; 487 146 1576 LEN=1969; translated  
MNTTEDTKTDVINSNGSASTNGKTGGESGPVENAKVKNKEAILTGGMGYGRKKRQALDAF  
WSILWPGLEKIGWKRIVGEGSDEGSMIFLPPGIIAMRRGKRNIIEYFDRIKLVIEFLEERR  
SKAEGKILDLYRKEIPATGGDAVASNPKRVGGRPRLRVSRSIIKDREIEEIDTSWKDGR  
LYPKRSSKIGKKHQVSSLPRAGTFENKSVDPNRYELIWNWKEAAEKGMLNFIENVPSN  
KREKALELMHKSNIYVSNIKGFSEQIDASNLSQWTKTDREKFHEEIFRSRKNFKSVLQNM  
GKTNMGDVIAAYLGHYKKSDDYRLLKAVRSQEREKANTHAVDHCAICGEGGSLLICD  
GCESEWHMGCSKPAKAIPEGHWECDICVDRKFLEGRKRILENVKMNATDQPSGKREKLG  
LHQGSDIGSKRHDQSMPTSFPPDVFVDFVIKDFSRNVNSILSTATITLKSEEDLISN  
>comp11126\_c0\_seq4; 178 146 532 LEN=532; translated  
MNTTEDTKTDVINSNGSASTNGKTGGESGPVENAKVKNKEAILTGGMGYGRKKRQALDAF  
WSILWPGLEKIGWKRVSNTSSVYKCNIVGEGSDEGSMIFLPPGIIAMRRGKRNIIEYFDR  
IKLVIEFLE  
>comp11127\_c0\_seq1; 447 145 1559 LEN=1818; translated  
MMIRTLRRAQAQAPAKLFRSNRSSFQFAIKACSNNSRHFSTSPWADFEMAPVDPVGL  
NEIFQKDDFPQKVIIVGVGAYRDDAGKPYVLPVREAEKIMMENKMDMEYTGIAEPKFVD  
LALKFVYGDSDAPILENRVQGTQALSQTGGLRVFVFGELMRKHGHKHIYVPNPTWGKMTNKX  
LPAELAGSSAQCFLLHSHNSPFPNGNHIPIFTNAGLEVRKYRYYSSENSDLDFAGLIDDIK  
NMPEGSIVLLHACAHNPTGMDPTMEQWKEMSDTIKKHKLPPFFDCAYQGFASGDPIDAA  
AVRMFVEDGHLISMVQSFSKNFGLYGQRIGALS SVVGRDEDEAKRVVSQMKMVI RPYM  
SNP PRQGARLVTTILEDPKLTQDFLDQCKGMADRINLMRSALKNSLVEVGSTKNWDHITKQIG  
MFAYSGLTADQVMKMRDVHHVYCTADGRISMAGVTTGNVDYIANAIHDVSK  
>comp11127\_c0\_seq2; 464 145 1470 LEN=1729; translated  
MMIRTLRRAQAQAPAKLFRSNRSSFQFAIKACSNNSRHFSTSPWADFEMAPVDPVGL  
NEIFQKDDFPQKVIIVGVGAYRDDAGKPYVLPVREAEKIMMENKMDMEYTGIAEPKFVD  
LALKFVYGDSDAPILENRVQGTQALSQTGGLRVFVFGELMRKHGHKHIYVPNPTWGNHPI  
FTNAGLEVRKYRYYSSENSDLDFAGLIDDIKNMPEGSIVLLHACAHNPTGMDPTMEQW  
KEMSDTIKKHKLPPFFDCAYQGFASGDPIDAAAVRMFVEDGHLISMVQSFSKNFGLY  
GQRIGALS SVVGRDEDEAKRVVSQMKMVI RPYM SNP PRQGARLVTTILEDPKLTQDF  
LDQCKGMADRINLMRSALKNSLVEVGSTKNWDHITKQIGMFAYSGLTADQVMKMRDVH  
HVYCTADGRISMAGVTTGNVDYIANAIHDVSK  
>comp11127\_c0\_seq3; 142 1 326 LEN=585; translated  
XENSHDVSFCFRINVEDFLDQCKGMADRINLMRSALKNSLVEVGSTKNWDHITKQIGMFA  
YSGLTADQVMKMRDVHHVYCTADGRISMAGVTTGNVDYIANAIHDVSK  
>comp11127\_c0\_seq4; 330 276 902 LEN=1161; translated  
MEQWKEMSDTIKKHKLPPFFDCAYQGFASGDPIDAAAVRMFVEDGHLISMVQSFSKNF  
GLYGQRIGALS SVVGRDEDEAKRVVSQMKMVI RPYM SNP PRQGARLVTTILEDPKLT  
QDFLDQCKGMADRINLMRSALKNSLVEVGSTKNWDHITKQIGMFAYSGLTADQVMKMR  
DVHHVYCTADGRISMAGVTTGNVDYIANAIHDVSK  
>comp11127\_c0\_seq5; 330 263 889 LEN=1148; translated  
MEQWKEMSDTIKKHKLPPFFDCAYQGFASGDPIDAAAVRMFVEDGHLISMVQSFSKNF  
GLYGQRIGALS SVVGRDEDEAKRVVSQMKMVI RPYM SNP PRQGARLVTTILEDPKLT  
QDFLDQCKGMADRINLMRSALKNSLVEVGSTKNWDHITKQIGMFAYSGLTADQVMKMR  
DVHHVYCTADGRISMAGVTTGNVDYIANAIHDVSK  
>comp11128\_c0\_seq1; 956 1 4173 LEN=4252; translated  
HSLEMDVTEEEQDEVFDGGAIRRRTRDPVSSDLVIRLRTTYSTLEATEVSFSRVAYGASK  
SDHMRLEAQLGNERGRVTKLFDDETVVTLMSPKHIDSFIEGGKSFDMTKGLSISQHDE



NLNESQVHVSNNVLEKTADNPEKLIIDIEMPGSQTPMSEFNIGMRMKSAAQVVLAPCATVTP  
TLAAFRCRTSPRNFSTTFGGIETTPDFESVPKALQAGLEPITEEDDPAQISCPGSDLDD  
DADEIAPEKRDGSSSPYCTNDGIFRGARNIVKLEFSIRQGCSDRRKAQVSRGQYVYETIM  
VLWLQAWSNYVSNLPQNSENGVAINFLGQGVIGNTFSMFYLQIDFILPMLLKSIVILRCSQ  
LLKAPGKRGARCILDEHDVYVFESFFEMLAIGLMGQAMTELQEPTEHGTLCDAINTCDHI  
LDFIIGLLAVFHPAHMEGIIISRFIMTLRKCENDNNAYRKKTSIEWNEATVHRTRCQLRLR  
IVEKLAVVPNFALNYPQRFLSKHLSSRREKSSWTMQHEIGLSNNGNKQERESNAMDDGL  
LPRAGWLASILTNESSLICAHSCETVITDVMATIEHESKNDKTPLRSSKKKQAVPSLKR  
SNLLMFQSMIAHAIISCVYELLIRRHAMDRRFQKSSRERIAALFTGPILERSLASVRWLA  
RVDSTHKVRSIWLCLFVYILQEAPENLVREHIRKYSNPSDFKIHQFIRLLRLGSATFQSF  
VDQERHCMFPSEIDKEISPWLLQESFNTVCATTIIVVEECADLTSSIPNEQKMFRLDLD  
LLLHLVLTTPQSTVTHLRAVGGAIQAFEKFGAQMFLETTGGHFQHWIRVIVGLMNSVALSV  
RSIAVDFVVSILCGVFDLNGNIEDVTLIFATVLPVAREIALCSVNGLVKKLEDAEKSI  
WPLRRSFADIEDANPLDDDRVDPQLLPVLTFCRASQAIIDGVLVEMRLRGTGCVVVGT  
ILPENRQKYTFDADEESLFEAANYFTPETSPMQRLRWLLTLKSLHESKGQWVEAAETLIM  
SARTISDAIPHLNYIWRPNRFLSWSDSRRSLWLSTVGEEIGNPERGNAQVMTFANSFLEP  
EGLTTTDEVSQNLELSRPTLQHICSLLSISVSKEAVDMYSQEGGTDALAYTRLESLLRIVM  
SVLDGQETRALQTRGLGLNAILQRKQYVEDVTLRKYIASITGDMTKIAEKLLVVAKDET  
KSSKSTTSQNETQEILIEDNRYVRLLSGKKPRRFEESTSLPTFLEWDSPCICRVPKGV  
IEEALKSKSRNSKLSDRAICEAFCKSIRNGLLQDLDATELVFATGTPTTKDASPDVTYIN  
IDIVRTDSLSETGLQNGSGPNLRRFIYSKPCDTQQGVESKYVQMTVALPFPCPLSRQRS  
MLTNQLVSSD

>comp11129\_c0\_seq1; 214 1 866 LEN=1493; translated  
XRSKLDTVSDESLNDLGMKTLKHAYTELAKEYDILFASCLIVVEFALGLLIIQKVPYTE  
IDWVAYMQEVEFWLDGEYDYRKIHGDTGPLVYPAGFLYLFGLQWLTDRIPEAQIIFLG  
FYVLTQSVVFGLYLMLVRQVRKTRQFEGSKTSEISDNASCSTHEVWSFRIAMGLLCISK  
RYHSIFLLRLFNDGPTMLVAYISFWCFMENKWNLCGFVFLAVSLKMNVLFFAPGLLYLL  
IETSPIMTIPRLAICGVTQLIIGAPFLARYPTSYLKAFELDRQFFFKW

>comp11130\_c0\_seq1; 183 179 472 LEN=733; translated  
MANLLVSLAVLGSQQIGRAKDPVKYLLSTEQRARERQVAYETVRLLEDVIECYRSSGVN  
HYTDCKEINQKYFDLVTKKDMGQLHPNWKNNPEKHDGW

>comp11130\_c0\_seq2; 213 206 574 LEN=835; translated  
MSPPSANPTTGKTHVAEKTKLHEGGSLKPYSHEELGTSDDIGRAKDPVKYLLSTEQRARE  
RQVAYETVRLLEDVIECYRSSGVNHYTDCKEINQKYFDLVTKKDMGQLHPNWKNNPEKHD  
GW

>comp11131\_c0\_seq1; 301 137 1042 LEN=1257; translated  
MTQSSISLSFLVLIGCALLAVNAELTPFYDFQTTYSDSRKSDGIRNKIDTNSMDPEQRQ  
LTSLRARNLAGRYGSRNGGKHHGHKGADYYECESEFYKSHKKDKKSKKDKKEKHHKHDK  
KKCKNVTGKPIYDDDAVEKPKPPRPDRPYKDFMRFIMVREEAGSPAAGDFGVGDTLALNG  
QIYYWEDYDDNLMSDVPVGTFTVTLCTGISEAGDDLCTYEIVLGLLADRTRNGNRKNGNA  
GNTKTPIQSVGAFVANGPNYVSENYMIVTGTETEFAGYQGTMTVTTEDLVNPLYADLYL  
A

>comp11132\_c0\_seq1; 220 131 953 LEN=953; minus strand; translated  
MIPPQQKTDPSVLSFCVFFSSGGIQRQPGPIATIPLCLDGASVSVSITIRLLARSFVRS  
FGARLWSTRHLACLRLRLLLAALLPAVQVEKALVALPGKLLGADGHVVREGSLGPVVVL  
LDGQVLGDHREAAGDADDDGDPDPGPELGPLLVGLVGVGRQDLLLVGDGPDLLMASAC  
ISASVPALGTVWTQRVLVVVVFVPLGGAFETESALLPPATVRRRTARLLARLFAAARDM  
VVLMLPMEQSRSRVFDSTLWVLLACWNATVQS

>comp11132\_c0\_seq2; 206 104 604 LEN=913; translated  
MSLAAAKSLAKSLAVRRTVAGGRSALSLSVSKAPPRGTTNTTTNTRWVQTVPKAGTEAEM  
QAEAEQIRARIAYQKEVLAANPHKSHDEEWTELWTWIRISIIIVCIPGCLAMVAKDLAIE  
EHHHRPEGPLPDYMSIRSKEFPWECDQCPFFDLNCWKKCRQEQQSA

>comp11134\_c0\_seq1; 439 472 1835 LEN=1835; minus strand; translated  
MDRCQQHTNDGNDGCPSEGGKANNESVVRTASQCHGHILRWVCLSGSGGKQWLDAAEKQNE  
SSITTCFRGQSNRTIGLDTSVGEQWLHVRTSVRDSLSADTTDLESVNNNDNRNRDGEIIPM  
SNHVPSPRRSPSQFQSQTEKTTQESSQLSLLAYLNQPESEESRSQMTEQEPPSLPIL  
DVLPNRERRNKTSHCHHHQGGNDLLSSHAFLEPVPFIPVGVNQERVLWTVKDRSPLAE  
EPQSSSELEEYAVELWRSNQASPFWDETGETAQMQATHVPLPRRRLIALSHGDAIRIRV  
QTTTTTHTSKRTAGSSEEVHSPSQSMPTSLADRSPLAQDLATITVQYFESEAKAKETSPA  
TTRISGLAAIEAEASPNQRQGGSTSAPAGVLTGTAKNDQHQTAKASKAATRFEDQPNTFCG

TTAGTPTTNTAANPMNNTVRSASPRQCQRTASTA

>comp11135\_c0\_seq1; 526 201 1646 LEN=2553; translated  
MTPEEIEEIKTFVMDSYENDLEASKTYQKSEDDWLSKSWAGFKSPTQMSRIRPTGVDIEM  
LRKIGITAGTVPDDFKLHRQMKKIFNNRREQAEKGEIDWGTAEALAFGSLLEVEGNHVRI  
TGQDVQRGTFSHRHAVVKDQDTEQDYTPLNHITKRMDPSCPKEEMSGPDTQAGFICRNSI  
LSEFAVLGFELGYSLENPNALVLWEAQFGDFVNGAQIMIDQFISAGEDKWLRSGLVMMLL  
PHGYDGGGAEHSSCRLERFLQMVEDDPHVVPEFNKDERMQIQKHNWQVINCSTPANYFHC  
LRRQIHRDFRKPLVVVAPKNLLRNRRCVSTLDDMGPGTTFKRLIPETNPDISENPDQVKK  
LVFCSGQIYYELLAEREKRDVKDVALVRIEQIAPFAFDRVAESAAYQNAEVIWAQQEPEK  
NMGAYSVNSRIMTATREINGNEKRPRYVGRPVSAAPATGMTLVHQAEYNDILNGVFDEE  
K

>comp11135\_c0\_seq2; 1070 161 3307 LEN=4214; translated  
MSKILLASHRRLFTRSMRIGKKTIAKHRNDTRWASACFSTQIEEEEVPPLESFLNGTST  
LYAEQMYEMYLEDPASVQDSWRTYFENEANEVPPFDSNDFNKPTSVPGKRSAAVAGGAAPS  
DSLAI SHLIRAYQVNGHEAANLDPDLDFNDESFPYRPKPGADGYPSNLEIEYYGFSEEDL  
DRKLLFKGRSSGGQRGYLEDLAKAPDKVTLRILGELRKYCGTLGVEYMHIGDPDKMNW  
IRQRMENPHWNQYDKEKKAHIFERLCFADTFENFMAYKFNTTKRFGLDGGEAVVPLKDA  
IDRASELGATSFVLGMPHRGRLNVLANVMRKPMPPLIFSEFAGTHYSIDEHYKGDNDNHGF  
SGDVKYHLGSSMDRTPDGRRIHMSLVANPSHLECVNPLVVGKIRAKQYYQGDREPEDVRN  
VVPILLHGDAAFAGQGVVYETMQLANVKDFAVGGTIHVIVNNQIGYTTNPINSRSTPYCS  
DLGKAFNCPIFHCNGDDPLAVSTALETAVEYRHEWGTDVIVDVICYRRNGHNEMDQPAFT  
QPKLYKKISRHPALQLFEKRLVNEGTMTPPEEIEEIKTFVMDSYENDLEASKTYQKSEDD  
WLSSKWAGFKSPTQMSRIRPTGVDIEMLRKIGITAGTVPDDFKLHRQMKKIFNNRREQAE  
KGEIDWGTAEALAFGSLLEVEGNHVRI TGQDVQRGTFSHRHAVVKDQDTEQDYTPLNHIT  
KRMDPSCPKEEMSGPDTQAGFICRNSILSEFAVLGFELGYSLENPNALVLWEAQFGDFVN  
GAQIMIDQFISAGEDKWLRSGLVMMLLPHGYDGGGAEHSSCRLERFLQMVEDDPHVVPEF  
NKDERMQIQKHNWQVINCSTPANYFHC LRRQIHRDFRKPLVVVAPKNLLRNRRCVSTLDD  
MGPGTTFKRLIPETNPDISENPDQVKKLVFCSGQIYYELLAEREKRDVKDVALVRIEQIA  
PFAFDRVAESAAYQNAEVIWAQQEPEKNMGAYSVNSRIMTATREINGNEKRPRYVGRPV  
SAAPATGMTLVHQAEYNDILNGVFDEEK

>comp11135\_c0\_seq3; 395 201 1058 LEN=2738; translated  
MTPEEIEEIKTFVMDSYENDLEASKTYQKSEDDWLSKSWAGFKSPTQMSRIRPTGVDIEM  
LRKIGITAGTVPDDFKLHRQMKKIFNNRREQAEKGEIDWGTAEALAFGSLLEVEGNHVRI  
TGQDVQRGTFSHRHAVVKDQDTEQDYTPLNHITKRMDPSCPKEEMSGPDTQAGFICRNSI  
LSEFAVLGFELGYSLENPNALVLWEAQFGDFVNGAQIMIDQFISAGEDKWLRSGLVMMLL  
PHGYDGGGAEHSSCRLERFLQMVEDDPHVVPEFNKDERMQIQKHNW

>comp11135\_c0\_seq4; 401 201 1292 LEN=2638; translated  
MTPEEIEEIKTFVMDSYENDLEASKTYQKSEDDWLSKSWAGFKSPTQMSRIRPTGVDIEM  
LRKIGITAGTVPDDFKLHRQMKKIFNNRREQAEKGEIDWGTAEALAFGSLLEVEGNHVRI  
TGQDVQRGTFSHRHAVVKDQDTEQDYTPLNHITKRMDPSCPKEEMSGPDTQAGFICRNSI  
LSEFAVLGFELGYSLENPNALVLWEAQFGDFVNGAQIMIDQFISAGEDKWLRSGLVMMLL  
PHGYDGGGAEHSSCRLERFLQMVEDDPHVVPEFNKDERMQIQKHNWQVINCSTPANYFHC  
LRRQIHRDFRKPLVVVAPKNLLRNRRCVSTLDDMGPGTTFKRLIPETNPDISENPDQVKV  
SSY

>comp11135\_c0\_seq5; 395 201 1058 LEN=1753; translated  
MTPEEIEEIKTFVMDSYENDLEASKTYQKSEDDWLSKSWAGFKSPTQMSRIRPTGVDIEM  
LRKIGITAGTVPDDFKLHRQMKKIFNNRREQAEKGEIDWGTAEALAFGSLLEVEGNHVRI  
TGQDVQRGTFSHRHAVVKDQDTEQDYTPLNHITKRMDPSCPKEEMSGPDTQAGFICRNSI  
LSEFAVLGFELGYSLENPNALVLWEAQFGDFVNGAQIMIDQFISAGEDKWLRSGLVMMLL  
PHGYDGGGAEHSSCRLERFLQMVEDDPHVVPEFNKDERMQIQKHNW

>comp11135\_c0\_seq6; 939 161 2719 LEN=4399; translated  
MSKILLASHRRLFTRSMRIGKKTIAKHRNDTRWASACFSTQIEEEEVPPLESFLNGTST  
LYAEQMYEMYLEDPASVQDSWRTYFENEANEVPPFDSNDFNKPTSVPGKRSAAVAGGAAPS  
DSLAI SHLIRAYQVNGHEAANLDPDLDFNDESFPYRPKPGADGYPSNLEIEYYGFSEEDL  
DRKLLFKGRSSGGQRGYLEDLAKAPDKVTLRILGELRKYCGTLGVEYMHIGDPDKMNW  
IRQRMENPHWNQYDKEKKAHIFERLCFADTFENFMAYKFNTTKRFGLDGGEAVVPLKDA  
IDRASELGATSFVLGMPHRGRLNVLANVMRKPMPPLIFSEFAGTHYSIDEHYKGDNDNHGF  
SGDVKYHLGSSMDRTPDGRRIHMSLVANPSHLECVNPLVVGKIRAKQYYQGDREPEDVRN  
VVPILLHGDAAFAGQGVVYETMQLANVKDFAVGGTIHVIVNNQIGYTTNPINSRSTPYCS  
DLGKAFNCPIFHCNGDDPLAVSTALETAVEYRHEWGTDVIVDVICYRRNGHNEMDQPAFT

QPKLYKKISRHTALQLFEKRLVNEGTMTPPEEIEEIKTFVMDSYENDLEASKTYQKSEDD  
WLSSKWAGFKSPTQMSRIRPTGVDIEMLRKIGITAGTVPDDFKLHRQMKKIFNNRREQAE  
KGEIDWGTAEALAFGSLLEVEGNHVRITGQDVQRGTFSHRHAVVKDQDTEQDYTPLNHIT  
KRMDPSCPKEEMSGPDTQAGFICRNSILSEFAVLGFELGYSLENPNALVLWEAQFGDFVN  
GAQIMIDQFISAGEDKWLRSGLVMLLPHGYDGGGAEHSSCRLERFLQMVDEDPHVVPEF  
NKDERMQIQKHNW

>comp11135\_c0\_seq7; 486 201 1463 LEN=1568; translated  
MTPEEIEEIKTFVMDSYENDLEASKTYQKSEDDWLSSKWAGFKSPTQMSRIRPTGVDIEM  
LRKIGITAGTVPDDFKLHRQMKKIFNNRREQAEKGEIDWGTAEALAFGSLLEVEGNHVRIT  
TGQDVQRGTFSHRHAVVKDQDTEQDYTPLNHITKRMDPSCPKEEMSGPDTQAGFICRNSI  
LSEFAVLGFELGYSLENPNALVLWEAQFGDFVNGAQIMIDQFISAGEDKWLRSGLVMLL  
PHGYDGGGAEHSSCRLERFLQMVDEDPHVVPEFNKDERMQIQKHNWQVINCSTPANYFHC  
LRRQIHRDFRKPLVVVAPKNLLRNRCVSTLDDMGPGTTFKRLIPETNPDI SENPDQVKK  
LVFCSGQIYYELLAEREKRDVKDVALVRIEQIAPFAFDRVAESAKEYQNAEVIWAQQEPK

>comp11135\_c0\_seq8; 945 161 2953 LEN=4299; translated  
MSKILLASHRRLFTRSMRIGKKTIAKHRNDTRWASACFSTQIEEEEVPPLESFLNGTST  
LYAEQMYEMYLEDPASVQDSWRTYFENEANEVPPFDSNDFNKPTSVPGKRSAAVAGGAAPS  
DSLAI SHLIRAYQVNGHEAANLDPDLDFNDESFPYRPKPGADGYPSNLEIEYYGFSEEDL  
DRKLLFKGRSSGGQRGYLEDLAKAPDKVTLRILGELRKTYCGTLGVEYMHIGDPDKMNW  
IRQRMENPHWNQYDKEKKAHIFERLCFADTFENFMAYKFNTTKRFGLDGGEAVVPGKDA  
IDRASELGATSFVLGMPHRGRLNVLANVMRKPMPPLIFSEFAGTHYSIDEHYKGDNDNHGF  
SGDVKYHLGSSMDRTPDGRRIHMSLVANPSHLECVNPLVVGKIRAKQYYQGDREPDVRN  
VVPILLHGDAAFAGQGVVYETMQLANVKDFAVGGTIHVIVNNQIGYTTNPINSRSTPYCS  
DLGKAFNCPIFHCNGDDPLAVSTALETAVEYRHEWGTDIVDVICYRRNGHNEMDQPAFT  
QPKLYKKISRHTALQLFEKRLVNEGTMTPPEEIEEIKTFVMDSYENDLEASKTYQKSEDD  
WLSSKWAGFKSPTQMSRIRPTGVDIEMLRKIGITAGTVPDDFKLHRQMKKIFNNRREQAE  
KGEIDWGTAEALAFGSLLEVEGNHVRITGQDVQRGTFSHRHAVVKDQDTEQDYTPLNHIT  
KRMDPSCPKEEMSGPDTQAGFICRNSILSEFAVLGFELGYSLENPNALVLWEAQFGDFVN  
GAQIMIDQFISAGEDKWLRSGLVMLLPHGYDGGGAEHSSCRLERFLQMVDEDPHVVPEF  
NKDERMQIQKHNWQVINCSTPANYFHC LRRQIHRDFRKPLVVVAPKNLLRNRCVSTLDD  
MGPGTTFKRLIPETNPDI SENPDQVKVSSY

>comp11135\_c0\_seq9; 401 201 1292 LEN=1653; translated  
MTPEEIEEIKTFVMDSYENDLEASKTYQKSEDDWLSSKWAGFKSPTQMSRIRPTGVDIEM  
LRKIGITAGTVPDDFKLHRQMKKIFNNRREQAEKGEIDWGTAEALAFGSLLEVEGNHVRIT  
TGQDVQRGTFSHRHAVVKDQDTEQDYTPLNHITKRMDPSCPKEEMSGPDTQAGFICRNSI  
LSEFAVLGFELGYSLENPNALVLWEAQFGDFVNGAQIMIDQFISAGEDKWLRSGLVMLL  
PHGYDGGGAEHSSCRLERFLQMVDEDPHVVPEFNKDERMQIQKHNWQVINCSTPANYFHC  
LRRQIHRDFRKPLVVVAPKNLLRNRCVSTLDDMGPGTTFKRLIPETNPDI SENPDQVKV  
SSY

>comp11135\_c0\_seq10; 939 161 2719 LEN=3414; translated  
MSKILLASHRRLFTRSMRIGKKTIAKHRNDTRWASACFSTQIEEEEVPPLESFLNGTST  
LYAEQMYEMYLEDPASVQDSWRTYFENEANEVPPFDSNDFNKPTSVPGKRSAAVAGGAAPS  
DSLAI SHLIRAYQVNGHEAANLDPDLDFNDESFPYRPKPGADGYPSNLEIEYYGFSEEDL  
DRKLLFKGRSSGGQRGYLEDLAKAPDKVTLRILGELRKTYCGTLGVEYMHIGDPDKMNW  
IRQRMENPHWNQYDKEKKAHIFERLCFADTFENFMAYKFNTTKRFGLDGGEAVVPGKDA  
IDRASELGATSFVLGMPHRGRLNVLANVMRKPMPPLIFSEFAGTHYSIDEHYKGDNDNHGF  
SGDVKYHLGSSMDRTPDGRRIHMSLVANPSHLECVNPLVVGKIRAKQYYQGDREPDVRN  
VVPILLHGDAAFAGQGVVYETMQLANVKDFAVGGTIHVIVNNQIGYTTNPINSRSTPYCS  
DLGKAFNCPIFHCNGDDPLAVSTALETAVEYRHEWGTDIVDVICYRRNGHNEMDQPAFT  
QPKLYKKISRHTALQLFEKRLVNEGTMTPPEEIEEIKTFVMDSYENDLEASKTYQKSEDD  
WLSSKWAGFKSPTQMSRIRPTGVDIEMLRKIGITAGTVPDDFKLHRQMKKIFNNRREQAE  
KGEIDWGTAEALAFGSLLEVEGNHVRITGQDVQRGTFSHRHAVVKDQDTEQDYTPLNHIT  
KRMDPSCPKEEMSGPDTQAGFICRNSILSEFAVLGFELGYSLENPNALVLWEAQFGDFVN  
GAQIMIDQFISAGEDKWLRSGLVMLLPHGYDGGGAEHSSCRLERFLQMVDEDPHVVPEF  
NKDERMQIQKHNW

>comp11135\_c0\_seq11; 1030 161 3124 LEN=3229; translated  
MSKILLASHRRLFTRSMRIGKKTIAKHRNDTRWASACFSTQIEEEEVPPLESFLNGTST  
LYAEQMYEMYLEDPASVQDSWRTYFENEANEVPPFDSNDFNKPTSVPGKRSAAVAGGAAPS  
DSLAI SHLIRAYQVNGHEAANLDPDLDFNDESFPYRPKPGADGYPSNLEIEYYGFSEEDL  
DRKLLFKGRSSGGQRGYLEDLAKAPDKVTLRILGELRKTYCGTLGVEYMHIGDPDKMNW

IRQRMENPHWNQYDKEKKAHIFERLCFADTFENFMAYKFNTTKRFGLDGGAEAVVPGLKDA  
IDRASELGATSFVLGMPHRGRLNVLANVMRKPMPPLIFSEFAGTHYSIDEHYKGDNDNHGF  
SGDVKYHLGSSMDRTPDGRRIHMSLVANPSHLECVNPLVVGKIRAKQYYQGDRPEDVRN  
VVPILLHGDAAFAGQGVVYETMQLANVKDFAVGGTIHVIVNNQIGYTTNPINSRSTPYCS  
DLGKAFNCFIFHCNGDDPLAVSTALETAVEYRHEWGTDVIVDVICYRRNGHNEMDQPAFT  
QPKLYKKISRHPALQLFEKRLVNEGTMTPEEIEEIKTFVMDSYENDLEASKTYQKSEDD  
WLSSKWAGFKSPTQMSRIRPTGVDIEMLRKIGITAGTVPDDFKLHRQMKKIFNNRREQAE  
KGEIDWGTAEALAFGSLLEVEGNHVRITGQDVQRGTFSHRHAVVKDQDTEQDYTPLNHIT  
KRMDPSCPKEEMSGPDTQAGFICRNSILSEFAVLGFELGYSLENPNALVLWEAQFGDFVN  
GAQIMIDQFISAGEDKWLRSGLVMLLPHGYDGGGAEHSSCRLERFLQMVDEDPHVVPEF  
NKDERMQIQKHNWQVINCSTPANYFHCLRRQIHRDFRKLPLVVVAPKNLLRNRRRCVSTLDD  
MGPGTTFKRLIPETNPDISENPDQVKKLVFCSGQIYYELLAEREKRDVKDVALVRIEQIA  
PFAFDRVAESAACYQNAEVIWAQQEPK

>comp11135\_c0\_seq12; 945 161 2953 LEN=3314; translated  
MSKILLASHRRLFTRSMRIGKKTIAKHRNDTRWASACFSTQIEEEVPPLESFLNGTST  
LYAEQMYEMYLEDPASVQDSWRTYFENEANEVPPFDSNDFNKPTSVPGKRSAAVAGGAAPS  
DSLAI SHLIRAYQVNGHEAANLDPDLDFNDESFYRPKPGADGYPSNLEIEYYGFSEEDL  
DRKLLFKGRSSGGQRGYLEDLAKAPDKVTLRILGELRKYCGTLGVEYMHIGDPDKMNW  
IRQRMENPHWNQYDKEKKAHIFERLCFADTFENFMAYKFNTTKRFGLDGGAEAVVPGLKDA  
IDRASELGATSFVLGMPHRGRLNVLANVMRKPMPPLIFSEFAGTHYSIDEHYKGDNDNHGF  
SGDVKYHLGSSMDRTPDGRRIHMSLVANPSHLECVNPLVVGKIRAKQYYQGDRPEDVRN  
VVPILLHGDAAFAGQGVVYETMQLANVKDFAVGGTIHVIVNNQIGYTTNPINSRSTPYCS  
DLGKAFNCFIFHCNGDDPLAVSTALETAVEYRHEWGTDVIVDVICYRRNGHNEMDQPAFT  
QPKLYKKISRHPALQLFEKRLVNEGTMTPEEIEEIKTFVMDSYENDLEASKTYQKSEDD  
WLSSKWAGFKSPTQMSRIRPTGVDIEMLRKIGITAGTVPDDFKLHRQMKKIFNNRREQAE  
KGEIDWGTAEALAFGSLLEVEGNHVRITGQDVQRGTFSHRHAVVKDQDTEQDYTPLNHIT  
KRMDPSCPKEEMSGPDTQAGFICRNSILSEFAVLGFELGYSLENPNALVLWEAQFGDFVN  
GAQIMIDQFISAGEDKWLRSGLVMLLPHGYDGGGAEHSSCRLERFLQMVDEDPHVVPEF  
NKDERMQIQKHNWQVINCSTPANYFHCLRRQIHRDFRKLPLVVVAPKNLLRNRRRCVSTLDD  
MGPGTTFKRLIPETNPDISENPDQVKVSSY

>comp11136\_c0\_seq2; 942 1 3837 LEN=4259; translated  
THSNRASRSLDVTRYRIVPLSVVMVVKYLCAAPRPESWEEKAEALLKSLDGDKAKREE  
VARQTLALLKERRKHEKRKAGPGRKSNAEHAI AFYEYLVGFEDKSTHDIDTDDDEKSATS  
SSDETIDTEEFNLQHDNVCDVCNLGELVCCSTCTLAHFHQDCVRPVMKSI PSSWSCP YCI  
TQGIHNYKRHSKTWKSAA SGI RQMNKMKLEKEIVQREEEHDEEEKNKDDTIQGTKGEGGT  
TVEEESKAPNGTNSIETEQSSTKNSEKGRKGNIEGRGDSE RQASQETS RQHSKEKVN  
TASSVVSSTPSANSSVSSNSDSKRNTSLDRKSGAESLVRSRRQRKQPSLYQPQMCADS  
QWKSDEKRRKADHSDSSFESSSEDDSGSSRNSADYVDPKSTKSNSSKTTVRTRKESVL  
GHEIEDDVAVRVGRAEGERKSNERIFCNFCHDDPSIPICVFCGCRVCFGKHDKSTLLLCD  
SCDNEYHTICLGLSSVPSTKNWYCPDCEKTKTEDVVVTRPSSKRRASAVAKAMSGTGTEE  
NTQRRHSSKKNKAI AAGVTA AKISTTTTTTRSTLVETPRRRGRGRPPKIKVENEPSVPVQL  
PPRRRVKTPKAAANSADPTEQQYQRKRGRPEKSTTNTSSSFSSAKATAATPPSSGRKRGR  
PPKTAVEAPVVTSKTASRKRGRPPKCSPPALITNKVDSGGKKKATKPI SPPVSTVSIKT  
SCSSTASEVAGRSQEHMKVKVSRVSGRTVKRASFDHDEVEGEQHLRASKTPQVEENQTRN  
GTPKAI VSKSQETRGRHRRQKEVPEKVHEPPEPTRKKQKVEEKAQPRPKVASLGSKTEST  
KSDISVSLAAEDKDNEISGQPPVAPVRMKPILDPPAPP IAP IRNKSALDPTASLIPHVLI  
KPVLDTPAQPVRMKPVLDSSSTPRLPQKATLLDNLKPTDKAENAMVSKIPINNSARSEEKS  
CTKNGVANTVAVAKKPMI INKAGSQSSSLPPAINTPSVAAAAANAPTKSATTVNETSTISA  
NVVQKPTPASKNEIPISSSKPSSTTAVPNYPSTPILDLVALEAAVRALPEPEDKGTCKG  
ITKIPRRKPGARECMQISRRFGVNI IPEKYMKILLDYCRGKVEHLIKMRERLDCHSRFL  
ESQLAGLEARIKEVGDSDKIVVPAVPPHKRESSGRNRVGRITPPP SLHKRSTITQSSLTIS  
RKT'TTKTTVASITSGRI PPPVKSQVPSAVAAAAAIAAGTTPKRPAPPKAPT VAPV SFAA  
APRPAVQNSTMTSKTKNT

>comp11137\_c0\_seq1; 393 116 604 LEN=1050; translated  
MAETDAMAAARARMI AKRFGGASTSTGGKGSVRRKNKKVSRSAQAQSDAKLGTTLKLLGA  
TNIPGIEEVNLFKEDGKVIHFNTNPKVQAAIAANTYVISGPNEEKSLQELLPSIVSQLGMD  
NLSQLQSMQAQAGVGATEAADD DDDDDV PDLVEGNFEEVSEN

>comp11138\_c0\_seq1; 221 129 551 LEN=616; translated  
MSVNEVRVKRVDSSKFKQVKGTPESNRTFAIGNEDHTLGNALRHILIQNSKVEFAGYSV  
PHPSEPIVHIRVQTHQPTTALQALQESCETLNSQCEYVLQQLEEKLPVETADSI ALQAKL

AEMLEDEEEEGDEEDVCMEE

>comp11139\_c0\_seq1; 420 596 1492 LEN=1552; translated  
MIAGGAAGIEEELKQLTTSFADKQAALVEAKRKS GGNLMKADLNDSLDAETMSKVNVDVDS  
EYLKTVFIAIPKTAKENFEFSIESIASDVVGFGGPDWSRDASKLGGPISFGNQIDRHKVVS  
GSPVVPGSIQLVKQDDDSFLYAVTILKGEYEAGYYEGSEFHPGTYKEFEPELAKACREKR  
FVLRDFTWDP SQAMKSQMVREQQLQIEVDGMKSALMRWCKTHFGDAFVAVMHIKAIKRVFVE  
SVLRYGLPVDFTSVLYKVNPGKDHQLTQKLDKSLGSGADDDVEDGEEYHDFVLLKFEP

>comp11139\_c0\_seq2; 467 100 1356 LEN=1416; translated  
MSYFLVAISNDGGAPEQAYRKM QSAGACPEAPYAEMFKFEVPSLTVGTLDTLMTLSDDL  
KTDGVVESTVRKIERTTAELFGGKSSDLTVGGVPAQRYIQQFAWDSAKYPNRRPLKELVA  
MIAGGAAGIEEELKQLTTSFADKQAALVEAKRKS GGNLMKADLNDSLDAETMSKVNVDVDS  
EYLKTVFIAIPKTAKENFEFSIESIASDVVGFGGPDWSRDASKLGGPISFGNQIDRHKVVS  
GSPVVPGSIQLVKQDDDSFLYAVTILKGEYEAGYYEGSEFHPGTYKEFEPELAKACREKR  
FVLRDFTWDP SQAMKSQMVREQQLQIEVDGMKSALMRWCKTHFGDAFVAVMHIKAIKRVFVE  
SVLRYGLPVDFTSVLYKVNPGKDHQLTQKLDKSLGSGADDDVEDGEEYHDFVLLKFEP

>comp11140\_c0\_seq1; 472 269 2090 LEN=2090; translated  
MSCDKDNSTLSPDSIKGLVLQTRAALRFLGSCVVSADGEWNHSEAMVATI QSKAMVDHRWY  
DPLSTILSRSRGDKSRILAAARLMSNLVTSNEQTASILSTNVRIAPSNKSVASSILDKIT  
DKETIELPLSSRLIAESNWVDMFLFAAKSRNRDAFAAIAAVLHNCIASLLIKEHENRDIP  
FIRDVASNGMLINLLRHFVSAEAITEALDNEKEDSKGGDGLWDSATEWIQLLLSKLAKL  
GMFPDMYSCIGAACDKTSPESAPIRILPEQNVLLQCMSREAEAYAMEFTSNNKAENPFGG  
EAGSSGDSYFLADLAVAVSPWFRHERLQTSSTTTTHDQDEQCSFNDTLLQSGFLTNEIL  
ASTLGVDSALSATLRLDLGQKTSILQETAKSLGVVLDLAEKSAGRKASDVHLTSDDQRL  
LVALVQFIGNLCYKCKHNQDLLRTTLVPPAKKPVLRVERIREEGNDPIPSGVRNGLHVLL  
TCTTHATSCTFLREWGVI AIRNALDDNANNQAVVEELMAQGPVESADLEQAGVRVQLDSK  
GKVSQRRSTKSENVIHGAIPNLI EP GK KYGMASQGFGRKKN DILCHKGMPPK LKFRWFFS  
RTNIILR

>comp11142\_c0\_seq1; 143 1 679 LEN=1114; translated  
XQALKHIEQSVSISIALRLDKARWNRQLRKRFSTLITIVFPNGRNTAVSLYFHTHHIIPS  
QMIRSVATKISKLSIQRASWAPQLCLLSSSTFTERYRYGVITTTGGHRTAKRPYTSPPAA  
KTVAITYVDPDGTSTTVDAEVTGLMTVAHENDIELEGACGGELACSTCHLIFDPEIYDT  
LPEKEDDEEDMLDLAFEVTETSRLGCQIPVQENFDGITVQIPDDGF

>comp11143\_c0\_seq1; 327 429 1658 LEN=1730; translated  
MGPVLEIIGDLSDSKSWVVLQHCDVLRGKSQEDNDRNMNTLLREIERRREENPVQQINGW  
IPLCFGQVIALIASTMNASSYVLEYGMQMVFPFLLFNSYAILTLHLFWSAGSIKEQADS  
PRYRLPLTRLKLRTPWYQYLCLSFLDIVPNYLALLAIHR TSLTSATLLQSLTIPSTMIFC  
RLLLGKKYQRMHYIGVVL CMLGGGITILT DKGILLSPDRETPQPHSFSGDVLAILAALGY  
GVGDACAEFWSKHV NRE EYLG MIGLFGAIWTLIASLLYERDAVLEAFATDYETFLRAAGV  
AACVVASLLAYVTE SKFLMKSDATLLNLSLQTQNF WAVLFSVFFFRET PHL P FYVAMIL  
VVTGAFVYELGNNEHRVAFKLDTFKANLDIATESTPLTSRNETSLEI

>comp11144\_c0\_seq1; 439 317 1438 LEN=1923; translated  
MTMKHPREDQLLLGSDHSKTKRPR TSSDASE T SAIENKSSNIILGSGASVHNHSSNNTLS  
SKIKPLQTKHGIDSSRSRPM MALLYSV DDEARKLGHKWPQPPSASSTVTSSSGPSSQAPA  
PAPDSTALAAAVLLQKQKQKQKQTRPATTREALNFCQPLVARPRVHKI KEVAPTTESSAT  
SPAPTPEPRESPPASSAPAPATATLDNIKA AVEAAAPAAIDAYNTAENNAATITAVNAVL  
AQHRIAGAAVAQAQTGFPTNP SPAPT PSIPLGGITKSGRPLHALSFPTLVVSTAAGANTSY  
VVS NPRYDATYLHGNRPLPFRGPTARQQA IHD AVHS DYKKVYRPLQPPRLPSPQEALV  
IAAISTAASPACR

>comp11145\_c0\_seq1; 455 146 1477 LEN=1604; translated  
MEALTTSRGSCGSFNHAVSRSSSELLSCAKTAWKLREREREQLRLDQKGNLGTGPPPPPPPR  
NNPNLRLASSEGPPPTSLAVLDDGF TLLRAMDYGT KKLQALVRRRGHTNDP THEIASLVK  
QLEQDLKELTSYCKQLLMIRRRKQEQRHWELVVEWFQQVASRNSGQLHECLKLRGEILAE  
QAQKHRKLVESGGNKS KTSVPSNGVNHGAASVAPSMSATATPLFDSTLFTSPKGSQNTL  
GKDEDGKSDSLRQRNKRQPN SRKTPS AALNGSSSNYYRGNTPVGPTSGGYGAVYGVVSAG  
GYAGYGGGGYSSGMRQRRGTSYSSLTIPAEQE QEEQKVHSQIQMRERKRQTQORLDEA  
RQAESTLSEVSKLYSKMSTLITQQGETLEKIEDDVECALVDVTAGQEELTKLYAIKKNR  
PLI IKTFLIILNFLIVFMRAYRDR

>comp11147\_c0\_seq1; 740 167 3046 LEN=3156; translated  
MPSYNEYEDDDDDVEVVYDVPYVNGGSRPGKQKHPKPRGGRTNGAARGNANVSPDGVM  
IGNYVNFANVDFPFEQDQDALAEFFDDNDPSGGDSKEDWERPNMFNDPRKTGVLNDAVHQ

IAGSPWAKPPMNTTNRPTPLSIALHTSTLSFLVTVSLVGFLLFVAIWTFTGVGRVIVEI  
ILALIAFIGLFWNVYFSISSIMKCFIPAKAFRTNTKYCSVIPENKPKHAEWMSVTIQIPV  
YKESLQEVMMPTLNSCIRARDHYRRNSGAKCNIVLADDGMMAYLKNNFAAAEMLWETIVA  
TNGKYFKLSQLLQKVPKPSRRHLKGLSSKAVYEVFHRMLYYYHHKIGFVARSTFDRRGKF  
KKASNLNSHLRLAWGAKQLSEIDITFEEALIENSHNSDGSRFVMFGGDIEIGDLQLIND  
ADARMAESVIKTVPEFLNDKHLGFTQHATKTLDDQRRESYYINMLSSYTDALYMGHFLL  
SSILGCHPPLVGHISIILRSEAIKATGRIRTLKAQRWLKNI GLPFLSVEQIGSFNLQDHG  
STEYWSESHVSEDFELMIHLYNLGFNGRYVNYPNCEFQEGITRTFDEEAGRHRKFALGAH  
ELMFNSFNSWLGHGPFPTPLFWTFLKSDIPSYYKVFLTSYLFGYTSGGCYILVFSIAAITR  
LCGVQSQVEFLSAFSSAGVLVLSVVCYIIGYTTFLFAMIKMKWSNNKLLFPEYRDHGI  
YLCWRLIRYCMCFQVMFYVSMGNYFFLGSMDHLLARPNICSATNKDSIKITRCIAFGDMA  
RFNIGSWGVAVYLLIISYLVVLQDANWNYNEWPENKLETFLFAGPSAFLALSIFYIPVIL  
NPFILGWPFNPLCGRQSVKKAADRAATKHVDLNTFMQ TENRLNKEIGRAEDKPDVELG  
SLATKDFGRSNMTTVPQTHFQDTAPRSRYRSKRPNTLTHADIQRSAREERGSFTLAMI  
>comp11148\_c0\_seq1; 326 414 818 LEN=818; translated  
MKKIHLITNEDIFFDIDGDDSLFGYDSEYGEDGFDYQTDAYSQRTSSPISGETDDFESN  
EETREPLPPPEIVHEQDENS GKESGDGSHDDSGADAPIELEKETEAGEE SSGEKEKGNNT  
EHDNNNNNDHNNNNN  
>comp11149\_c0\_seq1; 2438 124 4283 LEN=4283; translated  
MTHEPAHYPSAGQNLQRETSVVRARPFKPSAVSSRMTLIVA AVTAMIIGEHHASAANRR  
SAANQMPHRPLHMSHLRGGSKSDKILSSIRGGDQDLGDEDLDEYIEFLLAYADDKATEAD  
NPLFRGMNANQVLEDENENEEESLIEPLVDNVNDDAQIDAMVETLVATVDDQVEVEGDLEV  
ENIEDHESKTEAVQVEEVVPIELAIASSLEEETGTVEDIAVESASEETSATVVEENIEP  
ATIPSSSDEVEKVGVEVSTEPATEPVTEEISLGI VEDDTE SAFDEVD DKEAEIALAAGEVT  
LVDDVATQTETKDEKLEASNIELVDAEEKETTKSIDDQVEEGKETDPFYLGSSAVENMP  
VPLNEDQASTSTSEEVETTTEPTEKVPLFTSLMRKIGLKKKEVTEQVDQTSADDVEQIEEA  
LDAEGVAEEANIVMGTS EDVEEHIISFGESDSELQLQTHKVD AEVTTGDVSES NQFPEE  
VSDSAASEFDSQESTLEPIGIGKEENTVGAEVSLEAEVAETREPDALPSIDEKTDQQVTT  
SVVTVAKQYYQGAWSVKEFWSKNRWLK KETE EVPLERDYTKIYQKYFADNLQAVDADD  
SPREKQDRLSNAFLRPWGTLTKYLKPDREGAES AETSTASYYSIGIQGYIADDAKSETE  
VSGQLIDKIETDIEDLEMQVGGGVIITASEDDLQEE LDNEEDPASIEDTELHLDDSVSPN  
GHIGKEVEADGEEMNQVVAEIEDTEVQVGNIEESADVEDMEEVV DDEETFEAL EDSEVQV  
DNDSTIDEDEVGFAEPEADIEMQVSDEIDIAD EEHLOQEVNNEATPTAIEDSELHWDNDVT  
SNVDGEEEEVEVESNIEFNEMQIDSEIPIADEEVVQEEKGDEDTLIEDSALQVDNDDV  
TLDEYEVEADVDEVD D D IEAADMQDDIKVDIAD EVDV D KIGADVEGAEKHVDCEISIGDE  
EDFEDDETPE SVEDESEFQDDVDITLDE TDAEVEVDGIYADAEGA EKNVDSEIAITDEEGF  
KEENG SQEIPDNTEIDDEDNDSINNTSAKDS SPRKLFTRLWGM SGRTSQSDSVVEVTSEK  
DQTEIEENIVEIEDSIDREETGRTEGSSKRNI FMRLWGTNNE SNEFYSLGLQGV PDSDSI  
TTEDHDVISAESSTEEDTVEELDVDISV SIGESDTGGGSLDVVTFDISDSSGVEYSEET  
DFPEIQSIEEQESVDVKLKENVRKGGQGD RRNVLQLHRPESEEI KEQKIHT E V T S S I A S S  
EDATVDKNVYRLELHREEDDALISEYGQDNIAAAQLE DALAIMGD SPGSDQDDV LLESEC  
ALEDTEENHEENAESSIAAEVIEDAFSDEDSIEEDYEEKEFEAQTLAETANDELSEEGE  
DEEEGIX  
>comp11150\_c0\_seq1; 505 341 2038 LEN=2068; translated  
MAVVAVMTVHPSSLVVGGSPPKKLEIDTQAVSKNESSNASVESDDKKEANSNENDFHND  
VMEKREQRSQNSNFSKPPRMSATDDYTILPEGYVPKDEDVICSWARQNHSHPGNEKFRV  
MINEYAPTYLNVNTKYQKSEVIKIVAEVRSRSPGGGFIKKDFYSNRWFVEVGDEKARDKV  
GHAIKAAVALGKQFRGGKRQSQSLAKRRMNSNIGNFNFINATNMDMNANL FNKAALMN  
GAGLEAVTSGLSKGMHFP SMNMAMNSGNANMNMMSMNAMNTNS S M S K S A L S N L S G R N Q L  
AGMQNMGATSGIMNAIGMNVGTMGMNSITSGSFPRELEEALAMNRF RNDFA PLGGAATS  
DSSLGSLYGVGKSPGDSIGLSGVNGRVGVDDSGLMDQFQRRRLHLEAMEKKEDPMTMLQ  
GSGQRTSWPEETRYNSNNEYSNL SMDLNNHHSALNGINS SHNYR PMLS FGRGQGNFEN  
MNSNSYESVSTAKNSILSKLAAANSNL MQGASNFGNGDDMVSSMMSDNNNPETTNNIMGI  
NNELPKPGIGPGLQNSNHIHKQNGW  
>comp11150\_c0\_seq2; 220 341 694 LEN=694; translated  
MAVVAVMTVHPSSLVVGGSPPKKLEIDTQAVSKNESSNASVESDDKKEANSNENDFHND  
VMEKREQRSQNSNFSKPPRMSATDDYTILPEGYVPKDEDVICSWARQNHSHRKL SLL  
>comp11151\_c0\_seq1; 548 28 1902 LEN=1965; translated  
MTMVEDDFPPFLMSNEDTTQLDSAKRCLFPREND FSTNSIWGGVDTISKEHDDTNQKMGV  
KSAEQTKHSPISVSVL NIGCPVRGFHNDK K FDDCTSSSSTLLSPSPDSRAKSDRDEVEE

QTVIEVQYVESARVDRDINFDADSV EENQVPCSNQSKRAKTPLRNRTS IERN TIGDARAR  
PLLDVEKTPSGSETKKKSVTPSPLLGCGGYGACLPYCGDTHQFVERKITKFL EDNSVS  
TPDAFKTTCTDWQAWSYFGFASPEDSSNNSPSRESIRTTLRRTSHSLRSRKS NVRQLKR  
NLAPFAQSPARSPARAPSLFRNRSF SVSDHRS AIARVSTDNKPNRKSFS DVF DLCTLYEK  
VDLNSQDLVWKNTDTG SNENDISYSDSPEDFMRRRPTSEAKRPADNNISQSGEGGSPCY  
QNSPGRSFLDPHNDEVFSNIVREM FNQTTTLVLHPVSESNTTGQALLQSARPIAVDAWLE  
RGQHLAYALI QPKWIWKAKPKINSEGQSSVCQKFCLQGI ELLDITKILKVEETEGVSHSL  
AKPSHCFFIKSIHDEEFCFEAKSRKERDRIVS SLKLLIARFGAKVLTGDPEVYYEFFWMT  
DGVPGDAPDLLEAFGLVEAEVVSF

>comp11152\_c0\_seq1; 264 95 676 LEN=994; translated  
MMQEEDDTGSSSFDQKQATFKRVTQYWMKSTIHVVPRWCLFTFLLVIFFLRIYLIQGYF  
IVAYGLGIFLLNFI AFLSPLEDPDGPGLPTTEKEGKEYRPFARRLPEFKFWLACTRGT  
FTSIVMTFFSVFVDPVFWPILLMYFFVLFMTMKRQIMHMYKHKYVPI SWGKSKYK DAGV  
ENNMFGGGMSKGR

>comp11153\_c0\_seq1; 394 1 1534 LEN=1754; translated  
XTGGFQFGSSAPAPAKTTTTVDPSKSDSGASSTAPPKFSFGASKNVTPASEQAPDQKRK  
KDSGGSAPLKENQKQVPTFSFGNSSSTTASAAPAPASGFSFGKSSESTSNATTSATTPGF  
TFGSTTKPSTESSIAAVPPLGVSVDGNDSDSKKKRRSVGSDATSSIQTAPT PKFSFG  
SSTPAPAAPPAPAPAPFTFGKPSVDSSSQATSSDKAPGFGSSAAAAPAPSSAPSF GSSS  
TPAPAPAPVAPFSFGSTPAPAAPTNSFGSATAPAPSFGSTPAPAPSF GATPAPAAPFSF  
GSTPAPAPAVAVPSFGSNAPAPATFGSTPAPATSSGFGSTPAPSNAMNFGSTTPAPVPFG  
SASVPAPTSFGFGSTPAPSNTMNF GSSTPAQAPPAFGATPAAPAAPFGTSAPMGFGSSAPA  
PAPFGSTPAGPSQPF GNSAPTFGSAQPPAGAPPAMSF GASAAPAQPSGFGGGGGFGQTPP  
PQQNGGFSIGSGAPRSNARRGRRIVRARRPK

>comp11154\_c0\_seq1; 162 355 1715 LEN=1844; translated  
MTAGPQRTVLVTGGAGYIGSHTCLELLRIPNEQYKVVVDNLDNSSEESLRRVRELVGEE  
LGECGEDRIQFRNCDIRDKEGLDKGXVEESLKTGKCEKSTEPYVDISDRAWEMDYLSRGA  
TLTKTSVSVQPEQFSALFYLAIAQLTSSEHSLDQNKXLTFKIVLTFEPEIDSCIH FAGLK  
AVGESVQKPLSYDCNIGGTVNLLERLEEHKVRHFV FSSSATVYGEPEMLPLTESARLSA  
TNPYGRTKLFVEEILRDAFASNPEKWNILILRYFNPIGAHASGRIGEDPQGI PNNLMPFI  
AQVCVGRPELSVFGGDYDTPDGTGVRDYIHVVDLARGHVAALEKLYTTPDLGCEPVNLG  
TGRGVSVDLVLVGGMGKATGKPV PYSIVDRRPGDVAEMYADPKLANDLLKWKAEYGV EEMC  
EDTWKWQSTNPGYATETDEVGLEACEETRATN

>comp11154\_c0\_seq2; 277 355 1482 LEN=1611; translated  
MTAGPQRTVLVTGGAGYIGSHTCLELLRIPNEQYKVVVDNLDNSSEESLRRVRELVGEE  
LGECGEDRIQFRNCDIRDKEGLDKVLTFEPEIDSCIH FAGLKAVGESVQKPLSYDCNIG  
GTVNLLERLEEHKVRHFV FSSSATVYGEPEMLPLTESARLSATNPYGRTKLFVEEILRDA  
FASNPEKWNILILRYFNPIGAHASGRIGEDPQGI PNNLMPFIAQVCVGRPELSVFGGDY  
DTPDGTGVRDYIHVVDLARGHVAALEKLYTTPDLGCEPVNLGTGRGVSVDLVLVGGMGKAT  
GKPV PYSIVDRRPGDVAEMYADPKLANDLLKWKAEYGV EEMCEDTWKWQSTNPGYATET  
DEVGLEACEETRATN

>comp11155\_c0\_seq1; 621 1 2850 LEN=2850; translated  
XRSLLIYRNTYSFASGSAKQQGVMASEALSNNHNTALLREEVNEDGSAKKTIAATPTDA  
AATLVSLSNPDNDNAAVPPINCAARDQSVTKNLLSGSIAQPSPESTAQTSPSGQKQDPPN  
HLTSEDPNKNNLDATENEKDVACVDAPGAISDPNDTSAENSQQHQSQPPSSKPI SDIEKN  
QDSFVNQNAVCKDPGLSMQNLPSPLIEVPPSSQAIDVHGNGVNP SGSRVSVVDGVT PG  
AVPVSNNVGDASLRGPSLKVLSGENQSESEIAAARTSLLEERGNKIDKDNPDAGKTSK  
TQRSKLSPEELTAKIARYLRKHAKQLVRNVDFRENTADMAKLR TYPYSEVPSY YGKKEE  
GKDEKTSLEQRKRLARDTQHFP LLKGGKGLQFPMALLCETDSDDPHHP LLLAFVNYWRQ  
LKSEKQHNLKALFGHYLHANTSNERFRYVQSKKAEADSKSSPGDTNKKEEGGFRAPPR  
STHWGRSLETCTQLADALGFRESC ESEATGLKMACDWLRTANLEAPLVKCKRDDCIYPA  
LARNSGSCCRHGFFYFAPQKMYGSKFKRRGYLLMGDIYTRPYVTTTNSNGAKSDARKSKQQ  
ESPDLFTIRRLEPCSCGNETCVGLGYSPTMVRVDANKLPKELQQEIWSNNDTLDIEISKK  
KNSESVLR LAPWHFHPEHRVALPDGSRVVDFRSSSVFRDPLTSKEWKGVPPPTYSPEAF  
LQEATVKEYVARKNDVAKTTDMLPAWCLEYTKLEEGPYTIFEKQRDYLLARTLEMEKEMT  
RQAESFWTKQWAQEADTDR LQAKYDEKKFLKRKRPRPSSSTNNNSNNNRNGKESCSSSRK  
SRQKLLDVAVNSTLGHHLVDEGNADSGSIFLDTNRHPQDLSDNRRLLP SLWDH HQQWP  
FTTTS AAPYLFC AVVRSTFASASAQSPHPTTQQQSASAPSTTVSTPSAPX

>comp11156\_c0\_seq1; 502 1 1398 LEN=1398; translated  
XVYGSCLSGLSLGNADV DLSLTFDEAVADKSKFEKGVSSAKSYNRAVTDTVYQV KRKLE

KKGPNGREVF CGLEAIPRARVPVIKGIYRDAKNPHSKDGS L PFDICLLNDIAVANSGLIK  
EYSDIDPRVKSLMIAVKRWTKDKQINSAPDNTLSSYTWMLTIFYLQ CIGFV PNLQCP SL  
MEKCN YFENQSKHARQKDNINNLD TAYLRWKQAEKAWKRSQGLDEACSSVATLLYGF F W  
FYSREFPMHRHMVSIKRGGAASARLPKTMFPDRCSLHFCIEDPFETYGSHFPHDLGGHAD  
EKGALYIMHCFGASEKYLGLILSGKAGDAEPRNLWPPGNQMEGFDRSVSTNGRDLAEQKR  
VVSLDVTSEESDEILVHDRVLEMLQPFAARAGSFIIGSTS AKKGT KV VVDFDALEPVI AV  
LAAHRQNP FELAGKKLHLDKKHIPEPKPSKKKKKKKNA AAAAGNNNX  
>comp11157\_c0\_seq1; 309 116 1081 LEN=1481; translated  
MNNICKSATVNLNVVAFTYGF TATLNVALPKKSLCLMVASQSE DVDRFCKARELVRSLVE  
EDKCYSKNSGAI AFGEVCAANCIYEDCFEPQPFV GKRAVTNHVVSKANQRKKGKGVRI DR  
ISDGSSACGFAWTWVSE DGKEEGLRGTT FVELNENGEIQYVREIPEPLYKPGDLTLELLK  
GVTKDAVAKPPPIYESKTPQSANEVAKYLFYEVQGGDIDESMRLFSDSIIYRDFNYDEVL  
RGKTEVRKFIEDFSFPGIEFKPDRFDDGKFSTCFTW DVC LDGQEDSIKGM SFYEIDPESR  
LVTYVRGMYCVRVFCMLRFLN  
>comp11157\_c0\_seq2; 351 116 1150 LEN=1405; translated  
MNNICKSATVNLNVVAFTYGF TATLNVALPKKSLCLMVASQSE DVDRFCKARELVRSLVE  
EDKCYSKNSGAI AFGEVCAANCIYEDCFEPQPFV GKRAVTNHVVSKANQRKKGKGVRI DR  
ISDGSSACGFAWTWVSE DGKEEGLRGTT FVELNENGEIQYVREIPEPLYKPGDLTLELLK  
GVTKDAVAKPPPIYESKTPQSANEVAKYLFYEVQGGDIDESMRLFSDSIIYRDFNYDEVL  
RGKTEVRKFIEDFSFPGIEFKPDRFDDGKFSTCFTW DVC LDGQEDSIKGM SFYEIDPESR  
LVTYVRDVPESA IKPPPLGGLARALRPGLGVFQGVPTGSRP GGM  
>comp11158\_c0\_seq2; 154 77 541 LEN=888; translated  
MSRSYSRSPRKQLDQLFAFDAGCSLVFGIVAL LAPHNLIRKITSGSYNHSVHETFRLYAC  
LRLACGWILWHARA VDDGRFRKHICEALLGCYLLQALAVLRAELTLGRSESWTPVNWVAI  
AILSALGGAYGSHRFRGRGNSIKIYELPTGHNLQ  
>comp11159\_c0\_seq1; 461 1 1140 LEN=1254; translated  
QQQQQQQNNQQQQQQNGNQNALAGTMVVERPCETDVVFGIETGGEAQKYLGNQMYSRLIR  
CNKKRFHTSTTEEK RIRICH SIVAAIKGDGRFLKLDREKGIWGRISDTRAVGLTKMILS  
RVEITQPTTETNRVIAPPATITELIDL VGESDEEDNIGN TALNSTPREVKEPSGKKN SIV  
KDEKINTSLNSIPRKVKEPPIRKGRIVKRRKVRKSECMTLMAHTLFDLQQRKYPDTVTQ  
SEYESIERLAKKKTGLSIHCNISK TAVQKISQSI SIPLEAPP SMLNDATSKEYELNMIDF  
KNPKGGV ESSKPTVSLPIATDAPSQSKETIVEGKDSVVDNNTQDDAPSTPAEENVAEQHQ  
YSEDKDGDGDYDSEESLVF  
>comp11161\_c0\_seq1; 198 100 510 LEN=933; translated  
MARTKQTARKSTGGKAPRKQLATKAARKSAPATGGVKKPHRYRPGTVALREIRRYQKSTD  
LLIRKLPFQRLVREIAQDFKSDLRFQGS AVLALQESAEAYLVGLFEDTNLCAIHAKRVTI  
MPKDIQLARRIRGERA  
>comp11162\_c0\_seq1; 169 102 1211 LEN=2059; translated  
MIRASFSPHSITIALIFCVAVAQSWIGSATT SRTKAPLSAFRRISLLGAHDDSGFGVNEP  
DREAGPSSRAVLNRAARAGAVSLASVAVVPSPA GAISEDRCPLDPRCGADGKLREKG  
PDGKPIPRVTNRITHVVQLVIDVGERREEVGF LRFGLYGDDCPESVKSLLRFLTPIGITG  
VVDASAMENSIGVKSSPVSL LQGGVVPTICPGRGV EFGVPSQKKAYARAMGLREGGDNFV  
PQNRPEPTGSEAGARKHDVAGLISIPEQGIGFGSSGGSVDEAYASAFVLTADESASQLYD  
NKLRRRVVGQVIDNESMEFLARLASLP IQKKL GSSSDKGPPLLKVTVLDIGVQKVGAAGS  
ESSKKT KKK  
>comp11163\_c0\_seq1; 836 358 2739 LEN=4392; translated  
MEELEKSGCDERLGREEQTQLKQSAMSSSTTDSTIADNTTNQNKERDAKITSQNEALVGE  
DSSLKRS LNRHDFLELDKGPQSTMEHTMSTANDIGRVMSAANGTRNVSNKRLKRGESLDA  
IPKTPATPPTSGATMNTTREDHSPNPPPTPPPSVASTATNTSSVAPSEEAATPSIGSGS  
MLAKHKDVSSGGNGGWTDDDAYERMPKTP IAPPQSTSSSRVTSRHTAASPLL CAGGVYL  
ADVPPAPPTTPAPKLGGNVYRDLGLATPLPYTAGFVQNNANQLEMQQRQNNQRQKQLQEEI  
QEGAITPAPHR SQTDTARPPAATGTTATSLSDDFSEWAVGDRYKLCRMLGRGSYGEVAQA  
IDKYQGRPDAFVAIKRIVGPFQEVDAVRLFREIHI LRRLRTLGNKNCIVPLLDVVQPPT  
EDLNDFHDLYL VFDYVDTDLYKLIMSPQYL TTEHIQTFLYQMLIGLKYI HSGNVIHRDLK  
PANILLNEDCSLKICDFGLARIVDEISVARSSSSSIKDKNSGNTSNGDANDSDTAALRQM  
KAVKKMAGRSCSISEQCF SYDDEGGVTQPSKLP LTRQLTKHVVTRWYRAPELILIQPYTT  
AVDVWSLGCIFAELL SMQEGSVPGYQDRTP LFPGGACYPLSGDADNVGRLDQLNVI FNVI  
GTPSNEDIASLGKANEYIKTLKPIKPKSLEDIYPAADSHALDLLHRMLKFNPKERCTAEE  
ALNHIFFSGIRREEMETS V GKPMESPEFLNEQEIDIEVLKQKVYNEVLWFRDNQRHL DAS  
IQTIRADQQRDTE



>comp11163\_c0\_seq2; 572 358 1965 LEN=1965; translated  
MEELEKSGCDERLGREEQTQLKQSAMSSSTTDSTIADNTTNQNKERDAKITSQNEALVGE  
DSSSLKRSLSNRHDFLELDKGPQSTMEHTMSTANDIGRVMSAANGTRNVS NKRLKRGESLDA  
IPKTPATPTSGATMNTTREDHSPNPPPTPPPSVASTATNTSSVAPSEEAATPSIGSGS  
MLAKHKDVSSGGNGGGWTD DDAYERM PKTPIAPPQSTSSSRVTSRHTAASPLLCAGGVYL  
ADVPPAPPTTPAPKLG NVYRDLGLATPLPYTAGFVQANANQLEMQQRQNQQRQKKLQEEI  
QEGAITPAPHRSQDTARPPAATGTTATSLSDDFSEWAVGDRYKLCRMLGRGSYGEVAQA  
IDKYQGRPDAFVAIKRIVGPFQEVDAVRLFREIHILRRLRTLGNDCIVPLLDVVQPPT  
EDLNDFHDLVLFVYDVTDLYKLIMSPQYLTTTEHIQTFLYQMLIGLKYIHSNGVIHRDLK  
PANILLNEDCSLKV RMNAQQMIRTG EKKIYIHDGSLSHHKSLVLYTKTDLRLWVG

>comp11163\_c0\_seq3; 836 358 2739 LEN=4877; translated  
MEELEKSGCDERLGREEQTQLKQSAMSSSTTDSTIADNTTNQNKERDAKITSQNEALVGE  
DSSSLKRSLSNRHDFLELDKGPQSTMEHTMSTANDIGRVMSAANGTRNVS NKRLKRGESLDA  
IPKTPATPTSGATMNTTREDHSPNPPPTPPPSVASTATNTSSVAPSEEAATPSIGSGS  
MLAKHKDVSSGGNGGGWTD DDAYERM PKTPIAPPQSTSSSRVTSRHTAASPLLCAGGVYL  
ADVPPAPPTTPAPKLG NVYRDLGLATPLPYTAGFVQANANQLEMQQRQNQQRQKKLQEEI  
QEGAITPAPHRSQDTARPPAATGTTATSLSDDFSEWAVGDRYKLCRMLGRGSYGEVAQA  
IDKYQGRPDAFVAIKRIVGPFQEVDAVRLFREIHILRRLRTLGNDCIVPLLDVVQPPT  
EDLNDFHDLVLFVYDVTDLYKLIMSPQYLTTTEHIQTFLYQMLIGLKYIHSNGVIHRDLK  
PANILLNEDCSLKICDFGLARIVDEISVARSSSSSIKDKNSGNTSNGDANDSDTAALRQM  
KAVKMMAGRSCSISSEQCFSYDDEGGVTQPSKLP LTRQLTKHVVTRWYRAPELILIQPYTT  
AVDVWSLGCIFAELLSMQEGSVPGYQDRTP LFPGGACYPLSGDADNVGRLDQLNVI FNVI  
GTPSNEDIASLGKANEYIKTLKPIKPKSLEDIYPAADSHALDLLHRMLKFNPKERCTAEE  
ALNHIFFSGIRREEMETS V GKPMESPEFLNEQEIDIEVLKQKVYNEVLWFRDNQRHL DAS  
IQTIRADQQRDTE

>comp11164\_c0\_seq1; 639 279 2462 LEN=2511; translated  
MNFFCMLLITTAWTSALVSSATLRGAGTGAEAGAGDAALVPTSLHHRRLREGTTCGLFQA  
DIEHGPNPMYSEEKWLCKLPQEESRLGGLEYVEIYNSRKI IHNATSGRSAMTVGTAFID  
PGNLNMYIPEDTQVEIHDLDT SQYEREQFRSVAESTGVLTTLVIRVIDSKGVAPDASIE  
TLEDDVFDSDVCLKSQMEACSYGKLQIEPFGQTE TKVTVKNGVVDIHM DYDMSTDTDDD  
TKRRAVQTKSLEAALEQLGELEEDKYGLVMFCMP PGINDWLAHAWTNHRFSFYNNWCSS  
VSAQLHEIGHNLGLAHSGEKRIYDDKIGMMGMSYDNKNGPRMCFNSVKS FQLRWYEDKVR  
TIDPLSKPSQRFTMNGVADY LKNPEALISLRLEQKAI GQDYIIGFNRRDGINEGTIMDWD  
MVTIHRKQNGPYEVTSEKVAKLALGQGYTIRSF DGERDVRIEFIGRNEGDATIEI IDID  
NGPINEPVDPIPC EHTIQFKTDNYPTDNLWYI SMRDAIGSAVEVSPKYADPLTTYTHK  
VCLKHGGKYNFYIHDLYGDGVC CGQSGGFYKVIDSKGKELISSGTEQFKTKIIA FEVDEA  
PGSLPTKAPVPTPTNEPTQAPVPAPTKEPTQAPVPAPTKEPTKAPVPAPTKESTKAPVPA  
PTQAPVPAPT KPPKENKKCKDRRGKFRVRKQWGRONCKWYAKNNKCDEKKGRKKPIWQFC  
KKACGKC

>comp11165\_c0\_seq1; 567 61 1848 LEN=1888; translated  
MGEAIAIGTRQGQGEESNNDRNCSRDAFRGVARPISLSEEF SHVVKALESTERNLRLK  
SHPMLFDRAPHLEVDVVDKIEKERQKKKHRQKEEQ LQQQLQQQPGGAMVSTAAPIKATISK  
DTLTASLKRLLLKGVFKMDHLMIPSELSPTFRFESILTLDVSHNELTDL PGLSLFKNLQT  
LDLNRNWFNTLPSEIGMLNELRTL VASRNFLRPNTQSLRLESRESARHLETFDLRYNQK  
CGRPFHRDRVQEELLPLKPTIQMTLWEE LGETPGTYIGSSAAVRNPILLRSQLEPLGTVA  
LRKRLVRDFGQEPTDPSEVDRAGVMRLLRAYFDEGMAHFQGNAGVANQTD EACYDSLIA  
NRTTLQVYGTVPVQTNLNDLLEELNKWTSY TGLVNKNRERPSIHASNYMILRRPRSREEL  
AAEESRSTRDKSRRAIRKAKKLERYRRLWEVGIAALRMVDPVFADQKCTEIAVTHGFSG  
SPHIDKQNCGPFYGLSLGNFDDSDGKGGIVVESSARVVVQVNTRNRLGRVDGRFVHWVKP  
WGRHHRHGQDSSGARVDGENQAE EEEQRYSLIYYETGNDFVPPGPAVFTIPKDSP

>comp11166\_c0\_seq1; 421 2395 3897 LEN=4108; translated  
MASLSTSTVIAAKESTSSYLVI GNGPIGASVAKHLVGGFFSENRCSSD TDSTNSKQQRSCD  
NNPIVTTIIDGRLSGMGSSHADRARLIRAFDAEGDIDWTRWNKRSLKAFPEIERLW NKPFTF  
NGDNLDEYRSTFLHNRHEKKQFFAKCGLLVGDKQFVERSMRAALVQSTPSSTEPLRRMS  
PHHCCQKWPFLKPKAGCDEAVFDPSGGI IDPLAFVRAQNYVTEHLHDHRC LQVRQGIATA  
VRGGGEVELASGETLKASKKVI VCGGAFSKSLTSSGILGESSSGDGIDRVGRLSLRERL  
RASKRTVALLEVT PDVAQGILSDMPTIKYAFGLEGNEDDVGNDGGIGRSYSSGITTIAHD  
QNKVEAGSVYVLPV VVYPEKGGWFVKIGGGPNDF FANDSQNEEIQEWLSSGGDPDCVEW  
LEDHLRSLLEPVLGA AHGMACVTTVESPTGFAGTG VVVEDSFDES LVLVSACQKGAGP  
ADAVGWEIARRIVSPSSKD

>comp11168\_c0\_seq1; 311 73 762 LEN=877; translated  
MAPNRKTHELFATNAELESKATVQAKYLPLTSEIQRQPQPQQALVTDPKTEKQPPT  
VSYWDWAPDTAEKKAEAIIDDFSLARFESNLISDSLRRERNETTVDDEEPTTEESQSYWDW  
SVGNNDTEAETDSQENESVPPQDQHKTERHGEECNVENYWDWTGESDHEDDPSASRTDHL  
HRLVSSSRKKYHRRHSHLPEPECHVSDPEGSAEHFWHWAEFHGKDATVQ

>comp11169\_c0\_seq1; 530 60 851 LEN=1005; translated  
MAPKKGSKKQSKPAAVKKSADPLYPSKAKTFGIGGDIRPQGRDLRFVVKPKYVRIQRQR  
AVLYQRLKVPVPSINQFTKTIGKNEAMTVFTLNFNKYRPETPAKKQRLKEAAAAAAGGKAA  
SGNKAPNCIKFGLKHVTTLIEEKKAEVLVIACDVDP IELVMWMPALCRKMEVPMIVKDK  
ARLGALVHQKTAAVVALTGVGKEDSAQLNLLKESALERYNNNADLVRKWGGGVMGLKTQA  
KLEKRAKAMAIIEAKKLASLGKA

>comp11170\_c0\_seq1; 594 1 1993 LEN=2025; translated  
XRTPFVSDDCGKKQKNNRLTTVETYRTLDDKTMFPDARNLSLRQWSDSADTKIPIPVAIT  
LHNFIPSPVSTKRPSSITKSASYSDDIYHTDSNESDESSVGSPPSKGRGIMWLNRPQH  
NNLLPRVNLEITAIKQDQLDKEENGEIDTNDIVQKTTIVYTEQSPQVRSVHPSWEHLDE  
RICIDNHSEWWNQNDLYKSMKVKLWIVPEPAQSEEEKEVEQPVPMEEKCLLETYLHPSFL  
ERIDLGSASAKKGEDADDGSSLPALPPNAMLVHFSVSDGSIRCPPNIYQVLWEKFGHTYGI  
LEAPPVEDFDRFEDDVFATLDHVKQTPQRPCRISITSLLDQDND SINQNGPDDIDNDNDG  
TPNNLESQDDEQPPSHQHEQDSNPMTPPRRPVTTSTKQQYQKDDDDFVFRCEQDIIEEE  
KRREKLDLLRLIAEEERGLEEDLDCLQTEQRTLISLVEEIQGVERDIDRLKTELNKQSLK  
WEREEFLKEAQAIKLRDLRDIYPITSDFKATHGEIAVALTISGENESYFIRGLQLPGDI  
YTTTVVEEVNTSLGYCAHLVFMVAKYLTIQLRHRIFCNGSRSSIEQDGVGVFPLFLGRL  
EARMLEREQVDRGARLLGANVDCIMMHLDLMPSSSEFVSSPAHEIHILAKLRSVLDVFAEG  
KIAP

>comp11171\_c0\_seq1; 692 180 2005 LEN=2050; translated  
MTCFGTVAKXPHLILWNSAAAFVLIGFPLSIYGIVAHLSNYNQPETQVYIVRILFMVPIF  
SVQSWLGLRFKEYSIYFETIRDFYEAYVLYSFLQFLIEVLGGEALILMLKDKSPTRGVH  
IWGFHLCLKPWLGMQPVPRKTYMKNKDGETILTASGGTGSAITASETSIPGVGGLMQPMGGQ  
NQQQPVNRKPLKRVYWTSPFFLQCKLGVLYVLLKLASTIAILILEPYNLYKEGFSYK  
GYLYICILTNSQWTALYCFYFATKNELTPIRPVGKFLSVKLLVFFTTWWQSLFISIL  
YQMQLIPHYTSAEATLFGGSGVDGEDLDLGLLRAEPDWSVPLSPEDAAALDEFGGNAFWS  
STSSSGSSGIIIEYSPEDVAKALQDYLCIEMFIFAIVHIFVFPHTEYSPEAVKARARALN  
QMPNKNWNKRLGRKWKKEYDNKSAWSGTTNTSKESGEIELYPRNSTTAGNQRDYNNPQQRS  
KRSDSIDDDDLRNHPLDDLEEDLEQRPLLEGEDEESYDCDDNSGYSYDEDEYDEEEGS  
PKTPVKRKNFFSALLDSTIPQDLRDNVTGIIKGEYVVERKTLHHAATSDSYDLLSRTHK  
HNKGASQL

>comp11171\_c0\_seq2; 913 1 2237 LEN=2282; translated  
XNNNNHNNPNSNRNRENFRPDHGATVPSASPPTLYGLERAVQGGASNPSNPHVAPAGSEA  
PPATTPAGTKGGTAGGAAEAVKAKTGATGAAAWAAGGSAGAAGTGRSSAAPSAAAMNVAR  
ILSWCTVVASVAGVWVYSYELKKTGKDPHLILWNSAAAFVLIGFPLSIYGIVAHLSNYNQ  
PETQVYIVRILFMVPIFSVQSWLGLRFKEYSIYFETIRDFYEAYVLYSFLQFLIEVLGGE  
EALILMLKDKSPTRGVHIWGFHLCLKPWLGMQPVPRKTYMKNKDGETILTASGGTGSAITAS  
ETSIPGVGGLMQPMGGQNQQQPVNRKPLKRVYWTSPFFLQCKLGVLYVLLKLASTIAIL  
ILEPYNLYKEGFSYKGGYLYICILTNSQWTALYCFYFATKNELTPIRPVGKFLSV  
KLLVFFTTWWQSLFISILYQMQLIPHYTSAEATLFGGSGVDGEDLDLGLLRAEPDWSVPLS  
PEDAAALDEFGGNAFWSSTSSSGSSGIIIEYSPEDVAKALQDYLCIEMFIFAIVHIFVFP  
HTEYSPEAVKARARALNQMPNKNWNKRLGRKWKKEYDNKSAWSGTTNTSKESGEIELYPRN  
STTAGNQRDYNNPQQRSKRSDSIDDDDLRNHPLDDLEEDLEQRPLLEGEDEESYDCDDN  
SGYSYDEDEYDEEEGSPKTPVKRKNFFSALLDSTIPQDLRDNVTGIIKGEYVVERKTLH  
HHAATSDSYDLLSRTHKHNGASQL

>comp11171\_c1\_seq1; 180 1 564 LEN=564; translated  
XVPNRKESQQESFDRLASHPEQPAKFQAPVEKQSVVFPVGSRESRDRTEPVPEPNQAXAAN  
ATEPQLQPIQHFTTLYNTTLQYTSNERWFAAPNGRFRPKRPPAAFRPVPVAVPLLPERRL  
AGSRAGVPAPEVLSVRRRERAPPNHPEPRDAKKRERQGAAAGGHAGTAPPRHERQQRQQ  
QQQQQQQQ

>comp11172\_c0\_seq1; 539 159 1550 LEN=1715; translated  
MIAFGAALSFLQLQATGFVVPASSSIGRNQCFEAASATFTSHKKCGSFRHESLTRRF  
AALDDDEDDGDFDESGPLAKGIDSVSWLPSVSGAKGDNMPITSTTEGSEIIPVFPVGGFV  
YTPNTEHVLNIFEPYRQMYTDILMNGTKRFVVTSHPTQGRFARTGVLFELEDLKEVS  
EQTQDQIKYICNHKVTGRVTINKILNPEVWETRESYLKAEGTIIDDSGKDDEPKDEPMAG

NPYGAVVAAATTKDENDLRIIFSKVVDLQHELEEDVRFNTNAAKSTLAVSDGAGEDGLWQT  
IRLWQSFIEQRLVSRQNELQQEFQEKLLKFLQKERGLKQDELPSAIGFGDLSPELQLELQ  
ELQKRMAIELQPLVLESSLTMQKVLEAKDHSARCKLLKYFMQAEVTRLKTKKSLRGLFSS  
DSESLTEEDGIPADELIPTTESKKEDEEKKPASFFDEPDAFQ

>comp11172\_c0\_seq2; 454 159 1698 LEN=1863; translated  
MIAFGAALSFLQLQATGFVVPSSASSIGRNQCFEAASATFTSHKKCGSFRHESLTRRF  
AALDDDDDDGDFDESGPLAKGIDSVSWLPSVSGAKGDNMPITSTTEVRDMSXTKVNXPVT  
RQRAGMLNIAFSSSHAFSNVFPFCDFQPYNSAFFCQQGSEIIPVFPLGGFVYTPNTEHVLN  
IFEPRYRQMYTDILMNGTKRRCVVTSHPTQGRFARTGVLFLEEDLKEVSEQTQDQIKYI  
CNHKVTGRVTINKILNPEVWETRESYLKAEGTIIDDSGKDDEPKDEPMAGNPYGAVVAAA  
TTKDENDLRIIFSKVVDLQHELEEDVRFNTNAAKSTLAVSDGAGEDGLWQTIRLWQSFIEQ  
RLVSRQNELQQEFQEKLLKFLQKERGLKQDELPSAIGFGDLSPELQLELQELQKRMAIEL  
QPLVLESSLTMQKVLEAKDHSARCKLLKYFMQAEVTRLKTKKSLRGLFSSDSESLTEED  
GIPADELIPTTESKKEDEEKKPASFFDEPDAFQ

>comp11174\_c0\_seq1; 1103 115 3600 LEN=4413; translated  
MRRQRTVVVNPEECSTSPHGSPPHSPKSIKSGESSFQTGLSVGYVESVVGHDDPTLVH  
TNVKENPSSRNDDHIRNIHSEALGSFLTASYSEEERDSPEDARELGQSLDDEKLRQQQVE  
LDRTQDAWRAKRQEVSDDDVDETEDFYVKEAGEFTPSSSRKRYQLAMKEATIEEVEERQE  
TIEEDEMNEGPHPEEERTVEESSRFESHIGMLTPKSDTYADDPESHVQTETIERAPKPM  
SSPKIQQHDPQEGADRILLDVSRRQHQTKDNTENTSIDECPQNPPEQGSTSSSLGDYST  
QYRMQELIGTSSNQERISKKEMKQQQNSIPLYEGGKVDSSSAAGSRTAAASKSLVQCET  
SDLDFEYPSMDELDDRKNVSSHGDFVAKTHDQEKARDFVDIEDNIVVPCTVKNDCCN  
YNDKIIRAVQERLTDQSVAPYAMDQIEPNKPKGLFKPKIGYSSPMKSIISMWRKPEALAS  
QVDQSNDEYDAEANMTSNPRKRRWKLKIVNVCLGAVIIVAIICAVLLGIEIAARNKGSSS  
VKRDETQETASPTVSPIESRLEDRPKVSPVESRSENSPTASPVESRSEISPSATDAPVQL  
PESPIQYSSAIEEELMISGDSIYNMSTPQYAAWDLLTKDPANLDDLGSSELESQRFIA  
ALFYFAMNGNDWIDQYGFLESHVCDWNNGPSDDPVGACDSDLKITGFVINENNLRGQL  
PRELQELTDITILQLRANDIYGTLPSELGKLSLLEEIDLRQNELVGTIPESIFNLPEIKR  
ILLLRNSQLGGTIPASIEKASNLEMISIQRCVDTGSLPSTIGSLRFLFFLTLHNSLTGT  
IPDSLVLNLSKLEVLLESENKLTGHIPPLSGQDSLIIISLYDNKLTGSIPTTLGDLPTLMF  
LDIRDNRNLNGTIPHGIGLNRNLVTFFAENNQLTGTLPSFSSNAGLLQAVNLSRNKLSGDL  
NNIFGQGSVARLVNINLAHNSFVGSISPSIGRMNSLSELNLRGNSISGTIPTEVGLLRE  
LDTLILQDNDLTGTLPEELGLVEQLVYLNIAASNQFEGTIPDTLVLLSRLTVLDDLQSNLDM  
GSIPTIFGQLSNLDELHYLHNSNVLVGDLSGTFCKRHDPDSTFRFVGVFTSDCLQPNPAVQC  
SCCTVCCQDDECFNMPKLPK

>comp11174\_c0\_seq2; 1103 115 3600 LEN=4170; translated  
MRRQRTVVVNPEECSTSPHGSPPHSPKSIKSGESSFQTGLSVGYVESVVGHDDPTLVH  
TNVKENPSSRNDDHIRNIHSEALGSFLTASYSEEERDSPEDARELGQSLDDEKLRQQQVE  
LDRTQDAWRAKRQEVSDDDVDETEDFYVKEAGEFTPSSSRKRYQLAMKEATIEEVEERQE  
TIEEDEMNEGPHPEEERTVEESSRFESHIGMLTPKSDTYADDPESHVQTETIERAPKPM  
SSPKIQQHDPQEGADRILLDVSRRQHQTKDNTENTSIDECPQNPPEQGSTSSSLGDYST  
QYRMQELIGTSSNQERISKKEMKQQQNSIPLYEGGKVDSSSAAGSRTAAASKSLVQCET  
SDLDFEYPSMDELDDRKNVSSHGDFVAKTHDQEKARDFVDIEDNIVVPCTVKNDCCN  
YNDKIIRAVQERLTDQSVAPYAMDQIEPNKPKGLFKPKIGYSSPMKSIISMWRKPEALAS  
QVDQSNDEYDAEANMTSNPRKRRWKLKIVNVCLGAVIIVAIICAVLLGIEIAARNKGSSS  
VKRDETQETASPTVSPIESRLEDRPKVSPVESRSENSPTASPVESRSEISPSATDAPVQL  
PESPIQYSSAIEEELMISGDSIYNMSTPQYAAWDLLTKDPANLDDLGSSELESQRFIA  
ALFYFAMNGNDWIDQYGFLESHVCDWNNGPSDDPVGACDSDLKITGFVINENNLRGQL  
PRELQELTDITILQLRANDIYGTLPSELGKLSLLEEIDLRQNELVGTIPESIFNLPEIKR  
ILLLRNSQLGGTIPASIEKASNLEMISIQRCVDTGSLPSTIGSLRFLFFLTLHNSLTGT  
IPDSLVLNLSKLEVLLESENKLTGHIPPLSGQDSLIIISLYDNKLTGSIPTTLGDLPTLMF  
LDIRDNRNLNGTIPHGIGLNRNLVTFFAENNQLTGTLPSFSSNAGLLQAVNLSRNKLSGDL  
NNIFGQGSVARLVNINLAHNSFVGSISPSIGRMNSLSELNLRGNSISGTIPTEVGLLRE  
LDTLILQDNDLTGTLPEELGLVEQLVYLNIAASNQFEGTIPDTLVLLSRLTVLDDLQSNLDM  
GSIPTIFGQLSNLDELHYLHNSNVLVGDLSGTFCKRHDPDSTFRFVGVFTSDCLQPNPAVQC  
SCCTVCCQDDECFNMPKLPK

>comp11175\_c0\_seq1; 296 1 1036 LEN=1073; translated  
XRNRGVRSLKPVKKGDAIVNIPYELAVNLGREGADPTVPAVAFLRDYCELTGSGGGSGDR  
AAYYSMLPPFGGADCLGSTDFFDLALAEELQAPLVAEETRTRRKKTSRFLSDVAPLVET  
GGFPSWTDGSDVTEHDLAWAVLVTSRVLTVOGEASEGNSYRLLIPFLDMCNHDRGSPHV

LSGRAVPGGELKVVAGAPVKEGDQVNICYGGGMVGNDRFLQDYGFLLDTSSNGVAYDMVAQ  
QLLGKRRIVEGIGSGRFMSESDRARTLDRLEGETSLEDDERLLEETSDFSLAAAYSRIYIGV  
KKALSXARSVRLMDGVWERLLRASPKGWNECHTEIDRWRGLRNLV  
>comp11175\_c0\_seq2; 484 174 1651 LEN=1688; translated  
MSFGKSSGNHSDTRVMGHRRLSLGIALQVGCCLCGWSSAPAPATAFSIHGRVGGALDR  
LRIRSPSALHMAKAAKKKKTKKKGSGGGGGGLKGFSGVGGSKRDEQVDLDRSKEARSFYG  
FMEDGGAGDNLRCIAIGGFPVGTGEKAFRLRGVAALKPVKKGDAIVNIPYELAVNLGREG  
ADPTVPAVAFLRDYCEITLGGSGGSDRAAYYSMLPPFGADCLGSTDFFSDLALAEELQAP  
LVAEETRTRRRKTSRFLSDVAPLVETGGFPSTWTDGSDVTEHDLAWAVWLVTSRVLTVQG  
EASEGNSYRLLIPFLDMCNHDRGSPHVLSGRAVPGGELKVVAGAPVKEGDQVNICYGGGM  
VGNDRFLQDYGFLLDTSSNGVAYDMVAQQLLGKRRIVEGIGSGRFMSESDRARTLDRLEGET  
SLEDDERLLEETSDFSLAAAYSRIYIGVKKALSXARSVRLMDGVWERLLRASPKGWNECHT  
EIDRWRGLRNLV  
>comp11176\_c0\_seq1; 1362 1 3894 LEN=4474; translated  
VSSLPYHQKNHHTNSLMIKSSGTAATLTSTAVDNEVKAIVSPTPTEDLEKSKSDNKM  
LLKSNTRAPPATSTTSLSNKNSNKKSKAPSGVPIKSKIKATKKEDKFFKYVGNHDEIN  
GNPNKNPNKTSAFARKKLYSSSSSLSSSSLLASHPPPCKLPIMSRYCGCCGDILSTKTYGY  
EGTYDRRLRFHPEERIPQDRSEIQAAARRIHQTLASKGNIKGSDFLKKTTAANTKRKKK  
SSKGVTPATSLSGDHHHQESSVKGLPLWPEESLRMDETILEGLLSLKRTPLQEVDCRCWK  
EPSPPNFKRDMAMTQLICESNSNNSAVGKLSKSLAKAGKTLGKKHKVGTKTNTTNTAP  
GETTTTTVSTKVVITKCPKTGKKIKKTVRTVKKLVKKTLAGNNNNNNNANKKNLPVGP  
SGFATAHAAKPGVSPPAFSSPTSNGNASINGMKNKYGYVTMIAGDKSSSKKSSPSGGNK  
DNSDDPNAKGNKGSKKRSRDKQQTQGVSEDEIDHSHTNSSDDGSDGYGGENSYNGPG  
ISAKRRRNDEKADQELRERLMNCPLEGGLIYPSQAELMELTTVRKRNALQTFYKRFNEL  
RQFIAVFGDANVPQQFPENHSLGIWVNKMRMERKKWDTGCERTSLTERKIELLESIDFIW  
AQNHKGEIGWERRFQEIKKFKRKHGHCNVPTKSAENRALGRWVSTQRTMHKNYVKGFVKG  
SLTKEEQERRILLLLKEGFLFSMIPNGHEGVGGTEAGGRPAEEGGDGGGTSAAEETTAM  
VPSATTLPTGGNPLGENDKESVHTVAAPTEETTAMVPVTAKSLDSMTTVTIPIFSSKID  
DKAVPMKSDTNPQKHSOVAIASADDERKATDTTGSADVEGNNDTYNQKEVVEETKSH  
GNGSFEEKKEEGDQSESDVKGPTSLPKVTETALEPEAQAEQAQANEHAPADNISQQVS  
NGGPAVASATQVSVTTTPTSTPSVSASASPIRSYPEESIVEQNNAVTDRNERTKINSSDA  
TDDAENGDKLKEEDHKLFTNKSTVAENTDTQGANTNKSVSDDGLTPSPPTNPLESKAE  
NNSNEEAIITEAPRSESQVLEGGSCDGKIIETATKAPPVSKATRDQVQTNSEDSNEGEP  
PKTPTSSKNTKIAEKIVSPTSFVFSVLRIQEKGFTTTVSLRLKDKRISRNGTKRLSQD  
NGGERSDAMNTDQDEELKLVTSGLLRIIIKMEDPDMEVMQRMRSNSVTEPTQONDIGNC  
NPLSAPSPSRRSIRARKPSARQLEAEKSPLRETILGR  
>comp11177\_c0\_seq1; 261 1 809 LEN=1095; translated  
XTALQKSQQPFQASKTTRRTIMFGQKSVSPTRSVLVFLLLALLIVGEALVVEGLQNL  
IPKGLGGLGNANNRGSTLSAENLELRLTISELGDENRLLSNKSIQELVAELEKTPSIP  
QPAISPSVYGRWRLMHTDNANTASPIQRKAVSSGAFFIYQDIVLNDAGQLIVSQVVKFSE  
TNELKVDALASTSAYPLKELTERKGDGKLLGLNILGVSLVGEAAQEDENRPSRIDFVFD  
EGRFEGPDLISIPVPPFRLPILRDAVKGW  
>comp11178\_c0\_seq1; 223 103 711 LEN=1001; translated  
MVKFTINDDNDNRHDIIESFEALDTSKTGRIGVDLAYTLLLGLGYMSDYKRKDDFTLTT  
LEKSARRIERADCEDYDEADFESGIKLETLLTIVATHPSLSEKNHSNTFAQRTFKLIDGN  
GKGYLDSSDLIRLGDVRGNLTSQKHQIRQYNDIAISETQACDMIETTNEMFAEKGTESK  
ENDNRKRLYSTTFEKLFASTT  
>comp11179\_c0\_seq1; 518 327 2236 LEN=3885; translated  
MAEKSGIALQGTVAEWQRAASAMGSTVVFPGVASPPIWGRKMRRVVPMTLARATPGVP  
PDTNAAEESLIGITAANGSQQSLVASHDCFLAETETGHYDPLMQVLPYRRLCRAEASNQ  
RLYGLPVSPSLALGDAKEERGLNATGKLAYYNLGPIDDRGNYPLLSGVEMALVVVHGA  
NRNGDDYFCSAKATIDLQHRFGDTIKKAQPANGSTKERRILVVAPVFLPTPSPTGDLGSA  
SQGRHHPFLSFLWDEAGDRDGSWRYGADASGPLPGISSYDAMDIVLNLRRSGLFPNLR  
RIALVGHSSGGQLVQRWSLLTPSEVWPPPLSSSSPTNVLEDSIDSASKPKIKPRRLSGTI  
PVAPSKNDADADSSITIHAVVANPSNYVYFTPLRFFNDNNGSIQNRNRNRKNSNEYLR  
SNNQTMQNTPWRLPFVHQNGNDANDNDNSYENCFFYNRWEYGLDDGGPMDVPYLRQAI  
RDSKSRVLVDRYLTERSVSYLVDLDRCDGNQPCESHLETTCADELQGRNRYERNARYMA  
SLRLGSGFRRQRATDHTRDGGFARAGSSSSARWTSRRTNASDLISHHRRRAVVPNVGH  
AMMFQSEQGIEAIYYARDTEEKPRIRKSLSEKTL  
>comp11180\_c0\_seq1; 193 1 1013 LEN=1363; translated

XRSKGFPLDQSKTRPEQTRSDRIGSGETRHRRTTQRNAAQRNATRHSMLVLRFRRHGRRK  
PLRLLPCAATILRASLLVLVLSLLAHRRAEGRVPPGLEGI PPKNRSRNRRRRDMIVSTV  
PQLASLVLLDRGNSNSRALALPFFDQPEDRRQKELCLVNLMLRQSWALGLSRKLGAEAPGD  
ETPEGWEDKKKSLYLEARLGSKVVAESKRISGGATANVFMKGLHVRECLDDLVIYVVGK  
GAKRKQMDTYREDLIEALASIVEFDGLETTQDDSPRSSLTLSMYNAQKSLFVQRMLAERI  
VPLVDDILRLFDPDTRAQSEYYMREYYPSEAIARKPP

>comp11181\_c0\_seq1; 173 88 495 LEN=1526; translated  
MSDLQATTGVEANRAELIALNQELLDIVNLDYETYDRLCADDMSCMEPESNQNVVVGKG  
FHKYYFDVFGGSCNKGEVSVSGMNTKTHNTVTVRPHVQWIGTAATGAVLSYVKLTQQTA  
PGKAPVTMQQSETRVW

>comp11183\_c0\_seq1; 1049 112 3573 LEN=3640; translated  
MVIVEDCLRPDSQLPTDDEEKSDDTFREKNVDDNVRDSPRNTLEGSISLLEDVDFIDQNR  
NNNSTDLASVSPGTSFVSRRRLSTKMSLRVAQFDAYRNHVESISPVQSLNDSTFCFSFSS  
SRPKVNESIVTRSDRKKALANRIQNFEGKNSKRCILRLDLRTPPEVRKIVKTSKNNNRDL  
PILRRYEHLSEESQLRRELASKIAARERHRRGLCLKSKEERVLLRRNRARFYRIGFGN  
NVATFRSSKNEEAGRTKDGVCDRVRAAPFDFTNFVPQSF SKSDIQHQLILNVVERSFFVK  
EFRKHGKARCEGALDALTNAFEPLTFQPAHVLLHEGTKEQNDQFYIVDEGKLNHFHKDGKL  
ISEIDEV GAYFGELALLYNVTSEHTVSVHESKQTHLLRIEQRAFRGLLRIFSKRAAKEKR  
DALLGVDFLHDLICENETLTNRLLS IMIREEMTLGETYNMSQDITFMVIQSGQMVARIE  
KTLNPGDYFGSRALIGSLPRQSTNNTDMEVSSEKVVFFRIDNHSMGQIIGPRRLQNLMDM  
RRLVATPLIKEAKLSNCAHDLMAEGMSEKIIDEKDDNILEVDVDFDPPAIYVVREGQLLVF  
SHDERAGVKTENLLTEGSTFGHAQLRLSTENGIPRYHRVEGLTVSSVDGQYASIGVLSLD  
EMATKSCMDVTHEAICFLPTTDKSTTGTIRKETHGIMPKEKKAREAIQSHLPFEDLEKIR  
LLGEGEFGEVWLVSANVSSEGSPEHRQKFALKSQLKIHRNHGFDNTDLIRREIEVMQKLR  
HSQLADLVTTYEDDASIHMLMLVPHGELWDRIHVEDEQGNWSSGLPEDHAKFYAMSIAD  
TLNYMHSGKIVYRDLKPENILIDASGYPIVDFGFAKYCPEKTYTFVGTPNYVAPELITN  
GGHNRSVDFWALGVTVYEMITGENPFFFEDMDQASLFHTICQEEYFPLPKDTNDQLVDFI  
EKLLNKDPAQRLGMLAGGVNDIVLHHWFEGVDLSQVQAKLFPAPWKPTQLTEDAFETMPS  
CDSHVSSSPNESMGARSTQPSSASVGLGDSKIANDEERTTEHDSKSKIKKEKSKKIKK  
TKLNaNHLSINNI SYPDLKIFEDFQYSIPEWRVPDEKDPATGRSEKEKKRSELRRSLLKS  
SFDSFGINEDNI

>comp11184\_c0\_seq1; 928 81 3329 LEN=3452; translated  
MRRVYGKIGSPLNREQLKRAEKDRRGISVASLSSRRQQTNQQPHRKYVYRRKFHSICN  
VGSLRSIAAENRTWCSVSDIRLPTQQEQQQYPKNLKPFLLSRQFARNLVRQHSTLDMKSVY  
RKTTSRLLATPLGGLDDKLWSEAHMTILWLLNNSCGTNNENAPATVVSSDEASEGVHNL  
GLLDRMYAEEQETLDDHDGDIPEFFDELLNLI VNRWRLLISSHQVLLDRKETNSSVRAK  
DEDEITMITPRNLLDRLYCYQETS PSLQPNIQSYAMIDTISSMVEIYDEDEYKKEVEKEE  
LMETVDEI INWVVDQACDDYSDGTDNGDDLIANDTIRDEALPSASSSLLKQORRYAPT  
PNVVLFSSTMNAWAKSGLSGAPERVDELLENMHDLOEWYPEWNIAPNKFTYSTAIDVWAKVQ  
RVDKVKELLQKMHHQAMEKDNP SLKPGLPAFNGYLVALARSGRVEEAETLLGQMEDLYAS  
GELEPPSVISYTTVIDGFARSKREGASMRAESFLRRMIDSEDLSPNAVTYNSVINAHVQ  
SFNIEAAENLLQEMHETFLRTGNMDIRPTMQSYSVVSGIAKSRRRDSGIRAEQILEQIK  
EMARSGDLKPPDVILYNAVLDCAWAKSSVTPETALRAATFLEKMRDEIVPDAISYNTVI  
HCLAQSGRAYDAELMLEKMKKEGIYPNSITYNTLLAAYLNQTQTRKLGGFHKDRSMQSNK  
TDTDRAENLFERMRNDPNIDPDVVTYNTMLHAYSREGDIETAERLLQEMFLEDSPVAPDS  
TSINTVINAWTKSGRENAPQRAEAILEQMLHPSDNSKEGRDGKLVKIRPTSITFNSVMTA  
WTKTRRAEAAERCQSLNLMVHNEDGAIQPDYVTFNIMIYAWSLSTQDDAPDRAEALLSE  
MRQRFKSGNARMRPSTKTYGSLINWAKSRRPEAGKKAEDYLKIKIKISEGKQRGHRQNS  
RSFREEQPRVFEFTSAIRAWYKSDDPMAIYKADGILYLLQEVKRGNKQATPDSKLFGAF  
LQILASSMVPKKNIYADRVVEMMIEFKVKPNKMLLDLMLKRCYSGLQERPDLNSESQQVNN  
KH

>comp11185\_c0\_seq1; 395 60 1640 LEN=1794; translated  
MATKISHFALQKFTSNGLKYSRSLCTLLSKPSSPSCSHSVYPLPSTFTLSDYRRAFMNSV  
ADSSSENDSVISPDEILNQCELYDLLLSLNEKLGIAVPKSSPHTSLPFCLLVGNHSSG  
KSSFINYLLQRNIQKAGVAPTDDTFTVIA PGVDTDADGPTLVGDPDLGFAGLRQFGPTL  
IHHSQIKYRESPLNFMLVDSPGMIDSPGTGSKEVMDRGYDFPGVVRWFAQRADIVLVFFD  
PDKPGTTGETMSVLLNSLSGMDHKLLIVLNKADQFEKIHDFARAYGSLCWNL SKVIPRKD  
LPPIFTMSLKDEDSQASQLPASLSDLSANKDDVVELCMKAPKRRIDNVI TNLYDSTSTLI  
LFSKIWNWVSRYNKEWRNSRLREAGLASTSGMALGAVNYLGLDAMIQGGVLGTSIVGVG  
GLIWYHQSYLNHVQODLVSLLESLSASFQORTHAEVQDGEFVANIWQVRGSLRSALTA

FENGGNQATASSELSKLNILDIEIPRLRRLANEAQFYDSNSPRA  
>comp11185\_c0\_seq2; 217 254 916 LEN=1070; translated  
MSLKDEDSQASQLPASLSDLSANKDDVVELCMKAPKRRIDNVITNLYDSTSTLILFSKIWN  
NDVVSRYNKEWRNSRLREAGLASTSGMALGAVNYLGLDAMIQGGVLGTSIVGVGGLIWIYH  
QSYLNHVQQDLVLSLESLSASFQORTHAEVQDGDDEFVANIWQVRGSLRSALTAAFENGGN  
QATASSELSKLNILDIEIPRLRRLANEAQFYDSNSPRA  
>comp11185\_c0\_seq3; 217 97 759 LEN=913; translated  
MSLKDEDSQASQLPASLSDLSANKDDVVELCMKAPKRRIDNVITNLYDSTSTLILFSKIWN  
NDVVSRYNKEWRNSRLREAGLASTSGMALGAVNYLGLDAMIQGGVLGTSIVGVGGLIWIYH  
QSYLNHVQQDLVLSLESLSASFQORTHAEVQDGDDEFVANIWQVRGSLRSALTAAFENGGN  
QATASSELSKLNILDIEIPRLRRLANEAQFYDSNSPRA  
>comp11185\_c0\_seq4; 330 60 1797 LEN=1951; translated  
MATKISHFALQKFTSNGLKYSRSLCTLLSKPSSPSCSHSVYPLPSTFTLSDYRRAFNMNSV  
ADSSESNDSVISPEILNQCSLEYDLLLLSLNEKLGGIAPVKSSPHTSLPFCLLVGNHSSG  
KSSFINYLLQRNIQKAGVAPTDDTFTVIAPGPVDTADAGPTLVGDPDLGFAGLRQFGPTL  
IHHSQIKYRESPLNFMLVDSPGMIDSPGTGSKEVMDRGYDFPGVVRWFAQRADIVLVFFD  
PDKPGTTGETMSVLLNSLSGMDHKLLIVLNKADQFEKIHDFARAYGSLCKWNAXHTMICC  
GLNPLLRCNELTWEHSYTI SFEIAVDIFVLSFFIDRIPEXGWNLSKVI PRKDLPPIFTM  
SLKDEDSQASQLPASLSDLSANKDDVVELCMKAPKRRIDNVITNLYDSTSTLILFSKIWN  
DVVSRYNKEWRNSRLREAGLASTSGMALGAVNYLGLDAMIQGGVLGTSIVGVGGLIWIYHQ  
SYLNHVQQDLVLSLESLSASFQORTHAEVQDGDDEFVANIWQVRGSLRSALTAAFENGGN  
ATASSELSKLNILDIEIPRLRRLANEAQFYDSNSPRA  
>comp11185\_c0\_seq5; 255 899 1729 LEN=1883; translated  
MSVLLNSLSGMDHKLLIVLNKADQFEKIHDFARAYGSLCWNLSKVI PRKDLPPIFTMSLK  
DEDSQASQLPASLSDLSANKDDVVELCMKAPKRRIDNVITNLYDSTSTLILFSKIWN  
DVVSRYNKEWRNSRLREAGLASTSGMALGAVNYLGLDAMIQGGVLGTSIVGVGGLIWIYHQ  
SYLNHVQQDLVLSLESLSASFQORTHAEVQDGDDEFVANIWQVRGSLRSALTAAFENGGN  
QATASSELSKLNILDIEIPRLRRLANEAQFYDSNSPRA  
>comp11185\_c0\_seq6; 217 1224 1886 LEN=2040; translated  
MSLKDEDSQASQLPASLSDLSANKDDVVELCMKAPKRRIDNVITNLYDSTSTLILFSKIWN  
NDVVSRYNKEWRNSRLREAGLASTSGMALGAVNYLGLDAMIQGGVLGTSIVGVGGLIWIYH  
QSYLNHVQQDLVLSLESLSASFQORTHAEVQDGDDEFVANIWQVRGSLRSALTAAFENGGN  
QATASSELSKLNILDIEIPRLRRLANEAQFYDSNSPRA  
>comp11186\_c0\_seq1; 637 183 2411 LEN=2621; translated  
MFHRRFLPARTAAPELLLLLLLPLMLLRGLPGCCGLAARLAVPTRLRNTIVLGGPRSPSP  
APLSLPLKRHGRRCSSSRTAPLPAEVLFGEEEDPSGPKGILSRKAPRVVAAAASAIL  
LLGLSACL SARISSLVSP LASSLAALGPSLLRRLPAAAP IRTPLALALGIVLTARALAL  
AFGAGRRRARDATSEWQRYAEHPGARGRAILAMVAKQSLWIATAAVLGGLGARARSKRLR  
RHAGAAFSASLLGLGPLYVKLGQIASCRKGLLGEWEIEALEDLQDRVPARKGSEALELAH  
SALPGGRDDFDKCFVDFDTTPLAAASLGQVHRARLRDTGEEVAIKVQRPHLKKIYDRDLA  
LLTALARSMKLSLRSRSGGAGPSWTQIFADAEAILYREIDYRDEASNAARFASDFGL  
GIGGTSNATTTALARNKPMPEASSWIRTPHVYPHLSSERLLVQEYVPSIKITDGPGLDA  
ANLTAEDRAGLADDLARAYLRQFCCNLFFSTDPHPGNLGVLELVPTDGHGDTNLSTSTRPR  
LVMYDFGQVATLTKSQADGILEIEAIIDTDVERSIEAFQKMEVLVEDADLDQVRQKVAE  
NYRTGKIKANRKKLRQKGFTRDDNDGESGLLSANKTTAAAESQGGYSESQVMSSTL  
PAEYAFVARAISQMDGVGKSLDPDFDFISSAOPYIVEIKGTDLYLKDEATKFARSCQERL  
EMLRDFWTKGIQAWISTSTQNK  
>comp11186\_c0\_seq2; 405 183 1994 LEN=2140; translated  
MFHRRFLPARTAAPELLLLLLLPLMLLRGLPGCCGLAARLAVPTRLRNTIVLGGPRSPSP  
APLSLPLKRHGRRCSSSRTAPLPAEVLFGEEEDPSGPKGILSRKAPRVVAAAASAIL  
LLGLSACL SARISSLVSP LASSLAALGPSLLRRLPAAAP IRTPLALALGIVLTARALAL  
AFGAGRRRARDATSEWQRYAEHPGARGRAILAMVAKQSLWIATAAVLGGLGARARSKRLR  
RHAGAAFSASLLGLGPLYVKLGQIASCRKGLLGEWEIEALEDLQDRVPARKGSEALELAH  
SALPGGRDDFDKCFVDFDTTPLAAASLGQVHRARLRDTGEEVAIKVQRPHLKKIYDRDLA  
LLTALARSMKLSLRSRSGGAGPSWTQIFADAEAILYREIDYRDEASNAARFASDFGL  
GIGGTSNATTTALARNKPMPEASSWIRTPHVYPHLSSERLLVQEYVPSIKITDGPGLDA  
ANLTAEDRAGLADDLARAYLRQFCCNLFFSTDPHPGNLGVLELVPTDGHGDTNLSTSTRPR  
LVMYDFGQVATLTKSQADGILEIEAIIDTDVERSIEAFQKMEVLVEDADLDQVRQKVAE  
NYR  
>comp11187\_c0\_seq1; 391 37 1561 LEN=1739; translated

MNNTDERFNRKISRLLPLSVFQDLITRAPLDGRDDGPESLKANICKRLKGFVRVRRNARGRS  
KNKNRGRGVGSGISLSTTTTYNIKTIGQLLRISKYTLMLALDPILTYEEVGI LLNRVCNQ  
CAPNPISALELFGATTLNTDNVLGMSRYRDEGKQHENDPISFGSKMKYLPTSLPSLDRIL  
NGGVRLATVTELVGRSGVGTQLAFQLCVTAAKFNQGAIIYIDTEKKMSLERLGEMSEQRR  
LIGNNHESRDEDDMGMYKSTQLVLNNTLVHQPENTDELLQVLDGLEYEILIRNQAGQAF  
FQSGASTDINTSLSNTAVRGKYPVRLIIVDSIAAPMRRDYGTDSAPQRAASIFQCAQKLR  
RLADQLHLAIVVINQVGAASVDSNAMKNRSENKNDISGFGLNAEQHPSNVRAALGTSWH  
HCVSTRLLLEALNIPNFMPSPLESSLGNTNRNGFQWEKAI EPTH LITK IAVVKSNTTAL  
GETRFAITTAGIIEDRPSASPHKDQQL

>comp11188\_c0\_seq1; 661 89 2080 LEN=2128; translated  
MVSASNACIPVAYPVVTQVPSLPNTVRGEPVLDGQSGRISAGKPFLSYTSGLKCVIRSL  
KPEEKLPNSEYPTLVYRGHQYATSCVKISTSGAYACSGDVRGKLRVWALDHEEHLCKLEQ  
QGLSSTVRDISWDGESKRIAFAGDRLDNQSVCTRVILWDAGNTQGSMLQHLKKGKSCAVAF  
KPNRPFRLATGGKEDGKIHFHKGPPFQIRIGVENEKPCESAHTKGINCVRYTSDGALVASV  
GGDKSLCIYDGKELALKTKLENIHTGTIYACAWASDNKSLITSSADGTCKLFEVSADGAS  
VEEKHVWVVAEHMLGEPCEKAPRGGMQLGCAFAGGTIPVSVATNNQISILPMPGDGGKIE  
VLTGHNAPIGAVAFDHANGLFYTGSDGILCKWDLKEIKAIERIVPADNKDLTYQIHKGA  
ISGATILKDSQLLSMGWDDKCYFTKGGKLSQSDTIDLGAQPVATSTGTSLTAVLTVNGVIL  
LKDGKQVSSGILPLEYTANCIEVSKDDSTIYIGSNCKIYVYSSELKEKHVIADGHLKPV  
HSLALSNDGTMLAAGDARDVCVYKTADYSTVIGKSKFCFHLQKIAALAWSRDDKVIASGG  
EDDSIYLWSIEKKKRLHYQFAHRGGVVALSFKTDTDPDMLVSVGKDCSVVSWDVTNDVKK  
KFG

>comp11188\_c0\_seq2; 526 202 1692 LEN=1740; translated  
MQHLKKGKSCAVAFKPNRPFRLATGGKEDGKIHFHKGPPFQIRIGVENEKPCESAHTKGIN  
VRYTSDGALVASVGGDKSLCIYDGKELALKTKLENIHTGTIYACAWASDNKSLITSSADG  
TCKLFEVSADGASVEEKHVWVVAEHMLGEPCEKAPRGGMQLGCAFAGGTIPVSVATNNQI  
SILPMPGDGGKIEVLTGHNAPIGAVAFDHANGLFYTGSDGILCKWDLKEIKAIERIVPA  
DNKDLTYQIHKGAISGATILKDSQLLSMGWDDKCYFTKGGKLSQSDTIDLGAQPVATSTGT  
SLTAVLTVNGVILLKDGKQVSSGILPLEYTANCIEVSKDDSTIYIGSNCKIYVYSSELK  
EKHVIADGHLKPVHSLALSNDGTMLAAGDARDVCVYKTADYSTVIGKSKFCFHLQKIAAL  
AWSRDDKVIASGGEDDSIYLWSIEKKKRLHYQFAHRGGVVALSFKTDTDPDMLVSVGKDS  
CVVSWDVTNDVKKKFG

>comp11189\_c0\_seq1; 514 116 1534 LEN=1641; translated  
MIWKGIKTPISMVYSTALPIIFPALISAFATTTNTNMIPKLRGVVFDMDDTLVLANLD  
IPEMYKKVFGKDPNREDFDILKEIKALECPEEQARAHRIIEEMEEESRQOMTLMPGCVE  
LLTWLSAHNIPTALVTRNTRKTTHMFSERLQAIQOEKGRRGHGDLDLSFQKIIARDMGS  
DNTPIPPKPDPAAMKIIARESFDIKNEKDLFPFEILMVGDNVANDVGFVGNAGACTALLA  
SDEKYADAADIFVEKLTTELPRKIWNHFEIDGSLGNTPEANQLPLHGSPPTPQSKLCKAV  
VDNDVATVTRTMLGDLSDLEITAADENKNTALIWAAEIGNLELTRILDTVVAKLSEDEN  
YRKEERLLSFVNRHGFGLGATALNRAARRGHTHIVDSLSPKDCEVASCDFADVPNDKLQH  
PLHFAAFKKHPETVASLLQCGANPWVLDKGRTPLEDTSCECQSLLKKAML

>comp11190\_c0\_seq2; 100 256 465 LEN=465; minus strand; translated  
MAAAAATTAEPRRRNEKAEETS CADSSAPHSASPSWQWQVFSFSRPPSPMQWTASPSQWH  
MWSSSWSSWS

>comp11191\_c0\_seq1; 411 217 1149 LEN=1612; translated  
MELKSQQENPTS YGKKAPLSISPPSAAESLFLGPATPDAFEVNDGSFMRKFLNTDNAGQQ  
LPPEHTHFFGKTIKKS GSFHSALTRVSNVSNDDFVSCVENSSDIDSIDSTENNYVSPTA  
VRSSRFSMETIEDTISSNDNDIDMMAKKTCTAIKKEITTPVVTEVKKTPLPDVAPAAVEE  
PVADASMKVDAAEVYVYKAKEILLWGKSVVVSFFVGTSEAVAGKALGVVGTDL SQVDGK  
IESELTKFDAGILNPAIEAIAKVLLGVAGKSEDALKPIIE LLLKPF GKLIKSEA AEETPE  
AHTENPEITK

>comp11191\_c0\_seq2; 337 71 661 LEN=1124; translated  
MSFTLGNVTWYDFFNLEDTISSNDNDIDMMAKKTCTAIKKEITTPVVTEVKKTPLPDVA  
PAAVEEPVADASMKVDAAEVYVYKAKEILLWGKSVVVSFFVGTSEAVAGKALGVVGTDL  
SQVDGKIESELTKFDAGILNPAIEAIAKVLLGVAGKSEDALKPIIE LLLKPF GKLIKSEA  
AEETPEAHTENPEITK

>comp11191\_c0\_seq3; 411 413 1345 LEN=1808; translated  
MELKSQQENPTS YGKKAPLSISPPSAAESLFLGPATPDAFEVNDGSFMRKFLNTDNAGQQ  
LPPEHTHFFGKTIKKS GSFHSALTRVSNVSNDDFVSCVENSSDIDSIDSTENNYVSPTA  
VRSSRFSMETIEDTISSNDNDIDMMAKKTCTAIKKEITTPVVTEVKKTPLPDVAPAAVEE

PVADASMKVDAAEVYVYKAKEILLWGKSVVVSFFVGTSEAVAGKALGVVGTDLSDQVDGK  
IESELTKFDAGILNPAIEAIAKVLLGVAGKSEDAKPIIELELLKPFGLIKSEAAEETPE  
AHTENPEITK  
>comp11191\_c0\_seq4; 411 242 1174 LEN=1637; translated  
MELKSQQENPTS YGKKAPLSISPPSAAESLFLGPATPDAFEVNDGSFMRKFLNTDNAGQQ  
LPPEHHTHFFGKKTIKKSGSFHSALTRVSNVSNDDFVSCVENSSDIDSIDSTENNYVSP  
TAVRSSRFSMETI EDTISSNDNDIDMMAKKT KTAIKKEITTPVVTEVKKTPLPDVAPAAVEE  
PVADASMKVDAAEVYVYKAKEILLWGKSVVVSFFVGTSEAVAGKALGVVGTDLSDQVDGK  
IESELTKFDAGILNPAIEAIAKVLLGVAGKSEDAKPIIELELLKPFGLIKSEAAEETPE  
AHTENPEITK  
>comp11192\_c0\_seq1; 157 1 942 LEN=1237; translated  
XTKPANKPLAQDYSVLVYRRTPHPKRLVRIMRTELF GASVEHVLF GDDFDQNAKAVVAALR  
SADREACERS SRANNDNARSFALCHWELCSENDGCHSRLYLTHPTITLSNRASTLANQKD  
TIFLASGGDDFVDEGIIIVDECYLEETATNNKQQALQVATQWKFSIIYSSTYQAPVLYFS  
VQDVNGNPVGRRLLELVLEAAHQRSIYTASNDFPSDMWDFLSQEEHPLTGLSSFFLHPCQ  
SAQRLQCLTDVNTKSPTVTNSVATAVATNGFTRMSVLWSWMSMILPAVGHSVPPVYFQQI  
QNR IAHQSTSTMP  
>comp11193\_c0\_seq1; 113 1 511 LEN=901; translated  
XMKSQDLQESGVFEP SRLQDPESADRASASGRTPGNRSGAFVPSPPVESPPVHSPSPR  
GAASSASANTSWISAVRSTAAEDPWPALVAELRSRCEFLERDRDEVTRITAQILESERTS  
HRAELEAAMATAERKANEALHDLHLEKNRELGA VYRSVCPQCQQEVYSMM  
>comp11194\_c0\_seq1; 498 393 1667 LEN=1862; minus strand; translated  
MTMQQKRVPKPLPKIKEYGPN AIEVKDLTFGYSSTGALDAQDERNVLHNLNLTLKTGSR  
CLLIGANGSGKSTLLRILAGRHLTQQEVKVLGLNSFRET KLNFRAYLNC DWGMTSIAFV  
GASVPLCADIPVYKMMVGILIVXLSVHKSKSRWCFTSGLNCQSSNLSRRKLLLLLSIVGRH  
CVLLLLFQKLP HDALDWICRTPYVTYLFGLEEKLQNSYPERREDELVRMLGIDL NWHMHQLS  
DGQRRRVQIMLGLVRPFKILLLDEIT TSLDVCVRQDLLKWL VKESDERGATILYATHIFD  
GLDDWASHLFLYLNNEGRGCGWQ GK MSELEKYQELKRENHPSKMLAIADHWLRRELEEARAK  
NQYEKATYAAMELDPTDRQGGYASGRNIPMNETASTQPQRQSTLADAMGNAGKLDTHRQT  
SAAP  
>comp11194\_c0\_seq2; 142 564 2033 LEN=2033; minus strand; translated  
MTMQQKRVPKPLPKIKEYGPN AIEVKDLTFGYSSTGALDAQDERNVLHNLNLTLKTGSR  
CLLIGANGSGKSTLLRILAGRHLTQQEVKVLGLNSFRET KLNFRAYLNC DWGMTSIAFV  
GASVPLCADIPVYKMMVGILIVICRYTNRNHDGVSPXGLNCQSSNLSRRKLLLLLSIVGRH  
CVLLLLFQKLP HDALDWICRTPYVTYLFG LAGEAPELDPERRDELVRMLGIDL NWHMHQLS  
DGQRRRVQIMLGLVRPFKILLLDEIT TSLDVCVRQDLLKWL VKESDERGATILYATHIFD  
GLDDWASHLFLYLNNEGRGCGWQ GK MSELEKYQELKRENHPSKMLAIADHWLRRELEEARAK  
NQYEKATYAAMELDPTDRQGGYASGRNIPMNETASTQPQRQSTLADAMGNAGKLDXAPPD  
ERRPLGTDGRNPF GCGWRRTAAHARALGR TTE TNNHRTHGGLWQEV SFVLSTLTARSKQA  
SMVWAGKPCDX  
>comp11195\_c0\_seq1; 202 356 769 LEN=1129; translated  
MLEKKPLEYIEEISLANEDMFVWDCTIKGPADSPYAGGKFVLRISFPEQYPFKAPTTLTFL  
TKIYHPSVTL DAGDVCADVMGPWGPTLNARHCLAVIYSMMQSPEADHPLEETIAQQLREK  
PKDFEKTAKKYTKEHAK  
>comp11195\_c0\_seq2; 216 133 576 LEN=936; translated  
MSKRLKERAMLEKKPLEYIEEISLANEDMFVWDCTIKGPADSPYAGGKFVLRISFPEQY  
PFKAPTTLTFLTKIYHPSVTL DAGDVCADVMGPWGPTLNARHCLAVIYSMMQSPEADHPLE  
ETIAQQLREKPKDFEKTAKKYTKEHAK  
>comp11196\_c0\_seq1; 435 161 1430 LEN=1480; translated  
MWKIQSAAALQRTGGKAVASLAESAAAAMAPAVPEASGGSSSADAPQPPATGMHGAI RCY  
SQT SFALQE QSETAAKGSSTLTLPPNLMFDFKSSFAPQRM AAAAAAPELLEEDSDNAGD  
DSVEAVDGEESD DTDSD EFDGEDEDSPLVFCPDSFQASGKFPVKPLPERLQVSVRDGTS  
PSPGVEGTIWLDP TVFGVEEIRIDLIAQNVNYIRNKIRGFRKAKSKTVSEVSGSRKVRN  
QKGGGIARAGHSRPAHWRGGAKAHGPKNTKNYGN TKLNKRVKTLAMRSVLTQKLMEGNLV  
VVDHLRLESHKTRPWARVLETEFKV GKALRATRLRSNPHLSQTTSALILDHYLEPEEGGD  
ESEDYHASYQGV PINLWVASSNIPRITVQNRFLNVYDLLKNEKLILTL SALKEIEEKWG  
EK  
>comp11197\_c0\_seq1; 317 93 866 LEN=969; translated  
MKIYSSETLSAVVFTSAFSQINAGPDVVENKGPVAVECIP IHEQLQKMGASAFSEKLDER  
GLDFKYGQFTIFAPSDELFE SKVSELQSEGYSEGTINDILLFHVSAEGIKGNIEEHCNMA



LPMLNEELHVNQETSTTLCNGEKIYQVGPNGDGSRRPKIASEGMEACDGVIFAIKNALM  
LPTLSNATTPVSPTSPNVEPTPNLKPTPKPVAIVPTASPTPVSPNQPOSSSGNKLLLT  
SQSLAFVSTAILLSFC

>comp11198\_c0\_seq1; 812 1 1320 LEN=1427; translated  
DDDGNNLLDGGKTFGVLDFFDDDDRANGDNVFDNDDDDIVDDDDDDDDAYSDEASDEGPTIAT  
PFVAKLRASLTLETVWQRDFESTTDSRALGCGFDADSNTVYLAGLVEDGGELVGRRTSLLG  
DDVFLMRLDATDGAVVWAKQLGTSMDRLAYGGSGLAVLEGQKGVLLMGDTKGNLYSIPD  
KESEIFVVEVDADGNLPEITETSGIDYSSEASDLEISNPVNTEGAEVQTEKESEKDNGS  
DESTPEDANSIRTSIRIGHVVYLFITIGLVTVGCSGISYVLSKSKKRASTERALVFSYLQN  
FDLEDIDVKQAATGGWHGTYVGNLAQGLNVREEDQLYGGRGSDGAGAEDGTGNTTLDSD  
SVKRQLNKLSSHSSVVRDILFMDYDESIYKDGDSKNGTKADNDAKNRDNLVKDPILYSDP  
GKGDDDEKEDDDPWGSEII

>comp11199\_c0\_seq1; 262 1 1092 LEN=1465; translated  
LRDNNKARHNSSEPNIISFELHVIDAMKVSAPATATSMASLIASSTAALSISPSPKPKT  
EPHQHSHASHNSLLRAQQQSVSTPYDIASDDGIAITTFKNEGDKEQSHRSSVMKPAPCDY  
EVNLEAWSQISSVVKSNLGLGLEIRVEWKPEDDIVQVARYVVGETNPWFVDGRNLKLYPA  
ARLLNLVSSMKAYVDICESSLHDIEMYRLKLSAMYGDSATRCPLWHIDNVPPIRWIQTMLG  
PGTSYVDDDESKPNKYLHRVRYPDREMLTQQEQDIGSGRRHWKDVCEKSHAPIQQATEGE  
PIVLPGYRWSETSRQHHPQSVTNGNGYLPVIHRSPHDVPKDQGRILLNLDVICGDHKC  
DCC

>comp11199\_c0\_seq2; 295 518 1525 LEN=1898; translated  
MKVSAPATATSMASLIASSTAALSISPSPKPKTEPHQHSHASHNSLLRAQQQSVSTPYDIAS  
DDGIAITTFKNEGDKEQSHRSSVMKPAPCDYEVNLEAWSQISSVVKSNLGLGLEIRVEW  
KPEDDIVQVARYVVGETNPWFVDGRNLKLYPAARLLNLVSSMKAYVDICESSLHDIEMYR  
LKLSAMYGDSATRCPLWHIDNVPPIRWIQTMLGPGTSYVDDDESKPNKYLHRVRYPDREMLT  
QQEQDIGSGRRHWKDVCEKSHAPIQQATEGEPIVLPGYRWSETSRQHHPQSVTNGNG  
YLPVIHRSPHDVPKDQGRILLNLDVICGDHKC DCC

>comp11200\_c0\_seq1; 202 263 999 LEN=1316; translated  
MATSTPAIFFFHWMNQTQNALVNFNRNATQPLNMSAVAQGYLGAVTTSIGLSMGLKSVI  
DRSTRLTALQKATVQRFVALPAIITAGAINVFLMRQNELTTGIEVYEQEKLDATPGGNR  
SGDAVDEDESEVPVVVGTSQLAACKALSXDDDL ENGLAPAGVFNDARRHVPGGPDHSKEPT  
PADSPIQFELYLFLVRLWIAGDHCTLP SDRNGRGIEPGGQVPTPQGRAGKSGDLSLVQQG  
TVALVW

>comp11200\_c0\_seq2; 321 62 1242 LEN=1559; translated  
MTPPDTSSSTSPTATAISISAIDSLDQSSNDDSVPPFSLKADRYDQSTYYGRFRKMLDVV  
DPRTLCSQQELDDAVQLLKDFEDRTESEGLD SGNISTYHNGFDNEKLWQAKKIKDAI IH  
PDTGEIIPRPFMSGYVFPNAPVCVGAIMATSTPAIFFFHWMNQTQNALVNFNRNATQP  
LNMSAVAQGYLGAVTTSIGLSMGLKSVIDRSTRLTALQKATVQRFVALPAIITAGAINV  
LMRQNELTTGIEVYEQEKLDATPGGNRSGDAVDEDESEVPVVVGTSQLAACKALSXDDDL  
ENGLAPAGVFNDARRHVPGGPDHSKEPTPADSPIQFELYLFLVRLWIAGDHCTLP SDRNG  
RGIEPGGQVPTPQGRAGKSGDLSLVQQGTVALVW

>comp11201\_c0\_seq1; 64 1 1384 LEN=1946; translated  
XNNNNAANNIGFLVARLFRRIVIVLMIAAAAVGCAMLQILPLYSVTVEFFDSTFDALLY  
EVLEVRDWRDHVLECTGGLANRSDYHHHLHKKWGLNGIRDAVIGRTGIVDCSKGVLHIPS  
ERVLISDSLQSLTATPTAGRRRPTLQSELRDYAYGVNASWFMSCSGHPTIYSEGQQYNRD  
EAKNRENQCTDTLGTNDHSHSAHSICNGRRRIFDKCFRGIHDHFATTGEVRAAFSLANEL  
VDKGGDHFVHYDVSLTMAVPSVVDKVRNLLLETSYFNGQRRTKDAQTI EPVAFRVLTG  
PMDGHDVQLKQTGNMGSMYLT HSSALNEENYLNWVLR SRQHNDQARFQSKYRPWPFRLP  
KRDTCDLKFDLGADSRFCILTTIHLTTGAGENFQGGTSLFVDDHPSNARDSKRRRIARGVS  
VDSSRGRLVSTGGNENLR CRFPVRS GFRTTELQIWWNCEHE

>comp11202\_c0\_seq1; 1171 83 2500 LEN=3134; translated  
MSWLNNVNLLTKLDGQAETMAEMVAEHDEAADEVGIDNILAKRGLSSVSSDDEEESDAN  
DGEQKSEVDDLKEDQEIADDSKDGDKKTEDSNAVDTAGGSQLSVEKESPETVEEKAAAAK  
VLNEDTSDNDKSDGGGAVKTPVVTERRQETKASNTDSLEVSSQDPSSGPKEDALQST  
GKGLKDNSPESDDGDEKNKTPSNPLSSSTPGDGTAPLSLSPSPDMASLRAKVAPIQEA  
SALLFGQKEKQRPVAMTSPGRPKRELAQAQKEARILRRHVSLNEQLETAESLQAQRKE  
LERAGERMEKDRIRLQKQKDAFQKRNAQETELLSQHEKTLKEQQARFEEQLERYRGLS  
EEEKRRKQQGGDWDKEMSNAIEREQEMRQTLNALEDEKAVLLSQISTLQGGQAVLGSRL  
SLTEAADNAMERERDAENRLDVALNQHARQITQRQARESELERTVQELNAALVVSSQGV  
DEETPSRVGGNDSLLEARISALEMDLQAANSNLAIEREQSETLQIQLRSFTNETTHEATM

VHAKEIQYDRKIADMSLTITKLEAEVREYKVNQDPNPSAGSFNDAELSNRIKVLSEEV  
VRLRDKIANHNSESLAMKNRLKVAVDRSKKLEDELLIYRNSPGADGDRYDSMEQNLKPGI  
YSKRRHGAQANGSIRNAMLNLSRGDRAEKIGQVVDQIDSF AASTGKYLRNPLARAGFI  
FYLLMLHLWTFVLLFFHAHSFDTI PNSSDIGHL SHGPQAVMQHEL NKNIDL I INSDASA  
AVQISADKQORTAHKDQTEEEVKAA

>comp11203\_c1\_seq2; 1005 1 2561 LEN=3083; translated  
PAGASAASDASSSSQLLPVMVWLHGGAFFQQGSAARPEYNARRLAQEERVLVVTVNYRLGA  
LGFMVSSSELGLYGNGLMDQRAALHFVKRRIESFGGDPDNITLFGESAGAVMIGLHLQME  
NNGLFHKAILQSNPMGYQFRSVVADFLGDALRRTVDCRDLECMRTEAVEEIMRAQSSLM  
GIPRSVGDFFAWGPTLTTGATAFSSPSSFSQARQWERDRSLFSIDQOISARSRSGRYR  
RESTTRFTVNVTQPLHNLNLPDDIPIIIGTNKHEGEIFVHGAFPLTMSKAVYWMFV GAL  
FKDSAPRVLKHYRYPVAQLEADA AVLVEKQVSEEEHKQYWMENKEELENEYLELLKTTAA  
TRGGGQSNGNRNETHGETETASSWWQKVFSPRDPEEIESRRRQRLEILKKKAKEKALKKA  
AKVSI DYRPVMSRIINDYLFRCPSWHYAHLLSLQRVKKSSSTRKKGGHRDHRNNVYVYRF  
SQPTHVPGYKECWGKSCHTAELPYVFESMDIIRSDYSTLGTVAQEEAPTPEYPYTDLMS  
AYKGVVEDDDVDFEENHDDTGKEDDDSSSWTSTSSSTLSNQLSNYTSYFQRILRHFFDDY  
FLEDSDEETAHDMARRWVAFSRTGNPNHDESSVEWIPWRFIPHSVDLDQVPSVKDQSADE  
SIPWGENGREIYNIWRDVEEKVLQDLEENDGLSYEGEELERNVEDAFRKRALVLSMEVV  
EEDSLRTELIRNKHTSGGINGENALGALRTYLTRWNSTLGGYASSEGNGGGNDHYVMIQQ  
IQRMAQDMGVLGRGLSGEYDKLLGGVFGSSGSSSTHGYWEDDFFPQFIELQWPPEGRLL E  
RXLHVRL LGTNTM

>comp11203\_c1\_seq3; 1010 1 2568 LEN=2959; translated  
PAGASAASDASSSSQLLPVMVWLHGGAFFQQGSAARPEYNARRLAQEERVLVVTVNYRLGA  
LGFMVSSSELGLYGNGLMDQRAALHFVKRRIESFGGDPDNITLFGESAGAVMIGLHLQME  
NNGLFHKAILQSNPMGYQFRSVVADFLGDALRRTVDCRDLECMRTEAVEEIMRAQSSLM  
GIPRSVGDFFAWGPTLTTGATAFSSPSSFSQARQWERDRSLFSIDQOISARSRSGRYR  
RESTTRFTVNVTQPLHNLNLPDDIPIIIGTNKHEGEIFVHGAFPLTMSKAVYWMFV GAL  
FKDSAPRVLKHYRYPVAQLEADA AVLVEKQVSEEEHKQYWMENKEELENEYLELLKTTAA  
TRGGGQSNGNRNETHGETETASSWWQKVFSPRDPEEIESRRRQRLEILKKKAKEKALKKA  
AKVSI DYRPVMSRIINDYLFRCPSWHYAHLLSLQRVKKSSSTRKKGGHRDHRNNVYVYRF  
SQPTHVPGYKECWGKSCHTAELPYVFESMDIIRSDYSTLGTVAQEEAPTPEYPYTDLMS  
AYKGVVEDDDVDFEENHDDTGKEDDDSSSWTSTSSSTLSNQLSNYTSYFQRILRHFFDDY  
FLEDSDEETAHDMARRWVAFSRTGNPNHDESSVEWIPWRFIPHSVDLDQVPSVKDQSADE  
SIPWGENGREIYNIWRDVEEKVLQDLEENDGLSYEGEELERNVEDAFRKRALVLSMEVV  
EEDSLRTELIRNKHTSGGINGENALGALRTYLTRWNSTLGGYASSEGNGGGNDHYVMIQQ  
IQRMAQDMGVLGRGLSGEYDKLLGGVFGSSGSSSTHGYWEDDFFPQFIELQWPPEGRLL E  
RDCTCDFWERIRYRY

>comp11204\_c0\_seq1; 321 137 655 LEN=990; translated  
MVFSLFPRANNNKKNPFWVALFALAVAVLSAGSSHGFTAPAASLARTH HHHASVP TAVL  
SAVADAPAKEKQKESTGVEIVKDEDVESDEKTGKNGWEIQLFNDPYNHRTFVAKCLCTIC  
GKSDGESYQIMMQAHRNGMGVGRYHYEIAELYYGSLRDEGLTVQMVEVDDE

>comp11204\_c0\_seq2; 295 137 553 LEN=609; translated  
MVFSLFPRANNNKKNPFWVALFALAVAVLSAGSSHGFTAPAASLARTH HHHASVP TAVL  
SAVADAPAKEKQKESTGVEIVKDEDVESDEKTGKNGWEIQLFNDPYNHRTFVAKCLCTIC  
GKSDGESYQIMMQAHRNG

>comp11205\_c0\_seq1; 227 1 1184 LEN=1184; translated  
KILNCTSTTIIIIIDNDNVQGNSENDPRQYLNHQFRMQH SKVVTPQTTRD SPRQQSPPPP  
ASRCFYPCNPWSIFFQMGLAALAIALYQLYSRFDWTPCSSDPPINFDRDPNSYHYTFR  
DSCKLFSSEYTEAREKFRNAVVAFGTRQAIQASETQKLINTDAVRESGSAELVTFPVVVD  
LGGETEKL SLTIDIAVLPGNTKELGTIVHSSGVHGI EGYAGSAIQ LALLELLSSSRATAS  
SSDSRSDERNENTIRNDLRERPTIVMVHAVNPVGM AEFRCNENNVDLNRNGIRGDTGDA  
FKEFLRNRDPNVAGYDDFRHLFVPD TDGDSHG GPADPTLSLYDTTVGFFAKAIPALWKHG  
FSKLKRAMVSGTCCISSCSWFPRSNTRPKSLNST

>comp11205\_c0\_seq2; 118 262 1149 LEN=1202; minus strand; translated  
MMDFKLYNVVIPKQLRHGSSVLWIHIVLVLVYNACVSPCLGEFDGLQKQGHASSNHRAS  
PFRRLGIGLLEGRSVRKGFSSAGLGP SLVELVERVVEDKGP AHEGPRQRPPELLPHEKP  
RPRATTAAPVFP LAAFHQIAVGI RKKLHEYAPGKLVAGKGLVGKHLVVARHAVGRRIVVR  
QCPLCVGWRTLLAAAIDLDRILSKRPQPGVDIDPYHRGRIPEKFWAVFHKKVEQSPDGR  
LPLFSTVIQPTGVVVLPCVWSGVFV EPRSRIESSRIGVRIGDC EIASKSYGEFT R

>comp11205\_c0\_seq3; 373 1 1815 LEN=2142; translated

KILNCTSTTIIIIIDNDNVQGNSENDPRQYLNHQFRMQHSHKVVTPQTTKRDSRQSSPPPP  
ASRCFYPCNPWSIFFQMGLAALAIALYQLYSRFYDWTFCSSDPPINFDRDPNSYHYTFR  
DSCKLFSSEYTEAREKFRNAVVAFGTRQAIQASETQKLINTDAVRESGSAELVTFPVVD  
LGGETEKLSTLIDIAVLPNGTKELGTIVHSSGVHIGIEGYAGSAIQLALLELLSSSRATAS  
SSDSRSDERNENTIRNDLRERPTIVMVHAVNPVGMAEFRRCNENNVDLNRNGIRGDTGDA  
FKEFLNRNDPNVAGYDDFRHLFVDPDGDGSHGGPADPTLSLYDTTVGFFAKAIPALWKHG  
FSKLRAMVSGQYHDPGGLNYGGEEWQPSVRLLDFFVKDRPEFFRDSTSVVWIDVHTGL  
GPFKDSIQIYGRREQDPPPNTERALADYYTAAHSVSSDEDMFSNQAFRTGYELTRGILM  
EFLADAYRDLVESGEGENRRGGGARAGFFMWQEFGLTLPGLVGRALILDNALYQLYKRR  
PETGGEEAFSYRSPFLKQAFYQSTEWRSVVRGVALFLQSVFETKARRNARVVNQHKH  
NMNP

>comp11206\_c0\_seq1; 480 208 1563 LEN=1680; translated  
MNSGSSDGPPLHSPRIAARRMRRSDSIPENSETTPAGGNTGTEDASIEELLMRHSTPVFN  
RGAAMASPLAERNSSPSPLRLNRPRSNPRSRTPMRISEEQHEHEEAQQEIVDNATTEGRR  
ITIRLGTGSHVGTNTASYASRRIRQQEPARVKSCKKQGPSHRKTRRWNNDFVNLAAELSS  
GKGSAAAVDALLKGSAAASKHRSILDPKQHESKAMKQFREDGSMKLVREKFFEGSLPSDN  
IHLSSSSSKRKIVSDNNMLTPLERFHRIETRLRRIIVKACENSYAASKVVSTLEEFVLRV  
HNGETDERSNEEWQEFLLGTPTVTTLRENKKNKTRSQDNSDEDQEVTPCSERRI IKFLFDS  
NSSTGGFHRLLLHGVCQFHCLRATSSSTVVDGKKARVLTATGTFSGAELSLVEFIMERCK  
SGQDSSLEKLNATERAHADESLANKLSALKV

>comp11206\_c0\_seq2; 450 208 1773 LEN=1890; translated  
MNSGSSDGPPLHSPRIAARRMRRSDSIPENSETTPAGGNTGTEDASIEELLMRHSTPVFN  
RGAAMASPLAERNSSPSPLRLNRPRSNPRSRTPMRISEEQHEHEEAQQEIVDNATTEGRR  
ITIRLGTGSHVGTNTASYASRRVSRCTESSQFIRLIALVVEKSRLESSVCIIFFLFLILV  
FCVYATKLQFKMARYNTVQFIKIDRLRPRDXQIRQQEPARVKSCKKQGPSHRKTRRWNNDN  
FVNLAAELSSGKGSAAAVDALLKGSAAASKHRSILDPKQHESKAMKQFREDGSMKLVREK  
FFEGSLPSDNIHLSSSSSKRKIVSDNNMLTPLERFHRIETRLRRIIVKACENSYAASKVV  
STLEEFVLRVHNGETDERSNEEWQEFLLGTPTVTTLRENKKNKTRSQDNSDEDQEVTPCSE  
RRI IKFLFDSNSSTGGFHRLLLHGVCQFHCLRATSSSTVVDGKKARVLTATGTFSGAELS  
LVEFIMERCKSGQDSSLEKLNATERAHADESLANKLSALKV

>comp11207\_c0\_seq1; 257 114 692 LEN=1347; translated  
MGRSSQPVPVEGPGPSDGTETEEVEQQEGFFTLSESFQEQEMAQEFQNEQVLRMFQKQMEK  
IGERKNAAYKEHIEQRANLERKLNFRQNEKVQNTLNTAIEGMEDKFTDMANVVEYDID  
RLGKQYLKLSALTEKNILNIPCFVEQTEIASCLNTKSKSGEMKDDPFACDVFIQALNDCTY  
RIITSKKDEAAQ

>comp11208\_c0\_seq1; 442 1 1482 LEN=1557; translated  
XIVKASRSFSFPYIITPLFCVSFEQQGTRRSGVTLVSPDHRKKAEPQLHSHKKNRKAEEERR  
RRKKTHTHVANEENVAGTLTNSVVKVPSLI IRRGKCESVVTDLIQDLRRLMMPYTALN  
FQEDASYRKLTLAKYQHVCLPLGVSHIIAFSQNKDRLSMRIAKTPQGPTLTFRVHRFSL  
SKHIQKLQRRPVNTKSLDSDPPIVVTNNFGDQTAPPQVKLMRISFQNMFPAINVANVKLK  
DCRRVVLFLHIEEESPEGESADGSAAVAKQVQVEVRQYAIKATPVGIDKKVRRLIQSKIPNL  
NKVQDIADYIAGNANATTSVDAASDSEPEDGSNAVQVLAQNYVGKGNKSQGKSALKLVEL  
GPRLCLELVKVEQGLAAGTVMYHAHIKKTPEEAKAIEEKAIEYKVRLLKNQRRQEQERNVER  
KRKAAEEKREAKKRRKQEREDAAMDLLRNPLNENDAFEDTNLLDDDDDDIDEMEDPVDD  
ASISDDDNHGYS

>comp11209\_c0\_seq1; 191 1 753 LEN=1214; translated  
NGSAYSQYKIGYLYIAIENSSSILRYKMKVIGSSERVASWAFALVTLALSFSITSPFVIK  
QNTRTSAPPSRSDAAATDVHEDSMDNESRRNFLGRAPASVMSCMLALNILTLNNTPAMAS  
DDAIELPTKEAVTECFDFIRYELNDPKGGVGFQMGRIDDGDFAGLLNFSKSYDLEFRKRR  
FGNAKLLQDKEAKSKATEYANAVTFDLIGINRSCRSGQENS SDSANKYLQELRDDVNKFL  
ALEKTIQVKP

>comp11210\_c0\_seq1; 427 358 3287 LEN=3287; translated  
MERKNYYDYDGNSSSQRPQHTQFLDLTNGEGGESRQGMASIFRGDDGYAGTNNLGNRSR  
TPAPIPSIRTSMSISRGGGNDVVTCLGSKLDPNTPGRLVETGQEQTGRWTKDEHEAFLI  
GIKMYGKEWKKVAAKVKTRTVVQTRTHAQKYFQKLAKANEGKEDVTHVDMGTASEARRGG  
SAIKKKQRIAPSTSNKMARTTSVASAAQVISTFSGQHSRPPMTLNVPIEASKTARGA  
HGAHGFQAGNAPIGNEPKIEAESSQDRSMYQPAHGFLGAFGSGAVTSETRPLPASSSSG  
VKDVIKNNLGMGSKNFLNKAAPRIGTTAFPSMKIVAPEHDSAVKRGKFPPEPSAAGGKRK  
VDELDAHMLQLIGEPLMKPPKSLSGREHPLNQKSNLKRRIASMPHNDQNPFGSSEDTGTA  
TPPPLEEGKTTQNVAGFEVLNKTQMI LDGSVNPSDLMNSPKKPIGLSLQIVNPESLGV

HKMIVGRNADGLKSPVTPWEGGTSSFSKVRMEFFKLNLEEKVKEVQFTHMQKKYSRRAT  
SEEKLIKIPAKDLTVGGGMPVAPKMEPHGEQHSCFVHPICGPGSAFGRSLLHKAVCDMDII  
AVQSQMSSRPDYFDRRDEKGYCPIHSACALCLKNPENSVVSAEIVRMLIAEGVDASIRD  
EGNTPLHWAARAGDKKTAQLLLKNNPKDAKNERGETPLHWAMRSGRVGIPVASILIE  
ARPSVWNTQFKRPIDVAADGFLDEPDVMEIRALDEKKKKLLKKEQRRKLREAAVERRES  
ANLFEISAQSRTLVLVYHPECLEHIPKGGKDWENPDRINSIMERIQEGNPGSETPSIYQ  
REIQISKEFERAKLDLLSRVHSTEYLNMVNELSKDLERKQKEQNATNGTNKDDTSGTPQ  
VVPFTPMEDEFIRTLAERQYMQIKKLMMIARSSLFLQVLRISITKAQESSIKISDHS  
DTSFSAGSLRAARRAAGAVQHAVDX

>comp11210\_c0\_seq2; 646 358 4184 LEN=4223; translated  
MERKNYYDYDGNSSSQRPQHTQFLDLTNGEGGESRQGMASFRGDDGYAGTNNLGN  
SRSTPAPIPSIRTSMSISRGGNDVVTKLGSTKLDPNTPGRLVETGQEQTGRWTKDE  
HEAFLIGIKMYGKEWKKVAAKVKTRTVVQTRTHAQYFQKLAKANEGKEDVTHVDM  
GTASEARRGSAIKKKQRIAPSTSNKMARTTSVASAAQVISTFSGQHSRPPMTLN  
VPIEASKTARGAHGAGAHGFQAGNAPIGNEPKIIEAISSQDRSMYQPAHGFLGAF  
GSGAVTSETRPLPASSSSGVKDVIKNNLGMGSKNFLLNKAPRIGTTAFPSMKI  
VAPEHDSAVKRKGFPEPSPAAGGKRKVDDELDAAHMLQLIGEPLMKPPKSL  
SGREHPLNQKSNLKRRIASMPHNDQNPFGSSEDGTA T P P P L E E G K T T  
Q N V A G F E V L N K T K Q M I L D G S V N P S D L M N S P K K P I  
G L S L Q I V N P E S L G V S H K M I V G R N A D G L K S P V T P  
W E G E L R A L V S E E K L K I P A K D L T V G G G M P V A P K M E  
P H G E Q H S C F V H P I C G P G S A F G R S L L H K A V C D M D I I  
A V Q S Q M S S R P D Y F D R R D E K G Y C P I H S A C A L C L K  
N P E N S V V S A E I V R M L I A E G V D A S I R D P E G N T P L H  
W A A R A G D K K T A Q L L L V K N N P K G K L I M S H H I G S T F  
L Q Q K C T H F Y L F F K L I N T T Q M R K T R E E K R P S I G Q  
C V L A E L G Y X V A S I L I E N G A R P S V W N T Q F K R P I D  
V A A D G F L D E P D P V M E I R A L D E K K K K L K K E Q R R K  
L R E A A V E R R E S R A N L F E I S A Q S R T L V L Y H P E C L E  
H I P K G K G D W E N P D R I N S I M E R I Q E G N P G S E T P S I  
Y Q R E I Q I S K E F E R A K L D L L S R V H S T E Y L N M V N E L  
S K D L E R K Q K E Q N A T N G T N K D D T S G T P Q V V P F T P  
M V L R S I T K A Q E S S I K I S D H S D T S F S A G S L R A A R R  
A A G A V Q H A V D C V L V G R H R N A F C I V R P P G H H A G I  
N G L L G E S C G F C I F N S V A A G A M H A I S D E R L L C E R C A  
I V D I D A H H G N G T E E I V R K C H D P A K L F F F S I H L Y  
D N D R K G K R E T K S F Q Y K F Y P G T G D E D D L P L N I I N  
V P I T P L W K E G N Q F Q I G G T H N T R H R T R I R A N Q S D D  
G S S S E T G T P K V S D A E V D I K M S R A S S P T S F S S S G  
S G G G R Q A Y R K A I Q N R L L P A L R A F N P D L I L I S A G F  
D A C K G D V G N A K H L G G K E K M G I D L E P E D Y A W T T R  
K I L E I A D I C C K G R V V S V L E G G Y G R H P V S G V Y D P  
G E P L D K S L F S E C A I R H A H A M I D P Y N V E E R F G S S  
R K N S L

>comp11210\_c0\_seq3; 720 358 4089 LEN=4128; translated  
MERKNYYDYDGNSSSQRPQHTQFLDLTNGEGGESRQGMASFRGDDGYAGTNNLGN  
SRSTPAPIPSIRTSMSISRGGNDVVTKLGSTKLDPNTPGRLVETGQEQTGRWTKDE  
HEAFLIGIKMYGKEWKKVAAKVKTRTVVQTRTHAQYFQKLAKANEGKEDVTHVDM  
GTASEARRGSAIKKKQRIAPSTSNKMARTTSVASAAQVISTFSGQHSRPPMTLN  
VPIEASKTARGAHGAGAHGFQAGNAPIGNEPKIIEAISSQDRSMYQPAHGFLGAF  
GSGAVTSETRPLPASSSSGVKDVIKNNLGMGSKNFLLNKAPRIGTTAFPSMKI  
VAPEHDSAVKRKGFPEPSPAAGGKRKVDDELDAAHMLQLIGEPLMKPPKSL  
SGREHPLNQKSNLKRRIASMPHNDQNPFGSSEDGTA T P P P L E E G K T T  
Q N V A G F E V L N K T K Q M I L D G S V N P S D L M N S P K K P I  
G L S L Q I V N P E S L G V S H K M I V G R N A D G L K S P V T P  
W E G E L R A L V S E E K L K I P A K D L T V G G G M P V A P K M E  
P H G E Q H S C F V H P I C G P G S A F G R S L L H K A V C D M D I I  
A V Q S Q M S S R P D Y F D R R D E K G Y C P I H S A C A L C L K  
N P E N S V V S A E I V R M L I A E G V D A S I R D P E G N T P L H  
W A A R A G D K K T A Q L L L V K N N P K D A K N E R G E T P L H  
W A M R S G R V G I P V A S I L I E N G A R P S V W N T Q F K R P I  
D V A A D G F L D E P D P V M E I R A L D E K K K K L K K E Q R R  
K L R E A A V E R R E S R A N L F E I S A Q S R T L V L Y H P E C L  
E H I P K G K G D W E N P D R I N S I M E R I Q E G N P G S E T P S  
I Y Q R E I Q I S K E F E R A K L D L L S R V H S T E Y L N M V N E  
L S K D L E R K Q K E Q N A T N G T N K D D T S G T P Q V V P F T  
P M V L R S I T K A Q E S S I K I S D H S D T S F S A G S L R A A  
R A A G A V Q H A V D C V L V G R H R N A F C I V R P P G H H A G I  
N G L L G E S C G F C I F N S V A A G A M H A I S D E R L L C E R C A  
I V D I D A H H G N G T E E I V R K C H D P A K L F F F S I H L Y  
D N D R K G K R E T K S F Q Y K F Y P G T G D E D D L P L N I I N  
V P I T P L W K E G N Q F Q I G G T H N T R H R T R I R A N Q S D D  
G S S S E T G T P K V S D A E V D I K M S R A S S P T S F S S S G  
S G G G R Q A Y R K A I Q N R L L P A L R A F N P D L I L I S A G F  
D A C K G D V G N A K H L G G K E K M G I D L E P E D Y A W T T R  
K I L E I A D I C C K G R V V S V L E G G Y G R H P V S G V Y D P  
G E P L D K S L F S E C A I R H A H A M I D P Y N V E E R F G S S  
R K N S L

>comp11210\_c0\_seq4; 353 358 3382 LEN=3382; translated  
MERKNYYDYDGNSSSQRPQHTQFLDLTNGEGGESRQGMASFRGDDGYAGTNNLGN  
SRSTPAPIPSIRTSMSISRGGNDVVTKLGSTKLDPNTPGRLVETGQEQTGRWTKDE  
HEAFLIGIKMYGKEWKKVAAKVKTRTVVQTRTHAQYFQKLAKANEGKEDVTHVDM  
GTASEARRGSAIKKKQRIAPSTSNKMARTTSVASAAQVISTFSGQHSRPPMTLN  
VPIEASKTARGAHGAGAHGFQAGNAPIGNEPKIIEAISSQDRSMYQPAHGFLGAF  
GSGAVTSETRPLPASSSSGVKDVIKNNLGMGSKNFLLNKAPRIGTTAFPSMKI  
VAPEHDSAVKRKGFPEPSPAAGGKRKVDDELDAAHMLQLIGEPLMKPPKSL  
SGREHPLNQKSNLKRRIASMPHNDQNPFGSSEDGTA T P P P L E E G K T T  
Q N V A G F E V L N K T K Q M I L D G S V N P S D L M N S P K K P I  
G L S L Q I V N P E S L G V S H K M I V G R N A D G L K S P V T P  
W E G E L R A L V S E E K L K I P A K D L T V G G G M P V A P K M E  
P H G E Q H S C F V H P I C G P G S A F G R S L L H K A V C D M D I I  
A V Q S Q M S S R P D Y F D R R D E K G Y C P I H S A C A L C L K  
N P E N S V V S A E I V R M L I A E G V D A S I R D P E G N T P L H  
W A A R A G D K K T A Q L L L V K N N P K D A K N E R G E T P L H  
W A M R S G R V G I P V A S I L I E N G A R P S V W N T Q F K R P I  
D V A A D G F L D E P D P V M E I R A L D E K K K K L K K E Q R R  
K L R E A A V E R R E S R A N L F E I S A Q S R T L V L Y H P E C L  
E H I P K G K G D W E N P D R I N S I M E R I Q E G N P G S E T P S  
I Y Q R E I Q I S K E F E R A K L D L L S R V H S T E Y L N M V N E  
L S K D L E R K Q K E Q N A T N G T N K D D T S G T P Q V V P F T  
P M V L R S I T K A Q E S S I K I S D H S D T S F S A G S L R A A  
R A A G A V Q H A V D C V L V G R H R N A F C I V R P P G H H A G I  
N G L L G E S C G F C I F N S V A A G A M H A I S D E R L L C E R C A  
I V D I D A H H G N G T E E I V R K C H D P A K L F F F S I H L Y  
D N D R K G K R E T K S F Q Y K F Y P G T G D E D D L P L N I I N  
V P I T P L W K E G N Q F Q I G G T H N T R H R T R I R A N Q S D D  
G S S S E T G T P K V S D A E V D I K M S R A S S P T S F S S S G  
S G G G R Q A Y R K A I Q N R L L P A L R A F N P D L I L I S A G F  
D A C K G D V G N A K H L G G K E K M G I D L E P E D Y A W T T R  
K I L E I A D I C C K G R V V S V L E G G Y G R H P V S G V Y D P  
G E P L D K S L F S E C A I R H A H A M I D P Y N V E E R F G S S  
R K N S L

VKDVIKNNLGMGSKNFLLNKAPRIGTTAFPSMKIVAPEHDSAVKRGKFPEPSPAAGGKRK  
VDELDAAHMLQLIGEPLMKPPKSLSGREHPLNQKSNLKRRIASMPHNDQNPFGSSEDGTA  
TPPPLEEGKTTQNVAGFEVLNKTQMILDGSVNPSDLMNSPKKPIGLSLQIVNPESLGV  
HKMIVGRNADGLKSPVTPWEGGTSSF SKVRYMEFFKLNLEEKVKEVQFTHMQKKYSRRAT  
SEEKLIKIPAKDLTVGGGMPVAPKMEPHGEQHSFCVHPICGPGSAFGRSLLHKAVCDMDII  
AVQSQMSSRPDYFDRRDEKGYCPIHSACALCLKNPENSVVSAEIVRMLIAEGVDASIRDP  
EGNTPLHWAARAGDKKTAQLLLKNNPKGKLIMSHHIGSTFLLQKCTHFYLFKLIINTTQ  
MRKTREEKRPSIGQCVLAEELGYXVASILIENTGARPSVWNTQFKRPIDVAADGFLDEPDPV  
MEIRALDEKKKKLKEQRRKLREAAVERRESRANLFEISAQSRTLVLVYHPECLEHIPKGG  
GDWENPDRINSIMERIQEGNPGSETPSIYQREIQISKEFERAKLDLLSRVHSTEYLNMVN  
ELSKDLERKQKEQNATNGTNKDDTSGTPQVVPFTPMEDFIRTLAERQYMQIKKLMMIARS  
SLFLQVLRISITKAQESSIKISDHSDTSFSAGSLRAARRAAGAVQHAVDX

>comp11210\_c0\_seq5; 548 358 3188 LEN=3188; translated  
MERKNYYDYDGNSSSQRPQHTQFLDLTNGEGGESRQGMASFRGDDGYAGTNNLGNRSR  
TPAPIPSIRTSMSISRGGNDVVTCLGSKLDPNTPGRLVETGQEQTGRWTKDEHEAFLI  
GIKMYGKEWKKVAAKVKTRTVVQTRTHAQYFQKLAKANEGKEDVTHVDMGTASEARRGG  
SAIKKKQRIAPSTSNKMARTTSVASAAQVISTFSGQHSRPPMTLNVPIEASKTARGA  
HGAGHFQAGNAPIGNEPKIIEAISSQDRSMYQPAHGFLGAFGSGAVTSETRPLPASSSSG  
VKDVIKNNLGMGSKNFLLNKAPRIGTTAFPSMKIVAPEHDSAVKRGKFPEPSPAAGGKRK  
VDELDAAHMLQLIGEPLMKPPKSLSGREHPLNQKSNLKRRIASMPHNDQNPFGSSEDGTA  
TPPPLEEGKTTQNVAGFEVLNKTQMILDGSVNPSDLMNSPKKPIGLSLQIVNPESLGV  
HKMIVGRNADGLKSPVTPWEGELRALVSEEKLIKIPAKDLTVGGGMPVAPKMEPHGEQHS  
FVHPICGPGSAFGRSLLHKAVCDMDIIAVQSQMSSRPDYFDRRDEKGYCPIHSACALCL  
KNPENSVVSAEIVRMLIAEGVDASIRDPEGNTPLHWAARAGDKKTAQLLLKNNPKDAKNE  
RGETPLHWAMRSGRVGIPVASILIENGARPSVWNTQFKRPIDVAADGFLDEPDPVMEIRA  
LDEKKKKLKEQRRKLREAAVERRESRANLFEISAQSRTLVLVYHPECLEHIPKGGKDWEN  
PDRINSIMERIQEGNPGSETPSIYQREIQISKEFERAKLDLLSRVHSTEYLNMVNELSKD  
LERKQKEQNATNGTNKDDTSGTPQVVPFTPMEDFIRTLAERQYMQIKKLMMIARSSSLFLQ  
VLRISITKAQESSIKISDHSDTSFSAGSLRAARRAAGAVQHAVDX

>comp11210\_c0\_seq6; 599 358 4188 LEN=4227; translated  
MERKNYYDYDGNSSSQRPQHTQFLDLTNGEGGESRQGMASFRGDDGYAGTNNLGNRSR  
TPAPIPSIRTSMSISRGGNDVVTCLGSKLDPNTPGRLVETGQEQTGRWTKDEHEAFLI  
GIKMYGKEWKKVAAKVKTRTVVQTRTHAQYFQKLAKANEGKEDVTHVDMGTASEARRGG  
SAIKKKQRIAPSTSNKMARTTSVASAAQVISTFSGQHSRPPMTLNVPIEASKTARGA  
HGAGHFQAGNAPIGNEPKIIEAISSQDRSMYQPAHGFLGAFGSGAVTSETRPLPASSSSG  
VKDVIKNNLGMGSKNFLLNKAPRIGTTAFPSMKIVAPEHDSAVKRGKFPEPSPAAGGKRK  
VDELDAAHMLQLIGEPLMKPPKSLSGREHPLNQKSNLKRRIASMPHNDQNPFGSSEDGTA  
TPPPLEEGKTTQNVAGFEVLNKTQMILDGSVNPSDLMNSPKKPIGLSLQIVNPESLGV  
HKMIVGRNADGLKSPVTPWEGGTSSF SKVRYMEFFKLNLEEKVKEVQFTHMQKKYSRRAT  
SEEKLIKIPAKDLTVGGGMPVAPKMEPHGEQHSFCVHPICGPGSAFGRSLLHKAVCDMDII  
AVQSQMSSRPDYFDRRDEKGYCPIHSACALCLKNPENSVVSAEIVRMLIAEGVDASIRDP  
EGNTPLHWAARAGDKKTAQLLLKNNPKDAKNERGETPLHWAMRSGRVGIPVASILIENG  
ARPSVWNTQFKRPIDVAADGFLDEPDPVMEIRALDEKKKKLKEQRRKLREAAVERRESR  
ANLFEISAQSRTLVLVYHPECLEHIPKGGKDWENPDRINSIMERIQEGNPGSETPSIYQRE  
IQISKEFERAKLDLLSRVHSTEYLNMVNELSKDLERKQKEQNATNGTNKDDTSGTPQVVP  
FTPMVLRISITKAQESSIKISDHSDTSFSAGSLRAARRAAGAVQHAVDCVLVGRHRNAFCI  
VRPPGHAGINGLLGESCFCIFNSVAAGAMHAISDERLLCERCAIVDIDAHHNGTTEI  
VRKCHDPAKLFFFSIHLYDNDRKGKRETKSFQYKFPYPTGDEDDLPLNINVPITPLWKE  
GNQFQIGGTHNTRHRTRIRANQSDGSSSETGTPKVSDAEVDIKMSRASSPTSFSSSGSG  
GGRQAYRKAIQNRLPALRAFNPDLILISAGFDACKGDVGNAKHLGGKEKMGIDLEPEDY  
AWTRKILEIADIACKGRVSVLEGGYGRHPVSGVYDPGEPLDKSLFSECAIRHAHAMID  
PYNVEERFGSSRKNL

>comp11210\_c0\_seq7; 525 358 4283 LEN=4322; translated  
MERKNYYDYDGNSSSQRPQHTQFLDLTNGEGGESRQGMASFRGDDGYAGTNNLGNRSR  
TPAPIPSIRTSMSISRGGNDVVTCLGSKLDPNTPGRLVETGQEQTGRWTKDEHEAFLI  
GIKMYGKEWKKVAAKVKTRTVVQTRTHAQYFQKLAKANEGKEDVTHVDMGTASEARRGG  
SAIKKKQRIAPSTSNKMARTTSVASAAQVISTFSGQHSRPPMTLNVPIEASKTARGA  
HGAGHFQAGNAPIGNEPKIIEAISSQDRSMYQPAHGFLGAFGSGAVTSETRPLPASSSSG  
VKDVIKNNLGMGSKNFLLNKAPRIGTTAFPSMKIVAPEHDSAVKRGKFPEPSPAAGGKRK  
VDELDAAHMLQLIGEPLMKPPKSLSGREHPLNQKSNLKRRIASMPHNDQNPFGSSEDGTA

TPPPLLEEGKTTQNVAGFEVLNKTQMI LDG SVNP SDLMNSPKKPIGLSLQIVNPESLGVSHKMI VGRNADGLKSPVTPWEGGTSSFSK VRYMEFFKLNLEEKVKEVQFTHMQKKYSRRATSEEK LKIPAKDLTVGGGMPVAPKMEPHGEQHSCFVHPICGPGSAFGRSLLHKAVCDMDIIAVQSQMSSRPDYFDRRDEKGYCPIHSACALCLKNPENS SVSAEIVRMLIAEGVDASIRDPEGNTPLHWAARAGDKKTAQ LLLVKNPNPKGK LIMSHHIGSTFLQOKCTHFYLF FKLINTTQMRKTREEKRPSIGQC VLAELGYXVASIL IENGARPSVWNTQFKRPIDVAADGFLDEPDPVMEIRALDEKKKKLKEQRRK LREAAVERRESRANLFEISAQSR TLVLYHPECLEHIPKGGKGDWENPDRINSIMERI QEGNPGSETPSIYQREIQISKEFERAKLDLLSRVHSTEYLN MVNELSKDLERKQKEQNATNGTNKDDTSGTPQVVPF TPMVLR SITKAQESSIKISDHSDTSFSAGSLRAARRAAGAVQHAVDCVLVGRHRNAFCIVRPPGHHAG INGLLGESCGFCIFNSVAA GAMHAISDERLLCERCAIVDIDAHGNGT EIVRKCHDPAKLFFF SIHLYDNDRKGGKRET KSFQYKFYPGTGEDDDLPLNI INVPITPLWKEGNQFQIGGTHNTRHRTRIRANQSDDGSSSETGTPKVSDAEVDIKMSRASSPTSFSSSGSGGGRQAYRKAIQNRLLPALRAFNPDLILISAGFDACKGDVGN AKHLGGKEKMGIDLEPEDYAWTTRKILEIADICCKGRVVS VLEGGYG RHPVSGVYDPGEPLDKSLFSECAIRHAHAMIDPYNVEERFGSSRKNLSL

>comp11210\_c0\_seq8; 474 358 3283 LEN=3283; translated  
MERKNYYDYDGNSSSQRPQHTQFLDLTNGEGGESRQGM AISFRGDDGYAGTNNLGNRSRSTPAPIPSIRTSMSISRGGNDVVTCLGSKLDPNTPGRLVETGQEQTGRWTKDEHEAFLIGIKMYGKEWKKVAKVKTRTVVQTRTHAQYFQKLAKANEGKEDVTHVDMGTASEARRGGS AIIKKKQRIAPSTSNKMARTTSVASAAQVISTFSGQHSRPPMTLNVPIEASKTARGAHGAGAHGFQAGNAPIGNEPKII EAISSQDRSMYQPAHGFLGAFGSGAVTSETRPLPASSSSG VKDVIKNNLGMGSKNFLNKAPRIGTTAFPSMKIVAPEHDSAVKRKGFPEPSPAAGGKRK VDELDAAHMLQLIGEPLMKPPKSLSGREHPLNQKSNLKRRIASMPHNDQNPFGSSEDTGTA TPPPLLEEGKTTQNVAGFEVLNKTQMI LDG SVNP SDLMNSPKKPIGLSLQIVNPESLGVSHKMI VGRNADGLKSPVTPWEGELRALVSEEK LKIPAKDLTVGGGMPVAPKMEPHGEQHSCFVHPICGPGSAFGRSLLHKAVCDMDIIAVQSQMSSRPDYFDRRDEKGYCPIHSACALCLKNPENS SVSAEIVRMLIAEGVDASIRDPEGNTPLHWAARAGDKKTAQ LLLVKNPNPKGK LIMSHHIGSTFLQOKCTHFYLF FKLINTTQMRKTREEKRPSIGQC VLAELGYXVASIL IENGA RPSVWNTQFKRPIDVAADGFLDEPDPVMEIRALDEKKKKLKEQRRK LREAAVERRESRANLFEISAQSR TLVLYHPECLEHIPKGGKGDWENPDRINSIMERI QEGNPGSETPSIYQREIQISKEFERAKLDLLSRVHSTEYLN MVNELSKDLERKQKEQNATNGTNKDDTSGTPQVVPF TPMEDFIRTLAERQYMQIKKLMMIARSSFLQVLR SITKAQESSIKISDHSDTSFSAGSLRAARRAAGAVQHAVDX

>comp11210\_c0\_seq9; 188 326 1186 LEN=1225; translated  
MHAISDERLLCERCAIVDIDAHGNGT EIVRKCHDPAKLFFF SIHLYDNDRKGGKRETKSFOYKFYPGTGEDDDLPLNI INVPITPLWKEGNQFQIGGTHNTRHRTRIRANQSDDGSSSETGTPKVSDAEVDIKMSRASSPTSFSSSGSGGGRQAYRKAIQNRLLPALRAFNPDLILISAGFDACKGDVGN AKHLGGKEKMGIDLEPEDYAWTTRKILEIADICCKGRVVS VLEGGYGRHPVSGVYDPGEPLDKSLFSECAIRHAHAMIDPYNVEERFGSSRKNLSL

>comp11211\_c0\_seq1; 969 438 4937 LEN=5065; translated  
MNAQQETILSAVVVSSSTHWAGQPI SQDERRRAFSALQDFSTQFEGRIPVCLQWLQQPQLTVANGTIDCTITTTQLYACEILSSCLNDKTKKYAQWQEGDRLQLRQAVMTAARLQASAPLVNPRDGSSNKTNTTTSLPLANKLASLLSALVVRDFPQRWTTCIQDLFQQLWSETAPLVGNRMCLQVLQVAEDCTDSDFNSKISTKRRNDILMGLNEVSHQFLPLLFRSLEHITTLTQAR TSIHQMRFLVQONQQRVSTMTPEQSAAYWAEAEKIKATSLVITDTLTKLHLFCRSMPLIEWIMNSKYDFASALFHLMRESTENINVLSVNCLEQLALRAKLSYTTWTQWIQDLPQAVAQANQQMTQETEYLVQVEKANTGNQSPDSFDIPDALTRQLEYHRALSRLATVVSSHIGLITQDKALLKSSSDNSNNKRKNADSF AAYLRLLVLDLLHHPSGRVVGEQINLVWGMLRDPQISKSTLLDPLVTDILNSFTNHMVKLDWDEVEEENHPQSHLMQASWEDEDDYDAWNHEYRAKASQLFKYVGNQCQPHVASSVLLTRIRNLI SQHGNGEPRDHCRTNQQLTDKSTASRQFEGMVHPMENILNGLPPWSLNAQKSSSAGSQQKQEHQKRLEGIQRAQTQASLSELANGIVSWNPSYLWLKFRRQAQLECLKHYWKYDPSTLLQGVNSLLGYIGAPDEWGETKIEADGSKRSLGETVGFRRKSSMSLVGLSKQVPHHLVPWLSELSNATRSLLSQPDL LQTNRMNLYEFLSVVATAVEDPVQRANF IGSVLGDALNTLQSAETQDALSSVDNFVAAIGITQAAGNPASVTDVANVKA VTDTRFSRIFSSFNELL SVGKRCH EAAK KRANGIPVAAVSGATNVNIPKGMTVTEAAETLHFPDEGPVSINDLARDDPFVPLWPRILPHILRMLNIMLKLWQPGQQAVYLQNP IQRYVLAISDDDAFLARKTDGKTGGVFGEGGTAGSII PGTD RRDMNLAPRWSGWL NEMRNALFQTLG LLAGQRVLYAPEIAEFYPQLVSVVTD PDNLRAMEHRHCTQY LKQFIEVLLLS CPPTLYS THLTP IIGPVFEHMQYRLGKTWDPTINPSGQLSCKPLITSDSDSAALLASQNGEVWYTSY YARSGLFVGGDLAETAESA VEKHRVEVTRTYS DVIQSALALKGDWALVLANLAKENDGSS

YEKKKGPPTSRLIVADGGRVNADGTPRKENQAAVDARKLKR IHALNHFMLLENEAIAGYL  
TLTVIQLSYPDYYTCRRITRICHRLMLETVAWHPNYTDLLGRRMLAAITKNIVTEPKWMV  
GTEWDMINVRDIYIRLVLGQILQMGQGPGLQQPPSANRASGAVYEQAKSAERPLQGGG  
MLTVPSELPHQLLNSLPGISVEMIKKLDQDLLAKRAAKSQKDIIRDFLR IAADGWKENQH  
PNNQSVLDSAVAEESLLHNASKSAVVEDLPEKLVLSNRKSRGQKANEAEAVGLSSFSLTR  
>comp11212\_c0\_seq1; 803 156 2561 LEN=2587; translated  
MNQGSSEYSGSIVALSGSQDEGTTFTIEGMLTAKPHAFAGAVLSPKHARELTPSLCLAIA  
SGLADQSYRKTAVPYTLWITEAWRVLGWGEPSAALFWEMATMYHTLYLAGRAYATDFHET  
SNIPPIILSCGSTSSMGSNTHTYTMGGGTGGSSAGDKRKFSSTSASAKELPVWLVATFLLM  
HCEEMAYQRNLSALDDRRMNATLSDPLMNLKYPGLSPRAHLNSGWHNDNSHCTAYLLR  
HLRKL LLLAAVSHNPDAVRAIMHLAAIPSPPPGPTTEKFRNQRSLMGAAFHTRYSADDL  
RQHDEHGNVGLAVRLSMEDLERLHFWLQPPSGGGVDDSPKIGDYLWSSLYASAPPTA  
TIPIGDVEREIRRHLELELLMAGVEMDKKEEVSTDEETA VSSSFSQLSLTDSTSGDDGER  
AKQPQHGNQKEISYTHLRGTTILLKPNQSPSETPGTVSIASGDHHELISPGSQSNNRL  
HDLAMSSCSDVHMYLLRPFENVTISSCTGCTIVVGAVAGLVHVDCERTKVTTASRRILL  
SNSCDTIMNVFTPTPLLVGDNRSQFAPYNTYYEGLREDLLATGLAAA AVPADNQSQFH  
GSRSLNEGAWPPLQCASNKWKQPV EISKLEIPQVAGSNSPPPGSPNSVSGADDKRAPNS  
NAGTIGDTSVQTPILLPASEFHVLFVPIESESARQRRSEQESHEAGGGTGEQPSNESKYC  
RALAEVLQFSPFRLPIEYERRALVKADRMNIQQAIRKSVPEDKQKQFEEELNRGFRDWL  
VASGNLRQVLDLVLHLERRGVL

>comp11213\_c0\_seq1; 2161 591 6303 LEN=6353; translated  
MALVASSKATSFVDQHPQDYDPENRLVTSLSFFPRTSSSRANTLKLWLSSQEPEDIDIDA  
GEEKRKENINAAHDELYEFLTGRTGGAGAERVRKRDQIMEFMRSSSSGEAKNLVQPLRKE  
DGKVDKELVSQQQEEERELR TKVKFDSLFSGMPTLEEIVSRSPTEKENITKDKTTTKKKT  
RMTDDDDFSWFEPERERIEREYDQLLQETKRRIREERLEEEEVERLIQAIASEDDAEDI  
DGISQPSSIPDNAENIVESIVSQEMKRMIESVQLERAKQRLQAFESERTSELNARDYQGV  
TDDVVDNIFKETADQLEQSEILKAGADNYQYERLRQQEASFKEAQEDQONVPEDGADLD  
NWTLDRLNEMLEKSENNEDDDGSI TDILEENIEELRKQIERESKKGSI EPQTMKEWQMYQ  
AIGTRLMKDQMRQNL DAGSGLDGFNAIMNGGGDDDEESSGMSNVDEEQVTQQLDSWREYI  
ETEDKLRQKIGLKS GFELPFGLDGLTKLDQIEIEAEAEESARRESEKANAGKSRRVRRDV  
NIQAIEMEDLIRKSDGRRAEFLKKQLEEIKEGMEENDYDTEEEEEELVSLDPVDLTGV  
FTQSTDDIIEEKKEESTFSSSEDMDGINKLLSFSGTEPQYTKKAEPPEESIPKPEPNTPF  
FSDSFSDSTETQAPVPDTPFFQDNEVITEEEVVDVENKLGSAEEQRLQRMFRKGNVRSYA  
EQDEIRKKWEYQYEQYKIRDKSGLSKTDEDDPSPSLTEGVLEQYDPTDVMNEDGDFDA  
EKVLSTIGPRPTKTKKTPESGSGTPATKPPGVSDNAQSGVSDSDVADAIYRSVSAAGGIG  
REDKATRDKDRAEYDAYLKKEEELKTGLDELENELDDIDPEVSEFEEMDIDDPDYVEEVL  
DSRPVVNRKRKFDERELSDMGGFLAGSTDAEDSESDSDSIDGTEFDDIVPDWLKKEREASG  
KTEGKNLFRKRDRKTTGRSEGGKIGGAF LGNNEVSDDDN YDTE SLEEYKRRAGQRTNMG  
IDIRDALGRRGPDNDLYRSSTERKEGGWAKDFETR KAKLLDYIQLDPSELNSLIALKD  
SAYATGASQYLPRINKPFKEFGAIFRLEGLVLDITGLQQKAWNRVAAEFGLLEPFLEDVR  
RAAVLKPEDAVKEVFFTSMGDFILVRRIVDAFRRIFRQEFNAWATTEGFASEIEGPNADS  
TSRTNSFAIGFEEKVDEIVEQEIQTRSPSDEGSRLRYLQEA WAKTANQFGLAPPTNEQIA  
ESSIVTPDIAVSNIFGWSQEQKQINKIVSAYSMLQAGGNISFDEEKSISASPSVPTNRPL  
SREEITDEMILELQFMAGDVAEENSLDVPNPEEILAASSINNPEITILDGFGWTS DPTL  
AAELASSYVDYLSEYINKYIHNRDYPVPRESKVGATEPTMGRDDPAFQMATEEKEKAILS  
RQTDAWTETA AAFDFDTPTIEQILSVAHMTPEDAVIKILLTNFNIEECDVEQEDEFYELL  
PDI IETYE FALKKSSAGSNAVATGAAIVEDGNNASIIPTEDEILEQKFTAWKETAEYGF  
NAPSAEQIRSTTNMPVEDIVHKLILMNNIDNDCASDQVEEFYEVLPDIEEAYELALEQSA  
TSYSFNPEGAAESITDSSREVSQDEIYCASFSWTSVAWTLGFRLPTQEDVQFAMTVGPK  
EAIMGGFGWNTSDEEAAKIVEQYLIQIKARDEWVKKGYTTTIEFDNNDIEQDELLPVEA  
MPDVLDLIRSLKKVEMGLGVVTNLERDQMKILLDYAGLSDLFPEGNRVSYSNGYLLDSQQ  
LLGTSLRIERRPDHCVVDFSSPAASAAAHEHDMRSVALIGAFPRYELLDADTSPLSVTEL  
TATNIRRLFGERIYDKPMLDTEGENPLEAGKQVKIKTQFEGDE

>comp11214\_c0\_seq1; 198 207 643 LEN=1230; minus strand; translated  
MDISDPIEAGPGIMLYTKELYEHVVTVMSPNGVFTQAGIADSV PAPPYATGGERTTCFG  
PIRNTLAEVFSVLPYTQNI PSFGTDWGFV MAYNNSPDGCGAE EWKKMIPQTIDNLVEEH  
ISGGEASFKTYDGXNAPADVPPHKK

>comp11215\_c0\_seq1; 146 227 1039 LEN=1554; translated  
MSRELNEQQNASVGMTVGMIEVLILQPFNYAKNMVQQQRPI SMNPATMYRGVVPNCINMG  
SCTMIQFVVGGKLNKIVSGGNDKHQFSLQEEMKCGIVAGSVSALVGSPLLELIMIQQQRKG

GSGAARISELAQNPINF SRGLFGMAVREALWTCGYLSIPPVVRRTLMDSYPTTFDTNDKA  
RIPAALLGGLFGCYMTHPFDTIKTCMQGDIERKVYGNFIDTAKSINAESGFTGFYRGATF  
RYGRMVCAVFI MDLLREKIGRLMYPFAFKN

>comp11216\_c0\_seq1; 224 182 1570 LEN=2023; translated  
MMSSCGAENTTATVLP LPHGHHINCGQSPSQMPSKHNGTSKHNKTSETGEHKRCYDGNLSH  
KKNDRNKNKKNNDNRDNNNYFDFPLVQSMVAESSRTRALCKEGSKQMSYPKSNTGWIRT  
LFVFEGRALGRILLPWSVVTSYAIWVAVVYETFLRQPGEGSTTG VREKNFYIESMLELVI  
STTLGFLLVFRLNRSATRFWMARGCWGVLVVKIRAMVGTVLLYGS HDSYHRDQVIKWITA  
FSIVSMNHMRGISRIDPETVGG LQITPDELDSLGRAFHPP LHVADQIRFHLGALFGPESI  
GDIGGNNNSINNNKSETDLLSHRAAIAITVSDFRSKQLLSLEEQLNIMIDEEGAMERIKGT  
PLPMVYVTHLRTWLLVFLLSQSHLRQQALGPYLTVALVSLMAFALLGLEGAAAEVEAPFR  
RDKTNHLDMSDFCLAVLASVQQQITEDANRRRTARAQQKASGD

>comp11217\_c0\_seq1; 152 722 1894 LEN=1894; minus strand; translated  
MQKAWLFSTALYSIRFDLAYAFTAFGSVEPSLFSPSPKDLSPRLAPTASPSASARGRAGD  
STGIASPGWSALGQPLGDAFLVEKRSAAAKGPPGGVAAGRC DATAAGPARAVLRGDHRFP  
LRKALQANRAGGPARPADPRGGGNPARREAPEDA AVVPPPAASWWFAGGGGRITSRAPG  
HQGDHQCHQRRPNADAFHSGGALLPGVRVSVEDLRSCDPAAGAAAASGSTHHARRVVRK  
AGSGFGGGSYRSLQVAEQENGFWRPEETQAHGHRDAEDEKEQRRGTLPSLAEVVVVRL  
ICFVVVALLFRSEALGLGLLGF PDAVRSGGMPARIDIHSAVRPVKKCIERAFGFSVHFVV  
QYQQVVTEEMKCCNKQANDRSLSVWVG YVQX

>comp11217\_c0\_seq2; 141 867 1930 LEN=2264; minus strand; translated  
MQKAWLFSTALYSIRFDLAYAFTAFGSVEPSLFSPSPKDLSPRLAPTASPSASARGRAGD  
STGIASPGWSALGQPLGDAFLVEKRSAAAKGPPGGVAAGRC DATAAGPARAVLRGDHRFP  
LRKALQANRAGGPARPADPRGGGNPARREAPEDA AVVPPPAASWWFAGGGGRITSRAPG  
HQGDHQCHQRRPNADAFHSGGALLPGVRVSVEDLRSCDPAAGAAAASGSTHHARRVVRK  
AGSGFGGGSYRSLQVAEQENGFWRPEETQAHGHRDAEDEKEQRRGTLPSLAEVVVVRL  
ICFVVVALLFRSEALGLGLLGF PDAVRSGGMPARIDIHSAVRPVKKCIERAFG

>comp11217\_c0\_seq3; 141 722 1785 LEN=2119; minus strand; translated  
MQKAWLFSTALYSIRFDLAYAFTAFGSVEPSLFSPSPKDLSPRLAPTASPSASARGRAGD  
STGIASPGWSALGQPLGDAFLVEKRSAAAKGPPGGVAAGRC DATAAGPARAVLRGDHRFP  
LRKALQANRAGGPARPADPRGGGNPARREAPEDA AVVPPPAASWWFAGGGGRITSRAPG  
HQGDHQCHQRRPNADAFHSGGALLPGVRVSVEDLRSCDPAAGAAAASGSTHHARRVVRK  
AGSGFGGGSYRSLQVAEQENGFWRPEETQAHGHRDAEDEKEQRRGTLPSLAEVVVVRL  
ICFVVVALLFRSEALGLGLLGF PDAVRSGGMPARIDIHSAVRPVKKCIERAFG

>comp11217\_c0\_seq4; 152 867 2039 LEN=2039; minus strand; translated  
MQKAWLFSTALYSIRFDLAYAFTAFGSVEPSLFSPSPKDLSPRLAPTASPSASARGRAGD  
STGIASPGWSALGQPLGDAFLVEKRSAAAKGPPGGVAAGRC DATAAGPARAVLRGDHRFP  
LRKALQANRAGGPARPADPRGGGNPARREAPEDA AVVPPPAASWWFAGGGGRITSRAPG  
HQGDHQCHQRRPNADAFHSGGALLPGVRVSVEDLRSCDPAAGAAAASGSTHHARRVVRK  
AGSGFGGGSYRSLQVAEQENGFWRPEETQAHGHRDAEDEKEQRRGTLPSLAEVVVVRL  
ICFVVVALLFRSEALGLGLLGF PDAVRSGGMPARIDIHSAVRPVKKCIERAFGFSVHFVV  
QYQQVVTEEMKCCNKQANDRSLSVWVG YVQX

>comp11218\_c0\_seq1; 190 1 647 LEN=703; translated  
XNNNNNSNIPQPHLRNVSLVGAICLAAGTEGIETGLGSIVPLVEAAPFSFWSRFLFRTNA  
VLGGLFRYLLPWPVPVWAAAAANSYATSGLPASDREWLS EPGNLGPYLVALGDMAARGGY  
PGIYDDQSIVLQPFHPHEEVLKGFYGGCDDSSSSSLPSVGI FQGAVDANVPASHARHLHE  
SVFCERSELLVYEG LGHVSLIAGKAGDYSSFATKP

>comp11219\_c0\_seq1; 584 69 1601 LEN=1684; translated  
MTKVRQAVRWSVLIVLSTQSLFLFSDAFTPSFVWQEKASSFSYASRASDHKPLLNSVAAA  
VTGTASGLQSTSGIRFFDDPSSCNADQDVDRVYTVQILMSATGGGHLASAI ALEDALNSL  
YPGKFECDIVDIYTEYGFWPYNLVRMYKLMAEYSWSWDLFYKFGETG FGLRLNEWMLD  
VFCYDAFTKCMERKFESTQQRADMVVS VHPLCQDLPLKILADLDADAERSTPFATVVTDL  
GGAHTTWFNPDVDKCFVPSDVLNEKAQSRGLDSSSQIVQYGLPIRKGFWPKSKSKSDASS  
VVAEVRQDLGISNLPTVLVVG GDMGGIVDIASTLGTKTLGNQNGSNTNPNPDYQMVVCG  
NNQQAQQTLKGM DWPKGVEVNVQGFVRNMDEWMKASDCLVTKAGPGTIAEASICSLP CML  
FAFLPGQEENIPFVEEAGFGRYSSDPNEIAATVSSWLR SPEKLRMKHAALSAARPSAT  
LDIARDLAEIALSTNGQQQEQAEMMVTVR

>comp11220\_c0\_seq1; 237 20 861 LEN=1478; translated  
MAIIVRLFLSLV PDLWVQCNAIPRNTTPRNPTKPNPMTQNSTAEVNPDL DATFRIPFAP  
WHKPLQARPFSS TLVGNAGCAPP AVRKAVLELQRQQAHKDHMTSGRPRYGSRKIFFQRMW



ARLHGRSADGETAVVVESDVSPETARAEAKRANTLKF SCKTSTIKSNI INKTVPFHHTKE  
EPSEDDVVRSPSEVSNNSDEEDNHSSEADESKKEQNCVNVNIRLSIDHNVATNSNSNV  
HSGDKRKLNVTTTAAATNSSELRDDERAKKLRI SPIESVEV

>comp11220\_c0\_seq2; 517 295 2106 LEN=2723; translated  
MTAMPMAPGMDPHMVAYFQAQQRLQKHQHQQRGQQALPPGPNNVASQQQPHQRTQGQPPR  
QNQQQPPQQQQQQQLQQEVLPGRKPRADANVASVLLQLKTKQNGEHVPATEAEALRIQAEH  
QAALNVRTATVRGLPQMNASPOLAGLHGYPGAPVPPQAPGPMPPAMGMNVNMPVNMPMNMN  
MYGYPGMVPFALPQNSMGMPPPAGYPMPPGVHVPVPMGVAVGDHASAGQMVQGLNHAAP  
GVMPQGRPDNGGSGVAGGHGTEKAGT IMTDAYIESLISDDVVSKIATTRTASNAEPPSSNAP  
PNVTDGSTSADKNMNVPLVVPKDRDLIPDALFVALGQMKPTRLQQSDRVGQYKTRQINFL  
GMCKKHCQGQPGFGRYFPNSVRSQAQTTSQTILKHIGGKCRMCPPAVRKAVLELQRQQA  
HKDHMTSGRPRYGRKIFFQRMWARLHGRSADGETAVVVESDVSPETARAEAKRANTLKF  
SCKTSTIKSNI INKTVPFHHTKEEPESEDDVVRSPSEVSNNSDEEDNHSSEADESKKEQ  
NCDVNVNIRLSIDHNVATNSNSNVHSGDKRKLNVTTTAAATNSSELRDDERAKKLRI SPIES  
VEV

>comp11221\_c0\_seq1; 178 815 1216 LEN=1577; translated  
MTVDPHQIHNLATSNDPDDIIPLLDKLNRVVATLGNCKGTECYELRGQHIHALLEDNFND  
TSGLKRILKKGAMQSSIRKRIPCHDPIKATGDKRNDMNLGRKSFAYDLYVPEPFVYGFPP  
SDGDNLSEELLQIW

>comp11221\_c0\_seq2; 534 1 1928 LEN=2289; translated  
XRITSTIIFKTMVLFLLLLCTAITVTVVANSYIDEVDSSSSSRTRPLNEGGIDATPKNIIL  
FMTDDQDVTANSIDPSIMPKLNRLFREGGMEFSNYVSTGLCCPSRATILRGQYCHNTEV  
FDNGDMNNSYQSGGWSKFLDTGLENETIATLLQSAGYETAMVGKYMNGYNVYDEKAGLH  
KPPGWDHWMGLLKCFFNYGPIFSDNGERILKTNKTVYQTD FIRDWVLDFLTKKRDSKPF  
FLMVTPFAPHTPSTPAKRHEHLFSDAIFPRYDSFNPSDDVQQQRPAAWIKDIPPLTQEID  
GMDNFYRNRLRSLQAVDEALESITETLEFLGLTDDTFFIYTSDNGQHFHGDHRIPAGKRQA  
YETDVLVFPFLIRGPGIQKGSKSSQIVQSVDLGPTFLDVATR SNQYNKRSGKILKSTYPM  
DGKSIMPIMTANSLGTSEVNDFRWAALLEMYSGSSNIGERYKDIKGYQNHMYPNTYQAV  
RVIHGPADWARGANLLYVEWCTGEQEELYNMTVDPHQIHNLATSNDPDDIIPLLDKLNRVV  
ATLGNCKGTECYELRGQHIHALLEDNFNDTSGLKRILKKGAMQSSIRKRIPCHDPIKATG  
DKRNDMNLGRKSFAYDLYVPEPFVYGFPPSDGDNLSEELLQIW

>comp11221\_c0\_seq3; 201 461 1105 LEN=1466; translated  
MTANSLGTSEVNDFRWAALLEMYSGSSNIGERYKDIKGYQNHMYPNTYQAVRVIHGPAD  
WARGANLLYVEWCTGEQEELYNMTVDPHQIHNLATSNDPDDIIPLLDKLNRVVATLGNCKG  
TECYELRGQHIHALLEDNFNDTSGLKRILKKGAMQSSIRKRIPCHDPIKATGDKRNDMNL  
GRKSFAYDLYVPEPFVYGFPPSDGDNLSEELLQIW

>comp11221\_c0\_seq4; 467 1 2039 LEN=2400; translated  
XRITSTIIFKTMVLFLLLLCTAITVTVVANSYIDEVDSSSSSRTRPLNEGGIDATPKNIIL  
FMTDDQDVTANSIDPSIMPKLNRLFREGGMEFSNYVSTGLCCPSRATILRGQYCHNTEV  
FDNGDMNNSYQSGGWSKFLDTGLENETIATLLQSAGYETAMVGKYMNGYNVYDEKAGLH  
KPPGWDHWMGLLKCFFNYGPIFSDNGERILKTNKTVYQTD FIRDWVLDFLTKKRDSKPF  
FLMVTPFAPHTPSTPAKRHEHLFSDAIFPRYDSFNPSDDVQQQRPAAWIKDIPPLTQEID  
GMDNFYRNRLRSLQAVDEALESITETLEFLGLTDDTFFIYTSDNGQHFHGDHRIPAGKRQA  
YETDVLVFPFLIRGPGIQKGSKSSQIVQSVDLGPTFLDVATR SNQYNKRSGKILKSTYPM  
DGKSIMPIMTANSLGTSEVNDFRWAALLEMYSGSSNIGERYKDIKGYQNHMDVRNTKQF  
ESLRVTKXKSFLIAKILVFDPIINDSYCFKYPNTYQAVRVIHGPADWARGANLLYVEWCTG  
EQEELYNMTVDPHQIHNLATSNDPDDIIPLLDKLNRVVATLGNCKGTECYELRGQHIHAL  
EDNFNDTSGLKRILKKGAMQSSIRKRIPCHDPIKATGDKRNDMNLGRKSFAYDLYVPEPF  
VYGFPPSDGDNLSEELLQIW

>comp11222\_c0\_seq1; 566 287 1507 LEN=1694; translated  
MNTPTPTPKYNKKAAVCISPEQMQESEEVLLYRSNDGKSQLRTRCRKRAATVLTSDASTD  
GSGETFVTDGDSVSSGEAASSRKNRTRTRTVQRRKATTTENPSPMPTKLTQAQIHSKS  
YTFPYKLFDLMEHATGEGGSAGSVVSWLAGGTTFCVHDHARFAAEFLPTHFGHHNFRSFD  
RQLNFWGFVLSPRHINNKSFGGKTWQHPFFQKDRRHLLGLVVRKTVSKSSPGGAKQNK  
KPKGKPRQKQTVARTVSPVHTAPAGRPGQAWDACPVGYDPRHLLPLCPIEWLLEGDDG  
DSDVADGGAGVLPRTDLPVPSGSCSDDLPAVALDLNTSLNTVTMDDSDMEEADLFLSIF  
EDHAEKKHNPHGSGGAEESDELFSFVFGSSVDTDTILHAMNNSVSV

>comp11223\_c0\_seq1; 1011 242 2818 LEN=2858; translated  
MTVLAALMCRTRYAMAFMRPSSTLGQKAVPAAAGAGLRPRPKANSESLFRLIDQLQQ  
EEAKFLDIRNGALYSATASETETAGAI GNEPQLPPTFFLAGKNVMDVPPRLRFAPSPGTS

LHVGARTALYNWLLAKKGQLDFPGSESAFVLRVEDTDLARSTKESEQSVLEDLKWLGMI  
WDEGPADVIDCSGYGPFRRQSERSNIIYIQAAEKLLQEGKAYRCFCTNEELEEMRAQQEAAG  
IPPRYDGRWRDAPEEEINKMLDAGKPYTVRFKVPESRVVIDDAVRGTVAWDAEATVGD  
ILLRSNGVPVYFNCVAVDDALMGISTVVRAEEHLTNTVVRQGLVLDLSDGAPRPQYAHCSLI  
LGEDKQKLSKRHGATSCNQFRLDGFPLDAMINYLALLGWNDDGTNEIFTRDELIEAFELD  
RVVKSPPSVFDMKLRWVNQOHMKMVPLEDIVELVKDQFEFQDILKDGATKSDLALVDMFA  
ATTLARERMQTTQDAVLNAKTVLGYGLPSTFDEIKDPEAKSMIEQGNFYNLAQRILTEY  
DAGDFPLPNAENPMETFQEDKCAFTQTYQGHMKKMAKENGVKGNLFHPVRLALTGEMSG  
QDVTQQLALLTLATNENSVDVDAEKAGIVPVAERMEKLSFCESIPPEFRQPKAKETKQNA  
EKSVAADTPAATSSPADGAVKDPKDDYEGPPITALDIRVGKITKVEKHPEADKLYIEEID  
VGEDEPRTIASGLQPYLKEEDLADMVVLVLCNLKARKMVGIPSHGMVLCASNADHTDVR  
VSPPIDAKIGERVTVPDFEFEGEEAEPYAENKVGKKKIFQKIAPYLVTSKYGVPEFLGR  
LMTSSGVCTSPIDGTVS

>comp11223\_c0\_seq3; 1287 165 2696 LEN=2736; translated  
MAFMRPSSSTLSGQKAVPAAAAGLRRRPRKANSESLFRLIDQLQEEAKFLDIRNGALYS  
ATASETETAGAIAGNEPQLPPTFPLAGKNVMDVPPRLRFAPSPGTGSLHVGARTALYNWLL  
AKKGQLDFPGSESAFVLRVEDTDLARSTKESEQSVLEDLKWLGMIWDEGPADVIDCSGYG  
PFRQSERSNIIYIQAAEKLLQEGKAYRCFCTNEELEEMRAQQEAAGIPPRYDGRWRDAPEE  
EINKMLDAGKPYTVRFKVPESRVVIDDAVRGTVAWDAEATVGDILLRSNGVPVYFNCV  
AVDDALMGISTVVRAEEHLTNTVVRQGLVLDLSDGAPRPQYAHCSLILGEDKQKLSKRHGAT  
SCNQFRLDGFPLDAMINYLALLGWNDDGTNEIFTRDELIEAFELDRVVKSPSVFDMKLR  
WVNQOHMKMVPLEDIVELVKDQFEFQDILKDGATKSDLALVDMFAATTLARERMQTTQD  
AVLNAKTVLGYGLPSTFDEIKDPEAKSMIEQGNFYNLAQRILTEYDAGDFPLPNAENPME  
TFQEDKCAFTQTYQGHMKKMAKENGVKGNLFHPVRLALTGEMSGQDVTQQLALLTLATN  
ENSVDVDAEKAGIVPVAERMEKLSFCESIPPEFRQPKAKETKQNAEKSVAADTPAATSSP  
ADGAVKDPKDDYEGPPITALDIRVGKITKVEKHPEADKLYIEEIDVGEDEPRTIASGLQ  
PYLKEEDLADMVVLVLCNLKARKMVGIPSHGMVLCASNADHTDVRVSPPIDAKIGERVTV  
PDFEFEGEEAEPYAENKVGKKKIFQKIAPYLVTSKYGVPEFLGRPLMTSSGVCTSPIDG  
TVS

>comp11223\_c0\_seq5; 1210 1 2547 LEN=2587; translated  
QRTTQQAFMRPSSSTLSGQKAVPAAAAGLRRRPRKANSESLFRLIDQLQEEAKFLDIRN  
GALYSATASETETAGAIAGNEPQLPPTFPLAGKNVMDVPPRLRFAPSPGTGSLHVGARTAL  
YNWLLAKKGQLDFPGSESAFVLRVEDTDLARSTKESEQSVLEDLKWLGMIWDEGPADVID  
CSGYGPFRRQSERSNIIYIQAAEKLLQEGKAYRCFCTNEELEEMRAQQEAAGIPPRYDGRWR  
DAPEEEINKMLDAGKPYTVRFKVPESRVVIDDAVRGTVAWDAEATVGDILLRSNGVPV  
YFNCVAVDDALMGISTVVRAEEHLTNTVVRQGLVLDLSDGAPRPQYAHCSLILGEDKQKLSK  
RHGATSCNQFRLDGFPLDAMINYLALLGWNDDGTNEIFTRDELIEAFELDRVVKSPSVF  
DMKLRWVNQOHMKMVPLEDIVELVKDQFEFQDILKDGATKSDLALVDMFAATTLARERM  
QTTQDAVLNAKTVLGYGLPSTFDEIKDPEAKSMIEQGNFYNLAQRILTEYDAGDFPLPNA  
ENPMETFQEDKCAFTQTYQGHMKKMAKENGVKGNLFHPVRLALTGEMSGQDVTQQLALL  
TLATNENSVDVDAEKAGIVPVAERMEKLSFCESIPPEFRQPKAKETKQNAEKSVAADTPA  
ATSSPADGAVKDPKDDYEGPPITALDIRVGKITKVEKHPEADKLYIEEIDVGEDEPRTIA  
SGLQPYLKEEDLADMVVLVLCNLKARKMVGIPSHGMVLCASNADHTDVRVSPPIDAKIG  
ERVTVPDFEFEGEEAEPYAENKVGKKKIFQKIAPYLVTSKYGVPEFLGRPLMTSSGVCT  
SPIDGTVS

>comp11224\_c0\_seq1; 441 255 1742 LEN=2023; translated  
MRIHCTICVLASLSSLFLAENFATAFIHGGSTKCVFQPDIRNNIDCNLYKREPRATRL  
STSPSFSRDRSKINKSNSKRTTELRAATGIPLTSSPSIVPSSIDDSNDGGLGVLFNLGPP  
TTGDDVEEFLFNLFADPDIIRLPGLAPLQNI IAGFIAKRRAPKSRAAYDSIGGGSPILK  
YTNAQAKLLSESFKEKYNMPIKTYVGMRYWKPYTEDALEQIRRDVKVILVILPLYPQFSI  
STSGSSRLRVLQEDFSKRSYGDVHTVVPVSWYDRPGYVKAMSNIQTEVDSFTDSEKAQAK  
NNAPNLAPIHVLFSAHGVPKSYIEAGDPYQKQMEKCIDGKAKLYETNSPEDLTIHLSYQ  
SRVGPVIEWLRPYTDDVLPVPELGEVQNLVVVPI SFVSEHIEETLEEIDIEYRELAEE  
SGVSNWRRCPAPNTDPTFIADMADMVYEALNEPAQTVTETCIANNIEGIDLEALDSDVAVSAG  
VGGVADGDLFKIKP

>comp11224\_c0\_seq2; 441 255 1742 LEN=1931; translated  
MRIHCTICVLASLSSLFLAENFATAFIHGGSTKCVFQPDIRNNIDCNLYKREPRATRL  
STSPSFSRDRSKINKSNSKRTTELRAATGIPLTSSPSIVPSSIDDSNDGGLGVLFNLGPP  
TTGDDVEEFLFNLFADPDIIRLPGLAPLQNI IAGFIAKRRAPKSRAAYDSIGGGSPILK  
YTNAQAKLLSESFKEKYNMPIKTYVGMRYWKPYTEDALEQIRRDVKVILVILPLYPQFSI

STSGSSLRVLQEDFSKRSYGDMVHTVVPWSWYDRPGYVKAMS NLIQTEVDSFTDSEKAQAK  
NNAPNLAPIHVLFSAHGVPKSYIEAGDPYQKQMEKCIDGIKAKLYETNSPEDLTIHLSYQ  
SRVGP IEWLRPYTDDVLP ELGESGVQNLVVVPISFVSEHIEETLEEIDIEYRELAEEESGVS  
NWRRC PAPNTDPTFIADMADMVYEALNEPAQTVTETCIANNIEGIDLEALDDSVAVSAGG  
VGGVGADGDLFKIKP

>comp11224\_c0\_seq3; 441 255 1742 LEN=1880; translated  
MRIHCTICVLASLSSLFLAENFATAFIHGGSTKCVFQPDIRNNIDCNLYKREPRTATRLEF  
STSPSFSDRSKINKSNSKRTTELRAATGIPLTSSPSIVPSSIDDSNDGGLGVLFNLGGP  
TTGDDVEEFLFNLFADPDIIRLPGLAPLQNI IAGFIAKRRAPKSRAAYDSIGGSPILK  
YTNAQAKLLSESFKEKYNMPIKTYVGMRYWKPYTEDALEQIRRDVKVILPLYPQFSI  
STSGSSLRVLQEDFSKRSYGDMVHTVVPWSWYDRPGYVKAMS NLIQTEVDSFTDSEKAQAK  
NNAPNLAPIHVLFSAHGVPKSYIEAGDPYQKQMEKCIDGIKAKLYETNSPEDLTIHLSYQ  
SRVGP IEWLRPYTDDVLP ELGESGVQNLVVVPISFVSEHIEETLEEIDIEYRELAEEESGVS  
NWRRC PAPNTDPTFIADMADMVYEALNEPAQTVTETCIANNIEGIDLEALDDSVAVSAGG  
VGGVGADGDLFKIKP

>comp11225\_c0\_seq1; 420 278 1207 LEN=1207; translated  
MNISISNLTDERGVTA AVTQSGVALQDASDEIKDKEHVVTIAVAQNGKALQYASERLRDT  
ERVVK IAVAQNGWALS YASTRLQNYQPLAITAVTESGWALACASSQLQNN EEVVTA AVRK  
AGCALRFASQNMKNNERVVTTAVTQNGWALEYASSKMKNNEQVINAAITQNGLSVRFASE  
MMKNNERMMTAAVTQDGLALTYASEELKNNQRLVTA AVAQNGLALKYASNRLKDDEKIVI  
SAVSQYAYILQHACNRLKGESTIVQTALHTNPRAIEYCSQEFFIAASRQYIHS LQC GTDT  
EKVDS DQRPN

>comp11226\_c0\_seq1; 300 111 1154 LEN=1450; translated  
MSPFVPASRCSLAVVLLSLSAFLGGCQASTVSLTVSPYSNSRRPAFFSREHSSRQNQFL  
PNILDDDLGDGHYKKEVECSVAKNLVRGAFLRILSDLSGGTPLESIKCRVTVTKDNMFQA  
YQNI VNEGSFWSLWSGTPSRTVEGALLGAFFILGSTAAKKQVIAMGGGKNLAALAGGTVG  
GVAQAI VMT PAGMIFTSLNVNQGKKG YENDNAWTVATRIVKEKGLKGLFYGGGPMCLRQA  
SNWSSRSLFTEIARTNLKMSKFGLLGEIGSGVIGGLGSCWNTPIETIRVNMHRDVS MGKD  
SQSFGYYWNEISEEDGVPGLFRGVTPRGIQAIWQTVFMVVV PNVLGI

>comp11228\_c0\_seq1; 304 264 1166 LEN=1607; translated  
MRFLLNTARRSAKSTPAVKANKKVIDSFVGT DANKSHVTKSWGQQCSPTCGCVLRFEATV  
DKRQRI IDCY TAKSVVTTIDQENGRRLRPLYTTRTTRLMFQECNCQSIHALAKQVTDYL  
PNKRFDHIKGMNDFASIRSSIGFRHSVLVENDLPRDTHCFDIVEEAFTGMISGKIPSRR  
PMDAAFKIMVAAESLRSGSVVFASRRKRNEKHAQSKSHQRHERKEGDTDSFGRR LGVDR  
NRINMSTSKTMSTLGMFDINAENWLDDEEYDRVEYGMNSTSDRFDWVS YVDDL YLVKDSA

>comp11228\_c0\_seq2; 304 250 1152 LEN=1593; translated  
MRFLLNTARRSAKSTPAVKANKKVIDSFVGT DANKSHVTKSWGQQCSPTCGCVLRFEATV  
DKRQRI IDCY TAKSVVTTIDQENGRRLRPLYTTRTTRLMFQECNCQSIHALAKQVTDYL  
PNKRFDHIKGMNDFASIRSSIGFRHSVLVENDLPRDTHCFDIVEEAFTGMISGKIPSRR  
PMDAAFKIMVAAESLRSGSVVFASRRKRNEKHAQSKSHQRHERKEGDTDSFGRR LGVDR  
NRINMSTSKTMSTLGMFDINAENWLDDEEYDRVEYGMNSTSDRFDWVS YVDDL YLVKDSA

>comp11229\_c0\_seq1; 360 168 1130 LEN=1365; translated  
MIDNDNLPHLLLYGPPGTGKTSTIVAAAKRMYGASKYSSMTLELNASDARGIGVVRNEIK  
EFAGTQQLFSRGVKLIILDEADAMTSDAQFALRRVIEKYTKNARFCLICNYVSKIIPALQ  
SRCTRFRFAPLAPSQIRGRLEEVAREEKVPITKDGVEAILDLSGGDMRRV LNLQSTAMS  
LSATRSSVAATSSDMEIDDENASRNAAVDEIAVYTTSGSPLPKDIDEILASLLNDSFRDS  
CNKISEMCTTNGYALADILKQLTLKLCAMKGLDSIPLGRLLDGMSQVECLAMSGIEEKI  
QTASLVGVFVETRERLEIKQ

>comp11229\_c0\_seq3; 424 106 1185 LEN=1420; translated  
MSLSGKAKDNSNLPWVEKYRPERLEDLVAHEKIVNIITTMIDNDNLPHLLLYGPPGTGKT  
STIVAAAKRMYGASKYSSMTLELNASDARGIGVVRNEIKEFAGTQQLFSRGVKLIILDEA  
DAMTSDAQFALRRVIEKYTKNARFCLICNYVSKIIPALQSRCTRFRFAPLAPSQIRGRLE  
EVAREEKVPITKDGVEAILDLSGGDMRRV LNLQSTAMSLSATRSSVAATSSDMEIDDEN  
ASRNAAVDEIAVYTTSGSPLPKDIDEILASLLNDSFRDSCNKISEMCTTNGYALADILKQ  
LTLKLCAMKGLDSIPLGRLLDGMSQVECLAMSGIEEKIQTASLVGVFVETRERLEIKQ

>comp11230\_c0\_seq1; 447 232 1260 LEN=1853; translated  
MKARMISLSLLVPSAVGFTSSGSQRTSATQLHVG TNSNEMMPLKRGSTCALITPFTEDNK  
IDVPGLEKLIDFHLEAGTDNLCVLGTTAEASVMSMDERELALKTIVGKAKGKIPLMVGVG  
TIDPNDVKKYTQQAIDLGADASLLVTPYYVKPPQRAMISHFTTMADMGLPVVLYNVPGR  
TAVDLS DSTVATLSQHENIVGIKDATGDVSR L TSLKNVLGEEASRNFLKFSGDDGTTDFV

LEGGDGCISVTANIVPKAVREMVHAALDGNLQALAIELNQLALLNSRLFVESNP IPAKWC  
AHRMGIIDSPFCRPLDMDPQFKDFMEEALASANMLVHAQQ  
>comp11230\_c0\_seq2; 415 255 1163 LEN=1756; translated  
MPLKRGSTCALITPFTEDNKIDVPGLEKLIDFHLEAGTDNLCVLGTTAEASVMSMDEREL  
ALKTIVGKAKGKIPLMVGVTIDPNDVKKYTQQAIDLGADASLLVTPYYVKKPPQRAMISH  
FTTMADMGLPVVLYNVPGRATAVDLSDSTVATLSQHENIVGIKDATGDVSRLTSLKNVLGE  
EASRNFLKFSGDDGTTDFVLEGGDGCISVTANIVPKAVREMVHAALDGNLQALAIELNQP  
LALLNSRLFVESNP IPAKWC AHRMGIIDSPFCRPLDMDPQFKDFMEEALASANMLVHA  
QQ  
>comp11231\_c0\_seq1; 605 158 1972 LEN=2209; translated  
MSVEVFQGFQDMDKKERKAALKKEAEKRGISYDEMCKQYKNSTPSGGKRKKNEADKLESD  
EHKKDIKRMRSYSKDLTDEKKDDGPD SKRRRTRSMDEAEKKA AAAEKNLTPPEWRKEQ  
TITLKGHGKYASESKFANPFIEFSDAPFSDRIQRTLSAAGFTRPSAIQAQAWPLAIEGKD  
LISIAKTGSGKTCGFLLPVFHDYEKNRTGRSGGYTKPILLVLPAPTREL CVQISEESRKF  
NPLGVRVSVCCYGGSSKYPQIQALQRGVECI IACPGRLNDLIEMKKCDLSGIKYLVLDEAD  
RMLDMGFEPQIRSI VEKTNAAATRQTL LFSATWPKEIQRLAHDFLKDVPVQINVGEVNALVA  
NKDIKQTIHMISEEEKIDKLESILKELTAEAGGND DKARVANGGKAHAKVIVFVAKKISC  
NDLANKLWDDGFAVDCLHGDRPQWERSKVMNAFKSGTLRMLIATDVAARGLDVKDVGVVV  
NYDMPAGVNGVEDYVHRIGRTGRAGAKGIAHTFFT GKDRKCATGLVEVLTKAEQEI PPEL  
AAMGRPRFGRGGGRGGYGRGRGRGGGGGRGRGYMSGGGGGYGRGRGGGGYGGGRFGGGRG  
GYRR  
>comp11231\_c0\_seq2; 609 158 1984 LEN=2221; translated  
MSVEVFQGFQDMDKKERKAALKKEAEKRGISYDEMCKQYKNSTPSGGKRKKNEADKLESD  
EHKKDIKRMRSYSKDLTDEKKDDGPD SKRRRTRSMDEAEKKA AAAEKNLTPPEWRKEQ  
TITLKGHGKYASESKFANPFIEFSDAPFSDRIQRTLSAAGFTRPSAIQAQAWPLAIEGKD  
LISIAKTGSGKTCGFLLPVFHDYEKNRTGRSGGYTKPILLVLPAPTREL CVQISEESRKF  
NPLGVRVSVCCYGGSSKYPQIQALQRGVECI IACPGRLNDLIEMKKCDLSGIKYLVLDEAD  
RMLDMGFEPQIRSI VEKTNAAATRQTL LFSATWPKEIQRLAHDFLKDVPVQINVGEVNALVA  
NKDIKQTIHMISEEEKIDKLESILKELTAEAGGND DKARVANGGKAHAKVIVFVAKKISC  
NDLANKLWDDGFAVDCLHGDRPQWERSKVMNAFKSGTLRMLIATDVAARGLDVKDVGVVV  
NYDMPAGVNGVEDYVHRIGRTGRAGAKGIAHTFFT GKDRKCATGLVEVLTKAEQEI PPEL  
AAMGRPRFGRGGGRGGYGRGRGRGGGGGRGRGYMSGGGGGYGRGRGGGGYGGGRFGGGRG  
GGRGGYRR  
>comp11232\_c0\_seq1; 223 59 1280 LEN=1840; translated  
MDFSHPPKVASSIPHSQPVVSM DYHADGNHLFVASEMDSKVTI VDAVRTGKPLDNGHNRG  
QSFRCDEGV SCLSATHNDYCVLTAGNKETT VQYWSLYDNKILRKFRGHTSTIHEINICP  
SEDMFLTSSKDKTVRLWNLQQSGCVAKLDLPSSSVSAAGNPRV VFDSTGMVFTILAEMAD  
GEGHYLHLYDARNYQGGAFSELKLT TKSVEAMQTHRVPQPPLRPGAALALNKIDFNASG  
NRILVQSEEG LALVLDGYDGT LQRVFSSTVGRGTVSCFCPDDKSVLLGN DGTIDVFDLQ  
SGSLVTKLEGGHNGPNTTPKSPVRALAAIQDTRKSPRAGTPTRGASRRLSVFSLFAPV FV  
VRDFRRWEWV LVLVVV PYTDFVLFVLPILPPI SDPIACRPSLWIW  
>comp11232\_c0\_seq2; 359 59 1105 LEN=1665; translated  
MDFSHPPKVASSIPHSQPVVSM DYHADGNHLFVASEMDSKVTI VDAVRTGKPLDNGHNRG  
QSFRCDEGV SCLSATHNDYCVLTAGNKETT VQYWSLYDNKILRKFRGHTSTIHEINICP  
SEDMFLTSSKDKTVRLWNLQQSGCVAKLDLPSSSVSAAGNPRV VFDSTGMVFTILAEMAD  
GEGHYLHLYDARNYQGGAFSELKLT TKSVEAMQTHRVPQPPLRPGAALALNKIDFNASG  
NRILVQSEEG LALVLDGYDGT LQRVFSSTVGRGTVSCFCPDDKSVLLGN DGTIDVFDLQ  
SGSLVTKLEGGHNGPNTTPKSPVRALACNPRYAQIASGNSNTSLWIW  
>comp11233\_c0\_seq1; 494 619 2571 LEN=4333; translated  
MATTNADSSNRNLNALATNHASTTSASAGSGENEGWSRGGRFANSRE VYTRSLFRVC  
LKFTTSEDEDEGKPEPGTAFWTL YGRQTTIGNGPPSSNADDICRRMDDSMTGPSAGILA  
RLSDFDGEQAAGYALRAGMTTGWHIRGDRGDAAVRVGKAKVFSGKNGPDGPTREAQILSL  
DADRWILCKGASFAAGNSVFNVEDVNEGKQKITIHC SKGPMRGLIDIHASRCPFVFGRA  
HEADLCIMDRELSRKHGAI VYLPNRNARGARLNGIGSFVLVDLESTNGTYMRLVGPYGYR  
GMGSLAIGDEFIVGRTGFS LNRFDYGISEAIGARPTMEDRTIVVQSLLYEPQHGYHKNEP  
KDTLQELAMTTFAAVFDGHGDECSNYLVETLPHQIREHMYAERSALSAAIESRSMARP  
EQATEDAA SELMRKILKAYLKT DKDFITPKNAPQSGSTAATLIVMGRRLFAANVGDSRV  
VLCRVGGQCVELTSDHKPSRPDEAARVRAAGGFILHKRVMGELAITRAFGDKSFKMGIKA  
MLEDEADEIARGLNENSEAKDLTAPLVSAEPEIASLVMSHNDEFLL LACDGLFDVFRSQD  
AIALARQELIAHRGEPAEVARILSDQAIRVRRSRDNVSILIVLRPFWEM

>comp11233\_c0\_seq2; 494 619 2571 LEN=3317; translated  
MATTNADSSNRNLNALATNHASTTSASAGGSGENEGWSRGRQFANSREVVYTRSLFRVC  
LKFTTSEDEDEGKPEPGTAFWTLYGRQTTIGNGPPSSNADDICRRMDDSMTGSPAGILA  
RLSDFDGEQAAGYALRAGMTTGWHIRGDRGDAAVRVGKAKVFSGKNGPDGPTREAQILSL  
DADRWILCKGASFAAGNSVFNVEDVNEGKQKITIHC SKGPMRGLIDIHASRCPVFGRA  
HEADLCIMDRELSRKHGAIVYLPNRNARGARLNGIGSFVLVDLESTNGTYMRLVGPYGYR  
GMGSLAIGDEFIVGRTGFSLNRFDYGISEAIGARPTMEDRTIVVQSLLYEPQHGYHKNEP  
KDTLQELAMTTFAAVFDGHHGDECSNYLVETLPHQIREHMYAERSALSAAIESSRSMARP  
EQATEDAASELMRKILKKAYLKTDFITPKNAPQSGSTAATLIVMGRRLFAANVGDSRV  
VLCRVGGQCVELTSDHKPSRPDEAARVRAAGGFILHKRMGELAITRAFGDKSFKMGIKA  
MLEDEADEIARGLNENSEAKDLTAPLVSAEPEIASLVMSHNDEFLLACDGLFDVFRSQD  
AIALARQELIAHRGEPAEVARILSDQAIRVRRSRDNVSILIVLRFWEM

>comp11234\_c0\_seq1; 258 731 3183 LEN=4467; minus strand; translated  
MSQPSHYIFQVVPLRECKDNLQATLSKIQQFFPGRYKALYRLQSSLYAAEKHIIDYVUNA  
SQSVKKPKGIHDYGDILRALEYLKQASRKANASKPRDCE SNISKQRSRPQSPREPPLEHQ  
FQRNKTGRSVDSQLVFLVVLQLLLVRIDDAHYVIAGYRMDLSSDSVGRKRKDNPNF  
ARKRSRGSNNLSSIGFCLGVGLIAGVLGRKCVGERHIKPRVLP MYFPHGTSLLLAATKA  
GGSLAGLVLFNFINTCWMTDKIVRSSNELSEWSKRWNLVHGAVGDRKGRERGCFSPTV  
VAENELPRIATPKGSIDADRKARILIECAKKNFKAYFWSSTGEIRFFILKRFMDIYYAS  
IGAGVHCTKEKPNFFLPLVAGVAACFYTITGAPTSPVND DASC DLIRHAWKQEWITQI  
PNGLFNAFLSSRWLTFHSRGMVSLPLLKNLTLRASRM IKGASVADRIVLGGVSCFVLSKD  
PAPELAGILRSQARKGFRNSLGYFSQLPTIDETETHQDEGNPVRKKIVGSKGQHHQRDVI  
LHLTGGGFFAHTIASDLPYLLDWSSTGAVVICPEVSPSPSKSFR LFRSDP THSIFGLVL  
VVAENQFPVQLNQIFAIYKLLATGNTGTSLGFDANSIIVTGESVGGNLAALCVKLAMGN  
IQAEGRGGNLD ESSPLNGGGDRPKRMPDAIVLSCPALNLATEVSRSRSTGTEDPVLPSAL  
LSAISDAYVSSERERRHPLASPCYAPDEILRRFPALLFAGARDPLLD DSLAFHERLRL  
GVDSEIVAVNNVPHAYLGLGTAGFP GAVRVQYAVDW

>comp11235\_c0\_seq1; 246 460 840 LEN=1185; translated  
MVRPANMVSTTAHQAFLTEEETLAILNKSNECIESECAVDEVEDELLTVLKDTEKELEGRL  
EKIMNTISHLQHINEKEERQTDEVRAFVRDLRVFDTGKPAFSPQGFSGDIGKGARTAYD  
VLPPKKW

>comp11236\_c0\_seq1; 317 74 1078 LEN=1113; translated  
MNRIRHSYNRRSSKGTDFNIFVSWIISLCAVLSTKLFSCSSAFTRSSLSLVQPTASHKL  
PVVGRGPLFSSSLTDVYDNDREEAIRVKKKEELAKRRGVSSKTGQGQNRVKDDQEWKFFDTA  
RVHVTGGDGGNGCVSFRREKGEPMGGPNGGNGGRGGSVWFV CDES VNTLAPLRNKVHIRA  
GKARNGLGKKGKQKGDIMPVPPGTVVRELHTQKLAGELKVDGEKMLVAKGGRGGRGN  
AAFKTDRNTAPKIAERAEPGAQRWLSVELRLVADVGF LGKPNAGKSTLLAAASAARPKIA  
NYPFTTIVPNLGVCDISEEGAGLVLC DIPGLIEG

>comp11236\_c0\_seq2; 664 74 1966 LEN=2014; translated  
MNRIRHSYNRRSSKGTDFNIFVSWIISLCAVLSTKLFSCSSAFTRSSLSLVQPTASHKL  
PVVGRGPLFSSSLTDVYDNDREEAIRVKKKEELAKRRGVSSKTGQGQNRVKDDQEWKFFDTA  
RVHVTGGDGGNGCVSFRREKGEPMGGPNGGNGGRGGSVWFV CDES VNTLAPLRNKVHIRA  
GKARNGLGKKGKQKGDIMPVPPGTVVRELHTQKLAGELKVDGEKMLVAKGGRGGRGN  
AAFKTDRNTAPKIAERAEPGAQRWLSVELRLVADVGF LGKPNAGKSTLLAAASAARPKIA  
NYPFTTIVPNLGVCDISEEGAGLVLC DIPGLIEGAAGGAGLGP AFLRHVQRCKVLLHVVD  
GSADDPIGDFITINEELRKHDPFLAEKPQVVVNKVDISEVKEMEDDIISELKRKAGHSR  
VLPISAATTENVKELMGR LKKFVSVQPEADLPPIVEVDLSKASLEYDSDDYEIISDPAYP  
GQWRVKGEYIEQVARMTHWEYPEAVARFGRQLEAIGISNDLQLRGAEDGDLVMVDKYDFE  
FNSYYNNQYIPQELLEKDLMYDDNGNYIPPSEEEDEIPAWRPFNEGGFLDVDSDELEGFM  
DEEWFMD EDDFDEDEGEFIFSDDEVWTSDD

>comp11236\_c0\_seq3; 456 1 958 LEN=1006; translated  
XYTGTDWWNIFLTLNLYRHCIEXAAGGAGLGP AFLRHVQRCKVLLHVVDGSADDPIGDFI  
TINEELRKHDPFLAEKPQVVVNKVDISEVKEMEDDIISELKRKAGHSRVLPISAATTEN  
VKELMGR LKKFVSVQPEADLPPIVEVDLSKASLEYDSDDYEIISDPAYPGQWRVKGEYIE  
QVARMTHWEYPEAVARFGRQLEAIGISNDLQLRGAEDGDLVMVDKYDFE FNSYYNNQYIP  
QELLEKDLMYDDNGNYIPPSEEEDEIPAWRPFNEGGFLDVDSDELEGFMDEEWFMD EDD  
FDEDEGEFIFSDDEVWTSDD

>comp11237\_c0\_seq1; 685 544 2154 LEN=2230; translated  
MNGGYGMNGAGASNGMSNNVGYGRDDADQNKYKPKPNRKGSSSFTGGMGFVVGIGLFC  
YAILMTTLYWSKSSQTKSMLSRDLDPDTLTVIETMESIKRQLKSSESMRQRNEQATKSKH

SNEINTLERSNRMLKEQLEHHTDVVVPEARGKIEKHTRREKAFADQIGWLMDATRRESKR  
MVLERFGAGPHKVSVHYLIPEDPLKSDGPKIKKKFQIDLAPLDLVP HAIHLFLEQVDHGL  
LDGTHFYLNPHIVQAGPQPEWGHTAVDGNDDTFYQHHPKKEELSNSAIGTMEKYEKQAQ  
KKKQEDHGHDDRFDDDDDDMYENYFNEDYAI EDKRTQRFADMGLEQLAFPDYHQEWP  
AWTVGFTGRPGGPDWYINKVDNRQGHGPGGQYQYALNEQGDSCFGVISGGPQREEVKDI  
YTGGIYGDNSEWHHFMTHPIEIVHAEILTKEPMDKHIHLTHLTSQHKVYNHRKKHRHID  
EELLPESTIHHGEGVDPNNLPNHLKERLAYKKKGAKISINKVKHGHRPHIDGAAEA  
>comp11237\_c0\_seq2; 293 646 1383 LEN=1459; translated  
MEKYEKQAQKKKQEDHGHDDRFDDDDDDMYENYFNEDYAI EDKRTQRFADMGLEQLAF  
DYHQEWPDAWTVGFTGRPGGPDWYINKVDNRQGHGPGGQYQYALNEQGDSCFGVISGGP  
QREEVKDIYTGGIYGDNSEWHHFMTHPIEIVHAEILTKEPMDKHIHLTHLTSQHKVYN  
HRKKHRHIDEELLPESTIHHGEGVDPNNLPNHLKERLAYKKKGAKISINKVKHGHRPHID  
GAAEA  
>comp11238\_c0\_seq1; 339 251 1264 LEN=1583; translated  
MTGGIDEQRAKTALLFREAGPGLTIEMSLNKIYHSTRSEFQQIDVINTYFGKTLVTDGK  
TQSAQFDEFAYHESLVHPALLNFANNNNGNGPKTVLIGGGELATAREVLRYP SVEK CIM  
VDLDEKVI EVSLEHLEEWGGREVMKDRFELVVGDAYSWILECKDKFDCVIMDISDPIEA  
GPGIMLYTKELYEHVVTVMSPNGVFVTQAGIADSV P APYATGGERDTTCFGPIRNTLAEV  
FSSVLPYQTQNI PSFGTDWGFV MAYNNSPDGCGAE EWKKMIPQTIDNLVEEQISGGEASF  
TYDGI THQRMFHLTKTVRKQLAEDDRIMTKDQPIFMY  
>comp11238\_c0\_seq2; 245 1027 1527 LEN=1846; translated  
MDISDPIEAGPGIMLYTKELYEHVVTVMSPNGVFVTQAGIADSV P APYATGGERDTTCFG  
PIRNTLAEVFSSVLPYQTQNI PSFGTDWGFV MAYNNSPDGCGAE EWKKMIPQTIDNLVEEQ  
ISGGEASF KYDGI THQRMFHLTKTVRKQLAEDDRIMTKDQPIFMY  
>comp11239\_c0\_seq1; 226 757 1224 LEN=1290; translated  
MVALSATDFGNFITHPLMKPPSPVNSDRSNSRLVFQKENVSINPSTGLIIFYGTYAGSE  
WKFELQRNTRGAEKAKIDATLVE SRGTD DERD V D V DAMEKSLALTTSKFFNDMVFELDGTF  
LSFEDMMLTDKGRESSVMSLSRIKVKKFPSPGLEF  
>comp11239\_c0\_seq2; 226 186 653 LEN=719; translated  
MVALSATDFGNFITHPLMKPPSPVNSDRSNSRLVFQKENVSINPSTGLIIFYGTYAGSE  
WKFELQRNTRGAEKAKIDATLVE SRGTD DERD V D V DAMEKSLALTTSKFFNDMVFELDGTF  
LSFEDMMLTDKGRESSVMSLSRIKVKKFPSPGLEF  
>comp11240\_c0\_seq1; 203 1074 1713 LEN=3328; minus strand; translated  
MIQQGILTSEILLAFMLYQGQLQNE MMNLFNSYSSLVKSTGAGDKIFELLDRKPPPPGIG  
SQQVQMR LGSDAQINDESIGIRFENVEFSYPSRPEQLILRN MNLDICAGSTFALVGPSGC  
GKSTIVNLLQRFYDASSGRILVDGQDIRSLDLKLRHRHRIGIVTQDPILFSGTILSNIMYG  
MPNATTEDAIDA AKRANA HDFSDFPKATKRR  
>comp11240\_c0\_seq2; 203 1074 1713 LEN=3423; minus strand; translated  
MIQQGILTSEILLAFMLYQGQLQNE MMNLFNSYSSLVKSTGAGDKIFELLDRKPPPPGIG  
SQQVQMR LGSDAQINDESIGIRFENVEFSYPSRPEQLILRN MNLDICAGSTFALVGPSGC  
GKSTIVNLLQRFYDASSGRILVDGQDIRSLDLKLRHRHRIGIVTQDPILFSGTILSNIMYG  
MPNATTEDAIDA AKRANA HDFSDFPKATKRR  
>comp11240\_c0\_seq3; 203 1074 1713 LEN=3194; minus strand; translated  
MIQQGILTSEILLAFMLYQGQLQNE MMNLFNSYSSLVKSTGAGDKIFELLDRKPPPPGIG  
SQQVQMR LGSDAQINDESIGIRFENVEFSYPSRPEQLILRN MNLDICAGSTFALVGPSGC  
GKSTIVNLLQRFYDASSGRILVDGQDIRSLDLKLRHRHRIGIVTQDPILFSGTILSNIMYG  
MPNATTEDAIDA AKRANA HDFSDFPKATKRR  
>comp11240\_c0\_seq4; 203 1074 1713 LEN=3289; minus strand; translated  
MIQQGILTSEILLAFMLYQGQLQNE MMNLFNSYSSLVKSTGAGDKIFELLDRKPPPPGIG  
SQQVQMR LGSDAQINDESIGIRFENVEFSYPSRPEQLILRN MNLDICAGSTFALVGPSGC  
GKSTIVNLLQRFYDASSGRILVDGQDIRSLDLKLRHRHRIGIVTQDPILFSGTILSNIMYG  
MPNATTEDAIDA AKRANA HDFSDFPKATKRR  
>comp11241\_c0\_seq1; 570 92 1381 LEN=1426; translated  
MVSTSCYHPIIASLCIASIAFCSAFRANGGCARGMP SRVGISHRSAQSLVVE SGR TATA  
TSTQLYMGAGEYKKNLKTFRYLEIECWRQPQFRDLEPVLK SVAESCKQINRIVQRAQT  
DDLYGVALGPDGKPLDDNIQGEVQQQLDVL CNTYMLRAFCGGSSSIHSVASEEEDETRC  
CSDVMTDSAF AKGEYIAVFDPIDGSKNIDASLPVGSIFGIYKNQPGSEVDESTFLQDGRN  
LVAAGYCLFSATTVLV LTHGNGVDGFTLDPDSGAFLHTLKD IRI PRKGKIFSFNEANSRG  
FDEPVQRYLNSLKEGTSKVD MAMTARYIGALVADVHNILVNGGIYGY PSTRSNPDGKLRLL  
LYECAPMAMIIEQAGGAASNGRKRILEIKPKEIHARSPLFIGSVENVFELDQFYEYYDTD

GATEAKGSK

>comp11242\_c0\_seq1; 367 170 1414 LEN=1594; translated  
MRGEKTVYSDPWVLEDDQGTINDSYSEKSLAAADSLALSPENEVFEHTLPSDGSIDY  
NSNFSIATAKNRRRRVAVIAFVSLMIGIIVIVLSVVLTKQKNSNDRENSSQSIDSIEGSL  
QSEERMENEGDVEGGAIILEPESEMPDIYYQLKAIVHNPAALLDTDTPEGKAFNVLVEEFE  
TQKSPTTRSIDYLDLQRYALLVFYFGTDGGSWTSTDGWATPSGECEDWTGVTTCQKSLVRR  
IDLDKNNLHGRIPEDFCLIEGLQYLKLSGNKVELPSCVSNLSSLEELDFKGNFAGELPI  
WLHSMPSVTLLDLSDNKFEGSIDMLFPQLSRGSGLFFPKLRTLNLANNKLRGEIPENMLR  
RMSNLDELILYGNTLLSGSLNELCKGDGISLIEADCNNVFCCKCTSGNNCPSSL

>comp11243\_c0\_seq1; 432 185 1096 LEN=1285; translated  
MTWYPIDKTERCLMHNSAGVAYESLPCLYENTIGLTYTSIEKGYNPINVRDSMTENPWVP  
VLAIAMYGIMIGVGRTYFSTREAWSWRALALWNLGLSVFSLIGFCRVAPQLIHNLHYHS  
LSENVCFDPEQMYGSDRMVGTWVQLFVLSKFPPELIDTFFIIVHKKPLILLHWYHHISVLA  
YCWHSYVTKAPPGIVFCVMNYAVHAIMYFYYFLMAVKRKPWFNSMYITVSQISQMVG  
IVTILGFVVPPLYTSSTGNECHIKKENNAALIMYGSYLMFLQFFFKRYSGKGGKTKAT  
KKD

>comp11244\_c0\_seq1; 235 88 870 LEN=1911; translated  
MAAPLRSIFECCALSFLIWAAPTIVLVAANFDFNGGQPKFCKPYTCGKGLTPVQKWPLSFES  
SGCSSLGGMIATSGATDGSNDIHERCCDQRAACLQTCGSVKTACDEELKKCVEKNCSEK  
GDDEEKNQRASIFSIMVSLENCQPYSAVQSHHCECVPAEDAPAKREDLLHKFYETFS  
SPD SVGKAKDLSKKADTTRKMANLMGKLVQKYYPDTIQVKVDPNAERMEQLMRESQKATNTVV  
EEDVEAEDDAAAAEEVQEL

>comp11244\_c0\_seq2; 235 88 870 LEN=1517; translated  
MAAPLRSIFECCALSFLIWAAPTIVLVAANFDFNGGQPKFCKPYTCGKGLTPVQKWPLSFES  
SGCSSLGGMIATSGATDGSNDIHERCCDQRAACLQTCGSVKTACDEELKKCVEKNCSEK  
GDDEEKNQRASIFSIMVSLENCQPYSAVQSHHCECVPAEDAPAKREDLLHKFYETFS  
SPD SVGKAKDLSKKADTTRKMANLMGKLVQKYYPDTIQVKVDPNAERMEQLMRESQKATNTVV  
EEDVEAEDDAAAAEEVQEL

>comp11244\_c0\_seq3; 235 88 870 LEN=2058; translated  
MAAPLRSIFECCALSFLIWAAPTIVLVAANFDFNGGQPKFCKPYTCGKGLTPVQKWPLSFES  
SGCSSLGGMIATSGATDGSNDIHERCCDQRAACLQTCGSVKTACDEELKKCVEKNCSEK  
GDDEEKNQRASIFSIMVSLENCQPYSAVQSHHCECVPAEDAPAKREDLLHKFYETFS  
SPD SVGKAKDLSKKADTTRKMANLMGKLVQKYYPDTIQVKVDPNAERMEQLMRESQKATNTVV  
EEDVEAEDDAAAAEEVQEL

>comp11245\_c0\_seq1; 482 50 964 LEN=1902; translated  
MNTLVSSFVKKVQSKHWKDKLKKRTQKLDPVEQENLLEFLEDHLPSSNGTGSVAVGII  
ESDS TAASTAAGVDGDFEGSDSDCSFVEDDYELLQCDLDRASIKLEALQSKRDFLQTRLQTYQE  
KIKAAEQLRHQNAEDNGTEQDGDPECHNKRLMAMNEKIEGYKSLKPIEDIYEGIEKELL  
SHQLKMESIQDRQLELKLKTEECRVVHELSSNAGGLESQDVPPEEQHAETSQHIGLISNA  
CNDNHSSRRRCNDQVLPSEENDVENARVEREECSENTEISIEDSAEESASVSLVPIGEH  
SGIT

>comp11245\_c0\_seq2; 265 1 796 LEN=1828; translated  
XQRSSAKATMAPLTFTKTPKASFYALLVLLSFLLCWPCFAFVAPTPATKTPTQQRNH  
FDS FSTRHLHATESSGLFKAGLLADEESQERAELASKKLRITISDLGWKQAESRRSS  
IRPKLW PFGGSDELAIQDKANYSPEPNCPPEPWLGLEEFYVLVNDTAAADIIFVALAG  
GRAFVER DVAESVLDLWGMDSSTTEKTKPKRRRPSKQFDQIAFEQTVKIGQRDFIA  
AWSAFLGLTG FALTGIVFPTNPLQLALVDLLDSIL

>comp11245\_c0\_seq3; 558 1715 3475 LEN=3832; translated  
MLVVEEQTKVNPSWFESPVRRVSTSGGTAPFFRLNLTEGLKQLGCRGIEIDKNYWI  
GKDL SHAQDEKDFYLQVLRIRERSERDDGNKRVDTEGICLLENFMFDYLGVL  
EAKSVEQDGKHG ICQLLVMRNLRNNDYDFRMLDLKIGEKTAQAGWKGKSRMSAL  
KHLVMDGLSNSVSEGYRL AGFDGCSEAFESMHPLMDILATDEVKNISTSAVSS  
TKRSSVQTSVGLEIDQSQVKLAKRI MLNSLDGTEMLRHFLDLHMEEMGLALE  
DHLSPTEVAEIVSHELMSKLI SLAVTCHKVHI POKWIGSSVAVAYDSCFFPS  
RSSSHEDDIRSRVLVNI FDWGRSELLTAKEYEDLTKEDAD DRDKYWDLYRAGI  
DQLSYNATRFYFHQFSNSTGWMVTIQVMDFDSMSFDDYIGTVEIPL PDLSDS  
SALKALGENKAYKLVPRKLTGIAAVLGSSELCFCSISWVKFPSESRLVGVWRVSI  
DRAVNLPRMDLVANSSDAYCMVATTDAKESFHRQHFFHQQTICIKARTLNPQW  
GETIDIPV ARRGNDSLSMSELTANGISSIDDHNIPLFEWHNEYFHFSDQNMKRW

>comp11245\_c0\_seq5; 203 1 893 LEN=1250; translated  
XSWDKIPLNDIDLLVRSRSVAVAYDSCFFPSRSSSHEDDIRSRVLVNI FDWGR  
SELLTAK

EYEDLTKEDADDRDKYWDLYRAGIDQLSYNATRFYFHQFSNSTGWKMVTIQVMDFDSMSF  
DDYIGTVEIPLPDLSDSSALKALGENKAYKLVPRKLTGIAAAVLGSELFCISISWVKFPSE  
SRLVGVWRVSIIDRAVNLPRMDLVANSSDAYCMVMATTDAKESFHRQHFHQQTICIKARTLN  
PQWGETIDIPVARRGNDSSLMSELTANGISSIDDHNI PNLF EWHNEYFHFSDQNMKRW  
>comp11245\_c0\_seq6; 558 1784 3544 LEN=3901; translated  
MLVEEQTKVNPSWFESPVRVSTSGGTAPFFRLNLTEEGLKQLGCRGIEIDKNYWIGKDL  
SHAQDEKDFYLQVLRIRERSEDDGNKRVDTEGICLLENFMFDYLGVLVLEAKSVEQDGKHG  
ICQLLVMRNLNNYDSFRMLDLKIGEKTAQAGWKGKSRMSALKHLVMDGLSNSVSEGYRL  
AGFDGCSEAFESMHPLMDILATDEVKNISTSAVSSTKRSSVQTSVGLEIDQSQVKLAKRI  
MLNSLDGTEMLRHFLDLHMEEMGLALEDHLSPTTEVAEIVSHELMSKLI SLAVTCHKVHI  
PQKWIGSSVAVAYDSCFFPSRSSSHEDDIRSVLVNIFDWGRSELLTAKEYEDLTKEDAD  
DRDKYWDLYRAGIDQLSYNATRFYFHQFSNSTGWKMVTIQVMDFDSMSFDDYIGTVEIPL  
PDLSDSSALKALGENKAYKLVPRKLTGIAAAVLGSELFCISISWVKFPSESRLVGVWRVSI  
DRAVNLPRMDLVANSSDAYCMVMATTDAKESFHRQHFHQQTICIKARTLN PQWGETIDIPV  
ARRGNDSSLMSELTANGISSIDDHNI PNLF EWHNEYFHFSDQNMKRW  
>comp11245\_c0\_seq7; 558 877 2637 LEN=2994; translated  
MLVEEQTKVNPSWFESPVRVSTSGGTAPFFRLNLTEEGLKQLGCRGIEIDKNYWIGKDL  
SHAQDEKDFYLQVLRIRERSEDDGNKRVDTEGICLLENFMFDYLGVLVLEAKSVEQDGKHG  
ICQLLVMRNLNNYDSFRMLDLKIGEKTAQAGWKGKSRMSALKHLVMDGLSNSVSEGYRL  
AGFDGCSEAFESMHPLMDILATDEVKNISTSAVSSTKRSSVQTSVGLEIDQSQVKLAKRI  
MLNSLDGTEMLRHFLDLHMEEMGLALEDHLSPTTEVAEIVSHELMSKLI SLAVTCHKVHI  
PQKWIGSSVAVAYDSCFFPSRSSSHEDDIRSVLVNIFDWGRSELLTAKEYEDLTKEDAD  
DRDKYWDLYRAGIDQLSYNATRFYFHQFSNSTGWKMVTIQVMDFDSMSFDDYIGTVEIPL  
PDLSDSSALKALGENKAYKLVPRKLTGIAAAVLGSELFCISISWVKFPSESRLVGVWRVSI  
DRAVNLPRMDLVANSSDAYCMVMATTDAKESFHRQHFHQQTICIKARTLN PQWGETIDIPV  
ARRGNDSSLMSELTANGISSIDDHNI PNLF EWHNEYFHFSDQNMKRW  
>comp11246\_c0\_seq1; 174 282 827 LEN=940; translated  
MPRGPRAAKGLLLASIRSKDPVVFLEPKALYRASVEEVPVDDYELELGKAEVMRPGTDVT  
VLGWGGHLRVLEEACDLAEKQEGISCELIDLQTI VPDVDCVANSVRKTGKLVVSHEAPV  
SSGFGAEEVAKLQEECFYSLEAPIQRVCGYDTPFPLVFEKHYIPDKLKNFEAIKRVFADSI  
>comp11246\_c0\_seq3; 208 702 1585 LEN=1698; translated  
MSGGTAVGEIQFADYIFPGTCKVNRAAAPIIRALRVSHVPNWFMYCNTILTFIQRSIKL  
STKWLNFIDIDQAINGTAEALHCGARVALLVTADTTIXQSPEAFLSHIPGIAVVMRGPRA  
AKGLLLASIRSKDPVVFLEPKALYRASVEEVPVDDYELELGKAEVMRPGTDVTVLWGGH  
LRVLEEACDLAEKQEGISCELIDLQTI VPDVDCVANSVRKTGKLVVSHEAPVSSGF  
VAKLQEECFYSLEAPIQRVCGYDTPFPLVFEKHYIPDKLKNFEAIKRVFADSI  
>comp11246\_c0\_seq6; 226 161 706 LEN=819; translated  
MPRGPRAAKGLLLASIRSKDPVVFLEPKALYRASVEEVPVDDYELELGKAEVMRPGTDVT  
VLGWGGHLRVLEEACDLAEKQEGISCELIDLQTI VPDVDCVANSVRKTGKLVVSHEAPV  
SSGFGAEEVAKLQEECFYSLEAPIQRVCGYDTPFPLVFEKHYIPDKLKNFEAIKRVFADSI  
>comp11246\_c0\_seq7; 347 190 1377 LEN=1490; translated  
MNTISTTNPAAATRMFRRSVSALHRNRVRSFGFCGATENSVAGASFSTVALSASPSTTTTA  
TTTPGSETKSMNLF TAINNALSIALETDPSSIVFGQDVAFGGVFRCTQGLQDEF GPD  
NTPLSENGIAGLAIGYSTMSGGTAVGEIQFADYIFPAFDQIVNEMAKFRYRSGNQWNCGG  
VTLRSPCGAVGHGGHYHSQSPEAFLSHIPGIAVVMRGPRAAKGLLLASIRSKDPVVFLE  
PKALYRASVEEVPVDDYELELGKAEVMRPGTDVTVLWGGHLRVLEEACDLAEKQEGISC  
ELIDLQTI VPDVDCVANSVRKTGKLVVSHEAPVSSGFGAEEVAKLQEECFYSLEAPIQR  
VCGYDTPFPLVFEKHYIPDKLKNFEAIKRVFADSI  
>comp11246\_c0\_seq9; 225 190 1488 LEN=1601; translated  
MNTISTTNPAAATRMFRRSVSALHRNRVRSFGFCGATENSVAGASFSTVALSASPSTTTTA  
TTTPGSETKSMNLF TAINNALSIALETDPSSIVFGQDVAFGGVFRCTQGLQDEF GPD  
NTPLSENGIAGLAIGYSTMSGGTAVGEIQFADYIFPAFDQIVNEMAKFRYRSGNQWNCGG  
VTLRSPCGAVGHGGHYHSQSPEAFLSHIPGIAVVMRGPRAAKXETSLTVIDSNAXFYMI  
FLVSNQEPFQPYFDAYLSIFXGLLLASIRSKDPVVFLEPKALYRASVEEVPVDDYELELG  
KAEVMRPGTDVTVLWGGHLRVLEEACDLAEKQEGISCELIDLQTI VPDVDCVANSVRK  
TGKLVVSHEAPVSSGFGAEEVAKLQEECFYSLEAPIQRVCGYDTPFPLVFEKHYIPDKL  
KNFEAIKRVFADSI  
>comp11247\_c0\_seq1; 303 1 741 LEN=786; translated



QQQQQQQAADATGSSPSDNKVTTTPNTEMPEDLLKFIQDVGPARGSVDRDFTTSRLLKE  
EHSDELNKAESARTAKRERVRLMQLGDDNFTTEKNTNFSVGDVSASVADEHDFGLSNLQ  
LYDLMVASDAGVDDAVDVDAFHEKAVSDNREDEGRPDPPSAASLKEAEKSKAKELALLSQ  
TLEVL EIPALRMNADGDILGLYKNDVPGPEMTTITTTIPEDKIIMVLKDL SINGKSNMHA E  
RTPTGH

>comp11248\_c0\_seq1; 289 483 977 LEN=1412; translated  
MQQSRLCDGGMQEMTTAAACVNEVFPNATIRTNRRQLKEDMDAGPNPSLVISLDDCDDEN  
ESDNGNAGNGKRDKTTSINGGQTTKTNESGTVLWSREQRNLF EKYPKRRRSIKDIRECL  
IALKESWSAASSSTTNSCSIISTAPPISKSVDISTNNGDACGK

>comp11248\_c0\_seq2; 323 131 754 LEN=1189; translated  
MSLGEADRKRKAAEHLASAKHQEEIEPPKQKPKALPSPQNFVVYSRLCDGGMQEMTTA  
AACVNEVFPNATIRTNRRQLKEDMDAGPNPSLVISLDDCDDENESDNGNAGNGKRDKTTS  
INGGQTTKTNESGTVLWSREQRNLF EKYPKRRRSIKDIRECLIALKESWSAASSSTTNS  
NCSSIISTAPPISKSVDISTNNGDACGK

>comp11249\_c0\_seq1; 259 125 613 LEN=830; translated  
MKSPISILSLLLLAVVGSQAFTTQSSSSLRNSPRTADTRLYLDIGSMIRNFGKKATASHI  
LIGPVGSRGTGRGMLQEDAI AKLTELKEEINNDPEKFAEYAYKEYSSCRSSAKGGDLETFGP  
GMMVKQFDKICFEDEVGVVHGPISTAYGEHLILVRERTGDDK

>comp11250\_c0\_seq1; 135 67 411 LEN=411; translated  
MVRFTISATPCSLALLLLWQQHTATDGFNSRLATTARATEGGSALFGYAAFQYEENDAIM  
QEQNGGVVPTKPRTPVQTVPSAMSKITVTKPSDDQHDANFHTVKTVP SAMSRIER

>comp11250\_c0\_seq2; 64 1 195 LEN=310; translated  
GSASDDQHDANFHTIRTVSPVSDTRRPRKSSGLESTSRVTSSTANFCKK SCTYERGEHD  
PYEE

>comp11251\_c0\_seq1; 606 148 1902 LEN=1922; translated  
MLLTRVTTGFSKALNARRVLQSTSSGFFSFHDNGKNNGHTKIKYEQGSRCQRSGISSLSM  
STAEPTIPSATTAARAAAEVTVVTK EAVPQVVSVPNKFPV PKPFDYHQQLTIKIDSLTNMG  
WGVGRVKLSEKTTDSFADNNSDNTDGEEMDERM WVVMVPHVLVGETVRVSI FRNMKGH  
SEADLVEIVEPSPERVV PKSLAGTCGGCQYQHMSIKAQREWTKKHVEEVL MQQDIQGYN  
TPELLDVLPTSGTDEVYGYRSKITPHYQAPIENPDGTFELQAIGFQRSSNRNLVDVPECF  
IAMPDINKKYKETRVLHEEAKRGLLNQPPKKKKRRRGRSGGAKGATLLFRQADDEDDE  
NGISKPLVVTDNQYMTTITIKGLKFRYIAGNFFQNNYV VPLMVDVAVVKAASIPVSATGK  
PPSKLIDCYCGSGLFAISAASNFDLCVGIELNAKAI E EATANAVSNGITNCQFMAASAEA  
IFTSPPEITVAGFEQERVQTFDRQETVVI VDP PRKGCSEEFKQLYDYNPQRIVYMSCGP  
ATQARDAKGIVEVGGYEITSIQPFDFLPQTKHIESLVVFEKKES

>comp11252\_c0\_seq1; 271 1 780 LEN=845; translated  
DDDDDDGKISDARSLESTEAVAFDIECRHIPRSHNPISDSL CNLNMNIIAAKSWNDSIQ  
KLEEA EKHVMDHEL SASSPHTISERLSNILETTT KTKYSLRPPVYDMLADLAVRTKDYK  
LLVDIGERLVEEGSFKTKPHSSKRRHGSSTSPMDAMKIEGNQKKKGI RYQIEGWRGLGKE  
KKARFLERKHKVLLSSDGGDDYNYVSNRALKGLGDIAMGDWGT AIPDTWKPVVHKWFASV  
RYDSEDELVPLWEENIDRQ

>comp11255\_c0\_seq1; 641 95 1477 LEN=1744; translated  
MSYTTPSKRRGGVETVSHTHFIFPVLKNAEILQCLDELGIEVCKTELAEPQRHREKVRKI  
FWQLLEHCCGITEDDIDKLCPKNLDQYVPPAEAE LHDNFVDMLFFKMRKMMETCGIVDF  
SWKDIHVPTSKRLRCQLSAVINMAKFREEQLKIYAELNEPRHQLLV TLEELHAENVQLQE  
QLNIVLAESSQOMDEFDMVAKECQELESEIASSNKLQASKREEASKLKIEMTR LKDELAA  
ATWSLQESQAEERLLGQVVSSPTRRKKELDTKKDALEKEKAETRRLQQEITDGKTKIAA  
LQQATKDLQETIALQRNILEESSKYEEAAGKLEDAEKEVEANQEKASELEEKTQDSERSL  
ARMEEKVVHMHRQSKMKLDAAQDNIEIAKEQLLIVERDRREGLARVEAGEAEVRSIKAQM  
ESEQKKEEIEAIVEEYKLEKSFLKRNEQRIILIDSAM

>comp11255\_c0\_seq2; 449 95 1078 LEN=1275; translated  
MSYTTPSKRRGGVETVSHTHFIFPVLKNAEILQCLDELGIEVCKTELAEPQRHREKVRKI  
FWQLLEHCCGITEDDIDKLCPKNLDQYVPPAEAE LHDNFVDMLFFKMRKMMETCGIVDF  
SWKDIHVPTSKRLRCQLSAVINMAKFREEQLKIYAELNEPRHQLLV TLEELHAENVQLQE  
QLNIVLAESSQOMDEFDMVAKECQELESEIASSNKLQASKREEASKLKIEMTR LKDELAA  
ATWSLQESQAEERLLGQVVSSPTRRKKELDTKKDALEKEKAETRRLQQEITDGKTKIAA  
LQQATKDLQETIALQRNILEESSFEML

>comp11256\_c0\_seq1; 456 113 1357 LEN=1742; translated  
MGACCNDKPKSSIA PGSSGRKRSVLLLCIAIAIAFVFQYVVAHYVVNIKIDNYVTNAWL  
SGCNDLET KALVERCAGQTGVYRAAFSALVFFLLAAVAVACKRTANREAWPAKYILFLFM

VAGMCFVPNDPLFTSIYLNVARVGTIFFILFQQVIFVDLAHNWNDGWVERSNKAESEETR  
SGKKWLVAIVVSAAFLLLLASVMGWGLLFYFFGGCGTNVAFIAITIIILSLTVVGAQLTGNE  
GSLASSIITAYATMLCYNVARNPNAVCNPQLKTDDVLSIAIGVGLTVVSLGYVGSAT  
ADNSLGGDATFDSSDDDDIENIDTALSSTEENSRTITGVVANYQSTKIDKDNKVGVGETGE  
NSSKENIPNTFSNNWKLNVALAAVTCWFSMALTDFTIQADGTVANPQIGDANMW  
>comp11256\_c0\_seq2; 471 127 1440 LEN=1825; translated  
MVPFISCIIVSSVTFCFCSAGASLMGACCGNDKPSIAPGSSSGRKRSVLLLCIAIAIAFV  
FQYWVAHYVNIKIDNYVTNAWLSGCNDLETKALVERCAGQTVYRAAFSALVFFLLAAV  
AVACKRTANREAWPAKYILFLFMVAGMCFVPNDPLFTSIYLNVARVGTIFFILFQQVIFV  
DLAHNWNDGWVERSNKAESEETRSGKKWLVAIVVSAAFLLLLASVMGWGLLFYFFGGCGTN  
VAFIAITIIILSLTVVGAQLTGNEGSLASSIITAYATMLCYNVARNPNAVCNPQLKTDD  
VLSIAIGVGLTVVSLGYVGSATADNSLGGDATFDSSDDDDIENIDTALSSTEENSRTITG  
VVANYQSTKIDKDNKVGVGETGENSSKENIPNTFSNNWKLNVALAAVTCWFSMALTDFTI  
IQADGTVANPQIGDANMW  
>comp11257\_c0\_seq2; 493 178 1626 LEN=1770; translated  
MSLTANFCAIQVASLGLAILVLSLPSLVEVTAFSVNVNSCPSTPCAVLLPGLHRISRHC  
LRSSSDNDNDDDETDQPPQRWPDFAKDWSLRSLSMWIMGGLTMAATTGTAVPVLAAADFQ  
EGISPVTKSALGISIRSTVQSAKLVDVLDLKWERFSDSLRDQKCDPRTNRRLFDNGIR  
SDGTPRGNPVLGALCEPVPLKVVDDEGLYKLVLDQGLDAAAYETLGNNNIDRSTLRGMVDQ  
TRDKLEPVFARAINDGNSVSQPTASAPSIDEAKKRQRYNLETFARIRAYSEAVSKTPPFL  
SSSSTPAATTKPQSKASFTREIGRKLELVWGRNLEILAGPTSSESYEFQSPFPKDPDIP  
LPYDADQLANALGAIKESLTKLQDGGGLIGHWEISIPEDDYGEVVTIAVDDDDVCLGAQILA  
REENSPLNGSPVAMVRSALDRAKIPYAALDVFFIDPNTTKNELYNPTQLLISLRNLGE  
EP  
>comp11257\_c0\_seq3; 416 178 1713 LEN=1713; translated  
MSLTANFCAIQVASLGLAILVLSLPSLVEVTAFSVNVNSCPSTPCAVLLPGLHRISRHC  
LRSSSDNDNDDDETDQPPQRWPDFAKDWSLRSLSMWIMGGLTMAATTGTAVPVLAAADFQ  
EGISPVTKSALGISIRSTVQSAKLVDVLDLKWERFSDSLRDQKCDPRTNRRLFDNGIR  
SDGTPRGNPVLGALCEPVPLKVVDDEGLYKLVLDQGLDAAAYETLGNNNIDRSTLRGMVDQ  
TRDKLEPVFARAINDGNSVSQPTASAPSIDEAKKRQRYNLETFARIRAYSEAVSKTPPFL  
SSSSTPAATTKPQSKASFTREIGRKLELVWGRNLEILAGPTSSESYEFQSPFPKDPDIP  
LPYDADQLANALGAIKESLTKLQDGGGLIGHWEISIPEDDYGEVVTIAVDDDDVCLGAQILA  
REENSPLNGSPVAMVRSALDRAKIPYAALDVFFIDPNTTKNELYNPXAAFQLAEPGG  
RTIKIPDYLLSKQLDKRPVFNPILYEVRKPVX  
>comp11261\_c0\_seq1; 449 630 2363 LEN=2399; translated  
MDAPAESSGREDSKTPDHASKAEITPPEKINDPVHSKNGDTPGTSNGYPQVIHPHETPQ  
QSAYYGSYNNNPQITPESPSNSNGRATYNAGGSFFQPPQSVGAFQNSPFTNEGMPHYAG  
NNTLQPPSSPTQSMGGIPPASPLFPRMTAGAI PAYLNTPRGGDTSMNPGMSPVPSGYASS  
NGMYIQGAYPVLSGRPSGSSSGNNSSTFNSNNGNEEFVAVNENRNAPYSISPAHGGMPFV  
PGIQHRPDRSSSFDDTSVPHSSLDGPQEIYAGAGPGPQAWGYGPPPPDSYGNNANVTHVPL  
RTSGGPPVPYPGGQYRPPPNYINAGPYGGFNPTNSPGPIQTTGSNKGPDGANLFIHFI  
PNHFVNLDMYQLFSPYGRLLSVRIMVEKDSGRSRGFGFVSYDNPDAALAIKELNGFAIG  
NKRLKVQHKQIRPAEQEANSVNTVSTGGYPGGGRGRGGRGAFSGRGRPNLPPSGAAYMP  
SGGFYNATNDLNDNPSPPPAVSGS IASGEAKNVVVVLGNGPSNSTNVPTTETAVATSAVS  
RQDKHKATSDPLSKMDPLGQTLDPDIGGAATAAVSHDN  
>comp11261\_c0\_seq3; 449 1197 2930 LEN=2966; translated  
MDAPAESSGREDSKTPDHASKAEITPPEKINDPVHSKNGDTPGTSNGYPQVIHPHETPQ  
QSAYYGSYNNNPQITPESPSNSNGRATYNAGGSFFQPPQSVGAFQNSPFTNEGMPHYAG  
NNTLQPPSSPTQSMGGIPPASPLFPRMTAGAI PAYLNTPRGGDTSMNPGMSPVPSGYASS  
NGMYIQGAYPVLSGRPSGSSSGNNSSTFNSNNGNEEFVAVNENRNAPYSISPAHGGMPFV  
PGIQHRPDRSSSFDDTSVPHSSLDGPQEIYAGAGPGPQAWGYGPPPPDSYGNNANVTHVPL  
RTSGGPPVPYPGGQYRPPPNYINAGPYGGFNPTNSPGPIQTTGSNKGPDGANLFIHFI  
PNHFVNLDMYQLFSPYGRLLSVRIMVEKDSGRSRGFGFVSYDNPDAALAIKELNGFAIG  
NKRLKVQHKQIRPAEQEANSVNTVSTGGYPGGGRGRGGRGAFSGRGRPNLPPSGAAYMP  
SGGFYNATNDLNDNPSPPPAVSGS IASGEAKNVVVVLGNGPSNSTNVPTTETAVATSAVS  
RQDKHKATSDPLSKMDPLGQTLDPDIGGAATAAVSHDN  
>comp11261\_c0\_seq4; 402 630 2523 LEN=2559; translated  
MDAPAESSGREDSKTPDHASKAEITPPEKINDPVHSKNGDTPGTSNGYPQVIHPHETPQ  
QSAYYGSYNNNPQITPESPSNSNGRATYNAGGSFFQPPQSVGAFQNSPFTNEGMPHYAG  
NNTLQPPSSPTQSMGGIPPASPLFPRMTAGAI PAYLNTPRGGDTSMNPGMSPVPSGYASS

NGMYIQGAYPVLSGRPSGSSSGNNSSTFNSNNGNEEFVAWNENRNAPYSISPAGGMPFV  
PGIQHRPDRSSSFDDTSVPHSSLDGPQEIYGAGPGPQAWGYGPPPPDSYGNNANVTHVPL  
RTSGGPPVPYPGGQYRPPPNYINAGPYGGFNYPNTSPGPPIQTTGSNKGPDGANLFIHFI  
PNHFVNLDMYQLFSPYGRLLSVRIMVEKDSGRSRGFGFVSYDNPDAALAIKELNGFAVS  
YALCDLRFGGDRTIFAHMISRITLKCLTNCLSRYYTTFQFRSFCISRLNKHHMIGNKRLKVQ  
HKQIRPAEQEANSVNTVSTGGYPGGGRGRGGRGAFSGRGRPNLPPSGAAYMPSGGFYNA  
TNDLNDNPSPPPAVSGSIASGEAKNVVVVLGNGPSNSTNVPPTTETAVATSAVSRQDKHKA  
TSDPLSKMDPLGQTLPLDIGGAATAAVSHDN

>comp11261\_c0\_seq5; 402 1197 3090 LEN=3126; translated  
MDAPAESSGREDSSKTPDHKSKAEITPPEKINDPVHSKNGDPTPGTSNGYPQVIHPHETPQ  
QSAYYGSYNNNPQITPESPSPNSGNRATYNAGGSFFQPQSVGAFQNSPFTNEGMPHYAG  
NNTLQPPSSPTQSMGGIPASPLFPRMTAGAIAPAYLNTFRGGDTSMNPGMSPVPSGYASS  
NGMYIQGAYPVLSGRPSGSSSGNNSSTFNSNNGNEEFVAWNENRNAPYSISPAGGMPFV  
PGIQHRPDRSSSFDDTSVPHSSLDGPQEIYGAGPGPQAWGYGPPPPDSYGNNANVTHVPL  
RTSGGPPVPYPGGQYRPPPNYINAGPYGGFNYPNTSPGPPIQTTGSNKGPDGANLFIHFI  
PNHFVNLDMYQLFSPYGRLLSVRIMVEKDSGRSRGFGFVSYDNPDAALAIKELNGFAVS  
YALCDLRFGGDRTIFAHMISRITLKCLTNCLSRYYTTFQFRSFCISRLNKHHMIGNKRLKVQ  
HKQIRPAEQEANSVNTVSTGGYPGGGRGRGGRGAFSGRGRPNLPPSGAAYMPSGGFYNA  
TNDLNDNPSPPPAVSGSIASGEAKNVVVVLGNGPSNSTNVPPTTETAVATSAVSRQDKHKA  
TSDPLSKMDPLGQTLPLDIGGAATAAVSHDN

>comp11262\_c0\_seq1; 181 1072 1596 LEN=1693; translated  
MCKNGYTARWDHQITRKKGDGKNERCPRLRQGSRPAAPWNPVKVITYAEKREDNHLSLAHL  
WWDWYSYYTSVEGNFPFLIIRMEDMVFYPEELITQVCECAGGKIRTDQKFQLITDSAKGD  
SRGHDTSTGIYEAWIKYKSKPNTKERYGFSEADYNDARTALNETFMKALGYQHPS

>comp11262\_c0\_seq2; 275 136 1383 LEN=1480; translated  
MALVSPSKASPSQPMLSHPISTQTLARLLLVAASTVLFNIIICLLPHIPGNSLQANPYFF  
SEDGFMHTTSKSSGKTNTTVANHHSSRTGSDDRSGKSISDWFRDEAGVVLTPEMKEKLP  
WSQVREVVGEGPVLIGLESCPAYREKVPALERMLGSSGMFNTGTNLVTHLLKRNCIEPER  
REKMGPNESKESYGMRWQVPWGKHTPVKFRSKHSTQKAKEIKKEFILPVVTRHPYSWFG  
SMCKNGYTARWDHQITRKKGDGKNERCPRLRQGSRPAAPWNPVKVITYAEKREDNHLSLAHL  
LWWDWYSYYTSVEGNFPFLIIRMEDMVFYPEELITQVCECAGGKIRTDQKFQLITDSAKG  
DSRGHDTSTGIYEAWIKYKSKPNTKERYGFSEADYNDARTALNETFMKALGYQHPS

>comp11263\_c0\_seq1; 261 1 1306 LEN=1456; translated  
XFMDTDYKSVDTVPYEHYHPSEICTRPASAVIHEATPTKTFXDKIVAMPDDEEKAGADASL  
SAAAEDPRKHKRIKNASIFNFVYPKHVTDKYKLLDAIGRGTGFLVRKCQLIETGEEFALKA  
ILKKKVPDVELLKTEITILLEVDHPHIKLYDVYEDIDNVYLVTELCTGGELYDRVVEKT  
NSPEGHFSEFCAARIIRNILSGIRYCHEEKDIVHRDLKPENFLLTDSTDDAKVKIIDFGL  
STHAKISSVMHDQVGTIYYVAPEVLSGXEFDIVVEVPLNYIVTHFIRPSFNLDQSYNEKA  
DIWSIGVVAYVMLCGYPPFNNGTEFLTWDLVKAGDVI FPSASWDHISEEAI CF IKRLLEF  
NPKRPSASEALQDPWLNQKKVQPLGLAWASSFIPKLSRLASDVEDARDVKHLDHEKKSIF  
FAGFLMKRKSEKELC

>comp11263\_c0\_seq2; 253 1 1450 LEN=1600; translated  
XFMDTDYKSVDTVPYEHYHPSEICTRPASAVIHEATPTKTFXDKIVAMPDDEEKAGADASL  
SAAAEDPRKHKRIKNASIFNFVYPKHVTDKYKLLDAIGRGTGFLVRKCQLIETGEEFALKA  
ILKKKVPDVELLKTEITILLEVDHPHIKLYDVYEDIDNVYLVTELCTGGELYDRVVEKT  
NSPEGHFSEFCAARIIRNILSGIRYCHEEKDIVHRDLVGRSILLISGLSKQOTSNRMC  
LEKKENEYKTRDKNKCMPPYPAISNAIXEVVNIANRLTSRVHATDIFFLMLQKPENFLLT  
DSTDDAKVKIIDFGLSTHAKISSVMHDQVGTIYYVAPEVLSGSYNEKADIWSIGVVAYVM  
LCGYPPFNNGTEFLTWDLVKAGDVI FPSASWDHISEEAI CF IKRLLEFNPKRPSASEAL  
QDPWLNQKKVQPLGLAWASSFIPKLSRLASDVEDARDVKHLDHEKKSIFAGFLMKRKSEK  
ELC

>comp11263\_c0\_seq3; 323 1 1225 LEN=1375; translated  
XFMDTDYKSVDTVPYEHYHPSEICTRPASAVIHEATPTKTFXDKIVAMPDDEEKAGADASL  
SAAAEDPRKHKRIKNASIFNFVYPKHVTDKYKLLDAIGRGTGFLVRKCQLIETGEEFALKA  
ILKKKVPDVELLKTEITILLEVDHPHIKLYDVYEDIDNVYLVTELCTGGELYDRVVEKT  
NSPEGHFSEFCAARIIRNILSGIRYCHEEKDIVHRDLKPENFLLTDSTDDAKVKIIDFGL  
STHAKISSVMHDQVGTIYYVAPEVLSGSYNEKADIWSIGVVAYVMLCGYPPFNNGTEFLT  
WDLVKAGDVI FPSASWDHISEEAI CF IKRLLEFNPKRPSASEALQDPWLNQKKVQPLGL  
AWASSFIPKLSRLASDVEDARDVKHLDHEKKSIFAGFLMKRKSEKELC

>comp11263\_c0\_seq4; 191 1 1531 LEN=1681; translated

XFMDTDYKSVDTVPEYHPSEICTRPASAVIHEATPTKTFXDKIVAMPDDEEKAGADASL  
SAAAEPRKHRIKNASIFNFVYPKHVTDKYKLLDAIGRGTFLVLRKCQLIETGEEFALKA  
ILKKKVPDVELLKTEITILLEVDHPHIKLYDVYEDIDNVYLVTELCTGGELYDRVVEKT  
NSPEGHFSEFCAARIIRNILSGIRYCHEEKDIVHRDLVGRSILLISGLSKQOTSNRMC  
LEKKENEYKTRDKNKNCPYPAPISNAIXEVVNIANRLTSRVHATDIFFLMLQKPENFLLT  
DSTDDAKVKIIDFGLSTHAKISSVMHDQVGTIYYVAPEVLSGXEFDIVVEVPLNYIVTHF  
IRPSFNLDQSYNEKADIWSIGVVAYVMLCGYPPFNGGTEFLTWDLVKAGDVIFPSASWDH  
ISEEAICFIKRLLEFNPDKRPSASEALQDPWLNQKKVQPLGLAWASSFIPKLSRLASDVE  
DARDVKHLDHEKKSIFAGFLMKRKSEKELC

>comp11263\_c0\_seq5; 217 1 1401 LEN=1551; translated  
XFMDTDYKSVDTVPEYHPSEICTRPASAVIHEATPTKTFXDKIVAMPDDEEKAGADASL  
SAAAEPRKHRIKNASIFNFVYPKHVTDKYKLLDAIGRGTFLVLRKCQLIETGEEFALKA  
ILKKKVPDVELLKTEITILLEVDHPHIKLYDVYEDIDNVYLVTELCTGGELYDRVVEKT  
NSPEGHFSEFCAARIIRNILSGIRYCHEEKDIVHRDLKPENFLLT DSTDDAKVKIIDLGE  
SIWVDTFLRNSSFANAFKFIIVYNKRLMNDRLSTHAKISSVMHDQVGTIYYVAPEVLSGXE  
FDIVVEVPLNYIVTHFIRPSFNLDQSYNEKADIWSIGVVAYVMLCGYPPFNGGTEFLTWD  
LVKAGDVIFPSASWDHISEEAICFIKRLLEFNPDKRPSASEALQDPWLNQKKVQPLGLAW  
ASSFIPKLSRLASDVEDARDVKHLDHEKKSIFAGFLMKRKSEKELC

>comp11264\_c0\_seq1; 184 114 861 LEN=1148; translated  
MDSTEYSNAGGEKIQPLMVSVTAPSTLPEGYTFEAYLNDDKKRPFTCEVPEGGVKEGQTF  
YTPLPPSAGDERIQAPTGRWKDGLCDCFSNGICHASLCCALWCDKCLAMGQIMTRMSLTWL  
GEPGQRISTQDTFKVVVLLVAAAYTMFSTALEIASLDYTPETTPASIVAMKGVGSTLFGFG  
PSTVSAEPAKVSNGSIPFPKSTARAAKISVARSFAPAAQSARWQGTRASTKPIPAAVFPA  
VDTRRAPP

>comp11264\_c0\_seq2; 107 583 997 LEN=1284; translated  
MTRMSLTWLGEPGQRISTQDTFKVVVLLVAAAYTMFSTALEIASLDYTPETTPASIVAMK  
GVGSTLFGFGPSTVSAEPAKVSNGSIPFPKSTARAAKISVARSFAPAAQSARWQGTRASTK  
PIPAAVFPAVDTRRAPP

>comp11265\_c0\_seq1; 1189 279 3035 LEN=3574; translated  
MGGPNKGAASNVVAVRIRPLAKYELENGSKKIVTSLPNLNNATAPGAPPEIPREP  
EVLEVRPENAEKRWFELDAVLDGTSTQEEAYVKAGAKQAVTEDLFKGFNCTILAYGQTGA  
GKTFTMGSAAGTSMIDIGENDGIIPRACVDLFTQIEKRCGNAKVELSYLEIYNEEMRDL  
RDESEKSGKVKELKVRITLNGEVYVAGLSSRPVDSPKVIGDYMEEASTKRAVASTKMN  
AVSSRSHAICVLRKIGVLEDSSKFEAKLTLVDLAGSERIKKTGAEGGRRKEGININKGLF  
VLGQVVSALSETRPKYKRKPPYRDSILTRLLQDSLGGNSRTIMVACVSPADFNLDITTT  
LRYATNARNIKNTATRNVIKTLSPPEAAKLQRENQLLAAQVKELQETIRKMGLATAEDDS  
TVSTATTVSSEDDSSSGAPGETTMSQQKARIHDLNEVQRLKNGVSSKNGGIITESMAKD  
AIELPEFKKRIAELEEEVAVKKDLEMENMELQSEIQELKADADSARLAANQMSKIMEQLK  
ELKGDIDKKRMEFDHIKVEEAWVSFVYQVLETNRQHLKHLHDFMVAAREVDSPEFGLN  
HPRGGIIGRFRKRIEMRRSSIRSPNGGSIHGSSHGSLHGYGDAQQAQVQQQQHHSQIQ  
QQTPEETKAEPRPTPEEDPTNIMKVIIVNLKDELKAAHEVIRQQRVQVELAMEDKEKRA  
TDASAGSDKESDQGTSGSVSVEEYQSLKARYTQLEIDRCWAEFQLRDRITNDALKFHRR  
IRAVMQKNMSTPCEEDAAREEEIKAKVDGEIKKRMRAVTENLKCFEERMVQMENHVQAE  
MASLKEIQNSLRVQQDNMELEIGKTEIEQFMLNEDDTKLLLEQLTTLVGPVKNLGTFFPS  
DLLERSEQEHDEEAGAVI

>comp11265\_c0\_seq2; 1094 348 2729 LEN=3268; translated  
MGSAAGTSMIDIGENDGIIPRACVDLFTQIEKRCGNAKVELSYLEIYNEEMRDLRDESE  
KKGSGKVKELKVRITLNGEVYVAGLSSRPVDSPKVIGDYMEEASTKRAVASTKMN  
VSSRSHAICVLRKIGVLEDSSKFEAKLTLVDLAGSERIKKTGAEGGRRKEGININKGLF  
VLGQVVSALSETRPKYKRKPPYRDSILTRLLQDSLGGNSRTIMVACVSPADFNLDITTT  
LRYATNARNIKNTATRNVIKTLSPPEAAKLQRENQLLAAQVKELQETIRKMGLATAEDDS  
TVSTATTVSSEDDSSSGAPGETTMSQQKARIHDLNEVQRLKNGVSSKNGGIITESMAKD  
AIELPEFKKRIAELEEEVAVKKDLEMENMELQSEIQELKADADSARLAANQMSKIMEQLK  
ELKGDIDKKRMEFDHIKVEEAWVSFVYQVLETNRQHLKHLHDFMVAAREVDSPEFGLN  
HPRGGIIGRFRKRIEMRRSSIRSPNGGSIHGSSHGSLHGYGDAQQAQVQQQQHHSQIQ  
QQTPEETKAEPRPTPEEDPTNIMKVIIVNLKDELKAAHEVIRQQRVQVELAMEDKEKRA  
TDASAGSDKESDQGTSGSVSVEEYQSLKARYTQLEIDRCWAEFQLRDRITNDALKFHRR  
IRAVMQKNMSTPCEEDAAREEEIKAKVDGEIKKRMRAVTENLKCFEERMVQMENHVQAE  
MASLKEIQNSLRVQQDNMELEIGKTEIEQFMLNEDDTKLLLEQLTTLVGPVKNLGTFFPS  
DLLERSEQEHDEEAGAVI

>comp11266\_c0\_seq1; 509 304 2213 LEN=2246; translated  
MGGGPLGLTMTKGRAGTQNCGLWEICIFVMAILSGTASSVLSKLMMLQGVGLSGEPEVF  
RKP IFQTFATFLGMSMGLVLHIVVLKFRLPFPGYEYF SRKENRRIANHDEESDGEPEPG  
NATNECKLGSFSIAATSMIRAKYFGSGQFITATKGT KDY TNTDYGTLLTPVYKKNFDE  
NHIHTTLESLEPRGNCQLPTPFSTNDQNL SKKDSNQNIPLCMYFLAAPS VFCLVATAL  
SMIGLQYVDVSVYQMLRCSGIVFVAVMKQHFLGDRLHHFQWIGVLWNVVGVLVGT TALL  
DKNASKSMESSLGSXVTALTEEEGEQDGDQKTLYGVGLILSGAIVQAMLFVFEKVMKME  
MSTPPLLLIGTEGLWGCLLCLLVVYPLAYAIPGDDYVCS TNSNVGSCYNDDNTSGSYENP  
ANTYAIKSSSHIQIAFTMYLIAIFGFNF FAIMVTYMLDSVWHAILDNFRPISVWFV ELL  
IYYVFSSTTNASRSP TQLSFGEDWTPWSWIQVCALVVL LYGTAIYNAPNAGPIKLGKNW  
YSLGFDFTDEYREIEEHRTRVLSLVR TTKFEFVPTILADQETLN GRYQNDGDEDDSLDI  
HRQNDENLNQQTHIDDSLRSRHRHQKTASRISFNF

>comp11267\_c0\_seq1; 463 1 1831 LEN=1953; translated  
XSKLKTECGVDANKIKRQQQNNKNDTQQFSSMMSLLGVAISSIFIGPVSDKIGRKGPILW  
MAIISAAGNIVKYFTRHTFWGFCISNLVFGFFLGNLPIGMAYIGDIYTDKIEKEKQLGVL  
VGCFVLGNAGGMIAIILMNESGLFSPLWVGTALMIASSAYVIKAFIEPGDTRLIDCGGGK  
DGLEETE EVQRPETINNKVMWNIILGALADNFGSTALFPMCLSP LALEQYYFHFVDAGVA  
PILTISGYQWLSVCVALLVIPSTMITPHVFAKIGASGCCVFGNVFTGLLTMALLLIAGYA  
PATQLSFGFFVVMYGGFPFTVFSQLTTGPM LDVIAPEDKLG YVQGLNNAAMNFGMAIAP  
WLFGLLADVTSTNTSIWIGIGISFIAGVINAPLMWRPEMGP PPKPLPYDEWIRKNEEAE L  
GQEMLSDEHVPPALLFLINRQRGIENKPYILPKIKSYAEDKDKLGE LRANALDN YRFRHA  
LQDQTLAELTAPNGRFNAEELCDLLNTAISNVDEEAVNQSTADVGQWIGDYMAANGYYPH  
QNSLIKQMIMSTFPSINTDGKATPENIEQTLIRSRYLIGKYADLEEKKHGKYSLLGGIL  
GKGHRPQFFT

>comp11267\_c0\_seq2; 498 1 2069 LEN=2191; translated  
XSKLKTECGVDANKIKRQQQNNKNDTQQFSSMMSLLGVAISSIFIGPVSDKIGRKGPILW  
MAIISAAGNIVKYFTRHTFWGFCISNLVFGFFLGNLPIGMAYIGDIYTDKIEKEKQLGVL  
VGCFVLGNAGGMIAIILMNESGLFSPLWVGTALMIASSAYVIKAFIEPGDTRLIDCGGGK  
DGLEETE EVQRPETINNKVMWNIIVSAMD LVL RCLLVPGVWWFWLYPMAYIMQLF PSGTS  
GNTLDFIGATVQLIFFSLSYRLYNKTIDFSNNNNNDNHRFTSSARALADNFGSTALFPMC  
LSPLALEQYYFHFVDAGVAPILTISGYQWLSVCVALLVIPSTMITPHVFAKIGASGCCVFG  
NVFTGLLTMALLLIAGYAPATQLSFGFFVVMYGGFPFTVFSQLTTGPM LDVIAPEDK L  
GYVQGLNNAAMNFGMAIAPWLFGLLADVTSTNTSIWIGIGISFIAGVINAPLMWRPEMGP  
PPKPLPYDEWIRKNEEAE LGQEMLSDEHVPPALLFLINRQRGIENKPYILPKIKSYAEDK  
DKLGE LRANALDN YRFRHALQDQTLAELTAPNGRFNAEELCDLLNTAISNVDEEAVNQST  
ADVQWIGDYMAANGYYPHQNSLIKQMIMSTFPSINTDGKATPENIEQTLIRSRYLIGK  
YADLEEKKHGKYSLLGGILGKGHRPQFFT

>comp11267\_c0\_seq3; 376 1 1937 LEN=2059; translated  
XSKLKTECGVDANKIKRQQQNNKNDTQQFSSMMSLLGVAISSIFIGPVSDKIGRKGPILW  
MAIISAAGNIVKYFTRHTFWGFCISNLVFGFFLGNLPIGMAYIGDIYTDKIEKEKQLGVL  
VGCFVLGNAGGMIAIILMNESGLFSPLWVGTALMIASSAYVIKAFIEPGDTRLIDCGGGK  
DGLEETE EVQRPETINNKVMWNIILGALADNFGSTALFPMCLSP LALEQYYFHFVDAGVA  
PILTISGYQWLSVCVALLVIPSTMITPHVFAKIGASGCCVFGNVFTGLLTMALLLIAGYA  
PATQLSFGFFVVMYGGFPFTVFSQLTTGPM LDVIAPEGGVRPAGHVSRNNVFAFRTI H  
SLFNXVFFLPYFLKDKLGYVQGLNNAAMNFGMAIAPWLFGLLADVTSTNTSIWIGIGISF  
IAGVINAPLMWRPEMGP PPKPLPYDEWIRKNEEAE LGQEMLSDEHVPPALLFLINRQRGI  
ENKPYILPKIKSYAEDKDKLGE LRANALDN YRFRHALQDQTLAELTAPNGRFNAEELCDL  
LNTAISNVDEEAVNQSTADVGQWIGDYMAANGYYPHQNSLIKQMIMSTFPSINTDGKAT  
PENIEQTLIRSRYLIGKYADLEEKKHGKYSLLGGILGKGHRPQFFT

>comp11267\_c0\_seq4; 284 1 1349 LEN=1421; translated  
XSKLKTECGVDANKIKRQQQNNKNDTQQFSSMMSLLGVAISSIFIGPVSDKIGRKGPILW  
MAIISAAGNIVKYFTRHTFWGFCISNLVFGFFLGNLPIGMAYIGDIYTDKIEKEKQLGVL  
VGCFVLGNAGGMIAIILMNESGLFSPLWVGTALMIASSAYVIKAFIEPGDTRLIDCGGGK  
DGLEETE EVQRPETINNKVMWNIIVSAMD LVL RCLLVPGVWWFWLYPMAYIMQLF PSGTS  
GNTLDFIGATVQLIFFSLSYRLYNKTIDFSNNNNNDNHRFTSSARALADNFGSTALFPMC  
LSPLALEQYYFHFVDAGVAPILTISGYQWLSVCVALLVIPSTMITPHVFAKIGASGCCVFG  
NVFTGLLTMALLLIAGYAPATQLSFGFFVVMYGGFPFTVFSQLTTGPM LDVIAPEDK L  
GYVQGMCTYRNLVTSFDCSTFQIDTMFQ TW

>comp11267\_c0\_seq5; 694 167 2242 LEN=2364; translated  
MTAADPTTTTDDKKTDEPVEAAVKNDGTS DDEWSNWREKLLSSPRSLSPKYKLITDKNYRE

NSINALRFAILASAI STKMLAPNYAIMCSGTDPE SFPTTAPFGFNSATYFIPMMSLLGVA  
ISSIFIGPVSDKIGRKGPILWMAIISAAGNIVKYFTRHTFWGFCISNLVFGFFLGNLPIG  
MAYIGDIYTDKIEKEKQLGVLVGC FVLGNAGGGMIAILMNESGLFSPLWVGTALMIASSA  
YVIKAFIEPGDTRLIDCGGGKDGLEETE EVQRPETINNKVMWNIILGALADNFGSTALFP  
MCLSPALAEQYYFHFVDAGVAPILTISGYQWLSVCVALLVIPSTMITPHVFAKIGASGCC  
VFGNVFTGLLTMALLLIAGYAPATQLSFGFFVVMYGGFPFTVFSQLTTGPMLDVIAPED  
KLG YVQGLNNAAMNFGMAIAPWLFGLLADVTSTNTSIWIGIGISFIAGVINAPLMWRPEM  
GPPPKPLPYDEWIRKNEEAELGQEMLSD EHVPPALLFLINRQRGIENKPYILPKIKSYAE  
DKDKLGELRANALDNYRFRHALQDQTLAELTAPNGRFNAEELCDLLNTAISNVDEEAVNQ  
STADVQWIGDYMAANGYYPHQNSLI IKQMIMSTFPSINTDGKATPENIEQTLIRSRYLIG  
KGYADLEEKKHGKYSLLGGILGKGHRPQFFT

>comp11267\_c0\_seq6; 411 1 2175 LEN=2297; translated  
XSKLKTECGVDANKIKRQQQNNKNDTQQFSSMMSLLGVAISSIFIGPVSDKIGRKGPILW  
MAIISAAGNIVKYFTRHTFWGFCISNLVFGFFLGNLPIGMAYIGDIYTDKIEKEKQLGVL  
VGC FVLGNAGGGMIAILMNESGLFSPLWVGTALMIASSAYVIKAFIEPGDTRLIDCGGGK  
DGLEETE EVQRPETINNKVMWNIIVSAMD LVLRLCLLVPGVWWFWLYPMAYIMQLFSPGTS  
GNTLDFIGATVQLIFFSLSYRLYNKTIDFSNNNNNDNHRFTSSARALADNFGSTALFPMC  
LSPLALEQYYFHFVDAGVAPILTISGYQWLSVCVALLVIPSTMITPHVFAKIGASGCCVF  
GNVFTGLLTMALLLIAGYAPATQLSFGFFVVMYGGFPFTVFSQLTTGPMLDVIAPEGGV  
RPAGHVSRRNNVFAFRTIHSLFNXVFFLPYFLKDKLGYVQGLNNAAMNFGMAIAPWLFGL  
LADVTSTNTSIWIGIGISFIAGVINAPLMWRPEMGPPPKPLPYDEWIRKNEEAELGQEML  
SDEHVPPALLFLINRQRGIENKPYILPKIKSYAEDDKDKLGELRANALDNYRFRHALQDQ  
TLAELTAPNGRFNAEELCDLLNTAISNVDEEAVNQSTADVQWIGDYMAANGYYPHQNSLI  
IKQMIMSTFPSINTDGKATPENIEQTLIRSRYLIGKYADLEEKKHGKYSLLGGILGKGHR  
PQFFT

>comp11267\_c0\_seq7; 289 1 1259 LEN=1527; translated  
XSKLKTECGVDANKIKRQQQNNKNDTQQFSSMMSLLGVAISSIFIGPVSDKIGRKGPILW  
MAIISAAGNIVKYFTRHTFWGFCISNLVFGFFLGNLPIGMAYIGDIYTDKIEKEKQLGVL  
VGC FVLGNAGGGMIAILMNESGLFSPLWVGTALMIASSAYVIKAFIEPGDTRLIDCGGGK  
DGLEETE EVQRPETINNKVMWNIIVSAMD LVLRLCLLVPGVWWFWLYPMAYIMQLFSPGTS  
GNTLDFIGATVQLIFFSLSYRLYNKTIDFSNNNNNDNHRFTSSARALADNFGSTALFPMC  
LSPLALEQYYFHFVDAGVAPILTISGYQWLSVCVALLVIPSTMITPHVFAKIGASGCCVF  
GNVFTGLLTMALLLIAGYAPATQLSFGFFVVMYGGFPFTVFSQLTTGPMLDVIAPEGG

>comp11267\_c0\_seq8; 249 1 1111 LEN=1183; translated  
XSKLKTECGVDANKIKRQQQNNKNDTQQFSSMMSLLGVAISSIFIGPVSDKIGRKGPILW  
MAIISAAGNIVKYFTRHTFWGFCISNLVFGFFLGNLPIGMAYIGDIYTDKIEKEKQLGVL  
VGC FVLGNAGGGMIAILMNESGLFSPLWVGTALMIASSAYVIKAFIEPGDTRLIDCGGGK  
DGLEETE EVQRPETINNKVMWNIILGALADNFGSTALFPMC LSPALAEQYYFHFVDAGVA  
PILTISGYQWLSVCVALLVIPSTMITPHVFAKIGASGCCVFGNVFTGLLTMALLLIAGYA  
PATQLSFGFFVVMYGGFPFTVFSQLTTGPMLDVIAPEDKLG YVQGMCTYRNLVTSFDCS  
TFQIDTMFQTW

>comp11267\_c0\_seq9; 735 167 2480 LEN=2602; translated  
MTAADPTTTTDDKKTDEPVEAAVKNDGTSDDDEWSNWREKLLSSPRSLSPKYKLITDKNYRE  
NSINALRFAILASAI STKMLAPNYAIMCSGTDPE SFPTTAPFGFNSATYFIPMMSLLGVA  
ISSIFIGPVSDKIGRKGPILWMAIISAAGNIVKYFTRHTFWGFCISNLVFGFFLGNLPIG  
MAYIGDIYTDKIEKEKQLGVLVGC FVLGNAGGGMIAILMNESGLFSPLWVGTALMIASSA  
YVIKAFIEPGDTRLIDCGGGKDGLEETE EVQRPETINNKVMWNIIVSAMD LVLRLCLLVPG  
VWWFWLYPMAYIMQLFSPGTS GNTLDFIGATVQLIFFSLSYRLYNKTIDFSNNNNNDNTA  
SLHQLGALADNFGSTALFPMC LSPALAEQYYFHFVDAGVAPILTISGYQWLSVCVALLVI  
PSTMITPHVFAKIGASGCCVFGNVFTGLLTMALLLIAGYAPATQLSFGFFVVMYGGFPF  
TVFSQLTTGPMLDVIAPEDKLG YVQGLNNAAMNFGMAIAPWLFGLLADVTSTNTSIWIGI  
GISFIAGVINAPLMWRPEMGPPPKPLPYDEWIRKNEEAELGQEMLSD EHVPPALLFLINR  
QRGIENKPYILPKIKSYAEDDKDKLGELRANALDNYRFRHALQDQTLAELTAPNGRFNAEE  
LCDLLNTAISNVDEEAVNQSTADVQWIGDYMAANGYYPHQNSLI IKQMIMSTFPSINTD  
GKATPENIEQTLIRSRYLIGKYADLEEKKHGKYSLLGGILGKGHRPQFFT

>comp11267\_c0\_seq10; 455 167 1522 LEN=1594; translated  
MTAADPTTTTDDKKTDEPVEAAVKNDGTSDDDEWSNWREKLLSSPRSLSPKYKLITDKNYRE  
NSINALRFAILASAI STKMLAPNYAIMCSGTDPE SFPTTAPFGFNSATYFIPMMSLLGVA  
ISSIFIGPVSDKIGRKGPILWMAIISAAGNIVKYFTRHTFWGFCISNLVFGFFLGNLPIG  
MAYIGDIYTDKIEKEKQLGVLVGC FVLGNAGGGMIAILMNESGLFSPLWVGTALMIASSA

YVIKAFIEPGDTRLIDCGGGKDGLEETEVEQRPETINNKMWNIIILGALADNFGSTALFP  
MCLSPALALEQYYFHFVDAGVAPILTISGYQWLSVCVALLVIPSTMITPHVFAKIGASGCC  
VFGNVFTGLLTMALLLIAGYAPATQLSFGFFVVMYGGFPFTVFSQLTTGPMLDVIAPED  
KLGIVQGMCTYRNLVTSFDCSTFQIDTMFQTW

>comp11267\_c0\_seq11; 600 167 2348 LEN=2470; translated  
MTAADPTTTTDDKKTDEPVEAAVKNDGTSDDDEWSNWREKLLSSPRSLSPKYKLITDKNYRE  
NSINALRFAILASAI STKMLAPNYAIMCSGTDPE SFPTTAPFGFN SATYFIPMMSLLGVA  
ISSIFIGPVSDKIGRKGPILWMAII SAAGNIVKYFTRHTFWGFCISNLVFGFFLGNLPIG  
MAYIGDIYTDKIEKEKQLGVLVGC FVLGNAGGGMIAIILMNESGLFSPLWVGTALMIASSA  
YVIKAFIEPGDTRLIDCGGGKDGLEETEVEQRPETINNKMWNIIILGALADNFGSTALFP  
MCLSPALALEQYYFHFVDAGVAPILTISGYQWLSVCVALLVIPSTMITPHVFAKIGASGCC  
VFGNVFTGLLTMALLLIAGYAPATQLSFGFFVVMYGGFPFTVFSQLTTGPMLDVIAPEG  
GVRPAGHVSRRNNVFAFRTIHSLFNXFVFLPYFLKDKLGYVQGLNNAAMNFGMAIAPWLF  
GLLADVTSTNTSIWIGIGISFIAGVINAPLMWRPEMGP PPKPLPYDEWIRKNEEAEELGQE  
MLSDEHVPPALLFLINRQRGIENKPYILPKIKSYAEDKDKLGELRANALDNYRFRHALQD  
QTLAELTAPNGRFNAEELCDLLNTAISNVDEEAVNQSTADV GQWIGDYMAANGYYPHQNS  
LI IKQMIMSTFPSINTDGKATPENIEQTLIRSRYLIGKYADLEEKKHGKYSLLGGILGKG  
HRPQFFT

>comp11267\_c0\_seq12; 526 167 2586 LEN=2708; translated  
MTAADPTTTTDDKKTDEPVEAAVKNDGTSDDDEWSNWREKLLSSPRSLSPKYKLITDKNYRE  
NSINALRFAILASAI STKMLAPNYAIMCSGTDPE SFPTTAPFGFN SATYFIPMMSLLGVA  
ISSIFIGPVSDKIGRKGPILWMAII SAAGNIVKYFTRHTFWGFCISNLVFGFFLGNLPIG  
MAYIGDIYTDKIEKEKQLGVLVGC FVLGNAGGGMIAIILMNESGLFSPLWVGTALMIASSA  
YVIKAFIEPGDTRLIDCGGGKDGLEETEVEQRPETINNKMWNIIVSAMDLVLRCLLVP  
VWWFWLYPMAYIMQLFPSGTS GNTLDFIGATVQLIFFSLSYRLYNKTIDFSNNNNNDNHR  
FTSSARALADNFGSTALFPMCLSPALALEQYYFHFVDAGVAPILTISGYQWLSVCVALLVI  
PSTMITPHVFAKIGASGCCVFGNVFTGLLTMALLLIAGYAPATQLSFGFFVVMYGGFPF  
TVFSQLTTGPMLDVIAPEGGVRPAGHVSRRNNVFAFRTIHSLFNXFVFLPYFLKDKLGYV  
QGLNNAAMNFGMAIAPWLFGLLADVTSTNTSIWIGIGISFIAGVINAPLMWRPEMGP PPK  
PLPYDEWIRKNEEAEELGQEMLSDEHVPPALLFLINRQRGIENKPYILPKIKSYAEDKDKL  
GELRANALDNYRFRHALQDQTLAELTAPNGRFNAEELCDLLNTAISNVDEEAVNQSTADV  
GQWIGDYMAANGYYPHQNSLI IKQMIMSTFPSINTDGKATPENIEQTLIRSRYLIGKYAD  
LEEKKHGKYSLLGGILGKGHRPQFFT

>comp11267\_c0\_seq13; 496 167 1760 LEN=1832; translated  
MTAADPTTTTDDKKTDEPVEAAVKNDGTSDDDEWSNWREKLLSSPRSLSPKYKLITDKNYRE  
NSINALRFAILASAI STKMLAPNYAIMCSGTDPE SFPTTAPFGFN SATYFIPMMSLLGVA  
ISSIFIGPVSDKIGRKGPILWMAII SAAGNIVKYFTRHTFWGFCISNLVFGFFLGNLPIG  
MAYIGDIYTDKIEKEKQLGVLVGC FVLGNAGGGMIAIILMNESGLFSPLWVGTALMIASSA  
YVIKAFIEPGDTRLIDCGGGKDGLEETEVEQRPETINNKMWNIIVSAMDLVLRCLLVP  
VWWFWLYPMAYIMQLFPSGTS GNTLDFIGATVQLIFFSLSYRLYNKTIDFSNNNNNDNTA  
SLHQLGALADNFGSTALFPMCLSPALALEQYYFHFVDAGVAPILTISGYQWLSVCVALLVI  
PSTMITPHVFAKIGASGCCVFGNVFTGLLTMALLLIAGYAPATQLSFGFFVVMYGGFPF  
TVFSQLTTGPMLDVIAPEDKLGIVQGMCTYRNLVTSFDCSTFQIDTMFQTW

>comp11267\_c0\_seq14; 254 1 1021 LEN=1289; translated  
XSKLKTECGVDANKIKRQQQNNKNDTQQFSSMMSLLGVAISSIFIGPVSDKIGRKGPILW  
MAII SAAGNIVKYFTRHTFWGFCISNLVFGFFLGNLPIGMAYIGDIYTDKIEKEKQLGVL  
VGC FVLGNAGGGMIAIILMNESGLFSPLWVGTALMIASSAYVIKAFIEPGDTRLIDCGGGK  
DGLEETEVEQRPETINNKMWNIIILGALADNFGSTALFPMCLSPALALEQYYFHFVDAGVA  
PILTISGYQWLSVCVALLVIPSTMITPHVFAKIGASGCCVFGNVFTGLLTMALLLIAGYA  
PATQLSFGFFVVMYGGFPFTVFSQLTTGPMLDVIAPEGG

>comp11267\_c0\_seq15; 501 167 1670 LEN=1938; translated  
MTAADPTTTTDDKKTDEPVEAAVKNDGTSDDDEWSNWREKLLSSPRSLSPKYKLITDKNYRE  
NSINALRFAILASAI STKMLAPNYAIMCSGTDPE SFPTTAPFGFN SATYFIPMMSLLGVA  
ISSIFIGPVSDKIGRKGPILWMAII SAAGNIVKYFTRHTFWGFCISNLVFGFFLGNLPIG  
MAYIGDIYTDKIEKEKQLGVLVGC FVLGNAGGGMIAIILMNESGLFSPLWVGTALMIASSA  
YVIKAFIEPGDTRLIDCGGGKDGLEETEVEQRPETINNKMWNIIVSAMDLVLRCLLVP  
VWWFWLYPMAYIMQLFPSGTS GNTLDFIGATVQLIFFSLSYRLYNKTIDFSNNNNNDNTA  
SLHQLGALADNFGSTALFPMCLSPALALEQYYFHFVDAGVAPILTISGYQWLSVCVALLVI  
PSTMITPHVFAKIGASGCCVFGNVFTGLLTMALLLIAGYAPATQLSFGFFVVMYGGFPF  
TVFSQLTTGPMLDVIAPEGG

>comp11267\_c0\_seq16; 460 167 1432 LEN=1700; translated  
MTAADPTTTTDDKKTDEPVEAAVKNDGTSDDDEWSNWREKLLSSPRSLSPKYKLIITDKNYRE  
NSINALRFAILASAIISTKMLAPNYAIMCSGTDPEFPTTAPFGFNSATYFIPMMSLLGVA  
ISSIFIGPVSDKIGRKGPILWMAII SAAGNIVKYFTRHTFWGFCISNLVFGFFLGNLPIG  
MAYIGDIYTDKIEKEKQLGVLVGCFLGNAGGGMIAILMNESGLFSPLWVGTALMIASSA  
YVIKAFIEPGDTRLIDCGGGKDGLEETEVEVQRPETINNKMVMWNIILGALADNFGSTALFP  
MCLSPALALEQYYFHFVDAGVAPILTISGYQWLSVCVALLVIPSTMITPHVFAKIGASGCC  
VFGNVFTGLLTMALLLIAGYAPATQLSFGFFVVMYGGFPFTVFSQLTTGPMLDVIAPEG  
G

>comp11268\_c0\_seq1; 264 297 1434 LEN=1434; minus strand; translated  
MDELLLELMNDDAVDPQSAVHQLLEDDSEIQEEIQKGQIPRTRTCNKRDRPEEDRASSTRA  
YKKQSKPSNRQHKANLAEASVDDRLGIRMSNRLVSSNDLSELITDYTYHSPSVLSAMTLQ  
HLNLLLQDPTRIIDAATVAGKTESLVTIGIVFSNTGTRISSNGGAFSVLTIGNLNSGPCL  
TIFLFGGEAYGKYCTSCKQGVIALLSPTLLPANRRDGDNRESNSNTVSFSVYNASQIKIV  
ANARDYGICKATTSSRVKQSDGKWAVIAGKPKHYVNREISEYCEYHRKNRQSGMRQGP  
KFQQLRAIHQETAPMVVATPARRGNLIGSNTSTKPNRFLNHTSFNNDRSRILQAKPCSNT  
GSGSVMPSIGGNCGNIPKHX

>comp11269\_c0\_seq1; 1174 31 3714 LEN=3822; translated  
MNPLASTVRRSHSSSPDRIGRESKTEADETSIIDNTGNIIGGSENERKNDRSEEEHNK  
TENNHFEETMNRDSEERSGEFSAGDNSATSYNHEEDRDDGTNPDCPFHNSSTTVNSSTTS  
QTSSTGSRKRRRSGPRNDKTI FRTFDPMQVITPEQLEGFSLLVTTPIWIFDFIERRNRYA  
NPAGLDLWSAPSLEEFLNRKMNDMSAASVARTQECQNRVERAQQVQDMWTFPPKPKARTV  
QMTMTAVRLSADEDHCSILVVANMTTASSASSSSSFGASKSSISSASSSSVHSASNAKTSA  
TVTTASASVSTLASTSVSEPSRDSSSKQSLSFSTTTVSAKKTIDPNEELDVNTTNTSCKS  
NGNIDILSEKEETKEEKQVGEDTDGNNRHEEKDAEEDFCDPQDDDTIPMNHILEPDSHAS  
MNHHTMTGIDEDNPVNQEIILRGVEIRHLPMAVCQFDMKGRVMFQNPAAAYLPALDDEEEK  
QENDDDEESLLHDMTDDESGFYEQFLDPPQYGGSSNNGRGNFMDRFVNKKVARELLEG  
LQDAPKKGLLLGTISSTTYNTTTSVIEAELHTSTKGRQWCAIQLRKTKDPVTSRPVILY  
SAQDKSDAMEAKREREARLQKSEFLAIMAHEIRTPHQTGFIDLLELDACSNIITASSA  
GAMKTNKTSSTFDGTDSSIRNAIFPHITIDNTMGRKVRSTSMIDARQPRSSWPASGNPHQ  
PIGNLTGEQRNYIKLLKSSANQLMTVIVSDVLDYSKLEAGMKIERIPFELLSVVQGSMEA  
VRGSCEEKGLTTLLEYGSDNDEDEEGNGEDETIGNRLDNLGVDSPSIDLRKQFRRRSS  
IDKSSSFYLP RRKKIGRTHSFGRQKSKDKSHPNIRTNIPFRILGDPNRLRQVLLNLLS  
NAIKFTEKGGIHVRVSSSTKKWAPPATRAATTRHKNSSISPHSNGKLSLSTSSSSSTVKKR  
EEGKAEMLGDAVDSMKWNSTADNVNSRPRCLKIVVSDTGMGISKEQDITFEKYQQANLS  
VARNFGGTGLGLSICKLLVEDTMGGSIGVDSDESRRGSSFYITLPIEVPRETND EASGCAI  
GGKDSEEVGASMKILVAEDNKINQKLVANMLKRMGHR SILVDDGRQAIDMIEKQNSQNQR  
PFDVAVLMDIQMPVMDGLEATRRLRTMGYTDLPVIGLTASVKRSDYVELGFNDWLPKPIILM  
KDLKAKLLKLHSDHSESDSESSKVQV

>comp11270\_c0\_seq1; 462 55 756 LEN=923; translated  
MKLLSLLLISASASAFGVKSPALTKTISSVTVDNDVVKPAFKKDATKSPLFRDPTIVRGG  
AVPGWAAYNKALDESPLTAKACTSLVGWGLGDVLAQVFITGGAFDVKRFITLSLFLGLLYH  
GPSGHYFYNWLDGKIPGKDGASVAKKILIDQTMWCPLFMVTFVFTYLGLVNGDSFGTIGTK  
IKTDLAACQGSWVWPAVHFVNFKFI SNKHRLFLNAVQVGFNMFLSLLGSK

>comp11271\_c0\_seq1; 265 58 825 LEN=1059; translated  
MIRFSLTTLTIATILSSTTQTS LAARNGDKCGVTSSDFLSYDYRGEVRVAGQTGCTLGED  
EQDCFCAPNLADGESLSEWEWQCNGKVAFGPSTTEKICPDLVPVAKGLLLEVVVSERSRG  
LQDDGGKIAAVGTESMQSKTGIPCDTAIHPTGRPGDEVCPYSDCETGGNHSAVCACVDLG  
KYGMGVGMEWVCMHATCSCGDDQENSVESLHSSDQDEALEPDSGDSVEASAAGSVGKAL  
ASISGLTTMAVVLWN

>comp11272\_c0\_seq1; 449 217 1428 LEN=1428; minus strand; translated  
MKNSHAWKRKTAPSVMYRMLVSMAMLIVLVSFTGNNGGLLVS AEMEASWTPNEEGPAMP  
LSMHQRQQLVQLQQA IQNSPDPNGTLQQAQSNMSPNELYQMI EKNKDLQQDPALLSE  
LQQFAQQSGRGMNSLPKMVVKFIAGLGVAMRQTAQQNPRAFTTSLMAALLIFYTLLSIPR  
TGLQISSGRSILTLSSGPTTVFSPDDRYLHKMIGKVD SMVASPKLSIKTMKDWDDLK  
LTRELVS DYGAKDNEEDTDDLNDPYGRVETHSLGRKNELKQAVTAQFMLGPDQFLTDFPL  
GDTLEEIAAERENIIDMLYANAAGLLTERNLVEFSDATSKARDRLRAVCGDGKKDRDSSL  
SSKDFGVI VVPLGKLGRLYGLMYKVTSETS QKSSSAVSSQTLT

>comp11273\_c0\_seq1; 732 125 1417 LEN=1632; translated  
MGKRVRGAKLRSKKRGTQFEKEIVETQAVAAEEGAVA EKADEELFVLDTTAVVPSKKQIA



AKKKQQRKQSVSAKEQRQIQRLVDNHSAKELEALAKTTTITAKRAPKRIKARQTRPTFDM  
WADEDDSGGNSSALVSKASESAKPKTAVAVSSGPHGIVPSNHVIGITTKAMPAPLPKNK  
DRAPVMVDLAGSGQSYNPDQKDHKNAIQKALLVETKRKVAEKNAKESASQGMRPETRALL  
LGDSDSEDESDDSDSDEEAAPTTEAIAKKRPEKMTAQRNKQKRIRAEQYEIKQRKKQKQF  
AHELKRVKSVNRTLKKEEAERKKTKKIEQLKLDTERSKGKDLTYQLAEENPRYAPTYPV  
ALPGEELRSGASLRTIKPKGSLVTDREVMVSLMDRGMATAKKQLKLNKRVQGKRRKIKVRGKNY  
RATQEGDILG

>comp11274\_c0\_seq1; 1258 382 4794 LEN=4901; translated  
MSEGNNTGDNFVVRGLRLEAIFHPKFDNERKNSNLKNNKANTSKGGGMSSNIRSAMLEKL  
GETETRSASPLNDTSTASSPKTKPTTAAGRGHLEVSLKHSGLVLSGSTRYYSKNSACN  
EFTRTAEVLLRQRFETVRGALANHNSGDTNTTPARPFRSYECSFFVSNRYTVAFVCT  
AEMLDGHDGQIPNLDYVVVTVAVADRGRERFLSTTEVLEFCHDFRLPHNDVWTFPPGDSKSH  
SSSTGSATRLFDLYDKSLRETGDTEQTVRKLTEIADVVPSPVPHSIYQGSVCEGFIVRY  
VDSHHEAEREKVERLARVSSEILGEVPPSRASSPPASKSADKISNTSIDS DPVLTDTDLRA  
LYRSISVPSNDGTSDDASNSGGNKAQEKDGKFAAIAAPGRKRAALFSERLGGELLSGTCCS  
VGSEGDAVREKDDCQQAQRKRRIHHRFDLKKLEAQNDDCGGFTDWKNHHLPALAKDLIHS  
KDRETRRIAALLQTLDDLKGGAINYTWMEKYEKQKGNPEGCDHTQTMDRDLRRRLYCTI  
HVRNDSTFFKQNVQRPSDMTLFRGFCVEVLLSPPEEQSDTDKASADMTIEPAPVSTG  
PPLMLKMKLLPYMVRTFVCRNLLGTIEKKGAEEFERVARGLLEKWKISPEAQERWMAFFC  
GWAAYVLKVKNSQDQARAREGDSNGLTKDTGTKSQPNAIDKSFELGPLTNFSYLRHLEY  
TKLYDAGTFKAMASASPLSSPESYVFCVVSQSTEVSRALADHLARHFSETEATDQESNS  
GTGTMPIFALGEAAKNRRCKSCIAVANVCDQTKGKFLFDKMAKNLVLILLGSGKEDI  
LAMARSPDARPSWLDIETTGEKGLTHMWKTWKYPCAEERIALASSVVLEPKKEDST  
VAVLTELAGESEVVKSVRAVGRSVMEQAAKQSDPRLGGILVLFPGIPGCGKSSLLATLE  
TRLEQELSSRKESENGDAYDRSVRIREGDKMGKFWDAIEDLLSDDDDGDHPSPLVLADKN  
TPPASWPKLGQICSDSNGVLLPVLDPKTVLETTIKGSIQPSGDLPSASHFYFSLDYL  
AVSMSRVLDPPGEHAGKLDGFMACMIVAQFYFVRYVAADAFMEKLEEKLGNDSESK  
IKTMNPIELPFFKGPDESKVIPDDLKLLVEALQLRHGHDKAKKFKVKKDDPQ MIDLEGR  
LRSSFEMHKETLSAMSVGLDVAKAEFVHQLIDRIKSNSTQTTGGPADDTDAKHTVANDQ  
GSDNATESSIKLVSLDIDRAKIHLLYKHEESGALAGFFEQTKRPQTDAQEAASASYIKQ  
DGLDNNNSIKSRSSSERYPSPCFTEKTHVTMSFAGESHSGEQLVERFHHLQGTESVSIT  
GFLWSLENAAFSVKVPVSDGSPSLPVPCCANAFPHLTVWCAPDVKASLSNNLPALVESG  
AAHRIDFSGEAEVLVGRISFWNHANEP IRV

>comp11275\_c0\_seq1; 1360 158 3133 LEN=3481; translated  
MASGDNSTLYVLYGSATGNAEGISKDLTAELNEKKE SRLPAPFSKAVCLELNQFKKCMKV  
WETAPSNPGQKHGAILVSSTTNGNDPPENAGRFTRFVKKQNRDKSNPKPFVAVAYLAL  
GDTNYDQFCETGKLIDRMVDSLGGTRAKPLVCADEGTGLLEETVDPWMETIAQDLANACL  
GLPSSAEASSSEEEKVDTNKSANDETPSSETAPAAADPTTESPLSEAVPITPAPEKSPSP  
LYILYASATGNSEAIKADLAATYEMILNPNDSKTYFPTVCAELNQFKKAKWAEVWNQP  
PAPGNDSVKHGILIVASTTNGNDPPENSDFLRYLKK SARAAKDPTSRPFQHVAVAVLG  
LGDTNYDQYCENAKLLNKYMSDLGGTQIKPLTCADEGTGQLEEVVDRWTSTILMEVTDAC  
RGQSSVEAPAPATKKPAVVAKKERKVDVEEEKADSDVMVQSSPSNAPGVLI IQSLLGD  
DIHKATKSLPKPTLQSHVKSVEFLSENAETATSAAATDDDDRSDGSRYTLEQPYESTIRS  
ARYLTATSSDAANEICEGNVARDVLERFPLHIENDVSEASRNGKRVI ELELAIPDDNS  
WEYQPGDSLGLVITNTTESVDFVLGMLKSHHGIVPTQKVSIDSGVPLTVEEVVREKIDLC  
TVLKTRKVV LALSQICTDPQERAVLELLSSKTEKGAELLETFVHAQRRSVVDLLEFPSC  
QCITLQSLVSI LPPIPRYYSVSSSPLDDARGSSLTVAFSVVDYLT PSLSGSDGTELGAR  
RIHGLATSHIEALCAPFLSSVSGATNEPACAMKIFPKPTEEFRLPEDLATPLVLIGPGTG  
IAPFMGFLSHRKAMVASGADDAAGLVEVFFGCRHSDHDYLYREELETFEKDGVI GHMNV  
FSRDGPKKEYVQDIMLSDEECSKRLADTLLNANGRVYVCGDGNHMGRDVSQSAFAKLLGPY  
LVSSNESPEESGRAYVEKMKGEGRFLLDIWS

>comp11276\_c0\_seq1; 383 207 1007 LEN=1426; translated  
MTAKDVNNTGVQTEDEKQHFDIYVCENPVYKTRILDAMNYVSDDFNAMFEEHIA PPF  
EAAASKKDTVEYVDLCAFCGNTTMACLHGMSYDEIRENWKDDDSCKAIDKPRRTLGAENG  
CHVTAIDISPQAMAYGKSVGLYDES FVCDLNNLEGEAFGRAKETLAKADIFLSTAALCYL  
SVEAIEDLVDAFCSGTSPDGMMLVNFNLPFCLEKSDATKRILLSKLDFVASRATRHRM  
SQLEMDNYPGEEWSLLELWVLKKN

>comp11278\_c0\_seq1; 592 1 2412 LEN=2784; translated  
LEWVFLEYTLAERDEAVSYLRLLKMLGQVTGGSTSRDNAKPN TVADATAGSNEDSGIAT  
LESPPLETQDEALDFYRSTKQHKKLVVSHYCVDKLFEI IAVSLDNASNGIPSLSKLFHG

VDENEIQKMNEIQKIIESCHANSARSNNLDIDEWRLVPLLYNRSVDEYTKRGAALILSY  
ILKTGCERIELLRSCNASHDNRRKKNNSNNNNKPKSTWQETDVFDFLNLLSFPDEHKAATFS  
KSNSPEEELTTVLDQTNLQRAIDESLGSFVSWLTGRLQCS DHYLSLGVVTPTLGVLLSGT  
KRARTAFHQAGGIGYLVRHLKAKRTRTRTPSKWGGEDDWFRRPATKVGPAANSTSPGSLT  
ARTILAFSKPKSSPPHSQLPASPERKRGVRSRKTNPSTSTSLINAYSHSDSFSVSSSF  
SSTNSNSIFNHLGSPSSPGATESETHHTEALVESDTNHTHLQGFISRAGEALSGPSVLA  
TLAATSTIAASSLLSPAQALQLPHPDRISRKRPSVSSSVQQVYDLVFLWCMSMDCQTD  
ESVANHFARDGAVSALAHLLKTAPREKVLRLTLACLRLSLTTLPAHSRVGGDKTSDIDAN  
SFVREMIGCGVLKSLDTVRLRRWNDEDLEDDLEFLHGFLSDRTEQLSQFHVYEAETGA  
LRWDDRFBTKDFRRNVGQMEGRDGRFGVVKSLVQILYASTKSGRLRSSGGTVVYAGLNE  
VGGDSWGEDDISDDEVCECLAVCLFDLGEFVRHYPNGKHVLDKVLGAKPLVMCYVNHPRW  
EVREQALLCASKILVNNWRSIEI

>comp11278\_c0\_seq2; 616 123 2755 LEN=3228; translated  
MVFYFVLSPPVEKAFCFVTLQQQDAIQIQVGGGIRNIDSQGFDPTEEEEGSDGN  
LPPFWLSPPEWSLLKSAEENPLEYTLAERDEAVSYLRLLKMLGQVTGGSTSRDNAKPN  
VADATAGSNEDSGIATLESPPLETQDEALDFYRSTKQHKLVVSHYCVDKLFEIIAVSL  
DNASNGIPSLSKLFHGVDENEIQKMNEIQKIIESCHANSARSNNLDIDEWRLVPLLYN  
SVDEYTKRGAALILSYILKTGCERIELLRSCNASHDNRRKKNNSNNNNKPKSTWQETD  
VDFLNLLSFPDEHKAATFSKNSPEEELTTVLDQTNLQRAIDESLGSFVSWLTGRLQCS  
DHYLSLGVVTPTLGVLLSGTKRARTAFHQAGGIGYLVRHLKAKRTRTRTPSKWGGEDD  
WFRRTKVGPAANSTSPGSLTARTILAFSKPKSSPPHSQLPASPERKRGVRSRKTNPST  
STSLINAYSHSDSFSVSSSFSTNSNSIFNHLGSPSSPGATESETHHTEALVESDTNH  
THLQGFISRAGEALSGPSVLAATLAATSTIAASSLLSPAQALQLPHPDRISRKRPSVSS  
SVQQVYDLVFLWCMSMDCQTD  
ESVANHFARDGAVSALAHLLKTAPREKVLRLTLACLRLSLTTLPA  
SHSRVGGDKTSDIDANSFVREMIGCGVLKSLDTVRLRRWNDEDLEDDLEFLHGFLSD  
RTEQLSQFHVYEAETGALRWDDRFBTKDFRRNVGQMEGRDGRFGVVKSLVQILYAST  
KSGRLRSSGGTVVYAGLNEVGGDSWGEDDISDDEVCECLAVCLFDLGEFVRHYPNGKH  
VLDKVLGAKPLVMCYXKPSVGGGAGPALCLKNPGEQLEGA

>comp11278\_c0\_seq3; 605 123 2762 LEN=3134; translated  
MVFYFVLSPPVEKAFCFVTLQQQDAIQIQVGGGIRNIDSQGFDPTEEEEGSDGN  
LPPFWLSPPEWSLLKSAEENPLEYTLAERDEAVSYLRLLKMLGQVTGGSTSRDNAKPN  
VADATAGSNEDSGIATLESPPLETQDEALDFYRSTKQHKLVVSHYCVDKLFEIIAVSL  
DNASNGIPSLSKLFHGVDENEIQKMNEIQKIIESCHANSARSNNLDIDEWRLVPLLYN  
SVDEYTKRGAALILSYILKTGCERIELLRSCNASHDNRRKKNNSNNNNKPKSTWQETD  
VDFLNLLSFPDEHKAATFSKNSPEEELTTVLDQTNLQRAIDESLGSFVSWLTGRLQCS  
DHYLSLGVVTPTLGVLLSGTKRARTAFHQAGGIGYLVRHLKAKRTRTRTPSKWGGEDD  
WFRRTKVGPAANSTSPGSLTARTILAFSKPKSSPPHSQLPASPERKRGVRSRKTNPST  
STSLINAYSHSDSFSVSSSFSTNSNSIFNHLGSPSSPGATESETHHTEALVESDTNH  
THLQGFISRAGEALSGPSVLAATLAATSTIAASSLLSPAQALQLPHPDRISRKRPSVSS  
SVQQVYDLVFLWCMSMDCQTD  
ESVANHFARDGAVSALAHLLKTAPREKVLRLTLACLRLSLTTLPA  
SHSRVGGDKTSDIDANSFVREMIGCGVLKSLDTVRLRRWNDEDLEDDLEFLHGFLSD  
RTEQLSQFHVYEAETGALRWDDRFBTKDFRRNVGQMEGRDGRFGVVKSLVQILYAST  
KSGRLRSSGGTVVYAGLNEVGGDSWGEDDISDDEVCECLAVCLFDLGEFVRHYPNGKH  
VLDKVLGAKPLVMCYVNHPRWEVREQALLCASKILVNNWRSIEI

>comp11278\_c0\_seq4; 451 1 2405 LEN=2878; translated  
LEWVFLEYTLAERDEAVSYLRLLKMLGQVTGGSTSRDNAKPNVADATAGSNEDSGIAT  
LESPPLETQDEALDFYRSTKQHKLVVSHYCVDKLFEIIAVSLDNASNGIPSLSKLFHG  
VDENEIQKMNEIQKIIESCHANSARSNNLDIDEWRLVPLLYNRSVDEYTKRGAALILSY  
ILKTGCERIELLRSCNASHDNRRKKNNSNNNNKPKSTWQETDVFDFLNLLSFPDEHKAATFS  
KSNSPEEELTTVLDQTNLQRAIDESLGSFVSWLTGRLQCS DHYLSLGVVTPTLGVLLSGT  
KRARTAFHQAGGIGYLVRHLKAKRTRTRTPSKWGGEDDWFRRPATKVGPAANSTSPGSLT  
ARTILAFSKPKSSPPHSQLPASPERKRGVRSRKTNPSTSTSLINAYSHSDSFSVSSSF  
SSTNSNSIFNHLGSPSSPGATESETHHTEALVESDTNHTHLQGFISRAGEALSGPSVLA  
TLAATSTIAASSLLSPAQALQLPHPDRISRKRPSVSSSVQQVYDLVFLWCMSMDCQTD  
ESVANHFARDGAVSALAHLLKTAPREKVLRLTLACLRLSLTTLPAHSRVGGDKTSDIDAN  
SFVREMIGCGVLKSLDTVRLRRWNDEDLEDDLEFLHGFLSDRTEQLSQFHVYEAETGA  
LRWDDRFBTKDFRRNVGQMEGRDGRFGVVKSLVQILYASTKSGRLRSSGGTVVYAGLNE  
VGGDSWGEDDISDDEVCECLAVCLFDLGEFVRHYPNGKHVLDKVLGAKPLVMCYXKPSV  
GGGAGPALCLKNPGEQLEGA

>comp11279\_c0\_seq1; 219 1 903 LEN=1344; translated

XEATFDLGMShLFLVQAIIVYELDIHAKPKYGIRMLRVAPISELLQLQLRITTRRMENDTN  
DNPnLPLDIYISTGCVILPAFIGAWYYFSKRACRkVVFPWNGSDTIRTSETDFAKMEEIF  
DAHYQKHihKQDRDDVDNYSSEELANRFVkwINRQNVFTDYVQQEYELQRHTQNNLCQND  
GTAIKTDSpDSTIQKGCIGSNDTTGNLILMTKKKLIDANNsNKVVDQTRLcGDDDRDSS  
LFWECIPNPQQSQFNfCSITPTISNDNDEQRDTFQSTSTVSPKGEIKIPHVAGSRTYFIV  
>comp11281\_c0\_seq1; 709 59 1474 LEN=1838; translated  
MRFLHLIRPVMAILPEVEAPDRKIPFREKLLWTSIVLFI FLVCCQIPIYGVQSAKSSDPF  
YWMRVILASNRGTLMELGISPIVTSGLVMQLLAGSRIIEVDYNVKEDRALFSGAQKLFGL  
LITLGEAIAYVASGMYGDLSSIGAGNAILIIFQLFCAGLIVLTLELLQKGYGLGSGISI  
FIATNICETIVWKAfSPTTLNTGRGTEFEGAIIALFHLLITRSDKVKALREALYRQNLPN  
LTNLMATVLI FVIVIFYQGWVRDLPVKYQKYRGQQGNYPKLFYTSNMP IILQTALVSNL  
YFVSQQLLYNRAPTNVLRLLGQWQDVEGTMGQKIPVGGIAYYISPPRSFAEIIYDPFHAV  
FYLTFILTACALFSKTWIEVSGSSARDVAKQLRDNQMVMKGHRDSALIHVLNRYIPTAAA  
FGGMCIGALSvVADFMGAIGSGTGILLsvTIIIFGLYENFVKEQREGGAFGF  
>comp11282\_c0\_seq1; 586 45 860 LEN=998; translated  
MKFSVAITLLAMASPAAGFDGIRASSKSGQSLMGKARKLENGNNNYSSWIGDAALKFDGC  
AAIPMFEREEGLTSNLVAKFKLCPKNSSCHNAGEYVEMREFVETYQNALKESQYEC  
ETAKETCEYKcQNGQYNYQYNADGNGNNGNNGNQNQNNNNNNNNNYDNNNGINEVC  
EDLYEEALKCESNVKTTYKDTSGCEMIHTILPQLNKAMKSLRGPMSVVAAWFFGVGFFA  
LAGYLFMLHKKAEQKALDAKSGYVGGNLS  
>comp11283\_c0\_seq2; 212 51 1016 LEN=1016; translated  
MKLVLSSTIISSLAALPATVYGHGYLETPMARNLYAHREGRSGNPSNAPAIPLYQTTPQG  
LNRNKNVCGMDQGYPDNDYDSWLDTQGNPMPWISQAIYNPGDIEVNSFLTAHHKGYLEV  
KGCPRGRDSTQECFDSYPLEFVKDLLYDMPQDTAYPNRGYLHGVEPRLSMQFKLPEGLVG  
EQVLLQWVYWTANSCNPIGFAEYYSTPKPVGPTGPNWNSLLSTCPPESETPIAPIPNPNS  
SVLAPERFINCAEVTVTGVQTPAPPFPSPIPPPTSAPVENPVTSPPPVSQPPINPGIVGTC  
GGGNTGNGICPVHSMCCSKWGH  
>comp11283\_c0\_seq3; 97 1 246 LEN=246; translated  
CGYESTGHCDQLAPIDAPSNPIPPPVS SPVAPPTSAPVENPVTSPPPVSQPPINPGIVGTC  
GGGNTGNGICPVHSMCCSKWGH  
>comp11283\_c0\_seq4; 426 1 1221 LEN=1459; translated  
CGYESTGHCDQLAPIDAPSNPIPPPVS SPVAPPTSAPVENPVSQPPINPGIVGTCGGGNT  
GNGICPVHSMCCSKWGYCGYESTGHCDPAPIDAPSNPI PMPVSPPVSM PVDAPTLP LPP  
THDHHDDNSRLIAYLGNWQSCPSDEQVARYTHIVIAFAVSYTWSPGKNVCSETCEIMVPP  
VCGDAARPDLIQKWKNMGKKVILSFGGAGMGGSWVGDNDCWDYCFGRETQVVDR LTDIV  
NEMGLDGDIDIDYEFYEDHQNGSGFTKGAEAQNFLSQVTIGLRDSMPAGFELTHAPMEPD  
MVPKGKGYFEVLKEVASSLDFLMPQYYNGYVQSHSNFDGALDHYTTLANQMFNGDASKIVY  
GFCINDCGSFNLDGYESA EVMWLSKEYPCNGGAFFFWANDDRNSEW  
>comp11283\_c0\_seq5; 446 1 1236 LEN=1474; translated  
CGYESTGHCDQLAPIDAPSNPIPPPVS SPVAPPTSAPVENPVTSPPPVSQPPINPGIVGTC  
GGGNTGNGICPVHSMCCSKWGYCGYESTGHCDPAPIDAPSNPI PMPVSPPVSM PVDAPT  
LP LPP THDHHDDNSRLIAYLGNWQSCPSDEQVARYTHIVIAFAVSYTWSPGKNVCSETCE  
IMVPPVCGDAARPDLIQKWKNMGKKVILSFGGAGMGGSWVGDNDCWDYCFGRETQVVDR  
LTDIVNEMGLDGDIDIDYEFYEDHQNGSGFTKGAEAQNFLSQVTIGLRDSMPAGFELTHA  
PMEPDMVPKGKGYFEVLKEVASSLDFLMPQYYNGYVQSHSNFDGALDHYTTLANQMFNGDA  
SKIVYGFCINDCGSFNLDGYESA EVMWLSKEYPCNGGAFFFWANDDRNSEW  
>comp11283\_c0\_seq6; 561 51 2006 LEN=2244; translated  
MKLVLSSTIISSLAALPATVYGHGYLETPMARNLYAHREGRSGNPSNAPAIPLYQTTPQG  
LNRNKNVCGMDQGYPDNDYDSWLDTQGNPMPWISQAIYNPGDIEVNSFLTAHHKGYLEV  
KGCPRGRDSTQECFDSYPLEFVKDLLYDMPQDTAYPNRGYLHGVEPRLSMQFKLPEGLVG  
EQVLLQWVYWTANSCNPIGFAEYYSTPKPVGPTGPNWNSLLSTCPPESETPIAPIPNPNS  
SVLAPERFINCAEVTVTGVQTPAPPFPSPIPPPTSAPVENPVTSPPPVSQPPINPGIVGTC  
GGGNTGNGICPVHSMCCSKWGYCGYESTGHCDPAPIDAPSNPI PMPVSPPVSM PVDAPT  
LP LPP THDHHDDNSRLIAYLGNWQSCPSDEQVARYTHIVIAFAVSYTWSPGKNVCSETCE  
IMVPPVCGDAARPDLIQKWKNMGKKVILSFGGAGMGGSWVGDNDCWDYCFGRETQVVDR  
LTDIVNEMGLDGDIDIDYEFYEDHQNGSGFTKGAEAQNFLSQVTIGLRDSMPAGFELTHA  
PMEPDMVPKGKGYFEVLKEVASSLDFLMPQYYNGYVQSHSNFDGALDHYTTLANQMFNGDA  
SKIVYGFCINDCGSFNLDGYESA EVMWLSKEYPCNGGAFFFWANDDRNSEW  
>comp11284\_c0\_seq1; 418 470 2263 LEN=2897; translated  
MTGIQLPPGESKGI SKQDTPADRYPTLKQVPERYSIIQFGICLFEHKSSSETETSDAASF

HVRRYKFTLFPDERTSREITLSPSSIHFLQLQNNMDLNLWAREGVFPCTQDGAARFVEKF  
LKHHEEVESASNTTPAKPHRKVVLTkDDDKFHFARVMSSSLREWLDAPIPGAGTQGAEGIS  
FLLPRCNSFLRRSLYESIERDYPYLILERHNNQIRVWRCTSEERARRNQRLLLVEGYSKL  
VQEKIGAQRIFLALTKACSGEP I RTRTEHI ILAPDANEAVMDFSPGKRLSNRKIPLVVHN  
GLMDILFLMTHFHAPKLPETWRDCKSLVHSYFPLIYDTKIMALDYCSSTGRTRLDDVYEQ  
AVASHPHWKNRIFSLNGQAQLDKQSHDAAYDAYMTGVAF CALSYGIQDECKIPPVDASSE  
FALWDCSTEDFSFSRSMYGRNKLYFHLSPYTIDLESPELDPLGRGMSHESTFLVSDIDPS  
VSSRDIANCLSRLYDSSNQRVNFDVIWVNDTTFIVGAQIVSLIEDPERFEEHGWLILEAL  
RNRFNKNETIKSLRSVTEKAPNTIWNLWGLLGNSKSGEESSESEGDPRPRKRARRS  
>comp11284\_c0\_seq2; 463 172 2142 LEN=2776; translated  
MSHSPNFSSVAGSPNRPAAPFSDGESIMVNSTKSDFLQSNDFISHLSSASWIAIDEEM  
TGIQLPPGESKGISKQDTPADRYPTLKQVPERYSIIQFGICLFEHKSSSETETSDAASFH  
VRRYKFTLFPDERTSREITLSPSSIHFLQLQNNMDLNLWAREGVFPCTQDGAARFVEKFL  
KHHEEVESASNTTPAKPHRKVVLTkDDDKFHFARVMSSSLREWLDAPIPGAGTQGAEGISF  
LLPRCNSFLRRSLYESIERDYPYLILERHNNQIRVWRCTSEERARRNQRLLLVEGYSKLV  
QEKIGAQRIFLALTKACSGEP I RTRTEHI ILAPDANEAVMDFSPGKRLSNRKIPLVVHNG  
LMDILFLMTHFHAPKLPETWRDCKSLVHSYFPLIYDTKIMALDYCSSTGRTRLDDVYEQA  
VASHPHWKNRIFSLNGQAQLDKQSHDAAYDAYMTGVAF CALSYGIQDECKIPPVDASSEF  
ALWDCSTEDFSFSRSMYGRNKLYFHLSPYTIDLESPELDPLGRGMSHESTFLVSDIDPSV  
SSRDIANCLSRLYDSSNQRVNFDVIWVNDTTFIVGAQIVSLIEDPERFEEHGWLILEALR  
RNRFNKNETIKSLRSVTEKAPNTIWNLWGLLGNSKSGEESSESEGDPRPRKRARRS  
>comp11285\_c0\_seq1; 452 526 1947 LEN=1991; translated  
MECQLKWDVDKNTHLINKWLEMELPILVAAIRHHRGKKKHDSSSNAKDSQYYQYTKDDIV  
YAILTQKHGRQKQTIMDFQLIPWVCLYNETDGENDDGKSDRRGAQELATLVPRKRDKGDQ  
IVVMCNATTLTENTVIALTGVLPTPQSQISEDSRSTNTTKNKNDAVEPSIFFYDLEQP  
LECDRLEEQEKSEVHEKNKIGACLRFKGDYDRSIVPQWIEYHRLIGVEHFVWVNEEWNL  
SGLFNQSYITYIPFNFNWAENHSSHFPHHYIDVKKNEISQEPAQSA CIYNARKYGYDWI  
ITTDVDEYVHVPKGSNKTND EAESPLELFLRRYDRLLYSCLIMNSIPYGRNMWLKEPDFP  
SNPFLIDYVWRRNMNLSEYPLYRYKQIYNPQQVWSLGVHYCYVADGEQNLQLPAEDGLFL  
QHFKLAHKGVYKFKFEKLMKSEDDLKDTTVRDMYRSDLADAMTRLEMKRKYT  
>comp11286\_c0\_seq1; 1389 461 4237 LEN=4364; translated  
MMKLRSKRDRQHRPLLPQEAPMLSDQMPSTDDGDRSGQVAGRKGGSWKRLFGKGQQGSS  
SSSNHHHKNNNYADADDTDFFGYDYSIDAAGVIDAFTNANANAKPNLNTSVSTNDSQNE  
FELATADFLPSAFTFDPERNNHKNQNNHNSDDFQPRKNPSGKKAGRPSRSRSPKPRNGSG  
DKNKSSFPSSRPSGKKDDVIDHINEAIKEASSAKKSQSTRSLVRNRSLSGRSRSRSLTK  
SRSLRRSLK GKASAAQQEQQQQPSSPARDAPGPSPEASRSAGTPKHIRIKPKRRNRSF  
AEAPALET SANPSKPKPPSRSLRGTGPGSSVSPASASSPRDSNSNNNNSSSSSRKSH  
ATLDDVKKVLSKPFGREHILTEHTWVVHVSRAEWDPEESLWKYRVI IQRREGNRLHDF  
TCFALRSLEDYWFQSLQTEFFGGLLLPSLSIYLGLPDILSCQHEVDPQLLSSWMSDTL  
NGIRGQGEIMFSLANA EIATCESMEAFLYRTEFVRPLAEAPSVSQNQAASSGGDARESG  
WNFFPELPGANCVGLPKPAKEVSA CHSPSLGTANTFNLRADSFLEAPVTFDDSNSTLTIH  
ADLLRGERDLIWSWRTRALQTM EKLRILKEQEKFGVAVKRF AICVSNLFAYEKDI ETAR  
LGDSRSRRELQIPYRRLQKTMVDDCLRILTRHKLERATPSIESIYIMLGAYVADLSTVEP  
SITAYLKGLQKLA AQSKTELLEKEHQEMEADASAPPGLAKQIQEGLMVVKKQLASTIN  
DEAGGIAGSAGEERRYRLRQEVQSIENRLLVNETLLKDYMSTVCR TAPVRTSRMIYAFLE  
KEKEQCKALRDAAVELNKKVNIASKDTLSKMVNRHHIETKEDKETEIKLVHKIVNIGNTK  
KFVKEGGEDRSEEVEKVELSFETE QRESEKSKRIKAMNDCRARIGRWD AKLAMSI MEA  
VGVNDANVRVEETTRALRTPVRKHA INLRENVERCIEGLDVL RNSILQGSMDIRDVRADF  
ITEIQNLLSYSYVPVGDQPSVLP AALLEREGISISDPAGWRSIEIGSCGNALNMYIESRD  
SSTEWLLLESGLVLDKDYSHRVEAIESFVYMECVGIQLEKHF SQVRASALTAF EKKTDITS  
AINIATRKKMPVLVKELNEKLAKLGPVVSHTTVKEAKEAHLESKLLKQELHTMAMRRLAR  
ARETSTERAIALMTVWTK EEEASSANEESILDALTLRVQESI HEDDLGVYLRNSPARI  
>comp11286\_c0\_seq2; 886 1 2710 LEN=2837; translated  
SRFIVEDGFRGSCILTLVLCLSRILPQNLVWVHVSRAEWDPEESLWKYRVI IQRREGNRL  
HDFATCFALRSLEDYWFQSLQTEFFGGLLLPSLSIYLGLPDILSCQHEVDPQLLSSW  
SDTLNGIRGQGEIMFSLANA EIATCESMEAFLYRTEFVRPLAEAPSVSQNQAASSGGDA  
RESGWNFFPELPGANCVGLPKPAKEVSA CHSPSLGTANTFNLRADSFLEAPVTFDDSNST  
LTIHADLLRGERDLIWSWRTRALQTM EKLRILKEQEKFGVAVKRF AICVSNLFAYEKDI  
ETARLGDSRSRRELQIPYRRLQKTMVDDCLRILTRHKLERATPSIESIYIMLGAYVADL  
TVEPSITAYLKGLQKLA AQSKTELLEKEHQEMEADASAPPGLAKQIQEGLMVVKKQLA

STINDEAGGIAGSAGEERRYRLRQEVQSIENRLLVNETLLKDYMSTVCRTAPVVRTSRMIY  
AFLEKEKEQCKALRDAAVELNKKVNIASKDTLSKVMNRHHIETKEDKETEIKLVHKIVNI  
GNTKKFVKEGGEDRSEEVEKGVLSFETEQRESEKSKRRIKAMNDCRARIGRWDAKLAMS  
IMEAVGVNDANVRVEETTRALRTRVKHAINLRENVERCIEGLDVLNRNSILQSGMGRIDV  
RADFITEIQNLLSYSYVPGDQPSVLPALLEREGISISDPAGWRSIEIGSCGNALNMYI  
ESRDSSTEWLLESLGEVLKDYSHRVEAIESFVYMECVGIQLEKHFSQVRASALTAFEKKT  
DITSAINIATRKKMPVLVKELNEKLAKLGPVVSHTTVKEAKEAHLESKLLKQELHTMAMR  
RLARARETSTERAIALMTVWTKEEEASSANEESILDALTLRVQESIHEDDLGVYLRNSPA  
RI

>comp11287\_c0\_seq1; 484 25 780 LEN=909; translated  
MKSALFSLVASATAFAPVATNNRASVAVQESKADLVALAEELNPIVKFYDPLNLAEFFF  
WDKTNEETIGFLRHAIEIKHGRVAMFAFVGIVHANGIKFPWPMQMDGTFPPTGTNPPELW  
DQVSDAAKWQIFGLIFFLEAWSEIATPEHKHYMNGGKPGAFPFDYELPHPVVPFKSLYD  
PLGFSGKNKSEEAKARGRKEVEINNGRLAMLGIFGFLSEATIPGSVPGLTGIVQPYSGEVMA  
PFSENMLKFGL

>comp11287\_c0\_seq2; 486 21 788 LEN=1023; translated  
MKTASILLSLAASASAFAPAATNSRASVAVQESKADLEALAGDLNPIVKFYDPLNLAEAE  
FWGTSNEATIGFLRHAIEIKHGRVAMFAFVGIVHANGIKFPWAMQMDGTFPPTSTNPPEL  
WDQVSDSAKWQILSLVAFLEFWESELSTPNHTHYMAGGKPGDYPDFVSGADGIPHPVFNL  
YDPFKLSKNKSDEAKARGLKVEINNGRLAMLGIFGFLSEQTIPGSVPALSGIVQPYSGEV  
MAPFSENVLGMPFGM

>comp11288\_c0\_seq1; 327 132 1376 LEN=1947; translated  
MNADRMLLVEDLPSVFKDLSPIPQNDGPDRCVVIQYPSAFALSYNMRAVWEAKEFSERA  
LKLSATCLKLNPNANYTVWNFRRLCLSSLGLSSDRETIRKDELTASLGGENPKNYQVCNF  
CLWRSMPPPCRVLFDVSVISSREARNPLLSEVAYFLHLPNRSTHTIASHAKTNYPCVRLQ  
QIWHRRALLETYGARDFMEEELAYIEEVLGIDSKNYHAWSYRQWILMTVDDDSIWEKEM  
GFVSRLIQEDVRNNSAWNQRWLVSHRGKRGNHPLSLDVARREADFAIEKGARLDPYNESP  
WRYLVGILREQHQRQKDNIGSTDDFTRNVIAEYEAKASGLRTVLEEAQRNPDTCVNMTS  
ARIDLLEMVGTKESELEVATQLATSLATEHDPFRKKYWWLVVKRLQNQAKSTSGS

>comp11288\_c0\_seq2; 342 132 1181 LEN=1752; translated  
MNADRMLLVEDLPSVFKDLSPIPQNDGPDRCVVIQYPSAFALSYNMRAVWEAKEFSERA  
LKLSATCLKLNPNANYTVWNFRRLCLSSLGLSSDRETIRKDELTASLGGENPKNYQIWH  
RRALLETYGARDFMEEELAYIEEVLGIDSKNYHAWSYRQWILMTVDDDSIWEKEMGFVSR  
LIQEDVRNNSAWNQRWLVSHRGKRGNHPLSLDVARREADFAIEKGARLDPYNESPWRYLV  
GILREQHQRQKDNIGSTDDFTRNVIAEYEAKASGLRTVLEEAQRNPDTCVNMTSARIDL  
LEMVGTKESELEVATQLATSLATEHDPFRKKYWWLVVKRLQNQAKSTSGS

>comp11288\_c0\_seq3; 225 132 866 LEN=2077; translated  
MNADRMLLVEDLPSVFKDLSPIPQNDGPDRCVVIQYPSAFALSYNMRAVWEAKEFSERA  
LKLSATCLKLNPNANYTVWNFRRLCLSSLGLSSDRETIRKDELTASLGGENPKNYQVCNF  
CLWRSMPPPCRVLFDVSVISSREARNPLLSEVAYFLHLPNRSTHTIASHAKTNYPCVRLQ  
QIWHRRALLETYGARDFMEEELAYIEEVLGIDSKNYHAWSYRQWILMTVDDDSIWEKEM  
GFGR

>comp11288\_c0\_seq5; 240 132 671 LEN=1882; translated  
MNADRMLLVEDLPSVFKDLSPIPQNDGPDRCVVIQYPSAFALSYNMRAVWEAKEFSERA  
LKLSATCLKLNPNANYTVWNFRRLCLSSLGLSSDRETIRKDELTASLGGENPKNYQIWH  
RRALLETYGARDFMEEELAYIEEVLGIDSKNYHAWSYRQWILMTVDDDSIWEKEMGFGR

>comp11289\_c0\_seq1; 1209 165 3281 LEN=3303; translated  
MASQCLEDKADTIKDLVKRINVPQTLSSNLGHLNEAGGVKGLLDLVSTHPDHGAAENSIE  
TRRELFGSNVLPSTPRQSFQWQLFVDTFDDATLQILIVAAIVSLAIGIYDDPEVGYVEGMA  
ILSACLVSVVAVNDYQKETFRELSAANDEVDVLVIRSGKFQKVPVEDLVVGDLSLE  
AGDSIPCDGVVVHYDGLAVDESALTGEPEEIEKDFTSDFLLSGCTTVAGSTRFVAVG  
PNSQWGIKSHLEKEQEETPLQEKLDVMVAVNIGHVGMAAAAATFIAMMWIKIFIDPEYLK  
DVSVFKHALDAFIIIGVTIVVAVPEGLPLAVTISLAYSTKQMLRDQNLIRHLTACETMGN  
ATNICSDKTGTLTENRMTVVRGVFADTKDTECKKPLGISRTAMNVILEAFACCSTARILP  
AAPVVDEEENYDIRPQVIGSKTEGAMILLSQSAWGNDDTDTRREANFGKEGGSRLFPF  
SSSRKRMVTLVKKGGENVMTYHKGAEEIILANCTLYLDADGSEKPMTSEKRKYFENIISE  
FAEDALRCIAITHRNQIENITKDISKISIADCESLIEKEMCLDALVGIADPLRDDVDAI  
AVCQKAGIFVRMVTGDNIETARAIKQAGILTKGGTAMTGEEFRKLTPAELDRVLPVTLQV  
LARSSPEDKHTLVQRLNGLMPETEHEWLERHPGRDFATEKDLLLPGYKEEWSRSRGGVG  
EVVGVGTGDGTNDGPALKAADVGLSMGLSGTDVAKNASDIIIMDDKFSSIVKAVLWGRSVF

DNIRKFLQFQLTVNVVALTITFLSALVGYDPPLNAVMMMLWVNLIMDTMGALALGTEPPKQ  
ELLDRPPYKRNSSLISLPMWRNLIQSTYQLTLLVYLLSKGPVLYSCEDGSIHHTIIFN  
AFVFCQIFNEFNAREIGDIFNPLGALGESPMFVLVIIFTVLSQWFIVEYGGFTQTTPLS  
LEEWIMTVGYGALSIPIGFFMRILPVSEDPNSFAGLSGKLDDVKMGSTSWLRFLFIVLMP  
ILAAIVYQLAWEVEELKH

>comp11290\_c0\_seq1; 825 167 2446 LEN=3330; translated  
MSFSAPRRPLDLAFVVVQSPQVPHPMGDNNNSNSSNNYADSDSDETFDDMPPLTDMDTSTS  
IHANIDADNDANTGGTGTNVVAMTGI P SERDIYEETNLRTEYIVSEVDEDEDEDEYEDED  
YFDEDEDDADTAAEVMMAHYLQRVLEDIPEYDTGDVFEDEDEYEEESHAYDDFDEDLEGGSDP  
CNCPCQVLHRIVGRHSSCYEATDSCSDEGDEHDNDVPLDPLASPCAICMEPETAARRFAC  
LPCCSSGSRMATRQDSHGHHLPGLPPTTTDTSSSTRFCYKCLVTCLVKNGCGVHRTLERG  
DHDHGSSDKTNGNTDAQLAGECPRCKKLLVLEELPLEDNKDASKPKWQHPLPGGLPKQCL  
AKPPLARKASEEIAHYKRTVAAIPSTEAMFWYVASRNHLRIYLVVLATCPNPRYIPEELL  
LTIDPSSSTERIRLLCQWGLIAKRQNSPACASTKSRTSLRKRKLSIMQQLWQRGPLGTAAA  
AAEMPDRSDAFWNKHYQAILGSVRTWRISRACCSLAEASRNLPNRSQVYQIDPTVQHTL  
HRLSAMYQLGLDLDPAIDRVGEEDQREYEGYFGLCLLAPRSKLQTQNTTGGTSMHDENL  
ELFLEENGRRHCLLVARDCFSSAVMAAGRLRIRCSLALARWGSSLVLLSWGVGLPLPVS  
WPLAVANNGAARWRWYAMDGLNLVVGLLLAKILVQVFWIGIHLAKAVAVCHLAGSWLLE  
RQRKRSKRQANQDAGTTETHGILEGKRAVGAGILAVYVAW

>comp11291\_c0\_seq1; 351 1 1169 LEN=1277; translated  
XRTTPSHPLTNGNMLAEPSATRNEHTSHGSRSAANKTTTTAMHRPAFLAAVALAVAVA  
AAPSGKNALSFAEFAIGPSAGQRPRTSRAGATGSGNSSLFAGRI PRVRRSPGVPMEVLR  
SNEKNGAVFGGGDGAIDGRNNTS PF AITGPLVSAFARTAAVAASAVAVALLVGT PAHA  
DTRNPAGPEMHRQLPPGGSSVVLSSSSSSSMATSGSSPYTGTPTGDLVDPTRGEAVVE  
LESGVTYRDLRMGTEGGPSVAEGDRVNIQVWLKRSNGYTI DASTNNDGV PFI FVVGGRTK  
QQSHSQSQSQPQRAIAGLDEGIRGMAVGGIRRIVIPPSLAYVEGLDENSPGPVPVGFPG  
KQRI RRVMENRMDVPDESFLLDVKVTRIQ

>comp11292\_c0\_seq1; 812 74 1708 LEN=1759; translated  
MVVLSASVCTRQ GKALVSRQFVEMNRLRVEGLLAAFPKLI GHAKQHTYVETDVVRYVYQP  
LENNLYLLLITTKASNIVEDLGTLRLLAKVVPDVAGGFQEHVINENAFELIFAFDEVLT  
GGYKEDVLSAIRTNLLMSHEEKIAVALQKSKQEAARAEMQKAKTLQEERMAQMRQAF  
VTGQATSGPTGRMEGFGGGGAPSQQSGIGSFMDQFQQPNEDSQQQAVQEEYNPYAALQRP  
KAPTAVAPKVLAKSGMKLGGMGGAKKDSLISAMAAEDNLF GGASKAGGPDFGFGKAVAPP  
AAAPSTPLTSLSEKITVAMNREGAVESCDVKGILNLTANTDAGAAAVIAVNKAQLPTTF  
NFATHPKVDKKVYERQGVLSLKGKGFVGRGVGILRWSTGSDDAPPVVSINCWPEEEGGG  
RIMVNIEMELTRMDVVLHDVNI LLPLGTQNP SIESIDGQMKHDP AAGMMCW HFDTV DAS  
NSTGSLEF SV DGENTEVFFPIQVGF RSETLLCPIEITGVTSSVSGAPIPNQMTKSFVPES  
YQVA

>comp11293\_c0\_seq1; 634 333 2246 LEN=2246; translated  
MPTTGHPFTILLPSLGGRRRCVRFVQGIPTHSVALLFMIAL LALSGKCRSEPNATLVSAT  
RRSPYLMVDPKPPPPDCHRTLAPAYFLETTREAH TLVVELPQKVS RKNL GIDVDYQTGSI  
TVLGWWSERKIRGEAPRKM CVHMMWRIDPSLMTEEA VRSEDSVSVYDLVMSLRDQRLVLS  
LPVSKCTTENDGLSPPAPPPSPIVPSNHTERIDRNKNSDDDDDEDSWPS SRTP TFFLL  
ALVLLAVGATGQGTPEGLTAV ALGGQLVGNILEYVVNPGDLRAEGKDTVTIVYTVPEEAW  
IAVGFSTEGLMIGSEAVIGFPATGEVVKYGLTSFIQSTGVLP LPEAQQT LIDASITQGDG  
LTSMRFTKIMEEPGEIPIVIGPNI FMGSVGF DNNFFMHAKRDSFGIELAVAEETDDAVGA  
DAAGGEEEVAPAATTVVI IETRKRSLWKAHGWCALAWGLCAPLAIGAALLRRWFPDGLW  
LTIHQGLNI AVGVLTVASFGLAVAAIGSETPAGGSSYHFS SDFP PHRFI GLVVFLLVAFQ  
VLSGLFRPHNPGKGEK SCTR RFWEVLRHVLGLVLLALAWYQIDSGIGIYQLIFSDSASA  
RLSGIFWGITGSLSAIIVVGFVVTKMTDRADDDDDDDG

>comp11294\_c0\_seq1; 572 163 1869 LEN=2752; translated  
MASISVTLDSNSSNPWPESPTFDNEQDFDYDLNASNEIRDRDRPPVSEICMKQIFEDSH  
DGIDFPPFQNT RPIVSAHSKIWRAGHSNNIL TLLTGTPE DVKSYFIGLLVSSITVLIVFL  
TWMILLITLTKGLSDRAGFLAGR SKLPPKPVGEGLPSTEPQPVADLKPEEEIGTVEAAP  
ESAEEDGNNGNGESSNVDIKNEDGNMIDSDHLTSSSKRDSRET KRNVL LSKNEWNEVYS  
TKKKEERWMKIVVVFACL MVI FMSIVMAAKGVQSLKGS LDDGKASISYAEKLLDNAQGVV  
NELTNGLGEFQTD FLDLLERSNTGMC PRLKPEGLCESLLEVDSCDFTIEVDIDQDIDDK  
LDVNTTVDFNYSHSV DVSKLSESIKDKIGIDGTLDLREILFPSAQNVYEDLVGAFSKDWL  
FLDKMRDFS DTIGSVSTLATETEEQINAINWVFYIAVIFDVIVGLLAVCMIIHILAGDRL  
PLSLKCFQRRCLFPFFIACVSI AFIFAIAFLIASMALSDSCANGPSDRILSVAQYYMGDR

LAADYVTDIIKEWFSREYLRTYLISQKN

>comp11294\_c0\_seq2; 220 439 921 LEN=1188; translated  
MQHDQSFLDGAQKIFEDFDVAIQNIAGSVTDFCGTTDQYLFGDMISTTFKYLCGVTGLLV  
DLRKAFCRCSTWMPLYYNTLYNAVYCNAIDGLWSIAATQFTTVLMTCCIILTFRAVFFDLEI  
VESGTDGTGEEPAALSSPGDDSKNNIETETKDDRDIIEVKAG

>comp11294\_c0\_seq3; 703 163 2334 LEN=2601; translated  
MASISVTLDSNSSNPWVPEPSTFDNEQDFYDYLNASNEIRDRDRPPVSEICMKQIFEDSH  
DGIDFPPFQNTPIVSAHSKIWRAGHSNNILTLTGTPELVKSYFIGLLVSSITVLIVFL  
TWMILLITLTKGLGSDRAGFLAGKRSKLPKPVGEGLPSTEPQPVADLKPEEEIIGTVEAAP  
ESAEEDGNNGGESSNVDIKNEDGNMIDSDHLTSSSKRDSRETKRNVLLSKNEWNEVYS  
TKKKEERWMKIVVVFACLMVIFMSIVMAAKGVQSLKGLDDGKASISYAEKLLDNAQGVV  
NELTNGLGEFQTDFLDLERSNTGMCPRKPEGLCESLLEVDSCDFTIEVDIDQDIVIDK  
LDVNTTVDFNYSHSVDVSKLSESIKDKIGIDGTLDLREILFPSAQNVYEDLVGAFSKDWL  
FLDKMRDFSDTIGSVSTLATETEEQINAINWVFYIAVIFDVIVGLLAVCMIIHILAGDRL  
PLSLKCFQRRCLFPFFIACVSIAFIFAI AFLIASMALSDSCANGPSDRILSVAQYYMGR  
LAADYVTDIIKEWFSQCDVQPPSMQHDQSFLDGAQKIFEDFDVAIQNIAGSVTDFCGTTD  
QYLFGDMISTTFKYLCGVTGLLVDLRKAFCRCSTWMPLYYNTLYNAVYCNAIDGLWSIAAT  
QFTTVLMTCCIILTFRAVFFDLEIVESGTDGTGEEPAALSSPGDDSKNNIETETKDDRDIIEV  
KAG

>comp11294\_c0\_seq4; 200 136 309 LEN=576; translated  
MTCIILTFRAVFFDLEIVESGTDGTGEEPAALSSPGDDSKNNIETETKDDRDIIEVKAG

>comp11295\_c0\_seq1; 415 205 1083 LEN=1120; translated  
MNSQNILLDSDIRDWVVLPLFVIMVSAGLLRVHVGMLLPDPKNQAKIEQRTQSSVRATS  
TLKTGAINFLSASKLEARKLAYPEILKDQAEWCESYMEEREREKEENPSDDDDDDMPNPLA  
AMDGMKGGMVMQNMVMMQGIQFFSFGFILLKVPFSLTMGFKQMFQRGLGLENLDTSY  
VSSISLYFLFMYGLRAFFRLVIGTPTLEAQESQRMWMLGKKGPTNPAPKEDAQIKAL  
NAEADNLEMTLPKQFKSNLDQVEKRLLNKYPKKAALGKDDFLLHKKSKKN

>comp11297\_c0\_seq1; 644 136 1887 LEN=1999; translated  
MKQYLRKKSLEFGLLRNSDDEEDEDDESSFESSSSGSSMPHLMAPPEDRDSSGDEEDEN  
GIGKEKMDNFEFPPESWDEIDGNCTEALGNMFTKSELDEFGGDWSRLVALPDTTV  
RKRLFDFQKRHLVFRIAWSFFEKMGVILSNTRQTKHQAEFYDIVKVGHDGREPHIEV  
QYGNPNKEDAEIFLRDETIETIECTDEVARAFEKHVMASVGNMNDMCSGLVFIQGGF  
GPISPEPIPCDEVEMLIGAAPPIDRITFGVEFELSCSIGSQPQTVGLALVNHAGVRAK  
LRVQKYARPGHYHLFLGSEKMEIDNDSFGEEWTFVNDSSIEGNPDHAHSCQFELVSPVLR  
GENGVEVCRKVFTTALDTSIAIHVNRSMGFHVHVGIPDEKASLAMLQYISYSFCRFEPVMD  
SFLDESRTGNLYCKSNRDGVLGRGDEYKEIPKFAKRITPAMENETGEKSADDTSDDNDE  
STLHGNIFSCGSKAELFALVNP SGRYHKLNLMLNLTGRQPTIEFRQHNATDVVDEIEAWI  
RFCVAFVERCIDRGEFPDGAASEPRTSTGMASEDASLFDLFRW

>comp11298\_c0\_seq1; 569 117 1838 LEN=2875; translated  
MATKKRQRLKQEDEETEADSSSRNKTTKKNKTAATTPKTVAFDHRYIVAPMVGASELPFR  
LLCRKYGAQLVYTPMMLASQFATSAEYRKKEFQTTFFDRPLVCHFAANNPKEFARAAELA  
EPHCDAIDLNLGCPQRTAYVGHFGSYLLDAKDRPLVLSMVQAAASAVKIPIFVKIRLLDT  
YEDTLELCRQLYDAGASLVAVHARYRASFRHKGAGARDGPALLDQVERLRRLDSSEKYTG  
KLLITNGNTITYEDVNNLELTKADGIMSAGILDNPALYLGRFGSRPNGDKDNAVQSGE  
DRAMDIEVKGKVFDEWPKRKKWIKLKKIASIESKIEKKGIASISSKEKKKFSQKMELE  
QKLRKCSVSGSTFVSLNELYKTSDDKVQLALEYLNLRVQYPATMRTVIFHTRRIKDELT  
TYQMMECLSCSSIEDVENAILKIKHYQENPGSFQFDVERAKKEREALERKKIEEGKRKA  
YEARMVRKAKREKREDLEYLRQGAAPVTLKTVEEMKMLSKEKQLQMWKERDHSQHCHMMF  
HLSGDCSRGRACAFHLVASKTKNSFVESDEVAG

>comp11299\_c0\_seq1; 432 76 711 LEN=881; translated  
MAPNTAPIKYAQRSDSLTYLTIALPDVKDEKIVLTDDKLTFFEGTSGDKPYQIDIEFMKEVD  
SEGSTYKVLPRSVQMHLKDKKEEEFWPRLKDKALEKNQVKIDWDRYVDEDEEEEGFD  
MSNMEGGMGMGGMPGMGGMPGMGGMPGMGGAGGMDMEALMKQMGAMGGGAGGMPGLGDMA  
GLGMPGMDGDDDDDEGDDDDLDLPELEEAN

>comp11299\_c0\_seq2; 370 1 603 LEN=773; translated  
HRRSHNPLLTSVQRTAPPSDVKDEKIVLTDDKLTFFEGTSGDKPYQIDIEFMKEVDSEGST  
YKVLPRSVQMHLKDKKEEEFWPRLKDKALEKNQVKIDWDRYVDEDEEEEGFDMSNME  
GGMGMGGMPGMGGMPGMGGAGGMDMEALMKQMGAMGGGAGGMPGLGDMAAGLGMGMDGD  
DDDEGDDDDLDLPELEEAN

>comp11299\_c0\_seq3; 381 1 621 LEN=791; translated

HRRSHNPLLTSTVQRTAPPSDVKDEKIVLTDKLTFFEGTSGDKPYQIDIEFMKEVDSEGST  
YKVLPRSVQMHIILKKDKKEEEFWRLLKDKALEKNQVKIDWDRYVDEDEEEEGFMSNME  
GGMGMGGMPGMGGMPGMGGMPGMGGAGGMDMEALMKQMGAMGGGAGGMPGLGDMAGLGGM  
PGMDGDDDDDEGDDDDLDLPELEEAN

>comp11299\_c0\_seq4; 421 76 693 LEN=863; translated  
MAPNTAPIKYAQRSDSLYLTIALPDVKDEKIVLTDKLTFFEGTSGDKPYQIDIEFMKEVD  
SEGSTYKVLPRSVQMHIILKKDKKEEEFWRLLKDKALEKNQVKIDWDRYVDEDEEEEGFD  
MSNMEGGMGMGGMPGMGGMPGMGGAGGMDMEALMKQMGAMGGGAGGMPGLGDMAGLGGM  
GMDGDDDDDEGDDDDLDLPELEEAN

>comp11300\_c0\_seq1; 587 124 2115 LEN=2115; translated  
MPTFSSRSWRWNCSCFVAWAVATVALPVQTRQSSIACCRGDKLRATRRNSNIYADADST  
LDVNLNFDNLLAFSIVPASTNPSNKFTKSFLEKAVHRLPSDPHTLVPTIDVRLLEANNGG  
RLSFRVPIPSQGTNDRIILDDYCDGNRNDTTEEDSSTAVANQSVSFSEWNRWLSPYGMKSL  
RLVICERVATDPGHTDASDESSSTAWTSEERIWSALEANLPSQLPWEIYESFGNTVPEH  
TATRQTKDGNDISEEAPSHQKNPQIHPTRFDVTCRRWSTFRCLSKDEFSSSTRTKATLRKL  
LLRKYGCLEQPRDPESAAAHASGSNRPLQDCDFHLLMYGADNTRLEWTMLAPPTTKKFS  
NEDYLPKPGCKRVEAWMLMRDLRDGVLARAASCNKNEEVIVLDPLCGKATFLVEAATTWG  
IENSTPMNGANTNDDRASVSFIGVDASSQQLLEDAEAENVEAVAEALGGDCTIELRQGDSRD  
LSRLGFGDGSVAIATCPPFGRQFFSLGDDAAERRAASDGGATKRTNEALQASRYDWLRE  
WTRVLDPHHGRIALLVDVDHQAEALAAIRATGSLRVRVLRPEFRLGRLKATVIVADADPN  
NKADDGGCNSSGXAETIPMGRNREGGQSGVVSAAAYRIAPGASSLYKHTAELLTYDDQVPT  
MKLSX

>comp11301\_c0\_seq1; 45 1 546 LEN=838; translated  
ETCSYMEDPVPQIAHIRRGNSHNSGYRRVAAYEPXHDSNP IEFNRIESNQKLRLFAAPA  
RKHAPSFHIEGDSSENGSFEGRGFPSDRGWDQNALTSRNVETHHRRSAGEGEGGQPHR  
SDRARRSQLRTIAAAPGTAEQFSATTADGKPPVEEQSVREKRTTGAKRGGLAIEPPDLLP  
P

>comp11302\_c0\_seq1; 561 203 2164 LEN=2619; translated  
MQFPAGSLAILASKVGSDELSDGRSFIENWNRFHRYQKSNEADADGLSASHEKLRNKRGT  
RMVTKIVNEIQKLRHVVECDPLAETEVEDYRRLSGQELSTSF TANHDNVDELGILAAPFS  
SPTCGVGRKCRKATSEEASSLGGICEDIDGWYQEFLLHRRGLQEASGNSTDSQGYDPNNI  
VQTMFACENGLVGYDCECDFDTGDAYVGTAVCTTIPSCSTTESLTCGVPVTDYKSTYY  
VSLQQRGIWDAEFCLEFLEPYAQTACYKTSTIDYGVTPNSECDISLDGEYCSSCEVYKF  
RDSNICYVFCGNTSQSGKGHTRSGNTCDFPAHGIGFFIESYGCPSCDICQSDSPLDPM  
VMAMTEPENSVVFFNTTYDCDYVQVSLAGLFTPDSCSYFAE IAGDACGCAAVKATDLVS  
TPAESDLPVTENIIVTTDSPTSAPIENGECKICPDGVSNDPDIISFPGSNASTNQISCAE  
VELAIMAGSISGNELCEAVQKEALGPCCGVAADEDETSIESVNESEPQSPPLVSMGDAES  
DHCTLCGDGKFHTEVGNVSVPVTPQGIFTCQQLDMGKNGTLDNKGICLLVQTLAQTPCGC  
KADGIITVPTAPEASEEEATSSSSPLYSGTPALFVSAATAFLVALSSWNFL

>comp11304\_c0\_seq1; 568 397 1566 LEN=1848; translated  
MKSYRISTLVKLALLAASNKHIALHLVSSYTFDPLNNSWKPSGRRKKQNRGSSFSQNSYA  
PPEPRREQPNVPRPIPGVDITWDERDIVRHHTTFVVGQEEQQINDPAFVVPKASLVEI  
QYNKKTGEVSLLDDEEGVVTPEEYKRIVNDVKYSHEGESESSTGNTSSKPNFKHQGGEDDA  
VVGTTVYLDPELDPTDVIDTEVEDVDGRPSTSAKQEIHIPHYEQKLKDYPPQQLQDQSQ  
PSTDYTESILAETTFDSYSIHPPAAKYDHSVAYQAAATGSYAEAQQQQLFQQQQYQKYQ  
NVQQPVQTATAVAEPTADHVYYQQQQQQYETGNVYDQYQYEPMTMTQKLTNDQSVEDI  
YFDDGTYRRSRGFGFASRRRESFTDSELEY

>comp11305\_c0\_seq1; 282 1 731 LEN=918; translated  
XTFPVFGAQIHSGMSARIKLRPDGSMSETNTPEIPYDYSCVSLYDAECGYGLEKYQT  
SKNPQCPENFVCSDAVGGIGVMANCINSMDCAMLSEMTVIFYGDKGKDDRMNDVILFLREM  
IPHHENAVNMAKTLFISGEVDCDDPDDEEDPACLLEPIVRSIINVQNSQIQTMKGLLEGF  
GVPENQQCNVLDSDTQSDTKDSVNEDEYETKESDTQSDASIIQSSFGVLIALMVGSQLI  
GFN

>comp11305\_c0\_seq2; 525 290 2119 LEN=2149; translated  
MISFMNNAVLASLTLTILTTDTVEAAESSYVSGVPCTPCAIAISRSMDICTINLRVNF  
FASSTGYFEVEGCEGVNPTLHLTVGRTYLFDQSHASNWYHLIGFAYEADGAHVVPVDELEP  
GIAPGNSNCTETLSCPAPMYWKGGEYTGVSNIPLVPIPEEPSDDFGLDAVEPLYFYPL  
GDWEELGPFVTALNFDVNYDQDIFYFCHIAGMSARIKLLDANGEMLNPEDETPPEIPEYD  
VIDAFDYECGTFNLTDVANPKDIDTCPDIFVCEDEGIEPQTQYSECVQAMNCHMMASMTTN  
AVGQSALFCHQMI PHHQAVNMAKSLHHTHDVICVEEESWECELSPILYDIINVQNSQIM



DMRAALDLLGAGEYENCVDVFTMDRDVLP SRRLVEPDMQEQTHRVTAEEQSQSACAFVH  
GVDCRPCEGTTGACVIRMGVNLLAGEWGYFTVEGCDGVNPTLHLEVERTYLFQSDKSNW  
YHLIGFSYEADGAHVGVDELEPGIAPGNSDCAETNSCPAPMYWKDDEYTGVSNTPSLVP  
IPEGSSDDFGLDAVEPLFFYPPLGGWEEMVPFVTSLTFDDENYDKDIFYFCHVRKHYFAPF  
PSLELPHQL

>comp11305\_c0\_seq3; 764 290 2767 LEN=2954; translated  
MISFMNNAVLASLTL SILTTTDTVEAAESSYVSGVPCTPCAIAISRSMDCTINLRVNF  
FASSTGYFEVEGCEGVNPTLH LTVGRTYLFDQSHASNWYHLIGFAYEADGAHVVPVDELEP  
GIAPGNSNCTETLSCPAPMYWKGGEYTGVSNIPLVPIPEEPSDDFGLDAVEPLYFYPL  
GDWEELGPFVTALNFDVNYDQDIFYFCHI HAGMSARIKLLDANGEMLNPEDETP EIPYEYD  
VIDAFDYECGTFNLTD FANPKDIDTCPDIFVCEDEGIEPQTQYSECVQAMNCHMMASMTTN  
AVGQSALFCHQMI PHHQAVNMAKSL LHTHDVICVEEESWECELSPI LYDI INVQNSQIM  
DMRAALDLLGAGEYENCVDVFTMDRDVLP SRRLVEPDMQEQTHRVTAEEQSQSACAFVH  
GVDCRPCEGTTGACVIRMGVNLLAGEWGYFTVEGCDGVNPTLHLEVERTYLFQSDKSNW  
YHLIGFSYEADGAHVGVDELEPGIAPGNSDCAETNSCPAPMYWKDDEYTGVSNTPSLVP  
IPEGSSDDFGLDAVEPLFFYPPLGGWEEMVPFVTSLTFDDENYDKDIFYFCHI HSGMSARI  
KLIRPDGSM LSETNTPEIPYDYSCVSLYDAECGTYGLEKYQTSKNPQCPENFVCSDAVGG  
IGVMANCINSMDCAMLSEMTVFYGDKGKDDRMNDVILFLREMIPHHENAVNMAKTLFISG  
EVDCCDDPDEEDPA CLLEPIVRSI INVQNSQIQTMKGLLEGFV PENQQCNVLDSDTQDS  
DTKDSVNEDYETKESDTQDSASIIQSSFGVLI ALMVGSQ LIGFN

>comp11306\_c0\_seq1; 412 1 1483 LEN=3616; translated  
XNHLDARRVATRTNQSLLRERK GKIMKKSFIPTVALHIAFASIASIAVAGDLPGGSEDGK  
QQLVVFAGPHKTSESNVEEFFYKYARGDHP ELSQYD SLLGWSWPQILGLGNHKAYDRLVT  
DSDKPDVQTKIIDALVNRLGTSSRGLIMGGDEYDRVGN TSWSHRADATAIKKITTATGIQ  
TEGVTIVLLYQNPRVEQWLSIFTQKIMEGSSSDTA FGDDYEEFLCNPE SASERIETLETA  
MNPLLLSTIYINAGYNVAMIDLEGVRDAGLMVEHVIGCEILGGNCTDGWLYNLKTEDSLV  
KFKNYHEREDNAKH PFHSLTIGDIQDLERLLQLRDCNYRSITDHSNFRLLYGKGPF RHCP  
KHGDAAMKNLTNASLLFSAMQSQKGCNTDAISLESILKNAPDVNVYDLYEYS DDEIPSKR  
IHPVWIVQIILAGGILLRLAFGMFTEWKVRRNTGDTLDGIMPRI IEDQYPGRYSLDG VVP  
RSSEDQHRSLIEIM

>comp11306\_c0\_seq2; 383 1 1629 LEN=3762; translated  
XNHLDARRVATRTNQSLLRERK GKIMKKSFIPTVALHIAFASIASIAVAGDLPGGSEDGK  
QQLVVFAGPHKTSESNVEEFFYKYARGDHP ELSQYD SLLGWSWPQILGTVLVXCARKFPD  
RQATESTL FVICVFSFVIVGAF LPISAFFSPLPDIAGLGNHKAYDRLVTDSDKPDVQTKI  
IDALVNRLGTSSRGLIMGGDEYDRVGN TSWSHRADATAIKKITTATGIQTEGVTIVLLYQ  
NPRVEQWLSIFTQKIMEGSSSDTA FGDDYEEFLCNPE SASERIETLETAMNPLLLSTIYI  
NAGYNVAMIDLEGVRDAGLMVEHVIGCEILGGNCTDGWLYNLKTEDSLVKFKNYHEREDN  
AKHPFHSLTIGDIQDLERLLQLRDCNYRSITDHSNFRLLYGKGPF RHCPKHGDAAMKNLT  
NASLLFSAMQSQKGCNTDAISLESILKNAPDVNVYDLYEYS DDEIPSKRIHPVWIVQIIL  
AGGILLRLAFGMFTEWKVRRNTGDTLDGIMPRI IEDQYPGRYSLDG VVPRSSSEDQHRSLI  
EIM

>comp11307\_c0\_seq1; 765 1 2245 LEN=2475; translated  
XVPDSPRASAGELYSNLSSSAT TNRPTSRVASYNASKHAK EVMGENYPPRSKRSGSMNFK  
PVSSSSSSHAASSLLYSSSGGATMMNSAGTPTVSASDSNRHRLYFTSLKGD TSSHSW  
TERRKKGLFGRFGKQQQQQQRQQNQLNQLSSGPEVTGGGGGGPMDPDGQVNEEDNYST  
HGESLAPT PDDDTAFQSTEQLGDSEMEGTSSPPSRSSPASP DNGSNDEKSKESGESASAG  
TPPQPKPKH SKFPSIPVLV FASVVVLCVGTLAGGLTYLW DKKSLDP IRPPTQAPVPGE  
YGPPPTVHATGGDMPP IDPSVLP SDATLLQLFAFAIGQDSVDN SSSAAKAAADWMLNED  
PRKQSMRPTSAGWIQRYLLVYTYFSTTGNGESTWLS CNPPSHGEEDARNSDECRFAYPTE  
LPNGDVIFDLV PSSRWLSGTDECRWGGVACGKTVIDEASG TSMRAVTSIVLAQQLLRGSI  
VTELTA LPELEMLDL SHNGLSGTLSEFRSLQTLRLQYNDLTGTIPVNF FDDQSVMKELN  
VGSNNMTGTIPGQVAQASQMLTGLYLF DNGFTGSIPI LGEMPLTTFQAQNNRLSGMLPFDL  
HVSGKWPD TLTWWVFGNQSLSGPIGETLGYLSSLED FRVQDNRLTGRIPESIGDLQRLFR  
FEVNSNALTGTVPDEISDL PVL RDVQLQFNEFRGVVPPGLCFLTSMETLEADCLDIAVDG  
FLFEAPPRTECYCCTSCC DPIAKECVTY

>comp11308\_c0\_seq1; 702 310 2031 LEN=2031; translated  
MRKKTASTVSTTTYDDLATISTYTSAGRDREWRKFVHRG SNRKWSRGQQQEHQRRRNRGN  
RNNTRSSIAGLAGIIVVFGLIAGVVFAMIFLRAENR SRRNEFESGASVTVAKIGDSFDEY  
ADVASLIHGRCRHRPRFNATSFERNQTSYTEYNAWSE SFRDRFRELYEYIDASGLEFKA  
MQFDPNISALERPNAESEAGAFYGEHYPEVDYTGFRGFNGDATSLEPRWRNQSFYFPIHY

MEPIRGNEAAIDL DYSSSRIRAVNALFRTRKPSLTDRLSLVKHEGQVSRCS SGNDDTS  
YSGPSFGVVLMPGVRLSEDDETSWPRDFSSIVLCISDLMKRAAIHQNKVSVYI HDLSH  
PKEIDPVFMGAARLDCNSTYSSDENRNHHDGTAMVQSASSFHLLLEEVSLYDLDCDDDISC  
YQKTI SI ANRKWTVTVLNEEGPDRIQMVVAMIGLFVFAAFVGLAVVWVANDRRNRVYAK  
LKSRAAAERNALVLENANKAAQTERELNDFLAHEVRNPLAAAMAATQFLRTELDRRSRSI  
RIGIDHFDANTDAEINMDIDMGEDSDDDDDDDDG

>comp11309\_c0\_seq1; 1041 198 4947 LEN=5188; translated  
MYNCQKKQREGSKPKLSHRQCTFLWYLF FGMVHEATHLVTAWWLG YELVRVMSQ NATLIP  
ESSSSPYIDAWTHLAYEVILGRQCSLHNL PKDLEEPVKHSGWIGS LLLLLLLLLILRWSSR  
RCTKRKTASTNGSNGPCTKI QSFIFDEVMSSDMLLA AFVTTCEAITTDLIGIGPILPLNS  
GSRVQVFCGNFGVILLNKWWLQ NRESESAALDTLQQMVEVTMMRGAQSGGVVYHPVQS  
KETKDTTAPCFKAVRSRVV NKKRTDLSKLVRAKVERDFRAKVRPTSLSQETDSFVPRM  
MAGHTRFATSSSLSTLDGTHPHQWTPPSTRRVYSMEKNGNTRNKNYFVPRPTLVTVENYIT  
HNGDFDFQSRGKTYDLETIQEWLSVVTETEMPAVVDS CAIAGMVDILRTQGC FGLSARY  
ALVLGMESSNCGMNMKTENGRKQRTAMP PYTYGLENVIGLAF EKALEEFCIENGATCLR  
EIGSHGRSRAILSRKALERLRTL PNDLSRPLIKAIGTQTLMD SFGARRTGARKNLFDFSI  
DNE SDEEFDGDIESNPVDKSLRPF CRMTIDAFFDNDLFMTTKLFMESAKGSFGISVTSNL  
DAHRQMCLAARGQTI SIAFY PDKDLICYGSEQA AVKAGMSTKLDRSIDKEKLESTTCSNR  
DVDNESTRLDLDDL GGEIIVLDWGRQKYQTSPVSLPNCHLEEHMMNGKITAILHQESKS  
TRTDESELFHRMTKLSNHLIQPLQPSTDDPVLKDIQDIPYVCKNIQDDWNARRPIYSIGG  
LNRLTAYNLSRCLRKRLEQHVAGTVPKKSLDILLTGCEVSLYLAEQFATDLQKSFPKLCI  
EAVSSNKLLGLYGQEI AVPSIGFPYAPQTRNIKDAIVI IVSHSGGTFGPLACSNLLQSAT  
QSIYVVTSEWDTQIGKQLRMMDEITGSI SNLMNQRI FSTDIGMRPAEPCSVSVAATHQLL  
TNLFSYISVVILSDPRFRVT TKAQINEQDIQILEKCNEMNIEALTETVGHNQRGYPLDTV  
SRLRRNLYELGNLWSDHILEQARAYIMGGVYIFVTVTCGWPLVSLIGRGGVVEGHRIMY  
FLRFLDSCIYFWLPQICIMI IRIFQGRNLRHRMVGRTVVI GDIPWEVNLVFPNFVKLLME  
QMNDFQYPDSIRWLKQRFLNAADAF LSKCFAVSYSIAGLNVLSGNPSDHFVHRHTRHVR  
GTLAIFGRPDGRLSALSTAEGSVCLSVNQASSIQSYGGTCE SITIGHNPFTLNLSKTAIF  
LKRHRPLFLCERLLVEADAEERTTREREQLDES SVSSDES VSRHRNSLAKSCKNVFTSF  
RKRDISPLNTSIHQMMDTSI SLQIHKRRSTHALVGAYLDI KEQSN SIRHASDLDSGEINE  
SYAVDDCVAEVINEKKSDDRLQRV FQFKDKDGDGILSEADFVKGLVAID SALT ESEAKIM  
FREADSDRSGAVDYNDFIAFLKRFRYDQRVKMPPSNRDN RGMIVVQASKEKYFGETLRKY  
NAGKNVKMDMDFVLAQSQHLVQELYETRIASMQRFVAMCVFFHHI SKRVERFFARISFGY  
WGYRLDRTHSIVRIATTASPVR

>comp11309\_c0\_seq2; 1082 198 5079 LEN=5107; translated  
MYNCQKKQREGSKPKLSHRQCTFLWYLF FGMVHEATHLVTAWWLG YELVRVMSQ NATLIP  
ESSSSPYIDAWTHLAYEVILGRQCSLHNL PKDLEEPVKHSGWIGS LLLLLLLLLILRWSSR  
RCTKRKTASTNGSNGPCTKI QSFIFDEVMSSDMLLA AFVTTCEAITTDLIGIGPILPLNS  
GSRVQVFCGNFGVILLNKWWLQ NRESESAALDTLQQMVEVTMMRGAQSGGVVYHPVQS  
KETKDTTAPCFKAVRSRVV NKKRTDLSKLVRAKVERDFRAKVRPTSLSQETDSFVPRM  
MAGHTRFATSSSLSTLDGTHPHQWTPPSTRRVYSMEKNGNTRNKNYFVPRPTLVTVENYIT  
HNGDFDFQSRGKTYDLETIQEWLSVVTETEMPAVVDS CAIAGMVDILRTQGC FGLSARY  
ALVLGMESSNCGMNMKTENGRKQRTAMP PYTYGLENVIGLAF EKALEEFCIENGATCLR  
EIGSHGRSRAILSRKALERLRTL PNDLSRPLIKAIGTQTLMD SFGARRTGARKNLFDFSI  
DNE SDEEFDGDIESNPVDKSLRPF CRMTIDAFFDNDLFMTTKLFMESAKGSFGISVTSNL  
DAHRQMCLAARGQTI SIAFY PDKDLICYGSEQA AVKAGMSTKLDRSIDKEKLESTTCSNR  
DVDNESTRLDLDDL GGEIIVLDWGRQKYQTSPVSLPNCHLEEHMMNGKITAILHQESKS  
TRTDESELFHRMTKLSNHLIQPLQPSTDDPVLKDIQDIPYVCKNIQDDWNARRPIYSIGG  
LNRLTAYNLSRCLRKRLEQHVAGTVPKKSLDILLTGCEVSLYLAEQFATDLQKSFPKLCI  
EAVSSNKLLGLYGQEI AVPSIGFPYAPQTRNIKDAIVI IVSHSGGTFGPLACSNLLQSAT  
QSIYVVTSEWDTQIGKQLRMMDEITGSI SNLMNQRI FSTDIGMRPAEPCSVSVAATHQLL  
TNLFSYISVVILSDPRFRVT TKAQINEQDIQILEKCNEMNIEALTETVGHNQRGYPLDTV  
SRLRRNLYELGNLWSDHILEQARAYIMGGVYIFVTVTCGWPLVSLIGRGGVVEGHRIMY  
FLRFLDSCIYFWLPQICIMI IRIFQGRNLRHRMVGRTVVI GDIPWEVNLVFPNFVKLLME  
QMNDFQYPDSIRWLKQRFLNAADAF LSKCFAVSYSIAGLNVLSGNPSDHFVHRHTRHVR  
GTLAIFGRPDGRLSALSTAEGSVCLSVNQASSIQSYGGTCE SITIGHNPFTLNLSKTAIF  
LKRHRPLFLCERLLVEADAEERTTREREQLDES SVSSDES VSRHRNSLAKSCKNVFTSF  
RKRDISPLNTSIHQMMDTSI SLQIHKRRSTHALVGAYLDI KEQSN SIRHASDLDSGEINE  
SYAVDDCVAEVINEKKSDDRLQRV FQFKDKDGDGILSEADFVKGLVAID SALT ESEAKIM  
FREADSDRSGAVDYNDFIAFLKRFRYDQRVKMPPSNRDN RGMIVVQASKEKYFGETLRKY

NAGKNKVKDMDFVLAQSQHLVQELYETRIASMQR FVAMCVFFHHISKRVERFFARISFGY  
WGYRLDRTHSIVRIATTASPVSGSDVRQRIDGLRLLNKVLHSVSAIENAYLSYRERKGRK  
ENEVEA

>comp11309\_c0\_seq3; 491 1 1442 LEN=1470; translated  
XALPISVVETKVSQCADAFLSKCFAVSYSIAGLNVLSGNPSDHFVHRHTRVVRGTLAIF  
GRPDGRLSALSTAEGSVCLSVNQASSIQSYGGTCESTITIGHNPFTLNLSKTAIFLKRHRP  
LFLCERLLVEADADEERTTREREQLDES SVSDES SVSRHRNSLAKSCKNVFTSFRKRDIS  
PLNTSIHQMMDTISISLQIHKRRSTHALVGAYLDIKEQNSIRHASDLDSGEINESYAVDD  
CVAEVINEKKSDDRLQRVVFQKFDKGDGILSEADFVKGLVAIDSALTESEAKIMFREADS  
DRSGAVDYNDFIAFLKRFRYDQRVKMPSPNRDNRGMI VVQASKEKYFGETLRKYNAGKNK  
VKDMDFVLAQSQHLVQELYETRIASMQR FVAMCVFFHHISKRVERFFARISFGYWG YRLD  
RTHSIVRIATTASPVSGSDVRQRIDGLRLLNKVLHSVSAIENAYLSYRERKGRKENEVEA

>comp11309\_c0\_seq4; 1193 198 4982 LEN=5010; translated  
MYNCQKKQREGSKPKLSHRQCTFLWYLF FGMVHEATHLVTAWWLG YELVRVMSQ NATLIP  
ESSSSPYIDAWTHLAYEVILGRQC SLHNLPKDLEEPVKHSGWIGSSLLLLLLLLILRWSSR  
RCTKRKTASTNGSNGPCTKIQS FIFDEVMSSDMLLA AFVTTCEAITTDLIGIPILPLNS  
GSRVQVFYCGNFGVILLNKWWLQ NRESESAALDTLQQMVEVTMMRGAQSGGVVYHPVQS  
KETKDTTAPCFKAVRSRVV NKRTDLSKLVRAKVERDFRAKVRPTSLSQETDSFVPRM  
MAGHTRFATSSSLSTLDGTHPHQWTPPSTRRVYSMEKNGNTRNKNYFVPRPTLVTVENYIT  
HNGDFDFQSRGKTYDLETIQEWLSVVTETEMPAVVDS CAIAGMVDILRTQGC FGLSARY  
ALVLGMESSNCGMNMKTENGRKQRTAMP PYTYLE NVIGLAF EKALEEFCIENGATCLR  
EIGSHGRSRAILSRKALERLRTL PNDLSRPLIKAIGTQTLMD SFGARRTGARKNLDFSI  
DNESDEEFDGDIESNPVDKSLRPF CRMTIDAFFDNDLFMTTKLFMESAKGSFGISVTSNL  
DAHRQMCLAARGQTI SIAFYDPKDLICYGSEQA AVKAGMSTKLDRSIDKEKLESTTCSNR  
DVDNESTRDLDDLGEIIVLDWGRQKYQTSPVSLPNCHLEEHMMNGKITAILHQESKS  
TRTDEL FHRMTKLSSNHLIQPLQPSTDDPVLKDIQDIPYVCKNIQDDWNARRPIYSIGG  
LNRLTAYNLSRCLRKRLEQHVAGTVPKKSLDILLTGCEVSLYLAEQFATDLQKSFPKLCI  
EAVSSNKLLGLYQGEI AVPSIGFPYAPQTRNIKDAIVI VSHSGGTFGPLACSNLLQSAT  
QSIYVVTSEWDTQIGKQLRMMEITGSI SNLMNQRI FSTDIGMRPAEPCSVSVAATHQLL  
TNLFSYISVILSDPRFRVTVTKAQINEQDIQILEKCNEMNIEALTETVGHNRGYP LDTV  
SRLRRNLYELGNLWSDHILEQARAYIMGGVYIFVTVTCGWPLVSLIGRGGVVEGHRIMY  
FLRFLDSCIYFWLPQICIMIIRIFQGRNLRHRMVGRTV VIGDIPWV SQCADAF LSKCFAV  
SYSIAGLNVLSGNPSDHFVHRHTRVVRGTLAIFGRPDGRLSALSTAEGSVCLSVNQASS  
IQSYGGTCESTITIGHNPFTLNL SKTAIFLKRHRPLFLCERLLVEADADEERTTREREQLD  
ESVSSDES SVSRHRNSLAKSCKNVFTSFRKRDISPLNTSIHQMMDTISISLQIHKRRSTHA  
LVGAYLDIKEQNSIRHASDLDSGEINESYAVDDCVAEVINEKKSDDRLQRVVFQKFDKGD  
DGILSEADFVKGLVAIDSALTESEAKIMFREADS DRSGAVDYNDFIAFLKRFRYDQRVK  
PPNRDNRGMI VVQASKEKYFGETLRKYNAGKNKVKDMDFVLAQSQHLVQELYETRIASM  
QR FVAMCVFFHHISKRVERFFARISFGYWG YRLDRTHSIVRIATTASPVSGSDVRQRIDG  
LRLNKVLHSVSAIENAYLSYRERKGRKENEVEA

>comp11309\_c0\_seq5; 450 1 1310 LEN=1551; translated  
XALPISVVETKVSQCADAFLSKCFAVSYSIAGLNVLSGNPSDHFVHRHTRVVRGTLAIF  
GRPDGRLSALSTAEGSVCLSVNQASSIQSYGGTCESTITIGHNPFTLNL SKTAIFLKRHRP  
LFLCERLLVEADADEERTTREREQLDES SVSDES SVSRHRNSLAKSCKNVFTSFRKRDIS  
PLNTSIHQMMDTISISLQIHKRRSTHALVGAYLDIKEQNSIRHASDLDSGEINESYAVDD  
CVAEVINEKKSDDRLQRVVFQKFDKGDGILSEADFVKGLVAIDSALTESEAKIMFREADS  
DRSGAVDYNDFIAFLKRFRYDQRVKMPSPNRDNRGMI VVQASKEKYFGETLRKYNAGKNK  
VKDMDFVLAQSQHLVQELYETRIASMQR FVAMCVFFHHISKRVERFFARISFGYWG YRLD  
RTHSIVRIATTASPV

>comp11309\_c0\_seq6; 1152 198 4850 LEN=5091; translated  
MYNCQKKQREGSKPKLSHRQCTFLWYLF FGMVHEATHLVTAWWLG YELVRVMSQ NATLIP  
ESSSSPYIDAWTHLAYEVILGRQC SLHNLPKDLEEPVKHSGWIGSSLLLLLLLLILRWSSR  
RCTKRKTASTNGSNGPCTKIQS FIFDEVMSSDMLLA AFVTTCEAITTDLIGIPILPLNS  
GSRVQVFYCGNFGVILLNKWWLQ NRESESAALDTLQQMVEVTMMRGAQSGGVVYHPVQS  
KETKDTTAPCFKAVRSRVV NKRTDLSKLVRAKVERDFRAKVRPTSLSQETDSFVPRM  
MAGHTRFATSSSLSTLDGTHPHQWTPPSTRRVYSMEKNGNTRNKNYFVPRPTLVTVENYIT  
HNGDFDFQSRGKTYDLETIQEWLSVVTETEMPAVVDS CAIAGMVDILRTQGC FGLSARY  
ALVLGMESSNCGMNMKTENGRKQRTAMP PYTYLE NVIGLAF EKALEEFCIENGATCLR  
EIGSHGRSRAILSRKALERLRTL PNDLSRPLIKAIGTQTLMD SFGARRTGARKNLDFSI  
DNESDEEFDGDIESNPVDKSLRPF CRMTIDAFFDNDLFMTTKLFMESAKGSFGISVTSNL

DAHRQMCLAARGQTTISIAFYDPKDLICYGSEQA AVKAGMSTKLDRSIDKEKLESTTCSNR  
DVDNESTRDLDDLGGEEIIVLDWGRQKYQTSVSLPNCHLEEHMMNGKITAILHQESKS  
TRTDELSEFHRMTKLSNHLIQPLQPSTDDPVLKDIQDIPYVCKNIQDDWNARRPIYSIGG  
LNRLTAYNLSRCLRKRLEQHVAGTVPKKSLDILLTGCEVSLYLAEQFATDLQKSF PKLCI  
EAVSSNKLLGLYGQEI AVPSIGFPYAPQTRNIKDAIVIIVSHSGGTFGPLACSNLLQSAT  
QSIYVVTSEWDTQIGKQLRMMDEITGSI SNLMNQRI FSTDIGMRPAEPCSVSVAATHQLL  
TNLFSYISVVILSDPRFRFTVTKAQINEQDIQILEKCNEMNIEALTETVGHNRGYP LDTV  
SRLRRNLYELGNLWSDHILEQARAYIMGGVYIFVTVTCGWPLVSLIGRGVGVVEGHRIMY  
FLRFLDSCIYFWLPQICIMIIRIFQGRNLRHRMVGRVTVIGDIPWVSQCADAF LSKCFAV  
SYSIAGLNVLSGNPSDHFVHRHTRVVRGT LAIFGRPDGRLSALSTAEGSVCLSVNQASS  
IQSYGGTCE SITIGHNPFTLNL SKTAIFLKRHRPLFLCERLLVEADADEERTTREREQLD  
ESVSSDES VVSRHRNSLAKSCKNVFTSFRKRDISPLNTSIHQMMDTSISLQIHKRRSTHA  
LVGAYLDIKEQSN SIRHASDLD SGEINESYAVDDCVAEVINEKKSDDRLQRVVFQKFDKDG  
DGILSEAD FVKGLVAID SALTESEAKIMFREASDRSGAVDYNDFIAFLKRFRYDQRVKM  
PPSNRDNRMIVVQASKEYFGETLRKY NAGKNKV KMDMFVLAQS QHLVQELYETRIASM  
QRVAMCVFFHHISKRVERFFARISFGYWG YRLDRTHSIVRIATTASPVR  
>comp11310\_c0\_seq1; 388 176 1138 LEN=1233; translated  
MATEDSNPKIIAVMGATGKQGGAVVEALLTVPEQFSIRAITRNPDGDKAKALAAKGCEVV  
KADADDEASMV SALSGAYGAFLVTNFWEDMSMAHEIEQTDK LQNA AIEAKVEHVVLSTLE  
DTRPLIEASADVDTWPVLQDEFKSYVPHFDGKGEAGQRFLASAAPTLLFTCFYFTNFID  
FGMGPKKHAEDQPFALTFPIGDKPIPM TSLRGI GHTVKAIFQDPSTINTCRGAVSAFHTG  
QEMADAFSKCLDVPVIYNAVD PATYASFGFPGAADLANMFRFFTSFKSEHLDEAEAEKLL  
GRKPDSLSDWIEDNKAAFAV  
>comp11311\_c0\_seq1; 255 250 792 LEN=854; translated  
MSLLVYNAYVWLKRRARIPRNGTRWKYRSAPVWKAAPIVQNVSKFRSWVATADTQAEKYS  
AAPGPIDFKSAKDSVRDKELVDFMEAFYKSADIPAETHEWDAEDKAFKLAHFDQVKEQAA  
VYAE LKEDTLKEIEFLKSTKT TEDTTIHDLMCNNPTIHEEIEDEIERREWFKDLVVADKA  
>comp11311\_c0\_seq2; 244 1 546 LEN=608; translated  
CELQSYTMSAASATSRRVVRNLAHRKIDWSAPVWKAAPIVQNVSKFRSWVATADTQAEKY  
SAAPGPIDFKSAKDSVRDKELVDFMEAFYKSADIPAETHEWDAEDKAFKLAHFDQVKEQA  
AVYAE LKEDTLKEIEFLKSTKT TEDTTIHDLMCNNPTIHEEIEDEIERREWFKDLVVADK  
A  
>comp11312\_c0\_seq1; 746 451 2652 LEN=2920; translated  
MAPSSKRGGKRNATIARLNPSNSLGSNGTDDQSGDGSDLRTGRWTAETEYCDKLITAY  
EKGELPISEGVKLNDFLSTMLKSKQSRLTKMKNAKLSAKTYKPNAGFVVDEDAKSF SQ  
LEVAFYESIQC DMERAEIRFHMQKEWREFFSTYCVSMGQKLEADAWLSSAEELDRRASQA  
KDAARMARRKVMMGYALTKDAMNPERGVFIEKSLMSDGHRSDEVMSSGHSAMNTITTMAN  
QSSLLSSQKNKQANRARS IKDFSSPFVGRVIQYIERHQLPFEHVD AWVPSFVSQDNEPN  
LMGTDDKSGAEQKRC LCFAGYASTDTEIPSGGGRAIPLCTNIKFDLYSFG EYSSKFSFDV  
GCGLPGRVYSSGIC SWEQGVENAPSHQFERCGGAAQWGVKTVLGVPI P SPNVGRIVMLLY  
SRSDRTRDPEMVRVTDELTKLMPTPKWKLVDVGSAPPKPDGKTNDKRI PDMLKLLAEN  
IPTHRHSPFSPYLPGFALRLLLLKRNKTS EDNELATTM LDSYSSYLSSGRNSTETAWMV  
ARDYMLLTQTSSQHTAVMPQNHQSLHQQQQIIQHNTQPRQPIQQVQHQQPQQQQLGQVHC  
LQNIQQQHQQHNILPAAQQMQAHTQVPRVHPAQSNPVHQNQNPGVSIAPASISTAPAPIV  
HTNTNNTLVPTPANHVQGTISSLGHP THATPNGQNTISQNGIAALSHFAQQHQMVHAG  
GISSLQNDKKGIG  
>comp11312\_c0\_seq2; 410 451 1910 LEN=1910; translated  
MAPSSKRGGKRNATIARLNPSNSLGSNGTDDQSGDGSDLRTGRWTAETEYCDKLITAY  
EKGELPISEGVKLNDFLSTMLKSKQSRLTKMKNAKLSAKTYKPNAGFVVDEDAKSF SQ  
LEVAFYESIQC DMERAEIRFHMQKEWREFFSTYCVSMGQKLEADAWLSSAEELDRRASQA  
KDAARMARRKVMMGYALTKDAMNPERGVFIEKSLMSDGHRSDEVMSSGHSAMNTITTMAN  
QSSLLSSQKNKQANRARS IKDFSSPFVGRVIQYIERHQLPFEHVD AWVPSFVSQDNEPN  
LMGTDDKSGAEQKRC LCFAGYASTDTEIPSGGGRAIPLCTNIKFDLYSFG EYSSKFSFDV  
GCGLPGRVYSSGIC SWEQGVENAPSHQFERCGGAAQWGVKTVLGVPI P SPNVGRIVMLLY  
SRSDRTRDPEMVRVTDELTKVRFLFFIPVPNSFKRKEIRERATNFFQKVFNKCTNHHFI  
SLQLMPT  
>comp11313\_c0\_seq1; 818 131 2467 LEN=2573; translated  
MVKKMRWFVKILFCASCLLF IATSTYLLVLHRDPTWPAHILPIGAYSATYGGGTGKNRTA  
LNLWQNQHNPSPGPPVLLAEATAEATATATAEKGSKEIIRNGNEPTEVVLSIQNQPK E  
DGSRT EESRNAPGGSDVPKEILSLPNQTQODENPPRTEETQQDDNAIPA EKTQRDRKP

PQNKEKQRFWRYDDAGPDILHARTHFLSSIPSKYRILSDEVLTGEQDDKAFIDDLRDRYA  
TNPDHTWPRKLLHYETNP SIAVLPERYRNHPSWLSFFGSSGKDNHNDNSEPRGAGFPRY  
VASYRVTHWNCHDGETNLKLYGGSWDVPKSEIGKTDYLGIALLDADMNILVDTTVTLSK  
VATTVRDKKNLFSYSYDYRLFNLGDGGGNDGDDGNSDDHDELYLTSEKFI S PIALQLLP  
AASSSSLSFPAGDDSQIPDNFVEITTAFFPMSATTD RGPVLKVWTRDYSACPMGAYEHT  
VSKQKGNPNTKNLLYFGKRGDNTAKALFYPRHNPNDVRDVHLNRNCKKRDNKRI IRETT  
IDYNT PAPKQQPVPSFQTI EALKYPNKADKLFMSDRGSACCVKVKDLVRQTIASAPVT  
NSTSTSKADTGT PGNANNSDEHDTLLVAIVHPKTKFP GKRLPRGVNPNTYLSRFIAFLPE  
APHTIVAQSGMFCLGFPSRGIDDEEQQQPSHTTGRDNNSGGDGYYESPLTYRTLSDTMN  
FANETLRCPRIHFILSMIDKVKEDPSEEDAVLLSYGVSDCF SRVVEIKKSEIVRMLSP  
>comp11315\_c0\_seq1; 707 199 3048 LEN=3433; translated  
MTFLRDYAI SLARQRRISWII LFI IYTTAAWLSLTSQRIVSVPLAARTPASFANSAE RVMH  
YSRGP IIRGHRSVRLSNAGQGRPTSTASF SKSLLFSDQDDQEAPDFKINDSELIDSLIQ  
ARTTREVEVILRKSLSDDL NQMDLFPESVYGDNEKIDFDVDSDTGNISFSRSLNATAA  
ILRRMAHISVFEARSELANSNELKTMKIKVSDEASQNF SKLQKKMIASLLEAIGIKLSH  
RSSLSHSHKATSQRTNDPQERPGVYPLSDVLQALAVLAPDEAKKKMKPFVAVLVVEFLNAH  
ETSELYRLGP IRLVQCLQAMAKLEIDHPTLYNNICQRL LKPDVSKIPARFLAHGLSALA  
TFQTRRSREKASNPSTEWALGGLREDSSEETNENDNTIDKDTMRLSRAFMRRLRKQKVAR  
EATVEDMCRALVATRDL LLDLGAMANMEDEAAIFGFTCLRTILETRKTSESDSSPSSPES  
LSLNP IQVTNMITSWASLSDQSREDTVIGDLLQICIDDDI IDGCNVAQLERIIQSIRKLN  
VANHAEVTRCVGERLMI IVEDNEHSNFQDIYPTTVNEILRWPVLVHRRNNTVMEPFVNA  
SLLFSRKSFL EQSSVKEIANFLWFLSIARRFDEKILLNIGHCLMEDK MVDSCSPKIASRI  
LATFTSLVVSKEKLS ELMELKQDLFYNYGGHLLS SKLSSAETSSALYAYAKANYVQDK  
GVFDHLVDLLASSRHSCSSRQLSQT LWSCGKMITWERQEME QMDDGNSEMEDPPYLENAL  
SIAKELSGRGDELS PADVAQIYWGIGRLEIHDDTMMSL FANRTAEICSSMNSIELSNVLW  
GLAKVRYSDGKLIGLSERL TEDDIIVSSPQVAASIMFSMGR LRWKDEILFQKLSSTMID  
HIEDVNAQSIANTLWAFRAVRMRPPRELLDTWAITRLGIVPVTNQPEAK  
>comp11317\_c0\_seq1; 229 199 444 LEN=488; translated  
MAMDQVGDG VLLGAGASVLGNVKIGDGCQV GAGGLVITDLPPHSVAVGVPVKIIGSFVDV  
TEQPSVEMNQMMNQTF LSDGI  
>comp11317\_c0\_seq2; 583 131 1801 LEN=1845; translated  
MDPLNVF LLLLHVQVVRVSSFATQ QHPQDSAGITSVYGGRTNLVSHNPLTTPSPWRLQQR  
RHRFTLNAEPTTNKGEEKNNDEEKARRKASTYNLGVGKNL PFGSSGIDNGDEIDPNELQW  
NVPETPN SKPLEKSQSNSTSKKQSYS AKDGSSEPKRVRKMVAR TDQAGQLRNAMWHEEHY  
SKKTGPPPATTNTTAPGGYNSRQSSDEAEGPFRPELFY PNIDLSIPPSVYDPETS RDV  
VWDLMRWEAYQEAQREPLLV SFLYSSILNHD SLESSLAFLLANKLSSAAMI STQVQSLIL  
GALDKDPSIGRAIRADIMVSAV FVCLLLRLRLPAGPGFVVRTDAVLACAFSRFVFFFLGV  
VHDPDSCXPQAVRDRDPACTCLPDVFLYFKGFHALQTYRVANAIWKTDNKQVLAHYLQSQ  
MSQTFQIDIHPNATL GSGIMLDHGTGIVIGETAHLGHNC SILHHVT LGGSGKKGVDRHPK  
VGDGVLLGAGASVLGNVKIGDGCQV GAGGLVITDLPPHSVAVGVPVKIIGSFVDVTEQPS  
VEMNQMMNQTF LSDGI  
>comp11317\_c0\_seq3; 609 131 1800 LEN=1844; translated  
MDPLNVF LLLLHVQVVRVSSFATQ QHPQDSAGITSVYGGRTNLVSHNPLTTPSPWRLQQR  
RHRFTLNAEPTTNKGEEKNNDEEKARRKASTYNLGVGKNL PFGSSGIDNGDEIDPNELQW  
NVPETPN SKPLEKSQSNSTSKKQSYS AKDGSSEPKRVRKMVAR TDQAGQLRNAMWHEEHY  
SKKTGPPPATTNTTAPGGYNSRQSSDEAEGPFRPELFY PNIDLSIPPSVYDPETS RDV  
VWDLMRWEAYQEAQREPLLV SFLYSSILNHD SLESSLAFLLANKLSSAAMI STQVQSLIL  
GALDKDPSIGRAIRADIMAVRDRDPACTCLPDVFLYFKGFHALQTYRVANAIWKTDNKQV  
LAHYLQSQMSQTFQIDIHPNATL GKQNF CGRARLLRGVLYNLXDYRENRIDAKQWYFKEN  
TIAILISLYFNCVYTGSGIMLDHGTGIVIGETAHLGHNC SILHHVT LGGSGKKGVDRHPK  
VGDGVLLGAGASVLGNVKIGDGCQV GAGGLVITDLPPHSVAVGVPVKIIGSFVDVTEQPS  
VEMNQMMNQTF LSDGI  
>comp11317\_c0\_seq4; 543 131 1956 LEN=2000; translated  
MDPLNVF LLLLHVQVVRVSSFATQ QHPQDSAGITSVYGGRTNLVSHNPLTTPSPWRLQQR  
RHRFTLNAEPTTNKGEEKNNDEEKARRKASTYNLGVGKNL PFGSSGIDNGDEIDPNELQW  
NVPETPN SKPLEKSQSNSTSKKQSYS AKDGSSEPKRVRKMVAR TDQAGQLRNAMWHEEHY  
SKKTGPPPATTNTTAPGGYNSRQSSDEAEGPFRPELFY PNIDLSIPPSVYDPETS RDV  
VWDLMRWEAYQEAQREPLLV SFLYSSILNHD SLESSLAFLLANKLSSAAMI STQVQSLIL  
GALDKDPSIGRAIRADIMVSAV FVCLLLRLRLPAGPGFVVRTDAVLACAFSRFVFFFLGV  
VHDPDSCXPQAVRDRDPACTCLPDVFLYFKGFHALQTYRVANAIWKTDNKQVLAHYLQSQ

MSQTFQIDIHPNATLGKQNFGRARLLRGVLYNLXDYRENRIDAKQWYFKENTIAILISL  
YFNCVYTGSGIMLDHGTGIVIGETAHLGHNCSSILHHVTLGGSGKKGVDRHPKVG DGVLLG  
AGASVLGNVKIGDGCQVGAGGLVITDLP PHSVAVGVVPVKIIGSFVDVTEQPSVEMNQMMN  
QTFLSDGI

>comp11317\_c0\_seq6; 649 131 1645 LEN=1689; translated  
MDPLNVFLLLLHVQVVRVSSFATQQHPQDSAGITSVYGGRTNLVSHNPLTTPSPWRLQQR  
RHRFTLNAEPTTNKGEEKNNDEEKARRKASTYNLGVGKNLFPGSSGIDNGDEIDPNELQW  
NVPETPNSKPLEKSQSNSTSKKQSYSAKDGSSEPKRVRKMMVARTDQAGQLRNAMWHEEHY  
SKKTGPPPATTNTTAPGGYNSRQSSDEAEGPFRPELFYPNIDLSIPPSVYDPETSRDV  
VWDLMRWEAYQEAQREPLLVSFYSSILNHDSSLESSLAFLLANKLSSAAMISTQVQSLIL  
GALDKDPSIGRAIRADIMAVRDRDPACTCLPDVFLYFKGFHALQTYRVANAIWKTDNKQV  
LAHYLQSQMSQTFQIDIHPNATLGSGIMLDHGTGIVIGETAHLGHNCSSILHHVTLGGSGK  
KGVDRHPKVG DGVLLGAGASVLGNVKIGDGCQVGAGGLVITDLP PHSVAVGVVPVKIIGSF  
VDVTEQPSVEMNQMMNQTFLSDGI

>comp11318\_c0\_seq1; 802 90 1973 LEN=2111; translated  
MDLLGEYDSNSEDENATGKTTATQQKAQRADRRFLRAAPSSISIMTRRKHGHELIVHNDPS  
NRDVLITEPVQGPQVEDPSRAQKNQLARFDLEKNAVIDEASFQKQKQFQRTGQALGPDE  
KTTVVRTTLGYNSDRLRLFEEQERERQKRQRELYGSDDDTGGNGEGKKS KKKAKEPLV  
YGSDDAEVYGVWAPPSKEERWHADNALTDIQKGGIESLAPEQISEREYIKERDRLLGEKE  
EEREEISGFERLMERKMAHLLP PKTAGDDRPMEPTKTTFFHGESETDYKGRSWMAPPTGMA  
SILSLSRTVEEEMDDHKCFVPKCVHRYTGHNKGVQIRLFPKTGHLLLSAGLDGKCKVW  
SVGEPGQRRVLRTYEGHKA AVR DVQFNHDGSRFVSASFDRFLRLWDTESGRVLQTFGNKK  
VPYCVFYPKDDNFVVGTS DNKI VTYDCTTAEITQEYNHHLAPVNAVAFVEEDNGNVKM  
ISSDDKVLVWEWDIGVPIKYVSDPTMHSMPCLVLHP SHQYLVGQSLDNNIVCFQVQK  
FKLSK KKKFSGHQVAGYACEPSFSPDGRFLVSGDGKGMFVWDWKM QKILQK FRAHESGP  
TIACVWHPINPSMVFTCGWDGVIKMWQ

>comp11320\_c0\_seq1; 634 141 1816 LEN=1862; translated  
MATRDSRAEVEPPSYFYHHRIGSDTDTNMRSNSEWKIECDAILNNGRDDSISQNDCEQ  
SQSSVFSPIKQTCHDIDGVLNEIRLRSSPDNDCMFRNGNYNGYDDAMSDVSAFTTNN  
LVRELNKAHESFLDSAGAIQDRFDFRSDTYENDLSLAWAGGTENEW NDFIWPEGDKISK  
ENHSGEYCDYLWEAEWILEPSYHRNRGNFRGFKILSSWYKRVKQRNRHYTNLEQTPSSS  
SRLGTRRISTLCALLGVVLVIVGITVTTTTWSSKQEQRQPTSIVDSHNPTSLLPGGG IAS  
LSPMPIDESSKALNVAEPEHRDSSSSPTQSLTPAPTIPLYLDDSVTSHADTLPPVAALP  
VSGSRVDAVKIDVDENFGDTTNRGPPSLPNKSLSVVKLPVSGATHAATKESGSSLPSSST  
SSTLPISGATPSNGVNLEAARTTSSGNRSPVLPPTSQAKLPISGSKATVNIDSNEESTEK  
HPYLATNEKDI IATSQQNPPKESKDKKKADNSIPVRRALRNSNNXNFWETTKITTLKY  
QSQQTIELDMTSSRIFYH

>comp11321\_c0\_seq1; 660 83 1306 LEN=1539; translated  
MSSLQKAVAEINSTGNAKSGTATSFEVGGAGPGSAGAYKRSENLGAAASYTVGETGEAPK  
STRRYSGNKNAASYTVGETGGAKGSSNAKSNKVVVKTKHFTIISDRDYEEEEKNSSSAMD  
LDYHDVQTSMDVDDKTGKRAPAMRRSSSKTQTFCHIGGTEEQQTNNVHTIGVASNDSAED  
ERQIEQMEGVIDQGTKMPLVVLDGANVAYAYAKVMAELNGGPSLNAPSSQLKPDVIRGIQI  
ATDFFLDAGLRALVVL PQYWFGGKRSTTNAITVTSQLEILSDLKVKGLVAVSPPTDDDDA  
YALTI SRREESRSLKPPRNNGEGPGFVLSNDLFRDAQDREPPSGTLKEWLTTRNEKVGPG  
RISYTFGDMGSMNDRGERILDFVPNPRHPLVVWMENKGT SIDCTYCS

>comp11322\_c0\_seq1; 1072 556 3182 LEN=3422; translated  
MTXDDDIGALGSILSWDEDEDGVV GAVGVNGSLPNSALPDLVSNHLNKDKDGGLSYLQ  
QPLVGSIGAQDTSTTNIPLPTRIN YQTGGSHNPAPTAPVQEEQVKPKGAAGENASTQQQ  
QAQLQQQQQIRLQQQIQQQQQQIQQHQLQQQLGIQQQQQRMQHQMVTTAPAAAQATQQ  
ALGAQTPSQPQSQVVTHPAQVQQVAPQPASHTTNLQGGTVLSLLQQNALLAQQAQNGLV  
MQGVSQQASQEKPADQQQQAAPQFGIDPNILRRIQVAQLQQQFNAVQQAQAVQAQAAL  
QQQQQQRIQYPGQVQMI P SPVTSIPIVATTTAVQPVI STTKKHGRASSQKPPPQTQKKEK  
TRKTHATKTPLVASD TDGEISLQSSVLEKKSTGSRKKGEPIDTSNMTPEERAKANRDR  
NREHARNTLRKKAYLET LKSTVNDLCQERDTLVTERAGAASILVEMNNTRTEVLM SFFA  
LRSANEKRRQLWASILDESCFACILPVT PYSRFPASEVQVSKCQRTILGIDGMMSDTASL  
HVLLNNTLVDRARFPTAAIQFRYTLVTEEAVVAGNQMMARWVMQTLNAVQCGARMEVSKQG  
MLCCKFNSAHKIVGLELMFDMALMLQLKQAAGSHTFSVIPNTVQTCQRSFDSMPVMILA  
DEPYTIVQVNKLWEDMSGYTAEEVVGKTS CRVLEGEQTDNAVEVFMDEIRFKRPTSAMI  
LHYKKSHERFKNF FTAYPLSTDSRITHYLIFTSYVGGVGDGSESTNNVTTTRGVVDNPQVA  
LQPSIAQTNLLTQNL RANFNAAQRQAAATTTTNL PNFQPLIALPPVLSNPVPPTTILSTC

LPSQSQNPSAFLPQQQLQMNAQKRPHEISISTGNVGS

>comp11322\_c0\_seq2; 1169 99 2774 LEN=3014; translated  
MGKDYTEFEHSDNDNEDDDDDDIGALGSILSWDEDEDGVVGAPVGVNGSLPNSALPDLVS  
FNHLNKDKDGGLSYLQQPLVGSIGAQDTSTTNIPLPTRINYQTGGSHNPAPTAPVQEEQ  
VKPKGAAGENASTQQQQAQLQQQQQQIRLQQQQIQQQQQIQQHQLQQQLGIQQQQQRMQ  
HQMVTTAPAAAQATQQALGAQTPSQPQQSQVVTHPAQVQQVAPQPASHTTNLQGGTVLSL  
LQQNALLAQAAQONGLVMQGVSSQASQEKPADQQQQAAPQFGIDPNILRRIQVAQLQQQFN  
AVQQAQAVQAQAQAALQQQQQRIQYPGQVQMIPSPVTSIPIVATTTAVQPVI STTKKHG  
RASSQKPPPQTQTKEKTRKTHATKTPLVSASDTDGEISLKQSSVLEKKSTGSRKKGEPID  
TSNMTPEERAKANRDRNREHARNTRLRKKAYLET LKSTVNDLCQERDTLVTERAGAASIL  
VEMNNTRTEVLMSSFALRSANEKRRQLWASILDESCFACILPVTTPYRSFPASEVQVSKCQ  
RTILGIDGMSDASLHVLLNLTVDRARFPTAAIQFRYTLVTEEAUVVAGNQMMARWVMQT  
LNAVQC GARMEVSKQGMLCCKFN SAHKIVGLELMFDMALMLQLKQAAGSHTF SVIPNTV  
QTCQRSFDS PMVMILADEPYTIVQVNLWEDMSGYTAEEVVGKTSRVL EGEQTD TNAVE  
VFMDEIRFKRPTSAMILHYKKSHERFKNFFTAYPLSTDSRITHYLIFTSYVGGVGDGSES  
TNNVTTRGVVDNPQVALQPSIAQTNLLTQNLRFNAAQRQAAATTTTNLPNFQPLIALP  
PVL SNPVPPTTILSTCLPSQSQNPSAFLPQQQLQMNAQKRPHEISISTGNVGS

>comp11323\_c0\_seq1; 225 165 704 LEN=1076; translated  
MPERYASNFFGAGPANTKSSVGNSTARQRWIGFDESILLRLCVCRFSLFLISCRDLFLI  
SLKAVMFGGLISTTLLGLTIDKLDLYADLAVESYMDMADEPDFWKKMTEGMSPEEKEKAK  
ELMAK IKAQRAGEDAPVTEAPQALASDGSEASTETTTTAPVEATKEETAKASNDMFSDY

>comp11323\_c0\_seq2; 153 1 477 LEN=849; translated  
PVDVTTHVDISNAAQSMWIATIDSDIANIQLEEFRTV FAGGI AVMF GGLISTTLLGLTID  
KKDLYADLAVESYMDMADEPDFWKKMTEGMSPEEKEKAKELMAK IKAQRAGEDAPVTEAP  
QALASDGSEASTETTTTAPVEATKEETAKASNDMFSDY

>comp11323\_c0\_seq3; 132 1 322 LEN=398; minus strand; translated  
XIPPAKTVRNSSSWMAFAISESMVAIHMLCAAFDISTCVVTSTGKISNFVVLVDDVEESWC  
CSGGVTPNPATDGSRAETMHKDE TREYMMI IDSDIGRIANSGSNDAS

>comp11324\_c0\_seq1; 492 223 1431 LEN=1510; translated  
MGSTTTATTTTTLSLPSFDS CIVTDAPEQHTFEDGLQVPFVLSPLSRKDN DATVRIETP  
EDAARFVRNHRTAIDQMLEERGAVLFRGFLETPDDFNAFVEAFDGYTDLSEYKSM SFAV  
RTKLAHR ICTTNEGKSGGLVFHHEQAQTPLWPSHVFFCCQLPARPGDGGGETGIVSSPLVY  
DELRRRHPGFCSKLEAEGVRYTVFAGPRQDPSKGAGRSWKSFFHASTREECERKMGLGGW  
TWEWGVGPSNASASVGSDFLKTTPVLEAVKKVGN SGRKCFNQLIATTANALEFGRKGG  
GDQTHRNGYDPLVDVPTQEGIDE CVRFNGD PVSLEVLLEAKEICEELAIDVRWQKGDVV  
LLSNYLMHARRPWKGPEGTRKLLASLVQEEHCTSFG RPLVA

>comp11325\_c0\_seq1; 1068 290 3310 LEN=3515; translated  
MSIEDEISDYVQQQFEAFQLEEEEDLGSEIESSSRAASTIEKHVCVLILNNGIEKLELNEE  
QNSAAPP SFIAS TFLIPLLVKYTDAALAMETNSSNKDAVERV FYLV SALACRIS SRNDEA  
VRFILERAET FSTVLLERLRAQAC SMLGCFASHIGTTISRYQKKNKSNQEVN FLREDLES  
IGNLLPRLIDKSQAVRQSAIHAAGMWFGLNGKEFEGISTTSVLEGLLWSMWH DSSVTN  
RVEAVKAVPIDSAETLDHIIARIHDVKEKVRVAIETLHLKVDPRRREIMTEE HFRDIIR  
HGLTERCGSTNLATTKLICTKWTKAAHF C PVELMRFMGATTYEE ECEKALQVVLNMARSR  
GTTKSDTILQELSDPEIRSLCSNLEKSMVKLNDSSVIFDEYQLFYTRVACSTAQESSDLT  
FAQKEDLMSKTTPIPTL CDLFQKHLHRFVESVQEDDEECMDQECFVCLQLLQLTKVTGL  
QEEGSRRH FANIMIEVLANSETPDDLIEDCVEALRAANENEFDFYNAVSLILANLTSTTS  
SVDAEATDHTRVLFIFSI VLENAPS NLSTHEVFDVMTKIILSAVTNSNRTVREIGICCFG  
KLGLYSDTATI ASDFKPILLNIAANENESIQCRAQALLGLSDWAILFSDVLQPLTDSSSG  
NSLSLLVIVQEMI QHKNS TLSAIASEVATKLLFSAQTLDNHLLSLLLVS YLDP SKIQQLG  
EANDHDVDVKDVGSPRLRQLL S LFFPAFCLKSVECRQ LLECIENALNVALNNS SKKRT  
KKRSVAFPLVKIVNYAFSIVLSDSNASTTPVSTEISNEIIEEPKANNFD PALMASLQVSS  
FLVKN GHELNLTQLRSLCKFLGNQDIRIENHNKAELGKLDRIEELAF LDDPSSLKALLP  
LTDLLSGVESYEDHDEGDEIDYETDQQDFVGTCD DDETI SEYTRDVEPVDEKMQDEIMM  
DSIARLSLENKENPPSHVKVSRKSRSSSIQSNISVLESV GSPNV

>comp11325\_c1\_seq1; 160 979 1098 LEN=1491; translated  
MELGGISDPLDLLEWWMDEAGESID ESELLRALEGVTRT

>comp11325\_c1\_seq2; 639 407 2770 LEN=3050; translated  
MGDMLLEDGVGLSNGEKETAPATVETETQSEAPSRKTTVRVVD PTRDLFQLLLSDF FSSKK  
GNGAKRYRTFMVLA YRESCHQSKTLLWRLMNEAIPKIEFQLLKDEHQ LDDNGERDENVRS  
EII FVPMP IGEKGEKAFNEKFM DQMGISRLPYLFFLADEE EPGVEAF AHID DVFAVSEMY





MSISAAREARRENWNTYDEYATIDSMQPSDEWEGSRAVEDY YRVNSRSSIDFDKYSAPDD  
EVSYREPLDGDCCDDVDQEQPHGQEDETGSYFAAPTREFVDYISHLTSSFSVEGSKLRQYG  
ASYYSNATFSKKEDTEGKKEIKSKRSGSNHSRCI IENTESI QDRRDEYKQRRGSNAKGGD  
DDCHRQDQSTMSCSVEEISQISELTMIDIPTIATEQPQKTFAHCAPTLPTI SEVKQFQSPE  
IAAATCVDGVRNSKACSPGSDTTTNESEGNNDVMDVDFVGLVEDALCTPMKTSKSERKKVF  
MEAFYEEESQVVKMAKKSASKKALHETSKHSRSSLSTNHAGNQKPERRSPGYSEDEGSIM  
DPANRTNAPESSTHSVGRTEHSMKIVDKPPLDTTGFPALGVPQDEELTMDWSKMMSLA  
EKQLAAGEKHVGAEEENSVVSRISAISRELSKASFYTSIRGDQSHSPQTNFRSKAAFVSK  
STNIESSPTSSITNSSSTHGTMEHSVVQELRELSALESSSFEEQSRFLLTSSLFRIMRHL  
IPTLNKPKWEADDEEEERAFDEVSADEKIAKAMSLARKRAVGPQGETFYDGAALQTLRIV  
AFFMAFVLPYGVPRRPFQLRPLKTKKMTIESKPVVSLQLVCENDA

>comp11331\_c0\_seq1; 383 115 1750 LEN=1750; translated  
MTSNSRLLAELKPFNKYPKNPDKAALQVLASGRRRRSKPVFFVAQPTNDGAVKTRSRKQQ  
RQRPRYNEEENASNDESEEDNRMNRVIDVAHRCNKRKRTGTTRNEVLCALKNRSIDQLKA  
YYQERNKYNSLNCNGKQKQSDPKDRIHRKEKTQPSQDCE TNDDPECHEIKRVVKITHSSN  
VKQIRRSRESESRYYNDGSDTINTADNINNDDDV I KKG YKIRKAFTFWYDGVVVS NK P  
EWRYCHEENQNLKMWKVRFDNDDEEELTRQOLEEYHANLLSTRKTRFRVDTVAEPVYSNL  
SCASKTLDMSYNKAFADLCNRVGF TQDEV RWALAEVGLPYCLNASVERIMERK D STAME  
RFKNSQRRELRMLEFFAGKAVVSEALHNYGSYWRTRS IDKDPNSRATDKIDFMKVRWKNI  
GKLPDFIWITLPCFTHSFLARGDNRSTKENWFAKAPALWQDRFLARMSWFLEWVKKKND  
HVIFVIENPTGWMGEMAMIKTIVGKMEMRRTTVDYCVS GGS DKVSTNLWTVNSSCGYATS  
YVFNVX

>comp11331\_c0\_seq2; 450 115 1962 LEN=2404; translated  
MTSNSRLLAELKPFNKYPKNPDKAALQVLASGRRRRSKPVFFVAQPTNDGAVKTRSRKQQ  
RQRPRYNEEENASNDESEEDNRMNRVIDVAHRCNKRKRTGTTRNEVLCALKNRSIDQLKA  
YYQERNKYNSLNCNGKQKQSDPKDRIHRKEKTQPSQDCE TNDDPECHEIKRVVKITHSSN  
VKQIRRSRESESRYYNDGSDTINTADNINNDDDV I KKG YKIRKAFTFWYDGVVVS NK P  
EWRYCHEENQNLKMWKVRFDNDDEEELTRQOLEEYHANLLSTRKTRFRVDTVAEPVYSNL  
SCASKTLDMSYNKAFADLCNRVGF TQDEV RWALAEVGLPYCLNASVERIMERK D STAME  
RFKNSQRRELRMLEFFAGKAVVSEALHNYGSYWRTRS IDKDPNSRATDKIDFMKVRWKNI  
GKLPDFIWITLPCFTHSFLARGDNRSTKENWFAKAPALWQDRFLARMSWFLEWVKKKND  
HVIFVIENPTGWMGEMAMIKTIVGKMEMRRTTVDYCVS GGS DKVSTNLWTVNS SKLHAALS  
MFSKSSPESCSHHGRPYPHHPRYKPAEISRDLAETVAESVSARFGVNDLKV CYKAEPEVS  
TEEITFFNKMMGGAD

>comp11332\_c0\_seq1; 251 57 551 LEN=848; translated  
MSNPVFFDITIGGAAAGRIVMELRADVVPKTAENFRALCTGEKGFYEGSSFHRVITEF  
MCQGGDFTNHNGTGGKSIYGEKFADENFKLKHTGPGILSMANAGPNTNGSQFFLCTVQTA  
WLDGKHVVFVGSVVGMDVVKKIEAVGSGSGRTRAQVLI AKSGQL

>comp11333\_c0\_seq1; 255 1 911 LEN=1437; translated  
XTKPCNQFLRLFFCANLVISIINAYRPFPCARLRNLPFDATLEDILILFQGLVVIDVVL I  
GQGEAFVIFANPMDYQMALQRDRQTIGRSFVAITPGSRSDYYS AIATQQWQETQGGPIVR  
TSDDIHLGEEHHHHHKDTKGTELFGMIPSGYPSQSSLGGHGGGRSDSGSRRGGGGG SIGG  
GSMGRSNTGRMNPPGVIVKRTGGGIQIGEHTGFLMRGLPFSATKEDIYVFFEEYNTV S  
DSIVLTYRSDGRATGEAYVQFETGEDSKRAMDLHRKMMGNRYIELF LSNKEEHGRALARF  
GDR

>comp11333\_c0\_seq2; 307 1079 1987 LEN=2513; translated  
MEGVPLPPGIPGLGGSTDPLEAVLGPFP CARLRNLPFDATLEDILILFQGLVVIDVVL I G  
QGEAFVIFANPMDYQMALQRDRQTIGRSFVAITPGSRSDYYS AIATQQWQETQGGPIVRT  
SDDIHLGEEHHHHHKDTKGTELFGMIPSGYPSQSSLGGHGGGRSDSGSRRGGGGG SIGG  
SMSGRSNTGRMNPPGVIVKRTGGGIQIGEHTGFLMRGLPFSATKEDIYVFFEEYNTVSD  
SIVLTYRSDGRATGEAYVQFETGEDSKRAMDLHRKMMGNRYIELF LSNKEEHGRALARF  
DR

>comp11333\_c0\_seq4; 331 154 1263 LEN=1789; translated  
MNQNQHGHQEQQGNLEERREPQFLFENPPVAYGYVDTSWAAHITMMHQLEPHQR YEY P  
HQPLQQSMEGVPLPPGIPGLGGSTDPLEAVLGPFP CARLRNLPFDATLEDILILFQGLV V  
IDVVLIGQGEAFVIFANPMDYQMALQRDRQTIGRSFVAITPGSRSDYYS AIATQQWQETQ  
GGPIVRTSDDIHLGEEHHHHHKDTKGTELFGMIPSGYPSQSSLGGHGGGRSDSGSRRGGG  
GGSIGGSMGRSNTGRMNPPGVIVKRTGGGIQIGEHTGFLMRGLPFSATKEDIYVFFE  
EYNTVSDSIVLTYRSDGRATGEAYVQFETGEDSKRAMDLHRKMMGNRYIELF LSNKEEHG  
RALARFGDR

>comp11334\_c0\_seq1; 408 82 684 LEN=1100; translated  
MTRTTRLSLFLVLAALILVAFIGEVSFAFRERSDVILPTQQQLTTLKDNFGDIAMRIRGGA  
VAIEIESSDEEETDDEEEEDVPKIAKATKKAAKKAAKKSVAAMKPKKKKSSLSNFFRVP  
YIVKACLNPVVFQMVGGYWKSLYNINYLADKSADSSQDLRSALEQKARYGGGGKPSRG  
KRKMKPGQAKTSLDLPQLNT

>comp11334\_c0\_seq2; 405 82 910 LEN=1326; translated  
MTRTTRLSLFLVLAALILVAFIGEVSFAFRERSDVILPTQQQLTTLKDNFGDIAMRIRGGA  
VAIEIESSDEEETDDEEEEDVPKIAKATKKAAKKAAKKSVAAMKPKKKKSSLSNFFRVP  
YIVKACLNPVVFQMVGGYWKSLYNINYLADKVRSLVLLHMLPKTFHERSTTSILEAVA  
SVQRP IHNWVTKQKSELVMTSSANSVVMFFKYVLLICFDYFYNSFLQSDSSQDLRSALE  
QKARYGGGGKPSRGKRKMKPGQAKTSLDLPQLNT

>comp11335\_c0\_seq1; 398 508 1566 LEN=1624; translated  
MTYEDIDRSPEEKARKITINTHTHEYETGTRHYGHIDCPGHADYVKNMITGAAQMDGGIL  
VVAATDGPMPQTRHILLAKQVGIPNLVVFMMNKCDLVDDDEELLELVEMEIRELLSEYGYD  
GDEIPIVRGSALAAEGKNPEMGRDRVLELMDTVDENIPEPERVLDKDFLMSIEDTFSIA  
GRGTVVGTGRVEQGIIVNVGDDLEVIGFDQDQKTTCTGVEMFRKLLDQGMAGDNIGALLRGL  
KREEVRRGQVLVKPGSIKTATKFAEIIYALTKEEGGRHKPFMTNYRPQFFLRADVTGAL  
HLQEGTEMVMPGDNTTIVTVELITPIAMEPGVRFNMREGGMTVGTGVITKMLE

>comp11336\_c0\_seq1; 123 1 713 LEN=898; translated  
VLCCVFAAALVLAASVVVLFDDGMRMQKQTAGTNPVVPVYVGSGLGFVDASCMNLSRGTWKS  
FRGMLYLNMLVFRFVSFRVLF AIFPFAPSSVPKTKTKTPIDETNDGADQTTQVLQNRFYE  
STKFDTELNRNFKGRNIHYQSFWTLTANRGALGSEQVKT LAEAKGLTPQQYMF AFMMSME  
NVTPLSGTTSRMHMAQDVAVMERVQSGESMFTTHEQRLF AKILGMPMDAPGSTAYN

>comp11336\_c0\_seq2; 393 108 1169 LEN=1354; translated  
MVAIRRASRYTGLSASIRSLALLGFAGLLGGAGVFLLSMDGGETQRGTRGLVGVGAHSA  
GATLRKPHLVYGTAWKKEETAGLVRQAVATGFRFIDTACQPKHYNEAGVNGWTAQAQEL  
GLSRGDLWLQTKFTPIGGQDPNNVPYDQEAPLADQVRTSLEVSLKNLRTDYLD SWVLHSP  
LEAFEDTMAVWRVMEEAVDAGKVRQLGISNICYDLDFVFTLYQQARHKPAVLQNRFYESTK  
FDTELNRNFKGRNIHYQSFWTLTANRGALGSEQVKT LAEAKGLTPQQYMF AFMMSMENVT  
PLSGTTSRMHMAQDVAVMERVQSGESMFTTHEQRLF AKILGMPMDAPGSTAYN

>comp11337\_c0\_seq1; 273 94 1203 LEN=1412; translated  
MSGVKRDIDDAEESSSDTEASPFVCMPEYGEHKRAVSSVQLAPSRLTKHSAALCASASA  
DGSVKIWDLSDFEPAHRGGEYPLQSSATLVGHGRGINDVCWSNGTDPFIATASDDKTLR  
LWDAQTEALVDFRGHDFVFCQFNPNASLLVSGSFDETVKLWDVRSQCISTLPAHSD  
PVTAVSFNRDGT CVVSASHDGLIRVWDVGTGECLKTVFAAGNPPVSHVTYSPNGKYVLAG  
TLDSALRLWPMSVSGKSKCAKTYTSEQHTNTKYCIASRFLVSQPKRRQCIVTGSSEGHVV  
LYDVQTRKVHQVLEQVHKDVMAVDAHDDLELLASGGMSKDRTVRFWRTKKEVESMRAKK  
AKKQTEESE

>comp11338\_c0\_seq1; 396 420 1540 LEN=1773; translated  
MTNKKKDEDDDPNDKQIRTSKTPSWVWLCALFAVITYVGMPPDLPQPPHGQSPSIQHV FY  
YGWLTAVFTGLGALPLAFAPNLAAYWVGLSNGTLSTGHYVLLAKWSDAYGSFF TICLEMR  
SKFDLNMVPGXSPFNVI FSWQLDIISQLNGIVAVAAGMMIAASYLLYEGWTFDDPNDCE  
SVSVPARTIIGGFVGLVFINVTERLLADYEDLTVGGLAGADAKRALLIFFVMTLHSFSEG  
VGIGVSFGGTHGSELGVFISASLAVHNIPEGLAMSVTLMPRGTSLATAIVFAILTSIPQP  
LMAVPAYEFVYHFIPVLPVGLGFAGGAMAWVALFELLKEAIEDSGILT TACVSSASLIGM  
HFLNEIIDHGARS

>comp11338\_c0\_seq2; 429 420 1358 LEN=1591; translated  
MTNKKKDEDDDPNDKQIRTSKTPSWVWLCALFAVITYVGMPPDLPQPPHGQSPSIQHV FY  
YGWLTAVFTGLGALPLAFAPNLAAYWVGLSNAVAAGMMIAASYLLYEGWTFDDPNDCECS  
VSVPARTIIGGFVGLVFINVTERLLADYEDLTVGGLAGADAKRALLIFFVMTLHSFSEG  
VGIGVSFGGTHGSELGVFISASLAVHNIPEGLAMSVTLMPRGTSLATAIVFAILTSIPQPL  
MAVPAYEFVYHFIPVLPVGLGFAGGAMAWVALFELLKEAIEDSGILT TACVSSASLIGMH  
FLNEIIDHGARS

>comp11339\_c0\_seq1; 386 198 1213 LEN=1213; translated  
MAHHLVSSKVAPEVCPRENRADHDTKRQQRGRDPREDSAELEERRLPGAVKQKVM DTSR  
LNPYFTTIQKALS RKQIAN DVYRNEWCPKSDGEGDAPDCGHAMNRLRLYARAAADMETLLG  
GTYFRQVGTDDHPQYREAAIRLDCLGNTVAVRLKQKDYHAAKLAVALLEVPNHPKSL  
LRAAKAALLDPASTLGEAEAAIRAESA MASEGGDGSASSAERKELLRLKAQWKKKRDDY  
KQTTTRAMFGNKLNHNEPNSSGSGSSNEDNGHHGAKRDPDP RARGGAAS TGQSPLPACGG  
TDDAAEAVSPKRHAWHAI VFLVVPILLVLF AKPGSTRX

>comp11339\_c0\_seq2; 348 1 1092 LEN=1092; translated  
XLERAFWMVVVGDGVDLPALEMGIRFMRVGQTALIWHPKFALGRGTRTTIQSGSNTAAE  
IPERIPPNSSVVYRVTVKQKVMDSRLNPFYFTIQKALSRKQIANDVYRNEWCPKSDEGDA  
PDCGHAMNRLRLYARAAADMETLLGGTYFRQVGTDDHPQYREAAARIRLDCLGNTVAVRL  
KQKDYHAAKLAVALLEVDPNHPKSLLRRAAKAALLDPASTLGEAEAAIRAAESAMASEGG  
DGSASSAERKELLRLKAQWKKKRDDYKQTTTRAMFGNKLHNHNEPNSSGSGSSNEDNGHHGA  
KRDPDPRARGGAASTGQGSPLPACGGTDDAAEAVSPKRHAWHAI VFHLVVPILLVLFAPK  
GSTRX

>comp11339\_c0\_seq3; 534 76 1486 LEN=2232; translated  
MVDQDDKNGWQELMGKELLMKVVS DGSAGSKGSGGGADTDNGTIEPQQAVLVSFEGRTA  
DEPSDPNGLLFQKADDWL VVVG DGDVLPAL E MGIRFMRVGQTALIWHPKFALGRGTRTT  
IQSGSNTAAEIPERIPPNSSVVYRVTVKQKVMDSRLNPFYFTIQKALSRKQIANDVYRNE  
WCPKSDEGDAPDCGHAMNRLRLYARAAADMETLLGGTYFRQVGTDDHPQYREAAARIRLD  
CLGNTVAVRLKQKDYHAAKLAVALLEVDPNHPKSLLRRAAKAALLDPASTLGEAEAAIRA  
AESAMASEGGDGSASSAERKELLRLKAQWKKKRDDYKQTTTRAMFGNKLHNHNEPNSSGSGS  
SNEDNGHHGAKRDPDPRARGGAASTGQGSPLPACGGTDDAAEAVSPKRHAWHAI VSTWSS  
RSSSFCSRDTGTSARGERAKPGSTRAKTAAGRGRVDALPGTRGPRAATW

>comp11339\_c0\_seq4; 550 76 1378 LEN=1378; translated  
MVDQDDKNGWQELMGKELLMKVVS DGSAGSKGSGGGADTDNGTIEPQQAVLVSFEGRTA  
DEPSDPNGLLFQKADDWL VVVG DGDVLPAL E MGIRFMRVGQTALIWHPKFALGRGTRTT  
IQSGSNTAAEIPERIPPNSSVVYRVTVKQKVMDSRLNPFYFTIQKALSRKQIANDVYRNE  
WCPKSDEGDAPDCGHAMNRLRLYARAAADMETLLGGTYFRQVGTDDHPQYREAAARIRLD  
CLGNTVAVRLKQKDYHAAKLAVALLEVDPNHPKSLLRRAAKAALLDPASTLGEAEAAIRA  
AESAMASEGGDGSASSAERKELLRLKAQWKKKRDDYKQTTTRAMFGNKLHNHNEPNSSGSGS  
SNEDNGHHGAKRDPDPRARGGAASTGQGSPLPACGGTDDAAEAVSPKRHAWHAI VFHLV  
PILLVLFAPKPGSTRX

>comp11339\_c0\_seq5; 370 198 1321 LEN=2067; translated  
MAHHL SVSSKVAPEVCPRE RNADHDTKRQQRGRDPREDSAELE RRLPGAVKQKVMDSR  
LNPYFTIQKALSRKQIANDVYRNEWCPKSDEGDAPDCGHAMNRLRLYARAAADMETLLG  
GTYFRQVGTDDHPQYREAAARIRLDCLGNTVAVRLKQKDYHAAKLAVALLEVDPNHPKSL  
LRAAKAALLDPASTLGEAEAAIRAAESAMASEGGDGSASSAERKELLRLKAQWKKKRDDY  
KQTTTRAMFGNKLHNHNEPNSSGSGSSNEDNGHHGAKRDPDPRARGGAASTGQGSPLPACGG  
TDDAAEAVSPKRHAWHAI VSTWSSRSSSFCSRDTGTSARGERAKPGSTRAKTAAGRGRV  
DALPGTRGPRAATW

>comp11339\_c0\_seq6; 332 1 1200 LEN=1946; translated  
XLERAFWMVVVGDGVDLPALEMGIRFMRVGQTALIWHPKFALGRGTRTTIQSGSNTAAE  
IPERIPPNSSVVYRVTVKQKVMDSRLNPFYFTIQKALSRKQIANDVYRNEWCPKSDEGDA  
PDCGHAMNRLRLYARAAADMETLLGGTYFRQVGTDDHPQYREAAARIRLDCLGNTVAVRL  
KQKDYHAAKLAVALLEVDPNHPKSLLRRAAKAALLDPASTLGEAEAAIRAAESAMASEGG  
DGSASSAERKELLRLKAQWKKKRDDYKQTTTRAMFGNKLHNHNEPNSSGSGSSNEDNGHHGA  
KRDPDPRARGGAASTGQGSPLPACGGTDDAAEAVSPKRHAWHAI VSTWSSRSSSFCSRDT  
TGSARGERAKPGSTRAKTAAGRGRVDALPGTRGPRAATW

>comp11340\_c0\_seq1; 392 1 1313 LEN=1448; translated  
XHFSIYKSDIKPSIKVAQNMF GKTLAERTLKEWRFYVVDYKDLKCKINKSKEDSLSQEE  
TKAAFDAILHLSEKKLSKFYHDKQAWAEGYIPTLETRVEDLRKSASLPGSPGSPSSISMN  
GSMTSDDFEVLTSSSPTGIADNLQLRLDKLTI DGNERSDGAFLKQAYRQMGASKHFQDF  
IYAKKSLVTFQRELDLLEFLDINKTAFSKILKFKDKQTGSSFREDRLDEILQRNAFLEG  
EVLMMKRRVEGLIEEVTS LKPRLPNGWENRKVYTI GCFDLFHRGHQNVLLSLREFGAYL  
IVGIHDDSEYFKLKNKYTI DNLETRMNNV KPFADQIYVIPSTDPLVYIKNMVSDQDIANG  
SCCYARGDDMLNFP SREWVESVMPVHFVPRTEGCSSTLIRTIYHSENQELRQKAAFAKTR  
YDGKPIDEDGNV LK LKA

>comp11340\_c0\_seq2; 447 796 2052 LEN=2187; translated  
MKFGKTLAERTLKEWRFYVVDYKDLKCKINKSKEDSLSQEE TKAAFDAILHLSEKKLSKF  
YHDKQAWAEGYIPTLETRVEDLRKSASLPGSPGSPSSISMNGSMTSDDFEVLTSSSPTGI  
ADNLQLRLDKLTI DGNERSDGAFLKQAYRQMGASKHFQDFIYAKKSLVTFQRELDLLE  
FLDINKTAFSKILKFKDKQTGSSFREDRLDEILQRNAFLEGEVLMKRRVEGLIEEVTS  
LKPRLPNGWENRKVYTI GCFDLFHRGHQNVLLSLREFGAYLIVGIHDDSEYFKLKNKYTI  
DNLETRMNNV KPFADQIYVIPSTDPLVYIKNMVSDQDIANGSCCYARGDDMLNFP SREW  
ESVMPVHFVPRTEGCSSTLIRTIYHSENQELRQKAAFAKTRYDGKPIDEDGNV LK LKA

>comp11340\_c0\_seq3; 447 1178 2434 LEN=2569; translated

MKFGKTLAERTLKEWRFYYVDYKDLKKCINKSKEDSLSQEETKAAFDAILHLSEKKLSKF  
YHDKQAWAEGYIPTLETRVEDLRKSASLPGSPGSPSSISMNGSMTSDDFEVLTSSSPTGI  
ADNLQLRLDKLTIIDGNERSDGAFKQAYRQMGASKHFQDFIYAKKSLVTFQRELDLLE  
FLDINKTAFSKILKFKDKQTGSSFREDRLDEILQRNAFLEGEVLMKMKRRVEGLIEEVTS  
LKPRLPNGWENRKVYITIGCFDLFHRGHQNVLLSLREFGAYLIVGIHDDSEYFKLKNKYTI  
DNLETRMNNVKPFADQIYVIPSTDPLVYIKNMVSDQDIANGSCCYARGDDMLNFPSPREW  
ESVMPVHFVPRTEGCSSTLIRTIYHSENQELRQKAFAKTRYDGKPIDEDGNVLKKA  
>comp11342\_c0\_seq1; 1285 232 3390 LEN=3437; translated  
MAKEEAADDGNGNHARSGSCVEDILAEMLTALATGARAVQGLPLGDDFDYQSSFPFRQL  
LDDSQESLLEALLMSLDDASSCLSLDKNGNHYHIDFENLDDPLLWETCTDLCDALLEQAE  
LSTASNESASKEQGLARGLETARNRAQSSFGRLLEGIVDMEKPQVVNKFPGFSPNLNSND  
DEYTMGIDNDNDIPTGNSNGRTDIFVPPFLAKKHFFKKPLLALDDPEWRRPGHGVETKLG  
EMKPVRVSPNVIAPSHHYQHPYLEELKSIDYPEWQFETTAERPQKILKDDGPLSGNATMI  
DTQEGKELKTLLESDEFQLREIAIDLEAHSYRSFSGMICLIQISIKGGRDFLIDFPFVW  
NHIHNTLAPTLANPNIVKVFHGADSDIAWLQRDFGLYVNLFDTGRAARALKFPSAGFAY  
LLEHYVEGAKADKSHQLSDWRQRPLPSAMKEYAIMDTHYLLDIYNAMKYDLLHDKNTSIE  
KVLEESRKVCTIRYTPVFRPDGYRSLTQRRGHKTQLNSRQDDVLRRELWDWRDQLAREND  
ESNTFICTNTQLMRVAMACPVNLSTLQGLLQPMPLLRNSKEVLGIIQNCLNSHQQRK  
QEHPSSSAYFKPANPENDNMDENETPRRPSRSLMSPVLGTEALYREAGWISPAHELGDK  
EDGEDGIVEDIVTTSATENESDVDGEELKGDPRGDENSNKEKSKRKRPRGLVVHEANEKF  
QSRQFTLHSLQMGNDASTDTSTSKKAQNTIKTREVIDGFGSARVTHLTPEDMEEAIELA  
KNSADRIRTSQETCGILGLISSADLRDDEDDSTDLAGNDDNQVGERGKPTQEEFVIPR  
SMREIYRISNRNRNKKSSSPLPQEHDEEELKELEKAESILKTRSSEGKNYIEMIPSSPK  
RQRTKSSGAASLSSSEDAIGQDSGSLTRDDDIALMQEVGWEGKEEIDSMLKQRRDADGD  
YDESSEDGKQGETPKPFDYSNVGAIGAFNPTPSANPFFSGAALTGGHLSQQASKADKKK  
TSTIINRGGKQARRQAERPDKRGARSQAYKKG  
>comp11343\_c0\_seq2; 152 1 850 LEN=1631; translated  
XPYFRDRSDTLLOFAIKDATQMTMLPLSSRKLGSYHSMVRWAMGGWTFVVENAVLSENR  
TWLIDLMDGDDNYHTIYGTFTSIATVSIYAYYKIKTRKVP TSASQLKRWNANDSPPLAVAV  
GSWMCMTTGLVMASQVAPTFQLPVSYSTNAQTKMQIRCPDFADKRLETNDPFEVRGLE  
RISRHPGLWSFGMIGMSQSLLAPTIPLQIWWLGP SLVAVLGGSH TDSRFRRMGGVLRPE  
YDSQTSNIPFLAMITGKQTRGWEGLSREIKPLNAGLALATSSLW  
>comp11344\_c0\_seq1; 468 500 1585 LEN=1743; translated  
MERMKASINPLFSDVTWGAGGSTAELTLDIANQLKKTGHVANMHMTCTNMEKDGDPKAV  
HSALQTAKDSGIMNIVALRGDPAHGQEEWTAADGGFTCALDLVEYIRENFGSEFGISVAG  
YPEGHPNAISLVEDPSTMTEAEKARSSTDDEGKVYTCRDEDYKKEMDYLKIDAGGDFI  
ITQMF FDTKVFGS FVKDCRKGWIDCPIVPLMCINAYAGFVKMTKFKCKTRVPTELRAKMD  
SLKDDSDAIKAFGIEFGTQMCQDLIEIGVDVLHFYTLNLEKTTYGILDGLGYNVTGSADD  
SDEKTMVAKGSAWARVGDVKVTTEGVEGTVAIESDGTATIEFEGESPTVTLKKEDYSKV  
F  
>comp11344\_c0\_seq2; 527 202 1419 LEN=1577; translated  
MSTTDANPKIIDLIKQKEDGSKPFVSI EFFPRTETGVKNLYARMERMKASINPLFSDVT  
WGAGGSTAELTLDIANQLKKTGHVANMHMTCTNMEKDGDPKAVHSALQTAKDSGIMNIV  
ALRGDPAHGQEEWTAADGGFTCALDLVEYIRENFGSEFGISVAGYPEGHPNAISLVEDPS  
TMTEAEKARSSTDDEGKVYTCRDEDYKKEMDYLKIDAGGDFIITQMF FDTKVFGS FVK  
DCRKGWIDCPIVPLMCINAYAGFVKMTKFKCKTRVPTELRAKMDSLKDDSDAIKAFGIEF  
GTQMCQDLIEIGVDVLHFYTLNLEKTTYGILDGLGYNVTGSADD SDEKTMVAKGSAWARV  
GDKVKTTEGVEGTVAIESDGTATIEFEGESPTVTLKKEDYSKVF  
>comp11345\_c0\_seq1; 449 256 1902 LEN=2282; translated  
MKTGEMCCAGVTAEKPMKKRPRSLRWSTASSPISNVFVFLLLIAWSERCVKQPLCAHSFI  
SPQRSFSVTRWSEVAADSSKNGQEESPLNSWSNSAVGGRKRESRLQVRRRVKAVLEKARI  
RTGVRNGSV PSSSPPRPTS NVVAEAAASIGGLGDGSADIVFTSSTSQVLKRNGVTNGAT  
NATAVAKQSKNGSSQSTNSTNSFLYQDDELGLGMRNDAFLNTSAGTNGISEEAFETSSNT  
SIQRSYVSGNSNSTTSESSGTTDVRPRKPKEFDVIRGDVPSANAFVEPLPFQLPKLSVE  
QKQKLVNGERIQEQSRMGREGSYVVL DVEAPPVWECCLDFESYPELIPTVKSMQLYT  
STKLN TGFISEKPVVPGTGRETRHYGTPSITRASFILSKFRFNIAAIHRYTPHPEGDYMV  
FTLDPSC TNAV LK GAKGTWYTQENPDGREVSLSKMWT KD K Y IFFPLWIAVFRINLSCNCS  
PYILL LLYISLYLKGFTRVYLLAGLQISRALPKFIVDYAADRAMPRATKWLKPEVDALKE  
ELFTA KDP  
>comp11345\_c0\_seq2; 443 256 1767 LEN=2147; translated

MKTGEMCCAGVTAEKPMKKRPRSLRWSTASSPISNVFVFLLLIAWSERCVKQPLCAHSFI  
SPQRSFSVTRWSEVAADSSKNGQEESSPLNSWSNSAVGGRKRESRLQVRRRVKAVLEKARI  
RTGVRNGSVSPSSSSPPRPTSNVVAEAAASIGGLGDSADIVFTSSTSQVLKRNGVTNGAT  
NATAVAKQSKNGSSQSTNSTNSFLYQDDELGLGMRNDAFLNTSAGTNGISEEAFETSSNT  
SIQRSYVSGNSNSTTSESSGTTTDDRPRPKPEFDVIRGDVPSANAFVEPLPFQLPKLSVE  
QKQKLVNGERIQEQSRMGREGSGYVVLDEAPPFVWVECLLDFESYPELIPTVKSMQLYT  
STKLNTGFISEKPVVPGTGRETRHYGTSPITRASFILSKFRFNIAAIHRYTPHPEGDYMV  
FTLDPSCCTNAVLKGAAGTWTQENPDGREGFTRVYLLAGLQISRALPKFIVDYAADRAM  
RATKWLKPEVDALKEELFTAKDP

>comp11346\_c0\_seq1; 523 168 1882 LEN=1925; translated  
MFPSRRLRILGAIIVACPCSLVCPVVASPVDDPLRIVGGNNADIEEYPYYVKIPGCGGVL  
IASEWVLTAKHCGNFEGRAVIVGAHHQSAPGVFRGGAARVCTEYVGHGPGFTSTGCEFCPP  
FENDFALCKLDTPVYVNDTTVTLRLGEQPMFPPAEVEEVAIGFGRNFTGPTSLSGPPPEF  
LQEVTVAVDEVNCDYDPSNICATSEEKKGICFGDSGGPLLHKGPVDDATGRRTDTHVGV  
SFVYGRLLDDNEDFAFCGLGRPWLDPVYGRVSSAIGFVQRTICEEGNSRSPFCNTDPLACE  
SETEQKLVVRIVTDFFPSRTNWTLLREAGGTEPLLARDYDQPPFFAYEVGSNQRTNRKAI  
SSFQGLTASPFSFLVFSYQDEICLARGALYEFIDRAGGAKGGGLYSLILDGKEAGTFSE  
ASLADPIGGGVVFTDSDNSAPGESGVPLLCTDDAAYXVREQADRQDLRLVLRGDCGCGH  
GPEEAEEAQAARLPQEGPRERPGARGEQVPLALPRGLPAGEATGQKSDWKSQRRSVVGGMT  
VPP  
LLPAAPLGIPNNPMLYRTSSRWPFLLYLLHAA

>comp11346\_c0\_seq2; 488 168 1786 LEN=1829; translated  
MFPSRRLRILGAIIVACPCSLVCPVVASPVDDPLRIVGGNNADIEEYPYYVKIPGCGGVL  
IASEWVLTAKHCGNFEGRAVIVGAHHQSAPGVFRGGAARVCTEYVGHGPGFTSTGCEFCPP  
FENDFALCKLDTPVYVNDTTVTLRLGEQPMFPPAEVEEVAIGFGRNFTGPTSLSGPPPEF  
LQEVTVAVDEVNCDYDPSNICATSEEKKGICFGDSGGPLLHKGPVDDATGRRTDTHVGV  
SFVYGRLLDDNEDFAFCGLGRPWLDPVYGRVSSAIGFVQRTICEEGNSRSPFCNTDPLACE  
SETEQKLVVRIVTDFFPSRTNWTLLREAGGTEPLLARDYDQPPFFAYEDEICLARGALYEF  
EIDRAGGAKGGGLYSLILDGKEAGTFSEASLADPIGGGVVFTDSDNSAPGESGVPLLCTDD  
AAYXVREQADRQDLRLVLRGDCGCGH  
GPEEAEEAQAARLPQEGPRERPGARGEQVPLALPRG  
LPAGEATGQKSDWKSQRRSVVGGMTVPP  
LLPAAPLGIPNNPMLYRTSSRWPFLLYLLHAA

>comp11346\_c0\_seq3; 370 201 1372 LEN=1415; translated  
MFPPAEVEEVAIGFGRNFTGPTSLSGPPPEFLQEVTVAVDEVNCDYDPSNICATSEEKKG  
ICFGDSGGPLLHKGPVDDATGRRTDTHVGVSSFVYGRLLDDNEDFAFCGLGRPWLDPVYGR  
TSSAIGFVQRTICEEGNSRSPFCNTDPLACESETEQKLVVRIVTDFFPSRTNWTLLREAGG  
TEPLLARDYDQPPFFAYEDEICLARGALYEFIDRAGGAKGGGLYSLILDGKEAGTFSEA  
SLADPIGGGVVFTDSDNSAPGESGVPLLCTDDAAYXVREQADRQDLRLVLRGDCGCGH  
GPEEAEEAQAARLPQEGPRERPGARGEQVPLALPRGLPAGEATGQKSDWKSQRRSVVGGMT  
VPP  
LLPAAPLGIPNNPMLYRTSSRWPFLLYLLHAA

>comp11346\_c0\_seq4; 405 201 1468 LEN=1511; translated  
MFPPAEVEEVAIGFGRNFTGPTSLSGPPPEFLQEVTVAVDEVNCDYDPSNICATSEEKKG  
ICFGDSGGPLLHKGPVDDATGRRTDTHVGVSSFVYGRLLDDNEDFAFCGLGRPWLDPVYGR  
TSSAIGFVQRTICEEGNSRSPFCNTDPLACESETEQKLVVRIVTDFFPSRTNWTLLREAGG  
TEPLLARDYDQPPFFAYEVGSNQRTNRKAISSFQGLTASPFSFLVFSYQDEICLARGAL  
YEFIDRAGGAKGGGLYSLILDGKEAGTFSEASLADPIGGGVVFTDSDNSAPGESGVPLLCT  
DDAAYXVREQADRQDLRLVLRGDCGCGH  
GPEEAEEAQAARLPQEGPRERPGARGEQVPLAL  
PRGLPAGEATGQKSDWKSQRRSVVGGMTVPP  
LLPAAPLGIPNNPMLYRTSSRWPFLLYLLHAA

>comp11346\_c0\_seq5; 496 168 1902 LEN=1945; translated  
MFPSRRLRILGAIIVACPCSLVCPVVASPVDDPLRIVGGNNADIEEYPYYGXVLRQYVG  
KSTIDLATESNALQTFRPTNAVVLNSSATVKIPGCGGVLIASEWVLTAKHCGNFEGRAVI  
VGAHHQSAPGVFRGGAARVCTEYVGHGPGFTSTGCEFCPPFENDFALCKLDTPVYVNDTTV  
TLRLGEQPMFPPAEVEEVAIGFGRNFTGPTSLSGPPPEFLQEVTVAVDEVNCDYDPSNIC  
ATSEEKKGICFGDSGGPLLHKGPVDDATGRRTDTHVGVSSFVYGRLLDDNEDFAFCGLGRP  
WLDPVYGRVSSAIGFVQRTICEEGNSRSPFCNTDPLACESETEQKLVVRIVTDFFPSRTN  
WTLLREAGGTEPLLARDYDQPPFFAYEDEICLARGALYEFIDRAGGAKGGGLYSLILDGK  
EAGTFSEASLADPIGGGVVFTDSDNSAPGESGVPLLCTDDAAYXVREQADRQDLRLVLRGDC  
CGHGPEEAEEAQAARLPQEGPRERPGARGEQVPLALPRGLPAGEATGQKSDWKSQRRSVV  
GGMTVPP  
LLPAAPLGIPNNPMLYRTSSRWPFLLYLLHAA

>comp11346\_c0\_seq6; 531 168 1998 LEN=2041; translated  
MFPSRRLRILGAIIVACPCSLVCPVVASPVDDPLRIVGGNNADIEEYPYYGXVLRQYVG

KSTIDLATESNALQTFRPTNAVVLNSSATVKIPGCGGVLIASEWVLTAKHCGNFEGRAVI  
VGAHHQSAPGVFRGGAARVCTEYVGHGFTSTGCEFCPPFENDFALCKLDTPVYVNDTTV  
TLRLGEQPMFPFAEEVVVAIGFGRNFTGPTSLSGPPPEFLQEVTVAVDEVNCDYDPSNIC  
ATSEKKGICFGDSGGPLLHKGPVDDATGRRTDTHVGVSSFVYGRLLDDNEDFAFCGLGRP  
WLPDVYGRVSSAIGFVQRTICEEGNSRSPFCNTDPLACESETEQKLVVRIVTDFFPSRTN  
WTLREAGGTEPLLARDDDYDQPFAYEVGNSQRTNRTKAISSFQGLTASPFSLVFSYQDE  
ICLARGALYEFELDRAGGAKGGGLYSLILDGKEAGTFSEASLADPIGGGVVSTDNSAPG  
ESGVPLLCDDAAYXVREQADRQDLRLVRGDGCGHGPEEAEAEQAARLPQEGPRERPGAR  
GEQVPLALPRGLPAGEATGQKSDWKSQRSSVVGMTVPPLLPAAPLGI PNNPMLYRTSSR  
WPFLYYLHAA

>comp11348\_c0\_seq1; 447 1 2827 LEN=2827; minus strand; translated  
MFSVLGWLLCLLLTEIPRGAAFVVTSSCSSSNGCVNGAELHRFSKSFVVRSAAGSDTDVS  
ATNSGKDDGNSDNGGFFWDFRGHSCYAEIDRPAVSIDPNNKEGPKKPTIILVHGFACTV  
YWRETRACLIREGYTVHSDLLGQGKSAPGRADNILYSIDLWAQLVDEYARKHVALSDD  
HDKSGIVLVGNSLGLSVALSAATGDCFVHDRANPGTYLASRVEGICMFNCGVGLNTKNV  
LKVASNPWLKSIILGVVFGLLDILVFGNKLKLLSYVIDNQVSKDITRNALTALYSFADDPQ  
SRVDELVDSEFIDPVLNDSTSDVVEVLSQIYTNDAGRTPIELHNKYLSDGKKNVPIHLI  
GDKDVVTPIEGDVGVFYTELASNPGSGVSMQVINNAGHVLFDERPECNAGLIEWLDEKLL  
KQNXTRRNWFLFENKTSGSGRLLGRICVVLQQVGNQPVLRGCRHERSLASLVFVDPV  
RWAFFDRQRRVAEKPPNHSEVAGPGRKVQRAHALSVDHADRTDAEPVPPQYQLEVVAAAG  
YCDPGLACLVVVIGATRAVLCSARCGAVYFRDQERRRLGPRERGI V SQGRRRFVPRR  
SSCPVQMLVTMEYPRTKDPEDAFPNGFQAICFAFGSNRQSGEPLPHPGDAARPVVIDAV  
HRRGLCALLGEGDLTTQSRAIAGSSAERRAAADSRSTAGAFLRVSAGSNPFRPEPIDLV  
QASFPRQTQLPERHQALGDPHPLREPPQLFEVPGVVGHHHEAPEGGPGLPVGAAGIR  
PRGQQPLGTLDPAVAVLRPPDRARRQALVEGRGAVRAGVCVRAAGQQGPNAHPAPPGR  
EVEGRPPQGIGVEAEEGCSFRIRSTEEASPLRAATRRQSHSGWALWWAVGSGCRPSLVG  
WGAIP SAGRCLRRRVYTETNPSVDPRFVSSKAVCHAMARAAV

>comp11349\_c0\_seq1; 748 214 3194 LEN=3363; translated  
MSSAITENGHNKISKKRKNKYQSPFRKIGICLVALRYQPRKNNLSVVGSGSGAGKVS  
DIWEPVATARFSEVWTDQQRGRDDGLALIGSRIRCFPPKAVLKEPYNATSRLLEGTVNM  
VHDCEDHAPILIDLVDNKDNTTSLVRLPFLRLDDDGKSAVGRVLKESEQRKRLYEEQI  
KGGKHKAVRVTLSLSSHTTSTVTKNPIQAKWVIRKRAPTKIIRGIPLPVVKTPVA  
NNGENDKIGRNKAGNNVTSIDEEKYIEMSNSGKHGGTNCASNDRKNEGPNKTPPPMH  
SLTSKRKKIAIDSTTNTSYNKDFSDPMLYLDGNDSSAAQQEGNWRWEAGRYHSPHQVIFAS  
QRPISKELLKLLCYNFVGEVVISIKPTQPKNTFIGTLALVTIRLMVLPETHRTGRLSHHG  
PWLDFENNDLDTGLSSQKEKNDNTTQHTNVISPEKQENVVSDMNSASDINHXLQVPI  
EELVIVHRKIHREFASEKTVNKGTTIDEPSSMILRSSYSFLSDTYLCELEGEAEEMKL  
DMHRCRRQCQHSSVKGRLAGVSHTLCELCFECLKSSPAAKWGTYKDEKQKKYRCDCDFCV  
DRTNNNLLADLSNKISESESKLDSTLQQLKEYSADRDSGFIATRFLVLSINPVDFMFS  
LLSTFMNSASSKPIITKIKARVSKGTRKLT P K K G V R D R A R K N S A M S P F S K Q K I S Q F P T M V  
SRSEPFIRSTCSRLLPYDVQNRKFSVSAADLYEWKAFRSHTPDFSEKPRNLRVFRKRNG  
ILGKNDSLKMPQGRAARAQQRRLLRSAAAMGVVDVDTLAGRESNVRFDRSNIHGWFVTD  
VDIRDGEMIEYRGEIIGNAMAEKREKEYEAAKIGSDYMFRLDDFMVSDATKQGNVARFI  
NASCMPNCYPKIIISLDGTRKIVVYAKRDIQAGEELTYDYKFDLEYDPAKRIPICGAP  
ECRGLNWDQRYVANDFPEAPAGSNHDKALESTRK

>comp11349\_c0\_seq2; 320 8 1196 LEN=1365; translated  
MFASGTNEELVIVHRKIHQSESKLDSTLQQLKEYSADRDSGFIATRFLVLSINPVDFMFS  
PSLLSTFMNSASSKPIITKIKARVSKGTRKLT P K K G V R D R A R K N S A M S P F S K Q K I S Q F P T M  
PVSRSSEPFIRSTCSRLLPYDVQNRKFSVSAADLYEWKAFRSHTPDFSEKPRNLRVFRKRNG  
ERILGKNDSLKMPQGRAARAQQRRLLRSAAAMGVVDVDTLAGRESNVRFDRSNIHGWFVTD  
VDIRDGEMIEYRGEIIGNAMAEKREKEYEAAKIGSDYMFRLDDFMVSDATKQGNVARFI  
NASCMPNCYPKIIISLDGTRKIVVYAKRDIQAGEELTYDYKFDLEYDPAKRIPICGAP  
ECRGLNWDQRYVANDFPEAPAGSNHDKALESTRK

>comp11351\_c0\_seq1; 1275 124 4161 LEN=4293; translated  
MSPTIKQKGEIETTSPVGDNLTESKESPIAMVVAPNTEMGEGSVTEEPTKHAETDEAE  
GKKTITGDSIPDVVPTDQIPMEVQVAIDGAPHTATTAGEDGVPLEIISSEEVQNDINIG  
GDGNEVSGSIGDGYQADNDHRKNTNPRSNMNGHGRMGTNNQLSSNSTIADTVSIEDTA  
GLSFRSRNVCKVIKGEIHNVLNIMRTDQCASPLRFLLEEMPTDELHPLFERFSELHHSMT  
DWELRYGGSSQRHHPPEARLYLPPFCVAIQSRDISAKVTGAALQSLQKFLLYGFLANEGPN  
AFSTIANITLLCTFEESSEFASANHERGVNQG D G V A R S Q G R F A S S G S A I S S K N S G R E D D E



KEISSAPDADEGSTKSSSIKLSKRAKLEWRRRQRLKKEARLKTQAEKAQRE  
>comp11355\_c0\_seq1; 284 39 536 LEN=885; translated  
MARIADYVECDQHEKAYQKQDAVVFVARKRAVGNARQKPMRFVKNVGLGIKTPDAAIEGS  
FVDKKCPFTGNVSIRGRILTQVISTKMKRTIIVRRDYLHYIRKYRRFEKRHKNIAAHCT  
PAFPVKEGDIVTVGQCRPLSKTVRFNVVGHSSERAKTGKKTFRVF  
>comp11355\_c0\_seq3; 284 39 536 LEN=893; translated  
MARIADYVECDQHEKAYQKQDAVVFVARKRAVGNARQKPMRFVKNVGLGIKTPDAAIEGS  
FVDKKCPFTGNVSIRGRILTQVISTKMKRTIIVRRDYLHYIRKYRRFEKRHKNIAAHCT  
PAFPVKEGDIVTVGQCRPLSKTVRFNVVGHSSERAKTGKKTFRVF  
>comp11356\_c0\_seq1; 338 579 1602 LEN=1626; translated  
MLPLVLQPKFTSGPTGVEYTTLELNAFDLLRINLVHGWLLEPEAQEFWVGNNTYNQLQNL  
IIVGNDASARLREIDDNCDNSEELSNQATRGAIIISAFLESSHQLTQHGLFVLHEFVREG  
DMVVFFRNNHFNALTKHQDNLYLLVTDEGYADVNSVVWEKLDVIDGDTEYVNADFTVPPP  
INNHVSEVETGGQISTKNAQSQADYQLALQLSRECGQVSSATAVNSLESTSSHKDQSSVD  
KTIRASLSDHKNQRSEKVVATMASASQLQSSENIFGPTSGSSADEMLQEQSDMLLALALELQ  
RQEELQQQDYDNNTIEECKINEQRQRRTQIVPYHRIPIY  
>comp11356\_c0\_seq2; 370 471 1569 LEN=1593; translated  
MLTNNHGENGSDHHINETLRIFPNLQFGMDVNPKFTSGPTGVEYTTLELNAFDLLRINLVH  
GWLLEPEAQEFWVGNNTYNQLQNLIIIVGNDASARLREIDDNCDNSEELSNQATRGAIIIS  
AFLESSHQLTQHGLFVLHEFVREGDMVVFFRNNHFNALTKHQDNLYLLVTDEGYADVNS  
VVWEKLDVIDGDTEYVNADFTVPPPINNHVSEVETGGQISTKNAQSQADYQLALQLSREC  
GQVSSATAVNSLESTSSHKDQSSVDKTIRASLSDHKNQRSEKVVATMASASQLQSSENIF  
GPTSGSSADEMLQEQSDMLLALALELQRQEELQQQDYDNNTIEECKINEQRQRRTQIVPYH  
RIPIY  
>comp11356\_c0\_seq3; 370 322 1420 LEN=1444; translated  
MLTNNHGENGSDHHINETLRIFPNLQFGMDVNPKFTSGPTGVEYTTLELNAFDLLRINLVH  
GWLLEPEAQEFWVGNNTYNQLQNLIIIVGNDASARLREIDDNCDNSEELSNQATRGAIIIS  
AFLESSHQLTQHGLFVLHEFVREGDMVVFFRNNHFNALTKHQDNLYLLVTDEGYADVNS  
VVWEKLDVIDGDTEYVNADFTVPPPINNHVSEVETGGQISTKNAQSQADYQLALQLSREC  
GQVSSATAVNSLESTSSHKDQSSVDKTIRASLSDHKNQRSEKVVATMASASQLQSSENIF  
GPTSGSSADEMLQEQSDMLLALALELQRQEELQQQDYDNNTIEECKINEQRQRRTQIVPYH  
RIPIY  
>comp11356\_c0\_seq4; 338 728 1751 LEN=1775; translated  
MLPLVLQPKFTSGPTGVEYTTLELNAFDLLRINLVHGWLLEPEAQEFWVGNNTYNQLQNL  
IIVGNDASARLREIDDNCDNSEELSNQATRGAIIISAFLESSHQLTQHGLFVLHEFVREG  
DMVVFFRNNHFNALTKHQDNLYLLVTDEGYADVNSVVWEKLDVIDGDTEYVNADFTVPPP  
INNHVSEVETGGQISTKNAQSQADYQLALQLSRECGQVSSATAVNSLESTSSHKDQSSVD  
KTIRASLSDHKNQRSEKVVATMASASQLQSSENIFGPTSGSSADEMLQEQSDMLLALALELQ  
RQEELQQQDYDNNTIEECKINEQRQRRTQIVPYHRIPIY  
>comp11357\_c0\_seq1; 1228 98 2755 LEN=2887; translated  
MPSRTNVYRCNGSNPQQQLHRQAEIKEELQKLESVVGTLFELQGSQKNSKRSFSFRKIF  
PRRAPKDVTSDEDFMARIKELEELCHNLSSDGNEFFDRTRVKKLTQESRDEKDFFSI  
DRNEATSRTIQTCDILSKLSTEADLENSESAESSDDNETSKWAI IETIENVLAFFTGQ  
ECMIDESMTFNTTQERAIGESTTYLTQESTDEIFHDHFCGLFETWCLAKNEEGNESENK  
PETQEESPADSNTTAKIVDTHDQVTRTEKDQIALFDQESDQIEGKTIDQTKLDSEKDNEI  
LAIQLDSNFFDAFSSLISTNSIVVGEGERFDKHESATAMAINASETKECDPDQTDSEV  
KQDDEIGEDEDKDLGNYEKGDP IAETAFDCSI LEHIF SSTNSTTEANEIVGTPGIVASDE  
TACNNVTGAI EPKLSI IELPELQSALSLANI PRFEVVGFKATSERDRDTEIEPGNKKRE  
GLTPKVSNRERRQKARKGDMAKAKPSKSSKLGKPNQKINSFKMAKSRKNQGNMSTKKVK  
QRKMMRLFVRKLNQGITHDSSKTKENETTKIDMNRGAPETSINVQSEKEVNLSVEAQEQT  
EKDTSKNSKSEKVSRRKSDVVCRPSTDAACDPSSIDISSSVRILTANKEKDHNGEENR  
DENCGDKEESDGDVNCDFDADGDLI VADDEDSAERQKYDLFKSFLAALQSKERDPDDDEI  
VECFSPVLSMGDSYDSGLVSEKDDDEYINHYYDFSGDNENCSEDEFDEQEGSYDDFFYAN  
DDDSFVNALQAI SRDEATMSRLKTVLDKSRAKKPDNIKLEKEEVTEERNDDTAVTTPVT  
GTRTEAPVTNKREKAVSAFPKRQSRQLQKQNEKNTIPTDDELFTL  
>comp11358\_c0\_seq1; 819 1 2145 LEN=2330; translated  
XLQVDSSILTSYPSTVSILYFCGSVFTHSKEKTKEASKVAMQDTKSASDALQAATDLATV  
REPLSDALPFFNYGTAGFRFKANLMDGLMVRVGI VGALLLMKQPPEAATNATITTGVM I  
TASHNDES YNGVKLANPDGSM LTPPQEAFLTKWVNERDPVKFRDFLEELAREVLADKNN A  
GSD FVLVGRDTRSHSPRLSDLLIEGANAFVECVLSRQREDASPAAPLSARVSDLGVLTT



PMLHHIVLHSNPSFLPPYIDPKPTRCGYIETYAEAYVDLLKGLTAKTGTAAAPESLVSLR  
VDGACGVGFRAANELWKEIQRLSGSGDAGVVPTPLCVHNGETDGPLNDSCGSEHVQKQLS  
PPNWCAAAPSDSFSFPYCCSLDGDADRIVFFGQASGTELAQLLDGDKIAILIAHVLKEK  
FQSAVAAGGDSLPPVKMGIVQTAYANGASTDYVRSTLSIPVEIAKTGVKHLHHSASVEHFD  
VGIYFEANGHGTVVFGKAFAFAQQCPDPFFVRLHRLINPAVGDALSDMLLDVYLLRELG  
WTLEDWSTKLYEDLPSRMLKVTVEDRTIIECSSNESECLKPEAVQPLLKAAMESVSSGRC  
FVRPSGTEDVVRVYAEAAATREEDALADEAARIVFDTCAGXWNEAVTGQRNETREEGWYS  
ERATEKHRAPTSNKAMEQSWASWLRVWSSGASLLALNAPMEYKIGSSFSFPSTPL  
>comp11359\_c0\_seq1; 546 236 1822 LEN=2223; translated  
MSEDRNPHQRLIHRHDELSSMRLVSAPLQGSNVDRKYTARSHDHEFNQTFRTIALTIAGMG  
LSLLVTIFSLFHVDIFLVRVYRPLHAYSNGNLI FAVVNTCNDLLGAYLLDAAATRINRSD  
LIGISGCFALFFLTPFFRWKDPNENEFYDEAHFVVSISMYDTLYSFTAILLGSLVIDNH  
HLTDKERINFMASGKILNLFAAFFVAKIGLEIFEAENMNRFRIFLVTALIVAILFLIAQ  
VMVHYRIKIYKSMRIRFLHNAKRENQTPKPTARLNPKQVFRDFWRYNNFWAWIWMELLL  
ESQISFSDAFLKTFVDQLLYDEGVSRREGCDWLLSAVRPLALICTILCYIPIRGLGYKKLY  
PLLFAINIALCSWIWFGASHKSTGVIISFLIIPAITNAVATAGFHLAMSDMALEMKRMH  
LVEGRQDEASLAGLFMGVNALFCKPAQSILPVVAANMLDNLGLTSDGNEDVQRVLFKLLI  
IPPLVFSFLEWISWRRFTLTPANTSKMRDELRRWDSSINSFSDAEVPE  
>comp11360\_c0\_seq1; 426 283 2574 LEN=3041; translated  
MPVYICQAGVNSSEPWRHGLQVYAAPFALADAPSDDSHEEHNKVTIAPRMVPTSTEAAAQ  
REAERNNDNLIRLVQRREIEGANIERTLPQTAETTGSVEGGNAGQDTSRADNQQQHVAS  
LKFGLPVRIRHAEVVLVDDVCIAYERHWLRLRWPGSKGGFAGYVALGKVNETHVFSQHVI  
DALQLRETAKLPASEKELEGEGETSHGSRTEESDTGPSQQHIGDVSSSIDAEEEKDDAN  
EDGNRDELDQNASALSSEPYESISAFCLRTGIEFPSSGYMKLMSMYDDGLSPAVSSAPL  
PTEGIFCRICREGLHDDADDEQPSNTIANEIDETQVQCMPCPSDFPPNEGSTQRIKPVKT  
QGPVEPHVYHPNSHAAENPLISPCECAGSMAFVHYLCIEQWRCSRHRPKARRGLNCETC  
GKPYALPPPSVRPVDNDWLEAMPHPVIEALRQPHIWWQIGAAIVRKRWRP IAPVVMSP  
IVALYCRARLLKKKEWHVDGGHVVSADAERDGNVFDASEVTIVPDSAKMCPGTLYINTC  
ATNPADGTXSIVYGIATLLAFPGILRDPLVYDLGFSFIPLSFYVMAILGGGIATALKKS  
FGLDLRGRTYEIVIVLLTLGLALVSLGLLRAFFGDSSGCYGLVLSRSLNEDDQFTRFLRK  
LQRSILEPAKNWFLIWDRAAMSSGTWPKKILCMPNQEYGC FEHLYKANAEFLFDEVNGGK  
CSMDMILVSSLLQSAIIVAAGNHFWKRRERQRRARRPRVHQD  
>comp11361\_c0\_seq1; 551 316 1197 LEN=1833; translated  
MPVPCFNVIINGGEHAGNRLAFQEFFVIPTGAETFSSESMEIGCETFHALKKVIQTKFGGDA  
TLIGDEGGFAPPDVEGLAMIMEAAENAGYADKISVGLDVASSEFKVDGKDAYDLDFKS  
ANGDPSMVLSGDEMVALYQKLI AEYPIVTI EDPFDQDDWTNWNKITAATDIQIVGDDLTV  
TNPAKIQEAIDQKSCNCLLLKVNQIGSISESIDAVKLSKQAGWGVMTSHRSGETEDNYIA  
DLAVGLGTGQIKTGAPCRGERTAKYNQLLR IEAELGGAAVFPGAGFRTPAWMA  
>comp11361\_c0\_seq2; 706 40 1416 LEN=2052; translated  
MLTQFSRTVARKASTGAASKRMMSAITGVDAREI IDSRGNPTVEVDITTATGTYTASVPS  
GASTGAYEAHELDRDGGSRYLKGLKAVENAKTILADAVMGIDAADQRAIDEAMIKADGT  
HNKANVGANAVLGISLAASKAGAGVQGIPLWKHYANVAENIPETMPVPCFNVIINGGEHA  
GNRLAFQEFFVIPTGAETFSSESMEIGCETFHALKKVIQTKFGGDATLIGDEGGFAPPDVE  
ESGLAMIMEAAENAGYADKISVGLDVASSEFKVDGKDAYDLDFKSANGDPSMVLSGDEMVA  
LYQKLI AEYPIVTI EDPFDQDDWTNWNKITAATDIQIVGDDLTVTNPAKIQEAIDQKSC  
NCLLLKVNQIGSISESIDAVKLSKQAGWGVMTSHRSGETEDNYIADLAVGLGTGQIKTGA  
PCRGERTAKYNQLLR IEAELGGAAVFPGAGFRTPAWMA  
>comp11362\_c0\_seq1; 158 1 620 LEN=826; translated  
HRMAITTNAFSDVFYVRQASVVNQILSKLDGVNSIDNILMIGMTNRRELLDSALLRPGR  
EVQIEVPMPDKDGRREILKIHFGILRQKGLSIPLCCAIDGIPCSSKHELIMSEKFPPTYL  
KLSDEATKEKKRDALKRGLSKLFQKVRPCYDLAAETEGFSGADIAGLVR SAGSLALSRA  
RKDGSVNDIMITLEDKHALEEYVKK  
>comp11362\_c0\_seq3; 607 271 2253 LEN=2459; translated  
MALSFATAAPPENSKTVDL DENDVASATDQDSIFDIVAGCAASCLFSDKRRDAKAEHS  
ELVSSSTTNWINDETAFLVQKAIDRMKLLKLA EERSGLDRDEASAWIRWMKSTPTPMVIDL  
SPELRVIANETMSDEDFDLIEQSRIQFLSRMGAKLILLPSGSSLSRPMREPPASLIYGLK  
LYGGVTRYRMLSSNSRPPRRRTGERSATKVSASENIPAWIQYGGADRMYESVDIGSAAV  
LEITLLPRGQALPTDMTSSSSEM VVQNYVWKPQDVFGIIPVETGESSEADVLSGYSPVSQ  
AGKDRNDAFKADFKEDVGGKLPQIDAI VRRVLDGRVIRPAAEDGGVIEKDETTTALQTAS  
LEAQELAILGLTPVRGLLLYGPPTGKTLARQIAKALRARS PKIVSAPELLDRWVGSE

KLVRELFVEAEAEALAACNGDATKSALHVVIDEIDAVFRRRSAGEDSGEQTRASVVNQIL  
SKLDGVNSIDNILMIGMTNRRELLDSALLRPGRLEVQIEVPMPDKDGRREILKIHFGILR  
QKGLSIPLCCAIDGIPCSSKHELIMSEKFPTYLKLNSDEATKEKKRDALKRGLSKLFQK  
VRPCYDLAAETEGFSGADIAGLVRSAAGLALSARAKDGSVNDIMITLEDKHALHEEVKK  
>comp11363\_c0\_seq1; 553 1 2056 LEN=2077; translated  
XQQQQQQQGLADSNVATLNNQLIDLFFRCFAFDDIDVSGAVIPLAASLVSLSDPAQCP  
KQQENLLPKLLTITYNQMRYPDFQYDFEDDDEAEEMRYRTELKLNKKFVRANPDLCLQ  
FTCQILSQLPLPLSTAPTNPVEVAISLVYQYCEGIRPPPGMKVVMRNETFCNLLVGLHTS  
DITEHPHREILILYYETSRYYPPLKERSDLLQKVLGAI TGRGLQHEDAKVRSRCCYLL  
LRLIKSMGTSGNKKSGNCLLRPYVETAVSGIQSLENKSI ELRVDDTLNLFETIGLLLG  
KNGLSPSEQQYLTQVMTPHVRSIETILNDKKHELAQDPDAYGETLSNSVAAIAYLSKGF  
KKPPIEVQNVLLET LKVAFSVLEMLPNNEEVRNKTYIFVQRLIQCLEDKVLDVMPRLFI  
LIKHCNSGDILDVSQLINQLCIKFRAMCVLDSNLLPFLQKCHHLSNTVVSENSSAQER  
HQGEDATVAPHLRTEELSIQKLSFAVLNHVVANDVTGVLLSSANASSLEAILQSMSEGAI  
NVEDSLMKKTCLIFFRLLLNQWVPDVRGTNISGGAPEFVVQGYVTFVCDSLIPGMFQVLL  
RTDGVFDVDDANDFRVLVEFARILEILKARLPEVSENAITRIFMQIQLPPMVDGFRSAN  
TMKELEECLHVLVRKNQEFKQNAKI  
>comp11364\_c0\_seq1; 616 75 2285 LEN=2566; translated  
MVSLALCRCGLLNLLRVSTDPSELELVGLELDQYVVRNSFRYFNTQPHFDDKRVEWWFGD  
GAKSLLMLPKEYFQSFDLVVVDLSETVMSFQVTDKLSIFQTL SLLLTP EGI MLKNGEYYM  
GKMSQYFDYTLQYFEYDVPFICDQGMVIGSNSIDFFNRTMKDHGV ELLVYESQDEINEKF  
NEYRFT EYRKN DARKQGKCVDTDNESDDR GSTNAGILMVVEAENLTYKFQSIDFTKELL  
MKTLT TIGFSTLPSDAHSSNIVVMNEGYVSARIFPEQSYVAFDIQLWGNFHLMEKARD  
GLVEAFGGAEDSTSSFRIVTGGMQGTPSQESDRQTIGPRMVNSRNCEEDPPPDSATTATQ  
SIDLVDGALEASLGLVEEGPVTVAVLCAEGDPCKSIEVLSKASDKVRKVVVYTCSTLE  
QSSAWFAPDVSQKMACCEAKIVKTLSSDSPDKRISMLVIDDSADHIMGKVLVGI FTSTWN  
RKRL LASSRFVAFVNNSETSHAWRRNVLVKIRKQVNYKPM SLVDLVLEDTQTSSMVSILS  
LHDPDFFFHQKEMVERFNTKHGDTAGATMEVESVFDGLPAPQPGHFRPKKFKADDYDPEP  
AKEQHKEQLSLGRQSI VQFEISGNHVVTAEILQNALQRAFSSENAFEFSAFENNSIGD  
GLVVVALSQELATNVVVTWDGNLHLNVNLFARDVQPRLRQQFIEEFTSTLRMAKVTLSDT  
HPRGTGRVVSFPGHIN  
>comp11364\_c0\_seq2; 1655 132 4052 LEN=4333; translated  
MFLAKKGIALALALAVSPAEEAGTRKATADLIEWIQSTGGLYNPRQEERTA FDRSRGVF  
ASETIDPGEILLKVPWGSILGTKQATRSQALALQKAREIEMEADYPDERTMFAECRAVSAL  
MEEHARGGASFFATFLRYLSLLGDGADDPDFFPFPPPPALWSEEGRALLEDINDHGTLPP  
QGLFVRLNHDWFGSCIEDISNSTEARIAAAVSAHGGTGNVLKEFGFVVPLLDNAHYRQRQ  
DGSRLKSDGHINTELVVQEGEYVLLATRTIRPGEEIYRSFGDASIGFDDDEDQEDDDGF  
DDEALMEFETGAI FRDYGVVNTETYPKFFHFRIITSDDVDESLGIILDKPESFGDLGNG  
NGNGKGLSAAVIDDGEEYDWEIEMYMARAKNRLERIGFGSQPGNGPPANSGLSAYEWE  
TARAYHANLLEAVSMAADKLAAMDGENAVS CPCGLPASGAACPVDGFS DLPTLP IAFLD  
LEFDENNPYGPSEDSYAMCNDYVSEWRDYTPCGDEEV LRSQYQEI RFFSHPETKDTVMK  
LDYTVQQVSSYRPHYHEFAVHYPARFIDTVKRVLVFGGGDSMVLHEVLKYP SLELVVGLE  
LDQYVVRNSFRYFNTQPHFDDKRVEWWFGDGAKSLLMLPKEYFQSF DLVVVDLSETVMSF  
QVTDKLSIFQTL SLLLTP EGI MLKNGEYYMGKMSQYFDYTLQYFEYDVPFICDQGMVIGS  
NSIDFFNRTMKDHGV ELLVYESQDEINEKFNEYRFT EYRKN DARKQGKCVDTDNESDDR  
GSTNAGILMVVEAENLTYKFQSIDFTKELLMKTLT TIGFSTLPSDAHSSNIVVMNEGY  
VSARIFPEQSYVAFDIQLWGNFHLMEKARDGLVEAFGGAEDSTSSFRIVTGGMQGTPS  
SDRQTIGPRMVNSRNCEEDPPPDSATTATQSIDLVDGALEASLGLVEEGPVTVAVLCAE  
GDPCKSIEVLSKASDKVRKVVVYTCSTLEQSSAWFAPDVSQKMACCEAKIVKTLSSDSP  
DKRISMLVIDDSADHIMGKVLVGI FTSTWNRKRL LASSRFVAFVNNSETSHAWRRNVLVK  
IRKQVNYKPM SLVDLVLEDTQTSSMVSILSLHDPDFFFHQKEMVERFNTKHGDTAGATME  
VESVFDGLPAPQPGHFRPKKFKADDYDPEPAKEQHKEQLSLGRQSI VQFEISGNHVVTA  
EILQNALQRAFSSENAFEFSAFENNSIGDGLVVVALSQELATNVVVTWDGNLHLNVNLF  
ARDVQPRLRQQFIEEFTSTLRMAKVTLSDTHPRGTGRVVSFPGHIN  
>comp11364\_c0\_seq3; 1646 132 4231 LEN=4512; translated  
MFLAKKGIALALALAVSPAEEAGTRKATADLIEWIQSTGGLYNPRQEERTA FDRSRGVF  
ASETIDPGEILLKVPWGSILGTKQATRSQALALQKAREIEMEADYPDERTMFAECRAVSAL  
MEEHARGGASFFATFLRYLSLLGDGADDPDFFPFPPPPALWSEEGRALLEDINDHGTLPP  
QGLFVRLNHDWFGSCIEDISNSTEARIAAAVSAHGGTGNVLKEFGFVVPLLDNAHYRQRQ  
DGSRLKSDGHINTELVVQEGEYVLLATRTIRPGEEIYRSFGDASIGFDDDEDQEDDDGF

DDEALMEFETGAI FRDYGVVNTETYPKFFHFRIITSDDVDESLGIILDKPESFGDLGNG  
NGNGKGLSAAWVIDDGEEDWVEIEMYMARAKNRLERIGFGSQPGNGPPANSGLSAYEWE  
TARAYHANLLEAVSMAADKLAAMDGENAVSPPGGLPASGAACPVDWGFSDLPTLP IAFLD  
LEFDENNPYGXVGGVLSLYDPGSGSKMKTDFCAPFSPSFCFFLFLFCWLVAWLLCLSLP  
GYRSILTKISHERVRYAMCNDDYVSEWRDYTPCGDEEVLSQYQEIRFFSHPETKDTVMK  
LDYTVQQVSSYRPHYHEFAVHYPARFIDTVKRVLVFGGDSMVLHEVLKYPSELELVVGLE  
LDQYVVRNSFRYFNTQPHFDDKRVEWWFGDGAKSLMLPKKEYFQSFDLVVVDLSETVMSF  
QVTDKLSIFQTLSSLLTPEGIMLKNGEYYMGKMSQYFDYTLQYFEYDVPFICDQGMVIGS  
NSIDFFNRMKDHGVLELLVYESQDEINEKFNEYRFTFYRKNDARKQKCVDTDNESDDR  
GSTNAGILMVVEAENLTYKFQSIDFTKELLMKTLTTIGFSTLPSDAHSSNIVVMNEGY  
VSARIFPEQSYVAFDIQLWGNFHLMEKARDGLVEAFGGAEDSTSSFRIVTGGMQGTPSQE  
SDRQITIGPRMVNSRNCEDPPPDSATTATQSIDLVDGALEASLGLVEEGPVTVAVLGAE  
GDPCKSIEVLKASDKVRKVVVYTCSTLEQSSAWFAPDVSQKMACCEAKIVKTLSSDSP  
DKRISMLVIDDSADHIMGKVLVGI FTSTWNRKRL LASSRFVAFVNNSETSHAWRRNVLVK  
IRKQVNYKPM SLVDLVLEDTQTSSMVSILSLHDPDFFFHQKEMVERFNTKHXGDTAGATME  
VESVFDGLPAPQPGHFRPKKFKADDYDPEPAKEQHKEQLSLGRQSIVQFEISGNHVVTA  
EILQNALQRAFGSSENAFEFSAFENNSIGDGLVVVALSQELATNVVVTWDGNLHLNVNLF  
ARDVQPRLRQQFIEEFTSTLRMAKVTLSDTHPRGTGRVVSFPGHIN

>comp11365\_c0\_seq1; 607 753 2807 LEN=2891; translated  
MKLSDVERPGMGKGMTMKQIFEEHGKPYFTLQIIGEGDSAACFIHAKKDRSAFGKTFIVG  
EKTICYVYKPEPSKLASALDR LFADIECVVSV DCEGVPESELELLQIATGSSVYIFDCHQIG  
AEQVCQGLKSL LQNETPVKLIHDLRNDIAIALEAFGGIKLSGALDTQLLAELFCGSPFEG  
NAFLSRLDLPKHPSKDFVHGRMNSGINLWDKRPIAQTSL EYAAMDVAFLQNAAEIQEIL  
APNNLDKLIHASSIRAKNSIKHKGYRAICFDKENTFAIASTELMMATRPKDGFFGKELKI  
ESDVDEIFDVLPSVYNKIFVDSEKKNYSLMGIFTRSSPTSKRAKEDLPIELLNDIVLDI  
GRRALCWIDGSRVHLCDDEDKVVTQGEIEEITARLGTFWSDNRAGLDAGITRKMGS LHRF  
SAMRDRDGQIIGMTIRIGRNVLGNAAMLMDVLNHTNMSVLI LGEPGSGKTTIVREATRIL  
AQDKNVI VVDT SNEIAGDGKTPHRCIGLARRMMVPSLDKQSAVMIECVQNHTPHVMVIDE  
IGRPKEVQAASTVKQRGVRLIASAHGNLRGLLKNKDLNGLVGGQERITIGDDMAKEEAKR  
KQKLALDQGGNYRPVGI SKTQTKRRSDPTFEIIVEVSRESRNEWRIVTNSAKAVDRILDG  
FQYHCQLRKRDPATGEMWMEFGHA

>comp11365\_c0\_seq2; 607 1293 3347 LEN=3431; translated  
MKLSDVERPGMGKGMTMKQIFEEHGKPYFTLQIIGEGDSAACFIHAKKDRSAFGKTFIVG  
EKTICYVYKPEPSKLASALDR LFADIECVVSV DCEGVPESELELLQIATGSSVYIFDCHQIG  
AEQVCQGLKSL LQNETPVKLIHDLRNDIAIALEAFGGIKLSGALDTQLLAELFCGSPFEG  
NAFLSRLDLPKHPSKDFVHGRMNSGINLWDKRPIAQTSL EYAAMDVAFLQNAAEIQEIL  
APNNLDKLIHASSIRAKNSIKHKGYRAICFDKENTFAIASTELMMATRPKDGFFGKELKI  
ESDVDEIFDVLPSVYNKIFVDSEKKNYSLMGIFTRSSPTSKRAKEDLPIELLNDIVLDI  
GRRALCWIDGSRVHLCDDEDKVVTQGEIEEITARLGTFWSDNRAGLDAGITRKMGS LHRF  
SAMRDRDGQIIGMTIRIGRNVLGNAAMLMDVLNHTNMSVLI LGEPGSGKTTIVREATRIL  
AQDKNVI VVDT SNEIAGDGKTPHRCIGLARRMMVPSLDKQSAVMIECVQNHTPHVMVIDE  
IGRPKEVQAASTVKQRGVRLIASAHGNLRGLLKNKDLNGLVGGQERITIGDDMAKEEAKR  
KQKLALDQGGNYRPVGI SKTQTKRRSDPTFEIIVEVSRESRNEWRIVTNSAKAVDRILDG  
FQYHCQLRKRDPATGEMWMEFGHA

>comp11366\_c0\_seq1; 291 241 741 LEN=1007; translated  
MVASTSPIHVVAASLVLSISAFGPCLEPLSHSHSYNHGRF SHLYASEGEENNHHSDES  
LPSYSCEF DLVTAAPLDGLDELSTLFNHGGFDGTFPFLQEQAEMALGTYEENGLLEFDI  
WENESLDLCGDECKECEIPKDWFAVSPAEEIDVMKFLGVTRVKPLR

>comp11367\_c0\_seq1; 364 1 907 LEN=1048; translated  
XKGRGTDCLAGNYDTRIHRHTRTPPTPHPRIPSTPNPIPTLDTMSDTRTEHVWVLYGSQ  
TGNSEQAEDFSKEIVETFDDSSYFEDLGLPEVRVETTCLQLDDFLEYRHAASF SKTMVIFV  
SSYGVGQAPLGS PKFRSFAEEILALADGGAEGAGSL LKGLTYAICGLGDSGYTTYLVNPT  
TINKALAAAGATRIGEMGKADAKQIGEDSQANVIARWKKELLVPLARSLAAAADDA SEES  
ADTVKQMQACSIPIVMKIDPDYTPPKKEFGGRSGGAIPMNLFVAVIVAVIAALFVTGKIE  
AP

>comp11368\_c0\_seq1; 1153 243 1946 LEN=2092; translated  
MSNKGIGGWLSGIGKGIQSTHERMLADKQAKDEGKIWDRKKKEWVFYLDTEWEEIEEKE  
KLQKQKESGETDSGGSGPERNVKDREYYDLLGVSTNATPAEIKKSYKKARIVHPDKNPG  
DPEAANKFQQLGHAYNILSNEQSRANYDKNGKAETTAEQASDV DATVFFNVFMFGSMLV  
EPYIGELWIAHTADGMLKDGGKGGLELDDMTQEELQLPEEERAKVLKERERIMDEKLTA

MREENELAMAKRQVTCAKFLRERVASYNSIRALDQSGSEGTTTEQQRAAEKKGVKKDFVE  
ECEKEALNIASGAQGDWYLNIIIGFSLEINADLYLGFERSFLGLGGHFARTRANASGLNTN  
MGLLGAGLRAVGAGVRTMQTAETIQKDLEKAAGEASGAETEGASDNVAATGEDGGKTKLT  
ELSEEDQMKLAMEMQDAMDDSLPTFLEFAQAINKRDIQTTIKGVCKKLFDDASVPKESRV  
IRAEAVRILGKTFQVAARKVNPDSNAKMSADDIKLKMNVAAAMATMAKAQQQELSADDQE  
ELMKQAKEAMEQQQQGTAATGPTDGT  
>comp11369\_c0\_seq1; 97 1 480 LEN=1999; minus strand; translated  
QGEQDSRLTELVDFAFEVINFSQNSLVCEQGDDEIADYMYIIYRGECEGVYIDGKQLEENYGV  
MQQGLIGDLAMIFDQPRAAATIKAATPVTAFRLHRKTFNYCLSISSLATKVSQNRDESPK  
ERMQRREVKEIDSVIDRISGVTSRYEGNIIKPFKPTRKWLW  
>comp11370\_c0\_seq1; 200 90 551 LEN=1213; translated  
MSPTPKRFVTVNGVNLNPEYIAWKKNGGTRPQPNEAPISKMVLHIEVLQGSIDLVAKD  
RNLFGKKTTSDPYVKVQLLCHPEPSTRKKPQTLTLGRTPVKKNLSPVWNHNSVRPAIPYN  
RRSESLRLAFQIFDEDVLSDDSMGVVTLPPLEW  
>comp11371\_c0\_seq1; 318 49 618 LEN=1036; translated  
MKLCARTLLFASTLSSAAAYSIKPQNEVGRREMFQKVGAAAFVAASAPANALDGCPCGKSN  
NCLTTKWTPPAGTDSAAAATLKKVIESYPQDQNKVDLGGWTIVDDSFAPGKVASVEYK  
SGIGNFAKFFNGGKPFVDDLKLEIGADGAVDVKSSSRIGDSDLGVNQKRLAYIVESLRKE  
GWSAPDPKY  
>comp11371\_c0\_seq2; 318 49 618 LEN=911; translated  
MKLCARTLLFASTLSSAAAYSIKPQNEVGRREMFQKVGAAAFVAASAPANALDGCPCGKSN  
NCLTTKWTPPAGTDSAAAATLKKVIESYPQDQNKVDLGGWTIVDDSFAPGKVASVEYK  
SGIGNFAKFFNGGKPFVDDLKLEIGADGAVDVKSSSRIGDSDLGVNQKRLAYIVESLRKE  
GWSAPDPKY  
>comp11372\_c0\_seq2; 483 79 1569 LEN=1588; translated  
MTSEFNEHNFGWPREEANRVKLLLPRDSSPLHEKFDSDQRTCVFRFDEDRDLLTIVLEDE  
TSESVVDFLDPYDIIGVNIIEIKPISLSPFRKVSNRVSEENDSRIHDEKEIVATNRALAADN  
EPASEVPVDTQANAVLSLFVYPKRKTRAKVSMLRFCGAERNNGSKPSKAEIALEQEGDPQH  
DSPGRRYAHHRQFIIAPTEDLTDLSIMVNAIIRLSRVSTNRTEGVSCDKEERLLVIINPS  
SGKKLGVHEYDTILLPMLAQAGISHDCLVTTSHKHAERMKKQNPTSDFKDISEYSGIVL  
IGGDGTIHEVLQGIHHRSDRDKILKKIKLGAIGAGTSNGLSASLAHASKENYLPDLSAFM  
IAKGASSWIDLSRYETKSNSYASFLTFSWAMIADIDIESELIRWAGFLRMDIWGVVRVLF  
LRKYRAKFSYLPPEGGKKTITMPPLGDPLSNSEGWITFEDEFILFWASQVTHAGEHMFHA  
PPCKVNDGVFHMIVR  
>comp11372\_c0\_seq3; 483 79 1714 LEN=1733; translated  
MTSEFNEHNFGWPREEANRVKLLLPRDSSPLHEKFDSDQRTCVFRFDEDRDLLTIVLEDE  
TSESVVDFLDPYDIIGVNIIEIKPISLSPFRKVSNRVSEENDSRIHDEKEIVATNRALAADN  
EPASEVPVDTQANAVLSLFVYPKRKTRAKVSMLRFCGAERNNGSKPSKAEIALEQEGDPQH  
DSPGRRYAHHRQFIIAPTEDLTDLSIMVNAIIRLSRVSTNRTEGVSCDKEERLLVIINPS  
SGKKLGVHEYDTILLPMLAQAGISHDCLVTTSHKHAERMKKQNPTSDFKDISEYSGIVL  
IGGDGTIHEVLQGIHHRSDRDKILKKIKLGAIGAGTSNGLSASLAHASKVGVVICVSTRQ  
QILNEYMCALYEGGMKKVNGCLTLFADFFIWTHSGMLENYLPDLSAFMIAKGASSWIDLS  
RYETKSNSYASFLTFSWAMIADIDIESELIRWAGFLRMDIWGVVRVLFRLKYRAKFSYLP  
PSEGKKTITMPPLGDPLSNSEGWITFEDEFILFWASQVTHAGEHMFHAPPCKVNDGVFHI  
MIVR  
>comp11372\_c0\_seq4; 526 79 1942 LEN=2137; translated  
MTSEFNEHNFGWPREEANRVKLLLPRDSSPLHEKFDSDQRTCVFRFDEDRDLLTIVLEDE  
TSESVVDFLDPYDIIGVNIIEIKPISLSPFRKVSNRVSEENDSRIHDEKEIVATNRALAADN  
EPASEVPVDTQANAVLSLFVYPKRKTRAKVSMLRFCGAERNNGSKPSKAEIALEQEGDPQH  
DSPGRRYAHHRQFIIAPTEDLTDLSIMVNAIIRLSRVSTNRTEGVSCDKEERLLVIINPS  
SGKKLGVHEYDTILLPMLAQAGISHDCLVTTSHKHAERMKKQNPTSDFKDISEYSGIVL  
IGGDGTIHEVLQGIHHRSDRDKILKKIKLGAIGAGTSNGLSASLAHASKVGVVICVSTRQ  
QILNEYMCALYEGGMKKVNGCLTLFADFFIWTHSGMLENYLPDLSAFMIAKGASSWIDLS  
RYETKSNSYASFLTFSWAMIADIDIESELIRWAGFLRMDIWGVVRVLFRLKYRAKFSYLP  
PSEGKKTITMPPLGDPLSNSEGWITFEDEFILFWASQVTHAGEHMFHAPPCKVNDGVFHI  
MIVRGNVSRRLALILLSMHEGAHFGMSGVEFIECSAFRLEPLTEGSFNLDGGEVIESGD  
IQAAVLPSSIQAYCMPQYTC  
>comp11372\_c0\_seq5; 526 79 1797 LEN=1992; translated  
MTSEFNEHNFGWPREEANRVKLLLPRDSSPLHEKFDSDQRTCVFRFDEDRDLLTIVLEDE  
TSESVVDFLDPYDIIGVNIIEIKPISLSPFRKVSNRVSEENDSRIHDEKEIVATNRALAADN

EPASEVPVDTQANAVLSLFVYPKRKTRAKVSMRLRFCGAERNNGSKPSKAEIALEQEGDPQH  
DSPGRRYAHHRQFIIAPTEDLTDLSIMVNAIRRLSRVSTNRTEGVSCDKEERLLVIINPS  
SGKKLGVHEYDTILLPMLQAGISHDCLVTTTHSKHAEERMKKQNPTSDFKDISEYSGIVL  
IGGDGTIHEVLQGIHHRSDRDKILKKIKLGAIGAGTSNGLSASLAHASKENYLPDLSAFM  
IAKGASSWIDLRYETKSNSYASFLTF SWAMIADIDIESELIRWAGFLRMDI WGVVVRVLF  
LRKYRAKFSYLPPSEGKKTITMPPLGDPLSNSEGWITFEDEFILFWASQVTHAGEHMFHA  
PPCKVNDGVFHIMIVRGNVSRRLRLALILLSMEHGAHFMSGVEFIECSAFRLEPLTEGSF  
NDLDGEVIESGDIQA AVL PSSI QAYC MPQYTC

>comp11373\_c0\_seq1; 998 1 5091 LEN=5091; translated  
XEV LGLSRDWFQDWGSFQSQSQREEREREQAKVNGVSKCDATAADGSCASDELQSLESA  
KETFPVSSSTLSQHRPRRQDALPLWTIDGKQVFRHMPQHVFGLALHQGQPIALLRYQL  
HWYRLPTSRTAEHNQDESGRREDELIMIIDGIGYPKSDPADKSDGTNR SADGANNSEPTG  
GKSEG NKASGIELPEEKRNVCLEDETTKGMIDNVFREAPSLPVEATPNDEIEIVMMILA  
LEHTRACGVFYAVWDTPEPFVAKNECFRVMVKLHRS DTV E VPK EGT VQNSHV E EKAGSTD  
KHASGSFKFQPMICDLKKCSSRLAILKKEGKERGTSYHERQKEATAKNEDFGSSPMRL  
VEMPSFAKASTYFN SADVMDCRH SKRGLDTESTCTNIYSGATGQTRDVSLK LKAKIDPS  
DESQVGVNIVYSNEGSQWRTQP VHSSQAMKTPQHAAEGEVKECERKKGKCGNEKETCIEL  
NESNSEGHISWNLMKCFPIMDKLSHSPGEAENEILNKLTMKQNALIAMEGSLEPQARRLL  
TKTIEERIKYESSSEVERRRNTKNTLMKFQDYLFRKRRIDQVRQELREEDMDAVCSICQD  
GDVSPDNQILFCESCNI AVHQCYGVERIPEGDYCYIACRHFERDKMIQSLSETSRLQAR  
ADLSPLPIVCELCPSTYGAFTRLQNPKADSDPSDVKWVHMMCAKWQGLDFVNKG DASLVE  
DTTQLKQSYRRKNVSCCICKGSRGAYVKCRECDNWCHITCARESGLCEVVHGEDVKGPII  
EDNPWSILCPEHSSVEKKQKNSKRIEELIKASKDLPEPEPPPLEELGPYNKLTGEQRK  
VALSVREYEDKYIADILKTKLSGVRCEVCDTIEDIHGRNLSRCEVCGSVIHTCELFPEN  
PGQRSFKCFGCRFRSERKGESE PQCSMCNQKGGILVNATSAPMDFKKAYWNKNEREFERS  
LYKKAMWAHISCTYWLKDV MIDHNAKTVDLSNVIAANGKHF IQHINRCGLCGMRNGYKTK  
CSAGRCHAHGEMNKPYHFVTCARQVGFVESHNEDE FIVNCYIHGTNENNLRARLEDLI  
EMEKKRAGKDFSRSNAPMKFSDGSKLLHGGIMVMRILGWAWRWA EWVWVQYGSTWEPLLEP  
GQDELMMTPEDLRIVESTAESRMNDARRCRLSAFGAALRNRCYDTKDGFNNEALGRALRA  
ILHTQTLVGPLDEYEIAFFSDLLARAYRSKSRLLGFGE DKIPVANEAFCLHKQDNTPKFE  
LCDRPLPGKQVPLDQIYEIGVSEPDFFLLSKNTENDGQVDHEMCKEIDYKYKMLKVDS  
DSDDL SLSAVIETSLFDKENSYILTQRRGRIPKIMNLQIVVKVAGERVEANHSRQRHSA  
IGIYKASEEKMNFDTGEGFGLHPAKKIEFLEDIQIRSLAHFMATPTTEMAGPYNTWRREKG  
LNPCVASANTINKWKS DVRKYCKLFETNGNAPEDHGISPFSPVGQKPEPIQFEPESRSNS  
IKRPRNKSTSSSESGTEIFRTSKRSRSQVETTELDIGSKSQDDGGLGIDIELDVEDRGSNK  
RSMLPKRGQKTAGSFDLKKVGGSSDTLKRKRKSKDQMKTADHTKDKIPQPNHSVRPRRSN  
TYRAGALREVD DDIRSKRSRSQIETTRLDIGSKPQNDTGRGIDIELNVEDRASNKRAMLR  
KRGQKAAGSFDVKKVGGX

>comp11373\_c0\_seq2; 247 1 857 LEN=1098; translated  
XSDTLKRRQKSKDKMKTADHTKEQITQPNHSVRPRRSKTYRAGDLREVDDDINDTDSNGS  
DSENGVPIALPRPVKTRNDVELEIFCALPEEAISFLKTIDVTTPKAFLSFSTGYIADTYC  
DYRRKIRQKPLKGSAAAKVSSWKRIVKNAAIKAGEIELANTTSTTQVKKKSSNKKLSVE  
SSIDDGVANECYLCGDGGDLIVCDGCDKTYHLECVNLDDVPQGLWYCTDCNENNEDNDTC  
VVCNDGGKLIICDACENPYHLECVGLRNIPKEDWFCPKCSKLR

>comp11374\_c0\_seq1; 492 229 1443 LEN=1517; translated  
MAKKKVLMLMGKAHSGKTSMRSIIFANYLARDTTRLSP TLDVEHHHVRFLGDLVNLWDCCG  
QDAFYESYFERDRETI FRGVELLIYVFDIESETPEKDFDFHFCGVLEAIEENSPDARIFL  
LIHKMDLVAEEDREALIEDRKQLIEESCLSCGVENFQCFGTSIWDETLYKAWSEIVTNLI  
PNIRLLEAHLNKF CGICDADEVVLFERATFLVISQAQAGSGPDDG LLEDGPGATPSSSLM  
DHPGDTNGSHDNTGMSPSHRPNGEDAGGETGVPNSVDAMTAAGSSGGLPNPGLGYPPSEIP  
ADLDSAAITPNPMQRHLSTRPHF DAHRFEKISNI IKQFKLSCGKAQSQFQGMQVQNSRFT  
AYIDQFTVNTYIMVIVSNPSVHTAATLWNIQNARNDFERFIPRV

>comp11375\_c0\_seq1; 257 145 1050 LEN=1079; translated  
MMRLQNRVFEPSVALLFC SLFCLSLPRLVHGASGAGWNLPPKSTAVVTGGTKGIGKAVVE  
ELA EKGCRLLICSRKQEDLDRVTKQWNEEDGFDVTGVCADVSTSEGLESLFSDIVNWLGD  
DQRLDILLVNNVGMNIRKPSVEYTKEDTQTVWR TNFDSMFDLTMMCHPLLKRNPGERSSSV  
INIGSVAGVTCMKSGTPYASTKAAMNQLTGNLACEWGLDGIRVNCVAPWYINTELAKQVL  
KDEAYLKS VVERTPMGRVGEPEEVAGLVAFLCLPISQYITGQVISVDGGFTRNGYYSFY  
R

>comp11375\_c0\_seq2; 140 1 1175 LEN=1204; translated

XKSKGHPSALHSERNRRALRNIDRTLPSIVSERIRSRPSTYSFELKRDDDAFAESSFRTL  
GGTSFLFTFLSEPSSVGSRSKRGGLELASQKHRRRYRWNRDRKGRHSASCRTLAESPD  
PEHAAVGXGLRNNHFANRRRLTFVPGRRRGVGRKGVQIVDLQOKTGGSGSGHKAMEEED  
GFDVTVGCADVSTSEGLESLFSDIVNWLGGDQRLDILVNNVGMNIRKPSVEYTKEDTQTV  
WRTNFDSMFDLTMCHPLLRNPGERSSSVINIGSVAGVTCMKSGTPYASTKAAMNQLTG  
NLACEWGLDGIRVNCVAPWYINTELAKQVLKDEAYLKSVERTPMGRVGEPEEVAGLVAFL  
LCLPISQYITGQVISVDGGFTRNGYYSFYR

>comp11376\_c0\_seq1; 339 1 1106 LEN=1261; translated  
XYIICISHHQYSTSPAKNDHPFITGILFFISRETATFKMTRSADNVVGMMDNAYFVGRQE  
LLSFFNDLLDLQLTKIEQTATGAIACQLADYIFPGSIPLSRINWEARSDYEYVANYKLLQ  
AAFTKNNVQRFVDVVKLIRAKYQDNLEFCQWLKAFYDQSGAYREGYDAKAIRAKGKGGKK  
YNDAMNKAAGGPPSRSTKSSYPSKPRVSTRTRQRPVTKPKEPLRASENKARPIRQDSTSK  
RAPVKANPDPKLVIRNTELEKQVIELESASVSDIERERDFYFGKLRITIELFLQIKQDQNW  
GCEREDVVDNLFKVLVYATADDDVIVDEHGHVVPVAVSQETSHNEDITAQLDEALEDNIL  
AIDEIVGASE

>comp11376\_c0\_seq2; 270 771 1325 LEN=1480; translated  
MNKAAAKGGPPSRSTKSSYPSKPRVSTRTRQRPVTKPKEPLRASENKARPIRQDSTSKRAPV  
KANPDPKLVIRNTELEKQVIELESASVSDIERERDFYFGKLRITIELFLQIKQDQNWEGCER  
EDVVDNLFKVLVYATADDDVIVDEHGHVVPVAVSQETSHNEDITAQLDEALEDNILADEIV  
GASE

>comp11376\_c0\_seq3; 270 297 851 LEN=1006; translated  
MNKAAAKGGPPSRSTKSSYPSKPRVSTRTRQRPVTKPKEPLRASENKARPIRQDSTSKRAPV  
KANPDPKLVIRNTELEKQVIELESASVSDIERERDFYFGKLRITIELFLQIKQDQNWEGCER  
EDVVDNLFKVLVYATADDDVIVDEHGHVVPVAVSQETSHNEDITAQLDEALEDNILADEIV  
GASE

>comp11377\_c0\_seq1; 350 200 1204 LEN=1799; translated  
MTPQRFQLPMVGTSPRIVPQTFSLDTEMKPASPVCPLQDPMQEGVELLLGIATIVSKEI  
ASSGKELFGDKHDVFPFSKHSVAPDQGLDTRPLTEFPSSPTKDDDFACSRVRTVSDINGCR  
SPRRSPDVEESRNSTRKSSLLPPVVSFVNTLRTRSRKPSLKLGMHGKGGKRQIKVPKLST  
THQAQTNQSPPNIMDQHKRKAFFESSVTGKSITVIHRKKFSWKNYPELEAFLVANREEYL  
RHSALNYTIQKKYNNRLTEQLLDLAARHQYVFNEEEFSFVTVRDRIRCFYKSYVQSSKK  
RGIVLGYAARKAGILTQADLQRSARKEGTIVNPL

>comp11378\_c0\_seq1; 916 419 1873 LEN=1873; translated  
MEASSRSILVEDVNDGDEDTFGVETDTEADDFDFDEPEEITDDFLDELSPYASTTNDFDGA  
SATSAAFENYNMSGAGTALVDNNASTDFDFLSDPVPVGGTENGNGPAAGLEAPSAAGGGDN  
ALDAFGDGIQDAATPDAAPVGRGLFGTLGRMGRMVVNGAGGGRSANDQSPDLLDMDSGA  
DDPNTGTGQQFQVDLAGGMAVQSDSTDNNGSNDVDPFDGTAAGETGEPQTPSGGGLFGTLG  
RMGRMVVNSAGKTNGNDDPTPHDLDDGGFFPDRDFDEAEQQQGGPEGSAGADSDAPT  
QQAAGGLFGTLGRMGRVGGRIFRSRSPQVDPDPSGDNDLADGNSLPHPGSLENMNSNVA  
NPMGDSGDLNLGGQGNLPHPEALMRQSNAAAPPAADTGNVSGNDDAILDVNGNSLPH  
DAMPNDSLAIKEDENLDILHGVGNSLPHPEALMRQSNSSARDFGNNDGENDDAILDVDG  
NSLPH

>comp11379\_c0\_seq1; 240 149 571 LEN=571; translated  
MRLAIALSAIVALGSASNEGNHDGQLSDRSDSVMIGLSEHYGFSNKNLKPAPHAERKVL  
ANKSTPLESKKVDLDSSPDLGIVRNEPSVASNEALVHNTMSRPDDSSLEGHYLLLEDPEKL  
DLDLSSPDLGIVRNEPSVAS

>comp11379\_c0\_seq2; 315 610 1415 LEN=1415; translated  
MKLGIALSTVVAIASASDDWDRYGKPLSSARTPVRPGFKSSDDKNHVAGPRSSSISVSKG  
TAKNDDILNKEPKSNPDATIGANHKPRFVLRNESDELAGEPSESIDAEKGDTSMPDLG  
VIDKAVAVADGIPADDSNHKHRLEDPPAQGNHEPCDEAGAGRPSIIPPEEQRVLKPRTDC  
EAACPNGRPVINVSGWDFAEILHSCAYSSSDCPYDLPINCWDTSRVTNMDRAFKPNELGS  
FNEPLNCWNVSSVTSMYLMFNFQRSFNQP

>comp11379\_c0\_seq3; 393 610 1510 LEN=1510; translated  
MKLGIALSTVVAIASASDDWDRYGKPLSSARTPVRPGFKSSDDKNHVAGPRSSSISVSKG  
TAKNDDILNKEPKSNPDATIGANHKPRFVLRNESDELAGEPSESIDAEKGDTSMPDLG  
VIDKAVAVADGIPADDSNHKHRLEDPPAQGNHEPCDEAGAGRPSIIPPEEQRVLKPRTDC  
EAACPNGRPVINVSGWDFAEILHSCAYSSSDCPYDLPINCWDTSRVTSMSAFSTRSSP  
DYLKHFNKPLNCWDVSSVTNMYMMFNFQVFFNQPIGDWDVSRVEDMSGMFSHAASFNQPI  
X

>comp11379\_c0\_seq4; 339 177 1137 LEN=1137; translated

MRFAVALSTLVSLGSASDDVNRADGTLSSNPSPHPSKSF SIGLSKNHAGLSSISKASISK  
ANNSKSKVLSNKAISIDAENEDLDVIPDIGIISKKPSVASNDKDFDMFPIDDHNKQGYHL  
LQDLTMPSENEQVSHGVADAGDLWVSQEEQRPLQSITDCTANCSTGRSHLLEDPVVSRDSA  
DLRAGQEVQRVLEPSTSTDCAVACTNGRPI INVSGWEFRSLLRSCAFSSSDCPYDLP INC  
WDTSRVTSMSAFSTSRSSPDY LKHFNKPLNCWVDVSSVTNMYMMFNFQVFFNQPIGDWDV  
SRVEDMSGMFSHAASFNQPIX

>comp11379\_c0\_seq5; 261 177 1042 LEN=1042; translated  
MRFAVALSTLVSLGSASDDVNRADGTLSSNPSPHPSKSF SIGLSKNHAGLSSISKASISK  
ANNSKSKVLSNKAISIDAENEDLDVIPDIGIISKKPSVASNDKDFDMFPIDDHNKQGYHL  
LQDLTMPSENEQVSHGVADAGDLWVSQEEQRPLQSITDCTANCSTGRSHLLEDPVVSRDSA  
DLRAGQEVQRVLEPSTSTDCAVACTNGRPI INVSGWEFRSLLRSCAFSSSDCPYDLP INC  
WDTSRVTNMDRAFKPNELGSFNEPLNCWNVSSVTSMYLMFNFQRSFNQP

>comp11380\_c0\_seq1; 1238 98 3328 LEN=3366; translated  
MGKSAARDTMVLLLSVLLLVMSSTSSASFLDKDKVRSIRANSAPTRNLSFVHSSRRHRCG  
NREYGFPRKRTDKIAATFLSKLRGGSNKSESVANGGANESTTDNNGKRTSSKAKENRNRNK  
NKYKKQLVHKDENKNKRSDSNTKNKRKVTDEEEEEVVDEENGVD CDHSLGSRENKSDTSS  
IKLIEQNRPSKFLVDPFRMNELARYEASIEQEVETNDENDDAEETTPIAARKEMSHES  
KNEEDDEERDRRNKKGKKKWDRTKAATVTEPPTNEGSKSGEEGEPLIASDDGEVSNGLLE  
DPRIEGDEQTTKSDSVTTDDSNSFWVDVWVTQHLSDPEDFEGEHVGDADVEEGIDIDVAL  
EIVDKERSGSSSENGKFGIEDGSEVKEKRSKGRKKNKGRSTSENIKLSKAPDGNITVS  
SDIVCPSVIEAESSTKENAATSTADENAKMAVSELDVAPSYLSSGAWITIDNLLTIGLA  
SKYPALRFSRKIRTVRKL SARITGLHGVMGKPIRSLSDLMNGTDTDIDTNTNIDHGS  
YSIKKQIAAIDKARERVELAEAEKVRRRKR SFFGFRVKS DVEIEAAVHKIQKSEDDPTS  
DKEKIEKTKVPQKSPEEMEEYQRMERVREIDTLISEGQRQLAELICEKVDLQRRPNPLF  
NYTTKETITRTEVSTNDEAVIDGIHQSGSQTDPNATKKVKIQATRKIIFPPDDLVAEYLD  
MMLSTRRLTKMNHTQLWREGENAEDDDEESIGDDLFTPSADVHRLYQRSPRSDGNGSKK  
GSRNGKGGGGSWLLRQSIGNGPTLGEKIGQAAETAAYKAVTNALMSFLARLISSLHGIN  
VMKHSDIRLVLEQSPDLPPVPKDG IIRGDHSNYAEEETIKTVMRQKSRRSKRRSSKRRLSE  
TLFVQQEAVTETLLSHVQISAPLLKLFPLAWQRALLGNI IALSCAIISDFVEGLHFQILG  
HELFSFRPITEVDMARHFQ MAGGRFNQRRYKAAEFEEAAVQATAEDLKEELKFLDSWHER  
ALGSGVLRQTADIARIVLTLTDDVLSGARMDLWSVQAGGPRMLAGLEHRIEERS

>comp11381\_c0\_seq1; 272 1 1018 LEN=1116; translated  
XTGSLLLHRTTPPPSSSLQPAL LAVPHAKTTAVPFRSVPFRFVSRMPQQSYDIDAILAE  
EELIPCTTLFEFSLHLAGLDPDGAHHRKQHPQQHEAPEDDAGGSSAYLPENSRIKVP LWAV  
ETWATLGFVRLQLPRHYGRRARERYDADPGDANLRRRNERFFLSGRRLVHLIEQSSTQVA  
RAIASLPRSRNSSNTMIRHTQALRQVSEEARSLRRTLLQTYAGERLRKVF DWSQSGSSTT  
GGSDVDDVDSGYLGQLTEMEQRLYYSGAKAVADLEEWKVYGNRRLWRGPPAAP TNEPHNP  
SNPATDSPAGGAQSHKRSVVTPEETRQLEPKEQRRRLG

>comp11381\_c0\_seq2; 229 1 1075 LEN=1173; translated  
XGTKEPRTIPPPPIDSLPQNPPQSGRSTTGSLLLHRTTPPPSSSLQPAL LAVPHANTTAV  
SFRGXPPQSYDIDAILAE EELIPCTTLFEFSLHLAGLDPDGAHHRKQHPQQHEAPEDDAG  
GSSAYLPENSRIKVP LWAVETWATLGFVRLQLPRHYGRRARERYDADPGDANLRRRNERF  
FLSGRRLVHLIEQSSTQVARAIASLPRSRNSSNTMIRHTQALRQVSEEARSLRRTLLQTY  
AGERLRKVF DWSQSGSSTTGGSDVDDVDSGYLGQLTEMEQRLYYSGAKAVADLEEWKVY  
GNRRLWRGPPAAP TNEPHNPNPATDSPAGGAQSHKRSVVTPEETRQLEPKEQRRRLG

>comp11382\_c0\_seq1; 680 454 3084 LEN=4047; translated  
MPPLVTWTVKSLGHSRLRLSRLERSREEIESLSIPTKRLPLEEKEQHTVPSSNLHSSCAK  
TRAVATNHDSQRRKESDDETSIPVQPVLRRDDTSPRRNSETEQSEMIPTYSSSHVRSGL  
NSRMTPIVNGSSDGDQPSRHPMKNNANSGLTKSASKSNSFIRISPSPTQTNNAE AAS  
LSTKKTSTEPVKKHITQNN TAGKRNICSTTGNNKEDTNLSSVVVLRDFIGGNVIANSS  
TTESALVPPTLTPSSSSSSVETKTENETRLALKKDGPPASKTMEAVDKQGRPLPSIRQQ  
QLPLQQESAPSKSLNNTDIAPSP TQKNSIVSSLTSEKGPLHLKLQSDNQSLSSSTIKDAIV  
VHPTPPVTQAQKVETIRPLKPEVSATKQASSGELPSALPSKLESKPVSSSTKKEAIGPSD  
KQSI PSRLIPLAGKPSPTMCPALPAKSIHSAGANKADRSSMSSPSSVAPQPTTNNNFQSK  
KNLKTGHPSTPGSKKRKRS GSDSTASTSSKPKGQSSGRWTADEHQAFLEGLAECCREWKK  
VAQRIPTRSSAQIRSHAQKYFAKLQRDQETS AATTAVNAVSGSLIQGD LAAAAANCSTT  
SFLMTGVPLASGGS LVVVGEGR LSGTIVTGPAALPPSVQRNVERIVANPRAAQREVEDT  
MEALRRRYRQLQQRLEERRKQRDEKRRRQQQSTQQQPSVLSSNATESTDDSSSTIASS  
HQLPQARQTTTTTPEQQSRSPKQPCNPCRKRALNLP MNRNQPN SKRSNGR SSSPPTG DEN  
SSVSSNVSSIAASRTDLGNEEIVALEVLGEALPRGDSVNDLQVLDSRDPFVALRDDTVPS

APEVPIVLGIHQSLVPNSDDNNTKHHQVDPGLKTTK  
>comp11383\_c0\_seq1; 523 91 1668 LEN=1712; translated  
MTGTPNTSTSPGTVDESSTTERKGVWLFRCMILLFLDVLLSVLFMSPIIPWVRYQEES  
GSSISPNKHSYAFSESLDLLLALSGCRAVAALSAFAVSYLRGNVREKYSFDVLHPNGKKK  
TRDELEEEALQQSFGSWLSCYVNRAAFPSELFLCLATTLVAVGKCLVRLNIEIGVLRDAEP  
IHPIFWLAFFLSAAVSVTEMVYVDAVCVCLGKKGSTAEKPLLLRHISHLSLPLLANDSL  
EGQEESENGRNEEDQPESAAIDENAVGDSGIGGDADYKASWSDLLKLCAPDAFLISIAFV  
FLLFAAMMQIYIPKYTGACLDALDAQAYSSNDDGSNDDNESIKDIPGFMSNVKLLIVSVL  
GGFFSGVRGSIFTMVGGRVNVRLRLRLMDALLTTEQGFFDVTKTGDITSRLSSD'TTLVGD  
QVTLNVNVFLRSLVQVIGVLTFFMFMISWQLSMLAFISVPVITILSRWYGTFFVRSIAKVMQ  
TKLADGNSVSEAALSSMPTVRAFDAGPTEYKEFTTHMDKVCVQVV  
>comp11383\_c0\_seq2; 723 91 2823 LEN=2876; translated  
MTGTPNTSTSPGTVDESSTTERKGVWLFRCMILLFLDVLLSVLFMSPIIPWVRYQEES  
GSSISPNKHSYAFSESLDLLLALSGCRAVAALSAFAVSYLRGNVREKYSFDVLHPNGKKK  
TRDELEEEALQQSFGSWLSCYVNRAAFPSELFLCLATTLVAVGKCLVRLNIEIGVLRDAEP  
IHPIFWLAFFLSAAVSVTEMVYVDAVCVCLGKKGSTAEKPLLLRHISHLSLPLLANDSL  
EGQEESENGRNEEDQPESAAIDENAVGDSGIGGDADYKASWSDLLKLCAPDAFLISIAFV  
FLLFAAMMQIYIPKYTGACLDALDAQAYSSNDDGSNDDNESIKDIPGFMSNVKLLIVSVL  
GGFFSGVRGSIFTMVGGRVNVRLRLRLMDALLTTEQGFFDVTKTGDITSRLSSD'TTLVGD  
QVTLNVNVFLRSLVQVIGVLTFFMFMISWQLSMLAFISVPVITILSRWYGTFFVRSIAKVMQ  
TKLADGNSVSEAALSSMPTVRAFDAGPTEYKEFTTHMDKYLEMTFKSAVAYCGYATVSTS  
LPQLVTALVVFYGGLLVRNGSLSSGELVSFLLYLQSLSDAFSSIGYIFSSLTQAVGAADK  
VFELMHRDRRVIPTMDSNNNGVTNQSSLVQKVRVTGVEPNECKGEVTLQDVMHYPAR  
PNRRVLRGMSLTVPVPGSIVALVGPSSGGKSSIIISLVQNLYSQSSGKVMLDNIDVHEYSR  
WLSHHISIVQQEPTLFARSIRRNI MYGLEGT DREPTQEEIERVAMLSNCDDFIRKMPMQY  
ETEVEGERGVQLSGGQKQRIAIARALVRKPKILLLDEATSALDAESEHMQSAIDHMIDTA  
RSTDGAGMSVMIVAHRLSTIRNADII FVVQDQGVVEQGNHTELIQREDGAYASLVRRQMN  
VQNKLESGGD  
>comp11383\_c0\_seq3; 657 91 2990 LEN=3043; translated  
MTGTPNTSTSPGTVDESSTTERKGVWLFRCMILLFLDVLLSVLFMSPIIPWVRYQEES  
GSSISPNKHSYAFSESLDLLLALSGCRAVAALSAFAVSYLRGNVREKYSFDVLHPNGKKK  
TRDELEEEALQQSFGSWLSCYVNRAAFPSELFLCLATTLVAVGKCLVRLNIEIGVLRDAEP  
IHPIFWLAFFLSAAVSVTEMVYVDAVCVCLGKKGSTAEKPLLLRHISHLSLPLLANDSL  
EGQEESENGRNEEDQPESAAIDENAVGDSGIGGDADYKASWSDLLKLCAPDAFLISIAFV  
FLLFAAMMQIYIPKYTGACLDALDAQAYSSNDDGSNDDNESIKDIPGFMSNVKLLIVSVL  
GGFFSGVRGSIFTMVGGRVNVRLRLRLMDALLTTEQGFFDVTKTGDITSRLSSD'TTLVGD  
QVTLNVNVFLRSLVQVIGVLTFFMFMISWQLSMLAFISVPVITILSRWYGTFFVRSIAKVMQ  
TKLADGNSVSEAALSSMPTVRAFDAGPTEYKEFTTHMDKYLEMTFKSAVAYCGYATVSTS  
LPQLVTALVVFYGGLLVRNGSLSSGELVSFLLYLQSLSDAFSSIGYIFSSLTQAVGAADK  
VFELMHRDRRVIPTMDSNNNGVTNQSSLVQKVRVTGVEPNECKGEVTLQDVMHYPAR  
PNRRVLRGMSLTVPVPGSIVALVGPSSGGKSSIIISLVQNLYSQSSGKVMLDNIDVHEYSR  
WLSHHISIVQQEPTLFARSIRRNI MYGLEGT DREPTQEEIERVAMLSNCDDFIRKXELVL  
AAEVAMTTQDACFIVEDKNSNISSSEDADAXMRQRLVNEAAAKWWTETKVSHASYQTSSA  
YIQKHISESSSRFRIAIARALVRKPKILLLDEATSALDAESEHMQSAIDHMIDTARSTD  
GAGMSVMIVAHRLSTIRNADII FVVQDQGVVEQGNHTELIQREDGAYASLVRRQMN  
VQNKLESGGD  
>comp11384\_c0\_seq1; 441 192 1079 LEN=1316; translated  
MRSKPSQSAPKGGVKGIRKGGKRRKQYRPSFLDCQSLTHVVGFPQNELITTSVASEFVK  
EMFFDRFVKEVVKPFQPRKNKESGDGERYNSATPKNDGNTGYHVMVGGKLVKKRNTPOG  
NETNDPKESTTQNRNEIDDALARKRQFWKENIVVGSNQCLRVLETASKGLAATPNKKDGD  
TGAQAKPSLIVLAKDIYPTICTAI PVLARNLGIPLLLLPGKASLELGKAMNVKRTSVLI  
FLSGDDINGENDADKKSTGGGVEDKERRETATAIASFVSFIKEQMSVSGRDKIG  
>comp11385\_c0\_seq1; 354 584 1039 LEN=1190; translated  
MYAVQILLMILLGESSSSPSSSFLAGTTIDNAGSHALSRAFRMFQEGREEEIGRDTY  
FFPGVFEGVFNRTVRVVVGNINTFN'TTDGSNKPNNDDYVVSIFRSDDDEKEREFRKMGMM  
DVAEANDEDDSAELLPLCLVELHRTPDISLL  
>comp11385\_c0\_seq2; 332 428 1058 LEN=1209; translated  
MEIPHSMGFGGVYVELGFNPVFTPLTIQDEDDGFLMIDPHTGKLTTKIMAVSPKHPIMY  
YAVQILLMILLGESSSSPSSSFLAGTTIDNAGSHALSRAFRMFQEGREEEIGRDTYFF  
PGVFEGVFNRTVRVVVGNINTFN'TTDGSNKPNNDDYVVSIFRSDDDEKEREFRKMGMMDV



AEANNEDEDDSAELLPCLVELHRTDPDISLL  
>comp11385\_c0\_seq3; 366 340 1917 LEN=2068; translated  
MAKSSVPQRRDRPTTNGMSRGSNLKTNRQQPAMQYPKTQSQQPQRNSPRQKFHSQVRPLK  
QGRSTNRRPRINAAGRNTNRYRSRANMSMDTIPEENPKRKKKKYRKKKVLRAWVLPVAVFLS  
CLCIIWLEHYIGKLIGLEDFREYVYQDQLIDPLDRLAQDLVDLRAQETSIIIGNPISTRVVA  
NISFTPRDGNCPKGQRRMINIHNPMSHSVRGRLIPKIVHQQAKTRCLTMRVDEPRSSGSPS  
DGCIKLTVPNLPILRYPVDSGATTSTTKSLEVDCSRGIAGAHRGNXEFPLLKQIISDCF  
EKNRERPRYRSLSELWKFLLWVFGGVYVELGFNPVTFPLTIQDEDDGFLMIDPHTGK  
LTTKIMAVSPKHPIMYYAVQILLMLLGGSSSSSPSSSFLAGTTIDNAGSHALSRAFRM  
FQEGREEEIGRDTYFFPGVFEGVFNRTVRVVVGNNGINTFNTTDGSKPNNDYVVSIFRS  
DDEKEREFRKMGMDVAEANNEDEDDSAELLPCLVELHRTDPDISLL  
>comp11385\_c0\_seq4; 354 727 1182 LEN=1333; translated  
MYYAVQILLMLLGGSSSSSPSSSFLAGTTIDNAGSHALSRAFRMFQEGREEEIGRDTY  
FFPGVFEGVFNRTVRVVVGNNGINTFNTTDGSKPNNDYVVSIFRSDDDEKEREFRKMGMM  
DVAEANNEDEDDSAELLPCLVELHRTDPDISLL  
>comp11385\_c0\_seq5; 354 1586 2041 LEN=2192; translated  
MYYAVQILLMLLGGSSSSSPSSSFLAGTTIDNAGSHALSRAFRMFQEGREEEIGRDTY  
FFPGVFEGVFNRTVRVVVGNNGINTFNTTDGSKPNNDYVVSIFRSDDDEKEREFRKMGMM  
DVAEANNEDEDDSAELLPCLVELHRTDPDISLL  
>comp11385\_c0\_seq6; 269 1 915 LEN=1066; translated  
NPMSSHVRGRLIPKIVHQQAKTRCLTMRVDRATIKWAFRRWSYIIHDEESRSLFERHCG  
SSSRKCEFPLLKQIISDCFENRERPRYRSLSELWKFLLWVFGGVYVELGFNPVTFPL  
LTIQDEDDGFLMIDPHTGKLTTKIMAVSPKHPIMYYAVQILLMLLGGSSSSSPSSSFL  
AGTTIDNAGSHALSRAFRMFQEGREEEIGRDTYFFPGVFEGVFNRTVRVVVGNNGINTFNT  
TDGSKPNNDYVVSIFRSDDDEKEREFRKMGMDVAEANNEDEDDSAELLPCLVELHRTDP  
DISLL  
>comp11386\_c0\_seq1; 145 186 869 LEN=1367; translated  
MFSPWVILSAASDRALLSLTTVPTLSGWIHTAVVTGATTAAAGLVAAGSGFIDPVRDFDP  
PWQTKANDNENGRRTTAPSHRLLLPWYVKLSAFVFPVSLGEEVLWRGAMIAPHPSAWTPAT  
VSIFLPRAGVLLVHVLVHPVAGLTVWPRGREVFCDPFRFLALATIVVGGSTVAYVASGGS  
AIAASLTHGVCVVLWRDFFGGEAKLMRGTTTTPTSDGVISEKKKEK  
>comp11387\_c0\_seq1; 570 97 1650 LEN=2150; translated  
MTAADTRNATSTAPIKVTDFDIVAKEVPGPKYVLAEDYNNGKHIGNNRFDVLDVDMYVDDF  
HMNQSKNHRAECDRIIGIIRNVNSRGRFLGKALTTPEGDGSDSDRFIELSDKDARLLI  
EETITTRIEAKQKEIFEPLPLLLDAIGFGRESFYNEGKHYDNNHNNIDGTNTGKTGPPVLR  
RSRSASEMGSADDAFWEVLRDLEPEPVDYESNRQADEFEPLPLHANDSSCIDPDLVLR  
TRGYRTNHNNTGDTKKRGRYSLLRRSNSFESAFDRKKTIKNLYGVVPKLRQRPGLIP  
SFDDPQASSPAFVADAIHSTMDMIAGMGRGATSGAGVTRHRGMDVVFQKDPSPAGGGYA  
LSPKADIVGNRLRVLIDLEKDRVGRVPTVEQHTAASGMVTTVTNDWKGRLLVDRGRFAS  
YASLGREEATAAVLCLLVGSPSGGTPAHGATRPAAASGATSSLLSSAPPLPAFLKASNEI  
LNGGRQKHTMTTKERQARAVENTLAKRQLAKEKDKED  
>comp11388\_c0\_seq1; 283 102 1958 LEN=2152; minus strand; translated  
MWMFGENGVSIPTPDGSEEVKNIPPEKVKNTSSTYNXLNFDSTWYHMQPDAHLCLNSS  
FSHAIQYQTGEGSSRIRCDFNDVSDGHKYVWASVARGVPEIDVFLIDTGDLVGSFGTCC  
SPRDLDPYPTREEIIVHCSEYSNISASHMDVFSANSPSVPIPTTITMHDNTNMRSYGKLEV  
HSSLGDVAYSTVSGQPKLYKIDLAGRSVMEVDVSNVSPKLRRLINLVLLPSRNLSLMLS  
SSISLTLNSTEFYGVYDIAYSPKNGHIFARTEVCCTCGFEGADSLECGRYGSRNITISGE  
TVEGQCXTSLSRPTDVTGVVIEYDNTDVTVVGSHKFFVGSAPVYAPFSSPDGEHIVMFGLD  
GGQTVIEILKVGNTGEMSVRQHLRNGIAFAWFLFDDXTLTHISFNPI SAFINEQEVETTLS  
LDFNTTNVEEYGVYNDFAIYQTDENMLFVVSSSSDYKVAIVDMSTPSYDVSYVMLKDVY  
EGRRYSRQVEWAEGTNYVVIIGRQDDEAYVIDLESKELIRTFTEVDSRKLKLSVAPYHFMG  
MADEYGSYMAANGIGSGGNDDVLSIVALALSCVAIAVAASVFAKKS DPKLEPKESAVP  
LTKHKVDDPSLAVPPSVA  
>comp11389\_c0\_seq2; 254 1 364 LEN=432; translated  
XQCEPIREQCKENDMSPEECKPLFECKEGLKKEECEDMLHKPEHNPIEHCVGTGMSEED  
CLGLLADCKETGDQIKEQCGSIKEQCKEEELSPREECKPLLEVCKEALENEVCKELFPKPL  
K  
>comp11390\_c0\_seq1; 797 161 2299 LEN=2578; translated  
MVKFGGHVEAIREGLVDARLYIIPYNEIKSLVYEDKGSNISKSPKHAGSMKTNPASAMN  
LAVGNRGEGEKKQADSGDEVTEDEEQFFMRVWVKVALSDAEEDFRGAREEIQWQIFAGITE

READPEMENDPPVRGAHPGNAIKLYVDRLGETEAQELLVVMKEVYRAASINSEGLRKLKLV  
KKS DKHRKDRNGLSSKLLPLLYTSSLYTGQNMMDAIGLLRDLICGRSDSNTNGRVYAS  
DDSLIGAYNDGHF SKLVKRNSETRHQEAIDIRKMEFDWLKSLVRSIPNDLLPKLVHRG  
FHHTKDRNDKRPVENSL SAYEMAWTCGIELCECDIALTKDEKLILAHDENFERLSLDALH  
ANSKRKVGDLTFKELIS MPLSNGVRPPLLIDVLR SASAISERSKLVIEIKPGNESSAFAL  
ARLLTRHPDLRSNVAMIMSFDAATMHQLRAELDRVVL PDSRGELAADR IPLGGAPLQNSN  
THRRVTSYDHF GTLSSGWLAGMGMGAGSSPVPLSSQTRRRDGSIDLSSIGLSISQTNLAA  
SPSSQSVTRLGKGFPSGSGQLNGATGEPLATSGSWEKQAVDHYGNSFSMPKLMMLTVADP  
PSIPCELQVQYNELHRVDSWLRHEDGFLDGVYLQYEPGMLTPEGAACLRELSQRFLVGIW  
GYAERDPDDFETFEWL VKEGNC SFVNSDL PKHFRKELLIQKERLPPRYSHTK  
>comp11390\_c0\_seq2; 721 161 2140 LEN=2861; translated  
MVKFGGHVEAIREGDLVDARLYIIPYNEIKSLVYEDKGSNISKSPKHAGSMKTNPASAMN  
LAVGNRGEGEKKQADSGDEVTEDEEQFFMRVWVKVALSDAEEDFRGAREE IWQTI FAGITE  
READPEMENDPPVRGAHPGNAIKLYVDRLGETEAQELLVVMKEVYRAASINSEGLRKLKLV  
KKS DKHRKDRNGLSSKLLPLLYTSSLYTGQNMMDAIGLLRDLICGRSDSNTNGRVYAS  
DDSLIGAYNDGHF SKLVKRNSETRHQEAIDIRKMEFDWLKSLVRSIPNDLLPKLVHRG  
FHHTKDRNDKRPVENSL SAYEMAWTCGIELCECDIALTKDEKLILAHDENFERLSLDALH  
ANSKRKVGDLTFKELIS MPLSNGVRPPLLIDVLR SASAISERSKLVIEIKPGNESSAFAL  
ARLLTRHPDLRSNVAMIMSFDAATMHQLRAELDRVVL PDSRGELAADR IPLGGAPLQNSN  
THRRVTSYDHF GTLSSGWLAGMGMGAGSSPVPLSSQTRRRDGSIDLSSIGLSISQTNLAA  
SPSSQSVTRLGKGFPSGSGQLNGATGEPLATSGSWEKQAVDHYGNSFSMPKLMMLTVADP  
PSIPCELQVQYNELHRVDSWLRHEDGFLDGVYLQYEPGMLTPEGAACLRELSQRFLVGIW  
>comp11393\_c0\_seq1; 355 169 2107 LEN=2355; translated  
MTQRNKGLLRKDRRRNATPSSRGQNAFASQASTPTPTLPSCPLPPAAVFAVFFLAVQLVA  
LNIGVILFEGKGAGNAFSRSGAIPSKRDFLARTQTQQQRQRRAGREAPDGSFNHPIYH  
RTRKDVET FVHCVGENYQERLSWKKKSCFKNYFCFDAATKNYVVF DAPENKAIYEHRDR  
HPLLD FSQSYL KMAPSEPN SVSLGGINTKWKGDTHRLEWSPEIRTMNADESLSYYELPSS  
VVMIPFHS MN GSNPGHLVWDDFLPIFTLLSMFQLKEKSKELMLMRYILKGN GSKDGE GS  
RGLWASCDWTDEKKEACR KMYKKFLPLMLGADPVREDPV TTEEFDFRPS SDAGKSS TTLV  
CASHGLAGIGALTDHGTEKTHGWDQSDYQLTQNHGRGGTIYEF RNFMLRNMGI PVESHQE  
PPFRVVFSESSSRDTRNFDFKKQK EFLKQNFHPSYVSVESYVLSDSLAEQLEISSQAS  
IFITSCGGGAVSAMFMPRGSSVIMYYVENG GIVNNKPTGTPARLDWDLFNNMAYLKVHWL  
PSSTMNTDADTNALFLLIQHELEGLIREKSYDHF FNYGHLSESGWKIEEYLLCTSYEYWA  
LVLLFECL ELSPATIGARYEQDIGCRTFAHANVKLSSRGLLLPSE  
>comp11393\_c0\_seq2; 355 169 2107 LEN=2380; translated  
MTQRNKGLLRKDRRRNATPSSRGQNAFASQASTPTPTLPSCPLPPAAVFAVFFLAVQLVA  
LNIGVILFEGKGAGNAFSRSGAIPSKRDFLARTQTQQQRQRRAGREAPDGSFNHPIYH  
RTRKDVET FVHCVGENYQERLSWKKKSCFKNYFCFDAATKNYVVF DAPENKAIYEHRDR  
HPLLD FSQSYL KMAPSEPN SVSLGGINTKWKGDTHRLEWSPEIRTMNADESLSYYELPSS  
VVMIPFHS MN GSNPGHLVWDDFLPIFTLLSMFQLKEKSKELMLMRYILKGN GSKDGE GS  
RGLWASCDWTDEKKEACR KMYKKFLPLMLGADPVREDPV TTEEFDFRPS SDAGKSS TTLV  
CASHGLAGIGALTDHGTEKTHGWDQSDYQLTQNHGRGGTIYEF RNFMLRNMGI PVESHQE  
PPFRVVFSESSSRDTRNFDFKKQK EFLKQNFHPSYVSVESYVLSDSLAEQLEISSQAS  
IFITSCGGGAVSAMFMPRGSSVIMYYVENG GIVNNKPTGTPARLDWDLFNNMAYLKVHWL  
PSSTMNTDADTNALFLLIQHELEGLIREKSYDHF FNYGHLSESGWKIEEYLLCTSYEYWA  
LVLLFECL ELSPATIGARYEQDIGCRTFAHANVKLSSRGLLLPSE  
>comp11394\_c0\_seq1; 256 341 1135 LEN=1249; translated  
MSTDSSNPTPKPGAAAATATPATHPTDTSVSKATTTTVGTSTVAEK SADSSGLES LGEQ  
VSQNTPTTQPLRIDTTKMMFEARLTGSF SNLQNR ENTLLRRKDALSSRSGSESPHYRGQ  
STNTFDGSSISSLEDDQIDTDILTDMGVLELNLKDDQEQEIAHSLHKSLSNLPAVNERLR  
DETLEDCHAFTDLKREGT LSRGSIITGGEV TLEPLEEIEDEGDPNERTSKIKITNLAEI  
LEAPDEEETADANAPPENKAPVPS  
>comp11395\_c0\_seq1; 379 166 1803 LEN=2731; translated  
MTGSNSGRPAIS IATR TLAVLASLYSSPNHGSFN RNNGIFGN SCSASLVSSLFVAVSSTSA  
FQQERRILPNRSSTGCLGRRRHFN SNTARDDSFYRPWNPSKTNNLR YRNIRCYHSSIPS  
TTSFLKASEVSVDEGAPFANGDRENSERKVAETTRHLPRLFIDKGS DNNSNSFVIPLREK  
SLVPLTVDQEHYLLDVMRITNAKRWGPRIGGK KRKNNDDEAGAYEKDALDYTGCVRIFNG  
VDGEW LARVVVPEEDAGGGTKNKKQRRKRGGKQKTNSNGGEASTSSGTVLECLQRLLPQ  
ERAGTHRERQDEAAIVGNRNKHNEIASRLRYLGYLKDKQRRRWVIEKATELGADCITILE  
TDFSNNNNP SDPGSYKRKQKEVRWEEDREKHLHAIEAAEQCERLTVPELSDQSWTIDEI

ADRVALPAGGQESDGERDTSIAGHVVMVCRERSESSPPILSALRELSAAPASESAGDTN  
AAIVLHVLVGPPEGGWSPRELEVFSGLTGSGLRFVSLGSSVLRAETA AVAAVAIAIQMHRDA  
DVGRM

>comp11396\_c0\_seq1; 735 291 1997 LEN=2204; translated  
MSEDKQGNRLAGSSIRSTKLPRTTAMAMAMAMAMVCCGLASSVLEEGTHGFVVAPSRPRA  
PRHPYPDLRRESQCQIRLSMSSFAGEPCDDDDDDGNNENNQDEDAEDDEDDDDYIDTESLG  
DWRSEFRNLAMGDTKDESNNTNNTNNTNLPSPSEKKAREGEERVITENEAVLRTQNEKLA  
EYATDLWAYETPKPEVGGVLVLRMPIEVELYRNYKHSIMGSKLRAMLI EDGKARGDADTD  
AVADADTDAEKGGPVGPDDLEMSHWYGRSSDLVEEQMKKIADKADEEGQIDASTLPEDHA  
EMLTLYLENQEEWQEVCLVLEQTTSSGGSRSSKTVVLNRPMAFKLTKDLARVVYLGSYGI  
DSVQPETARRLTRFATAFREECVAVCVGGPDHQGEPAILVHGISGLEGASEISPGTGIYRG  
GLEAAIDGVL DGLYSPLEFRFFVVGCHDYQESMLDVEVMLGKLPVACSRVLPKQCISLP  
KPLWHEVMELCGGGDLPDISVLEMRKHEDVTFQVLEEDEIEIEIDGETSGLASSAADFGI  
LMIDDDDEDELDIEIILDDDGDDAPWGW

>comp11396\_c0\_seq2; 480 317 1369 LEN=1576; translated  
MGSKLRAMLI EDGKARGDADTDAVADADTDAEKGGPVGPDDLEMSHWYGRSSDLVEEQMK  
KIADKADEEGQIDASTLPEDHAEMLTLYLENQEEWQEVCLVLEQTTSSGGSRSSKTVVLN  
RPMFAFKLTKDLARVVYLGSYGIDSVQPETARRLTRFATAFREECVAVCVGGPDHQGEPAIL  
VHGISGLEGASEISPGTGIYRGGLEAAIDGVL DGLYSPLEFRFFVVGCHDYQESMLDVEVM  
LGKLPVACSRVLPKQCISLPKPLWHEVMELCGGGDLPDISVLEMRKHEDVTFQVLEED  
EIEIEIDGETSGLASSAADFGILMIDDDDEDELDIEIILDDDGDDAPWGW

>comp11397\_c0\_seq1; 269 696 1505 LEN=1865; translated  
MTPEQRTICTNLMVRGFRDACTEAETT VTGGQTVLNPWP IIGGVATSVVTRDEYVSSDGA  
RIGDVLVLT KPLGTQVAVNVHEWRKKHQKHGDRFWDKILENDNGTNGESLLTDSEAEEM  
MHKAVRSMSKLNRLASKIMTKHNAHAATDVTGFGILGHAQNLMDNQIAECGVELHTLPCI  
ANTLKVND EILNFRRLRAGYSAETSGLMISMTESDAIAYCTELRQLEKDSYNYSNGEDL  
DFGPWIIIGRVTEDPNRKAIIT EDVEYLEV

>comp11397\_c0\_seq2; 269 499 1308 LEN=1668; translated  
MTPEQRTICTNLMVRGFRDACTEAETT VTGGQTVLNPWP IIGGVATSVVTRDEYVSSDGA  
RIGDVLVLT KPLGTQVAVNVHEWRKKHQKHGDRFWDKILENDNGTNGESLLTDSEAEEM  
MHKAVRSMSKLNRLASKIMTKHNAHAATDVTGFGILGHAQNLMDNQIAECGVELHTLPCI  
ANTLKVND EILNFRRLRAGYSAETSGLMISMTESDAIAYCTELRQLEKDSYNYSNGEDL  
DFGPWIIIGRVTEDPNRKAIIT EDVEYLEV

>comp11398\_c0\_seq1; 226 1 1103 LEN=1103; translated  
XVVTATPSEGSVTAATTPHCPRCTGLPIATSTGSPSTRAVPCRAATCPPSRQPVPPTDGEA  
DPDRVAQCIPHLRALQPVPDDAPRAACLEDPPGVSGAARTGCLFFPGRWVGRFLLLALML  
ILVGSQVMDRGISSLRLTPIILFLGRWLFPPLFVDGWNELQWNGCVVDMERNKWKMEHS  
IESHPSECAFSPKPPQVWGSIRELTEGIEHAIPPGRASLFPSWFAPSGRAAPGNPEGSS  
STTPPAGRDGSHSNNISNNNNNNKTKNKP NKATVLLARQNQHRSVPAAPTVTTHLARV  
LCVCVCFACVCHGFVAVPPVHPCPTPHDPAMP PPSRKRQQPICFRSLALPLANTEEEKPS  
KDGNGNGX

>comp11398\_c0\_seq2; 151 1 836 LEN=836; translated  
XRCYRNTQRRFRDSRNHTALPPVHGVDCHQHGQSIAPVPCRAVLPLVHLPDSPFQPMAR  
PIRIASLNAYLICGLFNRYRTHPERRASKIRREFLGPHGPDVCFQEVWGSIRELTEG  
IEHAIPPGRASLFPSWFAPSGRAAPGNPEGSSSTTPPAGRDGSHSNNISNNNNNNKTKN  
PNKATVLLARQNQHRSVPAAPTVTTHLARVLCVCVCFACVCHGFVAVPPVHPCPTPHD  
PAMP PPSRKRQQPICFRSLALPLANTEEEKPSKDGNGNGX

>comp11399\_c0\_seq1; 666 265 2263 LEN=2554; translated  
MRLMTNNSLENCKKRRGRSTRAHDSLGATASVTATKPLNANARSLGVLPLMLLLLLLSA  
TNTYTIPGCLAQFNEPPGARREQTFRVEEFELSNINQHYPGDLRYCYCTFRGKWSGERHPK  
DFPKSPSWSAPTIVSHSKDWRMWTGTETVTVAGVEYLAEQGFPTIMYNEFQNA GFETLHMI  
VGERMFNTTESQELPPINVTYTHPFLSAMTKITPSPDWVFGFSDLRTISYDTETYNRIV  
VKS YVWDAGTDEGEAYHSFDRDLDPQIPCMRF CVPTNVGGGEGTKDSNVKHEPDLNR IH  
HPTALAGKCPDKDKRTAVPRGGQFLDYTGTYIPYPAEYECVLRVGNGEVYPGNAFHEDQ  
IRPALFVPRPDDDFLDGISPYDQPAYDIHVAELNYVEPEEEPEGWNKNLLWLILLLLLLC  
CAPFCAFFAM YMMFYRKKKNKDGSGTG GGDGTENGEDGDTNRSLPDEAFLDEATAEHDSN  
QEF SNYDYSNIDPSQSDAPYDDDTGYGDVADEIGEDDEYSKFLLESRRVAQDVVYGGDD  
SGAGYGESGDAFRTSYRDDEGGGHSSYRDGDVLERECECECECKSGGIGPRACIGLAVVL  
EGLAEGGHATAVGC PHRETDPRD GWLEGAGSMHGMFTCSGALVYNRNTKDG NRSFLIWLQ  
STNNT

>comp11399\_c0\_seq2; 642 39 1608 LEN=1899; translated  
MTKKFQLQLKFATPQQGFPTIMYNEFQONAGFETLHMIVGERMFNTTESQELPPINVTYTH  
PFLSAMTKITPSPDFWVGFSDLRTISYDTETYYNRIVVKSIVVDAGTDEGEAYHSFDRDL  
DPQIPCMRFCVPTNVGGGGEGTKDSNVKHEPDLNRIHHP TALAGKCPDKDKGRTAVPRGG  
QFLDYTGTYIIPYPAEYECVLRVGNGEVYPGNAFHEDQIRPALFVPRPDDDFLDGISPYDQ  
PAYDIHVAELNYVEPEEEPEGWKNLLWLILLLLLLCCAPFCAFFAMMMFYRKKKNKDG  
SGTGGGDGTENGEDGDTNRSLPDEAFLEATAEHDSNQEF SNYDYSNIDPSQSDAPYYDD  
DTGYGDVADEIGEDDEYSKFLLESRRVAQDVVYGDDDSGAGYGESGDARTSYRDEGGG  
HSSYRDGVDLERECECECECKSGGIGPRACIGLAVVLEGLAEGGHATAVGCPHRETDPRD  
GWLEGAGSMHGMFTCSGALVYNRNTKDGNSFLIWLQSTNNT  
>comp11401\_c0\_seq1; 369 585 1559 LEN=1704; translated  
MELGGFKSEEYLAINPQGVPSLKCQITGRCFAESDTVCRYLLSTYSDLGPSFQPENPLS  
NEIARFHDMYLTTIQSCLYRAAPPFGPFWTRKDALNEYSKQLYVISDLMSEQGPYLCGEQ  
VSLADATVFPISIVFSSFMFPKFDNQGLFLDGDQQRSPIPKKIEDWYQRMIDTDAAFKKT  
DEITDALAKWDAGGRWDPIWLAGMRDTEPETLFDKIVNKEIPTSIVKEDEKILAFKDINP  
AAPAHVLVIPKDRDGLTRLSKATPEHYEILGRLMVAAGEIAKDKSLGFGDGARVVNDGE  
IAGQEVFHLHVHVLGGKEFGWPPG  
>comp11401\_c0\_seq2; 333 1 1331 LEN=1476; translated  
XLFD SQKRPNEREKIERSTVRKKVMLFSVSHSLKKAFAAATTSSWGNLSEFVSTTR  
TTAVHSTGSSVGDTSVIENK KATAKNLLFDVPVSNNGGRCRIILYKKKIPSECSV  
ELGGFKSEEYLAINPQGVPSLKCQITGRCFAESDTVCRYLLSTYSDLGPSFQPENPLSN  
EIARFHDMYLTTIQSCLYRAAPPFGPFWTRKDALNEYSKQLYVISDLMSEQGPYLCGEQ  
VSLADATVFPISIVFSSFMFPKFDNQGLFLDGDQQRSPIPKKIEDWYQRMIDTDAAFKKT  
DEITDALAKWDAGGRWDPIWLAGMRDTEPETLFDKIVNKEIPTSIVKEDEKILAFKDINP  
AAPAHVLVIPKDRDGLTRLSKATPEHYEILGRLMVAAGEIAKDKSLGFGDGARVVNDGE  
IAGQEVFHLHVHVLGGKEFGWPPG  
>comp11401\_c0\_seq3; 338 1 1295 LEN=1676; translated  
XLFD SQKRPNEREKIERSTVRKKVMLFSVSHSLKKAFAAATTSSWGNLSEFVSTTR  
TTAVHSTGSSVGDTSVIENK KATAKNLLFDVPVSNNGGRCRIILYKKKIPSECSV  
ELGGFKSEEYLAINPQGVPSLKCQITGRCFAESDTVCRYLLSTYSDLGPSFQPENPLSN  
EIARFHDMYLTTIQSCLYRAAPPFGPFWTRKDALNEYSKQLYVISDLMSEQGPYLCGEQ  
VSLADATVFPISIVFSSFMFPKFDNQGLFLDGDQQRSPIPKKIEDWYQRMIDTDAAFKKT  
DEITDALAKWDAGGRWDPIWLAGMRDTEPETLFDKIVNKEIPTSIVKEDEKILAFKDINP  
AAPAHVLVIPKDRDGLTRLSKATPEHYEILGRLMVAAGEIAKDKSLGFGDGARVVNDGE  
IAGQEVFHLHGE  
>comp11401\_c0\_seq4; 374 585 1523 LEN=1904; translated  
MELGGFKSEEYLAINPQGVPSLKCQITGRCFAESDTVCRYLLSTYSDLGPSFQPENPLS  
NEIARFHDMYLTTIQSCLYRAAPPFGPFWTRKDALNEYSKQLYVISDLMSEQGPYLCGEQ  
VSLADATVFPISIVFSSFMFPKFDNQGLFLDGDQQRSPIPKKIEDWYQRMIDTDAAFKKT  
DEITDALAKWDAGGRWDPIWLAGMRDTEPETLFDKIVNKEIPTSIVKEDEKILAFKDINP  
AAPAHVLVIPKDRDGLTRLSKATPEHYEILGRLMVAAGEIAKDKSLGFGDGARVVNDGE  
IAGQEVFHLHGE  
>comp11401\_c0\_seq5; 231 1 1461 LEN=1606; translated  
XLFD SQKRPNEREKIERSTVRKKVMLFSVSHSLKKAFAAATTSSWGNLSEFVSTTR  
TTAVHSTGSSVGDTSVIENK KATAKNLLFDVPVSNNGGRCRIILYKKKIPSECSV  
ELGGFKSEEYLAINPQGVPSLKCQITGRCFAESDTVCRYLLSTYSDLGPSFQPENPLSN  
EIARFHDMYLTTIQSCLYRAAPPFGPFWTRKDALNEYSKQLYVISDLMSEQGPYLCGEQ  
VSLADATVFPISIVFSSFMFPKFDNQGLFLDGDQQRSPIPKKIEDWYQRMIDTDAAFKKT  
DEEVDLSVGITLMHYIGDEPLKADILVVIETTANQKNSTQIDPQITDALAKWDAGGRWD  
IWLAGMRDTEPETLFDKIVNKEIPTSIVKEDEKILAFKDINP AAPAHVLVIPKDRDGLTR  
LSKATPEHYEILGRLMVAAGEIAKDKSLGFGDGARVVNDGE IAGQEVFHLHVHVLGGKE  
FGWPPG  
>comp11401\_c0\_seq6; 272 585 1653 LEN=2034; translated  
MELGGFKSEEYLAINPQGVPSLKCQITGRCFAESDTVCRYLLSTYSDLGPSFQPENPLS  
NEIARFHDMYLTTIQSCLYRAAPPFGPFWTRKDALNEYSKQLYVISDLMSEQGPYLCGEQ  
VSLADATVFPISIVFSSFMFPKFDNQGLFLDGDQQRSPIPKKIEDWYQRMIDTDAAFKKT  
DEEVDLSVGITLMHYIGDEPLKADILVVIETTANQKNSTQIDPQITDALAKWDAGGRWD  
PIWLAGMRDTEPETLFDKIVNKEIPTSIVKEDEKILAFKDINP AAPAHVLVIPKDRDGLTR  
LSKATPEHYEILGRLMVAAGEIAKDKSLGFGDGARVVNDGE IAGQEVFHLHGE  
>comp11401\_c0\_seq7; 267 585 1689 LEN=1834; translated

MELGGFKSEEYLAINPQGVPSLKCQITGRCFAESDTVCRYLLSTYSDLGPSFQPENPLS  
NEIARFHDMYLTTIQSCLYRAAPPFGPFWTRKDALNEYSKQLYVISDLMSEQGPYLCGEQ  
VSLADATVFPISIVFSSFMFPKFDNQGLFLDGDQQRSPIPKKIEDWYQRMIDTDAAFKKT  
DEEVGDLVSGITLMHYIGDEPLKADILVVIETTANQKNSTQIDPQITDALAKWDAGGRWD  
PIWLAGMRDTEPETLFDKIVNKEIPTSIVKEDEKILAFKIDINPAAPAHVLVLPKDRDGLT  
RLSKATPEHYEILGRLMVAAGEIAKDKSLGFGDGARVVVNDGEIAGQEVFHLHVHVLGGK  
EFGWPPG

>comp11401\_c0\_seq8; 236 1 1425 LEN=1806; translated  
XLFDSSQKRPNEREKIERSTVRKKVMLFSVSHSLKKAFAALATSSWGNLSEFVSTTR  
SIS TTAVHSTGSSVGDTSVIENKKATAKNLLFDVPSVSNNGRCRIILYKKKIP  
ESECSSVVTPELGGFKSEEYLAINPQGVPSLKCQITGRCFAESDTVCRYLLSTYSDLGPSFQPENPLS  
NEIARFHDMYLTTIQSCLYRAAPPFGPFWTRKDALNEYSKQLYVISDLMSEQGPYLCGEQ  
VSLADATVFPISIVFSSFMFPKFDNQGLFLDGDQQRSPIPKKIEDWYQRMIDTDAAFKKT  
YDEEVGDLVSGITLMHYIGDEPLKADILVVIETTANQKNSTQIDPQITDALAKWDAGGRWD  
PIWLAGMRDTEPETLFDKIVNKEIPTSIVKEDEKILAFKIDINPAAPAHVLVLPKDRDGLT  
RLSKATPEHYEILGRLMVAAGEIAKDKSLGFGDGARVVVNDGEIAGQEVFHLHGE

>comp11402\_c0\_seq1; 264 69 1173 LEN=1462; translated  
MIRFSRVLGSLLYAGTASITGCFRFTGGHIVTAFSSNCFSPPKSRDCGSRAIHLTSLT  
LAMVSITENSTQSMESTEVEAENSRRDEGRTEKILPYVDSHNSATVTIPTNGKDEF  
AFDLENFSTLLANTVSVLRELEKSSLVVEVPMAKARLIEEIEAADLGFYHHAQGT  
TAKLNTWLRREDIPSKVPEFATHHVGAVVINSKDEILCIRELRRNYHPWKIPTGLADL  
GESIHDAAVREVLEETGITATCQSILSFRHTHGVANGRSDLFFVCHLIPKENDDGS  
IPTPVPQACEISEAKWVPLSDYRDMVDGLTEESKGHVMTFVMNSIFDKGLRINMTEV  
SSVVPGRRPTPLYFPEVPEK

>comp11403\_c0\_seq1; 497 115 1629 LEN=1918; translated  
MKEIICLFLLCFLVENTFALSPVAPKSESTVPKTSNPSSKWIGAECTMREYHAAE  
VAGGKDAFGSKTSDENNVDDNDRSSFWSDENFITYSIGENNAIDATYLPKNGNS  
IFESRSSVVTGEECRFIVEEARETIVQGLIDERQQSDDNEPPEDRRVNAISNSQL  
GEARLSRMPKTRAWLKEALQTRFYPLLKNRFVDDIVLYDGLVLGNLAPTMSQPI  
HRDASLLTINVALSALDDYEGGGTYIEALDEVLTIDQGHLLCHAGSAMHAGNAI  
SKGERWVFLVFLLLGEQHPQLARRCHAEAEIETRRELDEAEAVLQTGLKSIAP  
NHDHLLHNTMGRRLHMMKGEHSKAFRSFQNASAYPICQNAMVSMQQLVDRRR  
PRAALRRFDTVLERIGDRDLDPGSPSOLSQKSLAYGARDAARCALVCADHLYRS  
QVAEQEAEASPPTQSTSTWELWTLRHLPTAIQRLKTCCLAAAPNEPTLLGMLN  
RAEFLLAEAEPPQKP

>comp11404\_c0\_seq1; 395 254 1480 LEN=1542; translated  
MSVRLSHTTNHPTETTGFLLQRRERTGREPTDTTAAPIVASPPPPVSKWIHPALL  
CALAYALYNVICIKKGSATIHPIILGGVVLECVAAALFGGLALAILLVYQKLSPP  
AETNRHQGSSENNQRQDGYIVGEKSSDDTCISVRVEKDGIIWWSIGAGVWGV  
AEIISFVVSFGPMGVPVTQSIP IIVGGSVLF AAVLGLSLCKESMVLTHGWF  
GVAMLTGIIILVSTAADDEHLYSHSND FEDRREGAPLPSAPL FVWLSLALCC  
AMAYAFYINIGIKQGSSSVHP I VGGVILQVVAIIFGLCALGAILVW  
NENVRNKGGEARTVLHYDSSGVLWSSLAGVAVGIAELLSFGVSGMGVKATQ  
SIP I IIGGSVAFGAVIGIFVLGEGDLQGWVGVLLLVSGIGVVGTDPHSIG

>comp11405\_c0\_seq1; 1013 1 2291 LEN=2291; translated  
XGNGNSNSTSAASISLGEEDANSHQNSESESLPPKAQDQQEQQQDQDQEQQQE  
QQEQR NQTEEESCSSTCTSTSTPDEAASVSKPAEEEEEQEEVASKPQRPT  
PTLAPHLSSIAQLE GSIARGLTEMSNLDRSRVEEVEHGVDCARHWQPREI  
GNASAHADAHNEDLQRTAILLRKFQEELDRLLAEHGRGNRNKNTPSLTLT  
ASYERCLERNFAYATLPNGALRLMLRADLWDVPRACLRFRLHLSLEKYYG  
DLGLKQPLTIDCLDREERNKCCHHIGGTGTPPKGRSSSK INKNNGGASS  
SSSSSRGIYNKKGRGAKKASGSSSKRKSLSLDPMLALKSGSIQVLP  
SRDRSGRRVVVFQMPQDTEDLQTQQQTQQQTQQQSKFRAIFYFLCALAGS  
DAETQQKGLVLVLNASNKTEAKNQSSSTLEHKPNQSTASDTPSTEPVTVTP  
SADLVTSTTEEKACQSS LLLKEYEELVRSIPIRFGAVHLAFDGS  
DQTQTEETTANHRVTPHSICEAMVRSFLKDHPYN IARVKLYNRDASND  
STKKEKLSPFGIPTHQIPVTHGTIKLKEHNSWVKTEWSRQQQMA  
PNHNHKVIECPGTNDVLF SQGGKYWNGVNRFRQGNLEFMEFLET  
KIDVYQSTLSWKKKHA ILLACVAEFANQSLPGSNPPRFLETATQIEG  
ITAPDGCWVELPLTSPLLMQKIRQTLNLH IRRLEASGKRKPAPTKV  
VRAKKTTKKKQQRPEEEACKSSSSNNN

>comp11406\_c0\_seq1; 482 68 931 LEN=1111; translated  
MVDALQEAPLLPAAGNAPENPRGMDGPHNIVSAGESAAGDHNDFFSATDE  
DLEDEEGRAYHRWDPSYASGASDSGAGGDRDTTGIGIGSYADLLYDENL  
DEEDEAYVYKHIRGGIREAVTVRTAPTCKGPGPAAAADGAPVSGGETGT  
ARTQRPQQQQQQRVEMYKPRSSDAVLSLCP

CFNIVCMDCQKHRYANQYRAMFVMGIAVDWNHVLVYDEAKRALVSKAPAQGEAGGDPAG  
AAKPFVAAGGGEYYAVECAACGTRVAALDMRDEVVYFQGCLESSSAF  
>comp11407\_c0\_seq1; 353 88 768 LEN=985; translated  
MPPFSSRLAPLLALWLSSPPAVSAQQPLDGMALSLVPEGLLDFFPADCMGQLEKDVLP  
MSNLCITLLPTEDELAIPSEDEITSCEVVEAALCPITSRCPGQEQEANDFFRCTITSAG  
ADLSQNVTDLIAGCSLDCATFVPEEEDEDEVSGEPLPPTVAPVEATPSPTYELPAISASK  
APSGAPIGVSDSSDTEAPTASSGASMGV GASVATVSSLAAMVALGW  
>comp11408\_c0\_seq1; 863 248 2125 LEN=2125; translated  
MCRPDKGGSDSNSKTNTAVNGDMASKSRIANATTKPQRLRREKRDKDGEYIILLSDAGLAS  
GPPEKSKKKKVKSKALQKHGKDNPSGGLEALVPSLIGVGLVMVMAQRGFRGRASVAGID  
LGTNSVICIQRLSKGVGVIDCVEDPLTGSPIVPSVSVYDLHREAGEIKVGPSSKTKTL  
LDPHPSRVVGHAAKRIDTHPHQTLYNAKRVLGRPYGDTAVEELRREVEFRVEQEQRD  
DDDDTRENLPLESVFRVDSTVALSPQQVGGYVFNFLVGI TRDFLGHNDVKSAVLAVPAKF  
DAHQRRRTFEAFQLAGLKVAVLEEPTAAALAYGLHKKEGVEKILVYDFGGGTLDISILH  
VSEGYCDVMGSDGDDRLGGADFDVAVAHLLAEKHSSVLENLTAYGDDHSSGKNQDRDEDM  
AEILASSCDRITDEIPLCSISSFHTLGEKVKIDLSQQQKQKESVQIEEGSIAARTKCL  
ALPPLTAATRSSLSEMCDSLFEEMLEVTLEEYNTACQPLFDRSVVPATRLVEDLTLQKE  
EIDEIVMVGTTTRMPQIRELVRQAFPGAQLNTHIDPDLTVVCKLRARVQTRRIVFVRFV  
LHFMPTTTPFDWLLTRGLEAGVVTG  
>comp11408\_c0\_seq2; 385 263 928 LEN=1066; translated  
MGSDGDDRLGGADFDVAVAHLLAEKHSSVLENLTAYGDDHSSGKNQDRDEDMAEILASSC  
DRITDEIPLCSISSFHTLGEKVKIDLSQQQKQKESVQIEEGSIAARTKCLALPPLTAA  
TRSSSLESMCDSLFEEMLEVTLEEYNTACQPLFDRSVVPATRLVEDLTLQKEEIDEIVM  
GGTTRMPQIRELVRQAFPGAQLNTHIDPDLTVAYGAASVID  
>comp11408\_c0\_seq3; 944 248 2017 LEN=2155; translated  
MCRPDKGGSDSNSKTNTAVNGDMASKSRIANATTKPQRLRREKRDKDGEYIILLSDAGLAS  
GPPEKSKKKKVKSKALQKHGKDNPSGGLEALVPSLIGVGLVMVMAQRGFRGRASVAGID  
LGTNSVICIQRLSKGVGVIDCVEDPLTGSPIVPSVSVYDLHREAGEIKVGPSSKTKTL  
LDPHPSRVVGHAAKRIDTHPHQTLYNAKRVLGRPYGDTAVEELRREVEFRVEQEQRD  
DDDDTRENLPLESVFRVDSTVALSPQQVGGYVFNFLVGI TRDFLGHNDVKSAVLAVPAKF  
DAHQRRRTFEAFQLAGLKVAVLEEPTAAALAYGLHKKEGVEKILVYDFGGGTLDISILH  
VSEGYCDVMGSDGDDRLGGADFDVAVAHLLAEKHSSVLENLTAYGDDHSSGKNQDRDEDM  
AEILASSCDRITDEIPLCSISSFHTLGEKVKIDLSQQQKQKESVQIEEGSIAARTKCL  
ALPPLTAATRSSLSEMCDSLFEEMLEVTLEEYNTACQPLFDRSVVPATRLVEDLTLQKE  
EIDEIVMVGTTTRMPQIRELVRQAFPGAQLNTHIDPDLTVAYGAASVID  
>comp11408\_c0\_seq4; 344 263 1036 LEN=1036; translated  
MGSDGDDRLGGADFDVAVAHLLAEKHSSVLENLTAYGDDHSSGKNQDRDEDMAEILASSC  
DRITDEIPLCSISSFHTLGEKVKIDLSQQQKQKESVQIEEGSIAARTKCLALPPLTAA  
TRSSSLESMCDSLFEEMLEVTLEEYNTACQPLFDRSVVPATRLVEDLTLQKEEIDEIVM  
GGTTRMPQIRELVRQAFPGAQLNTHIDPDLTVVCKLRARVQTRRIVFVRFVGLHFMPTT  
PFDWLLTRGLEAGVVTG  
>comp11409\_c0\_seq1; 298 239 1162 LEN=1442; translated  
MNCFEALLITSLEFAFRHMNTPD SAAPTGD TAESH AHCSICLPPLVKATVEE LELQRQQ  
LEQELSSPNSFPYELYDLLQHVDNRGLGIFISWTIDGKSFR IHDHASFEKTILPIYFKG  
MSSYRSFRRQLNNYGIYQDRVSR TYSHKFLVRGKRMLCSKIVRDINHRYRPKANMSGTGK  
LPREKQPSQNICSSHSPSNANDCSSSTNIKNSDDALFSENQVTDQTILSPNPVDFESIN  
RNRKKNNNYPSNSDYDNNTLQSF LRDQYWANLPGNLLPIDVNEIIVTFSSPEQQRQLT  
SSRAEQK  
>comp11409\_c0\_seq3; 298 239 1162 LEN=1632; translated  
MNCFEALLITSLEFAFRHMNTPD SAAPTGD TAESH AHCSICLPPLVKATVEE LELQRQQ  
LEQELSSPNSFPYELYDLLQHVDNRGLGIFISWTIDGKSFR IHDHASFEKTILPIYFKG  
MSSYRSFRRQLNNYGIYQDRVSR TYSHKFLVRGKRMLCSKIVRDINHRYRPKANMSGTGK  
LPREKQPSQNICSSHSPSNANDCSSSTNIKNSDDALFSENQVTDQTILSPNPVDFESIN  
RNRKKNNNYPSNSDYDNNTLQSF LRDQYWANLPGNLLPIDVNEIIVTFSSPEQQRQLT  
SSRAEQK  
>comp11410\_c0\_seq1; 1492 101 4364 LEN=4437; translated  
MRYHTKGNNSQSGSNAYSISGRIGR NESNKEDREASSRFSSAPNVRNVRAADRSTKEEGR  
QDVII EAQERSDDKEYRILYDEIERINRILQSGSSREAVGTISLTSSFNKDAEISPSMHE  
KIMRLIKAMMPNSTPDQKNAFIRDLFDMGIRVQNKQDRSQIQQQSSSYEVGYESMFEES  
NSIVESVSGKEQKISTLDEFDDGSNSII EKSGENYLEEDLYASTKGANSSTEVENQWDEL

RSKALNDNSGRISSAAVLSSEIEAALIEDCVATGIDSSPKSRALAGFQKNLIDGECQSV  
HHRLTPAYQCPQAE DNSNF SKRRGQPD DTS GHQPMRPRCTHPNRFEIETASETNSILEDN  
EIDADDIPSIDEGTSTTSRKKDDGIGLEQPGKGTFFFDVSE PANSFQSEETQLTKKVSQDM  
QSFNFKRDNSCKTQRORRAPATSEGTVDRE EENYPKIEVTLHQSSGDKSPSAKTSNLGLV  
ESTTRSHPGDISIVDESIGSDMIVGDKPGISSSSSEIDDMMSGSDGENAELCDATTTDSF  
RHLTSLIHVKSSLTIGTEFASP KTDQKKA EYSFFQNV DLSVGETNGQSFTDKRQSEAEI  
QPSWRLDPSKSLDFELQILSVETGETTSYFVHKHMMAVGPRSSDYMNEAFRCENSSTFQ  
VTLDEKTFPLVPKILDFIYHRENEINITTESAVPLRQLGKMLKITHIEVKAATFILNEMD  
ISNLAQYVADSCHFND EEVMN AVVERCCANIEAIPITDRLWIVMEPELFLRIISSKSFDR  
DTLSKHLSVLLTEYLELHQYEINIDLFATLTSEKI IPTMDRNAAMPLIELCQFYDSSREC  
EALQKRCAYTVASYWD TTSQTDRQLFSLLRNLPSSTLVDFLEIVESGSCTTEKRRNELE  
TEHTTIVAGIPPKAMSI EDLCENALREGNEKELLSWRMDPQNSYSDWDLHIKSLNHEETQ  
VYHVHKHILAVGKHKGSFFAQSFNSEEV SLEQK GCTTILLDCEAASVVPFVLDVFVYLGGD  
ELEISNENSVPLHYVARVLGISTLIETTT SFIENDISLDNIVDYIIDAGYKDDKTMTLA  
TRKCTQEITSICVDS DILQNI EPEIFEEIVSSEDIKQSEKCHVNVLITKYFSLHDFQGNS  
AENLLKCIDVDQVDQFSALTLLNILSGSKNYEGVETFEKMKKSCAFVITENWADLTEDNI  
RREEVFSMFP SLNADLLTTMFD AVDC KYRIEYTESMTIQGELVDRYRKQAAEANRLRHEE  
VASLRRELEARTTKMLSLQKALEGKLEQVDRALNRRTTRGTAAITSMWPWRKTTKNFDVL  
RDEKRTILEALSEQHTVLI SPQSERQESFPDS DKSEDEDNDWYQDEEGDKNKAIEMEKKK  
EGVFSPTHSGDFEKT DAGGVQNNISDEQSTVLQKNKSKAA

>comp11411\_c0\_seq1; 360 215 2400 LEN=2574; minus strand; translated

MTL FQFGWCF FLPVVISK GDSIKNL PKTTIEISP YII LSLVVFSSNVCKSASARYV SFPT  
KVIFRSTKLI PVMIVASILNINDNR TYGRSDFLAAALLCAGAAGYSFGEHSLNDDK KDSY  
FGILLTGSVLCDAFTPNIQQWLMHPATE SPGQKRKNSLQSLPSSSSLSLTPSLPDI I I  
SDSSTGREN ETVVAPRFFSRGPGILKKRGLGLSVSTLMTNAYAVGCIGLLLFMGVTHRLE  
DAIVEAMVRPHLFGNLT LIGVSLSVAVFARTRLIKESGAVTAVTVTTLREFVTVLLSYLI  
YPKIFSKLHAVSALLVFGGILLSSYSESQTGHEASNGGKRNAVAGS XDSYSNKI IKTGS  
VATRPSNYLLQRVGYAAXIVHSFLSQKIITTRLRWPVAHGTGRGLLGIAATPRATGVSTA  
GRSATADGHPKREATPRWDPAGNLADHALRGHAREPDHPGSGQRRHEESLAPGNVLESL  
DHPDVVHSLGKSHQASAGDAELLSV FQVPAHERAPXPLEDVSPAGQRLQDEPLAAEKAA  
RHGPGELHADIDRMGTAQEGP LLAHQ LPPVLVDVEPENLGRKIGPECHGAGGSGWSPVGI  
VADEKVLPREHALEALREAPAGRGIDGHVFGHVHHPGLGPQHLVGSEADGDDLGLAPLD  
PALGVEIDGQPDHPVLAGVPGRPASAAAPSTTAGLSEEEPERHRAEGRNHGAGRAADAAA  
FLPASTEG

>comp11412\_c0\_seq1; 179 367 600 LEN=749; translated

MTVATPFLDFAQEDHHHRGKAGTESGSSGSSKTATGSEAGAMGPGERTRAVLLRRRANED  
RSDCLLRHSFVVKAVVC

>comp11413\_c0\_seq1; 478 389 2467 LEN=3218; translated

MRAPVSARVAILAMSIYSAVLLLLLVPGPAKASSPYRVPSHRQRRSGTAPRGDPPLSRRR  
RRRV DADD CDGSSGESDGDGGEYDVFFPSLDDSDG SFHSPSSP SHFDPDEAVSSSSDEF L  
DVEDLGRS NSNGSSAKKRPRSNRRR KLEKAEQILEALEREQELGSRSLRSIKKPKRKP  
SSLRKGSSSTRKRRRRKKKTKKRN AKLSNKRSGTGGEVKSDNSLNEKEFGSTNHIAATSS  
GESKPMAGAAV SPTMPRASSFASAPKSHPDRTTWEVPSYSHKISTMMKKSHTTSPTKQPQ  
TNKPKMATTVPKTT SATTGIVQRPVSAPGSPAFVTPRKT TAAPIPAVG SVARTKQGSPA  
TTS GTTSGTTPWVRKFLAGRPKDRLLPLPRDYISDNFNLAQLPPIVERIGYEAMGDNAIS  
VAKALQQHRIAKAAEAE SNGTTQSKSASSYVIYRRALHLILKEEGEENDSMVEEDLIIPP  
YAVQKAAETLYLMLHARFVVSPRGLEAIRHVMAQDNTVFGK CPRSTCRGTGLLPYGYSND  
YTS DATIPTVTSAMRKEHDS CCHRYCPCSGEVWISWESKTDGCAWGPSWCHLFLLAFTQ  
VYARELAEAA SRRESLSSYTPPPSVVPSPLSRSFLSRRGSI TNDTSDSSVENDPDAVFSS  
RPTPSVFGFR IHPTTAFGRPLNEPTLRGGSYE

>comp11413\_c0\_seq2; 478 365 2443 LEN=3194; translated

MRAPVSARVAILAMSIYSAVLLLLLVPGPAKASSPYRVPSHRQRRSGTAPRGDPPLSRRR  
RRRV DADD CDGSSGESDGDGGEYDVFFPSLDDSDG SFHSPSSP SHFDPDEAVSSSSDEF L  
DVEDLGRS NSNGSSAKKRPRSNRRR KLEKAEQILEALEREQELGSRSLRSIKKPKRKP  
SSLRKGSSSTRKRRRRKKKTKKRN AKLSNKRSGTGGEVKSDNSLNEKEFGSTNHIAATSS  
GESKPMAGAAV SPTMPRASSFASAPKSHPDRTTWEVPSYSHKISTMMKKSHTTSPTKQPQ  
TNKPKMATTVPKTT SATTGIVQRPVSAPGSPAFVTPRKT TAAPIPAVG SVARTKQGSPA  
TTS GTTSGTTPWVRKFLAGRPKDRLLPLPRDYISDNFNLAQLPPIVERIGYEAMGDNAIS  
VAKALQQHRIAKAAEAE SNGTTQSKSASSYVIYRRALHLILKEEGEENDSMVEEDLIIPP  
YAVQKAAETLYLMLHARFVVSPRGLEAIRHVMAQDNTVFGK CPRSTCRGTGLLPYGYSND

YTSDATIPTVTSAMRKEHDS CCHRYCPCSCGEVWISWESKTDGCAWGPSWCHLFLLAFTQ  
VYARELAEASRRESLSSYTPPPSVVPSPLSRSFLSRRGSI TNDTSDSSVENDPDAVFSS  
RPTPSVFGFRIHPTTAFGRPLNEPTLRGGSYE

>comp11414\_c0\_seq1; 485 121 1479 LEN=1649; translated  
MIENATSEDRDGEMIPDTKSFNIVLNALAQGRERESEVRAEELLQRMEVLSLTYDCKPDN  
TSFNTVLNGWASSRHRGSAQRAIAILEHMKKRYDAGLTKVHPDESTYNTVLKALAKSRDE  
DAINQAESIFEYYLEACESGKLNLSHNAFTYNSMMNCYARSNHPEAAKRSMELFETMKAN  
SGKPGWELCFVDVFTYNTLINVISKEESYDASEQAI SLLKEFEQSF AETGDVRF RPNIRL  
YTSVVKAI GRSKNTQRAQDIVDRV ESSYIKGLTHWEGKPDVSFYNALINAYGWS DMEGR  
SEKCLGVLKHMVSLFESGTLDDAKPDTVSFN SILNACAHETAKGQSKSDS IMKIAVETFD  
LLNSSTEYGNPDQNTYVQVLICVATHMAKNDEKRSSMAEATFLQCAARGLVGP NIVAKLF  
AAVSNRHF KALMG PASYGGSKLRFDMAKL PSEW

>comp11414\_c0\_seq2; 704 172 2523 LEN=2585; translated  
MRLRLSGATLLAVVSLSRCHAYFAGEQIVRAKPGTASIDVRGWRAATSTRPLGKDSRPVP  
TCLFSSSSEAAEAPSGELLAIEIVTL CGADEF GKAIEVLQKESTGAHLKSCYATILKSLAK  
REEQVEEQRRRDKASVGIASSQSASEKEPDRHLLAGNILDALLELGDSNDELLPTNEDFN  
TVIKMWGSSTYLENASTRCAASVEELWRLYDKKREERYVPLKESYLYTIKACSQRDRSGD  
AAKLAERMMSKMKLS SEDYPHLTPDRSIANEVINAWGKSGRKYEQGLRSQSVLEKMIENA  
TSEDRDGEMIPDTKSFNIVLNALAQGRERESEVRAEELLQRMEVLSLTYDCKPDNTSFNT  
VLNGWASSRHRGSAQRAIAILEHMKKRYDAGLTKVHPDESTYNTVLKALAKSRDEDAINQ  
AESIFEYYLEACESGKLNLSHNAFTYNSMMNCYARSNHPEAAKRSMELFETMKANSKPG  
WELCFVDVFTYNTLINVISKEESYDASEQAI SLLKEFEQSF AETGDVRF RPNIRLYTSV  
KAI GRSKNTQRAQDIVDRV ESSYIKGLTHWEGKPDVSFYNALINAYGWS DMEGRSEKCL  
GVLKHMVSLFESGTLDDAKPDTVSFN SILNACAHETAKGQSKSDS IMKIAVETFDLLNS  
TEYGNPDQNTYVQVLICVATHMAKNDEKRSSMAEATFLQCAARGLVGP NIVAKLFAAVSN  
RHF KALMG PASYGGSKLRFDMAKL PSEW TQNAGSRQRSSRRRQQNFQVTKNVISNSKR  
RKQ

>comp11414\_c0\_seq3; 307 172 1402 LEN=1402; translated  
MRLRLSGATLLAVVSLSRCHAYFAGEQIVRAKPGTASIDVRGWRAATSTRPLGKDSRPVP  
TCLFSSSSEAAEAPSGELLAIEIVTL CGADEF GKAIEVLQKESTGAHLKSCYATILKSLAK  
REEQVEEQRRRDKASVGIASSQSASEKEPDRHLLAGNILDALLELGDSNDELLPTNEDFN  
TVIKMWGSSTYLENASTRCAASVEELWRLYDKKREERYVPLKESYLYTIKACSQRDRSGD  
AAKLAERMMSKMKLS SEDYPHLTPDRSIANEVINAWGKSGRKYEQGLRSQSVLEKMIENA  
TSEDRDGEMIPDTKSFNIVLNALAQGRERESEVRAEELLQRMEVLSLTYDCKPDNTSFNT  
VLNGWASSRHRGSAQRAIAILEHMKKRYDAGLTKVHPDESTYNTGXDAVDR

>comp11415\_c0\_seq1; 759 1 2102 LEN=2362; translated  
XRKGFTHPFLKTAFCFSSDRIVVIDQDKVKPNSEAFKYFKRHAGGCGKQGCISIIIGKKV  
VSEYACAVCVNRCKQAPGDAVS VVKLP SNLTTDTT HRYGPNTFKLHGLPVPRPGHV LGLL  
GTNGTGKSTGLKILAGRLKPNLGIYAGSSEGSPEWSDIVAYYRGS DLQNYFKGLVNDK L  
SIAMKPQLEARFTRALKGKTVRHHMEIRDERKMMDRYAKDL DLLHLLDRNVEDLSGGELQ  
RFAVACTLCRKADVYMFDEISSFLDVKQRLQATTLIRSLVHEQESQVEEWPGEAHAASK  
YVIVVEHDLAILDYMSDFIQCMYGT PGAYGVVTARSVRNGINQFLAGYIATDNMRFRD H  
ELTFKVTSMDFNASGNNDGDDEEEKKDEGKKRKDDESSSGNVLRYP SMSHTRS SRKNEKGE  
IVSSFTLHVESGSFRDGE CIVLLGENGTGKTTFMELLAGKTREQRGKEAAIGSYDADHYK  
GGDHKPSLAALGVSYKVQGMNPKVRKFGGT VQQFLEQE INRSLSDRLFRLLVLRALNLEE  
LFDLPVRSLSGGEMQCLAI CVCLGTPALVYLIDEPSAALDCEQRIVA AKVMKRWV VNH LG  
RTIFLVEHDFVMASAMADRVI VYQGRPGIEATAGSPTSLADGFNRFL ENLDVTFRKDP IN  
CRPRINKNSRIDKIQKQNGEYMF DIVEGGDEDIDDDDI

>comp11415\_c0\_seq2; 871 165 2270 LEN=2530; translated  
MVAKKINRKTGKDEQEEKRIVVIDQDKVKPNSEAFKYFKRHAGGCGKQGCISIIIGKKV  
VVSEYACAVCVNRCKQAPGDAVS VVKLP SNLTTDTT HRYGPNTFKLHGLPVPRPGHV LGLL  
LGTNGTGKSTGLKILAGRLKPNLGIYAGSSEGSPEWSDIVAYYRGS DLQNYFKGLVNDK L  
LSIAMKPQLEARFTRALKGKTVRHHMEIRDERKMMDRYAKDL DLLHLLDRNVEDLSGGEL  
QRFAVACTLCRKADVYMFDEISSFLDVKQRLQATTLIRSLVHEQESQVEEWPGEAHAASK  
KYVIVVEHDLAILDYMSDFIQCMYGT PGAYGVVTARSVRNGINQFLAGYIATDNMRFRD  
HELTFKVTSMDFNASGNNDGDDEEEKKDEGKKRKDDESSSGNVLRYP SMSHTRS SRKNEKGE  
EIVSSFTLHVESGSFRDGE CIVLLGENGTGKTTFMELLAGKTREQRGKEAAIGSYDADHY  
KGGDHKPSLAALGVSYKVQGMNPKVRKFGGT VQQFLEQE INRSLSDRLFRLLVLRALNLEE  
ELFDLPVRSLSGGEMQCLAI CVCLGTPALVYLIDEPSAALDCEQRIVA AKVMKRWV VNH LG  
GRTIFLVEHDFVMASAMADRVI VYQGRPGIEATAGSPTSLADGFNRFL ENLDVTFRKDP I



NCRPRINKKNSRIDKIQKQNGEYYMFDIVEGGDEDIDDDDI  
>comp11416\_c0\_seq1; 449 1132 3225 LEN=3713; translated  
MSRRRQTKNTGSMAAWKSLLVLCVVLASLVPGCIGQGESKEQIFARLAKDMQDNPRDAS  
ARYLMAQFLMMYRGMESGVELLMSSFDANQVDTALGMQNPVQGF IASNFLTRYHQEWHNH  
EAKNFFANMAYFLSRQMSGEMDIAEMCTQVHLATMLNSYPLTNEEVDESAAHMEEWSKKL  
LDIFDKKHPNAQLDEEFMSQNVLGFAGDPYVHCMLTLFPLSFMYRADVAKLANLNFVGV  
RVWPKLLHTAEHVRKYEEEEQKLASRDTNGGLPSQKCIDGKIKLGIVSATLSRGHSVAEDF  
GGVIQRLDRNVFDVTFVYIHEKSDPGEDEDFVTANPEDKLIHYQKLDGTDNRDGAWPRRI  
GKDI EELKFDMIFYPELTMS SIVRRLGMERLAPVQINSHGHPVTSGHPREIVQHFSWAE  
AELPLEQSQTHYTEELQLIPKGKIHQYTPRVETGPKGKRISRMTQMPFDHYTRKDYPEF  
SDAIQNSTPEDDDIHLYVCMQKPFKLFPEFDELVCGILQKDPMGHAVLHKEDMKGNTGIF  
EKRMRAGCDMDRVHFLPTQPPHKLLALYDTASVIIDSYPAGGCTTTREALELKGAVVTW  
PARLLGGRWTLGLYHTIGLDEDARNRLVADSKEDYISKAVELGTNRSLRKSVESSILEAV  
PTLFGRYEAVEEWEKILKRVSPVKQCS DGSGGERDEL  
>comp11417\_c0\_seq1; 302 389 1003 LEN=1229; translated  
MNQVFDSFLVSSESTYELSTAWFGDISAQILFEEAGSEHHQMARRLTEIDTKTINNVEL  
PFGSKNACLKRSFEQEVLSQDCANSIRMLEHTFFLETEM SRQKEAFVSRFLFYNYLYLIF  
LLLLARYISARRLNRRRLKRKILETVYANPSIRKQIELEIGETIDYGTKEHTSLVSRRGE  
KVIQNKGLLHPKNIVCEGIPVQIV  
>comp11417\_c0\_seq2; 355 159 1076 LEN=1302; translated  
MLTMQSYSGNIIFLLL VATNAHASDAIQSQANHDDLELLSHAAYHKVETFCARDVERYCF  
PKENPLPIFFLSGDPILDWIFVVSAPSANVPSAPEDHEIDHFMNQVDSFLVSSESTYELS  
TAWFGDISAQILFEEAGSEHHQMARRLTEIDTKTINNVELPFGSKNACLKRSFEQEVLS  
QDCANSIRMLEHTFFLETEM SRQKEAFVSRFLFYNYLYLIFLLLLARYISARRLNRRRLK  
RKILETVYANPSIRKQIELEIGETIDYGTKEHTSLVSRRGEKVIQNKGLLHPKNIVCEGI  
PVQIV  
>comp11418\_c0\_seq1; 360 77 1081 LEN=1860; translated  
MKS KLALIVAINSVIVISDAL TIVPPTGKNVANPRLSSLLPNQIKASSITDEKESDCTDT  
VASGSNLLRLRGDGTPLVPHSKALIREMLAELLGTFLIVFIGTGSVSSAIFTDSLVLGF  
QIASVWIIAVTIAICTTASISGAHLNPAVSI AFAMVRPSKSFNWKVLPYSISQCFGAIL  
GSWLN FVVYGS SIAVFEAKNEIIRGAASGIASAKAFGEYFAAPVSTMTAFLAESIGTAIL  
AFVIFSLTHPKNDTMESNFVPP LIGLTVGGLIAVFAPLTQAGFNPARDFGPRIVAWFAGW  
KTVAFRSAWLYIVAPIVGA VLGATLADKVL YAND  
>comp11419\_c0\_seq2; 734 1 2764 LEN=2911; translated  
XFV LCLQNQTEPDRHTLAGWFLQ GAYRAFYSYLRNDGMCRVVGIPEDQLKIASLGKARLD  
KGYPSAQKVISYGVPRGLATALAPFQRGGVEFVVEKEGRALIADDMGLGKTIQSIASMSV  
YHDEWPLLILTPSTARYHWAAEFMNWL GSESSVNOGRAAGAGNGGTADPDNDKAEGEDCA  
ITHPPRAPMRLKKESEIHVLVAGKEKVFPTSDVRIVICSYGLATSLIESKIFPGLFKCA  
IVDESHMLKNIKTKRTKMLIPILHATNRCVLLSGTPALARPTELWPQLKILSTERD GWW  
DEDDFVRKYVQTSSAIRRAELHTMLTGTVMIRRLKHEILKSLPNKQRERAI DVLT PPMR  
EDFRRYMELLRQKGVMMAKIAKRNKQNPNTNHPDPNPSNQIEAKREKIALLNIEYNEIY  
RKKLQDIEAVVRTVRMTDEEKQHLMGKYETE VKNEVD AWYTERANEIRDAQPAEAENKLN  
DRKSILNKMYAMTAEAKTPLIAEMVGKWLDDPTKGKLCVFAHHIKVLDEIINRVGLSNKS  
GSKKR FIRIDGSTSPKERQSQIVAFQNDPEVRIAVLGITAAGVAVTLTASSTVWF AELFW  
TPALMIQAEDRCHRIGQ NATVRCLYFVASGTL DVLLWDLLEKKFQDLGEFVEGREKMKIV  
VKKTYGSI EEFRSIFDRASDDDLDDVKLGENENLTNSEDLSKLENDLRNDIVQLAE EEMR  
LVSHGEDEEGTDTKIGGNALQKKSAPAAK SGLGQTEDEAICLSDDEDENPPQNQDASAAV  
PSEQAQPNENGFQYSRMRPLKCR IYKQYFEGSTFGIQLLYVDHRLTIARNNVGKIKPSV  
GDVLVAVNGNRLPFGCRLDQVCR YMKAQLNHGAVELTFIEDEPFVKYRMSDIKARDLIC  
NPKEFHKKPEDDVIELVDDD  
>comp11419\_c0\_seq3; 855 1 3101 LEN=3248; translated  
XEFPLPSLPVQPTQSHSQHKHFELSLLN VSEFTITGLPLSLDGRPSSVLGFRKIIKEVSR  
GHGKCVFERDHRADRPPSGGRSPPSEGEQ GALGDPQNNPDGKWR IPLGAYRAFYSYLR  
NDGMCRVVGIPEDQLKIASLGKARLDKGYPSAQKVISYGVPRGLATALAPFQRGGVEFV  
EKEGRALIADDMGLGKTIQSIASMSVYHDEWPLLILTPSTARYHWAAEFMNWL GSESSV  
NOGRAAGAGNGGTADPDNDKAEGEDCAITHPPRAPMRLKKESEIHVLVAGKEKVFPTSDV  
RIVICSYGLATSLIESKIFPGLFKCAIVDESHMLKNIKTKRTKMLIPILHATNRCVLLSG  
TPALARPTELWPQLKILSTERD GWWDEDDFVRKYVQTSSAIRRAELHTMLTGTVMIRRL  
KHEILKSLPNKQRERAI DVLT PPMREDFRRYMELLRQKGVMMAKIAKRNKQNPNTNHP  
DPNPSNQIEAKREKIALLNIEYNEIYRKKLQDIEAVVRTVRMTDEEKQHLMGKYETE VKN

EVDAWYTERANEIRDAQPAEAEENKNLDRKSILNKMYAMTAEAKTPLIAEMVKGWLDLDDPTK  
GKLCVFAHHIKVLDEIINRVGLSNKSGSKRFRIDGSTSPKERQSQIVAFQNDPEVRIA  
VLGITAAGVAVTLTASSTVWF AELFWTPALM IQAEXYVDRIINAERSYDEYNLSLVFVRLA  
KDRCHRIGQONATVRCLYFVASGTLVDLLWDLLEKKFQDLGEFVEGREKMKIVVKKTYGSI  
EEFRSIFDRASDDDLDDVKLGENENLTNSEDLSKLENDLRNDIVQLAEEMRLVSHGEDE  
EGTDTKIGGNALQKKSAPAAKSGLGQTEDEAICLSDDDEDENPPQNQDASAAVPSEQAQPN  
ENGFQYSRMRPLKCKRIYKQYFEGSTFGIQLLYVDHRLTIARNNVGKIKPSVGDVLVAVN  
GNRLPFGCRLDQVCRYMKAQLNHGAVELTFIEDEPFVKYRMSDI IKARDLICNPKEFHNK  
KPEDDVIELVDDD

>comp11419\_c0\_seq4; 641 1 2842 LEN=2989; translated  
XFVLCQLQNQTEPDRHTLAGWFLQAYRAFYSYLRNDGMCRRVVGIPEDQLKIASLGKARLD  
KGYPSAQKVISYGVPRGLATALAPFQRGGVEFVVEKEGRALIADDMGLGKTIQSIASMSV  
YHDEWPLLILTPSTARYHWAAEFMNWLGSSESVNQGRAAGAGNGGTADPDNDKAEGEDCA  
ITHPPRAPMRLKKESEIHVLVAGKEKVFPTSDVRIVICSYGLATSLIESKKIFPGLFKCA  
IVDESHMLKNIKTKR TKMLIPILHATNRCVLLSGTPALARPTELWPQLKILSTERDGGWWD  
DEDDFVRKYVQTSSAIRRAELHTMLTGTVMIRRLKHEILKSLPNKQRERAIVDVLTTPMR  
EDFRRYMELLRQKGVMAKIAKKNKQNPNTNHPDPNPSNQIEAKREKIALLNIEYNEIY  
RKKLQDIEAVVRTVRMTDEEKQHLMGKYETEVEKNEVD AWYTERANEIRDAQPAEAEENKNL  
DRKSILNKMYAMTAEAKTPLIAEMVKGWLDLDDPTK GKLCVFAHHIKVLDEIINRVGLSNKS  
GSKRFRIDGSTSPKERQSQIVAFQNDPEVRIA VLGITAAGVAVTLTASSTVWF AELFW  
TPALM IQAEXYVDRIINAERSYDEYNLSLVFVRLAKDRCHRIGQONATVRCLYFVASGTLVD  
LLWDLLEKKFQDLGEFVEGREKMKIVVKKTYGSI EEFRSIFDRASDDDLDDVKLGENENL  
TNSEDLSKLENDLRNDIVQLAEEMRLVSHGEDEEGTDTKIGGNALQKKSAPAAKSGLGQ  
TEDEAICLSDDDEDENPPQNQDASAAVPSEQAQPNENGFQYSRMRPLKCKRIYKQYFEGST  
FGIQLLYVDHRLTIARNNVGKIKPSVGDVLVAVN GNRLPFGCRLDQVCRYMKAQLNHGAV  
ELTFIEDEPFVKYRMSDI IKARDLICNPKEFHNK KPEDDVIELVDDD

>comp11419\_c0\_seq7; 959 1 3023 LEN=3170; translated  
XEFPLPSLPVQPTQSHSQHKHFELSLNVSEFTITGLPLSLDGRPSSVLGFRKIIKEVSR  
GHGKCVFERDHRADRPSPGGGRSPSEGEQALGDPQNNPDGGKWR IPLGAYRAFYSYLR  
NDGMCRRVVGIPEDQLKIASLGKARLDKGYPSAQKVISYGVPRGLATALAPFQRGGVEFV  
EKEGRALIADDMGLGKTIQSIASMSVYHDEWPLLILTPSTARYHWAAEFMNWLGSSESVN  
QGRAAGAGNGGTADPDNDKAEGEDCAITHPPRAPMRLKKESEIHVLVAGKEKVFPTSDVR  
IVICSYGLATSLIESKKIFPGLFKCAIVDESHMLKNIKTKR TKMLIPILHATNRCVLLSG  
TPALARPTELWPQLKILSTERDGGWWDDEDDFVRKYVQTSSAIRRAELHTMLTGTVMIRRL  
KHEILKSLPNKQRERAIVDVLTTPMREDFRRYMELLRQKGVMAKIAKKNKQNPNTNHP  
DPNPSNQIEAKREKIALLNIEYNEIYRKKLQDIEAVVRTVRMTDEEKQHLMGKYETEVEKN  
EVD AWYTERANEIRDAQPAEAEENKNLDRKSILNKMYAMTAEAKTPLIAEMVKGWLDLDDPTK  
GKLCVFAHHIKVLDEIINRVGLSNKSGSKRFRIDGSTSPKERQSQIVAFQNDPEVRIA  
VLGITAAGVAVTLTASSTVWF AELFWTPALM IQAEDRCHRIGQONATVRCLYFVASGTLVD  
LLWDLLEKKFQDLGEFVEGREKMKIVVKKTYGSI EEFRSIFDRASDDDLDDVKLGENENL  
TNSEDLSKLENDLRNDIVQLAEEMRLVSHGEDEEGTDTKIGGNALQKKSAPAAKSGLGQ  
TEDEAICLSDDDEDENPPQNQDASAAVPSEQAQPNENGFQYSRMRPLKCKRIYKQYFEGST  
FGIQLLYVDHRLTIARNNVGKIKPSVGDVLVAVN GNRLPFGCRLDQVCRYMKAQLNHGAV  
ELTFIEDEPFVKYRMSDI IKARDLICNPKEFHNK KPEDDVIELVDDD

>comp11420\_c0\_seq1; 201 2114 2458 LEN=2590; translated  
MQISYLEIVTTDVDAACELYATLHSTTFGDADPSLGGARTAQIAGGGLLGVRSPMHAGEK  
AVTRAYTLVDDIKVAVATLEAAGAVI AVPPMEIPERGWCAIYFLGGIEAGLWQR

>comp11420\_c0\_seq2; 480 1949 3430 LEN=4673; minus strand; translated  
MEQRSGRKERSQTFKWFSSSTLLYYFCDRMAMYMNHRYYTKLVSSSVVWGKKGSKLIILKL  
QRPVLF EFKAGQYAYLRISTINNEWHPF SIASRPDSSNLEFYIEVHEGKTWTKHLWNLFD  
DEVTSGSFDVASLKI EVMGPYGSLSRQNYSHTLAIGAGTGVPVILSMYKEHMHKLVS  
AQIFCCLRYFTIAFQTCFALVSIFFWNADGILAYVDVVFVVISPFADWYWIEVCSDFQKL  
LPSDITLFSILIWYMIGRFWVKAVSPNQSVRYRVTKHVQSSQVDQLKFLWITRSASQVSE  
ILPDI LMLWDLVVKWGIENAQKVKITIHVTPNELSCALLRKEYENSEFFRNGGIIFR  
RPNLRRVIEDHTIELINSRVNSHSLLAFCGSPSL SNEIEYNKISNDVITAMTGHSSQSHMM  
DFVSESYGGKKAASSNKKRKKGD TLSLEIDHDDDEDGVEVQLLTSRKNLSYYSNESCLDCL  
SFM DIQKSFEISV

>comp11420\_c0\_seq3; 504 1949 3575 LEN=4818; minus strand; translated  
MEQRSGRKERSQTFKWFSSSTLLYYFCDRMAMYMNHRYYTKLVSSSVVWGKKGSKLIILKL  
QRPVLF EFKAGQYAYLRISTINNEWHPF SIASRPDSSNLEFYIEVHEGKTWTKHLWNLFD

DEVTSGSFDVASLKIEMGPGYSSLSRQNYSHSTLAIGAGTGVPILSMYKEHMHKADAN  
LQEDDHETIYKSATAATLPIYGSVVLSSLPVLGVALFALMIPGALVSATQIFCCLRYFTI  
AFQTCFALVSIFFWNADGILAYVDVVFVVISPFADWYWIEVCSDFQKLLPSDITLFSILI  
WYMIGRFWVKAVSPNQSVRYRVTKHVQSSQVDQLKFLWITRSASQVSEILPDILMLWDL  
VVKWGIENAQKVCKITIHVTDPNELSCALLRKEYENSEFFRNGGIIFRRPNLRRVIEDHT  
IELINSRVNSHLLAFCGSPSLSNEIEYNKISNDVITAMTGHSQSHMMDFVSESYGGKKA  
ASSNKKRKKGDTLSLEIDHDDDEDGVEVQLLTSRKNLSYYSNESCLDCLSFMDIQKSFEIS  
V

>comp11420\_c0\_seq4; 504 1949 3575 LEN=4848; minus strand; translated  
MEQRSGRKERSQTFKWFSSSTLLYYFCDRMAMYMNHRYYTCLVSSSVVWGKKGSKLIILKL  
QRPVLFEFKAGQYAYLRISTINNEWHPFASIARPDSSNLEFYIEVHEGKTWTKHLWNLFD  
DEVTSGSFDVASLKIEMGPGYSSLSRQNYSHSTLAIGAGTGVPILSMYKEHMHKADAN  
LQEDDHETIYKSATAATLPIYGSVVLSSLPVLGVALFALMIPGALVSATQIFCCLRYFTI  
AFQTCFALVSIFFWNADGILAYVDVVFVVISPFADWYWIEVCSDFQKLLPSDITLFSILI  
WYMIGRFWVKAVSPNQSVRYRVTKHVQSSQVDQLKFLWITRSASQVSEILPDILMLWDL  
VVKWGIENAQKVCKITIHVTDPNELSCALLRKEYENSEFFRNGGIIFRRPNLRRVIEDHT  
IELINSRVNSHLLAFCGSPSLSNEIEYNKISNDVITAMTGHSQSHMMDFVSESYGGKKA  
ASSNKKRKKGDTLSLEIDHDDDEDGVEVQLLTSRKNLSYYSNESCLDCLSFMDIQKSFEIS  
V

>comp11420\_c0\_seq5; 480 1949 3430 LEN=4703; minus strand; translated  
MEQRSGRKERSQTFKWFSSSTLLYYFCDRMAMYMNHRYYTCLVSSSVVWGKKGSKLIILKL  
QRPVLFEFKAGQYAYLRISTINNEWHPFASIARPDSSNLEFYIEVHEGKTWTKHLWNLFD  
DEVTSGSFDVASLKIEMGPGYSSLSRQNYSHSTLAIGAGTGVPILSMYKEHMHKLVSA  
TQIFCCLRYFTIAFQTCFALVSIFFWNADGILAYVDVVFVVISPFADWYWIEVCSDFQKL  
LPSDITLFSILIWYMIGRFWVKAVSPNQSVRYRVTKHVQSSQVDQLKFLWITRSASQVSE  
ILPDILMLWDLVVKWGIENAQKVCKITIHVTDPNELSCALLRKEYENSEFFRNGGIIFR  
RPNLRRVIEDHTIELINSRVNSHLLAFCGSPSLSNEIEYNKISNDVITAMTGHSQSHMM  
DFVSESYGGKKAASSNKKRKKGDTLSLEIDHDDDEDGVEVQLLTSRKNLSYYSNESCLDCL  
SFMDIQKSFEISV

>comp11420\_c0\_seq6; 468 1949 3673 LEN=4916; minus strand; translated  
MEQRSGRKERSQTFKWFSSSTLLYYFCDRMAMYMNHRYYTCLVSSSVVWGKKGSKLIILKL  
QRPVLFEFKAGQYAYLRISTINNEWHPFASIARPDSSNLEFYIEVHEGKTWTKHLWNLFD  
DEVTSGSFDVASLKIEMGPGYSSLSRQNYSHSTLAIGAGTGVPILSMYKEHMHKADAN  
LQEDDHETIYKSATAATLPIYGSVVLSSLPVLGVALFALXDILEHYPNRNIP IHGDDIKV  
SLRTYNLVVCRDRIIYNLVSATQIFCCLRYFTIAFQTCFALVSIFFWNADGILAYVDVVF  
VVISPFADWYWIEVCSDFQKLLPSDITLFSILIWYMIGRFWVKAVSPNQSVRYRVTKHVQ  
SSQVDQLKFLWITRSASQVSEILPDILMLWDLVVKWGIENAQKVCKITIHVTDPNELSC  
ALLRKEYENSEFFRNGGIIFRRPNLRRVIEDHTIELINSRVNSHLLAFCGSPSLSNEIE  
YNKISNDVITAMTGHSQSHMMDFVSESYGGKKAASSNKKRKKGDTLSLEIDHDDDEDGVEV  
QLLTSRKNLSYYSNESCLDCLSFMDIQKSFEISV

>comp11420\_c0\_seq7; 468 1949 3673 LEN=4946; minus strand; translated  
MEQRSGRKERSQTFKWFSSSTLLYYFCDRMAMYMNHRYYTCLVSSSVVWGKKGSKLIILKL  
QRPVLFEFKAGQYAYLRISTINNEWHPFASIARPDSSNLEFYIEVHEGKTWTKHLWNLFD  
DEVTSGSFDVASLKIEMGPGYSSLSRQNYSHSTLAIGAGTGVPILSMYKEHMHKADAN  
LQEDDHETIYKSATAATLPIYGSVVLSSLPVLGVALFALXDILEHYPNRNIP IHGDDIKV  
SLRTYNLVVCRDRIIYNLVSATQIFCCLRYFTIAFQTCFALVSIFFWNADGILAYVDVVF  
VVISPFADWYWIEVCSDFQKLLPSDITLFSILIWYMIGRFWVKAVSPNQSVRYRVTKHVQ  
SSQVDQLKFLWITRSASQVSEILPDILMLWDLVVKWGIENAQKVCKITIHVTDPNELSC  
ALLRKEYENSEFFRNGGIIFRRPNLRRVIEDHTIELINSRVNSHLLAFCGSPSLSNEIE  
YNKISNDVITAMTGHSQSHMMDFVSESYGGKKAASSNKKRKKGDTLSLEIDHDDDEDGVEV  
QLLTSRKNLSYYSNESCLDCLSFMDIQKSFEISV

>comp11421\_c0\_seq1; 209 334 1506 LEN=1592; translated  
MSILASLQQFRNHPVALSTNRNDENVKNEPRNFTITSNYKSETKIPIFYNLYIGNETDIP  
RIRDLMSEQLSMRDPTIHTPVYITIGSEIDDKTLESFVYGSKNEAKADEIVHLRHVESG  
NELLSLESLEWEHCSKEENHETSVVYLHSGSYSNTIENTRLRFFLTAGALSQDCAVGLAR  
RSARKGMEVSHPRCNVCFSTRFSPLPHPTSGNMWAARCDYIAKLFHPSKFDARMRRFSPP  
GSTRACIGRGRWAAEHVHTHTPTVEPCDLYTSNRFLFNYEHLPLNLSAKDVRKVLYGEGN  
TNDGSSMMKLQEAPRFDLKTFSSTGICKDTGVGTLDMLRKEARVLYGYTADGSDRKEAGG  
TGGKKNQSYNTMPLSWWGKFWNNGSTLV

>comp11422\_c0\_seq1; 245 51 443 LEN=723; translated

MKIYKSIFLLFALVLSAANAFTMDSQTGSAFLVLSQRARAYDAP TSAAPVRTGVSSLSMGG  
KKAKFGIFSPAVYGAKIVLGTDLNKLGRKGISLHSSSTIGDFCQWAGAYHLR TKLIKKAK  
TNGDILGFLV  
>comp11423\_c0\_seq1; 257 389 838 LEN=1055; translated  
MTSRNNNTQSSRELQKRGIRETIEGRIPKKIRRRSDSNGSAGSQREEEGAIVGNEEALLD  
PVAARKALEMFQEVSGEPVLSSEEAKTSIEADERGQRNEPVGRDTENSQEKKKIEEEKAK  
QKERMEAGEAIRRKFQPKIVSLQESNCLL  
>comp11424\_c0\_seq1; 111 56 403 LEN=613; translated  
MRGMPLAAAAYTRRALAASASSAARRSFALVPPARPASAAAARLIQRRATTGSVSSVFYLK  
TLGEGHSGCGTRSRSRNHARKQGEFVETVVFVGLVGLPIGVLGIGGLCKMAGEGRL  
>comp11424\_c0\_seq2; 231 422 987 LEN=1071; minus strand; translated  
MPLVSFRPPTDGKNRDREQNNRHTRVATRPEEDLSVPPTARSSVARSVPSRFHTTQRNAT  
QRNAMATPFRSVAPSLSQSPVALEPALSGLHAEAPDPQDADREAHQPHKDGLHKLALLPR  
VVSASASRSASAPVFAQRLEEKTDETDPVVARWISLAAADAGLAGGTTAKDLLAAEDAD  
AARALLV  
>comp11425\_c0\_seq1; 519 231 1082 LEN=1131; translated  
MFAASKTSSLLAARSAFRRSYAATQQAESTLVLVRHGESTWNLANKFTGWYDCPLSEAG  
HVEAAEGGKLINEAGIKANVAFTSMQKRAIRTLWHVLEQTDRMWIPVTKSWKINERHYGG  
LQGLDKQQTVDKYGKDQVLVWRRSYDVPPTVDKTSEHHPANDERYADLEEWPEEFTESL  
ATTLDRVVPFWESTIAPELTDGKTVVIAAHGNSLRALVKHLDGIDESEIAELNIPTGTPL  
VYELDDDLKPIPQEGAFSPLQGRYLGDDAIRARIEGVKNQTK  
>comp11426\_c0\_seq1; 362 329 1387 LEN=1762; translated  
MAKRMGIEENAPSRRANLANRDSASSDLVNDHSNPQEVGTGATKAVLRKKEGANVQNQRSA  
LEKSTNSPNDLEERRKLFVGGPLTDITDPEFREFFSQFGELEALVMFNVRTRRSRGGF  
VTFVDANVSKSLLQTDGQDGI GRLEIRGKTCEIKAAAPKGRAPTRGEKANRCYRGSHSY  
HKAQARQLPPAAHNGQLPVVYPNGTYNLPFHQPHAYASAEYHTHMYHSNTVPHSHGQAY  
PQASPYGLVMTADGDHGAADLIGTPYFSPSPVGMNPPPEQFSVLNWFSPAHQIPAHFHQQ  
VRGFTPLIPDHLNLVHPVLEDGTSPIEPMEQDIEKMSTGQNVDRPLGLGEE  
>comp11427\_c0\_seq1; 940 112 1830 LEN=2090; translated  
MERLAKEQKRIAAKQKDGEDSADSFASKQEASASDMLNFLDRARKGEMVPPDAI IQYAE  
FFQDDLTLDNMPRMLINMCKYMSIPPYGSDPFLRFQLRHRIRMLKEDDQRILWEGIDSL  
TKMELREACQERGMRSTGLSKEAYKQSLQQLWDL SVHKNVPI SLLIMSRTFFLQEEITSP  
GTAVASDETHSVTGLADAI SGMDKEVLNEVILQVATSKELKSDPDVRKIQLEVVKQONEK  
IKEEREERDAKKKKDTTEKEEPQTKTAQIGKENIAEGRATQTADVETINKEEILD AIDVK  
VDELQADLKTAAAEIEMGEREL SPEEMESISQLLSADPVVKEREHLDRIKQAMREDEPE  
TKAEGHDDR IAASPGDTSTLEMYDSDKVASSIIEKLEMEAAKEADKHTSFTTELNTAGR  
H PESDRVDIVNGDVAAEEVVNEKPEDPVVARLKKRIESMVDKIEVQLSDVQVKIGDKLHYLD  
KDMDGILSREEMASVLSQVLKDL SFEEALEIADEMENDKDGVFTVQELINWIETNKLKVF  
ESEGRDAEMDKIMENHSEGH SNEKDETGSNKK  
>comp11427\_c0\_seq2; 1117 385 2721 LEN=3197; translated  
MTYHQFLLNHNGSSKYNGSELNHLFPQYEVRAFLSTSPSSGSTTKKLEKSQTKIPGYS  
RQAKIPIPKSSPTVSTSMNPLASIDVKAIGKGSVDMTIYVTKALVKFMIKLPGNIVFYAT  
HPTERREKTSKIKESIKKEVDHYWIGIKLLMADVKTARALLRRTLQGSTLTRRERKQLLR  
TVSDLFR LVPMSMFLIIPFMEFALPFALKIFPNMLPSTFQDSLKNEENMKRELQSR IAMA  
EFFQETMERLAKEQKRIAAKQKDGEDSADSFASKQEASASDMLNFLDRARKGEMVPPDA  
IIQYAEFFQDDLTLDNMPRMLINMCKYMSIPPYGSDPFLRFQLRHRIRMLKEDDQRILW  
EGIDSLTKMELREACQERGMRSTGLSKEAYKQSLQQLWDL SVHKNVPI SLLIMSRTFFLQ  
EEITSPGTAVASDETHSVTGLADAI SGMDKEVLNEVILQVATSKELKSDPDVRKIQLEVV  
KQONEKIKEEREERDAKKKKDTTEKEEPQTKTAQIGKENIAEGRATQTADVETINKEEIL  
DAIDVKVDELQADLKTAAAEIEMGEREL SPEEMESISQLLSADPVVKEREHLDRIKQAMR  
EEDEPETKAEGHDDR IAASPGDTSTLEMYDSDKVASSIIEKLEMEAAKEADKHTSFTTEL  
NTAGRHPESDRVDIVNGDVAAEEVVNEKPEDPVVARLKKRIESMVDKIEVQLSDVQVKIGD  
KLHYLDKDMDGILSREEMASVLSQVLKDL SFEEALEIADEMVSFNILIHESREHMVQF  
>comp11427\_c0\_seq3; 852 229 1827 LEN=2303; translated  
MERLAKEQKRIAAKQKDGEDSADSFASKQEASASDMLNFLDRARKGEMVPPDAI IQYAE  
FFQDDLTLDNMPRMLINMCKYMSIPPYGSDPFLRFQLRHRIRMLKEDDQRILWEGIDSL  
TKMELREACQERGMRSTGLSKEAYKQSLQQLWDL SVHKNVPI SLLIMSRTFFLQEEITSP  
GTAVASDETHSVTGLADAI SGMDKEVLNEVILQVATSKELKSDPDVRKIQLEVVKQONEK  
IKEEREERDAKKKKDTTEKEEPQTKTAQIGKENIAEGRATQTADVETINKEEILD AIDVK  
VDELQADLKTAAAEIEMGEREL SPEEMESISQLLSADPVVKEREHLDRIKQAMREDEPE

TKAEGHDDR IAASPGDTSTLEMYDSK VASSI IEKLEMEAAKEADKHTSFTTELNTAGRH  
PESDRVDIVNGDVAAEEVVNEKPEDPVVARLKKRIESMVDKIEVQLSDVQVKIGDKLHYLD  
KDMDGILSREEMASVLSQVLKDL SFEEALEIADEMVSFNILIHESREHMVQF  
>comp11427\_c0\_seq4; 1031 385 2936 LEN=3412; translated  
MTYHQFLLNHNGSSKYKNGSELNHLFPQYEVRAFLSTSPSSGSTTKKLEKSQTKIPGYS  
RQAKIPIPKSSPTVSTSMNPLASIDVKAIGKGSVDMTIYVTKALVKFMIKLPGNIVFYAT  
HPTERREKTSKIKESIKKEVDHYWIGIKXEFASYIITQPMYVRHALPFMYVFMKYDEPAA  
RRFKLPSPFSETKEQFASXHLTLTYRKMIVGWIKMRTIKTASHGRRQNGSGFIKENATGI  
YADTARTKTTPSNRVRLVPVGSVDVSHYPIHGIALPFALKIFPNMLPSTFQDSLKNEEN  
MKRELQSR IAMAEEFFQETMERLAKEQKRIA AKQKDGEDESADSFASKQEASASDMLNFLD  
RARKGEMVPPDAI IQYAEFFQDDLTLDNMPRMQLINMCKYMSIPPYGSDPFLRFQLRHR I  
RMLKEDDQRILWEGIDSLTKMELREACQERGM RSTGLSKEAYKQSLQQWLDLSVHKNVPI  
SLLIMSR TFFLQEEITSPGTAVASDETHSVTGLADAI SGMDKEVLNEVILQVATSKELKS  
DPDVRKI QLEVVKQQNEKIKEEREERDAKKKKDTTEKEEPQTKTAQIGKENIAEGRATQT  
ADVETINKEEILD AIDVKVDELQADLKTAAE IEMGEREL SPEEMESISQLLSADPVVKE  
REHLDR IKQAMREED EPETKAEGHDDR IAASPGDTSTLEMYDSK VASSI IEKLEMEAAK  
EADKHTSFTTELNTAGRH PESDRVDIVNGDVAAEEVVNEKPEDPVVARLKKRIESMVDKIE  
VQLSDVQVKIGDKLHYLDKDMDGILSREEMASVLSQVLKDL SFEEALEIADEMVSFNILI  
HESREHMVQF  
>comp11427\_c0\_seq5; 852 112 1710 LEN=2186; translated  
MERLAKEQKRIA AKQKDGEDESADSFASKQEASASDMLNFLDRARKGEMVPPDAI IQYAE  
FFQDDLTLDNMPRMQLINMCKYMSIPPYGSDPFLRFQLRHRIRMLKEDDQRILWEGIDSL  
TKMELREACQERGM RSTGLSKEAYKQSLQQWLDLSVHKNVPI SLLIMSR TFFLQEEITSP  
GTAVASDETHSVTGLADAI SGMDKEVLNEVILQVATSKELKSDPDVRKI QLEVVKQQNEK  
IKEEREERDAKKKKDTTEKEEPQTKTAQIGKENIAEGRATQTADVETINKEEILD AIDVK  
VDELQADLKTAAE IEMGEREL SPEEMESISQLLSADPVV KEREHLDR IKQAMREED EP  
TKAEGHDDR IAASPGDTSTLEMYDSK VASSI IEKLEMEAAKEADKHTSFTTELNTAGRH  
PESDRVDIVNGDVAAEEVVNEKPEDPVVARLKKRIESMVDKIEVQLSDVQVKIGDKLHYLD  
KDMDGILSREEMASVLSQVLKDL SFEEALEIADEMVSFNILIHESREHMVQF  
>comp11427\_c0\_seq6; 940 229 1947 LEN=2207; translated  
MERLAKEQKRIA AKQKDGEDESADSFASKQEASASDMLNFLDRARKGEMVPPDAI IQYAE  
FFQDDLTLDNMPRMQLINMCKYMSIPPYGSDPFLRFQLRHRIRMLKEDDQRILWEGIDSL  
TKMELREACQERGM RSTGLSKEAYKQSLQQWLDLSVHKNVPI SLLIMSR TFFLQEEITSP  
GTAVASDETHSVTGLADAI SGMDKEVLNEVILQVATSKELKSDPDVRKI QLEVVKQQNEK  
IKEEREERDAKKKKDTTEKEEPQTKTAQIGKENIAEGRATQTADVETINKEEILD AIDVK  
VDELQADLKTAAE IEMGEREL SPEEMESISQLLSADPVV KEREHLDR IKQAMREED EP  
TKAEGHDDR IAASPGDTSTLEMYDSK VASSI IEKLEMEAAKEADKHTSFTTELNTAGRH  
PESDRVDIVNGDVAAEEVVNEKPEDPVVARLKKRIESMVDKIEVQLSDVQVKIGDKLHYLD  
KDMDGILSREEMASVLSQVLKDL SFEEALEIADEMVDENKDG VFTVQELINWIETNKLKVKF  
ESEGRDAEMDKIMENHSEGH SNEKDETGSNKK  
>comp11427\_c0\_seq7; 1119 385 3056 LEN=3316; translated  
MTYHQFLLNHNGSSKYKNGSELNHLFPQYEVRAFLSTSPSSGSTTKKLEKSQTKIPGYS  
RQAKIPIPKSSPTVSTSMNPLASIDVKAIGKGSVDMTIYVTKALVKFMIKLPGNIVFYAT  
HPTERREKTSKIKESIKKEVDHYWIGIKXEFASYIITQPMYVRHALPFMYVFMKYDEPAA  
RRFKLPSPFSETKEQFASXHLTLTYRKMIVGWIKMRTIKTASHGRRQNGSGFIKENATGI  
YADTARTKTTPSNRVRLVPVGSVDVSHYPIHGIALPFALKIFPNMLPSTFQDSLKNEEN  
MKRELQSR IAMAEEFFQETMERLAKEQKRIA AKQKDGEDESADSFASKQEASASDMLNFLD  
RARKGEMVPPDAI IQYAEFFQDDLTLDNMPRMQLINMCKYMSIPPYGSDPFLRFQLRHR I  
RMLKEDDQRILWEGIDSLTKMELREACQERGM RSTGLSKEAYKQSLQQWLDLSVHKNVPI  
SLLIMSR TFFLQEEITSPGTAVASDETHSVTGLADAI SGMDKEVLNEVILQVATSKELKS  
DPDVRKI QLEVVKQQNEKIKEEREERDAKKKKDTTEKEEPQTKTAQIGKENIAEGRATQT  
ADVETINKEEILD AIDVKVDELQADLKTAAE IEMGEREL SPEEMESISQLLSADPVVKE  
REHLDR IKQAMREED EPETKAEGHDDR IAASPGDTSTLEMYDSK VASSI IEKLEMEAAK  
EADKHTSFTTELNTAGRH PESDRVDIVNGDVAAEEVVNEKPEDPVVARLKKRIESMVDKIE  
VQLSDVQVKIGDKLHYLDKDMDGILSREEMASVLSQVLKDL SFEEALEIADEMVDENKDG V  
FTVQELINWIETNKLKVKF ESEGRDAEMDKIMENHSEGH SNEKDETGSNKK  
>comp11427\_c0\_seq8; 1205 385 2841 LEN=3101; translated  
MTYHQFLLNHNGSSKYKNGSELNHLFPQYEVRAFLSTSPSSGSTTKKLEKSQTKIPGYS  
RQAKIPIPKSSPTVSTSMNPLASIDVKAIGKGSVDMTIYVTKALVKFMIKLPGNIVFYAT  
HPTERREKTSKIKESIKKEVDHYWIGIKLLMADVKTARALLRRTLQGSTLTRRERKQLLR

TVSDLFRLVPMMSFLIIPFMEFALPFALKIFPNMLPSTFQDSLKNEENMKRELQSR IAMA  
EFFQETMERLAKEQKRIA AKQK DGEDESADSFASKQEASASDMLNFLDRARKGEMVPPDA  
IIQYAEFFQDDLTLDNMPRMQLINMCKYMSIPPYGSDPFLRFQLRHRIRMLKEDDQRI LW  
EGIDSLTKMELREACQERGMRSTGLSKEAYKQSLQQWLDLSVHKNVPI SLLIMSRTFFLQ  
EETSPTGTAVASDETHSVTGLADAI SGMDKEVLNEVILQVATSKELKSDPDVRKIQLEVV  
KQONEKIKEEREERDAKKKKTTEKEEPQTKTAQIGKENIAEGRATQTADVETINKEEIL  
DAIDVKVDELQADLKTAAE IEMGERELSP EEMESISQLLSADPVVKEREHLDRIKQAMR  
EEDEPETKAEGHDDRIAASPGDTSTLEMYSDSKVASSIIEKLEMEAAKEADKHTSF'TTEL  
NTAGRHPESDRVDIVNGDVAEEVVNEKPEDPVVARLKKRIESMVDKIEVQLSDVQVKIGD  
KLHYLDKMDGILSREEMASVLSQVLKDL SFEEALEI ADEMENDKDG VFTVQELINWIET  
NKLVKFESEGRDAEMDKIMENHSEGH SNEKDETGSNKK

>comp11428\_c0\_seq1; 346 248 1096 LEN=1482; translated  
MKHTIAFSAFTAGFVLC LTL SLLCPVVALIPATPQEQT SRAIRSIKNAIDGRREEGKPV  
RLFVDYLVPLPPETKAEDIDPWPGLAQMYPYAE EILSSILKGVVEDPVQQCSSQVISAP  
DCCGFFVQESQTS AKNDVAA I LFP GVDQLQ QIEDIDAMVGKERTLIMFNKQFQRPADFGF  
GSSDRSKNSIFNKYTQGF AFQEFACRGEDLKLTFEYPNWKSCV ICEEEDGNKEIPVLPDQ  
IDRPNYEDLEKKINEVLPEPLWMRKMGEAE EKGFKFQRGSRD

>comp11428\_c0\_seq2; 231 375 752 LEN=1138; translated  
MVGKERTLIMFNKQFQRPADFGFGSSDRSKNSIFNKYTQGF AFQEFACRGEDLKLTFEYP  
NWKSCV ICEEEDGNKEIPVLPDQIDRPNYEDLEKKINEVLPEPLWMRKMGEAE EKGFKFQ  
RGSRD

>comp11429\_c0\_seq1; 358 126 878 LEN=1357; translated  
MLPPTS YTTLLLDMDGV LAEVSQSYRASIVATCHKY GANSVTLDVIGDCKAKGGCNNDWK  
LSLDLINQDPNGQKGLTLDEVTETFE EFYQGTEGTPGLCELES LIPDKKILEELKKRSK  
IGIVTGRPISDCEKFLKLHLGLDHLVDCSVC MEDGPAKPD PFPVLECCKRLGV EPSKSVL  
VGDT PDDIRA AVAAGCSGVGVATPEAVEELATKGETYEKAKLCIAMKECGVDVIFEPGFE  
KLIDYFPEVE

>comp11430\_c0\_seq1; 564 1 2522 LEN=2709; translated  
ESFEFASVLLSTTVSWTGQNDRKLYTGRRSYIKSIDPAKXEKQAENSDCSSPTTSGEMM  
RRIGNTCLTRGVSCSKI IERRRLLASSSPSKSRLQPEKITLDRHHGGGEHRDEV RPQNH  
PDQRNSKRERSTAI PRDGLSLSDFVHRARHGDSDDLLEAATTASAQRTGGQPVGTFHIKT  
YGCQMNVS DSDIVRAV LLENGYVEATLDNAKINSKNTINGNTRKQKKNRPWTPESTADII  
LTNTCAIREKAEEKVWQRLRHLRKNKGS HQVVGVLGCMAERLQNQLLEENVADLVVGPDA  
YRDLPRLLQQITGAETSATSHGERGNRNETTRSGDENGDDLQELGRQLLSDVPMQSETQQ  
HRHHQDAIQGRIELRKPLRSKKEQKPRRPTAINVDLSTSETYDDIMPVRGDEASNPFSAF  
VSIQRGCSNRCSFCIVPFTTRGGKERSRPFRSIVDEVSYMVETEDLKEVVLLGQNVNSYHD  
RSPPALQERPEQNMLSLSNNGFRSR IRRPNIGGYRFVDLVEAVADISPELRIRYTS PHPK  
DYPLELLQLMAERPNI CSQLHMPAQSGSTEMLKRMRG YTREAYIELIDAVRTVIPDVAI  
SSDFIAGFCDETEEEHADTSLSLQYVEYEQAFLFAYSMRDKTHASRAMEDNVAADIKQRR  
LQELIDVFRKVKHAKNERVEVGRRLRVLVEGPTKKQRADLPEGTATWHGRTDQNKRI LFD  
VETNAEIAQT NATVWKEHHALEMLHQHQQQQQYFNLPLEQLATTRRTDLTPGDYAVVSVT  
EAKGHTLRGRMLWKTTLSDFARFESNHLPKLQOEDLNNLQENLFRGWNTNFEEAASLRAK

>comp11430\_c0\_seq2; 134 1 882 LEN=882; translated  
ESFEFASVLLSTTVSWTGQNDRKLYTGRRSYIKSIDPAKEKSKKQRTATVPXPPTTSGEMM  
RRIGNTCLTRGVSCSKI IERRRLLASSSPSKSRLQPEKITLDRHHGGGEHRDEV RPQNH  
PDQRNSKRERSTAI PRDGLSLSDFVHRARHGDSDDLLEAATTASAQRTGGQPVGTFHIKT  
YGCQMNVS DSDIVRAV LLENGYVEATLDNAKINSKNTINGNTRKQKKNRPWTPESTADII  
LTNTCAIREKAEEKXLA AVAPPEKEQGVSPGRGGTGLHGGAFAKPAIREKVEEKV

>comp11431\_c0\_seq1; 730 1 1550 LEN=1707; translated  
XETPNKHNR CNKYEFKMI AARRIAQQAGVRAYSSTAGAFSAGKVTTVIGAVVDVQFPDK  
LPKILNALLEVEVPEGNERLVLEVAQH LGENTVRTIAMESTDGLVRGQKCVDTGAPIQVPV  
GPLTLGRI INVIGEPVDEKGP IFADEKEKKFAPLHRSAPTFT EQGRSQDILVTGIKVVDL  
LAPYAKGGKIGLFGGAGVGKTVVIMELINNIAMNHGGYSVFAGVGERTREGNDLYHEMIE  
GGVIKIDEKTGSTE GSKAALVYGQMN EPPGARARVALTGLAIAEYFRDEEGQDVLLFVDN  
IFRFTQAGSEVSALLGRIPSAVGYQPTLATDMGALQERITSTGKGSITSVQAVYVPADDL  
TDPAPATTF AHL DATTVLSRSIAELGIYPAVDPLDSTSRMLDPRVIGDEHYEVARATQKL  
LQDYKGLQDIIAILGMDELSEDDKLT VSRARKVQKFM SQPFHVAEVFTGTAGK FVSLEDS  
IKGFKEIINGDYDHLPEVAFYMGGIEDVKEKAASI

>comp11432\_c0\_seq1; 1203 340 2823 LEN=2897; translated  
MMDPEKSSKRNIADV DHRNDKNIVISSSSGDGDKDDSKDDQKAHNSSGGGGRKRS PAHR

TRPWTAADSNRCEYVLEVLNHDVMLGRGSGPNDHVGNIKFRDLVHSRKTEYLSSTNHRQTK  
AFIAKEIVDQVYERGGFRFLKKGTAETARMLPKVLADMGIIDDENDTAPGELGEEPVEVY  
QIQKHSIVMEKAKQALRQNRGGSPNHSDSPVGKGHSPLSKHPPVMGSPVHKNKISHNS  
SPHDVLLNNNRNSSSCGARRHSMGSGLETNSFNPTWGVANGNGSIPTRLNNASSISPGAN  
NNTSSTSSNNNIGLRQHGGMFGGAGIQSNAAMEPFHVPNSNYSSSSQQQHQQQEODSP  
FHQQRFHQHDQQQREPTSGNQALIDLQHQHDMMLQYQQQFGQNQQTRFLLEQHKQMIQKE  
LEVEIRKEQLRQLQLQQMQKQFVSGPPLFSKEQNDPQPNPHRSQPRQEQTIPLRHPSQEGP  
PNFLNGMATYTTTTLDKMEGNRQETNSHRLDSNLGMGEAKEMMLKTSSKGGRDENRKKKEIR  
NTKDDKSITQMSTMMGSFKDMSVRSNEDASMHNSNDTIGTIDNMTGGMVGGLSMAHMSG  
ISILTMNDSTDSLKNTGRAKDLGAHNASWGTDPVKGKGVSGIGIIQNSSQSRLDRRPA  
AASERSAAAAAGAAALGKNFFGGSVNHHHQGSRFGNDGHVAPRRSSTPANSRAYMANHHG  
GSSGSSNNTAAAVSAILAMAGGECGNGVNGFGPLQQQQQQQHQQHQRHHAPNYEYEEYYS  
MGETRVGGLAAGKASPPPPAAGSKKKKPLHHGVPEGSTPCCQHGL

>comp11432\_c0\_seq2; 1233 340 3010 LEN=3275; translated  
MMDPEKSSKRRNIADVDRNDKNIVISSSSGDGDKDDSKDDQKAHNSSGGGGRKRSPAHR  
TRPWTAADSNRCEYVLEVLNHDVMLGRGSGPNDHVGNIKFRDLVHSRKTEYLSSTNHRQTK  
AFIAKEIVDQVYERGGFRFLKKGTAETARMLPKVLADMGIIDDENDTAPGELGEEPVEVY  
QIQKHSIVMEKAKQALRQNRGGSPNHSDSPVGKGHSPLSKHPPVMGSPVHKNKISHNS  
SPHDVLLNNNRNSSSCGARRHSMGSGLETNSFNPTWGVANGNGSIPTRLNNASSISPGAN  
NNTSSTSSNNNIGLRQHGGMFGGAGIQSNAAMEPFHVPNSNYSSSSQQQHQQQEODSP  
FHQQRFHQHDQQQREPTSGNQALIDLQHQHDMMLQYQQQFGQNQQTRFLLEQHKQMIQKE  
LEVEIRKEQLRQLQLQQMQKQFVSGPPLFSKEQNDPQPNPHRSQPRQEQTIPLRHPSQEGP  
PNFLNGMATYTTTTLDKMEGNRQETNSHRLDSNLGMGEAKEMMLKTSSKGGRDENRKKKEIR  
NTKDDKSITQMSTMMGSFKDMSVRSNEDASMHNSNDTIGTIDNMTGGMVGGLSMAHMSG  
ISILTMNDSTDSLKNTGRAKDLGAHNASWGTDPVKGKGVSGIGIIQNSSQSRLDRRPA  
AASERSAAAAAGAAALGKNFFGGSVNHHHQGSRFGNDGHVAPRRSSTPANSRAYMANHHG  
GSSGSSNNTAAAVSAILAMAGGECGNGVNGFGPLQQQQQQQPPAVDGSGLTLWFDDCNK  
DWEADETAVLASRNLSCVATERVALARHTTTSTMAEPQSKNHAVAATASTLETTEGLIRR  
SKRKRNPHGSDRLKHPLLVSLLRVVEAGFYGRDARDDWGCNVYGDVRVQ

>comp11432\_c0\_seq3; 1203 221 2704 LEN=2778; translated  
MMDPEKSSKRRNIADVDRNDKNIVISSSSGDGDKDDSKDDQKAHNSSGGGGRKRSPAHR  
TRPWTAADSNRCEYVLEVLNHDVMLGRGSGPNDHVGNIKFRDLVHSRKTEYLSSTNHRQTK  
AFIAKEIVDQVYERGGFRFLKKGTAETARMLPKVLADMGIIDDENDTAPGELGEEPVEVY  
QIQKHSIVMEKAKQALRQNRGGSPNHSDSPVGKGHSPLSKHPPVMGSPVHKNKISHNS  
SPHDVLLNNNRNSSSCGARRHSMGSGLETNSFNPTWGVANGNGSIPTRLNNASSISPGAN  
NNTSSTSSNNNIGLRQHGGMFGGAGIQSNAAMEPFHVPNSNYSSSSQQQHQQQEODSP  
FHQQRFHQHDQQQREPTSGNQALIDLQHQHDMMLQYQQQFGQNQQTRFLLEQHKQMIQKE  
LEVEIRKEQLRQLQLQQMQKQFVSGPPLFSKEQNDPQPNPHRSQPRQEQTIPLRHPSQEGP  
PNFLNGMATYTTTTLDKMEGNRQETNSHRLDSNLGMGEAKEMMLKTSSKGGRDENRKKKEIR  
NTKDDKSITQMSTMMGSFKDMSVRSNEDASMHNSNDTIGTIDNMTGGMVGGLSMAHMSG  
ISILTMNDSTDSLKNTGRAKDLGAHNASWGTDPVKGKGVSGIGIIQNSSQSRLDRRPA  
AASERSAAAAAGAAALGKNFFGGSVNHHHQGSRFGNDGHVAPRRSSTPANSRAYMANHHG  
GSSGSSNNTAAAVSAILAMAGGECGNGVNGFGPLQQQQQQQHQQHQRHHAPNYEYEEYYS  
MGETRVGGLAAGKASPPPPAAGSKKKKPLHHGVPEGSTPCCQHGL

>comp11432\_c0\_seq4; 524 387 1753 LEN=1827; translated  
MRRKHRGLVILAVGPICGLLNRWLLVHRDEITAATTHRSFGVAIENATIDHSYITNNAT  
ATSVTILAESFLRPSNRSLLGDLLTGTETTGTAEENENAFAEFDESLETTSPFWELLA  
NHRVVSCKGDKCLFRSYAASNSSEDEKDSQPVTADATGYLVSKPGKNLDTGIHDGWKIA  
RYLETRFGIRHFLLSPPQPAILDPIEARDLFGSNASDSGGNETDCVGESSEGNATAASAS  
IDTTVQKIRIMPQGSRELRLHHRTEIRSRLGLEQAAVERVDHGASPEFPFLSTLRAE  
VEETVRLLECEPLLALDQIADTRGRIHHLDFDRVLSQLGGLRRYNQTKFVAKVRSRIE  
STSGLLETVREWIGEQRGGQTNSSSSNTNTTSGTMPPNYEYEEYYSMGETRVGGLAAG  
KASPPPPAAGSKKKKPLHHGVPEGSTPCCQHGL

>comp11432\_c0\_seq5; 951 340 2367 LEN=2367; translated  
MMDPEKSSKRRNIADVDRNDKNIVISSSSGDGDKDDSKDDQKAHNSSGGGGRKRSPAHR  
TRPWTAADSNRCEYVLEVLNHDVMLGRGSGPNDHVGNIKFRDLVHSRKTEYLSSTNHRQTK  
AFIAKEIVDQVYERGGFRFLKKGTAETARMLPKVLADMGIIDDENDTAPGELGEEPVEVY  
QIQKHSIVMEKAKQALRQNRGGSPNHSDSPVGKGHSPLSKHPPVMGSPVHKNKISHNS  
SPHDVLLNNNRNSSSCGARRHSMGSGLETNSFNPTWGVANGNGSIPTRLNNASSISPGAN  
NNTSSTSSNNNIGLRQHGGMFGGAGIQSNAAMEPFHVPNSNYSSSSQQQHQQQEODSP

FHQQRFHQHDQQQREPTSGNQALIDLQHQHDMMLQYQQQFGQNQQTRFLLEQHKQMIQKE  
LEVEIRKEQLRQLQLQQMQKFVSGPPLFSKEQNDPQPNPHRSQPRQEQTIPLRHPSQEGP  
PNFLNGMATYTTTTLDKMEGNRQETNSHRLDSNLGMGEAKEMMLKTSSKGGRDENRCKEIR  
NTKDDKSITQMSTMMGSFKDMSVRSNEDASMHNSNDTIGTIDNMTGGMVGGLSMAHMSG  
ISILTMNDSTDSLKNTGRAKDLGAHNASWGTPDVGKGVGSIGIIQNSSQSRLDRRPA  
AASERSAAAAEKVLSE

>comp11432\_c0\_seq6; 951 221 2248 LEN=2248; translated  
MMDPEKSSKRRNIADVDRNDKNIVISSSSGDGDKDDSKDDQKAHNSSGGGGRKRKSPAHR  
TRPWTAAADSNRCEYVLEVLNHDVMLGRGSGPNDHVGNIKFRDLVHSRKTEYLSSTNHRQTK  
AFIAKEIVDQVYERGGFRFLKKGTAETARMLPKVLADMGIDDDENDTAPGELGEEPVEVY  
QIQKHSIVMEKAKQALRQNRGGSFNHSDSPVGKGHSPMLSKHPPVMGSPVHKNKISHNS  
SPHDVLLNNNRNNSSSCGARRHSMGSGLETNSFNPTWGVANGNGSIPTRLNASSISPGAN  
NNTSSTSSNNNIGLRQHQQGMFGGAGIQSNAAMEPFHVPNSNYSSSSQQQHQQQEODSP  
FHQQRFHQHDQQQREPTSGNQALIDLQHQHDMMLQYQQQFGQNQQTRFLLEQHKQMIQKE  
LEVEIRKEQLRQLQLQQMQKFVSGPPLFSKEQNDPQPNPHRSQPRQEQTIPLRHPSQEGP  
PNFLNGMATYTTTTLDKMEGNRQETNSHRLDSNLGMGEAKEMMLKTSSKGGRDENRCKEIR  
NTKDDKSITQMSTMMGSFKDMSVRSNEDASMHNSNDTIGTIDNMTGGMVGGLSMAHMSG  
ISILTMNDSTDSLKNTGRAKDLGAHNASWGTPDVGKGVGSIGIIQNSSQSRLDRRPA  
AASERSAAAAEKVLSE

>comp11432\_c0\_seq7; 625 387 1940 LEN=2205; translated  
MRRKHRGLVAVGPICGLLNRWLLVHRDEITAATTHRSFGVAIENATIDHSYITNNAT  
ATSVTILAESFLRPSNRSSLDLLTGTTTGTAEENENAFAEFDESLEDETTSFPWELLA  
NHRVVSCKGDKCLFRSYAAAASNSEDEKDSQPVTADATGYLVSKPGKNLDTGIHDGWKIA  
RYLETRFGIRHFLSPPQPAILDPIEARDLFGSNASDSGGNETDCVGESSEGNATAASAS  
IDTTVQKIRIMPQGSRELRLHHRTEIRSRLEGLREQAAVERVDHGASPEFPFLSTLRAE  
VEETVRLLECEPLLALDFQI IADTRGRIHHLDFDRVLSQLGGLRRYNQTKFDAKVRRIE  
STSGLLETVREWIGEQRGGQTNSSSSSNNNSPAVDGSGDTLWFDDCNKDWEADEVAVLAS  
RNLSCVATERVALARHTTTSTMAEPQSKNHAAVAAASTLETTEGLIRRSKRKRKNPHGSDR  
LKHPLLVSLLRVVEAGFYGRDARDDWGCNVYGDVQ

>comp11432\_c0\_seq8; 1233 221 2891 LEN=3156; translated  
MMDPEKSSKRRNIADVDRNDKNIVISSSSGDGDKDDSKDDQKAHNSSGGGGRKRKSPAHR  
TRPWTAAADSNRCEYVLEVLNHDVMLGRGSGPNDHVGNIKFRDLVHSRKTEYLSSTNHRQTK  
AFIAKEIVDQVYERGGFRFLKKGTAETARMLPKVLADMGIDDDENDTAPGELGEEPVEVY  
QIQKHSIVMEKAKQALRQNRGGSFNHSDSPVGKGHSPMLSKHPPVMGSPVHKNKISHNS  
SPHDVLLNNNRNNSSSCGARRHSMGSGLETNSFNPTWGVANGNGSIPTRLNASSISPGAN  
NNTSSTSSNNNIGLRQHQQGMFGGAGIQSNAAMEPFHVPNSNYSSSSQQQHQQQEODSP  
FHQQRFHQHDQQQREPTSGNQALIDLQHQHDMMLQYQQQFGQNQQTRFLLEQHKQMIQKE  
LEVEIRKEQLRQLQLQQMQKFVSGPPLFSKEQNDPQPNPHRSQPRQEQTIPLRHPSQEGP  
PNFLNGMATYTTTTLDKMEGNRQETNSHRLDSNLGMGEAKEMMLKTSSKGGRDENRCKEIR  
NTKDDKSITQMSTMMGSFKDMSVRSNEDASMHNSNDTIGTIDNMTGGMVGGLSMAHMSG  
ISILTMNDSTDSLKNTGRAKDLGAHNASWGTPDVGKGVGSIGIIQNSSQSRLDRRPA  
AASERSAAAAAGAAALGKNFFGGSVNHHHQGSRFGNDGHVAPRRSSTPANSRAYMANHHG  
GSSGSSNNTAAAVSAILAMAGGECNGVNGFGPLQQQQQQQPPAVDGSGLTLWFDDCNK  
DWEADEVAVLASRNLSCVATERVALARHTTTSTMAEPQSKNHAAVAAASTLETTEGLIRR  
SKRKRKNPHGSDRDLKHPLLVSLLRVVEAGFYGRDARDDWGCNVYGDVQ

>comp11433\_c0\_seq1; 330 457 1814 LEN=2103; minus strand; translated  
MNSPLSTVFLADSSSTLAAVVTVIGSTLALNRYFRIQRDRKRLGNFSPSTPSFLPSFDLL  
HAIRAGTLEKFVESRKKALGSDCFYIRLPGMARHTLCIINPEDHAEVLRKERKLLKLVLDL  
PDTLNETHGPGSLQALSGNQHNFYRKIFASLLSPAALLESFTPFDFAFSOMWADLEEKSV  
EGESPVVIQDAICRTQFFLMSKVLYGMTPESTSMDMILQMRDDFEAQLEGHFAPRMSAKF  
KLAKEGSKRIHDVLRKKFELILEXKASLNIAENSVHLQNLREEANSFGSDHFPPTFANLKS  
DMPYAEVGIKEALRLAPFTVGLAYAMEDNIAFTFKGQKMQGPMSEFFMSFGQNFKNPSLFP  
EPDKFLPERWIPGSKSYVSKEAQAFTPFMGMRHLCLGYQLAMLVMKSSLYCFKADETRV  
IKFDAEKTRVKPGLFSPYSVSDGLLGRVTKN

>comp11433\_c0\_seq2; 486 457 2028 LEN=2317; minus strand; translated  
MNSPLSTVFLADSSSTLAAVVTVIGSTLALNRYFRIQRDRKRLGNFSPSTPSFLPSFDLL  
HAIRAGTLEKFVESRKKALGSDCFYIRLPGMARHTLCIINPEDHAEVLRKERKLLKLVLDL  
PDTLNETHGPGSLQALSGNQHNFYRKIFASLLSPAALLESFTPFDFAFSOMWADLEEKSV  
EGESPVVIQDAICRTQFFLMSKVLYGMTPESTSMDMILQMRDDFEAQLEGHFAPRMSAKF  
KLAKEGSKRIHDVLRKKFELILEERRHLFESSNGEKKDYDDKNIMIGNAMESVADALLK



EGADRDLKVLDEIDNFDLLEASHGTTMTMTTAMYYLNI AENSVHLQNLREEANSFGS  
DHFPTFANLKS DMPYAEGVIKEALRLAPFTVGLAYAMEDNIAFTFKGQKMQGPM SFFMSF  
GQNFKNPSLFPPEPKFLPERWIPGSKSYVSKEAQA AFTPFMGRHLCLGYQLAMLVMKSS  
LYCFAKDETRVIKFDAEKTRVKPGLFSPYSVSDGLLGRVTKN

>comp11434\_c0\_seq1; 969 1 3222 LEN=3327; translated  
DDDDSSSIATPRGSRNGDCTFSYVRISDNAV LGDILQRIKEWTKLKTTFVAFPLVSKQGSS  
EKQTKARTSRKDEDVSEKGEKESHVPPTKESTDDNRFHKGNNAKFHYQYAAFDASDLIPCF  
VPMHRNADSSNSSTNEHEDEDANGSPKKQHLEYHSPQSLSLAIPQH PAVKGTDL LKALSWI  
DAFGPILNEVEVDGGLFLNLVRLLEKEGKEDNDNDPVSP IGGGDSVEI SAYESA VRFTG  
MKRRHLLVQNFVESLAGEICDAWPIQDR LNRVDNPPQHFNKEKNHFTGGNGITSRKLVID  
SKNSLRLATIVDRCILARIVTAIYLHRS DPTSAILLFRYLLSTGSS LQLEEDFYPNHP  
PVQSLCVVEAILNTQFDGMNANSHPTKVAQGLPKNRTLLDYLVDNILLPDHTIDENNPFL  
MVE SFHLSIAISATIFCIRTNHDDSRVSELALVEVGAYNRLKEQLDAAVSTRKRGPLAIE  
TIDTLKWSETLRPFYVEECRRFSKAFLDDLASAVQKEDDVKFGYGNHELPSMTIVMAWL  
LPMTLVVEGDGHKLREIFSQWSEMFLSLRSLDCLFVVEACVRAMRQLEISS LKSYRTVIC  
SPATNEVSTVVQSI VARLVE SMTDWDSS TIVTEKNSAINPTTLHTLIGICYEVADGESAL  
KLIQRWIVSSNEEKKAIPKQQLSSKRNDLSRPIDFWSAFPMVRVINLQRRQDR IASFMAQ  
AMHAGLWVLRGVI PDRWKMMEGKRKNNDLGETMANDKSPDLTSYIGTYAIDGSQGS PAE  
VEKMLMEWLDV GELKNGASKTELKSLVLPQWRPNDLRAFDI HASDDPNLMVSLSPSEKAC  
ALSHIATWKG IASASSDTCKFSYTG LARGDPIHNKND DDPICPVALVLEDDAVLVDRF  
QERLDQILRELPRDFHYCALGYARPK EAPLVDIPGCAHIKLP TMTWYLTGYLLSKSGARY  
LLDRLPVEGPVDAWMGRKMILTSNWENDYGHRLGVGDAPHIGSDSSRPTLTKKEIRLCVQ  
FRAYCASIPLCDQKVRTAIATGASTKHRNKKPNQNWRLRDS DIVYSGNIGKAT

>comp11435\_c0\_seq1; 200 154 798 LEN=1001; translated  
MSYSYLFKYIIIGD TGVGKSCLLLQFTDKRFQPVHDLTIGVEFGARMVNL DSDKLVKLQI  
WDTAGQESFRSITRSYRGAAGALLVYDITRRDTFQHLSRWLEEARQHAQSNM VIMLIGN  
KNDLEHRAVSTEEGKAFAE ANGLIFLETSAKTAYNVEPAFINTAENI HGKIVSGEIDVT  
NESNGIKMGMANSGGVGGLPGLNERSNANSRGCC

>comp11436\_c0\_seq1; 601 380 3055 LEN=3118; translated  
MRTYTTASVFFSSKTAFLYLSVFFSTVTITKAAGGLSSTSSGTSTPFEYLENDLKACAYQ  
LKSGKEIGEHTTVNICLSLYERFLDHYDRDGNNGAAGYSHFTKTVHF IHQHNHKYPYAS  
HKLRLNQFADTSKSYLQLDDPSDQPMGSDDG EKYSQWQIDLENFWELHHGEREDDSKSEE  
EMEKDDSANEGRSRKL RWGEVEVRL LGTSSSIRAENEYKEQQQTQLRQRKQHQKH DYRE  
EEEEPDSRRSLLEEF IAPSLSSKLQVVADSRHNTKVI MPGDGTNAPPRFSSPQVPNKLMG  
TAVELHKGRKSDPITGAHLFDDDPQQHEF SKSLDWSTEHNPDGVPLVH SVFDQGICGSC  
WAF AATGSVEASAARNFARNHFVKGLIE IDEELEGIRKMKGGGAYDDDFGDEDDDMGRR  
GKYHALVEEFTTDSMRVEAEVFEELNLSIQELLD CDVSVDEGCVGGNPLLA FYYIHKHGL  
VPWAEYPYEGYDR TKAPQRKTSMTTMKLGNNGGTIPTLIEVPQTENGQVGNYP SQQATSN  
KEHQQLNNNAYTPSCHKDKVTNP IATVESWGLLHKNHEDLIENALLYVGPVAVG INGAD  
PSFINYGGGIFD SPNCDAQANHALLIVGYDEETITMASGEMKTVRYWIARNSWEGEGWGEN  
GFVRVKRGS GGKIPGVCGIARSPSVALGGIYRRDRTEPLKNRDTYKTTSRYRKDKYVSS  
YDTTASLDIQNRKNHPDCYSSFAGNIEFVSKGCVKLSIAYERNQTI FLTTISLLVALIAI  
VPLALSLSRQHRVASNGSIRLEYCEDEHRSPERLSNRSLSFQSTMSERTHLLTLKDMYA  
GRRKQEEETSRPRGRSIVITSS TQDPFRLEPSSTIEHSSDDSRSEAGVSDH

>comp11436\_c0\_seq2; 589 380 2671 LEN=3254; translated  
MRTYTTASVFFSSKTAFLYLSVFFSTVTITKAAGGLSSTSSGTSTPFEYLENDLKACAYQ  
LKSGKEIGEHTTVNICLSLYERFLDHYDRDGNNGAAGYSHFTKTVHF IHQHNHKYPYAS  
HKLRLNQFADTSKSYLQLDDPSDQPMGSDDG EKYSQWQIDLENFWELHHGEREDDSKSEE  
EMEKDDSANEGRSRKL RWGEVEVRL LGTSSSIRAENEYKEQQQTQLRQRKQHQKH DYRE  
EEEEPDSRRSLLEEF IAPSLSSKLQVVADSRHNTKVI MPGDGTNAPPRFSSPQVPNKLMG  
TAVELHKGRKSDPITGAHLFDDDPQQHEF SKSLDWSTEHNPDGVPLVH SVFDQGICGSC  
WAF AATGSVEASAARNFARNHFVKGLIE IDEELEGIRKMKGGGAYDDDFGDEDDDMGRR  
GKYHALVEEFTTDSMRVEAEVFEELNLSIQELLD CDVSVDEGCVGGNPLLA FYYIHKHGL  
VPWAEYPYEGYDR TKAPQRKTSMTTMKLGNNGGTIPTLIEVPQTENGQVGNYP SQQATSN  
KEHQQLNNNAYTPSCHKDKVTNP IATVESWGLLHKNHEDLIENALLYVGPVAVG INGAD  
PSFINYGGGIFD SPNCDAQANHALLIVGYDEETITMASGEMKTVRYWIARNSWEGEGWGEN  
GFVRVKRGS GGKIPGVCGIARSPSVALGGIYRRDRTEPLKNRDTYKTTSRYRKDKYVSS  
YDTTASLDIQNRKNHPDCYSSFAGNIEFVSKGCVKLSMYVQID

>comp11438\_c0\_seq1; 432 216 1832 LEN=2159; translated  
MKNPFGCSFLALLLLISGATTPVLAGECQGTKLVLLAGPRRTATTSVAEFLFKYARGARP

DHKHGKIYHPLAKVRWPLVYGPVTNSTEPERPYKRYNRVVTEPEQKDYLAEVIDAIKHDY  
EIPVNTVIFGGEEFDQMGNPSENSDQQMQAFKDLIKGVGAPAECSVVINYRVPRFEHW  
VSLYNSKAGTDDKDVRDLEEMDKYTPYNEHMCMDKTSSTRISELASSMNPLHLAQTYLDA  
DPGWKVDLIDMGGVDYYSIDISHVIACDILGGKCDNDRWVNLHADESIRNNAIVRDYNA  
LELEEITNSEKIFRYRDCAFQKELTNDKKYKDRFQIFHGQTIWEDCNHSDKKLENIYKSL  
KLIKKGTRLVYDALLSQVDCTPYGDFARSPEHSIEDILSGKHLHDSKDAPAENMAQAEEN  
SDSPMEQAEENKYFPVDLGVSGLAVAGLVALSILCCFCVCVKRMCCRAPSMGNKRGYSGM  
GSNPRIEMQSRKRNTYSDSLKNMYKKKGSTARHRRHNDSSSDDSSASDDSFQDDFI  
>comp11439\_c0\_seq1; 922 1 3496 LEN=3700; translated  
EPVANEGRSGSEAEAEHPEAGKAEASPGKASPDDSKPFDEGTPFDEEPAPAPEASKKNE  
PGLLFLPRSPKRFSTRTTTTYMSKASARSALTDRETEKIKNTGKGRFSGINAISETMSSGTSI  
SSLPSRVPVVRERQLMVEELTDARISAESYEGTSGERRGRIVKGRARHSGPSGSPPLPRP  
HHPPPHYDAEDTGDERRGATSADFNETYETYGTDSVSALSENDTDFLSRRDNFDQARRR  
ALDAAIEVEDWDLAAALS DGMRAANLPGGYEKAHTSWNQSELDKFIATNDWDAVKAYIAK  
MRRASASANANARKKVGSRSRIQHREAASESSWSGSDSGSSYETYDTESEXDLRQTDTERD  
GTMCEEHGVGVSFRDFDIGLXLDWIELNWTNKALLVSDIISPCFLDIEGAGKCFSTQDFSTQ  
YLNPKNSQSKIAESSWGAXESVEVDKNGNQRRNSASSMFQSSAFSKGRKRGEETALR  
KVDCIDESREIICGGLRLKYAYFSQRGYYPDSPNKANQDAYSVTERVGSNDAFFAVY  
DGHGMNGDQCAQYARDKLPYLEKYMNAKAKAREAKKPEKMSVKQSSRNIQDNFNPLAHI  
ELSKEQMOKACTRAHVDCNNAMHQDIDDSLSGTTAISAYIHGRNRVTVCNVGDSRAVLG  
KATQSTGYEYGRGQALKAYPLSRDQTPYRKDERIRIRKTGARILSLDQLEGLEPIYNRDD  
DPDNDEGDIELGEELDEGGDPPRVWSPDGDYPGTAFTTRSLGDAMAEELGVFAEPEMLTRE  
IKPEDRVIVIASDGIFFELTNQSVIDICAKFTDPLKACRAVVAESYELWLQYELRTDDIT  
IICIFVEALTEPSVMEETEYVATHSTRNDSHSGEVTLASGAARPVRNRMTKEKAQIEKLLK  
KNFVVDEADLAELNKEVDLDALYTHKSASEKARIADAIKTSVMFRNVTDDQRELIYGVME  
PIRVKKGDWVIKQGSVGRDFYIIDEGSFEVIRIRGEEDDGGSGVLTHIYEGSASKHLHP  
CFGELALMYSAPRSASIIARTDGI LWALHRSFAFRQILAQSQGRKELMKTLKIPMFGKL  
SKEQITKLAVSFDEIAFGRGENIVQQGHVGDMSFVITSGTCERVKVTKEPKSSTLKTGD  
HFGHEVILDKEKYSATVVSLQTMGTG  
>comp11439\_c0\_seq2; 319 1 1056 LEN=1233; translated  
EPVANEGRSGSEAEAEHPEAGKAEASPGKASPDDSKPFDEGTPFDEEPAPAPEASKKNE  
PGLLFLPRSPKRFSTRTTTTYMSKASARSALTDRETEKIKNTGKGRFSGINAISETMSSGTSI  
SSLPSRVPVVRERQLMVEELTDARISAESYEGTSGERRGRIVKGRARHSGPSGSPPLPRP  
HHPPPHYDAEDTGDERRGATSADFNETYETYGTDSVSALSENDTDFLSRRDNFDQARRR  
ALDAAIEVEDWDLAAALS DGMRAANLPGGYEKAHTSWNQSELDKFIATNDWDAVKAYIAK  
MRRASASANANARKKVGSRSRIQHREAASESSWSGSDSGSSYETYDTESEQI  
>comp11440\_c0\_seq1; 1093 125 3163 LEN=3313; translated  
MSPPNSSSNKPFVIPSLIPPLPSSSATSISQKENIRFHSTHGNNKTAYDGTVKRSLFSKY  
QQDTEKQKLNDSFVSAVKDGGVHGLNSHRLRSVPHLKDSKRKALSPVENLSSVSRNLH  
NGKNNDSSICKSPSFASPLPTIPRSSSIDKYNRSKGRVLLFGETMESLFCLNKAHSTE  
EQYALCNSIVDGSRTDDPSVWSRVLELTRAQHRKTNLPNSDNSNCNKENLIRLHRRATLR  
FSLRDMPGTKDFNNSRKHQRDIFDIWLSYAKVHAKVGNLEESRRTFKFMEDNKSALMDY  
ASSIDQQKEEFGSASVFFYLSFADFESNYGHDKTRARQILLRGIKEKAEPISVLEEALTVL  
DCSDVDSDEVTRRFRMKGTPASEKKKEVSLGSIKFEINPSPNREYYPTPQFKRQILGCDV  
RGKSPKRPRLDRNKSTETEAVSKLSTEVQPMTTDSSKTKNKSSLLGETVVGPTSAIGR  
SASQKPPVSKTRLALTSRLARKGLSGKAKRVDCSVTYDDDDFSDDDSQHDSTKPTLKT  
QERSTESKSTEGKSSSKLSSFKLDLSYMWEDPNKKGKDQNEIENQKSSDASNSTGSGV  
STNNTQLSTINTHQSGSSEENASAEKDAAHSSSTDKQSQRSQTTEQTPAGELVSMKKE  
ENDSATLGE LAKNPESDVDRKKLGS DKSIRNQVDNSAMSREALVAKANLEFLPLVHEDN  
ILKVRGSTYAKLGVIGKGGCKVYRALS KKSVAIAIKKVKLAGMEKKAIEGYANEISLLK  
RLRGNPAIIQMYDSEVDLQRKSI FVVMELGEVDLNVHLQQRALSERSRSLNMFIRLTWQ  
QMLSAVHCIEHERIIHSDLK PANFLFVRGALKLIDFGIAKAI VNDTNTNIYRENHIGTLN  
YMSPEAILDTGSGEDGPRMKIGRASDVWSLGCILYEMVYKTPFYKLFHQKLQAI VNP  
HKIHFPEDEAEAAIHAMKLC LRRNPEERPPIVGKNGLLNDHWFLHSRRHPK  
>comp11442\_c0\_seq1; 358 177 1118 LEN=1225; translated  
MKICGSIVIASLAATASAFAPTSLSSSSRSALHSFSYDPNGSGGLPPASQAPAPAAAGS  
GRESPIDDDFLKKAPTATRIQDTLRTWDFANPDTKRVQIGAEKSGRPMHSRVEYWHPT  
SYIPFQVTAYTEDGLERPIDCIIETPKHPKTIAMFN TASQQMPFDAAADDTRMISPYDAL  
AKGPDAAHCDVVQGGMIKYYNFDADVESI QVYIRSPEYNMKAKLEITTGPN SVRQTYEV  
YCSSGYKTPFYTVIQTPGMQPSTLRVINQNTVEFPFDAYVLPYRVGDAGMGATNENLWGW

EQPRPASNIMQW

>comp11443\_c0\_seq1; 376 453 1634 LEN=1634; minus strand; translated  
MQSISVAVFAICSIAPVPRKTHELALLILAVCFALPGDAWEMKDVATNTKPPVAPSART  
TLATNTNENTSHRFPTRRSFFFLAPILPSAAIANAAAAMAETTTTTGGGIDTNQSANDEPS  
QRGDEASKPQQQRPFVSAAYPRKELTNSIVASRDTNISPAEVYETILRLRKERPGESGVT  
ASGSVPPGRPRALDVGAGAGVSTQVIYDQLGYVDIDAIDWSGEAWRINVVEGGYCPPTVN  
FYELDDERFVETVWKEEHLEKYDIIITFNFAVNRQKALYFCRNLLKPDGLLLAPVNAQTDY  
WLKQTYQLLNANGEVWVSTIDVGAWSVQFQPDVTQDTPGDLVQPVQRPKDAPVGTSPSM  
VVRRNGVPSNTCTGMVPTCCQHWFQPLPTPKXX

>comp11444\_c0\_seq1; 1465 86 4919 LEN=5107; translated  
MAQVGSAAATGSPAPSVPLPKATVPTIKRWRCDVCKVQFFTFDFNEAVAHEEVCQAALDRER  
NAQRQAQIHPQTTANGAVSKGQNPFAALITQDTLDPMEQTGDSNHFEPTATTATAAATST  
KAAKDRDCSHCEGRNKPQLESDAQTPRKPPSPVITPTKAPATKPDERSSEPICALSLRTT  
KKRKHLEGDPSSSKSVVTKKCAPDTTIATVQAIKESLSKTLTRWKKTSGMLSETEIAPVQ  
NMLQRLDSDLVDTLEVLQTTLIGKVVVKLKKSNTKQRHLELKANALLEKWKSIASAGSNGQ  
KISPSSLPSKRQASKKKQTQSQQPQHSFFNPRSVAKPSSATAATNKSAPKTTASSAVTN  
PFFAPRRKIPSPADAVLAESKSLKRKLPKAVVDVLAVTGCGNEKDKSRNSATTRKRTAA  
TSTEEAENLSPSTTKAIASIFQVKGSTLSSKQILAEQRRRAELAAARENERKKEQERQAKR  
AALFRNTQANTKHSHTNDTGTNRPLSVCDDPEPSSRGTTRKKQHVGNKPLPPAAPRF  
PVPNHVLRGPRGNGPSSSKPSVTMLPPDHPFRTRAACDVIANTVIEEAQPKPSVWLSSP  
SALDTSVVPATRFTRIQHALLIETFSVAPSTVNMKPGALSLLPWSETYGMKDGVLGASS  
QEIFRQLVEYIDHWRVARNDSLERAAERHRKLRGKRRSSRKSSAKRKHKQTKKRRHCRD  
EDDWLVDDDCDDDECYNFDTEYAMAPLCLLTGPSASGKTAMVHTVARHCGNCKVLEIN  
TARARSGAALKHAIIEEATQSNSSLDMLKSKNKTINDSGGANFFFASKTSGGSHKKARNKI  
IDSDGDSGDETEPPPSDNKSSVTIVLIDEVDILFDDAEGKGDAGFWSALGTLAKATKCP  
LLTANSCPPQLDRHLSGLPCRRLFLEKPSPEMCAASKILQVCHQPGNALSIRSELRAKGP  
DAIHGQLAKIATSCGCDLRKLMHELQVFAASGADTSSDRSSIMVGDNTIGDRQLEESTSV  
CRKKLPVPDWQPVLSITPSKIAMNQHSVLMRLRGKHFGLRPEAFSVEARVRIQPHGNCL  
THIVDDETMLVLCPPYVNVVDEEKDCSTFCRLLKRVLSVSIANIGPANGLSNRIVASEE  
LVDGTRVYGTNPLMVEYEFTEDLPPNSNENDADELASDVKPEDSEEVVFNIPDGNKPAL  
KVREKLTVETEDVGLMQWKNAISEAESSRTSATTKVQKTSKEDLEMVARLDVLSQSAH  
NASDASFLEDFGEGLPYLSGACRGFADYTEDCALGSSGRAGGVDMLRMHEKSRPPREEK  
LFELGWNDCYFHGDSEYMTLPHISQRRCKEKGHTNPYYCMNQFRGDEDAAGQLACSGM  
SNAATSNAISTEELENNFSVEDLDRFAHQQQQESSPSCSGGASFAEDMYLPRGVSPAIL  
DLPEILRKASSTSTNSLPSQSFWSIARDNQWLSLETNRAECSQRLLSHAIEYFLPWGND  
LAKWSYGRFGFANNKWRTHMILECLPILRRIGMLETANEYAFKAREESDATKQRRRVD  
EQHGPSAGLAGTITSTRSRLRFGGTKRTETRARLGLCWSGTVLCILPQHE

>comp11445\_c0\_seq1; 261 249 1907 LEN=1990; translated  
MVGHDQPSEFPTESSSIGCQDPTVHNEGRETVDNNGNQRRRLCLSFGHNKEAKGIMYGGV  
ARGAISMSNVYLANSMIHLACRAAGGFGPDDRQCVNDQLEIYGMKPAALISNIAFVSGIL  
GALVLPFLFGAIIIDYTPYRKSVMGVTAFILTLVTGIQIGTTSKTFWIMAILQAIIFMIYQV  
QVMVLFAYYPEVAREVQKRINAYSSTWSFYQFLAQAGVNIIVILGFSVGFKMGTVKTA  
SOGVVLAFCLVFLSLCWSMLPSPSKHKLQDGHSLIFASFRQNLKTMKHILTKYKTGLRW  
FILSTVFGEAAASAVGTTAVIFLNGNLGLSAIKIGIFFEVSLIGVVVGTGKVMVTKYTN  
PKISLMLSNLGLAITVGGGVWAVQDVPIQELSYIWGFTIGVFLGWFYPTENVFYSMCVPM  
NQEAEFSGFFGWASQIWFVFPPLVFTVLIQIGISLAWGLTVIGFHFAIAFLLLCLCSKWE  
DIVEETSTFTMNFSEDEDTTGNQAIENTENHVNGQKNLSKTTTRNDLEETTTTYYGTLLR  
PYHHPVPYKFPS

>comp11445\_c0\_seq2; 265 249 1541 LEN=2117; translated  
MVGHDQPSEFPTESSSIGCQDPTVHNEGRETVDNNGNQRRRLCLSFGHNKEAKGIMYGGV  
ARGAISMSNVYLANSMIHLACRAAGGFGPDDRQCVNDQLEIYGMKPAALISNIAFVSGIL  
GALVLPFLFGAIIIDYTPYRKSVMGVTAFILTLVTGIQIGTTSKTFWIMAILQAIIFMIYQV  
QVMVLFAYYPEVAREVQKRINAYSSTWSFYQFLAQAGVNIIVILGFSVGFKMGTVKTA  
SOGVVLAFCLVFLSLCWSMLPSPSKHKLQDGHSLIFASFRQNLKTMKHILTKYKTGLRW  
FILSTVFGEAAASAVGTTAVIFLNGNLGLSAIKIGIFFEVSLIGVVVGTGKVMVTKYTN  
PKISLMLSNLGLAITVGGGVWAVQDVPIQELSYIWGFTIGVFLGWFYPTENVFYSMCVPM  
NQEAEFSGFL

>comp11445\_c0\_seq3; 209 249 785 LEN=862; translated  
MVGHDQPSEFPTESSSIGCQDPTVHNEGRETVDNNGNQRRRLCLSFGHNKEAKGIMYGGV  
ARGAISMSNVYLANSMIHLACRAAGGFGPDDRQCVNDQLEIYGMKPAALISNIAFVSGIL

GALVLPPLFGAIIIDYTPYRKSVGVGTAFILTLVTGIQIGTTSVSICVLLGHSLRCDEIR  
>comp11445\_c0\_seq4; 157 547 981 LEN=1557; translated  
MKHILTKYKTGLRWFILSTVFGEEAASAVGTTAVIFLNGNLGLSAIKIGIFFEVSLIGVV  
VGTKVGMVTKYTNPKISLMLSNLGLAITVGGGVWAVQDVPIQELSYIWGFTIGVFLGW  
YPTENVFYSMCPMNPQEAFFSGFL  
>comp11445\_c0\_seq5; 153 547 1347 LEN=1430; translated  
MKHILTKYKTGLRWFILSTVFGEEAASAVGTTAVIFLNGNLGLSAIKIGIFFEVSLIGVV  
VGTKVGMVTKYTNPKISLMLSNLGLAITVGGGVWAVQDVPIQELSYIWGFTIGVFLGW  
YPTENVFYSMCPMNPQEAFFSGFFGWASQIWFVFPPLVFTVLIQIGISLAWGLTVIGFHF  
AIAFLLCLCSKWEDIVEETSTFTMNFSEDEDTTGNQAIENTENHVNGQKNLSKTRNDL  
EETTTVYYGTLRPHYHPVYKFP  
>comp11446\_c0\_seq1; 414 71 1432 LEN=1710; translated  
MATSYSIRNVSCVNEAKAGVPILTGIYLDHMIDQWNASHAQVGVGLEVVAKTSQDTTEDE  
TKEDGDSKTNPPTDDHADRNQYASGNQVELCTAVGNTLGLLKKVLASTEDTSPTNSRFC  
CPLDEALVECQISSTNDATAEDDVATYSLAPYGIYPRNVGRTQIGKLQTFAIESFWRALA  
SSSGIAISLKKIRGDNAHHIVESSEFKAFSRALRVFLDPPGIWNQGSNDLEGIALKREGK  
IERTTKETSISVHVLVFNSSSEDTLVETGTPFLDKFYTVLAQEANMTLKIIRCKGDLWDDH  
HTAEDVSIAGQCLTQALGNKAGLNRMWLSNATSKDATVEVTMDLSNRPHYEHNLHEILG  
RNEYVDFDGEIGDSSVDNAALLSCEMLEHCLDSLVMNSRMTVHIVGKEVEETTRVADVCL  
ATAMAFGRALRVCSMVDQRRAGTTASSKGTLSV  
>comp11447\_c0\_seq1; 527 431 1699 LEN=1813; translated  
MKNLQSPSMPVLPVPSDDSLNNTSGSEASTSNNNNIATSKTMHRSGSSVTFSEIENSSD  
LPVSTHTPVMPIHIGYKQVLTGGAGFIGSNVAESLLARGDDVIVDELNDYDYNKIKKAN  
LRLLEESYPPEGRVKFYCGDIDQDLMERIFETEKPKWVCHMAARAGVRPSIQDPFVYIH  
SNIKGTQMLMELSHKHRVENFVFASSSSVYGGSKSTFFSEEENVDNPNVSPYAASKKACEL  
LAYTYHHLKLNISGLRFFTVYGRGRPDMAFFKIDRVSRGVEMQQFGDGSSSRDYTYI  
SDIVDGVIRAIARRHKYEVFNLGKGEGLSLKEFIDLQYVYVGGKAIKVLDPQPGDVPYT  
CADVAKAHEYLGYKSTISFEEGIRRTAEWYKTAYQKQEIIEICPELQANGLGRAPSMVCLE  
GN  
>comp11447\_c0\_seq2; 527 557 1825 LEN=1939; translated  
MKNLQSPSMPVLPVPSDDSLNNTSGSEASTSNNNNIATSKTMHRSGSSVTFSEIENSSD  
LPVSTHTPVMPIHIGYKQVLTGGAGFIGSNVAESLLARGDDVIVDELNDYDYNKIKKAN  
LRLLEESYPPEGRVKFYCGDIDQDLMERIFETEKPKWVCHMAARAGVRPSIQDPFVYIH  
SNIKGTQMLMELSHKHRVENFVFASSSSVYGGSKSTFFSEEENVDNPNVSPYAASKKACEL  
LAYTYHHLKLNISGLRFFTVYGRGRPDMAFFKIDRVSRGVEMQQFGDGSSSRDYTYI  
SDIVDGVIRAIARRHKYEVFNLGKGEGLSLKEFIDLQYVYVGGKAIKVLDPQPGDVPYT  
CADVAKAHEYLGYKSTISFEEGIRRTAEWYKTAYQKQEIIEICPELQANGLGRAPSMVCLE  
GN  
>comp11448\_c0\_seq1; 330 273 1121 LEN=1389; translated  
MASHGNTRRQTVNGLALLTVATLLAVLSSSPSAAAFATGPALPQQRLCQQQQKQQQQHR  
RPATTSLRMAPPGSSVLKPAAGPLMDSGKALARSCELLIDFTRTLDLGGALSNAQAQIR  
NAGDSLAQAGASCRFKTGLELVIDELREAAACLSEATDKLELATEEASADGDPILLEEKVA  
ALVGP SRVCAARLEQAGAGLLMRQGLPEVGAAMVDAAGMGGLSAGIGSLAEARSGDADG  
TLSAQRMAYAAERLGRAGTELKGEVDPKPKPEGRAFLKGGGF  
>comp11448\_c1\_seq1; 192 1 1200 LEN=1200; translated  
XESNRIAPPERQLWPSAVANRLVAATR TNANADA AHRYAHATDPRHEATRTEATMGTKRL  
LIQSTSLALGLLVGVAVRHGFCGGTSKRGNTKDLPGVPGRGPLGA AVEAAWVEDAVCS  
PIAYALGGGKIRTSGEASSKAKPTFTTTEGVLPDRRRMVLAVEDPGALPGWIGALSGEWA  
GTSGEPLMREVLGRHPMELELIDPPELAPAGDPSETAARLAVASRAVAEAPPDRHTLLLY  
VPEGLLPGESGGDGI EWKSFLRTRTQGP GTTTVLVPSVRSPPGGGKTGRGPASLVEDW  
MARQHVAEAKRKG PAPPAPT FGGRMTR EMPIEHFLAVLFP LFP LFPVFPFVSFLKEFKRY  
RAXPFGQAESSEPIGGAERQPASLARKDGRHNSMNNNSNNX  
>comp11450\_c0\_seq1; 207 425 1054 LEN=1650; translated  
MELETGSGNMYQVSYSEANVGMVSKSKIRVTWDFFSNGGRQHVVLAWSKSTGKQQIT  
MDGTEVWFGRNKGRSVLDHNNWKTREDESLKHLVLA TCAPP MNEHFRNYELLINGQLFASLP  
SCGREDESSFAPLLPSVGTGKLSIIIEILYPNGYTPPLDKDQLRQQKQKQQQQGARLQDLA  
PSRSNTSSKLV PYNNTVAHRPIVDLLI  
>comp11451\_c0\_seq1; 828 1 2394 LEN=2467; translated  
PEIKKTTKLMIFKSSVFLLLLP GASGFTAPKTTSSTKLDAGRTLYDKIFDDHTVTESD  
GSTLLYIDRHLVHEVTSPQAFEGRLRANRGVRRPDCTLLTVDHNVPTEDRTELKDVESFI

TEINSRTQVLELEKNVERFGLKYFGMEDERQGI VHIIGPEQGF TLPGSTCVC GDSHTATH  
GAFGALAFGIGTSEVEHV LATS TLPQVKGQNF LIQIDGELDEAVT SKDIILHICGVIGTA  
GGTGSVIEFAGSAIESLSMEARMSISNMAIEAGARAGLIAPDEVTFEYLKGRPMSPSDED  
WDNAVAYWKSLSRDEDAVYDKTVV IKAEDIAPT VTWGTSPQDVAPINGNVPDPEKAPDAA  
RKAAMERSLNYIGLEGNQPLEGVKIDKAFIGSCTNGRIEDIRAVAAIATGRKVAEGVHAY  
VVPGSGLVKKQAEDEGLDKILIEAGFDWREPGCSMCLAMNDDKLPQERCASTSNRNFEG  
RQGGGGRTHLCS PAMSAAAAIDGALADVRKFPFLGDADKDPKFGVNAKGSRVFTTEQFV  
SPGPIIDPPAPYMKENTGDGEVASGLPKFQVLK GKSAPLDIQNIDTDMIIPKEFLKTIKR  
AGLGF AFAELRYKNPDQVAALGEDVAESNDDFILNKPEYEGTSIL IAGDNFGCGSSREH  
APWSINDMGIRCIISTSFADIFYNNCFNNGMLPLVLRDEVEVLLK DSEDPNNELTV DLP  
NQKVIRSNGESFDFEIDAFR KICLLNGLDKIGL TLEKVDQIAEFETKRSASYPWLDGASM  
KVDPKVRMHENAPIWAN

>comp11452\_c0\_seq1; 711 28 1200 LEN=1264; translated  
MSHRKFEAPRKG NLF PKKRTKKHSGKIRSFPKDDSSDSPHLTAFRGYKAGMTHVVRGV  
DRPGALMHKREVVDAVTVVETPPMVVVGVVGVVETPQGLR LTLTVFAEHLNEEFKRMYK  
NWRAKKKAFTKYAKKYTEDGGK DIEAELERISKFC SVVRVIAHTQVKKLNLRLKKAHIM  
EIQVNGGDAAAKVAF AKGLFEKEITVDSVFNKDENIDVIGVTKGRGYEGVTTTRWGVTRLP  
RKTHRGLRKVACIGSWHPARVSTTVARAGQNGYFHRTELNKKVYRIGKKDDKASCQTEAD  
LTEKGVTPMGGFVHYGEVNEDWLMLKGAVVGVKKRPLVLRKSMKHTSRKHLENIDLKFI  
DTSSKLGHGRFQTAE EKAKFLG PLASKQQA

>comp11453\_c0\_seq1; 339 1 1219 LEN=1243; translated  
XMRKNASNWILLWYGFFTSLPWGIVFVFLNDYLSQEKGSVQEATFLVMLFGVGC AIGGL  
TGGYLGQLFMRGNRSNLPYMAVSTFLGIFPFL LLLNSEFPNHNGIRSKFY SVLGGCIAS  
LPSVNVRPCIINVNPPE SRGAALTAANLFVTLGRGIGPCCITLLGSVFSLSRQSSFN TTL  
LVFWTIAAAQMLFLAKTLPEDQDRMEEALARYAATAQGGRTTCEVGDPPQDEETTASPL  
GRRAGSDGSLEPITPERRRSVPAGEDDGD EALYSSYSMVSSPPAQYMTIDRKTARQSIQ  
FVRLGIQEFQDEITYRNTICRGCDTISPCPSQDDLPTTSVAAAAIAASALLDDHHDEGDD  
GASILQEDHDTTIPESXDPAAPRPVEEPAAGAPVANERARGPHKMC

>comp11454\_c0\_seq1; 222 1 708 LEN=1259; translated  
RVPVLEEEWQKLPKQAI VTTTEKDSKMAFGSIFHAQSLSPAICRSTVRR IAPLSRNF SVNK  
KLSTEERNEAVRHANKAMKGYTQTRILAKQGLP SKNRPQSQEYQSANA IQFSLFISLGI  
AFIISPILGRKIAQDDEFREKYVPDWDYDFRVKPPKSAWTRKELHDQIVDVERDMRERA IK  
GDFTP EKLEALKQTLQPRSDLSTEDIAMAKKYGWGAIHPGVDPDDYDEDDDDYEE

>comp11454\_c0\_seq2; 222 1 708 LEN=1108; translated  
RVPVLEEEWQKLPKQAI VTTTEKDSKMAFGSIFHAQSLSPAICRSTVRR IAPLSRNF SVNK  
KLSTEERNEAVRHANKAMKGYTQTRILAKQGLP SKNRPQSQEYQSANA IQFSLFISLGI  
AFIISPILGRKIAQDDEFREKYVPDWDYDFRVKPPKSAWTRKELHDQIVDVERDMRERA IK  
GDFTP EKLEALKQTLQPRSDLSTEDIAMAKKYGWGAIHPGVDPDDYDEDDDDYEE

>comp11455\_c0\_seq1; 344 1 1349 LEN=2150; translated  
XAERFWR LKIERHETGEAAITATGMLGMARRAMSSGRAASSSAPAATKRIRSV EKIAARV  
FCRPGTNRSSDDNDSDNDNDTSRGTDDAF PAGAVGGNPVTIFASPETLPKSLQQLAET  
CDWESVMVGTKAHG DAGACHRAHGRSDPGDQPSPTMAFFMPSGEEVSFC AHA AIGGATA  
MAGKPGGTGTDGSSSWTFRASMTGDAFRVDSTPEGGNRSGEERDARS GDGSCRCCLHV  
TSVPFTEEPLTEPASEALEAWS DRLGWSRSPRDGGGAVAPARNASVARPKTLV ELGSDA  
VHRAGAPPLPTSGGGDPPSFADACAVMDGSTGVYVYARAPSPENERSYECRQFP PRASGY P  
EDPATGIAAAAALASLRF GSTGSAAPAGEYEPTYDIYQGTAMGRPSLIQVVGLESAREEG  
SESGGTSTVSVFGLQGLVEIDDRCTIEVG

>comp11456\_c0\_seq1; 237 271 1441 LEN=2260; translated  
MAATSLGVASPAEAPSEDCGRSMGVGGI SEGIHRVGLAAAVANANANAKASTNANASGA  
ARATPGPARGAS PSSGMGSSAPQRLPPPPTTTAGLPRSHPYSGSAYGGLARGSGIPGRGG  
SSGDIRSRLLSRLGIYGSPPAGDAGGKAAQM QFQKQPLTAAQHRRVRILRGMGVGHNVF  
YQSPPDGSATRRPLSGVVP SKEPLKTGIYS DDEIDDDSDCDEESIVVPDSDCDEEQAGS  
TSGKTKTKMRRSSSTSKLLRTPTRIAFQDQVEVVP I PTRHEYS DRIKSRIWSNRYELQE  
NAERNAVEFASEGNWRNVTEDEGMYICSVSGELVHPAWVGGLP TVDNNNSDNNTPGSVG  
TQSQQTNT PAPPAPGGENLAAPGAPAGGN

>comp11456\_c0\_seq2; 297 271 1503 LEN=2322; translated  
MAATSLGVASPAEAPSEDCGRSMGVGGI SEGIHRVGLAAAVANANANAKASTNANASGA  
ARATPGPARGAS PSSGMGSSAPQRLPPPPTTTAGLPRSHPYSGSAYGGLARGSGIPGRGG  
SSGDIRSRLLSRLGIYGSPPAGDAGGKAAQM QFQKQPLTAAQHRRVRILRGMGVGHNVF  
YQSPPDGSATRRPLSGVVP SKEPLKTGIYS DDEIDDDSDCDEESIVVPDSDCDEEHDLQ

HEEGDNGSRTGVSRRRSSAGSTSGKTKTKMRRSSSTSKLLRTPTRIAFQDQVEVVIPT  
RHEYSRIKSRIWSNRYELQENAERNAVEFASEGNWRNVTEDEGMYICSVSGELVHPAW  
VGGLPVTDNNNSDNTPGSVGTQSQQTNTAPPAPGGENLAAPGAPAGN  
>comp11457\_c0\_seq1; 381 85 1635 LEN=1907; translated  
MGNKQTKGKCDNSRHVGTPLKTEALQDNLVKETQSSGYFVTGSLKKDIQIAHLKKYTKT  
EKKTGGVAIKLFDGQSFTPSHDFKAEAQILGRCDHPNIVKLF EITKVDNKL SLILELCDG  
GSVLDRLPYGENQVKKIVRQVCSAVSYLHGKNIVHRDIECSNIMYSTKSEDSEVKLVDFG  
SACELEMVPNHPGAFKFLKEKTGSLSVMPPEFVVRGKYGPKVDVWSIGVVAYTLLNNGEAP  
FKGSSIPELESKILQGAINYRKWEHSEEAKAFCKSTCKINEGMRVTAATLYDPWITSAD  
KNTFKTLPELVTSFNFYRNALPLKRIALNVLARRVKSSKYRNVFEHLNKNHTGLMTQEE  
FMDGFKHSGNSEAELEYEIKQLDINNNGITYTEFIAATLEGGGELEEGTLREAFDLISS  
NGRYITKKDVESIVSESLKDRGTADKAKNMAEYQMRRTFKKHHEEKIHYEDFAQMFEGHF  
RDLHSMDAITETSLNAEQFAKMNESGQEFDMGVIEE  
>comp11458\_c0\_seq1; 519 104 1297 LEN=1787; translated  
MTSVVRVNPVGPAPVKSNDPASPSPKKSNGKRKSASLPSETVEYLKAWMMSPEHIAHPYP  
TEQEKVEIMKATKIELKQLTNWFVNNRKYWKPRVEARLQQQAQAAQAAVQAHNAAVAAV  
SATKCATAQKQLMVGVLDSRRTNLLSSPVTGFKLASRTTLP SKVINSPILRFDSITSPP  
PTLQQKPFASSPLTLMAQVLDHQSKPFVPIPRSTSTATVTNTESSTAAASVSASEGEMSD  
SGNASDDISMDGANVLPPEHKFIHKKMKKSLIKSKISSINPQLTSSQTIQDATSARTSH  
ARNVSFCSLDKIPSNAAISISQISAASSVSSNNSKKRANVDNELPLVVATCTTIHTPKRFR  
TESTNLWRKKCEDATTYIDEDLPSLDEAARLFGFTSA  
>comp11459\_c0\_seq1; 344 156 1331 LEN=1398; translated  
MVTLLKLLPFDAHNHIQLGPPPTPPLLASGNINTSIENDNQDYDFENDRASLVSSLSDYLL  
QEILGKQLSGMAIMSTHPRDFPTILGLEREIKDAIATFPSSNLVEENMKILPCFGVHPWF  
LHELSDNDWALVSSSLDGELVPKW TAGLEELLQKHPHSPVGEIGLDGFHFRSKGDAKEL  
TTPMDKQVEAFLLQLKIATRLQRPVSLHCVRALGNMMSDFEMVASENYERLVVEVEKGAW  
IPKDIELRVLPPRIYFHAFFGGKASTVTQMIKTLEKPRRIKIPQNTSGDVTNTGRKKFVK  
IIPPKVYFGFAPPVNFQSPKTPSVVQAVGLQRLVLETDRDIRAIKPDCCQQAIPWLASVL  
EVSEELVRITNTNVQDLYYSWKSPTQTSQT  
>comp11460\_c0\_seq1; 944 425 3475 LEN=3735; translated  
MSNKAAEELAEAAALSRVAARKTVGRNLSGTSFGSGATDGSWFSTEQLSVGGDRGARRTIS  
QAEAIADDDNESYKSMGSNSGFRSRRSRGKNTAVPLRRKIIDEYKKEAETLQHEL SYAQA  
EIAELDQSLNLERESSKAARDACTGAKKELERVQEEKDFLIESVREIEKNLVAKDERVKK  
LEQVVDQQLDTEVLLERKLGKTEEELLRVEEELGEALGANEDTNETVPAESGSLPTARMG  
SIRKDVVELKGTIGLRKEESRFLQATSEVDSTEEGGNPSKRRELIARSQEKFKSKREK  
ELDARERDLLEFEDRLKKE SARIQNERQATNQNDANGIDSQITLNEKSKLMKLELENE  
REKLD RVMNMANDGEATVGRKVTMDPSPASEGDGSGAEAAATDTHNEVIRNLTEKVEALG  
EECRTRDSDLS DALARVERKNDIQNLREEVAKLSGTPSDDGGS AVHAQAAPVERN  
SDLIQNLEEEIEQLRKKVEIKNGDLTDALARVERKDELVQSLKERVEKMGDRCRMKDEDLSDA  
MAIVDNKNDLIESLKEQVEKFDKNGGDLGALCLVEKSKQIKGLEEEEVERLEVKCRAKD  
GDLSDALALVDTKNEI IKNLKEEVEKANEICRNTE NSDVSDVALVERKTERIKCLEKEV  
EQLVEKEYETRNGDVERKDNLITSLKEELEKLEKDEKQNTENDLADALALLERKNDLIKSLK  
TEVNKADENSEIERIKSLEEEVKKIAGECHSKDTELSNALALVEKKNELINTLEEEVGLK  
KENCQDASGGEDDGKDLLIRELQNLVLESKKQAHHYSSGSYVNKLKHQIKALKENIRGLK  
IRLKQEETVTDSTLKKKDDSI RLVEKQMEKLFELERREKREESLGT DGTVDSDSGLNRLI  
EDLEEEIVHLKTENTNLKKEME QIEANENLGRDSSRSNGVDIGDDCSLGSIESFTS QLSQ  
LSFCSVHSASQLQNPETSGAMQVRVSNLWSKMRKGGEPNPSGQTFPYAIGSLNND  
>comp11462\_c0\_seq1; 213 86 517 LEN=1045; translated  
MTEDKYEYVSYKAPKTIVAETVYHFFRGGLYGAAFGMVTPFYEAGTKGAMQEAKTGIFKP  
APVFGSLSSVPSNALIFGSL LAVQRFAKSTEF LR GKQDPWNDIAGCFVAYPPYQ TCLK  
HAVLHNRVVGILLASIAFANIP  
>comp11463\_c0\_seq1; 576 1 2206 LEN=2520; translated  
XEAGTSHSVALDDAGCVWQIGNGEHLIQRVSFLSHRDPPESPSPVSSIASGGSMHFAISR  
AVAGSDLATPGPECTMPSMPGLNDLMEAVRAE EGSIQEKNGAGPSSHRSSREDLARRTEE  
LFRSPAVMNSL FMDPREIDGMYQTLICGSQTREVRQAMASSIETGMLMGLKSTVDSRLMY  
FESVRFLLLYLQCP IWRDETIRESNADDDKENEP AIVFDARGDLLFLLCETILGLPFEGY  
KAFLAWSATVYGEELFVPFLVRPLVHQLNHRLVKNITHGVPMIAGVLLWLHTVNERSDSR  
LARAEDFHCSGLENMPTEALFEDLAKYHTASDGERS SNFFLAHPFLMAPTVKQQLLQVE  
HQMSMVQAAQAAGVSFDQRTRQFEFKPYFVLAIDRKYLLPQTLDAVAKASTGELRKS LKV  
VFKGEDGIDAGGVTKEFFQLLCEKLFVNTGMWTISEHNETWFNPD CSWNGDGFYLVGVL

CGLAVYNSVILDVHFP HAIYRKLLGLDLGLEDLIDKDVRKGLQSLLDYDGDGVEHIFCLN  
FEVSWMEYQGERKKELKPEGSNIAVTSNDKEEYVMLYVKWLLVDSIASQYNEFERGFNQV  
MADSSLDILTADLELELLVTGTPVLDFRALEQSCEYEGGFDPDSAVVKNIIWRWVQSATLST  
QEKFLRFCTGSSKGP IGGGLKMPFKIQRAGPDSPLPTSHTCFNTLIIIPDYGDYDKLTE  
RLGRAVIECEGFGLQ

>comp11464\_c0\_seq1; 894 579 1940 LEN=1940; translated  
MNAAHQLAARLQLQQQLNNQYGDGNQRGGLQQQQNQGGQNLMMNNGMGNSAGGNNMGMG  
LQQQQQLQQAYLQQQQQLQQQNSQGGNLGGLQDMNMQRRNPQQQQQLQAMMQQRLAAAR  
SNSQISGSNNNMAGNGSGGMANFGGVGGQANWGNALGNQHQQGRQQNSLDLNNPNQM  
GGIGMNNLGGSLNNGNNNNNNMNAQQQLQQQHNNALLGQRSTSQGMNQGGFNPINNN  
NSNMGMGIGGGMGMMNAGSGGSQNDTTALQQQIAFLQRQLQQQQQQNNSSVQGRNNN  
NNNTGMSPSFGRQTSQSTPGTFQNNQGNQNNNSLFSMQGMDGNMNNNSQRSNPNSSGSMGL  
GAHNNNVGNSDPFSMMGGGQNNKQNPNNHLGSSVNNNLLNENDLLRQQRMLGQTNNTAN  
NVGSNSMMGLQNDLMGRRSSELSMSNNNNNNNN

>comp11464\_c0\_seq2; 1573 281 4318 LEN=4595; translated  
MTPEKNGKNGDSWEDSKPPASDSASAMTAGSASASASASASASASAPTDRQREQQRLQLH  
QLLPDFEAVFALLNMPPELARTRDPGDNNSLPLHTAMTIGAPTTTIMILVEAYPDAIKSF  
DASGNTPFHAGILPALSRIIVPSSSLIEAGIRGKSPVAGVLSILSNLDFLLDSFPEVVQQ  
KDGTGNLPLNTFCSSFPVSLKSKVSLGGGGRTTEVARAVTRTLEKLYRASPAASEIIGPS  
TGSPVSIIVGECAAAKCIDDLRRETMLRKLKLLLETARDGRALQTLFSLNPNVSLWAFFS  
LFDENDVLLKHPHQSQTRQPQSQQQQQQSLQQQLHQQQSQLPENAGGSAGTDGRVLVLD  
LNKEVLSNWCLLDIVADFDTADAASALLQVIVEQKNKLNLDHQEFESICNEDGDVILRFVS  
RARVSDIVRTRVADRKLNSSSPALKRWGQYGRFLRRYRLEKRNKHVSESCVVVFGTET  
MKESDGRIVEHPVALKFMATREMFCEVYQRREVGRKRSKEGSKYIVPIKASFSSMAIDEF  
ECTKVNLA TELVPYPNIRLKGSDLYVIVMDCGAGYDLHDFISHQNIAGKDLLVVTIAK  
EIALCLKFLNEICGVCHGDVKARNFIARGVGLVGFAAIDLNNSSMIGREKVGKRTSSGY  
LPPEQA AVEAFERSNNSSLSLASEESMDSIMVKIAAASARNDTDGVKRLMRLCSKSPYL  
KEMKSKPGDV IATPQYDMWCFGALLYFLCTGKQLFNVD MKEDVDDDDLIILRDWDDWKY  
EKLSKVDSKWPVALLDALLQKDPKDRPEDWNYVVNGLNRLGNAQDNYDRLFVVFQSAPLVF  
KDKNNNIQPLPRVDLNQESRMLCEALKDAETLGCTIDVIFETASLDRLNAFLAQGISQVM  
HFSGHGHP SYIALEDERGGLEMVSADVLKRMVSAVDSGLLVVFI SACHSQWVGEAFVDAG  
VPHAVCCLVNERLQDAAAREFTRNFRYALACQNTLLKAFNMAQQAVQNSPLVVNSEIEAG  
KFLLLPERPDDPSYHDVVPVFFSSETPSVMGESSNKIETVGFPRPKDFIVGREVQQYSILN  
DLSTTDIVRVYKSGVGKTAIVSAVCDHILRRSRTYFPDCIFWFP TQGLVDCTNNLYQDI  
LSFINLI INEDNVDIKDGSELQKILQSI TKMTAEKSLLLVFDLESYENGEKEKRNTKNFR  
TVFDELKIQTT EAIKILISEQTSMGSDQTRGEKVVPVWELDFESAVTLFANSIPSNIR  
RRHPILNSTEKLISYICNPPEEVVNDKNYERREEELWKQMF GAGMPRACRDIARGLNDR  
AKELLTWWEVQEKEDVQIPFDDLFL

>comp11464\_c0\_seq3; 1541 281 4498 LEN=4775; translated  
MTPEKNGKNGDSWEDSKPPASDSASAMTAGSASASASASASASASAPTDRQREQQRLQLH  
QLLPDFEAVFALLNMPPELARTRDPGDNNSLPLHTAMTIGAPTTTIMILVEAYPDAIKSF  
DASGNTPFHAGILPALSRIIVPSSSLIEAGIRGKSPVAGVLSILSNLDFLLDSFPEVVQQ  
KDGTGNLPLNTFCSSFPVSLKSKVSLGGGGRTTEVARAVTRTLEKLYRASPAASEIIGPS  
TGSPVSIIVGECAAAKCIDDLRRETMLRKLKLLLETARDGRALQTLFSLNPNVSLWAFFS  
LFDENDVLLKHPHQSQTRQPQSQQQQQQSLQQQLHQQQSQLPENAGGSAGTDGRVLVLD  
LNKEVLSNWCLLDIVADFDTADAASALLQVIVEQKNKLNLDHQEFESICNEDGDVILRFVS  
RARVSDIVRTRVADRKLNSSSPALKRWGQYGAFOPLRVALCCAELLPGQAAGRRSFL  
ASVSMPELLPTTNNNTQNLAVSSGSLLTPOVDFCAXYRLEKRNKHVSESCVVVFGTET  
MKESDGRIVEHPVALKFMATREMFCEVYQRREVGRKRSKEGSKYIVPIKASFSSMAIDEF  
ECTKVNLA TELVPYPNIRLKGSDLYVIVMDCGAGYDLHDFISHQNIAGKDLLVVTIAK  
EIALCLKFLNEICGVCHGDVKARNFIARGVGLVGFAAIDLNNSSMIGREKVGKRTSSGY  
LPPEQA AVEAFERSNNSSLSLASEESMDSIMVKIAAASARNDTDGVKRLMRLCSKSPYL  
KEMKSKPGDV IATPQYDMWCFGALLYFLCTGKQLFNVD MKEDVDDDDLIILRDWDDWKY  
EKLSKVDSKWPVALLDALLQKDPKDRPEDWNYVVNGLNRLGNAQDNYDRLFVVFQSAPLVF  
KDKNNNIQPLPRVDLNQESRMLCEALKDAETLGCTIDVIFETASLDRLNAFLAQGISQVM  
HFSGHGHP SYIALEDERGGLEMVSADVLKRMVSAVDSGLLVVFI SACHSQWVGEAFVDAG  
VPHAVCCLVNERLQDAAAREFTRNFRYALACQNTLLKAFNMAQQAVQNSPLVVNSEIEAG  
KFLLLPERPDDPSYHDVVPVFFSSETPSVMGESSNKIETVGFPRPKDFIVGREVQQYSILN  
DLSTTDIVRVYKSGVGKTAIVSAVCDHILRRSRTYFPDCIFWFP TQGLVDCTNNLYQDI  
LSFINLI INEDNVDIKDGSELQKILQSI TKMTAEKSLLLVFDLESYENGEKEKRNTKNFR

TVFDELLKIQTTEAIKIIILISEQTSMSGSDQTRGEKVVPVWELDFESAVTLFANSIPSNIR  
RRHPILNSTEKLISYICNPPEEVVNDKNYERREEELWKQMFAGMPRACRDIARGLNDER  
AKELLTWWEVQEKEDVQIPFDDLFL

>comp11465\_c0\_seq1; 956 88 2571 LEN=2786; translated  
MDQLACLPHLIDRIPRPPVWPGKRNQPADDYRAMQGEEDVEYTYDGGKRRIKKNTKQDY  
IKGLTSREISMLSQVAWDVLKPKYDHPAPTVTIKWKSPPDAKTFSTRKSAWEHATKLSKQE  
VAIDRNLLGIGASGKLLKEFFPSAKTAIEVGKMRFERDGLWVVGQENSWQADREDELMLQ  
DQEREEAAAASKVYTSGLQLYVAENRHSYRDEHGNTLVEADKALRHQWRCLPPKEQERWND  
KVQEQFEDDEDSSSEDESSSEEEGGESGNDKDTTNPVATKDDNTDSDSESDDESSEVISH  
YQYFLRQRRHNYRHEQQMKLEAIAANSKGTKRTRFTLAQADKELKQQWREMEMEEQQDEWI  
AKLKRMEEEEEVNETKNGMKQQLHQPSSENSGDEILNLDAGVVTAAAGEETEAKI IVENT  
DFHFRHPITTAGIAMDHGEMESSNFEEKKIDDDQFAATPTEEIAKSSGKSKRKPPTK  
TKQRAKTTKTPSTTKPTTKASTRKKRQSTPKYCLKPDQINQCHEACMEHYETVMRTVKTR  
DLSRELADGFDVLRERGHGRFDMELPAFDDPGFDFLTDLTKTPWMPIVRAILGQDAVLIH  
KGCFFMSLPGAGSQVYHQDGVHLTTQSQRPCCHAINVFVPLVDLHSRNGPTEFVLGSHVLGH  
DGYDRDFLETPKPTAGTPVVFYDRLGHRGLGNSSTGCRPIVYCTYARAADGRAFRDSVNF  
SRKRYHKIGELSAKPLSREERRNKRKRSIESAREKKELDQTIALSATETETPVPVAGEEPL  
SVTVVDSVCEAGPASIESQKRVKEDPRMAEDGIAEAKEPEVENTPA

>comp11465\_c0\_seq2; 1067 244 3132 LEN=3347; translated  
MPKALAKKGKPAATRKGEGKKNVNNSSSKKERKPRSEYVVCPTYDQKVVISKATVSDL  
KPSGKNTSNIHKNSDKRLWTISSSQIRHDHYAEVAQALSIYEQNLLPSSGGRSWEVTVQ  
LSEPNARILFRSWKGRMELACLPHLIDRIPRPPVWPGKRNQPADDYRAMQGEEDVEYTY  
DGGKRRIKKNTKQDYIKGLTSREISMLSQVAWDVLKPKYDHPAPTVTIKWKSPPDAKTFSTR  
RKSWEHATKLSKQEVVAIDRNLLGIGASGKLLKEFFPSAKTAIEVGKMRFERDGLWVVGQ  
ENSWQADREDELMLQDQEREEAAAASKVYTSGLQLYVAENRHSYRDEHGNTLVEADKALRH  
QWRCLPPKEQERWNDKVQEQFEDDEDSSSEDESSSEEEGGESGNDKDTTNPVATKDDNTDSD  
SESDDESSEVISHYQYFLRQRRHNYRHEQQMKLEAIAANSKGTKRTRFTLAQADKELK  
QQWREMEMEEQQDEWIAKLKRMEEEEEVNETKNGMKQQLHQPSSENSGDEILNLDAGVVT  
AAGEETEAKI IVENTDFHFRHPITTAGIAMDHGEMESSNFEEKKIDDDQFAATPTEEIA  
AKSSGKSKRKPPTKTKQRAKTTKTPSTTKPTTKASTRKKRQSTPKYCLKPDQINQCHEA  
CMEHYETVMRTVKTRDLSRELADGFDVLRERGHGRFDMELPAFDDPGFDFLTDLTKTPWM  
PIVRAILGQDAVLIHKGCFFMSLPGAGSQVYHQDGVHLTTQSQRPCCHAINVFVPLVDLHSR  
NGPTEFVLGSHVLGHDGYDRDFLETPKPTAGTPVVFYDRLGHRGLGNSSTGCRPIVYCTY  
ARAADGRAFRDSVNF SRKRYHKIGELSAKPLSREERRNKRKRSIESAREKKELDQTIALS  
ATETETPVPVAGEEPLSVTVVDSVCEAGPASIESQKRVKEDPRMAEDGIAEAKEPEVENT  
PA

>comp11466\_c0\_seq1; 661 1 2344 LEN=2427; translated  
XGTENPDARNFEEESKQSGATEHIKALEIFEDNRSPQEDALNP AIWPQIEEMTPDSIKDNE  
KARTGEKKPRLFLHVGPOKTGSSTFQSMCLKSELGTGELMGDNIYIRHILAAEGDFDCEI  
DQWGAYLNCRASESLKALIEKAKKNGKDLLLTDENLGITFVPALRDVINDEDWDVTVIVI  
YRRIHEWLVSWYNQINKTTNKGADGNVLFNEKGDYRTEHLLWPDQGSYVVPNFSSWYEN  
FTQYWKPAEIAKKHRSIEFYNYLSESF DNVLNLHQLHQEGDMVTNMICKVIGANHACGKI  
RSNEIKLRRNNGSINLDDLILSVFAYDQGYIAKTLARKEVNAVAKYMKQSSKVLPRKCN  
SEVIDQIRNWLVDTEKVVVGDKWSNAAKDQLQVYESYVAKGKMCDDLKDAIQLQDEDWM  
NFFKSIGKEKRRKIVLHVGP IGAKTIHNTLTTLSGDGNALQKDNYTLVDIDKNNHFDCGA  
DGCKASPTLKSFLSVDGVEKNLIIADDNLDERFVEAFKEAIDETKWDLKVVVGYIRLDQ  
LLLMVYNHEYNYDDLDPDSIHLFGPNDSVKRENHSRWPDEGGITIPSFNKWFHAIKADST  
IEQIKKMNMMHRNAYVSSFDNVDFYAYHQRDDLVINFLCNVVPGATHSCKALKVVDAEKA  
NTQALAYNYPESDILAVRARELGLLNKKFTRQAVRDAIGRKLQYRQKVL SRICVSGVTKQ  
LYDWTIESEKAI VGDGFTSKRIAWINHDFKHFME SGKLCADFVEKEIEDITWVNF FKNNF  
A

>comp11467\_c0\_seq1; 317 206 1291 LEN=1376; translated  
MSDTSFVDPVFLARFGLSRVNLIDYFLHPLNPFRTPNNTSNEVLTMQGISIELLMQPSF  
GHIPLSPMAEEAYAKNLSKLTGDQYELLPPDPNDLEQYTLPSPLYTIRHVIRTNVNSV  
KVLGIYYVVEGVIYKPAIRSLMKSNSVRTLDGLAGMASIVFERATQLTVARVARYCSIM  
ARHLVVFVFEWYSVRLDITLGAVTDXITGFI SFFGCFDVTGAC SALSVCARYLPSTGYTW  
LFNENEDVNKSKNNVDAVDPVVS LMKLNKRMRKRI LDNRKAGERNEAEEEGLRASAAID  
QILVRLSKNSHFTAATSIDDDRTSTNIPQYQGGTIAVAEPTSSNDRTTTTGV LASSSLNV  
K

>comp11467\_c0\_seq2; 389 206 1096 LEN=1181; translated



MSDTSSFVDPVFLARFGLSRVNLIDYFLHPLNPFRTPNNTSNEVLTMQGISIELLMQPSF  
GHIPLSPMAAEEAYAKNLSKLTGDQYELLPPDPNDLEQYTLPSPLYTIRHVIRTNVNSV  
KVLGIYYVVEGVIYKSPAIRSLMKS NVSRTLDGLAGAC SALSVCARYLPSTGYTWLFNEN  
EDVNSKNNVDAVDPVVS LMKLNKRMKRRKILDNRKAGERNEAEEEEGLRASAAIDQILVR  
LSKNSHFTAATSIDDDRTSTNIPQYQGGTIAVAEPTSSNDRTTTTTGV LASSSLNVK  
>comp11468\_c0\_seq1; 105 1 539 LEN=558; translated  
XKTYLAVTVGNPGKRVKIDKPIGRHPIHRQKMRVVPDPHRKNSSGISPKDRLRFKNSFQS  
SSQSGRRALS FVDALQFDGKLSLVQVRIETGRTHQIRVHLQDRHTPIYGDDVYGISDWNK  
RLQKVHGIERPLLHAHRLEISHPITGEHMVFIAPMSEDMVSI AKGIWPDGPNVIPDAYK  
>comp11468\_c0\_seq2; 528 231 1532 LEN=1551; translated  
MLWAKPPPVS NFDLSSIEAFEALDLEDLEENVDSLGYDVRDVEDGNHVS LPIKEDPIKI  
VTVPDKLKGKRIDAVLAKLLEPEQSR SACGNLVADGCVHQIITKNGTENEVLLDRKAFKV  
EAGMTLKVTLPKKERPDEIIAQNIPLKIIYEDEHMVVINKDAGMVVHPAAGNWDGTVVNA  
LAYYLANDSPYGTGDFVDGDGKSTLIRNDDDDDDILSLRPGIVHRLDKGTTGILIVSKTVE  
ALTKLSEAFASRKVKKTYLAVTVGNPGKRVKIDKPIGRHPIHRQKMRVVPDPHRKNSSGI  
SPKDRLRFKNSFQSSSQSGRRALS FVDALQFDGKLSLVQVRIETGRTHQIRVHLQDRHTP  
IYGDDVYGISDWNKRLQKVHGIERPLLHAHRLEISHPITGEHMVFIAPMSEDMVSI AKGI  
WPDGPNVIPDAYK  
>comp11469\_c0\_seq1; 599 160 2597 LEN=2884; translated  
MTRRRNRPKLSNALTLRLRF GIVVLLSLSILYPIYDVLADAVQHLNLDGPESLAEGKNLF  
QDGN YDQAALYFWRAVLLQGESRGKYSVEEAFQGF LSCYSIRGRTVDGFLFIAKEVIARK  
QKDMALAYIDQALAI EPENKEALALRERIKSGGASGGQVKTKERENKFQPQWGTPEANN  
PSAMTGKTPEDLYEYGSTLFSRKNYEHCADVFEL SCKRSGYSLGPSCSNAVYCRMMIMDW  
GFNGTGFESDMLRLKELAEYEKEKFR TGDLDNFKWNRAMSTHPHMLGYPLPPMLKRYVA  
ESVAFMDEM MARI SDGGTSL SPLPKDMPFDPVSQREKYVAEASQPGFKLKVGFVGS GFNS  
KAVLYLSQDIFRFYDRDKIEMHIFSLAPPDNENFINIGMKGTDWRKR VAGHVDFYFDNEE  
IKMDHVGLARYIHDQGIHVLIEWDGYARQGERA QGLMALRPSPLQILHQEFLGTSGGIYV  
DYIVTDKITSPPHLADLYTEKFLYLPNHFFSKGHAVQEEVKKPTYDYLPATKPKYKIGTGS  
PSENACLSQS AKKPKFVFCNFNFKLKN SPETVRSWIRILREVPDSMLCLENPQSGKKYL  
QRFVHEAAGNPKTSKDPDTKEFVPDFEPTDGD SLNKR IHFLPWERNPFDHQARNQDFCNV  
MLD SHPYNGHTVAQDALYGGVPIVTRSDGDDMSRVTTSANIVLGLEELNAVGGVHHYED  
IAIELGNNTKYDNIRRLIDTALQTNPMHPYWDAPRYVKNLESGLIAAWNRFIAGEEPA  
TIEVVESFETSKGTYDETLINNP SDRIDHDEL  
>comp11470\_c0\_seq1; 401 1 1339 LEN=1811; translated  
XHNTQDNQDSSPKGDLQITHPRKTRDNTNTLCNNFSSTTRQTLNHSSAMGIKTTLWSSLY  
GAPVEEELVVD SNGDDHSSIVKDRNDEDDKLR LTAKLLAAEEALASERKRSNELLQRLO  
LKAVSIDCQLIENETLLSDCRADLSSARRTNRRLTETIAGIRSENEFLLKRTAALARRDQ  
IQKAAIASSHAEIAKLSSTIDGFRVRFESLASGVTTVKTTTTTTTTKTGEGESSARGGTRI  
IWRHDAETTEAKEIGEKQSVDNQIGTVERIVLDRSPPPPSSSIELQMKLRFIDILTKH  
QSVWELEREGLRGKICGLEQQLLHQEPREVS GDDHGEHTVEHDVTNRAREGRSTNASE  
EAHNAAVKPIEPTTTLETAETIEYSLLSTTEGYNSDAPKGNVLAVEPSTPKKIER TETIE  
TTTTSSLSSEVDGTSASQIEIKGQL  
>comp11471\_c0\_seq1; 285 171 851 LEN=982; translated  
MATTTSSMTLLEKTKALIDLERSLTKTLEKVEPWLTT SATNKSRVGIRVRPIPTSMNEA  
QQVLAVARNFSGRTSAPAGWNP NAPVIGFSTPNLPHQLRGGALAALELQRARQAERDKK  
RKRL EEELEEQNKEKEKQKTEEEETNKKKMEMEIDGDGDGIDDKKLTSTEDRKGSPNKQQ  
RARLQPHIRARSTSLERRVARPVIATTMNLS DSSSEEDSDDSDES  
>comp11472\_c0\_seq1; 157 119 1622 LEN=2044; minus strand; translated  
MSIEAWTAKSKIHRQAATAGXRLASFL LLEDLLYGCAGR DARSPAASHIDVPQGGTVDA  
AIETPAVPQVETGQLRCARHREFS QLHQATQVEAREAPSILEGHGFQARAAGGLRWQSVS  
RCRSIGKKKQKEQPQGRVLRGCTSKQQQGFQW SLAGKRQDFVSDRVLGWNGXLVAFSFS  
FILTYVQNPEGRANQPEPRKVVRKPGVEVAEAPRREVQGVHAEALLQDQAFQEGGLFHQP  
LDLGVGEADAEGQVQDPEARADEPREAAE GKAAGKARPGQARKEAHR LGQAVAVAQAE LL  
QGRAPAEAGQAASLSAGECSQTS DLXARRALPERRQQPVAPGAPGEDQVGEVLEPEASAS  
DGAALQPDRSQPPRRRTRVEDFQQAPAPAVPRFDALQVEDPQVRKALQQPLQDGPGRGL  
GWPGSPLAPEETALAFGHAQVGRRGNEFP HSPGCNREPRIVGQGQVRQENVHRVGI EHV  
QRRRQRTGGTAFVAAGDTASP  
>comp11472\_c0\_seq2; 105 119 1407 LEN=1829; minus strand; translated  
MSIEAWTAKSKIHRQAATAGXRLASFL LLEDLLYGCAGR DARSPAASHIDVPQGGTVDA  
AIETPAVPQVETGQLRCARHREFS QLHQATQVEAREAPSILEGHGFQARAAGGVQNPEGR

ANQPEPRKVVVRKPGVEVAEAPRREVQGVHAEALLQDQAFQEGGLFHQPLDLGVGEADAEG  
QVQDPEARADEPREAAEGKAAGKARPGQARKEAHLRQAVAVAQAELLQGRAPAEAGQAA  
SLSAGECSQTSDLXARRALPERRQQPVAPGAPGEDQVGEVLEPEASASDGAALQPDERSQP  
PRRRTRVEDFQQAPAPAVPRFDALQVEDPQVRKALQQPLQDGPGRGLGWPGSPLAPEET  
ALAFGHAQVGRRGNEFPHSPGCNREPRIVGQGVQRQENVHRVGI EHVVFQRRRQRTGGTAF  
VAAGDTASP

>comp11473\_c0\_seq1; 128 1 357 LEN=898; translated  
VGGTEAPLPTAEPSPQIVSFEPATNSTILPSLLETVGGTEAPLPTAQPSSQVESVAPFS  
TTNSTIPPSLLEPVGGGQLPTATPSTFPAPTTPHPTMPRRRLSPTTLGVVDPSMEDEGS

>comp11474\_c0\_seq1; 367 191 1543 LEN=2506; translated  
MEHHRSLVRLRLLFVAITLVFTIGSARIKTEPVSSSLPSSTSSSVFVGAQQYQSTSHSWQGC  
STFLTTPNMDGWAVYAAQPFRADELVELTFFIPILESPYTRHSVLDNFVFGFQRNKHEGED  
TNMSDVVYNNVLLGNGAFYNHHPNLKYVQVSEKQGGDVPVHLVGFRASTRDIAAGEQLYV  
SYGDDLSEAWFENRGLNSQSMTSEAIENMLPFFVSSYCSKIYAGIGQPTWRDNILPILT  
SMHYNSSGGAGTILEPSSWMDLTRLAPFDAGLS DARAKVAIRKGAQIEKSLGLVISRNYVR  
GTPMGPIAFYWENLKIDHHQHLIDLRRDNKLVLYQGHDTNWESVDRFVGYSEITILPVS  
GNI GLVRRVGGTGDQYNCKLIVRSNKDHSNVGVTLELIATRDIRDVGDLKLNIAPEFDF  
EYRLLHDEMEESGQPHHPGIFDIIVDEEL

>comp11475\_c0\_seq1; 345 63 989 LEN=1307; translated  
MTRNTPVLFIVTCSFACNALQTLPLKTNDRFVLSGGPPNQIPTILWYTPLEVDIND  
DAVEEKVEVMRGIEDSNGNEEETTLTLQGKISVSSRLPKDSAEDVSRFFRAPEHRNLLV  
TGGGERPCTEVDFTESELLSDWRSRCLLEGSNQPDENDSVLSVITRGIEFPGLKVATSSLI  
GVKYVESETESPRYEFVLLSNEQTVSGLAPAVWIFNKLGTGAGENGSGNNSKFKSLTIVTY  
EEDNGKIVFMTDGLSIDITFPFLLKILPGDKKIEERGSKSIVKTLDRDQVQSMKAFA  
KAYSEQYN

>comp11476\_c0\_seq1; 710 1 2433 LEN=2598; translated  
XMMFSLINTVTNLLDYNLYAPFLDHTDFIVLQDANTTPSQKESLTNKNEEAETAIPPSKK  
TPWIPINAFKIGYQVRRFLDDGEWYVARVMTEPRLVFDVEKGIDVLSRKVKYFYFDEQEEW  
FDEQQLNEYAYNEGDHNVGSDHFFDGYDDQSNSSDDGNYAENENIMNKEGDERHTSFPDF  
PSDGDSDNGVTTKSSPKSKNQSTGDYRVEPQKMPADVEIAKRKEDELKCTSFPDFPVDP  
EDEDTGFAKPSPEKNKQSPGDCHRESIGATGTAERKEGGVKCISFPDLAGEAEDGSPGV  
PISPSPKKKKQKSNNDYNNEHQENSATATGNITAGSQKSAECTDKKRLRDLPHSEHPFSAT  
TSRNLVSSSSSDENVNRRRSNRERKKVESYLSASSVEFSSSSKKPPSNGTSNGRRKTGK  
LGVNNTKKEARHILIDKMGICEKEVDWALDKMPPPYSQNEVVNFIHKEREKKENGSDNG  
SEQVVFVRFKPETGMKVRVREGGSSYHGEVTKGPTYMKKQGDSEPHKFWEVTFDGGKEDL  
DWNELFLNRASRPVKGDGCRGRTLYALELFSGEGIVTQEFCEKKWCVKSIDNRPESYAT  
NILDLMEIKYRDIGFVPDFI WASPPCTTCSPLSGSHHRDCKNGEFEKTKEASDHNLMAQ  
MMYILNWAKKNPHLIVVIENPRGQMQLNPMIEFARNFGLHKATVDYCVFGRPDKKPTN  
LWTNEYDLFSRLSLDFRCREDTCPYHCSRHPASARGYTNIFNVAIIPKQLAEVADYVHS  
RFYFDRVAHSRATLSREEEEFDFRMSRG

>comp11476\_c0\_seq2; 632 1 2187 LEN=2712; translated  
XMMFSLINTVTNLLDYNLYAPFLDHTDFIVLQDANTTPSQKESLTNKNEEAETAIPPSKK  
TPWIPINAFKIGYQVRRFLDDGEWYVARVMTEPRLVFDVEKGIDVLSRKVKYFYFDEQEEW  
FDEQQLNEYAYNEGDHNVGSDHFFDGYDDQSNSSDDGNYAENENIMNKEGDERHTSFPDF  
PSDGDSDNGVTTKSSPKSKNQSTGDYRVEPQKMPADVEIAKRKEDELKCTSFPDFPVDP  
EDEDTGFAKPSPEKNKQSPGDCHRESIGATGTAERKEGGVKCISFPDLAGEAEDGSPGV  
PISPSPKKKKQKSNNDYNNEHQENSATATGNITAGSQKSAECTDKKRLRDLPHSEHPFSAT  
TSRNLVSSSSSDENVNRRRSNRERKKVESYLSASSVEFSSSSKKPPSNGTSNGRRKTGK  
LGVNNTKKEARHILIDKMGICEKEVDWALDKMPPPYSQNEVVNFIHKEREKKENGSDNG  
SEQVVFVRFKPETGMKVRVREGGSSYHGEVTKGPTYMKKQGDSEPHKFWEVTFDGGKEDL  
DWNELFLNRASRPVKGDGCRGRTLYALELFSGEGIVTQEFCEKKWCVKSIDNRPESYAT  
NILDLMEIKYRDIGFVPDFI WASPPCTTCSPLSGSHHRDCKNGEFEKTKEASDHNLMAQ  
MMYILNWAKKNPHLIVVIENPRGQMQLNPMIEFARNFGLHKATVDYCVFGRPDKKPTN  
LWTNVSDT

>comp11478\_c0\_seq1; 264 34 471 LEN=1356; translated  
MSSSLMQGAEFQHILRILNTNVAGKRNVVFLTKIKGLGRRFTDLICKKAEIDVKNRAGE  
LTADEIEKLVAI IQNPRQFKIPLWFLNRQKDFKTGKYTQVFAQNVDKLRDDIERLKKIR  
AHRGLRHWWGIRVRGQHTCSTGRRK

>comp11480\_c0\_seq2; 377 68 1495 LEN=3067; translated  
MVKTNLNGKFVTTQIIGPVLDAFSPGNLPPIYSALKIELADGTSTIVEVQQLLGDNQVRA

VSMRSTDGLKRGVEALDLGAPISVPVGTVTTLGRIFNVI GEPVDEQGDVVSFDETLPIHRDA  
PAFTELETKPSIFETGIKVVVDLLAPYRRGGKIGLFGGAGVGKTVLIMELINNIKAHGGV  
SVFGGVGERTREGNDLYEEMKESGVINESNFTESKVALVYGQMNPPGARMRVGLTALTM  
AEYFRDVKQDVLFLFDINIFRFTQAGSEVSALLGRMPSAVGYQPTLATEMGALQERITST  
TQGSITSIQAVYVPADDLTDPA PATTFAHL DATTVLSRNLA AKGIYPAVDPLDSTSTMLQ  
PGIVSETHYEVAETVKETLQRYKELQDIIAILGIDELSEEDRLTVARARKVERFLSQPF  
VAEIFTGSPGKYVSL EDTIKGFTMVLEGE LDDLPEQSFYLVGNIDEAIEKAETLK  
>comp11480\_c0\_seq3; 318 68 1231 LEN=1252; translated  
MVKTNLNKGFVTQIIGPVLDIAFPSGNLPPPIYSALKIELADGTSTIVEVQQLLGDNQVRA  
VSMRSTDGLKRGVEALDLGAPISVPVGTVTTLGRIFNVI GEPVDEQGDVVSFDETLPIHRDA  
PAFTELETKPSIFETGIKVVVDLLAPYRRGGKIGLFGGAGVGKTVLIMELINNIKAHGGV  
SVFGGVGERTREGNDLYEEMKESGVINESNFTESKVALVYGQMNPPGARMRVGLTALTM  
AEYFRDVKQDVLFLFDINIFRFTQAGSEVSALLGRMPSAVGYQPTLATEMGALQERITST  
TQGSITSIQAVYVPADDLTDPA PATTFAHL DATTVLSRNLA AKGIYPAVDPLDSTSTMLQ  
PGIVSETHYEVAETVKETLQRYKELQD  
>comp11481\_c0\_seq1; 11 1 620 LEN=620; translated  
DAPNAGAAEVRCIHDTTVCVKTNHADLGYDDADAAEAALNNMNYCSEISHTKDRCDAKQI  
SSCIHPLEDCFDHTRTGLTRCPDAPVSTGVLRCNQAVAPCINPAENIADCTGDVSDLKIC  
ADVADTVPRCD SRHIAPCFDPVAPCPYSATTNQAFRTTISICPDRADARRNDIPCHNENR  
ADAPNGGDPEVRCIHDLTVCRASNHVA  
>comp11481\_c0\_seq3; 435 445 2346 LEN=2346; translated  
MRCDSRQQAPCIDPMQKCPYLTPGRASLQTCADKVALRRNGVVAIPCHNDNRADAPNAGA  
AEVRCIHDTEVCVRGNEDLGYDNAEAAGTALDEMNFCEENTLTETAAMSRCTKNLNAAC  
FSRNFPIARANDGTEGVTACYEAGDASNFCPEQELTCSPQVTTKCLNADEDFCPNLTRP  
PLCTHESWTA VTYGYPARQDPNVIAGQKRCRNQGD ERQPYPCIDPTESVCEATENPNPGDL  
KICADRAYLVNRCDRRNHSPCIDPTIECPTSTATPTPLAVCPDLVHADTTIPRCSVRQPF  
NKACIDPASPCNASLNPAWQTLKVCEDLASGFNRCDPLQRTPCINPAQPCPF GIDITGLS  
ICADLSVNSSLNRCHTSQNA PCLNPATPCQVADNPAPSTLSICADLARNYNRCHPNQQVP  
CKDPTAPCTTAINPNYSTLPVCADLVSSAPSTLPSSIPSNLPSLSPSTLPSNLPSLSPSD  
IPSGQPSLSINPSAAPSAA PSASPSASPSLSANPSAAPSASPSAMPSALPSVHPSESPSV  
SPSSSPSMSPSSSKIPSS TSPFRPTVSVRPTFKGQTYEPSDAPSSMPSSSPSVAPSAPPS  
IAPSGSPSASPDRPSASPSTSPSSSPSVSPSGS  
>comp11481\_c0\_seq4; 136 445 705 LEN=705; translated  
MRCDSRQQAPCIDPMQKCPYLTPGRASLQTCADKVALRRNGVVAIPCHNDNRANNPADA  
EARCIHDTTICVKTNFANLGYDDADAA  
>comp11482\_c0\_seq1; 311 266 1069 LEN=1207; translated  
MAGR TCSNQLMKVLTTPSKVANALDWRKSMGAAIATVDVHADRIGITXLEAPERGFDFHG  
VNF SVVYGGTLLQLVLAPDPPAGETQDPRGIPPEALRAGTGAQGLWIRGVLAHPEGHGP  
GGTLRATLFAIEELLKSGADEPSSSSSSSSSSSLRDSGDLRKPSAPVFTPSRPVCLWDGVH  
REQPATDAFGRSTAFARPKSCESAGTMHVASEEQYHQDESIVAASVWEDFVRTNWPEVYR  
QRERQEQAETVGPGRSHLGPVLA  
>comp11482\_c0\_seq2; 311 281 1084 LEN=1222; translated  
MAGR TCSNQLMKVLTTPSKVANALDWRKSMGAAIATVDVHADRIGITXLEAPERGFDFHG  
VNF SVVYGGTLLQLVLAPDPPAGETQDPRGIPPEALRAGTGAQGLWIRGVLAHPEGHGP  
GGTLRATLFAIEELLKSGADEPSSSSSSSSSSSLRDSGDLRKPSAPVFTPSRPVCLWDGVH  
REQPATDAFGRSTAFARPKSCESAGTMHVASEEQYHQDESIVAASVWEDFVRTNWPEVYR  
QRERQEQAETVGPGRSHLGPVLA  
>comp11483\_c0\_seq1; 182 198 455 LEN=985; translated  
MGGLCSKN SYHVEEDQSLDVS RHYVGS LDKVDNVVKPSNYRPKTEPIGIGEIVTNTDDVA  
ANDDANDAPRTTVRMDAASDSGSDS  
>comp11484\_c0\_seq1; 1318 252 4745 LEN=6318; translated  
MSSDSNSASVRVDGKGD TIEASTRSQEKEPLANSVSSLSVVSAPP IAAVTTTQSPH  
SYSFSN NAGKNPNEATSLDFIGNSSAVK KLFMSIDAAMGPGALTANQSKKRKPSLLAVH  
NFGTLI LDDAEDESNYEVYSE RNQTGGGANPAATETSENTFLPSSRSLALALSPASAG  
EDAAEQDYREQSDALSL SNIVGPSSALTTMKESVRPVRHESVESSETETALLAPPKPP  
REYIRWKFQDMNLLLGH DALIVRPTPGTGA AHPGGSSTQGAMSGITVRVEDAEFLRDLFE  
AFQRQKNFLD NSKNQLSYAQALLQKGEPEPVSS TAKITNTNGNDFDRGAFDAKEDGGIQ  
EQFSSTRMHVDASHSSGFNPPE TKGGEETHESK KKSNE SFSEVPLQTCIVPFSGPLGGR  
LSPQNSPITGPSVDASTKSPPSVASTFGTSSPAISIVL DAYLDNL MANVPQLALCLQEK  
LVQSIKLLPTEEIPSKMFHPSTLDTSRPVDFLAASNS SRLGKTNVQPSTSSHPLPQEEEF

FSPQIMEMNASALLRFLKTHCTQNNSTYLLRREWPATEENPGGGSGDEGGSSSQPLQNIH  
LYDISAISTQKQKKWIWWLATMSYRFALRLRHLESSTSSSSQSPAHVGLSESQKRAIRD  
RQRSLFQQTLDLLQDLMDIDGNAHESMVASVREHMADTYLSSAAVGGDDDLDENSPVYRE  
TKGKRSSMHSSTPETSEFSPSPVVTMAASSKASSATSPSSSILPSNSMTRSRSSEYLPR  
AIPSPSNHDDRQHQPYASISIDKLNKAQDHLVRGIDTLTAVFEKDLERRRLQKEIEAQKQ  
EAIRKRSRRRQRQKHNVQEATSLCNNYEENADEDLKTVSPAMSMQLFGMNFKLVNISLR  
LAEHHLRNYSSSAMQALRTAARRLKDAAHLLDFYKMETEKNIDGSGEDKQDDKTQQEPL  
QLQYIWLLEHCGHFARFASDELWRDRGHASGEDVISVLNDVENAFVENDGIFGAKRREN  
QFWRMVQLDVLLKTSKGRISLQSLSGVVAPPNVDSKQAEAIARAESVLQKERVIRRERR  
KVLVASCVSYSRAITAFEFIMPSPDPAYDKMVLNLLQQR LGDACNETGKVLLAALRELLV  
INQGGKNDGSQLAAEALLCSAEFWFTQGLDAFEACGDTRNLALLRCNLCQSYKLRANS  
FSKGDASSSSKHAEDCLQNAADQLLTAHIDLGERDVPQTWDMVSEELAATFLVLGVRRR  
QSLGSGNAPVIFQVMRLSPGQERSIVDPMERALKIYEQSDNSHQAAAVHYQLALTYSKL  
WTCQLNESNTRKKLSKAFFEYSSAFVYFSNHSQGNPTFCLLCLDLASLYAAIPGEEGII  
KSLGCCLDCCDTFSMEAIIKASTALASSTAKSKADWYEKMETIAKSVDDR VFKLLKSLYKI  
DSVRYNDLYREGLTAKMVRVSPEDDELDMNPKSAALLALHNVLLVIKKSYGILVSKQ  
>comp11484\_c0\_seq2; 1318 252 4745 LEN=6412; translated  
MSSDSNSASVRVDGKGTIEASTRSQEKEPLANSVSSLSVVSAPPAAVTTTGGQSPHIP  
SYSFSNNAKGNPNEATSLDFIGNSSAVKKLFSMSIDAAMGGAL TANQSKKRKPSLLAVH  
NFNGTLILDDAEDESNEYEVYSERNQTGGGANPAATETSENTFLPPSSRSLALALSPASAG  
EDAAEQDYREQSDALLSNIVGPSSALTTMKESVRPVRHESVESSETETALLAPPKPP  
REYIRWKFQDMNLLGHDALIVRPTPGTGAHPGSSSTQGAMSGITVRVEDAEFLRDLFE  
AFQRQKNFLDN SKNQLSYA QALLQKGEPEPVSSTAKITNTNGNDFDRGAFDAKEDGGIQ  
EQFSSTRMHVDASHSSGFNPPETGKGEETHESKKS NESFSEVPLQTCIVPFSGPLGGRL  
SPQNSPITGPSVDASTKSPPPSVASTFTGSSPAISIVL DAYLDNLMANVPQLALCLQEKG  
LVQSIKLLPTEEIPSKMFHPSTLDTSRPVDFLAASNSRLGKTNVQPSTSSHPLPQEEEF  
FSPQIMEMNASALLRFLKTHCTQNNSTYLLRREWPATEENPGGGSGDEGGSSSQPLQNIH  
LYDISAISTQKQKKWIWWLATMSYRFALRLRHLESSTSSSSQSPAHVGLSESQKRAIRD  
RQRSLFQQTLDLLQDLMDIDGNAHESMVASVREHMADTYLSSAAVGGDDDLDENSPVYRE  
TKGKRSSMHSSTPETSEFSPSPVVTMAASSKASSATSPSSSILPSNSMTRSRSSEYLPR  
AIPSPSNHDDRQHQPYASISIDKLNKAQDHLVRGIDTLTAVFEKDLERRRLQKEIEAQKQ  
EAIRKRSRRRQRQKHNVQEATSLCNNYEENADEDLKTVSPAMSMQLFGMNFKLVNISLR  
LAEHHLRNYSSSAMQALRTAARRLKDAAHLLDFYKMETEKNIDGSGEDKQDDKTQQEPL  
QLQYIWLLEHCGHFARFASDELWRDRGHASGEDVISVLNDVENAFVENDGIFGAKRREN  
QFWRMVQLDVLLKTSKGRISLQSLSGVVAPPNVDSKQAEAIARAESVLQKERVIRRERR  
KVLVASCVSYSRAITAFEFIMPSPDPAYDKMVLNLLQQR LGDACNETGKVLLAALRELLV  
INQGGKNDGSQLAAEALLCSAEFWFTQGLDAFEACGDTRNLALLRCNLCQSYKLRANS  
FSKGDASSSSKHAEDCLQNAADQLLTAHIDLGERDVPQTWDMVSEELAATFLVLGVRRR  
QSLGSGNAPVIFQVMRLSPGQERSIVDPMERALKIYEQSDNSHQAAAVHYQLALTYSKL  
WTCQLNESNTRKKLSKAFFEYSSAFVYFSNHSQGNPTFCLLCLDLASLYAAIPGEEGII  
KSLGCCLDCCDTFSMEAIIKASTALASSTAKSKADWYEKMETIAKSVDDR VFKLLKSLYKI  
DSVRYNDLYREGLTAKMVRVSPEDDELDMNPKSAALLALHNVLLVIKKSYGILVSKQ  
>comp11485\_c0\_seq1; 969 1 3219 LEN=3321; translated  
EKPSTTAYSIRRESTELVFPKNDDEPSSCDGGQMMELPEPCANNNEANPDGVCGALS  
LDIAMP SLKARIECGGLSIDTEPATIPWPELHSSDANAAAMEGSSYPDHSP IIPRKFVKI  
DNTKTPRAALSAGGKESGENATAMDFEILPDESDEEEDVDVEANP SDENGSGTRND DEN  
IGVEEGFQNI MNQIGELAMDENDQSPSNSGSDNEEDVVFPLSLRKNVDADDEV PNP FESS  
ASVAQSSAAPSSRRRFLFAPKSPKSQQKSIGKFTSSLTNSDTSGNDAAAPSEKESKRQ  
QILTTMIRKIGRKNQKPDPLPDTTPDINLTD SALDEQDSSSESSFDE DENWSDEESQL  
FDDDVDEAIDCSNLKSSLPNSFLDLPPDIYDYLDSNLVAMIGNQDVNTFAREHHLFVKGL  
LQLLAERDLIGVEDDVLETHNITKMGVLRKKDAKIGSR IKYVEVRKGNLTYFEDK KESQI  
GRTIHLRKR SCTCRVSTNREAGQDFVFELIVDGRRFLWTAQSEEECLGWVRAINQAMIG  
DVDDSRDLPLDLTLRYNAVEDYQSVHKSLEAQTRQEYLVAMNTLFYRQTSSSALRVPMK  
WIRDTYLEEKSEEEPMDHERIKYAVRDFWKNLCNNTIVLNGHLVEADGVYSGERVIGAL  
SRCILEFDKVENNTDFDQIFNSLKR SRQESH SITELEAVSYARNILNGALQSTSKGDIKA  
VVEGLFRNEDVAYAELESSEPLHVYVSYAGDDFSESKPRPTENVGWIETKSKKSKKWKYR  
YFVISEGVL SYFERAEP RP YRLGGQMVLRDAKITILEGNILSLDVQKQERLLRFMDRGL  
IRWKSIIEDKSKGDVAMEAD FENFEETR IDGNDEELLTETPNREEDNTPPSKPKPVVPL  
PDENATDSKSRRAVRGASAKILK KATLAKNGMKRAKDATEARMKSIRTGAGRFFGGRGNS  
NPEGKMKRRPTNDMLVSTRSLYGVTEKREPTVQAVVEMNNVFKVRSKASTSDSNGETLL

IVRVKLYQAFLLSGGPHGRLACGDELLLMFEFSVGEAEDIQNYVLFQAPTSL  
>comp11485\_c0\_seq2; 978 1 3063 LEN=3527; translated  
EKPSTTAYSIRRESTELVFPMKNDDEPSSCDGDGGQMMELPEPCANNNEANPDGVCGALS  
LDIAMPKARIECGGLSIDTEPATIPWPELHSSDANAAMEGSSYPDHSP IIPRKFVKI  
DNTKTPRAALSAGGKESGENATAMDFEILPDESDEEEDVDVEANPSDENGSGTRNDENV  
IGVEEGFQNI MNQIGELAMDENDQSPSNSGSDNEEDVVFPLSLRKNVDADDEVPNPFESS  
ASVAQSSAAPSSRRRFLFAPKSPKSQQKSIGKFTSSLTNSDTSGNDAAAPSEKEKSKRG  
QILTTMIRKIGRKNQKPDPLPDTTPDINLTDLSALDEQDSSDESSFDEDENWSDEESQL  
FDDDVDEAIDCSNLKSSLPNSFLDLPPDIYDYLDNSNLVAMIGNQDVNTFAREHHLFVKGL  
LQLLAERDLIGVEDDVLETHNITKMGVLRKKDAKIGSR IKYVEVRKGNLTYFEDKKESQI  
GRTIHLRKRSCTRVSTNREAGQDFV FELIVDGGRRFLWTAQSEEECLGWRAINQAMIG  
DVDDSRDLPLDLTLYRNAVEDYQSVHKS LKEAQTRQEYLVAMNTLFYRQTSSSALRVPMK  
WIRDTYLEEKSEEEPMN DHERIKYAVRDFWKNLCNNTIVLNGHLVEADGVYSGERVIGAL  
SRCILEFDKVENNTDFDQIFNSLKR SRQESH SITELEAVSYARNILNGALQSTSKGDIKA  
VVEGLFRNEDVAYAELESSEPLHVYVSYAGDDFSESKPRPTENVGWIETKSKKSKKWKYR  
YFVISEGVL SYFERAEPRPYRLGGQMVLRDAKITILEGNILSLDVQKQERLLRFMDRGL  
IRWKSIIEDKDSKGDVAMEAD FENFEETR IDGNDEELLTETPNREEDNTPPSKPKPVVPL  
PDENATDSKSRRAVRGASAKILKKATLAKNGMKRAKDATEARMKSIRTGAGRFFGGGRNS  
NPEGKMKRRPTNDMLVSSSTRSLYGVTEKREPTVQAVVEMNNVFKVRSKASTSDSNGETLL  
>comp11486\_c0\_seq2; 371 251 1395 LEN=1395; minus strand; translated  
MASIYSSGLVIAAGTYDGVLAGWFEKESKDG TATTEGSSLTLSFATAVHDGSIRSLCIA  
GNANKNQPGALLSCGYDESLKTHDWSKRQTSSGEV RTPNGFGTPMCSMFAPPTGHSTHCI  
VGFSSSEKIC IYKRDWSIQHVLNGHEGGIGSLAVHPTGKLAVSGGVTDGKLLWDLTKG  
RLAMVNKINPRSTLGG RARYDPI TSVIWSKEGDFYALSHGSHITVREVATGKALLDVEMP  
SKVNQVALMSGPEGLFVVAACNDGSLPVLAVEDSDDENRKA IMAIEPVDSHLAREERFKC  
IQSVRGYFIVTSNSAGVVSLMNLQGA VNMMSPPQEGENSRS DSDGSEDEESDDSDMEL  
AVDIVESVRLGTGARITCLAA X  
>comp11487\_c0\_seq1; 659 144 1903 LEN=2014; translated  
MVL IQSLSCGQIVVIVLLCLSSLCQVANCEIRGFNLLLEPASDYIHFVEGFLLTPGYVDL  
SELLFVTADGDGPGTSDPN DHAKANNKTSSGGGGDFYMDGSALDI AVFRLVSFASDRNAI  
TWSFNINMSKGNIIHAIYTXPLIIDADGIILIVAVSSQKNVIQPAAGVIGRNLGLAQR  
ALKXALRYCCSNDAIAMGLCAGTQYGR LIMDADKYVGKHRMINIPATGNYSNHLKFRFE  
ETEESGKYVVVFASCNDEGRRVIVEGHTIWKSKHGYLP GD LFG LMYFYAVVFLAYFAILL  
WYGITMKMFEDANIPIQTWIFGTICMGTLELFFRSGDLFVWNEDGQRFWIAYYLGIIIGV  
LKRGISRCLLVMVSLGWGVIRDELG SIMKKIHVLGGLYIIVISLVNDIMTEIMVAEVQRIS  
QEEEEELFDIVSILGLVILVLDLIFYFWDLSL SGTMEYLETMKQTRKLLRYLR LKCI LM  
FSILFGVIWAVFGIVD TYDEGIVTQEATWVIDAAMEMNYLFVLI AVAILWRPQNAKEYA  
YVMELPAAVSATLDDDDDEGAIELSGIVPSAADDSDDEFNDEIQ  
>comp11487\_c0\_seq2; 730 144 1760 LEN=1871; translated  
MVL IQSLSCGQIVVIVLLCLSSLCQVANCEIRGFNLLLEPASDYIHFVEGFLLTPGYVDL  
SELLFVTADGDGPGTSDPN DHAKANNKTSSGGGGDFYMDGSALDI AVFRLPEECDSTRGG  
CDWTELGIGSKSSSEGALRYCCSNDAIAMGLCAGTQYGR LIMDADKYVGKHRMINIPATG  
NYSNHLKFRFEETEESGKYVVVFASCNDEGRRVIVEGHTIWKSKHGYLP GD LFG LMYFY  
AVVFLAYFAILLWYGITMKMFEDANIPIQTWIFGTICMGTLELFFRSGDLFVWNEDGQRF  
WIAYYLGIIIGV LKRGISRCLLVMVSLGWGVIRDELG SIMKKIHVLGGLYIIVISLVNDIM  
TEIMVAEVQRISQEEEEELFDIVSILGLVILVLDLIFYFWDLSL SGTMEYLETMKQTRK  
LLRYLR LKCI LMFSILFGVIWAVFGIVD TYDEGIVTQEATWVIDAAMEMNYLFVLI AVAI  
LWRPQNAKEYAYVMELPAAVSATLDDDDDEGAIELSGIVPSAADDSDDEFNDEIQ  
>comp11488\_c0\_seq1; 186 24 362 LEN=592; translated  
MKS VLSLIVAF LFVAASVQAFQSASSLSGYQRTSALQMTVLT YKGKKKNFKAGSPMKNA A  
AGLVKPRYSCKKGCNSCTLSVGGQRIKACVGVKVPPEPRLKSLQEKGLEIR  
>comp11489\_c0\_seq1; 541 108 1487 LEN=1678; translated  
MLSPNHESEEKEGQDSTQAI RENDGGNEAAPATVNPQQVVSNTYTTNVPNPNPLPLDWT  
KMGEGHTAEDLMPARCPHDVAI WSPEDTDICLVGTAGQKITLLGDDFSDPERTNLSELIS  
LVLRSHLIKDM SIGICLPKLEKLELYDNMVQALDEESLKGCGPSTLKILDMSYNSIRSMT  
PVEFCNGETTLELYLANNK LKEISG I KHLKSLRKL DLGANKIRVLSKDEL SGLDSLEELW  
VGKNKIVTLDGIQSLTKLRRLDVQSNRLTSLSNEDGICYLNSQRENLEELYLGHNGLDDD  
GISGLISLTGRGGSTIMFPKLNVLDSLNRNLKTTAALVVD AKNDNVFAEWPMLEELWLSG  
NAIENFEAVYPLKEASDRKHLPLETLYLEYNPVGKEFEYRKKLAEFIPSLDQIDATKIR  
GYGSVPVPLGAGIVGTTEEQLRQFQAAAFKRAEQQRQNA

>comp11490\_c0\_seq1; 410 126 860 LEN=909; translated  
MAFRISIVFLVAATIMGSNAFVLRSTGRAATSLASTTTDQTLLSVTLEKPLGVILEEVEE  
GQAKGVYVLELAEDGSAAASEFKDQLVGLPLANVMGNDVTSMDFDSVMDQLIAAPSPISL  
DFLLASDGESSAPPAEEAFVPGTTVAIKVLDNNGNPETIVQAKVGDNLRTTLQQNNIEVY  
QGLKQKLGNCGGGGQCTFCAAEFIESEGWEERSDYEDQRLAKAPKARLTCLNNIQGPATI  
RLV

>comp11491\_c0\_seq1; 274 213 1247 LEN=1525; translated  
MCGPTITSKSKIQASSKAPVDVLEPPSMLSRYS CATAMLAIFGVWGKIAFYNHSGDGT  
DESKAPGVGTEIHSWKIPLILTSCYLLGLPVLRLMLTTKFLSPTMDVKLLLLKETMIVYNGG  
QVLLNGWMVYRFLDAVINRGHPFIGDLFTVDTGATFAVWIHYMDKYLEFFDTIFMVLGR  
MDQVSVFLHLYHHVSI AAWWF AIRCYPGGDAYFGALLNSWIHVMMYSYITLSLLKFP  
KRFITQAQLLQFTSVVVYTGFSFAIVRKGQAEAKHYACFAVQTFEMTSLFYLFSLFY  
AYKKKAMMKRTSSLNEVPEQSSISSDTSDEVASNSSSSEEPKKE  
L

>comp11491\_c0\_seq2; 138 213 797 LEN=797; translated  
MCGPTITSKSKIQASSKAPVDVLEPPSMLSRYS CATAMLAIFGVWGKIAFYNHSGDGT  
DESKAPGVGTEIHSWKIPLILTSCYLLGLPVLRLMLTTKFLSPTMDVKLLLLKETMIVYNGG  
QVLLNGWMVYRFLDAVINRGHPFIGDLFTVDTGATFAVWIHYMDKYLEFFDTIFMVLGR  
MDQVREHFFRRIMHP

>comp11491\_c0\_seq3; 177 353 529 LEN=807; translated  
MTSLFYLFSLFYKAYKKKAMMKRTSSLNEVPEQSSISSDTSDEVASNSSSSEEPKKE  
L

>comp11492\_c0\_seq1; 212 105 794 LEN=794; translated  
MANSRETAPGRHGYHRVVVETVSSSSSDDEHEHEHERNNDNDNDRGDGPVVMHFP  
EPAAAAGTGAAKQTASATAEGGDRHRVPVQALEAQAQAEAAAGPVAWCPDATTRPLP  
PVLFFPARQQPHHARFLPSPPALFTGGVALRGAFGTEPNPIESNRTGFSQTHGPD  
DAVRSIRPSVFAAQGTHTKALLXTPTEHWTGADTKYPSTTNAIQGYNATVKQH

>comp11492\_c0\_seq2; 212 105 812 LEN=812; translated  
MANSRETAPGRHGYHRVVVETVSSSSSDDEHEHEHERNNDNDNDRGDGPVVMHFP  
EPAAAAGTGAAKQTASATAEGGDRHRVPVQALEAQAQAEAAAGPVAWCPDATTRR  
DRALLLNPLFPVLFSPARQQPHHARFLPSPPALFTGGVALRGAFGTEPNPIESNRT  
GFSQTHGPDDAVRSIRPSVFAAQGTHTKALLXTPTEHWTGADTKYPSTTNAIQGY  
NATVKQH

>comp11494\_c0\_seq1; 340 116 1471 LEN=1916; translated  
MRVGYHRLIQCCPKRLSSLRPNPKRLSFSFGSHAGSSPLFDQAIVTCLPGLFEL  
SSELQMLGIQHHPSSKTKKAGKIRLHKDYSTIDDLFRCLYLGSASQVRLRLASFSAR  
GLPELKRKTAKVPWNEICSVDSVTNGTIDVRVSSKSKLYHTGAIRERILQSIHHF  
GLPNETFGTKHRRKGSKASKIKDRPAHDSFPAVLLDVHVSYDHVEIFLNAFPLPL  
HERGYRQOLAKAPLREDIAFSMLLTAGWKPSWSLGNETTQDNEWQGLVDPFCGSG  
TIAIEGAAMMLGLPGRFRYHSPFRGTLQNSKKWSTEVQQSIAAAAVKKHELGDNS  
FISISASDRDSGAVEATKANAEERAGVLEAIHVENAPLSDQRWFGTPSEAPHS  
LLIVTNPFFGKRVSSKSTSSSTKGLLP LYQSLGKYVECLSQKYKRRLCGII  
LTDNPGLW

>comp11495\_c0\_seq2; 752 784 4967 LEN=5071; translated  
MIESVNEHNDIPGEMTACSPINVMGTTAKNSVPTHEATEATPPAATSTNASTPS  
PSPQPTPSENPAITPTAFNSSPKLRKVSVEESIDNAVSVQRLVEYFLVVSCKPR  
WEIYNSTAGHPVPANGNPGDVPKSPKRQGARFSPITTRPTAIADQGIQTSTSS  
NTNTTISARETTGTEHAIHHALSTGKGIHGEEDDECREDPSLSIAETALPPPQ  
PTETWNRTEGAEENIRLPDASELDNLHAFSPKVTARFPSEDHSDHPLNPMIT  
QFCFSGGDVVHPSTEYKMPSAHHFVMTNDKGRKVYGTCLMIYEEYKPPKNAP  
WQRCENIYPAWCGGTGIEVSVTTEENRLYIPKCLCILSIWPYVTAFREYLAQ  
LYRLATSTDCMKAPIERYVMNLCSSEIPAPPPGAFEVKMSILDSVIRFWSP  
AKLPIAYVSLPYQTLFDCLDIDNIIHLWYCLTMERKVLLLSSQOSILTVCS  
EILCSLLYPMKWSHLYVPLLPKFLCPILDAPVPYLCGVTRDDWFSVQKFVCD  
ETIVVDLDRNSIIFGQRTAELPQVPGKKWKLKLNHSLQDIAGHLFWRGRGLE  
TEYDLLVRKKIDHSEFKIEAERKGEHFWEKELATLDQAFLQYTPDSEHVSND  
TTDDGDGEEQNIWDRLQEAFLRFFVAVFKDYRKFIVHPDKSKLESQSTG  
PDWLNWQNHKFD RDGF IASQNSDYYYLSEL CSTQQFDDFITKRLYSPE  
LPDIIFFDQSIDAKLNRSLKLVHTPFLQSAKTHKQLETFVAVEPN  
TSNLRMEAPFMYDTPDFTFDASLFCRPIPGMITAEFDRQASLVKRLQLNCS  
PTFDKSDLDVLDYGSYDYTEPMSFTVFFVYSAVIGREWQYQLKRRELENT  
VLPSSAEAIPLERVAEECESKDPSEVQEGEKAVSASQPDYLSDLTMGVCGG  
VCPGGERAAGDAMAYISDKNPCPDFTSDAQAAAYDTLSNYVSSLDPTDGC  
RNSLLDNDDAFAEYEEAREVSV AQDLDALEMMETRGLNTDPDVKSLMEAC  
GRCGNTKRALALIEIMKRDGLVADNDVLIFFMASFAHCRPYEEASAFAP  
TESKMKAGRRGSDAYSQFLKMMVMRGDSEGNIYNMPIPSDEDSSLS  
DGLSDSGSEVSTEPVASSVFQMFAPHLKAKTKKKRRRRKKKQLKNIPEN  
LSDRIKKQ

LELGESLLEFLYDPDISIDTFGDACPMCSNMNEENIVSGWQQCNFQDFTTSCPQCShRFV  
PRFKISCSPPDFEGSQGPGTPLYCEFLSPVWLRKELGHILGGTNSIDQILDPLAKWQGH  
TSDHLVEPDRDVQAI PAAFFIFATGKFSKPSYQSGPTGLSVHSSRLCVMYSTRGGDYPG  
LGAKCSMAIEQRVV

>comp11495\_c0\_seq4; 752 701 4884 LEN=4988; translated  
MIESVNEHNDIPGEMTACSPINVMGTTAKNSVPTHETEATPPAATSTNASTPSPSPQPT  
PSENPAITPTAFNSSPPKLRKVSVEESIDNAVSVQRLVEYFLVVSCKPRWEIYNSTAGH  
PVPANGNP GDVPKSPKRQGARFSPITTRPTAIADQGIQTSTSSSNTNTTISARETTGTEH  
AIHHALSTGKGIHGEEDECREDP SLSIAETALPPPQPTETWNRTEGAEENIRLPDASEL  
DNLHAFSPKVTARF PSEDHSDHPLNPMITQFCFSGGDVVHPSTEYKMP SAHFFVMTNDKG  
RKVYGTCLMIYEEYKPPKNAPWQQRCENIYPAWCGGTGIEVSVTTEENRLYIPKCLCILS  
IWPYVTAFREYLAQLYRLATSTDCMKAPIERYVMNLCSEIPAPPPGAFEVKMSILDSVIR  
FWSPPAKLP IAYVSLPYQTLFDCLDIDNHLWYCLTMERKVLLLSSQQSILTVCSEILC  
SLLYPMKWSHLYVPLLKFLCPILDAPVPLYCGVTRDDWFSVQKFVCDETIVVDLDRNSI  
IFGQRTAELPQVPGKKWLKLNHSLQDIAGHLFWRGRGLETEYDLLVRKKIDHSEFKIEIAE  
RKGEHFWEKELATLDQAFNLQYTPDSEHVSNDTTDDGDGEEQNIWDRLQEAFLRFFVAVF  
KDYRKF IHVPDKSKLESQSTGPGDWLNWGNHKKFDRDGF IASQNSDYYYLSEL CSTQQF  
DDFITKRLYSP ELPDIIFFDQS IDAKLNR SRLK LKKVHTPFLQSAKTHKQLETFVAVEPN  
TSNLRMEAPFMYDTWPDTFDASLFC HPRPIPGMITAEFDRQASLVKRLQLNCSPTFDKDS  
DLVDLYGSDYDTP EGMSFTVFFVYSAVIGREWQQYQLKRRELENTVLPPPSAEAIPL E  
RVAEECESKDPSEFVEQEGEKAVSASQPDYLSDLTMGVC GGVCPPGGERAAGDAMAYISDK  
NPCP DFTSDAQAA YDTLSNYVSSLDPTD GCRNSSLLDNDDAFAEYEEAREVSVAQLDLAF  
DALEMMETRGLNTDPDVFKSLMEACGRCGNTKRALALIEIMKRDGLVADNDVLIFFMASF  
AHC RPYEEASAFAPTESKMKAGRRGSDAYSQFLKKMMVMRGDSEGNIYNMPIPSDEDSS  
LSDGLSDSGSEVSTEPVASSVFQMFAPHLKAKTKKKRRRRKKKQLKNIPENLSDR IKKQ  
LELGESLLEFLYDPDISIDTFGDACPMCSNMNEENIVSGWQQCNFQDFTTSCPQCShRFV  
PRFKISCSPPDFEGSQGPGTPLYCEFLSPVWLRKELGHILGGTNSIDQILDPLAKWQGH  
TSDHLVEPDRDVQAI PAAFFIFATGKFSKPSYQSGPTGLSVHSSRLCVMYSTRGGDYPG  
LGAKCSMAIEQRVV

>comp11496\_c0\_seq1; 348 1 1361 LEN=1430; translated  
XERGGLLRLGADKTTGLRGLYLGRSVRSGAALLEVPLSSCLRDDAPPSWLPEARKDPHA  
WATRLAAGLADLALRNPAERTQDEERTERERERETKAPQGETERAQKLWWSLLPDQEHLG  
ASLPVHWLEATVLSARSTALEIAVDSAFFARAEAVDDLKVGLEQSPYAERWKGSGSGTSS  
GTSAKELAAHVLDLVQTRSCRLEEGGGSGEDLGRALVPVFDLNLHGSR RAGDANASFVE  
EGGSNRGKRLVVRATKDIAEGSEARIDYGASARPAWRCLHSYGFVSDYKRTVPAKEGETG  
QRNDRDNNSNNGRERDEDAPDNLAEVYMKGVRYEVTDDSI PADMVADASPLEWVGVDAD  
GLAVGEAPSPPVIVLTPTIASRIADRIADAAYLLLEPEQILDGDEGSSIPPTPFVISH  
QLAARLRWTQHRILLSAAGLTQFAKEEESRFR

>comp11497\_c0\_seq1; 673 75 1338 LEN=1338; translated  
MMSLTDDHPHDIGDNEVPTVFMGEYGEESDTRSS EIDGDETGFAAQLRKQRKQVLEKDA  
MANGFASDLRKHREQFNLVNVDDEAEDVTGNTFDDVGYFDGHNSTLAASAGDGMNGTAPG  
EVHSELTDGIFEKGRNNNHICSGSLKSEL RINEDGVDDGLREFDTTSPSLPERPINEIDD  
EDHFGDFDKAQIQIASPEENDGGHQIETPTHFEPKADENMDTENDIAFP PGVIDMGNDAN  
EVAESKLLTSGEHNQSTLEQIETGNENDYNNNIIEEIDAALLEPEPSSIESQDSGDDFR  
DLNAGSLQYELPNQAANEDGHDDACFHDLDAALSQ LDESNTENQAIISDNYDSEGLDAIS  
SKPQTPKDENE CIHDNVEDLDAGPSDFEPSNIEIQATDDDFGEFDAALPQSEPSEVKNEA  
SX

>comp11497\_c0\_seq2; 784 75 1491 LEN=1491; translated  
MMSLTDDHPHDIGDNEVPTVFMGEYGEESDTRSS EIDGDETGFAAQLRKQRKQVLEKDA  
MANGFASDLRKHREQFNLVNVDDEAEDVTGNTFDDVGYFDGHNSTLAASAGDGMNGTAPG  
EVHSELTDGIFEKGRNNNHICSGSLKSEL RINEDGVDDGLREFDTTSPSLPERPINEIDD  
EDHFGDFDKAQIQIASPEENDGGHQIETPTHFEPKADENMDTENDIAFP PGVIDMGNDAN  
EVAESKLLTSGEHNQSTLEQIETGNENDYNNNIIEEIDAALLEPEPSSIESQDSGDDFR  
DLNAGSLQYELPNQAANEDGHDDACFHDLDAALSQ LDESNTENQAIISDNYDSEGLDAIS  
SKPQTPKDENE CIHDNVEDLDAGPSDFEPSNIEIQATDDDFGEFDAALPQSEPSEVKNEASX

>comp11497\_c0\_seq3; 391 75 729 LEN=729; translated  
MMSLTDDHPHDIGDNEVPTVFMGEYGEESDTRSS EIDGDETGFAAQLRKQRKQVLEKDA  
MANGFASDLRKHREQFNLVNVDDEAEDVTGNTFDDVGYFDGHNSTLAASAGDGMNGTAPG  
EVHSELTDGIFEKGRNNNHICSGSLKSEL RINEDGVDDGLREFDTTSPSLPERPINEIDD

EDHFGDFDKAQIQIASPEENDGGHQIETPTHFEQIGRAX

>comp11498\_c0\_seq1; 1085 237 5258 LEN=5409; translated  
MEELTLGCDDHARIRDLVFTANKKRLNSFLGFKSRKSSSEIGATCSEIAPSSPKACALLN  
LFRSVIYKDTNPNSEDSKENEDTIAVDDIFQALLMIDPSYITPWSALDEFASALPKYSGP  
VIPIAQCISSAEFFLNTEFQFAPSLRYPGPKTIIPRYVREIMVQFAEKLNFHSGTSEPVY  
YTLVSQVLVHTTFTVCKGWSSDLFDAMVSAVYLQRPHTHSMKMTWLKLVQLSQSIVSDIQAE  
KIAKIMMDEVCVTSIDTSSSQDVLAIISI AVNMANRSCTTTKDKKSSTDVVGKFWRRSLFL  
TLYQVLLSQSNELYDQAEKKIMEGMTTWGAKSLKSWIAELIDDHSSSMITLNKTMIPPF  
TCNFLSLCTEILRAEDKPIRSGLLNCIVNHNVEDLKVFEKYISDKECKSMLNFVLGDGKS  
YLCEEEIHEIYYRIDGTFDLQGSDAHNVKCLSACGILALQSLRLKESKIHESPVKKRYP  
SDFLFSRARRLVNMADDIVTNTLDSHNVLHASTFAIVVRTVSYFEVPELRCSEQRKQ  
ISEPSKLQNSYFATLRLITASALKIDSNDWIDRRSQLIDMSLPFSHGTYLGCVLATIP  
AQFRILSRKELLAPLNSQWGSEIDQLEISEQQAESGVHHRVTDGMRGLLELIRSGRWMK  
NEVEAWFILSDLLVMDIPPLPFESRRWLLRTLTTGITDGVFSIDSLDHLRAATIRISSF  
FVQDNTLSKIGHAQPRKIEEIKTLHRLIVLLRSLASVKNYSESRHILLAEGRESFLRAI  
LTYKNDRSSRYTHHDDVLKYYSDKAMNVDSFTFCWLLFLKVNSYILGYSVAQNAKT  
DYL  
ESSSRDQDTTFCHFANRIKDFEESLRLKIRPFGDYIDLLPSWLNADSDRAPFSEKQNSI  
EQSETTPTPLWLDIILELLFLVPLPTRKSHDFNDPLPWKLITATGFLMSQMNPCLLSME  
TIKETAEPFLSISLLVRKAIRLDCALSVIEDLLVPTVSYCRALHLNLETVDPGICILMI  
GSLWNLYQAIASEKACVKIIEYLESKVSVNEEGCSQRDRDVFSLTSVHSESDVDEIVQKL  
RLSCLRAFLSCLSSISNSEESDLCISRSLIGGILGALTTDLRAGLNGNSGGLPRELYLTF  
CILIEECASLLFDQKKSQQDSSIFLLFKEVATNLANILTVIPLRDAALFRTTFILAAAVF  
PSLCRDLTRRSLCNPDSSTPIIGDEMFOFELVVFQVVKDCVEILIRWSALREPYLIPWL  
DIAGPDHSDLKIDEGLDGIKYHVKSSEDAFDDAKAGNGDIPRFVHVPSRPNHKKSSGRI  
RLNTEKSVSWALSCLLGLQKWLSEERTIHTSNTIESSDLSQDWLEDWKKNFRRRVEL  
RKSLVDNTRFFRTSPVLSQRGHNGNRVPLDMVATNLPSAPRSRLCCLIECVSRVLVYSAQ  
RLNSFLCGGAKVLARDLSIFESMCLSALWFGDEDMDDFLVGLFQWLAIVSRKRNRPPS  
ESVSSRNFDTEELFRQVSMVATHVHKLYLTLKELQKQLRSHYAANEHCAFSLKIGIFFGE  
DTANEILSGIAVKIHSLLQVMPKEFQVNPLPDFPSSMAAETEIPVQNSQRSGRKRTRSGS  
MVPRCKSRTRRLRRKRNKVVDFMDLDGGMNSPRRNPTRDAYADLEDFLVEG

>comp11499\_c0\_seq1; 534 1 2499 LEN=2574; translated  
PTKQPEPVPTPKPVPVPVPEPPNTLTSPLPIAINETCNLTSGDECCVLSDCQNPVEVCEQ  
RTCICKDGNPRFTLIWNGDEDLHLFVITPDGVEISADNTFDVFSGGTYERGNTDKVQLLGY  
HVENIYFSSGESPSGTYYKYLVRSSSTGRSIDKDSWSVEIHDGGELVHQENGSGDSVTFTYF  
RPKDVNGPQRPDQASRCSLEEEECIDADCANVSGDICIQRTCISEGSLRISLEWTGDD  
DLLLTVKTPEDVVISQGSDFDAGSGGRYEGSKQSTFGFHVENVYFPKSGAPSGTYLINVD  
SSSVNGVGNDIWTVRIYENGGKLFEEVGFGGSGAFSYKTAAPVPTLAPIAPAVILPTG  
PSVCTTDSCLDGAQVCVGEVCINEGSPRFTLQWPGESLYSLTVVTPGGTYISAFSPFD  
PDSGGIFEGPTQQRISGDDVESIYFPMKGLPLGLTYTYVTNSVASSDETWTVTVSVNGE  
NLMTKTGSGKSDEFTFQFIEAVEDKEAIEAQGRQSPVPAPQDQKECDQLKAECCNTDC  
SSDEMCSFDICVKKGAPQFLLSWEGNYDVALAIVTPLGTAISWEYPLDADSGGIFEDHAY  
SEENRRIENIYFAPDEGLGVYPYIHSYQTSDDANWTLGIYVDGEEVSTESGKGSSEV  
LFFDYKGLVLDGQGGSEEEVCDPLALPEGQCCSSIDCFPNEACTSRTCVDENRPRFTLSW  
EGENDLDLVVVTPLGGVISSLNLEDPESGGKFGEDFDQFESGLHAENVYFPMDDGGPVGEY  
SIYVRSFLSSNGVDDEWTVGVYVKGEEQLSVSGSGTSEQITYTFFPLVSYAG

>comp11500\_c0\_seq1; 593 115 1629 LEN=2650; translated  
MAEMKISNPALWASKAGATSKNGNTKISQQQLHSLRAYENRRRLAYSSKRETTSLYWKS  
YCDLLSASLRETGRAQRIVLGTSHAYGMYAEAMQRIYDDTFLEDEKGNIAKDKQRKLLQ  
RKKALVGD SRGNPQPTTAVAKDAVSVLKEVREAQNELASRFEESSKNMDEE IADLIGSL  
LDTTREL FNKIERLGSSILVELEKTEEEVRKAWDNYLNSRSDGASSTDES RPKKVTDQWV  
EMQYRVAVTYQNLAWDKNEVLSNLFKIKQEEINRRMNLREFLVAFQQRQLFLDLPS  
IQSKVLEELTGKEMTRDDMEKAVQTIIDERTSKYKRKTMAADLVSETEDDFADFNLESPL  
TSDLCKAKVVLKAEADGDWTL SLAVMSADSFLHMFIDSPRVKLTTSPEVAFTLLAPTL  
IITSDGSGKSNFGRGWS DPLTPTESVILAKSRVKQMDNSFELIEFISQPAASKFAIGRT  
TRRRILIQPTKEEADDWIIQILTA

>comp11501\_c0\_seq1; 666 210 2048 LEN=2134; translated  
MSFVTCSTRVRIARAIGKRFSAAIKSTSRSQTKATNLRYISSTSTLHDGELAEVCNANVV  
SSFPPIINPESWDMPLPDFLMSWKKKSEVASGTANLLNDNLAI FDGSTGMKRTFADYYK  
DTSGIAGSLRYDFDVEDTSCVCLFAPNHVDYLPVTLAVGLTGAKITPVNPLYKSNELLVV  
LDKSRTSVLIAHKSNDVALEAAKDAKHVKHILVMTEDGESAQGGIESLESIKRHSQSFD



KTSDCYDCAATTHPYLLPYSSGTTGLPKGVCLSHANLTANILQMEEVEGPPYVGPEDGLFS  
PLPFFHIIYGMVVSMYYGWKDLPILTI SGRFDFELMLEMIQKYRPSNAHLVPP IILALGK  
SPLVDQYDLSLRTIMSAASPLGSDTESAVQKRLGCQLKQAWGMSELSPIGTMNASAPDI  
PVGSVGPLVSNFTFGKVLDS DGRSLGPNKEGELI IKGPQVMMGYLDEPEKTKECLSSSTGWL  
RTGDLAYYDEDEGYFFITDRIKELIKTRGFQVAPAELEDLLLGHEDVNDVAVIQIPDEESG  
ELPRAYIVLKDGSDEEKHEETKSDIYEWVKERVAPYKRLDGGIVFVDSIPKSASGKILRR  
ILRDELAEQMKE

>comp11502\_c0\_seq1; 705 69 4561 LEN=4772; translated  
MPTSPDQSSALTL LSKPRLCLHGSRNSNSVVTQAQLRNLGFHKCFGVTHLVAPWLCSGEI  
DENVRVCEGDSFY S W M N K T K D N K G C L P D L V A S L K F V L R H V I Q E G P Y D A V Y G F S Q G A G I A  
A I L S C R A I R K K I L W D M G E T K V D E N P A T D N P W K F I F A A C T T L P I P W R D I T H Y L K L S T I T S I  
E I P S V H L I G I D D P F K Q S S E R F F D D F N G D D D K K L P V Y F E G G H E I V S T S G S L G R A S Y A A I E W  
F S N F N P E W I L P S I G F D D S P L C A I A K E I N G F T V G S S S Q E T L K G T F G Q Y Q L N A I C D R D F D L S  
M M R L L E N E E I E H K I A F R A P G K A P M T Y G A L R R F V R G R G N L S T I G C T R G D K V A Y L T P Y G V L G  
A V A F V S I S A Q C T A V P L D P E S S A D L V M A F R Q L R P D V L I V F D D L G A D V C E Q A S S T A A N A G V  
R V I D A S G D F K E A T F S F A D C E Q N N K D I L E N K G S D T C I L L R T S G T T S E P K I V P L D T W S I L T N  
A I A I A N N L G L R D T D V A L N A M P L F H I G G L M T N L L A S F V S G G S S I F L P K F N V S T F A E R L T K S  
K G G V V E P T W F S T V P S I L A A L E S Y V S S E E S S L L R S S L R F V R V G A A A I S D D L I I K C Q Q T F G  
C R V V P T Y S M T E C M P I S Q P Q Q D A T I V D E R P G S V G R A L A V S I C I V N S N L V P L P Y R K K G H S E S  
I I G E V C I S G S T V T K G Y L S N D E A N R S A F F R L A K K S W F R T G D L G Y L D R G G Y L Y L T G R S K D M I  
K V N G E Q V S P I E V E E A C M R F P G V E L C I A F S Q P S N N S W G E Q V G I A C V L S A S N F D R G H S S L V D  
E T E F Q T E L R R F L K V E Q G L V D W K I P E R I Q I V C E G D L P K T K S G K Y K R A G L D K I L D E A Y P S S A  
T N Q P M A D R D Y L A T K M S P L H P A A V G V Q F V L A V A V M Y V H I G N L N V W A I D S P T E G S G T Y Y Y E R  
L V D R T G V G A F S E W S N R T W C F H T P L F F F V G G F L L A T G T H S P I L G K S A L L G F Y K V R I L S L H  
P M Y L L S V L L C V A I F V A Q C H P E N F I P G F D P T R T P I E G E A F V C Q A A P V E M S W G G T L I S S I V T  
Y S L L L Q S W P V A I P F T W F L S Y Y T W F S S V M F C I F V F P W C H K P F F A A K D D R T A L W K L T I S W L  
G A L Y V F V G I F S A G L A V S D S E S T L N W F A L S M Y L F P P G W L P C F S L G I G A S F L L E H Y R R K G E V  
A R Y A K V S G L L T D F I S L F L L A G W I F Y G T S S S S L A A P S S V V T D I G E R Y W A A Y V S R L V C P L G F  
V W F I G L A I G R G V T A R I L S R H T V V C W L A P S S Y N V F L F H Q P I S E L Y F F A T R R T W W A Y P K S F Y  
W F S P Y P I P V K T W E I P I V M T I V I L F S M L M H F Y V N G V L I G A T T N C I R C G F K G E R Q Q D G E A S H  
D H G Q H H P E I K S V A T I V L E T I A R V C H I D P S R L R G E T D L T E I G M S S M T L P V A I S E I N S A L K S  
H P S E A K L A L R H V Q S M G S I T D L I S L A S E G G S S R A M R S S L R A S R L S R S A S R V S L G S S R H S T N  
F S L F G N N D A E S S E V E D V E E X A T F L A F H D M A P L S Q H L V A W F F S P G L K I L D D T H S R V G

>comp11502\_c0\_seq2; 195 954 1694 LEN=1905; translated  
MVGVPKELLVQVPDPGKDMGNPNRDDHCDLFDADAFLLNGVLIGATTNCIRCGFKGE  
RQDGEASHDHGQHHPEIKSVATIVLETIARVCHIDPSRLRGETDLTEIGMSSMTLPVAI  
SEINSALKSHPSEAKLXTEARSEHGKHRPYLSGERGRKQPGDAIVAACIEAQPLCLEGO  
PWQLEAQHKLFFVRKQQRRLRGRGRRGGATFLAFHDMAPLSQHLVAWFFSPGLKILDD  
THSRVG

>comp11503\_c0\_seq1; 242 134 908 LEN=978; translated  
MLAIIILVTL LSLAFCDGLSMNHPTSRRVFLEVSPALIVSPA VGF AALPPASRDVDVGGGY  
DLLSDRRGAAEQDAIYPKSMEGIWDCQRIVARVEGDKFQAGEAYGASEAMRALQEGK VET  
FRTRYIASPVIESEG VVDRGFETSSRAKSSDVQWSVEKPNILQRDNKVKLVVVKRSVEV  
PSDKGFGFDELLRVEDGTTTRAVQVKRRYRRSFDDQGNRVVEGLEIMKTFRVLDGIAGTE  
LPTSTVKSQIRLVRPPL

>comp11504\_c0\_seq1; 338 28 621 LEN=904; translated  
MKTACVLATILASAAAFAPASTNSRSTSLAASQFENEAGV VSPVGFWDPAKLSAGIDQET  
FDSYRLAELKHGRVCMLAVLGYVATETYHFPGDIA PGIPFDSIPSGYAAIAAVPLL GWLQ  
IIWTVGIIETTGNLGNFP IGYLDLEPEEYFKRQTQELQHGR LAMLAFLLELLRHDTQTLG  
NNDGLDTLISGLPFIYN

>comp11505\_c0\_seq1; 693 1 1737 LEN=1737; translated  
XAAAAAASKRTSAATPDEADGTQPVTSKSSVPAE VFDARVVPELV D V R Y L Y S E G E D T S N  
GDLPRAPLSDNLATSTENQYPGLGGACYDIIVIGMQEATFSMKATTKATASEKENDDDDK  
NASETKPRNNNDNDHQKAR PQHRDR TDDSSDDDFDLLEYETDDENNIETDDDASL GKDNE  
IDPIYKNESFWRDNDNNNDNNNGSVLLEGEYEGWSDGGVLWSDPPSDGNWGVCKKVTVV  
FGVAICVTQQAWNERSKCDHIANVFYQLLDNDANGIPDDEEVLAEMVQKGYLLI V P A T E Q  
EFEQS IDRIPAAASVSQPIWTT EATPNSCQVPTNRGASATDRSTWSSAVNTGGMSCNPQQ  
DASVEEILHLISRAASTVYPTKWSSFASEFGSAIKAANGNCGFGYSGNWINPSTNGCSG  
HFAYNDATCDEACNVEGIFWASISYIGGMYTMDMAKTTKNEWLMCTPDSNMEVYPSGVR  
NAVSLQSGAPILYAMVADTTSDGHGWLPSVMPDGKYVGSADNVP GPVPAPVPSVPAPVP

APVPAPAPAPDPDDPETSCEDDASFKFKNNKNNKMCCKKWL  
>comp11506\_c0\_seq1; 473 75 1178 LEN=1243; translated  
MARIVRQNRHSPQWRRPVALVSFSLVALLLTGTTSFATTPPTASQGIVHGTNKKNIIRLTA  
LDGKAEIPGPTRNADKLICSFDETFDSGRTSWPYTAADLNRLDNTDDSKFYDSPRMVTHI  
DDMAIESLTFEYKNTFEELAEQSDDEEATKKTIDILDLCSSWVSHLPVVDATSSSFQYGNVV  
GLGMNQEELNANPQLTSSILQNLNIDPKLSSLDDESFDVVAMTVSIDYLIKPLEVIQEI  
RVLKPNGVALISFGDRCFPTKAVAMWLQADPIDRITIVASYFHYAQYDQEANKEGGDDSN  
DGKDEVLYKWKSIDAYDLKDEPQEAPPKPSMGEIMSNPALGFAMMNTASAVQKANNCDPL  
FVIKASK  
>comp11506\_c1\_seq1; 271 1 527 LEN=881; minus strand; translated  
XQLTSSILQNLNIDPKLSSLDDESFDVVAMTVSIDYLIKPLEVIQEI  
RVLKPNGVALISFGDRCFPTKAVAMWLQADPIDRITIVASYFHYAQYDQEANKEGGDDSN  
DGKDEVLYKWKSIDAYDLKDEPQEAPPKPSMGEIMSNPALGFAMMNTASAVQKANNCDPL  
FVIKASK  
>comp11507\_c0\_seq1; 314 1204 3233 LEN=3265; translated  
MADVDERVAAKAALAEAAEEELQSLCASHAGTFVSVERRGRALEVSLEELLATVQSVKLDV  
ASTQEALQEEDGPGRARENSLAALSEKHRVRRRTLLQHSSLELLELPSLMDACVRSN  
LYEEALSIAAFSNTLERRHTEQNQVVLKVIAQVRSRQVDLRRYLLHSLKNQVTMPECLEI  
VTALRRLNSIDLRLRSSEKSSVERVFAAMELSLQVDFLEARDVWLDQPTTATTNYATST  
PRGSNSSKXRAFAFDIGAIARYDRAISDEVVAMFEYDVI VNVPRNIQINVPLLDILRRT  
SNSXWASMSYYISLTQQNFCLKNVGAVADCRMFEIATQFNAI FRAQQSSHTTNGGSSSAS  
IADSNIDNDGQVSVSLLSMWVTRRIHSFLKTLSSQLRLMDESGSLRDALDACIFFTGSMG  
RLGADFTAQLPPLFEQQLVIIVVNNWKEGTNQLAETLKI CREAGVASPLFSSTIVPTGPL  
SSAGNTYAENDEEGYSSSTSSIMPPPRNLMALPPLGRLVNACLNGLNELRRCLLPGVFS  
QLREAIEKEFLLTKNILHAHERAVMTPGLRGDAAKLRENAKDMKKAAKTIIFPYVRGAL  
ELSLGNESGAKVHFDKVRKAIAPPVPPPPKPTVEEENTQEKTE TDIPEPTAPTAPTSTG  
NAALAPSAQTETPKES  
>comp11507\_c0\_seq2; 385 1277 3121 LEN=3153; translated  
MADVDERVAAKAALAEAAEEELQSLCASHAGTFVSVERRGRALEVSLEELLATVQSVKLDV  
ASTQEALQEEDGPGRARENSLAALSEKHRVRRRTLLQHSSLELLELPSLMDACVRSN  
LYEEALSIAAFSNTLERRHTEQNQVVLKVIAQVRSRQVDLRRYLLHSLKNQVTMPECLEI  
VTALRRLNSIDLRLRSSEKSSVERVFAAMELSLQVDFLEARDVWLDQPTTATTNYATST  
PRGSNSSKIVLSHSTSEQLLDTIERYRTRMFEIATQFNAI FRAQQSSHTTNGGSSSASIA  
DSNIDNDGQVSVSLLSMWVTRRIHSFLKTLSSQLRLMDESGSLRDALDACIFFTGSMGRL  
GADFTAQLPPLFEQQLVIIVVNNWKEGTNQLAETLKI CREAGVASPLFSSTIVPTGPLSS  
AGNTYAENDEEGYSSSTSSIMPPPRNLMALPPLGRLVNACLNGLNELRRCLLPGVFSQL  
REAIEKEFLLTKNILHAHERAVMTPGLRGDAAKLRENAKDMKKAAKTIIFPYVRGALEL  
SLGNESGAKVHFDKVRKAIAPPVPPPPKPTVEEENTQEKTE TDIPEPTAPTAPTSTGNA  
ALAPSAQTETPKES  
>comp11507\_c0\_seq3; 314 1277 3306 LEN=3338; translated  
MADVDERVAAKAALAEAAEEELQSLCASHAGTFVSVERRGRALEVSLEELLATVQSVKLDV  
ASTQEALQEEDGPGRARENSLAALSEKHRVRRRTLLQHSSLELLELPSLMDACVRSN  
LYEEALSIAAFSNTLERRHTEQNQVVLKVIAQVRSRQVDLRRYLLHSLKNQVTMPECLEI  
VTALRRLNSIDLRLRSSEKSSVERVFAAMELSLQVDFLEARDVWLDQPTTATTNYATST  
PRGSNSSKXRAFAFDIGAIARYDRAISDEVVAMFEYDVI VNVPRNIQINVPLLDILRRT  
SNSXWASMSYYISLTQQNFCLKNVGAVADCRMFEIATQFNAI FRAQQSSHTTNGGSSSAS  
IADSNIDNDGQVSVSLLSMWVTRRIHSFLKTLSSQLRLMDESGSLRDALDACIFFTGSMG  
RLGADFTAQLPPLFEQQLVIIVVNNWKEGTNQLAETLKI CREAGVASPLFSSTIVPTGPL  
SSAGNTYAENDEEGYSSSTSSIMPPPRNLMALPPLGRLVNACLNGLNELRRCLLPGVFS  
QLREAIEKEFLLTKNILHAHERAVMTPGLRGDAAKLRENAKDMKKAAKTIIFPYVRGAL  
ELSLGNESGAKVHFDKVRKAIAPPVPPPPKPTVEEENTQEKTE TDIPEPTAPTAPTSTG  
NAALAPSAQTETPKES  
>comp11507\_c0\_seq4; 559 1204 3048 LEN=3080; translated  
MADVDERVAAKAALAEAAEEELQSLCASHAGTFVSVERRGRALEVSLEELLATVQSVKLDV  
ASTQEALQEEDGPGRARENSLAALSEKXSREATDPAAALELAGTPGIAVPDGRLEIE  
FIRRGPEHCRVQYAGTAPHRTEPGRSQGHSTGAVETGGSATVPLAFPKKPGYHAGVFGN  
RYGAAPIEFDRPRAAAIDKSSVERVFAAMELSLQVDFLEARDVWLDQPTTATTNYATST  
PRGSNSSKIVLSHSTSEQLLDTIERYRTRMFEIATQFNAI FRAQQSSHTTNGGSSSASIA  
DSNIDNDGQVSVSLLSMWVTRRIHSFLKTLSSQLRLMDESGSLRDALDACIFFTGSMGRL  
GADFTAQLPPLFEQQLVIIVVNNWKEGTNQLAETLKI CREAGVASPLFSSTIVPTGPLSS  
AGNTYAENDEEGYSSSTSSIMPPPRNLMALPPLGRLVNACLNGLNELRRCLLPGVFSQL

REAIEKEFLETKNILHAHERAVMTPGLRGDAAKLRENAKDMKKAAKTIIFPYVRGALEL  
SLGNESGAKVHFDFKVRKAIAPPVPPPKPTVEEENTQEKETETDIPEPTAPTAPTSTGNA  
ALAPSAQTETPKES

>comp11508\_c0\_seq1; 394 1 1752 LEN=3523; translated  
NHFVPRKRTIGWDYEEWNALDRGTIGWNTEGNTDWCWVFIESKFTMAIGFKTIPYLHEIE  
EGGGDLGDANSDRNGFSHCGINETTALLVATPRVYGLFTSDRMVLATSRGERTIKRKSS  
SGFLAIVVSATAMAFLVLAHCTNCKIFFFDASVSMTIGTRFYSTNNAVLEPIQPITE  
TTTTTTEYGEVWLIRHGKEDSASAFVESSSSWSPNGGNLNLQRMRQLTILYELNAKGWD  
RAEHLGSLVKAKQWPEFHALFATRPPTAQEIEDAVENPLDYFAIARDPTGQSLVWREYQ  
TLLPISDYLRQPIVADFCCKGDTKEAALEIAKTAVHASESGKPGPGSPDLSILALPAAGNV  
TNINITNSNRSNIVLVSWDHCSLPTLVVDGFGCKEIECYRCWSDHRFGDVLKLNVSVT  
TTTTSSNRDANDSEPLAVGTLQSSKSTNTDTDVVRQQVSVSSTILSMTGESYPGDDYCY  
VDHDEEPDGVGNSPDHVTSTPTSVSIRKSTPCVTSYCSNRPSAGFLVDCLCYRHGKNEDD  
DANAIMETNNVRDGVNEEKDHTKEKEDLASSSSGWISLMKQIQ

>comp11509\_c0\_seq1; 494 76 1383 LEN=1503; translated  
MGRITTIALGFYNVFLFACLTPKPDVAVVSAFSRTGPGQLQNRPRRGPVDGTALASTNGPS  
GGDFGELTSALVTLDDQQWQMQQSGRGRKPRWSKLFLLPPEDEPDEGGDESETLGSKPRGEDF  
VWMLEPPSSSIPSCVVVFTGGAGLGQFPQVVYNELLTKVSDKLNVCITAPYEVGLDHFS  
LAKETGERIRRALLVLDNEDAKPLPTYSLAHS LGCKLQTIYMAATGLESSFDFGIGFMAF  
NNFSFAKTITMARSFAQELRGGGMPASGMGGVNPENINSIFDFAEMAVGAIGVDFSPS  
PQDTQRQLIQLRYSESMKAKTRLFVFGDDTLDSQEFRDACESGVGVSNLPGGHLTPVYFQ  
FKVDDLAGEAMGGLGDNFTPENINMAKEAIGGFQGASFGDEENFSALADEVCDWILGKPP  
TAASIPRISSGGADS

>comp11510\_c0\_seq1; 330 56 628 LEN=1249; translated  
MKFSNSIAVFAVLTSPVITAFSTSSRIAQSTTSISSSSLSASRRDVLGNAFASAAGMASLI  
VTQEARAEPRMYLAEPDEFKANEAKAMEFKRAQLAIKKEFNEVIAKFLAEPNDEAAIV  
EDLKRLQNLVAKTGGLPLGIKKDELFLKIRSKKGGKGYWPTNCEIAYQSLQGEIRFQQSPN  
MDKEMGNPFQ

>comp11511\_c0\_seq1; 482 236 1492 LEN=1612; translated  
MDIRKRKDTPEAIDDDGAPNRRTKLRTEEDLGDVPAGTEDPSAENATMVSTAAAASAVD  
ASALPSSDTPETLPVSNPDAIEVEKALIAPANAA SPESITAIENPDLVAAATEEIIAPKID  
PKPYTAEELANWNQMFFQLMLYRIENGNVNVKSTDRKHGDLYSWIVQLRKDYKTRERDPS  
ESPLTEAQISVLESVRFAFTTRGEEHWQKSYERLKEYKANHGHLVPRQCEIQGLGDWVT  
SQRQQYQEYRKRPTPLTKQRKELLDEIGFQFRIRNRPEWGSKYQELLDYKEKHGDTRVP  
QHFKENKALGKWKVAKQREYKYLHKKGKHSFLTPDRLEKLNSIGFVWSVRGESSTSQADKN  
VTNPLPDEKIEPTAVVAVDVHMPKTEGEDKVIKEDMVVNTDSQVPVDDEVNDIRSVNV

>comp11511\_c0\_seq2; 468 236 1634 LEN=1754; translated  
MDIRKRKDTPEAIDDDGAPNRRTKLRTEEDLGDVPAGTEDPSAENATMVSTAAAASAVD  
ASALPSSDTPETLPVSNPDAIEVEKALIAPANAA SPESITAIENPDLVAAATEEIIAPKID  
PKPYTAEELANWNQMFFQLMVSAARLSLAISLEDHCWIPNHARAEFLNAMVANRVELNGY  
LQHHFAQLYRIENGNVNVKSTDRKHGDLYSWIVQLRKDYKTRERDPSESPLTEAQISVLE  
SVRFAFTTRGEEHWQKSYERLKEYKANHGHLVPRQCEIQGLGDWVTSQRQQYQEYRKR  
PTPLTKQRKELLDEIGFQFRIRNRPEWGSKYQELLDYKEKHGDTRVPQHFKENKALGKW  
AKQREYKYLHKKGKHSFLTPDRLEKLNSIGFVWSVRGESSTSQADKNVTNPLPDEKIEPT  
AVVAVDVHMPKTEGEDKVIKEDMVVNTDSQVPVDDEVNDIRSVNV

>comp11511\_c0\_seq3; 395 236 1623 LEN=1743; translated  
MDIRKRKDTPEAIDDDGAPNRRTKLRTEEDLGDVPAGTEDPSAENATMVSTAAAASAVD  
ASALPSSDTPETLPVSNPDAIEVEKALIAPANAA SPESITAIENPDLVAAATEEIIAPKID  
PKPYTAEELANWNQMFFQLMLYRIENGNVNVKSTDRKHGDLYSWIVQLRKDYKTRERDPS  
ESPLTEAQISVLESVRFAFTTRGEEHWQKSYERLKEYKANHGHLVPRQCEIQGLGDWVT  
SQRQQYQEYRKRPTPLTKQRKELLDEIGFQFRIRNRPEWGSKYQELLDYKEKHGDTRVP  
QHFKENKALGKEKETKGIADHYVYLPACFSRIALII LLTLFLMLPSLNFDFVIVGCKTA  
GANKLHKKGKHSFLTPDRLEKLNSIGFVWSVRGESSTSQADKNVTNPLPDEKIEPTAVVA  
VDVHMPKTEGEDKVIKEDMVVNTDSQVPVDDEVNDIRSVNV

>comp11511\_c0\_seq4; 381 236 1765 LEN=1885; translated  
MDIRKRKDTPEAIDDDGAPNRRTKLRTEEDLGDVPAGTEDPSAENATMVSTAAAASAVD  
ASALPSSDTPETLPVSNPDAIEVEKALIAPANAA SPESITAIENPDLVAAATEEIIAPKID  
PKPYTAEELANWNQMFFQLMVSAARLSLAISLEDHCWIPNHARAEFLNAMVANRVELNGY  
LQHHFAQLYRIENGNVNVKSTDRKHGDLYSWIVQLRKDYKTRERDPSESPLTEAQISVLE  
SVRFAFTTRGEEHWQKSYERLKEYKANHGHLVPRQCEIQGLGDWVTSQRQQYQEYRKR

PTPLTKQRKELLDEIGFQFRIRNRPEWGSKYQELLDYKEKHGDTRVPQHFKENKALGKEK  
ETKGIADHYVYLPACFSRIALIILLTLFLMLPSLNFDFVIGCKTAGANKLHKKGKHSF  
LTPDRLEKLNISIGFVSVRGESSTSQADKNVTNPLPDEKIEPTAVVAVDVHMPKTEGEDK  
VIKEDMVVNTDSQVPVDEVNDIRSVNV

>comp11512\_c0\_seq1; 819 195 1835 LEN=2060; translated  
MSDKTEPVVDNYISGVFVPPSTNDYMDVINPADAKTIGKVAVSASSDVEDAVVSASKAA  
AAWANRTIKQRAAVMMKFHTLVQQHAKPLAELIVKENGKNLTEALADVAKGNETVEWACS  
LPQLAPGTTLRVSGQVSCDTRRDPLGVVACIVPFNFPMVPMWTVPIALVMGNTVVLKPS  
EKVPLTMHYAADLQAGLPGVFNMQVQTRACVEALVDHPDKAVTFVGSPPVAKIVAQ  
RCRALPEPKRCTALGGAKNHLVALEDCEAEGAAADITVSFAGCAGQRCMAASVLLTVDEG  
GAGESEPAAGTELVQKIVSTASAIKAGSGPGEMGPVIDKVSYERILSYIDHSIEKGAEVL  
LDGRSWKRDNGFWIGPTILKHTNPEEDKTLSEEVFGPVLVSVYVDSWEKAVAIENASPF  
NAASIYTTGGNAEWFTRFRASMLGVNIGIPVPREPFSFGGLYGTRSKYGDMDITGDGA  
MEFFSNRVKVTSKWPVVRGPLSRKRGRSGDAPVATNGSHNGTHNESYHGSDAATEPRDAA  
NFAGQM

>comp11512\_c0\_seq2; 773 195 2081 LEN=2306; translated  
MSDKTEPVVDNYISGVFVPPSTNDYMDVINPADAKTIGKVAVSASSDVEDAVVSASKAA  
AAWANRTIKQRAAVMMKFHTLVQQHAKPLAELIVKENGKNLTEALADVAKGNETVEWACS  
LPQLAPGTTLRVSGQVSCDTRRDPLGVVACIVPFNFPMVPMWTVPIALVMGNTVVLKPS  
EKVPLTMHYAADLQAGLPGVFNMQVQTRACVEALVDHPDKAVTFVGSPPVAKIVAQ  
RCRALPEPKRCTALGGAKNHLVALEDCEAEGAAADITVSFAGCAGQRCMAASVLLTVDEG  
GAGESEPAAGTELVQKIVSTASAIKAGSGPGEMGPVIDKVSYERILSYIDHSIEKGAEVL  
LDGRSWKRDNGFWIGPTILKHTNPEEDKTLSEEVFGPVLVSVYVDSWEKAVAIENASPF  
NAASIYTTGGNAEWFTRFRASMLGVNIGCVTPRCLVCSWFGIKSMVGPILVRHVVD  
FFQNTNLLLMMNLAIEVICHECVRDSKXSLFFLFFLSLVSNGGVPPNPQRRIPVPREP  
SFGGLYGTRSKYGDMDITGDGAMEFFSNRVKVTSKWPVVRGPLSRKRGRSGDAPVATNGS  
HNGTHNESYHGSDAATEPRDAANFAGQM

>comp11513\_c0\_seq1; 192 1116 1892 LEN=2155; translated  
MTNSCQGDSSGPMFIPDALDRPDQDLLVGLVSWGYGCSDMFPGVYTRVSYHYDWILDNI  
CSVDPEGAPEYVDCNTIINGLVTSPSTYFPTIPVNVQEASIPAVITPDVEAYTPKATNP  
PIKRPPKMPNTNPQAMNPPINRPAKLPTNPQADRPKLPNTNPQTKPPAGKEMYDEINCPAV  
FPRSGTPCVMVEPYKYKCMYYEMGPDVSCSCRYDSLIICTGNFYTNVDPDISVYSKRG  
SKKKDGFLSFLMEWFGGI

>comp11513\_c0\_seq2; 324 238 924 LEN=2019; translated  
MNSSIGKEHFVGLLLAVIALIAPPVSSEQRQPLLRGLENDDLPHRKPRIVGGETVANPQE  
RYPYFAVFDKIMCGGALISKRWVITAAHCAGASSSFEINGKHYHTREVLSHGYDDRHM  
NNDIGLYQLSEDLIDTPYLRMSPVKITELSSMAVIGIGDTKAYLHKTRKKEAPLELKL  
AELDLVGFADCEVPEYVPHGDAEYIDPDSMICAQKLGDRYVELHCVSK

>comp11513\_c0\_seq3; 305 590 1795 LEN=2058; translated  
MCGGALISKRWVITAAHCAGASSSFEINGKHYHTREVLSHGYDDRHMNNDIGLYQLSE  
DLIDTPYLRMSPVKITELSSMAVIGIGDTKAYLHKTRKKEAPLELKLAEELDLVGFADCE  
VPEYVPHGDAEYIDPDSMICAQKLGDSQGDSSGPMFIPDALDRPDQDLLVGLVSWGYG  
CSDMFPGVYTRVSYHYDWILDNICSVDPEGAPEYVDCNTIINGLVTSPSTYFPTIPVNV  
QEASIPAVITPDVEAYTPKATNPPIKRPPKMPNTNPQAMNPPINRPAKLPTNPQADRP  
KLPNTNPQTKPPAGKEMYDEINCPAVFPRSGTPCVMVEPYKYKCMYYEMGPDVSCSCRY  
DSLIICTGNFYTNVDPDISVYSKRGSKKKDGFLSFLMEWFGGI

>comp11513\_c0\_seq4; 390 238 1659 LEN=1922; translated  
MNSSIGKEHFVGLLLAVIALIAPPVSSEQRQPLLRGLENDDLPHRKPRIVGGETVANPQE  
RYPYFAVFDKIMCGGALISKRWVITAAHCAGASSSFEINGKHYHTREVLSHGYDDRHM  
NNDIGLYQLSEDLIDTPYLRMSPVKITELSSMAVIGIGDTKAYLHKTRKKEAPLELKL  
AELDLVGFADCEVPEYVPHGDAEYIDPDSMICAQKLGDSQGDSSGPMFIPDALDRPDQ  
DLLVGLVSWGYGCSDMFPGVYTRVSYHYDWILDNICSVDPEGAPEYVDCNTIINGLVT  
SPSTYFPTIPVNVQEASIPAVITPDVEAYTPKATNPPIKRPPKMPNTNPQAMNPPINR  
PAKLPTNPQADRPKLPNTNPQTKPPAGKEMYDEINCPAVFPRSGTPCVMVEPYKYKCM  
YYEMGPDVSCSCRYDSLIICTGNFYTNVDPDISVYSKRGSKKKDGFLSFLMEWFGGI

>comp11514\_c0\_seq1; 305 207 998 LEN=1557; translated  
MMQMPVAAMATVLLASSDPSAILRTDAFGTGRPVQRHRHRHETNRLPATHASTAGGN  
PRCRGVPGTKALAQSSALGAGLFGGIFGGGGGSAPTGGDEHGNGAVLAEYGVGLPGGD  
NALLQQKLESLSFVTKEWAGLFAAGGITLTPVKVSRSGVSAGEGGGVCRLVFEKVDTG  
YGDKDKDDGNENENTTKNEKKEQAKQGGVEVSVLPPGEGRTTATVRVTRCEMDGNTMKE

MSEERILRELRDAIAVWEKESAL

>comp11515\_c0\_seq1; 907 257 2200 LEN=2339; translated  
MTAGTEGIALASAGSN DATNKDTMALSKTSKTSV LVIETNDENIGLNSPSTDTTSLSRSM  
RIEEQSKETEVLVGLDVYSDIAKDDDCESVSSSTSSSFMSIYFERTDFLPWENLYAKA  
EYAPHVGF AIAAGGFACMHPFMFFAGAVTAMGALRAAGAA YD YATCSLQSVSTEDADGQA  
TTSCDWFPAAFSLSYTDNINDEAKRQFSPVRGNMGDVE SVPLLAKTSSSCST SASTTVE  
SVENEIKLGKKENASKPVVNDP SMPCLIQSPPKIYHQGTLET LGPVQWVKDTF PSLPTIA  
LDNAEFRGLYAQEFFDVFVADDAPFGFP AFHKLRRDKVKYGLWRNGISSEIFESDGS GI  
ELPPTLTTKERDVEYHAKTNSFLGPAYAPT KKTQRAYFVSKKMLVVDIKMTLHDIPFSKQ  
FYLI ERWIIDGTHSNAKNQPKDLHSRKKKNKNSNSKPSSSHCVYVTVSSKVCFTQEC AFE  
STIAKESAKQVCEISKWNIMAQDGLKRTEEARMKRLRQKQLIEEQRARREQQQGVMS SP  
LLAQSSGIAKQFENDESIEIEHLDIVLPDHKNESRRNGRNRSCNGSRRNSFPLRQKNDGT  
QTNRRSLSRKFSKILSRSGHPNGIDVRTGNEVLS SPPKVR ISSAPCL

>comp11516\_c0\_seq1; 871 292 2469 LEN=2852; translated  
MVKTTARKHGSVSAADKTASVSTLQMVGKEVDPEEILPLGQNNITPFGFGFSSPLFRVLN  
VADRNGGYKATASNIVTDVMDGITNGKADVALVFEDGENGELLGIFTETDYIEFSMERV  
KASKNEEEAAKYLVS SVKDYITPIDQVIALSKDDAANVAIASMKQANVRHLV VADQVDNY  
RLTEKSEIIGVVNMQDVM SVVQKDERLSLQSI AKKYPYLSSPLEQMKEELKSSANAAARD  
DPEKVKTDIIRAGTAALSFSFLALFFSRSEWLHDHADLAMI AIFVIGYIGIIFEEVFEFN  
KAAVALLMSTGLWVTYADYFESTGVASDTVITQLGEQLSEVSDICFFLLAASTIVEV VDA  
HQGFKVV TNNIKTTSKKS LFWTIGFLTFFLSAILNNTVTVIMCSLLKLVPNVDDRKL F  
GGMVVVAANAGGVWTPIGDVTTMLWINNQLSTVPTVTELF LPSVVCLVVSLAFLVNQVE  
EDDSLENSDLAEPSELAPRGLLVFWSG IASLLCVP IFAEFTGLPPYLAMLTGLGAIWTLT  
DVIHMGEEGDEDLKV PQALAKLDTAGILFFLGILMSIGVLDKSGLLKELAVFLSDNLP SL  
DI IATVIGIASALVDNVPLVAATMGMYDLVDYGTDDKLWQLIALCAGTGG SILVIGSASG  
VALMGLEKVDFLWYAKKVSAGAAIGYFAGIAAYLAQNA ILSGSM PNLLSEAPLAVDVVQT  
AMTSM

>comp11517\_c0\_seq2; 662 170 1810 LEN=1854; translated  
MNF SRACFSAIVVLATANAFQQRPSINN KFAATTSQLSVASVSQPPSLETDAFVNEISEQ  
NPLKVI IAGGGVGLALANTLTKNPNMEVTVLERTDQFKRFGGPIQLASNALKILNEMDT  
TVYDQIMDKFTFTGDKENGIKDGIRTEWYAKFDL ASPAEARGMPYTGVIERPDLQEIYLN  
NLPKGTVRNGDGI STYTTDSETGRVTCEMESGAKITGDV LIGADGIWSAVRSKMHGTPAK  
GDDSGASYSGYTVFAGELNYDSPDNGDVGYKVYIGPQQYFVITDIGNGRYQWYAF LARAP  
GSVNDPKPEGSSKYLQDLFE GWSPEVHAILKVTQEDEIEQRDLYDRPPSIFKPWTQDHVA  
LLGDGIHAMMPNLGQGGCQAI ED AFVIAQELDGAKTRSEVTGKLESYARRRQIRSAAVQG  
LSRFASDIIIRGFDTPAKITWEDGKPKFENCNYAGIVTRMLQPILPIFFKVQFNFLYD GW  
KNEFGIDVVAALSFLTIGGIMLLLSAGVVGEAGIAASVGLEAFIGAEGVLD FEAINTFVR  
ELVSMQ

>comp11518\_c0\_seq1; 273 164 1057 LEN=1148; translated  
MSIRSVDLSRWPLPPSSSPQERVRLC LPHYQVWPVMPVHNEWLLSVSRAYGFDDEGGGGV  
GGVLRHLIYTANSEPKAIKKLI FRTVRCLHCHVGARAGQHPKIDL GTTGGGEDEEKDDSN  
NDNDNKTNPPTRIAIHTFHYEWLRRVTE SCGIASVEKCVRIVIDYYQSRIKQALHSDGPE  
AASEKELELFGRNRGD DPGFLAALGRSLRETAPANTGSANANAGASGD DPSACSQEDAAR  
ALERCQVGRNSASYARARNETEAE TRARREGEMAVENSAATRRAREEIRRALGSPMG

>comp11519\_c0\_seq1; 390 97 1661 LEN=1802; translated  
MSTPPTL TEAFRILGQRRKKT YTENEEGTND AVDILGIVTNI STDTSSSTTVLVPNLSSRR  
HFVSRSR IWLVD DSRFN AHGEEFPQH LTSXELFFYGSSEIDRIHQENIKAGDIVRFNRVS  
LKEFDPRGLAQFRFSSYDHEPGVNW FRLGHIDKQCFNESSGFHDNNYSPTGIPTMKTS  
RGRIVELASWYNKHYHLISRLSTTSNIALPTRRRL LSEIQFTSGVLSNVRVKVTQVDLEP  
ARSAAKNISYRVDSSRKKKRSRMTLPPTAF AVFTDESGVLM PFIDTSGRFVEILRSSKNA  
DHNSLSLLMTNVST EYQSNLRGLETVTSDIVLVPTRSTSGLLVSDEKNSNPNNGNHTDGI  
SDSDVIQTQETMDTDAKREHTVISRLMDLCLNGISLKKNSQSVFSIPSKYLEAILDNRGK  
SFRRNAMVHLDTSCCSLQLPPNNTSETVRVFEAKPGVLKTL CGSLEVEELSNDEMLCDHS  
MRFLRTL VQEDVVLKWTLVREERKQNVAITKVVLHRI PRKS

>comp11520\_c0\_seq1; 632 27 1780 LEN=2021; translated  
MSDWFSA AEPIDNEEEVDVWGNASSLKEDIVHDKLPCPTRRSPVLCRNGCVASSQPLAS  
SIGLDLLRRGANAAEAAIGVSAALCVTEPCSCGLGDMFCLY YEASTKKVTAVNGSGRSP  
SRLTLEKARADCPNEEDYKFSAHAVTVPGTAMGYEDLLK KHGSGNFTLADLLEPAAKLAE  
EGFPVQTTTAAH HKAGMAQIVKWLEKGEAVPLSVDGERGPEPGDIVYNPDMARVLRDLGA  
KGAKEGFYEGETGNAIVEAIQKHGGLMSQQDLADTKTSFPDPICVSYRNVKLWEVPPNGQ

GIAGLVALKGIETLEEEACSFEDIGSRSSYHRMIEMMRLGFADARAHVGDLDHMKVKCDN  
ILDEERLSKRAEDLFDPLAATIAGVPDPSSCTVSFQVVDKGN AISFVNSNYMGFGTGIV  
PKGCGFSLQNRGLGFLIGKSENHPNVLGPSKRPLHTILPGMLTYKHTDDLYATISNLGG  
NMQPQGHVQLTVHMVRSGLDPQAAIDMPRFCIADGTQQGKVLMEKEVPSHVVRGLKNMGH  
KIQGNVDGLSRAAFGRAQIIKRDPKTGVLWAGSDGRADGCAMGY  
>comp11521\_c0\_seq1; 511 109 1269 LEN=1371; translated  
MPEINLETTVGGIPLSTCVYNASGPRTGASAAALAKIAASSAGAILTKSATVEKQNGNPQP  
RIWHSGDDLASMNSEGLPNSGIDYYSKTTIDETMEGCGGAAKPYLVSI SGKTLADNLVM  
LDRIAKTMEEEKRIVGVELNLACPNVIGKPIIAYDFDQMRDILETISKKNYGFVLGKLP  
PYLDGKHLQAAAINEYSGMVKYVVSINTIGNALSVDPISEAPYIASNNGLAGLSGPAA  
KFTALANVRQMRQLDSGIDVVGVGITTRDAFEFLLCGASAVQVGTCHWKEGPKCFDR  
IVGELRELLAEKGYASARDCMGKLRPWSKEGAAKTRAAKRAAKSLEAAGGSSTATATAGN  
THQIVQVVLVLAVALLLADKLG TINL  
>comp11522\_c1\_seq1; 330 217 741 LEN=836; translated  
MPVLLAPCLLLVVVVSAYAPNRPPSTGSDDLERRGVLSKTAAMAFVATGGALPEPASAG  
VQASKFCAYGEGNDCEDLAEGNPYILELQRRSAANKQNNIDSAKNAFYAKNYPDWFAAVG  
KTMVQKESDGT FIVDDAELYKLRQEGKITTKVPSAMGGRVTDVTDVTKPMLVLKD  
>comp11523\_c0\_seq1; 128 1 507 LEN=612; translated  
LFQPKQRTNKATMIFSSITKTTLAASFMTATHGFTAPAVSTKGTFSYFGSTLCMSSEGT  
AGEDFSLDPKETA FVFIEYQNEFTTEGGKLHDAVKDVM EKTNMLENSSSLLNTARESGST  
IIHAPINFEPGHDEISDTAYGILAGVKEGSAFTRGEWGADFSGT YCTH  
>comp11523\_c0\_seq2; 257 1 961 LEN=1095; translated  
LFQPKQRTNKATMIFSSITKTTLAASFMTATHGFTAPAVSTKGTFSYFGSTLCMSSEGT  
AGEDFSLDPKETA FVFIEYQNEFTTEGGKLHDAVKDVM EKTNMLENSSSLLNTARESGST  
IIHAPINFEPGHDEISDTAYGILAGVKEGSAFTRGEWGADFSANMMPQEGDLTVK GKSGL  
CAFASKFAQRVLSIGSVNRNELRSVHIAIVSLEPCCGNVCVFSRFFILSALLFLIISGT  
NLDFLLRQKGAKNVVLGGFLTNCCEVESTMR TAYELGYNVYTLSDCMAATSMEAQEATLAH  
NFGMFSIPKTSKEIVDAMN  
>comp11523\_c0\_seq5; 235 661 966 LEN=1100; translated  
MMPQEGDLTVK GKSGLCAFAS TNLDFLLRQKGAKNVVLGGFLTNCCEVESTMR TAYELGYN  
VYTLSDCMAATSMEAQEATLAHNFGMFSIPKTSKEIVDAMN  
>comp11523\_c0\_seq6; 209 1 998 LEN=1132; translated  
LFQPKQRTNKATMIFSSITKTTLAASFMTATHGFTAPAVSTKGTFSYFGSTLCMSSEGT  
AGEDFSLDPKETA FVFIEYQNEFTTEGGKLHDAVKDVM EKTNSKPRQGI VLKIDLLENSS  
SLLNTARESGSTIIHAPINFEPGHDEISDTAYGILAGVKEGSAFTRGEWGADFSANMMPQ  
EGDLTVK GKSGLCAFASKFAQRVLSIGSVNRNELRSVHIAIVSLEPCCGNVCVFSRFFI  
LSALLFLIISGTNLDFLLRQKGAKNVVLGGFLTNCCEVESTMR TAYELGYNVYTLSDCMAA  
TSMEAQEATLAHNFGMFSIPKTSKEIVDAMN  
>comp11523\_c0\_seq7; 287 1 798 LEN=932; translated  
LFQPKQRTNKATMIFSSITKTTLAASFMTATHGFTAPAVSTKGTFSYFGSTLCMSSEGT  
AGEDFSLDPKETA FVFIEYQNEFTTEGGKLHDAVKDVM EKTNMLENSSSLLNTARESGST  
IIHAPINFEPGHDEISDTAYGILAGVKEGSAFTRGEWGADFSANMMPQEGDLTVK GKSGL  
CAFAS TNLDFLLRQKGAKNVVLGGFLTNCCEVESTMR TAYELGYNVYTLSDCMAATSMEAQ  
EATLAHNFGMFSIPKTSKEIVDAMN  
>comp11523\_c0\_seq8; 239 1 835 LEN=969; translated  
LFQPKQRTNKATMIFSSITKTTLAASFMTATHGFTAPAVSTKGTFSYFGSTLCMSSEGT  
AGEDFSLDPKETA FVFIEYQNEFTTEGGKLHDAVKDVM EKTNSKPRQGI VLKIDLLENSS  
SLLNTARESGSTIIHAPINFEPGHDEISDTAYGILAGVKEGSAFTRGEWGADFSANMMPQ  
EGDLTVK GKSGLCAFAS TNLDFLLRQKGAKNVVLGGFLTNCCEVESTMR TAYELGYNVYTL  
SDCMAATSMEAQEATLAHNFGMFSIPKTSKEIVDAMN  
>comp11523\_c0\_seq9; 106 1 544 LEN=649; translated  
LFQPKQRTNKATMIFSSITKTTLAASFMTATHGFTAPAVSTKGTFSYFGSTLCMSSEGT  
AGEDFSLDPKETA FVFIEYQNEFTTEGGKLHDAVKDVM EKTNSKPRQGI VLKIDLLENSS  
SLLNTARESGSTIIHAPINFEPGHDEISDTAYGILAGVKEGSAFTRGEWGADFSGT YCTH  
>comp11524\_c0\_seq1; 588 293 1966 LEN=2190; translated  
MTKGKVVNAMHWFKRGLRLSDNPALLACLEQKPKNIYPVYVLDGNSYQLLRCSPLRANFL  
VECLQDLDNRLTLGSRLYVLSGDP TVVLPEKWEWEITDLSYEEDETGEPYALQRDEKI  
VNLAQISDIRLFTAQSETLYPLKDYVAKSGKKPVPPTMTAFQKLFGGMPTMKKVL SHPSK  
DQFPRNENLDEL SKLYLPPTHPTDLPWPRGIPKAEVDSLWDASDCVN LAPVVHGGETLAR  
KALKKKLKDANWVATFEKPQTSCTSLEPSTTALGPYLSWGCLSPREVWFAIDKAIKSSV

TKVSKPPVSLHGQLLWRDFNNLMAHDANIHHPGSWNHMEGNKYCRQIPWDDDDPKLVEAWK  
EGKTGFPWIDAAMRQLAQEGWIHHLGRHAVACFLTRGDLWQSWEEGAKHFQAQLLDADYA  
LNGFNWMLSCSGFFYQYFRCYSPISYQQKNDPTAEYIRKYLPELKDVPKYYIYSPWEAP  
PLVLENAGVRLGKDYPPYLVVHDKIIVKENMGRMKQAYDDHKAVEAEKAQAACKAAAASKK  
NSSSSSAQSRKKRQKTK

>comp11525\_c0\_seq1; 240 100 948 LEN=992; translated  
MVSSLRPSDTEPPSAASKNKLITILDRSVSPVLENPDETASRQAGVDPYTERLHRFHGTS  
VVFECRGLSLQSTFATACTIFHRFCHATSLETDVWSVAMASTLLATKVEDEPKSLKQ  
FIEEHAKIYARRLVLADLSRQQSGNNSNSEKTLEDLVQATPQLAFLRSPIEKWRKAEDR  
RRVCDTRLPPQQLNKFGVPYKEWYEQITKMESILLRQLGFTFWHISDSHPHKFILNFCQAL  
ELHDAKFAQRAWDYCNDSRDLDSLRYLPEIIVSRLCPSPI

>comp11525\_c0\_seq2; 196 1 630 LEN=1499; translated  
XHYHGENLSAKTFRDNTGFTKRSVVTFLRELIXISDALTLDDIYAHVIPASFSIQFAQRA  
WDYCNDSRDLDSLRYLPEIIASSSILLAARDFDAALPVEPRPWVEVFGSETTEKGGQV  
DAANAILGTSDLGTSDLRSRGTGKDRGVSNEGEDDDDTKYRVSMMLAASKGFLRSLVNTSSN  
GDAETSFNDPDSFLWFCQKEIFEKEMKNE

>comp11525\_c0\_seq3; 162 1 418 LEN=1287; translated  
XRSVSFFIAQASSSILLAARDFDAALPVEPRPWVEVFGSETTEKGGQVDAANAILGTS  
DLGTSDLRSRGTGKDRGVSNEGEDDDDTKYRVSMMLAASKGFLRSLVNTSSNGDAETSFNDP  
SFLWFCQKEIFEKEMKNE

>comp11525\_c0\_seq4; 337 100 1305 LEN=2174; translated  
MVSSLRPSDTEPPSAASKNKLITILDRSVSPVLENPDETASRQAGVDPYTERLHRFHGTS  
VVFECRGLSLQSTFATACTIFHRFCHATSLETDVWSVAMASTLLATKVEDEPKSLKQ  
FIEEHAKIYARRLVLADLSRQQSGNNSNSEKTLEDLVQATPQLAFLRSPIEKWRKAEDR  
RRVCDTRLPPQQLNKFGVPYKEWYEQITKMESILLRQLGFTFWHISDSHPHKFILNFCQAL  
ELHDAKFAQRAWDYCNDSRDLDSLRYLPEIASSSILLAARDFDAALPVEPRPWVEVFG  
GSETTEKGGQVDAANAILGTSDLGTSDLRSRGTGKDRGVSNEGEDDDDTKYRVSMMLAASKG  
FLRSLVNTSSNGDAETSFNDPDSFLWFCQKEIFEKEMKNE

>comp11526\_c0\_seq1; 1066 131 4208 LEN=4543; translated  
MRNMLAPKRKLPWLMMIIVIQLSLRQKSVGSWHIIPRTIKQGINRQLLSPPRYIPCGRN  
TNPCLRSTTALMYTVETGMQATAPFVTAPTATLIKEAQTLSQTKTPLPPSFEVTSAYLP  
TGDQPEAIDRLVEQVQRGDKYSVLRGITGTGKTFVMAHTLARCNRPALILCHNKTLAAQL  
ARELRSLLQKNQVHLFVSYNHYVPESENEKIGKFTSKSSISKELNALRHLTTRALVEH  
SDTVIVASISCIYGLGLPASYLDSAFTEWVGGAQYSEEEIIGMLQGGMYTSKENE  
LELSDTTSLEHGEYHMSRSSIDGALSVILWPTEPSAIRVHFVNTKTNKENLSYSIGSID  
TICPNDDNTFRMESVTIFPARHSTGSDERFEESLSRIQEELSNQVKNFNAESKFVEA  
DRLSRRVSEDLMLLRETRNCNGIENYSRHLALRNEGAAPDTLLDYFGSQNFLLFVDESHV  
ALPQLAAMYRGDKARKKMLVKHGYRLPSALDNRPLKEDEFWDRVTQTVFVSATPSKKELD  
LISNIHENTPIDMTIRPTFVCDPPIDIRPTGNQLEDLVAEVKKRIERKERSLAMTLTKRD  
AEDLSSFLIEQGIPTSTYIHSGLKTRERSDALKSLQLGKIDCLVGVNLLREGLDLPEVSLV  
AILNADVEGFLRSETALLQTI GRAARNQNGRAILYADRITDSMEKCVSSTRRRREIQLAY  
NKENCKEVRSAKSSFLPIFDLLSDKIKEETALDEESSTSEPMTASAAGYRKGESTVHVL  
RNMDLNRLPKPKPGVYFWKDRDSNIIYIGKAKQLRQRIMSIVRPRAKHGSRIKAMLA  
KSETVDFLITPSEADALLLEANLINRHKPPYNVLLKDDQSYPICASVGEDELPEFRM  
VPRRQVYGDAGTYRYFGPYPDYSIDITALEGIEETYGLRSMRFRKARFGDFDKEAYQAR  
FDEAFREVFQTSEGSPMVPLSNMRLKGEAEASIIFDSAYNKS RDVVVVVESDFLNEI  
IVLVLQLRQGI VIGSFSYIFEFGKGHIMDRDLSEAIEAVLIERHYRSGEAPLRAGYS  
FFPDEILVQHPIRNLKELKDVIKLSRDSVEVERKDAKISVRKPAVSGSKKKVDARVIE  
FALQNAKQVARERETRRHGDALLTSVDGTAATELASLLSLEAKPEKIECFDISHLQGEA  
AVGSRVVFVNNRPPQPHLYRFRNVNTVADTRDDYANLEEV LARRFLRARSVNSFDP  
VDKDDPWAVPDVVVIDGGKGLAAALRGMKARVFPNSLYSNETMYKDVES  
SCLKNNIPVFPVIALAKRNEELFEPGSRYSINAKPDSALLLRLALRDESHRFAV  
SSHKKRRSNMNL

>comp11527\_c0\_seq1; 629 168 1682 LEN=1789; translated  
MDRTRNNSKTGARRCLGFVTGVMLMGTADALVRNSMPLKSRHYVSNTSTSSLA  
VTMSSVEDQKKTFRPNPVVSAEAEALSHSETTMKLTTPSYDLFQMLTEEGGEAP  
ATTGGNAMRDG SVLKGTKIDELQGVQLSMFKGCGKMKIETLPDPFKMVEKELQ  
PFSDSIKELVSTDQPI LSMAAKHFFEKRHGKFRPTIVQLMAKAVAAASPEHMT  
SDSSTAHSVDIEKEDTEVFEKIGGAAAWQWSGASKINVDGGMITPENHKGSDA  
WRKQAQLGQIVEMIHVASLIHDDVLDEADTRRGGEAVHKLYSNKVAVLAGD  
YLLARASVLLARLENTAVVQIMATALESVAGEIMQLKAPPELLEMESYLRS  
SYKTA SLICYACRSTALLGGHAYGSTVATACEEFGFHMGLAYQ

IQDDILDFTAAASVLGKPALADMDLGLSTAPILYAAQEFPELKPLVMRRFKKKGDKKEKAL  
EALYSSDVAMDKAKALANFHAQVR  
>comp11527\_c0\_seq2; 652 455 2053 LEN=2787; translated  
MDRTRNNSKTGARRCLGFVTVGMLMGTADALVRNSMPLKSRHYVSNTSTSSSLAVTMSSVE  
DQKKTFRPNPVPVVSAAEAEALSHSETTMKLTSPSYDLFQMLTEEEGGEAPATTGGNAMRDG  
SVLKGTKIDELQGVQLSMFKGCGGKMKIETLPDPFKMVEKELQPFSDSIKELVSTDQPI  
LSMAAKHFFEKRHGKFRFRPTIVQLMAKAVAAAASPEHMTSDSSTAHSVDIEKEDTEVF  
IGGAAAWQWSGASKINVDGGMITPENHKGSDAWRKQAQLGQIVEMIHVASLIHDDVLDEA  
DTRRGGEAVHKLYSNKVAVLAGDYLLARASVLLARLENTAVVQIMATALESLVAGEIMQL  
KAPPELLEMESYLRSYYKTASLICYACRSTALLGGHAYGSTVATACEEFGFHMGLAYQ  
IQDDILDFTAAASVLGKPALADMDLGLSTAPILYAAQEFPELKPLVMRRFKKKGDKKEKAL  
EALYSSDVAMDKAKALANFHAQRAVDALMRLPQTEARDALVRLTHTVITRKK  
>comp11527\_c0\_seq3; 652 224 1822 LEN=2556; translated  
MDRTRNNSKTGARRCLGFVTVGMLMGTADALVRNSMPLKSRHYVSNTSTSSSLAVTMSSVE  
DQKKTFRPNPVPVVSAAEAEALSHSETTMKLTSPSYDLFQMLTEEEGGEAPATTGGNAMRDG  
SVLKGTKIDELQGVQLSMFKGCGGKMKIETLPDPFKMVEKELQPFSDSIKELVSTDQPI  
LSMAAKHFFEKRHGKFRFRPTIVQLMAKAVAAAASPEHMTSDSSTAHSVDIEKEDTEVF  
IGGAAAWQWSGASKINVDGGMITPENHKGSDAWRKQAQLGQIVEMIHVASLIHDDVLDEA  
DTRRGGEAVHKLYSNKVAVLAGDYLLARASVLLARLENTAVVQIMATALESLVAGEIMQL  
KAPPELLEMESYLRSYYKTASLICYACRSTALLGGHAYGSTVATACEEFGFHMGLAYQ  
IQDDILDFTAAASVLGKPALADMDLGLSTAPILYAAQEFPELKPLVMRRFKKKGDKKEKAL  
EALYSSDVAMDKAKALANFHAQRAVDALMRLPQTEARDALVRLTHTVITRKK  
>comp11527\_c0\_seq4; 629 224 1738 LEN=1845; translated  
MDRTRNNSKTGARRCLGFVTVGMLMGTADALVRNSMPLKSRHYVSNTSTSSSLAVTMSSVE  
DQKKTFRPNPVPVVSAAEAEALSHSETTMKLTSPSYDLFQMLTEEEGGEAPATTGGNAMRDG  
SVLKGTKIDELQGVQLSMFKGCGGKMKIETLPDPFKMVEKELQPFSDSIKELVSTDQPI  
LSMAAKHFFEKRHGKFRFRPTIVQLMAKAVAAAASPEHMTSDSSTAHSVDIEKEDTEVF  
IGGAAAWQWSGASKINVDGGMITPENHKGSDAWRKQAQLGQIVEMIHVASLIHDDVLDEA  
DTRRGGEAVHKLYSNKVAVLAGDYLLARASVLLARLENTAVVQIMATALESLVAGEIMQL  
KAPPELLEMESYLRSYYKTASLICYACRSTALLGGHAYGSTVATACEEFGFHMGLAYQ  
IQDDILDFTAAASVLGKPALADMDLGLSTAPILYAAQEFPELKPLVMRRFKKKGDKKEKAL  
EALYSSDVAMDKAKALANFHAQVR  
>comp11527\_c0\_seq5; 629 455 1969 LEN=2076; translated  
MDRTRNNSKTGARRCLGFVTVGMLMGTADALVRNSMPLKSRHYVSNTSTSSSLAVTMSSVE  
DQKKTFRPNPVPVVSAAEAEALSHSETTMKLTSPSYDLFQMLTEEEGGEAPATTGGNAMRDG  
SVLKGTKIDELQGVQLSMFKGCGGKMKIETLPDPFKMVEKELQPFSDSIKELVSTDQPI  
LSMAAKHFFEKRHGKFRFRPTIVQLMAKAVAAAASPEHMTSDSSTAHSVDIEKEDTEVF  
IGGAAAWQWSGASKINVDGGMITPENHKGSDAWRKQAQLGQIVEMIHVASLIHDDVLDEA  
DTRRGGEAVHKLYSNKVAVLAGDYLLARASVLLARLENTAVVQIMATALESLVAGEIMQL  
KAPPELLEMESYLRSYYKTASLICYACRSTALLGGHAYGSTVATACEEFGFHMGLAYQ  
IQDDILDFTAAASVLGKPALADMDLGLSTAPILYAAQEFPELKPLVMRRFKKKGDKKEKAL  
EALYSSDVAMDKAKALANFHAQVR  
>comp11527\_c0\_seq6; 652 168 1766 LEN=2500; translated  
MDRTRNNSKTGARRCLGFVTVGMLMGTADALVRNSMPLKSRHYVSNTSTSSSLAVTMSSVE  
DQKKTFRPNPVPVVSAAEAEALSHSETTMKLTSPSYDLFQMLTEEEGGEAPATTGGNAMRDG  
SVLKGTKIDELQGVQLSMFKGCGGKMKIETLPDPFKMVEKELQPFSDSIKELVSTDQPI  
LSMAAKHFFEKRHGKFRFRPTIVQLMAKAVAAAASPEHMTSDSSTAHSVDIEKEDTEVF  
IGGAAAWQWSGASKINVDGGMITPENHKGSDAWRKQAQLGQIVEMIHVASLIHDDVLDEA  
DTRRGGEAVHKLYSNKVAVLAGDYLLARASVLLARLENTAVVQIMATALESLVAGEIMQL  
KAPPELLEMESYLRSYYKTASLICYACRSTALLGGHAYGSTVATACEEFGFHMGLAYQ  
IQDDILDFTAAASVLGKPALADMDLGLSTAPILYAAQEFPELKPLVMRRFKKKGDKKEKAL  
EALYSSDVAMDKAKALANFHAQRAVDALMRLPQTEARDALVRLTHTVITRKK  
>comp11528\_c0\_seq1; 198 1 2168 LEN=2244; translated  
XRQSTLKDSTGRRHLGLTEWMPISIFSSKRTMPPGLDVERHKDTEDMASRTTGQTSPLPADG  
RDTGRLGRDRKRRRRRRRKHLPDPNLIIVILAYCDASDYISLLRASESVFVTPPLRFHLC  
SADSLSSLRKYPNLSLVGNQGGQQLAVQVLLQSLFGRCPNRNLKHLEISNLRGITGASW  
FAGLSKASLVSFDTNLCARLDHGVLLDYLNNCPTTLRHLHLNGCRCVGPAILACIGRRHP  
GLLSLGLSQRIGTPDVFALLRVLTSKHLDLQSLVHIHDKESPESEDYFLDLLPDGI  
ESLNLGTGKPLRLVSHDVFMTNTYLNRSLEYMHAVQGRVQRVQDNLRALNNEGIANEM  
LHGNRHVLDLDFQPDVYIWKNEPSFRLKIRHLVNLGAGSPHSGIFRGTVATFSLGRCLREVH



LAGCEGVSDWEIQALAVNCGETLTCFQMRAGTIGNQALQSLAKYCRVLGEVDVSACFGIG  
DDGIIALCHNLRRGERIGGCKGGKEEAPPASKRSRTLRLPSLKILRVASLPRLTNRAIEAV  
AELTSLIILDIQQCSKVEPFVHKTIRRLPCLVEVNAKDIAPRSIPLSLWLRNDPGVTRS  
LKFVNQRVFFHHSELTEGCQKTGTLKHCCIARSRSQRLSGSVPLAQMYHCLDCNMI PALD  
RGFCVECKLRCHEGHKTFLGSFARFSCDCPFVDANNVCLAFRPPLLPPTTEQDSAVEGGN  
AK

>comp11529\_c0\_seq1; 1343 224 4970 LEN=5255; translated  
MESYPGELLVGVFPLVFCVDATLPSKDDGVSSGRSQFDKFLDTIAASSSMVDDDDDETIHD  
GGPMMQRVAQEQSDNEDEFLLKSNSSGGVDEFRLARRRSTGTEASLPGGQQPPTTPPKSP  
RPDRNGRQSPLLKTLNRMGSKRNMRRNRNSGDFARGGDPASPHQVEIDFPPSFCEALQQ  
GQSFFQARIVSTSPRHGFPPSKDPSGQSNRVVALTGLMPGQLPPHQRSQSLSLQQRQE  
TLSRFKSAAEKRPIDGILPSGWLEKHAALPSVIVVVAQIHPHQETQQRQDDLLVEALE  
NLQHS LAPKRKVDVKVVALVREGVSPILAEQWSQGILGRLPSFLRGDNADNAEHESLVTL  
VEEKELRSDDQGDNTNPVDPEDSSSSALPLLHYSIRKSSIRYYKDRSREVKGKLLRLGG  
PQAAMTLSPALFPLVIRYCFKAAVFYEFQWKQEKSLKYMLEAYRLVETYYRYLLTVQHDK  
EIDAHNGNDDQD TDAGNKHPDANPGPPPLPDI STTLSSASSEQVDFDCGEGVEMSLPSTP  
PAVASAPSFSEYYALARTTVVAEDMVHQCRALADWLNFKILQLCLVSHERTGMLAASVQ  
WQRHSRAFCCPRRSFLHTEGAPWLDWSYASQQLLVVSQLLERHPPRALGRLGAPGSEEFD  
EDLLRCCSWRTEGAAEALLKTGHRIKNSGEMGEPSPKESPETTSRIRYVGGLDHEGFRP  
LFQEE SKKNHMEALNLCALRGIALFENEVNQLKRDKTLIPWTRSGARLRYLAGGALLALG  
RHSEAI PHLEKAI GLCKGWDY LESLVRLLIECFQNLGDLHTLSAGGDASSRQARTSFLL  
DCYFRAHLPADELSSALERLAE TNVLDTVESGVKCKIRWNLGTGNDEMGS SGLPFFFDL  
SFPACTHATAGQVKVAVWIKSNLNYALCINLSMLTLLGPLSIPSKDIPVGETGMVVVQ  
PYEAEIEFGTEVTLPGDLDPATDGTSTVAGDTNAAVPNSSPVKAVTKPRLKTSGF SAGGG  
TRFVTENDVASEACLGKTLRCDGISMLLAPLVPATGSSNSSTTNIELTIKLEPEPPPN  
VRRSTFDHNNYLSSAWKRPA CLSMNEGPTCLRVLP SANMIVTNVTDELTKGTALEGTVN  
RIVLKLQAPDDEVCTNILVSLNCSSVLKTSEGATKLI VLNESDVDNDDQKDLEDMMNPRV  
RNPVLVKNNASKTFMTDFGYILPDGWSAIGAGDGHGNTSDYKIEVSPLNAGEIGYAYFD  
IYRPTPDPTTVYGGVPRDMNLYDDYKCKTNIDVSI RYSQEGKVIKEASRDRVKG DYVSL  
DHTVSLEWSSPLSVEFSTTAQDAYPSGNRHNSNILPENGS PPKQDLGLPVKETILIDNNR  
ILTNGIMHSPASTAGL FVEVEKVQFVENDRDKNNSCFKLLSDNDSNGTIYKGEADHPSIK  
QGVGSKISFAWIAEACMEKQYREESFTLPLGTILVQWQPLPFELSKEVQFLQKDSFTGSH  
GPLKLHQPGTCRFNGPLCYIESAPFEAKPENLPDSIQVAVP FKMYSIKNNTPLDQELEI  
TLQDSSAPGDDQND AFLSVVT

>comp11529\_c0\_seq2; 448 224 1368 LEN=1368; translated  
MESYPGELLVGVFPLVFCVDATLPSKDDGVSSGRSQFDKFLDTIAASSSMVDDDDDETIHD  
GGPMMQRVAQEQSDNEDEFLLKSNSSGGVDEFRLARRRSTGTEASLPGGQQPPTTPPKSP  
RPDRNGRQSPLLKTLNRMGSKRNMRRNRNSGDFARGGDPASPHQVEIDFPPSFCEALQQ  
GQSFFQARIVSTSPRHGFPPSKDPSGQSNRVVALTGLMPGQLPPHQRSQSLSLQQRQE  
TLSRFKSAAEKRPIDGILPSGWLEKHAALPSVIVVVAQIHPHQETQQRQDDLLVEALE  
NLQHS LAPKRKVDVKVVALVREGVSPILAEQWSQGILGRLPSFLRGDNADNAEHESLVTL  
VEEKELRSDDQGDNTNPSPPPX

>comp11530\_c0\_seq1; 257 323 1255 LEN=1255; translated  
MEDDSSSTDESLPGLQTRTAVRPDFKYPKIRDNLKDDSSSTEDSLPGLHNRS AVPPDSSSSE  
DESENECLHNTHSSHGAFPPGNIGYEQSDRGWISERATESDSYGIPVLI EPGDEGCSSGE  
DEASGSAFPVPRAETVPAQQSAEQKREKARRKRAARKARAAERRRAGEEAAERRKCAER  
EAAIAIASWFRCLA EHRFRRTRSAVVRLQALS RGVLTRATPTGVGRREHLDAFRRFYRV  
WGECSKLLLAESSLLPSSVPSSSGFRIDFSTPDWASLRDQAFIRQQELMSDREDNDS  
INDDDHVSNNN

>comp11531\_c0\_seq1; 318 1 701 LEN=846; translated  
XDEENV DGEKPSRKELRQKKRQERK KKKNEKDI EPENKDGDDENLLSRKEKKKLNK  
RKQKKLRRKEKRAELKSVLKGGEVVAEAQEGEGESGVPEDKENNVASRRRSRRK  
LRKQRQKEFQNL EDRSSNVNMEPFAEII TVSDPTRKGNENDSETTLTKQLRRRKRKELR  
KKLLEFGTGEVIDHAMTTDLIWDKVAL LQQATNTNSGGLRGTGSDAELNDLF

>comp11531\_c0\_seq2; 871 1 1332 LEN=1332; translated  
XKATEAPTNDLSPTTTISIEKDGASPREVRTAPVDSKMSKSNKSVKSTKATKAPVTVPT  
DPSTTPAIDIEKEGTS PRGVTTAPRVDSKTSKTSKSVKSTKSTKATEAPVTPSGVTTTP  
DAGSKETRAKTSRKS NKSEKSEKSHKSEK GAVVVEPKDKGETTSPIRLPAILPTRSPTQS  
PTRAPTMSKEEKEK LKKKKRKKRKEKEEENKTEGDKEEKGD TATYAPTLSPTNAPTAS  
PTKASTTLP ESSPSSL LDDVPQATPYPTESAFPSGAPNLSLLPSDSLYPLLEDDADIQ

YTLAKDSKFDTKDYKKDKQDKHKKKVDKHKHKKNDKKDESQDEVDKEYEDEDDEDEE  
DKNHKEDKKQEDKKHEDKKRKRKEKVDKHKHVKNDHDEKNYRKEKSHDEDDDEEYD  
EYEEENEKDEIEYEDEEETDEEX  
>comp11531\_c0\_seq3; 339 1 387 LEN=387; translated  
XYEQEEQNESEEKHERDYENEETDEDQYEQDEQNENEDKDEIEYEDEEETDEEGYEDE  
DEYDQLQDQDEENVGDKPSRKELRKKRQERKKRRERKKKKKNDIEPENKDGDDGDE  
NPLSDQIDDX  
>comp11531\_c0\_seq4; 755 1 1069 LEN=1069; translated  
DPSTTPAIDIEKEGTSPTAPVTSPGGVTTTPDAGSKETRAKTSRKSNNKSEKSEKSHKSE  
KGAVVVEPKDKGETTSPIRLPAILPTRSPTQSPTRAPTMSKEEKEKLKKKKRKKRKEKE  
EENKTEGDKKEEGDDTATYAPLSPNAPTASPTKASTTLPSSSPPSLLLDVQPATPY  
PTESAFSPGAPNLSLLPSDSLYPLLEDDADIQYTLAKDSKFDTKDYKKDKQDKHKKKVDK  
HDKHKKNDKKDESQDEVDKEYEDEDDEDEDEDKKNHEDKKQEDKKHEDKKRKRKEKVD  
KHKHVKNDHDEKNYRKEKSHDEDDDEEYDEYEEENEKDEIEYEDEEETDEEX  
>comp11532\_c0\_seq1; 65 2324 2431 LEN=2431; minus strand; translated  
MAYDGKNRKNQEFRVRTGKMETGIPRLVVLWHGMPK  
>comp11532\_c0\_seq2; 268 290 1298 LEN=2543; translated  
MCGPTTKKHAKSETTIAPAIPSGIARRRTAIVGSLAGLVLFYNGLRVIFRDATAWLRPADE  
FCQNQSDGGENCIRSDLFAKQATS AVVQLYLGGMGFLTWHATKKVDKGIPTPEGRLEFGY  
LDEADRLNAAIFVYQTFDFFTSMTVPEHNTTIFLFHFLAAVTSLLSLEYQMVHYAIF  
GGCSEISTIFLVLCDFDVYFPAQDRGSLWGVIIILFCQVAFTFSFLYRVIQWVQVQVSLW  
SDVFFVAKKGSIEDYRPGKRWFLFVFLAMDFVLGSLQVYWFVGFLLPKILELLEADQCWH  
GAKLEGMEVKEEIFVAIWNDFHAKYHVSVAASP  
>comp11532\_c0\_seq3; 65 2166 2273 LEN=2273; minus strand; translated  
MAYDGKNRKNQEFRVRTGKMETGIPRLVVLWHGMPK  
>comp11532\_c0\_seq4; 205 290 877 LEN=2701; translated  
MCGPTTKKHAKSETTIAPAIPSGIARRRTAIVGSLAGLVLFYNGLRVIFRDATAWLRPADE  
FCQNQSDGGENCIRSDLFAKQATS AVVQLYLGGMGFLTWHATKKVDKGIPTPEGRLEFGY  
LDEADRLNAAIFVYQTFDFFTSMTVPEHNTTIFLFHFLAAVTSLLSLEYQMVHYAIF  
GGCSVRMIVGWRVRE  
>comp11533\_c0\_seq1; 350 118 1890 LEN=2183; translated  
MAPIGKNGDKRTGGIAWAGSLVGSANPDNLGYRYSNPLKRFKAGGINDGSENGPELPS  
NLVVQFQNRQGDDELSDLVPHSTIEDLQALVHSLLENDDGGDEKMNRAKRIPYSFYA  
KITSKAGIVDEVEITSSLSDFKEYHNLSVTEVTLQLTYQPLAVFKVRPVTRCTSTMSGH  
TEAILHVSYS PDGLNLASGGDTSVRFWDVNTSLPKFTCKQHKDHVLC TSWSPDGRFFAS  
ADKRGTLILWDPHRKRKRGNRETGEKSLSEPIWIKAKAHKQYISALAWEPLHLNQGRGE  
RIVTASDKGTCKIWNVRTKQSLVTLSGHTDSIEAVKWGGEGFIYTASRDRTIKVWTAKEG  
DVLGKLVRTLKGHGHVNTLALSSDYVCRTGPDYDFAPSGRPQRFVETEIDADNDEDTIR  
RAKYEAALGRYQAFRDQOEGNGEKERLVSGSDDYTLFLWHPTS AKHPVKRLTGHQAVNH  
IQFSPDGRYFASASFDDKVKLWNGFSGEFLTTLTGHVGVAVYQVAVSSDSRYLVTASKDST  
AKLWEVPSGKVAKATLPGHADEVYALDWSPNGASVATGSKDRTIKVVKH  
>comp11534\_c0\_seq1; 616 230 2038 LEN=2160; translated  
MAIAVEDSLWILLAGAVPFFLPSIDNGDGVHWEAWMVL CASVGSVVLNSFS PAHRTSG  
NRTRTRRTKHLGGGERGATMSIVLVPVLLRVL AHYSSGAAGSDPQARGCWTTYAKITAIL  
VLPFP TAVTAVLYVPAVLDPSIGNPIAGLFFVAWFLVLPRIATSGVAKSFAFGWRVVC  
LLLLVAVSEYAGAMSAASERFRSRFTHRHEHHVGT TASSLWPMVALSGSLSCCAFACL  
GSSLRERLSWWWRIGLNVLGPLLVDATLYVCTTPGAAAFESTPYHDHYGKFFPLLSIRW  
LVDFLVEKENDTERFWGLVYVWCVLVASSVPTLA ILSMASPNKTGKTDAQKIQRTTAPK  
RKP KPSVVVTRKWFHLVAVILFGPITLRLPQLMSLSYIAAASILLVLETMRGDEAPVLQA  
FYTAFLLDRKDSGDQVIVSHLFLIVGCAIPLWIGQVLDALIAGAPSADAIAIANADGEAE  
NALLLEQHFSVLLLLAEFGVLCIGVGDAMGAVVGKSFGTHKWGRNQRTLEGLAMWSSMV  
AIGSAVLCCTSGHGF GALVVASTLTTVLEAFTMQLDNLVLP LFGSCVILLLSAPPLPYG  
YV  
>comp11535\_c0\_seq1; 249 130 906 LEN=963; translated  
MAI IHTPRTLISIGRILRRRRRLASANSNIDSADKAVASNFGVFPVPAQTSVGSNVEGNA  
SSIDSNTNNTINAHVYNCRANWFWDLDYIGHMNNASYLTHAEYARWEWTAETGALQAMYR  
TRTNFIVTSTAVRFRKEIAALRNAFEIHSLLRGIDEKHFVISQTFRNPSDERILAQVMVQ  
AVAVRNRTIVPPRTMLDAMGLPGEIVDSL LPSNSDEQERSDFVDGENAMDV LARFMDLD  
EAFRHEATADDQWLLTRK  
>comp11536\_c1\_seq1; 353 1 3264 LEN=3306; translated

NSVLWRETSITSALHILCAAAREDRFVEALMAAKEQPLKMPVTIEFKELKPGSGSALAI  
DMKARDVKVSRLLTDLFSIRNSRYLRSTIVEYVGYDAVSKEQCTEISAAALSIYRMQQT  
MPPRTTLGTLSGDGAGASGF SKAMADRLLISSRNADRQRDEVLELILNWILSELRTGAV  
AKYGLAEVLLGLPSNTTNGNWKPGCGRYSGAIGDCFDAILDVLEHNDMSRGSFSGISALS  
EIFFRLHNLIKTRDPLSIKVAIYTAERLREVDFTENVLRMPLVDSKAMDPDQLVQNLHS  
MGWLLKGLSCELQLLVGFTGDFASQSEFGRYFEQHPARCNSLLSSLYGSDTGVRNLVES  
LPLELVLMDPNLAHPAQEILRAAVCNLPGAGDIVQGYQILDSNIVASKMKGASQAMDSEA  
ATKWIIEYFNFIANRNCVSHVTNAISVLVDASLYCAEAMSQYHTSLESSEDFSDSWLRSN  
GPRDLLVNFLRLDEISESSDHQGMDCFLIPVATRNLNVVLTLESEFVTSPQNGDPVGC  
LLQLAALVARIIPASSIGNDTAEAAFRYERTAALGSALALLRSSASLEPGFAAQYRDD  
FIGAAHGLSRISGFKVDSKDDSHGIVSVLARGCLASIVLALSPIENESIVGMSVCVSCI  
PQLFLERSISLVADLDEDICNQLQAIQATGAKLLIDTGDIDRALMCAARQYAEQENSVI  
RDLEKTSSGFSKATIRIPGFLGLKLCALLATSDLSEDLAMNFATNCIQIISAYESTI  
QRLCYNFPVQADFLRWFLKALVSASSLVKPLKKNHLEKLGDLVKETITAAQFLGIGMLL  
EHLSENPLNNMFPDHLPRELRNRQESVGSRIVSVEKDNSATWWDVLKTIILVNRVGD  
DKISYKFLAPMGNQVMMMSQSENWSEDTFEYSIVAADTSLGLQLRRTERSDDLNGSS  
LARGLFRCVIAAKTVGDRLEYVRLKSTHSVHSMDDTDDNSGNIIELELEYLTLTSS  
SLEQCVEQLLMLCLQVCDKENGSVLKQILVAIESSGIDKTTFCVLSEERS  
SFMTIVCDEIKQSCARES  
SGIFIKR

>comp11538\_c0\_seq1; 1079 126 2417 LEN=2509; translated  
MKLEVGGPLPSNRLAYTNRIYISPDNAAGIGGYEYKNNIPVKGSMLEVELNGHPYQVE  
PHQVPNNEVALNGLQRRFLNLSLSTTVKLNPFVPSNLALATLELAVDLLAKKKATDP  
KAKPK EIDTNRLATTVLTAL EEQIMEPKRTMALDFEGTKLELTVKHLTTISV  
GKSKRREKEGAG EELEGKSKAASCKVQLLAPTSIVFSRKEGGAPLAFTGEQIAE  
GEGGGGATNLTGDFDF EKLGI GGLDAEFNQIFRRASFRIWPAHI IQQMGIIH  
VVRGMMLYGP PGCGKTLIARQIGK ALNAREPKIVNGPEILNKFVGGSEEKIRE  
LFADA EKEQLEMGDNSMLHIVIMDEMDAICK QRGTVKDGTVSDSVVNQLLSK  
IDGVD SLNILLIGMTNRKDMIDDALLRPRLEVHVEI GLPDTKGRLLQILQIHT  
KNMKAARRITPEAVKRLPELAEKAKNFSGAELEGLVKAASSFAL ARCLDVKDL  
GKAPDTKNLVLQFQDFQALNDVEPKFGAKSQELKAHYRNGFVVPYGASFQ  
MMSTLGR LVEQVRTSDRTP LMSVLLQGPAASGKTAIAAKLAVDSGF PFVRM  
VSADEMIGY SDVSKCQMIHKAFMDSYKSPLSIIFLDDIERLIDYVPIGPRFS  
NAVLQALLVLLKKIPPEGRRLMVVGTSSPHLLKDLGLVQAFGITQSVPLLEPK  
DVCEVLRVA AKMGKEDARSIA KAIHHPKPIGIKQLLMVAEMAKQGS  
DKGSVDVNIFMECLHTVGY

>comp11539\_c0\_seq1; 196 215 1104 LEN=1104; translated  
MITVLGNDGGDDHDTNGRGEPAAALSGASLPLAAAAARRGAGRPLPPDNSELMD  
RLKSFL PAMASANKELLAPAPGGTGRPGSFGGTAVRLDDGLALDDESGGDS  
DDEETDRPTGPLIRE VDPHGPGLAAAPGGGDVPPAPVAGGSGGA AKGPTIE  
LRFGLGDLSGNPLAELLDDGGERG DDAGKNGGDGDKAGEPAARLRSVEALL  
GGDRPDGKKARAAGPPDHGALLMPGWP NAKRA TRVPTPVRTRDRANSRARA  
IRTAIGGGVALVTRDQTAAGGKLVSDRGTILQNTLNR

>comp11539\_c0\_seq2; 299 258 1070 LEN=1116; minus strand; translated  
MTDPPSPPLVETPVAERVGPLPVALPLRKKTVVAGPVRPR IHPVAVPLVVFEA  
ALVGPA IAPSVDPSPVPLVVRVPLAGVAVGVGGLPAAVPPAVLPPALVGP  
PVRVGHGPETPGDGG VGGFVAFVVVGTAVVVQGGTQDLALVAVPSKGV  
DDRGVQGCQLLVVVA AVVANASVFLF VPANVARCIFVVAALPAALV  
PGRRTIAIDHGVNAPGFWWVLPQVCDLFLQGHSECVGRR KGLDRIVHAT  
LQQLIKPNLLFCQAITDACF

>comp11540\_c0\_seq1; 103 1 392 LEN=568; translated  
XVSI DYEKMFKVS LAVVVVAF CALIGVAHGQTQTD FRPDSKRQQV  
ISQYERRKKHLQELH EKASQKVEHHERGLVLLKDEEYESFKKQAKLYKE  
KLESIGERISESDIDRALKRSEVRSQ KYRDSIKVDL

>comp11541\_c0\_seq1; 1172 329 5631 LEN=5631; translated  
MSPPHGQRLPPSQLGHRVRMKPLAVFNLDGIPYIAPSEDSMAFQKSNENVN  
STESRSNNK KMPNMTAETPAESEQTIRNQHNPELRITEIDNGTDSSTETE  
ISMELSVHKGEALRIRSK NGKSNANDES DVCTAAQPKQSWWMTADEN  
FLEQWIMEKLDKI ISKAEHEEEKYLM DVWDE RILMQQLLHAINAAK  
GHCRGEEREDKRLGTS AETMERTTENDNNNNKQGAGVKETKNVML  
SVSEDNESLESKDEESCETPMNARLESVLGVRDTAQK KKKLMDLVTT  
KAVSR SQQLPG ISSVTRDPGVASVQKPI SNSKRNEGSLLKITKIRRAL  
PKWIPTSSASENEDDKMNL LFSPEDFRSSVIGSVHNQLPQAVRDHPK  
SLLYIEITDHPGDCSYLLEAHATHDHDGLEHLRA TTDAYIRSKIAAV  
NLRLLLEDGFSLELDVPLSLREPIGVSFAKFSVKHKGSKQDRCDANQ  
RQDSTNNTAHSPQPKGIWIKDVLPCKGLAKAMGGHEVDFGAAVLAV  
NELAVSDPLDLQE LLVKAKKASQESIILTICISKSDSLCRIPIQKLE  
REFKIRRRDKTAYDPAVYQKLRNLPF

NSSPELNSTSPKAYTIATGAKLHEGIPVGGMERDDSNRGKTKTVPLEGSASTKLPASLD  
KSTSVENLPALSPGFAQARSPIAPAQEKLYKATSSVENGKEVPSKIIATKPITQKTLDFV  
DESSRSEKNPAFSLDPALATSSSTTSATEKPTRAPLSSGNQKEDSVFKETDEVSSKKPAP  
RSSSASSLNPVSPSLRSDLSTGNAGAEHFPKKKRTLPAKIPAKEMISTEANGTSTSQKEV  
NGLDHGSNKSNSDSLVTASPDGSKQRDSSSKSLKSGKSQIGNTALKAMNYSNNQTEVHNG  
PEMPTNKSGRKQQGEAAIKTTTLNAVTDLIDSDDENOVAGNEICTTESKNRSKN SYHHFE  
RRYKLIQLDFRDTRI SEKAVCFGMWEQHKIHIIGGTCGDDCKCHMTLSRTFANDMIKAYV  
KKEFKWKDDDLQATEKDLKEKTRGIFLYFFPRFIGKLANQYPNETGTGLIERLVEMWH  
THQQTRLNSGMFGVRCSEDCQCEVCWEGLFGKGQPKRFGSDPSTRKGDQNSEKRNAHSTS  
LQVASTPARKSRQTETGHRPSFFSASVELPFEIVFNTIKPLGGYFRTERGQNGESKCLL  
LSKCDSGPMATDDRIKVGTVTAVMVGTHRNAVSHHHQLQDFYGS AKRGRKNLCVIFQND  
RHCKQETLTASRSNWTRTGAWTGKIKGGWSSGTALAQPKHRYQQQDMHLENALKGSVRSS  
RDTNQRPYPRPPFNHEFSGAGSPRFHGAFSPGGDQRPRGSSSQEHFIDTVRNKSCRDLIS  
LLENGPEFSHEFVADVLQPNLYLTEELKKNLNIHSATGRNTEAKKKVVKVYINSAYLIQK  
AMSLRTWLSVYIELKSLCLDRANPAEDFGRSDIIGTEVTRTRSPDAELGRLPALPLGHRID  
YPANRFSTHNNYMSLENRQLEVKILKGDPHRDRFRPKVEGTIAIPLNDIERICPSDGSW  
FEISKRLGEGVTIALHVQRRADIEYITLKRQEI EATIKTQIETVERFNEEYSRSLQTKI  
TSNVRGIHGISLLYAAIEAASEPRLIDRILSTGADPRQRSQQGSPLAQLRQLYDRCLSKA  
RDARTMGRPHEYLVAQDQQRARAKAVLDALLSPQLPPLPPTPAEVLSTRIFGARENEECC  
SRVQYRGSAAARGGKPHPTEHCLEWDLPV

>comp11541\_c0\_seq2; 933 42 4279 LEN=4279; translated  
MDVWDERILMQQLLHAINAAKGHCRGEEREDKRLGTS AETMERTTENDNNNNKQGAGVKE  
TKNVMLSVSEDNESLESKDEESCETPMNARLESVLGVRDTAQQKKKMLMDLVTTKAVSRS  
QKQLPGISSVTRDPGVASVQKPI SNKRNEGSLKIKIRRALPKWIPTSSASENEDDKM  
NLLFSPEDFRSSVIGSVHNQLPQAVRDHPKSLLYIEITDPHPGDPCSYLLEAHATHDHDG  
LEHLRATTDAYIRSKIAAVNLRLLLEDGFSLVDVPLSLREPIGVVSFAKFSVKHKGSKQD  
RCDANQRQDSTNNTAHSPQPKGIWIKDVLPCGLAKAMGGHEVDFGAAVLAVNELAVSD  
PLDLQELLVKAKKASQESIILITICISKDSDLCRIPIQKLEREFKIRRRDKTAYDPVAVYQK  
LRNLFPNSSPELNSTSPKAYTIATGAKLHEGIPVGGMERDDSNRGKTKTVPLEGSASTK  
LPASLDKSTSVENLPALSPGFAQARSPIAPAQEKLYKATSSVENGKEVPSKIIATKPITQ  
KTLDFVDESSRSEKNPAFSLDPALATSSSTTSATEKPTRAPLSSGNQKEDSVFKETDEVSS  
SKKPAPRSSSASSLNPVSPSLRSDLSTGNAGAEHFPKKKRTLPAKIPAKEMISTEANGTS  
TSQKEVNGLDHGSNKSNSDSLVTASPDGSKQRDSSSKSLKSGKSQIGNTALKAMNYSNNQ  
TEVHNGPEMPTNKSGRKQQGEAAIKTTTLNAVTDLIDSDDENOVAGNEICTTESKNRSKN  
SYHHFERRYKLIQLDFRDTRI SEKAVCFGMWEQHKIHIIGGTCGDDCKCHMTLSRTFAND  
MIKAFLSKCDSGPMATDDRIKVGTVTAVMVGTHRNAVSHHHQLQDFYGS AKRGRKNLCV  
IFQNDRHCKQETLTASRSNWTRTGAWTGKIKGGWSSGTALAQPKHRYQQQDMHLENALKG  
SVRSSRDTNQRPYPRPPFNHEFSGAGSPRFHGAFSPGGDQRPRGSSSQEHFIDTVRNKSC  
RDLISLLENGPEFSHEFVADVLQPNLYLTEELKKNLNIHSATGRNTEAKKKVVKVYINSA  
YLIQKAMSLRTWLSVYIELKSLCLDRANPAEDFGRSDIIGTEVTRTRSPDAELGRLPALPL  
GHRIDYPANRFSTHNNYMSLENRQLEVKILKGDPHRDRFRPKVEGTIAIPLNDIERICP  
SDGSWFEISKRLGEGVTIALHVQRRADIEYITLKRQEI EATIKTQIETVERFNEEYSRSL  
QTKITSNVRGIHGISLLYAAIEAASEPRLIDRILSTGADPRQRSQQGSPLAQLRQLYDR  
CLSKARDARTMGRPHEYLVAQDQQRARAKAVLDALLSPQLPPLPPTPAEVLSTRIFGARE  
NEECCSRVQYRGSAAARGGKPHPTEHCLEWDLPV

>comp11542\_c0\_seq1; 1916 186 5720 LEN=5812; translated  
MPQTTALELVQTALKDHDNDNDGEANHLEPLAATKNRKKSSKMKKADALEKTTLEEDDE  
GPSKLLPGSSPITQSKKKRKSMPSSRKLANTDKRQSMNPSPFRASVSKRNSSDGNHR  
TPHPVRKDSSTSKNSKQRRSRHSTLGHSLQTSASKNSGDPDQRRSRHSTLNRSTHSSA  
SKNSGDKGRARHSAARMLEDGIAKDGNSGKTKSKKQNRKVAATI SRSSMYE SPPLAS  
SNKTPRTSQNLSNTHHTTIPLMEEAESMEDTADDNSKSKSRSSRLRKARSLFGGLTSSR  
VIRMSDEDLGVESSKPDNKTGSSKEAQSLLGWAKKKMASTANLNSNTNVQKSKKEKRY  
KQKSKASEADDDADGKSKQKNLLDLVGGITSGHSNNKQPQGATDV SFDEIASNDIDKS  
ELLEENSEHLKINHSTSGRGNLSGMSGMNSSGTMDGSQECPPVWQIKAVASQDGNLVDDDE  
ISDIGENTNHDFYPREDVLEPEVIDGVTVFYHADSDDIVYEKKRHPGTVFLRSIIREILD  
DTNTDRFSPKIYKLIKRLKNRKFVRYSPSQPDVQDLDSWREATKQENIQLLGAAFE  
KEHRRQRNEIGSDDSDDDPSDSEIDISLESGRAPSFQEMSKENKLAMIKTHRNGDEDS  
SPTMSSIKHTALPFVVPADDGVEPNALT PRQGNLEHNLTYRSEESNAMKGALRECRLAR  
EVLAGDHHDDAVVDGMVAEEKLLALLARMAETDEEDGEVSSPIGLLNDALNQLDRAAHR  
RKYASIAPLLERLQKIESEMEHCVSRKQKRETRKKRSEKQKEQQKDKYHSNDKGRHGRN

ERQGDVQASNDRALYGDDTDS CDI SGLHDDVDYRSEEDRNYDNNFDGDDSDDESRTNL  
PNGHILNLDGSDDDVSSVGD SGIYSESEDEMSEGENSRDVIDSSVGDEDEDGIDSDSDDGKP  
KKILEKKNQKLEQYFDRVDHLFQTRRKFEERASAVDP SGKFQKIKVKAHSGGTVIEEEGQ  
VYKKEYQQRDPDRIVRNLDL YEAAELAQPEFESFLRLLAE EINGLDVTE SLIVPKLKS  
RDRAF EKANSEYFRRNPGPPESWLHDIVRGGIVCKSIKQLKDVNNWLSSSGHLVQAKNRF  
LEPVFNNGYRDLLYHVSIPYQDALVHICEIQVHLEDIYVMNKQFGTIKHYEYFRSCFANPS  
RSQENTLSDL SMMNEHGKIAGR LMKMLLKSTDI EQRLRFAGLCRGNLDEFDRSLELYRRI  
LHLQE QSHGPEDQELATTYLNI GLVLGALGDTDES LLNLLKSLAIQENFLGMEHIEVANT  
YVEIGHMLVKRGDYS GAYSQYQRALVIREKKLGKDHFLVIKSLQDIGLVLQKKGDFE ESE  
TEYRRALGIQQQVLAEGHPNVATTHSLIGTTLSLYGDY EKAMA EHKLALSIRKEKLGKIH  
SNTADSHSAIGVVLYHLGDLKSSRW HHRALWIRESVLGKNDIACAASHSALGEILSCCE  
DDEGAVIELKRSLNILETNVGMNPNVTAGSYLELGD IYSRHGKDDDALAQYRKAKVIRE S  
ILGQNHDPDTALTYMCMGKALGKMKG YHEEALAMHKKAVVVFESMLGDTHPVTATGYSLR  
GDTFA SNGFLEAGLNEHQKALKIRKTALKVGHDPDIAESWARIGNLQLADPGDEAS FAPKN  
ACYSFRQVLTNLVHRCGEDHPDTAMAHVDVARSL LVLAEETTLETDEREGFWDEATGQLR  
TALSIFRTMDPSV GKHNNSDSNLSNDSGSASENYRDEAVLGRTCVTLATILETRGNDEDE  
EEAQKLYTEGLECLTSWLGEDHPETKGAKEKLLAFRSTRSGPSS  
>comp11543\_c0\_seq1; 630 390 3401 LEN=4317; translated  
MDDISMKNVCPMISQRTRSKIECVSLNRVTIVVGPTGSGKSTLVPSVLEEGLNTRVLCS  
LPRRLAVLSIAKRVACL RGCPELGGSDVGFHVGNRNESTNQDKILFTTAGILLEELRHN  
GVDSLRFKFCVIVDECHERSPENDLVLALTKRLMTRYPKEKFRVLVMSAAFNHQRYSSYF  
KDVPGCSTIDTITLETAQSFTAWHSQVETFYLDNLP IPEDDLVP HKPFLQLMKGDPNTDL  
HSDNGISLSSPMLALIQT LVRQLDAQEPKTS PFIIFAPTYRHLEQVYHTLVGADCGPLTL  
SVLHSAIDIDDCMR TMASASRDKLSRHILLASAIADSSITIPGVTCVIDLCRSLEVRWDV  
SKRNYDVKT TWCSSKIADQRKGR TGRTCPGRVFRLLHKNFYIQQLQEWDLSQLAMSSCQD  
ELLSMVC ADEKLG LDDPRQFFRGCLDPPPVRTINSAFKFLIQIGACNEVQQMPNFHSNKM  
ASYAQIVPSKYGEMINALPMSVTD AQVVLEGGRI GLLHETLAMMAIMNHRPSPIVHHFGD  
TELNQVLLQDHYPNADVTEKQSVTLANLSAYLYWETHWLRNYEKRSKSEKQSTEVSHKSK  
RPNGWVWTEEDDKENINWCQGERLNPSSLSRIKEIIDSTLNALYLAKHEPKWLRCADPNP  
LWKRVDKQLESTSHMGRSMFFRLYAPSQGGFDLIDALTNLAVNRS AESALSSAKAYFGL  
PSSKT VTTARTEGMACVNFLLGRCHHGTLCKYVHSFSAPRPLCRFHPKCKKGPSCVFSHG  
EPTQCIISEDRAASCFFPLKELSF EAGVIGWFVYNHSNTILLGEGNF EFAKSLKNLGMPP  
LLATTDVLSGMSIADTRVVNAMIGVDATSLHTNEEFIDEVERRRHPNDTGKAI SLVWNFP  
YITGEDENSKEHEILIRDTFQS VKLLFERQSYPKHEGRFCLGLQGDQLSRWNVLKSAWAV  
GWKLHCWGDYVYINFPGYTPRRLGGEPFPV GAPRFYVFC LGER  
>comp11544\_c0\_seq1; 439 100 1083 LEN=1323; translated  
MVRFLTGLLALLAFSAEAFQSVLLASKTPATSLYTKSIVEDDVSGDRKSDRRSFLSGGTI  
GLVGLAGLASSVFPGTALAE EEFASIAARAQKLSSEAGDRVAAAAIANGSGDTRTAYD  
FELPVSGKSIPFRELIGQEVDE DGRSKCKVILVSNMKEDDPIARKDIPEFISLAAKYGRS  
GEFAVILTPTDQGYEPDTSQLIRLKLASEYGYGINPATILTDKTDILGKRALPFWRWMQ  
SNCRTPAGLGRVEGNFEKFLIDGR TGLPLRRYPRKYKPSNIKNDIEAIIAGRPLPPAGAN  
FLEEWRTAAVEAEANTYRFQKGLNYYD  
>comp11545\_c0\_seq1; 484 201 1370 LEN=1623; translated  
MIAAADRYSSAKIVLFLVPLFLAPWRTSAFVAHRPRLGSLQFEGRSSWNSLHSSSWSS  
FRSHQTSLLHARRIKKGGTAESFETTEPTKKRKKKKKNKYAKFSKA EKNELDPFEALVRES  
EQKLSIETEKQKQKEREELPPPPVAATKTLEFPNNKDIDPYDPMTFGFVEIGSIVAPH  
GVHGWVKVQGCTDFPERL TRAGMPLHMKAARKRAPRKITLASGKFLGDDQFLIQLQGYD  
RTAAQALKGSTLYFASQODTVEREEDDIVLSELIGLSVYRTPASEDEEGEQVLVGTILGV  
VLAEMCAIPGLLDQIEIGVTRKSSDGEAVRAGAPQDLLLVPLVPEIVTKIDLENQMIL  
VDPPKGLLDLTYVREEKVR IKGLLAPAKE  
>comp11546\_c0\_seq1; 499 190 1353 LEN=1381; translated  
MRTTHTERTRFVAWCLCCVLASRAWLLVEASAAGASPD SHSSSLFGVLGRALCGGEGGDD  
RNRGLPRSLPYVRLGR LPLWNGSSGPVPEPRRDAFTPDERTVPQSFRSRSRRRFHGHLER  
RLAACLEASLSTVSPVRTGMTLP IIPLGVDMD EQTCEELAENEALDLLVESGLEMAGGD  
NDWIEWKMHGSTK KLM EENDQSETAVLEKGEVMVYIGKAKREGHGSNLPIIKTKSILPLA  
AEEMADLLMDSRVKIYNKLSVGR TDVRTIGEGTKVVCNLTKPPIAKSNMVSCTLMHSRK  
LEEGSAHFVVSRAAPGMVDES LSELPRNDILLGVNLEDHGPGE CVMTAVTHVYSPALPT  
MLAKKMGVSSAINFVKDIRNSCIGSKS  
>comp11547\_c0\_seq1; 382 761 2179 LEN=2294; minus strand; translated  
MSSCCGSSLKHKVPEIVKLD DDKANDMREALIMKEVKLPLATQTHEVCWEPVTQHVVYVTQ

MTNSTLVRIGVDSKGMLLDKMEAWRVGPENGLHNASISYKNPGCLWLTCQYLNLLLLVD  
VRPENMMQVKEIYQVPSYFKDPKTDQVLHIGGPHCTRECPHTGQMWACLKGGALDDNKNNN  
PCGKLSQCCDPEKLANMEEHSDPEYDIKIPNSYAVWQLDTKNYDPNSECGAKGGKLYH  
CRNSPMLALDAKGNWIPQDQSDTIQFIDQEKESVQLQIPWPEDAKIAEKHTGPGIAT  
APDGSIMVQLETNATLVRIDPETQKRTLYDIQTPEWARGIRMIHLDFRAASVPEHPNRI  
YAISSSTLLQDESTDALFIMNMCNDWKCIEGMRIVPLPSQGSACHRIAYCEIEDGDDECD  
GSVFITELSKSKLLQVKVNDVLMHGLTEEVIWEGFEHRKYAMTDETFGR  
>comp11547\_c0\_seq2; 382 662 2080 LEN=2195; minus strand; translated  
MSSCCGSSLKHKVEIVKLDKANDMREALIMKEVKLPLATQTHEVCWEPVTQHVVYVTQ  
MTNSTLVRIGVDSKGMLLDKMEAWRVGPENGLHNASISYKNPGCLWLTCQYLNLLLLVD  
VRPENMMQVKEIYQVPSYFKDPKTDQVLHIGGPHCTRECPHTGQMWACLKGGALDDNKNNN  
PCGKLSQCCDPEKLANMEEHSDPEYDIKIPNSYAVWQLDTKNYDPNSECGAKGGKLYH  
CRNSPMLALDAKGNWIPQDQSDTIQFIDQEKESVQLQIPWPEDAKIAEKHTGPGIAT  
APDGSIMVQLETNATLVRIDPETQKRTLYDIQTPEWARGIRMIHLDFRAASVPEHPNRI  
YAISSSTLLQDESTDALFIMNMCNDWKCIEGMRIVPLPSQGSACHRIAYCEIEDGDDECD  
GSVFITELSKSKLLQVKVNDVLMHGLTEEVIWEGFEHRKYAMTDETFGR  
>comp11548\_c0\_seq1; 303 62 1111 LEN=1205; translated  
MGMQFSNLFSSGSGSSNTEDPFSFSELNKAHASSKASLPDPVFNASDGVKLAVRIFRP  
RNTETSSDKENEEESIALVFYHGGGAHSGAGYPTMAEGLAREYGISVYLPDLRGHGCSGG  
PRGDAPSQEQVWRDISTVLDVFVARDQNKLDVDNKGEKLSNKIYLGGHSSGGGVVNVVSW  
QDKNQSSVAISGYVLVAPQLGHNSCTARPKTSNRPDFAKVNIPAFIFNGIFGVLGNFAAV  
QFNYPADILEQDEGMVAFNTVNMANAITPVPDKAQIETSMGQDSLSTLQSPPIGLWVGSE  
DELFLPEKVAAYIPSEKNVGIIVVGENHLGILVRVHEQIGPWITRNE  
>comp11549\_c0\_seq1; 442 139 864 LEN=1034; translated  
MKSFSSTLLAIAALPSALGAGNVGKTSNSCACEALRYGFNINCSQAAMNAAIAALEANN  
CSKDSATCNGSTECIKNFLIIQSHHDHCFHEEVPEI IETNIHVYENVCTDAHCNINMKFD  
TEARKCPPVDCETSVGDDAWQVMSVSNCKEDCSSSDCANNFRI IKAVIDSCPRDTLSTVV  
EIAHYHDVEACDAFGCNLAVAAQDSSDLICDDLFSISAGEGPQGTGLAAVLASGVAAAAL  
L  
>comp11550\_c0\_seq1; 274 1 1504 LEN=1575; translated  
EVCTAIMGRSKQGRPIKRRRVVLEADDSVVAEEQTTFAEQQQQQGEEELAKAIELLRKT  
QDRVEAAAAEATRLDLSRKDRWVHLKLPKTSSIPLTMSAVVFDEEDTMPISRAIDDDDS  
ATIPVEGTTIDSTTFVSHVPPWLGGLGFARLSREDFVAFRKLHQAIKDRINNTNKHAQK  
NGSTSTSSKLGWASWSGSVNDPRKRAFGLPPTWVSTAHTYVKERNKLDRAKLLDXFMS  
LDLNSKLTSHRDLLEFQFNIPELKGYPETRNRLDITMPETYVAEDTKTDERKRNKRA  
MVLDESVDVDPGVREAIIDNICRVFRECLLSKNERCDATPNAHDNDSGYRHRLAQFLRYEN  
LVAAQPNLHSGRALLPVHLDLPLKDGFGVIVITIGVEGSGTILFRDAKGVKNGVTMNLDE  
GEVYMLADRARDACAAGVLADARKEDCTSDGIPFSKRESLNLRFGLDAMLPPSIVNGTN  
DAASSSLPVI PASNVFRHWDE  
>comp11550\_c0\_seq2; 488 1 1353 LEN=1424; translated  
EVCTAIMGRSKQGRPIKRRRVVLEADDSVVAEEQTTFAEQQQQQGEEELAKAIELLRKT  
QDRVEAAAAEATRLDLSRKDRWVHLKLPKTSSIPLTMSAVVFDEEDTMPISRAIDDDDS  
ATIPVEGTTIDSTTFVSHVPPWLGGLGFARLSREDFVAFRKLHQAIKDRINNTNKHAQK  
NGSTSTSSKLGWASWSGSVNDPRKRAFGLPPTWGYDPETRNRLDITMPETYVAEDTKT  
DERKRNKRAMVVLDESVDVDPGVREAIIDNICRVFRECLLSKNERCDATPNAHDNDSGYRH  
LAQFLRYENLVAAQPNLHSGRALLPVHLDLPLKDGFGVIVITIGVEGSGTILFRDAKGVK  
NGVTMNLDEGEVYMLADRARDACAAGVLADARKEDCTSDGIPFSKRESLNLRFGLDAML  
PPSIVNGTNDAAASSSLPVI PASNVFRHWDE  
>comp11554\_c0\_seq1; 317 179 982 LEN=1441; translated  
MKKVSKIGRSKIGMFFNHTPAQKDSPSDDIVQRLLEENCKLRQDLSANNRIRELEEKVE  
SVSATKEIQEHKTSIAAPKSTLLETHVMEKQDTIDDRDSSHISNDESEFDTDDFSIE  
VSTVELTMQRYQSQELLDNDELQSTTSSACTTPTGNDKESNNRRRQSQLRRRLRGNGKSP  
NFYTQQRSLLDIYGYDDDSVSVTSDLSCSVASSRLTKGNSFSEGGSLMSGRRLPLYDMKS  
LLRISSTDSVIRSMLDNESTLLGEI  
>comp11555\_c0\_seq1; 336 1 480 LEN=637; translated  
TQSKLKPPTTLPIPSIETIVQQETAKMSNFSKFLVALVVAVLSGRESSAFAPVSTPSC  
ALSTSTSSSSSALSMGLFDMFSKEAKEERERKKAEIAEQERLQKEIIDRRRNPKKMEY  
EYKTQVRRELRMAGKDEEAVEVAKTLYDGADEQTDLRGL  
>comp11556\_c0\_seq1; 164 39 476 LEN=701; translated  
MRCYSLLFLFSLGPAATDPEVGSVIVPESTGRKGRKRGLKSSKNAGPGDQCAVTVAE

RDEAMAELEAIMTMDSMSEDDQVTVSNDCLIGIAVASVSCPLTAACIVSTCTCCFCLNL  
PLCWPSVQSHCYETMKQLIHDCGWG  
>comp11557\_c0\_seq1; 238 173 919 LEN=972; translated  
MRPSLDSFKQASSNALSKAQLMVGLNKDDCSSNLDVEMANASGVGESNSTRTSSFRGLF  
VRGDDEPSVDNSEQSSTFVEEAADLLCPELTLQQRLLIGFASCFTIAYLITFMSFKFFVQL  
IEGYPIPFALNYTIGNILAMSASGFLCGPKRQFRNMFDKRKTVSIVYLSCLASTLVVVF  
IPLFWAAKLTILISLLVSQFGANIWYLSYVPYGRRTALKLVRRYLGLNSNTRGGDGMF  
IGSGELT  
>comp11557\_c0\_seq2; 214 173 499 LEN=713; translated  
MRPSLDSFKQASSNALSKAQLMVGLNKDDCSSNLDVEMANASGVGESNSTRTSSFRGLF  
VRGDDEPSVDNSEQSSTFVEEAADLLCPELTLQQRLLIGFASCFTIACE  
>comp11558\_c0\_seq1; 760 87 1754 LEN=1957; translated  
MSDVIMDTEDTATSNVNLNAEDPITKMEEDPEAGTAADAPNETSNERTDETTNEVSNEAA  
NHVANELNTDKAGDSTEEQPVENPEEGETPDEPEAKKGPEDAATLAEVSNAPDTVEVANA  
APDAIKKDAANIPPVSTESDTPNPSTEVKNSSNEDHVDVVVVASAAGGKEDSTIVADSEPM  
EGVSIEQASEPAIVATATQKEVEVAPTESEIPVKENKKRVRVGRTPTRKIPKLDEKELA  
TPSTDVSGAASSNVDTAGTPAVVYATAPAIKSASHASGAAEPSSTVAIASPSPPNQGV  
SKHDEKWYSMFQKLIIEFKETKHTLVPQCYTADPRLGRWVHYQRVEYWIFQQKGSAKITE  
ERIALRNAIGFEWDPQKAQWEKMFALKKEFKKESHCRVPKGYDKDWELANWVRNQRLEQ  
ANLSKEGKKSMTPERFKLLDELGFKWSSPTPARARRNSKPLAVSAKKNSNSAEATVQKQ  
EVKAEQTAGVTATPVVDEKPPDATTVAVDGKVMVTGATDAVVTNGVEGELEDPTKLDAGN  
AKDPSHLEAAKQVEI  
>comp11558\_c0\_seq2; 262 199 573 LEN=776; translated  
MTPERFKLLDELGFKWSSPTPARARRNSKPLAVSAKKNSNSAEATVQKQEVKAEQTAGVT  
ATPVVDEKPPDATTVAVDGKVMVTGATDAVVTNGVEGELEDPTKLDAGNAKDPHLEAAK  
QVEI  
>comp11559\_c0\_seq1; 544 1 1899 LEN=1955; translated  
ISSDVWDAPINAAAYTMTNSNNINNFARFVSTSPSSIPHDPSVTLASNCVRDFFGPTVQ  
LVADALMSRSGGSTLAQIIALIETKAYISGERSNERQKIMRLAKMRSSTINTMNSNGDPP  
SPASVRASLLTLIQHSIVNVKKRTRSFSTSKKSKHAVTRHKSTYLIEIDIDRARIFPRYP  
QFVEYIKKQDETAAILVEEMLVQGRVRTVQAITLTVQIQKQEDDKGETSSSRSDHRY  
TSRQAVLESFLRLARNGYIEEVSKVKEMKEDDDEGETEFERPVVTANSNDDGFDHDEDPT  
VVSLLRGTGPKNLPKAIWRINTDMFHEQMRAVRLGWLVAERYNHKIQSSGSIVSAALKL  
AAHNRFGNTNLKSSSNANNSHGNSSIGAIDFESIHNFTVEKIPRFLPKTIVQNLEKKEG  
GVIDNIYKALVELTQESNPVVVEQVEVAPGQPGQCKFQIQTRRLVEYLRDRIVHQI VWDT  
HGEI AARIC SILRSNGYMESDQIAAASMNPAKDTLELLYCLYRDNYIDLFNINQKQHN  
SSMIYLWGYSRHRCTRTRTAADNVCKALCNMRLRRQHEVEVGSNWIEREKEADATDENDNEA  
DKLMKARFWQGLERLDNAAIQLDETLIILKDY  
>comp11560\_c0\_seq1; 284 64 1114 LEN=1267; minus strand; translated  
MCAGNGSDRRKPSSEPRSKQTCGGTDSRKARVEAEWTKKRAIAPSVARRIPLAWMHPFGA  
CVFFCSVLIDSVAGVDAPHFGFELRDRPVRDGRDLPLPALVAVVDAVDQGHPAVAAAVFV  
FFFVQFQHETKGNRPLLVEPPVSEVDKLAGPSGDHGDPAAVLLARVSGTTGLCFGKVR  
SWEAVGSGLGGGRVPPDPLDDKALDDPEAVVPVEALPHELQKGRRRGRLPGRVPAADG  
DPEQPARGGLGVLECGVDTKHSTTTTALSASASAAAVVRGTPAVLLPPARILEGGASGG  
VNQRTSAPKKRAASAQLRTSAAAVAPVLPRLRGHGEDEFGGTGLGFMGG  
>comp11561\_c0\_seq1; 502 191 1666 LEN=1705; translated  
MNETTSRYAVWSYATAVCLVCAISLNGKSAVVHGFGEKIHHRNPQAVASSLRSSSSPFE  
EPADDPSIQWDLFNTHHAKGSWKGVWTTYDYIGDVMDETVAVDLNPKSSEDGLDIVEHE  
HTIVIGAKRSDCATCFDSMETRTPVQYTPDNILKKSRLAGVSMVNGPSILRSGAMATE  
LILKHGDGRIRATFHHPVWERGVEPGSCPPQGLKFRAMLSREALRPTAPTVEAKDV  
PADGNPVFFRPVPPFNWKKWSGTSWTWGPQSGNRGWALDDLETDTSWQGITPVDCWNLR  
LPGGIHLQAPRIINDASVVICRLAWLPTDETLRVEAGVSALQPMVMEDDTMVGFEPPAL  
SSLRCDMLEKTGELENASRPSRDWNADGEDVETLQSLQNKLSIEALEERNSAQLDSFVD  
QNDQWESLEPDERELLSKAEVVKKIEELSNKNTNDIEPPSIDESNKTVKKITKTDDATV  
TPATPRDYLSL  
>comp11562\_c0\_seq1; 650 210 1274 LEN=1310; translated  
MVVLSLRVAVAASCLSAAHGFVVPNAGRAGNAIVAGGATQLHGRARGGLGSIDADET  
SGPSKKTRTGLKKSTKLQRKQKKKGGKSGSAPSAMSPPLEKFLQQSGSDGVVEAEVVG  
KTKSARGGRDRRQKQSEQRAIDKERSAKVGTVLEKLEEVLEERTGKVGDI LAVVRELLEI  
PSNDNGDLRRLLSGKDRSDYRLAWVGSDDALCHVGTGLHKVPLARMKEVFMNCLGKNKIE

ILEVISILGPPFNVKNLVQGTAKPSSSGSAGSEMQUIVYDTMYDGTGKEIMAGTDDNIRRV  
LEVAFCDERAIVVVMPDENANAKPLDGDGRRVLLFVREDDLDDKLEGLRVNELD  
>comp11563\_c0\_seq1; 500 355 1563 LEN=1742; translated  
MKSFLQLGQPLVFLVASSNAFSLVTRTGPSALSSSSSSSLHVSSYSSAEDTPPEDDGRA  
SGESKEEKPRHIEFADLGIAEQSSERKRIIQEEENNQRVFKYGDDLWNMREVMDKLSRK  
LLKSINTGDREKEEEEIRAELRQVEGQDPDLVYKVELEKLRQKARREGRDEDAMRHSIIASA  
ARSILPQYNLEGLWVGKYQHGYEMVNVTYQGDLLVAYKVTGDKNVPRGEITFQADLDPL  
HRGANVDSSGDPSTPTVEQLQPIILTDKAARKWGTSQLPRHKGLGQVAEAGFKKNQWMEG  
QLIIIGQEYFSFAWVPIEQQIFFGRPSPELALKMLREAGGTGIAPVKSWEPTPTMDADVT  
VMKDYIHSCKLEKTAESDDFLSGDPFSCIFVDGDTEECYLQ  
>comp11563\_c0\_seq2; 384 355 1707 LEN=1886; translated  
MKSFLQLGQPLVFLVASSNAFSLVTRTGPSALSSSSSSSLHVSSYSSAEDTPPEDDGRA  
SGESKEEKPRHIEFADLGIAEQSSERKRIIQEEENNQRVFKYGDDLWNMREVMDKLSRK  
LLKSINTGDREKEEEEIRAELRQVEGQDPDLVYKVELEKLRQKARREGRDEDAMRHSIIASA  
ARSILPQYNLEXTMGWKVSLRGNTDDADDDAXNANGMTLTVSHRFSSFIIIWALSKCNYH  
NLXLIRYQGHGYEMVNVTYQGDLLVAYKVTGDKNVPRGEITFQADLDPLHRGANVDSSGD  
PSTPTVEQLQPIILTDKAARKWGTSQLPRHKGLGQVAEAGFKKNQWMEGQLIIIGQEYFS  
FAWVPIEQQIFFGRPSPELALKMLREAGGTGIAPVKSWEPTPTMDADVTVMKDYIHSCK  
KTAESDDFLSGDPFSCIFVDGDTEECYLQ  
>comp11564\_c0\_seq1; 447 255 1025 LEN=1593; translated  
MARFYLASFIATIVALSLVQAQDQGGYNDYGDYAEYQDYNNDYAQEDSLYYDYAERDE  
RKNSPATGGGGVGLKLVATGIASWIMGARFHSGRAVKELKRKHKSEQKKLYSQYYNDVYKL  
GDQNNLLQEIEELTALVKSTEAKAELEALQRDYDEFKQPDLDSDDRISRAEFNMYVKDY  
LSNYPGLTEKDYPKFEDFDHGDGDGYVSFEEYSQQMAVQAEQAELEELYGKSGNSAAKAQ  
AYSIDLARGAGGNKMY  
>comp11564\_c0\_seq2; 438 255 1270 LEN=1838; translated  
MARFYLASFIATIVALSLVQAQDQGGYNDYGDYAEYQDYNNDYAQEDSLYYDYAERDE  
RKKYVXFLLICWRVLRWIVNEPVVDSRKRCSLLMLLPSCRFFKIVFQGDSSDWAQSYITL  
LIASFLLNNVIRNSLNPLSFAHVRSSPATGGGGVGLKLVATGIASWIMGARFHSGRAVKEL  
KRKHKSEQKKLYSQYYNDVYKLGQNNLLQEIEELTALVKSTEAKAELEALQRDYDEFK  
QPDLDSDDRISRAEFNMYVKDYLSNYPGLTEKDYPKFEDFDHGDGDGYVSFEEYSQQMAV  
AEQAELEELYGKSGNSAAKAQAYSIDLARGAGGNKMY  
>comp11565\_c0\_seq1; 711 105 2756 LEN=3130; translated  
MTAAIETNQDGGESSDPKQQHQKMASSTSSRYPVKIKRPTTSDSGDPTDDCLFDAQRI  
FRLVEDERYLSANALYQSVRERIQQGEIDGIEFGGRRNNSGTLGSIKGRKMPMPKKKNS  
SRKGIIEQRKAAMELLVENEIILNKMEDRCIMFEKAKLNINNDDDWTLAQSLFGVTTFY  
RHEQDGSMSIKLEGPVKDCSLFDQVAVLREFDLNHLWAPFCTASMTVAHLGKLDTVGWFL  
VGLPHFGLMRDSLFRAGCDSIYEDGSLIIVATGIEDRPEDNNDNKTNSQVQDLPDLSLQ  
SSFDNFNAEEERIIDEIRNDPLLKSLDLPPVPTRMGGGRLTLRSFAGQIHLESPTAATTKL  
VANIDPNMKLIPQALLDFVMKRMCGVILNKMQRAAKYINDDPITNLHAIRMREDKDFYKT  
FLLPKFEGVCKLRGWQMPPIAAFELSDAQLEMADVFMKQKHKSEVTAIKHYGATENNLE  
TFLES PRNGEASVANGPRVTRDMHKDLDDMSDI SKTTVATFNPIEHYKRYVEKTNRK  
AREIQEARERAARRLQPKALDDDAIVRLNQLQNRQRQKAREPKSRGKTTNSPIGVEPDG  
SKSFADNTNRRWKVSLRSHSFFTKVFLVQLMVTFLFCMLYLDSAFQKFAHRNGPYQSER  
GRDLATLAYMGMVSLVHAIFCYVAMIYAFGALQLGSIAGKRTRLFYSEYVHYAVVLSAT  
MVGFGIVKPGMDRALKWIWNWYSVNLNVLSFLLLEKIPDKGIVALQMALSGILSVIFSTK  
TLILESNI FGRCIVHVTKTSVGFGLRTIRRPFETYANSIQQYEDGVDSMPWREDAFLTT  
RALLSHSAFFLLVLLFLFDFSAKKARKAIYIDKSRDSGTTASF  
>comp11565\_c0\_seq2; 476 191 2098 LEN=2472; translated  
MRDSLFRAGCDSIYEDGSLIIVATGIEDRPEDNNDNKTNSQVQDLPDLSLQSSFDNFNAE  
EERIIDEIRNDPLLKSLDLPPVPTRMGGGRLTLRSFAGQIHLESPTAATTKLVANIDPNM  
KLIPQALLDFVMKRMCGVILNKMQRAAKYINDDPITNLHAIRMREDKDFYKTFLLPKFEG  
VCKLRGWQMPPIAAFELSDAQLEMADVFMKQKHKSEVTAIKHYGATENNLETFLES PRG  
NGEASVANGPRVTRDMHKDLDDMSDI SKTTVATFNPIEHYKRYVEKTNRKAREIQEAR  
ERAARRLQPKALDDDAIVRLNQLQNRQRQKAREPKSRGKTTNSPIGVEPDGSKSFADNT  
NRRWKVSLRSHSFFTKVFLVQLMVTFLFCMLYLDSAFQKFAHRNGPYQSERGRDLATLA  
YMGVSLVHAIFCYVAMIYAFGALQLGSIAGKRTRLFYSEYVHYAVVLSATMVGFGIVK  
PGMDRALKWIWNWYSVNLNVLSFLLLEKIPDKGIVALQMALSGILSVIFSTKTLILESNI  
FGRCIVHVTKTSVGFGLRTIRRPFETYANSIQQYEDGVDSMPWREDAFLTTTRALLSHSA  
FFLLVLLFLFDFSAKKARKAIYIDKSRDSGTTASF





GLTASAESAVVQIAALGPATTLFDSLVTYTYFLAIATTNQLAPGLAEAAATETGAAASAC  
GSKNPWRDLRKSASHLLGLAIVFGSLVSAITFVFGRIIEYMGAGSTNMGAAEAGAIVP  
LATNYARIRAAVAPVSIILGFVAQSVSTNFCVDLLVAAVVAGRVGVCRGAXHTAFRFDAMR  
FDSILFDRVWIDAVFALLIAPVLLIPIFGXGESNESTTNNNDALTVLLVNLDIATPAIAV  
AAASVVNVVGDALALSARYGIQGAAVATAMATVTSCAILLRKVRKTTNRWKMKQEDLER  
>comp11570\_c0\_seq1; 701 262 1848 LEN=1892; translated  
MTKSSVCGRPFADVPNVKHVGTAKAFASAAPSSDSRETASNHSKRVLGQDASKKYEELMG  
ASKLQLAPMMEYTDHRHRLVRLVSRKTLTYTEMVAANALARERDDCMKDYERTAMEDSS  
RTSPPSRQEIRENYADHYLQRYLSQGHIEPLEGPSVLQLGGSDPKQLYEAAQTVMDMTDR  
GHCDYTALNLCGCPSPKVAGKGCFAALMDEPRLVAELTNALHDGCDGKLPVTVKCRIG  
TDTDEPFTMEGYAETDPELEYKNVCQFIETVASNSPVTDFQVHARIAVLRKSFSPADNRK  
IPPLKYDIVRRRLATEYPELTFSLNGGIDTLSQAQDQLNQCPENLNGIMIGRGAADPWGFA  
MADSLLYESGNEEGFTPRNRLEVLTEYVKHADAEERGDVPIRRFITKAVQTLFTAEPK  
AKRYRIALDEIGMPKLLREGKNLADQPPLSELILNAAHTLSEEVLLRTPPEESYERKL  
YDERKSALRAGRSSAVTDWQLERIQQQKENGGGTYEAALAGGETSIRD  
>comp11571\_c0\_seq1; 462 82 1959 LEN=2394; translated  
MIDITSKDEDGGSREGPQPSKFS DHASRLIFGSCNSQHIEQPFWKIIGERNPAAFWVTGD  
SVYADDRPKQSVGGRELHSGNLDASWWWPSLSRVRSRSPGYADATPDYLRRELYRQQLEV  
PEYRDLITGGGISIFGALDDHDYGTNNGDKTFPFRTQSGIEFTRFLGLDDRSSAMARRAS  
RGAGVYGVQVYDFSSAKGRLLSDADAGLDPDVIIPDATYRDRRNDSGDNNGGSSSNNSDKL  
VAVFVLDVRSNKTPWAKGFPERYALNPEGDFLGEDQWKWFETAIGRSNARVNIIVSGIQV  
HAPWFYDSNKIENWSGFPAAQHRLYQTVLQPNVRAPILFSGDIHMAQILRKDCRRMASGT  
DLGNEGDSGKGSQRHRTLRLPLYEVTSSGMTHSWSSNSGRCGRPKNSRLCSFYFPFNVLVE  
IVMTYAHYASPWTALLRGNDDDRGDGSRGAGGSRERRAGAQQRQYTLERNIAEVEVDWE  
ESVVTVRILGDRGQTLRQDWSMDRLTGGGEPGIPGAGSLLGDPSFEEGQKRLESSLRRG  
FPSDHGEYICVNYRGNIDRVHFAFSVSTIGVFVAIGTYPFLLCLGLVLARWVLRRHGKAS  
PPVRRRREAGTGKSTSGKADRPKTD  
>comp11571\_c0\_seq2; 91 1 959 LEN=1394; translated  
XFVVRGKCFSGFPAAQHRLYQTVLQPNVRAPILFSGDIHMAQILRKDCRRMASGTDLGNEG  
DSGKGSQRHRTLRLPLYEVTSSGMTHSWSSNSGRCGRPKNSRLCSFYFPFNVLVEIVMTYA  
HYASPWTALLRGNDDDRGDGSRGAGGSRERRAGAQQRQYTLERNIAEVEVDWEESVTV  
RILGDRGQTLRQDWSMDRLTGGGEPGIPGAGSLLGDPSFEEGQKRLESSLRRGFPSDHG  
EYICVNYRGNIDRVHFAFSVSTIGVFVAIGTYPFLLCLGLVLARWVLRRHGKASPPVRRR  
REAGTGKSTSGKADRPKTD  
>comp11571\_c0\_seq3; 374 82 1023 LEN=1073; translated  
MIDITSKDEDGGSREGPQPSKFS DHASRLIFGSCNSQHIEQPFWKIIGERNPAAFWVTGD  
SVYADDRPKQSVGGRELHSGNLDASWWWPSLSRVRSRSPGYADATPDYLRRELYRQQLEV  
PEYRDLITGGGISIFGALDDHDYGTNNGDKTFPFRTQSGIEFTRFLGLDDRSSAMARRAS  
RGAGVYGVQVYDFSSAKGRLLSDADAGLDPDVIIPDATYRDRRNDSGDNNGGSSSNNSDKL  
VAVFVLDVRSNKTPWAKGFPERYALNPEGDFLGEDQWKWFETAIGRSNARVNIIVSGIQV  
HAPWFYDSNKIENW  
>comp11572\_c0\_seq1; 247 243 797 LEN=946; translated  
MKPAWDKLGDEYAASSTVLIADADCTDEAAQQLCQDFGISGCTYFTAGAVFFAFLTAKNF  
KSTLTLTFAIFMIDLTXPSYPTFSPTIKYFLDGDKEGSDYQGGDRDFGSLKQFVEDTLEI  
KCNVDDGSDCTDKEKGYIEKMKAKGSDERAKQIKRLEGMAGDSMKAELKDWLRKRLHILR  
MLER  
>comp11572\_c0\_seq2; 247 243 797 LEN=922; translated  
MKPAWDKLGDEYAASSTVLIADADCTDEAAQQLCQDFGISGCTYFTAGAVFFAFLTAKNF  
KSTLTLTFAIFMIDLTXPSYPTFSPTIKYFLDGDKEGSDYQGGDRDFGSLKQFVEDTLEI  
KCNVDDGSDCTDKEKGYIEKMKAKGSDERAKQIKRLEGMAGDSMKAELKDWLRKRLHILR  
MLER  
>comp11572\_c0\_seq3; 287 243 668 LEN=817; translated  
MKPAWDKLGDEYAASSTVLIADADCTDEAAQQLCQDFGISGYPTIKYFLDGDKEGSDYQ  
GRDFGSLKQFVEDTLEIKCNVDDGSDCTDKEKGYIEKMKAKGSDERAKQIKRLEGMAGDS  
MKAELKDWLRKRLHILRMLER  
>comp11572\_c0\_seq5; 287 243 668 LEN=793; translated  
MKPAWDKLGDEYAASSTVLIADADCTDEAAQQLCQDFGISGYPTIKYFLDGDKEGSDYQ  
GRDFGSLKQFVEDTLEIKCNVDDGSDCTDKEKGYIEKMKAKGSDERAKQIKRLEGMAGDS  
MKAELKDWLRKRLHILRMLER  
>comp11573\_c0\_seq1; 338 107 957 LEN=957; translated

MSKLTDYSKFDHLTEDDSDNDSNDRKLAVEENDKSTAEMAAAASPSPSLPPGVSR IADN  
KHGATARPSLGAARRDETSGRYRFEYNGRIVYEFEQSLDEMTIYILPPPYVTRGNQIDC  
RISANHFKLGLVGHVSVGNSSGNKDNQRQWFLNEATGGTVDVDESTWTLEDYDGDGNHKG  
VTRRKII VVTLIKANRGSAAWAAALKGNPNPSAGGRTAHATGTGTQSSSCGTTMDPFSKEQV  
KKDLMLQRFNENPGFDFSGADFNDSVPGAREFMGGKNINSTNX

>comp11574\_c0\_seq1; 569 123 1726 LEN=2121; translated  
MSESTYSIALAKTSRAKCKTCKEPIQK GELKVFVEAPLREGANFAMSASYHVSCFKIPRK  
LASAGVDVEQFVGDYLMNDGELLDRREEVLDMLREAASKTKAKTKKAKSSENGSSSTD  
LMERLKEAASVDDDGGKAPPKKKAKTNSKSKEEQEFKAMIS IYRKYQKGYTVAKLKDILR  
WNQQLLTGTKSFVLFKVIDGELHGRLSICPLCQGD LKLMEGDYDKIYCSGRYDEGWLLCI  
FFLTSQRIAGHRKQNSSXLLALCLLFHFFFTPLFNNFFPFSFLQSCETDIGRRI PCSYTV  
PLGNAETIRARPFYLEEPSEEEKEAMKQFREDAREGGGGGTKPGDNPVAQELLEKAEALD  
GKLDFTTNPGRKHAVGEFVALVKGKVDLPENRNAKMEVGKLV MANCNGKSPKEIMQIIFD  
KFGFADVKQEKA AAKEAAAEEAACANPKNAALILAFEECSKY YFAESNRNAALS YKKA IAT  
LTELEEA VTE DNALSFSKGKTKLPGIGKATAEKMREFCQTGTFAKLEEKREAHK

>comp11574\_c0\_seq2; 478 123 1579 LEN=2300; translated  
MSESTYSIALAKTSRAKCKTCKEPIQK GELKVFVEAPLREGANFAMSASYHVSCFKIPRK  
LASAGVDVEQFVGDYLMNDGELLDRREEVLDMLREAASKTKAKTKKAKSSENGSSSTD  
LMERLKEAASVDDDGGKAPPKKKAKTNSKSKEEQEFKAMIS IYRKYQKGYTVAKLKDILR  
WNQQLLTGTKSFVLFKVIDGELHGRLSICPLCQGD LKLMEGDYDKIYCSGRYDEGWLLCI  
FFLTSQRIAGHRKQNSSXLLALCLLFHFFFTPLFNNFFPFSFLQSCETDIGRRI PCSYTV  
PLGNAETIRARPFYLEEPSEEEKEAMKQFREDAREGGGGGTKPGDNPVAQELLEKAEALD  
GKLDFTTNPGRKHAVGEFVALVKGKVDLPENRNAKMEVGKLV MANCNGKSPKEIMQIIFD  
KFGFADVKQEKA AAKEAAAEEAACANPKNAALILAFEECSKVCKRWTESQIRKPGYFLFYR  
SLSNG

>comp11574\_c0\_seq3; 585 123 1568 LEN=1963; translated  
MSESTYSIALAKTSRAKCKTCKEPIQK GELKVFVEAPLREGANFAMSASYHVSCFKIPRK  
LASAGVDVEQFVGDYLMNDGELLDRREEVLDMLREAASKTKAKTKKAKSSENGSSSTD  
LMERLKEAASVDDDGGKAPPKKKAKTNSKSKEEQEFKAMIS IYRKYQKGYTVAKLKDILR  
WNQQLLTGTKSFVLFKVIDGELHGRLSICPLCQGD LKLMEGDYDKIYCSGRYDEDEDIGRRI  
PCSYTVPRLGNAETIRARPFYLEEPSEEEKEAMKQFREDAREGGGGGTKPGDNPVAQELL  
EKAEALD GKLDFTTNPGRKHAVGEFVALVKGKVDLPENRNAKMEVGKLV MANCNGKSPKE  
IMQIIFDKFGFADVKQEKA AAKEAAAEEAACANPKNAALILAFEECSKY YFAESNRNAALS  
YKKA IATLTELEEA VTE DNALSFSKGKTKLPGIGKATAEKMREFCQTGTFAKLEEKREAH  
K

>comp11574\_c0\_seq4; 494 123 1421 LEN=2142; translated  
MSESTYSIALAKTSRAKCKTCKEPIQK GELKVFVEAPLREGANFAMSASYHVSCFKIPRK  
LASAGVDVEQFVGDYLMNDGELLDRREEVLDMLREAASKTKAKTKKAKSSENGSSSTD  
LMERLKEAASVDDDGGKAPPKKKAKTNSKSKEEQEFKAMIS IYRKYQKGYTVAKLKDILR  
WNQQLLTGTKSFVLFKVIDGELHGRLSICPLCQGD LKLMEGDYDKIYCSGRYDEDEDIGRRI  
PCSYTVPRLGNAETIRARPFYLEEPSEEEKEAMKQFREDAREGGGGGTKPGDNPVAQELL  
EKAEALD GKLDFTTNPGRKHAVGEFVALVKGKVDLPENRNAKMEVGKLV MANCNGKSPKE  
IMQIIFDKFGFADVKQEKA AAKEAAAEEAACANPKNAALILAFEECSKVCKRWTESQIRK  
PGYFLFYRSLNSG

>comp11574\_c0\_seq5; 592 296 1606 LEN=2001; translated  
MSASYHVSCFKIPRKLASAGVDVEQFVGDYLMNDGELLDRREEVLDMLREAASKTKAK  
TKKAKSSENGSSSTDLMERLKEAASVDDDGGKAPPKKKAKTNSKSKEEQEFKAMIS IYR  
KYQKGYTVAKLKDILRWNQQLLTGTKSFVLFKVIDGELHGRLSICPLCQGD LKLMEGDYDK  
IYCSGRYDEDEDIGRRI PCSYTVPRLGNAETIRARPFYLEEPSEEEKEAMKQFREDAREGG  
GGTKPGDNPVAQELLEKAEALD GKLDFTTNPGRKHAVGEFVALVKGKVDLPENRNAKMEV  
GKLV MANCNGKSPKEIMQIIFDKFGFADVKQEKA AAKEAAAEEAACANPKNAALILAFEEC  
SKYYFAESNRNAALS YKKA IATLTELEEA VTE DNALSFSKGKTKLPGIGKATAEKMREFC  
QTGTFAKLEEKREAHK

>comp11574\_c0\_seq6; 501 296 1459 LEN=2180; translated  
MSASYHVSCFKIPRKLASAGVDVEQFVGDYLMNDGELLDRREEVLDMLREAASKTKAK  
TKKAKSSENGSSSTDLMERLKEAASVDDDGGKAPPKKKAKTNSKSKEEQEFKAMIS IYR  
KYQKGYTVAKLKDILRWNQQLLTGTKSFVLFKVIDGELHGRLSICPLCQGD LKLMEGDYDK  
IYCSGRYDEDEDIGRRI PCSYTVPRLGNAETIRARPFYLEEPSEEEKEAMKQFREDAREGG  
GGTKPGDNPVAQELLEKAEALD GKLDFTTNPGRKHAVGEFVALVKGKVDLPENRNAKMEV  
GKLV MANCNGKSPKEIMQIIFDKFGFADVKQEKA AAKEAAAEEAACANPKNAALILAFEEC

SKVCKRWTESQIRKPGYFLFYRSLNSG  
>comp11574\_c0\_seq7; 485 296 1617 LEN=2338; translated  
MSASYHVSCFKIPRKLASAGVDVEQFVGDYLMNDGELLDDRREEVLDMLREAASKTKAK  
TKKAKSSENGSSSTDLMERLKEAASVDDDGGKAPPKKKAKTNSKSKEEQEFKAMISYRK  
YQKGYTVAKLKDILRWNQQLLTGTFKSFVLFKVIDGELHGRLSICPLCQGDLLKMEGDYDK  
IYCSGRYDEGWLLCIIFFLTSQRIAGHRKQNSSXLLALCLLFHFFFTPLFNNFFPFSFLQSC  
ETDIGRRI PCSYTVPRLGNAETIRARPFYLEEPSEEEKEAMKQFREDAREGGGGGTKPGD  
NPVAQELLEKAEALDGKLDFTTNPGRKHAVGEFVALVKGVLDLPENRNAKMEVGKLVMAN  
CNGKSPKEIMQIIIFDKFGFADVKQEKA AAKEAAEAACANPKNAALILAFEESC KVCKRW  
TESQIRKPGYFLFYRSLNSG  
>comp11574\_c0\_seq8; 576 296 1764 LEN=2159; translated  
MSASYHVSCFKIPRKLASAGVDVEQFVGDYLMNDGELLDDRREEVLDMLREAASKTKAK  
TKKAKSSENGSSSTDLMERLKEAASVDDDGGKAPPKKKAKTNSKSKEEQEFKAMISYRK  
YQKGYTVAKLKDILRWNQQLLTGTFKSFVLFKVIDGELHGRLSICPLCQGDLLKMEGDYDK  
IYCSGRYDEGWLLCIIFFLTSQRIAGHRKQNSSXLLALCLLFHFFFTPLFNNFFPFSFLQSC  
ETDIGRRI PCSYTVPRLGNAETIRARPFYLEEPSEEEKEAMKQFREDAREGGGGGTKPGD  
NPVAQELLEKAEALDGKLDFTTNPGRKHAVGEFVALVKGVLDLPENRNAKMEVGKLVMAN  
CNGKSPKEIMQIIIFDKFGFADVKQEKA AAKEAAEAACANPKNAALILAFEESKYYFAE  
SNRNAALSYKKA IATL TELEEA VTE DNALSFSK GKTKLPGIGKATAEKMREFCQTGTFAK  
LEEKREAHK  
>comp11575\_c0\_seq1; 338 218 808 LEN=821; translated  
MALVPLPAEDVKDLLVVGSPSLQYETYWGRTKRETYNRLLESTMVAAIGCFFSYFVSFV  
VGSFVATIFGSLFAFWAVLSPDFKARQRNWEFLGGRAIVDPWMLDDANGSVDRNNAGLYG  
SMFLGRIEDACVVEDNASIDEFDLEEFQDYKNEEDEQEEITGFYPYLIRLRITDNDGRELQ  
IHSRLSEEYLG IQKGI  
>comp11575\_c0\_seq2; 371 218 994 LEN=1507; translated  
MALVPLPAEDVKDLLVVGSPSLQYETYWGRTKRETYNRLLESTMVAAIGCFFSYFVSFV  
VGSFVATIFGSLFAFWAVLSPDFKARQRNWEFLGGRAIVDPWMLDDANGSVDRNNAGLYG  
SMFLGRIEDACVVEDNASIDEFDLEEFQDYKNEEDEQEEITGFYPYLIRLRITDNDGRELQ  
IHSRLSEEYLG IQKGMPIAGILLSTYESFSSLSAMSDVYVPDVGCFVGDYPYLNRPGMEE  
LLSSDDDLWNTLQSQSRW  
>comp11576\_c0\_seq1; 240 1031 1714 LEN=2239; translated  
MCLAALVFAQVLRMTENVITIFRHGNRDSA AVKLADLFWFVFDGIFLSW MVNVLTYTITM  
EISRDEYTD RRGFFGSNRWQAWWKS RSLFFFWILYTVFVTLSTALILIGLLAFTMGAVDM  
TDEHFVFDYIKANAINDLLL LTGIAIILRPKLVGQSPSPFSTNSIGADETERVADVDYSL  
LLTESSEDEQGSGGETREEQGERSFEMTTTAVSSGLDSTAMNAAP  
>comp11576\_c0\_seq2; 415 404 1567 LEN=2092; translated  
MASSSSPSSSSHLTREQQGLLNFEVVVALWYFILMLWYGYRCRNWKVTTSQFSNSIDST  
NTNLEQYGLSPIHWLIASIAAMGLANFLFSVSVLEALDHTSAIGSKVLKLSYINMFFACL  
RHPCTLSLGLVAPKVAFGSDRYFYFPSESAVRTDNIKTTAMCLAALVFAQVLRMTENVI  
TIFRHGNRDSA AVKLADLFWFVFDGIFLSW MVNVLTYTITMEISRDEYTD RRGFFGSNRWQ  
AWWKS RSLFFFWILYTVFVTLSTALILIGLLAFTMGAVDMTDEHFVFDYIKANAINDLLL  
LTGIAIILRPKLVGQSPSPFSTNSIGADETERVADVDYSLLLTESSEDEQGSGGETRE  
EQGERSFEMTTTAVSSGLDSTAMNAAP  
>comp11577\_c0\_seq1; 855 184 1695 LEN=1757; translated  
MTRSRAVRISPSSAFLCYFLAAVMMGAPLVQGS IATQRSFLSPKVATSIAGFGIRQRKN  
NGDHVALLTSVRGGSSTVEEMADEDEDEDIDEVSESEDESDVKKVPSIVSKEPVRLI  
LSTNWGNAVIDQTVELTPARTRDIGTIKKSLSKQLPGRPP IVALEIVYEGRVLDLDDTLVD  
ELFEDEDEDEDEDEDEVEEGNEPSRKLTLNILPPVDPKFATELVPKLMSYSGDDDYETD  
TAATVGDGDSLTTDELVDAYYLNQVAMMRNAQLLADPNT PSSPFMRMELQDQARELREQ  
QSETPVEIWEKCMTEPTKGGSGSQVEWRGQRYRSSKGGVTTQLKTTIQTNLNVNWEEAIK  
YSLFLFLGYFGGRNSFSRHL LFWGAPLSFGLQARPVKMLFKTIFYMMSNPPLILL SFLP  
APQQA ILSMDLEKSVIALYGEDGAKTICPTV LSETEEADAVTRTVSAEDEDSDSDSDV  
EDTDLEDEDEYDSEDQYDDEE  
>comp11578\_c0\_seq1; 369 386 1752 LEN=2264; translated  
MRARTLVAALGTRNIARASTPLFFGGFLRSPFGTTAAAAAATTQRASVAMPVSTEAATT  
TAAKTPAHPIAAVAQLRSTSDKFRNLLDVAHCAGLARSRGASMLFLPECFGFMGESAEQT  
LREAEDPSRLEAAGGGGPGGELAAALEAAVRGAAAGTAPGGTTGVSPPPVDSLDDGLRTI  
ARASGLWISGGGVHVS GAPPEDGSKEGRPRVYNTHVVL DADGALRAS YQKIHLFDVSI PG  
KVDLRESRTTAPGTRLVVCNSPVGRLGVTTTCYDMRFPEVYTELVGTMGAQVLLLLPSAFTV

PTGAAHWHTLLRRAIENQCYVLAQAQYGTQCKKGQLWLSLFGKRNLITWWLHERLPMWY  
EHSGSKQHRLVSSSRLPNALTTILCCAHLQAVDPWGKILADAGGYPTAEEAETGQDDRT  
TPEPPSIVTAEIDLSDIRQRMPIDLHRSSARF

>comp11578\_c0\_seq2; 388 386 1606 LEN=2118; translated  
MRARTLVAALGTRNIARASTPLFFGGFLRSPFGTTAAAAAATTQRASVAMPVSTEAATT  
TAAKTPAHPAIAVAQRLRSTSDKFRNLLDVACAGLARSRGASMLFLPECFGFMGESAEQT  
LREAEDPSRLEAAGGGGGPGELEAAALEAAVRGAAAGTAPGGTTGVPSPPVDSLLDGLRTI  
ARASGLWISGGGVHVS GAPPEDGSKEGRPRVYNTHVVLDADGALRASQKIHLFDVSIPIG  
KVDLRESRTTAPGTRLVVCNSPVGRLGVTTTCYDMRFPEVYTELVGTMGAQVLLLLPSAFTV  
PTGAAHWHTLLRRAIENQCYVLAQAQYGRHNARRDSFGHSLAVDPWGKILADAGGYPTA  
EEAETGQDDRTTPEPPSIVTAEIDLSDIRQRMPIDLHRSSARF

>comp11578\_c0\_seq3; 369 386 1752 LEN=2228; translated  
MRARTLVAALGTRNIARASTPLFFGGFLRSPFGTTAAAAAATTQRASVAMPVSTEAATT  
TAAKTPAHPAIAVAQRLRSTSDKFRNLLDVACAGLARSRGASMLFLPECFGFMGESAEQT  
LREAEDPSRLEAAGGGGGPGELEAAALEAAVRGAAAGTAPGGTTGVPSPPVDSLLDGLRTI  
ARASGLWISGGGVHVS GAPPEDGSKEGRPRVYNTHVVLDADGALRASQKIHLFDVSIPIG  
KVDLRESRTTAPGTRLVVCNSPVGRLGVTTTCYDMRFPEVYTELVGTMGAQVLLLLPSAFTV  
PTGAAHWHTLLRRAIENQCYVLAQAQYGTQCKKGQLWLSLFGKRNLITWWLHERLPMWY  
EHSGSKQHRLVSSSRLPNALTTILCCAHLQAVDPWGKILADAGGYPTAEEAETGQDDRT  
TPEPPSIVTAEIDLSDIRQRMPIDLHRSSARF

>comp11578\_c0\_seq4; 388 386 1606 LEN=2082; translated  
MRARTLVAALGTRNIARASTPLFFGGFLRSPFGTTAAAAAATTQRASVAMPVSTEAATT  
TAAKTPAHPAIAVAQRLRSTSDKFRNLLDVACAGLARSRGASMLFLPECFGFMGESAEQT  
LREAEDPSRLEAAGGGGGPGELEAAALEAAVRGAAAGTAPGGTTGVPSPPVDSLLDGLRTI  
ARASGLWISGGGVHVS GAPPEDGSKEGRPRVYNTHVVLDADGALRASQKIHLFDVSIPIG  
KVDLRESRTTAPGTRLVVCNSPVGRLGVTTTCYDMRFPEVYTELVGTMGAQVLLLLPSAFTV  
PTGAAHWHTLLRRAIENQCYVLAQAQYGRHNARRDSFGHSLAVDPWGKILADAGGYPTA  
EEAETGQDDRTTPEPPSIVTAEIDLSDIRQRMPIDLHRSSARF

>comp11580\_c0\_seq1; 216 367 912 LEN=1253; translated  
MRELKYHEKLLRGVDLYSWKKEDNLRVAKIMRRYHIQNRDDYTAYVVICGMVTKLSAKL  
KTLKHDDPFRVAMTDQLLTKLEDLGLINKATSLKNADDITASAICRRRLPVMMVRLKMAQ  
TLKTAITFIESGQIRVGPVCVTDPAFLVAKNMEDYVTWVDSKVRRTVQKYNDKLDLDFDL  
L

>comp11580\_c0\_seq2; 216 253 798 LEN=1139; translated  
MRELKYHEKLLRGVDLYSWKKEDNLRVAKIMRRYHIQNRDDYTAYVVICGMVTKLSAKL  
KTLKHDDPFRVAMTDQLLTKLEDLGLINKATSLKNADDITASAICRRRLPVMMVRLKMAQ  
TLKTAITFIESGQIRVGPVCVTDPAFLVAKNMEDYVTWVDSKVRRTVQKYNDKLDLDFDL  
L

>comp11581\_c0\_seq1; 920 113 1594 LEN=1882; translated  
MAKKKKSASAEADSTSQNPTVDALKETLKKVEASLLPAVDSFCGRSEKSDDGVEPPLPST  
KGLDFIHVKNLTLSSYLIELTVHLRDAVVESSDGESKEEDSNDEGEDSDKKQQQRQRRR  
LLEMRTVLDKSRGLDKKRLRYQIDKLLASLTDSSAFATGVGNDGDQSDDEGGVGFDDGQD  
DPLRHRPDPKSM LDSDEGDDSGDDDEGDDSGDGGEDSDSDSGDGMDEDDDLAAARATLSMS  
RQGKSKKKNKDEDDGDEDDDEEYGAASKYVAPRLTAVPYTHDVADKRLEKEKQR  
KLRA TELAQTLRQYGDQPETEDVFGGGNSEVYKQRAASRALAQKEAERIEFEESTMIR  
LTTSRKDKKEKRVERMMEGGANLAQIANLGNLVRETEAFGRDDAVNSDDDRHREEAYDA  
YLRGDQGGKSAEDTGSRYANGKRRRDPGENISDGAGRRLKMGKPKAKNHLQAALYGS  
SGKPSKGKKKSR

>comp11582\_c0\_seq1; 737 162 1604 LEN=1680; translated  
MTKTGKQRRSSTASHLLATITLVSTLAMLLYARTSPLSNGLASDVFGDTGTAPRLRRYNA  
AFAPIPDFPALPASRKLQOSTVGDREIHNNNNNNDGAFDALVVELSGVADPIAIQQNW  
KAAKANGHPVTRKADMKRVTLVDSSTFGTDWMTWDVAGERDGTQGDTCVAVQRKVP  
LAEQVEAADVLLLNKIDLAPDQVEVAAALAKSINKKAVVEEIAFGRVASPKQIVREEAS  
ETTKEEAPSQSGCCSNPSCPSNLAKKKQEEEEAKQPRATVSTDDLGIVSFVYKADRPFD  
APKLMGLLNTWPIPVKEDLGGLEHFSPEAAADGGEDVGRTSPFFGVLRSKGFCWMAPTN  
WATDGTGDPWRHDSAMYWSHAGKHFGISVAGKWWGTLVEEMKEYFANDREEYNRIRTEE  
FVTEEWGDRRQELVFIGANIDRGQITEALDACLLENEKMKRYAKGAESYQRESGKSLVVP

>comp11582\_c0\_seq2; 517 277 1318 LEN=1394; translated  
MKNRQSNRIETALSVALDARDVAGERDGTQGDACAGQRKVPPELLAEQVEAADVLLLN  
KIDLAGPDQVEVAAALAKSINKKAVVEEIAFGRVASPKQIVREEASETTKEEAPSQSGCC

SNPSCPSNLAKKKQEEEEAKQPRATVSTDDLGIVSFVYKADRPFDAPKLMGLLNTWPIPVKEDLGGLEHFSPEASAAADGGEDVGRTPSPFFGVLRSGKFCWMAPTNWATDGTGDPWRHDSAMYWSHAGKHFGISVAGKWWGTLVEEEMKEYFANDREEYNRIRTEEFVTEEWGDRRQELVFIGANIDRGGQITEALDACLLNEKGMKRYAKGAESYQRESGKSLVVP

>comp11584\_c0\_seq1; 1144 316 4398 LEN=4640; translated  
MTRSIGRFITFCCIMIAVVLPMQSTRRRRLFSNALLSGSNAFTRKPSHSTISKYLLSIPSSH  
HERFPLRSRSHFSVTDIGRRRSYTTQEODVHSTTSLSAAKTNFNFTSLVVQGPPTFSFK  
KNKKSQRPFKLVVVEVSPSKCQTIKILQKYVKDNDLAYDFVLTSSMGHIRNIPQKKSFKG  
QKIAGIDLNNYSPTYEVIKEDMLSKQLQELSAAAQQLILATDDDREGEAMAWHLLQVL  
EGEGNPFINTSDAKGKVAEDKQHLRVRFTTEITKKAIVEAIENPETSRLDNLVEAQQARR  
ILDRLAGFTVSPVLWKKIAPGLSAGRVQSVGMAMTVQREERERLTFQRTEYWGKANFSAF  
DDDDAGQLFETNLISINGQVLASGTSDFDPKQSDQLTPSAKNKLHLTEQSAAEFTNLIQT  
KGDQSWKIDKITSKERKQKAPVFFITSSLQQEANRRLGLSVSGSMRSAQQLYEKGFISY  
MRTDSTHLSEDAQNAIREEIIKDLGGPDNYVAATENSGKISSKSSKNKKPDPQAAHEAIR  
PAVGENGRFLKPELLPLDFDKAAVEVYRLIYQRTVASHMTPQISNQTSSISITGLSGDEDE  
TEVLFRTSGSVVVDPGYTRVYPRQADSKAPILPPFEEGQSLSCDSVRGLSHTTQPPARYT  
EASFIOLEAQQVGRPSTYAGTVKSLRDRCYIGSPINSDANRRGGVKEVSGPAISAQRAA  
GGEDFTGSKNGRGLPVLPSLSAFVVTSLLEKHCEMYVDPTFTAKMEERLDRIANSEVEVSE  
NERVSYLSEFYEGEEGLASKIEYIDNNVDADIARRADLPALAWNSTQNSEDIGLFIGPWG  
PYVMKTSASKADDDEEKVVKASLPPGMASDISTITGLEGLDAVLKTKEQDGLILGQHPEDG  
RNIRLKVGPYGGYLQWGEDGDDEKSTHTLPREYRSFKKPDLEDMDGESGDTLADMIGLSL  
EKAIQYVNLPRTVCLMNDLPIVASIGPYGPKYNNFTFMQLKPKDGDVITIDGDLAQLV  
TDGIINKKSKFGAGVLAIEGKDEAMITVKRGRFGAYINWNQVNAKLPSEYIDDPSEL  
EEAWTLIQQAASSPGKRTKKKTDDIEIPPGPKRPPSSYFLFTAERPEVSAAFSSSLGEV  
SKELGRLWSSLSDDDEKKPYVEKAAIAKAAVDVEKAQWQKETKQLRRSCKGNTAARGSSMN  
GPKRPRSAIYFFCKKNRDEVSKDFKLGDISKELGRRWNDIDAAKAEYVKMAEDDKHRY  
TMEMEEGVGSSGKTGKGVSKTKKRKVKVTKKTSKTGKQKRSPSAYMLFCASHRSQIVDEN  
GQKCLKLPETTKILAQMWRECDDETRARFVQEAENQKAVLH

>comp11585\_c0\_seq1; 1548 422 4344 LEN=4431; translated  
MPLPDIYNRNDSVPSSQSFGRMGGNHPRRNGSGGRRNSRQPGNLNSLPFEQGIICSLKE  
SFGFIHCAERPEEIFFHYSEVTNCHPDDLIDTEVEFKVGVAPSGGGSSDRQKHAASFVAT  
LPPGTVVWETEHEGRFYEGLVEKPCGFSSGRGGGSGTGGGPQADGTIRLVVGEEDA  
TNEVDGEAEAEAGETSEGATELNENNEDGDVEGKKNKKKQKQKPNGKSGPVVRLRTG  
EYTGAGESGGGGSNRLYRGDMVAFRVFLDKRTKQKYARQITLLQSAREKRRLQKEKLL  
EKATKEEGIVVSLNNGFGFLRSNKRREDVYFHYSHLVIPEVEEGGENDEFELVKQEV  
LVVTEEQQERQNSGSKSSRDNSVKISARQIHCLPKGSVVFQTLQEGVKGVARAPQPP  
SPGSKGDDSRMGFCRVEGLAGDVLHSDVPVGGVFTYQNHNRNSTAAGLWIEGDTLLFDV  
VKEVVDGSRVAVPTKHRIGLGGSILAPSNAEEDDAEGAAATPAIRLVLDLSMVGRAE  
TMKNDYGFIFHAERPVDVHFKTYDLLPDELQEDVRRAMGIDEPIRLREDTAVRFDICAH  
NITATANRGRRRGGGQQQARENIRGQRILLPRSEVTLEKVLATGCKGSIRSVNPQQPY  
IGVLDLEPLSEEQGGALKPMSMEERHPLVAKMIDSFLEESSLPNGKKSIVFRDTLGMND  
DVTTEMAKLGAGVLECSHIPVPLAPHPGRICIRRVSEENNSEDAENQNSKSPKE  
SAKGGKKGKQSPIERSLKNLRFKSSLEAFREDVPPSPGDIVECDVVQYRRTGKIAVRN  
LKIVERATTEAPSATVSSGVGVKDVVPRRNFVGFISLLDENNTKNEILFFHLSKDNQLV  
GSEVRFDIAMEGTRKTAINVESVPKGTIPSTASKNACMGYILMEPSHTTLKNTPARKTAK  
ASGDKVATGRWAEANDDAKTTVVKQDMVEDGCILLLEDKTMGMFQKRRTRRRKRSKSID  
TDSMGDVSIDEAKSGESVDGVADEDDGLSDDGDREDDGTVSILSRLSYTNGSIAIHGAG  
ASSMDGSTNPKRGISLSSREENGXTVRDIRIVKRETALLQRGTLENIEITKTEDNSNK  
GTARFVAATEKQEVYDVLAEVVSVALLEKETSVEGILHEGKIYGLCRTSDLYLTSKL  
VVGSGKNRQRPKLNLTVKKDRGGTIMAQSMMAKGPDDTIGFKPGWTTTQSQYTVIDSDES  
DEEVKNGEEDNDPVQSDQKDETEVEEETNDGDGSEAKAEGIDEGGE

>comp11586\_c0\_seq1; 436 1 1658 LEN=2130; translated  
KRSNACILALILVVGVSFQVVHVHVHIAFLAKPKDTTKIQNHHEGTAYSTRQALFRTE  
TENPHGGHHRVWKQEPSNEERVHDGSNNKNGGKNNNETMSSLVTHSYGTTDVFDRKLR  
EHLRRIENTRRKIENXKRKRKHNHARLLPIEALWLYPGYRNQIMALTVLVLQANHEGH  
LLLDLSLWHKDTYGTIEFDPFDFYFDVEAWNHRHACGGDSRDNAYRRCLPRLILYDVEH  
WDPTTANYLPSVRNGKPGDATRPYGYTKGSTRLAARYMLYARGNGKFPVPPNQTGTNRDA  
TPPRNPAEILMLEGALRHPALQAVVDRSRRQLEVAALASSGGQNSRYMTLHARVEPDM  
QKHPVCIEKKVLSLRDIVAMVESKWRVPPVGVVFLPINREYLEKEGTPPGSGSGEPTNQI  
AVDNLRELNRLTNHPYDRGANETATTGMWGGRPVVEFGSAALEGTVEHRPSTSGAIL

NYFLGLGADLFGVTEVSSFSHDLAARFYRRAAASAAGVGSNGGTFDYRYLPGVGLREWI  
ADDAVAPPGFSC  
>comp11588\_c0\_seq1; 188 173 1207 LEN=2663; translated  
MVTALEI IKDNTELDYDPDALLAAWAEIMEPIEVEDGHIFIKEGEVIKNIVFVENGKLVRT  
KLSVPEEERAGILEAGLEKIRENSIKIDEVLPGTTPTGVWHSFEADRAAFATVASSGPCK  
IWLMPSEKFRAVISRPEFSMVVMAAMANRIRVGSKSIRNLEKVKDGASKDSCENVIKML  
SYDSTSWVVENFDAALVKFNEDNKNDLKI EIDYTSERLSSKTAHYACGEKTSIAMELCRS  
KSNRPDTSLTFFDRFGFKXGYDVVCLFVNNTANADTIKILRKCEVKMICNRCAGFDRIDT  
KAALAYGVSLARVPAYSPYAVAEFAVSLLMGINRKIAKASTRVK  
>comp11588\_c0\_seq2; 282 453 1988 LEN=2612; translated  
MEVIKNIVFVENGKLVRTKLSVPEEERAGILEAGLEKIRENSIKIDEVLPGTTPTGVWHS  
FEADRAAFATVASSGPCKIWLMPSEKFRAVISRPEFSMVVMAAMANRIRVGSKSIRNLE  
KVKDGASKDSCENVIKMLSYDSTSWVVENFDAALVKFNEDNKNDLKI EIDYTSERLSSKT  
AHYACGEKTSIAMELCRSKSNRPDTSLTFFDRFGFKXGYDVVCLFVNNTANADTIKILRK  
CEVKMICNRCAGFDRIDTKAALAYGVSLARVPAYSPYAVAEFAVSLLMGINRKIAKASTR  
VKMSNFSLD SGLMGTDI HGKTVGVMGTGKIGQILCNI IKGFGANLICFDVFEADAVKEMG  
GKYVTKGELFAQSDVIFLMMPLLPPTKHTINADMLHLLKPGMLLINSRGGGLVDTKAVLK  
GIQDGI IAGYGADVYENESDYFFQDWSAKAVDPDTLVALMGSNVLLTAHQAFFTQEAVD  
AIVNTTLSNVKLFTEGKTMYPNNFLPRRN  
>comp11588\_c0\_seq3; 149 453 1361 LEN=2817; translated  
MEVIKNIVFVENGKLVRTKLSVPEEERAGILEAGLEKIRENSIKIDEVLPGTTPTGVWHS  
FEADRAAFATVASSGPCKIWLMPSEKFRAVISRPEFSMVVMAAMANRIRVGSKSIRNLE  
KVKDGASKDSCENVIKMLSYDSTSWVVENFDAALVKFNEDNKNDLKI EIDYTSERLSSKT  
AHYACGEKTSIAMELCRSKSNRPDTSLTFFDRFGFKXGYDVVCLFVNNTANADTIKILRK  
CEVKMICNRCAGFDRIDTKAALAYGVSLARVPAYSPYAVAEFAVSLLMGINRKIAKASTR  
VK  
>comp11588\_c0\_seq4; 204 453 1265 LEN=2721; translated  
MEVIKNIVFVENGKLVRTKLSVPEEERAGILEAGLEKIRENSIKIDEVLPGTTPTGVWHS  
FEADRAAFATVASSGPCKIWLMPSEKFRAVISRPEFSMVVMAAMANRIRVGSKSIRNLE  
KVKDGASKDSCENVIKMLSYDSTSWVVENFDAALVKFNEDNKNDLKI EIDYTSERLSSKT  
AHYACGYDVVCLFVNNTANADTIKILRKCEVKMICNRCAGFDRIDTKAALAYGVSLARVP  
AYSPYAVAEFAVSLLMGINRKIAKASTRVK  
>comp11588\_c0\_seq5; 147 186 518 LEN=1142; translated  
MLLINSRGGGLVDTKAVLKGIQDGI IAGYGADVYENESDYFFQDWSAKAVDPDTLVALMG  
SNVLLTAHQAFFTQEAVDAIVNTTLSNVKLFTEGKTMYPNNFLPRRN  
>comp11588\_c0\_seq6; 321 173 1834 LEN=2458; translated  
MVTALEI IKDNTELDYDPDALLAAWAEIMEPIEVEDGHIFIKEGEVIKNIVFVENGKLVRT  
KLSVPEEERAGILEAGLEKIRENSIKIDEVLPGTTPTGVWHSFEADRAAFATVASSGPCK  
IWLMPSEKFRAVISRPEFSMVVMAAMANRIRVGSKSIRNLEKVKDGASKDSCENVIKML  
SYDSTSWVVENFDAALVKFNEDNKNDLKI EIDYTSERLSSKTAHYACGEKTSIAMELCRS  
KSNRPDTSLTFFDRFGFKXGYDVVCLFVNNTANADTIKILRKCEVKMICNRCAGFDRIDT  
KAALAYGVSLARVPAYSPYAVAEFAVSLLMGINRKIAKASTRVKMSNFSLD SGLMGTDI H  
GKTVGVMGTGKIGQILCNI IKGFGANLICFDVFEADAVKEMGGKYVTKGELFAQSDVIFL  
MMPLLPPTKHTINADMLHLLKPGMLLINSRGGGLVDTKAVLKGIQDGI IAGYGADVYENE  
SDYFFQDWSAKAVDPDTLVALMGSNVLLTAHQAFFTQEAVDAIVNTTLSNVKLFTEGK  
MYDHPNNFLPRRN  
>comp11588\_c0\_seq7; 337 453 1892 LEN=2516; translated  
MEVIKNIVFVENGKLVRTKLSVPEEERAGILEAGLEKIRENSIKIDEVLPGTTPTGVWHS  
FEADRAAFATVASSGPCKIWLMPSEKFRAVISRPEFSMVVMAAMANRIRVGSKSIRNLE  
KVKDGASKDSCENVIKMLSYDSTSWVVENFDAALVKFNEDNKNDLKI EIDYTSERLSSKT  
AHYACGYDVVCLFVNNTANADTIKILRKCEVKMICNRCAGFDRIDTKAALAYGVSLARVP  
AYSPYAVAEFAVSLLMGINRKIAKASTRVKMSNFSLD SGLMGTDI HGKTVGVMGTGKIGQ  
ILCNI IKGFGANLICFDVFEADAVKEMGGKYVTKGELFAQSDVIFLMMPLLPPTKHTINA  
DMLHLLKPGMLLINSRGGGLVDTKAVLKGIQDGI IAGYGADVYENESDYFFQDWSAKAVP  
DPTLVALMGSNVLLTAHQAFFTQEAVDAIVNTTLSNVKLFTEGKTMYPNNFLPRRN  
>comp11588\_c0\_seq8; 376 173 1738 LEN=2362; translated  
MVTALEI IKDNTELDYDPDALLAAWAEIMEPIEVEDGHIFIKEGEVIKNIVFVENGKLVRT  
KLSVPEEERAGILEAGLEKIRENSIKIDEVLPGTTPTGVWHSFEADRAAFATVASSGPCK  
IWLMPSEKFRAVISRPEFSMVVMAAMANRIRVGSKSIRNLEKVKDGASKDSCENVIKML  
SYDSTSWVVENFDAALVKFNEDNKNDLKI EIDYTSERLSSKTAHYACGYDVVCLFVNNTA

NADTIKILRKCEVKMICNRCAGFDRIDTKAALAYGVSLARVPAYSPYAVAEFAVSLLMGI  
NRKIAKASTRVKMSNFSLD SGLMGTDIHGKT VGVMTGKIGQILCNI IKGFGANLICFDV  
FEADAVKEMGGKYVTKGELFAQSDVIFLMMPLLPPTKHTINADMLHLLKPGMLLINSRSG  
GLVDTKAVLKG IQDGI IAGYGADVYENESDYFFQDWSAKAVDPPTLVALMGSNVLLTAH  
QAFFTQEAVDAIVNTTLSNVKLFTEGKTMYPNNFLPRRN  
>comp11588\_c0\_seq9; 243 173 1111 LEN=2567; translated  
MVTALEI IKDNTELDYDPDALLAAWAEIMEPIEVEDGHIFIKEGEVIKNIVFVENGKLVRT  
KLSVPEERAGILEAGLEKIRENSIKIDEVLPGTTPTGVVHSEADRAAFATVASSGPCK  
IWLMPSEKFRAVISRPEFSMVVMAAMANRIRVGSKSIRNLEKVKDGASKDSCENVIKML  
SYDSTSWVVENFDAALVKFNEDKNNDLKIEIDYTSERLSSKTAHYACGYDVVCLFVNDTA  
NADTIKILRKCEVKMICNRCAGFDRIDTKAALAYGVSLARVPAYSPYAVAEFAVSLLMGI  
NRKIAKASTRVK  
>comp11589\_c0\_seq1; 282 268 1008 LEN=1450; translated  
MAVEKISQRSRKPKSAGEIRSTTDCIDTNPEHL SRNVSSSLPSQSSFRNNSFPLGCLI  
YFSYSMSIAVDSQFLSLYYKSKGFDGATLGMLYSLTPMTTFLTVPIWLSLITARRDTKHPH  
RRSGGIRSNANEEVSETALFKTLYFCILLATASQISLAIFSDPIYMMLAVTIAGIFQSPV  
KPMLDGIIMDQLKDRTEFGKVRFFSILGSGFGTHLGGRLSSSFQATTDHDPETRDSNEDK  
SVWDTIW  
>comp11589\_c0\_seq2; 135 1 678 LEN=1926; translated  
XWIPSFGRMKNEERTSSHVAVPRSQTHDSSKWNPSLPVKLSVASSMLDSQFLSLYYKS  
KGF DGATLGMLYSLTPMTTFLTVPIWLSLITARRDTKHPHRRSGGIRSNANEEVSETALFK  
TLYFCILLATASQISLAIFSDPIYMMLAVTIAGIFQSPVKPMLDGIIMDQLKDRTEFGKV  
RFFSILGSGFGTHLGGRLSSSFQATTDHDPETRDSNEDKSVWDTIW  
>comp11589\_c0\_seq3; 135 1 678 LEN=1120; translated  
XWIPSFGRMKNEERTSSHVAVPRSQTHDSSKWNPSLPVKLSVASSMLDSQFLSLYYKS  
KGF DGATLGMLYSLTPMTTFLTVPIWLSLITARRDTKHPHRRSGGIRSNANEEVSETALFK  
TLYFCILLATASQISLAIFSDPIYMMLAVTIAGIFQSPVKPMLDGIIMDQLKDRTEFGKV  
RFFSILGSGFGTHLGGRLSSSFQATTDHDPETRDSNEDKSVWDTIW  
>comp11589\_c0\_seq4; 282 268 1008 LEN=2256; translated  
MAVEKISQRSRKPKSAGEIRSTTDCIDTNPEHL SRNVSSSLPSQSSFRNNSFPLGCLI  
YFSYSMSIAVDSQFLSLYYKSKGFDGATLGMLYSLTPMTTFLTVPIWLSLITARRDTKHPH  
RRSGGIRSNANEEVSETALFKTLYFCILLATASQISLAIFSDPIYMMLAVTIAGIFQSPV  
KPMLDGIIMDQLKDRTEFGKVRFFSILGSGFGTHLGGRLSSSFQATTDHDPETRDSNEDK  
SVWDTIW  
>comp11591\_c0\_seq1; 663 160 2211 LEN=2317; translated  
MAEENISIFLVLFVTLATVLI LSKYLHESKHISSVVPEAMVIAVGMVAGYLIHIVLGK  
RLANANNYNVYNNNDNNNDDDQQQSV DYDLAALLSFNPEFFFIFLLPPIIFNTGLRMG  
PLFFRHITPIIMFAIVGT AISAIATALILYGFVQMGLSGGF EPTLAELLTFGALISSTDP  
VSTLAVFQVKRVDPRLFYLCFGE SVLNDALAI VLFYFSGKFVSINNEENDIVAALKKFFI  
DLFTNFVGS SVLGTFGGCCAAFLFKQIDMRQNLVEISVYVLLVYIPFLISEILHLSGIV  
TILFTGVAANRYIVPNLSAITKVN SDMVFR LGAHLAETAIFLELGLSVFGMVGYWNWVFI  
GCATLACL IARALNIYPLAIFNRMLILKDMMPSPTRGWS DYSSTKHPTMNGTKEGIGQ  
QQVVTPTT TNSGGPDMIWGERGRNSRKTQHATFENQNF SRHANTEHNAYHNAS PQRNAS  
AELGFRTQSFSDQSVATEVTATPWESKDLKIRGNTTHMLWFCGLRGAVAYACVRTFPDDL  
GHRNEFAMTTMAIILITV FVLGLTTECALSWFDIDVGVDEKKYMQSYLREPIASNALLNL  
ERRLVKRCVIRDFDIMESIR RDIHRHHEHGSSPTM VIRDRRACAQSIEAIEMTESGYLSA  
VSDDMTIEKLVRTDSLFDYGGY  
>comp11592\_c0\_seq1; 815 156 2616 LEN=2772; translated  
MLRENLLMETLWDWGG RMLAGDDGHSEFGFHIAFPDLYLTIVYFTCIYLLGQFASRVLRM  
PSLVGEIFCGILLGPLANIVPNPEALV LIGEVLILLVIEAGIDIDMAVMNLVGT RGLI  
IAVVG SFLPIGVGLIAWAINVGDWKAI IASGAVFGPTSLGIALNVLKG GVLNTPVGQM  
IVAAAVVDDMIALV VLSQLEGLVGEITVVGIVIPMV SALLFLVIGGYIAV FVLPKLF SRF  
ILPKCPENSRDKVEMTIMFGLVLGLMPATYYAKASYLMGSFLAGLTF CNSDGLHHQFVKQ  
FKRILQWLMRIFFASTIGFQVPIKDFGDKKLF GKXLVFCLSWLIGKVAVGFLVPNFVKVQ  
KKFTGNHFRDCLITGFSMAAEGEF AFVIAVFAVDKGLISEDLYASLVLA VLISTIIP PFA  
LRFTINFY NKKEEA VARAAEREEMREHSVALDLKNGDEELVDGIKKQTEVFLVIQTQSD  
SSWGLLIKIMGVLGKGLDVIDHRAWS PRGINTTLVNEVYAASPIRVKDGQTQVEALDAL  
IEDITNAIKDAIDQKNSRVKVRWFPGVVEEVVEETNERQHTDIRQRL LHEASSALERKA  
KLQTSATKEKTYEEIMGISSTVPKVDESKEESKDPGDM SFMQSARVLDQTTQOKPRRRRL  
HKTHSTPVVGGGLFGETVEARSGR DGSSRFRVSDYTKTKQEDLNFSLKASGLPAEITIK



GQVFQIRISSDTYRNLKNGMEGQTTDSRGVPITGIEITAQDDAPVVQKLQGFVRNAGLQR  
IQEESSEYSAEDSEKGLVMIQLSSSSLSRIYIGDGAYSCA  
>comp11593\_c0\_seq1; 390 572 1312 LEN=1845; translated  
MTEAEKKAEEEMRKKDAEKLARRKKKFDAAARFEHIEKTNQIYGQPKPQPKPVEPNRNEKEE  
IKRKGWNI FKKKPKKESKAAPQAMEKKSPSVDARSVKPEICSTPLEIAPNWAFTDKQNA  
RPQPNVGHSSDPDYMATKKIPKNIASSTGSKKASDGPEPPKYNTVGYGTAGRKAGTGISST  
IAAFQPGVFKPKTGDPRKMKQPKIETSTSESMDVRGNITRITITRKITDPNGKVRTETEVV  
QVPARR  
>comp11593\_c0\_seq2; 390 572 1312 LEN=1968; translated  
MTEAEKKAEEEMRKKDAEKLARRKKKFDAAARFEHIEKTNQIYGQPKPQPKPVEPNRNEKEE  
IKRKGWNI FKKKPKKESKAAPQAMEKKSPSVDARSVKPEICSTPLEIAPNWAFTDKQNA  
RPQPNVGHSSDPDYMATKKIPKNIASSTGSKKASDGPEPPKYNTVGYGTAGRKAGTGISST  
IAAFQPGVFKPKTGDPRKMKQPKIETSTSESMDVRGNITRITITRKITDPNGKVRTETEVV  
QVPARR  
>comp11594\_c0\_seq1; 114 1 284 LEN=284; translated  
SSMFSGAAQFNGEMMNIINGAAHLWNTEKVLDMSSMFDGATNFNGYIDYWDISSVKDMSS  
MFSGATSFNSHLYYWDPAEVTDMSSMFSGATEFNG  
>comp11594\_c0\_seq2; 204 414 807 LEN=807; translated  
MKLSRFALATFLLVEGLSMCNGDINSCPPSKCAGLRRTTVTTKAELQNSIEELSSVAGPE  
LTSWLPICECLDVGEIENMEGLFGILGERLPSLDLRCWDVSRVTTMKGMFDGATNFNGHID  
YWDTSSVEDMSX  
>comp11595\_c0\_seq1; 285 1477 2247 LEN=2866; translated  
MPKNQYLNWRWYPWYRVISSVIGYNYFVLWSICFYQPQVLLNYRRKSTKGLSNDFAILNLM  
GWSFY SAYLISMYFDDEIKIMYQQRFNNESSSTVQSNDVAFSVHAMVLSFIYVVQIIYYGD  
SWCSFRLKPLTWLLVLAMGFPSALVPCLIKLGYLPYSTWLDYFYALSFFKICCTLTKYSK  
QVMLNWKRKSTSGWNIWYNFLECSGGSLSMLOITLDSADMRDMTGITGNI AKFALGFATI  
FFDVSSVVDL TSAATL  
>comp11595\_c0\_seq2; 285 1067 1837 LEN=2456; translated  
MPKNQYLNWRWYPWYRVISSVIGYNYFVLWSICFYQPQVLLNYRRKSTKGLSNDFAILNLM  
GWSFY SAYLISMYFDDEIKIMYQQRFNNESSSTVQSNDVAFSVHAMVLSFIYVVQIIYYGD  
SWCSFRLKPLTWLLVLAMGFPSALVPCLIKLGYLPYSTWLDYFYALSFFKICCTLTKYSK  
QVMLNWKRKSTSGWNIWYNFLECSGGSLSMLOITLDSADMRDMTGITGNI AKFALGFATI  
FFDVSSVVDL TSAATL  
>comp11595\_c0\_seq3; 368 804 2276 LEN=2692; translated  
MNSSGGFRRVEYESKDENALRCKFLQLFNEGPEILCSLTAIKPESGMEKLPGPPP IPAS  
LAALDDWSSGSEEHRRKNEQTPLIRHTSRKSGSRKNAFRKPDGFTELSTISDCKTHSQS  
SWSDGEKRIGDDDRSISTYSTTGESVASLKLATVSLNENFREGLSIPFTDEEGSYQKIA  
RGLGSLSVLGTIIIGLTMKPNQYLNWRWYPWYRVISSVIGYNYFVLWSICFYQPQVLLNYRR  
KSTKGLSNDFAILNLMGWSFY SAYLISMYFDDEIKIMYQQRFNNESSSTVQSNDVAFSVHA  
MVL SF IYVVQIIYYGDSWCSFRLKPLTWLLVLAMGFPSALVPCLIKLGYLPYSTWLDYFY  
ALSFFKICCTLTKYSKQVMLNWKRKSTSGWNIWYNFLECSGGSLSMLOITLDSADMRDMT  
GITGNI AKFALGFATI FFD A I FFSQHYILYPNKRAGTQEEGVPILIKTPSIVRTRSRDL  
SELNGVDVEA  
>comp11595\_c0\_seq4; 368 394 1866 LEN=2282; translated  
MNSSGGFRRVEYESKDENALRCKFLQLFNEGPEILCSLTAIKPESGMEKLPGPPP IPAS  
LAALDDWSSGSEEHRRKNEQTPLIRHTSRKSGSRKNAFRKPDGFTELSTISDCKTHSQS  
SWSDGEKRIGDDDRSISTYSTTGESVASLKLATVSLNENFREGLSIPFTDEEGSYQKIA  
RGLGSLSVLGTIIIGLTMKPNQYLNWRWYPWYRVISSVIGYNYFVLWSICFYQPQVLLNYRR  
KSTKGLSNDFAILNLMGWSFY SAYLISMYFDDEIKIMYQQRFNNESSSTVQSNDVAFSVHA  
MVL SF IYVVQIIYYGDSWCSFRLKPLTWLLVLAMGFPSALVPCLIKLGYLPYSTWLDYFY  
ALSFFKICCTLTKYSKQVMLNWKRKSTSGWNIWYNFLECSGGSLSMLOITLDSADMRDMT  
GITGNI AKFALGFATI FFD A I FFSQHYILYPNKRAGTQEEGVPILIKTPSIVRTRSRDL  
SELNGVDVEA  
>comp11595\_c0\_seq5; 279 1477 2361 LEN=2777; translated  
MPKNQYLNWRWYPWYRVISSVIGYNYFVLWSICFYQPQVLLNYRRKSTKGLSNDFAILNLM  
GWSFY SAYLISMYFDDEIKIMYQQRFNNESSSTVQSNDVAFSVHAMVLSFIYVVQIIYYGD  
SWCSFRLKPLTWLLVLAMGFPSALVPCLIKLGYLPYSTWLDYFYALSFFKICCTLTKYSK  
QVMLNWKRKSTSGWNIWYNFLECSGGSLSMLOITLDSADMRDMTGITGNI AKFALGFATI  
FFDAIFFSQHYILYPNKRAGTQEEGVPILIKTPSIVRTRSRDLSELNGVDVEA  
>comp11595\_c0\_seq6; 374 804 2162 LEN=2781; translated

MNSSGGFRRVEYESKDENALRCKFLQLFNEGPEILCSLTAIKPESGMEKLPGPPP IPAS  
LAALDDWSSGSEEEHRRKNEQTPLIRHTSRKSGSRKNAFRKPDGFTELSTISDCKTHSQS  
SWSDGEKRIGDDDDRSISTYSTTGESVASLKLATVSLLENFREGLSIPFTDEEGSYQKIA  
RGLGSLSVLGTIIIGLTMKPNQYLNWRWYPWYRVISSVIGYNYFVLWSICFYQPQVLLNYRR  
KSTKGLSNDFAILNLMGWSFY SAYLISMYFDDEIKIMYQQRFNNESSTVQSNDFVAFSVHA  
MVLFSFIYVQIIYYGDSWCSFRLKPLTWLLVLMAGFP SALVPCLIKLGYLPYSTWLDYFY  
ALSFFKICCTLT KYSKQVMLNWK RKSTSGWNIWYNFLECSGGSL SMLQITLDSADMRDMT  
GITGNI AKFALGFATIFFDVSSVVDL TSAATL

>comp11595\_c0\_seq7; 279 1067 1951 LEN=2367; translated  
MPKNQYLNWRWYPWYRVISSVIGYNYFVLWSICFYQPQVLLNYRRKSTKGLSNDFAILNLM  
GWSFY SAYLISMYFDDEIKIMYQQRFNNESSTVQSNDFVAFSVHAMVLSFIYVQIIYYGD  
SWCSFRLKPLTWLLVLMAGFP SALVPCLIKLGYLPYSTWLDYFYALSFFKICCTLT KYSK  
QVMLNWK RKSTSGWNIWYNFLECSGGSL SMLQITLDSADMRDMT GITGNI AKFALGFATI  
FFDAIFFSQHYILYPNKRAGTQEEGVPI LIKTPSIVRTRSRDLSELNGVDVEA

>comp11595\_c0\_seq8; 374 394 1752 LEN=2371; translated  
MNSSGGFRRVEYESKDENALRCKFLQLFNEGPEILCSLTAIKPESGMEKLPGPPP IPAS  
LAALDDWSSGSEEEHRRKNEQTPLIRHTSRKSGSRKNAFRKPDGFTELSTISDCKTHSQS  
SWSDGEKRIGDDDDRSISTYSTTGESVASLKLATVSLLENFREGLSIPFTDEEGSYQKIA  
RGLGSLSVLGTIIIGLTMKPNQYLNWRWYPWYRVISSVIGYNYFVLWSICFYQPQVLLNYRR  
KSTKGLSNDFAILNLMGWSFY SAYLISMYFDDEIKIMYQQRFNNESSTVQSNDFVAFSVHA  
MVLFSFIYVQIIYYGDSWCSFRLKPLTWLLVLMAGFP SALVPCLIKLGYLPYSTWLDYFY  
ALSFFKICCTLT KYSKQVMLNWK RKSTSGWNIWYNFLECSGGSL SMLQITLDSADMRDMT  
GITGNI AKFALGFATIFFDVSSVVDL TSAATL

>comp11596\_c0\_seq1; 1062 134 3568 LEN=3689; translated  
MLKVIYLT VYAVLIGVGGQLMPTAYA QDACIDDLDFMFKNDPKKNCNWVGRAAKNRCGRK  
SNGVKIHTFCPDACGKCPNDNDSNE SCFDDPKFKYNNDK KKKCNWVGLKPEKRC SKTWKG  
IELSAYCPQMCNACPEEEPTSCEDDKNLQFREN PQRNCDWVAKNTKMRCKKTWK GKKLK  
HCPMTC DACPDSPPI PDPDTGGDSE DACCSLDFKHCI GWCGPTKDSCLN CNHHDG VGLK  
DGPPQDKCKSRWKG CQNSPNSCCPGLT CREDPNDYLMCLPELPSTTAPTLSPIGSPSASP  
TFPKSPTE SPASPTVSQFP SGSP TTSPTSSPTESSYPSSIPTAMD TTPSNPSIRATGQ  
PTNGP SDSPINAPSPAGACCTLDFETCIDWCGPTKDSCLN CNHHDG VHWLENGPPKEQCL  
RRWTGCENDFN GCCDGMT CREDDNNFLMCLPLQSSSTMVPTKSP TGPPTSPSTHRPTQSV  
SEAI SPSPNSPSSPSASQNTASPTTLPTPLATTGSPESHSTASPSNSPTVLPSSKPSNSP  
QAQVSFSPTNIPQONSNGCCSLDYKNCIDWCGSDYDSCMNC SNPDVAWLPNGAPNSQCGE  
RWTGCDHNDTGHNGCCSGLSCQWRSESNYFACLPNLDPTSAPVPPPTDAPTNSPTVPI  
EPTISPAPTAEP SLLRTDKAMNTWDIYLGLDYITHKNSVNP NYALVASXSQ LQPSLVQI  
FVSFATELIIQLGSIFFSCNSGGAAGSGNLV VSESQAYGLLITGTVLASWNTHAGRVNS  
RRSDVLD SFEGYFNFWIEMSKNSSNKGSNCQPGGDYCKSSSGSKYVCLPDWRHYKTGGSE  
STGPAPDADEDAIVGII LAVKAVENDTNKPSWYETARKWADASATAFFEFV DKSRSNRH  
LVKLGSCWGGWEGEGNNSYHSPGSFRVMKDYQKSFNSDRDGYSGIPEEEWNKLIATSH  
EVLRAVQCSNGGALVPNWATIGEDSSGNIHSGGGFSGSGTPQY EYGAEAAARTTFRVALD  
AAFYPEMSGDWSPYLSNFYGRMDGNFQNGSFSSATFP SCRGPNTGQINMFGDWQSNAFI  
YGPTYSSLIAASSDITNANAMVDVAGEILGATPLPSSYYPRSWAMI SNLMLNGAMESAGY  
TLKN

>comp11596\_c0\_seq2; 1135 134 3472 LEN=3593; translated  
MLKVIYLT VYAVLIGVGGQLMPTAYA QDACIDDLDFMFKNDPKKNCNWVGRAAKNRCGRK  
SNGVKIHTFCPDACGKCPNDNDSNE SCFDDPKFKYNNDK KKKCNWVGLKPEKRC SKTWKG  
IELSAYCPQMCNACPEEEPTSCEDDKNLQFREN PQRNCDWVAKNTKMRCKKTWK GKKLK  
HCPMTC DACPDSPPI PDPDTGGDSE DACCSLDFKHCI GWCGPTKDSCLN CNHHDG VGLK  
DGPPQDKCKSRWKG CQNSPNSCCPGLT CREDPNDYLMCLPELPSTTAPTLSPIGSPSASP  
TFPKSPTE SPASPTVSQFP SGSP TTSPTSSPTESSYPSSIPTAMD TTPSNPSIRATGQ  
PTNGP SDSPINAPSPAGACCTLDFETCIDWCGPTKDSCLN CNHHDG VHWLENGPPKEQCL  
RRWTGCENDFN GCCDGMT CREDDNNFLMCLPLQSSSTMVPTKSP TGPPTSPSTHRPTQSV  
SEAI SPSPNSPSSPSASQNTASPTTLPTPLATTGSPESHSTASPSNSPTVLPSSKPSNSP  
QAQVSFSPTNIPQONSNGCCSLDYKNCIDWCGSDYDSCMNC SNPDVAWLPNGAPNSQCGE  
RWTGCDHNDTGHNGCCSGLSCQWRSESNYFACLPNLDPTSAPVPPPTDAPTNSPTVPI  
EPTISPAPTAEP SLLRTDKAMNTWDIYLGLDYITHKNSVNP NYALVASGGAAGSGNLV  
SESQAYGLLITGTVLASWNTHAGRVNSRRSDVLD SFEGYFNFWIEMSKNSSNKGSNCQ  
GGDYCKSSSGSKYVCLPDWRHYKTGGSESTGPAPDADEDAIVGII LAVKAVENDTNKPSW  
YETARKWADASATAFFEFV DKSRSNRHLVKLGSCWGGWEGEGNNSYHSPGSFRVMKDY

QKSFSNSDRDGYSGIPEEEWNKLIATSHEVLRVQCSNGGALVPNWATIGEDSSGNI IHS  
GGGFSGSGTPOQEYGAEAARTTFRVALDAAFYPEMSGDWSPYLSNFYGRMDGNFQNGSFS  
SATFPSCRGPNTGQINIMFGDWQSNAFIYGPTYSSLIAASSDITNANAMVDVAGEILGAT  
PLPSSYYPRSWAMISNLMLNGAMESAGYTLKN

>comp11597\_c0\_seq2; 227 166 579 LEN=960; translated  
MRLLTHTNFLQSNVKGTTTEGYPLRIEATNVIVEESTMDSILVSKVLKKNVNSGLIGAINDI  
RCNSSIKPEMSKTLSEASDIPSEPPKGESADEAILKNLHFFLFDVHVLDGFLVCPDTGRK  
FPIKDGIPNMILHEDEV

>comp11598\_c0\_seq1; 616 87 2546 LEN=2693; translated  
MGRTAEISVASNPSKAIDESTFESFCNDESQNTDTQTQMECTQLTQPGLTPDESSNLMHT  
PSSGKNTPLSPQILPFGRLVPSMPSILTAINLMPTQESYWLGRSQKCDVTAQYDRSER  
ASYLSKKGMAALDWGKSMISNRHCRIFHQNGSQIFVEDNSGNGTFINQQTCLKQGETRI  
LHSGDVIICLVNHETLRKRLSSDRIIQFVLQQFSFIVVRVQSKTRKSCVNPRAMNYNFRN  
HRNSSIDETGASQLSPLPPSRKIEFYDLREILGDGTSGQVRRAIHRQSGKERAVKIIISL  
RRNVNASMMEREVNLQLIDHPYIVKLVFVVERGVAMYLMELVKGGDLFDCIVEKQRY  
TEVEARRAMRLLNAVYYLHEEANIVHRDLKPENILCSSPIHVKLADFLAKIIKADGLK  
TFCGTPAYFAPEVLQRRGTVAGRGRYKPADMWSLGVILYILLTGKPPFDADMDEPSNCY  
EVDVESDALIWSEIPSAKDLVEKMLRQDPKQRYTVRQACEHTWINVDDGDTHCNPLNDPA  
VVSKQIGDKQESSKPSVKVCE TVANEIIGVKNDKSLHEESTALVASHFQSNSEKNSKSV  
KPDVSVHNVLRKPERKIADLKISSESNHEPCGDGEREGKGRNDDVTEFTSSDANAIAADNE  
ESSGVFSDDVCLPPRSPLSKLNLNQRSNKRFDHVMKQTKELFESPNGNGERQSAVTPNL  
SSIKRQPLQEDLKAKEKGDGNEVDPILSQFSSEVSSVESFSDNDSSTNDVSATNETQSEHS  
SKKRPLDDKETKNSTKASKRDKTCGSKQTTLNAWLVKKT

>comp11599\_c0\_seq1; 1889 1 6573 LEN=6667; translated  
EKVHCSFPQQHEMETKVKRSTELSAVDYRKWALNLVGRDWEIFWQEEQDGI EEDAGQQLE  
NPHIASAALGATTLSEQEATEYKKKETIEDPRTISNSTDKPEGTIRSRSSGIASRPCHID  
SDHDGDFVLSSEAAMGMVGDKMGPASKENEEIKVEEKDRKVT CNTDADDEESVIDDWDYD  
GRVLEIIDDTSTIRTIGRNGWKFRVRF LGDEDEVYEIFLVPKVRPSARAWVQRTMALLNP  
PAAASKEYNMEEDGFDLPDSTLEDEASLRKIKSKITGAASVLNGIDTENSKSLASLPT  
NWDFFRIQGLRYHLESQIHLRKKLSKIENHSGMELFTDGLRNPTEGYVNYLVQCSKDLAQ  
ACSWYCKSWNLLMYF GDGMGSGDFDTSTPNNNSNGGETEETLDLGLKTFSGFMTDYI  
MCGKDTIVNTMIDITSSGASNKRQQATARASSTRRTKRRRVLGGMDIDEEIDEGKSKV  
LLAASKVDTDVLSMIYIDSFIAALSESMHYGYVTTLASMLWLSHLVANPLISWKRTAGR  
ILGGINNNGNDTDHVS LGGGFGNITGHLSDDENEETEEMFTYQQIQSCLSSVRMKNVLSR  
FNLFDVLDKAKLGD IARNQSEALKLLSLTMTKLVS YEESYKKDKDEILSGLSDILI  
QMMSPESLYNVKFLSRDDHQLIITRDDL SKAIALRAWFVDVQHAQSMRERISFLQLLMS  
QIEPINLLPDPRTIPI LSDFPQISQHRDASIQSILEFQKILTSSSDEIQKRENNFLTSV  
TIDISNSPERD SHLTFLNTLYAKCKECSLIFPFEEKIAARIDLLK WYADVRGTTDCRLNS  
SDDNDAYSFVDLENQYNSLQAVRKGLSPTRAKLTKGVKSDSDTDNVVCRFISSNSHPDCE  
KAINKITQLYVTASSWKKRAEAVIFCLRTHGNVNAGQLLSTSKIPAMVDIKRIVDLIEEY  
PGLQIKIDGYIERLHRIKSESF RWSQHIYTTLENDNVSF TDVLP LMMKERDQRPRGIIV  
NPNRSVVDATIDLLVWYGKIKSAAVVVSERLSHSFTKDNPKAIADTYSKMIENEFYPI LA  
DGSEALEIYCGFDNQVHGINGRISVNSKRSL EILQTRFRIRKTSRAPSAEKINAHQLVSS  
LFLRMNCRDEKEGYPLLLILWFHWHFLVEDFVFRCTSDSKPNIERDQVP SLAYAKRLKAQ  
NPFVLLHVTMIGDPNTRSLVETRSTILIDL DQSI EEAQNSELDI KEVLAKTKDLLRGSLL  
DNHKEIREHLNKLMLSMWKTRSSGNAGLSLNEAYESSLEQHIKYFAWIVRTMQHPVLH  
KAEASFASSRASKISWHSLLYLHERIPNTISGCGGHILCVLRVRELYDAAKKWQDEVCRS  
TMI SKRGNKRRGGI IDTRNTEKDAKIRMSEIE SLAEDPILTKVDMPRHKAVKTMLDISRK  
FEIQLENFLAQDFAGNQDNAPLPKGD SLLGRKGQFILYRLTGSSSLF SMMQTSVQSLAEIG  
GDVLAETRGAAFDWMRS AVKWI EDLQHAVVLQAKFTDSNEKILAI PAKNARELCILGED  
VFLQTNKDMTKTFSNHG IHVSTNSIKKRLIVKLKKGGAHHSVGGIIRWCPILFNALRAD  
MSKLELWESRLQKVIDTFETFQTS SLIDSVTSDEENLLQWYSYGMLVRRALEEGQKSLVV  
SPSKDEIDNYVNVLTGITIDYLEKNCTRQLNKEFSKRLFANNSSICENRFEFLDALLYRQE  
AASVEFDENNEQMSQSLDPETT VRDKCRSNI EKALLRAAEAITLES DGMTSVKDL CALKA  
WEIENEMDEL FQRDSETMGVVS GEYREKALSLSIFENTENISLCLNVL TGHIKANTLVK  
MKRNE LANENVKIEREQAAATTLK GKLLSPAIDYVADSKSES RQKNPSSFPVFCGK PQSI  
LRNKGTLHVLQNDPSLDSEGEIASRGNIRNDVDEDDDGATAIDDYGRDKKLVKSSAKLNS  
AVQGQAEPSLSYMSPKASPRQLKPTPPPSLVGSFSMSANDSNRMSSTTGAPNEDRRMC  
SGKVFGGKSYRLEIQGQEKYAFFAIFYQEDESQATLNRYMPEFLTQKGRSRIDDFHRFVS  
EKLRGGRWQATCLR MATISANDDSVYREFFEYETKERIAMFKLSGASSGKLFVTPKF

HHIARQSREIQFANKNSTYAVILTCKGDAG  
>comp11601\_c0\_seq1; 216 206 937 LEN=2220; translated  
MAANAASASSNTAKKLGTSKGVFFGSLCVGTFGLGCWQLQRLLLEKWDIAIDDRQQQLGMS  
PIRYGNRGIENTLVHGNLSTYHPDRKDDQHPYRRRLLRGRLRHDKEVLIGPRGAPPVQVM  
PVQGLSAKQQQSRNAKTTTTSVGMQPGPQGFYVFTPMEDVDHGDARTTSDATSVVWINRGW  
VPKTVVPGADRPHYKNDPLQARARLDEELLRFKREPANRPEGPVEVTVVLSKPESELSQE  
QDA  
>comp11601\_c0\_seq2; 334 206 1267 LEN=1969; translated  
MAANAASASSNTAKKLGTSKGVFFGSLCVGTFGLGCWQLQRLLLEKWDIAIDDRQQQLGMS  
PIRYGNRGIENTLVHGNLSTYHPDRKDDQHPYRRRLLRGRLRHDKEVLIGPRGAPPVQVM  
PVQGLSAKQQQSRNAKTTTTSVGMQPGPQGFYVFTPMEDVDHGDARTTSDATSVVWINRGW  
VPKTVVPGADRPHYKNDPLQARARLDEELLRFKREPANRPEGPVEVTVVLSKPEKPRFIT  
PEHDYSKRPLQLFWIDGLALKAIADMMTEKEQQQTETALVTQVVDDEDDATSNSSDSN  
TQQLLVYPLQPPVSSVGNFKTTPAVHMGYAATWFGLSGAGWYMTKLMTKGRW  
>comp11602\_c0\_seq1; 201 1 605 LEN=1235; translated  
XSPRYCKCSPQQTIPEMRLLSLICAPAAIILAKNVVAFAPRTSRIGTSRGGTDVIFGKEP  
SDSSRLTRVNVLFQAQEDNINSIDESATSDAVAKEYGFDQKTTTQQQTAMPATQQTQSDR  
LRRSLDESARKFVRNDARFTWLSTLLVSGVYAYGCLAPDGEFPLGSLGIPSGGIVGGVAG  
VFFSLISIVLFFAPELFAKKR  
>comp11603\_c1\_seq1; 31 383 665 LEN=665; minus strand; translated  
MYVTIDLSGEADRRRESRPTAQLRCSAGAGVGSATETGAAGTPPAPGASCRPAGTVA  
VAEDGARPAGRMATGAFALVLEPALGSGVPPVVGX  
>comp11604\_c0\_seq1; 517 1 1575 LEN=1633; translated  
XQIHYMINLDNLQELNKILSIQVLKDANDEPSKVEILPAIADRTVNELENDQDQMEAVLL  
HSKERRQRRFNRPAEVEDENTYGEDDESPLNSVLLDLIQNKKWEKFLHRLKYPNIARIK  
FSGRSIDRTSAGNLVLEHVECKYNAPIDVVEALNEANEEAIMTKGNAGYLPLHCACAHGGS  
IKLIRFLQSLFPDATASVDDEENALPLHLACKVGTIKEDVYMSLLTSYPVGAKIRDHFGR  
LPIDYAKNIQSDSHRIAVECLKRSNWLESASKLASERTERDYQRRIRGYEQQAQQLKT  
IHEVHTKEIANFEANLKTDEEILQRTNYMEDLDRHLQDKTRDFEDRIKSLDALKTKSR  
KLQSQIEKAKKETSQTQLSLDRKIEEAIDLSSKLKEAEVIESQKKELEERTEDLQLTIE  
DMETLNQHSEWLESVMGSIRKLSVSPMAQGLEQKDELSTGSTFVSSKKRSSARKNGD  
SASIRTGKSGKLSRGPSSIKMSSSNSPPDKRDSFVGRFVGSYRE  
>comp11605\_c0\_seq1; 1133 89 3826 LEN=3994; translated  
MSSEQNPSTAKCSATSTATTAVSPKRLPTKDRGTGNDNDNGIGTHPNSLNPFNDAPSDR  
VVINSERESKCDLPTSSSAHNSRIRRLQSSSHVRPKPQVLTDFPPLSIPALQORRHSTGT  
WASFESRNDHENNFAMNNLAADDSSLVPKATNANDNDNDEPAVLPSTITDSMKENALAE  
EAAEQIVIEAERIFLEARRLSIATSDQAVSEGFCRTDETLGVPRNAVSSEEMASSNSDI  
DPESKQTLGSGQDGENGEIDESSSTSSSSLSTILREYTADYTDGSSKNETERSEEDSA  
QNGASGVDITVDNFAGVPQDEFDDETTNNNPSLRSVASRVASIEDFQEAIECTCLPSRLK  
DMNLDNNGNPLPQDKILSRLDGLPDSALLARKRDKFDQSI PFEDDANSPIATEDGLATV  
VVTDDGIEQIPIKSLKIESEEAQRLDDENSVMGWSFTSFMGMSMRDENDDFDSEPSST  
CNDSISSTSPALSSYPASSGPNNSLVKVSVDVVDGQNHQQRPPSFPRAFASQKISHKL  
SNWVDNKF'TTPGDLPKDGSYSVGESKTVVVEIMRGSWTWCTAWS PDGNQLAIATENHDL  
AVVDTTLSPVWRVKHDRVRRPKQGTTSIRSIAWGEHFIAIGGTGNAVSILAPTEPYQ  
ILHTIPSTGFVGLDWRGNSKLLVGSRNGRATVHEIWENLDTQNTMQNFDFPGSQSVCQ  
IKSKVIHTINRGKPVWNAVQFKPGDTFFAVGDSHGILLVYRFDDAVMMELINVANFKLED  
SILTIQWSADGKYL YAGGEDFEITVISTERWEPVHKIKRDRWVQFISSSQGSTHLAVGGV  
TSEVSI LDVQKGDNI INIGLKGFPVLSANWHPDDQYLVLTGQNDRI LAVETTNGRHVSG  
HFLRSVYPVASVAFSPDGHQVAIGNEMGVVGFILSGTTFVSAYELVVDCSNLSLIEWSP  
NGSYVVI AAVNKVI I VARKETLVGSVPLNTSGFFVAKVIRDLGCVNDISIDSTSRF IAVS  
GSRTRVVDADSNFENVLEIDYGGTTLANAWSHDGKWF AAIGKDHNLVIYDTSDAFLSQWR  
SVFTVETKAGLALAWGKSSSGGLQY CAYGGEDKQIHIMEIRTKERSWETVLTIPRDEI  
FGLDWNSSGGLVAAAISNGT VTVLDLSYLQSGCAVNEMDYNWQRQALT CYTEIRRNGKHS  
MKCVRWIP SATESEDFLAIGT DGEVEIVDLSKRDECRGFQSMAS  
>comp11606\_c0\_seq1; 373 162 1642 LEN=1642; minus strand; translated  
MTGRRRMLVSHRGASAVHGRGAPVASIGWAKKVPSTNAXGGEEDPDRLLDHQNVHDHGQ  
SRVPTNRVPCHRRGHKDRLEEVVHRSPHGADFLHGAFEAEMGVHRDARPFHDDSDRLLPS  
NRRDVGVDPCLSHPRFESVDL DLPFGHVPSRRDHGDPRLRFRGIGFGFSFSCWPFVLA  
RTDLCPSLRQRKSALRRYPWKNACCDDPDPRGDPFWNF SNPFHGFYLCWGHDFCRHART  
SSATDGVLWGPSLNFSPRFLFGEILCLLEXALSLEIPVSLAGSASLSPPRDCIAFSGAGV

SLQIAVSLAGTVFASPSLGGADSSAVFVSLAESAFWSLLCDCNASSSLDGAVSLTVSVSL  
SLSTVLPTRLGGSLGAGPGFSPISIGGLSSEAASLSFLAAVRSSFASAFGDFAAFSLARS  
VSVSASVFLFFLASSKSLFASSSAGSLGDDVRSRRETPRDSLCSFRSWCFRFRSSDSEV  
LREERDRSRSRRSRX

>comp11607\_c0\_seq1; 428 109 1899 LEN=2389; translated  
MVAMSGVVKRRQATPIRSRRRSKIYVCFVLFAAAYVFWWSIDDNLSNDLLHDSPLLVRT  
TASGPADAYLNNFPLRLRDSGDNIDKTNGRGLRDETFHSSAHCVGETHNETTAWKHRCK  
YVHLCVDFAAKTSDEGSSPEFFVVASRFDQEFSSRFHPSSSNRPSASSDQGRNSENNK  
VYYSSTGLGSNVALGAIDPSWERLPDTGGWLPYGYGFDKIRWAPRVYNSMPSKLYYELDS  
DVVMVPFHAMAADNVGHLLWDNFLPLYNLLRIFGFDQNDSDNGDSKERFRHLLIRVDLPP  
LSATCDLRPKKKEACRKSFEKFLPLFGVDPNTFTTSSQMRLTKHTTTTETATSPNETPATM  
HPVCSKHAVAGMGWLSDHGIRESHGWMNHETHSLDVALAKNLGRGPELYAFRNFMRLNM  
GLEPIPNDTGGGTLSTTITFRILLSAHSSTYTDRSFGLEEQHKALAEAFPTTEIVSVTL  
ADLPLREQLELLSQPKQPREHIIFVSANGGGTMTAYFLEPKGSSMILYNERGGRDYFSNN  
KNTGGQAILDWDLMNNGYVVRTHWLPDTSSMNEAEGLDALVYLVRHEMDATMNGLYG

>comp11608\_c0\_seq2; 320 182 1138 LEN=1751; translated  
MKETHRGRCRNLRRRPRRILQSGVDSACTTPLPIKVVIGSIAMFAFAATGTSRFFASSFS  
PMPNTNAASVRNDISNDNEKLPNTRSRVWAATPTPTGDARMTIPLNMASSNSDLGAPI  
CVYHQVDVPSSETNPVPRQAISVEDLTPTLQALLEESGMMNGLLTVISRHTTTSLTINEW  
ESRLADDISETLLKLVPDPERSISPASQKDVYKHNIDLRPFGDCSDEESYNIDSEAN  
RCRENGWDVDDPDQLQAWRDQEPINAHSHLLSILAGSASESIPVVDGKMLVGLQWQSVLLL  
DLDGPRDRTVGVQLMGYS

>comp11609\_c0\_seq1; 129 494 1057 LEN=1617; translated  
MKNKRSNESPTALSASSLSAPTGGGFFNNGGGEHRNRRRNRSYKIYCDMDGCLVNFEEK  
VRMLLKAGSSDIDKRVWEGISRAPQWFENLEWQMDGRRLWSAIKHLNPDILTGVDPDIKS  
SRIEKFNWCKRELGLEETDTHHVDMAGDVAALSDHYSVNGNLPRDDKTNIITCWSNNKYK  
ECSRSGS

>comp11609\_c0\_seq2; 189 494 1246 LEN=1425; translated  
MKNKRSNESPTALSASSLSAPTGGGFFNNGGGEHRNRRRNRSYKIYCDMDGCLVNFEEK  
VRMLLKAGSSDIDKRVWEGISRAPQWFENLEWQMDGRRLWSAIKHLNPDILTGVDPDIKS  
SRIEKFNWCKRELGLEETDTHHVDMAGDVAALSDHYSVNGNLPRDDKTNIITCWSNNKYK  
ECSRSGSILIDDRIDLKKNWEDAGGIFVHVNTETTIRKLRDLGVISEGGLDNGENDWYW  
EGSWRLWKDE

>comp11611\_c0\_seq1; 267 332 901 LEN=1907; translated  
MGNCFGFLFSAVESHTRPPVAAPPARRRKEQPFVTEEVLEIRMLARKYHEKVVECAKNSQ  
EAYQKGDKKKAHTLSEKKDWQKKQNDANIKAAKLILEPQSWQTSGEIDLHGLFLQEATN  
ATLEFLKYWSKKVWSDAKIVLIITGAGHSHENHKAVIRPHVEQILQEHLQDYKSVHGNGA  
FEITLKPRQ

>comp11613\_c0\_seq1; 195 205 852 LEN=1801; translated  
MGLLTILKKVKEEEREIRILVLGLDNAGKTTIVRRLCDRPIDEIEPTLGFSIQTLDYDLA  
DQIYDDENEYCSNNCKVDDDGSSSYKHLHWDIGGQSTIRAYWRNYFEKTDGIVWVDSGD  
RLRLNLVREELAKVLQQERLAGASLLILANKSDLEGALTKEKIAEGLRLEDDLKMGQHT  
RHWTIRGCSAVTAEGLSDSMEWLVRDITDRIYFAA

>comp11613\_c0\_seq3; 168 123 785 LEN=1734; translated  
MLAFATIIPPIIPQVKEEEREIRILVLGLDNAGKTTIVRRLCDRPIDEIEPTLGFSIQTL  
DYDLADQIYDDENEYCSNNCKVDDDGSSSYKHLHWDIGGQSTIRAYWRNYFEKTDGIVWV  
VDSGDRRLNLVREELAKVLQQERLAGASLLILANKSDLEGALTKEKIAEGLRLEDDLKMG  
QHTRHWTIRGCSAVTAEGLSDSMEWLVRDITDRIYFAA

>comp11614\_c0\_seq1; 261 121 738 LEN=876; translated  
MAENQARVVADADPGIYATAAVLPATNWSAQHPAEWACPRCSLLNPARKLYCIACFHRH  
QDLTPPLLDAREVRSDEEDGNEDYDADASEDPPFPIDEPGILATPLESSFAAEDIP  
MAQGEEDPYHKKIRRRVRRKRMIAAGVAGGVAGAVLIGPAMLVAGAVGGVVGTRIVSKQ  
RERSKDERLARERYAMASGATVSQG

>comp11615\_c1\_seq1; 1932 1 5061 LEN=5454; translated  
PPPPPTRRKVVQMARKKEPAPSTFRSSELSDMNFEAKPMDSAPKKQRVVRMAQKEEPAPS  
TFRQSDLSDFSFEAKLEALTKTRLVQMEQKEQQTGKTTTPVASSMFQPRDFRSNSGTTSD  
GMTFFDYQAPSPKKQRIVKMAEAQEPAPSTFSSAGGSDMSFEAKKDVAPPTKRRVVRMAEK  
EYSPSTFESTTSEMSFEPKAEIIPPTKRQVQMAEKKEFAPSTFESTTNEMSFEAKAEI  
LPPTKKRTVQMAEKKAFAPSTFESRGSDISFEARPVLPKKQRIVSMAETVASPPAPST  
EETKSTEAESAESQIIVPTTTERFAQQAKQNESASLAYESIGSKMFEARVAEPPSPAQDIPG

ATDKEEPAPPTGDSEPLAETQPVADAPKKPRIVQMAENKEAAPSTFRKSDLSDMSFEAK  
PMSDASKKKRIGRMTEKAQPAPSTFKNDESGMMYEAAPGLMFEEAIVETTKPSAPAEK  
KNEIEPSRVAPEETSPLAQQDEEERKPEPDEAPTSVASPPQDEETVQVESAAATPLKTEEE  
EEPLVEPKATTAPPDQEYEPAPGLMFEEAKVEEAETPATPSPSLEREETLQPPVVQKAPT  
TPEKEERAEPPLIVPEEIEEMKKKEISGPEQPTVVESATAGTSLETETEVVNNPPKKRVVP  
PSTTSMFRSVTPATDKPPSRMTMFQSKQPVKDEAPPSTMTMFQIRKPFKETPAPSRMTMFEH  
KKSDKEKPPSKTMTNKTPEKEKPPSKTMTFANRIPEKEKPPSRMTMFERKTSAKEKPP  
PSTAMFRRKVSESSFDTRAEASVVTAPSNSSESTESTTAELTESEGAQQQVEPKSAVKSE  
DSPPTKVPRSDNVETSFETKKSPTTEEKAVRSPEEKESPPSSKAIQSKNNDMSFEVKKPA  
PKEQVKRIVKMAEKNEAPPKLFQSDSGMMFEARRRSAPSTVQGGSMFGARTTKPAANK  
LEPFKNLVKGGGALISSMFRPRTTAGPSAEEREKASLAEAAARQQEKARVAEQMRLAEQRR  
LEEEARQKEARVAEQIRLAEQERVQEEARLAEARLSEAEKARLAKVAEEIRLAEEHKMA  
QEAQLDKKARLDALVDEEEKKLTETAQLVEEARENEEKGLFEDARAAEQKRETPRVAKA  
SQLAEDVQEKTPMIKVPRTASSKKIKRKDTGIGVEISLGSPPARRLVKMTEKKDLPLQKA  
VRGTESSKPREIIQNI SKTPEKKVAPSPKAFQGSNDSMSFTVQPARTRVVKASERKEVAV  
SESNP SNGSKAKVTDANNSALFQRGSKEATFDSGDSQFVYQSTKEKRLFLAQKVAQMFK  
AQESAPATLESDDGMNMVITGRKPTRKVRKATDDSI SGNRSNTDGD LASKNLPQDIPGN  
SDNDSMKMASFIANNLSKQAPAFGSIQSKMDVGSAKIATTDVQKFAK FVSDGLQMVNAE  
SQKKKKVVTTLEEARRERKERKRKKIFGFEIGPSEEEIAAQLMEGGKHLAVEGGKQLAKFT  
SDGLNMVYRAAEKQTKKEYISSSVVKSASKSDSSHAKKNKHVSNEVNPALFFATSDDTSMK  
KKAETQKSSAVAPSESSAAHGGKKGENDAKTKKASSAIDTPKPF FAVSTSENNAPKTEK  
AFKESVSSSHVSVSIGQNTTEEP IKDASTSSLLRS GGRMFVKFVGDGLQMVQKVATTKEKQ  
YRRPRK

>comp11617\_c0\_seq1; 82 1 502 LEN=1337; translated  
LGEWVSFPNDHFFEKSEHDTLNSSSLLCRLHGLSMCQLNIENFRESPPTEEEWVEDVGAP  
DTIDVYPEVNDGTDGDSSSKVVVNARVSSQHKKFHNCGYETWVRAREEWKQQT VETVPEK  
PALVERAQLMKGIRKATSQRTFELHRNVALPDMIRIYTDIWDGESR

>comp11617\_c0\_seq2; 211 166 735 LEN=1570; translated  
MRRRKSQSPSSSSDSSPKASNNRTFFGSKHKRIRLNKDSTVTEASSLSSRGSVQTD SAP  
WRVENFRESPPTEEEWVEDVGAPDTIDVYPEVNDGTDGDSSSKVVVNARVSSQHKKFHNC  
GYETWVRAREEWKQQT VETVPEK PALVERAQLMKGIRKATSQRTFELHRNVALPDMIRIY  
TDIWDGESR

>comp11618\_c0\_seq1; 254 458 1240 LEN=1662; translated  
MVKLSGKPVLFDP SLATPSTSSADNQRPSLVPKVAVHKLKGEVVTENDPHGRPSLIE  
RLKQSGVGRSRQGGKRKRQQRQMHLP IGRLDMPTEGLILVTNDGGFAREMELPSSKIHR  
VYRVRVHGRLLTTHKLDQVRRGGVTYENVRYPSMQVSLEKPKRARSMSNNWLRVTCTEGK  
NRQIRNVFAALGVSVTRLIRISYGDYKLESIPPGMAIPLPYKPVNQKAKGPLASQIRKK  
KKRKRSEDMASPVKVVTSIQ

>comp11619\_c0\_seq1; 383 418 1443 LEN=1811; translated  
MTTISIDSGDL DVVEKYAATGLVTDATTNPLFVSQAGANGDKRYEDMVSDAIMYAKKQMG  
GGDSTMPDFEPEVNLAMDKLSVNLGAKLSTLVTGRVSTEVDIRLSYDTEASVERARNI IK  
MYKEMGIPSDRILIKLAGTWEGIQAAKILEKEGIQCNITLIFSFLQAAAAAQANAYLVSP  
FPGRILDWHKSKGANANSNGSFHPTADPGVLVIKRIYSYFKHYGYKTICMPASWRPSRGA  
DVEGSDIDEILALAGVDEMTIPPAFLES LMVVDGDSVTRQCDPETSAAVCCDPDYKLDEA  
TYKAYMESEACATAKLEEGIEAFTQNTMELRKILYDKFAEA

>comp11620\_c0\_seq1; 390 614 1473 LEN=1473; translated  
MVR EAGPNVALQVRIQWWW DALSR IYDDPQQEQPSKKVNDSDYAPFSVSN TLAESYFKNP  
IVRVMNHAVHEKQLTRRFLERLSEARESDLH SKQPETTDMIEHADSIFSSLLYLTLETL  
DVRDESVDIVAQHAGIGLVTALRGIRFRLIREECSIPKDFLPKDFPYDKLIFTNNSII  
ADESDDEENATERAKHMENLLDEEERQLLRDAVEQVCILAYSHLSQAQQLQSNVPKHART  
CFLPVI PAMHYLSKLQKADYDIFDEK LLEHDNMTILALLGRTWLTGV

>comp11621\_c0\_seq1; 277 98 628 LEN=744; translated  
MALRLTCNRFMRAASGQSKRVGLRSFGAAADAAPAVGAPAPSVFDKIVSLTIVDPSGARR  
KINGVVGKSLYEACESNEVELGPMSIGGPSEIVHSETWTEPVFGTGPTSGYDHVIVTGAG  
VNTATPKTDAETRMIEDYWDFDEVFPESRLASMITVTKQMDGMIVYVPPRVDDSNP

>comp11621\_c0\_seq2; 199 684 965 LEN=1081; translated  
MSIGGPSEIVHSETWTEPVFGTGPTSGYDHVIVTGAGVNTATPKTDAETRMIEDYWDFDE  
VFPE SRLASMITVTKQMDGMIVYVPPRVDDSNP

>comp11622\_c0\_seq1; 280 566 1378 LEN=1601; translated  
MNRRLQSQWKRAPLASAVALLALVLSG SWLGAVDCWSSHTTETTTTPPPAGSNAPLSSHFI

AQSLSRRSILSTAACGVLLGEAALAANPNQALAEDEGEPSTTTTTTAPFIYERKQTVLNK  
KELSYQISIPSSMKEGSKPVKTHLDEVNFVSDSVKRYQYGITVDPVRISSLKEFGTPEEV  
AARVVTAEVNRDGI FEVTLLEDPFQTTSDGTDAYILKYL SVGKRGRKVYTNKIVVSPNQL  
LYVLT AQCKEDDFPEQEKEIKSTVDSFQTF  
>comp11622\_c1\_seq1; 141 432 1271 LEN=1413; translated  
MRSFCLLLCGLLLAGVAESFAPHSLFYNGVATGRRRAEKCLFNSAGDNDDETYVEGDQDPD  
SIARRDLIYNVIGAGLIGASGVASYSLSFQSNVYTPSGMQRLPRTQFIAALGDP SASEGII  
AESGQWGLWPVDPGPRGVWLKDYKADILQSSTGKYKAPAGWTFDPQNNWLEEHGLIMEAP  
DFPLKEGKYLVTGGRMVTTLTIEKGRWKLDEGTLYDVTHLPCRSARYQPIQGGDEGAG  
TPTAANPRDFPVIPGAIMPSVPGARQQDYAVLFVVGKAA  
>comp11623\_c0\_seq1; 222 130 816 LEN=1018; translated  
MSTDEEKPPREYVETLMRKGSYKSSNQSTLEGYVDAQATGEGDYFFEANKALLKIYQFLP  
KAADPNKVALVLLLAMLEYSPNTDWLALSYLIPERLQKTEPVSPVLRCKALDACKFSE  
FWDLFGTLKGDKYMVVCVGRSTETVQKGILEAMALTYRTASLEKVLANLNMDASAAAKLN  
GVPCVESVSSDTVTFVASSDNTKRSRVFQAGVSYSIAIANMCMNMTSSE  
>comp11624\_c0\_seq1; 103 326 1246 LEN=1463; translated  
MGAISPKNSTSDGQRITNHQKQAVVLLVLSAIIYTACKLDATLNMVPSPEATEGPKPGT  
EIKMIALLGERNSTRTWSSHLEECFSHAIEVRTKLTRYKHWFPASYRYPHETLVITQ  
FRNPYDWLKAMQHVPHPADHLQFRQDDRWMFLTSTWTMERVGTDKINNTRRCQEHFEY  
KDIISCETEPLRSSYKLDYSRHQPFYEMMNDGSGRPYENIMEMRTDKIRNFLSIKNYD  
GIADVWAVQY EYLLTKGTQELLDEVTRWTGIEPNCTARPPQRRNRPVVEREMADFIREHL  
NWTVEAW  
>comp11625\_c0\_seq1; 435 217 1470 LEN=1744; translated  
MNL TGLQDIEMGGVKCKKILLKARQSMVGMSNASSKMELKNWLAATPAGLIAESSGSIPF  
RKNILREWNIIDEDTVLPDVASKDRKGVGVLRFPASLLPDELKENGKILDDSECLAVDF  
GKVDWKVFSPEVPIIILFHGGGMNIGGPNDTILVEDMSRLIQNCPSQSSRDIITVSVSDYS  
LAPEDPFPLGVMDALSVVDYFLRENSIRKGVHITGTSAGANLSLVCGFESFRFPGRILS  
IQSQAPMLDPSSASMSYMNQRSYPSVSWLRWSWQAYLGLEKIEYKDDGDNETPLEKLLR  
KDSNHTSWKKWKTETYPSEALHRLVNPLLGIPDGLNIDNCNDEGTTKPTIIVRYQGD  
LYSDGKAAETALKPKTGSNANFY EELGLHCGILGPYNPDAPQEFWTVWSEALFHGGD  
>comp11626\_c0\_seq1; 428 380 1237 LEN=1528; translated  
MFRKKKKNKADLVAEIDTLGHQEDNVANARVIKAKKSPRGGFKSPKAADNMGGLKSLTTS  
ADGTLTEEWDPYLP RPPSMKHIDPADLV DENAEQVAVFNANTHEGSTMVRVLSEKGLRVV  
AAVRVFTSRNTKALIKLKGVTVKVADWNESSLKVASGCSRAFLVTKYWERFDSKIEEQ  
MAVNILRACAHADPP IKHLVLATFEDTRELISRNRKSQLVPTTEGKIYPRFEGKPIDDK  
AKEWKVQITHMNTSYMDDGPNKRKSLILIRGDTGRILVQPHIVGA  
>comp11627\_c0\_seq1; 306 219 966 LEN=1144; translated  
MIGLIASF EIIHRRKSVSWHTAKNRRSKISPAGFMQSVFGRSNSGASNESGHSD EEP TTP  
SQLKLVDATKDSINYGAPY PELQICPRKKQOTEVDDHNNIGGGPLKQSSAMSFQLDIPLH  
HIRRIESIDTLTIV IYAKDVHAVDEKKAGTEKEAARVSFQSSDDRDAASLDLKM LVEW NK  
HRQPDIEEELPVDGIRNRAQKAAHFAKREIEMREKKRDRERRKAGHMSNM TSGGLKYTAM  
AMANQGV T  
>comp11627\_c0\_seq2; 341 201 845 LEN=1023; translated  
MQSVFGRSNSGASNESGHSD EEP TTPSQLKLVDATKDSINYGAPY PELQICPRKKQOTEV  
DDHNNIGGGPLKQSSAMSFQLDIPLHHIRRIESIDTLTIV IYAKDVHAVDEKKAGTEKEA  
ARVSFQSSDDRDAASLDLKM LVEW NKHRQPDIEEELPVDGIRNRAQKAAHFAKREIEMRE  
KKRDRERRKAGHMSNM TSGGLKYTAMAMANQGV T  
>comp11627\_c0\_seq3; 251 201 804 LEN=1161; translated  
MQSVFGRSNSGASNESGHSD EEP TTPSQLKLVDATKDSINYGAPY PELQICPRKKQOTEV  
DDHNNIGGGPLKQSSAMSFQLDIPLHHIRRIESIDTLTIV IYAKDVHAVDEKKAGTEKEA  
ARVSFQSSDDRDAASLDLKM LVEW NKHRQPDIEEELPVDGIRNRAQKAAHFAKREIEMRE  
KKRDRERRKAGHMSNM HRED  
>comp11627\_c0\_seq4; 216 219 925 LEN=1282; translated  
MIGLIASF EIIHRRKSVSWHTAKNRRSKISPAGFMQSVFGRSNSGASNESGHSD EEP TTP  
SQLKLVDATKDSINYGAPY PELQICPRKKQOTEVDDHNNIGGGPLKQSSAMSFQLDIPLH  
HIRRIESIDTLTIV IYAKDVHAVDEKKAGTEKEAARVSFQSSDDRDAASLDLKM LVEW NK  
HRQPDIEEELPVDGIRNRAQKAAHFAKREIEMREKKRDRERRKAGHMSNM HRED  
>comp11628\_c0\_seq1; 558 285 2966 LEN=3679; translated  
MVCMDSPDPFDWIDERQTNINNDCEGRRDKTPCNASKSTWPQKEESEQK GKAKLQRKRKK  
YKVDVKQSDSDSDWIDESGTNMNDRKGRKTTTSPNTSKRCGPKPRKNMYSYSRFGFDV

ENKLPENFQPCFKFDVIYDCQORMANTHEGNQMLRELVWNNAPKYLAAKTRPLRGPIIQAIL  
DEIRTRSTTG VGFVRYSEEADRWFVAVGDVVRVDKIGHALRYECSRRSSGRGQERRGKTVK  
KVALGTVHKKRPSIPASKDISWMKSGIILRQKKHPNAAGLRVASRTSSSIVSTNSSAQS  
QLTVGRTRGAIITNGPNEKHKLQLDDTGSPTASTHSSSLLSTDVSRVTKRRRASASPPDN  
TVP SCHLQNHQHQSHPLSDSDSQGRNSNSGCHDSDDDQNRHSHSHGYPHHHTTAKTRRLHS  
DRMQPQVTKLGHTSQSPSDNTSHSYHLENECQQSHRPESNRQSSRSNGCHDCNNHLIHK  
HSDGHLHHHTMARIRSQHSNRMQPHDAFESNHPPSVGGRAGMTLAKETIVKTKSVAGTP  
DRALPASARSPSPIARSRHNCTTGISSCTDAAVTDSLVSGLTDNSFQISNGNDLMFPVRE  
ITVPIPLKTKNINTNIRSCPVPNNQETNSIDSNISSSNAGLSLHSSLPLGLAAPNQPKQ  
VVQASNHRSPHRHCSQTGGDEGSNYGQQQVKHHNGHSALPSSPLFGRDKKVSEQYQSLN  
ALNAFFDGPQEDGQTTDQLKKYQHQCQPAQPSPPVSPPHGQLHDPHYNPNLNGSRDEYR  
YLQRMSELLHAPLGGNDPTIQHKRQQHQLADEQKTFSLCSYGEVEEPKQRRGNEDFLRQQ  
ERVAEPEEVSTTSSISLEAQQEPQFLAIHHQEYADSEDEDEDYIYSNQYSSFI  
>comp11628\_c0\_seq2; 470 941 3232 LEN=3945; translated  
MCFAIRYNTPRKFTTRTEGNQMLRELVWNNAPKYLAAKTRPLRGPIIQAILDEIRTRSTTG  
VGFVRYSEEADRWFVAVGDVVRVDKIGHALRYECSRRSSGRGQERRGKTVKKVALGTVHKK  
RKPSIPASKDISWMKSGIILRQKKHPNAAGLRVASRTSSSIVSTNSSAQSQLTVGRTRGA  
ITNGPNEKHKLQLDDTGSPTASTHSSSLLSTDVSRVTKRRRASASPPDNTVPSCHLQNH  
HQQSHPLSDSDSQGRNSNSGCHDSDDDQNRHSHSHGYPHHHTTAKTRRLHSDRMQPQVTKL  
GHTSQSPSDNTSHSYHLENECQQSHRPESNRQSSRSNGCHDCNNHLIHKHSDGHLHHH  
TMARIRSQHSNRMQPHDAFESNHPPSVGGRAGMTLAKETIVKTKSVAGTPDRALPASARS  
PSP IARSRHNCTTGISSCTDAAVTDSLVSGLTDNSFQISNGNDLMFPVREITVPIPLKTK  
NINTNIRSCPVPNNQETNSIDSNISSSNAGLSLHSSLPLGLAAPNQPKQVVQASNHRSP  
PHRHCSQTGGDEGSNYGQQQVKHHNGHSALPSSPLFGRDKKVSEQYQSLNALNAFFDGPQ  
EDGQTTDQLKKYQHQCQPAQPSPPVSPPHGQLHDPHYNPNLNGSRDEYRYLQRMSELLHA  
PLGGRNDPTIQHKRQQHQLADEQKTFSLCSYGEVEEPKQRRGNEDFLRQQERVAEPEEVS  
TSSISLEAQQEPQFLAIHHQEYADSEDEDEDYIYSNQYSSFI  
>comp11629\_c0\_seq1; 794 400 3612 LEN=4305; translated  
MTPDSYSSLLSSSLNLSSTSTSLKVVIVGDEGVGKTSFVRRLVADELGIPIDEVTPNA  
SSSSSSFLPSKPHLYNSRWRHPEGLPEMISTGSVQNPEVGLDIYQLDLSDDASYIAX  
PEYSDSFSSNETIQALS IWDFMGKSENLC EIQKMFFTPQTLYIVVWDMAAKSVAPTKCE  
FATASSTPVVLT PNDNRNNGIHDNNTCRNDCTRPLPSDANAFQLGYDESDNSDYDDIDTF  
NQKELRRTRRMLERDIDKKVQSWIDRIQAITPGATILPIATHMDCFMPHNHPNSKDGEER  
TSMGT YAAEFCTEDLERKEIKNRCRLLKERIAFNEARKVEAYERIRCSRNDSESTSSV  
ESVPRPIFHFGNVQKDGQVLP HAI SVGFHSSDKKDDDDMSLGLHSHKKERDSKEGVLDG  
TVREFVIRIACMIASTRETLD DENIGYSESSSLSLSLATDMLRGTCQKMAGR SKILQTE  
YLTKKCSMGDLSLRVPTDSEYSIDENCYNDNYVFPALNSMHCLGELCYFGSNSSSPSKM  
CRGYDLQVLSDFVVDPTWLVESIDFILQYAREFVEKITSFSNATIESSNSLKRQRLTNC  
PTIEKEKVRSLWKNRLSTKQGLRFAEQYFQFQFCSENVKNDINLADKVFEFIQCLLVRHE  
VFIPLSYQKSDSRHFFLPGLLGHKVGSDFKTRISSQNSLSGALSSSSSSILMPIDENCEK  
SKVYADFAESNAAYHGLIFDDTAPQSLMERIIVHTIKSLSDILNANDGNKIFAKEIYCWK  
DSFRLKLEVDIGDKNKVQTV EINS LILEGATGDTCSRMTTCETILATYFRGHHDENCKIW  
MHTCSSRLAVQKALDEM QIEYREGAICPECLRKKPVSEIGTWTFGKIRSAMNDKEAFIR  
CRHGHR IEMRLDGLYQLVGDIEQSLGKCDTTGKRSLSTSDGIASTLKPRLSSRKLSTS  
TSGSILTSTASSAKRYSFRSSKNMPLDESLSTPAIDNCSNQIETKGDSSRICSSSKSRE  
ASSPDSHANIMTSSSTSTVIEPGQNKGTGKSSKECDGIMNLKLADAKQK  
>comp11629\_c0\_seq2; 909 400 4109 LEN=4193; translated  
MTPDSYSSLLSSSLNLSSTSTSLKVVIVGDEGVGKTSFVRRLVADELGIPIDEVTPNA  
SSSSSSFLPSKPHLYNSRWRHPEGLPEMISTGSVQNPEVGLDIYQLDLSDDASYIAX  
PEYSDSFSSNETIQALS IWDFMGKSENLC EIQKMFFTPQTLYIVVWDMAAKSVAPTKCE  
FATASSTPVVLT PNDNRNNGIHDNNTCRNDCTRPLPSDANAFQLGYDESDNSDYDDIDTF  
NQKELRRTRRMLERDIDKKVQSWIDRIQAITPGATILPIATHMDCFMPHNHPNSKDGEER  
TSMGT YAAEFCTEDLERKEIKNRCRLLKERIAFNEARKVEAYERIRCSRNDSESTSSV  
ESVPRPIFHFGNVQKDGQVLP HAI SVGFHSSDKKDDDDMSLGLHSHKKERDSKEGVLDG  
TVREFVIRIACMIASTRETLD DENIGYSESSSLSLSLATDMLRGTCQKMAGR SKILQTE  
YLTKKCSMGDLSLRVPTDSEYSIDENCYNDNYVFPALNSMHCLGELCYFGSNSSSPSKM  
CRGYDLQVLSDFVVDPTWLVESIDFILQYAREFVEKITSFSNATIESSNSLKRQRLTNC  
PTIEKEKVRSLWKNRLSTKQGLRFAEQYFQFQFCSENVKNDINLADKVFEFIQCLLVRHE  
VFIPLSYQKSDSRHFFLPGLLGHKVGSDFKTRISSQNSLSGALSSSSSSILMPIDENCEK  
SKVYADFAESNAAYHGLIFDDTAPQSLMERIIVHTIKSLSDILNANDGNKIFAKEIYCWK



DSFRLKLEVDIGDKNKVQTV EINSLILEGATGDTCSRMTTCETILATYFRGHHDENCKIW  
MHTCSSRLAVQKALDEMQUIEYREGAICPECLRKKPVSEIGTWTFGKIRSAMNDKEAFIR  
CRHGHRIEMRLDGLFLYQVLVDIEQSLGKCDTTGKRSLSTSDGIASSTLKPRSSRKLSTS  
TSGSILSTASSAKRYSFRSSKNMPLDESSTPAIIDNCSNQIETKGDSSRICSSKSKRE  
ASSPDSHANIMTSSSTSSTVIEPGQNKGTGKSSKECDGIMNLKLARCEAKMKRVFFRKSF  
LSLENLNLTECQIPVKDLNDPKFGRHLQSLSLAHNMFETIPKSLVYCLPNLRSMNLSHCF  
IYKLPKRWNLPMLKRLNLSHNLLIDFPEETMLLGLLELEELNLSGNKLAKVNI SANKIM  
TKLRRDLSSNELTSFPTDLNRFKALKYVDIKCENNI

>comp11630\_c0\_seq3; 608 195 1994 LEN=2052; translated  
MFTIEPSSSTERESLLPPPYSYEELYSSYQNEWDCQKKSNSRSDRTTNVGNCDTGTGIDIDI  
DIDESVSDLKVVTPVKHSDPKHENEKNADEIISENENETYLLACSGSGEVVVWKLGGQTT  
TKTTQSINPMDAATSNNSAAVALVRHTRWSISRSNDNAEDRKGDTDDSGDDGHAYGSECG  
ALSKMCIVSATFPDGA STSGGRNRKRQRQDQSGGQEDAMEDQQLLI IAGEDGLWSVPLSE  
VLQKQPMQGHSA SSVVYPPSLLRLSDRAFSQLQCLSPSTKSPVEAGNNVHSRLFALEKNT  
NNLLVWDARRIIQCHNNNNKNKNDVVPDNEIDLRCFSEQPVEKPKRRRLYQKSI VSGE  
CATTILVSKSHNQFNLLVGTDRSRVWILSIASDAANLTVSIKRLEPRFLSLNVGKKASTT  
KSSSAYVSNHHSRKKGSLGLPANERNQEATWKVTDLAASSDGTWWTASAVKTGKTKNNSD  
SDGTSGLIVTWHASSGMVTARRETREAIHAIRLEQE QPPPHGADGIGCSSTLLYSAGNEA  
AVSAWSSFSLDLTGRFWASPPSSKAI AVAFGTTTMAVGGVGNRVDLFFERCVRVQTVRL

>comp11630\_c1\_seq1; 120 178 610 LEN=610; translated  
MVMSPAETFNALIEAIRRLFTTPIAAWTGWQWFLALFLISWSPAAAAGRAGGGPTTAGA  
GDETETTTTAATITIRRP TGPAAAAATKAGNASCGSSSSNSNR TLGRRSPASSRGASEH  
RTARCLRRGKPAWIEIEIDIDIDI

>comp11631\_c1\_seq2; 379 129 995 LEN=1104; translated  
MRRELRAHHPVPEAMPTLDLHG YTKCEAIRRTTEFLDRANTMMKNSKPAWVQIITGKGNH  
SSGGPVLRTAIKELLEKRQMEHRLMNSKGSF SVNASSGFVLYDLEQPKDSKVL IAPQSYS  
SVTNDADRISRHFTLAANDREQKELKRI FHRRSKEDAAFDKAVSQSLESNKKRDEDNRK  
DSEVLERAISLSLLNEEKQKEKKKEEEEK LQEVIELSKRESILQSIDEEDQIRKAKEISK  
IEYDDPDADIKQLIELSMMPEETGLNQFDDQEGDKEILKALELSLIEF

>comp11632\_c0\_seq1; 200 1 1027 LEN=1027; translated  
XPRPSGAGPSGLLESLSGFDRVVF GDSILQHMVWDVGRKAYHGVLAEKIESGRVWVPG  
ETTEPVNVNPLPSPKTLEEYLSLLEASVGEGLR LPLPNDNDKNHDKNHDNDNDKDNETS  
GGGGQVALVLGSAAWDVIWPAEWQGP TFRRHLSAVRSLVERLLGGTIGGGISNHSNHYN  
NLTVVWKLPIAHLQAANPGLCFSGPEEAPDRGSCSGALRYATTERFRKVYRAQKKLLEQ  
MAGEAIGRESRLRALDLYEISYLSGAXLDDPQR LDPLLAGVERPHPRAPVPVTGMERNGT  
ERHGSRGF FRYGAGSRDETRRANRQTIKREIKFVALLKITSNQX

>comp11633\_c0\_seq1; 332 1 1631 LEN=1834; translated  
XSTVIPFGTVGALQQOQHRLRDSKQRTRRSKGS CAESMQEPDKDGGEGTDGASDAGRDCP  
ATATATATASWLREDCLEFYRNELLLLGDGGRGEGSGGQRARKRTPATPVHERVGLLRIG  
IDRAMVLKRRFPNARFLEFGVHEGKDLVRMAAFLRSIEERDRGRKKTKTNNNNNNNNK DQ  
SKPGANQNRDHPAYTTFFHGFDSEFGLPEDWINGQIGEDDQPFHKKGAFCTGGKAPVDH L  
RTDLDLGNHRPKTPIDSNNSDSRSSHCEPATRGIRFHKGWFHESLPRFLSEHEHAGEP  
VAFVHADADLYTSTKTVDLLCEHKLLRKGSVLVFDEFWNYPNWQNGEYKAWKEATERFG  
LAYECFAYHXAPPGEKTQALRVPVGGRRGHEQPRALSGAQRKTTERKATEGAQAAPNAK  
DLPRETATVLDEMRSRTTALDHFGAR GSI SGVGGSGPMDRCRVLLVAYKELGNAGREAS  
IHAAPTRRSSAKRVYHSLQVVTRTHLMAHRSYVGGP LLLQSRVCGHSTTQTFTSRRRKN  
EIG

>comp11634\_c0\_seq1; 533 115 2222 LEN=2603; translated  
MEGIRLLAQHNRAAQLQAHQQQAQAAAF AQORSNSDGLASAAAATTTTRSKDVYRLIWDAS  
ATLADRPPANLCIYDRFGATSPAGHENDPPIFDG SVANATPAPHGGVGASGGTGTILH  
LSCALDRPLMLAFFLIMGADGRANHTAFRRLLV VHEAACNGS INCLTLLLELGHQYAEVE  
GKNSSQSGSKNSGASDVFPMPDAMEITSSIPAPRLAARPPNGTSSNRRHLGRTHAAGGK  
KENDTSRYMNYIPILRRFQNLARSVNEGIMLELQAARSLLAHVPILETTKAALVRSCSFR  
NDTLYSSHSLRPFGCADGHGNTPLHWASFKNETECVALLLNYNADPNARAHP SGWTPH  
DAAYSNSLACIELLTSKGAQIDAKANS GATPLCFAAQEDASDSARLLLLERGADLSSRCAG  
PPPDDGAQYHNPLPNPHSRFSGYTPLHYCAHYNAQRASQVLLSHPKAKSAMEVPDL SGR  
LP IHVAVARGSSDVL RALLHAGARIDI PPNGSPTSVARPSPTTP IHFGLLPAVAARQQIV  
PAEPGSPNRSHASSATSTSPVTSPI LRSMIPSQPINSKPNWCLSQQAIDECRELI LKSE  
QSWSPDRHLLFTPNDRKAVMELLRVGKRLEQNGTGIFIDLWPTILGFCGRGWFFETDVC EM  
SFVENNGRTNKIPDNHGAELNDNNGSTHNRDSYLALPTLEG



NLQWSSSQPDWVSI AFNEKLQIRKYTSIRCV  
>comp11640\_c0\_seq3; 146 84 1240 LEN=1700; translated  
MTDNGVVS NYPDAPQSQRKEIYTYQAPWQIFALSWSRRPDPSSQFRLAIGSYLEQYSNVV  
SIIKKN SAKDDNGTLYQAAEFDHPYPCTKIMWSPDTRHGAKDLLATTGDYLR IWNV NEDG  
SGRGT VNVKKEGLLN NNNKSSEYCAPLTSFDWNETDPSIIGTSSIDTTCTIWDVNTQQART  
QLIAHDREVFDLAFARGKDV FASVGADGSVRMFDLRSLVNSTIIYESPDLEPLLRLLEW NK  
QVKLFDRQTPCIDCYIYYFGFTHGT YLTV ALMFXDPNYMATFMVDSRRTVILDIRVPSLP  
VAELGGHLGCVNALAWAPHSSCHICTAGDDSQALIWDLSAMPKRPVDDPILAYNADGEIN  
NLQWSSSQPDWVSI AFNEKLQILRV  
>comp11640\_c0\_seq4; 204 84 1142 LEN=1602; translated  
MTDNGVVS NYPDAPQSQRKEIYTYQAPWQIFALSWSRRPDPSSQFRLAIGSYLEQYSNVV  
SIIKKN SAKDDNGTLYQAAEFDHPYPCTKIMWSPDTRHGAKDLLATTGDYLR IWNV NEDG  
SGRGT VNVKKEGLLN NNNKSSEYCAPLTSFDWNETDPSIIGTSSIDTTCTIWDVNTQQART  
QLIAHDREVFDLAFARGKDV FASVGADGSVRMFDLRSLVNSTIIYESPDLEPLLRLLEW NK  
QDPNYMATFMVDSRRTVILDIRVPSLPVAELGGHLGCVNALAWAPHSSCHICTAGDDSQA  
LIWDLSAMPKRPVDDPILAYNADGEINNLQWSSSQPDWVSI AFNEKLQILRV  
>comp11641\_c0\_seq1; 773 753 2759 LEN=2987; translated  
MKPMLRSTVALSAMPMP IPVTP EHRSSQDTFPSRTPGSDSNVTAGKLDGNSDHSDDN TS  
DAATPLDTT SAMGRS ISSHN RREQPMQHEQTINEAAETA AQKTSIQTSDTLTTPSSRWV  
GVRAMLENEPCLATQKGLFLALKHHAPIQVVQFLLTINPNVMDIAKTGPTPLQVALYHEA  
SLDVIAL LLEASPFGLCVTNSDCPEDPLSYAKRRYGEDYNKYGLDSDVEDKDCQQHMRP  
GLIELLSRPLSYWIKERKGRDRQAKKNQYIQR IYHYRRQQQNKGSWKHDLQQLNDTIP  
SHISPPALQLKHN RNVIPSRISPPPLRFSHRLRTSVADCITESVNNNICDGSSPFSSAAL  
KQSPPPPPLPKKGTDTFFSNKDRDNKNHATQQQKTHTPKASIIATSVDREEFNNIKKIC  
ARLVKAHNISNQIIATRGNIDAQSELLATMCTKEEILEELLQQQRSQFIRNLIALDMKE  
KNFQSR LDQMEKRYIMQLETRLDRCMSSTRVWNESTRERLLDLQSDVEAEAKINDSFRNG  
MSDWVERWHYENQENKNRNVPSSSTCISSYVFATNLGETDETAPLCDEFRRGGRIFCRSD  
GNGTMDSGAAMVMESNVNDDLDISTDPIIGTNDNRHRQCTLLSWKRPWIPFKNRDRIQMV  
DSESQRGI  
>comp11642\_c0\_seq1; 1098 123 2255 LEN=2414; translated  
MLTSWTKGPEEPPLYSDWKVSFTAHR TVEEPNDGPSKDDQDTHSVSTASTTSADGEDSVD  
NSESKI VVESMPSPQCQQQHAYFSVHRNIIGPQSTFFTESFLSSQVDSNTVIALPTDLPP  
HAFDAVVEAFRILLDHCYHAGARAGNP KALNVLEKQLGGEHNEKATIVAVFCLSRFFEMD  
SQLCQKVHEFVSTDLTPD TVAAYYAVVKCLRSSWSSSSLPVLD FNPIMDMIILLCHRIP  
SVLSPDSDL SRIADLSLWLSIGSLLARDNDYNETGDSNIVDGDGAAAANKASATAPSGND  
DNESKVDPTGESPTRNSKA WSENLYFFD TYHQQESVVDLRDSFRTLTAESVLPEVSEKV  
ALRLLEQE HKHGLVWGSSKTPKGHGEPESDEETVDTVDEMETDHEEDEQEESTTETAAA  
VEIQEPSPENENA AVARRLTGLQERICALCESNWAGDENEVKDFAPGKLASITTPAVLE  
ALLVASVAEERHLGSR LRETASSLATEQKLRAEDSEKYDFFTK EHKFDIARELQRQMALA  
NKVKEESEKRKAAEEI AKSVESRVADEKKALRKVSEVLEA QLEAAEKVKKSLEKRLRVLE  
KERSKTESDRELYEHSVRET IKRLDGITNPFVEDDWCLKSCGGFTPLITMMSTVNDHREC  
DRIKAMLKRVL PDSSVYEGDFSLKGD DDFTLVTKDDDYQLTDYEDDGTTA  
>comp11643\_c0\_seq1; 222 124 747 LEN=1002; translated  
MTRRLERSTKKTAGDAVEDEEADCTDEEKGITSENEMDCNIPARFVCPLTLEVFTDPLM  
SRRGLTFERKAITEWLD RGN DTCPLTREPLGYRGLV PNVKLRLEVEAWKLEHG YKIKPCD  
AEEEMKRRQLCFVEVTSALLFYGH EGNRETVSPLPNFSGINRSR HASRRRRSQRSPDFNS  
TRHRRQRLISFIGEALNTIRRAPADDN  
>comp11643\_c0\_seq2; 222 124 747 LEN=1043; translated  
MTRRLERSTKKTAGDAVEDEEADCTDEEKGITSENEMDCNIPARFVCPLTLEVFTDPLM  
SRRGLTFERKAITEWLD RGN DTCPLTREPLGYRGLV PNVKLRLEVEAWKLEHG YKIKPCD  
AEEEMKRRQLCFVEVTSALLFYGH EGNRETVSPLPNFSGINRSR HASRRRRSQRSPDFNS  
TRHRRQRLISFIGEALNTIRRAPADDN  
>comp11644\_c0\_seq1; 381 62 1039 LEN=1183; translated  
MASFNKQPLPKSKGSSFD AF SKVDELVSKPVVGS DGAASWQAFRKNQANVRHQVSVAP  
KAPLKKQDKLGTGFSSWEEERAHEDMVRKNAGHASANSYTTFKNDK SAAKEAALRKKRK  
AQIEARIRPDDEEYFIASAT FEGWKFYDVFTTKNGATGYWDGMDSVKKERGE SMPEKKS  
GRLPSASPGVQTNETK DASVTNKPKKKRKKKGGPTIVHDPNNPMEQVQAILERRNQKLMG  
MITADHDLPSGW EAAKDPSTGKSYFFHRASGDRTWEKPKMSTGSTKDQGNNTETLPAGWK  
SAVDQVSGKTYHHSTGKTTWTKPR  
>comp11646\_c0\_seq1; 201 237 734 LEN=1821; translated

MTDAARHRGGLVVPSSGGDPLATATRKTMAAASSVSASSSHAQYLSRLIDFKQMDIQSALD  
QMKTLLSTRPHVYKTSYYRKQTKNHWARDDPAFAALELIFLTISCIAYAISFRVPISEG  
IAFFLYSVLFHWLGFGLIIATAGREMANRHLDTKSNSHVRQSVEW  
>comp11646\_c0\_seq2; 359 237 1058 LEN=1639; translated  
MTDAARHRGGLVVPSSGGDPLATATRKTMAAASSVSASSSHAQYLSRLIDFKQMDIQSALD  
QMKTLLSTRPHVYKTSYYRKQTKNHWARDDPAFAALELIFLTISCIAYAISFRVPISEG  
IAFFLYSVLFHWLGFGLIIATAGREMANRHLDTKSNSHVRQSVEWLYAFDIHCNAFFPV  
FVLLYGVQFFLLPLVLGKSLFALIASNTLYAGAFAWYWI THLGYRALPFLSQTEVFLFP  
IAAIGLVYVLNLVGYPPFGMGWNASRIMAHIIYFD  
>comp11647\_c0\_seq1; 542 382 1857 LEN=3482; translated  
MERSFAAIAPGRLCLFGEHQDYLGFPVIALALPLLCCRIDVTVALTEDVGRDSERTDDHI  
VINLQLPEALGGESREYDLEDLPPSPPPGSRQDGKDYDFALAAIHEVLKERKKSNGSQFTD  
TTGVCNNDRKKVHVQCTSSIGELPLRAGCSSSTAFVTAFFVMVLKQIFDDQHNRRLREN  
STGTCSNSNSCKGENSGDNGAGNGHLELAKLAHRAEVTHFGNPGGTMDHVAIAFGSFV  
ETKENGHVCSVLRIGPDPWEVELLPMFPFDSNMGEMDDKDNVWILGYSGEPKDTIKH  
LKRCKYDRIELLQKKLKGDWDHP IVVASDDCDGNDGSRSQERSTPTPTLSEAEQALRKAT  
ISNRDTEEKAAKLWRSYCGSQYIPQSKNESLGHSLARLMKKHHEALRDGLDLSTPRLEAM  
NQAALDAGAWGFKVVGSGGGGCGVAWAPSFKAMVVS DAMENVGGAECTWI IKNAGRARI  
ISTNESEVLQV  
>comp11648\_c0\_seq2; 509 188 1719 LEN=1761; translated  
MSAWGKNGSARSCDDLKRV EENDPRLTEITVLPLKKFGSREIFRLVKCLDSEKTRTFDH  
YKLLDXGIDDHTALEALGRALGMPLESIAVGD SNMGDGGVCALCRGIECNKKIEDGQNTG  
GLKAIDL SFKNVKG EGLRAI IRVLGALQSLDSIDL SRNENIGPSFDFLEFVSTKQPIFPG  
LVLDLDSGCRLDTSSCTTLLQAMQPI EDEDGQEKQTSERTSRNLVLKLN SNNFSDPLQVK  
DMMNVLSQGSLSVQLYISACQIGDDGMEHMIN ECCKSGVNN DATNFQSLHTLDVSNNDLS  
SIASLANRLHQ SANGNSHYFSNLKSLNLSN NPLGANLLSSIGSNVQWISSLEELDLSNTT  
CEIPGAVELICRSNSQSASLKKLNLFGNKL GSDGFLELAKVLRGGHASLEYLDLGGNGAT  
ESGVVELVKAVTSLSLTESE EKEELASGESTLRVLVVGNSGGQALEKVINEAGTTHPDL  
DIARDKAKKKQGV PNGGNMNNTPGTSWTS  
>comp11648\_c0\_seq4; 509 163 1694 LEN=1736; translated  
MSAWGKNGSARSCDDLKRV EENDPRLTEITVLPLKKFGSREIFRLVKCLDSEKTRTFDH  
YKLLDXGIDDHTALEALGRALGMPLESIAVGD SNMGDGGVCALCRGIECNKKIEDGQNTG  
GLKAIDL SFKNVKG EGLRAI IRVLGALQSLDSIDL SRNENIGPSFDFLEFVSTKQPIFPG  
LVLDLDSGCRLDTSSCTTLLQAMQPI EDEDGQEKQTSERTSRNLVLKLN SNNFSDPLQVK  
DMMNVLSQGSLSVQLYISACQIGDDGMEHMIN ECCKSGVNN DATNFQSLHTLDVSNNDLS  
SIASLANRLHQ SANGNSHYFSNLKSLNLSN NPLGANLLSSIGSNVQWISSLEELDLSNTT  
CEIPGAVELICRSNSQSASLKKLNLFGNKL GSDGFLELAKVLRGGHASLEYLDLGGNGAT  
ESGVVELVKAVTSLSLTESE EKEELASGESTLRVLVVGNSGGQALEKVINEAGTTHPDL  
DIARDKAKKKQGV PNGGNMNNTPGTSWTS  
>comp11650\_c0\_seq1; 378 309 995 LEN=1598; translated  
MNSLKKYNPFAEKKTPKELAKEARRETRKEVRASQRGMDRELRELDROEKQLTKELKQRA  
KVTNNGKDPALAA LAKQLVQTRKQREKIMTAKAHIGAVGMNATSMATQVAAAAAIGNVSQ  
AMKTTNEAMNVKETT KILQEFQRENEKLEVKQELMEDALMDAFDNDEIEDEAEQVTSQVL  
AELGVEMDSK MVGLDAPTMQPVGEQLSTEEQEALDSMLPDLKSRLDAL  
>comp11651\_c0\_seq1; 712 1 1540 LEN=1912; translated  
XNNNSGSTKQTCDS DGLVRSIHLESVGLDGTLSPELALLSE SLESYLTKN SIHGTIPSA  
WGKLTNLKRLQLSKNNIEGSLNGPELIGNLDRLEI IGLGNNRLTGTLPEELGSLPSLFYL  
NLP SNGFTGSI PSFANASGVLGHVSFRSNAL TGSVPEELALLESLDALFLEDNDLEGLVP  
ESVCAGDATHNGAMNVVD CGSVGCSCCKGCAVFYANNVSMDSFREAE RPSAPASNATTV  
REDPIDLALNSTAAPVDAATVADGATAEEASDAASNATVDAMVDATVDATSDAAADDTVD  
VTVDVTSEAAAEASDATADATANPVSDVTVD ETVTDAADATAEESMVAEVP TDEA  
DKATNSSAPETGNCE SIEVGFPCYNPGWSIDFELSHGGCGILPTEEYDFVAVYLSGREDT  
AIGTKSDLGDALFWASSCGLPACDGV IANGQMYRNTY PSTTAPLDGNPWWPISAGSMMR  
LRWLRSEDE TATGGNTTGIVVAESLPFVVADGCQ  
>comp11654\_c0\_seq1; 399 690 2099 LEN=2436; translated  
MTQIVHGIGGVYEFTFLDNNPITVSEFREKADKYM ECQVGAKKDHSIEMLERKFWKRLGP  
TMQSSMYGADM DGTFLGKDDDCDWNLSKLQ SCLQLLLIDQDDKYGGIPGVTTTPYLYFGM  
WASVFC AHTE DMNLF SINY LHAGAPKVWYAVAEGEDSRRFEHF MESNYVHAKKQCSEYLR  
HKRSLVSPAVLKKAGIPYTM TVQYPGDAIITFP GSYHSGFNTGFNVAEATNFATPEWIPY  
GLTAKVCNCRPDSVRMDVKKFENLLLRYEREVLQTKRVTWKDWARVKKKRAEEEEISNAS

YGSNPKKLNNTDDSKTIGKNSKAKDFWVEVMQTTAPKKS KSKSRKLNGLIEEKEVWHLA  
KQINRKTLPKPSDRVLCIIPAVIDRNDGRDTSSTNESEDQE ESEECFAGYIFERLNNDVRI  
RLNGMGKKEDIWMTVDS PKLFLDGGKWEEDNDFKMPAKHYWKEVDFSQK  
>comp11654\_c0\_seq2; 470 182 2011 LEN=2348; translated  
MPAHYRDRKVQEEARRFCKTKSNYPIQCKHFEPTLDEL RSTTFSDYVRHTILSQCEVGF S  
DNEEPPAVNGRHGTRGNSTNESSKRYRANTPKISYDYGLARITLPEEFSIHDGIAKDKT  
GRGKEWQSGTPLGDMMLPSPMTQIVHGIGGVYEFTFLDNNPITVSEFREKADKYMECQVG  
AKKDHSIEMLERKFWKRLGPTMQSSMYGADM DGTFLFGKDDDCDWNL SKLQ SCLQLLLIDQ  
QDDKYGGIPGVTPPYLYFGMWASVFC AHTEDMNLFSINYLHAGAPKVWYAVAEGEDSRRF  
EHFMESNYVHAKKQCSEYLRHKRSLVSPAVLKKAGIPYTM TVQYPGDAIITFPGSYHSGF  
NTGFNVAEATNFATPEWIPYGLTAKVCNCRPDSVRMDVKKFENLLLR YEREVLQTKRVTW  
KDWVARVKKKRAEEEISNASYGSNPKKLNNTDDSKTIGKNSKAKDFWVEVMQTTAPKKS  
KSKSRKLNGLIEEKEVWHLAKQINRKTLPKPSDRVLCIIPAVIDRNDGRDTSSTNESEDQE  
ESEECFAGYIFERLNNDVRI RLNGMGKKEDIWMTVDS PKLFLDGGKWEEDNDFKMPAKHY  
WKEVDFSQK  
>comp11655\_c0\_seq1; 30 1 360 LEN=360; translated  
HRTKGKQPPSPLRQYSNKATTIDSGPYETRRREQMQRTRWFECQNAFWVWALWWQLSAI  
TDVSRTPGNGNRI RSVALALDRSPYYQRYSSYPYCSDPGEMATRGIPLPVD ETNNNN  
>comp11656\_c0\_seq1; 743 667 2670 LEN=2670; translated  
MNRNSEDSTAKYMERQM QGDRASPKNNFKRISSAEKRTTGRGGTEVKISFGPSRPPSSS  
NGNAAKSKQRDSGGSTSSGNSSTINMSQSAAAAASMAAMGGDCSMGGVSFGDL DLEALKE  
KAAAAAGQKSFRNKHGLPCTEAEMKALMSMFVEIMGMSMNSSNNNNHGDKGGGGASGSS  
NTNSGDSKSSSYNSNGSSHKNDS CPVFSFGANPMDTSSIAAMAAATGAASAGMLPDH  
MAAATAGFFADGASWEALRRNYAAREDEDEDEE SFENRELT FEEVEFLHHRKQKEEAA  
KLASQFASGDWESLEQVAINDHLLSSEADDRERKAAKKREKKQRRAKLKEEAAQKAAEA  
AQKKREKSIVSWRSRVVSACQSNEVTKLDGLLQESPLRKLMEEQNSNKNRKNDSNDNTT  
HPSTSCIIPHLEFLLPNSVAKNRAQVERGIEARLRLADYVLHTELLLA FKPLRTGRTALH  
TACFHGDVRFLLQ LLDKVEIYEP SDGRDPLPSSFLDLTCDESGWSPLHYAAVSGSSEVLE  
LLLAKGSNLSTLTDVHTWRES DGVGLTPREL VQCQACNYEEVIETHGLALQEMTNAFF  
NHHQERRVFLK KLERVHRLSSIEKHGYSPLSSNDKAENNREAEANTGDGKVNQSET SAR  
NKKKKKKE  
>comp11657\_c0\_seq1; 749 222 2812 LEN=2999; translated  
MMLADTQQQRHPRSVEEEESYSSEPTVPVNSFRPPPTNQP SALAMMMGSPPSGSESHGQ  
YQTTLLNSTVLSLSID DVGTLPSLGLPEPPSPFSQPPE SIMGTP TNAQNEASQTAALSLSQ  
ARRKQQREQNNYFAPSAPTSESHGVRKNRNSQKTPPIREVYMEDDQTDPTDPDKHFNH DFA  
STEGGESDTLFENLEDQSLADRARRSLRSDARSPSRSMGSSRGVRSQPGKEQHGRGSSR  
TWGGLENIHENIGSDDVVRVHESALNALQQLKEELVKS NRNEELVREQE KWKQEEQDLR  
QQLTTLEATELQKSTDLDR LRQDHRRLKNNNEATEKORDELVKQRDLEKQARESARTIK  
ELRHRTL AGDNRHKEFKGQLDKLNDELED TLSAKGEIAAELARAQSERMELEXKLET VQK  
ELSEATNERDRAASDGKNIEAELLNERRKLQELRTSSDSDIRRLNESLRRANEAMHRLRA  
ELTPKVRSAVRNMSSPSSQMRGTRTAIFGSTTASVESTLGP PQTLDTAIADRLARLRDSA  
ERAHLIRGHKRELARL KADR DAGIQKLET DHADALKKVTKQLD GKRRADLEELADKLN RQ  
FESRLEEVEEHRKRISQLQKDYGR LQEE SDESLEALTRIARVSHNHEREKGRRHALER  
TVEDLNRKMKMHQKDL SAKHKG ELEKQRHQWESEKEVLLSNLQRDCNVAFENRRRIVNGN  
PKWAGAPLGVPTTGVERNHLHVHTTQTPHSMPSQGEVHRLHQQQENNGPSPLSMNSDLFF  
TETKNNPANLVNTEAAVNQNASNIKQSNVFPVPTVIHHEDSPSPIAMVSR TGSNDGSP TV  
VRSYSYSDIDSVLRETEELVKSIL  
>comp11658\_c0\_seq1; 662 2181 5240 LEN=5434; translated  
MGLTTEKETGPNDCPKIDSAQQQDTQTISID DQSASVDES DTKTSPGTTALSP DERIF  
EEYWNEQI IPEFRGRALTKLFS TFLRSSEVNLF FDHYWRKALQQVDTKNTLPRPLSLKE  
IRRRIGRSVYDADSLQAFVSDVESCFEAAIVSSSEASVSTETSSTIREAALRLLT VFRSR  
IVAFKTSQVEVATKSF SRASSRPDSIVAVLVQKTNSEKLNALLPSSATLLVVP AVLVDH  
WMEQFKLNVDISYCTGKIPLVFN YTGSNSSALKIEEILLKCRDKKTHFPFIFVDRTSTKK  
IPPPSFIALFKIVITNNRFSSEWKNGSFEDEMRRNH SKSTRNSGTSRFADFRDELATSE  
EACPLLKVNWLRMIVDEGHSMGRGRDNSSISFASWINAERRWAMTGTPTPQTSTQSGLTN  
VFNLMQYLQHEFFTRRHGD TVWNQLIVRSWNRGFLSSFFRLRSLLSLLMIRHVKSDITE  
LPLPIFKINTLSMGFEVSTYNTLVCAIQSNLVI TSMKGKTSGAQDSL LHKSQTKHAREA  
ISNLR LVCAGGTQVRPTLSDEYHTEFHQDFENCSDPIQRTKIREFISRATTGRQSKCDC  
CSVMLSTLLVFP CGHLVCTECVDSDTTSCIVCDKEFDVDAFQRLQPGFKYDWLHNVEEEA  
KERANCRIEPTAQDEGGALPLPGGHGVLIPSNQRQRRARTRKFGDGHTCQYDPKRS DGKC

VLCFAEHEPCYLVGERRCVVCYRSAENCPTSESKITHIIEKLLNLYHRKVEAERSAAHSG  
RNRVWGEKFLPTGGRRPPKVIIVFSQFRKVLNITGDRLLRRFGSGCIAEYWGKYRKKELQK  
FVRDEKCLCMLLGKDGSEGLDLSFVTHIVFLEQVWDKSLNQVVARAWRMGARGSVET  
LVAENSI EETMFLLLEGNDHDPDGDSSRATGVLKFRSTAKDQKNSEYQQAQVHYLLNSLK  
LIADNTTVVGIGGGSNDDSHKETTGSPPGDTGKKRQLSDTGGPQKGEQTKRHRVSFQV  
>comp11658\_c0\_seq2; 952 232 5016 LEN=5210; translated  
MTFPPVVPNGFLALTDENVYHAVGDDGDCCSESDSRISWFDVDL PFSRIVDSADQNSRDP  
DFRGDGDGDFSPSCCFLVLEKQKTSREPMEQQLPNMTLKSTVTGEEKHQYTGNDQKNQ  
QSTHTQEFPPRYDGTVHDI SCSLCGEGLSSQSKHKSRSASLLGLALASQDYGHIVVQS  
IKVGIYSRKSQTSETEHRANYQHRTHYRKRKARLLIAFACQELFGHHAKQKHRTSLSPKH  
LQTNRRRFFVDSKTTKSLPAATQLVLSIMSSDWREYDKLLDDGLLNSTSLVRRRKERTR  
ALSFFPSRMNLEDVFLRIGGVSSSPSSARWSAPAVSPRRSNDRQTEGATAKQLLLSMPSD  
VLCHHIGGYLRARSLAALRGTC LHLHWTLRAVVPGLRLDLYSHQIESLQWMRERESKPIIT  
EDDLLMEHRPPAKSIQTAQQQLYSDNTQPKPVSSNEEQIQTKKQKQPLGGLTASQWSAS  
NRRTKWDGDAHRAATGGGTVVLCPRLLQQLHDHDCAGDGGAIRISQSDCCEVVHGGQGT  
LGGDPLSRKVARGLLCDDPGLGKTITVISLILQTMGLTTEKETGPNDCKPKIDSAAQQD  
TQTI SIDDQSASVDES DTKTSPGTTALSPDERIFEEYWNEQI IPEFRGRALTKLSTFL  
RSSSEVNLFFDHYWRKALQQVDTKNTLPRPLSLKEIRRRIGRSVYDADSLQAFVSDVESC  
FEAAIVSSSEASVSTETSSTIREAALRLLTVFRSRI VAFKTSQVEVATKSF SRASSRPS  
IVAVLVQKTNSEKLNALLPSSATLLVPAVLVDHWMEQFKLNVDISYCTGKIPLVFNVT  
GSNSSALKIEEILLKCRDKKTHFFIFVDRTSTKKIPPSFIALFKIVITTNRFSSEWK  
NGSFEDEMRRNHSKSTRNSGTSRFADFRDELATSEEACPLLKVNWLRMIVDEGHSMGRGR  
DNSSISFASWINAERRWAMTGTPTPQTSTQSGLTNVFNLMQYLQHEFFTRRHGDVTWNQ  
LIVRSWNRGFLSSFFRLRSLLSLLMIRHVKSDITELPLP IFKINTLSMGFEVSTYNTLV  
CAIQSNLVITSMKGKTSQAQDSSLHKSQTKHAREAINLRLVCAGGTQVRPTLSDEYHTE  
FHQDFENCNSDPIQRKIREFISRATTGRQSKDCCSVMLSTLLVFPCHLVCTECVSDSD  
TTSCIVCDKEFDVDAFQRLQPGFKYDWLHNVEEEAKERANCRIEPTAQDEGGALPLPGGH  
GVLIPSNQRQRRARTRKFGDGHTCQYDPKRS DGKCVLCFAEHEPCYLVGERRCVVCYRSA  
ENCPTSESKITHIIEKLLNLYHRKVEAERSAAHSGRNRVWGEKFLPTGGRRPPKVIIVFSQ  
FRKVLNITGDRLLRRFGSGCIAEYWGKYRKKELQKFVRDEKCLCMLLGKDGSEGLDLSFV  
THIVFLEQVWDKSLNQVVARAWRMGARGSVETLVAENSI EETMFLLLEGNDHDPDGD  
SSRATGVLKFRSTAKDQKNSEYQQAQVHYLLNSLKLIADNTTVVGIGGGSNDDSHKETT  
GSPGPD TGKKRQLSDTGGPQKGEQTKRHRVSFQV  
>comp11660\_c0\_seq1; 332 353 1741 LEN=2454; translated  
MNRDDVLKVAHKEVASMMASELNSITSEERARILDDVHVGQISPEEGLN LVIRDKLNEM  
EAVLRSISIKPAFDEAQR LCRGTPHGLVNNPSFRLKFLRAERFNVDAAQRMINNLELIL  
ETFGECLVRPIQLGDMMLDRDNHGSDFLFSGNFFQIMPFRDRSGRRVVVRTGRKVFRN  
DDIDMETRLKALLYVCQELANDVEQCQMGVVLIGFPLTKCTGDPILSGPVKKIYSVFAQK  
VVPVRLAAVHL CIADNPWFRLASTLLLQAFSKEFRLRSRVHIGSIEECSYKLMTYGIPGD  
QIPIKSSGVIKCADHKKFIAFCQEREDAI FRNGGEFKGIFCPASKDILVGRGPRIKSHIG  
NETYRMLLQSKYDEYNVATMTRKKQILFDIVEQVHVYGG RFLVPTKNCWMETDDETARNK  
VSVAFRDVRKNMNAKKNLEYTDSVAEGLSMAMRVDAMDFGCM  
>comp11660\_c0\_seq2; 175 637 1149 LEN=1862; translated  
MTYGIPGDQIPIKSSGVIKCADHKKFIAFCQEREDAI FRNGGEFKGIFCPASKDILVGRG  
PRIKSHIGNETYRMLLQSKYDEYNVATMTRKKQILFDIVEQVHVYGG RFLVPTKNCWMET  
DDETARNKVSVAFRDVRKNMNAKKNLEYTDSVAEGLSMAMRVDAMDFGCM  
>comp11660\_c0\_seq3; 314 353 1917 LEN=2630; translated  
MNRDDVLKVAHKEVASMMASELNSITSEERARILDDVHVGQISPEEGLN LVIRDKLNEM  
EAVLRSISIKPAFDEAQR LCRGTPHGLVNNPSFRLKFLRAERFNVDAAQRMINNLELIL  
ETFGECLVRPIQLGDMMLDRDNHGSDFLFSGNFFQIMPFRDRSGRRVVVRTGRKVFRN  
DDIDMETRLKALLYVCQELANDVEQCQMGVVLIGFPLTKCTGDPILSGPVKKIYSVFAQK  
VVPVRLAAVHL CIADNPWFRLASTLLLQAFSKEFRLRSRVHIGEIPQAVYSSNSLNWYRK  
KCLLDSTLCNIWANRSXLHIGTSAHSFASRNTLSHESRFNEGSIEECSYKLMTYGIPGDQ  
IPIKSSGVIKCADHKKFIAFCQEREDAI FRNGGEFKGIFCPASKDILVGRGPRIKSHIGN  
ETYRMLLQSKYDEYNVATMTRKKQILFDIVEQVHVYGG RFLVPTKNCWMETDDETARNKV  
SVAFRDVRKNMNAKKNLEYTDSVAEGLSMAMRVDAMDFGCM  
>comp11660\_c0\_seq4; 175 461 973 LEN=1686; translated  
MTYGIPGDQIPIKSSGVIKCADHKKFIAFCQEREDAI FRNGGEFKGIFCPASKDILVGRG  
PRIKSHIGNETYRMLLQSKYDEYNVATMTRKKQILFDIVEQVHVYGG RFLVPTKNCWMET  
DDETARNKVSVAFRDVRKNMNAKKNLEYTDSVAEGLSMAMRVDAMDFGCM

>comp11661\_c0\_seq1; 678 1 2156 LEN=2250; translated  
XLIDACVEFTWKKVPEKLLLEWGLFTGVDGRFPLYHYMWITPGILSGILTYIISHSLHTRIP  
TQDDWIHTLHNSNGIQESDTF IPTFAISTIGMTSGLSLGPELPLILTAGMIGSWLGRICRQ  
SLLQARVMNLTAAAAAIGGMFGFPLAGGIFVMELPHRMGLQYFEALSPATIASIVAVLIN  
RIVIDNDVTGMFQYPFLSESLPSYIFKDAIIYGVFGGALGIFYTLNVKGIKKIVCHLLDF  
CDNPPVSYDNDTRTVDDLGELTPFVTPMNTTRSKPQSPFAGLIPNKATRAALTSTIAGI  
AVGITGIFLPHVMFWGEAQLQTMIDKRKTPLPIFGQGDDPTADLVALGQCMIDHGQESFL  
NIRCSVAIVLAKIFVTGLSLGTGIVGGHFWAPLFBVAAAASQFFTESISIASKWLGVSTSL  
TQYPCVALLCIMGATHVVTFRAHMAIILILTLTIDAFVPEDYALRNLKVAGDYSAVFPLL  
TVAVFVALQISRHSTFYEKQRSRDIQALPEALCEPGKEGKPLVMDYEGKLLHALDDSDYE  
YETDYDSDDDFSESLKTNEISVTLSQDDIEANFQEKKNYNAPSQSSTTSLPSLPSDSKEK  
SSTFTGTSPRISQIAKTESKRKKRIQVLDQLLNGPIETTSKRKTHRRTRSEPLLLLEINE  
RKNSMFSSAESTVWKKPVLKRVDSYGEIDQGPQLMDQARRRAASVAKADNGTKKKY  
>comp11662\_c0\_seq1; 401 118 1767 LEN=1845; translated  
MAENLSSRESARRWRVLLTGESLKPKLAKSRSRKRRRTPSTTSSASHQPVEDPFDNCNSIR  
VLPTHDIVESTLHQYLEKWKELDDRKVNQKTTTANISNKTQDASTAVRTPASNFVAQPM  
NTNNNGGWAMEDRLSLPEGFDFNTKSDSHQKDPPIDDGFSGERVISMTNPTETLSYHR  
ELWKLFDSPHRELEEQARGGHSVTNMQRIYAETHNLTGVTSDGSASSRLRMPERHGLP  
QSSALYSRDDQKGTTELQRKHAYNSHFSTVVFWRQPKRGASSDCHRMLIEFLDSQTL  
WDVHMLLEQMVEDDLWMTTGDHEGSGDNDRISIDNSSLPYDDETQTKTRKPENYDPSGCF  
FIENFYKTPVDYVTCICDWIDGNNPSSHISPLRKRYLGIDPTVDISYHKTMKETKLSQI  
PFRLNIRYYHACHGDVETAVILVDRKFISTKTGENSSSESVYPLIHDVWTPARFRLPATPI  
CDACEIYQSVFQTSLDCKTTDGGPRSLCIECCRDRLLENEKESVKLHRVWRDQANLSIR  
IARDHGLSF  
>comp11663\_c0\_seq1; 1242 1 4123 LEN=4243; translated  
XGALASTLCGESDSDTRGYSSFFVSSALFSLRQHCFYSPKLAI RPHSALYDKAGRIPRVR  
DGLFSASGAGGTSSVVNVSQPDAYNALSILNSSTKLQQLVLSILVIEGEHHIQIQNADEM  
FFKMGMIPTPLWAKNRKDAKEAKKVVILAALPGIQHVVSALLDSLGIQNELLGMPGMSVN  
HSDCDETKFSNPDNCTKQRNAIAWAKSQTILSAFVGENGRKTDVIAAAPAFSGANDGA  
GVEGADMIISLDTDWSRRDDFIIDTLVRRLCARNKFSGKDDTLIRLVCADSVEEQVFFDV  
DGENEACDWPLDTNGFFTLDPDSEEEILRCYKDPKNTSPFPATGILRKRGDLENVLSQ  
SGSLPSFFGFSVAKFLPKRIPVNGYKGMADAETIGELQFLRYFLRSEERGAVPVVASTVA  
KRMVTSEIIPVGLTSRQDLPIESRLFLEKCLHANTLLGSSAEDNSSLHVQOPHVSLLAG  
GQAAEESFVPKIDENPSALLFYEPGPGSPKNTNKASQGRYNAFAKVFSSKSWNGVSVRDGN  
QGCEPLVFFPPLFPLLEESSKKARIEYLSTPKANEIGLNNNEENSTALKRKRDRDFETEN  
DVKGDRKRPKTQSSAAHITNGHADVVSSSGIFVKESSAEPKTSAVDQLEKKNKNADLTKN  
KKEFKDSGAKDSRFLPEDDFGLLGTGAFARPIDIVSSSARDPRPNCSSLSHSNEYDCVS  
YQMPCDAAEANKSAMDMDEGMNSVILFVKKRPRSSQSPYKNGQGLSNITPLSINSRITG  
DES GKMRKKGSGQNAISTPTAFTRLPKASSANNQMLSRVSSSTASKQVKGDFRHRLLAS  
LKATGVTFLFDSIPYKAGLRVEERISKRLIILMWKSTLAMDLGPGLPIQLAEKLYSIDKD  
QNNGLDGWASIIQQPKDGASTGDLAISQSSMQRQAFKRSLVSPRCVDFGVFEVGYLGS  
GMTAISAAHSRVGVSPLPMGVKVMQPTEDQIKHSTWKVGDDKILQHTANKFGMNWLLVASA  
MSGFERAIINTNSSGEDQIVPSIPKSARQCRDRWQLLVKRQPSLANEVRRKEVLFHQAL  
SRFWAVERFDDLKVKVETQMLSTQGVSVFCKSSDFLNPTETIQSIADTDMSGVDQKDLAK  
VSSDVPTKSSSIDSPRSTVDKDKDEIPNKDITGHVLQDVGMTDAFPKPKSEPKRRTFSAI  
KMARSRRQVFPITIPGIDMGGNQAGHPVPSHPSHMQSVQMSVTAHLASGRTEMWPLQILD  
LADRQRNSAARAMHPTAHSNHPRHHQSGPSYQHRPQHPSPKSGAVRTSVGYSPGLANNVVS  
RSVNPSVPPRHQHRSPSVAAVTAQAYVPPQTNSNMATAKKNNDKLLSSKANPKNG  
>comp11664\_c0\_seq1; 315 1 1071 LEN=1087; translated  
ARINRHSKRMMASALLSRSRQAFSRSSRI PRPKLHPASSPALIAVANPRSSCSIRHTST  
YYDSQSGHLPLVHDEKEIRLFLDVTNGFNBSGAGDGEKLPFLPHRMSKDRFEAEVLEKL  
HHLIQQGIHGVLPPIKFPRDVRNLQTL SVVAPPNFALLSDSNGEENLNDGKTNAVEDG  
ILKPQENPSDPAIFSKILNYTGGEESQNSLQRCVQKGIHTTISVKEDAYAGDNNEDIKPI  
ALANNIATMIDTTGGCDYLWISSNTRSEVYTSNISDATIVEVCEELIYLDVAGASIKSRL  
VDSLNNMLEDILFAGANKYVIADKAQGEMVEDAAEQQKSLLRITDTKMKDFKYY  
>comp11665\_c0\_seq1; 263 1 918 LEN=950; translated  
GSSVSYQRPPYQRLVSATRISVPIMDMVSTKGVRCAIWQLFFACCGISLTLNDDVSISC  
GCSALTTAATADTRKDTYFRLHPRWQQESKLNVMGDAQGEYYGEASGSYMKELSLIEEL  
EQIVQLASQPIPERPDGIVVVVKFSSASRAECRATEAEFERFARNNPASIFMRCMEEYED  
ADLLEQVNVRSWPTTDIFYQGNRVARIEGPDLEGELEKVLNMYQFMNSDLDFSEGASKK

WGDGKAKDMTKTPRTTARFIPAYDFDTPDKGFFDEQGDKAQQNFEDTFGNWLPDIEDDED  
NERKS

>comp11665\_c0\_seq2; 199 358 612 LEN=644; translated  
MYQFMNSDLDFSEGASKKWGDGKAKDMTKTPRTTARFIPAYDFDTPDKGFFDEQGDKAQQ  
NFEDTFGNWLPDIEDDEDNERKS

>comp11666\_c0\_seq1; 280 1 1717 LEN=1791; translated  
XTETCVVADPAAQPNDLWESRGLVVQVYKSLDTAQPPVSIIDIASTLGAGSDLPLAIRK  
ACRFWFDPSIKTKGDVSRYLNSVSRNGFKISTLSNSKQGLDRRAQLVCSRGMVARKPRG  
KRATVQTTTTTRPISNEQKCPFSFTVYECRRSARWYFRKFGNGSRMHCGHCKLLPQQVGIR  
QFQNLTERNGENWSEDQTKSVPVNAVSPKEGNADRETCLAKRTPKVASDVNKAIDAFTA  
HAQQGGSATFASSVANVVRDQFLERMNGADNRISHANKASVHVNEMVLEPNDLSHFLSRK  
KIDWSGNIHQQIRGINNYRKNREYSSMLEKEISHYSGFASRKKIKEDELERIENHLNT  
INDKSFILDQAEIHRNYLAESKCKSPISIKEXNMNRNQNLAASYCNHDAQNMANMVIQQLS  
AAEPGRSNQLVDSMNMQKTWNTQYNAMNANSNTANQIQKSSLIHGSNAYGGFTKNI IQEP  
SGGRCAGTNFSNFTMGNMNTTERMAGIRKDNVSILRPTEIYDSPTNPEAGATNSKPD  
MVA SVENSTGSKNCFVEEDIVTQFLVQMHAHPEIV

>comp11666\_c0\_seq2; 324 1 2028 LEN=2102; translated  
ERLIAVSNIQENKDAIYSNIPPLAPLHTETCVVADPAAQPNDLWESRGLVVQVYKSLD  
TAQPPVSIIDIASTLGAGSDLPLAIRKACRFWFDPSIKTKGDVSRYLNSVSRNGFKISTL  
SNSKQGLDRRAQLVCSRGMVARKPRGKRATVQTTTTTRPISNEQKCPFSFTVYECRRSARW  
YFRKFGNGSRMHCGHCKLLPQQVGIRQFQNLTERNGENWSEDQTKSVPVNAVSPKEGNAD  
RETCLAKRTPKVASDVNKAIDAFTAHAQQGGSATFASSVANVVRDQFLERMNGADNRIS  
HANKASVHVNEMVLEPNDLSHFLSRKKIDWSGNIHQQIRGINNYRKNREYSSMLEKEI  
SHYSGFASRKKIKEDELERIENHLNTINDKSFILDQAEIHRNYLAESKCKSPISIKKEIK  
NIIAKETGKAGKYCGNXKATDDASNYI PHFFLTFEFDNRNSKQTLANMPQTNTIGNMTRSNT  
NRFVEHRTPNARLLTNMNRNQNLAASYCNHDAQNMANMVIQQLSAAEPGRSNQLVDSMNMQ  
KTWNTQYNAMNANSNTANQIQKSSLIHGSNAYGGFTKNI IQEPSSGGRCAGTNFSNFTMG  
NMNTTERMAGIRKDNVSILRPTEIYDSPTNPEAGATNSKPD MVASVENSTGSKNCFVEED  
IVTQFLVQMHAHPEIV

>comp11666\_c0\_seq3; 346 1 1930 LEN=2004; translated  
ERLIAVSNIQENKDAIYSNIPPLAPLHTETCVVADPAAQPNDLWESRGLVVQVYKSLD  
TAQPPVSIIDIASTLGAGSDLPLAIRKACRFWFDPSIKTKGDVSRYLNSVSRNGFKISTL  
SNSKQGLDRRAQLVCSRGMVARKPRGKRATVQTTTTTRPISNEQKCPFSFTVYECRRSARW  
YFRKFGNGSRMHCGHCKLLPQQVGIRQFQNLTERNGENWSEDQTKSVPVNAVSPKEGNAD  
RETCLAKRTPKVASDVNKAIDAFTAHAQQGGSATFASSVANVVRDQFLERMNGADNRIS  
HANKASVHVNEMVLEPNDLSHFLSRKKIDWSGNIHQQIRGINNYRKNREYSSMLEKEI  
SHYSGFASRKKIKEDELERIENHLNTINDKSFILDQAEIHRNYLAESKCKSPISIKKEIK  
NIIAKETGKAANMPQTNTIGNMTRSNTNRFVEHRTPNARLLTNMNRNQNLAASYCNHDAQ  
NMANMVIQQLSAAEPGRSNQLVDSMNMQKTWNTQYNAMNANSNTANQIQKSSLIHGSNAYG  
GFTKNI IQEPSSGGRCAGTNFSNFTMGNMNTTERMAGIRKDNVSILRPTEIYDSPTNPEAG  
ATNSKPD MVASVENSTGSKNCFVEEDIVTQFLVQMHAHPEIV

>comp11667\_c0\_seq1; 199 1 699 LEN=3448; translated  
KPSGSGSSVGTSTSTGGSSKWGSSSTSSSYRPIKSNGGGYAKTNGFGKYPNGGYGTGFM  
TGYFLSSSHYRHGHYRNKYRNSDTYPEEDLKYDEYFDRIENGCQVGVDSYRAFDNNS  
SNSMWTGCSEEWRYDMRVLKDLTPFVSPPLEFYACDLGDTCATCQDELRGQNF DALTLEK  
FDFDNKTYLVDCYLPKNKTLVNETFDCINDECIFLSEKYASPSASTVTSILHW

>comp11668\_c0\_seq1; 162 1 837 LEN=1248; translated  
VQKHSRHPCTLIMHFGSEENWYLYLYRYDETIRNTRNPHSHNSSYSYLPNLQMTVFGIN  
GFKVVSFLTILAVAALLSTLSSISAFSLTPDGRGLPPMRSSTGTRLKASSSTEHN  
GSDTK AEEVVRKYFDGVNKKDPEQLRSCFGESATIRDVCALDATERTVQSDVLVDR  
CMEFVTAHP DCLVRFHYGPNEHRQREDEDQDGVVVVAHWYIEGTWLGESCGIPSPDPP  
RPMTC EGQTRFRVAGADSDPKIQEFVVTRTFTEWENAMIAKRNKEAQLK

>comp11668\_c0\_seq2; 247 104 781 LEN=1192; translated  
MTVFGINGFKVVSFLTILAVAALLSTLSSISAFSLTPDGRGLPPMRSSTGTRLKASS  
STEHN GSDTKAEEVVRKYFDGVNKKDPEQLRSCFGESATIRDVCALDATERTVQSDVL  
VDRCM EFVTAHPDCLVRFHYGPNEHRQREDEDQDGVVVVAHWYIEGTWLGESCGIPSPD  
PPRPMTC EGQTRFRVAGADSDPKIQEFVVTRTFTEWENAMIAKRNKEAQLK

>comp11669\_c0\_seq1; 701 119 2026 LEN=2521; translated  
MTIDDAFPPTPWPGHDAFGSMNTNANTNIDDDINS MIDGLELFYKGNFYFEDNICTSTV  
VAENKSHNINLGIVSDLDLLET SRNKIKDSIANTSTNMIISTVVVDVNSTQTKPLLVSST



ISDDIQTPITADAAKTKCFVTNDTADKAFAPDKIAVGASADKAHQNISAPASAASAKGHE  
TLQSLVDNGTSKPTDLFHTTTCYSNSSSNCINISINTSTDSQSRTEKNIDDRKIDRSND  
PRMSFQTVLEQQRATIERNQQIIEAQONELHKQKQNTQLQQKALELPQKSKTKDQAKGSF  
VQQIQPTEKCLKHYQFAAIKQRATTVVSPMAAPLPTPVKSCIASSEVI SRENSSDNNSTINE  
TCSSSSNRWKLSPAGDTEQKILGNNDCCGNGIGINNNSNTSSNENVSDRNRHNAGIPAST  
KTANVCNHHQHKNVVRDANPQTVAMTNMRTSGNKHNLSMVDLEVRRENRKHKAKSRLR  
KKSLTSDLEQSLLEWLRNENAKFRACIEDHIARKKEQNESNEQPTNNNKYSIEGLLEERR  
IRSHDRFVCCILGEANQVASNGNRKTKTKGNRNRRIKNNSTNQPSLRKMPHGRGASVNEK  
TLKVLRLGLSKALLASRTSQQNRQMFANQSMPLTE

>comp11669\_c0\_seq2; 692 119 2128 LEN=2623; translated  
MTIDDAFPPTPWPGHDAFGSMNTNANTNIDDDINSMDGLELFYKGNFYFEDNICTSTV  
VAENKSHNINLGI VSDLDLLET SRNKIKDSIANTSTNMIISTVVVDVNCSDKIVYIKKG  
LSRDATSNDIAPTTIRTTLTPPIATQTKPLLVSTISDDIQTPITADAAKTKCFVTNDTAD  
KAFAPDKIAVGASADKAHQNISAPASAASAKGHETLQSLVDNGTSKPTDLFHTTTCYSNS  
SSNVCINISINTSTDSQSRTEKNIDDRKIDRSNDPRMSFQTVLEQQRATIERNQQIIEAQ  
QNELHKQKQNTQLQQKALELPQKSKTKDQAKGSFVQQIQPTEKCLKHYQFAAIKQRATTVV  
SPMAAPLPTPVKSCIASSEVI SRENSSDNNSTINETCSSSSNRWKLSPAGDTEQKILGNND  
CCGNGIGINNNSNTSSNENVSDRNRHNAGIPASTKTANVCNHHQHKNVVRDANPQTVAM  
TNMRTSGNKHNLSMVDLEVRRENRKHKAKSRLRKKSLTSDLEQSLLEWLRNENAKFRACI  
EDHIARKKEQNESNEQPTNNNKYSIEGLLEERRIRSHDRFVCCILGEANQVASNGNRKTK  
TKTKGNRNRRIKNNSTNQPSLRKMPHGRGASVNEKTLKVLRLGLSKALLASRTSQQNRQMF  
ANQSMPLTE

>comp11670\_c0\_seq1; 146 1 832 LEN=969; minus strand; translated  
XPRKNEAKTHYLLSCYCGTTSTVKTDEEFCEGESTDDAKFNGCLADLNHRFEYRFGYGGN  
NDAPVYKVISPPKFQMMGCATLTDSYPVPIDVYVASETSIGDEQNAQECNNRCHAENYSH  
FLLSCP YFDDAGPSYYTQCYCRNTVSN TDKTCPEGEDKDTRSGSGLCNIELSHSAEYQFSY  
GSDAHTAPAYKVIDPNKRRLTAKFSTNTADLLQRHLQQE SNNADTIGSFSGTEIRLSKED  
NTDAVFGNLAAPAADTSPVPSTAMAAGAVVAAAAALI

>comp11670\_c0\_seq2; 146 1 832 LEN=905; minus strand; translated  
XPRKNEAKTHYLLSCYCGTTSTVKTDEEFCEGESTDDAKFNGCLADLNHRFEYRFGYGGN  
NDAPVYKVISPPKFQMMGCATLTDSYPVPIDVYVASETSIGDEQNAQECNNRCHAENYSH  
FLLSCP YFDDAGPSYYTQCYCRNTVSN TDKTCPEGEDKDTRSGSGLCNIELSHSAEYQFSY  
GSDAHTAPAYKVIDPNKRRLTAKFSTNTADLLQRHLQQE SNNADTIGSFSGTEIRLSKED  
NTDAVFGNLAAPAADTSPVPSTAMAAGAVVAAAAALI

>comp11670\_c0\_seq4; 146 1 832 LEN=970; minus strand; translated  
XPRKNEAKTHYLLSCYCGTTSTVKTDEEFCEGESTDDAKFNGCLADLNHRFEYRFGYGGN  
NDAPVYKVISPPKFQMMGCATLTDSYPVPIDVYVASETSIGDEQNAQECNNRCHAENYSH  
FLLSCP YFDDAGPSYYTQCYCRNTVSN TDKTCPEGEDKDTRSGSGLCNIELSHSAEYQFSY  
GSDAHTAPAYKVIDPNKRRLTAKFSTNTADLLQRHLQQE SNNADTIGSFSGTEIRLSKED  
NTDAVFGNLAAPAADTSPVPSTAMAAGAVVAAAAALI

>comp11671\_c0\_seq1; 249 1 862 LEN=1438; translated  
XDRRARNAQSRARAALRERIAIEEQKPNQERNEEEMQIFAQYESRRKRKNDRSRERAL  
EKKEEIDRILAKPEKKRSKIEKQFLDNALS AKKRKNEGDRLRRLQRLKEMGLAAKGAAMKA  
AAMARAARHGYPYPPPPYGYGGPPMSPMPMGYQHPHMQSPGGFGSPPPGMYPSPQHGG  
RPGGPPGTPQGGMPYMPPREAYEQHPGNSPSQYPNPHGPGVVPGRVEQRRHADGMSMSISI  
GGGAGGEGGPEGGGGDPNMADVSHLLMYDNAEGGDGPPGGAGGEGK

>comp11672\_c0\_seq1; 314 136 1083 LEN=2340; translated  
MQKVGLALLFVVQKTSLVCGFASPQIVAERQHEAAFRHQHAFRLSSSGASSTSEIRSDY  
SYDTLFD FADSEK GADAVSKFDRIDDAIMGGISTSSLRLKSCTEANGTDDSSYASWSGVC  
RLDGGGFCGTRTLPFVDGKPLEVGADKEGLFLVVKLASDDEPERRVWKVTTTRNLNARSE  
QLYQAEFQIQKKEGGKSDSGWETIRVPFSSFVQVRGPRVIENGPPLDPTGGLFQIGMSLS  
KFQIASNTTELPNFRPGYFELQIREIGLYGTASSKAAQATT SNIQTTLTKKEAEQQRPAAL  
KILLPLLKLFSEQR

>comp11672\_c0\_seq3; 331 136 1368 LEN=1991; translated  
MQKVGLALLFVVQKTSLVCGFASPQIVAERQHEAAFRHQHAFRLSSSGASSTSEIRSDY  
SYDTLFD FADSEK GADAVSKFDRIDDAIMGGISTSSLRLKSCTEANGTDDSSYASWSGVC  
RLDGGGFCGTRTLPFVDGKPLEVGADKEGLFLVVKLASDDEPERRVWKVTTTRNLNARSE  
QLYQAEFQIQKKEGGKSDSGWETIRVPFSSFVQVRGPRVIENGPPLDPTGGLFQIGMSLS  
KFQIASNTTELPNFRPGYFELQIREIGLYGTASSKAAQATT SNIQTTLTKKEAEQQRPAAL  
KILLPLLKLFSEQRNRQKSATRLLKARGLNQLIEIAVFGIRRKATSKGMVLALADFFMRL

SSTTVRLSLFWTLKLALFYPLVTRTKIARKLAAVFSKKPTAQGSDALGSE  
>comp11672\_c0\_seq4; 467 1054 3421 LEN=4236; minus strand; translated  
MFSNALKVVLLFGIVFAGAQLPLSTIDVVFQSGEISASSANVMARCNDSTSTSVGIVFEC  
SDESCPEPQDATVDADTDFTHTFQIKDLDSFSLYKYTVSCSNSTGTPGTGSFKTAPANDQE  
VPIKFWAADLAGQGYGRNPDFEVTMVDGTTVKGQYVVFDTMEGLEPDFALFQGDMIYAD  
DSIPPSKAYTNGTETLGVWVWVNNPSKPFVAVTLEDFRYNWKYNFGDDKMQSFLSKIPVVFVQ  
WDDHEVTNTGGPVRWFLSVVNCDLAIAFXETLTELLELLLCFRITGEIMTGSSLYEEGLEV  
DTLYENSLKAFYEYNPILDGQSIYRSQKFGKHLEIFFPDYRSFRDPNPDNTNEDIAGMMG  
PEQTEWLKNSLKASTATWKVVISSHDPFGIVTGSSEGFDSYGNSDPKILGRELEFKELLSF  
IEKEGITGIVSLTSDVHFTAHVNLHPDRAEGNFTNFRPMDEFVIGPIHAGSFGPNYMDTS  
FGAEYQYGGCSVKDCCERYDDLTVISPNIRNFVPHFLVDAIVRDGPSYGLRKVVKPP  
PEVHELQSFYGAEVSEDSSELSVQLVNIDGSIMFSKTLKAGETVQGDKDCQTICKIKAND  
LYKVGGRMKSHVEPNHSLSCCVSSPFFSSSFLAGSVSQPNMFVXNDDFTILCDLFTEMAD  
PSLRVEDMESFTLFAPTNAAFDGMDFLKAIPAGTIVSYHATSPGSIVRAKDLKCTGL  
VEMALGGMSRTRKCIKNPDTDLWEFYQKGGGNRKNNIIPKIVESDIEACNGVIHVVDNVM  
PNFVDNVF

>comp11673\_c0\_seq1; 733 1 3170 LEN=3281; translated  
XNFGSLQDQSVNLEESRSGSFTGAGVSNVCAESVRTYCLRNFRKDESLCTDWIDVLNGNK  
PCDFQTSVGHSAKALEKGVKDGFRGRIIYIFAAGNSYGYGDNSNFQSYAKSRYAMTVG  
AVKVTEVQGDSTDGETNTILKPSHASYSTGGSSIFVVAPGGDYDTPKYQHIGAGGTEGNG  
DSCVTIGTGTSAAPVVGVALMLEANPGLTWRDVRYYIAKTSNPIDNDSNDYTFGLN  
SAGVGYSDLTDLXLIDAAEAVAMAEDWKIKDVHVPPPELGTASSGPVNLQIVDDPTATAT  
STIMVNPNLNSQTEDDALESVSVYKLLHYPNIGQLRITLTSPLGTTSLSPGGRSHHNQL  
EDDEWLEFLTLRSWGEVVPYGEWKLSITDTKPGNGGVTFCNRPINVAPEFANLDLPLTCME  
FKSSGFCSNGSMNDDLNVNEQQELYQKLLDEGSGDGVVSAKESCCCEGGGKIFGDDEFFTG  
QLKEWKLILGDGTPITGTNR IANYDPFLPEVTSFEFMRCRGETVYGHKLDCCNGLIEDICD  
LRVNEVLFATLHNVLNRFDSGNVYVNLKELEIERALEAGYRAFELDVCNCAGDFYFCYGN  
CNEAPRRDVVNTMAHFKEFLDLNPTEVVVFFFQLQSNVGREVNLEFYFDLMQIRGLTNM  
IYTHDPSSTWPTLRQLTDRNYDKVRLIYHFNPLCLYVQYNGICSQYPSKILSATAVLV  
TSLFLAYQMFHKNPNCNEDPGACPNQLLYKYDYVSDNTDREFRLPSEIEDRESSCAL  
QRPDNYNENTLVGLSNYVSPANFKLYGKVNARHAEQLNQYAIKDYVDTCSDIQGTDIN  
FVYNDWWGIGELIRLTQDHNSARALGDWYIPPTPAPTYNDEITEAPTFFPTFLPTFDVTM  
FQPTISPQPTNAPSDRPTQTIDPCSVFDGNCKGCKKNNEECLWCVSSNTCYDRGVFENIF  
DLDDDEVIPCAGEDILDSFDTTCKAPSRDQSSVYDDDFEISDSSDSNETSTEDDEVDEVIET  
PSPTTNQPVEPPTLPPVFVPLSPPTAVESSKNIFNKW

>comp11673\_c0\_seq2; 739 1 3040 LEN=3151; translated  
XNFGSLQDQSVNLEESRSGSFTGAGVSNVCAESVRTYCLRNFRKDESLCTDWIDVLNGNK  
PCDFQTSVGHSAKALEKGVKDGFRGRIIYIFAAGNSYGYGDNSNFQSYAKSRYAMTVG  
AVKVTEVQGDSTDGETNTILKPSHASYSTGGSSIFVVAPGGDYDTPKYQHIGAGGTEGNG  
DSCVTIGTGTSAAPVVGVALMLEANPGLTWRDVRYYIAKTSNPIDNDSNDYTFGLN  
SAGVGYSDLTDLXLIDAAEAVAMAEDWKIKDVHVPPPELGTASSGPVNLQIVDDPTATAT  
STIMVNPNLNSQTEDDALESVSVYKLLHYPNIGQLRITLTSPLGTTSLSPGGRSHHNQL  
EDDEWLEFLTLRSWGEVVPYGEWKLSITDTKPGNGGVTFCNRPINVAPEFANLDLPLTCME  
FKSSGFCSNGSMNDDLNVNEQQELYQKLLDEGSGDGVVSAKESCCCEGGGKIFGDDEFFTG  
QLKEWKLILGDGTPITGTNR IANYDPFLPEVTSFEFMRCRGETVYGHKLDCCNGLIEDICD  
LRVNEVLFATLHNVLNRFDSGNVYVNLKELEIERALEAGYRAFELDVCNCAGDFYFCYGN  
CNEAPRRDVVNTMAHFKEFLDLNPTEVVVFFFQLQSNVGREVNLEFYFDLMQIRGLTNM  
IYTHDPSSTWPTLRQLTDRNYDKRIIMFHKNPNCNEDPGACPNQLLYKYDYVSDNTDR  
EFRLPSEIEDRESSCALQRPDNYNENTLVGLSNYVSPANFKLYGKVNARHAEQLNQYAI  
KDYVDTCSDIQGTDINFWYNDWWGIGELIRLTQDHNSARALGDWYIPPTPAPTYNDEIT  
EAPTFFPTFLPTFDVTMFQPTISPQPTNAPSDRPTQTIDPCSVFDGNCKGCKKNNEECLW  
CVSSNTCYDRGVFENIFDLDDDEVIPCAGEDILDSFDTTCKAPSRDQSSVYDDDFEISDSS  
DSNETSTEDDEVDEVIETPSPTTNQPVEPPTLPPVFVPLSPPTAVESSKNIFNKW

>comp11674\_c0\_seq1; 354 1 846 LEN=1204; minus strand; translated  
DFKKRDERNKRNRREIQKSFVSFLQEKEGKGLSYNSTWESFLPTLFEEELDSRFVTS  
HELTDSDRRLYFADFAIELKKAEDEKRRRIQDERRRAEKAQRDKYRELLRELAVQKILP  
YSRWREIEEFIAQDDSFQVVEEQDRSAPRELFEIFVDNWDSIYRLERSFLLQLLRPPGKP  
DIVISAGIGFDLFFKILIEEAAYSSEIQDETSRIINRKDYVSSAQVLYNELTAQKSRDLR  
QGSSRRGSTNDDSEDEGEIEEIGEITDNNEQSGDNDNKPE

>comp11674\_c0\_seq2; 308 1 739 LEN=1097; minus strand; translated

DFKKRDERNKRNRKREIQKSFVSVFLQEKEGKGTLSYNSTWESFLPTLFEEEEKLDSEFVTS  
HELTDSDRRLYFADFI AELKKA EDEKRRRIQDERRRAEKAQRDKYRELLRELAVQGKILP  
YSRWREIEEFIAQDDSFQQVEEQDRSAPRELFEIFVDNWDSIYRLERSFLLQLLRPPGKP  
DIVISAGIGFDFSKKSAQKSRDLRQGSRRGSTNDDSSSEDEGEIEEAGEITDNNEQSGDN  
DNKPE

>comp11674\_c0\_seq3; 324 1 814 LEN=1172; minus strand; translated  
XWDSFENILSMGERRQALAEYQTKRTNELRNEQRQERIRANKAFGELLADILPSVPGFSA  
RTSRFTDIKDALAKDDRFFAIEDDSTRESLFFDFCDDSDRRLYFADFIAYSRWREIEEF  
IAQDDSFQQVEEQDRSAPRELFEIFVDNWDSIYRLERSFLLQLLRPPGKPDIVISAGIGF  
DLFKKILIEEAAYSSEIQDETSRIINRKDYVSSAQVLYNELTAQKSRDLRQGSRRGSTN  
DDSSSEDEGEIEEAGEITDNNEQSGDNDNKPE

>comp11674\_c0\_seq4; 338 1 836 LEN=1194; minus strand; translated  
XWDSFENILSMGERRQALAEYQTKRTNELRNEQRQERIRANKAFGELLADILPSVPGFSA  
RTSRFTDIKDALAKDDRFFAIEDDSTRESLFFDFCDDSDRRLYFADFI AELKKA EDEKRR  
RIQDERRRAEKAQRDKYRELLRELAVQGKILPYSRWREIEEFIAQDDSFQQVEEQDRSA  
PRELFEIFVDNWDSIYRLERSFLLQLLRPPGKPDIVISAGIGFDFSKKSAQKSRDLRQGS  
SRRGSTNDDSSSEDEGEIEEAGEITDNNEQSGDNDNKPE

>comp11674\_c0\_seq5; 384 1 943 LEN=1301; minus strand; translated  
XWDSFENILSMGERRQALAEYQTKRTNELRNEQRQERIRANKAFGELLADILPSVPGFSA  
RTSRFTDIKDALAKDDRFFAIEDDSTRESLFFDFCDDSDRRLYFADFI AELKKA EDEKRR  
RIQDERRRAEKAQRDKYRELLRELAVQGKILPYSRWREIEEFIAQDDSFQQVEEQDRSA  
PRELFEIFVDNWDSIYRLERSFLLQLLRPPGKPDIVISAGIGFDFSKKILIEEAAYSSEI  
QDETSRIINRKDYVSSAQVLYNELTAQKSRDLRQGSRRGSTNDDSSSEDEGEIEEAGEIT  
DNNEQSGDNDNKPE

>comp11674\_c0\_seq6; 294 1 717 LEN=1075; minus strand; translated  
DFKKRDERNKRNRKREIQKSFVSVFLQEKEGKGTLSYNSTWESFLPTLFEEEEKLDSEFVTS  
HELTDSDRRLYFADFIAYSRWREIEEFIAQDDSFQQVEEQDRSAPRELFEIFVDNWDSIY  
RLERSFLLQLLRPPGKPDIVISAGIGFDFSKKILIEEAAYSSEIQDETSRIINRKDYVSS  
AQVLYNELTAQKSRDLRQGSRRGSTNDDSSSEDEGEIEEAGEITDNNEQSGDNDNKPE

>comp11674\_c0\_seq7; 248 1 610 LEN=968; minus strand; translated  
DFKKRDERNKRNRKREIQKSFVSVFLQEKEGKGTLSYNSTWESFLPTLFEEEEKLDSEFVTS  
HELTDSDRRLYFADFIAYSRWREIEEFIAQDDSFQQVEEQDRSAPRELFEIFVDNWDSIY  
RLERSFLLQLLRPPGKPDIVISAGIGFDFSKKSAQKSRDLRQGSRRGSTNDDSSSEDEGE  
IEEAGEITDNNEQSGDNDNKPE

>comp11674\_c0\_seq8; 278 1 707 LEN=1065; minus strand; translated  
XWDSFENILSMGERRQALAEYQTKRTNELRNEQRQERIRANKAFGELLADILPSVPGFSA  
RTSRFTDIKDALAKDDRFFAIEDDSTRESLFFDFCDDSDRRLYFADFIAYSRWREIEEF  
IAQDDSFQQVEEQDRSAPRELFEIFVDNWDSIYRLERSFLLQLLRPPGKPDIVISAGIGF  
DFSKKSAQKSRDLRQGSRRGSTNDDSSSEDEGEIEEAGEITDNNEQSGDNDNKPE

>comp11675\_c0\_seq1; 253 1 1489 LEN=1549; translated  
XLPRVSSFPSPLVACSAPLRSTHGHKQNHRIFGPPRKATTEATSSAGPFPFRSCRGSONR  
TEPNLTERIHRTAGAFLFPMPTDGDPSPKKIPAAHPSKTALLLVLLVLLATTGNLSVRHGP  
PLVSAYRPGGSNLPDGSNANANGNARINARTSANPRAMRGAWRSRGSSHRDLVDQLVKR  
GIIETDSVRWAMAADRGNARGSGSEPSGAPDPYADRPLPIGLGQTI SAPMHAYAMEE  
LVPALAAARQQQQGRNRRGLRVLDVGTGSGYLTA CLGRWLSQPPQESAGGKSKNNSSEN  
SESSNSSSENENEASLPPGRVFGIDVRRSLVEAAERNLRRADGDL DTRAVTLAVGDGWE  
GLPEEAPFD AIHVGAAAESLPLALAAQLAVGGVLLVVP IGPEGEAQVLC IRRVGGT PFGQ  
AEVANGRLPEALFCGDDFEAXEAAGGEV RPAGQEKGGFPPLAGHGSSWTLEQRQRNDRDL  
VFRSCRIDKTEHAITI

>comp11676\_c0\_seq1; 488 117 1460 LEN=1758; translated  
MPSENDNPANKTGVQLGFVSEFDDDDHRMMAGHNLPLWQDWDGGQIGGKPSWLNPKDIPK  
HHLVCKCEDPLVFCQLYCPCDDINPNAFHRSFYVFACPNIECAKETTGTIRVIRTQLP  
AINPYLPEEDDDECWAMHIPKAWDVNLCKVCGQRGNGKCPVQGEYFCGRHHQKEYKYYAF  
DVRKDTSTEGSDSCFMPSVLTSSELVVEEPP IGNDDKSDAKARNTMFKAGNIEDNDSDE  
EFDRNLEQGDLNDMTGAGPETVTKDVTVMNFFDRINKITNVNTQCLRYLRWPDEERSRET  
ASPLWIRSDYTPNEENISPECKGADRRFEFQLMPQMLHYLLKDHQRKNKEKSQNLISKK  
DTEAVRAASNILEQAPPEQVPPDLATTTEKAMEAARAKIMEESNKVPSWGCVAVYTCTAS  
CDVMDATEDDELGAYIEEFTWKQPSLD

>comp11677\_c0\_seq1; 1125 182 2079 LEN=2079; translated  
MEDNESSTNRDSSHVVDDDDSDDEDLSYVSSSEDEDEFWEEVD TNDDTNDETTEVCSVDYD

HEFVEDDEIEYEHVIDDDTDNDFIDDNGHNLELLGSLQMRNTRDDKSHEHIGNNDDSSI  
IDKSCSSSYTDASYDDAVSSNLPPSDFDMGYSYRHSRDDDAIDPKDIELECRKLI AVVHP  
GLEDESETMLHGCDLQNLNLYNLKHQYYHILRHNTPNSTNVEMVDYDYDDDDHEHEFTDES  
ELSEMDDVANRPVQRESPIYNDTSLPKDAASANPKTVKVEKWLERNKDDPEDYEYACRL  
LCHAMYGEDDPEHDI ESMLSRSSHVDLYRYLKQYWYLAHTNQLSTTRNGDNDNDIASKQ  
DGMPADDGFVKKSKRQRIDSNEGNSTNNKDLDTSSDNTGKQPTKTRVHALASLYAARSKE  
HAEQDQRLVSEGGGGGRAKEKEKGLVHNKSSCTVENNDESDNKNAETNVESEGPSLQPS  
EQQQENLSLEDENSHLSSHEEVLLRQDGTSAQSQLMDTNDGSVSHISSDNHRSSQIRGEE  
ESDVEDHHASRDENDTSFKTEKYVSYSKEHDVLFDRQENGEDADKDQLFHLESAARKING  
DKPPKNELEDLEEFESREQQQGDGMMHIEEDDX

>comp11678\_c0\_seq1; 351 33 1319 LEN=1863; translated  
MQMFNLWTSTAQFEAKLEASERKLEISKRYTTLSADSLELTTFDYIPRSVAVPCLKPAE  
TSEDEKLIHCVRATSKESGNESTALPLVNLHGYNAGAYFYRNL SGLSSYFQNIYAVDM  
LGWGLSSRPSFDEVKANETVQSAEDFFVESLEAWRSMNEIDQMILSGHSFGGYVAVAYAE  
RYPERVDRILLSPGLVPDEKDPNIQRKMDWMQSSLRGKFFVGVFQTMFEWTTTPGAVIRT  
FTEHRGTMARSYVEKRLPEIFDDDESEALSDFYLSAVLPPSGEYFLRSILNSSFLAKE  
PLLFRVFNKVKSVNFLYGTTDWMDISGGMYTQALSHRLSKI QHKSPMSSAVFTTPDVKV  
YLVFNAGHLLILQNPVFNACMIRIAGGNIPNCEMPTLMDLNETEELNELWLEHTRKIRM  
KRTNSSSP

>comp11679\_c0\_seq1; 146 64 405 LEN=1372; translated  
MVSAPKQDLVTRDYTIHLSKKTTHKAQHRRAPRAIKAIRQFAQKAMGTQDVRI DAGLNKY  
VWSTGIKNPPTVRVRLSRKRTEDADENLYTLAQLVEVSSFKGLQ TENIIE

>comp11679\_c0\_seq2; 146 64 405 LEN=1046; translated  
MVSAPKQDLVTRDYTIHLSKKTTHKAQHRRAPRAIKAIRQFAQKAMGTQDVRI DAGLNKY  
VWSTGIKNPPTVRVRLSRKRTEDADENLYTLAQLVEVSSFKGLQ TENIIE

>comp11680\_c0\_seq1; 1095 321 3230 LEN=4265; translated  
MASTMGSTMESTMGSTMESTMASTMTSTTTPTTSHRAIDRRNDIPTSTKKTMYIKQ  
RKPLQKRAPTPIRYKLRDSSKNTSTNANTSGSGNNRAGSNRYRRGIRRHRSSAGTHEST  
KPNVPSTVDLQRRRSATT SRLRDRRPSKKSASSATSKDRHKTSSNSSSSSEDNILLED  
LKKGDNDGDASISLISMTEMAADLCQMKNCFFENIGPDISAQTTKSKTTTNDKNRKMK  
SSSSGNASNKNSNSDSNIVFDMVNALDFNNFQLRTSSKNTANKSWL FNKRSKAKSWHYN  
SGSNSSYTSPPPASTPETRSLNSGSFLPTPPRNRSRTRGTVRVDSAMEDDQSSIETSSIS  
EITPTGCAGFERGMGVSPRSRSPNYRPPSKEHRQPEELSLGQLFLSGMLSQC FPHGPVAG  
TEPQVTSTHHHNTLNNLNFHSTANAEAILKDGKTNGNSSGLLHQSNPVANNKSNKNT  
EAINNKNNGGAYQKNLEEEACSYIGNNCTDSYHQAIDVSI AKPNNINPPVFADNTERYNQ  
LVVGYVEDDEAKKQQPHRKYSRWF RSKREVQKRLSNTKIVVPPQQPSPNTRKSGDHPAS  
IAARRNMKAKSKDQQORAKMDENHHNNVEVIWKKS SFREHQMKNKAQ LLLCSNPHKAK  
MEEACPEKDSGAIGRLEPSSLASQRFALKPWF RPAGPRGKSKERKCS EKROQDSKETALQ  
LKSNSKQLPSVLT MVVCDTNRANHHKENENHAKHRRDLLHCTSSNKRSDTNQKQQEQ LQF  
EYDDEEDNGDGDYRVL SIVGHHHQNDLRPTT PFFDDES DSTYGF TTTTSSSKHEAPV  
ESPLSVGTNSGNRIRAVETDVENDADDEDNSERDDDSRSSTDA AIDVPNWDGNDAVVYNV  
PITLPGRRRRSRRNAKGDIDYSKQDGKSKTTNTMKNNDP SKKDQGE SSSSNVQPIS  
PRLRRLV

>comp11681\_c0\_seq1; 440 1175 2777 LEN=2896; translated  
MLGHDRYSGRHLRDSEKVEPPSIGLAKTLARYEFELGRLKTGTPARIDGKTIDWDILLP  
QPSEIPATPF SHLLQFNDEQPPLVDQGVVTCRQTATNEETHKLV MKYESTLPIYDGM DG  
AGNGPRYCP SLYKKVQRF PDRNSHNC FLEPEGLNTDIVYPNGMSGPYPEEVQLKILRS MK  
GLENVEIIRPGYDVEYDFVNPISLSHTLETERITGLYLAGQICGTTGYEEAAAQGVVAGA  
NAGRVASATSAGLSTPKPFIIGRDEGYIGVLIDDLVTRGTSEPYRMFTSRAEYRISLRAD  
NADLR LTKGKDFLGRVDEERISALEARGYLIDDRVQKLR SFDLKVTEWAERGGTELMGG  
SRMGKKTGNKSAEEV LQMPHVTLRNVEDIMIAVDRESRKNVSDNDEVTE SFELTCS PA  
SVYDSVEAIVKYRSYVDRQH QDMESWRKAQGMRI PPDIVYEHLDFP SFSKEELEKLAEAR  
PDTFAEASKISGVTPQSLVYLSIMSPEGTANEIGEKKQQQEKSEALNLWKS KF

>comp11681\_c0\_seq2; 612 268 2485 LEN=2604; translated  
MTSTLAFSRSFSKSRALKPRCISAKAAAMSADYDVIVVGGGHAGCDAAAAAARTGARTA  
LVTQR LDTVGELSCNPSIGGIGKGLVREIDALDGLIGKVADEAGIHYRVLNRRKGP AVR  
GPRAQMDRDLYKASMQQTLKEYPNLDLIEASVEDLLIEPSNLIHINSNPKQIRGVLTE  
QNGVKGELTSNAVVI TTGTFLRGVLMGHDRYSGRHLRDSEKVEPPSIGLAKTLARYEF  
ELGRLKTGTPARIDGKTIDWDILLPQPSEIPATPF SHLLQFNDEQPPLVDQGVVTCRQT  
ATNEETHKLV MKYESTLPIYDGM DGAGNGPRYCP SLYKKVQRF PDRNSHNC FLEPEGLNT

DIVYPNGMSGPYPEEVQLKILRSMKGLENVEIIRPGYDVEYDFVNPISLSHTLETERITGLYLAGQICGTTGYEEAAAQGVVAGANAGRVASATSAGLSTPKPFIIGRDEGYIGVLIDDLVTRGTSEPYRMFTSRAEYRISLRADNADLRLTKKGKDFGLVRDEERISALEARGYLIDDRVQKLRSFDLKVTEWAERGGTELMGGSRMGKKTGNKKSAAEVLQMPHVTLRNVEDIMIAVDRESRKKNVSDNDEVTESEFELTCSPASVYDSVEAIVKYRSYVDRQHQMESWRKAQGMRIIPDIVYEHDLFPSPFSKEELEKLAEARPDTFAEASKISGVTPQSLVYLSIMSPEGTANEIGEKKQQQEKSEALNLWKSFK

>comp11681\_c0\_seq3; 498 268 2346 LEN=2412; translated  
MTSTLAFSRSFSKSRALKPRCISAKAAAMSADYDVIIVGGGHAGCDAAAAAARTGARTA  
LVTQRLDTVGELSCNPSIGGIGKGLVREIDALDGLIGKVADEAGIHYRVLNRRKGPVAVR  
GPRYVQKMETCPDDXILHLFKWNLKCRITYIIASSLKLISPHFYDKSDLMQHLQAQMDR  
DLYKASMQOTLKEYPNLDLIEASVEDLLIEEPSNLIHINSNSKQPQIRGVLTEQNGVKGEL  
TNAVVITTTGTFLRGVLMGLHGDYSGGRHLRDSEKVEPPSIGLAKTLARYEFELGRLKTGT  
TPARIDGKTIDWDILLPQPSEIPATPFSHLLQFNDEQPPLVDQKVVTCRQTATNEETHK  
LVMKYESTLPIYDGMGAGNGPRYCPSPYKQVQRFDPDRNSHNCFLPEPEGLNTDIVYPNGM  
SGPYPEEVQLKILRSMKGLENVEIIRPGYDVEYDFVNPISLSHTLETERITGLYLAGQIC  
GTTGYEEAAAQGVVAGANAGRVASATSAGLSTPKPFIIGRDEGYIGVLIDDLVTRGTSE  
YRMFTSRAEYRISLRADNADLRLTKKGKDFGLVRDEERISALEARGYLIDDRVQKLRSFD  
LKVTEWAERGGTELMGGSRMGKKTGNKKSAAEVLQMPHVTLRNVEDIMIAVDRESRKKNV  
SDNDEVTESEFELTCSPASVYDSVEAIVKYRST

>comp11681\_c0\_seq4; 537 257 2610 LEN=2729; translated  
MTSTLAFSRSFSKSRALKPRCISAKAAAMSADYDVIIVGGGHAGCDAAAAAARTGARTA  
LVTQRLDTVGELSCNPSIGGIGKGLVREIDALDGLIGKVADEAGIHYRVLNRRKGPVAVR  
GPRAQMDRDLYKASMQOTLKEYPNLDLIEASVEDLLIEEPSNLIHINSNSKQPQIRGVLTE  
QNGVKGELTNAVVITTTGTFLRGGMHGNLNEMYHGKXSSALPFCLESPLVFTIFFTSPF  
FKIITYALSIDAGHGDYSGGRHLRDSEKVEPPSIGLAKTLARYEFELGRLKTGTTPARIDG  
KTIDWDILLPQPSEIPATPFSHLLQFNDEQPPLVDQKVVTCRQTATNEETHKLVMMKYES  
TLPYDGMGAGNGPRYCPSPYKQVQRFDPDRNSHNCFLPEPEGLNTDIVYPNGMSGPYPEE  
VQLKILRSMKGLENVEIIRPGYDVEYDFVNPISLSHTLETERITGLYLAGQICGTTGYEE  
AAAQGVVAGANAGRVASATSAGLSTPKPFIIGRDEGYIGVLIDDLVTRGTSEPYRMFTSR  
AEYRISLRADNADLRLTKKGKDFGLVRDEERISALEARGYLIDDRVQKLRSFDLKVTEWA  
ERGGTELMGGSRMGKKTGNKKSAAEVLQMPHVTLRNVEDIMIAVDRESRKKNVSDNDEVTE  
SEFELTCSPASVYDSVEAIVKYRSYVDRQHQMESWRKAQGMRIIPDIVYEHDLFPSPFSK  
EELEKLAEARPDTFAEASKISGVTPQSLVYLSIMSPEGTANEIGEKKQQQEKSEALNLW  
SKF

>comp11681\_c0\_seq5; 486 268 2326 LEN=2392; translated  
MTSTLAFSRSFSKSRALKPRCISAKAAAMSADYDVIIVGGGHAGCDAAAAAARTGARTA  
LVTQRLDTVGELSCNPSIGGIGKGLVREIDALDGLIGKVADEAGIHYRVLNRRKGPVAVR  
GPRAQMDRDLYKASMQOTLKEYPNLDLIEASVEDLLIEEPSNLIHINSNSKQPQIRGVLTE  
QNGVKGELTNAVVITTTGTFLRGGMHGNLNEMYHGKXSSALPFCLESPLVFTIFFTSPF  
FKIITYALSIDAGHGDYSGGRHLRDSEKVEPPSIGLAKTLARYEFELGRLKTGTTPARIDG  
KTIDWDILLPQPSEIPATPFSHLLQFNDEQPPLVDQKVVTCRQTATNEETHKLVMMKYES  
TLPYDGMGAGNGPRYCPSPYKQVQRFDPDRNSHNCFLPEPEGLNTDIVYPNGMSGPYPEE  
VQLKILRSMKGLENVEIIRPGYDVEYDFVNPISLSHTLETERITGLYLAGQICGTTGYEE  
AAAQGVVAGANAGRVASATSAGLSTPKPFIIGRDEGYIGVLIDDLVTRGTSEPYRMFTSR  
AEYRISLRADNADLRLTKKGKDFGLVRDEERISALEARGYLIDDRVQKLRSFDLKVTEWA  
ERGGTELMGGSRMGKKTGNKKSAAEVLQMPHVTLRNVEDIMIAVDRESRKKNVSDNDEVTE  
SEFELTCSPASVYDSVEAIVKYRST

>comp11681\_c0\_seq6; 389 1164 2471 LEN=2537; translated  
MLGHDRYSGGRHLRDSEKVEPPSIGLAKTLARYEFELGRLKTGTTPARIDGKTIDWDILLP  
QPSEIPATPFSHLLQFNDEQPPLVDQKVVTCRQTATNEETHKLVMMKYESTLPIYDGMG  
AGNGPRYCPSPYKQVQRFDPDRNSHNCFLPEPEGLNTDIVYPNGMSGPYPEEVQLKILRSMK  
GLENVEIIRPGYDVEYDFVNPISLSHTLETERITGLYLAGQICGTTGYEEAAAQGVVAGA  
NAGRVASATSAGLSTPKPFIIGRDEGYIGVLIDDLVTRGTSEPYRMFTSRAEYRISLRAD  
NADLRLTKKGKDFGLVRDEERISALEARGYLIDDRVQKLRSFDLKVTEWAERGGTELMGG  
SRMGKKTGNKKSAAEVLQMPHVTLRNVEDIMIAVDRESRKKNVSDNDEVTESEFELTCSPA  
SVYDSVEAIVKYRST

>comp11681\_c0\_seq7; 440 1164 2766 LEN=2885; translated  
MLGHDRYSGGRHLRDSEKVEPPSIGLAKTLARYEFELGRLKTGTTPARIDGKTIDWDILLP  
QPSEIPATPFSHLLQFNDEQPPLVDQKVVTCRQTATNEETHKLVMMKYESTLPIYDGMG

AGNGPRYCPSLYKKVQRFDPDRNSHNCFLPEPEGLNTDIVYPNGMSGPYPEEVQLKILRSMK  
GLENVEIIRPGYDVEYDFVNPISLSHTLETERITGLYLAGQICGTTGYEEAAAQGVVAGA  
NAGRVASATSAGLSTPKPFIIGRDEGYIGVLIDDLVTRGTSEPYRMFTSRAEYRISLRAD  
NADLRLTKKGGKDFGLVRDEERISALEARGYLIDDRVQKLRSFDLKVTEWAERGGTELMGG  
SRMGKKTGNKKSAAEVLQMPHVTLRNVEDIMIADVRESRKNVSDNDEVTESEFELTCSPA  
SVYDSVEAIVKYRSYVDRQHQDMESWRKAQGMRIIPDIVYEHDLFSPFSKEELEKLAEAR  
PDTFAEASKISGVTPQSLVYLSIMSPEGTANEIGEKKQQQEKSEALNLWKSFK  
>comp11681\_c0\_seq8; 549 257 2630 LEN=2749; translated  
MTSTLAFFSRFSKSRALKPRCISAKAAAMSADYDVIVVGGGHAGCDAAAAAARTGARTA  
LVTQRLDTVGELSCNPSIGGIGKGLVREIDALDGLIGKVADEAGIHYRVLNRRKGPVAVR  
GPRYVQKMETCPDDXILIHFLFKWNLKCRITYIIASSLKLISPHFYDKSDLMQHLQAQMDR  
DLYKASMQQTLKEYPNLDLIEASVEDLLIEEPSNLIHINSNSKQPQIRGVLTEQNGVKGEL  
TNAVVITTTGTFLRGVLMGLGHDYSGGRHLRDSEKVEPPSIGLAKTLARYEFELGRLKTG  
TPARIDGKTIDWDILLPQPSEIPATPFSHLLQFNDEQPPLVDQGVVTCRQTATNEETHK  
LVMKYESTLPIYDGMGAGNGPRYCPSLYKKVQRFDPDRNSHNCFLPEPEGLNTDIVYPNGM  
SGPYPEEVQLKILRSMKGLENVEIIRPGYDVEYDFVNPISLSHTLETERITGLYLAGQIC  
GTTGYEEAAAQGVVAGANAGRVASATSAGLSTPKPFIIGRDEGYIGVLIDDLVTRGTSE  
YRMFTSRAEYRISLRADNADLRLTKKGGKDFGLVRDEERISALEARGYLIDDRVQKLR  
LKVTEWAERGGTELMGGSRMGKKTGNKKSAAEVLQMPHVTLRNVEDIMIADVRESRKNV  
SDNDEVTESEFELTCSPASVYDSVEAIVKYRSYVDRQHQDMESWRKAQGMRIIPDIVYEH  
DLFSPFSKEELEKLAEARPDTFAEASKISGVTPQSLVYLSIMSPEGTANEIGEKKQQQEK  
SEALNLWKSFK  
>comp11681\_c0\_seq9; 561 268 2190 LEN=2256; translated  
MTSTLAFFSRFSKSRALKPRCISAKAAAMSADYDVIVVGGGHAGCDAAAAAARTGARTA  
LVTQRLDTVGELSCNPSIGGIGKGLVREIDALDGLIGKVADEAGIHYRVLNRRKGPVAVR  
GPRAQMDRDLYKASMQQTLKEYPNLDLIEASVEDLLIEEPSNLIHINSNSKQPQIRGVLTE  
QNGVKGELTNAVVITTTGTFLRGVLMGLGHDYSGGRHLRDSEKVEPPSIGLAKTLARYEF  
ELGRLKTGTPARIDGKTIDWDILLPQPSEIPATPFSHLLQFNDEQPPLVDQGVVTCRQT  
ATNEETHKLVMKYESTLPIYDGMGAGNGPRYCPSLYKKVQRFDPDRNSHNCFLPEPEGLNT  
DIVYPNGMSGPYPEEVQLKILRSMKGLENVEIIRPGYDVEYDFVNPISLSHTLETERITG  
LYLAGQICGTTGYEEAAAQGVVAGANAGRVASATSAGLSTPKPFIIGRDEGYIGVLIDDL  
VTRGTSEPYRMFTSRAEYRISLRADNADLRLTKKGGKDFGLVRDEERISALEARGYLIDDR  
VQKLRSFDLKVTEWAERGGTELMGGSRMGKKTGNKKSAAEVLQMPHVTLRNVEDIMIADV  
RESRKNVSDNDEVTESEFELTCSPASVYDSVEAIVKYRST  
>comp11681\_c0\_seq10; 498 257 2335 LEN=2401; translated  
MTSTLAFFSRFSKSRALKPRCISAKAAAMSADYDVIVVGGGHAGCDAAAAAARTGARTA  
LVTQRLDTVGELSCNPSIGGIGKGLVREIDALDGLIGKVADEAGIHYRVLNRRKGPVAVR  
GPRYVQKMETCPDDXILIHFLFKWNLKCRITYIIASSLKLISPHFYDKSDLMQHLQAQMDR  
DLYKASMQQTLKEYPNLDLIEASVEDLLIEEPSNLIHINSNSKQPQIRGVLTEQNGVKGEL  
TNAVVITTTGTFLRGVLMGLGHDYSGGRHLRDSEKVEPPSIGLAKTLARYEFELGRLKTG  
TPARIDGKTIDWDILLPQPSEIPATPFSHLLQFNDEQPPLVDQGVVTCRQTATNEETHK  
LVMKYESTLPIYDGMGAGNGPRYCPSLYKKVQRFDPDRNSHNCFLPEPEGLNTDIVYPNGM  
SGPYPEEVQLKILRSMKGLENVEIIRPGYDVEYDFVNPISLSHTLETERITGLYLAGQIC  
GTTGYEEAAAQGVVAGANAGRVASATSAGLSTPKPFIIGRDEGYIGVLIDDLVTRGTSE  
YRMFTSRAEYRISLRADNADLRLTKKGGKDFGLVRDEERISALEARGYLIDDRVQKLR  
LKVTEWAERGGTELMGGSRMGKKTGNKKSAAEVLQMPHVTLRNVEDIMIADVRESRKNV  
SDNDEVTESEFELTCSPASVYDSVEAIVKYRST  
>comp11681\_c0\_seq11; 612 257 2474 LEN=2593; translated  
MTSTLAFFSRFSKSRALKPRCISAKAAAMSADYDVIVVGGGHAGCDAAAAAARTGARTA  
LVTQRLDTVGELSCNPSIGGIGKGLVREIDALDGLIGKVADEAGIHYRVLNRRKGPVAVR  
GPRAQMDRDLYKASMQQTLKEYPNLDLIEASVEDLLIEEPSNLIHINSNSKQPQIRGVLTE  
QNGVKGELTNAVVITTTGTFLRGVLMGLGHDYSGGRHLRDSEKVEPPSIGLAKTLARYEF  
ELGRLKTGTPARIDGKTIDWDILLPQPSEIPATPFSHLLQFNDEQPPLVDQGVVTCRQT  
ATNEETHKLVMKYESTLPIYDGMGAGNGPRYCPSLYKKVQRFDPDRNSHNCFLPEPEGLNT  
DIVYPNGMSGPYPEEVQLKILRSMKGLENVEIIRPGYDVEYDFVNPISLSHTLETERITG  
LYLAGQICGTTGYEEAAAQGVVAGANAGRVASATSAGLSTPKPFIIGRDEGYIGVLIDDL  
VTRGTSEPYRMFTSRAEYRISLRADNADLRLTKKGGKDFGLVRDEERISALEARGYLIDDR  
VQKLRSFDLKVTEWAERGGTELMGGSRMGKKTGNKKSAAEVLQMPHVTLRNVEDIMIADV  
RESRKNVSDNDEVTESEFELTCSPASVYDSVEAIVKYRSYVDRQHQDMESWRKAQGMRIIP  
PDIVYEHDLFSPFSKEELEKLAEARPDTFAEASKISGVTPQSLVYLSIMSPEGTANEIGE

KKQQQEKSEALNLWKS KF

>comp11681\_c0\_seq12; 389 1175 2482 LEN=2548; translated  
MLGHDYRYSGRHLRDSEKVEPPSIGLAKTLARYEFELGRLKTGTPARIDGKTIDWDILLP  
QPSEIPATPF SHLLQFNDEQPPLVDQGVVTCRQTATNEETHKLVKMYESTLPIYDGMG  
AGNGPRYCPSLYKKVQRF PDRNSHNC FLEPEGLNTDIVYPNGMSGPYPEEVQLKILRSMK  
GLENVEIIRPGYDVEYDFVNPISLSHTLETERITGLYLAGQICGTTGYEAAAQGVVAGA  
NAGRVASATSAGLSTPKPFIIGRDEGYIGVLIDDLVTRGTSEPYRMFTSRAEYRISLRAD  
NADLRLTKKGFGLVLRDEERISALEARGYLIDDRVQKLR SFDLKVTEWAERGGTELMGG  
SRMGKKTGNKKSAAEVLQMPHVTLRNVEDIMIAVDRESRKKNVSDNDEVTE SFELTCSPA  
SVYDSVEAIVKYRST

>comp11681\_c0\_seq13; 549 268 2641 LEN=2760; translated  
MTSTLAF SRSFSKSRALKPRCISAKAAAMSADYDVIVVGGGHAGCDAAAAAARTGARTA  
LVTQRLDTVGELSCNPSIGGIGKGLVREIDALDGLIGKVADEAGIHYRVLNRRKGP  
GPRYVQKMETCPDDXILIH LFKWNLKCR LTYIIASSLKLISPHFYDKSDLMQHLQAQMDR  
DLYKASMQQTLKEYPNLDLIEASVEDLLIEEPSNLIHINSNSKQPQIRGVLTEQNGVKGEL  
TNAVVIITGTFLRGVLM LGHDYRYSGRHLRDSEKVEPPSIGLAKTLARYEFELGRLKTG  
TPARIDGKTIDWDILLPQPSEIPATPF SHLLQFNDEQPPLVDQGVVTCRQTATNEETHK  
LVKMYESTLPIYDGMGAGNGPRYCPSLYKKVQRF PDRNSHNC FLEPEGLNTDIVYPNGM  
SGPYPEEVQLKILRSMK GLENVEIIRPGYDVEYDFVNPISLSHTLETERITGLYLAGQIC  
GTTGYEAAAQGVVAGANAGRVASATSAGLSTPKPFIIGRDEGYIGVLIDDLVTRGTSE  
PYRMFTSRAEYRISLRADNADLRLTKKGFGLVLRDEERISALEARGYLIDDRVQKLR SFD  
LKVTEWAERGGTELMGGSRMGKKTGNKKSAAEVLQMPHVTLRNVEDIMIAVDRESRKKNV  
SDNDEVTE SFELTCSPASVYDSVEAIVKYRSYVDRQH QDMESWRKAQGMRI PPDIVYEHD  
LFP SFKEELEKLAEARPDTFAEASKISGVTPQSLVYLSIMSPEGTANEIGEKKQQQEK  
SEALNLWKS KF

>comp11681\_c0\_seq14; 537 268 2621 LEN=2740; translated  
MTSTLAF SRSFSKSRALKPRCISAKAAAMSADYDVIVVGGGHAGCDAAAAAARTGARTA  
LVTQRLDTVGELSCNPSIGGIGKGLVREIDALDGLIGKVADEAGIHYRVLNRRKGP  
GPRAQMDRDLYKASMQQTLKEYPNLDLIEASVEDLLIEEPSNLIHINSNSKQPQIRGVLTE  
QNGVKGELTNAVVIITGTFLRGGMHGNLNEMYHGKXSSALPFCLESPLVFTIFFTSPF  
FKIITYALSIDAGHDYRYSGRHLRDSEKVEPPSIGLAKTLARYEFELGRLKTGTPARIDG  
KTIDWDILLPQPSEIPATPF SHLLQFNDEQPPLVDQGVVTCRQTATNEETHKLVKMYE  
STLPIYDGMGAGNGPRYCPSLYKKVQRF PDRNSHNC FLEPEGLNTDIVYPNGMSGPYPEE  
VQLKILRSMK GLENVEIIRPGYDVEYDFVNPISLSHTLETERITGLYLAGQICGTTGYEE  
AAAQGVVAGANAGRVASATSAGLSTPKPFIIGRDEGYIGVLIDDLVTRGTSEPYRMFTSR  
AEYRISLRADNADLRLTKKGFGLVLRDEERISALEARGYLIDDRVQKLR SFDLKVTEWA  
ERGGTELMGGSRMGKKTGNKKSAAEVLQMPHVTLRNVEDIMIAVDRESRKKNVSDNDEVTE  
ESFELTCSPASVYDSVEAIVKYRSYVDRQH QDMESWRKAQGMRI PPDIVYEHD LFP SF  
KEELEKLAEARPDTFAEASKISGVTPQSLVYLSIMSPEGTANEIGEKKQQQEKSEALNLW  
KS KF

>comp11681\_c0\_seq15; 486 257 2315 LEN=2381; translated  
MTSTLAF SRSFSKSRALKPRCISAKAAAMSADYDVIVVGGGHAGCDAAAAAARTGARTA  
LVTQRLDTVGELSCNPSIGGIGKGLVREIDALDGLIGKVADEAGIHYRVLNRRKGP  
GPRAQMDRDLYKASMQQTLKEYPNLDLIEASVEDLLIEEPSNLIHINSNSKQPQIRGVLTE  
QNGVKGELTNAVVIITGTFLRGGMHGNLNEMYHGKXSSALPFCLESPLVFTIFFTSPF  
FKIITYALSIDAGHDYRYSGRHLRDSEKVEPPSIGLAKTLARYEFELGRLKTGTPARIDG  
KTIDWDILLPQPSEIPATPF SHLLQFNDEQPPLVDQGVVTCRQTATNEETHKLVKMYE  
STLPIYDGMGAGNGPRYCPSLYKKVQRF PDRNSHNC FLEPEGLNTDIVYPNGMSGPYPEE  
VQLKILRSMK GLENVEIIRPGYDVEYDFVNPISLSHTLETERITGLYLAGQICGTTGYEE  
AAAQGVVAGANAGRVASATSAGLSTPKPFIIGRDEGYIGVLIDDLVTRGTSEPYRMFTSR  
AEYRISLRADNADLRLTKKGFGLVLRDEERISALEARGYLIDDRVQKLR SFDLKVTEWA  
ERGGTELMGGSRMGKKTGNKKSAAEVLQMPHVTLRNVEDIMIAVDRESRKKNVSDNDEVTE  
ESFELTCSPASVYDSVEAIVKYRST

>comp11681\_c0\_seq16; 561 257 2179 LEN=2245; translated  
MTSTLAF SRSFSKSRALKPRCISAKAAAMSADYDVIVVGGGHAGCDAAAAAARTGARTA  
LVTQRLDTVGELSCNPSIGGIGKGLVREIDALDGLIGKVADEAGIHYRVLNRRKGP  
GPRAQMDRDLYKASMQQTLKEYPNLDLIEASVEDLLIEEPSNLIHINSNSKQPQIRGVLTE  
QNGVKGELTNAVVIITGTFLRGVLM LGHDYRYSGRHLRDSEKVEPPSIGLAKTLARYE  
FELGRLKTGTPARIDGKTIDWDILLPQPSEIPATPF SHLLQFNDEQPPLVDQGVVTCRQT  
ATNEETHKLVKMYESTLPIYDGMGAGNGPRYCPSLYKKVQRF PDRNSHNC FLEPEGLNT

DIVYPNGMSGPYPEEVQLKILRSMKLENVEIIRPGYDVEYDFVNPISLSHTLETERITG  
LYLAGQICGTTGYEEAAAQGVVAGANAGRVASATSAGLSTPKPFIIGRDEGYIGVLIDDL  
VTRGTSEPYRMFTSRAEYRISLRADNADLRLTKKGKDFGLVRDEERISALEARGYLIDDR  
VQKLRSFDLKVTWEAERGGETELMGSSRMGKKTGNKKSAAEVLQMPHVTLRNVEDIMIAVD  
RESRKKVSDNDEVTESEFELTCSPASVYDSVEAIVKYRST  
>comp11682\_c0\_seq1; 816 149 1369 LEN=1426; translated  
MMFDRRAILTALLATAVSFSDAFQQPLAYGNAVNTGSSTVLNMSTEAAAKKLPGTAQMD  
KPWEKLGFEFRPTNSHVQLKWKEGEGWSEPEI IKEPYVNLHIGATVLHYGQACFEGLKAF  
THKGDVYSFRPEENAARMQSSCRRIMPELPTDLFCDAVQTVVKDNIEFVPPYGTGGAL  
YIRPLLFSGSPRIGLQPADEYTFCIMVMPVADYYEGGLSKPVDALIIKDYDRAAPQGVGA  
VKVAGNYAADLLPNMESKKKGYPIGLYLDAKTQQYVEEFSTSNFVGIDNKNKKFVTPKSP  
SVLPSITNKSLMQIAEDEGYTVEARNVAVEELKDFDEVLAVGTAVVVTPVGSATILGQDG  
EEDTVYRFGEEGELGETTKRLYQRVRAIQMGDDEDTHDWNMKINND  
>comp11683\_c0\_seq1; 393 164 820 LEN=898; translated  
MNTMKLTLILSSITASVTAFSVSKSCSSKSTVLKNSPFENEIGAQQPLGFFDPLGLLDEA  
DATRFNRLRYVELKHGRISMLAVVGHIVTTGGVRLPGDIDYHGTSFESIPSGLAAISKIP  
TAGLLQIFLFGVLELGVMKDITGDGETVGDFRNDFLDFGWDTFTPEEKERKLAIELNNG  
RAAQMGILGMMVHEMLPSHDPYMINGFAGSPIDFNAGF  
>comp11683\_c1\_seq1; 284 1 781 LEN=850; translated  
XTTTTTTIGETENAVEVEVSLRPPCQSIVEVVCANENTTVFCGYLSQAEGTLGELLAGG  
NRNRHDLSTNDGIHGNKGNFLTTFAPSDEAFEALRGRAEADAAASPKSGFSPPVLSALLQ  
TREGIDTLLRHHFVEDPVAIPRRALACGGLRMSRQYTETLCVLDGSESETEGKAPERS  
ARKRVFQVGSNIAPALDFAIARTFDDDESRENDRENGGGQRQRHEPAMVSFPEIVVSDL  
VACNGVVHVLGDGVLIPATIP  
>comp11684\_c0\_seq1; 595 162 1784 LEN=2176; translated  
MSEKESLLPTTSGSRPSKSYMOSYSAGEDNGRLAEMAKEFGLQQQRQPRRQVREVVNTPL  
SSLTEFFNVRFLDHGFTHVRLRQVYTSYHPDDDEEGKELMGRPPRWHEDTAGEAEAHPP  
PKGDDLTSAVLGIKGMVGPAILYLPHGFAKAGWIFAIPCLILSTFLFLSSSACLDDAWK  
LESAKSNGAENLTEKRTVLSYPELAHRAHGTTGETFVKIGIAFMQSGVCLTYLIFVPQNL  
KTVTSILFGYDIDASYFVIVMLLIEIPMSWIRDIRKLTVTNLLANTLILYGLIACLAFA  
STAVQSNLGLGPVAEIAFRFSKLDNFSEGWFLFIGTSVLLFEGTITLLVPLQEAVYRKE  
DRKQFPVYQKIVLSIICFYCIFGMCCWVSFGDDVKTVMTTSLPPGLLATTVMAYSTAV  
IFTFPLQNFPSLEIATRISIATVMSNCCGKRTTWLQNRSVISSFLVFLALVGVATMESLD  
KVVSLMGLLGCPLAFIFPPLIHNKIDPNISAGRKRENWIIVGLGFCAMVVATMTTLATW  
>comp11684\_c0\_seq2; 595 150 1772 LEN=2164; translated  
MSEKESLLPTTSGSRPSKSYMOSYSAGEDNGRLAEMAKEFGLQQQRQPRRQVREVVNTPL  
SSLTEFFNVRFLDHGFTHVRLRQVYTSYHPDDDEEGKELMGRPPRWHEDTAGEAEAHPP  
PKGDDLTSAVLGIKGMVGPAILYLPHGFAKAGWIFAIPCLILSTFLFLSSSACLDDAWK  
LESAKSNGAENLTEKRTVLSYPELAHRAHGTTGETFVKIGIAFMQSGVCLTYLIFVPQNL  
KTVTSILFGYDIDASYFVIVMLLIEIPMSWIRDIRKLTVTNLLANTLILYGLIACLAFA  
STAVQSNLGLGPVAEIAFRFSKLDNFSEGWFLFIGTSVLLFEGTITLLVPLQEAVYRKE  
DRKQFPVYQKIVLSIICFYCIFGMCCWVSFGDDVKTVMTTSLPPGLLATTVMAYSTAV  
IFTFPLQNFPSLEIATRISIATVMSNCCGKRTTWLQNRSVISSFLVFLALVGVATMESLD  
KVVSLMGLLGCPLAFIFPPLIHNKIDPNISAGRKRENWIIVGLGFCAMVVATMTTLATW  
>comp11684\_c0\_seq3; 378 162 1154 LEN=2275; translated  
MSEKESLLPTTSGSRPSKSYMOSYSAGEDNGRLAEMAKEFGLQQQRQPRRQVREVVNTPL  
SSLTEFFNVRFLDHGFTHVRLRQVYTSYHPDDDEEGKELMGRPPRWHEDTAGEAEAHPP  
PKGDDLTSAVLGIKGMVGPAILYLPHGFAKAGWIFAIPCLILSTFLFLSSSACLDDAWK  
LESAKSNGAENLTEKRTVLSYPELAHRAHGTTGETFVKIGIAFMQSGVCLTYLIFVPQNL  
KTVTSILFGYDIDASYFVIVMLLIEIPMSWIRDIRKLTVTNLLANTLILYGLIACLAFA  
STAVQSNLGLGPVAEIAFRFSKLDNFSEGW  
>comp11684\_c0\_seq4; 378 150 1142 LEN=2263; translated  
MSEKESLLPTTSGSRPSKSYMOSYSAGEDNGRLAEMAKEFGLQQQRQPRRQVREVVNTPL  
SSLTEFFNVRFLDHGFTHVRLRQVYTSYHPDDDEEGKELMGRPPRWHEDTAGEAEAHPP  
PKGDDLTSAVLGIKGMVGPAILYLPHGFAKAGWIFAIPCLILSTFLFLSSSACLDDAWK  
LESAKSNGAENLTEKRTVLSYPELAHRAHGTTGETFVKIGIAFMQSGVCLTYLIFVPQNL  
KTVTSILFGYDIDASYFVIVMLLIEIPMSWIRDIRKLTVTNLLANTLILYGLIACLAFA  
STAVQSNLGLGPVAEIAFRFSKLDNFSEGW  
>comp11685\_c0\_seq1; 260 1 609 LEN=1161; translated  
QLNSFLPSWSMYVVDLSLEGAHSSVFEVLQAHFSKGDSPSSNSWFEGFASPFNAALPRF



ASAFPDLDDWHFGSVGRFFDCKFDAKI QPDENDNGEYCEANPPFTPGIMMAMVDHMVEALR  
RGDKNNIPLTFV VVVPSADNKKKRKSKSAISSDENNDIAVAKSAATRSFR TMLSSSYCTR  
HVLLNAREHGYVEGAQH LRPTQ

>comp11685\_c0\_seq2; 331 54 1121 LEN=1121; translated  
MPK K K KSKRQKVQDVSTFSGLSNITGFGDLGGAASIDDCMAEMMFHTESRSENQPQQND  
AISAPENTIESISIRYPETIHPPKRGAPRQPSWIQQANKAKTSSKYMMSAEDIENWNRSF  
ETWANGGIYSPGLLPNIDQEIARNFKVKELSDLL LKNKKFAGKDLRMPLFERWLLDSKHE  
EESEG VVGDCVLT LRSSPD SGASQRLLELT SKQNGVDQ TDAENVI AKLCRTTNLACQEL  
LSQEDRYRRQSPLNKGDRINMSTKPSSTNTFVSLEYSRKKWKKPFCFRINQIHYKKLKDR  
FLEIHPRFIFGGGXIVKNMTEMVERS FHV LVLALLLRY SALS GGGLLDDL RGGGMX

>comp11685\_c0\_seq3; 367 18 686 LEN=1238; translated  
METMVERS FHV LVLALLLRY SALS GGGLLDDL RGGGMQGAIHSSVFEVLQAHFSKGKDSP  
SSNSWFE GFASPFNAALPRFASAFPDLDDWHFGSVGRFFDCKFDAKI QPDENDNGEYCEAN  
PPFTPGIMMAMVDHMVEALRRGDKNNIPLTFV VVVPSADNKKKRKSKSAISSDENNDIAV  
AKSAATRSFR TMLSSSYCTR HVLLNAREHGYVEGAQH LRPTQ

>comp11686\_c0\_seq1; 670 1 2721 LEN=2815; translated  
GDTSGGAFVEELATIALGAHKAFDIRTCEVRSPSQAATATTATTTRPDSFVWVKVYEDEH  
LLVHASSCIGPETSSAEGSDPSRWNKRETSASSSLVFLYSFRSPPKGESGLGKAGASANT  
AATNSYCTLALFPCCGDAENACERLVQRSTNLPVLGEGIPMSSIDYVIFLDPKGHTVGM  
TETDKPRFFRWTTPSIGNSRVLVTLPQANGRHPEGPLSNHRARAVADEGILVRSQQLHRR  
LYGRMPRAFVEPPGAARESDTGNKAGHAGSGPRTGHNGLVLQSGTSLVLEKASRGARHW  
KEWNRKKS IWNKEPRDEWTRGTLDTLRSFLRPELNEACITPGE DDDKNEKRVNAEQSITD  
QNEIELEDEAE EEEIEMEKTDSMIDQNEIELEDEGE EESSGNDKGNERNKPALITGQNKNE  
LEDENEIDLDDENDVPENDPKDGNDIHLEGGGGSSIRWNGNNTLHRGRPFEAIDRNVASR  
GRGPRLLVLGTGCATPSAYRGASGYALVLPSPGTDPERGRGIPRQHYCYRQHTNHSSNGF  
DPPQRIENEAGDQIYLLDCGEGASTMLSRNCGHITDWSTRVIRGIWISHSHLHDHYGGLPTL  
LRILSDERKLEATFRGMPERTEHPDTQNRKRPRQSPSATGADSLPAVPWV VAPAKVLR  
LDLILDCHHGRSRDGTFRFCFEPRPHHDPRIPSGPFFHFENVKVHHNCCPAFGLLLGWKT  
DSESDPTQSGKASGTRRARTKTQFLCYSGDTRPSHNLVRACRRALQRCGQTSFRPDRAPG  
PYQNP IKKSGPVDLFLIHEATYREAESAMAYQKKHSTLSEARMVATDTGCSRVLMSHF SQ  
RYDNTTKERKDASERPE SNNGSKNNSLVTESTPTTSETNPMNAPTDDSSKPIVGLAADGL  
WIALDH

>comp11687\_c0\_seq1; 264 61 1693 LEN=2130; translated  
MTKLASEATESQPLIKKETPESSGTAAAAIADDIEARGSKSAAPT TTKSTETVLEDAIDIL  
KLAIPIFITFSWVGKKT TDTGLLGHLSQEALAA SALS DLWMTTTSVLLSGRILGVLIGG  
AVGAGNPKLAGXDHRIALKYHVAWHTIVALSVCRVLICKIMSLRSRMSLQSDRVLFSLDE  
WILTCAXGIYLQVSYVVLFATSVLVFAWNLTEQVWLRFGSDPEISKMAGTYSTLLSFAI  
PGMIAFGQLSQYFSAQKIMYPEVYSSAVGLFANLAFGLIFVLGWPIPGFAGFGFEACPIV  
TTSVTYVQLLFMVIVFVYIQKLHEPCWPGFKASEITWDRIKTFVELYFPAALSSSSDFWR  
VAVIGSMAASLGEADVAVFNTAYRIMWIALIFVVS IAGAAA INMSIRLGKRDPYGARQAG  
HVSIGMVVIMLCILGFFILLKNRWFGLIFTNDEEFLSLFQQCSVPFTISLIFMNL SVAIE  
RIPYSMGR TKEVFWMGFVASWGGQVPAVFI LTTYWRNDLVGLYTGMAIGYFLLTILYSII  
VIRR

>comp11687\_c0\_seq2; 250 83 1665 LEN=2256; translated  
MAGTYSTLLSFAIPGMIAFGQLSQYFSAQKIMYPEVYSSAVGLFANLAFGLIFVLGWPI  
GFAGFGFEACPIVTTTSVTYVQLLFMVIVFVYIQKLHEPCWPGFKASEITWDRIKTFVELY  
FPAALSSSSDFWRVAVIGSMAASLGEADVAVFNTAYRIMWIALIFVVS IAGAAA INMSIR  
LGKRDPYGARQAGHVSIGMVVIMLCILGFFILLKNRWFGLIFTNDEEFLSLFQQCSVPFT  
ISLIFMNL SVAIERIPYSMG

>comp11687\_c0\_seq3; 352 61 1524 LEN=1961; translated  
MTKLASEATESQPLIKKETPESSGTAAAAIADDIEARGSKSAAPT TTKSTETVLEDAIDIL  
KLAIPIFITFSWVGKKT TDTGLLGHLSQEALAA SALS DLWMTTTSVLLSGRILGVLIGG  
AVGAGNPKLAGIYLQVSYVVLFATSVLVFAWNLTEQVWLRFGSDPEISKMAGTYSTLLS  
FAIPGMIAFGQLSQYFSAQKIMYPEVYSSAVGLFANLAFGLIFVLGWPIPGFAGFGFEAC  
PIVTTTSVTYVQLLFMVIVFVYIQKLHEPCWPGFKASEITWDRIKTFVELYFPAALSSSSD  
FWRVAVIGSMAASLGEADVAVFNTAYRIMWIALIFVVS IAGAAA INMSIRLGKRDPYGAR  
QAGHVSIGMVVIMLCILGFFILLKNRWFGLIFTNDEEFLSLFQQCSVPFTISLIFMNL SVA  
AIERIPYSMGR TKEVFWMGFVASWGGQVPAVFI LTTYWRNDLVGLYTGMAIGYFLLTILY  
SIIVIRR

>comp11687\_c0\_seq4; 276 61 1753 LEN=2017; translated

MTKLASEATESQPLIKKETPESSGTAAAAIADDIEARGSKSAAPTTKSTETVLEDAIDIL  
KLAIPIFITFSWVGKKTDTGLLGHLSQEALAAASALSDLWTMTTSVLLSGRILGVLIGG  
AVGAGNPKLAGXDHRIALKYHVAWHTIVALSVCRVLIICKIMSLRSRMSLQSDRVLFSLDE  
WILTCAXGIYLQVSYVVLFATSVLVFVAVNLTQVWLRFGSDPEISKMAGTYSTLLSFAI  
PGMIAFGQLSQYFSAQKIMYPEVYSSAVGLFANLAFGLIFVLGWPIPGFAGFGFEACPIV  
TTSVTYVQLLFMVIVFVYIQKLHEPCWPGFKASEITWDRIKTFVELYFPAALSSSSDFWR  
VAVIGSMAASLGEADVAVFNTAYRIMWIALIFVVSIAGAAAINMSIRLGKRDPYGARQAG  
HVSIGMVVIMLCILGFFILLKNRWFGLIFTNDEEFLSLFQQCSVPFTISLIFMNLVAIE  
RIPYSMGRKTEVFWMGFVASWGGQVPAVFILTTYWRNDLVGLYTGMAIGYFLLTILYSII  
VIRSDWEKYAEIAQRRSETLPNEK

>comp11687\_c0\_seq5; 364 61 1584 LEN=1848; translated  
MTKLASEATESQPLIKKETPESSGTAAAAIADDIEARGSKSAAPTTKSTETVLEDAIDIL  
KLAIPIFITFSWVGKKTDTGLLGHLSQEALAAASALSDLWTMTTSVLLSGRILGVLIGG  
AVGAGNPKLAGIYLQVSYVVLFATSVLVFVAVNLTQVWLRFGSDPEISKMAGTYSTLLS  
FAIPGMIAFGQLSQYFSAQKIMYPEVYSSAVGLFANLAFGLIFVLGWPIPGFAGFGFEAC  
PIVTTTSVTYVQLLFMVIVFVYIQKLHEPCWPGFKASEITWDRIKTFVELYFPAALSSSSD  
FWRVAVIGSMAASLGEADVAVFNTAYRIMWIALIFVVSIAGAAAINMSIRLGKRDPYGAR  
QAGHVSIGMVVIMLCILGFFILLKNRWFGLIFTNDEEFLSLFQQCSVPFTISLIFMNLV  
AIERIPYSMGRKTEVFWMGFVASWGGQVPAVFILTTYWRNDLVGLYTGMAIGYFLLTILY  
SIIIVIRSDWEKYAEIAQRRSETLPNEK

>comp11687\_c0\_seq6; 228 61 1522 LEN=2113; translated  
MTKLASEATESQPLIKKETPESSGTAAAAIADDIEARGSKSAAPTTKSTETVLEDAIDIL  
KLAIPIFITFSWVGKKTDTGLLGHLSQEALAAASALSDLWTMTTSVLLSGRILGVLIGG  
AVGAGNPKLAGXDHRIALKYHVAWHTIVALSVCRVLIICKIMSLRSRMSLQSDRVLFSLDE  
WILTCAXGIYLQVSYVVLFATSVLVFVAVNLTQVWLRFGSDPEISKMAGTYSTLLSFAI  
PGMIAFGQLSQYFSAQKIMYPEVYSSAVGLFANLAFGLIFVLGWPIPGFAGFGFEACPIV  
TTSVTYVQLLFMVIVFVYIQKLHEPCWPGFKASEITWDRIKTFVELYFPAALSSSSDFWR  
VAVIGSMAASLGEADVAVFNTAYRIMWIALIFVVSIAGAAAINMSIRLGKRDPYGARQAG  
HVSIGMVVIMLCILGFFILLKNRWFGLIFTNDEEFLSLFQQCSVPFTISLIFMNLVAIE  
RIPYSMG

>comp11687\_c0\_seq7; 228 61 1522 LEN=2226; translated  
MTKLASEATESQPLIKKETPESSGTAAAAIADDIEARGSKSAAPTTKSTETVLEDAIDIL  
KLAIPIFITFSWVGKKTDTGLLGHLSQEALAAASALSDLWTMTTSVLLSGRILGVLIGG  
AVGAGNPKLAGXDHRIALKYHVAWHTIVALSVCRVLIICKIMSLRSRMSLQSDRVLFSLDE  
WILTCAXGIYLQVSYVVLFATSVLVFVAVNLTQVWLRFGSDPEISKMAGTYSTLLSFAI  
PGMIAFGQLSQYFSAQKIMYPEVYSSAVGLFANLAFGLIFVLGWPIPGFAGFGFEACPIV  
TTSVTYVQLLFMVIVFVYIQKLHEPCWPGFKASEITWDRIKTFVELYFPAALSSSSDFWR  
VAVIGSMAASLGEADVAVFNTAYRIMWIALIFVVSIAGAAAINMSIRLGKRDPYGARQAG  
HVSIGMVVIMLCILGFFILLKNRWFGLIFTNDEEFLSLFQQCSVPFTISLIFMNLVAIE  
RIPYSMG

>comp11687\_c0\_seq8; 286 883 1836 LEN=2273; translated  
MAGTYSTLLSFAIPGMIAFGQLSQYFSAQKIMYPEVYSSAVGLFANLAFGLIFVLGWPI  
GFAGFGFEACPIVTTTSVTYVQLLFMVIVFVYIQKLHEPCWPGFKASEITWDRIKTFVELY  
FPAALSSSSDFWRVAVIGSMAASLGEADVAVFNTAYRIMWIALIFVVSIAGAAAINMSIR  
LGKRDPYGARQAGHVSIGMVVIMLCILGFFILLKNRWFGLIFTNDEEFLSLFQQCSVPFT  
ISLIFMNLVAIERIPYSMGRKTEVFWMGFVASWGGQVPAVFILTTYWRNDLVGLYTGMA  
IGYFLLTILYSIIIVIRR

>comp11687\_c0\_seq9; 288 510 1496 LEN=2200; translated  
MTTSVLLSGRILGVLIGGAVGAGNPKLAGIYLQVSYVVLFATSVLVFVAVNLTQVWLR  
GSDPEISKMAGTYSTLLSFAIPGMIAFGQLSQYFSAQKIMYPEVYSSAVGLFANLAFGLI  
FVLGWPIPGFAGFGFEACPIVTTTSVTYVQLLFMVIVFVYIQKLHEPCWPGFKASEITWDR  
IKTFVELYFPAALSSSSDFWRVAVIGSMAASLGEADVAVFNTAYRIMWIALIFVVSIA  
GAAINMSIRLGKRDPYGARQAGHVSIGMVVIMLCILGFFILLKNRWFGLIFTNDEEFLSLF  
QQCSVPFTISLIFMNLVAIERIPYSMG

>comp11687\_c0\_seq10; 336 510 1727 LEN=1991; translated  
MTTSVLLSGRILGVLIGGAVGAGNPKLAGIYLQVSYVVLFATSVLVFVAVNLTQVWLR  
GSDPEISKMAGTYSTLLSFAIPGMIAFGQLSQYFSAQKIMYPEVYSSAVGLFANLAFGLI  
FVLGWPIPGFAGFGFEACPIVTTTSVTYVQLLFMVIVFVYIQKLHEPCWPGFKASEITWDR  
IKTFVELYFPAALSSSSDFWRVAVIGSMAASLGEADVAVFNTAYRIMWIALIFVVSIA  
GAAINMSIRLGKRDPYGARQAGHVSIGMVVIMLCILGFFILLKNRWFGLIFTNDEEFLSLF

QQCSVPFTISLIFMNL SVAIERIPYSMGR TKEVFWMGFVASWGGQVPAVFILTTYWRNDL  
VGLYTGMAIGYFLLTILYSII VIRSDWEKYAEIAQRRSETLPNEK  
>comp11687\_c0\_seq11; 324 510 1667 LEN=2104; translated  
MTTSVLLS GRILGVLIGGAVGAGNP KLAGIYLQVSYVVL FATSVLV FVAWNLTEQVWLR F  
GSDPEISKMAGTYSTLLSFAIPGMIAFGQLSQYFSAQKIMYPEVYSSAVGLFANLAFGLI  
FVLGWPIPGFAGFGFEACPIVTT SVTYVQLLFMVIVFVYIQKLHEPCWPGFKASEITWDR  
IKTFVELYFPAALSSSSDFWRVAVIGSMAASLGEADVAVFNTAYRIMWIALIFVVS IAGA  
AAINMSIRLGKRDPYGARQAGHVSIGMVVIMLCILGFFILLKNRWFGLIFTNDEEFLSLF  
QQCSVPFTISLIFMNL SVAIERIPYSMGR TKEVFWMGFVASWGGQVPAVFILTTYWRNDL  
VGLYTGMAIGYFLLTILYSII VIRR  
>comp11687\_c0\_seq12; 250 883 1665 LEN=2369; translated  
MAGTYSTLLSFAIPGMIAFGQLSQYFSAQKIMYPEVYSSAVGLFANLAFGLIFVLGWPI  
GFAGFGFEACPIVTT SVTYVQLLFMVIVFVYIQKLHEPCWPGFKASEITWDR IKTFVELY  
FPAALSSSSDFWRVAVIGSMAASLGEADVAVFNTAYRIMWIALIFVVS IAGAAA INMSIR  
LGKRDPYGARQAGHVSIGMVVIMLCILGFFILLKNRWFGLIFTNDEEFLSLFQQCSVPFT  
ISLIFMNL SVAIERIPYSM  
>comp11687\_c0\_seq14; 288 510 1496 LEN=2087; translated  
MTTSVLLS GRILGVLIGGAVGAGNP KLAGIYLQVSYVVL FATSVLV FVAWNLTEQVWLR F  
GSDPEISKMAGTYSTLLSFAIPGMIAFGQLSQYFSAQKIMYPEVYSSAVGLFANLAFGLI  
FVLGWPIPGFAGFGFEACPIVTT SVTYVQLLFMVIVFVYIQKLHEPCWPGFKASEITWDR  
IKTFVELYFPAALSSSSDFWRVAVIGSMAASLGEADVAVFNTAYRIMWIALIFVVS IAGA  
AAINMSIRLGKRDPYGARQAGHVSIGMVVIMLCILGFFILLKNRWFGLIFTNDEEFLSLF  
QQCSVPFTISLIFMNL SVAIERIPYSM  
>comp11687\_c0\_seq15; 316 61 1353 LEN=1944; translated  
MTKLASEATESQPLIKKETPES SGTAAAAIADDI EARGSKSAAPT TKSTETVLEDAIDIL  
KLAIPIFITSF SWVGKKTDTG LGLGHLSQEAL AASALSDLW TMTTSVLLS GRILGVLIGG  
AVGAGNP KLAGIYLQVSYVVL FATSVLV FVAWNLTEQVWLR FGS DPEISKMAGTYSTLLS  
FAIPGMIAFGQLSQYFSAQKIMYPEVYSSAVGLFANLAFGLIFVLGWPIPGFAGFGFEAC  
PIVTT SVTYVQLLFMVIVFVYIQKLHEPCWPGFKASEITWDR IKTFVELYFPAALSSSSD  
FWRVAVIGSMAASLGEADVAVFNTAYRIMWIALIFVVS IAGAAA INMSIRLGKRDPYGAR  
QAGHVSIGMVVIMLCILGFFILLKNRWFGLIFTNDEEFLSLFQQCSVPFTISLIFMNL SV  
AIERIPYSM  
>comp11687\_c0\_seq16; 316 61 1353 LEN=2057; translated  
MTKLASEATESQPLIKKETPES SGTAAAAIADDI EARGSKSAAPT TKSTETVLEDAIDIL  
KLAIPIFITSF SWVGKKTDTG LGLGHLSQEAL AASALSDLW TMTTSVLLS GRILGVLIGG  
AVGAGNP KLAGIYLQVSYVVL FATSVLV FVAWNLTEQVWLR FGS DPEISKMAGTYSTLLS  
FAIPGMIAFGQLSQYFSAQKIMYPEVYSSAVGLFANLAFGLIFVLGWPIPGFAGFGFEAC  
PIVTT SVTYVQLLFMVIVFVYIQKLHEPCWPGFKASEITWDR IKTFVELYFPAALSSSSD  
FWRVAVIGSMAASLGEADVAVFNTAYRIMWIALIFVVS IAGAAA INMSIRLGKRDPYGAR  
QAGHVSIGMVVIMLCILGFFILLKNRWFGLIFTNDEEFLSLFQQCSVPFTISLIFMNL SV  
AIERIPYSM  
>comp11687\_c0\_seq17; 298 883 1896 LEN=2160; translated  
MAGTYSTLLSFAIPGMIAFGQLSQYFSAQKIMYPEVYSSAVGLFANLAFGLIFVLGWPI  
GFAGFGFEACPIVTT SVTYVQLLFMVIVFVYIQKLHEPCWPGFKASEITWDR IKTFVELY  
FPAALSSSSDFWRVAVIGSMAASLGEADVAVFNTAYRIMWIALIFVVS IAGAAA INMSIR  
LGKRDPYGARQAGHVSIGMVVIMLCILGFFILLKNRWFGLIFTNDEEFLSLFQQCSVPFT  
ISLIFMNL SVAIERIPYSMGR TKEVFWMGFVASWGGQVPAVFILTTYWRNDL VGLYTGMA  
IGYFLLTILYSII VIRSDWEKYAEIAQRRSETLPNEK  
>comp11688\_c0\_seq1; 745 385 2390 LEN=2390; translated  
MSDISAE EALLKAKEI AARLTGAVGVGVANVNATGGDSSIPNAGVSTAVATESSAAA AAST  
PSSSAPSTAPTAR SERKRKRWGSAPGAPVAEALPGLTEAKLRQEQLLAEKPAGPSTKR VV  
VPTTRERGEAHFFSFLKERLPELSARINSSEFKGDEQNGMELGGRGAETQQIYGM PLEPM  
HVTIKGSDAFIAAAAPRLEELLAEGERAEREGPPPEDDGKRL EDGNKDKYSSSALTTRP  
YYQADHASRPKSEYRPATVAQLISGNPDVLDLKGAGGDGNVKLLEESIRVPNGVVGFI  
IGRGGETISSMQARSSCKVQIQKEHDLQPGQTERIITLQAVKQESIDECREIIESMVRDR  
VRAAGGNAGHRASNAGGGGADYYGRSPGVGAGSGGRTDNTE SKVQEALAGGHKLVTVVEV  
PDADVGLVIGKGGSTIKFIQETT GSSVQIPH SATPENPSVRCISITCPT EQGAESAKIQI  
LNILKNKMSNSNHTAHSAHNNHASNQPHAASVQVAVPNKDVGLCIGRQGCVIRQLQTKTD  
TRIDIPQQPPPGQNVRIITVTGPTQEACELAKTYIERIVNEQSSASIMTGSPYNNGNQNH  
AGNRHQYGGMGLGYQNQYHNNHRHHSNNGYNNNNNSGGDQNAAQSN DPAWQAYYAAQAI A

NKQQQQQQX

>comp11689\_c0\_seq1; 855 131 3194 LEN=3316; translated  
MFSPQPRTPKKNLRGGRRPKPKQROGIEERHSPQKSQWEHSRDQMMVVDGGKRSKSHSGTT  
IWKNLAAKRRQNSIRRRVRRYSRNDSDSDSHSSDNNSYSYGLGNNNNDSDSDEYDD  
DFDLGMHQENGKVQQHIQGTPEFSSLLSKSSAKKKKTEAQTSPNNSRHKRPMGISTVYP  
SMKGFENRNDKAPALTSEEAIRVMQRHSYISDSESESEEKSLGKTTPERETSYSTNE  
TSANTTTHTDDEHKENNRSHGTGKRVLVKHKKPREDPITITSKNKKYHEKKPSQQNRNT  
KNLSITSKSKTNQTKQQQTPQPRVPTKSAEKQHVCSSNNVDKSAEFDVPLSLQSSVLKRA  
KDIVGEDEKNAKQRDANGGYDHASNRSAQRSRVKQPSKSRQGI PNDDRAVI SDKNSQEEV  
HSVDASTKGGESNNGKDDSSDEDDSEYDDNFFQIDGDTAKTMPQNPLGNRGANSEPDKGR  
IDNDSSEATGLESSIEDVDSTEPACSDDEEYWAHFSFKTAKTSRSTSRHSRASANQAWVK  
AMQQDDDDIDFFDAIQNASESNRERSVKLSDEPPHVI GEDDDSDGEGWTEKLTSTFVGSTIG  
ALATGSKDSDEDSKRGDRGAHXARVGLDGI ILDKDDNDDDDNNNNNTANGEPPFSKQP  
QSRGRLELFFAAGGLRILNQWLKEAISYETKTPPTATKVSGPRAAASTTTAATTDTNVP  
IRKASATRPLTLVILRFLLEHIFPEKKTVTRSKINKQIQNLAKKIESIQEQLHKHQASGNV  
DVDPNLQEDLKDWTTPSIPPETALAQVKLAVDAVKT SWRNKAKAKSKSGKAKKANADP  
FGDMRSTIRERLQAMVLFKSGALPERPEWYNPSAVAAGTKKRPRSPEAGGSQSKRQPKTE  
SEAXTAPAATENQAGPVAQAKKSATAPGTAPPTKNGNGPRHQEHGVGARPLRERKPETGG  
LERRDEEPSSEQKQTTGGGLNISIRRHTIGGGVFFWYKRSTSVARSTGCYERKEGTRIEI  
S

>comp11689\_c0\_seq2; 565 82 1406 LEN=1406; translated  
MGAAAARRTPAACAAALAVVAASAI SVVFPFPGTGIGATDAFSAVRATRKEQFHGSEQ  
QPPPHRRSGRSRGRVRYNRPLVSERLMSTASDADPLGSHPTGGSTRDRQSEPCLDHT  
NTHNTTVASGGGSKREERKRYDAELEEAFAQQTRETNPLLGVKSIGVDYGLVRTGVAVT  
IGYNPEALDVI VTDRLPLFDDEKEGMSEEEAEKQEEKRLETQRSRVAERVVELARREKAD  
RIVVGLPLHKNNGTEAPQSM LARKFACDHLAPSVLRVLPVSVYMCDERYTSKEAAARIR  
SQTSQRNNSNDLYGLLDAESAKIIILEQYNDHLQRHNTKGRGSVDRGNDDTNVDDDDN  
NNSNNRADPSYNGELVTIRDPKLI EELTLEHNERLRLERERLAEERNERENRIKWRK LAM  
EKERLRAEEQRKLDAAANGVTAK

>comp11690\_c0\_seq1; 413 748 1752 LEN=1893; translated  
MSYADAWDET VGKSTSWIIAMSCFIDCWFGNLSYSMILADTISNLLASIGIAATRTQSL  
GVTGVVLLPLCLMKNLASLAPFSLIGIIGMLYTTLAMAIRYFSGAYAPGGKFVATALA  
AFGTAGAAAALS AKTLILTSMLSNA YIAHFNAPKYLAELKNNTMGRFTQVIAWSFGSSVA  
LYSIIITALGFLTFGSVSNGLILNNYSTQDLLMSFSRVAVGLSVTGSYPLLF DGT RDGLLD  
LFKVPKEKRTNSL FNKVT LGVLAGTTLVASKLTDLGLVASVGGATFGTALVFIYPTIMFL  
KSQKGEKTKETTFAKIIAILGVVMGALGTKLALD

>comp11690\_c0\_seq2; 659 121 1557 LEN=1698; translated  
MMGFLRTSTVTA VLLLAVSTNALLTPTRQSI PSSSSLIPGSKNSLVSSTTTRLGNDAA  
AAELPRGGA AEKSQGGGTATIPNEVFNLIKSIVGAGVLSLPAGVVAFGNAPSAMIPAV  
IAVMGVISAYTFALIGRVCQKTN TMSYADAWDET VGKSTSWIIAMSCFIDCWFGNLSYS  
MILADTISNLLASIGIAATRTQSL LGVTGVVLLPLCLMKNLASLAPFSLIGIIGMLYTT  
LAMAIRYFSGAYAPGGKFVATALA AFAFGTAGAAAALS AKTLILTSMLSNA YIAHFNAP  
KYLAELKNNTMGRFTQVIAWSFGSSVALYSIIITALGFLTFGSVSNGLILNNYSTQD  
LLMSFSRVAVGLSVTGSYPLLF DGT RDGLLDL FKVPEKRTNSL FNKVT LGVLAGT  
TLVASKLTDLGLVASVGGATFGTALVFIYPTIMFLKSQKGEKTKETTFAKIIAILGV  
VMGALGTKLALD

>comp11691\_c0\_seq1; 911 138 1580 LEN=1837; translated  
MMMSKPSPEDTEETAPPTTLDVGSVADLERRLALMGSDKKPPAAAAPPPAAPVVAAPA  
PAPVAAAAPAVKGGKNALLARIMAAKEKQEKQVAPPAAAPSATTTDLLMDFDAPAPAAQ  
APPAYDTNFKLDVPPPSFDVLERKQQQQLPPPMDFLPPPTDFLPPPTDFLPPPPIDSVLP  
PPPLNDVLP PPSMPPDL MNMGYSPSAPSAPMFEDLHTQQQELHPPPLPPPMEAPPPPE  
LDIDASILNALEPAEREAFL EQRKILEQIEKEKANNEASGAAARAMAFDQRSTSAVANV  
AASYERGGRPPAGS GEELDAETAQMIADAELA EKLQKEEYSKSQERRNRVRSNGNQTQQQR  
GEQQSSEESQSWYDWLTG SQAPAPAPATRSSPSRASSSGSRTLVSQAQTGEEGLTYASGF  
EGGGGARTAEQKSMFACVADSINVAATQMYALPVDEEGNVHGVD SQGLLAMPDVSQRDN

>comp11691\_c0\_seq2; 815 209 1408 LEN=1665; translated  
MAAKEKQEKQVAPPAAAPSATTTDLLMDFDAPAPAAQPAPPAYDTNFKLDVPPPSFDV  
LERKQQQQLPPPMDFLPPPTDFLPPPTDFLPPPPIDSVLP PPSMPPDL MNMGYSPS  
APSAPMFEDLHTQQQELHPPPLPPPMEAPPPPELDIDASILNALEPAEREAFL E  
QRKILEQIEKEKANNEASGAAARAMAFDQRSTSAVANVAASYERGGRPPAGS GEELDA  
ETAQMIADAELA EKLQKEEYSKSQERRNRVRSNGNQTQQQRGEQQSSEESQSWYDWLTG  
SQA

PAPAPATRSSPSRASSSSGSRTLVSAQTGEEGLTYASGFEGGGGARTAEQKSMFACVADS  
INVAATQMYALPVDEEGNVHGVDSQGLLAMPDVSRQRDN  
>comp11692\_c0\_seq1; 993 177 3871 LEN=3871; translated  
MSFRDVRNRTEVSKGVFLHGRELLEFCQQRGLCPLCAKTKVKRKKGVFGPKKWEPIALR  
NGVVVATESSSGNKGKGSKEKQKKKNGFSKRGRKSTSVEEPATIESNINIDVDIDEG  
DYLVIYKGFCLREGCFTLEHARRLVESAGKIGWPMKQARRNTHIGSFTTGKKEDPRPRSL  
SDGFRGVDGVKILANKPLSAKSKSSSGSKHKRSVSGSPGASSVSTSDNDNAETKVSSA  
DRTIFPPPQDRIKFLSEQVSLGAPDAFYRSKNNSVKSHNFYNGSDDGEDLGEESMGSGG  
KPRKTKRDIIDKTIRVLRGEFVPIGGSVIRTVDLTGVSLNYSEVTALAESLEASRNHTPV  
HLSSLILRNCNIDNDRILGILGTAFYEALWNPSTPTASNGTSSASFVRNYVMRLKTLDLA  
ENKIGNAGMDALCPYLEASCCGLEVLDSLNRHIETLGGVTIFDALRRNPHTKIEIDLSH  
NLLRKLDAENENDEDDCRSGNDKRLKDEVREIATPDQFEASISLGDSPLIHF SCHGRED  
ALALENGLGKLEKFLRNLEELVSNNTNGPLKVVVFVSSCHAHTIGQALIEAGVPHVCCQ  
RDAQFRDAVAMEFVKCFYRNAAKQMALNEAFETAVEDVLSSELSKNLRNVAKRFSLLSS  
LFFEPSAPIFFQQAVIDEDNDHADQQQILKVPPLPDRFVGREIDMFAILESMQSNSCVE  
ISGCEGCGKDSVVTAVVDYAMKRSEAFSIDQAYWIPTPAQVEVEPDSVYEDFSLCCGLIR  
NSSEDIWDTTNEELLDCLERLEIELEEASVVVIDSRSFNTEVSVQVSLQKLVLFIQTHAY  
AAKVLWISTERDDEGIEKSHIELGALDFRSTALLFGENDYISGNKGIQARSADEFAELV  
DPPFELKANTNVPVSLGVSQRMKEVYHRMNGFSPQVIAVAEWMRSRTDFTEVLKIASKPEL  
VVKSLNELERELVRWTLYAEAEVRAKKNYKRAVDLRAVVSLEAMRRGYSSLADLKEMEQT  
MKSDLANAISNRQYDVANNLKKDLLKLLKMMERRVPSTRLLQTQAVFDLKAQVDSIIA  
ETKSYDGAELLEDFFSFEVNCDGRTCTFRVCGVATVVRTDRKNDIGKNHPKPTRG  
IVCWSNEACDLDDPRSSFLLDDVDGEKFRARAELLPVVNETRYGAVRCVIGKSVVVGTT  
SDCCAGEGPSVGGAAVILAVGPFLLDAPVDSTX  
>comp11692\_c0\_seq2; 1316 177 4875 LEN=4875; translated  
MSFRDVRNRTEVSKGVFLHGRELLEFCQQRGLCPLCAKTKVKRKKGVFGPKKWEPIALR  
NGVVVATESSSGNKGKGSKEKQKKKNGFSKRGRKSTSVEEPATIESNINIDVDIDEG  
DYLVIYKGFCLREGCFTLEHARRLVESAGKIGWPMKQARRNTHIGSFTTGKKEDPRPRSL  
SDGFRGVDGVKILANKPLSAKSKSSSGSKHKRSVSGSPGASSVSTSDNDNAETKVSSA  
DRTIFPPPQDRIKFLSEQVSLGAPDAFYRSKNNSVKSHNFYNGSDDGEDLGEESMGSGG  
KPRKTKRDIIDKTIRVLRGEFVPIGGSVIRTVDLTGVSLNYSEVTALAESLEASRNHTPV  
HLSSLILRNCNIDNDRILGILGTAFYEALWNPSTPTASNGTSSASFVRNYVMRLKTLDLA  
ENKIGNAGMDALCPYLEASCCGLEVLDSLNRHIETLGGVTIFDALRRNPHTKIEIDLSH  
NLLRKLDAENENDEDDSFSSSTGFFGSPFGIHFGLAKNRTLRLDLNLSGNRMNRNGIEAL  
FGGLCIAGPHARLTSVSLGFNRIGDAGAQAIASCLATNRSLSIELNDNNIHNDGGRALL  
WAMGNNTTLKEISGLWSNNIDRRFIIIVSIRLLLLSASDGDENDNDDRRVNNDEDLTKYWE  
GQMNVESGYEEQEEQEQGDNIQNSYHCDVIEENSGRGRDRSYEVTTGEEDIESKCVSSH  
SRNSRSVDMEENVSDLSEDKDDDEQDRVKNKGNDELSSYEMLLAEDSNENDIMTADGMT  
ETNQEMSNTSFDRMIILNSAPLVYFDEETGLHKSIPLHDSGYEIEIRKAVAVAMTKGS  
KIEVRDEIATPDQFEASISLGDSPLIHF SCHGREDALALENGLGKLEKFLRNLEELVSN  
NTNGPLKVVVFVSSCHAHTIGQALIEAGVPHVCCQRDAQFRDAVAMEFVKCFYRNAAKQM  
ALNEAFETAVEDVLSSELSKNLRNVAKRFSLLSSSLFFEPSAPIFFQQAVIDEDNDHAD  
QQQILKVPPLPDRFVGREIDMFAILESMQSNSCVEISGCEGCGKDSVVTAVVDYAMKRSE  
AFSIDQAYWIPTPAQVEVEPDSVYEDFSLCCGLIRNSSEDIWDTTNEELLDCLERLEIELE  
EASVVVIDSRSFNTEVSVQVSLQKLVLFIQTHAYAAKVLWISTERDDEGIEKSHIELGA  
LDFRSTALLFGENDYISGNKGIQARSADEFAELVDPPELKANTNVPVSLGVSQRMKEVY  
HRMNGFSPQVIAVAEWMRSRTDFTEVLKIASKPELVVKSLELNERELVRWTLYAEAEVRA  
KNYKRAVDLRAVVSLEAMRRGYSSLADLKEMEQTMKSDLANAISNRQYDVANNLKKDLL  
KLKKKIMMERRVPSTRLLQTQAVFDLKAQVDSIIAETKSYDGAELLEDFFSFEVNC  
DGRTCTFRVCGVATVVRTDRKNDIGKNHPKPTRGIVCWSNEACDLDDPRSSFLLDDVD  
GEKFRARAELLPVVNETRYGAVRCVIGKSVVVGTTSDCCAGEGPSVGGAAVILAVGPFLLD  
APVDSTX  
>comp11693\_c0\_seq1; 264 51 804 LEN=850; translated  
MAGRAARDRCGSSVCPAEPFSGGCFLSIQAFPSSFRCPSPLSQEFVCPSPGKLYANNNSN  
YKDDSIIRREVCLGTAVVEELKRIVRTSAINSVDEEWEPTAKGGRRWELEIKIGNEHI  
CFGCAEITSLADIRDSSDRGLTILYILTQDLKCLVMSLIHLHFVKKPIPFYEGGADAA  
SNNARGGTIPVGAWPPPGIRRRGGERSLLHRMQKNSNDDDDNKKNKNNKSHHIRLTLTSGH  
WLPHTTHNY  
>comp11693\_c0\_seq2; 327 306 1197 LEN=1243; translated  
MASTMDAADYNDEFYLRVYMGHKSRRRFGEHFVVRATRCVAVLCCAVPCIHGGSRRGSSVCP

AEPSFGGRFLSIQAFSSFRCPSPFATPQEFVCPGKLRVYANNSNYKDDSIIRREVCLG  
TAVVEELKRIVRTSAINSVDDDEEWEEPTAKGGRRWELEIKIGNEHICFGCAEITSLADIR  
DSSDPRGLTILYYLTQDLKCLVMSLIHLHFVKVPIPFYEGGADAASNNARGGTIPVGAW  
PPPGIRRRGGERSLLHRMQKNSNDDDDNKKKNKNNKSHHIRLTLGHWLPHTTHNY  
>comp11693\_c0\_seq3; 315 306 1026 LEN=1072; translated  
MASTMDAADYNDEFYLRVYMGHKSRRFGHEFMFEVCPGKLRVYANNSNYKDDSIIRREV  
CLGTAVVEELKRIVRTSAINSVDDDEEWEEPTAKGGRRWELEIKIGNEHICFGCAEITSLA  
DIRDSSDPRGLTILYYLTQDLKCLVMSLIHLHFVKVPIPFYEGGADAASNNARGGTIPV  
GAWPPPGIRRRGGERSLLHRMQKNSNDDDDNKKKNKNNKSHHIRLTLGHWLPHTTHNY  
>comp11693\_c0\_seq4; 315 237 957 LEN=1003; translated  
MASTMDAADYNDEFYLRVYMGHKSRRFGHEFMFEVCPGKLRVYANNSNYKDDSIIRREV  
CLGTAVVEELKRIVRTSAINSVDDDEEWEEPTAKGGRRWELEIKIGNEHICFGCAEITSLA  
DIRDSSDPRGLTILYYLTQDLKCLVMSLIHLHFVKVPIPFYEGGADAASNNARGGTIPV  
GAWPPPGIRRRGGERSLLHRMQKNSNDDDDNKKKNKNNKSHHIRLTLGHWLPHTTHNY  
>comp11693\_c0\_seq5; 222 237 1109 LEN=1155; translated  
MASTMDAADYNDEFYLRVYMGHKSRYRQVQALEVLSAQNNNTNTNDQRPGPQGGKPLT  
TLPSSLSAVLYRTNRRFGHEFMFEVCPGKLRVYANNSNYKDDSIIRREVCLGTAVVEEL  
KRIVRTSAINSVDDDEEWEEPTAKGGRRWELEIKIGNEHICFGCAEITSLADIRDSSDPRG  
LTILYYLTQDLKCLVMSLIHLHFVKVPIPFYEGGADAASNNARGGTIPVGAWPPPGIRR  
RGGERSLLHRMQKNSNDDDDNKKKNKNNKSHHIRLTLGHWLPHTTHNY  
>comp11693\_c0\_seq6; 234 237 1280 LEN=1326; translated  
MASTMDAADYNDEFYLRVYMGHKSRYRQVQALEVLSAQNNNTNTNDQRPGPQGGKPLT  
TLPSSLSAVLYRTNRRFGHEFMVTRCAVLCVAVPCIHGGSRGSSVCPAEPSPFGGRFL  
SIQAFSSFRCPSPFATPQEFVCPGKLRVYANNSNYKDDSIIRREVCLGTAVVEELKRI  
VRTSAINSVDDDEEWEEPTAKGGRRWELEIKIGNEHICFGCAEITSLADIRDSSDPRGLTI  
LYYLTQDLKCLVMSLIHLHFVKVPIPFYEGGADAASNNARGGTIPVGAWPPPGIRRRGG  
ERSLLHRMQKNSNDDDDNKKKNKNNKSHHIRLTLGHWLPHTTHNY  
>comp11693\_c0\_seq7; 222 306 1178 LEN=1224; translated  
MASTMDAADYNDEFYLRVYMGHKSRYRQVQALEVLSAQNNNTNTNDQRPGPQGGKPLT  
TLPSSLSAVLYRTNRRFGHEFMFEVCPGKLRVYANNSNYKDDSIIRREVCLGTAVVEEL  
KRIVRTSAINSVDDDEEWEEPTAKGGRRWELEIKIGNEHICFGCAEITSLADIRDSSDPRG  
LTILYYLTQDLKCLVMSLIHLHFVKVPIPFYEGGADAASNNARGGTIPVGAWPPPGIRR  
RGGERSLLHRMQKNSNDDDDNKKKNKNNKSHHIRLTLGHWLPHTTHNY  
>comp11693\_c0\_seq8; 327 237 1128 LEN=1174; translated  
MASTMDAADYNDEFYLRVYMGHKSRRFGHEFMVTRCAVLCVAVPCIHGGSRGSSVCP  
AEPSPFGGRFLSIQAFSSFRCPSPFATPQEFVCPGKLRVYANNSNYKDDSIIRREVCLG  
TAVVEELKRIVRTSAINSVDDDEEWEEPTAKGGRRWELEIKIGNEHICFGCAEITSLADIR  
DSSDPRGLTILYYLTQDLKCLVMSLIHLHFVKVPIPFYEGGADAASNNARGGTIPVGAW  
PPPGIRRRGGERSLLHRMQKNSNDDDDNKKKNKNNKSHHIRLTLGHWLPHTTHNY  
>comp11693\_c0\_seq9; 234 306 1349 LEN=1395; translated  
MASTMDAADYNDEFYLRVYMGHKSRYRQVQALEVLSAQNNNTNTNDQRPGPQGGKPLT  
TLPSSLSAVLYRTNRRFGHEFMVTRCAVLCVAVPCIHGGSRGSSVCPAEPSPFGGRFL  
SIQAFSSFRCPSPFATPQEFVCPGKLRVYANNSNYKDDSIIRREVCLGTAVVEELKRI  
VRTSAINSVDDDEEWEEPTAKGGRRWELEIKIGNEHICFGCAEITSLADIRDSSDPRGLTI  
LYYLTQDLKCLVMSLIHLHFVKVPIPFYEGGADAASNNARGGTIPVGAWPPPGIRRRGG  
ERSLLHRMQKNSNDDDDNKKKNKNNKSHHIRLTLGHWLPHTTHNY  
>comp11694\_c0\_seq1; 142 1 1082 LEN=1209; translated  
XCKNYISNKIIRASCVPTTAEMIRLRTIIFAEFWLLAATITLAIIEQGTPTLAFVVRGAT  
GGCSLHEVFLAGDGDGDFGILAPLDPIERFHSVKGVRCREVELPLVGRVVVLEATA  
DAQEELVDECLELEEEKTENKPTRIAEGDPYGAWLWPAAWAVSNYILSESTLRNNLPSLS  
ILELGTGTGLVSI SIAMGGAKRVVATDYEPLALALTRYAADTINNSNKI IETELLDMCA  
LEQKLPISLPEGNTSKIDIVVAADIMYEPKTGIAMAHRAVEALRQNCRVIIGDSPGRPGR  
PAFLKTLRELGVDEGIDFRETIGKTCGPRHDLICGKGSTSVSEQAQELSVALLDLQPIC  
>comp11695\_c0\_seq1; 410 108 1637 LEN=1776; translated  
MGTNIHALAHRLTALSMAFLASAAALTLCLVLAGFGCSFVEIRALERESVGASNGADFEDLD  
TAYLGVRLSESDAAFYPAGDNSDRLLWVSRIFLYTGLSFGAATTLFAWLLGTCVRPTAP  
RWRILSVLAACSAVFQIPIFLVFEVDNCFDVFQSKLIGAYLNVVSVVWIVMTIWW  
QCLRAPRWDEELDAWRVNRNGNHRASSSCASSGGEAPAVQTVNNTANTNASEAASSPHHA  
LEAPWAPPGCHSRAHRYGRGGDLGGCDDGANDEESQRPLGGGPRPLHESPHRRAEAST  
ATSGTGRFRADTSGATSEAVHATKHSTEAQTRDDNASGSPRRRPPSPGFHVSCVYADG

TQQDAHFPVSVANCCGLMGVPTTEDEATNFKTFRDDFRVIEYTESADDNPPANQSESPDYLF  
FRKLQTEEKAAIARRAERDRVPVEYVTSVGVGNRGGSHYHHHTPGGGIATDDVSEMTRGSG  
WASGVSEILDDTDLRHQPRVVLEELRQHY

>comp11696\_c0\_seq1; 395 132 1544 LEN=1985; translated  
MSSPESSPKCDEQLIEQQREWLEETIPVDPPIPADYLSLTKLELANLDLTELPNFLPE  
LCPNLSILFCPKNFVEVPAVIGRFPNLQMVSFKECQTIERIHDPALQPQLRWLILTGNK  
IAAIPETIGRCKLQKFMLSGNRIRELPPRPVLSKLNLELIRLACNQLQTPPTELLESC  
PNLRWAAFAGNPFLEDAKKKANHFADQNNNTALPVLDDPVLNDNSWPVLRGAGGVTRKV  
PWKGQDVAVKTFSGALTSDGSPQDEKDISKLVVTSASSAGGAKEAALIDLLGETKVGAL  
VMEFLEGYKALAGPPSMTTCSRVDVYSEDRALDGFPLWKIALDTLRVLAKLHRLGISHA  
DFYAHNILIRPAASSATEPQAEYSVKVSDFGAAFRYRYSEDEINNIDNDRDLSKFGELVE  
MVEVRAFTVLVTELYYLAQESSQPWKDLLEECGKEGVTFTGLVERFQS

>comp11697\_c0\_seq1; 1444 1 5406 LEN=5741; translated  
RCLALQQRASITRSDQAKVFFRNLSERDMISRRQRGRGLGRIMHRQRGAHRRPISSSF  
FNGMDIFGFLAWIAVVATIAKNGNGLFCEASAWSYIFGESEIQEHENNHGEVLSASGEE  
LELVSPIVNREIRVSVKAPWPSSSMHSLVCEAFCLKGDYSFLDGLAVNHGRDHLVTFER  
ATEYALELAAGLEDKHEQTLRLLKVALTMRAMAPTCELHRTIAHDRIPEHVDFLESFGVI  
TYKTMDETAFLVETSANIPRSHTEMPKLTTERNALLLPDEVIRQGSKRIDVSKEVHG  
EDDDEMTGIFILYTLQGLSFATFYHKLINENKIPFVVRHMGSDDDDDQHTVTLQGYGVR  
DIRNVEYKVFDDDKRSDESTQDAMINLTKLGASDDIEIDDDSSHLDDTAGASCDSSDS  
DTFRQESVKTRYPRLLTTHFLAGINLTALDLSDESAGHSYSKEEMQRELWKLHTRFEQHS  
QLIPPTWQRRHLSIQAAAVVANSRQPLITLQDVSQNLPSMASTLVHVTVPKDINEIAGSM  
ESTLQRLISTSGGGIWINRPNVNIERPSFNVDVQQLQDEVKELEELERKFRSILPSQN  
LKNALERIQDAFIQGDSSFTSNDNGEDNGSADNEEADDHTTEGLYRIDLASGDKDSVIYM  
NDLEKDRSYSSWGTSVRNMLMAMQYGMPPSIRRNLFVLLVVDPLENETESSNTNYAEAL  
LGQLVQEYQYVRSVAVVAVSQKDINTCSQLVSSGKACELPADHWLSQEDPLTVNDLKEIKA  
TTRDVHRLYAYVRQVAVSSNGQASVMYQLYMGTSIQRETPSNGNYFSLFDLNFKNHEILV  
ALRLTHANIPLNIVESLRKNENVSNSYSGKAVMFATNKGLKTGMSFINGRPLPANEDDS  
EKLQIVFSEEQQLVFKMIVDGEITDEKPRNFYKLIKGNKKDVFRLHPLLTEGGSANAF  
LDLEHNFGTDSLMPVKLMGNDASYLDTDATFLYEAFLAIDTPKGLSLALDFLKAMNTLSK  
NVGDTTISARYRILPSTINSARTDLCKILNSAGKLGFEKVKELQFKLTSPPDSIDGYRE  
LVDSRSCNDLSYLQEESSDNFLTANGRVYNIDNPSLSITDIELLTSLTLOSTKIVSEMM  
KSDVDEISAFDVIGRTTAFLSTKKSEKKKRSDDPAAVIKVLEKKNNIVNNPLRFLWNRKEN  
NVRGSLRTRKVTAVDPTTETAQRSLPLLLLVIRDELKQLDLLLLAPRTELDGNSDIPISSY  
YRFVADPLAYQARDDSTGSPMALFSNLPTDQILTLRMDVPEPVDVQQTTRAIQDTNLRCD  
LQSACGDDDDQIDIEMHEQRHVTVNVEYGLQHLLLSGQCYEETNLSPPNGLQLVLSKELILST  
SKTTSEVSDPEDESIMKMEHSDVEIPHRSHYSDTLVMKTAGYWQLRANPGFWDLIKED  
SRGAEIFQMVGEIKPRGVRVTKAISDNTKRLVIRDFVGRGNSDFLLVKKRPGYELATLF  
HDDKGLSQNDVVHVFSLATGHLYERFLKIMMLSVTKRTSAKVKFWLFFENFLSPTFKA  
TSIAMAKRIGCEVEFVYKWPPEWLRGQSEKQRIIWGYKILFLDVLVPLNVKKIYVDADQ  
VIRGDLKELWNMDLKGAPYGYTPMCSSNESTLGFQFQFNQGFWKNHLRGKPYHISALYVVD  
LEKFRKDRVGDTLRAQYQALSADPGSLANLDQDLPNYVQFQVPIFSLPQEWLWCESWCSI  
ETKANAKTIDLNNPLHKEPKVSMAKRIISGDLFEESWIELDAEVGKYESEYFLGSLPLH  
Q

>comp11698\_c0\_seq2; 1510 1 4191 LEN=4728; translated  
SNSNSNSNYGKDRNRETETEKPRLGMPMSPATPSVTSVAPATPEDESIPYKNVNTKGGD  
SALSSWWSDFQFRLGKSQSSYAPIPMSTPPPSNAGMKTTSDAASKGSSDPKRPLLPFSG  
LTVITDTRNNDDDEAEAEADDICDNIDDSRYTRSLHSMPLVEEVTEDEESPKHHTLPTLD  
SESELESPPSQEGSHRSTYASNTTNNHNRGAKVSNRDGSSRNDEAAEAATWLELRPSP  
SATAATMTPRRITNDGDSASYKADGSDSSSTNNRVHDHQLGIEIELLEGEPEAEADGMKDASTK  
SPPEDETNALEEKCEKSTSKRNDVVPVSLWNSIRTRLGMINQPESSDQDMASNPVVVVGSKK  
TIPPGDTHLEGNSEEIFEVLVLSPPSQKSTQKHSMPYENSSSNPVAKLPI SLHVE  
TVSTTSSQNGSEHSGLHHLGSLVVDNYHQSRDCDASDEDLESGKRNGNSHGNNSNRRRRR  
CGSGRGLRRDHLAILGVLVGVLFVAAFFVLHKITRVGRDGSMDTNTDDDFYYSYEAKD  
NKNQDSTFGIAGDGSSFPGRITNVGFADRESTTEEERTQEWLNEAGLWFDVSDSDSSSV  
SQPSSSTNDPPIVSEEGNANANDLDNESVGDWTFDELFAGENVDDNQNPIINMGDDA  
LDSASDGLSSLSSNNSNVENANNQTMRVSLSPGAPVEMDSVFDDSIITSSPTLSPTL  
SPQTYRTSSPSSEGQADAVIQDGSAYDYVGNQTTSSSLSPSEAPFASALLSTNTPTTSS  
PTASMLSLTSLPTASPTSSPTAMPVMPPTASPTVPRTPPPIFPISVIEDMDAINDVLKRA  
RRQIELMIFDDDDLIGKVSRLFSFVVLEQTSLHGIHRDGRDITRLGSMRVESFLPLQFP

TLFLTASHCSSFDWSFMTALEGVTDXVDMTNPENGLDKPIDALLPVVQEFEGQGLSRTD  
VWMLSALVASELALPFENSDDLFPMHWIGRQTCELQFAKVAATGVAAPCGVDFFGSPTEC  
SAKRGPHVDQPHGLIGTKSIQKLFEEFEGFDAQQATALMGAHSVGKMARENVEFRGAWDL  
SISLDSGYWLNLVGDPDYFIETVDNQDLNIPTRHQWRGILPSHDGSGGGEQRTVAML  
NVDVSLVKNLPMMDASGSVGCAGPGFGLLKDCPPTNDEDKATPFLPFVKKYNSDARGFLT  
DFRDVLNLLIDHGHNLKPRPNTLCPKDRVCTFRPRSEGASHFAVEDHTPPSPSPSRAP  
PKPYQEPPDGQTKIWVDKMCYDSVGETLVVTYDHSVHEGWTDITIRLYAAEDVDENEPSF  
VIDEDVVDSPLEESLSCGSSTCHTWTSTRGGFQMPTQNLAGRGSYAVVLFKTDQNDSTP  
LKPLAADSFRLEGCDL

>comp11698\_c0\_seq3; 1538 1 4032 LEN=4569; translated  
SNSNSNSNYGKDRNRETETEKPRLGMPMPSPATPSVTSVAPATPEDESIPYNKVNTKGGD  
SALSSWWSDFQFRLGKSQSSYAPIPMSTPPPSNAGMKTTTSDAASKGSSDPKRPLLPFSG  
LTVITDTRNNDDEAEAEADDICDNIDDSRYTRSLHSMPLVEEVTEDEESPKHHTLPTLD  
SESELESPPSQEGSHRSTYSASNTTTNHNHRGAKVSNRDGSSRNDEAAEAAATWLELRPSP  
SATATMTPRRNDGDSASYKADGSDSSTNNRVHDHQLGIEIELLEGEPEAEADGMKDASTK  
SPPEDETNALEEKECSTSKRNDVAVVPSLWNSIRTRLGMNQPESSQDMASNPVVVVGSKK  
TIPPGDTHLEGDNSEEIFEVLVLSPPSQKSTQKHSMPYENSSNSPVAKLPISLHVE  
TVSTTSSQNGSEHSDGLHHLGSVVDNYHQSRDCDASDEDLESGKRNGNSHGNNSNRRRR  
CGSGRGLRRDHLAILGVLVGVLFVAAFFVLHKITRVGRDGSMDTNTDDDFYYSYEAKD  
NKNQDSTFGIAGDGSSFPGRNTNVGFADRESTTEEERTQEWLNEAGLWFDDVSDSDSSSV  
SQPSSSTNDPIVSEEGNANANDLDNESVGDWTFDELFAGENVVDDNQNPIVMVGDDA  
LDSASDGSLSSLSNNSNVENANNQTMRVSLSPSGAPVEMDSVFDDSIITSSPTLSPTL  
SPQTYRTSSPSSEGQADAVIQDGSAYDYVGNQTTSSSLSPSEAPFASALLSTNTPTTSS  
PTASMLSLSLPTASPTSSPTAMPVMPPTASPTVPRTPPPFIPIVIEDMDAINDVLKRA  
RRQIELMIFDDDDLIGKFLRLVFDHCVGGCNGCVDMTNPENGLDKPIDALLPVVQEFEG  
QGLSRTDVWMLSALVASELALPFENSDDLFPMHWIGRQTCELQFAKVAATGVAAPCGVDF  
FGSPTECSAKRGPHVDQPHGLIGTKSIQKLFEEFEGFDAQQATALMGAHSVGKMARENVE  
FRGAWDLSISLDSGYWLNLVGDPDYFIETVDNQDLNIPTRHQWRGILPSHDGSGGGE  
QRTVAMLNVDVSLVKNLPMMDASGSVGCAGPGFGLLKDCPPTNDEDKATPFLPFVKKYNS  
DARGFLTDFRDVLNLLIDHGHNLKPRPNTLCPKDRVCTFRPRSEGASHFAVEDHTPPSP  
PSPSRAPPKPYQEPPDGQTKIWVDKMCYDSVGETLVVTYDHSVHEGWTDITIRLYAAEDVD  
ENEPSFVIDEDVVDSPLEESLSCGSSTCHTWTSTRGGFQMPTQNLAGRGSYAVVLFKTD  
QNDSTPLKPLAADSFRLEGCDL

>comp11699\_c0\_seq1; 351 102 1001 LEN=1139; translated  
MIRGPGLRRHRKLTQTLRKRFPVLPFASRELSALPNPSPSGGNQNDNDGSSVLLYR  
RDTARNALPRASFLASSANSVYWLWYVDFVPAVNASPIEALHANPIYGFGLGLSILIQ  
TAFTLYPLSLVSKIEYKTSQPAAATSPSRKGSTPQMQRDILVWKHTLPLMSVSPVPLVI  
PLGGITMDKASDDARAILEELGGDVGKFEHGLGLYRVPEKKAKGSESSLTINFPLLAEIR  
SPSEVYDSEMMLQTLLSGKFKYRHGGGKKSRSSEDESHRQRGKNQRKYGHRKRNRAKGR

>comp11699\_c0\_seq2; 387 102 1031 LEN=1169; translated  
MIRGPGLRRHRKLTQTLRKRFPVLPFASRELSALPNPSPSGGNQNDNDGSSVLLYR  
RDTARNALPRASFLASSANSVYWLWYVDFVPAVNASPIEALHANPIYGFGLGLSILIQ  
TAFTLYPLSLVSKIEYKTSQPAAIPDGGSGAAAATSPSRKGSTPQMQRDILVWKHTLPLM  
LSVSPVPLVIPLGGITMDKASDDARAILEELGGDVGKFEHGLGLYRVPEKKAKGSESSLT  
INFPLLAEIRSPSEVYDSEMMLQTLLSGKFKYRHGGGKKSRSSEDESHRQRGKNQRKYGH  
RRKRNRAKGR

>comp11700\_c0\_seq1; 323 76 1112 LEN=1180; translated  
MSAMQIDEEEASPVEVPLVGEINQVTMHPLVLLSAADHYHRVARGTRKRVRVGVLLGSASK  
GVVDCNTSFVAVPFEEDSKNASVFYLDHNYLENMLAMFRKVNAKERVVGFYSTGPQIRQND  
LRIHDIVKRFLPSKTTIPVFCIIDIRPDRQSLPTTAYKVVEEVSTRDQREVKLNFAHV  
PTEMGAI EAEEVGVHELLRDINDPTVSTVASLIXGKISGLATLAEKLVCKDYLEACVRG  
DQKTNPDIVANLQNILNLLPNLNTPEMVR SILIKTNDMQLAIYLSALIRSVIALHDLINN  
RIRYGENGTIDIEEKEETEKEKSTTDDDDKDKSGSDSKEKTEEEK

>comp11701\_c0\_seq1; 242 198 1138 LEN=1366; translated  
MDCCGKYSSTFAQLSNTVLECDYDKNVTNLYKAIENESWGSVKCFFETEKWSYMHFMKDI  
HSPTEQARTWVTRSDPNGKVRWSQLPLHAAIIFQAPNDVIEKLIELYPLGVRCTDDQQML  
PLHLAFRVGADDSVMNLLISTFPEAVVTPNQCGLPYAIINGKESRKDYNEAIQQIAYQVS  
RNVVLSQEKMSTEKIEKLEDAVGVQTSVETLQKDNEILENQLSDAKNEINKLKDMCFMM  
QKTLAFSNRPPVPIRTAGYHPRKTMVQNSESVCTDASLCPNTNDSLFQTNESTISSVNAQF  
DPIPKTIKALKDE



>comp11702\_c0\_seq1; 205 226 936 LEN=1444; translated  
MTIIPIASMSRSTSYMTVFAIVTCLVILFPQIIDAAYVVSVPKDEECFIIASPGAAGG  
LLYGNFNDHLLDDSSISSEPLAVVVIDAKEEHVLFRRRRATEGSFRVNLKANQKVNLCQNG  
LVTAGRGRKSPTARSHDGGKPRTVGFAYTVEATDENQHIHTQHDRNKRAAGELVRSMANLM  
THHQYMRARENTHREVVEQFTFTQLMWWWVLESVVVVAIAGAQIMYFRNFLERRRYM  
>comp11703\_c0\_seq1; 164 108 956 LEN=956; translated  
MNSTDTKQAFIERLRRCPKLECNFWSRLNPSIRCGGEVSDKTYENGDFGRKGNSSLLFLA  
AKRFENNLFDNSQSSEHITTELYDEDRLVPSFSDIETPLSSTSGIKQYTEPKYNIPSYND  
VAVDETTNSGAEYNRIPNLRPIREKNCTEPEIDRNCHDDISADETRDYGDPAVDRIPNL  
SPIHQNRYTEPKFDRPCHENTSPDETIDYGHYPAYHRIPNLSPIHKNEYKPKCDNHCEYQ  
ISVGETRDYGDPKYDRIPNLDPHESNDSLSSSSTRTISTGGS  
>comp11704\_c0\_seq1; 389 320 1102 LEN=1130; translated  
MGMFSGNSTPAPEDVTPEYLLLESFGGSDDLGVNSIPEAMHALYEADAVCFDVDSTVINEE  
GIDVLADFLGKGDEVAKLTAAMEGGMKFEDALKARLDLLEPSRKEILDCEAHPLELTP  
GIQTLVETLHAKNVDVFLVSGGFRIMIEPLAEILSIPIENIVANTINFEYGTGKYAGFD  
SNEPTSQDMGKPKALEQLKEKHSYEKMVMVGDGATDAQAKPPAKAFVGFVGGVVEREAVKN  
QSDWFKDFSDMTKIVAMRQ  
>comp11705\_c0\_seq1; 121 235 851 LEN=878; translated  
MSADAESTTDHQGRQDVPVPPQVPGGPRRRDLPPPPGGPDPADPAVFRPHRRRWGFGPGR  
KKGAAAPGRPADRHPPEDPPGNEVAHGAAGTGGGWLRFVSLRCGHNSALSMSALSMALA  
LVRLAAARRGKAPRGQRPPPLGGNEAGRRPRCGAALCYAVQFNATERAPNRKRRTDRLATA  
RAEQASLPPPTGCAVVLRMESINK  
>comp11705\_c0\_seq2; 121 169 785 LEN=812; translated  
MSADAESTTDHQGRQDVPVPPQVPGGPRRRDLPPPPGGPDPADPAVFRPHRRRWGFGPGR  
KKGAAAPGRPADRHPPEDPPGNEVAHGAAGTGGGWLRFVSLRCGHNSALSMSALSMALA  
LVRLAAARRGKAPRGQRPPPLGGNEAGRRPRCGAALCYAVQFNATERAPNRKRRTDRLATA  
RAEQASLPPPTGCAVVLRMESINK  
>comp11706\_c0\_seq1; 790 69 2387 LEN=2601; translated  
MHSYARIVSATTNRGYLVRRRTIAAGLLSALLITKDEENKNEKKINSLFSALTTSLPLYD  
ELRGATSCDFKAPNEIRVPRTLSQIELERTQKSLQKSYDVKWERPLGEGGFAGVYLGREK  
KSGDLAAVKEISKEYTNDSTFQREMDAFLHIKKAGGHPNICGMKEHFDEGPFYLVLDLV  
QGGEMFDHLIKDGAYSEADAARLVREVGSAFLHGI GLVHSDLKPENLMLSSENASDAV  
MKVVDFGCAEIIDKNSPYSPDGKDCFGNTPGYSPPEMIDGARASTHLEPSVDMFMSGVI  
IYIMLTGIHPFDITGRSTDQQMNRRLRNMMPLRNSPLTAHLSSSAIDLIEKLIIDWDPK  
TRMTALEMLNHPVVKGETASKGKIENSDKRLKGFYKSGIAAQVFQNMVLGSDNSEADD  
ATRKMSLIQQSFQKIDSENNGYITTKDLKNLASNKSNDSDNHEDEENSQLSLGSFSELL  
SEHMKNVYLPAGHEIFSEGDEGDTMYFINSGRVEITTKDGYRTTTGQGDFFGEGVLLHED  
NKR SATIRCITPLHAIEIGRDYFEKYLNGFETEIALLERDRLRRQNRKAILSLQENLI  
EDIIEEGDYVYEQWEEGDDIFLLEDGAVDINVNGHSVYTVREGELLGEYATIFGRPRNTS  
ARCASDKCKLQVMHPKDFANMMR SNPVRDGLRDVVYRRELKKAIVFETHKSFPATEEEL  
KEVFEAVDKDGSGEIDLAEIDDLRKMMDKFTFTDEDISNILSSVDLEGDGTIEW  
>comp11706\_c0\_seq2; 749 69 2482 LEN=2696; translated  
MHSYARIVSATTNRGYLVRRRTIAAGLLSALLITKDEENKNEKKINSLFSALTTSLPLYD  
ELRGATSCDFKAPNEIRVPRTLSQIELERTQKSLQKSYDVKWERPLGEGGFAGVYLGREK  
KSGDLAAVKEISKEYTNDSTFQREMDAFLHIKKAGGHPNICGMKEHFDEGPFYLVLDLV  
QGGEMFDHLIKDGAYSEADAARLVREVGSAFLHGI GLVHSDLKPENLYVNSSEMGSXP  
YDFLVSSHTFYFLIGKHQILSMLSSENASDAVMKVDFGCAEIIDKNSPYSPDGKDCFG  
NTPGYSPPEMIDGARASTHLEPSVDMFMSGVI IYIMLTGIHPFDITGRSTDQQMNRRLRN  
MMPLRNSPLTAHLSSSAIDLIEKLIIDWDPKTRMTALEMLNHPVVKGETASKGKIENSD  
KRLKGFYKSGIAAQVFQNMVLGSDNSEADDATRKMSLIQQSFQKIDSENNGYITTKDL  
KNLASNKSNDSDNHEDEENSQLSLGSFSELLSEHMKNVYLPAGHEIFSEGDEGDTMYFI  
NSGRVEITTKDGYRTTTGQGDFFGEGVLLHEDNKR SATIRCITPLHAIEIGRDYFEKYL  
NGFETEIALLERDRLRRQNRKAILSLQENLIEDIIEEGDYVYEQWEEGDDIFLLEDGAV  
DINVNGHSVYTVREGELLGEYATIFGRPRNTSARCASDKCKLQVMHPKDFANMMR SNPVR  
RDGLRDVVYRRELKKAIVFETHKSFPATEEELKEVFEAVDKDGSGEIDLAEIDDLRKM  
MDKFTFTDEDISNILSSVDLEGDGTIEW  
>comp11707\_c0\_seq1; 236 149 831 LEN=1116; translated  
MIPLNNGCLKTLFLFCILGLLSVDAKNSPARLRGKHFDAL EERVNPIIDENVRGKTLKE  
LGIEQSIGQNNQQRRRKTQE QDAMKFFSVYDEF GPKFGTMGD TAGLRGMVYDLKAKTNG  
LIEKHVEGALQGTCSIVGSDGKQLCSYEIFILNEETGTIGSVVATGSVMMTLNNTKNVLI I

EATGDDFVGYKXGDGDDDDLYCDWGADRDGPGPRVPSIGRDWHGQDNS  
>comp11707\_c0\_seq2; 240 149 840 LEN=1139; translated  
MIPLNNCGLKTLFLFCILGLLSVDAKNSPARLRGKHFDAL EERVNPIIDENVRGKTLKE  
LGIEQSIGQNNQQRRTQEQDAMKFFSVYDEF GPKFGTMGD TAGLRGMVYDLKAKTNG  
LIEKHVEGALQGTCSIVGSDGKQLCSYEIFILNEETGTIGSVVATGSVMMTLNNTKNVLI  
EATGDDFVGYKXGDGDDDDLYCDWGADRDGPGPRVPSIGRDWHGQDNSWLT  
>comp11709\_c0\_seq1; 227 1 1111 LEN=1203; translated  
XDWTPKFHFCHLVAYDNHCSLDMNSAEAMMRLTASLLVTCLFLRLSSAFVAENGSHVNRE  
RTRRTVPSSRRRKIAKPLSTGTTTQCWKGKYGRNTPKRTRIDTDDILSYERTLITDRGYSY  
ILGSDESGRSGIAGPVVAATCCILTL SNNGEVIDP SCLPTVDLLPLPDRSSRSKNKLIQD  
SKQLSPEDREQIYETIVNNPQVYAFSVAQRSNTEIDRTNNILTSSMEAFRESIEDLTRDK  
LFPHIFSSQQNAGKSGNNDNEDVQIEIPDEWGNCGCYGIVDGKKAPKLSTIPSPFCRPMV  
KADQQVYTVALASIIAKVTLDRMTEEWKSYPSYGFQDNKGYATKDHIEAIEHEHGPCPLH  
RMTFKSLKGR  
>comp11710\_c0\_seq1; 763 86 1363 LEN=1481; translated  
MDRLIALSLLSTAGAFAPAGVHQQQHAQLSSSSLLVASTPVVETPPSPLTEWGSKISNIR  
VAQEEMRKQDLPEFGPEISATDLGIAGDKAAQLAYFKENAMELKQKMLDHGAIIFRGF DL  
MKEQDGFQQFYNAIEMKICQDPLQSV SARPTADGKKDSPVYEAVNKE SRKNFFIGMHNEF  
VGTRAPRAAAFVCFKAAEEGGEF LIADGRRIFRDLSDLVDELYDRSIRYSVMELPFFGW  
IDNLPDPIQGPVMAGMKGVVSAAINAKVDFD VDM LWEGGGYDNTRMLQARSPGQPAIVNH  
PVTGEP TWF CNVHSHSSKLRKDRESVYGAERFEDGASQINKSDMYFGDDGIITDEQLKQM  
DDVTVKNIRYVKMTEGDVVL LDNYKCMHGRNVFEGTRKHAVAWFEGWEGENEMKKVSSSL  
ESVSA  
>comp11710\_c0\_seq2; 591 86 1066 LEN=1660; translated  
MDRLIALSLLSTAGAFAPAGVHQQQHAQLSSSSLLVASTPVVETPPSPLTEWGSKISNIR  
VAQEEMRKQDLPEFGPEISATDLGIAGDKAAQLAYFKENAMELKQKMLDHGAIIFRGF DL  
MKEQDGFQQFYNAIEMKICQDPLQSV SARPTADGKKDSPVYEAVNKE SRKNFFIGMHNEF  
VGTRAPRAAAFVCFKAAEEGGEF LIADGRRIFRDLSDLVDELYDRSIRYSVMELPFFGW  
IDNLPDPIQGPVMAGMKGVVSAAINAKVDFD VDM LWEGGGYDNTRMLQARSPGQPAIVNH  
PVTGEP TWF CNVHSHSSKLRKDRESV  
>comp11711\_c0\_seq1; 356 73 417 LEN=1220; translated  
MDALTKDKKQYATAFAILSLYDGGAEVTSEQISALLEATGNTDVEAFYPIIFAQFLNDP  
KKIGEMIAAPGGGGGGGGGAAAAEEVVEEEEEEEEEAEAPAGGGGLFGDDGDGDY  
>comp11712\_c0\_seq2; 77 1 147 LEN=1040; translated  
GDDDDGNGNTGDEDF TILRFPVPSLDTSRTLYPIGAGDAVAAGMVGAW  
>comp11713\_c0\_seq1; 456 156 1343 LEN=1862; translated  
MSESGQFRDKFALHLAVELLGHDKVIKYL DKGDKQVPLYWRSKLMVSDPLKILRHFGE DM  
DCIRGRVLFVDVTFEFVKKQEQEQEVKSSINCDPPWRAQQPTSSCVILAALGFFLLLP  
NTIQEFSCGEEKDLGIGGGSYISTRPLDYSQLMSHVDSLQ LDPQSVTAEALARSMAGELL  
RQGPPCTDNKVEKMDRTGQLTAKYV ESSKANEENGLKNSGNLVPKACDSLHSLPKKFDL  
RVDIPYKSIGNVNGTLLHSSGDGT VTKYDKNALRFLYWDLSTNANHCHPLQKSDEPAVT  
AARQVVEDAFNRWRTQIIPNTVSGDCATDKSKNNIRNLQINLTGDNISQPTTVNSHTG  
NNSNKKRKRKVF RGASILPSARRKRNRGLVYDKNRG  
>comp11714\_c0\_seq1; 187 1 537 LEN=599; translated  
VSTCIFKPTQVSIWFIIVCGLGMFNYQGLYYDMIGISKYGEFDPIDEAELKELQLSGMTV  
GQLFADAKEFPYDWNYGVMIIYITFLSFTFAGTIVLEGVTTSIMAQATPPKLN TCFVNSGL  
LATLIGTLGRVLSDSMITMAALLDIHV FIDFVNATFFPLIILTAGCLILVYKYD KLV  
>comp11714\_c0\_seq2; 754 157 2841 LEN=2903; translated  
MVGFRSLKRSRRQGWAAAYLDYNKLRILYQLERSMLNQS NVIENRISQNDDA ILGDVA  
GRRCHQINEEFYLELQOEIEKISLFTLKIQGLLSEAIGYRFRDDDTIKVAKLFPDNFSI  
SREHYNGIPGDDLEMC LILGV ELLFLMQFVGVN ILGVRKVMKYNKI IRRANKPEYIFIV  
GGKDDFHLELIANSQSLSAIHSSLQSLLVDFHCKYKLLTKDTTRELNFFRFQSIVQAGYV  
IQKNSEIVNQPFKEFLSRKAMINVGSSSLGGIEGNEMHAVNVVLSFRPIGMLTSDFDEL DG  
MWIRWFPQYHHWKDRASKQMDTKLHLTDITHYIMGVLALEEVD RHRTRRNKLYLRGP KLN  
GLDFKEKSWGVDMP SMILNLASILLYTINYYIIAPTANHYAVVLGADGAYGATLIGTSS  
FSAIIAALLYSFWFTNCSFKSALIFSSICPIFGNLIYAL AISYDSMGLALTGRFLCGFGS  
AEVVNRQLISTCVSFKQITRASAFFVAAGAMGMSVGPLIAAILDDTTGRDYLVDFHLPFT  
PAGGIIFNSVTPGFLMAILWLAELLCLIF YFCEPERVNAVEDEFEEVEIRMESLPLMGK  
DYGSIGDERISNTSIGSSNLDLNNNSNRSSSPEPLKIAEGFWGGIISACSLICVNQGLPV  
TLVLF CYIELVDEVLISSCSMIVRRYFGWNASAAGYLVACLGLVLPANFVVEIFSRRLS

ERFIMKVSIFWFIIVCGLGMFNYQGLYYDMIGISKYGEFDPIDEAELKELQLSGMTVGQLF  
ADAKEFPYDWNYGVMIIYITFLSFTFAGTIVLEGVTTSIMAQATPPKLNTCFVNSGLLATL  
IGTLGRVLSDSMITMAALLDIHVFIIDFNATFFPLIILTAGCLILVYKYYDKLV  
>comp11714\_c0\_seq4; 261 105 617 LEN=679; translated  
MKVSIWFIIVCGLGMFNYQGLYYDMIGISKYGEFDPIDEAELKELQLSGMTVGQLFADAK  
EFPYDWNYGVMIIYITFLSFTFAGTIVLEGVTTSIMAQATPPKLNTCFVNSGLLATLIGTL  
GRVLSDSMITMAALLDIHVFIIDFNATFFPLIILTAGCLILVYKYYDKLV  
>comp11716\_c0\_seq1; 671 317 2167 LEN=2236; translated  
MASHDRVVDAKEKIVHSDGETDEAKLRHTIVELKDKVAEFQDQLVELKDIVLHQQTQCAK  
QRNARTTQTVAVRANKDVEVGGSEGTKTFEARITEAFADHYVKEVAKQDEKLAGLIKSR  
EDADDLARQQRENRSNDTTYGIITQLIVQLSHDIEKKEIEIAGLVKKRDKAVIWARQPK  
NNMASTSAAEFVWVMSDIEGSAETGDEALALARQQDVTRATPVNSEQVPRSMQYRQEDA  
TTLVSIIDTDQGRANQTRHREPSAAIPIGAKQSPRRKRTRQQDASATNTKHSPQTNRIQK  
QEASLAISENTRKQSLRTKQSWQSDSTPATPVDKQVPMKRSRQYATPATLASANGVP  
RTKRTRKQEAAPPPTPADVEPVPRTIWTGAQASQTIWTRPREKPPPATPFDAEKPRGRNL  
AADGAGRKSTGRHPAKFREATGTWTAARYAFSLLGDTFKNGDNPETLLLLGDVGDIGKVL  
AVAARRFDLAEGVLGLNTQTSHERLYRSPLGGPEELQRFDGSLGGFLRDARRVLAARFR  
ELGLVLGDNRWGGGVELLVPPQRFNLHNMNLAMGSSKFAEGFLVECRSMTKHERKRSRQG  
SEQDSEQDSICRVYDV  
>comp11717\_c0\_seq1; 337 1 1854 LEN=2133; translated  
QITNFTKLRKQTIIRGRMMWLVRLLFFVRVLFVHSMISLLLASDSIKCKSYGVSVHSFLFEGY  
ESGINSRKRMIPIFVKTAGTNLERATTRSRSQFRTIGSHAHLTSTTVHAGGENSASEPL  
SRSELGTFVVEEIEESLRENNFVSLILRGPKKKGGKGGDGLRGSIRQVLGRIKIST  
PKKKRKRPRPKKSHSESDDDTMLVLQMTVKYHGATDICKNFRLSEAPKTIHDLIVGDP  
ASEWAVEAVRAQSIQSAQLVTTNKIYDLRLDDGTIRKQKVKNTDGSVPSSAIPASHDRV  
QVPLSNKAEFFKVLGVTKDDGQPKPRMKGKLRQCQKQFVEIVGRIVDECQKQKKKDISV  
MCGGRAYLTFALHSYLQERYGSVTTTGVDVRPKLVAEISGIARSLGKSFDSLNFEGTIE  
KVVAQVSTHQNDKDKNSLNLVALHACDTATDDALYSGIAQNADVIVVAPCCHKQIRPQ  
VNAHFSSTRQNNALSSILKHGVYRERMSETVTDLSLRALLEFAGYKVQVFEFIGGEHTSK  
NVMITAKSSTKQSSETESIRQQITSLAGLYGISYQKLANWMEFGPLSEHSTKDGASSK  
MKTNKVSKIRMPRARPR  
>comp11718\_c0\_seq1; 118 67 264 LEN=713; translated  
MHSTIANAMARGKGTIPIKLLSSAGTGFFYTTRKNVSNQHKVAFVKYDPIVQKRVLFK  
EHKIK  
>comp11719\_c0\_seq1; 590 100 1074 LEN=1143; translated  
MLTTHSKSRAVIASFIALASANSVCVADATRPFATSTFVVKTRRNVMPRNRHSLMQLRGG  
EDATASAETEPSSKDDKSLDEKVVYAAMEKLGSLGPPIDADDMECKDGVCCAMPQKQESQP  
EIDPTKMADMIAEEMNVDSHLAMAALAAATSTVGEKKRFSFNESAATAMIQQELDLIETIP  
EDSQNVQTLTGEGFDVFMSSRRALAFANVEDARAILLADQMDAEEEEQEKAALAASS  
PTASAEETEQAQADFVEVKANFDPTKIPATAPTSPVPAPASSNSNDNMPKPAKKEDVVF  
TTDQLQKLVLESPVPVLLDVYADW  
>comp11719\_c0\_seq2; 1149 100 2397 LEN=2739; translated  
MLTTHSKSRAVIASFIALASANSVCVADATRPFATSTFVVKTRRNVMPRNRHSLMQLRGG  
EDATASAETEPSSKDDKSLDEKVVYAAMEKLGSLGPPIDADDMECKDGVCCAMPQKQESQP  
EIDPTKMADMIAEEMNVDSHLAMAALAAATSTVGEKKRFSFNESAATAMIQQELDLIETIP  
EDSQNVQTLTGEGFDVFMSSRRALAFANVEDARAILLADQMDAEEEEQEKAALAASS  
PTASAEETEQAQADFVEVKANFDPTKIPATAPTSPVPAPASSNSNDNMPKPAKKEDVVF  
TTDQLQKLVLESPVPVLLDVYADWCGPCVKLGPALDPAIKSGGMFRLVKINSNRPV  
QALEVAALPTVFGIKDGKIVHKFEGMPKSEDMRNFMGLFGAAPPSPVPTADEKVKYEE  
MTSKLIKSASAASFSSARERLTDRIVTKMDVLVKDDSVSNVEDAARLIRTFMNNVINNP  
YDQKYRTINLANKVVASKIGENPSCLAVLRSVGFSGTMTVLKDKQVINIAPLVAR  
TIDKWIVKMKEMAAAARKRQDELDRANLNLEELVEDEESEEVEEIDPTVCRVSLRLDG  
KNKVHNAELHRDDPLKILEELNINTEEDEVQITCVAKRLVVKSKDKEAMEKTLEEHLK  
PAANIVVKVASKADTSSMKERVAEKKIRKTGSHMTQSIGVYAKDDNNKAELIDGGGGV  
WYEHDISDDENEAEGEGDETDQKDAETTPPEKESEGEALAEETE  
>comp11722\_c0\_seq1; 201 1 451 LEN=701; translated  
XDMYEIXTFFQSEHSVQPNYVPTLEDEIEAERQKKVAELKNGKGTPIAESAFAIWAEN  
KRKRRAAEAKMVEQEMRKKKGGKGLAVLSGRALYDYKRDLFNIESENASNETSDQDNSK  
ENPVDQVATQVQSDLFLDGGDDSLDDLDDE  
>comp11722\_c0\_seq2; 644 114 950 LEN=1200; translated

MAKKGNGAATSKKAEQKKKNQQIEDRTFGLKNKNKSKKVQQYVKSVTNSVNNTGDRKKR  
QEEERRKKMKEEQKARKKAMKAEAEALFNDALGALSKKKTSMKAGKTEAKGRDADDEGKK  
KGTSRAMKMMYQMDAKEMDDKLEDPNYVPTLEDEIEAERQKKVAELKKNKGGKTPITAE  
SFAIWAENKRKRRAAEAKMVEQEMRKKKGGKGLAVLSGRALYDYKRDLFNIESENASNE  
TSDQDNSKENPVDQVATQVQSDLFLDGDDSLDDLDE  
>comp11723\_c0\_seq1; 259 69 1019 LEN=1290; translated  
MSAPLKLPTETSWTCDVGIKIAGKRWTYENGNSKKLRILALHGWMDCASFDALSHIVMD  
RLISDENFATDIDFIAIDLPGHGHSSHKSLDGPTSVQAEYCYVFEIVRQLEWNPEDLTI  
IGHSMGGSIALMYAAAFPTKRLCLLDTLGPMPKPPETISKNLRSNFKIRARGKMPSSVYP  
DFKTAVETRCKTPGLLFPQYISEETAKALVERGSTINENGQLQFRHDQRLNWPSSLYL  
SVTQLEQMYKDIASQNTSTCLMTAIDGMPFSPDKMIRIKTLLKPDICKSLPGSHHFHSDP  
DSVGGVADEIVPWLMO  
>comp11724\_c0\_seq1; 123 1 474 LEN=2302; minus strand; translated  
LQSEGSTDFGDCLRRIPSGMDVFLVFGQDDPWCKPAFARNMLRALEERPGSSNNPRQKSV  
HRYVQITNAGHCPNHEAPKAVGHLVRTWVDAKNDDRRKEKLSFVTGNGKKNIFGVKANS  
LSKELSFVEDWAEHTVTELDLDRDDIPLNLMDRITITFL  
>comp11724\_c0\_seq2; 123 1 474 LEN=2234; minus strand; translated  
LQSEGSTDFGDCLRRIPSGMDVFLVFGQDDPWCKPAFARNMLRALEERPGSSNNPRQKSV  
HRYVQITNAGHCPNHEAPKAVGHLVRTWVDAKNDDRRKEKLSFVTGNGKKNIFGVKANS  
LSKELSFVEDWAEHTVTELDLDRDDIPLNLMDRITITFL  
>comp11724\_c0\_seq3; 123 1 474 LEN=2169; minus strand; translated  
LQSEGSTDFGDCLRRIPSGMDVFLVFGQDDPWCKPAFARNMLRALEERPGSSNNPRQKSV  
HRYVQITNAGHCPNHEAPKAVGHLVRTWVDAKNDDRRKEKLSFVTGNGKKNIFGVKANS  
LSKELSFVEDWAEHTVTELDLDRDDIPLNLMDRITITFL  
>comp11724\_c0\_seq4; 123 1 474 LEN=2156; minus strand; translated  
LQSEGSTDFGDCLRRIPSGMDVFLVFGQDDPWCKPAFARNMLRALEERPGSSNNPRQKSV  
HRYVQITNAGHCPNHEAPKAVGHLVRTWVDAKNDDRRKEKLSFVTGNGKKNIFGVKANS  
LSKELSFVEDWAEHTVTELDLDRDDIPLNLMDRITITFL  
>comp11724\_c0\_seq5; 123 1 474 LEN=2247; minus strand; translated  
LQSEGSTDFGDCLRRIPSGMDVFLVFGQDDPWCKPAFARNMLRALEERPGSSNNPRQKSV  
HRYVQITNAGHCPNHEAPKAVGHLVRTWVDAKNDDRRKEKLSFVTGNGKKNIFGVKANS  
LSKELSFVEDWAEHTVTELDLDRDDIPLNLMDRITITFL  
>comp11724\_c0\_seq6; 123 1 474 LEN=2315; minus strand; translated  
LQSEGSTDFGDCLRRIPSGMDVFLVFGQDDPWCKPAFARNMLRALEERPGSSNNPRQKSV  
HRYVQITNAGHCPNHEAPKAVGHLVRTWVDAKNDDRRKEKLSFVTGNGKKNIFGVKANS  
LSKELSFVEDWAEHTVTELDLDRDDIPLNLMDRITITFL  
>comp11725\_c0\_seq1; 415 459 2060 LEN=2511; translated  
MAPNMDRNNAYAVPSSFSNSNKKSSHMDLILRENKQGMNPNAVDKLLTQELLSLSVRDR  
NDIQEEIHGVKCLAMDETPELIERSLRELETELEERIPDRKKQAYLKSQOVNQLVTQE  
PSLNSGSGHMSDPGSLQFVPPQSAHLSSSYVNEDEFRLRFLRCDFNVAKAAKRLVKYLD  
LLVDLFGELIALQRPRLSDFTKDELDRMRKGMIOQLLFRDRSGRRIVVFPEEERSQIPP  
ITKARIAMYMGWVAGSNDVITQRKGLVMAWLDKSFVERNQSWNIKYKFYEMVSTRISAI  
HMCSPDTPHYRFRAVGTMRGVEYLSKLNFLHGESVEVHYKLQGYGIPTEHIPISWTGK  
IKLQYLKQWMRIRQAIENPEICSNEDDDNRSSSTRNIEGASDGNSTTNNNSNIECPQF  
QDVI FRQGTSGMCHPGNVTFRSLIESVIMQEEESQRLQKQLEHMMERNNETMNTTNTKKS  
KNKKVKRRIKRPKQLALEIYEERQRTIHAADDNETAKLNSTTGRYLIWNNAKGW  
>comp11725\_c0\_seq2; 267 221 1081 LEN=1532; translated  
MYMGWVAGSNDVITQRKGLVMAWLDKSFVERNQSWNIKYKFYEMVSTRISAIHMCSPDT  
PHYRFRAVGTMRGVEYLSKLNFLHGESVEVHYKLQGYGIPTEHIPISWTGKIKLQYLK  
QWMRIRQAIENPEICSNEDDDNRSSSTRNIEGASDGNSTTNNNSNIECPQFQDVI FRQ  
GTSGMCHPGNVTFRSLIESVIMQEEESQRLQKQLEHMMERNNETMNTTNTKKS  
KIKRPKQLALEIYEERQRTIHAADDNETAKLNSTTGRYLIWNNAKGW  
>comp11726\_c0\_seq1; 672 99 2341 LEN=2414; translated  
MCHLDGVVVMFFSPFFLVRAWCTLGIRAALLSETGTNQQDDLEVVSYLDAQLTLNVDGTGA  
FLAGGFQEVTLSSSTKLMQNEQLMNRIPVESFVCGTKGINGGSPIEEEFKIGQDFQICI  
RPTDVSDFKVVSKDFVFCGIAADGTGGTKLVDDTGAPTSDLTIVTSDVEESMDTAGTPM  
GVLAAAFKSVVTPSYFSGAADSFRCKGEAILQHKTDPVEEDPVEDPLGAIITGCHYVVDSP  
FELAADETFQMGFCINGVLPVTTNAFVGFPCPEIQEEYGGTFCTYGTGAFQPIPSLDP  
VGGFFEGEAVQPQEVQLYDQVDTQKCMGRGVFYMHQGDGIDPEKVGLSGDSFKFKFHGMT  
KFPLTVCAYPKMEVPSDILQTSSGGKKEIDALGPFMSDGFVPTLNADGTPMVFAENHME

VCKTIEQPSQCSVSFDIDDPVQNPCTCFYQIDSPFLLDNEYKHLQIAFCVKGAMPHYTNI  
AVRNGDSKLEYPFYNSGPTINENPSVEYHLGRQPDGSYVDATTSFDPQVEQKCLGGDFL  
AHSEWGVSCIGTLIFAQIHTYFCTHFANSVIAXLATPTLDDFWTKHTFDPQFPEALKFTF  
NAPTTFEEPLIICAYTHGVANHFDAYNALLQDGFQTTGYYLGNEEYAELCKTISGPEQCT  
LYKKPAAPQGQRRNLNASFAAKSRGLQEGSPPEPGSSSFVTSVSLDLDRFDADRIGLSA  
SAYNVNSTEERAIAAAAALVAVALAAII

>comp11726\_c0\_seq2; 595 1 2136 LEN=2209; translated  
IIHFSIPNVRTSEFYTQTGQGTGVAKACIRAALLSETGTNQQDDLEVVSYLDAQLTLNVDD  
TGAFLAGGFDQEVTLSSSTKLMQNEQLMNRIPVESFVCGTKGINGGSPIEEEFKIGQDFQ  
ICIRPTDSDVDFKVVVSKDVFCGIAADGTGGTKLVDDTGAPTSDLTIVTSDVEESMDTAG  
TPMGVLAFAAFKSVVTPSYFSGAADSFRCKGEAILQHKDTPVEEDPVEDPLGAIITGCHYVV  
DSPFELAADETFQMGFCINGVLPVTTTNAFVGFCLCPPEIQEEYGGTFCTYGTGAFQPIPS  
LDPVGGFFFEAGEAVQPQEVQLYDPDVTQKCMGRGVFYMHQGDGIDPEKVGLSGDSFKFKFH  
GMTKFPLTVCAYPKMEVPSDILQTSSGGKKEIDALGPFMSDGFVPTLNADGTTMPVFAEN  
HMEVCKTIEQPSQCSVSFDIDDPVQNPCTCFYQIDSPFLLDNEYKHLQIAFCVKGAMPHY  
TNI AVRNGDSKLEYPFYNSGPTINENPSVEYHLGRQPDGSYVDATTSFDPQVEQKCLGGG  
DFLAHSEWGHTFDPQFPEALKFTFNAPTTFEEPLIICAYTHGVANHFDAYNALLQDGFQ  
TGYYLGNEEYAELCKTISGPEQCTLYKKPAAPQGQRRNLNASFAAKSRGLQEGSPPEPGS  
SSFVTSVSLDLDRFDADRIGLSASAYNVNSTEERAIAAAAALVAVALAAII

>comp11726\_c0\_seq3; 621 99 2332 LEN=2405; translated  
MCHLDGVVVMFFSPFVLVRAWCTLGIRAALLSETGTNQQDDLEVVSYLDAQLTLNVDDTGA  
FLAGGFDQEVTLSSSTKLMQNEQLMNRIPVESFVCGTKGINGGSPIEEEFKIGQDFQICI  
RPTDSDVDFKVVVSKDVFCGIAADGTGGTKLVDDTGAPTSDLTIVTSDVEESMDTAGTPM  
GVLAFAAFKSVVTPSYFSGAADSFRCKGEAILQHKDTPVEEDPVEDPLGAIITGCHYVVDS  
FELAADETFQMGFCINGVLPVTTTNAFVGFCLCPPEIQEEYGGTFCTYGTGAFQPIPSLDP  
VGFFFEAGEAVQPQEVQLYDPDVTQKCMGRGVFYMHQGDGEVVKIVFAQSHKCFCSRSALS  
PQLATTILNDSRTKIDPEKVGLSGDSFKFKFHGMTKFPLTVCAYPKMEVPSDILQTSSGG  
KKEIDALGPFMSDGFVPTLNADGTTMPVFAENHMEVCKTIEQPSQCSVSFDIDDPVQNP  
TCFYQIDSPFLLDNEYKHLQIAFCVKGAMPHYTNI AVRNGDSKLEYPFYNSGPTINENPS  
VEYHLGRQPDGSYVDATTSFDPQVEQKCLGGGDFLAHSEWGHTFDPQFPEALKFTFNAP  
TFEEPLIICAYTHGVANHFDAYNALLQDGFQTTGYYLGNEEYAELCKTISGPEQCTLYKK  
PAAPQGQRRNLNASFAAKSRGLQEGSPPEPGSSSFVTSVSLDLDRFDADRIGLSASAYN  
VDSTEERAIAAAAALVAVALAAII

>comp11726\_c0\_seq4; 606 99 2448 LEN=2521; translated  
MCHLDGVVVMFFSPFVLVRAWCTLGIRAALLSETGTNQQDDLEVVSYLDAQLTLNVDDTGA  
FLAGGFDQEVTLSSSTKLMQNEQLMNRIPVESFVCGTKGINGGSPIEEEFKIGQDFQICI  
RPTDSDVDFKVVVSKDVFCGIAADGTGGTKLVDDTGAPTSDLTIVTSDVEESMDTAGTPM  
GVLAFAAFKSVVTPSYFSGAADSFRCKGEAILQHKDTPVEEDPVEDPLGAIITGCHYVVDS  
FELAADETFQMGFCINGVLPVTTTNAFVGFCLCPPEIQEEYGGTFCTYGTGAFQPIPSLDP  
VGFFFEAGEAVQPQEVQLYDPDVTQKCMGRGVFYMHQGDGEVVKIVFAQSHKCFCSRSALS  
PQLATTILNDSRTKIDPEKVGLSGDSFKFKFHGMTKFPLTVCAYPKMEVPSDILQTSSGG  
KKEIDALGPFMSDGFVPTLNADGTTMPVFAENHMEVCKTIEQPSQCSVSFDIDDPVQNP  
TCFYQIDSPFLLDNEYKHLQIAFCVKGAMPHYTNI AVRNGDSKLEYPFYNSGPTINENPS  
VEYHLGRQPDGSYVDATTSFDPQVEQKCLGGGDFLAHSEWGVSCIGTLIFAQIHTYFCTH  
FANSVIAXLATPTLDDFWTKHTFDPQFPEALKFTFNAPTTFEEPLIICAYTHGVANHFDA  
YNALLQDGFQTTGYYLGNEEYAELCKTISGPEQCTLYKKPAAPQGQRRNLNASFAAKSRG  
LQEGSPPEPGSSSFVTSVSLDLDRFDADRIGLSASAYNVNSTEERAIAAAAALVAVALAA  
II

>comp11726\_c0\_seq5; 514 1 2359 LEN=2432; translated  
IIHFSIPNVRTSEFYTQTGQGTGVAKACIRAALLSETGTNQQDDLEVVSYLDAQLTLNVDD  
TGAFLAGGFDQEVTLSSSTKLMQNEQLMNRIPVESFVCGTKGINGGSPIEEEFKIGQDFQ  
ICIRPTDSDVDFKVVVSKDVFCGIAADGTGGTKLVDDTGAPTSDLTIVTSDVEESMDTAG  
TPMGVLAFAAFKSVVTPSYFSGAADSFRCKGEAILQHKDTPVEEDPVEDPLGAIITGCHYVV  
DSPFELAADETFQMGFCINGVLPVTTTNAFVGFCLCPPEIQEEYGGTFCTYGTGAFQPIPS  
LDPVGGFFFEAGEAVQPQEVQLYDPDVTQKCMGRGVFYMHQGDGEVVKIVFAQSHKCFCSRS  
ALSPQLATTILNDSRTKIDPEKVGLSGDSFKFKFHGMTKFPLTVCAYPKMEVPSDILQTS  
SGGKKEIDALGPFMSDGFVPTLNADGTTMPVFAENHMEVCKTIEQPSQCSVSFDIDDPV  
QNPCTCFYQIDSPFLLDNEYKHLQIAFCVKGAMPHYTNI AVRNGDSKLEYPFYNSGPTINE  
NPSVEYHLGRQPDGSYVDATTSFDPQVEQKCLGGGDFLAHSEWGVSCIGTLIFAQIHTYF  
CTHFANSVIAXLATPTLDDFWTKHTFDPQFPEALKFTFNAPTTFEEPLIICAYTHGVANH

FDAYNALLQDGFQTTGYLLGNEEYAEELCKTISGPEQCTLYKKPAAPQGQGRRLNASFAAK  
SRGLQEGSPPEEPGSSSFVTSVSLDLDRFDADRIGLSASAYNVDSTEERAIAAAALVAVALAAII

>comp11726\_c0\_seq6; 687 99 2225 LEN=2298; translated  
MCHLDGVVVMFFSPFFLVRWCTLGIRAALLSETGTNQQDLEVVSYLDAQLTNLVDDTGA  
FLAGGFQDQEVTLSSSTKLMQNEQLMNRIPVESFVCGTKGINGGSPIEEEFKIGQDFQICI  
RPTDVSDFKVVVSKDVFCGIAADGTGGTKLVDDTGAPTSDLTIVTSDVEESMDTAGTPM  
GVLAAAFKSVVTPSYFSGAADSFRCKGGEAILQHKDTPVEEDPVEDPLGAIITGCHYVVDSP  
FELAADETFQMGFCINGVLPVTTTNAFVGFVLCPEIQEYGGTFCTYGTGAFQPIPSLDP  
VGGFFEGEAVQPQEVQLYDPDVTQKCMGRGVFYMHQGDGIDPEKVGLSGDSFKFKFHGM  
KFPLTVCAYPKMEVPSDILQTS SGGKKEIDALGPFMSDGFVPTLNADGTTMPVFAENHME  
VCKTIEQPSQCSVSFDIDDPVQNPTCFYQIDSPFLLDNEYKHLQIAFCVKGAMPHYTNI  
AVRNGDSKLEYPFYNSGPTINENPSVEYHLGRQPDGSYVDATTSFDPQVEQKCLGGGDFL  
AHSEWGHTFDPQFPEALKFTFNAPTTFEELIICAYTHGVANHFDAYNALLQDGFQTTGY  
YLGNEEYAEELCKTISGPEQCTLYKKPAAPQGQGRRLNASFAAKSRGLQEGSPPEEPGSSSF  
VTSVSLDLDRFDADRIGLSASAYNVDSTEERAIAAAALVAVALAAII

>comp11726\_c0\_seq7; 529 1 2243 LEN=2316; translated  
IIHFSIPNVRTSEFYTQTGQGTGVAKACIRAALLSETGTNQQDLEVVSYLDAQLTNLVDD  
TGAFLAGGFQDQEVTLSSSTKLMQNEQLMNRIPVESFVCGTKGINGGSPIEEEFKIGQDFQ  
ICIRPTDVSDFKVVVSKDVFCGIAADGTGGTKLVDDTGAPTSDLTIVTSDVEESMDTAG  
TPMGVLAFAAFKSVVTPSYFSGAADSFRCKGGEAILQHKDTPVEEDPVEDPLGAIITGCHYV  
DSPFELAADETFQMGFCINGVLPVTTTNAFVGFVLCPEIQEYGGTFCTYGTGAFQPIPS  
LDPVGGFFEGEAVQPQEVQLYDPDVTQKCMGRGVFYMHQGDGEVVKIVFAQSHKCFCSRS  
ALSPQLATTILNDSRTKIDPEKVGLSGDSFKFKFHGMTKFPLTVCAYPKMEVPSDILQTS  
SGGKKEIDALGPFMSDGFVPTLNADGTTMPVFAENHMEVCKTIEQPSQCSVSFDIDDPV  
QNPTCFYQIDSPFLLDNEYKHLQIAFCVKGAMPHYTNI AVRNGDSKLEYPFYNSGPTINE  
NPSVEYHLGRQPDGSYVDATTSFDPQVEQKCLGGGDFLAHSEWGHTFDPQFPEALKFTFN  
APTTFEELIICAYTHGVANHFDAYNALLQDGFQTTGYLLGNEEYAEELCKTISGPEQCTL  
YKKPAAPQGQGRRLNASFAAKSRGLQEGSPPEEPGSSSFVTSVSLDLDRFDADRIGLSAS  
AYNVDSTEERAIAAAALVAVALAAII

>comp11726\_c0\_seq8; 580 1 2252 LEN=2325; translated  
IIHFSIPNVRTSEFYTQTGQGTGVAKACIRAALLSETGTNQQDLEVVSYLDAQLTNLVDD  
TGAFLAGGFQDQEVTLSSSTKLMQNEQLMNRIPVESFVCGTKGINGGSPIEEEFKIGQDFQ  
ICIRPTDVSDFKVVVSKDVFCGIAADGTGGTKLVDDTGAPTSDLTIVTSDVEESMDTAG  
TPMGVLAFAAFKSVVTPSYFSGAADSFRCKGGEAILQHKDTPVEEDPVEDPLGAIITGCHYV  
DSPFELAADETFQMGFCINGVLPVTTTNAFVGFVLCPEIQEYGGTFCTYGTGAFQPIPS  
LDPVGGFFEGEAVQPQEVQLYDPDVTQKCMGRGVFYMHQGDGIDPEKVGLSGDSFKFKFH  
GMTKFPLTVCAYPKMEVPSDILQTS SGGKKEIDALGPFMSDGFVPTLNADGTTMPVFAEN  
HMEVCKTIEQPSQCSVSFDIDDPVQNPTCFYQIDSPFLLDNEYKHLQIAFCVKGAMPHY  
TNI AVRNGDSKLEYPFYNSGPTINENPSVEYHLGRQPDGSYVDATTSFDPQVEQKCLGGG  
DFLAHSEWGVSCIGTLIFAQIHTYFCTHFANSVIAXLATPTLDDFWTKHTFDPQFPEALK  
FTFNAPTTFEELIICAYTHGVANHFDAYNALLQDGFQTTGYLLGNEEYAEELCKTISGPE  
QCTLYKKPAAPQGQGRRLNASFAAKSRGLQEGSPPEEPGSSSFVTSVSLDLDRFDADRIGS  
LSASAYNVDSTEERAIAAAALVAVALAAII

>comp11727\_c0\_seq1; 149 655 1290 LEN=1423; translated  
MFENIRSGYARLIPSGTNDQEDIEIMADLGIYEDEETRAERDALSGGNESDFCGRCPVSV  
QRFYDNLPSLTLRERLLGCVTMMVCGYFLSFGSFMRMKS LFMGNPVPLVNVTVGNVIAL  
CGTCFLTRPEMQFQRMFNPSRKLASTFYLGLAVTLVLLLLPHFPFRGMILFLLMIGQYV  
AITWYCLSYIPFARDFVSSGCRRMIGMAEDG

>comp11728\_c0\_seq1; 705 594 2531 LEN=2907; translated  
MSNKSQSSRSQAEPYRERLSAEVEGLKKQVEQLRKHVQHGQPQPNHPRNLAAAAAVQMH  
SQGGQSQHNPFGGGYGRNMQGSFNAQQLSQQHMSQQEQDQEQEQRRANLIASLPPSL  
AGGGQDNYGGPQAPSQGLGFSKDDFTSMRGRKQSRASQLAKIMEERRKLRADLDSLQR  
QQILDDPGGAASSGNFHDLQDRFGSNNPHLRSMGGSSNIHHMGGGGPRGGPGFGGHAV  
PPSI IAGARDALQRYPSAMQFPGSNNGGNVASAMASSRNHPMSENDLTPQVMDGSSNF  
GGSNIPSGRGGYPTPPSGAANNVGSNLGHLKRARGDFDVAIKREEMEVAARRSSMNADH  
HSVDHFGDKRRRMMTEAALREELQKRHLDTTANF SAAAGLKPTYGGRVSSLYPPNEILLG  
DKQSHATDSISALSSSHRLLASQREAQNMLLYGNSMNSNGSNRSNGSPTLNSGFFDPMQH  
DRKLPKQRLSKNFVPEADTVVLGKGNIPKTNFNLKLGKGLVMDSLMEYANGERRKIA  
VISKIIRWVTSRNYQTTGFVKFEDDTWEMTERDARVKITALFRDCLHDQYRSSSSSKVK

RRQELRKREITGGGSPTGSTSENDKEKEGIGIDKSKQTLTEENG  
>comp11728\_c0\_seq2; 705 241 2178 LEN=2554; translated  
MSNKSQSSRSQAEPYRERLSAEVEGLKKQVEQLRKHVQHGGPQPNNHPRNLAAAAAVQMH  
SQGGQSQHNPFGGGYGRNMQGSFNAQQLSQQOHMSQQEQDQQEQRRANLIASLPPSLL  
AGGGQDNYGGPQAPSQGLGFSKDDFTSMRGRKQSRASQLAKIMEERRKLRADLDSLQR  
QQILDDPGGAASSGNFHDLDQDRFGSNNPHLRSMGGSSNIHHMGGGGPRGGPGFGGGHAV  
PPSIIAGARDALQRYPSAMQFPGSNNGGNVASAMASSRNHPMSENDLTPQQVMDGGSSNF  
GGSNIPSGRGGYPTPPSGAANNVGSNLGHLKRARGDFDVAAIKREEMEVAARRSSMNADH  
HSVDHFGDKRRRMMTEAALREELQKRHLDTTANFSAAAGLKPTYGGRVSSLYPPNEILLG  
DKQSHATDSISALSSSHRLLASQREAQNMLLYGNSMNSNGSNRSNGSPTLNSGFFDPMQH  
DRKLPKQRLSKNFVPEADTVVLGKGNIPKTNFGNLKLGKLVMDSLMEYANGERRKIA  
VISKIIRWVTSRNYQTTGFVKFEDDTWEMTERDARVKITALFRDCLHDQYRSSSSSKVK  
RRQELRKREITGGGSPTGSTSENDKEKEGIGIDKSKQTLTEENG  
>comp11728\_c0\_seq3; 705 474 2411 LEN=2787; translated  
MSNKSQSSRSQAEPYRERLSAEVEGLKKQVEQLRKHVQHGGPQPNNHPRNLAAAAAVQMH  
SQGGQSQHNPFGGGYGRNMQGSFNAQQLSQQOHMSQQEQDQQEQRRANLIASLPPSLL  
AGGGQDNYGGPQAPSQGLGFSKDDFTSMRGRKQSRASQLAKIMEERRKLRADLDSLQR  
QQILDDPGGAASSGNFHDLDQDRFGSNNPHLRSMGGSSNIHHMGGGGPRGGPGFGGGHAV  
PPSIIAGARDALQRYPSAMQFPGSNNGGNVASAMASSRNHPMSENDLTPQQVMDGGSSNF  
GGSNIPSGRGGYPTPPSGAANNVGSNLGHLKRARGDFDVAAIKREEMEVAARRSSMNADH  
HSVDHFGDKRRRMMTEAALREELQKRHLDTTANFSAAAGLKPTYGGRVSSLYPPNEILLG  
DKQSHATDSISALSSSHRLLASQREAQNMLLYGNSMNSNGSNRSNGSPTLNSGFFDPMQH  
DRKLPKQRLSKNFVPEADTVVLGKGNIPKTNFGNLKLGKLVMDSLMEYANGERRKIA  
VISKIIRWVTSRNYQTTGFVKFEDDTWEMTERDARVKITALFRDCLHDQYRSSSSSKVK  
RRQELRKREITGGGSPTGSTSENDKEKEGIGIDKSKQTLTEENG  
>comp11729\_c0\_seq1; 181 356 904 LEN=989; translated  
MDCGTAPLCGVLTLETGYGKGYKHQKPGVHGLWPQTGRYGSSKCLPPKSTLDPKIH  
YCYDEDGDTIEHERWFENHEWEKKGICAGVSDADAFFDLVCNISRAPLALMTSVRNQ  
QSSDKSLDPFVEALESAGYPVFSTDNLFKQILLSACASEDGKWILADASEFSAKCG  
PRNSNDVVSQ  
>comp11729\_c0\_seq2; 173 586 1043 LEN=1128; translated  
MVFGXQTGRYGSSKCLPPKSTLDPKIHICYDEDGDTIEHERWFENHEWEKKGICAG  
VSDADAFFDLVCNISRAPLALMTSVRNQSSDKSLDPFVEALESAGYPVFSTDNLFKQ  
ILLSACASEDGKWILADASEFSAKCGPRNSNDVVSQ  
>comp11731\_c0\_seq1; 96 1 298 LEN=1049; minus strand; translated  
XYDPVTGMYTVDPIVVYDPLEGAENNNVARSCFAWSSIRWVFAQSYMTLSSAAEQNA  
SDGSRGRATPGVGGKGPAYGHDESGNVVDPSSPLLELLLSF  
>comp11732\_c0\_seq1; 973 88 1380 LEN=1475; translated  
MKFAVAAAALLTASASAFTTMTPRFGGNAVASIPASTAMAPLLTGSALQMAKQVPH  
GGGELVDLMVKSDEEKEAAIAKATVTLQATERQLCDVELIMNGGFSPITGFMDEATY  
DSVVENMALPDGTIFGLPVVFDTDDDELQPGTTILLKQGLAIATIEFTDKFTPNK  
VKETKECYGTSELEHPGTLMVATERGKFYMGKVTGLNSPVRDFPCKTPAEVRAEL  
PDDKDVVAFQCRNPVHRAHYELFTRALDDPLIGEDGIVLVHPTCGPTQADDIPGV  
VRYKTYEVLKEETKNDRVFEYLPYSMHMAGPREAIQHMMIRKNFGCTHFIIGRDM  
AGSKSSITGEDYYGAYDAQDIAANAEKLGVTVPVSLNLVYTEEEGYVTADEAKE  
KDLSLKKLSGTFKFRQMLRGGEDIPEWFAFKSVVEVLRENQ  
>comp11733\_c0\_seq1; 416 97 1902 LEN=2038; translated  
MKTITVHCWSAPRSRSTALLYSFALGDDKIPFDEPLYREYLEAKKESLTRPYLED  
LIAGTPPEGEDDPERWRRELLSLSERLELGAALKATPGEVIFCKHMAKHAFLYDF  
DNEYKLTGTPEVELLHRHVLLIRDVTVLSAWGAVGEVHGNSPSSSEIGVVSLSM  
SIYSELESKTDQPILVIDSDELAQDPKGLDLCLERLSIDYSDSMLSWAEGEHKCD  
GPWAKWVYHSHVHKSTGWNSSPKKYRTLNPGLQISMPAYLFLSHLTPYQKRGPPA  
SQLYEDPRNEHLLVWIGAPGYGRLLPRSQAGVSPWDSVQGGDGCWEGIRVYNGR  
IMSLDKHLRRLFRSAKALGFENVHTKEEVTEAIFQTLAANGMRNDAHMLRTL  
SRGEKYTSSMNPVFNVYGTTLIILPEWKPTEGATTYDNTKGISLISASQRNSP  
STCDSKIHHNNMINNILPKIQANLAGCADAIMLDMDGYVSETNATNIFMVDD  
EGLLTPHGDHCLPGVTRGTVLVLAKELGIPHEVRRVSLAEFHAAEEVFTTGT  
MGELTPVTNIDGRVIGTGVRGPITKQLQDAYKALPAKPEWSTEIPPFTE  
S  
>comp11733\_c0\_seq2; 307 97 1136 LEN=1136; translated  
MKTITVHCWSAPRSRSTALLYSFALGDDKIPFDEPLYREYLEAKKESLTRPYLED  
LI

AGTPPEGEDDPERWRRELLSLSERLELGAALKATPGEGVIFCKHMAKHAFLYDFDNEYK  
LTGTPEVELLHRHVLLIRDPTVLSAWGAVGEVHGNSPSSSEEIGVVSLSMSIYSELESKTD  
QPILVIDSDELAADPKGSLDLCLERLSIDYSDSMLSWAEGEHKCDGPWAKWVYHSHVHKST  
GWNSSPKKRYRTLNPPELMQGLQISMPAYLFLSHLTPPYQKRGPASQLYEDPRNEHLLVW  
IGAPGYGRLLPRSQAGVSPWDSVQGGDGCWEGIRGTLAEFFCYITX  
>comp11733\_c0\_seq3; 179 72 854 LEN=990; translated  
MSLDKHLRRLFRSAKALGFENVHTKEEVTEAIFQTLAANGMRNDAHMLTLRSGEKYTSS  
MNPVFNVYGTTLIILPEWKPTGATTYDNTKGISLISASQRRNSPSTCDSKIHNNMINN  
ILPKIQANLAGCADAIMLDMDGYVSETNATNIFMVDDEGVLLTPHGDHCLPGVTRGTVLV  
LAKELGIPHEVRRVSLAEFHAAEEVFTTGTMGELTPVTNIDGRVIGTGVRGPITKQLQDA  
YKALPAKPEWSTEIPPFTES  
>comp11734\_c0\_seq1; 358 1 1077 LEN=1530; translated  
XDDXEVQNNVTLKEMKMNKSRIQCLLLSLATVKLKGAFATAIPSLNTRIVTFGVTNNDNDV  
IDIGLFRFNSQSPYERNKNQRNLQEKKHTQGFTESIFRKLKTVRSILRFRLSSRFWNINK  
KRYLSIIASAIIVAGTFPSQVTAQLATNGIPSVNSAPKISRTVSETHFVQDLSSDNHMF  
DGFDTTEGLASHDDEFAIDAEDFRFARPAVEDVSQTLAAEASHPLETDLMLVNDIMVKKGL  
RNIAVVGTVGAVSLTLLKKNANASSLISGEESKIDDGRPQNVGEETILPDREERTGAIALS  
EVKSSILPLGGKKYVEARAQPKSPLKEAELAARYAAISSVEERAYQILIDLGMIEVTN  
>comp11734\_c1\_seq1; 419 1 746 LEN=1126; translated  
XQVQKHSRQATMGRPKGMNQKAAAAMERKAAAQAVKDSKAAAQREKDLQAEWSKGANNR  
GAARSEANAAKADEQARKKREKAALLAAEEEEALGNNGKAKKVPVTLSSKKGKKKNDLSLLE  
DALVSGAEKKQKAKKKAELAKAQKLTNEAKQKLEKDKPMDPLLANTEDMMQGATDDIVG  
RAANKALDEEHALSGINAALDQMTLGSQSNMSTKGLFKAYETRMMPPEVKHDYPGLKLSQ  
YKEKIFQMW  
>comp11735\_c0\_seq1; 464 231 2057 LEN=2117; translated  
MTTHHGFGSALLRGSVHALVFLQVAAAFQHQAQHCRTVNNFETKRTTSLGAAASRQKRV  
SNLKDWSKNEAGIQVASVLEIEQSKTTGGIGLVTSGTASSTDENSVVVTVPSSLALSVEL  
PTGGPDDRSVIKELVEDRQAFRSLPWFAQFSAYLYKLDKISPRKLEGDVLQPWLDLPR  
DFGTPIHWTQQEREERLQYPHMEVSVQRQEKTWNDMYQNLQSSGTRLMKDMFDDFLWGC  
ECARSRAFSGGYTGSFPNPLVYVFTLVLTAYVGLNLGTLEQAANGAGLVFCSSVLRDFV  
LPKFFKNKKYVICPVIDMANHDSMRRTANVAYEFFANAYSLSTTAAVPSNSEVVISYGR  
SNDQLLQYYGGIDRKNYATSCEDRRDFVCDFAFAEFSSFCGDIQVAQSFSAVCKFSGFVEQ  
DNPHDITYVMPPLREWDIESLEKACGGTFFPLDRLQKLDRAGLLGLISLNDLADSSPADDD  
ESKEEGVTSEGNPRGGVLSRAVGIDPAVFQALRALVSNAQEWEASGEAVGNFAAEVSPE  
NEQRARTAARTAIEMEIASKPTTLEEDRELLKRLKASKNGLQEPDELMAIMFRIEKKKLL  
KETLDRLQ  
>comp11735\_c0\_seq2; 513 231 1919 LEN=1979; translated  
MTTHHGFGSALLRGSVHALVFLQVAAAFQHQAQHCRTVNNFETKRTTSLGAAASRQKRV  
SNLKDWSKNEAGIQVASVLEIEQSKTTGGIGLVTSGTASSTDENSVVVTVPSSLALSVEL  
PTGGPDDRSVIKELVEDRQAFRSLPWFAQFSAYLYKLDKISPRKLEGDVLQPWLDLPR  
DFGTPIHWTQQEREERLQYPHMEVSVQRQEKTWNDMYQNLQSSGTRLMKDMFDDFLWGC  
ECARSRAFSGGYTGSFPNPLVYVFTLVLTAYVGLNLGTLEQAANGAGLVFCSSVLRDFV  
LPKFFKNKKYVICPVIDMANHDSMRRTANVAYEFFANAYSLSTTAAVPSNSEVVISYGR  
SNDQLLQYYGFVEQDNPHDITYVMPPLREWDIESLEKACGGTFFPLDRLQKLDRAGLLGLIS  
LNDLADSSPADDDSKKEEGVTSEGNPRGGVLSRAVGIDPAVFQALRALVSNAQEWEAS  
GEAVGNFAAEVSPENEQRARTAARTAIEMEIASKPTTLEEDRELLKRLKASKNGLQEPDE  
LMAIMFRIEKKKLLKETLDRLQ  
>comp11736\_c0\_seq1; 518 105 1333 LEN=1372; translated  
MSSLGSI FGVDSEKDTPNQNLFEKTEALPERPQHKPVAAPKRKSKRGEENTENEIKNE  
LTNGQEESSEKRRKRRKSHSNDSESAENQNEADTGENQAETTTDGAESKNKPGKEEE  
ERTIFVGNLPLTTTRKGLAALFRECGPVASSRIRSVPTGIKLPKDQAGNQNMMRKVCVN  
TNQIDKSLTDSVQGYVVFKEELADVEKALEMNNKIELGGMKIRVDRATPTVDPSSRSVFGN  
LPYAAKESTLKEHFEEGCLLEPEDVLGVRIVRDKXNLSVQGFVCPISGKNSVPTALKLH  
GSTYMKKKIRVMVCGKRFKGGKGEASQOKQKSKEIEKVTVGAFRRIIAKQQKEALGTNKR  
KRGEKKKNATPIKAGAGNISKRAALDKKVDKVRKQLQKRVAKGMGKNKR  
>comp11737\_c0\_seq1; 289 109 1110 LEN=1565; translated  
MRFKAKLMNDQLSLLHAIAPISKLQDAHRQYAVLYLDEEYVRISFRNSESGITCFVELS  
QRDLFVDHRIESAADNVIVCQVDLVSFKLALQSVVGGGGGANKQKQNGNNSERNLTLHS  
IHQNEVVVLKLAKRNRMPCLCLEGKHAQSDSANHDVEIHQAIPTILRRAEMQNHLPPQI  
NMPQVQLELPADRPIRPLLDRLKAMGQYVFLEGNMKGDLTIRLHHEGASMACYNDLVPR





VSSAGKNNLX

>comp11740\_c0\_seq1; 410 124 1455 LEN=1746; translated  
MRATLLLLAAIITSSTAICNYGVVAYIILPSSNTAFGNTPHSSLRISVREAVKSEQGLST  
NSGSKINNSENDVDEYAVNMNNVNSGRRSWASSLPLPENAIDEETANRARAAMEGPNPPA  
LEGRCAVNLNFNILPSASGSASEGNSSCGVQWLHVDPVLI VDDFLTEEEECQNVLQLTSQ  
QLPPDAGR VIRLES RVNSNGQASNRRSTTWYVRYGCKALAPLFHGLEGLLPTVRRNRIEE  
VQLVRYAGPGQGF AWHEDALDEKIAMP SIGGQRVATV LVYLDDVVDVDETKEDGPGGSLSSL  
PSSGR TMFRDLVGPGEYLAVAPRRGRALLFFPAITGRTELSDAASAADERSPGAPEGRK  
ATFGETHSFDDTRPDHRTMHAGEPPAPGEERGAKGPVSTKHIAQLWIHSSDHSPVVFPG  
GLNKHSDAQKHIDELRVQATTSN

>comp11741\_c0\_seq1; 449 94 942 LEN=1305; translated  
MTGSTRNEKDHRINPEIDANSVAKSKKELRLERKAAKAAAAAVKAKENADSEKNEKE  
GGHDRLDKEEYLALKKQRRRAELRKEQEAMRNQLREEKKLRKRKKNRELNAKGGAE  
NAK  
KKKQKTANAGANDAASNNDNNNNKKNKKSKEERDANMNAFRSVFHGGSSSENGGMVTRL  
GVQYKDTVVG TGKATREGVPI TVKYELTGGKFGAVL DSSKFTFRLGMGEVIRGWDIGLE  
GMREGRRKLI VPPKAGYGGKDIGAGPGAPLNF DITLLSCGR

>comp11742\_c0\_seq1; 189 368 1303 LEN=1303; minus strand; translated  
MIATIASGSAMVSRPPTAAELELEVLQLEFLVRPEMNL SVVPGLVVDAGDRQVVAGNHPVD  
DEPAADHREPGVQVEDRQGEPLDGEPLAVVGFEPARHTRQGLPYALLEEHLGSQTNAGLE  
DPGLLRGVLLLDPGQPQLVAPRGLVLP HLLFPLVEVQRVLVVDVLGVQE QRAAERVQPG  
GGLAPALSSVRVREGGFMPGLLRDGLLGVGLDELQAQLVLRVQLHLDLALVAVDHREG  
GQAPARAAADQKEGGATKFS SHSEASQTVLCGAFGRRAENEFPLGGAWFPALASGSSSL  
LIDSKRFAQKRX

>comp11743\_c0\_seq1; 428 1 1284 LEN=1468; translated  
XQQQQQQRLN LNLNLNTEMDTNQYHNDNTIALVYSQQQQSQQQEQRQQQHONYFDQTN  
Y  
QHQPFFHHYEQSWNNKVPVAPSGERFHIFNCDDPSFHITNDDNAVAKLSESTIHEDVEPL  
TITIPETPMDNTSTICRSKSDNHINGLVMGTRVSELIEQRARKRSNSSRAKTKSIE TKV  
IEGAKSNLYRVENPSKYDILCGQSRICANHMGNQRFQAVLDDFAPRYDVATSKQDKMTMT  
KEIVATIHNLGGFRFLKYKDEMWEEISTVAARDKVSHALRTKVASWKRQEQRLQQAGSGN  
EASPSGSGRRGSRNSKSKQCTTSRRRRSSASSASTGASDI IAGLSFDRIMGSSTPSESK  
INDMYRYQQDIFEAMTIPRLLNSEASMGYKAETFTVLIPIYNIYKGDNPPRILADRVC  
Q  
FETGGRQ

>comp11744\_c0\_seq1; 194 197 717 LEN=717; translated  
MDFFAGQNSTSNGGATKTGAGGMNVMLRRTWDVKMPPASKYVRNRMVYTGLGHTNII  
QRSRKIVLEILGPDVDENAADSDSLSLEGTGKRKPSRSGSTFMGDTGYFLEEEETNESLQR  
RRGTLQRSTEARNFIDL SSELKDDDLVVVRIKPRRGRWGINRDPEDSDDDDDX

>comp11747\_c0\_seq1; 523 394 2762 LEN=2777; translated  
MDSCSKHSPSCSELNDVVITANS DPGMPKDV SIDRGSEGLTAGSDPSFSRPRCVRDAS  
YSSTDEDGT VGGGSSRNDSDCETVATVTT SNSNYKYSR ISTATGSVC SHGSASVCS  
CSSS  
KIRNKLDNMNETNAGEIDRMMIKELQGLSVVDRGLVQEEIHGVSSCAVVENELKISDGLK  
RLEEEIRAIRREVLVSPTQVSR LGNTYNEAIWSYLAVEEECSSPSATTVNARTRLLYSYI  
FHDEFRLKFLRADLYDAEKA AHRYLRCEV LLLKYFGSYALQRPLMYDDL GKECQDAKAG  
YVQILPSRDRSGRLVVVSQPFPAQDVTTSMGTIIKLF TYIFSVVSEDVETQKRGVIFIFS  
TNDEALQHLEDPNDKLEYSLYREGSPVRRSCTHFCLPENNP KMFIRAVMMLA IPEKNGF  
EHAFTWKVSQVIIICESTLVTNKRHTVVR IEIPT YFFPPDCEHYLQTLPI SGLT IETQYK  
LMTFGIPVSELPITSTGGIKTKHHLQWTRTRKALDTARMKSLEG CYNEKMLQQQMEEKQQ  
TGSSVTS PRNCCMYPTYEDYLQYHGKEPIIHPMINDVLF SKGGKNVTHYGNIEFTDLMKR  
SLMQYVTGTPLQNRKMRAIRQAI VDEVQNRGGRF LTLDRKLRGGYCWTEIQEGPDLHDR  
IATSLYDHKRRLAAKLKIQKDRCGTAMFTTLDNSKRRKVVTTDDGQTD PDDTTAVLELFDKH  
GTSENQIILNETTSNSPARKQMSLRMDEXILNIQARQLLDEDPVLQECTISVSCYIPNFE  
YYWMNNDI

>comp11747\_c0\_seq2; 627 394 2628 LEN=2643; translated  
MDSCSKHSPSCSELNDVVITANS DPGMPKDV SIDRGSEGLTAGSDPSFSRPRCVRDAS  
YSSTDEDGT VGGGSSRNDSDCETVATVTT SNSNYKYSR ISTATGSVC SHGSASVCS  
CSSS  
KIRNKLDNMNETNAGEIDRMMIKELQGLSVVDRGLVQEEIHGVSSCAVVENELKISDGLK  
RLEEEIRAIRREVLVSPTQVSR LGNTYNEAIWSYLAVEEECSSPSATTVNARTRLLYSYI  
FHDEFRLKFLRADLYDAEKA AHRYLRCEV LLLKYFGSYALQRPLMYDDL GKECQDAKAG  
YVQILPSRDRSGRLVVVSQPFPAQDVTTSMGTIIKLF TYIFSVVSEDVETQKRGVIFIFS  
TNDEALQHLEDPNDKLEYSLYREGSPVRRSCTHFCLPENNP KMFIRAVMMLA MSREERL  
RTRIHMEGLT IETQYKLM TFGIPVSELPITSTGGIKTKHHLQWTRTRKALDTARMKSLEG

CYNEKMLQQQMEEKQQTGSSVTSRNCCTMYPTYEDYLQYHGKEPIIHPMINDVLFSGGGK  
NVTHYGNIEFTDLMKRSLMQYVTGTPLQNRKMRRAIRQAI VDEVQNRGGRFLLDRKLRG  
GYCWTEIQEGPDLHDRIATSLYDHKRRLLAAKLKIQKDRCGTAMFTTLDNSKRRKVVTDG  
QTDPDTTAVLELFDKHGTSNQIILNETTNSPARKQMSLRMDEXILNIQARQLLDEDPV  
LQECTISVSCYIPNFEEYWMNNDI  
>comp11748\_c0\_seq1; 137 558 1121 LEN=1163; minus strand; translated  
MDPQPLLEEDRSAHLDP LRRGRHPVQVSDGDVEAPRAAHPPLQCPRRAAVDDAPHTAPI  
DRTGAHHTGLCRRVQGPRLPGVLEEFPAEEGNLGVSCAVVGGRRSPAFSDGRRCRVVC  
PCDHGSSGVGKDRSKGHASTIDRFLGFSGGFYQVFLVVLVLSQAALDDDGGVCFLLRRPGTAS  
SFTRHPT  
>comp11749\_c0\_seq1; 104 1 435 LEN=838; translated  
ATLWSGGVYALEWDPTSGYIRSWVFRRGEI PRNLQQALAGSGNPRPDPSSWPTPYAYFAI  
GEGSGCPSEHFRHRLVINLAFCGAVAGNRFARDPCALYERYNVRNDSVATCNAYLESDE  
ARALLDEEAYWKIGGVHLYQREHA  
>comp11749\_c0\_seq2; 483 430 1872 LEN=2275; translated  
MAPRESDSLPPYDDNKKPALVGHLSIASRGCNGPEDPARGEDTEQAKQLPAWFGTAKSL  
LLVPGTLLFVLVLAGSFGSPGADHGLRSGIHTLAEALANKTAPSSDENADGSYTLHQGTG  
PYALVERHTGKSFFDHDFADGPD SIGSAGYNTYVGRHRAGELGLARVVQGGNDSGSDSD  
EYVVLSSRSGTTFDENGNYRESVRLEGKRRIDHGLILLDVEKMPTGCGVWPAFWSTDEA  
HWPDYGEIDIVEPINNQVAKTALHTSEGCDMAHVPRWNWTGHWDSATGLPDTFTGEPN  
FDTEVQADNCWTMPHQWANQGCVAIHDKNGTIGEPMNQNGGGVYALEWDPTSGYIRSW  
FRRGEI PRNLQQALAGSGNPRPDPSSWPTPYAYFAI GEGSGCPSEHFRHRLVINLAFCG  
AVAGNRFARDPCALYERYNVRNDSVATCNAYLESDEARALLDEEAYWKIGGVHLYQREHA  
>comp11750\_c0\_seq1; 762 1 2583 LEN=2698; translated  
RISNNSNIDKIQGLTSLICTAMINNIGQESANLHMSLTPLRHRLERCKMANSRGSEESQS  
ESKLDDETRRLVMDVLDLLKSSSGSAILNNKDLPRNDTKKTSKLITKIAKQSETESYCQE  
SESPSTSTTSSFSSSSSSKAKLLKLSPPTRRVKRTKTSPPSSRMERVLQLSPI TRRGRT  
VSPSPSRWIEKETTEDVKGIMKSSFSRRKERTISTSPTRRKERTISTSPTRRKERTRHM  
LSSSPGQRKERTAISSSLTRRRDERTAMSSSPTRRRKERTSLSSSPEVRQEVIEEKKQ  
TKSPDKSGKRRGRKPKSDRVDQRNGKLDLKLKSKTSTFDGNRIFAKTTSGSLGDLRMHE  
MNYRYQNTDESQDIHSCGHLSSRSASSINNIVLNHCNDTDDINEYIASLGRTKTRSATSQ  
FSKAEDRESNSSPKSPLRRSIATLGLKKTPSHQGTTRTETHNALEVPVSAPRSRSPNR  
MVRRSKSDTSTIQR TAILSSPHPRNSVKISIEGSKSSSPSSSVKKSTIGKTKSDASLI  
ANASSACESLRKERSIPSPPLCTSLRKERTSNLLRRERSILSSSPPKSAALRKEKSISK  
PKTPPPPPLLLDDSSHLSLFLDEEEDEDSNGLLAHWSRAESSHCNKINSSKPI TDNNQ  
STENLSGEECAK PQSSSSFASSSSNF SAGGKVRNIRTHEVYTGFFLLSEEGNGKPVNLK  
HGYGRTKFPDGRVFEFTYDRGTMMEGKMTYPADPSSRSRNGEERPTYVGKFDKQGFRCG  
KGIYTTSATTYLGDFFRDEM HSGGIL IYHNLTENSKYGRSSDES KNSKGRRFVGHWKDG  
LKHGVGKEVRVDGTIQREGVW  
>comp11751\_c0\_seq1; 1641 571 7359 LEN=7506; translated  
MTESPRNDNTPHYTSSIPXILPSTVKIQKDLKGRKFKELQVKL TEAIQLLQEFQYCTPVE  
ENGNSNSADRDDDENDVNGRSIHEEQDPDLGDEDATAVTQATEESMSTTADGENTHKSSS  
LDADTDVPFDDPLTRMPMHKAVSVALDAYRMTITHPAMGKSSSKAAACEQALLCIEQLVVR  
EYVSGRAGGKDDDSASGSAALAAARSRNQHPQEEHTDTKQAPSTMHRLLEALHECSNVAQ  
KLPAILSHVARCTKAVMTSPRCGIHEASMLFGIRIAFHSYLVTDYEPCKRASKAALLDIV  
DYVVQRLESCHESNVSKSLWYTDCCYMLRSFVKLSSKEIDGLDEKSSTTKAPKSYFWSWES  
ADTVDSLHLNKLILSLELQLQAFECAGPKFCNGDKFIQLVQSQNGSIALFKNCMSQCTQV  
AYVSQQLF IILAYKFKNHIKDEIEAFMTNVFFRVLESENSSYTQKAVALSRLSLCNDPF  
LLSQIFLNYDCDFDSMNLYKDVVFHFLAQLCARSTIASFTSAAGGRSKQKEAEKQAELSLA  
GSEVLVTIILQTFLLKATVENTNDEE I IDTAGKIRKDLHIEEVMISPTRRAANFAKYRQKN  
LDFKTSALSPHSLKQDVENGTSAIGDESGENSLSSDYQNVENPTAIENDTRRQSESKTADP  
EDLTGTILGFFEKKRNAEQNLELGVVFTMDVKKGLKFFIDNGFVTC DANDIAQFFLVNK  
DRLDKTQMGEVLRGEPDAPFIKGQPDLDPEKGGPGFFCRILHHYTMCLDFTDMFFAEAIR  
LFLSGFRLPGEAQKIDRIMEKFAERYTFQNPDVFAADTAFILAFSVIMLNTDLHNPSIK  
PERRMTIESFLRNNRGIGANGTDLDPEFLTAIFDRIKEKPFSLKEDDVAREKAAEAPTQL  
LGDNGLLGAGLIGGTTAEERKKAKFKKEREDMIMATELLIRRKKGRSAKAESLTDVDP  
ALVVKPMFDVTWGAAILGTL SQVMEISNDDRAIAVSLNGFVYAIRVSAHNNMSLARDTFLG  
SLAKFTYLGSVKELKGKNI EIRTLINVAVT DGEYLGESWGPVLQCISQIARMRMSASGL  
DNDETFQLQDSTHSGSSRSKKEQSSRSLSFSRESKMDVMKETETANSRVLNTIGEQLIDQV  
FSSSVKLSAPSLALFIEQLIAVANSEIEGDSKSGITGVSTTGSSSNHGESGPSIFSMQRL

VEVADYNMHVRPRLVWAEIWSLMAGFFTTNGSHSNPMVSVFAVDALKQLSLKFLEKPEAS  
EFHFQKLFLEPFLVMKNKATRPEVILACVDQMINTRVNNIKSGWRIFFDILAVGAG  
NPNKKVFNHLSILQGTLDKHLDRLRIFAEEEDSQGNQSSYFEDFLAMCKASLSFIDLK  
SKSSHPIGVSMRALCHTAIYADLIASKRISPPNLDQFEDPEMLGYTYKGLSEKEASEMM  
LWRPLFEGLSKGVRATRSREGDIGNLVQSGSVLAVRAILLRHGSSFTDHQLEAILNDTI  
IPTFQMAVENDKSPVTSIASESPSISDLDFLAGPLPIPPDSDDAGLLKFERVVQQLDNS  
RQMGPAELLEATFTVVRNGGVDLSEAHKFAKKVGYLISXLLCTEFPVLLVKNSDVNN  
FLCREDIGSKGSIEQFPDPSWISTTASIALGTLTDISSEILLVRGAEGGSTWRSTVAEII  
QYWCNGDITKWVPCAVVRIATAEFERFMTRATEKLSSTNPKNNVHVWSNHLIGFYSDIL  
GKNLVAAEIMMNLLEEKCGILITDPKSSSKNVYSDEKSSSSSSSSGSSSSGSSSSGSSSS  
GSSSDGKSVDEPRIKEVNEDEQHASDTTNKPKVGPLDNETTVGDVEINSHPDKEVEDDA  
EENVKKEGEIIVEEQEESVETARAQEGNETAVGNTKTEMSGDAVDNVERQEDDSFVKVQ  
AGSEDSEENVRKHANGSTSNDEVDSEAIARAEGNAGGAI EIDYGTQRQKVDRTDLLPIE  
TFARLDEKFNTRDSPNWMKLLPALKLRCAVAHYLQHILLSLREEQLIGFISQETISNLLN  
ILSRSRIFA EKAVKNEDLAHAFQEAMFSEWGISNDMGEEALENVARLNNTKGSAMFFLTQ  
TASATNGVIRLLSDLYDHDDTLGGEQDWRRAFAGQYLLKIKEDIFRKFTESDAKEGHKV  
DQNVWRNTTESGKVAIYCTSFASVVVGLLKAMLSFEP SLIERNKAAIFPLMCELVGVR  
EIRKLVRRVLI EKFGPLLGLGQDTGWLLPMRDSVENKDSFG

>comp11751\_c0\_seq2; 1812 571 7265 LEN=7412; translated  
MTESPRNDNTPHYTSSIPXILPSTVKI QKDLKGRKFKELQVKL TEAIQLLQEFQYCTPVE  
ENGNSNSADRDDENDVNGRSIHEEQDPDLGDEDATAVTQATEESMSTTADGENTHKSS  
LDADTDVPFDDPLTRMPMHKAVSVALDAYRMTITHPAMGKSSSKAAACEQALLCIEQLVVR  
EYVSGRAGKDDDSASGSAALARSRKNQHPQEEHTDTKQAPSTMHRLLEALHECSNVAQ  
KLPAILSHVARCTKAVMTSPRCGIHEASMLFGIRIAFHSYLVTDYEPCKASKEALLDIV  
DYVQRLESCHESNVSKSLWYTDCCYMLRSFVKLSKEIDGLDEKSSSTTKAPKSYFSWES  
ADTVDSLHLNKLISLELQLQAFECAGPKFCNGDKFIQLVQSQNGSIALFKNCMSQCTQV  
AYVSQQFLIILAYKFKNHKDEIEAFMTNVFFRVLESENSSYTQKAVALSLRSLCNDPF  
LLSQIFLNYDCDFDSMNLKYDVFHQAQLCARSTIASFTSAAGGRSKQKEAEKQAELSLA  
GSEVLVTILQTFLKAQDVETNDEEIIDTAGKKIRKDLHIEEVMISPTRRAANFAKYRQN  
LDFKTSALSPHKLATENGTSAGDESGENSLSSDYQNVENPTAIENDTRRQSESKTADP  
EDLTGTILGFFEKKRNAEQNLELGVVFTMDVKKGLKFFIDNGFVTCANDIAQFFLVNK  
DRLDKTQMGVEVLGREPDAPFIKQPDLDPEKGGPGFFCRILHHYTMCLDFTDMFFAEAIR  
LFLSGFRLPGEAQKIDRIMEKFAERYTFQNPVDFASADTAFILAFSVIMLNTDLHNP  
PERRMTIESFLRNNRGIGANGTDLDEPFLTAIFDRIKEKPFSLKEDDVAREKAAEAPTQL  
LGDNGLLGAGLIGGTTAEERKKAKFKKEREDMIMATELLIRRKKGRSAKAE SLTDAVDP  
ALVVKPMFVDTWGAILGTL SQVMEISNDDRAI AVSLNGFVYAIRVSAHNNMSLARDTFLG  
SLAKFTYLGSVKELKGKNI EIRTLINAVTDGEYLGESWGPVLCISQIARMRMSASGL  
DNDETFLQDSTHSGSSRSKKEQSSRSLFSRESKMDVMKETETANSRMLNNTIGEQLIDQV  
FSSSVKLSAPSLALFIEQLIAVANSEIEGDSKSGITGVSTTGSSSNHGESGSPSIFSMQRL  
VEVADYNMHVRPRLVWAEIWSLMAGFFTTNGSHSNPMVSVFAVDALKQLSLKFLEKPEAS  
EFHFQKLFLEPFLVMKNKATRPEVILACVDQMINTRVNNIKSGWRIFFDILAVGAG  
NPNKKVFNHLSILQGTLDKHLDRLRIFAEEEDSQGNQSSYFEDFLAMCKASLSFIDLK  
SKSSHPIGVSMRALCHTAIYADLIASKRISPPNLDQFEDPEMLGYTYKGLSEKEASEMM  
LWRPLFEGLSKGVRATRSREGDIGNLVQSGSVLAVRAILLRHGSSFTDHQLEAILNDTI  
IPTFQMAVENDKSPVTSIASESPSISDLDFLAGPLPIPPDSDDAGLLKFERVVQQLDNS  
RQMGPAELLEATFTVVRNGGVDLSEAHKFAKKDIGSKGSIEQFPDPSWISTTASIALG  
TLTDISSEILLVRGAEGGSTWRSTVAEIIYQYWCNGDITKWVPCAVVRIATAEFERFMTR  
ATEKLSSTNPKNNVHVWSNHLIGFYSDILGKNLVAAEIMMNLLEEKCGILITDPKSSK  
NVYSDEKSSSSSSSSGSSSSGSSSSGSSSSGSSSSSDGKSVDEPRIKEVNEDEQHASDTTNK  
PKVGPLDNETTVGDVEINSHPDKEVEDDAEENVKKEGEIIVEEQEESVETARAQEGNET  
AVGNTKTEMSGDAVDNVERQEDDSFVKVQAGSEDSEENVRKHANGSTSNDEVDSEAIARA  
EGNAGGAI EIDYGTQRQKVDRTDLLPIETFARLDEKFNTRDSPNWMKLLPALKLRCAVA  
HYLQHILLSLREEQLIGFISQETISNLLNILSRSRIFA EKAVKNEDLAHAFQEAMFSEW  
GISNDMGEEALENVARLNNTKGSAMFFLTQTASATNGVIRLLSDLYDHDDTLGGEQDWR  
RAFAGQYLLKIKEDIFRKFTESDAKEGHKVDQNVWRNTTESGKVAIYCTSFASVVVGLLK  
AMLSFEP SLIERNKAAIFPLMCELVGVRSEEIRKLVRRVLI EKFGPLLGLGQDTGWLLP  
RDSVENKDSFG

>comp11753\_c0\_seq1; 219 1 1107 LEN=1570; translated  
QQQQQQPPFASDVPEPSFDFPVRQDLAEEDYQTELYMEEGLPDLAYPQYAEPEVIAN  
PYDFTPFRDEQDRVIDIATPVPQSPAGAITLATDPIVSPA VEVKNIWETDAPQTIQGASL

KTWDFNSERLEAVQVLLKTEGRPLKADIELWQGENAPQKISVYSENGDTRPLSAFIATPY  
NGHTAIAVKNSSGEGEFPMKACVEADMYQNGNHLDGSGQYGNQLAKFTLQQLWDRARPKT  
VQGDGATYVVPLESNIQRVQILITSEKNPINARIEILEGPNNVKQVMEI STEDGKARPF  
CVLELPDPILTNVMRVVNTGPFEPFIECRIEFPKVEDTLNIDEENLYFLMDSGSPADQTS  
NNSPFLLS

>comp11753\_c0\_seq2; 219 1 1107 LEN=1466; translated  
QQQQQQPFASDVIPEPSFDFPVRQDQLAEEDYQTELYMEEGLPDLAYPQYAEPEVIAN  
PYDFTPFRDEQDRVIDIATPVPQSPAGAITLATDPIVSPA VEVKNIWETDAPQTIQGASL  
KTWDFNSERLEAVQVLLKTEGRPLKADIELWQGENAPQKISVYSENGDTRPLSAFIATPY  
NGHTAIAVKNSSGEGEFPMKACVEADMYQNGNHLDGSGQYGNQLAKFTLQQLWDRARPKT  
VQGDGATYVVPLESNIQRVQILITSEKNPINARIEILEGPNNVKQVMEI STEDGKARPF  
CVLELPDPILTNVMRVVNTGPFEPFIECRIEFPKVEDTLNIDEENLYFLMDSGSPADQTS  
NNSPFLLS

>comp11754\_c0\_seq1; 292 1 1680 LEN=1802; translated  
XISAPFHELVRARNKKCHRLGYPIEYSIDTYRAEFNDIPVTASMGCVVIGTRKKIDERNE  
QSHHAYPALGAHKKACAGCSSADGGNELFATRANALTPAKAIHPSGTAMEGSSPRGSHPLG  
SFPXEETTRGAVRRAEGFVRYALSFYHGGSSFLGVSYQGPAEDCVVVKTNRSRKRKNQ  
TIEVDLRGHRVSEGRRLREALDDDFGSSDWDNLQVSSRTDRGVHALKNTLHV DVRVPTPDA  
DRKSNTRSTERKLRDGLNFYLSRQHQKEQRQHQKEQGTDRSNFPTDPRSKHSNFRMHELRL  
ILGAVLSPEFMDNTEEGIARGQPHRVDWNRFSATQRTYVYRLLLLPGIAPNQNHGKPSDG  
EEEKDDDDDESEKAVPRSQGPLSPSFFGIPFEWDRAWCLGHNGLDLIAMQEAAGHLEG  
THDFSAPFRGLRCQRSSPIVSMASVDVSLHGLGFGVPDDPSTAPRLVTISFVANSFLYRQV  
RNMVGCLEVEVGKPGGRLGPGDVREMLRTGAGGRTSPREPRRYATAPPQGLFLVDVEHGXL  
SVLTGNEGTANTTHDRRVLE

>comp11755\_c0\_seq1; 333 77 1054 LEN=2161; translated  
MAEEATKPTVVMVTGGSGLVGQGIKDYVTENDNKNKTKAGETWIFLSSKDGDLTDRKATEA  
IFEKHKPTHVIHLAAKVGGLFANMAEKVEFYRENMIMNDNIMECSRIYKVQKLVGMLSTC  
IFPDKTTPIDETMIHNGPPHHSNEGAYAKRMIDTMNRAYASEYGCNFTSIIPTNIYGK  
HDNFSIEKGHVIPGLIHKCYKAKADDTPFICIWGSQTPLRQFIYSRDLAELTVVWVREYNE  
PDPILLSVDESAEVTIKDVALAVAKAMKFEKQVEFDTSKADGQHKKTACNKKLRKYRPDY  
EFTSMPDGIQQSVDFWVENYDTARK

>comp11756\_c0\_seq1; 348 425 3203 LEN=3238; translated  
MNPLKKTSSRRKSELHIDAVADDQNDNRNNQRAEDTRSTSSSKNSNSLGRIGKKGKEQSIK  
ASCTDQKNGEKKTKFNPSDEIKFEEDKKGKHILEIPHTDDICSASSEIEIEIEAMNFVDA  
LDQTSHGFMNKAPLTTQSVKRSSCYFSALTSYGFIER TAMKPDRIEAFYFYSNGMTLSLGI  
LFFAINVIVGAHAASQFTPFGGFVTDSDILRVTLPIARAGGRLVTFNCALLLLTGCKYMC  
TLIRTYVVPVPIPIGFPMDDIMPKYHRFVGLCIIVSGCILHTIPQAINYATGKIWLKNGG  
KIWTFNGIAQTQLLITGSLLLAIFVTFLLTTLKGFRTAAGFRWFVFSXTGGVALAYPL  
LIHGTYKGSPLFLYCAFIPLVIYLLDVILRRSKITKAEVLLWKTHSDKGHNLTTELVLKC  
PQNFVYTPGQYVELKFP TLSNHEWHPF TIASAPNSVIRDCGDTRVLVFFIKATGRWTQAL  
FNYASAFKLSKATQSQEMIIRGPHGAPIVNFSEYKHIMLVGAGVGVTPLLSVWQHLLGEG  
RSKIEAYHREPSFRYTFQEEDEKTSKFRSMCHRIEHVLESLTASICLLCISVIGETAVI  
TGTLFGYYWEANMIGSILASGLVLFHSGTILVSI VAYDGGIYQYFFRKCWLESGIVLVDA  
VNFFIVLPTLRTNPSDKEISTPLLFGLAGMSVFLHVARTFHV FYTVLVRPKTELMEGQKQ  
NHC SVQGI FVNRSYKGMRF AFEQLLQPLEEGLSGAFSLQFYATQEKDKKTKTKMSLKR  
GVDASFHGRKLASDWDTSTDNFYCFREGRPDWELIFRKSILKAHF SCTSGDSVGVVFCGN  
PALSKELENEVADRVSASAPILRKEGKGNELQVQDRGSHRELLGPGFDAAQARASTKIMYK  
AGEIPTGAGKNMEFYLLKPHATVVRTK

>comp11757\_c0\_seq1; 258 79 399 LEN=1168; translated  
MMMMDTDEDMRTMIKLAADNNEVFEISLCAAQISNMIVNSYEQNDDDDDDGAIDAKPLEF  
PKISGGCLKKVVEFMKYHDEKEKFKDIPFPFPNESLRGVSSLDKVDW

>comp11757\_c0\_seq2; 366 79 651 LEN=905; translated  
MMMMDTDEDMRTMIKLAADNNEVFEISLCAAQISNMIVNSYEQNDDDDDDGAIDAKPLEF  
PKISGGCLKKVVEFMKYHDEKEKFKDIPFPFPNESLREFLKETPWYSNFVSKENLGEGEL  
GKRMLFQLVTAADYLDIKPLLNLT TYKMFSDMNGKSFKEMSDYLGLESETESPDSSMDSA  
RQRKRTRTES

>comp11759\_c0\_seq1; 208 1 759 LEN=1030; translated  
TDARHGMLTAMRQVLVAHRAMSSRHGGPPSMAPASLQQWPLFVMAALKSPLL RPSKPRQG  
QRSLAPSPGGDERAYMYHARRASPACASLLVSPLLFDLGAASF EWKNAGSRYADATANL  
KNSPVVAMPSPTPASVSNLSADGIYLLDTCFNAYVIVEEGAECGDQGS DGLSQELEEKIH



TTKKGLSQSDSSDRATIDYGDSGNRSLKFPVLRVRCNGDTNFSKIDADTNYNECGSTPIEL  
EVERLATVLYRNV  
>comp11763\_c1\_seq1; 153 1 294 LEN=424; translated  
QQQQQQQQEQQQPHRSKKPTPQRPSALNADNLTTLRYKTRAALFYKSQLEAHVVRLLLEDP  
EGKPKYKGRSRRPASNSSSSRRSSGPRSVSQRRSGSESE  
>comp11764\_c0\_seq1; 651 157 1137 LEN=1291; translated  
MTSSSFFFVLTSTLLVAHTGAFAPHASTYRLQPTTTAGSSTSTALQMGILSRFRRKKKVL  
LDPIEMGAPIPNVDVQILSDEEIVPIGLHEALGNETSILIGMPGAFTTTCTKTHLPGYIE  
HADTLKTDYGVETIAVVTTNDKFVNNAWAKEVGLVSDTVADSDESTDEVDEGSEEGSGNE  
TVSPPVTILADGSELVKELGLVEDMGFGVGIRSKRFALVIENGVAKHLETDEGMDDCSN  
TSAENLLKVLTPLAKEEDETALDEMEIDENAGYVLAGVAFLVLWAYASAGDGGSAATAS  
AVAPASVAAAGSGAVDTGMSLLNTYR  
>comp11765\_c0\_seq1; 302 139 792 LEN=1084; translated  
MTTYQTL LAHPNVDEVLLHGNPKTAFEVFPKVKKNIDS IKHNNEMGLSLRFYFCQIAQN  
NWLHLDDDDMEFTTEAMNDLIAEYGRNPKRIVGRFGRNFKEGNSFNNGYNSVDTHKNSEVI  
LTKLMLMERDTCSAFFDYAHLVWADTVLQNGDGPLWNGEDIFMSLVANQVYDKNRDGSQ  
FNNYAMDWLDVWEADKSLKDYGNGLDISGGLEGVRFW  
>comp11765\_c0\_seq2; 281 463 1302 LEN=1594; translated  
MTQDPLVTPITQSDSPTGHTILQKPTSLIRTPPITYSIPPLPKKVSILMNF SRPRMI  
RESSMMRLLAHPNVDEVLLHGNPKTAFEVFPKVKKNIDS IKHNNEMGLSLRFYFCQIA  
QNNWLHLDDDDMEFTTEAMNDLIAEYGRNPKRIVGRFGRNFKEGNSFNNGYNSVDTHKNSE  
VILTKLMLMERDTCSAFFDYAHLVWADTVLQNGDGPLWNGEDIFMSLVANQVYDKNRDGS  
SQFNNYAMDWLDVWEADKSLKDYGNGLDISGGLEGVRFW  
>comp11766\_c0\_seq1; 331 405 2460 LEN=4510; translated  
MADTIEESCKHWDNLLMVMAGQNDDSQCPSVSSPSQNQKPKAQMTYGEAEMASSAVARW  
ITATTASKAALCEPDDAVAI FMPSSCEFVAALFGLIRSGVRAALVNTEL RGTSLVHALTS  
ALDRGSDAGAAGARGVRAVLVSPGLKHVFDLSREAGQLPSSIAVIECGAGCELDPWTETR  
RFAFHGRQAQPKSKASGWDGTCLYIYTSGTTGFEXEGQQDEPHADMDDGLRRQEALPAAVR  
RPALLPPPAAPLQRPWARPGGLPPERLHDGGAPKVFGAAVFSXTLRRTDARVGT LFGCRF  
LVTVSFHAVPRHTLACAKCLMLGSLDGVSPQLLSPYDVCLSCAMKLGVQYI GEMARYLVS  
APPSPFSDVRLRFALGNMPQEIWLFPQKRYNIDL VNEFYASTE GNVNVFN GTGVAPGA  
CGIVPLGFGWIYPIGIFRYD TDTGELLRDATTGLCVPASPNEPGELLGLIKSSDPTRRFD  
GYTNHSATR SKIVSNVCRKGD RYFRSGDLLRQDRRGFLYFCDRVGETFRWKGENVSTSEV  
ARALLECRGNGVGSNTQAAGATEAKGDTAWFAEAVVYGVEVEGY PGRAGMATVVMNEGAS  
SNKWQDSLWRS LQAELPRYAQPLFLRIATEIEKTSTQKYKKKKLQDESFFDCGGDAVYFR  
DDAANRFVPMDETIH HGILSGNRRV  
>comp11766\_c0\_seq2; 331 405 2460 LEN=3824; translated  
MADTIEESCKHWDNLLMVMAGQNDDSQCPSVSSPSQNQKPKAQMTYGEAEMASSAVARW  
ITATTASKAALCEPDDAVAI FMPSSCEFVAALFGLIRSGVRAALVNTEL RGTSLVHALTS  
ALDRGSDAGAAGARGVRAVLVSPGLKHVFDLSREAGQLPSSIAVIECGAGCELDPWTETR  
RFAFHGRQAQPKSKASGWDGTCLYIYTSGTTGFEXEGQQDEPHADMDDGLRRQEALPAAVR  
RPALLPPPAAPLQRPWARPGGLPPERLHDGGAPKVFGAAVFSXTLRRTDARVGT LFGCRF  
LVTVSFHAVPRHTLACAKCLMLGSLDGVSPQLLSPYDVCLSCAMKLGVQYI GEMARYLVS  
APPSPFSDVRLRFALGNMPQEIWLFPQKRYNIDL VNEFYASTE GNVNVFN GTGVAPGA  
CGIVPLGFGWIYPIGIFRYD TDTGELLRDATTGLCVPASPNEPGELLGLIKSSDPTRRFD  
GYTNHSATR SKIVSNVCRKGD RYFRSGDLLRQDRRGFLYFCDRVGETFRWKGENVSTSEV  
ARALLECRGNGVGSNTQAAGATEAKGDTAWFAEAVVYGVEVEGY PGRAGMATVVMNEGAS  
SNKWQDSLWRS LQAELPRYAQPLFLRIATEIEKTSTQKYKKKKLQDESFFDCGGDAVYFR  
DDAANRFVPMDETIH HGILSGNRRV  
>comp11766\_c0\_seq3; 338 405 2294 LEN=3658; translated  
MADTIEESCKHWDNLLMVMAGQNDDSQCPSVSSPSQNQKPKAQMTYGEAEMASSAVARW  
ITATTASKAALCEPDDAVAI FMPSSCEFVAALFGLIRSGVRAALVNTEL RGTSLVHALTS  
ALDRGSDAGAAGARGVRAVLVSPGLKHVFDLSREAGQLPSSIAVIECGAGCELDPWTETR  
RFAFHGRQAQPKSKASGWDGTCLYIYTSGTTGF PKASKMNHMRIWMMGCAGKKLCRLRSG  
DRLYCPLPLHSSGLGLGLGACLQSGCTTVVRPKFSVRQFSRDIATHRCTGVQYI GEMAR  
YLVSAPPSPFSDVRLRFALGNMPQEIWLFPQKRYNIDL VNEFYASTE GNVNVFN GTGV  
APGACGIVPLGFGWIYPIGIFRYD TDTGELLRDATTGLCVPASPNEPGELLGLIKSSDP  
TRRFDGYTNHSATR SKIVSNVCRKGD RYFRSGDLLRQDRRGFLYFCDRVGETFRWKGENV  
TSEVARALLECRGNGVGSNTQAAGATEAKGDTAWFAEAVVYGVEVEGY PGRAGMATVVM  
EGASSNKWQDSLWRS LQAELPRYAQPLFLRIATEIEKTSTQKYKKKKLQDESFFDCGGDA

VYFRDDAANRFVPMDETIHHGILSGNRRV  
>comp11766\_c0\_seq4; 338 405 2294 LEN=4344; translated  
MADTIEESCSKHWDNLLMVMAGQNDSDQCPVSSPSQNKPKAQMTYGEAEMASSAVARW  
ITATTASKAALCEPDDAVAI FMPSSCFVAALFGLIRSGVRAALVNTELRTSLVHALTS  
ALDRGSDAGAAGARGVRAVLVSPGLKHVFDLSREAGQLPSSIAVIECGAGCELDPWETR  
RFAFHGRQAQPKSKASGWDGTCLYIYTSGTTGFPKASKMNHMRIWMMGCAGKKLCRLRSG  
DRLYCPLPLHHSSGLGLGLGACLQSGCTTVVRPKFSVRQFSRDIATHRCTGVQYIGEMAR  
YLVSAAPPSPFSDVRLRFALGNMGPQEIWLFPQKRYNIDL VNEFYASTEGNVNVFNGTGV  
APGACGIVPLGFGWIYPIGIFRYD TDTGELLRDATTGLCVPASPNEPGELLGLIKSSDPT  
RRFDGYTNHSATR SKIVSNVCRKGDYFRSGDLLRQDRRGFLYFCDRVGETFRWKGENVS  
TSEVARALLECRNGVGSNTQAAGATEAKGDTAWFAEAVVYGVVEVEGYPPGRAGMATVVMN  
EGASSNKWQDSLWRS LQAELPRYAQPLFLRIATEIEKTSTQKYKKKKLQDESFFDCGGDA  
VYFRDDAANRFVPMDETIHHGILSGNRRV  
>comp11767\_c0\_seq2; 239 249 653 LEN=1013; translated  
MLVPAHRAAKAVAIASGAGRLLGQRQRAAVVPPGRKGLGGGAARAAAGTRTGKSASRNH  
GNSSSNSSKNHHNSNSNKNNDNDESHLNWKDRKEAPKWMRRIAPSKGGKWPPTPQEA VI  
LLSGLAVFLWSWTA  
>comp11768\_c0\_seq1; 636 1 1626 LEN=2008; translated  
HQQLYESRQISRYQMANLLKTCCLVATIQTIIQTSEAFQNIVCIVDRTSNKSNFGH SVI  
VPSIVGVAQDEIIAKRRLSSFSLSFGSPSEPFLVDEKLSVLQDVVKEMDARHKQIQEKLE  
TAEREHQETLRSLEDELDETRRITEARDKIIKNQTDQEMKQLEDRHADDVLLKTTNDQER  
ERQTEEF SARSANALEKQKAEYTVRIDKLSKLESKEKETKEMIDNFEEKDKEKSDVIDG  
LRSDLAKAKAMQNNIETKEHSEKEQSHAKESELRAIEIETLKAEHKEYVEKVRNEESERA  
AGEIEKLKAEHLQIVEKIRNEESKRAARDIEILKAEQQWVAKDIQNQASKKAACKIESLE  
AEHKQAIEDIRQKESKRVKDEIEKDVKVIKEIEELKAQHEKVVEDYALQLDKINKERDML  
SAKLDISLGNEEQVEIAAAAVKAGEKREKRIRKESDDFAQQLKQTRLQVKIMRWAMNGV  
ADENRDYLNQNDKLSSEQQELESELEALHRIAELEEEKQRSFWQRLRGWFSRGGPTKNA  
E  
>comp11769\_c0\_seq1; 1239 95 3043 LEN=3210; translated  
MTLITDIKTRKEKRKEARKKRKRHSHFVQDETEISSAIKSKNDEPGLKKIQSKSKSSIQV  
PKPTPSNRDKKRIKTKSKRTVDNSAEQSPLLHDINPD LADAIRDDAEIAELEKRLGITG  
GKKGKEKLNKEYSKLEGYGDDFGDFLDDLDNLVSRVTTADKYSENPKDVDSMEDDSSGES  
EPETKRSKKKKHAKNANDTQSSMEEYNSFEFSYGDLDPSVADALRNDDEEIAALEKKLGL  
SKKKEKNKLYKEYSTLEGFDDFGDFLDDLDGMMTRIKKPGKNMXYPTDRGESSDETGRS  
SGGESDDEELVPMKGSDDDFDEDDSVLEELERMEREENAYAGDSNDREDDGDRTESSNEE  
NSED SASSSEDDGTEEEKEPDHVDVADTYRPSIGEDIYGNNEIESESSGDKKPSKYVPPH  
LRKKQVVDNEEEIQRREIMRSLNNSLNRLSEDTLISVAQQVASLYSSNPTPLVHEL I W  
KNAKDACITSPFMVGLIPVYTACITGVHIQTGDTVQVGENILENVVVELLGR LKASRER  
DPDEIDNNRKEIESKQISNLMLFLGYLYNYGIVHCSFIYDVIRHLIENFSESDVECLLII  
LRHCGRSLRSDPTALKEIVLLVQKKKVENDKQVPSRTEYMISAIMDLKNNRRKKEDTV  
FTEKVSFRKVLGRIKASAAKAGLSKSSSEASLRISLDDILNAGTKGRWVKV GASWVGNQ  
YRFSEGESKQDGKPKESHKSLTSTLEDGDEELKLASKFRMNTDRKRAIFCIIMGGTDC E  
DTFEKLCRSSMLQNRSERDAVRVLMCECCGNEKSYNKFYGH LAARMCEYQPQSKFSLQLAF  
WDIFKQFDSIGARKVANLAKLLFHLVTHHALKLFV I KALDLSAEDMDENTMIFLTIL  
LSSILEYFPDPSQAKFLFAQRMSRSESDREDDGDEATRASLLIFFMETLKASPKNKKGS  
RFRKNFKAIVKELDTDGFEDIF  
>comp11770\_c0\_seq1; 417 1 1363 LEN=1496; minus strand; translated  
XAPKSTSGSKNTGATVSSGVTKAPPGWGKPSAVAVSVPPPQGPPIAKPPAGWGKP  
AAGTKGSGNGGNATAKTAGSAPKPTKSPKRQAAAPYVPKPLPAFVGNQTSQLSMVILG  
HVDAGKSTLMGQILVQTNQVSKRDAKQANLSWLLDENESERARGVTMELGKTLRGAQA  
RHRGAGRPGAPRFYTRVSTTVSASRIPSVATELVVRCMPRRSKELVLAIALAFVSI FSKA  
DWKQIQAPVLWNKPLIDALFAKPILEFLFVSTILFLGGTLPVTSFVVCDLAMDSFVSSAL  
LQHRMITGAANADVAILVIAAVTGEFEAGFTGGGQTKHEIMLARGLGVTQIIVAVNKLDV  
EGWKEERYQEIQNKVKDFLLKQEFKPKRIKFVPI SGLAGENVKARKSPELSEWYKGPTLL  
EAVNDFFPANRHIGASRRQPLETCTVPYFQCSFA  
>comp11771\_c0\_seq1; 333 1 1269 LEN=1513; translated  
SPSPPGQHPHPNHEPDPVSPSEFLPGNGQNQTADSEAYRIDKTRTG RFELLEVPVHDSNA  
FTQGLEILSVAKIELMERYRQQPQQQPQQQD SPAGETPQWPGRNDTNTNIAGGLPLATFP  
NASAGPLPAASPEGYVLESTGQYGASTLRIVELGTGKVVDELELGDEVFGEGCTYYYHHDH  
GPALSPGEEEGERNGVVRVVIITWTSGRGYVYERPVPSSGETWGDAPGLARVGEFRFSSE



TTSGEGWGIAYLPARNQFVVS DGTEYLHFWELTETEATGSSNDRSFAFDLADRVAVRELR  
REEDPPGDS PGDARWTRVDDLNELEWDPYSYGGNTILANVWQTTEVLRIWVGAGDPRLIA  
GTVSHAYDLS DLEDRADPRRRGAVLNGIAVAYGSSPARSAGGFVWTGKYWPEMYRIRLLD  
GG

>comp11772\_c0\_seq1; 382 842 1831 LEN=2141; translated  
MIRVARRLFSSDAPKLASAALDPITHFIFGANTDIGKTVLTAALLRASYPGSISSSSTH  
YIKPLQCGGSDSEFIRRNAPGLSSAKTLFDWDTASPASRIEDKPVSDQVLES LN GH  
LHVLENASATATNEKGASSSSSSGGGNRSSIWIETAGGVLS P S S S S P H N S A P Y H A R N D D S  
LGGWGWVTQADLYKSYRDRSSIVLVGDGRLGGISATLASLEATLNRNRYRVGGILLRDN  
SSEEDTNKEALQEYVESRASLPSLVDDALRPRTMQSGLFANPEKSIVSLPKLPPEPEPLD  
EWYASGQVKDQISSFVHDHLFC SYDDEAV

>comp11773\_c0\_seq1; 699 93 1933 LEN=2551; translated  
MTIKTKRSPEVAFETGDNKRQRTPSKDYEVSRRIDVQNLDDLKHSDPVLQIPLKNNNAI  
PDISPSSDLLQDLLFPLSPDDFKSCCFRRKAVHISSNRKDRVYDISTNYMFGLD SKRIF  
EETSSDRIFLWIPSNDRKEVSSLDLSNGQKSLQSIDIEDPNTAHILHTHSNYASYCRAP  
PELEQLLVSKMLRNVLGLGQYDPTGXVSFLQMIHFFTFNASLSYFLK KLFINWSAVGSK  
LTTLGRGEVETFIGTKDHLTGWHTDFQENFTIQLSGRKKWSLKQGTVKHPMRGTTPHYKS  
PADVIENQIKAARLSNPDYQFGKQDL DGNFGTEVDIILDAGDVLYFPAGMWHK VETLEE  
GVSINISLMGTTYASFCCRTLEHLLLEKEEWREVICSDKETGYDAVEK LKALIKDLP AVV  
EKIGSNSIAEGMLPPALRTPPAFEFYSNGDEGGKECEDENDKGIGTNEALGDQEVAAEVD  
EEDFSDDGDEDIIDINEFEMPETFKSITLSRENCWKRNP L ASLIKMT EIKSFFKKSEEQN  
YEDNKHLFVLNSNFAGNEMHESAVRVVLRDRSGELDR L CSLRGKELEDAIENLKAPPSAL  
IYFGYIIVSQHTS

>comp11773\_c0\_seq2; 433 1 1216 LEN=1834; translated  
GSKLTTLGRGEVETFIGTKDHLTGWHTDFQGDASSTIAHDAFDDIRRVNLLNALVVLKEN  
FTIQLSGRKKWSLKQGTVKHPMRGTTPHYKSPADVIENQIKAARLSNPDYQFGKQDL DGN  
GFGTEVDIILDAGDVLYFPAGMWHK VETLEEGVSINISLMGTTYASFCCRTLEHLLLEKE  
EWREVICSDKETGYDAVEK LKALIKDLP AVVEKIGSNSIAEGMLPPALRTPPAFEFYSNG  
DEGGKECEDENDKGIGTNEALGDQEVAAEVD EEDFSDDGDEDIIDINEFEMPETFKSITL  
SRENCWKRNP L ASLIKMT EIKSFFKKSEEQNYEDNKHLFVLNSNFAGNEMHESAVRVVLR  
DRSGELDR L CSLRGKELEDAIENLKAPPSALIYFGYIIVSQHTS

>comp11773\_c0\_seq3; 725 93 1838 LEN=2456; translated  
MTIKTKRSPEVAFETGDNKRQRTPSKDYEVSRRIDVQNLDDLKHSDPVLQIPLKNNNAI  
PDISPSSDLLQDLLFPLSPDDFKSCCFRRKAVHISSNRKDRVYDISTNYMFGLD SKRIF  
EETSSDRIFLWIPSNDRKEVSSLDLSNGQKSLQSIDIEDPNTAHILHTHSNYASYCRAP  
PELEQLLVSKMLRNVLGLGQYDPTGSKLTTLGRGEVETFIGTKDHLTGWHTDFQENFTI  
QLSGRKKWSLKQGTVKHPMRGTTPHYKSPADVIENQIKAARLSNPDYQFGKQDL DGNFGF  
TEVDIILDAGDVLYFPAGMWHK VETLEEGVSINISLMGTTYASFCCRTLEHLLLEKEEWR  
EVICSDKETGYDAVEK LKALIKDLP AVVEKIGSNSIAEGMLPPALRTPPAFEFYSNGDEG  
GKECEDENDKGIGTNEALGDQEVAAEVD EEDFSDDGDEDIIDINEFEMPETFKSITLSRE  
NCWKRNP L ASLIKMT EIKSFFKKSEEQNYEDNKHLFVLNSNFAGNEMHESAVRVVLRDRS  
GELDR L CSLRGKELEDAIENLKAPPSALIYFGYIIVSQHTS

>comp11774\_c0\_seq1; 293 100 1356 LEN=1546; translated  
MEAEELKKLDQEHVWHPYAPMPNSVPCFPVKSASGCDIHLMDGR TLT DGMSSWWACI HG Y  
NHPVLNKA AEDQIKNMSHMMF GGLTHEPAVN LAKTLTQAISP NQSCSNQEERLDKVFYCD  
SGSVSIEVAMKMALQYHYNLHTSDNNIDISSTSTGSTRAPKSKFLTIRGGYHGDTFEA  
MSVCDPVNGMHMFQSVLPKQIFCDRPKTFMGQPWDESDIEEVS RVMEERHDEIAAVILE  
PIVQGAGMRFYSPKYLQRLRGLCNKYNILLIFDEIATGFGR TGKMFAMEHAPGVMPDIL  
CVGKALSGGFLSFAATITSNKIATAFSQGPAGVLMHGPTFMGNPLACAVSLASLHILKSY  
DLPSMIGSIERQLIRELEPCKESPLVKDVRVMGAIGVVMKEPMDMKVVQOEIVREGVW

>comp11775\_c0\_seq1; 905 150 2432 LEN=2566; translated  
MSSIESEEPMKKLARLLKKAASELIAEGDPWAKHKMEK VPAERVIRHMYQPDTQ TWKQDQ  
TIVKMEKEPFTNGAMRFCYRMKKRSPPPQSSNHRFH DYGWTRASN FVAKAYLDDKGEID  
TSEEAKQNRNDILLQYEASHWASRFNDKSPPKRIIFIRAYAI EFPDREGQPWFAVERFI  
FGNDMYGAGFTKHNTNSGYVDDLRITPQVFAFSFYESEGNRLVADIQGVGNMFTDPQ  
VLS DYRF GDGLGPRGMALFFKTFRHNTVATAMGIPVFP LSKNELKHQSKYEEDEYSAS  
EDDPSLLDTL KGLNRF EKMDINRSRRQSVLHMPPKAI VSDDLQATERRSNMVKHDKPKPV  
KDVKKSQNFARLKR TTSEVDEVQLCLNI AKEDFEFNMKTYLRNESGELM QKVDRRKGLAK  
RSSLIIRSVSAPIEICDSTKLN LGRVHYQLAILHGIGRFP EIVPSN DSEDAPSHDVF SVL  
FHLAHAASLRCPACLALGRILAGLGT SVSDLLDSFVPVDFEAAKDLLKRAMESEFPNA

PKVAAGCVLYQLYLDEISVARQGIKNDTEDDGQDQPFQTKQSVASDLVLINLLKGILELIA  
ARDDERESNRQFKDRKATSTHTFRVGDQVQDYCLEGNYYPGVVDSVSEDGTMVNVTYDD  
DGTTESLPKEHVRMIIPPTATQTESGGPLTDEEAGFGIGGDETVTIATYQLRADLAELLA  
SSGDKIQASELYEEAAREAIEAKMKIASEWSLKAELLDD  
>comp11775\_c0\_seq2; 258 150 749 LEN=942; translated  
MSSIESEEPMKKLARLLKKAASELIAEGDPWAKHKMEKVPAAERVIRHMYQPDTQTKWQDQ  
TIVKMEKEPFTNGAMRFCYRMKKRSPPPQSSSNHRFHFDYGWTRASNFVAKAYLDDKGEID  
TSEEAKQNVNRNDILLQYEASHWASRFNDKSPPKRIIFIRAYAIEFPDREGQPWFAVERFI  
FGNGVFSKPVRLVSITFCYW  
>comp11776\_c0\_seq1; 492 1 1495 LEN=1597; translated  
XAKYLS DAGHEPVVYEARDVLGGKVS AWQDADGDWVETGLHIFFGAYPNMMNLFEEELDIE  
DRLQWKEHQMTFAMQELPGKFTSFKFPPGVPAPFNMAAAILTNTMELSLEEKVRMVPGLL  
PMLLEGQSFIDAQDELSVSEFMEKYGMPKRINEEIFIAMGKALDFTDPEKLSMSVILTAM  
NRFINEADGSQTAFIDGNQPDRLCKPMVDHITARGGQVLTGKPIASIEVNSDDNSVKSLK  
LADGSNVEADMYVSAMPVDI IKRLV PKAWSSMPYFEQLSELEGIPVINIQIWFDTKLTSTV  
DGLCF SRSPLLSVYADMSTCC E EYASETSSM LELVFAPATEAVGADR NWIGASDEE IIDA  
TMLELERLFPTEIGPKAPNGGAQITKSTVVRVPRSVYATTPGRNKYRPSQESPISNFMVA  
GDFALQKYLGSMEGAVLSGKLA AEVICDKATGRPTNGVKDVHSSIVKGSEKAPIGVRGDF  
PIAFGGGQQGTGPNPGHP  
>comp11777\_c0\_seq1; 524 31 1182 LEN=1232; translated  
MPPKDDTHNLLIADPEATTIVGMEGQKRIGIFS QLFPPRRSRELRTTTKNMGHKGDTLDE  
DQIDTDDDESS FSSSSSSSSFDI IDNIIGPLDANETFGPDASHLGTATYDEVPGSSIHLC  
ELLSSKDPDLIRVGLQRLMLLTKGRTLSGLYHSEEVASHVLVFGGPLGTIEELLRYIFAT  
LICDSPHQDHREKYLTGTGVA DFDKDALFDWILDYDPLTGIDGNGKHISYD DDDHSC  
SDSEDTERQPLHPQ GKANGIFHNHALRVLANALGKVASTTTKSLNDTEQQALRDP LWN  
MIRSLIENIETNRNTDATGYSKILRLLLSVDPETIEPLLYSLFDRLVFFAEYKGFYRY  
PMIYTEASELLNRITQHSEESNV  
>comp11778\_c0\_seq1; 502 241 2001 LEN=2227; translated  
MAILSVLAATVRQSRGFLPTEQLRRAAVTIPSVVRRSNSLQLSKALTRCRSTSALFGSDD  
ILGTPATTTDDGKRPFQITTP IYYVNDKPHIGHAYTSTACDVLARFMRLSGREVVFFLSGT  
DEHGQKVEQSAEKRGIPPEFVDEVSVSFTLELDLLEITNDK FIRTTEDAHKESVQHLWK  
SLVDKGYIYKGTYSGWYSVRDECFYNESELVDGKAPTGA E VEWAKEESYFFKLSAFEK  
LMEYYDANPDFIAPKTRRNEVTA FVEGGLRDL SISRSTFSWGVVPDDDEHIMYVWMDAL  
TNYISALGYPNTDAESEYSKYWPAALHVVGKDILRFHAVYWP AFLMAADLPLPKRIFAHG  
WWTKDGEKISKSLGNVIDPVDLVEKYGVDQTRFFLMAETNFGSDGDFSDNSMILKVNNL  
ANELGNLCQRTLSMVFKNCGKASPTPGDFTEEDEALLASARGLHERCAA AVSEQKIQGYA  
NELIQMVWDANKYIDTMAPWVLRKTDEERMATVLYVIMEVLRHVAILYQPIIPGSAGKIL  
DLLSVPEDQRSFEHLEGDEYKIKPETPISKPOGVFPRIEVP ELVES  
>comp11779\_c0\_seq1; 540 85 1269 LEN=1379; translated  
MSDSATKTKDPLLTAYATIAI VWGASQFVLVPYVVHLLVLTAILYVACHSSLV LREEV  
PKEGEEGYDPDAPAKETLNTEDAMQFP IMGSCSLFGLYLAFKFLGEDLVNLLIGGYFALV  
GVGALALTFSPVLDNIAPKSMNEYKMGFRKKI PHPLPAWILSEDFEIGLELTATDTVSIL  
LAAGVVFLYFQKKY WALNNVLGICFCLOGIERLSLGT YKIGAILLVGLFFYDIFVWVFGTD  
VMVTVAKNLDGPIKLLFPRSLPLDDTGKIELSLLGLGDIVIPGFFLSLLLRFDAENAKM  
PTDKVDVYEA FPKPYFYSAMIA YVMGLGVTLFVMIYFQAAQPALLYLVPA CLGSSFLCAI  
VRGEVSLLLAYSEEEEEPEEGETSKTEEDK KKKD  
>comp11781\_c0\_seq1; 140 231 470 LEN=741; translated  
MGGGWFFYVPKVWTPYGGWVWVNPQWKRNTAMGGLAIATIMTCLFKVSASRERRPIAPYK  
KIPSQSWCKFAKEDDPRLR  
>comp11782\_c0\_seq1; 724 124 2479 LEN=2479; translated  
MTRYHPNDVTE SREGDEVCRGDKWNYEKQDRDGPNGMSGPERLYSCGRENENKYRWQADS  
ESSDDAIEFTKERYNVRKHRCYESSTASISTTTTANPLARPRFRRYANQKAEQKVNIEDV  
ASDLSLGFQQLNFSRSLSSSYISLAGESESDDDCGVSSSKSIEPSGENINNREKETSEIE  
TAFFQLLSWDERQNPEISSDSIEGDKTGVDRSYDAGDEHSTFTRKFENSEDKNFMKDTEP  
TFFQLLSWDEEKVSENSD L LNRVSKSDSNLRRHMSEEDTLNLSIPSRNQEYSDCLCRA  
EERTEPSIDAATLGRNEAEVDVPAESFWTSGTNDSPRCQKDGETNGVVSNSGKSMNEEI  
TSTSVSLTNQEH LIQSNKAEERTKLAVHVSQPSLLSQTSESKTLDGVEKFSSVARSR IHT  
KNDSP LCKGVQFFSSCHIPNIQS QDSEYSHSKTMTTYSSHEESQIISIHRYSDDLTEGND  
TITTEVDGDKRFKSLASKWKGRKNM TSNAPLSIDKSMKEKYNQSVRRVTD SNNSIERKD  
ALSFKMESDKRIQTLASKWTEGGERMSSAMPLLIETSMIESTKQSERRADNAREGRSPDP

KSI AVYSDTELT SNKQQLG TKNKNEKLS PDEKINGR DSTSLIRQDTIGKQDFAKTRDNV  
GKVRTKSARTNKQKEQLFGIDCVVHQSF CPSDEEPNDVENVETVEKSTSDKNEGVVEYSP  
KYDESITKATIASCSTTKKTKAPAIKELMKRIDACGSNDQYIDNLLSNIDCIVHRLIKEG  
KLPGN

>comp11783\_c0\_seq1; 509 232 1992 LEN=2441; translated  
MPFAFDSL RQMAPPDIVGSKGSSKKGFGFGG AIDL SGKEKHLDDLIAQDFNELSFHDRNA  
INEEMHGVLN LAP EESPEMIASAVHRLSLDIAAIEHKPAFDRSQKWN YLSAPGGIDFSWK  
VSSYNK KSLATGMLSTYVNTLDFRLRFLRAELFDTKKA AVRIVKYLEMKMDLYDNNEELL  
RRPVLLSD LNSKEEKEYIKLGNHQ LLPFRDRSGRRV VSMIPDVSGNAPSVRFRVCFPRFE  
CNRTDIIFRIVMFVPI DSYXFLINLEIIDFCKSFGITLILDLFFSQGKIFLYLWVWASDN  
EETQKRGVV LVIW PQIPEESPRRKP YVPPSEGP AWLNFIESVPVRILAFHFCNNRAAGN  
VLKLVFHYVGSVL IKQRIRMKIHTGDRTEISYQLLGYGIPVDLLPLTVSGNIKTKNLLQW  
LKVRKVMEDSKYIDENGVGMPVPNSFFNDNIECPGLNDVIFRSGKNHMSHPGNVMFQGLI  
ESRHDEHSVAHQDDKAVITWWVMEQVELKGRFLEWNNQGMWSQIPDRTHIRSKVSSSFRTFR  
RKLNAFKNSQLNESSTSKFEQQDGNKRRKVEDGAF CNPTEMMF

>comp11783\_c0\_seq2; 609 232 1833 LEN=2282; translated  
MPFAFDSL RQMAPPDIVGSKGSSKKGFGFGG AIDL SGKEKHLDDLIAQDFNELSFHDRNA  
INEEMHGVLN LAP EESPEMIASAVHRLSLDIAAIEHKPAFDRSQKWN YLSAPGGIDFSWK  
VSSYNK KSLATGMLSTYVNTLDFRLRFLRAELFDTKKA AVRIVKYLEMKMDLYDNNEELL  
RRPVLLSD LNSKEEKEYIKLGNHQ LLPFRDRSGRRV VSMIPDVSGNAPSVRFRGKIFLYL  
WVWASDNEETQKRGVV LVIW PQIPEESPRRKP YVPPSEGP AWLNFIESVPVRILAFHFC  
NNRAAGNVLKLVFHYVGSVL IKQRIRMKIHTGDRTEISYQLLGYGIPVDLLPLTVSGNIK  
TKNLLQWLKVRKVMEDSKYIDENGVGMPVPNSFFNDNIECPGLNDVIFRSGKNHMSHPGN  
VMFQGLIESRHDEHSVAHQDDKAVITWWVMEQVELKGRFLEWNNQGMWSQIPDRTHIRSK  
VSSSFRTFRRKLNAFKNSQLNESSTSKFEQQDGNKRRKVEDGAF CNPTEMMF

>comp11783\_c0\_seq3; 457 232 2116 LEN=2565; translated  
MPFAFDSL RQMAPPDIVGSKGSSKKGFGFGG AIDL SGKEKHLDDLIAQDFNELSFHDRNA  
INEEMHGVLN LAP EESPEMIASAVHRLSLDIAAIEHKPAFDRSQKWN YLSAPGGIDFSWK  
VSSYNK KSLATGMLSTYVNTLDFRLRFLRAELFDTKKA AVRIVKYLEMKMDLYDNNEELL  
RRPVLLSD LNSKEEKEYIKLGNHQ LLPFRDRSGRRV VSMIPDVSGNAPSVRFRVCFPRFE  
CNRTDIIFRIVMFVPI DSYXFLINLEIIDFCKSFGITLILDLFFSQGKIFLYLWVWASDN  
EETQKRGVV LVIW PQIPEESPRRKP YVPPSEGP AWLNFIESVPVRILAFHFCNNRAAGN  
VLKLVFHYVGSVL IKQRIRMKIHTGMHFFPRDNLD CYSLVAEAFASNLTRLILISCCIAV  
VCRFTGDRTEISYQLLGYGIPVDLLPLTVSGNIKTKNLLQWLKVRKVMEDSKYIDENGVG  
MPVPNSFFNDNIECPGLNDVIFRSGKNHMSHPGNVMFQGLIESRHDEHSVAHQDDKAVIT  
WWVMEQVELKGRFLEWNNQGMWSQIPDRTHIRSKVSSSFRTFRRKLNAFKNSQLNESST  
SKFEQQDGNKRRKVEDGAF CNPTEMMF

>comp11783\_c0\_seq4; 557 232 1957 LEN=2406; translated  
MPFAFDSL RQMAPPDIVGSKGSSKKGFGFGG AIDL SGKEKHLDDLIAQDFNELSFHDRNA  
INEEMHGVLN LAP EESPEMIASAVHRLSLDIAAIEHKPAFDRSQKWN YLSAPGGIDFSWK  
VSSYNK KSLATGMLSTYVNTLDFRLRFLRAELFDTKKA AVRIVKYLEMKMDLYDNNEELL  
RRPVLLSD LNSKEEKEYIKLGNHQ LLPFRDRSGRRV VSMIPDVSGNAPSVRFRGKIFLYL  
WVWASDNEETQKRGVV LVIW PQIPEESPRRKP YVPPSEGP AWLNFIESVPVRILAFHFC  
NNRAAGNVLKLVFHYVGSVL IKQRIRMKIHTGMHFFPRDNLD CYSLVAEAFASNLTRLIL  
ISCCIAVVCRFTGDRTEISYQLLGYGIPVDLLPLTVSGNIKTKNLLQWLKVRKVMEDSKY  
IDENGVGMPVPNSFFNDNIECPGLNDVIFRSGKNHMSHPGNVMFQGLIESRHDEHSVAHQ  
DDKAVITWWVMEQVELKGRFLEWNNQGMWSQIPDRTHIRSKVSSSFRTFRRKLNAFKNS  
QLNESSTSKFEQQDGNKRRKVEDGAF CNPTEMMF

>comp11785\_c0\_seq1; 352 608 1324 LEN=1324; translated  
MSTLTVSMLS NKYGYPLLP LLSERGHQNDTSSDGD DDDVDDGD DDDYDGSNYIYNRQRDA  
IVGNTPKSPALIPNTSDTATAAGAGASND DGNDEGRAGNSGSNISTFEPTSQIRHSVRF S  
TAEYRYYPITIGDNPSVTRGVPTIGWHFWKEATQVVPVETLASENDEEDDHDHDFDFHYEN  
NCDCDCDDWDDDDYDDDDDDRDNFDDDDDDGSSYSGDSSTVSDVGQNRSTSNSASASASA

>comp11786\_c0\_seq1; 191 153 692 LEN=747; translated  
MIKGIIIVNNHGK PRLVKFYQAVESEQVQQSVIRR VFSQVTSRPDTFCNYLEGVVPEWGE  
NVKLIYRNYATLYFIFA VDAQESDLGILD LIQVFVEALDKCFENVCELDLIFHSDRIHYV  
LDEIVMGMVLETNISSVLQSIKDQGR LAVDSLKTTDDNETQNRKIREQLGDKAFNYNW

>comp11786\_c0\_seq2; 149 153 587 LEN=857; translated  
MIKGIIIVNNHGK PRLVKFYQAVESEQVQQSVIRR VFSQVTSRPDTFCNYLEGVVPEWGE  
NVKLIYRNYATLYFIFA VDAQESDLGILD LIQVFVEALDKCFENVCELDLIFHSDRIHYV

LDEIVMGGMVLETNISSVLQSIKE

>comp11787\_c0\_seq1; 216 135 665 LEN=709; translated  
MRFRSLRIDYRAEAEI EVLREERQLRQQRKQERRRDNDGNKRCDDSSISISHQSRPRKKRR  
VIRIFHEALEPKPEQRWHKPEQERDRNDNKKEAVLRPLPFWISTQVNNNSDKDSLAVSDTK  
TDTNHYPKKINDNDYEHNEYEHDDDTTMVNVNRDNCVKFCPTIRNYNDDCAVSACFI

>comp11787\_c0\_seq2; 1077 135 3881 LEN=4240; translated  
MRFRSLRIDYRAEAEI EVLREERQLRQQRKQERRRDNDGNKRCDDSSISISHQSRPRKKRR  
VIRIFHEALEPKPEQRWHKPEQERDRNDNKKEAVLRPLPFWISTQVNNNSDKDSLAVSDTK  
TDTNHYPKKINDNDYEHNEYEHDDDTTMVNVNRDNCVKFCPTIRNYNDDCATSDIDNLSIK  
NNQKEDRPYVVGTTGNTYATSITAATSIGKSHYPHPVQHKINYRIFYNTPWLLSLVSSIRR  
QANRRRIASYPAGDDDDNRRSYLYPRHRCRRSMEYESLTNESFFNFYRRIQQWTIDRSIL  
LTSYERNTKLFDKKLSIRSRLHTFCERHSTRPGSSSSSSCRYSGAILLPPNINNALKNGSH  
AYTIGSKRPRWEDWKQELGVVTTFRNTIAGSETLDGVSVPGEDNCDGGNLCSNWRYLNSR  
REQNPLVTKMNSSSPLLSPSPHPSPPELWKTAMMTVQAICTYQKQVLQKHALHRRREES  
PNTHAAFSEAEGTRHRTPLIHKVPASTGSENI SAREQTTLRLSPNGNRGRRGECKQQQLQ  
TMVQWKQIDRTDCTINDEKRSPSPLGKWEEQITTPATVAPTIAWKWPFDNSILFLSAPN  
WQENVVFGDRNCHEEEKKTREPAVALNFSDDVEYIDSDDYEQNGGKNSKPNAAEGLLD  
EKPLVMGEKYTERRPRTSSSEHYQGFTNNSTTENSACIACNGDEKEELSNIQEHHTVKAK  
EKELTLLQRFGLVAENNIGGNYSATKNETTIARKPSPKHNTAVDDRINDDADNNANAHCQ  
TPRCNKDMEIPPSDFNDETS PFEPVCSQYEEEDDRDENIASSKRGRLEHHSSSPTLE  
RTSRRDPEIKNRQKRRKRRRTKEEKKMLRKEKRAEKRRNKGEKNSKPQHKHMRQDVAKK  
SSEKLGKNGLMKANKREDSEIEIEELET PKKLEDITPEQITARQRNPEHVLDGNTLYKDN  
NFTSPLRKTQFSDLQGATGKNSKLFRT PQMGLNGDNSDKDITGDASNDPFYVSP EIEH  
ITESCDINDRMGISNSDITEVAANNNSPVRVLCSETFFENFGEVIAELARGIFDGIQSM  
NMP IHFTDTYLMDCGVDIETPFRGAI VVSTLSQIQTS GPNGLLQNF LPKIVELVSTSR  
YRHITIFLCIDTKLDTDTSQDILRLQTAFLCDAEYSAERTTTSIQLT SRACLAACIAKNIV  
WNRSRFDSNSHF SAMSMDH WLS DQRACQRLKFLMNI IPTLSVTGALHW

>comp11787\_c0\_seq3; 1008 135 3716 LEN=4075; translated  
MRFRSLRIDYRAEAEI EVLREERQLRQQRKQERRRDNDGNKRCDDSSISISHQSRPRKKRR  
VIRIFHEALEPKPEQRWHKPEQERDRNDNKKEAVLRPLPFWISTQVNNNSDKDSLATS  
DIDNLSIKNNQKEDRPYVVGTTGNTYATSITAATSIGKSHYPHPVQHKINYRIFYNTPWLLSLV  
SSIRRQANRRRIASYPAGDDDDNRRSYLYPRHRCRRSMEYESLTNESFFNFYRRIQQWTI  
DRSILLTSYERNTKLFDKKLSIRSRLHTFCERHSTRPGSSSSSSCRYSGAILLPPNINNAL  
KNGSHAYTIGSKRPRWEDWKQELGVVTTFRNTIAGSETLDGVSVPGEDNCDGGNLCSNWR  
YLNSRREQNPLVTKMNSSSPLLSPSPHPSPPELWKTAMMTVQAICTYQKQVLQKHALHRR  
EESESPNTHAAFSEAEGTRHRTPLIHKVPASTGSENI SAREQTTLRLSPNGNRGRRGECK  
QQQLQNTMVQWKQIDRTDCTINDEKRSPSPLGKWEEQITTPATVAPTIAWKWPFDNSILF  
LSAPNWQENVVFGDRNCHEEEKKTREPAVALNFSDDVEYIDSDDYEQNGGKNSKPNAAE  
EGLLDEKPLVMGEKYTERRPRTSSSEHYQGFTNNSTTENSACIACNGDEKEELSNIQEHHT  
TVKAKEKELTLLQRFGLVAENNIGGNYSATKNETTIARKPSPKHNTAVDDRINDDADNNA  
NAHCQTPRCNKDMEIPPSDFNDETS PFEPVCSQYEEEDDRDENIASSKRGRLEHHSS  
SPTLERTSRRDPEIKNRQKRRKRRRTKEEKKMLRKEKRAEKRRNKGEKNSKPQHKHMRQ  
DVAKKSSEKLGKNGLMKANKREDSEIEIEELET PKKLEDITPEQITARQRNPEHVLDGNT  
LYKDNFTSPLRKTQFSDLQGATGKNSKLFRT PQMGLNGDNSDKDITGDASNDPFYVSP  
EIEHITESCDINDRMGISNSDITEVAANNNSPVRVLCSETFFENFGEVIAELARGIFDGI  
IQSMENMP IHFTDTYLMDCGVDIETPFRGAI VVSTLSQIQTS GPNGLLQNF LPKIVELV  
STSRYRHITIFLCIDTKLDTDTSQDILRLQTAFLCDAEYSAERTTTSIQLT SRACLAACI  
AKNIVWNRSRFDSNSHF SAMSMDH WLS DQRACQRLKFLMNI IPTLSVTGALHW

>comp11788\_c0\_seq1; 207 292 801 LEN=1172; translated  
MALSCSAAPIVRPLLAGAARGTLFRASAPVFRWAGRAAAPSANPPAGFAPGQWPQTARS  
FASFLPPDPKGSSSLCPKKVTARLNEFQDLFVEARL CIDDAKDSVGT VYFEEDSEEAREAV  
EAAIECFETLVGEISDADEKNRVLRSNGLKVEQLRGELEMTLGEHDDHH

>comp11788\_c0\_seq2; 221 312 821 LEN=1192; translated  
MALSCSAAPIVRPLLAGAARWTLFRASAPVFRWAGRAAAPSANPPAGFAPGQWPQTARS  
FASFLPPDPKGSSSLCPKKVTARLNEFQDLFVEARL CIDDAKDSVGT VYFEEDSEEAREAV  
EAAIECFETLVGEISDADEKNRVLRSNGLKVEQLRGELEMTLGEHDDHH

>comp11789\_c0\_seq2; 197 579 1152 LEN=1152; minus strand; translated  
MWRLSAGRITVATASGAGARVVGRCR SRARVFSATGTEASALRDRRRSSGPHRSFHGTH  
HRLFAIDPTVATRGVADPEPDDIPDLLDHRFRSLDDGYDDDYGYDYERQQQEEDERERE  
AYRLRQEGINDELDRKVGPRWPDPWEISEDQWTATDTGPD SIPDWSPSFVSR IAQERLRV



RINWRQDGGHHPKEI ILETLMPNISWLNDDSQRWKEIKLAIARDFHMKRNRNDKPLEI  
PTDIVLPKETRQLGERVRRKKLYEPVKRTEVFSERASSKQEEGIRQQEGDLPIDSKTFAG  
KEISNYSKQDCLDKIIQTKQQYQKTELRSVSGAVSEQMHTNEDKKQQSLKRKRDPQIHT  
KASFEIASQTISEQHHFEIEEELQQRNLKRPRSLNFKATIGTKSDTLSQSANSRPNDLR  
SSFSKVSNQNKYSIDGSDSLQSTVKISQNTGRVSPEGTTTEKMRIEQKQRSYIECHRIN  
SDNKYGTNNEDEMIRILKESSVRTTSLEISVNTIGSSNESGPSTRTRFRKLHKKWGYSGV  
TLRVAPSDPSNPWEARCGRPQVVSGLGSAVIGRFKSREEAARAVDAALRQYGGVKDLQFL  
NFPTPEELRLMKSNTPNHCEGARQS IETLRQNLVKYKVKGMRYCKSETERDVTKGRDEI  
LRTDVGTDGIVQLNDIAKGTKQNKNRKHNKILTSVETTSIAGVDSRKKTQRENSKQKEN  
KILNSPLITSVGTVVTGLSRKQNR IENIKPTEKIVSSTKEKKNKTVSSAGTAIIGTPRKG  
SPLSTQNDKQVTSAAATSNIGSIAGPSREHAQKGNVQIEKKPHSISGTAIVGATEDDSSQ  
EQNQIGNSRQKDRSMSATNASIEEGSARKQTQNKASRPENKPLPSTRSTSSAVSQADSY  
RKSTTAKPGKSI STVTAGDRIAFEFNSGVYFGEIKECDTNHGCRSKWRWQVLFDDGEVYE  
FDVNDMRKSI ALHKRILEKEVNNWKYNVGNLCVGDRIAYMFGNGVHFGAIAKACKASDKPE  
KKRAWTVLFDGDVEEFDYKMKKSMAVCNEIRATEQFTNESNKDLNQNSHCRDSSHGEE  
KNTVNDKREEKLLKLLKDFMAQKEKIERQLPERVKKRFFKVGFAQWEQRYLPVLFPGPY  
DISPGAIRKQWLRTFNRAIEDDIPQIVFWFGSDVDDGFSILPEAYCLSFKAAKTKGLVA  
MKGNGSLARDYNKSLANLFAALKKPIGPGRLPFKKLEKHER

>comp11796\_c0\_seq1; 474 302 1393 LEN=1585; translated  
MMHGRLGRYLLLAIAFSTTVLFGCITTTDASSSSSSSIPRSTDRVGHLHGHPWNPS  
SNIDENGFLLPKYHRVSGEWEKEVKLRKKDRISLHNSPATIRQVPGDGNCLFHSISVAWA  
HATNGTHLEMTSPDTMEWLYRNSAKLRQLAVDCEERRKLLFLQGHEYLKATDLVEAAAA  
QYGISGCEYCDLMRQESYWGGEPEIVALCNVLRPIHVYELHVPEDKEDKQNHRSRKAR  
ARSFYGKGYCDSPSSSFVLRMACFGSPKFDRA PALHILSADSRFPDVRPGEQLESNHF  
LAIFPELLPEKRKSLTEEEEEEEKQLIRGGGGSTNREQSRPLDADTVSSSRPGWFRKP  
STR

>comp11797\_c0\_seq1; 465 448 2337 LEN=2693; translated  
MAFDVAHPQQRSHSRLAALSCGTKICQSQYRFKPTIKPFPIDGHSNTKTTGKSISTRFL  
SDCASFNQDPEDVQNSENEEMESHNDYSVTITKDGQAICISSFCRNLCGDGRESSEDSWE  
FASSLLWVNDPQYIHTSSGQRLRTLQYSRGFEILRARLLFVDTDSDSFDGADCADSSSTS  
LHPAPPRGSMHSRGGLYDIASDCLEKTKDKGRTLVLQLEWNYGEESIFDLVWLDHARNNC  
LGQDISSKSKSAIKTIQVRSESRKRPCERFSLSTAVSKEIAIGAMDNPRSTPVSSFYDYE  
ILENDEVLFEGMQDVFEAGVILIRNAPDLVKTKNERRTGYSSEDEVESSRMSESIVGNLG  
RRFSGGTL SHGSLYGDIFHVQSKHDPENIAYTNVALPPHQDLTYYESKPFLLHLCATNS  
RDDSNYIVGGESILIDGLAAAEELRRICPEIFDVLLKTEATFVKERHDADMVSPKPHVV  
DPTYGQVVEVNWSPPEFEGPLQMNPRVAVEDYILAYQAFERIVDDNHGDTNSHSSLLSQPL  
ERVLGDYAKEYTWEYAMREGEILVFNNQRMHLGRRSFRSVGTVQRHLIGCYTDALETSSR  
YRQLLRDRERKNGGGYGRNRTGSGCRWM

>comp11798\_c0\_seq1; 269 127 624 LEN=771; translated  
MNFFKKNLLSILFVFSITFFYPNGVDAQSSSKSDDVDPKKILEKVVSTAREQYNGLPDQG  
KFATGAVVGFTTSKVVVNSAVKFKVAGAAFVATEVLEAVGVLDNRNTAESESESTENLKRK  
AISKIGEIRTSIRRRLDGKNIKRWMETDRMGLGAAAGAFVGFLL

>comp11798\_c1\_seq1; 468 281 1516 LEN=1754; translated  
MTGSKRKRRTVGN SIDDEDVSAEAGHKAENEESTSKLKADTEQGVDREDESGMKPVKLEQ  
VSEENGTQNEEDSIKPEQPLWKRKRKKKEFLVDEEEEAAPT YTRRTEKGGYSHTNLSKS  
RISKANKGNKPWNFGKRRSSADRAKIAAGVRARNRTILLQKHLKHLGMTEEEYLIKKEIK  
YLRERVRAKLANGKHLDKKIEQKLQEAIDATNLKNIVLSDENGTNAKNTNKTGQETKSD  
SQNSEVKEESGEGNKEKEIGGIFSKEIWRPFSFENNSSYDQACPEGGPGGLICSSCS  
IKFNKLLTRTSEDIETYRMNKEAEVETETLNFLEKKTVLKEAVNSAKMKVPPLPPGSG  
RLGLRQDAASSSRMNGNRRTNIKFNPE SHGGWNLTS SIDLGF TGGFASV

>comp11799\_c0\_seq2; 185 1 649 LEN=842; translated  
XNNNNNNKHKKVQVQVQKQKQKQPTDMVRYPNQFDIHIEDLTMSRHDL LFS SCVKNGL  
RGLVLRVVKDRGIRSN SIRITSIDILPNGKISCTGEAKTHFASAPPVNFVRSGISYSNR  
GHVLTFFPGLVSLNSDIGLFPVHPTLDLDVGHNTKFRSIVIDGRKKRVKIAASVTITPD  
RTRLMTQDYVQTSEAFAAIFFYDVGQWLTRLGRFSK

>comp11800\_c0\_seq1; 304 97 973 LEN=1067; translated  
MWLSTNKKSKTGKNSSLISNGASGGDWRTTLPLDWTRMKRDRQGFDDGAGMGRHRGST  
RPRGSDNNGSGDGDGNSDAGRKIEGRAIFCLHDNDPDWIQGYFVAKGSTKPGMLVTR  
EVDDCMACCAGGYRRLSLTVYNRHRKGGAI GRKRKRP GPESSGSEEDNNENLSGAKREK  
PLRIRGVEWTGGDMMALYHPDYVDMKGELLLTGKRALPVLHRYFQNL IHRLEKEFCVEEC

SSVLDWLPDVAIVTGPMSLALHQNEIPKELTAQDPVLTINSINDYPLLYMV  
>comp11800\_c0\_seq2; 260 97 843 LEN=1196; translated  
MWLSTNKKSKTGKNSSLISNGASGGDWRITLPLDWTRMKRDRQGFDDGAGMGRHRGST  
RPRGSPDNNGSGDGDGNSDAGRKIEGRAIFCLHDNDPDWIQGYFVAKGSTKPGWMLVTRE  
EVDDCMACCAGGYRRLSLTVYNRHRKGGAIKRKRKRPPESSGSEEDNENLSGAKREK  
PLRIRGVEWTGGDMMALYHPDYVDMKGELLLTVRRTTIVCLFVMIGQIAWNARCIAGLEV  
TNAKFSS

>comp11801\_c0\_seq1; 600 244 1902 LEN=1902; translated  
MAVVEPSSPSTAFSWRQEKTLPTPKKSHGIPPAKFHLKQHQEGHAIDSHGNGDESSSLRD  
MKETSVPWEKERTERNLLIQEQKSFKELEDMRKGFRRITQLKTWPLQDMAMDHLDHLLG  
INASYQFHGGDYLSAESSSSVSSVESKPRKTTTTMIKTLTTSTSDNPTADDSNKKTQSQ  
EIRGGYHDFGEQSASDAVEESIDNQKQQRSPWSLEPRIFATEKGAGKRKYLVGQFGRIA  
DWYWRKTEPTSRHLYEVIREGTPCRLYFDLEFSRAHNPSVPTTQLLHELEDELATELQMH  
YGTFFLPRLKSSQIVNLDSSNEKKFSRHWIVHLFQEPGEGKHKSTTYKQEEEEFLFKDAPT  
VGRFIKRMVGRRLADDIGVEGGDFSKRPPALYKYL FVMNKDEGKRTCFIDLGVYTRNRLFR  
CFGSSKKGKTSTLQAVLSERVEPNVEYVAKDVEGSNKLTDTATERHYFPLSIPPKKEVSA  
SQSSRIQSFDDFIVANDWEPHAQALADSLVPLKQGPQLLASTIGEDNSNNLIKILDVEE  
GSYGSTSVSGFLD

>comp11802\_c0\_seq1; 1299 1 3138 LEN=3275; translated  
KKYIFVLVGTVVVYFTEQSEGLIELYNMEQPQRNLSKQHGNLLLLAVAVLALASTTNV  
QAFSTPSWTKKAATTSRLHSSVGVTSNDASLSSAVGISERAFRRELGSQENLMLPRQYGV  
NADVVFPSMNHVSCATLTKDSAIPSAALKHAISKVMEAHPLLRATVEGDGEPDERIDLF  
KMVRKGDNPCTFAANESDLEACDVLRLINVEGGADELEASWRASFESDLDDGSTWCNVQ  
GKSTPLWKLELHRSSGDGGAALLS FNHAISDQSSASKLTDQILALASDYDQNKSEVSKT  
PAKQAI PPSLEESVLGTGNRFKDIQAGGFLGTIRYIAGKALEEAKAPVILPDDAFNSQG  
GGLMGALTTISGNAAGDDSKSGERTSALAFRSLSKETTEQLLGACRKNVTITNALSAA  
STLVATDFVGNESNKERNYKVLQSLDMRRFGARLDKGEVSGCLAGSMDLMHGPLPDGSG  
RALLLDPSSSEKLDLRFWELAREGKQQTENFVSDSDGPVHAVRVDFAMTISDLNNLVHLTAQ  
SKDSQGRAYSAGFTNAGVYERLDAFELEEEGTAKTSTQHGYKIDDIYYAASNARSGSLY  
RFSCITVNGEMKFTFHPATP IVSEETNQKFADALLDVLRVVS GSDEELVSKTATANDSSP  
SGGDNNGNGDGPLGFLPKNSLVAAAAIGSVAVLSHAGAYADFYSSI QEMKANVEDPADF  
SAALNFWIFFAVGHPI LQPI LWISDVLHGSPGPMVGD LVPLTFILGNVVAIAAIT YIAEI  
RNAVNVA AVFAFFAYI GAGLDGQAGMGDFNLQIDDSYKQGI VKGCPAYEEVRQPSMNFDF  
LEKYQGLWYEQKFHDWTQFKEVYD TTDIKLTDGGRGWIDDFAVKGPAPDSAPLSWDKSP  
VANGAHYFLFGRVDPNDPKGILREKGFVFEFNYIVDVKKDPETGEYKEA IQFQCLERGG  
VRVFEGINFMSRNPTMTDSELDAMHKRAEQAGMYPYGASPEQMHRVATRPIDAPPIDNSW  
QAMWRFIGVDKLELLELLETSIEDGGR

>comp11803\_c0\_seq1; 1372 192 4589 LEN=4830; translated  
MTTQANALDKTFHLLVESSIHDVSEDDNSVYSYDYAENRQISAAERQALCEQLLAEKLT  
TQSREPKRHSSAQNNRSDSTLENDNRSIRDLFPNTKVYD LPSVLNPLLNDRVDTECLL  
PGTQDETANEEILSESTKAAFSLTLP SMQAGRLYAHLLNRP GALGSGLVLDLEPLTALLAL  
VRRWTV ECCGREQFALVSSSGSSSTFDSMTYSPSKSPPQKR SRRGSRSNRMMKSRHDNFE  
DGENNSEEQQIHNVLAMGTLVAAEICQIPQQEPEFASWSSESREVLIEATLVSIGTVAALL  
GKKRNTIDTSFDDKRDNNRDNLLQKMIISQGOQAFEQCLV VNEKEDQENDDPQRQQQHQ  
QQCHETAIIILRGLMHLQLKVVLPNGERGKIEAFTAASKIMSSLMRKC NLAWVASKEKC  
DSSLKNKTPSRVRRSSIGGV LKIQT PRSTISKSRRKSLDGGSTPMVSPVLK KKHNNEN  
RGLPSGTINGVSKVNDKPRGIQAI FLGLLQKLT TGRVGL EKAALRRSTVDTIQSCMKWLP  
HAERSHFLEYIIKICHSKVSVHRLVACEIMGNVLFQDWIAEHENDLI SKDDYDDRSFYDT  
NEEKETGDKNTGIQLPQALWKALQGR LMDRIA AAVRASAANSLENVMTEIQKNDKISVCYN  
KGESLLIALRKRAIKDETSTVRKAAVLA LTKVLLAQKEYISSYYISAICDL CQDSSLLTR  
RAAAEALTTLLKACISPHQNDASIDLTEDLYDVGLIEEAWSTCVLPMVLEETSITARNA  
FHKVVILP IVEEDDINGTQKKQVAWRILANVGNLTCRQGASKGAFQALQTALSHL GREDP  
NLIHIELFEIVTYMASSTLSQSDHHSEVNAVGVWSLLEALLCIDYNGTRKSFRTSKIDL  
SFCLSAWKVMI EKHSMPKSAPHRSTL KSSLVLSKIANTFASTDSDDILLTLNQHLLGF  
QFPDALGPAISAMTELTKR TKSGENSNE SWIKGIFSESEKEIKRFVQDANADSSVTEFR  
KPKLLRALFSVGEASMI GFKLD DDGSSPTPLFLKPSKRLKELVQIIVSGHLP GAAKPRIS  
SAIRAHAF TVLGKFLRDEDLARQSLT LFARELHPSLPNPSQVSQSNALLVMGDL CVRYT  
NMTDRYLPTMASCLQNGCTSDI SVLERS SVVRKHAVL LLSLLLQDYIKWRGLLFHRFLV  
ACSDDEEVAVLAESVLSGPLMVRNPKIFFNHFVESIFVLNRCVAHP IYVSATRQGDGGS  
GIAVGF DGINLDGKEGEARRRNM YNFFLLSKLTDEEKIGVTARLAKEVLGEAVGNEGDL SQ

VCKRLSPPESSSPRLKSAWNVLSDTLYVLTNKS IKVGRVQDEVDGGIDDPNQVVPNSRQ  
VNVAKTRLLSKISLKHMV EIVLPILCNLKVKLQASRSPLKELMAYLLEIFRNHKKVEVKE  
FLANDPTLLQEI EYDSRKHASNSEV  
>comp11804\_c0\_seq1; 246 143 622 LEN=712; translated  
MVSPA VTCCE DNGGTYQIVNASDGLGICSKDGIHTK DITFMEENCPSPTASPSTESSQK  
ARYAVYAVNNCDAEVRADFVLKRS AHGGTRTSHVEVKEGEC SYVGPTDQETVHYTSEGSY  
VSGGND SCKIIGDSQNSDCKLLGIATNACVINLCAKQYN  
>comp11805\_c0\_seq1; 389 1 1836 LEN=1843; translated  
RSVSTALLLAIGSNARNHRVFPAAQTESYNPENIPPV LGLVYSNNITFAVSI SSGSGSNRY  
SKKRPTVSTAEIEDFLHPAILRFK KSLTRFPDFKEDYIVNPLDLPLLPQPVEIIVESPD  
VKLYNGVPEDYNISITTASSR IYGSNDRYVVVTLKTSTVFGVLR ALETGQLIEFGWMD  
DSQHSEALSNDISGGDTTAHGVFCIKDIPLFIFDKPSFPYRGLMIDTSRHYLPLNLILEN  
LDAMEMNKLNVLHWHISDTQSFYAPKTMPELAEKGAYHPKRIYTLRDVQTI IREAYLRG  
IRVIPEIDMPGHNTNAIAKSHPEVMSHC PHPSEP INPTVPE TFDVFKAVYEDLNEVFPDDF  
IHLGGDEVQLSEHCWLKDP SIVKWMKD HGMNRNRTVELYEYFETRL FQTI AKLSKTPIVWQ  
EVFNLNLTIPQNTIIDVWKGF DKYTIQ NATNQNRVILSGCWYLDH LGDSWLTY YKCDPR  
NFTGANKDLMIGGHAS MWGEHVDASNFVSRVWPRASAVAERLWHGNVTQSGAVDTIADRI  
HDFRCRMVLQGFAAGPTGPGVCPT EVAYRSHLDECSFDS SRRNCLKGAANLSSV FSSIET  
KNHRMRREERR  
>comp11805\_c0\_seq2; 324 1 1422 LEN=1422; translated  
RSVSTALLLAIGSNARNHRVFPAAQTESYNPENIPPV LGLVYSNNITFAVSI SSGSGSNRY  
SKKRPTVSTAEIEDFLHPAILRFK KSLTRFPDFKEDYIVNPLDLPLLPQPVEIIVESPD  
VKLYNGVPEDYNISITTASSR IYGSNDRYVVVTLKTSTVFGVLR ALETGQLIEFGWMD  
DSQHSEALSNDISGGDTTAHGVFCIKDIPLFIFDKPSFPYRGLMIDTSRHYLPLNLILEN  
LDAMEMNKLNVLHWHISDTQSFYAPKTMPELAEKGAYHPKRIYTLRDVQTI IREAYLRG  
IRVIPEIDMPGHNTNAIAKSHPEVMSHC PHPSEP INPTVPE TFDVFKAVYEDLNEVFPDDF  
IHLGGDEVQLSEHCWLKDP SIVKWMKD HGMNRNRTVELYEYFETRL FQTI AKLSKTPIVWQ  
EVFNLNLTIPQNTIIDVWKGF DKYTIQ NATNQNRVILSGCWYLDH LGDSWLTY  
>comp11806\_c0\_seq1; 502 282 1379 LEN=1720; minus strand; translated  
MTTGTGIGPRRRTIRNNRLRFLGVVIVV GALGPF FARPVLPVRAFSSSSSSPSSITSRT  
DSNGFGGAINAGNDIDNAKPTIRVVPMAVSAPDHDSSG SNDGGDPPVLT KDVAGLADLRY  
DEWSSSMRPPPSRYAFRMATAEIAAERAEAGAVTFLARQHTRARESGGAI VGAAELSPI  
EFEGTQPCRGEADPRPNDQNHVSLYVTDVVTSSKHRRMGIANRLMDALEHYAYETFASGK  
GKESENE NDTSVVTLYLHVKPDNPSARSFYANPERGYGEP PSTLPFD TALLEDNAGIETG  
KQILLCKTLTRATHREAAVRLERQLASSPRGNGSETTTTTSAQGF GGGFGGSNHKAKKKP  
KRKKR  
>comp11807\_c0\_seq1; 482 51 1250 LEN=1273; translated  
MASINVSRNLLAPGIKSF RSFVQSELNLRQTPILLISSEVGASSPNLKP VADSCQWVRF  
TLGQQFGMRTVPTTISSAFPTKDSL DQTELMQRTGASSVSVSGAAMD LAKAVATTVQ  
ADQEKEIPLILIPGTYGGLLSAGASHSLFLDGD EDTLVPLPHRHQKITATVDGTNDNSSK  
CAATVATLDSQK YMEHLDEEKFDVLLHAVSAIILDAGSRKSMQP SLPNLLQATIDLIALR  
NSPEWDKKGKLM EAI PSLSSLLYQSAGLISYGLSDGFEEEDRSITIALGSSLIPTLFPE  
THPLSFLASLVPGLCHYYSLQDENATTGGNDRVRANFR TLVQQ LQERPSPLETKDES LQ  
GFSVPDMAVSQIQANQTVWKP SDVSDVLLQVLQHSLEH  
>comp11808\_c0\_seq1; 323 1 1265 LEN=1265; translated  
TTAKTRYLEEAMSADSQLGQS QKDNDVAISSDVAEE EYWPAPPLLTGHKIHTIRFGGSGA  
SRHGNVAGNQRDQDHGRVLR YKSMSEALTP LDMTYSDGNDALGDDEFYDGTGNLMWMAA  
VCFGHLVAKNAEPLRNYLPRTRHGSEKAYGDRQHRTRQRQRHRVCELGC GTGGAGISLLL  
FSNPSQNGVNGMEESDSRETTVGTNQIAVEKSDDGDIDGCCHV VFTDNDRESLELCKSN  
CELNGLDERDYSHRL LWWGPQDQNNQENREEEESPLQSTPLEQHSFDTVLATDVVYDLKM  
IAPLFQTVEFLLRKPV RQGC DKPSAEGSGGHLILSHVPRFCIPRQDRDEAGVEPGNES  
GDGDGDSDEPGEAFLELERFIRSEAGKVGLSLVETIRPHTVLS EDDLAAAGTGCDGTRDD  
DX  
>comp11809\_c0\_seq1; 391 1 1297 LEN=1860; translated  
XVNTTSTTTKMGTSRRSRNVHHQSRHLPDENKSR TKVTSSTIIDTAQANLDFNTALQEVD  
GDGKQITIVLLI VIPVILALVLGIAAGMTISIH YFENQNPTALFGGM RINSRESTLLY  
SRTSDVHQKVTTSDPMIASSNVVQRDGNLDL GKVV TATA TGQLNVLVVVDEVAPLRSDQP  
LQNSHDNANDQRYNEQFFQGA KIKAGNSLTMEQAELIAPGYGQWEASQPKIELREPSIL  
PSLCS DGETLGFDSWTTLR AAVHEANSISADR FMKWNEYFATNSFTAFQDDRLYYEEDIV  
FSICPGATLRGRKGGIFINAENNVLE CERGCVIDVGGTHLAFGANAKNV LVRGITFRRAS



TSSLTFYHDGAEATFEDCSWVNDSGISNYYGSIANVNSTSI VNFYRCEI IGLGKKQIAMGT  
TSASTNSLSIRV  
>comp11809\_c0\_seq2; 391 1 1297 LEN=1629; translated  
XVNTTSTTTKMGTSRRSRNVHHSRHLDPDENKSRKVTSSSTIIDTAQANLDFNTALQEVD  
GDGKKQITIVLLVIVIPVILALVLGIAAGMTISIH YFENQNPTALFGGMRINSRESTLLY  
SRTSDVHQVTTSDPMIASSNVVQRDGNLDL GKVV TATATGQLNVLVVVDEVAPLRSDQP  
LQNSHDNANDQRYNEQFFQGAKKIKAGNSLTMEQAELIAPGYGQWEASQPKIELREPSIL  
PSLCS DGETLGFDSWTTLRAAVHEANSISADR FMKWNEYFATNSFTAFQDDRLYYEEDIV  
FSICPGATLRGRKGGIFINAENVVLE CERGCVIDVGGTHLAFGANAKNVLVRGITFRRAS  
TSSLTFYHDGAEATFEDCSWVNDSGISNYYGSIANVNSTSI VNFYRCEI IGLGKKQIAMGT  
TSASTNSLSIRV  
>comp11810\_c0\_seq1; 660 151 1626 LEN=1660; translated  
MRFL LAT TLLFALLEQSNALNSAVPKASQTRAPVVLSAVSTELEVSPKATAGNDDIDAG  
GVEFPPLSPMDRTKRAATFYSTIVPIIANYFGLIGNLKI QEVLGTERFSEQDIEDLWNN  
QHEDGAKKVSEVITELKGFYVKTAQII STRQDLFPKEYTDALNGFTDSLDPMDASLAKAV  
VIKELLHKDEKFSDFVSEFDDEPLGSASVAQVHRAVLSEKYGGREVAIKIQRPSIESKLL  
GDVANLKAVSKALRAYLPLDY YTVFSELESQLADEFDFVAEAVSMDRIYQSLTRSADGSE  
LTEPPIVLRPVQGLVSKRVLVMDYLKGVPLSRAREEMAKRGIDPESPE SKLFG RKL LKA  
LTYSFGRNILETGFFHADPHPGNIFVLENGDIGLIDFGQVKQISGRSRET LAKVMIALDE  
RIGDDRPEDLEKIGNLAL ELGVALNDDAQDEAAA AVAMWLF D GATEVLPGGYDKGELSPN  
SPVKELESFPQ  
>comp11810\_c0\_seq2; 673 151 1944 LEN=2145; translated  
MRFL LAT TLLFALLEQSNALNSAVPKASQTRAPVVLSAVSTELEVSPKATAGNDDIDAG  
GVEFPPLSPMDRTKRAATFYSTIVPIIANYFGLIGNLKI QEVLGTERFSEQDIEDLWNN  
QHEDGAKKVSEVITELKGFYVKTAQII STRQDLFPKEYTDALNGFTDSLDPMDASLAKAV  
VIKELLHKDEKFSDFVSEFDDEPLGSASVAQVHRAVLSEKYGGREVAIKIQRPSIESKLL  
GDVANLKAVSKALRAYLPLDY YTVFSELESQLADEFDFVAEAVSMDRIYQSLTRSADGSE  
LTEPPIVLRPVQGLVSKRVLVMDYLKGVPLSRAREEMAKRGIDPESPE SKLFG RKL LKA  
LTYSFGRNILETGFFHADPHPGNIFVLENGDIGLIDFGQVKQISGRSRET LAKVMIALDE  
RIGDDRPEDLEKIGNLAL ELGVALNDDAQDEAAA AVAMWLF D GATEVLPGGYDKGELSPN  
SPVKELESFPQDLVLVGRSSILIKGISDR LNV PWSLAKEWAPIARDVLYGSASKSQAAS T  
PTDDRVRFKSVLSTLKKWSKGR TKKFATKLPSP I RTRLAAYLVRREERLSRKKLTGR  
>comp11810\_c0\_seq3; 385 151 1285 LEN=1285; translated  
MRFL LAT TLLFALLEQSNALNSAVPKASQTRAPVVLSAVSTELEVSPKATAGNDDIDAG  
GVEFPPLSPMDRTKRAATFYSTIVPIIANYFGLIGNLKI QEVLGTERFSEQDIEDLWNN  
QHEDGAKKVSEVITELKGFYVKTAQII STRQDLFPKEYTDALNGFTDSLDPMDASLAKAV  
VIKELLHKDEKFSDFVSEFDDEPLGSASVAQVHRAVLSEKYGGREVAIKIQRPSIESKLL  
GDVANLKAVSKALRAYLPLDY YTVFSELESQLADEFDFVAEAVSMDRIYQSLTRSADGSE  
LTEPPIVLRPVQGLVSKRVLVMDYLKGVPLSRAREEMAKRGIDPESPE SKLFG RKL LKA  
LTYSFGRYVIFEF GQPQPX  
>comp11811\_c0\_seq1; 1032 172 3113 LEN=3158; translated  
MRMGKPEKVRGDTPTQVGADGKKPKHAARGSVVGKLS PDVISVYFSP EMKQEL LKXLE  
KYAEELMQYEDATKAFAEARQQTEVEIDTNGEQQLPVEPI PKAPIFKSEYWLNELE EML  
KETSDFHQTNGGKWSHARAARFERIMDERYGR LRPILKQYPELET LVKSVQRKYATGYF  
SPFRQ GK PPIPKSTAVIILFMMQRGNLRWEITVLSVLFVGLQPWALVVLVAGIQTLMD  
NRKRRPLKPMKAYIPSTSPYYAVEENDEEQQESNIDEEAEAEKERQKKIDILKQPVGTEI  
GDQAFDSATHPYDTILLGSGPSSLYTAALLSRTGRKVLVLTGRE DASGCYSPPGSDIPFD  
IESSNVSRISKTQENLAPALASSTDFQGGIRFAQIGSAADGHAFQILSVPGMGAESSGEN  
SVPFVLRADGMRS LAEDAALSLGDGWPGIEAQDAGNSASAAYIQACRSLNASSTEYFVSK  
ILPDS TNSLRKDKLYQEATIRYAASFLDSGFQLNAHARSLLAAVGM PGENIKPSQASMGV  
HVSNVCSAMSGEGMHYP IGGPRALCHAFQKVI EENGCCVLTGVP IGRLLFEDTEDGSSKP  
EDTKKPSGEKEAGSGPAPPRCIGIQLLDKREIKFDLKKFENG GYKPAVVSMLGFISTFIR  
LLPNEVRDKYNTPVGLPALAERRPVIKILFSLKGSARDLDVTGADFYRLPNASLARDEM D  
SSTGQVKLGTIGGNDDDDAANEKIDQDEAAGLTDTE T NTKPKKSSRNKFEQGKSWMQIS  
FPSAKDPSFESRHGKITTCVVTIEADDDFVTPYETKPKLYAIQKKGSTHG DYQLLMERV  
RNDLLENYPQLKGI LHNEMYGPLYMGLSQT PVRYAAKGVRAESPYPGLFTGGSDLTVD D  
SFTASLYGGLLAANAVAGYTPLDIMYLEKNILT DISSYLELPDEMEDDLAVDYTHEEED  
ASKIAEKGEANDPPELQTEK  
>comp11812\_c0\_seq1; 969 147 1652 LEN=1838; translated  
MQLSSIALTVFAASAASIAYAFAPMPASYRSTVASSSSNSGTSLSYISSWGKAGMGLEIQD

EVSIPEDLNPDNTNIQSYLDEPDIIDQRDNLDTCLVSGYVNSKERSDQFVFDLLNHEENA  
FAFEKIVAFVNDKSAKKRLLSRSARYTGLLDKLDKDFKEAAAAPGALPVPAQLEGVRSWVAQ  
IESDNDLVSQVKAVADLAKDAKDIDNVSVIVTNAAGEVIPAADRAAAVQALKDSGKEYTLL  
LVVGTCLKDHDEGKTFYKYAEFDESEDEDALLPDAIFSRAESMRMITETLQLDAGSCKAL  
TFSEVYDNTTTEAKLIKGLREAGYVRCQEIDHVLDRDGFKNYQKELDEYDELNPGWREGVK  
MTDAWWEDPEFLRQLDEAKMKDRGGRPEEVKVEEETKDERTLVEKIMATEWKGKREFFSRS  
MAGTVDQQLTQAEFIESVWDRALFEGDLKYRQLNGEEDPDVEAELLDFKAQQRKQQAALK  
KAKAELQEIFDEEDLDGVDVGV

>comp11813\_c0\_seq1; 538 38 1045 LEN=1270; translated  
MLASPSYFCVAVAAALHSAFAFAPAALQNPVSPSSALFLSSNDEAVGRRDALAQAAQLVA  
GVAMTSVASSVPVAFADGDAPAAKVVVAGATGQTGRRVLERLAGAGNLQVVGVRNPE  
KAADALGESSTVVRGAMIQKVASVDTSAVALKRLDVVKDSVDDLASAMAGAESLVIATGF  
IPGNPLKMNAAAHEVDNVGTIKLIDAAKKTGTVKKIIVLVSSILTNGRNWGQEKSPGFVIT  
NAFGNVLDEKLVAENYLKSSGIDYTIIVRPGGLKAKPPTGALIVSGEDSLNSGEISRDLVA  
DVCVASLTDAKAANKVLEIIEDEGTTPPKVFNGLNM

>comp11814\_c0\_seq1; 355 1 1289 LEN=1333; translated  
XAFTEWQIATHFCFLESRFHSGTVARPLRPEILGMSDARGWARKGKLPPTYVLPQEERI  
RSLLLPLRGTGGSDGNRDNDQHDHGHANRTSGAATNDAPPAGRRKLVICYFRDHNGE  
NVVNTLLSLGVDVLFVDFPNFALDMPGNPNRYGAKWIIHDDIRDRERTRLSRMEGVESAEA  
GADADTTNGFQERRRVSENADLPNDDGLNATSAVISAANDIARQFKVQGHQDGPVKVIR  
VTDRSLFVPLMHVADGVASSAGSQLMSECIYSRMPLLAMYKEKDNEQRLNVELSQHADAP  
CHRPLVYGTSEFDELESTIKSNAALGSTKQPAIRNTHGGSAKRIPIPESFYFVREVRSSS  
VSDTYRNAHVLGGSASHPAERPSKAKGEEGTADHLDPDNLLEEDPFQSLPDAAAIIVE  
IVKQVIQKG

>comp11815\_c0\_seq1; 154 478 780 LEN=1423; translated  
MVVAKSGIQKEVLALYRTLLREATKKDRMVAGKSSRRPASFTDLLFANDSSSTA HARDEF  
RKQASRLRRNDFRTIEHKIRHGKQIKLLQMPGVVTFKSW

>comp11816\_c0\_seq1; 373 118 1257 LEN=1626; translated  
MADEEGFLNRDDDIIMVSDDDVDELEDEDDDEVEGVEDNMHDEDETTSSAAVNPPSEE  
DNVVARRAIQEIMRDNLSLSDQGKRMRIQSLMSGGRTAVAPAPTPIIPNQEEIKCNHYER  
NCNIIAPCCGRIVGCRICHDETSPPGHPMNRFMIREVVCKHCSTRQMASNQCINCKVQF  
GEYHCNKCNLWMGKAKKPFHCEQCGFCRVGGQENFRHCTECCMCISVNVFDTHRCFKDKY  
KNNCPVCREDMFSSRQSPQDLPCGHAIHAHCFRKLAFDYRCPICKKTVVVSQQSMAAAWE  
ARARDIAEHMPMSDLQRIVDIMCNDCEKSHARNWHFLGIQCGHCSSFNTVVEQVLSSGP  
QGVGANQADTQDNSGSGSA

>comp11817\_c0\_seq1; 554 1 1797 LEN=1825; translated  
XGHRHKQAKKHGHRKRRKREDESEDEPEEVSNPPEEVMRRRLAELEELNERMVSNTNTSIRW  
ADMSDVPALPGTDTTKQEQRNKLDFDKDHNQKRYPASPDHKSTHRKIFYQVHRPEAKKMAW  
EIEFDAIPNKDPKERSTYVDYVHHEYEPYQKLSAPPSRLGDYPILKPYREIMKTWPQDN  
LDDPPPVLKEYLQHFWDWVPSDMEAAALKFRTAKLPFKLINVPEVLAATQTWTDDYLADQF  
DGTNHSHGHNLPNSNGKNEGPDNFFAFFNVPLWDVLTGLIIPTRDNDWTFRRWANHAHY  
ADRFGISPHLPHYWQSGVPRDERYQHPKTFTFVSRDLPSFASTEANFVQWVPDAQKGIQ  
CRFGERGITAANHYDSGRNMIAMITGAKRYILSPPRECKKLGIVSSKGHSSFRHSMLNYG  
HMAALLDDRKDPNAREMPPEEAAWEMAGTAEAVSTVVKEGEIILYVPTGWFHYITSLQKSA  
QCNVRSRGPDTSGDPYFGGARDIRENASRTSRARQGRAGFGTDTQAQRDAMESQHRRTHR  
IASHRKRTRLPVAARQPRDGDRAEDTAFAPGCRLVAWRGVTNPEQHRNSSKGYDSTIL

>comp11818\_c0\_seq1; 727 341 2500 LEN=2730; translated  
MTRPPSFRTTLTGSNNTPSRKKTSSSSPAPPLSLSFYNNNSNNPLATPNRNDDSNTNSSTP  
RNAKQKNGYGNYGTPRSAGSKNALRPVAVRERSKAIQGCRELKNHRNMDPSTTISFLIT  
PPSEDNNGKENKAPSQAVMPFRVNVYCDTGTGTGTSRVIDGKVRQTFRRNITSLDVVERLL  
RQPEGPVEIGPSLIGMTDSIEDSSHMNGNKDWTKSDYLGVELADVGFCLDGEREKLEK  
HLRQLEEEAAIKAKEHSQLOKDKERQNTPKTAKQSVQQIRSHNPAGKMQAQMLEKAM  
AAKTDDSSNGNSTRIGRRRNKFTKLRSRFTFNKEVKKNDGNAITMNTKRKGGKLAGSN  
HKPSNSDIARQTAALSLANTAFPPKRTNSESNAAAMAASALTRNGSNASNYNEDRNDAAHTS  
SSHVVVSSTKSTNSTKYNKYNKNSSSFKNCGYEFHFKLPSEVMNQVDQCLRDIAMNKV  
VKGVAATNGRGTVFLYGNGGVAYTPAIPKALYQKLRQLRSSYSRRPCYVALGTRDRYFVS  
FNDGSADWKGSNVFVKVKKVVKVQQQASGSAASGNSVSTSRKSGAMSVVSAANTHHS  
KDTRDSQSPAALLPRSVAFGATYDTFFIVFHDGWSQYQGRSIPKSLEDKLA TRDDADDLV  
VCNLGPNGEWFLKAENGMWWSGITPELDSVLKKITAKGYLHNMDFGENGSYFVSYDEE

>comp11819\_c0\_seq1; 1012 237 4601 LEN=4617; translated

MTQQDMDLCKGLIKSLKSGKYSNFNALFLNPFDL SHTPGYLDVCGRVMDLSTLSQNIENG  
FYSSRNQVYEDCNLIFENAI RYHSDKDTTKWI IKPAQQMLKIAKREQQKIEKKVVSSGGT  
ATSLPKIKLKL GASGGDKPKIKIKQPAARATGATISRGTKPPTGAVGVASRGKTSPTSAT  
AGSSSSPSVKAPLNKKPRLTLKLGKSKTTSESSKNTQKAVVPASVTTT KKSNASPKI  
SLKTSAGSGGSRGKELPKGVTPSTGKALPKGVTVPSTAETNNKAATGTSSGSYKVTKAT  
KTSKSKPTGAKASIQKATTPKSTIRATAATTSSNKPKTSTTKGKPKGSKAKSVNKKKKNK  
FTLKASSAYKATAGGLPMTPSRKAQCYKILNGIKRRKAKNI VWFEPVSDKCLIQDYKAK  
IKYPMDLSTMQTKLDNTTFGPGGTSNTSSSKGYTTVAAFVWDLRRI FGNCLRYNTTNGKD  
SLRPIAVETLDAADQLCTFFLAKHEYAQNATAASATPLYPPLLFCWKLCVNVIDTLYNLT  
NPQDGNPTAYYFMHPVSFFFFGGTLPVDYLHKAPNPMDFGTVTSQLMEGQYTTLDQFESDC  
KLVISNCMAYYGEKTESKSFCDQAQRLNQLVQQQLDALNRYVKSSAGLAAANKAKLGVST  
ATLLPKPPMSLLLKILADLREQKYTDKATKITEPAMANFEKPVSVAVIPDYMQYVQSPMD  
LQTVDRKIRNVQYTTPEDFEYDMVLMFQNCITYNSARKMDHLVALGRFGLKSFRRIFSTR  
MKVLDDPSSAKPTPVLGMSGSSGSSSIRKDPPTVGIGQGSPSKIKLSTSGSGKAAPRISL  
SAATLSEAQKAAAKSKSNNSIKLSTNKAKSNQPVPLHIAIAQVKERFPPTSRRDFAKLG  
GELCSFFQGVAAASMDLGGPTQVRLQRSCPRIIPCEFIVLLFYAFGCSLCPVHRSFDCCE  
VFSAPKLF LANNGFSHILPQGLREAYGMKIKKPMDLTTAECTLLAGNRYTAPEDFVNDVA  
LVFANAICFNKDARDVGDPLSCAYYDASIHLLKYTRWLSLEILTEHFEDDEYIDEPEDDG  
LPLKSWKLTGKNQKMSRSEMEKIVLNEPLEKSLEGDRFTWMEAECEKLLKALRHQSDNKY  
MTFFVHGDNFPDYSAFISRPMYWEKVQKTLKRNKYDTFRGIIEDLRLIFTNALKYNAKY  
KNETETVSGKAFEGARVMSKLEIAINKLMVTVSDRVERERIDHNN AEREIEAEERRERE  
RIRAQWKSESAGEASRD PVKVEGSLRVRSSIRLSINRRQSDTDFEVPFFEEYDQHQDQS  
LAEVMKEHKATFERQRNELVTMOKSTQVIGQSVYNRMLQSARAREWISDEQSRLGIMHST  
PMVATAKQAPAAAITS PVDAASVPEPSSVSAMLSENDRDILT IKLTSKAISKQKKKMARK  
RKRAAMMDWGDDDE

>comp11819\_c0\_seq2; 1090 237 4463 LEN=4479; translated  
MTQQDMDLCKGLIKSLKSGKYSNFNALFLNPFDL SHTPGYLDVCGRVMDLSTLSQNIENG  
FYSSRNQVYEDCNLIFENAI RYHSDKDTTKWI IKPAQQMLKIAKREQQKIEKKVVSSGGT  
ATSLPKIKLKL GASGGDKPKIKIKQPAARATGATISRGTKPPTGAVGVASRGKTSPTSAT  
AGSSSSPSVKAPLNKKPRLTLKLGKSKTTSESSKNTQKAVVPASVTTT KKSNASPKI  
SLKTSAGSGGSRGKELPKGVTPSTGKALPKGVTVPSTAETNNKAATGTSSGSYKVTKAT  
KTSKSKPTGAKASIQKATTPKSTIRATAATTSSNKPKTSTTKGKPKGSKAKSVNKKKKNK  
FTLKASSAYKATAGGLPMTPSRKAQCYKILNGIKRRKAKNI VWFEPVSDKCLIQDYKAK  
IKYPMDLSTMQTKLDNTTFGPGGTSNTSSSKGYTTVAAFVWDLRRI FGNCLRYNTTNGKD  
SLRPIAVETLDAADQLCTFFLAKHEYAQNATAASATPLYPPLLFCWKLCVNVIDTLYNLT  
NPQDGNPTAYYFMHPVSFFFFGGTLPVDYLHKAPNPMDFGTVTSQLMEGQYTTLDQFESDC  
KLVISNCMAYYGEKTESKSFCDQAQRLNQLVQQQLDALNRYVKSSAGLAAANKAKLGVST  
ATLLPKPPMSLLLKILADLREQKYTDKATKITEPAMANFEKPVSVAVIPDYMQYVQSPMD  
LQTVDRKIRNVQYTTPEDFEYDMVLMFQNCITYNSARKMDHLVALGRFGLKSFRRIFSTR  
MKVLDDPSSAKPTPVLGMSGSSGSSSIRKDPPTVGIGQGSPSKIKLSTSGSGKAAPRISL  
SAATLSEAQKAAAKSKSNNSIKLSTNKAKSNQPVPLHIAIAQVKERFPPLRRDVKTLQSWE  
ASCARFFKELKRHPWISAARPKFVFNVPVPLFPGLREAYGMKIKKPMDLTTAECTLLAG  
NRYTAPEDFVNDVALVFANAICFNKDARDVGDPLSCAYYDASIHLLKYTRWLSLEILTEH  
FEDDEYIDEPEDDGLPLKSWKLTGKNQKMSRSEMEKIVLNEPLEKSLEGDRFTWMEAECE  
KLLKALRHQSDNKYMTFFVHGDNFPDYSAFISRPMYWEKVQKTLKRNKYDTFRGIIEDL  
RLIFTNALKYNAKYKNETETVSGKAFEGARVMSKLEIAINKLMVTVSDRVERERIDHNN  
AEREIEAEERRERERIRAQWKSESAGEASRD PVKVEGSLRVRSSIRLSINRRQSDTDFE  
VPFFEEYDQHQDQSLAEVMKEHKATFERQRNELVTMOKSTQVIGQSVYNRMLQSARAREW  
ISDEQSRLGIMHSTPMVATAKQAPAAAITS PVDAASVPEPSSVSAMLSENDRDILT IKL  
TSKAISKQKKKMARKRKRAAMMDWGDDDE

>comp11819\_c0\_seq3; 273 77 958 LEN=974; translated  
MYWEKVQKTLKRNKYDTFRGIIEDLRLIFTNALKYNAKYKNETETVSGKAFEGARVMSK  
LEIAINKLMVTVSDRVERERIDHNN AEREIEAEERRERERIRAQWKSESAGEASRD PVK  
VEGSLRVRSSIRLSINRRQSDTDFEVPFFEEYDQHQDQSLAEVMKEHKATFERQRNELVT  
MOKSTQVIGQSVYNRMLQSARAREWISDEQSRLGIMHSTPMVATAKQAPAAAITS PVDA  
ASVPEPSSVSAMLSENDRDILT IKLTSKAISKQKKKMARKRKRAAMMDWGDDDE

>comp11820\_c0\_seq1; 174 45 579 LEN=2220; translated  
MAPDSVVVLSVYEEGLDQNYGKHVSKNIDGSHPAYQHPDKPKFDDLPREYAAAASF AELF  
SRVVISARKDAIQLKIPGFPTECLKKFEFEDVDLRNTQGEDGLSLKNI FRLFRDNEETI  
KGVLNISDKLQMMRDMIEYFENQSD ESSWKS ENLFL EVWRAYEQNVSCVYGVFKDK

>comp11820\_c0\_seq2; 209 45 482 LEN=2123; translated  
MAPDSVVVLSVYEEGLDQNYAASFAELFSRVIISARKDAIQLKIPEGFPTECLKKFEFED  
VDLRNTQGEDGLSLKNIFRLFRDNEETIKGVLNISDKLKQMMRDMIEYFENQSDSSWKS  
ENLFLEVWRAYEQNVSCVYGVFKDK

>comp11820\_c0\_seq3; 337 45 1394 LEN=2039; translated  
MAPDSVVVLSVYEEGLDQNYAASFAELFSRVIISARKDAIQLKIPEGFPTECLKKFEFED  
VDLRNTQGEDGLSLKNIFRLFRDNEETIKGVLNISDKLKQMMRDMIEYFENQSDSSWKS  
ENLFLEVWRAYEQNVSCVYGVFKDKKKNVITVTFRGSQFAPCTAVGITRDWRTNLTNWHR  
ANATPDLAREKLGQLKNGVVFVHKGFYSYLFDNKFRQNKQTFQMKDDVKSLIEDGNPE  
NYMIYITGHSLLGALACLAFNLGACSEKWIPKPVTCVTLAAPRVGTMGFRKAFQOLEKD  
GFLRHLRITYNKDVVPALPSFSFGLLGFSLRFWWMFPKQMKHVGINICARNSIDPPVHP  
AGLGFWSSVKNVAVRNFSLFRPFWAVSRYHDTGGYIKRFRDNKEALDSLFDKMYQNPEIV  
GQDFRTYHYVEEKTNKEANNLDTIEVASA

>comp11820\_c0\_seq4; 302 45 1491 LEN=2136; translated  
MAPDSVVVLSVYEEGLDQNYGKHVSKNIDGSHPAYQHPDKPDKFDDLPREYAAAASFAELF  
SRVIISARKDAIQLKIPEGFPTECLKKFEFEDVDLRNTQGEDGLSLKNIFRLFRDNEETI  
KGVLNISDKLKQMMRDMIEYFENQSDSSWKS ENLFLEVWRAYEQNVSCVYGVFKDKKKNK  
VITVTFRGSQFAPCTAVGITRDWRTNLTNWHRANATPDLAREKLGQLKNGVVFVHKGFYS  
YLFDNKFRQNKQTFQMKDDVKSLIEDGNPENYMIYITGHSLLGALACLAFNLGACSE  
KWIPKPVTCVTLAAPRVGTMGFRKAFQOLEKDGFLRHLRITYNKDVVPALPSFSFGLLGF  
SLRFWWMFPKQMKHVGINICARNSIDPPVHPAGLGFWSSVKNVAVRNFSLFRPFWAVSRY  
HDTGGYIKRFRDNKEALDSLFDKMYQNPEIVGQDFRTYHYVEEKTNKEANNLDTIEVAS  
A

>comp11821\_c0\_seq1; 638 1 1114 LEN=1181; translated  
XGSKFGGTSKNDAAEKSTSSFGQTKAKVFPFKKASFGSKFGSVAKEPNFGKVDGSDNEEG  
GDEEKSTPSFGEAKTKMPFPFKKASFGGNTKSPKFGKVDNGDAEKSTPSFGQSKAKMPFP  
PKKASFESSAKIPNVGKVDSSKERASTERSSSTKSFSPKPDFGLNSKNGVSENGKDRKSE  
EMESDFFTDVSRRNGYDVVQERSFEDDDAPVGANDEVDTQELTTGPSSGGHVPSARPISG  
DDRESSRESTFLTEENQKSFFPKTLSTKSEESMYRVEPRGTVEQKSESSQEEEEESAYF  
TDKTKEGSFFPQPQSSPLQSQRKDDSKPRIQPIEETALGETDGLYGKTPDELMAEVMRI  
AREQEEREARE

>comp11822\_c0\_seq1; 576 178 1545 LEN=1786; translated  
MPSEFRGFVKVRIFLMLHAFTAFNPRTSLRLASSMTIQSPTRILPYIAPSFARHFKNPP  
KYRLQLANLPTPLHDVLLPNSCGR LADSVLQPLRDLNIELLVKRDDMTAGVELGGNKVRK  
LEFLLADALDGGYDSVITIGGEQSNHCRATATAACRMVGLSHLILRTRKRANEVEKNNEED  
SFGYVGNILFDRMAGASIHCTPGEYGRGTGSNGLIDLNDLESRGGEESKQTKVYKIPV  
GGSNGLGTWGYIEAVDEFVNQLDNEKVDHVVFACGSGGTAAGIGLGLSLAYLEKKNVEST  
PKIHAVGVCDYDPDYFGTITDIANEMGLEMSSIFPGSQTGATNDASIEAFVRDHVTVHQG  
KGLGYASSTSEELDFIVNFALETGISLDPVYSGKALFQF INEVKENPEAYRNSRVVFWHT  
GGALGNYEKVEALSSKLRLVSTVERMDVYGKKKDK

>comp11822\_c0\_seq2; 473 738 1640 LEN=1881; translated  
MVGLESHLILRTRKRANEVEKNNEEDSFGYVGNILFDRMAGASIHCTPGEYGRGTGSNGLI  
DLLNDLESRGGEESKQTKVYKIPVGGSNGLGTWGYIEAVDEFVNQLDNEKVDHVVFACG  
SGGTAAGIGLGLSLAYLEKKNVESTPKIHAVGVCDYDPDYFGTITDIANEMGLEMSSIFP  
GSQTGATNDASIEAFVRDHVTVHQGKGLGYASSTSEELDFIVNFALETGISLDPVYSGKA  
LFQF INEVKENPEAYRNSRVVFWHTGGALGNYEKVEALSSKLRLVSTVERMDVYGKKKDK

>comp11823\_c0\_seq1; 785 292 2646 LEN=2835; translated  
MTMQRHTGSGSLSDYVGMANTTQSSDRSTAGGLGALSAAATSASSSAAAADAAAARTAL  
GLLTSSSSLSGSIHSDHAPITSLSRNASLGNSFRSSLLPSSQANPNGLWGRSATLSSMPL  
LSPSELGTADGGGSEALQALMDEHRKRRLOGELKNAFMGPEQIAQQAKADLLQFQPKKR  
ARTMLAESTSNATAAVAAAALSSQKKSALSSYL GSTLGTDNSTLSAAAELAQNLSLLRG  
TSAPGSTSAASRLALASSGITDLNSSLASLGAGSNLSNLMHLEQIVRKQQLQEIHQSIQ  
REKLEALQRLSSSTQDVLHDNALLELVLRQQQKNALSSIGGNNTAALEAQIKALRNQQQ  
QMHLQANAGQKADNIDKQHRQLSKEESAVANFMRKNSANKNNSGLASLSTAQIQQMIA  
NRQIQQDEMLPPLIPAVSSMDSVAIMQMLLPKNRNAQNPNGANFPINSVGVGQNSAAS  
ALLPTSLASTASAPLANLLTPGPFNPNSMAANIGMFGGLGGNSANGLGMI PRSIAAAKIG  
AAAHMANGVALHPSASDLIYEQRRLATAAEVSNVTRDSSVGKPPDAFVDRDPDGRARDL  
PTLLVVPMDHMLSSHQTLRLRYQIEVFRAGEEDTSTHTRGRNKPVQLGQIGIRCRHCKVL  
PVCRRRGRSVYFPRAVEGFYQAAQNMNSTHLQTECPLMGDALRREFANLIATRGVSTGA  
GRAYWAKQARKLGLRNTENGIVFDKTRPEEEEGKDKSKDKKTDDSSDKGTEDKDKSTTKKP

ESTD

>comp11824\_c0\_seq1; 1166 1 3392 LEN=3504; translated  
XSTKVSIDNISQKGATGSPTNLKRTHSAMTNPDAATEATKAMENLTVGGPTAPKGTAKRD  
ALRANEIAVQQKWAERTFEFEGNPEYNEDEGSQKESFMVTFPYPYSNGHLHIGHAFSLTKAI  
FRAQYERHMGKNVLFPPFAFHCTGMP IQAAANKLKAELIASFGVPPQFPEDDPEVRKKMEAD  
MAQAAAAKAAAAAPDAKAKGKTKLVQKTGKGIVRQWNILAKMVPVEEIPQFVDPYHWLK  
YFPPIGVEHLRNFAGVDWRRRAFITTAVNPPYDAFIRWQFETLRKKEKILFGKRNNVYSL  
VDGQVCADHRSEGEVGPQYVLIKLQVLPVEEEGPRHAKMAKLETVGDKKVYMPAT  
LRPETMYGQTNCFVLPDGEYGAYTVDATDEIFIMSPRSARGLSCQVFKDNVGYTKFEFGKI  
ECLETFKGDELLGLPLKPLAKYEKVVYTLPLLTISMFKGTGVVTSVPSDAPDDYVSLKAL  
QDKPDFRAKYGITDEMVLPHYDIVPIISIEGYGDASAEFMCKKLIKSPNDKAKLTLAKDE  
TYLKGFTIGVMSYGPAGKVKVSEAKPIIRDEMIAAGQACLYFEPESRVVSRTNDECVVAA  
TDQWYLAYGEESWSEAVKHHVLDGDSFNAYDTNALGRYEYTIIGWLKEWACTRQFGLGTYLP  
WDTTWVIESLSDSTIYMAYYTIANHLQGLNNGEPGKSPSQIDPKDLSAEVFDYIYLNK  
DYPEGCSIAEEKLKSMDERFRYWYPMTLRVSADKLIIPNHLTMALFNHAAIWDEEPEIWP  
GYYCNGHVLVDAEKMSKSKGNFLMMNETVEKYSADATRFACADAGDSLDDANFSRETADS  
AIVSLSNEETWIVETLESSDLRSGADLNFMDKILINDTDRLITACGDFAAMQFREGLOK  
GWFEMLLARNDYRSWCSDSLPMHKAVISKWIEALILICPICPHWSESLWTKIGKDGAA  
VKAPWPVADAEDKLLTRQAKFLRDSLKKFRGNVGVKAKKGWTSASIVVTDSYDPWKENVLR  
FMQEQYSDENGFPTTFMKDMKKWCGQNVSDKKMIKDVMOFGSFFVKAESNEVGRVAMDLKL  
PFDQHAILEASLTYLRSQNLNLPDLLDILDLKKAEDIPER IAGMVSPGRPHMW

>comp11825\_c0\_seq1; 292 467 1171 LEN=1788; translated  
MWGALLARALTAAGVVVIVPDLRNYPLVSIQPMVDDVDSALDWTSSNNISQYGGDPTNIVV  
VGQSAGGHVACVALFRKIRKNIDKNNDNAKSNGEWMTSHIKGFAAVSSPLNLGSPLTKSF  
RRLGFDDVMVDRMFGFQKDKYDPYLTLEELQNSELEHEFLKALPPFCIYQGTDDKTVPFE  
VSESFYRKLSTSSNTKSVSFVLYDGWSHTDPILEGPMDADHRLHKDLLDNVNEW

>comp11825\_c0\_seq2; 255 467 1265 LEN=1882; translated  
MWGALLARALTAAGEADWCHRSDSSQAHVSDECLSLIPLVIVRNKVVVIVPDLRNYPLVS  
IPQMVDDVDSALDWTSSNNISQYGGDPTNIVVVGQSAGGHVACVALFRKIRKNIDKNNDNA  
KSNGEWMTSHIKGFAAVSSPLNLGSPLTKSFRLGFDDVMVDRMFGFQKDKYDPYLTLEE  
LQNSELEHEFLKALPPFCIYQGTDDKTVPFEVSESFYRKLSTSSNTKSVSFVLYDGWSH  
TDP ILEGPMDADHRLHKDLLDNVNEW

>comp11825\_c0\_seq3; 292 268 972 LEN=1589; translated  
MWGALLARALTAAGVVVIVPDLRNYPLVSIQPMVDDVDSALDWTSSNNISQYGGDPTNIVV  
VGQSAGGHVACVALFRKIRKNIDKNNDNAKSNGEWMTSHIKGFAAVSSPLNLGSPLTKSF  
RRLGFDDVMVDRMFGFQKDKYDPYLTLEELQNSELEHEFLKALPPFCIYQGTDDKTVPFE  
VSESFYRKLSTSSNTKSVSFVLYDGWSHTDPILEGPMDADHRLHKDLLDNVNEW

>comp11825\_c0\_seq4; 255 268 1066 LEN=1683; translated  
MWGALLARALTAAGEADWCHRSDSSQAHVSDECLSLIPLVIVRNKVVVIVPDLRNYPLVS  
IPQMVDDVDSALDWTSSNNISQYGGDPTNIVVVGQSAGGHVACVALFRKIRKNIDKNNDNA  
KSNGEWMTSHIKGFAAVSSPLNLGSPLTKSFRLGFDDVMVDRMFGFQKDKYDPYLTLEE  
LQNSELEHEFLKALPPFCIYQGTDDKTVPFEVSESFYRKLSTSSNTKSVSFVLYDGWSH  
TDP ILEGPMDADHRLHKDLLDNVNEW

>comp11826\_c0\_seq2; 166 395 1210 LEN=1339; translated  
MDKVLFMALIMLALLELLNFICNNLGDWINAKRIPVRGKHLDDLSPRDKLFIGISKAQTGP  
FLYILLRYCFHESNVLWTFGDGNFSFKTVLLPIPVLFIYVDFYTLHLHGFLHLQAVYPVI  
HKHHHTQKAPSRATDDAVNVHPVEFTLGEYNHLWTIFLCCRVFNLRMHILAPLLFLAIGG  
VLAGLNHTRFDLSFTLFGVTVFDSKAHDVHHRIPQSNYGYTMFWDYLFSGSYRYPYDPSDR  
VNPKAQLDPKTGKSYNYEFIKSRSSASSKEE

>comp11828\_c0\_seq1; 1545 81 5936 LEN=7928; translated  
MPVRPAGGERSKGTGVSRLSVKNPQGRSAPSGAPAQNKAPKRRFEPPIAISTPSHPAQV  
ADLQLLHQQSELSFYLRPSNSPTSEGSWYAKAKTSLYVLQNEGTIKDEATARDRGKFD  
ALHLRGSCHVSSVEVETPSTLPSAGAVSLKTKQELVKRKTIVFHHFDPLERVLLKPAKTYT  
IDDAKAKTKRHEADSOF SRGATGMTNAIRAASIGSNLGELEIFAITGSEKKANNNNKNEK  
SVPESDREEALKECWLDMQGAHASGDVSLRLAERMEQRNSLRKNARIDLVAGLMAKQND  
RAVKITVCYQIYLRGSSNDSTRHWGGIHALTKDQTPHVYTTGAYGDHEGPRSWIPTTD  
SASSRHRASHEITITVTAPMKDGLSVTGFGEFVGHETLLHDLRVVHPGDERTAVDIDKM  
KKEVGEDHVEWLLNTSIHGNVGEESTADPHLIPPEVCHSCKMTSINSILATCIWKSCSW  
LPISPRSQGFAGPFRILEDEPEYLNLSLVEDESGNSSSDEDDDDQSKEIYDPIQAARDNGE  
GIRQAYFAPIFARKFIHATSSNVSLIPDTKFDLTPLTKRQTELEELDKTVLTSTVGVPH

RALSLMRDILALPAFRTSSYTQIWIPEAVHGGVTSGLHCCPEVMNPNFLGGAIMDSRLL  
PPVNHRLPYYQGGRILQFLQARCAIRGWIMSAIPLSGRDDVGNNGYIHTLIESLIMSLYDR  
GHGAHGEGGGKGGVFFTKRFASRSGLNSSNLDFLPVQNI EEVDFDDGIVGGIVGAVPVED  
RNNDQLWRSASNGTESHTSSMDEFVAVRQLLTLDTVSALERGTDMDKKVQNVPTPSMGWVG  
SHFSLSYLSSNANSSSALGCGALELQHPIGGLPYRALKGDLVRRVVEGRAGIANFIRLVR  
ASFVAAHLVDTGRQELNYPLERNAKTSQEKGGDKKEKDAIERPKPRFIIICVNEILKKK  
GLSHTLFTRALQNLSGRVREQQLVGRMVDVERTSRDPRTNSPFVDPEGFPNSYVRGASQM  
YLRVGVHVPEAKDVSGVSKGIQLQAYAEPVIPEGGISYGGPITLRVVENEGQFREWVKDL  
NFDGSRRDWGSVTLHAKPVTLPKAQTAASGIIIESGSSGAKQSADSNKGDSSSNSRSPLGI  
TFSPIGAFTESSIHNGYQAIELIRITNLTPLLWVRVDPMLLYGGKIAVTQQDACLAEML  
FHDGDAGAQVDALRALAERPTKIQGSVKVSSVYDVKVSELVVRVLGDCLRGTALHSSLP  
HTPSVRAQAALAIQWQNNKAPKHKNDMGQSNWVGLHLLIQYFRERFYSNETVMPVKFNR  
IAVKKNHVEPSQTVNNVDGSNPSLQANEDDGYQYLDDFDEGVERS AVLEEADEVEVEEDE  
EYRVRSAVITAIASIRAKDDMTPTPVLEFLETVLKAVDAEMVGNLVTPEEVLIERKCR  
VNEDIIGGEDEESGDEVDDVVVTSMPYASSMLIADALLALCHINVSPSFITDPTTGKSVQ  
STARHPVSNLIEVSRRLWELEWELYESVRKDFQLKSLTGVSGVCYDTIAPCAITALYTL  
LRQSTTDITTVQYINSQEGETKERFKKLDEVATASFYISIFDSKPVRSVTRAAQAQAV  
CLCCATDRFETESRVGLLTALEFMFERIVDPHTSPGLRQTLAQLMLDACSGKICSMQ  
RVG AIGGRNDLVASAARFIHGPLGASYGGDTGAAIVTNVNGISYSAARAVNDGARHGL  
KLLRW AGHPRKGDLEELFVRVACFATKLWRTINGEPIEITDVTGTFHKGSVGCATD  
GQLRCTL LALWQWLWPKGCFAVMQVQIRKPTQWSGNCKELGVDNVMKTSTEEMEA  
AKEEEASLATLD ELVKKELDRQVWRGEMAIKAFEMNKSNIKSSNVSDLSATEQGIGQ  
PLPPIVRDTAFKQGG WIASAAQRRSAGSDGGTAITKIRLRTSNDQ

>comp11829\_c0\_seq1; 181 233 466 LEN=1193; translated  
MSSVLRDLDTSQPVDVTRTKLGEGRFRICLEGYFIGNGNKELVACKRFSQWRDIVNEY  
FAAEFKIIDVAIFFANEW

>comp11830\_c0\_seq1; 680 176 1414 LEN=1866; translated  
MATAVASSEIPMASPASTKAATLPAPKEEDELQEVKGLEMQLEFVELQEEYLKDEM  
RHLQRELLRAKEEIRRIQSVPLVIGQFNEMIDANYGIVSSTAGSNYYVRILSTLDRELLK  
PNTSIALHRHSHSLVDILPPESDSTVKLMTEKPNVTKYKDIGGLDMQKQEVREAIELPLIQ  
HHLYQQIGIDPPRGVLLYGPPGTGKTMMAKAVAGATKATFISMVGSEFVQKYLGE  
GPRMV RDVFRLARENSPCIVFIDEVDAIATKRFDQAQTGADREVQRILLELLNQMDG  
FDQTTNIKV IMATNRADTLDPALLRPGRDLRKEIFPNPDRRQKRMVFAATAKMNLS  
DELDLEDYVNRS EKVSSADISSICAEAGLQAVRENRYVVLPKDFDAAYKKAVNNREKELAFYTI

>comp11831\_c0\_seq1; 609 121 1275 LEN=1331; translated  
MSAEREDVVGSGNDKEDTDTAAEVPLVLRDLRGLKRDGRPSSLFDMSVMATPVAAIKA  
LLGVVERS NATMMELQAEKQAREIVMQDFLDRQQEPRQHSSSGRSGGARNMIALASGC  
DLFLKYATRTFLEHGDFAAARNQVLERGQRFAGISLAARDRIAHVAADFIOEGQTVLTHG  
WSRVVASILLKAAETKHFDIIVLEGRPDAAGAKAARAYASHESKIPTTVVLD  
SAMGHVME IVDVVLVGAEAVVENGGFVNKMGTALATCAKAHGKPFYVASESYK  
FARLYPLSQDLPAMGNNSPIGFVDTTIASTSKDGEEKDQIEEQPQGHSVTPVDLP  
DNVRVENSPCDFTPAKFITLLFTDLGVLTPSAVSDDELIRLYS

>comp11832\_c0\_seq1; 393 285 1235 LEN=1296; translated  
MGMGMGATSSKKKKGKKNKSKGRGLSSSSKSTPFDVNASIIRLEKKYDELQLSAAKDL  
KKEEEEAESYSSWSSGEIEMITTEYVIAARDASKKGSIPDWVPICQLCLKRQETDF  
HEGASDEIVQTAISVYCRELSFLAAEGSRVFTIARNEIQYSVESIDSFHKFVYDE  
VIEGKANKSPDQAMTKAEARKTLGLSENADEITKSDIRKAYRNLSFELHPDRFEGT  
PEECEEATNQFRVNLAYDTLSSGVREEGKSWYESLGGKERTGFVGPVNLLPLGAAQ  
ETMSRHKAEEAALCGLDPTMVQSFVARHLRSS

>comp11833\_c0\_seq1; 220 334 751 LEN=751; translated  
MMKIQLLCLIVLSIASLASGAGLRGTGTAAADFEEAAGLSEQDIDERAEFDPE  
DIEEEIEGRDLQKKNYNNNYHYGYYEYHNGNRNRNWNKNNDWNYKNNGNRYKND  
WNNNKKHGTWNHNNKHGNWNNNKHGTWSX

>comp11834\_c0\_seq1; 281 268 1654 LEN=2002; translated  
MTTWNVAVGWDEGWEQKLVWLRVSDRQLXLLPQAMIFPVFIDSLFLVWFRSLIQG  
FRTSLLRRGXVKLALAHGVLSGRPLEERSDEGSSDHEERLATSSELLVRSGETSS  
PSPGPDQLNQYSPPCGRGDLRVSIKYYERFYGYDGVGPEPDTVTTLGATEALAS  
ALRTLKGPKDKCVIFEPFHELYPSQCKLFYLEPVYVTLRPSAAGGGPEPTTWTYD  
PGELEDAVRDATILVLTNTPHNPTGKVFSTRRELAHIVSLCQKYDVYLVTD  
DDIYEHMICYDRHRHIVVPHEFPPEMADRLLCNSLGKSASATGWRLGWCV  
HPPHLRNTYRGIHQDLAVMSPHPMQYATLSYMGLPDRYFADLSA

RYGRRVARLGSALASLGFVPPQAYYLFVEYTTVPALKGMASGDAAMHLLLEHVGACV  
PGDNFYGKKGDATTENRYLRFAACRSDDDLDEAIRLLEGLG  
>comp11834\_c0\_seq2; 739 170 1588 LEN=1833; translated  
MGLFTTLASATGANNNSSEGDLAVRQTDGATATSSATIPTVVQLYSGQQIILMEDTPSVS  
GYTSLTYQAVQVGASRDDAVAAELKHRHANPDLGVWNCRVGLGTNENSGKGGNSNSGSDH  
DPLVDSLLAKLAQTSSSSSSSTPPPPVYCLTVDLSDETTVEPTLSALQAALVRHLIEH  
PPPAETKSEAVRTTSLYDLQTVQFGLAPDEPQAERSIEEARNARVGLMVCVAVVSSSDAR  
TADESSEAAYKKKQARALVVYHLRKFACSIHAALCFVERPGERKDSSPNTDASDEKTGED  
AATGSGSSESNAQRSVSYDKLSQLWRDMANGIQVWNAEAATSSAVPAPESASAAAAAALY  
GPGRQQEDLIESVLLRNANYPGHWDAAKDSLWVALPSEPHGGQAAEGAGAPAAGDDGWL  
QLRDSIASALPVASAEQTDKNKAAAGKDGADKPKKDAVSSFFESLLKDS  
>comp11834\_c0\_seq3; 290 118 1401 LEN=1749; translated  
MTETNANNATNAVQESQIRKMTRLAIEYGAVNLSQGFPNESPPWCVKLALAHGVLVSGRPL  
EERSDEGSSDHEERLATSLSSELLVRSGETSSPGPGDQLNQYSPPCGRGDLRVSIKYYER  
FYGYDGVGPEPDTVTTLGATEALASALRTLKPGDKCVIFEPFHELPSQCKLFYLEPVYV  
TLRPSPAAGGGPEPTTWTYDPGELEDAVRDATILVLNTPHNPTGKVFSSREELAHIVSLCQ  
KYDVYLVTDIIEHMCYDRHRHIVVPHEFPSATGWRLGWCVHPPHLRNTYRGIHDQLAVM  
SPHPMQYATLSYMGLPDRYFADLSARYGRRVARLGSALASLGFVPPQAYYLFVEYTT  
VPALKGMASGDAAMHLLLEHVGACVPGDNFYGKKGDATTENRYLRFAACRSDDDLDEAIR  
LLEGLG  
>comp11834\_c0\_seq4; 301 118 1449 LEN=1797; translated  
MTETNANNATNAVQESQIRKMTRLAIEYGAVNLSQGFPNESPPWCVKLALAHGVLVSGRPL  
EERSDEGSSDHEERLATSLSSELLVRSGETSSPGPGDQLNQYSPPCGRGDLRVSIKYYER  
FYGYDGVGPEPDTVTTLGATEALASALRTLKPGDKCVIFEPFHELPSQCKLFYLEPVYV  
TLRPSPAAGGGPEPTTWTYDPGELEDAVRDATILVLNTPHNPTGKVFSSREELAHIVSLCQ  
KYDVYLVTDIIEHMCYDRHRHIVVPHEFPPEMADRTLLCNSLGKSASATGWRLGWCVHPP  
HLRNTYRGIHDQLAVMSPHPMQYATLSYMGLPDRYFADLSARYGRRVARLGSALASLGF  
VPPQAYYLFVEYTTVPALKGMASGDAAMHLLLEHVGACVPGDNFYGKKGDATTENRYL  
RFAACRSDDDLDEAIRLLEGLG  
>comp11834\_c0\_seq5; 270 268 1606 LEN=1954; translated  
MTTNAVWDEGWQKLVWLRSDRQLXLLPQAMIFPVFIDSLLFLVWFRSLIQGFRTSL  
RRGXVKLALAHGVLVSGRPLEERSDEGSSDHEERLATSLSSELLVRSGETSSPGPGDQLNQY  
SPPCGRGDLRVSIKYYERFYGYDGVGPEPDTVTTLGATEALASALRTLKPGDKCVIFEP  
FHELPSQCKLFYLEPVYVTLRPSPAAGGGPEPTTWTYDPGELEDAVRDATILVLNTPHN  
PTGKVFSSREELAHIVSLCQKYDVYLVTDIIEHMCYDRHRHIVVPHEFPSATGWRLGWCV  
HPPHLRNTYRGIHDQLAVMSPHPMQYATLSYMGLPDRYFADLSARYGRRVARLGSALASL  
GFGVPPQAYYLFVEYTTVPALKGMASGDAAMHLLLEHVGACVPGDNFYGKKGDATTEN  
RYLRFAACRSDDDLDEAIRLLEGLG  
>comp11836\_c0\_seq1; 378 33 1166 LEN=1332; translated  
MEEYGM AAPSSSSSCASVFLITGASKGLGKAIATVASNYYSRAVSKPRSVDESNDPCN  
SNGQRNGLCCPSMPTVRFVLVARSSKGLEETKQEVLSRQRWIHNAASAGRNEHDIICRP  
MDLSDLDRNLNANIDILLDDVDRLCSLDNAPCTENHENRDRHGEQQQHKVVFINNAGSLGH  
LGPCISSPSLEDMRRTIDFNVTSSLWLSVRFARHLKEHQESERNRMTAATVVNLSSLVAV  
SDEFGLMGIYSAGKAARERYHTLLAKEEWNHDHNQRQGSVPANTKATVNSAPSQFASSTLK  
ILNYAPGPLETKMTKEIRGSDALDSELQADFEKPLDPRDSALKLIRLLEEGEYFDWESG  
AHVDYYDLPDSNDKENE  
>comp11837\_c0\_seq1; 249 1 1583 LEN=2103; translated  
XPLPPYPVYRGVRKLSVLI ALEFALGRNHQLNYKHDFLFGNTANIIDS VARGKGLPSSEL  
EEVRTYATMSEQYQAYTNTASQPIDFGAYPPCLVAWPINILDTLCDRYLGGLCSRWRALL  
PEHLASEDSSSWFSVTHKMTKTPNEYLPGLLSYQDFVEGDDEAPFSMGSMKRFAFATSST  
SLASVLSLTSLLVVLVFCIRVLKANIQPAFSSIARSYCRKTHGPDWEKEKANADRIYK  
FGEYVFRLCFHTMISIVGIWLFHDKPWWSSVSEFLVGGSGDDATTPMGTKSLYINFPFQ  
PVEPGMIWYYLVQAYNAEAMISLLKISLKVLELQPIRCEHHCNKTKQQPQKWQLPIKIEW  
SETCRGDFREMFVHHVFTNLLVIGSSFYRFHYIGSMVFI IHDISDIPVDLSKLANFLKWK  
TTTTICFVAMCITWLLTRLCVLPFIVWRSIIYESWLVCASGYIPPMYYNMFQPIFVGLLG  
VLILLHIYWFSLVFRMGYVLIRKGEAHDLSEHKNGEKQNGTESKKSQ  
>comp11838\_c0\_seq1; 1483 23 3112 LEN=3200; translated  
MAMVVVRRSNGVGVGKSQSSLPMMQGLFDDSEKRIIQALDRGLDDFVAGKIKFMDDDDD  
ALERQNGIPANVKTAEEAIEAELVDDVPAHTEKAVPAEDVVF DAYATTDLGESKERDTPA  
EPSQQKDPRTQQVDDAKARALATMQKPADKAEKPRSKQGSKPSVDFAVEAAKKAQA

RSRNAGTDNEHDKSRTSESAAHTVDFAVAAARKAVELRKKKQKQPSPTESKKAPPRRANN  
RKVRGDPEAISSEIKTSLKTEKGPSMPVPEGWKPRDYFKKQRAFSGTISPPKKVKARAK  
RKALSVAKKLATASSKRSTRAQAQAKIATQSNDTAANANTPADTSDIKESIDKRRLNAKL  
VDGSKPGDTDDDADTMNSLLEEATSDDRSIPSKKEIEKEIMKAAQTALDEIEAQGSEMTS  
EEMLKDILKFDEEKKKEEQPGSGFVSGALEEAKKLMKDRHRQIKERQKQKEQNKVGFKEF  
DKPDSNSFPKYPNSMDPSSNEKERKLTPEEELKAMFAAGQKIADGKIDSNIADRADVGGK  
TGTTEEDVDRLIAEETVSKYARILDDELAELVRINTSPGEELDGPMENPLFDPMMSGPE  
VYNPNVELDAVNYPGALPGTADVCLPKELNEAIKQAEFAASVLMKMEAKEEKDEKTGETT  
TKYFSGGKELTAKQVENLQKVVSEASKSGIIDNPVEVMAESSRLQIILLKELWDQPEERFR  
EIASNYKDLLSERFVGLIRDRLTAMADRDLALRRDDESLREPHEKEREILGQLVVYAQ  
ALLKETRALGAELEAHQLEIVRSICKVAMDPAAHTTEETANALSDAVRDMRPLDDTFVA  
YLKYAVAEAAKLARAGLLDDPDYNQWLFVLNIVQQGVYAEIAKGINRYIEHIWYVIRME  
SPQQRRRLLESIDDMPTMDVRFVQVVDNIVGSLGDGVNGNFDGVVPLGEMTNTLLQLQ  
HDVQELLPPIERIAEKARDADEWAARQKRRMMEQRKIGQQRLEAAKEVGHMENDVEAMFGS  
EGEVLDLRFD

>comp11839\_c0\_seq1; 548 233 2302 LEN=3687; translated  
MVVGDDPTASRSDLFQKMQDPKTRTLFEESDDESTSERATGGDSLDDLSNSNSSTESNG  
DWDDIATSHGNGSAKTPTPQSRARSSVNECDVLLASDLNKLFAEREMINDEIHGIGVER  
EYSIRHGVVEETPAMLEESFRALAELEKLRQGGHAPAFDRCQQLLREEAAAQNETPNE  
KKKKTCTKPTPCYVNEQDFRILFLRCERFDIAKAARRLCAYMDFTRDLFGDKVLRRLRRL  
SDMTDSEIDHIEKGYTQLVPGDRDRAGRRVYVHTATDNDMDNTEFTRAEHMASRMRICVFM  
IMALLEGDVKSQQLGIVCLFFFHYARIDEEEFWTWRSKSKQKCVAVIPLRVGAAHYCFPTE  
EYSDLSLIMKKVQSETRSRVRVHTGTSAECMRILQSFGIPTANIPLNTSTGELDLTNHKK  
WVEFCRTKEAKYLGDFGVSLRQRIIECPKHSDILFGRGQVVMKHPGNVMFRNLVQSKLAE  
YSSIKTKKESTNLTWEIVRILKNQYGARFLKEELMESDGLCWVEATNEVARRKVRIAFRD  
ARSRQNKLNNSCSKQVIDGGGTKSNKKQIQHPKQKAGGTNNKSTGRWEQNKGDWGVNNT  
GAAAPSTTNTISALDPNLLPSPVPCFRPFVQAMDELSEDFVFKPQQQQPDLSSLAGPQAV  
HSMGPMISSCNANHNHNYLNLDNLHGGFPE

>comp11839\_c0\_seq2; 267 227 1126 LEN=2511; translated  
MRILQSGFIPTANIPLNTSTGELDLTNHKKWVEFCRTKEAKYLGDFGVSLRQRIIECPKH  
SDILFGRGQVVMKHPGNVMFRNLVQSKLAEYSSIKTKKESTNLTWEIVRILKNQYGARFL  
KEELMESDGLCWVEATNEVARRKVRIAFRDARSRQNKLNNSCSKQVIDGGGTKSNKKQIQ  
HPKQKAGGTNNKSTGRWEQNKGDWGVNNTGAAAPSTTNTISALDPNLLPSPVPCFRPFV  
QAMDELSEDFVFKPQQQQPDLSSLAGPQAVHSMGPMISSCNANHNHNYLNLDNLHGGFPE

>comp11840\_c0\_seq1; 1030 1 1853 LEN=1909; translated  
XLNWMHHSPIYNPAVSSVSLWHRQPSHCKPTTPTGYHQPIDRSTMSLSNGSMAYNSA  
AGLGGMLKDGHEHFADDDGGGAVVARSISAACELSRMLSSSLGPGQRNKLIVNHLGKHIV  
TSDCASILKEIEVEHPAAKLLLELAVQQQETECGDGTNLALTFGGELLTSTLGLMKIMGWK  
HKTDIMEGFHLASTKLLNELLVTPKDGDNNGCVVAKIPHPASSEALKELKEKVLPLVGL  
SKQYGGSEGILSDLIVQACQIVLNEGETNQVLQPSIRTVKILGGSVQGSACVQGFVAQRG  
VETTRTASEKNAKIVVYASGIEASSTEAKGTVMKNADDLKNYNKTEETKMEI IQGIAQ  
SGVKVVVTGGNISDMALHFI EKYEIALKLSKWE LRRLCQATGATALVRLGAPTAEMG  
SATTTQKIVGGRTVTVFENDEEDGKSKIATLVLRASGSLVNDLERAVGDGIHAVQMACKD  
GRIVYGGGACEMECVQLDRLADQNPGLQYAIRAFKSLQCVGRTLAENAGWDVAVQVVA  
DMRAAHVNGNADVGVDVEDDPGSTSMKGT PASPGGIYDLMYVKRSALKLAIEAATTILKV  
DQIIMSKRAGGPKMPGQ

>comp11841\_c0\_seq1; 308 1 1045 LEN=1154; translated  
XGASAGGAARYTWEVVCWLDSELSRYRCHSIGPRHLKGVEMFTIGDCQSILLKLSNERC  
KELRAELNRATAIQIEAEAAMKEEGETFDGMMTDAEMTYLTSMEEVKSI SQKLVLAEKSF  
GLVRDRIEKLVAKYEALLVHFENETDSVAPSSVFSYESSCYSEDYSFAAAQKREDELLAR  
RARRAELRAELEARESRMAPGDSQSVVLEQERVLDLQKARISDLRSESSAAFTDRDRSVV  
LARAIRRGPPAAGSGDASGKGTGRSKIDDIKQFRDRSAAKSQVGSASGSASGGPNQ  
PSAPGGRSGSSGNRTDANHFQRTVGEEMFQHLDFYERSLKAVEGHRYH

>comp11842\_c0\_seq1; 1443 206 3358 LEN=3562; translated  
MSSRPKSKRGEDESASNAKPKQGRSSPVVKPKRRGKERDKGTSSKGMIKILDEAIENGA  
TEEAKARAASSTKKNAPIPPKGWKTFEEHVVEAAVNAETSKEERRKKRREARERAKAD  
RDSRNNQHREEAKRRMEEARKKKEDEASEKTKWMEDYKKKKEKELREEEERKRKAEERER  
KRRERLLREEEERKRREEEERKREQQQREQEERERREQKQREEEERKRIEQELREKEER  
RNRKKEEERKRKEQQRREEEERKQKEQERREEEERQKQREEEERKRKEEERERKRR  
KEEERERKQKELQEKELRKKQE QEEQKQKQEEADKREVQERKKQQQEEQKRRFDQRKQE



DPSFVERIPKRSALLAIGGKALEDYEKKRSAKALALWKNEGGASNNSWTIPTGQTFDGLF  
ACEDPDAIEQTEVLVDAESLGGAI EAFKADPETYLAMLYPNNSNQSNKIPVTVYVLRAGTP  
VFRPLDVRNDGTGAFCLWQHVVYQRLVFPFGENKLPDARDADHTDSMTYMGQKLHSETGDLQ  
RLPLLPGRGMGLADAPSTKLVGLTSPVEEDCIAEPNDIVQGSIGDCWLLSAIACLADFDW  
AVQRLFRKTQTAQHLGELPTDGSDDTPSGNSYTVTLWDLTTWEEVDVVVDERLP IRLSNP  
NELLGARPSRDGKLVWPYLEKAI IHC GG YDKLEGGNCTHAWPMLTGSRNQYI IQRNPKS  
NNSDGNDTVTYSCSARYDSYKEEWS PHANSPHDYKDGSAIWSVPWPRV GSTSESDSGCRD  
ITADELFDKIVAWDETNYLVGAGTSGQSDDEKTDGIVDNHAYSVIDSRQNI GGTGIDLLL  
VRNPWGKGGGLEHGEFMADGPGWKYPKVRYELNPI PEDMGLFWLTKDEFFKYFPSIYLC  
KFNMTRLREKDYTNDLQDEFKRTKKAQT TTKKQPTNEPLAPLEPWIVDKESDPNSSYKI  
VEQSYDGGVYFDELNKR VVKGCIVDGVKEFRSNPEKYLA IHYQNSIADGGWPVEVHQYT  
LIFREGTEGLDVDEVENNSGKRTLLTNVLR

>comp11842\_c0\_seq2; 1402 206 3506 LEN=3710; translated  
MSSRPKSKRGEDESASNA PKKQGRSSPVV KPKRRGKERD KKGTS SKGMIKILDEAI ENGA  
TEEAKARAAS TSKKQNAPI PPKKGWKTFEEHV EEA AVNAETSKEERRKKRREARERAKAD  
RDSRNNQHREEAKRRMEEARKKKEDEASEKTKWMEDYK KKKKEKELREEEERKRKA EEEEE  
KRRERLLREEEERKRREEEEEKRREQQQREQEERERREQKQREEEERKRIEQELREKEEE  
RNRKKEEEKRKEQQRREEEERKQKEQERREEEERQRKEQQLREEEERKRKEEEEEER  
KEEEERKQKELQEKEELRKKQE QEEQQRKQEEADKREVQERKKQQQEEQKKRFDQRKQE  
DPSFVERIPKRSALLAIGGKALEDYEKKRSAKALALWKNEGGASNNSWTIPTGQTFDGLF  
ACEDPDAIEQTEVLVDAESLGGAI EAFKADPETYLAMLYPNNSNQSNKIPVTVYVLRAGTP  
VFRPLDVRNDGTGAFCLWQHVVYQRLVFPFGENKLPDARDADHTDSMTYMGQKLHSETGDLQ  
RLPLLPGRGMGLADAPSTKLVGLTSPVEEDCIAEPNDIVQGSIGDCWLLSAIACLADFDW  
AVQRLFRKTQTAQHLGELPTDGSDDTPSGNSYTVTLWDLTTWEEVDVVVDERLP IRLSNP  
NELLGARPSRDGKLVWPYLEKAI IHC GG YDKLEGGNCTHAWPMLTGSRNQYI IQRNPKS  
NNSDGNDTVTYSCSARYDSYKEEWS PHANSPHDYKDGSAIWSVPWPRV GSTSESDSGCRD  
ITADELFDKIVAWDETNYLVGAGTSGQSDDEKTDGIVDNHAYSVIDSRQNI GGTGIDLLL  
VRNPWGKGGGLEHKGKYGDDWFSFTNVSCLHILLFNIFLFLRYECFLTNTVPTIYTLCD  
MQGEFMADGPGWKYPKVRYELNPI PEDMGLFWLTKDEFFKYFPSIYLCCKFNMTRLREK  
YTNDLQDEFKRTKKAQT TTKKQPTNEPLAPLEPWIVDKESDPNSSYKIVEQSYDGGVYF  
DELNKR VVKGCIVDGVKEFRSNPEKYLA IHYQNSIADGGWPVEVHQYT LIFREGTEGLD  
VDEVENNSGKRTLLTNVLR

>comp11842\_c0\_seq3; 1352 206 3817 LEN=4021; translated  
MSSRPKSKRGEDESASNA PKKQGRSSPVV KPKRRGKERD KKGTS SKGMIKILDEAI ENGA  
TEEAKARAAS TSKKQNAPI PPKKGWKTFEEHV EEA AVNAETSKEERRKKRREARERAKAD  
RDSRNNQHREEAKRRMEEARKKKEDEASEKTKWMEDYK KKKKEKELREEEERKRKA EEEEE  
KRRERLLREEEERKRREEEEEKRREQQQREQEERERREQKQREEEERKRIEQELREKEEE  
RNRKKEEEKRKEQQRREEEERKQKEQERREEEERQRKEQQLREEEERKRKEEEEEER  
KEEEERKQKELQEKEELRKKQE QEEQQRKQEEADKREVQERKKQQQEEQKKRFDQRKQE  
DPSFVERIPKRSALLAIGGKALEDYEKKRSAKALALWKNEGGASNNSWTIPTGQTFDGLF  
ACEDPDAIEQTEVLVDAESLGGAI EAFKADPETYLAMLYPNNSNQSNKIPVTVYVLRAGTP  
VFRPLDVRNDGTGAFCLWQHVVYQRLVFPFGENKLPDARDADHTDSMTYMGQKLHSETGDLQ  
RLPLLPGRGMGLADAPSTKLVGLTSPVEEDCIAEPNDIVQGSIGDCWLLSAIACLADFDW  
AVQRLFRKTQTAQHLGELPTDGSDDTPSGNSYTVTLWDLTTWEEVDVVVDERLP IRLSNP  
NELLGARPSRDGKLVWPYLEKAI IHC GG YDKLEGXVRANLN XERKTGLCIAELRCAVLC  
YTAAEYIAFCFGLFYSPWFNNSNISLSCSNASSMSAFLFLAIRIFTATR TNAYDYARTNL  
TTTTIGDRSNI EQCAKSVGGNCTHAWPMLTGSRNQYI IQRNPKSNNSDGNDTVTYSCSAR  
YDSYKEEWS PHANSPHDYKDGSAIWSVPWPRV GSTSESDSGCRDITADELFDKIVAWDET  
NYLVGAGTSGQSDDEKTDGIVDNHAYSVIDSRQNI GGTGIDLLLVRNPWGKGGGLEHGY  
KGGDDWFSFTNVSCLHILLFNIFLFLRYECFLTNTVPTIYTLCDAMQGEFMADGPGWKYP  
KVRYELNPI PEDMGLFWLTKDEFFKYFPSIYLCCKFNMTRLREKDYTNDLQDEFKRTKKA  
QT TTKKQPTNEPLAPLEPWIVDKESDPNSSYKIVEQSYDGGVYFDELNKR VVKGCIVD  
GVKEFRSNPEKYLA IHYQNSIADGGWPVEVHQYT LIFREGTEGLDVDEVENNSGKRTLLTN  
VLR

>comp11842\_c0\_seq4; 1393 206 3669 LEN=3873; translated  
MSSRPKSKRGEDESASNA PKKQGRSSPVV KPKRRGKERD KKGTS SKGMIKILDEAI ENGA  
TEEAKARAAS TSKKQNAPI PPKKGWKTFEEHV EEA AVNAETSKEERRKKRREARERAKAD  
RDSRNNQHREEAKRRMEEARKKKEDEASEKTKWMEDYK KKKKEKELREEEERKRKA EEEEE  
KRRERLLREEEERKRREEEEEKRREQQQREQEERERREQKQREEEERKRIEQELREKEEE  
RNRKKEEEKRKEQQRREEEERKQKEQERREEEERQRKEQQLREEEERKRKEEEEEER

KEEEERKQKELQEKEELRKKQE QEEQQRKQEEADKREVQERKKQQEEQKKRFDQRKQE  
DPSFVERIPKRSALLAIGGKALDYEKRSKAKALALWKNEGGASNNSWTIPTGQTFDGLF  
ACEDPDAIEQTEVLVDAESLGGAI EAFKADPETYLAMLYPNNSNQSNKIPVTVYVLRAGTP  
VFRPLDVRNDGTGAFCLWQHVVYQRLVFPFGENKLPDARDAHTDSMTYMGQKLHSETGDLQ  
RLPLLPGRGMGLADAPSTKLVGLTSPVEEDCIAEPNDIVQSIGDCWLLSAIACLADFDW  
AVQRLFRKTQTAQHLGELPTDGSDDTPSGNSYTVTLWDLTTWEEVDVVVDERLP IRLSNP  
NELLGARPSRDGKLVVPYLEKAI AIHCGGYDKLEGXVRANLN XERKTGLCIAELRCVLC  
YTA AEYIAFCFLFYSPWFNNSNISLSCSNASSMSAFLFLAIRIFTATR TNAYDYARTNL  
TTTTIGDRSNI EQCAKSVGGNCTHAWPMLTGSRNQYIIQRNPKSNNSDGN DTVTYSCSAR  
YDSYKEEWSPHANS PHDYKDGSAIWSVPWPRV GSTSESDGCRDITADELFDKIVAWDET  
NYLVGAGTSGQSDDEKTDGIVDNHAYSVIDSRQNI GGTDLLLVLRNPWGKGGGLEHGEF  
MADGPGWKYPKVRYELNPIPEDMGLFWLTKDEFFKYFPSIYLCKFNMTRLREKDYTN DL  
QDEFKRTKKAQTTKKKQPTNEPLAPLEPWIVDKESDPNSSYKIVEQSYDGGVYFDELNK  
RVVKGKCIVDGVKEFRSNPEKYLAIHYQNSIADGGWPVEVHQYT LIFREGTEGLDVDEVE  
NNSGKRTLLTNVLR

>comp11844\_c0\_seq1; 453 77 1258 LEN=1315; translated  
MTMMTRRLTSIPPSLFYRAASVSSRTPRAMRRGRFVAQPLQTHGGSASQFPGAGPTLVRG  
FSTGEKPSDDPHPEAPAPASAAEELLEASARGVGQVIFLNSPHSGRILGLGLVIGDPYL  
ATLAALGTVAATATATAAGLDRASVRDGLAGYNGCLVGCASAVFGPPSVLAATTATLIGA  
SATPFVAAALKEAMGGVPQWTLAFNAVALNAFLRSRPLLPDAAEGGAAAEAAAASSGGSVF  
VDVLLSPLTGISQIFVVSALSQVGVVVLGGIGSYSPMLAVHALGGSTVGTLVGALGGAPLE  
ELTMGLWGFNSCLTSMAGVFFVHSTPTVLLSAGGAAATASLFGTMKTVFGAYGSPCLTL  
PFCVTMSACYLLQRQVPALVLAKDPHSPEKNET

>comp11845\_c0\_seq1; 205 1 991 LEN=1379; translated  
LIFPQSNPREGDKDASETDLDTIHFMI AKERVSEFESFHQIKSLKNASAYENIPRPSTPP  
GLPPPE SHHAPSKLSFGVVCSSNINRSMEAHVVLGNAGLRVESYGTGTQVRLPGRTAMGK  
SLAQAISSYSSLLIRLERSDSLHFQRSLIIAGLSSDLFTHTHC IHGIGTYWNETEEPRIYK  
FGVPYEE MYNSMTKTREDEEFFTRNTVLHL CRRGAAVKRAPQRWQDMPSDLISEHDV VIA  
FEERIYDAVVEDLQIREPTENFAPIHVICLDTKDNPEEAQLQGQVALDLCWRLEAS EDLV  
TEAPEILDEFEREKMTHTPIKVLYQLCYL

>comp11845\_c0\_seq2; 223 1 823 LEN=1211; translated  
LIFPQSNPREGDKDASETDLDTIHFMI AKERVSEFESFHQIKSLKNASAYENIPRPSTPP  
GLPPPE SHHAPSKLSFGVVCSSNINRSMEAHVVLGNAGLRVESYGTGTQVRLPGRTAMEP  
RIYKFGVPYEE MYNSMTKTREDEEFFTRNTVLHL CRRGAAVKRAPQRWQDMPSDLISEHD  
VVIAFEERIYDAVVEDLQIREPTENFAPIHVICLDTKDNPEEAQLQGQVALDLCWRLEAS  
EDLVTEAPEILDEFEREKMTHTPIKVLYQLCYL

>comp11845\_c0\_seq3; 269 705 1121 LEN=1509; translated  
MTKTREDEEFFTRNTVLHL CRRGAAVKRAPQRWQDMPSDLISEHDV VIAFEERIYDAVVE  
DLQIREPTENFAPIHVICLDTKDNPEEAQLQGQVALDLCWRLEAS EDLVTEAPEILDEFE  
REKMTHTPIKVLYQLCYL

>comp11845\_c0\_seq4; 223 483 953 LEN=1341; translated  
MEPRIYKFGVPYEE MYNSMTKTREDEEFFTRNTVLHL CRRGAAVKRAPQRWQDMPSDLIS  
EHDV VIAFEERIYDAVVEDLQIREPTENFAPIHVICLDTKDNPEEAQLQGQVALDLCWRLE  
EASEDLVTEAPEILDEFEREKMTHTPIKVLYQLCYL

>comp11846\_c0\_seq1; 359 1 741 LEN=943; translated  
SNHSDHTDPATKMMFKSLTAVMALMCASGASAFAPVITSKASVTSLDMASGNSEDASKKL  
AASVLAATFILGNVVAVEPAQAMDDSYFGSSQVIAARSGGRAGGRSSAARAPSRPASSSS  
RSSSSSTTVINRTYVTPAAPVYSSPSVIVAPPVYNPMPGLGLSLGLNAV NQIGNDMRDYR  
QREIQDTRAE LQSSRMREAE MEARLRQLEAGQGQMSQAQQLQFQQQMMMQQQAAAANAAA  
AAAAAK

>comp11847\_c0\_seq1; 276 253 606 LEN=861; translated  
MQSTTPIMVVFLSVLVLALVNTGESFQAQIQVGNRSRSTQMELFGKRARI AKKVKKILGKD  
NGNTIAVVEPEANFPTEKKIKLSNGRAKDLAKKYKDIDDVGERAFQILLDLNMVGRA

>comp11848\_c0\_seq1; 479 234 2606 LEN=2634; translated  
MPFSLSHEKRSKQGT LWGIAFSPEIVVDGGSTYQYFATCGQHAFMYEYHRHEFRPFQRY  
KSSNTEEDFYAITFAHRRFSHYNEAQLQHFDVQETKRIICVAGAGGDILVIDVDENRIDG  
TLEGSVSSVFDLKAIDCELNGVRHLLCSSTKDEVRLWNLDTFANVCLFAGWPDGHFGDV  
LSVAWHP TGSWIVSGGDEPSEKNAIPEGSKMKDFQICVWNVLDSPR IREAIQASSDLPK  
FATERSQFHAHTERFAASVHNDVHSYIVDCVEWLG NLI LSKSVHSEILLWKPLVHDDGDY  
RKSSIVPIK KFPYKKG DVYFVRFALSLNDPDSKSSFLAVGNSVGEISVWDLK LKTLDDK

PVKMASKILRTRKSKTTKPNLSLTPIKRSLAFSPDGEALAGCDEGGSVFLWETNKFRKQKS  
ACTAAPKPALETA VAPKARDSLVPSETDMSPTNRAVSVFKTGSLLTVNATEIVAPSPRR  
SSSVAGTSRGLKEWKVNPVTPKPTVNCEPSANIDTIDSAKFNDAKARSVVDSSEDPNVGT  
SDNTKPNGGQOTISVAKANPSMIVDTSGNGKLSAGARFVAKSTSSSTMDTEKSTIPNSAG  
AKFIADAKRSTKPTDPARTNSVSKSSSSLNENSKSTKPTPVRVGLLLDKHQSSSGADATK  
SAANSSENTKSAVSILGAAPWIDLTEATAPSPGTKSNVFASLPKASPCIDLTTETSSNP  
AKPAINLSDSACIDLTTETQTAKPENTKPNAEHQSSGIIDLTTETPARGSQNTKPIPTNRQS  
KPECPIIDLS

>comp11849\_c0\_seq1; 285 179 1042 LEN=1257; translated  
MGSVFGKETVKEPAFKTVLQRSIVPTPYQIREYGTFRVGENFARLVATERGMLCISTGG  
FLTTLCFPLVGLFGFSLCCVNGNGTKRIESNEIEXQNPAEVEYAGGDKNTGTPFRALAR  
YIGVFGTAENEGGEAMAMTAPVAMEQRKGTMPAMTAPVAMEGTTEGAGRKRKMFFLPEEY  
DALEKIPKPTNPDKITELPPQVGVVHRYSGSLTEKLHDDKARALSAQLREDGIDRMTED  
YVLQHYQFWGYNPPFTLPMFRRNEVWLELTREEVEVLREKFGTGEMN

>comp11849\_c0\_seq2; 341 179 862 LEN=1077; translated  
MGSVFGKETVKEPAFKTVLQRSIVPTPYQIREYGTFRVVAEVEYAGGDKNTGTPFRALAR  
YIGVFGTAENEGGEAMAMTAPVAMEQRKGTMPAMTAPVAMEGTTEGAGRKRKMFFLPEEY  
DALEKIPKPTNPDKITELPPQVGVVHRYSGSLTEKLHDDKARALSAQLREDGIDRMTED  
YVLQHYQFWGYNPPFTLPMFRRNEVWLELTREEVEVLREKFGTGEMN

>comp11850\_c0\_seq1; 416 61 1391 LEN=1471; translated  
MLSLESIKTSTKKNSSYYYGRDLNITKYKKGEDGVRRRITLTKIGDDCDDQDGDDESKGIAV  
ESSELWSNYDQGCTIRLLCPHKHNDVIQSLSTLEVEFHCVMXANAYLTPPRSSQGFAPH  
YDDIDAFCLQLEGSKRWKVYEPKVKLPRTSSEDFTSEDLGEMKQVLDITLEEGDLLYMPR  
GWIHQACTLKDQKSHLHLTVSSMQQWAWADLMDIVVPEALAAASESETSSNLREGLPAG  
FMDYMGVQYEETEVDKLPESLKKSAEEMAADKKVQIRSLREQFREEAKERIMEIAKTA  
CEMLDASCDEMAKRYISERQPPALTTSEVALTAQGETADDRPLLPNSMVRLVVRPGIARL  
VIEDDKAVVYHCADNSREYQGNPLSPLFEMDDGPALEQLLTTVEPRWIFVNDLHFHDTVE  
DKIQITQALYDEGIIAVKDAEAE

>comp11851\_c0\_seq1; 594 171 2189 LEN=2998; translated  
MLISCGRNRNDGCSHRGISEGDCLDDSFHIEQQRKILKRTAPSALTNDKAWVEYVAEG  
GANVVFRQDKISTNNSISDCVLRVPKSSQPFCSVDLLDYIQNSVLPIMNDNGNNSCSERG  
GGRYQFCGRLVAPTSPTFLSELNEMLQSSTTDARRPDQRRGSGIRCHSTGLSATSTESKL  
MILPNVFNAGELCIELKPKSSLGPFNGSSNKSTVTRYHGTMKQQTCRYCMHQAWKEHCG  
KIPRQRNRGNLYCPIDLFSNDEGRMKMAIRALLNEPQNNLRLFPDQGEVTKKVTKAATS  
SESERVLGMEVEEIVDVVVAGLRQSRVLEDLHRAHELDSDIEGMWHLRKLDSLENFDE  
NTTIMDSMDQSCNFDHQKQEQQRREQDPKTHRLLQAMGCEVDDSLQVVRVSRVYQQMLE  
KFLLAATLKDCSILISMRKIQSDQSHNRNRSERFVEMEYIEKCNNGNIYYVLISIVDLDMKP  
SSRLSKYFNLDQDIVHHYSEMSGLHKKYCFGPTIPEKTPDSTIDESMVQIKGNMMCRILY  
PNPVCLLTVYDRMTMHTANVMTITWLTPIDNSGTFVCSINKRRYTAELLHVSSIFVLNVPT  
QDMEETVLGIGSCSGREIDKFQKFGLETCCPGHPSQNASDDDRTKHAVALQECVAHTLCI  
VKEKQDQAVVWQ

>comp11851\_c0\_seq2; 603 171 2201 LEN=3047; translated  
MLISCGRNRNDGCSHRGISEGDCLDDSFHIEQQRKILKRTAPSALTNDKAWVEYVAEG  
GANVVFRQDKISTNNSISDCVLRVPKSSQPFCSVDLLDYIQNSVLPIMNDNGNNSCSERG  
GGRYQFCGRLVAPTSPTFLSELNEMLQSSTTDARRPDQRRGSGIRCHSTGLSATSTESKL  
MILPNVFNAGELCIELKPKSSLGPFNGSSNKSTVTRYHGTMKQQTCRYCMHQAWKEHCG  
KIPRQRNRGNLYCPIDLFSNDEGRMKMAIRALLNEPQNNLRLFPDQGEVTKKVTKAATS  
SESERVLGMEVEEIVDVVVAGLRQSRVLEDLHRAHELDSDIEGMWHLRKLDSLENFDE  
NTTIMDSMDQSCNFDHQKQEQQRREQDPKTHRLLQAMGCEVDDSLQVVRVSRVYQQMLE  
KFLLAATLKDCSILISMRKIQSDQSHNRNRSERFVEMEYIEKCNNGNIYYVLISIVDLDMKP  
SSRLSKYFNLDQDIVHHYSEMSGLHKKYCFGPTIPEKTPDSTIDESMVQIKGNMMCRILY  
PNPVCLLTVYDRMTMHTANVMTITWLTPIDNSGTFVCSINKRRYTAELLHVSSIFVLNVPT  
QDMEETVLGIGSCSGREIDKFQKFGLETCCPGHPSQNASDDDRTKHAVALQECVAHTLCI  
VKEKQDQGSKTFGSVV

>comp11851\_c0\_seq3; 625 171 2321 LEN=3167; translated  
MLISCGRNRNDGCSHRGISEGDCLDDSFHIEQQRKILKRTAPSALTNDKAWVEYVAEG  
GANVVFRQDKISTNNSISDCVLRVPKSSQPFCSVDLLDYIQNSVLPIMNDNGNNSCSERG  
GGRYQFCGRLVAPTSPTFLSELNEMLQSSTTDARRPDQRRGSGIRCHSTGLSATSTESKL  
MILPNVFNAGELCIELKPKSSLGPFNGSSNKSTVTRYHGTMKQQTCRYCMHQAWKEHCG  
KIPRQRNRGNLYCPIDLFSNDEGRMKMAIRALLNEPQNNLRLFPDQGEVTKKVTKAATS

SESERVLGMEVEEIVDVVVVAGLRQSRVLEDLHRAHELDSLIDIEGMWHLRKILDSLENFDE  
NTTIMDSMDQSCNFDHQKQEQKRREQDPKTHRLQLQAMGCEVDDSLQVVR SRYQQMLE  
KFLLAATLKDCSILISMRKIQSDQSHNRN SERFVEMEYEIKCNGNIYYVLISIVDLDMKP  
SSRLSKYFNLDQDIVHHYSEMSGLHKKYCFGPTIPEKTPDSTIDESMVQIKGNMCRILY  
PNPVCLLTVYDRMTANVMTITWLTPI DNSGTFVCSINKRRTAELLHVSSIFVLNVPT  
QDMEETVLGIGSCSGREIDKFQKFGLETCCPGHPSQNASDDDRTKHAVALQECVAHTLCI  
VKEKQDQGHVLFVCAQQLAWSRKYFEDGKRFRSSSESLSPYLTFGLGSKTFGSVV  
>comp11852\_c0\_seq1; 818 89 2422 LEN=2576; translated  
MNRLRGVWPLLLL SLSVAQGEDALSGSNKHQSLNEPFQSSFHNLKHSPCTTLYNREGRTG  
CGTVDREIQSGPIFYFDGSSVPAAGEDYVAVIEEYMTAEVINKLVSYNTEGNLKGIMV  
LNGTDTNDSNDFPSPGPKYPLGYGTPSEGISYGDNSFAWNSNGDGLVHSDLYGVPMVYID  
EYESSYIRSAAKDENKASDIYTEFNFMGPDGINSKDC LAWVDTESQNWNPKCAPLGGV  
SVWGFAGSPPPSSDDSNANNNAKPAVVVGTSDVSTSMFHDLVPGSNEGASNVLATIMAA  
YLLGQSVDDATLDQLPNRIVFGFFEGEAYGYLGSRGFIDDVYFNFCMDQYKVR SKANDEN  
SDMACLYPMRPSLKFKDIGEIAAMLTVDQVGVPSGDGNLYVHNSGETDMGAFLAKVMKYS  
GTSYYTAVASAANNNGDYPYPTPLNSLLSVTGGNVDGAVLTGYDYHFTKRPPYQSHLQ  
WIKDQNMNLKAIASSATIMARTALAAAYDDGEYDYESASTYAKNAIPELSYENDVLDLA  
NCLFVNGNCKLLKHKASMEEAANDKDKTGFNIGTGQSLGMPNYYVGIYHMNTGQPFVKVG  
SKWYGSYDGADYKSKGDSFGMQPKMLQALRNMLHSFLGKGSMSVDENGVDLSPKKCSS  
AGACKGISYCGADADSAMCSADNVCVKRGFYHIALDEALVPTPNKNTGFFDISSSDAGV  
SPLWTEPYWSPNVGNLYRQSDTTAGWYVLAGGALFTAFCFFVVLLKVG MKKEKLY  
>comp11853\_c0\_seq1; 741 168 2108 LEN=2416; translated  
MPLGLAKDSMLNLAELASKTEGEPNAELED F SQNNLSEVENKASF TKVMVSDDEYEEWQI  
DHNDSDNDFADNGKSNIEEGEASEEEMNHGEKIPISLNI SASPSVDMDTNGKPSRLDPK  
VQQYAGFQADYHDFENYTSYGYQGNVSLSGTTVHDKVDKKDEAPWWQCIFPWSAVDDK  
DEKDDSI EAGGLAQMHRS AKTNDVGKDYDDEISMISAESDNALGEKLSQKDRQAVLARLR  
LAQPDGAEGGDSVVDGLSEFRKRSILKHASKNRDYYGLSTRSNASKESDSSRNLKGNRR  
SLFPAYEPKVKKNLHTSFSPMARVLAIKSSKEMDEEEKGNIWWQKADYDEFRKTGRMIS  
KVMLQGGSEIWLATNQSWQLPNQGAATLRR AIEINKEEASDKWWHNFHGSRRGLEHIAS  
IDEGRQRQANVKTSVRAVLTEQRRQKVFHREDPQKLRMCSLQYTSWAKDLALASGASDAD  
AVSKNFDDSRKSREFYLLKFSRAGKLNSTTIPQSGGPQTGGKQVVP AFMKPMMSIALKS  
NRLDANTTSRLQFEKKEVAKT SKAHRVTS DVQPTLP GKNNRGNGSIKSIPIHDPKMKLV  
GGESLASKAAGFANGEEAVNMSAVLTGMGAI AKNTDSTTRARPVLA  
>comp11853\_c0\_seq2; 687 168 2060 LEN=2552; translated  
MPLGLAKDSMLNLAELASKTEGEPNAELED F SQNNLSEVENKASF TKVMVSDDEYEEWQI  
DHNDSDNDFADNGKSNIEEGEASEEEMNHGEKIPISLNI SASPSVDMDTNGKPSRLDPK  
VQQYAGFQADYHDFENYTSYGYQGNVSLSGTTVHDKVDKKDEAPWWQCIFPWSAVDDK  
DEKDDSI EAGGLAQMHRS AKTNDVGKDYDDEISMISAESDNALGEKLSQKDRQAVLARLR  
LAQPDGAEGGDSVVDGLSEFRKRSILKHASKNRDYYGLSTRSNASKESDSSRNLKGNRR  
SLFPAYEPKVKKNLHTSFSPMARVLAIKSSKEMDEEEKGNIWWQKADYDEFRKTGRMIS  
KVMLQGGSEIWLATNQSWQLPNQGAATLRR AIEINKEEASDKWWHNFHGSRRGLEHIAS  
IDEGRQRQANVKTSVRAVLTEQRRQKVFHREDPQKLRMCSLQYTSWAKDLALASGASDAD  
AVSKNFDDSRKSREFYLLKFSRAGKLNSTTIPQSGGPQTGGKQVVP AFMKPMMSIALKS  
NRLDANTTSRLQFEKKEVAKT SKAHRVTS DVQPTLP GKNNRGNGSIKSIPIHDPKMKLV  
GGESLASKGESGHFERFVSVSCGCSVSDPW  
>comp11854\_c0\_seq1; 375 65 820 LEN=1039; translated  
MDERTRMLNTKSAVLSFFVSAIGWTLSEGFTTTPFLQH QYHPQRCAAGFCSTVFAYDDGS  
YNQGSYEEGTYDDGSYSDGGYAENNDLLLIREFLQNNYPDFYITILDKNEE IWKAI GDTEE  
GNEPGFTVFPVSVEALQNM DVEKQNQLLDERNLETIQKIAAYHVIGEPVTSEALFEAGGV  
LTVGGVPIERSVTGGFFGFGGTEDGGVTLSAKILRSASVGGQLVHEVDNLVSPS IMWR  
YMDQLRIPGSS  
>comp11855\_c0\_seq1; 116 362 571 LEN=967; translated  
MTAAMDYREHTIDDHTDLPRKAALRN LKVKLRDVRQLIQSDANIGRVNIDNHIQHDFFLM  
EYKRAK AIR  
>comp11856\_c0\_seq1; 294 48 953 LEN=1196; translated  
MTKLQVAFLLAGAMAFPCYAFQSGGTLRNQHLLGDCANAAGRASAVACSASRRDVSQFLF  
VPATLASVALLAPAEQPAFAANDEDLTAKMFNADGSLKEGVESEVKFRDVSFKWDQSDAF  
AMNEDGTVNQETKSGSYELSYQYPMRWS DGKGDPIYFDRSEGINRKA AKRITV FQAPG  
SVTPDRLEKATTIGVAKAIDAPQELSRLYKADVSGRTVEKGNQKYFEFDMASAPDTCGD  
SKENLGLGFCPYDDLFLLSATVVNDRLYCMVVECDSTKVVKQESKELKRARSTFFVDEAT



XETKRNETRYRGSNHHAHGVPRVHEQPQGVSI PARNPSRGGPVFGPLAVALAVALAFANP  
GVGSSGAEKPPARGNGQEVARGGGTGASAAWGSVATLSSVAAF DANGNGNANANANAATN  
AFGDVLFDFLGPSQREGTYVARFEPEKAGAGLLPPLVREAMDTVVVEAEPVDEGPGARV  
IWILSGAAGGLVLLGLGAAAAFRGPAGSPLGSRKGLVAAEPEDPPPASVARASGAGSPG  
DGLFVDEYA

>comp11859\_c0\_seq5; 210 1 983 LEN=1052; translated  
XETKRNETRYRGSNHHAHGVPRVHEQPQGVSI PARNPSRGGPVFGPLAVALAVALAFANP  
GVGSSGAEKPPARGNGQEVARGGGTGASAAWGSVATLSSVAAF DANGNGNANANANAAGN  
PRAPERNPPLYGVTADNTEDSSGEAETETE IPTGFYKISDLRDMDVVIYSLETETETETT  
TGEGRDTPAALCLGALQEDGTLSPLSAWTDEPAFGDSIECLVDEEDRFVLAGATEEQRRR  
EEGDGADGFGEARGGEMAGSTKLTGPVLRVHLLSEDEVSYGSRQCPRGPHNPHGEESEL  
LYYVSQERVLDRFGVAPALKPDLEILW

>comp11860\_c0\_seq1; 163 176 1282 LEN=1968; translated  
MPTDRGDANEKASDANSMDPNKKTTSADDHKNDVVQPLEPTGMPPWHSMTFLATMLSVTIP  
FLPSSEELDDLSTVETWTHRVPGLVSLKGLALIRLGTAFVALGLTFYLACINEGWDVHP  
NYKPHTKLRRDVCVRLQIGIGTLCPFTSWCWTMFGVGFTRGLVALAACLVEEGGDVLGFA  
PDEAQRALLEKHVLQNRALLRTTMVLWEMSAPLAMLVSCVVKYSIWPQVVKGGKPHNLAG  
IRNQLQHNCNSIFSLLEVTVLGGIPVVFSLHSMATFMGVVYILFTWTMATAYFGDSDHDKG  
PQYIYWFMDPTLGNASTAALAVLAFVMTFFYALFAVLTGAFLDATNPGIVANTLVLLLGS  
LAVCRFRD

>comp11861\_c0\_seq1; 285 78 1073 LEN=1363; translated  
MITLLDARCDSLTTLTWEAIPGAKRYILELKTNDDEGFRQLSSNLIQPQARKKNLISEKNH  
KFRVAPVFSNEETE VGSWISHDNAFRTLSKEEDEKSMEAPTTSIAGNQALMVSWKPASS  
NDENKYELOMRENKGGEAWKTIAASLTGTGAKKKNLSSELGYQFRVRPVGPSLSVSFSPP  
SEPSVAKGLSKALKQRWFSTLQNGTLLKNGTSAVVPLADALGGKEFVLFYVSAHWCPPCR  
KFTPMLANWYKTVGKNFVEVFLSADHDEGFRSYFQASHPWMAIDFEDDTRERLMATLK  
VSGIPRLVVIDANTGNIVEDNAV GKPLDLNQW

>comp11862\_c0\_seq1; 698 235 1554 LEN=1774; translated  
MWLASSSKSSRSLRHSITPLKKGMMLLALVLFTE SVTLTKAVRSVEAFGGSAGGSGAA  
RAQHESCAETSASSSSSSCAASGAQASLPPIVGRAGGSGGP IVAECCAEFRACRTRTKPE  
GAMEECLALSRRGSLAATEAVGAAASAAAGTAVATPLGIPLYGWKILFQAFLTTINVCW  
LVPLRSKSFGENKLALSLANAFSGGIFLSLAFGHMIECVHEYAASAVGDYNEATPYMLV  
LSGYLLIFFVEKVAFDAHEIMHEMEQGGQSDDGNAVSKSSGSDATTTKNTGRSAMILLAA  
LGVHSILEMMALGLSDSFSDSA ILLTSLIALHQPAESIALLVAF LKSGMPKDIITFLSVF  
SAMGPIGVALGMVNEFAAPIVDAIMLAVVAGTFVYV GATEVIPEEWEDSEHKWKKFFAL  
MGGIVSIFAITQYTM TLGV

>comp11863\_c0\_seq1; 310 1 896 LEN=1023; translated  
XRRKSGCYRNQGRPVPSLEPTIEIFDGFEGEVEWRSASFGLDIAGAGANANATASPVPL  
LPPNPDPSPPPEPTPSGEVVFVGVASESIMGPGGVFFGMIRDTDARIRPSFLGQTDAS  
AFRIDLASRPTLTLRSRTALLGAAPDRIPTD LLLRRRYGDPVGHYTARAKSVVVDGVPLA  
ETASGKGTKIFVIFDGTGVMVSRGLFDERYLQARRQSKTLFGRVELAFETEGGREVT  
LAANKPLTTPFDPERTWKRFPKRREGRKANVHIIVMGLAFLDDRVLTVDIDEQRLWVA

>comp11864\_c0\_seq1; 423 66 842 LEN=1245; translated  
MPDFSSEGF DIDASGGNTDDVIFEIGGGSTVVPKVEEAEAPTSQAPS DTPPSLLDQAEW  
KQRGNEEFKKNYLEAYDMYTNAIEVCPCPVTVD DILRQRDEFDEMEREKMLRMEETR  
QRRRDSSKKPTNNDPKEENTKTQSSAENTEGPRTFELEPQEHSEKLAIFLNNRSASLIQ  
LERFENAILDADVA ILLNPTYVKAYIRRSSAYEKTERTEALRDMKRALELEPSNATVRR  
SMMRLQKME DERLEKLKV

>comp11864\_c0\_seq2; 441 66 971 LEN=1142; translated  
MPDFSSEGF DIDASGGNTDDVIFEIGGGSTVVPKVEEAEAPTSQAPS DTPPSLLDQAEW  
KQRGNEEFKKNYLEAYDMYTNAIEVCPCPVTVD DILRQRDEFDEMEREKMLRMEETR  
QRRRDSSKKPTNNDPKEENTKTQSSAENTEGPRTFELEPQEHSEKLAIFLNNRSASLIQ  
LERFENAILDADVA ILLNPTYVKAYIRRSSAYEKTERTEALRDMKRALELEPSNATVRR  
SMMRLQKME DERLEKLKEETMSKLDLGN SLLGNFGLSLDNFQTVQDPNTG SYSISFNQN  
K

>comp11866\_c0\_seq1; 469 190 1212 LEN=1245; translated  
MTTYTHSSGHRPQFLTAVAMYLLATTFSLAMFGHTITPALASSPPMPSSGSTRPLDEN  
RFVRLAKKH YQKARELALIEQQVEDHNARWIASSKNRAEATSKRRLICLPLDERFDPPMG  
MFSHGHTQTGDKISLPPCFMTTIKENKA EVPWLFKVS RVDECGSSGDKLTTGERVNIDVV  
EKGFAAQPD LKEIVGGPLDCRAPANYCFMPWMMRALGLKPLDLVDVQLITTVPPGSMK

FRPHSAAFAKDISNPQAVMETELRHYSSTLTKGSSIAFDYNGKRYWFDVEELRAAPKGEKV  
SMVKVQDCDLATDFLVSKDVVKEKKRLEEARRARLEAEE  
>comp11867\_c0\_seq2; 512 145 1572 LEN=1763; translated  
MAALIRPKSATYEVHENVTVDTLDNEDHTFCGIMFPIKCKDLLPIDHLVITSVAVRGLG  
PLTVVWSNADANVGKGRSSRRPGNVLRRRGREDFVANDDYRIPLHPSSWTKLYDRTHK  
PCPRGHYTELVFDEPVRLKPGEMRAFYIHSTLPGDQAIYVDNSYYGDSGRRYNDKLSIL  
TGRAHVSTTCFGQDPIWGWGNAWRDRREFVGRLAYGTVYKLNPEVSPKFGTRFQDGT  
RALLCQRRWESPVSALEAIYYILNMCPWDWFEDESTNTMKDRRKLERARKRLILAQQQYD  
QEQQKAVASTTAFASKSDDGDAKPCMTGGVCTRTIHNQAAGTTGVAHGGKSTGLEDSEED  
ADESYDMKDSDEEDNDVDDHSMDDREMNTDEDVDDDEDESFSDSSDDDDHYHNANRR  
VFGFHYVSDDEENDGQEHDPHSPRTHWLRRIARVHVLRALASMEDQAFEHSL  
>comp11868\_c0\_seq1; 715 223 2133 LEN=2539; translated  
MLRTFLSLTVGMAAVKITVSSSSSRLSSFFYNKYDHYPPYCSNPSEMESRKIPPLRDYIG  
TSNSKHANANGNGNHSDDTNNSTTTSTPLIGETRLAHVTSVVRHGARTPWSSEMKCWD  
GFWDSPRTGVWDCGDLTTFMATPSRDGFFYNTGNSESGIGNDPAFFLFEKRYDALEFPED  
GLANVLNGTCEMGQLLEQGYEQEIQNGKILRDAYTYTKGEYDHDERMRLLDLSLDDENDL  
PWEYPHHLYFRADDYQRTVMMSGQILLRGLFDPEMTKIQSTTNKNIVIPLHIADEDRDIVD  
PNKYVCPRLQAIEDKAVQSPDYQAFENSRNSKEIRDYMQDKVKMDDASVLDMMCTICT  
DRPLPNAADDYDGTTKNWFTKMTEYKIQKYTKVMKYNNAEFAKLGMPPLWYEIMKNINRV  
LAEEDGAPKLALFAGHDTTLMPLLASLGPDLWKDTEWAPYASMLIEIHELIDGRSDTISI  
YTSKFAFRLLYNGKILTPKVDGCHEDCELCDIVHLKTIILDP IARRDIDCSAPITKEVTQD  
LEQDVLSSSLDIESDEEPSHLLSLSSTTTGMAIFVILVMSGGLGSAITYLIMRKKFTHSF  
IRKRVDFFGGAWDIDSPNDGEHGLELTEGETFRDEPM  
>comp11869\_c0\_seq1; 847 1 2743 LEN=3067; translated  
XESLNFVIVKIPSLAVQHFFILFEILRSLYADVDDVKSGAELLDKCLKDVIVVAMNTGQ  
FTAECVVPVAFARFVYMNNKDTKRLTLTWLQELTEKLI GAPILEFLHLFLTGFIDMIADPQ  
PAIKQSALAFQLSVLPKLLDNHVVEAIDDFQTAGIKVDFDKILQSLVTTMEHPDPFVRK  
IAMYWMSRIVKAHIGVEKKGQRDAGVSSSKSEADDDVFQGLEDENKKQKKQQQKKKQE  
GSSKGGDDTAAPLSAATISVRNALPHVLPGILLSIGDNSHRKVT SREYFLPDTTHTLAD  
QTNAQLQAVRKDGKAYVQHLSDFIVALREELDSPGGVNARNPPAIERRPYRMDVKYDGS  
GIESQGWFRASDDTKEANEDSMMSRLCALHWIIVLYESVVPDVLKADYAREFIPIIHQ  
LVDDPPEKIIYKSLEVLAKITIPVKGEHSGKRSANKSLSGLALSSPSWVAPT VGENRDES  
PYPMNDSSIGFALDLLDKQRSLLRSRDREVFSAIQLYSCNLHLIGDLSRVISYMCRLQP  
PEFVYVSFAVELDNFVRRQTRNKKRKDVSHHLSQDYQFVSAFIQQMCLVLLNSKEASEL  
RNVLKDCIGYGREAEERDRRRSRLFHILLHSF SHNLVATTSLCLWGGACRTASXISQEDR  
SLDISLVFLELDKLVEMIERPLFRNLHVRMLETDKNPLAEGSGTMLFQVLKSILMLLPQ  
SACYNILRDRLVMSRFRQSVIANDSHDDEQNL SKETE VFSRVLSVRRMHCR TVWETIR  
AESLESIPSRGPKSSAETKDEEGQSRPEGSRRDRLWLGYSVVEEATAKAKYKQQLNMVA  
GSEGEVEIEITGSYKEFFTFFPSDAFTE LAPNDEPAPVSFEQQSNPNAASTEDAKESKEE  
QDWKAFWSASDTKA  
>comp11870\_c0\_seq1; 562 439 2007 LEN=2097; translated  
MKEATDMVKG NLPNEDSDHSVENSSDAIWK SAMDPASGKIYYDTITRKTQWKKPAKL  
KELEKRKKKERRRIAKEFFNEMEKNILDSLRSRGEVIPGIPIHKTKAEGPPKELLPKSHVR  
TISAMHGVLLEELGVNPNNTLTKESNETPKYQKATQRNSASMSGRPPLPEFRRSVQDVEK  
TSTQRNSVSSEKLSRQKMGEKITDET NQKPVCDLAGEKILDAPINDKLYELRHDQIDVST  
RPLMGHTRRNTGGTIYLNQSMANPDVKATIKCVCGVYRAHIGQSKKHAHACRNNNAKSIS  
KFGVFDNFGSRKRRGSTQVPSLTEIVEFYEA FYERSQMEHDTIIFSLIYIERLIKSTNG  
TLAPSPGNWRSFLFSCMVLASKVWDDL SMWNDFANVTAHTVGLTLFTLPRINELELALL  
KCLEFDVKVSASEYAKYYFLIRTMLLRSGLVKEDEKPLGKRKA FEKLEALTNP NLD RYPA  
SESRRDRRSKSMDDGIFDTISNKDLLSGDPVLNDSVCLEQLVN  
>comp11871\_c0\_seq1; 270 1 1119 LEN=1898; translated  
HCQLPPTVLSTRAEEEGHGVPLFSRMVACGVPPFMLDTQYRMHPCIAMFPSDLFYGGKLL  
NGVSAPERRPLAGFPWPREEFPVAFVVPVKGIEMDDGVSKMNEAEAAAACDAVAALLSGGQ  
CIPSDIAVVTPIYAAQARLIRRMTRRLTQNSNQGYIEVSSVDGFQGREKQAVVFSAVRSND  
YGAIGFAGDWRVNSFTRARRALIVIGNDQTLRRGDPDTWMPWLA WADAHGLNMDKPGV  
PRGRYDPEQLRRVRGGTTAAEMLKDVLERQQAQLKIAEKQLQKA EKNAAGHIIGKDDDEE  
GSGEAGNAANGQGLSLEEDLARLTNTDGNWDDSDDEDDCNMHHSTSQPTLSSVDRADESC  
SENDS PVDVWDL  
>comp11872\_c0\_seq1; 577 227 1387 LEN=1587; translated  
MPFFTEKKDDELRIAKSNSSSSLDLNIIEQEHTGVFEDDAEDEEKKVVKFADVEAEKHD

AQRDQERSRQELLSKIARLTDSLKEAQENIKFEKDKRKKKEKSLKLAKEKLRNLQREQ  
DEDRFEELEEKRYLEHHWVLAQKELDQEKALHAKLHEDTEKEYDQGMKEEKSKYERMSK  
ENETRLADLKKAHIEQCEQLGREAWKANLEADRLHEELIARGLDVPRRTLANEERPAVRD  
QSRLQLIILYFSIISSIIYAYLGNDIKEIFSRKGICAPLIPGTTLDDNAYGVFEAPWWAP  
AVFKEQMFTAICTEGGFNSALSKTFTSTPSSIEWARDGKNNRLVVSTQ GKAVLKRSTAKAQ  
IKVNYIEFWKRNYSDEVPVDWLPKS

>comp11872\_c0\_seq2; 299 272 931 LEN=1131; translated  
MKEEKSKYERMSKENETRLADLKKAHIEQCEQLGREAWKANLEADRLHEELIARGLDVPR  
RTLANEERPAVRDQSRLQLIILYFSIISSIIYAYLGNDIKEIFSRKGICAPLIPGTTLDD  
NAYGVFEAPWWAPAVFKEQMFTAICTEGGFNSALSKTFTSTPSSIEWARDGKNNRLVVSTQ  
GKAVLKRSTAKAQIKVNYIEFWKRNYSDEVPVDWLPKS

>comp11872\_c0\_seq3; 299 272 931 LEN=1318; translated  
MKEEKSKYERMSKENETRLADLKKAHIEQCEQLGREAWKANLEADRLHEELIARGLDVPR  
RTLANEERPAVRDQSRLQLIILYFSIISSIIYAYLGNDIKEIFSRKGICAPLIPGTTLDD  
NAYGVFEAPWWAPAVFKEQMFTAICTEGGFNSALSKTFTSTPSSIEWARDGKNNRLVVSTQ  
GKAVLKRSTAKAQIKVNYIEFWKRNYSDEVPVDWLPKS

>comp11872\_c0\_seq4; 577 227 1387 LEN=1774; translated  
MPFFTEEEKDDELRIAKSNSSSSLDLNIEQEHTGVFEDDAEDEEKKVVKFADVEAEKHD  
AQRDQERSRQELLSKIARLTDSLKEAQENIKFEKDKRKKKEKSLKLAKEKLRNLQREQ  
DEDRFEELEEKRYLEHHWVLAQKELDQEKALHAKLHEDTEKEYDQGMKEEKSKYERMSK  
ENETRLADLKKAHIEQCEQLGREAWKANLEADRLHEELIARGLDVPRRTLANEERPAVRD  
QSRLQLIILYFSIISSIIYAYLGNDIKEIFSRKGICAPLIPGTTLDDNAYGVFEAPWWAP  
AVFKEQMFTAICTEGGFNSALSKTFTSTPSSIEWARDGKNNRLVVSTQ GKAVLKRSTAKAQ  
IKVNYIEFWKRNYSDEVPVDWLPKS

>comp11873\_c0\_seq1; 701 1 2012 LEN=2076; translated  
XCRISMKLF SITGRQVNESDPASNSIANTGN YITDLCPREYLGTKNNVWDEKAAQTVDTV  
KIDTEVLLRRTG SNSKKELVGAIDQGTSSSRFLFTKEGKIAAWAQKETTQIFPSEEGTV  
GWHEHDPMEIWRITVDCIKAVIEAMDKEVKKHNNKFLSGYSIAAIGITNQRETTVAWNAV  
TGQPYNAIVWDDTRTVSIAASHIAQGDDRLRDKTGLPLASYFAGTKVRWLLDNVDALQK  
DIDGQPEVVRFGTIDTWILYQLTGTPAKAKNSLVGGLFVTDVSNASRWLFLDLVKVDWD  
KDLVKEVCEPHNVPLTALPEIKASSEIYAILQKDSTGIDKLQGVPSAILGDQQAALFGQ  
VAFEPGEAKNTYGTGMFLMMNTGTKLVPSTHGLTTIAYKISDEVVYALEGSVSHSGSTI  
QWLRDQLGLLKSATDSEELASGHNDGLYMPAFAGLFAPHWRPDARGCVVGITAAHHKGH  
IIRAALAAAYQAREVFEEI EADSVELKALKVDGGGSHNKLMMQFQADMINAPVVIPQV  
QETTAMGAFAAGLAVEFWKDKQEI KSLWNQAGLFTPLMSEQQRESNWEWKKAIKRSLD  
WVETEEDDKFVDAREGTDSSVIRENDDKSTSKNNTKSDASGKSMRAFISLVLGATVAGG  
AGFLLGRRKR

>comp11874\_c0\_seq1; 350 372 1463 LEN=2327; translated  
MTLSCDASLKSRLVLFPSQKFDLIHVSSPGLLLFPAILASQLYQIPLLMSYHTLPIYA  
RSYLPRPFNALGEILAWFGLIIVHFFADLTTLVTSPQIEDEFRARYSTMRFMLPSSINMS  
LLVWKKGVDTTAFHPIHRDREMRERMIGTHGNPDDFLIVHVGRLAKEKRLKDLRGVLEEI  
NTRRNWNRNRTCPTIRLCIVGSGPEEEELRRYFEGTPTVFLGRLDGKELGQAFASGDVFC  
MPSDSETLGFVLESMA SGVPCVAARAGGPIDLI EDNVTGYLVPTGDVSAFADRIEAMMN  
DQELRRRLSLAARKEMERWSWYASMEQIRDQAYPKCVENFRSRRLSQRLYHRFMGQAKKP  
KTS

>comp11875\_c0\_seq1; 284 87 2509 LEN=2719; translated  
MSEKKTSSSTFVERLATFLPGLQNAPSDFAVRGAAPELPYQPFCVKGIVGGADVPLP  
VNQDVAERLKAVAEPVDHPPGQKAW EIDAAKISFKHPDWDKSLRNLVRRALLALGCHSCS  
SRTIEPMLDKAVLHEGGWF EAQNPSPERKDDAFASLVVQFP SVYSGGELVMKHGGRKVT  
ATFGKEGIMHYAAFFNDIEHSQYEP IASGHRLTLTYSLRWK KIRSPPPRISTHCTPLE  
GLVPLLSWALEKIGXTGPIGFELGSWNRLNNGMKS LINGPELEVVKSLLFHNKYLP PGAN  
LYVELIIVLQRIDDKVAIRCVDLDGGSKEAAYSDTITVIDSKSKGAADLNSLEWVGKI  
PASEDPYCSRFGSGSNALS KTVYKKNLVVFPARHEFQQLMKCRKFESAARWLLNSIRSL  
KIPCEKANS LPARFVLD RYDWDLHWEPLISAYSSNHIYGAFTLLFDIVTQSKRRDHAARL  
LSICENLQTNEISQSSILNFIGCFGWDSFKSSLPRLILRNHRTLDIASTLLRASVVPKD  
DDLITTISSDWE SFLSFGLDGTDEEVNIRPLWFFLSALNKPDERRVAIELNARKRFATG  
IFRFLQIHLEDAI IDPNEKAFVLTLLDGLFRDLRDMVRVAEEADAGVETNIQE QI WNC  
LEDKDAVLDDLYEYKFR LDPILKVLWKL FENMRD DERLAVLSDLVVERYTDLHHTRLLEI  
LLGPCLPPEGTIENASPIGRVLCWLQIVYMALASGRPVESHTGETHDTLLSKFRARNER  
LADPIPDPTPDLEHPTKRVKREAGNPL



>comp11876\_c0\_seq1; 877 75 2840 LEN=2990; translated  
MSARIILRRNALGNCVHGRSRTALVLDSSSRRLASASSSLRRRPLPKTQDAALTAIRVED  
YEKNYCDDQKQRHHLRSHLSFSSSRKTNGNASWIASRFPSSHEDFSTWFTPWFMTKIPKG  
FENFFPKEKEGDADLSASGTSKSSGKASSNEHANHNENNDKQATLKSAGDGKQRKRQR  
RSGIPPPEDNEPQNI PAMIALLLLI SAANNFFKSEDDENEGGRNGGEITFVDFRNHLDDT  
GQVDKIVVVNNSLARVILHPGSKGMPSNSQSSSSSTISAARTSSGHETNPAGLESQSSDD  
TILEFDSSDGNANNF SASDDSGLAAKNTPVYHFYIGSVESFEGKLSKAQGDVHPREWVPI  
QYVNEINILQEFIKLTPMLAMLGILFYYSRGLMGGGAAGGIGGGGGGGPGGIFQVGSNA  
KKVNPETVNVSFKDVAGCEQAKLEVMEFVQFLSSPEHFTRLGAKTPKGALLCGPPGTGKT  
LLAKAVAGEAGVPFYSISGSDFIEMFVGVGPSRVRDLFKEARANTPCIIIFIDEIDAVGRQ  
RGRGGFSGGNDERENTLNQLLVEMDGFSPPTGVVVLGAGTNRVDILDQALTRPGRFDRQIT  
VDRPDLQGRKEIFGVHLEGLNLEGEVEEYAGRLAGLTPGFAGADIANLNCNEAAIIVAARRK  
ADSVTFPDFEKATDRVIGGLESNKIMSDKEKKIVAYHEAGHAVAGWFLEHADPLLKVTII  
PRASGALGFAQYLPKEVFLRTQEQIMDIVCKTLAGRAAEVFFGRVTTGASDDLKRVTQM  
VYSTIQTYGMNSRVGLAYPQSDDGMPGDKPYSDESTAEAMDDEARAMVDEAYKRTIELII  
ERKHEVEKVANLLEKETITHTDDMIDLIGERPFDDGASDASYQYVSRSSQLGQETTDKSRCD  
QKEDISQDKQDNEGLAPGLA

>comp11877\_c0\_seq1; 314 1 1158 LEN=1158; translated  
XPGGGMPMGLMGGHPYARMGMGMGLGPQRFATTSAFARDAVNSAAGADPDDSMRSGGRGG  
ETGSGNAEEDEDDDSYAGSGSHADGDDPMGSESSSSGGGGGLADLFSPPVHLICNAGGF  
EGARASARDSKRWLLVNLQRDSEFSCHALNRDVWRDELVENLIGDGFVFWQEFDTTPEGS  
QYADRYKVYDYPHIGIIDPRTRRLMWKKEGWTQVNPLTAERFAEYAMDFCSRHSLDRPPQ  
AIRPPGAASRAAKRPMHEMSEDEQLQAAMRASLQDSTGGGSDDDDDDVVIVDSSGQQLDD  
DSKPRAVEPSAAAAAPPAAPPMSMLEELVPFDVGPPEPEKGARIQFRMPDGKRKIRRFDP  
QSVKHVYAFVAVRCVAFCFVFLFRGIGX

>comp11877\_c0\_seq2; 249 1 869 LEN=1151; translated  
XLNMRNVWYFFDLGSELAKADNTLLTLLFGLDLARFRTPHQQFDTTPEGSQYADRYKV  
YDYPHIGIIDPRTRRLMWKKEGWTQVNPLTAERFAEYAMDFCSRHSLDRPPQAIRPPGAA  
SRAAKRPMHEMSEDEQLQAAMRASLQDSTGGGSDDDDDDVVIVDSSGQQLDDDDSKPRAVE  
PSAAAAAPPAAPPMSMLEELVPFDVGPPEPEKGARIQFRMPDGKRKIRRFDP  
QSVKHVYAFVAVRCVAFCFVFLFRGIGX

>comp11877\_c0\_seq3; 399 1 1253 LEN=1535; translated  
XPGGGMPMGLMGGHPYARMGMGMGLGPQRFATTSAFARDAVNSAAGADPDDSMRSGGRGG  
ETGSGNAEEDEDDDSYAGSGSHADGDDPMGSESSSSGGGGGLADLFSPPVHLICNAGGF  
EGARASARDSKRWLLVNLQRDSEFSCHALNRDVWRDELVENLIGDGFVFWQEFDTTPEGS  
QYADRYKVYDYPHIGIIDPRTRRLMWKKEGWTQVNPLTAERFAEYAMDFCSRHSLDRPPQ  
AIRPPGAASRAAKRPMHEMSEDEQLQAAMRASLQDSTGGGSDDDDDDVVIVDSSGQQLDD  
DSKPRAVEPSAAAAAPPAAPPMSMLEELVPFDVGPPEPEKGARIQFRMPDGKRKIRRFDP  
QSVKHVYAFVAVRCVAFCFVFLFRGIGX

>comp11877\_c0\_seq4; 164 1 774 LEN=774; translated  
XLNMRNVWYFFDLGSELAKADNTLLTLLFGLDLARFRTPHQQFDTTPEGSQYADRYKV  
YDYPHIGIIDPRTRRLMWKKEGWTQVNPLTAERFAEYAMDFCSRHSLDRPPQAIRPPGAA  
SRAAKRPMHEMSEDEQLQAAMRASLQDSTGGGSDDDDDDVVIVDSSGQQLDDDDSKPRAVE  
PSAAAAAPPAAPPMSMLEELVPFDVGPPEPEKGARIQFRMPDGKRKIRRFDP  
QSVKHVYAFVAVRCVAFCFVFLFRGIGX

>comp11878\_c0\_seq3; 363 131 676 LEN=742; translated  
MVKTTLFI A AATVA AVGAFSPNMPQTESPATARRDFFKDTAAV VAGAALVSM PQVASAAV  
EVPEQVTQYSFPENWGLTLKYEEDA AKVREHMYTATTLGKGADRME EYGKNMKKEMIDFV  
SYRRFPKIAGKPSFSTLYTSINVLAGHYTSYGYKYPLPEKRRKRLYQEYSEIAKSLKRG  
R

>comp11879\_c0\_seq1; 856 363 2597 LEN=2823; translated  
MFRWLTQYPDI INNRLEEGLAEDVSVDNFYLDMNGI IHPCTHGNNDEL VYLDETAMFK  
KIFLYVDRLYKMQPNQVLYLAVDGTAPRAKMNQQR SRRFRSAKEAEQLAADLAARENFK  
GKELKIEKDKQRFDSNCITPGTDFMLKLSLALQKWVDYK LKTDPFWMNGATVIVSGPDVP  
GEGEHKVMDFIRESQOEYRKTGESTDLYGPGWTHVLYGLDADLIMLGLVTHE SNFMLLRE  
KMSVVMAGRGRNKYRKKKDMMEYTRHDFELLE LASLRKLLAIQFRKFS DQLEGDYSLDRI  
VDDFVFMCLVGNDFLSHCPHLEINGGAI SLMMTTYIDL LPDWGGYLT DREKIAPERFEE  
FIYHLSVYEEHFKKRGYEENE PGWKLES DNEHDENDFY GIFYSGNPTPSCAVAA NVKGS  
EPPPSRKVKKVPKTSAEVASEEEMKKVDE DNEYPHVVGPKGNRAFRRRH PDSQARSYRDF  
YYESKLGWPTEDREKTLFHRRAHARDYLEGLHWNLNY YHNGCCDWDWYFPHLYSPLATDM

VNLDEFYHDDPDDAEFKSFPFELGTPFPPLAQLLSVLPQSANLLPTALGELMLHPSSPL  
IEYYPSDFTSDPNGKRQAWAEIVQIPFIESELLLDTVNQILEKDDGDNKILTPSERRRNR  
PGKIHFKPTGDGEKVDKNTNGSNVSSKRSARGKKSNNVRGGQAKRTSPTSSVAGSKKKP  
SPKKARKTKVPSKKARKTKVSSEK

>comp11879\_c0\_seq3; 387 1 1113 LEN=1339; translated  
LFRSEENEPGWKLESDNEHDENDFYGIFYSGNPTPSCAVAAANVKGSEPPPSRKKVKKVPKT  
SAEVASEEEMKKVDEDNEYPHVVGPKGNRAFRRRHPDSQARSYRDFYYESKLGWPTEDRE  
KTLFHRRAHARDYLEGLHWNLNYYHNGCCDWDWYFPHLYSPLATDMVNLDEFYHDDPDDA  
EFKSFPFELGTPFPPLAQLLSVLPQSANLLPTALGELMLHPSSPLIEYYPSDFTSDPNG  
KRQAWAEIVQIPFIESELLLDTVNQILEKDDGDNKILTPSERRRNRPGKIHFKPTGDGE  
KVDKNTNGSNVSSKRSARGKKSNNVRGGQAKRTSPTSSVAGSKKKPSPKKARKTKVPSK  
ARKTKVSSEK

>comp11880\_c0\_seq1; 335 52 890 LEN=890; translated  
MNLSHYVLTALIVSGVASANDSQGCCSLDYKDCISWCGSTYDSCVNCGGSEGWLPNGAAS  
PTCGKRWTGCEENNGAGHSGCCPGLTCQSNNGGKWSCLPGNNSPVDPTPSPVAPPTSPPT  
PSPVSPVSSPVSSPTGGGGNNPTPGKATFYDGNPSGGACGYNDLPQVTFPMGFVSAIG  
GEEFDNGYGCACYEVTVCVGGYGDNPNCCLCGDSGQNTVIVQATDLCPCGCTTHFDLNTNA  
FTEIVKDQSSMADTCGVLETQFRRVSCFENDNIKIRSKX

>comp11880\_c1\_seq1; 128 1 364 LEN=406; translated  
XIKIRSKSGTSGWWYGLHIDDVAGYGAIQSIKLRALREVGQDSFDIVCDKSMGASYWF  
CNRPDGRVLEAPLDVHLTDSAGRTLQKNNVITNLDGDQEFDFKTNFGPIDGSNPSYLRGR  
A

>comp11881\_c0\_seq1; 234 1 837 LEN=1015; translated  
XVSGNNEVLLRLDQREMPPLKFGIFQCGRKQLNSPRFFSGNLLTGKIPESFFGLDNL  
VVLGLDDNALESPIAPFGNLTKEKLYLEDNLTIGEITEETIGGWQNMVDLDSVNRLEG  
PLPENLWSMGKLEVVDLSGNDFIGQIPKIGAVQDNLVFLALHDNNLEWRIPETISNFVNL  
KHLDISANRMTIPFPSTMSKLTNLVSIYTGINGFGDHPLPSFLQSMPLREISMKQNQIT  
GTIPTFLGNMTDLQVLDLDFNKIKGTIPSVSRTRIFPA

>comp11881\_c0\_seq2; 734 259 2256 LEN=2434; translated  
MTTDLEQDTSQDYIEDNSTLQPPPSDDDFMDVNPADVENQDGMADGNAFSDVAVDNPGD  
GEDDNVHDQLPTVDDYKATVSFKNKGATSLADGASNMVKSRAGLFHFGLSIPVHCPHYG  
VSICTVGCQFCVHFFICRVIKRNKPLKTFGLGADEIRFSDKIFYPLAGFLIVVFSIA  
VPLAMKNQGGKSEVAAVEADTGSGSYASGSKIITATPISSPTRAPTAVPTKSRDYAIF  
DYLNVYDFAKRSDLLEEGTAVGLATKWIAEEDKFEMPIPTATSGNRFIERWALAVFWFST  
NGHLWTFPLNFMRPIDHCQWHSFFQDPTGEIIQMGVTKCVEDFDGERVSSIEMSNLIG  
SIPTEIRYLVDLKMWITPFAALNEGVDLAPFLEMGKSLSHLELQYCSVTGTIPEELGKL  
KKLEFLGLGNLLTGKIPESFFGLDNLVVLGLDDNALESPIAPFGNLTKEKLYLEDNLI  
TGEITEETIGGWQNMVDLDSVNRLEGPLPENLWSMGKLEVVDLSGNDFIGQIPKIGAVQ  
DNLVFLALHDNNLEWRIPETISNFVNLKHLDISANRMTIPFPSTMSKLTNLVSIYTGING  
FGDHPLPSFLQSMPLREISMKQNQITGTIPTFLGNMTDLQVLDLDFNKIKGTIPSVSRT  
RIFPA

>comp11881\_c0\_seq3; 784 259 2626 LEN=3318; translated  
MTTDLEQDTSQDYIEDNSTLQPPPSDDDFMDVNPADVENQDGMADGNAFSDVAVDNPGD  
GEDDNVHDQLPTVDDYKATVSFKNKGATSLADGASNMVKSRAGLFTFLGLFLFTALITA  
IAVPLAMKNQGGKSEVAAVEADTGSGSYASGSKIITATPISSPTRAPTAVPTKSRDYA  
IFDYLNVYDFAKRSDLLEEGTAVGLATKWIAEEDKFEMPIPTATSGNRFIERWALAVFWF  
STNGHLWTFPLNFMRPIDHCQWHSFFQDPTGEIIQMGVTKCVEDFDGERVSSIEMCKYFL  
LEFVVTEFEILPIAATISNITHTRTSTTKTSLKWIANNLIGSIPTEIRYLVDLKMWITP  
FNAALNEGVDLAPFLEMGKSLSHLELQYCSVTGTIPEELGKLKKLEFLGLGNLLTGKIP  
ESFFGLDNLVVLGLDDNALESPIAPFGNLTKEKLYLEDNLTIGEITEETIGGWQNMVDL  
DSVNRLEGPLPENLWSMGKLEVVDLSGNDFIGQIPKIGAVQDNLVFLALHDNNLEWRIP  
ETISNFVNLKHLDISANRMTIPFPSTMSKLTNLVSIYTGINGFGDHPLPSFLQSMPLRE  
ISMKQNQITGTIPTFLGNMTDLQVLDLDFNKIKGTIPSELGRLTGLDTLMLNRNFLQGTI  
PASFSNLIDLVDLILDANNITGSADPICVNTAKLTFSSDCGGLESEVNCSCCTVCCND  
NNATCENNFDWRVNLDGIWEYDYQRLVYSFSQELLPSSAKMNYTNEKLEADSNIASSGNST  
RNSTGARE

>comp11881\_c0\_seq4; 801 259 2082 LEN=2260; translated  
MTTDLEQDTSQDYIEDNSTLQPPPSDDDFMDVNPADVENQDGMADGNAFSDVAVDNPGD  
GEDDNVHDQLPTVDDYKATVSFKNKGATSLADGASNMVKSRAGLFTFLGLFLFTALITA  
IAVPLAMKNQGGKSEVAAVEADTGSGSYASGSKIITATPISSPTRAPTAVPTKSRDYA

IFDYLVNYDFAKRSDLLEEGTAVGLATKWIAEEDKFEMP IPTATSGNRFIERWALAVFWF  
STNGHLWTFPLNFMRPIDHCQWHSFFQDPTGEEIQMGVTKCVEDFDGERVSSIEMSNNNL  
IGSIPTEIRYLVDLKMWITPFFNAALNEGDVLAFFLEMGKSLSHLELQYCSVTGTIPEELG  
KLKLEFLGLGNLLTGKIPESFFGLDNLVVLGLDDNALESPIAPFGNLTKEKLYLEDN  
LITGEITEETIGGWQNMVDLDSLVRNLEGLPENLWSMGKLEVVDLGNDFIGQIPKIGA  
VQDNLVFLALHDNNLEWRIPETISNFVNLKHLDISANRMTIPFPSTMSKLTNLVSIYTGI  
NGFGDHPLPSFLQSMPLREISMKQNQITGTIPTFLGNMTDLQVLDLDFNKIKGTIPSVS  
RTRIFPA

>comp11881\_c0\_seq6; 277 1 1260 LEN=1952; translated  
XVSGNNEVLLRLDQREMPPLKFGIFQCGRKQLNSPRFFSGNLLTGKIPESFFGLDNL  
VVLGLDDNALESPIAPFGNLTKEKLYLEDNLITGEITEETIGGWQNMVDLDSLVRNLEGL  
PLPENLWSMGKLEVVDLGNDFIGQIPKIGAVQDNLVFLALHDNNLEWRIPETISNFVNL  
KHLDISANRMTIPFPSTMSKLTNLVSIYTGINGFGDHPLPSFLQSMPLREISMKQNQIT  
GTIPTFLGNMTDLQVLDLDFNKIKGTIPSELGRLTGLDTLMLNRNLFQGTIPASFSNLID  
LDVLIILDANNITGSADPICVNNTAKLTFLLSSDCGGLESEVNCSCCTVCCNDNATCENNFD  
WRVNL DGIWEYDYQRLVYSFSQELLPSSAKMNYTNEKLEADSNIASSGNSTRNSTGARE

>comp11881\_c0\_seq7; 844 259 2505 LEN=3197; translated  
MTTDLEQDTSQDYIEDNSTLQPPPSDDDFMDVNPADVENQDGMADGNAFSDVAVDNPGD  
GEDDNVHDQLPTVDDYKATVSFKNKGGATSLADGASN MVKSRAGLFTFLGLFLFTALITA  
IAVPLAMKNQGGKSEVAAVEADTGSGSYASGSKIITATP ISSPTRAPT PVAVPTKSRIDA  
IFDYLVNYDFAKRSDLLEEGTAVGLATKWIAEEDKFEMP IPTATSGNRFIERWALAVFWF  
STNGHLWTFPLNFMRPIDHCQWHSFFQDPTGEEIQMGVTKCVEDFDGERVSSIEMSNNNL  
IGSIPTEIRYLVDLKMWITPFFNAALNEGDVLAFFLEMGKSLSHLELQYCSVTGTIPEELG  
KLKLEFLGLGNLLTGKIPESFFGLDNLVVLGLDDNALESPIAPFGNLTKEKLYLEDN  
LITGEITEETIGGWQNMVDLDSLVRNLEGLPENLWSMGKLEVVDLGNDFIGQIPKIGA  
VQDNLVFLALHDNNLEWRIPETISNFVNLKHLDISANRMTIPFPSTMSKLTNLVSIYTGI  
NGFGDHPLPSFLQSMPLREISMKQNQITGTIPTFLGNMTDLQVLDLDFNKIKGTIPSEL  
GRLTGLDTLMLNRNLFQGTIPASFSNLIDLDVLIILDANNITGSADPICVNNTAKLTFLLSS  
DCGGLESEVNCSCCTVCCNDNATCENNFDWRVNL DGIWEYDYQRLVYSFSQELLPSSAKM  
NYTNEKLEADSNIASSGNSTRNSTGARE

>comp11881\_c0\_seq8; 741 259 2203 LEN=2381; translated  
MTTDLEQDTSQDYIEDNSTLQPPPSDDDFMDVNPADVENQDGMADGNAFSDVAVDNPGD  
GEDDNVHDQLPTVDDYKATVSFKNKGGATSLADGASN MVKSRAGLFTFLGLFLFTALITA  
IAVPLAMKNQGGKSEVAAVEADTGSGSYASGSKIITATP ISSPTRAPT PVAVPTKSRIDA  
IFDYLVNYDFAKRSDLLEEGTAVGLATKWIAEEDKFEMP IPTATSGNRFIERWALAVFWF  
STNGHLWTFPLNFMRPIDHCQWHSFFQDPTGEEIQMGVTKCVEDFDGERVSSIEMCKYFL  
LEFVVTEFEILPIAATISNITHTRTSTTKTSKLWIANNNLIGSIPTEIRYLVDLKMWITP  
FNAALNEGDVLAFFLEMGKSLSHLELQYCSVTGTIPEELGKLKLEFLGLGNLLTGKIP  
ESFFGLDNLVVLGLDDNALESPIAPFGNLTKEKLYLEDNLITGEITEETIGGWQNMVDL  
DSLVRNLEGLPENLWSMGKLEVVDLGNDFIGQIPKIGAVQDNLVFLALHDNNLEWRIP  
ETISNFVNLKHLDISANRMTIPFPSTMSKLTNLVSIYTGINGFGDHPLPSFLQSMPLRE  
ISMKQNQITGTIPTFLGNMTDLQVLDLDFNKIKGTIPSVSRTRIFPA

>comp11881\_c0\_seq9; 674 259 2377 LEN=2555; translated  
MTTDLEQDTSQDYIEDNSTLQPPPSDDDFMDVNPADVENQDGMADGNAFSDVAVDNPGD  
GEDDNVHDQLPTVDDYKATVSFKNKGGATSLADGASN MVKSRAGL FHF LGSIPVHCPHYG  
VSICTVGCQFCVHFFICRVIFFPKRKNPPLKTFLGADEIRFSDKFYPLAGFLIVVFSIA  
VPLAMKNQGGKSEVAAVEADTGSGSYASGSKIITATP ISSPTRAPT PVAVPTKSRIDAIF  
DYLVNYDFAKRSDLLEEGTAVGLATKWIAEEDKFEMP IPTATSGNRFIERWALAVFWFST  
NGHLWTFPLNFMRPIDHCQWHSFFQDPTGEEIQMGVTKCVEDFDGERVSSIEMCKYFLE  
FVVTEFEILPIAATISNITHTRTSTTKTSKLWIANNNLIGSIPTEIRYLVDLKMWITPFFN  
AALNEGDVLAFFLEMGKSLSHLELQYCSVTGTIPEELGKLKLEFLGLGNLLTGKIPES  
FFGLDNLVVLGLDDNALESPIAPFGNLTKEKLYLEDNLITGEITEETIGGWQNMVDLDSL  
SVNRLEGLPENLWSMGKLEVVDLGNDFIGQIPKIGAVQDNLVFLALHDNNLEWRIPET  
ISNFVNLKHLDISANRMTIPFPSTMSKLTNLVSIYTGINGFGDHPLPSFLQSMPLREIS  
MKQNQITGTIPTFLGNMTDLQVLDLDFNKIKGTIPSVSRTRIFPA

>comp11881\_c0\_seq10; 777 259 2679 LEN=3371; translated  
MTTDLEQDTSQDYIEDNSTLQPPPSDDDFMDVNPADVENQDGMADGNAFSDVAVDNPGD  
GEDDNVHDQLPTVDDYKATVSFKNKGGATSLADGASN MVKSRAGL FHF LGSIPVHCPHYG  
VSICTVGCQFCVHFFICRVIFFPKRKNPPLKTFLGADEIRFSDKFYPLAGFLIVVFSIA  
VPLAMKNQGGKSEVAAVEADTGSGSYASGSKIITATP ISSPTRAPT PVAVPTKSRIDAIF

DYLVNYDFAKRSDLLEEGTAVGLATKWIAEEDKFEMP IPTATSGNRFIERWALAVFWFST  
NGHLWTFPLNFMRPIDHCQWHSFFQDPTGEIIQMGVTKCVEDFDGERVSSSIEMSNLIG  
SIPTEIRYLVDLKMWITPFNAALNEGVDLAPFLEMGKSLSHLELQYCSVTGTIPEELGKL  
KKLEFLGLGNLLTGKIPESFFGLDNLVVLGLDDNALESPIAPFGNLTKLEKLYLEDNLI  
TGEITEETIGGWQNMVDLDSVNRLEGPLPENLWSMGKLEVVDLSGNDFIGQIPKIGAVQ  
DNLVFLALHDNNLEWRIPETISNFVNLKHLDISANRMTIPFPSTMSKLTNLVSIYTGING  
FGDHPLPSFLQSMPLREISMKQNQITGTIPTFLGNMTDLQVLDLDFNKIKGTIPSELGR  
LTGLDTLMLNRNRLQGTIPASFNLIDLVDLILDANNITGSADPICVNNTAKLTFLLSSDC  
GGLESEVNCSCCTVCCNDNATCNDFWRVNL DGIWEYDYQRLVYSFSQELLPSSAKMNY  
TNEKLEADSNIASSGNSTRNSTGARE

>comp11881\_c0\_seq1; 717 259 2800 LEN=3492; translated  
MTTDLQDTSQDYIEDNSTLQPPSDDDFMDVNPADVENQDGMADGNFSDVAVDNPGD  
GEDDNVHDQLPTVDDYKATVSFKNKGGATSLADGASNVMKSRAGLFHFLGSIPVHCPHYG  
VSICTVGCQFCVHFFICRVIFFPKRKNPPLKTFGLGADEIRFDSDFYPLAGFLIVVFSIA  
VPLAMKNQGGKSEVAAVEADTSGSGSYASGSKIITATPISSPTRAPTVAVPTKSRYDAIF  
DYLVNYDFAKRSDLLEEGTAVGLATKWIAEEDKFEMP IPTATSGNRFIERWALAVFWFST  
NGHLWTFPLNFMRPIDHCQWHSFFQDPTGEIIQMGVTKCVEDFDGERVSSSIEMCKYFLE  
FVVTEFEILPIAATISNITHTRTSTTKT SKLWIANNLIGSIPTEIRYLVDLKMWITPFN  
AALNEGVDLAPFLEMGKSLSHLELQYCSVTGTIPEELGKLKKLEFLGLGNLLTGKIPES  
FFGLDNLVVLGLDDNALESPIAPFGNLTKLEKLYLEDNLI TGEITEETIGGWQNMVDL  
SVNRLEGPLPENLWSMGKLEVVDLSGNDFIGQIPKIGAVQDNLVFLALHDNNLEWRIPET  
ISNFVNLKHLDISANRMTIPFPSTMSKLTNLVSIYTGINGFGDHPLPSFLQSMPLREIS  
MKQNQITGTIPTFLGNMTDLQVLDLDFNKIKGTIPSELGRLTGLDTLMLNRNRLQGTIPA  
SFSNLIDLVDLILDANNITGSADPICVNNTAKLTFLLSSDCGGLESEVNCSCCTVCCNDN  
ATCNDFWRVNL DGIWEYDYQRLVYSFSQELLPSSAKMNYTNEKLEADSNIASSGNSTRN  
STGARE

>comp11882\_c0\_seq1; 892 108 1820 LEN=1927; translated  
MGKSKKPFIDKKKSSTYHVLYRSQRDVADADNEEGDGEKGVVLWVSPNKNKETDQKVLL  
GNEVGQGPQSDAEQFQDRTLSSWKDLAEVGLVDDFDYKHTKPITGGGQYFTNNAMNAS  
KKEIGAMLDARSMDVRDEIVQFVDRQLDSIALTSDCMDDEIAQMLFGDFEEGAFFELNDE  
FVLDAAKEPEPEGEDDEEAFDYASHIQGLIAKAKMONEGLGEMATIEHAGRKDQEFFANAK  
RVDKGYNDSDDDSGYFDEHDL EIVGVPGVVPKLTAEAEQALCDKFNMALEYSDDMGE  
YDDDDVIGDLPLEGDAQIEAALDDFLTEKKDEIFMQGTRHYMDGNKNGSGFAALVGT  
KMPAKEIVESETNNRDIKPI SDVLGEADTLRAPNAAPPTEEIFIDGKSYFSERMKNPWDC  
ESILSTYSNLDNNPMTIGSSRRRRRPPKPKGRGMDGNGSTVPIEEHKTQLSEKTGLPL  
GVLPSGRAVDYGDSEYFDGADTYMSVNGEKERSKNETAEKLRKLTVKKERQLARMQKK  
MLKEAFNDEFTRKQQEVMDVGGKSVFRF

>comp11884\_c0\_seq1; 1892 283 3281 LEN=3281; translated  
MEDPTPLAPLSSNAFDGNPSAGILMKSIDDNDALSDSSSVSSESSVSSDSSLSTEGSN  
DSDSTEETHPVLSSSNSTVSMDEADNP SLVATNEKEPLHPGDQELPPP KPKTL P  
APDLQV SKKKTVPARVSYVEGMENLQSLHEKVRQSKIKMDSLKLHHRVRSKEQLS  
QKTVLERDQ LLTELQSKTSLLAQAKEEALLWKQKHNDLAASRASASGADAQTDKED  
PVWKERFETAQSE LLEGRNKAKEASERADKSEAELEELNRRFEEARAEWETERASA  
ERSAEASMEETISAKDA ELAALKQDHEALRTEWEASRSKAEAAEAEERCKAEKIR  
LLEEKTEGLRLEASQSQD QKDAGQELTDSLRAEQAQKAMDSKDRIEKELSELQET  
CDAQAQKVKSLTEENEQLQKQ AADGASEKQDRLEEAIAAAVSELQEKLDASER  
SAESLKEQNEELEKKVAEGVSKHEDAAT EAESLREQERLQNELSVKTNHEDLAG  
KLESLTKENERLQNVLSENKRLQNELSEIQSK KSVDDASSQEALKELEKFEAAN  
SRLEQLTKQNEELQTELDGNAKRDELEHSIETKDN EMEALQEEFQERTDEALS  
WKKEKFEASEQRQKLESELESAGTTDNAEQDKIKELAAEN EELKANETLKADQ  
AEETSKLEAKIKDKERAMTRLRKSIVLERKLVESAKENKLLASQV EKGSGETE  
EKHLAALSCLKKEKDELMEKYEKLEGRHEDATQKSSERSQESSKLREDLQK  
ALKQNEELALQIEGEKKDSAAQSNITAELSELQREKEELHGNLKKLEKEREDAR  
QSEGHQQECLKLRDLQKALEQNKELSVQVEKGETASKAGDGRSSLEGSGRRISS  
WLPASS PSALLRESSMISSYLSPEQTLLQMPVSELEATPETKEEAAREKEER  
FARAKAEAL AKAKEMAAAKAKAEAEAKAKEEEFARAKAEAIKAKKEGA

>comp11886\_c0\_seq1; 226 138 599 LEN=945; translated  
MIRFFLLQNRQKTRLKWKYIPPTTTSTGTSTTLEAEKSRIEAEVHRLVTARDK  
KYTNF IEYNNYKVIYRRYAGLFFTTIAVDVQDNELSYLETIHLFVELLDAYFRN  
VCEL DIVFNFNK VYSILDEFMLAGEMQETSQEIILDRVKFMEKME

>comp11886\_c0\_seq2; 204 267 675 LEN=1021; translated

MVHPTDDDDATGTSTTLEAEKSRIEAEVHRLVTARDKKYTNFIEYNNYKVIYRRYAGLFF  
TIAVDVQDNELSYLETIHLFVELLDAYFRNVCEL DIVFNFKVYSILDEFMLAGEMQETS  
KQEILDRVKFMEKME

>comp11888\_c0\_seq1; 404 1 1939 LEN=1939; translated  
EPYIKETPTSRMAEQIAIAAPDNLPVTIPTKVTGPTDLQTRRPARSRVANVLKRLRKQNP  
RNALRRFSRTDTETTLDRLDEKAPSEISELTDIFHDDDLTLDNGKIPIKEDEKQTKNADP  
LEPSQCRAPSSMASLSARSSTLKDYTLSESLGAWLESFACLAKSSEMDSFLNSSNALAAS  
ATQSTIDVAKNVGGLVVHTALLPVTLPIQATATATDLLFNKGSNVLHYFCDNVVPLVVSQ  
TVKIPKNPLIMTKDPTTPKIHEYKLSRIKKTSESTITDTNINIDEDDFLERLRDLHSDS  
VQCAGQRSKERHYTRSSASEAVYSVDTDFWATQTTKTKFSILLRVEDIQLTMKPQEASE  
SESESHIVCVLDHEDFSDEQLVSDALALLSVRSIEIESSNEAVSDLSPSANREEPAQKMS  
IQIDWKALGQTKKDYKRLKLNSESEFYDALCSRVLTWSGKYLGPKYGSENPFYARGIV  
NGEPEDVNLNLLWDSKRTNEYNKHCVSREDKFSIFDYENNTTNGFYGAKIIIESETKIPMTK  
MSVRLSALMCAKFLGESPEDGYVIFSRSLSCGEAGNHLVDSGKLCQNGNNEVIIGINIMR  
PVPGRPGLSDLISISQVDASILPPFLKARVGIMAAEDFFKNARKALX

>comp11888\_c0\_seq2; 363 1 1586 LEN=1586; translated  
XREYILVRKKGHAQYAKLETRSRLIFFHYFRSTCLLVE SFACLAKSSEMDSFLNSSNAL  
AASATQSTIDVAKNVGGLVVHTALLPVTLPIQATATATDLLFNKGSNVLHYFCDNVVPLV  
VSQTVKIPKNPLIMTKDPTTPKIHEYKLSRIKKTSESTITDTNINIDEDDFLERLRDLH  
SDSVQCAGQRSKERHYTRSSASEAVYSVDTDFWATQTTKTKFSILLRVEDIQLTMKPQE  
ASESESESHIVCVLDHEDFSDEQLVSDALALLSVRSIEIESSNEAVSDLSPSANREEPAQ  
KMSIQIDWKALGQTKKDYKRLKLNSESEFYDALCSRVLTWSGKYLGPKYGSENPFYAR  
GIVNGEPEDVNLNLLWDSKRTNEYNKHCVSREDKFSIFDYENNTTNGFYGAKIIIESETKIP  
MTKMSVRLSALMCAKFLGESPEDGYVIFSRSLSCGEAGNHLVDSGKLCQNGNNEVIIGIN  
IMRPVPGRPGLSDLISISQVDASILPPFLKARVGIMAAEDFFKNARKALX

>comp11889\_c0\_seq1; 381 355 1098 LEN=1326; translated  
MIQPHNEISATPPTVAINDSSRIGKRRLS FVVGSCDDSEAMIITKQRKLDALSIDDTFEAL  
DIESSHKVVVSPHESMPTSEQEIEFEWMESVINGAVSENATGMPEAASSSTTTQMENN  
SEFNSSGKDTFDSFLVMNKS DPCYEEMISLLADDGKIVVDDHNKKENDNIFKNLRESFA  
SDRLPKDISLRTEQLASTKKNSKATRSSRISIREGLEQLVNASRLSAKTRTMLLACTINL  
CKVKDQQ

>comp11890\_c0\_seq1; 310 1 986 LEN=1165; translated  
XLLLEQQQKQEVKAPQLLVSLLPFRSSIVYFPTIYTRSVVAAEKNPLAESPRHTRRTIRG  
RAAPKTQADGGNCSGSSPPRSPAPSVQESTGSCPSESASRSPSPSPEPTKRATAAARGRRG  
RPPLAERKTGNHQENKHRATARKRPEPVVELENEGVKKKPRGRPPRAASRNKVL SYAEV  
DSATDEETDCESESSADEDFGGSKKARNQKSKTKIPGIARKKRRKPPAKGLPPRGPRRAS  
PSSLALFDKTNTRGQSPSTKRYAATPPSVNRNTPSSKRKRKAKSSSATPTQSTIGVVVGLT  
PIQDSVSKVWKSEG DWRDHGGIDY GDFY

>comp11890\_c0\_seq2; 363 216 1127 LEN=1306; translated  
MPRRSSRSTKTRSVVAAEKNPLAESPRHTRRTIRGRAAPKTQADGGNCSGSSPPRSPAP  
VQESTGSCPSESASRSPSPSPEPTKRATAAARGRRGRPPPLAERKTGNHQENKHRATARKR  
PEPVVELENEGVKKKPRGRPPRAASRNKVL SYAEVDSATDEETDCESESSADEDFGGSK  
ARNQKSKTKIPGIARKKRRKPPAKGLPPRGPRRAS PSSLALFDKTNTRGQSPSTKRYAAT  
PPSVNRNTPSSKRKRKAKSSSATPTQSTIGVVVGLTPIQDSVSKVWKSEG DWRDHGGIDY  
DFY

>comp11891\_c0\_seq1; 326 1 989 LEN=1097; translated  
XPSNPGLSNKEMAATKVLASTTWLTKAVFVLCISGLGHAYSFILVPRGSSKLHHGAYLW  
GPGISLSTALRSSPDEINENSSNGDFAFFDEATIYVRAGSGGQSSSTYKAKKANGANGIPD  
GGSGGLGNNVVKLKLDP SLNLAGLSKRTL RPNAFGGGGAAASSKRMGDKKQGVGTNVQAN  
NFVARERLYSFRAEDGKAGGRMYDNGKGGEDCEVLVPPGTVVQLEVETEPEEPQEDGEAA  
TTTMTVDNDKQYELVEVGTVSYEKPTLVVAKGGKGGEGTATLKGGKKGATRRGPEGGERC  
RLRLTLKIVADIALVGVNAGKVS MFAWF

>comp11891\_c0\_seq2; 560 33 1619 LEN=2056; translated  
MAATKVLASTTWLTKAVFVLCISGLGHAYSFILVPRGSSKLHHGAYLWGPGISLSTALR  
SSPDEINENSSNGDFAFFDEATIYVRAGSGGQSSSTYKAKKANGANGIPDGGSGGLGNNV  
LKLDP SLNLAGLSKRTL RPNAFGGGGAAASSKRMGDKKQGVGTNVQANNFVARERLYSF  
RAEDGKAGGRMYDNGKGGEDCEVLVPPGTVVQLEVETEPEEPQEDGEAA TTTMTVDNDKQ  
YELVEVGTVSYEKPTLVVAKGGKGGEGTATLKGGKKGATRRGPEGGERCRLRLTLKIVAD  
IALVGVNAGKSTFLAAVTRAKPRIADYPTTVPNLGTWIPPEDKNDSNHYSNFKDGT  
KKNERANRAAGSSGLVLC DVPGLIAGASEGVGLGHAF LRHI ERVILHLVDATSSDDPVG

DLAMVNDKRYGSGSLARKPQVVIIVNKIDAAFTGEEEEELMNDMRAELASRMKLEMGH  
TRLMWVSAKERDGVNDLMTRMASYVGKMKEDAEDEQKIKATGATTVE  
>comp11891\_c0\_seq3; 549 1 1619 LEN=1936; translated  
XPSNPGLSNKEMAATKVLASTTWLTKAVFVLCISGLGHHAYSFILVPRGSSKLLHHGAYLW  
GPGISLSTALRSPDEINENSSNGDFAFFDEATIYVRAGSGGQSSSTYKAKKGGANGIPD  
GGSGGLGNNVVLKLDPSLNTLAGLSKRTLRLPNAFGGGGAAASSKRMGDKKQGVGTNVQAN  
NFVARERLYSFRAEDGKAGGRMYDNGKGGEDCEVLVPPGTVVQLEVEETEPEEPQEDGEAA  
TTTMTVDNDKQYELVEVGTVSYEKPTLVVAKGGKGGEGTATLKGKKKGATRGGPEGGERC  
RLRLTLKIVADIALVGVNAGKSTFLAAVTRAKPRIADYPTTTPVNLGTWIPPEDKNS  
NHYSNFKDGTGKNERANRAAGSSGLVLCVPLIAGASEGVGLGHAFLRHIERCVRILH  
LVDATSDDPVGD LAMVNDKRYGSGSLARKPQVVIIVNKIDAAFTGEEEEELMNDMRAE  
LASRMKLEMGHTRLMWVSAKERDGVNDLMTRMASYVGKMKEDAEDEQKIKATGATTVE  
>comp11892\_c0\_seq1; 355 1 768 LEN=768; translated  
XTLRLKPRKMARTIERKLSGSTRLGVCRGDVSGKATLAETPAQSQLDPIAPTYVAPSAI  
PQAPAVDPGEEAKQQLVMKQKLERDKLLKEARKKEERDRRAKEELRMKKEEKQLEEQRK  
KELEERKRTALEERRREEQLRKEEAERKRREQENELQRQKEEALARMIAAEETRARAEEE  
ARKRKELEEKERKEDEERRRLELELRLAEKRRKQLEEQEMIRRQEEERRREALRLQREE  
KRKREAEQKANEWQX  
>comp11893\_c0\_seq1; 531 1 1469 LEN=1595; translated  
XALPISFRKRRLSLTNLRQLAEESGDDKNSSSETLEASESELOQDEQDKAHTFRKRRLSL  
TQKVNEEIDSPCRSKRPRLAADVSASGLGSALNQSLSLDTNLQSKILHATEIFSPASPSNE  
SSLPKFYQKSARHQLQSEDEYDHKTPKWKKRHIRSHAEDDKSLPFSRDLVGTFSCHGVPE  
IYEDDEFYRFLDDEDGSTDNPSSFSRKRATVAAKINQDRGGVAFVPGNCSKTALFSVYDG  
HGQGGELVSQYSLHEIQRLLEKHPDFNGNIEKAFKETFLRVDSLKEECLIDPTYAGSTA  
CVALLRDKTLVLSNAGDSRAVLGRKTERQREICWEAIDVTEQNPDLPAEQERIERMGGY  
VTPAPEPGLSSRVWLDKECSQIGLAMARSIGDHAVKSIGVIAEPVVSFHNVCENDEFLIL  
ATDGVWEFISSESQVLAEHLHKGATKACQILIETAAAKWHDEEGDYRDDITALVIRLQ  
HLLLEPTTNK  
>comp11893\_c0\_seq2; 521 123 1307 LEN=1910; translated  
MAITDGEKPVNNDTAILVEADVKGKTFKRRLSLTNLRQLAEESGDDKNSSSETLEAS  
ESELQDEQDKAHTFRKRRLSLTQKVNEEIDSPCRSKRPRLAADVSASGLGSALNQSLSL  
TNLQSKILHATEIFSPASPSNESSLPKFYQKSARHQLQSEDEYDHKTPKWKKRHIRSHAE  
DDKSLPFSRDLVGTFSCHGVPEIYEDDEFYRFLDDEDGSTDNPSSFSRKRATVAAKINQD  
RGGVAFVPGNCSKTALFSVYDGHGQGGELVSQYSLHEIQRLLEKHPDFNGNIEKAFKET  
LRVDSLKEECLIDPTYAGSTACVALLRDKTLVLSNAGDSRAVLGRKTERQREICWEAID  
VTEQNPDLPAEQERIERMGGYVTPAPEPGLSSR  
>comp11893\_c0\_seq3; 413 1 1118 LEN=1721; translated  
XALPISFRKRRLSLTNLRQLAEESGDDKNSSSETLEASESELOQDEQDKAHTFRKRRLSL  
TQKVNEEIDSPCRSKRPRLAADVSASGLGSALNQSLSLDTNLQSKILHATEIFSPASPSNE  
SSLPKFYQKSARHQLQSEDEYDHKTPKWKKRHIRSHAEDDKSLPFSRDLVGTFSCHGVPE  
IYEDDEFYRFLDDEDGSTDNPSSFSRKRATVAAKINQDRGGVAFVPGNCSKTALFSVYDG  
HGQGGELVSQYSLHEIQRLLEKHPDFNGNIEKAFKETFLRVDSLKEECLIDPTYAGSTA  
CVALLRDKTLVLSNAGDSRAVLGRKTERQREICWEAIDVTEQNPDLPAEQERIERMGGY  
VTPAPEPGLSSR  
>comp11893\_c0\_seq4; 639 123 1658 LEN=1784; translated  
MAITDGEKPVNNDTAILVEADVKGKTFKRRLSLTNLRQLAEESGDDKNSSSETLEAS  
ESELQDEQDKAHTFRKRRLSLTQKVNEEIDSPCRSKRPRLAADVSASGLGSALNQSLSL  
TNLQSKILHATEIFSPASPSNESSLPKFYQKSARHQLQSEDEYDHKTPKWKKRHIRSHAE  
DDKSLPFSRDLVGTFSCHGVPEIYEDDEFYRFLDDEDGSTDNPSSFSRKRATVAAKINQD  
RGGVAFVPGNCSKTALFSVYDGHGQGGELVSQYSLHEIQRLLEKHPDFNGNIEKAFKET  
LRVDSLKEECLIDPTYAGSTACVALLRDKTLVLSNAGDSRAVLGRKTERQREICWEAID  
VTEQNPDLPAEQERIERMGGYVTPAPEPGLSSRVWLDKECSQIGLAMARSIGDHAVKSI  
GVIAEPVVSFHNVCENDEFLILATDGVWEFISSESQVLAEHLHKGATKACQILIETAA  
AKWHDEEGDYRDDITALVIRLQHLLLEPTTNK  
>comp11894\_c0\_seq1; 625 261 1659 LEN=4294; translated  
MTAEINDNSNGSSPGTPTGWIGWKERGKQAYLRGDFSVLQAYSQALHHQRSSASLGG  
PSVLDQQLLSNMVACRLKLGAAQAEAAVANAKTCIGLNDRWAKGHVRLASAYIALRNC  
SGSDGIGSSYSNDACNSLQRALQLDPGNPTARDMLVRELRSRDHGRRSGDNGHQCQSER  
TPQPSAPPQHMDNCSSSRGTTRTTGDSSSNTNHRNPGDRRPPQDSRSSSNGNGNRNRHN  
ADNDIDDAGSMSWNERFHFQCQRAKFWYLSQSEDVQSLKVALAVVVLVYAFGGRFGLEY

LFQKSSGNNNINRRGGGGDVYEEFYRSRNNNRYNDHYNDRDSYGDRYSSYYGSSGGGYDR  
HGYGSSSSSSWSSWRSRGTGSSSSVSPEWNYYSRTLLAVVLTYYVAQRWFGIGPYQAMIL  
ETCSSGDGGAGECTIFQEGEEVDGAGCLVGTSGFTDREECGDETS  
>comp11894\_c0\_seq2; 485 3219 4499 LEN=4597; translated  
MEEEEKTTSPSLQQAENESAGELEQQASVEMQDNTYDNDSEKSNLIVAHGEGRKEETSET  
AIEPEPDTRAELGKNTATESGTAEEASRSLQSSSLSSSSLLSDQDLAVFGTLNTQLADAL  
AEKIEAAISKGVDSLPLLDGDCYRSGTARQSTGSDGGNGSGHPKSPKERLWETLRYRFVR  
NVDVLEAYCAQHLLTLRKHPARRKRIVAVLRYGPGALEPLSEAAASEDLPQEKYPSLSE  
LSSEEERTKVSVDIARLEADIEKARSRRNELLAALSTRRAGDRLAGVTETISGASLASV  
KQEVSGLVEGGRALGPLNDEARDLLGTLEGIKRDRSSQETNDSGDETFDFEQDDPLSRG  
ALVQKRRKALAPVEAYRRDKRELGLLTDSTNTGSNTGIDGSGAGINLLKSVDRDLVASRP  
LPTKPS  
>comp11895\_c0\_seq1; 442 129 1307 LEN=1361; translated  
MGKSSKAASRSKTTKDEASTPVERKAEDSPPASRKVVVDVATEHLPPIFLVFTTMACSGFL  
FVYAFRDVFATGRNIGGVHDEAYLFTTNSIAFFNNEKGWKSQQGGLSSISQVTTDANNMG  
GLFVRKVGGAACLAVQLQKLMPLLFHPANAQWKRGHFRPLFATSIVANLVLVAFYGI AIR  
EELAAVGADGLPTMFVGVLLFETIVMLGYLATSRYTKGPAVALQQGKTPTS SVVSRIVART  
NFLVSGMICVIAGRDLFSPGTILGFIPRDDIYLEWTGAFHLSPPEGSPEAETQGTERDFF  
VGEKYLSQLALNMLILCLYKFVAAFVVRNRNDGGGCIQARMIWKAQAVGSALVLYLFRL  
FSPAASTASLDFRWHLMLLAYETLILGLYGFL  
>comp11895\_c0\_seq2; 351 517 1496 LEN=1550; translated  
MLVQLFDXPAPKRNTKQFTTNSIAFFNNEKGWKSQQGGLSSISQVTTDANNMGGLFVRK  
VGGAAACLAVQLQKLMPLLFHPANAQWKRGHFRPLFATSIVANLVLVAFYGI AIREELA AV  
GADGLPTMFVGVLLFETIVMLGYLATSRYTKGPAVALQQGKTPTS SVVSRIVARTNFLVSG  
MICVIAGRDLFSPGTILGFIPRDDIYLEWTGAFHLSPPEGSPEAETQGTERDFFVGEKYL  
SQFLALNMLILCLYKFVAAFVVRNRNDGGGCIQARMIWKAQAVGSALVLYLFRLFSPAAS  
TASLDFRWHLMLLAYETLILGLYGFL  
>comp11896\_c0\_seq1; 180 1 255 LEN=563; translated  
QQQQQQQQPSMAPVPPVAAAAARQELQSMPIRAYLDQTVVPILLDGMALVKERPANI Q  
YLASYLMRHD PARAGTAPAAGIKK  
>comp11896\_c1\_seq1; 230 201 680 LEN=680; translated  
MSFPQGNSTPKLVGSNSINDPLAAALAAAAALARNGGTFLHEPFSGTVPVGVGAIVPVSVP  
VSVPTSPSNVCAHSLSSSSASAPASASVSASTFGSVGGRKTPKKSEPF DANSNGNNSGN  
NSGNSNGDDKDCDQGHSSGNAAKTRNDITLNL SRNISRN I  
>comp11896\_c2\_seq1; 1616 1 4385 LEN=4385; translated  
XISHNISHIASAKPSQNDVEQEEDHEHEAERRMARSERNREHARRTRRRKKAQLEALQA  
KLRLCLQSKNKTLTQSLED CR IASILVGFVSGDGD DR DATIQSLLEEAIEIGEREIFKRLL  
RSKRTRFVSDADILHGGNV DASASVHNSNSNSNDRNNASNPNAQSLNDSALSQATALTRN  
VTGGQSARTRPLSPSRAGLDDPREYQQRKRRVAGEDAGASNTSNSTEGNGNENGNDEHR  
DNENIQSQNATERFAPSSRGRSYANEMPMDERMEYEDEL RALALCDDYDGSQGMDFCD  
SALKAMNEICAGATGSGSGAAAGGGLSSTPKPKLKLGERH SVHNGASGVVEQTAIEVEYV  
EPMYKGRRFKDDDGANHASPKRKKALLRAMTKRARDEFKSKTHSSTKPPKNKEDATSDGE  
QGATNASDDNIYATFSSIEKRKFLKLINGGV SPLDATNTILKDR TTS GNNDQDNDEKSHD  
SDDSDYYPGIPDDDEDEEEQEEDQAAVVGDSPHSRAGKKGINKLAFWKRS SGGSTSGS  
TLVSASARVPPARVSPERDYNGYEQQRQNEEEGSDGSVSSCEQVGEDEIKTFLRAEREKV  
KKAKKATNTKSKSRKSNKPSAGATEIIGDLQENENYPYDTGRDANTNANANNSNKEAE  
DHQFERSGINYYDAVRKDRSGETYETDDFSESGASSKKHRKLIKIPKSIKGLSKLAQRTN  
NRPTVPDEAEDGDRDEAETERIATRATSTTGVDKQMIESHASIPSPTKETLRIVGAAE  
GDEPDGFMQQASIPQTMRESLDDDEGEVHPPYHLRQEAMERELARDDSKEDSLDMDAYL  
SETVSVQVGGGSSSHNNRSFDGVSVSGRSHRTAGTNHTTQSTRSRRPGQAKVRLEQKKEA  
LNI SGVSSKSHGWQESI EVAALKVGVWDP SHGWKDYVDPNSTEIP TDDFFDESMALAAQ  
QPADAKSVSTAPSEAGTASNEQPLSPGQSI AKLPKSPRSPLSRSGRKG RPQKVPTVTS PK  
GDKPRGWAETMRAAAARLDIGGKKWDPVKGWVGLSEEDSTIVAGVSERRDALDNVGITAE  
SDLQDFGTVAHLDAIANKQDKSMQFLSEDEEPSNEANNNYMEEEE TTFDGDQSSEMKTG  
ATKSI SNNSGRYVQIAETGSVQSHYRRTKADPN SKRMVNVKRENLNQGELDMFQESAERR  
KSGSPVDLDSLYEEEEHVDVSFGPGSGAKVVS GPNANAIYQSIYESQSNGSFDGEDFSWDA  
DDAVNESVDSHGRKPAPRLKIKIRD TASVSSRPNSAKSATKSQSEASFDSGSSP I PKLAA  
PKRDTSPIRAKPAKTNAALVSKKIAPALSSSSHAQDDDSPFKTDDAFRNTLTSTQNESDE  
DGDNHDAAVSSVIEKITPTALS NPRTKTPPKISELHKLWEAKTAKRDNENPSSKRKDTQN  
PEWKSFLGKKVDAESAAAAGMDX

>comp11896\_c2\_seq2; 1592 51 4281 LEN=4281; translated  
MVARRTTSIVPDDEPGAIELMEDDQPFVVKANSLLDDGSDGYGHRRRRRGRATVTRARA  
RVAATATATAKATSKEEEEEGDLPALSSSLNSSHNSNSNSNDRNNASNPNAQSLNDSALS  
QATALTRNVTGGQSARTRPLSPPSRAGLDDPREYQQRKRVRAGEDAGASNTSNSTEGNGN  
ENGNDHRDNEI IQSQNATERFAPSSRGRSYANEMPMDERMEYEDELRALALCDDYDGS  
QGMPDFCDSALKAMNEICAGATGSGSGAAAGGLSSTPKPKLKLGERHVSVHNGASGVEEQ  
TAIEVEYVEPMYKGRFRKDDDDGANHASPKRKKALLRAMTKRARDEFKSKTHSSTKPPKNK  
EDATSDGEQGATNASDDNIYATFSSIEKRKFLKLINGVVSPLDATNTILKDRTTSGNNDQ  
DNDEKSHSDSDSDYYPGIPDDDEDEEEQEEDQAAVVGDSPHSRAGKKGINKLAFWKRKS  
SGGSTSGSTLVSASARVVPPARVSPERDYNQYEQQRQNEEEGSDGSVSSCEQVGD EIKTF  
LRAERKVKKAKKATNTKSKSRKSNKPSAGATEIIGDLQENENYPYDTGRDANTNANAN  
NNSNKEAEDHQFERSGINYYDAVRKDRSGETYETDDFSESGASSKKHRKLIKPKSIKGL  
SKLAQRTNNRPTVPVDEAEDGDRDEAETERIATRATSTTGVDKQMIESHASIPSPKET  
LRIVGAAEGDEPDGFMQOASIPQTMRESLLDDEGEVHPPYHLRQEAMERELARDDSKED  
SLDMDAYLSETVSVQVGGGSSSHNNRSFDGVSVVSGRSHRTAGTNHTTQSTRSRRPGQAKV  
RLEQKKEALNISGVSSKSHGWQESI EVAALKVGVWDP SHGWKDYVDPNSTEIP TDDFFD  
ESMALAAQQPADAKSVSTAPSEAGTASNEQPLSPGQSI AKLPKSPRSPLSRSGRKRGPQK  
VPTVTS PKGDKPRGWAETMRAAAARLDIGGKKWDPVKGWVGLSEEDSTIVAGVSERRDAL  
DNVGI TAESDLQDFGTVAHLDA IANKQDKSMQFLSEDEEPSNEANNNYMEEEEETTFDGDQ  
SSEMKSTGATKSI SNNSGRYVQIAETGVSQSHYRRTKADPN SKRMVNVKRENLNQGELDM  
FQESAERRKSGSPVDLDSLYEEEEHDVSFGPGSGAKVVSGPNANAIYQSIYESQSNGSFD  
GEDFSWDADAVNESVDSHGRKPAPRLKIKIRDTASVSSRPNSAKSATKSQSEASFDSGS  
SPIPKLAAPKRDTSP IRAKPAKTNAALVSKKIAPALSSSSHSAQDDDSPFKTDDAFRNTLT  
STQNESDEDGDNDHDAAVSSVIEKITPTALSNPRTKTPPKISELHKLWEAKTAKRDNENPS  
SKRKDTQNP EWKSF LGKKVDAESAAAAGMDX

>comp11898\_c0\_seq1; 513 1 2898 LEN=2898; translated  
XQQQRQQQHRQKQQQOQAKPDLQPHAPWSPSEPGAPTEVARNF IKRHFNPYPLSRSM LTT  
TSPSHSDILSXGPKVPANFGRSIFAEAAAANSQQQRQEDEI I LPSLLDTASSVSSASVL  
GDQPGDREPM SVSKL TRHVENARKQSILSSCGSETTDTASRDNVASYLDAKYGTNKPNGM  
PSQLQAPTFSNK TARTAMLRSLSPDDDDNSGENPRAEEGQQQTPKQSQDGPVNTTTA  
NKP IIAEGGLRRRPMGAQVKALAAHYRRGRGTARGAQNHQQQRQDHGQCEKVTQTEHQD  
PQDLNVI I SYKSSHKVGVPNPIMSLTAPQVKT TTPVDSILSLSTSSHSPTPMSSNFILG  
IQPRKEQGENSKREQSFQPEDIRQHEGIDEDDESTLPEYDSE RENGSSNGMKNTTRSQEFV  
SYNERASPNTADV FQSKGISLSK KIRKKENGRRHESQKNAKTRSRGRDRDRRGKSPIQ  
PLFSSERLDETNDSSIRESSIRSKSLGRTMTSEQFMRMAKNL TGSEFGKEQGEPPRRS  
KLSLQREGRKPFHASIQLSQAMRAMSTERKNRLQRANERVNEDGEAVKERVTLGNEESLP  
RPETGPPGASSHQKGLPTIPNHISPSGSSFECDLTPSGTFPLNESAA SPKPTGKTEFSTF  
RKGTSNDLKSIKDKIRSYNLKRSPKRGRALNRIASPEETSP ILYTDHGYS SSSQSSF SAG  
RSRHCRKSPNATKSTEEKKEEERNILRKPSGNSFLDRLQRRYVKAQYFGE GEGEDESHTP  
VNDEF SVQSLRERFEQSFHSRQTDEEVANDRSVRNLKEMFESPNNHKGETVNNLR AKFER  
PKSRSLRSSFLNDNVGTAEMRKPLPNLMNSLSMRHHREKNSRLPNQRGQRQDKAKSNH SK  
GKERNPSHVSNESRAESSNSGYSYGFVSRGVPGSYSTAPGQGI VNNDIKGNLSDSDFSDA  
VTLDP SY

>comp11899\_c0\_seq1; 1066 360 3991 LEN=4417; translated  
MGAAASCPVLLPFDEDDTLKNSDPEDTDDIDTNGLYLLQKVALSSEEATVYCEDEDEDREN  
ENLVEESIVNNLEKEDSISIVFFEDDEDEDDADQSHGACFVLP LFD AISSHLSTLAEVT  
TAKPKRKRGSNWMHPGLRRQNSILADPMEWKNDQRD NAASKYPEASIDL LLLLLELQEVGLR  
EEDEADEREVEEEDDDPEEDIDLLRFELERA EANYSCVDEKKDKRKT SHEDEDEKEEGEP  
SDEQLDLLRLGLQEADASYVSLKDRQVEDKKGGEISNQQSDFLRLEQEEAEADLSDGETV  
WEAETSEAELESFGLDPKENTETTSIAEDMDFSEAESDSLRFELQE QSETS YQRREATNL  
LMRGDLNLCNRSSGSKNEPCKRSSFIDLQQLLFASPD ETNVEDSSSVKTNLTAKSSSSSS  
SSVLLFSSSSIPKQCKVVVDVFETHSTQLKPRSRSDHERFSLQKAGIPFRKCRDPLCSCH  
TPTPTPKNSSNRSENWRLPTDRKVAYQAQHR SATEQEGDDFFAASFYSRRRERKRALK  
MLKNKAPATEEDDITETTAEISESTRSASSASFGWCGQQSIHPRAANTNHKRTLSQRVVR  
NQANANHNIDRLEPSNRKQRSLS EYVEKNGYGLPGLASAGTLPTPLPLQKSPGSHRNQR  
HQTQPSPSGMSSSSHGTD SVNDHDDDTNVIHEVVFHARKRYI SEDRMAGINPDESPSS  
SGSVKPLRERCSSAHTSCSAHALASNQHPCDSSEKFKKI QDVSLHLVSP TSVTEEVVLQE  
KRHCLFPQRKSLHVDGCFQPQQSYP RGS IETSPTTNIDGSQEREKALKHCRDAITARR  
TIKAEWRRGKRHAASIREFQLQRRQRLQQTMLTRLYYTMGLIHYQQCRYDTAKHVLEHG  
LETLVADRANSSIPFPVSIATSEIIPVATEADVLF DADYNCGTYGGSM LPPPLTLDEVA



PHFSNQALLLAEELVLAKGKIFAAQGLWNDKQASGKVLQWSAFQRQRMHHSIPQTQSFR  
FQPSPNHQVVLEYWREWGPTTARAQALYAECFQRENRPDLAETYYQEALAVQRHVLGPSH  
LQVAETVYRIGNLHSARGRLDLAEPAYREALAVYRFHREGPWTTTDPHQSHTTASLLADE  
ATVLASLGIWIFLLRRDRDKAYWATQQALEATVHALGPSHRNVEAASVPDGLRSETLDKWS  
AVLTEWRSEP

>comp11900\_c0\_seq1; 1298 455 3526 LEN=3673; translated  
MNDGGASAGSSSSGAGGSGSKAQPPQTFSSKVAADGRSAQPSLHLSSEDEVNYLIYRYMQ  
ESGFVHSSFTFVYESMLGRSNMKNAERSIPPGALVSFLQKGLQYVGIETLHREHQQRGN  
VNSTSSNKKSKSGNTSSSNNSGSASLGGGASSTDATIMNLSLLSPTTINAMTRETAPLHL  
NVPPATAAAAVRARVEAENKIAEDRKQAAIMEAKAKSEAQSNKSSNRWTGPQSIPPQAS  
VTLTNPLSAVNTSAHSAMDAQAAKAAALSGYDIAEINELQQQQQQRHGLLVPQNNPLPQH  
QQQQQEAQSQQRQQQESAAKSSVNAAALMARDIQQREHMVQLQLRLQLQQEQEKHYQKL  
RQDSLKAAAQAKARGIPVETMPGINTAQAAVALASVAEQMGNMNNSSSNNSNSSSNNN  
AATSNNGSNSSSASNKRSSSAKKGPKNGKSPKQQKTSQQQQQPQVTTKGESNLNLPSPS  
PAAPQNNGLASLEAAAQLEAKRGMTESAAGAKHLQQVQYQQQQEQQQQQQDDVVMTDSG  
QPSGAVVAGDDNDHRQHHRHLQHPNLRPNTPTYNILDQMQLPASELSSHQAAAVSLQKL  
ISMNGNHVQGEIQNFNGTLEPQQPLQTTASPNVALSAPKLQAVLSAATTGPNQPHQPVV  
ATQVAPKEAQAQDALIDKEDERTNAKPEVLELKMHQSEVFMCAWNSVFTDTIATGSGD  
ASARIWKMGGPKAGNGLGVVKKLLPHGTGPKDKKNKDVTTLEWSSDGRLLATGSYDGVARV  
WSLEGNLVHTLRGHKGPIFSLKWNKTGNLSSGSYDKTTIVWDVSTSEGFQKQFQDHQA  
PALDQVWDDDTFASCSTDKTVHICRVGEDVPLKTYTGHTEVNAVWDPGCLLASCS  
DCTAKVWVDRNDRKDPYDFKDHQOEIYTVKWAPTGP GSMNPKKPLLATASFDGSRVRLW  
NVQDGSQI QVFSRHRDSVYSVAFSPSGNYLASGSLAGQLYVWNVTEGRHIKSFKGGKGDIF  
EVAW

>comp11901\_c0\_seq1; 546 103 834 LEN=1140; translated  
MAFFGALSNAELMKRISERLAPYGYGKDTMVATSFCCDEVNRPLEHALAKTFDEPFVMGG  
LAGFPFGGVTSTFGAMAHHIPDGGSCLVVYGPVGVDSFGSIGTVNRRGRAKGGSCCGSAA  
AALANVRKAMVPKTGEAVAPATIDSLDAQQS FVNQALMPYGEKLLMAADQNVLPYALY  
DAQKMMEGIVAKGAGAMEGNGYIAMVGGIQINTPDPITDYFLPLSFDLRNSQKLVKSV  
MWA

>comp11901\_c0\_seq2; 701 55 1260 LEN=1566; translated  
MKFSLSAVALLGASSAGAFAPKASARSATPSALGVTTLDQWQLLDNGSLVGSVRGHP  
TLADGDVITTSPLSRPDTARSANTVSTFTGSQYQLGAPMQLGGS AVAPSANEPGFGRSTF  
VKVAGTASLFAGGVALGAGVLGDLTGEKPVSIPEAKIGMAFFGALSNAELMKRISERLAP  
YGYGKDTMVATSFCCDEVNRPLEHALAKTFDEPFVMGGLAGFPFGGVTSTFGAMAHHIPD  
GSCLVVYGPVGVDSFGSIGTVNRRGRAKGGSCCGSAAAALANVRKAMVPKTGEAVAPA  
TIDSLDAQQS FVNQALMPYGEKLLMAADQNVLPYALYDAQKMMEGIVAKGAGAMEGNG  
YIAMVGGIQINTPDPITDYFLPLSFDLRNSQKLVKSV MWA

>comp11902\_c0\_seq1; 327 317 1090 LEN=1537; translated  
MAFLRNLDDYDDYDIDNGVDNDDYVVPKVASPSHPVGNAPLEYNHLCYSTGLDCAPSL  
ILSDSESSSYASCQTQEFFDLEEISNTLNLNENWQKLRVRKFGSAHVREYAITVGDHP  
ICRDGLALSDFHAKKVVYDIDYELLIRQRENQRRGIRRRKRVSKLDYWRREMLNRV  
GSYSNADLSRMQCELNQEA VSEFLQEGCADDGPHLELEYEDESIELEQVCNTNEDSSCI  
YGGRELFGWQMNQVILE

>comp11903\_c0\_seq1; 378 178 1320 LEN=1498; translated  
MNLKSRIISVYH MVGLVAFAAIELSPKIVSASVEGDAAVSEFLGNSRSNKMLKCRPVG  
EILCETDVFGSFCDLLKEADLESTLNLEIDNLQFTVFPNTALESEFEIESLLMSSNNST  
THDDQLASMLMLHILPNEKVKRADLQCDSTFVMANGDETKVTCITNNKNETVVSIVGPN  
TNDEDPRIVADVACNGVIHIIDGALHPSSDGLSSPSLWTPIPPEEPEHKPMVDCKTVE  
DIVCEMDDMTIMCGFLRGENA AVGVEDDHTDLWTLFAPTDSGFEYIQDVLDGLEPKTLDD  
VFQYHTVLEELYSDQLVCESSLGMGNGQASFTS C SPYSGYTYQEGPGNVTPRQPRIIAF  
DLPACNGLVHIVNNVMLPDF

>comp11904\_c0\_seq2; 623 339 1199 LEN=1199; translated  
MEDGWDMDDDDLVAEFDDFGHDPGTTNGAGDHQTPPLAAEKEERHAGEARPVSPLGFLSG  
SLDDSDDDDSFIPDLSRDFLQAADKKLERDLAGFLSPEKDSGDAGRENERERDDWLETE  
AEEDRLLRSKQKQREEEEEERERRRQQSQREAREKEALLLREKEEEDRLMLRREQQERELR  
EAREREALALRVKEEEEQRMEEEEQRRLLELQQQERELQQKEEEEERKMLLLKEQQEQE  
SARQAKLLEEQRKRQEELAAARQEQRRLAAIVAAEEEEDEEESDR

>comp11905\_c0\_seq1; 564 445 2304 LEN=2597; translated  
MATIVRDI PPVPEEETPGFDGESTIVFSPSTAATTTTHSAPEADDEALARRLQAEWNAS

DHPAAAAPADPHGAPPPLPPAPHTPQPAPRVATVSNPWEFDAQQASCTSCGEGFHAFNR  
HHCRLCGKIFCNCSQDQALVPPSAIVLTPSKGGKKAKPPNAEDPRNRTGGGATFTPDPD  
PDRMLTYIDEDKQLLYGKLEERFQLAREPLRVCTGCHQQLQPVQEELRTTNSNAMRFNH  
IDPTDPKRFLNSPLAFTLGHEVRKAAYTLNMLPMPKRMGSTIGGGESPRYTSNGHGDH  
KFDEFLLTGEDLDLQCKDECATITPNFSLDGVRIPARLLEEAKGVAVLTVAKGGFGLAG  
AEFGTGLVVARLGDNQEWSAPCAIGTAGLSWGALIGAQVSDHVFLMTDAAVELMFHNDG  
NLQLGADVGVALGPVGRALADFAASPGAFAPIYTYSLSKGMYAGISLDGKMIVTRNRVN  
EKFYGREITGQQILNGEIPSPPAARPLYDALARCHVYAKNDAGGGGSGAGLLHRPKTRV  
MHGYPEVLPHPMDPYSQGFNAHANTNTNAGGAGAVGRFHLQSPPLDYGDPLMPPAPND  
QHSFTGQSHMSDITSDPGY

>comp11905\_c0\_seq2; 456 445 2722 LEN=3015; translated  
MATIVRDIPVPEEETPGFDGESTIVFSPSTAATTTTHSAPEADDEALARRLQAEWNAS  
DHPAAAAPADPHGAPPPLPPAPHTPQPAPRVATVSNPWEFDAQQASCTSCGEGFHAFNXA  
APLPAVREDFLQQLQRPARGPALGDRPDPEQGGQEGQAAERGGPPQPDRGRGDVHAGSR  
SRPHADLHRRGQAAPLREGARGTVSCFGFFFRFVCFVFFGGERRAQYVLGLVLGVCRYRA  
LDLAARTKRNDVPTVHVLGGVNHLDREFNVLLHGDFFLLKLDFIGLGNAGKAGGFRIL  
ATRQKKERQHPTSSHPILLLSFILFSILFIGGFNRNATRNRFQLAREPLRVCTGCHQQL  
QPVQEELRTTNSNAMRFNHIDPTDPKRFLNSPLAFTLGHEVRKAAYTLNMLPMPKRMGS  
TIGGGESPRYTSNGHGDHFKDEFLLTGEDLDLQCKDECATITPNFSLDGVRIPARLLE  
EAKGVAVLTVAKGGFGLAGAEFGTGLVVARLGDNQEWSAPCAIGTAGLSWGALIGAQVSD  
HVFLMTDAAVELMFHNDGNLQLGADVGVALGPVGRALADFAASPGAFAPIYTYSLSKG  
MYAGISLDGKMIVTRNRVNEKPHYGREITGQQILNGEIPSPPAARPLYDALARCHVYAKND  
AGGGGSGAGLLHRPKTRVMHGYPEVLPHPMDPYSQGFNAHANTNTNAGGAGAVGRFHL  
QSPPLDYGDPLMPPAPNDQHSFTGQSHMSDITSDPGY

>comp11906\_c0\_seq1; 335 266 1178 LEN=1536; translated  
MPNIGENYNANENCTLTFEVPKDMKPPVLVYYELTNFHNQYRKYTTSRDDYQLTGKVGGO  
SAVDAANCDP INVLDGTRINPCGLIANTFFNDKFTLRDTEGAVDAKGNKLMVREDGIAWE  
SDLKYRFAMPDGYQQKQCGEGKCDSSCCEDFGFSCKEPAISPDKGLCYAYDYPNQNTTQY  
LYQTYPSVISPLEHLVNEHFVWVRVAATPNFKKLYGYFEETIPAGTKLEFDVNMNYVVE  
SFKGTKALTMNTNSMWGTDKPTIGITIIYSIGYFCLACGLFFGLKHLFKPRKIADRKYLHY  
KEE

>comp11906\_c0\_seq2; 453 192 1403 LEN=1761; translated  
MNTRDPSTSSMPSASGTGDLEDENLLDISEQVNRPEPTIQQQTINAWHPVLDPTWVI  
VSYFILAAITIPFGYYLQGESAKIVELRQVYDAGSTATAACPSIGENYNANENCTLTFEV  
PKDMKPPVLVYYELTNFHNQYRKYTTSRDDYQLTGKVGGO SAVDAANCDP INVLDGTRIN  
PCGLIANTFFNDKFTLRDTEGAVDAKGNKLMVREDGIAWESDLKYRFAMPDGYQQKQCGE  
GKCDSSCCEDFGFSCKEPAISPDKGLCYAYDYPNQNTTQYLYQTYPSVISPLEHLVNEHF  
VWVRVAATPNFKKLYGYFEETIPAGTKLEFDVNMNYVVESFKGTKALTMNTNSMWGTDK  
PTIGITIIYSIGYFCLACGLFFGLKHLFKPRKIADRKYLHYKEE

>comp11906\_c0\_seq3; 335 783 1695 LEN=2053; translated  
MPNIGENYNANENCTLTFEVPKDMKPPVLVYYELTNFHNQYRKYTTSRDDYQLTGKVGGO  
SAVDAANCDP INVLDGTRINPCGLIANTFFNDKFTLRDTEGAVDAKGNKLMVREDGIAWE  
SDLKYRFAMPDGYQQKQCGEGKCDSSCCEDFGFSCKEPAISPDKGLCYAYDYPNQNTTQY  
LYQTYPSVISPLEHLVNEHFVWVRVAATPNFKKLYGYFEETIPAGTKLEFDVNMNYVVE  
SFKGTKALTMNTNSMWGTDKPTIGITIIYSIGYFCLACGLFFGLKHLFKPRKIADRKYLHY  
KEE

>comp11907\_c0\_seq1; 673 356 1942 LEN=2155; translated  
MSLSMDTDDLAVQANSYASANGIQVERRTEGSGDGEEKPKTYFEGAPMSLLPNAYPRQAF  
EQAKSVAPAFNELVDRVSRDAEFLEATLGGGVSSMDPYTGKLLALYKDVYVEEGKGAAR  
TADRLGVHRSDYMLHRDGDGASYQLKQVELNTIASSFAGLSCKIASLHRYLTSRYETETS  
AFLQENVKQVVEDAAEGSPEGVPSNPALAEELPLGMKVAYDRYVERFGGDSGKKKPVV  
LFVVQDGETNTVDQRLLEFALWETHGIPVVRSLTKLDAELSAENGALVLESTGSEVAV  
VYFRAGYAPTDPDGGIEWRARLTLENSRATKCPCLGYHLAGTKKVQELARPGVLER  
FFPEDAGKVAAMRACFAGLYSLGDDAVGEDLKAVEEVLGDGHAGYVLKPQREGGYNFYG  
EDLAKKLAASVDRDGGTTLKLGEDLAEYILMQRLFPQQRAILMRGGRVEGTGDSISELG  
AFGTLVCDANGKVHNAAYAGFLLRTKFSNVDEGGVASGFATLSSPYLC

>comp11907\_c0\_seq2; 722 329 3634 LEN=3864; translated  
MAEPVNSYSGASPASHTASMNFSKLRPSITNFRKKLQRNSSASGNTHASSLNSGSGPNKL  
KQFIANGNGNKSTGSSAGLRSQGGPGHAKRKRISIGLGRIALAFVLVACAIGFGYAS  
YALMKNNAEDRLAKDRFDSIAERAESAEWVLAQKKQATDALALMFGSANPDAEKWPFVHM

DGYKDIAASLKLITKGSLSFCPIVMGYGGEEQQRFEYYDYDLYEAWGFHNGTGESSFGKG  
IFGFYDVVNAKLWPDYRYPVLTNYSKHGINNPNMMVFPVQSDFGHEHNALMLDVMFEEH  
RARVAHGIVACSEERGLAMEMAAEANETESDVENEPPIECGSITDMLWQSTKAEDVVAGP  
AGIMFSPiYPRNDPETLTGFI LHKQLWHDLLVHAFEPDVSGIRVVLHTSTGKEHSYDVDS  
GEVRYVGNRTHTCIKRDPEEVYWLKNGGGHIECDPEDEWVPPFRDDEYLYSEECDEYRWMN  
LSITENL FMPGTVEYFMDIYATEKFVSSMAHGLGETNDDDGVPISIVACIATVLMIFTS  
LLFVSYDYCVRQEFDSKEKLLLEAKRRFVRFVSHEVRTPLNTVCMGLTLLQNDLETSLS  
TKSNNKRAEENSNNDDLVLKRETV EEWMTLSGQVFQONADVAVGVLSDLLNYDKIQMGNL  
SLELSLINLWSALEKTIEEFQVSAKEKLVILELDLSPLLSLPSLSDSIEHESAKTTANP  
PKPVCKASELPDKVQNCVKIGDKIRLIQVFRNLISNGLKFSKEHDHMTVRVSFDLLPERK  
QKQEKISLHKGPLADVTKIGSVSVEVIDEGAGMTPEQVDAVFEDGTQFDRNKLQAGGSG  
LGLNIARGIVLEHGGTLTCS SQGLGKGSTFTLCTTLYSDNNPTPLATAHKVSKMKNNSSN  
GTVSKLSSTGEMAQFMDTDEENALESSEFSIPNFRVLVVDSDVTNRKLCQRLLERNGHTT  
EAACDGDEAVRMVKESLETGKFYDCILLDYEMPVMNGPNACQMMRKMGCSSYIAGVTGNV  
MSEDVDHFRNCGANWVLPKPFQLVLEDQWVEDGVTPFSSHPECSNQNMRVRESSPQLIEG  
ETVWPLLLLILRSNLPSYIKEK

>comp11907\_c0\_seq3; 336 254 2397 LEN=2627; translated  
MTYSCMLLNLTSPGSXVVLHTSTGKEHSYDVDSGEVRYVGNRTHTCIKRDPEEVYWLKNG  
GGHIECDPEDEWVPPFRDDEYLYSEECDEYRWMNLSITENL FMPGTVEYFMDIYATEKFV  
SMAHGLGETNDDDGVPISIVACIATVLMIFTSLLFVSYDYCVRQEFDSKEKLLLEAKRRF  
VRFVSHEVRTPLNTVCMGLTLLQNDLETSLSSDTKSNNKRAEENSNNDDLVLKRETV E  
WMTLSGQVFQONADVAVGVLSDLLNYDKIQMGNLSLELSLINLWSALEKTIEEFQVSAKE  
LVILELDLSPLLSLPSLSDSIEHESAKTTANPPKPVCKASELPDKVQNCVKIGDKIRLI  
QVFRNLISNGLKFSKEHDHMTVRVSFDLLPERKQKQEKISLHKGPLADVTKIGSVSVEVI  
DEGAGMTPEQVDAVFEDGTQFDRNKLQAGGSGGLGLNIARGIVLEHGGTLTCS SQGLGK  
STFTLCTTLYSDNNPTPLATAHKVSKMKNNSSNGTVSKLSSTGEMAQFMDTDEENALES  
EFSIPNFRVLVVDSDVTNRKLCQRLLERNGHTTEAACDGDEAVRMVKESLETGKFYDCIL  
LDYEMPVMNGPNACQMMRKMGCSSYIAGVTGNVMSEDVDHFRNCGANWVLPKPFQLVLE  
DQWVEDGVTPFSSHPECSNQNMRVRESSPQLIEGETVWPLLLLILRSNLPSYIKEK

>comp11908\_c0\_seq1; 225 220 636 LEN=858; translated  
MPRRALPPPTSIIYLGLVLLSFDYLAVADTRVHRRDEVTHGHIPSTHEEILSRREEHDI  
FSSRLQEIARQLDLHESGERLLTENEYRNFNRKKAFFENKLEELSRVFDERHSRRIMDRE  
ELLNEMTKARIKRTGEL

>comp11909\_c0\_seq1; 276 94 571 LEN=571; translated  
MHKRKVIKSGNKSSNSNNEGNPRDLGAPPARTMPSSVRNEVGDDFSDEGNADDGDIEI  
ASLLTPVNSNNHLGGDAKGNAAAKPKSKQWTPSWKIAGVTAVILFVVALATTSVSRSSVD  
LKMSQSQSSIFQTSEGI STSNSDANIIDGKNNDGNIKNTX

>comp11910\_c0\_seq1; 369 73 1434 LEN=1597; translated  
MRLQVLLVASLSHLATIADSFHSPSVTTSTRSISITRSITSTRATNPFRTLPKPEPGA  
PQTKTGFAMAPGATAPQARKKRPLQSIRSIVPDDSHGRNTATTGDVVITIEVDLAPEDG  
FVPEPLFDASGELTLVLGWGNYLPLGHELLEGMSEGESIENVSDAGFGRHNPEMVIKVP  
KANLKKVQNVDR IAPGMTLNLQGGIQVSVLEVTGDTITVDANHPLAGTSYLCNLT LKRID  
RFP SGLSLEVRNEPTTADTATEKLS PFRVATLAMGCFWVGLALMRTPGVVGTRAGYSQG  
SLDDPTYEAIKEGTTGHREAVLVVYDPRVVS YGDI LKVYDERLAVTAPEYFRLLDFAEED  
GGEADGETDGETDGASPASPPESQYRHGIYFHGEEQKRLAGDYIASIRDSRYCDIELLPA  
TVFYSAEEHHQQYLYKGGQAARKGCRDTIRCYG

>comp11911\_c0\_seq1; 270 1 1419 LEN=1736; translated  
XVHAGTQKQTRNFCPVAPKTTNDPXTGNEHTEKETKESCRADFLPEETNASCLTSYRRI  
FRVPNPSDR TNPSNWNPRPHPHPHPNPTMVSGSSVASHQSYSSASTTGTGLRS AFRE  
KVGIMQAWKPGSVSPNDRKLELYAYHKVAVSGDAPPSIPSSASAADRKYNAWRSKSGKT  
REESMRLYLQEADRQLRVYGSAGAPI PHTSGNASGSQSGGTPPNGATRTPQTT PAGRGA  
GSALPSSPTPRGLAAIPLLCAAAAESREAYLRRLSQT SVETAWWIRQEPLCAPVGD L AAL  
PESALLAVARFLEHVTLTTPCRNLVASF CWPLHKSFLVLWMLVILYVTVLGSSRNILAIL  
VWGSRRRTGLSLHREWGEILPMAAQSVSVMCEPHQPLTGRVLVGLVLLPGSSVGLLDKTGL  
ADTSPALAAALSMVAFLAATWYWLLVVPWLAGLLLGTAFCIGSCFVLI EVAGV

>comp11913\_c0\_seq1; 331 104 904 LEN=1172; translated  
MRSFCLLLGLFAVIQTAVSYAPSFVPRNNGVIAPMSKEIVASKVFGTRSTSSKMSSGVSS  
VKMMPIGVPKVAYRVPGSQQADWVDIYNRLYRERII FLGAEIDDELANQVIGVMLYLDSE  
DSSKPIYLYINSPGGSVISGLAIIDCMQHIKSEVITINLGLAASMASFILAAGSKGKRLA  
LPSSRIMI HQPMGGAQQAEDIKVEAAQILKIRDNLVKMYSMMTGQTTTERITKDLDRDNF

LSAYEAEDYGLIDRVLDYNKESDTQL

>comp11914\_c0\_seq1; 670 1 3258 LEN=3771; translated  
XKNAQNSFVQFTARVKSVDXIEHQHVRKSGRMDPDRVAYLQISCAGLGFDIGELWWT  
TNKNGESTSALAAIEEKEDSHGVTTDNHEKKLRFVQLYTSKSYEARPMLIRPADEEENS  
DSQADGSASEESSEKHVLSPTLVDAISKTAQVVWAHTKKSEGLTGRSDIRLQTAVGMPVA  
VDRDGNMVCVVMFSPNNIQSTDNALEYLQSIIRSATSSSIPCLLPAFDPREGLIALQH  
HHQHSKDEALPQLSNILTDGVTTRFVPLDENSDVRNQLSVPEVHSDHDLESAPRDCFG  
IPMLPAVAEIGNPNKAQLKNESLNDAFDEASFGVWSTIMQTLDQTDATLVSEQQETQK  
SLNGDY LPLHNSIENEIIAEKPYMDIDRQERLEEFASAFLDVSI FDLAEIWFPTGQNS  
DSLGLIS SVKSIDNNTPLDIFARESKNTLIKFWSGAVGRAHSSGNPVWSFNKNVFS  
DSGRAHLFRQTIETTLAVPVFSGRSKTPAFIFCCYSFVRSGISPFVLKFVQQALKLLW  
GGLDKVEPHKTV DGDVWKDCTPADLGEMAADVEMHQHFMIKKRPIGAISTEMESQEK  
SINSLTAEVDSLTYTLGGTTHTAPSIYTGQRGLEIETPSPQLIQRHTYEGIQNHLNDAIK  
SVVDMQPVHRHVP TNSNGSKRAHVFFQPSQIMYAQIAQE QPKDQNESSENQVHGALPA  
VSTHLPLPQPFRLPNQV VQPTINEYPGATTPHQSLQEPIQRFAFTHQSHNQTIDNVNPN  
HGYSFSSQQQQTEQQDQEI V PNAVLSIPMDNIILTGSTNSASSTPFVFPQHAPVEV  
NRISSQISLNITAPTRSVSQPTT NVKSNKSFKPCRIQGCDDPALARRPYCVRHSGSR  
MCEHEGCTKCAQGSTRF CIAHGGGRRCTYPGCDKGARDKFFCAAHGGGKRCKHAGCS  
KSAVGGSSSLCTAHGGGRRCAVEGCDKSAQ SSTKFCVKHGGGKCSFAGCEKVS  
RGRTNFCAAHGGGV RCKLAGCNRVAIGKVQLCRAHGGARAKQNAPKSYSGTSREIQI  
PMATSIGVPSEMMKATFCVPIIESVLDVGH DGNQQSLG TDLADI

>comp11914\_c0\_seq2; 354 550 1724 LEN=1760; translated  
MGXTTDNHEKKLRFVQLYTSKSYEARPMLIRPADEEENS SDSQADGSASEESSEKHVLS  
P TLVDAISKTAQVVWAHTKKSEGLTGRSDIRLQTAVGMPVAVDRDGNMVCVVMFSP  
NNIQS TDNALEYLQSIIRSATSSSIPCLLPAFDPREGLIALQH HHQHSKDEALPQL  
SNILTDGVT TRFVPLDENSDVRNQLSVPEVHSDHDLESAPRDCFGIPMLPAVAEIGN  
PNKAQLKNESLN DAFDEASFGVWSTIMQTLDQTDATLVSEQQETQKSLNGDY LPL  
HNSIENEIIAEKPYMD IDRQERLEEFASAFLDVSI FDLAEIWFPTGQNSDSLGLIS  
SVKSIDNNTPLDIFARESKNTLIKFWSGAVGRAHSSGNPVWSFNKVSLS DH

>comp11914\_c0\_seq3; 694 550 3569 LEN=4082; translated  
MGXTTDNHEKKLRFVQLYTSKSYEARPMLIRPADEEENS SDSQADGSASEESSEKHVLS  
P TLVDAISKTAQVVWAHTKKSEGLTGRSDIRLQTAVGMPVAVDRDGNMVCVVMFSP  
NNIQS TDNALEYLQSIIRSATSSSIPCLLPAFDPREGLIALQH HHQHSKDEALPQL  
SNILTDGVT TRFVPLDENSDVRNQLSVPEVHSDHDLESAPRDCFGIPMLPAVAEIGN  
PNKAQLKNESLN DAFDEASFGVWSTIMQTLDQTDATLVSEQQETQKSLNGDY LPL  
HNSIENEIIAEKPYMD IDRQERLEEFASAFLDVSI FDLAEIWFPTGQNSDSLGLIS  
SVKSIDNNTPLDIFARESKNTLIKFWSGAVGRAHSSGNPVWSFNKNVFS DSGRAHL  
FRQTIETTLAVPVFSGRSKTPAFIFCCYSFVRSGISPFVLKFVQQALKLLW GGLDK  
VEPHKTV DGDVWKDCTPADLGEMAADVEMHQHFMIKKRPIGAISTEMESQEK SIN  
SLTAEVDSLTYTLGGTTHTAPSIYTGQRGLEIETPSPQLIQRHTYEGIQNHLNDAIK  
SVVDMQPVHRHVP TNSNGSKRAHVFFQPSQIMYAQIAQE QPKDQNESSENQVHGAL  
PAVSTHLPLPQPFRLPNQV VQPTINEYPGATTPHQSLQEPIQRFAFTHQSHNQTID  
NVNPNHGYSFSSQQQQTEQQDQEI V PNAVLSIPMDNIILTGSTNSASSTPFVFP  
QHAPVEVNR ISSQISLNITAPTRSVSQPTT NVKSNKSFKPCRIQGCDDPALARR  
PYCVRHSGSRMCEHEGCTKCAQGSTRF CIAHGGGRRCTYPGCDKGARDKFFCAAH  
GGKRCKHAGCSKSAVGGSSSLCTAHGGGRRCAVEGCDKSAQSSTKFCVKHGGGKCS  
FAGCEKVS RGRTNFCAAHGGGV RCKLAGCNRVAIGKVQLCRAHGGARAKQNAPK  
SYSGTSREIQIPMATSIGVPSEMMKATFCVPIIESVLDVGH DGNQQSLG TDLADI

>comp11914\_c0\_seq4; 583 550 3305 LEN=4204; translated  
MGXTTDNHEKKLRFVQLYTSKSYEARPMLIRPADEEENS SDSQADGSASEESSEKHVLS  
P TLVDAISKTAQVVWAHTKKSEGLTGRSDIRLQTAVGMPVAVDRDGNMVCVVMFSP  
NNIQS TDNALEYLQSIIRSATSSSIPCLLPAFDPREGLIALQH HHQHSKDEALPQL  
SNILTDGVT TRFVPLDENSDVRNQLSVPEVHSDHDLESAPRDCFGIPMLPAVAEIGN  
PNKAQLKNESLN DAFDEASFGVWSTIMQTLDQTDATLVSEQQETQKSLNGDY LPL  
HNSIENEIIAEKPYMD IDRQERLEEFASAFLDVSI FDLAEIWFPTGQNSDSLGLIS  
SVKSIDNNTPLDIFARESKNTLIKFWSGAVGRAHSSGNPVWSFNKNVFS DSGRAHL  
FRQTIETTLAVPVFSGRSKTPAFIFCCYSFVRSGISPFVLKFVQQALKLLW GGLDK  
VEPHKTV DGDVWKDCTPADLGEMAADVEMHQHFMIKKRPIGAISTEMESQEK SIN  
SLTAEVDSLTYTLGGTTHTAPSIYTGQRGLEIETPSPQLIQRHTYEGIQNHLNDAIK  
SVVDMQPVHRHVP TNSNGSKRAHVFFQPSQIMYAQIAQE QPKDQNESSENQVHGAL  
PAVSTHLPLPQPFRLPNQV VQPTINEYPGATTPHQSLQEPIQRFAFTHQSHNQTID  
NVNPNHGYSFSSQQQQTEQQDQEI V PNAVLSIPMDNIILTGST

NSASSTPFVPHAPVEVNR ISSQISLNITAPTRSVSQPTTNVKS NKSFKPCRIQGCDDPA  
LARRPYCVRHSGSRMCEHEGCTKCAQGSTRFCIAHGGRRCTYPGCDKGARDKFFCAAHG  
GGKRCKHAGCSKSAVGGSSLCTAHGGRRCAVEGCDKSAQSSTKFCVKHGGGKKCSFAGC  
EKVSRGRTNFCAAVSSHR

>comp11914\_c0\_seq5; 572 1 2525 LEN=3987; translated  
XKNAQNSFVQFTARVKSVDHXIENDQHVRKSGRMDPDRVRLAYLQISCAGLGFDIGELWWT  
TNKNGESTSALAAIEEKEDSHGVTTDNHEKCLRFRVQLYTSKSYEARPMLIRPADEEENS  
DSQADGSASEESSEKHVLSPTLVDAISKTAQVVWAHTKKSEGLTGRSDIRLQTAVGMPVA  
VDRDGNMVCVVMFSPNNIQSTDNALEYLQSI SRSATSSSIPCLLPAFDPREGLIALQH  
HHQHSHKDEALPQLSNILTDGVTTRFVPLDENSDVRNQLSVPEVHSDHDLESAPRDCFGI  
PMLPAVAEIGNPNKAQLKNE SLNDAFDEASFGVWSTIMQTLDQTDATLVSEQQETQKSL  
NGDY LPLHNSIENEIIAEKPYMDIDRQERLEEFASAFLDVSI FDLAEIWFPTGQNSD  
SLGLIS SVKSIDNNTPLDIFARESKNTLIKFWSGAVGRAHSSGNPVWSFNKNVSDS  
GRAHLFRQTIETTLAVPVFSGRSKTPAFIFCCYSFVRSIPSFVLKVFVQALKLLWGGLD  
KVEPHKTV DGDVWKDCTPADLGEMAADVEMHQHFMIKKRPIGAISTEMESQEKSI  
NSLTAEVDSLYTLGGTTHTAPSIYTGQRGLEIETPSPQLIQRHTYEGIQNHLNDAIKS  
VVDMPVHRHVPTNSNGSKRAHVFFQPSQIMYAQIAQE QPKDQNESSENQVHGALPAV  
STHLPLPQPFRLPNQV VQPTINEYPGATTPHQSLQEP IQRFAFTHQSHNQTIDNVN  
PNHGYSFSSQQQTEQQDQEI V PNAVLSIPMDNII LTGSTNSASSTPFVPHAPVEV  
NR ISSQISLNKXNGTNEISQSTDDKR

>comp11914\_c0\_seq6; 559 1 2994 LEN=3893; translated  
XKNAQNSFVQFTARVKSVDHXIENDQHVRKSGRMDPDRVRLAYLQISCAGLGFDIGELWWT  
TNKNGESTSALAAIEEKEDSHGVTTDNHEKCLRFRVQLYTSKSYEARPMLIRPADEEENS  
DSQADGSASEESSEKHVLSPTLVDAISKTAQVVWAHTKKSEGLTGRSDIRLQTAVGMPVA  
VDRDGNMVCVVMFSPNNIQSTDNALEYLQSI SRSATSSSIPCLLPAFDPREGLIALQH  
HHQHSHKDEALPQLSNILTDGVTTRFVPLDENSDVRNQLSVPEVHSDHDLESAPRDCFGI  
PMLPAVAEIGNPNKAQLKNE SLNDAFDEASFGVWSTIMQTLDQTDATLVSEQQETQKSL  
NGDY LPLHNSIENEIIAEKPYMDIDRQERLEEFASAFLDVSI FDLAEIWFPTGQNSD  
SLGLIS SVKSIDNNTPLDIFARESKNTLIKFWSGAVGRAHSSGNPVWSFNKNVSDS  
GRAHLFRQTIETTLAVPVFSGRSKTPAFIFCCYSFVRSIPSFVLKVFVQALKLLWGGLD  
KVEPHKTV DGDVWKDCTPADLGEMAADVEMHQHFMIKKRPIGAISTEMESQEKSI  
NSLTAEVDSLYTLGGTTHTAPSIYTGQRGLEIETPSPQLIQRHTYEGIQNHLNDAIKS  
VVDMPVHRHVPTNSNGSKRAHVFFQPSQIMYAQIAQE QPKDQNESSENQVHGALPAV  
STHLPLPQPFRLPNQV VQPTINEYPGATTPHQSLQEP IQRFAFTHQSHNQTIDNVN  
PNHGYSFSSQQQTEQQDQEI V PNAVLSIPMDNII LTGSTNSASSTPFVPHAPVEV  
NR ISSQISLNITAPTRSVSQPTTNVKS NKSFKPCRIQGCDDPALARRPYCVRHSGSR  
MCEHEGCTKCAQGSTRFCIAHGGRRCTYPGCDKGARDKFFCAAHGGGKRCKHAGCSK  
SAVGGSSLCTAHGGRRCAVEGCDKSAQSSTKFCVKHGGGKKCSFAGCEKVS  
RGRTNFCAAVSSHR

>comp11914\_c0\_seq7; 330 1 1413 LEN=1449; translated  
XKNAQNSFVQFTARVKSVDHXIENDQHVRKSGRMDPDRVRLAYLQISCAGLGFDIGELWWT  
TNKNGESTSALAAIEEKEDSHGVTTDNHEKCLRFRVQLYTSKSYEARPMLIRPADEEENS  
DSQADGSASEESSEKHVLSPTLVDAISKTAQVVWAHTKKSEGLTGRSDIRLQTAVGMPVA  
VDRDGNMVCVVMFSPNNIQSTDNALEYLQSI SRSATSSSIPCLLPAFDPREGLIALQH  
HHQHSHKDEALPQLSNILTDGVTTRFVPLDENSDVRNQLSVPEVHSDHDLESAPRDCFGI  
PMLPAVAEIGNPNKAQLKNE SLNDAFDEASFGVWSTIMQTLDQTDATLVSEQQETQKSL  
NGDY LPLHNSIENEIIAEKPYMDIDRQERLEEFASAFLDVSI FDLAEIWFPTGQNSD  
SLGLIS SVKSIDNNTPLDIFARESKNTLIKFWSGAVGRAHSSGNPVWSFNKVSLS  
SDH

>comp11914\_c0\_seq8; 596 550 2836 LEN=4298; translated  
MGXTTDNHEKCLRFRVQLYTSKSYEARPMLIRPADEEENS DSQADGSASEESSEKHVLS  
PTLVDAISKTAQVVWAHTKKSEGLTGRSDIRLQTAVGMPVA VDRDGNMVCVVMFSP  
NNIQSTDNALEYLQSI SRSATSSSIPCLLPAFDPREGLIALQH HHQHSHKDEALPQL  
SNILTDGVTTRFVPLDENSDVRNQLSVPEVHSDHDLESAPRDCFGI PMLPAVAEIGN  
PNKAQLKNE SLNDAFDEASFGVWSTIMQTLDQTDATLVSEQQETQKSLNGDY LPL  
HNSIENEIIAEKPYMDIDRQERLEEFASAFLDVSI FDLAEIWFPTGQNSDSLGLIS  
SVKSIDNNTPLDIFARESKNTLIKFWSGAVGRAHSSGNPVWSFNKNVSDS GRAHL  
FRQTIETTLAVPVFSGRSKTPAFIFCCYSFVRSIPSFVLKVFVQALKLLWGGLDKVE  
PHKTV DGDVWKDCTPADLGEMAADVEMHQHFMIKKRPIGAISTEMESQEKSI  
NSLTAEVDSLYTLGGTTHTAPSIYTGQRGLEIETPSPQLIQRHTYEGIQNHLNDAIKS  
VVDMPVHRHVPTNSNGSKRAHVFFQPSQIMYAQIAQE QPKDQNESSENQVHGALPAV  
STHLPLPQPFRLPNQV VQPTINEYPGATTPHQSLQEP IQRFAFTHQSHNQTIDNVN  
PNHGYSFSSQQQTEQQDQEI V PNAVLSIPMDNII LTGST

NSASSTPFVPHAPVEVNRISQISLNXNGTNEISQSTDDKR  
>comp11914\_c0\_seq9; 643 1 3352 LEN=3865; translated  
XKNAQNSFVQFTARVKSVDXIEHQHVRKSGRMDPDRVAYLQISCAGLGFDIGELWWT  
TNKNGESTSALAAIEEKEDSHGVTTDNHEKCLRFRVQLYTSKSYEARPMLIRPADEEENS  
DSQADGSASEESSEKHVLSPTLVDAISKTAQVVAHTKKSEGLTGRSDIRLQTAVGMPVA  
VDRDGNMCMVVMFSPNNIQSTDNALEYLQSIIRSATSSSIPCLLPAFDPREGLIALQH  
HHQHSKDEALPQLSNILTDGVTTRFVPLDENSDVRNQLSVPEVHSDHDLASAPRDCFG  
IPMLPAVAEIGNPNKAQLKNESLNDAFDEASFGVWSTIMQTLDQTDATLVSEQQETQK  
SLNGDY LPLHNSIENEIIAEKPYMDIDRQERLEEFASAFDLVSI FDLAEIWFPTGQNS  
DSLGLISSVKSIDNNTPLDIFARESKNTLIKFWGAVGRAHSSGNPVWSFNKNVFSDSG  
RAHLFRQTNIE TTLAVPVFSGRSKTPAFIFCCYSFVRSGISPFVLKQALKLLWGGLDK  
VEPHKTV DGDVWKDCTPADLGEMAADVEMHQHFMIKKRPIGAISTEMESQEKSI  
NSLTAEVDSLTYLGGTHTTAPSIYTGQRGLEIETPSPQLIQRHTYEGIQNHLNDAIKSV  
VDMQPVHRHVPTNSNGSKRAHVFFQPSQIMYAQIAQE QPKDQNESSENQVHGALPAV  
STHLPLPQPFRLPNQVQPTINEYPGATTPHQSLQEP IQRTAFTHQSHNQTIDNVNPNH  
GYSFSSQQQQTEQQDQEI V PNAVLSIPMDNIILTGSTNSASSTPFVPHAPVEVNRIS  
SQISL NITAPTRSVSQPTT NVKSNKSFKVRFLILVGLLEFAVYFFSQIESRRRPSNLV  
QPCRIQGCDDPALARRPYCVRHSGSRMCEHEGCTKCAQGSTRFCIAHGGGRRCTYPG  
CDKGARDKFFCAAHGGGKRCKHAGCSKSAVGGSSLCTAHGGGRRCAVEGCDKSAQSST  
KFCVKHGGGKCSFAGCEKVSRRGTN FCAAHGGGVRCRCLAGCNRVAIGKVQLCRAHGG  
GARAKQNAPKSYSGTSREIQIPMATSIGVPSEMMKATFCVPIIESVLDVGHGDNQQSLG  
TDLADI

>comp11914\_c0\_seq10; 667 550 3663 LEN=4176; translated  
MGXTTNDHEKCLRFRVQLYTSKSYEARPMLIRPADEEENS SDSQADGSASEESSEKHVLS  
P TLVDAISKTAQVVAHTKKSEGLTGRSDIRLQTAVGMPVA VDRDGNMCMVVMFSPNNIQS  
TDNALEYLQSIIRSATSSSIPCLLPAFDPREGLIALQH HHQHSKDEALPQLSNILTDGVT  
TRFVPLDENSDVRNQLSVPEVHSDHDLASAPRDCFGIPMLPAVAEIGNPNKAQLKNESLN  
DAFDEASFGVWSTIMQTLDQTDATLVSEQQETQKSLNGDY LPLHNSIENEIIAEKPYMD  
IDRQERLEEFASAFDLVSI FDLAEIWFPTGQNSDSLGLISSVKSIDNNTPLDIFARESKN  
TLIKFWGAVGRAHSSGNPVWSFNKNVFSDSGRAHLFRQTNIE TTLAVPVFSGRSKTPAF  
IFCCYSFVRSGISPFVLKQALKLLWGGLDKVEPHKTV DGDVWKDCTPADLGEMAADV  
EMHQHFMIKKRPIGAISTEMESQEKSI NSLTAEVDSLTYLGGTHTTAPSIYTGQRGLEIE  
ETPSPQLIQRHTYEGIQNHLNDAIKSVVDMQPVHRHVPTNSNGSKRAHVFFQPSQIMYAQI  
AQEQPKDQNESSENQVHGALPAVSTHLPLPQPFRLPNQVQPTINEYPGATTPHQSLQEP  
IQRTAFTHQSHNQTIDNVNPNHGY SFSSQQQQTEQQDQEI V PNAVLSIPMDNIILTGST  
NSASSTPFVPHAPVEVNRISQISL NITAPTRSVSQPTT NVKSNKSFKVRFLILVGLLE  
FAVYFFSQIESRRRPSNLVQPCRIQGCDDPALARRPYCVRHSGSRMCEHEGCTKCAQGST  
RFCIAHGGGRRCTYPGCDKGARDKFFCAAHGGGKRCKHAGCSKSAVGGSSLCTAHGGGRR  
CAVEGCDKSAQSSTKFCVKHGGGKCSFAGCEKVSRRGTN FCAAHGGGVRCRCLAGCNRVA  
IGKVQLCRAHGGGARAKQNAPKSYSGTSREIQIPMATSIGVPSEMMKATFCVPIIESVLD  
VGHGDNQQSLGTDLADI

>comp11916\_c0\_seq1; 853 125 3637 LEN=3688; translated  
MDFTLEDETALPGKRDSGSADTMRDEEGQSI FPTS GPPPCRANDLDPAGGVRPSDHTTSK  
TSSLSKNSLSGKQLRRKNRRQLYRLLKNPNVVP SFLKVI EGRKKIKTEPGTVVTAIREKD  
EISVVDLGDSDDEDLLEPPKVVIDVDEYIGLKKKRKFSAAVLSLPLQVASNDDVVPITV  
SSNAFAPQTTNSSFAGTNGVDGIP SDEGWYEGTYPMAIQPDDTAYLSEFQVCIRENLEFF  
SATPEDCTNISGRRKPTVPGQV GIRC IHCARALRAAQPGWNGRRPKMPPGVSYPVNMS  
ALYSLAIQKPQHHEHCNLPAGSRLNAVLDMLKAKKNGESSGLRRRMKKNGITAVTYW  
HVSCYRLGLVELKNMAGLRFGRDLKLDLLPFDMVR SKVEQEHPTLFMSPKQMSISSKPSA  
KANVVPNRVGSMDPTVVSPAIIATNVLEILKKAKEEERDGENCLIFKKGAVLSDFMFLT  
TKQMALCHAIESDFATRGKTKQMRIGFAGFCRHKRNYPTNGTSAGFGFSVPKSTTAA  
DIFQNSCRSFTSVHENLGS AVSNMFLVHLMKCPVTPQRIKDALRALKRVH SKMQQLPRG  
SQSRFFLTLWKIRAAADKPLESDTGKVLHETIKKDGDEEYI PETIRSSFGNHTGRRNTNR  
DSLTKYSNSDLRSTPAIDAKEIKEILKNAEQSWEPGQNDNLIQREDRNLISDFVFLCMRQ  
LKVAIPTALEQENRKMKTTSRVAGLCCMHCSGQQFITTGRCFPSTADNLGALNVS LYKH  
ILNCPNVPLTLKRVIDALRKMHEQC SRLPFGSQRFLKRLFSRLQNVSF EAEKEVHPVA  
VRSLDFAKALRKYAFVETKAAMNTYWQCTKCRMVPFDYRAPGSLFFSRPSADAMEKHSKL  
CQKDG IQWDNILFSMKSLEKKYGNVKALVTMESFFEMVRTVVGNETEVIDTYMVTLGREG  
RLPEESFAGGIWRRLLPTKVDFNIVEKHFSALRNDLNLPPGSLRDFPDFLNLRLLS CNFV  
PLSSNDGVEKESTIAFKHQKAPLSIVQSGSGKQAPEQLTQGLKSNTGLELKERSDMQES  
ANINSSLQKADKFFKFSVTNDVDEEVQLVVQPTPKGSRQDISLLNGNQSLLVEGTNICE

EIPLVKAKCSGDQGNRTMECVVTGQFDDAI  
>comp11917\_c0\_seq1; 387 129 1142 LEN=1224; translated  
MNTITSCCTSGTKRIIRRLRNTTSLRYLSTNSNRVEASGASINNESISDSSKNSPYIQGS  
ETHFGFESVGIHEKEGRVKEVFESVADSYDVMNDFMSGGLHRYWKDQLLEMSAVSSMAEI  
VRKYEHEHTTSTLRILDVAGGTGDVSRFRLEAAGCPERARSSGEDPISVTVCDINSEMLRV  
GESRARKKYGSSLISEKALSFVEGNAQCLHNFEDNSFDLYTIAFGLRNVTVDVKGLEEA  
YRVLKPGGRFMCLEFSQVADPFLRQLYDTYSFAVIPGMGELVANDRASYQYLVESIRKFS  
NQEELVTRMDDAGFHLTKYTNMTGGIVAIHEGWKPLE  
>comp11917\_c0\_seq2; 90 1 459 LEN=541; translated  
XCIHNPTVLLSNCASILVRCHETYVLENYFPNFPVPFARLCTDIISQDKGLEEAYRVLK  
PGGRFMCLEFSQVADPFLRQLYDTYSFAVIPGMGELVANDRASYQYLVESIRKFSNQEEL  
VTRMDDAGFHLTKYTNMTGGIVAIHEGWKPLE  
>comp11918\_c0\_seq1; 400 47 871 LEN=1254; translated  
MDATEQLPRGQQLLLQRMIANHSLPDGEARAI FASLHGGDYGTDDDEENGGGPIMGEGIET  
LEAAFVSINRQLRPGFGLIITMVDTSTSGSGGATHYHAVVNTAADEVAKSETVFSRSWN  
VHERAFVRLVVRALVERS NRGGSNDNDDDEEEEEPPDDDDDEEENEDEDENKDNNGKKQKS  
REPQSPGIQRADLINLRSDLEGGCKLTLQATR VVGVLLEEKWLRVAPCTGADRRGSVRA  
LLELAPRSYLELYHYVTALGMEADKLPQFLYHRA  
>comp11918\_c0\_seq2; 456 291 962 LEN=1022; translated  
MNIIGSLGGRYSVLDIPRGGMQLFVKTLTGKTVAIEVEEGESIEEVKAKIAEKEGIPPEQQ  
RLIFGGQQLQDQKTLDDYDVGDATLHLVLRRLRGGLLGKGSFKVDENFVKENLVGLTAAD  
RAVMDAFTAQSLAEDSTEEENEDEDIRVRRALFRIGDIKRKFCDDSPVANMINPVATNAN  
EFDYTGKLITTDGKRSTKLTCLKFRRDNEGQLLDYVKEMKLDK  
>comp11918\_c0\_seq3; 309 127 1041 LEN=1673; translated  
MGELEQLAKWIEDGKAKNIIVLCGAGVSTGAGIPDFRSPGTGLYDNLQKYNLPYPHAIFE  
VNYRRNPGAFVSLANELWPGIKFRPTLTHHFLKLLADKGLLLRIYSQNIDGLEFLAGIP  
DDKLVECHGHFRTASCIDCHATADAAEVRATIVDRAETPKCSKCGGNVVKPDIVFFGEDLP  
DRFHKLKVKDMPKADLLLVMGTSLQVAPVSMIPNMVRCNRVLFNRDKVMTIRKKKDLFVP  
GDCDSNIQALLDLLGWTDIGNDDDEEEKEETTPSAEAKDEDELEKMFVKIQIAEKEEG  
QNKE  
>comp11918\_c0\_seq4; 198 1 1040 LEN=1672; translated  
IRFDRSQSICFPVMFCDGNWIELDPTVTVDRCGLCPVFPVPTAIHTGRKLSNLNLFQKRSV  
ASSSLNYTTPGAGIPDFRSPGTGLYDNLQKYNLPYPHAIFEVNYRRNPGAFVSLANEL  
WPGIKFRPTLTHHFLKLLADKGLLLRIYSQNIDGLEFLAGIPDDKLVECHGHFRTASCID  
CHATADAAEVRATIVDRAETPKCSKCGGNVVKPDIVFFGEDLPDRFHKLKVKDMPKADLLL  
VMGTSLQVAPVSMIPNMVRCNRVLFNRDKVMTIRKKKDLFVPGDCDSNIQALLDLLGWTDI  
DGNDDDEEEKEETTPSAEAKDEDELEKMFVKIQIAEKEEGQNKE  
>comp11919\_c0\_seq1; 239 51 287 LEN=424; translated  
MKFTVAFVALAVSGASAFAPAGRLSTAVYNEGPVIGKGMADTRDPDAYEDEDARKSI  
APAPSFEEYLKAREAEGN  
>comp11920\_c0\_seq1; 892 72 2408 LEN=2712; translated  
MSSTEHPRSALRNARRVCVKIGTSVVANGNGRPSLTRLGAITEQIAELHSRGIEVIFVS  
SGAVGMGRLLKKQSRMMMSFRDSIHAQEGADHLVADNINSAMGRSKSFVSLLEAPARKH  
SPEEKKKFYDSACAAAGQFDLMNLYRSLFDQYDITASQILLTQGFVDKSRLENLKYTVE  
RLLSHGIVPIINENDAVSANLGYTADDVFSNDNSLAALCARNFNAEVL LLLTDVDGVYDR  
RPSEPGAKMLELYVEETS DVSIGDKSSQGRGGMASKIGAALTAVSAGSDCTACVVAAGND  
LNAVRAILGPENKFGTKGTLFCKPGSGLEKQALVDCGSPSDSNDDISNEARDKAVARNE  
ARKLQALPHAVRQDILRAMADALIDKKEKLLAANSIDLVAEEENDTASVLKRLKLTDAK  
LETLAEGLRQIADLPDPLGVLKAKRELADGMELSLITVPIGVLMII FESRPDSMPQIAAL  
SIASGNGLLLKGGKEAVNSNAIYEVLGDAIESGSKGAIKGDI IALITSRGQVADMLSLD  
EVIDLVI PRGSNALVSIKANTKIPVLGHADGVCHIYLDKSAPAESACKIIVDSKTDYPS  
ACNAMETLLVHKDTIANGVAPQTLMALRAAGVKCLGGPEAMKLGCLDTPAKELKCEYGD  
TCMVEVVENMDQAIDWIHTYSGHTESIICSPDAEVGEEFLRKVDAACVFKNASTRFADG  
YRFGLEAEVGI STGRIHSRGPVGEGLLTTKWQLRSADTNIVAEYSSGEKKFTHKELM  
>comp11920\_c0\_seq2; 301 72 948 LEN=948; translated  
MSSTEHPRSALRNARRVCVKIGTSVVANGNGRPSLTRLGAITEQIAELHSRGIEVIFVS  
SGAVGMGRLLKKQSRMMMSFRDSIHAQEGADHLVADNINSAMGRSKSFVSLLEAPARKH  
SPEEKKKFYDSACAAAGQFDLMNLYRSLFDQYDITASQILLTQGFVDKSRLENLKYTVE  
RLLSHGIVPIINENDAVSANLGYTADDVFSNDNSLAALCARNFNAEVL LLLTDVDGVYDR  
RPSEPGAKMLELYVEETS DVSIGDKSSQGLPLLLFFFLLRKQIRSHLYVDNH

>comp11921\_c0\_seq1; 328 345 1115 LEN=1115; translated  
MSCDIGLYGLAVMGQNFALNMAEHGFKVAVCNRSKVDTTVARAKEEGDLPLEGHKDVK  
DFVAALSKPRKIVILVMAGKPV DSTISLLSEHMEEGDVIDGGNEWFPNSVRRRAEELKPK  
GIHFIGMGISGGEEGARKGPSLMPGGPKAYDLIEPIITKCAAQVDGEACTGYCGPIGAG  
NYVKMVHNGIEYGDMLIGECYDILKVGQVKSLLSNVLNVCTVDVRGIAHSWSQILWI  
QINLSWRKMMIPACCRT

>comp11921\_c0\_seq2; 726 345 1811 LEN=1873; translated  
MSCDIGLYGLAVMGQNFALNMAEHGFKVAVCNRSKVDTTVARAKEEGDLPLEGHKDVK  
DFVAALSKPRKIVILVMAGKPV DSTISLLSEHMEEGDVIDGGNEWFPNSVRRRAEELKPK  
GIHFIGMGISGGEEGARKGPSLMPGGPKAYDLIEPIITKCAAQVDGEACTGYCGPIGAG  
NYVKMVHNGIEYGDMLIGECYDILKHVVGLNNDMSKLFADWNTTELD SYLIEITSIIL  
AKKDDQGEEGHVVDYVLDKTMKGTGRWTVQEA AEQSVAAPTIASALDARYISGRKQERV  
AASKILEGPSVNEVSVDKNQILEDLKAALYCSKIASYAQGLALIKAA SDKNGWNVDLGLC  
ARMWRGGCIIRAKLLKGIQEAVGNNE LANLMVDPGFAAELNSRQMAWRRVVTLGLANGI  
ALPSTSASLSYDQYRRANLPANLIQSQRDFFGHTYERTDRPGVFHTLWDDSHKDIGDL  
GGRTAGEV

>comp11922\_c0\_seq1; 319 253 969 LEN=1221; translated  
MIEKTATILDPTRQKDFQEI AHHTQTNNRTSDRANNVKTARSAPCTPTGTRVCAIGGSNR  
EVPILPRELSFGYPSSSDCSFN PSTPDR TDNDIAC TRSFSLSSSLTDSSSVHTRSVNLY  
DLIDEEFV VNCVLSGSRCLDERI IRRSNSGGNNNNNTTSCSLSSRSQHRRRKSILDMI  
DRIDSTNVTDAEEDSSSVMTTRSYP RGVVVPPTADRETSALGNVAVFVSSEAYNQW

>comp11923\_c0\_seq2; 258 467 1360 LEN=1995; translated  
MASNLNDVQNPSIADDQPWHCDLVINVS NLDAGQETTRPMQNI PGPYLVNLSRYFIDGKE  
FEFPPYFTGLKFESILITSLKMASAKAGFVLVKKNSKSKTLMAKTGTFFQFYTTLCCQQHR  
LYEKSKNNKGERKRTTSRPTSS ENCCNYVFHLRMNAMDSQFN PGRWTISPSRGNVGT HNG  
HRRMKPEERQDLISGIRAAANDAVAQC NQLSFIDPIAETDEMYQQRIISM THEGLHLVEN  
DNDLRKHYEDKLQELMNNLQQMASDKQKDQRDND CRMQP VVGTVGSKQRGKRKRIDI

>comp11924\_c0\_seq1; 714 158 1504 LEN=1534; translated  
MARNSTTTTILMIAFAAVSGFQVAFAPSAARNTAARAASYVAFSRLQKPQAMTHHTSR  
LSMSTATDETSSLATPEEVPKKKPV RPDRVLSGVQPTGSLHLGNLGAIVQWVDFQNKDQ  
YND DGEVVPVENFFCVVDLHAITMPHDPKELKESTLSSAALYIAAGIDPAKSKIFVQSHV  
PAHSELAWLLNCITPMNWLERMIQYKEKSKKQGESVGVGLFTYPILMAADIMLYQSTKVP  
VGEDQRQHLELTRDIVRRFNDLFC KGNQYKKRCKAAGVASRPFVVEPDAIILKEGARVMS  
LTDGTSKMSKSDPSDASRINVLDDPKTIRDKIKRCKTDSFEGIEWDNPERPEATNLLNIY  
AAVQPTKRSKEDILAEVGDMSWGEFKPV LAEAIVNHLKPIQDRYHEVRS DPAALEAILKE  
GANAA NEVASRTLFNTKVAMGFVTPPAE

>comp11925\_c0\_seq2; 202 1 596 LEN=629; translated  
XPELHLYHFGLGTIMRSSSASP AVSDKEAKNVFVTGTRFDKLVRLSTSKVALEWMERH  
GFSSLTIQYGRGEKPELPPSSSLKIKTYDFRPSLIEDMAEADLIVSHAGAGTVMEVLR LKK  
RLVVVINTDLMDNHQTELAGAMADRGC LFMVDNPEKLNDSQ TWESFVDFVPVPHQGGDPN  
DMPRLNSFLGFPAKID

>comp11926\_c0\_seq1; 317 132 1103 LEN=1186; translated  
MVTQNA AIAALSSTALISLAPNVLLFLFPHFASGEGRSSKFLSLGQALAAGGLLGDVFLH  
VVPHSGGSHDVGLWILLGFSLFL L TDMLLRSMGNSHGHHHHDKTKSPEKSTSTVLLNLT  
ADSLHNFTDGLAIGTSFANFTGNVGN SVLNLVQSRGGLATLSILFHEIPHELGDFAILV  
KSGFSKREIFAQFGTAVSAMLGC VVGLEAADLAGDSLIFITSGGFVYLATVNILPDILD  
ETASLRFRLTQLLFFSFGVAFLYAVCLLEEMNGEHGSHGHHDHHDHDEARHLHEDHGHGH  
HGHHGHGHGHHDHNNHHHFVEL

>comp11926\_c0\_seq2; 205 132 1272 LEN=1355; translated  
MVTQNA AIAALSSTALISLAPNVLLFLFPHFASGEGRSSKFLSLGQALAAGGLLGDVFLH  
VVPHSGGSHDVGLWILLGFSLFL L TDXALAVNGREFARPSPPRQDQITGKQNL DGI VESN  
SGFTPQRELI FNTNWTYDRLQCFPDKMMKGVPRVLIPTNFY CILMFSKSIANNVGMCFCS  
NLSSXDGLAIGTSFANFTGNVGN SVLNLVQSRGGLATLSILFHEIPHELGDFAILVKSG  
FSKREIFAQFGTAVSAMLGC VVGLEAADLAGDSLIFITSGGFVYLATVNILPDILDETA  
SLRFRLTQLLFFSFGVAFLYAVCLLEEMNGEHGSHGHHDHHDHDEARHLHEDHGHGH  
HHGHGHGHGHHDHNNHHHFVEL

>comp11927\_c0\_seq2; 316 105 1304 LEN=1469; translated  
MMPSTSNKERTALQNDPGL EHMGNPPKKEPQAPGSSFTSTPSAQQSHSRSKQQDSPPST  
KASMPSSSVRLNPNYHDHSETNDGIP PPICLVSTCEEMNPSRRSSFEDCSIYAPSGTWGCP  
DANMAMLA VADGHGGRDIVEFLEDALLFHVSAELQIDPPENNVAGSGSSASTSTGGREKR



TTTHGDSIPARLERAFLLITDIHSKTMGLMSSGATVAMCLVTRGCGNNMYKTNTGDTDQNH  
HGKISESNPENVTIYAANVGDARIVLGHGKKAHRLTKDHRDDEEVRIEDSGGFIFK  
GRVLGILAVTRSLGDHCMKEYVIAKPYTSENSITVAPETDVSFIILACDGLWDVIKDQEA  
VDFVLDRIAEEKELVAKYLVEEALKRSTDNITVSVAFFT  
>comp11927\_c0\_seq3; 277 105 1114 LEN=1114; translated  
MMPSTSNKERTALQNDPGLHEHMPGNPPKKEPQAPGSSFTSTPSAQQSHSRKQQDSPPST  
KAMPSSSVRLNPNYHDHSETNDGIPPPICLVSTCEEMNPSRRSSFEDCSIYAPSGTWGCP  
DANMAMLA VADGHGGRDIVEFLEDALLFHVSAELQIDPPENNVAGSGSSASTSTGGREKR  
TTTHGDSIPARLERAFLLITDIHSKTMGLMSSGATVAMCLVTRGCGNNMYKTNTGDTDQNH  
HGKISESNPENVTIYAANVGDARIVLGHGKKAHRLTKDHRDDEEVRIEDSGGFIFK  
GRVLGILAVTRSLGDHCMKEYVSPRQNEKMERATDGX  
>comp11927\_c0\_seq5; 257 105 1142 LEN=1671; translated  
MMPSTSNKERTALQNDPGLHEHMPGNPPKKEPQAPGSSFTSTPSAQQSHSRKQQDSPPST  
KAMPSSSVRLNPNYHDHSETNDGIPPPICLVSTCEEMNPSRRSSFEDCSIYAPSGTWGCP  
DANMAMLA VADGHGGRDIVEFLEDALLFHVSAELQIDPPENNVAGSGSSASTSTGGREKR  
TTTHGDSIPARLERAFLLITDIHSKTMGLMSSGATVAMCLVTRGCGNNMYKTNTGDTDQNH  
HGKISESNPENVTIYAANVGDARIVLGHGKKAHRLTKDHRDDEEVRIEDSGGFIFK  
GRVLGILAVTRSLGDHCMKEYVIAKPYTSENSITVAPETDVSFIM  
>comp11928\_c0\_seq1; 572 111 1439 LEN=1535; translated  
MEDSVPGDFSSRNGIEAPFLFFSIRSPCYRCPERALDTHIYQAWKDPDSRIGFFKDACN  
NKQAILNLEREFQPVIVGEWSLATDNCAMWLNFGFNDNLPGFPRSPCKYIPCSPPYMGEY  
QPGTPTMPMQGPYGTGMSGPSFGMCPVGRDWIKEKNPLTGRDWVEAPPKAPSHYDDT  
DSVMTLLAYKKISAYSGVGHGFYFWNFRDDEPHWSYLLALEKGWIPQGSFNDPKIQNA  
CRSEDE MAYTCQVKRDMPDNSLLKAVKYILEQKNGTETDLEKSVVDMTGKELSDAANDMI  
MEFFDKNKLSGVTCDFFGGVAMLLLENRTVTDDDFVDWDVAYFGTVTNVSGPTWWELAGI  
ITFGILVGSALGFI LGMRFNKGFNHYFQKTAIGRRITQSNNVGLKKTLSITALDEAFDFDD  
VDYEDDQVKYGSIEDSPLLRRR  
>comp11928\_c0\_seq3; 390 189 1325 LEN=1457; translated  
MRMATGQLLLFATALAASIGWSSATESKVP EGGTQYPHFIAMNETMTCVEDKHSTPFNT  
QVRGVNLGGWVLEPWITPSLFYQFLGRTNESEIGMDTYTFCQVLGPKEANRQLRRHWET  
WVTEEIEKLANSGINSLRPLVGDYMYKPYGYPYVDGCFDGDALDYVDTLLDWAYSYGLSVL  
IDIHTMKDSQNGFDNSGQSMGFQWTTALNREYTDHTFEHWPIRDARWIGTFDQETASYS  
SINYDNIRHSLEVI ERIVDRYKTHPTVQGI EPVNEPWQYTP IEVLKRFYWEGYLIVKKN  
PYWKYVMHDSFRLDASVWGGFMAGC PERALDTHIYQAWKDPDSRIGFFKDACN NKQAILN  
LEREFQPVIVGEWSLATE  
>comp11928\_c0\_seq5; 759 189 2396 LEN=2492; translated  
MRMATGQLLLFATALAASIGWSSATESKVP EGGTQYPHFIAMNETMTCVEDKHSTPFNT  
QVRGVNLGGWVLEPWITPSLFYQFLGRTNESEIGMDTYTFCQVLGPKEANRQLRRHWET  
WVTEEIEKLANSGINSLRPLVGDYMYKPYGYPYVDGCFDGDALDYVDTLLDWAYSYGLSVL  
IDIHTMKDSQNGFDNSGQSMGFQWTTALNREYTDHTFEHWPIRDARWIGTFDQETASYS  
SINYDNIRHSLEVI ERIVDRYKTHPTVQGI EPVNEPWQYTP IEVLKRFYWEGYLIVKKN  
PYWKYVMHDSFRLDASVWGGFMAGC PERALDTHIYQAWKDPDSRIGFFKDACN NKQAILN  
LEREFQPVIVGEWSLATDNCAMWLNFGFNDNLPGFPRSPCKYIPCSPPYMGEYQPGTPT  
MPMQGPYGTGMSGPSFGMCPVGRDWIKEKNPLTGRDWVEAPPKAPSHYDDTDSVMTLL  
AYKKISAYSGVGHGFYFWNFRDDEPHWSYLLALEKGWIPQGSFNDPKIQNACRSEDEM  
AYTCQVKRDMPDNSLLKAVKYILEQKNGTETDLEKSVVDMTGKELSDAANDMIMEFFDKN  
KLSGVTCDFFGGVAMLLLENRTVTDDDFVDWDVAYFGTVTNVSGPTWWELAGIITFGILV  
GSALGFI LGMRFNKGFNHYFQKTAIGRRITQSNNVGLKKTLSITALDEAFDFDDVDYEDDQ  
VKYGSIEDSPLLRRR  
>comp11928\_c0\_seq6; 668 64 1716 LEN=1812; translated  
MKDSQNGFDNSGQSMGFQWTTALNREYTDHTFEHWPIRDARWIGTFDQETASYSSINYD  
NIRHSLEVI ERIVDRYKTHPTVQGI EPVNEPWQYTP IEVLKRFYWEGYLIVKKNAPYWKY  
VMHDSFRLDASVWGGFMAGC PERALDTHIYQAWKDPDSRIGFFKDACN NKQAILNLEREF  
GPVIVGEWSLATDNCAMWLNFGFNDNLPGFPRSPCKYIPCSPPYMGEYQPGTPTMPM  
QGPYGTGMSGPSFGMCPVGRDWIKEKNPLTGRDWVEAPPKAPSHYDDTDSVMTLLAYKKI  
SAYSGVGHGFYFWNFRDDEPHWSYLLALEKGWIPQGSFNDPKIQNACRSEDE MAYTCQ  
VKRDMPDNSLLKAVKYILEQKNGTETDLEKSVVDMTGKELSDAANDMIMEFFDKNKLSG  
VTCDFFGGVAMLLLENRTVTDDDFVDWDVAYFGTVTNVSGPTWWELAGIITFGILVGSAL  
GFI LGMRFNKGFNHYFQKTAIGRRITQSNNVGLKKTLSITALDEAFDFDDVDYEDDQVKY  
GSIEDSPLLRRR

>comp11929\_c0\_seq1; 167 193 573 LEN=1023; translated  
MTSAGLSTEVCVDVGETEMQCTREVLQTRARYDDTTINVGVTQRIDGSDSEKQAVRDVLR  
HMDNYFFHEVLALPEY EYARSRCKNSNELCAFWSSVGECSNRVFMLSNCPAACRFCLLL  
HSGLAS

>comp11929\_c0\_seq2; 161 193 468 LEN=1337; translated  
MTSAGLSTEVCVDVGETEMQCTREVLQTRARYDDTTINVGVTQRIDGSDSEKQAVRDVLR  
HMDNYFFHEVLALPEY EYARSRWYGYKFVLK

>comp11929\_c0\_seq3; 218 193 576 LEN=1188; translated  
MTSAGLSTEVCVDVGETEMQCTREVLQTRARYDDTTINVGVTQRIDGSDSEKQAVRDVLR  
HMDNYFFHEVLALPEY EYARSRCKNSNELCAFWSSVKGKCKYFYGKRRMRSIVLYQR III  
SVNTVSF

>comp11929\_c0\_seq4; 161 193 468 LEN=678; translated  
MTSAGLSTEVCVDVGETEMQCTREVLQTRARYDDTTINVGVTQRIDGSDSEKQAVRDVLR  
HMDNYFFHEVLALPEY EYARSRWYGYKFVLK

>comp11929\_c0\_seq5; 161 193 468 LEN=1172; translated  
MTSAGLSTEVCVDVGETEMQCTREVLQTRARYDDTTINVGVTQRIDGSDSEKQAVRDVLR  
HMDNYFFHEVLALPEY EYARSRWYGYKFVLK

>comp11930\_c0\_seq1; 208 75 587 LEN=803; translated  
MAFFSQISSLATILLASWLLFAAPPTAEAF LPTAPRTASATQTSSSLGMGLFDGIAKAFS  
NEEYGPDPKVRATARHILVESEGEAKVIMKMISSGEKTFQDCAREFSTCPSANQGGSLG  
SFSPGTMVPEFDKAI FNPDRVGDVMPVLTNFGHHI I VVEKRTGGGDWY

>comp11931\_c0\_seq2; 1363 73 3435 LEN=3480; translated  
MADDLDDIFGAIDGDGDDDAVESGAE EPMEDSDDDGGDSMAEPEEGGEDEGESKDGGE SA  
GAKPPKPPTS AETAKLYNSIMHAPT TSHLRETQQKEASELLRPTEAVQKQKEQAEQHAA  
SNAVNTGTSHDKSVRSYSAYPKNLPEGMELPKPKKSDKPAKVYPFKLDPFQAQAVEYIEK  
EESVLVA AHTSAGKTAVAEYAI AKSLNNGQRVVYTSP IKALSNQKFRELQEEFGDVGLMT  
GDITINPTATCLVMTTEILRSM LYGSEL MREVAWVIYDEVHYMRD SERGVVWEESI ILL  
PHRVRFVFLSATIPNAAQFADWICEIHHQPCHVLYTNYRPTPLQHYIFPDGDGGLHLVVD  
ERKGFREANFQKAMASLQASVDVAGADALLSSGN AKKRKRSAGGKKGDDQMTGLQRI I K  
LIMARNLNPV I IFSFKKDCERFALALNRE DYTDDVEKDLINQVYTNAIDSLGEDDQKLP  
QVLALLPLLKRGIGVHHGGLLPILKEVVEILFAEGLIKTLFATETFAIGINMPAKTVVFT  
NTRKFDGLDFRWVTSGEYIQMSGRAGRRGKDDRGLVIQMLDEKMEPAICKGILYGD PDP  
NSSYRISYNMLLNLMRVEDVEPEYLLRAS FHQFQREKEAPALLAQADDFMTQAENVDLGS  
EEESALAKEYYKMDQQLLLTKRKVASIAQKPEYIVKFLQVAGRFLDVSIDGEQYGWVLT  
SFKKRGGGSAGEAGKLASLSNRPTYTIEVLLRCVDRHFDSVDEKAMKEDRSNATLLWRGT  
SKSCRPPKPGDDEKLISMRVFTIGLEHIDRVSAVRIFTPTAIQSP EARKKVSM AVKEVKK  
RFPDGIPLLDPIKDLKIKDSNFTTLMERADALSKRLAAHKL TTEFPEETRVRLIKAYEDR  
MDLKERSRVL RQEAKSFQTMAMKDDLKMKRVLKKLGHVDANGVIQTKGR TACEINTADE  
LVVTELI FTGVFKTLTVEQCVALLSAMTFGEPMKDDEATQGMKS FLLNPFYKLOEVAKTV  
VQMQISCNLDVDEDEFLNKFN PAMMEAVFQWCKGVKFLDVQKLTG SFEGTTIRTLRLEE  
LVRQICTAAKAIGDHELEAKFE EGSKLLKRDIVFCSSLYL

>comp11932\_c0\_seq1; 244 332 556 LEN=1027; translated  
MSSDGDVMLLVGESFFD TSEEDATEYCEAEVERMLEVLEKMEEEE EATIVEEQEALKKVL  
YGRFGKSIQLEEKV

>comp11932\_c0\_seq2; 297 224 586 LEN=1057; translated  
MEVRREDQNNINKFARLNARVREL RDERK I IKQSLDRLEDASTELMMSSDGDVMLLVGE  
SFFDTSEEDATEYCEAEVERMLEVLEKMEEEE EATIVEEQEALKKVLYGRFGKSIQLEEKV

>comp11933\_c0\_seq1; 375 213 1322 LEN=1427; translated  
MSNQESKPVIKADPTKGVKVDVGDVSKPFRNEIKQKVAALKKEGIESPLL VGLLANKDPA  
ARKYAEWTGKACRADGLRYELRILDDPIEVESALIDANDDPRVHGIIVYYP IFGQQESFS  
GESQDDYLRDTVSHKCDVEGLCHLYRTNLYRNVRFLDYPTNNQKCLLPCTALSTLKIIEA  
CPGTYDMTKPVGRKLEGKTVTI INRSEIVGRPLAAMLANDGAVVYSIDINSIYMFRDGR L  
HPCGDDVNPESEVRKSSIVVTGVPTKNYKLPTEWINPNTTVVNVASFKNVDEEEL LKIPG  
VVYVPLVGKVTVAMLLRNL MRLYEQFHSPNSVKTNTPNESTSTFWTIGLQAYS AVVLT A  
VLAMQLLKK

>comp11933\_c0\_seq2; 302 213 1506 LEN=1611; translated  
MSNQESKPVIKADPTKGVKVDVGDVSKPFRNEIKQKVAALKKEGIGELMSWNGTHR LSF  
IYGSRNKNYSVHSF IGLSYFPYKIRTNGSIRVAILSLVIAHFVNSESPLLVGLLANKDP  
AARKYAEWTGKACRADGLRYELRILDDPIEVESALIDANDDPRVHGIIVYYP IFGQQESF  
SGESQDDYLRDTVSHKCDVEGLCHLYRTNLYRNVRFLDYPTNNQKCLLPCTALSTLKIIEA

ACPGTYDMTKPVGRKLEGGKTVTIINRSEIVGRPLAAMLANDGAVVYSIDINSIYMFRDGR  
LHPCGDDVNPESCVRKSSIVVTGVPKTKNYKLPTEWINPNTTVVNVASFKNVDEEELLKIP  
GVVYVPLVGKVTVAMLLRNLMLRYEQFHSPNSVKTNTNPNESTSTFWTIGLQAYSAVVLT  
AVLAMQLLKK

>comp11934\_c0\_seq1; 217 469 1776 LEN=2375; translated  
MKFALDKQEASPLRRYVEIGFNVGFVCFVLIIEIIFNYMVCVTRNSGPSSSYNAVARELA  
ESTNFEYPDTPPEEVAQYRRHFNDKMMVRRRREARDAEQRHRMRSHSRCCDANGKCSGNK  
IPAVSHNTATGKTASTGHVADVVELDQVPSNSNADVTLRKKARQNQPKKDSKQPGGHDGNA  
NNTHTRSWFMFMAPDEWGFCTKSNQPKPPRSHYDHVSKSLVMCLDHYCPWFMNAIGYFNRY  
YFLNFLIYVCVAMLYGAFISYRPFINSTGSVYRDQLLRKRYKTGVWMIHPYTPMPSEKGP  
LTLGFMLCLAVGIAVACLGSFHVYLTLSGQTTIEFHGNFINRAKAKRRGEKYRNPYDMGW  
KRNWQQIYGDYGNLTLMSVMAMVIPSRREPHFLPLPLGGEAGKRKHLRARDQDDGDEMTPK  
ILGSTSNLSDAGNIV

>comp11934\_c0\_seq2; 174 469 1056 LEN=1233; translated  
MKFALDKQEASPLRRYVEIGFNVGFVCFVLIIEIIFNYMVCVTRNSGPSSSYNAVARELA  
ESTNFEYPDTPPEEVAQYRRHFNDKMMVRRRREARDAEQRHRMRSHSRCCDANGKCSGNK  
IPAVSHNTATGKTASTGHVADVVELDQVPSNSNADVTLRKKARQNQPKKDSKQPGGHDGNA  
NNTHTRSWFMFMAPDEW

>comp11935\_c0\_seq1; 847 529 2752 LEN=3282; minus strand; translated  
MSQDNPTSDLENGGNTFAIEDDDECVIEDDDDEEFDDDEEARRTAIKEILGGTEDSADDY  
SHDQLPSVEEVKASRAYLPTAILLAKNHRKLYMAMAGAAVVAVLLSVIISVGVSSKSSK  
SSKAMPINQEDFENRLQEIINTLAPSVSKLPEMMHPESPQYHAAQFLAVGDEKHLDFNGK  
DGWRTTQRYILAVLFYSMNGMSWDDSFNFMSTRDHCDWNKEFNTPRGRILKGVQCDGRS  
VVDLDLCEFLSKKVTGXLDATSLGLFLFLIAPFIPASNNPXNTSFLFSRSSIFPANNNLV  
GKQIPEEITFLSDLERLHLHANTIGGAMPQLNSFRKLKSLGLHDLHLHGSIPSIGDMTG  
LTTLAFSQNKLTGSIPTSFQKQTLDRILGLDGNFLDGKIFPLLKLNKLEALYLEDNNLSG  
EIIYQCDWPSMRELDLSNINLDGRIPERIFDNKHLVYVFDINRNMFFGDFPQQIQQNDKLEY  
LSVYGNLSLGSVSDHIGFLPNLRHLDLASNSFSGLTLPDTIQLLTLNLVSLSTSGMNFDAKE  
LQININFPLLTNLQDLSMKGNLMLGTLPDHFDLALLSNLRMLDLGNDLSGTISTYYGTMSL  
AILQLNRNELTGTIPSELQYMPKLIKLLLDGNNLYGKTNIDICAANGSTMAHFTTDCYPGL  
NNKAPEVDCRCCTLCCNDENTDCNNKDWTANYDPKSRYGYIRPAYEFSLDTAKEGEWFKK  
LLEATNGDLSSLPSQTHIVSF

>comp11936\_c0\_seq1; 423 227 1517 LEN=1655; translated  
MVPESPASPENGARNDAPSMSDRDELAARDALSSGLNARSVVGKGMERFSALVNDNIV  
AARYGVFATVALLTVSPTNIDVLI VDSISLFLLPASADKTLTYVDCTVSKAYGISNTPLF  
FRYRNVAEIPKSFFIGRRRLYCRVVGVRDLNPNYHATGGLEDSSIQITVRHLSPIGMLLP  
TSWFESLMRISPSRGLTRDLTKGSGKAEVSKNETLRLQIAGVLAPPVVFRESYDPAQVLE  
RLAKDRTLVSQCQLLGREVLKPIKERNKSVFSESNQQSSSSVSESNGAISFDDTFAPNNEV  
PSVLDYHQVALCRISYRPQILQVFPTDLAEALVKAGSASVASDLFRSSPSTIQNSKKEIV  
DTSHRIQDIRQDLKYLDRLAVSEFESAQKSSGMWSVQEVREIKKIDITDEVHVFQANASLIR  
KIWRRIRGE

>comp11936\_c0\_seq2; 452 227 1408 LEN=1546; translated  
MVPESPASPENGARNDAPSMSDRDELAARDALSSGLNARSVVGKGMERFSALVNDNIV  
AARYGVFATVALLTAYGISNTPLFFRYRNVAEIPKSFFIGRRRLYCRVVGVRDLNPNYHA  
TGLEDSSIQITVRHLSPIGMLLP TSWFESLMRISPSRGLTRDLTKGSGKAEVSKNETL  
RLQIAGVLAPPVVFRESYDPAQVLERLAKDRTLVSQCQLLGREVLKPIKERNKSVFSESNQQ  
SSSSVSESNGAISFDDTFAPNNEVPSVLDYHQVALCRISYRPQILQVFPTDLAEALVKAG  
SASVASDLFRSSPSTIQNSKKEIVDTSHRIQDIRQDLKYLDRLAVSEFESAQKSSGMWSV  
QEVREIKKIDITDEVHVFQANASLIRKIWRRIRGE

>comp11938\_c0\_seq1; 422 197 1141 LEN=1185; translated  
MMNRHIFSAASKKFRGKLSAQARSVTMLSSVSGSSVANGACAIDQRASFAAKHNSSKD  
NATALVRSFSSMSLRRPPAKHSQGRGNGNGKDRKQKWRSHAVSLDFGNYQDDFADDQDD  
EYYYSNTDAALASPARGGGSSSSWHEEESQLAENVQEIQRQEDERRKRWLENKPPVRR  
PIIDERGRAYGRGGRKTASARVWIQPGFGTVVVKKDFVEYFDRMTDRELILEPLAATET  
LGRFDVTVTVEGGGLTGAGAIRHGLARALNHYNPDEYRPPLKRLGYLTRDPRKVERKKI  
GHLKARKKPQWVKR

>comp11939\_c0\_seq1; 362 95 724 LEN=1709; translated  
MNRYLITASIQAALLACLALSFESNAVVSASFNTAIARRKRTSSIVVSFEPAISYSAT  
ATLLKSSSEDAIAIATADDSEEEGEEVNYEVPEDAVINIKPKAMKRLRELREKQKNPDSY  
MVLRMGVRNGGCSGLSYVMDFSTEEDIQEDDEIDDYPAEMLKCVVDAKSMLYLYGLELDY

SEELIGGGFKFFNPNAEESCGCGSSFGV

>comp11940\_c0\_seq1; 197 289 795 LEN=919; translated  
MRFSSKESEGQGAKEVKKKEEIERVTWNPLRLMVLKLGFTPEPRFTSPLNYVKKDGVFSCA  
YCGHELFESSGKYDSGSGWPSFWRSIKDGSIGYKKEWDGRLECTCGRCDSHLGHVFLDGP  
LPGKVDKTLLETAPSSDPRGRKVDGYLPRFCVNGASLTFETKEDGSKD

>comp11941\_c0\_seq1; 504 134 1396 LEN=1426; translated  
MWTVPELSEIQOTLRNASSPIGMRMRAAYAKQLFVDLQKEEKGEENDGGIKDSSNQAER  
SRKMNDIVTVLCDQVFVEEHGSLLRHEFAYVLGQMKTEDACTALENLLSREGDCVMVRHE  
AAEALGAIASPQSRVLESTRIKYQGVLELSDTCLLALNRIDHEIRKKSJGDGNNDNSPV  
VGCACMLAPFNSVDPVEVDPAHVSLSTEELGEILLNTNGRTSDETSEKSTRGRGDLIERY  
RAMFSLRNRGGEECVKQLCRALVEDTSSPLLREHFAVFLGQLQHPSSISALEESLSRLDE  
HAMVRHESAEALGAIEGTFEDWQRIESMLTRYQKDFDPAVAESCIVALDAADYWGHDKTD  
PNSEHASNEDDMEQLDLQETSTAKAMGGAFGKQKHDSTLVESCEIRKQILSQHFNVVQTA

>comp11942\_c0\_seq1; 319 1 1030 LEN=1238; translated  
XNCIRVTQSDVTSTYSAFRTIDQETGAMKTSPLPFLILGCWTTACAFAPSRWDMSSGLGVR  
NGRYLESTSSSDGEATSRVEELKTELLEKIAILNRLQEEDGKIAVDFGVKGGIDEKSR  
PRKLDFTVTSERVGKAADAI FEAVGELSKVNPTETPTTEGLGDTTFTGTPPLDGPWNLLFS  
TAADANFSKDSKRGDAKAAANIVDARRGKITNVIRFAPANDKGNPKPKAVDELVRVLAAT  
AEGPNRVAIVFKYVAVRFRFFFLPLRWTLYIPVPAPTIGKIVIALSNAKNFLLRKKTEP  
RKIPKGFDFVFLDKELRVHKTGENNLFVQARPDWTTAWDTVG

>comp11943\_c0\_seq1; 172 41 379 LEN=694; translated  
MGDSRWTRVGRHSYNTRQHGARPVRTPGGKLAQRVYKTTNGPKCSDCGTSLQGIKHVKS  
SQYASLKKRERTVSRAYGGSACAGCVKKRIMRAFLLEEQKAVKKVLAERAGK

>comp11944\_c0\_seq1; 249 168 1379 LEN=1905; translated  
MVSCSISPISALTAVASVLVMTTSEAFSSQKLTTVPRTVPRFMSTTEEGKTQITAESS  
SQPNFDATNDLPSIPFLTKSIESDWKSNPNSGDVAAILGEDAGVFDDIQKEEWGELGERGW  
TFSAAVATIMTAVVVLWVYPATGYSDDLHWIEGFTGGNPHLVTLFFGILFPIVHSGLAS  
ARPYGEQIVGARTWRVIFAFPSLCLAYSWITYFISHAHDGLQFYDLSHNPTAHTVAWTVN  
FLSFFFLYPSVFNLKEVAAVEPPTLHLWETGIIRITRHPQFIGQSMWSAAHLAMVGTST  
ALTMALLVGHAFACWNGDRRYRDKFGDELWTTVVKERTSIVPFQAVLEGRQVLPKDFYK  
ELLRGPYFVIAVGTLAGAYLAHPYMQGGAALAKNTGWVPPGGIIG

>comp11944\_c0\_seq2; 249 168 1379 LEN=2017; translated  
MVSCSISPISALTAVASVLVMTTSEAFSSQKLTTVPRTVPRFMSTTEEGKTQITAESS  
SQPNFDATNDLPSIPFLTKSIESDWKSNPNSGDVAAILGEDAGVFDDIQKEEWGELGERGW  
TFSAAVATIMTAVVVLWVYPATGYSDDLHWIEGFTGGNPHLVTLFFGILFPIVHSGLAS  
ARPYGEQIVGARTWRVIFAFPSLCLAYSWITYFISHAHDGLQFYDLSHNPTAHTVAWTVN  
FLSFFFLYPSVFNLKEVAAVEPPTLHLWETGIIRITRHPQFIGQSMWSAAHLAMVGTST  
ALTMALLVGHAFACWNGDRRYRDKFGDELWTTVVKERTSIVPFQAVLEGRQVLPKDFYK  
ELLRGPYFVIAVGTLAGAYLAHPYMQGGAALAKNTGWVPPGGIIG

>comp11946\_c0\_seq1; 301 345 1451 LEN=1616; minus strand; translated  
MIRFSRVLGSSLLYAGTASITGCFRFTGGHIVTAFSSNCFSPPKSRDCGSRAIHLTSLT  
LAMVSITENSTQSMESTEVEAENSRCDEGRTKEILPYVDSSHNSATVTIPTNGKDESYAF  
DLENFSTLLANTVSVLRELEKSSLWVEVPMAKARLIEEIEAADLGFYHHAQGTAKLNT  
WLREDIPSKVPEFATHHVGVGAVVINSKDEILCIRELRRNYHPWKIPTGLADLGEIHD  
AVREVLEETGITATCQSILSFRHTHGVANGRSDDLFFVCHLIPKENDDGS IPTVPVQACEI  
SEAKWVPLSDYRDMVDGLTEESKGHVMTFVMNSIFDKGLRINMTEVSSVVPGRRPTPLY  
FPEVPFEK

>comp11946\_c0\_seq2; 301 463 1569 LEN=1734; minus strand; translated  
MIRFSRVLGSSLLYAGTASITGCFRFTGGHIVTAFSSNCFSPPKSRDCGSRAIHLTSLT  
LAMVSITENSTQSMESTEVEAENSRCDEGRTKEILPYVDSSHNSATVTIPTNGKDESYAF  
DLENFSTLLANTVSVLRELEKSSLWVEVPMAKARLIEEIEAADLGFYHHAQGTAKLNT  
WLREDIPSKVPEFATHHVGVGAVVINSKDEILCIRELRRNYHPWKIPTGLADLGEIHD  
AVREVLEETGITATCQSILSFRHTHGVANGRSDDLFFVCHLIPKENDDGS IPTVPVQACEI  
SEAKWVPLSDYRDMVDGLTEESKGHVMTFVMNSIFDKGLRINMTEVSSVVPGRRPTPLY  
FPEVPFEK

>comp11947\_c0\_seq1; 1012 147 3694 LEN=3694; translated  
MTTNDLHRPSKRPLSTGTSNKFSSRFSGADKKRAINARRPQPASVARLESLINGAIKKK  
RRQGNRERMTTGAVNKGMTSKPIRRCNSDGRDRGSMESKTKPNSSHGSCSIGSQRQF  
KENTRNVSSGNDGARWVSHVGSNNINTLGASKRRMVKNPFIEAKKRKQTAANAIDKNAAPD  
QSSNTVLSEARGSRKKAKRIRKETNTVHTEKNYNRGSALSKVISSEPTNPLYTSSWQSSR

DKVPQRWIGNATHSTTIDVLAQGRNQRGQTSQPPPTTKDEMNRMPPEALSSPSSKSQEV  
ASLAHTVAADRETRRAIGSEAASTSAISSDASSRPKLGLSLSKKITKGRSSISSSTPTS  
FRTTTAEISLAVCATANGHSLLSRTQGENEKADVSQGEDQRVLPSPPEKVVHRTNLLSADTT  
ENNATRLGNISSDAGRNPKKKASFRKNINDNFVRLNMKNAGACRGARKKSTKFSKERRT  
WCFQPPSGGRQDPYDSNTVANDGVTAPILAFDSTLPPLSLSPKKIDEETKDSKEEKNVGT  
RVNPPSSKSNATSYSVSRMSGLDPLDEFVDGTFHASKRRTLKDKSNTTLGPATGSTVNGTTC  
VVAGIVEPAVAPKCARHQRPCKLIKVRKNTSGNKGREFYACSMRGEQCDHFQWADDTVE  
AARATLAKNSSYSSFVTRQVVAHVDRFRTLTPVELKRETSRRGLNKNKGKQQLLTRLAIW  
TRDEIVKCSPEFEFEFEIEAAKRDVEASDGSVKSIFDSSPSEELDNGEFSDDDDSSADEL  
ELFDGKNKLKESNYTDDDSEEDLSVESNDESPNTTLAAAKDIQGDDEGFLSASLREIFGH  
DSFRTGQEWAIQRCLLEEKRSLLVAPTGFGLSLCYALPAALLDGVCIIVSPLISLIQDQLR  
SLPPRIPAATLSGSVSAAKTAAIILDDIVRRLKVLVSPERLISPAFRRLFNFRWNPDTK  
TKERKFEISLLCIDEAHCVSQWAHNFRCFLRFKGLKVMKPKSVLAI TATAGPRVIKD  
IGETLGVDISETLTEDSSESPDSECESEIKIVRKRDNIDVMTKFMSSNEEERLAAVAGIL  
TPSAGKYESQKESYAGKLATGSVIVYVWRQRDTEVVAESLVAAGVSGGVVVMYHGGMDANA  
RAKSQSKFMRGKARVCVATVAFGLGIDKADIVGEVRAIEELGX

>comp11947\_c0\_seq2; 1339 147 5018 LEN=5062; translated  
MTTNDLHRPSKRPLSTGTSNKFSRFSGADKKRAINARRPQPASVARLESLINGAIKKK  
RRQGNRERMTTGAVNKGMTSKPIRRCNSDGRDRGSMESKTKPNSSHGSCSIGSQRF  
KENTRVSSGNDGARWSHVGSNNINTLGASKRRMVKNPFIKAKRQTAANAIDKNAAPD  
QSSNTVLSEARGSRKKAKRIRKETNTVHTEKNYNRGSALSKEVISSEPTNPLYTSSWQSSR  
DKVPQRWIGNATHSTTIDVLAQGRNQRGQTSQPPPTTKDEMNRMPPEALSSPSSKSQEV  
ASLAHTVAADRETRRAIGSEAASTSAISSDASSRPKLGLSLSKKITKGRSSISSSTPTS  
FRTTTAEISLAVCATANGHSLLSRTQGENEKADVSQGEDQRVLPSPPEKVVHRTNLLSADTT  
ENNATRLGNISSDAGRNPKKKASFRKNINDNFVRLNMKNAGACRGARKKSTKFSKERRT  
WCFQPPSGGRQDPYDSNTVANDGVTAPILAFDSTLPPLSLSPKKIDEETKDSKEEKNVGT  
RVNPPSSKSNATSYSVSRMSGLDPLDEFVDGTFHASKRRTLKDKSNTTLGPATGSTVNGTTC  
VVAGIVEPAVAPKCARHQRPCKLIKVRKNTSGNKGREFYACSMRGEQCDHFQWADDTVE  
AARATLAKNSSYSSFVTRQVVAHVDRFRTLTPVELKRETSRRGLNKNKGKQQLLTRLAIW  
TRDEIVKCSPEFEFEFEIEAAKRDVEASDGSVKSIFDSSPSEELDNGEFSDDDDSSADEL  
ELFDGKNKLKESNYTDDDSEEDLSVESNDESPNTTLAAAKDIQGDDEGFLSASLREIFGH  
DSFRTGQEWAIQRCLLEEKRSLLVAPTGFGLSLCYALPAALLDGVCIIVSPLISLIQDQLR  
SLPPRIPAATLSGSVSAAKTAAIILDDIVRRLKVLVSPERLISPAFRRLFNFRWNPDTK  
TKERKFEISLLCIDEAHCVSQWAHNFRCFLRFKGLKVMKPKSVLAI TATAGPRVIKD  
IGETLGVDISETLTEDSSESPDSECESEIKIVRKRDNIDVMTKFMSSNEEERLAAVAGIL  
TPSAGKYESQKESYAGKLATGSVIVYVWRQRDTEVVAESLVAAGVSGGVVVMYHGGMDANA  
RAKSQSKFMRGKARVCVATVAFGLGIDKADIVGIVHLYVSN SPEHYLQEI GRAGRDRSA  
IAIALP LLEVP I RHALVFSNLVAKSQIRSLRLIKRMLSVVIVTGIENPTLARTFHIA  
LPVQSTVRACDCKPETIETFLSLIERIGGDNPLLOIEGYNDNATIALKKRTLKKLAEKE  
PVADSIQAVSQCIDAPLLEAGVEGDKDGNPAIPKSFQRQFLAYSKGSYSFSISHCANRLG  
PTAEPRHVFAALRRLQAFNELEFVLDTSEMGRVFLKISEEGFKMFRDDYGNMEEDLVE  
TIYESFSCSANSASKVLDMHYILDQVALSSASCIDENEDWSARNKSPSLVRFQEMTKTY  
FGGLEAERTAVKDLLPASFSKIREKELEIDALSLRNLPLQFQQQSNIMPEYLELGQP  
SVTDYALAITKFLYGMTPRTPIFTFRQYPLFGKWKGANFGLVHRAIVGLFEANLARKS  
ITY

>comp11948\_c0\_seq1; 100 1 553 LEN=728; translated  
XQQQHGRTIYNCLVNWYTPDHTIGLHSDNESEMDT SWPIVSVSWGGPRRFLLRPKPPN  
SSSTNHKNKPPPKIAVHEFWLGDGDLVMGGRCQE EFRHEVPRVRTTKDGVVGNRISW  
TLRKMRRKERSASHSSRTSRDPNQYSSAEGSGERKRNPEFPRNTTGDGKKRAIYNPYTH  
NTRR

>comp11948\_c0\_seq2; 100 1 553 LEN=711; translated  
XQQQHGRTIYNCLVNWYTPDHTIGLHSDNESEMDT SWPIVSVSWGGPRRFLLRPKPPN  
SSSTNHKNKPPPKIAVHEFWLGDGDLVMGGRCQE EFRHEVPRVRTTKDGVVGNRISW  
TLRKMRRKERSASHSSRTSRDPNQYSSAEGSGERKRNPEFPRNTTGDGKKRAIYNPYTH  
NTRR

>comp11949\_c0\_seq1; 387 51 1178 LEN=1277; translated  
MAGISMAKPLGVTCMVTISIVFTIVNMNQPFVFEFGYIDVPRELSNSKTKNADPDALDC  
KTFLQDYRAGKVEQMETEPGWEKSYVTRTKTPNPFYWSTHNPELDTIRSSSEKSRYYEI  
ELSKRIMEVFDETSSKNQKSIFLDVGGNVGWFSLLAAAHGASEVFI FEPNPANNVRTCES  
MVLNGWTDYDHNNAIFNLIPKGVGKKNATLDFFKTSSINPGTYSFNRKFEGINNIKRLKE

LRRKVPPEKIVGKFDVVTLDDFARSRGWQSKPSIGFFKLDVESFELDVLEGAKELLRS  
IIETYEVEVDQTKADVVKMMDIIFTSGYELVKHGGWQPHKIVEKKYQSGKELADDIND  
KVYQENLLFRRRSNY

>comp11949\_c1\_seq1; 888 156 2615 LEN=2741; translated  
MPAALNYRRVAWIFGIVIALLKVIDDANAVSPLPRGEKKSILVVG SANADTFLPLARLPT  
EGENLTLPLGRIPTVDVPGGKCTQAVAAKLLRSSPTSSSISKCFFIGQMGLDSAGNML  
RSAL EEQGVDCSHCGYHSDLPSGRGYVFLQANTGSVSAIVSGGSNALGWDDWERAWKKRQ  
ERQSDGRPIKRTELEEKLG TIL EEEGVRCVLLQREVPEFVNLLVASCVNDYNKKIEDDQS  
GSKKVVVFQDAGGEDRPI SGQMLKLCDFIVPNESEAKRLIESSPPIGKSAEEDAMYANE  
LQKMGSKNVLVTMGSSGSL LAKQTDDVEEESGDAFGSNTVFS PAIPCLEGRVVDETGAGD  
CFRAAFVAHAIEGCDHTTALRFANAAGSCSVQVQGAVPSAPYRKDIEKRINSETGVRSE  
DGGISPSLASSGALRGGDKKGFVSLERAKTTHPQAFMVQKNASNGSIDDQDGFVLRGGD  
SEESYSSDAFPFLIGSRLNSMKDRPELWQGKPLETPRDYV KRQGTINGLTCVDFNYPQH  
GPSAWSSFDEVKQSLKDEGLVAGAVCLRYPSKFARGAMNHPDLAMRKEALELTKEAAEVA  
TALGCDEVVIWSAFDGYDYPFQVAYDEKWDQLVVAFAQELCDSFPNIKFSLEYKPTDENTR  
FFTVP TTGAALLLVEEIDRPNMGLTLDVGHMLMAGENPGQSIAMVGRKGKLFGIQLNDGF  
TRLAAEDGLMFGSVHPSVALEIMYQLYKTNFRGHFYFDTFPQRTDPVREAEYNIRRVKRF  
WQAASEGIDESLLRKINDEHDAVGALELVDASLWDDRSS

>comp11950\_c0\_seq1; 396 90 1368 LEN=1890; translated  
MEPSLSLPANGAAEKTTEQEPPIPKRRSGS AKLVSFAEDALSRDRKGDGTGVVVEEEQGV  
FVGPLLGRVSLPTRGGGNHRGPPAVSFGGLPERETSGSGGGGVEFENLAVRMGLLKCGRH  
YRLVIPVPDHRNNTTKTANQGGGGSSCTDSSTTVRIIEDSLDDDLTGEIERKECLSPSSL  
PSTTTSDNGCDPAGDRKDS SSSSTLSCRQH QYFLKITLAPSRRGYPYRGRFALESVWRGSD  
HDPPRERPRQTGDRCESDNGSSKNGAGGNDESESNGDAGAPMAEGQHPAPLSPVRKCV  
SVQVDATVMGKDTGTPKLRNGVCLGKVAGYDSDENTEWQGFYGYQRAAGGPREPGKAA  
KQPFRLPHGMLPTPKKLRDWFVPMQTTVHHDLSARCGRAGIFRRPTAGTRKRPSAAAVLA  
PPPPP

>comp11950\_c0\_seq2; 396 70 1348 LEN=1870; translated  
MEPSLSLPANGAAEKTTEQEPPIPKRRSGS AKLVSFAEDALSRDRKGDGTGVVVEEEQGV  
FVGPLLGRVSLPTRGGGNHRGPPAVSFGGLPERETSGSGGGGVEFENLAVRMGLLKCGRH  
YRLVIPVPDHRNNTTKTANQGGGGSSCTDSSTTVRIIEDSLDDDLTGEIERKECLSPSSL  
PSTTTSDNGCDPAGDRKDS SSSSTLSCRQH QYFLKITLAPSRRGYPYRGRFALESVWRGSD  
HDPPRERPRQTGDRCESDNGSSKNGAGGNDESESNGDAGAPMAEGQHPAPLSPVRKCV  
SVQVDATVMGKDTGTPKLRNGVCLGKVAGYDSDENTEWQGFYGYQRAAGGPREPGKAA  
KQPFRLPHGMLPTPKKLRDWFVPMQTTVHHDLSARCGRAGIFRRPTAGTRKRPSAAAVLA  
PPPPP

>comp11951\_c0\_seq1; 382 440 2825 LEN=3548; translated  
MDHAEPLNDCTVPIAVEHRNHDDL PNTSASLSMSSFSAGATSHDEGA IPTSAAQYYEGEG  
LHADVGEDETEVVALRREYGMVTPSPIHHHEPEIDYGG LALVFLAPALGGFLYGYDIGAT  
SFVLSMMRADRHDHWHHNF SKVQQGLYV SCLALGALIGSHIVLTF LANTVGRRKEIRIA  
ATLYIVGAMNLVMSGTILAT TGVFQWPPR WYAKNGDGS DKYYSYEYTSIGFGWGF TSLIA  
GRLLYGAGVGFIMHGAPTYMAEMSPSNVRGALVSAKETVIVFGIVVGM LMGDLQSDYPSN  
WTGGISLDYVDCDEWVMSDFGCGLFLCATCAMYYL CXAGMNCFAVQICCKELAFXTLICS  
NLSKSTLYRELHCCVLYVFC DNDNRLIRVLDTFRRSYAAADLQDSSKQAVVAHEGYHEEA  
RESMQFVYKGNVEDEF EKMAETIQSLCCNHGRTVSSSHLNVDCDDSVTGGNSIHK SVGTA  
ERHGGQGGDEGNPNDEGGNDDDPNSMWSLKYRRVMSIGMGLLLAQQFSGQPCVLAYS RV  
LFEAAGWGGNTSVVTVTIMGIVSSFTVTQVDRLGRKKLLAAGSATMLLAVSLLAFGFWG  
DDNSNDKLSDFKKQLVLSMFIFISGYQIGFGPISWTVLSEIYPT EIRGIAMALSVEVNF  
FAKFLTQLFFPVIQDALGWGTTFIVFALTIFSGLAFVLFKVPETKGMTLEEIQIKLKTED  
TCDTAEILKSLGLDRFMDGEDSKALGPSNDSFEYANMESVDKASVTLRERRNSSVASFSS  
AVEPGCNPNLTPIV

>comp11951\_c0\_seq2; 529 440 2578 LEN=3301; translated  
MDHAEPLNDCTVPIAVEHRNHDDL PNTSASLSMSSFSAGATSHDEGA IPTSAAQYYEGEG  
LHADVGEDETEVVALRREYGMVTPSPIHHHEPEIDYGG LALVFLAPALGGFLYGYDIGAT  
SFVLSMMRADRHDHWHHNF SKVQQGLYV SCLALGALIGSHIVLTF LANTVGRRKEIRIA  
ATLYIVGAMNLVMSGTILAT TGVFQWPPR WYAKNGDGS DKYYSYEYTSIGFGWGF TSLIA  
GRLLYGAGVGFIMHGAPTYMAEMSPSNVRGALVSAKETVIVFGIVVGM LMGDLQSDYPSN  
WTDLYGYSILFAVPM LLLTFKIPRSKRWLLMKGYHEEARESMQFVYKGNVEDEF EKMAET  
IQSLCCNHGRTVSSSHLNVDCDDSVTGGNSIHK SVGTAERHGGQGGDEGNPNDEGGNDD  
DPNSMWSLKYRRVMSIGMGLLLAQQFSGQPCVLAYS RVLFEAAGWGGNTSVVTVTIMGIV

SSFTVTQVDRLLGRKKLLAAGSATMLLAVSLLAFGFVWDDNSNDKLSDFKKQLVLWSMFI  
FISGYQIGFGPISWTVLSEIYPTEIRGIAMALSVEVNFFAKFLTQLFFPVIQDALGWGTT  
FIVFALTIFSGLAFVLFKVPETKGMTLEEIQIKLKTEDTCDTAEILKSLGLDRFMDGEDS  
KALGPSNDSFEYANMESVDKASVTLRERRNSSVASFSSAVEPGCNPNTPIV  
>comp11952\_c0\_seq1; 231 253 651 LEN=789; translated  
MSLRAIISLPKRSILSNHSQKIDVHRFWTGNATLLGRSHSLPSGYSEKVQTKGKNPTEYI  
EAFKEVKLDYCSSSATISWYISDDENIDTASRELLSVGNLMKESFRDVAMTRPFFVLDGR  
GRRIALLSLLQQ  
>comp11952\_c0\_seq2; 231 149 547 LEN=685; translated  
MSLRAIISLPKRSILSNHSQKIDVHRFWTGNATLLGRSHSLPSGYSEKVQTKGKNPTEYI  
EAFKEVKLDYCSSSATISWYISDDENIDTASRELLSVGNLMKESFRDVAMTRPFFVLDGR  
GRRIALLSLLQQ  
>comp11953\_c0\_seq1; 288 1 693 LEN=1250; translated  
IPFREIDNRPLHINNI IQPQRM TKMKT Y T L L L V A A L F G G V D A F S T Q S P L K A R S C L Q A T A  
T D D A D T I P T N L P S D C G M D Y V P L A T M L A T G N F E D A D Q F T R D A L I E I S G A K E K G R D F V Y F T D  
V K R I P T T D L A T I E R L W Y K F S K G K F G Y S V Q K R Q M R L A K G D F E K F C Q K I G W T T Q D G D V E R K K  
R W F G A S E F T Y D L K K A Q K G H L P L T S A L R G T S L I K N L L E H P T F D N D D W M K E P  
>comp11954\_c0\_seq1; 892 36 2977 LEN=3232; translated  
MSRTKWISNPTIREKNFWSFLPTLLALILFSAFGQAAAQGNNA T N D D V Y S V D D D G I L D S  
N A T T V I P G S I V A R P A T A V T V A D A V L F P W F V Q F L G C L T V F V L S R F N L P V P F A A V M F I F G A L  
M G Y G A V T N Q A L E D P T N D V R K A L L D S I T L W I N I D S A T L L L I F L P G L I F K D A V D I P I N L F V V  
A A V Q I W I L A F P M V L V G T I L T G V V G K Y C L P Y E S A D P D S F G W W A V V L G A I L A S T D P I A V A S  
V L K T A G A S P R L V M H I S G E S L M N D G S S Y V F F Q I A V Q L W Y A S V G L P V Q Q E L G T W T A G F T Y F F  
R M S L G G T V V G T V F G F L L G V L W E L D R R M E R E F D I I Q V V F G L T T A Y L C Y F V C D Q I I T M S G V  
I S T V A C G L V V N Q F G R G L I H D K D M M S S Y L A L A D F L L N T L L F A L G G V I W A A I S F S N Q Q S A A V  
Q P I D W A Y L I V F Y I L C M V I R F V Q V G M F Y P I L S R I G L K S N W K E G V F L A Y G G L H G S V G V A L G L  
S L I Q Y V F Q K T E D E S I R K A A T I L Q F L G G G A T L L T L T I N G T S A G A I L K I L G L V K P P V S A E H V  
K H V F E G A A K D F V Y T E M S K L F Q E K R F Q K V D F I L K D N V L F V N K E P P K L H I E G P E V E N T H H E  
E T V R X I P S S G G K G K P Y I S L L N A T K R A T E R H F I D P T E S E E Y K S E L L V E M R Q I F L Q L L Q E A  
Y K V E E E M G E L D Q K Q D N G Y L F D V L L Q S A D L A I N E V I Y D K K P I E D W K H T E I F F R W D T M K K A E  
R P S S E R T S S V G S R I Q P R A L G E E L P S M N S E A V V A D T I V S K P S V S Q A S F A S S L K S I V S F D G S  
D S T T R K K T H M V D V K R I R L D V L R A L A F I H A H K M A E A K L R L Y V D R F D E D L D E S L Q A R H S V T D  
N A L E I V L A E S H K Q V C F A H E K L D K E V S D K D L D I V L S Y L C A Q I L L R R L L K F T E E K S E E G M I G  
K Q E T R A Y T R R M K D C L D E S D A D A I Q Q L T E L R L N D D T R D D C K R G P S S I L R S I V E D S D D A S A A  
F D D N N H Q L P V R H R L L S Y Y K R  
>comp11955\_c0\_seq1; 642 454 2271 LEN=2517; translated  
MGLKGKLIGEGERYRYGPMCIPTLPWKDKPKLNFDYDKDEEIPLLMSIFMGLQHCLAMVG  
GLITPPLVVFKFTVCGFAEAFCPDLVQYAVSAALITSGICTILNVLKLSIPFSEKVFGR  
LYMGSGVLSVMGTSFTFLPIYEIAIDQMKRDGLDGGVAYGKMLGTSMVCCLLELFLSILP  
HKRIMKIFPPIVTSISVILIGVALTGTGMKYWGGGVVCAEMGWKTHAQIVSQEDLSFPPP  
FPTCANGETSEFYGAPQYIGLGFVMTFLVFIELFGSVFMKNCNVILALLFGYMVAGLSS  
LDGNSYVDTSAIKNADPITFLWVETFPIGFYWPAVIPLLIAYIVTTIETVGDINAVFEAS  
ELETGSEYNTSIQGGTADAIN SILASLFTSMPNTTFSQNNGVIALTKCASRRAGYACG  
GWLIFLGVFSKVAGVITSIPDCVLGGMTIFLFANVLASGINLTKLVDLESRRNRFIMAFS  
LALGVGVTVWPYAFLDRRASPYTAAFWKCEDCS DAMKGLRNGVSI FLSTGYCIGSVTAML  
LNSILPCDSGLSYSVCRTNGEETKEMSEAVPKEEAKGDADDEDDEEKPADEEEADQEKA  
LVQEA  
>comp11955\_c0\_seq2; 634 454 2435 LEN=2681; translated  
MGLKGKLIGEGERYRYGPMCIPTLPWKDKPKLNFDYDKDEEIPLLMSIFMGLQHCLAMVG  
GLITPPLVVFKFTVCGFAEAFCPDLVQYAVSAALITSGICTILNVLKLSIPFSEKVFGR  
LYMGSGVLSVMGTSFTFLPIYEIAIDQMKRDGLDGGVAYGKMLGTSMVCCLLELFLSILP  
HKRIMKIFPPIVTSISVILIGVALTGTGMKYWGGGVVCAEMGWKTHAQIVSQEDLSFPPP  
FPTCANGETSEFYGAPQYIGLGFVMTFLVFIELFGSVFMKNCNVILALLFGYMVAGLSS  
LDGNSYVDTSAIKNADPITFLWVETFPIGFYWPAVIPLLIAYIVTTIETVGDINGGFVDV  
FAVVALLGFHVCLYPVRLIALQLADTSRFAILNPIVLTKRSSLPLYTAVFEASELETGS  
EEYNTSIQGGTADAIN SILASLFTSMPNTTFSQNNGVIALTKCASRRAGYACGGWLIFL  
GVFSKVAGVITSIPDCVLGGMTIFLFANVLASGINLTKLVDLESRRNRFIMAFSLALGVG  
VTVWPYAFLDRRASPYTAAFWKCEDCS DAMKGLRNGVSI FLSTGYCIGSVTAMLLNSILP  
CDSGLSYSVCRTNGEETKEMSEAVPKEEAKGDADDEDDEEKPADEEEADQEKALVQEA  
>comp11955\_c0\_seq3; 642 438 2255 LEN=2501; translated

MGLKGLIGEGERYRYGPMCIPTLPWKKDKPKLNFYDKDEEIPLLMSIFMGLQHCLAMVG  
GLITPPLVVKFTVCGFAEAFCPDLVQYAVSAALITSGICTILNVLKLSIPFSEKVFGR  
LYMGSGVLSVMGTSFTFLPIYEIAIDQMKRDGLDGGVAYGKMLGTSMVCCLLELFLSILP  
HKRIMKIFPPIVTSISVILIGVALTGTGMKYWGGGVVCAEMGWKTHAQIVSQEDLSFPPP  
FPTCANGETSEFYGAPQYIGLGFVMTFLVFIELFGSVFMKNCNVILALLFGYMVAGLSS  
LDGNSYVDTSAIKNADPITFLWVETFPIGFYWPAVIPLLIAYIVTTIETVGDINAVFEAS  
ELETGSEYNTSIQGGLTADAIN SILASLFTSMPNTTFSQNNGVIALTKCASRRAGYACG  
GWLIFLGVFSKVAGVITSIPDCVLGGMTIFLFANVLASGINLTKLVDLESRRNRFIMAFS  
LALGVGTVWPYAFLDRRASPYTAAFWKCEDCSDAMKGLRNGVSIFLSTGYCIGSVTAML  
LNSILPCDSGLSYSVCRNTEETKEMSEAVPKEEAKGDADDEDDDEEKPADEEEADQEKA  
LVQEA

>comp11955\_c0\_seq4; 531 376 1827 LEN=2073; translated  
MGSGVLSVMGTSFTFLPIYEIAIDQMKRDGLDGGVAYGKMLGTSMVCCLLELFLSILPHK  
RIMKIFPPIVTSISVILIGVALTGTGMKYWGGGVVCAEMGWKTHAQIVSQEDLSFPPPPF  
TCANGETSEFYGAPQYIGLGFVMTFLVFIELFGSVFMKNCNVILALLFGYMVAGLSSLD  
GNSYVDTSAIKNADPITFLWVETFPIGFYWPAVIPLLIAYIVTTIETVGDINAVFEASEL  
ETGSEYNTSIQGGLTADAIN SILASLFTSMPNTTFSQNNGVIALTKCASRRAGYACGGW  
LIFLGVFSKVAGVITSIPDCVLGGMTIFLFANVLASGINLTKLVDLESRRNRFIMAFSLA  
LGVGTVWPYAFLDRRASPYTAAFWKCEDCSDAMKGLRNGVSIFLSTGYCIGSVTAMLLN  
SILPCDSGLSYSVCRNTEETKEMSEAVPKEEAKGDADDEDDDEEKPADEEEADQEKALV  
QEA

>comp11955\_c0\_seq6; 634 438 2419 LEN=2665; translated  
MGLKGLIGEGERYRYGPMCIPTLPWKKDKPKLNFYDKDEEIPLLMSIFMGLQHCLAMVG  
GLITPPLVVKFTVCGFAEAFCPDLVQYAVSAALITSGICTILNVLKLSIPFSEKVFGR  
LYMGSGVLSVMGTSFTFLPIYEIAIDQMKRDGLDGGVAYGKMLGTSMVCCLLELFLSILP  
HKRIMKIFPPIVTSISVILIGVALTGTGMKYWGGGVVCAEMGWKTHAQIVSQEDLSFPPP  
FPTCANGETSEFYGAPQYIGLGFVMTFLVFIELFGSVFMKNCNVILALLFGYMVAGLSS  
LDGNSYVDTSAIKNADPITFLWVETFPIGFYWPAVIPLLIAYIVTTIETVGDINGGFVDV  
FAVVALLG FHVCLYPVRLIALQLADTSRFAILNPIVLTKRSSLPLYTAVFEASELETGS  
EEYNTSIQGGLTADAIN SILASLFTSMPNTTFSQNNGVIALTKCASRRAGYACGGWLI  
FLGVFSKVAGVITSIPDCVLGGMTIFLFANVLASGINLTKLVDLESRRNRFIMAFSLALGV  
VTVWPYAFLDRRASPYTAAFWKCEDCSDAMKGLRNGVSIFLSTGYCIGSVTAMLLNSILP  
CDSGLSYSVCRNTEETKEMSEAVPKEEAKGDADDEDDDEEKPADEEEADQEKALVQEA

>comp11955\_c0\_seq7; 523 376 1991 LEN=2237; translated  
MGSGVLSVMGTSFTFLPIYEIAIDQMKRDGLDGGVAYGKMLGTSMVCCLLELFLSILPHK  
RIMKIFPPIVTSISVILIGVALTGTGMKYWGGGVVCAEMGWKTHAQIVSQEDLSFPPPPF  
TCANGETSEFYGAPQYIGLGFVMTFLVFIELFGSVFMKNCNVILALLFGYMVAGLSSLD  
GNSYVDTSAIKNADPITFLWVETFPIGFYWPAVIPLLIAYIVTTIETVGDINGGFVDVFA  
VVALLG FHVCLYPVRLIALQLADTSRFAILNPIVLTKRSSLPLYTAVFEASELETGSEE  
YNTSIQGGLTADAIN SILASLFTSMPNTTFSQNNGVIALTKCASRRAGYACGGWLI  
FLGVFSKVAGVITSIPDCVLGGMTIFLFANVLASGINLTKLVDLESRRNRFIMAFSLALGV  
VTVWPYAFLDRRASPYTAAFWKCEDCSDAMKGLRNGVSIFLSTGYCIGSVTAMLLNSILP  
CDSGLSYSVCRNTEETKEMSEAVPKEEAKGDADDEDDDEEKPADEEEADQEKALVQEA

>comp11956\_c0\_seq1; 478 45 1349 LEN=2601; translated  
MPSLETTTSTKIIIEGDQTQTMLPMEVDGSENDPCDPKEEGFLDEYTEEDDEIGSPSLLNR  
VSASKLNQKGTVAAILQKKRYFFLLSIGVVITASLLSPVLFYARTRRPVLRRLNLVGD  
EFSQDGSNTQRFKIMQITDIHLGAEEDTDWGPRQDEKTFALLEKIFDYEPDCDLLVLGGD  
QLTANNQCQNCTEYYEILGNFLSTRGVPWATIMGNHDDMDFYVNETLSIPHPD  
TLRRDLRVDQHFPLSLSQASAKGELSGVTNYVLDVLDYTTGQPALQIFFLDSGGGYVARE  
AIYDDQIQWFRQQASLADVPAVLFQHIPTSQHEYVDGSCFGYQGEVVAELEYDAGIADAMI  
ETGRFHFLAVGHNHGNDYCCSYHSNNNDNQNRNTEDLYLCFGRHSGYGGYGKWD  
RGVRIYELSLTTSDD DGRSDTEKQFQWRTW

>comp11956\_c0\_seq2; 499 45 1421 LEN=2433; translated  
MPSLETTTSTKIIIEGDQTQTMLPMEVDGSENDPCDPKEEGFLDEYTEEDDEIGSPSLLNR  
VSASKLNQKGTVAAILQKKRYFFLLSIGVVITASLLSPVLFYARTRRPVLRRLNLVGD  
EFSQDGSNTQRFKIMQITDIHLGAEEDTDWGPRQDEKTFALLEKIFDYEPDCDLLVLGGD  
QLTANNQCQNCTEYYEILGNFLSTRGVPWATIMGNHDDMDFYVNETLSIPHPD  
TLRRDLRVDQHFPLSLSQASAKGELSGVTNYVLDVLDYTTGQPALQIFFLDSGGGYVARE  
AIYDDQIQWFRQQASLADVPAVLFQHIPTSQHEYVDGSCFGYQGEVVAELEYDAGIADAMI  
ETGRFHFLAVGHNHGNDYCCSYHSNNNDNQNRNTEDLYLCFGRHSGYGGYGKWD  
RGVRIYELSLTTSDD



DGRSDTEKQFQWRTWVRLESGEKVDFMDYDHSVNTGQND  
>comp11958\_c0\_seq1; 1016 235 2397 LEN=3322; translated  
MTATVSIKTLGLSTFLLGCALVAASLVVPLVQPPFAVPKPSFHIKQRIPTELFSTSASAAAY  
LESISYRSPTVEDGLLGATSKYLDALSSVSAQLNNNYGNNDNYSDNYAATEAASKPSV  
SAASTPFSDMLVNEVVQRVTQEFSSALNAFGGETYDSVLDGLSSTLVSQSVPPQYLWDM  
DFDLGDAEPKPAAKVARAAARKASQQEPQNSVNPEETMRELSNKLEGSFRSFKESLSST  
HSVTSSFRRETAQPNAAVTTAKQQENILQIQKLLDDGQLSPEALSQSAMEVANKASTMAE  
AANKAVVESIPSDAETVVNSLGETLSGTASGAHSLSETASSANSAISETQQRGLQNSIGS  
LVTNANQGIGKALSTLAEESTAAKSSIAESAGAASSAVTSAFGEAGASSIAESTNAASSAV  
SSAIGGGASSIAETASVASSAAASAIGGATSGTAKALAATAVTAARESVGATGAAVKAAV  
TAKPGMAATSGKVSATLSANQGFGLPGNAYSGGGDVAGLVEMVATVASIPRSILDATM  
METNHPGAMDDLMEGISTGLYRDILVPLSEPLSGAAAATSTTPMEQAQAVLETSSQMVMAM  
VVSIPRAVVEGVTGQPISEVQARVAQADLDVLAQQLSGFAATVSKLLVSVFLKVVAAQAI  
LVSQGGGAAIGTEQTEAIAKLVTVLLEDILPAIIDGLAMVLQQFVLLLLLDGGAAIVLGM  
>comp11959\_c0\_seq1; 2185 1 9086 LEN=9190; translated  
XQQQQQPQPQEQTATEAVQEKFKGLMKKAKDNLNPNKPLGPNLGFKPTAAMAQRHEDA  
LVSGKRPLYQFQITKLRTWRTGYTRLLCLYDDHFSTVDPDSDHQTNTWNYGQLTDFIAVE  
KDQFLLQVTSDKLKFQCHHVDRSMALSALLQCKDEHDNNPEKSGSVAPGMNKSAPIILCN  
RWTRHGHVVPSSLRLTPYGLVEIHPISKLSMQTYRFIDISAFSLSDDQTVILHLKTRK  
ARLFCFTNKSRSDIVMWMRQAEDRIGLELHMTDSCITLQEWKDRRRQEQRPKKTVPVATEW  
MVTKQSRRHDISVVGAAASGKGWPGGVVNRRLCITGTGEVLEKDESGAIVSIRQLSGLYAI  
VRPSAAGDTIWLEYGDGHSKKYSSKSRDSSLVSLDAATTLGKNRQVQVSDVPSGGYCLA  
SFSTMSTPEKSGGIFQPIISIPHLCKRVHTVGTAAFSYMNCSTESSTEDGVPMPNPISECR  
NVVEICREFNASVLPATAEGLPRAENDKQVLGSIISLWGLVAVLLESKKDRNLAEQAAGPI  
LQTLHRLSKTPAGYRSSIELATFLDCIPLLLTIDNAFSKFWAFRTITVLLSGLPGKLRDK  
EIEYVNSKSVIFNAGGPRIVHDMESILDQGGSDLLRMVMSDILQSVLCSCADTTSPEVFAS  
FMKALGENYSALLNTLYQQTPFVLENSALLLHLLNTHAPTVAADAIRESLASSGILLHFFH  
AAIFSPMAGQRFLSRFLCSLWLSGPMNCDEKLLKRMVPRGFIPYLKMPPLSRAEEEQLD  
VIEQDVIEENIPEGAGTSDQMTGAAGTNTARLRSRIALARATS IHGVQKQTPENFRVFF  
HTLTQDHNLPDLIWNQQTRRELRIGLESEIQYIYRETEARGMDKIAWNHQYITIDYPSLD  
TELSVGSVYMLWLEAGDGFIKTWDEPLRLFELLFRLLCELDNRNTKVTVMCVRCLERLY  
AVHGEKIGAFPDVMILIRSMASRNIEQHRLLGLLATILGVRQDGEEDDCVNVPENAE  
QLLNVDSEIQLCQFVAWHTNGVQVGNLMTTLEATQPKSVLITDGSQTQPSGYAHAISG  
KPSISVRNAGCPPVWFVATTHRIPPPPETVRGPFQVSELKMMESGEISPFTLVSTHVE  
SYEEEDGTSNAGSIQIDTGKWKRLDEIWQLRWQLCTDGNDTGIYSPSEVAKRAVLSLTRL  
VDLHRSLSRGLPYPIPIAKRIICGLSKDPFSSTSGETVDRKVSFLSVIAQSILCNDPD  
VVDRASNLLFNLTQYNEEATSKLYLTGVYFFMACYTGSNFLALARLIHSTHLDQHFRSGY  
AAAANKDELPIKDRSVLGGLLPDGVLYILMNYGIERFSDVDFVGYSDNPEVIWDLERKHL  
IEMVRQHLGDFPKRLWQNTTQYCYCPMPVAVYKRLKKEIFCHNYLRNLCEVRFDPWP  
ISEPVEVFRSCLEEFKKQMYRDESDEEEALQEATKILSLKPGDSSKELRKSRYMLARKYH  
PDKNPAGREMFQAYELLLPIIESGQKLIKIFHDQGVGANDYGNVSSNCAEGFSGGRS  
QMETLQLLIKTQVLCRRFEVEIGKYKYPAYQLLSCLKLPDTCIEARKVVDEGAEIFSS  
ALFMEQALFVRDCLDLFRCTLVSPNAEELVSELGVPILYSVDFYHLHAGLLQNR TG  
DISGKAGDDVVEILSTVVHTIAGVAFYESGRRAIESLPNLSEFCINWRRCIDGKYLSKP  
KRVNDSLSLKRFAVEGIANMGRSAILQKVLVSGSIWPLGKFLGYPDLDESSAPRDSIE  
DDIGASQASNNTLARLSARALGMLSGSLQDPKLVTPKYPELQAALNIMLTSPIALLLRNK  
RTSEILRLILNTNLESPAKIWNVEMRGEMLALLSSMETNRPEGEVQNLADELNALNGFKYS  
SLKNEQLIGGIYVRVFNKVGVDKGNLRDVEDPEFFAKELIKYIARCVNDFDGLPPDWIEL  
KLPTTKAEEDIVLSDSLETVPITDRRFIMVMSALRLMIRAESGVEDTIYAPSVLLSLEL  
PQDSEAFEIGCDVLSILTSRQGFVNTVANEGALWRLRLILERPVSDDSSSLDSSTRDDM  
LKKERGWNFLETSSSPSIPKILESSAWLELLGILVGYSNFTKVWIARVGAAKIISRL  
WDPKTGQTLASLLEHFLPSSLIVILKEEGPDAMLNLFDGESDSPELIWSSMRGELQVVA  
GLELDSCIQLRHDSGSWSSEHYNMKPGVRVNFTELEDELFIGGVYVGRFLKEPTFSIRDPT  
SFLEALLLRWTHELQMCCTDNEYNGEEKVSTDIVIGSQDKLQPVTDIVYLCKIRPNLCKD  
LAQWGYMSRCLKFLEKMLCRNLLGYPLLSVMRVVHVAANSRVNVESLIASGTNDTAHGIV  
AFTIRTIGDNTIHPDAGFILEMLKIFTEALGDLKKAELKKTGIKFEMPNPVVGYNAM  
APSPAPGEGPVSRNRVRSAGDDPLGLGMGMAPMPTPSISQQPGPYANASQSYTQAHIGN  
TNSTHLTGNQIPSSQKSNSGFWSLQSSVGAQQAYRTQHYQTPQNQKHSQQYASSQSEQQR  
QPVGASYSQRTSVFQQRLNSQRNVQQHSVATSYSQPTTTMAQPAYASQPSGQQQFVATS  
YSQPNNMITQQASNSQPNIHQSVPGSYSQPNVSMGQNMYSQGNNEHFNHRQQQYAATM

ASREIFVGGADSIYDSRSQTSYNATSQAQILPSNTNIRQSWQGSQAQTLQSSQTPLTQQV  
RQGNVAQTSMPSGTGYNVTSAVSNQVQSGQYHLSPPAKSSLKMRANESITMNNAGLQPSN  
QVQTRVSGNGIATQLFQQPPKIQHSQTEEVYNNRRLVESVAPIVETVADDNQSQDDQQAG  
HQNLQPSNEGRGIDARTPLLSPTVTAQAQAEVQGAPNCADGRRALLESALRCDLPKYLIE  
ESVLENAHLSRVKDPASVKVHAVELLKLLTQDPGYGMKFQLELEKIPSWKKYVAQDHSLE  
ITGHEQKADYFLTDGSSSIDPKMLTEA  
>comp11961\_c0\_seq1; 213 139 519 LEN=931; translated  
MASSLYPQQNAPLGAAGGGGESSASGQAGPSFDPEASPIPGQQAWAILDLHGKLVRSAD  
GSSSNNSGGDTQPPILADAPTLYNMLVESTPLVASGLNRMTINFSSLRYVVARDEHHVYL  
VQTKGV  
>comp11962\_c0\_seq1; 712 1 976 LEN=1312; translated  
XFIANQTTIMKFSTAFALALTAIGSTAAKTISGKAARKLVRSARRLEDAAEEEEQQEEDYA  
FLGNYNVKVMVGCKSQLETPIMNEAGEYEYSAVLLRLCPAADGCDSSATEGCKNGYGEILV  
GLSTYVEAYFEDINKQQEENANDGEEEEDEFDADRYAKCEEYNPDENADDANQGQWENYA  
FFVGPCTCTEDGLGLKLDLFQDEYCKSEIEFDASNGWSLPYSDGGLVSTNCASCSEYN  
DDGELEIKEMCQQTYEEAAAYKCEEGMETYSYFGQNVQGCETIEEMFPKTGGNGGKIFGWI  
VFAGVVAGLGGYVMWWRKKKASSIE  
>comp11963\_c0\_seq1; 422 57 2264 LEN=2659; translated  
MVLSSLASLTSSLATSKAASRNASKGKQGDLLPILIIIPGLMSSGLEIEESKIKPEWEGE  
LWLNLASIGISAMYFGKAQFRKPYDIIDSDESSEEEEEVAEEHRQANFKSAWLKHIV  
LSPDKESDPPGVKIRPIDGLEGVAYLAPGALTSQLTYPVFGPVIDILKEAGYNSEGGNTNL  
MASTYDWRLAPRTLQKRKYFTRTMESIEKLYYTNGSTPVVLLCHSLGCKIAHYLLNYAL  
DKKGQGWIDKYIHTYMPVGGPHLGAPKAMRGLISGTKMSLDTFLSDEEALSLSRSIGSGA  
WMIPSELDPGVPAANYISPHGVLEITFAHALDVDNLVKRRRTKGSRPKRYQLEICAKGFDC  
KKDDDSRRTVTRTPFHRVSPDLGPNVVVFPNSVSFATETQPYFNEALQFLLHEPGIASAKK  
EKEGWCNPLVWCLCCCCIPCMMLYRVIEMLLCLIRFSTFTADKIAGSAGSSATLAFSE  
RIKIPKSVWQGRVTVIKVPYMHKDDYGHFEGCCQATKQSRTVYLYVTLRWTKFDGKTSFR  
RLCSPVCRPMDASVLLPITSSSSSTKYEEFSGYDIAEREGLDDTLRFIKEYDKDKYRPRN  
LSSHDPPIINRIHAIYGVNVPTVEGCVYSRQDTCLSEHVMQSFYVPDKTALIGKSNKGYC  
VSEGLIMETPNTQTVHGGVRRSGDGTVPYWSLAHVKTWHGKDCTVTVQELDNAKHREIL  
NDERFHEALLDYVQL  
>comp11963\_c0\_seq2; 288 57 797 LEN=981; translated  
MVLSSLASLTSSLATSKAASRNASKGKQGDLLPILIIIPGLMSSGLEIEESKIKPEWEGE  
LWLNLASIGISAMYFGKAQFRKPYDIIDSDESSEEEEEVAEEHRQANFKSAWLKHIV  
LSPDKESDPPGVKIRPIDGLEGVAYLAPGALTSQLTYPVFGPVIDILKEAGYNSEGGNTNL  
MASTYDWRLAPRTLQKRKYFTRTMESIEKLYYTNGSTPVVLLCHSLGCKIAHYLLNYAL  
DKKGQGW  
>comp11964\_c0\_seq1; 327 608 1519 LEN=1557; translated  
MKSLSQNHIPRSLTSLRARQPNDFSCNQNKHHRQQLQIQQNPGLVNTSNISSGNNLIQ  
SNSIQNQFTALSNQKEAFVSENNLAKKELQIQKEHQSVNMEHDHLIELGRQAKERLGQG  
MEKLGILKEQEARILQLTKNEFRAIHDCNTHSNLLDRIKQETSEKYSGEMDPLNFELAAL  
LEGRQLQNETKRCLSLRSIEAIIPEIDKASKEQNRPQLLSEKENIYHSIGRLQEQATAQRK  
EIIAHLRYLYGTLVQQRKYGSTEGNLHRLNENRVTVSTRDIFETETNKEPSKHMDLFYGGP  
CGE  
>comp11965\_c0\_seq1; 156 1 600 LEN=600; translated  
XLPSSMPSIKIDFAASSLLPSDVASVSLVPSFFPSLPPSFSYEPSVSLILSKGKSGSKSK  
SSSKGNISGKGLSKGKSSKGDSSKGDSSKSKSKSEKSSSKGKSGFESKSSSKGKSASKGK  
GETKGHSTSDGKSKSDAKSASNGKSGSKGKSPSKGKSTSDGKSGTKSDSKGESLSEK  
SASKGKSAGKSKSKSEKGSAX  
>comp11965\_c0\_seq2; 192 1 1248 LEN=1583; translated  
XKSKSKSEKGSVSKGKSKSQGKSKSLKDSSTSPSYIPSSFPSSFPNGNPSRPPTPCDVLE  
TNIDIFHADVVQSNLEQERGELRFGNVGIVRGEAVDFLITSDDYTNSNPNGFNNGKKNKNG  
FGQFGSINLFTIHGDSSAGRAHFACFVQPGTTIEVIVDSFQWTVFDIDRRNSQTTGYNL  
WERLEIDATQATGYTLYPNPADSEVRQFCKNSLGVPPCAENEMTVFEALEDTGADNPGT  
PDVLTTELQKRSVSFTFTDRSCFSFSYDAYCPFEPDNDCAWYGGNNFLFAGYARELMYDG  
ECVVQPAPAPTPAPVPAPPAAPAFVCSALTAAPNCPSPWQPQCAIVGGCPAGMPTGYYPDL  
SSKMPATAGAPAPWRRPPTRDATPGRFSTRFPATTGPTCEEKTPMGFRSAGVATSE  
>comp11966\_c0\_seq1; 549 399 1988 LEN=2544; translated  
MYPLFDYHGAGGRQICYTSKTNKDGNVREKVLAWGHALCCLYLASVNFMYACYKGDGY  
IGMEEDEEEDPDRRPPNPELRITNEFRMYGDAMPFRYMTPPDGKLDPWTKAVITNQK

ELKCI ECGLLDHRNSMRIPLQCVANDPDEYFEHKDKHRLRNDDVRPCTQALHVGARWWD  
KSTTVRKCIFYFPGLTNSDGTIRENIDTVHCLYCKNHAENIDENFQQLKKEKVMLLQKQK  
QQHRNQAKGFPKLPSLNTKNVRKRPPSPDATPLPSFSKRSVPMNSVTNYPTRNTKNASLT  
SLKGNKGKGGKHNKGGKERHKELDPSIATPVNAGEQPKLGKRRREVANAMSVGVSKRDNLK  
IFEDLVNHEQEIVKNATMSLTGRRRFWKHKFLGLSTRDFDGIWHEAVEKIRNRNKNTDRN  
KPDMPGKNDRGSTFVDSVNNTFDLTTTYRGC GDSEINVERRSGLDPPGDEKAGTIDDGAK  
NQSSCKKKEKHKEIVQDRPPDRWANLFIGQRFEMGCEFTLDKFEENGVE  
>comp11966\_c0\_seq2; 557 321 2062 LEN=2618; translated  
MGKISSASVVHLLARPAKPWIPIGALXFYEIEQKKRPTECALCSVSDGTHAMYPLFDYHG  
AGGRQICYTSKTNNKDG NVRGEKVLAWGHALCCLYLASVNFMYACYKGDGYIGMEEDEEE  
DPDRRPPNPELRITNEFRMYGDAMPFRYYMTPPDGKLDPWTKAVITNQKELKCI ECGL  
LDHRNSMRIPLQCVANDPDEYFEHKDKHRLRNDDVRPCTQALHVGARWWDKSTTVRKC  
IFYFPGLTNSDGTIRENIDTVHCLYCKNHAENIDENFQQLKKEKVMLLQKQKQQHRNQAKG  
FPKLP LPSLNTKNVRKRPPSPDATPLPSFSKRSVPMNSVTNYPTRNTKNASLTSLKGNKGK  
KHKNKGKERHKELDPSIATPVNAGEQPKLGKRRREVANAMSVGVSKRDNLKIFEDLVNHE  
QEIVKNATMSLTGRRRFWKHKFLGLSTRDFDGIWHEAVEKIRNRNKNTDRNKPDMPGKN  
DRGSTFVDSVNNTFDLTTTYRGC GDSEINVERRSGLDPPGDEKAGTIDDGAKNQSSCKKKE  
KHKEIVQDRPPDRWANLFIGQRFEMGCEFTLDKFEENGVE  
>comp11966\_c0\_seq3; 549 632 2221 LEN=2777; translated  
MYPLFDYHGAGGRQICYTSKTNNKDG NVRGEKVLAWGHALCCLYLASVNFMYACYKGDGY  
IGMEEDEEEDPDRRPPNPELRITNEFRMYGDAMPFRYYMTPPDGKLDPWTKAVITNQK  
ELKCI ECGLLDHRNSMRIPLQCVANDPDEYFEHKDKHRLRNDDVRPCTQALHVGARWWD  
KSTTVRKCIFYFPGLTNSDGTIRENIDTVHCLYCKNHAENIDENFQQLKKEKVMLLQKQK  
QQHRNQAKGFPKLPSLNTKNVRKRPPSPDATPLPSFSKRSVPMNSVTNYPTRNTKNASLT  
SLKGNKGKGGKHNKGGKERHKELDPSIATPVNAGEQPKLGKRRREVANAMSVGVSKRDNLK  
IFEDLVNHEQEIVKNATMSLTGRRRFWKHKFLGLSTRDFDGIWHEAVEKIRNRNKNTDRN  
KPDMPGKNDRGSTFVDSVNNTFDLTTTYRGC GDSEINVERRSGLDPPGDEKAGTIDDGAK  
NQSSCKKKEKHKEIVQDRPPDRWANLFIGQRFEMGCEFTLDKFEENGVE  
>comp11967\_c0\_seq1; 410 140 772 LEN=851; translated  
MSMMEQLHETFEVARWVTSVSAAAFQLFDDDDDRQLRLIAATSVALLLGAVLSYKIFCV  
ASQGESAGGSHSVTSETRLET TAVEDNKEKTTSTAI DLVSEFDSDDDKDENDDDSVE  
EDDITVDS SSEEVEQRTQQISKPKPRKESLAQMRKRVAQEMKRSEEQRLLQQRNRSSGK  
TTKPSKPRATETRAEMKARVAMEFAAKRK  
>comp11968\_c0\_seq1; 356 247 2130 LEN=2279; translated  
MSDQISTDVPTTPSRARPRQRPRHFRVCYDEDGKANDSNDSVTNTAESRPQPWGVAPVNF  
QYEIETS VLSSDLSPRAQSTITNSVSAAIINSIHKHDCSPRRRRARRRRRQEALSDLP SF  
SALRSRTEILSISPGDWHWEKKECVSEYKIGSLSCNEVEGTVVIGFDELDF SATTIGSG  
GGASDFRSVGNVLSRVEEDMNDGNYLEKVNNDILELGVVVTCLKYVGSDFLDRVDKNEF  
EPVDVLLDSTSASLDTTDGITLFSKVAIPIMVTLFLLAMVLCWCAVSTWPTDWLREKMSR  
GNENKSLKRGSRKPSFGKEREPPDLERHTRRSLDYKNKSLPSSITIKGNI GNNDVDKGR  
IDASKIGDRKRKSRTRTPSLEATLHDLTETEKKNYGNHIVPLPMDNRNGRSYSTLPVDNR  
ASVSRFLHLPVRPKSMIHVV DGHPSDTETGSTAHSVGI VNNELRYKDG NMGDP AQRY SFP  
ILSSPRAI ISSLFTRSSPNEHSRNPSPVIDLVDRVNACTPGGNVQCFRHESELPTNNRSE  
NETVLRVYVPTDDR VNSLVE SPNADAVKSPSKRMSAKKSEAYRAYINRKIRQRAEECEEY  
DKPIPM EIGVRTFTDQGGRVREMAV  
>comp11969\_c0\_seq1; 1572 235 6825 LEN=6889; translated  
MITSFFKSVRSVRNDPALDES VKKEDSRAGKGGKPTGRKAQNESFSTGKTLVKKKLE NVL  
DEQGNPVFLNGVVKKQKYNYSIDGKTYTIQWDGGAPVSNWSESEVAWGVVLFESIGLEI  
SKEFGKDGIFQGI VVDVSRDDSESEGEVDLYRINYEDG DSEDFDGADLREGIQLHEKVT  
EKPKRKQAKIAIKDEIKEKKDDGETTEVTGRRRSRGRVSYAEIDEDFMDLDSDEEIK  
QKRKRLKPSKKKIA DSEDDDFEAPVEDQADTDLDDMMVDDDDFEEKTSR SKPTRKNT  
KTSSRKSTKKAEDKKWASNKSTGNKSIT EEFEEERLETERKRVKPNNNPQKWPEKGSYVDP  
VGVDP THGIVERIVSDQVRKVGGLLQNVRFQOQKQKDESELSPYIRLQTACSGTDAPSI  
ALGLIKESLARISSKSEKSDHLFN YEHMMSCEIEPFKQAYIARNFPGTPLFPDITKLSA  
IDESGSAEKVIDVYGRPQSIPEGDLFVAGT SCKDFSMLKTTRKDIQDKGQSGETFLAAV  
EFLDLYQPPFAIFENVDGAPWGMQEYIQGRIYLPNRNYNKAITSTKRKTNADEDLVFIV  
NDKGRYEAKAIPPQVGMKAGDIVQGFVKEGAVSSDVIPLLSEENSAGKEFSLGQLAKKHK  
IKLDKDTLVLEKKARYCTHLCKLDTKAYGLPQTRQRKYLFIWRSDDPDDDLGEYFQEILD  
HLKSPLLHSMEAFLLPDSHDIRSFRALRSGPGLMVKRDRAKELDFWEWEISR VKDLSA  
HKIYREKIGLADRSRWLTGWDTGRKQLAPTLWPELFD CWNMRLDMIDCF AAASIRDAI

SRDPLHHSFSWDLSONVTRTTFRSATVGVSGCVTPGGELLLPHKGRIVMGYKLLLLQGIP  
FSRLLLPETEVQLSDLAGNAMSVSVSATMLSAICAPQLRKQRVEVGKALISEFALSQK  
HDFAKGAVLKERGDFYNKKHDSPRGFIEIFSEIAKDLASDAFYSSVLCETSGETISKDT  
KILQCLSCGMSICHSCSDRYKTSDDLTELKFAQEGRPDQSHKFERRLRCAVPSILRLGK  
DCEESLEHGEGLDSYSFQLQQVDRKKKHWLLTYGAWEDHGSGRQVAEIRVRIGRNSSLDK  
SFGISAYIRCFAPAIRNENPLRGKLDKDSARLIMSVGTQNSRWELPQKKSTSQICIVGNSP  
VQSQRSLIELNDAAKALRNHKIMKSFLPPISSRNPLTHYHKSWKTPGKIEVSGDASGR  
INGIYYKMKCEQTVVLSALWRREDKAMYLYIRPDVVRAKLDTAVFAPSPNYDDGLEVCEL  
VDWIPENALNKSTHSTKARFLDWINAPEEMKVEVPHPSIQIIQQGRPFEDSLVAATSHSH  
DYPVLCELGGFSSEVIQSLIEYSETTSPCESEIDLIGRSGTRNAKRLSIVATPSLLKFAA  
EGKLPPLTSEWYSLPDVNLGTCKNHVPPRPSESWKKNSGDTGFVFERFYNAEESNEYH  
RLLKRPTAFKAKVSQTDGKLVLSMNPYVAVHRAAAILGGEATDCIDIEYSLSELSSMGEP  
DTKDFKVPNSDSYVPTVEPELELPLYPRQAKALTRMMDIERGKVKFPEERSEHILPGVG  
WCLIGKASKKSPLRGGVLGDAIGSGKTVVTTIALILKGAKAARSNRNAEGRSGATLIVVP  
PGLVKQWDDERKKFTKDRCLKCIIIDCTNKLKQTSVEDMCNADIVIVPAGIIEESSGKTRP  
YTEHLRKKANADPIPPAPRSHSQREAPSI EGRWVRNMSSGPEIYVGNKGTQKHRDSQAYY  
GHCYAEAI CKLRQKEFDRKERGVPLEYFVWERIVIDECHETLVTNKGYEQAEFKETARR  
GAREFLGLSQTNISKRPIVAASGVWGLTGTPLLETEARVTELANLMGGTYLTGAAHHWRK  
EERESGRDLFLNQEGFHSREYRCVQEAACHSYIKEACQRNRGEKLEVNLIREDICVNMT  
KNEGDAFLKQTSFQTHNSFALSVDDELGEKVPDVLGITASSVARHKALDTTEAIHSDP  
CTKII VFADTSYGGYCSALTALKNSKQPFQVDENDSVEQQNETISWFRHVDATDEDRKR  
PRILLLSFSQAAGHNLQEACKHVILFDPVYSGTDAVADASVEEQAVGRVFRQGGKYDVTV  
TRIVLKDPEGKRCLDDWIMERNLDENVLAAATS NF

>comp11969\_c0\_seq2; 1039 42 4868 LEN=4932; translated  
MIDADEDLVFIVNDKGRYEAKAIPPQVGMKAGDIVQGFVKEGAVSSDVIPLLSEENSAGK  
EFSLGLQAKKHKIKLKDKTDLVLEKKARYCTHLCKLDTKAYGLPQTRQRKYLFIWRSDDPD  
DDLGEYFQEILDHLKSPLLHSM EAFLLPDSHDRIRSFREALRSGPGLMVKRDRAKELDFW  
EWEISRKDL SAHKIYREKIGLADRSRWTGWDTGRKQLAPTLWPELFDWCNMRRLDMI  
DCFAAASIRDAISR DPLHHSFSWDLSONVTRTTFRSATVGVSGCVTPGGELLLPHKGRIV  
MGYKLLLLQGIPFSRLLLPETEVQLSDLAGNAMSVSVSATMLSAICAPQLRKQRVEVG  
KALISEFALSQKHDFAKGAVLKERGDFYNKKHDSPRGFIEIFSEIAKDLASDAFYSSVLC  
TCETSGETISKDTKILQCLSCGMSICHSCSDRYKTSDDLTELKFAQEGRPDQSHKFERRL  
RCVAVPSILRLGKDCEESLEHGEGLDSYSFQLQQVDRKKKHWLLTYGAWEDHGSGRQVAE  
IRVRIGRNSSLDKSFGISAYIRCFAPAIRNENPLRGKLDKDSARLIMSVGTQNSRWELPQK  
STSQICIVGNSPVQSQRSLIELNDAAKALRNHKIMKSFLPPISSRNPLTHYHKSWKTP  
GKIEVSGDASGRINGIYYKMKCEQTVVLSALWRREDKAMYLYIRPDVVRAKLDTAVFAP  
SPNYDDGLEVCELVDWIPENALNKSTHSTKARFLDWINAPEEMKVEVPHPSIQIIQQGRPF  
EDSLVAATSHSHDYPVLCELGGFSSEVIQSLIEYSETTSPCESEIDLIGRSGTRNAKRLS  
IVATPSLLKFAAEGKLPPLTSEWYSLPDVNLGTCKNHVPPRPSESWKKNSGDTGFVFER  
FYNAEESNEYHRLLRPTAFKAKVSQTDGKLVLSMNPYVAVHRAAAILGGEATDCIDIE  
YSLSELSSMGEPDTKDFKVPNSDSYVPTVEPELELPLYPRQAKALTRMMDIERGKVKFPE  
EERSEHILPGVGWCLIGKASKKSPLRGGVLGDAIGSGKTVVTTIALILKGAKAARSNRNA  
EGRSGATLIVVPPGLVKQWDDERKKFTKDRCLKCIIIDCTNKLKQTSVEDMCNADIVIVP  
AGIIEESSGKTRPYTEHLRKKANADPIPPAPRSHSQREAPSI EGRWVRNMSSGPEIYVGN  
KGTQKHRDSQAYYGHCYAEAI CKLRQKEFDRKERGVPLEYFVWERIVIDECHETLVTNKGY  
EVQAEFKETARRGAREFLGLSQTNISKRPIVAASGVWGLTGTPLLETEARVTELANLMGG  
TYLTGAAHHWRKEERESGRDLFLNQEGFHSREYRCVQEAACHSYIKEACQRNRGEKLEVN  
LIREDICVNMTKNEGDAFLKQTSFQTHNSFALSVDDELGEKVPDVLGITASSVARHKAL  
TDTTEAIHSDPCTKII VFADTSYGGYCSALTALKNSKQPFQVDENDSVEQQNETISW  
FRHVDATDEDRKRPRILLLSFSQAAGHNLQEACKHVILFDPVYSGTDAVADASVEEQAVGR  
VFRQGGKYDVTVTRIVLKDPEGKRCLDDWIMERNLDENVLAAATS NF

>comp11970\_c0\_seq1; 211 156 1226 LEN=1438; translated  
MQIGKRKSESKSNPPRLHSAITAILLVCV CNLSYDRYASILASREGDTAIVAKNKTLEES  
SSSLASAAAATLPSPREPRLGDGCYHVFLDIGANIGVHGRFLYEPHKYPNSRYSVPLF  
EKEYGSNRDPRDFCVFEFEANSKHWPRLQEVAASYSKQGWRYHVIEAAVSDYEGFTTFFH  
QGPKDEKFQEWGFSGAKNFGMEGAYEEKVPTIRLSEWIRHHILEREVPGGPPSGTSSDEN  
NNNAKPILSFKMDIEGYEYVVLPMIHEGII CGFEFAFGFHPKLAPIRTFNGKENTNSS  
SSPDDPPLHRVSLESAQLARQYASALTQTI ESSRHCSTHWNIDDES YLRDGMELP

>comp11970\_c0\_seq2; 211 141 1211 LEN=1423; translated  
MQIGKRKSESKSNPPRLHSAITAILLVCV CNLSYDRYASILASREGDTAIVAKNKTLEES

SSSLASAAAATLPSPPSPREPRLGDGCYHVFLDIGANIGVHGRFLYEPHKYPNSRYSVPLF  
EKEYGSNRDPRDFCVFEFEANSKHWPRLQEVAASYSKQGWRYHVIEAAVSDYEGFTTFH  
QGPKDEKFQEWGFSGAKNFGMEGAYEEKVPTIRLSEWIRHHILEREVPGGPPSGTSSDEN  
NNNAKPILSFKMDIEGYEYVVLPMIHEGIICGFEFAGFEFHFKLAPIRTFNGKENTNSS  
SSPDDPPLHRVLSAQLARQYASALTQTIESSRHCSTHWNIDDESYLDRDGMELP  
>comp11971\_c1\_seq1; 223 18 850 LEN=925; translated  
MLSIVARRIAKPAVARSGEYCWVLTVPALCSVVARALLANKTGERHRPEGSSDDGRFV  
FACRWRNSVSTPEGCEGTGPDPPSIGAGRRNAFRSTCSGGSNPPASGVLYWFHSHAPHRICA  
LTLPRLLPHPAAMRCAARGRLPNTASLFFFSPVPAARAFSSADLSSGENVVVPLIANSL  
EWALSSPPLHQFTEPPLVVETDHLDLNPGQEVEAVLAAEGHEVTDIIGKEKWVLNDPAV  
YEGLIPQNAEWTEFVDEKGTGEWVYLDEYGNKVDKPE  
>comp11971\_c1\_seq2; 137 1 475 LEN=550; translated  
XCIGFLTPRMYLCTNVASLVALPCRDAALFFLPPPVAARAFSSADLSSGENVVVPLIAN  
SLEWALSSPPLHQFTEPPLVVETDHLDLNPGQEVEAVLAAEGHEVTDIIGKEKWVLNDP  
AVYEGLIPQNAEWTEFVDEKGTGEWVYLDEYGNKVDKPE  
>comp11971\_c1\_seq3; 258 18 434 LEN=509; translated  
MLSIVARRIAKPAVARSAARAFSSADLSSGENVVVPLIANSLWALSSPPLHQFTEPPL  
VVETDHLDLNPGQEVEAVLAAEGHEVTDIIGKEKWVLNDPAVYEGLIPQNAEWTEFVDEK  
TGEWVYLDEYGNKVDKPE  
>comp11972\_c0\_seq1; 728 15 2066 LEN=2175; translated  
MKAFQITVSVLLGLSSHLGTTAFIPTSIRKGGSHQLPKVMATTTSEEIIPREVLFGNPTY  
AAPKLSPDGKFLTFLAPNDDGVLNVFLRSTEDENDDARMVTNDTSRGIRQYRWAPDSET  
ILYLQDFEGDENFHLWAIDAIKSDAVAKDLTPGKDVKASNLITNKRFPEILVATNERNP  
SLFDMYRVQYKTGDKFTDENPGDVLGWGSEDSSEFVREALVKNQEDASSTIRVRDSKDA  
DWRDLATFPYGENGNLVEFCADDGKTCLMTSSVGRETTALLKVDIKTGETLDVISANDKC  
DVGGITIDDDTKEVKAVSYNYARTERVFDEDELENDYKLLKSLGPDGADIGVASKTEDEK  
TWIVAYTRSDGPTEYVLYDQEKKETKALFVSKPDLIDYKFAPMEDIRVTARDGLELVGYL  
TRADTEKKTPLVLLVHGGPWARDYWGFFNAQAQWFANRGYATLQMNRYRGSTGYGKSLHKG  
DGEWVGTMQHDLDTSVQWAIDQGIADPENIC IYGGSYGGYACLAGLTFPTDLYKCGVDI  
VGPSNIKTLLDSIPPYWGPLRNDMLKIGDVADEEFNKKISPLYHVDEIKAPLLIGQGA  
NDPRVKQAEADQIAFAMKKKGIPEYVLYPDEGHGFARPDNRIDFNGRAEQFLATHLGR  
AEAFDGVEDATAVFPLLESTVEA  
>comp11973\_c0\_seq1; 627 378 3137 LEN=4092; translated  
MTNSNAEQEVGRTGDVVEYVVLVKSTSSQSKTTEGDTVAPNSTSSSPLSFTQTPGLNSSS  
SHHNI STTTTQESLGAVTSMHDYQQENRNSPPHNQNSSNNIDKLSRGPLSPQSAPPST  
SIPGAWGSASLGNTPVPSVIHTEAGVEGPAPVAKIKSHGSAPYFPTIDRTTSGNMMSGSA  
SSSGNLLAKKNSATKTTGKKKHQTMKPKKSTSGNTTLTQSI TSNNASSSQDARGGAASST  
GQKQORLERNRLSAQLSRRRRKQYLEELEERVVKLSLDMDSGRRAHAFRAINRISEKRK  
GALESVESLAKSIEECDPNENDGYGNKRGMLIGKLEFSLKSLEDTGHLSRVNSKELLIL  
NSFLGQQLKSFSLPSHSHKFI LWLTLQGDIFYRGGRAASERLSAARIGEKMLANGTDKVT  
ASAMWPLICNEVGLSYELEERLRVYQRTI ILQDKTTWLDHRHTARSSALVMQSFHNALGGM  
AQMVGRRSEMSQNILTPLQRAKFLAWTHKNSSRIKERLEARRKRPLDQQKDAKTGVGEE  
IDIGSCVDRNYPLKSHHLANMYI LNHQLQRILKDFPYQSPSILKPSVLKMLMRRASFE  
SLGQQKEGNLPRDDSFISGGSMKSFSSNGSLSKSGSSLSLGGGNDSEPTALNQITPTVG  
EQAADELVDQAIGFVKAIIPP I PKPTMLMKPNVHASAQNIAGVAGSSQRHDKQVVMMDY  
HNHCLVPVPVGSYGAPETSAAVPPSNQHPYQQLSIPVHHNGSHPPPPLNSHNYQAPPQLT  
YQSPQAPENYHQPPHSQAHEHYPPQHVHYPPQAMGSHHGEPMTMPMDHINHDSIARGFEA  
SSPVVRQDREQQHEQSAAMKGRHVRKSSFLPPHLSVVPEDNTNFTAADFLAVEDCLMDDG  
DCDWGIGIGVGLDNMDTTE  
>comp11974\_c0\_seq1; 1205 412 4629 LEN=4789; translated  
MRAYESKGMTETTQREVFVREEDFVRKVNVRNDDDF SRLVRNDEGAGRPQGQTQRIDSS  
TLSCSHVEIDETLCESDASIDNFFDSFEVSREDEEIFPEFFDSVSYAQSTEHLEEEESPSS  
RKSPSVFIRNDVQDLCEQAUNESYKRHSAEQRAIEVVDESEHELILQQYSVKENTFGNG  
SSLIDNITQSEESALHEVSSRAILGSNNEVIVAESPVSYSYEQFVDEQGRNSIKFIPAT  
KNHCRDEDEKDCNSKAQLEYNVTMARHFEEKSNFIENS RKKEYIEHAVGSENEVAN  
IEETLMQTI GNPTIANKKKQNQSLDCCDPPNLHHRHLDEEFVRNCKFSSSTFEADCKA  
LINTRSANRGFKKADIDKKGSEFSLERFQNHSEIELGPNYTMSDTEQKAIIGNLMAGELSS  
DNTNLDNTNSIKVDVHMEHIVPPALNIEVSEVDNEDTSLVRDDKHKIDVWFEEKHTDFMAM  
ESNDKMSATKSIGSNNTIYQKEPNLESKDEGRHGSKKEVLTISNETKIEGRIAILNIQSE  
KERTTEEMEQRTEIETIETIELLSPIQSEKEMISENYEQGTGKAEIYSSFKKEEENISGI

TEQTVIEEISEKTEIRAEIPRSPLQSEKKMIDEMLGKFLKTMESMDDDKFTDDDAQVLNS  
SRTGYIDSSSVLDDSEPRNHYSPPDNTSLKSSPRFGYDESGFSSPARSLLEQSNFYKPS  
FSKDVVAQVENNGQDMSREGNKKSIKVIDATDSSKARNPFAAVSYQAFSGNTVTQVDDNG  
QDLLSKVIDVLAEAMNKSEKMIDITESRPNLNAVVLQGTSEDEIASPENIGQGKLCGA  
HDKIETMVDALGSSTPQKSFPNVISRKGSNIKVAQVENGREILIQVIDKEKTTICAPGF  
SRLYDHIIPDMVSQDSVKNEIIQVEDSGQYVPLEATDEVERSVAASGSSRVHGTIPNVVGR  
ESSEHDVALVEYDSRQDNPFEEERSNGLPSVVENLLQQAVNCQSATKDVVATEFDVISTL  
CTPKFDQESVSEMSFSLVSERAKDCRMLMAPAVASQLDLSSCGSDPDHIFAKKSEPEDQN  
KGCSVETPPTMEKDELKSLVRLVASRDKPPGTTQRRERPIYSLPKKMPFHRTQERWRKGS  
AEKFRKRIRTPSTPNRVETSRSPPFFGRDKEGRLVPTDGSVVGWFI SPGRYSSIGSPCRRT  
RCTSQSNAIITGSVPFEKISLSKGSHRSRMRNENDSYSSSSLIGSASPKRSTSANIQTL  
HSVAGRSRSPAVSLFSRMPHGSQSAIRKLRNHCDINGKLSGKTLRVCNNKFVYNLHPNC  
GPCDRCWALASPEEREKFEIRGSHLRIAKTRSGCDRTCTVFPDINDGDSEPVR LCRQCF  
FATHKCEDCMLQVYRGNNKSVIRSN

>comp11974\_c0\_seq2; 1292 412 5031 LEN=5191; translated  
MRAVYESKGMTETTQREVFWRREEDFVRKVNVRNDDDFSR LVRNDEGAGRPQGQTQRIDSS  
TLSCSHVEIDETLCESDASIDNFFDSFEVSREDEEIIFFEFFDSVSYAQSTEHLEEEESPSS  
RKSPSVFIRNDVQDLCEQAWNESYKRHSAEQRAIEVVDESEHELILQQYSVKENTFGNG  
SSLIDNITQSEESALHEVSSRAILGNSNEVIVAESPSPVKSIEQFVDEQGRNSIKFIPAT  
KNHCRDEDEKDICNSSKAQLLEYNVTMARHFEEKSNFIENSRRKEYIEHAVGSLNEVAN  
IETLMQTIIGNPTIANKKKQNSLDCDDCPPNLHHVRLDDEEFVRNCKFSSSTFEADCKA  
LINTRSANRGFKKADIDKKGSEFSLERFQNHSEIELGPNYTMSTEQKAIIGNLMAGELSS  
DNTNLDTNSIKVDVHMEHIVPPALNIEVSEVDNEDTSLVRDDKHKIDVWFEEKHTDFMAM  
ESNDKMSATKSIGSNNTIYQKEPNLESKDEGRHGSKEVLTISNETKIEGRIAILNIQSE  
KERTTEEMEQRTEIDTIELLSPIQSEKEMISENYEQGTGKAEIYSSFKKEEENISGI  
TEQTVIEEISEKTEIRAEIPRSPLQSEKKMIDEMLGKFLKTMESMDDDKFTDDDAQVLNS  
SRTGYIDSSSVLDDSEPRNHYSPPDNTSLKSSPRFGYDESGFSSPARSLLEQSNFYKPS  
KSEIASQSNYWSNLSEADSNGEASLLKTKSISIMPSFRPLDESRSRIASPDNLNLSFVRSS  
ENDFLAATWIDSSGSHGALSRIILSKDEPGIRTASKEDCSMQDNSLCIMDNAKGTNYVTD  
PRPLNPAAVLSRGFSKDVVAQVENNGQDMSREGNKKSIKVIDATDSSKARNPFAAVSYQ  
AFSGNTVTQVDDNGQDLLSKVIDVLAEAMNKSEKMIDITESRPNLNAVVLQGTSEDEI  
ASPENIGQGKLCGAHDKIETMVDALGSSTPQKSFPNVISRKGSNIKVAQVENGREILIQ  
VIDKEKTTICAPGF SRLYDHIIPDMVSQDSVKNEIIQVEDSGQYVPLEATDEVERSVAASG  
SSRVHGTIPNVVGRESSEHDVALVEYDSRQDNPFEEERSNGLPSVVENLLQQAVNCQSAT  
KDVVATEFDVISTLCTPKFDQESVSEMSFSLVSERAKDCRMLMAPAVASQLDLSSCGSDP  
DHIFAKKSEPEDQNKGCSVETPPTMEKDELKSLVRLVASRDKPPGTTQRRERPIYSLPKK  
PFHRTQERWRKGS PAEKFRKRIRTPSTPNRVETSRSPPFFGRDKEGRLVPTDGSVVGWFI  
SPGRYSSIGSPCRRTCTSQSNAIITGSVPFEKISLSKGSHRSRMRNENDSYSSSSLIGSA  
SPKRSTSANIQTL LHSVAGRSRSPAVSLFSRMPHGSQSAIRKLRNHCDINGKLSGKTLR  
VCNNKFVYNLHPNCGPCDRCWALASPEEREKFEIRGSHLRIAKTRSGCDRTCTVFPDIN  
DGDSEPVR LCRQCF FATHKCEDCMLQVYRGNNKSVIRSN

>comp11975\_c0\_seq1; 1422 110 3784 LEN=3867; translated  
MMWRISAFAIATLALGNNQHTADAF TAPFSRVASKVSTSL LHETVEKEATAAKPETKEDD  
KPF FSNIMAANRAEIAVRIMRAATEMNAGTVGIYVNEDRYSQHRWGADRSF LLEKDDDEAT  
PISAYLDIDQIIKIAKDADVD AHPGYGFLSESEPEFAQACSDAGIVFVGPTVENLNR FAD  
KTSARQAAIDADVPVVP GSDGALKTTEEVEFVESIGLPV I KASMGGGGKGMRVVVR TME  
ELVPPFFESASSEALASFGDGSVFIERFVDRPRHIEVQIIGDGTGNVVHLWERDCSVQRRH  
QKVIEMAPFTLPDELRSKLHEYAVRLTSQAKYKNAGTVEFLV DSELRPYFIEVNPRIQV  
EHTVTEEVTGIDL VQAQMKIAAGASLDDVGLVQENI SARGVAIQCRVTTENPERDFAPDT  
GTISLYRNSAGCGVRMDGVYSGLKITPYFDSMIVKYTVRGSNFKEATARMSRVLQECRI  
RGVKTNI PFLMNCLEHEDFKNGELT TAFIDEHPELKTSTSYWNFANEYQADPLKLG SSE  
GRLRYLANLAVNGHPAELGADPAKLGSGITTAISSPLIPPSTTEKRSLRSILLNNEGPEGM  
AKAVRDNKGLMIMDTTWRDAHQ SLLATRMRTQEFENCAEATNEVMKNAF SLEMWGGATFD  
VAMRFLHECPWKRLES LREKTPDVPFQMLLRGANAVGYTNYADNVVYKFCDAQKSGIDV  
FRVFD SLNYLENLKLGVDAAGKAGGFVEGTMSYTG DVADPTKGKYNLEYMYMKGRELVD M  
GSHSLAIKDMAGLLTPRATTMLVSALREEFPDTP IHVHTHDTAGCGVASMLAAA EAGADV  
VDGAIDAMSGM TSQPSIGAI AANLRGTDLDTGLDMGQLAPLN TYWENVRSMYGPFFESGQL  
SGSSDVYQHEIPGGQYTNLLFQSKQLGLTEKWPEIKRKYAQANIVLGDIPKVTPSSKVVG  
DLAQFMVAQNLEPHDILDQAETLAF PDSVVNFLRGDIGIPGGGFPEPLRSKVLKGRGLEP  
VEGRPGQFLKEYNFQERESLRASYGKRISEKDLLSYALYPNVFKEWKEYETVYGDVDVL

PTHVFLNPMNVGQEIDLDLGKGRSRVIKLVAIQVDENGSRVEMFEVNGEAYYMSVTDNS  
AAVEGAVREKAGAPGTVGGSPMPGVVVGVTVKPGDEIKEGQTVATLSAMKMETSVPATSSG  
VVKRVLVNVGDKVDGDDLLVEIEV

>comp11976\_c0\_seq1; 666 307 2118 LEN=2323; translated  
MPPSKMKTNALPRTGASSKVKGGRDNAKNGHRS AETINRLNLYKSRAIRNKKGIVIGGDF  
MMGNRAGDREITAETGRIAPDRRWFGNTRVVDPKQLDTFRQEMTEKVADPYSVVLKRRKL  
PMGLLREAADRDAPPSQALLEQEPFSQAFGSKSRRKRVKLDQLMLARTDEDPNKNVVEEG  
RRKGGKAEVVENFSSTQDGEVNPYAKLLSVAKTSHE TYQSRNSREGIVPWGRDSNLTKT  
EGENVDRHEKKDDLFLKGQSKRIWGEFFKVVD CSDVILHIIDARNVPGTRCTMIERHIR  
DNASHKHLVFLNKIDLPVNWVAKRWMGELAKDRPTIAFHASMT HAFGKGALISLLRQFG  
KLHDDKKQISVGVIGYPNVGKSSVINTLISKKSCKVAPIGETKIWQYITLFRKISLIDC  
PGVVVDTAGDTETESVLKGVVRAERLETPEDIQAI VNKVKREHIAGQYKFTKEESKWK  
VTHLLETIATKAGRLLKGGDPCLRSAAITVINDFQRGRLPHYVPPPELKEDEEQIKSSEA  
VVQSIEPETQDLENVGEEENMKTDQTEEDQ TSEKNEIESTENKQAEEGEKDEPIAVAEGE  
WED

>comp11977\_c0\_seq1; 549 1 4067 LEN=4575; translated  
GTRNESVTD SAGSARISNSNNEVLNPTFRPLD G XKSSSDSGNNGRGKMGRSEEREQTRTL  
HDEFVAPPSCWFDTSP LPAGSSSNTTCDRR SRLNSSG SNCYDDEVHETE QYRNGEQSMRE  
AKETIHTEQHERQAMDNQEGDRYQQRKETKEVEDAFRQNP SCYPHRRDSKPIPAISGLR  
SAPPSCGPGCSGLARMPPGADSVVGNTRPSPSWQEISSQVLPAAARELLSSSIRRIYYT  
ARISYSKGRWHRKYSDMGHDAGGFVSPSSNLEFP HHLSELPPFSSLPWVDRQLVREWRT  
YLPETPQGV AETEDFDFEQARTLVPTQIARPVWQKADVCKACHKPFGLRLRHHCRSCGH  
SFCQDHSQSIQRLPHLGYDSDVPERVCDTCKRILEEQNLAE RVVWRLARCRDHTNDRLTP  
YFETGIDSAEVALRLTNAAIAMAKSIPLGAQATIAVD TVDVL RKYGLHGIYGIILRQEF  
LAAADLLRKALGINKSSWPLSVHEL SAAIFYALAQHRAMRGLSPDREHTIHRFRSATVGC  
QGNETPAKSRVGGTRTPAVDPATSHVRGRGCNNVPM AVDSYELSALDFRNSPVVDETDY  
NPVFSNYVKLDEKLQNPVQRDRPQGLASTEIDGQKHEM KHGQKQQQNLPLPNFTPVC  
DPVPDKVLGSLIFYAPIALNFIYATKEVEMQLLAGQQGWRL LYAYLHQD TDSLKTCDRPA  
SAMFVHREHKIACL SVRG TATINDVITDIRQTPVPFPNIDL DRESSENE DGDWNTIDRGQ  
GLALCGMVAASNLFS EHI DSIYFVKQGYRIRLVGHSLGGGVATMIGVLVLRYLEQLGY  
SNPTDGSNS EDIALLKVYAYGTPSCFDSKLANLVDSFVT TVVLHDDVFPRLTPTSCRGLL  
KHLLYIRETWVEKHIQEDLRAVGERARKAWAPRLRQNFALRSSTKSIKKYCKQILRGKG  
KLMSVRNDAMTRASNATSDIDIRDIRGNNSRDECSEFAEIESLTS DPSEWGEKFFVPTTN  
LSMSSSND ETDKHEKVIDETELHDSEAQLLLEFLGAGDNRKEGVIIDGDEFFEPEGNFVA  
DSVDESQSIGGDHFS DP I GELTSSTTIQSSDSWSLDINGNEFSSEKNHSSVDNDNENDRA  
AVVLDESPLHRMFLPGKV VHIYSHRGVYKAAYVPRTFKELRRI SLAGNMLS NHTTKSYFE  
SLLEVQTVRTASESPPKWTA YDEDDTCCCCANRFTWASTSNSEAQEARDKHNCRSCGGLI  
CDPCKNRVPIPSIGLTVPVVRCDRCYNDIMGGVSAASSMTSSVIAADEDEQAVVSFST  
SETSEENKKPERIRQKRS AVVDDLVS KMRSALT

>comp11978\_c0\_seq1; 120 1 1090 LEN=1090; translated  
XRRRPRLVADGGTAPAI IADGANLPLSALFGSQSPRSFWT LSFSGAGHLLPYHLGAAKI  
LLSGETGESLPIESVSGSSSGAIAATVTAWLPHRLDEFADRFLQDRGHAFRN LKGM LQEE  
EEEEAAAEASGMGKEHSRSP LLSICTTRCSDGGIHLFSFDGRRPRREQHERLRKSI EASCR  
IPRSFHPIDMAAGDGLL S RLLGGGSGGHGYPENEGVEIDGAGYADGGIAGPFPPTPLDGD  
PGCAGRIVVSPVSGEYFYRGERERGSAGTLP L LRAIRPGDASRRVPLVGPIELSGSPE  
GPTASGVGSGGDSGSDPSTG P L LVEAVGVRAEPSIQNLRALVTALGVVPSLPPTPWSAGR  
GGPD

>comp11978\_c0\_seq2; 187 1 1183 LEN=1402; translated  
XRRRPRLVADGGTAPAI IADGANLPLSALFGSQSPRSFWT LSFSGAGHLLPYHLGAAKI  
LLSGETGESLPIESVSGSSSGAIAATVTAWLPHRLDEFADRFLQDRGHAFRN LKGM LQEE  
EEEEAAAEASGMGKEHSRSP LLSICTTRCSDGGIHLFSFDGRRPRREQHERLRKSI EASCR  
IPRSFHPIDMAAGDGLL S RLLGGGSGGHGYPENEGVEIDGAGYADGGIAGPFPPTPLDGD  
PGCAGRIVVSPVSGEYFYRGERERGSAGTLP L LRAIRPGDASRRVPLVGPIELSGSPE  
GPTASGVGSGGDSGSDPSTG P L LVEAVGVRAEPSIQNLRALVTALGVVPSLPPTPWSAGR  
GGSDTDSGVLRDWMERQADAHEALIDLHKDRWQ

>comp11981\_c0\_seq1; 331 1 995 LEN=1718; translated  
XQITNRITEQIRRFCCIVGALKDSL L L IIEEDEFDVEISNFVVAAMLSVVISGSHAFTTV  
SPLVQSPPTAASESSTTLQMG LDMVTYMRCEWISAALCTNQT PRTADVALVLCQDGRPV  
TFVVRTIETLITSSLET DGVPVNIRRLQKTQEKSRGSGVSLVDQRADDLKETEDQSVD  
VVL SLQSAAMKENGLDWKKS IQEAARVLKPGGRFLFVEQSELDGESYLEYVGNLGTAI V

TKTETDDGDDDESMSEVYPAFECMGYDDVDLVLVPHVAAVFVKAEDAGLTDAQRAEKESK  
VEEERMAELSISAFERGIKKRRRKKKKKTEE  
>comp11982\_c0\_seq1; 361 324 1567 LEN=1567; translated  
MTPIGNSTWTVASSRFLKTKVKLRRQTFESDNDANTSQEPTHSGESSGSSNNYNGRS  
NSLKSLRKIFPYLSKRGLFSISRKPRDQIRNRPVHRRNDSSSFNGMKTSSDDRSCDFDS  
LDSLAFLEKESFENHLSCKGLEVVYQDVHECETCDNCTSTCDVDNSTNYRASMMKDSA  
RRLVENVESLAVTRTPSFNCMLHANEHYSDSSTLVKRASARITWMDLQRMNETDDECHA  
EIDIESDVEDENGQDDSYNAVGNSEIENDNGNDIDNTVDKDDVMDDVIDTEVKVDTDINNE  
NEDKNEDENGFHNENTSEQQDSQENVFSEDNENHDVQESNPMRRNAVSTFDGSLVKRRS  
GILRIGSKIVQKGESWQELSTLRDSSRSLKRDSTIGAHNAVWGSESTYRSNISGX  
>comp11982\_c0\_seq2; 863 324 3563 LEN=4396; translated  
MTPIGNSTWTVASSRFLKTKVKLRRQTFESDNDANTSQEPTHSGESSGSSNNYNGRS  
NSLKSLRKIFPYLSKRGLFSISRKPRDQIRNRPVHRRNDSSSFNGMKTSSDDRSCDFDS  
LDSLAFLEKESFENHLSCKGLEVVYQDVHECETCDNCTSTCDVDNSTNYRASMMKDSA  
RRLVENVESLAVTRTPSFNCMLHANEHYSDSSTLVKRASARITWMDLQRMNETDDECHA  
EIDIESDVEDENGQDDSYNAVGNSEIENDNGNDIDNTVDKDDVMDDVIDTEVKVDTDINNE  
NEDKNEDENGFHNENTSEQQDSQENVFSEDNENHDVQESNPMRRNAVSTFDGSLVKRRS  
GILRIGSKIVQKGESWQELSTLRDSSRSLKRDSTIGAHNAVWGSESTYRSNRSRRNSGKS  
IIRDMVNRASNCEPDDYEREGSNRGGVPIFAGTSVVSQDFEDFVRNERCKEQLWQFR  
CCDPRYRILKFFNDVANEGATGNSAFERTHVSPLLKYFSRSSVFTVWRPTSKDAIRRMML  
GQGVGKGLDIKGSARKGVLSAFVFPFLQIHKEEDKAKVRTLKDGDIRVFFDNEQNRDTA  
VKTLNEVAKEMEETVRQARDIINNADDYDDDVYENALEKLTLEMSDSTIHTIDDYAASNK  
YGMTVNERLFWEGMVVRQNIERKPGSENDRGRTSMPSFQDMNFDAVRKPKNCVAGGHTRA  
VILQLSNPPRNRVTEPESENTYDPMSPNLNVVAYEEKDPEMDRKRIIPVVSDFDCFIVGSR  
NVNYEEQVPDDQVDVLKWMVEQTEHVLETPEESWTKRWLNVLKDKARLKGCHHEIPTGGY  
SDPKTKFIFKFAIERLSVTGAVRHGAECFNYYFPQDLDDKLLVISDDLPNKYKGCRRWYV  
DQFELQQILKYKISHGFSFPLNPKWILCDPGWKEVYDKLISSDRPDVQKSMRCWYPPESG  
IRESIERIYKHPNGFERQFDESLGPGVARSRSSTRLSYLDGTTAMDIAEQELKYFMILQ  
RAKRLKVVILLNRMLSKIRECREMENHVPISQKEEQNERNKSLPDPCTVAVAVDLQAA  
>comp11983\_c0\_seq1; 543 2025 3683 LEN=3815; translated  
MCSAFPLKKSIEETTvkTKTATGSTSPMISTSPPPSCVGRLSILNNKILKNTADKDATT  
TINYYVIGTSHFRCDYSYKEVSDLICRVNPDGVVIELDPERLLRLTLDDASVRVAAAETTG  
AGAMEMIGKRWFGGDFLSAIEETSKELDIPFLGDEYPLETKQRFIDTVLDANSYNPTNIL  
KALQSLFRTRLDRTTNSNSKVLSINVDVVGTFLLDPRKLLPLVATLSVPCLILIFAIALD  
TTSVFPTNVSPHDGAMLDSEFFQMLATLLSLVLSFFASCKVFNNLIADRDAVIASNIQNAV  
TTLFMLKSKQLIRKRWTFPATEMEDECAHKEAPGNPNKLASSGIPLFTLKNALQDAVRN  
LNLFEPRWLKIDRLLLSNQKQKLT'TNRVAVDPATKASASGEQRIIGCVTCRNKFYSAI  
NVAEASRGFVEGRYADVIFRRRGRFGHLINVTEGSRPSGARKVRAEILGKETFDLSSPTD  
DGNADIEISVTEGYLTASNLVPIDENESTTSTMVKDVPNELNIIVVVGLLHANGVLENLS  
KNASKCQSKIER  
>comp11983\_c0\_seq2; 543 2251 3909 LEN=4041; translated  
MCSAFPLKKSIEETTvkTKTATGSTSPMISTSPPPSCVGRLSILNNKILKNTADKDATT  
TINYYVIGTSHFRCDYSYKEVSDLICRVNPDGVVIELDPERLLRLTLDDASVRVAAAETTG  
AGAMEMIGKRWFGGDFLSAIEETSKELDIPFLGDEYPLETKQRFIDTVLDANSYNPTNIL  
KALQSLFRTRLDRTTNSNSKVLSINVDVVGTFLLDPRKLLPLVATLSVPCLILIFAIALD  
TTSVFPTNVSPHDGAMLDSEFFQMLATLLSLVLSFFASCKVFNNLIADRDAVIASNIQNAV  
TTLFMLKSKQLIRKRWTFPATEMEDECAHKEAPGNPNKLASSGIPLFTLKNALQDAVRN  
LNLFEPRWLKIDRLLLSNQKQKLT'TNRVAVDPATKASASGEQRIIGCVTCRNKFYSAI  
NVAEASRGFVEGRYADVIFRRRGRFGHLINVTEGSRPSGARKVRAEILGKETFDLSSPTD  
DGNADIEISVTEGYLTASNLVPIDENESTTSTMVKDVPNELNIIVVVGLLHANGVLENLS  
KNASKCQSKIER  
>comp11983\_c0\_seq3; 543 2150 3808 LEN=3940; translated  
MCSAFPLKKSIEETTvkTKTATGSTSPMISTSPPPSCVGRLSILNNKILKNTADKDATT  
TINYYVIGTSHFRCDYSYKEVSDLICRVNPDGVVIELDPERLLRLTLDDASVRVAAAETTG  
AGAMEMIGKRWFGGDFLSAIEETSKELDIPFLGDEYPLETKQRFIDTVLDANSYNPTNIL  
KALQSLFRTRLDRTTNSNSKVLSINVDVVGTFLLDPRKLLPLVATLSVPCLILIFAIALD  
TTSVFPTNVSPHDGAMLDSEFFQMLATLLSLVLSFFASCKVFNNLIADRDAVIASNIQNAV  
TTLFMLKSKQLIRKRWTFPATEMEDECAHKEAPGNPNKLASSGIPLFTLKNALQDAVRN  
LNLFEPRWLKIDRLLLSNQKQKLT'TNRVAVDPATKASASGEQRIIGCVTCRNKFYSAI  
NVAEASRGFVEGRYADVIFRRRGRFGHLINVTEGSRPSGARKVRAEILGKETFDLSSPTD



DGNADEISVTPEGYLTASNLVPI DENESTTSTMVKDVPNELNIIVVVGLLHANGVLENLS  
KNASKCQSKIER

>comp11983\_c0\_seq4; 543 2126 3784 LEN=3916; translated  
MCSAFPLKKSIEETTvkTKTATGstSPMISTSPPPSCVGRLSILNNKILKNTADKDATT  
TINYVIGTSHFRCDsYKEVSDLiCRVNPdGVVIEldPERLLRLTLDDASVRVAAAETTG  
AGAMEMIGKRWFGGDFLSAIETSKELDIPIFLGDEYPLETKQRFIDTVLDANSYNPTNIL  
KALQSLFRTRLDRTTNSNSKVLsINVDVVGtFLDDPRKLLPLVATLSVPCLILIFAIALD  
TTSVFPTNVSPhdGAMLDsFFQMLATLLSLVLSFFASCKVFNNLIADRAVIASNIQNAV  
TTLFmLkSkQLIRKRWTFpATEMEDECAHKEAPGNPNKLASSGIPLFTLKNALeQDAVRN  
LNLfEPRWlKMidRLLLSnQkQkL'tTNRVAVDpATKdASASGEQRIIGCVTCRNkFYSAI  
NVAEASRGfVEGRYADVIFRRRGRfGHlINVTEGSRPSGARKVRAEILGKETFDLSSPTD  
DGNADEISVTPEGYLTASNLVPI DENESTTSTMVKDVPNELNIIVVVGLLHANGVLENLS  
KNASKCQSKIER

>comp11985\_c0\_seq1; 353 1 798 LEN=1100; translated  
NEDDDDYDNDNNQSKQSKPHTLPLKETNTRHKMGiWGSVkrKAEQTKMQANILLAKRN  
IEKRKKKfGKEfYNILtNDKQKLLGGTVSAGSLsVfKkNGkEDPLKDAFEKCHEDIRGMK  
ARMDELQRKIDVMEVKGsHTMPDGTMGQkVNKTGKMISDAGISTKIQAQMALIDREMLIR  
KENfGLEAYDMVksTEDKGGKGIKGNISKALVSLSEQeKEIQkVVDtAKNDVEVLEgKIK  
SMERQISfLSDPSETSETQALADnQ

>comp11987\_c0\_seq1; 538 193 1212 LEN=1341; translated  
MPKRKQRNHPVSDDEGDSGGEEAGWTQDSGTGEDVVLfSfQLMPEPSQSVLPERPGERKNI  
DKMDREAQEKSLsAVSRMILFRaFEREPIDRLKIiKdAGISGSDRIGSAAfNEASQRLRN  
VfGFELNRIpKYMENMkGLPAKfKDRHYVLNGAVDDDRGTHSRQIHGVHEGSMIERGFIM  
LVNGLIFCKGESKGNsmRKILeRDLYkYLHRVDDAIPEEPPAQGTsRAKARTQYRSgART  
ETHTPNADALLEQCAHWdYfVKEKATEENCfPQNLeeGDVLYSMGPRsAMEIGRkQIIAF  
CASILGEEPDLsMIGEVDDDIKEEEGPDDCVeeESQLAS

>comp11989\_c0\_seq1; 162 780 2456 LEN=3147; translated  
MAGEGPPVSRKKRNRTPPSSSDEESGKQSQPHIkefYsDDTFNPRRTNDLVVKEMMLLSV  
GARNEIIEEIHGVRcMARKETPELVENALWkMELELARIPPSKkQALVSAQRsDDNNTKS  
SRPSSCPsCYVNTKEfRLKfLRCELFDAQKAALRMVGYLELMVDWLFPTSSHPEILRRPV  
RLSDFDEEEKLLIRKGMiQLLPFRDRSGRRVLAGVATMGIRNnPLMVYKILfYfFLSVAGE  
DTESQqKGVVfLLWPNPDIAEKIQLRFPIHGgGKLcAMVFRWAPIRIVAYHLCTPANVPF  
FQVLRsVfVMTLGGsRLsRLKfHSGEPVELRYQISGYGIPVDLLPLTPTGNVKVSYLRHW  
IRLRATVEEADLDAPCPQNRHQGEHEHEHASNGTNSYKTRGVFTMIeCPGSLDVVFRPGR  
PVMNHpgNVAFRSLIEsMSKTHEtATQTKKSTIVKGVVDEIKTKGGRFLVWDEKHGCWTA  
ILDDNKQRHKVAIAFRNFkSYKKAQGNRQTNTTESTMVTAFEkLSHGGSsGGfSSAIStID  
NKKRKRtTTCSQGAfCFV

>comp11989\_c0\_seq2; 394 553 2229 LEN=2920; translated  
MAGEGPPVSRKKRNRTPPSSSDEESGKQSQPHIkefYsDDTFNPRRTNDLVVKEMMLLSV  
GARNEIIEEIHGVRcMARKETPELVENALWkMELELARIPPSKkQALVSAQRsDDNNTKS  
SRPSSCPsCYVNTKEfRLKfLRCELFDAQKAALRMVGYLELMVDWLFPTSSHPEILRRPV  
RLSDFDEEEKLLIRKGMiQLLPFRDRSGRRVLAGVATMGIRNnPLMVYKILfYfFLSVAGE  
DTESQqKGVVfLLWPNPDIAEKIQLRFPIHGgGKLcAMVFRWAPIRIVAYHLCTPANVPF  
FQVLRsVfVMTLGGsRLsRLKfHSGEPVELRYQISGYGIPVDLLPLTPTGNVKVSYLRHW  
IRLRATVEEADLDAPCPQNRHQGEHEHEHASNGTNSYKTRGVFTMIeCPGSLDVVFRPGR  
PVMNHpgNVAFRSLIEsMSKTHEtATQTKKSTIVKGVVDEIKTKGGRFLVWDEKHGCWTA  
ILDDNKQRHKVAIAFRNFkSYKKAQGNRQTNTTESTMVTAFEkLSHGGSsGGfSSAIStID  
NKKRKRtTTCSQGAfCFV

>comp11989\_c0\_seq3; 162 780 2456 LEN=3083; translated  
MAGEGPPVSRKKRNRTPPSSSDEESGKQSQPHIkefYsDDTFNPRRTNDLVVKEMMLLSV  
GARNEIIEEIHGVRcMARKETPELVENALWkMELELARIPPSKkQALVSAQRsDDNNTKS  
SRPSSCPsCYVNTKEfRLKfLRCELFDAQKAALRMVGYLELMVDWLFPTSSHPEILRRPV  
RLSDFDEEEKLLIRKGMiQLLPFRDRSGRRVLAGVATMGIRNnPLMVYKILfYfFLSVAGE  
DTESQqKGVVfLLWPNPDIAEKIQLRFPIHGgGKLcAMVFRWAPIRIVAYHLCTPANVPF  
FQVLRsVfVMTLGGsRLsRLKfHSGEPVELRYQISGYGIPVDLLPLTPTGNVKVSYLRHW  
IRLRATVEEADLDAPCPQNRHQGEHEHEHASNGTNSYKTRGVFTMIeCPGSLDVVFRPGR  
PVMNHpgNVAFRSLIEsMSKTHEtATQTKKSTIVKGVVDEIKTKGGRFLVWDEKHGCWTA  
ILDDNKQRHKVAIAFRNFkSYKKAQGNRQTNTTESTMVTAFEkLSHGGSsGGfSSAIStID  
NKKRKRtTTCSQGAfCFV

>comp11989\_c0\_seq4; 215 553 1323 LEN=3262; translated

MAGEGPPVSRKKRNRTPPSSSDEESGKQSQPHIKEFYSDDTFNPRRTNDLVVKEMMLLSV  
GARNEIIEEIHGVRCMARKETPELVENALWKMELELARIPPSKKQALVSAQRSDDNNTKS  
SRPSSCPSCYVNTKEFRLKFLRCELFDAQKAALRMVGYLELMVDWLFPTSSHPEILRRPV  
RLSDFDEEEKLLIRKGMIOQLLPFRDRSGRRVLAGVATMGIRNNPLMVVSIVCFVLRVVC  
GMWYMGSGWFVALFV

>comp11989\_c0\_seq5; 394 553 2229 LEN=2856; translated  
MAGEGPPVSRKKRNRTPPSSSDEESGKQSQPHIKEFYSDDTFNPRRTNDLVVKEMMLLSV  
GARNEIIEEIHGVRCMARKETPELVENALWKMELELARIPPSKKQALVSAQRSDDNNTKS  
SRPSSCPSCYVNTKEFRLKFLRCELFDAQKAALRMVGYLELMVDWLFPTSSHPEILRRPV  
RLSDFDEEEKLLIRKGMIOQLLPFRDRSGRRVLAGVATMGIRNNPLMVYKILFYFLSVAGE  
DTESEQQKGVVFLWPNDIAEKIQLRFPPIHGGGKLCAMVFRWAPIRIVAYHLCTPANVPF  
FQVLR.SVFVMTLGGSRSLRKLKFSGEPVELRYQISGYGIPVDLLPLTPTGNVKVSYLRHW  
IRLRATVEEADLDAPCPQNRHQGEHEHEHASNGTNSYKTRGVFTMI ECPGSLDVVFRPGR  
PVMNHPGNVAFRSLIESMSKTHEATATQTKKSTIVKGVVDEIKTKGGRFLVWDEKHGCWTA  
ILDDNKQRHKVAIAFRNFKSYKKAQGNRQTNTTESTMVTAF EKLSHGGSSGGFSSAISTID  
NKKRKRRTTTC SQGAF CFV

>comp11989\_c0\_seq6; 215 553 1323 LEN=3326; translated  
MAGEGPPVSRKKRNRTPPSSSDEESGKQSQPHIKEFYSDDTFNPRRTNDLVVKEMMLLSV  
GARNEIIEEIHGVRCMARKETPELVENALWKMELELARIPPSKKQALVSAQRSDDNNTKS  
SRPSSCPSCYVNTKEFRLKFLRCELFDAQKAALRMVGYLELMVDWLFPTSSHPEILRRPV  
RLSDFDEEEKLLIRKGMIOQLLPFRDRSGRRVLAGVATMGIRNNPLMVVSIVCFVLRVVC  
GMWYMGSGWFVALFV

>comp11989\_c0\_seq7; 215 780 1550 LEN=3553; translated  
MAGEGPPVSRKKRNRTPPSSSDEESGKQSQPHIKEFYSDDTFNPRRTNDLVVKEMMLLSV  
GARNEIIEEIHGVRCMARKETPELVENALWKMELELARIPPSKKQALVSAQRSDDNNTKS  
SRPSSCPSCYVNTKEFRLKFLRCELFDAQKAALRMVGYLELMVDWLFPTSSHPEILRRPV  
RLSDFDEEEKLLIRKGMIOQLLPFRDRSGRRVLAGVATMGIRNNPLMVVSIVCFVLRVVC  
GMWYMGSGWFVALFV

>comp11989\_c0\_seq8; 215 780 1550 LEN=3489; translated  
MAGEGPPVSRKKRNRTPPSSSDEESGKQSQPHIKEFYSDDTFNPRRTNDLVVKEMMLLSV  
GARNEIIEEIHGVRCMARKETPELVENALWKMELELARIPPSKKQALVSAQRSDDNNTKS  
SRPSSCPSCYVNTKEFRLKFLRCELFDAQKAALRMVGYLELMVDWLFPTSSHPEILRRPV  
RLSDFDEEEKLLIRKGMIOQLLPFRDRSGRRVLAGVATMGIRNNPLMVVSIVCFVLRVVC  
GMWYMGSGWFVALFV

>comp11990\_c0\_seq1; 487 40 1284 LEN=1390; translated  
MVDKEDPASSRGLRRRFSGEHKRERECDDAIDFAPVHGKRSSNQDRQVSGSPKFGRF  
RIPAILVTLALAEISRQSTKYFVAKISRLGDSTVYINYYDDNNNNKKDDDDDDHSYYGG  
FQDNFR TNGRNNHYDGDNYFFPERIYYDNTEDYEHDWEVFKTFASNYGSGNELSVLLNC  
PDVHSADRYANVVIPDEESFKLMNKVYHSTMAKYRTNESKYDTFPT EYRSQMTLSTEVRI  
APVVGRGIFATEDIPEGSVWVKSTNTAEFRSGNAYRKFIIGLSMYDKDLACDAILWSYIV  
KASPTEFAACIDMDAGSMFNDAMGVTRD TDVGGIDRDTKYGCTGRSLYATRNIQANTELH  
VDYGT FVQGDWNR LGLCAWGESPPSVGCEAAKATY LKDK EIKKRIAPFPIDAS

>comp11991\_c0\_seq1; 256 1 1292 LEN=1582; translated  
XEDLSLSLSIHL LSV PATLVKGAERHPQK GKPPDPPDRSLALPPERPTTVRATPTTMR L  
RPHRLSVETYGLV L VFFSAAFYALAGAFVKLAHARGGLPSTELVFARGIFQGLVVLGLC  
LCRDAKGQRLIAHPFGRSAEAQRLVWMRGVVIGGAGFLLDYHCVLPLGDAMTLM SLYPF  
VTIVLARIFLGE EIQALHMLTTVASVSGAVF IGQPTFLFGGGAESPTLGYVTGLLGSCC  
LASILILIRKAGKIGVHTFQLLLSWALFGVVF SVVLGPYEGKKGWPSGPAAWGCVLGVCV  
VGAGAHFV LNYAGRLAPAGLVSVVRASDIVFAYGF EILLFAQRPNAWTWIGVALV LGS LV  
AIGIEKIREGQNNPQIPSPKAGDRGGALPAGSGEEDRERGSPPAPETPSHGDEENQGLA  
VVSSQSFKDE

>comp11992\_c0\_seq1; 205 203 514 LEN=563; minus strand; translated  
MSVGSVTGSDIVLILVEARQTNGGDFVECFDLVFSLLVVVDISVCLPSSSAVLEFHDGGH  
ASGSSTA EDEFVSDVSAVSDKLVHGKSGRNHCVVCDVSPFFWV

>comp11992\_c0\_seq2; 635 89 1504 LEN=1562; translated  
MIASRFAMDKLVRNSANVANKLILGRGAARSMSTVVEFEHGRGAWKTYGDIDNIEQQKYQ  
IKTFNKISPVGLSRFHQDQYDVRSGDAANAHA ILLRSHKLQEEDVPKTVRAIARCGAGTN  
NIPVPRMTELGI PVFNTPGANANAVKELVLCGMLLGSRRIVDGINHMKDLGAQGLARERV  
EKDKAMFGGQEIKGKTLAVIGLGHIGAMTARDAEQ LGMKVKGYDPGLSVQSAMKLP RDMN  
LVDSITAAVSGADYISINIPYVKGGGTHGIIGKDVVEHFS PNAVLMNFARGELVDS DAM

KEFLDSGDGKYVTFDPEDLLWDHKNCIVLPHLGASTEAEAEDAAASMAADTIREYLENGTI  
VNSVNFDPDTHLDARPEDTVRFVTVNKNVPGALAAITEAISNEGLNIVQQINHSRGDIAYN  
VCDISTSGNDVVSFKNVQEQITMVEGVISTRIIYGQAGVGYAKNLDGEYFV  
>comp11993\_c0\_seq1; 916 352 3273 LEN=3329; translated  
MKSVMGRLEESISMLQTI GFESFDELVKSTVPADIMTDKPLVLEDPMSESEALNQIRKFA  
DRNKVMKSYIGQGYDTPVPAVILRNVLENPGWYTAYTPYQAEISQGRLEMLLNQTLVV  
DLTGLPMAVASLLDESSAAAEAMQMC FALKGGRGK KKKKKNKFFISNDVHPQTIGLIETRAS  
AIGIEVVKGNHSDVDFSDKDFCGAIVQYPNTYGALES DGESYKSFTARAHEADAMVIAAT  
DLLALTKLAPPSSWGADI AVGSAQRFGVPMGFGGPHAGFLSTSDKYSRKMPGRIIGVTVD  
SSGKPCLRMAMQTR EQHIRRDKATSNICTAQALLANMAAAAYAIYHGPEGLAEIGGRVHAL  
ARVAARELIADGFKLAHNEAGEFFDTIAVDVSSKGLTAAEVQAGAVEAGANVRIIDENTV  
GISMGEGVTRDDL YALLCHA FRLDAPDVTAEDDSLTSIPSKYARDGEILTHPIFHQHRSE  
TQMLRYLKSLENKDLSLNHSMISLG SCTMKLNATSEMI PVTWPEFCNIHPFAPHDQVEGY  
HELIEDLNTDLAEITGF AAVSAQPN SGATGEYAGLLAIKDYLESKGEGHRDICI LIPKSAH  
GTNPASAVMAGMKVVVVNNDKGNIDMEDLTAKIEKHRDNLA AFMVTYPSTFGVFEEGIK  
EIIIGSIHEAGGQVYMDGANMNAQVGLTSPGLIGADVCHLNLHKTFCIPHGGGGPGVGSIG  
VAAHLAPFLPGHVS GPEASGKLCGNELCVPKETGAIAGAPFGSAAILPISWMIKMLGEP  
GLKLATGQAILNANYMAARLNGAYDVL FVGKNGQCAHEFILD LRPLKSSTGVTEEDVAKR  
LQDYGFHSPTMSWPVAGTLMVEPTES EDLQELDRFC DAMLSIRKEIDDIGSGRIAYEDSP  
LHNAPHTLDDLMSDKWDRPYTREAA CY PAPIKSNKFWPTCGRVDNVYGDRNLVCTCPPL  
EAYEDEEEMKKVA  
>comp11993\_c0\_seq2; 916 337 3258 LEN=3314; translated  
MKSVMGRLEESISMLQTI GFESFDELVKSTVPADIMTDKPLVLEDPMSESEALNQIRKFA  
DRNKVMKSYIGQGYDTPVPAVILRNVLENPGWYTAYTPYQAEISQGRLEMLLNQTLVV  
DLTGLPMAVASLLDESSAAAEAMQMC FALKGGRGK KKKKKNKFFISNDVHPQTIGLIETRAS  
AIGIEVVKGNHSDVDFSDKDFCGAIVQYPNTYGALES DGESYKSFTARAHEADAMVIAAT  
DLLALTKLAPPSSWGADI AVGSAQRFGVPMGFGGPHAGFLSTSDKYSRKMPGRIIGVTVD  
SSGKPCLRMAMQTR EQHIRRDKATSNICTAQALLANMAAAAYAIYHGPEGLAEIGGRVHAL  
ARVAARELIADGFKLAHNEAGEFFDTIAVDVSSKGLTAAEVQAGAVEAGANVRIIDENTV  
GISMGEGVTRDDL YALLCHA FRLDAPDVTAEDDSLTSIPSKYARDGEILTHPIFHQHRSE  
TQMLRYLKSLENKDLSLNHSMISLG SCTMKLNATSEMI PVTWPEFCNIHPFAPHDQVEGY  
HELIEDLNTDLAEITGF AAVSAQPN SGATGEYAGLLAIKDYLESKGEGHRDICI LIPKSAH  
GTNPASAVMAGMKVVVVNNDKGNIDMEDLTAKIEKHRDNLA AFMVTYPSTFGVFEEGIK  
EIIIGSIHEAGGQVYMDGANMNAQVGLTSPGLIGADVCHLNLHKTFCIPHGGGGPGVGSIG  
VAAHLAPFLPGHVS GPEASGKLCGNELCVPKETGAIAGAPFGSAAILPISWMIKMLGEP  
GLKLATGQAILNANYMAARLNGAYDVL FVGKNGQCAHEFILD LRPLKSSTGVTEEDVAKR  
LQDYGFHSPTMSWPVAGTLMVEPTES EDLQELDRFC DAMLSIRKEIDDIGSGRIAYEDSP  
LHNAPHTLDDLMSDKWDRPYTREAA CY PAPIKSNKFWPTCGRVDNVYGDRNLVCTCPPL  
EAYEDEEEMKKVA  
>comp11993\_c0\_seq3; 933 1 3232 LEN=3288; translated  
XNILLLPDFTTGALVTWEHHI ENKGTXNEIFFMMNRRL LASSSSSLQAIRRRLLECPSPS  
LSVGRINRGAFTAVGTDVGTLRPFHAGSACASSSDALDMTDSFARRHMGPRLEESISMLQ  
TIGFESFDELVKSTVPADIMTDKPLVLEDPMSESEALNQIRKFA DRNKVMKSYIGQGYD  
TQVPAVILRNVLENPGWYTAYTPYQAEISQGRLEMLLNQTLVVDLTGLPMAVASLLDES  
SAAAEAMQMC FALKGGRGK KKKKKNKFFISNDVHPQTIGLIETRASAIGIEVVKGNHSDVDF  
SDKDFCGAIVQYPNTYGALES DGESYKSFTARAHEADAMVIAATDLLALTKLAPPSSWGA  
DI AVGSAQRFGVPMGFGGPHAGFLSTSDKYSRKMPGRIIGVTVDSSGKPCLRMAMQTR EQ  
HIRRDKATSNICTAQALLANMAAAAYAIYHGPEGLAEIGGRVHALARVAARELIADGFKLA  
HNEAGEFFDTIAVDVSSKGLTAAEVQAGAVEAGANVRIIDENTVGISMGEGVTRDDL YAL  
LCHA FRLDAPDVTAEDDSLTSIPSKYARDGEILTHPIFHQHRSETQMLRYLKSLENKDLS  
LNHSMISLG SCTMKLNATSEMI PVTWPEFCNIHPFAPHDQVEGYHELIEDLNTDLAEITG  
FAAVSAQPN SGATGEYAGLLAIKDYLESKGEGHRDICI LIPKSAHGTNPASAVMAGMKVVV  
VNNDDKGNIDMEDLTAKIEKHRDNLA AFMVTYPSTFGVFEEGIKEIIGSIHEAGGQVYMD  
GANMNAQVGLTSPGLIGADVCHLNLHKTFCIPHGGGGPGVGSIGVAAHLAPFLPGHVS GP  
EASGKLCGNELCVPKETGAIAGAPFGSAAILPISWMIKMLGEPGLKLATGQAILNANYM  
AARLNGAYDVL FVGKNGQCAHEFILD LRPLKSSTGVTEEDVAKRLQDYGFHSPTMSWPVA  
GTLMVEPTES EDLQELDRFC DAMLSIRKEIDDIGSGRIAYEDSPLHNAPHTLDDLMSDKW  
DRPYTREAA CY PAPIKSNKFWPTCGRVDNVYGDRNLVCTCPPLEAYEDEEEMKKVA  
>comp11994\_c0\_seq1; 511 602 2137 LEN=2532; translated  
MRLKIRLTVRTDLDEVTVQQRV PVLFKINWKM CNDCDRQYTNRTWQALVQLRQKRENGSS

RKGLAALEMALSKPSNRDLRRTVLKIDSSRNLDFYFSLPQAQHFAHFLARLAPIKIKT  
SQKLVSTDAKNNTANIKHTLTCDMVPLCRDDLVLVQKESRNLLGGRLALVTKVSSVVHLI  
DASPKRSPTNQIDRADITAEAYHKNGGGGGTASANEKGCYSILQTSERLVPFVVLDMELC  
GDNKDHRQYEGPSSGVEKYALADVQLARESDLGANDEILSCVTHLGNLIQPGDVVLGYDL  
VSTASNLNTTIHKASSAKKGSFSGASSVVGLEEVLSNVVLQDVVLVKKISAKEQKQRE  
LAEDMATRQINHDHEMDATLNDGGGKDTARRSGKMSKKKLRQKRDKKRRELEESAARM  
GFMDDFAEAEAYQDMVNEDDEVENNDNFAKQLEDDPELAAELRAVEKELAAAYPDENKK  
SDGDGNNLQENDSNKEKEGQTNKTNLAPIEE  
>comp11995\_c0\_seq1; 359 1 1231 LEN=1321; translated  
XFADEMMPLLRGRPVREIVRLRQAVLSELAKDSARGSSGGSDGESNSESDGDGESNSES  
DGDGHGDETTGHLRRLCNEFDAGRKKSSDVSLSINVSQDVGGLDHSVRAEIMDAIELP  
LKHPRLFPRNTGRSGILLFGPPGTGKTLVAKAVANECGLPFLSVKGPPELLGSYVGESEAN  
IRRVFASARLAASNPLPIAASILFFDEMDSLAPRRGETDHGGVMERVVASLLAELDGGS  
SGSPQNGRVFVLGATNRPDLLDPSLLRPGRLDRLVYMGIPDTHGERTRVLASQLRKMKL  
EADPMDLAGSVVERLPPRLTGADMSKLSGAMLHAIIRRLCLEADRARDERGGGVSIDRIL  
EEWGEEKCTPVVTLDDLLASAEVSPSVSEEMKRYERLRMEHCSSPRAT  
>comp11996\_c0\_seq1; 228 42 1204 LEN=1204; translated  
MTTKKSAIFPEAKHFVSREQVQFEFSSCVPPVTVDPGDLVHVQTNDCFHGRVQPESSLSS  
WKRQRSYKQQASTQLENDSDKCGGGSFNGSLLDEIPRNRNPISGPIFVRGAEPGDIL  
AVTLLDIRPRGIGIACCGSSAGQLCGWMKRKSTTIRFFDLSQCGEIVTMRDLGKSDVKEG  
LVLESTLSRSLGPIISFPASPMLGVIGVAPAGEDDPIGTIPAGKHGGNLDNKANCIGSTI  
YFPVNHGALLSMGDMHASQGDGEISGTGIEIGGDVLLRCEVLKQEDVYGDDESSREDQR  
LEYPVTEETHWITHGVAVCDFPETTSIACREAAKILVGQWGFSPPEESFLFLSVKGDLMG  
CQSCHPDVGTQIAKVSVARLNDLCPRAX  
>comp11997\_c0\_seq1; 653 1 1777 LEN=2071; translated  
XGGKQVLACCKKTWRLKKKRKLHSDQNHPIRKTQRFRIIDILHTLPLVTMSNHGRFLLR  
AGFNALLGAGRKQALLPVGAVVSPSSLPDSQREDSYGQKRQRPFLTSSSKRLFHSTAN  
REILPLVAAGAVVFIGRYSWKALNRMDDEDWEDYLWELKQYERARVQAKADATITIGVDLG  
TFYLLKLSRVNKNKPLIETAQGDRYRNGILSQDDDVIMGKPALEKFFYEKTDEKTDDGV  
ENNDSGSNKVLPYMELOQNESNDDATALVQKVFPVAEAMERVMSDGGSDASSDEKKNL  
RTVLTLPPLFYNKHGDGLFRKNYHDNSHOTITVPEPVAAIWGAQALNLIPTPESKEENST  
SSTMVMDIGGLASTISLVRDDKVVASVSLDGIGGENFVQQLVDRILVETGDETMGKEPMT  
LTMIQTNARSSALELVNKTQSKIHIPFLYMGRRPDDPHLETTISRRAVLEQAVQDGSKSI  
IPKLVEENMLSSSLPIPKDVTSLFTSAVTKVLEESNEIPTNIERILLVGGSRHKLFEEA  
CKESITALMGPNYQSKIVIPETSLRAELTALGAASLLPNFDYDYDKGLENV  
>comp11998\_c0\_seq1; 217 1 233 LEN=818; translated  
XKKKKKNKTTLNLFGEVVGRHLHIEHQDVTMGGGRKSKALRRAEQTAKEEENEALAEELGRE  
REEMQDEFKQTYGFNKE  
>comp11999\_c0\_seq1; 233 248 1678 LEN=2220; translated  
MFRRRIPKTTDSISIEGTGIVVEESNGHGRSGSSSVAGLKTFRNRTRRSKMSSSLGSLPKN  
ILCSPSTTTTVALFAFAAAWAFLLLSYRGGITAAGNETWYPVPLIGFVRSELALGCFVLC  
WIPFWVLATGWTLAGLLLLSPLAMLICVLVMPGPLPIIFRTVRCCGILTAFLALLVFPFW  
KRPQAAVVVFLAIAVATPYLPEFAKPMFSAIPVEEIEYEVINYEPDIIEDVGASALEAGP  
LLDFVWENRNDWVKVSHGRALGYFVFGKNFNHDQRNQVINEYTLRSGFRSTSYRETWGES  
DYRLYFPQKRKEVSTKFRERFGSSLASIYARVLGVDPGFIVLGDGTGLAKQERMGFPAVK  
IVFPSLFWHFNPNHTDNYLYQMDIIDGRQCDKDRQRTFLIPLTEPPGAGLYYWFGDGTR  
VDVDYKGVNVYSFEVSVLHAIRPFYFEWSWGSMMDSRVTIQAFGIPCGDYWYITH  
>comp11999\_c0\_seq2; 196 248 1051 LEN=2423; translated  
MFRRRIPKTTDSISIEGTGIVVEESNGHGRSGSSSVAGLKTFRNRTRRSKMSSSLGSLPKN  
ILCSPSTTTTVALFAFAAAWAFLLLSYRGGITAAGNETWYPVPLIGFVRSELALGCFVLC  
WIPFWVLATGWTLAGLLLLSPLAMLICVLVMPGPLPIIFRTVRCCGILTAFLALLVFPFW  
KRPQAAVVVFLAIAVATPYLPEFAKPMFSAIPVEEIEYEVINYEPDIIEDVGASALEAGP  
LLDFVWENRNDWVKVSHGRALGYFVFG  
>comp12000\_c0\_seq2; 123 1 626 LEN=626; translated  
XCYQFVAIEVNNKDRTOAATIKDQRSRIITYQTTSRKPQLIMNFVSWIVASILVLATFG  
KTVDAGKEDCYDGVWTSHGKTYKGTETCRCNDGGWVECEVHSSSDKKNACYWHGKAYA  
PHQWHEDKIQKCYCEKGSWRDCKDLKNDKCLWNGHYWESGKWHEDNGEKCYCWNGKMQDC  
SNTNKKGCWWNGKRYDEGAWYEDHDEVCY  
>comp12000\_c0\_seq3; 125 1 614 LEN=614; translated  
XCYQFVAIEVNNKDRTOAATIKDQRSRIITYQTTSRKPQLIMNFVSWIVASILVLATFG

KTVDAGKEDCYYDGVWTSHGKTYKGTETCRCNDGGWVECVESHSSDKKNACYWHGKAYA  
PHQWHEDKIQKCYCEKGSWRDCKDLKNDKCLWNGHYWESGKWHEDNGEKCYCWNGKMQDC  
SNTNKNKCWWNGKYYDEGHSEYEDKN

>comp12000\_c0\_seq4; 365 1 1203 LEN=1288; translated  
CKWNGNWDGEDLKKDKCWWNGKYYDEGDWYEDKNEVCYCKWNGDWGDCKSLKQRERCWW  
RGKGYAVGEWYEDHNQVCYCNSGKWKDCKILKQEKCWWDKGYEPGMWYEGHKELCYCN  
YYGDWTDCEGVRSEKCWWDKGYEPGAWYEGRDHVCYCNHNGEWEDCEGVRSEKCWNNK  
GFNSGKWHHEMNEKCYCDDDDGDWVDCDVKDVRDKCWNNKGFDSGSWHEVHNEKCYCTRDG  
EWDVCDLHHGGDNCKTISEIACGRDNLVSLCDALHRADLYDTLDDLRTFTLFPNDKA  
FGAFLDWRRLGDLRQAEVVDLLLTHVAGRVLSNDLSQRCSDLLDMESDRQTRTICKNAK  
RDVFQKGEKSKDDMPLIVDSDLRACNGIVHIMDTVILPK

>comp12001\_c0\_seq1; 349 168 1341 LEN=1378; translated  
MKSLQATLYRLLLIIGVGLWTCNADEKSHSRMRQNVRRRTRFIIANGIPISSHLPEEPI  
GRIEEDDTYIDYGEIFSMPTDPSKPKPKPKPKPKPKPKPKPKPKPSNSPATPPTRED  
RSMLIQSKGITSIERSRDILTELLMVSDSNLVNPATSQYRARNWLDNVDAIVCPDNT  
DRILQRYKLALLYELGGSEWTS CRAEEDIANSEEEEECPGKPFLLSEYNECEWGGMFCGG  
NYDSVTAEWLDAFYPLELMNLQSNLKGELYDEFYEFYFTSLKEIFLNNNNLAGTIDNKIGS  
LKTINVLQLELNSFTGVPVPEGLFEMELLAGLSLRGNQLTGSLELLCNARDERRNEFGSY  
LVLNMEADCLGDPKLVNHAARASDNMVLV

>comp12003\_c0\_seq1; 425 115 1842 LEN=3218; translated  
MARRMKDNMLMQMLFAFIIFLRLSIVGGLSNASTNFSQMTPGQSSALCAKKTQIIVVGGG  
PVGLSAALLLANQGYDVTVLEATETTKIKIFNPALAYLYNINARGQIFTKKIPSAHKKLV  
ERSVSSTDTGFLAPADLEKEIKYPLVPSFGDSDSYWIPRHEMVLLWEAVDEHNKEYASG  
NNHNRVKGISYEHGVQCLNVHPCAHEHNSVSVVTKNKGDKGKKTTLRAELVIGADGIDSKV  
RECLKQRSGLFQSWNYNKNKFKMRKWI SPATGLKALKALQLPADRYLVKDASGNKVATKKN  
DFVSVRGKRVGPLDTLSLSCLPVSESTKIRPGNCITRPNHVLWMTMKNKKEVKAWFKDNYP  
RLDLDDIISDDEWQRFADGLTFPPCQYSPGLMASSRDNRGIVLLGDAHSFSPDIGQ  
GINAGLMDAVKLECLANTSPDKKSATLAENNLGAALKQYERIQAPETRALVRLARFGSP  
YQYNQPLLKDRIGKKLWTANVLMRVLFNKLTFGIFPKPVVMNVSSKDLTYRQIARQADFA  
TFGLVFALMFVSVLKFVMRLPFIRVQLVLPQVLTTFMP

>comp12003\_c0\_seq2; 412 115 1939 LEN=3038; translated  
MARRMKDNMLMQMLFAFIIFLRLSIVGGLSNASTNFSQMTPGQSSALCAKKTQIIVVGGG  
PVGLSAALLLANQGYDVTVLEATETTKIKIFNPALAYLYNINARGQIFTKKIPSAHKKLV  
ERSVSSTDTGFLAPADLEKEIKYPLVPSFGDSDSYWIPRHEMVLLWEAVDEHNKEYASG  
NNHNRVKGISYEHGVQCLNVHPCAHEHNSVSVVTKNKGDKGKKTTLRAELVIGADGIDSKV  
RECLKQRSGLFQSWNYNKNKFKMRKWI SPATGLKLVGLFIDLAAFPVKLDLTLFLKRLIV  
LVLLIHFALQLPADRYLVKDASGNKVATKKNDFVSVRGKRVGPLDTLSLSCLPVSESTK  
IRPGNCITRPNHVLWMTMKNKKEVKAWFKDNYPRLDLDDIISDDEWQRFADGLTFPPCQ  
YSPGLMASSRDNRGIVLLGDAHSFSPDIGQGINAGLMDAVKLECLANTSPDKKSATL  
AENNLGAALKQYERIQAPETRALVRLARFGSPYQYNQPLLKDRIGKKLWTANVLMRVLFN  
KLTFGIFPKPVVMNVSSKDLTYRQIARQADFA TFGLVFALMFVSVLKFVMRLPFIRVQLVLP  
QVLTTFMP

>comp12003\_c0\_seq3; 425 115 1842 LEN=2941; translated  
MARRMKDNMLMQMLFAFIIFLRLSIVGGLSNASTNFSQMTPGQSSALCAKKTQIIVVGGG  
PVGLSAALLLANQGYDVTVLEATETTKIKIFNPALAYLYNINARGQIFTKKIPSAHKKLV  
ERSVSSTDTGFLAPADLEKEIKYPLVPSFGDSDSYWIPRHEMVLLWEAVDEHNKEYASG  
NNHNRVKGISYEHGVQCLNVHPCAHEHNSVSVVTKNKGDKGKKTTLRAELVIGADGIDSKV  
RECLKQRSGLFQSWNYNKNKFKMRKWI SPATGLKALKALQLPADRYLVKDASGNKVATKKN  
DFVSVRGKRVGPLDTLSLSCLPVSESTKIRPGNCITRPNHVLWMTMKNKKEVKAWFKDNYP  
RLDLDDIISDDEWQRFADGLTFPPCQYSPGLMASSRDNRGIVLLGDAHSFSPDIGQ  
GINAGLMDAVKLECLANTSPDKKSATLAENNLGAALKQYERIQAPETRALVRLARFGSP  
YQYNQPLLKDRIGKKLWTANVLMRVLFNKLTFGIFPKPVVMNVSSKDLTYRQIARQADFA  
TFGLVFALMFVSVLKFVMRLPFIRVQLVLPQVLTTFMP

>comp12003\_c0\_seq4; 412 115 1939 LEN=3315; translated  
MARRMKDNMLMQMLFAFIIFLRLSIVGGLSNASTNFSQMTPGQSSALCAKKTQIIVVGGG  
PVGLSAALLLANQGYDVTVLEATETTKIKIFNPALAYLYNINARGQIFTKKIPSAHKKLV  
ERSVSSTDTGFLAPADLEKEIKYPLVPSFGDSDSYWIPRHEMVLLWEAVDEHNKEYASG  
NNHNRVKGISYEHGVQCLNVHPCAHEHNSVSVVTKNKGDKGKKTTLRAELVIGADGIDSKV  
RECLKQRSGLFQSWNYNKNKFKMRKWI SPATGLKLVGLFIDLAAFPVKLDLTLFLKRLIV  
LVLLIHFALQLPADRYLVKDASGNKVATKKNDFVSVRGKRVGPLDTLSLSCLPVSESTK

IRPGNCITRPNHVLWTMKNNGKEVKAWFKDNYPRLLDDDIISDDEWQRFAEADGLTFPPCQ  
YSPGLMASSRDNRGIVLLGDAAHSFSPDIGQGINAGLMDAVKLECLANTSPDKKSATL  
AENNLGAALKQYERIQAPETRALVRLARFGSPYQYNQPLKDRIGKKLWTANVLMRVLFN  
KLTFGIFPKPVVMNVSSKDLTYRQIARQADFATFGLVFMFVSVLKFVMRLPFIRVQLVP  
QVLTFFMP

>comp12004\_c0\_seq1; 529 25 1512 LEN=1811; translated  
MTIRSRCKVSTTILFIASSVALACFLPWSCSASSEVVLDAASGEAEDSGYYDGDGNDDAID  
DHYYDNSVRENVYWEYEGLEDFPYFPEEFAAMQKHIDPMDAVFEKMDDQGIHPGHFILDD  
FVVGGVNLATYQVEHPPFQLYEDFDIGSYVVDGPRTMSWKQLVGIRNGLERPSLSWYVDK  
VARKRWFREQGIYPQPETYLAKYKDELSDTGRKEDETKAILAHLPTHEHGFCAPKPTHMSMT  
MGNWLVDIPPNRSGAGADAPKYTNRAQRLAASGQGGAYDPRVCADSLAEGLOREATEIE  
SWALKNVRPGIVIEELYSAGEDRDLPPHEFCMFVVWGRVYAGQWNLVGEDRYMGGFFYRD  
GSAAPGCPLDRLPDWVPWNEIVEIAESLSQHKDMFRVDMFVGVPRYSGEDEGVRIAVSES  
EVHPTTFMFCNPFIAEEMARLWVAGYRIGSYEVIPNDEVFVGFYGKSVPGGTPGGLHRKKA  
SSSGRRATTESGYVP

>comp12005\_c0\_seq1; 1391 334 5043 LEN=5266; translated  
MPSDSVMDFPSSLRSRYPADLSRIVPKERPKDFLKKDHHNHEGGDHRGDKKEGSSNSDD  
RKAENHFAALIGTTAGVSEDRFLSKLERDEKANRLVCQLVMKTPYRKYLRDDDENPKE  
EAAARLEWSTKMMGDNADLRSYAPKIKWVSPLASALSLSPPIDNSAVHSTSTVTIEEIT  
EDENTDGDGNGNRKATSDSDSSSSCINQEKSKDTAQVDKSTDTQTKKNKKEKNPFASS  
FHQVELMDWESNIDWQGFKEPSHNKSLASMNNDNTGANKATPHPSSTSNASTTTIDATAT  
DAMSLLEKRRNPFLNISFEKLSWTGDPDEALRKARSEPLILELGVAGRSVAKYVLPNH  
RPTPYAKSNEYQARLGLGDGKSKGARTNGAVRSTAELNRGTLHADKEELQRFVESRQIKR  
RQMAKDKTNRVKDAMGTLSSLGRGRGRTITSSLMGPGGTERTGRPARHVGASSHEHEYIE  
QLEMITNHTLVKNPSKIMLREYNRPKLPGTIVQTSLSWQFCIRYNGPSAADKQKPKETNS  
ASSYHSMIMGTIYAGAVSKTKLRTEADLTPTEGKLVFFFEYCEERPPLQLTKAMASKIITYY  
RGDKSKCPVSAGGDRPTRRKRQANNAGLGAEKKAGADGANTNSVDKPPRLFGPNTETS  
ITDVGKAPKRSKDDRKNERENYNIPEGVTEILHQKAHGPFIGEIEEGQSVTGLISNLF  
VAPIFQHKPEPTDFLMIVGRNSGASVAGRAESLSVVLDRMPSSMYTVGQTEPRTRVYAPN  
TQGEKNFTGPLLSYQIAKVLTRSEMKGHGLDFETLGHRTFPKLGSGNGMRQRIKHVALYD  
KNTQIWTAKRIGQDDYPGVEALGKQLSPEGVVAWEVADSARQRMNDLGIHQLYAGSHATA  
SVGVTMFYLAGQMISIEKLANVANLRDFTFKSNKAVKPLQRKYEEAANELEIMSNSLKQ  
RHDVAKFIEHELQALAPWHVTGEFTDVHVKGDSGMMKLTGLGDPGSIKQGFSLRADDK  
ANKHAGPIGQTAEMKKITGTSDDLRKLTMKQMGNILKKGMPQKQIDTLKRWRDRVHVIRD  
ISTMGASDVGGLERFARKEKINLNQKKEYTDRIQVIWKSQIDALSSRPGDGRAEEDN  
GDAQSDGEEAAQKKEAAKDDSDSDDDDFLKGLEQDLIVQSKANQLVAGQSGGDASLG  
QLHLATQDQAINNDARDLAAAFQRQRNEERAAQEGMTSHSPTRSPGVGAPQVNRKVIQRV  
TKTYPTGHSITVFKFIVKPEEVGQNLARMNREEYDPPKKSIVRDPDYMPEKQIGHAMFSD  
EDDFEFTTRGSRSQGTRKRKVGRRGRAAGRTKKKDLQFGKLSKVTKEQRIKKRREDE  
MEVYSSFQRRQGTSNRKERGSIRDRRPHVIFANKLESIRGAAESRPSASAFHKPVSRRAY  
PTYEMISHPMMATIKSKIEKYEYRSAESLLKDFDLIKSNAIKFNAAHSLAVEASAIY  
DMVKSMIESNKAELSHLEQAVADQMNTPQKKKSSSKSSTTSAGAGDVSQLGSWSAADIN  
LDDLSDSD

>comp12007\_c0\_seq1; 135 733 1206 LEN=1475; translated  
MAHNLARHQGERMSSSVFFSILGILSLLDIPSGGLLYLFTPAVQLVGQLPNSRTQSEAD  
QIGMRLAAEACYDPEALSRLFRMETAGASKPEFLSTHPSEQSRIREMOKWLPPEKKLF  
HMHDGERCRAFRQKLIYTTSTNMPQQFHGSDGKPCWK

>comp12007\_c0\_seq2; 135 973 1446 LEN=1715; translated  
MAHNLARHQGERMSSSVFFSILGILSLLDIPSGGLLYLFTPAVQLVGQLPNSRTQSEAD  
QIGMRLAAEACYDPEALSRLFRMETAGASKPEFLSTHPSEQSRIREMOKWLPPEKKLF  
HMHDGERCRAFRQKLIYTTSTNMPQQFHGSDGKPCWK

>comp12007\_c0\_seq3; 135 570 1043 LEN=1312; translated  
MAHNLARHQGERMSSSVFFSILGILSLLDIPSGGLLYLFTPAVQLVGQLPNSRTQSEAD  
QIGMRLAAEACYDPEALSRLFRMETAGASKPEFLSTHPSEQSRIREMOKWLPPEKKLF  
HMHDGERCRAFRQKLIYTTSTNMPQQFHGSDGKPCWK

>comp12007\_c0\_seq4; 154 1 1283 LEN=1552; translated  
XRFLQFLDDSWTHASPFALASKEREDGEHDDNDGSSVAGPSCATVDFYRWDPWGRIR  
SRKVSPAFGNTFSDEELVEARSRRFSFSSKQPGQRNHRRFKLNPHVHATNNKHRSSSGHRY  
RHHKQHIPNYVYLLGGLPVVGGIFLYVRFQDVVPLTGRRRWLATQPETEKRIGDENYRQL  
LSQYGNNVLPKQHPTTLMIERVGRRIFLAARKFAIENELRWFDAKHATFTVVNSHQANVF

VLPGNHVFFLTGMLEHARTEDEIGGILGHEMAHNLARHQGERMSSSVFFSILGILSLIID  
PSGGLLYLFTPAVQLVGLPNSRTQESEADQIGMRLAAEACYDPEALSRLFRRMETAGAS  
KPPEFLSTHPSEQSRIREMOKWLPEEKLFHMHDGERCRAFRQKLIYTTSTNMPQQFHGS  
DGKPCWK

>comp12008\_c0\_seq1; 963 374 4168 LEN=4233; translated  
MEVIDGDGMIVSDLDISKTPLGANEDMENSMDVSNAGDILVDPTQGITTTESVVAVTTTC  
GIATQRHTPQTLGKEDLDVPLNYDHSSLSNELDQTEKTKETIKEKPLSSIIATNLDQDT  
KISTRSSRSIAIVVPGDEEDSSTEPVTDGRMEIKKTLNFIASETTKVNNAASSKLDLTLFA  
SGAETMVDSFGNHLDEAADAKSASNLIIDTSGPSQEAELQVMEVSSSLDRSSSDQKGLSCF  
HDSHYNKVNSNSVAKEPGTQPLAQPPQHPSSSTWGMGNRHQEKHYLLMSLPIDSLHSIA  
SFLTPIEWRDFGQCSSGNTKISKEIFRRVRMHGFRCAFEVVTALKCGQHADAKELCALYV  
SAGVPIYPHSLGHSYHTLIWRLSIEVKQLQEQQTKNSINSVDISTPPNAPGAPRAADETI  
PVDFYNERDDMRMREELILGSGRVGLTYLEEKAMHKLNSKYTESHADRIIRSVNWRRRST  
NARGLPQVPFMPFPPTASGRRETHADWHAAGRCASSRGQLSRSNSFSGSRFRTPSTIL  
KVHRHLLDQHLLGRSGVDDGEGSMPTPPVSLSDAFFHPPFFSFLSTEETMRNRSNGSDSMG  
RTTTGNTSLLPAYYQPVSGRNLESEDTNDARRAGSMGSNYTDDSDSDFEAEMHPRPDI  
MEPLRLRNADEIVAAGAAMQPPAMVPPVPMVSLGTRPTSASASIISEMRKSSHQLTVQS  
GILSNIELDVYSTSSKSLKIGDDSKAGRQLSHYLNKGRFAAYHRCLERHISKNDNDGFEEC  
ILDFWDEFPLQATANIHYDYKHTAVPRISRLDEFLLTKPCPKAVGIIQCEIERVKLGSKNSM  
KGRFFPTYEYRLFIRHRPADPMSDLFDSQGLIDGIERRDTVLMMAKNRGRKHTESSMQAS  
KKGSNYYLSLPLQDDLDLHRSVNRLEETKKPSPNGAGLRTCSSDLGQLGRLQSNFVG  
TEFQIFTSHLSMMRKKPDSLLSKSMHSPMTSDDEALS DSGRQGESRRRSCFGRLSLRGK  
SNNDGRWTFSEPPQPHSSPLALLRPRSGDATPGRNRKVSAAESFESKQYIAETQPLFYE  
QEDGAIITYANLLGSRPRIMDVCIPRVNHDGVEWVKRYLENCKDHDGSSKDRLLNHLKQ  
LQQNGQMDHEGRLINPASDDPEVIATGEQEYSPPGDFGLMTLQNRPPWWNVELGSLVNF  
GGRVSVASVKNFQLCDRRDQDHIMLQFGRIEGRHAFTMDFRYPLTAVQAFIAISSLQSK  
ISFG

>comp12009\_c0\_seq1; 234 1 670 LEN=1023; translated  
XLPSDGPMEPSAVPSFSPSVVPSDWPSMEPSTIPTSTPSTSPSASPSALPSDGPSTLEPT  
TVPSSSPSVYPSDGPMEPSTEPTIFYEMEPQNCATNFTLVLTDKYPKETSWSLTYEAN  
GMVIGEGSKYKNDFEEHEESVCIRYDACYMFQINDKWDDGICCSNGQGSYSGYLDKEGME  
SLPIPGLNGGAFETTRRHKFCLENGDLVEGLGSAIGVRFNGA

>comp12009\_c0\_seq2; 234 1 670 LEN=1052; translated  
XLPSDGPMEPSAVPSFSPSVVPSDWPSMEPSTIPTSTPSTSPSASPSALPSDGPSTLEPT  
TVPSSSPSVYPSDGPMEPSTEPTIFYEMEPQNCATNFTLVLTDKYPKETSWSLTYEAN  
GMVIGEGSKYKNDFEEHEESVCIRYDACYMFQINDKWDDGICCSNGQGSYSGYLDKEGME  
SLPIPGLNGGAFETTRRHKFCLENGDLVEGLGSAIGVRFNGA

>comp12010\_c0\_seq1; 347 140 2069 LEN=2249; translated  
MPREIITLQVGQCGNQIGGEFWKQLCAEHGIAPDGTGPKNPWDDPSNVNIVGNYHNNARA  
QAQAQTQTQAHQAQTPGPPQFSSGASRGGTSSVAWGNHRGGSFRADDRKDVFFYQGEDR  
YIPRALLMDLEPRVINKVAYTGAYRRLFNPNENLVAEDGGGAGNNWASGYRQGAHEIETI  
LDMIDRESNDSLEGFVLTHSIAAGGTGSGMGSFLLERLNDHFPKCLVQTYSVFPPSWKDQ  
SDVVVEPYNSLLTMKRLTLNADAVVLDNSALNRIAVDRLRIQNPSVDHINSLVATIMAA  
STTTLRYPGYMNDWIGLLASLIPTPRYAPYAMAAPPLRVFGLSVGTESGISTPCAQES  
GLKRFRLEGEHFSFCIYLTPLYLSHTRTHRPNNKSRCHFMTGYTPLVLPPEASTGSAGSRNV  
PGAMDSSVGDLSANDNRMKQHEQGQNTGIRKTTVLDVMRRLTQPKNIMVSNANMRGRGSG  
CYISILNIQGNINPTQIHKALQRIREKRHYGHAHGDIPFIPWGPASIQVAMARKSPYL  
QHRHKVSGFMLANHTSMAELFERLLKQYDRIKSRNAFLDNFRKEECFQGSMMDEFDHSRE  
VVQSLMDEYRACERPDYVNFVGMGIGTDGSAGEQLDFTSPNKL

>comp12010\_c0\_seq2; 379 140 1867 LEN=2047; translated  
MPREIITLQVGQCGNQIGGEFWKQLCAEHGIAPDGTGPKNPWDDPSNVNIVGNYHNNARA  
QAQAQTQTQAHQAQTPGPPQFSSGASRGGTSSVAWGNHRGGSFRADDRKDVFFYQGEDR  
YIPRALLMDLEPRVINKVAYTGAYRRLFNPNENLVAEDGGGAGNNWASGYRQGAHEIETI  
LDMIDRESNDSLEGFVLTHSIAAGGTGSGMGSFLLERLNDHFPKCLVQTYSVFPPSWKDQ  
SDVVVEPYNSLLTMKRLTLNADAVVLDNSALNRIAVDRLRIQNPSVDHINSLVATIMAA  
STTTLRYPGYMNDWIGLLASLIPTPRCHFLMTGYTPLVLPPEASTGSAGSRNVPGAMDSS  
SVGDLSANDNRMKQHEQGQNTGIRKTTVLDVMRRLTQPKNIMVSNANMRGRGSGCYISILN  
IIQGNINPTQIHKALQRIREKRHYGHAHGDIPFIPWGPASIQVAMARKSPYLQHRHKVS  
GFMLANHTSMAELFERLLKQYDRIKSRNAFLDNFRKEECFQGSMMDEFDHSREVQSLMD  
EYRACERPDYVNFVGMGIGTDGSAGEQLDFTSPNKL

>comp12011\_c0\_seq1; 253 99 848 LEN=1342; translated  
MTIDKRSNDEHHTSPRSVRARCFHLYDHSKNYQISSILKTNQMRFRTRSPPMRDQYYEPL  
QSVLSSDSESPSEKILKIIMPNDILDDDVSVSPSSFPSTKLPKRKANVDYRELSHRCEI  
QRNSVRFHSHKVLVMRIPSRSQYTESMKRNMWCSLSGIARSAQRNTIEFTSEGWDWRNAVE  
EDSMYVHPKGTQYIHPVHVHRAASSAMKPTTPEVDREESISTFTESNRERVGSDTTGNF  
TDHTLPAHE

>comp12012\_c0\_seq1; 365 123 1007 LEN=1140; translated  
MMVRQENMVAFLATATMLWTASPSGTSAFSIQKSGPGTRTITTAATPTPIAMANVFPFSR  
HRPGFVFALEASSEDTTTADTGTNGIDIMDEVDSIFKSIDTNGDGVISPEELRTHLVDK  
MGYTTDYTTYLFDSIDTSDGSITLDEMKFAYNFREALSMYMTLGMGGADVTKRDVFKTL  
ARNQSGDFGSGASSDKLLLEDLADLVFDMIDTRSGQISKEELRAHFDAVTSKLSGDVAA  
TDTQSKDYVRTMFATLDADKDGDISREEVRTAFQKYDVKLLARTFGLRVYQLSE

>comp12013\_c0\_seq1; 457 276 1442 LEN=1783; translated  
MMIAASLLFLLGLVRPAIAFAPVGVFEFQSTTASSSSTMLQMATWSDSKAVKEYQNFLSSG  
AQEIVLKDDSPSIVVSPNEADLEFNELNPLAQALMHMGNGDDIILSPYQPLPEVLGEGE  
RSTSEYPIYITLPPQEIAPFLDNVDDVYENRQFDFCFAGGFQHGNIIEELLQERGYCRDS  
MTQILISGMELGEEGKIDLSVSLGPDGYGEEKWTGECAACGKWNNGAIKRLERNDRVRCST  
DFYRDWRRKMWERNCDAVMNLVGCVRAEPTTLADVAKYEEEEVSDIMWQISGNLRGWA  
ITLMYGFEERMFGFAERQSSQQCALVDEWFPYIWSKVFTKSPKFLEYLHYAKSDMGHFQ  
TVELPPMEEESELGSRMRQGNLRADGVV

>comp12014\_c0\_seq1; 20 1 522 LEN=522; translated  
XDSDNAAIAEMPSAAPSAMPTDMPQSPTTTTQKIRMRRQRRRRRRRQKRARVKAAREA  
DESIEHNQHRELSLETLLNQINAFVGRPTTYPVPLAPTLAPDATHYPTRAPVVTNPPTTR  
APVPNPSPDPNPTAAPKETPSPTVSPSTLSGSTSSSSSEGGSSGITAGNSDENTSSTX

>comp12015\_c0\_seq1; 1484 1 3895 LEN=4090; translated  
XDDDDNTKKGKTEDTKAAFTISFSAPMTTSENQATAAGPPDAPHNVFVYKQOTISPDEK  
KTIRSVVVDSTVEEIEPEKAFADCTLLSSISIAEGVTSINGAFDRCYSLKKVVIPKGVTT  
IAERLFFKCYLESIDIPEGVISIGDKAFRECSLISIQIPEDVTTIGEQVFKECSRLLI  
VAVPSGLQDIDPSAFDGCKILCSVEVSEGAPNEAKNVGIQTIADQLKIRFKDLPLHEACY  
HANLKGIESSLKENSRAEKQDKYNLNLPHILAINPNATGEMIRLVADNHPDAMANSNA  
LRMCPIHLASRNLGKKALDVISIFTDEKILKRLMCTVLDKDSNTPTILSIRHNFANLDM  
QRHLFKFQPCDESNFLKQHHRERVTELETWYVTDWITSDFKNLDAHAQNGWVGFVSNAS  
KTENIHAICDIIRNGQEEFVRDLGNKDSNGRKAFDVAVNDIKKAFQCRLYFLGRYELVS  
GPPIHKSDTCIVVGAFFMESDDFYKKMYEKARGAQSEVSKGSLREFLKNHNMNQWCEQI  
FTRVFSKYDQNGNDMLSDKQFLDFCKDVLNKGKHKRVAIKFMKNKDQFSRELLRREALQK  
KSVKMEQSVVSIIDETYDAAEDNKFKIALESLOVPGSEDKNKKMYKDYKYAVIMPCADRNL  
EMARSEQPDPNKTRSDLHQIATKLNALHQONI IHGDLKMQNIVRMGEKLWLIDLSDASAT  
KNETNTEIELAEFYVGQKFFSSGILPPEMIFHVKTEEQMVKFNDFYFKHTEVLELKKIMCKK  
STESLKFVCVKTFNKETIKKKDIAGNAEIEIEIKKGLPYAPVEATEAIDLWSFGTIMYFL  
CTKRSLFTVDVNDLVDGDAMEQLYSWNDEKKIKRLDDDVEDPSAKELLRKVLSKPKPEDR  
GRIRDLLDDPYFTKSVEDSPIKSVEILVKNGFENMSKMMKTSFDTLEKNRKIELENMGMR  
MLNGMNEATTVCPTAFVVLREVLVSEIDGSHDKLEEGLOEVKKVWTVVVEITEIEEEDK  
LERLLDSDAETCEENENSENPPSKLLNVFKKKQDIITDHKKTVYLYLVDELGTGEPVTS  
LKGYP IEITSPIDIVPQLLPCLOHTVTAIT IYNGVAGIFKMF GIPKVPSPGAKDALEKTAD  
FLSESSSVKWKVHNATKDVGSTYRFVVRGASLCELEKFFENNDSDKNYRGLHRILDYDG  
YACWTAVEGAKRDPFLKRRQSMRRAAENRELELLKLLKKEGGSDAVRQSSHQDAAESPDP  
NTKTTETRITEVRNKKKSPEDI DRSETEQNCVCCRLS

>comp12017\_c0\_seq1; 556 344 991 LEN=1101; translated  
MMFKTGKSNRYLTLCLLVLMVLVASLNNVVVAEEAVE TD TSAEDAAAAAKAAEEAAAAKA  
AEEAAAAAKAAEEAAAAAKAAEEAAAAAKAAEEAAAAAKAAEEAAAAAKAAEEAAAAAKAAE  
EAAAAKAAEEAAAAAKAAEEAAAAAKAAEEAAAAAKAAEEAAAAAKAAEEAAAAAKAAE  
LVDSAKSMTNKQKKQAVAFVAAAGFGTAFVAGKAK

>comp12017\_c0\_seq2; 529 344 964 LEN=1074; translated  
MMFKTGKSNRYLTLCLLVLMVLVASLNNVVVAEEAVE TD TSAEDAAAAAKAAEEAAAAKA  
AEEAAAAKAAEEAAAAAKAAEEAAAAKAAEEAAAAKAAEEAAAAKAAEEAAAAKAAE  
EAAAAKAAEEAAAAAKAAEEAAAAAKAAEEAAAAKAAEEAAAAKAAEEAAAAKAAE  
NKQKKQAVAFVAAAGFGTAFVAGKAK

>comp12018\_c0\_seq1; 171 323 928 LEN=1007; translated  
MTTAMATVANNIFVALNWVAFVGGWIFVTYGLQSVYPSWDVAHLMPVMLLEGICILEVV  
RIFMGNLKGNFVLGVVLHAIRLITILETMVRLPNHWTGPFILGSWATTEVFRYPMYMLPG



NNFCRSIRMVVPLLTFFVGFSEAYGAYIVFVDSKTPLGLKIALSAVLFVNGVLPPTMAY  
PALLKKGLPVLGLCRKREKKE  
>comp12019\_c0\_seq1; 296 88 669 LEN=820; translated  
MPASTKLRRISNVNLKGPEELVTITNPDVEVTLPEFPYGYRTSEATWDELVQIIIEVEYDI  
PKLSRSRDQQHHYEVFRHHMKQQYDSSRDFILISKFGFDAVPSNAKEDGSEIPNDQTTNN  
GIPSEQLKAHPCLEVDVTPKIVLVQNDFFPYMEDNVVHVVLWKIKEPITEEEIKEAREE  
LQSEKIKALGIIQW  
>comp12020\_c0\_seq1; 51 1 597 LEN=1202; translated  
QTSSFCPSCIFGSPKPKMVRHKNRWLLVKIELADDIRNKKKEPPIGLPSALFSPKKEFTT  
RLRRTIAWCFGIAGEGPACNTQIRFCDAAETQLALIRVSRREDCDMVRSSLTLLLRKQLLS  
LGEKAEGQPWTSSDYASVSVHGSARTAKIATFRKLRELYRLKLQKNRSMFSTDEGFET  
KICRGLQERLTLIQNNVS  
>comp12021\_c0\_seq1; 537 152 1711 LEN=1797; translated  
MGRQTLQRTVEIAQSTVGLEVIYGDTSIMINTRISDTNALSTVRKLGEQVKKEVNKLYR  
TLELEIDGIFRTMLLLKKKKYAAVTIEQNRNGEIKVGREEKGLDLVRRDWCVQSKDTGHY  
VLDQILSTEQEKEVTLISKILDNLEQLAQNMREGKLPLEKYVITKGLSKHPKDYDPGRALP  
HVHVAKMMIKNNRRLTVGDHIPYVICEPLETEEANNNDNNKSKSVAERARHPDEIIRSGG  
VLKPDVEWYLTQQILPPVSRLECEIEGLSQGLIAERLGLNASKYTQRRSFGDGEMNDEL  
VNYVPESYKTDKERFGDVEKLSLTCSACGVRSEFRGLLYLRKSQGDGTGLCTGFKCSNP  
DCEAQYLGDA SPFECMARIMNSMEMLMRGHIQAYHEGVLCDDPACGLETRQLSVC GGVC  
LSRGCNGRMKPLVSERSLQKQKLYFECLFDVGHVTKQLVASKTNFGSNENQLASMISKTD  
RKMADELFSVAKENTGECAYNWITPSFWKEVFGGIQAKQ  
>comp12021\_c0\_seq2; 883 1 3547 LEN=3633; translated  
XEHKMSYLDFFYMDAAERRNGDVLFFGKVALPDQTSEKKFVSCCAVVKGNLRNLFVLPKK  
VTGDDGEEYVGVWQVHQLKGIQPCIPKVGASWAGKVVQRKYAFDDPDVPREETS  
MKVVYDAKYPSPSEEICTGGGKECVAKILNGKASILETFLLKRKLMGPCWIRIAEPDPSE  
HSVSWCALELQVGNPKQVKRLDSLVAAGTPPRPAPPVSVTLKLTVLNPKTAKNEIVSV  
SAVCHKKVQLDGTQSPQLMTQVSLIRPIHLDSGPGTIQRGMKFRDMDKELRAKMPQ  
LKKMPNERALLSYLVTQIGNWDPDLVGHHAAGHDIQVLLTRCVEHKVVMWSKFGQRKT  
ELPSKTYFSSGKDWAISEAISGRLLCDTYLSAQEHLNETTYSLTNLAKTQLRTDRQIEP  
MDTPQYFHKSETIVALARHTLNDLQVQRLMFKLQILPLTKQLTNIAGNLWSQTMKSNRA  
GRTEYLLLEHFHRLKYLVPKHKGKEDAGKAKYAGGLVLDPKKGLYDTFILLDFNSLY  
PSLIQEYNLCFTTVDGWAAFHKQIEAAKEQTSNPNSNATEVALPPLPDESQETGVLARV  
IKNLVQRRRQVKGMMKKNREKYDELDIKQKAFKLTANS MYGCLGFSNSRFYAQPIAAL  
VTSMGRQTLQRTVEIAQSTVGLEVIYGDTSIMINTRISDTNALSTVRKLGEQVKKEVNK  
LYRTLELEIDGIFRTMLLLKKKKYAAVTIEQNRNGEIKVGREEKGLDLVRRDWCVQSKDT  
GHYVLDQILSTEQEKEVTLISKILDNLEQLAQNMREGKLPLEKYVITKGLSKHPKDYDPGR  
ALPHVHVAKMMIKNNRRLTVGDHIPYVICEPLETEEANNNDNNKSKSVAERARHPDEIIR  
SGGVLPDVEWYLTQQILPPVSRLECEIEGLSQGLIAERLGLNASKYTQRRSFGDGEMND  
DELVNYVPESYKTDKERFGDVEKLSLTCSACGVRSEFRGLLYLRKSQGDGTGLCTGFKC  
SNPDCEAQYLGDA SPFECMARIMNSMEMLMRGHIQAYHEGVLCDDPACGLETRQLSVC G  
GVCLSRGCNGRMKPLVSERSLQKQKLYFECLFDVGHVTKQLVASKTNFGSNENQLASMIS  
KTDRKMADELFSVAKENTGECAYNWITPSFWKEVFGGIQAKQ  
>comp12022\_c0\_seq1; 349 174 1565 LEN=1694; translated  
MPQPPETHPHRKRNRGEPHEPDPEGGLPPVLLRGPTGEGPSGGGAFVPAVHRDRYGD  
SGGVGKDHRSLLRAIARAFEEYQAVYLPGYAGGGSPGTPHPLCWEELGSVYERLGDADK  
ESLCIEHRFAEEQNQNSGRDAGTPAAASRFLCSKADPRASGYCSFTVQNDTKALSEMLER  
LPVKDPVAEAEPTLPSAPAPAPAGDKGAAGWSYEPCLWIFFGRNRANAGANADLEGRPEH  
TDQISHDGTWHYQLSGTKRWWRPTPQLLRWEKERKGPKRRRAGGSSESGGASEGENEG  
PGDEDRGLPEPLSIDCREGDVLVNTLRLWKHRTVLPTQPGPSVSYARDFWTREREAPGAS  
KGGTGAMTNVDGLYAADDIEENTVVFTEETMPGCELHRAGTREANCFVAELEDGTQAVV  
SSRFIAAGEFFCVPESSDSDSGWGDHDESEDDSESSEEQCI VVP  
>comp12023\_c0\_seq1; 275 1 1194 LEN=1372; translated  
XLVAYTLHIYLNTHYINRFQLQTDKRKSNQEKKNPKFGRSMITSRLFGLVPGAEQSN  
LNLPWSCAIYSIVNWMVAFCDVEGIQILCLKVLVPLENEQHRMTAQHAGLADIVLRDMV  
MFSESAELHIAAFHTIVLLARPHGGREGMMFRTSMTAGGIFRGIYQQHGKSGIAVMLDSM  
RRFQDNATLSAMSCWALVNIALVSDQKAVLVKLGGIQAITNAMYRHPYSAELQFRALFAL  
INLVIPSENVENNDNGVNTNVSENNAAVPSVPELGDLETTEREI IDELVGDIA SLVI  
RVMKNFCSSEAILNRACLVLHNLSTDDYHAILLWTPHCYQMLEWCIANFRDLDLILQQSA  
TGTLHRLQSTLALDEQMRSRFTKSLQAQQHHINLKR

>comp12023\_c0\_seq2; 1269 258 3912 LEN=4090; translated  
MDDHQSGCPGGPYHSLPPNRNDASNVEMSRSSSTGREATDGNTSENFRLSLPGFSLKVVH  
HDEERMPQRNHKHGVVPATNHRESPDTGTASSNGEFDQRMASKKADSDNVVTAATTQN  
SSSSSEYHDANQTTTAVATTTSSSGSGGDDDDRGECSSSTIDGGANAMNKGSEKSNRGEID  
IANHDPQIKKIDKIVSTGIRDGVSHRKKLHHQEQDATKHKKSWRSSTMNINKPSTDDGGS  
SLQVPGDDGSHRIVAMDTEGGVPVKPATVVASHLFPKASNSSSSSFAGSAIKSKTESQRI  
TQNQHLLLLPPHREPGYHKIRNTLYRFQKSEGIYGNSHRMKRCCKRRRRGGATDGSSTEEN  
IESDALKKPPVYTHRQHCRVDRSSSSSSKIIDAANKHKRSKKRSRNRSSADTETTFDHA  
RSMKAKDSTSALPNPSSLDDQTAGNSSSGSGTDGTEDEGYAGSVSSNENFSGNHQLGSASPS  
PSVTSSECEQKQEDRRDNDNDNDKHKSSHDPDSSEIADFSSSGSSETMDEEDVEGRRCN  
SSQKPVVKTFSSTPSSPSFSSSHYTDSDGLESSLAKRDADAEHERMVKMFARKRKLK  
EVKKPLATQRMSSKRLTVKNLDDGRPPILAMGCDIMAHILTFLHPPEILDVLTMPLSLYW  
RKNFTLQPELWRVLCLEVPFKANMDDPLSPPKSKIRSSDASDDSVIKGAGERLLDKYRL  
LYTSFVRCMKYVTQIRDDAVNGRSPAYIDYIGSALHEEPARYQFNFNGTNRNSSGPPP  
PAALGSRNLQLFLAQARNIVLNSNSDANNAGDEAKAEDTSENRIPIILTPARVGT  
HKKTDKRSNGQEKNGPKFGRSMITSRFLGLVPGAEQSNLNLPSCAIYSIVNWMVAF  
DVEGIQILCLKVLVPLENEQHRMTAQHAGLADIVLRDMVMFSESAELHIAAFHTIVLLA  
RPHGGREGMMFRTSMTAGGIFRGIYQQHGKSGIAVMLDSMRRFQDNATLSAMSCWALVNI  
ALVSDQKAVLVKGGIQAITNAMYRHPYSAELQFRALFALINLVIPSENVENNDNGNVTN  
NVSENNAAVPSVPELGDNETTEREIIDELVGDIASLVIRVMKNFCSSEAILNRACLVL  
HNLSTDDYHAILLWTPHCYQMLEWCIANFRDTLILQQSATGTLHRLQSTLALDEQMRSR  
FTKSLQAQQHHINLKR

>comp12024\_c0\_seq1; 311 117 1037 LEN=1069; translated  
MRSRVMTSVHQHQRNNATSNAFSAIAGNSHSSVTPPSNYARNLHLQRNILLVLCILS  
IIILSHWKSFSVAMYSLSHPSGAAKDDSSCEISLGEYLGVPVYHSVESGTIGEPKCLLNS  
KWMQVSLHTVKFPGSDATYDDMMWIDYYDRINVLVEDERKVGGSSEEPFLVVFQQT  
LEGRKSMVAVGGIIEVGEDPESAAARVEVEEMDGLACENFHFLLGRHRSDVNRGIGWLN  
LATNCTHSGSTKNVHSLANEIGAADTEKQKLSISLSELRQALAQGKFIQVQWTATVAQA  
LLRFYS

>comp12025\_c0\_seq1; 449 67 1242 LEN=1506; translated  
MAVLP IQHRNLSRFFSLAFFSLWELSQITAAAFAMRSATSISAAARQSCCNDKGAIP  
ETNVAPSLVPSNSTDGSSPILFLHGLDSSAQWTKGVLDLQADYRAVALDQRCGRSPL  
GDPTEFSPGALVEDIYAFLGTHPYFRAPVEPGGDENPAPPTIRPFVLVGHSMGGRVAM  
AATHPELVLALVVEDMDIRSRPLSERVQSKDHASTLSFDRALGRRGIQTKDEILKLFCE  
REGYPSSQVEKWLTPQDERIEGVGTGECYSQVHPAFRLLCYQQFFETDHGKVVWEAL  
GGGASSPFIHLLVADPTATICDDASLAAMATAMGTTVADADAPVLSPPSRRLAIRRYR  
ATHSIHNSRPDEFLLDLRAIVERAATRSEA

>comp12026\_c0\_seq1; 334 171 953 LEN=1006; translated  
MPQHEHMERHKKLHGVRMDHEERMKKEARLVHKRSEFSQKVHGIRAKLYQKRRFKEKAT  
MRKTIAMHNERTNTHKNDEAVAEGAVPAYLLDREGVSRKAVLSNTVKQKRKEKAGKWEVP  
IPKVKPVADDEMFVKMKSGRKRGKAWKRVTFTGAEAFTRKNPKYERFIRPSGLMRKR  
ANVTHPELKTTFQLDILGVKKNPSSQIYTNLGVMTKGTIEVNVSELGLVTTSGKVAWGK  
MAQVTNNPELDGCVNAVLLV

>comp12026\_c0\_seq2; 81 42 794 LEN=794; translated  
DIKGTNTSTVNVNDNDNDNNKKNNSQVNSLEYSWSFDQTRSSADKGRRIIPSNQAMDHY  
NALRSTEAAKEPDGDNYIVYRACCGLGHRLLRNAAAVRYAREKKARFLWVEWTKKEHV  
PKTACGFERREVGYLDELSEYFFGPGPIVLLNETEDEAYENKYLPLPKTYDPKVLETR  
DAWQKHSRKKPDLCLNGASNYTARCFGWQNHRAAGKEDERYWRQIRSLYRFNHRARSFA  
EHNRFSERIVL

>comp12026\_c0\_seq3; 167 1 719 LEN=719; translated  
XNNDNDNDNNKKNNSQVNSLEYSWSFDQTRSSADKGRRIIPSNQAMDHYNALRSTEA  
PDGDNYIVYRACCGLGHRLLRNAAAVRYAREKKARFLWVEWTKKEHVMPKTACGFERRE  
VGYLDELSEYFFGPGPIVLLNETEDEAYENKYLPLPKTYDPKVLETRRFYDAWQKHSR  
PDLCLNGASNYTARCFGWQNHRAAGKEDERYWRQIRSLYRFNHRARSFAEHNRFSERIVL

>comp12026\_c1\_seq1; 77 419 1163 LEN=1163; minus strand; translated  
MEHLLRRHEQPVLVLRPVLVVVAPDRVPFLRGLAEEAVGEPHRSIADLSRLVAGNRTEQ  
VPLLDLGLDFGRASLWDLAPQVRVEDRHEGNHGCKGGVPGDYRIGGPHQDHVEDLSVP  
ALPALLDGVPTRSVADPRPLGQSDLGEAHRDHAVGFHGLLQQREDRHVVGHKDQWGQLV  
EIVAAALVAPDCFWASRILAAICSSVLXEVFDVAIEAYARHPPALLGVEPRLVVPDPEVD  
PQDDPLREX

>comp12027\_c0\_seq1; 387 454 1276 LEN=1276; translated  
MRLPPKSITDHETSHRFAKDRRPPAPIEPRVPVAVASLSFDESSLASSASAREDFLLVLVS  
SVSGSVVQTKNQNRALTMVEACGIQPEVLDA SDPANALVRDEL FEMSGIRGVFPQFFLVQ  
GDRTSFFAD FSELEHMNDEGTLAEWLGME LPTVGPAGVANGDAAASEDAEDSNADQPARS  
APADPDGSI SKEF SMRDTGVAGNEMDC EHRYAASSSTEDLFNVDSVSKVLNAMSPAPVTP  
RERTDSSQKDRDDESESEFENESNFESYDDDDDDX  
>comp12028\_c0\_seq1; 549 130 1500 LEN=1805; translated  
MASIYSSGLVIAAGTYDGVLAGWFEFGEKSKDSTATTEGSSLTLSFATAVHDGSIRSLCIA  
GNANKNQPGALLSCGYDESLKTHDWSKRQTSSGEV RTPNGFGTPMCSMFAPPTGHSTHCI  
VGF SSEGKIC IYKKRDWSIQHVLNGHEGGIGSLAVHPTGKLAVSGGVTDGKLLKLDLTKG  
RLAMVNKINPRSTLGGRRARYDPI TSVIWSKEGDFYALSHGSHITVREVATGKALLDVEMP  
SKVNQVALMSGPEGLFVVAACNDGSLPVLAVEDSDDENRKA IMAIEPVDSLHAREERFKC  
IQSVRGYFIVTSNSAGVVSLMNLQGA VNMMSPPQQEGENSRSDSDGSEDEESDDSDMEL  
AVDIVESVRLGTGARITCLAAWCKTEESQIEEVEQKHVSEVKKEKKKNESIEKPLKRKME  
SRVDDSMDSDAVKKARSLVKKAKKLSKKEKKKAKK  
>comp12029\_c0\_seq2; 331 53 763 LEN=1291; translated  
MTIRVEREALLSVISTSPSLKPNATTTSDASKPCNPCIQDDNEYVIVDSVPTKSFLIRKS  
GDDDAASVCTLTSTSSVSSCDSSTD DISSIDRRVSFASQLVTDVWTRERTLPEDVSNLYYSS  
LETQTFRQEYRLEKKLISELSIDPETFPV DDEDLSNLVAATTCANSSGRHRISRVCVVYN  
DKLETFCNP TDFEMNGATQK LATLSNSQNSNCTENGDI PSDFFDND SFWSGSLTWY  
>comp12030\_c0\_seq1; 711 105 3503 LEN=3503; translated  
MMGMEVEMKLGKETEMETDTSYYSYWPEPFMDYQVESGQPGLEFYAFVAAAYTLLAFILI  
GPIVLWIRNQKQREFV DTSREFNKENS NKVYKDQENENRKHL PRAEVPQEPRKPPRNALDN  
HWSLDMVTRKSTERNDSSTQETTTTRRTGSDRDTIRNEQPKNSVRSQMPSSSDEHGERFS  
SRLSSSSSIGIDKRGSSRTSTSSSKSRSPSIRNALQRQFHQSYPDQDPDFQNHIAHLFSQ  
QPLNHGIQSQIKQKSSSNVVRKQRQQQHEHQAFQPTASNQPSSSSRNHHPNRTNEVSSS  
VPSAATTSKLYQHGGNPSNKGFSRRVLDVGGRRWKNRRP IGRVDVIKRNSSSIAESQNNR  
LSNLNLNSTNLNTLP IVPQEQRARRVMSDVASTILSEQHHQLHHPQIQLDISMMKQFN  
LERLQLQQQLYQQYNLPQGEHRHMLAIQQYEPRYNMGRSSRSSSASALSSIVDDISPND  
ADAMPDGRGNHFTETDEKYLSPDMSGGPKVQSRVCAPIEGFLSLATPDFEKWNLVVK  
SVPLTLGACSEALFRLITIAFISQKLGTESMIAYLLVGLFVRLTSEELAGAIIDALSSFV  
QASMDRTDVEAKDRSYMAGQYIQLGFIVQVMLNIPLLLVWAI FMPQFVMWLVNREIANI  
AGSYASIVVASYMVQALSRTLTVVFQIRGHQHFEVIDLVA AVIQVVAIACILVLVDGVN  
LNTVAYIQV LITVSSAIMKITYPQARGWMQPYHKGIFQNVALWNYKFGIFHLFKAVVPLF  
IGGVLEYGEWEILTL CIRSLGPAEVATWALLGLLWDFFEALIEGLAEAAANKICYLLSAG  
QVDRAKNLSYSAIYMAVIQSVMTSTLYMTGQYLAVLFTSDPAMQHIMNNTIAMIGVANI  
IMAYSRI SWSVVGSGQGRYQLATFVVFFSRWFVTMPCALVSI FVFRFDLNAVAGSLVVGYA  
TACSALTVVVLSDDWDRLVRLRQAMNLPAPMDFDAGDPKRPGE GAGSDGDGMVNPALV  
MNLDDFDDSDSDGDFGLGDYTNANEDDSAPTEAASKKSDARRAKGXAGRTGKKGFRTAV  
AEFDASLPLKRIRANGVSFVTIEVGNKNNRTTPPNQVSVLLAQNGITDLESYKVX  
>comp12030\_c0\_seq2; 181 1 1048 LEN=1555; translated  
XPIEQIQRPKPSIAAPNRP IPSKLHTNFDYSMSATQQASSPWLYFLLGNILPTIAYFAYK  
HTSPGKAAREETEYDSDDDSEYEHDDGARGGSSAAGEWGIADAPYKMVLVNVNHELGMGK  
GKIAAQCGHASVGCYKRAARLCPAGLRAWELTGC AKIAVKCPT EEMRGI CEAAAGRGLP  
LYLVEDAGR TQIAAGSRTVLGILGP ARVFEGLTSHLKL LERERETRAGSDAMRRRRGPWF  
GGPDANRSIDRSGMPHDDNDDDRKNPN GADRRLDRVSLAVVGSVSPAIXAVKKSATPWIP  
LAACVLPFRSPIGPSAFRFYPLHPWWQETDSDHNNKAQVLFDTYRTTK  
>comp12030\_c0\_seq3; 276 273 950 LEN=1109; translated  
MAVIQSVMTSTLYMTGQYLAVLFTSDPAMQHIMNNTIAMIGVANI IMAYSRI SWSVVG  
QGRYQLATFVVFFSRWFVTMPCALVSI FVFRFDLNAVAGSLVVG YATAC SALTVVVLSDD  
WDRLVRLRQAMNLPAPMDFDAGDPKRPGE GAGSDGDGMVNPALV MNLDDFDDSDSD  
GFLGDYTNANEDDSAPTEAASKKSDARRAKGVQDAPERKGSERR  
>comp12031\_c0\_seq1; 1144 77 4252 LEN=4292; translated  
MKNLVLLGEIRKKLDAQASAPASEAEDIVSLCEVLP HNYESESSTVVLTENGIVTKVTEDG  
DVLWTCNIEEATEDVGGGWFDVSFVDPELVCLSRGAI VTLDP TTGEAELVGVFDQGLEA  
AAWSPDKEVLLMVT SIEEDEDEDTDQNKDPEINSHLMTMNSSFEVLAEIRIPKYVPSSTS  
PESKISVAWRPDGSLCAVSSVDAEDSMRNVRIYKRETL EVHAIGRSEDASGALVKNLQNA  
SIGWAGTGCSQLLAAVQRKGGKTQQV VFFESNGLRHREFV LREAPSTAVSSLNWNSTSDI  
LAVSLREEDGSEKVLWHRCNYHWY LKQELRFC SRQLR LVRF SKENPHELLILLSSLEWR  
KYEVRWDPSTVLT FEEKSMAFVVDGSSLNLTAFQKALIPPPMCANSYVMDFPITDIAFCK

EHHRLGTSLVRI SNGDLVLEHTRGTVSSFSQTKVLWGNTKIDIDHYSLSRVFI IGAEGNN  
LHLVAFQSASCNERNDKIVEITVTGLDTQEPRSDVVGSYFLEGRVQRAVQWSDAMDGCIL  
QLHDGSLVEYDRSRHTRVMP SDMEPLLELCPWISAIKDVTPFCDSEYSRSGFVFGLSKSKS  
RLYLNDVMLADSASSFFLTLNHEFLSYVTTGSRQCTRFLPLKEVHAFDALMGPEQNYVLE  
GYEPRNVEQGARVVAAILPQQPQMILQMPRGNLES IYPRALVLQFLMSKITAGAYVEAFRM  
MRKHKVDLNLIVDLHPKDFLGRGIASFVKKVDTIDYLNLFISTLQNYDVTQARFPVPTWI  
QSSDEKVKESSEFDFSTKVNSICRKARSVMIDIEMAGEKPNGYLLPVLSTFAKENPPKL  
DQALSLIKDNALRLNKTTPSANPLFSETAQNSIKYLAFLAEYELLFETALGMYDFE IARA  
VARNSQMDPKVYLPLLKRFTLPMYFSRHEVDMRLKRYDLALKNLYESNARNETLDCFPQ  
YEVLEGNSFEACMKLINERKLHKLGLELFSSTDEKTKIVLMALGKSLMGESRPSTALAVY  
LSTEPDIEGAMNAARSAHDWKTYFSLLESKDNEEPKQDEFRIERRQTAREIANE IKA  
SAFSPQTVRQANLDASRLLLDYGDDLIGAVDCLTTAQSWSEAYRVATLHSRKDLMKRCVD  
SSIAFAHMSIDNFIDRVEEFNKTNLKYFEVLKLRKQNVLLQGPEPAGSVGDETGSLFSLA  
SNASNTSLRSSASTSSTSSVGSNVSSVISIKTANTFSMTGGKDGDRHRSKFNKGKSKKQ  
GRKKKPRKPGSVEELQGLVGLTKSSCPDSDYSATITGTIQFLVIVQNLALAKELFDAYN  
RLQESIEKSQSERLENAVAKDKKEAEGLTRSHGVEHDLNHILIDLPIEKEVDALACAPLAS  
SISDFFDFLPH

>comp12032\_c0\_seq1; 533 144 1589 LEN=2145; translated  
MAAEVVRQHQNLSNGEEIGE AQRPKRNALPKKRLPVAQTNNCS DGAVSNTSII DRKLEA  
EKVNHNANKSGKKIKKRRNQEIFSIESMLLEPKPRNIDQRPRKKVLTMSKSKKRSVMTD  
IEVKQEVQTVQGEDSPVLVSLLPDSVSLTSTNIRCPDLLVTSEDDHCLPRKIEGPFDP  
KFTTGIASFDPKNERKVDEVPFYVTDIFQRLFDAEEITKPSASYMTDIQSRINSKMRAML  
VDWLVAVHKKFRLQPETLYLCVNIIDRYLSLARILREHLQLLGVTALFVASKYEEQYPPE  
VKDCVYITDRAYTPQQVLDMEFEIVMVLDFKMTVPTSYPFLQRFHLITNSPDIVRDLASF  
YTERMLQEYCMLNFRPSLLASAAVCLAWNNPGVRENIEITGIPDGELPRVLEIIINYTG  
FCEREIRHTANVICNKIQEDDDVVQNNPCIKPLNQVISKYHDERYSEAACFPMPDVSHLDS  
Y

>comp12032\_c0\_seq3; 535 144 1690 LEN=2246; translated  
MAAEVVRQHQNLSNGEEIGE AQRPKRNALPKKRLPVAQTNNCS DGAVSNTSII DRKLEA  
EKVNHNANKSGKKIKKRRNQEIFSIESMLLEPKPRNIDQRPRKKVLTMSKSKKRSVMTD  
IEVKQEVQTVQGEDSPVLVSLLPDSVSLTSTNIRCPDLLVTSEDDHCLPRKIEGPFDP  
KFTTGIASFDPKNERKVDEVPFYVTDIFQRLFDAEEITKPSASYMTDIQSRINSKMRAML  
VDWLVAVHKKFRLQPETLYLCVNIIDRYLSLARILREHLQLLGVTALFVASKYEEQYPPE  
VKDCVYITDRAYTPQQVLDMEFEIVMVLDFKMTVPTSYPFLQRFHLITNSPDIVRDLASF  
YTERMLQEYCMLNFRPSLLASAAVCLAWNNPGVRENIEITGIPDGGTPESGTYEILVSEI  
ELFVRSFFSACLNLTFQISFLVMKLEIIINYTGFCEREIRHTANVICNKIQEDDDVVQNN  
PCIKPLNQVISKYHDERYSEAACFPMPDVSHLDSY

>comp12032\_c0\_seq4; 642 203 1882 LEN=2438; translated  
MKSKRSTIPLLEVPKDREDQRMEDGLITNKPRKSRRALGDVSNKSSRVEESQTNGNKEA  
VPIDNGKQPLRRSRRLSKMAAEVVRQHQNLSNGEEIGE AQRPKRNALPKKRLPVAQTNN  
CSDGAVSNTSII DRKLEAEKVNHNANKSGKKIKKRRNQEIFSIESMLLEPKPRNIDQRPR  
KKVLTMSKSKKRSVMTDIEVKQEVQTVQGEDSPVLVSLLPDSVSLTSTNIRCPDLLVT  
SEDDHCLPRKIEGPFDPKFTTGIASFDPKNERKVDEVPFYVTDIFQRLFDAEEITKPSA  
SYMPTDIQSRINSKMRAMLVDWLVAVHKKFRLQPETLYLCVNIIDRYLSLARILREHLQLL  
GVTALFVASKYEEQYPPEVKDCVYITDRAYTPQQVLDMEFEIVMVLDFKMTVPTSYPFLQ  
RFLHITNSPDIVRDLASFYTERMLQEYCMLNFRPSLLASAAVCLAWNNPGVRENIEITGI  
PDGELPRVLEIIINYTGFCEREIRHTANVICNKIQEDDDVVQNNPCIKPLNQVISKYHDE  
RYSEAACFPMPDVSHLDSY

>comp12032\_c0\_seq5; 644 203 1983 LEN=2539; translated  
MKSKRSTIPLLEVPKDREDQRMEDGLITNKPRKSRRALGDVSNKSSRVEESQTNGNKEA  
VPIDNGKQPLRRSRRLSKMAAEVVRQHQNLSNGEEIGE AQRPKRNALPKKRLPVAQTNN  
CSDGAVSNTSII DRKLEAEKVNHNANKSGKKIKKRRNQEIFSIESMLLEPKPRNIDQRPR  
KKVLTMSKSKKRSVMTDIEVKQEVQTVQGEDSPVLVSLLPDSVSLTSTNIRCPDLLVT  
SEDDHCLPRKIEGPFDPKFTTGIASFDPKNERKVDEVPFYVTDIFQRLFDAEEITKPSA  
SYMPTDIQSRINSKMRAMLVDWLVAVHKKFRLQPETLYLCVNIIDRYLSLARILREHLQLL  
GVTALFVASKYEEQYPPEVKDCVYITDRAYTPQQVLDMEFEIVMVLDFKMTVPTSYPFLQ  
RFLHITNSPDIVRDLASFYTERMLQEYCMLNFRPSLLASAAVCLAWNNPGVRENIEITGI  
PDGTPESGTYEILVSEIELFVRSFFSACLNLTFQISFLVMKLEIIINYTGFCEREIRHT  
ANVICNKIQEDDDVVQNNPCIKPLNQVISKYHDERYSEAACFPMPDVSHLDSY

>comp12033\_c0\_seq1; 222 64 714 LEN=1049; translated

MSFHRSVSSSAVRFLKRRPGFQTRSGRASAVPTRGYHATERRPGQAAVSDRGGAIVPAFG  
GGEVHLPADDPVGLQLYKKALYCPETRTLRTSMHVGTTDAGAKANGVVGDVDTQTARE  
HARNSGLRLLSTVHAALGGDLGRVEQVHLHGRIVKSAPGFEGHAAVVDGCSEVLAEVFGP  
ETGVGTRECLGAGSLGATVACTLELRVAPEPQGGSD

>comp12034\_c0\_seq1; 253 1100 2272 LEN=2474; translated  
MATNVILNLAHLAACGPCTGTFGRWKAGLQDDADLWNDLTLVNSVPGPKPPAIPRVVE  
VVSVSGDDLSTLAYETVSSHQRSHSRGRGHRSGSRHPAPIEEEKSTSPSLKRTRKAHLRG  
ADSRNHGDSLELEQALEDIGLEDDRGASRRGGDAELESIMGPRSYASETSRGPRSHLGS  
TGRSIQRRIPSSHTAPVRLSASEAHRPPSLLQKREEYHCAYAVVAASGSLGGGSQRSSR  
STNASTTTSREDSKEEQLELWDSFGDELDPDCRSYDCGYKKSEADEEDYHDDGSSYSSVH  
RKLSFYRKSTKRSTLFRSSSNNSKSKSNHHHLSTKKGANRGDKDWLLGLEHGGSSDDTY  
STVLTQNCSSHSRNSYRSSSSQHKKYKPIF

>comp12034\_c0\_seq2; 253 1242 2414 LEN=2616; translated  
MATNVILNLAHLAACGPCTGTFGRWKAGLQDDADLWNDLTLVNSVPGPKPPAIPRVVE  
VVSVSGDDLSTLAYETVSSHQRSHSRGRGHRSGSRHPAPIEEEKSTSPSLKRTRKAHLRG  
ADSRNHGDSLELEQALEDIGLEDDRGASRRGGDAELESIMGPRSYASETSRGPRSHLGS  
TGRSIQRRIPSSHTAPVRLSASEAHRPPSLLQKREEYHCAYAVVAASGSLGGGSQRSSR  
STNASTTTSREDSKEEQLELWDSFGDELDPDCRSYDCGYKKSEADEEDYHDDGSSYSSVH  
RKLSFYRKSTKRSTLFRSSSNNSKSKSNHHHLSTKKGANRGDKDWLLGLEHGGSSDDTY  
STVLTQNCSSHSRNSYRSSSSQHKKYKPIF

>comp12034\_c0\_seq3; 253 1209 2381 LEN=2583; translated  
MATNVILNLAHLAACGPCTGTFGRWKAGLQDDADLWNDLTLVNSVPGPKPPAIPRVVE  
VVSVSGDDLSTLAYETVSSHQRSHSRGRGHRSGSRHPAPIEEEKSTSPSLKRTRKAHLRG  
ADSRNHGDSLELEQALEDIGLEDDRGASRRGGDAELESIMGPRSYASETSRGPRSHLGS  
TGRSIQRRIPSSHTAPVRLSASEAHRPPSLLQKREEYHCAYAVVAASGSLGGGSQRSSR  
STNASTTTSREDSKEEQLELWDSFGDELDPDCRSYDCGYKKSEADEEDYHDDGSSYSSVH  
RKLSFYRKSTKRSTLFRSSSNNSKSKSNHHHLSTKKGANRGDKDWLLGLEHGGSSDDTY  
STVLTQNCSSHSRNSYRSSSSQHKKYKPIF

>comp12034\_c0\_seq4; 253 1067 2239 LEN=2441; translated  
MATNVILNLAHLAACGPCTGTFGRWKAGLQDDADLWNDLTLVNSVPGPKPPAIPRVVE  
VVSVSGDDLSTLAYETVSSHQRSHSRGRGHRSGSRHPAPIEEEKSTSPSLKRTRKAHLRG  
ADSRNHGDSLELEQALEDIGLEDDRGASRRGGDAELESIMGPRSYASETSRGPRSHLGS  
TGRSIQRRIPSSHTAPVRLSASEAHRPPSLLQKREEYHCAYAVVAASGSLGGGSQRSSR  
STNASTTTSREDSKEEQLELWDSFGDELDPDCRSYDCGYKKSEADEEDYHDDGSSYSSVH  
RKLSFYRKSTKRSTLFRSSSNNSKSKSNHHHLSTKKGANRGDKDWLLGLEHGGSSDDTY  
STVLTQNCSSHSRNSYRSSSSQHKKYKPIF

>comp12035\_c0\_seq1; 466 98 1582 LEN=2448; translated  
MSSTATTTTKQQIGRGDGETPSFLPSAASASTSPPSAEKQFPFGDTTAFVPLLVLVFSHR  
EAGLAIAAVGGGSGGRITAPAEENQGSASGKGAPREQKAAAVASKPKTKPSLAKRMLD  
DLFGNASCRRREGLLVAAAAALFSLNAGFLNGITVSSAFLAGKEAVRDKNNGWILNPGTE  
MVAGCAGSVTRNARAFADFSTMSPVFWYTLGLLGGAYGGGAALAGFLNKETNTAYALEPRY  
GTSFLLAGVLLTAAQAVVATGGPSALVFFAATASLGIQNGVVSLSANLIRCTMTGVATD  
AGLALGRCLHGDIYRTASAGAVRCGIIAFFWAGGMLASPSVASLGHRALWINAGVFYGLGL  
GCAVRWRHGLGGAATLWQAMLGSWNPREEAAVVLGSSPPALAAAREGWRALFSGDDRFAAN  
RGARAAGREQARLTEAEFLARLRRHEGLGQGISAFRARLLFRAADVDQDGTVGLGEWEAV  
LTTGESGGTSSSTE

>comp12036\_c0\_seq2; 439 157 843 LEN=1054; translated  
MAVTPKLVLDVDRDGVVNQDVGAPGVLVRSQLELTPGVALALGRLRRAGYTVALITNQSCV  
GKGLITEDDLVDKIHRLEEMLLAGDPDAKFDKIFYCTSLKESNDHRMKPNPGMIEEAME  
LFGVGVHSSDSILFVGDALTDIQAARGGVGTRILVETGYGRELMGGLNAPDLGDGEVTIV  
NEKESNINITSATDTIGNSPKPSIFPFLYAKNFYSAVHWILKNEKKEE

>comp12037\_c0\_seq1; 698 94 2680 LEN=2927; translated  
MPTLVDIVGSEATDENDGSITIFGGDESTVFDQNEIYNSSQSHNKSSGNLNLKAKDTV  
RSKRRKSVTFDESSFVLSLRRQKGSRRDNLNSDVLSLSCDNTPVKEKSILSTSMLS  
TKSINCHSYDQNKEGVIEETPRKMDQERNRPRRDEYLAHYQLYVKTAISKFESKFEKLR  
DYRKMTVEEKEKEQKVMKLLNRLKVSXSDNGGSSRTADPSFACDTSFRSPAENSRILDE  
SISPSFSPCPIEPHNNNSAVDLTRSFVAENGEHSAVQQNESQTICEKSELLLSMEDSVT  
LSGKTNNHGDQNMDDLHNIIEPSSAIVANDVAVPSNNKSDNASDCSMEIVRQAAAEESYR  
HDDRNSPCLTPEGNKISENCSKREATTSGKRGADLRRRRHDDNEHELSENLRSLISPS  
LSSTPKDLFIASQSPISPRLTYPSPDYNNNSNDDNDNGENYGDRIISLGRDSDDHSETTFQ

ESRRDSRITVNSLLTNTTPPSTYQSEKEKCRAFREVPMSLKKGATFHLEKIAVKRTELIS  
SKSVTSKTHRSTHRRRLVNFDPDLVRYGSRKRRALKEMYSWTRHAERDYEDGTCSTPAAG  
AFFSLSEEQIIDLNLKLLLSDYAEKPEESTHQRSQSGSLLKGNLTLIVLRAKEDSANWENA  
LREGSGCSVLNHSSLPLSERIRASTSEKACCYDVVLTTYDAMKSPDVAIPVTTDGHAILN  
KSNNDGGWHASRSSSQEEIKTQRQTKQLSVLHRIEFKRIIFLDVLGRKSYLAKAGTARAT  
ASVAMSSSSSRLAFFRNTADGNSALLGLRKSDKRAFQSVSSVLHLKDNFNKSHISDSSD  
DEERVDPLEDIAMDLKDLMY  
>comp12038\_c0\_seq1; 435 332 1405 LEN=1654; translated  
MPYACSASEPIPYDEKDCQYPRHDHHRMVDVHEPYSDCGQNSINRTEAIHHQLVEQW  
FQARFFVPRPDCFDKSEFNRRGGHYSSFKPTFPTRRLNPPSSFEEDDTNNIVVSSTRSSLAS  
AAQSMVLFSDSLVTQEIRSAINTGHYHQSSCASNTSSLSYRFASDDHGGFPGSSSSSVRAK  
ALDIFEDRCGRAPPPPVGVVVLDGSPLFPSIGEHKADDNDQNQEADQPIQNKVSKDETQR  
TADSTIIGFDEDYDEEDDDDDSTSSMMRILRRTFSFDDQLPIIHNGLQTASFCMANSSTED  
DIDHIDECCQGRSHNHQNFYSQKQLSFTIPITASTNHEDGGNKTIQRTNFWHHVSPLE  
>comp12039\_c0\_seq1; 176 30 281 LEN=1601; translated  
MDKYRLVQEHKGDSDSNDNQTNSNTKSNSTSGSNNDNSNSNRNTSSSDSKKNLTMSCVE  
RITQQGKPRNYISYAMKLFVSHS  
>comp12039\_c0\_seq2; 275 30 599 LEN=1325; translated  
MDKYRLVQEHKGDSDSNDNQTNSNTKSNSTSGSNNDNSNSNRNTSSSDSKKNLTMSCVE  
RITQQGKPRNYISYAMKLFADNSDKIVLKAMGRAINKAVTIAEILKRKMPHLCNSLSTV  
EMIDIFEPLEGLDRVTSRRYVSCMQITLSRTLEGIDTNHIGYQPPLPLEEMNPGDFHPM  
RDTALVASS  
>comp12040\_c0\_seq1; 286 552 1202 LEN=2154; translated  
MTVAQTLEVFNRERSARGESTVSEESITAYERFLRDLAFSVVIANSSTAETPTNRFPINND  
RNTKGVTKEQLEKICPERTILIPRNNNVKDDGIYSKCVDSLCEGDFFSFQTECGICLEAY  
DTEIPDDRTSNNNRNDSDIERNKYALGRNVVTVRTLPCNHVVFHSRCIDLWLLKRSTNC  
PICKRSVLLPRPPWPRSKEIDNNDGTDAKMSDIRVL  
>comp12040\_c0\_seq2; 222 257 685 LEN=1130; translated  
MIAITTEEFKEGIDNNSFDLILDVRRQDEWDTGHIPGAVHLPVETLSEGDGFRDLAKSNAG  
YSSCDKARARIVVYCRAGSRATKAIQQLEEMGLEGTLYNGGGTRQWVEAGYELTKESSPE  
PPADERAVAPEVEEGAGPDGAS  
>comp12040\_c0\_seq3; 86 1800 1988 LEN=1988; minus strand; translated  
MATAISMIAEQVLNTCCGDKLPTDVKPTKFNNTDPHFKKKFLRKDMKFELCEWKKLPPNA  
KTA  
>comp12040\_c0\_seq4; 541 698 2452 LEN=2898; translated  
MFRNENALPPISDDEEFDLIVVGSNGACGFLGELKHVPSDYRILVLEQGQNYFYTSV  
THQNGWSKTYGTGDIQFLHNTVTPDGRSVLSGRAKTMGGGGSINYTMIHESSEWLKQAG  
RDVAYWNECKELNDCLNRPNPFTPGFQTPFAKFIESNAEQSGFMGPNKRDIMIGNIPSNS  
EASNEDEKESKRIYIFPTQFNQFGQRTNSGVSLVQWERVFRWNTSVTDLVMVKSDTDPNI  
YTCTAVQTKNKKGASAVYKVKNGSGRVVLCGGSESPRLLLQTKELADENPKIGTRVNDHI  
CMLPILYVVEEQALAVGPTDNYESLFATVNFHRHGDGKGEYQTALVNFDFFTGDALRLVY  
LVSSLYLCLFPLVNWFKRFMGRNP IVYTYLSNI IRVLLTGIIYIIDLFSKLPKLVFRKNKR  
YILTTSLKFNATREGYYEKKGDRITLRFEDDDDFVIAEQAINKNIDFLESNGKRPNF  
LVRFLFQFITKIPYEKGRQVKKYVRHF SRKTLTLLSEQHLAGGCVFVDVDMGLESSASTGK  
VFGSDNIHVADLSVVPLPRVSTQMTAYLMGHVAKQLYSCKKSD  
>comp12040\_c0\_seq5; 86 1689 1877 LEN=1877; minus strand; translated  
MATAISMIAEQVLNTCCGDKLPTDVKPTKFNNTDPHFKKKFLRKDMKFELCEWKKLPPNA  
KTA  
>comp12042\_c0\_seq1; 280 1 873 LEN=1432; translated  
LVQTTTRMVVSSYAYALLLSLTVQFHWLEGEESASPGMFPDSVPAQEEEEQRRQREQEA  
FLMRSHQYLLNEGLPLLSTVRRAVEDVCFDGDDEEDTEDGDAGRGSGSQHWTNPSS  
TFVTRREEIEEALCVRLPRRLEDAGSGGRHRRRRRRNRWIRFVLPDEEAFDPIWDVCRSPV  
WEDAQEQVLGCLWHEVLRDGGTNRSDGRGWGGLFRPGEKANPAGPSGENTPPEPPGQGEK  
QPLVKVMARFKAASSLFDSDSGPETGWEGTIHGRLLLLPTVLELGDVTLE  
>comp12043\_c0\_seq1; 866 1 3881 LEN=4280; translated  
XTEPLNYFRKRTKQIALVYQLLVEFKGSKFKDKSGEAYLKTLLFITDPTAVELLRMSDHI  
RHRNVDPDPKQPSGMDNSTSQLRIPKAPYPPMNMQSSVPSKSSLSPSPHYSTTYARA  
SSSTSLGERTTTTTTAPESGLLGDASNTFLGGTTNAASVDDGNGGFSSGSKHYNNNN  
AGVNNSSNNGNNSAAAANPSQLMFYPQHDIVASINCISLKNNDPEGMHGHDRNNN  
PRGKNARSSISNTIGPRLLELRCLLELATHQEEDNDENKNIRKDSKETLDSRSSFFTRT

VAVSRGKPNLGTTSVSGSTCMDLPSLGVVKNYDSNGATFMAVTGLSTGALCLHKFHEIEPA  
ALLDGSNNLNPDAMDIKPSVGSNSEEDMVYASSIDYFHRHHRKATSVAWRPTIHTNHVA  
IGTAGSSAIAQNKPIPGQLHRPTGPISMRSRASDREYCCFIWDILDSKKTMPLSKFAHNS  
PVASLAWMMDQOTLAVGGQORTIQLYDLRLSTTNNSKLPPLSAYAHESGVHGI EVHPQRP  
HLMATFCRSVGEVVKLFDIRRMDSAVGEIKLTSSGGQNTSSSTASMPTS ISSQRMQQA  
EAIQWNVLEPGMLS IATGESVQEYDTNSGSRPSLVRVNRVRKGGKTIKAIALYRGKEETA  
SDGHVASVDSTVGRKTNVGDSDRLLSRLYPRRMVAVLEDQTI EDMARDANAPLAISPRDG  
RLFHALGPHLFMRSPSEGPSAMERI I ERAEMKKVYEEEDISATMMRRARCVQANPYSMNP  
ERNIKLMSRETLNEEAVDHEEASEPSGPALPKYRNRALLRLWGWIERVESLSFQEVDDAE  
SELRLTKEISNAGVLQLLTSQESNANERVGDEQTVFSELLSCNIYDSAARRAALSSCGWA  
GKFDLNI VMAECEALGEYERSAALAVWHEDVGA AVDALQRATEAVHQAQGGGETSFSFPV  
STQYAETLGLISMCIAGFGGKTESQRSVWRRACANLLQRDDLSSSTRSKHSTRVAYLRALC  
EFLLNAGTIESLLRVLENTHLSLCDRVAFAACRFLEKRELTAYLLRCVEICQELGDVEGLS  
ITGLSKPGIKILQSFVDRYTDVQTAALVVSRLVILPMDWATERKICFEWVESYRNLLNLWQ  
MWQSRAMFDVDRADVLRRFKARNGGASYQRRMPNPRVRQSPRPPDPDILPRIPAQLEARC  
NYCSSPLSLKRQEGTTNQWLSKMQPLLNCCPQCRKPLPRCSICLLSMGSLNPNYMELTRAR  
QGPRGAGKSLPSSDDLSSLSMNFSEWYTWCMK

>comp12043\_c0\_seq2; 867 1 3917 LEN=4176; translated

XTEPLNYFRKRTKQIALVYQLLVEFKGSKFKDKSGEAYLKTLLFITDPTAVELLRMSDHI  
RHRNVDVDPDPKEQPSGMDNSTSQLRIPKAPYPPMMNQSSVPSKSSLSPPHYSTTYARA  
SSSTSLGERTTTTTTAPESGLLGDASNTFLGGTTNAASVDDGNGGFSGSKHYNKNNN  
AGVNNSSNNGNNSAAAANPSQLMFYPGQHDIVASINCISLSSKNNDEPGMHGHDNRNNN  
PRGKNARSSISNTIGPRLLELRCELELATHQEEDNDENKNIRKDSKETLDSRSSFFTRT  
VAVSRGKPNLGTTSVSGSTCMDLPSLGVVKNYDSNGATFMAVTGLSTGALCLHKFHEIEPA  
ALLDGSNNLNPDAMDIKPSVGSNSEEDMVYASSIDYFHRHHRKATSVAWRPTIHTNHVA  
IGTAGSSAIAQNKPIPGQLHRPTGPISMRSRASDREYCCFIWDILDSKKTMPLSKFAHNS  
PVASLAWMMDQOTLAVGGQORTIQLYDLRLSTTNNSKLPPLSAYAHESGVHGI EVHPQRP  
HLMATFCRSVGEVVKLFDIRRMDSAVGEIKLTSSGGQNTSSSTASMPTS ISSQRMQQA  
EAIQWNVLEPGMLS IATGESVQEYDTNSGSRPSLVRVNRVRKGGKTIKAIALYRGKEETA  
SDGHVASVDSTVGRKTNVGDSDRLLSRLYPRRMVAVLEDQTI EDMARDANAPLAISPRDG  
RLFHALGPHLFMRSPSEGPSAMERI I ERAEMKKVYEEEDISATMMRRARCVQANPYSMNP  
ERNIKLMSRETLNEEAVDHEEASEPSGPALPKYRNRALLRLWGWIERVESLSFQEVDDAE  
SELRLTKEISNAGVLQLLTSQESNANERVGDEQTVFSELLSCNIYDSAARRAALSSCGWA  
GKFDLNI VMAECEALGEYERSAALAVWHEDVGA AVDALQRATEAVHQAQGGGETSFSFPV  
STQYAETLGLISMCIAGFGGKTESQRSVWRRACANLLQRDDLSSSTRSKHSTRVAYLRALC  
EFLLNAGTIESLLRVLENTHLSLCDRVAFAACRFLEKRELTAYLLRCVEICQELGDVEGLS  
ITGLSKPGIKILQSFVDRYTDVQTAALVVSRLVILPMDWATERKICFEWVESYRNLLNLWQ  
MWQSRAMFDVDRADVLRRFKARNGGASYQRRMPNPRVRQSPRPPDPDILPRIPAQLEARC  
NYCSSPLSLKRQEGTTNQWLSKMQPLLNCCPQCRKPLPRCSICLLSMGSLNPNYMELTRAR  
QGPRGAGKSLPSSDDLSSLSMNFSEWYTWCMKCRHGGHAHHIIGW

>comp12044\_c0\_seq1; 960 469 3868 LEN=4342; translated

MLVSLRRTLPLCSNLI LLMLLSSARWVAGSPYSVATDSVTGIKGEHDYSGSPNDFEEA  
QDAEWIKKTLAYRKYLTKERKELEDNRMIRMLEKEQNERQGGQQQQQTQTHELTRGTNS  
IRGGQQPQQQSQRDLQPDSSVPALKVLVVLVQWANHPDRDKAVSVADYETLFGNGSRD  
PALYPGGTVKDYFDTVSYGEFDVEFVIVPEWYLSEFTEQEFTADGSKGRTEEIEKAFDPA  
LQWDDDLDFDKQFDSDFDRKIDFTVFVHSGYDGTGGTDCETGKTSMERVASHARVAAG  
ASEFMSRDSVGLGAYIVVPGFRGFCNTEIEIEIGTLVHEFIHPFGIPEMYDTGDPFPTGNL  
GGLDRFSVMANSAGNSDGLSWPGHPDAWTRSELGWANPTVIESDGTIELRPVEEHPDMY  
KITTFGENEYLLLENRQPIPNDFDEKFFSPGGIAIYHVDENIWDVFPGRIRGNDPRGGP  
FLEGWPGNGRHYAVALLQADGLYELEQGINGGESTDLWNEATQVLGPGNGEKVASTANYP  
NTDSYQNGVITPTGITLSNFQTKDGTNIMTFDVCGFSDTDCPKVGDTPPEASVDTDPPLL  
PPATDEPLVTEPPTVSPTKATTEVPITETPTQIPTGTPLTESPSQTPTNLLTEAPTDIPT  
QLPTKTPTEAPTQAATQAATQAPTQAPTQAPMQAPTQNPDTPTIALSSQPTQIEPLSNM  
IPVVERNSFCNGAVPVTDAESFIQGSTQNAIYTSPIDTCGVDIANPGLWYTYNGTGYPFE  
ISLCSNDANAFDASMSLFSGDSCELRCSIGATFRDQVCASVDGRRNRNRFLQEFNESL  
GTAAANSSIIDSVEGTTYLLVHGLDPSNGTSVGDFFELSIQSAPPPTRAPPTFFHKPSKK  
SWNNLYYFLLLLLIIIPCVAAGYHLNYIKDEDPFDLKGKPTDLDMEQPSVDDEEFESAYT  
DKNEQSPRTLDETEDVSDQNFNIDILLCPISWFRTEMMPSERHIDMRLSDYSSHV  
ATTLEINANEESTVTGDKMSNLGIGAIVSFQCKFIHPHNLDAKFKRHRGQRLTNARVV  
RRALKNINSTPTACAVVHHEDFKDAKGTYLEIWCNESHVKVEKVGNOELIFK

>comp12044\_c0\_seq2; 856 469 3957 LEN=4431; translated  
MLVSLRRTLPLCSNLILLMMLLSSARWVAGSPYSVATDSVTGIKGEHDYSGSPNDFEEA  
QDAEWIKKTLAYRKYLTKRKELEDNRMIRMLEKEQNERQGGQQQQQTQTHELTRGTNS  
IRGGQQPQQQSQRDLQPDSSVPALKVLVVLVQWANHPDRDKAVSVADYETLFGNGSRD  
PALYPGGTVKDYFDTVSYGEFDVEFVIVPEWYLSEFTEQEFTADGSKGRTEEIEKAFDPA  
LQWWDDDLDFDKQFDSDFDRKIDFTVVFVHSGYDGTGGTDCETGKTSMERVASHARVAAG  
ASEFMSRDSVGLGAYIVSGANEXALFSCFFLVCLIASFFDRLSWEKRMVLLIFENLRLN  
LMFVQLTIDHTIHRSTCPHXNLTQQNNXYTHAMHQVVVPGFRGFCNTEIEIEIGTLVHEFI  
HPFGIPEMYDTGDPFPTGNLGGDLRFVSMANSAGNSDGDLSWPGHPDAWTRSELGWANPT  
VIESDGTIELRPVEEHPDMYKITTGFGENEYLLLENRQPIPNDFDEKFFSPGGIAIYHVD  
ENIWDVFPGRIRGNDRGGPFLEGWPGNGRHYAVALLQADGLYELEQGINGGESTDLWNE  
ATQVLGPGNGEKVASTANYPNTDSYQNGVITPTGITLSNFQTKDGTNIMTFDVCGFSDTD  
CPKVGDTTPEASVDTDPPLLPPATDEPLVTEPPTVSPKATTEVPITETPTQIPTGTPLT  
ESPSQTPTNLLTEAPTDIPTQLPTKTPTEAPTQAATQAATQAPTQAPTQAPMQAPTQNPT  
DTPTIALSSQPTQIEPLSNMIPVVERNSFCNGAVPVTDAESFIQGSTQNAIYTSPIIDTCG  
VDIANPGLWYTYNGTGYPFEISLCSNANAFDASMSLFSGDSCDELRCISGATFRDQVC  
ASVDGRRNRNRFQEFNESLGTAAANSSIIDSVEGTTYLLVHGLDPSNGTSVGDFFELSI  
RSQAPPTRAPTTFHKPSKKSNNLYLFLLLLIIIPCVAAGYHLNYIKDEDPFDLKGKPT  
TDLDMEQPSVDDEEFESAYTDKNEQSPRTLDETEDKSMQNEESTVTGDKMSNLGIGAIVS  
FQCKFIHPHNLDAKFPKRHRGQRLTNARVRRALKNINSTPTACAVVHHEDFKDAKGTY  
LEIWCNESHVKVEKVGNOELIFK

>comp12044\_c0\_seq3; 786 469 4070 LEN=4544; translated  
MLVSLRRTLPLCSNLILLMMLLSSARWVAGSPYSVATDSVTGIKGEHDYSGSPNDFEEA  
QDAEWIKKTLAYRKYLTKRKELEDNRMIRMLEKEQNERQGGQQQQQTQTHELTRGTNS  
IRGGQQPQQQSQRDLQPDSSVPALKVLVVLVQWANHPDRDKAVSVADYETLFGNGSRD  
PALYPGGTVKDYFDTVSYGEFDVEFVIVPEWYLSEFTEQEFTADGSKGRTEEIEKAFDPA  
LQWWDDDLDFDKQFDSDFDRKIDFTVVFVHSGYDGTGGTDCETGKTSMERVASHARVAAG  
ASEFMSRDSVGLGAYIVSGANEXALFSCFFLVCLIASFFDRLSWEKRMVLLIFENLRLN  
LMFVQLTIDHTIHRSTCPHXNLTQQNNXYTHAMHQVVVPGFRGFCNTEIEIEIGTLVHEFI  
HPFGIPEMYDTGDPFPTGNLGGDLRFVSMANSAGNSDGDLSWPGHPDAWTRSELGWANPT  
VIESDGTIELRPVEEHPDMYKITTGFGENEYLLLENRQPIPNDFDEKFFSPGGIAIYHVD  
ENIWDVFPGRIRGNDRGGPFLEGWPGNGRHYAVALLQADGLYELEQGINGGESTDLWNE  
ATQVLGPGNGEKVASTANYPNTDSYQNGVITPTGITLSNFQTKDGTNIMTFDVCGFSDTD  
CPKVGDTTPEASVDTDPPLLPPATDEPLVTEPPTVSPKATTEVPITETPTQIPTGTPLT  
ESPSQTPTNLLTEAPTDIPTQLPTKTPTEAPTQAATQAATQAPTQAPTQAPMQAPTQNPT  
DTPTIALSSQPTQIEPLSNMIPVVERNSFCNGAVPVTDAESFIQGSTQNAIYTSPIIDTCG  
VDIANPGLWYTYNGTGYPFEISLCSNANAFDASMSLFSGDSCDELRCISGATFRDQVC  
ASVDGRRNRNRFQEFNESLGTAAANSSIIDSVEGTTYLLVHGLDPSNGTSVGDFFELSI  
RSQAPPTRAPTTFHKPSKKSNNLYLFLLLLIIIPCVAAGYHLNYIKDEDPFDLKGKPT  
TDLDMEQPSVDDEEFESAYTDKNSAQILRLVDTDPLRTSPLMLLQLYVESIENVVLDIAE  
RTITKDVDETEDKSMQNEESTVTGDKMSNLGIGAIVSFQCKFIHPHNLDAKFPKRHRGQ  
RLTNARVRRALKNINSTPTACAVVHHEDFKDAKGTYLEIWCNESHVKVEKVGNOELIFK

>comp12044\_c0\_seq4; 925 469 3720 LEN=4194; translated  
MLVSLRRTLPLCSNLILLMMLLSSARWVAGSPYSVATDSVTGIKGEHDYSGSPNDFEEA  
QDAEWIKKTLAYRKYLTKRKELEDNRMIRMLEKEQNERQGGQQQQQTQTHELTRGTNS  
IRGGQQPQQQSQRDLQPDSSVPALKVLVVLVQWANHPDRDKAVSVADYETLFGNGSRD  
PALYPGGTVKDYFDTVSYGEFDVEFVIVPEWYLSEFTEQEFTADGSKGRTEEIEKAFDPA  
LQWWDDDLDFDKQFDSDFDRKIDFTVVFVHSGYDGTGGTDCETGKTSMERVASHARVAAG  
ASEFMSRDSVGLGAYIVVPGFRGFCNTEIEIEIGTLVHEFIHPFGIPEMYDTGDPFPTGNL  
GGDLRFVSMANSAGNSDGDLSWPGHPDAWTRSELGWANPTVIESDGTIELRPVEEHPDMY  
KITTGFGENEYLLLENRQPIPNDFDEKFFSPGGIAIYHVDENIWDVFPGRIRGNDRGGP  
FLEGWPGNGRHYAVALLQADGLYELEQGINGGESTDLWNEATQVLGPGNGEKVASTANYP  
NTDSYQNGVITPTGITLSNFQTKDGTNIMTFDVCGFSDTDCPKVGDTTPEASVDTDPPLL  
PPATDEPLVTEPPTVSPKATTEVPITETPTQIPTGTPLTESPSQTPTNLLTEAPTDIPT  
QLPTKTPTEAPTQAATQAATQAPTQAPTQAPMQAPTQNPTDTPTIALSSQPTQIEPLSNM  
IPVVERNSFCNGAVPVTDAESFIQGSTQNAIYTSPIIDTCGVDIANPGLWYTYNGTGYPFE  
ISLCSNANAFDASMSLFSGDSCDELRCISGATFRDQVCASVDGRRNRNRFQEFNESL  
GTAAANSSIIDSVEGTTYLLVHGLDPSNGTSVGDFFELSI  
RSQAPPTRAPTTFHKPSKKSNNLYLFLLLLIIIPCVAAGYHLNYIKDEDPFDLKGKPTTDLDMEQPSVDDEEFESAYT  
DKNEQSPRTLDETEDKSMQNEESTVTGDKMSNLGIGAIVSFQCKFIHPHNLDAKFPKRHR



RGQRLTNARVRRALKNINSTPTACAVVHHEDFKDAKGTYLEIWCNESHVKVEKVGNGQELIFK

>comp12044\_c0\_seq5; 821 469 4218 LEN=4692; translated  
MLVSLRRTLPLCSNLILLMMLLSSARWVAGSPYSVATDSVTGIKGEHDYSGSPNDFEEA  
QDAEWIKKTLAYRKYLTKRKELEDNRMIRMLEKEQNERQGQQQQQQTQTHELTRGTNS  
IRGGQQPQQQSQRDLQPDSSVPALKVLVVLVQWANHPDRDKAVSVADYETLFGNGSRD  
PALYPGGTVKDYFDTVSYGEFDVEFVIVPEWYLSEFTEQEFTADGSKGRTEEIEKAFDPA  
LQWDDDLDFDKQFDSDFDRKIDFTVVFVHSGYDGTGGTDCETGKTSMERVASHARVAAG  
ASEFMSRDSVGLGAYIVSGANEXALFSCFFLVCLIASFFDRLSWEKRMVLLIFENLRLN  
LMFVQLTIDHTIHRSTCPHXNLTQQNNXYTHAMHQVVVPGFRGFCNTEIEIEIGTLVHEFI  
HPFGIPEMYDTGDPFPTGNLGGDRFSVMANSAGNSDGLSWPGHPDAWTRSELGWANPT  
VIESDGTIELRPVEEHPDMYKITTGFGENEYLLLENRQPIPNDFDEKFFSPGGIAIYHVD  
ENIWDVFPGRIRGNDPRGGPFLEGWPGNGRHYAVALLQADGLYELEQGINGGESTDLWNE  
ATQVLGPGNGEKVASTANYPNTDSYQNGVITPTGITLSNFQTKDGTNIMTFDVCDFDST  
CPKVGDTPEASVDTDPPLLPPATDEPLVTEPPTVSPTKATTEVPITETPTQIPTGTPLT  
ESPSQTPTNLLTEAPTDIPTQLPTKTPTEAPTQAATQAATQAPTQAPTQAPMQAPTQNP  
DTPTIALSSQPTQIEPLSNMIPVVERNSFCNGAVPVTDAESFIQGSTQNAIYTSPIDTCG  
VDIANPGLWYTYNGTGYPFEISLCSNANAFDASMSLFSGDSCDELRCISGATFRDQVC  
ASVDGRRNRNRFQEFNESLGTAAANSSIIDSVEGTTYLLVHGLDPSNGTSVGFELSI  
RSQAPPTRAPTTFHKPSKKSNNLYLFLLLLIIIPCVAAGYHLLNYIKDEDPFDLTKPT  
TDLMEQPSVDDEEFESAYTDKQVSAQILRLVDTPLRTPSPLMLLQLYVESIENVVLDIAE  
RTITKDVDETEDVSDQNFNIDILLCPIIISWFRTTTEMPSERHIDMRLSDYSSHFVATT  
LEINANEESTVTGDKMSNLGIGAIVSFQCKFIHPHNLRDAKFKRHRGQRLTNARVRRAL  
LKNINSTPTACAVVHHEDFKDAKGTYLEIWCNESHVKVEKVGNGQELIFK

>comp12044\_c0\_seq6; 890 469 3981 LEN=4455; translated  
MLVSLRRTLPLCSNLILLMMLLSSARWVAGSPYSVATDSVTGIKGEHDYSGSPNDFEEA  
QDAEWIKKTLAYRKYLTKRKELEDNRMIRMLEKEQNERQGQQQQQQTQTHELTRGTNS  
IRGGQQPQQQSQRDLQPDSSVPALKVLVVLVQWANHPDRDKAVSVADYETLFGNGSRD  
PALYPGGTVKDYFDTVSYGEFDVEFVIVPEWYLSEFTEQEFTADGSKGRTEEIEKAFDPA  
LQWDDDLDFDKQFDSDFDRKIDFTVVFVHSGYDGTGGTDCETGKTSMERVASHARVAAG  
ASEFMSRDSVGLGAYIVVPGFRGFCNTEIEIEIGTLVHEFIHPFGIPEMYDTGDPFPTGNL  
GGDRFSVMANSAGNSDGLSWPGHPDAWTRSELGWANPTVIESDGTIELRPVEEHPDMY  
KITTGFGENEYLLLENRQPIPNDFDEKFFSPGGIAIYHVDENIWDVFPGRIRGNDPRGGP  
FLEGWPGNGRHYAVALLQADGLYELEQGINGGESTDLWNEATQVLGPGNGEKVASTANYP  
NTDSYQNGVITPTGITLSNFQTKDGTNIMTFDVCDFDSTDCPKVGDTPEASVDTDPPLL  
PPATDEPLVTEPPTVSPTKATTEVPITETPTQIPTGTPLTESPSQTPTNLLTEAPTDIPT  
QLPTKTPTEAPTQAATQAATQAPTQAPTQAPMQAPTQNPDTPTIALSSQPTQIEPLSNM  
IPVVERNSFCNGAVPVTDAESFIQGSTQNAIYTSPIDTCGVDIANPGLWYTYNGTGYPFE  
ISLCSNANAFDASMSLFSGDSCDELRCISGATFRDQVCASVDGRRNRNRFQEFNESL  
GTAAANSSIIDSVEGTTYLLVHGLDPSNGTSVGFELSI  
RSQAPPTRAPTTFHKPSKKSNNLYLFLLLLIIIPCVAAGYHLLNYIKDEDPFDLTKPT  
TDLMEQPSVDDEEFESAYTDKQVSAQILRLVDTPLRTPSPLMLLQLYVESIENVVLDIAE  
RTITKDVDETEDVSDQNFNIDILLCPIIISWFRTTTEMPSERHIDMRLSDYSSHFVATT  
LEINANEESTVTGDKMSNLGIGAIVSFQCKFIHPHNLRDAKFKRHRGQRLTNARVRRAL  
LKNINSTPTACAVVHHEDFKDAKGTYLEIWCNESHVKVEKVGNGQELIFK

>comp12044\_c0\_seq7; 891 469 4105 LEN=4579; translated  
MLVSLRRTLPLCSNLILLMMLLSSARWVAGSPYSVATDSVTGIKGEHDYSGSPNDFEEA  
QDAEWIKKTLAYRKYLTKRKELEDNRMIRMLEKEQNERQGQQQQQQTQTHELTRGTNS  
IRGGQQPQQQSQRDLQPDSSVPALKVLVVLVQWANHPDRDKAVSVADYETLFGNGSRD  
PALYPGGTVKDYFDTVSYGEFDVEFVIVPEWYLSEFTEQEFTADGSKGRTEEIEKAFDPA  
LQWDDDLDFDKQFDSDFDRKIDFTVVFVHSGYDGTGGTDCETGKTSMERVASHARVAAG  
ASEFMSRDSVGLGAYIVSGANEXALFSCFFLVCLIASFFDRLSWEKRMVLLIFENLRLN  
LMFVQLTIDHTIHRSTCPHXNLTQQNNXYTHAMHQVVVPGFRGFCNTEIEIEIGTLVHEFI  
HPFGIPEMYDTGDPFPTGNLGGDRFSVMANSAGNSDGLSWPGHPDAWTRSELGWANPT  
VIESDGTIELRPVEEHPDMYKITTGFGENEYLLLENRQPIPNDFDEKFFSPGGIAIYHVD  
ENIWDVFPGRIRGNDPRGGPFLEGWPGNGRHYAVALLQADGLYELEQGINGGESTDLWNE  
ATQVLGPGNGEKVASTANYPNTDSYQNGVITPTGITLSNFQTKDGTNIMTFDVCDFDST  
CPKVGDTPEASVDTDPPLLPPATDEPLVTEPPTVSPTKATTEVPITETPTQIPTGTPLT  
ESPSQTPTNLLTEAPTDIPTQLPTKTPTEAPTQAATQAATQAPTQAPTQAPMQAPTQNP  
DTPTIALSSQPTQIEPLSNMIPVVERNSFCNGAVPVTDAESFIQGSTQNAIYTSPIDTCG

VDIANPGLWYTYNGTGYPFEISLCS SDNANAFDASMSLFSGDSCDELRCISGATFRDQVC  
ASVDGRRNRNRFLOEFNESLGTAAANSSIIDSVEGTTYLLVHGLDPSNGTSVGFELSI  
RSQAPPTRAPTTFFHKPSKKSWNLYLFLLLLIIPCVAYGYHLNYIKDEDPFDLGKPT  
TDLMEQPSVDDEEFESAYTDKNEQSPRTLDETEDVSDQNFNSIDDILLCPISWFRTE  
MMPSE RHIDMRLSDYSSHFVATLEINANEESTVTGDKMSNLGIGAIVSFQCKFIHPHNL  
RDAKFPKRHRGQRLTNARVVRALKNINSTPTACAVVHHEDFKDAKGTYLEIWCNESHVK  
VEKVG NQELIFK

>comp12044\_c0\_seq8; 855 469 3833 LEN=4307; translated  
MLVSLRRTLPLCSNLILLMMLLSSARWVAGSPYSVATDSVTGIKGEHDYSGSPNDFEEA  
QDAEWIKKTLAYRKYLTKEGRKELEDNRMIRMLEKEQNERQGGQQQQQTQTHELTRGTNS  
IRGGQQQPQQQSQRDLQPDSSVPALKVLVVLVQWANHPDRDKAVSVADYETLFNGSGRD  
PALYPGGTVKDYFDTVSYGEFVFEFVIVPEWYLSFEFTEQEFTADGSKGRTEEIEKAFPDA  
LQWDDDLDFDFKQFDSDFDRKIDFTVVFVHSGYDGTGDTGCTGKTSMERVASHARVAAG  
ASEFMSRDSVGLGAYIVVPGFRGFCNTEIEIEIGTLVHEFHPFGIPEMYDTGDPFPTGNL  
GGDLRFVSMANSAGNSDGLSWPGHPDAWTRSELGWANPTVIESDGTIELRPVEEHPDMY  
KITTFGENEYLLLENRQPIPNDFDEKFFSPGGIAIYHVDENIWDVFPGRIRGNDPRGGP  
FLEGWPGNGRHYAVALLQADGLYELEQGINGGESTDLWNEATQVLGPGNGEKVASTANYP  
NTDSYQNGVITPTGITLSNFQTKDGTNIMTFDVCGF DSTDCPKVGDTPPEASVDTPDLL  
PPATDEPLVTEPPTVSPTKATTEVPITETPTQIPTGTPLTESPSQTPTNLLTEAPTDIPT  
QLPTKTPTEAPTQAATQAATQAPTQAPTQAPMQAPTQNPDTPTIALSSQPTQIEPLSNM  
IPVVERNSFCNGAVPVTDAESFIQGSTQNAIYTSPIIDTCGVDIANPGLWYTYNGTGYPFE  
ISLCS SDNANAFDASMSLFSGDSCDELRCISGATFRDQVCASVDGRRNRNRFLOEFNESL  
GTAAANSSIIDSVEGTTYLLVHGLDPSNGTSVGFELSI RSQAPPTRAPTTFFHKPSK  
SWNNLYLFLLLLIIPCVAYGYHLNYIKDEDPFDLGKPTTDLMEQPSVDDEEFESAYT  
DKVSAQILRLVDTDPLRTSPLMLLQLYVESIENVVLDIAERTITKDVEDETEDKSMQNEES  
TVTGDKMSNLGIGAIVSFQCKFIHPHNL RDAKFPKRHRGQRLTNARVVRALKNINSTPT  
ACAVVHHEDFKDAKGTYLEIWCNESHVKVEKVG NQELIFK

>comp12045\_c0\_seq1; 1233 1 3621 LEN=3690; translated  
XEKGSFWPPDAAVSSPLFSNRIVRGPTVRFDDRIRTGPGRHRGAGCHGKGRSRFAFASA  
STSQQRAASTSLSSVGSPTALHMVLTTPESIIEQASTVNLLDDLINESVRTSARRPIMM  
QFDPSSGWIWRRWKGTVFAETWISCARNMLFAVAVYIHKTYPTVFQTHLSGFNTLWGQL  
LSVTFTLTFVFNQSYALWRKCMELSRRLQGRHLHDVNMNASHAQRVIPSNPNEKSTYTA  
SSRQILELMSRYVRLFNLLTYASFTRSHRPILTPRGLRRLVERGLMTAQEREVLVDAVIP  
ATQRHSVLMWMI RLFVEGRASGHIQGGHGFSE TMHKFHIIRSQYGAIGDELQGRMPLA  
YAHIVQVLVDLILWMFPFMAFTTGMSPLLVI FGTGLLTI SYQGLFDLAKQFLDPYDNEY  
GRGEDPLCVDTLIAETNAGSIRWLYGFEE LPFSAQKLNDGELYDNLLPVRGYSVEELDQM  
EKEQLERELQLEEQLREDEEAAEEERLRKEAEKVAATESDEEEGDGSEHEHEDDLVDQ  
DANEERVETVATHAASDTIDEIVVENMNTIGNTSISENEERSLLSTDVTAPNATKSSSE  
QLTMSDNVTNSAADNPAE TARPVHKVTTLATDKRAVSSFKPSEPTKTSEQLTPDKNATI  
SSAESSSTEATR PVHKVTTLATDKRAISTFKPSEPAKEVREEPVPSGMTTSNYLATLRMQ  
NEKIKSLLAAADFENELEEEI IDFELFEDLPWFDEVGADGQELRLSQQLADEVWEEEKD  
DVQIKNMTKEEY EARLKEIEENAENELQETVEIMSAIPGAETDGTDEKLYTVAERRQKA  
PTYDQTRLDGISQLWGLPPEDLSALKEYEAPEKIDDMDFASVSQ LWGGTPSAGTQTTTQN  
ESEVVGLNDFSGISELWGSTPNEFQDDPARESDGGGRTSNAEIXNGENGDDFP SFAGLP  
WHDEKGPDGKEYRLS QLLADEEWVTETSSEEAAPMTLQDYNKEVEKIIITKAEELRETEA  
ILLSKPGTDPVGDYDDDQLAPMSNVTSSSEEEEEEQQNIKSDLDVLEMDVEDDYSIP  
DAEDDDVADI SPDRSDNDAFTKTPLEGVESILSSSDESNDTDDVLAADKEIDNAKIKDD  
VLNDVAIDDDQLEIESSDDDDTTNGKIKIEPIFIEEQDENVTLEHYDETS LPENDGEWD  
EEDDLRL

>comp12046\_c0\_seq1; 668 62 1501 LEN=1861; translated  
MPIDINELRPYKGGDPKYRKYMEQRFKPAEWVDEVIAEDEKWRALTKEKDEL RKQVNKI  
QKEKIPK KAKENCDAEIAEMKAVQQQIKEVEAQLPVLAE NRDKLLNRIGNIVDPEVPI  
SNNEEDNLVIDLKP IPPEGEGILPAPQGGKI QYTLPE TKPLTHDELLWRIGGYEPTRGSN  
VAGHRAYFLT NAGVLLNQAI INYGI AFLSARGYNVQPPFFM NKDVMSIAQLDDDFDEQL  
YKVS GKTDDP DSEKKEKYL IATSEQPLCAYHKDEWIEKSSLP LRYAGISTCFRKEAGSSG  
KDIRGIFRVHQFEKIEQFCLVDDDFEVSQAEQKMLQA AKEFYDSLGF SYRVVCLV SDEL  
NDAAVK KYDLEAWFPGQAYRELVSCSNCTDYQARGVGT RCGGKSTKGD MNARNSYVHM  
LNATLCATGRGICLLETYQTEDGVTVP EVL RPYMGGKDFLPFVRGPPEVSKGEKGGK

>comp12047\_c0\_seq1; 278 79 441 LEN=944; translated  
MSLEKKRKVEDYGLDFKGSAAEKEESDEKHTATSNSEEKSKSPVLKNDDGDSFFELSSKRR

CTVRSFKGNILIDIREMYEKNGKALPGKKGISMNLQYETLRDLIKDGHIQREVEALQKE  
>comp12048\_c0\_seq1; 1102 1 2907 LEN=2907; translated  
XPGPPLVEGAAPPLEEDERERAAADPSYFPFAGVTLKSTRDLTRGPPSPGPFVRLKK  
SDRHLVKEEPPSGPFGVTLKRSKRHLTDEEETSHTTELETTTRPSFGGVVLKSSKRDLT  
KEEKSSPTPEPEATATPSFGGVVLKNSKRDLTKEDETSPTSEPETVARPAFGIVLKKSNR  
DLTKLDESPPEAEFESAQKETVDDGEDLPEAPTTPEAETTARPSFGVVLLKSNRDLTKEE  
SPPKPQSEVAQKADEAATVEVKHTARKQEEPVWAQKRRESLKSQSQPEQSAAVDKKEGSV  
RSRKKPEWVQKRRNSLESQSQPEQSAAFDKDEGSVRSRKQEPWVQKRRESLASQSQPD  
RAEEVDEEGSMRSRNQEPPEWLHKKRKTQKSDASMQEGDSLNNKTIDGNIPSKSPWSVIK  
KNLKSVKALDATNPLTGPSQSDKGENDPLGSEMRKKEEQPEAVDSSAKKKNSEEEIPSK  
SPWLAVKSLKSLKDLDAIHPITEPPEPATQVASRSKGSQTGVADSLTCKNVEEDVPS  
KSPWLAVKSLKSTKELDAIFPLTEPPFSSAAQDELVVSKSMKPNEELGGTGEVDSLLGE  
KDIAKEISPKSPWLVTKKSLKSVRELTAIHSLTEPPDLLTEKNDRVVNEPMKRKEFSDDS  
GEADSLSVKKNIEEDTPSKSPWSAVKSLKSLKELDAIQPLKEPPEKKVTKQKQPFGAEV  
EGSLLATNDIEEDIPKSPWLVIKKSLKSVKTMDAQHPITEPRLDSDKNGDDFVAKKAMK  
EEQPSGAEAADSLSPKTNIAEDIPPTPKPSPWLAIKKSLKSSKSLDGRQSKMALPMSVIE  
NGAASQPTKPKPEPGLRPLHSSRPGKSLWAQKKDMTGASLKDQSYQSMRIVDATSSRT  
GAHEEGTDAMHESAPVLSSTEMSDSPQEDGSIANLSTTSSRSGLASSLYSSTSASLRVGA  
PLENKWKASX

>comp12048\_c1\_seq1; 617 282 1524 LEN=1524; translated  
MEEEEAPVIPRRRSKALKKSSKASGEMTDSGRSERKLLKQQSKRISSKKLAKETFLDD  
RSTEEPPKSKKKKNTGDDNEDEQDAEQRPSLKKSKKKSSRSSLAGGESSRNLSKSKK  
TGSSSRNLLGGEPSPDAPKSKKTRSSKYTALLEDEVEEDEGSGGGYEPTAPPGLTQQQ  
QQQGSPPPEEDAPRSAMELVESALVGCVVAEKPVDRAEHEREQQRRIQEEAASRAAAG  
GRTSFDPDASMGFSVPASSPGKGSARSSLSGSSSMRFDPSASSDSMRFGPGDHDNDNSVS  
SFVGNVSRSEGGSERDVSTFRRKPKLPGGKKKARESAKSLMGSRLGGQGVFPWQSSRT  
LSRPTFSSDEDEAFVVDGDGDYGS GAPSRERVFGRPAQPAGKGPAPPRSRAAA

>comp12049\_c0\_seq1; 1108 125 3411 LEN=3445; translated  
MSNQLFAAKSTRTKKKKASAKAMVAFFCVSSSLSAQGVRAFSTTAKAGVSAFVRSSNQK  
PRTFSPAARASASFPFSVDNRVGSFVGTNTFWGTPTSLRLSSTVADGEATKASCAYDLE  
NKEAGLGNYPTEFENDIYKWWESAGCFQPDQAKQTKKEESDKNGRKPYPVLPMPPPNVTGRL  
HMGHAIFVALQDVLARFHRMRGRPVWLPGTDHAGIATQLQVEKQLIAEGTSREEVGREE  
FLDRVWVTKAEQGGHITRQLRSLGASADWTRERFTMDSLDSEAVSEAFVRLHDKGLIYRG  
EYMNWAPMLKTAVSDLEVEYTEEEGKLYFFKYMVEGSDGGKFXAIDFLMRALRPWLAD  
YTLFVVISLWPYSLIRILEFLPVATTRPETIMGDTAVCVHPEDERYKDLVKGQAVVPMGN  
GRTIPIIADEYVDMFEGTGALKITPGHDPNDYAIKGFDLPIINIMNKDGLNENAGSYN  
GLDRFDAREALWKDMEKESLTIKVDPHTQVRVRSQRGGEIIEPLVSSQWFVKTEGMGAKA  
LKAVEDGDIEIIPKRFDKIWNWNLTDIHDWCISRQLWGHRIIPVWYVGETGESEFIVARN  
EKEARSKAVENHPEDVVLQRQEEDVLDTWFSGLWPFATVWGPANEGDVNSDLARFYPGT  
CLETGYDILFFWVARMVMMGIELTGESPFVSIYLHGLVRAADGSKMSKTKGNVIDPLDTV  
ADYGADSLRYSLVTVGTPGQDIPLNMEKIEANRNFCKNLWNSCKFVTGNALKDADEAEME  
ELGVTGPMSQEEFDKLLPEKYIVSKAHELVASVTEDIEKYQLGAAGSKIYEFMWDQYAD  
WYIEISKTRLYEGNGGGDIVEAKASRRVLVYVLDIILRVLHPYMPYVTEKLWHHLPRAKA  
GENQAAHALMMLSDWPQMDDAFPLVTNHDSVSTFEFCFQAVTRSIRNARAEYNVEQGKISA  
IVVAPAGTLKDAIEAELKSLVLLARLDPEDAKVVEAGSDDAKAANNDESQVLVVQDGEV  
FLPLSGLIDPEKERARLTKQQGKLEIEIQKLAGRLSSKGFVVDKAPAAVVDKAKAELE  
SQAKMVQSSLDALPQ

>comp12049\_c0\_seq2; 1119 125 3298 LEN=3332; translated  
MSNQLFAAKSTRTKKKKASAKAMVAFFCVSSSLSAQGVRAFSTTAKAGVSAFVRSSNQK  
PRTFSPAARASASFPFSVDNRVGSFVGTNTFWGTPTSLRLSSTVADGEATKASCAYDLE  
NKEAGLGNYPTEFENDIYKWWESAGCFQPDQAKQTKKEESDKNGRKPYPVLPMPPPNVTGRL  
HMGHAIFVALQDVLARFHRMRGRPVWLPGTDHAGIATQLQVEKQLIAEGTSREEVGREE  
FLDRVWVTKAEQGGHITRQLRSLGASADWTRERFTMDSLDSEAVSEAFVRLHDKGLIYRG  
EYMNWAPMLKTAVSDLEVEYTEEEGKLYFFKYMVEGSDGEFLPVATTRPETIMGDTAVC  
VHPEDERYKDLVKGQAVVPMGNRTIPIIADEYVDMFEGTGALKITPGHDPNDYAIKGF  
DLPIINIMNKDGLNENAGSYNGLDRFDAREALWKDMEKESLTIKVDPHTQVRVRSQRG  
EIEIIEPLVSSQWFVKTEGMGAKALKAVEDGDIEIIPKRFDKIWNWNLTDIHDWCISRQLW  
GHRIIPVWYVGETGESEFIVARNEKEARSKAVENHPEDVVLQRQEEDVLDTWFSGLWPF  
ATVWGPANEGDVNSDLARFYPGTCLETGYDILFFWVARMVMMGIELTGESPFVSIYLHGLV  
RAADGSKMSKTKGNVIDPLDTVADYGADSLRYSLVTVGTPGQDIPLNMEKIEANRNFCK

LWNSCKFVTGNALKDADEAEMEELGVTGPMSQEEFDKLLLPKEYIVSKAHELVASVTEDI  
EKYQLGAAGSKIYEFMWDQYADWYIEISKTRLYEGNGGGDIVEAKASRRVLVYVLDIILR  
VLHPYMPYVTEKLLWHHLPRAKAGENQAHALMLSDWPQMDDAFPLVTNHDSVSTFEFQQA  
VTRSIRNARAEYNVEQGGKISAIIVVAPAGTLKDAIEAELKSLVLLARLDPEDAKVVEAGS  
DDAKAANNDESQVLVVDGVEVFLPLSGLIDPEKERARLTKQQGKLEIEIQKLAGRLSSK  
GFVDKAPAAVVDKAKAELELESQAKMVQSSLDALPQ  
>comp12050\_c0\_seq1; 221 1 1197 LEN=1485; translated  
HTQRDICTLVYPMEESVRLLSCSREESKPLTIVVTGCNSGIGIEACKLLRLTSPRSRLFL  
VARNRERALRAADEIASLIAEPENTDDSNLCYSNEFHRHEEKEHNDGFEGYKKTIFPMVC  
DHSSFDVSRKFCEEMKNQLKALSEMGRHIGIDVLCNAAVLLAEDAKAQFTKDNLELTI  
QTNHFSPLIANELLNFMNDGARVVVTSSGLHAFQSFSGFEGVINPETGKIQHGFEMITG  
CSFDYKCKYAIKSKLCNVSFCLNQLRKRNAKAICFSPGLIPSSGLFKHQTRWHDTVLK  
KLGMGVVDSQSWGGALLAWMAISDMAYREGGCYWRAPLGISRRGGKIPDDLYLESLNEEA  
TNRKNRETLWEISSVLTGSAYHPINTPEEDLQERNQAR  
>comp12051\_c0\_seq1; 553 58 2004 LEN=2117; translated  
METNGDALLPSILHARYNNRSGNDAVDHESLLTNLFSLLSTLGDIASCFDPRSFDKEHHS  
NIVQNYGIVAWIYEGIRNNTPPSSFNKNDHGSFAFYGEGSLLYEWSTALQYIHDLTRHIAP  
FELHILASQSILFSEAPTTSYRILCLLLCTHSLQQCPFTPQKRWKRWQSLVCETLRIFQD  
SLPVLDDNNLDVDSQIILALFIHHILPSSCHVIDQLPTKNSYHVAMFSALVGTSTILE  
RKLDHCQERLSKGTDRDISIVSDFKEWKSIIYQALLSTRLSFERFGVFSEMTVWIDPMLK  
FIDDDEANRNEDVDFLMHRDNLSSWACIRSNDESEERVANMDTSINDVGLALLAMKAFQE  
RPKVYRPNFVWVWFPHVVALFRKSGECPVILEHSTSLFLESVQMVRENLSVAEKVVHR  
QPDAPVELFILLSNRLMSRAQTNPSSGSGKEETRTASHIDEEGQFKMRSQRTVGLIKELLN  
RFTAVSRVHIVKFKLQQCPTPGLQARFLDLLRPLILTSDIQAKKLLSELLSIVDNLFNK  
HWDRKKQNLIGIDLLIDRSVEISIGAITMIQMWCMVHENEFMADLIGIGYDLQGFHAAMK  
KQLKWWLENPSDAPKSHFRLFLLDNAIESALEQFAVQKSTSAQNGIQ  
>comp12052\_c0\_seq1; 1470 1 3838 LEN=3895; translated  
AARFGYTSMRAAAQAQGYKVLPLPEPNSKSAETNAAGLPTTEGLVSTQQSAKLVQATQQQ  
PRLSTIIANKFKQMGKSPPSNMTGEAAGGWSMPGGRVYKHGIGMATVSHAPPPRPPAPG  
MRELRVEDALLYLDVVKREFGGRPRVYNEFLAIMKNFKSQEVDTPGVIDRVSKLFRGNH  
LILGFNFKFLPDGYKISMEDLQQMDAAYEREQEMIRQQDASTTEKKQQQVAHLGKVQMPIQ  
QQKTAIEQQRQMQQKPPATHVAVRPPPPQMSMQKQKQTKVQDALHAEQAARQRMKI  
ASDLKEKQRQQSVPKQPKGKTGKLSKKQQQQQQAIAQQQPPPPQQMQHQAQVEFDHAI  
SYVTTIKRRFANDENTYRQFLEILHTYQKEQRGIKEVLEQVAHLFQDHPDLLKEFTFFLP  
DAVQEQAKERLHRAAAESESRLSAQNNIKSAETGSSKEVVDMTNHNRAMIGDQSKVTGQK  
RYKETQQTPMLVYTPQSPETFVYNSAVERQFFDGVKDSLTASTRDGGQAWAEFMKCLDMY  
AQEILSQSEMLNFVEPPWKANKYRFKEFKRILAAAGGQGGSTVSSMEDSWYSVPLSEIDF  
SRCRKCSPSYRALPRDYPAPPCSQRSDEEAKVLNNI WVSLPVGNEETFRHMRRNTHEAL  
FRIEDERFEIDMTIDSNLCTLALLEPFAQEMAQLSAEDSKMQPGKESDSRRSTERKGLGG  
KRFRTYTFDPNILGVIHRNSITRIYGDNGQEMI ELLKTNPSVAIPIVVSRLRQKDAEWKAV  
RDRLNRHWRDLAQASYKSLDHRGLTWRTTDKKAISNRTLLADIKDRAANNNGNESESAYE  
ARLQKAKEEHGSFFLTTMGNDFKRIVDLSKLPKPKDRKLFPTDMSLMYENSSCIQKDVIYRI  
LSFALERGSISPTDKERCHRLWTEFLGPWFNLKLNWMLPEPAVSFQETSSSTRLPRVVS  
DDNSHDDESAEDGEIDSRIVTEELRDDGSNDKDDTPLTVDHHPLPAGTTVSTIYGDGRI  
ISCRKQDSMYIVKLAFGTAFVRPSAVLVSVLEAEKSAYTTHRMVDDHTKLDSDDKLVIG  
TQSLYLFFRLHQLLCRRIGIARRLAYVVKDDPSLQTLVEQMPDHHGASAGKRRYDAFLSL  
VYALLDGGTGSSEGAQFEDRVRTLGHGWYELATLDKLI SHILKNIQNMANDDTMWSLVQ  
LFRRHIDAGGFKPEALRQEAAYLSDGEPMYAFQYCP IQKDRGEKAVLYVESLGVIVGSEE  
EDSLSDRALEPSSKRQRR  
>comp12052\_c0\_seq2; 520 165 1170 LEN=1170; translated  
MLPPSLSNKLPSSNGGPINNEIQEGSVGSNDGPDVDSSTGGTAPGTSGMAVTNSTSINANA  
GGDGDVMSDAQSSKPIGATSNGSDSNGAKKEQPEKPPQTQDDPSADSQMKDVTKEMAVD  
PPVIKTI VNAAKQENGNAGYPPAAGAGFTMPLSALPSDASKEAQSATNPAAAMDSLRAES  
KDAKVPPPLAAVTAIEEKKPSPVLAQQQLPPTPAYASAAAQFLGVSSAASLTAGASIPTM  
VEPDGTEKKKATPVTTAPPLQGPVLQLGARPGAIQPLSGAVKENPSTDASDLARRDREAA  
ARFGYTSMRAAAQAQGYKVLPLPEPNSKSAETNAAX  
>comp12052\_c0\_seq3; 520 247 1252 LEN=1252; translated  
MLPPSLSNKLPSSNGGPINNEIQEGSVGSNDGPDVDSSTGGTAPGTSGMAVTNSTSINANA  
GGDGDVMSDAQSSKPIGATSNGSDSNGAKKEQPEKPPQTQDDPSADSQMKDVTKEMAVD  
PPVIKTI VNAAKQENGNAGYPPAAGAGFTMPLSALPSDASKEAQSATNPAAAMDSLRAES

KDAKVPPPLAAVTAIEEKKPSPVLAQQQLQPPTPAYASAAAQFLGVSSAASLTAGASIPTM  
VEPDGTEKKKATPVTTAPPLQGPVLQLGARPGAIQPLSGAVKENPSTDASDLARRDREAA  
ARFGYTSMRAAAQAQGYKVLPLPEPNSKSAETNAAX

>comp12054\_c0\_seq1; 378 231 1175 LEN=1628; translated  
MAASSSSGYLVRNLWNAAPVLTNNLETTGLVDTAFNASLAKAAVTAFFDDYRSIRLGTSSVP  
GSSPKSADEPKARTRRRRRASSPGRTRAELPAPGPPGPRRSATEEHSISRCNPSALTDND  
FFFQHQKNRGYRLATRAIAGSDCARRLQEDYLVQIVSYYLENVCGAKPLADLLALGTGEL  
SIDMWAAVQRGKGAYHADHVHEGALVSGVYYASVPPGSAPLVLRRPGADDIHGTNGEDFR  
PASSHGEDSDVILPPTTEGNLVLFPVWVHGVPAAEIIIIGGRNAPSESDSRVSAFNVGTGA  
FVLGHDPWNVTRLE

>comp12055\_c0\_seq1; 238 1 273 LEN=273; translated  
EAKAKAEDDAKRKEEEEERKRIEAEAKAKVEEAKRKAEEKEKKRLEAEAKAKAEIIIKKA  
EERKRVEAEAKRKAEEERNRLEAEAEAKRKA

>comp12056\_c0\_seq1; 693 1 2782 LEN=3167; translated  
XSNCTATRRKVNDDDMNSEFVPIYQSVSGCLSLSNSLLLLSVGGAIFFSPRKALSVLLDY  
KNSYYNHSYRLESHVIDLSLELIRGSLNHEDSIGSACDMMAAVILAQGLGCIMMLYPLI  
SRGSSSALAIWNLRSTSITIQILITGLLWIVSALYDDRGNEAVLVNKKKYVGFYSQAHGDP  
VGAVQRRRTTFGLFLIGFVVFITACLGMMSFWPVATAENTRLHSESEMSRERTRHQESV  
DGNEDLTAPLLPTAQNFENTSQTSLOYEEDNSDQLQASNCDETASNIAEGCTLVDEQESE  
DLEVQQQCVEAENNESNINESDNTNNFDEPNRSIRGTQRLLAIAAPQVIYLYVGCITLLI  
RLPFSLSI PHFVSTTLGALADGEYHRAKTEIVWLFVLGTIDAFDFWCIWFVGYANQRIV  
REIRVDTFLSILKQDIGFFDCQTSGELASRLNSDCGEMAGDLTWFFRFSIESVVRVTGIT  
AYMLLRSPKLGACAI SIVPLVAVVNKHYGNWLSHNAAKVQDSLAAANSVAQETLGSIRTV  
VAFASEESEYKRYRERIDEQYRLNIRQTYIQGIYMFVSTFLINTIVQGTLLFVGSVMIQ  
QGILTSEILLAFMLYQGLQONEMNLFNSYSSLVKSTGAGDKIFELDRKPPPPGIGSQQ  
VQMRGSDAQINDESIGIRFENVEFSYPSRPEQLILRNMNLDICAGSTFALVGPSPGCGKS  
TIVNLLQRFYDASSGRILVDGQDIRSLDLKLRHRIRIGIVTQDPILFSGTILSNIMYGMN  
ATTEDAIDA AKRANAHD F ISDFPKGYETQVGERGLQLSGGQKQRIASRAIRHPSLLLL  
DEATSALDADSEMVVQKSIDSLLKQSKSITVVVAHRLRTRVRNADCIGVIKEGQIIEIGC  
HTELMSEKGYRSMIEKSMGDKIAVD

>comp12056\_c0\_seq2; 552 1 2429 LEN=3280; translated  
XSNCTATRRKVNDDDMNSEFVPIYQSVSGCLSLSNSLLLLSVGGAIFFSPRKALSVLLDY  
KNSYYNHSYRLESHVIDLSLELIRGSLNHEDSIGSACDMMAAVILAQGLGCIMMLYPLI  
SRGSSSALAIWNLRSTSITIQILITGLLWIVSALYDDRGNEAVLVNKKKYVGFYSQAHGDP  
VGAVQRRRTTFGLFLIGFVVFITACLGMMSFWPVATAENTRLHSESEMSRERTRHQESV  
DGNEDLTAPLLPTAQNFENTSQTSLOYEEDNSDQLQASNCDETASNIAEGCTLVDEQESE  
DLEVQQQCVEAENNESNINESDNTNNFDEPNRSIRGTQRLLAIAAPQVIYLYVGCITLLI  
RLPFSLSI PHFVSTTLGALADGEYHRAKTEIVWLFVLGTIDAFDFWCIWFVGYANQRIV  
REIRVDTFLSILKQDIGFFDCQTSGELASRLNSDCGEMAGDLTWFFRFSIESVVRVTGIT  
AYMLLRSPKLGACAI SIVPLVAVVNKHYGNWLSHNAAKVQDSLAAANSVAQETLGSIRTV  
VAFASEESEYKRYRERIDEQYRLNIRQTYIQGIYMFVSTFLINTIVQGTLLFVGSVMIQ  
QGILTSEILLAFMLYQGLQONEMNLFNSYSSLVKSTGAGDKIFELDRKPPPPGIGSQQ  
VQMRGSDAQINDESIGIRFENVEFSYPSRPEQLILRNMNLDICAGSTFALVGPSPGCGKS  
TIVNLLQRFYDASSGRILVDGQDIRSLDLKLRHRIRIGIVTQDPILFSGTILSNIMYGMN  
ATTEDAIDA AKRANAHD F ISDFPKATKRR

>comp12056\_c0\_seq3; 276 1 1315 LEN=1315; translated  
XSNCTATRRKVNDDDMNSEFVPIYQSVSGCLSLSNSLLLLSVGGAIFFSPRKALSVLLDY  
KNSYYNHSYRLESHVIDLSLELIRGSLNHEDSIGSACDMMAAVILAQGLGCIMMLYPLI  
SRGSSSALAIWNLRSTSITIQILITGLLWIVSALYDDRGNEAVLVNKKKYVGFYSQAHGDP  
VGAVQRRRTTFGLFLIGFVVFITACLGMMSFWPVATAENTRLHSESEMSRERTRHQESV  
DGNEDLTAPLLPTAQNFENTSQTSLOYEEDNSDQLQASNCDETASNIAEGCTLVDEQESE  
DLEVQQQCVEAENNESNINESDNTNNFDEPNRSIRGTQRLLAIAAPQVIYLYVGCITLLI  
RLPFSLSI PHFVSTTLGALADGEYHRAKTEIVWLFVLGTIDAFDFWCIWFVGYANQRIV  
LEHSFKLQVRILSRNNVA

>comp12056\_c0\_seq4; 642 1 2581 LEN=2966; translated  
XSNCTATRRKVNDDDMNSEFVPIYQSVSGCLSLSNSLLLLSVGGAIFFSPRKALSVLLDY  
KNSYYNHSYRLESHVIDLSLELIRGSLNHEDSIGSACDMMAAVILAQGLGCIMMLYPLI  
SRGSSSALAIWNLRSTSITIQILITGLLWIVSALYDDRGNEAVLVNKKKYVGFYSQAHGDP  
VGAVQRRRTTFGLFLIGFVVFITACLGMMSFWPVATAENTRLHSESEMSRERTRHQESV  
DGNEDLTAPLLPTAQNFENTSQTSLOYEEDNSDQLQASNCDETASNIAEGCTLVDEQESE

DLEVQQQCVEAENNESNINESDNTNNFDEPNSRIRGTQRLLAIAAPQVIYLYVGCITLLI  
RLPFSLSIPHFVSTTLGALADGEYHRAKTEIVWLFVLGTIDAFDFWCIFWFGYANQRIV  
REIRVDTFLSILKQDIGFFDCQTSGELASRLNSDCGEMAGDLTWFFRFSIESVVRVTGIT  
AYMLLRSPKLGACAI SIVPLVAVVNKHYGNWLSHNAAKVQDSLAAANSVAQETLGSIRTV  
VAFASEESEYNKYRERIDEQYRLNIRQTYIQGIYYMFVSTFLINTIVQGTLLFVGSVMIQ  
QGILTSEILLAFMLYQGQLQNEMMNLFNSSYSSLVKSTGAGDKIFELLDRKPPPPGIGSQQ  
VQMRLGSDAQINDESIGIRFENVEFSYPSRPEQLILRNMNLDICAGSTFALVGPSPGCDAI  
DAAKRANAHD FISDFPKGYETQVGERGLQLSGGQKQRIASRAIIRHPSLLLLDEATSAL  
DADSEM VVQKSIDSLLKQSKSITTVVVAHRLRTVRNADCIGVIKEGQIIEIGCHTELSI  
EKGYRSMIEKSMGDKIAVD

>comp12056\_c0\_seq5; 379 1 1765 LEN=1765; translated  
XSNCTATRRKVNDDDMNSEFVPIYQSVSGCLSLSNSLLLLSVGGAIFFSPRKALSVLLDY  
KNSYYNHSYRLESHVIDLSLELIRGSLNHEDSIGSACDMMAAVILAQGLGCIMMLYPLI  
SRGSSSALAIWNLRTSITIQQLITGLLWIVSALYDDRGNEAVLVNKKKYVGFYSQAHGDP  
VAVQRRRTTFGLFLIGFVMFITACLGMMSFWPVATAENTRLHSESEMSRERTRHQESV  
DGNEDLTAPLLPTAQNFENTSQTSLSQYEEEDNSDQLQASNCDETASNIAEGCTLVDEQESE  
DLEVQQQCVEAENNESNINESDNTNNFDEPNSRIRGTQRLLAIAAPQVIYLYVGCITLLI  
RLPFSLSIPHFVSTTLGALADGEYHRAKTEIVWLFVLGTIDAFDFWCIFWFGYANQRIV  
REIRVDTFLSILKQDIGFFDCQTSGELASRLNSDCGEMAGDLTWFFRFSIESVVRVTGIT  
AYMLLRSPKLGACAI SIVPLVAVVNKHYGNWLSHNAAKVQDSLAAANSVAQETLGSIRTV  
VAFASEESEYNKYRERIDEQYRLNIRQTYIQGIYYMVRKVGRLFMLS DH

>comp12057\_c0\_seq2; 524 149 1540 LEN=1743; translated  
MIRTRKNDRNRCNHGLLIATASTLFAMVMVCNIVVVTCTAETLSLRSRGHAAAAAATTD  
PLRNEIPTAMSSSSSSSLYMSDYDSKYVPAEQSAQGGSSVSQSRLTSLRFLSEYVKDHP  
ELRDLENILLAVQMACKTISNLVNRAGLVYSIQHSNNDGTSEGSINEPDYKSDGRYYSMK  
RLDKLSTTVLKNALKFTGTVMIVPEAKEIAEQPGQHQPGLVAVYDQDNIACLDPLDGG  
NADASICTGTVFVFEKAKSVDENIETDEDALLEAVLQPGRMRAAGYCLYSSATVLVFT  
LGSSVYGF TLDPQIQEFVLTHDKLTI PRRGVNYSCNEANSEGWPD SWKEYLKNLKLGE  
TRERYALRYVGSVMGDIHRTLLYGGVFAYPSNQLHKPQGNLQLLYKSAPLAFVMHHAGG  
AMDEAGD DLLNKCPERIHQKSPCFLGSPEDMDELKKYLTGLQN

>comp12058\_c0\_seq2; 444 124 1701 LEN=2179; translated  
MKSLRHRHADAASSPNSKSKQKSSSRLRRKSTSNRNVSSTTGLQYFII FVMCSIALAYT  
IALSRVTFNSTGDQNHVRTGERAASPREIQKQAAENARKLHDDQKQNRRRGKRKQAEKA  
QAPQDYPKHVSKPWRKLLKEVKKHKEKHPVVEKGRSDSNIFKPYNKKQVQLGPKRDKK  
GAIVYNPITKFKKEDLPSMGFDKKQIDELTGISRDKAIDGRERLVEILSEAGILDVDEP  
IAVLPKWEVTEELYGSKPVVGLLENCKKFRTOQFDPVDASIGTAGMFNTGTNPLAMYISNN  
CKLPRNKNDKAGGTRWQVPWGKHAPASRKWTNTAGHDHKVNKTNVMPIVVVRDPYSWMQS  
MCKHNYEARWPHSIFCPNLAKPELLPNGKPDIVPIKVYNPPANYTSLAHYWAQWYKEYL  
EADYPRLIVRFEDIQFHAKELVETVCQCAGAVPREDDALFRYVVD SAKWGA AHKSHTNMV  
SAMVKY GSEENRFKGMREVDWLVAKEVFTPEIMDLFGYKMPDHLK

>comp12060\_c0\_seq1; 305 179 1087 LEN=1212; translated  
MAARKENIPSNWKS CFRDDLFRNKVALVTGGGTGIGRSIATELALLGATVVIASRSTAKC  
EAAAKEINGALESFNASSAGRVVGPSTNIRKEEIEQKLI EHVKEYGALNMLVNNSGGQ  
FIQESAEISRGRFAAVVETNLQGTFLMMREAFNQYMRDHGGSVVNITIGNRNGMPGMMHS  
AAARAGIENMTASLCTEWIESNVRINCVRPGIIFTESGFENYGPAGEYFIGKIMKSLPSR  
RLGSAQEVASAVTWLLSDGASYVTGSTICVDGGGSYVGLPLIEIEDKAHLSVYGS LPTRA  
KL

>comp12061\_c0\_seq1; 1680 1 4826 LEN=5085; translated  
XEDDDDDDEKQNQIRPHNSNPESVRLPFPTAMLSADDIPTGELEEI QPNETATDHSPVGKV  
VIEDDEEAPMATTTTTTQESNPPTPDEENPSSVADTEEANAATDVDDSETT NENPGKEGV  
AETDTKDDDDPMREGPVASKEDPKDNDGSEKDG MEDGELTQRVAEHSDTEKQDPARDA SE  
VDAQKMDPAQDVVDTDTDTKIEDPRRESLETVTQIEDSIQDVAATDIEQDHAAQETAETD  
PGEDHAGQEVAEHLKQDDTTHIAENDSNCGGTNQQTQQQQQEEASFSTKEDVDTNSVC  
SSASTVSSDNSTRSDSSRSSGGNGFCFFDFVDLQTKLVLM PYVEEEGKGAVVASYPED  
GRFEGLVLEYLNGIEVLETADFDTLLAALREATTMPKLGFKPVRQEVETPLPVGGEEMKQ  
NEVVGDEDEASTMEDIDL SVIHEEKEDGGDGSEMKTTHADLSSSSIATPKTENRRSVC  
AVDGD TNKLI EPKNLFRTSSTETDKNIEASTTATPANAASSSSSAPSSYLEKRQSTPSK  
EHTKSINSALDHHHNEDSSAVGTNDSNKFSSGMFALS AWGMRMKAQSEKLLATTGEAIAA  
QQKRHHHHQQQK PSTS VLKSLKQQKQQQCCDMYLQTNVGAYFPISKNTGQSSIKAQHLQ  
AINTSS LFCIRKSATEACAIGRDTHNNVRYSFQWYQSLSTPKTKHNHRLLSNSYLADTDD

SIGESSHSSRRTHSSTGSISSYSSSSSSSSSSSSSSSSSYTCSSFSMSTAGVTHHTI SLASTAN  
HTKATTTTRTNKDNNNNIRWIPLKGATGPTFQPNNTTLVGGKLRICIVTVRPI LGTSQDET  
DDETNPSNADSSSNDNANA IMDADDE INVNNLSLFGDDYEEHYDNEIRGNNTQEGVEKI  
VCDSVIPIQADMILFNGAKQAMRKQASAKFGNLLGRGGEGCVNTTTPATATLACGKTRV  
EISAVRKFVSCDTNASNGNRQHGLPKHRRSVAMSSVKVYCRSSPGEEYLQLTDVPLLQVT  
ARASPTNSRHVDLLFPDIPPPRTSEEGPSSTMTTLDLDFLSDFCVVDHPSCAETGGIHRLEL  
EAPNRMTRRESFLLALGIANYQKASQLDNKKILYRDDVAFETNSLVSLRQKHTPPTTGSP  
LSIPNAQNEKTTSPKSLGSNNESGIDDSLVTISPGVGERRQPLSGNLMLSPTPASGVTGD  
TNQVLSPI SCHSSLPDDNDSNSIPQGTGDIQQALAFPPVVDHSGRVRELQREMQLRAQL  
SRKDKIVTELQRRVQSSERAHQQSMEALSNAQELKHSQEDCERILISKRHVERSMQSQH  
EATQKLETNHKVSMDSLQGELLRRSEKIVELEKLNALQNEKAVLGATVEARES KLVKLE  
ELQASNIELSEKVAQQEPLKLQVEESNRRYENLQRDFESKATAETKCREELDAALHTIQS  
MKIRIHTEQEKASSCSQLEATQKTNQQLKGERNNFKKKNESLSKEVARLCRGGRSMDI  
EKVLADHESLVQETELLRAQKRKALEEAQQYRISYEQAQAAEEMSTGMDNRETRRVLERT  
TELERLLSEMTDYSVAKEMQLDTMKQVNETLQKEIHNLAKANLRNDEV  
>comp12062\_c0\_seq1; 536 228 2000 LEN=2465; translated  
MNSSHNSYDPNVVIQAAEA KLAAGDVSGGQTLYQSSLFNWVDDAQFGNVQNKDQLQEAI  
TLWISYAHYLRKAKQFKTASEAYENATKCPVSGKVGR IWL DYARFLEDNRNKVRSAAQQLYL  
KALVGTNTNEGGIVQDEQDKNLLWSEFLTMMQTKANQPDLLTQGLKDAVQKEHTNQLASA  
NEDQQLDVVGSN TAAGDTMYDDLPTSKRPRLGSGSNNPAPEMASSSSSTTRTHVVTAKD  
VQVEEEALADIVKSVRKDPLFISTWMVRDGDGPPSIP IQLFSAAPPKLSDP SGRDLLGND  
LALALVQRLLTNGEVILAVAKGLWMLAGLTEEKTSKQLKSLDDGMAANHKE LRARLDERL  
SVAGAATVAVQTMNELELRNFEQDCLQKRQQLLNETAWESRQLLWVQQLLLAKLGLSGFQ  
GPTADAQELDLQVRVCSYLHSAFFLRERIGNDAHTKMLESQEKRLKDFKDNPRPSSPNRS  
RSPMQGTAAFSSNSPTRMNQNASPMMGTGERRSPVPMHYPI PINVAQQPPPPPLYPSHLP  
PPPPPPQLPPPPPPANYLHQPPQQYNSQQHMGMPGNYPPQQPQNPPYYR  
>comp12063\_c0\_seq1; 88 1 840 LEN=840; translated  
XENENENEDEDEDEIENETETKNESESESENEENENETGAGGSWGGGDRETETDPETETQI  
ETDARDVPPATEPKLVYHLVRFERVAKAKIVRGSRRLLFPFEQELGEWTITDIDDLXRRP  
ALLTAVAAGIGTGIGTRIVALQCNAWRGVSQRIRAGLIGQSRNAGALYCGGGQSKQGTQL  
TILGFWADQPKRIQYDGI LGFRRNTARYAAVGI R SAVAGTGPSVKLILYRGNFLKMPPR  
SRPKRNKGGGEGGTTLREGYLGEPEKTTANAI SLALRDAC  
>comp12063\_c0\_seq2; 122 1 690 LEN=855; translated  
XENENENEDEDEDEIENETETKNESESESENEENENETGAGGSWGGGDRETETDPETETQI  
ETDARDVPPATEPKLVYHLVRFERVAKAKIVRGSRRLLFPFEQELGEWTITDIDDLXRRP  
ALLTAVAAGIGTGIGTRIVALQCVAWRGVSQRTIAQRIRAGLVGQSRNAGALYCGGGQSK  
QGXAIDDLGLFGPINRSESN TMGFLGSV VATPYGTLRLESDPRLPERDPR  
>comp12064\_c0\_seq1; 283 422 1722 LEN=1750; translated  
MKRTNKRSTDLPPLELSSKDDDSFERDEEATQPSQKNAPRLVPPSVIYATIYFVCMIVVD  
FTIEGTQNAFPELHALPYAMTLFQFGWCFFLPVVISKGDSIKNLPKTTIEISPYIILSLV  
VFSSNVCKSASARYXKLSNQGDFS I HEADTRHDRGVILNINDNRTYGRSDFLAAALLCAG  
AAGYSFGEHSLNDDKKDSYFGI LLLTGSVLCDAFTPNIQQLMHPATESPGQKRKNSLQS  
LPSSSSLSLSTPLSDPIIISDSSTGRENETVVAPRFFSRGPGILKRRGLGLSVSTLMTNA  
YAVGCIGLLLFMGVTHRLEDAIVEAMVRPHLFGNLTIGVSLSVAVFARTRLIKESGAVT  
AVTVTTLREFVTVLLSYLIYPKIFSKLHAVSALLVFGGILLSSYSESQTGHEASGNNGKR  
NAVAGSAIPTRIK  
>comp12065\_c0\_seq2; 377 1 828 LEN=930; translated  
XKVPDVAFLVFLAFSVPVPSMLNFFSLFSLFGSLLSLATLPTVAADNVVVALYFAFLF  
SIKAGEEGETADPADSGGEGAAISELAVEDETAPSTITLPSLAISLSVASSLVTAGSFL  
TRALLPAGTSSLPLISALTVVAATSFPAFFSALSETGTALGVIFVQMFFACSGAAGSIKM  
VFEKAPALFAFSALQIGVHFATLVAVGRGIFRLPSRELYLASNANVGGPTTAAAMAQAKE  
WKKLVLPALLIGILGYATATALLSLGPILLRIVR  
>comp12065\_c0\_seq3; 475 1 1329 LEN=1431; translated  
VRGSFHAAAPAAPATTLANQPAVATATAAKAPVPASP TLLRSFSAAGGIGA AVKGLHSST  
GFVLTAVLWSTLGASLRRSKIGKALSAPLVTMALSLSAANLGAIPFRSPVYDFVNRLL  
VPLAVPLLLYDSDLRRVVRTGTLLAAFCVGFSTVLATLVAFPVPLRSLGPDAGWRVA  
CALAARHIGGAINFVAVAETLGIGGDAVAAAIAADNVVVALYFAFLFSIAKAGEEGETAD  
PADSGGEGAAISELAVEDETAPSTITLPSLAISLSVASSLVTAGSFLTRALLPAGTSSLP  
LISALTVVAATSFPAFFSALSETGTALGVIFVQMFFACSGAAGSIKMVFEKAPALFAFSA  
LQIGVHFATLVAVGRGIFRLPSRELYLASNANVGGPTTAAAMAQAKEWKKLVLPALLIGI

LGYATATALALSLGPILLRIVR

>comp12065\_c0\_seq4; 413 1 1275 LEN=1275; translated  
VRGSFHAAAPAAPATTLANQPAVATATAAKAPVPASPTLLRSFSAAGGIGAAVKGLHSST  
GFVLTAVLWLSTLGASLKRKRSKIGKALSAPLVTMALSLSAANLGAIPFRSPVYDFVNRLL  
VPLAVPLLLYDSLRRVVRDTGTLAAFCVGFSTVLATLVAFVPLRSLGPDAGWRVA  
CALAARHIGGAINFVAVAETLGIGGDAVAAAIAADNVVVALYFAFLFSIAKAGEEGETAD  
PADSGGEGAAISELAVEDEETAPSTITLPSLAIISLVASSLVTAGSFLTRALLPAGTSSLP  
LISALTVVAATSFPAFFSALSSETGTALGVIFVQMFACSGAAGSIKMFVEKAPALFAFSA  
LQIGVHFATLVAVGRGIFRLPSRELYLASNANVGGPTTAVSPFPVAGFALLLRRFATGA  
FLAAW

>comp12067\_c0\_seq2; 719 232 3482 LEN=3600; translated  
MFVIGNNKRDTSSDRHLRRDRIVNAKRNAPVSTSRWEERTQHFKDVFLFFALCMISTSFL  
SEQCAVEAFQIDSVGAGPRQRHKAQEQRFTISASTTTTKSQSCSESAAKMQLSVVPLKVA  
EDNYSGDSIETETMTVAGNSTSQFLMNFNASGSIGSLLMQMOKKEAELRQLNQSASLLLS  
EDQALKLDPNDGSSTNQEP TALKNNLFSWIRKTNGSAKNGFADVDAPTASEGVNGSTAEAA  
ISSMNDEMARELDDSVSIRITNSVKDITLLGPPDIYQSRSEEGNQDDDTPFRTVLVEEE  
TQETNAKNENAVTEDKLPPLSRPEHYDRRIGRDMRHLSVSIASCIDSVEEWQLFCQQT  
GGGLAPLVECIREGAESIREGSPSLASLSLEHQYLASSPYSSGSTTKEENFQAASSACKAI  
RDLCALSLDLASVITDGLLRANAAYKEQGEPSLMDDLCTILRYDDELSDLLVAPRRRRR  
RLLSFRRRKQKQAGQETPQDPSENDPLSSPTSKPSKWP IGFRRRRREARLRWKLYVTQL  
LLAMTCASDSAVDAIRCTEGLQDVLLVHSSYARKERRRRWMRYPGELIKSMWLKRRKLRN  
NKEASPATPEQRRQPFIEAASLKANLRGRITGTANQVLAAGYNEWVVKIPGQKGLGKFC  
TSAVFGPRDI IQFTTIIIESKAHISTHGVP IELKLIDFRPVGRILCLDGGGSRGMTSVVAM  
KCLVDSLGGMEVADCFDLVVGTSTGAI IAFVLVGLNRETSEQAVERYDVLIEKIFTKSAFS  
TPMLLFTTASYDESPFMNVLTDILKDRTMLDSRANPAVPLVFAVTSKMSSNPTHVALFRN  
YNYSGGELPDPFMINPDEARENLDLPLGNEAKIIRMSNYRKKEEHVQPVDETPVPDNGSR  
HPGSFRLLQKYALRASTAAPT VFKPVLMMGGEMYCDGGIVASNP SAI A IHEARTVFPVPI  
ELVVSIGTGGFKEQKSEPKIGWDGIIGQIINSATDGEQIHHILEDVLDGDTTAQ GKSSVS  
DTCYMRFNVPVLMGMPDEFPIDVTDPDKLQQIKTITKAYMEEPQKQKQLQVLADILKGRSST  
RC

>comp12067\_c0\_seq3; 543 232 2943 LEN=3142; translated  
MFVIGNNKRDTSSDRHLRRDRIVNAKRNAPVSTSRWEERTQHFKDVFLFFALCMISTSFL  
SEQCAVEAFQIDSVGAGPRQRHKAQEQRFTISASTTTTKSQSCSESAAKMQLSVVPLKVA  
EDNYSGDSIETETMTVAGNSTSQFLMNFNASGSIGSLLMQMOKKEAELRQLNQSASLLLS  
EDQALKLDPNDGSSTNQEP TALKNNLFSWIRKTNGSAKNGFADVDAPTASEGVNGSTAEAA  
ISSMNDEMARELDDSVSIRITNSVKDITLLGPPDIYQSRSEEGNQDDDTPFRTVLVEEE  
TQETNAKNENAVTEDKLPPLSRPEHYDRRIGRDMRHLSVSIASCIDSVEEWQLFCQQT  
GGGLAPLVECIREGAESIREGSPSLASLSLEHQYLASSPYSSGSTTKEENFQAASSACKAI  
RDLCALSLDLASVITDGLLRANAAYKEQGEPSLMDDLCTILRYDDELSDLLVAPRRRRR  
RLLSFRRRKQKQAGQETPQDPSENDPLSSPTSKPSKWP IGFRRRRREARLRWKLYVTQL  
LLAMTCASDSAVDAIRCTEGLQDVLLVHSSYARKERRRRWMRYPGELIKSMWLKRRKLRN  
NKEASPATPEQRRQPFIEAASLKANLRGRITGTANQVLAAGYNEWVVKIPGQKGLGKFC  
TSAVFGPRDI IQFTTIIIESKAHISTHGVP IELKLIDFRPVGRILCLDGGGSRGMTSVVAM  
KCLVDSLGGMEVADCFDLVVGTSTGAI IAFVLVGLNRETSEQAVERYDVLIEKIFTKSAFS  
TPMLLFTTASYDESPFMNVLTDILKDRTMLDSRANPAVPLVFAVTSKMSSNPTHVALFRN  
YNYSGGELPDPFMINPDEARENLDLPLGNEAKIIRMSNYRKKEEHVQPVDETPVPTMDPG  
TR

>comp12067\_c0\_seq4; 610 232 2806 LEN=3005; translated  
MFVIGNNKRDTSSDRHLRRDRIVNAKRNAPVSTSRWEERTQHFKDVFLFFALCMISTSFL  
SEQCAVEAFQIDSVGAGPRQRHKAQEQRFTISASTTTTKSQSCSESAAKMQLSVVPLKVA  
EDNYSGDSIETETMTVAGNSTSQFLMNFNASGSIGSLLMQMOKKEAELRQLNQSASLLLS  
EDQALKLDPNDGSSTNQEP TALKNNLFSWIRKTNGSAKNGFADVDAPTASEGVNGSTAEAA  
ISSMNDEMARELDDSVSIRITNSVKDITLLGPPDIYQSRSEEGNQDDDTPFRTVLVEEE  
TQETNAKNENAVTEDKLPPLSRPEHYDRRIGRDMRHLSVSIASCIDSVEEWQLFCQQT  
GGGLAPLVECIREGAESIREGSPSLASLSLEHQYLASSPYSSGSTTKEENFQAASSACKAI  
RDLCALSLDLASVITDGLLRANAAYKEQGEPSLMDDLCTILRYDDELSDLLVAPRRRRR  
RLLSFRRRKQKQAGQETPQDPSENDPLSSPTSKPSKWP IGFRRRRREARLRWKLYVTQL  
LLAMTCASDSAVDAIRCTEGLQDVLLVHSSYARKERRRRWMRYPGELIKSMWLKRRKLRN  
NKEASPATPEQRRQPFIEAASLKANLRGRITGTANQVLAAGYNEWVVKIPGQKGLRILC  
LDGGGSRGMTSVVAMKCLVDSLGGMEVADCFDLVVGTSTGAI IAFVLVGLNRETSEQAVER



YDVLIIEKIFTKSAFSTPMLLFTTASYDESPFMNVLTDILKDRTMLDSRANPAVPLVFAVT  
SKMSSNPETHVALFRNYNYSGGELPDPFMINPDEARENLDLPLGNEAKIIRMSNYRKKEEH  
VQPVDETPVPTMDPGTR

>comp12067\_c0\_seq5; 768 232 3330 LEN=3603; translated  
MFVIGNNKRDTSDDRHLRRDRIVNAKRNPVSTSRWEERTQHFKDVFLFFALCMISTSFL  
SEQCAVEAFQIDSVGAGPRQRHKAQEQRFTISASTTTTKSQSCSESAAKMQLSVVPLKVA  
EDNYSGDSIETETMTVAGNSTSQFLMNFNASGSIGSLLMQMQKKEAELRQLNQSASLLLS  
EDQALKLDPNDGSSTNQEPTALKNNLFSWIRKTNGSAKNGFADVDAPTASEGVNGSTAEA  
ISSMNDEMARELDDSVSIRITNSVKDITLLGPPDIYQRSRSEEGNQDDDTPFRTVLVEEE  
TQETNAKNENAVTEDKLPPLSRPEHYDRRIGRDMRHLSVSIASCIDSVEEWQLFCQQT  
GGIAPLVEICIREGAESIREGSPSLASLSLEHQYLASSPYSSGTTKEENFQAASSACKAI  
RDLCALSLDLASVITDGLLRANAAYKEQGEPSLMDDLCTILRYDDELSDLLVAPRRRRR  
RLLSFRRRKQKQAGQETPQDPSENDPLSSPTSKPSKWPIGIFRRRREARLRWKLYVTQL  
LLAMTCASDSAVDAIRCTEGLQDVLLVHSSYARKERRRRWMRYPGELIKSMWLKRRKLRN  
NKEASPATPEQRRQPFIEAASLKANLRGRITGTANQVLAAGYNEWVVKIPGQKGLRILC  
LDGGGSRGMTSVVAMKCLVDSLGGMEVADCFDLVVGTSTGAI IAFVLVGLNRETSEQAVER  
YDVLIIEKIFTKSAFSTPMLLFTTASYDESPFMNVLTDILKDRTMLDSRANPAVPLVFAVT  
SKMSSNPETHVALFRNYNYSGGELPDPFMINPDEARENLDLPLGNEAKIIRMSNYRKKEEH  
VQPVDETPVPTMDNGSRHPGSRFLLQKYALRASTAAPT VFKPVLMMGGEMYCDGGIVASNP  
SAIAIHEARTVFPVPIELVVSIGTGGFKEQKSEPKIGWDGIIGQIINSATDGEQIHHILED  
VLGDGTTAQKSSVSDTCYMRFNPLVGMPEDEFPIGELFELSSFAAIPISCHHTNMPFLYF  
FCILATGQLPKR

>comp12067\_c0\_seq7; 786 232 3345 LEN=3463; translated  
MFVIGNNKRDTSDDRHLRRDRIVNAKRNPVSTSRWEERTQHFKDVFLFFALCMISTSFL  
SEQCAVEAFQIDSVGAGPRQRHKAQEQRFTISASTTTTKSQSCSESAAKMQLSVVPLKVA  
EDNYSGDSIETETMTVAGNSTSQFLMNFNASGSIGSLLMQMQKKEAELRQLNQSASLLLS  
EDQALKLDPNDGSSTNQEPTALKNNLFSWIRKTNGSAKNGFADVDAPTASEGVNGSTAEA  
ISSMNDEMARELDDSVSIRITNSVKDITLLGPPDIYQRSRSEEGNQDDDTPFRTVLVEEE  
TQETNAKNENAVTEDKLPPLSRPEHYDRRIGRDMRHLSVSIASCIDSVEEWQLFCQQT  
GGIAPLVEICIREGAESIREGSPSLASLSLEHQYLASSPYSSGTTKEENFQAASSACKAI  
RDLCALSLDLASVITDGLLRANAAYKEQGEPSLMDDLCTILRYDDELSDLLVAPRRRRR  
RLLSFRRRKQKQAGQETPQDPSENDPLSSPTSKPSKWPIGIFRRRREARLRWKLYVTQL  
LLAMTCASDSAVDAIRCTEGLQDVLLVHSSYARKERRRRWMRYPGELIKSMWLKRRKLRN  
NKEASPATPEQRRQPFIEAASLKANLRGRITGTANQVLAAGYNEWVVKIPGQKGLRILC  
LDGGGSRGMTSVVAMKCLVDSLGGMEVADCFDLVVGTSTGAI IAFVLVGLNRETSEQAVER  
YDVLIIEKIFTKSAFSTPMLLFTTASYDESPFMNVLTDILKDRTMLDSRANPAVPLVFAVT  
SKMSSNPETHVALFRNYNYSGGELPDPFMINPDEARENLDLPLGNEAKIIRMSNYRKKEEH  
VQPVDETPVPTMDNGSRHPGSRFLLQKYALRASTAAPT VFKPVLMMGGEMYCDGGIVASNP  
SAIAIHEARTVFPVPIELVVSIGTGGFKEQKSEPKIGWDGIIGQIINSATDGEQIHHILED  
VLGDGTTAQKSSVSDTCYMRFNPLVGMPEDEFPIDVTDPKLQKIKTITKAYMEEPDQKQ  
KLQVLADILKGRSSTRC

>comp12067\_c0\_seq8; 701 232 3467 LEN=3740; translated  
MFVIGNNKRDTSDDRHLRRDRIVNAKRNPVSTSRWEERTQHFKDVFLFFALCMISTSFL  
SEQCAVEAFQIDSVGAGPRQRHKAQEQRFTISASTTTTKSQSCSESAAKMQLSVVPLKVA  
EDNYSGDSIETETMTVAGNSTSQFLMNFNASGSIGSLLMQMQKKEAELRQLNQSASLLLS  
EDQALKLDPNDGSSTNQEPTALKNNLFSWIRKTNGSAKNGFADVDAPTASEGVNGSTAEA  
ISSMNDEMARELDDSVSIRITNSVKDITLLGPPDIYQRSRSEEGNQDDDTPFRTVLVEEE  
TQETNAKNENAVTEDKLPPLSRPEHYDRRIGRDMRHLSVSIASCIDSVEEWQLFCQQT  
GGIAPLVEICIREGAESIREGSPSLASLSLEHQYLASSPYSSGTTKEENFQAASSACKAI  
RDLCALSLDLASVITDGLLRANAAYKEQGEPSLMDDLCTILRYDDELSDLLVAPRRRRR  
RLLSFRRRKQKQAGQETPQDPSENDPLSSPTSKPSKWPIGIFRRRREARLRWKLYVTQL  
LLAMTCASDSAVDAIRCTEGLQDVLLVHSSYARKERRRRWMRYPGELIKSMWLKRRKLRN  
NKEASPATPEQRRQPFIEAASLKANLRGRITGTANQVLAAGYNEWVVKIPGQKGLKFC  
TSAVFGPRDI IQFTTIIIESKAHISTHGVP IELKLIDFRPVGRILCLDGGGSRGMTSVVAM  
KCLVDSLGGMEVADCFDLVVGTSTGAI IAFVLVGLNRETSEQAVERYDVLIIEKIFTKSAF  
S  
TPMLLFTTASYDESPFMNVLTDILKDRTMLDSRANPAVPLVFAVTSKMSSNPETHVALFRN  
YNYSGGELPDPFMINPDEARENLDLPLGNEAKIIRMSNYRKKEEHVQPVDETPVPTMDNGSR  
HPGSRFLLQKYALRASTAAPT VFKPVLMMGGEMYCDGGIVASNP  
SAIAIHEARTVFPVPIELVVSIGTGGFKEQKSEPKIGWDGIIGQIINSATDGEQIHHILED  
VLGDGTTAQKSSVSDTCYMRFNPLVGMPEDEFPIGELFELSSFAAIPISCHHTNMPFLYF  
FCILATGQLPKR

>comp12068\_c0\_seq2; 179 1 708 LEN=843; translated  
LDELLKSGKASESEIYAKIEEYKEKFADYGRDRRSAMEFHRLNVERLLMPTQTTSFIMNT  
LKDSSGEAVTEDTHGAPPQQVANHSPAVPGPAPVSGSGSPAPEAPPAQAAPKTSKELFTL  
LVRKLEVTAPAQAALKDSRFVAEEMDQTLRETLTVLKDLRKRLAQCGQDLETEFHCIRQI  
LTPSQSAKFLVWVARNKACMHMLNELWSKNYPTSDKHVPGAAATGSISASASGDE  
>comp12069\_c0\_seq2; 267 114 755 LEN=997; translated  
MSAATLEERVVALERTHYKCPKDISVDDSMRRARGEVESLGLYSSRWAVPEPYYSWPLE  
KRASMLKAPTTHAHLCKSLLENNKVTDETDFDVTNPRFVMVILQYEAELATDLLTKSIRK  
LRPVEDRLDPSSFDWRVAEPEDNDRITGYQFNSVTPPLGLKEEVPIILSSAVSDLGYFWMG  
GGHVHLKLGLSASEFVNKVKNVKMEASVPRMK  
>comp12070\_c0\_seq1; 355 308 1592 LEN=1814; translated  
MATNKSSNPLTAMSAGCIAGAVEATAVWPMEFIKTQLQLGSKSGSKLPYGGMIEGLSYTV  
RTTGFFSLYRGLAPTLVGSVPKAGIRFGLNSLIKEKLRGEDGKLTPAKNFVAGLGAGVSE  
ALLVVAPVETVKTRVIELNMPFLGGLKHIVRSEIGGVYKGVRFTEENTXLARALRPFWRN  
HRVPFGSPGALLHCQKAGCVAHDRRLSQTALPTISSCRCTLI FRKQYCVVSQASATAMK  
QGSNQGLRFMWFNEYKKRITNDGEKPMTPMLGLFGGMSAGCFSTIGNNPFVVKVSPEII  
LMGRFFGAAGAWSPFRDSANRSTLCLERSCPRSARILIXLPSPLVSLTTHLLNDLNAVRO  
TRMQGTQATRYKNTMDCFVQVLRNEGIGAFYAGVIPRLGRVVPQGIIIFMSFESIQTSLV  
ANFSIFKH  
>comp12070\_c0\_seq2; 264 308 1579 LEN=1801; translated  
MATNKSSNPLTAMSAGCIAGAVEATAVWPMEFIKTQLQLGSKSGSKLPYGGMIEGLSYTV  
RTTGFFXVGCPCGRCPADPPPAARVVSCCLVSRQSHRLVSHAHRLAPLFFFSLCCLCVRDR  
RNEPRAAAASTAASRRPSWGASRRPGSGSAXNSLIKEKLRGEDGKLTPAKNFVAGLGAGV  
SEALLVVAPVETVKTRVIELNMPFLGGLKHIVRSEIGGVYKGVRFTEENTXLARALRPF  
WNHRVPFGSPGALLHCQKAGCVAHDRRLSQTALPTISSCRCTLI FRKQYCVVSQASATA  
MKQGSNQGLRFMWFNEYKKRITNDGEKPMTPMLGLFGGMSAGCFSTIGNNPFVVKTRMQ  
GTQATRYKNTMDCFVQVLRNEGIGAFYAGVIPRLGRVVPQGIIIFMSFESIQTSLVANFS  
IFKH  
>comp12070\_c0\_seq3; 179 308 1180 LEN=1402; translated  
MATNKSSNPLTAMSAGCIAGAVEATAVWPMEFIKTQLQLGSKSGSKLPYGGMIEGLSYTV  
RTTGFFSLYRGLAPTLVGSVPKAGIRFGLNSLIKEKLRGEDGKLTPAKNFVAGLGAGVSE  
ALLVVAPVETVKTRVIELNMPFLGGLKHIVRSEIGGVYKGASATAMKQGSNQGLRFMWF  
NEYKKRITNDGEKPMTPMLGLFGGMSAGCFSTIGNNPFVVKTRMQGTQATRYKNTMDCF  
VQVLRNEGIGAFYAGVIPRLGRVVPQGIIIFMSFESIQTSLVANFSIFKH  
>comp12070\_c0\_seq4; 375 308 1377 LEN=1599; translated  
MATNKSSNPLTAMSAGCIAGAVEATAVWPMEFIKTQLQLGSKSGSKLPYGGMIEGLSYTV  
RTTGFFSLYRGLAPTLVGSVPKAGIRFGLNSLIKEKLRGEDGKLTPAKNFVAGLGAGVSE  
ALLVVAPVETVKTRVIELNMPFLGGLKHIVRSEIGGVYKGASATAMKQGSNQGLRFMWF  
NEYKKRITNDGEKPMTPMLGLFGGMSAGCFSTIGNNPFVVKVSPEIILMGRFFGAAGAW  
SPFRDSANRSTLCLERSCPRSARILIXLPSPLVSLTTHLLNDLNAVROTRMQGTQATRYK  
NTMDCFVQVLRNEGIGAFYAGVIPRLGRVVPQGIIIFMSFESIQTSLVANFSIFKH  
>comp12070\_c0\_seq5; 325 308 1395 LEN=1617; translated  
MATNKSSNPLTAMSAGCIAGAVEATAVWPMEFIKTQLQLGSKSGSKLPYGGMIEGLSYTV  
RTTGFFSLYRGLAPTLVGSVPKAGIRFGLNSLIKEKLRGEDGKLTPAKNFVAGLGAGVSE  
ALLVVAPVETVKTRVIELNMPFLGGLKHIVRSEIGGVYKGVRFTEENTXLARALRPFWRN  
HRVPFGSPGALLHCQKAGCVAHDRRLSQTALPTISSCRCTLI FRKQYCVVSQASATAMK  
QGSNQGLRFMWFNEYKKRITNDGEKPMTPMLGLFGGMSAGCFSTIGNNPFVVKTRMQGT  
QATRYKNTMDCFVQVLRNEGIGAFYAGVIPRLGRVVPQGIIIFMSFESIQTSLVANFSIF  
KH  
>comp12070\_c0\_seq6; 284 308 1364 LEN=1586; translated  
MATNKSSNPLTAMSAGCIAGAVEATAVWPMEFIKTQLQLGSKSGSKLPYGGMIEGLSYTV  
RTTGFFXVGCPCGRCPADPPPAARVVSCCLVSRQSHRLVSHAHRLAPLFFFSLCCLCVRDR  
RNEPRAAAASTAASRRPSWGASRRPGSGSAXNSLIKEKLRGEDGKLTPAKNFVAGLGAGV  
SEALLVVAPVETVKTRVIELNMPFLGGLKHIVRSEIGGVYKGASATAMKQGSNQGLRFM  
WFNEYKKRITNDGEKPMTPMLGLFGGMSAGCFSTIGNNPFVVKTRMQGTQATRYKNTMD  
CFVQVLRNEGIGAFYAGVIPRLGRVVPQGIIIFMSFESIQTSLVANFSIFKH  
>comp12070\_c0\_seq7; 314 308 1561 LEN=1783; translated  
MATNKSSNPLTAMSAGCIAGAVEATAVWPMEFIKTQLQLGSKSGSKLPYGGMIEGLSYTV  
RTTGFFXVGCPCGRCPADPPPAARVVSCCLVSRQSHRLVSHAHRLAPLFFFSLCCLCVRDR  
RNEPRAAAASTAASRRPSWGASRRPGSGSAXNSLIKEKLRGEDGKLTPAKNFVAGLGAGV

SEALLVVAPVETVKTRVIELNMPFLGGLKHIVRSEGIGGVYKGASATAMKQGSNQGLRFM  
WFNEYKKRITNDGEKPMTPMLGFLGGMSAGCFSTIGNNPFVVKVSPEIILMGRFFGAAG  
AWSPPFRDSANRSTLCLERSCPRSARILIXLPSPLVSLTTHLLNDLNAVROTRMQGTQATR  
YKNTMDCFVQVLRNEGIGAFYAGVIPRLGRVVPQGIIIFMSFESIQTSLVANFSIFKH  
>comp12070\_c0\_seq8; 294 308 1776 LEN=1998; translated  
MATNKSSNPLTAMSAGCIAGAVEATAVWPMFEIKTQLQLGSKSGSKLPYGGMIEGLSYTV  
RTTGFFXVGCPCGRCPADPPPAARVVSCCLVSRQSHRLVSHAHLAPLFFFSLCCLCVRDR  
RNEPRAAAASTAASRRPSWGASRRPGSGSAXNSLIKEKLRGEDGKLTPAKNFVAGLGAGV  
SEALLVVAPVETVKTRVIELNMPFLGGLKHIVRSEGIGGVYKGVRFTEENTXLARALRPFR  
WNHRVPFGSPGALLHCQKAGCVAHDRRLSQTALPTISSCRCTLIIFRKQYCVVSQASATA  
MKQGSNQGLRFMWFNEYKKRITNDGEKPMTPMLGFLGGMSAGCFSTIGNNPFVVKVSPE  
IILMGRFFGAAGAWSPPFRDSANRSTLCLERSCPRSARILIXLPSPLVSLTTHLLNDLNAV  
ROTRMQGTQATRYKNTMDCFVQVLRNEGIGAFYAGVIPRLGRVVPQGIIIFMSFESIQT  
LVANFSIFKH  
>comp12072\_c0\_seq1; 380 1 957 LEN=1088; translated  
XEIYLDNFNNLSGDIPWEIGNLEALGTQCNPIRFYAGVLPSQLFVPIVNAFLPRLSLSLY  
LLSEKLALSNNNLTGWIPDGLGNMDNLEVLTLGNNNLTGALPKDVCKLKGVDVLLVDCDK  
QGCECCTECSATEAPTLSPPTLPPTGVPTVSPTVHPTSMIVRFTPQPSATEPPTASPTLSP  
TTKEPTESPTTGEPASPTACTGNEMKVSKEYCYTQAEIITVSLTNCQADRDDWVGLYRLD  
ETFNSMDLTNPDIWSWACGTRNCREPVTSQVIPLGTIHAGNGQWPLQVGTYYVAIIARNSA  
QPPIAFVSDAFVVSETC  
>comp12072\_c0\_seq2; 390 1 852 LEN=983; translated  
ILSLAEIYLDNFNNLSGDIPWEIGNLEALEKLALSNNNLTGWIPDGLGNMDNLEVLTLGN  
NLTGALPKDVCKLKGVDVLLVDCDKQGCECCTECSATEAPTLSPPTLPPTGVPTVSPTVH  
PTSMIVRFTPQPSATEPPTASPTLSPPTTKEPTESPTTGEPASPTACTGNEMKVSKEYCYT  
QAEIITVSLTNCQADRDDWVGLYRLDETFSMDLTNPDIWSWACGTRNCREPVTSQVIPLG  
TIHAGNGQWPLQVGTYYVAIIARNSAQPPIAFVSDAFVVSETC  
>comp12072\_c0\_seq3; 466 1 958 LEN=1089; translated  
XLVGGLPMDFGNIPDLEILDLDLADNQLTGKIPYSIVDVETLLEIYLDNFNNLSGDIPWEIGN  
LEALEKLALSNNNLTGWIPDGLGNMDNLEVLTLGNNNLTGALPKDVCKLKGVDVLLVDCD  
KQGCECCTECSATEAPTLSPPTLPPTGVPTVSPTVHPTSMIVRFTPQPSATEPPTASPTLS  
PTTKEPTESPTTGEPASPTACTGNEMKVSKEYCYTQAEIITVSLTNCQADRDDWVGLYRL  
DETFSMDLTNPDIWSWACGTRNCREPVTSQVIPLGTIHAGNGQWPLQVGTYYVAIIARNS  
AQPPIAFVSDAFVVSETC  
>comp12073\_c0\_seq1; 396 1 1058 LEN=1451; translated  
XNNNNKDTEGQHQQEAPRPQLKEGGMRLPAVPYGSTLDWDSVFPAPPESASGTREIWLEL  
GFGRGENLQALLESRFRREAAAAAAKEDARPQTPTRFCLVGAEVSGVGIGCLCKRIDRLR  
QQQQQSPPEPNRSGNAGESDDYVLYRPELDPYSEPSQNETGTNHHATRENDNPPTEEEPI  
TTECRGSSPTELRGRYYGDRRLRIHAGDGYKLLPKIPDGSLSAILITFPDPFPKESVDY  
RLVQQQTLVECHRLLNRNDSGGSSHGRFLATDHDGYHEWCHKTMAEANNNNNGDGGADD  
PQRQRGPLFRPVEPCPDRMGWLPASRYEQKGWDEGRSTKLSCWEAVAPSQA  
>comp12074\_c0\_seq1; 355 1 1394 LEN=1394; translated  
XSCDIKQGFQSQKNITMSKVFIAVPTEELFASADSVAKALATKYGILDVTVRSSESPID  
RLLTTVQQETNVVWVYFSGSSLAAYNLLQEEESPYPVLEVEAEGEPDEIAWTVAKWCGLGC  
EAVAKKVRQATAERRQAKLVRDSQLQTKSFKYHKAMS NVFDRNLQVTGDNIGLEAKRGKV  
RDRIEVDKTIALVTTDRQSGFDRQLALVPYKGA VLNLTSAFWFEQTKDI IKNHIVAI PH  
PYVTIARKCQFPPIEFVVR SYMTGSDTDSIWKNY SNGVRNYCGHEL PDGMVKNQKLAKNL  
LTPPTKEEEHDRPISAEI IAEKWMTQEDWDVCAEAALKV FALGQKIADEHGLILVDTKY  
EFGRDLETGEILLIDEVHTPDSRYWLASSYADRIAKGMEPENIDKEFLRLWFRERCDPY  
KEKVLPEPPRELVLLELSRRYITL FEMITWDHFD FPTDGE EGIASA  
>comp12075\_c0\_seq1; 239 177 833 LEN=1210; translated  
MSHLFSIIVLLLRRLRVAKNAQGISVKTHELYLLVVFVTRYLDLFTTFYSAYNSIMKVYVIA  
ATSAIIYTIKYQEPIKSTYEKGQDSFLHWQFAVIPC AVLAF LTHLIGSGISDFNMELLW  
TFSIYLECITIMPQLVVLQRYREVENLTGNYVFFMGAYRALYILNWIYRAKNEKNYRHHW  
VVYICGVIQTLTYADFFYYLKS KRKGGKFSLPTSSDK  
>comp12075\_c0\_seq2; 215 445 942 LEN=1319; translated  
MKVVYIAATSAAIYTIKYQEPIKSTYEKGQDSFLHWQFAVIPC AVLAF LTHLIGSGISDF  
NMELLWTFSIYLECITIMPQLVVLQRYREVENLTGNYVFFMGAYRALYILNWIYRAKNE  
KNYRHHWVVYICGVIQTLTYADFFYYLKS KRKGGKFSLPTSSDK  
>comp12076\_c0\_seq1; 803 132 2000 LEN=2127; translated

MGDCRIRISVARSLFASYPTDKLAADGADGSSSSASISHSDKAVVFSTTYSADTTVREVAE  
GNPLLLKHLFFGGDAPSLSPSPGDPPTVGFCLWDFTLHPPRDITSWPRKEYPDLQGPRSKT  
LHAAGWFPSGTWVAVPRGTEPGGLSGSSTDAYADAQYNTPVAGTTGPILGGRVEFLDPNL  
RSGGGGTRGAPLPSRVVETVANRFAVEERGEAPGVAAPRKIPRQDRLQKERERGAKLERR  
IAVLEEQSKAGKQNKKKKTSQVLRMLVKSRATGDKNLKQQDRLYCQCLVIIVDGENAGND  
NDNDVDNENPTGTSAEAENSGSSKEYRYFSPQDTFAKIANFQNPSEKKNLFGEVLCRRPA  
ANAKDPQTQSLIHRRFPVTMRVYEAIREGYLSLSKSNANYLDDMLIVRWYKDREDATLIDL  
QHDNETIASSEDENDVVATTKSESVATEPVTVPMDVEEETTSSPDGADADATTTLEDALLT  
DAIQKMEVLNNKGGKKTASTKKASAAALKVRQMKMKSKSKGNKKNLIDERFFFLEVVSI  
PKAGGDPVSECCFLSKKDPPIERVLQYIATIAGTSDEWRFLVPREGSRYQAISEVSMVPVQEA  
EKGIVKSFDRLLILCPRPQTNQN

>comp12076\_c0\_seq2; 803 129 1997 LEN=2124; translated  
MGDCRIRISVARSLFASYPTDKLAADGADGSSSSASISHSDKAVVFSTTYSADTTVREVAE  
GNPLLLKHLFFGGDAPSLSPSPGDPPTVGFCLWDFTLHPPRDITSWPRKEYPDLQGPRSKT  
LHAAGWFPSGTWVAVPRGTEPGGLSGSSTDAYADAQYNTPVAGTTGPILGGRVEFLDPNL  
RSGGGGTRGAPLPSRVVETVANRFAVEERGEAPGVAAPRKIPRQDRLQKERERGAKLERR  
IAVLEEQSKAGKQNKKKKTSQVLRMLVKSRATGDKNLKQQDRLYCQCLVIIVDGENAGND  
NDNDVDNENPTGTSAEAENSGSSKEYRYFSPQDTFAKIANFQNPSEKKNLFGEVLCRRPA  
ANAKDPQTQSLIHRRFPVTMRVYEAIREGYLSLSKSNANYLDDMLIVRWYKDREDATLIDL  
QHDNETIASSEDENDVVATTKSESVATEPVTVPMDVEEETTSSPDGADADATTTLEDALLT  
DAIQKMEVLNNKGGKKTASTKKASAAALKVRQMKMKSKSKGNKKNLIDERFFFLEVVSI  
PKAGGDPVSECCFLSKKDPPIERVLQYIATIAGTSDEWRFLVPREGSRYQAISEVSMVPVQEA  
EKGIVKSFDRLLILCPRPQTNQN

>comp12077\_c0\_seq1; 374 317 1519 LEN=1668; translated  
MIGRTNEAAVCSRLIQTYFRRQGGCCPKLSNGIRHSSSPSRSTETPPPSTVLLRHGQSL  
WNKIPFTGWCDVPLTDTGVKQAQDAARVMDERGFDFDIVYTSQLKRAYDTAEAILDVF  
DNTRVSSKSIITVRTWELNERHYGELQGLSKTNPPELVTLYGEEQMRWRRELKARPP  
EMDEVHPYQPPPAPLTESLYDCQKRVLRVWHGTIVPTMLLKEQTILISAHANTIRSLIAY  
LD EVPDDEVPHIHIPNSVPCFTFKIDPTTGRALKQDFSSLSKSKGNWLLSAENQERLVEK  
LGI DSESFARSVFGAWDLNGDGVLDKEEVGNGLFRWKKDSNPAINALAGKLLLEEFNIS  
DMSGSGITLQFQSSAIAASRKHNLPFFEGESLLSPNVVKQGIKA

>comp12077\_c0\_seq2; 297 317 1018 LEN=1772; translated  
MIGRTNEAAVCSRLIQTYFRRQGGCCPKLSNGIRHSSSPSRSTETPPPSTVLLRHGQSL  
WNKIPFTGWCDVPLTDTGVKQAQDAARVMDERGFDFDIVYTSQLKRAYDTAEAILDVF  
DNTRVSSKSIITVRTWELNERHYGELQGLSKTNPPELVTLYGEEQMRWRRELKARPP  
EMDEVHPYQPPPAPLTESLYDCQKRVLRVWHGTIVPTMLLKEQTILISAHANTIR

>comp12078\_c0\_seq1; 451 250 1992 LEN=2165; translated  
MMGAKTSRIVATKSSDAVDDGGEHSSSDEDQDMATFLQASAKLSSNKTTSSPPLNYITQL  
ILEMENSVALEAKDLAIPKLEKMAVFIYESMCI SARNYHSVQHVFDIIAHDRRLGDNPI  
AVLAACFHDCIYYHVDGGLTSVQAKLLKGSYKVEGLNLEVQDDLSDYITKHSIYKFFASE  
ERSANTENSVLLLNMVESIFGYIPGQSI SITNDGLNEFLSALVAVRMLSDHLPLEILAQI  
ACCIESTIPFRKIDEKTGKTHMQRLYDNMKETRDFNLKLSDEDLVVSVQRSCLLSNSDV  
GNFSTDRHWFLDNTWSLLPETNESLRNEYVYVVEHFHTALYKMYKFFGFLOPEVVFHEF  
QGVDPDLPMTQECSSNLEFGRTYVYVAKLVAMSLLSAVAVLTDGDAPISLFTGDLRAA  
KRRGSGLVTKDPSMMQRAQMMQRTSGLPFSKVRVSDFLRQPLHCCEDPPEESLKQCNE  
MVFQILAEGRRSESSFDTKRSPWAAMLGYMGDEGLNQILTEHTLYPMTQEHAWNLLRALP  
PIPVHSIVGIIICSHALSRQDKILDVLSKLAEEENGDKCTKA

>comp12078\_c2\_seq1; 437 1 1735 LEN=1784; translated  
QLRKISTLTEYNNNSHISSSNGTCGETTVPVVVCSVFRRCPPTEKVVQTETREQNDPHEQ  
EPSSSSTKLRQSRCVSSHGRIGVSPADGSRNVPFARAEPHAQPAESESPKTEMVFD  
RPA GTVSGAASNGDXVQGALLERCARGSAAGRRDSPRTAGFCSGTDNAQQQQRQQRHQQQ  
VPLTETDGPENELQGPVDAVHRARDRGG SARHNAPLAVCRRLCSEPASQSVRAPPQPLP  
DPRSPQISDGFHPRPVARYGSFVAFAAAFLAVVLPAGAGHHERDPVEWIEFYAPDEA  
SGEARAPVFLHGLLGSKRNFATCATMLARQIDKRRRIGVDLRNHGDTQPWSENMSYPS  
MAQDVVQFLQSQNIENAILVGHSMGGKVAQALALLHPEYVAGLVVLDIAPVTYTRDADPH  
WRAVEDILRTVHGVIEDIAEATGEEP NKREIDRSLRKSIPDPALRAFVL TNYSRNNQWKV  
PIGTMVKELEQIAGFDLTPDSEALVVNEPSSLSSTYEGDVFINGGQSRFVRHAYMDQI  
ASYFPNHMLTTIRGSGHWVHAEAPDDLVALLKRYLDR

>comp12078\_c2\_seq2; 267 176 760 LEN=809; translated  
MGGKVAQALALLHPEYVAGLVVLDIAPVTYTRDADPHWRAVEDILRTVHGVIEDIAEATGE

EPNKREIDRSLRKSIPDPALRAFLVLTNYDSRNNQWKVPIGTMVKELEQIAGFDLTPDSEA  
LVVNEPSSLSSTYEGDVFI INGGQSRFVRHAYMDQIASYFPNHMLTTIRGSGHWVHAEA  
PDDLVALLKRYLDR

>comp12078\_c2\_seq3; 406 1 2027 LEN=2076; translated  
QLRKISTLLEYNNNSHISSSNGTCGETTVPVVVCSVFRRCPPTTEKVVQTETREQNDPHEQ  
EPSSSSTKLQRQSRVSSHGRIGVSPADGSRNVPFARAEPHAQPAESEPSPKTEMVFDPRPAG  
TVSGAASNGDXVQGALLERCARGSAAGRRDSPRTAGFCSTDNAQQQQRQQRHQQQVPV  
PLTETDGPREENELQGPVDAVHRARDRGG SARHNAPLAVCRRLCSEPASQSVRAPPQPLP  
DPRSPQISDGFDPVARYGSFVAFVAFLELAVVLPAGAGHHERDPVEWIEFYAPDEA  
SGEARAPVFLHGLLGSKRNFATCATMLARQIDKKRRIIGVDLRNHGDTQPWSENSKFFVL  
PVEKNESIDNGGRPDAAFPALQCEHADALFLSSNEFVSVSSRVLVLSHIXLCMAFSFALI  
VSYPMAQDVVQFLQSQNIENAILLDITYVNFCHSSCDPGPRLRQSLFVLMPLFSRTLQQS  
MGGKVAQALALLHPEYVAGLVVLDIAPVTYTRDADPHWRAVEDILRTVHGVI EDAEATGE  
EPNKREIDRSLRKSIPDPALRAFLVLTNYDSRNNQWKVPIGTMVKELEQIAGFDLTPDSEA  
LVVNEPSSLSSTYEGDVFI INGGQSRFVRHAYMDQIASYFPNHMLTTIRGSGHWVHAEA  
PDDLVALLKRYLDR

>comp12078\_c2\_seq4; 439 1 1930 LEN=1979; translated  
QLRKISTLLEYNNNSHISSSNGTCGETTVPVVVCSVFRRCPPTTEKVVQTETREQNDPHEQ  
EPSSSSTKLQRQSRVSSHGRIGVSPADGSRNVPFARAEPHAQPAESEPSPKTEMVFDPRPAG  
TVSGAASNGDXVQGALLERCARGSAAGRRDSPRTAGFCSTDNAQQQQRQQRHQQQVPV  
PLTETDGPREENELQGPVDAVHRARDRGG SARHNAPLAVCRRLCSEPASQSVRAPPQPLP  
DPRSPQISDGFDPVARYGSFVAFVAFLELAVVLPAGAGHHERDPVEWIEFYAPDEA  
SGEARAPVFLHGLLGSKRNFATCATMLARQIDKKRRIIGVDLRNHGDTQPWSENSKFFVL  
PVEKNESIDNGGRPDAAFPALQCEHADALFLSSNEFVSVSSRVLVLSHIXLCMAFSFALI  
VSYPMAQDVVQFLQSQNIENAILVGHSMGGKVAQALALLHPEYVAGLVVLDIAPVTYTR  
DADPHWRAVEDILRTVHGVI EDAEATGEEPNKREIDRSLRKSIPDPALRAFLVLTNYDSRN  
NQWKVPIGTMVKELEQIAGFDLTPDSEALVVNEPSSLSSTYEGDVFI INGGQSRFVRHA  
YMDQIASYFPNHMLTTIRGSGHWVHAEAPDDLVALLKRYLDR

>comp12078\_c2\_seq5; 200 1 1183 LEN=1381; translated  
QLRKISTLLEYNNNSHISSSNGTCGETTVPVVVCSVFRRCPPTTEKVVQTETREQNDPHEQ  
EPSSSSTKLQRQSRVSSHGRIGVSPADGSRNVPFARAEPHAQPAESEPSPKTEMVFDPRPAG  
TVSGAASNGDXVQGALLERCARGSAAGRRDSPRTAGFCSTDNAQQQQRQQRHQQQVPV  
PLTETDGPREENELQGPVDAVHRARDRGG SARHNAPLAVCRRLCSEPASQSVRAPPQPLP  
DPRSPQISDGFDPVARYGSFVAFVAFLELAVVLPAGAGHHERDPVEWIEFYAPDEA  
SGEARAPVFLHGLLGSKRNFATCATMLARQIDKKRRIIGVDLRNHGDTQPWSENSKFFVL  
PVEKERIDRQRWTTGCRVSGSAMRARGCFVPFL

>comp12078\_c2\_seq6; 146 1 1186 LEN=1186; translated  
QLRKISTLLEYNNNSHISSSNGTCGETTVPVVVCSVFRRCPPTTEKVVQTETREQNDPHEQ  
EPSSSSTKLQRQSRVSSHGRIGVSPADGSRNVPFARAEPHAQPAESEPSPKTEMVFDPRPAG  
TVSGAASNGDXVQGALLERCARGSAAGRRDSPRTAGFCSTDNAQQQQRQQRHQQQVPV  
PLTETDGPREENELQGPVDAVHRARDRGG SARHNAPLAVCRRLCSEPASQSVRAPPQPLP  
DPRSPQISDGFDPVARYGSFVAFVAFLELAVVLPAGAGHHERDPVEWIEFYAPDEA  
SGEARAPVFLHGLLGSKRNFATCATMLARQIDKKRRIIGVDLRNHGDTQPWSENMSYPS  
MAQKTELIVVVHVDYHFVLDGLKFEKEILQLAX

>comp12078\_c2\_seq7; 301 1 663 LEN=712; translated  
RGVETIDVVQFLQSQNIENAILVGHSMGGKVAQALALLHPEYVAGLVVLDIAPVTYTRDA  
DPHWRAVEDILRTVHGVI EDAEATGEEPNKREIDRSLRKSIPDPALRAFLVLTNYDSRNNQ  
WKVPIGTMVKELEQIAGFDLTPDSEALVVNEPSSLSSTYEGDVFI INGGQSRFVRHAYM  
DQIASYFPNHMLTTIRGSGHWVHAEAPDDLVALLKRYLDR

>comp12078\_c2\_seq8; 404 1 1832 LEN=1881; translated  
QLRKISTLLEYNNNSHISSSNGTCGETTVPVVVCSVFRRCPPTTEKVVQTETREQNDPHEQ  
EPSSSSTKLQRQSRVSSHGRIGVSPADGSRNVPFARAEPHAQPAESEPSPKTEMVFDPRPAG  
TVSGAASNGDXVQGALLERCARGSAAGRRDSPRTAGFCSTDNAQQQQRQQRHQQQVPV  
PLTETDGPREENELQGPVDAVHRARDRGG SARHNAPLAVCRRLCSEPASQSVRAPPQPLP  
DPRSPQISDGFDPVARYGSFVAFVAFLELAVVLPAGAGHHERDPVEWIEFYAPDEA  
SGEARAPVFLHGLLGSKRNFATCATMLARQIDKKRRIIGVDLRNHGDTQPWSENMSYPS  
MAQDVVQFLQSQNIENAILLDITYVNFCHSSCDPGPRLRQSLFVLMPLFSRTLQQSMGGKV  
AQALALLHPEYVAGLVVLDIAPVTYTRDADPHWRAVEDILRTVHGVI EDAEATGEEPNKR  
EIDRSLRKSIPDPALRAFLVLTNYDSRNNQWKVPIGTMVKELEQIAGFDLTPDSEALVVNE  
PSSLSSTYEGDVFI INGGQSRFVRHAYMDQIASYFPNHMLTTIRGSGHWVHAEAPDDL

ALLKRYLDR

>comp12079\_c0\_seq1; 408 1 845 LEN=1678; translated  
XPSCGTAPPSAGERSLFLPVGSDTVDRGLFLQLSISLKLPLSHPLTPPRAPCIARFS  
GRSPVAIAADTALAIERTLSLPQGRSLFLTLATHHRGAYAAFGRREAGDLLASTACIDA  
VVTLPLPKPPEQKSKHQSRAGAIGSDWKAPVARNRGGSCETTRVHGGTDPTRNPNYNS  
CSKNDNNTNKNKSNAGGEESIFIHSLWQAQFQDRRCDSGADEKGNDRAGGTSLMDY  
AFVESFPADDDDDIDDDDDDDSTDEYESDPLELRWKHRGAYS

>comp12079\_c0\_seq2; 441 1 875 LEN=1708; translated  
XIRRVSSARELWYELLAMAGRPHGEQPSGAIIVVEDMDKLVPRDALPGGRGGRAPSNNQRK  
WHQRNLRISTLQKTVAIAADTALAIERTLSLPQGRSLFLTLATHHRGAYAAFGRREAGD  
LLASTACIDAVVTLPLPKPPEQKSKHQSRAGAIGSDWKAPVARNRGGSCETTRVHGGT  
PTRNPNYNSCSKNDNNTNKNKSNAGGEESIFIHSLWQAQFQDRRCDSGADEKGNDR  
RAGGTSLMDYAFVESFPADDDDDIDDDDDDDSTDEYESDPLELRWKHRGAYS

>comp12079\_c0\_seq3; 469 613 2565 LEN=4405; minus strand; translated  
MSNILRRSVKHGIGRLTASADGIPKQAAKNPSSRRLTQVAHKAPTRLIPVKKTSVQKQG  
AAVCALSNYGAGMLQGDSAEHSVHENSACLALISQASRIYTQRPGEVKARMYAKVEK  
DGVLVFTDPDCVMFASSYSQTQFEFIEHPEASVALIDWFASGRFKNQERWDFDKLTTTRTT  
LKWMEADAENKNSAKEETNQIPFLQDSISIDLRLNSNSDKNNRSVHDTHGVADEFNCFASL  
IYGYSEMEAVKDKCQVLADLFAAQHTRIRERDNGEGDTMLRSVKTIDDLKLSGRIVMGV  
SKISLPGKPSNAHVIRLAGETNEDLYRVFHECLIPLAPSFQGFYKDRILAQRSEIPVQG  
VTNEKQKIFETPTKKHQTKAAKSYSSRKPLESFNDFSQTSRSFWSVVMLADSGLP TGSF  
AHSAGLEAATQLGMIRNEEDVCSFIHAATRSSIQLLTPFLVRGLRITQCETSNGSDKKT  
EDLWEKLRHQCHAIMVTNEPACSASIDQKSLIRVAAHWLNANESHEPTLPNKYILDCL  
KSGSAPHIAPALGAIGLLGLDEVQVCRFLFAYCMARDLVSSAVRLSLVGPLASVPMMLDSV  
QEAAEDAICSAYHDFRSNPEDPLLVAASSAPVIEAVHPSHEVLQVRLFRS

>comp12080\_c0\_seq1; 240 1 1188 LEN=1235; translated  
XGTMSYFTHRRRAATNTDXKYDVRATYFGAMIVRASNERLRLGLIGALTI AVLSTAL  
VVDN CIRKLSATT CRRQSLSSSCVLKSFVNHYSDVSNRNDRNGPETQAAATRGAAHSSG  
SGSNKRIAI VAGNWKLN PSTAQEASTLLNLLASNFVHHRNGETPLETIVFPFPYLERAV  
SLEGTGIVKGAQNVGVEKGAFTGEVSPSMVRS LGCDYVMVGHSERRTLYGETDGSINA  
KIKLSLQERGLKVICVGETLQEYENLLSSVNSQLKEALNGVTKDDIVASISAADSIR  
LVVAYEPVWAIGTGKVATPDQAQIAHLVVRNTLEELYGSDIAAQIQIQYGGSVTPDSILS  
LISMPDVGALVGGASLTADGFTRIVDGAASMSAY

>comp12081\_c0\_seq1; 745 147 1694 LEN=1842; translated  
MAVEKYVIALTVVGIVDAISYMLVTPSLVFYVQLQGGTKDQYGLIMSAFSSFCMKPIV  
GWWSDHQGFRVPYVVSLLIALVGGIVYV LASALPAGNVAVLAIFGARLLGGCGAANSALG  
YAYVARSVPAKKQTAVNSLLSLCRILGMAVGPVGNILVARVDVPIGTHWRDLNSVGLI  
IVACNLTAMAAI LYFLEEPGGGEGE GDSVRHDEKAERTKSSSSAVLCSLLSVDVLVPM  
LSIFAFNANFQLIETGFAPAANDGLGWGPVQSSVALGSI SFVIAANMVAVMRLSERGVSE  
ANMLCGGLV LSTVAYVLYALWIKDSTAWN FYLPVLLGASSFPYLAATTTRITFLAVNAK  
PALKDYHGSMAVLSMAASVAGFVTPGIVAAYCLRHPGDVAASIDGRELAPAALFAPVLS  
IITLLGVLYLRVTGVLRRNEALAGATAAEDATNPESLPRVRESSPLVPKKNYSTRWSKAR  
RRSSNIEIVMEMESSFDGLEQSFARAGTLSEAIG

>comp12081\_c0\_seq2; 362 147 778 LEN=778; translated  
MAVEKYVIALTVVGIVDAISYMLVTPSLVFYVQLQGGTKDQYGLIMSAFSSFCMKPIV  
GWWSDHQGFRVPYVVSLLIALVGGIVYV LASALPAGNVAVLAIFGARLLGGCGAANSALG  
YAYVARSVPAKKQTAVNSLLSLCRILGMAVGPVGNILVARVDVPIGTHWRDLNSVGLI  
IVACNLTAMAAI LYFLEEPGGGEDDDDDX

>comp12082\_c0\_seq1; 322 102 614 LEN=910; translated  
MKSTSTAVALLACGLLSAEAFVAPSAAATAATKRFAETGFEGEAAPAEAEASSGPQLPEI  
KGFDFDWDKFGGDDDWITENVPKIVLDEITLAKQVTALNALEEKYRKRVRQQEEIEDYQT  
TGWVGNAELLSRFAMFFLAVGLFTEKFTGVSIPGQVEEMLRITGFIGFD

>comp12083\_c0\_seq1; 284 261 1088 LEN=1461; translated  
MSSQPPQEEVRSVLDVGIYGTDRTPRMLAGGTVTEVEW MRFCEIDDALSPLNRIHK  
LHRCCFAISFLGFFAVSALS VLFPPAGKYDDHYYDDGFRFGPEYLVLPVIVFVATIGA  
TSCFVAKKREKAFAEAEVCERISNRHPELGCFNHPGNHQSLRATMFLALVRRGDTAND  
HFVLVTRKQAPPQPLSDVELGGWDASGAAA STPSADSAFPDLDKMFPTVAASAHASSG  
GPTTLAGRLEENLRGEISEQEYEEKRKEIVYGV

>comp12085\_c0\_seq1; 433 184 912 LEN=1065; translated  
MQRGAQRSSGTRNESYSSSSVDANDKKRRKISSSVFYAVGLFVILVVCLPLVLTSPSQK

KELSEVEQAIWRQYQQOTTGSQVEQQSISNNKEEEDDDDDVKEGDNKAVDGEKGSLEEQ  
HDDKEDTSANNADGAPPNAATARMEAQSSRWVDGEKALKKKLMVLYEQQMKGKYLGVV  
TRYLGEDIPAYIGTPDSPMAEDEWKKLVEAKYEEMRLEEEEWKMEALIATRERDMGIT  
TA

>comp12086\_c0\_seq1; 439 516 2260 LEN=4382; minus strand; translated  
MVNSTSPPATWNVADVTAWATQAKLAPDVVSSLANNQVDGPTLVTLTKAELQSELGIISL  
PARRYLWELIRSLNFEQIPAAIDVHEQEIQSLLVANDTVADSQDPDAASGSKSGIKQSSV  
SSVVDELNIDVQTQRQVIEDHMAFRVQKMLNEGHDVCKDAEAAHREQERLDQLLAQAER  
DREYAESLAGGRQRATLNRRTTETRQVEVEPNIQPHEDNRLSSLFGLCTRACSDNKVNVA  
EAFRTGKVKPMPKAALVSDEERSDDAEEDTKPADVPSGIFNLPIEQCNVCYEDNLKGYN  
FACGHLQCVQCTRKLFQTALGDSKLLPLRCCEIPIDMNIANDLLKRDEAKLILRRVEEKE  
ASNKMYCPCSSFINLIDLIDSSTSLELVCGCGTIVICTACKTESHPGLTCRQNQATKSGSD  
ELVLQLSREQGWKQCPKCSVLIELRSGCNHMTASCASHQFCYRCLRDWNNEQAQCSSGTC  
ELWEEDQLIEAGEARVQQQEAAALGGRLPDLVRREVFRRRAIVGLQANETCNHHWIRNNGY  
KGDCPNCGFTMRAYGMHCTSNCGSTVCYTCARHRIPNRGWR

>comp12086\_c0\_seq2; 439 662 2406 LEN=4528; minus strand; translated  
MVNSTSPPATWNVADVTAWATQAKLAPDVVSSLANNQVDGPTLVTLTKAELQSELGIISL  
PARRYLWELIRSLNFEQIPAAIDVHEQEIQSLLVANDTVADSQDPDAASGSKSGIKQSSV  
SSVVDELNIDVQTQRQVIEDHMAFRVQKMLNEGHDVCKDAEAAHREQERLDQLLAQAER  
DREYAESLAGGRQRATLNRRTTETRQVEVEPNIQPHEDNRLSSLFGLCTRACSDNKVNVA  
EAFRTGKVKPMPKAALVSDEERSDDAEEDTKPADVPSGIFNLPIEQCNVCYEDNLKGYN  
FACGHLQCVQCTRKLFQTALGDSKLLPLRCCEIPIDMNIANDLLKRDEAKLILRRVEEKE  
ASNKMYCPCSSFINLIDLIDSSTSLELVCGCGTIVICTACKTESHPGLTCRQNQATKSGSD  
ELVLQLSREQGWKQCPKCSVLIELRSGCNHMTASCASHQFCYRCLRDWNNEQAQCSSGTC  
ELWEEDQLIEAGEARVQQQEAAALGGRLPDLVRREVFRRRAIVGLQANETCNHHWIRNNGY  
KGDCPNCGFTMRAYGMHCTSNCGSTVCYTCARHRIPNRGWR

>comp12086\_c0\_seq3; 439 780 2524 LEN=4646; minus strand; translated  
MVNSTSPPATWNVADVTAWATQAKLAPDVVSSLANNQVDGPTLVTLTKAELQSELGIISL  
PARRYLWELIRSLNFEQIPAAIDVHEQEIQSLLVANDTVADSQDPDAASGSKSGIKQSSV  
SSVVDELNIDVQTQRQVIEDHMAFRVQKMLNEGHDVCKDAEAAHREQERLDQLLAQAER  
DREYAESLAGGRQRATLNRRTTETRQVEVEPNIQPHEDNRLSSLFGLCTRACSDNKVNVA  
EAFRTGKVKPMPKAALVSDEERSDDAEEDTKPADVPSGIFNLPIEQCNVCYEDNLKGYN  
FACGHLQCVQCTRKLFQTALGDSKLLPLRCCEIPIDMNIANDLLKRDEAKLILRRVEEKE  
ASNKMYCPCSSFINLIDLIDSSTSLELVCGCGTIVICTACKTESHPGLTCRQNQATKSGSD  
ELVLQLSREQGWKQCPKCSVLIELRSGCNHMTASCASHQFCYRCLRDWNNEQAQCSSGTC  
ELWEEDQLIEAGEARVQQQEAAALGGRLPDLVRREVFRRRAIVGLQANETCNHHWIRNNGY  
KGDCPNCGFTMRAYGMHCTSNCGSTVCYTCARHRIPNRGWR

>comp12086\_c0\_seq4; 439 666 2410 LEN=4532; minus strand; translated  
MVNSTSPPATWNVADVTAWATQAKLAPDVVSSLANNQVDGPTLVTLTKAELQSELGIISL  
PARRYLWELIRSLNFEQIPAAIDVHEQEIQSLLVANDTVADSQDPDAASGSKSGIKQSSV  
SSVVDELNIDVQTQRQVIEDHMAFRVQKMLNEGHDVCKDAEAAHREQERLDQLLAQAER  
DREYAESLAGGRQRATLNRRTTETRQVEVEPNIQPHEDNRLSSLFGLCTRACSDNKVNVA  
EAFRTGKVKPMPKAALVSDEERSDDAEEDTKPADVPSGIFNLPIEQCNVCYEDNLKGYN  
FACGHLQCVQCTRKLFQTALGDSKLLPLRCCEIPIDMNIANDLLKRDEAKLILRRVEEKE  
ASNKMYCPCSSFINLIDLIDSSTSLELVCGCGTIVICTACKTESHPGLTCRQNQATKSGSD  
ELVLQLSREQGWKQCPKCSVLIELRSGCNHMTASCASHQFCYRCLRDWNNEQAQCSSGTC  
ELWEEDQLIEAGEARVQQQEAAALGGRLPDLVRREVFRRRAIVGLQANETCNHHWIRNNGY  
KGDCPNCGFTMRAYGMHCTSNCGSTVCYTCARHRIPNRGWR

>comp12086\_c0\_seq7; 439 926 2670 LEN=4792; minus strand; translated  
MVNSTSPPATWNVADVTAWATQAKLAPDVVSSLANNQVDGPTLVTLTKAELQSELGIISL  
PARRYLWELIRSLNFEQIPAAIDVHEQEIQSLLVANDTVADSQDPDAASGSKSGIKQSSV  
SSVVDELNIDVQTQRQVIEDHMAFRVQKMLNEGHDVCKDAEAAHREQERLDQLLAQAER  
DREYAESLAGGRQRATLNRRTTETRQVEVEPNIQPHEDNRLSSLFGLCTRACSDNKVNVA  
EAFRTGKVKPMPKAALVSDEERSDDAEEDTKPADVPSGIFNLPIEQCNVCYEDNLKGYN  
FACGHLQCVQCTRKLFQTALGDSKLLPLRCCEIPIDMNIANDLLKRDEAKLILRRVEEKE  
ASNKMYCPCSSFINLIDLIDSSTSLELVCGCGTIVICTACKTESHPGLTCRQNQATKSGSD  
ELVLQLSREQGWKQCPKCSVLIELRSGCNHMTASCASHQFCYRCLRDWNNEQAQCSSGTC  
ELWEEDQLIEAGEARVQQQEAAALGGRLPDLVRREVFRRRAIVGLQANETCNHHWIRNNGY  
KGDCPNCGFTMRAYGMHCTSNCGSTVCYTCARHRIPNRGWR

>comp12087\_c0\_seq1; 122 276 1539 LEN=1569; translated

MTTDGEPPPSAEPGEAPPEAAAAATAAAKGISPRRELARNTRPIPCYRVDQLPPRFGSDD  
LYERILPTAVETGSAVLVERFSIPPRSALSWRVPSGHLWRIVCTHGPQVADMNCWAEERP  
LGNRERERFYSSKTRQIHATHLSTGDRLWSSFPYLRPMATITHETIQYGFDDDGAGVHDV  
IGSRCDPYTHHYMTCKEVGRGRGSDSTTPVNTKTEWFNCTCHSNLTRRAIADGLKESDVH  
DVLNVFMCTGFTRDTHQYFTKPSVVDVGDYIEFLAEIDLVSASTCPQGDVSIACGETAE  
PVCYPLGVEVYRLKDSGLLEAEGGPAPSAAAMGATTGCNANRAPTTGRSAAQRATIRKGW  
WWPGLPANEGTHANRRGSPWQRKATNDAEKSGPRSDSTRTLKDARPEACLAVRKGPATSY  
>comp12088\_c0\_seq1; 1616 1 5485 LEN=5945; translated  
XSFSSVLTKQSASSATLQTFKHYYHPPDSSLTQTLHFDDLNEAFNNNRIGLDKGESYA  
SLTNSGDMQVQTRVSSLPSSVVEKKSFYTSEELLDLFEFPCPNFSLPGKLDNSFNNSLSR  
TKMTSQLAGTLFQTLFPREIRNNKIKTVNITSSNSKLIDEWIWGNNDKMGYAAGVMSF  
WIFVSLGLTLWLLLLWHFVGREKNESNRSYANVEGLTSECDDFNNGNPDAGDEKNTEDQIE  
EDFIAASTKNYNEFDNKKYSNTIDIFSPPTETGIEEREDISDYLNSTPSLEVPRDARLKS  
SKENQNGHQGTGNKYEYSDDCAHCHDNEHETDFNKEDIAHAADMNITNIASSYQTTTPGKSG  
ASRNHPFGKAQRKRDRGNRRSSNHNTGDRMTIISDCDTPSSFVGSSTQTPSMTQRTFSAK  
KYFEIPEGTETVNSEDHQSIIVDFDCSSKRKHQSFYGLAKGEDSENSVSAKDNNEAGIAR  
TKKSLPSFLGDVIFKSSYNRISSRDEEDGRSSEKEHKGCGPEPSNSLSSSSSPLSFLNMQ  
EQEVEHLLFQKIPIMPILSDLSMPPGLESESSVASSSLTNSDISLAVLASDDIYTGNHYAF  
TDTADKLNRYTARNTTTSKAMNKEAPTAPTMPVSTGIRPVGKNAKAVNDSAVISSAYLS  
YCFDDDHQDCILKRESSDETCPSPFASSPMKKAIFGSSSREIGVTKCGHRTRKQTERKLQY  
NKDDESSLIFPSLSSSSCPSPPPSDLRRLRELSMKSSLSVGRSSSLFSIPSPTTPTITI  
AGSYLGDRLNSLSESPSSQGYRRSPTLSPDDLGFYININQPKGFLNSTPVPNQLWLTRNWN  
ESNSKKDNDSDGDRETSNSTNMWTEKSDTGVSHHTMEEISVRNGNYDCSVLSSQIYGSSV  
SEAPMPTQQSETANTLKRELRQESMFRLFDYDDGNTTVDLVATTDDRSSTSATFIHNA  
GLQTKPRASFESDCLARDFANTNLSPNASITHHSMTCDILKKIKNASPSASFVSGVVGW  
SEDGRANTKSNKSEKISSSSNPHGSTSSNRTNSNRKSKRNNDVSRIFNREINPFY  
DRKFMRANSREDKENSLRNTNGNIHSRKRSTLLRSPFTSLTPPKVNFNKRPSDQDLLN  
LSESTGVGPFKISIVPMVSPSKCSMKLSSSYSSNLLKRKRRLFAKSWKDSNMSSKHY  
CYDPRARIKRLKDFINTADSEKSTDTASLYADSKIGARKGDSFETVQANYTNSCDTRRKT  
NSDIDNCVLPDPNPFESVLSNPDHSSIDCHANTVFQSIGVLSLSSGSGKQLIHKIIFAG  
SCVFLIVSVALFAVLGFAELHKSMELESQWEDLQLEAMIPAMTIDLNAMADKGITDDGN  
KQDDSEGDPVITMSLTELDRKSQTMVLLGDHCPKVRPALCSSNDLPFSFSPSSMCHLH  
DLPLGKSWMEWLDVANGDRSFPSPHLPSEGEDTGGGGNKDNDIKMSKSNSTFSQOEKGRYN  
RFLRWLDRSRDEAAAFSSQDDR IQDVLAAGTWILWLALFTNLGLAVVASAALVQLVGG  
RGAPWLLAPNIGSSSYCVCFPQTPNPDTKKVLF AIFWTLAVLSWIVGMCFSIAAVVSVDL  
CVIEEDVGGNSNNIYNSTNSFAIELIDRWQSEEDYDRLFDDVDGRAEHTNISDEYGGNY  
NNDNDYKVLIVDIWKLQLHRCAPTKGGQDANVNHNYSVPTQEVLEDLARLAGPSRTLAD  
GLNTFSSSGIYENICGRGGGVAPLVDASEDMSLQVCIDAQFAEIHLEWTPPPTCVRQEN  
SSLKAFDAPRWISIYDNLQNTVCRQGLW  
>comp12089\_c0\_seq1; 1007 812 2845 LEN=3238; translated  
MKGKLSSQLLCLCIPSDGDRKEVGEATNKPDLKVLGIEDDFDRAYVIAQVERFCDFY  
DIRGIRQQAEPVAGANASAVVNNNNNSNNNNRFFVVPNEATAAAAAALYGDIASLTDVH  
QQAIAAAAAATAANHHLPHQFLTADATAAAVAAAQQAQQQDGESQHHKSSATKHSHTGN  
GSDGSSAGAASSGAMAFASNQQHTNKTAQALLTKAQQQAKSAERALEHERRQNAKREQRR  
LSQDKKLARQRDREFLQKQKQAEKLARERAREEKTRKLLQRQERERFAQEKEAALRA  
ADLVASNRVPIEITRAGGRGRGRKSSVVPRIKSKPGSGGEGNEMVKSSTAHDNGNGANHS  
NGSNLAANAAGVPKQRSAIIVSTASDLDRIVTHSQNLWAKYNAIAKEHNQRVNWITVA  
KDLGIHVKVREKYARMHSRACQRNFDVANGHWIKDHPEIFQEPTPAEQKARMPPLPP  
PVQEDERSPEADHQALGAQVAIVEEHLEKEVLQLSNNTSENTMGLTNDQENAVATSI  
VNDNARIISNENKVAAVSGHGEAPVCVKEEGVGRNTITNVVVGNTNGQPTTSSSA  
VGTAPSPIPPPHDPLDAAAAATAAAVVDAAGVGGAAIDMHVAAVAAATAEGAGSAAAA  
TAVTVGSEDEVVVG YGI  
>comp12089\_c0\_seq2; 360 451 1248 LEN=1553; translated  
MQNILSRSAALRGIQRLATTPQTAPCRSLRCTSHRILPFCSSTGNATNPYASGGTASSIA  
IDSKSKTAVTIRSYSSHNNRNSDDEGSGARSSLPQGSNDLRRAYVHPLSQVVLEYLQDC  
HHDWVSKGLDRSLTLHRDGSFEARYVPPPVASKSCPPLPALQISAAPKHHAIPGRGSG  
AEPVISATVSASAAKSRDDAEREASAKATGTGTLRSSSGSDRESNRATPVDQEPAQATST  
DSNHGLGSNNNSNNNGTDRGNAGT  
>comp12089\_c0\_seq3; 1001 1 2347 LEN=2740; translated  
XGNMEGHEEHDHASLMEDEDPHNHGGMGEEEMDIEPNRVVVGNEGNREEFWAHEPSKEE



IWSMKRASKRKPSEWLKLLCREWAETDVNLELIETVDDKFESYKPYMKGKLSQLLCRLCI  
PSDGRKEVGEATNKPDLFLKNVLEI EDDDFDRAYVIAQVERFCDFYDIRGIRQQAEAPVAG  
ANASAVNNNNNSNNNNRFFVVPNNEATAAAAAALYGD IASLTDVHQQAIAAAAAATAANH  
HLPHQFLTADATAAAVAAAQQAVQQQDGESQHHKSSATKHSHTGNGSDGSSAGAASSGAM  
AFASNQQHTNKTAQALLTKAQQQAKSAERALEHERRQNAKREQRRLSQDKKLARQRDREF  
LQKQKQAEKLARERAREEKRTKLLQRQERERFAQEQKEAALRRAADLVASNRVPIEITR  
AGGRGRGRKSSVVPRIKSKPGSGGEGNEMVKSSTAHDNGNGANHSNGSNLAANAAGVPPK  
RQRSAIIVSTASDLDRIVTHSQNLWAKYNAIAKEHNQRVNWITVAKDLGIHVKVREKYAR  
MHSRACQRNFDFVANGHWKIKDHPEIFQEPTPAEQKARMPPPLPPPVEDERSPEADHQA  
LGAQSVATIVEEHLEKEVLQLSNNNTSENTMGLTNDQNENAVATSIVNDNNARIISNENKV  
AAVSGHGSEGEAPVCVKEEGVGRNTITNVVVGNTNGQPTTSSSAVGTAPSPIPPPHDPL  
DAAAAATAAAVDAAGVGGAAIDMHVAAVAAATAEGAGSAAAATAVTVGGSEDEVVGY  
GI

>comp12089\_c0\_seq4; 1007 592 2625 LEN=3018; translated  
MKGKLSQLLCRLCIPSDGRKEVGEATNKPDLFLKNVLEI EDDDFDRAYVIAQVERFCDFY  
DIRGIRQQAEAPVAGANASAVNNNNNSNNNNRFFVVPNNEATAAAAAALYGD IASLTDVH  
QQAIAAAAATAANHHLPHQFLTADATAAAVAAAQQAVQQQDGESQHHKSSATKHSHTGN  
GSDGSSAGAASSGAMAFASNQQHTNKTAQALLTKAQQQAKSAERALEHERRQNAKREQR  
LSQDKKLARQRDREFLQKQKQAEKLARERAREEKRTKLLQRQERERFAQEQKEAALRRA  
ADLVASNRVPIEITRAGGRGRGRKSSVVPRIKSKPGSGGEGNEMVKSSTAHDNGNGANHS  
NGSNLAANAAGVPPKQRSAIIVSTASDLDRIVTHSQNLWAKYNAIAKEHNQRVNWITVA  
KDLGIHVKVREKYARMHSRACQRNFDFVANGHWKIKDHPEIFQEPTPAEQKARMPPPLPP  
PVQEDERSPEADHQA LGAQSVATIVEEHLEKEVLQLSNNNTSENTMGLTNDQNENAVATS  
IVNDNNARIISNENKVA VSGHGSEGEAPVCVKEEGVGRNTITNVVVGNTNGQPTTSSSA  
VGTAPSPIPPPHDPLDAAAAATAAAVDAAGVGGAAIDMHVAAVAAATAEGAGSAAAA  
TAVTVGGSEDEVVGYGI

>comp12090\_c0\_seq1; 535 75 1232 LEN=1900; translated  
MVDATEPTKPTDQKTMILGVAALGFLVWAI AVTAQLGKNDAAAPVVEESAESMDFSLMT  
SKTTLEAPNVCKKIDLPNVECFIEALDDGADVSGEVVNVGPQAGANVTAGYVGGLEVD  
VEPITTPYYQAGLCPVNVHWHLGAEHYSAGEYDCEDHYDDHRDLVEGGMCGPTPVHERRK  
LAGKARQGYQCNLDAEDEKFTKPYEWKFCDASMEVGGTYEVHWP HSAAGACGTPNQYQT  
PFYDGVFCNLDMDTLLTLQAQDIASNVGVQAQVFVIVNDESYYPDLIKGMIVEPTLGMG  
SDMAMYTGSTTGTSRDNTVCSQYTPITWQVDRKCHMISASSFDKMCADMMEQRDDMTDDL  
YAHGSRVLVADALTADNQANRNLRA

>comp12091\_c0\_seq1; 268 1784 2740 LEN=3054; translated  
DNPTCFTSPFQFEITFECLQELDDDLWKVLYVGSQAQDAKDQILDEILVGPVVPVGNKF  
VLQADAPDPSQLAQD DLLGVTVVLTCSYKERE FVRVGYVNN EYHDPNAAASSAQASEN  
DGEQQLPPP I PNPVPLDRIQRQILADKPRVTKFPI SWGDEPLPQQQQR TNNNNNSPGIDA  
NNGKMATAAGSSVGAAMMADHAASGTPTATTGSAAMLPPPAMVTPSIPSKEDDEF AHGGN  
SSNAPAVDTSMREEEEE IMEDEDIMEEEELSV DSETGEQAGDGVVSMPEESNM SHSYFGN  
HHTTTGNTNGSNVQAMAE

>comp12091\_c0\_seq2; 437 1411 2403 LEN=2717; translated  
MALVNVNMVLDNPTCFTSPFQFEITFECLQELDDDLWKVLYVGSQAQDAKDQILDEI  
LVGPVVPVGNKFVLQADAPDPSQLAQD DLLGVTVVLTCSYKERE FVRVGYVNN EYHDP  
NAAASSAQASENDGEQQLPPP I PNPVPLDRIQRQILADKPRVTKFPI SWGDEPLPQQQQR  
TNNNNNSPGIDANNKMATAAGSSVGAAMMADHAASGTPTATTGSAAMLPPPAMVTPSIP  
SKEDDEF AHGGNSSNAPAVDTSMREEEEE IMEDEDIMEEEELSV DSETGEQAGDGVVSM  
EESNM SHSYFGNHHTTTGNTNGSNVQAMAE

>comp12092\_c0\_seq1; 175 574 1011 LEN=1396; translated  
MAWAGQPIRDVASQAGQYIQYGC GKGE CGTCECMMNGKWVRPCVETVPASAADASAGELV  
LQIKAIKAKKTSSGTFFSIRSFFMGFWNNLLGMLGFLKFRKASEN WDERKAYEDLVAQK  
TLEKLLLRQLQEAEAGSDQPAPGMA

>comp12093\_c0\_seq1; 336 107 673 LEN=742; translated  
MNVEGFRDEEGKENVEVPFDTCDFDNDDESQDPTVESRRTFDDFLEAGFQATKGLAAP  
LYASPPPTTTATSSSTSYHTIGSSHNLNDAVSVNISNIPNSSGIHIASF CRQWRYWCIL  
LSLGVANSSDATEILCISYMLGDPVFRSNMLGEREGGDGASHGSGLLAAAVFLGMLLGL  
VVGTMGDW

>comp12093\_c0\_seq2; 183 210 980 LEN=2964; translated  
MLRIESISTRIGRKPMLLLGLSCNSVAGVLSALAPSLYALALLRCIAGVGIGATVPPLFT  
LATELAPPSARGVCVTVCASFWMVGSIIYVALVALWCFEGPAADASDAAALAIATWRVFAF

ICAAPSALGAALVYWLVPESPRFLGIEGRSEEAVAIANSVLVCSMNGGSESGIAVPPLTIE  
ELEDTFPLSALRDLEDRQLLNNGGSDRGMPESESGVSGRGVEALAFLEATASDFVVRSTSKLRA  
KPAADHLASPAGLVLP

>comp12093\_c0\_seq3; 590 107 2136 LEN=3395; translated  
MNVEGFRDEEGKENVEVPFDTCDFDNDDESDQDPTVESRRTFDDFLEAGFQATKGLAAP  
LYASPPPTTTATSSSTSYHTIGSSHNPLNDAVSVNISNIPNSSGIHIASFQRQWRYWCIL  
LSLGVANSSDATEILCISYMLGDPVFRSNMLGEREGGDGASHGSGLLAAAVFLGMLLGG  
VVGTMGDWIGRKPMLLLGLSCNSVAGVLSALAPSLYALALLRCIAGVIGIGATVPPLFTLA  
TELAPPSARGVCVTVCASFWMVGSIIYVALVALWCFEGPAADASDAAALAIATWRVFAFIC  
AAPSALGAALVYWLVPESPRFLGIEGRSEEAVAIANSVLVCSMNGGSESGIAVPPLTIEEL  
EDTFPLSALRDLEDRQLLNNGGSDRGMPESESGVSGRGVEALAFLEATASDFVVRSTSKLRAK  
AADHLASPAVWFSLSFGTYGLLTLWINLLFEKVNLEENVYNALLFAAANLPGNLLSALLMD  
RIGRSTSLIGSIACASVSLMLFALSAVWNTPTGIVLSACLFCQFTVAAWNTIDTMTSELF  
PTLVRSTGLGMCAASGRIGALIAQFVNDALEKPVRLLLVASGTLGAVTPCLLPDGMT  
GRPVDHDMGPEEEIPVASSRGRTAEHAAWETSVIQASTAKPPTPLAARLYNVYRGGSLPV  
TTASETNSTAINFIW

>comp12095\_c0\_seq1; 436 132 1216 LEN=1547; translated  
MPTPSNNGNGGRGGEPEGRDSSPETSWFDSLFGGTDVDRDEIHEQLNRFDERKKRYEEERR  
RISSPSLFSPPFFVSPGELFGAPPRREGEHEGRSEDRFEPGAGVDIPGLPPSRRNHAEID  
EIHREMQSFFFAAFAGSGIVSDHEPPPKDGKAGLWGGSHGRTAVSSSSSSTTFVSNGAS  
VRTQQDSRRGARIDVELPKRDAQKGGVALEVLRRPCVLRWRTGDDPGDEEDDDAXAE  
GPFAGVGPAGPPEGGRRARGRHLPLDLGVPLGGQERADGRGSRPPEDGPGGTPGTRCG  
GAVPAVRSGVEEGLIEPATAAVSAIAAVWKSNGNPSLSWTGRDRTARSRKPHAFFVDADAL  
N

>comp12095\_c0\_seq2; 739 468 4286 LEN=4890; translated  
MVDEDNEYPNGDTLSTDEEPQTDIETGASLLPQPQTLDTGGTDEGIARVIHPDGNEENG  
GDEPSEDGDEITTLPVVKDIESKQARRAYNQYLVTKLMAVGSVGGGITTQPEINTPSKGS  
KTASIIISTIQQTRQYINNFGNTGVKKTFSFVSGDKVLVNRQIMNIANNVTVPRWKKRHMV  
NKSQFPETQGRTPQEKTPGFIYVACEVKTVPDENEPYFTVERYDTGQRQRVQIDWGMIL  
LEDPLAIAKAAISAARMTEAGLVSSLSRESTHENVSCDRMIFYRGTVVPLCRRTKRAG  
KACLVNLLHGNDPFSCKIRFTGINLLVMCSTVFLFLEVAQLAFLPADTDDICAAIGTAIW  
VVLVLELVFEVLIRPKDYKQLIESDKAFRPPSTARYIHKFYIVGEAIALVTYIPEIFCLNY  
TTDVCVGFIPDGRFALPEASADAVLGPTRRDSIVGRLVMGLMGFRFFGVIRHWKQMLINQ  
TFQPAERQGIKWIIPYDPSNRMRMRRRKMDKEDDDETVDFDDEDDLDSDKYHENQR  
LKSAANIGTALISVNCQRVLILMILSVLVLPLFYISISHQNNVSDNMAKLLQSQNLVSTDG  
IRRCDYLETALDWSLNMIAIVNQPNIPDQETTYILWAQVLPVRCPFQNGVITSCTKNGM  
KYREQYPESCKIWDNSNPPQLIHGNDQAVRNYFAKKNLIRGNGIYVRSRPEKADAFQFQDA  
LNDFNITVVFVNQNTIKRANIFQFFLLITFFLGLAFLVIVQNGVNYLALEPIQRMLRIV  
LRYAEDPLWIDVRKRKKNLDDIGSFETEHLDAITKISDLLRKCWGVAGAGIISNLG  
REKYGQVAIFNPTVPGKQVYALFGFVTCGYSDLLKNLSDVMILINDVAKVVHDEVYRW  
ALGHEHGQCNKNLGPCLMWWIRIGDFNEVQKKNKEAIEKLFDRKVYNTNRNYPSLRRNRNS  
VHTSRRRSTRATRSSTTVGSQEIQLESPLGIQGFTRALLGMLKSFAGIHRDRSLKEW  
KKDFRLSSSVAACEGYTVDVVYGM DAGWAVEGAVGSEYKIDATYLSPHVNMA SRMMGAAK  
QYGVITILLSKAVEKLLSGACRKKLRHLDCVYVKGSAVKQDIYTYDARHQGVDFLLERAP  
EQADRESEAYNQSIWDRDPDVRAMRQHVSDEFLEAYHAGVDQYLSGRWSEASESFRRADT  
IMIRTVVEEGYIELDMEDLEDRIFDENDLGEDIVAIRREFGDGACRTLSTYIDRRNGTTP  
DDWDGVRQLFSK

>comp12095\_c0\_seq3; 300 338 1421 LEN=1433; translated  
MKGHRFSRITLALVLAFLAATAARAFAFAPSTRSRARGAATELNSMWRNWIPTSGFLDV  
AVGERRGASASGNRFPEKDPSPGDPSPGRDPKSVSLVSERPASQLPTPGFLPSATAAVLA  
LSLVFSAPALAVSGGLDFAGLDISNQDFSNQNFKGDFTQVLRANTNFAGSNFVGRFP  
KAYLINANYEGADLRGVSEFEGTNMEGVNLKNANVAGAYFGATIIDAGSIENADFTDAQFP  
PKTLALMCDRPMKGTNPATGADTRDSAIARSRALPCRAVQEWGSLAVDDGLQRTGKQ  
MQMQIQIPAGLHGFRTEWIASDRIGRVSPVFLPCLRTEPGSNGAGGKSTTSQGLPHNNT

>comp12095\_c0\_seq4; 739 468 4286 LEN=6602; translated  
MVDEDNEYPNGDTLSTDEEPQTDIETGASLLPQPQTLDTGGTDEGIARVIHPDGNEENG  
GDEPSEDGDEITTLPVVKDIESKQARRAYNQYLVTKLMAVGSVGGGITTQPEINTPSKGS  
KTASIIISTIQQTRQYINNFGNTGVKKTFSFVSGDKVLVNRQIMNIANNVTVPRWKKRHMV  
NKSQFPETQGRTPQEKTPGFIYVACEVKTVPDENEPYFTVERYDTGQRQRVQIDWGMIL  
LEDPLAIAKAAISAARMTEAGLVSSLSRESTHENVSCDRMIFYRGTVVPLCRRTKRAG

KACLVNLLHGNDPFSCIRFTGINLLVMCSTVFLFLEVAQLAFLPADTDDICAAIGTAIW  
VVLVLELVFEVLIRPKDYKQLIESDKAFRPPSTARYIHKFYIVGEAIALVITYIPEIFCLNY  
TTDVCGVI FPDGRFALPEASADAVLGPTRRDSIVGRLVMGLMGFRFFGVIRHWKQMLINQ  
TFQPAERQGI EKWIIPYDPSNRMRMRRRRKMDDKEDDDETVDFDDEDDLDSDKYHENQR  
LKSAANIGTALISVNCQORVLI LMILSVLVLPFYISISHQNNVSDNMAKLLQSQNLVSTDG  
IRRCDYLET AIDS WLNMAIVNQPNIPDQETTYILWAQVLPVRCPFQNGVIT SCTKNGM  
KYREQYPESCKIWDNSNPPQLIHGNDQAVRNYFAKKNIRGNGIYVRSRPEKADAFQFDA  
LNDFNITVVFVNQNTIKRANIFQFFLLITFFLGLAFLVIVQNGVNYLALEPIQRMLRIV  
LRYAEDPLWIDVRKRKKDNDLDDIGSFETEHLDAITKISDLLRKCWGVAGAGI I SSNLG  
REKYGQVAIFNPTVPGKQVYALFGFVTICGYSDLLKNDSDVMILINDVAKVVHDEVYRW  
ALGHEGQCCKNLGPCFLMVWRIGDFNEVQKKNKEAIEKLFKRVYNTNRNYP SLRRRNR  
VHTSRRRSTRATTRSDSTTVGSQEI QLES LPIQGFTDRALLGMLKSFAGIHRDRSLKEW  
KKDFRLSSVAACEGYTVDVVYGMDAGWAVEGAVGSEYKIDATYLSPHVNMA SRMMGAAK  
QYGV TILLSKAVEKLLSGACRKKLRHLDCVYVKGSAVKQDIYTYDARHQGVDFLLERAP  
EQADRESEAYNQSIWDRDPDVRAMRQHVSEDFLEAYHAGVDQYLSGRWSEASESFRRADT  
IMIRTVVEEGYIELDMEDLEDRIFDENDLGEDIVAIRREFGDGACRTLSTYIDRRNGTPP  
DDWDGVRQLFSK

>comp12095\_c0\_seq5; 381 167 838 LEN=1049; translated  
MQRKTPFRRVAKSNSNSNSNANATTARCLLAAAVLAVPALLGGVAATAAGVGVAGLPGSL  
SEPGHRSLLRPLSDPFEAGAGRWLSEGSRVVGAEEASTAADHPPSSDEEEHEHEEGETPRD  
SDGGSGSGEGVTAVVPLPHAFEPTEGEGAAAPASPSGGRRWV LALAGAAVACGAVLLHR  
ALEQSKWNRRTTHQLLRDTDEAFDLTFREDDLEDDLELSSFE

>comp12095\_c0\_seq6; 300 209 1292 LEN=1304; translated  
MKGHRFSRTTALVLAVALAATAARAFAPSTRSRARGAATELNSMWRNWIPRTSGFLDV  
AVGERRGASASGNRFPEKDPSPGDPSPGRDPKSVSLVSERPASQLPTPGFLPSATAAVLA  
LSLVFSAPALAVSGGLDFAGLDISNQDFSNQNFKGKDFQVLRANTNFAGSNFVGC RFP  
KAYLINANYEGADLRGVSEFEGTNMEGVNLKNANVAGAYFGATI IDAGSIENADFTDAQFP  
PKTLALMCDRPMKGTNPATGADTRDSAIARSRALPCRAVQEW TGSLAVDDGLQRTHGKQ  
MQMQIQIPAGLHG FVRTEWIASDRIGRVSPVFLPCLRTEPGSNGAGGKSTTSQGLPHNNT

>comp12095\_c0\_seq7; 169 271 843 LEN=855; translated  
MIAAAQXLSNAYRQSTLAPARTDTTPCSFLLPPVGLVAVQANVAGAYFGATI IDAGSIE  
NADFTDAQFPKTLALMCDRPMKGTNPATGADTRDSAIARSRALPCRAVQEW TGSLAVD  
DGLQRTHGKQMQMQIQIPAGLHG FVRTEWIASDRIGRVSPVFLPCLRTEPGSNGAGGKST  
TSQGLPHNNT

>comp12095\_c0\_seq8; 314 1 709 LEN=920; translated  
XDCRPTLYCKRHHTLPTPSSRSNSYSNSNSNSNANATTARCLLAAAVLAVPALLGGVAAT  
AAAGVGVAGLPGSLSEPGHRSLLRPLSDPFEAGAGRWLSEGSRVVGAEEASTAADHPPSSDE  
EEHEHEEGETPRDSDGGSGSGEGVTAVVPLPHAFEPTEGEGAAAPASPSGGRRWV LALAG  
AAVACGAVLLHRALEQSKWNRRTTHQLLRDTDEAFDLTFREDDLEDDLELSSFE

>comp12096\_c0\_seq1; 1083 144 4282 LEN=4282; translated  
MPRANNKRGNTPSRTQTKSNDKRRKRRKRSRSPDCVADGSEFACIDLTEDGDDIDDLRRV  
LVPKSGGKRAAIDEVIVLSDSSDENDPPASCFTXTNELDMIEQQSNAYKPKSPTYFLH  
CYLVSDAKTTKTSADERTQTAEVSRVSKKARVKKEGQTS PSSARPNNDLATMYDDVEIV  
QAEAPKFTRAADSVSRKASAGGNTGDNEDDVVVEGVLNETRLPHMRQHCTSF PFRTRRS  
RKL SVSVRRDNQQSCDLCYCYVCDPVKDCKNWHSSSSTPKNNHCCATEKDR IWEDMRL  
RSKVTDERAEDEPPEGFHFMKDCDR LACDKCWCYVCDKPGIDCTNF EHVAA NPEEECYRR  
ERQKRKLS TYGRPGPFEP TNP DAPRDI ELTKCRHCSWFVRLRPDRGVTPSSDDWCKYCGR  
VASDEDLEKNQKAATSTEEKNSYFFGQKEIPFRIKAHDPRLLE YKVNWEDNDGKAEWHY  
DEAERQEEVFLHRIGRSPNLQNIYTSIQRVAEENIPNKP IGQSHKRMDDTDAI IVGDPKQ  
LQLLYLIVEKKIDGLEINASWCKESKIGRFTLRFMLPKCFMVEHPVSNKHSALQRYLPHL  
LGLWFGMFPFQVSELGILKASNSSYRYITKLRNQYKQRNQHKSLPRKEIKEIDNNLF  
PILRKKLESFSVKMREDEIAKESKLT LAPSNA SKFSGSVCT SAPSGSSCDLFRNSLVRY  
FSEL FVKHMASSYNVSDSVEGICQGS MFRTKSNFFDFVLGFQSNVVTEL CYRDRARKQI  
RERPSEFSIKQTLTQLENLGHETEDCVEGLTIELLDFQRQSLK WALERERILGGIQSYHW  
VKVPNRGEGHEDELYFNPLLRQFRKDKPKVIRGGFIADQMGLGKTVISLSLILKNPAPEI  
PSSGSPISVLKKKSHTVLSPNIAATPGNYDWDENLYEKTSTSNKKKGSIIICRGTLVICPVS  
LVGQWIAEAKSKLKEPGLIYPYHGSNRKRDPKILTKNSIVVTTYDV IQSDAFYHKEKSHV  
KDYCSPLEQIRWWR IICDEGHCLRHPSMRSKAVRSLVSDHKWIVSGTFSFGNPPFFYEA  
VFNLDVFLLI SFNFYKGT PMNTSPDDLK NQLKFLGFENVQKSFDEL RHSV DKKRFNMDLL  
TYFLRPIMIHNNQEQT YRGTSTTLMSLPPKTEKRKLIRLTTEEKKELQEI EKKTQEWYLK

FRSIHFKTMSKHFLKISSRLTPMRIACSGGEYPIFSESEHVGADADDHENVEYNNSNNTA  
SGDIVRSKVFVQSKFKYLLSELEEKANERDCKFIAVVIKIFXVCQVSHRLFSSIPNCLS  
SAKSLVFSQFSSTLEWLKIELPKHGFQFRTLSGDMMSQKRAKALADFQNDPPTTIFLLSM  
>comp12096\_c0\_seq2; 1295 144 4633 LEN=4883; translated  
MPRANNNKRGNTPSRTQTKSNDKRRKRRKSPDCVADGSEFACIDLTEDGDDDIDDLRRV  
LVPKSGGKKRAAIDEVIVLDSDDENDPPASCKFTXTNELDMIEQQSNAYKPKSPTYFLH  
CYLVSDAKTTKNSADERTQTAEVSRVSKKARVKKEGQTSPPSSARPNNDLATMYDDVEIV  
QAEAPKFTRAADSVSRKASAGGNTGDNEDDVVVEGVLNETRLPHMRQHCTSFPPFRTRRS  
RKLVSVRRDNQQSCDLCYCYVCDPCVKDCKNWHSSSSTTPKNNHCCATEKDRIWEDMRL  
RSKVTDERAEDEPPEGFHFMKDCDRLACDKCWCYVCDKPGIDCTNFEHVAANPEEECYRR  
ERQKRKLSSTYGRPGPFPTNPDPARDIELTKCRHCSWFVRLRPDRGVTPSSDDWCKYCGR  
VASDEDELEKNQKAATSTEEKNSYFFGQKEIPFRIKAHDPRLLEDEYKVNWEDNDGKAEWY  
DEAERQEEVFLHRIGRSPNLQNIYTSIQRVAEENIPNKPIGQSHKRMDDTDAIIVGDPKQ  
LQLLYLIVEKKIDGLEINASWCKESKIGRFTLRFMLPKCFMVEHPVSNKHSALQRYLPHL  
LGLWFGMFPFQVSELGILKASNSSYRYITKCLRNYKQQRNQHKKSLPRKEIKEIDNNLF  
PILRKKLESFVSKMREDEIAKESKLTTLAPSNASKFSGSVCTSAPSGSSCSDLFRNSLVR  
FSELFVKHMASSYNVSDSDSVEGICQGSMTFRKSNFFDFVLGFQSNVVTELCYRDRARKQI  
RERPSEFSIKQTLTQLENLGHETEDCVEGLTIELLDFQRQSLKWALERERILGGIQSYHW  
VKVFNREGHEDELYFNPLLRQFRKDKPKVIRGGFIADQMGLGKTVISLSLILKNPAPEI  
PSSGSPISVLKKSHTVLSPNIATPGNYDWDENLYEKTSTSNKKKGSIIICRGTLVICPVS  
LVGQWIAEAKSKLKEPGLIYPYHGSNRKRDPKILTKNSIVVTTYDVIQSDAFYHKEKSHV  
KDYCSPLEQIRWWRIICDEGHCLRHPSMRKAVRSLVSDHKWIVSGTPMNTSPDDLKNQ  
LKFLGFENVQKSFDELHRVSDKRRFNMDLLTYFLRPIMIHHNQEQTIRGTSTTLMSLPPK  
TEKRKLIRLTTEEKKELQEI EKKTQEWYLFKFRSIHFKTMSKHFLKISSRLTPMRIACSGG  
EYPIFSESEHVGADADDHENVEYNNSNNTASGDIVRSKVFVQSKFKYLLSELEEKANER  
DCKFIAVVIKIFXVCQVSHRLFSSIPNCLSSAKSLVFSQFSSTLEWLKIELPKHGFQFRT  
LSGDMMSQKRAKALADFQNDPPTTIFLLSMRAGAVGINLTQANRVFLMEPSFNPALQA  
IGRIHRLGQKRAVEVRLVVDQSFEEERMINFLDRKYSRCPNDEKKENSNKAFATKDYDG  
IAGNVNADKTTLLTAEFVDFVDFVGSYQPERKTSKDAVVDGDVDPADENISKGIV  
>comp12096\_c0\_seq3; 1224 144 4620 LEN=4870; translated  
MPRANNNKRGNTPSRTQTKSNDKRRKRRKSPDCVADGSEFACIDLTEDGDDDIDDLRRV  
LVPKSGGKKRAAIDEVIVLDSDDENDPPASYAKTTKNSADERTQTAEVSRVSKKARVK  
KEGQTSPPSSARPNNDLATMYDDVEIVQAEAPKFTRAADSVSRKASAGGNTGDNEDDVV  
EGVLNETRLPHMRQHCTSFPPFRTRRSRKLVSVRRDNQQSCDLCYCYVCDPCVKDCKNWH  
SSSSTTPKNNHCCATEKDRIWEDMRLRSKVTDERAEDEPPEGFHFMKDCDRLACDKWCY  
VCDKPGIDCTNFEHVAANPEEECYRRERQKRKLSSTYGRPGPFPTNPDPARDIELTKCRH  
CSWFVRLRPDRGVTPSSDDWCKYCGRVASDEDELEKNQKAATSTEEKNSYFFGQKEIPFRI  
KAHDPRLLEDEYKVNWEDNDGKAEWYDEAERQEEVFLHRIGRSPNLQNIYTSIQRVAEEN  
IPNKPIGQSHKRMDDTDAIIVGDPKQLQLLYLIVEKKIDGLEINASWCKESKIGRFTLR  
MLPKCFMVEHPVSNKHSALQRYLPHLLGLWFGMFPFQVSELGILKASNSSYRYITKCLR  
NYKQQRNQHKKSLPRKEIKEIDNNLFPILRKKLESFVSKMREDEIAKESKLTTLAPSNASK  
FSGSVCTSAPSGSSCSDLFRNSLVRYSSELFVKHMASSYNVSDSDSVEGICQGSMTFRKSN  
FFDFVLGFQSNVVTELCYRDRARKQIRERPSEFSIKQTLTQLENLGHETEDCVEGLTIEL  
LDFQRQSLKWALERERILGGIQSYHWVKVFNREGHEDELYFNPLLRQFRKDKPKVIRGG  
FIADQMGLGKTVISLSLILKNPAPEIPSSGSPISVLKKSHTVLSPNIATPGNYDWDENL  
YEKTSTSNKKKGSIIICRGTLVICPVS LVGQWIAEAKSKLKEPGLIYPYHGSNRKRDPKIL  
TKNSIVVTTYDVIQSDAFYHKEKSHVKDYCSPLEQIRWWRIICDEGHCLRHPSMRKAV  
RSLVSDHKWIVSGTPMNTSPDDLKNQLKFLGFENVQKSFDELHRVSDKRRFNMDLLTYFL  
RPIMIHHNQEQTIRGTSTTXDVLASKGTPFVASLHQIYNVFLLSHXTNNHFLHLHILDEKR  
KLIRLTTEEKKELQEI EKKTQEWYLFKFRSIHFKTMSKHFLKISSRLTPMRIACSGGEYPI  
FSESEHVGADADDHENVEYNNSNNTASGDIVRSKVFVQSKFKYLLSELEEKANERDCKF  
IAVVIKIFXVCQVSHRLFSSIPNCLSSAKSLVFSQFSSTLEWLKIELPKHGFQFRTLSG  
MSMQKRAKALADFQNDPPTTIFLLSMRAGAVGINLTQANRVFLMEPSFNPALQAIGRI  
HRLGQKRAVEVRLVVDQSFEEERMINFLDRKYSRCPNDEKKENSNKAFATKDYDGIAGN  
VNADKTTLLTAEFVDFVDFVGSYQPERKTSKDAVVDGDVDPADENISKGIV  
>comp12096\_c0\_seq4; 1078 144 4747 LEN=4997; translated  
MPRANNNKRGNTPSRTQTKSNDKRRKRRKSPDCVADGSEFACIDLTEDGDDDIDDLRRV  
LVPKSGGKKRAAIDEVIVLDSDDENDPPASCKFTXTNELDMIEQQSNAYKPKSPTYFLH  
CYLVSDAKTTKNSADERTQTAEVSRVSKKARVKKEGQTSPPSSARPNNDLATMYDDVEIV  
QAEAPKFTRAADSVSRKASAGGNTGDNEDDVVVEGVLNETRLPHMRQHCTSFPPFRTRRS

RKLSVSVRRDNQQSCDLCYCYVCDPCVKDCKNWHSSSSTTPKNNHCCATEKDR IWEDMRL  
RSKVTDERAEDEPPEGFHFMKDCDR LACDKCWCYVCDKPGIDCTNFEHVAANPEEECYRR  
ERQKRKLSTYGRPGPFEP TNP DAPRDI ELTKCRHCSWFVRLRPDRGVT P SDDWCKYCGR  
VASDEDELEKNQKAATSTEEKNSYFFGQKEIPFRIKAHDPRLLEDEYKVNWEDNDGKAEWY  
DEAERQEEVFLHRIGRSPNLQNIYTSIQRVAEENIPNKP IGQSHKRMDDTDAI IVGDPKQ  
LQLLYLIVEKKIDGLEINASWCKESKIGRFTLRFMLPKCFMVEHPVSNKHSALQRYLPHL  
LGLWFGMFPFQVSEL CGILKASNSSYRYITKCLRNYKQRNQHKKSLPRKEIKEIDNNLF  
PILRKKLESFSVKMREDEIAKESKLT LAPSNASKFSGSVCT SAPSGSSCSDLFRNSLVRY  
FSELFVKHMASSYNVSDSVEGICQGS MFRTKSNFFDFVLGFQSNVVT ELCYRDARKQI  
RERPSEFSIKQTLTQLENLGHETEDCVEGLTIELLDFQRQSLKWALERERILGGIQSYHW  
VKVPNRGEGHEDELYFNPLLRQFRKDKPKVIRGGFIADQMGLGKTVISLSLILKNPAPEI  
PSSGSPISVLKKSHTVLS PNIATPGNYDWDENLYEKTSTSNKKKGSIIICRGT LVICPV  
LVGQWIAEAKSKLKEPGLIYPYHGSNRKRDPKILTKNSIVVTTYDVIQSDAFYHKEKSHV  
KDYCSPLEQIRWWRIICDEGHCLRHPSMRSKAVRSLVSDHKWIVSGTPMNTSPDDLKNQ  
LKFLGFENVQKSFDEL RHSV DKKRFNMDLLTYFLRPIMIHHNQEQTYRGTSTTXDVLASK  
GTPFVASLHQIYNVFLLSHXTNHFLHILDEKRKLIRLTTEEKKELQEIEKKTQEWY LK  
FRSIHFKTMSKHFLKISSRLTPMRIACSGGEYPIFSESEHVGADADDHENVEYNNNSNTA  
SGDIVRSKFV FQSKFKYLLSELEEIKANERDSKSLVFSQFSSTLEWLKIELPKHGFQFRT  
LSGDMMSMQKAKALADFQNDPPTTIFLLSMRLVPLRRTSPRVHSHKHQILRWCS SHFLNKL  
YSRHSNYTEPAAVGINLTQANRVFLMEPSFNPALEAQAIGRIHRLGQKRAVEVVRLVVQD  
SFEERMINFLDRKYSRCPNDEKKENS NKKA FATKDYDGIAGNVNADKTTLLTAEFDVLF  
VGSYQPERKTS GKDAVVDGDVDP S ADENISKGIV

>comp12096\_c0\_seq5; 1268 144 4735 LEN=4985; translated  
MPRANNKRGNTPSRTQTKSNDKRKRKRKSPDCVADGSEFACIDLTEDGDDDIDDLRRV  
LVPKSGGKKRAAIDEVIVLDSDDENDPPASYAKTTKNSADERTQTAEVSRVSKKARVK  
KEGQTS P S SARPNNDLATMYDDVEIVQAEAPKFTRAADSVSRKASAGGNTGDNEDDVV  
EGVLNETRLPHMRQHCTSF PFRTRSRKLSVSVRRDNQQSCDLCYCYVCDPCVKDCKNWH  
SSSSTTPKNNHCCATEKDR IWEDMRLRSKVTDERAEDEPPEGFHFMKDCDR LACDKCWCY  
VCDKPGIDCTNFEHVAANPEEECYRRERQKRKLSTYGRPGPFEP TNP DAPRDI ELTKCRH  
CSWFVRLRPDRGVT P SDDWCKYCGRVASDEDELEKNQKAATSTEEKNSYFFGQKEIPFRI  
KAHDPRLLEDEYKVNWEDNDGKAEWYDEAERQEEVFLHRIGRSPNLQNIYTSIQRVAEEN  
IPNKP IGQSHKRMDDTDAI IVGDPKQLQLLYLIVEKKIDGLEINASWCKESKIGRFTLRF  
MLPKCFMVEHPVSNKHSALQRYLPHLLGLWFGMFPFQVSEL CGILKASNSSYRYITKCLR  
NYKQRNQHKKSLPRKEIKEIDNNLFPILRKKLESFSVKMREDEIAKESKLT LAPSNASK  
FSGSVCT SAPSGSSCSDLFRNSLVRYFSELFVKHMASSYNVSDSVEGICQGS MFRTKSN  
FFDFVLGFQSNVVT ELCYRDARKQIRERPSEFSIKQTLTQLENLGHETEDCVEGLTIEL  
LDFQRQSLKWALERERILGGIQSYHWVKVPNRGEGHEDELYFNPLLRQFRKDKPKVIRGG  
FIADQMGLGKTVISLSLILKNPAPEIPSSGSPISVLKKSHTVLS PNIATPGNYDWDENL  
YEKTSTSNKKKGSIIICRGT LVICPVSLVGQWIAEAKSKLKEPGLIYPYHGSNRKRDPKIL  
TKNSIVVTTYDVIQSDAFYHKEKSHVKDYCSPLEQIRWWRIICDEGHCLRHPSMRSKAV  
RSLVSDHKWIVSGTFSFGNPPFFYEAVFNLDVFLISFNFYKGT P MNTSPDDLKNQLKFL  
GFENVQKSFDEL RHSV DKKRFNMDLLTYFLRPIMIHHNQEQTYRGTSTTLMSLPPKTEKR  
KLIRLTTEEKKELQEIEKKTQEWY LKFRSIHFKTMSKHFLKISSRLTPMRIACSGGEYPI  
FSESEHVGADADDHENVEYNNNSNTASGDIVRSKFV FQSKFKYLLSELEEIKANERDCKF  
IAVVIKIFXVCQVSHRLFSSIPNCLSSAKSLVFSQFSSTLEWLKIELPKHGFQFRTLSG  
MSMQKAKALADFQNDPPTTIFLLSMRLVPLRRTSPRVHSHKHQILRWCS SHFLNKLYSR  
HSNYTEPAAVGINLTQANRVFLMEPSFNPALEAQAIGRIHRLGQKRAVEVVRLVVQDSFE  
ERMINFLDRKYSRCPNDEKKENS NKKA FATKDYDGIAGNVNADKTTLLTAEFDVLFVGSY  
QPERKTS GKDAVVDGDVDP S ADENISKGIV

>comp12096\_c0\_seq6; 1049 144 3668 LEN=4282; translated  
MPRANNKRGNTPSRTQTKSNDKRKRKRKSPDCVADGSEFACIDLTEDGDDDIDDLRRV  
LVPKSGGKKRAAIDEVIVLDSDDENDPPASCKFTXTNELDMIEQQSNAYKPKSPTYFLH  
CYLVSDAKTTKNSADERTQTAEVSRVSKKARVKKEGQTS P S SARPNNDLATMYDDVEIV  
QAEAPKFTRAADSVSRKASAGGNTGDNEDDVVVEGVLNETRLPHMRQHCTSF PFRTRSR  
RKL SVSVRRDNQQSCDLCYCYVCDPCVKDCKNWHSSSSTTPKNNHCCATEKDR IWEDMRL  
RSKVTDERAEDEPPEGFHFMKDCDR LACDKCWCYVCDKPGIDCTNFEHVAANPEEECYRR  
ERQKRKLSTYGRPGPFEP TNP DAPRDI ELTKCRHCSWFVRLRPDRGVT P SDDWCKYCGR  
VASDEDELEKNQKAATSTEEKNSYFFGQKEIPFRIKAHDPRLLEDEYKVNWEDNDGKAEWY  
DEAERQEEVFLHRIGRSPNLQNIYTSIQRVAEENIPNKP IGQSHKRMDDTDAI IVGDPKQ  
LQLLYLIVEKKIDGLEINASWCKESKIGRFTLRFMLPKCFMVEHPVSNKHSALQRYLPHL

LGLWFGMFPFQVSELGILKASNSSYRYITKCLRNRQYKQRNQHKSLPRKEIKEIDNNLF  
PILRKKLESFSVKMREDEIAKESKLT LAPSNASKFSGSVCTSAPSGSSCSDLFRNSLVR  
YFSELFVKHMASSYNVSDSDSVEGICQGSMTFRKSNFFDFVLGFGQSNVVTCLCYRDARKQI  
RERPSEFSIKQTLTQLENLGHETEDCVEGLTIELLDFQRQSLKWALERERILGGIQSYHW  
VKVPNRGEGHEDELYFNPLLRQFRKDKPKVIRGGFIADQMGLGKTVISLSLILKNPAPEI  
PSSGSPISVLKKSHTVLSPLNIATPGNYDWDENLYEKTSTSNKKKGSIIICRGTLVICPVS  
LVGQWIAEAKSKLKEPGLIYPYHGSNRKRDPKILTKNSIVVTYDVIQSDAFYHKEKSHV  
KDYCSPLEQIRWWRIICDEGHCLRHPSMRKAVRSLVSDHKWIVSGTFSFGNPPFFYE  
AVFNLDVFLLI SFNFYKGTMPMNTSPDDLKNQLKFLGFENVQKSFDELRSVDKRRFNMDLL  
TYFLRPIMIHNNQEQT YRGTSTTLMSLPPKVRRL

>comp12096\_c0\_seq7; 1009 144 3578 LEN=4281; translated  
MPRANNNKRGNTPSRTQTKSNDKRRKRRKSPDCVADGSEFACIDLTEGDDDDIDDLRRV  
LVPKSGGKKRAAIDEVIVLSDSSDENDPPASCKFTXTNELDMIEQQSNAYKPKSPTYFLH  
CYLVSDAKTTKTNSADERTQTAEVSRVSKKARVKKEGQTSPPSSARPNNDLATMYDDVEIV  
QAEAPKFTRAADSVSRKASAGGGNTGDNEDDVVVEGVLNETRLPHMRQHCTSFPPFRTRRS  
RKL SVSVRRDNQQSCDLCYCYVCDKPKDCKNWHSSSSTTPKNNHCCATEKDR IWEDMRL  
RSKVTDERAEDEPPEGFHFMKDCDRLACDKCWCYVCDKPGIDCTNFEHVAANPEEECYRR  
ERQKRKLS TYGRPGPFEP TNP DAPRDI ELTKCRHCSWFVRLRPDRGVT P SDDWCKYCGR  
VASDEDELEKNQKAATSTEEKNSYFFGQKEIPFRIKAHDPRLLEDEYKVNWEDNDGKAEWHY  
DEAERQEEVFLHRIGRSPNLQNIYTSIQRVAEENIPNKP IGQSHKRMDDTDAI IVGDPKQ  
LQLLYLIVEKKIDGLEINASWCKESKIGRFTLRFMLPKCFMVEHPVSNKHSALQRYLPHL  
LGLWFGMFPFQVSELGILKASNSSYRYITKCLRNRQYKQRNQHKSLPRKEIKEIDNNLF  
PILRKKLESFSVKMREDEIAKESKLT LAPSNASKFSGSVCTSAPSGSSCSDLFRNSLVR  
YFSELFVKHMASSYNVSDSDSVEGICQGSMTFRKSNFFDFVLGFGQSNVVTCLCYRDARKQI  
RERPSEFSIKQTLTQLENLGHETEDCVEGLTIELLDFQRQSLKWALERERILGGIQSYHW  
VKVPNRGEGHEDELYFNPLLRQFRKDKPKVIRGGFIADQMGLGKTVISLSLILKNPAPEI  
PSSGSPISVLKKSHTVLSPLNIATPGNYDWDENLYEKTSTSNKKKGSIIICRGTLVICPVS  
LVGQWIAEAKSKLKEPGLIYPYHGSNRKRDPKILTKNSIVVTYDVIQSDAFYHKEKSHV  
KDYCSPLEQIRWWRIICDEGHCLRHPSMRKAVRSLVSDHKWIVSGT P MNTSPDDLKNQ  
LKFLGFENVQKSFDELRSVDKRRFNMDLLTYFLRPIMIHNNQEQT YRGTSTTLMSLPPK  
VRRL

>comp12096\_c0\_seq8; 1107 144 3566 LEN=4269; translated  
MPRANNNKRGNTPSRTQTKSNDKRRKRRKSPDCVADGSEFACIDLTEGDDDDIDDLRRV  
LVPKSGGKKRAAIDEVIVLSDSSDENDPPASYAKTTKTNSADERTQTAEVSRVSKKARVK  
KEGQTSPPSSARPNNDLATMYDDVEIVQAEAPKFTRAADSVSRKASAGGGNTGDNEDDVV  
EGVLNETRLPHMRQHCTSFPPFRTRRSRKL SVSVRRDNQQSCDLCYCYVCDKPKDCKNWH  
SSSSTTPKNNHCCATEKDR IWEDMRLRSKVTDERAEDEPPEGFHFMKDCDRLACDKCWCY  
VCDKPGIDCTNFEHVAANPEEECYRRERQKRKLS TYGRPGPFEP TNP DAPRDI ELTKCRH  
CSWFVRLRPDRGVT P SDDWCKYCGR VASDEDELEKNQKAATSTEEKNSYFFGQKEIPFRI  
KAHDPRLLEDEYKVNWEDNDGKAEWHYDEAERQEEVFLHRIGRSPNLQNIYTSIQRVAEEN  
IPNKP IGQSHKRMDDTDAI IVGDPKQLQLLYLIVEKKIDGLEINASWCKESKIGRFTLRF  
MLPKCFMVEHPVSNKHSALQRYLPHLLGLWFGMFPFQVSELGILKASNSSYRYITKCLR  
NRQYKQRNQHKSLPRKEIKEIDNNLFPILRKKLESFSVKMREDEIAKESKLT LAPSNASK  
FSGSVCTSAPSGSSCSDLFRNSLVR YFSELFVKHMASSYNVSDSDSVEGICQGSMTFRKSN  
FFDFVLGFGQSNVVTCLCYRDARKQIRERPSEFSIKQTLTQLENLGHETEDCVEGLTIEL  
LDFQRQSLKWALERERILGGIQSYHWVKVPNRGEGHEDELYFNPLLRQFRKDKPKVIRGG  
FIADQMGLGKTVISLSLILKNPAPEIPSSGSPISVLKKSHTVLSPLNIATPGNYDWDENL  
YEKTSTSNKKKGSIIICRGTLVICPVS LVGQWIAEAKSKLKEPGLIYPYHGSNRKRDPKIL  
TKNSIVVTYDVIQSDAFYHKEKSHVKDYCSPLEQIRWWRIICDEGHCLRHPSMRKAV  
RSLVSDHKWIVSGTFSFGNPPFFYEA VFNLDVFLLI SFNFYKGTMPMNTSPDDLKNQLKFL  
GFENVQKSFDELRSVDKRRFNMDLLTYFLRPIMIHNNQEQT YRGTSTTLMSLPPKVRRL

>comp12096\_c0\_seq9; 1430 144 4532 LEN=4782; translated  
MPRANNNKRGNTPSRTQTKSNDKRRKRRKSPDCVADGSEFACIDLTEGDDDDIDDLRRV  
LVPKSGGKKRAAIDEVIVLSDSSDENDPPASYAKTTKTNSADERTQTAEVSRVSKKARVK  
KEGQTSPPSSARPNNDLATMYDDVEIVQAEAPKFTRAADSVSRKASAGGGNTGDNEDDVV  
EGVLNETRLPHMRQHCTSFPPFRTRRSRKL SVSVRRDNQQSCDLCYCYVCDKPKDCKNWH  
SSSSTTPKNNHCCATEKDR IWEDMRLRSKVTDERAEDEPPEGFHFMKDCDRLACDKCWCY  
VCDKPGIDCTNFEHVAANPEEECYRRERQKRKLS TYGRPGPFEP TNP DAPRDI ELTKCRH  
CSWFVRLRPDRGVT P SDDWCKYCGR VASDEDELEKNQKAATSTEEKNSYFFGQKEIPFRI  
KAHDPRLLEDEYKVNWEDNDGKAEWHYDEAERQEEVFLHRIGRSPNLQNIYTSIQRVAEEN

IPNKP IGQSHKRMDTDAI IVGDPKQLQLLYLIVEKKIDGLEINASWCKESKIGRFTLRF  
MLPKCFMVEHPVSNKHSALQRYLPHLLGLWFGMFPFQVSELGILKASNSSYRYITKKLR  
NQYKQRNQHKKSLPRKEIKEIDNNLFPILRKKLESFSVKMREDEIAKESKLTLPASNASK  
FSGSVCTSAPSGSSCSDLFRNSLVRYFSELFVKHMASYNVSDSDSVEGICQGSMFRTKSN  
FFDFVLGFQSNVVTTELCCYRDARKQIRERPSEFSIKQTLTQLENLGHETEDCVEGLTIEL  
LDFQRQSLKWALERERILGGIQSYHWVKVPNRGEHEDELYFNPLLRQFRKDKPKVIRGG  
FIADQMGLGKTVISLSLILKNPAEIPSSGSPISVLKKSHTVLSPNIATPGNYWDENL  
YEKTSTSNKKKGSIIICRGTLVICPVSLVGQWIAEAKSKLKEPGLIYPYHGSNRKRDPKIL  
TKNSIVVTYDVIQSDAFYHKEKSHVKDYCSPLEQIRWWRIICDEGHCLRHPSSMRKAV  
RSLVSDHKWIVSGTFSFGNPPFFYEAVFNLDVFLLSFNFYKGTMPMNTSPDDLKNQLKFL  
GFENVQKSFDELRSVDKRFNMDLLTYFLRPIMIHHNQEQTYRGTSTTLMSLPPKTEKR  
KLIRLTTEEKKELQEI EKKTQEWYLFKRSIHFKTMSKHFLKISSRLTPMRIACSGGEYPI  
FSESEHVGADADDHENVEYNNSNNTASGDIVRSKFVFQSKFKYLLSELEEIKANERDSKS  
LVFSQFSSTLEWLKIELPKHGFQFRTLSGDMMSQKRAKALADFQNDPPTTIFLLSMRAGA  
VGINLTQANRVFLMEPSFNPALQAIGRIHRLGQKRAVEVVRLVVQDSFEERMINFLDR  
KYSRCPNDEKKENS NKAFATKDYDGIAGNVNADKTTLLTAEFVDFVDSYQPERKTSG  
KDAVVDGDVDPADENISKGIV

>comp12096\_c0\_seq10; 1301 144 4621 LEN=4871; translated  
MPRANNNKRGNTPSRTQTKSNDKRRKKRSPDCVADGSEFACIDLTEDGDDIDDLRRV  
LVPKSGGKKRAAIDEVIVLSDSSDENDPPASYAKTTKNSADERTQTAEVSRVSKKARVK  
KEGQTSPPSARPNNDLATMYDDVEIVQAEAPKFTRAADSVSRKASAGGGNTGDNEDDVVV  
EGVLNETRLPHMRQHCTSFPPFRTRSRKLSVSVRRDNQQSCDLCYCYVCDPCVKDCKNWH  
SSSSTTPKNNHCCATEKDR IWEDMRLRSKVTDERAEDEPPEGFHFMKDCDRLACDKWCY  
VCDKPGIDCTNFEHVAANPEEECYRRERQKRKLS TYGRPGPFEP TNPDA PRDIELTKCRH  
CSWFVRLRPDRGVT PSSDDWCKYCGRVASDEDLEKNQKAATSTEEKNSYFFGQKEIPFRI  
KAHDPRLLEDEYKVNWEDNDGKAEWYDEAERQEEVFLHRIGRSPNLQNIYTSIQRVAEEN  
IPNKP IGQSHKRMDTDAI IVGDPKQLQLLYLIVEKKIDGLEINASWCKESKIGRFTLRF  
MLPKCFMVEHPVSNKHSALQRYLPHLLGLWFGMFPFQVSELGILKASNSSYRYITKKLR  
NQYKQRNQHKKSLPRKEIKEIDNNLFPILRKKLESFSVKMREDEIAKESKLTLPASNASK  
FSGSVCTSAPSGSSCSDLFRNSLVRYFSELFVKHMASYNVSDSDSVEGICQGSMFRTKSN  
FFDFVLGFQSNVVTTELCCYRDARKQIRERPSEFSIKQTLTQLENLGHETEDCVEGLTIEL  
LDFQRQSLKWALERERILGGIQSYHWVKVPNRGEHEDELYFNPLLRQFRKDKPKVIRGG  
FIADQMGLGKTVISLSLILKNPAEIPSSGSPISVLKKSHTVLSPNIATPGNYWDENL  
YEKTSTSNKKKGSIIICRGTLVICPVSLVGQWIAEAKSKLKEPGLIYPYHGSNRKRDPKIL  
TKNSIVVTYDVIQSDAFYHKEKSHVKDYCSPLEQIRWWRIICDEGHCLRHPSSMRKAV  
RSLVSDHKWIVSGTFSFGNPPFFYEAVFNLDVFLLSFNFYKGTMPMNTSPDDLKNQLKFL  
GFENVQKSFDELRSVDKRFNMDLLTYFLRPIMIHHNQEQTYRGTSTTXDVLASKGTPF  
VASLHQIYNVFLLSHXTNHFLHLILDEKRKLIRLTTEEKKELQEI EKKTQEWYLFKRSI  
HFKTMSKHFLKISSRLTPMRIACSGGEYPIFSESEHVGADADDHENVEYNNSNNTASGDI  
VRSKFVFQSKFKYLLSELEEIKANERDSKSLVFSQFSSTLEWLKIELPKHGFQFRTLSG  
MSMQKRAKALADFQNDPPTTIFLLSMRAGAVGINLTQANRVFLMEPSFNPALQAIGRI  
HRLGQKRAVEVVRLVVQDSFEERMINFLDRKYSRCPNDEKKENS NKAFATKDYDGIAGN  
VNADKTTLLTAEFVDFVDSYQPERKTSGKDAVVDGDVDPADENISKGIV

>comp12096\_c0\_seq11; 1390 144 4442 LEN=4692; translated  
MPRANNNKRGNTPSRTQTKSNDKRRKKRSPDCVADGSEFACIDLTEDGDDIDDLRRV  
LVPKSGGKKRAAIDEVIVLSDSSDENDPPASYAKTTKNSADERTQTAEVSRVSKKARVK  
KEGQTSPPSARPNNDLATMYDDVEIVQAEAPKFTRAADSVSRKASAGGGNTGDNEDDVVV  
EGVLNETRLPHMRQHCTSFPPFRTRSRKLSVSVRRDNQQSCDLCYCYVCDPCVKDCKNWH  
SSSSTTPKNNHCCATEKDR IWEDMRLRSKVTDERAEDEPPEGFHFMKDCDRLACDKWCY  
VCDKPGIDCTNFEHVAANPEEECYRRERQKRKLS TYGRPGPFEP TNPDA PRDIELTKCRH  
CSWFVRLRPDRGVT PSSDDWCKYCGRVASDEDLEKNQKAATSTEEKNSYFFGQKEIPFRI  
KAHDPRLLEDEYKVNWEDNDGKAEWYDEAERQEEVFLHRIGRSPNLQNIYTSIQRVAEEN  
IPNKP IGQSHKRMDTDAI IVGDPKQLQLLYLIVEKKIDGLEINASWCKESKIGRFTLRF  
MLPKCFMVEHPVSNKHSALQRYLPHLLGLWFGMFPFQVSELGILKASNSSYRYITKKLR  
NQYKQRNQHKKSLPRKEIKEIDNNLFPILRKKLESFSVKMREDEIAKESKLTLPASNASK  
FSGSVCTSAPSGSSCSDLFRNSLVRYFSELFVKHMASYNVSDSDSVEGICQGSMFRTKSN  
FFDFVLGFQSNVVTTELCCYRDARKQIRERPSEFSIKQTLTQLENLGHETEDCVEGLTIEL  
LDFQRQSLKWALERERILGGIQSYHWVKVPNRGEHEDELYFNPLLRQFRKDKPKVIRGG  
FIADQMGLGKTVISLSLILKNPAEIPSSGSPISVLKKSHTVLSPNIATPGNYWDENL  
YEKTSTSNKKKGSIIICRGTLVICPVSLVGQWIAEAKSKLKEPGLIYPYHGSNRKRDPKIL

TKNSIVVTTYDVIQSDAFYHKEKSHVKDYCSPLEQIRWWRIICDEGHCLRHPSMRSKAV  
RSLVSDHKWIVSGTPMNTSPDDLKNQLKFLGFENVQKSFDELRHSVDKKRFNMDLLTYFL  
RPIMIHNNQEQTyrGTSTTLMSLPPKTEKRKLIRLTTEEKKELQEIEKKTQEWYLFKFRSI  
HFKTMSKHFLKISSRLTPMRIACSGGEYPIFSESEHVGADADDHENVEYNNNSNNTASGDI  
VRSKFVFQSKFKYLLSELEEIKANERDSKSLVFSQFSSTLEWLKIELPKHGFQFRTLSGD  
MSMQKRAKALADFQNDPPTTIFLLSMRAGAVGINLTQANRVFLMEPSFNPALQAQAIGRI  
HRLGQKRAVEVRLVVDQSFEEERMINFLDRKYSRCPNDEKKENSNKKAFAFKDYDGIAGN  
VNADKTTLLTAEFVDVLFVGSYQPERKTSKDAVVDGDVDPADENISKGIV

>comp12096\_c0\_seq12; 1207 144 4658 LEN=4908; translated  
MPRANNNKRGNTPSRTQTKSNDKRRKKRSPDCVADGSEFACIDLTEGDGDDIDDLRRV  
LVPKSGGKKRAAIDEVIVLDSDDENDPPASCKFTXTNELDMIEQQSNAYKPKSPTYFLH  
CYLVSDAKTTKTNADERTQTAEVSRVSKKARVKKEGQTSPPSSARPNNDLATMYDDVEIV  
QAEAPKFTRAADSVSRKASAGGGNTGDNEDDVVVEGVLNELRLPHMRQHCTSFPPFRTRRS  
RKLVS SVRRDNQQSCDLCYCYVCDPCKVDCKNWSSSSTTPKNNHCCATEKDR IWEDMRL  
RSKVTDERAEDEPPEGFHFMKDCDR LACDKCWCYVCDKPGIDCTNFEHVAANPEEECYRR  
ERQKRKLSTYGRPGPFEP TNP DAPRDIELTKCRHCSWFVRLRPDRGVT P SDDWCKYCGR  
VASDEDLEKNQKAATSTEEKNSYFFGQKEIPFRIKAHDPRLLEDEYKVNWEDNDGKAEWHY  
DEAERQEEVFLHRIGRSPNLQNIYTSIQRVAEENIPNKP IGQSHKRMDDTDAI IVGDPKQ  
LQLLYLIVEKKIDGLEINASWCKESKIGRFTLRFMLPKCFMVEHPVSNKHSALQRYLPHL  
LGLWFGMFPFQVSELGILKASNSSYRYITKCLRNYKQQRNQHKKSLPRKEIKEIDNNLF  
PILRKKLESFSVKMREDEIAKESKLT LAPSNASKFSGSVCTSAPSGSSCSDFRNSLVRY  
FSELFVKHMASSYNVSDSVEGICQGS MFRTKSNFFDFVLGFGQSNVVTELCYRDARKQI  
RERPSEFSIKQTLTQLENLGHETEDCVEGLTIELLDFQRQSLKWALERERILGGIQSYHW  
VKVPNRGEGHEDELYFNPLLRQFRKDKPKVIRGGFIADQMGLGKTVISLSLILKNPAP EI  
PSSGSPISVLKKSHTVLSPN IATPGNYDWDENLYEKTSTSNKKGSIICRGTLVICPVS  
LVGQWIAEAKSKLKEPGLIYPYHGSNRKRDPKILTKNSIVVTTYDVIQSDAFYHKEKSHV  
KDYCSPLEQIRWWRIICDEGHCLRHPSMRSKAVRSLVSDHKWIVSGTPMNTSPDDLKNQ  
LKFLGFENVQKSFDELRHSVDKKRFNMDLLTYFLRPIMIHNNQEQTyrGTSTTLMSLPPK  
TEKRKLIRLTTEEKKELQEIEKKTQEWYLFKFRSIHFKTMSKHFLKISSRLTPMRIACSGG  
EYPIFSESEHVGADADDHENVEYNNNSNNTASGDI VRSKFVFQSKFKYLLSELEEIKANER  
DSKSLVFSQFSSTLEWLKIELPKHGFQFRTLSGDMSMQKRAKALADFQNDPPTTIFLLSM  
RLVPLRRTSPRVHSHKHQILRWCSHFNLKLYSRHSNYTEPAAVGINLTQANRVFLMEPSF  
NPALQAQAIGRIHRLGQKRAVEVRLVVDQSFEEERMINFLDRKYSRCPNDEKKENSNKKA  
FAFKDYDGIAGNVNADKTTLLTAEFVDVLFVGSYQPERKTSKDAVVDGDVDPADENIS  
KGIV

>comp12096\_c0\_seq13; 1203 144 4633 LEN=4883; translated  
MPRANNNKRGNTPSRTQTKSNDKRRKKRSPDCVADGSEFACIDLTEGDGDDIDDLRRV  
LVPKSGGKKRAAIDEVIVLDSDDENDPPASCKFTXTNELDMIEQQSNAYKPKSPTYFLH  
CYLVSDAKTTKTNADERTQTAEVSRVSKKARVKKEGQTSPPSSARPNNDLATMYDDVEIV  
QAEAPKFTRAADSVSRKASAGGGNTGDNEDDVVVEGVLNELRLPHMRQHCTSFPPFRTRRS  
RKLVS SVRRDNQQSCDLCYCYVCDPCKVDCKNWSSSSTTPKNNHCCATEKDR IWEDMRL  
RSKVTDERAEDEPPEGFHFMKDCDR LACDKCWCYVCDKPGIDCTNFEHVAANPEEECYRR  
ERQKRKLSTYGRPGPFEP TNP DAPRDIELTKCRHCSWFVRLRPDRGVT P SDDWCKYCGR  
VASDEDLEKNQKAATSTEEKNSYFFGQKEIPFRIKAHDPRLLEDEYKVNWEDNDGKAEWHY  
DEAERQEEVFLHRIGRSPNLQNIYTSIQRVAEENIPNKP IGQSHKRMDDTDAI IVGDPKQ  
LQLLYLIVEKKIDGLEINASWCKESKIGRFTLRFMLPKCFMVEHPVSNKHSALQRYLPHL  
LGLWFGMFPFQVSELGILKASNSSYRYITKCLRNYKQQRNQHKKSLPRKEIKEIDNNLF  
PILRKKLESFSVKMREDEIAKESKLT LAPSNASKFSGSVCTSAPSGSSCSDFRNSLVRY  
FSELFVKHMASSYNVSDSVEGICQGS MFRTKSNFFDFVLGFGQSNVVTELCYRDARKQI  
RERPSEFSIKQTLTQLENLGHETEDCVEGLTIELLDFQRQSLKWALERERILGGIQSYHW  
VKVPNRGEGHEDELYFNPLLRQFRKDKPKVIRGGFIADQMGLGKTVISLSLILKNPAP EI  
PSSGSPISVLKKSHTVLSPN IATPGNYDWDENLYEKTSTSNKKGSIICRGTLVICPVS  
LVGQWIAEAKSKLKEPGLIYPYHGSNRKRDPKILTKNSIVVTTYDVIQSDAFYHKEKSHV  
KDYCSPLEQIRWWRIICDEGHCLRHPSMRSKAVRSLVSDHKWIVSGTPMNTSPDDLKNQ  
LKFLGFENVQKSFDELRHSVDKKRFNMDLLTYFLRPIMIHNNQEQTyrGTSTTXDVLASK  
GTPFVASLHQIYNVFLLSHXTNHFLHILHILDEKRKLIRLTTEEKKELQEIEKKTQEWYLFK  
FRSIHFKTMSKHFLKISSRLTPMRIACSGGEYPIFSESEHVGADADDHENVEYNNNSNNTA  
SGDIVRSKFVFQSKFKYLLSELEEIKANERDSKSLVFSQFSSTLEWLKIELPKHGFQFRT  
LSGDMSMQKRAKALADFQNDPPTTIFLLSMRAGAVGINLTQANRVFLMEPSFNPALQAQA  
IGRIHRLGQKRAVEVRLVVDQSFEEERMINFLDRKYSRCPNDEKKENSNKKAFAFKDYDGI



IAGNVNADKTTLLTAEFDVLFVGVSYQPERKTSKDAVVDGDVDPADENISKGIV  
>comp12096\_c0\_seq14; 1261 144 4531 LEN=4781; translated  
MPRANNNKRGNTPSRTQTKSNDKRKRKRKSPDCVADGSEFACIDLTEDGDDDIDDLRRV  
LVPKSGGKKRAAIDEVIVLSDSSDENDPPASYAKTTKNSADERTQTAEVSRVSKKARVK  
KEGQTSPPSSARPNNDLATMYDDVEIVQAEAPKFTRAADSVSRKASAGGGNTGDNEDDVVV  
EGVLNETRLPHMRQHCTSFPPFRTRSRKLSVSVRRDNQQSCDLCYCYVCDPCVKDCKNWH  
SSSSTTPKNNHCCATEKDRIWEDMRLRSKVTDERAEDEPPEGFHFMKDCDRLACDKWCY  
VCDKPGIDCTNFEHVAANPEEECYRRERQKRKLSYGRPGPFEPNPDAPRDIELTKCRH  
CSWFVRLRPDRGVTPSSDDWCKYCGRVASDEDELEKNQKAATSTEEKNSYFFGQKEIPFRI  
KAHDPRLLEDEYKVNWEDNDGKAEMHYDEAERQEEVFLHRIGRSPNLQNIYTSIQRVAEEN  
IPNKPIGQSHKRMDDTDAIIVGDPKQLQLLYLIVEKKIDGLEINASWCKESKIGRFTLRF  
MLPKCFMVEHPVSNKHSALQRYLPHLLGLWFGMFPFQVSELGILKASNSSYRYITKKLR  
NQYKQRNQHKSLPRKEIKEIDNNLFPILRKKLESFSVKMREDEIAKESKLTLPASNASK  
FSGSVCTSAPSGSSCSDLFRNSLVRYFSELFVKHMASSYNVSDSDSVEGICQGSMPFRKSN  
FFDFVLGFQSNVVTTELCTYRDARKQIRERPSEFSIKQTLTQLENLGHETEDCVEGLTIEL  
LDFQRQSLKWALERERILGGIQSYHWVKVPNRGEHEDELYFNPLLRQFRKDKPKVIRGG  
FIADQMGLGKTVISLSLILKNPAEIPSSGSPISVLKKSHTVLSPNIATPGNYDWDENL  
YEKTSTSNKKKGSIIICRGTLVICPVSLVGQWIAEAKSKLKEPGLIYPYHGSNRKRDPKIL  
TKNSIVVTTYDVIQSDAFYHKEKSHVKDYCSPLEQIRWWRIICDEGHCLRHPSSMRKAV  
RSLVSDHKWIVSGTPMNTSPDDLKNQLKFLGFENVQKSFDELRRHSVDKKRFNMDLLTYFL  
RPIIMIHNEQTYRGTSTTXDVLASKGTPFVASLHQIYNVFLLSHXTNNHFLHLHILDEKR  
KLIRLTTEEKKELQEI EKKTQEWYLFKFRSIFHKTMSKHFLKISSRLTPMRIACSGGEYPI  
FSESEHVGADADDHENVEYNNSNNTASGDIVRSKVFVQSKFKYLLSELEEIKANERDSKS  
LVFSQFSSTLEWLKIELPKHGFQFRTLSGDMSMQKRAKALADFQNDPPTTIFLLSMRAGA  
VGINLTQANRVFLMEPSFNPALQAIGRIHRLGQKRAVEVVRLVVQDSFEERMINFLDR  
KYSRCPNDEKKENSNKAFATKDYDGIAGNVNADKTTLLTAEFDVLFVGVSYQPERKTSK  
KDAVVDGDVDPADENISKGIV

>comp12096\_c0\_seq15; 1228 144 4645 LEN=4895; translated  
MPRANNNKRGNTPSRTQTKSNDKRKRKRKSPDCVADGSEFACIDLTEDGDDDIDDLRRV  
LVPKSGGKKRAAIDEVIVLSDSSDENDPPASYAKTTKNSADERTQTAEVSRVSKKARVK  
KEGQTSPPSSARPNNDLATMYDDVEIVQAEAPKFTRAADSVSRKASAGGGNTGDNEDDVVV  
EGVLNETRLPHMRQHCTSFPPFRTRSRKLSVSVRRDNQQSCDLCYCYVCDPCVKDCKNWH  
SSSSTTPKNNHCCATEKDRIWEDMRLRSKVTDERAEDEPPEGFHFMKDCDRLACDKWCY  
VCDKPGIDCTNFEHVAANPEEECYRRERQKRKLSYGRPGPFEPNPDAPRDIELTKCRH  
CSWFVRLRPDRGVTPSSDDWCKYCGRVASDEDELEKNQKAATSTEEKNSYFFGQKEIPFRI  
KAHDPRLLEDEYKVNWEDNDGKAEMHYDEAERQEEVFLHRIGRSPNLQNIYTSIQRVAEEN  
IPNKPIGQSHKRMDDTDAIIVGDPKQLQLLYLIVEKKIDGLEINASWCKESKIGRFTLRF  
MLPKCFMVEHPVSNKHSALQRYLPHLLGLWFGMFPFQVSELGILKASNSSYRYITKKLR  
NQYKQRNQHKSLPRKEIKEIDNNLFPILRKKLESFSVKMREDEIAKESKLTLPASNASK  
FSGSVCTSAPSGSSCSDLFRNSLVRYFSELFVKHMASSYNVSDSDSVEGICQGSMPFRKSN  
FFDFVLGFQSNVVTTELCTYRDARKQIRERPSEFSIKQTLTQLENLGHETEDCVEGLTIEL  
LDFQRQSLKWALERERILGGIQSYHWVKVPNRGEHEDELYFNPLLRQFRKDKPKVIRGG  
FIADQMGLGKTVISLSLILKNPAEIPSSGSPISVLKKSHTVLSPNIATPGNYDWDENL  
YEKTSTSNKKKGSIIICRGTLVICPVSLVGQWIAEAKSKLKEPGLIYPYHGSNRKRDPKIL  
TKNSIVVTTYDVIQSDAFYHKEKSHVKDYCSPLEQIRWWRIICDEGHCLRHPSSMRKAV  
RSLVSDHKWIVSGTPMNTSPDDLKNQLKFLGFENVQKSFDELRRHSVDKKRFNMDLLTYFL  
RPIIMIHNEQTYRGTSTTLMSPKTEKRKLIRLTTEEKKELQEI EKKTQEWYLFKFRSIF  
HFKTMSKHFLKISSRLTPMRIACSGGEYPIFSESEHVGADADDHENVEYNNSNNTASGDI  
VRSKVFVQSKFKYLLSELEEIKANERDCKFI AVVIKIFXVCQVSHRLFSSIPNCLSSAKS  
LVFSQFSSTLEWLKIELPKHGFQFRTLSGDMSMQKRAKALADFQNDPPTTIFLLSMRLLVP  
LRRTPSRVHSHKHILRWCSHFLNKLYSRHSNYTEPAAVGINLTQANRVFLMEPSFNPAL  
EAQAIGRIHRLGQKRAVEVVRLVVQDSFEERMINFLDRKYSRCPNDEKKENSNKAFATK  
DYDGIAGNVNADKTTLLTAEFDVLFVGVSYQPERKTSKDAVVDGDVDPADENISKGIV

>comp12096\_c0\_seq16; 1170 144 4747 LEN=4997; translated  
MPRANNNKRGNTPSRTQTKSNDKRKRKRKSPDCVADGSEFACIDLTEDGDDDIDDLRRV  
LVPKSGGKKRAAIDEVIVLSDSSDENDPPASCKFTXTNELDMIEQQSNAYKPKSPTYFLH  
CYLVSDAKTTKNSADERTQTAEVSRVSKKARVKKEGQTSPPSSARPNNDLATMYDDVEIV  
QAEAPKFTRAADSVSRKASAGGGNTGDNEDDVVVVEGVLNETRLPHMRQHCTSFPPFRTRSR  
RKL SVSVRRDNQQSCDLCYCYVCDPCVKDCKNWHSSSSTTPKNNHCCATEKDRIWEDMRL  
RSKVTDERAEDEPPEGFHFMKDCDRLACDKWCYVCDKPGIDCTNFEHVAANPEEECYRR

ERQKRKLS TYGRPGPF EPTNP DAPRDI ELTKCRHCSW FVRLRPDRG VTPSSDDWCKY CGR  
VASDEDLEKNQKAATSTEEKNSYFFGQKEIPFRIKAHDPRLLEDEYKVNWEDNDGKAEWHY  
DEAERQEEVFLHRIGRSPNLQNIYTSIQRVAEENIPNKP IGQSHKRMDDTDAI IVGDPKQ  
LQLLYLIVEKKIDGLEINASWCKESKIGRFTLRFMLPKCFMVEHPVSNKHSALQRYLPHL  
LGLWFGMFPFQVSEL CGILKASNSSYRYITKCLRNYKQQRNQHKSLPRKEIKEIDNNLF  
PILRKKLESFSVKMREDEIAKESKLT LAPSNASKFSGSVCTSAPSGSSCSDLFRNSLVRY  
FSELFVKHMASSYNVSDSVEGICQGS MFRTKSNFFDFVLGFQSNVVTELCYIRDARKQI  
RERPSEFSIKQTLTQLENLGHETEDCVEGLTIELLDFQRQSLKWALERERILGGIQSYHW  
VKVPNRGEGHEDELYFNPLLRQFRKDKPKVIRGGFIADQMGLGKTVISLSLILKNPAPEI  
PSSGSPISVLKKKSHTVLS PNIATPGNYDWDENLYEKTSTSNKKKGSIIICRGTLVICPVS  
LVGQWIAEAKSKLKEPGLIYPYHGSNRKRD PKILTKNSIVVTTYDVIQSDAFYHKEKSHV  
KDYCSPLEQIRWWR IICDEGHCLRHPSMRSKAVRSLVSDHKWIVSGTPMNTSPDDLKNQ  
LKFLGFENVQKSFDEL RHSV DKKRFNMDLLTYFLRPI MIHNNQEQT YRGTSTTLMSLPPK  
TEKRKLIRLTTEEKKELQEI EKKTQEWYLFKRSIHFKTMSKHFLKISSRLTPMRIACSGG  
EYPIFSESEHVGADADDHENVEYNNSNNTASGDIVRSKFFVQSKFKYLLSELEEIKANER  
DCKFI AVVIKIFXVCQVSHRLFSSIPNCLSSAKSLVFSQFSSTLEWLKIELPKHGFQFRT  
LSGDM SMQKRAKALAD FQNDPPTTIFLLSMRLVPLRRTSPRVHSHKHQILRWCS SHFLNKL  
YSRHSNYTEPAAVGINLTQANRVFLMEPSFNPALEAQAIGRIHRLGQKRAVEVVRLVVQD  
SFEERMINFLDRKYSRCPNDEKKENS NKKA FATKDYDGIAGNVNADKTLLTAEFDVLF D  
VGSYQPERKTS GKDAVVDGDVDP S ADENISKGIV

>comp12096\_c0\_seq17; 1332 144 4544 LEN=4794; translated  
MPRANNNKRGNTPSRTQTKSNDKRRKRRK RSPDCVADGSEFACIDL TEDGDDDIDDLRRV  
LVPKSGGKKRAAIDEVIVL DSSDDENDPPASCKFTXTNELDMIEQQSNAYKPKSPTYFLH  
CYLVSDAKTTKTNSADERTQTAEVSRVSKKARVKKEGQTS PSSARPNNDLATMYDDVEIV  
QAEAPKFTRAADSVSRKASAGGGNTGDNE DDVVVEGVLNETRLPHMRQHCTSF PFRTRRS  
RKLSVSVRRDNQQSCDLCYCYVCD CPVKDCKNWHSSSSTTPKNNHCCATEKDR IWEDMRL  
RSKVTDERAEDEPEPEGFHFMKDCDR LACDKCWCYVCDKPGIDCTNFEHVAANPEEECYRR  
ERQKRKLS TYGRPGPF EPTNP DAPRDI ELTKCRHCSW FVRLRPDRG VTPSSDDWCKY CGR  
VASDEDLEKNQKAATSTEEKNSYFFGQKEIPFRIKAHDPRLLEDEYKVNWEDNDGKAEWHY  
DEAERQEEVFLHRIGRSPNLQNIYTSIQRVAEENIPNKP IGQSHKRMDDTDAI IVGDPKQ  
LQLLYLIVEKKIDGLEINASWCKESKIGRFTLRFMLPKCFMVEHPVSNKHSALQRYLPHL  
LGLWFGMFPFQVSEL CGILKASNSSYRYITKCLRNYKQQRNQHKSLPRKEIKEIDNNLF  
PILRKKLESFSVKMREDEIAKESKLT LAPSNASKFSGSVCTSAPSGSSCSDLFRNSLVRY  
FSELFVKHMASSYNVSDSVEGICQGS MFRTKSNFFDFVLGFQSNVVTELCYIRDARKQI  
RERPSEFSIKQTLTQLENLGHETEDCVEGLTIELLDFQRQSLKWALERERILGGIQSYHW  
VKVPNRGEGHEDELYFNPLLRQFRKDKPKVIRGGFIADQMGLGKTVISLSLILKNPAPEI  
PSSGSPISVLKKKSHTVLS PNIATPGNYDWDENLYEKTSTSNKKKGSIIICRGTLVICPVS  
LVGQWIAEAKSKLKEPGLIYPYHGSNRKRD PKILTKNSIVVTTYDVIQSDAFYHKEKSHV  
KDYCSPLEQIRWWR IICDEGHCLRHPSMRSKAVRSLVSDHKWIVSGTPMNTSPDDLKNQ  
LKFLGFENVQKSFDEL RHSV DKKRFNMDLLTYFLRPI MIHNNQEQT YRGTSTTLMSLPPK  
TEKRKLIRLTTEEKKELQEI EKKTQEWYLFKRSIHFKTMSKHFLKISSRLTPMRIACSGG  
EYPIFSESEHVGADADDHENVEYNNSNNTASGDIVRSKFFVQSKFKYLLSELEEIKANER  
DSKSLVFSQFSSTLEWLKIELPKHGFQFRTLSGDM SMQKRAKALAD FQNDPPTTIFLLSM  
RAGAVGINLTQANRVFLMEPSFNPALEAQAIGRIHRLGQKRAVEVVRLVVQDSFEERMIN  
FLDRKYSRCPNDEKKENS NKKA FATKDYDGIAGNVNADKTLLTAEFDVLF D VGSYQPER  
KTS GKDAVVDGDVDP S ADENISKGIV

>comp12096\_c0\_seq18; 1372 144 4634 LEN=4884; translated  
MPRANNNKRGNTPSRTQTKSNDKRRKRRK RSPDCVADGSEFACIDL TEDGDDDIDDLRRV  
LVPKSGGKKRAAIDEVIVL DSSDDENDPPASCKFTXTNELDMIEQQSNAYKPKSPTYFLH  
CYLVSDAKTTKTNSADERTQTAEVSRVSKKARVKKEGQTS PSSARPNNDLATMYDDVEIV  
QAEAPKFTRAADSVSRKASAGGGNTGDNE DDVVVEGVLNETRLPHMRQHCTSF PFRTRRS  
RKLSVSVRRDNQQSCDLCYCYVCD CPVKDCKNWHSSSSTTPKNNHCCATEKDR IWEDMRL  
RSKVTDERAEDEPEPEGFHFMKDCDR LACDKCWCYVCDKPGIDCTNFEHVAANPEEECYRR  
ERQKRKLS TYGRPGPF EPTNP DAPRDI ELTKCRHCSW FVRLRPDRG VTPSSDDWCKY CGR  
VASDEDLEKNQKAATSTEEKNSYFFGQKEIPFRIKAHDPRLLEDEYKVNWEDNDGKAEWHY  
DEAERQEEVFLHRIGRSPNLQNIYTSIQRVAEENIPNKP IGQSHKRMDDTDAI IVGDPKQ  
LQLLYLIVEKKIDGLEINASWCKESKIGRFTLRFMLPKCFMVEHPVSNKHSALQRYLPHL  
LGLWFGMFPFQVSEL CGILKASNSSYRYITKCLRNYKQQRNQHKSLPRKEIKEIDNNLF  
PILRKKLESFSVKMREDEIAKESKLT LAPSNASKFSGSVCTSAPSGSSCSDLFRNSLVRY  
FSELFVKHMASSYNVSDSVEGICQGS MFRTKSNFFDFVLGFQSNVVTELCYIRDARKQI

RERPSEFSIKQTLTQLENLGHETEDCVEGLTIELLDFQRQSLKWALERERILGGIQSYHW  
VKVPNRGEHEDELYFNPLLRQFRKDKPKVIRGGFIADQMGLGKTVISLSLILKNPAPEI  
PSSGSPISVLKKSHTVLSPNIAATPGNYDWDENLYEKTSTSNKKKGSIIICRGTLVICPVS  
LVGQWIAEAKSKLKEPGLIYPYHGSNRKRDPKILTKNSIVVTTYDVIQSDAFYHKEKSHV  
KDYCSPLEQIRWWRIICDEGHCLRHPSSMRSKAVRSLVSDHKWIVSGTFSFGNPPFFYEA  
VFNLDVFLLI SFNFYKGTMPMNTSPDDLKNQLKFLGFENVQKSFDELRRHSVDKKRFNMDLL  
TYFLRPIMIHNNQEQTyrGTSTTLMSLPPKTEKRKLIRLTTEEKKELQEIEKKTQEWYLK  
FRSIHFKTMSKHFLKISSRLTPMRIACSGGEYPIFSESEHVADADDHENVEYNNNSNNTA  
SGDIVRSKFVVFQSKFKYLLSELEEIKANERDSKSLVFSQFSSTLEWLKIELPKHGFQFRT  
LSGDMMSQKRAKALADFQNDPPTTIFLLSMRAGAVGINLTQANRVFLMEPSFNPALAEQA  
IGRIHRLGQKRAVEVVRLVVDQSFEE RMINFLDRKYSRCPNDEKKENS NKAFATKDYDG  
IAGNVNADKTTLLTAEFDVLFVDSYQPERKTS GKDAVVDGDVDPADENISKGIV

>comp12096\_c0\_seq19; 1176 144 4735 LEN=4985; translated  
MPRANNNKRGNTPSRTQTKSNDKRKKRKRSPDCVADGSEFACIDLTEDGDDDDIDDLRRV  
LVPKSGGKKRAAIDEVIVLDSDDENDPPASYAKTTKTNADERTQTAEVSRVSKKARVK  
KEGQTSPPSSARPNNDLATMYDDVEIVQAEAPKFTRAADSVSRKASAGGGNTGDNEDDVVV  
EGVLNETRLPHMRQHCTSFPPFRTRSRKLSVSVRRDNQQSCDLCYCYVCDPCVKDCKNWH  
SSSSTTPKNNHCCATEKDRIWEDMRLRSKVTDERAEDEPPEGFHFMKDCDRLACDKWCY  
VCDKPGIDCTNFEHVAANPEEECYRRERQKRKLSTYGRPGPFEP TNPADPRDIELTKCRH  
CSWFVRLRPDRGVTSPSSDDWCKYCGRVASDEDELEKNQKAATSTEEKNSYFFGQKEIPFRI  
KAHDPRLLEDEYKVNWEDNDGKAEWYDEAERQEEVFLHRIGRSPNLQNIYTSIQRVAEEN  
IPNKPIGQSHKRMDDTDAIIVGDPKQLQLLYLIVEKKIDGLEINASWCKESKIGRFTLRF  
MLPKCFMVEHPVSNKHSALQRYLPHLLGLWFGMFPFQVSELGILKASNSSYRYITKCLR  
NQYKQRNQHKSLPRKEIKEIDNNLFPILRKKLESFSVKMREDEIAKESKLTLPASNASK  
FSGSVCTSAPSGSSCDLFRNSLVRYFSELFVKHMASSYNVSDSDSVEGICQGSMPFRKSN  
FFDFVLGFQSNVVTTEL CYRDARKQIRERPSEFSIKQTLTQLENLGHETEDCVEGLTIEL  
LDFQRQSLKWALERERILGGIQSYHWVKVPNRGEHEDELYFNPLLRQFRKDKPKVIRGG  
FIADQMGLGKTVISLSLILKNPAPEIPSSGSPISVLKKSHTVLSPNIAATPGNYDWDENL  
YEKTSTSNKKKGSIIICRGTLVICPVS LVGQWIAEAKSKLKEPGLIYPYHGSNRKRDPKIL  
TKNSIVVTTYDVIQSDAFYHKEKSHVKDYCSPLEQIRWWRIICDEGHCLRHPSSMRSKAV  
RSLVSDHKWIVSGTFSFGNPPFFYEA VFNLDVFLLI SFNFYKGTMPMNTSPDDLKNQLKFL  
GFENVQKSFDELRRHSVDKKRFNMDLLTYFLRPIMIHNNQEQTyrGTSTTXDVLASKGTPF  
VASLHQIYNVFLLSHXTNHFLHILDEKRKLIRLTTEEKKELQEIEKKTQEWYLKFRSI  
HFKTMSKHFLKISSRLTPMRIACSGGEYPIFSESEHVADADDHENVEYNNNSNNTASGDI  
VRSKFVVFQSKFKYLLSELEEIKANERDSKSLVFSQFSSTLEWLKIELPKHGFQFRTLSGD  
MSMQKRAKALADFQNDPPTTIFLLSMRLVPLRRTSPRVHSHKHQILRWCSSHFLNKLYSRH  
SNYTEPAAVGINLTQANRVFLMEPSFNPALAEQAIGRIHRLGQKRAVEVVRLVVDQSFEE  
RMINFLDRKYSRCPNDEKKENS NKAFATKDYDGIAGNVNADKTTLLTAEFDVLFVDSY  
QPERKTS GKDAVVDGDVDPADENISKGIV

>comp12096\_c0\_seq20; 1393 144 4621 LEN=4871; translated  
MPRANNNKRGNTPSRTQTKSNDKRKKRKRSPDCVADGSEFACIDLTEDGDDDDIDDLRRV  
LVPKSGGKKRAAIDEVIVLDSDDENDPPASYAKTTKTNADERTQTAEVSRVSKKARVK  
KEGQTSPPSSARPNNDLATMYDDVEIVQAEAPKFTRAADSVSRKASAGGGNTGDNEDDVVV  
EGVLNETRLPHMRQHCTSFPPFRTRSRKLSVSVRRDNQQSCDLCYCYVCDPCVKDCKNWH  
SSSSTTPKNNHCCATEKDRIWEDMRLRSKVTDERAEDEPPEGFHFMKDCDRLACDKWCY  
VCDKPGIDCTNFEHVAANPEEECYRRERQKRKLSTYGRPGPFEP TNPADPRDIELTKCRH  
CSWFVRLRPDRGVTSPSSDDWCKYCGRVASDEDELEKNQKAATSTEEKNSYFFGQKEIPFRI  
KAHDPRLLEDEYKVNWEDNDGKAEWYDEAERQEEVFLHRIGRSPNLQNIYTSIQRVAEEN  
IPNKPIGQSHKRMDDTDAIIVGDPKQLQLLYLIVEKKIDGLEINASWCKESKIGRFTLRF  
MLPKCFMVEHPVSNKHSALQRYLPHLLGLWFGMFPFQVSELGILKASNSSYRYITKCLR  
NQYKQRNQHKSLPRKEIKEIDNNLFPILRKKLESFSVKMREDEIAKESKLTLPASNASK  
FSGSVCTSAPSGSSCDLFRNSLVRYFSELFVKHMASSYNVSDSDSVEGICQGSMPFRKSN  
FFDFVLGFQSNVVTTEL CYRDARKQIRERPSEFSIKQTLTQLENLGHETEDCVEGLTIEL  
LDFQRQSLKWALERERILGGIQSYHWVKVPNRGEHEDELYFNPLLRQFRKDKPKVIRGG  
FIADQMGLGKTVISLSLILKNPAPEIPSSGSPISVLKKSHTVLSPNIAATPGNYDWDENL  
YEKTSTSNKKKGSIIICRGTLVICPVS LVGQWIAEAKSKLKEPGLIYPYHGSNRKRDPKIL  
TKNSIVVTTYDVIQSDAFYHKEKSHVKDYCSPLEQIRWWRIICDEGHCLRHPSSMRSKAV  
RSLVSDHKWIVSGTFSFGNPPFFYEA VFNLDVFLLI SFNFYKGTMPMNTSPDDLKNQLKFL  
GFENVQKSFDELRRHSVDKKRFNMDLLTYFLRPIMIHNNQEQTyrGTSTTLMSLPPKTEKR  
KLIRLTTEEKKELQEIEKKTQEWYLKFRSIHFKTMSKHFLKISSRLTPMRIACSGGEYPI

FSESEHVGADADDHENVEYNNSNNTASGDIVRSKFVVFQSKFKYLLSELEEIKANERDCKF  
IAVVIKIFXVCQVSHRLFSSIPNCLSSAKSLVFSQFSSTLEWLKIELPKHGFQFRTLSGD  
MSMQKRAKALADFQNDPPTTIFLLSMRAGAVGINLTQANRVFLMEPSFNPALAEAQAIGRI  
HRLGQKRAVEVVRLVVQDSFEERMINFLDRKYSRCPNDEKKENSNKKAFATKDYDGIAGN  
VNADKTTLLTAEFVDVLFVGSYQPERKTSKGDAVVDGDVDPADENISKGIV  
>comp12096\_c0\_seq21; 1136 144 4645 LEN=4895; translated  
MPRANNNKRGNTPSRTQTKSNDKRRKKRSPDCVADGSEFACIDLTEDGDDDIDDLRRV  
LVPKSGGKKRAAIDEVIVLDSDDENDPPASYAKTTKNSADERTQTAEVSRVSKKARVK  
KEGQTSPPSSARPNNDLATMYDDVEIVQAEAPKFTRAADSVSRKASAGGGNTGDNEDDVVV  
EGLVNETRLPHMRQHCTSFPPFRTRSRKLSVSVRRDNQQSCDLCYCYVCDPCKDKCNWH  
SSSSTPKNNHCCATEKDRIWEDMRLRSKVTDERAEDEPPEGFHFMKDCDRLACDKWCY  
VCDKPGIDCTNFEHVAANPEEECYRRERQKRKLSYGRPGPFEPNPDAPRDIELTKCRH  
CSWFVRLRPDRGVTSSDDWCKYCGRVASDEDLEKNQKAATSTEEKNSYFFGQKEIPFRI  
KAHDPRLLEDEYKVNWEDNDGKAEMHYDEAERQEEVFLHRIGRSPNLQNIYTSIQRVAEEN  
IPNKPIGQSHKRMDDTDAIIVGDPKQLQLLYLIVEKKIDGLEINASWCKESKIGRFTLRF  
MLPKCFMVEHPVSNKHSALQRYLPHLLGLWFGMFPFQVSELGILKASNSSYRYITKCLR  
NQYKQRNQHKKSLPRKEIKEIDNNLFPILRKKLESFSVKMREDEIAKESKLTLPASNASK  
FSGSVCTSAPSGSSCDLFRNSLVRYFSELFVKHMASSYNVSDSDSVEGICQGSFRTKSN  
FFDFVLGFQSNVVTTELCCYRDARKQIRERPSEFSIKQTLTQLENLGHETEDCVEGLTIEL  
LDFQRQSLKWALERERILGGIQSYHWVKVPNRGEHEDELYFNPLLRQFRKDKPKVIRGG  
FIADQMGLGKTIVISLSLILKNPAEIPSSGSPISVLKKSHTVLSPNIATPGNYDWDENL  
YEKTSTSNKKKGSIIICRGTLVICPVSLVGQWIAEAKSKLKEPGLIYPYHGSNRKRDPKIL  
TKNSIVVTTYDVIQSDAFYHKEKSHVKDYCSPLEQIRWWRICDEGHCLRHPSMSRKA  
RSLVSDHKWIVSGTPMNTSPDDLKNQLKFLGFENVQKSFDELRSVDDKRFNMDLLTYFL  
RPIIMIHNEQTYRGTSTTXDVLASKGTPFVASLHQIYNVFLSHXTNNHFLHLHILDEKR  
KLIRLTTEEKKELQEI EKKTQEWYLFKFRSIFHFKTMSKHFLKISSRLTPMRIAACSGGEYPI  
FSESEHVGADADDHENVEYNNSNNTASGDIVRSKFVVFQSKFKYLLSELEEIKANERDSKS  
LVFSQFSSTLEWLKIELPKHGFQFRTLSGDMSMQKRAKALADFQNDPPTTIFLLSMRLVP  
LRRTSRVHSHKHQILRWCSHFLNKLYSRHSNYTEPAAVGINLTQANRVFLMEPSFNPAL  
EAQAIGRIHRLGQKRAVEVVRLVVQDSFEERMINFLDRKYSRCPNDEKKENSNKKAFATK  
DYDGIAGNVNADKTTLLTAEFVDVLFVGSYQPERKTSKGDAVVDGDVDPADENISKGIV  
>comp12096\_c0\_seq22; 1247 144 4748 LEN=4998; translated  
MPRANNNKRGNTPSRTQTKSNDKRRKKRSPDCVADGSEFACIDLTEDGDDDIDDLRRV  
LVPKSGGKKRAAIDEVIVLDSDDENDPPASCKFTXTNELDMIEQQSNAYKPKSPTYFLH  
CYLVSDAKTTKNSADERTQTAEVSRVSKKARVKKEGQTSPPSSARPNNDLATMYDDVEIV  
QAEAPKFTRAADSVSRKASAGGGNTGDNEDDVVVVEGLVNETRLPHMRQHCTSFPPFRTR  
RKLVS SVRRDNQQSCDLCYCYVCDPCKDKCNWHSSSSTPKNNHCCATEKDRIWEDMRL  
RSKVTDERAEDEPPEGFHFMKDCDRLACDKWCYVCDKPGIDCTNFEHVAANPEEECYRR  
ERQKRKLSYGRPGPFEPNPDAPRDIELTKCRHCSWFVRLRPDRGVTSSDDWCKYCGR  
VASDEDLEKNQKAATSTEEKNSYFFGQKEIPFRIKAHDPRLLEDEYKVNWEDNDGKAEMHY  
DEAERQEEVFLHRIGRSPNLQNIYTSIQRVAEENIPNKPIGQSHKRMDDTDAIIVGDPKQ  
LQLLYLIVEKKIDGLEINASWCKESKIGRFTLRFMLPKCFMVEHPVSNKHSALQRYLPHL  
LGLWFGMFPFQVSELGILKASNSSYRYITKCLRNPYKQRNQHKKSLPRKEIKEIDNNLFP  
ILRKKLESFSVKMREDEIAKESKLTLPASNASKFSGSVCTSAPSGSSCDLFRNSLVRY  
FSELFVKHMASSYNVSDSDSVEGICQGSFRTKSNFFDFVLGFQSNVVTTELCCYRDARKQI  
RERPSEFSIKQTLTQLENLGHETEDCVEGLTIELLDFQRQSLKWALERERILGGIQSYHW  
VKVPNRGEHEDELYFNPLLRQFRKDKPKVIRGGFIADQMGLGKTIVISLSLILKNPAEIP  
SSGSPISVLKKSHTVLSPNIATPGNYDWDENLYEKTSTSNKKKGSIIICRGTLVICPV  
LVGQWIAEAKSKLKEPGLIYPYHGSNRKRDPKILTKNSIVVTTYDVIQSDAFYHKEKSHV  
KDYCSPLEQIRWWRICDEGHCLRHPSMSRKA VRSLVSDHKWIVSGTFSFGNPPFFYE  
AVNLDVFLLI SFNFYKGTGMNTSPDDLKNQLKFLGFENVQKSFDELRSVDDKRFNMDLL  
TYFLRPIIMIHNEQTYRGTSTTLMSLPPKTEKRKLIRLTTEEKKELQEI EKKTQEWYLF  
FRSIFHFKTMSKHFLKISSRLTPMRIAACSGGEYPIFSESEHVGADADDHENVEYNNSNNTA  
SGDIVRSKFVVFQSKFKYLLSELEEIKANERDSKSLVFSQFSSTLEWLKIELPKHGFQFRT  
LSGDMSMQKRAKALADFQNDPPTTIFLLSMRLVPLRRTSRVHSHKHQILRWCSHFLNKL  
YSRHSNYTEPAAVGINLTQANRVFLMEPSFNPALAEAQAIGRIHRLGQKRAVEVVRLVVQD  
SFEERMINFLDRKYSRCPNDEKKENSNKKAFATKDYDGIAGNVNADKTTLLTAEFVDVLF  
VGSYQPERKTSKGDAVVDGDVDPADENISKGIV  
>comp12096\_c0\_seq23; 1305 144 4646 LEN=4896; translated  
MPRANNNKRGNTPSRTQTKSNDKRRKKRSPDCVADGSEFACIDLTEDGDDDIDDLRRV

LVPKSGGKKRAAIDEVIVLSDSSDENDPPASYAKTTKNSADERTQTAEVSRVSKKARVK  
KEGQTSPPSSARPNNDLATMYDDVEIVQAEAPKFTRAADSVSRKASAGGGNTGDNEDDVVV  
EGLVNETRLPHMRQHCTSFPPFRTRSRKLSVSVRRDNQQSCDLCYCYVCDPCVKDCKNWH  
SSSSTTPKNNHCCATEKDRIWEDMRLRSKVTDERAEDEPPEGFHFMKDCDRLACDKWCY  
VCDKPGIDCTNFEHVAANPEEECYRRERQKRKLSYGRPGPFEPNPDAPRDIELTKCRH  
CSWFVRLRPDRGVTSSDDWCKYCGRVASDEDELEKNQKAATSTEEKNSYFFGQKEIPFRI  
KAHDPRLLEDEYKVNWEDNDGKAEWYDEAERQEEVFLHRIGRSPNLQNIYTSIQRVAEEN  
IPNKPIGQSHKRMDTDAIIVGDPKQLQLLYLIVEKKIDGLEINASWCKESKIGRFTLRF  
MLPKCFMVEHPVSNKHSALQRYLPHLLGLWFGMFPFQVSELGILKASNSSYRYITTKLR  
NQYKQRNQHKSLPRKEIKEIDNNLFPILRKKLESFSVKMREDEIAKESKLTLPASNASK  
FSGSVCTSAPSGSSCDLFRNSLVRYSSELFVKHMASSYNVSDSDSVEGICQGSMPFRKSN  
FFDFVLGFQSNVVTTELCTYRDARKQIRERPSEFSIKQTLTQLENLGHETEDCVEGLTIEL  
LDFQRQSLKWALERERILGGIQSYHWVKVPNRGEHEDELYFNPLLRQFRKDKPKVIRGG  
FIADQMGLGKTVISLSLILKNPAEIPSSGSPISVLKKKSHTVLSPNIATPGNYWDENL  
YEKTSTSNKKKGSIIICRGTLVICPVSLVGQWIAEAKSKLKEPGLIYPYHGSNRKRDPKIL  
TKNSIVVTTYDVIQSDAFYHKEKSHVKDYCSPLEQIRWWRIICDEGHCLRHPSSMRKAV  
RSLVSDHKWIVSGTFSFGNPPFFYEAVFNLDVFLLSIFNFYKGTMPMNTSPDDLKNQLKFL  
GFENVQKSFDELRRHSVDKRRFNMDLLTYFLRPIMIHHNQEQTYRGTSTTLMSLPPKTEKR  
KLIRLTTEEKKELQEIEKKTQEWYLFKRSIHFKTMSKHFLKISSRLTPMRIACSGGEYPI  
FSESEHVGADADDHENVEYNNSNNTASGDIVRSKVFVQSKFKYLLSELEEIKANERDSKS  
LVFSQFSSTLEWLKIELPKHGFQFRTLSGDMSMQKRAKALADFQNDPPTTIFLLSMRLVP  
LRRTSRVRHSHKHQILRWCSHFLNKLYSRHSNYTEPAAVGINLTQANRVFLMEPSFNPAL  
EAQAIGRIHRLGQKRAVEVVRLVVQDSFEERMINFLDRKYSRCPNDEKKENSNAKAFATK  
DYDGIAGNVNADKTTLLTAEFDVLFVGVSYQPERKTSKGDVAVDGDVDPADENISKGIV  
>comp12096\_c0\_seq24; 1353 144 4531 LEN=4781; translated  
MPRANNNKRGNTPSRTQTKSNDKRKRKRKSPDCVADGSEFACIDLTEGDGDDIDDLRRV  
LVPKSGGKKRAAIDEVIVLSDSSDENDPPASYAKTTKNSADERTQTAEVSRVSKKARVK  
KEGQTSPPSSARPNNDLATMYDDVEIVQAEAPKFTRAADSVSRKASAGGGNTGDNEDDVVV  
EGLVNETRLPHMRQHCTSFPPFRTRSRKLSVSVRRDNQQSCDLCYCYVCDPCVKDCKNWH  
SSSSTTPKNNHCCATEKDRIWEDMRLRSKVTDERAEDEPPEGFHFMKDCDRLACDKWCY  
VCDKPGIDCTNFEHVAANPEEECYRRERQKRKLSYGRPGPFEPNPDAPRDIELTKCRH  
CSWFVRLRPDRGVTSSDDWCKYCGRVASDEDELEKNQKAATSTEEKNSYFFGQKEIPFRI  
KAHDPRLLEDEYKVNWEDNDGKAEWYDEAERQEEVFLHRIGRSPNLQNIYTSIQRVAEEN  
IPNKPIGQSHKRMDTDAIIVGDPKQLQLLYLIVEKKIDGLEINASWCKESKIGRFTLRF  
MLPKCFMVEHPVSNKHSALQRYLPHLLGLWFGMFPFQVSELGILKASNSSYRYITTKLR  
NQYKQRNQHKSLPRKEIKEIDNNLFPILRKKLESFSVKMREDEIAKESKLTLPASNASK  
FSGSVCTSAPSGSSCDLFRNSLVRYSSELFVKHMASSYNVSDSDSVEGICQGSMPFRKSN  
FFDFVLGFQSNVVTTELCTYRDARKQIRERPSEFSIKQTLTQLENLGHETEDCVEGLTIEL  
LDFQRQSLKWALERERILGGIQSYHWVKVPNRGEHEDELYFNPLLRQFRKDKPKVIRGG  
FIADQMGLGKTVISLSLILKNPAEIPSSGSPISVLKKKSHTVLSPNIATPGNYWDENL  
YEKTSTSNKKKGSIIICRGTLVICPVSLVGQWIAEAKSKLKEPGLIYPYHGSNRKRDPKIL  
TKNSIVVTTYDVIQSDAFYHKEKSHVKDYCSPLEQIRWWRIICDEGHCLRHPSSMRKAV  
RSLVSDHKWIVSGTFSFGNPPFFYEAVFNLDVFLLSIFNFYKGTMPMNTSPDDLKNQLKFL  
GFENVQKSFDELRRHSVDKRRFNMDLLTYFLRPIMIHHNQEQTYRGTSTTLMSLPPKTEKR  
KLIRLTTEEKKELQEIEKKTQEWYLFKRSIHFKTMSKHFLKISSRLTPMRIACSGGEYPI  
FSESEHVGADADDHENVEYNNSNNTASGDIVRSKVFVQSKFKYLLSELEEIKANERDCKFIAVVIKIFXVCQVSHRLFSSIPNCLSSAKS  
LVFSQFSSTLEWLKIELPKHGFQFRTLSGDMSMQKRAKALADFQNDPPTTIFLLSMRAGA  
VGINLTQANRVFLMEPSFNPALAEQAIGRIHRLGQKRAVEVVRLVVQDSFEERMINFLDR  
KYSRCPNDEKKENSNAKAFATKDYDGIAGNVNADKTTLLTAEFDVLFVGVSYQPERKTSK  
KDAVVDGDVDPADENISKGIV  
>comp12096\_c0\_seq25; 1067 144 3476 LEN=4984; translated  
MPRANNNKRGNTPSRTQTKSNDKRKRKRKSPDCVADGSEFACIDLTEGDGDDIDDLRRV  
LVPKSGGKKRAAIDEVIVLSDSSDENDPPASYAKTTKNSADERTQTAEVSRVSKKARVK  
KEGQTSPPSSARPNNDLATMYDDVEIVQAEAPKFTRAADSVSRKASAGGGNTGDNEDDVVV  
EGLVNETRLPHMRQHCTSFPPFRTRSRKLSVSVRRDNQQSCDLCYCYVCDPCVKDCKNWH  
SSSSTTPKNNHCCATEKDRIWEDMRLRSKVTDERAEDEPPEGFHFMKDCDRLACDKWCY  
VCDKPGIDCTNFEHVAANPEEECYRRERQKRKLSYGRPGPFEPNPDAPRDIELTKCRH  
CSWFVRLRPDRGVTSSDDWCKYCGRVASDEDELEKNQKAATSTEEKNSYFFGQKEIPFRI  
KAHDPRLLEDEYKVNWEDNDGKAEWYDEAERQEEVFLHRIGRSPNLQNIYTSIQRVAEEN  
IPNKPIGQSHKRMDTDAIIVGDPKQLQLLYLIVEKKIDGLEINASWCKESKIGRFTLRF

MLPKCFMVEHPVSNKHSALQRYLPHLLGLWFGMFPFQVSELGILKASNSSYRYITKCLR  
NQYKQRNQHKSLPRKEIKEIDNNLFPILRKKLESFSVKMREDEIAKESKLTLPASNASK  
FSGSVCTSAPSGSSCDLFRNSLVRYFSELFVKHMASSYNVSDSDSVEGICQGSMFRTKSN  
FFDFVLGFQSNVVTELCYYRDARKQIRERPSEFSIKQTLTQLENLGHETEDCVEGLTIEL  
LDFQRQSLKWALERERILGGIQSYHWVKVPNRGEHEDELYFNPLLRQFRKDKPKVIRGG  
FIADQMGLGKTVISLSLILKNPAEIPSSGSPISVLKKSHTVLSPNIATPGNYWDENL  
YEKTSTSNKKKGSIIICRGTLVICPVSLVGQWIAEAKSKLKEPGLIYPYHGSNRKRDPKIL  
TKNSIVVTYDVIQSDAFYHKEKSHVKDYCSPLEQIRWWRIICDEGHCLRHPSMRSKAV  
RSLVSDHKWIVSGTPMNTSPDDLKNQLKFLGFENVQKSFDELRSVDDKKRFNMDLLTYFL  
RPIIMIHNNQEQTyrGTSTTLMSLPPKVRRL

>comp12096\_c0\_seq26; 1265 144 4556 LEN=4806; translated  
MPRANNNKRGNTPSRTQTKSNDKRRKKRSPDCVADGSEFACIDLTEGDGDDIDDLRRV  
LVPKSGGKKRAAIDEVIVLSDSSDENDPPASYAKTTKNSADERTQTAEVSRVSKKARVK  
KEGQTSPPSSARPNDLATMYDDVEIVQAEAPKFTRAADSVSRKASAGGGNTGDNEDDVV  
EGVLNETRLPHMRQHCTSFPPFRTRSRKLSVSVRRDNQQSCDLCYCYVCDPDKCKNWH  
SSSSTPKNNHCCATEKDRIWEDMRLRSKVTDERAEDEPPEGFHFMKDCDRLACDKWCY  
VCDKPGIDCTNFEHVAANPEEECYRRERQKRKLSYGRPGPFEPNPDAPRDIELTKCRH  
CSWFVRLRPDRGVTSSDDWCKYCGRVASDEDLEKNQKAATSTEEKNSYFFGQKEIPFRI  
KAHDPRLLEDEYKVNWEDNDGKAEWYDEAERQEEVFLHRIGRSPNLQNIYTSIQRVAEEN  
IPNKPIGQSHKRMDDTDAIIVGDPKQLQLLYLIVEKKIDGLEINASWCKESKIGRFTLRF  
MLPKCFMVEHPVSNKHSALQRYLPHLLGLWFGMFPFQVSELGILKASNSSYRYITKCLR  
NQYKQRNQHKSLPRKEIKEIDNNLFPILRKKLESFSVKMREDEIAKESKLTLPASNASK  
FSGSVCTSAPSGSSCDLFRNSLVRYFSELFVKHMASSYNVSDSDSVEGICQGSMFRTKSN  
FFDFVLGFQSNVVTELCYYRDARKQIRERPSEFSIKQTLTQLENLGHETEDCVEGLTIEL  
LDFQRQSLKWALERERILGGIQSYHWVKVPNRGEHEDELYFNPLLRQFRKDKPKVIRGG  
FIADQMGLGKTVISLSLILKNPAEIPSSGSPISVLKKSHTVLSPNIATPGNYWDENL  
YEKTSTSNKKKGSIIICRGTLVICPVSLVGQWIAEAKSKLKEPGLIYPYHGSNRKRDPKIL  
TKNSIVVTYDVIQSDAFYHKEKSHVKDYCSPLEQIRWWRIICDEGHCLRHPSMRSKAV  
RSLVSDHKWIVSGTPMNTSPDDLKNQLKFLGFENVQKSFDELRSVDDKKRFNMDLLTYFL  
RPIIMIHNNQEQTyrGTSTTLMSLPPKTEKRKLIIRLTTEKKELQEIIEKKTQEWYLFKFRSI  
HFKTMSKHFLKISSRLTPMRIACSGGEYPIFSESEHVADADDHENVEYNNNSNTASGDI  
VRSKFVFQSKFKYLLSELEEIKANERDSKSLVFSQFSSTLEWLKIELPKHGFQFRTLSGD  
MSMQKRAKALADFQNDPPTTIFLLSMRLVPLRRTSPRVHSHKHQILRWCSHFLNKLYSRH  
SNYTEPAAVGINLTQANRVFLMEPSFNPALAEQAIGRIHRLGQKRAVEVVRLVVDQSFEE  
RMINFLDRKYSRCPNDEKKENSNAKAFATKDYDGIAGNVNADKTTLLTAEFDVLFVDSY  
QPERKTSKDAVVDGDVDPADENISKGIV

>comp12096\_c0\_seq27; 1049 144 3668 LEN=4371; translated  
MPRANNNKRGNTPSRTQTKSNDKRRKKRSPDCVADGSEFACIDLTEGDGDDIDDLRRV  
LVPKSGGKKRAAIDEVIVLSDSSDENDPPASCKFTXTNELDMIEQQSNAYKPKSPTYFLH  
CYLVSDAKTTKNSADERTQTAEVSRVSKKARVKKEGQTSPPSSARPNDLATMYDDVEIV  
QAEAPKFTRAADSVSRKASAGGGNTGDNEDDVVVEGVLNETRLPHMRQHCTSFPPFRTRSR  
RKLVS SVRRDNQQSCDLCYCYVCDPDKCKNWHSSSSTPKNNHCCATEKDRIWEDMRL  
RSKVTDERAEDEPPEGFHFMKDCDRLACDKWCYVCDKPGIDCTNFEHVAANPEEECYRR  
ERQKRKLSYGRPGPFEPNPDAPRDIELTKCRHCSWFVRLRPDRGVTSSDDWCKYCGR  
VASDEDLEKNQKAATSTEEKNSYFFGQKEIPFRIKAHDPRLLEDEYKVNWEDNDGKAEWY  
DEAERQEEVFLHRIGRSPNLQNIYTSIQRVAEENIPNKPIGQSHKRMDDTDAIIVGDPKQ  
LQLLYLIVEKKIDGLEINASWCKESKIGRFTLRFMLPKCFMVEHPVSNKHSALQRYLPHL  
LGLWFGMFPFQVSELGILKASNSSYRYITKCLR NQYKQRNQHKSLPRKEIKEIDNNLFP  
ILRKKLESFSVKMREDEIAKESKLTLPASNASKFSGSVCTSAPSGSSCDLFRNSLVRY  
FSELFVKHMASSYNVSDSDSVEGICQGSMFRTKSNFFDFVLGFQSNVVTELCYYRDARKQI  
RERPSEFSIKQTLTQLENLGHETEDCVEGLTIELLDFQRQSLKWALERERILGGIQSYHW  
VKVPNRGEHEDELYFNPLLRQFRKDKPKVIRGGFIADQMGLGKTVISLSLILKNPAEIP  
SSGSPISVLKKSHTVLSPNIATPGNYWDENLYEKTSTSNKKKGSIIICRGTLVICPV  
SLVGQWIAEAKSKLKEPGLIYPYHGSNRKRDPKILTKNSIVVTYDVIQSDAFYHKEKSHV  
KDYCSPLEQIRWWRIICDEGHCLRHPSMRSKAVRSLVSDHKWIVSGTFSFGNPPFFYEA  
VFNLDFVLLISFNFYKGTMPMNTSPDDLKNQLKFLGFENVQKSFDELRSVDDKKRFNMDLL  
TYFLRPIIMIHNNQEQTyrGTSTTLMSLPPKVRRL

>comp12097\_c0\_seq1; 329 378 1350 LEN=2080; translated  
MENAIQGSLSKTDGGFATVFLVVLSTIYSVDGSKSGFQKNMLGDTIQNIMGRGRIRKTLA  
QSTPALTSVMSVYTEKNGSSRMNRRYASLSNSASVSMVSSVKVQSSSTKKRVRSLLDVAVG

STGFYYGIDAQRMIPNRSRQRKPRPPKLEESMVIAIEELKMMRQEMEQMRIEMQQLKRKM  
LGDDASFQIDDHATTEMKEKALQKRRKEADKLAEEIESWANDRLQEGEEEGWIRVECSKM  
VRASVNGTGRTOAFMKWVDPGRGEKADKEDFAKHPCIKCESVIDAPPEIVCLYLSQEEAF  
PRYNDVVDNYKDLEEISPHAKICW

>comp12097\_c0\_seq2; 396 378 1911 LEN=1980; translated  
MENAIQGSLSKTDGGFATVFLVVLSTIYSVDGSKSGFQKNMLGDTIQNIMGRGRIRKTLA  
QSTPALTSVMSVYTEKNGSSRMNRRYASLSNSASVSMVSSVKVQSSSTKKRVRSLLDVAVG  
STGFYYGIDAQRMIPNRSRQRKPRPPKLEESMVIAIEELKMMRQEMEQMRIEMQQLKRKM  
LGDDASFQIDDHATTEMKEKALQKRRKEADKLAEEIESWANDRLQEGEEEGWIRVECSKM  
VRASVNGTGRTOAFMKWVDPGRGEKADKEDFAKHPCIKCESVIDAPPEIVCLYLSQEEAF  
PRYNDVVDNYKDLEEISPHAKICWSSSPQILFVKPRDFVTFCHHRWKPDGTQVIVNQACE  
HPKYPLEKMEKEGKSCRGYALRGANFISRPCEDPTKTRITIVAHCRPGGGLPEWATKTAV  
KTLAPLEPFKLFHKINQQAQDRAQLQARLKQAEETVSKMPPGTSSRPGGFAQIGYACFW  
PKGGGKEELTGINDFSPVDNRRNGGENDID

>comp12099\_c0\_seq1; 243 79 1338 LEN=1452; translated  
MDHYFYPSHHGGFALLVFMVLVVTSAALLIANWSGLVLVNDNIGTSINEPCIPTFQIAMDNH  
LEIDASNLALSLIKSAHYHQDYNNSSISHHYFVRTAPSNIQEELSKFVWGSVVKQIRARL  
RGTGDGDCDADFANSDFRVIDPVDVDFEVYFMRPELDDLDEKKIHFVGNLKVPGICTIRALTY  
LSGNDATLFAITSDENYTTYSHSSIILDFNRELHYVALNSTSKTSMNQSLGATYMEQEPR  
VMVKSAMHVIPPGNHFLLLTHFQIGLHRIMVFGARSFRRAFESKSDQKMSKLNLCMMMAID  
NTMRFNLKIHMMPLIVIGLPLGVILYALILYPLQFVPIFHIVMRWRYHTDQVIKKGWV  
WIVTGLIVLNNLASVTRNLQRHITASSTISTMNKNKITSSPALILVGVNEIRFLLLHIGW

>comp12100\_c0\_seq1; 195 1059 1631 LEN=2100; translated  
MSFSMSSIPISNSSQAKLAWENNHVQEIPDEPPRPITSSRVGPQYQAQISPCKLEQFAGLT  
AAKRSFLDCDSLWDPKLAEEAKERGEDISGFLDGDHELKQELLFSILHKSQYCVKLRARL  
NYEKILSCDHVPTSSSLNSQEAQEFVLTQENQKDFSKIAKSLNRRTSDCLVHYYQWKVS  
SRSYHTMKKYW

>comp12100\_c0\_seq2; 195 1059 1631 LEN=2064; translated  
MSFSMSSIPISNSSQAKLAWENNHVQEIPDEPPRPITSSRVGPQYQAQISPCKLEQFAGLT  
AAKRSFLDCDSLWDPKLAEEAKERGEDISGFLDGDHELKQELLFSILHKSQYCVKLRARL  
NYEKILSCDHVPTSSSLNSQEAQEFVLTQENQKDFSKIAKSLNRRTSDCLVHYYQWKVS  
SRSYHTMKKYW

>comp12101\_c0\_seq1; 631 75 1616 LEN=1875; translated  
MGEVDFEMSSQAKYWMFDEDSLLECRKRACSNNTASKSSTNGKPRVRKFACGYNGRKT  
TASEATAKTNESDHATMFDLPRNMTPKDQETLIHFHFAQIQKLVGPNAIFPLLRGSSVL  
STAIMLFRKFFLSNSVDFHPRNIAAASALLAVKTD CERNLPIDVLSHATFVVMRAQND  
PLSMDELGRVITIEIEAAERILLEGCDYRLRSHHPYGAIKVLASDVVSHFMKPPERTNDT  
AYHSSCSVDDTMGRGSVYTSRPSIVCGYPSYTSYYNDDHIGLDTLCERALSIAQSALVYS  
DINFLFKPGQIAFAAVALALDSHAYNYDESPTS NRLGTMREYMFARFSQKSEDEISEY  
EEEVSKIIISTLENC SAIDLEMFS PFQFHQRRYAKTAEREAIKTRKAI FTASRLRVVSKS  
TFRAPVASSLRARPSPPPFQYRHHHEHYPTTSSRAHYYQHLYSQPYDFDGCQRKRGRE  
EECEWTPEHQHNNHPSYHHSKIARVTPINTPFM

>comp12101\_c0\_seq2; 631 75 1616 LEN=1858; translated  
MGEVDFEMSSQAKYWMFDEDSLLECRKRACSNNTASKSSTNGKPRVRKFACGYNGRKT  
TASEATAKTNESDHATMFDLPRNMTPKDQETLIHFHFAQIQKLVGPNAIFPLLRGSSVL  
STAIMLFRKFFLSNSVDFHPRNIAAASALLAVKTD CERNLPIDVLSHATFVVMRAQND  
PLSMDELGRVITIEIEAAERILLEGCDYRLRSHHPYGAIKVLASDVVSHFMKPPERTNDT  
AYHSSCSVDDTMGRGSVYTSRPSIVCGYPSYTSYYNDDHIGLDTLCERALSIAQSALVYS  
DINFLFKPGQIAFAAVALALDSHAYNYDESPTS NRLGTMREYMFARFSQKSEDEISEY  
EEEVSKIIISTLENC SAIDLEMFS PFQFHQRRYAKTAEREAIKTRKAI FTASRLRVVSKS  
TFRAPVASSLRARPSPPPFQYRHHHEHYPTTSSRAHYYQHLYSQPYDFDGCQRKRGRE  
EECEWTPEHQHNNHPSYHHSKIARVTPINTPFM

>comp12102\_c0\_seq1; 232 232 657 LEN=1023; translated  
MPLIHSASPSQKDQSFASQANDQKVKHSLFQRANNVLSRHRSSVANVQTMGLFGLGAPE  
IAIILAAGAFVIGPEALGNMLGSAAGNLKNEYGDLPNELKKIPEEFQKGFEESTENAKAR  
NAKQMEVLPDEDLKKYIDRNP

>comp12104\_c0\_seq1; 465 1060 2352 LEN=2378; translated  
MGTELYQLYDGTLLKLGCKLLWHRIAMDETRIQMISTSQRNFPFAPTNRNGIDDAIYD  
SVIDMSAYYKSSLKDDNVGKTACSGSLLDRLKSDGFALVRGTGIPGQLCREALRITHSFL  
QDADESRRSCLSKRDRARRGYSPINTENFASLIGAE GPNDLVRKFRMGPPSSRSDEK

SSLLQANIWPSSSISAEWDESKCRAFQSTVEDYYDKACSAANEILRAICDGLLLEHPNLS  
VSLKPLSSSSVSPGVESEIKGEADLPEEAGLAHNTSILTLGYNRSRHKKVHQQKKRTI  
HPLVAAHTDVGVIITVLLYDSGDCAMLQRRSRSSDGSDFQDVVLPFHVKDDPVFVFNIA  
DCLSALTGRRLPSTVHRVVPREGIVPRNCLALFVGLKGEQTLTIDGSEISYANWRKNRIL  
ESQRILKGN

>comp12104\_c0\_seq2; 746 140 2197 LEN=2223; translated  
MPKNGSSSVPIRRRIPKSRRRDGLIQFAKDITSQNGEDGIIHKIFNDVLPMTKEEDGI  
RNQRYCVDVGAWDGRHLSNTFSLHPSPPFRSWKGVLEADPDRFKELKSLNEPVGNICL  
NELVSSDPSSKDSLVSILRREAPELPTDFDFLCIDVDGSDYWLLHEMFEHGYQPKVVCIE  
SNPTMPNDLIYIPPRDDKTRHGCSLAALVELAEENDYVLVETIYNAFFVPNDLYQKYFQ  
KYAPDTSIEALHETTMGTELYQLYDGTLLKLGCKLLWHRIAMDETRIQMISTSQRNFPF  
APTNRNGIDDAAIYDSVIDMSAYYKSSLKDDNVGKTACSGSLLDRLKSDGFALVRGTGIP  
GQLCREALRITHSFLQDADESVRRSCLSKRDRARRGYSPINTENFASLIGAEGPNDLVRK  
FRMGPPSSRSDEKGSLLQANIWPSSSISAEWDESKCRAFQSTVEDYYDKACSAANEIL  
RAICDGLLLEHPNLSVSLKPLSSSSVSPGVESEIKGEADLPEEAGLAHNTSILTLGYN  
GSRHKKVHQQKKRTIHPLVAAHTDVGVIITVLLYDSGDCAMLQRRSRSSDGSDFQDVVLP  
PFHVKDDPVFVFNIA DCLSALTGRRLPSTVHRVVPREGIVPRNCLALFVGLKGEQTLTID  
GSEISYANWRKNRILESRILKGN

>comp12105\_c0\_seq1; 827 231 3174 LEN=3375; translated  
MCVLAVIGRSLTNSLGVISNGNGRRMMFPAAQAFQREISLVRHQNSLDAAFPPKIGLQTA  
LSAGMEGKLLSNKDIVERRELMNRGKRAASKSAQERVSRNLDIKRLHTENNAAVSGNS  
TSSEFQVPPLYAVKVVWVDELREELKLSGREKRGRVFIKTGSEGTTTFRGMKDEIFGFRR  
ALRKNTFCLTANLPQFDEEDGNI VVSHPPLTKEVSOGDHLTWKIENDEVDIKTFAMADEF  
FEDPTNSVLKRPSIQINVRKDPNAPLPPPPPAYLNGMPDPAESESMTMLSFYAFPPSGIA  
NPEDFALSILKILWRPFQTLGRIYVATEGVNAQMSVPTNVLSHFMECCRSVPELGQYMEND  
INIDPEPLSQKEFAVAGAPRNGKPAPPFRNLHIRVRSQVVADGLDKPLDWQSAGYDMPPL  
EWHEQLKKVREAKDKPIEEKSDVPVVFDCRNTYETDVGIFEGAEPDLENFRDSWDVLKD  
RLADTPKDAPIMTYCTGGIRCMYIWLILKTREVHCILXLQVLNRSNHTLSKCLWLYDXLI  
SNFRFHMVGKVGAYLTQELGFTNVSRLAGGI IAYDRTLNEKKEGEEESMFKGTNFVDFGR  
MGRQITDDELGTCITCGAPTNLVSNCRNENCHKRMIQCENCRTTYHGTCTACKNRVNG  
DTLFEKRPESESRGEQSNEAGYDNLDDYSLGHSSPVPSIYKEMELNTQAYLASGAHMVSGA  
AQGRLLTQLASMTNRNGRIELGFTFTGYATAACLEGGARNVGVQVGIAPNKDSESNDDGPYVM  
TMRDNRALNLAHLRVEIKYGFDEEVVEAICALRSEDAVKEVEEDMVSMSIAGGVAR  
CDLVRVTDALATVEAIASGDFSNGS DCHAMAPFDLVFVDADKTRLLEYVEACLKSDRLLN  
RGGLIVVDNVLWGLVLEASTGEFVSVSDREDESEKAELRKNRRARKLATTMHRFNLSAIA  
DDRVEVLVLPMDGLSVIRKK

>comp12105\_c0\_seq2; 952 231 3032 LEN=3233; translated  
MCVLAVIGRSLTNSLGVISNGNGRRMMFPAAQAFQREISLVRHQNSLDAAFPPKIGLQTA  
LSAGMEGKLLSNKDIVERRELMNRGKRAASKSAQERVSRNLDIKRLHTENNAAVSGNS  
TSSEFQVPPLYAVKVVWVDELREELKLSGREKRGRVFIKTGSEGTTTFRGMKDEIFGFRR  
ALRKNTFCLTANLPQFDEEDGNI VVSHPPLTKEVSOGDHLTWKIENDEVDIKTFAMADEF  
FEDPTNSVLKRPSIQINVRKDPNAPLPPPPPAYLNGMPDPAESESMTMLSFYAFPPSGIA  
NPEDFALSILKILWRPFQTLGRIYVATEGVNAQMSVPTNVLSHFMECCRSVPELGQYMEND  
INIDPEPLSQKEFAVAGAPRNGKPAPPFRNLHIRVRSQVVADGLDKPLDWQSAGYDMPPL  
EWHEQLKKVREAKDKPIEEKSDVPVVFDCRNTYETDVGIFEGAEPDLENFRDSWDVLKD  
RLADTPKDAPIMTYCTGGIRCVKVGAYLTQELGFTNVSRLAGGI IAYDRTLNEKKEGEEES  
MFKGTNFVDFGRMGRQITDDELGTCITCGAPTNLVSNCRNENCHKRMIQCENCRTTYHGT  
CTACKNRVNGDTLFEKRPESESRGEQSNEAGYDNLDDYSLGHSSPVPSIYKEMELNTQA  
YLASGAHMVSGAAQGRLLTQLASMTNRNGRIELGFTFTGYATAACLEGGARNVGVQVGIAPN  
KDSESNDDGPYVMTMRDNRALNLAHLRVEIKYGFDEEVVEAICALRSEDAVKEVEED  
MVSMSIAGGVARCDLVRVTDALATVEAIASGDFSNGS DCHAMAPFDLVFVDADKTRLLEY  
VEACLKSDRLLNRGGLIVVDNVLWGLVLEASTGEFVSVSDREDESEKAELRKNRRARKLA  
TTMHRFNLSAIA DDRVEVLVLPMDGLSVIRKK

>comp12106\_c0\_seq1; 845 193 2466 LEN=2734; translated  
MATPRATQQGIPFDEPNKDAATLLASGAPNPDDTFDKDPFDGIEDIYDDLEAAGPQPPPP  
TRDAIIDQVGSTYPSEGEDVEVTQQGYSFFCGMDPSKEESSNKISKLWRTMMVHKYCEMN  
EDGTGNDEGNHIDSGANPEVAGPI IRVMDNGEKQHEDEVEVKQISPKVYKPDPPNESYN  
RDTIIQHKIDQNEEGATENADEPNKPRLVKWNPKFPPELPAQMVFSSRQQTAVDVFEEG  
NGDKDMQEARKIRKNYTPSFQSMGNRKTFGVSHRIIFLVSINFFFFVLLIILISRFQRL  
DNKTDVDSFSSNATKTNIAEDSTLVPVPVDVKSELFLLEDQGDGTGQDGI VLRPNQALEN



GEYFCSPSKRYMIVMMDDLAIVDVSSELVWSANVTGAAQMLLQEDGDLVIQDEAGEVIW  
STGFPVPEPTGLYDLQMVFMEGDEAAIAVQQAPTSGLTSLASNFWMGDVPSFEYCEDCEKV  
NLAFFVVRGTFYLPTYDGTTELAWRDENGRPAHFPMQGYSSSDPEVARSHVEGMEYGNID  
LAISSWEGQGTNFRDRSRMTMLLEETKRQNGGLKWTVYHESEQTNRPSPEAIASDLDYLLK  
WFAHDWANIDGKPVIFVNNEGGCDVAERWTTGAAADWYVVLRRFNGFETCEFQPDSDWH  
ERRVNPFFANGVDVQQGLYYNLAPGEWEPGRRRRLDRLSAREWCNNVQNMVDSNEQWQLI  
VSFNDARDGTAIEPSVEWRSSSPYGSFLDCLHDPQLF

>comp12107\_c0\_seq1; 212 177 561 LEN=624; translated  
MWLDGNDIYGTIPTEIGLLSGLASFMANATITGTIPTQIGNLSQLRRLWLFNNQLTGTI  
PGALNNLELLELVVELHGNDLKGSMPEGVCLSVEKSDYEFKSLTSDCVKEVNATKIVAQSA  
SDSFVAR

>comp12107\_c0\_seq2; 693 80 1610 LEN=1673; translated  
MTDAENMMNDLQLEDVEDYSADYPVSDGGYPNAGANMAPAGNIEQESTGKSPKYRRAAVI  
ALIRNNKWSFAVLGVVVVILIAIIASTAGGKKPIAAAVPTMKIDDAHAGFPPVKQYIEDV  
DKDVLIEFKTMLDNTFTRHNLDTSVLDTEGSPAQQAMIWCKDKKVNMSMEHTEKLQRYVL  
AVFFYSTNMVPSMHVENPLAWKNADNWMNTNAHSCEWMGVECNEDKFIVAIYLEKNRLSGK  
IPVEIAIIANNIESLDFTDNIMHMRESDFDAFLSLKLLHTLLMDDNYLYNNDGLPSQMG  
MTSMEKMRLSYNVFEGELNKNVLDLSDMKGLTHLEIESNYFTGGIPNAILEMENLTYLYLR  
RNNMEFNLNFKENRFTENIFAMWLDGNDIYGTIPTEIGLLSGLASFMANATITGTIPT  
QIGNLSQLRRLWLFNNQLTGTIPGALNNLELLELVVELHGNDLKGSMPEGVCLSVEKSDY  
FKSLTSDCVKEVNATKIVAQASDSFVAR

>comp12108\_c0\_seq1; 357 663 2403 LEN=3431; minus strand; translated  
MGPLPTTSFLSKSKREEEKDQDEVDEFKNIKLRNQSCRQWLVSSESIKIAFLLSFGVLLQ  
WKIMKQVDVTEDELSFQPFVSGHRALKTLNAPLGEKNDNPKYRNCPPFRDSPIVESIYVYPH  
PGSPEWKGDILSNYTRIQTNSSEDFIVYPWIDNDRCKAAGVGPYDGTSQLVQYNTTELL  
VRDIITHPDSCLRTNDPEKATLFFVYPIGILEKTERFRSHSCLQORTHARIMASKIETRKF  
PFSTSQFQTHSPIVISNELSKTFIDMYPLCARKNILVYPNTNGRWFNGALDNEAVAMMT  
EHSGIRKLSSEPGAIOSEIDLAKQSELKETSNGSNSTPPRLLGYYSGGNHGTCVDLRKS  
MKDEFRCSPSGKMKVKKYKALNNYAHGYRQSTFCPCPGGDSPSAKRNFDSVFAGCIPVIL  
SEDFVWPFTESEFDRSSNSGSESGIVALNPYDFSIRLNAKDHWHKFDSPKNCNPKINTGE  
GHNETDHRSLQSVLEAVPSKELARLRQGLARAAEVYSYRKRPDLPDEPLREGLLPDGG  
AHMLVRLAERASGALWNACRQEMKGDISKDSVKKFKC

>comp12108\_c0\_seq2; 357 1245 2985 LEN=4013; minus strand; translated  
MGPLPTTSFLSKSKREEEKDQDEVDEFKNIKLRNQSCRQWLVSSESIKIAFLLSFGVLLQ  
WKIMKQVDVTEDELSFQPFVSGHRALKTLNAPLGEKNDNPKYRNCPPFRDSPIVESIYVYPH  
PGSPEWKGDILSNYTRIQTNSSEDFIVYPWIDNDRCKAAGVGPYDGTSQLVQYNTTELL  
VRDIITHPDSCLRTNDPEKATLFFVYPIGILEKTERFRSHSCLQORTHARIMASKIETRKF  
PFSTSQFQTHSPIVISNELSKTFIDMYPLCARKNILVYPNTNGRWFNGALDNEAVAMMT  
EHSGIRKLSSEPGAIOSEIDLAKQSELKETSNGSNSTPPRLLGYYSGGNHGTCVDLRKS  
MKDEFRCSPSGKMKVKKYKALNNYAHGYRQSTFCPCPGGDSPSAKRNFDSVFAGCIPVIL  
SEDFVWPFTESEFDRSSNSGSESGIVALNPYDFSIRLNAKDHWHKFDSPKNCNPKINTGE  
GHNETDHRSLQSVLEAVPSKELARLRQGLARAAEVYSYRKRPDLPDEPLREGLLPDGG  
AHMLVRLAERASGALWNACRQEMKGDISKDSVKKFKC

>comp12109\_c0\_seq1; 238 192 1403 LEN=1826; translated  
MTGTDILTPEFDS PARKSTIIVAGFNLTATIMGGGILSIPYAFSKTGILLGPFLMLIAAI  
TTERS MYLLCLCSRLTGAKSYGEVGEAAFGKKMEYFISCI LCF LMF AII GY MV LAKDIW  
TSILIVVEKLETVPNEEFVLSIIILIVPFLVQKSLHALRFNVCYGVFVSVSTLCVALVRN  
AWAAA VWP DV I W W ST NT ED I L I A F P I I S L S F L G I F N V L P I Q N A L V K P S R L R I L L V D G A I  
SAVLA FGVV F L A G Y L L A G L N T S G N I L K N C D T T H D L N L L L G Q L G C G T M V V L A I P M M L P C  
R S C L L E V L D V L V N G P H I T P V E I E E S E K L P L I T A D A T F T R N N Y N S T N K A Q E E Q K S V R E D E K  
V V D Q N R I G K V N I T E S I F I H Y A S T F F I F A T C Y M V A I R V P G V A V V W

>comp12110\_c0\_seq1; 325 99 890 LEN=1221; translated  
MYSSIVRKS VGRSL LTRV VQH HQ QTR SVV SVK KALVKAGETEE PEDVPALAKRMEAMSE  
KDGLMVFDSGTNLPDPVLPENKAEVAALDASYKTSVRMPDGRERMVVIKQLRARPNQNPL  
NPEKYWKISFDDDGAVGERWKNSLMNWNSTADTYGCDPLYFKNAQDAVYFAEKRGWKYL  
VQEPVVRKMRHDDAQYQDNFLPQAIAGKVKREGIQCDHWQRKAAGASNYFRPLKFGDGT  
VRQHGANEETMPATESYKIR

>comp12111\_c0\_seq1; 664 387 2263 LEN=2562; translated  
MIGGMGLPQNQAAMSRPKPEDAASHITVSDPVQHSEGVNKYTSYRVDVRPPNSDMATT  
QVFSAVLRRYSDFLWLYERLQGERPGAIVPPLEKQPVGRFNPAFLEIRRRELERFLRA

AVHPELQGCACLDNFLKADDMTFQAAKNSKAGPGGVVLQQSGMMGGMGMGSMGHSVMMP  
PPQMSSTPKKEGFKRWFAETKTSISGDLVRAERLGCDPRGVLLSPFSFGVRLAAVFAAWL  
GWFTIHDTHLLVLLLLSCVVLSCVLVCCVASYPPFLFCIVVLVSHGLAGXVGQVRSPPDE  
LFEEVQRYIHGLDTQMKNVSTQASGLVRKKGEMANGLFEFGLAFNLLGQSEADALGDALC  
RLGETADQLSVLSAEHADLESSQFEDPLVDMIKMIHAVKLALHKRHEKRLTYSTCLQEVE  
YKNSQLNKIRSQGLMGMEAKAYSAEMSLRRAQENAEIARDQFATVSQRVLREVDRLFRET  
TEDMRLTVLEYIRMQVEYNKRMEQIWANLIPQLEKQVQLDPNANVIGDASAAGQGPQPPQ  
PVVQGGQAPGPQILSPHHQQPVASSGNPNPQQAQMPPAAGPQGSTILGTFAPGSLPSQQQP  
QVFGGQPQDPGMLSVQYREPPKNVF

>comp12111\_c0\_seq2; 652 387 2009 LEN=2308; translated  
MIGGMGLPQNQAAMSRPKPEDAASHITVSDPVQHSEGVNKYTSYRVDVDRPPNSDMATT  
QVFSAVLRRYSDFLWLYERLQGERPGAIVPPLPEKQPVGRFNPAFLEIRRRELERFLRRA  
AVHPELQGCACLDNFLKADDMTFQAAKNSKAGPGGVVLQQSGMMGGMGMGSMGHSVMMP  
PPQMSSTPKKEGFKRWFAETKTSISGDLVRSPPDELFEVQRYIHGLDTQMKNVSTQASG  
LVRKKGEMANGLFEFGLAFNLLGQSEADALGDALCRLGETADQLSVLSAEHADLESSQFE  
DPLVDMIKMIHAVKLALHKRHEKRLTYSTCLQEVEYKNSQLNKIRSQGLMGMEAKAYSAE  
MSLRRAQENAEIARDQFATVSQRVLREVDRLFRETTEDEMRLTVLEYIRMQVEYNKRMEQI  
WANLIPQLEKQVQLDPNANVIGDASAAGQGPQPPQPVVQGGQAPGPQILSPHHQQPVASSG  
NPNPQQAQMPPAAGPQGSTILGTFAPGSLPSQQQPQVFGGQPQDPGMLSVQYREPPKNVF

>comp12111\_c0\_seq3; 657 387 2237 LEN=2536; translated  
MIGGMGLPQNQAAMSRPKPEDAASHITVSDPVQHSEGVNKYTSYRVDVDRPPNSDMATT  
QVFSAVLRRYSDFLWLYERLQGERPGAIVPPLPEKQPVGRFNPAFLEIRRRELERFLRRA  
AVHPELQGCACLDNFLKADDMTFQAAKNSKAGPGGVVLQQSGMMGGMGMGSMGHSVMMP  
PPQMSSTPKKEGFKRWFAETKTSISGDLVRAERLGCDPRGVLLSPFSFGVPRMVHDSRHS  
PLGFFAVLCCLVLSVVLCCILSFPVVLHCGPCVAVACRCVGVQVRSPPDELFEVQRYI  
HGLDTQMKNVSTQASGLVRKKGEMANGLFEFGLAFNLLGQSEADALGDALCRLGETADQL  
SVLSAEHADLESSQFEDPLVDMIKMIHAVKLALHKRHEKRLTYSTCLQEVEYKNSQLNKI  
RSQGLMGMEAKAYSAEMSLRRAQENAEIARDQFATVSQRVLREVDRLFRETTEDEMRLTVL  
EYIRMQVEYNKRMEQIWANLIPQLEKQVQLDPNANVIGDASAAGQGPQPPQPVVQGGQAPG  
PQILSPHHQQPVASSGNPNPQQAQMPPAAGPQGSTILGTFAPGSLPSQQQPQVFGGQPQD  
PGMLSVQYREPPKNVF

>comp12112\_c0\_seq1; 449 64 1211 LEN=1229; translated  
MGKVFFSKKQKAQMRERRRKKKLSQEKNSNDCTSPNDRVDQISLIVNNEGSHVENV  
AKSTNKKRQRVDDGDVVTEIATSVDSDGKKRPIELTTRKIARTLYVLLPSDMSAKAAK  
KFRKDARREIRQSKQINYNEDDYDDIDFVTQEDMPSIVQPSKKKKKQNFPSIKDLLKQK  
HQLLEEIQKEESKLQEKLNAIPEVVREKYVALDCEMVGIGTDGKKSALARVSIVDWNLEVI  
LDTYVQVPVRVDFRTHVSGVEAKHIKSNAMPVKECRDKVAKILKGKILVGHALTNDF  
KALMTSHPKDRFXDTAKYRPFQRYGNAKWRARKLRDLVKENLKGKFNQEGEHDSVQDAK  
ATMELFQVVFSSQWEKELESKKR

>comp12113\_c0\_seq1; 453 126 1523 LEN=1691; translated  
MSPSENPVDEDEDIELDMAGELLYLSNSIEQDTTASDDTKECRTRAPSLSVVQSYGNPLPE  
EEANKAVPVGSDGLIRHAIIVVPDKFCVDGKLI SGLNERDFDVERGVIKPRRPTLPITRKD  
LMSSLTKVNSDGGVRYIFNGVLNGWPSLQHFELIGLEKKRSLPGRVQPPTYLMEYTGKAW  
VPHWRAEKEGKEGIPPEFTEPGKIYRATLRGASWTSLGWSAESPGFIFWYEAHNRQGPV  
LYGSDTISKVEDDICKMVHMI SHRYAVNRESPKDKLTYHSLVFLWENSPYCTIMEGAFL  
NGVSGYKGCNWDKDEEVTALYEILPEMISPWLTRAAELRCYDVKAKNLDELKEYIE  
KYNTRFLDPQYTFSHPARLSYRSRNSIAHYLVNYISRNSSYSEIARNQCQTFADLCSFL  
AGKKDIVPYHPINRIEYHNRSFLFLYDSSMYKAKKSESLMGKVAW

>comp12113\_c0\_seq2; 325 126 1112 LEN=1912; translated  
MSPSENPVDEDEDIELDMAGELLYLSNSIEQDTTASDDTKECRTRAPSLSVVQSYGNPLPE  
EEANKAVPVGSDGLIRHAIIVVPDKFCVDGKLI SGLNERDFDVERGVIKPRRPTLPITRKD  
LMSSLTKVNSDGGVRYIFNGVLNGWPSLQHFELIGLEKKRSLPGRVQPPTYLMEYTGKAW  
VPHWRAEKEGKEGIPPEFTEPGKIYRATLRGASWTSLGWSAESPGFIFWYEAHNRQGPV  
LYGSDTISKVEDDICKMVHMI SHRYAVNRESPKDKLTYHSLVFLWENSPYCTIMEGAFL  
NGVSGYKGNKRRFSRFFVLLVDYHSR

>comp12114\_c0\_seq1; 262 380 796 LEN=796; translated  
MRFAIAVSALVALGSARNEENSGRSLKTSHPQRDSINHGLSDIKSLGKESNTRLLSQN  
QSTDHGSARTRLEKDLFFPDLGIINQHGTSSSHISVETRYRVNDCKQKEHLGDSSMQNEN  
ESFDDTIVDPIVDPIVDPI

>comp12115\_c0\_seq2; 191 145 831 LEN=969; translated

MSSRGFSGKGNKTAEDAGIPNETAQYMKSLQDPEVIERVRCVIKDAHVFKLPPRAQAGGWR  
GADWRDEVWQGTVKVVERGEMTLVLLVDRKSGDIFAVCPKEGAVDRCDVSSRYFVLRIE  
NENGRHMFVGMFNERNDADFNTSLEDSRREHEAAKEPLKQFSALPSKDYRIKEGEKIR  
VNIKSMRGDSSKNLRSKNGILKPKSSKSKPKGGGFLKPKSSKDTPRRS  
>comp12116\_c0\_seq1; 162 1 988 LEN=1142; translated  
PVPPSSGVQFYSSSRSKRMIHHHRLLSNTRHRYRVGLSGEGVRSTLGYGGYGALDIVHR  
CLSTTIATTDANVTDLYPYDIQQARRTQARGRHFLRAKSIIRQPTLRSLSSSPLHQQLQF  
RYFAFDSRKARKPKKRKDPFRVLKIPKESLYKDVKTKFLKIAMSHPDTHGDDLSDDEEKD  
AMRDKFIEARMAFEMLAEDEDDGTAILVEEKEDRESNFDWFRNETGLKNPFDVDIDPET  
MKEVAEMTEKLGGSQGMDRDGGMWALARMVTSAVKSGGDAQSILRLESGDVKGPGQIPSG  
SQDDPGNGSRSDENYLLLYEPGLGAMN  
>comp12116\_c0\_seq2; 214 1 819 LEN=1298; translated  
PVPPSSGVQFYSSSRSKRMIHHHRLLSNTRHRYRVGLSGEGVRSTLGYGGYGALDIVHR  
CLSTTIATTDANVTDLYPYDIQQARRTQARGRHFLRAKSIIRQPTLRSLSSSPLHQQLQF  
RYFAFDSRKARKPKKRKDPFRVLKIPKESLYKDVKTKFLKIAMSHPDTHGDDLSDDEEKD  
AMRDKFIEARMAFEMLAEDEDDGTAILVEEKEDRESNFDWFRNETGLKNPFDVDIDPET  
MKEVAEMTEKLGGSQGMDRDGGSKSFVFSGDN  
>comp12116\_c0\_seq3; 162 1 988 LEN=1169; translated  
PVPPSSGVQFYSSSRSKRMIHHHRLLSNTRHRYRVGLSGEGVRSTLGYGGYGALDIVHR  
CLSTTIATTDANVTDLYPYDIQQARRTQARGRHFLRAKSIIRQPTLRSLSSSPLHQQLQF  
RYFAFDSRKARKPKKRKDPFRVLKIPKESLYKDVKTKFLKIAMSHPDTHGDDLSDDEEKD  
AMRDKFIEARMAFEMLAEDEDDGTAILVEEKEDRESNFDWFRNETGLKNPFDVDIDPET  
MKEVAEMTEKLGGSQGMDRDGGMWALARMVTSAVKSGGDAQSILRLESGDVKGPGQIPSG  
SQDDPGNGSRSDENYLLLYEPGLGAMN  
>comp12116\_c0\_seq4; 214 1 819 LEN=1325; translated  
PVPPSSGVQFYSSSRSKRMIHHHRLLSNTRHRYRVGLSGEGVRSTLGYGGYGALDIVHR  
CLSTTIATTDANVTDLYPYDIQQARRTQARGRHFLRAKSIIRQPTLRSLSSSPLHQQLQF  
RYFAFDSRKARKPKKRKDPFRVLKIPKESLYKDVKTKFLKIAMSHPDTHGDDLSDDEEKD  
AMRDKFIEARMAFEMLAEDEDDGTAILVEEKEDRESNFDWFRNETGLKNPFDVDIDPET  
MKEVAEMTEKLGGSQGMDRDGGSKSFVFSGDN  
>comp12117\_c0\_seq2; 880 182 2656 LEN=2922; translated  
MPDAFPRSLRAASKRGRHGEQRSRDSSQTSSLVTAPSRSNGMISPPLETPRVLTRSAITG  
LTHGLDASDVLECYSLVRSAPLHGVSANSTITVQKMTIGIRFRPTAADLKNPYNTKTPMEL  
TLEYGPARGPLLSDEAMPTVQGNKSSSYLVWDNIGKVYFTQKIDAGNYINSNYMASMT  
GAVLNKLLHEAVGYTEKRKIYQPFVSDKGRMLRSSSSMDFAWYVWVSHLARLGVEIEP  
ILSPSMYEARLYAKSANKVFPDPASTRAAASFYEHLYGICLESIASRSVWSSGKSSQLPGD  
NVEENGVKARDKPKSSSSGANNSDGARRGNRRLEDRNDGPDWETREDGNGDYDDDDGDTI  
DHDDDDVDVTALDTDEEGYDDNGDDNGEIEENEKDLQDDVRISSSYDEARESGETTSTQVEP  
KRLPSNELPNRNDPTPGPSETTYPTALPTEGIHDVEKAQNAAMDAQKADEAMIAAQTEG  
ETKAADAAQAADAALVAADATSSAAAQAAMNLLSGDGALMSSIVSTCFNSPTYGISST  
DSNGTATTEFYLFDRDPSTYYKLELVSPYLEIAKLDRTIPNAATLLSGMSAGGDALDWTALA  
LSILFIMFLMVLLICQQMGKHYIEAIFRCQRWFFNPRKYDYEGSTISGVQSGSHFFFGKR  
GIPISMGRRSPYAEDIVATDGEPIYRDNAGDEMDNDKRLTMSPEMPRKLHRNPSMELEMT  
GFSSPQHEHHPLTPRNISSKQSWRLDHSNSDHSSTGSSEEGFEKIPTRLLRNPDVEMPS  
LKSKSKVAIPVSSSSNGKNNQHASNANATAYRASPSFEEGIASI  
>comp12118\_c0\_seq1; 224 1 1024 LEN=1245; minus strand; translated  
XGARLEKTIAPSHAFLEYMDLPHGLPLLMRKDDNDERNETHRGGKRTTTLWQDFLISCR  
TKQFCALCNQWQREKEHKLGNSDIPRAQITAKQIEAFHFIFGRGLMAACRGELVQASNPW  
PLEHVNITSKEVLELLIKHGANPLEKDIRGTTLLHWAAGSGNAEAFETLLPYFPDRLLEK  
TERDGATPLHWACAGATSGEFGTGGHFHLCQHILSECRLKDSLKDEIVTSAKELVNQ  
QTKDGN SPLMWAASGSLDVTVKLMVRYRAKWDL SNRNGCTVAHWAASGGNLEVCRYLFEV  
VGVDFFVPNYGGNTPLTHAVAFSRIDVVEWLQGTFFVQSGD  
>comp12118\_c0\_seq2; 228 1 1078 LEN=2037; minus strand; translated  
XGARLEKTIAPSHAFLEYMDLPHGLPLLMRKDDNDERNETHRGGKRTTTLWQDFLISCR  
TKQFCALCNQWQREKEHKLGNSDIPRAQITAKQIEAFHFIFGRGLMAACRGELVQASNPW  
PLEHVNITSKEVLELLIKHGANPLEKDIRGTTLLHWAAGSGNAEAFETLLPYFPDRLLEK  
TERDGATPLHWACAGATSGEFGTGGHFHLCQHILSECRLKDSLKDEIVTSAKELVNQ  
QTKDGN SPLMWAASGSLDVTVKLMVRYRAKWDL SNRNGCTVAHWAASGGNLEVCRYLFEV  
VGVDFFVPNYGGNTPLTHAVAFSRIDVVEWLQEIAPTEDDGDILMAKQLVSLFSGYCILW  
>comp12119\_c0\_seq1; 886 1 2522 LEN=2595; translated

XTIQTARIQLQTGINNETS IMAQWHHYRMIGVRFLVLFSLMNPTSNAFYSTRQHQTVPRTVSVLLTEDSQIGIEVQGDHPPVRRFQGRMTKSLADNAKSEEQSSTNMRVDGQDISVVVNDGINLSVGGIKPSARLKRPTTFMDFLELIGPSVGATRSESIGNAAI AVPADVSTTLKEERAIEDRKRIYDATKANAKAQEKENAKDFKTASNNIDEKKVSGAKAKEASKNKVGEKKQFEAPSLLEKKAKQEKEHQAAEKSQTAMKVMETAVKTVKQEKRSVVEAETAEEKKAEEAKKRLDVKAKI SVEKTEKNENSQQLDSKAQSSAAKKAELRAKTLEKADQLRAAAMKKAEEELK PVEVPKAMVNASKNALETKKKLLQIKARADGVTQKKEAQEQEKQQKARVNVVPEKETEKKGKHPEAKSEAAAKEAGKHNEQLAKKVAKENMKSLSESKAKEESDKLEVLQMLIQKRKKQQL ELDKIETELLHKTNEIKKKKKELLLQIEAENKMEIPAADTQRKA EYTPKEYRSLSLQQKE RLKAERANARVIHDEKQDSGRSNPDDAKVTNDNEPHPILGP IVIDLGYKRVHSVSSGQLGTIP IWKQRIYRSDRARRMADEKADQMNLGFPGIICLYEDAAGKLFVIDGQHRVGMQAL REERNKTKKQKVNQSEAWKDQEFYFRNVLVEVYSELSKSDATNSSSFAEQVYTEINKAEP LMLVDMPGVASKSERKII SDAVKILHHQYNVMFSPSQRCRSPNVNIDNIRNNIFGSNILK RHKELTTGKKLANWLMIQNAALGERYERDTNTQEFVSPKAWKKASKYGFYLGLENSWLYK

>comp12120\_c0\_seq1; 297 375 1263 LEN=1263; minus strand; translated  
MHSNPVVPFFLEKINACLLLLLLLLCGSLQNSRRFVLFRRFRTCPARVASLLRQVGEFRQQL  
VGPLGVEPDRPGPVLEGDPDVPGVVVQEEGRPSGDGLGRAATRTPVASALAVAGVVLV  
PPGLELLHRAGHVGLLAVAAPGPVPPGAVPAPDRDPPGGVDKVAPRRLYRQPEAGEGFG  
VHGPA GPVKVEKDVVKDAPDEEGLGGEGHHGDLDSPGQGGPYQLGVDGADVREELLEGA  
LPDPPGVDAQDRLVEVQGQKVDPYLVPEVLDHLLDHGGVAVGSGVVVPAFAPVAVVX

>comp12120\_c0\_seq2; 183 1 849 LEN=900; translated  
XNNGDRGKGGDHNSRAYRHPAMIQKVI EHLRDEVGINFLALDFDQTILGIHTRGVWKGSL  
EELFPHVRPVYAQLIRAALAGGIEVAVVTFTSQTFFVVRGVL DHVFFDFGDAGGGAMDAKT  
LSGLGLAVQTAGGHFVDTTRRIPIRGGDRSWRYHGTGSRDGKQPHMASAVEELEARRDED  
HSRERNGERGSNGGACCGPPEPITRR'TLLD'DDARNIRVALQNGTRAVWFDPKRPDKLL  
PELANXVVARTPREQKCGNETKRIKTRIDSA'TAVLQGTAE

>comp12120\_c0\_seq3; 297 485 1373 LEN=1373; minus strand; translated  
MHSNPVVPFFLEKINACLLLLLLLLCGSLQNSRRFVLFRRFRTCPARVASLLRQVGEFRQQL  
VGPLGVEPDRPGPVLEGDPDVPGVVVQEEGRPSGDGLGRAATRTPVASALAVAGVVLV  
PPGLELLHRAGHVGLLAVAAPGPVPPGAVPAPDRDPPGGVDKVAPRRLYRQPEAGEGFG  
VHGPA GPVKVEKDVVKDAPDEEGLGGEGHHGDLDSPGQGGPYQLGVDGADVREELLEGA  
LPDPPGVDAQDRLVEVQGQKVDPYLVPEVLDHLLDHGGVAVGSGVVVPAFAPVAVVX

>comp12121\_c0\_seq1; 814 117 3191 LEN=3865; translated  
MSQHHSPLFRYDRHPDEERGRCLIASTDLRKDRLIFVERPVIAMQSTGMHEGALVCSYC  
MAFCGSPGQNLKVISDPSFLEEMATSNNNQRCVNEKDDDDVNNYALNGPHALYCCRHNCG  
HIYCSLECQQDDWKWGGHRELCTGMIPDPDECTSRQYQQKELGANTLTAVADEKEQDDLS  
NTSPSSNVDSFIDPLLEFKVYARNTNEIFLLVATWLVRI IKHNLPHYHEDDDLNTHPYTD  
QMNTWWDVKANEEAILKKEKEDPEEKANKSNVEGGSLIEDILKQLCEDSHSYLSRTLKNR  
LEQSQDSPWLTPIGMARLIGSLEQNCLGIRRKHALQRNLMQDTNLRQEFHTELIQCLEGA  
GMIEDNNDKCDNTCPDVDGCGNDRELEKGPREGLSKYSRDDIATFLASLTQDF'TNGC  
VFDEWDEIIRPLDGI SHYSIATKMNHSCNPNVILVYKTRGWGRDHPLVAYIVALKDIKEG  
EELTISYIDSEDPYEERQTALANYGFICTCSKCISEKDEIGQRKNEEDDDANSLNDDLFG  
DDESIDDDDLFGNNDGDGEQANGVAENTDSAENEDGNDYNEEPRGAQSLLDVLKQLDTI  
SNKSNHAAIPVEYLAPASNYVVKQASSLISDFQNAEGFKGDGQKIENLLKKIKAAIRERD  
FSACRLVGSGLLELYLSLLESNGSWTTPMYRASYWCSAITASIGYAHEGSFLLSIKYLDK  
AII LGQDRSLIEDYFGYVELHASQMAAAPCP IAVDCKVPDYRCPKLKELVASRTLPKPIQ  
IPVKELISDEKSNKASIMASYNQSQTCVIRHLASEWAAVEKWRYLDRLAWEF'GHRLVPIE  
IGSMTTRMKEAVVTFRSFVANYMSSASRDFWSFEDATDGKSQIAYLAQHPFLDQVSDLC  
KDIDMNPYGVQPTNINIWMTGGTRT'PLHFDSYDNL'LIQLVGAKYVRLYEKENS'DR'LYVR  
QDKSYGSQGNMSELDCQE'DFEKHPLAKDCNYKEVLL'FPGDCLFIPSRQWHYVRSLS'TSV  
SVNYW

>comp12123\_c0\_seq3; 515 113 1479 LEN=1479; translated  
MSPSPPSLSPTLTTHRALEFLNLTKYAGQRKVP ILEWLLAWTTVVVFGIRYLIDYARLR  
WNLHSLASEASSPSSNQRLCDRISLCP'LAHTEDQLAVTAEERWERLRQALLRSPLSSAL  
VDNGDSGSIDASTECSGNSASIS'TLGGSSVIEGAARKSHRKKKPKAASLIVQMTKEWT  
DDDWITIVRSDLVRR'EASLYMH'TLSKSLSSPRKNGLGALVVL'SKL'RRLWPQ'FLQLPESI  
LEQSSSSSSDNEHDL'SLIVPMYKEKVTDI SYTLNKA'F'DNC'SGDPKRIQV'VVVHVQSSPTD  
ENDDDGNSLLRQQLLQEQEQQKEPPQPS'ENNSNEDERPSLTSSW'GELKVV'TIPYQGGGR  
GKTLNVGAKHATASIL'TFLHADTMVPAGWDEQIKKALTWNNN'ISSNGSGRDNGNSFFPH  
ACAFTMAIDVDSYKTN'GASSPLSSHRKEPAGLLGA

>comp12124\_c0\_seq1; 305 30 470 LEN=941; translated  
MSDKDPKRRCFHCVFTNSKGTNGSLGIITPELLASLFAKPLRNSRRKKRYSSHEGHSHQ  
RNRKACIGTTRVGVQSVSTANNNNNDDDDINNHDMEKHRVQQVSTNEQHVVTPSPLLNPE  
TANPKPVEEKPIKKEEEDQNSTIEVA

>comp12124\_c0\_seq2; 403 1 880 LEN=1351; translated  
XSSGKSSERSSETSTDDNASRNSPGSGDASDKAGNSSAESQSDDAGSGTFRSGSSGASSG  
AKGSEPPAARTTPSATIVTDTNEKGGGKTGGGKHARKDAVPVPMRLLNFTAMTLPCLDY  
PAIKKWNKVAAETNSPTIPPLHVTVTLMMSDKDPKRRCFHCVFTNSKGTNGSLGIITPELL  
ASLFAKPLRNSRRKKRYSSHEGHSHQRNKRACIGTTRVGVQSVSTANNNNNDDDDINNHD  
DMEKHRVQQVSTNEQHVVTPSPLLNPETANPKPVEEKPIKKEEEDQNSTIEVA

>comp12125\_c0\_seq1; 437 355 1641 LEN=1871; translated  
MYHRHSTSSTGSTGSGAPPQHHQQSYPFQRRARSAGSRHGSQMNPNYDSYVSHNNNNNNKS  
YSSLPDTDQHYGDHSNNNVSYDSGYGNDDDKYSKRGNGSAYTSMSSPTFIVWRIVPFLV  
LVLLPWIPNQFVRSQVKSRLHIESLLEQKQLVENLDQTTARINELKRDVEILHKDNE  
SFQELKRNGKSPRNLAAGEEDLGDVRTTAADMESEGYETMEEEEEILVRRIDRLEKSIQS  
SAVKRLTEKYNGQYRFKVNVRDQRDRQFFVIETAMLAEMPHAI DHFFRMIENKLWDGL  
PLIHEPHSLIVSATPTLTDGSHAWGGQRFVDANITHMAFTEHSPTYPPPHRLTYVAFSG  
RPGGPGFYISLDNELEYAREQESTFGVVMEDRDVLYQFFLQKDMGMRKILTIESIEILPT  
KRPKEEAS

>comp12125\_c0\_seq2; 424 1 659 LEN=886; translated  
XKNDIPTMLFRSAVFAALAAAYASAETMIPDLNIPTTSTMGRILSKARRLEQNNNQNEQ  
NDQDASWLAGYSIKYDSCASLIQVREEGGGDDEGILYTQNLVKFVVCPGNTGSCSDCGSG  
IAQYVVMQEFVEAYVEMKEQQKEQACETIAEYCYCDNANDDQACENQCYVDQGMESCIE  
VEGQEEFNLAEYMECKEMEGAEGNNNNNNNKYGNNDNSK

>comp12127\_c0\_seq1; 312 92 544 LEN=544; translated  
MPDSQNDPKYDFKPPEDNIKKWPKINNQFQGVSPFDFA MRQKNEEKRRKEKERETKSKL  
YSYQAKGVSTLVEENAKALNAAESARKEEARKNVEDAKRVNMAAAGFGAEQAARNADFER  
EKAYKEAQRNEKETQKNVNMAAAGFGVEQAA

>comp12128\_c0\_seq1; 475 369 1529 LEN=1718; translated  
MATYYASKASELTETVRERVADLQRLKARNELNARVRMLREELHHLQEPGSYVGEVVKQ  
MGQNKVLVKINPEGKYVVDLDSQVDIKDLVPNTRVALRND SYTLHKILPTKVDPLVSLM  
KVEAVPDSTYDMIGGLEKQVMEIKEVIELPIKHPPELFESLGVAQPKGVLLYGPPTGKTL  
LARAVAHHTDCTFIRVSGAELVQKYIGEGSRMVRELFVMAREAAPSIIFMDEIDSIGSAR  
GGGGDSEVQRTMLELLNQLDGFEPAQNIKVV MATNRIDILDSALLRPGRIDRKIEFPNP  
NVDNRMAIMKIHSRKMNLNRNIDLK VIAEKMPNASGAECKAVCTEAGMFALRERRVHVTQ  
EDFEMAVAKVMKKDGD SNISLQRLWK

>comp12129\_c0\_seq1; 295 738 1124 LEN=1580; translated  
MADAMKSTAKAMHKMNKAVDVPAINKMMQDFERENAKTEIMQEIMGDTIDDALGGEENE  
EEDAVVNQVLDEIGISFGEDLPSAAPTAPVGVSEAA SPGKVAMSASGGGGMDPQLSELE  
ARLNNLKR

>comp12129\_c0\_seq2; 342 126 806 LEN=1262; translated  
MGNILGKEKPLKEVLRENKRMINRAIRELDREKNGLEREEKRLTLEIKKAAKEGQMGPVN  
IMAKDLVRTRQYITKFIEMRSHLQGCALKLQTVKSHHAMADAMKSTAKAMHKMNKAVDVP  
AINKMMQDFERENAKTEIMQEIMGDTIDDALGGEENE EEDAVVNQVLDEIGISFGEDLPS  
AAPTAPVGVSEAA SPGKVAMSASGGGGMDPQLSELEARLNNLKR

>comp12130\_c0\_seq1; 559 248 2083 LEN=2213; translated  
MSIDFNGDSKDNKTQSAIGEHSIHVEEVGGVCHLVEPLIPRVSNPSSSRTESNVSARSC  
NNENCNLVAIEQEEHAYYELLEDGNSLDPAFFDGRNDYYS LDPHRFFILAI FCLNLLG  
SAVWITFAPIEDAVEAKFRQFDHFFHENDATI SNQDVNWLSMVSMAVYAPGTALCAWAIP  
KYGFRETAISSSFVMAIGCFRWMSSLITL NEDASNADWLSAMPYFILLGQALVSLG  
QTVFLNAPARVAASWFQTTKPIGAINLFSNFGIILGQSLSPLCVVEETGEHLDQLLAGQ  
AIAMGICALFTGFCFRDEEPLPPSAAEAARREREQQQLPRASSSSSESQEATSPDTSVS  
KDVKILLTNPQYIVL LLAGLIEYGLNSAIITLMQPWVASSGFPGDKIAGLCGSLTTGGI  
LGTSAATLLDQTNFNQAIRWSFLVMFLAGIGQVAALHPECPTWLLATTTFFITGMTQMP  
LLTICLDAAAHAHTYPVPEELSSAGLQLVGCYLG MFLVDMVYLMETPSGNDDGENHDQKH  
SFAAEVNVAYLTLGLSSILACCYKSEDPRS NAGNSGEI IHSDSTRAPSSIEVLNIDDN  
EGMIHENLAVN

>comp12131\_c0\_seq1; 224 1 598 LEN=825; translated  
XDSDDDDDEDEETDGVGDKLSNDDATSDSDDFRQKLLANWNDPSGTAAKEITYTAAAPSEP  
ESATEDSAVRISRYPRIASLFGNARVIEGPDMP SVVVGAVRANALPADDEDNIVILNARG

NDEMVAVRALATKYGTQKKIILVNCQFRPVPKELLGAETVYSVLPLAGKKKGEDTSASGS  
GGDETPAPKIVVLRYPKDW

>comp12131\_c1\_seq1; 257 274 1194 LEN=1652; translated  
MKLISVCFHVVVSRIGTSAFQVLSRNTCRRQYASTSILCAKAKSKKKASKRAGDFWEAR  
MDVWRPDVNDVERISWGPAPAKKGTGSRGVPHRLNLDERFLFDNARKKGFLETEGSGWRS  
QRREAPLLNTYRSLCDARGQASIVLHKGSTGVDELVCDSLPLRNPATFDEVAQKCLELRE  
GGEVVFQSGTDEVSSSEDEHEDLSMTLQIVDEATTSETTSSGNQNNGSNSSSDEETS  
GPWETRPIYQLPPYCI SWELQRSEAKALGKALAKHFLTMEGKNKQSKKPIGVKAGKGRRH  
GGYGIG

>comp12132\_c0\_seq1; 268 306 1056 LEN=1056; translated  
MANTTNQTRGRRSGSTLRSAAAGGAAARLATVVAIGLPTPVRSVLPPALSAATSEPGNAFS  
RSLSTGDFGAVNELFENARILVPEEFVSEVAFADLDLTI RNICYDMSLGGIAVDHER  
TSDTSFLVTGVSGLDVTCEMNYEYSYGILSGDGWLKIETENSQASSVSFSGTDFDRAR  
PPTGSAVQGCESDVGIREMDFEEDLASEVLEVFQGLVRNAAERAIGDVACEELS VAGT SV  
LGNLVGEAAGX

>comp12132\_c1\_seq1; 1557 1 6500 LEN=6707; translated  
XGRLEPYLGHLEAATDPLHLETGLVLPDDLEALDLQDTNGYVGRTVSEILGYLDAHLGA  
SAPGSPGQDRQDLVNSLLRSFVLEEDGSLPMDPASMPSLADQILFEGHDLRLETF SVTLN  
EIRLFGLD S ITRLNSFRIRIGKHTLQNELTWDLSLFEFDLTLDMKPSTLEDAILVDPTSPG  
IREDFTIGFALENIDVEVSLLLVLDGDAMGSMELGPLFHTE NLLPCVLSVVDHARISGLD  
VDPAYVTDGPTLSGFVSSGLDRFVSDSIGAAFSVYEASLRTAVPNLFRTEVREGINAFLS  
SARASSGGVPGCPEAPSFDEGVLDREFLDPESSGSGYGLV PAMKKMLDEELIATGDETG  
RPRINEALVAPFTGAQSGTRGT VVFPFDLFRFAAPNTVSQRFGMESLELRLFDPKIENID  
TIQNP IRLFEPNATSGQILDNYATLGVPQRKLRIGVKGRIDAEGDPALATTNEIDLSVEL  
SGAEAWVSLMARIDAGSLFRFPLRDVANPECWLN TLESPA AIGEGQSTGFALAGALLDTS  
AMGFNVSCASCTGAGPSVFPMMGSLGAAGVSEVLGGRLVRLVLDLLRS DSTQAYINHRL  
MDAALRCPHSPEYVGPSASSRDDL EQEFP SLDHGSLETLVFAAAVAEMATVVVARAHES  
YDLET SFPLSAQHDLGAKDDARLVDFTALEESVGEKASSGIAGFLAFLHRGADDPGGNGS  
LGVNSILRASLLDKNGEFSVSFEGPEATNDETGISL KELKIFGLDTISELKVFDAVGAQT  
LQNKIRWDEIRIQLVLSLGHKGDASAAKSEITVSVGLSGVDLSLALFLEM DLRLEALE  
LWSIMETTKILPCLVSGAREARFTELELSIGSFAEVSIDGFDSSEIGSAA SESTKLFLEQ  
YGEVASSMPKFFDSTVRSLLNWLKHYTGELASDMCKHSPSRGSGFV DLRDLLQTA AIA  
THLGGTGLSGYGD TFR TALGFVRDLFKTDESTGLSGFNTV VIEPLTASN DGGAGAIHYPD  
DLFHSEEKIKIGALDTSVQFRAYDAKVENLNTV GAPLEL FVG IPEEPYLLNNTITAGVGE  
QPLRFSSTVLLSLQGDDEIRNEIDLNLELTDANIIVSTMTKIAENR LFGFPLRDVFDL  
NCWLATIPAPELDPRGVRVHDSEVTVSLSLSSSVGALAVSAK CANCSSPRMVEFVDLIS  
SPDARNETTDVANALLEYVTQLMGGNLFQVQMDRILNDAARKCPHSPSYDPNAIPLVYEA  
FEAPDTSYSMGLILLGALALAAVIVFLMIIILVRCIVQRRH SKWLFKLP PHQMKKLAQQ  
QKSEMDLEKLNRTTSSMFLSRDIPCIVRFVVPVVIISNVAFFLSGHL SLGATVNI EAEV  
AGETFTIENFFEF SMARSTIDIWKAGGWELAILILFSGIWPYTKLLMTLWLWFSHP SKV  
SISRGSILT WLDWLAKWSMIDIFVLVISIAAFRISIESPNAAYLP SDFYAIEMMVIPLW  
GLYANMIAQLLSQVTSHIIHYHRQIVTRGTSRLNENHLPDVVVPASLDARAQSQPHEQE  
DLQNMQLHSLNAGQERSHSAEALDEIFIESSSVPTPKAATENKMSLS SYQFSRPHRGE  
NEKLVVRRYVNMILPLCGCSLVICIALGCILP SFSLELLGIVGVAVEFGQDFE EATVYHS  
AFSVIKLLFDQASYLGTLRDYLGLIVLSILFVSTILFIP I IQSITLLRQWFSSTTITEKR  
KISVRIEILQAWQYLEVYLVALFVSSWQLG SVSDFMINEYCKNLEDTF AQMVYFVGLKEE  
DAQCF SVTSHIEMTSFFLVAGAVMLSFLSSFVSKGTFQYLRDETNVAQRLEGRGDLTINS  
GDGSQQYDDGNERDDIGVVANIRQVPVLF TDTFRWLLSSIAQTGYAESGDSHWSLPEATV  
VADGLPND SRLIKGTYVSNL GSEKEVDQVANGSFQEKGRYPERGKSITSASSFKSYHHS L  
KGRKLIHDDDGDEKRHHKYS PKQQQRREARRYLSSSHGQNSVNSQMESV GSTSEGEHFED  
ISYNSMQFPLSSKKPPPSEYRLSKNSLKP PPSYSSPIENKPTILT KMPSSSSLPSSPRS  
TSRMDDCTHTTINKEYDDDTVF TGEDEYSRVK S ISDIIVEMDNDANTLHFDDG SFSQQSS  
SRHQFT

>comp12133\_c0\_seq1; 90 241 455 LEN=455; translated  
MKHRADGGDASSKLYGSFPAAEDPGANLSADAPAGPAGAGSFRGGANPSPPP NARPPSY  
RKIERGSGDGSG

>comp12133\_c0\_seq2; 292 283 1178 LEN=1178; translated  
MDVENTSETDVNVQLISKEGDKFPVPTAVANMSELVKSMMDDNDDDDDERVCRICLEEDS  
PETMIAPXPLQGLEQVGP RPVGRVADQRERPCLFQVHGVPLRVPPGARLRGGERERERQ  
RQRERERRLRTDRRVL RP AEAPPVLLLLDGVQGR LHRDPSAAARGRPPGSNRQGVRRGPA

ASGAGFAVSRGTRKRAAPSYWYYYYYGFGWLAFLIATGVCGLVVLCTNGCNLKRAIPRVGPP  
SEADGEAADAGREREREQSRHERSDFRRTGNFYHSGTNYNYTRVDSENDYFYPQQQQX  
>comp12133\_c0\_seq3; 138 1 868 LEN=868; minus strand; translated  
XLLLLLLGKVVVLAIDSCIVVIRARVIKVSATEIRPFVAALFSFSFSSRVRCLSVRFWR  
RPDPGDGSFQVAPIRAQDDQSTDAGGDQKGPAAESVVIIPIRRGRASFRERRRNQLRKP  
PVPVARLDDCSQEDDHELLQKDPGADVPGHHPVEEAPAALLPAAAPADRSAAVVPALVVV  
VVLALVLPPEGLQVVLEALRAPGKGTVSLVGPPLVQALAVDPPARALAAAGCNHGFGA  
VFLQADPAHPFVVVVVVVAAAIAAAPFNLSIGGGPRVRRRARVGPPEAEGS  
>comp12133\_c0\_seq4; 236 283 482 LEN=482; translated  
MDVENTSETDENVQLISKEGDKFPVPTAVANMSELVKSMMDDNDDDDDDDDDEKKTTE  
IPLPNVX  
>comp12134\_c0\_seq1; 226 353 1315 LEN=1723; translated  
MGNQPSNGGVPGGHHGQSPSDDQRRHHNNNRGGSASYSYNGGAYPQSTGPNAGGAVGGQ  
HQHQHQTSSQHKNMMSRSSSDASMSGVGGGDADHTVKSNGNPAVENWLDLDDTVPTVFRW  
EHGGRQVYITGTFNGWSRQIPMHRSGNDFTYIHNLRGKHAFAKFIVDDEWRFAPDQPTVA  
DIEGRINNFIDVTDFKPYTGDREFEKEKAAAEYGFIADEDETSEAHDDDGPRDGEIFSQ  
TMPDLDEYTKEPPLPPLRHIILNKPPQLQDTAALPVPQHVALNHLYCTAIKDNMMVLG  
ITQRYKTKFVTTVYYSPEAK  
>comp12134\_c0\_seq2; 179 353 1175 LEN=1946; translated  
MGNQPSNGGVPGGHHGQSPSDDQRRHHNNNRGGSASYSYNGGAYPQSTGPNAGGAVGGQ  
HQHQHQTSSQHKNMMSRSSSDASMSGVGGGDADHTVKSNGNPAVENWLDLDDTVPTVFRW  
EHGGRQVYITGTFNGWSRQIPMHRSGNDFTYIHNLRGKHAFAKFIVDDEWRFAPDQPTVA  
DIEGRINNFIDVTDFKPYTGDREFEKEKAAAEYGFIADEDETSEAHDDDGPRDGEIFSQ  
TMPDLDEYTKVGLYCSVPAASNSVGPSNKLAAVW  
>comp12135\_c0\_seq1; 390 145 1227 LEN=1781; translated  
MKFFSKRCIVLAPIFVVSVSDGAEVFRKASRTVPAKNSIHRSKNTITEHPFVSTGSRR  
LDVRGGGRTNEKEKASISSSVFNLVNNVAGAGILTLSNGVAIGTGGIPAIIVISAALGALS  
AHCFSIIGQACEMTGQSDFKGLWEKTIGKNTAYLVDTMIAIMCLASSVIYSGILGDVFTP  
LLKQVGFDPDAWNFRSNIIAITTFLLLPLSLIKDLSKLAFTSMLGFTAILYTVCFIVFRA  
LDGSYNVPAGKFLQDGLITSPSFEKSSMLKIGFASLVLSNFGLAYIGHYNAPNYRSLR  
HTNSKRFRFMTNSAYTTFLFLYTTAMIAGYATFGDVCQGNILLNYHPDDLSTFGRVATG  
>comp12135\_c0\_seq2; 447 145 1608 LEN=1657; translated  
MKFFSKRCIVLAPIFVVSVSDGAEVFRKASRTVPAKNSIHRSKNTITEHPFVSTGSRR  
LDVRGGGRTNEKEKASISSSVFNLVNNVAGAGILTLSNGVAIGTGGIPAIIVISAALGALS  
AHCFSIIGQACEMTGQSDFKGLWEKTIGKNTAYLVDTMIAIMCLASSVIYSGILGDVFTP  
LLKQVGFDPDAWNFRSNIIAITTFLLLPLSLIKDLSKLAFTSMLGFTAILYTVCFIVFRA  
LDGSYNVPAGKFLQDGLITSPSFEKSSMLKIGFASLVLSNFGLAYIGHYNAPNYRSLR  
HTNSKRFRFMTNSAYTTFLFLYTTAMIAGYATFGDVCQGNILLNYHPDDLSTFGRVATG  
FSILFGFPLVVFAGAREAIIGLASNFGNAGLGSEKNFNLVAGILTFVTIISCTVRDVSIV  
VGLTGAALGSALVYICPPLLYTKAVALRYGNDSVASKRAKMNALVPPFGVICIGILGCFMT  
MKEASLK  
>comp12136\_c0\_seq1; 1443 165 2534 LEN=2548; translated  
MTHSIYFARALLLAACFIQDASSFSQVSRGSSNVVRSKPTFMSAVADESGTSSAEERMKA  
AMAAEEMNSPKSAADTSNFEFGLGGRPFPLSMIVGQDNKQSLLLASINNRMGVVIS  
GGKGTAKSVMARALHQLLPPIEVIKGSQFNVDPEGEFGMDDYLKLDIANGGVPLAERETE  
VIPCFVQVPLNVMEDRLLGSADLEESVKTGKTVFSPGLLAKAHRGVLYVDDINLLDEET  
ANILLNIVTDGYVLIEREGLSLRYPCLLIATFNPEEGELRDHLLDRIAVSLSADAQPL  
DNEERVAAVKSVLEFSGSGAQSSEAEALAEAIENEDDLKTAIVFAREYIKDLKVAPSQ  
IQYLCEEAIRAGCQGHRAEIFACEVARAAALEGRQVNSDDLRLAVKLAIAPRGTFVNT  
MDEDEMMAPPPPPPPPQMDQDQNEDEDEDEDEDEDEDEDEDEDEDEDEDEDEDEDEDEDE  
FMFDADATPIDPDLIAFTSRERNKGKGGGMIFSQDRGRYIKPMLPKGVIRLAVDATLR  
ASAPYQKARRERAVGTYKESRGVHIESGDVRIKMARKAGSLIIFIVDASGSMALNRMNA  
AKGAAISLLMEAYQSRDQICLIPFQGECAADVLLPPTKSI SMARNRLEQMPCGGGSPADA  
LQMAVLTGLNAQSSGDVGKVVCMVLSGRANVPLCVSKGEEFDPEADED SKDGKPSRKYL  
KDEVLCAKQLGATPGFNLLCIDTENKFI STGLAKEIANAAGGKYHQISKADGNAIASVT  
NAALNELKQ  
>comp12136\_c0\_seq2; 1152 165 2637 LEN=2651; translated  
MTHSIYFARALLLAACFIQDASSFSQVSRGSSNVVRSKPTFMSAVADESGTSSAEERMKA  
AMAAEEMNSPKSAADTSNFEFGLGGRPFPLSMIVGQDNKQSLLLASINNRMGVVIS  
GGKGTAKSVMARALHQLLPPIEVIKGSQFNVDPEGEFGMDDYLKLDIANGGVPLAERETE

VIPCPFVQVPLNVMEDRLLGSADLEESVKTGKTVFSPGLLAKAHRGVLYVDDINLLDEET  
ANILLNIVTDGYVLIEREGLSLRYPICRPLLIATFNPEEGELRDHLLDRIAVSLSADAQPL  
DNEERVAAVKSVLEFSGSGAQSSEAESALAEAIENEDDLKTAIVFAREYIKDLKVAPSQ  
IQYLCEEAIRAGCQGHRAEIFACEVARAAAALRQVNSDDLRLAVKLAIAAPRGTFVNT  
MDEDEMMAPPPPPPPPQMDQQNEDEDEDEDEDEDEDEDEDEDEDEDEDEDEDEDEDEDE  
FMFDADATPIDPDLIAFTSRERNKGGGRGMIFSQDRGRYIKPMLPKGKVIRLAGGVPRI  
RPTVSSATSIFQPNFLYTVCFCDFVVDATLRASAPYQKARRERAVGTYEARGVHIE  
SGDVR IKKMARKAGSLIFIVDASGSMALNRMNAAKGAAISLLMEAYQSRDQICLIPFQG  
ECADVLLPPTKSI SMARNRLEQMPCGGGSPADALQMAVLTGLNAQSSGDVGVVCMVLS  
DGRANVPLCVSKGEEFDEADEDSKDGKPSRKYLKDEVLACAKQLGATPGFNLLCIDTEN  
KFISTGLAKEIANAAGGKYHQISKADGNAIASVTNAALNELKQ

>comp12137\_c0\_seq1; 555 602 2088 LEN=2088; translated  
MASATPSLPLSMIEDAKSSDSEIDAYAARVLKAMSPDTSIFDDSLGPYVASMIRCADIR  
AKEEVKSLAEFDSILELLEDQCSMDREKAADCVLIRITDAVVTHVLPFSERTAATVGVRR  
RCNSFPLYTQHGGALDSFRSMSSALPESMAALAEETGETEAQAQTPSKSFGPADTANAFSL  
GGPSPLRLDNLIPDLMGELDDPSPAYSSPSALASVLLAPKIGLRAAPTTLAQTRTQSQS  
HRYATSFEPKQSPQTSASLAAVHGQRNNEFPPLGTSPEAFPPPLGARVEKPKKVKIRSSK  
SSDGKIQHSDKDLAATLFRPARPRQNSIESEEAASRSRGSSNASASMLAMSATGTIDEE  
SAVCGNGMSNNIYFQQQLDSCVEILLSMNPDLSEEAAGLMAGTDFNLAQYIIDS AIR  
APPICRHMLHDGCYRS DCTFSHDVEGHTCLFWRGRGCGKGSACKFLHGFHEKLLDGDIMS  
GYRSQQQPNSNNNSX

>comp12137\_c0\_seq2; 575 1 1957 LEN=1957; translated  
XASENQFHESLHRIASLLPVAFLFPHSHQQEQPQLRTRTTIDAASTTPKQNTVKARTTPA  
NRPTPKDIDIRSTKQORLETTSTRPCDDIRRFQICQTLTNSIQFESDWRLEFSAHPTAE  
QSGDDWLRGCGKGAQNFVPVNLAPRKE SRAMETATMASATPSLPLSMIEDAKSSDSEI  
DAYAARVLKAMSPDTSIFDDSLGPYVASMIRCADIRAKEEVKSLAEFDSILELLEDQCS  
MDREKAADCVLIRITDAVVTHVLPFSERTAATVGVRRTRCNSFPLYTQHGGALDSFRSMSS  
ALPESMAALAEETGETEAQAQTPSKSFGPADTANAFSLGGPSPLRLDNLIPDLMGELDDP  
SPAYSSPSALASVLLAPKIGLRAAPTTLAQTRTQSQSHRYATSFEPKQSPQTSASLAAVH  
GQRNNEFPPLGTSPEAFPPPLGARVEKPKKVKIRSSKSSDGKIQHSDKDLAATLFRPAR  
PRQNSIESEEAASRSRGSSNASASMLAMSATGTIDEE SAVCGNGMSNNIYFQQQLDSCVE  
ILLSMNPDLSEEAAGLMAGTDFNLAQYIIDS AIRAPPICRHMLHDGCYRS DCTFSHD  
VEGHTCLFWRGRGCGKGSACKFLHGFHEKLLDGDIMSGYRSQQQPNSNNNSX

>comp12138\_c0\_seq1; 639 1 1393 LEN=1665; translated  
XQQQQQQQTATVDCAIKILNLDHVDSNLSEIRLEVQSMRLSSHPNVLSCFAAFVVRSTDW  
LVTQLMRKSSSLHCLQGARRIAAARKRREAAAAQTEPSTEVPLPMEHHILYIMHETLLGL  
QYIHEHNGQIHRDIKAGNILIDHNGDVRIADFGVSGWLVNAGTQQEKAKTFVGTFCWMAP  
EVMEQINGYDYKADIWSLGITAMELAKGYAPYAKFPPMKVLILTIQEDPPSLDITYDEEDG  
DVSEEWLESYDDEEFKSFVDSCLQKNPVKRPATSDLLDSKPLSGYKDPVYRERRKA  
AFVEEVCNLVRDVGSIAGTAAAE SNAARAEGPDASSSDRENMPGCSPVSI FL SKEESNRP  
AGTTWVFADGSQVLSSSLTNDLSVDDVLD EIDQFGLQTGGEHYSRGDDHSLQQQQRQQQ  
NEAAAIEAQTTP EDEGDDLNAFMDEFEMNTQGENFRRPSRQVE

>comp12138\_c0\_seq2; 639 1 1393 LEN=1649; translated  
XQQQQQQQTATVDCAIKILNLDHVDSNLSEIRLEVQSMRLSSHPNVLSCFAAFVVRSTDW  
LVTQLMRKSSSLHCLQGARRIAAARKRREAAAAQTEPSTEVPLPMEHHILYIMHETLLGL  
QYIHEHNGQIHRDIKAGNILIDHNGDVRIADFGVSGWLVNAGTQQEKAKTFVGTFCWMAP  
EVMEQINGYDYKADIWSLGITAMELAKGYAPYAKFPPMKVLILTIQEDPPSLDITYDEEDG  
DVSEEWLESYDDEEFKSFVDSCLQKNPVKRPATSDLLDSKPLSGYKDPVYRERRKA  
AFVEEVCNLVRDVGSIAGTAAAE SNAARAEGPDASSSDRENMPGCSPVSI FL SKEESNRP  
AGTTWVFADGSQVLSSSLTNDLSVDDVLD EIDQFGLQTGGEHYSRGDDHSLQQQQRQQQ  
NEAAAIEAQTTP EDEGDDLNAFMDEFEMNTQGENFRRPSRQVE

>comp12138\_c0\_seq3; 622 1 1668 LEN=1924; translated  
XQQQQQQQTATVDCAIKILNLDHVDSNLSEIRLEVQSMRLSSHPNVLSCFAAFVVRSTDW  
LVTQLMRKSSSLHCLQGARRIAAARKRREAAAAQTEPSTEVPLPMEHHILYIMHETLLGL  
QYIHEHNGQIHRDIKAGNILIDHNGDVRIADFGVSGWLVNAGTQQEKAKTFVEPRAGWYV  
SHRTASHRIVSHCLVSSVLPVCDVCACRLLLLDISSAIVVLDVDGGPCLVDLYLPLSRSI  
SYHAAFPILLVFI PPYSSFRAIPFHATQAPEVMEQINGYDYKADIWSLGITAMELAKGY  
APYAKFPPMKVLILTIQEDPPSLDITYDEEDGDVSEEWLESYDDEEFKSFVDSCLQK  
NPVKRPATSDLLDSKPLSGYKDPVYRERRKA AFVEEVCNLVRDVGSIAGTAAAE SNAARA  
EGPDASSSDRENMPGCSPVSI FL SKEESNRPAGTTWVFADGSQVLSSSLTNDLSVDDVLD



EIDQFGLQTGGEHYSRGDDHSLQQQQRQQQNEAAAIEAQTTPPEDEGDDLNAFMDEFEM  
NTQGENFRRPSRQVE

>comp12138\_c0\_seq4; 622 1 1668 LEN=1940; translated  
XQQQQQQQTATVDCAIKILNLDHVDNLSEIRLEVQSMRLSSHPNVLSCFAAFVVRSTDWL  
LVTQLMRKSSSLHCLQGARRIAAARKRREAAAAQTTEPSTEVPLPMEHHILYIMHETLLGL  
QYIHEHNGQIHRDIKAGNILIDHNGDVRIADFGVSGWLVNAGTQQEKAKTFVEPRAGWYV  
SHRTASHRIVSHCLVSSVLPVCDVCACRLLLLDISSAIVVLDVDGGPCLVDLYLPLSRSI  
SYHAAFPILLVFIPPFYSSFRAIPFHATQAPEVMEQINGYDYKADIWSLGITAMELAKGY  
APYAKFPPMKVLILTIQEDPPSLDTYDEEDGDVSEEWLESYDDEEFKSKSFRSFVDSCLQK  
NPVKRPATSDLLDSKPLSGYKDPVYRERRKAAFVEEVCNLRVDVGSIAGTAAAE SNAARA  
EGPDASSSDRENMPGCSPVSIPLSKEESNRPA GTTWVFADGSQVLSSSLTNDLSVDDVLD  
EIDQFGLQTGGEHYSRGDDHSLQQQQRQQQNEAAAIEAQTTPPEDEGDDLNAFMDEFEM  
NTQGENFRRPSRQVE

>comp12139\_c0\_seq1; 263 402 956 LEN=1187; translated  
MHRSIIPSDQQPDDERVFIEVQPYASRRDDAWFALTLDDHEEIFAPSVYNETMSTLLKLR  
LKVPPKLQKKDFQFVIDVAGEGVSFVGPVAVCDGNRSFSRQHDDHVLLKIESADAFRETV  
AADGPQEHRSREPPSRPIGNIDL VAGWAAGYDAVKLTPKMIVRRRN VETETKAATGYDDSI  
DGEL

>comp12140\_c0\_seq1; 411 370 1590 LEN=1824; translated  
MSLSLPSNDNDGDSSRLQIKPLTGGLSNHLLLASNNSKTVLVRIHPDTKGETASEFSVVD  
REREPKFAAWLASHKEKLAPTIYGRFANGRVEEFYTNTRPLAWGEMKYYAPWIAERMASF  
HSLDAPPSDVLPRPTKAVTATIYDTIGSWLNEARSTIQKRKA EHDSEAKNEGEELFLSQL  
SSEAWLENELRRLPPP NHARAEADKSTVAEALTFIRRIAVTHMDCQPLNILIGNDDDE  
NNAATANFAQGANTLRLIDFEYAGWNPIAADIANTFCEYCEATNLCADWDKEYPTPAQQD  
TFFWNYLLHSDPQRAKKFSSYPRRQQDPNHYAADDAEWNLF CATLQKEVGRFSLLSHLGW  
SIWSVIKAQEEGGVDFDYMAYAHHRMEGYTWSKKRYIATTTGDTVTE

>comp12141\_c0\_seq1; 164 137 592 LEN=794; translated  
MNENQNIYVRDGRSTSRVLNRPGGTQCISLGGYTEAELERMKKLREEREAAKKTGVENEK  
KAVTNERPCSWPAETNHPSPPSLEKTASVPERATKEGPSGASVPPSAQRTRTRISSNAFAS  
SSTTNSFNVLTRDPTSKVSNPPGGRTSFTLG

>comp12141\_c0\_seq3; 149 168 653 LEN=653; minus strand; translated  
MPSVSSPGFDFVHPRVKLVRPPGGFDTFDVGRSVRTLKELVLEDAKALLEIRVVLC AEG  
GTLAPEGPSLVAPSATEAVFSREGGGGSFVSAGPEQGRSFVTAFFSFSTPVFLAASRSSR  
SFFIRSSSASVYPPRDIWQVPPGRFKTRLRKVSANQTTSNAA

>comp12142\_c0\_seq1; 397 153 1115 LEN=1395; translated  
MNMKSSLRMIVGWSFGTVYRFSMNAVAFVPPSSCNRCYSSKGLTTSATTARNPVHNDISS  
ISKSMNELDGRSFSRGFALSSGAKVDETTANSTVGETSSRIETLFPGAELLTIELIDHL  
PLGCTIEESLHEEDDSIFISKLTKEGNAEKAGLRVGDVVVGVTGSGFELTGTINSDVEKI  
KKLVAAVPEEDPLVIEVARGTRILERHESTLVDLCNLSGSEKDVQDCVVNFLSGGYDYD  
SEDVVSDEEVACDDEDPECLIDGMMNLWADELPPPPPTTSGITDQTKPRSAKAPKPSNRS  
SPSGTWVRDPKTGKMRNIDA

>comp12143\_c0\_seq1; 425 205 1011 LEN=1228; translated  
MSTEEDKTAKVPATEPTPEEPEAKKQKIDESEEEKKTDEDEDKTPSEPAMTAAEPKNSSYP  
MAPDSDWPEAWYMMDDGTIEDQKALNRLEPNKPATVKRLKDLGIGFWKMDAETYKYPAKA  
IPWDPKDATDPKLKEIRDARGYSYADIISVRPDLPLPGYDEKIKAFYEEHIIHDAEEIRYII  
DGSGYFDIRKEDKWIRIWIKKGDLMTLPEGCYHRFTCDETDYIQAMRLF IGQPVWTPFN  
RPQEEHKSQRQHYVETYIKGATEGPLDSF

>comp12143\_c0\_seq2; 5 1 565 LEN=782; translated  
XHVSINGTQPXVPRLVCIAYDL DGI EYSIQLLRIESLQPLSQTIFHVISDTENSCVIHPG  
GYSYADIISVRPDLPLPGYDEKIKAFYEEHIIHDAEEIRYIIDGSGYFDIRKEDKWIRIWI  
KKGDLMTLPEGCYHRFTCDETDYIQAMRLF IGQPVWTPFNRPQEEHKSQRQHYVETYIKGA  
TEGPLDSF

>comp12144\_c0\_seq1; 230 191 730 LEN=1041; translated  
MAPFLKEFRKTWVPLLKTFSSSAADVGYDMFYK SIGSM DAEIVEKYQLATFIF FIVACV  
MLGFTTFTLLCKGFAPKRKVKSDDDAKIEMSGFERLMRHL YKRANQILFLEMILEDIPQF  
VLSTLVTYALNRQVTPSMVLNVTT SAYNFVFNIFDILTPDEEEEEEDKGPMGEPLSATVL

>comp12144\_c0\_seq2; 230 191 730 LEN=1242; translated  
MAPFLKEFRKTWVPLLKTFSSSAADVGYDMFYK SIGSM DAEIVEKYQLATFIF FIVACV  
MLGFTTFTLLCKGFAPKRKVKSDDDAKIEMSGFERLMRHL YKRANQILFLEMILEDIPQF  
VLSTLVTYALNRQVTPSMVLNVTT SAYNFVFNIFDILTPDEEEEEEDKGPMGEPLSATVL

>comp12145\_c0\_seq1; 630 277 1497 LEN=1745; translated  
MMDAIVQLIRNFLCCVKDWELFSDTAFYDPAHTNSLLKSYLGVLELPQYVDKTTPLEAII  
ITQLYACLSCARSGIALAWTSAGKLRRAVRLLEGRLSAVAALDRSSPKTEIAAHRIVNES  
LVKEAKAAVRNVFVGLLVAPIGFSFFWLFANSHVTEAGWIGGLTALIDALTVMEVALVP  
LLYYMLVDGFQFRLARETKECIDVVASSKTSKDSSFDTEYLVNTRYEFMEPGWVPPFYES  
GIGAMARPSDKEETEOMAGETKRVKQTLDLWFAGSASSSGKDDSKEDAKIRGEAIDNAL  
ATMNKSLFGLSAKGYREFLYLVLFVAFYGYLMAIVGFYYPDDDFQPGWIKGMKFGYDNN  
FADWSGNFAGDLMWTIEPAVILASPALISYLQPTTEQKPAKAKTE

>comp12146\_c0\_seq1; 143 1 1186 LEN=1186; translated  
LPPKPTNPFRRSDDAPKGSFPPKFPFVPAIRNGGPVPPADPPVVRPWRRRSPGPSGSV  
PEAVAAQAQMOWQMRMQQAPP IRGKHQAHPHGAGGRPSEQGAAGPVRVELHDLLGGGP  
LAYPRAWAYQQVLLGHRLWSKRRAAHTPPTEEGAPPDCLLVLEHAPVYTLGRGASEEHLA  
FLDGPASASACASGLARTARGPGTARLSLDRSGGERLERALAKAKAEEGGPPEAALEA  
VGEWTASIEPVLAPNGVPVYRVERGGEVTFHGPSQLVVYPMLDLKRPGAPYKADLHWYLK  
GIEEVVLSSTLAHYGIEGDRDASHPGVWVGSKDIAAVGISASGWITTHGFALNVDPDLSPF  
DTSVILPCGIPDRGVTSMGEVLRNRNRDNRDKHK

>comp12146\_c0\_seq2; 144 1 1162 LEN=1162; translated  
LPPKPTNPFRRSDDAPKGSFPPKFPFVPAIRNGGPVPPADPPVVRPWRRRSPGPSGSV  
PDAVADAYAETSTTDPGEAPGAPPDGAGGRPSEQGAAGPVRVELHDLLGGGPLAYPRAWA  
YQQVLLGHRLWSKRRAAHTPPTEEGAPPDCLLVLEHAPVYTLGRGASEEHLAFLDGPASA  
SASACASGLARTARGPGTARLSLDRSGGERLERALAKAKAEEGGPPEAALEAVGEWTASI  
EPVLAPNGVPVYRVERGGEVTFHGPSQLVVYPMLDLKRPGAPYKADLHWYLKGIEEVVLS  
TLAHYGIEGDRDASHPGVWVGSKDIAAVGISASGWITTHGFALNVDPDLSPFDTSVILPC  
GIPDRGVTSMGEVLRNRNRDNRDKHK

>comp12146\_c0\_seq3; 395 1 1821 LEN=1903; translated  
LPPKPTNPFRRSDDAPKGSFPPKFPFVPAIRNGGPVPPADPPVVRPWRRRSPGPSGSV  
PDAVADAYAETSTTDPGEAPGAPPDGAGGRPSEQGAAGPVRVELHDLLGGGPLAYPRAWA  
YQQVLLGHRLWSKRRAAHTPPTEEGAPPDCLLVLEHAPVYTLGRGASEEHLAFLDGPASA  
SASACASGLARTARGPGTARLSLDRSGGERLERALAKAKAEEGGPPEAALEAVGEWTASI  
EPVLAPNGVPVYRVERGGEVTFHGPSQLVVYPMLDLKRPGAPYKADLHWYLKGIEEVVLS  
HTALKSGMLAAEAVFEGLVAETDQPPVAETFELSESYPTEPASYADKLEASWIYEELFE  
VRNVHQAFSKWVGGLAYSGLATHFTKGREPWTLSETDSSETEEASGHEPIDYPPPD  
GKLTDFDLTNLQRSNTYHEEDQPAHLRIRPEKAEVPETVSLPVYGGPEQRFPCAGVYEV  
ERESSGDDDDQESSPAGGAASPGGKLVINAQNCIHCKCCSIKMPDEYVEWTVPEGGGP  
QYQVM

>comp12146\_c0\_seq4; 116 1 1391 LEN=1391; translated  
LPPKPTNPFRRSDDAPKGSFPPKFPFVPAIRNGGPVPPADPPVVRPWRRRSPGPSGSV  
PDAVADAYAETSTTDPGEAPGAPPDGAGGRPSEQGAAGPVRVELHDLLGGGPLAYPRAWA  
YQQVLLGHRLWSKRRAAHTPPTEEGAPPDCLLVLEHAPVYTLGRGASEEHLAFLDGPASA  
SASACASGLARTARGPGTARLSLDRSGGERLERALAKAKAEEGGPPEAALEAVGEWTASI  
EPVLAPNGVPVYRVERGGEVTFHGPSQLVVYPMLDLKRPGAPYKADLHWYLKGIEEVVLS  
TLAHYGIEGDRDASHPGVWVGSKDIAAVGISASGWITTHGFALNVDPDLSPFDTSVILPC  
GIPDRGVTSMGEVLRNRNRDNRDKHK

>comp12146\_c0\_seq5; 531 1 1795 LEN=1877; translated  
XAGLAAAIRFKQLCLEQETDLSVCVIDKGSEIGSHILSGNVFDPRAIHELFPQWAGKAGN  
DESGENPHWTEVFYYESQGSRA TPVESDAFQILTEGGSAYPVPVGVFLPSQLHNDGNYILSL  
SQLCRWLAEAEENLGEIYPGFAASEVLLSEERESNGPSVLGVATRVDVIGIRDGLPKATF  
ERGVELRARQTLFAEGARGSCSEFLMEKLGRESEAVQNQTYGLGIKEVWEVPEEVFQKG  
LVQHTLGYPLQSSPTDKTFGGSFLYHQEPNLVLAGLVVGLDYKNPNLNPYKEFKWKTHP  
EVRKHFEGGTCISYGARVLNEGgyHAI PKVTFRGGALLGCAAGFLNAVKIKGSHTALKSG  
MLAAEAVFEGLVAETDQPPVAETFELSESYPTEPASYADKLEASWIYEELFEVRNVHQAF  
FSKWVGGLAYSGLATHFTKGREPWTLSETDSSETEEASGHEPIDYPPPDGKLTDFDL  
LTNLQRSNTYHEEDQPAHLRIRPEKAEVPETVSLPVYGGPEQRFPCAGVYEVVERESSG  
DDDDQESSPAGGAASPGGKLVINAQNCIHCKCCSIKMPDEYVEWTVPEGGGPQYQVM

>comp12146\_c0\_seq6; 394 1 1845 LEN=1927; translated  
LPPKPTNPFRRSDDAPKGSFPPKFPFVPAIRNGGPVPPADPPVVRPWRRRSPGPSGSV  
PEAVAAQAQMOWQMRMQQAPP IRGKHQAHPHGAGGRPSEQGAAGPVRVELHDLLGGGP  
LAYPRAWAYQQVLLGHRLWSKRRAAHTPPTEEGAPPDCLLVLEHAPVYTLGRGASEEHLA

FLDGPGSASASACASGLARTARGPGTARLSLDRS GGERLERALAKAKAE EGGPPEAALEA  
VGEWTASIEPVLAPNGVPVYRVERGGEGGRREGRKCLFGPRVGRWRVVSAGGREACDAMP  
SMPCDAAHHRFPLSFGGGVQWLVGWVRSFVPILAGGYHAIPKVTFRGGALLGCAAGFL  
NAVKIKGSH TALKSGMLAAEAVFEGLVAETDQPPVAETFELSESYRPT EPASYADKLEAS  
WIYEELFEVRNVHQAFSKWVGGLAYSGLATHFTKGREPWTL SHET TDSSETEEASGHE  
PIDYPPPDGKLTFDLLTNLQRSNTYHEEDQPAHLRIRPEKA EVPETVSLPVYGGPEQRFC  
PAGVYEVERESSGGDDDDQESSPAGGAASPGGKLVINAQNCIHCCKCSIKMPDEYVEWT  
VPEGGGGPQYQVM

>comp12146\_c0\_seq8; 115 1 1415 LEN=1415; translated  
LPPKPTNPFRRSDDAPKGSFPPKFPFVPAIRNGGPVPPPADPPVVRPWRRRSPGPSGSV  
PEAVAAQAQMOWQMRMQKQAPP IRGKHQAHPHGAGGRPSEQGAAGPVRVELHDLGGGP  
LAYPRAWAYQQVLLGHRLWSKRRAAHTPPTTEEGAPPDCLLVLEHAPVYTLGRGASEEHLA  
FLDGPGSASASACASGLARTARGPGTARLSLDRS GGERLERALAKAKAE EGGPPEAALEA  
VGEWTASIEPVLAPNGVPVYRVERGGEGGRREGRKCLFGPRVGRWRVVSAGGREACDAMP  
CHAMRRGSPLSIPLVWVGCTMVGWLVRSFVGVFVRWLVLAKKVTFHGPSQLVVYPMLDL  
KRP GAPYKADLHWYLGKIEEVVLS TLAHYGIEGDRDASHPGVWVGS DKIAAVGISASGWI  
TTHGFALNVDPDLSPFDTSVILPCGIPDRGVTSMGEVLR RRNRDNRDKHK

>comp12147\_c0\_seq1; 386 147 1450 LEN=1738; translated  
MEDFPKIDRANDDDDCGGDGERASLALASPLFGPRKASAE EGLLSLWTGPERSLSPGSSH  
PWTDRTRALRVMTHAGRILWKAAGLGGAKGVAGPVSMVLLAGLLKRSVGRGLLGIQGAAR  
NGSRALAGSNQTETETETDDDE IDEMYSED TGETIHNDCIVDTIVESIVDGDGNAPPEP  
VRGKRRKPALLSFLPRASIDHDENENDDHHREVV EEWDFGGANTQAGASMSRPPKRTR  
RETGRRVWEEDPFSSRHGVFSRERPKTVRDRKDRGAETLRPRKRARAADTDGTTKTAAT  
TPSAAARTRTPTATTKGKDGSSGLPPRXAPDAQTRPMVLP IFYNATTNTNDTNANNXFL  
PKLP TETDQRQIDNQSTADHAEWLILGGTARNESIPVRVPIPRFTQQETQTKDTSKHDVR  
PNPRNRSDEGNDGF

>comp12148\_c0\_seq1; 268 95 643 LEN=748; translated  
MTRSKIDPPSMRKAFIMSGDINDDEDDAYQKKIYIDILLDWWVFP LLLFVQFGSIMYSQ  
QQQGILRIQWVPTMAMIAVFCIACIVYRKLFRVHPLGSMV LLLVPEFATNAVLATVMLTS  
DLTTALYTLVGCTVVLVTA AIGQLQVCLYNRSIRSPEPDDYRILNQDEQGDVYDDYNEH  
LC

>comp12149\_c0\_seq2; 358 1 1402 LEN=1458; translated  
XIEYDTIVRYKKVQSESSGQPGSKLLRATPNRKKPPKEQPESIPRSEXMTS QDDNTDASN  
AKPKAPSKPKLGQPSASEESASKYPNMG LCQQIHKLVAKAE GATDGT LQTEVLT RIREEL  
ENPSLYESVELMLGVDTGIWSAADLASKKEAHQKTAE ELEQKVEDAKESAGDMEVMDARV  
ELARFAAKSLTENEALEAYKKLLDLPKISSGKKIDAVMESARVSSFYGN TKKASEFTDSA  
QKMATEGGGGDWRNRNLKVYRGLQRLLERDVKGAAALLIDCIATFSCNEICSYQDFIVY  
SIMSNLLHLPRPQIKAKILDGPEILSVANDIPVVIKLVQSLYDCDYKKFLNAMVEVEPIL  
HGDRYFHPHLSFWMRELHILAYKQFLDSYQSVTLKAMADAFGVSIDFVDYHASRFIAAGR  
LSAKIDKYGGVILTNRPD LKNAQYRETIQKGD LLLNRIQKLARVVDL

>comp12149\_c0\_seq3; 261 118 795 LEN=851; translated  
MATEGGGGDWRNRNLKVYRGLQRLLERDVKGAAALLIDCIATFSCNEICSYQDFIVYSI  
MSNLLHLPRPQIKAKILDGPEILSVANDIPVVIKLVQSLYDCDYKKFLNAMVEVEPILHG  
DRYFHPHLSFWMRELHILAYKQFLDSYQSVTLKAMADAFGVSIDFVDYHASRFIAAGR  
LSAKIDKYGGVILTNRPD LKNAQYRETIQKGD LLLNRIQKLARVVDL

>comp12150\_c0\_seq1; 245 631 1500 LEN=1824; translated  
MVPLAKNKKDYAASDDTAVVESKVVLTGNIEMLSRMLDPNR TLLIETRLDADDGLHFDS  
LSDIQETARALPVDKRGWQIICSNLHYEWRNNEVT LVSANKTKIESPGVLRVVKESICVT  
PGYTLVRHREAPSF EFPEWPPMGHNVVTRDWPECKLVESEATAGVS NNGNATYDCWKRLG  
YYP SAI RSRTITSAGMSRVDTIPGAKSKFENRSILFWKLVQRDFNIEPERAIFTSQYIHD  
NLESVVLN DLKGCQTFGH SCKNSSKIKLEQLLAKHNQSKIDWNVDPQSA

>comp12151\_c0\_seq1; 233 193 588 LEN=866; translated  
MKSLVLLPLLLATARA FGTSSRTPSSGRGATALFDGNGTGGWGIGGQRQITPEEYAKGDR  
RYFDGYKMNEQGDFIKQIEEEKEALQNDAMDEFLGVARFAGLNVKDPSSKLNKFADAGFL  
DDDDDDLDLSV

>comp12151\_c0\_seq2; 309 269 664 LEN=942; translated  
MQSLVLLPLLLATARA FGTSSRTPSSGRGATALFDGNGTGGWGIGGQRQITPEEYAKGDR  
RYFDGYKMNEQGDFIKQIEEEKEALQNDAMDEFLGVARFAGLNVKDPSSKLNKFADAGFL  
DDDDDDLDLSV

>comp12152\_c0\_seq1; 1550 1 4753 LEN=4937; translated

PIFSFLTFLVPSVSVFVFGSSQQKTAKLKMAVANETMMDCLEPQGESAFFLADGSNPIEA  
RSFGAPVSVSGEVVFNTGMVGYPEALTDPSYRGQILVLTYPVGNVGPDESIEDEYGLP  
KFFESKEIHIAGLVSSYSWKHSHWAAQKSLATWLKENNI PGICGVDTRELTKNLRHGS  
ILGRVEVKTSESDDDDFGRPSSPTMFEDPNKRNLVAEVSTKEVVVYGKGNPKIIAYDCGM  
KFNIIRYLVDTHNVELTVVFPNYDLEANSNDNVEWEGFLFLSNGPGDPTMCPETVKSIIKYL  
KLEPPKPIFGICLGSQLLSLAAGAKTYKLYGNRGMNQPCIDLRGTGRCYITPQNHGFAVD  
SKSLPPLWKPLFLNANDLTNEGIVHTTKPFFSVQFHPEASGGPCDTAFLFEKFFVGETRGE  
SQPLILQNGLSYERKTYKKVLLVGSGLSIGQAGEFDYSGSQCIKALKEEDIEVILINPN  
IATVQTSQEKEEAARMADR VYFLPIRPNVMDIIRKEKPDGIIVSMGGQTALNVGVELWR  
SGELQKAGVEILGTQIPVIEATEDREIFSDKLKEIGETIALSYSATDIPTAKEAANKIGY  
PVLIRAAAYALGGLSGFAANDEELEAMAAKAFTTSDQILIDQDLRGWKELEYEVVRDND  
NCITVCNMFDFPLGIHTGDSIVVAPSQTLTNREYFMLRRTALKVVRHLGIVGECNIQYA  
LHPESERYCIEVNARLSRSSALASKATGYPLAYVATKLSLGKNLVQIKNSITKTTTACF  
EPSLDYCVLKMPRWDLKFFNRVSNRLGSSMLSVGEVMAIGRTFEEVIQKACRMVNPNLG  
LDGEDSKIVDSSADLEEKLRIPPTDERLFAVQLALERGSVEKIFGLTKIDPWFLSKLYNI  
ASMRKACKHAGSLDELVKTNPRERLRKLMAGFSDRQIAMYVGLPETREGEQKVRDLRKK  
FGVIPVVKQIDTLAAEFPAQTNLYMTYSGEKDDVDVTESSSEEHISPSYRSDILARSDSP  
ALDSPSFMRRARTLSTGQTVKNLLTAKERGVIVLGCAYCIGSSVEFDWCAVSCIRQLRR  
DGFKSIINYNPETVSTDYDESERLYFEELSLERVMDIYERENPVGVVSVGGQIPNNLS  
GPLRDSGANILGTDANDIERAEDRFQFSKMLDNMNIQPEWSVLKSKQEAIDFSNKVGF  
VLVRFPSFVLSGAAMRVASTESQLTNFLELAEDVSGDKPVVTKFVEGAKEIEFDVANRG  
EILNYAIGEHLNAGVHSGDATVVLPAQKLYVTKIKHVCRYASSIAKALRITGPFNIQFM  
AKGNQVQVIECNLRASRTFPFVSKTFNHNFIALATKAMTSMEVEPYKFSLLDIDYVCVKA  
PMFSFTRLRGADPSLGVEMASTGEVACFGETQNEAFMQSLLSTTFKLPTNKHSILLSIAT  
SEKRFEFAESLIALQKLGKYTYLGTPTGTSQYYKEKYNIDLKVVTKPAGESSDDGPGTALHE  
IKEGNIDLVINISDGTGRKDELTAGYLIRRASVDFGTSLITNVKCAVELVTCLERGMDDK  
DAFEPRHIGEYKIPSVGWTLTDQ

>comp12153\_c0\_seq1; 255 163 513 LEN=870; translated  
MMISRRFLLLALVCLTTSTHGFIPTRKKSTERRAAFSKQSNNDVQDEAVENVPQTTQYE  
PGASPTAMMAIPPAMAYAASLYEYEEEEEQDVSNEIALISCIISLAIGFGTYLV

>comp12154\_c0\_seq1; 350 348 1076 LEN=1117; translated  
MNSIRVQYIINEIQKVQMAEDKSQNGIANSKASAPTSNKSTPPLAGLKALDVGCGGG  
LLSESLARLGGDVTAVDPSLTLVEHAKEHAEMDPRTRSIRYRGGYTIEQLAQESSEPCYD  
VICLLEVIEHVTDVDSILKAANSLKPNTRGRLFVSTMNRTIKSHVVAIVGAEYIMGYLPP  
GTHDWNFEFRSPQVEEALMHRSGLQEVVDVQGMVITKPPFGQWHWKLDREDDINWIGTYK  
LA

>comp12155\_c0\_seq1; 329 1 1105 LEN=1338; translated  
XNDHKILHHLIQIYSKDEKYFPRALRLDLLLELYPAYDLQESLTRATFHKLGLRSLKQR  
EKAWEKQKASQNPSTRSDSDGCSRELESAFRILDKMISHEWWFPNEDTFRILFPLAAFSD  
NPAPGTERVLARLEACRFLSVLSPPKPRATLSASQQTARPGPSVSTSNRPFGLSLEASSHA  
LTAWMNTASYNNTVPPGHPHPAERAWAILQALRTGSSEALLLDGADPASGHRHGFRRSP  
GPTDALYTLALKVCSRIMDSPQSLEVAMDIFEAAAEDKMLLEGDICRVLLGVIMNFSSD  
SDNLRVVEAAKR VHQALVELDPDYGAAPAVLGLKQTSYIRIRHPELYENHLAELKLL  
EPEVSSPV

>comp12156\_c0\_seq1; 649 527 1999 LEN=2549; translated  
METATATSDHNNALDTINTAMSNTDAQSVQSGATQPHSPSRITAITPLSLSPASHKAPT  
KIQDNAIGKIDAIPCRSQQQKQHGDLSLGTILDQQQQQEALNLSYQQHRQSSNPFVSDDD  
HTEPSSANTGENNVSMISANNNGAVGKGYTRSDMNI GATSTFGRLVKSAAKSINNRPNT  
TTTDRKESVDEEGVIQGVLIYGYLQKLNKRWQTRWFETDGECLTYFKSSKRIKLLASL  
DLAKVGSIIINKEDENGCGFTINIAKRPYHLRADSKTAMNDWVITLNRVKEARMQEGNVK  
LVMPNPFQTNQPPIDLLDDQNF TTPRVVVVANRQRTHAVEDDFHSWEAIATMDDDDNHGMN  
QNSTGGGS IARWQPKP TSIANLASKILRWARSIRQYHCSADAENQVIILDHNL SAEPSTV  
TATKSGSTNQSPQNVVNAVPTADLLDTGGIDSRNNSVLRKGNQVQDSRGRKAIIVDDD  
DDENGARFLS

>comp12157\_c0\_seq1; 508 181 1524 LEN=1683; translated  
MMFRVAVMMIALVGSNGFHTPTPRHFRSVEVFTSTNDQDGPETFTEGLVAAGSSSLQSOLAS  
AFSNLDESDQYDAVLTGLCAKILDEPSLSDGEVIVALQDSINLLEEMNSRRVSASSRSLM  
ALVDAAAAAKDKTMAKIVSLSAKNGSVS QYGSLOREIIPLP TANTKVKCPDGTTKTRS  
ERLAALADVPTDERGTEISSALAVTTVLGICWVAGVLDIEQITPFTSFLWVLIIVLVGTLD  
NFYDLIKFGTNTFAKDVGEKLPKELPLGLGSGQLTGTTVKGFNRLIQVDTERECECEAAA

FFAAAYTLGLPCFSFRPNALEAAVMAAESSQPDNDLDPLLTNNGIMKILVWLMAPVAMENV  
KHPQLIQSDPREADGFLSRLEKSSLIN EKDLWWLEEGPEEKEAMLKWAYAEADVLLQRQS  
ATVTEITERLASGAATVGDVAAIENY

>comp12157\_c0\_seq2; 423 186 1127 LEN=1286; translated  
MAKIVSLSAKNGSVSYGSLQREIIPLPTTANTKVKCPDGTTKTRSERLAALADVPTDER  
GTEISSALAVTTVLGICWVAGVLDIEQITPFTSFLWVLIIVLVGTLDNFYDLIKFGTNTFA  
KDVGEKLPKELPLGLGSGQLTGTTVKGFNRLIQVDTERECECEAAAFFAAAYTLGLPCFSF  
RPNALEAAVMAAESSQPDNDLDPLLTNNGIMKILVWLMAPVAMENVKHPQLIQSDPREAD  
GFLSRLEKSSLIN EKDLWWLEEGPEEKEAMLKWAYAEADVLLQRQSATVTEITERLASGA  
ATVGDVAAIENY

>comp12158\_c0\_seq1; 1603 532 4608 LEN=5176; translated  
MDKIDGENTPTNTTTDTTMSNSDELNGKSSSSAKENGEVKKESQDTKVVDKDVEMKDASAA  
DKSKDVKVEESSSSNNSSSATTPASNGAAAAPAPSLPVLRGTL SYNSEPRQHILIRGMWN  
FENSNAFPQKFELVRNLPDDEDTLTTLPKDGFEFNGSFTLAYFHHTTSK GKQKERSRVIAE  
SGVKIKFTKIEEKESDEK GSEEYKVDGTGANQFGIFHINGTAKPTKHGDGQYQIELRKRY  
DAQATAAAGASTTGSATGGAKKSKKQKKN SMKGGSSNFDES DP SKLPPPSVSYDKNV VCL  
RGKLTRGTDGEHDGLLDPLLVSSDNL I HKISGMWSSGLDLMVSDPENIRGLCNKFEYEHK  
SSNPNASFPVSGRYSGWFNLDNEQGGKTKINEKDITLRFKNNAGYHNVEGKGSNAFGKY  
TITGTLTKDNIVTIFRHFIPKTKASLASSSGSASSRLLVTSAPPPLNAPGQPRTASPHY  
GSAGAAPATKQLSLTDVDIPGDDDGTLAEPLKPLEHTTYS AVSRGVL RVNEDGSHACKGK  
WAMTREHFSSGQTSNFTVRLEAHHAEEAIKNSESTTSGR LFPVDS DKYKGSFQLKKGGS  
YETI IDTQVVMKFRONTAGTFNVY GKG VNSIGIFNL TGTLIASGKTGGQVELYRVYPPEL  
LSSVQTTAPSKTKGKSTGLPAGSNLPPALAAKNFGNMGAQGGNSYSTMMPGPPRGGAGN  
NGATYGSMSRRESTRVVKVPSRLEDEDPAQFSRIMDKCNVLLRI IREKDVEMGAFFSEP  
VDP IALNIPTYHQVIKEPMDLRTL NKKMEANEVKSPEEFARLCRLIFENAVMFNVDP SHS  
VHQAAARNLLILFNQKYRDVERQVANLRRVGIQEDGKSKKGDKKRKRGGTGVGGQGSEET  
KSMKRRRLDEAHMALANSQAMTSLIGAAPHSSTDNVTRKEFNIMLGMIQKLQHQQVQ  
TYTALAE LSSDDPGSGVRRSLYDGVDSAGATSSSSKRGGAGGNKKKAKKTEQPKPTEK  
RKPQPEPAIVEDDSTPLTLAEQEF LTTT IPEIHPDNMLGLIQI IREAAKLTGEEEE IDME  
IDQFDTSTQRKLWNYVTKFHKPKRQKQA AKKTKAPSQASKKAAQGRKAQTAKEQSPAAT  
PVAPAEKPKSDSFFSFGNEEDSDSESEGEIGEDEEQTEAQSGAQDTSKDFQLAGLGGDD  
DEDEDKDDADSDHGATSWNISKLEETEKKDGDVDDDWGAAREKAVAATAREEDKKKRE  
EKLKAEAEQQKERNLAKAVAHGEEIKALRQAEIEEEARLQEENERQAE EERQKVRE EERR  
RTQSVEQTVDFAEREIMQOLEQNYEVGGASPS SDFGF

>comp12159\_c0\_seq1; 303 210 1331 LEN=1700; translated  
MPYSSADGHVVANKNNNTNSVSKRLHHKYYTKSQTSP LVRVAMIASTLAVVAGRAVAFSS  
NNARSTFLRRHSNISRQWATKGLCFDAPRYTRGLFMAAMTEADEAADIDIDRTWNLGG LR  
KEVTRLTLRCHKKTGKANQRLQKAQDEVERLTGSDDVSMEELEKCPNLDELEAQVEELRT  
RLAQLNQL EELLADVKGKNVVLPEEIASLAIALEVNDEPPKRQERGP KKKK GPRVMNSFR  
LPYRRFYTANKTEIRVGKQAEDNDELSIKPEHRDGADWWMHASGCPGSHVVIRCHDQNLN  
DEVVMDAAAALAAARQSKCSGGVIKVS LTRARDVKKPPGAKAGLVMLTGNVRTVSVNMKQAQ  
ERLDRLDKTVLVN

>comp12160\_c0\_seq1; 681 392 1786 LEN=1999; translated  
MSFSDLGRQAISAFSSPPAAIRGSSRRRKSEGS DVGRFDKHKHHPPTASRRQSDGGAV  
VVSQRDWKTSRGVPRLDHLQCPVTQKNLLGHDQGNDA SLASTSISATSTATHDDDDDE  
YYSSNETESASSIDRHRRTMARDSE RERSRRLPNHYRHGSGEKTSLSGAKQPRQSSSS  
SLSTEIARFQKMVADLESASRAPAVASSPEAMWKSRI LLRSARDAEADLERKLLGDKAQQ  
NHRPGQQALPQTVVAARNNKLARDFRASQQFRSVLQAMELQQR AEVSVLTSSAAAAAG  
DPDGTSTGPTAKAQKLEEDFFDRAMRERNEEVQKISTSMRKVNEIYQDLAGLVDGQQEQI  
DKLEDLNEEVKADTRAGLEEIQHGMWKLCAADHTSVFNSSSSNNNSTLQQQFQGGPHNLG  
GQQAFGLQGGQIDSAPSSGGWPNQAGAGGWSGTAAQSGGWQGN

>comp12160\_c1\_seq1; 420 1 827 LEN=976; translated  
XSSSSNNKDNGRHSLIDLSDDAPLEEGPPPPLDPSDLLTCMMCHHHGGTTTASSPSQH G  
KRSRFDPGASSSSVWKASLQLPSNFESVQESAQDAYQRGHAMVGGIVEQVHEVVANSNLP  
SSPVALQLREVRNRMYCTPQPQDYNNDYCD DDDND DGI EDGDGKGHEANRDWTTSDDG P  
DENNIGKHYFQIEETSNSPSRRRS GNPVRDEDYPRHDQQQKQHRHGRHSKTRHSSSKQ  
VSPEFHKSQYDDYGQERQRDRKTSRSPRVR

>comp12161\_c0\_seq1; 755 152 2245 LEN=2273; translated  
MASRFVWPATQLLSLICIIIGVSESFVPTSTIRGGRI VSSKLLQLPDLPLSVVRSRNQFI  
LRSANKEEIDDEAVDTEASDADEPSATTDQKKKAKKEEWNTSLFPAKMFYPPPEVTIEDG

GVSSDSTDGRTTGFRAGTKKLI RQLSSKKTKNISPSEVYDERKFRLQIRIQGLAAMVGL  
LAGVAVSGFKMGIETVKEVCYTHGIPGLTSGPLVSFVPIFAITTLGGIAVAILASLGSFP  
PGVRGEIDEVDDASLAFFDELHYQDEDDSVSEDTWEKKMERFNPLYAFGFVRKAFASIFT  
LGTGCSLGPPEGPSVEVAMAMSRVCMFLFPETTNVGGLTEDNLDGNSSNAVSYKYSKEDV  
QARVRNRLLLLSCGAAAGVSAGFNAPLAGVFFALEVVQAALPSYTI PQLP SGVANDDSSK  
IIELEQESLSAEPSSITAILIASVVSGLLARVLLGNELALSVISYEIKTPLLELPLYLLL  
GAMSGLVAVTFSQSAKLAKRTFDGEAGPGPVKEAFGSLPSFSRPILGALTCGIVSIFRPE  
VLFFGYETLNGLLSNNTIPTLTLTLLGAKIFTTAVSAGSGLVGGTFAPSLFLGGMCGAS  
FHNIVASIFQAFDSAGVGS SHVFFPGIVFQLADVPAYAMVGAASTLAALFRAPLTASLLL  
FELTRNYDILIPLLASAGVGSLSVSDIVESKLEARNYK

>comp12162\_c0\_seq1; 286 1 1405 LEN=1685; translated  
XSYKRGIVFAVRTAQHNQQHTSIQHTVRI IAVTMIPARSLGFAMAARIAVFFVLVSTHLVG  
VVIAGSSNRGMGPWGVSVVGPNNRYESISSRSLWNPAPNGRTTTSKEIGIRKNPELSSPML  
LHGVRGGYESSRSTNPSSTFVRVVGTTIAQALISAGRIVLPTLAGALVAIKFYR  
ALPIDAITAQIGLVYCFLLGGYYPTFFSTLQAARYCGLDVMLEAVGQLTDEAIKVVDIEIER  
TDFWDDVDREPTAREVFLRKANIVLKTVPVRINQATAALYTTWLGVSTVLRREYARTIS  
LSLTLADGLERAAEVVLVPALNVLTSPDYRKWVPAVIGWSAKAAAMRLVWRIERILTAST  
SALAGGAMF SRSVSMVRKHREKKT LAIENKPHNSSEYDEEEDSEDEYEPPIGENVVG  
AVGGLGFYTQMECQYKKA FSEVFPPLSLVTWPFDLAERWIQWYITSY

>comp12163\_c0\_seq1; 818 83 2431 LEN=2549; translated  
MSLATSGGIGAGAGAVSMASAHAGAVAMPVQPTPPPASDIPLGTTAAPANLSALGAD  
LVDKSQQLSLRQAKDLAEMP IVAIDLYSNEPIVASFPKVKDGPDELMPELVGRMNNKV  
AMKTSEAAHKTFRKWLSKSKGYEDLQADVFTKLDDKSAVVVQSPELWMGLRRLEKGPDYL  
KKMVCDDSNTPAFAEASQGVGMTLANGTLDGVSPEGDDFDRVVCKVRLHESK KALT  
PEEILQLLL NQAQYHVS RKANAEEMENIISYPCAIPVPAPYCNDQSVEAILDATNGTGM  
IFQRSVCALAGALLPGTEQKPNMVMQEIDTILQERKKAYQLEQIKNPDATFNDSTLLLLLT  
GVTKDTTECTAIEMSSKGTGKYACPYGNFKVICSVSYRHEKPE SILNKCF AELFETLDHV  
APEAPTPIGMVSYGSTSEQKNIQVKWDLKKGLETWEEIPHFSTKLDCVASGAALLAGVS  
HGRLVNFVQLPNKKKPKPQMALQTMNVAPVAVGVM TNYHAGKAGKWNPVKTI FDFDRRVP  
AGPYSLELSAAECAIRREGKVS DKDEEKFYKAVKDKEAAKHIPEREQAALNRLQIVQKF  
TRDGEWISIGDVMSPLVILEKDEEKTACEKVSLELSLGVSLITQTLVGDRQSVVQATKS  
ARMSAIQWYIGVAFAILFFGGFLFKSWNDERILERDTRRL LAYYKHVLP GSMLDGDENNA  
RYVAYKYRNKKEKLWRGLEKKYDIPVLQED EWEGWSENGDEDEDHEDLDTNEDTDEKEQ  
EL

>comp12164\_c0\_seq2; 416 366 1394 LEN=1861; translated  
MTAPTRTRMSLSAVATVACLWFFAVVVEAGIATMGLQRDKMPVGIDDVLHSFERARKLQE  
VEMQEF LVDQGEKEEDHMHEHDHEHEGLEEGDHEHDQSEIVSIQLDGLFAATPDVNAVVE  
QMDGNATTTESNTTFVDANIT TADDGDLEADGSDFFEVNEEMEILDEANQQIALETVVTE  
ARLDDEAASSIVVGTIT TGPGRGREDAAPNLEPTEISFMIMMEEF RYSNGAETIEQISIG  
TKFGFSGRIVTKAEELGVASGTCTVTS DIKKELSYCEIYHKIETDNFGGYGSVMVAGTAD  
EVGGRFLVTGTGGSLQSTNQGYAMFQFDPAGNPVVYVLLKLF

>comp12165\_c0\_seq1; 376 276 1561 LEN=2735; minus strand; translated  
MNPEHITGTVA AEVIGNNANCSG SVCMMSLSNHHEKTTGIDDSSCYLGN SKNRANEDHR  
AVITEVKENDDK EGQYPPKTKGMK KHRVSGTDAMMEKTNKVASSLKDAMEELDRIWDVDD  
DDNSCASSLSSFDDEDHEKQMQNVESLPSSPSRNRVRQTAALLVRVFSNELYDPAVQALAE  
HEELRSEAINLTHQLEISQREVKRLKGSELRSKESI QVSIVSDVVLIRFASQSIISQRFF  
VFSHSNYXIHFNHRKTNNNECSQNL LKAVDRSTEEAKDSSQAKLVEAKLRADLLQTRKER  
DDLHHESMVSKRSLELVTNEANSLKQEK SRLQKENIRLEREARSARVLAESLSR SKNANL  
NNGNDEHNAEFYKRKTRDLETHLQGMTARLA EKNQELMELRHCRDRNLSQNRLEALRADK  
ILETRMLL

>comp12165\_c0\_seq2; 387 276 1576 LEN=1665; minus strand; translated  
MNPEHITGTVA AEVIGNNANCSG SVCMMSLSNHHEKTTGIDDSSCYLGN SKNRANEDHR  
AVITEVKENDDK EGQYPPKTKGMK KHRVSGTDAMMEKTNKVASSLKDAMEELDRIWDVDD  
DDNSCASSLSSFDDEDHEKQMQNVESLPSSPSRNRVRQTAALLVRVFSNELYDPAVQALAE  
HEELRSEAINLTHQLEISQREVKRLKGSELRSKESI QVSIVSDVVLIRFASQSIISQRFF  
VFSHSNYXIHFNHRKTNNNECSQNL LKAVDRSTEEAKDSSQAKLVEAKLRADLLQTRKER  
DDLHHESMVSKRSLELVTNEANSLKQEK SRLQKENIRLEREARSARVLAESLSR SKNANL  
NNGNDEHNAEFYKRKTRDLETHLQGMTARLA EKNQELMELRHCRDRNLSQNRLEALRAGK  
KISNKKIRVSNAR

>comp12165\_c0\_seq3; 376 276 1561 LEN=2613; minus strand; translated

MNPEHITGTVAAEVIGNNANCSGSVCMMSLSNHHEKTTGIDDSSCYLGNSKKNRANEDHR  
AVITEVKENDDKEGQYPPKTKGMKHRVSGTDAMMEKTNKVASSLKDAMEELDRIWDVDD  
DDNSCASSLSSFDEDEHEKMQQNVESLPSSPSRNRVRQTAALLVRVFSNELYDPAVQALAE  
HEELRSEAINLTHQLEISQREVKRLKGSELRSKESIQVSIIVSDVVLIRFASQSIISQRF  
VFSHSNYXIHFNHRKTNNECSQNLKAVDRSTEEAKDSSQAKLVEAKLRADLLQTRKER  
DDLHHESMVSKRSLELVTNEANSLKQEKSRLOKENIRLEREARSARVLAESLSRSKKNANL  
NNGNDEHNAEFYKRKTRDLETHLQGMTARLAEKNQELMELRHCRDRNLSQNRLEALRADK  
ILETRML

>comp12165\_c0\_seq4; 376 276 1561 LEN=2523; minus strand; translated  
MNPEHITGTVAAEVIGNNANCSGSVCMMSLSNHHEKTTGIDDSSCYLGNSKKNRANEDHR  
AVITEVKENDDKEGQYPPKTKGMKHRVSGTDAMMEKTNKVASSLKDAMEELDRIWDVDD  
DDNSCASSLSSFDEDEHEKMQQNVESLPSSPSRNRVRQTAALLVRVFSNELYDPAVQALAE  
HEELRSEAINLTHQLEISQREVKRLKGSELRSKESIQVSIIVSDVVLIRFASQSIISQRF  
VFSHSNYXIHFNHRKTNNECSQNLKAVDRSTEEAKDSSQAKLVEAKLRADLLQTRKER  
DDLHHESMVSKRSLELVTNEANSLKQEKSRLOKENIRLEREARSARVLAESLSRSKKNANL  
NNGNDEHNAEFYKRKTRDLETHLQGMTARLAEKNQELMELRHCRDRNLSQNRLEALRADK  
ILETRML

>comp12165\_c0\_seq5; 250 273 956 LEN=1187; minus strand; translated  
MRGSRCSITTFIVFQESTVDHNKYSDGSGKGRSIGRCSAILNWSIGI IKRSIKLVGIA  
SIMFGLFWLRIICSSLASVVDNTEPLKIKASSIDSSASTNSPYVKLCYQSQEKEDKKD  
DDWNEEDYIKRMNKLSSHNTVTSVPNYPKNIAVIHHSRKSRSKAPETRVQIRKRVARQ  
MEEEANQTAPFLKAPPLKKKNETKKQMRARVARQMEEEAANRQKKS  
V

>comp12165\_c0\_seq7; 376 276 1561 LEN=2401; minus strand; translated  
MNPEHITGTVAAEVIGNNANCSGSVCMMSLSNHHEKTTGIDDSSCYLGNSKKNRANEDHR  
AVITEVKENDDKEGQYPPKTKGMKHRVSGTDAMMEKTNKVASSLKDAMEELDRIWDVDD  
DDNSCASSLSSFDEDEHEKMQQNVESLPSSPSRNRVRQTAALLVRVFSNELYDPAVQALAE  
HEELRSEAINLTHQLEISQREVKRLKGSELRSKESIQVSIIVSDVVLIRFASQSIISQRF  
VFSHSNYXIHFNHRKTNNECSQNLKAVDRSTEEAKDSSQAKLVEAKLRADLLQTRKER  
DDLHHESMVSKRSLELVTNEANSLKQEKSRLOKENIRLEREARSARVLAESLSRSKKNANL  
NNGNDEHNAEFYKRKTRDLETHLQGMTARLAEKNQELMELRHCRDRNLSQNRLEALRADK  
ILETRML

>comp12166\_c0\_seq1; 189 1 685 LEN=785; translated  
XLI IHRVTGTSCLTRSDTVSGNKHPSRRHNIAAGKRKLENGSETDIPQPHPSIHPKMVN  
IIAPYEEDETSGNKPSASLSGTSKPTLPAESKRRSKKEAVFNGRTQGPKFGLLQWQRL  
VRSRKPNTNFRKDIPWEEISRHNKVHGDGMMVNLGIVYDIGPYLPYHPGGIDIFTKTNLLG  
ADGTFKAFKHPVWSIEGFIGTLAIGTVAADIPPSLEEDEENSHSDGG

>comp12167\_c0\_seq1; 350 1 1273 LEN=2403; translated  
XIGREIGKEKKIAGHEKDRSGDRNRCQSATRTNDYRNTSIKRRSSLAKKRXAMNEPRRES  
GAAGVDDLNLSSLLHILVHSGYVGTDLGRLSATNSAVNRVNDGNIWASVYKQMYQNYE  
MTHVIPKEVIDKREYRWLVRKFLKNAVSEAPPVPLLPAPHTEDDLVLFGELSYNPDKNN  
SAAHKVERRFSITGETLRPLLDGMLDTTFSKPIVVGDAEIRRLNSIQLMQYPDRVLVVP  
AACHLKSIELRVLLRLRDMKSCCVYEPNNTERNFDAYPMLKPLDRAMDLTDFRNLTIK  
LDFQTDIIPGCINLFDGAAAYHSPERDFETKGLPLQESATANSITIRFPYLFSSIIASATVS  
VSLDKKILITGCSLEARKTPLDDDWWSPMFYEEESVGIKSKTFPNNGVTVGHILSEMYCPD  
DSDE

>comp12168\_c0\_seq1; 314 155 772 LEN=881; translated  
MGKRQCVGFDKFGCLTTLPSPDGGNGVLGGDGPNGDGVWPVGFTKNAVALLRETLNAF  
LQSVGEELAEVDSPISEPDVVRAIGSIDCGGDSPEGSNPTGGAGALVLEEIVSRARDLL  
VLQAEQQRREEGEKAADCDCGNVRPPGGPRTDAGAAPGKTRKRPKRPRITAEMAEQER  
LLKASKRALDEAQQGGGRDAFRVELS

>comp12170\_c0\_seq1; 276 368 1636 LEN=1820; translated  
MRETFKELMIARPPTRDEEKQSILKHIFVKASSRSTTLHLDDLWKRIQRQSQMHRDGTK  
FILRQFLRENAQTRNFVRMONTLRGMKNEQSSVKQELNKQREVAESYKCELLVAREKIS  
EKDRQLAHFRKIFESRTPQSPSSIVSGSRGRRSIGSSGQESSLLLGHDRYIAPRRPRRV  
SDQYDRGTTTTGVENLQRSSSQHDYRRAGQYTPPNPYEQVGSRTSGSII PPPPINPN  
KRSSEALSQQSPNRPVNNNNFAVRNPYQKTMGPSAPYHSHPSDSTGHHSAMTLSQPPL  
HRQRYSTGSSGESVSSRRSNGSGGGRIRNITAATGYFFSGGAPAPSVDAGRKRPLSPG  
GAFSGNRGSGSYRPNSCYRQQHRASGGPPSYHQRRYQDEQPQFLPRPRSQSQSGERDGY  
RR

>comp12171\_c0\_seq1; 797 158 1417 LEN=1615; translated

MPPSSSMSCPYNGWVGTLATFAAGGLAAAAYFHHKLLASKATDFPATVGTKTSSEPTPID  
YPEYDYKNDPKGSFTKICDLLIEEILQDLPANYELPKRETEWLRKMLEHTVKGKMNRL  
MVVESGVAIIGESKITNEKLCQLAVLGWAI EWLQAWLLVADDIMDSSVTRRGQPCWYKTL  
GDAWYIAINDAVTIEAFCFKILKRHFHGDGLQLKLVLDLMMETTLQTELGQLSDTLCDVL  
TLKDLTPERWGLIVKYKTSFYFSYLSVAFAMTLAGVRDQAAAYDAARDILIEMGVYFQAQD  
DFLDCYATPEVLGKIGTDIADKKCGWLF TKAYHELASDEQKAFLEHYGKCEVGSPEELK  
IKELYTELGLKETIATYEQNSYDKIMAMKNSAAGETLKAAGVPWTVFEKFLAKVYKRSH  
>comp12172\_c0\_seq1; 332 160 1254 LEN=1594; translated  
MSPFKPHWDLYPKSYVAPKTSFPLIDHLDGDLTKDVWKNVSFSDVFD DIRGSVDAPSEDR  
PNSNCRTRFKAMWDNSHLYIGAVLESDFETQAHFTERNSPIYQKSDFEVFDVDFGSGHN  
YKELEVNPINTVWNLMLDRPYDDDGHEFSGRIAKPGDDRYEVSHQKTATKLLLEGLNDS  
NGSATWSVEVALSFEDLLAHTDASQKGVIPGVDSALRINF SRVEKQGAINWTWQPQVVD  
PPNQRYSGFVAMHLPDAWGYMVFGEELMTPPGNGDDTRPKSNTLEPATPRIQRDP SWPA  
RVAAMNVYYAQRHYFNQNDKNYATSIDSLEGFVDDLI VTPFQITIKSTPGGYKATVRGGK  
HYVWV  
>comp12172\_c0\_seq2; 378 160 1323 LEN=1764; translated  
MSPFKPHWDLYPKSYVAPKTSFPLIDHLDGDLTKDVWKNVSFSDVFD DIRGSVDAPSEDR  
PNSNCRTRFKAMWDNSHLYIGAVLESDFETQAHFTERNSPIYQKSDFEVFDVDFGSGHN  
YKELEVNPINTVWNLMLDRPYDDDGHEFSGRIAKPGDDRYEVSHQKTATKLLLEGLNDS  
NGSATWSVEVALSFEDLLAHTDASQKGVIPGVDSALRINF SRVEKQGAINWTWQPQVVD  
PPNQRYSGFVAMHLPDAWGYMVFGEELMTPPGNGDDTRPKSNTLEPATPRIQRDP SWPA  
RVAAMNVYYAQRHYFNQNDKNYATSIDSLEGFVDDLI VTPFQITIKSTPGGYKATVRGGK  
HYGKDVVITNNRFLQVVDPSGKRVDTA  
>comp12173\_c0\_seq1; 378 414 1244 LEN=1704; translated  
MGGADADVDMNAGASEERNGNHTTDKSAGANPFQGTHPVAVPKSLSPLRQAMAQRRRHPH  
KHNHKHSPKKEGKNKHKHKPPHVGGRVGGRRQRRLWQLPESSII EYTKWIQDKPEADRT  
SEERFLWKCMI RSLGVVFPFGKEKANNGRNGGRKHRQERIREFVDRLETKEPAERTANEEL  
FVKMYHKRRSQRKAARKAQRKQHQQQASAEPVALSWMRNGSSNSACASETSKNRPNGSDN  
GSKKGLEPMASLESRESMMKMLSSDKLQVRFAD  
>comp12174\_c0\_seq1; 375 156 870 LEN=1959; minus strand; translated  
MYWYIQLNVDGQQRSYKNKLSLEEGQRRDMKHHDLQSGDMLIPLPPYYVPLRPSSSSSQ  
LWCGPQGFREIVDLFVPVYNKFTVNNNDNDIVEVPCYPSGKPKGKKREADAVCAIRLVLYW  
FRTRGSVARSMGMAFGLTSTVMYKWLKFSWRVMLVALHKKHPDAMVSVPTNEEV DKYVKAI  
GDKYPQLGEQHVWGAVDALKQVIEASGDWYKQRSFYNAWKENTYINSVFAFAPDGR IW  
>comp12174\_c0\_seq2; 375 156 870 LEN=2047; minus strand; translated  
MYWYIQLNVDGQQRSYKNKLSLEEGQRRDMKHHDLQSGDMLIPLPPYYVPLRPSSSSSQ  
LWCGPQGFREIVDLFVPVYNKFTVNNNDNDIVEVPCYPSGKPKGKKREADAVCAIRLVLYW  
FRTRGSVARSMGMAFGLTSTVMYKWLKFSWRVMLVALHKKHPDAMVSVPTNEEV DKYVKAI  
GDKYPQLGEQHVWGAVDALKQVIEASGDWYKQRSFYNAWKENTYINSVFAFAPDGR IW  
>comp12174\_c0\_seq3; 726 46 3294 LEN=4579; translated  
MVAFDRPVGASPDAKEIEYICALHQSGETVRS DGSIRAEDIQVYLC SRFGIDVGLDEVRO  
TILRGMGSSNEDEVLDLMEVTAILLIPLLLKAAAYVEGSYNDDFGAFNNKGNDESETPSV  
ASAAADNCSTIPLPQGILSPPADLLKVCADIILHDVLVGCRKDSGAETEAITTDFIRN IL  
LMYGEDELAADQTLLEEMVEACRFESIEGRVCHDEETANKSNACATNTAFDAKAFGRGLT  
SDVRLYDLRNETRQSSIMEDIYFHNRI RFEDAHDGDDTTRIPKNEKSIKNLNASLLVKRR  
GSITAKNTIGDPTKIVPSSLEVDTD TGVEETLPSMMNIHEVKRIY TAPAIDILAGTYRSK  
VLIVCLWCATVFGFLSLTWIRNPLGIDRIDAKCNELYGEQGSITANAFGMFCHAGASVLN  
WLF CFAMFCVFGIS IIGMASVGNFNMEQPRWYLPFFGCVAI LLLVFPYLYLQPEYSTIRSD  
SREKTYMPRYTALFLLCITLYLHLTHVVTI WFGIVDFGKRKIGRIMGFSALKQELQIKQ  
SAAFKNLLATNAMDIHRCTSSPKVFLTRFGHGLSAYSLHGTRYVKAGGLFWCWQKFRDQ  
TIFEEEGMFYSARLIASNL SQWFVSFFVLVVGSNFFVATVNNWKSADARAERS SFIGNYL  
AKRLDAKWNSTTQKEALALVHAVVKS VNATGAFCDSSAIPDPSEICKLGIRGDWTCEEAN  
NTTEALCSLLYNPALED TNPDLYGALLKSGGLEGAVSDFRNAV MASITSIGDSSLPVEQW  
MVVVPLIVGIIVAFITSI RSLLYIPSVTTTTMIQLRTGVIPALGNPDFDKRLKPDNITL  
LTGASFVWGC FVSAILSGAVVAFVFLVFWQETS YAAFRIIVLGVGFVIFMLIRALLGRCC  
RVAFFNGLYRKKPAHANIAMLALEWANYFFTIFIIIVRMIKMI IATTASLGRIDRPFLAK  
GRGRKLDKLPQVHTCDLLAHEAHRHPFVETLGLVYLMKFRYSESFCHRAGSAWRLIFVYA  
LMPWLHKHRIRGIGQRDTTYQKEKNEPYMTVP SDGVSGNDGSAIDENSFRDRSGKTRMC  
RI  
>comp12174\_c0\_seq4; 681 46 3382 LEN=4667; translated



MVAFDRPVGASPAKEIEYICALHQSGETVRSDSIRAEDIQVYLCSRFGIDVGLDEVRO  
TILRGMGSSNEDEVLDLMEVTAILLIPLLLKAAYVEGSYNDDFGAFNNKGNDESETPSV  
ASAAADNCSTIPLPQGILSPPADLLKVCADIILHDVLVGCCKDSGAETEAITTDFIRNIL  
LMYGEDELAADQTLLEEMVEACRFESIEGRVCHDEETANKSNACATNTAFDAKAFGRGLT  
SDVRLYDLRNETRQSSIMEDIYFHNRIREFEDAHDGDDTTRIPKNEKSIKLNNASLLVKRR  
GSITAKNTIGDPTKIVPSSLEVDTDTGVETTLPSSMNIHEVKRIYTAPAIDILAGTYRSK  
VLIVCLWCATVFGFLSLTWIRNPLGIDRIDAKCNELYGEQGSITANAFGMFCHAGASVLN  
WLF CFAMFCVFGISIIIGMASVGNFNMEQPRWYLPFFGCVAILLLVFPPLYLQPEYSTIRSD  
SREKTYMPRYTALFLLCITLYLHLTHVVTIWFQIVDFGKRKIGRIMGFSALKQELQIKQ  
SAAFKNLLLATNAMDIHRCTSSPKVFLTRFGHLSAYSLHGTRYVKAGGLFWCWQKFRDQ  
TIFEEEGMFYSARLIASNL SQWFVSFFVLVVGSNFFVATVNNWKSADARAERSSFIGNYL  
AKRLDAKWNSTTQKEALALVHAVKSVNATGAFCDSSAIPDPSEICKLGIRGDWTCEEA  
NTTEALCSLLYNPALEDTNPDLYGALLKGSGLGAVSDFRNVAMASITSIGDSLLEVEQW  
MVVPLIVGIIIVAFITSIRCSLLYIPSVTTTTMIQLRTGVIPALGNPDFDKCRLKPDNITL  
LTGASFWGCFVSAILSGAVVAFLVFLVWQETSAAAFRIIVLGVGFVIFMLIRALLGRCC  
RVAFFNGLYRKKPAHANIAMLALEWANYFFTIFIIIVAWYVLAARPEPFFISTQIDQLPQ  
IYFVDFLQIKMIIATTASLGRIDRPFLAKGRGRKLDKLPQVHTCDLLAHEAHRHPFVETL  
GLVYLMKFRYSESFCHRAGSAWRLIFVYALMPWLHKHRIRGIGQRDTTYQKEKNEPYMTV  
PSDGVSGNDGSAIDENSFRDRSGKGTMCRI

>comp12175\_c0\_seq1; 300 1 800 LEN=846; translated  
XQQQQQQRKKKVEWSSDLSPIGPQPVENRNTFWDPDSEGHMLNYFLDSNSPPFGPSHLSS  
NTLSNPSRAAPGDRSMVSDRILQHPFHSGLQEASSMSSANSILRVRQGPSPLGPNKNHY  
NLGHSQVHGEMDNDLRQPPPTPVIQHYFPSSSHKPHQNLQEIILGHLPKLLGII SVNRYN  
TFPSTNNSIVNNNNNGNNNDNIGNNNRARKSGKKARRRDLQRRRELRRQREAAAMRVGLNG  
GGDDPVDALAMQRIIEEQIAAENNG

>comp12176\_c0\_seq1; 226 523 1495 LEN=3839; translated  
MKVREVAKNYQRWKDRRKEQYGKLSRYKSRRKVHYQRWNLTRNQVWIKIQKVLVEEYSK  
KEWFDELGRPLTARDSTGRFVNPWQSQSTNGVHSLTTILRWRWQRFMRENISFLPTFKLP  
TIQSGETNLISKPSPLLTHEVPPLPVADHSNLQFTWIGHSTSLFQIRKTFTILTDPIFSK  
RASPFSTFLGVERELPPAYTIEELTNHKVNNGSDRDRNFVCCITHDHYDHMDTESVKNL  
RDLISLWVVP CGIGNWLAETCSIRRSKIIIELEWWEQLHLAKHMGDVVVVHDHDSYDGD  
DVLTIIPVARAAIGVDVRFSTETR

>comp12176\_c0\_seq2; 241 523 1461 LEN=3665; translated  
MKVREVAKNYQRWKDRRKEQYGKLSRYKSRRKVHYQRWNLTRNQVWIKIQKVLVEEYSK  
KEWFDELGRPLTARDSTGRFVNPWQSQSTNGVHSLTTILRWRWQRFMRENISFLPTFKLP  
TIQSGETNLISKPSPLLTHEVPPLPVADHSNLQFTWIGHSTSLFQIRKTFTILTDPIFSK  
RASPFSTFLGVERELPPAYTIEELTNHKVNNGSDRDRNFVCCITHDHYDHMDTESVKNL  
RDLISLWVVP CGIGNWLAETCSIRRSKIIIELEWWEQLHLAKHMGDVVVVHDHDSYDGD  
DVLTIITCCPSSHW

>comp12176\_c0\_seq3; 241 523 1461 LEN=3764; translated  
MKVREVAKNYQRWKDRRKEQYGKLSRYKSRRKVHYQRWNLTRNQVWIKIQKVLVEEYSK  
KEWFDELGRPLTARDSTGRFVNPWQSQSTNGVHSLTTILRWRWQRFMRENISFLPTFKLP  
TIQSGETNLISKPSPLLTHEVPPLPVADHSNLQFTWIGHSTSLFQIRKTFTILTDPIFSK  
RASPFSTFLGVERELPPAYTIEELTNHKVNNGSDRDRNFVCCITHDHYDHMDTESVKNL  
RDLISLWVVP CGIGNWLAETCSIRRSKIIIELEWWEQLHLAKHMGDVVVVHDHDSYDGD  
DVLTIITCCPSSHW

>comp12176\_c0\_seq4; 226 523 1495 LEN=3749; translated  
MKVREVAKNYQRWKDRRKEQYGKLSRYKSRRKVHYQRWNLTRNQVWIKIQKVLVEEYSK  
KEWFDELGRPLTARDSTGRFVNPWQSQSTNGVHSLTTILRWRWQRFMRENISFLPTFKLP  
TIQSGETNLISKPSPLLTHEVPPLPVADHSNLQFTWIGHSTSLFQIRKTFTILTDPIFSK  
RASPFSTFLGVERELPPAYTIEELTNHKVNNGSDRDRNFVCCITHDHYDHMDTESVKNL  
RDLISLWVVP CGIGNWLAETCSIRRSKIIIELEWWEQLHLAKHMGDVVVVHDHDSYDGD  
DVLTIIPVARAAIGVDVRFSTETR

>comp12177\_c0\_seq1; 221 1 909 LEN=1365; translated  
RIFTTTRQDELSMTYLWSSNNSKIVTTLITCLHNCDKQTNQQIYQTEMAVLRKPPAVTK  
SSRRKMKPRLPIRQLAIVCSVYLWLAYTITITIPGLKDRIVVSIKKRLNLLPEGILKNA  
YAQAKPDSTGMDAFEYRRIPGLIAIDTTSVNNVHGNKEEDVLPQTVAFLPNKNGKLTR  
EISTLHERTLKFRPQLQKYVQISDDGIIGIIPMGTFRLRMGSVEGTIEQSPELRIVSDDN  
IDGGIDFVLGTFWMEHSARFGEDELYVSTTPVGDSNDAATEINRVMVPYLSMRSTRNNF  
EL

>comp12178\_c0\_seq1; 586 1 1688 LEN=1837; translated  
XRTGRFHGPERQTTLPGCVCLREASVPMALGITESTKVPPLFASRRKPTTRTRNQCNRTL  
DPTAAPIDAAGTRPNRRGGWLRRLCPSPARLGVAVAVATAILATDTTAFRHAVPFSVSGGS  
RGLFHKPGLARTTTTTTAAAAGTRPYPFSGISPFRLFFSRVDEGSADRKSYTSEAMRINP  
NLRGCFVSGSDGMSNPLIVEQILELLPPGVQRRRSDPSSVNVLYIGTATYDLLSFRKR  
QTKCFVDLGFVDSLVALADANPPPDRKCAASKLEAADVI VGGGNTLFAVDRWKQLGL  
VPYFRKAMERQCVLTGGSAGAI CWFDSGHSADPD TYVEPMLRKFGE SHPRDNHQDESS  
AYDEGNKKEWKYLRVPGLGFVPGKMICCPHHDRIQSNGLLRADDFDAMLLKRAASLSDRS  
TSRDVVGIGIDHHAAFIVEGSRVYVSLPDEAGSVGSATGAETDSKARFAVRADGTAEGV  
PGVWIKRAGGNSNDEDQPPRVKAAVCPSEGDLAELLGDIFSEDGLCDCEFDSEFDDDE  
NRIALELCRRENPSATSSIESC

>comp12179\_c0\_seq1; 330 317 1777 LEN=2399; translated  
MTTFWRVALVYGFLALFHGLGATRSCRILAVGASGGGSRRSRRRGFYFSLLSQRRHPPR  
DPNPPPTIEDLEEQATNNNEVIDVVLQILGVNGGVVIDRYIPSRWLWNQWYASVFSNA  
MSTTIRNMVASFGLCCLMRRRAIFGDWKVWKYPVSAVAAKAPTEALLRLLDVFGTLWNSL  
LPLTTVVLALFVTQAYNFWISVYHLCRNIQGRMSDIELVLATSVGRKTNGVTHPNLFRPP  
GRGIRRRREASSYTPSAEAFLEDTTHQLRAFHVLFWASQARRFRILLTDRGMSRLVAKGI  
LTQREKELLDLQGVPKTQKHVILLESVALGCREARQTDKKTRRRRVVLEGGNGLEHCLLD  
KICSLRTSCNQITNQIAGRMPLSYVQVQVVLVDFFLVPLAHYKGLGLWAVLSTGILSI  
FYSGLLDLAYDFLDPLMDDKEYKSGKDGNDGDHCAVYFDLAVLIRESTAAHRWINAG  
AKLGRR

>comp12180\_c0\_seq1; 492 88 1413 LEN=1725; translated  
MKFLPLALAAVSTDALLTSPVKNGQKVQVLQRTRVTKDIKMPDPI PVEGQEAALMLMQ  
TGRLYRYNTGPGEESA VICEKEICDYTGFKYCVGLNSCGSALMLLLKTTGLKPGGKVL  
NAFTFGAVPSAIEHANGKAVYVESNKDHVMDVADLELKLKENPDCGHVLI SHMRGKLADM  
DAVKDLCDKYDAILEDAAHSLGVFWQGEHSGHKGVACA ISSQSYKMINSGEGGFLTDD  
PSIAAQ TATIAGAYEGLSVKHTTVPPPEAFKGLSVKHPNYSIRMSNLAAAVIRPQVGTLE  
ERIEKYNRRYMYVVDKLESSSVGKHLVVKLTPGVTRMVHDSIQFNLGEIFTEEMTQDFI  
DECGSHGLPVELFGHKSARNFVNWGFAPAEDPLPQTAEMLSRACDCRMPLMWEDEDFND  
LANVIEESLEAVLAKNKMDAI

>comp12181\_c0\_seq1; 384 1 1483 LEN=1586; translated  
TTTPKIRSFLSAFVFIKMSRPPMSRKTLASIQTNNGSGNENKNKNASDANS SDFHSLC  
FNVNDFQVLARKRLPKDLYEY LASGSDDEQTLAENRKAFSRWFRLRPRVLRPVGNISTKT  
LRFGTGRAKCEVAYPVSMVFVSPAGVHALCDKMGECATARACAKASILFGLSQHSTKSI  
EEVAAATQSRAMPSSTLSPSLKFYQSYILNDRRQTINLIRRAIRAGYQGLFLTVD SVRFG  
YREADARNGFNALPPPHRLVNYDEFDYN SDDINGADNDSKCSSRRL EQTYNSQEKKAW  
DQNSEQMF EQNVSWEDVRWIKREL RNEQEKRMRQKPIPLVIK GILTAEDAVLAVQAGADA  
ILLSNHGGRQLDGLSAIDVLP EVAHAIKTSGIPIWIDGGIRRGTDVLKALALGASAVGI  
GKPIFFALGVGEEAVSHLLSLLQTEFEAAMAICGIERVEDIRSSHVTRHPYPTFIDPIF  
DQVRQARQFSSN

>comp12182\_c0\_seq1; 453 446 1471 LEN=1724; translated  
MGLFSSLDTKALVLGSA AIGLAPFFCFFFQIVFPKPQLLIVSISAGFFYLLAASAASLCW  
YILDPTIGLSNVWAAIVPGVFFQFIFRCLFVTTYHKVENVIEASIEKSEEEEREHQQQAG  
NDRSDDDENVQVAKNKL SLNDAACGIAAGVGFGLHAILMFGSLLASETYDAGVLYQPS  
CPKVP SLMVSALNTFCFFFLDI FWMLFAFFGVRRRVLFPRGGGALSDINPLSRPFGHYFG  
NTRTGGNQALLTILITHFCAAGFTTFNVFYGCIFSLTTLPLVLTIVVAYIFWSGVSKIYM  
PLPHSNVRLSLPASYSYSGSHVGENGLGGDGLD TLERHRNDD

>comp12183\_c0\_seq1; 192 323 868 LEN=1503; translated  
MRPLTEDETKTLFLK LSEYIGKNVEKMINRSDERYCFRLVKDRCYVSESIMKAATS IAR  
DHL LHAGTCIGKFTKSGKFR LHVTALEYLAQYAKHKVWVKQSAEMSFLYGNHVNKQGLAR  
MTESTPQYAGVVVFNMDIPMGFGVAAQSTEH CQSLDASGNVVLHQADIGDYLRGLEDDV  
F

>comp12184\_c0\_seq1; 508 1 1199 LEN=1396; translated  
XKSRTKTLPPKEHNNYFIMFSRLAVLALTCVLAQANVINHSNGDIPMNSKAGRKL VQNR  
RAQNNYNYGNGQQQYGNNGEEVNWDEIDTAYLANYSVKFQGC HHVQQWNDNAADADDIKI  
MTQRLVRFRCPAETCTSATTKGCD SNYGDYIIDMETYVNA YMSNIQNQYMNNGQNNGY  
GNRKLDDR YNVNFEDYLQCSQMDMNNNQRARARQLRELNNQYSSGQYYQYQNDNDVQY  
YVGPYCAQQGGEIRLGVFYDDTCTVAASEGPEIFKMMHNGMSLPYSESSMVSLQCMSCGM  
YGEVNEMCESVYQDAGKCETKMSVYYPNESACSYLEGIK VIRDGDG VIRTSSSTRKSTAAAI  
ATGVFLSAALLLSGYVYYLR TKLGRARINLAASSQNAGL

>comp12185\_c0\_seq2; 433 1 1067 LEN=1201; translated  
XQVDLDSSSSSKWSGAFKSPKFDQFELRNHKLVGVDKNVHIPSFSESPKAFVLFEYL  
RKPDDSGLDYELKWDLQIGNCNDASSTAGAEIPQDNLPSIWQVDDGDKVYYATEQSSGE  
EIMLRPNAAKAGVQVGKVPFELVESGLHCLRIFYEHFGTVVSHLHYEITVTKEGFTTGV  
VDVDSSSASIQAEVKEEVVVTAAVCGVDTSNFAGFKVQEFSCVQTEVGYVISSFKNVV  
CENGAVTKILFHQDGTVDLLTSFDLNAKRFTSVVTTGLIEGDDNQFECTGSSVLEKARRD  
LQASEENAEGFLFAVQIPIAARSDGVDALGIAAPGVASGPLALGTTGAIALAAALL  
>comp12185\_c0\_seq3; 280 638 1276 LEN=1835; translated  
MSYEFNWALNGDGVTPPKRSAFRINKPLDLKVAGLALPKTNPLKVKGKAI AEAGTEALS  
ESFDQFCQEARQSLSDNLFCEPGEHVPGTHAGVRVISNSSALAPSLAYLDRCPKKSPP  
DSMPITCFVLEGHAEFEFGYSIEEIEVPIAPEDGVSFVFDLGYQPKEAKSVATVVVVGKKP  
ELAKVVAGIEASQKALAEDEIERAKSSEEKAE  
>comp12185\_c0\_seq5; 323 155 967 LEN=1526; translated  
MVFVSFFSKAALTTNSKVVGTTVVRALSSVAPAWEGGVPDSVSRVKGKTSAFPNEYPGMS  
YEFNWALNGDGVTPPKRSAFRINKPLDLKVAGLALPKTNPLKVKGKAI AEAGTEALS  
FDQFCQEARQSLSDNLFCEPGEHVPGTHAGVRVISNSSALAPSLAYLDRCPKKSPPDS  
MPITCFVLEGHAEFEFGYSIEEIEVPIAPEDGVSFVFDLGYQPKEAKSVATVVVVGKKPEL  
AKVVAGIEASQKALAEDEIERAKSSEEKAE  
>comp12186\_c0\_seq1; 534 1 1941 LEN=2262; translated  
HGSIDGKNRHNDVAPAAATTRKRTRTRTRMHSHTTCEDDGDEDHRSGSASGGGKSAWYPT  
TLPHTRKGNVGHRLHRRRIIPLLAMGIVVLVNAACLRSFAPQSYDSVVEAGAEARAAPRG  
RLFYCGYKFLVHEHVPFGEYFVGNKPWALEDSGSEDTDTNHNDILVVGLWGPSCNDDEG  
DERTSFSGKILYVNGESHGNPVSNAWWEWEDNENGNNGGSSNSNSTDARHRLDKIFQLG  
PYPVRQDDLSPKDRFYNEHSLGVFQMAVALLGNVYLPKLSVELDPADVNPFLLELKDEEE  
SATPQKTNAVFSFDGLKQLAEGNGYGEYKPYERIPAAVYVSRNCVGFQRQSTAEALLAKTF  
PGPNAGVQGGERDQSGDRHRGLLDGSEVPDNDFAGLHARAVALNRKNQSTGLLDDR IKQH  
LQAI AERETSQDEVDPDSGVP HSKQEDTDSVDALSEHRRETDETSFLHYGGECTVDGGIPV  
PEDALELEWRNNDRTSFRNTNYLTIYTRYKYCLVMENTLQEGYVTEKLLYGLLGGCLPIYY  
GSREVYDIFRADS FVYLD PYNPETGLAEIERLEQNPDEYARRTDRSRPLLKAGKDGTTLD  
TLDRYFSLLPDIDGTGKLCRELHERMGLPVPEGLAPEAPRTKSWVWW  
>comp12187\_c0\_seq1; 365 753 2140 LEN=2282; translated  
MLNGDFSFLKNSRDIAHKDQPIRDGNIHISAPHIYGSVLEALELKKDAGLSVLNAGSGTG  
YFTCITASILGLQSIHYCVEIHEDVISHSREAI AAWRDTQSANQELSNIDIHGNALELD  
INRGEALGFDR IYIGAAIEKENVHMFKRMLKPGGILVGPVGDDELVKIIRSLCDSSEGSQ  
QFTTKVISGVRFAPLLNGPSMHTIIPARIWNPSTHTLYPDTFRGACNQLLLCSNASRIQP  
VKICPPRKVNAASMLPKALWAEILSFTHRNFWDVPTNEVDFLHQRLQEEQANVERANEAK  
REIESRLRHVERERDIYKILARTLRSHLHTSLLGGNSISDEAIEETAALLFDERESLSV  
FSLGNTLRRMVQGINDEEMGDDGDDDFEFLEESDYDDDNMSETMDDVEGNSDEEDRSD  
NESLSATSNYRNQNP SLAAAPVVSIVGAQIRKVSSEEDLPV  
>comp12187\_c0\_seq2; 230 310 918 LEN=959; translated  
MAWRSSGTTNDEMVDNLKRFRVITSPQVEAGFRNVERRLFPVKNSRDIAHKDQPIRDGNI  
HISAPHIYGSVLEALELKKDAGLSVLNAGSGTGYFTCITASILGLQSIHYCVEIHEDVIS  
HSREAI AAWRDTQSANQELSNIDIHGNALELDINRGEALGFDR IYIGAAIEKENVHMF  
KRMLKPGGILVGPGLRMLR LIF  
>comp12187\_c0\_seq3; 218 812 1381 LEN=1422; translated  
MAYRNRISYFSNPLIFSSSCIYLFQSRPKNSRDIAHKDQPIRDGNIHISAPHIYGSVLE  
ALELKKDAGLSVLNAGSGTGYFTCITASILGLQSIHYCVEIHEDVISHSREAI AAWRDTQ  
SANQELSNIDIHGNALELDINRGEALGFDR IYIGAAIEKENVHMFKRMLKPGGILVGP  
GKLRMLR LIF  
>comp12187\_c0\_seq4; 140 753 1261 LEN=1302; translated  
MLNGDFSFLKNSRDIAHKDQPIRDGNIHISAPHIYGSVLEALELKKDAGLSVLNAGSGTG  
YFTCITASILGLQSIHYCVEIHEDVISHSREAI AAWRDTQSANQELSNIDIHGNALELD  
INRGEALGFDR IYIGAAIEKENVHMFKRMLKPGGILVGPGLRMLR LIF  
>comp12187\_c0\_seq5; 478 310 1917 LEN=2059; translated  
MAWRSSGTTNDEMVDNLKRFRVITSPQVEAGFRNVERRLFPKVNQCPTPNSLFMAYRNR  
SYFSNPLIFSSSCIYLFQSRPKNSRDIAHKDQPIRDGNIHISAPHIYGSVLEALELKKD  
AGLSVLNAGSGTGYFTCITASILGLQSIHYCVEIHEDVISHSREAI AAWRDTQSANQELS  
NIDIHGNALELDINRGEALGFDR IYIGAAIEKENVHMFKRMLKPGGILVGPVGDDELVK  
IIRSLCDSSEGSQQFTTKVISGVRFAPLLNGPSMHTIIPARIWNPSTHTLYPDTFRGACN  
QLLLCSNASRIQPVKICPPRKVNAASMLPKALWAEILSFTHRNFWDVPTNEVDFLHQRLQ

EEQANVERANEAKREIESRLRHVERERDIYKILARTLRSHLHTSLLGGNSISDEAIEETA  
AALLFDERESLSVFLGNTLRRMVQGINDEEMGDDGDDDFEFLEEEESDYDDDNMSETMDD  
VEGNSDEEDRSDDNESLSATS SNYRNQNPSLAAAPVVSIVGAQIRKVSVSEEDLPV  
>comp12187\_c0\_seq6; 253 310 1038 LEN=1079; translated  
MAWRSSGTTNDEMVDNLKRFRVITSPQVEAGFRNVERRLFPVKVNCQTPNSLPMAYRNRI  
SYFSNPLIFSSSCIYLFQSRPKNSRDIAHKDQPIRDGNIHISAPHIYGSVLEALELKKD  
AGLSVLNAGSGTGYFTCITASILGLQSIHYCVEIHEDVISHSREAIAAWRDTQSANQELS  
NIDI IHGNALELDINRGEALGFDRYIGAAIEKENVHMFKRMLKPGGILVGPGLRMRL  
IF  
>comp12187\_c0\_seq7; 455 310 1797 LEN=1939; translated  
MAWRSSGTTNDEMVDNLKRFRVITSPQVEAGFRNVERRLFPKNSRDIAHKDQPIRDGNI  
HISAPHIYGSVLEALELKKDAGLSVLNAGSGTGYFTCITASILGLQSIHYCVEIHEDVIS  
HSREAIAAWRDTQSANQELSNIDI IHGNALELDINRGEALGFDRYIGAAIEKENVHMF  
KRMLKPGGILVGPVGDDELVKIIRSLCDSSEGSQQFTTKVISGVRFAPLLNGPSMHTIIPA  
RIWNPSTHTLYPDTFRGACNQLLCSNASRIQPVKICPPRKVNAASMLPKALWAEILSFT  
HRNWFVPTNEVDLHQLQEEQANVERANEAKREIESRLRHVERERDIYKILARTLRSH  
LHTSLLGGNSISDEAIEETAALLFDERESLSVFLGNTLRRMVQGINDEEMGDDGDDDF  
EFLEEEESDYDDDNMSETMDDVEGNSDEEDRSDDNESLSATS SNYRNQNPSLAAAPVVSIVG  
AQIRKVSVSEEDLPV  
>comp12187\_c0\_seq8; 443 812 2260 LEN=2402; translated  
MAYRNRI SYFSNPLIFSSSCIYLFQSRPKNSRDIAHKDQPIRDGNIHISAPHIYGSVLE  
ALELKKDAGLSVLNAGSGTGYFTCITASILGLQSIHYCVEIHEDVISHSREAIAAWRDTQ  
SANQELSNIDI IHGNALELDINRGEALGFDRYIGAAIEKENVHMFKRMLKPGGILVGP  
VGDDELVKIIRSLCDSSEGSQQFTTKVISGVRFAPLLNGPSMHTIIPARIWNPSTHTLYP  
D TFRGACNQLLCSNASRIQPVKICPPRKVNAASMLPKALWAEILSFTHRNWFVPTNEVD  
FLHQLQEEQANVERANEAKREIESRLRHVERERDIYKILARTLRSHLHTSLLGGNSISD  
EAIEETAALLFDERESLSVFLGNTLRRMVQGINDEEMGDDGDDDFEFLEEEESDYDDDN  
MSETMDDVEGNSDEEDRSDDNESLSATS SNYRNQNPSLAAAPVVSIVGAQIRKVSVSEEDL  
PV  
>comp12188\_c0\_seq1; 382 181 1203 LEN=1736; translated  
MTSCHDSSSSLDQNDGRSIAKGGVTTFFPWKLHIMLDTMETGEKSIVCWQPHGRAFM  
VHKPKDFVQEVMPHFFNQTKYASFQRQLNLYGFSRLTHGPDKGAYYHNCFVRGKRHLCKG  
MIRQKIKGTKVRKSLSPEDPNFYTMSSTDIFISPGKVRQEKLENACQSSSVQSCNDAVH  
TTTSSSSSEESPVSYSIAPLDPFQPKPNALSASKHSGRINAARKSNSSNCELLSNNIRP  
LSTSRIVSPQHCONDQWDVLEEVKGGDLLFFEGQPFYRLEHFEEVPGNQLCTAKRVHYTQ  
SCESANNTDGFQDRFSKLIFNMDSRAFDNDLLQKTSCP  
>comp12188\_c0\_seq2; 334 521 1423 LEN=1956; translated  
MDETGEKSIVCWQPHGRAFMVHKPKDFVQEVMPHFFNQTKYASFQRQLNLYGFSRLTHG  
DKGAYYHNCFVRGKRHLCKGMIRQKIKGTKVRKSLSPEDPNFYTMSSTDIFISPGKVRQ  
EKLENACQSSSVQSCNDAVHTTTSSSSSEESPVSYSIAPLDPFQPKPNALSASKHSGRI  
NAARKSNSSNCELLSNNIRPLSTSRIVSPQHCONDQWDVLEEVKGGDLLFFEGQPFYRLE  
HFEEVPGNQLCTAKRVHYTQSCESANNTDGFQDRFSKLIFNMDSRAFDNDLLQKTSCP  
>comp12189\_c0\_seq1; 499 349 1800 LEN=1999; translated  
MADQSPPIVVI IAGPTAAGKSDVAARICAQQRGMIISADSVQAYRGVQIGANKPSLEERK  
ETPHILIDVADSSSENYNAEWRDAIFCIQSLGRCNQEQEDTATTPAADSNRRKEIEEY  
IQEARIEKGYLSDKGEKEIEKILPVVCGGTMMYLQWLVRGRPDAMRPTPKAVEISYKTI  
QEFQDNDNDYEGAVKHVASFQKFAERAQQLTNGDWYRLRRTLEIALTIEEEKKVADDS  
DSSSRVANMVEQLYSGQREGDLASLGFVRCFFLCPDDRMSHTRVVDKRCEQMLMKGLLE  
ETTELSLSGCLPEMAERAIGYRQTLDYLSRDHKQEGEEEGSKSKLTAEKEGFEFYLINE  
FTTATRRYAKKQMSWFRKDKFEMFIPVSLKLDKPDVDAANA INQLCKLSREDYKEL  
SGDKYLSGQTKRENAQQKTMKFYTPERHILIPGSKEYENVLTEAIQCRQRVRSNNKKR  
NRE  
>comp12190\_c0\_seq1; 209 371 1006 LEN=1224; translated  
MRSYSLQSLCTTQTTLKAVYNALGGEANCVYLTHDHYYRDQSHKTLEERSKTNFDHPDS  
LETPELLVKHLRELKEGGIAVLPTDYFKTHSRTPVTTLVHPKKIIIVEGILIFTNPEL  
CSE LDMKVFVDADSDTRVLRIRRDIVERGTTESIITQYEAHVKPMHTEWVEPSK  
LKADVII NSERGTSQKIAIDMLSNHLRVAADLEAPSSS  
>comp12190\_c0\_seq2; 254 198 845 LEN=1063; translated  
MAKPIVLGIAGGTGAGKTTLSKAVYNALGGEANCVYLTHDHYYRDQSHKTLEERSK  
TNFDHPDSLETPELLVKHLRELKEGGIAVLPTDYFKTHSRTPVTTLVHPKKIIIVE  
GILIFTNPE

LCSELDMKVFDADSDTRVLRRIIRDRTVERGRRTTESIIITQYEAHVKPMHTEWVPEPSKLKA  
DVIINSERGTSQKIAIDMLSNHLRVAADLEAPSSS  
>comp12190\_c0\_seq5; 191 87 389 LEN=607; translated  
MAPYYFSFASTPTLHQDADSDTRVLRRIIRDRTVERGRRTTESIIITQYEAHVKPMHTEWVPE  
SKLKADVIINSERGTSQKIAIDMLSNHLRVAADLEAPSSS  
>comp12190\_c0\_seq6; 195 198 668 LEN=1204; translated  
MAKPIVLGIAGGTGAGKTTLKAVYNALGGEANCVYLTHDHYYRDQSHKTLLEERSKTNFD  
HPDSLETELLVKHLRELKEGGIAVLPTYDFKTHSRTPVTTLVHPKKIIIVEGILIFTNPE  
LCSELDMKVFDADSDTRVLRRIIRDRTVERGRRTTES  
>comp12190\_c0\_seq7; 150 371 829 LEN=1365; translated  
MRSYSLQSLCTTQTTLKAVYNALGGEANCVYLTHDHYYRDQSHKTLLEERSKTNFDHPDS  
LETELLVKHLRELKEGGIAVLPTYDFKTHSRTPVTTLVHPKKIIIVEGILIFTNPELCSE  
LDMKVFDADSDTRVLRRIIRDRTVERGRRTTES  
>comp12190\_c0\_seq8; 182 198 998 LEN=1216; translated  
MAKPIVLGIAGGTGAGKTTLKAVYNALGGEANCVYLTHDHYYRDQSHKTLLEERSKTNFD  
HPDSLETELLVKHLRELKEGGIAVLPTYDFKTHSRTPVTTLLEVSTFDTAKTDSRVVWLIDR  
VWAQELTSDXLALPMPYPFWLTQRPPIRQRKQVHPKKIIIVEGILIFTNPELCSELDMKV  
FVDADSDTRVLRRIIRDRTVERGRRTTESIIITQYEAHVKPMHTEWVPEPSKLKADVIINSER  
TSQKIAIDMLSNHLRVAADLEAPSSS  
>comp12190\_c0\_seq9; 192 764 1159 LEN=1377; translated  
MPYPFWLTQRPPIRQRKQVHPKKIIIVEGILIFTNPELCSELDMKVFDADSDTRVLRRI  
RDTVERGRRTTESIIITQYEAHVKPMHTEWVPEPSKLKADVIINSERGTSQKIAIDMLSNHL  
VAADLEAPSSS  
>comp12190\_c0\_seq10; 123 198 821 LEN=1357; translated  
MAKPIVLGIAGGTGAGKTTLKAVYNALGGEANCVYLTHDHYYRDQSHKTLLEERSKTNFD  
HPDSLETELLVKHLRELKEGGIAVLPTYDFKTHSRTPVTTLLEVSTFDTAKTDSRVVWLIDR  
VWAQELTSDXLALPMPYPFWLTQRPPIRQRKQVHPKKIIIVEGILIFTNPELCSELDMKV  
FVDADSDTRVLRRIIRDRTVERGRRTTES  
>comp12191\_c0\_seq1; 650 1 1584 LEN=2148; translated  
LPKPIVILKHQVMIMRGLCTALSASPMSMAMGSALSANPVLSLFGSNLENAENYNSTMI  
GKPNLSLKKILPDLEPIGLKNLDSPIYDAMLEGIDSDKGGESTTMIKLDTDAVVHKVILG  
ALPSKVSRRHNHPMSVHSLTKLAGSAKGNRNVILTD DFAIGPLASSVAKAFPLFSLKSNK  
PAERKVDVAFCKSDGTFVDNSEQLKAQTVASGVQLAARLVDSHPPELLTTTQFAEEVESL  
AKMNPKISFKQLVGDDELKSYGGLYGVGKAAVCPPRLVLELDYDGGGDETVALVGKGIYDT  
GGLSLKPKVGMCGMKHDMGGAAGLVGGFFSAAELGVKKKVHCILCLAENAI GPTAFRND  
ILSMYSKGTVEVNNCDAEGRLLVLDGVAHATKHIENLDLVDMATLTGAQLVATGKKHAG  
ILSNDEDVEKRAMKCGMHSGDLCFPLLYAPELLMDEFKSEVADMKNVSKDRSNAQTSCAG  
HFIESHLDES YEGGWLVDMAGPGTKGERATGYGVGLVLSLLDAPGF  
>comp12192\_c0\_seq1; 729 757 3105 LEN=3519; minus strand; translated  
MEEEQPLEANKGRDNDGDDGTASGSASEESASSGQACSGLLHPVTPERHSKRSTERPASP  
ETPELVEGVFFFTSPGTPPELVEGVFFFAEENLPGPIPPRLVVEVAADPASCCTICSGKNIV  
PLLPRNAPEKKGARRSAFRFGAWIVLASLVGFWSGRSASSFVKRQSLWMGTPLLPEESSM  
DAMRMRQEHEHFARSPATLRERRARA AWETTRQRPEERERRKRFAEFVHVHPLLTRPVP  
RSIALAVDSGSPAERDAGNEMARDLSEILVYDAIERATVVFVAGSDARRTHGGSQGS  
ELLAGLLGASGRQDSDLDLCLYVDP CETNPWEHLRTSGAPAHHDVSI VLAGRWDDPASGD  
RTCYHTRWEEDLYAATDGVAVKRVGKTYPLDHP SRKPRGGSGKGGTTNIDRIEHFFVDP  
ELENHWSSPFAHVTDYDVFEAMGIATNLAVAFRSHRHGYPNWRSTEAGYKLAMKQRWRGG  
RFQDGEHGVRYFDSAEMVRIQRPSKHS AVSSCEHYEDLIEGDLFQEDEEFYCLDGFDP  
HYPNVPSRNFYVQSTVGANAGRVFAAVDLVTE SYIMLENAIHLVFSFPGGSGMVEQML  
HRFCLPDRTERPGRKRAELDSFHCIVQIYADAYGYRNSWSGIEINSGIGTFINHCNGTS  
NIGFDYELTEFDIVPDGHDPNPEAFDIPLEFKNGKSYNPNYDRHEGLEHIDATERPIEAH  
EELLDNYIAMGGATYFLAQAVALKRQCSGTKGTVRTYERGTSTHRYDVMGSRYATDPDKG  
RG  
>comp12193\_c0\_seq1; 613 444 2777 LEN=2777; translated  
MPNKITGEMGLQITFTQDEKYELALQYQEDRHRYRIHPNVFGPACMSNVRRMGGGGSGVA  
VFCGKHSELGDIVMKHGGFDDMKELFALS KISTELKTRGGLPTNESSPASNAARSI IACL  
PEFKMVYISPQHLEFKERALWGKLLKLIKFGNLVSKISNEKQPEGSFATLISKMKHADEN  
ASHNSQTQTPKRPSLVSLDDSAFLSKGTSIRIYEGEHSDAEVYLDAKDRKQKPSLVFVVP  
KKRIKTIHPTSIELECAPEFDPLQQIYDGLYPMMTKHLFKFTLAQKRIGGEWAKTGNQWL  
YEGRLDGLLLTSLISGFVQTVHNLQLLTMPEEVEVVEQVRREVESIKSSDVEVKEISLLT

DQFMGNAIKKNFDPDKGRMRLLRSTCKKFLQHILHLEPEEQPARCMGILGEATASMSDV  
FVGATTEPPRIHPNKDFWITLMTQAVSNRIDMSPNATKRIWTSGLTDAGIHNLFVSMDDL  
YFFDLGVPQLHSLPGFMTKFLFSFFHTLGMQEDTNNSDIWVCRFVPQDDKLALTPETENL  
LAGAYDAFXVSLDRIIDEIFDGDHHLRWLLQYVTLQLLSDASFCLQRWNMKGGRPRDD  
NHNQGLEKWLWRALWDMYVAYDINSSEAWERFQVEHPSCEESRTSIGDDIRKSMARSMFG  
SELLELQSDSLRCLIDTIDDEKEEEEEKDEINAESTRSRLRKRLSNPRHANPRQRRWTSE  
SLEKSSLRQLTAATFDYHDDVPGVEHSDLDSSSYDDDDDDSSSLPADIELPEVMLCFSX  
>comp12193\_c0\_seq2; 684 444 2827 LEN=3226; translated  
MPNKITGEMGLQITFTQDEKYELALQYQEDRHRYRIHPNVFGPACMSNVRRMGGGGSGVA  
VFCGKHSLEGLDIVMKHGGFDDMKELFALSKISTELKTRGGLPTNESSPASNAARSIACL  
PEFKMVYIS PQHLEFKERALWGKLLKLIKFGNLVSKI SNEKQPEGSFATLISKMKHADEN  
ASHNSQTQTPKRPSLVSLDDSAFLSKGTSIRIYEGEHSDAEVYLDAKDRKQKPSLVFVVP  
KKRIKTIHPTSIELECAPEFDPQQIYDGLYPMMTKHLFKFTLAQKRIGGEWAKTGNQWL  
YEGRLDGLLLTSLISGFVQTVHNLQLLTMPEEVEVVEQVRREVESIKSSDVEVKEISLLT  
DQFMGNAIKKNFDPDKGRMRLLRSTCKKFLQHILHLEPEEQPARCMGILGEATASMSDV  
FVGATTEPPRIHPNKDFWITLMTQAVSNRIDMSPNATKRIWTSGLTDAGIHNLFVSMDDL  
YFFDLGVPQLHSLPGFMTKFLFSFFHTLGMQEDTNNSDIWVCRFVPQDDKLALTPETENL  
LAGAYDAFXVSLDRIIDEIFDGDHHLRWLLQYVTLQLLSDASFCLQRWNMKGGRPRDD  
NHNQGLEKWLWRALWDMYVAYDINSSEAWERFQVEHPSCEESRTSIGDDIRKSMARSMFG  
SELLELQSDSLRCLIDTIDDEKEEEEEKDEINAESTRSRLRKRLSNPRHANPRQRRWTSE  
SLEKSSLRQLTAATFDYHDDVPGVEHSDLDSSSYDDDDDDSSSLPADIELPEKHNMTSVK  
TYVSMDSVLEENEE  
>comp12194\_c1\_seq1; 207 411 1567 LEN=2040; translated  
MSTFLTSESVNEGHPDKLSDQVSDAVLDAFLAGDEASRVACETCCKTGMMIFGEITTS  
ATVNYEQVIRDAVKDIGYDDPAKGFYKTCNVIVAIEEQSPDIAQSVDAQNMEDLGAGDQ  
GIMFGYATDETETLMLPLTHMLATQLGSKITEVRKNGVCDWVRPDAKTQVTCEYKLDEKGV  
PVPQRVHTVVISCQHSEDVTQEQIASDLMEHVVKTVIPEKYLDEKLSTILTRREDDSSVD  
PXGDAGLTGRKIIIVDTYGGWGAHGGGAFSGKDTTKVDRSAAAYAGRWVAKSLVAAGLCKRA  
LVQLSYAIGINRPLSVFVDYGTVAEGKTDADLTAIVEKNFDLRPGGIIRDLNLRPPIFR  
KTAAYGHFGREDPPDFTWEKPKKLEL  
>comp12195\_c0\_seq1; 356 73 1233 LEN=1307; translated  
MEAIDYKLLREERKRLKNKKSNSQSVRKQTEDNETEAGNHNLLKKNQKRFDTNVNPDYQEE  
AIDYKRLRLDERERLRDKKSIISNTNVRERNSSFNDCRWDFEAGFLSFRNLALRVISEDP  
QLISYSPTALGQQTPLRYSQKEDNTYDAKSSEHISPEEALMNWLERIPSGDGLREWKT  
TYGKRRVCMFGEEEAACSNIESPQSLPPLNDIAREMVKQNI F PSSPPNHVLLNEYQPGQ  
GILPHTDGPLYLDRTATLSLGSNVVIEFTKRLSSNQIGRKQISKTIFFSRNHIPSKEENI  
HQQIADKDPISNEPGDEPITVLLSEGSLLVFEGDAYMNYCHGIEMDVLQDVTTDKCLNAP  
AGRVPVPRGFRYSLTFRHKKPRAEAKS  
>comp12196\_c0\_seq1; 181 122 673 LEN=1135; translated  
MATRGVFQCRTLTLRYCEHGGSSRAVREYLASGKLEWASARPTVEVRVSVANGRHPNLS  
AGYETQAVSNKTAANHGVASRPVLHQVCLRSKGASSGPDEKAALSERGGTGTGPLPKHPV  
EAALDKLYNKSGRKMFKFTKPIYTQTPSIQGVWTPSLDLHLMGEASGGSGSDGFDLTI  
VTEA  
>comp12197\_c0\_seq1; 396 1 1148 LEN=1760; translated  
XITFSATTTPLSLIKHQKQKFCNNQKSKTINSNLHKRIYHSGIMYGGLFGDLPSTKKDAA  
KNDKDKVSDKDNNSKGEGSNDNDAKNQSAALSCKRGNFLFAPRKQPLQKSGTNTTEK  
SSKSSSNPSSNFLQTVGKSGTSMFVPAAMKAKRKKAPAPAPQKTSNNASSQSCSHLPS  
IGTETITTTTTITTTKRKSIHSTDEDDSRPPVVVDIHGTGTTSDQSSAKNTGQTSASIS  
ESSFVAKNDRILDYDFVFPNDLLDYWETLAAKKQREFLERETREALERQQELREHLEQE  
RSELLGGDRGERMPGRGRGRGISNLP SWLVDRQGSNDGKQQPEEGLGGNPARHMGRRGR  
GISNLPALVLEQQORREAAEGPQ  
>comp12198\_c0\_seq1; 490 1 1501 LEN=2263; translated  
XGSQAAQDSPIGKSPKPTIRKEASMQLIPTNLGPVSETENPMNQSISVNDLTLASPKRS  
VNKEDSSQWMPTSLEPVLELDNSMNQSLAPLSERNTSMDQSIGINDFSFNASSVPSLAS  
GSFRSIMITKLPVSEDFMAKLNESIRIDGSI SDFSYVND SARGVSFDEVYDKEEILGEG  
AMAQVFRCVHRENF SYAVKEVLAENYDSDPDQVKEE IHALKCLRDPYILKLWVFTGP  
DTTHLIMELMEGGDLLGILIDKGFSESESRIRSKLLEAIFFCCHKYIVHRDIKLDNII  
ISDRDSNDDSKIKLADFGCSRTFVAGEKGLKTLGSPQYAAPELYMHEDGYDEKCDLWSA  
GICVFVLLGGYAPFDGEGMELRSVVC DGYLHFPSEWEGISENAMNLIKSLIVVDPDERA  
TVVEALDSEWLRRRDRESVLKYRNVNMDGVS VSGTFDAWIKLQQKNGISLRKLP SDSYHSS

HSELTDDMNNSCRSFNDEIH

>comp12199\_c0\_seq1; 242 92 1095 LEN=1532; translated  
MSSITATLAPTDAPSYEGNFSYLRQNMWMLLWFTTMVVFIIILPFCTSKRRREACARGIR  
ERRWISQEEFDAEEFNLEAREQDSRRQRENTQRHFQITKTQEDEIRHQYLSYIMEDYT  
MVSCHASRFQPSCKVAVKFFPTAPEYRIVAFSQLSAFXTTLIFLMLRPNLWTVFAPLQTL  
KSSDIQDKEDIGDTSTEDNLEHETTLIGKETEESSENDVENQCDATMVSSSIESGDTARVA  
KIDENKASTDGEVVP EIPVRQKRSNTETSEDLLECEFDNNQTVCVPLAGQSVGKEIDEIE  
GATSGNALYSNNRRVVSNGCAICLCRFEEDQITW

>comp12199\_c0\_seq2; 268 92 925 LEN=1362; translated  
MSSITATLAPTDAPSYEGNFSYLRQNMWMLLWFTTMVVFIIILPFCTSKRRREACARGIR  
ERRWISQEEFDAEEFNLEAREQDSRRQRENTQRHFQITKTQEDEIRHQYLSYIMEDYT  
MTLKSSDIQDKEDIGDTSTEDNLEHETTLIGKETEESSENDVENQCDATMVSSSIESGDTA  
RVAKIDENKASTDGEVVP EIPVRQKRSNTETSEDLLECEFDNNQTVCVPLAGQSVGKEID  
EIEGATSGNALYSNNRRVVSNGCAICLCRFEEDQITW

>comp12201\_c0\_seq1; 407 1 1753 LEN=2834; translated  
XKSDEVKSEPADDTKETAPDNNACTPEKNICQNGAPCIKKTEIIDGKQRGANYCKCPEGY  
SGKLCHGTTPMDNNQDNKDSEAKNQDSKNDNPDGTAGLSVCTKDGKECQNGAPCVIKTME  
LGGETVDANYCKCPDGFAGVCHGKHSNPQDSNDATLPVSKNDNGTSKTPIDKSSGPKI  
CSKDGDECKNGGICVLSDFGNYSCEPFGSGTVCDSEYICPLDCKHGSSCRHFDQVNGMI  
NSDGLEPTSIFYCECVGNYKGMTCNIPYQSCP KSKDGKNDLCLYGGECIEGFP GDYVCKCP  
KDR TGGSCFEFGQQSNIEDYNGPCFANDDCFNGLCIREHDADE TAKSGMLSKRTHCLCTS  
GWGGDNCEAKCDLDCQHGGSCR FASGGDDAATSGPYCD CRDIDFTGDYCEIPLDECPGN  
DGIACMHGGKCTGADSGVFCDCPPGRTGLFCESIDGNAKPSQPSISNSNSNSNSFGFSPSS  
SSSSSSSVPVGLT SIITVVAVLSLVGLLTFYRRKVS LKSGVLEDEDAQAQVENGENGTAE  
GSSGGVASQADGDEDIFDYDTSGVVDVNLDDTEPV ELDK EKQIV

>comp12201\_c0\_seq2; 407 1 1753 LEN=2681; translated  
XKSDEVKSEPADDTKETAPDNNACTPEKNICQNGAPCIKKTEIIDGKQRGANYCKCPEGY  
SGKLCHGTTPMDNNQDNKDSEAKNQDSKNDNPDGTAGLSVCTKDGKECQNGAPCVIKTME  
LGGETVDANYCKCPDGFAGVCHGKHSNPQDSNDATLPVSKNDNGTSKTPIDKSSGPKI  
CSKDGDECKNGGICVLSDFGNYSCEPFGSGTVCDSEYICPLDCKHGSSCRHFDQVNGMI  
NSDGLEPTSIFYCECVGNYKGMTCNIPYQSCP KSKDGKNDLCLYGGECIEGFP GDYVCKCP  
KDR TGGSCFEFGQQSNIEDYNGPCFANDDCFNGLCIREHDADE TAKSGMLSKRTHCLCTS  
GWGGDNCEAKCDLDCQHGGSCR FASGGDDAATSGPYCD CRDIDFTGDYCEIPLDECPGN  
DGIACMHGGKCTGADSGVFCDCPPGRTGLFCESIDGNAKPSQPSISNSNSNSNSFGFSPSS  
SSSSSSSVPVGLT SIITVVAVLSLVGLLTFYRRKVS LKSGVLEDEDAQAQVENGENGTAE  
GSSGGVASQADGDEDIFDYDTSGVVDVNLDDTEPV ELDK EKQIV

>comp12201\_c0\_seq3; 407 1 1753 LEN=2458; translated  
XKSDEVKSEPADDTKETAPDNNACTPEKNICQNGAPCIKKTEIIDGKQRGANYCKCPEGY  
SGKLCHGTTPMDNNQDNKDSEAKNQDSKNDNPDGTAGLSVCTKDGKECQNGAPCVIKTME  
LGGETVDANYCKCPDGFAGVCHGKHSNPQDSNDATLPVSKNDNGTSKTPIDKSSGPKI  
CSKDGDECKNGGICVLSDFGNYSCEPFGSGTVCDSEYICPLDCKHGSSCRHFDQVNGMI  
NSDGLEPTSIFYCECVGNYKGMTCNIPYQSCP KSKDGKNDLCLYGGECIEGFP GDYVCKCP  
KDR TGGSCFEFGQQSNIEDYNGPCFANDDCFNGLCIREHDADE TAKSGMLSKRTHCLCTS  
GWGGDNCEAKCDLDCQHGGSCR FASGGDDAATSGPYCD CRDIDFTGDYCEIPLDECPGN  
DGIACMHGGKCTGADSGVFCDCPPGRTGLFCESIDGNAKPSQPSISNSNSNSNSFGFSPSS  
SSSSSSSVPVGLT SIITVVAVLSLVGLLTFYRRKVS LKSGVLEDEDAQAQVENGENGTAE  
GSSGGVASQADGDEDIFDYDTSGVVDVNLDDTEPV ELDK EKQIV

>comp12202\_c0\_seq1; 309 292 918 LEN=971; translated  
MTERVHVNATSPTGLDVEFDIDL PQAICSLLNIDANDPSGQTQSLHLDRRHVWKHRIK  
GDSGKIQYVGDRR KLEQGSSLLHEDHLNELLEEMAERHGLSGDDEYHYDDDEVSCGSCY  
AADEDECNTCDDVKRAYKLGWHLNINDIDQCKHELKTKEGE DEGCNVHGLVALDSSG  
GSFHLAPGRSFETADQTDITAI FNMLLR

>comp12202\_c0\_seq2; 350 292 1356 LEN=1474; translated  
MTERVHVNATSPTGLDVEFDIDL PQAICSLLNIDANDPSGQTQSLHLDRRHVWKHRIK  
GDSGKIQYVGDRR KLEQGSSLLHEDHLNELLEEMAERHGLSGDDEYHYDDDEVSCGSCY  
AADEDECNTCDDVKRAYKLGWHLNINDIDQCKHELKTKEGE DEGCNVHGLVALDSSG  
GSFHLAPGRSFETADQTDITAI FNMLLSTFEQFNVTHTINKIRFGDEFPGNQLDGETR  
VISDGYGMYQYFKIVPTVVKFQNGTRISTNQYSVTEHLRHVNPGGGRGLPGVFFFY EIS  
PLHVEIVQDYRKGYIAFFTSVCAIVGGVVTMGLLDQLLYSQIWRGSRGEGVLV

>comp12203\_c0\_seq1; 543 61 2190 LEN=2407; translated

MIQYEGTNSMSSSFV IIP TTDADNIDDDSI E VARMYSSSEGFELFDRDTS DTSRDFELN  
NTRDNVSNRQEITVVNTHDS ILDIDSQCDEDA SFSEDENM L L G I I N E V P S S P S S S T P M D  
EMVKS R P V S P T P S R Q S K P H R E K T E R K N D E T H A N D V R D R K Q Q K T S S I M D S L T L Y S V T D S F V  
D S I C T S T A C V P S K N Y E N Y N N C A K P S I N N N R S A M A A M D D K I K K F Q E S C H S A V L N G C D T D Q Y  
S P W K Q T E N S S K A M V S M D I W Q L L G C S S P V G N L E L A D I W S I R T S E M F R N G T D S K N V R E N K L P  
V R A S I K K R L K R I H R L R M D D R C V R G A S R H G V T I T N H G T D S A H Y N L N S I R K G F H M K K N N A S N  
T L E I K T R I N S T H M D Y L N R K S S G S K Q A S Y R G I G K S Y S M L D D S L A D F I G Q G T V E P I P F E N E D  
D G Y D S D P E I N C Y S A S S S M I T D S P K R S Q A K R V D D P S S I S S F D S P E Y P Q H S V V P A V S P L P S S  
D R N V L R Q D S V P M D E I D M R E S V Q Q T L N S T W T L T W H P N A E N R K E Y N I S H N K P I C I N M W L E R G  
T V I T T S G V V I E P A F M W R D A Y Q P L L L S Q H K L N N S T Q K P W S M R L L N A C R I I P Y L S S S S R S H A  
S I D R S K Y P M A R Q N A S F L L K S C G G E E F L L E A K G T E D A I A I T E R W K L V V A R F A C L A V T E D V G  
G I A R E F F H P T C S D S K M L T I S N L H D D D P L D H S H C G T D E D G L F N R V R L A E S

>comp12204\_c0\_seq1; 233 304 1295 LEN=1295; translated  
M P T I R C Y L I F L L F F T V D L F D G A F A F T S N L S S L A S A G S R V P S G I A S R R H F L T L F P K N S P T A  
G P R T S I S D V G S L S S S S L M G I S D V F G A I E Y S D L L Y D D T Q T A F D G W E W T A N M G A P A A L I A A A  
V L V T F G E T R R D T V P L K T D K R W V R F T K R M M R F L L M T S F A S E V I S I F V G N M L G S M L L G H E A Q  
N I I K K R I G Y G A P L T L V H H H H E L E Y L L T Q I S F L Q G L L H W L G A V I C E L I L P Q K G E T P S A K L M  
N K C L A S W L V T L V L A I M S F Y N S H V N F Y S G Y G S M I X K V D R S T F R T R K A V Q T V E F A L Y T F V R D  
F H C V D V A G F Y E N V E G R M I A N T N L Y D I I I K Y G

>comp12204\_c0\_seq2; 250 191 1245 LEN=1245; translated  
M P S V R H R Y S D T Q F V H G I L M I N M P T I R C Y L I F L L F F T V D L F D G A F A F T S N L S S L A S A G S R V  
P S G I A S R R H F L T L F P K N S P T A G P R T S I S D V G S L S S S S L M G I S D V F G A I E Y S D L L Y D D T Q T  
A F D G W E W T A N M G A P A A L I A A A V L V T F G E T R R D T V P L K T D K R W V R F T K R M M R F L L M T S F A S  
E V I S I F V G N M L G S M L L G H E A Q N I I K K R I G Y G A P L T L V H H H H E L E Y L L T Q I S F L Q G L L H W L  
G A V I C E L I L P Q K G E T P S A K L M N K C L A S W L V T L V L A I M S F Y N S H V N F Y S G Y G S M I X K V D R S  
T F R T R K A V Q T V E F A L Y T F V R D F H C V D V A G F Y E N V E G R M I A N T N L Y D I I I K Y G

>comp12204\_c0\_seq3; 233 140 1131 LEN=1131; translated  
M P T I R C Y L I F L L F F T V D L F D G A F A F T S N L S S L A S A G S R V P S G I A S R R H F L T L F P K N S P T A  
G P R T S I S D V G S L S S S S L M G I S D V F G A I E Y S D L L Y D D T Q T A F D G W E W T A N M G A P A A L I A A A  
V L V T F G E T R R D T V P L K T D K R W V R F T K R M M R F L L M T S F A S E V I S I F V G N M L G S M L L G H E A Q  
N I I K K R I G Y G A P L T L V H H H H E L E Y L L T Q I S F L Q G L L H W L G A V I C E L I L P Q K G E T P S A K L M  
N K C L A S W L V T L V L A I M S F Y N S H V N F Y S G Y G S M I X K V D R S T F R T R K A V Q T V E F A L Y T F V R D  
F H C V D V A G F Y E N V E G R M I A N T N L Y D I I I K Y G

>comp12205\_c0\_seq1; 624 1 1069 LEN=1109; translated  
X G D F G A A P S Q P E L S T I E N Q G G N D D D D F G D F D A A P M S I E P S D H V N A A I I G D N D D A F G N F  
G A A T V E P S T I A N E G D D D D D F G D F G A A P T Q T N N G N G E K C D D D F G D F D A A P P L E S N A P S V D G  
E T F S D F A T V P P K S K D A S T I S N D F G K F D T P P E I L T P M A P I G R I S D R A R N I F A K M Q T L H A F S  
D E D R E S T H D N E Y I G K G S L S T F L A S I N S R Q E A E D S R E E N D L D Q L L A G A P T S A E D S C S P L V A  
N E D G G G P Y G C F I Y P S T G L H A P R N Q F Q D E K L L R R K S S I R K I P D V L P I R L P V G K E S P L D T A S  
P A Y E C D G K K G S T E L F Q L P K L E V S G G A E D S S E K I Q R F Q L K I P D L S F M L Q S R L Q L P T S

>comp12206\_c0\_seq1; 578 323 2889 LEN=2889; translated  
M D D A R N L Y H W H Y L V R K K L P T C S A F T A A Q I V F E S P Q Q R Q R R R Q R Q Q D D P C G T T K Y T A K S C  
V Q S L S A V S P S F A E E M L D T A A T L S S P T D S T E P T A R S E E Y P Q K N P L R I V P P N K A F Q N T A G K G  
A E V S I V S M N L L A P F Y N S L Q L N Q K T T T D Y E R W E F L D H D R T Q R V P M A L N M A K R T N A D V L C L Q  
E I E G G K L G E A S A G G T G E F T L R D D I R E W L A E P T V L E R S G D G N L I V L D G Y D S F V W S P L N P G N  
K R G D V V G L C I A W R S Q K H S L V N W Q G Y R R G M V C R L E A R D N N A D Q D D N S E T Y R P S F A L A N L H L  
P A R P S N V L G R L K T M S R T I Q K L S G I E S E M Q K D R V T K N A S N A N I H N T I D G L M I V A G D F N S D Q  
N S V A A R L L T H G Y T N Y G N V R D R N Y K A K I T K A S A T D M S H P Y R F L D S Y D H G D H P N N Q D T R F K N  
C S F R D L Y A P V T V S L K G R G P G I M D H L F Y A T G S K Q K H N L Y P P K I R N T R K N P S R V A A K T S R V S  
T A D T L S A S L L Q Q S Q S K R T K R R K K G E S R G G G G N E A V A F A A R Y A P D P R A R I K I K S V L A T V D A  
E N G D E E R L E I I R A G L P N A E E G F P S D H L P V G A L F S A S G K S I E P I G N G D N D D G G N V G S T M T M  
P T S E A V S D A N V L G E A D R S H N E T T S V L E N S S N S Q S N G G D K G D S N S R T K G D Q T S Q E G L K E R R  
I K T S L P S G V S S S V Q R R R N S R T S Y G L R R R H N M V L N A I T D W L V G R G A T S V V L D K P L Y K N D L  
L T R V L G E S S Q K L K K K S R A P D L M C M V V N A G A S T D I E E C L V V E V A V A S D P N K V R M K K Q S K Y  
K D L V E L L T G S S S Q R C C F A A L V V G D D G H I P D G T R A D I R S L A Q L T I Q A S G G S K S P D E A T K E  
V E T E L F C T H L Q S L V A S

>comp12207\_c0\_seq1; 155 194 707 LEN=707; translated  
M K T L M K P L P R L G L G M A A L G R P G Y I N L D R D S V F G A S D S R S I E D M Q N Q A N I V L D C M F E Q S R S  
K Q N Q P W V D C A R S Y G L S E K F V G E Y L R K K N I Q P G D V Y V S S K W G Y S Y V A N W K V K L E A G K P H E V  
K D H S V E V G C V A V F Y L S D R V I A K R Q R R I L T F S D V P F T V K M N E S I Y L P C M S Y Q X



>comp12207\_c0\_seq2; 265 194 1271 LEN=1271; translated  
MKTLMKPLPRLGLGMAALGRPGYINLDRDSVFGASDSRSIEDMQNQANIVLDCMFEQSR  
KQNQPWVDCARSYGLSEKFFVGEYLRKKNIQPGDVVSSKKGYSYVANWVKLEAGKPHEV  
KDHVENFLKQFDESMNILGDYMNLYQIHSATFESGVLENEVDHKALNKAKQENGIAIGL  
SVSSPKQDEVIQKAMDISVDGEKLFDSVQCTYNVLEQRPAPCLMKAHEAGMDIIKEGMA  
NGRVLNPNVIEYSKKLSVSPDQLALACILAQPFQPRVLSGAVTPEQLESNLEAETIAER  
LRQDSVLLAEIMEKARMDSEYWSDRSXSGLELSAMTKLRKNQHVMRTTSITNIQFDIEX  
>comp12209\_c0\_seq1; 69 1 680 LEN=879; translated  
WNRTRFKKTIEDTIRDGDDTVQRTLFRNTMKPNFDGNPKHTALETGHVVSVCVHGREYCP  
ICCFDFREMNAESRMQSEVDLSKRQAKRDQKRVRDGPICAVEGCKIPVRGCAVGAETLDTA  
RSSASEGDWKRHKKKCKKSLPSFVDSTGKKIATYPIGTTIDIVGSTQELRAKIRKPHFP  
GTAEGSDSLFSDMAMYSIQVVGGSNDAFLELCEDEVHNKECWRKVVD  
>comp12211\_c0\_seq1; 173 368 718 LEN=1012; translated  
MSEMPAELAPLDEKGMPPKYKGGKRGPKPKARKRKVKAGRQKRKHTGYTLFMQETYPKAK  
IENPDLPPKALISIMAKLWRNLAAGGKREWKERAETVNSDDTKDDSDWLCSVQTF  
>comp12211\_c0\_seq2; 173 389 739 LEN=1033; translated  
MSEMPAELAPLDEKGMPPKYKGGKRGPKPKARKRKVKAGRQKRKHTGYTLFMQETYPKAK  
IENPDLPPKALISIMAKLWRNLAAGGKREWKERAETVNSDDTKDDSDWLCSVQTF  
>comp12211\_c0\_seq3; 285 17 577 LEN=871; translated  
MADQSMATIFSVAAATSSSSLECTTGLSLLSESMVSYLRKEAVLADEKAKRLRQAAEIAK  
EFGITDESQKLYEMDPAELPPLDEKGMPPKYKGGKRGPKPKARKRKVKAGRQKRKHTGYTL  
FMQETYPKAKIENPDLPPKALISIMAKLWRNLAAGGKREWKERAETVNSDDTKDDSDWLC  
SVQTF  
>comp12212\_c0\_seq1; 705 428 1690 LEN=1788; translated  
MEEGNAKINAI FEANLARSGR TKPTNLADGPTREYIRDKYERRKFYDPAGFSFNSSGSA  
APVAGGTTGAGCSEVQVRPGAPSDIARRRVANRQAKMKPPNVATREARTVVRTTKVAQAPV  
SAPVDFDLDFGSPTTTTTPAPATNARGGGDVFS SPLVPAAPPTNQVTQGALKNAIPPPP  
KSAPQATTPATLAEELMKNPAPVATKTTTTSNDDILALFGSPKPKQNQPQSGFGMQAMNQ  
GPGGGFNANSMTSMNGMMPQQHVNMFNAFGNRQNMMTQQQHQQMMMNQNNNNVNNMMPNS  
QAMANQMMQQQMMMQRQMMMKQQQQMQRNQFQMNNAGAMNNTNMFNSPNGMNSMGRMAN  
NNNHMNSAIKGMQNMNMGNIIASSQSSDDGGFGTTPMGGSSQQQTMKDDAFSSSLGGMNAFR  
>comp12212\_c0\_seq2; 778 67 1590 LEN=1688; translated  
MADQKSLKRLKALMQRPENQVCSDCPEKRPTWASLIVPPPAPPTEKLGFLFCLECSG  
SHRRLGVHIAFVRSINLDSWKWEVRAEEGNAKINAI FEANLARSGR TKPTNLADGPT  
RERYIRDKYERRKFYDPAGFSFNSSGSAAPVAGGTTGAGCSEVQVRPGAPSDIARRRVANR  
QAKMKPPNVATREARTVVRTTKVAQAPVSAPVDFDLDFGSPTTTTTPAPATNARGGGDVFS  
SPLVPAAPPTNQVTQGALKNAIPPPPKSAPQATTPATLAEELMKNPAPVATKTTTTSNDD  
ILALFGSPKPKQNQPQSGFGMQAMNQMGPGGGFNANSMTSMNGMMPQQHVNMFNAFGNRQ  
MMTQQQHQQMMMNQNNNNVNNMMPNSNQAMANQMMQQQMMMQRQMMMKQQQQMQRNQFQM  
NNAGAMNNTNMFNSPNGMNSMGRMANNNNHMNSAIKGMQNMNMGNIIASSQSSDDGGFG  
TPMGGSSQQQTMKDDAFSSSLGGMNAFR  
>comp12213\_c0\_seq1; 314 1 811 LEN=1299; translated  
XSRTLPPQTRGENFVLPVSVVASLGVRCVVEEQQQGSPGDSAQAYHELQKNQREGLLPPK  
IKLPPPPPLGPVAVASLPPVAAAGEEPTQRQPTVDRLVWEIQQALEESPEDASIESIVISGEG  
EPTLRGLDFELARRIRSLSEAPAEPKARRFPFAIRLTTNGLVVARRGDDSVQQLLWDS  
GVSSVSVALMTWEAGQYTDLMAPCVGRAPGGGDDEAFERVRAFCSAAAGVEGMEVETTAV  
DRPDVDKERTREALSRELGVAAAPVWRPYP  
>comp12213\_c0\_seq2; 314 1 811 LEN=1210; translated  
XSRTLPPQTRGENFVLPVSVVASLGVRCVVEEQQQGSPGDSAQAYHELQKNQREGLLPPK  
IKLPPPPPLGPVAVASLPPVAAAGEEPTQRQPTVDRLVWEIQQALEESPEDASIESIVISGEG  
EPTLRGLDFELARRIRSLSEAPAEPKARRFPFAIRLTTNGLVVARRGDDSVQQLLWDS  
GVSSVSVALMTWEAGQYTDLMAPCVGRAPGGGDDEAFERVRAFCSAAAGVEGMEVETTAV  
DRPDVDKERTREALSRELGVAAAPVWRPYP  
>comp12214\_c0\_seq1; 489 100 1899 LEN=2088; translated  
MIGWIKGSISILVLLLSFSLYPSDARRLERERGTHYRTRSLIHGSASNGKGGQKAGKAD  
GKAGKAAGKAGKESQHTTLDYIQTNVQMDSESKYWTRKSCKEKRNRRTGKATKASLCSH  
SSESSIVSTESLDPSFTSTIIPSPDPSNYPSSSPSTNPTQLPSSSPSGTPTSSPTVSPS  
GIPTESPTSSPTKSPSRVPSQSPTLSPTESPSGMPSGRPSQPPTIAVETSTGRSSGMESY  
CTNPEPSVDVGGNFDDQILVFQYLLFITDITQEDVIVPVMKRIHDGLANHFLLTCSIVG  
DFTENQPKFHVGVFSDPPDFIFSDCEKIALESVLPNPPSGSKCMVVQAELKMHVYFPQA

RLRRYLKDKRSRMLPTS SVTSADPQVITATGTYLNL SMSGGEFDDGENVLKTHFLAFVME  
GDTYGTIDRESPKVAGVNAQLQGEQGDSRVVAGAMTMVAAAICLI VV FVSLRRRKRERSE  
AYLQRLKGLSNLSESDTDAFDRGTYVVGESDDNSLDWFND DANYGVCKQVPEQKISLDYQ  
HDVHKCTSA YCDCHRWDNIRPRFIAPDSPNVPDILEDLRHKFSPALEERSYTS PD TVDL  
>comp12215\_c0\_seq1; 316 1 1745 LEN=1745; translated  
XPGRIDAALQERARQQQNQFMFVQRYGVNVLF PARVVPKAKGEAGEAKPVKTNKDLVN  
ARLLENGILFENLQSLPQLQEGVARSVENLMRTQAFNSVQIELDTKQSNEPQPASGDEDE  
APDRPESAHTHSLNVILDEKNWYSLYIGGGVKHEGMEAMNSSTKLPKAQFESSVTL SNL  
TGYLDRSFFQYTVDQANARVLLSHERPLYSWFPEDSQAAYSIVGLGKGSQYSLGFRALI  
DTVDFESSRSYQEFQRS LGWRLDNTGNVGRPD MAPVTGPGDFYWGLDWT LGLRDI VPRKH  
AELPYAADASPEIVVQSGPSLLHSLKWEARTNGSGLDDRYQPTIGVDAHASTE LAGPPGD  
VGGFFKAQGG LAIHVPLDGDVDELGN YTPPEHPSWLDRI SVHATASGGLLRPLSFGGLCRS  
PTISDRFFVGGPMQLRGFLPAGIGPRS AKGGSTSPGGDAMGGS LFYTAGLFASMAPPGS  
LLDSYGLRFFGFWNAGTXGGDLPPHPAPPRQGT EGTREASPRADLEAGRPEHADGGGRGD  
LGGDPPGADGGHCLCPAQVRALGRPPELSVWLWIQLWLAGSAX  
>comp12216\_c0\_seq1; 268 106 1080 LEN=1211; translated  
MTSDEEIEDGHDQCREQEVDPIERWIPYYLRRFVAPYHDEF CYTHLYHFRLVAALMMEGF  
LP IATEGVILPKLHHERSVIPLPEGLHVSKSIRKKS KRFR LTVNEDIDRVVEGCRQQHGR  
SCWLYPDLVKVLKDIHDAGRVDTVI IHGKKQETAPVRLYSIEVWNDATGELAAGELGYTV  
GSIYTSLTGFSAQDSAGSVQLISTGRLLS QLGFKLWDLGMDMEYKRDLGSTLMKRKDFVA  
FVAGTRVTDGNLLL PATNDVGFDC KSLVDQTL SLEAIRQSGS SNSNNRQECKHANSTSSD  
QCDPSQPTKKKRTSLPDKTKVVVR  
>comp12217\_c0\_seq1; 738 1 3485 LEN=3494; translated  
XTIKFKNCQDFNPSCVSE RGTQSRLQIDLVKRQKAMAQGTNPFEDNDDP VTSASTNPF DN  
DASDIGGGGAPSGRTGTNPF GPN SGYDDDDDDIGEDEEAESFEVEEEENLGAPVEASWQY  
LGDLPYRRVPVYSNVRWGGKPKDNGSSSESLNYGLSAFPKAALQRHPDLLDARELQELLN  
RTTVTKVVGCCYGGPIAAVTLPIVGETSWFSHTEIRILTNSGNPLATVEFP IPELERKYA  
PSDIMEIGFIDRTVLVVVLKDSLCLTYDLSGGALLPPFFILPRGEGQGTDLFQACIFEGG  
AVSFSIFVPLGRIISSFDYFFVLM LGCFTDPADRANPAXLTSYLT XILSIMAVLSTSKHS  
AIVEFLDEHDDPMYLN TAHLGARKILPPSYISTDIGGIGFND SMPPFCGLITFLPTATFA  
SSNFLSYAAIAVLSRKTASRHPEVFLSTNDNSV VVNTATTEMKDLDCRERIASPIVEM  
TFAPNGRFLACFTESSMLTVISSTFETKVLD FDTSEGSTQPPIEIRWCGEDSVVLHWKNL  
GILMVGYPYGDWLRFPYENHGNLYLIPEIDCCRVVSDASVELLQRVPPATALLLRIGSIEP  
AAMLLDASDAFDNGS ISSDEAARAITKTGMLAE AIEGCTDAAAREFDIATQKRL LRAASY  
GMHFTFKNLKGSRNVMGGIYEDEKEDGNTQTMPSRITAKFVETSKRLRILNALRNPSVGI  
VLTSAQYDAITPVGV IARLIAVKKPALGASISKYLFLPKSVQLYARA AKA AFV IASKDR  
SDADVAEGAIRIITEDKYGSASASKYTSSI INRGGYATVAMASIKAGRPGVASLLLLLET  
SVVDKVPALISIGSYADAVAVATSARDSDFIFYATMEYRKHCMSEVQDPVQGNK NFLT SV  
VTKFSQESYNTIRKYTG TMPDVKNEISLQIRRQKFVDAGMTLARRALD GKTESRGKQAIL  
SEASKILSMGKDTSFHK TCTDEYI ELLKDQDILRTKYSASEVAPES SSVVSTIYSILRFA  
GKNERDKNRLLNDADKVAKKFRVPEKMLWHTKVRAFSETKQWKNLLHLANSRTKSPIGYT  
PFARAAIKGRQPPGDILRYIERITV PDERFGLYGE GGMWKKALEEAVRMKDGRRIMDVKA  
RCNDPQIQLD AEQMIARLAGS  
>comp12217\_c0\_seq2; 905 1 3335 LEN=3344; translated  
XTIKFKNCQDFNPSCVSE RGTQSRLQIDLVKRQKAMAQGTNPFEDNDDP VTSASTNPF DN  
DASDIGGGGAPSGRTGTNPF GPN SGYDDDDDDIGEDEEAESFEVEEEENLGAPVEASWQY  
LGDLPYRRVPVYSNVRWGGKPKDNGSSSESLNYGLSAFPKAALQRHPDLLDARELQELLN  
RTTVTKVVGCCYGGPIAAVTLPIVGETSWFSHTEIRILTNSGNPLATVEFP IPELERKYA  
PSDIMEIGFIDRTVLVVVLKDSLCLTYDLSGGALLPPFFILPRGEGQGTDLFQACIFEGG  
AAVLSTSKHSAIVEFLDEHDDPMYLN TAHLGARKILPPSYISTDIGGIGFND SMPPFCGL  
ITFLPTATFASSNFLSYAAIAVLSRKTASRHPEVFLSTNDNSV VVNTATTEMKDLDCR  
ERIASPIVEMTFAPNGRFLACFTESSMLTVISSTFETKVLD FDTSEGSTQPPIEIRWCGE  
DSVVLHWKNL GILMVGYPYGDWLRFPYENHGNLYLIPEIDCCRVVSDASVELLQRVPPATA  
LLLRIGSIEPAAMLLDASDAFDNGS ISSDEAARAITKTGMLAE AIEGCTDAAAREFDIAT  
QKRL LRAASYGMHFTFKNLKGSRNVMGGIYEDEKEDGNTQTMPSRITAKFVETSKRLRIL  
NALRNPSVGI VLTSAQYDAITPVGV IARLIAVKKPALGASISKYLFLPKSVQLYARA AKA  
AAFV IASKDRSDADVAEGAIRIITEDKYGSASASKYTSSI INRGGYATVAMASIKAGRPG  
VASLLLLLET SVVDKVPALISIGSYADAVAVATSARDSDFIFYATMEYRKHCMSEVQDPV  
QGNK NFLT SVVTKFSQESYNTIRKYTG TMPDVKNEISLQIRRQKFVDAGMTLARRALD GK  
TESRGKQAILSEASKILSMGKDTSFHK TCTDEYI ELLKDQDILRTKYSASEVAPES SSVV

STIYSILRFAGKNERDKNRLNDADKVAKKFRVPEKMLWHTKVRAFSETKQWKNLLHLAN  
SRTKSPIGYTPFARAAIKGRQPPGDILRYIERITVPPERFGLYEGEGMWKKALEEAVRMK  
DGRRIMDVKARCNDPQIQLDAEQMIARLAGS  
>comp12218\_c0\_seq1; 270 282 824 LEN=1106; translated  
MDRNEHMSSDPASSGAAGSNEDTYGELPEEPDTFDANPPPLKRGGVRFPSAKSMEQVKRI  
SRASLYNSDEIKDYWGTTSTDKMMQKTELRRDVRDMYLSRESDSDFTKLGIDTLAGKGE  
KKKSNRMVSRHAVLDEQDLQEHGVHDDKLLAGVYSVTSRKAKKDARKKAEQLHASLAE  
>comp12219\_c0\_seq1; 278 1 652 LEN=879; translated  
XASAAMVSRHKGISAFIVPASAEGYSLGAKEDKLGIRASSTANVILDNVRVPVKNLLGAE  
GEGFKIAMSTLDGGRIGVAGQALGIASASIDCAVRYALERTAFAFDKPIANFQMIQLKISKM  
VLARDQARLLTWRAAQLKDAGSSFTREAAKLAASEAATMCSHQAIQILGGMGYVTEMP  
AERHYRDARITEIYEGTSEVQHIVIASDVIKEFKGKM  
>comp12219\_c0\_seq2; 592 120 1424 LEN=1651; translated  
MISRLAVSLPRRGRSAISAALAPAAARATPSTTATAKRSITSHSQLPEETGMVYEMCRKF  
ADEELAPKATEWDQKHEFPTDAVAALSELGLMGINTPEENGGSGLDALSIAIAMEEISRG  
CASVGVIMSAHNSLYLSPVQAFGTPEQHDEWIAPYAFPSVGADGRLENVGCFCCLSEPGNG  
SDAGAASTTAIRDGDDWILNGTKAWITNAYEADAADVFFATTDKSLKHKGISAFIVPASA  
EYSLGAKEDKLGIRASSTANVILDNVRVPVKNLLGAE GEGFKIAMSTLDGGRIGVAGQAL  
GIASASIDCAVRYALERTAFAFDKPIANFQMIQLKISKMVLARDQARLLTWRAAQLKDAGSS  
FTREAAKLAASEAATMCSHQAIQILGGMGYVTEMPAERHYRDARITEIYEGTSEVQHI  
VIASDVIKEFKGKM  
>comp12219\_c0\_seq4; 357 120 800 LEN=977; translated  
MISRLAVSLPRRGRSAISAALAPAAARATPSTTATAKRSITSHSQLPEETGMVYEMCRKF  
ADEELAPKATEWDQKHEFPTDAVAALSELGLMGINTPEENGGSGLDALSIAIAMEEISRG  
CASVGVIMSAHNSLYLSPVQAFGTPEQHDEWIAPYAFPSVGADGRLENVGCFCCLSEPGNG  
SDAGAASTTAIRDGDDWILNGTKAWITNAYEADAADVFFATTDKSLK  
>comp12220\_c0\_seq1; 1141 1 2030 LEN=2030; translated  
VTGHPVLPDGDHISASPPVESFFKKGYYVITTTETGSRYLKKNPKRGIGGISLKKTPKPPTP  
EDTQQEIDDQMAKLDKSNMMLGAVAAVGVAGVVGLNVANNDPGAILGANFQSNNGNNLDS  
SNSIMVGSKSRTGVAPPTSPSSFTLAPTTPLVPAQQEDDILGLRQEQEEARNEKAAADEK  
LRAEQQERREREAAKAERLALAKREREAQALRIERQEQKEREAAAKQKEREAEKAR  
IAEKEAEERLERLARQRETERQRRLLEEETARKFLEKARLEKEQKLARQQEIQOQQQER  
ARLRLEAAENVKREAEKAAANEKAKAELRERQEELTSLKKQRQQQEQEETKREQQREKSR  
LRLEAAERTKREAEKVAANEKAKAELQERQEELTSLKKQREKQQEQERRQAIDKADRAK  
IESDARKAEALAKELEQRQKAERESSVWKTITQGVKGI AVAGATGAAGLVTSFELRRMP  
QNNQTEAATGSSIDRNTTSSRSMGISIEDSSDSSVESSTSDQPKPPSKKLKGGKTLATN  
ITEKLFVDGIDDLAEVETVLAEVDDKTKDKGTAKSATSQNASESIPVYFAKTNPNSKG  
DRSSEDKIGEMVFGAGATSSDSGINAEASDGPDEEVAAIETEGTAQLIADGAGEIERIKA  
EESVRLEELARLEAEMX  
>comp12221\_c0\_seq1; 227 286 969 LEN=969; translated  
MSRTMKPEELIRALAFVANPEELIKPDPSVVTPIRDDSFGDGFRAVAKGLGKILSANA  
LDLYGIEEHEEEDPGEAGEDPGEAGDPLPETETTGAAGLVDEAREQPGPVVEEAQAA  
DLGGLLRNGRGEKVPVPHDRVEPLGEPWGPVHHRVGPPQGRDGDQAHQRLRARPAQRGTEA  
RGRPGPLDHEGEDAKESGLHQAGAHGGDAGGQRVPEELVPVAEAIELX  
>comp12222\_c0\_seq2; 444 1 1792 LEN=1792; translated  
CTMRFLSPLSFLLVLPETACFGLSSTRIPGGQGLTRLESSLSTPTPEDLKGGKEDDGRSDV  
FVKTFVDYFAQDLDEPKRANIQAVPGYGKTYLAWKVMGVLPRVHDPASDSGRKSESKIA  
VYVTPYLHLIDQALSNDREHRLMMTKIDPSHTIKTMIIVSNTSRKKERCSTNVNEIADFL  
SESSERDGETWNILVCTYHSLHKVSKALDCNNIHGIDFAVDFEAHRMEGADSRFGDPKKK  
KKDIXYGLYDSNIEIRNRLFMTGTPNNYTQDTKI KVLPSPVKSNGEIIIFIPQSKDSSAK  
IRSFDESFLGFCPLANKSHRESVEEKTTLPI SLYFADTRVFKYSEDGSWNPETEKDHFL  
AVAIRSAYHKLKVKHAVSFHSTNLRKRFRMNTMQDEKSNSNISVFHMNHTMSAAKRKQIL  
SGAKASAKSLITNCKLLSMGVDWPSLELVVIADPVKSAVGGQMIGRIGRKAQKGERGYV  
LVPVPIKDEDGTLDRDCQAYEILVNTFNHVMVNLRELCDLILVIEKSSKEGRPLELSEY  
PKRIKDAFIFPPSIPLTLQLELMDRAIVEYKGNSTSKWENMYSLLVQYNKREGHSNVV  
>comp12223\_c0\_seq1; 215 248 694 LEN=908; translated  
MKFLSQTILAVTLGFAATAAAQYDGFGRGLKKDKAEKSAKKTVPVAPVPIPVPTAPPPTP  
SPTVKVIKKGKSSKNTKSKKGGKGETPTTAPTVPVAPPPTDSPTKNPTMAPTKSPTRSPTA  
APSELSTVATTVTSTVTTSNLGS GSITA  
>comp12224\_c0\_seq1; 570 96 2321 LEN=2465; translated

MKENVERSLRSHLPEKSRGEASGGNMSVSRHKKTASHAVISIRTIAALCGAALVCHTYYY  
GRNTARTYRSALNTSNLDYYSRAVSYSKSLPATSLDSKIFPHQFQQLKEKQFSISRPN  
DSWLTLEERLQIEKEFRRHRESIYSLLLPSPHDNDDDYDYDDDDNDDRIVNSETVLQ  
WGNDFDYLLLEHGHRHDQGLYEFHSLWGLGMEEDAKKHRNDPRVLSAAWTSKSKKPRFI  
HEHNI CHAFRHARDIAQFNTPHVLLTHLNENWGTLSSYVPSRTHDWGDILEHWGKLDGSP  
CDPLEVQEFYLNSPQTLAVFTTQHQUALFNHPKVHSIPIGVANAPDGGEAMLRLSKQKRQ  
NQKKSANKSLSNNSRRNLRNKDIRERGGKIEQHKSFADNSTSIRSSYRKLKSRLLNSRP  
QFLMINASPSPTRKQIDAVIRNFENSGHPQGGKIKNMYEQYEGTWEQQRDQYYDDMSNS  
KFILCPSGIGYDTRAWESIAMGAI PVMERHKYTYKIITFPASSGNRPKLI SLEEASQKG  
LQEKLQKQONATLETIEYYDGWQKSFDDL PVVWIDGFEFGDEAPKQGGKGNLTPQFLEDQ  
YDELALREGNFRYEKLTSLYWIQFMESFLKNNNDNDELWNRAMSSLSSTFNNHTVSVE  
EFMTMSKDSHNHKLHQVEGEEEEEQQQQQEDDYRSNYLFGSYQPVVLSWVLFIELKVAG  
ILSVIAIRRWNVSKTSDNGN

>comp12225\_c0\_seq1; 462 127 1329 LEN=1449; translated  
MDFTSRRGSTSIYWRTOQFTYPPVCNGLLLTIGLLLLLIHDVHPWLLTKLPTIHRVTR  
QRSSPRIRLKFDFGETPKNAWREDGLSTIRSNSKSKAAMLAEELQIFFQLVLASVGM  
LISWEDVSMHPMREIYSILLSSSSSTSTPQSSSLFVPSGITQRWGRSTVRGMASGGRE  
RQAIVTAADLESSTNNDLPSYNEVMLAHRTERIPLWNAEEGVPPTTRESVFDVSRVQVQL  
ALLRIRDCQELARNYEWDELKAILDENVLRKDKLEKSCYVLKRADEFLSREARDEIGFDWG  
SCAWRHCGALSDAQEAIDALQYQVGMLEPFECIYVLDVVERSRLRDILAVTNNYRDVTLKI  
PEYVPIQRMSDLSSEENEDVLDQRDQYEMDTLAFLRNIS

>comp12226\_c1\_seq1; 343 472 1215 LEN=1817; translated  
MICISGPKVKIPMGASLFVDGKKEVQKLPPLLRVYHKPKWVLSVMNDKKGRKNLGDLD  
LFSMMHPVGRLDYDSSGLLLFSSDGKLTQKLLHPSNEVQKEYAALVVGKVNEDDLRETL  
QGVETSIGTFPADLIETRFIPKDEVKFMIEI IDNLPPEYDLSKLEKNGHLFFKDAEELS  
EVHVVEEGKHRMVRILANSGYPIVIGLKRNRFGPIKLLKDDLLPGSMRELTREEEDWAK  
MLKRKGN

>comp12227\_c0\_seq1; 437 236 1375 LEN=1514; translated  
MSLREALYKEKTGDKEGRSVIGMKKTDDSVSSSTLFDSQQRQDLLGYHNANKSDDNTTR  
SDTFRSAEFTKFIHQKYMQSKEPNGTAFDSGRTNNSDDSTNRASGFDSVDFTKFLQQLQ  
SKDSVNGIDFSLFKSKEPNLGMFGSRDSSDKPEATNKDNTRKTSTAIPGLKSQDWVKFD  
MLGKHVEIPI SMGMFSSKQSEGSPTMRSAPSLRTDFSSSSMIHSLKNTAIELPSEPKVPS  
ATKTRKRRKRKPRKIIIPETKTYVEPSDKDVL MGRGGKSNHHPGNSRYRGEVEKQERYK  
NADDKDEKTNISEELVRAIQSGGNFLEKDDTGAWYIIDDVVARRKVSQALREDKDPEKR  
RAKRKRFLEKRAREQKRQR

>comp12228\_c0\_seq1; 499 121 1608 LEN=2025; translated  
MVTSKRATVRYPIRRTSIKKIVLNTDYDHDGSDNDGNVDEELQPTGLRIGRMVDAIEFP  
VGDCKEKAYTVERGDQEKIDDNHVIESGPGDFSKGDTESKGETRIGSIAEELSRVGVRIA  
KKFSSRVYLGRVTDVYDAETENATPLAEDFDGDVVFYHILYEDGDEEDFTYEELQEGIALY  
SDVPKRRRQKYENRTNLVTPTPGMTSKTSSSFLPLYSETP IHTLILGTHPGRNSLNNQ  
YFAHRSNAFWWIAGDCLGFRRTGKRVGEYEMKLCADLRYDESHIIPYHDQVNI LCRHG  
FALWDVIASC DRHGLSDSAIKNDKPNDEEFLRKHPTIKTIAFANGKSGLAIFYRHFHHL  
FESGVLAEITTFEGPWSNFGPLTSDLGDKASNPLNKENGIKCKCVPSVSPAATNMTYR  
EKRD TDWTVVFPGLNFHQQLSELNRAGSATNKKSRGQNYFPMELLNKGGRIGMYLPEAR  
RHR IARFHAKRKRTRW

>comp12230\_c0\_seq1; 671 282 1571 LEN=1828; translated  
MTFQPKSVAMIAALFWMVHVPSVCYGLIPGLPSTRTAQSITGTLSSLGASRTLKGSDET  
FEGGGSISKSRQDREAKTLYDYL GASP KDTQEQLKIRYTTLVKT LHPDSNPDRDTQNSY  
YDLSDINA AWEVLKDPVTRRKYDRSLNAKEIAEGIESFVSMGIHAFENTAIPWFQKTADT  
TAAAVDASTKKAQEVNEQARSAYGVFELENQSKAMEQKAKASTARASKIKKELDSLPSKR  
VGSLEKQEQFLSSAEAQRI LR TFQSDGAGAKPPAGLKNDMKTLVDTEGKQDALRTVQS  
AERSTQMAARVEQAMRAEELALKRLEDAQRAFEARKNFASVQEDEKVARTEERAALQV  
FNKLENALERISGKVRVGLLQQQELFLDTKAKELKKDIEECEQSAINYRAEAKLLKTKAK  
EKADEELKP

>comp12232\_c0\_seq1; 290 179 598 LEN=598; translated  
MKLAI FTALVASAAAFAPASHKGASTALKAADFSEVGAQMPLGFWDPMNMVSGDQGRF  
DRLREVEIKHGRI SMLAVAGYLIAEAGIRLPGNVNYSGLGFSDVRNGFAAFNDLGGAGIG  
QIVAFVGLLELAVMKDVTGE

>comp12232\_c0\_seq2; 406 20 625 LEN=2675; translated  
MKSAILASLIATAAAAFAPAQQKASTTSLSAFEDALGAQPPLGLYDPFGLIANGDQDRFDR

LRYVELKHGRISQLAFLGNIITRAGVHLPDIDQSGDAFASYPNGWAAVGADGISRAGVY  
QIIAFIGFLELFVMKDVTGEGEFPDGRNGFIDFGWDFDEATKLRKRGIELNNGRAAML  
GIFGLMVHEQLGGELPIVGM  
>comp12232\_c0\_seq3; 300 1 417 LEN=417; translated  
AIFTTLVAGAAAFAPAQQATTSTALNADVSGEIGAQAPLGFDFDPLGIIGDAKDADEEQFA  
RLRWELKHGRISMLAVAGYLIAEAGIRLPGNVNYSGLGFSDVRNGFAAFNDLGGAGIGQ  
IVAFVGLLELAVMKDVTGE  
>comp12232\_c0\_seq4; 306 1 373 LEN=373; translated  
XAFAPANKAASSSAVKAFENELGAQPPLGFDFDPLNLVADGDEEKFARLRYVELKHGRISM  
LAVAGYLIAEAGIRLPGNVNYSGLGFSDVRNGFAAFNDLGGAGIGQIVAFVGLLELAVMK  
DVTGE  
>comp12232\_c0\_seq5; 385 179 784 LEN=1124; translated  
MKLAIIFTALVASAAAFAPASHKGASTALKAADFSEVGAQMPLGFWDPMNMVSGDQGRF  
DRLREVEIKHGRISMLAIVGYLTTYAGVRLDGMESMPNGFAALSPSAWAENPVAKSQIYG  
TVIFIAFMEFCVMKDHLGNAEFPDGRNGGFDLGDWDFDEKTKLRKRAIELNNGRAAQM  
ILGLMVHEKMGNVADILPLAK  
>comp12232\_c0\_seq6; 356 1 603 LEN=943; translated  
AIFTTLVAGAAAFAPAQQATTSTALNADVSGEIGAQAPLGFDFDPLGIIGDAKDADEEQFA  
RLRWELKHGRISMLAIVGYLTTYAGVRLDGMESMPNGFAALSPSAWAENPVAKSQIYGT  
VIFIAFMEFCVMKDHLGNAEFPDGRNGGFDLGDWDFDEKTKLRKRAIELNNGRAAQMGI  
LGLMVHEKMGNVADILPLAK  
>comp12232\_c0\_seq7; 447 1 615 LEN=806; translated  
AIFTTLVAGAAAFAPAQQATTSTALNADVSGEIGAQAPLGFDFDPLGIIGDAKDADEEQFA  
RLRWELKHGRISMLAVVGYLTTAAGVRFPGAEDIPGGFAALDNLPGMVWAQLIATWAMM  
EAANQDQFQAPWVGVDGNAEGKAEFKGDFRNGALDFGWKQSDDWKRRKRSIELNNGRAA  
QMGIILGLMVHEKMGNIDAILPLAK  
>comp12232\_c0\_seq8; 473 179 796 LEN=987; translated  
MKLAIIFTALVASAAAFAPASHKGASTALKAADFSEVGAQMPLGFWDPMNMVSGDQGRF  
DRLREVEIKHGRISMLAVVGYLTTAAGVRFPGAEDIPGGFAALDNLPGMVWAQLIATWAM  
MEANQDQFQAPWVGVDGNAEGKAEFKGDFRNGALDFGWKQSDDWKRRKRSIELNNGRA  
AQMGIILGLMVHEKMGNIDAILPLAK  
>comp12233\_c0\_seq1; 440 502 2649 LEN=2682; translated  
MTATKKKGHGHIQVKKRRTWDNYYPLENFYSKHHGSDVKAEDDPLFKFVSSLRNNYRRQ  
VLDSRESAGKSNSKTQQLAEKIRCLNIDFVWYVPNKKRTWEYYPRLQEFYAKHGHSN  
VTKEEDKDLHQYITSLRNNYVPESALHQSAKSKRILPADKVQALKEIDFSWKKCAPPRTV  
RPGGRTWEYFPRLQSFHEKHGHANVTPEDDPLFQYVSSLRKNYRHQYLGTSSSETAKTN  
WWLPEERFQALQDLNFSWYTESRAPKKALQSKTRQPSRLWTEYYPKLQKFHDRHGHCNIT  
AENNEDLYLWIKSLERRYQLPEDKLQALQQLGVTLKPKDKRRFLMQEMLPRLQSHQERF  
GRVAVTQNEEDTLNEWTRKFVRQQGYPKLWDLGFPDQDKWRKGYWKKMYKQLVGYHNS  
NRDDRVPNSNYELEYFIRDQRRQYVRWRKGLSTTMTVDRIESLEKIGFVWAKTRPKIKK  
THEERWDMVQQLKVYREKKGHAEVPEYDENPQLGRWVMNQRTFYRMNEIGIYTTLS  
RIQQLEQLDFVWRYREKHHWTFMGRLRDYEKIHGLIIDVTDVFNEDLRQWLNEQRYFYK  
SNTKGHRLTRERIEALQSLPGRFWSGKQAKIPTKDDWTQLLGAIRERGISAEVKAKQHW  
DGVNPFEDVKSYSDDLLALWNEENDPDDGDEEDDSFYEDDEANRLFLGESRL  
>comp12234\_c0\_seq1; 789 222 1580 LEN=1822; translated  
MKFIVAILSLGASLLVQTENAVAFSSFTPKSSFGVKTASRSLSLMNVETNDDQKTVKVG  
VIGMGRIGLVHLEAITKAPGVVPIVSNPTVSKAEAAANQYNI PKFTDDAMDVINDPEVD  
AVWICSPSQFHADQIKACAAANKHVFCEKPIATDLAETVEAINACNEAGVKLMIGLQRRF  
DQNFERVKQAVAAKEVGEPIMIKLCSRDPAPPPASYVKGGGIFADMAVHDLDMTRFLAG  
SDPVDILAIGSTHIDMSIAEFDGSEKYDTASCIVRYPNGVQAMIDVCRQSSFGYDQRAEV  
LGTGMIQTDNVYPNTAKIYKQDYTGADMPDFDFLSRYNEAYVTETIAFCDSL VNDKPV  
PCTGTDGLIALIMAI AADKSAENRWVKFNEIVQEVYCSSPTECELIAQDDMFPEGFRPT  
EKAEDLLVPDVKMKNGAVMGSFSDRFKALFK  
>comp12235\_c0\_seq1; 540 109 2112 LEN=2521; translated  
MGEQKLVVGLHFPQTPDASQLLSAREGDYDVTALPCTERAKVRGDVTSITGRWWR  
TSVVGIVQQDNSQDSFFQKIGKQIEWAIHMGIPAVILPPPPYGGQDYARMILSLGLEAQ  
ASNLIQIWKTRNLVSSLENYERLHRLCDGLSNIGIILEMEMPSTMSASATVGTQMLLIH  
KAIGMQLKAITFPAKAFLTNKKGYPTLAKSHQVILTQTLRRVGRTRVLIIEGPSVHEHVS  
EAGETKCMSYLQYIRHMRTRSEVTSVLDTEEATLETPLYLDSLQRPLQPLKDHLEFSMYET  
FEKDPVKYSKYQEA VYMALKSLNLS PDKTITIAVAGAGRGPLVMRSIQAFNQLOTPSK

NLTLKVYALEKNPSAVVYLRSMTENNSVWKGIVTVVNTDVRKLTRDHLNGNEIDIIVSEL  
LGSFGDNELSPECLDPLLESECKNSTISIPMQYSAFVAPVSSSRHLHIEATQQAQVPHEG  
AQPLGIQRAMETSIVVVRTHSASQTHVEQLCWTFDHPSTTQDKERTATLEFSPDPTFAAQL  
GCGYGPADPAISGIVSEAPTASTGGITIHGLLGSFTAVLFESGESRSEIISIAPHEFSEGM  
FSWFPIYFPFREPLRVPAGSNMSVKMWRKTKDARVWFECATVHRDGEILATSPIHNPNG  
RSSYVSM

>comp12235\_c0\_seq2; 229 109 1064 LEN=1064; translated  
MGEKGKLVVGLHFPQTPDASQLLQSAREGDYDVTALPCTERAKVRGDVTSLTGRWWR  
TSVVGIVQQDNSQDSFFQKIGKQIEWAIHMGIPAVILPPPPYGGQLQDYARMILSLGLEAQ  
ASNLIQIWKTRLNVSSLENYERLHRLCDGLSNIGIILEMEMPSTMSASATVGTQMILIH  
KAIGMQLKAITFPAKAFLTNKKGYP TLAKSHQVILTQTLRRVGRTRVLIEGPSVHEHVS  
EAGETKCMSYLQYIRHMRTRSEVTSVLDTEEATLETPYLDLQRPLQPLKDHLEFSMYET  
FEKDPVKYSKYQEATLETP

>comp12237\_c0\_seq1; 1061 85 2799 LEN=3010; translated  
MAMMVEPIVSKTRVICIKNLPPKITEQDLKEFILNEQGHRKRQKQASSRSNSYEREMQLQI  
TDCKILKNSQGKSRKVAFIGFRQPEQALHVIKGFHRTYLNMSRITVEAAKAKRDEKGLKD  
DEDGDEKQEGKGLKPNKNMIENSKQGSSALSVLAVEANQKGSDDKVEEFLSLMGAGNSNS  
KFWNSDTRGEEIAGILPKPSCDDSNDDTSSTSSSADDDKSHREDEIAKSSHEIKTGST  
LSDLDLFLRSKKRQVDDLEQPQNDYSDSNSSTSSSSSSSSSDNSDQDGDSTIDRDQEHRS  
RQGTIQKLSDDIDTSADDDMDDEAKQLAEIAGASKTRLFVRNLAFETTEEELEEFSPFG  
KVTECHIPVDDKRNKGFIFTESAVDAIEATNQLDKVDFQGRLLHILHARPPQESLS  
GSENREKLSWKQRQELARKEKETKGTGEASKGWSASFVRGDVAVDNLAQRLGLRKGDL  
GVKDNLSSGDAAVRLALGETQIIEENRKYFRQHGVDMELV SANENQSTQKTAQKRSKTA  
ILVKNLFPDTRVEELEKLFHVGQEPVNILLPPSRTIAMIEYGHSTDAKRAFRKLAYRRFK  
HVP IYLEWAPLQAKLDNINNRDSSSKDDISSQCAKSDNERPATEMDTATSISNFGNKS  
GNDSGDDGENDHVSSTLYIKNLNFETTEESLQIFEKKGDRNVLSVRI PRKVTP TNSGH  
ATQENRSLSMGYGFVELASHELAKKAIKMLQKLV DGHSLQLAISSQKQGSRTPSNSAST  
GKKPPTKIMVRNVFPQATRSEILKLFGTFGQLKRVLPKFDGNHRGFVVEYLTGKEAS  
VAMSALSRTHLYGRHLVLEWASVDEKSDSGKNMERLRQKARRDAAGAAAASAEQKRKNKK  
IRFE

>comp12238\_c0\_seq1; 622 455 2756 LEN=2756; translated  
MAAATTGMDTCLCERRTQQVPKNDPNDFDFAALGSPKSKRPQSVLTQDKTTALVRKHRT  
LRLLDKYKTQSSVDSKYEWKDEKEMIGEGAYSKVYRAVSKEDGEVVALKNISKKYTDSQYF  
QQEVEAMLYIQEKGGPHLISLHEHFEDGNSYILILDFIQGGELFDHLIEMGAYSEMDAS  
RIVREVASALLYLHGIGLVHADLKPENVLLTTTRRGDSVVKVADFGTAVFVGNDTGTTVT  
NKKKLKPEPVYGAFTPAYSPPEVLRTEPIQPSMDMWSLGVILFIMLTGCHPYDVS GEST  
DEEIEARIKSTKYRIPINDREIAGHLSKSAKDLITKLMNRDPKRLTAYQMLQHPVVRGE  
TATTAIQGSDQRLSKFRVFKSRLQAKFFENAIRWSDMSHDADANAKRKTSLIERSFKAF  
DSDKDGHVYAKDVLGTDEDNIEEIVEGGGPTINISDYENLLSENMENKYFAAGHTIYEEG  
DEGHAMYFLESGAVEVIADGTRAVRTSGDFFGEGALLHPRNVRSATLRCLTPVHALKISQ  
EYFEKYIASSSSGLYLTLEKEDKIRKRNRAKTILRMQAGLKTAAKPKSKFYVEGDHGD  
MWILEKGVDIQVAGGKAVFSVYPGNIFGEHAVITGNSRNCDAVCVSKEGCVAQALQGRE  
FRKLLASSTSVQDSLKELYLRREFKKAIVMRMRKNFPYDDPEEAFAAADEKHVGRRLDKGN  
VSALMREMNP DFTDEEVEGVIHALNLTGSGSVTFEEMKKALIGDIRTX

>comp12239\_c0\_seq2; 687 396 2427 LEN=2782; translated  
MHFIGNNGDXLSIRAIATESSSQQQQQLNIKQRHHRHRHFSSATQSSSEDEEYDDDKN  
NNAPKLRKSKSIIIDPNEVESKRRKVNDVPIREVLDKHSFRWLNPIISQDATIRDAVPTV  
IEGLSGMMVVEGNDNRVVGLLTSRDLLRMMAGFKEDGLSDTEILDSVVEDYMTPI SQ  
VIYARPSETIGMCRSLMAKLGKCLPILSDEGKVEGLITARDMNDYGLSATDKGKKAYL  
NDISERVGLSSDTSMAEPPTFMHAHLALQKPLFTNLGIAELPHPFKTHDGVGFNRDYG  
PEDLATDCSLSEDAHFSTRVHLEDEKDRVLRDVTYFGVADGVGSRQYGVDPRLFSTKLM  
EECENILLEACHRDKNNGGKFRVISP GDILSQAYERVKAENIIGSSTACVALFDCIRH  
QLHFSNLGDSGIVLVRHIDSDVAGTLKRDRITPRAERTSDLRVAFISQQQLHSFNHPYQL  
GWTGEDTKDDKTSFKSAHDSCTTSIHLRRGDIIMATDGCTSSNLCIDAASRRRCRLNRYC  
GAYGFRILSNAXNFVFFSLVTVFDNVDIDDVAKIALEWEQSVGLIRGGDVAARDKRWAS  
GNSLTLLSSEKVGSLATKLC EAAREASLDNTKDSPFAMLAKDNDIMWSGGMPDDCTVIVA  
HVVGQAADDLMDVGNK

>comp12239\_c0\_seq3; 657 396 2257 LEN=2753; translated  
MHFIGNNGDXLSIRAIATESSSQQQQQLNIKQRHHRHRHFSSATQSSSEDEEYDDDKN  
NNAPKLRKSKSIIIDPNEVESKRRKVNDVPIREVLDKHSFRWLNPIISQDATIRDAVPTV

IEGGLSGMMVVEGNDNQVVGLLTSRDLLRMMAAGFKEDGLSDTEILDSVVEDYMTPI SQ  
VIYARPSETIGMCRSLMAKLGKCLPILSDEGKVEGLITARDMNDYGLSATDKGGKKAYL  
NDISERVGLSSDTSMAEPPTFMHAHLALQKPLFTNLGIAELPHPFKTHDGVGFNRRDYG  
PEDLATDCSLSEDAHFSTRVHLEDEKDRVLRDVTYFGVADGVGSRQYGVDPRLFSTKLM  
EECENILLEACHRDKNNGGKFRFVISP GDILSQAYERVKAENI IGSSTACVALFDCIRH  
QLHFSNLGDSGIIVLRHIDSDVAGTLKRDRITPRAERTSDLRVAFISQQQLHSFNHPYQL  
GWTGEDTKDDKTSFKSAHDSCTTSHLRGDI IIMATDGLFDNVDIDDVAKIALEWEQSV  
GLIRGGDVAARDKRWASGNSLTLLSSEKVGSLATKLC EAAREASLDNTKDSPFAMLA KDN  
DIMWSGGMYMCQCASIEKII

>comp12239\_c0\_seq4; 613 396 2385 LEN=2881; translated  
MHFIGNNGDXLSIRAIATESSQQQQQQLNIKQRHHRHFSSATQSSSEDEEYDDDKN  
NNAPKLRKSKSIIDPNEVESKRKRVNDVPIREVLDAKHSFRWLNPIISQDATIRDAVPTV  
IEGGLSGMMVVEGNDNQVVGLLTSRDLLRMMAAGFKEDGLSDTEILDSVVEDYMTPI SQ  
VIYARPSETIGMCRSLMAKLGKCLPILSDEGKVEGLITARDMNDYGLSATDKGGKKAYL  
NDISERVGLSSDTSMAEPPTFMHAHLALQKPLFTNLGIAELPHPFKTHDGVGFNRRDYG  
PEDLATDCSLSEDAHFSTRVHLEDEKDRVLRDVTYFGVADGVGSRQYGVDPRLFSTKLM  
EECENILLEACHRDKNNGGKFRFVISP GDILSQAYERVKAENI IGSSTACVALFDCIRH  
QLHFSNLGDSGIIVLRHIDSDVAGTLKRDRITPRAERTSDLRVAFISQQQLHSFNHPYQL  
GWTGEDTKDDKTSFKSAHDSCTTSHLRGDI IIMATDGCTSSNLCIDAASRRRCRLNRYC  
GAYGFRILSNAXNFVFFSLVTVFDNVDIDDVAKIALEWEQSVGLIRGGDVAARDKRWAS  
GNSLTLLSSEKVGSLATKLC EAAREASLDNTKDSPFAMLA KDNNDIMWSGGMYMCQCASIE  
KII

>comp12239\_c0\_seq5; 731 396 2299 LEN=2654; translated  
MHFIGNNGDXLSIRAIATESSQQQQQQLNIKQRHHRHFSSATQSSSEDEEYDDDKN  
NNAPKLRKSKSIIDPNEVESKRKRVNDVPIREVLDAKHSFRWLNPIISQDATIRDAVPTV  
IEGGLSGMMVVEGNDNQVVGLLTSRDLLRMMAAGFKEDGLSDTEILDSVVEDYMTPI SQ  
VIYARPSETIGMCRSLMAKLGKCLPILSDEGKVEGLITARDMNDYGLSATDKGGKKAYL  
NDISERVGLSSDTSMAEPPTFMHAHLALQKPLFTNLGIAELPHPFKTHDGVGFNRRDYG  
PEDLATDCSLSEDAHFSTRVHLEDEKDRVLRDVTYFGVADGVGSRQYGVDPRLFSTKLM  
EECENILLEACHRDKNNGGKFRFVISP GDILSQAYERVKAENI IGSSTACVALFDCIRH  
QLHFSNLGDSGIIVLRHIDSDVAGTLKRDRITPRAERTSDLRVAFISQQQLHSFNHPYQL  
GWTGEDTKDDKTSFKSAHDSCTTSHLRGDI IIMATDGLFDNVDIDDVAKIALEWEQSV  
GLIRGGDVAARDKRWASGNSLTLLSSEKVGSLATKLC EAAREASLDNTKDSPFAMLA KDN  
DIMWSGGMPDDCTVIVAHVVGQAADDLMDVGNK

>comp12240\_c0\_seq1; 271 378 1284 LEN=1284; translated  
MNATIHSQRAILVVVVVLSLLAATAAAAANSIQTHFGGVSFAGGMSYDAEHQTVYVTGQV  
GPHSCFVGLKRVKAPAEGAQTKSAPVEPATGLKFLSKQTF SERAICQTIAFRRDVSRPG  
NALLLSLSEEGLLTDKREEGSRAMHYGGLVALQYSADGTSSHYAPDHSVLMYQTAPVT  
VPRSI TNDPKHTNRVVFASMTSDSKAIEYRNALGTPHENDGLGLTTVPNLTPGGGLLYG  
NNFAMTVESIRLATEFSDAQIQWRKPFVVKRNGSSVRRRTGVTVNQILSHRIGGEGGDD  
DDX

>comp12241\_c0\_seq1; 1271 258 4529 LEN=4529; translated  
MRRSRREP NLERTKSGRVKSSGASSQQQQQQQORGKSPRRGKSPRRTKPKRTKSGD TDL  
RRGVRRTQSGDTVSSRKKSEGKSSGKSSGGDGLRSERTYNDNKNKNLLLTIPKE  
YLSKPEKAEPILYYLPKTAQSHGGANAALKSNGFPSLRSLAAQDDIRLHRARQQAAY  
RDTKLLSTYKIENDQLYLSRQQLHERELLGKLDMERRLIVKELLERNTTGLTAKEATA  
IQLARWQRALELYVYDPPARLEDIDQRGLPNAPGPEAGGVAQAQLDEPESKEKMDFWT  
XLEKLREIIG EEDGMTEFSQAANMCSTLVDVTRQVTKDSTDAVLEVADAYQIRLEAHEL  
FCRNALVRTEEIQNQFRINGRAALQIGNQLEFAESKRKRCEASMLIRRWWLMESLAEQE  
NLSGEPLKVTEEVRGAVPLTSCRMDPLFTRPENSIEASRTLRLRQVVKSRGNAANMQ  
TGKWEKSDVTSSRRFDLTADLIRRTSEALEERLLNSFSDIYGRGGAYEFGAMGRAGTINW  
QELRN IARACWMFEGGRRLFETYVDIVVATRLPELFDTEKMKRVGMVDGEEKEEEEFDM  
DTARTQLSSLFNRVSEVFTQEFQLIGHVFVDSDEADGALTESIPLTVARALCVRVIGDPK  
NGLQAKINSLDKIDRKSDFDTGTKKLDTFVI IHDKAASL FELKDAEASLVRDKNAGTK  
ARNAVESLKVFLNSQEI SLNNSHRTGYLNLELRLHHECCASLDQAGCILTRPTPMKMNQ  
NLLDKGILEEYQAPHL SLEKNSLKKSGFNDILSGPLKSSVLRQPLIHATDSLARARLMFG  
NGKEVGESASRVVTSIYHQMCIFYGQGFLYPIVEALQEMLKSNNPHQAPQLPFDEEQPAH  
DLGIDPAFWVALERIHSAAKAFDRELWAEPRKGSNRVWDILSSGGDASDSGNTIALARDC  
RVDFNELESRGEDAILRALDTLSAHIQWILVTGSEAAALSSGGGLFKSNVSSGGPYAMN  
SGAALEAPNNPAVKSLTYCLRVQFVHIQAALTPQSLSAFWSALSMRLYDILVTRLLQNWY

VSTAGAVILARDVEALRSVAMLAGTKHEHWDILRELLTLYMTPPDALKIMLVGPEGDPNS  
GKGLFGSAGRDQSLVFMSSRRVDYRYKTNQGRKSAAWVILNELHVRDPTDSYVNMGFLO  
LEENEETVXLIYNIKQVYLLKHLLEGDWKCSIRPSLYLLSQHQVSSSLRYESSCSLLDEYK  
SYNRVGVGDPTLAPLSWLCLNGKRKKGTRWERFWDPEQLPSYRGQKHSRCDHRSPTML  
IKVPYGSVAIVGRGVANMTWIASSSSIHKVVNAIQDGTSEEPSRIFMPPKRCLRGSATNI  
ALCRFIEMPSGRSPITDAIKAADADQNAEQMFRRIAIKMKHKMWV

>comp12241\_c0\_seq3; 573 1 1811 LEN=1840; translated  
ASNHKTKKQAPKNRYQSTRSSVLGAGMTRPQAPQTLSPPSVAKKLSVSPQSGSTAVTT  
LTGASPPSSSSQYGTNPPKQPSSTTYSDRILQASAKSQTNKMASLTQYLREEDGQPQRE  
PRIAIQLPANLLKIPFDDRDNEEDKKKQEEESDRMKLKFVSVKSVKKQATMMKLWTASTK  
AQGETSNDGFDGERSMRFPSVGGGGDVYVGGSYCDLDASERTNLSSVTGSFPGAGSNNHS  
NSNNNSNSVLESATKAFGAQVQASKRQSMASLLSTPWKTTKKQIRRLSLSASHTNNNH  
NSDSDNCNCNSMAAAAATATAIALGEESDHEADHEAHSXRVFPERQPGPALLRTHGIE  
TGPRAGPAQPLLPWNAAVRQQEKHFPGPSVPGRRPRTGRRTTDVAPAAGAQVGRQGS  
GTQESPSRAQEAATAEDVPAQSRTPEAAQRGTQDLAEDRHALQRDRKTKNSPAGGDDEGI  
LHLLHGCFRGAHGDPQQRREAEKQDPFCPRRGMQNDRFDEGERTTQSHKRETEGFDRV  
KHQPCGAVLRNMPVLLRYGGCNGASDTTRVSDARHLDFRYCATVRSFLRLVHFRRIHNS  
HSP

>comp12241\_c0\_seq4; 743 360 2579 LEN=2627; translated  
MGPFVLAETTFPSLGASTSSKSSGSGSVKARPEAYHSNHRGIRVSGWSSEATPTKPNKKG  
SILAPAASTPTSTGTTTSTSTSSSLEDNFNGEQEHNVEVIHSSPGRRSQRNHPYSYRPN  
DSRTTITSTRKVEHEHQEEDPANAKMSLQLDRYGFITNIDSKGRILETNGAENIKVP  
SYADSETERREKKWKATLQGWKQARQQGVGGGTGGSKQLKQPSRQHGSSAGSGPSGSS  
PNSGILQRKPAPRNHSFASGNKVVLRRLRKGVPDSVRGKTLALGGGIRVPGMYQDIVRV  
TSDAMLTNCRELQRTHEALHSTASGGRSSPSSNTGGSGSGTPESSNPASTRTSPTS  
SEVSTFTNPSPTKPNKGASSSSPEEAKPSVGNVDAASGGRSSSPTTPRSSGIEKDETK  
PSGKEKSGCYAATRDFRSIQDIERDIHRTFPRHNLFYEEERSIVESPSSSTGGDREDPF  
ESPSAGTTPGDPELAALILNLEMDLKVAESRDMASANNGLKQYKLHDRTDHTITATTQS  
GQAALRRVLRAYSYYDPEVGYCQGMNFIAGMFLTLMTTEEEAFWLLVSVMSDKPCHMRGLF  
GEGMLQTHKVLVAEKLTHHYLSRLARHFKEKHVHTMYATQWLLTQYTSSFKFDLVVRV  
WDAFLGEGWKIIRVMLALLLKYQPRLLKMSFEEILTFRELPERVEGGQIMDMALKIPL  
RRKVIARYEREWESQKKK

>comp12241\_c0\_seq5; 794 256 1984 LEN=1984; translated  
MDRTPKPSGSHDAAGNGGCCYQIDCQTSKKGRMFAGSKRRICWRFGFPSAEALERGRSGSD  
CRGEEHEVVFVWLSLTSKGFVLCGHEVHWSKESAFSVKKTTPFDGGGWKWTWESPMAGAN  
RSLTVVAHGPGAFFDKRKINNSNSNSGSHHAKSSSSSSTTVESGFRRIEFLVDGVSFS  
ELPFVFEELGGHKGHGERTNASANANANASPNPNSSAIPIANATPNTTAGTNANMAAPST  
EIQNQGFLLGASNNAAWNTAAVNPATNNPVHNMNMLNPLYLLEAAPVAATEVANDSGSNN  
PAGNGSNSSISSTHASIMQQNALIMEQNAAALQHLQQTNNFLAANPGASLGILAPIMNMN  
MSMSMITGTNTINANPMAAGAQPAAAGNPAAAYQPAQSLAATTAEEGAGANPGVLLP  
STLAVSQQIIAAAAAQAHPAAQSGPLAAGSAGRADGSSGSGSVNNFLRTAILQNSGL  
PLFQQPLVPLPGVPPTFAIDASNTNGLLVAVGDNRRATEIKNGGTNGTSHAALADAG  
SNGNGNGAAAAANAASVLP IASVNLPLQRQQQQQX

>comp12241\_c0\_seq6; 686 1 1430 LEN=1430; translated  
KGTKRNRTRRSRSREPNLERTKSGRVKSSGASSQQQQQQQQQQQWQPPPREEQQQQ  
HYGRERVSQIEFLVDGVSFSELPFVFEELGGHKGHGERTNASANANANASPNPNSSAIP  
ANATPNTTAGTNANMAAPST EIQNQGFLLGASNNAAWNTAAVNPATNNPVHNMNMLN  
PLYLLEAAPVAATEVANDSGSNNPAGNSNSSISSTHASIMQQNALIMEQNAAALQHLQQT  
NNFLAANPGASLGILAPIMNMNMSMSMITGTNTINANPMAAGAQPAAAGNPAAAYQPA  
QS LAATTAEEGAGANPGVLLPSTLAVSQQIIAAAAAQAHPAAQSGPLAAGSAGRADGSS  
GSGSVNNFLRTAILQNSGLPLFQQPLVPLPGVPPTFAIDASNTNGLLVAVGDNRRATE  
IKNGGTNGTSHAALADAGSNGNGNGAAAAANAASVLP IASVNLPLQRQQQQQX

>comp12241\_c1\_seq1; 188 1 1072 LEN=1225; translated  
XQQQQQLNASLAFVGTQASGSGVGVQVAANNSVQVAAAAAVASMKSXPLDAPPAATA  
PPGHVPAGHHQPPPALSAAARGAAATAGGPGTTAAEPVPSARTGHGGSRCPEPLGPET  
PANNSTAKSTAKGIPGVSAPVPGARLQLFDSLVLSSKTNRVVRGGRGRNEGNCPCGKEY  
TTASWPGWDSLQALFPDESCKTEXGASTIRGPLMAFEVQYRHASWKDGSRFVSSSTYS  
NKLPHELSTNETILGLIGFVSNRSFVTHSSLPIDQVAQNMSKLFHMKACTMIPESTKKQL  
ISLQSVSSRASGGKEYWAEGLRVLGVEDEGVLRFSNSTSSSSQAPAVSNQASKSSK

>comp12241\_c1\_seq2; 196 1137 1340 LEN=1493; translated



MIPESTKKQLISLQSVSSRASGGKEYWAEGLRVLGVEDEGVLRFSNSTSSSSQAPAVSN  
QASKSSK  
>comp12241\_c1\_seq3; 254 1 902 LEN=1055; translated  
XQQQQQQLNASLAFVGTQASGGSGVQVAANNSVQVAAAAVASMKSGLSTLHQQQPH  
LQAMPQATINHHQHYPQLPGVQPPRQAVPAQPPONLYHPQPELATTVGPAPNPSALKH  
RQIIAQKQAPKESQGSRPLYLEHDSNCLTAYQCFLRKQIELFEVGEDEMGRGTAQGRNT  
PLHRGQVGIRCRHCSHLTKAARPRGGVYYSRTIDGVYQVAQNMSKLFMKACTMIPESTK  
KQLISLQSVSSRASGGKEYWAEGLRVLGVEDEGVLRFSNSTSSSSQAPAVSNQASKSSK  
>comp12241\_c1\_seq4; 196 967 1170 LEN=1323; translated  
MIPESTKKQLISLQSVSSRASGGKEYWAEGLRVLGVEDEGVLRFSNSTSSSSQAPAVSN  
QASKSSK  
>comp12242\_c0\_seq1; 295 91 1611 LEN=1621; translated  
MNP SKLLLALALLAGPSHALITPLPTKLHVAVTRTTPVVRPSAFP GSSRLAVAGGTTRSL  
EGEADLGVKEKPLPRELMPITLGVFAQMLGEGISLSSLPYLTRLGATPTS VGLAISCF S  
LAQMTFAPVLVGLSSRIGRSVVLRI CLAGAIASSLLIAFSGSVYGI IAGRTLAVGFAACV  
PVAQSGVTDVLDKDTALGLSRVSAASQLGVVVGPAASAIFQEAFGAMGLAPTRCLPAVF  
CLTSVFKLCVLI LMTLMNRRSGVPASPEAKAVREEEPKQEETTGD RKQEPGVGKKD TVRF  
GQMLRTITIAMGWTA ILSNSIYGLFAPKFLGFSQPQLSATYSVGAALMVATQVVFPRLV  
AKFGEYRVCTLGILAAGAGIGGQSLFRSQPFHSALYLANRGGAAVADTSTASLVARLSGT  
RASC SRNLALLTSTRAASRI LTPLLSSKMFEVSCRRG SVLPPGALPFVTAACFAMAVAPL  
PTLLKRAEHRGSDSSRTNDKHTQSRT  
>comp12243\_c0\_seq1; 348 187 1233 LEN=1522; translated  
MSNSNQRP PKWLM DRITGQSKYND RERPPAPCCWVPPCVAWFP ELLETNGCCKIFGGMG  
VSTEE SFRMLCLHMGFVANIGAMILTAYTCL SISLQYFLLSMASMEILEYTEMVQYPNVG  
QESPE TVTIYTGLQGVAMNPSLATSPTGQQIVIGYDDFCAFSNDGLERYLDPTKDCSSC  
ASTFFSMNAVLSILISVATFFPTFFSQQLRMYSYDINCVKNFLTILGLVTIFLNLNVM L  
TYFYLC SKESFYRDGTIFFNEEG IASSVAPADGFYWRVEYQWKWGWGLVFLVAGTALKLI  
DLLCNLAVPTPSVTRDRKEQDIYETIVFASPADDTDDDEINQNDADPI  
>comp12244\_c0\_seq1; 430 437 1603 LEN=1675; translated  
MDARASDSEIYSCSREDNNRDAVERWISAVVWSLKLDFSNTRHSKEIKDLLFLEDEAGFK  
NASLPSSTHEKDSNDVGEKLP RWIVRGIPEKPRYKEV GIRLFEWNQRYLRFRETSTNGGG  
VLANQRI AIPAEQLGFEEHGFGE STMGYNPSSSSSGHP EEGTTPPQSIQGVRSWLSVAGD  
RGILRLLGLRDTAGSVLP IERRLLPSRAELQRAAAVLHEKKPKPGNANANTASPPSRA  
HNGVSRPRAKQALLTVAARARSKHAHRALTEASFFGVARGSVARQNRETSDLLAELMDDC  
VWINCHNFGGVNKD TSSSWVLEIRQERGYGARWLEQPDAAATEADDGSTGCFLLRPGHH  
QKDRNLSVSFRGFLEPQAEDGHENRRH  
>comp12245\_c0\_seq1; 542 1 1827 LEN=1903; translated  
XQQRKEKERQEQQKQDR LKLLAQQQKEKERQDRELQVQREVATFEAPT KRKGQATARART  
EIASAASTRNICDSANAVTDPTGNPESSPMAADKEALQDAVSVPKEVPESVIRSNTKTSK  
QIDPQTVRPASKSTILAVSPSGGLETP LHSTRMQTGAQDES PDSTGKINTISKFLQPKRI  
AIRKEEGKQVEEHTKR LKSKDHEKAAMTTPPATAKQSGADSPVASLKLKDSNSMPFTSPK  
PKMKKRKNSSLPNAPT KRKKS SVVSENVLPEDSSSSTKSLNASSAKDTSAPERKRDLVAL  
NDGPEPSESEVVSTALLLTKLAGDKAPKIVPISKKPTSEIATAIESKPIAVGTPETPAVD  
GGRSKETSQAKSKSKPLAIAKQQQAPKLKACAPTGKPKLVPKSTPN SKPHAPVQQQSQIP  
SRETL LNERINEQYNQLCAFLKNFTDQSMKLIHARNLRGPIPSALDDRKQLDAFSKLREE  
HRAAHNFLQSRLLRS AEATLFL LKESRISSEEARTQLRQC IKKFGKILYDTLHRQEMERL  
ALVSKIPKSRSNLAKNRKQGMSSIPSSRPTEEQSNYPCKEAF EKVEHICAAITRPVGRPR  
SGPAALRG  
>comp12245\_c0\_seq2; 602 1 1870 LEN=1946; translated  
XSSLQQQRDR LKLLKQQRKEKERQEQQKQDR LKLLAQQQKEKERQDRELQVQKEQLRLLK  
HQQKEKDRQOREREQRLHLQHQQETYAIPQTPSPIHTGNPESSPMAADKEALQDAVSVPK  
EVPE SVIRSNTKTSKQIDPQTVRPASKSTILAVSPSGGLETP LHSTRMQTGAQDES PDST  
GKINTISKFLQPKRIAIRKEEGKQVEEHTKR LKSKDHEKAAMTTPPATAKQSGADSPVAS  
LKLKDSNSMPFTSPKPKMKKRKNSSLPNAPT KRKKS SVVSENVLPEDSSSSTKSLNASSA  
KDTSAPERKRDLVALNDGPEPSESEVVSTALLLTKLAGDKAPKIVPISKKPTSEIATAIE  
SKPIAVGTPETPAVDGGRSKETSQAKSKSKPLAIAKQQQAPKLKACAPTGKPKLVPKSTP  
NSKPHAPVQQQSQIP SRETL LNERINEQYNQLCAFLKNFTDQSMKLIHARNLRGPIPSAL  
DDRKQLDAFSKLREEHRAAHNFLQSRLLRS AEATLFL LKESRISSEEARTQLRQC IKKFG  
KILYDTLHRQEMERLALVSKIPKSRSNLAKNRKQGMSSIPSSRPTEEQSNYPCKEAF EKV  
EHICAAITRPVGRPRSGPAALRG

>comp12246\_c0\_seq1; 124 1 436 LEN=1211; translated  
XTNQVRNYTFKMFVFRHVEVGRIVLINYGPEKGLATIIDIIVDQNKCLIDGPAELTGVS  
RQVIVSYSRIALTDLTVKIQANARQKTLKAWSEADTLAKWEASSWAKKMSAKKTRANLSDF  
DRFKVMVAKKQKSEIIAKKMVELGA

>comp12247\_c0\_seq1; 352 375 1010 LEN=1250; translated  
MKTTTAAIILTSTTAAVSGFSVLPTQTKTHAAIHTNTQLYGLFDGVKDAFTQPPSSLDSE  
R ETPIDRWMGWSVVSSENEVKEGSAAPVDFVDSMDEKNYIGVELTKPMGIVFEENDSEYGGI  
FVQSVTEDGAAAKDGNVQAGDQLITVGTKNVSGLDFDEALGAIIESTDELTSLSFFRGT  
AKQFYGPTGPSKEWLGAFCEKGGVAASAAASE

>comp12248\_c0\_seq1; 476 82 1005 LEN=1069; translated  
MSKFLQAFALFLGIAAISRRCRAFSAVAPTVPNGSIKIDIQPVNGGEKLALEDYLKND  
GKTLFIFGTYAADFNAIEYAQRLRYLPILEEECGVTKFGVVLNCPDAALAMADVLDL  
TTKVDLFDVNTGAAGKKWGVSRGWLPDNEVDNPFLLKLFGLWGLGAWATLPAVIGGYIGN  
PFVFPQRWIEDALAVGQNKDRWPNTALELSQDGKSIIEVNKFTELPVVGTPRRRPLELATL  
RLQSMIGISLKDWEKLPDEEALNSGVLTLQGGCIVVDGTTLETVFDWKDPGICAVANFED  
LINKLKA

>comp12249\_c0\_seq1; 999 1 2786 LEN=2962; translated  
AATYRKMMLKMGMPDGAVLQKMNVDGVAQNIQDSVLAGEEPLASRSTYLTAABAASAPVP  
QGMALVQKDAAVIQDGMVLPVPEKQAEKLVPEGMVAIPKDKARDGIPEGYVLPKQV  
RGPDDDLILVKKDQKDEVPYIIFMGPENPSPNKVKGEGNENVDISGANIVSMDNLSDEV  
K KLHKNEKGSRPRFLQALPEDKEMEDDFIRKNLLPASSPREPDRPPKKTAPSSSVAEVLA  
QMSSMGGEFDAEKMQELLEKLETAEKRQKLEKQLAAAGVAIAEDIDYDVCVKKVEAIG  
K RMNEIGGSDVTHPDKEEQNRLREEYFKLEQEMDKYSSAMLI TDEYLAEQARIEKKWEDD  
N GPANLAALKLRRHMPVEVRNMSEAQLTNEPTPNGKYLPAIAKKFKRSNVLQLIRRNPD  
DIVSMHPATLENMRVASLTLTERRAVYEHLKTCGPKWFAQKAEKMTERKWTWYKMMKDNF  
KENVAIWDRHVAQYGGPAGHPYATRANPHEGCLIGKQCPLKADKVIDYDKEDYGYTDKA  
VYEVSEVRKADVDDQAKAKAEALALMKEKKANERSDTLKKHYKGLLQVAKANGSCESM  
DEIVDKIEFGMTSWIEEMIENGNDVSKLTDNKKKEVVKINNVLSEIKSPILDICGRSGM  
QLSGKKTNDEKPDPRSIIVECSLSLEVI ESFDFVFAKYVKDRLQELGMADTRIKSTISMLKN  
FLDELNERNYKTLKSASWQRLPRSRKLLTRKDI EDEIKKKKMESEPDVVEEAGGPPLPGP  
PRGGLMDA IKGKFIADFFVFTCYCLQHALNCLFRSVF GGRGGGRGGLLDAIQGRGRGRGG  
RGDGGRGGLLDAIQGRAVVEEAEAVEEEDCWMQFRAVAVVDVAEREEEEVYLTQSKVEV  
V DVAEMEEEEVYLMQSKAGVVVTEEEEE

>comp12249\_c0\_seq2; 1067 1 2704 LEN=2880; translated  
AATYRKMMLKMGMPDGAVLQKMNVDGVAQNIQDSVLAGEEPLASRSTYLTAABAASAPVP  
QGMALVQKDAAVIQDGMVLPVPEKQAEKLVPEGMVAIPKDKARDGIPEGYVLPKQV  
RGPDDDLILVKKDQKDEVPYIIFMGPENPSPNKVKGEGNENVDISGANIVSMDNLSDEV  
K KLHKNEKGSRPRFLQALPEDKEMEDDFIRKNLLPASSPREPDRPPKKTAPSSSVAEVLA  
QMSSMGGEFDAEKMQELLEKLETAEKRQKLEKQLAAAGVAIAEDIDYDVCVKKVEAIG  
K RMNEIGGSDVTHPDKEEQNRLREEYFKLEQEMDKYSSAMLI TDEYLAEQARIEKKWEDD  
N GPANLAALKLRRHMPVEVRNMSEAQLTNEPTPNGKYLPAIAKKFKRSNVLQLIRRNPD  
DIVSMHPATLENMRVASLTLTERRAVYEHLKTCGPKWFAQKAEKMTERKWTWYKMMKDNF  
KENVAIWDRHVAQYGGPAGHPYATRANPHEGCLIGKQCPLKADKVIDYDKEDYGYTDKA  
VYEVSEVRKADVDDQAKAKAEALALMKEKKANERSDTLKKHYKGLLQVAKANGSCESM  
DEIVDKIEFGMTSWIEEMIENGNDVSKLTDNKKKEVVKINNVLSEIKSPILDICGRSGM  
QLSGKKTNDEKPDPRSIIVECSLSLEVI ESFDFVFAKYVKDRLQELGMADTRIKSTISMLKN  
FLDELNERNYKTLKSASWQRLPRSRKLLTRKDI EDEIKKKKMESEPDVVEEAGGPPLPGP  
PRGGLMDA IKGGRGGGRGGLLDAIQGRGRGRGGRGDGGRGGLLDAIQGRAVVEEAEAVEE  
EDCWMQFRAVAVVDVAEREEEEVYLTQSKVEVVDVAEMEEEEVYLMQSKAGVVVTEEEEE

>comp12250\_c0\_seq1; 227 102 878 LEN=1436; translated  
MLRNVSVLGLRQSSRLQSSTLRLRLPAKNSNALNKLHFNQNRDISQKVLAPLASTIGLRS  
LSSQAQEPPKKDGGDPDTKEIVLTPGQKVAASRLTMWAGIFAFACGCAYFIGKELIPT  
KMSPNVFNSSSKVIRANSQVTMKYEGEIKFYGKDHGHRREGRRNFIEHTQYTDQEDGSK  
RTRVRFNMEGQFDSAICFAEVSSDMPSGEFVYVLVQDKRSGRVITVIDNRAALTAKRMAG  
GNQETANAMQQLLGGNNK

>comp12251\_c0\_seq1; 685 1 1502 LEN=1647; translated  
XDGASQQNRRYKYEYEHYHLGARQSKALGTSSSRQIQEKPTTQRKKGKGISNEPNPNTPT  
KTRQDKRRQDKTTDPMFSQTLRRTALSCGARACQHHRALAAAGRVRFLNLHEYQSAKIME  
DAGVNVFPGI PAHSVSEAVEAAKAIGDEEVVIKSQILAGGRGLGKFSTGNQLQGGVHIIP  
TADVEEFAGNMIGGTLVTKQSGPAGKPVNTVLLAKKMSLKREFYFAIMMDRESQGPMI IA

CDEGGTSEDLAESNPEKIIKVPVSLEEGITDEQIATVVNGLNPSGDKALAGEQIRALYQ  
LFVVDKCTMVEVNPLAEDQDGNLIAADAKIGFDDNAAFRQADVFAQRDESQEDPREVAAS  
AYDLNYIGLDGTIGCMVNGAGLAMATMDIVDMHGGTPANFLDVGGSSATTEQIEAAFRIT  
EDPAVKAILVNIFFGGIMRCDVIAEGIVEASKSLSLTIPVVVRLEGTNVALGKQILDESGL  
DLISADDLDDAAKAVAAIQ

>comp12251\_c0\_seq2; 678 1 1476 LEN=1621; translated  
XDGASQQNRRYKYEYEHYHLGARQSKALGTSSSRQIQXEANGISNEPNPNTPTKTRQDKRR  
QDKTTDPMFSQTLRRTALSCGARACQHHRALAAAGRVRFNLNHEYQSAKIMEDAGVNVFP  
GIPAHSVSEAVEAAKAIGDEEVVIKSQILAGGRGLGKFSTGNQLQGGVHIIPTADVVEEFA  
GNMIGGTLVTKQSGPAGKPVNTVLLAKKMSLKREFYFAIMMDRESQGPMMIACDEGGTSE  
EDLAESNPEKIIKVPVSLEEGITDEQIATVVNGLNPSGDKALAGEQIRALYQLFVVDKCT  
MVEVNPLAEDQDGNLIAADAKIGFDDNAAFRQADVFAQRDESQEDPREVAASAYDLNYIG  
LDGTIGCMVNGAGLAMATMDIVDMHGGTPANFLDVGGSSATTEQIEAAFRITTEDPAVKAI  
LVNIFGGIMRCDVIAEGIVEASKSLSLTIPVVVRLEGTNVALGKQILDESGLDLISADDL  
DDAAKAVAAIQ

>comp12252\_c0\_seq1; 420 47 997 LEN=1357; translated  
MAQLEYNLPILILGSSKSLPMPKAGGAVSSTPNQGASTDPVVSSSIGDASNTKHTKIPT  
VAESPASLYSEKLIPDNVVPDIVEELLVTLGLIQREATADNNGTTVRQPRFAVHFHGKPKQF  
LVTPTNILSEIAKAQAEIQASRQRQELLEALGLSDQLAAEKVKQIVLQHPQVVDVYV  
TALRNLQVDGMLIAGASGAAAAGSSSSSSAPNRGGTGASSKAAAAGKRRQSSGAAPAKR  
KRQRARKEARAESIDATGAPVPPPPGGAAGSSSGTKNTAGSPSATEALPAGAVSISGGTSA  
SKPSFSVSDDRSKNKQ

>comp12252\_c0\_seq2; 370 47 1102 LEN=1462; translated  
MAQLEYNLPILILGSSKSLPMPKAGGAVSSTPNQGASTVVSIDMEKMCFGANRMFSSSEL  
YLPPPNNLXFLSNKDPVVSSSSGDASNTKHTKIPTVAESPASLYSEKLIPDNVVPDIVE  
LVTLGLIQREATADNNGTTVRQPRFAVHFHGKPKQFLVTPTNILSEIAKAQAEIQASRQR  
ELLEALGLSDQLAAEKVKQIVLQHPQVVDVYVVTALRNLQVDGMLIAGASGAAAAGGS  
SSSSAPNRGGTGASSKAAAAGKRRQSSGAAPAKRKRQRARKEARAESIDATGAPVPPPG  
GAAGSSSGTKNTAGSPSATEALPAGAVSISGGTSASKPSFSVSDDRSKNKQ

>comp12253\_c0\_seq1; 320 199 936 LEN=1120; translated  
MEEHVLEWVSIGASAGVAIAAVILAPHVYRIFWPRIITYPWNEEAVHGASGTMDQQRV  
FAASYNPPHYGHLRMLLEHLSRRYSKVIAVVGFNPSKKYLVSPQERADLLREMLKKSSTG  
DNVEVVVDGYIWRYAKRIGATLFFRGIRSWEKDGRDERMLQILNTWGPVLYGPLFIP  
TVYIEGDPTYNHVSSTLIRTICTSTGGKEQQQQTAEQKKNKEAMLSELVPSHVAEKVAKL  
YDTNQ

>comp12253\_c0\_seq2; 166 199 602 LEN=1364; translated  
MEEHVLEWVSIGASAGVAIAAVILAPHVYRIFWPRIITYPWNEEAVHGASGTMDQQRV  
FAASYNPPHYGHLRMLLEHLSRRYSKVIAVVGFNPSKKYLVSPQERADLLREMLKKSSTG  
DNVEVVGXDVPWSP

>comp12254\_c0\_seq1; 191 409 831 LEN=1080; translated  
MKSFKNLLKMSKQAFEEGFDIGILPEGQLNPHPEEKLLPCFPGAFTLAKMSRRPIRFMAL  
HGTHRFWHAREDIGMTVTGKDISLRVYPGEGRKYSSPEEFVSTFETVVGKFATTGKDLDE  
DELNAWLDGSKWEDETKSEE

>comp12254\_c0\_seq2; 416 271 1506 LEN=1755; translated  
MASNTSQIIRRRRNNVQNGMISTKTFLYLFFTSVLATFPVGNVRAFAPTTKLILTSKKI  
HVGTTHVGHQHSYHSLRQSSPRNTSLVLASTKDADIDGATVNGGSDLFVTTLKPARSISK  
LTATLRKIGLMAFIASMLALPVALFPYLLHRLNLSKVEQQNRALRAGQFCARWLLRL  
IPFANVSCVSSPDQETDPQPCIWVCNHTSALDIFVLLAKDKELRGKRKRPKIVYWKGLE  
DNPITKLLFTQCGFIPVEMEGNAAGEKNYNMKSFKNLLKMSKQAFEEGFDIGILPEGQL  
NPHPEEKLLPCFPGAFTLAKMSRRPIRFMALHGTHRFWHAREDIGMTVTGKDISLRVYPG  
EGRKYSSPEEFVSTFETVVGKFATTGKDLDEDELNAWLDGSKWEDETKSEE

>comp12255\_c0\_seq1; 552 232 1032 LEN=1151; translated  
MRQSYRLVSRANKMPVPGSNRAALSTSSTNSSLLRRQDERIPSPTAAIRTSASRSSYHT  
TSSLLHLVHKDAAAAPTEEELAEETEETIPTWQNPLHNNPEMQMFEEDFAEGEEIPAI  
PMPPLETDPEKAVAPPHIHELALAHQIVHLNLELLEKELTEKIADHYGFDEMMAAQYGGPA  
VAGGGAAPAEAAAEKTIFFDLKLVGFDAKAKIKVIKEVRAIAGLGLKEAKELVEGAPKVV  
QKELKQDKAEELKEKLEAVGAQVEIV

>comp12256\_c0\_seq1; 815 1 2080 LEN=2207; translated  
CSSDQEVHLLIDAQKQATQGNEEKAIETIKDGVNILEQEVKRIKQMEESVTSKPKFEK  
TALYIVLHEEWAEAAAGLMADIRTMSTLYERQEEYDKAICCEEAKSIYERQAIFFDERHH

KKGSTARKEASMENMMEAIDEARETQGIRQSMHETVERIQTKLEATKDETSRGLFYEDI  
FDKLSSTVLSLELMLYLGEMHPQIANTKVLLSMYYIEIGQNDKALRTMNDAILICEIGLGD  
HPKTGTKYHEAAKLYERIGGEENVLKSIDLIEKAIATLEKAEGDHSETLASILNSVGALY  
IKQTKYDVAVERLKDAILVIAKDNNGDKSDDFSTEHVQLWLNLAECHSLRKEASLSINALR  
NAARVQRDKRKKYDALEKDVGNLPLDLLTNTGISLTLRRLGTSLAAELKFDDATDCFLEAL  
SLVKADLDTVKELAKFDPNIDLPLHQDEVASVLYDLAKVKQEDDKYDEALKLYRESLHLR  
KESDSKAVDKRSNRVACAMCLAGMGSINLLQNKPDFAFKRFNQAIYYIKQEGIPDSHSI  
ARMLWQKSHIAASDMKRVKIQSEKSTSNEIKLTTITQLEEQAEAFKGRDYVKCMKTLDT  
VIGMKRDCLKRAEEEEKRVENARCQLAVSLIAMGDTMLITNAKKKSADCLTEAYGLLKSS  
GVPANNKHFRIEKIRRSIRKMKERSETMAEF

>comp12256\_c0\_seq2; 1085 207 2707 LEN=2834; translated  
MEISSRTSSSDVAIPLKNDGDSRNSPTTVIEVVDSCGTNKFVDPDRPVDDDNVTVAFAS  
VHNLYISTNSPNSYNKEDRYVKPRKRRKDRKKYHMCILPTIQEVSKEEEEEGEDELTFGV  
LSPLEDDISSHLRAISLPSNGDVGFKEVHLLIDAQKQATQGNEEKAIIXIKDGVNILEQ  
EVKRIKQMEESVTSKPKFEKTALYIVLHEEWAEAAAGLMADIRTMSTLYERQEEYDKAI  
CCCEEAKSIYERQAI FDERHHKKGSTARKEASMENMMEAIDEARETQGIRQSMHETVER  
IQTKLEATKDETSRGLFYEDIFDKLSSTVLSLELMLYLGEMHPQIANTKVLLSMYYIEIGQ  
DKALRTMNDAILICEIGLGDHPKTGTKYHEAAKLYERIGGEENVLKSIDLIEKAIATLE  
KAEGDHSETLASILNSVGALYIKQTKYDVAVERLKDAILVIAKDNNGDKSDDFSTEHVQLW  
LNLAECHSLRKEASLSINALRNAARVQRDKRKKYDALEKDVGNLPLDLLTNTGISLTLRRL  
GTSLAAELKFDDATDCFLEALS LVKADLDTVKELAKFDPNIDLPLHQDEVASVLYDLAKV  
KQEDDKYDEALKLYRESLHLR KESDSKAVDKRSNRVACAMCLAGMGSINLLQNKPDFAF  
KRFNQAIYYIKQEGIPDSHSIARMLWQKSHIAASDMKRVKIQSEKSTSNEIKLTTITQLE  
EQAEAFKGRDYVKCMKTLDTVIGMKRDCLKRAEEEEKRVENARCQLAVSLIAMGDTMLI  
TNAKKKSADCLTEAYGLLKSSGVPANNKHFRIEKIRRSIRKMKERSETMAEF

>comp12257\_c0\_seq1; 300 114 1271 LEN=1746; translated  
MKSISAIFLAGIAVCWGPKASFQASRNAVAVPAPVRFSA LSSPFLPFPSSNMVHRDPS  
RPIPPSQRLRGAKRASPSLGAIPVPTDVLT SFLPPAMGFVKSEWTVSYGYGFATALSAG  
SLLLKQSPGVWNLASLHAAALVFYGFRLNAFLFLRNRLSPTYRAIGDEIEKKSERYATR  
LSRAPFVLSGCLLFYGLYVPVLLTTRLFASNARAVAATPVVAVAAAMKVLVGLQWFGYLLA  
AVGDLTKSYVKGSEKNGKFLVTSVGFVSLRHPNFTGEVLSWTANALCGTLGAYLLRSGL  
SPA I LGQLGLSVLGSSGMLFVLLRATS NLEDRQEREHGGTEKYTTWIKNSWCGWKL SLAA  
PKEKEEAPHEITMNAEVQEDFGSGI

>comp12258\_c0\_seq1; 345 366 1745 LEN=1873; translated  
MIVSAAGIEMTPTTTQTRIRPMLSPMKMSIRSSFIVFFALFLPLFRSSTTTSAWLPQL  
PENIGRRGVLGSFASVTTGILTASKLEPSDQLVAPDLFSSQRVRLPPSPSLPSSSFDAY  
YITPVENNIRSKLDKIDNKRFLNELTAHSGGSIWLGEHHNSLSDHNFQAAVIREVHQERK  
KHRRSRDTPMAVGLEQVQSQFQPI LDAYTSKGISIDDMKFMVQWDRRWSWSFDNYKKIFE  
VAKDLGIRLLALNVDSEDLVLVEKGGYPGLPIKQLHKYIKDPVGFADFAQTGEFKTYNDY  
VIKPSYELHQRLGLLQYTVTGEQMESEMTFGRFLSGRLLWDEGMASKAFSWCASNP DGLL  
IGLVGADHVKFENGVPGRFSRMARSKQMDTGCTTVVINPTLIDSRPMGTVSRIPTSDSAE  
YPERITLQLRYTKGAGGQSPPDNSGRDGVLSFSNYVVVT

>comp12260\_c1\_seq1; 344 1 1074 LEN=1524; translated  
PILIQTNISSDHSQKQQLILVAQSHIRFGPARRNHSFORMASNSTQHSPAASAAAESST  
PIHPGGADGADGAMSAQE QDAKTQAQMNEIHEEIRASQKLTSGLLPI SELSLTFAGGTES  
DETNGNGFLEGCAYLETVYASYRAVRGDGNCYYRAFLFAIVEHLCKKETSAAEESKRIRGY  
VEGSI EEVVKCGYDRFTIEMFH EEFVDLLG SVEKERESSSSISSALCDRLNEENATSDYC  
VWYLRVITSVYLKSDPNRFVHFLDDPSYTDVATYCTREIEPMGRECTMVGV LALAEAFRI  
RVDVEYMDGRPLNGGKLT KHTFGVNANDGSSLDGVNLGLLCITLLYRPGHYDILYK

>comp12261\_c0\_seq1; 196 1 684 LEN=684; translated  
XRCCCFMPARNPSQAAPPGRTVSSFFQPRSSVLDEKWNVEAPPVRVPEELPTEASTARI  
RGRRCRRYVPLTPNHSSWVVHVSGFCPPPSKRVFREFWEKHPPEKHSLVLF GKPVLENRY  
SQMYSVAKAKAPAKPTGRKPVDSGGSHQHEYYTYSGTTRHCLPCDPSKRDEK FVV D L CSS  
ADQIVTALLGNQNNEGRTQAHQTLQNTGEGRVGKLGVARTEDEQQQQQX

>comp12262\_c0\_seq1; 207 1 437 LEN=437; translated  
XDGTGYIAVVFVSVCKPCDPVEEPPSSSVAPVPEHPHCLEDREANVVNTKPDV MIGSE  
IISVTDLNSKSVSLDILADEDFDMVSI SYDDVGTNQRQCYQALNVTEGARLSIEAACYEQ  
YASLTVFFYVGDDFDVDDCEACSLPS

>comp12262\_c0\_seq2; 280 1 857 LEN=966; translated  
XDGTGYIAVVFVSVCKPCDPVEEPPSSSIGHEHTRNSPLLSEVTKRVEPECFDSVLLV

GKDTGNDPFC EYTSFPLIVEELDDIGSNEVRF S ITNYWVSSSSEIELVYDRGDGLGRQYQ  
SLNSLSRGTMY PFTLAAACDPTSKSAIIEVHVCNNGVLHSSSRAMCGDGSVGS CSFTYK V  
PC SADILCDGSRRLNDRNSINIEQGFLTDEMKA AAEPCNDDDDAPYCLHDDYPCQGD EER  
MVYVCHYSSISGYQTF CVPEVDS DILRFNSNHHC GPCD G WNGVEQ  
>comp12262\_c0\_seq3; 203 1 400 LEN=400; translated  
XVIAYYFELRCGSICNRVAPVPEHPHCL EDREANVVNTK PDDVMIGSEIISV TDLN SKSV  
SLDILADEDFDMVSI SYDDVGTNRQRCYQALNVTEGARLSIEAACYEQYASLTVFFVYVGD  
DFDVDDCEACSLPS  
>comp12263\_c0\_seq2; 833 201 1634 LEN=1690; translated  
MKFLRSTLSLLAMAAPSLAFVQPSLPVQRSASMGALNMEEVKIGIFGGGT VGGGIVEIIE  
SKREHFQKMTGKLNLVKSICVRDLEKPRDFTVPEGCKITTFDDILGDDSLDIIVEVMGG  
TTLANDVVCKALENGQHVV TANKALIADKLADIEGLISKVNEGREGDAVEFRYEA AAVCGG  
IPIIRSLQSDVVGDEIEMLSGIINGCTNFMLTAMDVHGQSYDEAL SEASDLGYAEADPTL  
DVGGFDARSKL KILMRLAYGIDVDEDDISCRGITELTKLDFQYAKMMGGTIKLVGVA KSV  
SDGKVA AFVSPAYITQSDSLFSVSGATNAVEIISKNLQTTTLIGQGAGRFP TANS CINDI  
VALAKGDKTPLPFNPAADNVQFVN NYESNFFIRLKYRDALGITRQVGEVCEKYGVS IHSI  
LQNPITSRDDAAFAIITEKVP ISSVKKFCADIEELDWC RGP SFYMPVLREDWESDLV  
>comp12265\_c0\_seq1; 1067 183 3655 LEN=3792; translated  
MTEDESSPSASSAIGATEEQHQQLSAIETPSVDKRQYKHISLSG SNGVQNSNRLQVLLIS  
DPETDKSSAAMDIGIGQFCDGTHLPGIAHFLEHMLF IGTTKY PDENAYDSFLNSHGGSSN  
AFTDLEHTCYFYFDVQ EESLEGA LDRFAQCFIGPLFSK GALEREVQAVDSEHAKNLMQDQW  
RMFQLSKSKLVGDNSNHPFGSFGSNAESLPTVTLGSSNDEKDEGETKDNTDSGTHIRE  
QLLEFFHTYYRKS LDLYKLVVLGKESLEDEAMVKRYFVELVDFLFGNDDGDEIKNINMGS  
TRDMLGDLYPPPDSWQVPQRLHVVPISKVHALELQFPMREIKTLYKSKPTRYLSHLLGHE  
GRGSLLSLLKAKKYATDLYADDASKSCASFSIFTIKMELTELGLE NVDEIVSMVFAYIGL  
LKEQGPQEWIHTEAQTVSDMQFRFLSQRNPMDYTCSVAGFLQQYPPGLCLSGPYKTFEWD  
ADLVTECLASLIPDNLFMLVSSPTFEGSTQETERWYGTQYNTVEPN EALWSHWKNI ESSA  
YPALRLPFVNDMIATDFSLIESPSSVPKNK PQCIHQDYNLRLWYKPDNVFDMPKVNIMYH  
FSSGQGTFS PHAI IAAQLFTELVT EQCNEFSYEATMAGLYCQIAPSASGLDLQVSGYNHK  
AHVLVERLLDTMMDLLSDEQPDSTLSELFDRVTFKTEQAFHSFFV GQPYQHCIYGGDLVL  
EQRTP IEDKMNVLKQTNLS DVLTFARSFLKHCHLEGLVHG NVSAQHAYDITTTVWSKIHP  
FQKNSLDAIITRAPLEKRVVRLSDNHGKNKNS SFLYSFPEFNEANTNSC VEVILQMGALD  
LKTNSTLALFAQLIREPAFNQLRTEEQLGYIVHTSLKTSGDHVKSLLLLIQSDSFDPCHV  
EQRIEVFLENFRQLVGMSETDFQTFVDTVVASFLEKVRVPRCATLRRMASIWLFPVLT M  
TGXFRGPIHCRARLDSITFDLMLGLFLRSFGLL ICLCSTFLIAFSSLCL IYYLSPPQKN  
LGEESSRYWHVILNKTFDFARYEKIADHVKKHTKSQVLSFYDKYVALNAPYRRKLCVHV V  
ANQHESVLTAKLGKDIVEDGVPLDSEENTTDTIYIEDPIQFRRSMP LFPMPAKVNV DVVN  
LGINKGGNGGITRRTTGA  
>comp12265\_c0\_seq2; 1076 183 3416 LEN=3553; translated  
MTEDESSPSASSAIGATEEQHQQLSAIETPSVDKRQYKHISLSG SNGVQNSNRLQVLLIS  
DPETDKSSAAMDIGIGQFCDGTHLPGIAHFLEHMLF IGTTKY PDENAYDSFLNSHGGSSN  
AFTDLEHTCYFYFDVQ EESLEGA LDRFAQCFIGPLFSK GALEREVQAVDSEHAKNLMQDQW  
RMFQLSKSKLVGDNSNHPFGSFGSNAESLPTVTLGSSNDEKDEGETKDNTDSGTHIRE  
QLLEFFHTYYRKS LDLYKLVVLGKESLEDEAMVKRYFVELVDFLFGNDDGDEIKNINMGS  
TRDMLGDLYPPPDSWQVPQRLHVVPISKVHALELQFPMREIKTLYKSKPTRYLSHLLGHE  
GRGSLLSLLKAKKYATDLYADDASKSCASFSIFTIKMELTELGLE NVDEIVSMVFAYIGL  
LKEQGPQEWIHTEAQTVSDMQFRFLSQRNPMDYTCSVAGFLQQYPPGLCLSGPYKTFEWD  
ADLVTECLASLIPDNLFMLVSSPTFEGSTQETERWYGTQYNTVEPN EALWSHWKNI ESSA  
YPALRLPFVNDMIATDFSLIESPSSVPKNK PQCIHQDYNLRLWYKPDNVFDMPKVNIMYH  
FSSGQGTFS PHAI IAAQLFTELVT EQCNEFSYEATMAGLYCQIAPSASGLDLQVSGYNHK  
AHVLVERLLDTMMDLLSDEQPDSTLSELFDRVTFKTEQAFHSFFV GQPYQHCIYGGDLVL  
EQRTP IEDKMNVLKQTNLS DVLTFARSFLKHCHLEGLVHG NVSAQHAYDITTTVWSKIHP  
FQKNSLDAIITRAPLEKRVVRLSDNHGKNKNS SFLYSFPEFNEANTNSC VEVILQMGALD  
LKTNSTLALFAQLIREPAFNQLRTEEQLGYIVHTSLKTSGDHVKSLLLLIQSDSFDPCHV  
EQRIEVFLENFRQLVGMSETDFQTFVDTVVASFLEKKNLGE ESSRYWHVILNKTFDFAR  
YEK IADHVKKHTKSQVLSFYDKYVALNAPYRRKLCVHV VANQHESVLTAKLGKDIVEDG  
VPLDSEENTTDTIYIEDPIQFRRSMP LFPMPAKVNV DVVNLGINKGGNGGITRRTTGA  
>comp12267\_c0\_seq1; 1417 264 5566 LEN=5566; translated  
MAGLKSQ LSSLMP ISEACDILGEDRVK RIVSGIFMFQTNQQSPNRSYTK EQLRNLEEFAFA  
EKADVLVQAMMFVPGKVLAKKSGGVQQAMMLMKAMDMS SALSSTDGADQIPAPIRNSWK

SLLTTRSLMLDKATIIRFLVPSCAQPHGTGPGVXMGLFDCLVYAVQIKPSLTTTSTTSAST  
PLVTIPDIIIFFAVCQKYWDLQGGSDPDVIPSFSGDDPAIKNMSQLMFLVYDGYRKNLSVI  
GRDTIHRFMSDVYGDSEFKTSAAKDVLGKMFTNPNSPLTGREFRAGISQTMSTPTPSHF  
LLDWMATLAQAIMPPLHSKSSNNNDDETEGADIGRNLPSAAVLLQKMDKQRRWLPEICE  
KYFLAEFRLYEIKRRFHSLSVESNTNIIRGDPMRAAVNQDGGNSNGTADGRDRGNVRRKSG  
VNSNAPKHVI PAHSFLRKVCHPSEEMGHGGFLPKEIAERIFESVARSLSSSLGESDGVGDE  
SKEDPETGTCTYWDLCHVLQFGGMALRSKDKDESLVKWIMQLFGNRGQNTLNRMELGDLMV  
CLCKHADFRKRVRDPKMDIADDSNNEEENTDGP IEMMVNTLSALDLALVPQSFARTKSE  
YSSKVPVNELVDHFLETVEAKEDIVTEEQFLRWYNETEQYSRQLGPLIVDIRLIAGVIF  
GVPPKLASLEYLLVKDIQERHRKRYPTDVSRRGPRGTIWYLLDATWYKAWSELINVRN  
TQEDCEDLRDMSSTSSPRRLGQINNTKLLRENGSLALRTSIKWQHDIYELPPLGWSALQ  
AWYDGGPPVSRVTVPYNSGTSSSGIPNSRGRQSSLRDNEIELYPLFVTMFLCDSSSRGE  
ARPFQQQVPSRVTPIRMLLIQLCKEMDADPNMCRLLWVMEPSGDPDENENNDWLLNVDLN  
IDEQRKNRVGVNQNGTSNITLLLELKNEETDKWPRGIDGKNWMFRKGDSTMETGDIIVG  
LYNMGNTCYLNSSIQLSHTPIFRDYFTSKCYLNDINTTNPLGHEGQLAQVSAVLINSIW  
KRFNQQQPVHQPKRIIAPGSYFPVNAAPALTPKTLKESLGFNEHFAGNEQHDAQELLAFL  
LGGLEDLNRIVKPYIEAPDSGRPDSELAIIWANHLKREMSIVVAMFTGQYKSLKLC  
KTCKYESARFEPFSFLQLPLPEDDTIPVSLIYSSSEPSVGI TKYSVRVHNNGTLYDVLIS  
LAKVIHSDKQASDSNISDDSGKFSHIEKSEAEIEIAKQKSAYAKMAQNMAIVDMREGYIF  
KIAPNVWRLPDLQNKDTGELPMLHVYGLEPLPETSIDICQEEDEEIEKEKTHEEDSKSSE  
DTAENCAFLAFAQRSELLSKELIHPLTHQVFGIPLLLRVADLDCKTGSEVYDLVAKHLK  
PLVPSGALKFLTNPPEILPDCEVESSSTGAEDEKSKDEIRENLEKATSDTEEVSAAGMLPR  
YGFRLRLASREGRRCSICPWYECCIGCLVPDDSKPTVVANGDSIVIDWHFAVDVATAGFG  
IRANQADPSFSRKPDLNLRGSRGSPGVVVKDHI SCGVGLKKGQGDVITLEDCLDAFAEEEEKIP  
EAYCSKCKDFKIQTKRMSLWRLPPVVI IQLKRQFTQHMRRLRDFVQFPVEGLDLSRIM  
ATDGTGSPKKTSNQSSKSEKAHSQEEKKASASDEETEEISSHINDDNGRGEKLYDLY  
GVVHHQGALSGGHYVASLKSDDLQWRLFNDAQVYIEHSRDVVDSSAYILFYIRRDVASQ  
KLSDFWDRKRVGEGLETEEMDELKGG

>comp12268\_c0\_seq1; 582 1 1975 LEN=1990; translated  
GNLHDTQCQVMSILLDFLTDRTDVTETNGNKGDERILVYSKFLPSFQDLLHNYGLDMATA  
WLLCRPSVKAFLEVRPEELDESSSLKRFELSEKIRKSYKGTLPESVWSVLTTPDMFEFFYL  
NVLGDIECEPEGVYTSEVNRINEELERIQGLKAPVPKSETGKIDRLKAVSKQLDADMKKQK  
KHVGSTLKKLSDEKNNFFTSEIISREAAKVFLMYCIYPRALLSPDDAMFASAI AFRLHKI  
WTPGFSVMHYIDELISIVSGALFGLTEAEANVSILIWQTLKVANQWRFEDEGMYDSEVLG  
KPGSYMESTVESETSTNPVSHKEFIKLYNKWQYSLADALIGCLESTEYIHMRTGLVVLSR  
LVKVFPTGPTLGNKLLKVLEPLQDESSSRPDIRASANAYGMMLLKARDDGKWEENEADV  
KARAEKEKEAAKERKKKIEQSFQELERDNQKITEQIGTDDRRDRDRDRPRGSTRDQYSSR  
QTSGGGRDDYSRTENGRDRRSDDRRGDDRRSGRDEDWKKREREDDSNKRDDRGRGGGR  
RSSGGDEDIRGGTREAGEGPRGRDNNEARWRDRDAPPQRNNSKRGRSSTSPENDRDTD  
RSGPNSKRARTDDYNSNNYP SRRSGPTAAEARRRDLHEPHEEETKEDKKNDTNYTI

>comp12269\_c0\_seq1; 457 1 2436 LEN=4743; translated  
XLEVVGKNQNAYSTQLPECRRI CEVLKEAETEPGLESTKNPKSRRTHATDDNFGGGKTAS  
AAIVKGI MGLQKRPLVKEGGPRRQLQTIIFSTIGIVALFVFLSVVSESETFSAKSDHAQV  
RTQTPASVDSAQIQTPQPKPAVTESETLSTKSDHAQDRTPQTPSKDSAQVQTPQPIKRD  
SNEICLSICGKRRQKRAEVFRGDLTDSKALLKLASAERLLQKLRKDYGEYFESIFVNS  
ENGKYRPCIGATDEGPSLQRLKRLMIKILSMQSKIKKQDSYSTGCDCTSETGKALRNNV  
EEKDDPSLLYEDIDSTAFFEKYVWATGGHSAAGHGNLFNESYTAYMERDVKDI FGSIGI  
EFEGRNYAMGGTHSATDVSMCWKEIFGQDVDFFSWDYGMTDGNVSKLHFHSYRGGISES  
RPAAMLIHYGGRAGKNRLGAYAAL EEMGMAAFHSNEGLMASMRDEIPDSSGLSTNEAINA  
LPEYVRNFKCGTSLEKGDPCGSEXIHEVGLRKSNETNKLAPWIDQALVGHGLGLFLMDA  
LLSTLQDLTKYDDAATEELLSQLEKEDKDLHASFIRAEIPKPYRNLLKALNELTFTEGES  
KIDFSLFFKGSICHTARLPSQTRYRGILTDTDMVGEAAPVGEETYLGFDFKARESKAT  
ENNELRLVYDMYREREDKCRGIIVKPDYPDSFYTNSLDGWTKLTFPNEAEKKAYGYDPAH  
YEGIFIVHGKVCWGWKCPKGFLLPEEDHAENWEMKINNQYVTTVKNIGNGSVILGGENG  
FRFTANSNAQYEIEIKVKNENHYFQLFDFVLY

>comp12269\_c0\_seq3; 446 1819 2928 LEN=3294; translated  
MSDVQDSSAGYNLLVGRPVEQEKY TALLSWLKSNGATVNESLEIRQSSQGEQAGYGLFVN  
RPTEQDELLFSIPRSLCVTIEKATSSDDDEGVLGEALEALIEKAGPGGITVAMAGYLAKD  
YILTCLEEDDRKKGETKKNSSRWGPYLALLPWERG INNQEHILFWNNKKIEDLLQGS LCY  
QEARSLEEFVALSIRVLGPILKKSVRVARGEESATTNALERLSSLLPWQQSKQGEDAPDS

IDDKLVADAIKGAFTVLLTRSFQDDSTEEEGCEKLVPLLDLLQHS DTPNVRHRVVLNDS  
DGDSVVEVRARLDIAAGSELWNQYRSEEDEAMPYSRFFTRFGFVPGINEPIENL LLDKST  
IFYPQQA EV

>comp12270\_c0\_seq1; 264 96 641 LEN=972; translated  
MVCASLTQICTLPHYCTAKTVIPNLGVWVWPQALFDPDGRGTKGGGGTGGNGLVLC DVPGL  
IEGASRGVGLGHAF LRHVERCHVILHLVDATSEDPVGEFKMLNGELIKYGTGQLARMPQV  
VVINKIDAYESDKKPSLSLEELEAQLKDAMSHSRLMRMSAKEEDGVDDLMVRLSAFVKKV  
A

>comp12270\_c0\_seq2; 481 1 1635 LEN=1966; translated  
QPVDLVTLVTDLLCNTMTSFDQRKRFLGQPEFVFAIVVLVALASLQRSPSVLYCDAFVA  
PSARSSCQQSKRIRQVQFSGERIRESPQFSRSTVVQTIASGDSAGDETQNADAANAESSV  
EYSFYDEV TILVKAGSGGQGASTYRKGVGQNGPPDGGNGGNGNVILMVDDSLNTLAGL  
SPIAYKVN SFGGSGAAVSAQQGRPRYKSFRAEIGCDGMRQMKSGRYGKDVTIRVPPGTVV  
HEI IENEDDDEYGDNDKENLVELG TLLLLPEQGGEVNIDNLDNNVVMTRMRSSAIS SYA  
KPTTTLVVARGGEGEGSGINQKGRGVQRPLSPQGG EKRLRLTLKLVADVALVGV PNA  
GKSTFLSKVTRAKPRIADY PFTT VIPNLGVWVWPQALFDPDGRGTKGGGGTGGNGLVLC D V  
PGLIEGASRGVGLGHAF LRHVERCHVILHLVDATSEDPVGEFKMLNGELIKYGTGQLAR M  
PQVVVINKIDAYESDKKPSLSLEELEAQLKDAMSHSRLMRMSAKEEDGVDDLMVRLSAFV  
KKVA

>comp12271\_c0\_seq1; 566 95 1660 LEN=1834; translated  
MNRDRVCSSASGSRYRL LGVAAIAAMIFVATAISDGPHPKWFAQAF SVGRTSHARASARR  
RGSTSIRPSVLAASRPDGNASTNEWVSYFEEVFNNNSNDLGEDDDHRGSAGSNGRTG EK  
EAVGFQTPVTTYANALD LLDIDAIDGAPPDDLTA VLFFAHYCKTCHRANIPFKQLAYEHGGS  
GSGDGGGSDSDATGSGVRFLRFETSSLSPNQFRSLGLERVPFLQIYRRGVCVASF SATK  
ATGPTTTKMVLR SRLSEHLEACKRRSDADWSAFRRRYAGDIEANASARRRLRAELVAGGG  
IDADMDMDMDMGMDIDTDPGTGASQATKHERLYRSVRTLTSEAE LLDLVVGD TTDSDGET  
LVVMFHSHFDPSCLRAQH KFRKIADERRQKHQQDTPMASRCRMVRIESSLLSDET L NHL  
GIRRYPHIQIYRGAPDFGGRV TSGDVH HARTRAKECAASF SVPRSFLFGKMLHESLDAID  
ERTPEEWEKFYE QHGDEIEAQQAGLERIVRKT SKRHDRPGQ

>comp12273\_c0\_seq1; 421 108 1628 LEN=1668; translated  
MEMRIPVVS PRITIQVIHPLSCYRFHAGKNVGKNKRTL VYTQDSGAEDRQFQSTVKNPI P  
DFSDTR IAYDSKSTTELLRAAICFRSCKIPSLVSNAEYLLHIFRNLCGGPIVDAALKATL  
YGHFCAGEDRERILPVIQKLRNSGVGSILDYAAENDVSREDKSS ESPTAWALDYDY ESEA  
LCDEHVSIFLQCIKDAAVSSMGGEHHGYAAIKMTALGNPKLLARLSEAIVEAKRFFSMFD  
LNGDGLISREEF EFGYNRYFVDGDVRVEE IFEFDFPDTGFI DYITWSMMLSPQDL PKIV  
RNCQTTGRLSRACPTDEEIE LLNVIYNRGRKLGKEAAESGVRL LIDAEQARYQPAIDNLV  
LELQRQFNVD RPIIYNTYQCYLRDCPERLR TDVARSERFRYHFGAKLVRGAYMESERDL  
AASMNL RDP IHPTIEKTHECYDNSVEYLLRHSTESDLNVEVMCATHNQASITNAINSMNS  
LGIDRRASTICFAQLYGMSDQLVSEL

>comp12273\_c0\_seq2; 348 108 1909 LEN=1996; translated  
MEMRIPVVS PRITIQVIHPLSCYRFHAGKNVGKNKRTL VYTQDSGAEDRQFQSTVKNPI P  
DFSDTR IAYDSKSTTELLRAAICFRSCKIPSLVSNAEYLLHIFRNLCGGPIVDAALKATL  
YGHFCAGEDRERILPVIQKLRNSGVGSILDYAAENDVSREDKSS ESPTAWALDYDY ESEA  
LCDEHVSIFLQCIKDAAVSSMGGEHHGYAAIKMTALGNPKLLARLSEAIVEAKRFFSMFD  
LNGDGLISREEF EFGYKYVILFFETKCLLSVAALPFAKHTVNSTKQAFITFFHSRYFVDG  
DVRVEE IFEFDFPDTGFI DYITWSMMLSPQDL PKIVRNCQTTGRLSRACPTDEEIE LLN  
VIYNRGRKLGKEAAESGVRL LIDAEQARYQPAIDNLVLELQRQFNVD RPIIYNTYQCYL  
RDCPERLR TDVARSERFRYHFGAKLVRGAYMESERDLAASMNL RDP IHPTIEKTHECYDN  
SVEYLLRHSTESDLNVEVMCATHNQASITNAINSMNSLGIDRRASTICFAQLYGMSDQLT  
FNLGNRRYRSYKYVPYGVKNEVMPYLLRRAKENSAIVGGATLELESIKAELKTRFTIKI

>comp12273\_c0\_seq3; 440 108 1796 LEN=1883; translated  
MEMRIPVVS PRITIQVIHPLSCYRFHAGKNVGKNKRTL VYTQDSGAEDRQFQSTVKNPI P  
DFSDTR IAYDSKSTTELLRAAICFRSCKIPSLVSNAEYLLHIFRNLCGGPIVDAALKATL  
YGHFCAGEDRERILPVIQKLRNSGVGSILDYAAENDVSREDKSS ESPTAWALDYDY ESEA  
LCDEHVSIFLQCIKDAAVSSMGGEHHGYAAIKMTALGNPKLLARLSEAIVEAKRFFSMFD  
LNGDGLISREEF EFGYNRYFVDGDVRVEE IFEFDFPDTGFI DYITWSMMLSPQDL PKIV  
RNCQTTGRLSRACPTDEEIE LLNVIYNRGRKLGKEAAESGVRL LIDAEQARYQPAIDNLV  
LELQRQFNVD RPIIYNTYQCYLRDCPERLR TDVARSERFRYHFGAKLVRGAYMESERDL  
AASMNL RDP IHPTIEKTHECYDNSVEYLLRHSTESDLNVEVMCATHNQASITNAINSMNS  
LGIDRRASTICFAQLYGMSDQLTFNLGNRRYRSYKYVPYGVKNEVMPYLLRRAKENSAIV

GGATLELESIKAELKTRFTIKI

>comp12273\_c0\_seq4; 329 108 1741 LEN=1781; translated  
MEMRIPVVSPRITIQVIHPLSCYRFHAGKNVGNKRTLVYTQDSGAEDRQFQSTVKNPI  
P DFSDTRIAYDSKSTTELLRAAICFRSCKIPSLVSNAEYLLHIFRNLCGGPIVDAALKATL  
YGHFCAGEDRERILPVIQKLRNSGVGSILDYAAENDVSREDKSSESPTAWALDYDYESEA  
LCDEHVSIFLQCIKDAAVSSMGGEHHGYAAIKMTALGNPKLLARLSEAIVEAKRFFSMFD  
LNGDGLISREEFEFGYKYVILFFETKCLLSVAALPFAKHTVNSTKQAFITFFHSRYFVDG  
DVRVEEIEFEFDPFDTGFDYITWSMMLSPQDLPKIVRNCQTTGRLSRACPTDEEIEELN  
VIYNRGRKLGKEAAESGVRLLI DAEQARYQPAIDNLVLELQRQFNVDGDRPIIYNTYQCYL  
RDCPERLRITDVARSERFRYHFGAKLVRGAYMESERDLAASMNLRDPIHPTIEKTHECYDN  
SVEYLLRHSTESDLNVEVMCATHNQASITNAINSMNSLGIDRRASTICFAQLYGMSDLV  
SEL

>comp12274\_c0\_seq1; 344 640 2130 LEN=2165; translated  
MERKPCNWMKQIGGWVWMTLSLPAVNPFISIQNHLATRSRTPRYHDPQHAPFPNTFFPSHE  
KDEDGTNPGGIPTRMRSCAGRTTRLLEDTSDLGICDSIQSSLELQDGGFRKSSMENGWRV  
GLKQLYSSPATIGLKNKNSDNRYLLPIEDIEARTAAGVGLSLSIGKGTVPSPPLVVQPN  
AHPWPSSPYFLRAFVEANPVWVRELVLKYGAVVFRGFDEYASPSNSILRALES CSDRARS  
VGLEGYLVAPSPGKSEATSSNAIRILPEVVTTDAGITDLRKIYPDLPELRTKLANRK  
LLYRRSENAPVQSPETKVPAFDIGERKTDDQNGGPGPWFQFQFTTNKKIFERTYRTIADA  
VLRNERRIHNSAVERNEYLADPFAFHPETRERVWFGLAHTFHWTSAKALFGVFCRTGSL  
EALGRALRTGARSLVWHGIRRETRTPVEVTFGDGTPISVGEMHQIRRVVRKNTAYSQLOE  
GDLLIIDAVSVGLQID

>comp12275\_c0\_seq2; 210 36 311 LEN=578; translated  
MAGIVTEASIRAKCIEAESLKEISHVECEVLGGCDGGAKVTVTVVSTAFVKLPLLKRHRL  
VNEIFSEELKSESIHALSVKAYTPAQYEAKK

>comp12276\_c0\_seq1; 541 125 1729 LEN=2023; translated  
MKTKNPRAKVTNVSKEKHSKGAAVVDYLVTTSFDEGSESLVRRSFEDFKWVQERLVKE  
RMGIIIVPILSNKKPAKVKDQFFFEFIFTRQENMNRFLQRVIHHPPELVADAPCLLPFFTSNP  
TDWKTAKENAANDKESLMKENTTSNGGADDLGDALLETIHVDVDTAVHGLGLEEQKGTMR  
WFSAKRTEWALKNQNLILEETPAEAKKFTDMKTYASHLEVCVRILSEDYKAILSSNKVLA  
EKTGTIGAAFAQLWGEHELSTSSSKLYQGLGKVSNSVLR IKNHVVFGERHFENPIDDL  
LLDVIALQDALKKRKEAVYAYTRLSKEGQKLNKQLDRIRMAGNMVSQQDKYYKLETAMRH  
CDNR IAESRNHSDLVTTRLERDIERFRVEWHERMRHVLFHQQVEFLQSQVNDFSSVL  
PELAAMDSKRSDLASEDSPEPEKMGINLSFGSSGAKASIGLVGAPANPPPPPPDEELSPP  
PVPLDDDKPPDTPVISLNASFSSDDGFDAAPAMGGDSTVSDETGTHSKPIVTSV

>comp12277\_c0\_seq1; 1024 107 2932 LEN=3028; translated  
MATAASPPVPRPPIILPSRGVARVKS SVLSGDTVLLGKAPGPNEKSPEVVFTLENISAPR  
MASKGNANKDEPGAFLGREWLRALVVGKMAFETRKQGASAGDRVYGLLNFTPPGAGPDQ  
TVSVALEAVRNGFATPRMTPSESEEEAPAGGPEEWEKMSLWQAYDEAKRAQVGIH SVLPL  
VREIKNAGDAFESQALVDMSSKVGGRDGKIKCVIEYIFDGSRCRVQVTD PAMGDLQYGSFT  
LLLGGITSPRVGNPRAVPPTSEEFADQARNFSELRI LQRELDLVLHGTDKSGACIVGSI  
LHPKGNIAAELLKNGLAHMSDWSLRMMPVDPPELRLAESAIAKQKLLKIWQSYVAPTLG  
PSEISGTVIEVLTGDTVNLPEGEVYDSEDKLVKVS LASIRAPRVGNERNVGRASEPYAAA  
CKDRLRVMTVKGQCKVQVHYEREIPFGANTELRFQFGLSTKTKPDIGEALITEGYATTQY  
HRDNEETSPRYDDLRAAENVSKASKRGMHSGKAVKTTSVNDLSTPQKAMAYSGSLMRAGK  
MKAVVEYCFNGSRFKMLIPSENCYVMFAPNAIRVPQSPSPAGNARQMRPAEPFGDESKRH  
ARLTVLQRNVEITCTDVTKGGVIVGSMFVGTGANKKDYSELVTLGLATVDQRKIDYGEA  
PAELVDAQTAQAQKIGIWSIAQPVKEEAPKPEEKAENELLSVRISEIRSGTHFFCHVNN  
NESAKTIDDSMKLFTTNNGTDAAPCEVKVNRVVAALFDDGSGKSWYRAKIVEKQDSGTKA  
VVFLFDHGNIATVPVATHLRPLDPSLGTQDIPPAAKEAVLALTL SRPISDDFGLDCARML  
QSLCWGKDLKISTTGRDENGKMAVIITDSDGESINEQLVAAGLARA AKPFAAKALANMV  
DGSAVIKLAKDLSAAQESARNSRVGMWRYGDIGDEDEEGF

>comp12278\_c0\_seq1; 392 464 1451 LEN=1785; translated  
MRTPHTVHSDAGGGGQRCSEQPVRTGVRVRDNKNNETNQIVAAIGAGEWVRETGQPSSA  
AKHESCRHDEAGSVAADGSPRRGRPLDIGYCLKYHYFPTQSVTNAVLTVVGDGIAQTV  
E AGETNGSNKSTSNQALSPSVSSYDPKRGLVYFFKGLGSGIFWAWWFDFAEVWSAELTQSV  
LSHATGGFGLDGDAAGVDAITCAVRTAINIALEQFLVAPFVFAAWDIPVTAAMRGSPPDQ  
IFPGQIVEKLPPLFVANARVWTPVNVVTYNLPLEYRLPFTSAASIVSE SINAGITSKQPA  
RAVPPVVLPEAGGKLAMANATATAAATT

>comp12279\_c0\_seq1; 132 84 542 LEN=919; translated



MVNELNYSTYCEVHDCWERVRRVEGYKERVGIQVFIKFFTLCPDAMAVFGYEGNGISECV  
QSPSFLPHATRFVSMFDKAI DMLGPDIDMLTDIMLDLGRKHAGLGVKKEFYPPMGVALID  
ALKDVPDKFTRETELCKWIKVYAALTLDM SRAE  
>comp12279\_c0\_seq2; 222 371 694 LEN=1071; translated  
MAVFGYEGNGISECVQSPSFLPHATRFVSMFDKAI DMLGPDIDMLTDIMLDLGRKHAGLG  
VKKEFYPPMGVALIDALKDVPDKFTRETELCKWIKVYAALTLDM SRAE  
>comp12280\_c0\_seq1; 624 76 1680 LEN=1884; translated  
MATDADIVPQALTDVFDLYDSVTLSQLTEEQSTLYDVVFADLSQKYFASSPWPSPAAIA  
TECNGDPLFLAFYRELTHRHWHAVSRPSLRERMEGWVYRELDFELLEGAEEEDSTSSQPK  
LFILPGWAFEILHEFVYQFQGFQCFRTTLFASANKYKLLQSADSDGDGAPAPSGKRGP  
HVVENLALMQEDA AKECWSVDTVMYLLHRFVEIGTNPCKTVPAYQYFGIFASVALSRLEC  
LLTDYPASLEALAPILENSTTTVKHDQETKTFTQVIQSVFPARLSLTYHAGISFLMLRR  
YKDAATTVGDLCTYMQRGFKTGQLRSMNV DQLYKNFDRMIALLAICTHICPQTNLVEES  
IGRTIREKHGAQMSKEAFTL FVFCAPKFI SPAIPDFVTSGSVDNAYKQOIYLLLEQELKD  
QAAFQTLRSYLKLYTSIPTSKLVNFGNKENTLASLKLKMRQLELSKSEIPSLKEATL KSA  
LDIQYYAEKVEGANDEIVHVDEAEKQRRYENYFFGQATQSYDIRKTAKVIDTSL  
>comp12281\_c0\_seq1; 492 1 1499 LEN=1588; translated  
XVDQTQAKLRMCDRNMDFVPKRNQYERLDLNFEEENTRLFLSLLEKQRKEELPLSICKQI  
NDSINITLHPDCDADEFREAVDI IENENFNVA FVGPFGDENLTHIGRWFLSVLRTEEK  
LPALIHSEIDWILLNAAEDFLHNAWLKIDSKEKASEMIRLFP TLLPNFENNINAGDHP I I  
LQSRCDESI SHTIKRMSLIPFTAKLGFKNLQFEKWERGGVLAEPEDGGNNVLQNL CSSFD  
NKFAGCSPEKDQTLVEETALGVMKTLRRMKLFKKGDIQRYNLVQKLF FDESRSWPSESKT  
EDHVISEKRFRFLTDWDPEALTAPFRDDDKDNEGLLP IHHSTDYGSIDNFLLYLKAGIRH  
FPNKLGFVFSKRVT KIVPKQKDN ESTASTGVQNESRYINTYQIPYFKACEKFGEENVER  
EVIDKVLADCPETQDPKLLLLLGAEEDV DLSGLYLLLRDPAHWSTVVS KKGSSSNTKSS  
KRDMAINESVDRKRKLEK  
>comp12282\_c0\_seq1; 290 1 620 LEN=620; translated  
XSSNNNTDRRRRKHEQQSHGRRRNTHYTGKDPTYEEMEAQICVLVQLVQNDLPLRLYQFR  
SAMESEA EAVTKRLLYLVKCEYRAPFR AFLEAHQNLRLAPRMELVDHYLKRNKNADSGRNDR  
EKKSSLEALKAELQALLNTPELVELLAL EMEA EKL ELDVGKALFPFTELARILAHKNVYL  
EAVPGIVEVDEL PVLRET VRSVLPDA  
>comp12282\_c0\_seq2; 576 1 1283 LEN=1403; translated  
XSSNNNTDRRRRKHEQQSHGRRRNTHYTGKDPTYEEMEAQICVLVQLVQNDLPLRLYQFR  
SAMESEA EAVTKRLLYLVKCEYRAPFR AFLEAHQNLRLAPRMELVDHYLKRNKNADSGRNDR  
EKKSSLEALKAELQALLNTPELVELLAL EMEA EKL ELDVGKALFPFTELARILAHKNVYL  
EAVPGIVEVDEL PVLRET VRRRLGYALCRKAGSETSTGIRPILLDLLMVP RDDVPSTRAMF  
FERKPM SLYTASASLEERIDEFLAELTTISSLVRETISPPPHHKPALNVDAHASFAKGCT  
EHHDP ELLKQCQLLDWFAIVERQHLLYETQKDLPEEIRRAEMKLSIAGASHKSLTTAKESL  
EILEGIRAERFGVLKEMVEEVCLREMNLYVSLTGPLPQEVLELEEMPSAPGVFGIPIEIA  
GETLPIG  
>comp12283\_c0\_seq1; 623 114 1649 LEN=1968; translated  
MKFTTCLPLTLVLLQTVSPLPFGARGKTEETADTDSNEKIVSSSVRGAASKVSKSIEDF  
APGFAIEAFFQSPIDSDASAAMKDTIRT MATSEDMHDFLQKTRRSLHRNPEL MYELPFTS  
ETIQKVL EEEIEFTTGWAKNTHPDVYPGNGGYGIVAHIGSLDENQPCVILRADMDALPI  
EEATQGIQEFKSRTHGKM HACGHDGHTTMLLGA AALLKSVEKEIQGTVRLVFP AEEGGA  
GMKRMVEEGLVELEPKAQNAFGLHVWPTLPSGTVASRAGPLMAAAEMFEIVI SGKGHAA  
MPHLTIDPIVASASFVTVNQSI IARTISPLESGVSVTQITSGDAFNVIPASATIRGTIR  
ALSTEMLMSLRDKVANI LDSIDSMHGCSSTIKYSPDFYPPAINDAELFDWSKTIGAMVSR  
EGKTRDVVPTMGGEDFAFLAEAIPSVFFF IGQGTGGDEKHHIPRTDFGLHHP SFALDEEV  
LPVGVELHANLALRSLK KLSLASDEITKEEL  
>comp12284\_c0\_seq2; 470 974 2544 LEN=2933; translated  
MFAVSLPAEANGNGKQNNKVS I IDMMNAKYSMSNAPGKSSSSSTGTARSRSSSISSTVTL  
DERDAARAMLGISPCSVADSSIMGGRGASDGLGKPRQPRAGRSPGSAGAGHSSRRKHLQQ  
ATGAESGAGGLGSFLAPATTASACFDP SRTGNDAA PSMVVEGVRDXNSAGLDALAF LATQ  
EQEASTVTTATRI PSNKEVTVPYSEVSLVPKPAVTSDDDDSEIMPPPRTTTGSLRRR  
RSVSNPEGMGDKWGLPPGLAPRKSSTTTVRRRLRLVPLSILEEEMTEADA AVLAKQKSTA  
SASALAASLLRSDAANHRVMNLHREQLPKLVEEEEAEDGGNSE EDEENLDHGELLRRAR  
SRLLEDLSQSNLSGAKGGLTLP HSLRKYKEVYNKNGRIGIYTPAERAAI IARYQSKKTRR  
VWNKKIRYNCRKNLADRRLRVKGRFVKRSVTETPKPPSAEDANAVQTRNAPAANAAPSLV  
TSSIP EESEIVADSEMPDVSDPDAGFCPTDAQPYRRLRRHTIT

>comp12285\_c0\_seq1; 554 107 1438 LEN=1586; translated  
MDSTSKEESSSTNAETTKASGSQNAQTPTSKPKSNVSKSGTTLDDANEELSQLIISGKI  
KSDDVRLKASLKEHVSLKEKVEKLSLLGRSAKAQREAKVDSETAQKRLGQAMKEIERL  
NKKLQTRPHMDLLDMDFETNFDKALLSVGQSGGQETSDAEPTTQAMESDDLDTMDDM  
LMQELGEAKNRIEKLETLNTAMMSRSSQLEESAKVLQREERDEARNSSKRLQMELRMANLE  
AEQANRAMIDKVASLEEMQMEIDLVTKANAKANVRAAKGEEAANSLKSDKNHIQQLESQV  
QALKEWALASAEAKQLMHERCRILEGKLLKQQGKNVGNKSNKLLFTKTGSMVIGAGA  
NHPVHLSLGEHATTVDSTRFVILRWKFDSSPSDMTVDFNIMKGTCTTSSEYAKADYLIKGR  
MIQGGAGGETEGAFNTDSACTILW

>comp12286\_c0\_seq1; 703 484 2151 LEN=2712; translated  
MVEELEMEEITPEIVARMENVEIALVKFLEAKGAALLEEGKEESIFKPFPPSIAPPDEL  
LGDEGNVEFQSWGEHGYNSAQGANTSERLQRRLLLEEALERIRARLNEEYFIVEHQAFQQ  
YSEEEIILRQAQEAALQKSREAAMLKKAQAERRSVSAAKVS AVYRQQEQQRKKEQYMEQEQ  
QNRyedLSFESKESNEPENPNKNSLGFVPRKRPTIQVGSLSGKGSEGRDDKAMDGSDDK  
SDEDFWEERRSRAPDGIPILYNWIQDEVCITGNVKKSIYFSDGATISTSSVTNRAREGT  
LVTTESGSQYFLEEQA VRESVGDYQYNRDDASRLK PATSQNDNTMTAPKGIPTVKCWQFD  
NGGGIVGLIYGSPDAEDGDYIETSPIVNGEIDNNSVVYTQSGSRYFLSGDPPENAFD TLL  
TFRDEVETERSKQGGTFTLTKLGGVEDGEGRGRSRSTFSLFDLFGGKRNSESPNSLDS  
VPLPLPPSPDKMPPIGTPTLTGCVFNDNGTITGYIFGSPKIDDGYLITTSVVVEGERRQ  
FETVTTETGSLYFLG

>comp12287\_c0\_seq1; 1345 1 3664 LEN=4078; translated  
XTTTTTTKISSLEMRSTGSYLDISIDPLVARIFEDERESLEDESDDLFMESLRSVKSGIL  
ESSRGMFVWRQTLAKGRLPTESDFANPTSSVRFWPPAPLFSCLLDAANSLQLSRLALRHP  
ETIPMILRSILRKTFDYARRIDKKIDAIDSGDEEKEDEDEDENYSYDWERDTESSARNEEE  
FLFPLDSLNDDDIARDVAESLVEEWSEVVKGVSLMDDIFGFDHDLSSGEEDDGDGDDD  
GGAAGAMGFMRDGIWSHTGWQLIPDLQQQISDIPELNDLVQKLGRRPSAEEDGSNRRR  
FEKFAPRKPHPEGGLGAEFDPCLRRESVSGIALSGNPSEMLPSEAVLLRSRVIDEKGTS  
SSKVLRLFLAKMAESKLQSYELSGWADIP SMPRENPLYLNRLPSAPGGPIIVCLDTSWS  
MSGNRESLSKAVVLACVIEARRQGRECQVVSFSTERKVMETGVITANSEGIKRLLAFLSH  
SFGGGTDVTGALKFAIEALESSDNELSNNGTRTENFCMEAADILLVTDGEIPDPVPLEV  
MESIDRLKTLKGIELHGLLIGKSESKPLSRVCTHTHDFLSKYSIPSAFTNAGLNVHSSTH  
NVLRQQGQMSTTQLYAKRSYDDDDDDYSYGRKRKSQKKGKRKWDVQDEDEEDYEGSWMK  
TTEGRNPSFGGMIIEGKMKGMDDDDQVLGLGEDSVDEEFSILQKEADTVVRKLWTEEKLA  
EERAASDECWEAHTLNAAVARVEDGLVERGEDARLVVLAMIANEHILLGKPGTGKSI  
GLRLAKLCEGTFQRLLTRFTTPEELFGPLSLKSLLENDEYRRVTSGLPTADIAFLDEIF  
KANSAILNTLLTILNERKFDNGGSRESCPMRCVVGASNELPDSEELVALYDRFLIRKEVM  
RVSDQGVLELLSMSNPGESSCTTNSDEGC DIPLVSDLDGIIDSLSSAADSIVMDDDACEL  
MRDMRSFLENHGIEISDRRLVKAARLLKISAASDGRKKVDTVDFLLLQHCWFNEPSQRA  
IIREWMWDNLTPSDGDTGTSPNQIRFLENLRKEIRSTLRKTNGCIDGSLGGTPDDIASL  
DVLREESER IATIAQQRDLALARHMELVRTSGDFTWIEPDDASAIQQLLPRAEVWPQL  
KKVAEDIAALWMAISPPSSSRIPNELRESVIEMLWEDGSTLARAFTDDELQISSKEAKAK  
YDLETFRRWKRTKKKANKASK

>comp12287\_c0\_seq2; 542 104 1453 LEN=1867; translated  
MFAGKSILGLRLAKLCEGTFQRLLTRFTTPEELFGPLSLKSLLENDEYRRVTSGLPTAD  
IAFLDEIFKANSAILNTLLTILNERKFDNGGSRESCPMRCVVGASNELPDSEELVALYDR  
FLIRKEVMRVSDQGVLELLSMSNPGESSCTTNSDEGC DIPLVSDLDGIIDSLSSAADSIV  
MDDDACELMRDMRSFLENHGIEISDRRLVKAARLLKISAASDGRKKVDTVDFLLLQHC  
WNEPSQRAIIREWMWDNLTPSDGDTGTSPNQIRFLENLRKEIRSTLRKTNGCIDGSLGG  
TPDDIASLDVLREESER IATIAQQRDLALARHMELVRTSGDFTWIEPDDASAIQQLLPR  
AEMVWPQLKKVAEDIAALWMAISPPSSSRIPNELRESVIEMLWEDGSTLARAFTDDELQI  
SSKEAKAKYDLETFRRWKRTKKKANKASK

>comp12288\_c0\_seq1; 361 161 1876 LEN=1955; translated  
MDYHHTIANELRHHERMKDPDESMAFGEELLYREVTKVSSSEDRTAIDEEIHGARCMAVKETP  
GLIRRALIEFQNELDRMPDQKQTYEECCVRTMLYVDEEASCYALHDNEFRLRFLRAELF  
DPAKAALRFKAYLDFVKIHWGTDIVLKRFRMSDFNKSETKLFKRGYFQVLPFRDRSGRR  
VVTFLGGFGPETDPVTRSKVIFYLVDALSRTDIESQQKGFILVTEAFCWCENTTSNEKRT  
NLSLSFPHQPESPFYKLLLESVPCRIIAIHNCWPD RPSFRLIAKILTLCAIPTQRLRL  
KFHIGDEMEMRYRLKSYGIPIELLPITETGSIKMNHHTHWIKTRRHIEQGIDTVAVIVEC  
PGVNDVFRQGTSSMENPGNAQC RD LILALLEQKDGVIPTPMINPPAASAAATGNANQQN  
LIVDRLLIEITDGYHGRFLEWDKDRSVVWQIVERCKIRQKASVLLYSIAKRYGRRGAPNK

NGNHYSYTLRSDSVPSFSPALLRQDLQTM DIKSDDDESDDLTVLNNTLGPFCFVERGRRRA  
IEKQVCCPKSEELQPSHFSASQDRRKR SRNL  
>comp12289\_c0\_seq1; 649 98 2191 LEN=2437; translated  
MIQTVPAPAEKETMEAAAQNEEKSSYSKR SNVVELWKKREGTIKAANIASSERARGNECE  
EKKETSQWVDFDSIQDSRQEQEKSS TPQGGSERNGPESFSDAFFDWDTENMNNDFTAPRRS  
SVRDSWKKKAATIPSPQPSPRVGVTRDTI SLQCETGDPEPESAPESKEIPPTTSGVVRS  
STVVRSSSFKSPVVRSSSFANNRTAGSPQACGSSAFDELKSKWAKFGVRKQNEQNGSSQ  
STPRLSELSSKVIIVSPSEPSQNDVGMKEI PQIENEQQKKISGHGSQSSNGENVGAANTKT  
AKPEIKETEPLMPPQASNDLKKSLSPSSSAARRLGSKSFRSKYGRKPIPSLNRATEKAAH  
DTKSPTTKEDPGQKISSPPVQKISPDCSKPSIENPSFPLDESTQNEHNMSPSSNLSKSLG  
PNLYGRSRSFDRSKHVSAQSTMYTSGSADDSTVIKEGSATVSR SALSSRASRRLRDIRQ  
SQRQQMQKGDANENASKETLSKSPISTDKSGLTRAETNPLLESQIEEPGRIRSRTSSSIQ  
KSRTQESHGGNTFISVEESTLSPSFCSEGTFGNSQMRFNHATELN SGNETSLSKLGPT  
SPLHNVVPDMNDMIPDEFVSEKNANFESFKTAYDNTSLSQIARDMTEEASKIFELDIHAA  
INNLDGMFQSQSPRKMAGRAPSPVEEVAIEVEYVADD  
>comp12290\_c0\_seq1; 413 360 2176 LEN=2176; translated  
MMLGKITRSCAFLVPSSVSRRSARSFQGLSSVRTITQKSIYGPFTAPNYRFGFGKDSCLYS  
TSSDDSAISKSRAPFRMPRNSADDSSQKAGKNSANS GAALSWNKLGLLTEICSCLODELK  
LPTPTMVQSLVIPQLLGTESIAFLAATGSGKTL SYVLPVQLKEQEMFEDYERRPKR  
PRVLILAPTRELALQITAVVKSLSHAVKLS TQALVGGVKNKGSQRKAMENRPVDIVVATPG  
RLLQQWKDGNLFLG SVQTVVDEMDTMLEQGFQREL RDIMYPLLYAASPKEVDIAAEKDG  
WGGTRPVKKKAGKVPNDNFSNLPLKENAPQIVMTSATMTQSIQRLLGENPKTSKLAVTA  
KRLHGSHPAANADEKDSGANAKLKFPPMKIVSTPGLHKAIPRLEQIFVDVGTQDKVSLLL  
DVIASQRARATIIFCNTASSVRAVQYALAEARMESL AYHGE LNSAVRTENLKKFREIASD  
KSMETDNFNNKILVCTDIGARGLDIPQVDSVVMFDFPLNAMDYLHRSGR TARGAGKGV  
TALVAKRDKVLATAIQQAVLRGETLDGLSSRKS DYRPGARFGVKPKKKKAARSNRRGSP  
RGTRRX  
>comp12291\_c0\_seq1; 166 135 611 LEN=1225; translated  
MKSVTKSILVSFFLWVLGVLSSQTAYVSAAEVVVESISKSEGPSVPVTRDYSYRSDVTLY  
IEEKNGERTPSGWSTRVEDGAATEAPFSFQPGVNLIQGWT DGVLQMEEGERALLHVPASL  
GYGNRAMGSKGGAFWIPANSDDLFDIKILGRV GASSEL  
>comp12292\_c0\_seq1; 600 1 2767 LEN=3074; translated  
XEGRTCTSVLSGWGISEQGSCLSTVRHCASHPNQVWYTSKQSRGPLHEACL R GACRHVIR  
ALLEATNYRGATDRDRHWNTPLHLLFVDSTLSVLNNSNI VWSPEYLAGLVEDLIAHNPEV  
VAGCTNNGDTP LHSACMAPETMVD PSTIVRLLLEANPSAAHKRNSSHETPLRLHCERRNA  
SPEVAELLLNQNL DALVTLD SRCGWAPIHAAAANANFRLLR YLVEARPDAVKVQTSQRQT  
ALHLLCQNHTHLSAPSSRGS SSGVTA AVELLLRTDPEAVVHKDTVNGQTPLHLLCKTEGS  
RSAPLPVVTLLLDKNPSAAAISDFQOYLPLHYACEMGCAPEVVRALLEAHPDAARALTRK  
KDSALSLACTRNKSPETVQMLIQANPSALTETNDYGF SPLHCVCNRNRQPRMGIVEALVAA  
CPESLGL ETNAGETPLRLAETNTGT FAGILQLLATNGNKGAPSGPGESGMNDRMSWTDDS  
IENADGNPRQTKKDDHNGAGGKSHQEQA PLNDALDLLN NYRNNYRSSRDP TFSRKSVKT  
NKMGNTP LHDACFLKTTPEYHELEMI AKKNPEYIRVRNNAGHTPLQLL CMIGRIDERIIST  
FAQMGGPEIFA EKDSNGNTPLHAAVQQWIDAASIRCLIRAAPDALRSRTTYGDTPLHLAC  
LRRCTEEVVQEMAMAASSGDVLPALVPNLA AHTPIGIAMANFKETRDADKCPGFPGYGN  
AYNVLSTLIKIVYYGPQQCQQQLKNLSLLRACVVLHRQNI RLDPTFIRQVIHMYPEEVK  
QVDEDGNYPLHIEASIP IEKMTLLDGNC PGSRMGILRVLLEAYPSACAARNKENQFPLGL  
MINAGRLWGHTIAVALRAFPPALHWCKGVDDRF GALLLEKASKECGTDTLFSLLVSRPDL  
FEMASSSGSIQHEYSGGDYAMR  
>comp12292\_c0\_seq2; 261 1 1163 LEN=1470; translated  
XPPFPVDFFYFSVHDACFLKTTPEYHELEMI AKKNPEYIRVRNNAGHTPLQLL CMIGRIDE  
RIISTFAQMGGPEIFA EKDSNGNTPLHAAVQQWIDAASIRCLIRAAPDALRSRTTYGDT  
LHLACLRRCTEEVVQEMAMAASSGDVLPALVPNLA AHTPIGIAMANFKETRDADKCPGF  
GYGNAYNVLSTLIKIVYYGPQQCQQQLKNLSLLRACVVLHRQNI RLDPTFIRQVIHMY  
PEEVKQVDEDGNYPLHIEASIP IEKMTLLDGNC PGSRMGILRVLLEAYPSACAARNKENQ  
FPLGLMINAGRLWGHTIAVALRAFPPALHWCKGVDDRF GALLLEKASKECGTDTLFSLLV  
SRPDLFEMASSSGSIQHEYSGGDYAMR  
>comp12293\_c0\_seq1; 658 528 1802 LEN=1845; translated  
MRSSRPDVSEFDLILGENDSSQQQSI VRSRRKIQLSGDDARS DRVTVLASSTFAAPGLE  
EEVAGVEEEADPYADMLEESSTIARYEQKEEDLSFIERTSNK LKEMDMQDVISTLIVPSI  
FVAAGVRWGVTKASGKVSQADGSLED FANEMVYHDGDFEEMKLCVNAYNKKLMWLGPNK

SKTMLKLYLKYCKKRIVSPQAISSLSYVFSFLKLSKEDKAAAIMVSLCEDMGVDGLSTAQ  
KLLFFGTRILKSAEGKAALDP IREILMSSYRGEEMVAESMVETSQTAMAENAYKTAVVNG  
GKDQTSLTVGWEVLGLDKEEAMRIFEEEEAEAGFISEREKLYGGQSQKYDDKGNRIDDDGN  
LEDPENAIGADEPEKPPASNVMECTECSYTLFIAKGREAKFFGDNFKCPECGADKDKFEK  
DMSD

>comp12294\_c0\_seq1; 90 146 505 LEN=946; translated  
MDEEQEAPQQVLDLAEASVPNSLRGIRACKRCGILKTLQFILDGCENCDFLDMIDNPER  
ANICTSAFYEGQAALMDPRESWAAKWIRVGNYPGVYALSITGTFDREIEDDLEARGIRW

>comp12295\_c0\_seq1; 167 50 800 LEN=1284; translated  
MPAISPPAPSDGGSVEKPLSLKGAMEAADRIRKFLLEQKDPAEQWFPPGTWQGAAFA  
ATGLLMTPLRGSLLSAAGPRGPFQGFVDLVVTPILAVGAAQAGLVIGTLYGSSHYLERVA  
MDAATNTNATFSEYGTEKIVSVRQSQDGKLSFSPTTADSAAQRERTVAHLCCQVLLPFPS  
STEDSLRTRSSQQMSTDVGNISPSVLGIRERKPKWALSAPLTTAGNENIDFHKRFFVWGIF  
SPLNFQND

>comp12297\_c0\_seq1; 578 236 1921 LEN=1989; translated  
MATACDSCKNLHSPGSCLGPTASKRRRRRLSETAAKQSNAGKGDHRLSRIIVGSILL  
LSCQQQPNSASALFLLPLPGRSLVSSLLSRSQNSNHNKRMLQISEDYQNDADAADTSET  
INAYLNKTVGSPTTTIQQIQTSSASSPSTSTREDESSLGLEAKTDWSGTSTQLVNPVGT  
ITVRKKPATSERDRLISEAAKLRQSIQQQNELITLERRIECCTADGKESPVTSNSNIVI  
SGISYSLYSSASIAATNLASGLVRFQASSRVFLRKIDRVQKRVGPNNQWEGRVGAYLFY  
EFLSGLRIASKLAKEPRQIQQLVSDPRTPTLVPHAPAILARLDRLLETHVRPIIESVLNDR  
QHLASIEPYLDEILERFDDIEPHLPWILDNIDALAPYTGLLLKHIDALLLFAQGDEWEES  
NSNSSYSLANQLLPYLEYYVSKLDVIGPHLVLLRPHVPLLLKHNRIAKVSPHIEKLFARG  
YGTRLAASANMDVLLFWFGWTLRIPFLPGIFFALPWSPTIVDFLANRLPKKFARKGKAYC  
RNLECAIDDDYGGAWNQLEKE

>comp12298\_c0\_seq1; 283 245 923 LEN=972; minus strand; translated  
MVCLCWIGFVSYLCFQTHGTDPPPVPVGDWVSVSVSVSYFASVSRFVCLRSSQSPV  
SLPRVAATVRPAFKGRSWGSFVRPVHGFAAGTAGAQRQRAKPAFPPEAFSLNLTPEPNGTE  
PIQTTGAAICRFVPCAATGERSRPQTPTLTPTQEEAFPLRRSIRPVRLEFLGFYARSR  
YRFYGDRRWGCADAVQRGAMRRVEVAMVEGNPFPLGSGRADCCVK

>comp12299\_c0\_seq1; 391 237 1801 LEN=1865; translated  
MGKNNYLCILNSPCXDDALFYTDQRSILILATFCVITGQFGKIRREPFCEPHKRWWKAG  
LDTKFIHYTLPVGTHTILVLDADVREILFSNYGENPRFVKKLMGLIPLVGNGLVTLEGK  
DWQRHRRIVHPSFQPLIRESLGHYIPNIMRTFIGFWEKAEGREITVMNQISNLTLEIIG  
EVAFSDHDFHALDSIEQWVHEGEDGVAESTRVNDRVVQAMTSMFENTGTRILMQLMNISFL  
DFSTAKSSKMLDEAVDEVVTAACKLLEKTKMLEKGDATKTLGFGQISLLQRLLLDAENSDT  
KKSSRKSVMEELRDEVKTFLLAGHETTATWCHWAI FALCKNPEIQELVFSDIETHSSKD  
EESDITIEKMTYFD AFMKEVLRMYPPAGMIVRYNVYEEHYKGLTIPAGTRLTIP IHL  
LHRHPLYWKDPDVFQPERWLGKEHPASNKHAYMPFSNGPRNCIGYYFAEMEAKLLMAPLI  
RHFVIRLSPSQKDVDFKFTT SITMKSNSPLKIVTNVRGKTT

>comp12299\_c0\_seq2; 449 237 1694 LEN=1758; translated  
MGQFGKIRREPFCEPHKRWWKAGLDTKFIHYTLPVGTHTILVLDADVREILFSNYGEN  
PRFVKKLMGLIPLVGNGLVTLEGKDWQRHRRIVHPSFQPLIRESLGHYIPNIMRTFIGF  
WEKAEGREITVMNQISNLTLEIIGEVAFSDHDFHALDSIEQWVHEGEDGVAESTRVNDRVV  
QAMTSMFENTGTRILMQLMNISFLDFSTAKSSKMLDEAVDEVVTAACKLLEKTKMLEKGD  
ATKTLGFGQISLLQRLLLDAENSDTKKSSRKSVMEELRDEVKTFLLAGHETTATWCHWAI  
FALCKNPEIQELVFSDIETHSSKDEESDITIEKMTYFD AFMKEVLRMYPPAGMIVRY  
NVYEEHYKGLTIPAGTRLTIP IHLHHRHPLYWKDPDVFQPERWLGKEHPASNKHAYMPFS  
NGPRNCIGYYFAEMEAKLLMAPLIRHFVIRLSPSQKDVDFKFTT SITMKSNSPLKIVTNV  
RGKTT

>comp12300\_c0\_seq2; 324 1 1407 LEN=1498; translated  
KKHLSDIVQDVGIGITTISSQKGAANIVNGVMICVLYAALPPEAQMLAFAPKPKGCSRKI  
ILATNIAETSVTLDGIRYVVDGCGKHKTRDFSDATGMESLTVQDISRAQAAQRTGRAGRVS  
AGLCFRLYTEDAFDGLAEASVPEISRVNLSVLLVLKMGVSDPLQDFDLTRPSTSLRR  
ACELLYALGALSMSMELTAHGRKMAKLPVDPIYAHLLQLSPSYGCTSEMLTAVSMLSAEN  
VMFRPGGGGPEGNGKASLGQKAVQAHRRFASYEGDLPTLKNIFEAWRKEAIYTPSGVKK  
GRGNEYGKILHGQWCARNFINGRALVRAFNVRRQQLSSICAKSIDKGGLNMDVVSQSCGED  
EIQFLKACAGLFLQSATRLTTSDETKGRRHDSNGGNSGRLGPSRGRYKTKIGSEVVSIIH  
PTSTIFGRNPAPKSVVYTELLITKKTLYLRGVTQIREEWLAEVAPDFFK

>comp12300\_c0\_seq3; 968 143 2854 LEN=2945; translated

MSELSNKKRRRTVSSDTKPSKKGNDDDDDIGKPVFSNGNDDVLSHLRNTAKKKKKKH  
ENRRSFLSSTAATAASSSSKTSVALSLQEERVRLSKIRKELPVYAFKQEILRKMTEH  
DVLLVMAETGSGKSTQIPAYLEEGLLSANRSEKKNARKETPGKRGKYKNKEGSSLSRS  
TAAASASATAPYHARSICVTQPRRVAAMTVARRVAQERGCVLGTVVGYRVRFDCCSRKT  
KLLYATDGMLLREAMSDPLLRYGVIVLDESHERSLQTDILFGVVKRAMRARGHVDTSDE  
NSDESNEEDAGSEETRDGKMKRLLRAKAEWNLPRLKVVMSATLQISTFQTFPPDAVTI  
QIPGRFLFPVQTVYTKKEYQEDYIDSALATSLQIHYGMDDGDDGGDILVFLPGQEEIETLNQ  
LLKRHLEEDRDGGKVQKHLSDIVQDVGIGITTISSQKGAANIVNGVMICVLYAALPPEAQ  
MLAFAPKPKGCSRKIILATNIAETSVTLTDGIRYVVDCGKHKTRDFSDATGMESLTVQDIS  
RAQAAQRTGRAGRVSAGLCFRLYTEDAFDGLAEASVPEISRVNLASVLLVLKGMGVSDPL  
QFDFLTRPSTTLRRACELLYALGALSDSMELTAHGRKMAKLPVDPIYAHLLQLQSPSYGC  
TSEMLTAVSMLSAENVMFRPGGGGPEGNGKASLGQKAVQAHRRFASYEGDLPTLKNIFE  
AWRKEAIYTPSGVKKGRGNEYGGKILHGQWCARNFINGRALVRAFNVRRQLSSICAKSID  
KGGNMDVVSQSCGEDEIQFLKACAGLFLQSATRLTTSDETKGRRHDSNGGNSGRLGPSR  
GRYKTKIGSEVVS IHPTSTIFGRNPAPKSVVYTELLITKKTYLGRVGTQIREEWLAEVAPD  
FFK

>comp12300\_c0\_seq4; 366 127 1446 LEN=2187; translated  
MRSLWRLMSRVLRFGIFLSLYIILRVASFTPSRRLRGLSDKTIAELARKRYSSKNGDEND  
PFPMKGRIAVVTGAAGGIGGELSKTIFRLGGTVVALDRNVAGLEELQRSLQEDCFEDES  
STSKNSNNGDKDSDKQVGNISNIEDVQIRFVKIITNQEDLSSVACAANLILSRFDRIDL  
NNAGISYDANRSKSAVRVSAHQKDLAFTVNYLSHFLLTEKLIPILSKKGRIVHVTSTYHW  
KVDGSDLVPSSEEDGVPIAYHSDPEKQRPGLGRSYANTKLAQIWHRSVSRSLPEGCSSV  
CACPTWAATGIAGEKGRAFLGEYAFPIADCGPGITSAVNAMLRDDELGDALNDGKSFVA  
NTTLVQYKLTSLLLTNNFVQNTLWRENADMCAAFLLVFQKFAHEDFIIQKTSPESSND  
KEKREKQYQWSKHEVKNWL

>comp12300\_c0\_seq5; 210 225 581 LEN=672; translated  
MDVVSQSCGEDEIQFLKACAGLFLQSATRLTTSDETKGRRHDSNGGNSGRLGPSRGRYK  
TKIGSEVVS IHPTSTIFGRNPAPKSVVYTELLITKKTYLGRVGTQIREEWLAEVAPDFFK

>comp12301\_c0\_seq1; 486 503 2192 LEN=2291; translated  
MNPKL TNSNLLRFRVVI IALSLLLMTLSSLGEHTVVEGRESVKKERQSLSGEEIVGGRSS  
PLRQQHRLRFLSLVDIELSFWYLPASSTNSFETSPLATIEATRHFALGLNEDEGTVI  
DLNVRVLSQNSNIQPSSTTATILEINNADSIAAHVLTTLLEITIYELTDDNLQANDMGK  
RITRLLTSRAREVLDDLLLDTEFFATVFAIGSESSKAPLMVSKQTSSDIVGSDGDRK  
QSLGLFVIGLIGVISIGIGVIFLCTLLPKKSREVEGLNHKEKMIKEPPVPTVFI  
RNVV TENTTEDLPSVTQSSEIIQAIDSISKDSIEPSIEITSSEFLRDKQKHAEEQRAVFSR  
KGI QTIYTEDKLPYNIQKLRKKDDAESNLKSYINGYCSKWMTAGSASETLRPSKLI  
SHSRI NSRIRMKEEKCDIESQIQNLKKKRNAIEQRIRKKYETLIDFSPSECRDANEI  
IKSRVTRE DTIGWVGPVEVQGRFNAIDDDDISALTYGSFYGVGDGQDMKILFNEK  
KEYIRSKQLIITD GISLMGTFCRIPERLTFDGHVQ

>comp12302\_c0\_seq2; 416 779 2020 LEN=2348; translated  
MKLLLLDHVDSPIYIRGVGFLYLRVYVGDPKSIWGWIEPYLYDDEPIAVAATSSKNK  
GQQKGR QQRDGTGDFVRRFLSSSERDFYGTMLPRLPIQVERDLQVKLLFAEKVQERAK  
KHSNRK TMDYFKTLGSRVMALYGDDENPITWYEGVVDRVLLRDEETRRELKIPKFI  
VTFPEYGNTE TVTLGEMEMPGVSLDSTNDIETSARRGEKRGYRSQSEIRGGYERD  
NYRDNRRDYNGRGYS DRGYRDEDRRRSGIAPRRGYDNADHRRRDNGNRRGYLDGDD  
RWKRDNDRRREYGHDDR SRSRGPALPSNDDL YEEVRRRERENVTARGNEAVVRRS  
QSVKASLTGSAPYNRQESTKHV PAPSNGPYYSNRERPASHLTISESSAAAPKKRSM  
EIIAAQQEKKRKL MARYG

>comp12302\_c0\_seq3; 480 89 1678 LEN=2006; translated  
MSRSALWRQEGAKKREKQAEDLFVMAVEEGRNNRSKSLPLWGPDDSFHFNPLLEKTIK  
SQYFQKCCRDITDWNKLVDEIYYQVKDLEPWTGQPSTAFCLLLRLLTLRCSEKQMKLL  
LDHVDSPIYIRGVGFLYLRVYVGDPKSIWGWIEPYLYDDEPIAVAATSSKNK  
GQQKGRQQRD GTVGDVRRFLSSSERDFYGTMLPRLPIQVERDLQVKLLFAEKVQERAK  
KHSNRK TMDY FKTLGSRVMALYGDDENPITWYEGVVDRVLLRDEETRRELKIPKFI  
VTFPEYGNTE TVTLGEMEMPGVSLDSTNDIETSARRGEKRGYRSQSEIRGGYERD  
NYRDNRRDYNGRGYS DRGYRDEDRRRSGIAPRRGYDNADHRRRDNGNRRGYLDGDD  
RWKRDNDRRREYGHDDR SRSRGPALPSNDDL YEEVRRRERENVTARGNEAVVRRS  
QSVKASLTGSAPYNRQESTKHV PAPSNGPYYSNRERPASHLTISESSAAAPKKRSM  
EIIAAQQEKKRKL MARYG

>comp12302\_c0\_seq4; 378 89 1914 LEN=2242; translated  
MSRSALWRQEGAKKREKQAEDLFVMAVEEGRNNRSKSLPLWGPDDSFHFNPLLEKTIK  
SQYFQKCCRDITDWNKLVDEIYYQVKDLEPWTGSESSHMAKNGGSGDAEARMIQKLGPE

KSYQSIRDSKLIHPVFWDXVDYSAMAMSRDLVFLTAIRVNPALKKLSDRYKPRSAIYCFL  
FAPSSFDVEVFRKTDEAPLDHVDSPIYIRGVGFLYLRYVGDPKSIWGWIEPYLYDDEPIAV  
AATSSKNKGQQKGRQQRDGTVDGDFVRRLFSSSERDFYGTMLPRLPIQVERDLQVKLLFAE  
KVQERAKKHI SNRKTMDYFKTLGSRVMALYGD DENPITWYEGVVDRVLLRDEETRRELKI  
PKFIVTFPEYGNTEVTLGEMEMPGVSLDSTNDIETSARRGEKRGYRSQSEIRGGYERDN  
YRDNRRDYNGRGYSDRGRYDEDDRRRSIAPRRGYDNADHRRRDNGNRRGYLDGDDRWK  
RDNDRRREYGHDDRSSRSGPALPSNDDLYEEVRRRERENVTARGNEAVVRRSQSVKASLT  
GSAPYNRQESTKHVPAPSNPGYYSNRERPASHLTI SESSSAAAPKKRSMEEIAAQQEKKR  
KLMARYG

>comp12303\_c0\_seq1; 301 207 1160 LEN=1337; translated  
MGSVNEDNWVDGIIDQLLQARSRKPGTPVDLSVQDATSLCNYAREVFMQQPMLLELGAPI  
KICGDVHGQYTDLRLFEYGGFPPEANYLFLGDYVDRGKQSLEVVSLLFAYKIKYPENFF  
LLRGNHECAGINRIYGFYDECRRRFSVKMWKQFCNTFNCLPCCAVIDDKIICMHGGLSPE  
LSQMEQIANLARPCDVPDPTGLLCDILWSDPDPSITGWGENDRGVSFTFGGDVVRQFLRRH  
DLDLVVRAHQVVEDGYEFFAGRELVTVFSAPNYCGEFDNAGAMMTVDDTLMCSFQILKPA  
SAAQQRYGGRQNTPGRR

>comp12303\_c0\_seq2; 301 286 1239 LEN=1416; translated  
MGSVNEDNWVDGIIDQLLQARSRKPGTPVDLSVQDATSLCNYAREVFMQQPMLLELGAPI  
KICGDVHGQYTDLRLFEYGGFPPEANYLFLGDYVDRGKQSLEVVSLLFAYKIKYPENFF  
LLRGNHECAGINRIYGFYDECRRRFSVKMWKQFCNTFNCLPCCAVIDDKIICMHGGLSPE  
LSQMEQIANLARPCDVPDPTGLLCDILWSDPDPSITGWGENDRGVSFTFGGDVVRQFLRRH  
DLDLVVRAHQVVEDGYEFFAGRELVTVFSAPNYCGEFDNAGAMMTVDDTLMCSFQILKPA  
SAAQQRYGGRQNTPGRR

>comp12304\_c0\_seq1; 225 443 1051 LEN=1213; minus strand; translated  
MTFFFLLRRFRFFPSRRFGPGLGGFFRRLVLVNDHDFLDDLVIPADQELQDLGSDVAKDHH  
HDHNDSHDDVHQDVGRRIVPARFPQGILDGQEKGLEVVGHALDLADGEAAPGVLLPDL  
VLSQLFFVAPLFLFDTRHCVHPSAEIGTGIDVRVDGCQLRGEQEHEGQEHVPHVPHAAAE  
QFMDCFFCHRGMPLRLNLDLIAW

>comp12305\_c0\_seq2; 184 1 546 LEN=867; translated  
FGNRHQYDEDEGADEGPGVKQSFEELCRAHIQAFAKTAEKFALTTKLTERISQWQAHLMP  
ILEEEEQKASFDIHRYSQMLLDSSIETVQENKRKSLDHKLQNNNTSDSPCMNTNSVEFRSV  
TEGCTQSDICRFLFLASLSLANSGLNLMIEEGALDYRFEILSGKVDKPMETYRAPSTTTSGV  
A

>comp12305\_c0\_seq3; 870 1 2143 LEN=2143; translated  
XNINA ILKVQEQSDDSKSSTARWQSKEKQRRQASFHGENQQQKHCTR TNIRHNKNGLDRF  
PLHHSISNHTTFFVMVSSTRPKRNSAGREHGRSLDLSNKLNTSANTSGVDLALATLQPLR  
DLARNWDVDVASCLEEYLQELAGIHPQQLQKIAEGASANNPNIISTDNGAPNFAQAALILQ  
NSSNVYGRKVEYLYSLVYKALDEFFQASKATSSSRQNSRKNKSVADVDVDFDFDPHECF  
LLLDDVVPEDLTPTHRKINLKEEEDKETRDRMSLVGGVGGPRSAIDRSQNNNNMTRLSL  
GGLSVTRMERNNSFGNGNISSQQQQRALLGILNNGSLRLMSGHCDVGDGGLLLMPGSQSA  
NPKNHNSNSFSNGITSNPDNSLNVNFDGADVGTSP TENSVMVSGARNLFDDGYNADDYDDH  
DDGQGFAMNDDFDCGDANMACANVQETE EGV CALASSQTSSSAKRVAFADSVVDDSEKN  
QHRKQQQKKKDPWQLLDPHSLGEHSYKPKPLKRKGT YRLEP GILEPPSECVTGSSTSR  
TKPERRSLVQPTLRSSLAVENFRMAMGKQLEPSKKISSRGLAYGDEF LYIAKENARL KAA  
KRRLERKQEQRSSVALLRQSEKKIGDIDNSNEGKFDEIYDDDDDDNGVAFDFGGGDNDYD  
DEGDRDYATGNSGLVDLEDALATGINMMKMEPRTKARALNNRLKNSAVLTSKLLQ

>comp12306\_c0\_seq1; 501 86 1439 LEN=1455; translated  
MASLPYSYAPERLLESFRKLKAEEDGKTKPQTTTTPTTDDSEGGCRPCGGGKFVVAAVQL  
TASGLEDSSVAGLLERAREAVRIAEEKADLVLLPELFLGPYFCQSQEACLQNLAMEIR  
SEEGAGTDDEEGGFNLIETMRGLARRYGVVLPVSLFERKRNALYNSIVMIDADGVSPLG  
TYRKSHIPDGTGYQEKFYFSPGDTGFKVWKT RVGKVGVAICWDQWFPEAARAMALMGADV  
ILYPTAIGTEPDPSINSADHWQRVMQGHAAANMVPVVASNRYGTEILLRKDGTTEQQRI  
TFYGRSFITDETGGKVAEAGEVGPDDPVAVITSSIDPSANRSTR LAWGLFRDRRPELYGV  
LQTKDGGAWPAGGIASGNPSHGPHSGGVGR TNAPRKR PASAEASTLHHTTMRAFLGRDLG  
AIESYKTSKGRSATASKVYCDDESKCKNK

>comp12307\_c0\_seq1; 110 120 1237 LEN=1237; translated  
MSSSVTPKSKTILGKTLVSVPEAISLHDESDDSNVKFIDGSWWLGKDRNGREEFETGPRI  
TKARYLDIDDVSSKSADNLPHMMPSSSLQSAAMDAMGISKSDHVIVYGTSGCMFVTRAYM  
QMRIMGHPAELCHLMDGSLDEWIDAGGPVEAKESSPSHPVIDAKNLKEASASYTATDPQN  
IIEEMEELRSLIEEGKTTGEDPSVRVVDARSEGRFTGTAPEPRPGLRGGHMPGAINLPITD

LLDPSDKVFRFRSKEELQRIIQEAGIPLPLNPNNGSKIVSSCGSGVTACALMTAFDILDEDS  
SNVYLYDGAWIQWGGQSDTPIVLISVERIEWRKPLKLLRTALHHTNKRTEIPEEGPEHNN  
NMQARILWSRNLX

>comp12308\_c0\_seq1; 204 636 1760 LEN=2079; translated  
MWGFDNDFTVQLSREYEIISPSANENSVPFLSSMLKELETGKSLVTNLNFPKTNEEHFRNS  
LVSLEKKVYMYHHTINSSRGKEGAVVLDMLLAHVYAYHQGAIYGGSCGEGNDVGRESEIS  
LIKAIGLEPFLQFACPRDLKTNDRKKVIPGKSYIQDGTRAFTPEYMDILKSLIKYPEKPE  
DQKKMNIIVVHMSRGKHFTPCARAPHRGFEPYLPNKHYQVSTKTKVQTGVVKRSNLSDNL  
TILVLQLLINKYLKPDQENKVIIFSQLGAFEFKDFEFREKGYELHIDEDITDIWSAVLLSD  
VFIMSRSSFSFVPAMVANDSTQVVYTPFWDKPIRGWDIVRSDIQNQSDAEFQRLKSTCEK  
KPKDLAKFRKKEGR

>comp12308\_c0\_seq2; 201 636 1679 LEN=1998; translated  
MWGFDNDFTVQLSREYEIISPSANENSVPFLSSMLKELETGKSLVTNLNFPKTNEEHFRNS  
LVSLEKKVYMYHHTINSSRGKEGAVVLDMLLAHVYAYHQGAIYGGSCGEGNDVGRESEIS  
LIKAIGLEPFLQFACPRDLKTNDRKKVIPGKSYIQDGTRAFTPEYMDILKSLIKYPEKPE  
DQKKMNIIVVHMSRGKHFTPCARAPHRGFEPYLPNKHYQLLINKYLKPDQENKVIIFSQ  
LGAFEKDFEFREKGYELHIDEDITDIWSAVLLSDVFIMSRSSFSFVPAMVANDSTQVVYTP  
FWDKPIRGWDIVRSDIQNQSDAEFQRLKSTCEKPKDLAKFRKKEGR

>comp12309\_c0\_seq1; 396 1 1386 LEN=1437; translated  
RRYNKEASSQRIMSISETTPTWTTPSWSHSVIMCTLLLLWGLFLNENVLFAASGFGPTRT  
TRTSSFTNTHALGGLTVGRRTVDSLSTADDEATAEVEIADAASLRSVTFNIMKDQEPQ  
LLCNFLMELGAASTCIVDADRGTDEKAIFFDEFDETSMTRTAVTTHNWNCHVSAHFPAS  
VSLEWIMEIVQDTFPNLPRYDKVTKVEDKDWVLHVQKSWKPIVLPFVLRFPWHTDKVVA  
EALVENNDNDLTDLDDAVQLDLQGGIAFGTGEHPTTQLCLEFIHNVRRPNMLVMDYGAGS  
GVLGMAACKLEPTTSAIGVDIDVDAVHIANANAETNQVMKNYLSDLVQTIISDNDESTS  
IRLQKAYSSTGKQEVAESLPEDLNGPIYDALAANILAAPLVSLAPYISKLLKPGAPMGLS  
GIMTSQSDMILEAAYADYFDDMKVEKELGGWVLITGKRKKE

>comp12310\_c0\_seq1; 799 1 1925 LEN=3208; minus strand; translated  
XEIEAFQKSTKNNLLPIVHGLVSSAKEKLDALSAQFKHGDEILQSRCQSVLSRLENCNA  
ISKLESAYLSSSESVLDTLATQLEASKENLSTAVAEITAKLEEDRGIRQIHRDELVKSTG  
TFQSHCHTSIDQMNSTAFHTATLNKFFVEGIKENQLSRSNLQSLSSMDGYLKDKNAEYV  
KKLEHQCSVLKEQHEALVAHQRRQKMNKALVTNVMSGMSLVEKEMRAIDQFQSDSFGS  
LLAANEKSKDSNAAIHQTSLDVFDYLGTTNGHLENDIRNNFNGQDQLGSALQQESSAFDA  
NMKTSFEGLRNPIDTFANETMNTLQSLEKEDLNTTESIIHTTRLQVETATNQASARIQEG  
AKKGISSLNESTEQGWKYVKEEVLDTVRNDLCQIQGDQSQVCSASKESITGIGETLDADE  
NAASEQIRKQGEYISLVEKHLEDGIDGSFAGSVDQHREHIEDSQWLETALQKQVEAMGGH  
LCNSKDAVSMSSKQLENLAHNIHRLHEEPVDIPCRNIPEYSESLTFTKDPQAILRESQFE  
NSDCGESSKENTPMTSKDSALSNNLHADKKKVHSTSQKGAVLNDRSGSLNSQPTPTSRMK  
NIRLNANESPLKRTAAENNVKTGIPCGLRKRKRKTKVSQK

>comp12312\_c0\_seq1; 195 1 961 LEN=1042; minus strand; translated  
XGFIRTKKTNASSAVETAEVLDCTRSSFEPGLLEKPCELDETRGPAPAEFSLIFPTQYGD  
FTADCVRERAPVWADRUYKLAHGYNGNYFFRVIIPGRYIQFGTSGDPAVSNVNYTSTT  
DPECSVLRPQPPDMPYCLASSSSSHPHDCTGVPALSNDFTLAMSTSYKQGVPGYDPGVT  
WNATAELFINIGQNHFLDSNLFIPICTIDPVAMEEVVLRFPSPFGEVSELGGNGPSLGLLY  
QDGNPYIESNPEWNASMAVTSIVSICTAPDIPTKGEMEAKSDRASARSIGTNHGRSRLSW  
IASIAWKGIAVWLISLIVLN

>comp12313\_c0\_seq1; 225 111 835 LEN=1034; translated  
MKLSAFLVLAVATARQKPSFHETSREXPTLSLQATKNHDRESENATTFANVALASIFSL  
LLSAGPLPAFADGQTEKFKLPPVDLTDKTRCTLKSSSIGQANAARDKLYDLRQCKLSGES  
AVGFDLSGVIMTETDVSKVNFQDAVFSKGYLRDSNFEGADFSNAIVDRASFKGSSLRGAI  
FKNTVLTGTSFEGADVENADFTEAAGNFIDLKCNLCKNPTLKGENPTTGEDTRFSVCGGPG  
S

>comp12313\_c0\_seq3; 225 111 835 LEN=1023; translated  
MKLSAFLVLAVATARQKPSFHETSREXPTLSLQATKNHDRESENATTFANVALASIFSL  
LLSAGPLPAFADGQTEKFKLPPVDLTDKTRCTLKSSSIGQANAARDKLYDLRQCKLSGES  
AVGFDLSGVIMTETDVSKVNFQDAVFSKGYLRDSNFEGADFSNAIVDRASFKGSSLRGAI  
FKNTVLTGTSFEGADVENADFTEAAGNFIDLKCNLCKNPTLKGENPTTGEDTRFSVCGGPG  
S

>comp12314\_c0\_seq1; 735 428 2842 LEN=3185; translated  
MSSQRGQRQRKQKGGIPPELMNVFNPNESVDDVDDDDMNGTNGNHTNPNGNDFHYNYGQQ

QRTYAYKDRPGSLRGDGYGGGKARYNPVTNPSTMAVQSHNYEPDESEVWRAYVAQVHFS  
NRGQWWTGKKRSLKRWILTFVAVGVIQALVATACNFSRSMATKKYDYVYELLNPSMEAY  
EEDMEANDDDLAADATGSNGSTNTVPESTGGDIWKAFWSFVLIQTAMCFAASIFVYIEPV  
SGGSGIPEIKCYLNGIDLPRVVRKTLFCKVIGVAFSVAGGLPVGKEGPMVHSGSVVAAG  
ISQGKTRFWGVDTSFSKFSDFRNDREKRDFVACGAAAGVASAFGAPIGGVLFSLIEGASY  
WSTKLTWRAFFCAMTTMMTLFALKNVDTWWGQADVGLKLSFGGFNSLSGEASNFSIWELP  
IFALIGCLGGLIGAVFNAANEHLTIWRMKRVNFSKTRRLFVAVVIAMGVSVVSFMLPLIW  
NRCTELPQDMQDWTNQEKNLVESLVPFQCEPGKEYNEVASLIFTEADTAIKQLFHFREAG  
GDDNSTFSSGALFLFFVPYIMMATVVYGIAPVPSGLFVPSLLAGAAFGRLCGHLLHKL DHT  
SGTFADSGTYSLMGAAAVLGGMARMTISLTVILLEATGDMQYVLPMLMIVLMSARFTGNVF  
NEGLYDIHIHLKHIPFMEPDVPPIAERNEIVAGQVMSAEVKCLRPVERAGVVYDLLRSCQ  
HGTFPIVDTASGGTLYGTASRDMLCTLLQRRAFGNPDVLDYDNDSDLLGPRRLSPLVQWD  
TIERAYPRYPTIDDFDIGEADRNCW

>comp12314\_c0\_seq2; 735 420 2834 LEN=3177; translated  
MSSQRGQRQRKQKGGIPPELMNVEFNPNESVDDVDDDMNGTNGNHTNPNGNDFHNYGQQ  
QRTYAYKDRPGSLRGDGYGGGKARYNPVTNPSTMAVQSHNYEPDESEVWRAYVAQVHFS  
NRGQWWTGKKRSLKRWILTFVAVGVIQALVATACNFSRSMATKKYDYVYELLNPSMEAY  
EEDMEANDDDLAADATGSNGSTNTVPESTGGDIWKAFWSFVLIQTAMCFAASIFVYIEPV  
SGGSGIPEIKCYLNGIDLPRVVRKTLFCKVIGVAFSVAGGLPVGKEGPMVHSGSVVAAG  
ISQGKTRFWGVDTSFSKFSDFRNDREKRDFVACGAAAGVASAFGAPIGGVLFSLIEGASY  
WSTKLTWRAFFCAMTTMMTLFALKNVDTWWGQADVGLKLSFGGFNSLSGEASNFSIWELP  
IFALIGCLGGLIGAVFNAANEHLTIWRMKRVNFSKTRRLFVAVVIAMGVSVVSFMLPLIW  
NRCTELPQDMQDWTNQEKNLVESLVPFQCEPGKEYNEVASLIFTEADTAIKQLFHFREAG  
GDDNSTFSSGALFLFFVPYIMMATVVYGIAPVPSGLFVPSLLAGAAFGRLCGHLLHKL DHT  
SGTFADSGTYSLMGAAAVLGGMARMTISLTVILLEATGDMQYVLPMLMIVLMSARFTGNVF  
NEGLYDIHIHLKHIPFMEPDVPPIAERNEIVAGQVMSAEVKCLRPVERAGVVYDLLRSCQ  
HGTFPIVDTASGGTLYGTASRDMLCTLLQRRAFGNPDVLDYDNDSDLLGPRRLSPLVQWD  
TIERAYPRYPTIDDFDIGEADRNCW

>comp12314\_c0\_seq3; 582 317 1864 LEN=2207; translated  
MVHSGSVVAAGISQGKTRFWGVDTSFSKFSDFRNDREKRDFVACGAAAGVASAFGAPIGG  
VLFSLIEGASYWSTKLTWRAFFCAMTTMMTLFALKNVDTWWGQADVGLKLSFGGFNSLSG  
EASNFSIWELPIFALIGCLGGLIGAVFNAANEHLTIWRMKRVNFSKTRRLFVAVVIAMGV  
SVVSFMLPLIWNRC TELPQDMQDWTNQEKNLVESLVPFQCEPGKEYNEVASLIFTEADTA  
IKQLFHFREAGGDDNSTFSSGALFLFFVPYIMMATVVYGIAPVPSGLFVPSLLAGAAFGRL  
CGHLLHKL DHTSGTFADSGTYSLMGAAAVLGGMARMTISLTVILLEATGDMQYVLPMLMIV  
LMSARFTGNVFNGLYDIHIHLKHIPFMEPDVPPIAERNEIVAGQVMSAEVKCLRPVERA  
GVVYDLLRSCQHGTFFIVDTASGGTLYGTASRDMLCTLLQRRAFGNPDVLDYDNDSDLLG  
PRRLSPLVQWDTIERAYPRYPTIDDFDIGEADRNCW

>comp12314\_c0\_seq4; 582 418 1965 LEN=2308; translated  
MVHSGSVVAAGISQGKTRFWGVDTSFSKFSDFRNDREKRDFVACGAAAGVASAFGAPIGG  
VLFSLIEGASYWSTKLTWRAFFCAMTTMMTLFALKNVDTWWGQADVGLKLSFGGFNSLSG  
EASNFSIWELPIFALIGCLGGLIGAVFNAANEHLTIWRMKRVNFSKTRRLFVAVVIAMGV  
SVVSFMLPLIWNRC TELPQDMQDWTNQEKNLVESLVPFQCEPGKEYNEVASLIFTEADTA  
IKQLFHFREAGGDDNSTFSSGALFLFFVPYIMMATVVYGIAPVPSGLFVPSLLAGAAFGRL  
CGHLLHKL DHTSGTFADSGTYSLMGAAAVLGGMARMTISLTVILLEATGDMQYVLPMLMIV  
LMSARFTGNVFNGLYDIHIHLKHIPFMEPDVPPIAERNEIVAGQVMSAEVKCLRPVERA  
GVVYDLLRSCQHGTFFIVDTASGGTLYGTASRDMLCTLLQRRAFGNPDVLDYDNDSDLLG  
PRRLSPLVQWDTIERAYPRYPTIDDFDIGEADRNCW

>comp12315\_c0\_seq1; 701 117 1976 LEN=2161; translated  
MPASANQNPAPEVPSTKKLKLGTMGATGKSRGASAAAGGGGATATAGASERDEFDVKVA  
YLLACPHVESPMDSPAIKAAIEGIEKEQRRRIRDAKLRSRFVAGTRAGVPCDLAVGEEIV  
VVEKDDLDGAAMASRPVAAVCIAGASSNDDTEWQDVATQQKGGSIGCGGEDGNDDDD  
DDGMESGIAIDGSFGTEDEPDGNAKADSYLGRTLARACIEAIAEQQTRAPVVVSTPLA  
AVAVALHAALRSEVLGFACTGVPEDHARKGGIGFAPPVRELSRTEFLPKEDSRSTTNG  
KSTSNKHAPLPLRYRKADTGAVVLNVEGIPSSGDVVGATEWGGTECRITFAPSGGRGDS  
HLGLGFPLTDHVNLD SWNAAMLKAGSGSKIAPSLHYKNLSGLLTRFCRAFDFGAVAGPEP  
AGDRGATGTSTGGARPHTGTSTDRKAAKAPDAILELNPAGSKPEIAATEPRGGRFAVPS  
TLGEAFPAASASGRNRVVPVGMVPPRLGDFSGDLLPVGWQDPRHARPGVGGNLMGPN  
HPLFAGDGGIGPVGGPGFAGAGPGTMQPRYDPVLPVGGVPHVPHGRGFRPGSDRRARMG  
EPNPDHLPNSLGDMMFM



>comp12315\_c0\_seq2; 426 138 860 LEN=986; translated  
MMNRSNNILVTAQSIGFWSHGLFRFVLIVATAFLLAPLSCLADDDNDSAASQGNCPKVCL  
DVRQGSRYHGLFHPVSTPSSVQDFYNYHNYSFNNGDDIVPLLPDQSLVLIHHDSELCDLSF  
VVVHDSKDDFTGGQALMFVSGNHEDALVQDGPDGSRSDRYVYRGYRRGADDDRTELFWE  
WGWQKSPSKRYKTDGIADRWKNSLDGSSNDDDDDDANGYDDDEPNQSGRRLSRGQNAE  
>comp12316\_c0\_seq1; 363 332 1725 LEN=2019; translated  
MRQTVAIRLARSVGFPSRHSAGHPARHLSSYGRAGGEFQNHQQSGTEPPQORTHQAQSAEGS  
RQPGQQQRGFTSINNRTPYNL CFLRHGQSTWNRDNRF IGWTDTPLTDDGVLEARVAGKML  
KNSGILFDEVHTSLLRRCIRTTNLVLMVEVEQEYIPVHKVSNAAVAASGGRQATALAEPIF  
VSALAGGIVGVGAVPVADIVVVVVALAVVVVVVVVVVFLSSTISRCDFFPGLRGPSCD  
SKHWRLNERNYGELVGKKNKETVKLHGKEQVKQWRRSYDQPPPEMCDHHKYHPARDPRYR  
QMKNLIPKSESLKETKARSSVYWDVIAPELRAGKTLIVGHENLRSMIMRLEGIPKED  
IINLCLPRAVPLAYRLDENLKPIDRPDGKLDPEATGFLRGEWLGGDQAVLEILERDRKQVY  
DTTIRKNLETCDADRKNKWDWMNLVVGKAGPEAQAKSNPGEKAA  
>comp12316\_c0\_seq2; 286 332 1474 LEN=1768; translated  
MRQTVAIRLARSVGFPSRHSAGHPARHLSSYGRAGGEFQNHQQSGTEPPQORTHQAQSAEGS  
RQPGQQQRGFTSINNRTPYNL CFLRHGQSTWNRDNRF IGWTDTPLTDDGVLEARVAGKML  
KNSGILFDEVHTSLLRRCIRTTNLVLMVEVEQEYIPVHKHWRLNERNYGELVGKKNKETVK  
LHGKEQVKQWRRSYDQPPPEMCDHHKYHPARDPRYRQMKNLIPKSESLKETKARSSVYWD  
DVIAPELRAGKTLIVGHENLRSMIMRLEGIPKEDIINLCLPRAVPLAYRLDENLKPID  
RPDGKLDPEATGFLRGEWLGGDQAVLEILERDRKQVYDTTIRKNLETCDADRKNKWDWMNL  
VVGKAGPEAQAKSNPGEKAA  
>comp12318\_c0\_seq1; 420 226 1250 LEN=1424; translated  
MTIKIRSCLPIVVAAMILCCDAAYVGDEGNLRGPISRDVERTESITQATMIHPTHTLLKN  
DTITPSNNNEGIIKKEEQRQTPYVLRGSGVPYKSNNEQKNLSISDDGTKEKRAHKKQGEDE  
RQAETFGSQKEMSVLENEILEIRRIKRSQEQLQEKLQQP I VVIKSTNEGGENGNETETE  
SELSAESESDGNCVYSFHKERDLHVDLKTTSLHKGGKCRLDVDIVQKSEIHARALIGDGA  
CRFDSTHGHWYIAKCIVDENESNGKTKNREKFPFVFTKAFCSGCEICADPEESP  
HGHGHPVGPLFRTWGRPAFAICELPENXEIQTKKKKTGDNK  
>comp12319\_c0\_seq1; 1108 255 4193 LEN=4468; translated  
MGGSTGNYSGGSSAAYPPSLYDTSVSSASGGRPSRQNTPAHSSVGRQQQEYSRMPNSYAN  
HHQQQRGRHVSPKSSSRMNTNYSYDYPHRRDYASMSDPGGSRLEHTQDQYHHAQSEYARS  
EIVSPSSSYYESQERFRNPARRFQHSSSWQHQAQSAKSQSPSSPPRRGLPPHPYHPHQYSSH  
SARRERSFDETYPSSPSHSHHERSSVDTSQSSSVRDLKKQLWDQDEVLQVRIPPSPQR  
INRTKQPIPGSPVRESGRSLHQSHQRGPPSSASNEVSRFARSLSPRRYQHHQSSHTANN  
NASPQIHMAGSNI SDTSYNNRFHSKFYEAAMVAQHRGEEQAESPLPSNKYPQHRRHRAS  
SRPFDEDPDQHAHEYQKRRNHSQAQASPPLPGASNRNISPAGNAGDYKNGGGHGFTRKESK  
HDNNARRPPRMTSPPPPSSPIRRSHGRDDRRASRGRSRDASQPKSNDRKSIRRVRTPSP  
LILERMRSFDNEYHSDHNRESGIPSGRDRGHKNYGADRNDYPAKDFRNPMDRNERHDG  
HQNAIAGRYRGSSNIADKEILRNQPGAGRATSSFRKDSGNDRSKDRNVVAIDRDQMPGGS  
RPRQQHSPRETVRDDAGGVEDDIGGVEDDIRVAHLVDKLSAISRENPEALAQIDSILRQ  
ESRSFHARTVDNTRGVGRAGDSSQRRQAQLAKDPLSKRRQDDDAIGDRDAIYNDDDDND  
EDDDESSDVSSLTNPFTQPNSSRPVYPTMLDSAYATETEHYKLHSTAPSNNPGRSNTGIN  
HTNTSPFTPTSSFRPRPSHLHNSNQPTSPPEKPI SRSELKRQQLQKYPPPSTIKVK  
DDVLNTEIARTASTDMRERMLERNQSSRTKKEKTSYGEQEGKAMEEGPKNKLGTFMTEKQ  
ALAQKLRGWDELSNQVSESRSEQERNAQGRKTAGRGTEASSEFQKNTSRRHPWDNKMDLI  
QTKDTSNEGEVGIEMDDTEDHYARDTPGTSRNRSDDDIQNRHFEDARNSIRSRNHKNP  
FDDHGSDRTEADVSAHFDPISFSVEGSNSNTMPKVNSLEGVPPQFHPNNEDL SRNEGK  
KRHGKGSSEMDNSWANPSSSIIPNFDDR LKPA SNEK PRAKVRSPGRQPSTPKDPSDLSE  
HSALETGHGGIEWLD DANHLTSRNLGTAESRSIGMLACKTIGNKELQRKEKKPGFLRA  
FMDKKKKATGTGSAASA AVGSVGLSASVESRGRVRSASQIHSRNATNIRLLPAPYGVF  
ESKNDSAKQRGTGNRSGSAPRHRSGSSEKFRSSMAKKFNRVMQLYDTEEM  
>comp12320\_c0\_seq1; 323 233 1063 LEN=1433; translated  
MSSLRNAVKRIAHKERSQPVD RQH LGILEKKKDYKQRAIDYHRKEDRIKAMKQKASMKNP  
DEFYFAMHNSKVENGKHRSTDDYRELSPLDVKVMKDQDLSYVRMOKQKDLKKA EKLQASL  
HLLNSDSADSVAKRSHTVFVESGKAAKEFDVADHFGTIP EFAGRTFNRLRKSEIEKLAK  
ERMGVNDDDDIDDDYNETKPKFTVEQLIKMKKAERKQAKKLAKARAGAYREMEARRERAE  
NMQKAEAHLITEKLVAGKGRKRKIKTSEDGRPAQYKW  
>comp12322\_c0\_seq1; 376 346 1350 LEN=1485; translated  
MXYPIFMFALDLEELDSFRDSIWPLSRWLQVREPDLKNGEGLLEEEQTADKASRPERN

DESESGAHSDDPNTPAKDAIGTRLLRLVTQKTEGKFRPTLSTHRVVILTHLSYYGYNFPN  
VSFYIYVDKATEELSAVVGEVSNTPWTEMHCVLHPDSTDRVQTKATHADEGKAVGSATT  
AKKRPLKKIEYSFPKEFHVSPFMEVDYWDWTFAGVPGPELPPGESQITVINTLRRRTND  
RIEFTAKLVVDRNPITPTSVVWQMVRLPIFCFIVQVWIHYQAALLFAKGIVYVPHPEGTE  
TAASTAIATIMVPPFAIRDLVCRPPQEAESKTA

>comp12322\_c0\_seq2; 382 1 1315 LEN=1450; translated  
XTKFCNSVVFQHGREALRYRGGIEYANQPSRPMESHGSPVLGGLLAGLSLVAAASAALLF  
VVAVLLPWVSVVAVAWFAPPALRHSALYTGRVWHTRLHPKKHAFTYPIFMFALDLEELD  
SFRDSIWPLSRWLVSQFREPDLKNGEGLLEEEQTADKASRPERNDESESGAHSDDPNTPA  
KDAIGTRLLRLVTQKTEGKFRPTLSTHRVVILTHLSYYGYNFPNVSFYIYVDKATEELSA  
VVGEVSNTPWTEMHCVLHPDSTDRVQTKATHADEGKAVGSATTAKKRPLKKIEYSFPKE  
FHVSPFMEVDYWDWTFAGVPGPELPPGESQITVINTLRRRTNDRIEFTAKLVVDRNPIT  
PTSVVWQMVRLPIFCFIVQVWIHYQAALLFAKGIVYVPHPEGTEETAASAIATIMVPPFA  
IRDLVCRPPQEAESKTA

>comp12323\_c0\_seq1; 266 421 1260 LEN=1495; translated  
MAYDCEGTKIASHWNIPIYMSSTIAPGIYVFTFVMTFLAHRTRSIPFCLIHRRGPRHET  
GESRLDEDEVEYQPLVRPAILVVFSLFALILLVTFIDLNLALSDDVLVGRGTGWASVLN  
NPEGSNTLAMAFLYLLPMTLVSFCLYFGCLLWRYGNEFSMVVPTSSANAWVCPVVGSLAM  
IVGQMFQPDFLITSNITGILYMIAMTRTLYEIRYDITQAGELGQFLTALENTHRRKDQR  
TPSGRIVANESEGASTDLNGAVDEELEEAMASVRGAALT

>comp12323\_c0\_seq2; 238 184 918 LEN=1153; translated  
MTFLAHRTRSIPFCLIHRRGPRHETGESRLDEDEVEYQPLVRPAILVVFSLFALILLV  
TFIDLNLALSDDVLVGRGTGWASVLNNPEGSNTLAMAFLYLLPMTLVSFCLYFGCLLWRYG  
NEFSMVVPTSSANAWVCPVVGSLAMIVGQMFQPDFLITSNITGILYMIAMTRTLYEIRY  
DITQAGELGQFLTALENTHRRKDQRTPSGRIVANESEGASTDLNGAVDEELEEAMASVRG  
AALT

>comp12324\_c0\_seq2; 521 1 2175 LEN=2175; translated  
XDSSQSKQSPQIKEVNRSTLSSVTVSKVQEMFAADSSQLKQKSPQNDQVSDRSALRSGN  
VPEVRELFVSDSSQPNLYSSKQKKAQNVLSSDKVSQARAVFEKKDEQIAVGPEPIRK  
GQNAKIQDVLATWTQKRQCDNMLSSSEHEVEIKRFNASGMEDRKQNRVKEspratrdQENV  
TDEDCKGCTKRRAPQCDHSVLEDKTSSFNKSYAEETVRIQRAQFGTEQSRLGNAEDPEF  
KFQPNSAIKSTRVDFDEVVTNDFCDSNHSGNDAEDLCQARAPDCTPLILPHSLELSSTD  
ESEGAHHPPIFTENFKLASDTPNRLSDGPDDEVRDNRSLHFHAQYTKKETPKEQIISL  
VHYSIDIPRDQNCESVSFLTFEDTRSDKSFKRSSFQDFLKPDTIEVVEDLVMGAHNQLHTS  
LAYINSEDDSDVEPIPPPTKPRKVEPCQDETTSTTKKDQKVTLCDDVIDLSELSQNA  
WAAFDNITFHEETRIHSHFKDNTFDHNRTKSKKVENSSPKRVEFREISNTSMKTKFKSW  
ANFESNEIVRTQYRESVIQENKKEIKNLEVGDTPKRVQPTRKSNVDRECDSPEDNGP  
MEKKERRKTPRQKRVQNHACSTLENDTNKDLNPAFLSDFAAVAIPNQEIVLERPFGGDS  
SESRKNKDLPSNPSALGTSSNYKKDFKSGQKKGIPQNKIRNEECTNIDVKSQEIIVKTGVR  
GHAPEL

>comp12325\_c0\_seq1; 587 186 1562 LEN=1887; translated  
MAGYYVGTKDDASQKEMLFALHKGTCVASIIILGFSALIMFFFFEGRESDGWAIIFGCIS  
IGLFAGVLIGQVTEYFTSYSYWPTQSIAEAGITGPGTVVIQGLGIGMISTVLPAILVVT  
ILSCNALYSSYGIAMSSVGMSTLSFTLATDAYGPIADNAGGIAEMAHMEGRVRETTDAL  
DALGNTTAATGKGFAIGSAVLTAISLLAAFKDKAGIENVDIGDPIVLSGVLIIGTLPFVF  
AGLTMLSVRKTAGAIDEVRRQFQDTPGLREGTAEADSDRCVEISTKFSLQEMILPGIYA  
ILSPATIGFLVGNCLAGLLGGSIASGMMLATMMANGGAWDNAKKYIEIEGAHGKGTD  
IHKACVVGDTVGDVDFKDTSGPSLNILIKLMSIIALTIAPSMNGVGDWETALWGLIPLSVM  
VLGTVLVWFFFWRDNKELLDGTNDLELTAQDRPLSKVI

>comp12325\_c0\_seq2; 668 178 1758 LEN=2083; translated  
MDIPEDDARNPAVIADNVGDVAGMSADLFESFVGSIIAAVALANGDIVLVMLPLWV  
AGIGIASMAGYVVGTKDDASQKEMLFALHKGTCVASIIILGFSALIMFFFFEGRESDG  
WAIIFGCISIGLFAGVLIGQVTEYFTSYSYWPTQSIAEAGITGPGTVVIQGLGIGMISTV  
LPAILVVTILSCNALYSSYGIAMSSVGMSTLSFTLATDAYGPIADNAGGIAEMAHMEGR  
VRETTDALDALGNTTAATGKGFAIGSAVLTAISLLAAFKDKAGIENVDIGDPIVLSGVLI  
GGTLPFVFAGLTMLSVRKTAGAIDEVRRQFQDTPGLREGTAEADSDRCVEISTKFSLQ  
EMILPGIYAILSPATIGFLVGNCLAGLLGGSIASGMMLATMMANGGAWDNAKKYIEIEG  
AHGKGTDIHKACVVGDTVGDVDFKDTSGPSLNILIKLMSIIALTIAPSMNGVGDWETALW  
GLIPLSVMVLGTVLVWFFFWRDNKELLDGTNDLELTAQDRPLSKVI

>comp12325\_c0\_seq3; 856 143 2440 LEN=2765; translated

MNAEAINCSSFGVEEGSFPCDATPIEAVSLGIASGGVALIFSIIILAAANVKQSERGNTTMN  
RISDKINSGARAFLLTEYTFLLAIFVAIIFCALFTLYALDPPSGTNWFDGLRYSALFLFGA  
SLSAFSGWRGMMMAATDANVRTANAADKGGNAALRVAFTGGSVTGFVVVGMGLAGLSVAL  
FCLTLGYSNFNQTEKLI IASDTLAAF GFGASSIALFTRVAGGIYTKAADVGADLVGKIVEM  
DIPEDDARNPAVIADNVGDNVGDVAGMSADLFESFVGSIIAAVALANGDIVLVMLPLWVA  
GIGIIASMAGYYVVGTKDDASQKEMLFALHKGTVCVASIIILGFSALIMFFFFEGRES  
DGAIFGCISIGLFAGVLIGQVTEYFTSYSYWPTQSI AEAGITGPGTVVIQGLGIGMISTVLP  
AIIILVVTILSCNALYSSYGIAMSSVGMSTLSFTLATDAYGPIADNAGGIAEMAHMEGRV  
RETTDALDALGNTTAATGKGFAIGSAVLTAIISLLAAFKDKAGIENVDIGDPIVLSGVLIG  
GTLPPVFAGLTMLSVRKTAGAIIDEVRRQFQDTPGLREGTAEADSDRCVEISTKFSLQEM  
ILPGIYAILSPATIGFLVGPNC LAGLLGGSIASGMM LATMMANGGAWDNAKKYIEIEGA  
HGGKGTDIHKACVVGDTVGDVDPFKDTSGPSLNILIKLMSIIALTIAPSMNGVGDWETALWG  
LIPLSVMVLGTVLVWFFFWRDNKELLDGTNDLELTAQDRPLSKVI

>comp12325\_c0\_seq4; 513 186 1653 LEN=1978; translated  
MAGYYVVGTKDDASQKEMLFALHKGTVCVASIIILGFSALIMFFFFEGRES  
DGAIFGCISIGLFAGVLIGQVTEYFTSYSYWPTQSI AEAGITGPGTVVIQGLGIGMISTVLP  
AIIILVVTILSCNALYSSYGIAMSSVGMSTLSFTLATDAYGPIADNAGGIAEMAHMEGRV  
RETTDALDALGNTTAATGKGFAIGSAVLTAIISLLAAFKDKAGIENVDIGDPIVLSGVLIG  
GTLPPVFAGLTMLSVRKTAGAIIDEVRRQFQDTPGLREGTAEADSDRCVEISTKFSLQEM  
ILPGIYAILSPATIGFLVGPNC LAGLLGGSIASGMM LATMMANGGAWDNAKKYIEIEGA  
HGGKGTDIHKACVVGDTVGDVDPFKDTSGPSLNILIKLMSIIALTIAPSMNGVGDWETALWG  
LIPLSVMVLGTVLVWFFFWRDNKELLDGTNDLELTAQDRPLSKVI

>comp12325\_c0\_seq5; 782 143 2531 LEN=2856; translated  
MNAEAINCSSFGVEEGSFPCDATPIEAVSLGIASGGVALIFSIIILAAANVKQSERGNTTMN  
RISDKINSGARAFLLTEYTFLLAIFVAIIFCALFTLYALDPPSGTNWFDGLRYSALFLFGA  
SLSAFSGWRGMMMAATDANVRTANAADKGGNAALRVAFTGGSVTGFVVVGMGLAGLSVAL  
FCLTLGYSNFNQTEKLI IASDTLAAF GFGASSIALFTRVAGGIYTKAADVGADLVGKIVEM  
DIPEDDARNPAVIADNVGDNVGDVAGMSADLFESFVGSIIAAVALANGDIVLVMLPLWVA  
GIGIIASMAGYYVVGTKDDASQKEMLFALHKGTVCVASIIILGFSALIMFFFFEGRES  
DGAIFGCISIGLFAGVLIGQVTEYFTSYSYWPTQSI AEAGITGPGTVVIQGLGIGMISTVLP  
AIIILVVTILSCNALYSSYGIAMSSVGMSTLSFTLATDAYGPIADNAGGIAEMAHMEGRV  
RETTDALDALGNTTAATGKGFAIGSAVLTAIISLLAAFKDKAGIENVDIGDPIVLSGVLIG  
GTLPPVFAGLTMLSVRKTAGAIIDEVRRQFQDTPGLREGTAEADSDRCVEISTKFSLQEM  
ILPGIYAILSPATIGFLVGPNC LAGLLGGSIASGMM LATMMANGGAWDNAKKYIEIEGA  
HGGKGTDIHKACVVGDTVGDVDPFKDTSGPSLNILIKLMSIIALTIAPSMNGVGDWETALWG  
LIPLSVMVLGTVLVWFFFWRDNKELLDGTNDLELTAQDRPLSKVI

>comp12325\_c0\_seq6; 594 178 1849 LEN=2174; translated  
MDIPEDDARNPAVIADNVGDNVGDVAGMSADLFESFVGSIIAAVALANGDIVLVMLPLWV  
AGIGIIASMAGYYVVGTKDDASQKEMLFALHKGTVCVASIIILGFSALIMFFFFEGRES  
DGAIFGCISIGLFAGVLIGQVTEYFTSYSYWPTQSI AEAGITGPGTVVIQGLGIGMISTVLP  
AIIILVVTILSCNALYSSYGIAMSSVGMSTLSFTLATDAYGPIADNAGGIAEMAHMEGRV  
RETTDALDALGNTTAATGKGFAIGSAVLTAIISLLAAFKDKAGIENVDIGDPIVLSGVLIG  
GTLPPVFAGLTMLSVRKTAGAIIDEVRRQFQDTPGLREGTAEADSDRCVEISTKFSLQEM  
ILPGIYAILSPATIGFLVGPNC LAGLLGGSIASGMM LATMMANGGAWDNAKKYIEIEGA  
HGGKGTDIHKACVVGDTVGDVDPFKDTSGPSLNILIKLMSIIALTIAPSMNGVGDWETALWG  
LIPLSVMVLGTVLVWFFFWRDNKELLDGTNDLELTAQDRPLSKVI

>comp12326\_c0\_seq1; 443 111 1025 LEN=1199; translated  
MASSTAVTPDLKPINYVNVIA YLSNFLVYVYSSRAGLPDNGTLSAKYQTLVTPAAYAFSI  
WGIIFTAELIWTIVQLLPSYRSKDIVTKGVGYNFALACLAQGLWTIFFGFEKIALSLVAM  
ICILIPLVSILLRVSRASSSTFGEFWLLKFPFLIHASWIMAA TLVNTNVVAVAYKASPKV  
QAIIGWLSLVIVFFVGTFFFTSTIWSRKKRVVVP IVLVWATVAIASELSKPKDLISTTFS  
DSTIEQTKGASETVAIILLLVIVIVELIKS QLSKDETEVGGTTEEEREILD TDENENDTVHY  
SALS

>comp12327\_c0\_seq4; 701 548 3388 LEN=3658; translated  
MSVANQYSQRGRLLRHGEGQGARGKQWFSRSDRFS SATRSLRSESHAAPNHVHRMVAHN  
QNIEMSQISQLSMDLSYSSYGTHSHPTGFVDSIPLGQPSIESYSQGHSHSSSISHQQQGC  
NDPRERFACSEFTSSRNEDATTALNSLHNSRSSSSSSLSRPKRKPSLLTTKKRRKNGTQ

KMRFAGPGDDRFGTDAHAMSQGSWGTNLSISACASKSPSRTSAQDSSRSRAHRFQAQTPLD  
TRTLPHLGGIGGANS SYHSPPEQIRHRNAGKLCALRDMSDNFDHRYERSNDSRPLVLIG  
SLRRSSSRHPSLSIADRTFAKAATPRKKLDVPPYLLDSQLRQQQHEIRRQQQHQNQINPS  
NTETAMTGTNKVMGDMLEDNKSQEKYPLGQEKENRDGNIRTEIDTGTEDGAQGHTHSQS  
ELIEERESGMTSSLNGTPVPAVWVENGKSNTNALSSTSQNCNGNGSNAVTTAVTSQEHQL  
DLIEPSILETQKKQGMADFKHEHLQSLLEMEMSKSKTNFNEILRTATSCAESKFVEKIKTL  
QKTTQSELNRNAEALREATTSELDKAEATQTIAQSNLDQKRSEIEKSIEDLVDSEKNKL  
EETSICKVQKLERFTEGSLRSLKFKTEKWIAGSCKKIANSLKPYMSIASETNTQSKEEAS  
DGFVKIPKTTKCCRSDIKSTNSDQVNTKSSRSKENYSVGQQHSPAENEVSLTQGSNKKG  
SPKSNGEKAQLRPLRRSKRTRQSRNPNSNLNSCTPLPKGKGAKNSMKKEEANDLSCP DG  
KDRIVTSESEIPLAATRDKALCVTPIGEASGSKQKGQKKLAVRARRRSIAKQDVPRSIS  
HGQKSPHVSPMKIRRPETHRNASKNHVPSEIVAYSNVYLSPLEDPKPVVYNTKIRPRSDI  
ALKTKRTRKPKSKTISGRSKRRKGGARTYAKRPNHFDMEKDSFEF  
>comp12328\_c0\_seq1; 300 199 906 LEN=1002; translated  
MKSINPLLSVVVMASVGSVTFASVTTTSPKATTSLNASSKRRTAEWLSHLTVGVAAFAVA  
STFSITEPAFADQGATAASNAKITTTGGASTLQSGRTIAITRGVNLDNSNFAGQNLKGVAF  
QQSIVRDSNFKGANLVGSSFFDATLDGSDFFEDADMTLSNVEMAQFNANLKNVTMKEVYV  
SGATLFEVGSIEGSDWSETFLRKDQKYLCEHPTAKGTNPVTGVDTRESLMCRD  
>comp12329\_c0\_seq1; 621 98 1420 LEN=1713; translated  
MSEGKFDVGSIVRAKRGSKRCRAMVATVGDGGEHDP SRD TVC ILWEPIYPKPISGRFLI  
APKAGRLEAEREQA E V T V G V E T V E E L L P F E R C G S N N S D E T A V A P T A T I T A S K H T S T K H N I  
GLWKERGDQLRLRGDASAATSYYEKALSDSSSVSIGGSIVLSVEGFPRIAEVDCIDDED  
DGGTIDVTLVHNGQERSVKEASVLLGIMEADADRLQERILLNLARCMLQLSDLDAANRPG  
YLKSAVLAATLVLALSSFRSSEEDSDGTPSPAKKHSQTALVLRCKAYTGLSRWKNARSDA  
RQLVASGDEKQGSKLLAVVERKKATQSKQDKKLAKELCKLVESATNAARDGSEANPVSPS  
SSAPGASSASKPMARRAKTSKQLSSQGGPPRGLQFEKGDASASNITLIVSSLVRCGRVF  
FMLSVA AAVLISKYFQTSKE  
>comp12329\_c0\_seq2; 572 98 1177 LEN=1502; translated  
MSEGKFDVGSIVRAKRGSKRCRAMVATVGDGGEHDP SRD TVC ILWEPIYPKPISGRFLI  
APKAGRLEAEREQA E V T V G V E T V E E L L P F E R C G S N N S D E T A V A P T A T I T A S K H T S T K H N I  
GLWKERGDQLRLRGDASAATSYYEKALSDSSSVSIGGSIVLSVEGFPRIAEVDCIDDED  
DGGTIDVTLVHNGQERSVKEASVLLGIMEADADRLQERILLNLARCMLQLSDLDAANRPG  
YLKSAVLAATLVLALSSFRSSEEDSDGTPSPAKKHSQTALVLRCKAYTGLSRWKNARSDA  
RQLVASGDEKQGSKLLAVVERKKATQSKQDKKLAKELCKLVESATNAARDGSEANPLRY  
>comp12330\_c0\_seq1; 417 1 2002 LEN=2359; translated  
LFRNGMKPKQDPRRQLAFCDNRLYEEREKLDLFDVGS P N K H S S T E D F A S Y V V L G F A Y L L I  
EIFLALKFHWIVTQHELSIAFQEQHQHQHQHQHYQSKSSNSNIGHRRIKKNIPDPGRFNG  
FPVYHDLTLNKSYSRYPYSSVRCVGENYQGSDFSWMHRSCHFRFLCFNVSSREFEVYAR  
PDDEILQSI V S R R Q P F V D I S S G V L L Q P R N E T Q N G I D S G V S L A S G T V R H R P R D R V G S A A G D D  
DTSRQGSKEAYKWFPTVIRSSPPERYYALDEDMILVPFHTMLKEEGPREKEYSVLWDDLF  
PVYTLNMFQLVPGENQKEVILMRYISKMENRADGNQVQFQRKMDEFRPLMMRRGRVDE  
KVIQDKRNSFENTYWTQLDSILMPTPNTPI LSHLVCAKDG LAGL G P H G I Q K A E G K H T A N  
LLPKYGGKGLLWLF R N Y C L R N L G L I R A S L T L S A R G S Y Y E M T N I E T S N S I V R I I F S A P A Y G  
IASRIYKGTDDPQIGHDGQDSTPIITELRDFLVSPAIRSKSENGDRSSVASTNSSRVHIE  
SHDFSKEFTSLTDRVELMMGTTFVIATCSEAVASMAIFLPRGATLIVFYETKNQYPEHEN  
SREGKGFVTS DRPTSPNCAVYRDLLNLSHVRVQWLPITLGDTRVLLNLVEHELKVNGKK  
KSDGNS  
>comp12331\_c0\_seq1; 437 154 1266 LEN=1451; translated  
MEGSVDLTIQSIHGAAWRQCGANGVDDIGALS AIKAHV SFSGSVPMKVSSFAICPDK GK  
LFVESDTHEIVETSEKETKMNPKTRLLNTTFTDPFEEQRLHNSISSNTSSSSSTSSSSY  
RPHLHFDLREEKVIDATEIQDLILDPNADRVDVGSMT PQHDMI IKLHITFRSVDGDAIS  
ISSEGVAELRIRQTNFENLPLTLDLPI T Q P T C G D S S N T V S E N V P K N C Q I L F G S S S S I R V R  
LDDASKRQQYLATQTTTSQEYILSDHVDEIQLVGMVKKIHEYEEERGKIRDDEAEPKRFV  
GNNGKGRRLWSFACGGTGDVKHSIKAFFDEMRNKTKCVDL ELATNPTMTSTIITRESLD  
FENIPKHHFR  
>comp12332\_c0\_seq1; 388 135 980 LEN=1265; translated  
MAPINDEHKDLALVPESVLKRRHDLDDLRRKRAAQEEKVKSKRGSYVRK PATFLAKAKQ  
RRNEQIRYRRVKKKGMQKKASKKTEIKTKEITVAGNESDSESEEQAQIIQYKANSVGS PY  
V F V I R I R E D A G H P P R C V L N I L H Q L R L K D P N T G V F V R Y D E V T K R H L H L V E P W V V Y G K P S D G  
LVGDLMERKSFGTVKGEKVPLSDNTI IENALGNEHGMI CMEDLVHELTTVGSFEAVATF

LRPFPLSATRSKFEKNLLSLKQKDYGDRGEEIDEFIKQML  
>comp12333\_c0\_seq2; 296 175 1572 LEN=2121; translated  
MGYWDASYAVKTTDVLALFRITPQPGVDPVEAAA VAGESSTATWTVVWTDLLTACDRYR  
AKAYRVPVPNTTDDVFFAFIAYECDLFEEGSLSNLTASIIGNVFGFKAVSALRLEDMRIP  
HSYLKTFQGPATGIVVERERLNKYGTPLL GATVKPKLGLSGKNYGRVVFEG LKGGDLDFLK  
DDENINSQPFMRWRERFLNCEGINRASAATGEVKGSYLNVTAATMEEVIKRCEYAKEVG  
SVVVMIDLVMGYTAIQSAAYWARENDMLLHLHRAGNSTYARQKNHGINF RVICKWMRMSG  
VDHIHAGTVVGKLEGDPLMIKGFYDVLRLTNLEVNLPFGIFFEMPWASLRRCMPVASGGI  
HCGQMHQLIHYLGDDVVLQFGGGTIGHPDGIQAGATANRVALEAMVLARNEGADYFSNEV  
GPQILRNAAKTCGPLQTALDLWKDISFN YTSTDTADFAVTPTANV  
>comp12335\_c0\_seq1; 627 1 3177 LEN=3208; translated  
XVLSMAXLRGADAVAYYILGR IALNFTGRFQIQPHRRRERRRLQSLFPFH EEEEEKIEGPI  
ARPTPTANSMPAAHPMEEQQRSMEQQRPDSATPRKRPLGHCTSLRGPPSRESRWRTPQQ  
RSTRGSNSSVIRNPYSKSRRRRSPGQTSPPWPQQQPQPRSSPNLGGGQQWRSPRRESGG  
SACNSARHHARGGFGPARNNDGGVPSPKTAQPRSWAEELGSSPEFGDITDGIRD LALEDG  
LPAGTERRQKGGDLQEKAIALAKDRQNI FLTGKAGTGKSWTTRRIVEYFRNEAITTHVTA  
PTGVAAINVGGKPYTNGGNFQKGEYYSDFNKMMS EGRKTMKETKVLLIDEISMVDGHFF  
DVLECIVAIIRCYSEVRDRLKAIQDEADNIVNPHVLEMRWSTTPDGLADIPPWGGIQLIV  
IGDFFQLPPVNSSPSSSGDDGRCGNAIEENDELCEEESDLRIGRQGSYAFQSHSWQKSE  
MHTIELETVHRQTNRNDGLFELLNDMREGKTSDLRSPRHS AALSALRNPLPLRSDGIVPT  
RLHARNRDVDAVNRNKLAGLEGE EILFVSIDEVVFQKYKSKVIKKYGLECLTGLPFLFG  
SVEAPPVPEALQQARNGLAELEEKERL KATDDYEALIAMRPALTTQKEK VETLEKDETL  
NSTISVSSI AKYTGKDPNILFENFQRFD CQIKHDYKVLKEHAYERFFKNNCRAKDKIEL  
KEEAQVMLLWNLDVRDGLANGSRGVLKAFIPVSSYCSLLKAEMRTREEQEERERE GPDIL  
QKGQSPNASTQADDNEEKVANEQTEHEIGSRNDRCSSTDETHVVNDNFDCIDPGILDELK  
LNIECKNCDKLKAE LQSVEKRLADIRSDKILPKSLPYVRFTNGKGR LIPVIPFRKEFKG  
CGHATRWQVPLCLAWAISIHKSQGMTIDWLHV DLRGCFAPGQAYVACSRGRSLDSMTVEN  
FSFDEVRADENVNKFYQSLKEGGEPYTTTWC DTMKFDNEKKIQKKLERFHKNRKCGWCD  
APCIVRKVKKESHNKGRWVACSKSTSNERGHLFEWIYI  
>comp12336\_c0\_seq1; 252 168 1484 LEN=2026; translated  
MNSNNIMNRS GHAVRRIASNGYHDEK KMDSSPQLNHRKVSSSSV PPHSSLP MGGGGSPQK  
VYENNNSSIKTSPQTVFDDENPYPKRTKT VPRKRRGGSCSFLLFVIFAAGAGYLFVSYRE  
REL MGRQLKEQEEAMRELEVELS IKFDRRLETLAKEKADLEKNEQLHKASLVETQQWKDK  
YHRLEGEMHEITEKHKN DPEHIRELEWQVQKLESYNTQLQERRQMKHEVELMSRRALLE  
KYGPGPHEVEMFVRFDNTEGEEVDGGYITLELAPVDEMPHAVYWFLEQVEHGLYDGC SF  
HRNAGHVQGGPVRNFLSPPEGDGPTLEQRFTDSGFRSILFQEYSPNYPHVKYTAGYAGR  
PGGPDFYISTQDNTEAHGPGGQGHYEDAAEADPCFARVVHGF DVVDRMSESPVLPGD DRA  
MERNVAIVFMKRLLRDEH  
>comp12337\_c0\_seq1; 370 1 1157 LEN=1193; translated  
XSEPGPTLAPMQPSV SPLPHSPNQSTQPNN DWAIDDQSNDEEPRMPISIPPVTWAALDYY  
EAFEKTPESIGDGCNFRGDGVDAKRTE DRTCIVRDN SQCYIGWWD PGEHLLYRISIPRGL  
SQNYDIKVRVASKREARDV GMEIISFDGTKILQSKQFEAPGNGWQNF KDVVWDSIDLNAG  
RYILKILSNTGSINLCSTSVMP TNNEPDQDLDFEIQVPGYYNALHYANI GLLDTTVEHRG  
DCPYRKNTPVDAKMNDL VCKQAISEYDLHCHIAFTEVDEF LTYRFRKVPTQTKVRVSLR  
VASKSPREILVELDSLETADNFFFRATKVVQTS GNEKNSWDIYETIAVWDEIDIGTAENY  
SLKIVFLSGRTNLCAIGIDYISLVV  
>comp12338\_c0\_seq1; 935 1 3374 LEN=3783; translated  
XSQEVANTGVPVQGSPLVFNSSKELSSRLLYHIQH LHNHILLFLHHS CANVEEEKVIH  
QQFKMPRKEKESDSRDEHVEEEDDDECKPPARKSKKKK RKKKPEDDAGDTADDVSNTNA  
DTEEATDSPDKKSWRDRIKFRGKDPGELDKKDKDESEDDGKEEGAPKQKSWKDRISLPF  
GKKDKDGGDDDEKDEADAMSTAQETVDTKT TQAKLNKRTIEDFETEYHDAIRDHDWDLV  
EGLLKDYDETLYKKQRKAPGAKKKKNL KLLKYVPDMSRFKKEEIEPEIPVTPLMALDHEG  
RTPHLHCHEPTPAKVLIRLMNCCRDA AAVKDKQGLLPLHIAVENRRANIVIERLVRGFY  
QGSWMGDNDNRTPLSIAVDIAVEKQIEQNI VPTKTFWGFPS SPEDIKWQEAQEKVWSVAA  
FLVKNRFRDRKRLLTVEHDKIFVALNK APPMVASNFLAAGRKH MVKTEVAGKLFLLIS  
RQYPMYIFNWYLQVIAIPFIMEQQDSTGCGAVAAHFRVGC MKHKDQRTNREKDSFATTMK  
KLAYAKLHKKDFVTTTPQYLEWWEKLIMF INLWAI RFSENVADDTICKDNNVLLHTALINP  
DSPPLLIQLLAKLFPDSILHRHPKSTALPIHIACRH WQFRDYPRRKGEKIVSINQVC MEL  
LKKDPTQTRKRYRNRLPLHHAIAVFKPWF EIEPLVDQDKASLLIRDPV TLLQPFQMAALK  
IQETYDIENLTKRGFTPV EWKNMSSEEQDRQMRKLLYEYDLKQLNLIYMVLRRSPDAKK

MKSSQDTLSVSKTKNSKKADEYHAQFQIVAMLEMKIARSVFGLGNVGGHFIGWCYESNEE  
GLWKTHRRNFAMVKEAIDGFPVPGGMQKWWQKLFWLWQDCPRDNI PRADFL LHCAVCN  
PNVSPWIVELILECFPRSATLPLPDSGDCYPLHIACTTDTYIPLPFEPNKRCI IEMVSK  
AFREAILMKWRDRLPLHAILGSKQWEEMRSMVEDEPVSLAIPGSESDLFPFQLMALHKQ  
YSKSEM KQFQKIAEAEFRENFSETYTI SEDEKAEQLNKVIERHERETIGCTFELLKHNP  
LVHVGLIDRQNQTEDS IASGNSTVDDCLNMDVAFSNLNFDESM  
>comp12339\_c0\_seq1; 348 1 1439 LEN=1439; minus strand; translated  
XASTADCGTSAVDSTVNPLQQSLRSTRIELLTRPLATERSKNENENDRAQTADVIGDGS  
QPNRDPGTGVRSLIQVDRKSESQNEARKHQGPPREDKTHSNGTNTSHSLNGRNYQPAIRN  
KPAISTNDVAPAPLHPRSASLTGAPLPLPSLPFDVVVAAADPPCEQLTQDDAFL LQPRSQ  
TSFLGGVIQLKKNRDEGTDIDKEKPIEGRVPDVAATCVVKNGIENCADVPCTTSVATVKR  
EGADASLDGSMCTQPSKTGGAPKASDCNDANKSPPSNGLAPRFFHDEWEDTDATVSNAIS  
TRMANRSVCSKCNKPN SHNSSFGEKISNANAELMEKDPNDDGLACEFENDDDDDDDAT  
IPISVAPPLGYPDTEAKEVTVMNNPHTRSRSSTFPLLTQPPEPKRTEECGQNKACNRD  
GATGMPKAYSYTVENRTKSSIEESTQPCFKAEQISELKESCSIYPSDSLNPVHDP RQGL  
X  
>comp12340\_c0\_seq1; 1964 202 6105 LEN=6200; translated  
MDLQAILDSSDDSSSSFSGGNHSSPNRSHNSNSHSALTYNSYTYNHYGGGLDGGAGSE  
DAVDLERILREDDDEDDEEEDGMFTRSTGSGGESGGSMYDRRRSERGLEDERIPRPGLS  
SSRRVSSARSNNTVSNMSQAEEDILQAILGEDEGDDDDDDYGGSEYRSQASSSYMYGYN  
DGGEYGDDEEPVLVPAGQRNAGRQTSNDIYAMQNQSQVDLILQQSSDEEDIFGEENDE  
FSSMMRLRQQYKYTHNNYSKSKEKNLDDCIDSDSDSDDLVDVGNVDSFATAIQSQDSEL  
SSDKKNDYSIVGGRAQTPPPPSLPSRRKEHSKTRERSKTKTNGSKSNALIASSGIELEK  
ASRKALQVARAKEAKLLKSTREARDNIVSPLTVKRRLKPKIDLDTKSQRQAQLQHDKAAK  
AATKASNTNSNGSSNNGPYFNFSGGVI SMKQMQSVSKSIVERCHASMDDEDLPTAVGIN  
SRFVAIGTQTGAILVYDHFEVLRQILGGAKRMTSAGDDPTSNSGGIGAGGDNSFNP KLAG  
AVTTLDLSLVQGEFLAAGYTGGNVVLWDIIRGIPLKSVVETNNSPYPSPMVSVRFFSADL  
KLVTVDAGGLVNKLSFSKNMLWSTYVEIDCLLDGTAGQILALDVLQPYEYIKQQQLQ LQQ  
NKQQDKTNPSSSEGA AKLRSTMKKLVLIAMSSERN SFVVAVEPTVQVLHRWLKPDDDR IE  
GKRLQGT EQVYLPCLSWGVALVNGGGNVINPILARAWGCCIQLLRPSFPDSGESSTSQGA  
ASEGFQYPAFGVHDEFDVP IVALEWLNDRSLVYLSMNNEFTVVDTVMMTLLE RLDFSN  
LKL VYAEFSLSRKVVLAKQEEYDDEDENESENK KEDDASQE QKIETYFCTTFQNSFRSCD  
KRLLLLCQGELRSVSVVGARPRISGLENDEWLEALALALDHYENTIKSQEDRKRDRQKD  
LSKHPGLQPRNGDSLTEDEEWIAKLLIRYLNIAVENAPE TNNDNFNPPEIRESQMDLARS  
HFQMLAGVCVEFCVVTKRDL LYGPIFRRFHSAGFLSVFLDVLEPYILNDKLN YIAPEAM  
MHFVEHCR TNNGIATVERCLLHMDVTIMDFDTILNLLRANEMYSALFYIYNQGLMDY TTP  
LEILCESIFDAADTLGQITNERRIDGVFQNDFERFGYKAILYLQNI FSGKNFPKGTAMAE  
ETVHTVRPQLLKFLLQSRYPKRSIRAPAQVIGQALRYPYAHILLMVDPKAMFDTLSTA  
MDAPDKFNTNGTSGIESIGGWEVEVGGENSVQNAATSSRSTTGAPARQEI IAMLLS IMM  
PSKADIMITHQTTLYRTE SALNAFLDFLADYLMRGVIRTDKSVTFMILNRMATRYNMARD  
SEDRKNWQGVIALLSALPRSSYDSDEV LKLVKESGIHRASLLHQEEASVWPHGNM TME  
RRAKHFC AAIDCYLDDDDLDFRKEVFSYVKKECSGASDEEKEPNTLRDALITK LIDLVL L  
DPLLTAE LAADLFVDDPDLVIRSLEDEEAKFMFLKAVISGELYEMDSVAGSVLNAQLTTE  
HHQEYMG LMAKLYPDMVYDYLS THNNYRTEECLHLCQKYDIADASAYLLERMGNVTSALQ  
LILQTMESRMMNLKRTIRGISTDTFNKYYP RHSKYTRISKRDCINPELYGKQEK EIEGLK  
KILTVALDVCERN SSGFSRSETEHGSDFWVFNLDRLINAKGFLRLSKEQPTHAKVMAGV  
LSELLRLTMQRMVSSVPLPDLVRKVTSDHSGSRLGEVREMIESLLITYGQELDVFGGAVN  
VFHYDSHQMEKAHSLCVRGSNVQSVMGVTLNKS FASGKAMNRI GNEHEILQLGGPSSST  
RRDASVASGGHQRSKGSVSNQERGLGDTLSRLRSRRRQGASC GSIAMGATSND SRIRKA  
SGLNLMTANELSYRRGELSDDATFFEDRAVGQLGEAQHRGRIMSFIY  
>comp12341\_c0\_seq1; 219 284 1266 LEN=1266; translated  
MLRRVRGLRRWSGWHLRQASSCMSTAAAPLVGEEIDIDEYEWNFRQSTNRYDD SARIRDF  
QITKQHPLYPKLFAPLDLGP ELGILPNRVLMGSMHTGLEGHSMPSWIEGMLNYLDPSDNG  
GDHGGVDHSSLDRMATYFQRR AIGGVGLMVTGGISPNTQGWVGPFS AQLTNDTEMEKHRV  
VTEAVHSVDVPIYGASNP DNDTVTPKILMQLLHTGRYAYHPFAVSATTGKSPISPF TARA  
LSTNGVKKTIDEFVYSAMLAREAGYD GIEIMGSEGYLISQFLSPKTNSTRTDQY EEDPSR  
IDQGFPSNWSGRFESTLEPISLWSFGFP  
>comp12341\_c0\_seq2; 750 1 1829 LEN=2294; translated  
EEDPSRIDQGF XLELVREVRKHLGTD FIVVFRLSLWELVEGGMSWEETVMLANELRQAGV  
TLLNTGIGWHESRVPTIASNVPRGAFTAPT LRLRSELHAAMVAQDSTIDSGDEILPV PPI

VSTNRINAPDTAESILEGGVSDMVSMARPLLADPDFLKKAMAEEPQTINTCIACNQACLD  
HAFVVGKTASCLVNPAACHEEEFGEARGKEQKETLPLDQRLNLGVVAGPAGIAFACTAAE  
YGHTVTLFERSDRVGGQFHMAKRVPKKEEFYEAIRYWERRLEGLSSPTSSQGSVTVRLNT  
EVSVEEMADWTKQGDRESKAAGATDAIDKWIVSTGVTPRDPKIPGSEDFPDNVLSYVDVL  
RHNKPVGKKVAVIGAGGIGFDVSEFLLYGKAQSEAEIQQDLVLEGNHNPGEDSRSPAS  
RVSIDDFWTEWGVDPKQERRGGLSKEGPTLPHGPPQRSIVLMQRKKGKVGAGLGRITGWI  
HRASLHNSKAATMVSGVASYDAIDSDGNLVYTKDGEQRVLEVDITIVLCAGQLEDTALESA  
SEVDGGLKGRVYPIGGAFAGELDAKRAIDMGRTRLAHKIHLEEVVPGNHVFSPPGPEEK  
LFRFLKQWA

>comp12342\_c0\_seq1; 304 85 1160 LEN=1229; translated  
MMVAFKYATIQMVLALLAIAGTRVVTYAEINSPIGTLPAMSYNQSKQTENLPITPFVSQD  
QNIKKARTIPFLRGPQLLETVLSIRGGKIVKSLRPSVNSIASSEQKLAKIKKGMILLT  
SISSSSXGLFRTQETWLALFDKEKLQASVVQTLNLDLPFLYSRSFYTIAMALWETLGM  
STIPVETAAGMVFRSAFYWSGLGKVMGACLAFLGLGRGALSGMVDKLSNFTLNLVQSQ  
TKDNPLLVTVLIKLSCFPETVKNFGSSMLKPIQWMMFVSATLVHGLTFTALWTYLGVDTA  
ARLKD TAGLLPPDQLLKTLLSLALINGIVVSPLAMAYWIRALKQKQTSQKSTKKIKK

>comp12343\_c0\_seq1; 307 1 776 LEN=926; translated  
XQRLSDEFGIEAVVTPPKVPYHVTLTLLPSKSNLVEPIITVVEDLEDWPSYGTKFRVEEPM  
VQVRIMAPVEYTGAVMELITNKRGTDLTTKTIDKNSWMFEAQMPWAEVVVNFHDMKTAT  
AGYGS LDTSEADPPLREARLSKVDFLNGEPVGPLSFVSHTPNAQADARVVKKLQEVLP  
RQQFVTVIQAKADGKIVASERIRAYRKDVLNKSGKMGVGGDISRKKKLEKQKQGGKRSQ  
QSGKVTLTSAAFNSVISR

>comp12344\_c0\_seq1; 730 348 3296 LEN=3387; translated  
MNKQIDRTAPVVSKTTSFGMRKSTFYFLVACLFGNSSSLSSQPHNRMGPKCTEENIIESR  
VNEAVFDSLSESTLSHFSSSSKRGFNKTTSDSIIIGGRQGQRSSLMQSNFPERLKDSSTS  
SLSSTSILPQSFRLVRNDVIDQLRRNENFDDAKMIIISGMIEYLRENCLCVIVEDKNEPLE  
TETTSATS AENRTQIYDQKQYNKQIISPQDHRDISETIDEAFQAFFARAFAPISLNDNDNI  
NRNKDQKRSSWNRVALGIELLQLQLASSDVLVAPYHNIPKSVIVKALAAVTRLQERQQRG  
YQQRVDM SDETLIIHPDTAFRLQLRLATGFGVRNSHRSQYFRNSEKKVSNKGSSARLAP  
LHEVDFNRVLNIYSSTGKMEMAHRVIALQERTPHAPALSPVTYSILVKGYGKLSDAENID  
VLLRHAAAMEEGESIMKPDTIFFNSLMDAYINCRQLHKAQTILMAMVSNDFISDAIDRR  
VPEL DLNSNKNKFFTFPPNVCPPPNLRSYNILLKGYAKEGMLQDALDLTNEMISIGSRSN  
NSGQWWDHVTTNTLVQAAVVAKEFDIAQDILDRHLSVGSFKKSRSLDHPNADAYTTLM  
GYAKDSK LKQAIKLLKTMKDRKVKANEYHYSCLIGSLAHEGRIEHA EKMLVHVKTHGAIP  
RNQLRVIYNAYISGLVQKTGHYSTNAVDNEHEQNINKALLILREMI EERIMP DANTVAII  
LDGFGHC IKPRMKEAVTLVERLETQRIIPMNHIRVTTALVRVCGSCQSLDGAVACFRRLS  
RPDVTAINALIDA AVRS GNDNVAVETFNRYFSGDIPRAV PNVISFSTLIGAHM KKGTFDG  
SRAARELYQDMRFQRRILPDKGLVDVIVKGI VDTSRACGVQASDARFVAGVLRDAEKLDW  
EEGQLDRRKR AVESAMNHN VANAWEEEAELYGLWK KDSRSNLKDNMFER YGWNKVD SG  
FRLWGP GKETGSTTDDFLESKGW

>comp12344\_c0\_seq2; 611 348 2948 LEN=3058; translated  
MNKQIDRTAPVVSKTTSFGMRKSTFYFLVACLFGNSSSLSSQPHNRMGPKCTEENIIESR  
VNEAVFDSLSESTLSHFSSSSKRGFNKTTSDSIIIGGRQGQRSSLMQSNFPERLKDSSTS  
SLSSTSILPQSFRLVRNDVIDQLRRNENFDDAKMIIISGMIEYLRENCLCVIVEDKNEPLE  
TETTSATS AENRTQIYDQKQYNKQIISPQDHRDISETIDEAFQAFFARAFAPISLNDNDNI  
NRNKDQKRSSWNRVALGIELLQLQLASSDVLVAPYHNIPKSVIVKALAAVTRLQERQQRG  
YQQRVDM SDETLIIHPDTAFRLQLRLATGFGVRNSHRSQYFRNSEKKVSNKGSSARLAP  
LHEVDFNRVLNIYSSTGKMEMAHRVIALQERTPHAPALSPVTYSILVKGYGKLSDAENID  
VLLRHAAAMEEGESIMKPDTIFFNSLMDAYINCRQLHKAQTILMAMVSNDFISDAIDRR  
VPEL DLNSNKNKFFTFPPNVCPPPNLRSYNILLKGYAKEGMLQDALDLTNEMISIGSRSN  
NSGQWWDHVTTNTLVQAAVVAKEFDIAQDILDRHLSVGSFKKSRSLDHPNADAYTTLM  
GYAKDSK LKQAIKLLKTMKDRKVKANEYHYSCLIGSLAHEGRIEHA EKMLVHVKTHGAIP  
RNQLRVIYNAYISGLVQKTGHYSTNAVDNEHEQNINKALLILREMI EERIMP DANTVAII  
LDGFGHC IKPRMKEAVTLVERLETQRIIPMNHIRVTTALVRVCGSCQSLDGAVACFRRLS  
RPDVTAINALIDA AVRS GNDNVAVETFNRYFSGDIPRAV PNVISFSTLIGAHM KKGTFDG  
SRAARELYQDMRFQRRILPDKGLVDV

>comp12344\_c0\_seq3; 490 348 2875 LEN=2875; translated  
MNKQIDRTAPVVSKTTSFGMRKSTFYFLVACLFGNSSSLSSQPHNRMGPKCTEENIIESR  
VNEAVFDSLSESTLSHFSSSSKRGFNKTTSDSIIIGGRQGQRSSLMQSNFPERLKDSSTS  
SLSSTSILPQSFRLVRNDVIDQLRRNENFDDAKMIIISGMIEYLRENCLCVIVEDKNEPLE

TETTSATS AENRTQIYDQKQYNKQIISPQDHRDISETIDEAFQAFFARAFAPISLNNNDNI  
NRNKDQKRSSWNRVALGIELLQLQLASSDVLVAPYHNIPKSVIVKALAAVTRLQERQQRG  
YQQRVDMSETLI IHPDTAFRLQLRLATGFGVVRNSHRSQYFRNSEKKSNGKSSARLAP  
LHEVDFNRVLNIYSSTGKMEMAHRVIALQERTPHAPALSPVTYSILVKGYGKLSDAENID  
VLLRHAAAMEEGESIMKPDTIFFNSLMDAYINCRQLHKAQTILMAMVSNDFKFI SDAIDRR  
VPELDLNSNKNKFFTFPPNVCPNLRSYNILLKGYAKEGMLQDALDLTNEMISIGSRSN  
NSGQWWDHVTTNTLVQAAVVAKEFDIAQDILDRHSLVSGSFKKSRLDHPNADAYTTLM  
GYAKDSKQAIKLLKTMKDRKVKANEYHYSCLIGSLAHEGRIEHAEKMLVHVKTHGAI  
RNQLRVIYNAYISGLVQKTGHYSTNAVDNEHEQNINKALLILREMI EERIMPDANTVAII  
LDGFGHCIKPRMKEAVTLVERLETQRIIPMNHIRVTTALVRVCGSCQSLDGAVACFRRLS  
RPDVTAINALIDA AVRSGNDNVAVETFNRYFSGDIPRAVNVISFSTLIGAHMSTNQVEN  
DIX

>comp12345\_c0\_seq1; 339 1 1568 LEN=1765; translated  
XPSRSLGPLLALVSVQTDNSCLQSVGEASPPSANESSRNDGEQLQQRQPTGGPGSCYQR  
YYQHSLQEMVAETTRHIRLDP SLFSERLDRAFRVWKDCIETTWRNRLSPSDFEGLQQRIR  
ENRLRFRMSCMRVEPSLLPSSFSRKRKKKQALSEQLFVYSRKELCRGIMDACGSDLVFN  
YHQQNPKNNDNDAREKEEIGGWTVDLDFKFDIELVLLIIPPGLRSTTGKLAIGISLCPYS  
FLRSKSF EAGQIPPDVTVPYLGGDILSQGIVRLRPTTAHLLLQMANPRSCDVVLDPCAGI  
GTIPVEAECYQACLQPTRNRSGRSQDPCCLAIGGDLV LNNPKYTRIAGINENISRGAII  
NTTSSLLVAWDAHLPMRTSSADIAVSDLPFGQQCLS VNSLNQLLPLVFLECARVLRST  
GRMVMLAGGSPIALIANIEKLSGKYWKSPIRRVSPVSI GGILAWTIVVMRNEEPFDRDIV  
PEQRSLIKKIAQKRDRISRQRNSESEGEQQTGKRRRHANEAQP

>comp12346\_c0\_seq1; 207 100 1185 LEN=1249; translated  
MIGRALVKSGLQSGTIMGIADLGTQLFVEGRGLPAGGPSAATTTTTATATDGHWDVARTL  
RWASLGLVLHGPIYFFAGFSFLDRRFAAGTASSWTTVAKK TAAAQALLFPPYLVALFGALG  
LLEGDPDVLGKIRGRVPEAFASGVRLADRQRGQLRGGSEPAADVPVGRIVGGLEFLSQL  
LQPAVAAACLKADADRDRCTPGLPGA HARACIEAAPRHQNGSLTESTSDGSSPRHARLLA  
NRRPGVPPDDGERRAGTHRWTVLWSIASRRNANXEAGGGEAMLPWARAEDAHVWDLGG  
GMPADAHNAASERSLSQPGCSRSALYECRKAGTRRKIGTTISMESTLAEKESRGANSAA  
HC

>comp12348\_c0\_seq1; 199 249 902 LEN=1051; translated  
MPLPEDSGSVGLETFPQEFSEADEDRFQNLAA SCGLVVACERAGPAADGNSYTMRGISMT  
ERGLIAPLHRLFTETDCPTIAIGDGGNELGMKVFVDQVANNPKISNGATIGCVVAADRLV  
AASVSNWGGYALAAGAALASARARGAAVGEWVDRCLP TERDERALLDRCVAAGCRDGV  
TGGKEATVDGMPLETSLECLRDVRR TALSAGLGGNTREE

>comp12348\_c0\_seq2; 318 123 1142 LEN=1291; translated  
MTPPPTATALREGPTATPTTTASVCAELQAVIGTDAGDRGMKSLVVEGDLGEASELLGSL  
GVPSRVLVLSGFPCCVDESPPTETDGP PGTCAIARAAAAMGHSVTVVTDDCNKAVFAAAL  
EGMPLPEDSGSVGLETFPQEFSEADEDRFQNLAA SCGLVVACERAGPAADGNSYTMRGIS  
MTERGLIAPLHRLFTETDCPTIAIGDGGNELGMKVFVDQVANNPKISNGATIGCVVAADR  
LVAASVSNWGGYALAAGAALASARARGAAVGEWVDRCLP TERDERALLDRCVAAGCRDGV  
TGKKEATVDGMPLETSLECLRDVRR TALSAGLGGNTREE

>comp12348\_c0\_seq3; 188 123 576 LEN=576; translated  
MTPPPTATALREGPTATPTTTASVCAELQAVIGTDAGDRGMKSLVVEGDLGEASELLGSL  
GVPSRVLVLSGFPCCVDESPPTETDGP PGTCAIARAAAAMGHSVTVVTDDCNKGGYAMRR  
GRVFGACIVDGFVIVPCALCLAGSGGV LIPGX

>comp12349\_c0\_seq1; 855 149 2479 LEN=2655; translated  
MKRVLGTRPASVREDV GKSSNGVPPSSSSSSS FSSSLSSLSNPPGEDSTITTNVQVCA  
RIRPLIKSSPSKPTRRLSFI PGGNSRSPRMSGPFS DTRTTYDQSNVQDDGDFVAWDISR  
RRTASQSDRTEKIQRTHSYTLDRLFGSESTTHEIYDESVASLVKAAMEGYNSTV LAYGQ  
TSTGKTHMTGKQKAPGLIPLCVRDCFNYIQDNPSAESREYLFRFSYLEIYKENIRDLLS  
SSSSASEPVRFLDGPNGLIIRGLKEEVVSSPEKVFKLLRQGEKRRQVGATHMNQHSSRS  
AVMRLKIESSTIDRRDRTRVSLSLV DLAGSESVRLNGVERRDEGQYINKSLMALGQCV  
LGLSESSKSEGGKINRSHIPFRD SKLTRMLQSSLSGNAKMLLMCCISPLASHMEESHNT  
FKFATRARI EQTATIQTAGDKEETLLQTYRDEIEDLKKQLAEAAEQKQTL LNEQREYQA  
MKERQNILQSTEDEIEVVATLPSQSDINNVTT SNTMESTTEEIEELVEAIQTMEHLILKS  
RSLQQRSSSNPEAAENNDTILETNSSCDSEKLEDFLDYALESSKTEDLLVDNKTC AVPSS  
TNDVTTSP LDPKSMANTEDKLHSELTRIRGLLGSVLQKRGVPSKIVRKS LDFSTPARGPL  
QSRNALDQSLSDELEVGTGAEGNINERYGTTKEDAEKKAELSLRMQLEQQERTTSLRK  
ADSHFLQRQLEEKDMLLEEVSSLLEAVERRQGELE RENFALKVELSRLRDEKGFV



>comp12350\_c0\_seq1; 1125 423 2738 LEN=3021; translated  
MSSTSQLATAASRAMLLLSLPAAIIVADGLSGGFQSGPSPGFSFYSGGMSYRGGANVVWLTG  
SHYNTDLYPNDDGSKFERMMGTESDGASSCYIAKLDLKGASDTFNFLDDWKS YGNAGK IET  
CSSITATSMSDAYVVGSVGEGGLFSDGYPMQGLLSVLDPDTLEFLDATLIKSAEDPSRFM  
VYPLDVVHDNRRANIYIAALSTDAQENTVLDSEPNWHIQRKIGSGFDVTIVKISTRNEK  
PSAEWVKHFPLDVEADGTTTPPVFVAGIILQKDEAGINHVLSGSTRGTGEAFGPADPGTT  
DEDGFIVQLDPKDG SFLKQKRHKGT DYNFMESLREGTDTDDFIKGCNNRGAYLDGGNSD  
VFYVVGGTKGDMTTDGGQPQDYDDNAGFQFGAGVDAKYRETWNREQSLMPFLRQVSINKS  
LAPNWTQWGALPGEVSPGQSLPTSAYAVDCFDVNDENSAIYVVGVMNGAKMTQGDVEMI  
NQGGDDIIVAKVDEITGNVFWLTQLGSMDDEKLAHYGSVAVNTEGNVLIYGDTTGNMYRQ  
RGDEESNDKTDMLMTVDGLTGAVMDKYLLGGTSSGSVATTINGVPPVVSIPPVAAPT YA  
PVVAIPATPINPPTATPVEEPVAKQENKAGGKSNAGVVVVGILFGIIAFAIVFLVFYSRH  
VKRKKAEAQKSSIFAQLQQFDVEDIDLRRSPPGGWHGTYMNKLAHG VNSADDLQAEESTST  
PYEDTPMTHSSVAKDALFMD SNAKSGEDGSNFQIDDEDEVDIRLNANSEVV  
>comp12351\_c0\_seq2; 501 115 1344 LEN=1496; translated  
MTTPTNHTHSSSLFDGDTIESAPSQSSLEQNSSIEESQIFVSMGGEVSGHTRYSSSALS  
ASGLKSKGFSNNNTSHNTNISDSLGP LEEEEPETPVAREETTTPTGENTAEATPTITPT  
QPQIANSILRPSSYAIKPPEQQEKKHEEEEEEEEEQGPQKPNLIISTDSGTTNEDHDTIS  
HHAFSPTLHTSNQTPGGALKQNKND FDFENAGLNLRVNDQNAEHASAWAIHLALIFFCAL  
VVACSVLTFVTIHTYGFFTLFLLLAIVVAFCGFLACFVDSTILSQNP KLPVRQKILTAVQ  
ATRKIIIEEYESFVRDWREEVLM LTEGGENYDPNVTGGTANGTRYHNSDFDGTTL PQQRR  
KKS KVFKLVRPFLGLK KKLKSKAKGRRKKEKSVIPFDEMP SYNPPAVGIV  
>comp12352\_c0\_seq1; 344 1 1681 LEN=2204; translated  
SWYTLFDLEDSLLKQTKTRRAMISTMKIPKEL YRRERMSHLKRL LGYKSIGSFHTEDVDV  
LMSQSSNVYEIPKLPFDQKLEPDKSDFLLDRKKWTF LNHGAFGASLRVGYDRAEQWRCVS  
STFIRDDISNRIHSERRIYRRLLDDKTPMSLRSSMSKVSLDLTFLVDYIATNHQFHLE RQP  
LRYFDRDLLPHLVYSARRLANFCHASRDHFTLIPNVTYGLNTILRGYS DIHKEKSHVILW  
DTSYGS LKMAHEYCPERVTEIPVSNYFDRCWDDSLNDP SDVFEEALCDSVEKIKTENNN  
KQ TENALLILDHTTSNTALNMPLEKLSRAAKEMNMLVMVDGAHGILAQDLHLNETELPDV  
DFYLGNGHKWLS CPRGIGFLYCPDASLRHSILRLPAVISHGIGQGFQSRFLWDGCRDYTA  
ALSVPVAVLDFWEQKQNKAKDSLNGVFPQTEINNRLQQAVKLLSRTWHPDEDWERSLLVPF  
ALHSPMMALVRLPDRMQSSSSTSGDAKAVQDFLYK KLI EVP IKCV EGVLYVRISCHIYNE  
IDEYQRLAETLLRFPTSQ L  
>comp12352\_c0\_seq2; 362 1 1512 LEN=2035; translated  
SWYTLFDLEDSLLKQTKTRRAMISTMKIPKEL YRRERMSHLKRL LGYKSIGSFHTEDVDV  
LMSQSSNVYEIPKLPFDQKLEPDKSDFLLDRKKWTF LNHGAFGASLRVGYDRAEQWRFH L  
ERQPLRYFDRDLLPHLVYSARRLANFCHASRDHFTLIPNVTYGLNTILRGYS DIHKEKSH  
VILWDTSYGS LKMAHEYCPERVTEIPVSNYFDRCWDDSLNDP SDVFEEALCDSVEKIKT  
ENNNKQ TENALLILDHTTSNTALNMPLEKLSRAAKEMNMLVMVDGAHGILAQDLHLNETE  
LPDVDFYLGNGHKWLS CPRGIGFLYCPDASLRHSILRLPAVISHGIGQGFQSRFLWDGCR  
DYTAALSVPVAVLDFWEQKQNKAKDSLNGVFPQTEINNRLQQAVKLLSRTWHPDEDWERSL  
LVPFALHSPMMALVRLPDRMQSSSSTSGDAKAVQDFLYK KLI EVP IKCV EGVLYVRISCH  
IYNEIDEYQRLAETLLRFPTSQ L  
>comp12355\_c0\_seq1; 427 548 2725 LEN=2943; translated  
MVNDKSSSPASSTNSYPRDGSSTGNSSGASQSN SDDPCLVIKSQPPSSVYSNESFKVEVQ  
LELPKTS GPPSTIWNVDNEVNLKATLCYAKTGKPKVDEAILMTTPMEITIPGEPKIDNSS  
NVTDENNRGKRSVVVECMIRTD SISRGETGYVVRFS TTGEDKNLLSTPSSRTRFVKGIS  
TLP THLVNYKIRCKVEQDWESIWKDEGGRDKCMEVSVAIYDKDGQLKTGENIPLKPVLC  
YEVGP GAPESKVANQDILRTLGTANLVLDKDTGR TKLRFRVEDVSKNHQGNFCLKVGP E  
TSTKRYKDI AVAFTPPVNVRSKRNRKRSRGASNRHSTGKAGNDNPGTSDSPSATRQRLSGV  
FGAGPDNLRSGRGGQSGNLNPNANDALQQAIRGIIGWADV VVNELHPLQWQVLGGYQQHE  
DGSGPDYSRPHYHMPNPNVPI MRILNAYTDHVRGHLQVLVSAVEEAQANNTAPGGIHS E  
FMQSSLQGRDFTNDPYSSLLGSNRFVQSGAGMPGDPGLS QGVVGGIIPGLHPTMAADGFR  
ARGEVGGGLPY SARVNMTNQTISGMPGPSAYGLHG HNSMQAPGM PHQQGIRGSHFDTRQR  
AMAMESRQSQVKYVLAKQYKTLRTGSRLGFPAFSAEKEILGFFREGGAKGGV NKFFPISR  
HKDDFGPLEILQASEILED FIAKESKAVHCLKDY PNLSSMLDACLLYDWSKEAGNPTNSQ  
TMQET  
>comp12356\_c0\_seq1; 373 749 1627 LEN=1934; translated  
MKSL LCAIANEIPCRPSLDPSQAKNRLLI VDAATQGPDSSC LLRCINLPKGEEKSPLQL  
KWANRPFQYSSAINYEVAEMII EILTTLCDKQKSSMGDESNDTAKFFWDPTCGSGTFLTL

AMEKGFHVEGQDINPSVANGAVCNLEYMFGEAEVEKFATVQTQDSCNSLRDNESSSSSVK  
NAAISCVAANLPWGRNSVLYRDEIQRILGVSRSQIEVGTPCAFITRPSDSGKDKGPSFLF  
ESTGFDVLGQAFVQPQRNFLLPASKKKKNSGIGNSGSTKDNRNQCIVTVALAK  
>comp12357\_c0\_seq1; 246 289 1023 LEN=1170; minus strand; translated  
MLPVFVPAQAVPSSTGGPVSWSFILQAVAAVAFATKARVVRHAPALGFRWARVLSSSLG  
LVFLPAPGPAPLPEPVQDDAGGHVDVHAGRPGPVLGDPHESAAALEVRWLDALALVPHEH  
ADAPAAPGKVPKVALVQELAALVDLHPDQEDPLPVHVGDAVPPLEPVQGDPSVQGLE  
KGRGEDSPAGGVFLADQEDLGAAGGRGREHRLDVGDLDDVADHQAQPQGRIVVVLPL  
LLPL  
>comp12358\_c0\_seq1; 878 276 3446 LEN=3507; translated  
MPPLIHSSEAIEMSTRSSEEQNTEEAKSPAQPVLDPDPSEQQKVIAAIKEGKCVTVRACA  
GSGKTTCLMQVASSLPSTRKVLIIITYNRSLADDCARIQKLSLGHVSCYTIHGLASRVA  
GKVCNDDHKLIELLNQWDNSPRSVMSHPVPLDMVMLDEAQLRPLFYKVLSHIFRTVCGG  
AIGNTNRSMQLCLVGDQKQLLYDFPTYGSDKASASFFLQPEYWSQFTRNRKWIQLSLSV  
SYRLTPCIASFCNLFWGTSVMVGGNTSSHNLPVQYLMKYAYPNTSSRYDPDKLSTSFLLAKI  
IDKHGPEENVLFLAQS IKNVDLP IRVHVNELMKIKDRHTGMQKYNFHIKESVRGFEGNVW  
KNKVRVWTFGSGKGCADVVVVFGEVFRKPHGLNQIGVALSRARKRLFVIHGKRYIQGQ  
CLPLTYYPILGDTPSRMEQHVVRWGENDSQILTLDPDVGGRSDVTKWALGQLADKQVI  
KIDFGASDNDTMPQSVALAQQQVKDIYVASEFGYFSALAEKFLQYGAWETIASMKDGKE  
RNKRIPYETNIQFATTTEDVSALYGEAVTYMLQWEMCKSVPNVETVVSNGIIRLHPQSQY  
TEQLIREHLRDISCEELSEEDSHRLEREFATKGNVKGAYLINFMNAHLSLKKKRVIEG  
DQVREINFRVKVVECKSEDDKQLNEFLPQIKAIYELEMSSKRPFHWVYLANAVMAFSNY  
HEKFRQIGTDPDSYESWVNSEALLDGLERLRNTMQLISSSSSTSKYVENEGKSIDKNIYG  
NNNISNCKGTFERELHIDFAEDDWIHEKNNGRMVVGVGICDWINGDGIRQNIRRQKSKG  
DSLHDVDLLEIKFVHQLSNIHRLQVLVYCALYVLELNNQDEEKNGVEILNDCHVDNDNK  
DLEVEQNVECCRGMLYNARTEEMEICSIKACDAMDFLLDISQFKYNGKDRKQELLQLKQT  
ANNSVGSDEMSSISYRPKRPKRLERNGLTYTAFVDDDEDDDKDDDDVKAASAKAS  
NGRCPRTYRWKKRKPPTSESAFQPGTGTDDDDPIILD  
>comp12359\_c0\_seq1; 732 1 1709 LEN=1849; translated  
XTYCFLEFPSQAEAAKCLLDNCRITIDSVDLTLKWATKAKQQQHPHQAQNDHQRQRE  
QQQHFTQEEAKDSTTLFFHPPRNTKLVANSSSSSSSSNSKAAEPTREGTSKASDQSTTT  
ANDKSNKSKSNDESQSNAAATEDSVKAKVDSGTDQONDETAAEVKAQGTDAEQTDNGKKE  
DTNSSATDATTSENGKGGMNHTGPIETADAAEIDSGDVDAKPQSNKPTGFAATLRDYVQS  
VLEDALNDGVEKDEERVADSEPALRVEVRCKDQYGFLEFASHAAATMALAAITKSTDGG  
LLAEGGGMPKDLVGTTLRWAKGSASSATGNKNHARKGGREQVLEALGMKRQYYPADGRKD  
CWFCLSSPTCETHLITGVYDDWYATMPKGPVHQGHVLLVPEHTSEGAWTLNEEWIKLVE  
KTQKHASQTYDSDLFVFERAMETRGYHITHIQVPIPRDSSTKLQTTMMAHATASGFDLR  
PIQSDLGKALLEKGDYFYAEIRTRSHQHRFLYKRGDETGSGVPLQFAREVLA SVLGNP  
KLAHWKACVVDKEQETNLASAFRDSFNAM  
>comp12360\_c0\_seq1; 468 1 1680 LEN=1696; translated  
QSFTIEEVPAAALEYSKMTKQEELEKEYRGADAGTVGRGRSGFSQSQKSVSPKRQNNNSR  
SPRRQNNKSRSPMRHSNGRQKQNGKSRSPMRHNKSRSPVRGQCYNSKAKKNPAAMTVIVNR  
CDLWDSAAHFQPDCEYHPQTQQSHARVVPYSFVPGKGTGPCFVNGFSPPPGLMEKQDEP  
KPM SVATVRVPHHVESIQFP IQAGGKLHCDVIDTSTPNPHDPNIVHDKYWAQRRR LFSRF  
DFGIQLDAEGWFSVTPEIIADHVAERVSNLVNSSPAFRERESPFGKGVVILDGFCGCGGNS  
IAFGKIPSHIVSKVVCVDTDYSKLLKAHNASLYGIPKDKLIFVHCNSIFILKYCYKDGE  
FILDRPQSNMPQYMPVQGR LFAGYPIGGLDILPRHIDLAFDPPWGGIDYEILGKNGY  
DLERNMKIQVNWCDDEEKNEEPEEEDCGVSDDFDFTAAPKHNQGSKR SRKKNFNKKEGE  
FVNGKELIKLAAEAVRSRVVMLDLPRNTSKNSLGSALASGYRGNLKLEEHYLNGLRKT  
TAYLGS DYSSLINGNSAV  
>comp12360\_c0\_seq2; 197 1 705 LEN=840; translated  
QSFTIEEVPAAALEYSKMTKQEELEKEYRGADAGTVGRGRSGFSQSQKSVSPKRQNNNSR  
SPRRQNNKSRSPMRHSNGRQKQNGKSRSPMRHNKSRSPVRGQCYNSKAKKNPAAMTVIVNR  
CDLWDSAAHFQPDCEYHPQTQQSHARVVPYSFVPGKGTGPCFVNGFSPPPGLMEKQDEP  
KPM SVATVRVPHHVESIQFP IQAGGKLHCDVIDTSTPNPHDPNIVHDKYWAQRR  
>comp12361\_c0\_seq1; 726 67 2499 LEN=2688; translated  
MQQGNWDVTQLEEMSGTRLSFHCWPSSRLEATRCVAPIGALYTPMKKLHPSCCPPTALPY  
DPIRCSSPSCRAVLNPHYCQVDFR TKLWTCPCFMRNHFFPAHYAENITETNLPAELIPQYT  
TCEYELQTI PDQPPCF LFLVLDCTNSKEELAE LADSLTQALHLLPPDCLVGVITYGTNI  
NVYDLSSDSISKAYILRGNREYGP GKIGELLGCI GGRRNQQHQKQGAHMPPGGQGDILN

RFLRPFSECAVYVESILDDIRKCPWPVPTDKRPARATGSALSVAVSLLHLAIIPRRGARVM  
LFTGGPCTSGPGNVVSRLKEEDMRSHADLAKKAEPLYQPACDFYAKLTNPSALGDTSDKN  
KKKSSAPQANCAYHVVDIFACSLDQVGMLEMRLVEATGGTMLLGDSFGQSAYQETLKRV  
FNKYPDDVPQDGGQMSMVYGATMEVFTSREFKVSAGI GPGTSLNKHGPNVSDLEVGKGGT  
SAWNLGGLGPETTIAIYFDVTNNGNPLPDNKRRYTQFVTKYQTSTGKTRIRATTLCGTW  
YNPPVLKDGAPANFDAQNSPVRASFDQEA AVL TARLAVHQTD TDELSDVLRWLD RSLIR  
LCAKFAQYRPDDPSSFNLTPEFSMYPQFMFHLRRSQFLDVFNSSPDEASRHRDYLIQQNT  
TNSLIMIQTLLSYGFNGPPTPVLLDSDSVRPDTILLLD TFFQVVVFHGETIAAWREEGY  
QEREHAAFRQLLEAPQADAGLIMDSRTPVPRFVVCDQHKSEARFLMARLNPTSTHNSDL  
DGGGQGT T VY TDDVSLRVFMEHLTKLAVQQ

>comp12361\_c0\_seq2; 529 171 2603 LEN=2792; translated  
MQQGNWDVTQLEEMSGTRLSFHCWPSSRLEATRCVAPIGALYTPMKKLHPSCCPPTALPY  
DPIRCSSPSCRAVLNPHYCQVDFRTRKLWTCPFMTRNHFFPAHYAENITETNLP AELIPQYT  
TCEYELQTI PDQGPFCFLVLD TCTNSKEELAE LADSLTQALHLLPPDCLVGVITYGTNI  
NVYDLSSDSISKAYILRGNREYGP G KIGELLGCI GRRNQHQKQGAHMPPGGQGDILN  
RFLRPFSECAVYVESILDDIRKCPWPVPTDKRPARATGSALSVAVSLLHLAIIPRRGARVM  
LFTGGPCTSGPGNVVSRLKEEDMRSHADLAKKAEPLYQPACDFYAKLTNPSALGDTSDKN  
KKKSSAPQANCAYHVVDIFACSLDQVGMLEMRLVEATGGTMLLGDSFGQSAYQETLKRV  
FNKYPDDVPQDGGQMSMVYGATMEVFTSREFKVSAGI GPGTSLNKHGPNVSDLEVGKGGT  
SAWNLGGLGPETTIAIYFDVTNNGNPLPDNKRRYTQFVTKYQTSTGKTRIRATTLCGTW  
YNPPVLKDGAPANFDAQNSPVRASFDQEA AVL TARLAVHQTD TDELSDVLRWLD RSLIR  
LCAKFAQYRPDDPSSFNLTPEFSMYPQFMFHLRRSQFLDVFNSSPDEASRHRDYLIQQNT  
TNSLIMIQTLLSYGFNGPPTPVLLDSDSVRPDTILLLD TFFQVVVFHGETIAAWREEGY  
QEREHAAFRQLLEAPQADAGLIMDSRTPVPRFVVCDQHKSEARFLMARLNPTSTHNSDL  
DGGGQGT T VY TDDVSLRVFMEHLTKLAVQQ

>comp12362\_c0\_seq1; 511 146 1480 LEN=2398; translated  
MVQVAVQDSKTSSSSSPLPNPVAATVNAGGDLFSPTSAAA WALSTLHNFGAAVPNENGG  
PRPTADSLTGTRLFNNSGVTNADSARPHITTSASNHNKNTSATGGTTSNTQSTSGVTWGRP  
QFQHSNHSTFVDPSPLLMRTSEIQVGSVNREKPLARMMNSTSMVTPTPKKLKVS DTGSAT  
YSRKKKSLGVLAE NF INHYAKYPPGAVVIDHAAVDLGVERRRIYDVVNILESVNLVEKK  
QKNTYSWMGMDHFD DFFGKLQAKAVMEY PEDAKRYLDNTIPLDDL SKTRKTKENKSLAKL  
SEEF LQVFLVGFETLSLPEASDKIQGTTSM EELIAMGGGARGKSTVVGAI PDAREL KAAA  
ARGLKTKIRRLYDIANVFLSVGLLKKVENIDTSRRPNF SWNYKLSAKDLYDRHKRKRTRSL  
TESHDPTPDSLSSSSQNLTKEF SI

>comp12362\_c0\_seq2; 511 146 1480 LEN=2346; translated  
MVQVAVQDSKTSSSSSPLPNPVAATVNAGGDLFSPTSAAA WALSTLHNFGAAVPNENGG  
PRPTADSLTGTRLFNNSGVTNADSARPHITTSASNHNKNTSATGGTTSNTQSTSGVTWGRP  
QFQHSNHSTFVDPSPLLMRTSEIQVGSVNREKPLARMMNSTSMVTPTPKKLKVS DTGSAT  
YSRKKKSLGVLAE NF INHYAKYPPGAVVIDHAAVDLGVERRRIYDVVNILESVNLVEKK  
QKNTYSWMGMDHFD DFFGKLQAKAVMEY PEDAKRYLDNTIPLDDL SKTRKTKENKSLAKL  
SEEF LQVFLVGFETLSLPEASDKIQGTTSM EELIAMGGGARGKSTVVGAI PDAREL KAAA  
ARGLKTKIRRLYDIANVFLSVGLLKKVENIDTSRRPNF SWNYKLSAKDLYDRHKRKRTRSL  
TESHDPTPDSLSSSSQNLTKEF SI

>comp12363\_c0\_seq1; 253 205 792 LEN=1137; translated  
MVSLRCFGLLLVQILLVQDDAVATSATTLETGENLISFPWCIPPTPYPPQVAREGDTVYF  
NWDGEYHNVYLYPSGTCTNK TGRVYLGEISGQAKYFTDADVGKNLTFVCDVSSHCSQGQ  
IVVFE GA EAFGLPATMDPEASAT PFPYSTTTPCGDVYFNGLGPGDDGADPDASAAA AVGS  
GFLFFVASGAALLGL

>comp12364\_c0\_seq1; 57 1 306 LEN=713; translated  
TKAPSQKSVKSTKSPSKSSKAPSKSKSDKKGVTGPTQSPTGGNSPTKSPTRTPTKAPT  
KAPTKSPTQSPTPGVTTGTSAA TSGDSFTSSLAAGAEIVM

>comp12365\_c0\_seq1; 308 135 956 LEN=1032; translated  
MTTCCNKFTRMCTIFTRVVAIAYATLAAFTFLEARDLAQSDGYQYSDTGIVYVPLLLCA  
PPSVENDGSSLI I SSDSNCRDMNYLVSAPFVCSACSALACVFFVIMDILARFGKGFPSMS  
AVAGMGLYLVLVILVQSGISTGALVEQNIYVWNMQEYLDEQDFDGTAKSYANTHILV SST  
GCAFAAAFLILMDAILYRWNEKRQAAIEDQRI VDFVRASQAKTEL RDDASIDHDIKQSTT  
VDTLIDTIESGKCAPPDASET TGIPPWVSPYKQ

>comp12366\_c0\_seq1; 898 1 2723 LEN=2826; translated  
XRLQPVCCQNRVPCPVFRLVSSWNGIWF LQFFQEIDY PVKVL TSAASNETKEAKLEQYLP  
TTHETEXSLQEV RVPVARTHCTPSLNDGRDLARIDTDQNTKHATRGT PPAKQNP LALA

IPVPRGDVPAKESQQDEERRPRKGGSTTAAAKTPVATAWCFSLLLVVHASHTQNLALGQR  
DNENAHGNANGNAAHNPPQCRPPEATRYDWERLNYYEILGLAADGSSIGDKKKKKR  
KKTGGEEGGEGTGSKN SALEGVSNKEIRKAYRKQAQKFHPDKQA AKKNALSSSSGGGGT  
SSESISVEESNARFAKIAEAYEFLTDENKRKDYDLFLEYCQNTQLVKDHEAQEVGLLATI  
LKKRFGGLFEFVATRDPFSIFEEFFFGKDDDEENTDRGYFDPNDPFSHLRYTKSNLGRNR  
HHGGYEHQYHPPEEEDPVRVFSQHTMYDPSTGENVVRVLQTEEFAPQGETTASSRSYRQ  
NRSSPHDGTGTSPGSGGNPSSGSSFYRIVAQDFKERYDPFAARAVYVPI TE PYLQEDGY  
RTESASPHRGSGRDPGGASSKRSNIESSILHPWQVLTSPSEPMVSPNQKYVAGLSQD  
CELLVVLNDHHLARDGRSGRGEREKILWSTQRPYGTNGYAADHCFVAVLKGSHLVVTVGKH  
PHDASGSSNGTNRILWHS DARSDDHDSRHGYEYEDEF GFWHKRQRSYLAQLDNDGALT  
VYSVWNVPLEEQHQKHHPHLQKQFFSSTFSFLGLDRSGRGRSHHHHS PRDLVLR AFVA  
AEDLWHGRIDANQEYGHLYSSGTSITYKRCTYSTSSPFGCYRLGRRVTQVALECFWKMQA  
ALSRINH LADAWLDLIYEEDDLFYDLKESIWRNTNAFGSKVAALQARWVRKLLLETFRAF  
STVSSSR

>comp12367\_c0\_seq1; 395 206 1129 LEN=1503; translated  
MAFEQSLDADRVDGFNIFSAFVRVPLLVLGGILGADGSASANAMGSDSLMGPCHGKSIDD  
DENDSTPTNNLDEHSRGEAMDCTKLLNQEMTNAASADIGPLERDTTDMRQENSLNTE  
IKQTKNLSWSEDEGLPLVYENDESVLHHDPN SNP YASATAKPTKSAMRKSRSIRHVAGRL  
AHQERITPAGTSRYIPNMKPRATGNGLIMPTRPYGGHPSVDNKANGTNGAEMSPQGWYI  
NTTPTPELYYKHSASCSSTAVRKQVSEKAVPTASGITDGKPCQNRVFDLQNSTKTNP  
MGWTSIPI

>comp12367\_c0\_seq2; 221 1267 1776 LEN=2150; translated  
MGNEQSVLHHDPN SNP YASATAKPTKSAMRKSRSIRHVAGRLAHQERITPAGTSRYIPNM  
KPRATGNGLIMPTRPYGGHPSVDNKANGTNGAEMSPQGWYINTTPTPELYYKHSASCS  
TAVRKQVSEKAVPTASGITDGKPCQNRVFDLQNSTKTNP  
MGWTSIPI

>comp12368\_c0\_seq1; 560 236 1972 LEN=2323; translated  
MADVFNQLFRKIPSVS QLQGGDGGEKFSSIKALGAIRKCVQQLQTELKGLDLSDFTVVW  
GAHSLLLAGFTRKVTRIEQLTALLVIEAVSCENRKIGMPCIDSPFLPILVKDTLAILHDL  
KVEENYNGGNGTNESEGRDSFVERECLLDLVE SFLPIIMGKEKHQALIAATNKNPEEVM  
SPETQKDLEDTIKQWTTVYDDNGYTSPLVWAKRESEQQDLERLLLQEERKGDCKTVSNEE  
LYGPLPSVCSPPFARVPVPPLLPVTAYEDDDDEEQYNEKGNLDFDFVQAE LLWLTPTTLR  
LMLLPGEEDKVVSTEEYRNV LKLIQTQAFDTTLTPSDQRTVLELLNASKQEQKQDLKQP  
QGSSKQRRNRGNKNGSSSSNSNTNAQHSSGREEE SR IQLVQESGLTPQNLPRLVEHNP  
LIAHECLLVILQHSPENVKNEYLSALVGMDSLHSMVVRNLATHNHVHTGNGTAAALKE  
VGS HHNKNDQEPVLHPEYINLFISSCIASCENMPDRHAQNRLVRLVCVFIQSLLRNRIV  
DVADIYYEVQAFICIEFSRIREAAALFKLLKISNPTSSN

>comp12369\_c0\_seq1; 394 206 1480 LEN=1789; translated  
MKS IQSSFDRITIDSNDGKVESNNQGTIQIDKNIMHRRTHSIPKDMRFIDHGSFPPVDS  
GANRVPRVRRMPTESPADFSEIPRNQTHFIRGMLVDLRQAGQPTLGRGQPSTSSSTSS  
PVRTNPTHFMRGMLTDLQQC DLSPARASKLAPP SLTPTFTSPVTPARTEKKS NFSFLSLLK  
AHQGDVTTHTSATAMTTL SRTSLRSSNSIRDGIMLPFSSRN RDTMRKTAVVEVSPHVADD  
SDPNVFRKRNRCE SISMDEIVHDDDVSRAGKLLRGL ELSRPF SRISTDPLVPGDSQKSV  
VFDEKITSLSSTSPLPQNSISKGTTTTTEQSWLNSMAHSQNEVAASTINTSASPTDFSE  
VKLQKTSLENATKTGGDDCHVIVLNDIGSAPMDSGPHDKKSGKSLFSRRSRVSI PNHPGQ  
KNKA

>comp12369\_c1\_seq1; 987 1 3426 LEN=3606; translated  
IILPMYFHLSEMLTTYLKGGS CILQKRGIKIKCERFKYGGIIVNSFNAEEEDKEKSEAAT  
TSSETVATASAIGSSTK KKRGRRSTTPKKEKGTETTQPRTPPTIESSATKKKRKRKITSP  
EPAPIPTPTPRTRNAVAKKEINRNAGPTIVEKDAVAPTSTTSKTTNKEYPATMDARVHRL  
RHMGYIPGSVSALT PRTSNCGQIVVARTDGSYELKSVTSPPKGIASSNRHYADNIRVPMH  
RLVTIAETPPATGRKPSNDEDSVDSEMDAEDDESSLLLC PDAASSLCWVYPSALSVPVC  
VSGSPGNLWIVDFKTSRPIDVSSGGGGFXDLAVLSCGDGGGSDDNGAGFPFVAAACED  
GSVRIWRVSGDGS SRGQILQDTPFATLPSVGAPILSLVWRHVATR SKGKNRATIQT VVF  
AATADGTIRKYGLEIDRQQQIIDSSEPSDSYSIPNPPK SILRMTVESKGRKDSTKVWTL  
LLRDNTVVAGNSLGQVFWNGETGTLTQTIVQSNRADVLKLVVDSDETKIFCSGVDSRV  
VCLERKKPPIKAI AAQQSNATGSSKDLTALVASHLTSYRPWRMTVSQRPHTHDVKAMAI  
VASASASGARPTETLLTAGVDTKICSYSVSNFSQSQPQTWYPWPSATSLFSSSISTAKGG  
PRLVAMQRYNGIELYELEALKSRKNNHIMLSAHESHKTVIAQHPTS IPLGTIKLDGGE  
EEQDSSSVPTPSSPLRASLLSPDGQYLAVSNMSSTYVFYIDYIASAESPRRIRPRMIELP  
EEIRNVSATTF LFV GATLYVGDSSRDQKVYVARLRPGKTKGEDEDQMGIDVDDSKKSLQ

ETIILPTSCQTSSGQIALPIQSIHANDEFLVTLSHAQENAIHIFRRKTKNRPFHEHFWTLP  
SLGGGTDARPAAVTLLDGNKLAVATYRSHLYLFDIETKSLNEWSEKYGFPLKDSKWTEDA  
LCDRGYPVRLIPRQNGRLVLSFGTFCVIDLTKPMPQRCRTVPKRPVWRTRKKYKAVVHD  
DGEDHDNVEDNDDHWLDSRVTKVVEDEYSHNDLDAEDDDATEAKNSQASASRSDTKSIK  
VPNEIHDEELAARSTICSHYKNILYANFLGAKEMIVVEQPWLDIVETFPALQRKIYGA  
D

>comp12369\_c1\_seq2; 987 1 3426 LEN=3466; translated  
IILPMYFHLSEMLTTYLKGGSILQKRGIKIKCERFKYGGIIVNSFNAEEEDKEKSEAAT  
TSSETVATASAISSSTKKKRGRRSTTPKKEKGTETTQPRTPPTIESSATKKKRKRKITSP  
EPAPIPTPTPRTRNAVAKKEINRNAGPTIVEKDAVAPTSTTSKTTNKEYPATMDARVHRL  
RHMGYIPGSVSALTPRSTNCGQIVVARTDGSYELKSVTSPPKGIASSNRHYADNIRVPMH  
RLVTIAETPPATGRKPSNDESSVDSEMDAEDDESSLLLCPDAASSLCWVYPSALSPPVC  
VSGSPNGNLWIVDFKTSRPIVVS SGGGGFXDLAVLSCGDGGSDDNGAGFPFVAAACED  
GSVRIWRVSGSDGSSRQILQDTPFATLPSVGAPILSLVWRHVATRSGKGNRATIQT VVF  
AATADGTIRKYGLEIDRQQQIIDSSEPSDSYSIPNPPKSI LRMTVESKGRKDSTKVWTL  
LLRDN TVVAGNSLGQVQFWNGETGTLTQTIVQSNRADVLKLVVDSDETKIFCSGVDSRV  
VCLERKKPKIKAIAAQQQSNATGSSKDLTALVASHLTSYRPPWRMTVSQRPHTHDVKAMAI  
VASASASGARPTETLLTAGVDTKICSYSVSNFSQSQPQWYWPWSATSLFSSSISTAKGG  
PRLVAMQRYNGIELYELEALKSRKNNHIMLSAHESHKTVIAQHPTS IPLGTIKLDGGE  
EEQDSSSVPTPSSPLRASLLSPDGQYLAVSNMSSTYVFYIDYIASAESPRRIRPRMIELP  
EEIRNVSATTFVFGATLYVGDSSRDQKVYVARLRPGKTKGEDEDQMGIDVDDSKKSLQ  
ETIILPTSCQTSSGQIALPIQSIHANDEFLVTLSHAQENAIHIFRRKTKNRPFHEHFWTLP  
SLGGGTDARPAAVTLLDGNKLAVATYRSHLYLFDIETKSLNEWSEKYGFPLKDSKWTEDA  
LCDRGYPVRLIPRQNGRLVLSFGTFCVIDLTKPMPQRCRTVPKRPVWRTRKKYKAVVHD  
DGEDHDNVEDNDDHWLDSRVTKVVEDEYSHNDLDAEDDDATEAKNSQASASRSDTKSIK  
VPNEIHDEELAARSTICSHYKNILYANFLGAKEMIVVEQPWLDIVETFPALQRKIYGA  
D

>comp12370\_c0\_seq1; 1515 101 4906 LEN=5047; translated  
MADNNSKKEEDAERERKRRNAHKRMGKILTKAWELPNAEPFQTYQYHGDDDEKKGSSIL  
CLTSLGIKVDKKGYGKGEWEDFARDIGGIYALHLKRKTKHAKLADKHLERVCGMLSER  
KDYLAQAARNAPVPRIEKRRSAASSGGGSAKRRKTPSRTPAEKKAGESVAASSYSTTGSK  
DELADREQRGMENLVAFIEKEGGDRGMVENYRCRVTVKPSDGRFDVNFNEHGKRF RSMI  
EVGRFLNLVDNKS GPPSSRRSAAAAGIGNLKKRRRVGSSSTASSAKQVEAEKKRLRKL  
DRLRKQYGRATKALDTFLEDDKDAQYPVDDSVLQEEVAAETNASGADTAVLPTNCPAARN  
PDIDSFHGLPKHCMAEALQAWDFLCTFSRALSLOPIPLDDFLECINYPVPPQAIDS DTYS  
APPVYLGEAHLGLLKLILGDPSSDDWWWSILETEQSENAVLANKDATKGANVKEEESDLP  
LIRINFALLADPEDPLITNSWLRALQPIRNMDSADAASMKKALDEATNVVANRWVLAFF  
RKAIKLGTSGPSFMKQAVLWLLDKVTEAKPELSRTSKASDVLKRAQVVEVEHQMEKL  
SSATLTVNEEDLASDAEEDDESDDESHADNDNFHNSKALDAYTEEDQPASYIPKPKPPT  
LVDFLLPPGKPTPTQSVQLFSPSSWPHIVGA AVCRIIHRKRLRNEVDDRLRQSRDLSQL  
TVKERRERESISSGRVFSFISGGVDDGSVEHALETLCAGGNYLELTPSERLMVLRILIE  
AAYDTNRVYEVVSSNHSQRTNAMKALDVEQRRAKREAKEKASADVTTARKDLAMEARHNF  
LEEKREEIRKLNENNQELTAEDIDTLTEQDILDFDEDIKADFDALPTPESFKKTEVMERV  
AKLQEAFAAFETELLIIVVTMDELLERERDMLLAMEENLKELGGEDALMNP DVERSLVRRIE  
KLRRDIRRAEESA EYLPDIRNQAIENLKEAML DGTIKSLRGAIRTAKTAKLFGNDDDTNG  
IWSLDIVRDAHMELENAKQLKRVADAQKDLVSKLNKCFIRTEPLGYDRFRNRFRWFESSD  
QSHVWTEVNLALEGS DSNLTNKQGFIDVVS DPKVVFVGP RDIYEDFPSPPTESNPEFLLF  
GRQYHHS GTSASLATREWGCHVNESSIRALMKGLDSRGIRENNLKKSLKEALEEKTSG  
EGAVESKEQIGDAEAGKTDDVENQDQEHGDKESHQTTGGDEVAFESVKNSALAAPS K SIE  
TDQIEKLQPSAIGERVVRVIAVDSNKDGEICRYEVASIIGWKTRMGQVPVEKDETEFEPQ  
LQTVPTHWRWANTENGEVWLTGIELLESICRYHKWRKDAHYFEHDA AFLAFRNSLGRH  
CGKAADAPHAMTPIRFGQYMVKVEAELYQKLVLT YDNNWGGKNGSRNTWITSMREYSFE  
FETVKEGLLTLENAFFELIGGEFEEGSDSTTS GKELLSNPNTREHIELES IETNVSSLWS  
SKDSRNVFIEIVSNKTVGFLTLAFELMCRNTRS YLTANGVKGT KTSYVSTQSVYDQYAA  
RPMRTTRRMNAWQSQEDDWEEPRLGAVRSTRANVNYAED

>comp12370\_c0\_seq2; 1451 101 4390 LEN=5148; translated  
MADNNSKKEEDAERERKRRNAHKRMGKILTKAWELPNAEPFQTYQYHGDDDEKKGSSIL  
CLTSLGIKVDKKGYGKGEWEDFARDIGGIYALHLKRKTKHAKLADKHLERVCGMLSER  
KDYLAQAARNAPVPRIEKRRSAASSGGGSAKRRKTPSRTPAEKKAGESVAASSYSTTGSK  
DELADREQRGMENLVAFIEKEGGDRGMVENYRCRVTVKPSDGRFDVNFNEHGKRF RSMI

EVGRFLNLVDNKS G P S S S R R S A A A A G I G N L K K K R R R V G G S S T A S S A K Q V E A E K K R L R K E L  
D R L R K Q Y G R A T K A L D T F L E D D K D A Q Y P V D D S V L Q E E V A A E T N A S G A D T A V L P T N C P A A R N  
P D I D S F H G L P K H C M A E A L Q A W D F L C T F S R A L S L Q P I P L D D F L E C I N Y V P P P Q A I D S D T Y S  
A P P V Y L G E A H L G L L K L I L G D P S S D D W W W S I L E T E Q S E N A V L A N K D A T K G A N V K E E E S D L P  
L I R I N F A A L L A D P E D P L I T N S W L R A L Q P I R N M D S A D A A S M K K A L D E A T N V V A N R W V L A F F  
R K A I K L G K T S G P S F M K Q A V L W L L D K V T E A K P E L S R T S K A S D V L K K R A Q V V E E V E H Q M E K L  
S S A T L T V N E E D L A S D A E E D E D S D D E S H A D N D N F E H S N K A L D A Y T E E D Q P A S Y I P K K P Q P T  
L V D F L L P P G K P T P T Q S V Q L F S P S S W P H I V G A A V C R I I H R Y K R L R N E V D D R L R Q S R D L S Q L  
T V K E R R E R E S I S S G R V F S E F I S G G V D D G S V E H A L E T L C A G G N Y L E L T P S E R L M V L R I L I E  
A A Y D T N R V Y E V V S S N H S Q R T N A M K A L D V E Q R R A K R E A K E K A S A D V T T A R K D L A M E A R H N F  
L E E K R E E I R K L N E N N Q E L T A E D I D T L T E Q D I L D F D E D I K A D F D A L P T P E S F K K T E V M E R V  
A K L Q E A A F E T E L L I V V T M D E L L E R E R D M L L A M E E N L K E L G G E D A L M N P D V E R S L V R R I E  
K L R R D I R R A E S A E Y L P D I R N Q A I E N L K E A M L D G T I K S L R G A I R T A K T A K L F G N D D T N G  
I W S L D I V R D A H M E L E N A K Q L K R V A D A Q K D L V S K L N K C F I R T E P L G Y D R F R N R F W R F E S S D  
Q S H V W T E V N L A L E G S D S N L T N K Q G F I D V V S D P S K V F V G P R D Y E E D F P P S P T E S N P E F L L F  
G R Q E Y H H S G T S A S L A T R E W G C H V N E S S I R A L M K G L D S R G I R E N N L K K S L K E A L E E K T T S G  
E G A V E S K E Q I G D A E A G K T D D V E N Q D Q E H D G K E K S H Q T G G D E V A F E S V K N S A L A A P S K S I E  
T D Q I E K L Q P S A I G E R V R V R I A V D S N K D G E I C R Y E V A S I I G W K T R M G Q V P V E K D E T E F E P Q  
L Q T V P T H L W R A W T E N G N E V W L T G I E L L E S I C R Y H K W K R K D A H Y F E H D A A F L A F R N S L G R H  
C G K A A D A P H A M T P I R F G Q Y M V K V E A E L Y Q K L K V L T Y D N N W G G K N G S R N T W

>comp12371\_c0\_seq1; 522 118 1200 LEN=1363; translated  
M N N L M G D V P A W A L E S D S D S D G G N S K G G D I E M Q D K K D N D S Q Y M D S F F S E V D G I N N D I K A V A  
Q A T K N I G I I N E Q S M Q A T T T A E E Q N L S K K L G P L I A T T N K R A K R T K T L L G L L K E E T E K L K E G  
G K L N A S N V R Y V S Y F I V L Q T M A P F K N V F V M V G G D E F L V S H R S L F V V L I C G L R S S L Y N F D N V  
Y G T K V Y X E N M N T T L T K K F I D E M K A Y Q Q A Q Q K Y K T D I K N K V T R Q V Q V V K P D A T D E E I D Q V L  
K S E G G R D A L Y K K T I L A G G V N D Q I K T T Y A K V A G K Y Q D V L T L E Q S V A E L H Q M F L D F A L L T E Q  
Q G E L L D Q I E F N V T Q A T D Y V E E A N V E T H Q A I E Y Q K S I R K K Q C W I I V I A S V A A G I V I Y F I V K

>comp12371\_c0\_seq2; 557 118 1032 LEN=1195; translated  
M N N L M G D V P A W A L E S D S D S D G G N S K G G D I E M Q D K K D N D S Q Y M D S F F S E V D G I N N D I K A V A  
Q A T K N I G I I N E Q S M Q A T T T A E E Q N L S K K L G P L I A T T N K R A K R T K T L L G L L K E E T E K L K E G  
G K L N A S N V R V R E N M N T T L T K K F I D E M K A Y Q Q A Q Q K Y K T D I K N K V T R Q V Q V V K P D A T D E E I  
D Q V L K S E G G R D A L Y K K T I L A G G V N D Q I K T T Y A K V A G K Y Q D V L T L E Q S V A E L H Q M F L D F A L  
L T E Q Q G E L L D Q I E F N V T Q A T D Y V E E A N V E T H Q A I E Y Q K S I R K K Q C W I I V I A S V A A G I V I Y  
F I V K

>comp12371\_c0\_seq3; 497 118 1321 LEN=1484; translated  
M N N L M G D V P A W A L E S D S D S D G G N S K G G D I E M Q D K K D N D S Q Y M D S F F S E V D G I N N D I K A V A  
Q A T K N I G I I N E Q S M Q A T T T A E E Q N L S K K L G P L I A T T N K R A K R T K T L L G L L K E E T E K L K E G  
G K L N A S N V R Y V S Y F I V L Q T M A P F K N V F V M V G G D E F L V S H R S L F V V L I C G L R S S L Y N F D N V  
Y G T K V Y X E N M N T T L T K K F I D E M K A Y Q Q A Q Q K Y K T D I K N K V T R Q V Q V V K P D A T D E E I D Q V L  
K S E G G R D A L Y K K T I L A G G V N D Q I K Y V L F C Y L C L P T T A S I R A E T D V G C F L L L L F P L A T R W R  
F L Y R T T Y A K V A G K Y Q D V L T L E Q S V A E L H Q M F L D F A L L T E Q Q G E L L D Q I E F N V T Q A T D Y V E  
E A N V E T H Q A I E Y Q K S I R K K Q C W I I V I A S V A A G I V I Y F I V K

>comp12371\_c0\_seq4; 532 118 1153 LEN=1316; translated  
M N N L M G D V P A W A L E S D S D S D G G N S K G G D I E M Q D K K D N D S Q Y M D S F F S E V D G I N N D I K A V A  
Q A T K N I G I I N E Q S M Q A T T T A E E Q N L S K K L G P L I A T T N K R A K R T K T L L G L L K E E T E K L K E G  
G K L N A S N V R V R E N M N T T L T K K F I D E M K A Y Q Q A Q Q K Y K T D I K N K V T R Q V Q V V K P D A T D E E I  
D Q V L K S E G G R D A L Y K K T I L A G G V N D Q I K Y V L F C Y L C L P T T A S I R A E T D V G C F L L L L F P L A  
T R W R F L Y R T T Y A K V A G K Y Q D V L T L E Q S V A E L H Q M F L D F A L L T E Q Q G E L L D Q I E F N V T Q A T  
D Y V E E A N V E T H Q A I E Y Q K S I R K K Q C W I I V I A S V A A G I V I Y F I V K

>comp12373\_c0\_seq1; 594 197 2527 LEN=2873; translated  
M L E E T L S S P N Q P P A E V A Q M L M N Y V N V E L A A G G A S A E A R F F K L F S L L C K R V F G E M S T D H K  
H L T G G W L S R S M K W D R P R V L A Q S S M R G G P R K Y T Q S T S I Q S D P V V K L L G V T T K S A L S K E K G P  
L T L I E S F A K E A E H R P N V R Y Q F P F L A L P K H M Q D E W L A L L Q I A L G G A T Q N I R Q P S E N S N R L M  
G S L F R V K L L D Q K Q L L L H Q Q G K V P K D Q R R P L Q L N P I Y S P T P K S P A P G M I Q S P A K K N N D A N  
P D V L L S M L E Y F L V M F I R Y P L A A P E E K R P S Y Q S R N E L Y G E S V Y F E L F Q E Y V R Y Y I P T N I P Q  
G A F N G F D I P Q R P S E I F V R T V I A L W M E G Q N Q P A P T N E A I K A L E D R R G P M S F D L N A S F D L V F  
S N Y K P L P N Q I I R C I H K V V T R V V S D G T I A D F V K E V S Q G Y K G S D P G I L C M S P T M T I F Q Q P F Y  
N H I R T V F R Y A S L H N Q S N V F Y S A F N D W L I W L E P W N T E Y P T R R T I G S M S R S Q S G T A S R S T Q I  
V Y P K A N Q R S K F K P F W E G Y I A S N L H F Y I V P L A L F L R R A R E L D F S P S L Y R R S M T T V Q K V L R V  
Y T P E V V S V I N R L L K E S K A D G Q S H S K F A V M V K N H E K N L G P Y A P P A V P L S L S S C Q D D M K N L L

EEISLQHFKKVEGLDFVSRTLASVFGSGAHLGEEKELQTLVNNAKIIVVDFDRDFEVGPRS  
KKYGTNATQGLGYGAPDRTAEGSFSNQGRNEVVGIVKCNPEDI SFMGDTMNAKVQSHEI  
GFLVHQSVQVSNFLNSILGLQDFNDECFGSDLFPRRINLRFLADYRNLMLFLCPLVW  
>comp12374\_c0\_seq1; 1737 284 5536 LEN=5570; translated  
MFGGSQTPFGSPAGGFGQPANSTPAFGTPAPAFGSAPAPGGFGGNTFGSTAANTGGFGSS  
GGFGAAPAPGGFGAAPAPAFGAPAPATGFGAPSPGGFGAPAASSPFGAPAPAPGGLFGSA  
PAPATGGLFGSTAAPTGGFGAPAPAAGGFGGGGAFGASTTPAFGVPAPSTGGLFGSAPA  
PATGGLFGSTPAPAPGGFGASSGGFGASPAPAFGAPAPATGMFGAPAAAAPSGGLFGAPAA  
PAGSGGTKIAAFQPAVRPDGTSQITLHSISAMQQYSTKSAEELRFEDYSLGNKGSAGAQT  
GAFGSPAAGAFGAPAPATSAFGAPAPAPGGLFGSAPAPATTGGFGAPAPATGAFGAPAA  
PAFGAAPAPATGAFGAPAPAFGAAPAPAGGLFGASAPAPAGGSLFGAPSPAPAGGLFGST  
PAPAPTSFGGFGTPAPAPAPAFGAAPAPTGSFLFGTPAPAPATGSFLFGAPAPAPAFGAAP  
TPAPAFGATTGAFGAPVPSTGLFGSTPAPAPAGGGLFGAAPAAPSI FGAPAPAPGSIFGA  
PAPPPAGPPQAAAPYAPPALGAVMPPAANEIMASQLAALESKRKEMEQNDNFRNKPAESS  
SVTALTLSESQSKRSTIVPTTPARISSYRASPMSNAKLRPRGFASPPSETNGNPIPQSLS  
KLGTTGGKMAAPETVAASSATRLIIAPSPKPKLKLTLGGGEKKVISNIPNTTTPRKANGSV  
LNGGLGSIKKVANTPEPVSTPQNFNTTAMDGSSDTPRDENLDRAQQYYQQTVDSSSENSAD  
TPGKNKKQTVAPTLKEGYSCHPSIDSLKQMEPADLAAVSNFCVARTGVGKVEWEGAVDV  
REANLDRIILIEPKSVSIYTEEEENGRKPEVGTCLNRPAILLTLEGVFPDPNDPDKFSRK  
VARVTKNMDAELLGYDPSTGEWIMRVKHFSTRYGLDDDDDDDEEMENKPTKQLKQYPENRE  
RRVDFRFGEREGRSPLSSKDGSKMARQDTPYKMKGGFILDGDSEEKEDQTMKTIDSMTE  
ASIMDEAEKAFIQMOTSLEAENAAVAMRKKIEKATATFSEEGISIAEEKGSLGTVRYIPD  
LKDLQEAESMPSSFSSRIVKSKSIATNKSSSIDFGLRMGRSFRVWSPNGSFLSLAKNSKR  
FLIRKRPKVEELNIPLKLEAHKMRVEEVHREGDCPLFSLPSRGLTNNSLKKTLETYS  
EVLKDKKGFGLSAYSLLQVFQETKMDNTANSQILAYGDARKPESHVNIENHCMSITRWF  
VETCSAEVQKEINQAGVSREKYRALLSAVSGDLSTATKIAEDENLFQLSILLASGPECR  
KDVVFQEVMAWRKQGI AQGMHENLSRIYRLISGDLGMEENIFKHSTKGSQNFWDKRRMVMK  
LMFAKPENSCKTLLSAITQYETDVSNGVAPFPFSAFYCDGHVESTLFRLRLRGTQAAALPSS  
ELSLSSVVDPSGYTSDRNNFVSFHLASSITSIYESASLTPEQECTLLDGYAFQLKSHGL  
WEWAVYVFLYVLSDNANQGPTWRIERAKDLVLQNYCDDGAENAKKRHFLEKLGKLPFSWFE  
EALSYSRSLGTSNRYGYIEHKLNVEITEGKILERTFVFNILFTNREDRDKVLALLEGLES  
SAETKSLTLAVLKFFDILYRIEELMASREEIDDSVPTLLKACEEIKHTFSSYKASEEKL  
VNHGLDIVPEKETVPMGSFLSEALYQTSHFELQILALKEGMGISSTASQMLKLIKSSQGVG  
NRENICRWLM

>comp12374\_c0\_seq2; 1737 277 5529 LEN=5563; translated  
MFGGSQTPFGSPAGGFGQPANSTPAFGTPAPAFGSAPAPGGFGGNTFGSTAANTGGFGSS  
GGFGAAPAPGGFGAAPAPAFGAPAPATGFGAPSPGGFGAPAASSPFGAPAPAPGGLFGSA  
PAPATGGLFGSTAAPTGGFGAPAPAAGGFGGGGAFGASTTPAFGVPAPSTGGLFGSAPA  
PATGGLFGSTPAPAPGGFGASSGGFGASPAPAFGAPAPATGMFGAPAAAAPSGGLFGAPAA  
PAGSGGTKIAAFQPAVRPDGTSQITLHSISAMQQYSTKSAEELRFEDYSLGNKGSAGAQT  
GAFGSPAAGAFGAPAPATSAFGAPAPAPGGLFGSAPAPATTGGFGAPAPATGAFGAPAA  
PAFGAAPAPATGAFGAPAPAFGAAPAPAGGLFGASAPAPAGGSLFGAPSPAPAGGLFGST  
PAPAPTSFGGFGTPAPAPAPAFGAAPAPTGSFLFGTPAPAPATGSFLFGAPAPAPAFGAAP  
TPAPAFGATTGAFGAPVPSTGLFGSTPAPAPAGGGLFGAAPAAPSI FGAPAPAPGSIFGA  
PAPPPAGPPQAAAPYAPPALGAVMPPAANEIMASQLAALESKRKEMEQNDNFRNKPAESS  
SVTALTLSESQSKRSTIVPTTPARISSYRASPMSNAKLRPRGFASPPSETNGNPIPQSLS  
KLGTTGGKMAAPETVAASSATRLIIAPSPKPKLKLTLGGGEKKVISNIPNTTTPRKANGSV  
LNGGLGSIKKVANTPEPVSTPQNFNTTAMDGSSDTPRDENLDRAQQYYQQTVDSSSENSAD  
TPGKNKKQTVAPTLKEGYSCHPSIDSLKQMEPADLAAVSNFCVARTGVGKVEWEGAVDV  
REANLDRIILIEPKSVSIYTEEEENGRKPEVGTCLNRPAILLTLEGVFPDPNDPDKFSRK  
VARVTKNMDAELLGYDPSTGEWIMRVKHFSTRYGLDDDDDDDEEMENKPTKQLKQYPENRE  
RRVDFRFGEREGRSPLSSKDGSKMARQDTPYKMKGGFILDGDSEEKEDQTMKTIDSMTE  
ASIMDEAEKAFIQMOTSLEAENAAVAMRKKIEKATATFSEEGISIAEEKGSLGTVRYIPD  
LKDLQEAESMPSSFSSRIVKSKSIATNKSSSIDFGLRMGRSFRVWSPNGSFLSLAKNSKR  
FLIRKRPKVEELNIPLKLEAHKMRVEEVHREGDCPLFSLPSRGLTNNSLKKTLETYS  
EVLKDKKGFGLSAYSLLQVFQETKMDNTANSQILAYGDARKPESHVNIENHCMSITRWF  
VETCSAEVQKEINQAGVSREKYRALLSAVSGDLSTATKIAEDENLFQLSILLASGPECR  
KDVVFQEVMAWRKQGI AQGMHENLSRIYRLISGDLGMEENIFKHSTKGSQNFWDKRRMVMK  
LMFAKPENSCKTLLSAITQYETDVSNGVAPFPFSAFYCDGHVESTLFRLRLRGTQAAALPSS  
ELSLSSVVDPSGYTSDRNNFVSFHLASSITSIYESASLTPEQECTLLDGYAFQLKSHGL

WEWAVYVFLYVLSDNANQGPTWRIERAKDLVLQNYCDDGAENAKKRHFLEKLGLPFSWFE  
EALSYSRLGTSNVIYGYIEHKLNVEITEGTKILERTFVFNILFTNREDRDKVLALLEGLS  
SAETKSLTLAVLKFFDILYRIEELMASREEIDDSVPTLLKACEEIKHTFSSYKASEEKL  
VNHGLDIVPEKETVPMGSFLSEALYQTSHFELQILALKEGMGISSTASQMLKLIKSGVVG  
NRENICRWLM

>comp12375\_c0\_seq1; 721 67 2864 LEN=2959; translated  
MTTKKTEQQEQLKDLPSFVKPSGAGHVSNTLTFESSIMLGSSTGNILHSFKQDGSSISVSV  
DTDSLTYGAQGELPSLP IPNLEETMNKLLLHLLEALQDDSGEYRDTKEVIKEFLSQGPPEL  
QKLLLEYDRGTGRATGAI GSYVEEFWSEAYLAPDASVVLNLPYFLLEESDPKLAGNQIQ  
RAANLCFASVKMASQLRHENLKPDTFKGRALCMGKWAYALNAVLCIVLLLNFVFLNVTMLL  
LLEPLQWVDQFRALFGASRVPKSHSSDTIAVYENSNHVAVMCCNQLFYFQALWPDGDVA  
VDEGLVDILDIAIWHVHAHRMETSDSKKEVQYVGNRRKSSEINKKKGHADLEEMKEGEQH  
YLNSVSAFGVLTSLCRKQWAQAREEMIKDSPTKNANSFKIVDSALFVLVLDLDDCAPKDKHE  
AASNMLHGSYELSEWRTENDAYTTEYQVGSCTNRWYDKLQI IVTADGGAGINFEHSAIDG  
HTALRFVSDIYADTVTSFAQSITKLVHAHKGLIPDIITANVRRAAVTLNDRGRPKLDVFP  
KKISFHLSDSIKRKIYFAETALGDQILASDTHILEFSDYGKLFITFNKLSPPSYVQMSMM  
LAYRRLYGKIVCAYEPVLTGKGFYHGRTEAMR PATMEAKQLCEVFCSSSSTSEEKLI ALRQ  
ATQVHSKLVKECAQKGVDRLH FALKCIANKHELVPPEFFRSEAWRKLNHTILSTSNCGN  
PSLAQFGFGPVPVDPGYGIGYI IKDSHLHYAICSKHRQTTRYALTLEGVLREMASLLKPI S  
QTKVHDSLLRGRSLKDLTSQNASCDSYSDIWGESSFRSLVGEAKPKVIHEGGENRWSAD  
VPGSKLDGSEITFDIEPDNHSSSSAVAAVEGNTKDNELIETPPLTTSTSDNTP IRPDRRR  
SSSIVGNGQVAAAIQLDDLMSMNSVDLENAK

>comp12375\_c0\_seq2; 770 67 2757 LEN=2852; translated  
MTTKKTEQQEQLKDLPSFVKPSGAGHVSNTLTFESSIMLGSSTGNILHSFKQDGSSISVSV  
DTDSLTYGAQGELPSLP IPNLEETMNKLLLHLLEALQDDSGEYRDTKEVIKEFLSQGPPEL  
QKLLLEYDRGTGRATGAI GSYVEEFWSEAYLAPDASVVLNLPYFLLEESDPKLAGNQIQ  
RAANLCFASVKMASQLRHENLKPDTFKGRALCMDQFRALFGASRVPKSHSSDTIAVYENS  
NHVAVMCCNQLFYFQALWPDGDVA VDEGLVDILDIAIWHVHAHRMETSDSKKEVQYVGNRR  
KSSEINKKKGHADLEEMKEGEQH YLNSVSAFGVLTSLCRKQWAQAREEMIKDSPTKNAN  
SFKIVDSALFVLVLDLDDCAPKDKHEAASNMLHGSYELSEWRTENDAYTTEYQVGSCTNRWY  
DKLQI IVTADGGAGINFEHSAIDGHTALRFVSDIYADTVTSFAQSITKLVHAHKGLIPDI  
ITANVRRAAVTLNDRGRPKLDVFPKKISFHLSDSIKRKIYFAETALGDQILASDTHILEF  
SDYGKLFITFNKLSPPSYVQMSMMLAYRRLYGKIVCAYEPVLTGKGFYHGRTEAMR PATME  
AKQLCEVFCSSSSTSEEKLI ALRQATQVHSKLVKECAQKGVDRLH FALKCIANKHELVP  
PEFFRSEAWRKLNHTILSTSNCGNPSLAQFGFGPVPVDPGYGIGYI IKDSHLHYAICSKHR  
QTTRYALTLEGVLREMASLLKPI SQTKVHDSLLRGRSLKDLTSQNASCDSYSDIWGESS  
FRSLVGEAKPKVIHEGGENRWSADVPGSKLDGSEITFDIEPDNHSSSSAVAAVEGNTKDN  
ELIETPPLTTSTSDNTP IRPDRRRSSSIVGNGQVAAAIQLDDLMSMNSVDLENAK

>comp12375\_c0\_seq3; 661 295 3110 LEN=3205; translated  
MTTKKTEQQEQLKDLPSFVKPSGAGHVSNTLTFESSIMLGSSTGNILHSFKQDGSSISVSV  
DTDSLTYGAQGELPSLP IPNLEETMNKLLLHLLEALQDDSGEYRDTKEVIKEFLSQGPPEL  
QKLLLEYDRGTGRATGAI GSYVEEFWSEAYLAPDASVVLNLPYFLLEESDPKLAGNQIQ  
RAANLCFASVKMASQLRHENLKPDTFKGRALCMDQFRALFGASRVPKSHSSDTIAVYENS  
NHVAVMCCNQLFYFQALWPDGDVA VDEGLVDILDIAIWHVHAHRMETSDSKKEVQYVGNRR  
KSSEINKKKGHADLEEMKEGEQH YLNSVSAFGVLTSLCRKQWAQAREEMIKDSPTKNAN  
SFKIVDSALFVLVLDLDDCAPKDKHEAASNMLHGSYELSEWRTENDAYTTEYQVGSCTNRWY  
DKLQI IVTADGGAGINFEHSAIDGHTALRFVSDIYADTVTSFAQSITKLVHAHKGLIPDI  
ITANVRRAAVTLNDRGRPKLDGGVLLRSLIRFDXDPMMRCFAIFVDLLVFNXDVDFHFLT  
PLAVFPKKISFHLSDSIKRKIYFAETALGDQILASDTHILEFSDYGKLFITFNKLSPPSY  
VQMSMMLAYRRLYGKIVCAYEPVLTGKGFYHGRTEAMR PATMEAKQLCEVFCSSSSTSEEK  
LI ALRQATQVHSKLVKECAQKGVDRLH FALKCIANKHELVPPEFFRSEAWRKLNHTILS  
TSNCGNPSLAQFGFGPVPVDPGYGIGYI IKDSHLHYAICSKHRQTTRYALTLEGVLREMAS  
LLKPI SQTKVHDSLLRGRSLKDLTSQNASCDSYSDIWGESSFRSLVGEAKPKVIHEGGE  
NRWSADVPGSKLDGSEITFDIEPDNHSSSSAVAAVEGNTKDNELIETPPLTTSTSDNTP I  
RPDRRRSSSIVGNGQVAAAIQLDDLMSMNSVDLENAK

>comp12375\_c0\_seq4; 770 295 2985 LEN=3080; translated  
MTTKKTEQQEQLKDLPSFVKPSGAGHVSNTLTFESSIMLGSSTGNILHSFKQDGSSISVSV  
DTDSLTYGAQGELPSLP IPNLEETMNKLLLHLLEALQDDSGEYRDTKEVIKEFLSQGPPEL  
QKLLLEYDRGTGRATGAI GSYVEEFWSEAYLAPDASVVLNLPYFLLEESDPKLAGNQIQ  
RAANLCFASVKMASQLRHENLKPDTFKGRALCMDQFRALFGASRVPKSHSSDTIAVYENS



NHVAVMCCNQLFYFQALWPDGDVAVDEGLVDILDIAIWVHAHRMETDSKKEVQYVGNRR  
KSSEINKKKGHDADLEEMKEGEQH YLNSVSAFGVLTSLCRKQWAQAREEMIKDSPTKNAN  
SFKIVDSALFVLVLDLDDCAPKDKHEAASNMLHGSEYELSEWRTENDAYTTEYQVGSCTNRWY  
DKLQIIVTADGGAGINFEHSAIDGHTALRFVSDIYADTVTSFAQSITKLVHAHKGLIPDI  
ITANVRRAAVTLDNRRGRPKLDVFPKKISFHLSDSIKRKIYFAETALGDQILASDTHILEF  
SDYGKLFITFNKLSYVQMSMMLAYRLYGKIVCAYEPVLTGKGFYHGRTEAMRPATME  
AKQLCEVFCSSSSTSEEKLIALRQATQVHSLVKECAQKGVDRLHFALKCIANKHELVP  
PEFFRSEAWRKLNHTILSTSNCGNPSLAQFGFGPVVDPDGYGIGYIIKDSHLHYAICSKHR  
QTTRYALTLEGVLREMASLLKPISTKVHDSLLRGRSLKDLTSQNASCDSYSIDIWGESS  
FRSLVGEAKPKVIEGGENRWSADVPGSKLDGSEITFDIEPDNHSSSSAVA AVEGNTKDN  
ELIETPPLTTSTSDNTPIRPDRRRSSSIVGNGQVAAAQQLDLSMMSNSVDLENAK

>comp12375\_c0\_seq5; 612 67 2989 LEN=3084; translated  
MTTKKTEQQEQLKDLPSFVKPSGAGHVSNTLTFESSIMLGSSTGNILHSFKQDGSISVSV  
DTDSLTYGAQGELPSLPINLEETMNKLLHLEALQDDSGEYRDTKEVIKEFLSQGPPEL  
QKLLLEYDRTGRATGAI GSYVEEFWSEAYLAPDASVVLNLPYFLLEESDPKLAGNQIQ  
RAANLCFASVKMASQLRHENLKPDTFKGRALCMGKWAYALNAVLCIVLLLNFVFLNVTMLL  
LLEPLQWVDQFRALFGASRVPKSHSSDTIAVYENSNHVAVMCCNQLFYFQALWPDGDVA  
VDEGLVDILDIAIWVHAHRMETDSKKEVQYVGNRRKSSEINKKKGHDADLEEMKEGEQH  
YLNSVSAFGVLTSLCRKQWAQAREEMIKDSPTKNANSFKIVDSALFVLVLDLDDCAPKDKHE  
AASNMLHGSEYELSEWRTENDAYTTEYQVGSCTNRWYDKLQIIVTADGGAGINFEHSAIDG  
HTALRFVSDIYADTVTSFAQSITKLVHAHKGLIPDIITANVRRAAVTLDNRRGRPKLDGGV  
LLRSLIRFDXDPMMRCFAIFVDLLVFNXDVDHFLTPLAVFPKKISFHLSDSIKRKIYFA  
ETALGDQILASDTHILEFSDYGKLFITFNKLSYVQMSMMLAYRLYGKIVCAYEPVLT  
TKGFYHGRTEAMRPATMEAKQLCEVFCSSSSTSEEKLIALRQATQVHSLVKECAQKGKGV  
DRHLFALKCIANKHELVPPEFFRSEAWRKLNHTILSTSNCGNPSLAQFGFGPVVDPDGYGI  
GYIIKDSHLHYAICSKHRQTTRYALTLEGVLREMASLLKPISTKVHDSLLRGRSLKDL  
TSQNASCDSYSIDIWGESSFRSLVGEAKPKVIEGGENRWSADVPGSKLDGSEITFDIEPD  
NHSSSSAVA AVEGNTKDNELIETPPLTTSTSDNTPIRPDRRRSSSIVGNGQVAAAQQLD  
LSMMSNSVDLENAK

>comp12375\_c0\_seq6; 721 295 3092 LEN=3187; translated  
MTTKKTEQQEQLKDLPSFVKPSGAGHVSNTLTFESSIMLGSSTGNILHSFKQDGSISVSV  
DTDSLTYGAQGELPSLPINLEETMNKLLHLEALQDDSGEYRDTKEVIKEFLSQGPPEL  
QKLLLEYDRTGRATGAI GSYVEEFWSEAYLAPDASVVLNLPYFLLEESDPKLAGNQIQ  
RAANLCFASVKMASQLRHENLKPDTFKGRALCMGKWAYALNAVLCIVLLLNFVFLNVTMLL  
LLEPLQWVDQFRALFGASRVPKSHSSDTIAVYENSNHVAVMCCNQLFYFQALWPDGDVA  
VDEGLVDILDIAIWVHAHRMETDSKKEVQYVGNRRKSSEINKKKGHDADLEEMKEGEQH  
YLNSVSAFGVLTSLCRKQWAQAREEMIKDSPTKNANSFKIVDSALFVLVLDLDDCAPKDKHE  
AASNMLHGSEYELSEWRTENDAYTTEYQVGSCTNRWYDKLQIIVTADGGAGINFEHSAIDG  
HTALRFVSDIYADTVTSFAQSITKLVHAHKGLIPDIITANVRRAAVTLDNRRGRPKLDVFP  
KKISFHLSDSIKRKIYFAETALGDQILASDTHILEFSDYGKLFITFNKLSYVQMSM  
LAYRLYGKIVCAYEPVLTGKGFYHGRTEAMRPATMEAKQLCEVFCSSSSTSEEKLIALRQ  
ATQVHSLVKECAQKGVDRLHFALKCIANKHELVPPEFFRSEAWRKLNHTILSTSNCGN  
PSLAQFGFGPVVDPDGYGIGYIIKDSHLHYAICSKHRQTTRYALTLEGVLREMASLLKPIST  
QTKVHDSLLRGRSLKDLTSQNASCDSYSIDIWGESSFRSLVGEAKPKVIEGGENRWSAD  
VPGSKLDGSEITFDIEPDNHSSSSAVA AVEGNTKDNELIETPPLTTSTSDNTPIRPDRRR  
SSSIVGNGQVAAAQQLDLSMMSNSVDLENAK

>comp12375\_c0\_seq7; 612 295 3217 LEN=3312; translated  
MTTKKTEQQEQLKDLPSFVKPSGAGHVSNTLTFESSIMLGSSTGNILHSFKQDGSISVSV  
DTDSLTYGAQGELPSLPINLEETMNKLLHLEALQDDSGEYRDTKEVIKEFLSQGPPEL  
QKLLLEYDRTGRATGAI GSYVEEFWSEAYLAPDASVVLNLPYFLLEESDPKLAGNQIQ  
RAANLCFASVKMASQLRHENLKPDTFKGRALCMGKWAYALNAVLCIVLLLNFVFLNVTMLL  
LLEPLQWVDQFRALFGASRVPKSHSSDTIAVYENSNHVAVMCCNQLFYFQALWPDGDVA  
VDEGLVDILDIAIWVHAHRMETDSKKEVQYVGNRRKSSEINKKKGHDADLEEMKEGEQH  
YLNSVSAFGVLTSLCRKQWAQAREEMIKDSPTKNANSFKIVDSALFVLVLDLDDCAPKDKHE  
AASNMLHGSEYELSEWRTENDAYTTEYQVGSCTNRWYDKLQIIVTADGGAGINFEHSAIDG  
HTALRFVSDIYADTVTSFAQSITKLVHAHKGLIPDIITANVRRAAVTLDNRRGRPKLDGGV  
LLRSLIRFDXDPMMRCFAIFVDLLVFNXDVDHFLTPLAVFPKKISFHLSDSIKRKIYFA  
ETALGDQILASDTHILEFSDYGKLFITFNKLSYVQMSMMLAYRLYGKIVCAYEPVLT  
TKGFYHGRTEAMRPATMEAKQLCEVFCSSSSTSEEKLIALRQATQVHSLVKECAQKGKGV  
DRHLFALKCIANKHELVPPEFFRSEAWRKLNHTILSTSNCGNPSLAQFGFGPVVDPDGYGI

GYIIKDSHLHYAICSKHRQTTRYALTLEGVLREMASLLKPI SQTKVHDSLLRGRSLKDL  
TSQNASCDSYSDIWGESSFRSLVGEAKPKVIEGGENRWSADVPGSKLDGSEITFDIEPD  
NHSSSSAVA AVEGNTKDNELIETPPLTTSTSDNTP IRPDRRRSSSIVGNGQVAAAIQLDD  
LSMMSNSVDLENAK

>comp12375\_c0\_seq8; 661 67 2882 LEN=2977; translated  
MTTKKTEQQEQLKDLPSFVKPSGAGHVSNTLTFESSIMLGSSTGNILHSFKQDGSSISVSV  
DTDSLTYGAQGELPSLP IPNLEETMNKLLLHLLEALQDDSGEYRDTKEVIKEFLSQQPPEL  
QKLLLEYDRTGRATGAIGSYVEEFWSEAYLAPDASVVLNLPYFLLEESDPKLAGNQIQ  
RAANLCFASVKMASQLRHENLKPDTFKGRALCMDQFRALFGASRVPKSHSSDTIAVYENS  
NHVAVMCCNQLFYFQALWPDGDVAVDEGLVDILDAI WVHAHRMETSDKKEVQYVGNRR  
KSSEINKKKGHADLEEMKEGEQHLYNSVSAFGVLTSLCRKQWAQAREEMI KDSPTKNAN  
SFKIVDSALFVLVLDCCAPKDKHEAASNMLHGSYELSEWRTENDAYTTEYQVGSCTNRWY  
DKLQIIVTADGGAGINFEHSAIDGHTALRFVSDIYADTVTSFAQSITKLVHAHKGLIPDI  
ITANVRRAAVTLDNRRGPKLDGGVLLRSLIRFDXDPMMRCFAIFVDLLVFNXDVDHFLT  
PLAVFPKKISFHLSDSIKRKIYFAETALGDQILASDTHILEFSYDGKLFITFNKLSPDSY  
VQSMMLAYRYLYGKIVCAYEPVLTGKGFYHGRTEAMRPATMEAKQLCEVFCSSSSTSEEK  
LIALRQATQVHSLVKECAQGKGVDRHLFALKCIANKHELVPPEFFRSEAWRKLNHTILS  
TSNCGNPSLAQFGFVVPDGYGIGYIIKDSHLHYAICSKHRQTTRYALTLEGVLREMAS  
LLKPI SQTKVHDSLLRGRSLKDLTSQNASCDSYSDIWGESSFRSLVGEAKPKVIEGGE  
NRWSADVPGSKLDGSEITFDIEPDNHSSSSAVA AVEGNTKDNELIETPPLTTSTSDNTP I  
RPDRRRSSSIVGNGQVAAAIQLDDLSMMSNSVDLENAK

>comp12376\_c0\_seq1; 472 99 1628 LEN=1682; translated  
MASNIQVTTPSIKDTTKLERIGTHSHITGLGISETLEDLSGAATGGNPSLSRSSSSSTPG  
SGLIGQVKARKAMGLVYKLIQHKGIGGRAILLAGPPSSGKTALAMGLAQQLGSDGNNSKS  
DTDSSNDVPFCSLSATEIFSLEVSKTEALTQAIRRSMGVRIVEEQEVMEGEVVEIQIDTL  
AGGGGKVGKTGRLTLCCTDMETIYDLGTMKIERLTQERV TAGDVIRIDKATGKISKLGRS  
VSRSRDYDAMGSNTKFVQCPEGELQKRTTVTHTVTLHEIDVINSRQQGFALFTGDTGEI  
SETVRNQIDAKVDEWKTEGRATLVPGVLFIDEVHMLDMDCF SFLNRAMESDLCP I VILAT  
NRGIAAIRGTNFRGPHGIPLDLLDRLLI IPTIPYSIDELRGILRVRCTEENVDMTDDALE  
LLTRIANETTLRYAIQMITTSFLVAKKRKSKQVQVAHIERCHKLFFDVQRSTRFIMEYQD  
QFLFHELEDDQKHSGATKVEETKENKMEE

>comp12377\_c0\_seq1; 619 89 1648 LEN=1784; translated  
MTEGKKVFLAREFFDLVDEHKTMMIEELAKAVSISSVSAQLDQHLDDIEMMEWTNSYIQ  
RLGGSTTMVNPPLTTSERPLPPILLGEFKTNDPSKKTVCVYGHLDVQPAAI EDGWDTPF  
VLTEKDGKLFGRGSTDDKGPALSWLWIIYLHQKLGVDLPVNIKILYEGMEESGLGIFEL  
IQSEGKPGKFLDDVDFFCISDNYWLGTKPKCLTYGLRGLAYFELSVEGSTKDLHSGVLGG  
TVFEPMTDLISLMTLVESSSGKILVPGVYDSVAPVTP EEEALYETIDFDLESFKEENGI  
KSIDKLLCHDKNLLMNRWRNPTLSLHGIEGAFSGKGAKTVISKKVIGKFSRLRVPDQD  
PQKIEELVRNHLQKEFLKLOSPNKMNLELHHGAHPWLSDPKHPNF EAAAKAIEIVYDGVK  
PDYTRGGSIPIASALENATGMNVLLLP I GACDDGAHSQNEKYNVVNLNNGVKVLGVYLH  
QLGKVEGPKPSSCKPLLTDEELMIPGAFVVRGFACKCVM

>comp12378\_c0\_seq1; 416 56 1129 LEN=1581; translated  
MTTAGVFGGNQRHKKSSLAMAVLAGLLLVTLAFVWVQMLFIEGMVLRSPELVATGLQHA  
RKDDPNRVSLDAPGDKARQASDP AKRDTE SKLRAERANKPKRPSMTSAIFDENQWKDRSK  
LIADVAGVVPNSCGYSIGLKNLTQEELHPVAGKRHMITPPKGGKLSLVCCETTGNLAMV  
AHRWAPLGAKLFLEMVTSGYFDSTVPMRCLKGFLCQFGLNSDPEVSKKFGGSIQDDPN  
WLPPEGNFRENKDGVMRFAGYLA YAGGGKNTGRGNQLIMSLEANGPLAGGSPWEVWPWEL  
VGKESFVTL SKLYTGYGEDGPSQKGLHNRGMDEDMRKEFPKIDYINSCVLVDEMETS

>comp12379\_c0\_seq1; 1246 187 5406 LEN=5676; translated  
MASRNNPGSPAALTI PGSSSLGTSNTATTPQQYHKTPRGGNSRSLAAPLVSAACKHLLQP  
NGSIKGSVAAAVLPHFDDLCSAFPVESFGDRNALYGV DGKRRPITHTRIRDFILNEFGP  
TLHEYGIGRGQRIALVLPNGPELALSILACAHWASCVPLNANGAISELKKDLQASRAKMI  
IGMAGMAGESPSDDLRALQDMARALNIPFYGMVPSNEEVGIFRIIPMSLPSKVPLDVANQ  
ANAAYEENIMLIQRADSDTE DASCCTTMSKPPRLQVNYNHHLERLATYNFLSNDHEDE  
VLVLF TSGTTGNKKLVPHKLGDMI IAAAVI AVSWNL SHEDINCNL MPLFHVGGIVRQVFA  
PILSAGSVICCP SFD AHLFWQLLSQHPSQPRSSDGVVTVLGENNHTSTLPASFTWY YAA  
PTMHQVILANLPRNDDDETT PPPFTKTADGAERHLRMIANAAGLLPSLANELRNTFGA  
NVLP SYGMTECMP I SSPYNYELTKPGTSGVAVGPEICIFNNNMKSMPPNKEGNICVGRG  
PCFRGYGAVGAVLGGGHNHKVPRALGQGGWFNTGDLGYLDEDEGYL FITGRSKEVINRGG E  
IISPLEVEEEEIVQHPSILACAAFSAPHDVLQEA VGIVLVHKPGCRRLDLPTLHIFLQEKL

APAKWPQCMVYMNALPKSHTNKLRLVKGQRLNLPPELHDGMAPVERTFEATCPPQGTLVG  
VSIPISENITVDLEIYIQGTLRRELQVPEDVQVDEEFDVAVKLEQSSSAQKQLIVTAHPSRIG  
SVSVHVRNVC PKAVIQT SERVF DAYLRPSHVCSYSDEISLQNIKKYPEPTDAVMCILRGD  
VAKRIITDPMVREIQELVQQLIDLDCLPAYDSSFFHVGGSSLLASQLASQIRKKYSCDFS  
GTDIFRHNTCLGMAQHIQRQKGMCSDNISLQSSSLSNNDGGQSRKQCPVDLQONAPLD  
SKLLVPETGIFTRFLQVPSLLIFPLYQFTRFFLFFMSLLLILQRVPGERNIYKFILTLV  
GFHFFWTLVTPLI FVLIKWAVIGKYKEGRYPIWGSYYLRWWFVDVCRKIIIGRGVWGTSNW  
TLCMYFRILGATIGAGAHISVDAEIAEFDLVTIGNGAKIEYSTVRGFGLDRGAMIMGPVC  
VDDWASIGVRSV VAPYTKVPTNAHVGP GTSSYEITHNDDRHVHYNRYAVPEPAWWMQVFV  
CHPVMFFVNTF SHLPAMYVLYLVKMHYQVHDEGFSTMGDLMEWLCEPRRIPIYYILIRIA  
RSTVAPYFYMAAAIFTKKCVIGKFKPGPRDITSQWTLARHFLSATLFSRENMQQMTDMLG  
RHFEPVSCLYRLLGAKIGKRVFWPGNQPVFTGEFDLLEVGDDVVFGSRSVILTSTLDTSE  
KVI FCAGSNISDNTIVLPGAIGKNAVLGSNTVCPAGRYLPEASIIYLGSRGGEPMVLEPG  
TEANAKEVMLSVD MKEKDL SFEGDETTIRPFGRATARGEANYFVFPYLMIMYRCLCNII  
FAMVHSFPLLAALHITGGLLYGWQLAGRYDDELYNGLQLYATMFGIFIFTHAIRTMLCF  
AIEISAKWFFVGLRSEGRFNWHE SKYGQNWEFYQVIGQVRKINRIMVTDLLAGTPYMSMY  
YRALGSKIGKDCCLYPAGADPQMPEPDLVTLGDRCLVDVASIVSHLNTRGNFELVRIVIE  
DDVTLRTRSRIQQGVRMETGSMLEKTLAMTGEVIDAQSVWQGAPARQVHSYELGSSMV  
>comp12380\_c0\_seq1; 591 120 2099 LEN=2223; translated  
MVNEGDANAGDNNHGHGTDADKEIYISDHSRSMRNAYDHC IKLFCGLEATNEKNSPPCD  
TSTGTTKSTTRPIHRTNRTLQTL LKHRYDNVYNNIGIDFEEHRNRREEAYRNFWSPPAP  
FAATDQSAARSI AISSDVATEPNTPVSP TTIETMWVQLANDYRNPDGQQT AICPNQVRYF  
QDRFQDLNIPCLIKGLDRLPHYEYVNQKWRIESSRTGSSGGEKTDQYDLFAQNQQRLHAN  
NQEENTVAKVNRQWFRDELGENLLVPLRYIPPNDDDAPS YGTLNSALMLDEDGRAVECET  
QEVSMKEWIDSLEQMDQNRQAGGVKPKDGARPRDDNNIQGYFKGGGLNTTIYYLKDWHLQ  
QQFPSKLSKPPCSDS DIPSLVSRSNLSCES SLYRCEFFGHDL LNSFLIRFTKGDYRFCYW  
GPPRSFTARHSDVLHSFSWSYNVVGTKKWTFCYCNEDSNLDGKMNELDSEDTNTCEEKTK  
TFSIVQESGQTI FVPATWQHVVNLEETISINHNWITSSNLDLVWDCLGVEMAAIQKELI  
GWGSGMDENMEACENMLRGCLGLDVT SFVLMTLVRVLEIYVVLVFEEDGGSLIAEDQERE  
RLFFDLFLLTSVLRDVLATKDDLQLKNRFSAVLESNDLAQNLQSMVESVIDWEKVLNI  
>comp12381\_c0\_seq1; 413 72 1223 LEN=1400; translated  
MMIYFRVFNLITIVLLVAVKVTAEKDCLEDPPEPILVEAIGNVDGSEDCLNDAIRIVAS  
ATDSESGINYVTFVTNQLWKKEGTPMLS VSYPPGGYQGECECDMQTGDGDAAGLITFNSTR  
EYTAQC SHGYAEVGVYLFVGD SNDFDIEECESCAVPNADYTGYLRLSCDRICEEAVDED  
MPSDRLTY PPTQGFEEPELLASLDPKVEEAI SEDPFPSCPEDIALERQYGR TDFSVNQA  
IQILSKDTSTVTIKLTEAWMGENAPRTNIDHIFISYKTSMFSTHCYEFDDVPLGDVIEEE  
LTITCNVLKPRAFLTICVADALAHGVLGMADDAKVPKCCQPSFPDP TPVVCYSL LINCET  
ECIDESQRRKLSSPTKGFLRSGR  
>comp12382\_c0\_seq1; 640 218 1906 LEN=2216; translated  
MAYGKQKLGTVNAPVDVQDVEANETQA AHNQFPPPSELIERERSAYS L DGRSLIVPDYGD  
VDDMSSLGTSKYTYRGDVNNAEYIGDMRIVGKGDHKELGNS SKSALENKLSRVEKNSGIQ  
YGGYDEQNETAPLERKTKGKKNFTSQPVQVKGHEDEIPKTSGCCPRWINKAPLWLKLI I I  
SSLALIIGA AVLIVVGLK LSTAPSSLVESESSSGTTSPPVYVSLETEAPEQYQIPTTLNP  
IHVPSTPPTKAVVANAEPSSNTPVVL DVSTTSPT SAPTTAPSN AVTQSPTLSTINFYIMG  
GRFDGDDGKILVNLKTLPNMDGNTVLFH LGDFNSPYATSCVENSFVNNVNNYQQSSVPV  
YFVPGDNEYNDPCNPTEALGFWKQYLLDFESKHWSKPSWEVQRQTPDYSENFAFLQREVL  
FVGINLVGGIVHNSEEW NARHEADLQW IQSRAANFYGN YTTMVVLAHADPDIVINDYFFR  
GFYSMVESLEERVIFLHRNLGVDTWNSEAGYNGIPNL DVVAVEGSTWPPMWMQIDPISGS  
YNIDQFSWHSEYITTGKLNQYP  
>comp12384\_c0\_seq1; 418 144 1187 LEN=1330; translated  
MRPYLLQGHERPITVVKYNHDGDL LFSASKDQVPCIWRV ENGERIGTFHGHKGTIWDLDP  
DRFSNHLLTASADATVKMWSCETGELLKTFVHRGPVRGVAWSDDNKLFASISDPFVEHNA  
KISVDFSRDGE GIDGETIEPVLEIDVPKENNKRVM TNIWWTYLNEHLLVAFDNGLIRLY  
DPNTGDI EDEFRAHEKKINRLQMNREKTMFITSSADFTSKLYDAVNLKHLKTYTTDRPVN  
DAVISETKDHILLGGGQEAMSVTTTSGKVGK FETRFFWL VYEEEFGTVKGHFGPINAIAI  
NPNGRNYASGAEDGYVRLHMF DKS YLDMKDPVPEAEESVDDDADA E  
>comp12384\_c0\_seq2; 466 205 1423 LEN=1566; translated  
MTPPTKTTRQPRKHKRKNKNKHKHKS KHNHETTMQQPANQKLENP TRITYNTNTQTQR  
PYLLQGHERPITVVKYNHDGDL LFSASKDQVPCIWRV ENGERIGTFHGHKGTIWDLDPDR  
FSNHLLTASADATVKMWSCETGELLKTFVHRGPVRGVAWSDDNKLFASISDPFVEHNAKI

SVFDSRDGEGIDGETIEPVLEIDVPKENNKRVMQMTNIWWTYLNEHLLVAFDNGLIRLYDP  
NTGDI EDEFRAHEKKINRLQMNREKTMFITSSADFTSKLYDAVNLKHLKTYTTDRPVNDA  
VISETKDHILLGGGQEAMSVTTTSGKVGKFETRFFWLVEEFGTVKGFHGPINAIAINP  
NGRNYASGAEDGYVRLHMFDKSYLDMKDPVPEAEESSVDDDADAE

>comp12385\_c0\_seq1; 348 177 1235 LEN=1429; translated  
MADQNGTSEASPLLEKSDAVGTDTTDMLTETESVPAGDEDDNDNSTTYSEEPATKKRSK  
KKKKKSKTLKLTQTAFQLEREVSKSLAKHNLAQAQLACRHFWI FTVPQAVLTCVSSILA  
FVSTSDLLTPYHKTLCGLIVGSTSGVVVFLQTMMSGICNYGARAAMHQGVAIDLRLRDDL  
VLLRHKLASLQKQEKRQKEAQCGLGNTTAAQSSKSDQNDDEDDDDTDDHGTSTFDSIRNR  
YQQLTACKSVIPMELLESEFSGLESNLHIAKSQQNMTHMYGVYGHIDFDDYLETKAYDIL  
AGEILNAYNFPLRLPHSKRVVQSMERLKFQLVKYQNFWPDPQQVIEEVV

>comp12387\_c0\_seq1; 390 279 1089 LEN=1135; translated  
MLGGNSRDEDDYDEDDYFDDYDEDDYDRRPRRRRRRGNNGPRDEYGEDQLDDLGYNRRN  
EDGFLNIPSSFGQRDGRWLPDAVSKSLLAGIFILGVGLGVTVD SAINTNPRDLASRDAID  
QAAFN SKLCADM GASAMAFDQRFVFSFNPFNVYVAQADV KPACVLRQANVVPVLKNKKLI  
NDKEVAGCKANMNTWAFVGDLDNTPQLSCVYKSEDAQNEFLSNPKFGIGEDYLLDDDRAMN  
NNIKKIKDGMTDAQMELRKRAAEVPGLD

>comp12388\_c0\_seq1; 526 128 1402 LEN=1402; translated  
MIPANKRRTLIPLWFSVIWCRKLLLETFAYESSSSSSSSPRKPLFHVAPMQCYTNSQTRKL  
FDMLSPSSIKWTEMEKMDDIYPRTESIDYMLDALEKRLGPPGDHHD TTNLVLQLGTNDPE  
RLQTCVEQTLRHYNIGEINLNCGCPAIESGGASTYGASLMKDARLTGQLVESVRKGLER  
TESLR TTKPRVSVKCRIVAFD TDKDMRPLTEGDYEALKEYASTIREHGADHTILHARPAV  
LSGLSPVKNRIVPTLDYGFVERIASDFEGEMDVTLNGGIT TLEQLESLSRGEDGTAISGY  
MAGRWCLRRPLDLVGIEDSLEGR TGCDASLSLLVGAIEQYVDDAIEMLGSSSQRHKPTAA  
DICLPLFLVVEQLRDDYDYEDEESEVPPPLLYAEMESLYDVLQESVAQIEGLCGSGKK  
KKKKK

>comp12389\_c0\_seq1; 689 49 1767 LEN=1767; translated  
MSSFMDGWDGDEDLNISDSIADSGDGLVDDGNI EPTANRIGDGWGDDDDFFNDSTDEG  
LPPAVPAAPSTESMTVPVTSFDTNMDPKGNEKEALGATSTQGFQNRNIIPPTPHHAQTET  
NQN PQHSQTLTEL SHYVASLERILSSINAVLEFEYNTFQKAEELVEYRSRPLAEYTRT  
KELERMNYEIVLPNGHVETNKDKIVIDDLLPDHAIVSRAANQSL LADLLQVITGHDLIVR  
PQYFTVCVATWCKFTIHKGDNGADIIDCRAKLSLSLPTEEGDRLLIAEVDV CVLFSFGQP  
MVEFTV RGINVLLKDYSKLAGVAEFLKAI EGSNEDDEL TNASPD MYRDAFLERSQRLFS  
LSSEGMSAFQQVDSVVNIKGLKLISSFI PDTDQLLQAEQEAIAFAEARKEELQKHQHS  
VASLGRPTPPPRTSNTQFDQPYENATHGKDAERP KSI LGGVRS GWKTLANSVTL PDDD  
PLIYGEPAPPPPKVPLYNKPIESAHMHRKEVIVETVTSNLLCTKGDTRLQDGNFQKQNN  
PSK LKAPHIDHNREGHSDKASEDNGFYEDNEKG

>comp12389\_c0\_seq3; 884 49 2214 LEN=2620; translated  
MSSFMDGWDGDEDLNISDSIADSGDGLVDDGNI EPTANRIGDGWGDDDDFFNDSTDEG  
LPPAVPAAPSTESMTVPVTSFDTNMDPKGNEKEALGATSTQGFQNRNIIPPTPHHAQTET  
NQN PQHSQTLTEL SHYVASLERILSSINAVLEFEYNTFQKAEELVEYRSRPLAEYTRT  
KELERMNYEIVLPNGHVETNKDKIVIDDLLPDHAIVSRAANQSL LADLLQVITGHDLIVR  
PQYFTVCVATWCKFTIHKGDNGADIIDCRAKLSLSLPTEEGDRLLIAEVDV CVLFSFGQP  
MVEFTV RGINVLLKDYSKLAGVAEFLKAI EGSNEDDEL TNASPD MYRDAFLERSQRLFS  
LSSEGMSAFQQVDSVVNIKGLKLISSFI PDTDQLLQAEQEAIAFAEARKEELQKHQHS  
VASLGRPTPPPRTSNTQFDQPYENATHGKDAERP KSI LGGVRS GWKTLANSVTL PDDD  
PLIYGEPAPPPPKVPLYNKPIESAHMHRKEVIVETVTSNLLCTKGDTRLQDGNFQKQNN  
PSK LKAPHIDHNREGHSDKASEDNGFHEDNEKGI PDNNSAGLHQPPVSVESTKIKITDI  
QCSDNEAEQCTKGEKPTRFDEETNKLEPDNSSDGDGWD DFGFDDSSYD VDNNGVGDHDL  
SKSSTMQEQEVQTFVPPPDETKVDPLPVATMV DENRERGDGNIETRKRWVNPRPYRPIK  
G

>comp12390\_c0\_seq1; 240 193 1038 LEN=1511; translated  
MTNHRQEIETSCRETTSKQRRETEHKKSSKLLKQKPYFQKSYRRET PGDALAPRIK  
FKSVLAQPFSLWNEIEEIVSEFLVDFSTQSRSI IKNLIRFLELKVMMGEYKPSGLLSPT  
EAVAHVWHVLI L ETELYRDVYAIQDFHARPHRFIHHALFRKYHTNEYDQLERTQRLFK  
SYYGTEMPAVLWKEVDSHGPNVDLPTSVIVEDTSVVTGTMAETFPDEKSPKWAYPWL PSC  
HCFGVFEDALCGRKENRNYEEIYVQGENVSLSTPRGLAYE

>comp12391\_c0\_seq1; 534 151 1767 LEN=2022; translated  
MACCKSLLARRIVLWYIILGSI VILPLTFNASMGRFVTISGEDQSQSLGAFNFVYDGE  
EVGGGSNNFLGCVSNSEFWKQETSNDIGFLANRIASALLLAFTVLATI ICTCLQCF SKHG

KSHLWNVMRVLYLGAMVVSQGAMYIVFASDLCTGGDGTQLCFVGTGIVGMFNFVLLFGM  
VVATFNSLPPRNPVFQCWGSDADYESSDDGGSTEEEEDEVMRKFKSFGEAGHSASISAVEN  
DSVSLFGGSRMSKKSRRSVRSKTLDDDEDAVSKAEKGLSSAGSGRQSIGSTGKKDSGVS  
SKSLKSSASEKAKKPVSGVTAVPTADSASVSSGKSGRSASKLMPFVSKYMSKDSKSGDNE  
SVASGRSKMSSGSNIDEMHTDSLSSKSSNFSTKSQEMANFISQLIEMTELNEGGRVKAD  
EQENKVQIVDEYPKKEEGKEIESSPSSDVVKIRTEYYDLGSRITKEITHRDGCTIVTTIL  
GDTAIVQPKQAVDAPIQVAASAGSISDSSKYKVLKMTSSEGTSTILKQKAVGQGEFAL  
>comp12393\_c0\_seq1; 483 208 1341 LEN=1638; translated  
MMKNTSEPELKRVPLEEVCLSLILAFGLGKDCFEFFLRQAPQPPSDDSIQSALSVLLEEVGAI  
TSEFNFLTPLGHHLAKLPVDVRLGKMLVFGSLFRCLDKVLTIAASLSSKSPFATFLQDAT  
TAKAKHKQFEDPDSDFATLCNVWEGYNAARSKSKKDGSRYSYQSNYLNQSSMHEIATARKD  
FFNLLSGIGFVEKGNSSPSFFGSEDWETNPINRNAKNWTLVHAVVFAGLNPVVARLEDST  
LGSYTLWSRDQQIYFHRTSVNASKKRFLKNQNWVVFVEKFGTPNRI SVTTTTCFVNSVPLL  
LFGGPLLVKHTDRLVVVDGWMEIEMAAQIGVIMKELRRQVESLLLKLIVIQDSGNPDRRE  
KEIIDSIVDILSQTSSG  
>comp12393\_c0\_seq2; 1570 1 4736 LEN=5033; translated  
QQLLTKSEREDTRGDDRTRHSFYVIEVLILWGXLNLTLLKNEALMGKSKKKKQRSDARGY  
GNSNNNSNQKCCQPSKHPASAGTSSNDIVVTKQTHEGIKSLVAQIRLADDDVVCDNRVVEI  
VPASDSVSTSIKRVPLTKI IDRLIDLGFYDDGDGAADDIKTKPGNPNIKKARSSYLEQ  
MVVELGYGITLESALDWLCLNVPTLELPLFTDGNLNRNHWMQQDEDEKKGGRNSTSSIEV  
LKFISSSSSLAKPVP IGVVEENSGTARDVEIEKEQEELQEERRKEQQKQRQIAKEKVEKE  
EREAVKRRLLEQYAYDDDASEHNNYDEDLGNGFCRREHQNEGQAQSNDDGGSTKDCDKAA  
SLSPQEVLELLTKQAEELLELEADLGEANNYMRSKQELKSLKIQVKKLKQVVTGLHRKVEN  
QKRKEQQENKEEEERI QKEARENEKEEEDI AVIFGGGGFFDQDEKEDEEDEQDQIEITDK  
GRRLQSLLDPCPIPKGWTGTTTPKKTLEEVCRKQKLGKPKFLRLGGEGYKLSGIKLGKMRNK  
KEQSQNEAIVKEEWIALESNFLPGSSLPDYALALQALFEIDSNKPLYGLFPPAFRSIWLWS  
LEEIQQQSDQLQNEADMKKSARVRKLLAL IETRHKPHHSSQHTSTSESASPQNHVATSER  
NLTTNAKDSNTKDFIEESWEDMDLLDDEDDHNNNHGQHTMSKSMVITTTESGKNLKRKF  
LQRQSSESYLKLKQRENLPMISYRKEVLETIRDNQVTIICAETGAGKTTQCPQYILEEA  
LLDEQGDKINIVCTQPRRVAASVAERVAEEMNDRLGNQVGYQIRMESKRSKYTKLLFCT  
TGVILRRLQDDNDLKSLTHIIVDEVHERQVQTDVLLIALRQLLETSSRDLKVIILVRSCMF  
FVSFTMLFILPMGLKXIVMLVLLLKMSATLSDLSLFSNFFSNAPVIKVPGRTPPVSNYYLE  
DLLDASGHIIEEGSRYAFREYQKAETTTLWISGQGGKHEMVDLAQRDTEVSGIYSGYS  
MPTQLSLERVDESILNYDLIEDI IQLLFVHPERNSTLLAPDGADISNGSVLIFLPGIGE I  
RSLMDRLSANRTLGNKSKFSI IPLHSLKSSIDQRKAFLPVKVGCRKIILSTNIAETSVTI  
QDVVVVIDCGREREVRNRKRTSTSI LVTDWCSKANTKQRAGRGRVQPLCLKLFSSKTA  
EMMNTSEPELKRVPLEEVCLSLILAFGLGKDCFEFFLRQAPQPPSDDSIQSALSVLLEEVGA  
ITSEFNFLTPLGHHLAKLPVDVRLGKMLVFGSLFRCLDKVLTIAASLSSKSPFATFLQDA  
TTAKAKHKQFEDPDSDFATLCNVWEGYNAARSKSKKDGSRYSYQSNYLNQSSMHEIATARK  
DFFNLLSGIGFVEKGNSSPSFFGSEDWETNPINRNAKNWTLVHAVVFAGLNPVVARLEDS  
TLGSYTLWSRDQQIYFHRTSVNASKKRFLKNQNWVVFVEKFGTPNRI SVTTTTCFVNSVPL  
LFGGPLLVKHTDRLVVVDGWMEIEMAAQIGVIMKELRRQVESLLLKLIVIQDSGNPDRR  
EKEIIDSIVDILSQTSSG  
>comp12393\_c0\_seq3; 1122 1 3496 LEN=3496; translated  
QQLLTKSEREDTRGDDRTRHSFYVIEVLILWGXLNLTLLKNEALMGKSKKKKQRSDARGY  
GNSNNNSNQKCCQPSKHPASAGTSSNDIVVTKQTHEGIKSLVAQIRLADDDVVCDNRVVEI  
VPASDSVSTSIKRVPLTKI IDRLIDLGFYDDGDGAADDIKTKPGNPNIKKARSSYLEQ  
MVVELGYGITLESALDWLCLNVPTLELPLFTDGNLNRNHWMQQDEDEKKGGRNSTSSIEV  
LKFISSSSSLAKPVP IGVVEENSGTARDVEIEKEQEELQEERRKEQQKQRQIAKEKVEKE  
EREAVKRRLLEQYAYDDDASEHNNYDEDLGNGFCRREHQNEGQAQSNDDGGSTKDCDKAA  
SLSPQEVLELLTKQAEELLELEADLGEANNYMRSKQELKSLKIQVKKLKQVVTGLHRKVEN  
QKRKEQQENKEEEERI QKEARENEKEEEDI AVIFGGGGFFDQDEKEDEEDEQDQIEITDK  
GRRLQSLLDPCPIPKGWTGTTTPKKTLEEVCRKQKLGKPKFLRLGGEGYKLSGIKLGKMRNK  
KEQSQNEAIVKEEWIALESNFLPGSSLPDYALALQALFEIDSNKPLYGLFPPAFRSIWLWS  
LEEIQQQSDQLQNEADMKKSARVRKLLAL IETRHKPHHSSQHTSTSESASPQNHVATSER  
NLTTNAKDSNTKDFIEESWEDMDLLDDEDDHNNNHGQHTMSKSMVITTTESGKNLKRKF  
LQRQSSESYLKLKQRENLPMISYRKEVLETIRDNQVTIICAETGAGKTTQCPQYILEEA  
LLDEQGDKINIVCTQPRRVAASVAERVAEEMNDRLGNQVGYQIRMESKRSKYTKLLFCT  
TGVILRRLQDDNDLKSLTHIIVDEVHERQVQTDVLLIALRQLLETSSRDLKVIILVRSCMF  
FVSFTMLFILPMGLKXIVMLVLLLKMSATLSDLSLFSNFFSNAPVIKVPGRTPPVSNYYLE

DLLDASGHIIEEGSRYAFREYQKAETTTLWISGQGGEKHREMVDLAQRDTEVSGIYSGYS  
MPTQLSLERVDESILNYDLIEDIIQLLFVHPERNSTLLAPDGADISNGSVLIFLPGIGEIRSLMDRLSANRTLGNKSKFSIIPHLSKSSIDQRKAFLPVKVGCRKIIILSTNIAETSVTI  
QDVVVGELTTTIDKIETYSIGFTWSX

>comp12393\_c0\_seq4; 1155 1 3404 LEN=3404; translated  
QQLLTKSEREDTRGDDRTRHSFYVIEVLILWGXLNLLKNEALMGKSKKKKQRSDARGY  
GNSNNNSNQKCCQPSKHPASAGTSSNDIVVTKQTHEGIKSLVAQIRLADDDVVCDNRVVEI  
VPASDSVSTSIIRFVPKLTKIIDRLIDLGFYYDDGDGAADDIKTKPGNPNIKKARSSYLEQ  
MVVELGYGITLESALDWLCLNVPTLELPPLFTDGNLRNHWMQQDEDEKKGGRNSTSSIEV  
LKFISSSSSSLAKPVPVIGKVEENSGTARDVEIEKEQEELQEERRKEQQKQRQIAKEKVEKE  
EREAVKRRLLEQYAYDDDASEHNNYDEDLGNGFCRREHQNEGQAQSNDDGGSTKDCDKAA  
SLSPQEVLELLTKQAELLELEADLGCEANNYMRSKQELKSLKIQVKKLQVVTGLHRKVEN  
QKRKEQQENKEEEERIQKEARENEKEEEDIAVIFGGGGFFDQDEKEDEEDEQDQIEITDK  
GRRLQSLLDPCIPKGTGTTPKKTLEEVCRKQKLGKPKFLRLGGEGYKLSGIKLGKMRNK  
KEQSQNEAIVKEEWIALESNFLPGSSLPDYALALQALFEIDSNKPLYGLFPPAFRSIWLWS  
LEEIQQQSDQLQNEADMKKSARVRKLLALIETRHKPHSSQHTSTSESASPQNHVATSER  
NLTTNAKDSNTKDFIEESWEDMDLLDDEDDHNNHGHQHTMSKSMVITTTESGKNLKRKF  
LQRQSSSEYLKLSKQRENLPMISYRKEVLETIRDNQVTIICAETGAGKTTQCPQYILEEA  
LLDEQGDKINIVCTQPRRVAASVAERVAEEMNDRLGNQVGYQIRMESKRSKYTKLLFCT  
TGVILRRLQDDNDLKSLTHIIVDEVHERQVQTDVLLIALRQLLETSSRDLKVIILMSATLD  
SDLFSNFFSNAPVIKVPGRTPVSNYYLEDLLDASGHIIEEGSRYAFREYQKAETTTLWI  
SGQGGEKHREMVDLAQRDTEVSGIYSGYSMPTQLSLERVDESILNYDLIEDIIQLLFVHP  
ERNSTLLAPDGADISNGSVLIFLPGIGEIRSLMDRLSANRTLGNKSKFSIIPHLSKSSID  
QRKAFLPVKVGCRKIIILSTNIAETSVTIQDVVVGELTTTIDKIETYSIGFTWSX

>comp12393\_c0\_seq5; 1603 1 4644 LEN=4941; translated  
QQLLTKSEREDTRGDDRTRHSFYVIEVLILWGXLNLLKNEALMGKSKKKKQRSDARGY  
GNSNNNSNQKCCQPSKHPASAGTSSNDIVVTKQTHEGIKSLVAQIRLADDDVVCDNRVVEI  
VPASDSVSTSIIRFVPKLTKIIDRLIDLGFYYDDGDGAADDIKTKPGNPNIKKARSSYLEQ  
MVVELGYGITLESALDWLCLNVPTLELPPLFTDGNLRNHWMQQDEDEKKGGRNSTSSIEV  
LKFISSSSSSLAKPVPVIGKVEENSGTARDVEIEKEQEELQEERRKEQQKQRQIAKEKVEKE  
EREAVKRRLLEQYAYDDDASEHNNYDEDLGNGFCRREHQNEGQAQSNDDGGSTKDCDKAA  
SLSPQEVLELLTKQAELLELEADLGCEANNYMRSKQELKSLKIQVKKLQVVTGLHRKVEN  
QKRKEQQENKEEEERIQKEARENEKEEEDIAVIFGGGGFFDQDEKEDEEDEQDQIEITDK  
GRRLQSLLDPCIPKGTGTTPKKTLEEVCRKQKLGKPKFLRLGGEGYKLSGIKLGKMRNK  
KEQSQNEAIVKEEWIALESNFLPGSSLPDYALALQALFEIDSNKPLYGLFPPAFRSIWLWS  
LEEIQQQSDQLQNEADMKKSARVRKLLALIETRHKPHSSQHTSTSESASPQNHVATSER  
NLTTNAKDSNTKDFIEESWEDMDLLDDEDDHNNHGHQHTMSKSMVITTTESGKNLKRKF  
LQRQSSSEYLKLSKQRENLPMISYRKEVLETIRDNQVTIICAETGAGKTTQCPQYILEEA  
LLDEQGDKINIVCTQPRRVAASVAERVAEEMNDRLGNQVGYQIRMESKRSKYTKLLFCT  
TGVILRRLQDDNDLKSLTHIIVDEVHERQVQTDVLLIALRQLLETSSRDLKVIILMSATLD  
SDLFSNFFSNAPVIKVPGRTPVSNYYLEDLLDASGHIIEEGSRYAFREYQKAETTTLWI  
SGQGGEKHREMVDLAQRDTEVSGIYSGYSMPTQLSLERVDESILNYDLIEDIIQLLFVHP  
ERNSTLLAPDGADISNGSVLIFLPGIGEIRSLMDRLSANRTLGNKSKFSIIPHLSKSSID  
QRKAFLPVKVGCRKIIILSTNIAETSVTIQDVVVVIDCGREREVRRNKRTSTSIIVTDWC  
SKANTKQRAGRGRVQPLCLKLFSSKTAEMMKNTPSEPPELKRVPLEEVCLSIILAFGLGKD  
CEFFLRQAPQPPSDDSIQSALSVEEVGAIITSERNFLTPLGHHLAKLPVDVRLGKMLVFG  
SLFRCLDKVLTIAASLSSKSPFATFLQDATTAKAKHKQFEDPDSDFATLCNVWEGYNAAR  
SKSKKDGRSYCQSNYLNQSSMHEIATARKDFFNLLSGIGFVEKGNSSPSFFGSEDWETNP  
INRNAKNWTLVHAVVFAGLNPVVARLEDSTLGSYTLWSRDQQIYFHRTSVNASKKRFLKN  
QNWVVFFFEKFGTPNRSVTTTCFVNSVPLLLFGGPLLVKHTDRLVVVDGWMEIEMAQIG  
VIMKELRRQVESLKLKLIQVQSGNPDREKEIIDSIVDILSQTSSG

>comp12394\_c0\_seq1; 424 166 1254 LEN=1409; translated  
MNDSTNQRRPNKDADIESVMIPETDRLLTTNPTKDNVPSGGTISAMGLKVLILLAVQNS  
SKNLLMRYVMKEKQFLTSAAVIGSECTKLSLSLFYILCVEKKPFGSIVKYFKDDWKNTL  
LVSVPASAYNLQMTLEYIALANLDAAMFVSVLQTKLLFTASFSAIVIGKKLKYIQVISLI  
LLTVGVMMLCNMKGEDQGISNSKGCATLGIIVSSGFASVYTEKVIKSQRVLSVQGGQYS  
LAYTQVQLASMSLLTIGIYACIMDFKTIVEYGLFHNFNNGGAFLTVFNSAIGGLIVAGVLK  
YADSVLKGATAISVIGTGLMSMVLFGTKLSVVFYFMGIVNVVIAVLLYNGKNLDQLCCSN  
NK

>comp12395\_c0\_seq1; 495 154 1431 LEN=1606; translated

MPAIRATLHMLLLVVVVALLLHGGNGLSIDPEMNRSAFAAVAAAGGATTGWFTRSVPEA  
HAETAASTTTTTTATTNPLPGGSL SAYQIFDPATPTRNPTIESLAEDQLIQSLSKKSGAL  
WLGEHHNAERDHRAQIDIIRKLHASKTKGQSGNGERLIGLEQVQVQFQSVL DAYIGGSL  
STEEMREKVEWDKRWTWPF DGYRGI FETARELKIPLVALNV DSEDLAKVENGGF SNLPPE  
KR SKYILDPEGFAAF AKPGKYKCYVEYVILPSFDMHKKLGLLQYTMSGEKLD EEMNF KKF  
FSGRILWDEAMASGAYRWTRDNPNGLLVGLVGADHV KYRAGIPGRYDRMVGN SRDCV SVM  
LNPSLIDTRPSGSVSMEQNTLDPNQLTLQLIYAKDGV DATTDARFLDENIGGSFPLADYI  
VTSSS

>comp12395\_c0\_seq2; 454 154 1575 LEN=1750; translated  
MPAIRATLHMLLLVVVVALLLHGGNGLSIDPEMNRSAFAAVAAAGGATTGWFTRSVPEA  
HAETAASTTTTTTATTNPLPGGSL SAYQIFDPATPTRNPTIESLAVSKKYERRDFRVNDN  
ALKTSESRRTNSDTIQ LFFAHGDDCGDGGATSVEDQLIQSLSKKSGALWLGEHHNAERD  
RAQIDIIRKLHASKTKGQSGNGERLIGLEQVQVQFQSVL DAYIGGSLSTEEMREKVEWD  
KRWTWPF DGYRGI FETARELKIPLVALNV DSEDLAKVENGGF SNLPPEKR SKYILDPEG  
FAAF AKPGKYKCYVEYVILPSFDMHKKLGLLQYTMSGEKLD EEMNF KKF FSGRILWDEAMA  
SGAYRWTRDNPNGLLVGLVGADHV KYRAGIPGRYDRMVGN SRDCV SVM LNPSLIDTRPSG  
SVSMEQNTLDPNQLTLQLIYAKDGV DATTDARFLDENIGGSFPLADYI VTSSS

>comp12396\_c0\_seq1; 243 1 864 LEN=1062; translated  
XPQGTAAATVHAISCDVSS EDSVVR LFRQIDELGSGGGPGVDILVNNAGINATAGSVEELT  
AGDMEAVLGVNVVGAFLCAREAIKRMKQKKGSGTGTGNRIVNIGS ISSFSRPNSTAYT  
TSKFAIAGLSKSLALDVRDHGIAVGTIHPGNV VSELLSPEDVEVRGRTEGFLRPEDVAGC  
VLT MVELPPSANVLEMTVMPPPSPWGGGEPGRCGAMERDAMERNAMERDARKCDRPRQD  
PYHERNRGRTVSRDVAKTTEEREVRQSGSRSMRRQQQQHQKQQL EE

>comp12396\_c0\_seq2; 424 1 1187 LEN=1385; translated  
XNGATRENKPPPLAPPKTHRTASHRTPHRTASHNTPQHNTVHPLERTMLTNKLALITGGG  
GSIGKAIAGAF LERNISVVLAGRRLSKLEEARADLLEKQAEKGRPQGTAAATVHAISCDVS  
SEDSVVR LFRQIDELGSGD SGGGGPGVDILVNNAGINATAGSVEELTAGDMEAVLGVNV  
VGAF L CAREAIKRMKQKKGSGTGTGNRIVNIGS ISSFSRPNSTAYTTSKFAIAGLSKS  
LALDVRDHGIAVGTIHPGNV VSELLSPEDVEVRGRTEGFLRPEDVAGCVLTMVELPPSAN  
VLEMTVMPPPSPWGGGEPGRCGAMERDAMERNAMERDARKCDRPRQDPYHERNRGRTV  
SRDVAKTTEEREVRQSGSRSMRRQQQQHQKQQL EE

>comp12397\_c0\_seq1; 398 605 1510 LEN=1934; translated  
MKPNGLWVEQDDQNL YKTAIRRTLYWVGAAIGYGFLLI FVAGPETS GEFYAGYLLEQSL  
IDNLLVFL LLFEYFKVPLECQNRVLNWGIIGSIVMRATMIGAGAV ALNQIHEVLLVFAAI  
LLFSSFKVLV GEEEDDEDLSENAIVKFANL FKSTDKFDGDRFFTMEDGVRTATPMLLC  
MIAVEISDVVFAVDSIPAI FGVTE DPLVVFSSNMFAIMGLRSLYVILSKAASELKYLDKA  
VAVVLGFIGGKLIAEYFGVHISTELSLGVVVTMLGGGV TASILDKSDEDAIDVTTTTID  
N

>comp12398\_c0\_seq1; 546 174 1623 LEN=1623; translated  
MTDPFAASAEGPPP GGC PFAQKQPPSERRAAPRRTSASSTGSSSCPFAQALHESDDASAS  
SSVSAGLSASLSSPPSPGSLPWKECPVFANRSCPFKDAKSPEDVSEILRKL PASHTDQSQ  
TTHAVLVETLALFHRDRAL ENFSFSAILSRLVREHGYAYAFDDEDSSSSSVHGDDLGT  
DSEEFRVPRTRTPPPREDTAREAPDASDASDPIPC E P S P S P S T S P S T S T S K P P K Q E R R L S E  
ALKTGTEDAHKEAESVHFVKNFIRGKIDRRMYALFVAQMFHVYRHLEKALDEHAP EHF PD  
CHFPKELARTEALREDIDFWQGSDDFPVSPATRDYLERIEAVARDRPILL LAHAYTRYL  
GDLSGGKVLARVAKRALNDRGPDGLTEGLAFYDFPLLRGSVVAFKDKYRQCLNDLEFDD  
ANEAVQAI VQEANVAFLNMLR LFEELDVESVPGASVRP IQEVYSRVASISTSTST SASA  
SASX

>comp12399\_c0\_seq1; 237 333 1487 LEN=1984; translated  
MMAGCLAGMSGTIVGYPLESMKVWVQTN TMGKNKHLVAKKGFKAPKDASTKHGRGGKCCS  
NSSTTKSR IAKSSKASGARRSNSTTATTMQQRATGAAARIVTKPVSTIVRTVRALYSGVT  
GPLVTVGMVQSMNFASF DATRRFLYALQH GQAGSVCNNYRSQDSL TNVAMSGSVGGM TTA  
TLTAPLLMMKINQI SGNTRFKAFREVFVVESSGQTRFKPLRPYGA AFLPHLLSEALGRS  
IYVTAYEGLKRSRLASKEIPDGAGDGFDFVQNNGGDGGGGNCLSLPDRMACAAASGII  
CWGTFPLD TLRNRMYHAASRQPKMVL TN SPKSRAPSVLETIRVIRKERAFYRGFSISIL  
RAGPVAAAVLPVYDLTLEKLSSE

>comp12400\_c0\_seq1; 227 586 1173 LEN=1720; translated  
MLEPHAKEGDKTPNSVSIPAEGTDDDKQNGDGKTLNSESSGAEGVEDGKQNVDATEKRAV  
TGFRHGR T LATS KSLFVTGFAPVINKIHVEKLF SKFGR LERISDFMQKPGSTAGWRYCF  
VEYDSIENAQKALDNL DGRMLLRKRLVVKPSHADPGSSSGTKANAAPMNP AKERV LIDKK

IAALRKKIQESQGGD

>comp12401\_c0\_seq1; 217 1 1361 LEN=1471; translated  
XGSWAIVGRYDQAHKRLEYYISKMSKIKRDDNKQKWEDTEFPLVCETCLGDNPYVRMTQE  
KFGKCKQVCETPFTVFQAGTKGRLKRVEICRSCAQAKNVCQVCIYDLQYGLPVKVRDR  
ILAEAGSGNACAVVPQSGANRAWYTAQQERALAQQQNMVGEANALAVAKLKEMANMKPRY  
ERNMAKLCSSFARGEENRANCPRHELKDRNDPMSKQNTKDRFYGSSDPVANKILGRQ  
RRREQEAAKSDSESGFDKSRATLYLRFKGDAPYPKLTEPDIRDKFYSGEISSVRIQAEKG  
QAFVEYTQPDAAELAIASMNRSLLNREIMVNWARSPPKRGDADVAKHGENRRSLPQPPVA  
VKPMAPPGGVSKPLGLPKGFTTAIKPPAHIAAIAAARRNKATNGPQIGGFPRPGGPIRR  
VGANAASVVGSRKPYPSADPGRLGSKTSNAN

>comp12402\_c0\_seq1; 345 336 2352 LEN=2951; translated  
MNSSSQPPPAAPTIAPLIDATTIGGTAATMPSQKAVKPRIEGMDRLGMDNDLSGYADMT  
EAEKQMREEELSFYSASDNDHGDDNIWGLPAALAGTSTSGKDIGWDRELWISVPLVCSVR  
SACDMLRDAMVTISSHDSFGCILFFGSVFLVLLIXDVIYFAVPWCACMLQKDDFAVYGLL  
ASEIGACFFPQSSKELQLVNSFGVYLAAFVMRPIGAILFGEIGDRIVGRKHALVFSILLI  
TIPSVLMGILPGYETLWVSPILLVVLRLMLQGLSVGGQLAGSYVLSIEQSSARNRGFRGS  
ICDASSVGGFLLASLVTTTCVRFSCCTKEQVDAWAWRLPFLFSLLLAPLLYHVVNQTEESKF  
WAERNEQKVIIEEQVREAEELDNTRPAILDLMDSPPFRRLQLAGMIGLLSATTSTFYVFLF  
FCPVYLSSELKGFMTQAHADSMNFVAVGTIYVMLLFSGQASDRFPHRKDLMCIGLPGLIVA  
CPVMFAMFETESWWGIFLGQILLATCLALVTGGMAALEVELWMADPTLSFTGVAVGHNTA  
ATLFGGTMPPLVATALYYESTTMVDPEEMYPNFFNTLVPQMLPGFYISLLGLISLFCVACV  
LKHPHDVRTGSARLKAHVLEENRKSQRKSKSLRAEKKRRKKNMEAQLEQMSHHPNTARSN  
ATVDYLPSSIA

>comp12402\_c0\_seq2; 221 336 638 LEN=3122; translated  
MNSSSQPPPAAPTIAPLIDATTIGGTAATMPSQKAVKPRIEGMDRLGMDNDLSGYADMT  
EAEKQMREEELSFYSASDNDHGDDNIWGLLSGVGGNIYEW

>comp12402\_c0\_seq3; 215 336 2309 LEN=2908; translated  
MNSSSQPPPAAPTIAPLIDATTIGGTAATMPSQKAVKPRIEGMDRLGMDNDLSGYADMT  
EAEKQMREEELSFYSASDNDHGDDNIWGLLSGVGGNIYEWYDFAVYGLLASEIGACFFPQ  
SSKELQLVNSFGVYLAAFVMRPIGAILFGEIGDRIVGRKHALVFSILLITIPSVLMGILP  
GYETLWVSPILLVVLRLMLQGLSVGGQLAGSYVLSIEQSSARNRGFRGSICDASSVRYLI  
KSDCLNDIYTSQVNDLESRWEGEDMDVRIEVLNSNSQKTFSPFLPDVLISQTGRWLFARLA  
GNDMCAILLYEGTGGCLGLATSFLVVFAPLGTPLPRGQSDEESKFWAERNEQKVIIEQVR  
EAEELDNTRPAILDLMDSPPFRRLQLAGMIGLLSATTSTFYVFLFPCPVYLSSELKGFMTQ  
AHADSMNFVAVGTIYVMLLFSGQASDRFPHRKDLMCIGLPGLIVACPVFMFAMFETESWWG  
IFLGQILLATCLALVTGGMAALEVELWMADPTLSFTGVAVGHNTAATLFGGTMPPLVATAL  
YYESTTMVDPEEMYPNFFNTLVPQMLPGFYISLLGLISLFCVACV LKHPHDVRTGSARLK  
AAVLEENRKSQRKSKSLRAEKKRRKKNMEAQLEQMSHHPNTARSNATVDYLPSSIA

>comp12402\_c0\_seq4; 433 336 2138 LEN=2737; translated  
MNSSSQPPPAAPTIAPLIDATTIGGTAATMPSQKAVKPRIEGMDRLGMDNDLSGYADMT  
EAEKQMREEELSFYSASDNDHGDDNIWGLLSGVGGNIYEWYDFAVYGLLASEIGACFFPQ  
SSKELQLVNSFGVYLAAFVMRPIGAILFGEIGDRIVGRKHALVFSILLITIPSVLMGILP  
GYETLWVSPILLVVLRLMLQGLSVGGQLAGSYVLSIEQSSARNRGFRGSICDASSVGGFL  
LASLVTTTCVRFSCCTKEQVDAWAWRLPFLFSLLLAPLLYHVVNQTEESKFWAERNEQKVI  
EQVREAEELDNTRPAILDLMDSPPFRRLQLAGMIGLLSATTSTFYVFLFPCPVYLSSELK  
GFMTQAHADSMNFVAVGTIYVMLLFSGQASDRFPHRKDLMCIGLPGLIVACPVFMFAMFET  
ESWWGIFLGQILLATCLALVTGGMAALEVELWMADPTLSFTGVAVGHNTAATLFGGTMPPLV  
ATALYYESTTMVDPEEMYPNFFNTLVPQMLPGFYISLLGLISLFCVACV LKHPHDVRTGS  
ARLKAHVLEENRKSQRKSKSLRAEKKRRKKNMEAQLEQMSHHPNTARSNATVDYLPSSIA

>comp12403\_c0\_seq1; 537 142 1688 LEN=1805; translated  
MSTQPVANNISSLSTNGSSDPTAKNKPTLDANGVGVVAGRGSISSMKVQDFMSYLAKEAN  
ISNMTVETNDGRRISATFEQGVDDTTNQUALPSPADLSEANGNGNAVVKKEPLDGKKDEKD  
GCQNASALMSPTKRDIATMAMMGANKDASTSGVAVQGPDLETHASLQWAVNYRNKHVAV  
TYSSIGAGNSSLLTNGSAHKTNGNSSALPPKKRAAQEEGSPDF SADWNPM TALADAATV  
VQREHVQVPQGVPIAIAQAQAEFAKSMGKSFPAAQKKKTAKRKSRIKIVPEVKVVFVDFN  
QKMFVFLVEGDEAIVSDLHAKKITAFRIFLLSLHFLLLIVVVLAVLFFDHPGNKTYRDI  
VT KQQS FYRGCDKNEKTKVAQIVDHIQNTVGGRFLELDREVKQWFLV PNVVARRKVGQALR  
ENNT EEARAAKRAKYQKRLNSNKNFDASEGGDNTY PKAPVVP GDIARDSNVQVMQVVDGN  
GSASTAIYPIVGTGTGTYTRSFQVEDSESSNRVEV

>comp12403\_c0\_seq2; 587 142 1584 LEN=1701; translated



MSTQPVANNISSLSTNGSSDPTAKNKPTLDANGVGVVAGRGSISSMKVQDFMSYLAKEAN  
ISNMTVETNDGRRISATFEQGVDDTTNQUALPSPADLSEANGNGNAVVKEEPLDGKKDEKD  
GCQNASALMSPTKRDI AATMAMMGANKDASTSGVAVQGPDL ETHASLQWAVNYRNKHVAV  
TYSSIGAGNSSLLTNGSAHKTNGNSSALPPKKRAAQEEGSPSDF SADWNPMTALADAATV  
VQREHVQVPQGVPGIAIAQAQAEFAKSMGKSFPPAAQKKKTAKRKS RKIVPEVKVFVDFN  
QKDVLFGRGGRSNHHPGNKTYRDI VTKQQSFYRGCDKNEKTKVAQGI VDH I QNTVGG RFL  
ELDREVKQWFLV PNVVARRKVGQALRENNTEEARAAKRAKYQKRLNSNKNFDASEGGDNT  
YPKAPVVP GDIARDSNVQVMQVVDGNGSASTAIYPIVGT TGT YTRSFQVEDSESSNRVEV  
>comp12404\_c0\_seq1; 326 67 711 LEN=956; translated  
MAQQTPEFKLILVGDGGVGKTT FVKRHLTGEFEK KYVATLGVEVHPLAFHTNRGPIKFNV  
WDTAGQEKFGGLRDGYI IQGQCAIIMFDVTSRITYKNV PNHWRDLTRVCENIPIVLCGNK  
VEIKDRKVKAKQITFHRKKNLQYYDISAKSNYNFEKPF LWLARKLSGDNALHFVEAPALQ  
PPEFQFDDKLNQYEQELQDAAAQPLPEDDDDDL  
>comp12404\_c0\_seq2; 223 187 576 LEN=830; translated  
MFDVTSRITYKNV PNHWRDLTRVCENIPIVLCGNKVEIKDRKVKAKQITFHRKKNLQYYD  
ISAKSNYNFEKPF LWLARKLSGDNALHFVEAPALQPPEFQFDDKLNQYEQELQDAAAQPL  
LPEDDDDDDL  
>comp12404\_c0\_seq3; 223 187 576 LEN=821; translated  
MFDVTSRITYKNV PNHWRDLTRVCENIPIVLCGNKVEIKDRKVKAKQITFHRKKNLQYYD  
ISAKSNYNFEKPF LWLARKLSGDNALHFVEAPALQPPEFQFDDKLNQYEQELQDAAAQPL  
LPEDDDDDDL  
>comp12404\_c0\_seq4; 326 67 711 LEN=965; translated  
MAQQTPEFKLILVGDGGVGKTT FVKRHLTGEFEK KYVATLGVEVHPLAFHTNRGPIKFNV  
WDTAGQEKFGGLRDGYI IQGQCAIIMFDVTSRITYKNV PNHWRDLTRVCENIPIVLCGNK  
VEIKDRKVKAKQITFHRKKNLQYYDISAKSNYNFEKPF LWLARKLSGDNALHFVEAPALQ  
PPEFQFDDKLNQYEQELQDAAAQPLPEDDDDDL  
>comp12405\_c0\_seq1; 502 547 1854 LEN=1886; translated  
MSHTDEEWEQIRIPIPLSVEEDYEIVIPPSIVPSSMDAHDSSPRTARSGGIMLQRLREWR  
HQQSLQRNQLGLSISKTFAELSR EDPQMEKDAIKRAMELSMLDMALVQYHPN NHSPQD  
QQSSPHVVLGVSRNANPAEIKAA YRKLARLHHPDKGGKAHRFEEIARAYRSMLSSTSFSS  
TETKDERIASIGYYYGHNQEQRSQKIQLTTASCDKELQD HKRLVNDL FQADGMDLQACVE  
KQLTALGMLGLAFKDAGAINRNERNEI IHNSCFYLSLATS YLWGIGALS FHNSEENTKE  
EDEL LIGDTALQLKRTIEAAVVKAHPEWVLE GKVGEEVQAFSDFLVYTLDSQTQLSELAV  
VIFDATSGFCDVYKGN YEDRTPSLQSN TITLRYIPGHYQPLIPSN SYAYR PALRDI INV  
LDDLGVFYVITDGNS  
>comp12405\_c0\_seq2; 402 547 2003 LEN=2035; translated  
MSHTDEEWEQIRIPIPLSVEEDYEIVIPPSIVPSSMDAHDSSPRTARSGGIMLQRLREWR  
HQQSLQRNQLGLSISKTFAELSR EDPQMEKDAIKRAMELSMLDMALVQYHPN NHSPQD  
QQSSPHVVLGVSRNANPAEIKAA YRKLARLHVSEIVGGFSVRILFGSLDTSFGTLVVGTE  
ESFLILIFEPLIIYFFNNSLHPDKGGKAHRFEEIARAYRSMLSSTSFSS TETKDERIASI  
GYYYGHNQEQRSQKIQLTTASCDKELQD HKRLVNDL FQADGMDLQACVEKQLTALGMLGL  
AFKDAGAINRNERNEI IHNSCFYLSLATS YLWGIGALS FHNSEENTKEEDEL LIGDTAL  
QLKRTIEAAVVKAHPEWVLE GKVGEEVQAFSDFLVYTLDSQTQLSELAVVIFDATSGFCD  
VYKGN YEDRTPSLQSN TITLRYIPGHYQPLIPSN SYAYR PALRDI INV LDDLGVFYVIT  
DGNS  
>comp12406\_c0\_seq1; 801 1 2623 LEN=2849; translated  
XGNTFPKRTSPFGGTTALPNYRQGN SFNKAASPFVAKSTFPKTGPKNEATRFSGGS  
SVSPKTEKQSESPKIEFSPFGQSSASPVVQETDGRPQRGDL SNWNPTDKANMNNVND E  
TRSSPVDETDSSDFRIKPKLPSKPQNDMYERMOMEQAKRLEEYERKQRI SNGDTSMEVKK  
PVAKEAQETPYNVREEDERRKLAERADIEEKRI IAQEMAQLEKQKQETALKSLYKKGS  
QGEEKRSGYDVGANE EKNSQMTEEDKKEKERMKEIQRLAREQARFEIDARGLSKEEKSVL  
EKPRMERLQQLAREQARFEYDRRHANTRKELTNQSETKKKSVGESSVFKTSGTRSDDR TQ  
DRIRQEF SMP SKNGVRPRANNSQKQVREFQVADMR SNEEKMQEQVRQYRQSSTEEETL  
MGTKKINQNKGS MFKSVQTASTEDVRREKSR LDQLENLA EKKGQYKTRNNIREPPNDVKK  
RSFYEEESGTQIIDVAKDDTKDVDDSKITDSGNYDKEGQRNQE QVQDENY GDRKAGSRA  
ESPHNRLDRESKNREKQSSEKYEKRKQLEAQARQRSKQQSIRNERLKVDQKVNSSSQRII  
PEASNRVVVEDRVRKDPEQQTYLQPE SRLKEQKGLAKRQKEVADAIMKTDGSYK PSTES  
FANTS RMLKEVCGFPLSDYKGSKQFVHKKT NMGVYVGR T LSVVVRVSTPGTFVEFS INKK  
ASEFDFGVKVPDKGYAIDIKKSA PFTKHSKGK TLLQD T VLVGAACAPCTLQFKFENKQ  
STLLEKVIISYDIKVTSPSRELLLGARRLRAESCLQAVEEDLLAMTGGTKSTTLKEEINS

LQSQIDEKTKKIDSLKDEERRWVALIAKMEASKV  
>comp12407\_c0\_seq1; 212 191 1027 LEN=1127; translated  
MTSHTPYTIVSIGCHKASKKIPNERVTYSGNFRDADVTPINKNSNLIICYPLDQVSPKED  
DVREVEVCDRYGAETMSISSIVSEELLTARITTVCDASLGSSEISSTNEAETNIREDMN  
HRVRFKPGTSMAPKLTTKQKNMRKLVNKIHYGNSDSLSSLSLSSQKTCDSVRWWTNEELD  
VIRQSCESAVRQREDGTIEGDSLDRFSVRNRKRRKLIIRSKMYETTKAIQEYESATKTKV  
PDLLESEVLGIYSKPMERYAIKTALKMLQPGQYISKSRG  
>comp12408\_c0\_seq1; 1573 127 5877 LEN=6813; translated  
MPNIVISEDVFSTLLKRIERQYTGSRNGRNAWSHLSTRQEWTPRPPDESAYALGKGLARS  
FLDLCASATSPTISNGVQEEELFILFANRDVNPVAVCQGFENLLQPDEKGRFMDLDAFFPA  
CILLTEQNEVKRQSSYLEEDDSVGFHFDPLTSMIRSYADYTCKKFI SDRNSSFALLDSTS  
SSSHIGLIAKAYSKLRTQAARLAMLDRFTDVAFEAGRTSNGSQTVYRYMLNPLLACSVLS  
SKTGRSDGGDSSMVESVLCMEGIWRQIYSLVEDVPTAKEDDCVSLYTLMDAIEWLTETLN  
LFLLSIPGHKRHLKIPCKELAHRWLSVVLVGVFLAQSLGDNKQLQRSIVDWFNLS  
KSLLRWFAAVPSYRIRMHPFWSLRLKLMALYGSKMLSLESTLKLATICICHVPKEDVKE  
ILGLFALAVENSQLLHPICFISILKGLGLIFSTDEICAANTKNLLYALLQTNQTENKITTS  
ERSTAVLVNMIQLFEDGNSTDAIMSYFLPNDFDHNRAFTPIQQAGSLVLYGIGLLNE  
GTDHHLTPYAVLRKLLLAYPHLGITFLPVIVNRINTAAVRGVGCFMMEQIELLADVVRH  
PQCAREIWNLLGKEFMREGVPAIIRSSIRFYFKICQGNKKLYKRVIESMGNTLVNSNSN  
DGNNDNLEIRLAIAASTSDLARDDLIRDPTDIISWLQEFITDTGWVRSVSTMHLQKDDH  
GKAAVAHFISIQUALHFLVIAQELDFKLVVLVLRKCLDVHNLDEISKLPPIVLESILLG  
DGESDEDDSSDDDDCLKAIIGIPSQTSRSVETLIGLWNHNCLKSEHFSPTVKATIFRCK  
RNVLKSRLARYSFEALGLDEEGVQNAIAAFSSSEDNEKSHRITPGGSRYNALNYLVSDGIAF  
LSTLNRHNRIRSTDFQGDLSNDIVTDFSVTLSTFISKIMKFEEDTLGSTLWQKRQSAGQR  
ERKPKSKRKGSSHSSKLSEALPSPKSVLDIYEEQRCQASSLALSSFEEISKSLFLDLAT  
DVTSDPSDAIFQTIYVQSWLNAARSLNHLISQRSISKSLNLLNDIEEWRSHNSDSMFM  
MLSSIAILIPTVLGPGYGFSSYMQDISKEVWEAYNSRMFEDSDVAKLCLGFVVICDLSLG  
NCDRLLQIVRILEKTATGYGGLPSFGAYYALACMAKRCATSGRNEAIYAKANTDLSKIAG  
RILIFLINELSKCIKGTNVAIGILTTAIRNEMINPEETESLNDLKGESIKFNESKRRTSR  
ALFIALGICLPMVTKSNDRLLPPIISFLESLEWGYGVGLCVGPVLRACHESRIILDDKGMK  
QKIDAYSKIFKEGIDRGINVLHDILYALTTLQSKSASHSIEKIRMTEEEGARWSMSIVIA  
VSSIAFIPCLGHGIFITDSPCLKDDVNDVIAIDLVOFLSEENADMAIVMRGFLASLANFN  
GSKDSSRIDAEEERLSGTLKPEAHFGTASEILMSSLRIYINNQDEIGLVPLLKCLEAIALP  
DQFVSVLVELVKGEESTKTACMKLLVSQISGRPRAVFDGRDFIKLALKICKMPVMSIQSI  
LGNAEAAEIFIDSFGEMLTKFISQEVETVIENVFQFCISQVDQNYNLIISLLQSIKLILO  
QAEKDKSPRFSPKCLNSINLFLQRKFSFAIHDATSNETMNVPPNQITRIVDAYADCIVFI  
PESLLIENNNQLFDTDPDDIGFAGEVLRVVMNLIIRNGRCSFFSHSYQEVASSMAWLSQQ  
VIACREGALSPALLHVACIAEASSKEAADKRDILVSYLDNLLMVDNRARFVLSLEILSA  
LVFQWCQGSASDGLSLLQTLGSPVEKWDLRPEVTKKIFQIAVHDLFPNLAKFARDGNL  
SGVIFNRLWRIYTKWLHQGTDESTLTALRLSLLCCRDMEVTVNPTDMTMLVNSLV  
>comp12410\_c0\_seq1; 316 209 1784 LEN=2186; translated  
MKNTVFVAFVTLFIVSSDAFTNPRNVMGRLLRVVAKVEPAAITTLRGHRDDNNCSSEQSLT  
NEEISRYSRHLVLSVGMAGQKSLKNSSVLVVGAGGLGSPCLLYLAAAGVGHIGIVDADV  
VDTSNLQRQI IHSMTVGTGSKCESARQRIHSINPFVNVRLYEEEFTSATAQRILSGGFEE  
NRPYDVVVDGSDNFPTKYLINDICELVGTWPVYSAILAFEGQLSVFNYPNYRDMLPT  
PPPPGDVPSCAEGGVLGVLPGXSTFSRGANNAVLSRSTKYGNIXTYYNLDIVPFHFVAVPF  
PSYQYNGLSSDEVIKILLNRKSEEITSGRVLVFDAMKMKFSDVGLVKHHRQTINKLID  
YQGFCAQPKTIAESSKENLSDAKEEKQVDGRMTDELETFESEEQASFQPIEPKECLKKL  
SDGWTWPVLDVRLKTENDIVALPFTDKVPHRMVRVENVPKSGDILVYCKAGVRGKKACK  
RLAELGVDANRLYNLEGGIMKWQKEIDXNAKVLIARSTAASVSD  
>comp12410\_c0\_seq2; 283 1211 1872 LEN=2274; translated  
MGCLQATEVIKILLNRKSEEITSGRVLVFDAMKMKFSDVGLVKHHRQTINKLIDYQGF  
AGPKTIAESSKENLSDAKEEKQVDGRMTDELETFESEEQASFQPIEPKECLKKLSDGWT  
PWLVDVRLKTENDIVALPFTDKVPHRMVRVENVPKSGDILVYCKAGVRGKKACKRLAEL  
GVDANRLYNLEGGIMKWQKEIDXNAKVLIARSTAASVSD  
>comp12410\_c0\_seq3; 457 209 1656 LEN=2058; translated  
MKNTVFVAFVTLFIVSSDAFTNPRNVMGRLLRVVAKVEPAAITTLRGHRDDNNCSSEQSLT  
NEEISRYSRHLVLSVGMAGQKSLKNSSVLVVGAGGLGSPCLLYLAAAGVGHIGIVDADV  
VDTSNLQRQI IHSMTVGTGSKCESARQRIHSINPFVNVRLYEEEFTSATAQRILSGGFEE  
NRPYDVVVDGSDNFPTKYLINDICELVGTWPVYSAILAFEGQLSVFNYPNYRDMLPT

PPPPGDVPSCAEGGVLGVLPGTMGCLQATEVIKILLNRKSEEITSGRVLVFDAMKMKFSD  
VGLVKHHARQTINKLIDYQGF CAGPKTIAESSKENLSDAKEEKQVDGRTMDELETFESE  
EQASFQPIEPKECLKKLSDGWTPWVLDVRLKTENDIVALPFTDKVVPHRMVRVENVPKSG  
DILVYCKAGVRGKKACKRLAELGVDANRLYNLEGGIMKWQKEIDXNAKVLIARSTAASV  
SD

>comp12410\_c0\_seq4; 394 696 1744 LEN=2146; translated  
MSTVGTSKCESARQRIHSINPFVNVRLYEEEFTSATAQRILSGGFEENRPYDVVVGDSDN  
FPTKYLINDICELVGTWPVYSAILAFEGQLSVFNYPNYRDMLPTPPPPGDVPSCAEG  
GVLGVLPGTMGCLQATEVIKILLNRKSEEITSGRVLVFDAMKMKFSDVGLVKHHARQTIN  
KLIDYQGF CAGPKTIAESSKENLSDAKEEKQVDGRTMDELETFESEEQASFQPIEPKEC  
LKKLSDGWTPWVLDVRLKTENDIVALPFTDKVVPHRMVRVENVPKSGDILVYCKAGVRGK  
KACKRLAELGVDANRLYNLEGGIMKWQKEIDXNAKVLIARSTAASVSD

>comp12411\_c0\_seq1; 1678 24 6263 LEN=6486; translated  
MAEQQRMKKDDQRPPDLNNCIEQFVALYNEKSKSIESL GALYLAAIGVLYHLRLDQKTIF  
SRRQQKENNDDEVQFPKPWEIPAMTAILLNQPFRLRSLISCMKSNSTDGFEASSVASSVSG  
TASQLNLMYTPGARKRGLSWEKNTSISTEVMKSMKLAHGQSPMVGKRTVMGNITKPMQD  
IKMLAGTILYVAMESIDHWPAPMIEAYAEDCFGPRSWVDDPAYRLLVDNLSLIHRDDNG  
DHGGGNCGLDLDVLLADASKVAEFFRKNHSRRYQNTTIMSTEANMKRSSMSAVHEKRAFT  
LKRQRSESVGSQNSKKTFSFSPQQLKTKVKS DILYESDSGDEEEVAITTSYSKYPNDDGGG  
SSSSSGEDEDNPIATVLAKPTYPVQKQLNIYSQVRRRYFGQNLESAFVAVSDKLSQRLDM  
KSKQNSGLLQCLTSFTSIPSVRIITGNLEKWLQSPALSGLARALFSKTVNSMKNTDPPL  
RELDLSDNLRMLKANQLNAHIENVTAVATRIPTVTITKHIYRHILREILVNMDSHDS  
TSLDHLSMIHAVHDVLPRELSAIGIASTLFELLLNRPDPFNLDLATPNYIRRIQELIRAI  
SKFGSSFDGCIVLNAMLSLKADPKYAWSIIDEENKARLMFQCVTLLVDPGAMTQRIQPTG  
KSVRIVNPSEESVAKVKAKLIEARKLLIRWCCVDYAPFYSESEQKNTTKARTEKKKDEI  
TGAGTPIYSSILDGDGDRSFSFPWVKVMRSVLFLEKSDSPILGNFLFMGHAPFEDVQGWED  
EAKRINFCCDNGADVDEMLWTVVQVASNEIEGVLSKDIALLLLEHMFERCKKGMKSSLL  
VHDP TLLILKLYELAEYIPSVKSKQDISHQLNGGCKEMPDKENNQDVFPRLGYPGMWWR  
VTGLALILCGASPSAIGDNVLKNFPTL KALIKMITS DRYRFPTVDSDDAARKEQKRIEQ  
MRDEEGKLAEYLFAPPNKVKKKAKYNVHKIDSGTQSSGQRSSKRQQAQREQEINRQRQKE  
EAEAQAEASRRKLLKTAQKSI TIWDPYKGRPKPKESIDLIFSIGELFDLKRVFQSSTE  
PDFLLTTIGSTTRGAIERAHDWLIPIISFLPETVSRLPASASCFLIRAYGTNGDERTGL  
HEL SAPLLQHVRDSLIGDFGETDAVRTFDLLLDIANHDPDRRRCARRVLTNAIGKENLG  
EIDTTFDGSNHAWAINLMHVKHSKSI VSDAIQRLAIAASFERRGNLRYLVLALNKLTRFA  
KNYGVGDWDFASLFIELVSKRPTVFANALSSYTDLRSLAIEVVGEEFRAYVDGKISNLS  
NKNM VHSILCRSDKNGSSI KVEMPLALLQSSCVLLSIWSEDDARGRDSTAIEGLVIMLM  
NSREYHGEADITEKQGTENV DGLASAKILVTQKTAIAVESWVMLAKSRSDFI AKRAALAA  
PTNVLPRLLLCSGLPRASLV TMINRLGKLGKKADDIHKTF TQLLVP SASSEWDLGR LGHR  
REISRKLLGRVCAYSRLYRLSELNGKEEVSFVFEWLSNSCRSSRKPTK LKAKKPKIPPP  
KIYECIENAKMLFDSMSMDMLGNTDVS SAEEMHADTSDMTNFLLFQDETTVSLPITLDDA  
VENFLVETFKENKSDLLDNWLLKNFSHEPFP LKKRRNTEEKRPRLGNEELAFLLLLKCYT  
RLERKVESISSTLVKWI PKLSSLRGSPKFWRI LFARGQKPAFLWDNLSR C FQVWDREHM  
TRCRQWILSNRKEELD LVKTVRFLILASRFPTIN VDSFVDLTLTAEYETWGRTEEAVRS  
ATGLALDCLLSFDYETRLRSRSDAPECLV LLLLIAKLGRNQVQFVTGAIMERLQNDDEQN  
ERLLLLSLLRIYAYLPFSMNLS TAALRSNLMKAVELSAEDWLSWRSPLDDSVREMIGTAF  
SNTSSLRSVQSLFDVAKKHPL LLLLRKLEMMENILEKDASDMGTAGADDKAGLVRGQGLNE  
PLIGAFNGKELKLFVKHWGYNYTEHIWSSILDVISA V PNEVLFQCGLKMGLLELLGAYLR  
LVLVQSQLRTNNDR LVNLKERISEVLGRFQTANLKS FDSW

>comp12412\_c0\_seq1; 203 1 1055 LEN=1677; translated  
XDVTKNLTVSGTGSNLVSSNTSRMSLNALLDEL D H LSGGPQAKNLECTPPLVAFQNVIVR  
SDDDNPKSKNDINKTIPKIMHFSHKSRCLPQDLAAIIGEWKRTL PDYSIFFHDDNAVNKL  
LEEDWPEFPELHRAMKCVHVNGAMTVDVWRILLIYKYGGIYSDMDVSPLRKFTSKTIRR  
LSAFFFTDPYSRPSQWFI AAEQGHPI MYRTMFAIVKNLLDL DHVFRPKVVFVTGPHAMKA  
GWDQFVTSGLP EGNFSYENNYEYEGADGKVKL KTHPSRVVEVKRGYKDIVTLYNSTENV  
TREERISHESGVEHWRVWVKLSSEHKGAKVSCRDY LKTLDDGSEEVPTRF

>comp12413\_c0\_seq1; 242 690 1391 LEN=1521; translated  
MIMGDTCTRGCRFCVKT SRKPPPLDPEEPEKVSNAISKWGLDYVVLTSVDRDDLVDQGS  
NHFREVIQK LKQKPPDLLVEALTPDFQGNQEF IHALATSGLDVYAHNIETVRRLTPKVRD  
RRATYDQTL DVLRYAKSVGNCLTKTSIMLGFGESEDEDIMETLQDLRAADV D VVTFGQYLQ  
PTRRHLPVKKYVTP EAFEEWQVKA EALGFKYVASGPLVRSSYKAGKQCLQSWF

>comp12413\_c0\_seq2; 316 151 1281 LEN=1424; translated  
MMFRRAVATVPLEGFSTRRLSSPAPSVKVTKSTPKSFSRLEALREKLSAEDATIDDFSG  
EKSVVRRKAAPRSKILPKPKWLKVQPADSDNYRRLRQTVRDSGLATVCEEARCPNIGE  
CWGGGEDQTATATIMIMGDTCTRGCRFCSVKTSRKPPPLDPEEPEKVSNAISKWGLDYV  
LTSVDRDDLVDQGSNHFREVIQKQKQKPDLLVEALTPDFQGNQEF IHALATSGLDVYAH  
NIETVRRLTPKVRDRRATYDQTLDVLRVYAKSVGNCLTKTSIMLGFGESEDEDIMETLQDLR  
AADVDVVTFGQYLQPTRRHLPVKKYVTPEAFEWQVKAALGFKYVASGPLVRSSYKAGE  
YFLKNLLKQKEQQKTA

>comp12413\_c0\_seq3; 281 151 1254 LEN=1384; translated  
MMFRRAVATVPLEGFSTRRLSSPAPSVKVTKSTPKSFSRLEALREKLSAEDATIDDFSG  
EKSVVRRKAAPRSKILPKPKWLKVQPADSDNYRRLRQTVRDSGLATVCEEARCPNIGE  
CWGGGEDQTATATIMIMGDTCTRGCRFCSVKTSRKPPPLDPEEPEKVSNAISKWGLDYV  
LTSVDRDDLVDQGSNHFREVIQKQKQKPDLLVEALTPDFQGNQEF IHALATSGLDVYAH  
NIETVRRLTPKVRDRRATYDQTLDVLRVYAKSVGNCLTKTSIMLGFGESEDEDIMETLQDLR  
AADVDVVTFGQYLQPTRRHLPVKKYVTPEAFEWQVKAALGFKYVASGPLVRSSYKAGK  
QCLQSWF

>comp12413\_c0\_seq4; 277 690 1418 LEN=1561; translated  
MIMGDTCTRGCRFCSVKTSRKPPPLDPEEPEKVSNAISKWGLDYVVLTSVDRDDLVDQGS  
NHFREVIQKQKQKPDLLVEALTPDFQGNQEF IHALATSGLDVYAHNIETVRRLTPKVRD  
RRATYDQTLDVLRVYAKSVGNCLTKTSIMLGFGESEDEDIMETLQDLRAADVDVVTFGQYLQ  
PTRRHLPVKKYVTPEAFEWQVKAALGFKYVASGPLVRSSYKAGEYFLKNLLKQKEQQK  
TA

>comp12414\_c0\_seq1; 570 76 1923 LEN=2130; translated  
MKAIRQLLVTSLFSSSRAVQFPKSFQKQQTIRQRFYNDVAVTTSADILHASSLEVDISN  
ENIFDDIDDESPLSLPSAMLSFPRHSKDVVNDVLIETEALVQNLHRDSKAVDPKTTKRS  
MSPMDSHDSIYANTYVDLGNIDTVGFYDYTLVHYTEELLTLLYSMALNRLVNDRHYP  
EMLTCGLNYDAFFSIRGLAVDKDTGWICHSYTHKVAVAWEGREKVSTSRIFEEYRGRG  
LNPRERKARLKPLNDLFSMAECCLIADTIQYFKDNDIDFCSSNVVTDILGAIRDTHISGD  
FHRIVADNPEKYFDPTPHLKDVLGNLKDSDGKRLIFASNSPFWYVDAGMKFVLGEEWIDI  
DAVIVSAGKPAFYTETRRPFREVNTEETNRVRFQKVEKLETGKVYTEGCLRELTKLMDWN  
GGDSVESMGPLSMNSNVLYIGDSLFAADLVDAKREYGWITAAVTPEVGFELDVQSSNDHVL  
AEKTIALLTALRQVQLEMGTREYTVEDSLVLDKLEKLVSMWRDRETNMLGNPFGSVFRA  
RYQPSLFAHSLRRYCDLYMNSVGSRLRYSQHRFYPEPDFRLLAHEITRSTVHCTEPQP  
DPESCEIDDSLKGSS

>comp12415\_c0\_seq1; 219 1 1201 LEN=1619; translated  
XKSKLLLSRPSNTNSQERHTSALSQLEIILPKEVRSNYDEMIHGPRFYGYHGHPIRDL  
EVLPLPALREASDSLWVTAGDSSLDNKYWFEDLRPEVGAYRRVFEPPARMNADVTYWLNFL  
AEERAQEQGARARPRLAAINTAVEATTVNERTHRLRPQDVFRLDNIRAQDTLVVSI  
GGNDVAMPMPCTILSVLSLVKMPRLRCLESASCVCASPACDEHCHGCGPVALSSCACA  
FPCLGYAVHLFGTRVQKYIEKLTAKTKPKRILVCMIIYYPDEAMTPSWAGNALRCLG  
YDKNPATLQWLIQRMFVEATSKIRIRGATDVVPVPLFRVLDGKVSVDYVARVEPNSR  
GGKMAEYLLNVIERHEENPSLPPQERHRDPYHPPSSSTSVPIESTYMVDRS

>comp12416\_c0\_seq1; 787 1 2685 LEN=3355; translated  
LRANQNQKHPFFKNIGIDNARRKAPSMTTVNPSSEILEALGDKENTPIRRSHRKRKSNR  
KFADMSNIDSQNAISGKNKTIAKIGSRNTGAKSENNVFSNREVVEKENATASLRSSVSS  
RDACEKEDRAAEGISIEPQTPASSSSECFSSPMVTKVDSECSRSISKQCLSVRSPPLSTA  
QMERCRTHSNGQTPTSILRRRCAPAKEGYVDGTTREDAVDPTSNCHFESLLAFAASTS  
SPTKTCDSKGIAPSLSSPPKQVELDLEALGNRLKELFKQFSRVVGRAGRPRNIIQRS  
IVTFGSPPPCILPRLIGCYTMYRDSQRRQHARLKLKLVNDDSLMSNDLVDRPTKICR  
KDSTADQEEATAAESLYPIHNLLNKLVLHLEWTVLAGHEHRDEQEGKNIPSPATAATSSANS  
ALAKAISNCNGEHQRKRVRQFAAFDDSAVVRAPSDVLEGSYKQDDCITALTDLLDVVE  
ELFPRAISCSASSLPKSKYCAASRSVRDFVYFLNNEFRSQHHDKICAKSLIAIENQNIPIE  
RIQKAANAYSRLNLSLHPEGKTVKLLPVAMTREPRADNDELVVPVSIRTLEEFIRIRP  
LSWEHRLANTSAQLVRYWRLTMNPIPERSDLQTKTDQWNSRLYDCVRLTNQSDQEFESI  
EISTSIDDDGSSCSTFDDDKLSSLLSNALAHLYGYLGFSSPLLERDSWKDKLDRVIPDE  
ECCASIVCQEGFGSRSSPVCLDEEDWQEEHLRAGSDFCAFHRRALFIERLLTIVAKKK  
WGDHWNDTVHSAAKKLARLACSNAIQPEDLHILLGIPVNGLLDRLQDILPLSRKRYEIV  
RANLRKTEKNFRLGFSSTKRKKMYQPRIGELEMNWTWELHPDTKFPSISLRES

>comp12416\_c0\_seq2; 787 1 2685 LEN=2955; translated  
LRANQNQKHPFFKNIGIDNARRKAPSMTTVNPSSEILEALGDKENTPIRRSHRKRKSNR

KFADMSNIDSQNAISGKNKTIARKIGSRNTGAKSENNVFSNREVVEKENATASLRSSVSS  
RDACEKEDRAAEGISIEPQTPASSSSECFSSPMVTKVDSECSRISKQCLSVRSPPLSTAQ  
MERCRTTHSNQOTPTSILRRRCAPAKEGYVYDGTTRREADAVDPTSNCHFESLLAFAASTS  
SPTKTCDSKGIAPSLSSPPKQVELDLEALGNRLKELFKQFSRVVGRAGRPRNIQRS  
IVTFGSPPPPCILPRLIGCYTMYRDSQRRQHARLKLKLVNDDDSLMSNDLVDRPTKICR  
KDSTADQEEATAAESLYPIHNLLNKLVLHLEWTVLAGHEHRDEQEGKNIPSPATAATSSANS  
ALAKAISNCQNGEHQRKRRVQFAAFDDSAVVRAPSDVLEGSYKPDQDCITALTDLLDVVE  
ELFPRAICSSASLPKSKYCAASRSVRDFVFFYLNNEFRSQHHDKICAKSLIAIENQNIPIE  
RIQKAANAYSRLNLSLLHPEGKTVKLLPVAMTREPRADNDELVVPVSIRTLEEFIRIRP  
LSWEHRLANTSAQLVRYWLRITLMNPIPERSDLQTKTDQWNSRLYDCVRLTNQSDQEFESI  
EISTSIDDDGSSCSTFDDDKLSSLLSNALAHLYGYLGFSSPLLERDSWKDKLDRVIPDE  
ECCASIVCQEGFGSRSSPVCLDEEDWQEEHLRAGSDFCAFHRRALFIERLLTIVAKKK  
WGDHWNDTVHSAAKKLARLACSNAIQPEDLHLILLGIPVNGLLDRLQDILPLSRKRYEI  
VRANLRKTEKNFRLGFSSTKRKKMYQPRIGELEMNWTWELHPDTKFPISLRES  
>comp12417\_c0\_seq1; 358 163 1119 LEN=1220; translated  
MVSNGIFEVLIIISCIAILFSDAFVAIPTANTKARNSILFLSKEVDGSKDGYRFGDLTRG  
VLKKVRGSDAESSDSKSGYRFGDLTRGALNKAKESSSSYKFGDISRWADKKAKEQVSKFT  
NKENYQFGDLSKEVIRRLVSGEYSRDDLFLFLKIVATIGINMQPVTSVLPLKVLTELLNL  
TVEASIAQSVSQRVVSSIANEIDGRMKEFVTGDRNYQTGDLTKRALSKWTGKENYEVGDI  
TKTFLEKKAQAQKSEASGENSSEGLELFSKKEEASMLEDWKLLLESRRKQEGLGSGKDD  
DSYREWDEKFLASKSTST  
>comp12418\_c0\_seq1; 89 1 1452 LEN=2143; translated  
XIESTPNRHLLKPPPAHSSCLAESQKKIVEIHXTDKVRGTNREAYTLEEEVRRALEQKA  
ALTSRNPRESRFSHFPEKEVELQCKQGNKSQDDNYHTVIVNSSLTVLQTSDDTKLKADVE  
QLGKRSKAINLSLMPYELKILEEQFGSILDELPPQYRFDADIHNYISDTLDTPEGM  
DTKVEAPSRYKGVPEAASDP IGTNENDADYVSVMKGFRDFCPQCKTFDCQFHITSYP  
DAATQASVAIQYDKRAISQLSRSARRSFNQQPVRGGRSGSDSRVSSVRGKARNSFTV  
DVTDGQKFLHLSGEVMECPFCRFPCRGSEKLSKHLKRYHSDSFYFETS  
DRKITARKRTVGTMTMIPKRQYYHPNSKIPIQIGHDRDLDDDES  
LYSWYHDYRKERIEDFDDLTENEKKIESLWNRFLGCS  
SVVVEDRAVPKICMSLIRKHSADLSGLEWEFYLQVITLWERRMLSVIDVEQCMLLYHSLQ  
DSKLW  
>comp12418\_c0\_seq2; 213 1 2445 LEN=2496; translated  
XIESTPNRHLLKPPPAHSSCLAESQKKIVEIHXTDKVRGTNREAYTLEEEVRRALEQKA  
ALTSRNPRESRFSHFPEKEVELQCKQGNKSQDDNYHTVIVNSSLTVLQTSDDTKLKADVE  
QLGKRSKAINLSLMPYELKILEEQFGSILDELPPQYRFDADIHNYISDTLDTPEGM  
DTKVEAPSRYKGVPEAASDP IGTNENDADYVSVMKGFRDFCPQCKTFDCQFHITSYP  
DAATQASVAIQYDKRAISQLSRSARRSFNQQPVRGGRSGSDSRVSSVRGKARNSFTV  
DVTDGQKFLHLSGEVMECPFCRFPCRGSEKLSKHLKRYHSDSFYFETS  
DRKITARKRTVGTMTMIPKRQYYHPNSKIPIQIGHDRDLDDDES  
LYSWYHDYRKERIEDFDDLTENEKKIESLWNRFLGCS  
SVVVEDRAVPKICMSLIRKHSADLSGLEWEFYLQVITLWERRMLSVIDVEQCMLLYHSLQ  
DSKLWQRNATPLNPRKRVICSRHLHIFQSLGGGMPRFLKAI  
SRTAITSQDLVNTFPVLDTAIKWP  
KLKKRKITEVVRMRAKIYRGPSSSLASTLVLV  
PKKTVARASKTTICAPNIVFGANTALISIRAAIAHRIAGL  
PNSAPAAATRIENAIQIPACAAVRTKDVTASXANMDVTLANRVP  
LLIGRSSIKGAGLGLFTKNPLKKGDI  
DEYIGEFIKREHEVNRSQEYYFDHSDDYVIDATYQGNKTRFLNHSQTPNIEAKHRFVNGEKRIAFYAKQDIP  
SQSELFYSYGKSYNKIWRSKGIPELCVDSDDDGFESEDDSESLEESQSVDDDFCSV  
>comp12420\_c1\_seq2; 263 1 1301 LEN=1301; minus strand; translated  
AGGSRGGGYFGAYTIGLVGKPSAGKSTFFNAATAFSRQRGQHG  
EAASGGKPGENQNAAPGSSRGS  
GSDLGGASMAAHPFTTIDPNVGYCLVPAPPGSCPEDDHGGGEL  
SEGCGSTHGRDPHGRRFLPVLLKDVAGLVP  
GAYEGRGRGNQFLNDLTDANVLIHVVDSSGSADASGNKIVVE  
GGDETGGSGDPQQHQRTDPLDDLAWIRAE  
LVEWVYSNLVAKWAVISRKGRSKLAGMFS  
GYGQKPEMVEAAFALEGLAERYQRDRALDKI  
HEWDECDVHRLVSLFLGVRFPMALCLNK  
YDLSSARGFVDKIQESL  
PVHGAHAGVPLSARKEMEFVREQMAVEKLSGGAPPPGAASGTP  
PLGVWECLASAVELREPI  
LVFPVSDMATMAPMKALSKVATGDP  
SLPTSGMIRCI  
EASGGSA  
PSCWNSRDGQYAA  
>comp12421\_c0\_seq1; 272 120 686 LEN=1147; translated  
MRSSTIATVLVGLCALESGQAWSAPKPGSQVTRKSM  
LQTLVKGGVATAAATVLVQQPAFA  
DKLPSGVTYEVVKEGKIKPDVGELIAIRFAAYVDGRKID  
DIFDTPEPYYTRLGSGGLLK  
GVESTLPLMNLGDRWKL  
TIPGELAFGPKGRPASAGKPRIPGNAEVVFDVEIVGL  
PGKEPEL  
LIELIGDE

>comp12421\_c0\_seq2; 192 120 548 LEN=778; translated  
MRSSTIATVLVGLCALESQAWSAPKPGSQVTRKSMQLQTLVKGGVATAAATVLVQQPAPA  
DKLPSGVTYEVVKEGKGIKPDVGLIAIRFAAYVDGRKIDDI FDTPEPYTRLGSGGLLK  
GVESTLPLMNLGDRWKLTI PVS

>comp12422\_c0\_seq1; 244 1 1555 LEN=2878; translated  
XNSAKTENS PFGPSPGITQCPRATTRYRSFFFV PVRNATKITSSPETS PGTMEQSSAETQ  
KQSQSKCDREGEAKVNSDGDVNSPPPLYFGYSAL TVWRVAFYI IMAYTWGKSVLGPFGG  
WTDATTYDHA EWVYDFAPKTFEATERLRWF SVAVALLSIFSDTATNIFALLAGQLIFTNL  
VCFINHYYLFFLLATLMAFYCNCGKDNVHNKAGWIHAIRGQIVVYAFASLWKFDSDWLN  
GGIVEAIFLSFEEQGDHRGIPWSDINASYPGIFSFIALSGIFLDSMLFLVLMFLPPGHKL  
QALGLVFHGF TAYTMAERIGYSFPLTMIFSGFAFQRSDVVDKQESLGGDTLSHFQWLSL  
QIQWLK RANQCKPKHAVQQHVVKTKKQILPLLFLVIQWLIPLR MPLVSHGFEFKYTFEGYR  
WSWTMMLH SKFNIKSPGLSFMSLRPKCGSHFPFNPLAKEYPVMDPHSF PYEFFIMDQERV  
TSXPTDVSP PNAETFIFCRTKNWGPMSKGNDDDNVLF L

>comp12422\_c0\_seq2; 206 1 1428 LEN=2751; translated  
XNSAKTENS PFGPSPGITQCPRATTRYRSFFFV PVRNATKITSSPETS PGTMEQSSAETQ  
KQSQSKCDREGGSEVGGWTDATTYDHA EWVYDFAPKTFEATERLRWF SVAVALLSIFSD  
TATNIFALLAGQLIFTNLVCFINHYYLFFLLATLMAFYCNCGKDNVHNKAGWIHAIRGQI  
VVYAFASLWKFDSDWLN GGIVEAIFLSFEEQGDHRGIPWSDINASYPGIFSFIALSGIF  
LDSMLFLVLMFLPPGHKLQALGLVFHGF TAYTMAERIGYSFPLTMIFSGFAFQRSDVVDK  
DQESLGGDTLSHFQWLSLQIQWLK RANQCKPKHAVQQHVVKTKKQILPLLFLVIQWLIPL  
R MPLVSHGFEFKYTFEGYRWSWTMMLH SKFNIKSPGLSFMSLRPKCGSHFPFNPLAKEYPV  
MDPHSF PYEFFIMDQERVTSXPTDVSP PNAETFIFCRTKNWGPMSKGNDDDNVLF L

>comp12422\_c0\_seq3; 206 1 1428 LEN=2620; translated  
XNSAKTENS PFGPSPGITQCPRATTRYRSFFFV PVRNATKITSSPETS PGTMEQSSAETQ  
KQSQSKCDREGGSEVGGWTDATTYDHA EWVYDFAPKTFEATERLRWF SVAVALLSIFSD  
TATNIFALLAGQLIFTNLVCFINHYYLFFLLATLMAFYCNCGKDNVHNKAGWIHAIRGQI  
VVYAFASLWKFDSDWLN GGIVEAIFLSFEEQGDHRGIPWSDINASYPGIFSFIALSGIF  
LDSMLFLVLMFLPPGHKLQALGLVFHGF TAYTMAERIGYSFPLTMIFSGFAFQRSDVVDK  
DQESLGGDTLSHFQWLSLQIQWLK RANQCKPKHAVQQHVVKTKKQILPLLFLVIQWLIPL  
R MPLVSHGFEFKYTFEGYRWSWTMMLH SKFNIKSPGLSFMSLRPKCGSHFPFNPLAKEYPV  
MDPHSF PYEFFIMDQERVTSXPTDVSP PNAETFIFCRTKNWGPMSKGNDDDNVLF L

>comp12422\_c0\_seq4; 328 1 1927 LEN=2516; translated  
XNSAKTENS PFGPSPGITQCPRATTRYRSFFFV PVRNATKITSSPETS PGTMEQSSAETQ  
KQSQSKCDREGGSEVGGWTDATTYDHA EWVYDFAPKTFEATERLRWF SVAVALLSIFSD  
TATNIFALLAGQLIFTNLVCFINHYYLFFLLATLMAFYCNCGKDNVHNKAGWIHAIRGQI  
VVYAFASLWKFDSDWLN GGIVEAIFLSFEEQGDHRGIPWSDINASYPGIFSFIALSGIF  
LDSMLFLVLMFLPPGHKLQALGLVFHGF TAYTMAERIGYSFPLTMIFSGFAFQRSDVVDK  
DQESLGGDTLSHFQWLSLQIQWLK RANQCKPKHAVQQHVVKTKKQILPLLFLVIQWLIPL  
R MPLVSHGFEFKYTFEGYRWSWTMMLH SKFNIKSPGLSFMSLRPKCGSHFPFNPLAKEYPV  
MDPHSF PYEFFIMDQERVTSVLQMFPRQMPKLSYFVEQKIGDQCPKVM TMTTSYFSSVND  
GPYHRIIDPTSDLLEVHRSHSNL TWPSKLWYAVIDKAPIGQEFVLRGTGSVNLP L ASGPK  
RLKDEITFVDRSPCLQVDPIKVHLNSFQIQFEADSEVDLRLSILGCPDATFTNCERTYIN  
QGEQLRVPRYRTVLIGIDEDLGMICSETRKEDVVIKLTSLVH

>comp12422\_c0\_seq5; 328 1 1927 LEN=2647; translated  
XNSAKTENS PFGPSPGITQCPRATTRYRSFFFV PVRNATKITSSPETS PGTMEQSSAETQ  
KQSQSKCDREGGSEVGGWTDATTYDHA EWVYDFAPKTFEATERLRWF SVAVALLSIFSD  
TATNIFALLAGQLIFTNLVCFINHYYLFFLLATLMAFYCNCGKDNVHNKAGWIHAIRGQI  
VVYAFASLWKFDSDWLN GGIVEAIFLSFEEQGDHRGIPWSDINASYPGIFSFIALSGIF  
LDSMLFLVLMFLPPGHKLQALGLVFHGF TAYTMAERIGYSFPLTMIFSGFAFQRSDVVDK  
DQESLGGDTLSHFQWLSLQIQWLK RANQCKPKHAVQQHVVKTKKQILPLLFLVIQWLIPL  
R MPLVSHGFEFKYTFEGYRWSWTMMLH SKFNIKSPGLSFMSLRPKCGSHFPFNPLAKEYPV  
MDPHSF PYEFFIMDQERVTSVLQMFPRQMPKLSYFVEQKIGDQCPKVM TMTTSYFSSVND  
GPYHRIIDPTSDLLEVHRSHSNL TWPSKLWYAVIDKAPIGQEFVLRGTGSVNLP L ASGPK  
RLKDEITFVDRSPCLQVDPIKVHLNSFQIQFEADSEVDLRLSILGCPDATFTNCERTYIN  
QGEQLRVPRYRTVLIGIDEDLGMICSETRKEDVVIKLTSLVH

>comp12422\_c0\_seq6; 366 1 2054 LEN=2643; translated  
XNSAKTENS PFGPSPGITQCPRATTRYRSFFFV PVRNATKITSSPETS PGTMEQSSAETQ  
KQSQSKCDREGEAKVNSDGDVNSPPPLYFGYSAL TVWRVAFYI IMAYTWGKSVLGPFGG  
WTDATTYDHA EWVYDFAPKTFEATERLRWF SVAVALLSIFSDTATNIFALLAGQLIFTNL

VCFINHYLLFLLATLMAFYCNCGKDNVHNKAGWIHAIRGQIVVVYAFASLWKFDSDWLN  
GGIVEAIFLSFEEQGDHRGIPWSDINASYPGIFSFIALSIGIFLDSMLFLVLMFLPPGHKL  
QALGLVFHGFATYMAERIGYSFPLTMIFSGFAFQRSDVVDKQESLGGDTLSHFQWLSL  
QIQWKRANQCKPKHAVQQHVVKTKKQILPLLFLVIQWLIPLRMPLVSHGEFKYTFEGYR  
WSWTMMLHSHKFNKSPGLSFMSLRPKCGSHFPNPLAKEYPVMDPHSFPEEFFIMDQERV  
TSVLQMFPRQMPKLSYFVEQKIGDQCPKVMTMTTSYFSSVNDGPYHRIIDPTSDLLEVHR  
SHSNLTWPSKLVYAVIDKAPIGQEFVLRGTGSVNLPLASGPKRLKDEITFVDRSPCLQVD  
PIKVHLNSFQIQFEADSEVDLRLSILGCPDATFTNCERTYINQGEQLRVPRYRTVLIGID  
EDLGMICSETRKEDVVIKLTSLVH

>comp12422\_c0\_seq7; 244 1 1555 LEN=2747; translated  
XNSAKTENSFPFGSPGITQCPRATTRYRSFFFVVPVRNATKITSSPETSPGTMEQSSAETQ  
KQSQSKCDREGEAKVNSDGDVNSPPPLYFGYSALTVWRVAFYIIMAYTWGKSVLGPFGG  
WTDATTYDHAEWVYDFAPKTFEATERLRWFSAVALLSIFSDATNIFALLAGQLIFTNL  
VCFINHYLLFLLATLMAFYCNCGKDNVHNKAGWIHAIRGQIVVVYAFASLWKFDSDWLN  
GGIVEAIFLSFEEQGDHRGIPWSDINASYPGIFSFIALSIGIFLDSMLFLVLMFLPPGHKL  
QALGLVFHGFATYMAERIGYSFPLTMIFSGFAFQRSDVVDKQESLGGDTLSHFQWLSL  
QIQWKRANQCKPKHAVQQHVVKTKKQILPLLFLVIQWLIPLRMPLVSHGEFKYTFEGYR  
WSWTMMLHSHKFNKSPGLSFMSLRPKCGSHFPNPLAKEYPVMDPHSFPEEFFIMDQERV  
TSXPTDVSPNAETFIFCRTKNWGPMSKGNDDDNVLF

>comp12422\_c0\_seq8; 366 1 2054 LEN=2774; translated  
XNSAKTENSFPFGSPGITQCPRATTRYRSFFFVVPVRNATKITSSPETSPGTMEQSSAETQ  
KQSQSKCDREGEAKVNSDGDVNSPPPLYFGYSALTVWRVAFYIIMAYTWGKSVLGPFGG  
WTDATTYDHAEWVYDFAPKTFEATERLRWFSAVALLSIFSDATNIFALLAGQLIFTNL  
VCFINHYLLFLLATLMAFYCNCGKDNVHNKAGWIHAIRGQIVVVYAFASLWKFDSDWLN  
GGIVEAIFLSFEEQGDHRGIPWSDINASYPGIFSFIALSIGIFLDSMLFLVLMFLPPGHKL  
QALGLVFHGFATYMAERIGYSFPLTMIFSGFAFQRSDVVDKQESLGGDTLSHFQWLSL  
QIQWKRANQCKPKHAVQQHVVKTKKQILPLLFLVIQWLIPLRMPLVSHGEFKYTFEGYR  
WSWTMMLHSHKFNKSPGLSFMSLRPKCGSHFPNPLAKEYPVMDPHSFPEEFFIMDQERV  
TSVLQMFPRQMPKLSYFVEQKIGDQCPKVMTMTTSYFSSVNDGPYHRIIDPTSDLLEVHR  
SHSNLTWPSKLVYAVIDKAPIGQEFVLRGTGSVNLPLASGPKRLKDEITFVDRSPCLQVD  
PIKVHLNSFQIQFEADSEVDLRLSILGCPDATFTNCERTYINQGEQLRVPRYRTVLIGID  
EDLGMICSETRKEDVVIKLTSLVH

>comp12423\_c0\_seq1; 646 16 2288 LEN=2426; translated  
MSNTIDDPVAECHRIGLSPSKNHTLLDFLPEVVWGNVALHLSARDVLSLLSVNRRRLCSA  
LGESESGFWDMLSNRDGASCYAYYHRMKELQTPRAADDKVDGCVWRRAKHSFLFHCHKANP  
TKSFGGVRWYPVRPYGRFSGISDREGHVACVVSARKVISNQVVDGLSMSSESSEEGQLARIRE  
RFVVIITGGFSDDDSVCKFLNXLKSVTFRHRWRDLSLIPKFLFFPEPIDIINAGTGILEDN  
PRNSERRLHRWSVKRLEPRSGSSFVYGATLTALPTEYSMTTNGECQPRLTVMRAIRFGG  
FRAGGYSGETSQVSMLTLTQEAHARRRHRGKREPERKHDNEGDESEEHAIIDMEWQWDQQ  
FKCDWSNISTTGVISGDHDVEGSPERYFLSRAYHSSTLLLDRLVVLGGMKSDCSILNEA  
ILDTKTWTWIGEGRISLGADGIDSRPSGRHGHSVVLDDTRNRLVLFGGGSGSDLLRSGDD  
NSEVWELQLGDKWQGDHFAASF PWKWKLLHNSNRRYGNSESEHNIGHDTENAERLLTSL  
PSETLCLGRCHHGKIKISRDTVLLFFGSGRPSTNGVIAYDLKADVFRHDQVSQPLSSSTT  
SGGVCIKGIIPKPRFTGVA AFLNEDGYILTHGGYCSQDHDITIGTMDVLDLAPAFRGQPLS  
SSSFDGLPIDHQRVSYANVTNSQADRWRQDPDAALQRMQLQTLTGTPLAERRAAAGNLLNQ  
MHRGDLPSNRQTMLLMSMIALGRANFESDDEYNSDIS

>comp12423\_c0\_seq2; 610 16 2437 LEN=2575; translated  
MSNTIDDPVAECHRIGLSPSKNHTLLDFLPEVVWGNVALHLSARDVLSLLSVNRRRLCSA  
LGESESGFWDMLSNRDGASCYAYYHRMKELQTPRAADDKVDGCVWRRAKHSFLFHCHKANP  
TKSFGGVRWYPVRPYGRFSGISDREGHVACVVSARKVISNQVVDGLSMSSESSEEGQLARIRE  
RFVVIITGGFSDDDSVCKFLNXLKSVTFRHRWRDLSLIPKFLFFPEPIDIINAGTGILEDN  
PRNSERRLHRWSVKRLEPRSGSSFVYGATLTALPTEYSMTTNGECQPRLTVMRAIRFGG  
FRAGGYSGETSQVSMLTLTQEAHARRRHRGKREPERKHDNEGDESEEHAIIDMEWQWDQQ  
FKCDWSNISTTGVISGDHDVEGSPERYFLSRAYHSSTLLLDRLVVLGGMKCRILLIRVS  
LFRKEGEGLDGCSNLSFLNDRALGNLPTSFFCIAFFAADCSILNEAILDTKTWTWIG  
EGRISLGADGIDSRPSGRHGHSVVLDDTRNRLVLFGGGSGSDLLRSGDDNSEVWELQLGD  
KWQGDHFAASF PWKWKLLHNSNRRYGNSESEHNIGHDTENAERLLTSLPSETLCLGRCH  
HGKIKISRDTVLLFFGSGRPSTNGVIAYDLKADVFRHDQVSQPLSSSTTSGGVCIKGIIP  
KPRFTGVA AFLNEDGYILTHGGYCSQDHDITIGTMDVLDLAPAFRGQPLSSSFDGLPIDH  
QRVSYANVTNSQADRWRQDPDAALQRMQLQTLTGTPLAERRAAAGNLLNQMHRGDLPSNRQ

TMLLMSMIALGRANFESDDEYNSDIS

>comp12423\_c0\_seq3; 667 16 2342 LEN=2480; translated  
MSNTIDDPDVAECHRIGLSPSKNHTLLDFLPEVVWGNVALHLSARDVLSLLSVNRRRLCSA  
LGESEGSFWDMLSNRDGASCYAYYHRMKELQTPRAADDKVDGCVWRRRAKHSFLFHCHKANP  
TKSFGGVRWYPVPRPYGRFSGISDREGHVACVVSARKVISNQVVDGLSMSSEEGQLARIRE  
RFVVITGGFSDDDSVYI INAGTGILEDNPRNSERRLHRWSVKRLEPRSGSSFFVYGATLTA  
LPTEYSMTTNGECQPRLTVRMRAIRFGGFRAGGYSGETSQVSMLTTLTQEAHARRRHRGK  
REREPKHDNEGDESEEHAIIDMEWQWDQQFKCDWSNISTTGVIISGDHDVEGSPERYFLSRA  
YHSSTLLLDRYLVVLGGMKCRILLIRVSLFRKEGEGLDGFCNSLSFLLNDERALGNLPTS  
FFCIAFFAADCSILNEAILDTKTWTWIGEGRISLGADGIDSRPSGRHGHSVVLDLDRNRL  
VLFGGGSGSDDLRSRDDNSEVWELQLGDKWQGDHFAASF PWKWKKLHNSNRRYGNSESE  
HNIGHDTENAERLLTSPSETLCLGRCHHGKIKISRDTVLLFFGSGRPSTNGVIAAYDLKAD  
VFFRHDQVSQPLSSSTTSGGVCIKGIIPKPRFTGVA AFLNEDGYILTHGGYCSQDHDITIG  
TMDVLDLAPAFRGQPLSSSSFDGLPIDHQVSYANVTNSQADRWRQDPDAALQRMQLQTL  
GTPLAERRAAAGNLLNQMRGDLPSNRQTMLLMSMIALGRANFESDDEYNSDIS

>comp12423\_c0\_seq4; 703 16 2193 LEN=2331; translated  
MSNTIDDPDVAECHRIGLSPSKNHTLLDFLPEVVWGNVALHLSARDVLSLLSVNRRRLCSA  
LGESEGSFWDMLSNRDGASCYAYYHRMKELQTPRAADDKVDGCVWRRRAKHSFLFHCHKANP  
TKSFGGVRWYPVPRPYGRFSGISDREGHVACVVSARKVISNQVVDGLSMSSEEGQLARIRE  
RFVVITGGFSDDDSVYI INAGTGILEDNPRNSERRLHRWSVKRLEPRSGSSFFVYGATLTA  
LPTEYSMTTNGECQPRLTVRMRAIRFGGFRAGGYSGETSQVSMLTTLTQEAHARRRHRGK  
REREPKHDNEGDESEEHAIIDMEWQWDQQFKCDWSNISTTGVIISGDHDVEGSPERYFLSRA  
YHSSTLLLDRYLVVLGGMKSDCSILNEAILDTKTWTWIGEGRISLGADGIDSRPSGRHGH  
SVVLDLDRNRLVLFGGGSGSDDLRSRDDNSEVWELQLGDKWQGDHFAASF PWKWKKLHND  
SNRRYGNSESEHNIGHDTENAERLLTSPSETLCLGRCHHGKIKISRDTVLLFFGSGRPST  
NGVIAAYDLKADVFFRHDQVSQPLSSSTTSGGVCIKGIIPKPRFTGVA AFLNEDGYILTHG  
GYCSQDHDITIGTMDVLDLAPAFRGQPLSSSSFDGLPIDHQVSYANVTNSQADRWRQDP  
AALQRMQLQTLGTPLAERRAAAGNLLNQMRGDLPSNRQTMLLMSMIALGRANFESDDEY  
NSDIS

>comp12424\_c0\_seq1; 190 1077 1591 LEN=2226; translated  
MDCDVSTFPAPIDLSDKTKACKLTTIFSVDRQVRQAIEDNFVASVVDLSFENALQAQGVW  
DIHVELEPGEASESPSLSPSLSPSPTGRXKQAPNSLSYLSTNSSSYSSANSNTNKSPSYEEA  
FKEADQKTKAYQTDDNSSTKYSSANSRYIRENRGAISLRFQTACNINEVVW

>comp12424\_c0\_seq2; 190 1400 1914 LEN=2549; translated  
MDCDVSTFPAPIDLSDKTKACKLTTIFSVDRQVRQAIEDNFVASVVDLSFENALQAQGVW  
DIHVELEPGEASESPSLSPSLSPSPTGRXKQAPNSLSYLSTNSSSYSSANSNTNKSPSYEEA  
FKEADQKTKAYQTDDNSSTKYSSANSRYIRENRGAISLRFQTACNINEVVW

>comp12425\_c0\_seq1; 422 1 1405 LEN=2001; translated  
XDNDNDNEERYWLRETAFLHIGKAGGGAIRERIRHLGFKTMKYGFDMMKKPKGHKREK  
AMVYLMALRDPIDRFVSNFYWSGLLLCHDGPNNHLGEPRTKISMIPENMDRYCKKVGEKS  
THRADIHRSRYHGNANELAMALCEDPRVKEAAIEDIQDFSHARASINDWLGFFYKSRK  
PDKPDKIPVGVILEKGFDFEQQIDGAVEFALRHSLWKDEEERIRRRNTTQEKDYYTDTDT  
DRVTTQATWHATTQAEALPALRNDTRLAEAEHAIHQEKLASVQKLHDPKNDHTSHTADEN  
EKNYPPIWIKTMHVHQERGLTATSACCLAKHFYGEDYILLGLGDTDSEQNDTGVSPLAELV  
CKGPAASQCREALASIAARRHADRNCPAVLEGLSRGAPTEPNSAPPPSKLP IVDGAVLEA  
RSESFQISEGLAMASILLGLFYGLYRGRSGSRAAAGTVAKRVTTATV

>comp12426\_c0\_seq1; 1045 562 3689 LEN=3770; translated  
MQMALSSLFLAFLSHLTTNRGKTKLKFAMLNILAAIFVVSISVMATTYGETVFIGTISD  
EYANDPSQVPFLFDLVEIGREFWSASYFMFLVCLACVWGDMAKENTIFVMGLPNLSLCAAG  
MIVAQLIVGILWLRLVLLNKANDGEILEESVAHRVSPLAFEYAAALMTIFFAHNLIFTLFA  
YDEDDDNICYEKNNSQDNIQDYSTDESYSGNNSREERDEEEGFTVTIDGDVIDTNS  
NTYHNCDLVKSIPQNTKIPKGPLEEHSVDNCSSESHFNDIEEDIESGNYIENREIQEVET  
SSSDSNQNLINGDATLTKNDSFEPQMENMCSYVSTFLPYSQNEDEDERNDDEGQTLSDDDVAH  
LERKSNQVFSALAPTVTSSASDIAAVHTLARNNSDIANRPTTNEISLGQHDSYSQDKSLH  
TKLSDPEERIDSEIEICISSGNQKSVEKLRKSKESTSSSTPASVPPXNKNTVPPPLLSNDA  
NVPIDDVNLVPHVGIKETQLKKKSSEIDIEGSKTSDDHDFELEEIEVPLEDNPFKLAND  
EILADLHSINMEEHSSSTALPRSTLRPKRKKKSRRYRKKKVSQKMIQVDIPRVIREEEER  
NSTSSSSSGSYNLVSKKLIKSKDPVINTTTKSFTDPEHIGVDQKSENSEKTFYWERHSN  
EKDGRHQTKTDES LHVESKPSLSDKHSSTEENPGLSFSNSKTTEQVPNDSVKKVQSTEHE  
ALIQTKGADWMSTPSSNDDFTQLDCFNSSLLSLKTALDGTYCNPSTHIFPNFQQHNKDP



SQMASQHRLLRNNTAQRCKREPSLVPALLEATTFSSDCVSTLT'TDLDDEGDNAGKSI STSS  
SSLDSGVSVPSSNPSPGPKLRGEKVPRATLDSKTDGTGGSERNEGRKTELDCGGIEQGARTD  
CDRHEAGPGDGSRRPTPIGADDRGGRDGSKGGTGIAPAPVVRATTKDAAPERGS GSGSA  
AASEGSVPPPPKRREPASVGSRSRSCSSRSSGDESGRQSSNKYSLLQFSSTSSEEDSNKTR  
VDGIPLVTQNPDASQRHGQGS

>comp12427\_c0\_seq1; 448 86 1387 LEN=1710; translated  
MDESSDDSNKDGSHLEMASLVETEKVKNKEESKNVTGDMNLPSSISSPCSNFFALLLAYAS  
YGVQYAPRTCFLAVIGLVFVPSYFIVADVFFNPTEHFGEILNDYSDLSVQSKLDSL MKNI  
DHWCLGGGNDSCRCEPTLPTPRFDYRRWSNAHAGNKMQIENMIKQDFTTTPDIAFLGASV  
IEKMDGRWFGDISGEGLNEVANIFDKHFGKDGMSAVALGIAADTNQSVLWRILNGEMPA  
QFNPKIWWLELGLNDLGRSRCSEEVVIVGLRVVEEIMRLKPKDAKIVVNSLFPMAFSD  
RAPTTDDLKRSFGTKPERARNQPRPGSNTVNRPGKQKNPRNFRPRDFGKKEIGKQAPRER  
NPVKNEGPGQRRNRI LDGTENQGRNRLNQRSLRDRDTRFRNRSREKNQVKLLDKTSQQK  
YNQITRTEQKMPW

>comp12428\_c0\_seq1; 289 1 1772 LEN=1876; minus strand; translated  
XPHHTVAPVALVLHGTAREVVAGSLPRLFDTDGQRFWHRIVSSRERDGS AKGGGNLRVGN  
DREPVALMQQVVPRQPQT'TGLLEDLLEAPERRGVDLGLGHDVPHRPPMGVSPAFQGSASA  
ADPHKDVRPEHVLVPAEPLPHGHDPFPVDPVREGLGVPSGGSFPPRPLLALLRGGVKGQA  
GPVAEKQGPHVGPVPRPPDQPGPAPDGKDLELHPAPEEGGPSAGIVPSAVLVVPRPRL  
REALLHDDPRPDVPGVGLPDGPAALLLDPPEVVFREVAGDGVDPVPAFEDRHRL LAVPD  
VRGVLGRVVVDEPDPPAAGEVGRGLGDVVPGLGEPLSEGLRKAPAFQPQLVVRVKGQGGDA  
LDAGPRPGGRKPPLEGLVDVEAQRGVGRVPPAFQELDPGLVPFELGRQVKVPKEGKGRG  
IAATGFAPDAGSFVPAEPGQVDPVHHKGIKGVLGAVKDGGRGGKGPLASNGFPAPQDG  
SKAPAGSGPIGQRGPASGFEGPENGTEGGQHRDSQQQGHGDGGXIAAARERGN GPASLVG  
RGGLEWKVDGLKSMEGSAVSTAXGSAAFVVS SKKRNDPKDWN NVKQPM DP

>comp12428\_c0\_seq2; 287 1 1754 LEN=1858; minus strand; translated  
XPHHTVAPVALVLHGTAREVVAGSLPRLFDTDGQRFWHRIVSSRERDGS AKGGGNLRVGN  
DREPVALMQQVVPRQPQT'TGLLEDLLEAPERRGVDLGLGHDVPHRPPMGVSPAFQGSASA  
ADPHKDVRPEHVLVPAEPLPHGHDPFPVDPVREGLGVPSGGSFPPRPLLALLRGGVKGQA  
GPVAEKQGPHVGPVPRPPDQPGPAPDGKDLELHPAPEEGGPSAVLVVPRPRLREALLH  
DDPRPDVPGVGLPDGPAALLLDPPEVVFREVAGDGVDPVPAFEDRHRL LAVPDVRGVLG  
RVVVDEPDPPAAGEVGRGLGDVVPGLGEPLSEGLRKAPAFQPQLVVRVKGQGGDALDAGPR  
PGGRKPPLEGLVDVEAQRGVGRVPPAFQELDPGLVPFELGRQVKVPKEGKGRGIAATGF  
APDAGSFVPAEPGQVDPVHHKGIKGVLGAVKDGGRGGKGPLASNGFPAPQDGSKAPAG  
SGPIGQRGPASGFEGPENGTEGGQHRDSQQQGHGDGGXIAAARERGN GPASLVGRGGLEW  
KVDGLKSMEGSAVSTAXGSAAFVVS SKKRNDPKDWN NVKQPM DP

>comp12429\_c0\_seq1; 133 191 494 LEN=494; translated  
MGAQQSADADEDCRPFCEIETPFKRNALNDPLGSLPDIPASRRKQREFSSRYDGLEKE  
TSSASNMNSLYGNVAQTNNSSRTAGVFEGSVRERLHLTREKX

>comp12429\_c0\_seq2; 427 191 1486 LEN=2026; translated  
MGAQQSADADEDCRPFCEIETPFKRNALNDPLGSLPDIPASRRKQREFSSRYDGLEKE  
TSSASNMNSLYGNVAQTNNSSRTAGVFEGSDAEALHOKYQLMEVLGVGSTSTCHRCV DK  
KTGAHYACKI IDKQMI EERF HGMMEQFHT EIEALRALDHPSIIQLLDVFI SEEKIFIVME  
LMEGGELFDYVQKGLTTEDEASSIVRKVTSAMVYMHSONIVHRDLKPENLLLRKPN GP  
HDSVDVKI IDFGLSKCMTEPVAQSFLGTRGYLAPEMLQRRNYTKAVDTWALGVIVFVLLC  
GCLPFDDSTTVPSDDLVRAKFVLRFPWRWAKNLSPSAKDLLSHLLDVNPARRYTADQALD  
HPWVTGKAALKG NLLASPGRIK KSPALRKGANRTPQNGVRGK KYPPSRHQANIGLSPP  
PQRVIARKTSI

>comp12430\_c0\_seq1; 256 34 471 LEN=949; translated  
MTDQERTQKIGGVRIQDGEEVFGVAHLFASFNDTFVHVTDLSGRETLVRVTGGMKVKADR  
DESSPYAAMLAQAQDVAEKCKELGITALHIKVRGTGGSKARSPGPGAQSALRALARNGLKI  
GRIEDVTPIPSDSTRKSGRRGRRL

>comp12431\_c0\_seq1; 420 269 1309 LEN=1764; translated  
MAMATRAIPSFQTKSRRNLFANEGLDNEEPLV KDSNEPTIGSEFPEEEDPAVNENENDD  
KVNDTVLSSENDGTNTCGQALTLKIKTSPSKSIS SKTSPRKKKTPSPRSPSGSIFSWLF  
GGFSGGSKRRPPMKAKGIYYDSTTCDVRKESDRTLAIGENGEAEYVPDWIASNLEGHQR  
NVPVLVRRPEYDCYNEVDDKLLKVMIKARKLPQEPGYASNHIMVNAARTIRNVPPLR  
RERYMDQIAREQAKMMAEERNLFHIETPRDLERRLKEMDMSNELPVFTRMGINIGKGT  
IAEIHFRFMMAAALAEARNNIQDKRFSRGMGMGTHDKYGVLYMCQIYGG

>comp12432\_c0\_seq1; 492 1 1709 LEN=1769; translated

XNYEVIDGFPPFAKSTSVKSDLFEKGI DAFFDMNISFSTTVSTSLALTIVCCYPGSVAPFL  
LDGSPHRPAIALVAKPITPPSSVFLFAAADGNDEYDDFYADFDPSDYEIYDQGSQSSHWD  
DDQYTRDIDADNSPVDSEAVIDLIKKRSEMRSMRQYKKADSILDDLLENFQVMVRDKDRK  
WRTGCSQSKIDSNWLHASTKQKGNLNGRKNFGPKGHDYVYDSDAGPSIASISEEKIDGLL  
AEMLSFKFKRDYDGADAIQEELLSAGVLIDGKTRKWRADGKSF SKFAPNEYKMPHAYDI  
SHNLKEIEKLI SERALARAERLFRSDEIRDDLLEFRDVRINDKLLLWSVGADQWTKAY  
ESYMSDRSAAPSDAALVEKLVKERDIARGNRDFGKADELRSQLLDLNVTVDKRIWYV  
HKGSKTGGRTILNSKDSSAYIYRGRQQQLPPDEFNEIQNLVNERDGHKKKKRYRNADATR  
SRLKDYGVRVEDGTREWYVAGNEYCMAQNSAEIDEESSRSKVEEMIKDRTLARGERDYEK  
ADTIKNELFEIYNVAIDDKKEWRKKKSF

>comp12433\_c1\_seq1; 2586 1 8192 LEN=8802; translated  
XDDDDDDKMESEDNIFDESDDDDSNNEGDGDGDDAERDTEDDAPKEALTGRKKRVRKKQT  
PVKPPQAKSRRHIKAAAKKPSRSSSSSSNSSGDSRRSSSDGSSSSDSSSPSPVIVRKKIG  
GRPGKSSKAVVNPRKKDPGPVKPFVCRGCGKSFTARGINAHEKRCMPVYTPRDSSSPDNT  
PDPSPQKKEVELGSDSEEEASADEAVFSVEDEETDLRAAPAPKPTFPCQYCGKYFKAQGI  
SKHQKSLKLLREKAKVAKRKGRTGEAAEGKERTNKGRKSRAATSQAANTDADADSNHG  
SSWEDDVPTAENRKSADSSNDSEGEAAEIANEDKDKTNHRKPSKADSSVVPKGRKRRK  
PPKYYQEEATMSSDAVSDTGEDADSSSSSSVSSEEEPVRRKTKRSKTAIADDISNSEQNIS  
KELGRAKVNVRVDSLAMVAAPVTKTRKKPSAATVVGSAALSSSNMVHGKDEKLAPP SKLP  
LKGKKKEKKKGASDNRSMASASANMAPITAFFPVATSTKPKTVSGKASPAGGDDDRNKSH  
SESSMELPLSTTGKAEDQSVKRKKNPNSGATTIASKNKAKADTRTRTNDGDYPSAIDGDA  
VSTRTKRLSSEGVSISSTKTKMRVDSSEINADEGDNGQNSGMVIAQAQVATGERGGLEGK  
KNAESSKSVEPKRSTKALSKANEKAREKTVEPDGTRASADDHVAEKRSKSEKEQPTS SVV  
AVSTRPTRRRKLTPKAAQAAA I LVAKATTMCKMKA DAVDVDESESNSSPNKTAPSGTNLM  
GESELTKSRPEKNEVNMPGTERLDASDTVIGSDKPKVVDTAQKAASESDKIPSDVKQ  
RKALDVEHISQPYTHELKPTESEHKPESEPNESDTEKERTPDAGHADR SERDTSKATS  
DVPNMPDVKDEGKSKPDGSTSTNCNPKLSDSEDKDKTEPSSSHPDDEETTKLDGEHCVTA  
EPNSSTHHEEQPKGSDVEQETKSGSTSPQNLVQAPQDTNHVTEASIQHQKGTGSIVEAA  
KNAAAATLAAFSLFSSKPKSDKDIMHSELEEDASMVIQERKEEKSTISIAVTNNEVHESK  
TTVPDTKLTTTHDDEKLSDPNEAISAVATATSHSNPKGVEKGDDESKDLATSVLKQNSEQTP  
FSTAIAGAPANGETHALMLSSKAEAHQDGKGESISSQGTNAVSMIDDKDTVEKGMQMTIS  
EKNIPLVSDPKSLISMKDGAHDGENSMGQDKHVLVKRTDVAETRSVPAALNQTAVTCHDG  
SPTLADNTTDKMATADQDSKPKQEI KIKPQVEKIALVGLSTSTENDHTRVVKVHQNGRN  
ELASEPAELTKLSQTSQKDFAKVESKEANIVTNESTRAITVVPKPKNDKEKQMS  
EVQSIDKTRSESDPVIQQSSGSTMELESESATKLNLDNLHIERQNDIGSKLMPKPEPDT  
DGVSRGTGKDNVTKKKNTIEIEIITAERGTPVNAPRCGDAAELSRKLNVEAIDSDKPNQDSA  
TDSKSVDPDLTFVKADKAIGNESTE QEDTVHSNASFQQLQAVDGVKAVNAATVAVLEKL  
ECDDAVHTESNEKDAEAKETVPTRTKTKTPDL SNKAETKTEMVVSGDKQSDGSRLPKQEK  
DIEADHEL TASGESIHQVKSSVGRDALFVPTSLNNTNSSDDVKEIQDHSKLNLTSSVAQ  
QGEAEQADDQNFSLSNAKNIDSDMGESKESIKATKISIGREPLSDSQLRTAVGDQRPEL  
QEPLHETSGHKNASPSSTRNP IALP SAGNEDDSL VNGKVEEELDTTVVDGDKTGKIEDVAA  
GKTTECSHEKEQEQAISTDALKLTAEENRNDTDPKEATRNDVNATLFLVKSVESRLDNA  
STDVTEMDIDLSPKACSNVTLEGVHAHASTTLPQPIDTEGATRTEIHEQKAIDSALKTTAE  
VDSEASTKIEGQKRVDSALEPSAQVTVEGVTSMEVENVKNVDSAVKQIGNFDMEGATRME  
VKEKSDSISGRKQDDLTPHSENTSFRSVEKPKVSWVAMSTLSSSRPVKTVSPTTVYDC  
DKIDRVKTLTYTTSQIHLGRGFERIFGMYWDAICLRSSPLNRNAHKRCDRVISEFLKS  
RKLKRIHNKFI MSIMRRALKDRVPYTDVSEHVPLRWRHRVKVPQVNTSRILPKKKFYPHF  
EELKESLLQISSVPHIDEKTPYKEVVDVDDPTDKKERNPQEGPTEPIASSCIPGALVVD  
PFLRDTVEASDMKVSDCAMWLLTVALKEYIKNLLNDSIEYKKGLEKGELEFPQSIHFPNVL  
ASNSNKSMMKISKGKASTATQEI MRKKQISSIDLFAALKMLPCGQPS SIGGSI SRISLEQT  
LLSGFNMQS FSNAGVTFKAVQSFISSEITNSSKELKTEKKLKPYPMTSVE SRRDASRDT  
KSDREEDVKKTPNKTNVLESPNSSVPKMDAKASASATGIVSNIVNTPLVSNQPSGAMSTT  
DSMINTPLRVNPPASNVPTAGPLPDISQIEENNRDGSEVKIVKVTKPVEKVKIGMQ  
PTQSGMQRSGAGRGAKNLAALMARAAGSNTQTESAESKVGETPASAIARGGQGATTRTP  
ATIPMAGRGA SEPTRTSLPTLAPMYGGDSFANSSASTTVLNSQKHIMEVVSQQNMQIAKH  
DSVAE VGGKSLSLSQNSQSKPALADQTPNIEEKEAASKDTQFPVPPRQSVVPPVRRGKGGK  
FGSKDLAAMRARSMTTTPKPAEPGGDKIGGN

>comp12434\_c0\_seq3; 385 1 2260 LEN=2359; translated  
XEEYSRVLYLDADILPKSNLDYVMEELSEQDDMFRENVVLSYKQEPATGGFFVLKPNASDY  
EELVDIVRNVEHKYLQIPYPHWDNSEGWGHVIDESDPWKSTKTKRGTKWNFYGSQADQGF

LYYWTKYYKKSVSIIINLVDIQHWGLES GTNSLQLLRHDNDTLREYMCTNSECDSSAWKMA  
PYQNFVHLTGRSKPWKYKNTSLEEGINSKKNHTSFKRYSN E EYWYWLLKNALQETGFHDR  
VSLDFITQEKRESAVGSTPSFDQRAQYIRRKAKNGWRQY EYEERDFNEGNYDERLLTLAN  
SGRETGRRAQDLVASLESFQPQTALRPYLIRLEAIKNNLMTQAMPQISPGE EETALDSTS  
ANEAADTRKWAYAFL LGGARSNTTETEYLG GFYSVVVAVYQLRKLGSRADFVLMVQIAAE  
SPHHKLSGF EQDILQKMNIKVIYI PKFANGKLECFYSLMMEKFRILNLTEYSRVMYLDYD  
VLPTCNLDYLF DLS DPLPRLPGRGSNMMDQTS DATFRLKENVILAYQSEPSAGGIFILKP  
DASDFNQIQRIIYEKEVRSSKQPYPHWDPMFGWGHVITK PDSWKDMRGRTGSNWTWYGAE  
ADQGLLYYWTKYVKKSVSII SKHNI EQWDSNYWDTDSKGT LFLRQNETNMPEIAKKPLEN  
YGCPVEGF LPAPYNDFFHLTGRAK PWF LEREQLENPDCFN NNNNERECKMQAKWYRLLNEA  
MVS IKIPDGFSLDFLGTKKLAPVGHAPNDKVRKW

>comp12434\_c0\_seq4; 373 1 2279 LEN=2279; translated  
XEEYSRVLYLDADILPKSNLDYVME LSEQDDMFRENVVLSYKQEPATGGFFVLKPNASDY  
EELVDIVRNVEHKYLQIPYPHWDNSEG WGHVIDESDPWKSTKTRGTKWNFYGSQADQGF  
LYYWTKYYKKSVSIIINLVDIQHWGLES GTNSLQLLRHDNDTLREYMCTNSECDSSAWKMA  
PYQNFVHLTGRSKPWKYKNTSLEEGINSKKNHTSFKRYSN E EYWYWLLKNALQETGFHDR  
VSLDFITQEKRESAVGSTPSFDQRAQYIRRKAKNGWRQY EYEERDFNEGNYDERLLTLAN  
SGRETGRRAQDLVASLESFQPQTALRPYLIRLEAIKNNLMTQAMPQISPGE EETALDSTS  
ANEAADTRKWAYAFL LGGARSNTTETEYLG GFYSVVVAVYQLRKLGSRADFVLMVQIAAE  
SPHHKLSGF EQDILQKMNIKVIYI PKFANGKLECFYSLMMEKFRILNLTEYSRVMYLDYD  
VLPTCNLDYLF DLS DPLPRLPGRGSNMMDQTS DATFRLKENVILAYQSEPSAGGIFILKP  
DASDFNQIQRIIYEKEVRSSKQPYPHWDPMFGWGHVITK PDSWKDMRGRTGSNWTWYGAE  
ADQGLLYYWTKYVKKSVSII SKHNI EQWDSNYWDTDSKGT LFLRQNETNMPEIAKKPLEN  
YGCPVEGF LPAPYNDFFHLTGRAK PWF LEREQLENPDCFN NNNNERECKMQAKWYRLLNEA  
MVS IKIPDGFSLDFLGTKKLAPVGHAPNDKQISEYLAVKXX

>comp12435\_c0\_seq1; 1795 1 5853 LEN=6603; translated  
RQRWSDLPQPD TKEKGNRLTKEQKMLPIAIGGASLSSEQLRKA FRPSSGSPAVAASIRE  
DGDDKNSGQPYQSVSWAVCPQNEWQARTVVSFYDDNRNRIRPRWRRRRDEPQPIKKKRM  
VEIRVQISPLTSAFSSKAFRETRYHLELLTNFDEEGDGEDKATNGGEGVSSSSNRSLSD  
LDSYTDCTSRKSSNRSLSHQHQTPOVVF SADRKHLMLVLFHPE SRRKRIQQKGLRSQSS  
LILFQLRAPKTTTND SNERSAIPLPPYIVTTKSEHSDDLSTSPSSPSGASTNAKSPVAT  
HPKFVPCWGVTTVCRLGGGTDDTFYHGSTAQGEENQNNANAQQHQPNLSSTTIFLAVR  
SDGTLLWVDTQSVRV TATARLPSALCNDLVFGCIKASP ISTLEK GILALVVTSSSSPPQH  
STTSTSTSSQSSGTSLS DNDVEDDDIYGYGNTRTSEEDHDEEKIRRGDCVLVKWSLVSAT  
PVQKTF LRRASTGNV SFQSDSDWDQONENKRF SQTKRSEGLTDSLTKTNETFEDNMNPLQ  
RMLGNLNKQQNIAAAMEEKEEQ LRRKQHMDQFV LQQLK KKVGLKSGTFSSPSSSSPFLH  
RRGGEKTAHLVKPPPSPRSSRSLFSRRSSGTTDSMNSESGCDMAMPNIQKSMQVKILSVW  
SPPSLASAGARNQYSEENSKAIVGDVCFGSI PSILCVVYHESQSAHKSSPFPVKRVGQI  
LAIEKRSNGNSCELLPVVSLYLSSEQVAEAPSVSNYKTDILLDCMSSLDESSYTESIEKS  
EISTPEILPSQMIGIEHDPFTDSFVINAI FNGDKKMHVWGCAWDWR SNAIGWMIQQEIAS  
LNLGRIGSDNQVWARLYCGRDPCNGGGSYLIYINSSQRYDVNYDGVLDASTV FIVKNEK  
RTIPMAILSPTNSMNTRI FTERC SLLAKDHI SFPSVSRQDSNTTMRKIGWKI SALPLSY  
VKSHGAPQIAAIS PSTAKSIAVASACGVCLDTQKGN GNKWKQFGTPSEEVL FSTIAMTW  
WEGSPDGVDDEKDDLLVAVTETKNGEQFLSCWSSKR LLDLMHQLLDTPDLEWKPGESQDP  
EPSFGIPLPKDIKVTNISLLPQPQNGLSRRSGDPRKAVVLVYSPDLEIECEFLVLR LQVF  
RNKVPSSHAVGESYVARRPFYVMAHTALRASMKHDKLP GSVTSAFIAGASF KYDLTKSAE  
KKSNSNIGDNELLVTLGLNRTSGGMYAYS SAFEHGNLR IASLSNLQVSKYQLSDIVVFGAP  
SDVDLMPVVKFVWNI ELLNGDLVCWSVPSSVAPKHDQ IDDYMADLSIQNETNNQRTPGVK  
GPKGLRPPFFVCDEKCTNKNERLALGTLCEVGSVSDWAFQSSSGCQTDI SLGVVPQSGFG  
CVLRSGQKSQKFARSQIGDIGSGLFSSNLLDMNTYSQSVFVITPPAFV I SLYALLLEAAS  
IRMDSGLES LIDKRRHLKVI EGQVQSR L TSEGNADMSMMALRLI IFRSLEMITKMHRRYT  
KDP SNSMEFNLLLSQSL LAVVNAVRECTTNLRFASL LLEVGRQTEPGNLQFLFPLPLPD  
KNI ELKHI PNKFTARS AIDLFTICMNEGSLAASALPLLT SKDQARYYCGLLLD EAIHN  
FIQNTKSTDYNFDKTEEERRALGDFCRFGMKLEDAECFE EKLV TENQEKRTRGRDSNSVD  
MDRSSSNQSLILETPEMAQRNLICTLNASSILNYIVPSTIKGETEKQREEDAIRREATT  
FISKSLDDPALDFAMLPNWDENFDSQHSNGAEITN IASLVGDALLGLIQEEQADNNWKAI  
SAISKMILQEGADVLSFDL FVEMANKSQPLDILSMIPESYDVNNGIEENLTKYIEE E IN  
SSSAQINDHDAETVVDLALLLIQRIHTLPLADIADQALMEVGLVIIVMVGCDIMGRSAFI  
QDMLDQDCILNKCYKDATTAGKETVPTHAA

>comp12436\_c0\_seq1; 1078 119 2449 LEN=2577; translated

MVYMLDKLNSDDDTGRIEQLEAELQVRKAFHDFMSTSEGLDIDLKELKEMQEKLKHS  
SANQSLAKKLQDMQHILLDLERSKSKETKQRLKSETKLRREAERALAELESAPKNRASAFP  
IKSMDSGIVTETASNTTKGYAERELEAVTAELIATQKKLRKTKDDLDKSQALTKDLERNL  
HNIGGDESAKILSGDDEALLRELDEIRAEIDAARNDIQSHSPNKILGKQQIFDYEKELED  
TREENARLTEEISCLRNIYDQDTVGS LANEKALNHVDKVKLRREVESLRNKLQRAQDDY  
ERQIVDIEIYWRNKSQQANIEKHDPEEVSDDDIIGLKFANDNSSRRERALEKKAWEAE  
LLKKSEEECSKMRSEVLSLTESLYKARQNRSEASKIGINESKRQEGVLLLEAWNEVEDKKK  
EIIITLENQLVSTQNEVRLLESEEISNMSGAFKAQLEYNSVVELEKVDLYELSLKATES  
NSDGAEISLLRTQFQILNEKNEALGRHVKKMENEILSVREEQEEVLVGVARTAI AEELQ  
ATVDRAVDETDQRNQEVEAITNMMEARLRGTEESVDMLEKQISAVSRIASNGATIAGTNE  
QSPSNGWLMNQYSEKNEKAKAAISATMSYLSASSKSSVGRDEDDKILDDLLSLAERTAT  
SASEVQNAVPSVQKNPYQSTIDGSPRLEISKAI EKLTITISNTNKWSPKTETSDGDDTVG  
SATASLSSNSLQSI RSRSKYAEILQKVADYNKSFSPVAENENDDEARGEVGVVEERE  
>comp12437\_c0\_seq1; 742 85 1302 LEN=1667; translated  
MIQRRNMNCLFLAGISVLGTLCTHGSVEGFSSHPSLPSNPLCRAASPSAVFASTPSATDN  
GDDTANKPPAPVLNGKRILPIKIMSAGLRGHQLAAAYAVLGPAYKKAGGTEGWEACQHV  
ITRDLGETLKGHLDEHGS DRVAVRALSFLIPNESAMESIASDWRKEAMQAKGMTNFDPI  
MAAMDLEDMLDDDDDFDDDDDFEMMAGAMSTSREEMATARGIEEPVKEEEDAVVSPFD  
QPTVYTTTDGDALPFNQENVDKVLDEIRPYLISDGGNVSVQRVDEETQNVYLKLEGACGS  
CPSSTVTMQMGIERVLKENFANLGEVLQVEDEDEKPKELTYQVVEKEVNRIKPAIIAMGG  
LVDILEVDAIGTVKIKFRGANKVRQGLEMALLDIDFVKHVEFVME  
>comp12439\_c0\_seq1; 278 137 1279 LEN=1490; translated  
MYSVRKLLLSHRKTIILGTTTSTAIICLVSTQDSDESLRYHRESARGILDSIPCACDGG  
SAKIPLRPVGASDLSQIAANPPSLWNRALVSI GLSSPPLPRRLTPKDPAFQIPRKF  
RQDDEEKMRKLVIEDAPKLRDDPNLEEKMASLRQEVFELAYGKGVTAQMREDFLIRY  
GCTGFSDEILSRLIELCGTRGIVEVGAGHGQWQKALTD AHRRESARKSAENQPESTG  
SGSSDFCVAYDNNSNPLNTHIYNQYTQPHHDHFGTVQKVESTMHLEKVLRSWACRGR  
ALLMVYPPGSM AIDALKTYTGASSDNDTLIYVGEGRGGANGDDAFFDFLENEEWILV  
DVLEVTRPPGDKGCEKLYILNKIRERFEE  
>comp12440\_c0\_seq1; 536 196 1869 LEN=2015; translated  
MVRAVASRVITRPRISKHMAKEAASEAARMVEMAKSAEVPLTVQRPVTRASDYTNIR  
DDKSLANVTMRAMGNSRRVFLDPYLD AEDLEGLAHRIRALS KSEGINSVLIATDDQAD  
YGNVDSDTNNNCLPRYLTDNRKIDLSGVGLDVPAPDHTWYVSGGYNPVKTNTDDNYD  
IDYLL ESKRKA VAVAVQGFGAETKIPIISMPHGAVTDGGYALCMGSYVLATEETS  
SVSILNPSRGLS FDPIGFSFILPRLGWEFDQESKKYSGCGMIVALAGYEANASDMI  
ETGLATHLIGDSGILP ILEELATLPPWNQQGLVRQPRQLYGQNRNIHNQNRQ  
QQNYLQQQLQSQRPSPNQLHD VNGKFRNHSIAQLISQISDVADASNDFFDFTS  
IYEDGCDDASLDVDHVPWDEGFFSST LVSM AAEELDDVFRQENSLEGLMEGL  
REVA AASSGSENLS TPVLAKQLLDRMERQSPLSLR VVYQLMKMGRERTANMEN  
CMAREGKAQRALMNKPDFGNWLTHVRKFGGNE SLAPPFDGWGHSSVKEVTAE  
EVDQILS  
>comp12441\_c0\_seq1; 562 161 1234 LEN=1577; translated  
MKNFVGAIAGWVTTAVVLM LAESSAFAPHS AKHRTVGTKTAPSPPLASPTS  
IASAPAD SDFEKPIPVREDEGASGAAADENRYNDLETAADLWTVSVSADNRL  
DRAAGVPFLDSKSKD HFVDDVSVVSRNGMGIELLELAGGRDDDYGLTIVSGV  
SGNAEKAGVIAGDSIAGVEVN KVGSGTNEVESSEAFDCECKNF DATIGLLGS  
FPPEIESLTLKIKRIRRWPKVKVVVAYP PSQCADGV DNEETVELFAGENL  
KRALQTRGIVFEDRDAACDFCGGKCTV SIDTGMQLMS PKGLTEEKL  
MKNNPKCRLSCKTVVGYNMQEGNVRLRINLNEWNTSDKGGF SNPFASK  
>comp12442\_c0\_seq1; 741 94 1158 LEN=2524; translated  
MSDRERSRSPERSDAPADKQDYPPAGGDDKAPAASQDEGGDGG SAPANN  
SGDAAGGG DEVKLYVGNLDYATDEQRLRDEFSSQFGTVTDVFLPVERD  
TRRPRGFGFVTLSTRDAEKA ISKMDQAQLDGRTRVNESRPKGERGASG  
PGSGTFNSSGKDEVKLYVGNLSFDTPESI RRIFFEEFGTVTDCFMPMDR  
DSKRVRGFVFTMPAAEA EVACNKVNGQEV DGRTRLRVNEAQ PRGGGGGG  
GYRGGGGGGYNH DGGGGGYGGGGGGYGGGRGSYDDRGGYGGGGG  
RYDDR DGGYGD RGGHRGGYDDRGGGGGYRGGGGYGGGGGGYDDGYGG  
RGGGGGYDRY  
>comp12443\_c0\_seq1; 86 337 722 LEN=722; minus strand; translated  
MELSSFVTDHQPSRLVVAIHYSLSFSYFGAAWLV RPCRPRCVCGTEGG  
SHRIPRASTHL MQGASGXVDDVAVPELLEALVHDPDRLGPGQIGPVV  
LVVEEAQQKVGAVAVG SVLDLLARS VFVEPIEAG  
>comp12443\_c1\_seq1; 248 178 1023 LEN=1023; translated  
MPNTVVS WVLVVA AAAAAAGCFRSGPFLVAEASSAAGTETLVGIVGKDFV  
LLGADSSVSQS

IALTASNLDKIAPLADPPDAYGDDGGSSSSSAGNPGHSPDHHWKRRTQRRNGQLPIIAAA  
AGDAADSDRLLSYLRAIGSV EYTNNGVGC DVRHVSLDDEESVEPSGGGRLRAGGLDAR  
SMAHLARRCIWEKLRSRTPYRICLLVAGMVARDDGGRPGSTASDSSGAAAAGRTGPAFASQ  
KVQKQVRQAWKAGPDTETGGDTAPSDQNGAPTGPYQPRLYWL

>comp12444\_c0\_seq1; 536 817 2973 LEN=3126; translated  
MAELDSRSYNRSLLEDANYVMERILQPMSLPWTHEVIPVARNIPCDIDEMIDVLTADDGS  
HAPFANGNFGFGQYETGSFRSGVSAIRLANSENFRAAARRSAEPGIIQFSTTVLPSTLP  
SYRPENLSAIPPLTTSTNDLQDDRSIRGETELRCFEAIQTLKRRKIEQARSRVASYDI  
SVKISSSSSRSTIFTSSSEELGVTADAMPSTLEAVLPVEVENGRKMTKMKGKLEAEKLG  
SYDIRHGLSSSQSSKSKTPVGRTRLVWTSKISSDQPQRVSFLSLLTGKKLENGAHKRPR  
NIVVRLKVDGKVYRPSKEAVDEDEDHEKESYSVGVNLQASLECDGIVKCLETKPNKIE  
LPDSLPIIESVPDSTGIIHVCTSPGTISSYSVQPSLMRASQNRVSRCTVCWKSTEGGL  
EVKKMECGLSVHIQCCLDPGEYRILSTTSDLKKKEQWKCSVCCYREKEHGGTCGTTNAS  
HMITSMKSKRKSIPSSKLLKDPQFESMQVQKRGHSNVTDGEIACAICLRSGGAMSQITVE  
SEIIVWVHEVCRIWTANQKVSTSSKIQSCALCGSNSNLSTCFGSRKYKSREQTANKIYSSR  
RVVRC AAVGCHVFVHPMCALVSSLT SQWKNESNYNGSENHPLDRINVAKKRDTVLC SQYT  
LTFASVCGKTS GVR CATTIPIFFCGIHN PAREQS F YGLNPGG EK MNTKKNLKI PSWNE

>comp12444\_c0\_seq2; 595 298 2784 LEN=2937; translated  
MASSREHLHIFENGNNE SAETR GDQGH SALDSKIR TNKNITAAHYFDG STNDMEQQNACH  
APRNHFTRSRNLRSNSNITNSEEEKSSVRLEKHS GAKSDLSIDTCASIMAE LDSRSYN  
RSLLEDANYVMERILQPMSLPWTHEVIPVARNIPCDIDEMIDVLTADDGSHAPFANGNFG  
FGQYETGSFRSGVSAIRLANSENFRAAARRSAEPGIIQFSTTVLPSTLPSYRPENLSAIP  
PLPLTTSTNDLQDDRSIRGETELRCFEAIQTLKRRKIEQARSRVASYDISVKISSSSSR  
STIFTSSSEELGVTADAMPSTLEAVLPVEVENGRKMTKMKGKLEAEKLGSYDIRHGLSS  
SQSSKSKTPVGRTRLVWTSKISSDQPQRVSFLSLLTGKKLENGAHKRPRNIVVRLKVDG  
KVYRPSKEAVDEDEDHEKESYSVGVNLQASLECDGIVKCLETKPNKIELPDSLPIIES  
SVPDSTGIIHVCTSPGTISSYSVQPSLMRASQNRVSRCTVCWKSTEGGLEVKKMECGL  
SVHIQCCLDPGEYRILSTTSDLKKKEQWKCSVCCYREKEHGGTCGTTNASHMITSMKSK  
RKSIPSSKLLKDPQFESMQVQKRGHSNVTDGEIACAICLRSGGAMSQITVESEIIVWVHEVC  
RIWTANQKVSTSSKIQSCALCGSNSNLSTCFGSRKYKSREQTANKIYSSRRVVRC AAVG  
HVFVHPMCALVSSLT SQWKNESNYNGSENHPLDRINVAKKRDTVLC SQYTLTFASVCGK  
TSGVRCATTIPIFFCGIHN PAREQS F YGLNPGG EK MNTKKNLKI PSWNE

>comp12445\_c0\_seq1; 216 1 874 LEN=1323; translated  
XLALVFHEWAVRRGDTDDAMALQTM LDSYLHPGLYNDRDLYADIRLQKHLFFCHTKNWEK  
AKQVGTALVRYCKQKGFLEHQVRVLIQMGIAELEVDNRNQC TTALSPLLEALT VCEQTEMH  
GLHAAAMSILARVFLGLRNPKRAIAVLDGTLPALLOREHVWFRAEAYLSLARAHLALAAS  
HGEARGRAPGASGRRHHRALRALGEAVRLFEECQDRGRLRETCYLQARIHALLRNTKERD  
EASERFLVLAGHPAADPGPDGGVGS SHRGSILDAIGNPHAIRVLVGRSVHS

>comp12446\_c0\_seq1; 204 1 726 LEN=1459; minus strand; translated  
VPKNIPGAFQELRESKREQLSAFCFGSGDGEDYLN SCGWALAENIETADLIVARGTFLV  
LSATECADKKVDEDAYWSAYRSTLERASKLKNPPPMVVCNPDKVRPDADKSPMPGTIGVA  
YQGLLQTAGMSAEDLILSLGKPFPSVYEIALSSIENSNDIQPRVAMVGDALETDTVGTAT  
ATGIDSIIWVVEDGIHNQEISVASSLAEGCEAALQDFNKHSED TYAKGLSVSPTVVLPHFQ  
W

>comp12447\_c0\_seq1; 553 102 1280 LEN=1402; translated  
MICGLNRSMLSVLVAAALAAASNSAFVVTGFVPAKSSSPVSKTTP LAPASRTPRQAAERGR  
DPRRCGPSTVEAIGAGGAQQRRLTRHFAWPI SRDPTGVTSDYPLTITRIAITVASCYLT  
WYAQTQYSNVMASAAVTLVCSMVFDKRLGQA AFCGSFAGMCSQAVIPTRNLALALGGITS  
LLYEIFIHAQNAFLGVGGRLGATAFLATS AVAYKTGVKTGLGRLTLFGGTRALKLSALRW  
ESTIAPFAFWHAVGAVATIVLREVSDDSAADPVRASAVVGLAGALLLPNDAAAALAVYG  
GSFVGMSLPSKLMGLSALDLSHRLFTLGNVVSLLLAFALSGALSGIVHGATIDWKLWQGG  
WGKAGMCA FVGCMTYRSVTLLGKLTREKR

>comp12448\_c0\_seq1; 97 1 109 LEN=1247; minus strand; translated  
XANLGEGLGGKESTTLVDAFVNSIHEESADMIASAN

>comp12448\_c0\_seq2; 321 341 1600 LEN=2316; translated  
MDTPHSAPEASSPVLLPHSTQFN YAIPIPIAEVAVGAATRASSLNATRDLHPRTRSMSSV  
LPGAPTNYAFP NAGMVAGPATR TLPRNATIGIHPRTRSMTSVSTGAPTNYVFPAAHGLHL  
DENGATGPTTRSRKRSPQAIGTIERRTEAEPDNSTSDPTEISRKRRTASRKKPPPGAAL  
KKPPAGASCCKRSVNDTEEKPTAEVVNCCICMNDVEPNELASINGCEHKFCFCCIEKWISE  
RENKCPLCKARFGKIERVNNKRRKKGTKNTKKVKQRDQRSDVAPGAALEGLIANLNRSRGL

ARIIFGGFDFQGVGAGGIQSSGAPPAPLNFSSSNRGDDSDDEEDSPMAAFMRALHGGPGA  
IGIRTSTTVVRPVTVTARFTTTTTRS YARNVHDSTAGNEFENPLEIVDDESVDVEIEID  
>comp12448\_c0\_seq3; 321 846 2105 LEN=2821; translated  
MDTPHSAPAEASSPVVLLPHSTQFN YAIPIIAEVAVGAATRASSLNATRD LHPRTRSMSSV  
LPGAPTNYAFP NAGMVAGPATR TLPRNATIGIHPRTRSM TSVSTGAPTNYVFPAAHGLHL  
DENGATGPTTRSRKRSPQAIGTIERRTEAEPDNSTSDPTEISRKRRTASRKKPPP GAAL  
KKPPAGASCCKR SVNDTEEKPTAEVVNCCICMNDVEPNELASINGCEHKFCFCCKIEK WSE  
RENKCPLCKARFGKIERV NKKRKKGTKN TKKVKQRDQRSDVAPGAALEGLIANLNRSRGL  
ARIIFGGFDFQGVGAGGIQSSGAPPAPLNFSSSNRGDDSDDEEDSPMAAFMRALHGGPGA  
IGIRTSTTVVRPVTVTARFTTTTTRS YARNVHDSTAGNEFENPLEIVDDESVDVEIEID  
>comp12448\_c1\_seq1; 590 146 1483 LEN=1515; translated  
MKFVSSALVAFLGVAACVEAFSAPRAIGRPSTAVRAAASAEQDLELTRVLLDFFQEDGS  
SQGAAEPKARSYVSPRPENDLMIRAALGETVEKTP IWLFRQAGRHLPEYTAYKEETGRN  
FVELLKY PESAECTLQPVRRYEVD AAILFSDILVIAEALGIEVTMPGGVGIL IPEPLAG  
PEEVATRIP SIDEISEAFVEDKLGHVLEAVRQIRSKMAEEGKSVPLIGFSAAPWTL LFYM  
VGGSSRKNTDSGMRWLSEHP EESQKLLDILTKIVIEYMSKQVENGAHMLQVF EAMGMMID  
EENFNKFALPCLEQISKELKSRFPDVPVMVFSRGASFANGNLSKLEYDVVTIDG SVDRST  
ARDSVGDVRS LQGNYPRELIEDEEGTKTPETVRATAREMLEALGPQKLIANLGEGLGGK  
ESTTLVDAFVNSIHEESADMIASAN  
>comp12448\_c1\_seq2; 482 1 977 LEN=1009; translated  
XQQQQQQQTQSV AECTLQPVRRYEVD AAILFSDILVIAEALGIEVTMPGGVGIL IPEPLAG  
PEEVATRIP SIDEISEAFVEDKLGHVLEAVRQIRSKMAEEGKSVPLIGFSAAPWTL LFYM  
VGGSSRKNTDSGMRWLSEHP EESQKLLDILTKIVIEYMSKQVENGAHMLQVF EAMGMMID  
EENFNKFALPCLEQISKELKSRFPDVPVMVFSRGASFANGNLSKLEYDVVTIDG SVDRST  
ARDSVGDVRS LQGNYPRELIEDEEGTKTPETVRATAREMLEALGPQKLIANLGEGLGGK  
ESTTLVDAFVNSIHEESADMIASAN  
>comp12449\_c0\_seq1; 258 150 1025 LEN=1025; minus strand; translated  
MTVTGTLC SILRSPSVSFPRIAPNHRRPVRF LPKTHQKLQSIPDGV LAPHRIASHGTASH  
RIAPVPAELPHRGANTSLT SVLGRKVTLV VYSMXGMGPAPLQGH LKPLQKEGHHHQDLDL  
GQV PARADPRPGPKGPEPVPEGRFRHPHPRRLASIVVVVVVAMLALAVGSGPAAGNDQPP  
AGAECSGARPLRTPREGPPVQGGPQGLHPGGVPGQQEELRPSGKDDPVLDVGPGLAVVH  
RGRSLQPQDLVQKGPQPGQSFVQPIEIDGFLGGLSFVRLVALAVVAVAVAVX  
>comp12449\_c0\_seq2; 208 1 920 LEN=1010; translated  
XNGNGNGNNGKSNQTNKGKTAETIDFDRLNEGLPRLRSLLYEVLRLKGPSPMNGEAR  
TDVEVNGIVFPAGTQFLLLARYASRVETLWSALHGRSLPGGPEGAGPGXILPPP VAGRSR  
RRDRFRPPKQASQPPPPPRWKQASGGGGDETDLPERVPGLWGRAEGLPGPGPGRGRGPGG  
GVLPSEEVSGVPGGGPVPSPHGVHHERHLSTEHRREAGVGPVAVREFGGYGCDAMRCDAVW  
CQNTVRDGLQFLXAF LGETGRDGDGLVQFLETRKETGGWNKEYRSQSSAASLLMEAE TS  
LSMGRQF  
>comp12450\_c0\_seq1; 479 217 2351 LEN=2372; translated  
MPSVPSSKRQKVDQVDHSDK KKKKPRGPPSEEVLKLS DQLKKSREKKLDEALAVFWDSS  
NSKIRDGHHACIMVDMSARCGKISVGENLLEKVTKEGMHISVETKTALLKGICHSGDIAK  
AHKLFSSMCLSKAKSNYPNVRTLNTLLRGCLWSAVTTSKEGTIIGGVVTAKTAWEKYKSL  
DLGDQSSARTLPFDVSSFEYYITLLCQALRINDATTVVSEM XNGFGLSEDKEGTVSSDDQ  
SLTEGLAMAYCALARAYTILNQKEEAVDACKTSLTYAKASKDALKRDSSFSRKR SWKETE  
KRENDRRTESNTIYRNHRLSEVENEAKTMLNIWHDVDIDGIDSKILSRGLARRLITRLIF  
LSGGGTTDAQNNSSSIDKKDKAKKDL SKEVQRDLLNSLYSYGLAPTTVSLGISMDDNI  
QILKKKDCNRILGSVGLQGGILKSDGTLDLHRIF SAGIGVSKPQKRKNKSRKVEIELGA  
GFGDWIVRKAIQDPSTDFLAVELRADRVAQIFARTAVLSSVKPVDNLCVVGADSGNLLSN  
HISDESIDTIYVNHPEPTQTTFGAENANLV SIMEGGQEP AHMLSSTV IIAAKALKRKST  
SRFVI VTDNYVGR LICATIEKVMRQNSHLLCAMDLAKVDNKDSFVKVEIDAEGSQGSVL  
MFEKPNESIGYPSRSTEEGESYFDRLWRAGAGRHAETHARYIIVMSPNCS  
>comp12451\_c0\_seq1; 326 304 1468 LEN=1577; translated  
MASLLRRLAPLAPRKSSVSMATGRCCFGNTAFAPSKGAGAAPIQLHTEWIAPTASKDEND  
TGGGGAREQDGHYTMFLHGLLGSGRNLSFARKVVRQESSAGGSLCHGGILVDLRGHGS  
TFREQQRREKDG SACDDASTFGDCARDIEHTLRGGSTPKHPAEAPPARVLVGH SFGGRVA  
LEYAAGLADTEPLGALWLLDTVPGEANESVDRVLATITKVLGDANRGGNQKVP TKKEIVS  
VLTGPPHGM DLPTAQWLAMS YDEESGDNFGFDNDLVTR LKPEFERQDFLGLLRGV LRAER  
SGTGAASRTQVHVVRG GKNRGTVPILSELEKVRKEFPANFHLHVLPSAGHN VHIDDTEG  
LVQLFAGDDDDEADAMRCDAIQCETVH

>comp12452\_c0\_seq1; 802 1 3323 LEN=3953; translated  
XDISGDNXQKRNIQQRQKQQLKQQQYFPLHDNKITELKQNSSKSARYIQSMFGGYNPSA  
RGPGGSGPAQAPRGYIAGRGRGAAGFQTRSDLGNTGDTAAFGGGPTSMPPASANAGSSNSP  
WGSAPRGYVAGARGGASKMGAASQAFGPNQPLDDNNTGSGGREQRATASARTSAPPSGA  
VEGQYDDDDHEADLIWAAIDERLQNRKRKRKKSNEVQGPAHTDDPRARERMKIQHSFRD  
VKEELGTLSEEAWMNLDPAMGDHSLKHKRAQEKKQGOIFTPITDSMLESRIGATSDKSSM  
NLNTQVNINDKSDGTETSAVNMSGIGAARGTVLGLSLDRMSESANDSGLATSVNASGYLT  
SMSTLNGGAPGALPNNLGD IHKARLLLKSVRDTNPKHGPWIASARIEEAAGKTLKARKI  
IQEGCETCPKFVDVWLEAARLHPLPVAKSILATGVRRVDNNVPLFLKAAELETVPAHKKA  
VLRKALEANPHSLQLWKQAIDLEDSQDRAKLLLSVAVEKVPTAIELWMALARLETYEEAQ  
KTLNKARKALPLEKSIWMAASKLEESQNHLSRIPKLVDKAFKTLAKKDVVSRNQWISEA  
EDCEMAGAPHTSAAIVAKAIGLGVLEDEDIRTWSDDAKQVLARGHVATARAAILAHALQQF  
PSRKGLWMQAVELEKTAGAKNVSTDFAESANDTGEAENSRENNENNQSKKQHVLINESL  
DQVLQAASERLPRVEVFWLLRAKERWLAGFVDSARDILTKAFEANPDSERVWLAALKLEW  
ETGETERARVLLERARERAPSERVYMKSTALLEREAGDTRAAALALIEEGLQKYPKTAPKLY  
MMGGQICSDLLPRALANSNSTDEKIKKKKSYLDKARKIYQEGIEKCVENVTLWILASRL  
EERAHTFVSENGSTASESSTNQGVAKARSLLELARKHPKNDLLWLEATRLERRSGNTKL  
AESLMARALQCEPKSGRLLAENIATAPRVEQKSKSADA IKRNPESPLVIATVASLFASDR  
KITKARKWFERAVLLDPDLGDSWAKYYNFESNHGKQKQDAIRERCIKAEPKHGETWQSV  
MKDTSNRHKTPEGELELVASEIKSRAV

>comp12453\_c0\_seq1; 168 1 707 LEN=1162; translated  
XQKSTTEQNNMGDGLTSLYPLCTTIPRLSPCARAGTIQNVKMRPAQFVINWISFLWLHRS  
IFSSSENFVLAFAKAKRIRTICTATNDCLTSPTFSQVLSVRGGDIVYLESIEDTEKVVADN  
VDDDNQLVVIYFSSSTNCPCKRVAPLFAELSEEFQDSNIVFCKVNVDENPGTAEKYQVTG  
WPTFLFLKKGKIMEIVGGKIAEATLYDWVKLMAKPEDGEEVNSGKESTKNIDS

>comp12454\_c0\_seq1; 396 244 2043 LEN=2325; translated  
MIPTNKTRNRIWLSFVTSLVFSLVAFLYNEISNFQDRTFVRENGDDASIADAETSRSRI  
RGHDTRSDVDSSGGDRPVMVLHVGPPTGTTTTI QHGFRVATRLASEDNVYFIGCVLSD  
IVRVGGSRNKTSALDSSPSIAADTHNNTTSVTMFRVKDFLWSGRPLKEFTDVLRSRQNRK  
HNVVVSSEILSSEFSNSAKYWKRLFRELFLSSYNSSSSGGDAINEEPPFFGFNVKIVVTYR  
HFFQWLPSYWAAYHKKYLTQIGPSQMNPRKQDEHGITFQNGTKVLYPYKGYIPGII EYVEW  
FLHNITQYIDPNVTHTSYTRFPNPTKGNEREALPTSHGSIWSYSQWSSKAELHDRVDVF  
DMHQQLHWDDDVNLNYTKTKTVKRNNLFADFVCQMLPTASNTCIYLSSENTDDGNFRKR  
VNDSPQHTFLSKQDMHR IKQMAERKGRKIRNAPTALQVPSTIVARWFRKQERTNQTSGLK  
RCMGRATLERLKDVSWNFLQMLLLGKRNSEHRSSVSTTPPDSRAVLFRRSSMATSHLLF  
SSQSERRVLGLEHGVSWTSPIRAHDRSFEEYVTTGVFCEIDTEQLFENQSF INYVLV

>comp12455\_c0\_seq2; 908 159 3631 LEN=3916; translated  
MNETTIASMSSSAWNLPLTSTLDTNASSTSHSDEXIPATAPAWMVEFVNFRRRLFLWT  
VEPIIVLFLGPEENLLTNNENTTSAFWNI SNENYGYDNQTSRRLGLYPEYVENASTY  
RDTSMFATLITLFGMGCILLIFLSCFYHNQKTSPLFISPRRHRLPKLVPPPLPIGGYF  
DWVKVCFYMSDQEI IRRIGYDALIFLRFHRLALRCIVKMSIFSGVLLPLNYTGGGGANA  
KNIKGYVESLFTVDFLRFTMANVISGSPRLWVHCFAAYLQTAIVVRELLVEYETFNSIRH  
CYLLSREPHLRVTLVTNIPRHLRSPSKISTYFTHVYPNVAVKHVVMCQNLLYLESLVTART  
HLLSKIEQELLLL CRKEKARLFENSSHSAFARFLGKLEDYGI VNGSQERFATLYTQLEE  
LNGEIEQEQRRLRVMKKMDRMEAGEGRKEIDYILASPFVIEHDPNQRRLLGLKQVDAAS  
SARTEEYSPPEKEDMAGMENQSI PGANIGANLRARS PRPGEHKKQPKRGAKRVGFEDAP  
RKSAKSAIRRYSRLSRDVSFFGRPILSAAALDSDGHI EDHINEVTDKAFVVMRTFAAATI  
AIQSMHSSKPGAMQVTSAPPEPRDILWQNVYVSKGATRTRSYLGEFLVILII SFYTI PVAL  
VSLLVSETALINSRPLAQLDQATSLFSSVIALVQPVCI VMIQQMLPPLFMIIGKLEGLI  
CFSDVQMRASFYRFLQVNLIFLVTTIAGSIFDTIAI IVETPEAAFEMLGNSLPRMSSFF  
ITFVTIKTFFGLGLELVRTLSLVQATLRFLLPHATLRTARKVLGGFLRAIDDPGWFPFH  
KILAQDMLVVVISVVFVAVVAPLVLLPCALFCLFSRIMWTHHHLVYVESVFESGGMFWPKI  
FRRFIFGLIIAQMTITGQF ILKEARHEAYATIALMFMTYLF LRSTRARYDPTSSTLPLEV  
ATVMDISLSQEEKARKRRAQERAERMSAKSQSNLPHGRSNETDDCTYTTGSIPDSGASDH  
DSELGTLVAGYDPFEQAYLQPALRANPRARPEQPFPPAQLGREDILFGRTSNKTNNSNS  
GLTDVDDSMDSGATVRLKSMSQQDRKLTNRWWEDQMQRCDQNVFSILMGECGLTIGR  
RATMAEPAVGPSEHQIV

>comp12456\_c0\_seq1; 428 83 925 LEN=1334; translated  
MDTQPKKTSFAPGDDIEVAENSSESGSDENQNLATKGSVDVSTRNKALIQAQMASYKQKG  
SYELSEDVYAFITASPFFSWSFLFACGVIFIKYFVYSTLLIGTDLDDFGGAVKAATTVKF

FLIPVAVAMQEDLMAVYAGLANSTRYDPQVQKISEGATRFKFGLAYLLRFIDGTFSLTVNF  
LVMLTTNDVFLGVFLNFAALHFLQEIDDFVYSLVEKGGFFGDGMEYQSTLCRQISWPRRKG  
NKLSELATNLDTVLFAALTLICVVIYFYVTISFVILADDP  
>comp12457\_c0\_seq1; 203 1 1322 LEN=1662; translated  
XTTTSKSLPWHHPAPRSLVMEVVAIRKLAKNYGGDSEWKGVLNKSTLLHEVEESIVALHF  
LKCQLLALLESDDNRTTNKTHPSRRRREMIVVDACCGKGVFSLCSYVFAARRNGDDE  
EDDNNNENNDLKLNCQSQTIRKIIIMLDKDPKLRWDHVKDTNNDNRNENQQRPLIECWPRFN  
LHEIDEVVDLLSHQVDDSQERNNSYKKTNRKTKHERDTEQRESLPVIAIAVVGIHLCKTLS  
PTCIGIVNALGPKKCPCLVLPACCLPRVVLQSRYKERKPNANTTLLQVRQYETPVELDRR  
RKAKERRDASMVRGNRIGGKTRPVSMVRLPPPIPGGNYPSPVAGGSTIGIPGSACWKCGE  
LGHQKDCPSNQSTGKPRLVPPMSLSLDVSGILQEETPFQAYCNLLATSIQRDEVSVRQT  
NIENGHFKSRNKERDTLAKNW  
>comp12458\_c0\_seq1; 344 1087 1713 LEN=2924; minus strand; translated  
MTAVTTAACANTEDAAAMDEIDIISFFLSLPDNCALACASVSKMKNKGATNSAPYQGKQS  
SGPTGATSGKAKCHQKISARDAKNDWNKKQMKPKGQRIPWAWILSFSSSSQNHAKSSAM  
KSAASKATAAANATAHQRTVKHSPSSERLQKKLEKIYNREKKRNLAKKKRGWPPPIWKR  
NNNGTRSGDIDCSFLVDSYGF EACHIEV  
>comp12458\_c0\_seq2; 344 984 1610 LEN=2406; minus strand; translated  
MTAVTTAACANTEDAAAMDEIDIISFFLSLPDNCALACASVSKMKNKGATNSAPYQGKQS  
SGPTGATSGKAKCHQKISARDAKNDWNKKQMKPKGQRIPWAWILSFSSSSQNHAKSSAM  
KSAASKATAAANATAHQRTVKHSPSSERLQKKLEKIYNREKKRNLAKKKRGWPPPIWKR  
NNNGTRSGDIDCSFLVDSYGF EACHIEV  
>comp12458\_c0\_seq3; 344 1087 1713 LEN=2535; minus strand; translated  
MTAVTTAACANTEDAAAMDEIDIISFFLSLPDNCALACASVSKMKNKGATNSAPYQGKQS  
SGPTGATSGKAKCHQKISARDAKNDWNKKQMKPKGQRIPWAWILSFSSSSQNHAKSSAM  
KSAASKATAAANATAHQRTVKHSPSSERLQKKLEKIYNREKKRNLAKKKRGWPPPIWKR  
NNNGTRSGDIDCSFLVDSYGF EACHIEV  
>comp12458\_c0\_seq4; 344 984 1610 LEN=2432; minus strand; translated  
MTAVTTAACANTEDAAAMDEIDIISFFLSLPDNCALACASVSKMKNKGATNSAPYQGKQS  
SGPTGATSGKAKCHQKISARDAKNDWNKKQMKPKGQRIPWAWILSFSSSSQNHAKSSAM  
KSAASKATAAANATAHQRTVKHSPSSERLQKKLEKIYNREKKRNLAKKKRGWPPPIWKR  
NNNGTRSGDIDCSFLVDSYGF EACHIEV  
>comp12458\_c0\_seq5; 344 984 1610 LEN=2821; minus strand; translated  
MTAVTTAACANTEDAAAMDEIDIISFFLSLPDNCALACASVSKMKNKGATNSAPYQGKQS  
SGPTGATSGKAKCHQKISARDAKNDWNKKQMKPKGQRIPWAWILSFSSSSQNHAKSSAM  
KSAASKATAAANATAHQRTVKHSPSSERLQKKLEKIYNREKKRNLAKKKRGWPPPIWKR  
NNNGTRSGDIDCSFLVDSYGF EACHIEV  
>comp12458\_c0\_seq6; 344 1087 1713 LEN=2509; minus strand; translated  
MTAVTTAACANTEDAAAMDEIDIISFFLSLPDNCALACASVSKMKNKGATNSAPYQGKQS  
SGPTGATSGKAKCHQKISARDAKNDWNKKQMKPKGQRIPWAWILSFSSSSQNHAKSSAM  
KSAASKATAAANATAHQRTVKHSPSSERLQKKLEKIYNREKKRNLAKKKRGWPPPIWKR  
NNNGTRSGDIDCSFLVDSYGF EACHIEV  
>comp12459\_c0\_seq1; 218 292 915 LEN=915; translated  
MATVIEPEHELLSTPLPTDFRALSVLQELAFPEQEQQNNYLRYHRYHKECPAKLELCRIV  
KLRSQKAGGAGSSDQEGDGNVVAACQLQLRPRRSDGVVDVFI EWIGCHPDHRGKGMGT  
MLLEWAEKFAKEILGATTLGLYMVR SNTNARRLYERNGFAAVHRQSRDNKDTMTVSAVSK  
KSRLRRFQRSFDRMFGHWSVLQMEKKLY  
>comp12460\_c0\_seq1; 395 70 1512 LEN=2272; translated  
MISQTPLGEIRIADSRFLGFCFAVESAEVREYQNHRLRSHPDAAHIPVVWRCGKKWGDA  
SNDWKSLSRKEITWDEDKEPLNSIGPVMALFESRFFAEDFVGGSNSSGKTGLMVGIVRY  
FGERLLGVTCGRLSGCYKSLRQTLHRRFFPNVPWELNFAPEHDIYGMGAGDCELIIN  
IVEDDLPLATTKSDDGKCAKDSLPLQLQERILSELQFDGFKGAGGEELPRLQNLQADLSAG  
FPIYRYPGNYSGDEWTTFAWSPTSLQLKQSV EERLKPVLVHQTMNHCVTNYRDTDFIA  
HHGDKDLDLNRKGVIVSVSLGDRTRTLELRRRAEPRDVRLILPHRSMLVLGPHTNREWTH  
SILRKEESQGI RLSLTMRDVTTFRDITTGRLFGDGVESKTLHDIRSRALFENTACFAGFC  
ALSTSIVSKKESALFNIALLGIIYIAGIHGFRILSDIRRKQYEEQKAREFFSRTSSSGTKY  
>comp12461\_c0\_seq1; 1773 176 4870 LEN=5109; translated  
MKRFNTDRIRQRMREQNERFPSSKGKLLSSAPVRISVSPQSDKENI IPSINNRSKTNISN  
VPINSAENDNIKPRKFPQLSISVTMSEGEDQGIPTTDVVQNETSRVSDDGDDSTVPSVW  
AMMEHYQSPSKDRDRSDEVASSKSLAIVEDDCERPSTKGRSPNSVGSLLCSVGTHTKTP



FQKNDNENYVKPKMLPEAIDALEQKDAIKVPSKIHVLQDDGELVQSSSFYSQGEVSDIAHL  
DEIETSNNDLSTVDEEDQGEIFRPDTAASSVEQAVSTSTINFENLRNRTIQPTPARVRQE  
WVASEDEDEDLSSHPGSLQESMIHSLHLSLHGDSRGAEEKPSHVPFLHVQTDDISQHSIS  
SPKESTSESNVKCISSGAPTASGSDQERDKSQVPEENTAYLDRLGEESSLRMRQNNTD  
EVQGRRLRERVLELEQALKLTVATPRGTIVDENPLKTLDRNQLVKEVRFADQTCVELSS  
KLSELQTLNGLRLLKQVVALEQEQEELQNVGTKEETRSKQLLEKDQTIERLKEDLAMANK  
KLAAKTLDEKNTQAVMKKAFESLGLSDDALGYSIASSIVSEQDSIAQDHSLCRQTEQQV  
EVMLECAKKGQQVQMAQKSDELRAENDALKSELNQLRARKASGAIPTMDNSNEMLQTR  
ENEFLGRQLGIVQERLDQTSKLRDECHRSESLKVHLVRSMDTYEGLIEPFERRLEIATK  
FSHKFEGIGNVDEDLLEKEKEFGQIKVSI SLMKRESELFLTSTSNFETISDLDQNKQIV  
TMAKATFSRLGQHYKQLEIDVEKMEGFSDRLDCLSETVSHLRSSLLFEKESVSSCESNT  
AAEMERDVIQNHLLQGGTTIDVIKSTIPTPKSRISDEDEMYTLMEEARIPRTDEISISSDL  
DDISRLHDDMTLESIVRTGVSFTSTSNMDMFKDSLETAMNECKRVKERSIKLKEQIESQ  
NDTIQKLEQENGKLSLAISRNEEYCLVEKALQEAKEEIEGLRCTVASIQSDNEAHCLQM  
NEQKRESTVIVEENDRLMKSVVQIQKQKETFEARINECEKSLALTKAELECATSSCDEYK  
ERFEDLQAHFSTKIYKVTQKELESAETRRALQVALHESCELKRLHHEAVTKLSKEVESK  
LRLEALVNELQNYKMVQSDLEDRTLESQFAYEDMRKERAELKSKLSQSEKEATSLKELY  
ANLKGMRMQMIEESSRKIQEIEQKSSLLSNHKTMDKRIAFHGLIADLQCKDLKEYFI  
SKENNSVSLNKFESAMNEIDCWNSIIPPLITDEIESMHHTSKRIPDLKDEIEQLNDNLSKY  
EIRQTDQMKHAKDQSTQNEKLFDLLRQAEEMERSSLOIQEMSEAMVAMQOREYEANHKF  
KVMESLQKLTQSKTSAIENNEEFKMKSLLLDTSATLEKKDSQMMEMNSQMNNLKSEV  
NEVTALLRSKDAEEHSLRVNIESCEKKNARLREYIRKLTNKCEEWEGSYDRQSRAIERLQ  
EKNTRIKEKACDIAGRYRALVADVNRKMKHHDREKWSNERSNLTNVHAALQEQLEQIA  
KELA

>comp12462\_c0\_seq1; 1001 105 3038 LEN=3236; translated  
MPLARRLSSNSKEAFSNFCDKNKPLSRRLSSNGSVASSTSTDHRRQSIAQDRGQRVLRRR  
NQQKQLSKFSPKSSVSKSTKDNVTSPEPKRRTSVNKENNGIQNTNLMMSPTPYWKVARE  
RGDKHSPRETRSARKKKLIEEKTRDGVLSFSPPNQVANARKEMLELERKTRERDSRIDEN  
RKNQQLLVFSDKDFESLTDIPADSNEDNDEHTSSMKTVKQKSKVGVNNGEDERVVSNDE  
GNVSSFSIDDERLARYSEELSCLTKSTNHGEHSQEMMNAIKGLGEKFEILDRRLSEFPS  
QPMTTHQFSDPKTLEELGEKMRQIDGLSKKNSKLEKENKTMDLKLLKVEIDLHSEREKLD  
AAIVDLEKVESMNEKLTTLNEYKAKNHVLTNKVLPRTTEKELKKSQVQLKYYKRRVEQTS  
ATLQEEYEAAMKDLKSEHDLRLRKTTEEKAFHQTNLNEDSYRAHQEERLENERKEQMLKEAQ  
KSLEMTKSELEVERSRADDQMKKFQNALKELKRTKVEKEKLEGGQFLDFKDELMANSEESS  
AAIRLVEKDRETLENRLKEVENQLKEVTEEKNDALDRLSTSDKREDDLFNRLRESDRVRK  
ELHARVMVLIGSIRVFRVRPALPEELESSSDKDLKHVFKFSDGLGTTNRDKNSKYGCDD  
PTKNVLEVTEPYKDRGGLSQRKRWKSFQFDFNVFNPSHCQEDLWEATEPLVQCAIDGFNVT  
LFAYGQTGSGKFTTMLGDSQSPGKEGIIISRSIRKLFKAKSKIEELSQGEKSVSVTIEMLE  
IYNEQVIDLLSPKATEPLKVSNGRAVGSIHQSVSDEASVFKILAVAQKRRTVKATSSNAT  
SSRSHLLFTIETVTSKDGVSQVQGLNVCDLAGSERLSKSGAHNSGGALLKETKCNLSL  
STLSNVIEKLQAGEKNVFRDLSKLTSLQLNSLGGNSKTLICICCNPLQSHFHETLCSLRF  
AAKINKVDLKSQNFIA

>comp12463\_c0\_seq1; 344 162 1381 LEN=1547; translated  
MSMSSSGTPLFGNFSSQPNKTPKSPKGTMIENPYTKNAQYGALTTLTNQSSSLALRSMR  
SPLTAMTPNRDNLRQKVKPMATPGPPKMSLSLMGGLTPMQVSGVCFETRCGSGXGNDE  
SIWNNLVKIATAATAETDHTIPVGYGIYVQSVVTRAQYLLAAAIVSNILPXKSKYVLNTR  
LIGVADETFNPKTTKAKQEEQRDLALKAPQAVATPMPVVASPRLLENKTTTDDNYFADSNAN  
FSSQSLVADHWVVAHGYSNEYKSLGILSSFGTIENQEAGGNWLAQVYESRSLSAEKAL  
SRQSVLLGNTLTCGMTRGTPSLMQSLSSGKGQHQRNNILPREQNIQVTEELHNDGKHATQT  
AGKLGEQDILLLENSAYESREPFQRRSMCDKVLAWYFEWDEHPHSD

>comp12463\_c0\_seq2; 415 162 1257 LEN=1423; translated  
MSMSSSGTPLFGNFSSQPNKTPKSPKGTMIENPYTKNAQYGALTTLTNQSSSLALRSMR  
SPLTAMTPNRDNLRQKVKPMATPGPPKMSLSLMGGLTPMQVSGVCFETRCGSGEATMK  
DLEQSGENRNCCNCRDGSYHTGRMKPSTQRQPQAKQEEQRDLALKAPQAVATPMPVVASPR  
LLENKTTTDDNYFADSNANFSSQSLVADHWVVAHGYSNEYKSLGILSSFGTIENQEAG  
GNWLAQVYESRSLSAEKALSRQSVLLGNTLTCGMTRGTPSLMQSLSSGKGQHQRNNILPREQ  
NIDVTEELHNDGKHATQTAGKLGEQDILLLENSAYESREPFQRRSMCDKVLAWYFEWDEH  
PHSD

>comp12463\_c0\_seq3; 444 162 1136 LEN=1302; translated  
MSMSSSGTPLFGNFSSQPNKTPKSPKGTMIENPYTKNAQYGALTTLTNQSSSLALRSMR



LELQSTENKDMKISLERKETELKQRKDQINELVTKYTDKIAVLEAKLDEHSAAMTSTGGK  
VETVQAQADRKDDKIRELLKSTAEMEAKLEAATR SKENARLKAESLSKELDEKESKLRSE  
EVERIELETKLHTQSRSKDEARSKMSELSSRLERKERELRQVSDRYKIYVMELESKLDQG  
TDTKHHLLQLEIDQLRNNLDSASSVSSEALELRQKVNAL EATVANSRESIESLEQKLEEAS  
ASRKEISTSLKKANSEKAEVIAALEGVINEVQNREDEIESLSELLQRRDEELQHAKI IAT  
KALASAKDIQKRYKHKDANEHSGIMGRMDEVNEDIDRLR TENETQQRKIFSLERDLKDKK  
LECKRLKDQLRQFDGRQMRENVKDDISAVSTQSTEF TNF SNPPNSEMAVEGQLQLSSQMS  
MDSGSFSPSNRVQNTSSRSDDGFGHADFA SVEEHF SKDSFDSQVGDTEWQDFDDGNGSG  
FDSTASDQQSAVKAKVERDALRKYVRQRYSSRGQKSSY

>comp12470\_c0\_seq1; 417 172 1986 LEN=3314; translated  
MLPKKRPNSPKRSASPVPSSRRQRLSPTSSSSRTPNRGRSSPPPPRPRGSAPSKTSPNNT  
AAKRTAGTKTTGVM DYLRQSVSRD SLLGLYSDEKRGRYVCRAVLQRLPETSQQIIVRLSC  
TGGEFSISNIRIWLKGFNAGGAGTSSAAMNKLLSRQLNELYHWAIVTEKQQASAWTDQT  
VLRLTPEFFKSLKDSLQSLDASPCALTEEMKFL ENEANKDETSGRPVRF PAMPTEPDL E  
RYTQSQWDAVLHYLVGTPNMTIQPNPAVAHFLLQTNLMQPD PDYKRSREEAPLVITQKGY  
DFMLQDNSQQVWHFVYQYLATVAESKKGEVFREALLVLI CLSFSRFGE CYSTASLTKPGV  
KIVKDLGLFGI IYYKKIGRGFIFYP TRIAMQLTGGNQ TSGGIGGKGGMYSWSSKALESS  
LAQPRPNDSSHLAIIVQTNFQLCAYTTSELHVSMLGLFC DVNTIRRLPNVIFMTITRDSI  
KGAFNLGIQAQQILRFLEKHAHPKLRQGSGLGASVSN SPLPGNVVDQICLWDRERHRVI  
WNDVFMHQPI MDGEFRAVQKYVMKHGAHAWSSERSNKIYMKYEHVEHVQKFIQEWRAKAA  
AASR

>comp12470\_c0\_seq2; 417 172 1986 LEN=3466; translated  
MLPKKRPNSPKRSASPVPSSRRQRLSPTSSSSRTPNRGRSSPPPPRPRGSAPSKTSPNNT  
AAKRTAGTKTTGVM DYLRQSVSRD SLLGLYSDEKRGRYVCRAVLQRLPETSQQIIVRLSC  
TGGEFSISNIRIWLKGFNAGGAGTSSAAMNKLLSRQLNELYHWAIVTEKQQASAWTDQT  
VLRLTPEFFKSLKDSLQSLDASPCALTEEMKFL ENEANKDETSGRPVRF PAMPTEPDL E  
RYTQSQWDAVLHYLVGTPNMTIQPNPAVAHFLLQTNLMQPD PDYKRSREEAPLVITQKGY  
DFMLQDNSQQVWHFVYQYLATVAESKKGEVFREALLVLI CLSFSRFGE CYSTASLTKPGV  
KIVKDLGLFGI IYYKKIGRGFIFYP TRIAMQLTGGNQ TSGGIGGKGGMYSWSSKALESS  
LAQPRPNDSSHLAIIVQTNFQLCAYTTSELHVSMLGLFC DVNTIRRLPNVIFMTITRDSI  
KGAFNLGIQAQQILRFLEKHAHPKLRQGSGLGASVSN SPLPGNVVDQICLWDRERHRVI  
WNDVFMHQPI MDGEFRAVQKYVMKHGAHAWSSERSNKIYMKYEHVEHVQKFIQEWRAKAA  
AASR

>comp12471\_c0\_seq1; 281 215 523 LEN=962; translated  
MVDYLQKGVHINALTHDNSSPLRVAINELGEDHEVVKFLMAVGAEDHGG SVEDEQEEEE  
DDEYEDDYHDDYEPDETPSEVSDPAPESQAGKVAWPDDDEEL

>comp12471\_c0\_seq2; 523 323 1705 LEN=2144; translated  
MCLSTLGAASSQE QFGTQCSFAITGPTLDGCDPSLLDHRQKFYDEFMEGCGERYDREDCE  
NEESVRYKMNI EQPQSMVNMTATGYRKT KAPASLIKLLTEFWEANKDKQEEEEWGEYSIY  
TNHWAAPTYVVDVESPRLSGGGERLKKAIWDA AIDGIAEWTGGVAKLRPVSLYGI RVIYKE  
GAVLNPHVDRNPLVSSGIVNVAQDIDEPWPLEVYDRNGHAVNVTMEPGDMILYESHSLIH  
GRPFALKGRFYANVFIHFEPYDGDWTTKGQTQLGDNNGDLPPYILPGSPQEKAWREEYPN  
GWSKIYAEGDEPPVNEYAAYGDLQELKEVGDKDPGMLRWMDENGWTP LHEAARTGNFEMV  
DYLQKGVHINALTHDNSSPLRVAINELGEDHEVVKFLMAVGAEDHGG SVEDEQEEEEEDD  
EYEDDYHDDYEPDETPSEVSDPAPESQAGKVAWPDDDEEL

>comp12472\_c0\_seq1; 435 250 2622 LEN=3206; translated  
MAPRVSPMPRQQQLARQQGAVKSEQGVGHYSGTQSYATDSMDGLSKNFSASAAIVGDRKS  
PGIQENISRDNRIDYTD FVKRKYFEQAGHSDRHYPTNF AIYREENGHEAVDQIILPAASS  
SSDRNSLSSVAEDVGTI HTRLLDANRISNLSANANS GNPKLQVSEDRMSNR TKPYWNRP  
HTPPLTLYANEGTPALSHSSVGSPEKPGNIDNDNPAMDEVAGYLSPPDMEATGSL LKHA  
ITDSSAVSTAHP LSSCEDMTVDGSHASVDS SRGSMSTATLSLIKQPVLYSAIGSLERA  
NCNSLTNLNKRFLTPSKEFCKPGGPPGMVQSILVPPARPYRVDH NKQQKTRTTTTYSGLQG  
VLPGAVGGTDQMKDQQRKEDIVQDGT SQGTT HQKSNNTKHNSEETNLSTLSSSHEEKSN  
PRKRSDFNYSIDGNLSSQDNTNATIDTKASNPKKTSADLNSNSKSKTNRKVRLSYDSKG  
KTRKSKSKTIEMFRPSSDAYTPRIERKKIKYKAAEARPCVQQMSSPMGTLQRPNFRDALR  
RVAMILQRHIVKIESRFDEHQRS GFSSPARRKATTRDGLF HASMREVF NEDAYRTPTFK  
CNMARIPMARPGMVYGLRKIKVQYSIPTETEIYEF GHQLFKSVQLSSECSIVCL IYVERL  
MEVAKVPLLACTWRPIFMCGLL LASKVWQDLSSWNI EFSVYPQFSLEAINKLELNF LRS  
VKWDLYISSSSYAKYFFALRSLVEKQDFRQRYNRMVGGVGNVAQDEALKVQERTERVKEE  
AMMQLSRSMNW

>comp12472\_c0\_seq3; 435 250 2622 LEN=3025; translated  
MAPRVSPMPRQQLARQQGAVKSEQGVGHYSGTQSYATDSMDGLSKNFSASAAIVGDRKS  
PGIQENISRDNRIDYTDVFKRKYFEQAGHSDRHYPTNFAYREENGHEAVDQIILPAASS  
SSDRNSLSSVAEDVGTIHTRLLDANRISNLSANANSNGNPKLQVSEDRMSNRTPYWNRP  
HTPPLTLYANEGTPALSHSSVSGSPKEPGNIDNDNPAMDEVAGYLSPPDMEATGSLKHA  
ITDSSAVSTAHPPLSSCEDMTVDGSHASVDSRRGSMSTATLSLIKQPVLVSAIGSLERA  
NCNSLTNLNKRFLTPSKEFCKPGGPPGMVQSILVPPARPYRVDHNKQKTRTTTTYSGLQG  
VLPGAVGGTDQMKDQQRKEDIVQDGTSGTTHQKSNNTKHNSEETNLSTLSSSHEEKSN  
PRKRSDFYSIDGNLSSQDNTNATIDTKASNPCKTSADLNSNSKSKTNRKVRLSYDSKG  
KTRKSKSKTIEMFRPSSDAYTPRIERKKIKYKAAEARPCVQQMSSPMGTLQRPNFRDALR  
RVAMILQRHIVKIESRFDEHQRSFGFSSPARRKATTRDGLFHASMREVFNEDAYRTPTFK  
CNMARI PMARPGMVYGLR KIKVQYSIPTETEIYEFQHLFKSVQLSSECSIVCLIIYVERL  
MEVAKVPLLACTWRPIFMCGLLLASKVWQDLSSWNI EFSSVYPQFSLEAINKLELNFLRS  
VKWDLYISSSSYAKYFFALRSLVEKQDFRQRYNRMVGGVGNVAQDEALKVQERTERVKEE  
AMMQLSRSMNW

>comp12472\_c0\_seq4; 415 250 2442 LEN=3290; translated  
MAPRVSPMPRQQLARQQGAVKSEQGVGHYSGTQSYATDSMDGLSKNFSASAAIVGDRKS  
PGIQENISRDNRIDYTDVFKRKYFEQAGHSDRHYPTNFAYREENGHEAVDQIILPAASS  
SSDRNSLSSVAEDVGTIHTRLLDANRISNLSANANSNGNPKLQVSEDRMSNRTPYWNRP  
HTPPLTLYANEGTPALSHSSVSGSPKEPGNIDNDNPAMDEVAGYLSPPDMEATGSLKHA  
ITDSSAVSTAHPPLSSCEDMTVDGSHASVDSRRGSMSTATLSLIKQPVLVSAIGSLERA  
NCNSLTNLNKRFLTPSKEFCKPGGPPGMVQSILVPPARPYRVDHNKQKTRTTTTYSGLQG  
VLPGAVGGTDQMKDQQRKEDIVQDGTSGTTHQKSNNTKHNSEETNLSTLSSSHEEKSN  
PRKRSDFYSIDGNLSSQDNTNATIDTKASNPCKTSADLNSNSKSKTNRKVRLSYDSKG  
KTRKSKSKTIEMFRPSSDAYTPRIERKKIKYKAAEARPCVQQMSSPMGTLQRPNFRDALR  
RVAMILQRHIVKIESRFDEHQRSFGFSSPARRKATTRDGLFHASMREVFNEDAYRTPTFK  
CNMARI PMARPGMVYGLR KIKVQYSIPTETEIYEFQHLFKSVQLSSECSIVCLIIYVERL  
MEVAKVPLLACTWRPIFMCGLLLASKVWQDLSSWNI EFSSVYPQFSLEAINKLELNFLRS  
VKWDLYISSR

>comp12472\_c0\_seq5; 415 250 2442 LEN=3109; translated  
MAPRVSPMPRQQLARQQGAVKSEQGVGHYSGTQSYATDSMDGLSKNFSASAAIVGDRKS  
PGIQENISRDNRIDYTDVFKRKYFEQAGHSDRHYPTNFAYREENGHEAVDQIILPAASS  
SSDRNSLSSVAEDVGTIHTRLLDANRISNLSANANSNGNPKLQVSEDRMSNRTPYWNRP  
HTPPLTLYANEGTPALSHSSVSGSPKEPGNIDNDNPAMDEVAGYLSPPDMEATGSLKHA  
ITDSSAVSTAHPPLSSCEDMTVDGSHASVDSRRGSMSTATLSLIKQPVLVSAIGSLERA  
NCNSLTNLNKRFLTPSKEFCKPGGPPGMVQSILVPPARPYRVDHNKQKTRTTTTYSGLQG  
VLPGAVGGTDQMKDQQRKEDIVQDGTSGTTHQKSNNTKHNSEETNLSTLSSSHEEKSN  
PRKRSDFYSIDGNLSSQDNTNATIDTKASNPCKTSADLNSNSKSKTNRKVRLSYDSKG  
KTRKSKSKTIEMFRPSSDAYTPRIERKKIKYKAAEARPCVQQMSSPMGTLQRPNFRDALR  
RVAMILQRHIVKIESRFDEHQRSFGFSSPARRKATTRDGLFHASMREVFNEDAYRTPTFK  
CNMARI PMARPGMVYGLR KIKVQYSIPTETEIYEFQHLFKSVQLSSECSIVCLIIYVERL  
MEVAKVPLLACTWRPIFMCGLLLASKVWQDLSSWNI EFSSVYPQFSLEAINKLELNFLRS  
VKWDLYISSR

>comp12474\_c0\_seq1; 370 1 659 LEN=814; translated  
XESLELATQKCAELTLANEELTRCNEELEDTTAERDELELRLVEWTSKAYEWNRAEEAE  
RNLA AAKKAAGKASNKGGQHKPTVSGVTEEECNPQGMMLLAAIERNNNNGGGNGGNGSG  
NPNGDTGGKRWSIFRRGGGGEASDPSP EAGGDSRSFDFGSEEDLEETVARLRSELVRLSTA  
HKDEAYLTRKKVAQLEGENQALLLQNATLEKLSRFQEEH

>comp12475\_c0\_seq1; 833 166 3045 LEN=3370; translated  
MTPPVHSSRSASARTITPPESSIVDLTQENDDDCLVVNIAADTEITPPEVDEVAVQHC  
KFASFSTVVVGIQYYDGV AHAGEF INIVREPKNPYDSNAIRVDNLQKKVGH IKCQWAAI  
IAPFM DRYCSSSRDES NPPELALS LVGTILFGGGSXNSAVDIEFVAFGAASTMDELDR  
LRPLALDIKKA FK RQKDFRTEANITKSKAAAI VESKTM DWTTQAKELDAFFDKQSEQQQL  
KDLPEVPVPSQLKTELLDYQKNWTAMAGERDNNPKVPCLYSQRKEKNADVWCNITKASQ  
PTKPGTVQGGIMCEMGLGKTLQLISLILAAPPQSTGIPGTSK VANLHQPHCTLI VCPVS  
VMSNWQRQIDQHVDEGLNVGVYQGPSRATLLQKVKEGEINVLVSYNTLAADYTKIFGK  
AKDDDGSKIPARPKKQRPIDSI FKIPFHRI CLDEAHI IRNPRSCFFRACNEVSAQRKWA  
VTGT PPFVNKADDIYSLMVFLGYEPLNDMKIYRAISFP IQNNDEEAGLACL RVAMADVSL  
RRSKDTAGIQLVDKTVQLTKVSFEEDPHKAIYDALFGSVRVAFEAVLQNGEKEV LKNYS  
NIFEKLLRLRQACCSGKLVPLERRQRALT VWNELKQRSNNDQTPKLTAE EGGLELLEK LKD

AFDTDKNNNNELPECAVCLMEMEEAQCIILKKCSHVYCEDCINRVYTTNLGRSKCPLCRK  
PFSKSDMIRKSAATAATQIDKREVAIHDDNMRRSPKISALLKIIQAGMHPDEKGVIFSQF  
TSFLDLISQALQEEGHTFVRMDGSMNTTKRMAAVRAFSSDEKDGPRFILCSLHAAGTGIN  
LTRGSKAFMMDCWWNASVENQASSAVTFMTSKLVDKMLNQYTKNNPSSFPFLVDRIHRIG  
QTRPVTIYRLVMKDSLEERIVELQTVKSLQAKGSMQKLGAEKKKTRLRDLKGLLMIE  
>comp12475\_c0\_seq2; 855 166 2954 LEN=3279; translated  
MTPPVHSSRSASARTITPPESSIVDLTQENDDDDCLVVNIAADTEITPPEVDEVAVQHC  
KFASFSTVVVGIQYYDGVAHAGEFINIVREPKNPYDSNAIRVDNLQGGKVGHIKCQWAAI  
IAPFMDRYCSSSSRDESNPPELALSLVGTILFGGGSXNSAVDIEFVAFGAASTMDELDR  
LRPLALDIKKAFKRQKDFRTEANITKSKAAAIVESKTMWTTQAKELDAFFDKQSEQQL  
KDLPEVPVPSQLKTELLDYQKNWTAMAGERDNNPKVPCLYSQRKEKNADVWYCNITKASQ  
PTKPGTVQGGIMCEMGLGKTLQLISLILAAPPQSTGIPGTSKVANLHQPHCTLIIVCPVS  
VMSNWQRQIDQHVDEGLNVGVYQGPSRATLLQKVKEGEGINVLVSYNTLAADYTKIFGK  
AKDDDGSKIPARPKKQRPIDSIKIPFHRICLDEAHIIRNPRSCFFRACNEVSAQRKWA  
VTGTPEFVNKADDIYSLMVFLGYEPLNDMKIYRAISFPIQNNDEEAGLACLRVAMADVSL  
RRSKDTAGIQLVDKTVQLTKVSFEEDPHKAIYDALFGSVRVAFEAVLQNGEKEVLEKNYS  
NIFEKLLRLRQACCSGKLVPLERRQRALTVMNELKQRSNNDQTPKLTAEEGLELLEKLD  
AFDTDKNNNNELPECAVCLMEMEEAQCIILKKCSHVYCEDCINRVYTTNLGRSKCPLCRK  
PFSKSDMIRKSAATAATQIDKREVAIHDDNMRRSPKISALLKIIQAGMHPDEKGVIFSQF  
TSFLDLISQALQEEGHTFVRMDGSMNTTKRMAAVRAFSSDEKDGPRFILCSLHAAGTGIN  
LTRGSKAFMMDCWWNASVENQAMDRIHRIGQTRPVTIYRLVMKDSLEERIVELQTVKSLQ  
AKGSMQKLGAEKKKTRLRDLKGLLMIE  
>comp12476\_c0\_seq1; 943 1 2767 LEN=2893; translated  
ARKSRLAIDEIAYGFMGSKALSVALKVGVFDAIDTAAKQQQQQQMHPVPEASAEETAI  
HVFCSQDDNEEDIPIPLTSIIVQTPSPVPPQSNRGEDEKEDDDNEDSDVCHLQEPQPSWLLR  
FHPVMFFFLQHASCTTNYKSSKKTNENESRNKSKNTRVKISPLPMLFQMFLOTAQQQL  
HQNKQNCSWNFHPVTIEKLRKGSRI SVSCVYVENDDPWLDSTRASEEEKNRSPGSKPRH  
MSGEQAIAIALGGRIVNLGSLVLLSTIYGYVIVTVTDIGMHSGDVRENSVSDGNETTRIV  
YRLSDDVLADHDYHIQGPPTLHDENSRNHLQPDGESLI AWEDDVPGYESLLKDIMDVFGV  
QGDPAASGVVLTGCSGVGKSRLASCLAYHFSSKSGTFRQHNQQTQHQTSESKTAKSSSNM  
SSLKYQNHIIYSSVQDLTFQASTETNLLENVLPKLRGRKLWIVDDLHLESVEGNGDEA  
KNDSETMMVQNAIVEAIDRFHESCCILGLAHSVSNLPSSELTSGRLEKALQILOPTQLQR  
IEIWKRIADENNGLLLNPNPSEKNDWIVALASSTAGCVPRDIMRIYQDAITKLRARQR  
ECEDGLETPVLEWEDLREAIAKSVIPSQLAELDVIKPTVFDMLSWKEIHLQSWQDFAGY  
PSLKSSVYRQVVVPWRYFLQSLDES LTGDIKENKKSLEPPPGVLFHGKSGTGKTVAAC  
LAATLGLPIIQVRATDLKWLGGSESLRSLFKRARAVSPCVLFLDEIDAIACNREEDD  
NNDVSSRILSTLLNEMDGVS SAIQKSRVLVIAC TNRIGSMD SALLRPGRLQEHFHEIPN  
ASDLEEILKLR TGKIPLAQLNLKDLAMALLETGATGADVGGLCREATFIAMRRVEFRED  
ISVAVTREDFESAICERFGIL  
>comp12477\_c0\_seq1; 546 200 1861 LEN=2010; translated  
MSTKQKAVLVVTPYSTGCCVALEMQRGYAIVALWINGFAEEMKTHVPLS CAEELKYVRE  
IDEQASLELTLEEIERHSVEADLDIVACLAGGEAGVDVADILSEAMGLLSNGTLRV DGEI  
LNRRDKKVQEQELLRKAGMRAVRQAGSDKFEDVEEFLRTE SYPLVLKPTESAGSDGVKLC  
NFEEAKDHFHQLMNSQLVNGGDCGEVLCQEF LKGEYVVDHVS LNVGHKTMVWVYDKRE  
RNGSAFVYFGCVPIEADSEEAKLIIPYIRKTL DVLGVKNGP SHGEV IITESGPCLVEMNC  
RANGGDGAWQPLARGLTPGDYSQVEVTADAYLNPEKFD SYPDIPGRLIGQGVVCLVSYG  
KGVVRRTPGFV LKLPSCIHFESGVQVGSKVDLTIDLITSVGSVIVYHENPAIVKDDLH  
FIRYLENMNGLFVFE DNRAEIEEKKED EVVNTKVAIADATVSSQTAKDTTVIRQAKELE  
GEPDDGRFPDAPFLKKTISLQRTVDLDRNNLFDGEGPPTMIRTVSIPKTQGHRRTFSEQ  
GPSMFRTL SLQKK  
>comp12478\_c0\_seq1; 743 104 2056 LEN=2323; translated  
MKLQELLLLLLAPLFGPIYTPKLTAAATDDVDQSIYSLRGSAMKGT EGVLS SSSLMDSERK  
LQFIFPRPTVPVPTPAPT VSAVEVPT EDEPKLTMSPLFLAWQISPTLVPEIPPTDTPTVP  
PVPFPPTDTPTVPPVFP IMPRPEQRPIVPTNLENSQSSPPRPTVDDSN DENSPSTLPRPT  
IDDLLPPSPTPPP NPPVAPT PP IRKQTV DVNGNACGMQTPGTLILHGGVFNYEDPLSDSL  
GQAMVREMKT SRENRLVDPLVFLPGARREVT DIDEQTFEDQWRNIMADGV PFSVLHPRDR  
DPAFTDVS DAEQADQEDFVRPLKDAMGVFLPGGRQWRLIDAYKYTETEEEMWNVLKRGV  
IAGTSAGAAVMASLMPRGDEGSAAFLAEREWHQHGFVSNLAVDNHVSARGREFAMY E  
AMNSQKENRKTGLIGLNENTM VVVKQHFNVLGDRGDDSVVRVYDCSKVDYFDDCTFDNA  
PYTEL RPDWYDL CRRKQLFI PPSNFNDMNEDGGLGSRFGAYELPYRYANDFKAGNPRQ

FLCSGRRCRFKSNPIVVDSSQGIVRITGRVVFSEGSSELSGDRLQIRYRINGDRFQKLVFD  
TNFEPEGHNPKTVFAAIPVPYGRSILNLEIDAQTAEEGAAQFRVVDLGIE  
>comp12479\_c0\_seq1; 1580 65 3712 LEN=3802; translated  
MHIQQVVIDGFKSYARRTVVEGFDPHFNAITGLNGSGKSNILDSICFVLGITNLSQVRAG  
NLSELVYKQGQAGVTKASVTVVFNNEDEASSPVGYEQCKEVTVTRQVLLGGKSKYLINGR  
NSPAGQVQNLFHSVQLNVNPNPHFLIMQGRITKVLNMKPHEILGMVEEAAGTRMYETKRIA  
AIKTIDKKQAKVDELNSVLSEEITPTLERLRGEKQSYLMWSKNNADIERIERFVVASDFL  
RAQQALDNNVEGSSEMEDKVTELETQVETYEQIEEHDNAASELSSKLGKGFQDQSHSKLK  
KEEEKLSKQLVKVTSTWQNSQELTKKAETDLADARALVTETKNLNCNEKEKQISQDAKAVE  
DIVSAKEEAERTLEDLSLKFQNMASGISMSQGNEMTLDPDQIAKAHSDSKTAEAKVKQAT  
MKIKHLTKSLTSVEKQMKKEQKSADTLNRRREASTQKA EKFRKLLSELNFDQDEFKLDQ  
EKDHLTSSVEELNGIVETLTAQLGSRALFNYSDPVVRGFDKSKVKGLVAKLIQVQNPVHAT  
ALEVVAGGKLYQVVVDEAITGKAILDRGNLKRRTIIPLDKIQPRRVTAACNKANQIAN  
SLGAKAWPAIELVGFDEEIRSAMEYVFGASIVVDGAKAANQICDATKTRTVTLTDGDVYDP  
SGTITGGSKNNLGSTLVELTKLLEASKQLSADKERLSTVLTALRDLKGSSEFDKLSHKL  
SLAEAELEGIKKQVSQTSYGVLEEKFTSMSKELEEEANEEYTYMQDEQKEKWDLYHELKEK  
EVELTQQREDMLGQIESDIKKAKKAAADAVKRAREAESSKDTLLMELESKADVVSAEVA  
VSTAEASLKEANEEIISKEIVVGEVKALWDEAKAAQTKFEERITQFSSELAEIKRERANL  
TKKAEKCTLEAKKLTVSI SRIRKERQSAEKVVISLLKNHPWIESEKSAFGVEGGDYDFTA  
ANPDDMSAQLHALKSEQESLSKKINKKVMGMIEKAEGEYTELLRKRKVVENDKKKIKSVI  
EELDIKKKSELERTWKKVKNKDFGSIFSTLLPGASAKLEPPEGMQAFEGLEVKVAFGDVWK  
ESLSELSGGQRSLALSLILSLLLFPAPMYILDEVDAALDLSHTQNIGNMLKTHFSQSQ  
FIVVSLKEGMFNANVIFRTKFDVGVSTVSRITGTGSSSRQVRLAGSNDMNSESTSQLTR  
KRNHSSRRKQGKEN  
>comp12479\_c0\_seq2; 412 84 767 LEN=857; translated  
MGMIEKAEGEYTELLRKRKVVENDKKKIKSVIEELDIKKKSELERTWKKVKNKDFGSIFST  
LLPGASAKLEPPEGMQAFEGLEVKVAFGDVWKESLSELSGGQRSLALSLILSLLLFPAP  
PMYILDEVDAALDLSHTQNIGNMLKTHFSQSQFIVVSLKEGMFNANVIFRTKFDVGVST  
VSRITGTGSSSRQVRLAGSNDMNSESTSQLTRKRNHSSRRKQGKEN  
>comp12480\_c0\_seq1; 24 1 456 LEN=549; translated  
YTPTNTPKNTPTNSPTEQPSNTPDTPILTLTGGTPTDDQSPNTSPTGSPTEQGCCSRYF  
DQCIETSECSVHTIDY CENQCVYSGVNGPGILYWLPSGGPTPSGCLKRYHTNCYGNSPPT  
PCCEPAVCVALTVTSSMCLHPDEIGNPLNGS  
>comp12480\_c0\_seq2; 1165 376 4383 LEN=4476; translated  
MDTTRTQIPLNESSRSKFSVPHHGNVDEHGDKNKIENETSKSCNVFDDSLKICCMEEENVV  
EESDADMVDRTFDVRKMQHQEGPETRTDISITTTCCSSGSNI VSSCTVSSSLFNGDSDARL  
SNMEACWNHSHSLFSLNLDANPSLFSFFVSKKQEQEDQQEQEPDDDALS VSENSEFSDDAL  
ASLVSSKNAKDHDCTVTTTTSLTQTHPSQSTKETAGIAELRPSRSHLVCNKPNFTLLF  
DEPGHSDVKNKVI RFAKSVETVIGEDDFDEADLFDGARS DNARKGFASIGGSLSSGGGS  
MHP SQHVVGARSIRNLI EEQSPSSSLFEGHDLYNNGDYIYNDDASIVSCNSEEERIE  
QGNNRIRRRMLLYVVGSAIASTFVSI SNRLSRMYDTPDEVAADVSDNASPGVEQVLKTV  
AGGDGINSGSAAYSKASATSFAPTQMVANTSTSATASSVTTTTSGVVTQVTQTMAMKAVS  
NFVGSATSI SSTTVSKTTIGKGIIGIRTGTGCASIAAIPGGGTIKSVLITSVLGIAAIAAG  
TSTLLVPTTDTLLAQNFMLPCPHEDTDVQSEIIRFTLDIPPPENGENIFGTETIQKNV  
LEDMFASVYNDLTDSGCNELFERRIDPGGVSLITFSDENNMLESQWKVTVTCWEECPEEP  
TFGATRKSESIGMGRRLQEATDTEQSGGVNEKTMPI SKIEFRTLFEQGLRSLAAHSTPF  
YNIKPSASSGGDSSNRSSDTPSYLPSIIPSAIIVVLP SFGPSRSPSDKPSDIPSNKQSSY  
PSDVP SGFPSTIP SARASLFPTRSLTEVPSVMP SNTPSMLPSFDPSGSPSVVPTNTPSVL  
PSLDP SGSPSEGPSEM KSSVSSAPT SAPSTLRPFTPSGSPSIVTSGSPSGTHSLPSEE  
PSIQSSKIPSRTPSELPSIVPSPIPSEPPTNIPSEIPSTGPSSVPSSEPSYLP SRSPSQL  
PSKIPSTMP SRHPSGTPSKTPSVLSSETPSSIISESPSESPSEVPSILPSANPLPMPSES  
PSDLPSGTPSGFP SKLSSSTPSSSETPSGIPSSMPSRKNSMPSDIPSTLPSTIPTLAHS  
ESPSNISSGTPSTLPSAAPSRI PSAKPSESPD TSGPPSYLPSRTPTLMPTLSPTDNLG  
GPPSEFASVTPSAVPSNNTDTSSEAPSKLPSAIPSKFPSTKPTDVPTDQPSNTPGTPT  
EQPSNTPDTPILTLTGGTPTDDQSPNTSPTGSPTEQGCCSRYFDQCIETSECSVHTIDY  
CENQCVYSGVNGPGILYWLPSGGPTPSGCLKRYHTNCYGNSPPTPCCEPAVCVALTVTSS  
MCLHPDEIGNPLNGS  
>comp12481\_c0\_seq1; 399 233 1402 LEN=2360; translated  
MVRKWLKSLSLKNLVKTNNSNGSEDEAEFGSNESPKNLVQERKLNAEDSKTFTKNSSHE  
SIIAGRKIKGASKNNQREDEVIVAKNVSPKTKLRKDDLSE DGSSLSGTLSTK KKYRNINQ

EEDALQARAPSTEEKSVRADNEVGLQSTDYKKSSKKDPGRRQRDTSEFEGSSQNKSNDGD  
DKKDDRSHRSGKKKKSKRKLIDGNNDVVEVDEKDLVIQNLSQQLEKKERTICALNDTVEK  
MQNQLEVMELILENSQRMNRTIEVEDNASLDDKEVFDIPPKANPPKAPFLVAALKAKSNS  
NSKLYDDDRDPLDDNDEGLYLD SKTSL ENVFTKAGFLSELNSDNE SLSDDDLDFDRVSSRP  
RPKKPFLESALKAKSLSELAYVHTDISIS  
>comp12481\_c0\_seq2; 249 1 495 LEN=1453; translated  
GDSLDDDEIFELPSESERPCKPILTAALKAKSMSNINFQFDEDNASLDDKEVFDIPPKAN  
PPKAPFLVAALKAKSTSKLYDDDRDPLDDNDEGLYLD SKTSL ENVFTKAGFLSELNSDNE  
SLSDDDLDFDRVSSRP RPKKPFLESALKAKSLSELAYVHTDISIS  
>comp12482\_c0\_seq1; 199 157 1140 LEN=1498; translated  
MTSHAFRRLSLLLAFLCLAPFSFCSSLLVPKEPKGGPPSLFYQEDGELFSGMAEKSNPIS  
DGNSGSSDQLYSESVETDDFISCE NDFVGYDGYPSYHTLEPALDILVDWTLDYADA VDLA  
GGMTRVSVGVESMIAEEFVFRSPEIGPVSKDDFINLMNYQYNGLDLGS AIPDLTVSYEG  
WHQDPHPDWRIWTVARYSGTHTGTARLPGSGLT LSPSKDPNEQVRFTTGPELQSFKWTPS  
KKLIFQTVGYVGDHYTGSGQG HGS LDGLLVSMGLPPLYLETTEPIRNVQNWFSQFRKSD  
CPRIKSPYSYLPQWWHERKDSGHNIQR  
>comp12483\_c0\_seq1; 515 137 1786 LEN=1858; translated  
MPCDYSNIEHTNSSEEEEEDES RKKRGSSTRKNESEHSKVRSDRNISVDNTSCGSSAKTN  
ALDDQIREGRGEQEA IPTPTSM PMSDSSSMVD TNANVPIATTSRTDDRSHGSNHSYRT  
FTTNEQQEKQRHQWGEIWDLES ALLYLVLQGTGSR SNGYNNCETKWV VHNKDRSNTNKS  
FSKKVEVQISDGDANRDKDQDQSIHRDDDSKSD ETAVVREYLTPEKNSWIRFRAAHAGDA  
SSIAQWYRRKRSE DGNHDLCP SNSSTMESTTNYETTHDRSDSNVVEE EVVSDQHEDPEI  
DKHAILRNASTSDESSDRQRQGST RNEEQERH I PHGGGEEKEGEAHSSSLQLEHWLA  
EGLGDENTCPCVYGLLAVHRLPNETTGK DSSLQDTAIDNGLNSSEAVNLLPLEYSNGST  
PCHDDQIQCLAAVLLSLSWTS GKRNLRIEWMSIDANQLQTGDEALAVQQKIWLRIHTLS  
VMTACEAIDVDEFVLCTATTT SALQQQSILSSSA FEEEEPLNDGNRTKRRPKNDVTPQPTR  
IDRVVPSPE  
>comp12484\_c0\_seq1; 828 1 3307 LEN=3654; translated  
XNPDYNLME TFKSTSGVDSL LIPWKRVTQHKEVAQEIQRVITKKSEESNKVLDDLAKEI  
EENELAALMEKQVLEAREN FESAKKAQELSNYLHRQA ILLSDLEVKLS ENFIVTNFPFDP  
RDNHYTFCIHCGCAGDLLLCEGCSNVSHPKCAGLETVPEGDWFCNK CISKSTTSRTDSNM  
NGLNDATTQDNKQSSIDIKTKGLDEKAKSSSTTEKGMDQNL YEDDDFCQKSI PSTIPDND  
MGRSSGKSEVQHTADGVKLEVQVPETGERDETPSESIKASGMPMVNAQIDRNVIQNSDM  
GQKEVQHAPDVVKSEVQVAKTDVTDQTSSESYIKASRTE TDNSQIDRPV VETNKVASHPE  
IDDHELEKNQSELKLLANLIDQRVDLKPNDNHTNVQKPSIEQKPSFGDPLDILDDSHA  
REFLSFISIKSAAELFSMESVLI AKDLEQWRKEKGMKPLAPRGSISTVNSWKKMVRARSA  
EITSKMEEHRRLSYCFQSLPSQAQEFCSYIGITDPEV FVGMGTKELSKQYSRWRKRRKMS  
VLNGTGSCAYVSKWXSIRKALPSYLTAGENSGVHVLSL SKCHIKNGFKVRKLFEDGNYYM  
GQVVS GPAEVLEEENGRMVLCKVKYEDDDEE EFTLEELWLGIDKPNRYELSTSSETDQ  
KSTEKDFGQKVETAIENVEVDLKL TENKVEGEIEREENVEVNYQSEENPIKLEAERGKKN  
VEVDLQLTGKIMDRELEIERPKNIEVSHQSTENPVKRGAEIEIDNVEVKAGIRRTRNLEM  
EEKSEKNADNQAEGVDKVDGDNISNQERTKLAIEEEEEEMERIVNITQVEHQKKSPTPLSD  
QQLDIIVVESEEEKR SSKVIKVEYREDPIPRMNKSKDKQISRTEKETEVKQRRMRKAPK  
ITQRADSIQLPKIRGHQQTRK LISKVTEVEYREDDLLSVPNKIDVNGDGYTTEAVVTKV  
ERSRTSEKRTLSDGDGKKKLMEQQKPEETKRRRSRRSGRGRHYNEETDKCDETSNEGLAH  
RQKQKVTMNEVEKPKRVVTNITHREAGRPHLMPAIDEIVGRRSTRARSRTNEEQETDTK  
DIVASSAANKGLRRSSRSL S  
>comp12485\_c0\_seq1; 240 1 687 LEN=937; translated  
LCHAHISLIAASSDRRNRTRKDKDFNAMKMLKNRLTITVLLLALGTNFFAFASSPQLRSPN  
REQRTLAASLSTIPQDQYQRTLKGRGGSGSSSSSSSSSGSGGGGGGSGSGGSGGSGE  
DEISSAEDGSGWGNSTDTGETESFVAAS AISGVNGRSANDIMTNLFDNDRPAASIIVA AVG  
GLLCMVFLLSAMAILSFKILTS CRSDVEDDIYTTNNKTEQLMKESLEK  
>comp12485\_c0\_seq2; 164 1 369 LEN=566; translated  
GSGSGSGSGGSGGEDEISSAEDGSGWGNSTDTGETESFVAAS AISGVNGRSANDIMTNLFD  
NDRPAASIIVA AVGGLLCMVFLLSAMAILSFKILTS CRSDVEDDIYTTNNKTEQLMKESL  
EK  
>comp12486\_c0\_seq1; 434 87 1193 LEN=2090; translated  
MSKETNLSSSKKYCISFEDVKAAADRIRGVAHRTPVMTCRSLIASGQHDDGKDYFFKIEA  
MQKTGSFKFRGALNAVKAQLELNKANDQEGALSSITPVVTHSSGNHAQALALASKMASDG  
NTTVAATIVMPNTAPLVKKNV RDFGAEVVTVESTNEARKEGAERIVASTGAVFIHPS

PKVIAGQGTVCLEFVQVRELLNGNGDLDAVIIPVGGGLSSGNCISLRALLGEKVKIIL  
AEPPELLDDAKRSFMEGKLLKHQPDNKLDSVADGLKTTLPNTWPIIQDFVDDIITVSEEE  
ILRATKLVWERLKVAIEPSAGVGVAVAQSIENFTKYKKSQSDGVKNVGIILCGGNVDIVKIA  
SKMKEIGI

>comp12487\_c0\_seq1; 145 1 415 LEN=1111; translated  
XNNSNNNNNNHRRNNPPPSKPPNSPRHVVPNRSPMNLDPDKVIVIQNINGGISKPQLLR  
MIRPFAEENGFRVLSASVVMHGSLAFVDFDSVAAVHAVLAQHRYAPFWWNGMPLAIAQKS  
SPYADPRGPYGGDGGGGMW

>comp12488\_c0\_seq1; 480 100 1968 LEN=2131; translated  
MPRTQQDYAESLPTVDPFVTRKRTRTGNFAFKKRKSLRHSLLRNLCFFTIASVFIISTL  
EHTLTTKEWYSNENYEDKRCRQLKPINPNLDLSNLSPEKRFRAVQLAISHAWKGYMNV  
ASLDSFWNEGGGFIPHDDLNPVSKTGHSWLHYAATLHDSIDTLYLANMTIEYEQAVDWLT  
RYDIQTTSPQATKTFEYSLRILGGLLSYSLSGDTRLFAAARNGADSILEGPFQASPTII  
PRPFNVLAPSTRSLNSCTVWWDWKASIQRLYKAIYSTARNRFTQEHQTNSLAGFGSFGLE  
FAFLSTVSGDPRYRQVSDIEIFRHVNAHEKDGMIPIYSWDVLTGKPNSTRLSGSGSDSFYE  
YLLKIPTLNRCHYDAGMEMYTYPCTESDKQHLELYEKMVKKQLTRSHTKTTSIGVFPVDF  
GRRYDHLDCFVPGMLALGSSTRYPGSKSLVDDQDHLRLARQLLDGCATMYKDSKTNISPD  
TGNFNGDSFSSSEDPYLRPEYVESLLVYRRLTKDEDLQERAWGVFQSLEKYCKIPSGGY  
AGLKDVNDPMKGHVDDMPSYFLAETLKYLLLIIFAPDNYVSLDDFVFTTEAHPLRKLNSLE  
PEPGEDELPLCVLQCRPPTVPVW

>comp12489\_c0\_seq1; 443 144 1384 LEN=1705; translated  
MALPKFPRKNDGSTSRIIIVVTVVTVLVLFVSLTKETSTITMESYVSRATSTDMVYGS  
SGERRRSMMEWRDSSKNKCNELIETIGKNVDGAAMDQKESLERSFVSKISLNAQPSKISG  
SKENPYQRCRNVFIDLGSNIGDSVGYFIDNAIDVCSPMWAAANPETKLGVRWFPRPHLNV  
TSLEFSHRGSKANPLFGLLQQQMKESPSATSESFVYXGEGNPTFTERLTKLENFINDMN  
PRPIQHVHIFTESVVTATDGPTKLYLDKTSVEQNFWGSSILSSQQDAVKSANELNNGNTF  
SADVTGIKLSMTMVQSTMMALKADATKEEQSGLLIVKMDVEGAEYQVLKEVAASDILCKL  
TSLGNRVVVFVVEYHNMSITDPAERREKDGFDQAVKKIEACGVEFKSLSASWA

>comp12490\_c0\_seq1; 464 226 1833 LEN=2328; translated  
MILQIQVTPFVFLFLQTAYSLSLTERVRVNFRRSGSFGRHRFHGGFARFVAKNPSLRSDVLH  
SNKFETSNCNEQNYTDEYDNENRDGYHKYSKIRKGEIYIEDDFLSPVEIDALRKDIVQLQ  
ENGLFKPSGLSNRVEGDKNIFGSTDRLTCTITPDLFAGQKKFSSARFLVEEKMEHLKQKL  
QVILAHSSKDGKQLPHRIENREFDLKLELSEMYYSISPKGSNLPRHQDERHEDTKGVKGY  
VNQTRRSISWLIYLNNDENWGDTVADIRTNSKRKIGLPKAITAHSTHNAKDNGEDATGLGG  
ELRAYCRRCCPDEYVRCGSNEGDLQVWLRCSLSPSCSSPTKEDCEFEPFLDSWVKTNV  
QRLLTKSTSDESTDSSLEWQPMALYRLRRSSELILPPKDQTPWPVPVVEEYNNNEERNL  
SLREYISEPFGPNPSWPLEQELEPIAFTKALALQLRKKDHRSRFVGMEDICREDDTDYA  
SEFRIVDVVPRGGRLVLFDSVTPHEVLEVTETRLAIAAGWLHEPVQEFDPDWYGT

>comp12490\_c0\_seq2; 464 226 1833 LEN=2209; translated  
MILQIQVTPFVFLFLQTAYSLSLTERVRVNFRRSGSFGRHRFHGGFARFVAKNPSLRSDVLH  
SNKFETSNCNEQNYTDEYDNENRDGYHKYSKIRKGEIYIEDDFLSPVEIDALRKDIVQLQ  
ENGLFKPSGLSNRVEGDKNIFGSTDRLTCTITPDLFAGQKKFSSARFLVEEKMEHLKQKL  
QVILAHSSKDGKQLPHRIENREFDLKLELSEMYYSISPKGSNLPRHQDERHEDTKGVKGY  
VNQTRRSISWLIYLNNDENWGDTVADIRTNSKRKIGLPKAITAHSTHNAKDNGEDATGLGG  
ELRAYCRRCCPDEYVRCGSNEGDLQVWLRCSLSPSCSSPTKEDCEFEPFLDSWVKTNV  
QRLLTKSTSDESTDSSLEWQPMALYRLRRSSELILPPKDQTPWPVPVVEEYNNNEERNL  
SLREYISEPFGPNPSWPLEQELEPIAFTKALALQLRKKDHRSRFVGMEDICREDDTDYA  
SEFRIVDVVPRGGRLVLFDSVTPHEVLEVTETRLAIAAGWLHEPVQEFDPDWYGT

>comp12491\_c0\_seq1; 579 34 1002 LEN=1044; translated  
MKFCAAAILALSAAPAHFSYLDLTLGGAAPAVAAPAAAAEPPFYFTDEVTDQSADSPA  
YFTSGSEDVPASTSSGYLDALGGVSSAPSVAASSPGTAGSSASYLDILNGATSVTGP  
ITSYLDALPKNAAVGGAGINTYASSLNAYASEIGASIDAPAPVAAAPVAAAPTVAAPV  
AAVSDVGSVAGSSASYLDALSNSDSAVSGAGITTYVETLPLTSVLGGAGINTYASNLVS  
SSTIDGAGVPTYADTLGGGIPSFNTSFPFGESSIAVSSNEVEFTMGSVTGEFDF'TLEAS  
AEIIRQLKAAGPNGVTITGRFY

>comp12492\_c0\_seq1; 1328 368 2803 LEN=3003; translated  
MGRKGGKRSEALRSDRSQTPKIVENINDSDDEEIPEDAEFNSEDERLYGHFFADDGEEDD  
GEKSISSTSTSSAEVTSSEDDDDDDDEDGGQYMLDLLNKLDSDSGTGDDKNNDKISVAQM  
VKIPESDYSNSISKGLTLDNLMGIQDTQGFRNLQKSFSSKPSTTPAPLDKKTSSRAER  
KIAYEARSRDISRWVDVIQQNRQAESLDFKPKERTGLTRDMLVDKFKAKTDFEREIEEAL



EEAGQQDEEAVLKKEEEALQDDLGANRLTMEYYKKRRGQLAQIRALMFYHERKRRHQMKKI  
KSKKYRKIRKKQRDRDLKESAIESALEDHDQDLAQELKEKEEVARIQERMTLAHKNTSKWAK  
RILKRGKNVDIDTRRALSAQLKRGDDLRRKMMGSDEEDNHDDSEDENLIESARKVLQETE  
DDLDP TNGKTGLFKLSFMQKGVQRQRDQAREEARLKLGELEGNETDDYDDIVENEKEDD  
LDGKVEKTLSSKEMSSVLEKGEVATPLEFGNSNAIATSNGIEIDLDMNNSSDAEVSNH  
KRVPSVAANDGNISKYVTLKEFDKVPKALDHRSSSSKEVLQKKSMSKENKKAS IAGMKQT  
MVENSDDINPWMNSKSETRSSNKS AKKTKRKG I IDIEGATDILDAEKHDDMDKQRVKPG  
GKSLSEENGNSETKKITSLTQEELVRRAFVAQNESEIEEEFKKEKESIVVENDPTRKVEK  
GQGASEEVAGWGSWTGQGAPPPMPRKLPKKLRLAPKKKKEKRRFDDYKPDIIINKKRLKK  
AANKFMLADVPQPYASRVEYEHAMLG VGVGREW

>comp12494\_c0\_seq1; 905 1 2190 LEN=2330; translated  
PETLMRKAASPDNGNEDGNNDAILDENGNSLPHPDAMKSKNVANGKGEEDLENLDGNG  
NSLPHPETLKENYPVTMLQKIRAF AAGESGDNDESILDENGSSLPNPDVMKSRSGSNSEE  
DEDLENLDGNGNSLPHPD TLMRQSKDKALAA TREICADGYNDNDNASENGDIILDDNGNS  
LPHPD TLRGMTSTDNLLADIESATNAQDNKSSNNNVDDCSSNGEDRLDCGGNSLPHPDTI  
KASATSVRRRTASSLFGNIRRSVMSTLPGISILNYSEIETPTSQDQDDFRDEENAVDDMN  
AVASRSTLDAALLRQSDENRNALQHSGASFRDSSRSI FTIDDSIESNFISDSNSLSTFG  
GMSRMSIGRSTGKLLDANGSSSLPSQEEGASSGSASKHSSRRLRELQGSFLSTLNARASSS  
SLRSNGAAQREQE EFNFDNAYIEGDAGIDEEYGRKSGTWHSNRDVEFDNNGFPVAYRVD  
RFDDERSRGEKSSNSRKERIQKLFKEQTERFQDQRYSWRLGCLLFAVFLIFLGLMIPL  
ITLARERRQRIAVTAPPVATAPTESPIIETIGYDVDCDDEIDLVDENGKKVGDSENSIVT  
LSGNSDIVACYTTEQPIMFRFKRCRPSLDFTGVPPLGSLFMDQLWQPYYAASYLCGEQP  
CPSGGANPPI TKVMTGPP IAKPGDYRIFLVKESLWPYEYSVYTPLFRVVEDGQECPI PDD  
QIVTPVPVN

>comp12494\_c0\_seq2; 113 1 201 LEN=201; translated  
XLMRKS IKTIEGTNNGDNTDNDAILDVGNSLPHPD TMSKKNVANGKDEEDLDILGGNG  
NSLPHPET

>comp12495\_c0\_seq1; 192 156 431 LEN=717; translated  
MSRTKAMIVSHSVVFLGLGVTAAKLYDRDELNSYRGAYEKPMQRFRRWAGNAAMGTVALGS  
LWVALAVAGRGGKKEDEGGGCCGTGGMAESR

>comp12495\_c0\_seq2; 177 156 693 LEN=732; translated  
MSRTKAMIVSHSVVFLGLGVTAAKLYDRDELNSYRGAYEKPMQRFRRWAGNAAMGTVALGS  
LWVALAVAGRGGKKEEAAVAAGPAGWPSRGEAGRAGPSPAQPGTQGSQAQIGSQRSTQN  
KIGGKETDHLGISSGSI AVRWWVLARDAQHRTSPTEWTARSLVDTDVVGFPPQNVPKQ

>comp12496\_c0\_seq1; 549 42 1415 LEN=2092; translated  
MSAPSKRSVKFMESSDQPPPKWSRPMGSNSNSGSGEAPRNRNPPGVLRPSSHRVHAGNH  
RGRNQRGNEDELDDIDDWNEQEDGDHIGDQGLPTQSOLIEVKRRRREQRGERIAAFDGD  
HPDEAEASLATEGVRIEPFHMREEETDGTGYFDGDTYVFRNVPAGDGEADAWAD TLMRD  
GDDGDGPAIGIATSVRDLSSSSSSSSAATS AQEDLDGLSKEQLYERIVPLLGDARES IMQ  
AIQRYGR LAKTKNGKKHRRNHHHHQQQKQKQPEAE SGNNDNGRATDVAKSHLDDLTGVAN  
ALLLKGEVNIYDASRHDIFRRFP SLSTQPGSKPDSGGPAAPLSKNVKWEYQGNEDKQLHV  
VTTEQMIAWVQSGYFVGAQRVRIRTI AVQGEGNASKPESAEP SLSTQDDMLADLMDDSE  
DEEDSRPAKKARETGSTTTVKGEWMSDEVYKMYML

>comp12496\_c0\_seq2; 174 93 1043 LEN=1043; minus strand; translated  
MALPYLAEVLCCGRPLSWQAATHPRRTVLR IAGRVALAHKFVRFVAVPQSVSGVSSLARWF  
RIGVPDPLDEAYLEPVPAGSAAHRFVVPAPRGCVRPAIAAAVVF AASSVVSAGSGALAVE  
NLDHGHKRGPDQVGPGRGGRHKLLEP VAGGLVDQAHGVRGVVRAALFREPEGP GTV  
GLVDQHQLFGLPLCDAGLHVQAF AFAAVAVASKVGGPDDLVPGPHRVRVEELED PV  
PRVPIPRGPVGH AHPGVHPVRDAPLGD RRAPAVLGGSHHVDPPFRELGPEDGVDRR RAK  
VDRGEVGGVRGVVLRGD X

>comp12497\_c0\_seq1; 485 139 1884 LEN=2344; translated  
MGTAKFNCSIFFAVLVCFFLCAQTNGTLSQAQEKIGSNDEPNCSGSDVSKDGEISYCREH  
QQLHVPDGCRLVLAKVPSSELEANDGDQWGTYTMVPRKKGTPVSKNGDIVIQWSDPI PAS  
SYDFIQSKDHRMLRWMTWNGQETGGQYEGQAVESLVTGIGMTARSTTKKHRRNNMLPLV  
PRVDDGSLTRFDSPGAGAITRYHNYTWWFLKDLEAGDELVYSVEGKTSSSHTQVATAQNK  
IKDDNERERPSLEYLNANGYCLDNMRPRKSRIEGAGRGAFAVRDLPSGSVVPVVALVH  
RDELRTSNYNQHQLVLNYCFGNSSSWLLFPYTPIVNLI NHYNKPNVELRWSTANRQSDG  
NFNTTKTMFFELVATRP IKMGEIYLDYGRDWEDSWWKHVRETWKPSNMHYTPSYVMDDA  
IKMIRTEQE QKDHYPDNLLTSCFYRYSRSEERITAENNINKESLTSFRWHLTKGLYD  
MKNLRPCKVLKRIENQSGRSAYAVRILNRPGLDVGEIIPRGELHIVTHVPRAAIRFS DKE

GTTDQHLQYAFRHEIGLPEKLIIPSSWKISETDNSLMKQKEP  
>comp12498\_c0\_seq1; 457 167 1054 LEN=1253; translated  
MKTSILCSSIVAMMASNASGFAPTNPSASVSSTRIAAAAEEGDSRREFLSKSVATYTAAL  
LASTGVLAPLPANASPTDKVNALKLSYGLPPLTRVVPKGMKPLLEVYGKGRNRFPLLVQMC  
HPLTWVWVQLPSNDVNGEDGTVQAGEYAKGDTATFFLYEEEGHVDNIGKADKALFERALIK  
SISQKGANMYQNFKVTKVAPQTGNPEYNGKDYVLCDFKYELLTGAGFEVQRRGVASITSE  
GPGVEVLWAASTALRWGKTEETLRDIVGTFRVYGDGLNFSEEIANKDARFNTDVY  
>comp12499\_c0\_seq1; 203 41 837 LEN=845; translated  
MTTINSLGHARGVLNQQRRPQKKNGLPVLVAFLLGIVAGRFGSPATDRKVPAPPGASAR  
GNAGGIGNPPRPTSVRRLEDTPFRATSHADRATGTTIAKQQFLDPFVVPNLAGVSVATLR  
ANQTVEPHSHRSMHEFFYVLEGTADFALCGRETHRAKGGTFVHVVPGCVHSIARVQGTGG  
DGDDGDLRVLVVGVTVXGLTAVGVRTSQRFPADLLLSPLPAPRVRSPVRRPAQQTKGRAG  
LSTSMRFAGSCAVAEAIIDKLDIAY  
>comp12499\_c0\_seq2; 226 41 637 LEN=867; translated  
MTTINSLGHARGVLNQQRRPQKKNGLPVLVAFLLGIVAGRFGSPATDRKVPAPPGASAR  
GNAGGIGNPPRPTSVRRLEDTPFRATSHADRATGTTIAKQQFLDPFVVPNLAGVSVATLR  
ANQTVEPHSHRSMHEFFYVLEGTADFALCGRETHRAKGGTFVHVVPGCVHSIARVQGTGG  
DGDDGDLRVLVVGVTVGD  
>comp12500\_c0\_seq1; 318 93 915 LEN=1374; translated  
MEWQLISLAILVICSMQTAPVDSFGEAFAGITGRVPENLSFPPSTLDGTNIDPSKSNVDL  
QCVYKASRDGWSALDFHENVDSRGSALVVCLSKSGKKFGGYCPTGWLSTDDYVSSNA AFL  
WFQRGNEAVKCPVMQGGNAALFDYASAGPVFGAVVNYVQLPFICIVPIIFLDTIHDIFRH  
FRFDPFRKQADLKIGESQAAIMGGFAGPDMEDRSLSAGNLKQGSSSVGGAYDDVDNGWPV  
RGKFQLVELEVYANANIQPSGQRAGGGFKLWPF  
>comp12500\_c0\_seq2; 173 1 547 LEN=1006; translated  
XVQRCVVSNTFYDARRLDLKDLSLAFYCIIFLMFRVA AVAAVTLSSXKLGWLSTDDYVSS  
NA AFLWFQRGNEAVKCPVMQGGNAALFDYASAGPVFGAADLKIGESQAAIMGGFAGPDM  
DRSLSAGNLKQGSSSVGGAYDDVDNGWPVVRGKFQLVELEVYANANIQPSGQRAGGGFKL  
WPF  
>comp12500\_c0\_seq3; 158 438 656 LEN=1115; translated  
MGGFAGPDMEDRSLSAGNLKQGSSSVGGAYDDVDNGWPVVRGKFQLVELEVYANANIQPSG  
QRAGGGFKLWPF  
>comp12500\_c0\_seq4; 333 93 806 LEN=1265; translated  
MEWQLISLAILVICSMQTAPVDSFGEAFAGITGRVPENLSFPPSTLDGTNIDPSKSNVDL  
QCVYKASRDGWSALDFHENVDSRGSALVVCLSKSGKKFGGYCPTGWLSTDDYVSSNA AFL  
WFQRGNEAVKCPVMQGGNAALFDYASAGPVFGAADLKIGESQAAIMGGFAGPDMEDRSL  
SAGNLKQGSSSVGGAYDDVDNGWPVVRGKFQLVELEVYANANIQPSGQRAGGGFKLWPF  
>comp12501\_c0\_seq1; 504 1 655 LEN=1022; translated  
XSAAKAKAEELNAILEEKLKLAGGDAPPADADAPEPSEEALPAQEATPEEEDPSPGPPASY  
PGDVVVESLQSEVTDIASKLEAAGRDI AEKEEVQKAIAPLLAQLAIKQKFASRASKKEE  
SAEEADA EATEAAASTEETPDGAGGESATEGGGEEDGDDGKLP SHYAANDLRYQAEKLN  
ESIAAAESMAKALAAKLGKMDAEDAQPEAAAPSSEAN  
>comp12501\_c0\_seq2; 504 1 655 LEN=1008; translated  
XSAAKAKAEELNAILEEKLKLAGGDAPPADADAPEPSEEALPAQEATPEEEDPSPGPPASY  
PGDVVVESLQSEVTDIASKLEAAGRDI AEKEEVQKAIAPLLAQLAIKQKFASRASKKEE  
SAEEADA EATEAAASTEETPDGAGGESATEGGGEEDGDDGKLP SHYAANDLRYQAEKLN  
ESIAAAESMAKALAAKLGKMDAEDAQPEAAAPSSEAN  
>comp12502\_c0\_seq1; 719 266 2392 LEN=2488; translated  
MSFYDSVNDENEENFVHTKRDAGSNGGPPWQORYWDVQNNDPNRRGARTSDVSN TASS  
KKERRSNSKHLQLLVRSRPNCEGQQNNTVSSNGNRKVLASQSKPVLPLNHNKPNATFN CI  
DRYSPVMTT INGSSYAPSSTSIGTLTTQTTIASFATPFTTPTSRRTPSSTSVYSALTFVD  
DEEIDFGLVHRDPKRLNGDRDDEESQSVLSIKSPLISKLLRDDLGRVDDENGGNGLDFGS  
TTNVDQEKKRSRRVKS YEAEERNTRDHSMASACACASWSMWICLVVVL FALSSSDNESF  
GIHVVDRIWRVTSTFWIPDGDSGRGRDHVTSIRNQWIAVHVFLGSLGLMGLTLGKWGNA  
VIRAYEVAVASSILHEDECIVEAHPYHLSTRKRGRQDQIRSRSRPRHSGGPPVADENQV  
LYGSLSSSSFKHQHDCHDGPYLFIQNEQENRRQADSEKDDCLVLFPHLQWLLIQTIALT  
ILSIVCANTVWYPAGNQDTPPYNYDLASKLSQDDITAETREVGKDG YDERGFVSI TNP  
AFWATKAPGTKDSLAPVSPKEKLMTLF SVLSCAMTSLYWVAYIAQRYIQKSQQVHHQRKQ  
QTVVEDGKCVGFD TNRCNFD SHSGEII FVEDGNINLCHQTPVAKLEDEDDDSAMCVLAPP  
ATLAAKHEESPSSLEEFYERKLQQMGLVDIETFVLRKRYARRQQKNL

>comp12503\_c0\_seq1; 436 236 1024 LEN=1430; translated  
MEKGITGDMIYLEYDKKVENTTVGMPELKYTTDDDSNSDESEDEREPLSDDVYAFVFLVAP  
VFSKPFVFAAYTIMVKYVVFVGLASGIRLSDAGNIDVDNVMLQAVKFFLIPVAIAMQEDL  
INVYAGVANLMYDEEVLNVSENATEKKLIFSIVARFFDGLSLGVNFAVMLVTNEILGVF  
LNFAALHFLQSIDDVFFALVVKGFFGDEMEHMHSHICESISFPLRKSDSGCVKVLDSLLFF  
VTLSVCVAVYAAVAVVYLNNSFD  
>comp12504\_c0\_seq1; 563 1 1146 LEN=1218; translated  
NFFEKKVHEEEVYQLSQILYLTKTMPAADETSKDMALAILKQLQEQDFAKSSKALEKEI  
LKRFSLKSLPAVLSDKVLSQLPQIKKPEVDEDDSSSTCSDDSSSGSSSSSSSDEEETKPAVKKS  
KESVSITETKKKVDSDSSSDSDSDSDSSSSSSSDSDSSSESEDEPPKRTKTDDVTKSKK  
ESEIVTPVSSSDSDSDSDVSDVDVSSVSSVSSDDSDSDSDSSSSSSSSSSSDSSDSESE  
DEDLEAFQKAKRKAEEKAKQAAEAALAWTPKKIKKDKKEIKVEAGTDGAQALSAGKPFQR  
VDDSYWGDMAKDGAMADNSYEGVFGNDGFGARSSEKLLQVRGKRFQHEKTKRKRFSNG  
MSRTGGKIDMASNSTKYKYDD  
>comp12505\_c0\_seq1; 431 102 1256 LEN=1424; translated  
MEHNDEKLQERELVIIDFGKLNPNDEIKHILLKIANAFGSDGVGIIGVRNVPGFVEAK  
TDLLSLSHSLVNLPAEQLKELEVPEVLYNTGWSRGKEMLKDDIPDWNKASFYFNPVDRP  
GTEEREKFPPLSYPCNRWPKAESIPTFETAARKLGLMKDIAVDVSKLIDDYAHSINNSY  
PPGTYLNAIVNTEKVKGRLLYYPLPDTDEEESKICNGSEDSWIGWHNDSGFITALSGGI  
FMDVNGNILPSSLNEDAGLYVADRKNQVLRVNLPHDCMGIQIGECSQIITGGAVVATPHC  
VKGAPSIARTTLACFIDTPPTFALTGPPGQDIDKFISSSRVPLSKRWKNGMPFGFLE  
KTFKMYDFDPLLPTELEGSNLKEI  
>comp12506\_c1\_seq1; 509 1 1578 LEN=1887; translated  
RHDTNKTTTTTTSTTTTTTMLINKDMAATAIVAASSATRGIGFKGDLPSLPGDMKYFARI  
TKGNHPPPQEDAGAEPGTPRAKMNAVVMGRKTWNSIPTRFRPLKGRHNVLTRDPKFKM  
GDSGLPEGLVADGLPDAWRQLGSMKDELGEIFVIGGAELYERSIREKYVHTVLLTSVE  
TPPEMEFDTFPPDLFGEESDWKQCGLCEGEPRDAAATHEDNGLSYKFLRYERSNKEEQY  
LDLIRKILREGIVRGDRGTGTGRSLFQAQMRFDLRDGTLPPLTTKKTFRWGVAEELLWFI  
SGSTNANLLKEKNIGIWDGNASKEFLEARGLGHREEDLGPVYGFQWRHFGAEYKDMHTD  
YTGQVDQLAECIDKIKHNPEDRRILMSAWNPSALDEMALPPCHLLCQFYVDTTTDEVSC  
HMYQRSADMGLGVFNFIASYALLTHLVAVHTGRKPGELVHTLGDAAHVYLNHVPEPLKEQLE  
RAPRAFPKLFIDDPGRDKTIDDFSYSDLHVVGYPHGHKVMKMAV  
>comp12507\_c0\_seq1; 528 1 1034 LEN=1401; translated  
XASASAASDGSSARSYLTLAIAEMCRLAQRTVVDDINQSI A IHTGSINKHRSAQAADGLF  
ATALADGAPGNDDRNSNNKDP TSMRFRLAASRVLALYAIDRGNEAGEWLS SGLSELSGD  
EGSEEA STGPREGAWSLLTVAKSTAFDCAGLFGGPKRAGPVPEDLEDEYVSLT MARQNQG  
IRSTLAIDVERMFAEKIFAFPHPFEDLAFDRNLVVFQVLKVAFLALREDVRLVRF T NQGY  
RQLLVDTEFLKFMLPHYVKDEELADHSTANPVASLEGILAEATKNAKERCDGSAMLQDDA  
LETNQARAVVRGFMASNGGSDGLVGRFTI SEDDET DGG EETNAE  
>comp12507\_c0\_seq2; 528 1 1034 LEN=1419; translated  
XASASAASDGSSARSYLTLAIAEMCRLAQRTVVDDINQSI A IHTGSINKHRSAQAADGLF  
ATALADGAPGNDDRNSNNKDP TSMRFRLAASRVLALYAIDRGNEAGEWLS SGLSELSGD  
EGSEEA STGPREGAWSLLTVAKSTAFDCAGLFGGPKRAGPVPEDLEDEYVSLT MARQNQG  
IRSTLAIDVERMFAEKIFAFPHPFEDLAFDRNLVVFQVLKVAFLALREDVRLVRF T NQGY  
RQLLVDTEFLKFMLPHYVKDEELADHSTANPVASLEGILAEATKNAKERCDGSAMLQDDA  
LETNQARAVVRGFMASNGGSDGLVGRFTI SEDDET DGG EETNAE  
>comp12508\_c0\_seq1; 770 813 4295 LEN=6196; minus strand; translated  
MVVETLSSVQEDHPALCWSIDKEREIKNCYWSRQILELHFHFRNNSDSDEAGIHEKKEAN  
TSVSEDDFMSPAPSNCAIAEHSKEISP AVFSTSYKTL LLLAAGAARQIQEEFCQRFP IEN  
TDDCEHVINDSSEHTFRGSLKENINFAVAIPEGPMLPLAILVVYALNAGLRQQKQQQSRC  
LPYAVLVMPMPDEGKNRNSF ILNDTSPSFVLAIPGEDSMKQLQELIENQGNESNEETDTR  
TPRLLDFVELVKT SRSRLELSSFLQGCTQSVAPHAVGNLQQHILELATQIDIPSDCQTPA  
HQKNPSGNSKSSNRLSHIVYTS GTTGH PKGCISSARSLRKYIDAKNDAHDITPASTVLLA  
SSLSFDPCLSDVVATLEAGATLAIAPRINLVSGLT T TLLDLRVTHVLCPTLWGLTLLHR  
PANHPNTAIKEDFPCLQRVALGGEPIPNLSLVVAWARSRAEKEQKNGDSENSLSTCRLLAT  
YGVTEACVYQTCGEVFRESE TIF TDSNAALATTLSSSKRGQYVGHPLDGTEVKICREDFQ  
GNHLEEVREAGMLGEIVLYGDQIDIT TGYLNRPD LVGKFVAEEVAVTDNDGDLT SKKVR Y  
HYRTGDRGYINPTDRSL SITGRIVGEEGM IKINGVRVELGEIEAALTSGESNDSNDDQRT  
VVTDC LAKVIQDSGGQNTILAYCVFPETIWKEIGISLNDFR TKQQGVI INGGPLWSLLRI  
KCSNRLRKACIPSTFVGI PRLPLSRTGKRDR LGLPGLSSCSILRISNELSTPLEKYGLAG

SMVVETLVKYLNLQPCQQMLTKSVSFVAVLGGDSL SAVVVCRTLYARCHQIQNSRFVGGE  
YGQLPEPFDVTVLLRAQNLGDYVDLLEDETITENGLLRGQGTSDVNSSAATSVTTTHLPEN  
GSVDDALLYDALLQATTMNQSMIAKALLSLGANPNRDHAHGSRIGNTSGRNERRAIFKTA  
PLHLACFRGDAGLVKLLAKNASFKSPNTNGVFP IHLAAGGIDDNGPEGTVEEDSRRLDC  
VKLLLSAGCPLLKMDANKQSILHAAARGGHCSIIEFVIAVHQCDRYYNGPVPLRQFLEFQ  
DRWFRSAVHWAVINGRVRALKVLLKGCDDPSPFKPKSNKQTSMTAETPLEICQRLYGGTD  
KKGEMEQLRRRAINRRHSSR

>comp12509\_c0\_seq1; 584 177 1466 LEN=1648; translated  
MEGRNENHRAELSYRLCCPRPKLEVPFELSPDGI EISLSYLPWRIRQDDEAKSRENATSL  
SATQQQLPSFLDLRRQONIEFAEEKCREANNLLQSSKGESINNKAKTLLAQALDLVPDHL  
GSLISSGKLFIKIGKFSKAEGFLRTALRVDEDNVEARQHLVILQEKRRLSLEKVDKSN  
SHSRHLLLLNNNRKDKNNLTARESSAYQNALMERNLFAADRPLQQMGQDPADDEEEVAGDS  
SMLHDSIQNDQNDHDSKKNLKRKDRYRRYDRKERKKHRKRRKREKKYKKKKRSCRRY  
ARDDLSSSSSSSLDLSYSSASSHSSSSSSSESASISSKKTNSQIPNGADIRERAVG  
EKDNSKSTATDFDGPKYNIQDGEDGDSSRRHKRRRRRHDRDEKRRHKRKRHKRHK  
RKESRRMAT

>comp12510\_c0\_seq1; 996 66 2198 LEN=2216; translated  
MSEAPAEDISKVQDELDAALNAKITGQGSTVRQLKKGADADVIKEAVAALQELKISAAAL  
AEKLTANEPQFNRSFDDLIIRKMFVVPSEIHHGGVKGLFDLGPACGLKAAMVDMWRKH  
FVLAENMLEMECTNLTPEVVLKTSGHVDRFTDLMVKDPVTSECFRADKLEDAIDDLLEK  
NPTLDAETREEHLRVQRQADAYSPEELDKLLKYECKGPSGEAYGPSFPFNLMFKTSIGP  
EGTSVGYLRPETAQGLFVNFRRLLDLNAQKMPFAAAQIGLGRNEIAPRSGLLRVREFCM  
GEIEHFVNPDDKSHPNFSSVAEKELVLFGRDDQLGTGKTKTLKIGEAVKGGLVNNETLGY  
FMARTQLYMEKIGMDPERLFRQHLATEMAHYAADCWDLKSSYGVVECVGHADRACYD  
LDVHAKATNTSMVATVKYDTPKEIEVAKLKFDRKKIGMVFKKDARTVSGALDKLAESWKD  
FEP IAKALEADGKVTVDGFEVTKDMVSWEQSTKKVHELKFTPSVIEPSFGMGRILYSLE  
HSFYIRENDEQRCVMKFKPQVAPQKCAVLPISSSPEFNAIVDGIASLMEYDLATRVDKS  
TAALGRRYARSDEVGVPFAVTVDFDTLKDSDVTIRERDSMVQVRLPKSEVPHVIYDIHN  
RTSWDEVTSKYPPVQVDDGEGGAAAPAAPKEAAKTKVVSNSRGSFTRPA

>comp12513\_c0\_seq1; 286 287 1345 LEN=1455; translated  
MEMVTCNPAPIDLKGLLDGPPATIAPDKEEDQGSIPSVTARLLVDRCRHLGECVLWDDRQ  
NAVLVFSILDRTFHKLILSDDENTKLESYEFPKMIGAFGLLDASTDDADKHHPGYIVAW  
DGFQLYDLERGTAI SPMSGEVNGPGLPNRLNDGRVDPTGKRFVCGGMAASPDLPKVV  
KCEYDPSTQGLKHSVLYDKILTTNSICWSLSGEEMYLADSPCRNIRKLEYDLEEGKVRNE  
KILHSKR TGF PDG SVVDSEGF LWNATWRQEGGTGMVDRIDPNTGDVVFTVHLPDETSEAS  
CCCFGGEHLVLFVTSAFENIDPKTETHAGGLYAVKLP SGMKGCREKRFKTN

>comp12514\_c0\_seq1; 865 105 2909 LEN=2965; translated  
MTSGKGNNGGGGNGFKPLGLSEPVYRGI VRMGFRTPTPVQRKALPVVMSGADTICMART  
GSGKTA AFLIPLLESLLANQDDSSRSFSGKVRGVLISPTRELSLQTLRVLKMKSHFTNIK  
SIGIHHGERMEQQFEDLASKPDV IATPGRLAHILSEIPDFNLRECQICVLDEADR LLEM  
GFAQQLREINRTIPDRQKALFSATMPKMLIEFTKGGFTTDPQMVRLDAEVQVSEELRVS  
FITCRSLEKDAGLLQIMGAIQDDKDANESTRTGLTLVFCATRRHVEYVTALLRASGQEAT  
MIYGTLPDARNNSLAAFRHGRKPIMVVTDVAARGVDIPMCDHVIHYHFPPSPKLFVHRS  
GRVARAGRIGFCFALVEPDELPMVDLHLFLGRKLCIDGMTDTS DHKEIGGDEADESTQ  
NQEGIESYTMNEMTPDMTHYGSIPESILTLEVENVRRIMDSEMAGTEQAELMRSLTRVCN  
NAMKQYRRTRPEASREAVRRAKAILEGRKLTGQRVGGASIPPHLLRGMEMEYEAASK  
KKGIGTLNDLDNINKRNEFLKALSQFRPKETVFEAFATGGGKETGVNSHVDKGRTVHSSK  
KMDSSYAMTSMKNMRRQMRMSRDKGTTLVVAGSTLATEAAGDEGAGEENAFVMSQKAVS  
KPA TKAPTIVSKARMSKAERRRLKDPNASVASLAKKYQHEEKRKKHMRGSDFRD NAFFI  
ENDASSNAEEAQRQVEAALQPSAGSVKGITGNAMRLEEAMLDVVG DENAQLVQKQRMM  
RWDKSKRKYVQSSVGAELSGTSYSKRVKLESQIVKSDKLKLGEIYEKWKKTNR SVGRS  
GVFDNDGTNDDEA IASSGKQRRGKGGKGGKGGDEDEDGPRSAKAIQQSRESAQN SKMKNMVK  
ADRNRLEKKNRTEYNASKVQPKKGSQGGKGM SGRW

>comp12515\_c0\_seq1; 1265 1 2522 LEN=2909; translated  
XIEPSILKDRSL SFGFAPIPFNTIPMSMVLGETTGTTPPAAAGGDKDKNDGSAPPNETPHA  
VSFC EEQNTTKEIPRIDPTDKQNLWFSRSELHMNSVMTARVREAVKVKLVELLVCDNDDD  
EEEEELPFPIPTDENDGESFATTIPDCPTDERD TDGLLGTKPGPPNAMASATATAIATEN  
PRTDAGRTASPSTIAKQIEERILYQKAEVQNR LDEIMELPPDEILAF L TSGGGPHAKKE  
PPPPPPPE SPPPAADDVPYNWILDSDLEWKDL PDRVRKHCSVLGYTETS WNEEDQDLAFF  
VTPWSELAPGQRHALWLLGSYDEPSWNRDVGIMRERAERTAADSGENAAESFSSSSSSSS

SSQDDAPTAASGDRSDDRRDRSMGDSGSDDDNSNDDDEMKAFI SNFLPDEAEEQNQKENR  
NIEDKNEDNDTAKATSDDDDDEMAEFI SNFLPDEVEQQNQKENQNIKENNKDKVPNSIAD  
DGEDNDDDDDEMAEFI SNFLSDEAEERKQEKQNIKENNNDI IPYAI DDDDEMAEFI SN  
FVVDNEQKIEDNASPSSNGDGDSNGNAKGKNSDITTDKEDSRHLLAATEDTAHSPDPG  
GDEDKDEKAMMGEFI SNILPDHKEDPEETKAQDDIQNDGEDKHPFLAKEQVPI ENNDDDA  
VEVEGVPVAPTRGSNHEMAWKQDEEKQRAIEHDAKGETRSISLHAGESESTPLLPCKEN  
DRNNKRSTTESPSSSRSWIPYVVVAAACPLSGWPRTIPNLQEDDDERRPGPITGTDLGR  
ERVALHGTFENKSILWDWTSSIEVGLFWGGMALPASTVTRRDALEKPLWLPPTTRMRLCIH  
>comp12515\_c0\_seq2; 695 1 1201 LEN=1588; translated  
EMADFISNFLPDEAEQQTQKENQNAKENNNDKVPNSIDDDGDDKDDDDDEMAEFI SNFLS  
DEAEERKQEKQNIKENNNDI IPYAI DDDDEMAEFI SNFVVDNEQKIEDNASPSSNGD  
GDSNGNAKGKNSDITTDKEDSRHLLAATEDTAHSPDPGGDEDKDEKAMMGEFI SNILPD  
HKEDPEETKAQDDIQNDGEDKHPFLAKEQVPI ENNDDDAVEVEGVPVAPTRGSNHEMAWK  
QDEEKQRAIEHDAKGETRSISLHAGESESTPLLPCKENDRNNKRSTTESPSSSRSWIP  
YVVVAAALPLSGWPRTIPNLQEDDDERRPGPITGTDLGRERVALHGTFENKSILWDWTSS  
IEVGLFWGGMALPASTVTRRDALEKPLWLPPTTRMRLCIH  
>comp12515\_c0\_seq3; 797 74 1351 LEN=1351; translated  
MSMVLGETTGTTPAAAGGDKDKNDGSAPPNETPHAVSFCEEQNTTKEIPRIDPTDKQNLW  
FSRSELHMNSVMTARVREAVKVKLVELLVCDNDDDEEEELPFPIPTDENDGESFATTIP  
DCPTDERD TDGLLGTGKPGPPNAMASATATAIATENPRTDAGRTASPSTIAKQIEERILYQ  
KAENVVQNRLEIMELPPDEILAF LTSGGGPHAKKEPPPPPPESPPPAADDVPYNWILDS  
DLEWKDLPDRVRKHCSVLGYTETSWNEEDQLAFFVTPWSELAPGQRHALWLLGSYDEPS  
WNRDVGIMRERAERTAADSGENAAESFSSSSSSSSSQDDAPTAASGDRSDDRRDRSMGD  
SGSDDDNSNDDDEMKAFI SNFLPDEAEEQNQKENRNIEDKNEDNDTAKATSDDDDDEMAE  
FISNFL  
>comp12516\_c0\_seq1; 792 77 1813 LEN=1946; translated  
MAKEELKGLAASIRSATESETFDLGGLPSTTISQVIRDAFSEDFDLGGSGMIRVTLVVG  
GKGNRSKYDPSALKLVTTALSGAGYIEDRGASCVVESAGCYKFQHD TGKNLKTVVVFPKI  
LEEKAI DSKTSSSSKSSAMLPPNSLEYKIAVSTVSLFTNMLKWKFSWSQKRSLLN LIEE  
TLVGPLEKLDASLMRGGLMGEDERIFYEQCVSISDKKRLVKDAMSQQVHEGSLTANEVSF  
LLDQVASRIQEFKSGNQTPVDSLQARQAKLQSI AKNPISPSPLKHHAE LAKLWKQAAPLM  
YLNRTGGKLLSPAETKKGQLDDILSEIANLEESSRGLLEDES YNERISSYRRELQKQF  
GNLGGNEKKSRTIGSGMPSSSSNRKNDTWNSTTRFQTPRVGGRPGGDGWMMSGKDKKKKKK  
RLNKGDLFGAMMADSDSESEENHDERNPMSPGSTNRGTATKNGAISTEVSGTPHVSKK  
RKKKRAKATSYSKNSDDDAFLDAVAANTEISEEQSKAIKDASLPSENTLTGIQNIASKM  
FHVLFWALTKVILPIFLAILTRLSMTLFGTKKKNKKKAK  
>comp12518\_c0\_seq1; 377 241 2259 LEN=2376; translated  
MAIRTLRVLGDSSRCRRSLHRAWTNGRSSGGTARGFGTTPAASGNRGDSPQHDLRVVGS  
GVAGSAAALVAAETHGIPVTL L FAGSVPRDCNSWWAQGGII YRNYDPASGDSAESLASDI  
HRAGAGLCAEDAVRKVSVEGPGRVKELLSATGTAFANVPFDKRPDGELSLCLGGRLCSI  
RVSVVFD DPSRVGARNRFESIRQSGSPLTNPF AWRGSRASKQHISGVLDFANRVIFFAA  
GFLTGLSLFFTVLTTHLIDFASP AEASHAAPRILHYADQTGAIITDHITKAAARHPLITM  
QENTIVTDIVREDDLCIGVATLCRTTGQRSVEYAARGTVLASGGLGGIYEHSTNPSGFNA  
LGSSVALAKRAGVATQDLEYVQFHPTSLCIPFAKDFHPDGELAPRDI VARGVFAENAKVE  
DDPSRAHNAFLDITHRDPDWLHDFPTIQSHLSARGLDLARDHLPVTPAAHYTCGGITTD  
MQGRTSLEGLYAAGEAARTGLHGGNRLASTSLLEGLVFGAAVADFIGGSQRGRALGDLAR  
QRLAAGDTASKHRLETTTSLDAKQQESVTNRAVQLLGQVRRIMWNHVGLVRTPSGLHTAV  
EALGDISAETELHKRFPCL E TSGARDAACSGEGVAIASASNPRSAGTHFMAPDSEDFSD  
DEDDAMVVAGR  
>comp12518\_c0\_seq2; 410 241 2334 LEN=2451; translated  
MAIRTLRVLGDSSRCRRSLHRAWTNGRSSGGTARGFGTTPAASGNRGDSPQHDLRVVGS  
GVAGSAAALVAAETHGIPVTL L FAGSVPRDCNSWWAQGGII YRNYDPASGDSAESLASDI  
HRAGAGLCAEDAVRKVSVEGPGRVKELLSATGTAFANVPFDKRPDGELSLCLGGRLCSI  
RVSVVFD DPSRVGARNRFESIRQSGSPLTNPF AWRGSRASKQHISGVLDFANRVIFFAA  
GFLTGLSLFFTVLTTHLIDFASP AEASHAAPRILHYADQTGAIITDHITKAAARHPLITM  
QENTIVTDIVREDDLCIGVATLCRTTGQRSVEYAARGTVLASGGLGGIYEHSTNPSGFNA  
LGSSVALAKRAGVATQDLEYVQFHPTSLCIPNEARFL L TEALRGEGAILRDANCRFAKD  
FHPDGELAPRDI VARGVFAENAKVEDDPSRAHNAFLDITHRDPDWLHDFPTIQSHLSAR  
GLDLARDHLPVTPAAHYTCGGITTD MQGRTSLEGLYAAGEAARTGLHGGNRLASTSLLEG  
LVFGAAVADFIGGSQRGRALGDLARQRLAAGDTASKHRLETTTSLDAKQQESVTNRAVQL

LGQVRRIMWNHVGLVVRTPSGLHTAVEALGDISAEATELHKRFPCLETSGARDAACSGEGV  
AIASASNPRSAGTHFMAPDSEDFSDDEDDAMVVAGR  
>comp12518\_c0\_seq3; 511 241 1983 LEN=2100; translated  
MAIRTLRVLGDSSRCRRSLHRAWTNGRSSGGTARGFGTTPAASGNRGDSPQHDLRVVVG  
GVAGSAAALVAAETHGIPVTLFLFAGSVPRDCNSWWAQGGIIYRNYDPASGDSAESLASDI  
HRAGAGLCAEDAVRKVSVEGPGRVKELLLSATGTAFANVPFDKRPDGELSLCLEASHAAP  
RILHYADQTGAIITDHITKAAARHPLITMQENTIVTDIVREDDLCIGVATLCRTTGQRSV  
EYAARGTVLASGGLGGIYEHSTNPSGFNALGSSVALAKRAGVATQDLEYVQFHPTSLCIP  
FAKDFHPDGELAPRDI VARGVFAENAKVEDDP SRAHNAFLDITHRDPDWLHDRFPTIQSH  
LSARGLDLARDHLPVTPAAHYTCGGITTMQGRTSLEGLYAAGEAARTGLHGGNRLASTS  
LLEGLVFGAAVADFIGGSQRGRALGDLARQLAAGDTASKHRLETTTSLDAKQQESVTNR  
AVQLLGQVRRIMWNHVGLVVRTPSGLHTAVEALGDISAEATELHKRFPCLETSGARDAAC  
GEGVAIASASNPRSAGTHFMAPDSEDFSDDEDDAMVVAGR  
>comp12518\_c0\_seq4; 544 241 2058 LEN=2175; translated  
MAIRTLRVLGDSSRCRRSLHRAWTNGRSSGGTARGFGTTPAASGNRGDSPQHDLRVVVG  
GVAGSAAALVAAETHGIPVTLFLFAGSVPRDCNSWWAQGGIIYRNYDPASGDSAESLASDI  
HRAGAGLCAEDAVRKVSVEGPGRVKELLLSATGTAFANVPFDKRPDGELSLCLEASHAAP  
RILHYADQTGAIITDHITKAAARHPLITMQENTIVTDIVREDDLCIGVATLCRTTGQRSV  
EYAARGTVLASGGLGGIYEHSTNPSGFNALGSSVALAKRAGVATQDLEYVQFHPTSLCIP  
NEARFLLTEALRGEAILRDANCRFAKDFHPDGELAPRDI VARGVFAENAKVEDDP SRA  
HNAFLDITHRDPDWLHDRFPTIQSHLSARGLDLARDHLPVTPAAHYTCGGITTMQGRTS  
LEGLYAAGEAARTGLHGGNRLASTS LLEGLVFGAAVADFIGGSQRGRALGDLARQLAAG  
DTASKHRLETTTSLDAKQQESVTNR AVQLLGQVRRIMWNHVGLVVRTPSGLHTAVEALGDI  
SAEATELHKRFPCLETSGARDAACSGEGVAIASASNPRSAGTHFMAPDSEDFSDDEDDAM  
VVAGR  
>comp12519\_c0\_seq1; 320 1 1129 LEN=1789; translated  
XEVESVRFRRRVRYVFASGSEPE SKTRIERNMWLSMKNQKT VGP EIGIGYELGIADTGND  
DDILLKSCVGNRGLGWDLLPPGSPTFSVEQGDKNATGWHYAGYKQYPRRWKIGETGN  
SIDDQVPGD SHNSTQNAAKNMWYGGAQYDGDVARAKSVLTNLSQYMGYDDPEDEIIFGIR  
TEHEYEISGFFFQGDRTYHSDPVYAERYAANLERFVVS LKRDFNAPRAKFVLATLGQI  
PNRTSIATAKTATDGKTRDGSRENATGQSPQIDEKKKTKKQKDMEAAALRIEKQERLVFEA  
QMNLPERPGFVGNTACVYTPYCVHDEAKKDDSSKSSVQPSSTNHYKGLDIFVKVGC  
MGRAMLELLAQSDNDG  
>comp12520\_c0\_seq1; 743 1 1879 LEN=1942; translated  
XPQPLTELLAIETEAQHTASHTIRKMKTTCTDTENSTTLQGS HNDNQLRERERTS NSNM  
SSTDLYKNGFRAATLRHISAKNPIPKDERIALCHYHPEVRP YLFWPKNTPSAQKYAIP  
LAIKLGYDIEDAKCLGLNMEKYCYVLP TYDFEDAEREIGSIQKV FYDRVEQIQTNPAQFV  
RDLRQLEEDLQEVHKLKRNI ELLRKLDDRRRSIKRLRSVLKVQHRHSVTKEALQHEEHQ  
QRHHQHLSNQQTQQSFSASQLTNAPI EVGPSDDNNGVHQLQHQQYQOHSYPTGGATSY  
HQQQH QIMDSTQQQQOQPTPMPQPLGLQONQOQQOHNQFFQPTPPTQEQTIGIVTGGIN  
QNNEQQQQHSHHHHWAFNQYQATPLGGTSGSDNEQQQLPQQQLQPPSVHAYDPEPNHDS  
QQQHQNQQQPVPSPMEEANNPENGYSTYANHLEAAMAAA VAVGFKDDQEGLVAGVEDDPN  
HHHQQQQPNHSHPPPHNIVVGDIVAVDDLVDYNNNTNLD SRFGGEISDDEDLKD DDCS  
DTERYRQTLGGPSSQIYQRPRKWPRKVVVNPLPGNRATNDTNKLTRKSGVKRS GSKNSK  
SNTCTGRTIGSIRKKAKPIDLSERV  
>comp12521\_c0\_seq1; 305 316 932 LEN=1940; translated  
MASRQDDADKEQKQQRSSKRGEPTSSAAPMYITDPSAAEXSSFLRDHEGGKIKDICLDD  
QRDVYVPISTELFLRAYDEKDNRGSL EEPESILHQVYQGKTLLERIRENIELILRRWN  
GDSSASDFDRRIRSYYQERNLKT SVADAL IATVEDFLSTNPELPREVDV FVLESFLKSH  
ETRQSAIQKAYEELRKT PKHIPVAW  
>comp12521\_c0\_seq3; 318 316 1727 LEN=1812; translated  
MRFCGSENRNPQCCGKSSFLRDHEGGKIKDICLDDQRDVYVPISTELFLRAYDEKDNRG  
LEEPESILHQVYQGKTLLERIRENIELILRRWNGDSSASDFDRRIRSYYQERNLKT SV  
ADAL IATVEDFLSTNPELPREVDV FVLESFLKSHPETRQSAIQKAYEELRKT PKHIPVAW  
GNTNAKPRDYEQALEICHQTRRPVRFV LCHPECSKGTDDSSKNESTMLTLPWLSLESL  
KRNLHRLGTEGRFIPSN SIADCRERVATMIPGSFFKPARDTGQKKKNVEEHLVSIASPGS  
GRNGNGRYKPSFRYVLT TYRLIQKEYLRNDKGHFSSAQ RQNYNGERNPRPAKRLRSQNR  
GRGPQSFYRERQYNASNDHDRRYHNRDRDRSKQHQRDRGPRPSMNERQYNVSNDYDRS  
RYNEQGRDRNNRQQRQGPDIADPP  
>comp12521\_c0\_seq4; 318 316 1727 LEN=1812; translated

MASRQDDADKEQKPQQRSSKRGEPTSSAAPMYITDPSAAEXSSFLRDHEGGKIKDICLDD  
QRDVYVPISTELFLRAYDEKDNREGSLEEPSILHQVYQGKTLLERIRENIELILILRRWN  
GDSSASDFDRRIRSYYQERNLKTSVADALIATVEDFLSTNPELPREVDVVFVLESFLKSH  
ETRQSAIQKAYEELRKTTPKHIPVAWGNTNAKPRDYEQALEICHQTRRPVRFVFLCHPECSK  
GTDDSSKNESTMLTLPWLSLESLLKRNHLRGTTEGRFIPSNSIADCRERVATMIPGSFF  
KPARTGQKKKNVEEHLVSIASPGSGRNGNGRYKPSFRYVLT'TYRLIQKEYLRNDKGFHS  
SAQRQNYNGERNPRPAKKLRSQNQRGRGPQSFYERQYNASNDHRRRYHNRDRDRSKQH  
QDRDRGPRPSMNERQYNVSNDYDRSRYNEQGRDRNNRQQKRQGPDIADPP  
>comp12521\_c0\_seq6; 272 119 661 LEN=1669; translated  
MRFCGSERNRPQCCGKSSFLRDHEGGKIKDICLDDQRDVYVPISTELFLRAYDEKDNREGS  
LEEPSILHQVYQGKTLLERIRENIELILILRRWNGDSSASDFDRRIRSYYQERNLKT  
ADALIATVEDFLSTNPELPREVDVVFVLESFLKSHPETRQSAIQKAYEELRKTTPKHIPVA  
>comp12522\_c0\_seq1; 469 391 1341 LEN=1574; translated  
MPRIVGKSTRVETDGFSIDEYAGNVGSKDDRMSLAVVKVAKPYSEPFLTLHYDEWIAVL  
KGRVDCHVFDEETQQEVRAVSAGPGETIFVEKQQRFRPVFPVADTEYVPCIPAFKPERC  
IREDGSGGHDEAEKRIVDHLSKLERAAEDEPSAAGADEGSGSRSDNEDLALYHMCEES  
LWKASVASGEAYFPPTFAQDGGFTHATSVPAKLLLETANHFYTSSTDSWICLKCSARTLR  
RKCGIATVFEEPKPVGSTDVKEEWKKTENGEAAALFPHIYGGIPVSIPIGIVAGVYPMQ  
RDASTGKFLSIDGLTN  
>comp12524\_c0\_seq1; 296 305 1027 LEN=1535; translated  
MNLNVEPYSKRLLGDDECEAAALDQFEVELSPIDCQQPEHSDLRNAKRNI GIMFNFFGT  
TKGRLSEEVRAIQFHIREARNERRFKSCFSVALYTLGIILCVVPVGLFAVEMIQCK  
ICLETVVLETYFAASAFCCGGFGAMLVIGGDFWEYCLAKFLGGAVSSLSALFTIWMILQSI  
PSDSTIVALLVFIFVGTAAAMPGVAVYLLKIVCDECWVSDIQDFADDFSSLTCLVTEEE  
>comp12525\_c0\_seq1; 656 297 3470 LEN=3724; translated  
MGRGNSGDLQSLGWNAHRHLSSPIAQPRYRFQAVEKCKKSLEGSVQEI PNAREPFKQIM  
AEMVLLCTEAIKRSRSGRTASKPLSLEYIADRLDVEDPCFGYVVRSEEGHLQGFITVTF  
TNWQKTFSWDSLQEMSFYDGDLDNDVDTRNDANNHKEQGGSDGEGKQKQSATITPVRG  
TTENNIGSQNTSNAAKKGTPTPLLRGKTSNKRGRRPQRPKRIIDEDGSLAKELENTV  
RLGDPYNEGIVWPRIAEISLLGALGCGRVLVQLIEQLEFQRATGSANYDYIALQATDNS  
IPFYESLGFVRVAVCYDQKQEQDGTGDGRADGETSSEKTTTGLVMPKSI VSSPNFVHE  
VVKPGESPNELSKRFKVCVWDIIFLNKDIYELRPTSRLIKGTQLYVPKRQEEKPLSASP  
VVNDLASTCSTPGPETPTKWFVAKENDTPRKIAKQFGVACNKL VAGNRRRLPELQATSRL  
RAGTKVKVSNLDQDKICEPYCHWSFPEDTAVEGGDPSYMMVYKLNKRKTARSPTVRDSL  
AVPVSKYSPPKLLFPAPPKQVTASGSGAEAPAPEPQIRSLRLRSSQSSKERSIELKFPKQ  
PKRPEELKKKPPEDGKQIYWDHQELHPELNKSTPENKTIKDRWSRLGNHKKERYHGVA  
AEASKIYKKIEQYKGRLSVWKKCEDKIREDHELELQKAEAAAARDKENS MFNKVVKL  
RDDALDGKDYKYWFVLTTFIPDLKWCHLAPMVQEGHFGPDRKRSHGRPRYRLVDEKLGKEL  
DISSFCIPVSKALKRTVDADKEEWDIIDGPVELVKDDAVTDTISTLSESAICGSTRK  
RLSKQPKFRARTPVKPLNGKIVIGGSARHTQDPLKRTRASPASGRKRRLEEILA EKSSGS  
KMTSPTREKRRRCMRCIENGGSPSQAVECLGAKGRFGRDACEYFDANGTRKTS SGMEL  
TNTENSDDERRIRTNVVAHLEKIEVTLAPSPRRPNRRPDASGSKPSSPMRPAWSSPRD  
SATENKNGPLEEKKDDIESRGNIPTSDAFN SRKNAA  
>comp12525\_c0\_seq2; 343 273 2637 LEN=2891; translated  
EQLEFQRATGSANYDYIALQATDNSIPFYESLGFVRVAVCYDQKQEQDGTGDGRADGE  
TSSEKTTTGLVMPKSI VSSPNFVHEVVKPGESPNELSKRFKVCVWDIIFLNKDIYELRP  
TSRLIKGTQLYVPKRQEEKPLSASPVVNDLASTCSTPGPETPTKWFVAKENDTPRKIAKQ  
FGVACNKL VAGNRRRLPELQATSRLRAGTKVKVSNLDQDKICEPYCHWSFPEDTAVEGG  
DPSYMMVYKLNKRKTARSPTVRDSLAVPVSKYSPPKLLFPAPPKQVTASGSGAEAPAPEP  
QIRSLRLRSSQSSKERSIELKFPKQPKRPEELKKKPPEDGKQIYWDHQELHPELNKSTP  
ENEKTIKDRWSRLGNHKKERYHGVAEASKIYKKIEQYKGRLSVWKKCEDKIREDHELE  
LQKAEAAAARDKENS MFNKVVKLRDDALDGKDYKYWFVLTTFIPDLKWCHLAPMVQEGH  
FGPDRKRSHGRPRYRLVDEKLGKELDISSFCIPVSKALKRTVDADKEEWDIIDGPVEL  
VKDDAVTDTISTLSESAICGSTRKRLSKQPKFRARTPVKPLNGKIVIGGSARHTQDPLK  
RTRASPASGRKRRLEEILA EKSSGKMTSPTREKRRRCMRCIENGGSPSQAVECLGAKG  
RFGRDACEYFDANGTRKTS SGMELTNTENSDDERRIRTNVVAHLEKIEVTLAPSPRRP  
NRRPDASGSKPSSPMRPAWSSPRDSATENKNGPLEEKKDDKNHAGTFNESLVATSDAFN  
SRKNAA  
>comp12525\_c0\_seq3; 643 297 3486 LEN=3740; translated  
MGRGNSGDLQSLGWNAHRHLSSPIAQPRYRFQAVEKCKKSLEGSVQEI PNAREPFKQIM

AEMVLLCTEAIKRSRSGRTASKPLSLEYIADRLDVDDPCFGYVVRSEEGHLQGFITVTF  
TNWQKTFSWDSLQEMSFYYDGLDNDVDTRNDANNHKEQGGSDGEGKQKQSATITPVRG  
TTENNIGSQNTSNAAKKGTPTPLLRGKTSNKRGRRPQRPKRIIDEDGSLAKELENTV  
RLGDPYNEGIVWPRIAEISLLGALGCGRVLVQLIIEQLEFQRATGSANYDYIALQATDNS  
IPFYESLGFVRVAVCYDTKQEQDGDGTGDGRADGETSSEKTTTGLVMPKSISSPNFVHE  
VVKPGESPNELSKRFKVCVWDIIIFLNKDIYPELRPTSRLIKGTQLYVPKRQEEKPLSASP  
VVNDLASTCSTPGPETPTKWFVAKENDTPRKIAKQFGVACNKLVAGNRRRLPELQATSRL  
RAGTKVKVSNLDQQDKICEPYCHWSFPEDTAVEGGDPSYMMVYKLNKRKTARSPRTVRDSL  
AVPVSKYSPPKLLFPAPPKQVTASGSGAEAPAPEPQIRSLRLRSSQSSKERSIELKFPKQ  
PKRPEELKKKPPEDGKQIYWDHQELHPELNKSTPENKTIKDRWSRLGNHKKERYHGVA  
AEASKIYKKIEQEYKGRLSVWKKCEDKIREDHELELQRKEAEAAASRDKENSFMFNKVKL  
RDDALDGKDYKYWFVLTFFIPDLKWCHLAPMVQEGHFGPDRKRSHGRPRYRLVDEKLGKEL  
DISSFCIPVKSALKRTVDADKEEWDIIDGPVELVKDDAVTDTISTLSESAICGSTRK  
RLSKQPKFRARTPVKPLNGKIVIGGSARHTQDPLKRTTRASPASGRKRRLEEILAEKSSGS  
KMTSPTREKRRCMRCIENGGSPSQAVECLGAKGRFRDACEYFDANGTRKTSSGMEL  
TNTENSDDERRIRTNVVAHLEKIEVTLAPSPRRPNRRPDASGSKPSSPMRPAWSSPRD  
SATENKNGPLEEKKDDKNHAGTFNESLVATSDAFNSRNKNA

>comp12525\_c0\_seq4; 356 273 2621 LEN=2875; translated  
EQLEFQRATGSANYDYIALQATDNSIPFYESLGFVRVAVCYDTKQEQDGDGTGDGRADGE  
TSSEKTTTGLVMPKSISSPNFVHEVVKPGESPNELSKRFKVCVWDIIIFLNKDIYPELRP  
TSRLIKGTQLYVPKRQEEKPLSASPVVNDLASTCSTPGPETPTKWFVAKENDTPRKIAKQ  
FGVACNKLVAGNRRRLPELQATSRLRAGTKVKVSNLDQQDKICEPYCHWSFPEDTAVEGG  
DPSYMMVYKLNKRKTARSPRTVRDSLAVPVSKYSPPKLLFPAPPKQVTASGSGAEAPAPEP  
QIRSLRLRSSQSSKERSIELKFPKQPKRPEELKKKPPEDGKQIYWDHQELHPELNKSTP  
ENEKTIKDRWSRLGNHKKERYHGVAEASKIYKKIEQEYKGRLSVWKKCEDKIREDHELE  
LQRKEAEAAASRDKENSFMFNKVKLRDDALDGKDYKYWFVLTFFIPDLKWCHLAPMVQEGH  
FGPDRKRSHGRPRYRLVDEKLGKELDISSFCIPVKSALKRTVDADKEEWDIIDGPVEL  
VKDDAVTDTISTLSESAICGSTRKRLSKQPKFRARTPVKPLNGKIVIGGSARHTQDPLK  
RTRASPASGRKRRLEEILAEKSSGSKMTSPTREKRRCMRCIENGGSPSQAVECLGAKG  
RFRDACEYFDANGTRKTSSGMELTNTENSDDERRIRTNVVAHLEKIEVTLAPSPRRP  
NRRPDASGSKPSSPMRPAWSSPRDSATENKNGPLEEKKDDIESRGNIPSTDAFNSRNK  
AA

>comp12526\_c0\_seq1; 193 1 391 LEN=795; translated  
XSKVNRSSSTLPDSFFPHPLLQLENINTMFQRLLLIVLLAVAAISSIDAFTVLPKKSALS  
STELFGCRVNAKKEKIKRNRENMRKFSSPGKRGTSRRKILKKAQASEQRQRENEFINCKF  
ITGDSEEESE

>comp12527\_c0\_seq1; 134 143 643 LEN=758; translated  
MFLNLFIVNKSGLIHHRALSQKAPHIGTNEWLRIGSTFHSLSHAIATEASPIKLPGNKKA  
GADDGIEEIQAEGMTLVCLQTRTGIFVITAEPNATAVAVDLGQVLRREIYVLYTDCALKDP  
FYELEMPIRCELFTQGVKLIQRVESMINYSTSTSSSTSNTRVVTLR

>comp12528\_c0\_seq1; 401 129 869 LEN=2243; translated  
MTNSLASELRMWFYLFGIMLSLCPSPQPEVGGSRLENVWGMQDPIGKMCLMSTDPEDALSN  
SFGTNRATACEDSSSAIRMEYKIHKKVKHAKYQIFQTDCKDRFEDGKSPVRSVSPNQDNT  
IPLSLSESSDTSITASLELIPNKDSLSSSWFQSFNTELOQHTIEFCVRTSLYTPPQA  
GDMEVNFRETNIVAVFNTTEGDGNGDDYVVDVSVVLNPKELIGIKVELNSKMNGETSAST  
KKNDEL

>comp12529\_c0\_seq1; 543 1 1552 LEN=2189; translated  
XLFRAISTNRKSVTPKSTPDASRDETMLSANQSSMTEQSVCGNTKSYNGLGNSHRQLPW  
HQQVDNVRNVSDIRDVDKRQDLDSRTHLSSATTFFNNGDRCSRIARTDREPPPQAPLEDF  
NGNPRQRRSRRSKSTRSRKSGRTRSKSRKPSRSRSKSKPKQKEKTKRWLGRTGKKK  
ESAKPAFSAATASPSSSLISSPSNPLQKNKNYCDRIEMVAVKNEAIAKEGMVNQOET  
QNIFAANCMDNATKLLPVCGNLEQGVESFVNILAHPCGAKLGRKKEKTM SVILNHIG  
TSLRESQSESTPEIIVIPRSGKAKDLERFDKIEQVDDNDIGIKASKRSRFSPPKHSR  
RKRKGKEEKKESDRTTNEANKKEEQRFQSGSNDNNKLQKKYTFVPSSESLKYLFAINTDDEQ  
NSDDDYSTSSSETDSEDGFLEKMASWQNTSRIVPTFGVVGALGFGKNARNCSPIRDLR  
IVDSEVLSSFDEVGDIHSPKPSQRYRNLEETRMIREL

>comp12529\_c0\_seq2; 543 1 1552 LEN=1960; translated  
XLFRAISTNRKSVTPKSTPDASRDETMLSANQSSMTEQSVCGNTKSYNGLGNSHRQLPW  
HQQVDNVRNVSDIRDVDKRQDLDSRTHLSSATTFFNNGDRCSRIARTDREPPPQAPLEDF  
NGNPRQRRSRRSKSTRSRKSGRTRSKSRKPSRSRSKSKPKQKEKTKRWLGRTGKKK



ESAKPAFSAATASPASPSLISSSPSNPLQKNKNYCDRIEMVAVKNEAIAKEGMVNQOET  
QNI FAANCDMNATKLLPVCGNLEQVGVESFVNILAHPNCGAKLGRRKKEKTMSVILNHIG  
TSLRESQSESTPEIVIPRSGKKAKDLERFDKIEQVDDNDIGIKASKRSFSFKKHSR  
RKRKGKEKKKESDRTTNEANKEEQRQFGSNDNNKLQKKYTFVPSSESLKYLFAINTDDEQ  
NSDDDYSTSSSETDSEDGFLEKMASWQNTSRIVPTFGVVGALGFGKNARNCSPIRDLR  
IVDSEVLSSFDEVDYIHSKPSQRYRNLEETRMIREL  
>comp12529\_c0\_seq3; 329 1 1012 LEN=2087; translated  
XLFRAISTNRKTSVTPKSTPDASRDETMLSANQSSMTEQSVCGNTKSYNGLGNSHRQLPW  
HQQVDNVRNVSDIRDVDRQDLDSRTHLSSATTFFNNGDRCSRIARTDREPPPQAPLEDFS  
NGNPRQRRSRRSKSTRSRKSGRTRSKSRKPSRSRSKSKPKQKEKTKRWLGRTGKKK  
ESAKPAFSAATASPASPSLISSSPSNPLQKNKNYCDRIEMVAVKNEAIAKEGMVNQOET  
QNI FAANCDMNATKLLPVCGNLEQVGVESFVNILAHPNCGAKLGRRKKEKTMSVILNHIG  
TSLRESQSESTPEIVIPRSGKKAKDLERFDKIEQVDE  
>comp12529\_c0\_seq4; 329 1 1012 LEN=2316; translated  
XLFRAISTNRKTSVTPKSTPDASRDETMLSANQSSMTEQSVCGNTKSYNGLGNSHRQLPW  
HQQVDNVRNVSDIRDVDRQDLDSRTHLSSATTFFNNGDRCSRIARTDREPPPQAPLEDFS  
NGNPRQRRSRRSKSTRSRKSGRTRSKSRKPSRSRSKSKPKQKEKTKRWLGRTGKKK  
ESAKPAFSAATASPASPSLISSSPSNPLQKNKNYCDRIEMVAVKNEAIAKEGMVNQOET  
QNI FAANCDMNATKLLPVCGNLEQVGVESFVNILAHPNCGAKLGRRKKEKTMSVILNHIG  
TSLRESQSESTPEIVIPRSGKKAKDLERFDKIEQVDE  
>comp12530\_c0\_seq1; 348 1 1270 LEN=2207; translated  
XKKDYRNIGVEDKTMTSDPYFSMARGFGVCNVLTAALYSCVAHVWLAFFVSRKGGKVP  
QPGEEMMRKFAIVTGANTGIGFEVSRRLVQYEGWDVVLACRSKDKALTARDKINDFKS  
CNNRKTAAAGKAIQVLDLSDFNIRRFADAVETEYDNIDVLINNAGRNSGKSPGNPN  
LDLQSNYLGHFLLTNLLKLLKLLPSSVAKNGNKI INLSSVMHHSKGDMSKGGDFE  
SISSPAYWKRRAYYNDKSNAPSNVYAASKLAAIILHSFELNRRYADAHLTAAI  
AVNPGAVNSDIWRGFPKWMREYVFEKIYLTTKQGSEPIVAAAVRNDLVANKNSET  
GAVVYIQPYANPFSIFGGRLFPNSDEVSSSPQRGPMPLPTEMLGPFVGHRLTIP  
RPLPSNKDVAEATLWRVSSSELTEL  
>comp12530\_c0\_seq2; 348 1 1270 LEN=2462; translated  
XKKDYRNIGVEDKTMTSDPYFSMARGFGVCNVLTAALYSCVAHVWLAFFVSRKGGKVP  
QPGEEMMRKFAIVTGANTGIGFEVSRRLVQYEGWDVVLACRSKDKALTARDKINDFKS  
CNNRKTAAAGKAIQVLDLSDFNIRRFADAVETEYDNIDVLINNAGRNSGKSPGNPN  
LDLQSNYLGHFLLTNLLKLLKLLPSSVAKNGNKI INLSSVMHHSKGDMSKGGDFE  
SISSPAYWKRRAYYNDKSNAPSNVYAASKLAAIILHSFELNRRYADAHLTAAI  
AVNPGAVNSDIWRGFPKWMREYVFEKIYLTTKQGSEPIVAAAVRNDLVANKNSET  
GAVVYIQPYANPFSIFGGRLFPNSDEVSSSPQRGPMPLPTEMLGPFVGHRLTIP  
RPLPSNKDVAEATLWRVSSSELTEL  
>comp12531\_c0\_seq1; 558 1 2116 LEN=2152; translated  
AWKSLFEHRQQTGRRLIIVLPADKAAVLATIGSGKKEFSDLQDAEQATAFGYTI  
PLEGSLLYHRNSPDKGRDDHSRLFARQKLPSSLSLRRCSHFGDTMHFIDRLTKI  
SLDLRNVPPVHRNAYLQDSLRELNRRVRRRMITRGDVS LDVEDHRGPDDWPAI  
ADVTS DMLMYSVHLPDP M QNKVWPGTAATPSDQTTEGAVRILNI  
VWEEARVLSRRERCPYLVRVEVADTNLRGNDRLYASGAPGLGATMEEALAMA  
EAGASGGGRGDPGFHEHYEIPSELLAPGKPRGTTKPSAVTIRTKDLLVDVPP  
KEMPRGGWQADETVFYSHSPEDVYPTNSYDSVREDELEQLHYQMHN  
DPMYNEYGVGAQSPPPPAHQSPSLSTRGALLDRIFGQPLTDKCEEIRQASL  
GKVEGWRLASFIMKAGEDIRREALVMQIIAKLNDWFKTDIPEPYRPMR  
PYTIMCVGGDAGIVECLADAKSIDEVKKGTDGFSRLRDYFERAYGPPGTYG  
GAYQQKQPGTTTETLSFEEAQDNFLRSLVGYVICYILQIKDRHNANILMDR  
SGNIIHIDFGFVLGDTPKMCKVPIFSEKAPFKLSDEYWDV LGGWNTNQGGL  
GVRFCHMFEHAFACASAHSEEIAALVEATMLTMTQNSRQARALANGVRK  
RLKMRGPPGSNEQKAFVMELVNAARTSMGTTTYDWLQRNMNGYQ  
>comp12532\_c0\_seq1; 191 777 1877 LEN=3332; minus strand; translated  
MPSVPPQPDITVHYHNETSFSSESEQESSNNAKSSALYLFGDPSSPRMALCCAG  
FPDDHTVFRPFAKLSSEKILVGMCLPGYDDRPADGVPWTEHNPSGYTFDEM  
VSSIRAAARALRAASKAPGDKPAALTGIFHDWGVVPATMWAQRLEEEEEKD  
KADKSQPPTLDRIVFFDVLMPPLDRVQGYKYNPVEGFTALEAAITVLYK  
VILGLAFWLRANCSEYLAVVFFLCTVFLKGLRLDPLYSF DENSPKALYK  
NNVGHNSERMSLSRIIYMSYPYWNLMRKMGLAGTVHSNWKDTPILYLYG  
PNKRTQFHKKQTLRLLEREAKESRSISQAVAISGTGHYLYLQEQERCLEI  
VFRFMTAKK  
>comp12532\_c0\_seq2; 191 777 1877 LEN=3233; minus strand; translated

MPSVPPQPDITIVHYHNETSFSSEQESSNNAKGSSALYLFQDPSSPRMALCCAGFPDDHT  
VFRPFAKSLSEKILVGMCLPGYDDRDPADGVPWTEHNPSGYTFDEMVSIRAAARALRA  
ASKAPGDKPAALTGIFHDWGVVPATMWAQRLEEEEEKDKADKSQPPTLDRIVFFDVLMPPP  
LDRVQGKYNPVEGFTALEAAITVLYKVILGLAFWLRANCSEYLAVVFFLCTVFLKGLRL  
DPLYSFDENSPKALYKNNVGHNSERMSLSRIIYMSYPYWNLMRKMGMLAGTVHSNWKDT  
PILYLYGPNKRTQFHKKQTLRLLEREAKESRSISQAVAI SGTGHYLYLQEQERCLELVR  
FMTAKK

>comp12532\_c0\_seq3; 191 777 1877 LEN=3440; minus strand; translated  
MPSVPPQPDITIVHYHNETSFSSEQESSNNAKGSSALYLFQDPSSPRMALCCAGFPDDHT  
VFRPFAKSLSEKILVGMCLPGYDDRDPADGVPWTEHNPSGYTFDEMVSIRAAARALRA  
ASKAPGDKPAALTGIFHDWGVVPATMWAQRLEEEEEKDKADKSQPPTLDRIVFFDVLMPPP  
LDRVQGKYNPVEGFTALEAAITVLYKVILGLAFWLRANCSEYLAVVFFLCTVFLKGLRL  
DPLYSFDENSPKALYKNNVGHNSERMSLSRIIYMSYPYWNLMRKMGMLAGTVHSNWKDT  
PILYLYGPNKRTQFHKKQTLRLLEREAKESRSISQAVAI SGTGHYLYLQEQERCLELVR  
FMTAKK

>comp12533\_c0\_seq1; 651 112 2257 LEN=2257; translated  
MSSTPENSSTNPKTPPKTMGWAATLFGSTWLSKSKSRVDSSTNSTASKLQOREKRVAS  
PRPFQNLQEGFNQVSPQPNFTTPTTGSDVKPPGATMMLLASQQQIVSTASESAAPAKSP  
WKGSSNGIQFSAGDLHARSNTSSRGSNYGKRNNNFSMSTTTKVTRAARPQRRRGYNPSRL  
LTINRRRNNAPPNRADIAKLLSNARSTIEPSSRMIEADSNFRTSITRIRPGRLLPAGRQ  
GVTGRVQQLGSDTTSQFRINGKRAMDCVDRDDKDEPDTEKVSKKKRRVNFGREDEKS  
TAPIESLVSTPAKDTNKARASKRKATPHYKKPTAFGIGNDEGNKGNVDGEDEEMANPASA  
PPPKRELKAKRPTSSKKSETKTAHDFPIMSDTRKIVGGDFTAWSTAQEREFSGAQAVVG  
SQRVPLWCSGDLDSLKADIISSVSSPLSPPPQFKQKPLFEGKKKDRTVIDDDDEEETE  
AIKRVKPKWECPECGFKNDDSDNCQNMIIYDDKLNKKRCKGACRSKEVKAEGWGNLFAN  
FAHLRDPGNMIRCSNCGVYNKKDRDTCESCEASLGNSDANPSVPATKFNVPGSIGSDGSF  
LNGKGATTSAPSSGSIQSTGFSFPTSAPTQSSAAISGKNVVSQFKFAAPSASTDTSVTTT  
KAGGFKFGAPSEPAASASTSKTSTGGFQLGSAPAPSPSLPSAKPTAKAGGFQFGSX

>comp12534\_c0\_seq1; 331 1 771 LEN=2106; translated  
DEDDDDDEFQFGFGTIVNQHGGLRNGKYLVRVMDTNEQHDDLIARHVLFDHPDEYNISVG  
IGRDWPDARGIYVNSSNRNRNHNGSGNHNTTNNHHHTPDLMIWLNKEDHLRVIATSNNGD  
LLAVFGRLEALTEQIEQSLHKGHAFARHPRYGFVNTSPENLGTALRASVYIKLYRLGQQ  
PGFADLLDRLRLETSSRFEATGPGGGYTGVFDVANAERLQSEVQLINTMINGVGRLEL  
EKRLERGEAVDLEEV

>comp12534\_c2\_seq1; 314 93 1000 LEN=1000; translated  
MPSAGNLGHPALARAVSGAMAAAACGKAWALSSGESGERAPTGLSRPPLAPRWSSCEA  
EPKADPSFDFSRFGSGSYLRRYLTPAVYASLRDKTTRHGVTLLEDLIRSGVSLPWGARPP  
RGTGVYAGDEESYHVFADLLVPIVEDYHRYHFADKEAGVIGRGSQSGSASTSTHSRKT  
NHQDDDDDRRVTAVSPAMVLEDGPMYGRNSRKSMMMLRRQFTNLNKNVAVLKQVLDPTGD  
YILQTRMRVARSIKGFPPSPVIGRAQRREVEALFREMADEDWNSECDDHPGGDGLDEDD  
DEX

>comp12535\_c0\_seq1; 615 1 1723 LEN=1897; translated  
GTYNIGGITINVRDFPPALACLQLAAHFTSLVSGAIQDADSITTRIFQGESLSAQNTLD  
PDSNNNKGEEKEHEGSKTPSRKQSSANSNQWKYDVLARSVLTIRAVEIISKWLPRL  
LEVAIAAREDEKRRARVRSNPGGKETYQLTPFEVFLTNVAVVTKLVEHAAFCGLGSA  
PRGSGMDIKMTFGKSSSEKLRALLRSPPLPSQSARVKGELADMVAVLAQSSITVNQLRPL  
PGESTSTAKNVYTLSPLEDSRTLGEQSVMTIERRRCIYAFDICARGCSSRATGSGKFDAD  
SLLSCLRTLSEELTRPEECSTEVEKGCIVIRKCCDGLASYVRDRGDGPADAVAECAVLD  
QTRMTDVVREIGYLTNNHEAVEGVMMEDIMGLEGAMFDEFDLSIRDSTSSCCRMGWLDVR  
TSDLTKDSDSPSDSPSGFPPYLSASLLSIVRCRAQVEQALGSKVRRSEGQTYQHIAIVA  
EGIAEGICEQIQRRKMTLKVQRSDRLANELQFLMNTLKYLSSEAMSLLDGTRRMLCSKA  
GRNGMQGDGPDGLAALAEELERLGRVYVLCGLV

>comp12536\_c0\_seq1; 614 195 2228 LEN=2930; translated  
MGPREIPNLSVLALRAIGHARCKADETFAPNKDGSPTASRLLRSFHHRPVLACGETISE  
YLERAEESKKQSETARAQVPSIELIPMKRTPAIGIGSGRRKQANDVDLNPWIAAYQHQH  
LPEHTSTTDGGRSDEMVTETDESSTPNAFEQQHQHQPPPKVSDLIPTNPRDRTLIVIE  
NGCCALDLLQSYADALVELGRMDDSRGLRFFAEFKTNIELSYKASAQKAPAERSKTEAA  
PTNAVPPAPLDAPIPKPKKRRKSGGASAAAARKKKEAEALAEARRRARIILAALPKSTGS  
LSLHNCVLRRETTQNLNLSGILAHISALDLTGLQTLTDDTLKLLGATGLQLRRLSVKNC  
RRLTDAAVHHMCEHSPNLEAVDLGGDYNI SPAIVVDCLAVKTIRRGRGIFTTQALPKLVE

LHASGIGPSGGWTDLLPELFAALRGWRALSIGFSPSLTFAGWKAAILSVEQKFAVGEEEA  
MVLSDQDQGEAVAAPPAENSNESSSSSSNMCTLLSLGIPFCEQHLVNNAWLGLMGRHFP  
LRALDVRGNHYLSNITSWYDGRATIDSSSSKINTKQSLVVLARYCGISQNSVEETKRIYP  
LAAGDDALTVVTESDGIGWGLRREATDGGKSNPREHYERRLEAAKSRAAKASAAPATS  
AGPEEKTATTKAVLIAN

>comp12537\_c0\_seq1; 565 17 1705 LEN=1738; translated  
MEIADEGGTVATTPTGYTTELSNVSGTGSRSTAFSTNSNAEFPLSTSPPESTSQSVNTVG  
ISAYVPPREPVEVIDALTIVPEYKVIKEREKRKRIYLIIGGIILIAVFLVVAIVVLT  
RNREAKNDESNVLTTPGQNPNTNAPSQAPSEPTASNFVEILSTIGSFYDENGQFAAIFS  
NESSPQYRAATWVADTASIAGVIGNTNRIINRFLATLYFATNGDDWHKCGRGSTYCDSS  
EEWLTATNECDWYAI ECNDDSSITKIFFPSNGGKSNIRGTLPEYISFLSKLTVLIIPR  
GPVSGAFPDWKSLSNLEHVLMMNNRISGEFPQYLIRQNPMLKTVQFNNNNFQGHLLREEL  
SIDSTSLLDLSLNGNITGSIQISKLSLLTTFNLGDNFTGIIPQELYTLTYLKSFNV  
SNTLLDGELSPSIGNFSQLLSFDAANTDIGGTLPISSFFSLSNLRVDFVDFGKFNGLPEL  
FSELTNLDTAFLHNNFTGTIPVGFVRLPFLKLELHLNLSGIVSEQLCGRVVEGSGKI  
QILTVDCQKVSCTCCTNCPEDR

>comp12537\_c0\_seq2; 530 17 1624 LEN=1820; translated  
MEIADEGGTVATTPTGYTTELSNVSGTGSRSTAFSTNSNAEFPLSTSPPESTSQSVNTVG  
ISAYVPPREPVEVIDALTIVPEYKVIKEREKRKRIYLIIGGIILIAVFLVVAIVVLT  
RNREAKNDESNVLTTPGQNPNTNAPSQAPSEPTASNFVEILSTIGSFYDENGQFAAIFS  
NESSPQYRAATWVADTASIAGVIGNTNRIINRFLATLYFATNGDDWHKCGRGSTYCDSS  
EEWLTATNECDWYAI ECNDDSSITKIFFPSNGGKSNIRGTLPEYISFLSKLTVLIIPR  
GPVSGAFPDWKSLSNLEHVLMMNNRISGEFPQYLIRQNPMLKTVQFNNNNFQGHLLREEL  
SIDSTSLLDLSLNGNITGSIQISKLSLLTTFNLGDNFTGIIPQELYTLTYLKSFNV  
SNTLLDGELSPSIGNFSQLLSFDAANTDIGGTLPISSFFSLSNLRVDFVDFGKFNGLPEL  
FSELTNLDTAFLHNNFTGTIPVGFVRLPFLKLELHLNLSGIVSEQLCGRVVEGSGKI  
QILTVDCQKVSCTCCTNCPEDR

>comp12538\_c0\_seq1; 159 379 708 LEN=1105; translated  
MSESRIQMRAQFDANRSVPTSGPLFEELVKGMDAAHMLTHEIVRGDLNEETGRYDVKIK  
REHVQGSDDPSGNIKPEIEPITEDTVRRMENPGSVEVEVCKSSSSSAGNK

>comp12538\_c0\_seq2; 193 110 535 LEN=932; translated  
MASAAASRARVFAGFRRLNRARIQLFRGDDHAMSESRIQMRAQFDANRSVPTSGPLFEEL  
VKGMDAAHMLTHEIVRGDLNEETGRYDVKIKREHVQGSDDPSGNIKPEIEPITEDTVRR  
MENPGSVEVEVCKSSSSSAGNK

>comp12538\_c0\_seq3; 116 1 415 LEN=812; translated  
XPFQSDRGFAGFRRLNRARIQLFRGDDHAMSESRIQMRAQFDANRSVPTSGPLFEELVKG  
MDEAAHMLTHEIVRGDLNEETGRYDVKIKREHVQGSDDPSGNIKPEIEPITEDTVRR  
MENPGSVEVEVCKSSSSSAGNK

>comp12539\_c0\_seq1; 315 138 836 LEN=1353; translated  
MMRLSILLVLCASLFSVAIAGETTIEETMAAIEENIEEPAMLDMDRQRRKTWDVFGVLLMM  
IGNSDCGPHGRVHLLDCHLMEECDSDGNSKCVKLCNMSSDHHKSHYSAFCSSSSSANSYN  
DNVTPSNVEMDGNVAMEFQFWMVAAAFSVAVALVAIHLGQRKERRRAELLEDDASLAPSM  
AGSVNRRMVAVSALADGAFVKGNGGAGDKQVEMAAYKLDEPSPLYPTSSFV

>comp12540\_c0\_seq1; 692 75 1040 LEN=1040; translated  
MTGGVTSEESNKAGRWDNQAMEDLRQKKEALEDERNNLDRNQNTAGRQSMGRSNRIEELR  
NNYDSLNNRAEYSKSDMEFTSKALAEKNTLLKSIERKVPQLEEKVAQLEKELES LNATKE  
KAIAEVHAAKDEHLGPFLAATGLKDLESYERATRETRDEFNRNKRQLVEHIAQLEEKKS  
ESKRDLKPIAAGEKRLKNHQKLTDAKARQKLLKKEGKAARENLEAAEKAVTEAQEIEL  
ETEETAKKLQSEFKEAQQRNNVSKSVATEESALEQLRGRLEILQRARLEEVFLPVKGA  
ATSGRTTRSGRQIGGGDDANEE

>comp12540\_c1\_seq1; 231 809 1111 LEN=2676; minus strand; translated  
MKKVQDKLRECAETQTMVESLERLSNALHTTTPEDSTAVEDAMMAGNQASILEKAKEHK  
GENKAPTGAHKKSRKGGKHKKATIVPEKKEKKRPRYFVQF

>comp12541\_c0\_seq1; 345 69 1364 LEN=1456; translated  
MDLLGDLGTADQLTSTRAENEVLKEQVKALKQRCVLTVENEALKAEEVEIYRSEATAAQA  
SSGTAKSATSTRNNEVEADHFVKS GGGYAKNKSVLLENCHGVS NVLCCSISNDESVL  
ATGGADRNISLTLWNRAFGNETSQQVVESSSRIDCDAPVISIDFSRKGHNTKFVAAGCMD  
GTVHVLVYKDGSVISVNEVCKGFIKHGKYVKLAWSPDNILATASADGCIQVHKLEWN  
LIDSTGVKLEKIQLNLQSGPIESLCFREDQLCCYARGSPNVLCFDLQDNFKQKQKFLNKG  
SGNAFFDDHVSFAVMDMSPFERDYALALATDSSRNIIIMDWRSGNQVRNLYGHKNDCYSQPK  
LAWSKSGQYLYGNSQNESVVCVWDIASSSIVEQLNGHSSPVRDMYSSKSTETLVTTSTFDK

KTQFWLSTDNN

>comp12542\_c0\_seq1; 172 164 1405 LEN=1860; translated  
MIHPRSLFVGLALACHSLGWVPLLWAFRAPLYRGRPRGRIAGATAARRSALLASSGGSDRE  
AEPPAPESTVEGQGSETAENPPLVPPGQPQVPDTRSRAPATRPGPTPMDLMAAMGTSPRR  
IFTSFVSATGIALGGNFLGVTSRLLAGIPEERVEATGIDTYFPRGEYKRCRTPEYTFVIP  
KEWVADTYVELAKAQRRVQPLDYSMQRSRGGPGKITTLPSAYGPPGRFNQQGVSQAGDTN  
VSVIVSSGFSGFTLRGSLGTPADAAETLLSRISIAPEGSGRTATLLRSVGDGGDRTYAFEY  
LLDRGTRGPPLRNIAVVAASPEGDKLYTLTVVAPAERWKDDGYDXEAPKDRGQLPPPLIR  
FDSVRGDATDVNGNALEGTQAGWDDVFFVATEQHRQAGKQPCSPDASFPMGTR

>comp12544\_c0\_seq1; 238 94 432 LEN=1532; translated  
MPPKVQQKSKEQKMAAAMAGGKGGKKKWSKGRDQVDNKVLFKSKEQFERFHDEVPKMKF  
ISVSSVVEKLNINAGLARRALRDLEEDGKIRPILISRSQRIYTRSIGDDDDDE

>comp12545\_c0\_seq1; 923 195 2816 LEN=2867; translated  
MRISFALRLLATASMTAAVAGFTSHYHPTTTNAAESLSPFARTVLEMSSVSDSDTDASA  
TVPNFGVEVAKTGGRTTTAAQKAVAQDLSLGAAPRGRPTGGHYMTKGGIQVTASVEGLD  
YTRTGDKASLSNPNSSEAVIESLVQRLDSHKGVLLTSSYEFPGRYARWSLGFVDPPELVS  
GKGDKCTIKALNDRGKVLPAIEKAMQEMKQEDILSNVDVIVEEAESNMVQIDVTIVPPP  
PVGTFSEEERSRQPSLFSVVRKLVDLFGYQGGDGLGLYGGFGYDLTFSFEPIDLKQERD  
PEQRDLVFLPDSVYVIDSKRDAWHVQYEFNVDNKSTQGLPRVGLSDEFQPFDEEKTEF  
VKRDTEEGAFSKSVERAKEEFKVGNLFEAVLSQTFREKLTENKPKSTIFRRLRKRNPAPY  
GFFINLGEQEYLVGASPEMFVRCESIQENDYAPGAMRVETCPISGTVARGADALEDALRV  
KSLMMNQKEESELTMCTDVRNDKSRICEPGSVQVIGRRQIEMYSRLIHTVDHVEGYLRP  
EFDALDAFLCHTWAIVTGTGAPKTWAIQFVEDMENSRCWYGGAVGLVGFVDFGSLNTGLTLR  
TVRIKDGIAEIRAGATLLTDSTPLDEELETELKASAMIDAVVRTGSDSSDAASDAETPKP  
PENVGEGKSIILIDHEDSFVHTLGNLYRQTGATVKTLSRSGPSALAAIENMVEQGIKPDV  
VLSPPGPNPSDFGLSNSIELLIKHDIPAFGVCLGLQGMVEHFGGKGLVLYGYPMHGKPSDV  
TLTKDGMGDNSIFAGLPETFEVARYHSLHGIREELPAELKVTALTEDGIVMGIQHESLPM  
AAVQFHPEISILTSPAHGMAILKNFMRLHAMKEN

>comp12546\_c0\_seq1; 281 1 686 LEN=1122; translated  
XGANGNVPDGPSPSCQEMESQSQPLIEADGDKAGDSKQDKPEVPLDQKEQGSPKDNKRCAP  
DGTSGCQETESQPLKRPRSDEEGANGDFPDGSTQCDEMESQPLQEAQSEKAGDPHHNKVE  
VLTKQNWQDPNKENNRNGTDDTSECQEVFQSPKRPLSDEVGGNDGEHNKAEVPPKQEQQ  
QSSSEDSKPNCSGDGTARQCENKSQPLKQPRSDQVEVIDISSDSTESTLW

>comp12546\_c0\_seq3; 281 1 686 LEN=1153; translated  
XGANGNVPDGPSPSCQEMESQSQPLIEADGDKAGDSKQDKPEVPLDQKEQGSPKDNKRCAP  
DGTSGCQETESQPLKRPRSDEEGANGDFPDGSTQCDEMESQPLQEAQSEKAGDPHHNKVE  
VLTKQNWQDPNKENNRNGTDDTSECQEVFQSPKRPLSDEVGGNDGEHNKAEVPPKQEQQ  
QSSSEDSKPNCSGDGTARQCENKSQPLKQPRSDQVEVIDISSDSTESTLW

>comp12547\_c0\_seq1; 720 196 2160 LEN=2274; translated  
MTKRDPFPMTSMEAKALEASVSTNPGSNGTDPGGDASGENTSTSWSSMPLESGSSGAPSA  
TDIRGDETDKSELVARKKSIRKDEEEDIYTHVDKEVVDEDEEYLADPVLDTPLLEELRG  
DWRKRYTGQTKRAFFRFYRRLYGDKLPLSEMMRTLCLAMTLYFMIGGYWMLRSLKDSVLM  
ALCGYQAI PKAKMLSVFVVLGVVSVYNHLLSDSLAKHQLFYIFGTFYFFLFTAIAAMLMN  
PTIGLANKYQDEGRILGWVSYCAIESFGSVMVSLFWSFANSNISLETAKSSYGVMAFAQ  
LGSIMGPAIVTRFAEEWGIAQCYLLGAMNMLLLQGTMYFYIRTYGSNETRSKDGEVDESG  
KSKKKKERAGILEGLKLFWEFNYVKGIFAI SCLFMVEVTIVDFTLKVLAKKEYFSEEYPC  
ISNPDCYNAETKVFGLTEEASNAIASFMGLFGVATNSLSFIFSLLGTSAVIRKFGRLRTL  
LLFPPTLCLVVIIVVRLRPTLYVVFLAMIMLKANSYALNNPTKEMLYQPTSSAVRYKAKSW  
IDIFGARGSKALGSVVTNAFSDSATTLVANGSIVGMAVSCFLIWNARFMGKLFEEYTESG  
YVVGEEEDNPESKNIQMAIAQNEREDTSCAIEGEGEGEENDSAEKPIRKAEVAMV

>comp12548\_c0\_seq1; 365 97 1662 LEN=2523; translated  
MGQFISKIKAAFDGVREKLP RRVWEQQSLIDKRNSRVSGIDL SLIQDEFKDVSKDKFRFK  
ETKFNHYKATSEGKKEKLECKPIEYGIKFKKYPNLYYAMFY PDEALTPWENEQQYVYL  
HRAGLEGLKPSGVSPKANVTILTHEFQPLKPFKGDILPKRFCDKYTDTVLSQYKGTKIHS  
KKNLPLLPGRMGYCDEPHLKL IADIDPSSIEQKIGDCWLLSGISSLAEYDGAIERLFR  
KTKNLSELPKDSANKYTVTLYDLTTWTEVDVVVDERLCSRLDGSRRPLGAKTTVDAQLWV  
PYLEKAI AAHCGWDKIDGNC THAWALLTGVEQYI IQKQEGTDKFCNARYDPDKKEW  
LEHGNSPHDGPQGMFQIPWPSIGKKKGGKKPLSEKALFQRICQWDEANYLIGAASKGSSD  
KNSTDGIVDNHAYSVDRCRNVAGTGIDMIQVRNPWGYGGNEKAKFRHKGPWKKYPEIK  
KELRPIFNKSDGLFWLTRQEFFKYYSVDFVVGACDMKKFLGK

>comp12549\_c0\_seq1; 157 420 1124 LEN=1675; translated  
MKKAKMEARTKGLDDQRKALIEDYRKIQRDCCGGEYEGMNCYNTLFGRLAYEVTEGKLLR  
EMEAFGPVKDIKLIQVQNGKSRGIGFVEYENEEDEMKRAYRGADRMRIEGREIVVDVERGH  
TVPTWLPRLGGGLGGTRLGGKDKNVTAPGRFDPSRMMERSSSGMMGEEPPGMGRGHGPP  
PGGGYYDGPPSNYGGGGGGGGYGDYSRGGGDRDRRRRRSRSPDRGRYAPRPRY  
>comp12549\_c0\_seq2; 199 110 1036 LEN=1587; translated  
MTPKGQMSRGNTQPAVMMPPHIRATFMPNPPIRQLPPVKSKRRKKPTEGVFQFMDKFEK  
TPAPKRIVQPTPKSMKKAKMEARTKGLDDQRKALIEDYRKIQRDCCGGEYEGMNCYNTLFG  
RLAYEVTEGKLLREMEAFGPVKDIKLIQVQNGKSRGIGFVEYENEEDEMKRAYRGADRMRI  
EGREIVVDVERGHTVPTWLPRLGGGLGGTRLGGKDKNVTAPGRFDPSRMMERSSSGMM  
GEEPPGMGRGHGPPPGGGYYDGPPSNYGGGGGGGGYGDYSRGGGDRDRRRRRSRSPDRG  
RYAPRPRY  
>comp12550\_c0\_seq1; 347 115 933 LEN=1591; translated  
MTTPSETPPTGTPSTPSGVIDTPKSKKIYLIRHAESEENRRISAFRCRTFRSLKFKSLPKS  
SDVSTSIELLNVSQAQVSDVSETGAKQIAHMGEKLRKASFVVESSGIELVVHSPLKRARQT  
SEGMLGCMMASSSDGPLKEKRSRGTVSKVAETALLLEKTPAEWTPIIYNAFLKRISEFEDW  
LGEQPEETIALVGHSSQFFKAMLGLTYKFGNCEVWEVDFDSSSTQDGMSQDATANTSGEKI  
KEEQPSFYTPRSRWSNLVKKLHHCIEISSPRIV  
>comp12551\_c0\_seq1; 1393 223 4524 LEN=4555; translated  
MEGNSFDVEEFESDHGILDSTAWSKVKVASRSKETKMYGRSRFRDPSLSYFDSDLRNPL  
AEDEDEDTDVEDQQSNSMSPVDYSSFGRGYSITTPPTRRKKFVRAKSTSDASPPISRPR  
RLTQMIRSQSVSTFNPQRSISAACRSFSMGQTDYENSNPNSLSTLPSDDEDYTSKRLADT  
DATQKGRKKSASAKHSFQRNNDFTSLYNDNYETKFPFSFASDSFNLARNHIECRPGWGRV  
SNGNLSSNRNHGKDGKVRSSSSDFISPRSFLYNDETMESADSISSPSMSMSSSTRKRG  
VCKSRFLTDDSPVSRSRRISSPPSSVIGSASKLMDLSFHSIKNTAKSDRMMLLNVMT  
SDDDVNVSGESDISVSDDDVMVMDNLSQIREGPLSTKSGRLFNFEKASVDDVTKYMP  
YEDIEFLMNSLQQNFRGQGGCLSWNVAPPVDWPAKRRDSFFQATRKLGFTRAGGGKVS  
IQISKRRGRGLLSLLETSLANYGEREVGKSTPTAEGINTSMNFTFLSTVKKKLKSA  
TRVSKILRLTPKELALNSRFKFKDTTDELQFMSKLDMNDESQAIENDNNDKECLFDM  
SNGHSRTGVPRKSLDHHSSSDLNAMHGATPVPHRGRGRPPRLSLQSASSASMDTQSP  
FVTNSHLSKPAHIDTHVSCGMNANDFVSTPSVGRQGDWGSRPFNDRDWTSEQCEAVI  
IKKLFDRFKKLQKNAGLDVGEDQILSCNDVESSFLDFGAVSQFSDDLVSPISSAIDAG  
ITEQAISCEVSLLDNHASERVNEFPFSRVLRRRQTAFAKHRMSLYASAMNPADTFAK  
RRKSLFVQQASALPATTKNLLLSAPEFFSQYTSDTNESSFEKVGAAHEESPLENQVLR  
TIFDFLEERELFLIASLVSTKWSDVATESHANLVSSVAKCKEELKLEENENTRGSQR  
SWEYLTTTTPWACFLSEGAFKRKYKVFNKTCEIEEAVSVMNVQQIHSTGNINVVGAEL  
AVSVMSSLVRRGICPNFIVTRGMFSCQYEPPESHWGTAGNKMPKGFYSSSRIRKRRPRE  
PKKSGRFQYIRMELCDEGDAEEFLKRQDPDEVLTTPHQARNFLFQISFALYAAAEKFS  
LKHVDVKKLLNVFLQRMKPKQSEGNIVLRYGLGEHTFVLQSSRDDAIIAKLADYGTAN  
VDCVSNQKVTIAQFTTLENTPPDFLILGDEALQGHGDCFGLGLCMLHLFTGHAPYEEI  
LEGVTCPSRLKKELRRIWENEEETQFSVIRSIVLADVYKDEDGHVIEGDPDDTLYDT  
LYKFLVLFVFGIPDDSSGFLGSKVMAAVKATLVSDSRQKVRTRNKIVPCDANEFAR  
DRRKFSLSHGNNQYISRARTSLSALDGGMELLLSLVQFNPQVRASALDVLNSSFMA  
PLRETSNENQGYDDGNDEVLSTAFSTQKN  
>comp12552\_c0\_seq1; 603 119 1753 LEN=2185; translated  
MYKRRGSLSGNEARFFFPQENSNPRESILFDSQNSNGFRIPSDLVDEDAVEEEDDFAD  
FGDEDNIEAAIRSLPIFEKEETEKEQDPTEKETEEDLEKEEEEKEDVKTEEKNEGLR  
KRRRTRDKGANDDDYDSDIIEFVKLVERSRSMLMKPLLLRILNENKFEKLPFLEDSS  
SDLRASRKRSDKTGLDSTSYHRRQGGRRMTRSQSDLHSSGVHGLRNSSGHGMKSTRRT  
MRTSSMHRGPRNNMSSRMNDQVSPGAGLSRSPSTASRLRSKRTSESIRKHRNSQWEV  
NRSSSGREGMORLGSQKLSGNNDSSSSFGADLSSSKRRNSGAGSLKGEQSSGKQNAH  
WNLLKSSGGKDALLRIGSDQKLSGNNDSSSSLKVDVTSKSPASNGKQNAHWDLKSSA  
GRNALSMLHKMNSDDDDSSSSPSETEDAFVAPLASSREQTVGLHSLLDLRLGKDSNS  
SNKDDEDAEDTKAKKNKSILKFQLISKQLKLMGMIGNNKDKDKDKQTAKFNSSLSDEK  
DPKDANENSMSSLNED  
>comp12553\_c0\_seq1; 285 238 1227 LEN=1436; translated  
MAMLAETTRVSVGDFAAGKKTNPPTTLVGRSRAGDATAFAIPEMKWLFDCGAMVQEWK  
PRIIFLTHTHSDHIHFLFRFKDDERPPTIYLPEASMPFVETCLKAYEEMTECQSLAAE  
HSGNDTETTERKSGFLLKAVRPDEEFVSHGGNKFRVRTLSMTHRIPCLGYSIFRLRSSL  
KEDFKGLSGREIGQLKKDGDVDTKVVEEYLCFMGDTTAKVFEIDYPEILKHHSTVVLE  
CTFIDVDSRERAEVTKHTHWDDLQPHIASNPDTMFIHVHFSLKYSLSLRRFFRDQQVI  
YDNVHPM

LIEREVKEQWHKTGEEGEHPRCNCRICRD

>comp12554\_c0\_seq1; 713 478 2700 LEN=2996; translated  
MFKPENRQFTDTTYHRACELDDFTAESVEELMIEDHF'TTKDAEQHMLVHGASVYPNLLT  
NETASELREWIVHENRIREGWNVIEENRYTWGIDINMHPKLQTYWQELAANDQFRNGLE  
AIVGPDPAII EFTAITSSYGAEDQYMHADVIHHGSAVKYARSFVPSYSLFIPLQDTTYEM  
GATHVCPGSHQCSEADDICDDYGAFAVSGEGGGVWKMGDGALLNQQTfHKGMGYTQKGGP  
DRVVLIATFAPRPKHGKGVESRQIGQGGSYLLWNQWGHTFSDFVHADKRMTEPQKTLRS  
LGLIKNGWNYLSTLSMRMANEDTEMRPDNL EELLEEEEGGLWFLPRSWQDGIDEVSDISE  
YHGFAVGVMKRVEFEFGRFYLLVLGLYLSIF SFLVMTQRAVGVGKISRQSKVSI SLRFFL  
RIFVTHGIVIAFAWCALKTVEDSNWAKSIRS RKLRYRIPVSDVNDPAPSTIPHTMDILFVP  
HYASDYLASARVVDVVHPGNLYWKTITQQYSAAYHNLPIGTKDLFCETLLVDVTRTRRF  
LKQDEERFWTDIIEPDELITACHREMATSFDPLLGTMRVQIASLQSETIFGKFRDTAMQR  
KIIPDYLRKWDRVLFYLGSKKTI PNQDFVTKPKDGTKTKTMDLDKGIKSMTKIELVATNS  
ASSIPLRSHNWPPQLKRTEPYHGAWLKEGDRAEGRFRCEDEGEWFAGTITAAIPNEGTYD  
IMYDDGDNDDEGLSRECVNRL

>comp12554\_c0\_seq2; 489 478 2968 LEN=3264; translated  
MFKPENRQFTDTTYHRACELDDFTAESVEELMIEDHF'TTKDAEQHMLVHGASVYPNLLT  
NETASELREWIVHENRIREGWNVIEENRYTWGIDINMHPKLQTYWQELAANDQFRNGLE  
AIVGPDPAII EFTAITSSYGAEDQYMHADVIHHGXVRMDEWKYKLASVAKQVKVQASFFF  
FWTLEIQLDSTDCNTKMYACFTYS AVKYARSFVPSYSLFIPLQDTTYEMGATHVCPGS  
HQCSEADDICDDYGAFAVSGEGGGVWKMGDGALLNQQTfHKGMGYTQKGGPDRVVLIATF  
APRPKHGKGVESRQIGSANFFF GDXXKRKLDTISESEFFDILHRLIFVKFITKGQGGSYS  
LLWNQWGHTFSDFVHADKRMTEPQKTLRS LGLIKNGWNYLSTLSMRMANEDTEMRPDNL  
EELLEEEEGGLWFLPRSWQDGIDEVSDISEYHGFAVGVMKRVEFEFGRFYLLVLGLYLSIF  
SFLVMTQRAVGVGKISRQSKVSI SLRFFLRIFVTHGIVIAFAWCALKTVEDSNWAKSIRS  
RKLRYRIPVSDVNDPAPSTIPHTMDILFVPHYASDYLASARVVDVVHPGNLYWKTITQQY  
SAAYHNLPIGTKDLFCETLLVDVTRTRRFLKQDEERFWTDIIEPDELITACHREMATSFD  
PLLGTMRVQIASLQSETIFGKFRDTAMQRKIIPDYLRKWDRVLFYLGSKKTI PNQDFVTK  
PKDGTKTKTMDLDKGIKSMTKIELVATNSASSIPLRSHNWPPQLKRTEPYHGAWLKEGDR  
AEGRFRCEDEGEWFAGTITAAIPNEGTYDIMYDDGDNDDEGLSRECVNRL

>comp12554\_c0\_seq3; 662 478 2694 LEN=2704; translated  
MFKPENRQFTDTTYHRACELDDFTAESVEELMIEDHF'TTKDAEQHMLVHGASVYPNLLT  
NETASELREWIVHENRIREGWNVIEENRYTWGIDINMHPKLQTYWQELAANDQFRNGLE  
AIVGPDPAII EFTAITSSYGAEDQYMHADVIHHGSAVKYARSFVPSYSLFIPLQDTTYEM  
GATHVCPGSHQCSEADDICDDYGAFAVSGEGGGVWKMGDGALLNQQTfHKGMGYTQKGGP  
DRVVLIATFAPRPKHGKGVESRQIGQGGSYLLWNQWGHTFSDFVHADKRMTEPQKTLRS  
LGLIKNGWNYLSTLSMRMANEDTEMRPDNL EELLEEEEGGLWFLPRSWQDGIDEVSDISE  
YHGFAVGVMKRVEFEFGRFYLLVLGLYLSIF SFLVMTQRAVGVGKISRQSKVSI SLRFFL  
RIFVTHGIVIAFAWCALKTVEDSNWAKSIRS RKLRYRIPVSDVNDPAPSTIPHTMDILFVP  
HYASDYLASARVVDVVHPGNLYWKTITQQYSAAYHNLPIGTKDLFCETLLVDVTRTRRF  
LKQDEERFWTDIIEPDELITACHREMATSFDPLLGTMRVQIASLQSETIFGKFRDTAMQR  
KIIPDYLRKWDRVLFYLGSKKTI PNQDFVTKPKDGTKTKTMDLDKGIKSMTKIELVATNS  
ASSIPLRSHNWPPQLKRTEPYHGAWLKEGDRAEGRFRCEDEGKNIEKREKQEQYHCLHS  
YPFTYFFPYSLITLCAR

>comp12554\_c0\_seq4; 438 478 2962 LEN=2972; translated  
MFKPENRQFTDTTYHRACELDDFTAESVEELMIEDHF'TTKDAEQHMLVHGASVYPNLLT  
NETASELREWIVHENRIREGWNVIEENRYTWGIDINMHPKLQTYWQELAANDQFRNGLE  
AIVGPDPAII EFTAITSSYGAEDQYMHADVIHHGXVRMDEWKYKLASVAKQVKVQASFFF  
FWTLEIQLDSTDCNTKMYACFTYS AVKYARSFVPSYSLFIPLQDTTYEMGATHVCPGS  
HQCSEADDICDDYGAFAVSGEGGGVWKMGDGALLNQQTfHKGMGYTQKGGPDRVVLIATF  
APRPKHGKGVESRQIGSANFFF GDXXKRKLDTISESEFFDILHRLIFVKFITKGQGGSYS  
LLWNQWGHTFSDFVHADKRMTEPQKTLRS LGLIKNGWNYLSTLSMRMANEDTEMRPDNL  
EELLEEEEGGLWFLPRSWQDGIDEVSDISEYHGFAVGVMKRVEFEFGRFYLLVLGLYLSIF  
SFLVMTQRAVGVGKISRQSKVSI SLRFFLRIFVTHGIVIAFAWCALKTVEDSNWAKSIRS  
RKLRYRIPVSDVNDPAPSTIPHTMDILFVPHYASDYLASARVVDVVHPGNLYWKTITQQY  
SAAYHNLPIGTKDLFCETLLVDVTRTRRFLKQDEERFWTDIIEPDELITACHREMATSFD  
PLLGTMRVQIASLQSETIFGKFRDTAMQRKIIPDYLRKWDRVLFYLGSKKTI PNQDFVTK  
PKDGTKTKTMDLDKGIKSMTKIELVATNSASSIPLRSHNWPPQLKRTEPYHGAWLKEGDR  
AEGRFRCEDEGKNIEKREKQEQYHCLHSYPFTYFFPYSLITLCAR

>comp12554\_c0\_seq5; 552 478 2847 LEN=2857; translated

MFKPENRQFTDTTYHRACELDDFTAESVEELMIEDHF'TTKDAEQHMLVHGASVYPNLLT  
NETASELREWIVHENRIREGWNVIENENRYTWGIDINMHPKLQTYWQELAANDQFRNGLE  
AIVGPDPAII EFTAITSSYGAEDQYMHADVIHHGXVRMDEWKYKLASVAKQVKVQASFFF  
FWTLEIQLDSTDCNTTKMYACFTYSAVKYARSFVPSYSLFIPLQDTTYEMGATHVCPGS  
HQCSEADDICDDYGAFAVSGEGGVWKMGDGALLNQQTFFHKGMGYTQKGGPDRVVL IATF  
APRPKHGKGVESRQIGQGGSYSLWNQWGHTFSDFVHADKRMTEPQKTLRSLGLIKNGW  
NYLSTLSMRMANEDTEMRPDNLEELLEEEGGLWFLPRSWQDGIDEVSDISEYHGFVAVGVM  
KRVEFEFGRFYLLVLGLYLSIFSFLVMTQRAVGVGKISRQSKVSI SLRFFLRIFVTHGIV  
IAFAWCALKTVEDSNWAKSIRSRLKLYRIPVSDVNDPAPSTIPHTMDILFVPHYASDYLAS  
YARVVDVHHPGNLYWKTITQQYSAAYHNLPIGTKDLFCETLLVDVTRTRRFLKQDEERFW  
TDIIEPDELITACHREMATSFDPLLGTMRQIASLQSETIFGKFRDTAMQRKII PDYL RK  
WDRVLFYLGSKKTIPNQDFVTKPKDGTKTKTMDLDKGIKSMTKIELVATNSASSIPLRSH  
NWPPQLKRTEPHYGAWLKEGDRAEGRFRCEDEGKNIKREKQEQYHCLHSYPFTYFFPY  
SLLITLCAR

>comp12554\_c0\_seq6; 603 478 2853 LEN=3149; translated  
MFKPENRQFTDTTYHRACELDDFTAESVEELMIEDHF'TTKDAEQHMLVHGASVYPNLLT  
NETASELREWIVHENRIREGWNVIENENRYTWGIDINMHPKLQTYWQELAANDQFRNGLE  
AIVGPDPAII EFTAITSSYGAEDQYMHADVIHHGXVRMDEWKYKLASVAKQVKVQASFFF  
FWTLEIQLDSTDCNTTKMYACFTYSAVKYARSFVPSYSLFIPLQDTTYEMGATHVCPGS  
HQCSEADDICDDYGAFAVSGEGGVWKMGDGALLNQQTFFHKGMGYTQKGGPDRVVL IATF  
APRPKHGKGVESRQIGQGGSYSLWNQWGHTFSDFVHADKRMTEPQKTLRSLGLIKNGW  
NYLSTLSMRMANEDTEMRPDNLEELLEEEGGLWFLPRSWQDGIDEVSDISEYHGFVAVGVM  
KRVEFEFGRFYLLVLGLYLSIFSFLVMTQRAVGVGKISRQSKVSI SLRFFLRIFVTHGIV  
IAFAWCALKTVEDSNWAKSIRSRLKLYRIPVSDVNDPAPSTIPHTMDILFVPHYASDYLAS  
YARVVDVHHPGNLYWKTITQQYSAAYHNLPIGTKDLFCETLLVDVTRTRRFLKQDEERFW  
TDIIEPDELITACHREMATSFDPLLGTMRQIASLQSETIFGKFRDTAMQRKII PDYL RK  
WDRVLFYLGSKKTIPNQDFVTKPKDGTKTKTMDLDKGIKSMTKIELVATNSASSIPLRSH  
NWPPQLKRTEPHYGAWLKEGDRAEGRFRCEDEGEWFAGTITAAIPNEGTYDIMYDDGDND  
EGLSRECVNRL

>comp12554\_c0\_seq7; 599 478 2815 LEN=3111; translated  
MFKPENRQFTDTTYHRACELDDFTAESVEELMIEDHF'TTKDAEQHMLVHGASVYPNLLT  
NETASELREWIVHENRIREGWNVIENENRYTWGIDINMHPKLQTYWQELAANDQFRNGLE  
AIVGPDPAII EFTAITSSYGAEDQYMHADVIHHGSAVKYARSFVPSYSLFIPLQDTTYEM  
GATHVCPGSHQCSEADDICDDYGAFAVSGEGGVWKMGDGALLNQQTFFHKGMGYTQKGGP  
DRVVL IATFAPRPKHGKGVESRQIGSANFFFGDXKKRKLDTISESEFFDILHRLIFVKFI  
TKGQGGSYSLWNQWGHTFSDFVHADKRMTEPQKTLRSLGLIKNGWNYLSTLSMRMANE  
DTEMRPDNLEELLEEEGGLWFLPRSWQDGIDEVSDISEYHGFVAVGVMKRVEFEFGRFYLL  
VLGLYLSIFSFLVMTQRAVGVGKISRQSKVSI SLRFFLRIFVTHGIVIAFAWCALKTVED  
SNWAKSIRSRLKLYRIPVSDVNDPAPSTIPHTMDILFVPHYASDYLAS YARVVDVHHPGNL  
YWKTITQQYSAAYHNLPIGTKDLFCETLLVDVTRTRRFLKQDEERFWTDIIEPDELITAC  
HREMATSFDPLLGTMRQIASLQSETIFGKFRDTAMQRKII PDYL RKWDRVLFYLGSKKT  
IPNQDFVTKPKDGTKTKTMDLDKGIKSMTKIELVATNSASSIPLRSHNWPPQLKRTEPHY  
GAWLKEGDRAEGRFRCEDEGEWFAGTITAAIPNEGTYDIMYDDGDNDEGLSRECVNRL

>comp12554\_c0\_seq8; 548 478 2809 LEN=2819; translated  
MFKPENRQFTDTTYHRACELDDFTAESVEELMIEDHF'TTKDAEQHMLVHGASVYPNLLT  
NETASELREWIVHENRIREGWNVIENENRYTWGIDINMHPKLQTYWQELAANDQFRNGLE  
AIVGPDPAII EFTAITSSYGAEDQYMHADVIHHGSAVKYARSFVPSYSLFIPLQDTTYEM  
GATHVCPGSHQCSEADDICDDYGAFAVSGEGGVWKMGDGALLNQQTFFHKGMGYTQKGGP  
DRVVL IATFAPRPKHGKGVESRQIGSANFFFGDXKKRKLDTISESEFFDILHRLIFVKFI  
TKGQGGSYSLWNQWGHTFSDFVHADKRMTEPQKTLRSLGLIKNGWNYLSTLSMRMANE  
DTEMRPDNLEELLEEEGGLWFLPRSWQDGIDEVSDISEYHGFVAVGVMKRVEFEFGRFYLL  
VLGLYLSIFSFLVMTQRAVGVGKISRQSKVSI SLRFFLRIFVTHGIVIAFAWCALKTVED  
SNWAKSIRSRLKLYRIPVSDVNDPAPSTIPHTMDILFVPHYASDYLAS YARVVDVHHPGNL  
YWKTITQQYSAAYHNLPIGTKDLFCETLLVDVTRTRRFLKQDEERFWTDIIEPDELITAC  
HREMATSFDPLLGTMRQIASLQSETIFGKFRDTAMQRKII PDYL RKWDRVLFYLGSKKT  
IPNQDFVTKPKDGTKTKTMDLDKGIKSMTKIELVATNSASSIPLRSHNWPPQLKRTEPHY  
GAWLKEGDRAEGRFRCEDEGKNIKREKQEQYHCLHSYPFTYFFPY SLLITLCAR

>comp12556\_c0\_seq1; 302 1 1912 LEN=1983; translated  
XRTEKDSVLTKTIVLCSSEQNPA TRSLANALTQILEQQLSARLMRKVASSKRKRAEMINRF  
RCATRVPGRIAVGWSLPMVATAGIGLIAYGNSFQQIYTRSEASSNDNNETTSKETLEKP

TTGRFESSWIKGSIIEGVINQAVGTVASLTSNTNDARNSAGSKPEDTDTYQNMGKMLTKLL  
LPSSSTTSLSDVLQEVQSMGRGDIQDASTVVEVLDAKRCQKMLDSKLGEEFFGTDGFPP  
LQLQQLFYFIEREDEVKNP SWKRRRHYFFPGIDMKQMEDLNEKLLKLTDLAYADTEDEVDR  
RLQKEYNSELVYCSLDGLPNKPAHFIAVERDQSPWNTELEVLLVVCGTKRITDVIITDLLC  
VAEPYRDGYAHSGICESGRWIARKHVKLFEKIRLLSNKKKIKLTLGHS LGRAQQQVCYR  
FTADACFFFGFLTFRFDQFFAVAGIELNGDPFIDVEVVGFGCPALLSPELSTSYEHIVT  
TVIGDNDCVPRMSMATMVNTLLDMAEFDYTPFALRDI EETVNELERFLPSIVDGSV KRKV  
LNNLNGFLPDVSPNGGDEISKRMEVVLFPFGRCIHFYSDGFGTSGSVVPCTFFDELDIR  
RLLHDHLIKDGYQKIFLDVMRQYKNDNHYSFNEEKK

>comp12556\_c0\_seq2; 326 1 1833 LEN=1904; translated  
XRTEKDSVLTKTVLCSSSEQNPATRSLANALTQILEQQLSARLMRKVASSKRKRAEMINRF  
RCATRVPGRIAVGWSLPMVATAGIGLIAYGNSFQQIYTRSEASSNDNNETTSKETLEKP  
TTGRFESSWIKGSIIEGVINQAVGTVASLTSNTNDARNSAGSKPEDTDTYQNMGKMLTKLL  
LPSSSTTSLSDVLQEVQSMGRGDIQDASTVVEVLDAKRCQKMLDSKLGEEFFGTDGFPP  
LQLQQLFYFIEREDEVKNP SWKRRRHYFFPGIDMKQMEDLNEKLLKLTDLAYADTEDEVDR  
RLQKEYNSELVYCSLDGLPNKPAHFIAVERDQSPWNTELEVLLVVCGTKRITDVIITDLLC  
VAEPYRDGYAHSGICESGRWIARKHVKLFEKIRLLSNKKKIKLTLGHS LGAGAATIAGI  
ELNGDPFIDVEVVGFGCPALLSPELSTSYEHIVTTVIGDNDCVPRMSMATMVNTLLDMAE  
FDYTPFALRDI EETVNELERFLPSIVDGSV KRKVLNNLNGFLPDVSPNGGDEISKRMEV  
LFPFGRCIHFYSDGFGTSGSVVPCTFFDELDIRRLLHDHLIKDGYQKIFLDVMRQYKND  
NHYSFNEEKK

>comp12558\_c0\_seq1; 297 206 895 LEN=945; translated  
MKTGVTYSTLLVMGLVADVRSFSATRVTCLQPITSKTSQRFTLFAETSEEVSEEDERP  
DAFLEKKYPDFYQLVNDEMMAKQGPVTVFVPNAAAFEGGLGEKRNQIDDPNLEIREK  
IGAYHIISGESIDAMTLRTEDWSKGIPTDGSKPNTMISGFKTLSGEVPVGRSKSGGFLGF  
GAKEDGDIVIGPKAKIVQSYNVEGNFVHEVSDLISPVLLWRYCDQLRIL

>comp12558\_c0\_seq2; 297 218 907 LEN=957; translated  
MKTGVTYSTLLVMGLVADVRSFSATRVTCLQPITSKTSQRFTLFAETSEEVSEEDERP  
DAFLEKKYPDFYQLVNDEMMAKQGPVTVFVPNAAAFEGGLGEKRNQIDDPNLEIREK  
IGAYHIISGESIDAMTLRTEDWSKGIPTDGSKPNTMISGFKTLSGEVPVGRSKSGGFLGF  
GAKEDGDIVIGPKAKIVQSYNVEGNFVHEVSDLISPVLLWRYCDQLRIL

>comp12559\_c0\_seq1; 248 319 1155 LEN=1266; translated  
MKVFFVFCLLLRGVDPVGSVSVSASASVVTVP SAEAGAGSEAAPGDAVGAI VCGPGS  
TNASTNAITNTNTDSTGLPRAAVAVPLV LALALGSRGAAGLV TIPLLVALCLLLSGIAA  
LWGWFVWLFAPLRRIFHTGASPSQSNRHRHRRGSRMYH SKRRELFARRWR IEQSLRIRD  
FQ TIRWDRDPREQQEQGEQDANRGNDRPRCCPICLEEFKPGDNDKHKQRGEEENNVND  
IVNDMVNDNENENDTTIVSGPRDCCGNNV FHKARMQAL

>comp12559\_c0\_seq2; 374 319 1606 LEN=1852; translated  
MKVFFVFCLLLRGVDPVGSVSVSASASVVTVP SAEAGAGSEAAPGDAVGAI VCGPGS  
TNASTNAITNTNTDSTGLPRAAVAVPLV LALALGSRGAAGLV TIPLLVALCLLLSGIAA  
LWGWFVWLFAPLRRIFHTGASPSQSNRHRHRRGSRMYH SKRRELFARRWR IEQSLRIRD  
FQ TIRWDRDPREQQEQGEQDANRGNDRPRCCPICLEEFKPGDNDKHKQRGEEENNVND  
IVNDMVNDNENENDTTIVSGPRDCCGNNV FHKACILAWLLRPTEPAGGYR CNDS CPCCRS  
PLLATNERSNDKDNENDEYECERTIAAEDEAYARHVRS LYRRKMAEATLRRNAVVAAYLE  
REAQEDNANENENAKANENQNQNANENENDNQNQQEPRPRHSGRQQGP GTDGAATPRTPG  
LQSMGVLE

>comp12560\_c0\_seq1; 825 328 6806 LEN=6806; minus strand; translated  
MDHHRNATRDSQGDISKTKKQRI GGSNSGRFNVVCANNSARYHCHSSGRSVSSAASRSS  
NARNRLRRRQNLGIASSSSNRNHAGGRSRSRNSNCIMQGNASSSSPHILCAIGENLA  
RETVCVSLDLSAPFLLNVTKQSNQSYSETIAYLSVLC PDEVLMNEGRYHSPLARKVLQH  
FDVQRKHQQQQQNDMSMTGSETGQAAISSEEEATVVKFISRSYFDQTKGADLLRRLA  
RQDTYDSTLVEEYILLSSCHAVLHYTQTLTGA VTFTRHSLDVRVHTGGHNNHRMEIDRST  
LLQLELLTNNSHMATAGSSMSNHRKHSLI STMDCTKTSVGHRLLRITTLMAPPSSTLDKPT  
IAHRPMRMNHFS PNLNAHRSDAKKCGFIASFRRS WFSFDIPLLLFFSNAPQTDITARL  
DLVDTFHLNEDLFYATLQQLQNLASLDNMLTNI VVVP SRKQQEQQLQQRKQH QENRGGFGI  
SSTSASTSNNNASHLAVPLAPTAA PATGKSNAANAR IASKGISALVCIKSTLAFIPVLA  
SSKSGYPFKNIKAF LSNVDDIYKKADEYAEIHGISHVAVRYS AARGYYLSLPLEMASNLP  
NEFIQPSKSGKHIYCTTEEVQSLNTRS QDNIQDLLIL THERIQEVLDVARSKYDALARLS  
DAVALLDLCHSFADKVTL SKLPWARPLLTDGAVPAAE STETSDEGDDHISAVPPAANPGE  
SYAIAICNGRYGIDVDDSVFP SDGGPGEWIANDTYASLSKNLTI ISGINGSKSTYLKQI



AIIVLLAHCGSYVPAEEALIPVSLYRAADRIDCFRSATIRGVIQYPSIYLVDFIFHSDII  
HSSPTDSXARMMTADDQONEYKAITDFIAFFSRHVLI SVFRFCFFSDSIRFFFTENNISS  
FMLEMKEVAFICNNATSRSLILLDELGRATS NEDGVAIAWAVAE SLLAKGAMTYFVSHYP  
QMSQMSRAYPAVQNQH LIASIPDDNGEIEYSHKIGIGPCDATSSYGVEMALSCGWPSDV  
VQQEVSKTLHYLLHFSETKLLIQNFVVKARSIENSLKDKLAESPLCGEDTDIETEIRHKK  
TLKETTRRLVDCVTTDCEPSLESLRTALQASICMNEFGKSHYLLRXIDLNSFP SLFAKAL  
KVATLEAVPESAIARLLTGNSNDDIENTPASFQQKSMVETXLI LESEIRRSLYLYFNHER  
KTRTGGSSSTSSYVSVSSTETARSTKEAEEIDTVAALSSLATGPSRENSSSNSAPXLYSFL  
NNFPYALVQKFFIVLMQEISVYHNGPNRNIRNLNSVGVFGMRLFLNSSEEAPDGQSTCLR  
RLLSFFDVYLVQPQVGFSSHAGKLLGRKGRSEGKRECEVDEGV SIAIQRHSLRQLHQFD  
ARKSRYKGGGRDHRWHDFSRHLAGFHGVYRGDSVADGTEIASSGNE SNVVRLVVLFLKLG  
RGQGSWCRLVTRGKPFERGGQKTLDFRSLGCFGVLF LSGSVLVLGGMSEGLHCCLARNDPG  
VFPGIRWNPVGRVLPKPGSASNKVDHVLVDLFLSGCGALGRLFLWVQRERQLRRLRSR  
PEAFSVFVQVLEGVFQKEFLDGGLKQFFPQRNRPLDGLLLEESFVAGSVVLSVQHRQVLR  
ELPGGFQGS LVAQLLVQRTGQPPGARACEQLRVLVRLHGP PHKEAVEEVPAPLDRVRDGV  
GKVLGGAHRDRRFRGVRACPVGFALVWNHHLDVPLRSEGPGVDQGLFVCHALT VHEEAGL  
DVVEGVQDHVDPSPGPEGRIEGTRILPVPDPARVGFHPHRRVHPEDGLLGGPALELSDVLV  
PEEELPAQVGF LDRVHVRDHEAPGSKGAESHGGDVLEDLAPDCAGPHDKELLGPQAAGNL  
WSEEVGQAGGFVVFRRRFRGSGLFRFLRFGRVQNLVAVVQEKL PDGVVEARHGLEAF LRG  
DRPKDGLEWDELGGAGFQKGRAVLLPVIAFAFASALAGGLRGQLPKGRLVLLSRHG HATV  
GFRVRAEGLEAPKDGPAGLVEGLVEVAGGEDGVGGPFVGG LADGFGEGLGDFLDFLP  
AKGDGFRVDRVDGFGFAVLGFGGVDPNPDALGGFDPGDRPAAVLE DGSVGPQKDDGVAPR  
DVVVFPLDAPDQDRRRRRRRRCPFFATSF LWRQGLDAVQRDDQGG LAVRVVDRVGRAEX  
>comp12560\_c0\_seq2; 1012 328 7229 LEN=7229; minus strand; translated  
MDHHRNATRDSQGDISKTKKQRIGGSNSGRFNVCANNSARYHCHSSGRSVSSAASRSS  
NARNRLRRRQNLGIASSSSSNRNHAGGRSRSRNSNCIMQGNASSSSPHILCAIGENLA  
RETCVVSLDLSAPFLNLVTKQSNQSYSETIAYLSVLC PDEVLMNEGRYHSPLARKVLQH  
FDVQRKHQQQQQNDMSMTGTSTGETGQAAISSEEEATVVKFISRSYFDQTKGADLLRRLA  
RQDTYDSTLVEEYILLSSCHAVLHYTQLTLGAVTFTRHSLDVRVHTGGHNNHRMEIDRST  
LLQLELLTNNSHMATAGSSMSNRKHSLISTMDCTKTSVGHRLLR TTLMAPPSSTL DKPT  
IAHRPMRMNHFS PNLNAHRSDAKKCGFIASFRRS WFSFDIPLLLFFSNAPQTDITARL  
DLVDTF LHNEDLFYATLQQLQNLASLDNMLTNI VVVP SRKQQEQ LQQRKQH QENRGGFGI  
SSTSASTSNNNASSHLAVPLAPTAAPATGKSNAANAR IASKGISALVCIKSTLAFIPVLA  
SILKNHMERIENESKSRDTEAQRKQQQQQNNRDRIEENEQE ARDEASIA TAKTSL LIGL  
GVGKGHGSNASIGSYSSDSSSKDHQLLRAIIFALRQPELCIVRNAIDEAFT ESTSYTRN  
ANAMKHQECFALKSSDDNGMMDVKTYGPFKN IKAFLSNVDDIYKKADEYAEIHGISHVAV  
RYSARGYYLSLPLEMASNLPNEFIQPSKSGKHIYCTTEEVQSLNTRSQDNIQDLLILTH  
ERIQEVL DVARSKYDALARLSDAVALLDLCHSFADKV TLSKLPWARPLLT DGAVPAAEST  
ETSDEGDDHISAVPPAANPGESYAIACNGRYGIDVDDSVF PSDGGPGEWIANDTYASLS  
KNLTIISGINGS GKSTYLKQIAIIVLLAHCGSYVPAEEALIPVSLYRAADRIDCFRSATI  
RGVIQYPSIYLVDFIFHSDIIHSSPTDSXARMMTADDQONEYKAITDFIAFFSRHVLI SV  
FRFCFFSDSIRFFFTENNISSFMLEMKEVAFICNNATSRSLILLDELGRATS NEDGVAIA  
WAVAE SLLAKGAMTYFVSHYPQMSQMSRAYPAVQNQH LIASIPDDNGEIEYSHKIGIGP  
CDATSSYGVEMALSCGWPSDVVQQEVSKTLHYLLHFSETKLLIQNFVVKARSIENSLKDK  
LAESPLCGEDTDIETEIRHKKTLKETTRRLVDCVTTDCEPSLESLRTALQASICMNEFGK  
SHYLLRXIDLNSFP SLFAKALKVATLEAVPESAIARLLTGNSNDDIENTPASFQQKSMVE  
TXLI LESEIRRSLYLYFNHERKTRTGGSSSTSSYVSVSSTETARSTKEAEEIDTVAALSSL  
ATGPSRENSSSNSAPXLYSFLNNFPYALVQKFFIVLMQEISVYHNGPNRNIRNLNSVGVF  
GMRLFLNSSEEAPDGQSTCLRRLLSFFDVYLVQPQVGFSSHAGKLLGRKGRSEGKRECE  
VDEGV SIAIQRHSLRQLHQFDARKSRYKGGGRDHRWHDFSRHLAGFHGVYRGDSVADGTE  
IASSGNE SNVVRLVVLFLKLG RGQGSWCRLVTRGKPFERGGQKTLDFRSLGCFGVLF LSGS  
VLVLGGMSEGLHCCLARNDPGVFPGIRWNPVGRVLPKPGSASNKVDHVLVDLFLSGCGAL  
GRLFLWVQRERQLRRLRSRPEAFSVFVQVLEGVFQKEFLDGGLKQFFPQRNRPLDGLL  
LEESFVAGSVVLSVQHRQVLRRELPGGFQGS LVAQLLVQRTGQPPGARACEQLRVLVRLH  
PPHKEAVEEVPAPLDRVRDGVGKVLGGAHRDRRFRGVRACPVGFALVWNHHLDVPLRSEG  
PGVDQGLFVCHALT VHEEAGL DVVEGVQDHVDPSPGPEGRIEGTRILPVPDPARVGFHPH  
RVHPEDGLLGGPALELSDVLVPEEELPAQVGF LDRVHVRDHEAPGSKGAESHGGDVLEDL  
APDCAGPHDKELLGPQAAGNLWSEEVGQAGGFVVFRRRFRGSGLFRFLRFGRVQNLVAVV  
QEKL PDGVVEARHGLEAF LRGDRPKDGLEWDELGGAGFQKGRAVLLPVIAFAFASALAGG  
LRGQLPKGRLVLLSRHG HATV GFRVRAEGLEAPKDGPAGLVEGLVEVAGGEDGVGGPFV



SYAIAICNGRYGIDVDDSVFSPDGGPGEWIANDTYASLSKNLTIISGINGS GKSTYLKQI  
AIIVLLAHCGSYVPAEEALIPVSLYRAADRIDCFRSATIRGVIQPYSIYLVDFIFHSDII  
HSSPTDSXARMMTADDQONEYKAITDFIAFFSRHVLISVFRFCFFSDSIRFFFTENNIS  
FMLEMKEVAFICNNATSRSLILDELGRATS NEDGVAIAWAVAESLLAKGAMTYFVSHYP  
QMSQMSRAYPAVQNQH LIASIPDDNGEIEYSHKIGIGPCDATSSYGVEMALSCGWPSDV  
VQQEVSKTLHYLLHFSETKLLIQNFVVKARSIENSLKDKLAESPLCGEDTDIETIRHKK  
TLKETTRRLVDCVTTDCEPSLESLRTALQASICMNEFGKSHYLLRXIDLNSFPLFAKAL  
KVATLEAVPESAIARLLTGNSNDDIENTPASFQQKSMVETXLILESEIRRSLYLYFNHER  
KTRTGGSSSTSSYVSVSSTETARSTKEAEEIDTVAALSSLATGPSRENSSSNSAPXLYSFL  
NNFPYALVQKFFIVLMQEISVYHNGPNRNIRNLNSVGVFGMRLFLNSSEEAPDQSTCLR  
RLLSFFDVYLVPQRVGFSSHAGKLLGRKGRSEGKKRECEVDEGVSAIQRHSLRQLHQFD  
ARKSRYKGGGRDHRWHDFSRHLAGFHGVYRGDSVADGTEIASSGNE SNVVRLVVLFLKLG  
RGQGSWCRLVTRGKPFERQKTLDFRSLGCFGVLFVLSGSVLVLGGMSEGLHCCLARNDPG  
VFPGIRWNPVGRVLPKPGSASNKVDHVLVDLFLSLGCGALGRFLVWVQRERQLRRLSRSR  
PEAFSVFVQLVEGVFQKEFLDGGKQFFPQRNRPLDGLLLEESFVAGSVVLSVQHRQVLR  
ELPGGFQGSVAQLLVQRTGQPPGARACEQLRVLVRLHGP PHKEAVEEVPAPLDRVRDGV  
GKVLGHAHRDRFRGVRACPVGFALVWNHHLDVPLRSEGPGVDQGLFVCHALTVHEEAGL  
DVVEGVQDHVDPSPGPEGRIEGTRILPVPDPAVGFHPHRRVHPEDGLLGGPALELSDVLV  
PEEELPAQVGF LDRVHVRDHEAPGSKGAESHGGDVLEDLAPDCAGPHDKELLGPQAAGNL  
WSEEVGQAGGFVFRRRRFGSGLFRFLRFGRVQNLVAVVQEKLDPDGVVEARHGLEAF LRG  
DRPKDGLEWDELGGAGFQKGRAVLLPVIAFAFASALAGGLRGQLPKGRLVLLSRHGHTV  
GFRVRAEGLEAPKDGPPAGLVEGLVEVAGGEDGVGGPFVGGGLADGFGEGLGDFLDFLP  
AKGDGFRVDRVDGFGFAVLGFGGVDPNPDALGGFDPGDRPAVLEDG SVGPQKDDGVAPR  
DVVVFPLDAPDQDRRRRRRRRRCFFATSFLWRQGLDAVQRDDQGG LAVRVVDVGRAX  
>comp12561\_c0\_seq1; 399 695 1644 LEN=2379; translated  
MSSVFSADPPVFTRAPAPPPPPAYSSYVTSASSSSSKNKNNSD TYSQASSSAAAARTKP  
PHALRNGVNQDRYMQEQIAA IMAKEAEDANRASEIARRAEEDERRRGEQIAAQRKWEKK  
LEQIKTDVNRKIKSYLISFSEDTKSALSADWRDQEYLKESREYMQKEIKELIERKKT LKE  
HIDTVDIKTEEIKNWLAE SKKVTDDEEPEVDDICQPVNKLDAQMLDLSAESAA L TDAMYFL  
DRGMYMGQLDCTTHLKMIRKLAKRQFLIRAXLNQNQSSDCKKAT IETWAPLTKQNFVPPT  
KWNRQSMVFDVGCING  
>comp12561\_c0\_seq2; 341 1 1360 LEN=2095; translated  
XMVNDPRVTTLLGRLGGLYRDPNRVDRDASSLLKSSVGIHLTPGIAPLVENNGDSFHCLV  
LQGTIAIVYRGNTYQLLVDIYLPAGYPIRPPISYVRLAENMYLKEKHDHVGS DGMVYLPY  
TNEWNARTHSLIEMVAMSSVFSADPPVFTRAPAPPPPPAYSSYVTSASSSSSKNKNNS  
DTYSQASSSAAAARTKPPHALRNGVNQDRYMQEQIAA IMAKEAEDANRASEIARRAEDE  
RRRGEQIAAQRKWEKKLEQIKTDVNRKIKSYLISFSEDTKSALSADWRDQEYLKESREY  
MQKEIKELIERKKT LKEHIDTVDIKTEEIKNWLAE SKKVTDDEEPEVDDICQPVNKLDAQ  
MLDLSAESAA L TDAMYFLDRGMYMGQLDCTTHLKMIRKLAKRQFLIRAXLNQNQSSDCKKA  
TIETWAPLTKQNFVPPTKWNRQSMVFDVGCING  
>comp12562\_c0\_seq1; 338 142 942 LEN=1423; translated  
MASSGSGYDLSSATFSPDGRIFQVEYATKAVENAGPVLGKCS DGVVLGCAKP INHKMVV  
ATTGSYKR IHTCDTHVGCAS TGF LPDARVLVQRTVEEAADWEEQYGSKIPPEVLGDR LGQ  
YAHYFTLHGALRPF GA AVLAGYDPDTKECSLQLLEPN GAPYKY YGVATGKGKQA AKTEL  
EKLNLHKTP I PAEEAVKQILRILHLLHQEQKDAKPIEIEVSWICEATN WTHKGVPKDLLK  
SAEEWAKEQLEEEEEEDDDDEEGMEED  
>comp12563\_c0\_seq1; 1244 1 3669 LEN=4287; translated  
KPTLRRTTEDSNSEHESNHRTTIEPKMVLVSPSTDGDQVVNTDGT KKKKLTNHLEKSDG  
RRLVEYLVISSLPREIVASDEKKKDVPPDNDEQYRLSTEF DDESIELVDHEGFKP IVTA  
RYPQYDHEDNPF DANVCYFCHTSGAIQLKKNPYMPKFHYFVATGGTGKKMYGTCLTLWEP  
AQIKGRKKKGKNSNQEEPTETLDVFLPKCVLLSTYPYLMAFREYLTQLNRMSKTEEMTL  
PIERYITNVCLEIPAPPPG SFVQTTILDSIIKIWSPPHNQPIAWVSLPFSHLFQCLDID  
NIIIVWHCLVLERQVLLTSTQLSVLTTCEIILLSLFPMRWSHAYIPLLPKFLIPLSAP  
MPFFCGIDKASLAEALYDLSP ECVVVDLKNLVT LGPETEALPPLPPQQASSLRSQLDIN  
AGMVFREARSLTRNDYSDSGSRLPAHV KQMAEGMWEGLALFDEAFHLMFTPEESRKNL  
LNGNDTSGMEWNRDANDQAR IMAASGGDKTFALRKQSEWDAVQEAF LDTFVYLLRNYRK  
FLVFP SKHNEGNYGGAGFRSKEFVENQR LDMREFLEQFIGTQMYDNFVTKRLYGSGESDV  
AFFDLAVDRFLKSAGILSNVDVGG RLLQAAGMSRSSSNTNMSGEPRTNTPSRSYQKATEP  
LLQSARVHRKLTIVPPEPCQEDLPEIPQNGEVGASASEQSDEKSVGSGSTSSRTSSAYQ  
SVQDKAAEILNKSKRRYTYDTFPSEFREDFFSTPRPLSAAVLAEFDRQKDAQFRKKP

VLTSKNTRGGLHRDNSDPEKPPSPEVATFTVFFMAFSAVVGKELMGMNSESEDEEEEAKTI  
LATYSHSSAGESDNETETTIISSAAESDGDQTKGEPKSRFTDSLNALEIEEAKATGRAQL  
ALAFEMLTMMKKRALKADPEAYQSLIDACGRVGDTKRASDLLARMHEDGIVADGTVYACL  
VAAFSADTAWRNGTKDEDLPEWANSTAVEMDWNRLQKRFSMDRLRGRGTDDDEGDETNEPE  
TNGPPMSRFRQFISNRQGNKRTTPKVEESRVEFYVTEVERQIELGENLLEVVFPDISVD  
TDNETCPRCNFLSDDDVVDGWTPGDSNDYTTKCPNCTQRFVPHFCVQSSSSSVFGSKGP  
SSPLMCKERLSPWVLQKEIRSVMSDREGIENLLSPTWRGEEYKNSVLWNNLVLSCMRYRFP  
FSFLLQGNFEQNLIAPEPEDEN

>comp12563\_c0\_seq2; 746 1 2470 LEN=2470; translated  
KPTLRRTTEDSNSEHESSNHRTTIEPKMVLVSPSTDGDQVNTDGTKKKKLNTNHLEKSDG  
RRLVEYLVVISSLPREIVASDEKKKDVPPDNDEQYRLSTEFDESIELVDHEGFKPIVTA  
RYPQYDHEDNPFANVCYFCHTSGAIQLKKNPYMPKFHYFVATGGTGKKMYGTCLTLWEP  
AQIKGRKKKGNNSNQEETETLDVFLPKCVVLLSTYPYLMAFREYLTQLNRMSKTEEMTL  
PIERYITNVCLEIPAPPPGSFEVQTTILDSIIKIWSPPHNQPIAWVSLPFSHLFQCLDID  
NIIILVWHCLVLERQVLLTSTQLSVLTTCEILLSLFLPMRWSHAYIPLLPKFLIPIILSAP  
MPFFCGIDKASLAEALYDLSPECVVVDLKNLVTLPETEALPPLPPQQASSLRSQLDIN  
AGMVFREARSLTRNDYSDSGSRLPAHVQMAEGMWEGKLALFDEAFHLMFTPEESRKNL  
LNGNDTSGMEWNRDANDQARIMAASGGDKTFALRKQSEWDAVQEAFLDTFVYLLRNYRK  
FLVFPKHNENYGGAGFRSKEFVENQRLDMREFLEQFIGTQMYDNFVTKRLYGSGESDV  
AFFDLAVDRFLKSAGILSNVDVGGRLQAAGMSRSSSNTNMSGEPRTNTPSRSYQKATEP  
LLQ SARVHRKLTIVPPEPCQEDLPEIPQNGEVGASASEQSDEKSVGSGSTSSRTSSAYQ  
SVQDKAAEILNKSKRRYTYDTFPSEFREDFFSTPRPLSAAVLAEFDRQKKDAAQFRKKP  
VLTSKNTRGGLHRDNSDPVCILISSIFICSLFPLIFFRIFCSGX

>comp12564\_c0\_seq3; 407 1 438 LEN=745; translated  
KKSVKAKKRKAGDSEKPSKAKSSMNSWIDDAEESGEEDGDDDDDEEEDDEEGENDYIKDD  
FVVDDDNIEMKARRKKTGDLESDDDDDDDDDDEPPTRRRRSLPKTPSGPLGGGSGGS  
YDDGGGDDGPNEDDIRKLGDLFNK

>comp12565\_c0\_seq2; 202 129 560 LEN=1280; translated  
MGSNQGLLFLIVGKNEPLYEAEIHKRPNTPGSADTSVARQSYFVVHSSLDLVDNATWTSQ  
NMYLRVIDKVNQQYVSAFLTAGNIKFLLLHPGKGEIEIKNFFHEVHEFYVKLSMNPFYKY  
DTPITSKEFDKRVRAVARNLF

>comp12566\_c0\_seq1; 458 233 2221 LEN=2445; translated  
MNDQSDPPRRQNRTNIGISPRNKDDPFCLEDFGSHPKRFFDVDVDVDVEAEHDDHDET  
VHDQLPSVEDAKMYNATANRRTRRRRGRVLTKMALVCGVAIACVSYGMHARTKNQHRKAV  
ASLTETVRLSHPDAFRDSGSPQSRALRWMLHDDGLRLPLPSNRTPDFVQRYIIAVLLFAL  
TDSTTKPFMPQNDLRGAYDLLSGSHECEWNVDAEGVTTGFLCGNDDGSITDIVLPGADL  
DGELPREVEALNHLESVDMSGNLIHGKLPAMPYLTNLDLAYNRLTGYPDHFSEMTRLNI  
LSLSENALQGSIPNKFAALTDLKILALNGNQLTGGLEKIYSLSKLEELYLFSNSFEDQLS  
NGSFGKLLNLKVIDVKNLLSGPLDALFSTLTNLEVIDFHQNALNGHINDVVAKGHSR  
YMDVSSNLLSGGLPSSINLRALTHLNLNLSYNRFEKSLPSYKDMTQMOTLLLTEDDGLP  
QTIP EWLRGMTDLTQLSFRLT SRKGTIPTWFGELTRLELLDLWNHISGTIPTELGNLTN  
LKYLMLNRNRMGTGTIPTEVSRLPNLKMLLVDNTEFTGGLLTGDEETLDGGGVVCAAQEPD  
RRIPNMVADCGNGDDGTIENGQKEVDCPCCTGCCWDGSLRCNMKDWIIIELEDEYRSYRQ  
DR

>comp12567\_c0\_seq1; 216 985 1839 LEN=2485; translated  
MDDTVITNAGDFVYMVVNGATKFKDMAHFQEQLDAFEGDVTMEYLEDTMQLLALQGPAA  
EAIKILPAGFDLTSMAFMTGTDVTLDDGGIEGCRITRCGYTGEDGFIEIAPAEHCEAIAS  
KLI EDPTVNPTGLGARDSLRLEAGLCLYGNDLDETTNPVEGTLAWTLGRPGSRRRTEQGF  
CGAETFLTPEGLRKRQSRKRVGIMGKAPARQGTETIYDSEDNLVGTVTSTGYSPCLKKPI  
ATGYVDSGLAKAGTTQLKIRNKMQAEEVTKMPFVESRYRVP

>comp12567\_c0\_seq2; 433 159 1424 LEN=2070; translated  
MSLLQSSLRSSASAAKATTARRSMAAAAASSDEPLRKTSLHQWHLDLGGDMVPFAGYEL  
PVLYKGDKAPNGGVMKEHLWCRSEGKASLFDVSHMGQIRWHGADRAKFIKVVVVDIQGL  
EDHGLLSLITNAQGGIMDDTVITNAGDFVYMVVNGATKFKDMAHFQEQLDAFEGDVTME  
YLEDTMQLLALQGPAAEAIKILPAGFDLTSMAFMTGTDVTLDDGGIEGCRITRCGYTGE  
DGFIEIAPAEHCEAIASKLI EDPTVNPTGLGARDSLRLEAGLCLYGNDLDETTNPVEGTL  
AWTLGRPGSRRRTEQGF CGAETFLTPEGLRKRQSRKRVGIMGKAPARQGTETIYDSEDNL  
VGTVTSTGYSPCLKKPIATGYVDSGLAKAGTTQLKIRNKMQAEEVTKMPFVESRYRVP  
E

>comp12568\_c0\_seq1; 729 364 2178 LEN=2628; translated

MSSLLGFRSSRKASASASLADGEYDGGVSIIVSITADRTOQLGSVEKKHKESGSSKSKKKFD  
ISCAQVMSDVTFNAMPVVEEKIDLAELSTSTTHEFVVECENGERIYVPSSQGILIKSR  
CRHFRSLGSRGACSLVIDGTNDEAYERDNRVIKKDNWSPRTARHVIELLTEGTTWIEN  
NNRRFVELLKACDEISVPLCLGSIINYHDVLDPASSLRFFKLNDSPYRFLAGTIQSWQ  
WMHLLQKGVLLHLDSAKVLMSSKLPNEGSDSELRQKRLSKCDDLYSEFSVYSEKSKVNT  
LYTIFDLLSATSKIAERKGGKSPLQKRSAGGYTAVEESFRIIYKTQRGALKEPDLNMLWR  
MTSASYTLSTIDEQRFLPMSSCDETIASSTLPQSIQRLNLQLGDDFQIVKDSVARTSTTK  
SSGDETNDHESVDERTNEGTSSTMASPLTPQSALTGTTNLRHFSLKQETRTITGTSE  
AVLQHLFDPINSSSKNHTQSSEFHSDDLPAACLSIENPTPDTLGRFLNACETELGDSK  
SATHKIGYHISSPSLSSNRKKTGVTFFVAGTTKNIKILKYMADYSKTSIVGDIDFKL  
EELR

>comp12569\_c0\_seq1; 376 163 1500 LEN=1591; translated  
MNYLIELLQHTVFHKNFVDEDRSIEDNALFTVEIPLFSSIFGYGDLDDGKEAAVCGLIIPP  
HYLSYIQLVVIVLLQTIFFNAVLGLFLFKVVVEPKQRIQKSGSDDPLASGRAILFAFGLAL  
PCVVMETIYLSRTLGVKNMCLIMVLLATPIVNSLRIAEAAFGFTPVPERLSLWNYIIYFS  
CTQIVRFNPVCGKPYASLQSIGKTLMTLARDIALACLILSVLKPYNFEVFDTGREHVSM  
DHDLDLDFCWKHLNNYLVAFLLISTTVSKGSIAVAAYNIFYRVETHEMVLNPMMLKSKSP  
SDFWGRRWMMVHKGLKNGVYKPTRKQTSRVAGVFATFVVSIGILHEYVNYIMFLDRNNG  
NITPYRFRWKQMLFFGWNGILILEYICIGNWNIFKWMKSNLPQVVVSTLVISAALPLVHL  
FTGDWILYGYFDNVCSMEFVVLNT

>comp12569\_c0\_seq2; 249 897 1616 LEN=1707; translated  
MTLARDIALACLILSVLKPYNFEVFDTGREHVSMHDHDLDLDFCWKHLNNYLVAFLLISTT  
VSKGSIAVAAYNIFYRVETHEMVLNPMMLKSKSPSDFWGRRWMMVHKGLKNGVYKPTRK  
QTSRVAGVFATFVVSIGILHEYVNYIMFLDRNNGNITPYRFRWKQMLFFGWNGILILEY  
CIGNWNIFKWMKSNLPQVVVSTLVISAALPLVHLFTGDWILYGYFDNVCSMEFVVLNT

>comp12569\_c0\_seq3; 249 889 1608 LEN=1699; translated  
MTLARDIALACLILSVLKPYNFEVFDTGREHVSMHDHDLDLDFCWKHLNNYLVAFLLISTT  
VSKGSIAVAAYNIFYRVETHEMVLNPMMLKSKSPSDFWGRRWMMVHKGLKNGVYKPTRK  
QTSRVAGVFATFVVSIGILHEYVNYIMFLDRNNGNITPYRFRWKQMLFFGWNGILILEY  
CIGNWNIFKWMKSNLPQVVVSTLVISAALPLVHLFTGDWILYGYFDNVCSMEFVVLNT

>comp12569\_c0\_seq5; 292 163 951 LEN=1674; translated  
MNYLIELLQHTVFHKNFVDEDRSIEDNALFTVEIPLFSSIFGYGDLDDGKEAAVCGLIIPP  
HYLSYIQLVVIVLLQTIFFNAVLGLFLFKVVVEPKQRIQKSGSDDPLASGRAILFAFGLAL  
PCVVMETIYLSRTLGVKNMCLIMVLLATPIVNSLRIAEAAFGFTPVPERLSLWNYIIYFS  
CTQIVRFNPVCGKPYASLQSIGKTLMTLARDIALACLILSVLKPYNFEVFDTGREHVSM  
DHDLDLDFCWKHLNNYLVACE

>comp12569\_c0\_seq8; 249 1005 1724 LEN=1815; translated  
MTLARDIALACLILSVLKPYNFEVFDTGREHVSMHDHDLDLDFCWKHLNNYLVAFLLISTT  
VSKGSIAVAAYNIFYRVETHEMVLNPMMLKSKSPSDFWGRRWMMVHKGLKNGVYKPTRK  
QTSRVAGVFATFVVSIGILHEYVNYIMFLDRNNGNITPYRFRWKQMLFFGWNGILILEY  
CIGNWNIFKWMKSNLPQVVVSTLVISAALPLVHLFTGDWILYGYFDNVCSMEFVVLNT

>comp12570\_c0\_seq1; 328 91 1113 LEN=1241; translated  
MKFCKILRQSIDSSNPEWAPFWINYLEFENI IKDLPAVVS IHTNEIGNCKFIVKNPKEVE  
FFKQLHAELKKVSIFFTKAKKEIKIRFARVQDGIKI IHESDHVTTA QDKWMLSARSFAFKL  
HNNLLSLETFAIINYCAF SKILNKHDQKTGYRTKMAFMENNVVSQSSFAVYPDLLDMIQCC  
EAFHDQVSKNIGREESHKLG MVGTLHAPLSVTKEGVTFGKFQILETEIAPICNVEMNDTK  
TDAGFGKRSFAQMLATEIAAIKKEGKHTDAGIKTFARTITEGIGRLRKVSEDSTALENYI  
LGYGKMPKKSECRETVDYERHHLQNRVLVGTVIGHAKKQRLN

>comp12571\_c0\_seq1; 273 292 975 LEN=1036; translated  
MAMFSLACSSVRVMKRFSSSLRVGNRTHGGGLKIGEPDRDFSRGGLFLAAVIGIGAASCSF  
VFEKEEYLLHTRTVGTTIRNLS TMTTQMDYLEHDPKDYDIYIKNPTAEDLPYLLNQFD  
EHGKEVWPWIWTHPNETGPHFVFGVNRD TLCRIRQLRSISPSYNILLIASEESIKKA VD  
EADDPVYDETYCGIVSDASLELLNVEAKILMLSDERVIAFDSL TIA

>comp12572\_c0\_seq1; 527 231 1313 LEN=1567; translated  
MTKHVANGLTNGNIVRIGPLLSTCVDACQRCVEIRKVQAARESSGNKELEGVVLKDVQD  
PRSALTEADKAAHAAIVGSLRAEWGNSDAGEDCLSVVGEEDDDEELTKSLEDTVFPELDR  
DLFSEEIPDDIGPEIEAGSITIFVDPLDGTREFVEGRLENCQVLVGLAIDGEAVAGAVGI  
PFPDGTLEKDSTVIYGLDGLGTGVI GTTLTRGPFLKYS DGEKYPKPHHATGDSTAEVM  
EACRRGAIDGLEGSIVTYGGAGNKILGAALGEVACSIQHKIGGAWDLCAPEAILKAMGGR  
MTDLFGDEIAIYHPDAPSHCNQRGYIATPPGSGDNFHAALAAKMLSLPEVQKYQKEVEGM

>comp12573\_c0\_seq1; 354 1 824 LEN=843; translated  
XSFYLTTRKCDINRFQNRRTINEARQRRIMNAVEEEDLVQLLQSVLLENQEEENDELEEL  
LPYISGLLVAQLQEIEGNDVSEVDEILEENMVPFLDSIGVPTELIDAAATAIRTRLQSSA  
PTATEKAEGYSGQMOKLTQGAVNMSSVLEKQSENNGSEDESMWSTNSKVKANANTQIDAY  
TNKTSADKDRKQRQDLEKSRDLERQNERQETSTKAGVSAMILPTVKGKDMNVNVQRITL  
ALENGMNLDDQGDNLNFAYQRRYAIIGENGVGKCK

>comp12573\_c0\_seq2; 707 1 2141 LEN=2422; translated  
XSFYLTTRKCDINRFQNRRTINEARQRRIMNAVEEEDLVQLLQSVLLENQEEENDELEEL  
LPYISGLLVAQLQEIEGNDVSEVDEILEENMVPFLDSIGVPTELIDAAATAIRTRLQSSA  
PTATEKAEGYSGQMOKLTQGAVNMSSVLEKQSENNGSEDESMWSTNSKVKANANTQIDAY  
TNKTSADKDRKQRQDLEKSRDLERQNERQETSTKAGVSAMILPTVKGKDMNVNVQRITL  
ALENGMNLDDQGDNLNFAYQRRYAIIGENGVGKTLLNRANWEDLEGFPRHLRVLHVQKQ  
LHTENEETSVDLAVLEADIERVALLQEEKELTARLEGKGAEEESKNDNEDTVEARKKRLAE  
AAEDDKKFSSEDLAKLSSIIYERLTLLGADTAQSRATAILSGLQFTDEMNASPIKSLSGGWR  
MRVALAASLLIEPDILMLDEPTNHLDEAVLWLEAHLKSYPHTVITVSHDRGFLNEVCTD  
TIEFKDKKLTYYRGNVDFVVKLKGKQKNQMRREYEAAYKVKRDHMMEFIEKFRANAKRATI  
VQSRKAVNKMDAEAPEPVTMDAVWRFSSIPSEPLGRPIIAINDVTFDYNLKHDRGTGKKT  
KEEYLLQKVNFGLDNNSKIALLGANGQKTTLLNLMGQLRPVSGSVVNSGLRIGHFTQ  
HHSERFDLDSAVENLLNIFNSAEDQVIRSFLGRFQIQGADALKPMRYLSGGT

>comp12573\_c0\_seq3; 665 1 2233 LEN=2514; translated  
XSFYLTTRKCDINRFQNRRTINEARQRRIMNAVEEEDLVQLLQSVLLENQEEENDELEEL  
LPYISGLLVAQLQEIEGNDVSEVDEILEENMVPFLDSIGVPTELIDAAATAIRTRLQSSA  
PTATEKAEGYSGQMOKLTQGAVNMSSVLEKQSENNGSEDESMWSTNSKVKANANTQIDAY  
TNKTSADKDRKQRQDLEKSRDLERQNERQETSTKAGVSAMILPTVKGKDMNVNVQRITL  
ALENGMNLDDQGDNLNFAYQRRYAIIGENGVGKTLLNRANWEDLEGFPRHLRVLHVQKQ  
LHTENEETSVDLAVLEADIERVALLQEEKELTARLEGKGAEEESKNDNEDTVEARKKRLAE  
AAEDDKKFSSEDLAKLSSIIYERLTLLGADTAQSRATAILSGLQFTDEMNASPIKSLSGGWR  
MRVALAASLLIEPDILMLDEPTNHLDEAVLWLEAHLKSYPHTVITVSHDRGFLNEVCTD  
TIEFKDKKLTYYRGNVDFVVKLKGKQKNQMRREYEAAYKVKRDHMMEFIEKFRANAKRATI  
GKLDQKQISATIQLDPGIVLSSCNSNVLKSSIPKAVNKMDAEAPEPVTMDAVWRFSSIP  
SSEPLGRPIIAINDVTFDYNLKHDRGTGKKTKEEYLLQKVNFGLDNNSKIALLGANGQKKT  
TLLNLMGQLRPVSGSVVNSGLRIGHFTQHHSERFDLDSAVENLLNIFNSAEDQVIRS  
FLGRFQIQGADALKPMRYLSGGT

>comp12573\_c0\_seq5; 726 1 2536 LEN=2577; translated  
XSFYLTTRKCDINRFQNRRTINEARQRRIMNAVEEEDLVQLLQSVLLENQEEENDELEEL  
LPYISGLLVAQLQEIEGNDVSEVDEILEENMVPFLDSIGVPTELIDAAATAIRTRLQSSA  
PTATEKAEGYSGQMOKLTQGAVNMSSVLEKQSENNGSEDESMWSTNSKVKANANTQIDAY  
TNKTSADKDRKQRQDLEKSRDLERQNERQETSTKAGVSAMILPTVKGKDMNVNVQRITL  
ALENGMNLDDQGDNLNFAYQRRYAIIGENGVGKTLLNRANWEDLEGFPRHLRVLHVQKQ  
LHTENEETSVDLAVLEADIERVALLQEEKELTARLEGKGAEEESKNDNEDTVEARKKRLAE  
AAEDDKKFSSEDLAKLSSIIYERLTLLGADTAQSRATAILSGLQFTDEMNASPIKSLSGGWR  
MRVALAASLLIEPDILMLDEPTNHLDEAVLWLEAHLKSYPHTVITVSHDRGFLNEVCTD  
TIEFKDKKLTYYRGNVDFVVKLKGKQKNQMRREYEAAYKVKRDHMMEFIEKFRANAKRATI  
GKLDQKQISATIQLDPGIVLSSCNSNVLKSSIPKAVNKMDAEAPEPVTMDAVWRFSSIP  
SSEPLGRPIIAINDVTFDYNLKHDRGTGKKTKEEYLLQKVNFGLDNNSKIALLGANGQKKT  
TLLNLMGQLRPVSGSVVNSGLRIGHFTQHHSERFDLDSAVENLLNIFNSAEDQVIRS  
FLGRFQIQGADALKPMRYLSGGQKSRVSAVFLAYQRPHLLIIDEGSNHLSDAVDALIQA  
INEFKGGLLVVSHDQYFVNATCNEIWVVEDGKAARFEGTFNDYKMHTAKKTEKRVEDSLK  
KLV

>comp12573\_c0\_seq6; 768 1 2444 LEN=2485; translated  
XSFYLTTRKCDINRFQNRRTINEARQRRIMNAVEEEDLVQLLQSVLLENQEEENDELEEL  
LPYISGLLVAQLQEIEGNDVSEVDEILEENMVPFLDSIGVPTELIDAAATAIRTRLQSSA  
PTATEKAEGYSGQMOKLTQGAVNMSSVLEKQSENNGSEDESMWSTNSKVKANANTQIDAY  
TNKTSADKDRKQRQDLEKSRDLERQNERQETSTKAGVSAMILPTVKGKDMNVNVQRITL  
ALENGMNLDDQGDNLNFAYQRRYAIIGENGVGKTLLNRANWEDLEGFPRHLRVLHVQKQ  
LHTENEETSVDLAVLEADIERVALLQEEKELTARLEGKGAEEESKNDNEDTVEARKKRLAE  
AAEDDKKFSSEDLAKLSSIIYERLTLLGADTAQSRATAILSGLQFTDEMNASPIKSLSGGWR  
MRVALAASLLIEPDILMLDEPTNHLDEAVLWLEAHLKSYPHTVITVSHDRGFLNEVCTD  
TIEFKDKKLTYYRGNVDFVVKLKGKQKNQMRREYEAAYKVKRDHMMEFIEKFRANAKRATI  
VQSRKAVNKMDAEAPEPVTMDAVWRFSSIPSEPLGRPIIAINDVTFDYNLKHDRGTGKKT

KEEYLLQKVNFLDNSSKIALLGANGQGKTTLLNLMGQLRPVSGSVVVNSGLRIGHFTQ  
HHSEFDFDLDSAVENLLNIFNSAEDQVIRSFLGRFQIQGADALKPMRYLSGGQKSRVSFA  
VLAYQRPHELLIIDEGSNHLSMDAVALIQAINFEFKGGLLVVSHDQYFVNATCNEIWVVED  
GKAARFEGTFNDYKMHATAKKTEKRVEDSLKLLVR  
>comp12574\_c0\_seq1; 192 133 447 LEN=1209; translated  
MSSGVGVTGTLGRCYPFFADLKKCVSRKTADSPQAMCWGENEDYFECIHGFKEKKRRLQV  
IEEKKRREALGTKFDIHSDSGVTDFFSKPLTAGKIRAKAAASN  
>comp12575\_c0\_seq1; 428 268 2512 LEN=2714; translated  
METLVLIGFGLLLLISQIEGLAGSSPPRRPPRIRPRRQSPSTSSSDSDFDTGGGSSNHNK  
SKATGNDREELRVRHEQALQDPSLLTTVRFSDRTDIHPDTRRALEEGFGLRAMTRVQAE  
TYGAALEGRSILARSRTGTGKTLAFLPTIERLLDSDLDLYQPGRSIGCVILAPTRELAI  
QIADQAEILFDYHNKQRPSNKQLSVACIYGKALAVSPFCYSPQEEPQEKLSRDNGSTTF  
LHYPGLTDNLFALFLQIRSGGVKMQRDVRLLTGGYRGAGLPTILVATPARLLEHLEGNP  
LNKNHRYNRNHQQEQRSKNSFADVADTKIVVLDETDRLQKSNQYETQKILGFMARAEK  
RQTLLEFSATIPRAVRLISTSSVLNKKVKHNNGRRERKDDDATFLEVDCIGNKNDRPDDT  
APVGDKQSPAAVTLDAEIEGSPDSVHRQRIEETFAVLENMSQFIPALLAIIRREKQRDSQ  
NYKILVFFPAGRMVRFMFQFFTIGVIEGKNNIWEIHSRMSQSSRTRASAAFRNARNGILF  
SSDVSARGLDYPDISLVVQMGAPSSDQDIHRIGRTGRAGQVGRSLLVLLPFERQKKEQR  
RQKGGNKKRPKVSYNNDASIKQDRQLSSWLNECGHDDHEEMSSSKSLYQKCQDDLESTR  
LKVRSGHVVLTTGAEAAKYTFLAHYVATIKPPNKS KSGTKQYTNRGNSVNNLKPSEVLVH  
AEDFARGTGLADAPEMEETFLSKLGLL  
>comp12575\_c0\_seq2; 462 268 2361 LEN=2563; translated  
METLVLIGFGLLLLISQIEGLAGSSPPRRPPRIRPRRQSPSTSSSDSDFDTGGGSSNHNK  
SKATGNDREELRVRHEQALQDPSLLTTVRFSDRTDIHPDTRRALEEGFGLRAMTRVQAE  
TYGAALEGRSILARSRTGTGKTLAFLPTIERLLDSDLDLYQPGRSIGCVILAPTRELAI  
QIADQAEILFDYHNKQRPSNKQLSVACIYGGVKMQRDVRLLTGGYRGAGLPTILVATPAR  
LLEHLEGNP LNKNHRYNRNHQQEQRSKNSFADVADTKIVVLDETDRLQKSNQYETQK  
ILGFMARAEKRQTLLEFSATIPRAVRLISTSSVLNKKVKHNNGRRERKDDDATFLEVDCI  
GNKNDRPDDTAPVGDKQSPAAVTLDAEIEGSPDSVHRQRIEETFAVLENMSQFIPALLAI  
IRREKQRDSQNYKILVFFPAGRMVRFMFQFFTIGVIEGKNNIWEIHSRMSQSSRTRASAA  
FRNARNGILFSSDVSARGLDYPDISLVVQMGAPSSDQDIHRIGRTGRAGQVGRSLLVLL  
PFERQKKEQRQKGGNKKRPKVSYNNDASIKQDRQLSSWLNECGHDDHEEMSSSKSLYQ  
KCQDDLESTR LKVRSGHVVLTTGAEAAKYTFLAHYVATIKPPNKS KSGTKQYTNRGNSV  
NNLKPSEVLVHAEDFARGTGLADAPEMEETFLSKLGLL  
>comp12576\_c0\_seq1; 579 127 1248 LEN=1417; translated  
MSEETTITGPPKMPPVVKRIEEQTPESPPTVVCVLLVGMAGSGKTTLMSQLQDSTIDYDDE  
EDI EGEEAKEKTAGGDDGQNEEDDIDNEEDTKPQEKSMPAYCINLDPATLDVPYSPSIDI  
RDTVDYKEVMKQHRLGPNGAIMTSLNLYATKFDQVIRILEERADEKKLSEFLLVDTPGQI  
EAF TWSASGAILSESLASTFPTVMVFVVDTVRCASSPNTFMSNMLYACSMYYRTRPLVI  
CFNKTDVCSHEFCMEWMQDFEAFQEALDNARSEGDGGGESGFYDSLTRSLSLVLDEFYTE  
FSKNACGVS AVTGDGIENFWSKIRQAADSDFGLEYLEDLQHRIEEQEAKRQAMARVQARRM  
QRDVERDNANLPG  
>comp12577\_c0\_seq1; 234 186 554 LEN=1328; translated  
MCRNSENLSQKKSGEDSGKQLSIGDFDPTCPWDLRDRLPGEAAIRKIFSFVPDRFKEG  
SWLLLS TWVLAISISIVLYVTVDANIKFRASHNDTGIMEDFVGGKFYKAFTVEWYYNIGF  
FLW  
>comp12578\_c0\_seq1; 432 404 1264 LEN=2066; translated  
MSPTTAIPPTHVPCAREWPALSPSRIPPEDEGDWELLPDSEGESALQTSFERDAVRVVE  
PFEGEIEGRIGLADDNTTKSKPFCLKHAMSTPNFRTVLEECSDDEAVLVGNNSQTESQD  
GAASLASSMVMVSESPSVISIQSSWSSASKISFRDAIMKKAQETDQLSAVKEAEGTAQ  
QRDAKTKKRPKFVVTP IKRCAKSTGDLRSLARIAETGGGDDDVYNNDLVLGDTDAELYY  
SQKLQKLGKNGQKSRPDEAKRLQITMAKKENQRQRQKEAAMKKR  
>comp12578\_c0\_seq2; 432 404 1264 LEN=2270; translated  
MSPTTAIPPTHVPCAREWPALSPSRIPPEDEGDWELLPDSEGESALQTSFERDAVRVVE  
PFEGEIEGRIGLADDNTTKSKPFCLKHAMSTPNFRTVLEECSDDEAVLVGNNSQTESQD  
GAASLASSMVMVSESPSVISIQSSWSSASKISFRDAIMKKAQETDQLSAVKEAEGTAQ  
QRDAKTKKRPKFVVTP IKRCAKSTGDLRSLARIAETGGGDDDVYNNDLVLGDTDAELYY  
SQKLQKLGKNGQKSRPDEAKRLQITMAKKENQRQRQKEAAMKKR  
>comp12578\_c0\_seq3; 432 404 1264 LEN=1641; translated  
MSPTTAIPPTHVPCAREWPALSPSRIPPEDEGDWELLPDSEGESALQTSFERDAVRVVE

PFEGEIEGRIGLADDNTTKSKPFCLKHAMSTPNFRTVLEECSDDEAVLVGNNSQTESQD  
GAASLASSSMVMVSESPSVISIQSSWSSASKISFRDAIMKKAQETDQLSAVKEAEGTAQ  
QRDAKTKKRPKFVVTP IKRCAKSTGDLRSLARIAETGGDDDVYNNDLVLGDTDAELY  
SQKLQKGLGRKNGQKSRPDEAKRLQITMAKKENQRQRQKEAAMKKR

>comp12579\_c0\_seq1; 892 680 4723 LEN=8408; translated  
MANFPPLESSAVKNGIIGFFLPEEQKLLPRLYVVVVFVSWIVSWYTYVLLLEKEWRDLLAL  
RRVYFLEADHWSRNTLEETLLREERESRQGTVDIEKGSYAKTRDPWIHHPEQRDTPV  
NIELYSVLVGGPLSLPTEAFLTEDVKAVFSRKQSI EWQLAVTSAFFDHCVPNQPGFSSSV  
AAVTILPAASQVTQAWKHWHYKTAAKVRRRLFIRQEIAQLKKEMNVYKMKKGVSQRRMTKQ  
MKRKHEKTKKSFVYDESEKKKYFNEVLGTTDDLNVNTNNFLHSLNLGPEQTAVYSREFAQ  
AAAKIAPNGWNESRIRNSSLEELLEMEKHAIFAVQEASQALQKAQEVIVESGSLCNDADV  
SDLMFSATKTNGISIEKNEFHVEVRDSDEEPTKTGESIGYPTNRHSHLRSLTQNLEIVGP  
ISNASDPRSTQEKEFPTRNSRKNDRSDEIRSTPGLEALCLEAGLFLEQKVI STGISQKKT  
RNVFPRPTTNDIDAEQQRAKRAKSLFGSSQPDNTNEDPHSRRRHVRSVDDLGLLPAF SERK  
KSSESLADTRLGRTLQSHDVGRTESFAMSHSTERERLGYERHASDHVVRKIETKTDHHT  
NPIWKKLESEHRRNRIRKRLHNI SKNTNNGIQDKSIGDIDIKPTALSPSSVIPLRKTNN  
GHRCAEMPKNQERSNVIGGSLFSIDESRSSNDLMKLDAAVVTNGVTSSADLGSSEKTLI  
SSMADQGTQLTYAFEEKAGLRLRHRSATERLSETTNEKWTKVLQISNENSSRHDKDGKN  
DPIILSGSYSGSSIFESIITIFKNAFNLQIWRKRTTDMMDPFDLASESTFAVVFTSRQAA  
VAARHCLADSRGGDRWNTITDLPSPLADAPVSNLSSFVRPVTL SINDRQKMVRHTLTLA  
LLGTIYIFYVIPLTQVQKLI SPEYLEKIAPNLELAAYQAEYIFNGFVPMIWTGFYAICP  
PLFKI IANFGSNATSAACAEGSAIRYFWWFMI VSAFTGTSLVNSFEEGEHDIRYTVISIA  
STIPNTVSAMWLNWIIVRALIVSPTQYILQMNTFIFSWLGVKSLARAIQGGGSGGP I PFR  
IYIDSGFVMLCLLALAPASPLVAIAV FVYFLFCVPMRLWVMIFLYKPPQFDVGGARFPFIF  
DMCVSGMVAGKMLLGTMLLIRGAAGPAVFAFLPLAPI IFYRWILLKRYLKPFKDMALLQT  
SLLDGWDTNEGSCSTSKREEFRQFLVDCHKAAYVPVCIACEKSTVITSEPAVVLVVDTDHD  
EDNDDTASVSTECGGDIESAYGSSRKL LYPHYEPHKQPGRLMRRASSRSFLDLAVSGSPN  
GWLSTQQNYFHKPSTHQKRVVRNVTSG

>comp12580\_c0\_seq1; 203 1 1047 LEN=1047; translated  
TFEALIPLEVDTLFSFFPFQICVARVNI GLSSLISSVGETFRPDLILHTEDPRNNFNION  
LDTSAPNQMLLEGITTKEMSTRKH FVSKILDKIDRSQVYDFISPHPKIYYQYDSIKGYCP  
GVVVSFIVNRF SFI SFVKLILPMLVTCISAMNAIQDLKAGKGM DVASHLQVTSALTLTI  
VFILPDI VETTNRGKVLTRGNMIVIVFFFGMLLSSIPRSLFSGGQTS DALSKLYATPEVV  
GVVLMGCSLIFPLIHSY EYISIRRRIKDMAELEAQTGFFVMEQDTPKWK PQSVSDNILSV  
GEILKQGNQHMESESGNNDLGYRNGGKSKERYRRLH LKP THEEPI SG

>comp12580\_c0\_seq4; 571 1 1684 LEN=1721; translated  
QYVTPPHKILTKLLYRTFDHKSDLRPRATTTNEQNNVEKHHQQQEKQDDKRDNLV RPFYT  
LRKDKFTRSVGYLRAKEDLANDPTEEITNDNDNTDDHKESVVK TMSNATDATEETTESIK  
DDNKLKVNTLLLQSIRDDESRDNGGLVMVATLVQRVFTPEEMKVDSK GQVDGEDIYFPY  
RFNEIPVNVEKIRTRCLKGKKNRK IIGVVSTFQAI IPLQVETILPCFPFQISVGKVSIEL  
SSVTFGEGITYR PDLQLHTKEPRHNF CINLEAHVSHSKILDNITSREKMQKQKEKKD  
WFKILEKIDKSEN YDFVSPYPQIYYQYDKRKNYCPRFVLSFIVNKYSFACFVRFILPMFL  
VTI IATLNAVHDFMEGMDVGGHLQVTSALTLTVVFI LPDIMDSSYQNKILTSGNSIVLVY  
FFGMLLSSIPRHSFDGEVSASQLYAIPELIGVVL MGCSLCPFIWHACVYYRITTKIQSQA  
DCETQKMAFLKDTSCKNWSPEDSNDICIQT VVSILDEKNLEMYNEKYNEKENEKVKDTEEP  
RYRRLHFEPKRKKLDPPVVTW

>comp12580\_c0\_seq5; 198 339 932 LEN=932; translated  
MNAIQDLKAGKGM DVASHLQVTSALTLTIVFI L PDI VETTNRGKVLTRGNMIVIVFFFGM  
LLSSIPRSLFSGGQTS DALSKLYATPEVVG VVLMGCSLIFPLIHSY EYISIRRRIKDMAE  
LEAQTGFFVMEQDTPKWK PQSVSDNILSVGEILKQGNQHMESESGNNDLGYRNGGKSK  
ERYRRLH LKP THEEPI SG

>comp12581\_c0\_seq1; 315 162 1694 LEN=1803; translated  
MSLLSVDVLHQVFKFFVSSDQIVDGASIRVAGLVCKQWRDIVDSRSLWATPAGIKEREGD  
REYDGDNDGDHGCRCRVHQSLRIR EEVRSLSSETSLRSSLIGFVNLKQWGLASDGGVP  
ELYFFVRE RATRSTFLLSLSRDGKISPSILRDLYVHHFESKEDFLRNDRNHQGTGIIFPPQ  
RFPSGISIWNGRVLRWYRCDNETEAVSIMEEISCKQKQKLNQKRWLAESDNKISLVGHLM  
DLEKASLGDRDSESYHYEGRKHIMDWIVEIVECFDLEDRTIFQAMLLFDRFIASPERVK  
TSRFQLVAGACVSIASKRNEVFLTEKDIFCCDNIFSVANITATEKLVNLRLGWKLACPS  
SNEFLNMFLMIADIEKDSRTQYLCFYVSELSLAFDTSYRYPPSLIAASAMVLARYALRDD  
GGVASLWPDALAHATGLQLGDLVGCSVRLSND AETIRLHTSSSRLDMIYRRYSKPCRRSV



AELTIPVLASTAILTTSEARLRSQSPSAGI  
>comp12583\_c0\_seq1; 803 110 1456 LEN=1842; translated  
MGKRGNDLSQVSKEDYEASMKASSDVP TGPFAKASDDVMKRRIVRGRRSAVRKGPASAA  
AGSGVFSGVALNASPGATLAPSSAGSSNPFGGFTFGAGTSKTLPIPSAPAESKTSAFP  
FAVPAAPPKPATTFAAATAPGTSKTSEATEEDKLLIECAQAFKHKHKGAYDAVGAER  
FAATFRELSKSASSSTASTKPPTKTAAASTSTSWDASRPLFGAKPPASSPAAPLFGAAA  
PAPATGGFSFNTGSKPAASPAAPGGFSFNPTKTGASAAPVPAFSFSTTPTPAVKAAAEAA  
AAESASKAGTGAGDGDGENKDDQTDNDGAQEAEDNPCKTLFKANTKILRVKTNNYIKGVL  
KLEEHKETKKTSMVVRDKAVGHVQLNVAITKGMPIKKTIAQGKKSQGPTPIVLITAVFDE  
TSGDPELKFVITKMEDHEKLYDELSKLV  
>comp12584\_c0\_seq1; 358 216 1295 LEN=1447; translated  
MLLYSTGASPPPSFSSSPFWIAQAISALLLCPD LIERRVPMIAPFPGTWEDSRRRNIV  
DQI IDECWKNPNAGYEVQPTDEWIVNNQQQQQLDSRDRFDILEQEQLDENGEEIATSGKP  
STYGEITPLGARQLFGAMGLLDSRRDNHDQRRHPAHFFDLGSGTGKLVGQAVLELPNKTI  
KKATGIELSPSRHESAIRAMESLLQLPQSNNDWVNSIEF SHNDSNGFLTEEYFVVRSTNKL  
ELLQGD LFDV DLSTATHIYVASLCPDALMVELEERLQILMHKHETQE QACNQNETDEM  
EVQEVGELSSLQWVATLKPFPPTNLGGIRPSIRF MEMSWTKPYGCAVYLYRCNSTAAATEK  
>comp12585\_c0\_seq1; 107 1 984 LEN=1358; translated  
FRTISRKFLRCSRCLFGFALFVCSINYPLWRASAMAQSGFAVTGATSIGGGSGTISLIG  
NSLMRRVPPSISPYVYAFAPPYKGMVGVITGMTWARAAIFWGS DYGRELMQKQFGLSKTD  
FWATVIPLLVSTMVQCVNQPIVRASITLQNPESGLPNTMASIQHIYKNHGLGGLWHGTS  
AGILKTVPKYCTAVLVKDVMEEQ LPRVDDPSSPTYDRDLFRSAAKSATAGVAGAALTNP  
LDVIRNEMFKTNE SLVATVRRLVNETGYGFVTRGM AKNLVAVAI PVGCTIFFTDVLIQFS  
SKRNNFATNNTTKMYDDEIECRQRRG  
>comp12585\_c0\_seq2; 190 89 1066 LEN=1440; translated  
MGGSSAAKDHPWQYLAASAAAACINYPLWRASAMAQSGFAVTGATSIGGGSGTISLIGNS  
LMRRVPPSISPYVYAFAPPYKGMVGVITGMTWARAAIFWGS DYGRELMQKQFGLSKTDFW  
ATVIPLLVSTMVQCVNQPIVRASITLQNPESGLPNTMASIQHIYKNHGLGGLWHGTSAG  
ILKTVPKYCTAVLVKDVMEEQ LPRVDDPSSPTYDRDLFRSAAKSATAGVAGAALTNP LD  
VIRNEMFKTNE SLVATVRRLVNETGYGFVTRGM AKNLVAVAI PVGCTIFFTDVLIQFSSK  
RNNFATNNTTKMYDDEIECRQRRG  
>comp12586\_c0\_seq1; 658 442 1875 LEN=2244; translated  
MSQPVTIPIFGSTSNQQPQTGEWFMDDGEQDMDFDLLAEYLL EETPGSNQ TGPVNF EFS  
FVVSPEQSVDGAGDNGAAQAKSIITQHAATIAAAAPAPIPSPKMTQVVQYAPVPPPPPLM  
VAPQIAAKGM AVPATIPQYV PQRSSMAPAPASNQQAPT KAALKTGGAADAKRRRTNPP  
EVAPQGLINTSYMTNGTANMSPAVVAAAAAAMQGRGRKKTQAQIDRRRERNRILARRT  
RLRKKFFFESLQKEVMELQRENAVLKDIVRTEVNTEEGRLLLEQSNAAKKLPREVLEACG  
ENPDLQEDFNLVTSIQQSQHSFVITDPSLQDNP IVFASDDFLRLTGYSRDDV LGRNCRF  
LQGPETSKDKLDI IRKGLPSGEDISITFVNYTADGTPFWNKLFIAALRDAQNNIVNF IG  
VVKVASPEPGDPEFGKQIGVENPDAEKAEGDADGTVKAIEGAVDAAVAAAPLNVLSG  
>comp12586\_c0\_seq2; 658 1030 2463 LEN=2832; translated  
MSQPVTIPIFGSTSNQQPQTGEWFMDDGEQDMDFDLLAEYLL EETPGSNQ TGPVNF EFS  
FVVSPEQSVDGAGDNGAAQAKSIITQHAATIAAAAPAPIPSPKMTQVVQYAPVPPPPPLM  
VAPQIAAKGM AVPATIPQYV PQRSSMAPAPASNQQAPT KAALKTGGAADAKRRRTNPP  
EVAPQGLINTSYMTNGTANMSPAVVAAAAAAMQGRGRKKTQAQIDRRRERNRILARRT  
RLRKKFFFESLQKEVMELQRENAVLKDIVRTEVNTEEGRLLLEQSNAAKKLPREVLEACG  
ENPDLQEDFNLVTSIQQSQHSFVITDPSLQDNP IVFASDDFLRLTGYSRDDV LGRNCRF  
LQGPETSKDKLDI IRKGLPSGEDISITFVNYTADGTPFWNKLFIAALRDAQNNIVNF IG  
VVKVASPEPGDPEFGKQIGVENPDAEKAEGDADGTVKAIEGAVDAAVAAAPLNVLSG  
>comp12586\_c0\_seq3; 658 1018 2451 LEN=2820; translated  
MSQPVTIPIFGSTSNQQPQTGEWFMDDGEQDMDFDLLAEYLL EETPGSNQ TGPVNF EFS  
FVVSPEQSVDGAGDNGAAQAKSIITQHAATIAAAAPAPIPSPKMTQVVQYAPVPPPPPLM  
VAPQIAAKGM AVPATIPQYV PQRSSMAPAPASNQQAPT KAALKTGGAADAKRRRTNPP  
EVAPQGLINTSYMTNGTANMSPAVVAAAAAAMQGRGRKKTQAQIDRRRERNRILARRT  
RLRKKFFFESLQKEVMELQRENAVLKDIVRTEVNTEEGRLLLEQSNAAKKLPREVLEACG  
ENPDLQEDFNLVTSIQQSQHSFVITDPSLQDNP IVFASDDFLRLTGYSRDDV LGRNCRF  
LQGPETSKDKLDI IRKGLPSGEDISITFVNYTADGTPFWNKLFIAALRDAQNNIVNF IG  
VVKVASPEPGDPEFGKQIGVENPDAEKAEGDADGTVKAIEGAVDAAVAAAPLNVLSG  
>comp12587\_c0\_seq1; 99 1 287 LEN=1313; translated  
XRKMFVRSAVTSSPPMATL NITKSSRNKTYSEMAGVDLTQNGCDERS SKRRLQGDNDND

TCMDGGDTIIATVMDKDSHVSVAATGFQYRSVGALKW

>comp12588\_c0\_seq1; 1838 429 5695 LEN=6144; translated  
MPIGRGLPTRSRPRAKRSHLCPLLLPGAEGEAXGLPLTGGGASSSEAASSARSSSPSLSN  
SRSRSPSSARPSAASSSSSLSSKSKKKKSTSKAGGSSHSNSASSKAGARNPVKTEPGLSSSS  
SQRQRQTAQEEHDTQAHQLQVLEAKLDKKS AVKFSGGNRRTQGSSSNVWAVKLI VNGKVF  
DNNHSSVNRANFSIGRNGGDETSTSLLSRANQKEDEYHDDEEEQQQNLQEQEPYRPRRF  
RDVSSDQSNSSSESLSKHKGKDGNFHYCNICGEVGDVVCCDGC PHVYHPQCLPADSESF  
AALDTQHDDDPWYCPDCFSSKSKKRKRKGSISNSGANSRGGAGSETMSPYRQQRPKRCSYDA  
DAFVQDDSSDES DNRNKNGYKDG LLLLEDEDGDPVAVDIAEDDAYDEEDAEISEAMESPSST  
TSYPKSKI STPSKSSRGSSTSGKTTAPKNSSSPSLSSSVLSSASKKKSNSNKKQKTGA  
TSRSRASAPVRSRAASPTLSSRIESSSSDMKKKDKKKKKKRRKKEHSDGTARSNSGGSRA  
DGNDRKTRNDKSDGERGGMLSHVLNNNASGLVKAVPAFYFFLNENRNKIDRNLSRKHRY  
FNRLPKANMERNQLIAKEGIMWGKLSDELVKRYIDISMKDFERRIMEWKEAKILRSMFL  
AAEGDGGDASSGEQQQQSREVDRLLEDERLTRENHQRLYLGTTVGYKPYKPDLEESN  
NRILLELLQDTRFHPLPMIQSNRPAQEY GEMDFDRITIPYFDVNGPVSTCLGDECLGCAR  
GWNHFCNVLKRKIPAVARRAKLQPPSSLVATRI GLGLKNPLLEDNQDEENGGEKKNGA  
SPIRNINGGIKSSDENVETFTARDIPSAAAALPHYPWESLTAPTERADDVVRVFVEEA  
VCMKIPEPHRPRGGDYSDGFDENKKAHFSPTNKTIRFNLPLRKERRRRLDDFGNSSVA  
EDEDNEEITVNCGRCRTIIEGDTGCVPCRRQLVINMSRGEQADESEASRMLRIQTNM  
LGRVVMRDSEVESQEQGDEAVSNYILRQRWTPFTILPPSTLTSPMLREDGDSVDTNESES  
DDDNDGNDDVGENGSEENGEAIGRAVHEDCVPTSMDIDSSEENSPAKAVSDDAASDDPI  
EEESSTQASNHDL DARPPSKRLRASSRLGALESNGAANFASISKVNDANDRHLLTKKFK  
EEATMVNRKCSISISCYGILLALKRRDPLLHFAEPVVAEGYSDI IKKPMDFGKIKKNVLRN  
NYATLGAFISDVRLLCDNAIAFNPPDSIYSKTAKELLDVLAVMQKRASEWI STLKDAHAS  
TFNNIFNPQTIKNSECEVSKKSF LGGDPFHRLRKEWPEAVELEYEDNEWLQKSVETDFMRT  
KENESAYYGLAIRRAAMAAAMSLAPYTDSDGMYNTVGRRTHIEDENLRNFI AKKVAESV  
HPPELKELP SWREETIMRVLRSQARMMEGKMGSTHG CARCDGVRVDPE SNKAMNVKTR  
WGRTRKPNVPRIHKSRLGLSTGLGSQNTQERIRRHKASDIRKGLRKGSI SALVAAADK  
VNEVAVTARGSR IHGMGLFADQALQKGDVVAEYVGEYVSPAVTEKREKGYQKERIQDYQF  
RIDSQ LVIDATKQGGHGRYANHNCDPNCATKIIPFKLEDEAVKTT SNGNILKRVVIVALR  
DIEPMEELTYDYQFPLEVDLDERIPCNCNSEL CRGFMNWDLPEKGARNQDFRTQKRGANM  
RDRIRRLGRPLKGDK

>comp12588\_c0\_seq2; 154 1 574 LEN=1023; translated  
XHAFLNLLFLFYGKKADQALQKGDVVAEYVGEYVSPAVTEKREKGYQKERIQDYQFRIDS  
QLVIDATKQGGHGRYANHNCDPNCATKIIPFKLEDEAVKTT SNGNILKRVVIVALRDIEP  
MEELTYDYQFPLEVDLDERIPCNCNSEL CRGFMNWDLPEKGARNQDFRTQKRGANMRDRI  
RRLGRPLKGDK

>comp12589\_c0\_seq2; 385 126 1889 LEN=2030; translated  
MARTSVGFVWSAAFLFATSLFDLIVCPHKSVEESFQLQATHDLYYYGIGPSIRAGFPVSW  
NEIEDSNVANADNNGAISLYLPYDHLQYPGVVPRFTGPAILSLLCRIILLPCSLLNIDV  
DPNVVQFLARLCLLSLNYLGWLRFAVDRISATSSSLPWGTGNKLMTMSWLLAITACQ  
FHIPFYSSRMLPNTFALAIVLQSYTYWVERKVESAAALIVFGTAIFRCDLLLLLGTGLS  
WLFRRRELSVNTALKIGVLTGAASLMLTVPLDSSLWRRPLWPEGEVVFYFNTILGKSKEWGL  
FPWHWYFTNALPKSMMLTLLLVPLSIFPLVENLVDFEKKLRQSPNDTKRREGVDFWDLTL  
WIRFMLPILGFIVLYSFLGHKETFIFPALPILNLGAAVGM SKLAYFAYPPMLKHKGKAY  
FVSWIARFGFGCLMCI FLTLAGSLMFVATSTSNYSGDALSALSSHVQSASLSSDESFS  
PLYVHIDVAAAMSGVSLFGQRAAQMKTPSF EWKFSKAGYEVTNTVGEQRSSGYEKFTHLI  
VEDPEIVSPLDFKVIHVQQGRPRFSLHQRKIVTKATIFVLENNGWRN

>comp12590\_c0\_seq1; 197 1 1510 LEN=1957; translated  
XIIKKAIPCSVLLIAIVDECMSNDYNKMKYDRKRKSKNRLLLSSQQFSIVVKGSALFSLA  
LVFYLNRYFIYSVFNGTFDPSSSTKNSSSIEDSPKERNSEFLSLPAPFNTDLTVQSSKQEW  
ERQSQKPAIGFYRYSSIATINLPASDLEDLKT RNAEALYRGGVVSEINEEIVVLTRKGHK  
FNPEDGNRTPNQDRVLVSKRDGSFRGRNSGGDDWWIGLFDGHGFHGHAVSQYVSSEFSR  
RINKEWEDEKAADPLGAQNKNIETVKDNIRKTFLDINISIPSFISTSGCTGISVLKRGNL  
LYISNVGDSVAFVASYNKSKSTPEVKI IYSTRPHKPDTPSERKRIEGSGGRVQDAPFKGA  
SARLMIPVKVGSQIFEI GLAMSRSLGDHDGLKVGLSAEPD TDVLDLENFDKNNEFIVVTT  
TDGLVDFGKLS EEEVAMTMAEALSTKQTDLMNEQHRKQLRHPPESP GMEAAATQLILKAS  
QLW DSEPGGYRDDISIAARKLII

>comp12591\_c0\_seq1; 374 73 954 LEN=1114; translated  
MSSNDDEKPVAYPEGYTVPTVWEPKLM DGMGMNRPTAGKRF DSELPRGEHDLQLYSLG

TPNGQKVTILLEELGVYDAYTINIMQLEQFGSAFVDINPNSKI PALLDYAPPCSSAES  
EKEPLRLFESGILLSYLAEREKKFLPTDPRARTECLNWLFWQMGTAPYLGGGFGHFYKYA  
PLKIEYADRFAEAKRIVDVLKQLEQKDYVCGSEYTIADMAIYPWIRCLHTGYKGTFL  
LQLETYANVERWMATLAERPVRRLRVNGFGEDAVRERHSPDDFAEPPGEEA  
>comp12592\_c1\_seq1; 410 73 921 LEN=1078; translated  
MKVLVTGGNQGIGFALCRQLALEHNCHVLLSARSQQKGMDAVSKIDDAIGKSPGCKGSVD  
FLELDTTSDDSVAAAAAKFAATVGGDPSQKLGAIVNNAGI GLNTGHTGDILNTNLYGPKR  
VCDHFVPLLEDESSGRIVNMGS GSPMYVSGVRNRQDRAMLCSGPEGEATWEELVDHATKN  
LNGSDAYGLSKALLACYTGILSRAHPNLTVSCITPGFIDTQMTAGWGASKTPEQGT LAIK  
KCLFETLKHGSGWYYS DGVRSQYHFMRNPGEPEYDGVNPFLL  
>comp12593\_c0\_seq1; 431 137 1198 LEN=1241; translated  
MAPNLNSDDYYQILGVPRSAADAAIKKAYKKLAVKWHDPKNPGDEQATKNFQKISEAYAT  
LSDEKKRKIYDITYGKEAADQSENMPDGHPMGGMGGFGMPGGFSFGGGGRRGGHMS SDEA  
QFLFSQFFGGSDPFGMGMGGRRGGPGMHINFGGHPGMGGSFSGMGMGMPGMGGSGFGSS  
SSRREP KRYDAIPVGTNVSLKGLVSKPEKNGDRGEIMQFDPATGRYVYQIEDTGETIAVK  
PSNLLQHVVHKIHLGLSRVELNGQKATILAWDEGKERYNVYIANNPTTKCISLRPTNIVL  
ENGTVGRITGIQSKPELNGKWTIKSFNASTGRYDVQLSESKFLALKLDNIRL  
>comp12594\_c0\_seq1; 124 289 512 LEN=580; translated  
MVFARLFWSPLVFAPAVYLDSSGGVHAASSGAGHPRESFDGETPLRRTLPPVTL DALHPWNP  
FWKGASTADSIYPP  
>comp12595\_c0\_seq1; 373 334 2455 LEN=3090; translated  
MAGDLFLGGLCRAFVFSSTIASDNIGTKTREYVPHDECGLYLAPSSIPGAGLGMYS GSKK  
YEQYDLVSDSDLMIPTWDLDYHNGDDVYYHLWDEYTWSTSKSETQSTYAPXLAPHFRSIV  
SSEQPNQTVRVDERSHRLTLIHRFVTRFFARFEWTAKQHEGMFPDMYDDVENVYSASTIS  
SGFGAAINCMMPLVNVQDEGWDEF AAYKLTTSGVPSDSPGAGAFTPMTGRRFEAMETIEP  
FSELYASYGEGYFDGRPVYDFVFPDRHYEEADTLIQSFIGNVTSWQNE DKTKDQIVNSTN  
FEQELWGFIVELRDIWDKAKTLFALPGDNATTIDDLK NLMDFGGSALQNYNDTVKDLEWM  
NEHGQCMDNIREGVSKI PHAGRGAFASRFIAKGLSLVAPAPLVHI PNRSSLI IYDHMITEK  
GTWQRRVEKPIHHQ LLLNYCFGHEDTL LLLCPYGYLNFLINHNHKNPNTKVVWTDK KRLR  
HPEWFDMPVKDWGSEFHTGLAIDYVAIRDIEK GEEITIDY GIDWEIAWEEHVKNWDRPRR  
RYIPAFELNERVDLRIPTAYEP MEEQFEGVITFCRDY YFPDPDHDFEAYKFNTDEDTE DWA  
DYHYTCKVLLRHDDNRYTVEVFERERWLDKFD RYEQHKDTPAYILFDVPRDAMYFRDMVY  
HRDHHQFWSFRHDMRLPDELFP EIWKDPKGDTSDKATMSKSSKASA  
>comp12595\_c0\_seq2; 373 592 2713 LEN=3348; translated  
MAGDLFLGGLCRAFVFSSTIASDNIGTKTREYVPHDECGLYLAPSSIPGAGLGMYS GSKK  
YEQYDLVSDSDLMIPTWDLDYHNGDDVYYHLWDEYTWSTSKSETQSTYAPXLAPHFRSIV  
SSEQPNQTVRVDERSHRLTLIHRFVTRFFARFEWTAKQHEGMFPDMYDDVENVYSASTIS  
SGFGAAINCMMPLVNVQDEGWDEF AAYKLTTSGVPSDSPGAGAFTPMTGRRFEAMETIEP  
FSELYASYGEGYFDGRPVYDFVFPDRHYEEADTLIQSFIGNVTSWQNE DKTKDQIVNSTN  
FEQELWGFIVELRDIWDKAKTLFALPGDNATTIDDLK NLMDFGGSALQNYNDTVKDLEWM  
NEHGQCMDNIREGVSKI PHAGRGAFASRFIAKGLSLVAPAPLVHI PNRSSLI IYDHMITEK  
GTWQRRVEKPIHHQ LLLNYCFGHEDTL LLLCPYGYLNFLINHNHKNPNTKVVWTDK KRLR  
HPEWFDMPVKDWGSEFHTGLAIDYVAIRDIEK GEEITIDY GIDWEIAWEEHVKNWDRPRR  
RYIPAFELNERVDLRIPTAYEP MEEQFEGVITFCRDY YFPDPDHDFEAYKFNTDEDTE DWA  
DYHYTCKVLLRHDDNRYTVEVFERERWLDKFD RYEQHKDTPAYILFDVPRDAMYFRDMVY  
HRDHHQFWSFRHDMRLPDELFP EIWKDPKGDTSDKATMSKSSKASA  
>comp12595\_c0\_seq3; 416 334 2272 LEN=2907; translated  
MAGDLFLGGLCRAFVFSSTIASDNIGTKTREYVPHDECGLYLAPSSIPGAGLGMYS GSKK  
YEQYDLVSDSDLMIPTWDLDYHNGDDVYYHLWDEYTWSTSMFPDMYDDVENVYSASTISS  
GFGAAINCMMPLVNVQDEGWDEF AAYKLTTSGVPSDSPGAGAFTPMTGRRFEAMETIEP  
SELYASYGEGYFDGRPVYDFVFPDRHYEEADTLIQSFIGNVTSWQNE DKTKDQIVNSTNF  
EQELWGFIVELRDIWDKAKTLFALPGDNATTIDDLK NLMDFGGSALQNYNDTVKDLEWMN  
EHGQCMDNIREGVSKI PHAGRGAFASRFIAKGLSLVAPAPLVHI PNRSSLI IYDHMITEK  
TWQRRVEKPIHHQ LLLNYCFGHEDTL LLLCPYGYLNFLINHNHKNPNTKVVWTDK KRLRH  
PEWFDMPVKDWGSEFHTGLAIDYVAIRDIEK GEEITIDY GIDWEIAWEEHVKNWDRPRR  
YIPAFELNERVDLRIPTAYEP MEEQFEGVITFCRDY YFPDPDHDFEAYKFNTDEDTE DWA  
YHYTCKVLLRHDDNRYTVEVFERERWLDKFD RYEQHKDTPAYILFDVPRDAMYFRDMVYH  
RDHHQFWSFRHDMRLPDELFP EIWKDPKGDTSDKATMSKSSKASA  
>comp12595\_c0\_seq4; 416 334 2272 LEN=2794; translated  
MAGDLFLGGLCRAFVFSSTIASDNIGTKTREYVPHDECGLYLAPSSIPGAGLGMYS GSKK

YEQYDLVSDSDLMIPTWDLDYHNGDDVYYHLWDEYTWSTSMFPDMYDDVENVYSASTISS  
GFGAAINCMMPLVNVQDEGWDEF AAYKLTTSGVPSDSPGAGAFTPMTGRRFEAMETIEPF  
SELYASYGEGYFDGRPVYDFVFPDRHYEEADTLIQSFIGNVT SWQNE DKTKDQIVNSTNF  
EQELWGFIVELRDIWDKAKTLFALPGDNATTIDDLKKNLMDFGGSALQNYNDTVKDLEWMN  
EHGQCMDNIREGVSKI PHAGRGAFASRFIAKGLVAPAPLVHIPNRSSLIIYDHMITEKG  
TWQRRVEKPIHHQLLLLNYCFGHEDTLLLLCPYGYLNFLINHNHKNPNTKVVWTDKKRLRH  
PEWFDMPVKDWGSEFHTGLAIDYVAIRDIEKGEEITIDYGDWEIAWEEHVKNWDRPRR  
YIPAFELNERVDLRIPTAYEPMEEQFEGVITFCRDYFPPDHDFEAYKFNTDEDTEWAD  
YHYTCKVLLRHDDNRYTVEVFERERWLDKFDRIEQHKDTPAYILFDVPRDAMYFRDMVYH  
RDHHQFWSFRHDMRLPDELFP EIWKDPKGDTSDKATMSKSSKASA

>comp12595\_c0\_seq5; 373 592 2713 LEN=3235; translated  
MAGDLFLGGLCRAFVFSSTIASDNIGTKTREYVPHDECGLYLAPSSIPGAGLGMYSKSK  
YEQYDLVSDSDLMIPTWDLDYHNGDDVYYHLWDEYTWSTSKSETQSTYAPXLAPHFRSIV  
SSEQPNQTVRVDERSHRLTLIHRFVTRFFARFEWTAQHEGMFPDMYDDVENVYSASTIS  
SGFGAAINCMMPLVNVQDEGWDEF AAYKLTTSGVPSDSPGAGAFTPMTGRRFEAMETIEP  
FSELYASYGEGYFDGRPVYDFVFPDRHYEEADTLIQSFIGNVT SWQNE DKTKDQIVNSTN  
FEQELWGFIVELRDIWDKAKTLFALPGDNATTIDDLKKNLMDFGGSALQNYNDTVKDLEWM  
NEHGQCMDNIREGVSKI PHAGRGAFASRFIAKGLVAPAPLVHIPNRSSLIIYDHMITEK  
GTWQRRVEKPIHHQLLLLNYCFGHEDTLLLLCPYGYLNFLINHNHKNPNTKVVWTDKKRLR  
HPEWFDMPVKDWGSEFHTGLAIDYVAIRDIEKGEEITIDYGDWEIAWEEHVKNWDRPRR  
RYIPAFELNERVDLRIPTAYEPMEEQFEGVITFCRDYFPPDHDFEAYKFNTDEDTEWAD  
DYHYTCKVLLRHDDNRYTVEVFERERWLDKFDRIEQHKDTPAYILFDVPRDAMYFRDMVY  
HRDHHQFWSFRHDMRLPDELFP EIWKDPKGDTSDKATMSKSSKASA

>comp12595\_c0\_seq6; 416 592 2530 LEN=3165; translated  
MAGDLFLGGLCRAFVFSSTIASDNIGTKTREYVPHDECGLYLAPSSIPGAGLGMYSKSK  
YEQYDLVSDSDLMIPTWDLDYHNGDDVYYHLWDEYTWSTSMFPDMYDDVENVYSASTISS  
GFGAAINCMMPLVNVQDEGWDEF AAYKLTTSGVPSDSPGAGAFTPMTGRRFEAMETIEPF  
SELYASYGEGYFDGRPVYDFVFPDRHYEEADTLIQSFIGNVT SWQNE DKTKDQIVNSTNF  
EQELWGFIVELRDIWDKAKTLFALPGDNATTIDDLKKNLMDFGGSALQNYNDTVKDLEWMN  
EHGQCMDNIREGVSKI PHAGRGAFASRFIAKGLVAPAPLVHIPNRSSLIIYDHMITEKG  
TWQRRVEKPIHHQLLLLNYCFGHEDTLLLLCPYGYLNFLINHNHKNPNTKVVWTDKKRLRH  
PEWFDMPVKDWGSEFHTGLAIDYVAIRDIEKGEEITIDYGDWEIAWEEHVKNWDRPRR  
YIPAFELNERVDLRIPTAYEPMEEQFEGVITFCRDYFPPDHDFEAYKFNTDEDTEWAD  
YHYTCKVLLRHDDNRYTVEVFERERWLDKFDRIEQHKDTPAYILFDVPRDAMYFRDMVYH  
RDHHQFWSFRHDMRLPDELFP EIWKDPKGDTSDKATMSKSSKASA

>comp12595\_c0\_seq7; 373 334 2455 LEN=2977; translated  
MAGDLFLGGLCRAFVFSSTIASDNIGTKTREYVPHDECGLYLAPSSIPGAGLGMYSKSK  
YEQYDLVSDSDLMIPTWDLDYHNGDDVYYHLWDEYTWSTSKSETQSTYAPXLAPHFRSIV  
SSEQPNQTVRVDERSHRLTLIHRFVTRFFARFEWTAQHEGMFPDMYDDVENVYSASTIS  
SGFGAAINCMMPLVNVQDEGWDEF AAYKLTTSGVPSDSPGAGAFTPMTGRRFEAMETIEP  
FSELYASYGEGYFDGRPVYDFVFPDRHYEEADTLIQSFIGNVT SWQNE DKTKDQIVNSTN  
FEQELWGFIVELRDIWDKAKTLFALPGDNATTIDDLKKNLMDFGGSALQNYNDTVKDLEWM  
NEHGQCMDNIREGVSKI PHAGRGAFASRFIAKGLVAPAPLVHIPNRSSLIIYDHMITEK  
GTWQRRVEKPIHHQLLLLNYCFGHEDTLLLLCPYGYLNFLINHNHKNPNTKVVWTDKKRLR  
HPEWFDMPVKDWGSEFHTGLAIDYVAIRDIEKGEEITIDYGDWEIAWEEHVKNWDRPRR  
RYIPAFELNERVDLRIPTAYEPMEEQFEGVITFCRDYFPPDHDFEAYKFNTDEDTEWAD  
DYHYTCKVLLRHDDNRYTVEVFERERWLDKFDRIEQHKDTPAYILFDVPRDAMYFRDMVY  
HRDHHQFWSFRHDMRLPDELFP EIWKDPKGDTSDKATMSKSSKASA

>comp12595\_c0\_seq8; 416 592 2530 LEN=3052; translated  
MAGDLFLGGLCRAFVFSSTIASDNIGTKTREYVPHDECGLYLAPSSIPGAGLGMYSKSK  
YEQYDLVSDSDLMIPTWDLDYHNGDDVYYHLWDEYTWSTSMFPDMYDDVENVYSASTISS  
GFGAAINCMMPLVNVQDEGWDEF AAYKLTTSGVPSDSPGAGAFTPMTGRRFEAMETIEPF  
SELYASYGEGYFDGRPVYDFVFPDRHYEEADTLIQSFIGNVT SWQNE DKTKDQIVNSTNF  
EQELWGFIVELRDIWDKAKTLFALPGDNATTIDDLKKNLMDFGGSALQNYNDTVKDLEWMN  
EHGQCMDNIREGVSKI PHAGRGAFASRFIAKGLVAPAPLVHIPNRSSLIIYDHMITEKG  
TWQRRVEKPIHHQLLLLNYCFGHEDTLLLLCPYGYLNFLINHNHKNPNTKVVWTDKKRLRH  
PEWFDMPVKDWGSEFHTGLAIDYVAIRDIEKGEEITIDYGDWEIAWEEHVKNWDRPRR  
YIPAFELNERVDLRIPTAYEPMEEQFEGVITFCRDYFPPDHDFEAYKFNTDEDTEWAD  
YHYTCKVLLRHDDNRYTVEVFERERWLDKFDRIEQHKDTPAYILFDVPRDAMYFRDMVYH  
RDHHQFWSFRHDMRLPDELFP EIWKDPKGDTSDKATMSKSSKASA

>comp12595\_c0\_seq9; 699 377 3070 LEN=3659; translated  
MEGVVRGPRRQSEIITEVYGSSTRVSNVAGTRLSLISKADWDHPGSFDDGNMFASETTLN  
LGKVESPSSIVLDATANNKDGISFLAEVPAIIVTLMINFMTAIPFGVAYFPLGWAGDGSE  
AVENDDSTGAVSGPFPLPGKEILGIRMFLFASITGQIVMALASKFGSPVSVQLIENVPFY  
HALASIVIAEQGYGIEALSTLFFLFGGLSIVTGLMFYGLGKAGLGKVVYFPPSHVLVGF I  
GGIGVFIVISSIGVMTGKDFEFTTEGFQDLAANFWMFAPALAFEIVLRILMVLRLNEDGK  
PKFQLLAPLYFISIVPMFYVALITFGISMDEATDWELFFPAASTPEPSEVGYVSSFSERI  
LDRHTLDMFRVIHFNTVSWTAVRKS LATIVGMGFFSVINAPINIPAFANTCGADVDMNNE  
LIAHGYSNILAGFFGGIQNVMTYSISVLFYKSGGRSKAAQLVLVVGMIIFVFGGLSTMPY  
IPKCMAGTLLHIGVDLFMEGVYDSFGDYDKYEYGGVWVITAVMTFMGMTPALLTGIIVA  
LATYALQSVQYLDPIFKITNASTLKSSAWTRPPEALAVLDSISTGRSRIMVIQLQGNLFF  
GNVVDMGDTIKDALARQKPIIVMIDFTLVVSMDSAAQAVNKLKNTMHKNFNVQTNIFVM  
GQHRDYFPCYGLSTAILEEGLDEEAADVLELIPRNQICKDFDEGLIFAEDILITREDPT  
MLKRDNLIKHSLELKGDSLTEEEENNLAVHYLRNLIKPGPSCDEKRDAITFLSYFQREVY  
KKGEAVWKQGDKSDSAKLVLSGNLVASIPASDVREEIPRGVVIGELGLIDGVTDRLLSTVL  
CESDRAVIYSLEKMAWEKLIQEDPAVARVLDQIAIRYLSHRVQVRSNRIVSTNCLPV  
>comp12596\_c0\_seq1; 134 1 804 LEN=1594; translated  
VRFIRISVFRRLFLGISRIIDSSTRSRNSLAMICIPSLFLQCDPQLDRRSASDKKLPGIT  
RFQTNRNGNSTSSSPEAAGIVSDNKNNSQYTPKRSIIPAAIRLQRIWETEPPIGGFEM  
VGANQRAPFWERQQEQEKSPTKKLVVSLRRKSQVFAFLWTLVTFVAVDDYALLPVGT  
LLYAVAITMAWENWTDEAEENRRLMQQINRHKARLKTIQREVDNAKFEYHVLKNKPQVDI  
VVLHRRATAPKYNGRDMDSNWNADDDDDW  
>comp12597\_c0\_seq1; 231 205 528 LEN=878; translated  
MKTACTIVLLAQUALSATTAFAPASTQRSARLSPLFIGEDGNDSGIERGVSVDDQDGKSNVW  
AIEPKMEVESTSAEEKTKSALIAGAGLIAFAGAAGVALTNLPDPNQF  
>comp12598\_c0\_seq1; 418 347 1438 LEN=1550; translated  
MSISSTGNNHAGSRAGAESIDAAFEYHGAGTDTDTDVEAAKGTSTQDAYANSIVNDDSV  
PCGSGRNLHANANPNANTNANTNSINDDAGGNSGSNVHADYSNFLHPSPHHPHRPHAGGA  
NVAGGFRRLLHRDYLRLDLEDDVVLSPWPPTPSDRLGVSEVLQGRAAARARANKVSAFVVAY  
WIVSVVAVLLYGMVLGAGDRKGGKSSSKESTSAHGRATVLLGVSCAASLVGLLWAHYWY  
YKLDGRVQAKVRAIMDANGLGYREEAPRLAPSPLHRDDPAQAARFKLPEFVDVVLRSVAE  
EGSGEGSAGIHRPHDDDFSALTFRDSLIRSVASGSAGSQPHGRFASAFSLPRKIWGGQQ  
ASH  
>comp12598\_c0\_seq2; 418 335 1426 LEN=1538; translated  
MSISSTGNNHAGSRAGAESIDAAFEYHGAGTDTDTDVEAAKGTSTQDAYANSIVNDDSV  
PCGSGRNLHANANPNANTNANTNSINDDAGGNSGSNVHADYSNFLHPSPHHPHRPHAGGA  
NVAGGFRRLLHRDYLRLDLEDDVVLSPWPPTPSDRLGVSEVLQGRAAARARANKVSAFVVAY  
WIVSVVAVLLYGMVLGAGDRKGGKSSSKESTSAHGRATVLLGVSCAASLVGLLWAHYWY  
YKLDGRVQAKVRAIMDANGLGYREEAPRLAPSPLHRDDPAQAARFKLPEFVDVVLRSVAE  
EGSGEGSAGIHRPHDDDFSALTFRDSLIRSVASGSAGSQPHGRFASAFSLPRKIWGGQQ  
ASH  
>comp12599\_c0\_seq1; 179 1 681 LEN=1182; minus strand; translated  
SLDVVVPLPSLDVVVPLPSLPPFDVPLLPVLDGWRVGLREGLREGLREDLRD  
GLLDGLCVGTRIRGSATGEFLSPPEGFVAVGFVAVGATVGFCDGPIAGFSDGRRLGDRFGSS  
DGLCVGWVVGCLDGLVVRISFGGDTGESLKPVPVGLAVGFVWGLVGLDGLAVRISTGEA  
TGESLKAPVGFVAVGFCEGFKEGLLDGLGVGFREGFLDGTGLGFCEG  
>comp12599\_c0\_seq2; 247 1 547 LEN=785; translated  
XASKSGSKSGSGKSGIDKNSSSKDDASDLNRNLGPDEIDTKMRRRDRRKNRNRNKKFVDDGN  
ISNAAVLTESDDGFMGTTQPE SATPTATPTNNKDTRKKVNESSTKDKMKRRKRIRSRNLQ  
KKE SAVKR VFDGDIYYKDNNTPTVVP GSESXVAVFLVLDWIDIFLGF FEIDIDASTGYE  
HA  
>comp12599\_c0\_seq3; 340 1 599 LEN=837; translated  
TSKSGSKDGSESKSGGKEASKSGSKSGSGKSGIDKNSSSKDDASDLNRNLGPDEIDTKMR  
RRDRRKNRNRNKKFVDDGNISNAAVLTESDDGFMGTTQPE SATPTATPTNNKDTRKKVNESS  
TKDKMKRRKRIRSRNLQKKE SAVKR VFDGDIYYKDNNTPTVVP GSESXVAVFLVLDWID I  
FLGF FEIDIDASTGYEHA  
>comp12600\_c0\_seq1; 389 200 1609 LEN=1810; translated  
MKFTTAILLGLSLATGNVAASFQSYTTTKLSNSVSTTMATALHAMTVDIDESTPRDVWMT  
DEYMVNCGVQRADGFQLYDSSEETGASAPGMDFSVLTTTDLPAESPVLCPSELILSSEE  
IRAGELKGLVEPAEEMLEILGVPEKQFAMFHLFLKILMEYEKGEDSPWFPWLNSLPRTFK

TGASMPYCFECLPPLVSALASEERVKFVNFNSNCLQQVRFLSSETKNNKELAKWAYNIVY  
TRAFGNNDGTGKEEDNKRIVPMADMNFNATDTEVQISFDDDGNCYAYTTRDVPAGSPLRM  
SYGCPNPSYLFATYGFLEDESSPATFCKIMGIQPTQELRNIGLDFSRMLFYKDTGDITEE  
VWDVLLYTILEDLEDDDRQTQTTFYNACMQGDLDTKNSIHQQYFPLTSRALQIHVNSFLH  
ELDELNNKANTKDINEHPRIPIILEHNAFVKETFLRVKTNLDSMVAQMA

>comp12600\_c0\_seq2; 255 200 946 LEN=946; translated  
MKFTTAILLGLSLATGNVAAF SRQSYTTTKLSNSVSTTMATALHAMTVDIDESTPRDVWMT  
DEYMVNCGVQRADGFQLYDSSEETGASAPGMDFSVLTTTDLPAESPVLCPSELILSSEE  
IRAGELKGLVEPAEEMLEILGVPEKQFAMFHLFLKILMEYEKGEDSPWFPWLNSLPRTFK  
TGASMPYCFECLPPLVSALASEERVKFVNFNSNCLQQVRFLSSETKNNKELAKWAYNIVY  
TRAFGNNDG

>comp12601\_c0\_seq1; 1370 1 3345 LEN=3405; translated  
LKSQIEDAKRRLSALQDEARATKAAHDEESAVLKEETEAQVEHFRKLQERMNEIQHQMLI  
DEEAIVEQRREFEDLTNRIRQEREHWERSKAEESQWEKEKKQREEALEESLRDRVARAK  
HQLSALGDFLASEKESLKETYEAKMEQMDRMGNLSQLTARYQQERAQLDREKEAMSTKR  
EKLDLTLVGRLLDRSEQQYRDRQEELWEVARLNSMIVTEQESFEKERLQQARKHEAVLKT  
RDEHAAESETKAATIGSLEAEYNTLEREHKSRAELEKLADDSSQRIVVLQKKRDGLEAE  
LLKSQRQARSSEGLRATLQQEWKDRQEADASDRQKMLLMKRLEDNGNAVAEKQKEVDDR  
EMVVQDAINDVEKRLTELLETEQEMADRKEKLNKEIASQWKAWEEERDAKREFENELSG  
RQOKFDSEFNERRERLIVDRKQKAWEKQKLVEETKAVETEQSRIRESKEREIAEREEQF  
REQRTKEVAELEAEIQAQREELESQLYEMAEKHHQRNSDLEKELVETKRQRESDLKHF  
EKELKERLQOLELEIAAKREKRNSEELTARKEMERLLKEEKEALDLEMTQQRERSLQKIK  
KERDELQSNIETLLTQQTNHYEHRLEAMRKLRSRQDRQREAVSAAYSKWVRVAMFENA  
QEEQAGLEAAQAVEKSLRELGTNRESLKKMMTDLDARSTAVETLEREIAESKRQAQRDT  
EALGEARKTIDTERGILGTEREEICIQKRLAEERDTLQRDEAEFRSRCQSKNDMEKQKQ  
QDLVEKGRKLDLDERLQLDKEQEHLKDEFEKLRKERENLLEAKTAVRVSEAYCESRTNSLD  
DRERSLILERKTDFEKEKLLERERQSKFEFEKHHDLDEQERSLISMREELNITRRALE  
EREKAQKHELEDQERSFVTAQEELD KRRRALEEREKSQGAISSNVDRAVSQVLDQSMNFE  
RKWMEETAAAVFERETELNKKYAKLKRREEDLNQREREISVVSQDIAVQQARIQARADQL  
RNMEENVRNAELYYNKELRKCKETQKKMVDMAKSLKTKGDELKHRSLGLDKRMRECDALE  
QQLKHWQSELEDGEGAMAVSQNGSDMGFSSSFYSR

>comp12602\_c0\_seq1; 835 121 3089 LEN=3424; translated  
MKSKALETTIARGVISSAPSSAPKQRLCQHKFYGDYVNGMLGIVTPFFFAWKIMMEMYED  
MNQNHDPERNMLCNLDAVAMFGFTGISAISQYLAWTHDSLCSRIGFLGNCIAGSYMEL  
KEWPVKGVCTITARFQAGILTCLANITLSVREKCTRLVLMFVIGSYVSIKSPYSVYAED  
TLPNLGGAILIAIVLIHIFETCMIWGDGDCERSDNKVLSHSNSNVLRRLHLQKDEFI  
SARFVMAAVYIHHIFKLFIDFFAHQNNDMVEGII DLAKSTMIAGIGSVATGVFKTNIDQK  
EQLELLVRERTQVIHFKTKELRINVAFEACETAIAITDSSRVVIWANNAFEKLAKRTTT  
VQPSLGEQSRVSATSDTDALNETCSSVGRQLTDVIVLNDSTNETKLRGAFDFLSRPHDEI  
NIIIGDDCTNSSRGKSDYRLEVTPFVDYDEGTKTISNDNDNNLFLVAFHDITADRARKQAE  
NMAREEALLSKAMKESMVTLTVRISVLEFFLNVSFFHSNSDLXAYFNLVLYKFGSTPSQH  
ELRTPLOQIMGITSLLLEQDRDAKHFNKDALESLGLVMASRLLLLNLINLLDIKKATAN  
MMDEFLLTPLLATDPIRDAIDFCKPLASISMVKIAMECSDGTAFAFVNANALRLQOVLIN  
IISNAIKYTDRTTIQVTRTSSMSMNAKEVMGKAIACSHNEDEAIVDGKPVLVFVSVSDAG  
VGIDSHQARLLFRRFARLDLQPIINTLGINITIGQPSGTGLGLHLCKMFVQRMHGSLSWASN  
EDGKGFSTFSCPLPLVSALRSNLEGCSATTIPDARKSEVLENSPLESLSSNQDPTIRLPL  
RESMDFRRFRVLVDDTLINRKFVDRMLKKIGI IHVCMVESGAEALGVLFVSNHHRHYDV  
VITDLQMPGMSGTELTREIKRKPDPGRPVVIGLTANSSPDVAEKCAASGMSDVLKPI  
TLTETKEYFQKVIGLQPGIWKHEKKFL

>comp12602\_c0\_seq2; 813 379 3075 LEN=3410; translated  
MMEMYEDMNQNHDPERNMLCNLDAVAMFGFTGISAISQYLAWTHDSLCSRIGFLGNCI  
AGSYMELKEWPVKGVCTITARFQAGILTCLANITLSVREKCTRLVLMFVIGSYVSIKSP  
YSVYAEDTLPNLGGAILIAIVLIHIFETCMIWGDGDCERSDNKVLSHSNSNVLRRLHLQ  
KDEFIHSARFVMAAVYIHHIFKLFIDFFAHQNNDMVEGII DLAKSTMIAGIGSVATGVF  
KTNIDQKEQLELLVRERTQVIHFKTKELRINVAFEACETAIAITDSSRVVIWANNAFEK  
LAKRTTTVQPSLGEQSRVSATSDTDALNETCSSVGRQLTDVIVLNDSTNETKLRGAFDFL  
SPRPHDEINIIGDDCTNSSRGKSDYRLEVTPFVDYDEGTKTISNDNDNNLFLVAFHDITAD  
RARKQAEENMAREEALLSKAMKESMVTLTHELRTPLQIMGITSLLLEQDRDAKHFNKDAL  
ESLGLVMASRLLLLNLINLLDIKKATANMMDEFLLTPLLATDPIRDAIDFCKPLASISM  
VKIAMECSDGTAFAFVNANALRLQOVLINIISNAIKYTDRTTIQVTRTSSMSMNAKEVM

GKAIACSHNEDEAIVDGKPVLFVSVSDAGVGDISHQARLLFRRFARLDLQPINTLGINTI  
GQPSGTGLGLHLCKMFVQRMHGSLWASNNEDGKGSTFSFCLPLVSALRSNLEGCSATTIP  
DARKSEVLENSPLESLSSNQDPTIRLPPLRESMDFRFRVFLVDDTLINRKVFDRLKKI  
GIIHVCMVESGAEALGVLFSSNNHDRHYDVVITDLQMPGMSGTELTREIIKRKPDPSGRPV  
VIGLTANSSPDVAEKCAASGMSDVLYKPIITLTETKEYFQKVIQQLQPGIWKHEKKFL  
>comp12602\_c0\_seq3; 808 379 3188 LEN=3523; translated  
MMEMYEDMNQNHDPERNMLCNLDAVAMFGFTGISAISQYLAWTHDSLCSRIGFLGNCI  
AGSYMELKEWPVKGVCTITARFQAGILTLCLANITLSVREKCTRLVLMFVIGSYVSIKSP  
YSVYAEDTLPNLGGAILIAIVLIHIFETCMIWGDGDDGGCERSDNKVLSHSNSNVLRHLQ  
KDEFI IHSARFVMAAVYIHHIFKLFIDFFAHQNNDMVEGIIDLAKSTMIAGIGSVATGVF  
KTNIDQKEQLELLVRERTQVIHFKTKELRRINVAFEACETAIAITDSSRVVIWANNAFEK  
LAKRTTTVQPSLGEQSRVSATSDTDALNETCSSVGRQLTDVIVLNDSTNETKLRGAFDFL  
SPRHDEINIIGDDCTNSSRGKSDYRLEVTPFVDYDEGTKTISNDNDNNLFLVAFHDITAD  
RARKQAE NMAREEALLSKAMKESMVTLTVRISVLEFFLNVSFFHSNSDLXAYFNLVLYKF  
GSTPSQHELRTPLQGIMGITSLLLEQDRDAKHFNKDALESLGLVMASSRLLLNINLLD  
IKKATANMMDEFLLTPLLATDPIRDAIDFCKPLASISMVKIAMECSDGTAFAFVNANALR  
LQOVLINIISNAIKYTDRTGTTIQVRTTSMKNAKEVMGKAIACSHNEDEAIVDGKPVLF  
FSVSDAGVGDISHQARLLFRRFARLDLQPINTLGINTI GQPSGTGLGLHLCKMFVQRMHG  
SLWASNNEDGKGSTFSFCLPLVSALRSNLEGCSATTIPDARKSEVLENSPLESLSSNQDPT  
TIRLPPLRESMDFRFRVFLVDDTLINRKVFDRLKKIGIIHVCMVESGAEALGVLFSSNN  
HDRHYDVVITDLQMPGMSGTELTREIIKRKPDPSGRPVVIGLTANSSPDVAEKCAASGMS  
DVLYKPIITLTETKEYFQKVIQQLQPGIWKHEKKFL  
>comp12602\_c0\_seq4; 840 121 2976 LEN=3311; translated  
MKSKALETTIARGVISSAPSSAPKQRLCQHKFYGDYVNGMLGIVTPFFAWKIMMEMYED  
MNQNHDPERNMLCNLDAVAMFGFTGISAISQYLAWTHDSLCSRIGFLGNCIAGSYMEL  
KEWPVKGVCTITARFQAGILTLCLANITLSVREKCTRLVLMFVIGSYVSIKSPYSVYAED  
TLPNLGGAILIAIVLIHIFETCMIWGDGDDGGCERSDNKVLSHSNSNVLRHLQKDEFI IHS  
SARFVMAAVYIHHIFKLFIDFFAHQNNDMVEGIIDLAKSTMIAGIGSVATGVFKTNIDQK  
EQLELLVRERTQVIHFKTKELRRINVAFEACETAIAITDSSRVVIWANNAFEKLAKRTTT  
VQPSLGEQSRVSATSDTDALNETCSSVGRQLTDVIVLNDSTNETKLRGAFDFLSPRHDEI  
NIIGDDCTNSSRGKSDYRLEVTPFVDYDEGTKTISNDNDNNLFLVAFHDITADRARKQAE  
NMAREEALLSKAMKESMVTLTHELRTPLOGIMGITSLLLEQDRDAKHFNKDALESLGLVM  
ASSRLLLNINLLDIKKATANMMDEFLLTPLLATDPIRDAIDFCKPLASISMVKIAMEC  
SDGTAFAFVNANALRQOVLINIISNAIKYTDRTGTTIQVRTTSMKNAKEVMGKAIACS  
HNEDEAIVDGKPVLFVSVSDAGVGDISHQARLLFRRFARLDLQPINTLGINTI GQPSGTG  
LGLHLCKMFVQRMHGSLWASNNEDGKGSTFSFCLPLVSALRSNLEGCSATTIPDARKSEV  
LENSPLESLSSNQDPTIRLPPLRESMDFRFRVFLVDDTLINRKVFDRLKKIGIIHVCM  
VESGAEALGVLFSSNNHDRHYDVVITDLQMPGMSGTELTREIIKRKPDPSGRPVVIGLTAN  
SSPDVAEKCAASGMSDVLYKPIITLTETKEYFQKVIQQLQPGIWKHEKKFL  
>comp12603\_c0\_seq1; 396 70 1764 LEN=1884; translated  
MRSSLFQII IYLSTASILSVGADYACDFCPEPATLSDDDPFCKELLRLARIGDLYSEQTE  
CDLNLQSLARRCKCSAPPKAPHAPCDPCAASGTASMTIGKPLGKIAFHSTYSCIEMLY  
SARAGGLNADECKAFSISEIESHCGGCVETVQCDFDQSKCRSSQILVASNPDNYPGPSKL  
WSSSLTCEELIEGARAGDLLSEAGCRVFESSVEAAFQPGTFGLAIASLKECALQCDYDET  
ANTSLNRKPPVPIQNDLILSPRSDVDGSRVSDGSPSLMPSDGSPSLIPSDGSPSILPSDG  
PSFPPIVKCKDRSGNSGLVYGDVPSDGPSPQPSDEPSLFINMDRANVVPDRSPKPKPHSK  
SCLVCDFDNDSAFYLYKDFGQTGVTFEALSAPDHREACHEKDDYCDPKEPLYPDLENCY  
LADVTSFDDLIGIQAVIPPKAAIYSYKNTITQFNQAKSCNQSNDTVECTAENYRQSL  
AYGSENNVDDDEDNAQMSTNSEEIPCSGLKEGWFNYGSNVAVPSGLWKNQGPSYCFSGPIQ  
NAAAVWPVHPNGSNYGDMDRVDNAGW  
>comp12604\_c0\_seq1; 480 1 1949 LEN=2137; translated  
XLLHRELIDSMEKQIEDRTDELATANRNLESANAQLAGQKAKQLEHFACMSHEIRTPLN  
IVGMSLLLLLEDSEASAGGPAIDPMHADSIRMINTSGELLRAVVDDVLDYAKLESFSFEVDI  
KPTKLQDTIDSVLYSISQKFKEKNVRLRPHFEPTVPEYIETDNRRLQOVLFNLLGNAGKF  
SKPDSVIDLSVRVVTSSSDNPTSEECGSRVFLDFRKETQNIYGGTGLGLSITSKLVHRLG  
GKISLDSVLGKFSDFSVLDLPMGKCVDVEKISNSLKNITIVVVEQKQEDNHSPVQSHVRA  
EPVPLNVDVVEAYGLRVLRCTNWEGLQSKTSREKAQTPRGHFTFLVHESLYQLCSAEPFE  
SVFGKHPHAVITYGTNFLVEKTKAFHLKSLTGLFPVTL LASIARQVSAQANADPGGATLP  
IAGTGPGSEERPVPRESPLSAGLRGSPRGRDGTSGKGFQHGLKVL YAEDNLVNQKVLTRVL  
NRYGISDVTVDNGRKAVDVSAKTRYDCILLDIQMPVMGGMEACRLITERDPDAI IIFVT

AHALDEFVRRAKAAGARGFISKPFRLGDIDDVLTDIYXNGVTDTGDEEQHQ TAPGGSKDP  
FPSDRTRNFRGVAAAAMGCAVQRHDGVSADRKAGNR TARNEACAPDGPI  
>comp12604\_c0\_seq2; 664 359 4927 LEN=5322; translated  
MSWTNSTEGSGEVSESRKGSLLKQEKMPMECTDSVVTITSARTVLRVRIVNQISGLFKDL  
LVDIRNDLNLFDIAIYDKNSVKKANVRKWKGRMSQQVKNGSHEIRCSIWDDEVNAPCHTYS  
IDDMKQTTTTGLYHLVGPPEGGLIKLVLCSEKAMTTIVTNPMSMPTSNFVEHGGNGLQG  
LTSPCIASIGDSKSSSIPPESSAKKGFHHPYISKIESHSGTFRCPFSAIAVDESVLKEF  
NDKVRNRDATAKRRDLSDSHQ SALATDTVSDLDENDNSTLR TETIIGVNDAYSISQS  
VLTAESNMVRKITNESSRRYKYLVDINSDLTIHESIYEHKGVISAQVRKWTPEIVRGVR  
NKTKEIQCAVLGDGSLDGTVVQTYSLDDLKNSSTRDLFDLAPKSNPVQLLLRCIEKHVPNL  
QNSINDDIHTRLSGIPKSASTRTLPRRYTSGSETSLDRLLSSTRSRPNHMNLSGIRNAS  
FFTASPTGIKTTGSLSGRRDSFLSNNNKSKFRSRVTTESSNLQEISCLAPTKTSNSH  
GDLKTDDASPLDSTSRRLSRSLRGFSSVPLMDINKMKSPVQRRASVHGDCTRFQGLSE  
FRRLRNSKMGVEFHSGGNLNKATR TNSNSKMLPLAGA QNSKFTIPFFNGLKDLFSDSLDR  
THPQSNEERSMASSSKRSSVKDSERINRFLTFGANRKMPIEVPVKGKSNLENYKIHPQTGL  
TKKSLSMGNSQASVGTAKSSAPPIAEINVVKRSRYGSGKIDPPSIALSGDLVKEVFPYH  
VVIDENFNI IQIGNNLSHLMENRELIGKCISDIFVITGPIPSFGKKWDWDLLEKMKEQII  
FLEGV DENSSHQPKVKGSI IELSKRQILLSLSPNVKNLSELESMNLSISDLP IHSCQRD  
AVLLGEHSKSEVKLTNHLDDLHRELIDSMEKQIEDRTDELATANRNLESANAQLAGQKAK  
QLEHFACMSHEIRTPNCIVGMSSLLLEDESAGGPAIDPMHADSIRMINTSGELLRAVV  
DDVLDYAKLESGSFEVDIKPTKLQDTIDSVLYSISQKFKEKNVRLRPHFEPTVPEYIETD  
NRRLQQVLFNLLGNAGKFSKPDVIDLSVRVVTSSSDNPTSEECGSRVFLRFVSRDYGKG  
IDKKDFETIFQPFQASKETQNIYGGTGLGLSITSKLVHRLGGKISLDSVLGKFSDFSDV  
LPMDGKCV DVEKISNSLKN TTVVVEQKQEDNHSPVQSHVRAEPVPLNVDVVEAYGLRVL  
RCTNWEGLQSKTSREKAQTPRGHFTFLVHESLYQLCSAEPFESVFGKHPHAVITYGTNFL  
VEKTKAFHLKSLTGLFPVTL LASIARQVSAQANADPGGATLP IAGTGP GSEERP VRESPP  
LSAGLRGSPRGRDGTSGKFQHLKVL YAEDNLVNQKVLTRVLNRYGISDVTVVDNGRKAV  
DVS AKTRYDCILLDIQMPVMGMEACRLITERDPDAI IIFVTAHALDEFVRRAKAAGARG  
FISKPFRLGDIDDVLTDIYRTA  
>comp12605\_c0\_seq1; 635 1 2120 LEN=2147; translated  
XSVDKRFEIFLTSDTAKATAVQYTMKNTSSSFI FIFILALFGAVVSSSFGFVQQTNHVKSAS  
IITSKSKRAVQRNVATNDNISKNTEGGKFTLTPPSKYPTNRGQTVDSRKIIATGAGRLHL  
TAVRIAHILFASLDLAESSLHEVRMATISFEDLAKQISNCAESRDKGGEIGWVTIDDQDG  
SKNEHLDGILPAQAREQAIHITTKPGDIVMVESSRGFHLVQICDVMADVRKMSLKERKT  
SKNGIGKSGARVASAGVNP GSDEEKKDLTYKLETMGCQMN LADSERIEGQLQNMGIRPLD  
EVEDKEVKPDVILNTCSIREHAESKVYSYLGYPYAKRKR DGEDVAIVVAGCVAQQE SEAL  
LRRVPEVDLVMGPQYANRLADFFEDIANGNQVVATEATHIMEDSSKPRRH SKTCAWV NVI  
YGCNERCAFCIVPTTRGVEQSRPLESIIQEIEGLVEEGYKEVTLLGQNI DAYGRDMV PKR  
RFSDLLKTAGSV PGLKRLRFV TSHPRYMSLSV VDEILNTP TVCESIHIPFQSGSNAI LSS  
MGRGHTREKYLHIVDRIRSRLPDASISADVIVGFPGETEEDFQDTLTLMKEVVFDVTN TA  
AYS PRPNTPAATWENQIPEEVKKERLNRINVLVKEHAKERRARMMGR TVEVLVEERNVKV  
PTQVMGRTRTNYIVYFEGDIDELQGELVNVKIDTCETFYLSGTRVE  
>comp12606\_c0\_seq1; 1765 78 3611 LEN=3679; translated  
MGKSSFVFLKDPEYAWIPAKLLRSSGNVADVEIPQYADEQSTICDGGRS AKKTIQAEVDL  
KQYNRGLVLPQNV DENGKMTVFPDMVELPFLHEAAILYNMKRRHLDDFPYTRTGDII IAV  
NPFQWFTHIYTEKVRADYANKLVWEDHEGDPRKLVDPHVYEVSSLSFKGLAFGRKDQSIL  
VSGESGAGKTETVKIAMNHIASVQRKGVASSGEAFSDPVVNRVLESGLLLEAFGNAKTRR  
NDNSSRF GKYTQLQFDQSAGGALTKKEDVKCKLAGSVC DVYLLEKNRITYHDSAERTYHV  
FYQLVAAPDSQKAGFW SGLKGT TNESFRYIGTACTDTIEGMKDGEHWKRTVDILDQIGVK  
GDKLHSLFEAITIVLQLGNLSFMKDP SDDDKSVVRDKKEFGALAGLMGVTEQDLINCLTE  
RTMKTRTESYK VPLNADAAQDAADAFAKEIYAKSFLWLVR AINDATCAENNFEGGKTEF  
GIIGLLDIFGFESFVRNRFEQLCINYCNEKLQAKFTVDIFRSVQEEYEGYEGIPLDEIKFD  
DNTDVLDLIEGKTGLLSMLNEECVRPKGSDEAFVQKAF AANKKTPCLIVSKMNRKEFGI H  
HYAGKVMYDSEGFVDSNKDTLPADLFD CALNCKNEIVSKHLTTDKCSNLPEKQLAAPKPK  
KGP PRAKSNLVAPTAWSKYKQLVKLMTMLGQTNSRYIRCIKPNAAKVPSIMQHVSTIE  
QLRCAGVVAAVTLRSAFP NR IENKTAKFKFASMWERSRFP SKGTDDMEEAEK LKHDCTA  
LLTCALKDFKSNEKGSIFVVGKTRSYFRMGAL EYLEANR TKEMGSQVVS IQRFIRGW F IR  
KEFEQADNKRRKAVAKIQK WYQTVTKEIEAAARKAKAKAEQKAREERER IAREKAEAKAK  
KALELRLAKEKAEREARLAREKAE EEEERERRERAEAEKRRKREEEAVVKFAKEKEKKIKK  
FKKDIKTQEKELDDKEAVWAAEINHLEKRCEEA EKARDDVLEQIAKEEAKLAAMPTLSDG



DKKKLADSAEITGLLRKENKRLRASTTQLRKDYDTMQENNKRLLEANALAGASFEAMNEA  
SKKANNTNSQFLKNLEKYKKQNSKLEDMRMSAYYDAEAKIRRYQKSLAHIMEIIQDQ  
CEDAQLVEDILVLALECESEAKSELAAEAKEAQR

>comp12607\_c0\_seq1; 384 1 2126 LEN=2420; translated  
XSQNERCNSNEYPCSIENPQKTSTGSIIRSGQDNPQTRDSQNDQYNSSEYLVKKYAGNIN  
SPLANKDGLKNKYDGYLDKKYTSNESSITANEDKLNKYDGYLDKKYAGKAKKPLATKDG  
VVSKKDTKLGVMNDTPRTKDDYETKNGTNPTNKDAGNVHSHTEKLVGFENKYEPLNFSPL  
LCSVDTNITIPNTPKTTKGAESRPQKPKSKINGNPMTRGKFVVRKDLRKLKLSYLMNERKT  
SEENPSSSFLQSYADDSFFQKSLTKDTEEQAKSLIRRIISYSPDSSTTTTTTSAERQDEK  
SNSETCVTNSGTNLNLRFDWDDDFEDKPIHKRIDWVCFKDRSFARDFQNDGLQISQDE  
DFQISEDEDFKIPPAKLPKRCETWVIWGVIGMIFTCFVFSFSIYFLIVDETEISDSPLG  
EHFGMEKCIIMHDSAGTRLSSRYNATRQHLLFQSIENMSAMDKSGTPQRKALCWISDYDA  
YTSVSDDGKKEEILQRYSLAVIYFSSVDTEEKSNTPSSLRYSDFLSADHECDWEAVIC  
NPHGKVSSRLFNNSLSGNLPSEIGNLIALNFIDFSFNHLTGTLPEMEKLIHLEHLSLA  
FNQLQTSIPTFLGLMTSLTSLNFRSSGLIQQIPSDIGNLSNLESLLLDRNSLSGTIPPEL  
GNLYNAEQINLENDLKGNTVEELCELHYTGVLQELAVDEQVSCDCCT

>comp12607\_c0\_seq3; 362 1 2030 LEN=2545; translated  
XSQNERCNSNEYPCSIENPQKTSTGSIIRSGQDNPQTRDSQNDQYNSSEYLVKKYAGNIN  
SPLANKDGLKNKYDGYLDKKYTSNESSITANEDKLNKYDGYLDKKYAGKAKKPLATKDG  
VVSKKDTKLGVMNDTPRTKDDYETKNGTNPTNKDAGNVHSHTEKLVGFENKYEPLNFSPL  
LCSVDTNITIPNTPKTTKGAESRPQKPKSKINGNPMTRGKFVVRKDLRKLKLSYLMNERKT  
SEENPSSSFLQSYADDSFFQKSLTKDTEEQAKSLIRRIISYSPDSSTTTTTTSAERQDEK  
SNSETCVTNSGTNLNLRFDWDDDFEDKPIHKRIDWVCFKDRSFARDFQNDGLQISQDE  
DFQISEDEDFKIPPAKLPKRCETWVIWGVIGMIFTCFVFSFSIYFLIVDETEISDSPLG  
EHFGMEKCIIMHDSAGTRLSSRYNATRQHLLFQSIENMSAMDKSGTPQRKALCWISDYDA  
YTSVSDDGKKEEILQRYSLAVIYFSSVDTEEKSNTPSSLRYSDFLSADHECDWEAVIC  
NPHGKVSSRLFNNSLSGNLPSEIGNLIALNFIDFSFNHLTGTLPEMEKLIHLEHLSLA  
FNQLQTSIPTFLGLMTSLTSLNFRSSGLIQQIPSDIGNLSNLESLLLDRNSLSGTIPPEL  
GNLYNAGKSKYINDCN

>comp12608\_c0\_seq1; 763 100 2595 LEN=2595; translated  
MLNSLSPPEEFFVVGHCCEWPEGRAEQGDTAIYTEYLDFGVPADQCMYLDNDCTRK  
NCQDQLDIFLRKHRPGGAEPEKDHRLNSKGDGRDRDVETERQKAPDTLVFYYGGHSAHG  
FATIGGTWPYEQVAKTIQECFHGDRVFLIDCCASGNLWRHIPTASGSDGGRDTARNSTV  
SKSFHKTKEYALFATSQPIAATADGEWILTNWILQMLRDRPTMNNNGSEQNTDVSLERM  
ISILADRNVFETGDLLEYAYLSGRMPSSLGKNRDDSIDEKSLADWSWMPAKSRWSPKPHGI  
VMDESDEKTPPSTALPSTPLAWLPSESLALVASDDLCCPIPKAAMLPLYDCRVGDPV  
AYKHPGGYPRSVKKQQTLFPFYVPLWLHGRIVSIFETETKREVDATERSDVYFRIRVWY  
PSQQESWDVEVPHNSHRLINQFFVQNWMLPRAFCKTQVMAQKYRQYLDCSMATNTPVW  
VRATCESSVGGDNVDNIRVGRVIDWKDFNWNKILYFHKYSDSGKLIFFPKTRYDDYYWDE  
LPLSIKAAALALGYTKTHWDEDIEIPADGMDWGELSEAQKGAAGVLGYVRQKPVAGGSL  
SGSNGDEGVFSQRLCEISKAGPHVPEVWNNHQSLSLPLQIIFAGTNRIPIDDLVSE  
SAIKLATKNSNYSLTATDGPSENDELHELQMLSLLEALTSKGKAIGDAESFLGKELSA  
FWPECEKFFDAEPIDVAFDKDIGASLDLLATHFDYMFPGVYCPYIYEDGVRHLVPLSHI  
YRRCQPQLHGDEDEDEDEDDDDDDDDDDDERDGEEDDDDSIEGDRKGEDDDDDDD  
EEDDDSIIEGDRKGEDDDDDDD

>comp12608\_c0\_seq2; 381 304 906 LEN=906; translated  
MVDPDQAKYTSWDILLGRDDPLEGIDFSGNAGSHDSDPADSDSDNGSASDTTFTLKELEEF  
GNGRNGNPIYLSVFGRVYDVSKGTFYGPDANYNMFAGKDVTRALCLGRKEAEFLVRSTE  
GLDEKQIEEGKRWLSFFELHDTYRFVGSLETLDSEAWLDALLEDEDEDDDDDDDDDDYDDERD  
EEDDDSIIEGDRKGEDDDDDDD

>comp12608\_c0\_seq3; 802 100 3075 LEN=3357; translated  
MLNSLSPPEEFFVVGHCCEWPEGRAEQGDTAIYTEYLDFGVPADQCMYLDNDCTRK  
NCQDQLDIFLRKHRPGGAEPEKDHRLNSKGDGRDRDVETERQKAPDTLVFYYGGHSAHG  
FATIGGTWPYEQVAKTIQECFHGDRVFLIDCCASGNLWRHIPTASGSDGGRDTARNSTV  
SKSFHKTKEYALFATSQPIAATADGEWILTNWILQMLRDRPTMNNNGSEQNTDVSLERM  
ISILADRNVFETGDLLEYAYLSGRMPSSLGKNRDDSIDEKSLADWSWMPAKSRWSPKPHGI  
VMDESDEKTPPSTALPSTPLAWLPSESLALVASDDLCCPIPKAAMLPLYDCRVGDPV  
AYKHPGGYPRSVKKQQTLFPFYVPLWLHGRIVSIFETETKREVDATERSDVYFRIRVWY  
PSQQESWDVEVPHNSHRLINQFFVQNWMLPRAFCKTQVMAQKYRQYLDCSMATNTPVW  
VRATCESSVGGDNVDNIRVGRVIDWKDFNWNKILYFHKYSDSGKLIFFPKTRYDDYYWDE  
LPLSIKAAALALGYTKTHWDEDIEIPADGMDWGELSEAQKGAAGVLGYVRQKPVAGGSL

SGSNGDEGVFSQRLCEISKSA GPHVPEWVNDNHQSSLVPLQQIIFAGTNRIPIDDLVSE  
SAIKLATKNSNYSLTATDGP SNENDELHELQMLSLLEALTSSGKAIGDAESFLGTKELSA  
FWPECEKFFDAEPIDVAFDKDIIGASLDLLATHFDYMFPGVYCP I IYEDGVRHLVPLSHI  
YRRGCQPQLHGDEDEDEDEKSPVDMEDGSSSTKETSTVLVPTKDAMDETKRKL RDVVVEVS  
SFGEQFSEVASKLEDASGSLRVLIDQSSERQAPDRPLATATAAAPDMAADASQNVPRELS  
AASRSYVDEYWGDLPEHVRRALRVGYTGELWSDSGSIPLDSVQWNDLSGDQREALVTIG  
YNEAKWNAEDDSESEEDDDSCSSSSCSSEY

>comp12608\_c0\_seq4; 737 254 3164 LEN=3446; translated  
MARGPAEQGDTAIYTEYLD FGV PADQCMY LKNDCTRKN CQDQLDI FLRKH RPPGGA EEPK  
DHLRNSKGDGRDRD VETERQKAPDTLV FYYGGHGS AHGFATIGGTWPYE QVAKTIQECFH  
GDRVLF LIDCCASGNLWRHIPTASGSDGGRDTARNSTVSKSFHKTKEYALFATSQPYIAA  
TADGEEWIL TNSWIQLMRDRPTMNGSEQNTDVSLERMISILADRNVFETGDLLYAYLSG  
RMPSSLGKNRDDS IDEKSLADWSWMPAKSRWSPKPHGIVMDES DKEKTPPSTALPSTPLA  
WLPSSSESLALVASDDLCCPIPK EAAMPLPLYDCRVGDPVAYKH PGGYPRSVK KQQQTLPFY  
VPPLWLHGRI VSI FETETKREVDATERSDVYFRIRVWYPSQQESWDVEVPHNSHRLINQF  
FVVQNWMLPRAFCKTQVVM AQYRQYLDCSMATNTPVWVRATCESSVGGDNVDNIRVGRV  
IDWKDFNWKNI LYFHKYSDSGKLI FPGKTRYDDYYWDELPLSIKAAALALGYTKTHWDED  
IEIPADGMDWGELSEAQKGAAGVLGYVRQKPVAGGGSLSGSNGDEGVFSQRLCEISKSA  
GPHVPEWVNDNHQSSLVPLQQIIFAGTNRIPIDDLVSESAIKLATKNSNYSLTATDGP SN  
ENDELHELQMLSLLEALTSSGKAIGDAESFLGTKELSAFWPECEKFFDAEPIDVAFDKDI  
IGASLDLLATHFDYMFPGVYCP I IYEDGVRHLVPLSHIYRRGCQPQLHGDEDEDEDEKSP  
VDMEDGSSSTKETSTVLVPTKDAMDETKRKL RDVVVEVSSSFGEQFSEVASKLEDASGSLRV  
LIDQSSERQAPDRPLATATAAAPDMAADASQNVPRELSAASRSYVDEYWGDLPEHVRRAA  
LRVGYTGELWSDSGSIPLDSVQWNDLSGDQREALVTIGYNEAKWNAEDDSESEEDDDSCS  
SSSCSSEY

>comp12608\_c0\_seq5; 698 254 2684 LEN=2684; translated  
MARGPAEQGDTAIYTEYLD FGV PADQCMY LKNDCTRKN CQDQLDI FLRKH RPPGGA EEPK  
DHLRNSKGDGRDRD VETERQKAPDTLV FYYGGHGS AHGFATIGGTWPYE QVAKTIQECFH  
GDRVLF LIDCCASGNLWRHIPTASGSDGGRDTARNSTVSKSFHKTKEYALFATSQPYIAA  
TADGEEWIL TNSWIQLMRDRPTMNGSEQNTDVSLERMISILADRNVFETGDLLYAYLSG  
RMPSSLGKNRDDS IDEKSLADWSWMPAKSRWSPKPHGIVMDES DKEKTPPSTALPSTPLA  
WLPSSSESLALVASDDLCCPIPK EAAMPLPLYDCRVGDPVAYKH PGGYPRSVK KQQQTLPFY  
VPPLWLHGRI VSI FETETKREVDATERSDVYFRIRVWYPSQQESWDVEVPHNSHRLINQF  
FVVQNWMLPRAFCKTQVVM AQYRQYLDCSMATNTPVWVRATCESSVGGDNVDNIRVGRV  
IDWKDFNWKNI LYFHKYSDSGKLI FPGKTRYDDYYWDELPLSIKAAALALGYTKTHWDED  
IEIPADGMDWGELSEAQKGAAGVLGYVRQKPVAGGGSLSGSNGDEGVFSQRLCEISKSA  
GPHVPEWVNDNHQSSLVPLQQIIFAGTNRIPIDDLVSESAIKLATKNSNYSLTATDGP SN  
ENDELHELQMLSLLEALTSSGKAIGDAESFLGTKELSAFWPECEKFFDAEPIDVAFDKDI  
IGASLDLLATHFDYMFPGVYCP I IYEDGVRHLVPLSHIYRRGCQPQLHGDEDEDEDEDDDD  
DDYDDERDGEEDDSDIEGDRKGEDDDDDDD

>comp12609\_c0\_seq1; 748 1 1981 LEN=2116; translated  
XHYQKKE TVKKE SVLTLTFNQNRAKKMDFRSQLSAFQKKSSDSSSNRGNNGDNGHGNSNY  
SSNRGDRGGRGN YGNSSFYGGRGNSRYDYPNRGRDDDRYGGDRRRHRPAEWSQDSNYRH  
GPSTNRRRFHPPQHGYGSSGHGHGYGHGPPPSHDGLDELRLKLYRIPRGFPRAPTAEKA  
KSKSHVALLVICIDDLPFEEIWKGWMETLSSSLDESVDFFVSVLCHAKFPKKTSEWMR  
QRLLTFGPKQGRGNSFMDPVYLTREPEWGSVEITRAMLDLLQNLKIGNDAVPKCEDKRF  
CPSRFLARSPPSFDGSSIPPVDQFLYVSESCMPVVTAP EFFKKISDSTVSWVNARHRTTE  
DTPKNKYEDDQFAGINRRIPGQYRWKGDQWVLLSRKHASSIIGMDRPFKPAKHQLWQSF  
HINASDEMFPTALALLGELRYTKDGNDTQKGRRLRDEESSSTQTGEGGLSAASSPKNAV  
QTQSHSEANPSAESSPPMKNQQIVLTPVFTFDWTEGMKNPALFSKGATDLKRVGKLARDR  
GCLVARKFATHVSIPIPLEEQKITGVISLEEWATVIKEIQSCEKESASEQEDKPAVVAP  
PAEVNQAAKTTEDDDAEDVDANNSDGDGIAESTPVESGNAVDKEEEDDDDNDEGETQLE

>comp12611\_c0\_seq1; 254 2147 3421 LEN=3809; translated  
MILAPLTRGGNLPFRRLCADFGMHTSVSEMIYARSLLRGDP IENARLRRSEGESIFGVQI  
ATNQIDEGVNAIKRAVEMGADFCDLNCGCPIHEATRRLGSSLLRSPKKLQKLVRLVSES  
SEIPVTVKIRLGCETNSINCLENVRAAREAGAAAITIHGRTAQQGYSKNADWDLIRRAVM  
ETKDDGYGHIPIIGNGDILTYEARRRMEETGVDSVMVGRGALCKPWI FKEFNDNATWAP  
DTKERVQIYRVLANYMKDHF GDDMGRKKS WNFLPW HFEFLSRYTPYPEEDFAAQSIDRP  
LIQNRMVL PDHTDPLDVL LANRCS DAHEVIASILWSDSD ETAVQKLNIFAESQDFKRIL  
TTGSVNEGEDKVL SNL PKGKAGK WGKRRGRKPGPKRTEEEIAQIRAERA AKKERILAEGG

TWPP

>comp12612\_c0\_seq1; 446 307 2143 LEN=2143; translated  
MFSATSSSTRSVVVISKKAASFGVARRGTKGILERFPFAWPPVFASTLPQAATSFGVRRF  
HFGAKGSLPSSVSRLLDLAELSRGGSQEHFGQQRKKGSAQPTGDGQNTSSSDGEQHGLN  
PFSSLLRTHSRVSKAVRQGAGAVFSLAGFIGSSVVTLTTDRRSFRDRFVEPVRALKNYLK  
TSGVDNELAKSYNRRLGVNLCCLARVHMHQGAEEERLLRRVHLYRGAAEQTEKTKKHRL  
LGASSFISSEFSSSLSPPPCSKIKRSLLEEARRYMKYATAVYQAMINAAQVDAGGRLDG  
KVGRVTKETISAHIQVPEDDIVLLDVSNLKSSNHLRHMVVVDHEHEKVVLSIRGTFSL  
EIIIMDVAAFSREFCGGEAHSEMANMAERVWTVAGPKIKEVLSENPGYEFILTGHS  
LGGAGA ACLLSILVQNKFLPREQGIRCFASFASPPVYTPLEFVPKTVRSTTNFVHENDV  
VPPFLSIQ KVRKLLSSLQAVDQYARDHMSGKQITSLILGASPPPKDLIASVLEAEGS  
RSLVPKKGAPTL YIPAEVLLKENLDEKGEHSDGSYRYELTNARELSQREIRVYPDMFV  
DHFPSRYEHVFD HLEKRDDDDDDDX

>comp12613\_c0\_seq1; 539 1 1995 LEN=2056; translated  
KTIGKQSKNRVKKLLLLTSYDTTRQWNNTDTSKIEIATDMSGQTLSELANLSNSKSYV  
LGRGGSGSNSNSNNITDISKKATARASRSSYTANLSRDDFLIFELQSLPRQDKNDNNT  
LINDSSDYSIVYHHWTLRQLYRHVVSSIRIRSTDPVPHSLKSSTVATPNATTTSGASTH  
DNDVHTDVPNRKSSSTHNRTASTQRRQHSTPAVSRNNHRRQTSHDHPHSHSHQYHHGSQ  
PHAPIPPPKLLGSNLHPRDMRRLVTPFSASNEPELIVRRHVMVFNCPLRAIITRDRLLV  
LVPMGADSVLKKLEERIVGNRFYDDYDEEPEETRDLEALESKSESAEKTTTETS  
GIVFE SDLDSNDENDVESGFCEDNSAKKNEVYDENAIHDHDIPTVASDDWSDMIRM  
EMDQKDLT FELLCVNACLSTVFEMLADDTAELQEKGLKYVQNRIGNRNGSNGKLLR  
PEDSLAVIRNL KNAVQVMQARVKGFVQSIDRILNEDEDMALMNVSRVLTNPENFVQ  
PVSSEMLEIESDEPE LVLESNLNNALTLSNALDLIQGQVESASDLIDARMDAARNK  
FLLASLLMSIASLSLTVLTCVSGIFGMNLSGLEETPNLFLPVTYGGIIGSLLLGV  
AIFAGMIVTGVIITGLGPVDQDGI DSLF

>comp12613\_c0\_seq2; 471 1 2102 LEN=2163; translated  
KTIGKQSKNRVKKLLLLTSYDTTRQWNNTDTSKIEIATDMSGQTLSELANLSNSKSYV  
LGRGGSGSNSNSNNITDISKKATARASRSSYTANLSRDDFLIFELQSLPRQDKNDNNT  
LINDSSDYSIVYHHWTLRQLYRHVVSSIRIRSTDPVPHSLKSSTVATPNATTTSGASTH  
DNDVHTDVPNRKSSSTHNRTASTQRRQHSTPAVSRNNHRRQTSHDHPHSHSHQYHHGSQ  
PHAPIPPPKLLGSNLHPRDMRRLVTPFSASNEPELIVRRHVMVFNCPLRAIITRDRLLV  
LVPMGADSVLKKLEERIVGNRFYDDYDEEPEETRDLEALESKSESAEKTTTETS  
GIVFE SDLDSNDENDVESGFCEDNSAKKNEVYDENAIHDHDIPTVASDDWSDMIRM  
EMDQKDLT FELLCVNACLSTVFEMLADDTAELQEKGLKYVQNRIGNRNGSNGKLLR  
PEDSLAVIRNL KNAVQVMQARVKGFVQSIDRILNEDEDMALMNVSRVLTNPENFVQ  
PVSSEMLEIESDEPE LVLESNLNNALTLSNALDLIQGQVESGGAYVVNFALCLLAH  
VFQCFRDFVIDFSFSSFLT NPKRFNRCENGCCAKQVLASEFTYVYRITKFD  
SLDVVSGIFGMNLSGLEETPNLFLPVT YGGIIGSLLLGV  
AIFAGMIVTGVIITGLGPVDQDGI DSLF

>comp12614\_c0\_seq1; 496 1 1258 LEN=1435; translated  
XDTGEFCVEAGALMLADNGICCIDFDMKDERDQVAIHEAMEQQTISITKAGIQATLNAR  
ASILAAANPIYGRYDRTKTLKANVTLSAPILSRFDLFFVVLDDCNPETDRQVAKHILKVH  
RGEDHDDPAKKAPFTMDQMRRIKFARTLHPKITPESQRMVECYRKLKQGD  
SLGRSRSAYRITVRQLESMVRLSEALARLHCCDEITPAFVREAYRLLKTSIIQVET  
RDIEVDDDDDDY GDYGGGDVLEEQDGDGDESDNNGGPPDSQMPDSQGLETTQ  
QHVVYRPGYVGEERHPAEPAA ASDEGAGDTAPGMDATGVSPPEPKAETD  
DSGAKAGKKKKKKKKKKSKKAFGGVESSEPTAA VAEPPAEPEWKL  
FESMDLAISAGWAPGQSFSFIATNVKGQKVVPPDDKAEQAFPLGARR

>comp12615\_c2\_seq1; 255 189 1316 LEN=1405; translated  
MESESLSKTPAADAAYAYIRKFND  
SAALCIEIEEYDRAISSLTKALRIARSVIEKKQQLR TDQSSKDN  
GSGCGRHCSLDGCIRFSEDRRH  
IHPLQNKKNGEREDAFADNRNEASIRQ RFLLRHRRRQGRGEPLV  
GSSSNTGYSSNAGDDPSFYSWNR  
TSAFSGTSVSRGMSLR AFSTRRTS  
AMDYVSDVTTRESRRRGNTNAFMVYQ  
KLIRVPAPSVHRDCAIGSLAITTVSL  
VTFLNLALVYHLKAIHAAGT  
TNHSTLPAINKALQLYDVTYNALEKYR  
LEEKHQHESCLRF RATLCNNLSHVHML  
LAGDHESHVACLRELLSTIMTLTDY  
NARKSTDDTSGECSQSLEGLA  
NAAPLISSAQCANAA

>comp12616\_c0\_seq1; 474 62 1286 LEN=1364; translated  
MDDERFDGLYLNVAQTTRGIEPLLDVFSFLRRTDFFSGPPGAEDGAAAAIAKVHEVLQ  
KHADRYKKDRELAAAKKAKAKQKQQAASKPKPKPKSPPKAPAEPETTTTTNNDD  
EIIEM SNDGGFDASTTVKAKKPVVTALPSKSGPPGASTTEEPKQTQTQTQTRAQT  
ETQTPTTPPP QSGASPCETDGDAAEGPPPEGNGGTVPKGYVWTQTLSEVMVGV  
PVPEHTRGRDVKVAITP



FARMDGHTVGIVGNNPLTLAGCLDINASNKAARFVRFCSFNIPIVTFVDVPGFLPGTEQ  
EFGGIIRHGAKLLFAYAEASVPKVTVITRKAYGGAYDVMASKHLRVDSNYAWPGTEIAVM  
GAKGAVNVLYRGNENVEEHIAEYTSKFANPMTAAQRGFVDDVIDPRDTRRILCNDLRLLR  
TKSMPEIKKKHSNIPL

>comp12620\_c0\_seq3; 502 293 2061 LEN=2108; translated  
MLYLLASERILVGVKDVHEYIIFPVTFVFFGDDSRSPLEQDPSVLKARFKERLREERR  
KSLMGGGQDRIDRQHSRGLTARERLELLFDEGSFQELDAFKTHRCKEFGMDDNKTQFPG  
DGVITGHGRVNGRYVYAFSQDFTVFGGSLSETNAEKIVKIMEMARRVGAPIVGLNDSGGA  
RIQEGVDSLAGEYADVFLSNVDSSGVVPQISVVMGPCAGGAVYSPAMTDFIFMVESSSYXV  
RIKDNDFALVQIYYSWDFLLPQXTYLVFYFSYRFVTPDVKTVTNEDVTKEDLGGSKVHV  
SKSGVAHGKFENDVAAMKGMRRFLDFLPSSNDKATLPIKESTDPPDRLVPEIENLVPDDP  
NTPYDMKDVIHQIVDHGDIIFEIMPEMAQNIIVVGFARMDGHTVGIVGNNPLTLAGCLDINA  
SNKAARFVRFCSFNIPIVTFVDVPGFLPGTEQEFGGIIRHGAKLLFAYAEASVPKVTVITR  
KAYGGAYDVMASKHLRVDSNYAWPGTEIAVMGAKGAVNVLYRGNENVEEHIAEYTSKF  
ANPMTAAQRGFVDDVIDPRDTRRILCNDLRLLRTKSMPEIKKKHSNIPL

>comp12620\_c0\_seq4; 286 490 1408 LEN=1687; translated  
MILLWYKSITLGTFFYHSYFLVYFYFSYRFVTPDVKTVTNEDVTKEDLGGSKVHVSKSG  
VAHGKFENDVAAMKGMRRFLDFLPSSNDKATLPIKESTDPPDRLVPEIENLVPDDPNTPY  
DMKDVIHQIVDHGDIIFEIMPEMAQNIIVVGFARMDGHTVGIVGNNPLTLAGCLDINASNKA  
ARFVRFCSFNIPIVTFVDVPGFLPGTEQEFGGIIRHGAKLLFAYAEASVPKVTVITRKA  
YGGAYDVMASKHLRVDSNYAWPGTEIAVMGAKGAVNVLYRGNVSSPRRRDSWEEKAVNLL  
SDMPL

>comp12620\_c0\_seq5; 405 293 2060 LEN=2339; translated  
MLYLLASERILVGVKDVHEYIIFPVTFVFFGDDSRSPLEQDPSVLKARFKERLREERR  
KSLMGGGQDRIDRQHSRGLTARERLELLFDEGSFQELDAFKTHRCKEFGMDDNKTQFPG  
DGVITGHGRVNGRYVYAFSQDFTVFGGSLSETNAEKIVKIMEMARRVGAPIVGLNDSGGA  
RIQEGVDSLAGEYADVFLSNVDSSGVVPQISVVMGPCAGGAVYSPAMTDFIFMENPPRKF  
DARFQSAARYPAYALEVGISFYEFSAVFFLSLSPPGTVRIKDNDFALVQIYYSWDFLLPQ  
XTYLVFYFSYRFVTPDVKTVTNEDVTKEDLGGSKVHVSKSGVAHGKFENDVAAMKGM  
RFLDFLPSSNDKATLPIKESTDPPDRLVPEIENLVPDDPNTPYDMKDVIHQIVDHGDIIFE  
IMPEMAQNIIVVGFARMDGHTVGIVGNNPLTLAGCLDINASNKAARFVRFCSFNIPIVTF  
VDVPGFLPGTEQEFGGIIRHGAKLLFAYAEASVPKVTVITRKAYGGAYDVMASKHLRVDS  
NYAWPGTEIAVMGAKGAVNVLYRGNVSSPRRRDSWEEKAVNLLSDMPL

>comp12620\_c0\_seq6; 520 122 1312 LEN=1359; translated  
MEMARRVGAPIVGLNDSGGARIQEGVDSLAGEYADVFLSNVDSSGVVPQISVVMGPCAGGA  
VYSPAMTDFIFMVESSSYMFVTPDVKTVTNEDVTKEDLGGSKVHVSKSGVAHGKFEND  
VAAMKGMRRFLDFLPSSNDKATLPIKESTDPPDRLVPEIENLVPDDPNTPYDMKDVIHQI  
VDHGDIIFEIMPEMAQNIIVVGFARMDGHTVGIVGNNPLTLAGCLDINASNKAARFVRFCS  
FNIPIVTFVDVPGFLPGTEQEFGGIIRHGAKLLFAYAEASVPKVTVITRKAYGGAYDMA  
SKHLRVDSNYAWPGTEIAVMGAKGAVNVLYRGNENVEEHIAEYTSKFANPMTAAQRGFV  
DVIDPRDTRRILCNDLRLLRTKSMPEIKKKHSNIPL

>comp12620\_c0\_seq7; 206 622 939 LEN=1824; minus strand; translated  
MKMKSVMAGLYTAPPAQGPMTTDCGTTPEDESTFDKKTSAYPANESTPSWMRAPPESFSP  
TMGAPTRLAISIIITIFSAFVSLRPPKTVKSASRRLPGNIMQVS

>comp12620\_c0\_seq8; 355 122 1289 LEN=1568; translated  
MEMARRVGAPIVGLNDSGGARIQEGVDSLAGEYADVFLSNVDSSGVVPQISVVMGPCAGGA  
VYSPAMTDFIFMVESSSYXVRIKDNDFALVQIYYSWDFLLPQXTYLVFYFSYRFVTPDVK  
KTVTNEDVTKEDLGGSKVHVSKSGVAHGKFENDVAAMKGMRRFLDFLPSSNDKATLPIKE  
STDPPDRLVPEIENLVPDDPNTPYDMKDVIHQIVDHGDIIFEIMPEMAQNIIVVGFARMDGH  
TVGIVGNNPLTLAGCLDINASNKAARFVRFCSFNIPIVTFVDVPGFLPGTEQEFGGIIR  
HGAKLLFAYAEASVPKVTVITRKAYGGAYDVMASKHLRVDSNYAWPGTEIAVMGAKGAVN  
VLYRGNVSSPRRRDSWEEKAVNLLSDMPL

>comp12620\_c0\_seq9; 451 899 2276 LEN=2323; translated  
MILPGNLLDADFTVFGGSLSETNAEKIVKIMEMARRVGAPIVGLNDSGGARIQEGVDSL  
GADYADVFLSNVDSSGVVPQISVVMGPCAGGAVYSPAMTDFIFMVESSSYXVRIKDNDFALV  
QIYYSWDFLLPQXTYLVFYFSYRFVTPDVKTVTNEDVTKEDLGGSKVHVSKSGVAHGKF  
ENDVAAMKGMRRFLDFLPSSNDKATLPIKESTDPPDRLVPEIENLVPDDPNTPYDMKDVI  
RQIVDHGDIIFEIMPEMAQNIIVVGFARMDGHTVGIVGNNPLTLAGCLDINASNKAARFVRF  
CSFNIPIVTFVDVPGFLPGTEQEFGGIIRHGAKLLFAYAEASVPKVTVITRKAYGGAYD  
VMASKHLRVDSNYAWPGTEIAVMGAKGAVNVLYRGNENVEEHIAEYTSKFANPMTAAQRG

FVDDVIDPRDTRRILCNDLRLRLTKSMPEIKKKHSNIPL  
>comp12620\_c0\_seq10; 470 899 2059 LEN=2338; translated  
MILPGNLLDADFTVFGGSLSETNAEKIVKIMEMARRVGAPIVGLNDSGGARIQEGVDSL  
GYADVFLSNVDSSGVVPQISVVMGPCAGGAVYSPAMTDFIFMVESSSYMFVTGPDVVKTV  
TNEDVTKEDLGGSKVHVSKSGVAHGKFENDVAAMKGMRRFLDFLPSNDKATLPIKESTD  
PPDRLVPEIENLVPDDPNTPYDMKDVIHQIVDHGDI FEIMPEMAQNIIVVGFARMDGHTVG  
IVGNNPLTLAGCLDINASNKAARFVRFCSFNIPIVTFVDVPGFLPGTEQEFGGIIRHGA  
KLLFAYAEASVPKVTVIITRKAYGGAYDVMASKHLRVDSNYAWPGTEIAVMGAKGAVNVLY  
RGNVSSPRRRDSWEEKAVNLLSDMPL  
>comp12620\_c0\_seq11; 344 293 1458 LEN=1490; translated  
MLYLLASERILVGVEKDVHEYIIFPVTFVFFGDDSRSPLEQDPSVLKARFKERLREERR  
KSLMGGGQDRIDRQHSRGLTARERLELLFDEGSFQELDAFKTHRCKEFGMDDNKTQFP  
DGVITGHGRVNGRYVYAFSQDFTVFGGSLSETNAEKIVKIMEMARRVGAPIVGLNDSGGA  
RIQEGVDSLALGYADVFLSNVDSSGVVPQISVVMGPCAGGAVYSPAMTDFIFMVESSSYXV  
RIKNDFALVQIYYSWDFLLPQXTYLVFYFSYRFVTGPDVVKTVTNEDVTKEDLGGSKVHV  
SKSGVAHGKFENDVAAMKGMRRFLDFLPSNDKATLPIKESTDPPDRLVPEIENLVPDDP  
NTPYDMKVRDTPVPLFATKEKYADPIDSF  
>comp12620\_c0\_seq12; 293 899 1673 LEN=1705; translated  
MILPGNLLDADFTVFGGSLSETNAEKIVKIMEMARRVGAPIVGLNDSGGARIQEGVDSL  
GYADVFLSNVDSSGVVPQISVVMGPCAGGAVYSPAMTDFIFMVESSSYXVRIKNDFALVQ  
IYYSWDFLLPQXTYLVFYFSYRFVTGPDVVKTVTNEDVTKEDLGGSKVHVSKSGVAHGKF  
ENDVAAMKGMRRFLDFLPSNDKATLPIKESTDPPDRLVPEIENLVPDDPNTPYDMKVRD  
TVPLFATKEKYADPIDSF  
>comp12620\_c0\_seq13; 201 490 925 LEN=957; translated  
MILLWYKSITLGTFFYHSYFLVYFYSYRFVTGPDVVKTVTNEDVTKEDLGGSKVHVSKSG  
VAHGKFENDVAAMKGMRRFLDFLPSNDKATLPIKESTDPPDRLVPEIENLVPDDPNTPY  
DMKVRDTPVPLFATKEKYADPIDSF  
>comp12620\_c0\_seq14; 436 293 1361 LEN=1393; translated  
MLYLLASERILVGVEKDVHEYIIFPVTFVFFGDDSRSPLEQDPSVLKARFKERLREERR  
KSLMGGGQDRIDRQHSRGLTARERLELLFDEGSFQELDAFKTHRCKEFGMDDNKTQFP  
DGVITGHGRVNGRYVYAFSQDFTVFGGSLSETNAEKIVKIMEMARRVGAPIVGLNDSGGA  
RIQEGVDSLALGYADVFLSNVDSSGVVPQISVVMGPCAGGAVYSPAMTDFIFMVESSSYMF  
VTGPDVVKTVTNEDVTKEDLGGSKVHVSKSGVAHGKFENDVAAMKGMRRFLDFLPSNDK  
ATLPIKESTDPPDRLVPEIENLVPDDPNTPYDMKVRDTPVPLFATKEKYADPIDSF  
>comp12620\_c0\_seq15; 378 899 2156 LEN=2435; translated  
MILPGNLLDADFTVFGGSLSETNAEKIVKIMEMARRVGAPIVGLNDSGGARIQEGVDSL  
GYADVFLSNVDSSGVVPQISVVMGPCAGGAVYSPAMTDFIFMVESSSYXVRIKNDFALVQ  
IYYSWDFLLPQXTYLVFYFSYRFVTGPDVVKTVTNEDVTKEDLGGSKVHVSKSGVAHGKF  
ENDVAAMKGMRRFLDFLPSNDKATLPIKESTDPPDRLVPEIENLVPDDPNTPYDMKDVI  
RQIVDHGDI FEIMPEMAQNIIVVGFARMDGHTVGIVGNNPLTLAGCLDINASNKAARFVRF  
CNSFNIPIVTFVDVPGFLPGTEQEFGGIIRHGAKLLFAYAEASVPKVTVIITRKAYGGAYD  
VMASKHLRVDSNYAWPGTEIAVMGAKGAVNVLYRGNVSSPRRRDSWEEKAVNLLSDMPL  
>comp12620\_c0\_seq16; 270 122 806 LEN=838; translated  
MEMARRVGAPIVGLNDSGGARIQEGVDSLALGYADVFLSNVDSSGVVPQISVVMGPCAGGA  
VYSPAMTDFIFMVESSSYXVRIKNDFALVQIYYSWDFLLPQXTYLVFYFSYRFVTGPDV  
KTVTNEDVTKEDLGGSKVHVSKSGVAHGKFENDVAAMKGMRRFLDFLPSNDKATLPIKE  
STDPPDRLVPEIENLVPDDPNTPYDMKVRDTPVPLFATKEKYADPIDSF  
>comp12620\_c0\_seq17; 428 122 1409 LEN=1456; translated  
MEMARRVGAPIVGLNDSGGARIQEGVDSLALGYADVFLSNVDSSGVVPQISVVMGPCAGGA  
VYSPAMTDFIFMVESSSYXVRIKNDFALVQIYYSWDFLLPQXTYLVFYFSYRFVTGPDV  
KTVTNEDVTKEDLGGSKVHVSKSGVAHGKFENDVAAMKGMRRFLDFLPSNDKATLPIKE  
STDPPDRLVPEIENLVPDDPNTPYDMKDVIHQIVDHGDI FEIMPEMAQNIIVVGFARMDG  
HTVGIVGNNPLTLAGCLDINASNKAARFVRFCSFNIPIVTFVDVPGFLPGTEQEFGGIIR  
HGAKLLFAYAEASVPKVTVIITRKAYGGAYDVMASKHLRVDSNYAWPGTEIAVMGAKGAVN  
VLYRGNENVEEHIAEYTSKFANPMTAAQRGFVDDVIDPRDTRRILCNDLRLRLTKSMPEI  
KKKHSNIPL  
>comp12620\_c0\_seq18; 447 122 1192 LEN=1471; translated  
MEMARRVGAPIVGLNDSGGARIQEGVDSLALGYADVFLSNVDSSGVVPQISVVMGPCAGGA  
VYSPAMTDFIFMVESSSYMFVTGPDVVKTVTNEDVTKEDLGGSKVHVSKSGVAHGKFEND  
VAAMKGMRRFLDFLPSNDKATLPIKESTDPPDRLVPEIENLVPDDPNTPYDMKDVIHQI

VDHGDIFEIMPEMAQNIIVVGFARMDGHTVGVGNPLTLAGCLDINASNKAARFVRFNCNS  
FNIPIVTFVDVPGFLPGTEQEFGGIIRHGAKLLFAYAEASVPKVTVITRKAYGGAYDVMA  
SKHLRVDSDNYAWPGTEIAVMGAKGAVNVLYRGNVSSPRRRDSWEEKAVNLLSDMPL  
>comp12620\_c0\_seq19; 359 490 1528 LEN=1575; translated  
MILLWYKSITLGTFFYHSYFLVVFYFSYRFVTGPDVVKTVTNEDVTKEDLGGSKVHVS  
VAHGKFENDVAAMKGMRRFLDFLPSNDKATLPIKESTDPPDRLVPEIENLVPDDPNT  
DMKDVIRQIVDHGDIFEIMPEMAQNIIVVGFARMDGHTVGVGNPLTLAGCLDINASNKA  
ARFVRFNCNSFNIPIVTFVDVPGFLPGTEQEFGGIIRHGAKLLFAYAEASVPKVTVITRKA  
YGGAYDVMASKHLRVDSDNYAWPGTEIAVMGAKGAVNVLYRGNENVEEHIAEYTSKFANPM  
TAAQRGFVDDVIDPRDTRRILCNDLRLLRKSMPEIKKKHSNIPL  
>comp12620\_c0\_seq20; 362 122 709 LEN=741; translated  
MEMARRVGAPIVGLNDSGGARIQEGVDSLADVFLSNVDSSGVVPQISVVMGPCAGGA  
VYSPAMTDFIFMVESSSYMFVTGPDVVKTVTNEDVTKEDLGGSKVHVS  
VAHGKFENDVAAMKGMRRFLDFLPSNDKATLPIKESTDPPDRLVPEIENLVPDDPNT  
PYDMKVRDTPVLFATKEKYADPIDSF  
>comp12620\_c0\_seq21; 543 899 2179 LEN=2226; translated  
MILPGNLLDADFTVFGGSLSETNAEKIVKIMEMARRVGAPIVGLNDSGGARIQEGVDSL  
ADVFLSNVDSSGVVPQISVVMGPCAGGAVYSPAMTDFIFMVESSSYMFVTGPDVVKTV  
TNEDVTKEDLGGSKVHVS  
VAHGKFENDVAAMKGMRRFLDFLPSNDKATLPIKESTDPPDRLVPEIENLVPDDPNT  
PYDMKDVIRQIVDHGDIFEIMPEMAQNIIVVGFARMDGHTVGVGNPLTLAGCLDINASNKA  
ARFVRFNCNSFNIPIVTFVDVPGFLPGTEQEFGGIIRHGAKLLFAYAEASVPKVTVITRKA  
YGGAYDVMASKHLRVDSDNYAWPGTEIAVMGAKGAVNVLYRGNENVEEHIAEYTSKFANPM  
TAAQRGFVDDVIDPRDTRRILCNDLRLLRKSMPEIKKKHSNIPL  
>comp12620\_c0\_seq22; 429 293 1941 LEN=2220; translated  
MLYLLASERILVGVEKDVHEYIIFPVTFFVFGDDSRSPLEQDPSVLKARFKERLREERR  
KSLMGGGQDRIDRQHSRGLTARERLELLFDEGSFQELDAFKTHRCKEFGMDDNKTQFP  
DGVITGHGRVNGRYVYAFSQDFTVFGGSLSETNAEKIVKIMEMARRVGAPIVGLNDSGGA  
RIQEGVDSLADVFLSNVDSSGVVPQISVVMGPCAGGAVYSPAMTDFIFMVESSSYXV  
RIKNDFALVQIYYSWDFLLPQXTYLVFYFSYRFVTGPDVVKTVTNEDVTKEDLGGSKVH  
VSKSGVAHGKFENDVAAMKGMRRFLDFLPSNDKATLPIKESTDPPDRLVPEIENLVPDD  
PNTPYDMKDVIRQIVDHGDIFEIMPEMAQNIIVVGFARMDGHTVGVGNPLTLAGCLDINA  
SNKAARFVRFNCNSFNIPIVTFVDVPGFLPGTEQEFGGIIRHGAKLLFAYAEASVPKVTV  
ITRKAYGGAYDVMASKHLRVDSDNYAWPGTEIAVMGAKGAVNVLYRGNVSSPRRRDSWEEKA  
VNLLSDMPL  
>comp12620\_c0\_seq23; 286 1357 2275 LEN=2554; translated  
MILLWYKSITLGTFFYHSYFLVVFYFSYRFVTGPDVVKTVTNEDVTKEDLGGSKVHVS  
VAHGKFENDVAAMKGMRRFLDFLPSNDKATLPIKESTDPPDRLVPEIENLVPDDPNT  
PYDMKDVIRQIVDHGDIFEIMPEMAQNIIVVGFARMDGHTVGVGNPLTLAGCLDINASNKA  
ARFVRFNCNSFNIPIVTFVDVPGFLPGTEQEFGGIIRHGAKLLFAYAEASVPKVTVITRKA  
YGGAYDVMASKHLRVDSDNYAWPGTEIAVMGAKGAVNVLYRGNVSSPRRRDSWEEKAVNLL  
SDMPL  
>comp12620\_c0\_seq24; 521 293 1844 LEN=2123; translated  
MLYLLASERILVGVEKDVHEYIIFPVTFFVFGDDSRSPLEQDPSVLKARFKERLREERR  
KSLMGGGQDRIDRQHSRGLTARERLELLFDEGSFQELDAFKTHRCKEFGMDDNKTQFP  
DGVITGHGRVNGRYVYAFSQDFTVFGGSLSETNAEKIVKIMEMARRVGAPIVGLNDSGGA  
RIQEGVDSLADVFLSNVDSSGVVPQISVVMGPCAGGAVYSPAMTDFIFMVESSSYMF  
VTGPDVVKTVTNEDVTKEDLGGSKVHVS  
VAHGKFENDVAAMKGMRRFLDFLPSNDKATLPIKESTDPPDRLVPEIENLVPDDPNT  
PYDMKDVIRQIVDHGDIFEIMPEMAQNIIVVGFARMDGHTVGVGNPLTLAGCLDINASNKA  
ARFVRFNCNSFNIPIVTFVDVPGFLPGTEQEFGGIIRHGAKLLFAYAEASVPKVTVITRKA  
YGGAYDVMASKHLRVDSDNYAWPGTEIAVMGAKGAVNVLYRGNENVEEHIAEYTSKFANPM  
TAAQRGFVDDVIDPRDTRRILCNDLRLLRKSMPEIKKKHSNIPL  
>comp12620\_c0\_seq25; 359 1357 2395 LEN=2442; translated  
MILLWYKSITLGTFFYHSYFLVVFYFSYRFVTGPDVVKTVTNEDVTKEDLGGSKVHVS  
VAHGKFENDVAAMKGMRRFLDFLPSNDKATLPIKESTDPPDRLVPEIENLVPDDPNT  
PYDMKDVIRQIVDHGDIFEIMPEMAQNIIVVGFARMDGHTVGVGNPLTLAGCLDINASNKA  
ARFVRFNCNSFNIPIVTFVDVPGFLPGTEQEFGGIIRHGAKLLFAYAEASVPKVTVITRKA  
YGGAYDVMASKHLRVDSDNYAWPGTEIAVMGAKGAVNVLYRGNENVEEHIAEYTSKFANPM  
TAAQRGFVDDVIDPRDTRRILCNDLRLLRKSMPEIKKKHSNIPL  
>comp12620\_c0\_seq26; 385 899 1576 LEN=1608; translated

MILPGNLLDADFTVFGGSLSETNAEKIVKIMEMARRVGAPIVGLNDSGGARIQEGVDSL  
GYADVFLSNVDSSGVVPQISVVMGPCAGGAVYSPAMTDFIFMVESSSYMFVTGPDVVKTV  
TNEDVTKEDLGGSKVHVSKSGVAHGKFENDVAAMKGMRRFLDFLPSNDKATLPIKESTD  
PPDRLVPEIENLVPDDPNTPYDMKVRDTPVPLFATKEKYADPIDSF  
>comp12620\_c0\_seq27; 478 293 2180 LEN=2227; translated  
MLYLLASERILVGVEKDVHEYIIFPVTFFVFGDDSRSPLEQDPSVLKARFKERLREERR  
KSLMGGGQDRIDRQHSRGLTARERLELLFDEGSFQELDAFKTHRCKEFGMDDNKTQFPG  
DGVITGHGRVNGRYVYAFSQDFTVFGGSLSETNAEKIVKIMEMARRVGAPIVGLNDSGGA  
RIQEGVDSLGYADVFLSNVDSSGVVPQISVVMGPCAGGAVYSPAMTDFIFMENPPRKFR  
DARFQSAARYPAYALEVGISFYEFTSAVFFLSLSPPGTVRIKDNFALVQIYYSWDFLLPQ  
XTYLVFYFSYRFVTGPDVVKTVTNEDVTKEDLGGSKVHVSKSGVAHGKFENDVAAMKGM  
RFLDFLPSNDKATLPIKESTDPPDRLVPEIENLVPDDPNTPYDMKDVIRQIVDHGDIFE  
IMPEMAQNIIVVGFARMDGHTVGI VGNPLTLAGCLDINASNKAARFVRFNSFNIPVTF  
VDVPGFLPGTEQEFGGIIRHGAKLLFAYAEASVPKVTVITRKAYGGAYDVMASKHLRVS  
NYAWPGTEIAVMGAKGAVNVLYRGNENVEEHIAEYTSKFANPMTAAQRGFVDDVIDPRDT  
RRILCNDLRLLRTKSMPEIKKKHSNIPL  
>comp12621\_c0\_seq1; 434 183 2234 LEN=2422; translated  
MIAARHDSVVFMMELFVLVALLLPVGGFIDMDTPLDKRTTISQVDKTVYHLMVSDEF  
NTPNRSFTDGHDSVWTALDKPDDSSAGGGSQQFYNSSSVTTDDGYLKIISTTIGNTEWR  
RYDPVKKEYKDEKAYFKSGMLQSWEKFCFTGGILEVDIILPGDPFIAGLWPAVWMLGNLG  
RATYEASTNNIWPWSFDTCDRKLQPAQAI SACNEQNHYGMHAFQGRGATEIDLIEVMTGD  
SDGPLPGTDPVGLPYGDMTLQVAPGVTKNRPQCCSVPLYESTVSANGHTEYLANTWYEG  
LEMHGNTTINPFYGYTMGETKPGEPVTRTKEQAFQADAVGVAHQLTREHFRKLHTFRVE  
WQPGRGRIDWFAKKERKTDSSSTSEGDESEDEWLHVYGIKDDSLNLMGSQIPIEPSYL  
ILNTAVSSTWGFPIAPDNCEKKCFDCEDPKCSCNFPPGFCKMLRETEVAMYVDSIRVYQS  
RDPDAHVGANHTVGCDDPVDYPTKEWIKGHKYQYMRNAPFSYEDHGIPLKKVQTGGGK CET  
DNDCGGHISSVNLTEAYEGGETERNLESNRDTPDKGRGKCVSRSEFSSPLFKESSGAKS  
VCKCNPGYTGPHCLAQKHVDDTTSAFEKMKKSVFNSVPRIYVSPVLLVGLAGILAI AIF  
FACKVAGMKRREKEMERELSKLR  
>comp12622\_c0\_seq1; 323 307 921 LEN=1179; translated  
MQSTRLEPSEHSSMAMKTKANDPRDGGNDEGEVCAFVSSDENDGIAIRILKPTSIAGKD  
DSSVKESREETLVTVVRTQDETDELRVSTCSKTESGKSFSEDPDRSFELTLHRASILKKI  
SKLREQIDLAISDDEKVAFEDCLKLEILFLERKNREQGPYLGNRSKNKS VATPTASIAIV  
TSINTNFATIMENYSNDDTLVRK  
>comp12623\_c0\_seq1; 184 856 1341 LEN=1785; translated  
MNSSDRIFDPNIYLGANGGICGLFGLMFVCLTRMARANPSRTDGGTAGQLAQGVAAMAVL  
AFLMDNVSMATNVGGFFGGVIGILCGPRYTKDYAMRRKNSIGYDSVSYEYRSAMGFGIT  
PTRTGLVPLKVLVYLLAVTVAVPKYRNIPVAIIKGFMGAL  
>comp12625\_c0\_seq1; 194 411 1837 LEN=1931; translated  
MPNQYNPKEPTSQTSTTTSTATTDPTSLKRSVKSFLDSNFHTNGDRQLWDLLEHY PSTQQP  
LQQSEQNQQRNLGADHKGIFYEHDILSSELVCGAGPGRGMEQDAGYKLLVEKACAFNP  
LKSNNLDFIRMPANTLESRACSAWYXTYSKMRHLVRSQALIWGKDCDGF LAFSNETLPSL  
GIYQLPLVDYSNGPPYQDSPAWLGAQPTEEAYQNLWQKVRHMWKHVHDHHLGDYDYFYI  
SGDDVYLIVDNLRAYLEDLSALESRSNSMEVTPRFFGSYLPTRSMLAGGPGYVLRVAVLK  
RYVGLNRNGNRTSASIWSHCLGGLNKASEDLHISYCIQQFLKIKGNDDTDRNSRGEQRFH  
DTPASLYLMRATASKRGSYNERMAKGWELQSLPLMDLGKNLPNNVNANTDANASTVGPK  
HELDAVAAYSFSLHRIYTPTYMARIHAILHPKLCPIDSP LGKGLMQHYDFYRHDE  
>comp12626\_c0\_seq1; 109 1 129 LEN=504; translated  
GKGSKYYYGDDDDDGKGGKGSYKGSKQKHYDDREKLEKSH  
>comp12626\_c0\_seq2; 301 1 360 LEN=735; translated  
GKGSKYYYGDDDDDGKGGKGSYKGSKQKHYDDREKLEKSH  
>comp12627\_c0\_seq1; 257 1 703 LEN=873; translated  
XEDENENENEDQDEDEDENEDENEDEICQDDPNFLFADKPGKDCNWWKSKKR LCKRGIF  
APIVHQHCPMACGLCDDNEDEDDIDNESDNDNDNDSPDDNNNENPNDEDETCQDDPTFL  
AGKPGKDCDWIKRRRKFRCRPGPFNGSIAESCPVACGKCNDSDNDIADDNNENDSCENN  
PRFLFKGKPGKDCFEVVRMMTRGKSTKICQKSVRKACPVSCDMCNTNNSIEV  
>comp12628\_c0\_seq1; 173 261 958 LEN=969; minus strand; translated  
MIGSYDCCPVTDALTTSTQIXVSDRVSTLGSENPWRNKQVTNLSNRGDGIFEGNAEGEA  
LGAALGAAEGDALGEALGAAEGEALGVELGDSL GATEGDLVGAALGVGLGSAVLLTDAEV



LTVDVWVVEVEGASV GASV GALV GAGV GFEVGV LVGGCEGCEGGGLCFFLLFFVGGCERG  
GLCFFLLFFVGGATV GXLRSLLVDV FSGSLGMFQD TDCAVLKRKNSVRIDDFD  
>comp12628\_c0\_seq2; 238 95 706 LEN=1094; translated  
MKISQGILFFVLGFAIAAHAQDFDHGTVRILKHTKGSCKDIDKKTSTPTVPAPTCKSKKK  
HSPPLSHPPTKNSKKKHSPPSHPSHPPTKTPTSKPTPAPT KAPTEAPT LAPSTSTTQTS  
TVSTASVSNTAEPSPTPSAAPTRSPSVAPSPQPSESPSSTPSASPSAAPSASPSASPSA  
APSAAPSASPSALPSNIPIPPVA  
>comp12628\_c0\_seq4; 246 95 694 LEN=1082; translated  
MKISQGILFFVLGFAIAAHAQDFDHGTVRILKHTKGSCKDIDKKTSTPTVPAPTCKSKKK  
HSPPLSHPPTKNSKKKHSPPSHPSHPPTKTPTSKPTPAPT KAPTEAPT LAPSTSTTQTS  
TVSTASVSNTAEPSPTPSAAPTRSPSVAPSESPSSTPSASPSAAPSASPSASPSAAPS  
APSASPSALPSNIPIPPVA  
>comp12628\_c0\_seq6; 163 261 970 LEN=981; minus strand; translated  
MIGSYDCCPVTDALTTSTQIXVSDRVSTLGS ENPWRNKQVTNLSNRGDGIFEGNAEGEA  
LGAALGAAEGDALGEALGAAEGEALGVELGDSLGCGLGATEGDLVGAALGVGLGSAVLLT  
DAEVLTVDVWVVEVEGASV GASV GALV GAGV GFEVGV LVGGCEGCEGGGLCFFLLFFVGG  
CERGGGLCFFLLFFVGGATV GXLRSLLVDV FSGSLGMFQD TDCAVLKRKNSVRIDDFD  
>comp12629\_c0\_seq1; 38 1 727 LEN=796; translated  
XSLYCRWEAGKFRTIPRTEGVSTTDILGRMLLLTKEHHMERRAVSALGRQSKFLTTRLL  
QLFSENVKSPTEDMRVIYIDGSWDMFHGPHVALLKAAKERGDYLIVGIHGDCVNVKIRGM  
NLPLLLNLHERVLSVLGCRYVDDVLIDAPYEISAEMIASLRIAEVIHGACDVDGEYCSDED  
DRYMYAREKGVFHTVKNPCSFSKLTIFERIRQNQKTFQARFERKMS TEAEHYKQKYSHNE  
SN  
>comp12629\_c0\_seq2; 269 31 1313 LEN=1382; translated  
MAKKEILD LFGISESSQDLIRTVVTIALTILSYVLFGNRHM KRQKLAKELDVAKQLA  
FLQXKLSDPTEANTDGE EKK EIRIFMEGAFDLMHFHGMNAFRLGRSLGTHLVVGVNSDES  
ITECKAAPLMNNEERLAMVKSCKFVDQVVPNTPYIMKKEYIDYIFETYNVDI IHGDDPC  
IVDGRDVYETAKKAGKFRTIPRTEGVSTTDILGRMLLLTKEHHMERRAVSALGRQSKFLT  
TTRLLQLFSENVKSPTEDMRVIYIDGSWDMFHGPHVALLKAAKERGDYLIVGIHGDCVNV  
KIRGMNLPLLLNLHERVLSVLGCRYVDDVLIDAPYEISAEMIASLRIAEVIHGACDVDGEY  
CSDEDDRYMYAREKGVFHTVKNPCSFSKLTIFERIRQNQKTFQARFERKMS TEAEHYKQK  
YSHNESN  
>comp12630\_c0\_seq1; 527 95 1081 LEN=1153; translated  
MKISNNYSFAHGVTTLAIVGAVVGTASAFAPVHLPSTARSAIPSVYGLVQDSGSPTVLHA  
NLFDRFFRVSRASANNV LGRFEDPEQIMTQALQDMQNDLVRVRQTYAEVTATQRRMASSK  
RQLESQADEWHHRAQLALKKSNEGLAREALAREALLNQADGIQSQIDAQANNIDKLYEG  
MSLLEKKISEAASKKNQMAARARTAKSTQKINDMLSGLTGQTSMDAFNRMEDKVLALAEA  
AEVSAEMAETTMSNALAPSSSSGKGSSEMEFRLLLEASDTV DRELEK LKANMLPSSSAT  
TGAASSALERHPVKEFTTRSNEGTNMI  
>comp12631\_c0\_seq3; 267 142 987 LEN=1158; translated  
MRKCLKLLMF TLLRSSACSIRQATTKTSIQRLRATRDVPAIQRCNLACL PENYNTNFYC  
SHLRQWPD LALVAEEIHHPQQNETSEDRHQYRKHFPGF TGEREEPKVIAVVLGKVETRP  
SIDYDNPISRNGRVERLGHVTS LAVQKDFRRLGLAKAMMSQLHYHLQH HGIASCGLHVRT  
SNVAACRLYEDDGYEVDQIIKSYQDGEDAYFMRRIFRQEDSLNYDQGYRPGRLVKKAWK  
SGPEELRLPRIHIPSIKEIHEEHSSNPAGHPPPPAELLSGI  
>comp12632\_c0\_seq1; 845 116 2275 LEN=2378; translated  
MPRSQGT SRKGPKKHERASGMGRALQKSRVKRHTPSASLGMAQREGVESINMEQGDRV  
KQALDNRASVLDVNDLDDFLIQAEMADREFISEKERAVILDETAQAAGNCDGVILNGDER  
VNSNFSFKELSVPRRPAWDKTTTAAELDQREKDAFLEWRRGIAEREEEEISLRTSTVSSLG  
VTPFEKNLEIWRQLWRVLERCS CIVQIVDARNPLFYLSQDLKAYTTKELGKPM LLLINKS  
DYLTPVQRKAWHEYF SHPDHKWEHVFFSAHEQQQVDEDAARAAKEEAE EEEERQKEIS  
ILSKEYDDESDDDGDSNPSGNKDS SDEKKVRDEDL EEGVKEISPSDGMKNIGVDKPL  
SRVELLDWLQSFANANDCAMDQKYNRI PFGMVGF PNVGKSSVINVLMGNAKNAHG VVRVG  
VAAQPGKTKHFQTL LPPDRPEMLLCDCPGLVFP SFVSN TADLIAAGVFP IAQMRDWKPV M  
DLLCQRIPREVLNAQYSIKIPLPTADAIYEAQRVQGREDIRLPPPTADEFLTTF CVARSL  
LAASSGV PDYQRAARMI IMEYATGKLLYCHSPPHFDKET FQKETILLSLQKTKKLREKFL  
ESSDVQLPKAKDDSQSKTEDLDIEDDDMLLELLGGASVSGQGGQNDKMSVGT SKRQKKW  
GKKGRKGRNKDPYGCHSTPDQTLGPNEGQMGVSVKGGKHKRKNYTRATGYGSTRAYQ  
>comp12633\_c0\_seq1; 1299 316 5260 LEN=5260; minus strand; translated  
MANSNGVARPKSADARTSTGFAVERNVEGVPRDVGTTAMQNTTMLASTKTVDATKGTSLP

QRGIGEKKEEDAVPMKQNSKSTTSTNCGRVEKIESSSSTTSSKVKGAPSNRAQSQTIGSR  
VEGNTKSSSTNSPMP ISSPKGGNDGGNDRVTFDKKPNKPLAPESRSSISIVRNPRNPKAP  
NRDMTPQNLSMMAAKNKSRAASLSPASVTQQKPSKAMQSSSKPGVMKKNFLTNPSSAAMAA  
RGQVTNIPNIDMDESMVSLGDEELQIQRAPLTTKYNPYITHSDTSLADARRRLEIALDQT  
RQLRAAFTERVYGKYRVLQPPPQTRDIKVKLKDDPIGMHKKIELELKRIADEKSAEKKY  
SQMAVTDNDNVAAAASVPSAAATIPAGPNAV GASKATNGNTTSSAAPTDDTEQFLYVTS  
LSLIVLPEDTSLNIDL FVYRERAPLNAKTGQVRVGI SPAAAASSGNLMLE RARQ GKVARAE  
RIKRLQQKVDKLAHNFFD SHYKSSISAFNAAAIELPSSISSAKPTATAGKNSTSV PQET  
KSKISASRSRSSSKSAEGKKVAGVKRPPAPKTTTKVPAGQTAAGAKVIRARVQTPMTLQT  
LLNLNPIHEELRTDTKYSAATLAMMECGVGTYYGPTTQYHKNTPHRFKHPFPDSLGGRRR  
PVT SAGGVLDPSSSTANLQLTLP SIPSVKERRRYKKT SVLSRKEAGTTRAAASIRKILDQF  
TPSTNKAVVAIESNETQENHLLCRPNKQRKISEIGFVRGLHLDSVDEGRARVGGNTTESG  
KGD SDFIDSTLTLNLV LKAVGLIKSSVSTDSKSERSSFP S L T S S L F K E I P S T G T G P Y S D S  
LATLKELEKLLTQKQSFTA AFCSETDSCDTEHNLEDRSLDGCNIVQEIEPKTSAPLTLR  
GGSGNNNDMKESVKSPDRKQNSGGASAKNSKAGKSSIRKSNASNKPAMNATATQTNLMR  
QNLIREQGLQQQLASLQAQGVAAQQRSAQFQAQLHSADHFRQTNALQLAHQLRMSRLQAH  
GHSGATDLADYIGGLHHSTQAQAAYGWPPASAAAVAVANSNNLAALGLNPTGV MPLTVED  
RTRVLLAREQQNLAVQQAVRVAAAQRQQQALLMRGMAAVENPFAQQGYPHIPGQLLNPTA  
AALIARQGIQNRAASASHKKMTSESNNTSKNGKFESKEFSIGKSDDSSKIP SAGTIELKS  
AGASIKAKSSETKIERDVAK EITPAKRVDPNQVKAAPIVKKKEEQRP I P S V A D K K G E S Q K  
NSVLKTP TGLQYYVPDTPPGISTDFATTVLAGRCH EAI GVS VYRDL SGEGLRVVNYIISV  
GMAVPIPKTVVMNPLKDRMNSLVFKNSNVSSMPASSRDI IAAVILLWLWRNQE GCFQRAF  
AKSGRIDVDPECKWVNAAVNKAVTALSNEVIGSTSRANGLT TALLTHKTKSSTNLKGT  
GKAEQDSLKTTTTKIDLLAASVSVKSVIFSLFSPCENSAIPQFNLDYLDECRKLALFA  
KSQERALLATVVS RKSTMSLSFSHAYVSAIVRAGEALGHGALFEVIQNEKCGVSTMIPYD  
VFTDEYGAWEDPCRPPIGFNKGLTGDDL MRAHTRAI IQKSLKKLQARQNVKGGTHTIGP  
YVDHSNSAATSSGAKSTSGASRNTSHRR

>comp12633\_c0\_seq2; 1152 316 3936 LEN=3936; minus strand; translated

MANSNGVARPKSADARTSTGFAVERNVEGVPRDVGTTAMQNTTMLASTKTVDATKGTSLP  
QRGIGEKKEEDAVPMKQNSKSTTSTNCGRVEKIESSSSTTSSKVKGAPSNRAQSQTIGSR  
VEGNTKSSSTNSPMP ISSPKGGNDGGNDRVTFDKKPNKPLAPESRSSISIVRNPRNPKAP  
NRDMTPQNLSMMAAKNKSRAASLSPASVTQQKPSKAMQSSSKPGVMKKNFLTNPSSAAMAA  
RGQVTNIPNIDMDESMVSLGDEELQIQRAPLTTKYNPYITHSDTSLADARRRLEIALDQT  
RQLRAAFTERVYGKYRVLQPPPQTRDIKVKLKDDPIGMHKKIELELKRIADEKSAEKKY  
SQMAVTDNDNVAAAASVPSAAATIPAGPNAV GASKATNGNTTSSAAPTDDTEQFLYVTS  
LSLIVLPEDTSLNIDL FVYRERAPLNAKTGQVRVGI SPAAAASSGNLMLE RARQ GKVARAE  
RIKRLQQKVDKLAHNFFD SHYKSSISAFNAAAIELPSSISSAKPTATAGKNSTSV PQET  
KSKISASRSRSSSKSAEGKKVAGVKRPPAPKTTTKVPAGQTAAGAKVIRARVQTPMTLQT  
LLNLNPIHEELRTDTKYSAATLAMMECGVGTYYGPTTQYHKNTPHRFKHPFPDSLGGRRR  
PVT SAGGVLDPSSSTANLQLTLP SIPSVKERRRYKKT SVLSRKEAGTTRAAASIRKILDQF  
TPSTNKAVVAIESNETQENHLLCRPNKQRKISEIGFVRGLHLDSVDEGRARVGGNTTESG  
KGD SDFIDSTLTLNLV LKAVGLIKSSVSTDSKSERSSFP S L T S S L F K E I P S T G T G P Y S D S  
LATLKELEKLLTQKQSFTA AFCSETDSCDTEHNLEDRSLDGCNIVQEIEPKTSAPLTLR  
GGSGNNNDMKESVKSPDRKQNSGGASAKNSKAGKSSIRKSNASNKPAMNATATQTNLMR  
QNLIREQGLQQQLASLQAQGVAAQQRSAQFQAQLHSADHFRQTNALQLAHQLRMSRLQAH  
GHSGATDLADYIGGLHHSTQAQAAYGWPPASAAAVAVANSNNLAALGLNPTGV MPLTVED  
RTRVLLAREQQNLAVQQAVRVAAAQRQQQALLMRGMAAVENPFAQQGYPHIPGQLLNPTA  
AALIARQGIQNRAASASHKKMTSESNNTSKNGKFESKDTQIKGNDEKVDIGDSNGNIKKK  
RKIPPNK

>comp12634\_c0\_seq2; 417 141 1196 LEN=1722; translated

MDSLDFLGSSSESEFEGRNPTNTNIQSDDADDVSPT EALSVATPQPVP IGEKTIIVDDHTI  
CDSFEDAPANANFDDTMRI GNAPSSTEDRNNMFTKFAFPFKLHSILENSNKSEQEHIISWL  
PSGKGFKIHKPEFARSIMPQYFNQTKYRSFQRQLYIYGFDRIRTKSSDDYGAYYHHLFV  
RGASDLCLDMQRKKIKGTGLSNEERRKRSMLSKSVASSERNQTPRKNIH YQTIVAAPQAV  
PIENETKLLTPSMLLAKHRKNSNSSSNNNNNDEGLSRLPRLTSHTTDVESSADRWFPSL  
RMRPTHPRKRR CERKRMMADLTMPSLDDSVVPSPLLRNRSEPVDSYSVAA

>comp12634\_c0\_seq3; 279 270 911 LEN=1437; translated

MPQYFNQTKYRSFQRQLYIYGFDRIRTKSSDDYGAYYHHLFVRGASDLCLDMQRKKIKGT  
GLSNEERRKRSMLSKSVASSERNQTPRKNIH YQTIVAAPQAVPIENETKLLTPSMLLAKH  
RKNSNSSSNNNNNDEGLSRLPRLTSHTTDVESSADRWFPSLRMRPTHPRKRR CERKRMM

ADLTMPSLDDSVVPSSPLLNRNRSEPVDSSVAA

>comp12635\_c0\_seq1; 1299 113 5402 LEN=5564; translated  
MEEIPLVYPSHAETPRRYVIDIDQRRLLKADCDLSLGGHQQLFASIGSNNVPAYLEPVD  
EALSGAASISSVTLGGQELLVTTLSALVETPKIVSVALSWKKHKEDVLDSPAIIELDTKDL  
QVVAIRAFAAENS DAGISLVLVGCRTIVAITLDGNLFDVTDSQLTVLNREDIIPASLLE  
QVSPSNLQGNMIAFLPSKNHQIVMALAPLILTIDWKVTGSI SVWSETQCKEDMAARAAPF  
TGMITNLP SLILGKIDADVDMAPTAALCVSSNPIHSGNEDSTEVLVFLHSDASIRKWK  
IDPESSLSPIAVTTLESKKLALPSTWSAGVKSVALCARLYEQTFALAVHIKTNTISAYNE  
GKSDCNIWVFEKNEASLYCHVMTIPNDAVSLVGMFSFSPSQRRTLSVVYEAVKASNV  
RRNRDSVASGIKVINYPSSLISVSSEPEEIDTSDLDKIATKELARIRSLLYGSIVLREI  
EEEDEEAFDAEPFSDQALNRLDSL YMKHLFRPIFPRNGTVLAPSESCIRRALSKLVH  
GAMKEHGMSVELETKELYTNGETGKTPRNKAVETKLSVYESFVAPDDDDVNGVDMMIQDE  
YDELEEFEEEMI SEVEAHESRWQRLLEFEVWEEEQTLRSPQCVSWLTSLPVQVLVRGNITT  
VLTSNARPRTTNKESWIKSLDDASRNALELIEGDHEKSKNLYQIEEELTFIIANAQLATS  
PHTAITEGLTSLGRWARLQGNSSDDGRLRKLISQVPMKDLVDWVEGRPSDLEIFNYEPRQ  
ANVQSDVNWSGQVAKVQLRHASCSCAIRATDFIRRSRLGKCILLLELAAGSQVISSAFR  
AYVQSIAILWTSAQIRTDTAFTSTGNKMRGRKIRFDDSPRHGSPPSKRSSFQDSTSSI  
LMPSSSSMSTTLDVVMIRISQEMVGSFDFVEHSPCSAII MLSGSFVDLIFASKKKRIDGAR  
RFMPPEL CVLPVPYDRERPTHEPDLALRLLAPFVAFQISDDSPESVAARKEELSSCLLHAA  
LSKSFSPSQKSAMREMACDLLVPKHQENYNPVQKDYTREGLIAIKSIQTNRIAGSVEDLR  
SLMHSILPNATSLDIIRLCELATAKDLFSSYTSVSDDILDDTIRSHAVQIAKIMLRSLQL  
LHRLSILERYVTRSENTDFGDDYNSDSLQIISDAIADMEATFPDDFLKKMPEYVSIWTR  
KFNHAVRACRWSQAYNACVKNPLEAHRENNFNRLVRAMVDSGALNELLDMCTQLGIRSSD  
QMDDEAKESESIDLYEIASVLLTYADCDVYDARANSSSNTNLSDYQGALYALHASQEQW  
RRAAQSLDLRYVNAEKALRKSIGKSGINIQTSELRDGLIVQDLALSACGSANAHLVKDQ  
DYRFLVSGEYGFVSVIQSGGDTIVDTPNKLRVRSKDAKSNANDDGSTAERLSKFMVSSH  
LDGRAIRSLALRTLFFDRSTSF EFAKSAFRRGKETWQIDIDELFKNGYYQYGLLLAKAQS  
NTHRNGTAKLGGNDIFGDYLSHLMQDYLVPLSFSDDDAPRPTLRQLQLAIDTASSNESGA  
SYIVTERFMDLQKASALRASTFVLLQKLTMTHTAETPFGLGVASSFLDIDNSTKLPV  
WLERQLLGLDSVTVGGGAFAPRSKAGCLNYLGDPSALLRLYTRRGMFAEACDVVTLVLEN  
NDRVANPASRLPEKGNIDCVPYHSIDLWNLIEIACSKGVYDTDEQDYILTARQDMEEAL  
KKHYELMQVSEMGLRSARILNA

>comp12635\_c0\_seq2; 1337 144 5507 LEN=5669; translated  
MEEIPLVYPSHAETPRRYVIDIDQRRLLKADCDLSLGGHQQLFASIGSNNVPAYLEPVD  
EALSGAASISSVTLGGQELLVTTLSALVETPKIVSVALSWKKHKEDVLDSPAIIELDTKDL  
QVVAIRAFAAENS DAGISLVLVGCRTIVAITLDGNLFDVTDSQLTVLNREDIIPASLLE  
QVSPSNLQGNMIAFLPSKNHQIVMALAPLILTIDWKVTGSI SVWSETQCKEDMAARAAPF  
TGMITNLP SLILGKIDADVDMAPTAALCVSSNPIHSGNEDSTEVLVFLHSDASIRKWK  
IDPESSLSPIAVTTLESKKLALPSTWSAGVKSVALCARLYEQTFALAVHIKTNTISAYNE  
GKSDCNIWVFEKNEASLYCHVMTIPNDAVSLVGMFSFSPSQRRTLSVVYEAVKASNV  
RRNRDSVASGIKVINYPSSLISVSSEPEEIDTSDLDKIATKELARIRSLLYGSIVLREI  
EEEDEEAFDAEPFSDQALNRLDSL YMKHLFRPIFPRNGTVLAPSESCIRRALSKLVH  
GAMKEHGMSVELETIRTLHEWRNRDRKRSAMGSPSKLNRNMLTPDKQMTKTPRNKAVET  
KLSVYESFVAPDDDDVNGVDMMIQDEYDELEEFEEEMI SEVEAHESRWQRLLEFEVWEEEQT  
LRSPQCVSWLTSLPVQVLVRGNITT VLTSNARPRTTNKESWIKSLDDASRNALELIEGDH  
EKSKNLYQIEEELTFIIANAQLATSPHTAITEGLTSLGRWARLQGNSSDDGRLRKLISQV  
PMKDLVDWVEGRPSDLEIFNYEPRQANVQSDVNWSGQVAKVQLRHASCSCAIRATDFIR  
RSRLGKCILLLELAAGSQVISSAFRAYVQSIAILWTSAQIRTDTAFTSTGNKMRGRKI  
RFDDSPRHGSPPSKRSSFQDSTSSILMPSSSSMSTTLDVVMIRISQEMVGSFDFVEHSPCS  
AIIMLSGSFVDLIFASKKKRIDGARRFMPPEL CVLPVPYDRERPTHEPDLALRLLAPFVAF  
QISDDSPESVAARKEELSSCLLHAALSKSFSPSQKSAMREMACDLLVPKHQENYNPVQK  
YTREGLIAIKSIQTNRIAGSVEDLRSLMHSILPNATSLDIIRLCELATAKDLFSSYTSV  
SDDILDDTIRSHAVQIAKIMLRSLQLLHRLSILERYVTRSENTDFGDDYNSDSLQIISDA  
IADMEATFPDDFLKKMPEYVSIWTRKFNHAVRACRWSQAYNACVKNPLEAHRENNFNRLV  
RAMVDSGALNELLDMCTQLGIRSSDQMDDEAKESESIDLYEIASVLLTYADCDVYDARA  
NSSSNTNLSDYQGALYALHASQEQWRRAAQSLDLRYVNAEKALRKSIGKSGINIQTSEL  
RDGLIVQDLALSACGSANAHLVKDQDYRFLVSGEYGFVSVIQSGGDTIVDTPNKLRVRS  
KDAKSNANDDGSTAERLSKFMVSSHLDGRAIRSLALRTLFFDRSTSF EFAKSAFRRGKET  
WQIDIDELFKNGYYQYGLLLAKAQSNTHRNGTAKLGGNDIFGDYLSHLMQDYLVPLSFS  
DDAPRPTLRQLQLAIDTASSNESGASYIVTERFMDLQKASALRASTFVLLQKLTMTHTS

TAETPFGLGVASSFLDIDNSTKLPVWLERQLLGLDSVTVGGGAFAPRSKAGCLNYLGDPS  
ALLRLYTRRGMFAEACDVVTLVLENNDRVANPASRLPEKGNIDCVPYHSIDLLWNLIEIA  
CSKGVYDTDEQDYILTARQDMEEALKKHYELMQVSEMGLRSARILNA  
>comp12636\_c0\_seq1; 219 1 1260 LEN=1558; translated  
XLLLPVCHSTALKPLGATRPQRSKPQHNATNRKTSPIILLAPQKPPQPLAQAALAPPRHT  
TVMLLVLDIGQLPSLKKGMSSEEEASKRRKTCRFIEEAGRRLKLPVAIATAEVFFHRFYA  
RHAFQEHDRFEVAVAAALVLAAKTEEAPKLNVTLVQVCHGLKTKGQQMGRLSARPGDAGNS  
GVGEPSPDPPPLDTKGEEFLKLERVLLLERIILHTIGFELSIDHPYRFFVEQIKKLLQGR  
KLRyakDSSSESldpQAARKKMFNDLVQYSMSTANDSYQTSLCLQYGPRQIATACVFLAC  
MFLGIEPENGDKWTTLFEGSSSSAQGGGPERDHDEDEALVNICAQIGDLLSDKSSXKG  
RGPEAPRGPEAPPERRRSRGLRFLFPVPPSAQPPAASPAAAPGGLAGQAAKGGVGPRES  
>comp12637\_c0\_seq1; 482 59 1821 LEN=2502; translated  
MKRQSQEQQSQQTdGSNVGQQSTSDNNNDEIAQNGSRNSTANLESEGLASSPDEDFSSSG  
STGETISSSMTNNSNKNDEGVGTLREYDVLmGRGSGPNRHegNIHFRAIVGEVDFEFLSQ  
TIGASDSLNSRGRSXDApNRSPtKNRLAQAVLDKITIEKNGRFLQKLTkKEILDATSKGT  
SSDLIRARANSMDAAAMTAEAMAAEASATESASESDIKEDANNQETINTIVYKIIPEKQ  
ILAKIKQTFRFLRDkNEASYFAEKHRQRAKRMACRGNsRGACLSASSSSFFSLNSRGLPG  
NCSFAAYALLSQNPslGAAMNINPLSRQLNFASSAGNGVNSLNGLSNGNNLWAGRNITTS  
MGNIPSKAASSLSSSLKNCTLNNGVIGTTSRNMDLASRILCDLPQPNRIISGPNSLGG  
SSLMLNGSSSLVAMGNAARGVNNSSSSFLNKGNSADQATTKRLLLEELTLsRLVDLQKQR  
DQTI SAYLSLERGTGGSSAGSSISPIERLFENVNGTNSGSSAKTTLALPSDINRNHNSV  
ANSTPDSLTLQLQSNSSSGTNIINRSHRQLASVSTGKNALRVFNSI  
>comp12637\_c0\_seq2; 482 59 1821 LEN=2491; translated  
MKRQSQEQQSQQTdGSNVGQQSTSDNNNDEIAQNGSRNSTANLESEGLASSPDEDFSSSG  
STGETISSSMTNNSNKNDEGVGTLREYDVLmGRGSGPNRHegNIHFRAIVGEVDFEFLSQ  
TIGASDSLNSRGRSXDApNRSPtKNRLAQAVLDKITIEKNGRFLQKLTkKEILDATSKGT  
SSDLIRARANSMDAAAMTAEAMAAEASATESASESDIKEDANNQETINTIVYKIIPEKQ  
ILAKIKQTFRFLRDkNEASYFAEKHRQRAKRMACRGNsRGACLSASSSSFFSLNSRGLPG  
NCSFAAYALLSQNPslGAAMNINPLSRQLNFASSAGNGVNSLNGLSNGNNLWAGRNITTS  
MGNIPSKAASSLSSSLKNCTLNNGVIGTTSRNMDLASRILCDLPQPNRIISGPNSLGG  
SSLMLNGSSSLVAMGNAARGVNNSSSSFLNKGNSADQATTKRLLLEELTLsRLVDLQKQR  
DQTI SAYLSLERGTGGSSAGSSISPIERLFENVNGTNSGSSAKTTLALPSDINRNHNSV  
ANSTPDSLTLQLQSNSSSGTNIINRSHRQLASVSTGKNALRVFNSI  
>comp12638\_c0\_seq1; 480 1 1645 LEN=1741; translated  
XLSTRSSDRNNNNMMARIASRSVSTRQHRQRRSWRLAGVLA VTVSLATKRALTTTNA  
SSVSSPKKIAVIGGGASGIFASIAAAEHAFLHSSNGQKKQPPTKVVVLEATGKTLskV  
KISGGRCNVLHDTskPTSTILTGYPRGKkELTGLYHKRFTPTMARDWFELRGVELKVEE  
DGRMFVSDSSQTIIDTLMEAAARESGVDVRLKLVKNVDVDSNLEDDDAPTRSGEDHPT  
TFMVHYKDGSKKfSSIILATGSTPVGHALAKSLGHDPVSPVPSLFTLNCKHAVSSSSD  
EKGFLHGLSGLSVPTGSVTLRVESPSGPKKNGSSDGSKKKKRKAQQICQEGPILITHHG  
ISGPATLRLSFAAREFHdINyRGQVTVnWDINAASMDRGNPEdVLEELWKITFSNPkRN  
VASVCPLPNNsIPRRLWQALVlHSGFTIDAKWGSASKKAVRKL AQNLVACPLEITSKGTf  
KEEFVtAGGVDLKEIDMKTmesKVCpGLFLCgeVINdVGTGGfNFMNCWSTGFVAGESS  
SSRTSSLL  
>comp12639\_c0\_seq1; 473 126 1199 LEN=1592; translated  
MSEDASAGDDFSGLGGFFFYMFIVHPITAWILKpGRFERKKSIMYAIaFLAALAAIKTG  
LEMQQQGNYYQILDVTRESNPLEIKRSYKkLSLKLHPDKNKSPNAADEFDrvKQAYDVI  
MDLELRDVYNKfGKEGVANNKRYSETQFLIEVAIFVSWAVMTFLLTMGKkSGQARDWVF  
TGMIVMLVVEVVVMTSQTNPPLTWLFPtLTeYDLVKTmHSLFPafMNGCRSLGSYLfVDV  
DAQLRQFLlALQEQNKDILLVLRDvQIGVQNIQAHGggGghRLAGPSTGNIpVTADGADV  
ASKATPTGKIKELQERLQYSNANVAQAVQSLKTENKSSNFgyGMILGYIVISYLfG  
>comp12639\_c0\_seq2; 452 565 1627 LEN=2020; translated  
MAAQVLDQFFPPTFHVAFFVCFVLKTSRLRTRFFFQNLVIVNFDDRCILNNGYNIGLEMQ  
QQGPNYYQILDVTRESNPLEIKRSYKkLSLKLHPDKNKSPNAADEFDrvKQAYDVI MDLE  
LRDVYNKfGKEGVANNKRYSETQFLIEVAIFVSWAVMTFLLTMGKkSGQARDWVF TGM  
VMLVVEVVVMTSQTNPPLTWLFPtLTeYDLVKTmHSLFPafMNGCRSLGSYLfVDVDAQ  
RQFLlALQEQNKDILLVLRDvQIGVQNIQAHGggGghRLAGPSTGNIpVTADGADVASKA  
TPTGKIKELQERLQYSNANVAQAVQSLKTENKSSNFgyGMILGYIVISYLfG  
>comp12640\_c0\_seq1; 227 1 781 LEN=947; translated  
XVPAPVPAPAPVSAPITIPtLAPKSSPTTEPEVPEASEPKKELSDEECVSVVDHLCSDas

FSKFCELIKEFDLVDLSFLPKSDGVLTVFAPTNGAFEALDNEEFPGGALTDSSQSIYVLLY  
HVINTTETALHFDDLECNTLIKTANGRSTRTKCAGDAKYQRGPMQMDKLEIIVVPDIRA  
CSGVIHVVDNVVLPNLSKMNKPERTPKPNPKPTFISLSKPLGTVALKPPPEPSGALVESG  
RKPTLRAELESLAEFFRKGW

>comp12640\_c0\_seq2; 190 1 899 LEN=1065; translated  
XVPAPVPAPAPVSAPITITLAPKSSPTTEPEVPEASEPKKELSDEECVSVGKFVRFIWL  
RNACPTAFSLSAMVSHSIAAPFSMEPFHNTVDHLCSDASFSKFCELIKEFDLVDLSFLPKS  
DGLTVFAPTNGAFEALDNEEFPGGALTDSSQSIYVLLYHVINTTETALHFDDLECNTLI  
KTANGRSTRTKCAGDAKYQRGPMQMDKLEIIVVPDIRACSGVIHVVDNVVLPNLSKMNK  
PERTPKPNPKPTFISLSKPLGTVALKPPPEPSGALVESGRKPTLRAELESLAEFFRKGW

>comp12641\_c0\_seq1; 305 1 574 LEN=574; translated  
XSNSNSKTSNTNHGNGSSNSGHRNSSEPGDSVSAHPTAHTVATMQQQQQQEHASVKSER  
RWNWHSHTTGNVSHRTTTTTTARSYRTTTTTTTTTTAATTARTGRNLVAVYFARIILVFF  
LVWLPGMIMYIAYQPNKNAASLMHNVGLIFLFLSLQAILSNAMAMSKPDVARAXPGAAA  
LSTAQQQQQQQQX

>comp12641\_c1\_seq1; 225 26 912 LEN=949; minus strand; translated  
MPLFCSLSDDDLSLKQSHLRKRRPRTVDQPTTRFARDASAKRSRCFAVAARTCCPYFFL  
CLVCGSCPSPDFCKSPGQRAAKAAPAKTKRTSVGREPDTEADTGNPWTPTPASPEPLVVG  
LCPFYRSEEYLARALGGWESSIRLKAAPRNGEGPAFFKQRNKKVLFANGRSRWFRTVRCK  
QASRRFGSLRFRVRLVFDGRHLRVRMAVGPNGTAGGRAGGDGRDRVVFVICKGVGIGGD  
DAAGVVHGHGGLPRGLGVVWVGNHHPAVLPKEAFLWPPVAARAATVPPALGGP

>comp12641\_c1\_seq2; 141 1 379 LEN=897; translated  
XNSNNGAEAEASRSPQGRGYGCGSSCHRRPKKGLLRKDGRRVVSHPDAAEAPRQTSG  
VTVDHAGRIVTTNPHTFANDEDPVSTITTGTSSCAIGANGHSHTEVTTIHEDEPYPTES  
EGTKAP

>comp12642\_c0\_seq1; 784 1 3828 LEN=3841; translated  
XLEQQLEQEHEQEHEKQEHAEEDLASLLCLVPLVLCCEEDPTSAEPSATTSNCVVCNWPC  
VFFCVEKAMLCHKQLYPNQNIQSKLRKCRACKEGKLRVVVPLPLGDSNGCCPPEICRRPL  
FDVVEITDPASLSASGDDKAHQDGSRYWKTVAKKHGSVVEGGHKVIRLLENFETVGSYLRD  
SKNQIPLLPETGPVLENALMELERLFLCLNEEEEEESDEEEDSDVNEKKNPSEVVPFVSSL  
ERAADDKSSRQVVKFPRYSPTKKFRGSCLPATTTAIVFPQAGPRTRTAPIHWNSSISF  
PGRASDGNPSTSGEKDANHRDVEDAVPQTLTQANERANSIEDDGRPKKTKAKKTSNQ  
EPIPFSTEMARNETAGSQQTQQSFAGATIEAPRIIRGKKTCTKAVRRALIPPTVIDSK  
GRISVSSWMSIKPLLARLGHVYERDAGQGSQELFLPNGDPRTNVDAKEGTDYFTERS  
GYRAHLCAHGVEYIGDCKTNPPLEEDELELIAYWVRFHVYTTTEKTGGRMDASIIDLELSG  
KQKYKYYIKVLQRIGYQYKSGMLQDGYVPPGEGNNQCFSEEELWEHLGRYGLSDACQVEM  
FESIQUERAALEIHIIRKYHGVYGDIFHHCVKRNGDTSDAMEIGEHTPPANKEALEECSR  
GPGLSGEDDRNMSMSPRKLMDGEMEREANSAEAKANSDVVSNEVDFEDSEMIDSLAEHRS  
GVDCNRAVSSENLVDTSDVTSILEAASLKQHEQVCNNELSTNNMVDAPECTTAIGDDDSL  
KKPAEDQLPEVVRNREVSTGNLVGVSEHTNVEDAASMKQPEELVIEEVTLOGSTNEQKLI  
SCLHNITRDEIIAYGLSESMARVRSFVDHVLKSKGRKGDGPGCLKSPLLYLCCGNPPTGK  
TMTAMKTCERAAIAAQIENKNEWKAPEMFHISCPTRNFYDAGMKNLMKMMNIKASQLK  
RSSNNDKNAKILILDEVDQLLGHKGTESFLKQLSTWARSENNVLSIIAISNSVYNVTK  
RLSKEFEIVSXLRLASYLVSTSKSFLKLSYSISKQGLHKIVFETYRKDDLVRMSQTKIG  
FRVVDKKAHEFIAAKVANS SGDARQYFALMEKAIISCKDKQSKEKLSHTTKPVMIRDA  
MLAIRETNRKTKDTIQSLTSIEKMTLCAGVHLARKYEGKPIELGKKAHVSCATECLDDL  
SLEDFKGVIERLKDSGLLKLNDTCHKPFTSLSMFSSILNHP IHFDLQLEDVDSALEDTLMK  
ENWYKRMVERVSDQNV

>comp12642\_c0\_seq2; 890 1 3746 LEN=3759; translated  
XLEQQLEQEHEQEHEKQEHAEEDLASLLCLVPLVLCCEEDPTSAEPSATTSNCVVCNWPC  
VFFCVEKAMLCHKQLYPNQNIQSKLRKCRACKEGKLRVVVPLPLGDSNGCCPPEICRRPL  
FDVVEITDPASLSASGDDKAHQDGSRYWKTVAKKHGSVVEGGHKVIRLLENFETVGSYLRD  
SKNQIPLLPETGPVLENALMELERLFLCLNEEEEEESDEEEDSDVNEKKNPSEVVPFVSSL  
ERAADDKSSRQVVKFPRYSPTKKFRGSCLPATTTAIVFPQAGPRTRTAPIHWNSSISF  
PGRASDGNPSTSGEKDANHRDVEDAVPQTLTQANERANSIEDDGRPKKTKAKKTSNQ  
EPIPFSTEMARNETAGSQQTQQSFAGATIEAPRIIRGKKTCTKAVRRALIPPTVIDSK  
GRISVSSWMSIKPLLARLGHVYERDAGQGSQELFLPNGDPRTNVDAKEGTDYFTERS  
GYRAHLCAHGVEYIGDCKTNPPLEEDELELIAYWVRFHVYTTTEKTGGRMDASIIDLELSG  
KQKYKYYIKVLQRIGYQYKSGMLQDGYVPPGEGNNQCFSEEELWEHLGRYGLSDACQVEM  
FESIQUERAALEIHIIRKYHGVYGDIFHHCVKRNGDTSDAMEIGEHTPPANKEALEECSR

GPGLSGEDDRNMSMSPRKLMGEDMEREANSAEAKANS DVVSNEVDFEDSEMIDSLAEHRS  
GVDCNRAVSS ENLVDT SVDT SILEAASLKQHEQVCNNELSTNNMVDAP ECTTAIGDDDSL  
KKPAEDQLPEVVRNREVSTGNLVGVSEHTNVEDAASMKQPEELVIEEVTLQGSTNEQKLI  
SCLHNITRDEIIAYGKLSSESMARVRSFVDHVLKSKGRKGDGPGCLKSPLLYL CGNPGTGK  
TMTAMKTCERAIAAQIENKNEW EKAPEMFHI SCPTMRNF TYDAGMKNLMKKMNIKASQLK  
RSSNNDKNAAKILILDEVDQLLGHKGTESFLKQLSTWARSEN NVLSIIAISNSVYNVTK  
RLSKEFEI GLHKIVFETYRKDDLVRMSQTKIGFRVVDKKAHEFIAAKVANS SSGDARQYFA  
LMEKAIISCKDKQSKEK LKSTHTKPIVMIRDAMLAIRETNRKTKDTIQSLTSIEKMTLCA  
GVHLARKYEGKPIELGK LKAHVSCATECLDDLSLEDFKGVIERLKDSGLLKLNDTCHKPF  
TSLSMF SILNHPIHFDLQLE DVDSALED TLMKENWYKRMVERVSDQNV  
>comp12642\_c0\_seq3; 256 1 1120 LEN=1120; translated  
XPLLARLGHV FYERDAGQGS RQELFCLPNGDPR TNVDAKEGTDYFTERSGYRAHLCAHGV  
EYIGDCKTNPPLE EDELELIAYWVRFHVYTT EKTGGRMDASIIDLELSGKQKYK KYIKVL  
QRIGYQYKSGMLQDGYVPPGEGNNQCFSEEELWEHLGRYGLSDACQVEMFESI QERAALE  
IHIRKYHGVYGD EIFHHCVKRNGDTS DAMEIGEHTPPANKEALEECSRGPGLSGEDDRN  
MSMSPRKLMGEDMEREANSAEAKANS DVVSNEVDFEDSEMIDSLAEHRS GVDCNRAVSS E  
NLVDT SVDT SILEAASLKQHEQVCNNELSTNNMVDAP ECTTAIGDDDSLKKPAEDQLPEV  
VRNREVSTGNLVGV  
>comp12643\_c0\_seq1; 770 1 2126 LEN=2307; translated  
XKIGAERKNRKKENIILAE EDESKDKDKNKDRDEDKDKDKNKETTQYPTIQPSQVQLPSL  
EFPSQSPSAPATNNSQPIMNSTTTIEPVEVELLPFSLLVHGSISLEDELVIRRNLQDYLL  
NSAEEMQQQLDLFRDALRVNLELIQTVESYFQSDSVNGYDNGDNSTGENDNRNRLQING  
SASTSSTLLQYQASTVVKYEADPISNERIQLALQDNQIEALEDVDELQGYFLKRFTLGQQ  
TDVNADLATNENESQSATDNL PSEQNPVVLIEVQVADFP AKSLDFKETWQSINSIILLES  
SSMTNTANTGDDQIGVEEGSADKKASNPWADEINKLDQSVSNNGISSSKTKDCEEQRNEK  
TETDSVNTNTFASNKNSFDYSNRENTTEENQSLGEEGGDV DLTVPVARN SNRRQGI EDGH  
PPKSSFLKSFQKSSANETKETLQATYESNPYAGKVDISNETSNDDDSMMGYSLTSLP  
DDPNHQVRHDDNNTMEDLDETMSLASSESETPNPMFAGIHKVMNMPTRTDNSANPMHGT  
VEIGLQMKSRNNQH YDSKGILGDI EHENE ESSINATFLDDDDTNEGELSSVM SGFSSA  
GKTDCSEDIENGNLVLANDIEPERTTHIRDDASDAPSELDNDFEAALPGRLTARPVR  
FPDANTDSIILDDDDPAIVEYIVKNERSLRDDTRKGLRNQKQSQFTMEV  
>comp12643\_c0\_seq2; 909 192 2834 LEN=3015; translated  
MIKTVAHPVCRMGI RTSWVMICVLLSCVFGNPNVSAANPGNFRSSPRRVL DNQITYTNSN  
REKIGAERKNRKKENIILAE EDESKDKDKNKDRDEDKDKDKNKETTQYPTIQPSQVQLPS  
LEFPSQSPSAPATNNSQPIMNSTTTIEPVEVELLPFSLLVHGSISLEDELVIRRNLQDYLL  
LSAEEMQQQLDLFRDALRVNLELIQTVESYFQSDSVNGYDNGDNSTGENDNRNRLQIN  
GSASTSSTLLQYQASTVVKYEADPISNERIQLALQDNQIEALEDVDELQGYFLKRFTLGQ  
QTDVNADLATNENESQSATDNL PSEQNPVVLIEVQVADFP AKSLDFKETWQSINSIILLE  
SSMTNTANTGDDQIGVEEGSADKKASNPWADEINKLDQSVSNNGISSSTWKVAAGIIGA  
AMVLTGLAILFCVRRFRKRQISSKERKCFSGEADHDAMEIIGSNEHSTINDKSAVCAEDP  
RRRNTGRSNTFFFSEILRIGKQQNGTTKSVQDGSCHATNTKTKDCEEQRNEKTETDSVNT  
NTFASNKNSFDYSNRENTTEENQSLGEEGGDV DLTVPVARN SNRRQGI EDGHPPKSSFL  
KSFFQKSSANETKETLQATYESNPYAGKVDISNETSNDDDSMMGYSLTSLPDDPNHQVR  
HDDNNTMEDLDETMSLASSESETPNPMFAGIHKVMNMPTRTDNSANPMHGTVEIGLQMK  
SRNNQH YDSKGILGDI EHENE ESSINATFLDDDDTNEGELSSVM SGFSSAGKTDCSE  
DIENGNLVLANDIEPERTTHIRDDASDAPSELDNDFEAALPGRLTARPVRFPDANTDS  
IILDDDDPAIVEYIVKNERSLRDDTRKGLRNQKQSQFTMEV  
>comp12644\_c0\_seq2; 249 90 908 LEN=1281; translated  
MSPSSSTKSAKERKFKLPESGSSSKVADMGSNLAVICTHPWGPLGGNMDNNVVLAIIVWF  
QRLKIT TMRNFNFCGSQFGRGGRQVDQVKEANFLLTGQH QIAKTPQSSESTPENAPPKYI  
LLVGYSYGSIISASAKIPQCIGTVMISPLAVRHWLYMFGDYHLDQARKRGLPLLMM  
IGSNDNFTSEEAYMNTVHTMPENTTTGAVLKDADHFFRGREKDLMDIIGHWLLNVVPQC  
GNLKTLSVDFSPFEIPALDSTTSSETYP MCM  
>comp12645\_c0\_seq1; 279 44 997 LEN=997; translated  
MGGQPNMLVPFRVLILSMLCSVISSFAVGSSAAFMMKSSPESSSNFSTNSRRRQILRVG  
AGGLFSGLPFFGSDSGEASAASPADTKKGGGPTGEVSKIVKGMKRRRLGNSDIFVSELG  
LGTQRWVSTDFNAPDRNLCYEFMDEAILKRGVNLIDTAEQYPIPSGGRSSEG DTERVIGD  
WMKDRKVP RSDVVIATKITGGTNI TPRNIKKDCEGSLKRLQTDYVDVYLCHWPQRYSPQS  
NWGQSLNYNLDYETSYRRSLGAPTSFEDLCLSMEELIEAGKIRGWGLCNDNAYGLTACTR  
TAKALGTTTPCTVSKEEL

>comp12645\_c0\_seq2; 381 44 1540 LEN=1607; translated  
MGGQPNMLVPFRVLILSMLCSVISSFAVGSSAAFMMKSSPESSSSNFSTNSRRRQILRVG  
AGGLFSGLPFFGSDSGEASAASPADTKKGGGPTGEVSKIVKGMKRRRLGNSDIFVSELG  
LGTQRWVSTDFNAPDRNLCYEFMDEAILKRGVNLIDTAEQYPIPSGGRSSEGDTERVIGD  
WMKDRKVPVRSVVIATKITGGTNIIPRNIKKDCEGSLKRLQTDYVDVYLCHWPQRYSPQS  
NWGQSLNLYNDYETSYRRSLGAPTSFEDLCLSMEELEIAGKIRGWGLCNDNAYGLTACTR  
TAKALGTTTPCTMQGDFSILDRKSEENGVAEAASPYNENVGFMAYNALAGGMLTGYMEV  
PSAFDDPNRDRAMASLSQPRGRMDTRGWGGTLIRYRTDAAQEAIREYAKIAKANKMSLTE  
LSLRWCKQRDLITTTLLGHTNMNQLKETLDILSTKENLPPDVMWEIDRVHMKNRLPLFSN  
SRTGKDWYEGEQIGENIP

>comp12646\_c0\_seq1; 288 1 715 LEN=1274; translated  
XVDEIVDPMHSRARQKEHHIVQSKTDCAAACPNERPVINVSGEFRTLVDDECLKETCKYD  
LPINCWNVSSVTDMTSAFRDQEEFNPLECWDTSVTSMEAMFFETYSFNQPIGEWDVGN  
VENMKDFTFYNSFNQHIGDWNVANVRNMQGMFGESYRFNQPIGGWNVTNVRDMKSMFFFT  
YFNQPIGNWDVSKVTDMSYMFQATSSFNQNIQGNWNVAKEVMNMKNMFYDAKAFNQCLEMW

>comp12647\_c0\_seq1; 199 417 1337 LEN=1986; translated  
MAPSATPALPIAAAPTESQPAVDAKQAATPSTDASESKELPPNINVTSHPVLFHKITVLR  
SSKTSPGTFRSVLREVTYHLGYEATRDLKVRSNLPAVAVPLGKEVQSQHEDLRNADCGYRL  
EDRVALIPIILRSGLGMMDSMLELLPNSSVHHIGMYRTPGVHVAVPVQYFNRLPRGECTADV  
AYVLDPNVGSAAATVNAVVSILKKWGVPKIHVITVVASKAGLELLAKTHPEVAVTVGVVDP  
NLTDGIVLPGMGDVGDRFLFGTGNHDFEEDVGGGLSSDPVDEEQPPTKRKRASLSLEMD  
LTNSNK

>comp12647\_c0\_seq2; 129 417 1543 LEN=2192; translated  
MAPSATPALPIAAAPTESQPAVDAKQAATPSTDASESKELPPNINVTSHPVLFHKITVLR  
SSKTSPGTFRSVLREVTYHLGYEATRDLKVRSNLPAVAVPLGKEVQSQHEDLRNADCGYRL  
EDRVALIPIILRSGLGMMDSMLELLPNSSVHHIGMYRTPGVHVAVPVQYFNRLPRGECTADV  
AYVLDPNVGSAAATVNAVVSILKKWGVPKIHVITVVASKAGLELLAKTHPEVAVTGKNFVL  
FGPXVISFGVAVAQAFQNRASLSRIHLGRIHEKHTHTREYLIHAHRISAPVVRVRYNFFSL  
YDVTGVVDPNLTDCGIVLPGMGDVGDRFLFGTGNHDFEEDVGGGLSSDPVDEEQPPTKRKR  
SASLSLEMDLTNSNK

>comp12648\_c0\_seq1; 463 342 1559 LEN=2021; translated  
MRDQHVDTATKTKSSAEAKTKTPSFAVDNDPRYEQVRAILAKRAPLASKEKELLRSRIKD  
TLVEVVGGEHEHATKPTTIAAEKKLREIVSDLNRTGPTARQRDKCWTSPSYAASVLAIFY  
VCVEALRDDAVDTRSDSSRKGTGSGSIGSESDATAITTLHGSPQRAALESIANRIREAVA  
TTGDERPQTLPTTNPSEPRGPKKNDVTSKATGIIGTDANTAADTNPVAPATMSTDKLLT  
RLSDLARDYDSLAKREEHLELLQNLHDADILVRALAVESVGDEDTENEETTANYANER  
PPSAIAAPKRASGESQVLYAKGDTEIVQTIASDDDDQGSNGNDEDVTSRTRTSKPIV  
RKRKTISLSQRERPSKEEKGSALRKLEALFMEDDSDDSDSSMD

>comp12649\_c0\_seq1; 533 189 1490 LEN=1525; translated  
MVARLNRMIAEHPTLLRNKSSGLHRPLLVLDRNTDLITPIQHTSTYQALIDMLKHKA  
NRVEFDVTTDTMAKRPKTVQKFDLDPDQDPFYSRHKFHPFPEAIESNGVDLQEVTAKEQ  
SIRSKATGNEIPDPSSASDLATAVDSLPAALLERKKQLEVHTSILQAVMNQVAARDVPQF  
FELETSLATGSYKNDPNRAKNEVMELVADPSKGNIDDKLRLIVVYVLTNNAKTDDVDEVA  
AALQQAMEGAGDDGKPRLDKAGKIRLEMGTALAYLKQLRSMNMLPLSSALQEIDASSDA  
AGSSVFSVFNKATSQATGLLAKAADKVSSMLGQNHKHYATQVVENLCEMKPGTEDDDFL  
YLDPRVKGDVDVQKLRMTSRSPVHETTAFFVIGGGCYSEYQNLQLVANERRTVSYGSTELL  
DAGEFLTQLGKLG

>comp12649\_c0\_seq2; 658 167 2125 LEN=2160; translated  
MVLSTSQVTLKSSQLRAVYRMLAFNEDIDALEDEFSLPPAGSSHNQWKILIYDQECRSII  
SPLLSVSQLRRRGVTLHLLNSEREPIDVPVAVYFCRPTKENLSIIAQDCAKKLYGRSHL  
NFVTKLDRITLMEFALKLVVQSGTLDTIAGVHDQYLDVFCLEQKLFSLAKKDSYALYNGSG  
VNEQMIIEAMNEIAYGLFSVVATQGVPIIRCPRGGAPEMVARKLNRMIAEHPTLLRNKS  
SGLHRPLLVLDRNTDLITPIQHTSTYQALIDMLKHKANRVEFDVTTDTMAKRPKTVQK  
KFDLDPDQDPFYSRHKFHPFPEAIESNGVDLQEVTAKEQSIRSKATGNEIPDPSSASDL  
ATAVDSLPAALLERKKQLEVHTSILQAVMNQVAARDVPQFFELETSLATGSYKNDPNRAK  
EVMELVADPSKGNIDDKLRLIVVYVLTNNAKTDDVDEVAALQQAMEGAGDDGKPRLDKA  
GKIRLEMGTALAYLKQLRSMNMLPLSSALQEIDASSDAAGSSVFSVFNKATSQATGLL  
AKAADKVSSMLGQNHKHYATQVVENLCEMKPGTEDDDFLYLDPRVKGDVDVQKLRMTSR  
PVHETTAFFVIGGGCYSEYQNLQLVANERRTVSYGSTELLDAGEFLTQLGKLG

>comp12650\_c0\_seq2; 359 125 1168 LEN=1339; translated

MVSARDDALDYSKPKSKMVMKRPTKKKPKDKPKRPLSAYNFFFKEEREKIIKVVLAEDPS  
AVKQDPEDDGFLEETIGRLKKEGGKVSFEEMGKIIIGQRWKNIDPDRLSKYSELASEDTE  
RYKTEMQEYNGRQEAKMRAEAMKPAASFPTSSAGGPNERGVPSYSDARGAYGDMSAVGFP  
GMPNSMGPQGPAGSMGPGAMGGAYGYGYGDYSGYSGMGNPYGGGMPMSYGSYSSPMD  
PQSAYGGSPYSGMGMGASAFQGGMPMGYPEHLYGANPSMDPQQQQPTGSHPGPHGAHP  
GPHPSSHPPHQPQSHPPHPPPPGGGYSASHAYGGASSHQGNWQNER  
>comp12651\_c0\_seq1; 202 240 800 LEN=962; translated  
MSFSSKETAFNAIHKSVILLICFMAPSVLAWSPPRQFTRISSSSPSAKTSLRMSGPSTDE  
SPSKSSSAGAHDRRRFLSAAAMNVCLMGIGAPAVIAADSSYPPGTTFVSGKKPLPPGET  
VKKSDNTKGRKDPDFLRSIADCRNQCQSTPGPDGLAKSKEDCLSECQDICCTTYEQCTF  
NIVPRL  
>comp12652\_c0\_seq1; 178 1 1535 LEN=2229; translated  
EEEEEEEDDDDDIYNDDCSDKDPHCGYWAVMKPSECEVNP AFMTNIAGRHAGCASVSKFD  
ALVNCVFLTHSIPSVLFFRNRSRNSECMSLFMTFTPSFIRC VLLLALTWFS LCLVFGNR  
LHSKRYSDLPSSLDGTDGEGEPQSLVGHEEHSREDIEKRIIESRRYMELLIQSGDLDP ELI  
RSCRNENEDCXLL EEEEEYKCTKDTNFARSIDFTMDDPSPLTPKYPFHIQSAWGS DENPG  
YMTNCGPACQSCDMLAIEKRCPLDRDIIGPDVWGP GDLDKMFRRLSSEEPYTSKY NVNV  
LSSPDDEGGGPWVLTMDNFVTNEEADRLIEMGAVEGYKRSSDIGEMRPDGSTGEV VSSGR  
TSTNAWCSNECIEDEIVQSVTKRISNMTQIPELNSEDLQLLRYE VQGQLYKRHHDYIEYEI  
DRQGGVRL LTVYLYLNDVEAGGGTNFPDLELTVMPKRGRVLIWPSV INSDPNEKEMRTDH  
QALPVEAGLKYGANAWLHMRNFKDPLDRNC  
>comp12652\_c0\_seq2; 274 1 1426 LEN=2120; translated  
EEEEEEEDDDDDIYNDDCSDKDPHCGYWAVMKPSECEVNP AFMTNIAGRHAGCASVSKFD  
ALVNCVFLTHSIPSVLFFRNRSRNSECMSLFMTFTPSFIRC VLLLALTWFS LCLVFGNR  
LHSKRYSDLPSSLDGTDGEGEPQSLVGHEEHSREDIEKRIIESRRYMELLIQSGDLDP ELI  
RSCRNENEDCTFW SLLGECDENPGYMTNCGPACQSCDMLAIEKRCPLDRDIIGPDVWGP  
GDLDKMFRRLSSEEPYTSKY NVNVLSSPDDEGGGPWVLTMDNFVTNEEADRLIEMGAVEG  
YKRSSDIGEMRPDGSTGEV VSSGR TSTNAWCSNECIEDEIVQSVTKRISNMTQIPELNSE  
DLQLLRYE VQGQLYKRHHDYIEYEIDRQGGVRL LTVYLYLNDVEAGGGTNFPDLELTVMPK  
RGRVLIWPSV INSDPNEKEMRTDHQALPVEAGLKYGANAWLHMRNFKDPLDRNC  
>comp12652\_c0\_seq3; 207 1 1106 LEN=2143; translated  
EEEEEEEDDDDDIYNDDCSDKDPHCGYWAVMKPSECEVNP AFMTN NCRKACRLCERHKRY  
SDLPSSLDGTDGEGEPQSLVGHEEHSREDIEKRIIESRRYMELLIQSGDLDP ELIRSCRNE  
NEDCTFW SLLGECDENPGYMTNCGPACQSCDMLAIEKRCPLDRDIIGPDVWGP GDLDKMF  
RRLSSEEPYTSKY NVNVLSSPDDEGEARGMFFYFVVGFC LCEEYNDGQPCYFLLNSSYL F  
FRARVLTMDNFVTNEEADRLIEMGAVEGYKRSSDIGEMRPDGSTGEV VSSGR TSTNAWCS  
NECIEDEIVQSVTKRISNMTQIPELNSEDLQLLRYE VQGQLYKRHHDYIEYEIDRQGGVRL  
LTVYLYL  
>comp12652\_c0\_seq4; 228 1 1331 LEN=2025; translated  
EEEEEEEDDDDDIYNDDCSDKDPHCGYWAVMKPSECEVNP AFMTN NCRKACRLCERHKRY  
SDLPSSLDGTDGEGEPQSLVGHEEHSREDIEKRIIESRRYMELLIQSGDLDP ELIRSCRNE  
NEDCTFW SLLGECDENPGYMTNCGPACQSCDMLAIEKRCPLDRDIIGPDVWGP GDLDKMF  
RRLSSEEPYTSKY NVNVLSSPDDEGEARGMFFYFVVGFC LCEEYNDGQPCYFLLNSSYL F  
FRARVLTMDNFVTNEEADRLIEMGAVEGYKRSSDIGEMRPDGSTGEV VSSGR TSTNAWCS  
NECIEDEIVQSVTKRISNMTQIPELNSEDLQLLRYE VQGQLYKRHHDYIEYEIDRQGGVRL  
LTVYLYLNDVEAGGGTNFPDLELTVMPKRGRVLIWPSV INSDPNEKEMRTDHQALPVEAG  
LKYGANAWLHMRNFKDPLDRNC  
>comp12652\_c0\_seq5; 181 1052 1639 LEN=2333; translated  
MDNFVTNEEADRLIEMGAVEGYKRSSDIGEMRPDGSTGEV VSSGR TSTNAWCSNECIEDE  
IVQSVTKRISNMTQIPELNSEDLQLLRYE VQGQLYKRHHDYIEYEIDRQGGVRL LTVYLYL  
NDVEAGGGTNFPDLELTVMPKRGRVLIWPSV INSDPNEKEMRTDHQALPVEAGLKYGANA  
WLHMRNFKDPLDRNC  
>comp12652\_c0\_seq6; 253 1 1201 LEN=2238; translated  
EEEEEEEDDDDDIYNDDCSDKDPHCGYWAVMKPSECEVNP AFMTNIAGRHAGCASVSKFD  
ALVNCVFLTHSIPSVLFFRNRSRNSECMSLFMTFTPSFIRC VLLLALTWFS LCLVFGNR  
LHSKRYSDLPSSLDGTDGEGEPQSLVGHEEHSREDIEKRIIESRRYMELLIQSGDLDP ELI  
RSCRNENEDCTFW SLLGECDENPGYMTNCGPACQSCDMLAIEKRCPLDRDIIGPDVWGP  
GDLDKMFRRLSSEEPYTSKY NVNVLSSPDDEGGGPWVLTMDNFVTNEEADRLIEMGAVEG  
YKRSSDIGEMRPDGSTGEV VSSGR TSTNAWCSNECIEDEIVQSVTKRISNMTQIPELNSE  
DLQLLRYE VQGQLYKRHHDYIEYEIDRQGGVRL LTVYLYL



>comp12652\_c0\_seq7; 284 1 1002 LEN=2039; translated  
EEEEEEEDDDDDIYNDDCSDKDPHCGYWAVMKPSECEVNP AFMTN NCRKACRLCERHKRY  
SDLPSSLDGTDGFGEPQSLVGHEEHSREDIEKRIIESRRYMELLIQSGDLDP ELIRSCRNE  
NEDCTFWSLLGECDENPGYMTNCGPACQSCDMLAIEKRCPLDRDIIGPDVWGPGLDKM  
FRRLSSEEPYTSKYNNVNLSSPDDEGGGPWVLTMDNFVTNEEADRLIEMGAVEGYKRSSD  
IGEMRPDGSTGEVVSSGRSTSTNAWCSNECIEDEIVQSVTKRISNMTQIPELNSEDLQLLR  
YEVGQLYKRHHDYIEYEIDRQGGVRLLT VYLYL

>comp12652\_c0\_seq8; 168 469 651 LEN=2252; minus strand; translated  
MCMREQPIDPYMLDNVVNQLSDGQIVTATGPKRGVWIPHDGGGWSVSKFAGFTWLEPIDE

>comp12652\_c0\_seq9; 197 1 1530 LEN=2224; translated  
EEEEEEEDDDDDIYNDDCSDKDPHCGYWAVMKPSECEVNP AFMTNIAGR HAGCASVSKFD  
ALVNCVFLTHSIPSFVLFRRNRSRNSECMSLFMTFTPSFIRC VLLLALTWFS LCLVFGNR  
LHSKRYSDLPSSLDGTDGFGEPQSLVGHEEHSREDIEKRIIESRRYMELLIQSGDLDP ELI  
RSCRNENEDCTFWSLLGECDENPGYMTNCGPACQSCDMLAIEKRCPLDRDIIGPDVWGP  
GDLDKMFRRLSSEEPYTSKYNNVNLSSPDDEGEARGMFYFVVGFC LCEEYNDGQPCYFLL  
NSSYLFFRARVLTMDNFVTNEEADRLIEMGAVEGYKRSSDIGEMRPDGSTGEVVSSGR TS  
TNAWCSNECIEDEIVQSVTKRISNMTQIPELNSEDLQLLR YEVGQLYKRHHDYIEYEIDR  
QGGVRLLT VYLYLNDVEAGGGTNFPDLELTVMPKRGRVLIWPSVINS DPNEKEMRTDHQA  
LPVEAGLKYGANAWLHMRNFKDPLDRNC

>comp12652\_c0\_seq10; 176 1 1305 LEN=2342; translated  
EEEEEEEDDDDDIYNDDCSDKDPHCGYWAVMKPSECEVNP AFMTNIAGR HAGCASVSKFD  
ALVNCVFLTHSIPSFVLFRRNRSRNSECMSLFMTFTPSFIRC VLLLALTWFS LCLVFGNR  
LHSKRYSDLPSSLDGTDGFGEPQSLVGHEEHSREDIEKRIIESRRYMELLIQSGDLDP ELI  
RSCRNENEDCTFWSLLGECDENPGYMTNCGPACQSCDMLAIEKRCPLDRDIIGPDVWGP  
GDLDKMFRRLSSEEPYTSKYNNVNLSSPDDEGEARGMFYFVVGFC LCEEYNDGQPCYFLL  
NSSYLFFRARVLTMDNFVTNEEADRLIEMGAVEGYKRSSDIGEMRPDGSTGEVVSSGR TS  
TNAWCSNECIEDEIVQSVTKRISNMTQIPELNSEDLQLLR YEVGQLYKRHHDYIEYEIDR  
QGGVRLLT VYLYL

>comp12652\_c0\_seq11; 168 469 651 LEN=2451; minus strand; translated  
MCMREQPIDPYMLDNVVNQLSDGQIVTATGPKRGVWIPHDGGGWSVSKFAGFTWLEPIDE

>comp12652\_c0\_seq12; 188 1 1111 LEN=2148; translated  
EEEEEEEDDDDDIYNDDCSDKDPHCGYWAVMKPSECEVNP AFMTN NCRKACRLCERHKRY  
SDLPSSLDGTDGFGEPQSLVGHEEHSREDIEKRIIESRRYMELLIQSGDLDP ELIRSCRNE  
NEDCXLL EEEEEYKCTKDTNFARSIDFTMDDP SPLTPKYPFHIQSAWGS DENPGYMTNCG  
PACQSCDMLAIEKRCPLDRDIIGPDVWGPGLDKMFRRLSSEEPYTSKYNNVNLSSPD  
EGGGPWVLTMDNFVTNEEADRLIEMGAVEGYKRSSDIGEMRPDGSTGEVVSSGRSTNAW  
CSNECIEDEIVQSVTKRISNMTQIPELNSEDLQLLR YEVGQLYKRHHDYIEYEIDRQGGV  
RLLT VYLYL

>comp12652\_c0\_seq13; 209 1 1336 LEN=2030; translated  
EEEEEEEDDDDDIYNDDCSDKDPHCGYWAVMKPSECEVNP AFMTN NCRKACRLCERHKRY  
SDLPSSLDGTDGFGEPQSLVGHEEHSREDIEKRIIESRRYMELLIQSGDLDP ELIRSCRNE  
NEDCXLL EEEEEYKCTKDTNFARSIDFTMDDP SPLTPKYPFHIQSAWGS DENPGYMTNCG  
PACQSCDMLAIEKRCPLDRDIIGPDVWGPGLDKMFRRLSSEEPYTSKYNNVNLSSPD  
EGGGPWVLTMDNFVTNEEADRLIEMGAVEGYKRSSDIGEMRPDGSTGEVVSSGRSTNAW  
CSNECIEDEIVQSVTKRISNMTQIPELNSEDLQLLR YEVGQLYKRHHDYIEYEIDRQGGV  
RLLT VYLYLNDVEAGGGTNFPDLELTVMPKRGRVLIWPSVINS DPNEKEMRTDHQALPVE  
AGLKYGANAWLHMRNFKDPLDRNC

>comp12652\_c0\_seq14; 168 469 651 LEN=2347; minus strand; translated  
MCMREQPIDPYMLDNVVNQLSDGQIVTATGPKRGVWIPHDGGGWSVSKFAGFTWLEPIDE

>comp12652\_c0\_seq15; 168 469 651 LEN=2134; minus strand; translated  
MCMREQPIDPYMLDNVVNQLSDGQIVTATGPKRGVWIPHDGGGWSVSKFAGFTWLEPIDE

>comp12652\_c0\_seq16; 305 1 1227 LEN=1921; translated  
EEEEEEEDDDDDIYNDDCSDKDPHCGYWAVMKPSECEVNP AFMTN NCRKACRLCERHKRY  
SDLPSSLDGTDGFGEPQSLVGHEEHSREDIEKRIIESRRYMELLIQSGDLDP ELIRSCRNE  
NEDCTFWSLLGECDENPGYMTNCGPACQSCDMLAIEKRCPLDRDIIGPDVWGPGLDKM  
FRRLSSEEPYTSKYNNVNLSSPDDEGGGPWVLTMDNFVTNEEADRLIEMGAVEGYKRSSD  
IGEMRPDGSTGEVVSSGRSTSTNAWCSNECIEDEIVQSVTKRISNMTQIPELNSEDLQLLR  
YEVGQLYKRHHDYIEYEIDRQGGVRLLT VYLYLNDVEAGGGTNFPDLELTVMPKRGRVLI  
WPSVINS DPNEKEMRTDHQALPVEAGLKYGANAWLHMRNFKDPLDRNC

>comp12653\_c0\_seq1; 206 220 1366 LEN=1366; translated

MVLSNSDERIQKVVVIRHGIARHNLDPSTGRPCDLRDPRLDDPPLVYQGKQALYAGYR  
LKEWWRATQPGDNVKLVITSVSIISYDDEWRQIRLLWCHRSDCFGNRCCRWSANDAQRMI  
PKLASVPIFKHAKKYPAFDTVYSDIHPGLLAGGRIYVFRATTRAVVFLHGSLRSRFRNAL  
SGQTKKTVVADETLAYPTNGSCDDGGGRKLAKRHAGDAGRPRDPDFSLSEPIGEP SRKQH  
RSGDARGVAGGLLSASLSGCSGPREKTGPQLRHVCAGVRVTRKRVFTTPE SPPNYLNAMH  
VCFYLVVGRWLHWSKPI SRRFISPYQHPSQNAMIDFVVSFPLRLRVACFAPLSFLLSRLL  
ETLDTRNLMMDFSSIKASFVTK

>comp12653\_c0\_seq3; 198 220 1196 LEN=1196; translated  
MVLSNSDERIQKVVVIRHGIARHNLDPSTGRPCDLRDPRLDDPPLVYQGKQALYAXLQ  
TQGMVASDAAGGQREIGNNIPFDTVYSDIHPGLLAGGRIYVFRATTRAVVFLHGSLRSRFR  
RNALSQTKKTVVADETLAYPTNGSCDDGGGRKLAKRHAGDAGRPRDPDFSLSEPIGEP S  
RKQHRSGDARGVAGGLLSASLSGCSGPREKTGPQLRHVCAGVRVTRKRVFTTPE SPPNYL  
NAMHVCFYLVVGRWLHWSKPI SRRFISPYQHPSQNAMIDFVVSFPLRLRVACFAPLSFLLS  
RRLLETLDTRNLMMDFSSIKASFVTK

>comp12654\_c0\_seq1; 650 743 2512 LEN=2587; translated  
MNMSNDTSSNLSDDVGDGIGAEVGGDNFVVENKANNIQINGNGNVNYIEKQ SISISYQFAIA  
KHYYEEMEDRSGKDYRWIKPLAKPVSHVMIKDIERRKECYLSDWTDGFKNLKVVPAVLF  
LYFACVSPAISFGTIASEITNGSIGVVEFLLSAGASGMVYSVICGQPMAFIAPTGLTLAF  
ISGLFRFCTLKGLPFFPVYSWVGLWTSFFFTLLGLGGSSQLIRYCTRFTDEIFNALLSTT  
FMYEAVKSLTRNFQKADPNLNTTFFVALAMALTTFRTTDKVSFAFESSKFLNQKIRRYVKN  
FGPVIIFIAMSAINSLPGVAKFNVPTLSVDPHFQLAGARKFLVPINSIPNGVKLLCSLPA  
MLLSALFFMDQNISVRVVMNPDNKLKKGPAYNLDMVALGLITGVLSVLGLPVMCGATVQS  
MNHVKALTDVYNPETEEIEIVDVTETRLTGFLVHAMIAGSLLLLPVVRLIPIPVVSGVF  
LFLGRKLMKGNLQIRIRDTFVQKNRLLLEDNPIRMLGRKRTALFTGIQLLCLMGLWGFKE  
NPSTAIFFPSAIGMLMVVRNFVLPKIFDEEELVELGDPTPQLHLDDGVI

>comp12654\_c0\_seq2; 245 743 1054 LEN=1233; translated  
MNMSNDTSSNLSDDVGDGIGAEVGGDNFVVENKANNIQINGNGNVNYIEKQ SISISYQFAIA  
KHYYEEMEDRSGKDYRWIKPLAKPVSHVMIKDIERRKECYLSDW

>comp12657\_c0\_seq1; 281 1 1006 LEN=1337; translated  
XPTITLLERRTTVQLHNKTIQHNTTKSKPVVKFHRKMLYDNMTRLNMTMYRRKQQNGKV  
IVDYDDTILPSTFVDRWKIDNFKELPQHFQNMLEELSRTCDFRFLLEASKYGEV I IITNSD  
EGWVNFSAERYCPALLPVLAKEYPIISARTRYEKFYPCQPLCWKAAAF AHEVNEIYDSLKN  
TDDATSCASMEGTEVSSTSSLSMDMDEVNNSMSSSDLVVDSSEQLPRQIISFGDSNEE  
RMAVSI VSGQLDALPKSIKFMSSP LLIIGQLHLLTNHMEFVCESGKSLDMHITKVQAD  
QYAQSYLRDENLVYDERIVPAFVPRTRRELD CRPL

>comp12657\_c0\_seq2; 187 603 818 LEN=1417; minus strand; translated  
MLTAILSSFESPNEMICRGCSDDESTTRSEEDMEELFTSSSIMSDKDDVEETS VPSILAQ  
DVASSVFFNES

>comp12658\_c0\_seq1; 1493 1 4215 LEN=4411; translated  
NSSSSNKNATSSMFEISCSPLPSNQTHRGSSFGYGETRQRSFAEQQSDSVSGSFVEGKI  
IPLHPPSSSITNRADYSSDHVPPASNHHVTKQILQWGRSSNDRSRKRGLPLPEDDGSI  
SPTLPTH RHGEGSTEDHGRENERETNHANHNNAQDTDDDDADSCCTLADSDLYYGSSAY  
DNTGATSKIAEATCHSNIDSNNSNIDSTVSPATETHSGSISNSDYTETT VANSICSSVSR  
GEEHISSRLRKYGLYNLHEMKRRQQRRVNRNFKTPMSNGSSTTSSSNNNTDIHYQSSN  
STLQGSSSH PQGPAAVSILSGLTNEGNSMIDDNEESRGHQSKAQGNSNDN NNNIKNTGA  
GIPTRIRTAPLHVQMAVEE IHRWLFTEGGHFEDVQTLMTQYSLYVREHFGIPLDRLYYGG  
VGLHPKLTAYLWKWEPHGEFTHSEMPPEV FARRNELFSPDEPFCVLEQGRADYVRIRDTD  
SYIPPD TAKWFRAGKFKDYFALPDIHRGVSKGLAWSTKCPDGFCDDDI QFFRMTHPAL  
TIMRLHTNDMVLKTLTDRMESEITERTNQLAAANIKLEEANEESI SMHASKQLEHFACMSH  
EIRTP LNCIVGLSSLLLESDDLNDLELLETINMVYSSADLVQGVVNDVLDYAKIESGHFEL  
DIHESDLQSTLNGVVHSIANKLRSQDKNVEVRTSYSGRLGKTMTTDSRRLQQILYNILGN  
AAKFSMEGTTIDFSAKLLEPTKTKVDCPKVGNDDNNEDEAKDNDNIPTENKPPKHTIRFS  
IKDYGKGI EEKDFEKIFQPF SQASKETQTVYGGTGLGLSITKKLVTRLGGTIKIRSEIGR  
FTEFIVDLPYVDEPVDVSLLRDKLSETSIVLLDPMDGGAGERENEESD DSFLPFAEMVE  
DYGLNVLRCSWGELESKLGLKANIRENYIFLAHEDI EEQQGFLNTEKIVGRNRCSWFSF  
GSESSLNHRQRHFKTLTGIFPAFLLERLVEVTSSESIGFQEDHSLNASFSTFNQSIGELS  
IEDMSSESQESDDGKVL PKATGLFAIATSENCASPVDSRLIHGKPPGTNDSSPSATESS  
TKSRKAFATKYPPRDLKVLVVDNKNINQKILERILKRLGVNDISIVNNGKKAVDLTETTV  
FDCIFMDMEMPVMGGLEASKIITQRDKESARVVFVTAHDIEDIKERADKAGAFGYISKPL  
KMQEIH TFLGTIEGLGTIHS AKTAKKEFSNRVLVKTSSGDEL RKKRSTPPK KKRCTKYQP

ERELKVLMAEDNLVNQKVLDRILKRVGVKDVTVIVDNGKKAVDISSTIKFDCILMDMQMPI  
MGGLEACKIIVERDKDQVDCPKIVFVTAHALVEFKKALAAGGFDFIAKPFKMEDIDKMM  
KTVEDAIGSNTQDTNTAPMEENT

>comp12659\_c0\_seq1; 428 41 1144 LEN=1388; translated  
MMTARSLSFLLVCLSGTVSGTTQSQSERYEPDESLKSAFSLYSSWKKTHSKGAQLTLGEE  
EQRFKIWLENHERIESHNNQKPAPSFLLGHNEYSDLTRDEFQRFRLGKYSQSAELEKKH  
AQNLVSSQAEVKTARYLSEDOVPLDLPDYVNWIALGGVTDVKNQGACGSCWAFSTTGALE  
GAKYVKTGELVALSEQNLLDCDHKDLGCNGGLMDNAFKFDEKSGGLCSEADYPYEAQQS  
VCNPMNCTDVPGSIVSTFYDVPNGNEKTMLAALAMQPI SVAIQADQFVQFYKGGVLTDD  
ACGDQLDHGVLAVGYGSDLETNEPYFVVKNSWGPTWGEGDYIRMSRNSKNEYGMCGILKM  
ASYPVVE

>comp12660\_c0\_seq1; 460 216 1265 LEN=1472; translated  
MTITKTITKTNNLIAVAACFFFLGLTGGGSLFSRSPWQPLASAEDIACDVEATYGTWD  
DKRIPRNEIAVPGNYVLRYGIPAFSEKFDTMAEGGTWIRSFAFESYQMTDEDGQVDSGE  
SGRATATATAWLPEAARSLRGGDAQALAAPIPRNCFRSYSCRRRYMRMRNSLRFRMNGR  
SAANMGRSSMCHLCREDDDDAAALATEQRNDERDREPLFEDGAPGPHFPYREVTLDEI  
LGSGEAPLVPPGGKPSASHAAFEAFCAELGLVKDYDGSATATDCKVRFHCRPSTEREVA  
GDDLLVLDRRGGNSNGDSNGNDGTVEHVSPGVLYAVRAASPSDLGEGNH

>comp12660\_c0\_seq3; 460 216 1265 LEN=1423; translated  
MTITKTITKTNNLIAVAACFFFLGLTGGGSLFSRSPWQPLASAEDIACDVEATYGTWD  
DKRIPRNEIAVPGNYVLRYGIPAFSEKFDTMAEGGTWIRSFAFESYQMTDEDGQVDSGE  
SGRATATATAWLPEAARSLRGGDAQALAAPIPRNCFRSYSCRRRYMRMRNSLRFRMNGR  
SAANMGRSSMCHLCREDDDDAAALATEQRNDERDREPLFEDGAPGPHFPYREVTLDEI  
LGSGEAPLVPPGGKPSASHAAFEAFCAELGLVKDYDGSATATDCKVRFHCRPSTEREVA  
GDDLLVLDRRGGNSNGDSNGNDGTVEHVSPGVLYAVRAASPSDLGEGNH

>comp12661\_c0\_seq2; 239 239 877 LEN=1157; translated  
MPSPLPPQPLGTVMFRGEGQNPPSLEVECYLDLIPCPSAKMFSMLYDQVVPQLIQNKESH  
AAFRIHVVQHPWHPQSTMVHEAALAVRAVLGTTKYLEFVSGVYAAFSGDDKKFSDADTWN  
KTRTEIYEDLLSLVTPLGSEDDKAVRAMLI PADGSLSGNSGNGLTQELKWACRHRHARG  
VHVTPVFNIEAGQVSSGWTKDQWMEFLKK

>comp12661\_c0\_seq4; 129 401 1039 LEN=1319; translated  
MPSPLPPQPLGTVMFRGEGQNPPSLEVECYLDLIPCPSAKMFSMLYDQVVPQLIQNKESH  
AAFRIHVVQHPWHPQSTMVHEAALAVRAVLGTTKYLEFVSGVYAAFSGDDKKFSDADTWN  
KTRTEIYEDLLSLVTPLGSEDDKAVRAMLI PADGSLSGNSGNGLTQELKWACRHRHARG  
VHVTPVFNIEAGQVSSGWTKDQWMEFLKK

>comp12662\_c0\_seq1; 235 2290 2840 LEN=3788; translated  
MCNAWGRAPLERSWTTSLVLFETECVEVQREDVVQVTRDQKQVAKMQQLKVPPTMRLP  
TVIYIXSNGNDELSSMDTDYQETDNNYDSINYDDNFSYLAARDALDNNFGQHVTAQKS  
ISGNNSVRSESDSSLNQTATKDDLGTGTTINVIATKTLVPPPIRTITCLHNVQHLVNDF  
EAP

>comp12663\_c0\_seq1; 490 350 2278 LEN=2754; translated  
MLPTLSTQNYKNNNNNDRNDRNKMNNKNTHRRFQLACLAFLVVTFTAALVNPAPF  
FSVRGGESRAAPKNADRQRKNFKFGSTTLNMDDEALDNGTTNGAVEDCCANGDCETKTPV  
KQIRVTARKGLGATRMPPKRKNKNGFKQNGFASENIAATAISELCEVEDRPIPAEFVAET  
ALPTDMGQFRLRAYRLEADQVPNEYTGREPSVIYAADKSPFGVEGELKKGVHVR IHDQCL  
TSEVFGSKRCDSDQLKALKHIAEHGGAVIYLQOEGRIGLANKVAAYALQDVGLDVTVD  
ANLHLGFPEDCRNYGAIPSI FHDKIGS IGLMTNNPRKVNRLKELGVKIDGTVPVPTT  
NPYNHRYIEAKHERMAHENFDHLFSDSEDDTIVGETYVTEGEGMAAHAVKQSLQESIDDE  
NEEGCLAKDDGYCFGRQSVVDAIAAVKEGKMVVVDDMNRENEGD LIMAADLCTPEDMAF  
IVRYSSGVICIAMDSHRMDELKLPQMITNNEPKNTAFTITVDATKEHGITTGISSVDRA  
KTMNLLADMSTSAADFNRPGHIFPLRAVEGGVLARDGHTTEAGVDLAHLAGRSRAGILCEI  
VSEEHPTMEMRLEPMKRFKHHGLVLTIVDMIQYRKDTEDI

>comp12663\_c0\_seq2; 670 68 1924 LEN=2400; translated  
MNNKNTHRRFQLACLAFLVVTFTAALVNPAPF SVRGGESRAAPKNADRQRKNFKF  
GSTTLNMDDEALDNGTTNGAVEDCCANGDCETKTPVKQIRVTARKGLGATRMPPKRKNKTN  
GFKQNGFASENIAATAISELCEVEDRPIPAEFVAETALPTDMGQFRLRAYRLEADQVPNE  
YTGREPSVIYAADKSPFGVEGELKKGVHVR IHDQCLTSEVFGSKRCDSDQLKALKHIA  
EHGGAVIYLQOEGRIGLANKVAAYALQDVGLDVTVDANLHLGFPEDCRNYGAIPSI FHDK  
KIGS IGLMTNNPRKVNRLKELGVKIDGTVPVPTTNPYNHRYIEAKHERMAHENFDHLF  
SDSEDDTIVGETYVTEGEGMAAHAVKQSLQESIDDENEEGCLAKDDGYCFGRQSVVDAIA

AVKEGKVVVVDDMNRENEGDLIMAADLCTPEDMAFIVRYSSGVICIAMDSHRMDELKLP  
QMITNNEDEPKNTAFTTITVDATKEHGITTGISSVDRAKTMNLLADMSTSAADFNRPGHIFP  
LRAVEGGVLARDGHTEAGVDLAHLAGRSRAGILCEIVSEEHPTEMMRLPEMKRFAKKHGL  
VLTSIVDMIQYRKDTEDI

>comp12664\_c0\_seq1; 173 1 336 LEN=806; translated  
ASASASASTSTSTSEEEPLQRPPAECPPANMIGASAFGLHGHGGSHEQHQQHQHQHE  
AKQQHAHGGGSCPPWFLLLHDPKAGMRKQSWLAIGVFLAYTYQQCLPDSA

>comp12665\_c0\_seq1; 578 409 2179 LEN=2642; translated  
MGPTQADVWNVAGNSERHVWLLFKNFDRNRTRFLGSGNSSLSDRRWGKSAFEFNRGADN  
HNENPDSKFAKYLEPWSLDLFI SVDEI IRDDDPQNDRWISKMMIDFMKRLEINSERLTVL  
QQRVEDFHSRLRNLLRNSNQASASIQDMIHILEDERKVLRLQLRHYDTWKSASFQYMGW  
SPDGDEDIDNDDCEDPVIILDPKQRQIRWNALVQNASSESSARHAMTIEQMSELVILLKP  
LSPKHSKHPLILPPGESFDDDLDCVHDTVSAFMRCRMTQQLLSQHMMATGQDALGTSIGK  
RIEAKRQQRANPTDDDADAATNGKIVGAINVDYPVASILRASATEASQLCEATYILISP  
QCEFVAATEEIDDDSCGSDCVSPAPASDNSYESVSATFVRSWLQYTLIELLNAMAATVE  
RNPEIVSAAMDEDCNFSDS SDS SDS DSD DSD DSD DSD DSD DSD DSD DSD DSD  
GIDDDFDLERLFRFAQRDTVWDRMDDQQTYSLVRSPKGLGVGLSLSRWHMRHFGGELTL  
ERRAAGAIRVLSDSGGRGNGDSKWCLLKGKMTASIRMPKDSNIKLAI

>comp12666\_c0\_seq1; 207 668 1102 LEN=1381; translated  
MAFACKLRNVDEEIGDTRRIISLCVWNIITYAAFQTSFFTIEHFRNDLGEVFTFQVEMVA  
FALLDFYHMVSSPMVLVFPRIYVWYERTYGELENVQMYGAGRVRVEIVTKKKRPEELA  
CTAELTMDNDDSNRVYEREERLDV

>comp12667\_c0\_seq1; 665 261 1931 LEN=2029; translated  
MAASTSESTTTSAAPLPTWDQLKTLASDTPVGAALDADVELRSKGIGSPNVHNKLRRLFVD  
SEKEQQQPAYTLYRDHAGWCPYCQKTMLLIEAKKIPVNIELVNMRSYGDKPQSFLRKVPN  
GMLPALEDNASGNVALDSAYIMEFLEDYSNRDANSKSNHVGNMIPDRQTQPEEYRRYTSL  
MGLERELFRWWCTFMFRPEQPNIIMGGGTGGVAGLVGNLFGGNAEGNDDDSYVSPSMKGF  
LDCLETVDAQLGATNGPYFLDSSASGSNHPTMIDFVYASHVERMLASCAYWKGMMNRDPN  
DYPTLSNLRKWMDALEQHEYYLAFKSDYYTHVKDIPPQYGPNGVSRSKIQSYKAMIE  
GDSSTQSWKPLPLDDDSLQPLFRGIPLPLCVLEAADIRPDAQSGSYESTAKTSQAFRTAC  
QTMAAWKLCGNGSAVSRFASRGGPSGSKNFNRKTFGAELADPYAAPDEGVLESVDALLRV  
VSRTMLVVEANTVPSQDHADALVEAAGSHGGASVDGMVSSLAYLRDRIGVPRDLPLASAR  
YLRAYLNWAIDVLEEK

>comp12667\_c0\_seq2; 162 261 506 LEN=633; translated  
MAASTSESTTTSAAPLPTWDQLKTLASDTPVGAALDADVELRSKGIGSPNVHNKLRRLFVD  
SEKEQQQPAYTLYRDHAGWCP

>comp12668\_c0\_seq1; 458 168 1472 LEN=1652; translated  
MEKSNELERQSSIFRARSQISEAVGRSPLSEISDPRRLES IPTSDCLLSPRSNYKYDEN  
NKQKFVNMVNIYIYALNGLMCEHRPAKSKFGKKTTSRLKSDTKLSSSDIAMRPNMQL  
KLDLTTAVVSCQRNGISDQVCSETYLASMPLGDIATSLNRVRYAALWPSKQSAHKEG  
AIERSAFQIIRCMKQAFTPGIGAGSNYCHETLEIGINVSQRGQERIHGTLALIVIDGEE  
GEVIMNVPATPILLNSKKVKKRKNKYGYFSNDPSRRFFLDKTSVLRIGVQVIPEDAMRFA  
REKEEKRIQKESELNELLGDGDFMAGLLLLKMGDDDIQREGKSMNSCPVNPAKITTGIMPD  
CKAQNSILPNLLCGSIPISWVPNFKGPDTEPDVPKEIRTDNNIDQFTIHSLSMSSVSES  
TNGSDRIFEVAGEL

>comp12668\_c0\_seq2; 465 168 1463 LEN=1763; translated  
MEKSNELERQSSIFRARSQISEAVGRSPLSEISDPRRLES IPTSDCLLSPRSNYKYDEN  
NKQKFVNMVNIYIYALNGLMCEHRPAKSKFGKKTTSRLKSDTKLSSSDIAMRPNMQL  
KLDLTTAVVSCQRNGISDQVCSETYLASMPLGDIATSLNRVRYAALWPSKQSAHKEG  
AIERSAFQIIRCMKQAFTPGIGAGSNYCHETLEIGINVSQRGQERIHGTLALIVIDGEE  
GEVIMNVPATPILLNSKKVKKRKNKYGYFSNDPSRRFFLDKTSVLRIGVQVIPEDAMRFA  
REKEEKRIQKESELNELLGDGDFMAGLLLLKMGDDDIQREGKSMNSCPVNPAKITTGIMPD  
CKAQNSILPNLLCGSIPISWVPNFKGPDTEPDVPKEIRTDNNIDQFTIHSLSMSSVSES  
TNGSDRIFEGE

>comp12669\_c0\_seq1; 1315 1 5095 LEN=5152; translated  
RADSFHRLHSGDKKSFVPSASDGFDEVSQARLSMGTVDSLVEFGSVEAMLARRRKRAT  
VLFRTDGKYSNDQKLLMCAFLYILEYGRDTMGWCQLILPTPPVSHQEGNKSSSRGTESAV  
SAAKIMLPVLQPSLRRIILEGIGNLSSETQIVIPSTPEKEGESSDESKEKSQDDEKPVSL  
EYVARELRHSLMGAIIVGLAFANARDIALHAMAVLRRDLKAQKNGTDDTAIKTFTSLLCMT  
AEEIRVRYEGERRRRETALVDAAYDEQDEEAADSMAVEKLIIGDSIVPPSNERSTDETLK

EPVEEISFENDSEQSDRVPADFLLLNEGLTAGGASTVNRAKMEWSKYEGFSAALQTCNS  
NDGTPIDNGDCLEASAQIVLKMSPFLDAWDEFSAMDAVDTELVKLFDLTLGAVLSEDSS  
TGEALPEMDVFLHGGCEGAADAMTTFIELAASEKNRTMEVTEIFLPNHRNSCSSYTERFC  
WTRYMGMLRKGNADEFWGERGIADGNRDVRSRIVSIPCEPQFRRFIPKYLDNSSSHNRHGPS  
VDQAAHDEETDIDAFTKSLIESGHLEIVDITKKEINEEEKPALELPTSDTLDDDDFAETPL  
DISRPRSADEEDKQPEESVTPPANKEATTIDAYNRDEEEKVEFDKTQVDSMQFNITASAF  
ASPPDNSSSTLGLMHSAAAGLIERHLENCLHVKTEGSRKCSMLLTSTHLILEYDIDSEGL  
YEGEMMAVREEAERQRMIEESKGGIAKDGDKIQEEIENRHKMTAALRPKSIRWNLSELSH  
VYLRRYRLRDSSIELFFIPSGGTSFGGYGLYSPSTSLFLDFGPGYEGKTRRDDAAFAIMK  
RAPPQAIKQWPDHDAQFLHNQLSRLTIGWVEGRITNFDYLLHLNLAGRSYNDTCQYPI  
PWVLSNYHSEEIPDLTNPDPNFRDLRKPMPGALNPSRLEDFIERFNTFADPSIPPFMYGSHY  
STNAGVVLHFLVRLHPFAGLHRQLQGGHFDVADRLFSSVPRTWEMCTGSSAAEVKELTPE  
WYCNPSTFLKNTNKFRLGTSQDGELIGDVVLPWAKGSAEKFIEVMRNALESIDCSAMIPD  
WIDLIFGRKQQGPEAIAAHNVFFYLTYGSDVAAIEDEGLRQATELQIAHFQCMPQLF  
VRPHVRRVQYVKNKRLTFYQITSAYTFGIDTRKGTDDENEESTPLTCSNQQQIFGKPL  
YLPFFSAPMSHWVHLDAPPPGPHAPLISVRLAGTDRCLAQVDFHCFRWAWEAEDSTQ  
ITGFESSTTFPRDNGCFVAQRELPRFRTPRVLVHKPSHLQGDENHGYTYPVAVAISKTLF  
AGISVLLVLSGDGRGGLAMQLVDPAGVVRGEAVVGSIHSSRIRCIATDPIGNSAGHGG  
VGGELAVGSSDGTASIWRFMSSHFLPLRPRVYLSGHCSSPIYAVGLSASINAVTVSEK  
RLCLYSINGSVIRIIEPPTDTLELPEGMEILSTTFVKSPAVASVQGFVVAVCETKMK  
KTSRSVITLHLFSLEGVSLGSKALESWRGIPTRIVATPDGTTVLVCSGRGVTVHRVSAIT  
PLAFIDEWQITESSEGEVDGYLSPGSGSRALDIDLGP SLNRPVIAAACTNGVLRHLALA  
GISAYSERHKKVGLIPQGVGSLIKAPARGIKRVFGKASTIGTKAADAGKDISKEISSDVK  
EKGVTGFLGGMFGRKK

>comp12670\_c0\_seq1; 528 1 970 LEN=1128; translated  
XCKLQETMGVKEELEALRSQGVTKKNASKLKDASGLSTPEAEENAIKAEQERTRIGNYKK  
DAEQNLQSYNEAKISVAKGGNPSIPASPSKGVPAKKESAKATPAPVSAPVSAPAPAAAAG  
GADAEVEEPTLEEVPDLEEMPSMDAASSAATQSVAVPPPAPAPINRAERKARRMMEKLG  
KAVPGISQVVLKMRGGGVRGGIFTIASPDCYEKNGSYVIFGEARQGGGGLGGATQAQQQA  
QAIQQLAAMAKSDGSGIEMPAGAAAGGESPQVEKADTAVDETGLEAKDIDLCAQAGCSR  
AKAVKALRENDGDLVNAIMSLTS

>comp12671\_c0\_seq1; 505 273 2191 LEN=2641; translated  
MPLFPVHRIVSTIDSVPDLIYADV GKYSNIEEDGDEEIEIVDPLLKMSAAATGGTVGMLE  
SSGAATIDKSGFIHPQHDLQKRSYDVMLMMLKPKPALGRKLMKINEDPAFPVKQAGGRNEI  
TIIGMGTSTNGFAPKPDDELKQVHVDYLTYEECIKTNSFNLNYKFELFPHMMCTFGSGIY  
SQRGQCYGDSGGPYIVKGRSAAEDTQVAVVSWAVNCASDVFPVMSRSTSDPHTLKFKEV  
TCSMSTMPQGLCSEENNGASNLSRLNVPNGVTVSVRIFADPFGHELKWQLVDRSDEKL  
VYAEIPYGMISGDHLFQDVVVPAGGELKFKIDDAAQDGI FGDSDAI LYEIVLQDQNTNNE  
IIMVEGNGKFGNSKEEDFRVPLVGENTAAYFRAANEDVASDRYASVTGPTAPLKIYIKFA  
DYHEDTAWKVTSDVGTKIFASKNANSYRLGDDVTEEVLDL PAGQYRFTISDRRGTD EYRAF  
KFYQLSYLDRKTQRSGLTGGETIVYTS DGT FEGESISHDFVIPVAVDDSSSYSSSPADQ  
GII FGELDLMDEAQEAPAVKVEEK PSEMAQDEEICTGVADGDYCVSNASCCSKFCRGRFC  
QDPDNVKAPVSTVTGRQRVK TGSYGGYGGSSRGGGYARA

>comp12671\_c0\_seq2; 607 498 2645 LEN=3095; translated  
MKRTHNTNSGFRMASSCLLLGLVLLASVSSLAKAESEESHLLRGRNLIIGGGTTGDRFP  
YYVALK DANREIQCGGTLIAPDIVLTAHCRNSDLIYADV GKYSNIEEDGDEEIEIVDPL  
LMKSAATGGTVGMLESSGAATIDKSGFIHPQHDLQKRSYDVMLMMLKPKPALGRKLMKIN  
EDPAFPVKQAGGRNEITIIIGMGTSTNGFAPKPDDELKQVHVDYLTYEECIKTNSFNLNYK  
FELFPHMMCTFGSGIYSQRGQCYGDSGGPYIVKGRSAAEDTQVAVVSWAVNCASDVFPV  
MSRSTSDPHTLKFKEVTVCSMSTMPQGLCSEENNGASNLSRLNVPNGVTVSVRIFADP  
FGHELKWQLVDRSDEKLVYAEIPYGMISGDHLFQDVVVPAGGELKFKIDDAAQDGI FGDS  
DAI LYEIVLQDQNTNNEIIMVEGNGKFGNSKEEDFRVPLVGENTAAYFRAANEDVASDRY  
ASVTGPTAPLKIYIKFADYHEDTAWKVTSDVGTKIFASKNANSYRLGDDVTEEVLDL PAGQY  
RFTISDRRGTD EYRAFKFYQLSYLDRKTQRSGLTGGETIVYTS DGT FEGESISHDFVIPV  
AAVDDSSSYSSSPADQGIIFGELDLMDEAQEAPAVKVEEK PSEMAQDEEICTGVADGDY  
CVSNASCCSKFCRGRFCQDPDNVKAPVSTVTGRQRVK TGSYGGYGGSSRGGGYARA

>comp12672\_c0\_seq1; 258 164 478 LEN=985; translated  
MRDSKTLVSI LEKQKTAGKRYAAVCAAPAVVLANGLLEEPGATCYPAPSFREKLTNPVD  
DAVAVTGMVTT SQPGTSL SFALELGEQLFGKEKRDEIQKQMLL

>comp12672\_c0\_seq3; 295 1 688 LEN=1195; translated

XVPLPNVVTAMRNFAIALLLALGKRSQGFASKASYRSFYRTPTSLEMTKRVLVPIADGSEEI  
ETTCITDTLTRFGAEVTVASVMPEGQLVCKMSRGIKFMADKSIEEAAEEEFDLVVCPPGM  
PGAEHMRDSTLVSILEKQKTAGKRYAAVCAAPAVVLASNGLLEEPGATCYPAPSFREKL  
TNPVDDAVAVTGMVTTSSQGPSTLSFALELGEQLFGKEKRDEIQKQMLL  
>comp12673\_c0\_seq1; 323 283 2355 LEN=2587; translated  
MIASNLSSTATSLLLLALSRMPSTTANPSDGGRRPNIIMQPDDFRFLDNWTPPPNTPDN  
PNLADPFPVGLPNIERLRTNGLQMMQAYTGSPMCGTSRFSMTGRLPSRASTVISESGS  
EGWIPSWITIPSTKLEGTDCSRDNLAVAFRDAGYYTAMTGKWHLSRIDRDNYDYDKAVDI  
VKGCGFDHVDGLYVENMANGGENRPFNSYSDGTFSHNMEWVTHSAINFIKESSSSEVTSS  
ELAQTAFRKTTFSSDPMHSIHSHTYIPLNFCISFCCARSXNTPFFLYVNPTVPHGSRGIR  
EALTSFSCRDTANHNQVWESDPWIKGMSDGGCAAYRQTILDRAESDDDLGKIWLDDSVG  
ALLTALEDNGQLDNTIFLQEDHGTDTKSALFEGGIRIPQFVHYPNFIPPSQRFDFGLVSV  
YDIAPTMLDYAGISPPYQFDGKSWKHAI FNPTEEQNWKHSRCIFAEMQTDRAVRCGCYKY  
IKIYDTEWSNTYWRAERHMLVGELHGNLYDLCDGTGDYITANDNNREAVAFVDPDVESAL  
VNTLQCHLDRSHPQRTQDFSVCSAPFEPEPVPEPVPTQSPTTAGAFCDSDPLRVKFKFDT  
EGVVEAGKCGSKKYWSHCRDSCGKCDKCTDSKQTLKLAEKIKVVTKKDGEKITKNKKSVT  
CRAVKKAVNKKKLCCKNSDIAVSCVKTCGGC  
>comp12673\_c0\_seq2; 324 283 1569 LEN=1801; translated  
MEWVTHSAINFIKESSSSNTPF FLYVNPTVPHGSRGIREALTSFSCRDTANHNQVWESDP  
WIKGMSDGGCAAYRQTILDRAESDDDLGKIWLDDSVGALLTALEDNGQLDNTIFLQED  
HGTDTKSALFEGGIRIPQFVHYPNFIPPSQRFDFGLVSVYDIAPTMLDYAGISPPYQFDGK  
SWKHAI FNPTEEQNWKHSRCIFAEMQTDRAVRCGCYKYIKIYDTEWSNTYWRAERHMLVG  
ELHGNLYDLCDGTGDYITANDNNREAVAFVDPDVESALVNTLQCHLDRSHPQRTQDFSVCS  
APFEPEPVPEPVPTQSPTTAGAFCDSDPLRVKFKFDTCEGVVEAGKCGSKKYWSHCRDSC  
GKCDKCTDSKQTLKLAEKIKVVTKKDGEKITKNKKSVTCRAVKKAVNKKKLCCKNSDIAVS  
CVKTCGGC  
>comp12673\_c0\_seq3; 411 283 2220 LEN=2452; translated  
MIASNLSSTATSLLLLALSRMPSTTANPSDGGRRPNIIMQPDDFRFLDNWTPPPNTPDN  
PNLADPFPVGLPNIERLRTNGLQMMQAYTGSPMCGTSRFSMTGRLPSRASTVISESGS  
EGWIPSWITIPSTKLEGTDCSRDNLAVAFRDAGYYTAMTGKWHLSRIDRDNYDYDKAVDI  
VKGCGFDHVDGLYVENMANGGENRPFNSYSDGTFSHNMEWVTHSAINFIKESSSSNTPF  
LYVNPTVPHGSRGIREALTSFSCRDTANHNQVWESDPWIKGMSDGGCAAYRQTILDRAE  
SDDDLGKIWLDDSVGALLTALEDNGQLDNTIFLQEDHGTDTKSALFEGGIRIPQFVHY  
NFIPPSQRFDFGLVSVYDIAPTMLDYAGISPPYQFDGKSWKHAI FNPTEEQNWKHSRCIFA  
EMQTDRAVRCGCYKYIKIYDTEWSNTYWRAERHMLVGELHGNLYDLCDGTGDYITANDNN  
REAVAFVDPDVESALVNTLQCHLDRSHPQRTQDFSVCSAPFEPEPVPEPVPTQSPTTAGA  
FCDDSDPLRVKFKFDTCEGVVEAGKCGSKKYWSHCRDSCGKCDKCTDSKQTLKLAEKIKVV  
TKKDGEKITKNKKSVTCRAVKKAVNKKKLCCKNSDIAVSCVKTCGGC  
>comp12673\_c0\_seq4; 324 426 1712 LEN=1944; translated  
MEWVTHSAINFIKESSSSNTPF FLYVNPTVPHGSRGIREALTSFSCRDTANHNQVWESDP  
WIKGMSDGGCAAYRQTILDRAESDDDLGKIWLDDSVGALLTALEDNGQLDNTIFLQED  
HGTDTKSALFEGGIRIPQFVHYPNFIPPSQRFDFGLVSVYDIAPTMLDYAGISPPYQFDGK  
SWKHAI FNPTEEQNWKHSRCIFAEMQTDRAVRCGCYKYIKIYDTEWSNTYWRAERHMLVG  
ELHGNLYDLCDGTGDYITANDNNREAVAFVDPDVESALVNTLQCHLDRSHPQRTQDFSVCS  
APFEPEPVPEPVPTQSPTTAGAFCDSDPLRVKFKFDTCEGVVEAGKCGSKKYWSHCRDSC  
GKCDKCTDSKQTLKLAEKIKVVTKKDGEKITKNKKSVTCRAVKKAVNKKKLCCKNSDIAVS  
CVKTCGGC  
>comp12673\_c0\_seq5; 348 283 2469 LEN=2701; translated  
MIASNLSSTATSLLLLALSRMPSTTANPSDGGRRPNIIMQPDDFRFLDNWTPPPNTPDN  
PNLADPFPVGLPNIERLRTNGLQMMQAYTGSPMCGTSRFSMTGRLPSRASTVISESGS  
EGWIPSWITIPSTKLEGTDCSRDNLAVAFRDAGYYTAMTGKWHLSRIDRDNYDYDKAVDI  
VKGCGFDHVDGLYVENMANGGESTCLTRTRGLTIDVEIRILGFVXGFFWFLIVHRIALS  
SFFAPAFPKNDRPFNSYSDGTFSHNMEWVTHSAINFIKESSSSNTPF FLYVNPTVPHGSR  
GIREALTSFSCRDTANHNQVWESDPWIKGMSDGGCAAYRQTILDRAESDDDLGKIWLDD  
SVGALLTALEDNGQLDNTIFLQEDHGTDTKSALFEGGIRIPQFVHYPNFIPPSQRFDFGL  
VSVYDIAPTMLDYAGISPPYQFDGKSWKHAI FNPTEEQNWKHSRCIFAEMQTDRAVRCGC  
YKYIKIYDTEWSNTYWRAERHMLVGELHGNLYDLCDGTGDYITANDNNREAVAFVDPDVV  
RTPAFALRFHNKHGWASFLPRQSDCSCSLLVFLGVRSCKHAPVSPRPPISTENTGLFRL  
ASPFPEPEPVPEPVPTQSPTTAGAFCDSDPLRVKFKFDTCEGVVEAGKCGSKKYWSHCRDSC  
GKCDKCTDSKQTLKLAEKIKVVTKKDGEKITKNKKSVTCRAVKKAVNKKKLCCKNSDIAVS

CVKTCGGC

>comp12673\_c0\_seq7; 273 283 2461 LEN=2693; translated  
MIASNLSTATSLLLLALSRMPSTTANPSDGGRRPNIIIMQPDDFRFLDNWTPPPNTPDN  
PNLADPFPAVGLPNIERLRTNGLQMMQAYTGSPMCGTSRFSMTGRLPSRASTVISESGS  
EGWIPSWITIPSTKLEGTDCSRDNLAVAFRDAGYYTAMTGKWHLSRIDRDNYDYDKAVDI  
VKGCGFDHVDGLYVENMANGGENRPFNSYSDGTFSHNMEWVTHSAINFIKESSESSEVTSS  
ELAQTAFRKTTFSSDPMHSIHSHTYIPLNFCISFCCARSXNTPFFLYVNPTVPHGSRGIR  
EALTSFSCRDTANHNQVWESDPWIKGMSSEDGGCAAYRQTILDRAESDDDLGKIWLDDSVG  
ALLTALEDNGQLDNTIFLQEDHGTDTKSALFEGGIRIPQFVHYPNFIPPSQRFDGLVSV  
YDIAPTMLDYAGISPPYQFDGKSWKHAI FNPTEEQNWKHSRCIFAEMQTDRAVRCGCYKY  
IKIYDTEWSNTYWRAERHMLVGELHGNLYDLCDGTGDYITANDNNREAVAFVDPDVVRT  
AFALRFHNKHGWASFLPRQSDCSCSLLVFLGVRSCKHAPVSPRP  
IPSTENTGLFRLASPFEPVPEPVPTQSPTTAGAFCDSDPLRVKFKFDTCEGVVEAGKCGSKKYWSHCRDSCGKC  
DKCTDSKQTLKLAEKIKVVTKKDGEKITKNKKSVT  
CRAVKKAVNKKKLCCKNSDIAVSCVKTCGGC

>comp12673\_c0\_seq8; 274 426 1818 LEN=2050; translated  
MEWVTHSAINFIKESSESNTFFLYVNPTVPHGSRGIREALTSFSCRDTANHNQVWESDP  
WIKGMSSEDGGCAAYRQTILDRAESDDDLGKIWLDDSVGALLTALEDNGQLDNTIFLQED  
HGTDTKSALFEGGIRIPQFVHYPNFIPPSQRFDGLVSVYDIAPTMLDYAGISPPYQFDGK  
SWKHAI FNPTEEQNWKHSRCIFAEMQTDRAVRCGCYKYIKIYDTEWSNTYWRAERHMLVG  
ELHGNLYDLCDGTGDYITANDNNREAVAFVDPDVVRT  
PAFALRFHNKHGWASFLPRQSDCSCSLLVFLGVRSCKHAPVSPRP  
IPSTENTGLFRLASPFEPVPEPVPTQSPTTAGAFCDSDPLRVKFKFDTCEGVVEAGKCGSKKYWSHCRDSCGKC  
DKCTDSKQTLKLAEKIKVVTKKDGEKITKNKKSVT  
CRAVKKAVNKKKLCCKNSDIAVSCVKTCGGC

>comp12673\_c0\_seq9; 361 283 2326 LEN=2558; translated  
MIASNLSTATSLLLLALSRMPSTTANPSDGGRRPNIIIMQPDDFRFLDNWTPPPNTPDN  
PNLADPFPAVGLPNIERLRTNGLQMMQAYTGSPMCGTSRFSMTGRLPSRASTVISESGS  
EGWIPSWITIPSTKLEGTDCSRDNLAVAFRDAGYYTAMTGKWHLSRIDRDNYDYDKAVDI  
VKGCGFDHVDGLYVENMANGGENRPFNSYSDGTFSHNMEWVTHSAINFIKESSESNTFF  
LYVNPTVPHGSRGIREALTSFSCRDTANHNQVWESDPWIKGMSSEDGGCAAYRQTILDRAE  
SDDDLGKIWLDDSVGALLTALEDNGQLDNTIFLQEDHGTDTKSALFEGGIRIPQFVHY  
PNFIPPSQRFDGLVSVYDIAPTMLDYAGISPPYQFDGKSWKHAI FNPTEEQNWKHSRCIFA  
EMQTDRAVRCGCYKYIKIYDTEWSNTYWRAERHMLVGELHGNLYDLCDGTGDYITANDNN  
REAVAFVDPDVVRT  
PAFALRFHNKHGWASFLPRQSDCSCSLLVFLGVRSCKHAPVSPRP  
IPSTENTGLFRLASPFEPVPEPVPTQSPTTAGAFCDSDPLRVKFKFDTCEGVVEAGKCG  
SKKYWSHCRDSCGKCCKCTDSKQTLKLAEKIKVVTKKDGEKITKNKKSVT  
CRAVKKAVNKKKLCCKNSDIAVSCVKTCGGC

>comp12673\_c0\_seq10; 398 283 2363 LEN=2595; translated  
MIASNLSTATSLLLLALSRMPSTTANPSDGGRRPNIIIMQPDDFRFLDNWTPPPNTPDN  
PNLADPFPAVGLPNIERLRTNGLQMMQAYTGSPMCGTSRFSMTGRLPSRASTVISESGS  
EGWIPSWITIPSTKLEGTDCSRDNLAVAFRDAGYYTAMTGKWHLSRIDRDNYDYDKAVDI  
VKGCGFDHVDGLYVENMANGGESTCLTRTRGLTIDVEIRILGFVXGFFWFLIVHRIALSR  
SFFAPAFPNKDRPFNSYSDGTFSHNMEWVTHSAINFIKESSESNTFFLYVNPTVPHGSR  
GIREALTSFSCRDTANHNQVWESDPWIKGMSSEDGGCAAYRQTILDRAESDDDLGKIWLDD  
SVGALLTALEDNGQLDNTIFLQEDHGTDTKSALFEGGIRIPQFVHYPNFIPPSQRFDGL  
VSVYDIAPTMLDYAGISPPYQFDGKSWKHAI FNPTEEQNWKHSRCIFAEMQTDRAVRCGC  
YKYIKIYDTEWSNTYWRAERHMLVGELHGNLYDLCDGTGDYITANDNNREAVAFVDPDVE  
SALVNTLQCHLDRSHPQRTQDFSVCASPFEPVPEPVPTQSPTTAGAFCDSDPLRVKFK  
DTCEGVVEAGKCGSKKYWSHCRDSCGKCCKCTDSKQTLKLAEKIKVVTKKDGEKITKNK  
KSVTCRAVKKAVNKKKLCCKNSDIAVSCVKTCGGC

>comp12673\_c0\_seq11; 274 283 1675 LEN=1907; translated  
MEWVTHSAINFIKESSESNTFFLYVNPTVPHGSRGIREALTSFSCRDTANHNQVWESDP  
WIKGMSSEDGGCAAYRQTILDRAESDDDLGKIWLDDSVGALLTALEDNGQLDNTIFLQED  
HGTDTKSALFEGGIRIPQFVHYPNFIPPSQRFDGLVSVYDIAPTMLDYAGISPPYQFDGK  
SWKHAI FNPTEEQNWKHSRCIFAEMQTDRAVRCGCYKYIKIYDTEWSNTYWRAERHMLVG  
ELHGNLYDLCDGTGDYITANDNNREAVAFVDPDVVRT  
PAFALRFHNKHGWASFLPRQSDCSCSLLVFLGVRSCKHAPVSPRP  
IPSTENTGLFRLASPFEPVPEPVPTQSPTTAGAFCDSDPLRVKFKFDTCEGVVEAGKCGSKKYWSHCRDSCGKC  
DKCTDSKQTLKLAEKIKVVTKKDGEKITKNKKSVT  
CRAVKKAVNKKKLCCKNSDIAVSCVKTCGGC

>comp12673\_c0\_seq12; 297 610 1704 LEN=1936; translated

MSEDGGCAAYRQTILDRAESDDDLGKIWLDDSVGALLTALEDNGQLDNTIFLQEDHGTD  
TKSALFEGGIRIPQFVHYPNFIPPSQRFDGLVSVYDIAPTMLDYAGISPPYQFDGKSWKH  
AIFNPTEEQNWKHSRCIFAEMQTDRAVRCGCYKIKIYDTEWSNTYWRAERHMLVGELHG  
NLYDLCDGTGDYITANDNNREAVAFVDPDVESALVNTLQCHLDRSHPQRTQDF SVCASPF  
EPEPVPEPVPTQSPTTAGAFCDSDPLRVKKFDTCEGVVEAGKCGSKKYWSHCRDSCGKCD  
KCTDSKQTLKLAEKIKVVTKKDGEKITKNKSVTCRAVKKAVNKKKLCKNSDIAVSCVKT  
CGGC

>comp12673\_c0\_seq13; 247 610 1810 LEN=2042; translated  
MSEDGGCAAYRQTILDRAESDDDLGKIWLDDSVGALLTALEDNGQLDNTIFLQEDHGTD  
TKSALFEGGIRIPQFVHYPNFIPPSQRFDGLVSVYDIAPTMLDYAGISPPYQFDGKSWKH  
AIFNPTEEQNWKHSRCIFAEMQTDRAVRCGCYKIKIYDTEWSNTYWRAERHMLVGELHG  
NLYDLCDGTGDYITANDNNREAVAFVDPDVVRTPAFALRFHNKHGWASFLPRQSDSCS  
LLVFLGVRSCKHAPVSPRPIPSTENTGLFRLASPFEPVPEPVPTQSPTTAGAFCDSDP  
LRVKKFDTCEGVVEAGKCGSKKYWSHCRDSCGKCDKCTDSKQTLKLAEKIKVVTKKDGEK  
ITKNKSVTCRAVKKAVNKKKLCKNSDIAVSCVKTCCGC

>comp12674\_c0\_seq1; 367 436 1362 LEN=1427; translated  
MPYLAEQKRKQKQFVLVAAAADPEKDASAASGDANLALTDAPTPPEGLFERLDLNDHML  
SKAEYKSGWPLIAGELSSGFGSWLPANNGGFMKGFTSGVAMILATEIGDKTFFIAAVLSM  
RQKRSVFLGAVFSLYLMTVLSMMGLVLPKFVVPKYTHILGGVLFYFGFKLLIDAKGM  
NSSQVSEEELEVEEELLHPKKDERDEESQAVTNSIRKGFSEVAMQSFTLTF LAEWGDR  
SQIATIALSAAKNPYGVTLGGCIGHTMCTGLAVLGGRMLAARISEKTVSIFGGIIFLAFG  
VHSVFFES

>comp12675\_c0\_seq1; 860 472 3288 LEN=3626; translated  
MSSSDADNCEIGANDHAGDRVDEPNPNDVLCGRGGNINSHKGNEQFRKLVEKRKRVT  
ARFKREKRLIASSIVNEIRAMDPPGRFLARKGSMKDDSGFWYDIGDEKARDKTSQALREN  
APSIRAEIETEINQORAEMRRQEATTDPPQSSAKSGPNESSYPSAPIGHHHPGSHGHLGN  
PPPPIPPPHPGHSHTYSPAHSYQQYYDYHYHYGYGAPPPPPPGYTSNAAAAPAGA  
PPHPSLQPGYPATQPHYPWAAQSSPNAASGNRSTPPGPPATS AVVTPSPHSPSGRSTG  
VALNPSAADAKSPMAEGHASSAVDSTFSPFARATTQEEEDRRLAMALQEEENAKAFEDR  
NRRFGSDRRSSRSTAYCAPGYRPRLLNDSVEAPNEGGFGTPNRKKRPPMSASHFFGPHS  
FSRERANTGSSAPSNMENDSNLRMEKDHYEMNLKPPAQMHKREGRKNDNADNSHG  
IDQNHNDHDFSCSSFSTRGRMEFKDDSEFSMFEGEGTIVPSSNANSTGFSRVRNVFSS  
AFSNKDNKHSNAGSNFNPISLDQSDRNHGQSQYQHKCDSSRGDDNRSHNRKHCDDHHQH  
SQEQDQQNHQESSLLSQVASHILGNFGGSSWTDSDNPNKRDHQHHHGNDPEMEMEL  
GQEVIMDVRDESSMPPQSRGNGTQVDWPSRAGCHTWIPDSMVDTTASCNFGHDDNDR  
MHTTHQHVSAHSHRHRHHHPNDHSLNRETSYGRADISPINSMDMDFSLSSSLGGHRQRT  
NNINGGASTLMNVFEKKTADLNPEELLQIHRSGLOQTPSWERSYRSRSPVSLGELSGVD  
EMDGLIRVHSRDAKDKLFGMNGSTVEPQPSTSMGQYNVHQQRHQNHQHGSHHHPQGG  
QYQSPMKPSAMHGHHNQAPLSSRAQNYSESREIDMDWD

>comp12676\_c0\_seq1; 613 68 1306 LEN=1432; translated  
MAEETKNEEVAKTDETTKTEESKVNEDATVADEDVKAVAGVKERLKFSDANVRQDVF  
IRKLLMSSDEKSVVDALLRFNTIKKHTEKSSVI IQAAKELADVLVDEDKMTIARVVPF  
TKEMMNGNIPKSLYIQNLPIDESKRYDVKVD EIRALFGKYGDVAMVKKLFHSGPKNRNHG  
HYGPSGSKNRNIPIGAAMVEFHTQKDLEKAAEATLTTKGGEKVT PKDKITLAQSDTRKEA  
IDLEVTRLSEYVEMRKEEKSKRETKKRSAPESKPEEKEKTPKFVFDWEPGCVIKVRGLPT  
ACDREAMLAVVGKALDISPDDVKAKNIYVDYSRGQTDGAI RFPKSDSVAVVAKKLDKAE  
LMILDAKVEDASILEGDEEKYWDDFIAFKTKQ MIRRAEEKQRGNKKQKTRQ

>comp12677\_c0\_seq1; 42 1 1064 LEN=3218; translated  
XSNVFLALSLLDLFLRNFGFMTPSTTKVFFLLGLPAVPTVTGFRSGFCYHQRSKPSRQ  
HNPYSGVQTAWVPSFLEAATSDGGDNSESSKTVGKNNDRSTSSHPRVVM DIGREPLARM  
PFDWARLGVRMPLVPTDFGCGATTSTRRFVAPRSETVGFTGPEGARESPIAGNYWSVSE  
DGTVFEASYTIASELKRKRDVVEAGTELVLSTRLYTQTELDRLNEEYYQAREAMWSTGGD  
LNDASNRQQSARKWNPQTERWEKRYPDQNPLDMIKSRVMYWMQSAKQEKAKNQRPETL  
SDRGGRLPGVIGDDEYVYLQVQGVVRYGGDDGPVCLWTAQPIITNVPADRGR

>comp12677\_c0\_seq2; 42 1 1064 LEN=3360; translated  
XSNVFLALSLLDLFLRNFGFMTPSTTKVFFLLGLPAVPTVTGFRSGFCYHQRSKPSRQ  
HNPYSGVQTAWVPSFLEAATSDGGDNSESSKTVGKNNDRSTSSHPRVVM DIGREPLARM  
PFDWARLGVRMPLVPTDFGCGATTSTRRFVAPRSETVGFTGPEGARESPIAGNYWSVSE  
DGTVFEASYTIASELKRKRDVVEAGTELVLSTRLYTQTELDRLNEEYYQAREAMWSTGGD  
LNDASNRQQSARKWNPQTERWEKRYPDQNPLDMIKSRVMYWMQSAKQEKAKNQRPETL



SDRGRLPGVGIGDDEYVYLQVQGVVRYGGDDGPVCGLWTAQPITNVPADRGR  
>comp12678\_c0\_seq1; 284 101 1609 LEN=1719; translated  
MPTVKGTASVADSRARTKALRKTRFPRNYRTSVDIEKVNKPVLQWIEQKIASILGFDE  
IVSSTAINLFLPSDNSCDPKRAHLDLAGFLGDETATFCGELWTLMLAQASASGIPKTL  
EQKKKEMAEELSKGNEPQRQQLAPYQNQSLGSSGKPSRFSRFAPDRSNPSGRSSLDKHE  
ATNKIKETHISIEETSQEHTNGKEKSGRSRVEDAYEKQNMDDQFGRVLSSTERSLEVQKH  
TSRNQRDRNGSRTSESSRHRDRSRSPGKYNGREREASDHRRRYDNRYHGTDGDRRRPQD  
KRYHSNQYDDRSYHDQYHRQYNHSYKNHHRDRSRDQYRDSRDWRHEIHEMENLERRLT  
RLRKEYSGWDRNSANRSIHRIEDEMNDIQDRLYELEQRRRRYASYREDDRRRWSHRDRFP  
SYEYQREGRKRSSSTNSESSRSVQSDANDNVANGSSDGSRRSYRSRPERAKKNKNKSS  
KKRQRRRRSRSPSSSSERSYQS

>comp12679\_c0\_seq1; 386 122 1636 LEN=1819; translated  
MPNPSSRRSSILEAHDVFEKYHKHLSSFSEEDESIPEENLTGGSNLTESVKEGVQRGRKP  
NASFPMFHRVMKTGVIYATTRAKSNGFSAETEEWANMGQGAPETGTLPGAPSRNFSMTI  
PEAELEYAPVTGLTELREKIADYYNHLYRQKASQYTMNDNVCVPPGGRAGLTRIMAVLGN  
VNIGYFTPDYATAYEQCLGLFLRISPSPLLHRDINEALMEPDEFEFQCKGAGLGSVLLSNP  
ANPTGQSIEGEKLRRYVEIARNTETALLMDEFYSHYYDGEATDPLDGGIDDNSNWPKT  
SSATYIEDVNEDPIVIVNGLTKNWRCPGFRVCWIVAPKAIVSMLGSAGSYLDGGANAPLQ  
KLALPLMELDFIRKDTWALQRHFRMKRDFLLTELAKLGIKQWKPTATFYIWADISALPP  
PLNDCLVFLECAKHKIICVPGVFFDINPRGLKTLKSTCISNVRFSYGPPMRNLTLGMK  
QLASLISEWKEHPESIGDYAGENL

>comp12679\_c0\_seq2; 243 122 988 LEN=1058; translated  
MPNPSSRRSSILEAHDVFEKYHKHLSSFSEEDESIPEENLTGGSNLTESVKEGVQRGRKP  
NASFPMFHRVMKTGVIYATTRAKSNGFSAETEEWANMGQGAPETGTLPGAPSRNFSMTI  
PEAELEYAPVTGLTELREKIADYYNHLYRQKASQYTMNDNVCVPPGGRAGLTRIMAVLGN  
VNIGYFTPDYATAYEQCLGLFLRISPSPLLHRDINEALMEPDEFEFQCKGAGLGSVLLSNP  
ANPTGQSIEGEKLRRYVEIARNTETALLYVVGIFESMIGKRMLLRLSP

>comp12679\_c0\_seq3; 293 122 1357 LEN=1926; translated  
MPNPSSRRSSILEAHDVFEKYHKHLSSFSEEDESIPEENLTGGSNLTESVKEGVQRGRKP  
NASFPMFHRVMKTGVIYATTRAKSNGFSAETEEWANMGQGAPETGTLPGAPSRNFSMTI  
PEAELEYAPVTGLTELREKIADYYNHLYRQKASQYTMNDNVCVPPGGRAGLTRIMAVLGN  
VNIGYFTPDYATAYEQCLGLFLRISPSPLLHRDINEALMEPDEFEFQCKGAGLGSVLLSNP  
ANPTGQSIEGEKLRRYVEIARNTETALLMDEFYSHYYDGEATDPLDGGIDDNSNWPKT  
SSATYIEDVNEDPIVIVNGLTKNWRCPGFRVCWIVAPKAIVSMLGSAGSYLDGGANAPLQ  
KLALPLMELDFIRKDTWALQRHFRMKRDFLLTELAKLGIKQWKPTATFYIW

>comp12681\_c0\_seq1; 687 192 2780 LEN=2911; translated  
MLRKIATSRMVSSTLVRESRKAVVSWMPASTRNMSTTTVARAFPSTNAFHSVRFQSSAA  
SVDMEESTTAAAPLTTNHANETRPAKFPVPTPDRKYEFFANVEFTPEGIAVIRFDCPKKVN  
SISFALSEEAKQLWANEIEHNSGVKAVVFSKAPDMFIAGADIFDIKQVENKEDLVDLIE  
EGMNFVKHMRTKKVPLVAAIDGPALGGGLEWAMWCDYRVCNSSSKTKVRMIVGNTANPDF  
HLYNAMHPERFTXLTRLSRNFASFRRPTLCIILRNSKLGLEPKLGLLPFGGQTQNLHE  
LVGLQNAMDMMLTGKDIRPDKAKKMGLVDLVVAPQSVEKDAIQSAVDIVSGKIKPKRKP  
SWMNRLLEDTSIGRKIIWSQIDKMVQKNTNGKYPAPNAIIRCVQHGISNPATKFNENERKE  
FAKLAATKESEALIGIFDGMTQMKKNPFQSSAAAPVDTVTVMGAGLMGAGIAQITAEKGM  
SVLLKDRDDAAIERGESYMRGNWDKLLKRRRMSKFQHNLTNSNVVGLTDNSNLEKHFVK  
VDMVIEAVFEDLDLKKKIVADVERLAPDHCVFATNTSAIPIGAI AEGSKRPENIIGMHYF  
SPVPSMPLEIIPHEGTSETTKATAFDVGTQKQKTCIAVKDVPGFYVNRCLGPFLVEVSA  
LVCDGVSLDKLDSVKNFGMPVGPVTLADEVGDVTSVSHVASFVLSNADLGVMDGGNIDLM  
KNMIGKWLGRKSGQGFYTYDKKKKGTVSPEVKAYLDEFVTQDLNLDSEIQNRIISRF  
VNEAAKCLEDEIIEENPVVDIGLVFGTGFAPFRGGPFYLDQVGVSGYVDMNEFADKYG  
PQFEPCQLLKDYAITDKKPHLD

>comp12681\_c0\_seq2; 774 192 2627 LEN=2758; translated  
MLRKIATSRMVSSTLVRESRKAVVSWMPASTRNMSTTTVARAFPSTNAFHSVRFQSSAA  
SVDMEESTTAAAPLTTNHANETRPAKFPVPTPDRKYEFFANVEFTPEGIAVIRFDCPKKVN  
SISFALSEEAKQLWANEIEHNSGVKAVVFSKAPDMFIAGADIFDIKQVENKEDLVDLIE  
EGMNFVKHMRTKKVPLVAAIDGPALGGGLEWAMWCDYRVCNSSSKTKLGLPEVKLGLLP  
FGGQTQNLHELVLQNAMDMMLTGKDIRPDKAKKMGLVDLVVAPQSVEKDAIQSAVDIVSG  
KIKPKRKP SWMNRLLEDTSIGRKIIWSQIDKMVQKNTNGKYPAPNAIIRCVQHGISNPA  
TKFNENERKEFAKLAATKESEALIGIFDGMTQMKKNPFQSSAAAPVDTVTVMGAGLMGAGI  
AQITAEKGM SVLLKDRDDAAIERGESYMRGNWDKLLKRRRMSKFQHNLTNSNVVGLTDNS

SNLEKHFVGKVDVIEAVFEDLDLKKKIVADVERLAPDHCVFATNTSAIPIGAI AEGSKRP  
ENI IGMHYFSPVPSMPLLEI IPHEGTSETTKATAFDVGTQKQKTCIAVKDVPGFYVNRCL  
GPFLLVEVSALVCDGVS LDKL DKS VKNF GMPVGPVTLADEVGIDVTSHVASFLSNADL GVR  
MDGGNIDL MKNMIGK GWLGRKSGQGFYTYDKKKKGKTVSPEVKAYLDEFVTTQDLNLDESE  
IQNR IISR FVNEAAKCLEDEI IENPVVGDIGLVFGTGFAPFRGGPF RYLDQVGVSGYVDM  
MNEFADKYGPQFEPCQLLKDYAITDKKFHLD  
>comp12682\_c0\_seq1; 114 206 886 LEN=1266; translated  
MGFLLLSVEY PSESDKKRFLRTAGPHSGFTSPIHGFLAASATDDQWRSVLKAIRENAEEL  
SFLDDVPPQPRPLRPND DNYQAFSGTKWKPEVLVRAASSPLHPALFALMNRDDESTPYPR  
FGHCANCTNRTPQMNR CGRCKLVRYCSRACQSAHWKKVHKTSCVKAQPFSLYKSMNGNDG  
FHVSSDECRWLQAALS RDPNTSSDNVLQCFRAYFGVAGDLGGCFVL  
>comp12683\_c0\_seq2; 230 1 1244 LEN=1244; translated  
XRPAYLTDDGAKDE DADDPNAEETEETEEKQTFANEKQEEEDGEPKHDDPEDEPEDDGG  
NEANE EGGKEEXKDELEELTLAVNVKHSIDVHNRSSAGDESGPPKVLFWTDEDCLRS LQK  
TRPALVPYFRAETEGMYKADVCRGTALLEHGGFYLDADL GVRDDLWRDLRPETEFVTARV  
HKASNWVGRGFFQAILGSSPNSPVL SRYLELF EKHYDGREKVEKGPLGVLL LKTAWDQVR  
DERGETTVPTELYQELLYHEAGPLNTGPNRGALSPAPTWGKRRACHFVVAGMANDP SLAD  
VVLEAAEGGGSSXAAGDRPADRPEPDGEPHVRGAFEGGGFDPAGDRGHAVVGTGLSGD  
RGREP GAGRSVGTARPRPERWRLRRARCGGRERTNERRYHEVSILALFFLPK SX  
>comp12684\_c0\_seq1; 717 136 2760 LEN=2852; translated  
MSASERITHAHTHHPYAKRRRGGG CYAVANQCSSSSSSCAAVASGIYFSYDEAKQQIVE  
SRRASLSSLASDAGVKFQRFDKVSDAELFLHERGFVPTIESGGWISARDRSPILYEYSLA  
KQAANNSNKSSSGK GSSSHPTVRVTPTSNLINTNSEAVSQRLWPNNEHQREHVHATDHSR  
YQQQH QDQH QHQHPYI HSTQPVISIDSSPESSLPPAAAACSSYFQQKELVVSPSRKRQK  
RRRPRSNSNSESSSI SVLDDDEFDFYDRQQHDSKPTAKGENSKHGENRDENTSTSTPDVQ  
CQACPEFDIVQQRAIDAALIGKNVFLTGVAGTGKSLVTKRIVEDAKCMRKEVAVAAAPTGV  
AAVNLGPELGAQTVHSLAGVGPQTASGF EKMLSPWTAKKWKIEVLVLDEIGMLGADFL  
DWMDVYVRKARKKPLEPFGGIQLIFVGDFQAQLGPIPRGHS LRNKAFEPDQPGADCLMGV  
SECAA YAFQTVLWREADFHVHLRKYVRQKNKDFQLALMDIREARADSRVKTLVDICLS  
PLDDREGLEIPEGIKPTILYCTNRNV DKENFENLRKLSDRGKTFEATDHTS ISSDVNLAG  
RDAVGRLLKNNAFFKDCSASKQIHLKVGAQVMLLQNLDIKQGLVNGSRGVVEKFALCPVV  
KDI IHGQEQLIGPGDIDKFP GCRFEDLKFNQKTD FEGKIWRICRFDRYPLRVFVNNVSR I  
IVPEIFERSLYRQ GKCMREQIPLRLAWALTIHKSQGSTLDYVVC DLQGCFTSGQAYVALS  
RARSMQGLQIRNFSSKHVTADPLVEAFYDALDRDDMRNF LYHQAGLWWFPILKSPSWLKM  
FQYASSKSARLNAKQFRSWVAEYKPLEGYQGWGA  
>comp12684\_c0\_seq2; 294 494 1579 LEN=4334; minus strand; translated  
MSASERITHAHTHHPYAKRRRGGG CYAVANQCSSSSSSCAAVASGIYFSYDEAKQQIVE  
SRRASLSSLASDAGVKFQRFDKVSDAELFLHERGFVPTIESGGWISARDRSPILYEYSLA  
KQAANNSNKSSSGK GSSSHPTVRVTPTSNLINTNSEAVSQRLWPNNEHQREHVHATDHSR  
YQQQH QDQH QHQHPYI HSTQPVISIDSSPESSLPPAAAACSSYFQQKELVVSPSRKRQK  
RRRPRSNSNSESSSI SVLDDDEFDFYDRQQHDSKPTAKGENSKHGENRDENTSTSTPDVQ  
CQACPEFDIVQQRAIDAALIGKNVFLTGVAGTGKSLVTKVRAKHPGIQTQTRTNESNQVA  
A  
>comp12684\_c0\_seq3; 373 494 1579 LEN=6267; minus strand; translated  
MSASERITHAHTHHPYAKRRRGGG CYAVANQCSSSSSSCAAVASGIYFSYDEAKQQIVE  
SRRASLSSLASDAGVKFQRFDKVSDAELFLHERGFVPTIESGGWISARDRSPILYEYSLA  
KQAANNSNKSSSGK GSSSHPTVRVTPTSNLINTNSEAVSQRLWPNNEHQREHVHATDHSR  
YQQQH QDQH QHQHPYI HSTQPVISIDSSPESSLPPAAAACSSYFQQKELVVSPSRKRQK  
RRRPRSNSNSESSSI SVLDDDEFDFYDRQQHDSKPTAKGENSKHGENRDENTSTSTPDVQ  
CQACPEFDIVQQRAIDAALIGKNVFLTGVAGTGKSLVTKVRAKHPGIQTQTRTNESNQVA  
A  
>comp12684\_c0\_seq4; 285 580 1236 LEN=2207; minus strand; translated  
MDIREARADSRVKTLVDICLSPLDDREGLEIPEGIKPTILYCTNRNV DKENFENLRKLS  
DRGKTFEATDHTS ISSDVNLAGRDAVGRLLKNNAFFKDCSASKQIHLKVGAQVMLLQNL D  
IKQGLVNGSRGVVEKFALCPVVKDI IHGQEQLIGPGDIDKFP GCRFEDLKFNQKTD FEGK  
IWYEKIAANEKSFLLYRICYSISFCVVT DVRAPIRGSF  
>comp12684\_c0\_seq5; 520 136 2943 LEN=3035; translated  
MSASERITHAHTHHPYAKRRRGGG CYAVANQCSSSSSSCAAVASGIYFSYDEAKQQIVE  
SRRASLSSLASDAGVKFQRFDKVSDAELFLHERGFVPTIESGGWISARDRSPILYEYSLA  
KQAANNSNKSSSGK GSSSHPTVRVTPTSNLINTNSEAVSQRLWPNNEHQREHVHATDHSR

YQQQHQQDQHQQHPYIHSTQPVISIDSSPESSLPPAAAACSSYFQQKELVVSPSRKRQK  
RRRPRSNSNSESSSISVLDDDEFDFYDRQQHDSKPTAKGENSKHGENRIDENTSTSTPDVQ  
CQACPEFDIVQORAIIDAALIGKNVFLTGVAGTGKSLVTKVRAKHPXNPNPNANQRIESS  
SLVANSRFLPSISPFVFNFLFPLLLFFVHPNHRYFAHKRIVEDAKCMRKEVAVAAPTG  
VAAVNLGPELGAQTVHSLAGVGPQTASGFEMKMLSPWTAKKWKKIEVLVLDEIGMLGADF  
LDWMDVYVRKARKKPLEPFGGIQLIFVGDFAQLGPIPRGRHSLRNKAFEPDQPGADCLMG  
VSECAAYAFQTVLWREADFHVHLRKVYRQKNKDFQLALMDIREARADSRRVKTLDVICL  
SPLDDREGLEIPEGIKPTILYCTNRNVKENFENLRKLSDRGKTFEATDHTSISSDVNLA  
GRDAVGRLLKNNAFFKDCSASKQIHLKVGQAQVMLLQNLDIKQGLVNGSRGVVEKFCALCPV  
VKDIIHGQEQLIGPGDIDKFPGRFEDLKFNQKTDKFEKGIWRICRFDRYPLVRFVNNVSR  
IIVPEIFERSLYRQKCMREQIPLRLAWALTIHKSQGSTLDYVVCDLQGCFTSGQAYVAL  
SRARSMQGLQIRNFSSKHVTADPLVEAFYDALDRDDMRNFLYHQAGLWVFPILKSPSWLK  
MFQYASSKSARLNAKQFRSWVAEYKPLEGYQGWA

>comp12684\_c0\_seq6; 72 281 697 LEN=789; translated  
MREQIPLRLAWALTIHKSQGSTLDYVVCDLQGCFTSGQAYVALSRARSMQGLQIRNFSSK  
HVTADPLVEAFYDALDRDDMRNFLYHQAGLWVFPILKSPSWLKMFQYASSKSARLNAKQF  
RSWVAEYKPLEGYQGWA

>comp12684\_c0\_seq7; 339 95 1967 LEN=4140; translated  
MPFDVLGSKTEGLQRKQPNTGGGGLDWIGNTETIIATPTGTAAADRNSRNNSGSTMPTA  
STDAAVIEGNNENGSSVVPVGVHGVRLKRFERVVARLLSSGVEPFYVLLPPPPTATVPPEA  
TGKSRDKGHNDGGGSDDLWLFSSLPHSARVVGHPNHKRAQKKEGQLRSMLRCLRLVPPS  
TASVKKRPITIVDFGGGSGHLGIPLALLLPHCRIIVVDFNERSIDLLHQKAACVIKELEE  
SGCVDSRVQEQQPCETTTTTGDSHSHSVPPPILRCCGKSIGYQPLGNLFTFAGPVEGFVG  
EGFDVAIALHLCGQATDVCLRAAVLNAAAAIVVAPCCVGLSAGAFNPDIYHATGQNDAT  
VRYPPQSALFCRLGTDSSGNDGNGENMRSGDDWNALAKAADYSNEQEFRTSRNASRRTA  
KALLETDRLFLSHHYRTALTKMEPLEVTPKNDILVAWKPGAYEEGEGLNPDGAYFCTP  
DAECLADVCVAKSHLLGTHSPSPTALAPSGTAPPASSGNTVGFKFSKSVRNDWTEAEEEE  
VKNTIADFLVRTGKAGPDQRSGSHQHNEVLVFPTRMGGRKRKLIHYVAERMNLAHWGQK  
KVSEKTVAVARRRKEAGKGIASV

>comp12686\_c0\_seq1; 933 297 3020 LEN=3198; translated  
MFSKHKIFILLPLLLATPGAHLNTPKPELPDIFGNMNGLLVRTINTQRPTPVRPTEPTA  
SPTESPAPSPSPSEPTADPNRITPGPTDYPTESPAPSPSPSQTPTIAPTSPSATPSVA  
PTISSAPSAAPSATPSAAPSADAPSMAPSGQPSLSAAPSAAPTISTAPSAPKPSASPTQQPS  
SSPSSAPSYSPPTTVVHRTKTAVTTLLEEISAEMDELMAEFELFTLDFLKRKIEPSDEY  
GLNNLAVTVLSQSLVYPDPTAAPNSNETNFRERNLESNIWSVGLIEDIRSVAVVTTGRVP  
TDFNYTREVLLTFYDHWQYLYQLGNNIEFFNPLVAVSDWVPVDEASIDGKEKSKGSFA  
VAILFSLIAFSLAVYASYVAIRKHLNRNGGSPRKS SVGTFPSPKNSSPLNYSGDEVVQYLT  
RTMSENGSPAASYHDGVEGGGALAFIQNVNIETDEHGMESIALTPFKEKSPTAAIRNGL  
FVVNEANDDDNSPMSPLARSPTMGLQGQKSASKIGGQLKKWLTPRGIKYP SAANANKIM  
STESRHPPEHQSI LGYNYGKEHSDPDAYKASTKNKAGVYTTDKSTVDGRSKTTGISYNK  
KQKDEGLFTVPVSFFNRDQGNQAGAPESPMSSSLADSNASSFYARGNVNKQFTGRKSTTGE  
MEDEGYEVSACKVNAASIMRNKRKDPSENDENEPEVLSPLVKDQVQHFQKQQQAPKPPN  
STVGIETILGARSRSDNDDDDRRSHVSA AFLQTRSIFSPNMKNARKSPTNSQQQSYGYG  
NVRVRVQNQNDGKSVTSHSTLGAKPMQASGDFRDDRSTLSSVMKRAGRYDVYAPSGPIG  
IVVDTSKNGPSVHSLKSTSPMLGLINPGDLIVALDGEDTRDMTAAALTRLMLKSRQQNR  
KITLLSN

>comp12687\_c0\_seq1; 1097 87 3128 LEN=3304; translated  
MVRHHLIKTVGILSILLVWNVQGELSAPKESPLSLRLIDVETNISPINVLFNLKASIIV  
DGLEWLSQNQEISETSERSLLSYSTYINEQQTANGSIDFSVSSNNTSAVYFPTSIDAGVI  
EAKDSGVNSIRVLIHLLDDEIIELSATLDVRSYRPEMASIPIALSFLGLVFNHMHVHS  
LFLAIFIGSWIIEGSMTRGFKATFDTFLEAATDNHVSIIILFIVGIFGLMAMVNRSGGT  
SAVIKSLTQHSSKTRLAQFVIFLMGLAFFFNYPYVSIMIVGNIIGSIFKSFPLSSEKVSFL  
IDTTAAPVASIFPTSSWVVFSTDLIEREIEKIKALGYEEVSGVSGHSLIISSIMYQFYPI  
FVLGLAVLQILTGREMGLVLDENKARLSYNSIDPRKTSFRLKERSFNWYIPVVTLNLF  
LWYAFSQDDNESTEAFGTTWLMNTVAIIITQLFFVFQRRDGKVPFLSKCFDRYERDTIA  
YLTDTFPSASGSASIHYNPSSKSEDEENYLKALDDDCQMLQMNTEEEENGRKEKSWLVC  
STEPSELLTFHDGAKCMVQSAVRAAPIALSLVLTWAAGSVYQALGIDRVVISWIVSDTISV  
EILPITIFLSTFFLSITLGSMTTISILLPTIMTPLVDSLGGDSKGM SLVLASILSGAAA  
GDHIGPFSETTIIISALVSGITVRRHFITQAPYALFVLVMSLLVGTLPVSYGSYPAYVGYI  
IGVVVLLLFVILVCRQVKRYKSSIGGPPMPVSEVLHPMIAPQDKRREDRSATPMHPGT

DNQQQQPRTNEPLDGTDVVEGRESFKSKLQTTINDAGGDP IKGLVEDGILPNNFVNFLQKP  
PLGQGAPERNAPLDSAKESKKRLIEATIKKAEQDGNVFSDSLRTFLRTAQENLGNMLDDN  
RNQGISASASTESGGDDDDDDDDSLDNLMMNIAAKGWRAS INNILGDAKNKDDYSTDGGSS  
MMESESAFTSASSRSGPSHFSTGTSQLLNPLEFNDDFSSVPDEEQTAIASF  
>comp12687\_c0\_seq2; 1105 87 3235 LEN=3411; translated  
MVRHHLIKTVGILSILLVWNVQGELSAPKESPLSLRLIDVETNISPINVLFNLKASIIV  
DGLEWLSQNQEISETSERSLLSYSTYINEQQTANGSIDFSVSSNNTSAVYFPTSIDAGVI  
EAKDSGVNSIRVLIHHLDDDEIIELSATLDVRSYRPEMASIPIALSFGFLVFNHMHVHS  
LFLAIFIGSWIIEGSMTRGFKATFDTFLEAATDNGXRVNVSDLKASSSQSHFSTGRISN  
NWFSLLSMLLLPCYDSILFIVGIFGLMAMVNRSGGTSAVIKSLTQHSSKTRLAQFVIFLM  
GLAFFFPYVSIMIVGNIIGSIFKSFPLSSEKVSFLIDTTAAPVASIFPTSSWVVFSTDL  
IEREIEKIKALGYEEVSGVSGHSLI ISSIMYQFYPIFVLGLAVLQILTGREMGLVLDAEN  
KARLSYNSIDPRKTSFSLKERSFNWYIPVVTLNVFLWYAFSQDDNESTEAFGTTWLMNT  
VAAIIITQLFFVQRRDGKVPFLSKCFDRYERDTIAYLTDTFPSASGSASIHYNPSSKSE  
DEENYLKALDDDCQMILQMNTEEEENGRKEKSWLVCSTEPSELLTFHDGAKCMVQSAVRAA  
PIALSVLVLTWAAGSVYQALGIDRVVISWIVSDTISVEILPITIFLSTFFLSITLGSMTT  
ISILLPTIMTPLVDSLGGDSKMSLVLASILSGAAAGDHIGPFSETTIIISALVSGITVRR  
HFITQAPYALFVLVMSLLVGTLPVSYGSPAYVGYIIGVVVLLLVILVCRQVKRYKSSI  
GGPSPMPVSEVLHPMIAPQDKRREDRSATPMHPGTDNQQQQPRTNEPLDGTDVVEGRES  
FKSKLQTTINDAGGDP IKGLVEDGILPNNFVNFLQKPP LGQGAPERNAPLDSAKESKKRLI  
EATIKKAEQDGNVFSDSLRTFLRTAQENLGNMLDDN RNQGISASASTESGGDDDDDDDDSL  
DNLMMNIAAKGWRAS INNILGDAKNKDDYSTDGGSSMMESESAFTSASSRSGPSHFSTG  
TSQLLNPLEFNDDFSSVPDEEQTAIASF  
>comp12688\_c0\_seq1; 754 1 2085 LEN=2118; translated  
LINRGKENYTNFEHRQTMPEDTKQPTGGAGPGEKTKKKRVIIVTPPCPPAVSTGYLILRGV  
LQSLVGASMDEAAVSLLOPTYIKEKVPSPGKFSVNLGKKLGFCELDLPEDESSSVEDFWK  
AVQIALDRIIAQDLPIITGASLPKDQALEQYQKILNGGILKKTDPDLPFCSYLDGLVLA  
VPPSAPYPTTGSIKAITLDAKQCNI TAGKKSRAEITIKFTVEEKTGSDASLPTLAETL  
SCDSFAEVVTTTEGLASLRENKIRMNEGKQLLAAAAEAEAAKNVTNHVEAVTASNGNGEEM  
VVTAYEVSGDIDYTKLVKNFGSTLIDDALMQRITDHTVKGKVEKLRHFLRRIYFSHRD  
MNALLDCIEKKQPMYLYTGRGPSSSSMHIGHLIPFLFTKWLQDAFDVPLVVQMTDDEKFL  
FKGKYDPETGDNLNHYAGLT MENARDI IACGFYKKTFLFSDLDYVGTMYPNIVRIWKAV  
TTNTINGIFGFDGSSNIGKIAFP AIQAAPSFASSFPTVLEEPNPLETKAVCLIPCAIDQD  
PYFRMTRDVAHKLVGKNHGLNGKPALIHCKFFPPLQGAAGKMSSSDENSAIFLTDTPEDI  
ERKIKEHAFSGGQETKKLQEEELGANLETDVSYQWLSFLLEDDDELA AIGKDYGSGSGEY  
STGKVKARLIEVLQDLVARHQERRATITDDEVRNW  
>comp12689\_c0\_seq1; 605 91 1812 LEN=2223; translated  
MDKTKGEEATDGGDGHKVLDERFYQQTKAGSISKTPLSIRQLIRLFCPVREGLNPILP  
PNTQCLSVLSRDKPNGGEACYGEWEAATQIEILRKASCSSWFWTIEGSSANGPGSCRKLL  
QVVLAHGDKQNSNIMLFAKDI TPDWTTIPNVKYMQSILTAIQDNNANQKRQGI EPTEDST  
EKVGLSNVGNLSSQNVERHDVQHELESLLSSTAENG CARVASNNKQYDDHLYESDGGTR  
YVKDPLSGNWIHEALAPQSFSSSETNKKATPSTKPGKNTNSKKS KAKFSKRHAKLWIYIS  
GLPTTGVTVEDLQRYFSKAGMLDLDPETLKP KIKLYKDRSTGDLKGDASIRYARSESVEL  
ALQILDNSLWDKDHRI RVEKAKFQEKVDVGKVKLNI STDEVTTGGDDAKTYMKRKRPISEA  
QRKVARLALLQAQDEGFGRLTGGRKGLCIIVIKNMLYGIP EDELEDVLD EYFGKFGSIE  
KITCISKADVIVKYGEPIAASSAIEALNGT SNPRTLVKIEALYWDGVTDYTTVEGDEHK  
EQMEEERRHEEFGNWLESQEELPPELQLQVAQE  
>comp12690\_c0\_seq3; 156 208 582 LEN=989; translated  
MNC SQAWAWDEVHTKNRAVFTFLQANIANAFADMDVTYQDITMATIDEALSGPRFVPWVG  
ATRRRMNIKSDIDRPTNQCTT VQTQNWTEVFTKPFPPVGGTYTIQPPGKPAETVVIVGQ  
NDSP  
>comp12690\_c0\_seq4; 401 407 2802 LEN=3209; translated  
MAPCERYSYEECAA IHGLEIGPGATADQLSNAKLLCGEKVPLVSEIVNVAAAAATIYLI  
KQORMQCGCEWVVGRC SVVVRHGTKTWFDAAHVYMHMYIHIC IYTSYIIHLYITSLYILR  
QRTQTNSTFCLLSLFLSLLFVYGTAQPTSHPD RGILGAPEIEPDMGDRQTPRSRGEKGDRA  
GHDDPLLPRDPLVRGNHRAHPHPDPPAGQSDQLGGHRPLQDIRVRGLFHDVQORS AVVRG  
LPQQQDRDGVHLHLLARDPLHPGMENLEADVSMYFFIAYFSCADVGF SVLYGVLI GGLTGN  
ICVFIAMQARSKRFAAWKRPLAILVIVVFAAGSWYTLADGIFYIANVWMPDKEDVVEVA  
LSASLVWVLMVTFHVAMYGWT SNKKNAISSRFTSQVFSRGNVGDLDITIRSKNSNGSE  
GDDDGDDDEEANDGAVREQPVAKDGVQANDKDDRRVGF AEDTKPPGPDRNDPSGYVAPRDA

PSCWKMFM TKVVEAF PFFCGCCLKKKYQAI STRRLDYKKDAGDRTRFARFLIHIKRFFWY  
LLSFAFLFFTIVNIGASYEQCAARNALNSTFELLYPPDYRNSTLCAWDKPGPNATIKTFD  
SLQDVRDENYDVIHCGACGACSNWNDITLQYTSRKYLAVGSKVCAKKSIFTRFNPNDPDD  
VVVQCNHQ RIGFTMNC SQAWAWDEVHTKNRAVFTFLQANIANAFADMVITYQDITMATID  
EALSGPRFVPVWGATR RR MNIKSDIDRPTNQCTT V TQNWTEVFTK PFRPPVGGTYTIQP  
PGKPAETVVIVGQNDSP

>comp12690\_c0\_seq5; 426 1523 3205 LEN=3559; translated  
MQARSKRFAAWKRPLAILVIVVFAAGSWYTLADGIFYIANVWMPDKEDVVVEVALSASLV  
WVVLMTFHVAMYGWTKSNKKNAISSRFTSQVFSRGNVGD LIDTIRSKNSNGSEGDDGD  
DEEANDGAVREQPVAKDGVQANDKDDRRVGF AEDTKPPGPRNDPSGYVAPRDAPSCKM  
FMTKVVEAF PFFCGCCLKKKYQAI STRRLDYKKDAGDRTRFARFLIHIKRFFWYLLSFAF  
LFFTIVNIGASYEQCAARNALNSTFELLYPPDYRNSTLCAWDKPGPNATIKTFDSLQDVR  
DENYDVIHCGACGACSNWNDITLQYTSRKYLAVGSKVCAKKSIFTRFNPNDPDDVVVQCN  
HQ RIGFTMNC SQAWAWDEVHTKNRAVFTFLQANIANAFADMVITYQDITMATIDEALS GP  
RFVFPVWGATR RR MNIKSDIDRPTNQ R KYSTPRRRV FVGVALRFCSRSVHCSTSA PPKLN  
ALVTFPLFLQTCLLCARMHNRHPELDGSIYQAFQTTGWWNIYDSTSRKTRRDGCHCGTER  
FTVELPMRAASNRVFDLTK

>comp12690\_c0\_seq6; 419 1032 2780 LEN=2819; minus strand; translated  
MSTWVPYEPVRKKNKDNALLFFSEKGTAEADRSTKQHRTYPRSRGLHRRRLVPLTLPASM  
PQPRPLLNTEDTGFQILDSIATSSTYRSIDKEXIDSILKHNTGNPTEQKGTSPVESRTA  
MLPVLQPSMCEVESSNDHQPIGNNGTVEPQTQSPTS IHGHGHIHQSKSDAWEEFRNET  
SIASEQRPHVLFGRQLRVRSCCLSYRRHRYFYRSLVALWAWAVVVSIGAIWRAGAGDGI  
MEFLSISTRPPVDICFVTAQYASSRDQLDNLVNLREEAPRFFSDRNSDHYRFFAFTNQKD  
WIDELPGTEPATSTSTKTNPNTDANTDAKTKT KTKPKDNGWTILVKEFP PHTFQRFITQS  
RWPKFQGFQHKQIVRSCDVV F YMDGT VLP I GSPWR FQTEARRILDSYVQLSQEPHPHQDE  
DGGGIAGEMSRCKRKGKDI ES NLKATNDWFRAQPDFTND C QLYQNTFFGYAVNSPFFRA  
ANFAWEHFSQEKDSWRDQPLWCYTLHFGITPLVLPGNLFRYQAGRRGGNAHRHDESANN  
NAQLFYEAKTNARKNAAGDGAGGASDLPTGGKPGPAATATI Q

>comp12690\_c0\_seq7; 373 407 3009 LEN=3363; translated  
MAPCERYSYEECAA IHGLEIGPGATADQLSNAKLLCGEKVPLVSEIVNVAAAAAT IYLIS  
KQORMQCGCEWVGRCSVVVRHGTKTWFDAAHVYMHMYIHIC IYTSYI IHLYITSLYILR  
QRTQTNSTFCLLSLFLFVYGTAQPTSHPD RGILGAPEIEPDMGDRQTPRSRGEKGDRA  
GHDDPLLPRDPLVRGNHRAHPHPDPPAGQSDQLGGHRPLQDIRVRGLFHDV GQSAVVRG  
LPQQQDRDGLHLLARDPLHPGMENLEADVSMYFFIAYFSCADVGF SVLYGVLI GGLTGN  
ICVFIAMQARSKRFAAWKRPLAILVIVVFAAGSWYTLADGIFYIANVWMPDKEDVVVEVA  
LSASLVVWVLMVTFHVAMYGWTKSNKKNAISSRFTSQVFSRGNVGD LIDTIRSKNSNGSE  
GDDGDDEEANDGAVREQPVAKDGVQANDKDDRRVGF AEDTKPPGPRNDPSGYVAPRDA  
PSCWKMFM TKVVEAF PFFCGCCLKKKYQAI STRRLDYKKDAGDRTRFARFLIHIKRFFWY  
LLSFAFLFFTIVNIGASYEQCAARNALNSTFELLYPPDYRNSTLCAWDKPGPNATIKTFD  
SLQDVRDENYDVIHCGACGACSNWNDITLQYTSRKYLAVGSKVCAKKSIFTRFNPNDPDD  
VVVQCNHQ RIGFTMNC SQAWAWDEVHTKNRAVFTFLQANIANAFADMVITYQDITMATID  
EALSGPRFVPVWGATR RR MNIKSDIDRPTNQ R KYSTPRRRV FVGVALRFCSRSVHCSTSA  
PPKLNALVTFPLFLQTCLLCARMHNRHPELDGSIYQAFQTTGWWNIYDSTSRKTRRDG  
HCGTERFTVELPMRAASNRVFDLTK

>comp12690\_c0\_seq8; 565 407 2741 LEN=3148; translated  
MAPCERYSYEECAA IHGLEIGPGATADQLSNAKLLCGEKVPLVSEIVNVAAAAAT IYLIT  
NVYIQIAESSVLLKSSRIWGTGKPHEAEGKAIARATMIHCSLGTLLYVGTIVLIRILTH  
PLDNR TNSV VIGLSKIFASVVFMM SVSVPQWFGVYHSNKIAMVSFTSSREIRFTLGWKI  
WKQMVSMYFFIAYFSCADVGF SVLYGVLSKSHPGAVSLVSEMAPVGS GAVGGAIRSVLFC  
SVLTMSASLLFEILXESHSLRLQSLPFDLTRFGAVGGLTGNICVFIAMQARSKRFAAWKR  
PLAILVIVVFAAGSWYTLADGIFYIANVWMPDKEDVVVEVALSASLVVWVLMVTFHVAMY  
GWTKSNKKNAISSRFTSQVFSRGNVGD LIDTIRSKNSNGSEGDDGDDEEANDGAVREQP  
VAKDGVQANDKDDRRVGF AEDTKPPGPRNDPSGYVAPRDAPSCKMFM TKVVEAF PFFC  
GCCLKKKYQAI STRRLDYKKDAGDRTRFARFLIHIKRFFWYLLSFAFLFFTIVNIGASYE  
QCAARNALNSTFELLYPPDYRNSTLCAWDKPGPNATIKTFDSLQDVRDENYDVIHCGACG  
ACSNWNDITLQYTSRKYLAVGSKVCAKKSIFTRFNPNDPDDVVVQCNHQ RIGFTMNC SQA  
WAWDEVHTKNRAVFTFLQANIANAFADMVITYQDITMATIDEALS GP R FVPVWGATR RR  
NIKSDIDRPTNQCTT V TQNWTEVFTK PFRPPVGGTYTIQP PPGKPAETVVIVGQNDSP

>comp12690\_c0\_seq10; 557 407 2948 LEN=3302; translated  
MAPCERYSYEECAA IHGLEIGPGATADQLSNAKLLCGEKVPLVSEIVNVAAAAAT IYLIT

NVYIQIAESSVLLKSSRIWGTGKPHEAEGKKAIIARATMIHCSLGTLLYVGTIVLIRILTH  
PLDNRTNSVVIIGLSKIFASVVFMMMSVSVQPWFVYHSNKIAMVSFTSSREIRFTLGWKI  
WKQMVSMYFFIAYFSCADVGFVSVLYGVLKSHPGAVSLVSEMAPVGSAGVGGAIRSVLFC  
SVLTMSASLLFEILXESHSLRLQSLPFDLTRFGAVGGLTGNICVFIAMQARSKRFAAWKR  
PLAILVIVVFAAGSWYTLADGIFYIANVWMPDKEDVVVEVALSASLVWVVMVTFHVAMY  
GWTKSNKNAISSRFTSQVFSRGNVGDLDITIRSKNSNGSEGDDDGDEEANDGAVREQP  
VAKDGVQANDKDDRRVGF AEDTKPPGDRNDPSGYVAPRDAPSCWKMFMTKVVEAFPFFC  
GCCLKKKYQAISTRRLDYKKDAGDRTRFARFLIHIKRFFWYLLSFAFLFFTIVNIGASYE  
QCAARNALNSTFELLYPPDYRNSTLCAWDKPGPNATIKTFDSLQDVRDENYDVIHCGACG  
ACSNWNDITLQYTSRKYLAGVSKVCAKKSIFTRFNPNDDVVVQCNHQRIIGFTMNCSQA  
WAWDEVHTKNRAVFTFLQANIANAFADMVITYQDITMATIDEALSGPRFVPWVGATRRRM  
NIKSDIDRPTNQKYSTPRRRVFGVALRFCSRVSVCSTSAAPPKKNALVTFPLFLQTC  
LCARMHNRHPELDGSIYQAFQTTGWWNIYDSTSRKTRRDGCHCGTERFTVELPMRAASNR  
VFDLTK

>comp12690\_c0\_seq11; 593 407 2545 LEN=2952; translated  
MAPCERYSYEECAAHGLEIGPGATADQLSNAKLLCGEKVPLVSEIVNVAAAAATIYLIT  
NVYIQIAESSVLLKSSRIWGTGKPHEAEGKKAIIARATMIHCSLGTLLYVGTIVLIRILTH  
PLDNRTNSVVIIGLSKIFASVVFMMMSVSVQPWFVYHSNKIAMVSFTSSREIRFTLGWKI  
WKQMVSMYFFIAYFSCADVGFVSVLYGVLIGGLTGNICVFIAMQARSKRFAAWKRPLAILV  
IVVFAAGSWYTLADGIFYIANVWMPDKEDVVVEVALSASLVWVVMVTFHVAMYGWTKSN  
KNAISSRFTSQVFSRGNVGDLDITIRSKNSNGSEGDDDGDEEANDGAVREQPVAKDGV  
QANDKDDRRVGF AEDTKPPGDRNDPSGYVAPRDAPSCWKMFMTKVVEAFPFFCGCCLKK  
KYQAISTRRLDYKKDAGDRTRFARFLIHIKRFFWYLLSFAFLFFTIVNIGASYEQCAARN  
ALNSTFELLYPPDYRNSTLCAWDKPGPNATIKTFDSLQDVRDENYDVIHCGACGACSNWN  
DITLQYTSRKYLAGVSKVCAKKSIFTRFNPNDDVVVQCNHQRIIGFTMNCSQAWAWDEV  
HTKNRAVFTFLQANIANAFADMVITYQDITMATIDEALSGPRFVPWVGATRRRMNIKSDI  
DRPTNQCTTQNTQWTEVFTKPFRRPPVGGTYTIQPPGKPAETVVIVGQNDSP

>comp12690\_c0\_seq12; 454 1523 2998 LEN=3405; translated  
MQARSKRFAAWKRPLAILVIVVFAAGSWYTLADGIFYIANVWMPDKEDVVVEVALSASLV  
WVVMVTFHVAMYGWTKSNKNAISSRFTSQVFSRGNVGDLDITIRSKNSNGSEGDDDG  
DEEANDGAVREQPVAKDGVQANDKDDRRVGF AEDTKPPGDRNDPSGYVAPRDAPSCWK  
FMTKVVEAFPFFCGCCLKKKYQAISTRRLDYKKDAGDRTRFARFLIHIKRFFWYLLSFA  
LFFTIVNIGASYEQCAARNALNSTFELLYPPDYRNSTLCAWDKPGPNATIKTFDSLQDVR  
DENYDVIHCGACGACSNWNDITLQYTSRKYLAGVSKVCAKKSIFTRFNPNDDVVVQCN  
HQRIIGFTMNCSQAWAWDEVHTKNRAVFTFLQANIANAFADMVITYQDITMATIDEALSGP  
RFVPWVGATRRRMNIKSDIDRPTNQCTTQNTQWTEVFTKPFRRPPVGGTYTIQPPGKPAE  
TVVIVGQNDSP

>comp12690\_c0\_seq13; 398 407 2752 LEN=3106; translated  
MAPCERYSYEECAAHGLEIGPGATADQLSNAKLLCGEKVPLVSEIVNVAAAAATIYLN  
QRLHPDRGILGAPEIEPDMGDRQTPRSRGEKGDRAHDDPLPRDPLVRGNHRAHPHPDP  
PAGQSDQLGGHRPLQDIRVRGLFHDVGRSAVVRGLPQQQDRDGLHLLARDPLHPGMEN  
LEADVSMYFFIAYFSCADVGFVSVLYGVLIGGLTGNICVFIAMQARSKRFAAWKRPLAILV  
IVVFAAGSWYTLADGIFYIANVWMPDKEDVVVEVALSASLVWVVMVTFHVAMYGWTKSN  
KNAISSRFTSQVFSRGNVGDLDITIRSKNSNGSEGDDDGDEEANDGAVREQPVAKDGV  
QANDKDDRRVGF AEDTKPPGDRNDPSGYVAPRDAPSCWKMFMTKVVEAFPFFCGCCLKK  
KYQAISTRRLDYKKDAGDRTRFARFLIHIKRFFWYLLSFAFLFFTIVNIGASYEQCAARN  
ALNSTFELLYPPDYRNSTLCAWDKPGPNATIKTFDSLQDVRDENYDVIHCGACGACSNWN  
DITLQYTSRKYLAGVSKVCAKKSIFTRFNPNDDVVVQCNHQRIIGFTMNCSQAWAWDEV  
HTKNRAVFTFLQANIANAFADMVITYQDITMATIDEALSGPRFVPWVGATRRRMNIKSDI  
DRPTNQKYSTPRRRVFGVALRFCSRVSVCSTSAAPPKKNALVTFPLFLQTCCLLCARMH  
NRHPELDGSIYQAFQTTGWWNIYDSTSRKTRRDGCHCGTERFTVELPMRAASNRVFDLKT  
K

>comp12691\_c0\_seq1; 852 341 3169 LEN=3208; translated  
MNP SAYALCFLALFAPTRRWGSSEDNCGSFVAQGFTSQSMVSPLPTLSTKDSFRSSRRW  
PYGYYATVDENQKALDEETSTNGESDSSHLMPKVNGDASAEATLIAADSANATEPIDLA  
AMATDVNVSMTELLNEISGRINEGSTEIMEDITKVLDEQLQLSDAKSQELSVYVADLANK  
IRKAQEEEVQRQIEELEKIFVDPLERVAFSADAPLYEMSDKKPDAFNGTDALDLQPKLVLA  
GANSTLRRSAQKGTTELKELISNLNVAPLYYSVALIYRWASKSKKTLAMPTLYLLSAYKALA  
NVIKTSGGPKKSNRKKEDTTYEQYLKEAEAFQSGWKRTGEIAAKGPWAKKWAVLRRSAEV  
WAYFSSFYLKDRRICKKFESGKWSEEKFAERSRLGAEITQNLRLGPTFIKVGQLFSTR

IDIVPKEYIESLKLQDNVPPFSGETAVQIIERELGKPIDQIYDTFEKKALAGASLGQVH  
LATKGDQKFAVKVQRRYLKALFEVDLGQLRQLAVFADAVIDMTSEGGLFDQNTQRDWVSVY  
EENKRLLYEEIDYTNELENGLKFSKNFDPKPKWRHIRVDPVPEYSSSQVLTMEYVPGVKI  
TDMEKINELGLDPVDIATKSAEAFLEQLCRHGFFHCDPHPGNISVEKGPDKARLIFYDF  
GMMDSFGAVERKGFVDFMFAVYYDNSVKDACDALERMGLRTPDLDRVAIERVGQDFID  
RFQSTLRKDETWETDLSEEEQKKIIRQRRSQLGEEFLSLNRDSPFIIPPTWTFVLRAFFT  
LDGIGKTLNPKYDLTRIMVPYLKELIDLKDGSAKTTLLRIGKRVGLRPEDINQFITQPR  
RTAKVEDIADRLEKGFKLVRRALEVERQNERSKIVLQNSYEVIIFLGVLLQAGLGLLTAG  
SGFRGAKPIGKLLLGAASILTARVPLNLLKVRKLDKYYEKYS

>comp12691\_c0\_seq2; 729 341 3262 LEN=3301; translated  
MNP SAYALCFLALFAPTRRWGSSEDNCGSFVAQGFTSQSMVSPPLTLSTKDSFRSSRRW  
PYGYYATVDENQKALDEETSTNGESDGSSHLMPKVNGDASAEATLIAADSANATEPIDLA  
AMATDVNVSMTELLNEISGRINEGSTIEMEDITKVLDEQLQLSDAKSQELSVYVADLANK  
IRKAQEEFVQRQIEELEKIFVDPLERVAFSADAPLYEMSDKKPDAFNGTDALDLQPKLVLA  
GANSTLRRSAQKGTTELKELISNLNVAPLYYSVALIYRWASKSKKTLAMPTLYLLSAYKALA  
NVIKTSGGPKKSNRKKEDTTYEQYLKEAEAFQSGWKRTGEIAAKGPWAKKWAFLRRSAEV  
WAYFSSFYLKDRRICKKFESGKWSEEKFSASRLGAEITQNLRLGPTFIKVGQLFSTR  
IDIVPKEYIESLKLQDNVPPFSGETAVQIIERELGKPIDQIYDTFEKKALAGASLGQVH  
LATKGDQKFAVKVQRRYLKALFEVDLGQLRQLAVFADAVIDMTSEGGLFDQNTQRDWVSVY  
EENKRLLYEEIDYTNELENGLKFSSELSSFLFLRLCALVILDSVRLMAFFPKCSKNFDPK  
KWRHIRVDPVPEYSSSQVLTMEYVPGVKITDMEKINELGLDPVDIATKSAEAFLEQLCR  
HGFFHCDPHPGNISVEKGPDKARLIFYDFGMMDSFGAVERKGFVDFMFAVYYDNSVKDA  
CDALERMGLRTPDLDRVAIERVGQDFIDRFQSTLRKDETWETDLSEEEQKKIIRQRRS  
QLGEEFLSLNRDSPFIIPPTWTFVLRAFFTLDGIGKTLNPKYDLTRIMVPYLKELIDLK  
GSAKTTLLRIGKRVGLRPEDINQFITQPRRTAKVEDIADRLEKGFKLVRRALEVERQ  
ERSKIVLQNSYEVIIFLGVLLQAGLGLLTAGSGFRGAKPIGKLLLGAASILTARVPLNLLK  
VRKLDKYYEKYS

>comp12692\_c0\_seq1; 291 47 514 LEN=1233; translated  
MKISSIFFILASQAFASTVPVQRAVPKTMNLMSHDDTETVLATAKDCAEGECTLDEIDG  
LVSLKDKDQKQKASDRLKEIKDKMSLETVNGSDDRSVDEIRETVRAIYRIFQLGDKASGN  
DYPALSKPMGWTGEVGSPTTAYDALPPKPYKKS

>comp12693\_c0\_seq1; 290 1 854 LEN=854; translated  
GFQALSQRQKPPQARRTRLKAVDPSSVATILATTAQHQLQLQADPALSALLATAIDFGS  
IQSIHPAATNAAAAAAKTTTTETIQQLPSAGEAVQSQAKEALENGYKVMASGFTRGGG  
SSLPGFAETNSLLAPHVSPYPMSGTVTGDYPMFELGDRALALS YWLLLEYVQRLPYIAFAYV  
LVEFFFLRSDVDLYKEDVEDDP SGVLAETVSDTGVRVGLFLVLTFLTYVVFESCDAMLCG  
AVRRDGTGRAGPEIRTKECNADANAVANQGLRFQQQQQKQHYX

>comp12693\_c0\_seq2; 390 200 976 LEN=1206; translated  
MRTSRNEQRQLLGSLLFLAVMLSGGVSGFQALSQRQKPPQARRTRLKAVDPSSVATILAT  
TAQHQLQLQADPALSALLATAIDFGSIQSIHPAATNAAAAAAKTTTTETIQQLPSAGE  
AVQSQAKEALENGYKVMASGFTRGGGSSLPGFAETNSLLAPHVSPYPMSGTVTGDYPMF  
ELGDRALALS YWLLLEYVQRLPYIAFAYVLVEFFFLRSDVDLYKEDVEDDP SGVLAETVSDT  
GVRVGLFLVLTFLTYVVF

>comp12694\_c0\_seq1; 507 221 2017 LEN=2091; translated  
MSKCQKNRRRPELRRCQAVVSSVASATRQQQORRCASSISSKISMTAEEAGRKASQLALE  
AMEQKNRNHVVDNHSDDHNRNSQGS DNGNIIAKTSVATILSHAGIEICHEGSIEMVGTSK  
NFPMPSPPLHTATTYTRPPDGIYKDGDSIYARMDNPTRLLEKCFELEC SHPMFSSEKNT  
ADNIPMKTSFAFSSGMQAVTTILLAHSTSSSPLSTGSTMTVLI PKDVYHGIRSLSDVFS  
RHGVEVIEINMVTLGKNENGADNESGAVAIQNAIYDIAAAVTKDKYDRRGVDGNETDQGN  
KNDRHNVILWMETPSNPKCEVTDIEAICNSAQSAARWKNVIDVTTVVDTGTMASPIILTRP  
LELGADISFHSGTKYLAGHSDALIGTTLSPITPRGQILAPLIRSVQIAGGGVSPWDSW  
LTLRGMRTLHVRVERQCKTAMKLAEYLYEKMQLAAERSDRDPTTKVAAVQAVHYPLPSH  
PQHDVANRQMASTPPKSDHNSAAMQTN CYGGVLSFEMANEVEATAFAGAVQIAQRATSL  
GGTETLIEHRASIEPPESIVSPLGLLRVSVGLENAEDLIRDFDSAFIVERVMTTND

>comp12694\_c0\_seq2; 320 983 2125 LEN=2199; translated  
MTVLI PKDVYHGIRSLSDVFSRHGVEVIEINMVTLGKNENGADNESGAVAIQNAIYDIA  
AAVTKDKYDRRGVDGNETDQGNKNDRHNVILWMETPSNPKCEVTDIEAICNSAQSAARW  
KNVIDVTTVVDTGTMASPIILTRPLELGADISFHSGTKYLAGHSDALIGTTLSPITPRGQI  
LAPLIRSVQIAGGGVSPWDSWLTLRGMRTLHVRVERQCKTAMKLAEYLYEKMQLAAERS  
DRDPTTKVAAVQAVHYPLPSHPQHDVANRQMASTPPKSDHNSAAMQTN CYGGVLSFEM

ANEVEATAFAGAVQIAQRATSLGGTETLIEHRASIEPPESIVSPLGLLRVSVGLENAEDL  
IRDFDSAFAIVERVMTTNS

>comp12695\_c0\_seq1; 127 742 1128 LEN=1732; translated  
MSKESSSHNKTESGGLHIAVSVFIGLVVTLVSVLVGYVYVARKIKLRRGEAGDAAQNSTRD  
HSEAVNKLEADGGVLQEIMASFARSPNSTIPQSNNGNGNHNGSNIDPNQVEVGLYSKPRR  
DKAGRDL

>comp12695\_c0\_seq2; 84 154 891 LEN=1495; translated  
MSKIRKCPDGHRCEGSSCAEHPTEEGSYCDCGTSDFAGLFCFCEYEAETYCQMEQETA  
SHSFCSNRGTCVLTSTNNGGAQWNCDCPAEFEGPHCQFVTGNVPRDWPFGDFDPATGTMSK  
ESSSHNKTESGGLHIAVSVFIGLVVTLVSVLVGYVYVARKIKLRRGEAGDAAQNSTRDHSE  
AVNKLEADGGVLQEIMASFARSPNSTIPQSNNGNGNHNGSNIDPNQVEVGLYSKPRRDKA  
GRDL

>comp12696\_c0\_seq1; 245 72 1034 LEN=1345; translated  
MAELKLIKTLWGIDDPVSPELFRSIRDEGYFGVEVIRLCWIDEKSADVLVESLNEAGLGC  
VAQIHTAGGYIDPVTGQYVYCGAYDVSVHQDDFCQQLKECRALFDRVVKQCFVNVHAGVD  
AWSSDEAVQFLGFCLDEIEQARASSPNLTVTFETHRQRLFGSPFQTRDLLALPELAESKH  
LRLNADLSHWYCACERVFNPSEEDRDRWWPGVLASISPRCEYIHARFGWAQGPQMAPPSA  
PECEQDRKLQIDIWKELVKAQLEPHTMSSGGGPRDVFVSPPEYGPAPYLTAAPHTQQPIASL  
PGAVLYTKGIIEDLFLDCNK

>comp12697\_c0\_seq1; 562 300 1988 LEN=2268; translated  
MGSSDDAAQFEGATDGEQQTGTRQTTDSNTRDHAENGTGNE SRPPKRESVLDMATSKA  
LRPFVVISSSYLLFTVTDGAIRMIVLLHAYNKNFSALEVAIMFTLYELAGVVTNLAAGLL  
GAKWGIRFTLIAGLTLQFLSYGLLFGWQDDWSKTESIVYVTFQMWAGVAKDLTKLGGKT  
VTKLVTPEEQNTKFLKLVSLITGWKNSLKGVGYFLGSVLIGISYELALGFMMGLVVIAMP  
WAIFGLDKNLGTAKKKNASLSEIFVLDNLNLNLSFARLFLFASRDFWFEVPLPFFLRSP  
SCIGLGEQCTVDGDCMQGAVCVSDGLCTNINTGGCGGLGLPRGVVGAFLGGYIILYGO  
VQSWTPQLVTGPLQQTTPNKLTEILWGLINCLPTYVMWLVIITFGSVFQDYDRDAMTAWLV  
SVIVSFAIIFAINSSVHSFLVVKYASTDKIAVSVGLYMSNAVGRLFGTLGSGFLYTYIG  
EDFGDLAGSDAVAGLAACFLAGTVSSLLAALITYKINDQDEGLKCGSCWTIRHPELNACA  
GDEHGSIDTIKEGPPSSDKRGG

>comp12698\_c0\_seq1; 212 1 615 LEN=887; translated  
TDTIPQRCQNIDPNPSPPTQLFLADGTKLRQVERNPNQPNQPNATPIQSEPIAGMKLSA  
LPLLGLLARSPAATAFLPSRPAPRATATALSESILEAEDRFLAQAMEAPLSPRDLPEVVY  
TIVYNPGTPEEGVHTMKHPRGSDGELLFCFEGMADCVLFFARTIKEDPALDQEP IPTPTSR  
EMIQAAEGMGRMEIVPMDIQTQW

>comp12698\_c0\_seq3; 78 1 92 LEN=781; minus strand; translated  
XGVKGITVEEVAERCYANSMELYGNAFGKA

>comp12699\_c0\_seq1; 155 216 1658 LEN=2094; translated  
MTVVLPKSTRSSRNRI SGSTSIPTSTRNLLQHPGAYRWLFLVGVLLCHRLLNESRMLR  
IIDFGISSLEATRDLQEHDCPRQKRPLAVVHVGPNTGSNGIQHLVLQFMDQMKHEHDK  
YVVPVPPGGPNEIDITAYDYYYAKDNTRDLPIDKNTAHLAGCLNPNLGGWCKSFVANFE  
KFLYRADCEASNIVFSSEEFSPYIEISLLKLLLEPSFRVRIVLYHRRFDLWFRSMHNEF  
VKSTRDLHGDGVVFPITDKWLATNGVLGTQGMWSPVAVYRRYSKHFSNITVIDVDRKAT  
GTTIEESFFCNGIPDAPVTCRTIRAWAGSMGNQKLPANPSQSLYEISVLGALRAQGYNVT  
KKAETAIRARLRGSHVFDLSKVC PGKDRLOKFLNMSLSFERELADALADPSWNFDKAL  
KQDFWENVAPKLC SINLTIIEGWKTEDWFREMVKNPVPSPQIAKFQKYL SRLSNAFEDP

>comp12699\_c0\_seq2; 206 667 1262 LEN=1262; translated  
MQIHRNPTNDDSAAGEIDSPTIKMDYPSWKLGKTNLSSSDHEEHAGLKS PASPTLVSRAN  
SPANKEKERKRARAKKAKAKAKARRKRLDSDSDSDSDSSSESDSDSDKYRKARRASSR  
REGCGWVLKCVCLGAICGLVNVVIMESNLVKLDNLNYKDLKLEGKLDLKLKLEKLGKLD  
NLPRIEIHYGDESPQSKTP

>comp12699\_c0\_seq3; 509 1 1798 LEN=2319; translated  
XESPOKTPRTVKKNNWVKASSDSTDKDIWKVKPATIKKIVTKDKVQKFRRDDDEDKNGAK  
PKPKMTPPPTPKPTVPPPTPKPTEPPTDTLAPTIPSPPEERQWQLYKATKA EFESVMPWKN  
SSLFTTVSRTVFHQLAEDALRAAKPVVDDVYTSCEIYLMPPNEDEGAKKDEAWKPRVQFK  
CLGKGNDSVSKLQDKMCHTANICKVVFDEEAWEKELKVPLDLGYKKYEAVEAARKHRVH  
PKKSAIIMVGDLDYLTQDDVFKATLNKASYAYRSSHSFYLWIGELKSSVLDKREIESVG  
PALGARCADKHLPNMHHYKPIAFLVLLDMLPKSHSTSIFYMDADAEFTTLAFAEHMDNRL  
NYGIGPESYLEVSPQASLLATQNIKGKMLMNSGIMLLRNTRWARELSAIWWHARCGSKDQ  
LGLWIALFASLSAWTTDVPSPDNKKEAFAPTQSYPGQIFFTYESA IHKTFGHFRNNGHK



IQAAWEEITEHQKKNGLKNDSDGYNLPIPTNTKLYNGGTYPGLLPILRGAMELPHFVIA  
PQAPIRYNYDKAANATGDENANTLLLLRLKSEGDNSFVAHSKALESCSKQRCWPFLEK  
>comp12700\_c0\_seq1; 336 158 1294 LEN=1500; translated  
MKAADVYKFNPEIEILVTPKPKLSSSTSVIVQVMATGVCRSDWHGWKGHDDDIKSHGFPF  
IPGHELSGIIVKTGRSVNKLRTGDRVAIPFILSCGSCAECHVGKPTVCLKQEQPFGFTMLG  
SFAEFVEIKRADRNLRILPKGVSFVEAAALGCRFTTAYRAVIQQGLGMRNKNRPNDFRGS  
SNKITACVFGCGGLGLSCIMIAEAFREEGNIESIIAVDVSDKALDKALTLGADRAVNVKS  
LGMKDDAVRMKVMYEYTNGLGADLTIDAAGFASTCENAVHTCRRGGRMVQVGLPIGGRPPQ  
IPMGAVAGKELEIVGSHGFAATELPDLLGFVESGKLRVRQLVEKEVNLREGIEALMAMDR  
QSPLGITVITRFDDTSRL  
>comp12701\_c0\_seq1; 617 305 1963 LEN=2170; translated  
MDSIAALRSVLMMLDTPTRVALSGSQPQRQPWISPMQAQAKSPDSKKKSPVERTPLGKPPMS  
NKRLSSVLKTKSTTKIRPSPMDRVGTVMKKKVEALETSQTNLEKKLQVEIDRRSSLQAT  
HEKLSDFQTQQTSQLERMIASRDAFRAQVITLKKTIIEEQINHMKAIVSTMKNATKTMIES  
LRSKDKKEESMAEIKTLEKRLRQKEERYQQSESLVKSLTKEVEKLNADLKTRQGTHEVAMK  
ATTDAAHAKEISLLQDIIERTESDRLEHTEKEKEIVSLKDKLEKAQTKMDKMEQDHSVTS  
KMESDKADLENLIEMKKLRDELREKLEDASGELTQLHRQVEEALTASKTSEEKLRDQLT  
AYKALQSEKKYLERRMSDAKDIPSTATSTKELQVTIQKLESEKQALEQRANSSDENCKRV  
KKLLEGTQMEKLGLEQNLEEAERIESQNEILKKDLEEANNGVSCLEKLDVCESSNANLL  
VEVATYREKVRDLEGRLEEELEERDYCDQGENTDGMKKRDNDEDDDNESPRKRPKMRVDD  
QDQCVSESEIAM  
>comp12701\_c0\_seq2; 178 305 1339 LEN=1339; translated  
MDSIAALRSVLMMLDTPTRVALSGSQPQRQPWISPMQAQAKSPDSKKKSPVERTPLGKPPMS  
NKRLSSVLKTKSTTKIRPSPMDRVGTVMKKKVEALETSQTNLEKKLQVEIDRRSSLQAT  
HEKLSDFQTQQTSQLERMIASRDAFRAQVITLKKTIIEEQINHMKAIVSTMKNATKTMIES  
LRSKDKKEESMAEIKTLEKRLRQKEERYQQSESLVKSLTKEVEKLNADLKTRQGTHEVAMK  
ATTDAAHAKEISLLQDIIERTESDRLEHTEKEKEIVSLKDKLEKAQTKMDKMEQDHSVTS  
KMESDKADLENLIEMKKLRDELREKEGTCPSTYLKEIFDMIYISX  
>comp12704\_c0\_seq1; 92 168 698 LEN=1143; translated  
MSDNHHTGSLWTLVNLIVVFLSVILATDIVFAVDDRQERPGAIAEHLVYVNGTSLVWVA  
EVAWNTYDMVTLEQRPPHWKLSLAVEWAIISIYFVVDVINLMLQWRGVVNGNGDEELGSGL  
FDAVQGIIVTYSYLAASSFLAYETSIPYQPIQDVTPLYPWPMNSVQPDPIRNTGV  
>comp12704\_c0\_seq2; 92 158 688 LEN=1133; translated  
MSDNHHTGSLWTLVNLIVVFLSVILATDIVFAVDDRQERPGAIAEHLVYVNGTSLVWVA  
EVAWNTYDMVTLEQRPPHWKLSLAVEWAIISIYFVVDVINLMLQWRGVVNGNGDEELGSGL  
FDAVQGIIVTYSYLAASSFLAYETSIPYQPIQDVTPLYPWPMNSVQPDPIRNTGV  
>comp12705\_c0\_seq1; 181 240 1665 LEN=2196; translated  
MAQRPRDARIARPSSLGTGGTCSRGSSTSLASSSSMGDFFNPTETHAQLRTMLRDFVKN  
EVEPQALEFDRTE TLNPLQLQGLDGLLGLTAGEEYGGAGLDASAVALVHEELSYGDPG  
LCLSYLAHSLLLVNNLSVNGSKEQKERFLPSIVTGEQIGGMGMSEPNAGTDVLGMSKAV  
RDESTGSHWLTGRKMWITNGTLDGGKTTGDLFLVYARTGPNRSDXDQFRGGKGHAGILRG  
PENRGQAGNAGFGTFMYDSQYYLLEQFGVVDFLSLFIYPWLRTQFVLYFSHCKQPTAEL  
VFDDVPIPPENIIGE VNGATLCMMRNLEIERIGLAAMALGIARRCINVMTHYATHERRAF  
GKPLVDFGQIQSAISTSYAEYMAGRSYVYALARSLDLNSYGNGLDADGTKLYCAPMAKTI  
ADRAIQVLGGYGYVGEYNVERLWRDAKLLIEGGGTNESHKMNVRDLKRMPELE  
>comp12705\_c0\_seq2; 240 240 1756 LEN=2287; translated  
MAQRPRDARIARPSSLGTGGTCSRGSSTSLASSSSMGDFFNPTETHAQLRTMLRDFVKN  
EVEPQALEFDRTE TLNPLQLQGLDGLLGLTAGEEYGGAGLDASAVALVHEELSYGDPG  
LCLSYLAHSLLLVNNLSVNGSKEQKERFLPSIVTGEQIGGMGMSEPNAGMYCDVQGLCRS  
SVASEGHRHNXAAGNSLDVVTHIFFVTRYNLNPNQSNDEQSNQRIDSXYNAAFFQTKTDL  
TAGTDVLRHMSSKAVRDESTGSHWLTGRKMWITNGTLDGGKTTGDLFLVYARTGPNRSDVT  
SFVVEKDMPGFSVGQKIEDKLGMRASPTAELVFDDVPIPPENIIGE VNGATLCMMRNLEI  
ERIGLAAMALGIARRCINVMTHYATHERRAFGKPLVDFGQIQSAISTSYAEYMAGRSYVY  
ALARSLDLNSYGNGLDADGTKLYCAPMAKTIADRAIQVLGGYGYVGEYNVERLWRDAKLL  
EIGGGTNESSHKMNVRDLKRMPELE  
>comp12705\_c0\_seq3; 166 1470 1886 LEN=2417; translated  
MALGIARRCINVMTHYATHERRAFGKPLVDFGQIQSAISTSYAEYMAGRSYVYALARSLD  
LNSYGNGLDADGTKLYCAPMAKTIADRAIQVLGGYGYVGEYNVERLWRDAKLLIEGGGTN  
ESHKMNVRDLKRMPELE  
>comp12705\_c0\_seq4; 314 240 1535 LEN=2066; translated

MAQRPRDARIARPSSLGTGGTCSRGSSTSLASSSSMGDFNPTETHAQLRTMLRDFVKN  
EVEPQALEFDRTE TLNPLQLGDLGLLGLTAGEEYGGAGLDASAVALVHEELSYGDPG  
LCLSYLAHSLLLVNNLSVNGSKEQKERFLPSIVTGEQIGGMGMSEPNAGTDVLGMSKAV  
RDESTGSWHLTGRKMWITNGTLDGGKTTGDLFLVYARTGPNRSDVTSFVVEKDMPGFSVG  
QKI EDKLGMRASPTAELVFDVPIPPENI IGEVNGATLCMMRNLEIERIGLAAMALGIAR  
RCINVMTHYATHERRAFGKPLVDFGQIQSAISTSYAEMAGRSYVYALARSLDLNSYNGG  
LDADGTKLYCAPMAKTIADRAIQVLGGYGYVGEYNVERLWRDAKLEIGGGTNESSHKNM  
VRDLKRMPELE

>comp12706\_c0\_seq1; 213 161 640 LEN=836; translated  
MKTVERDADTNRNKNLREYNESEIEAIMDNYVIHCASVPKPLLDSSQAAKAPENPFMKKL  
PPYLQEVDRVPCDLGKQYVYFQEFFNHQKKAETTGVIVMSRKRRLPEPVYLRNFRKKLP  
SVTPEKRKRKRDNSTSKSISINKNSNYNISQLSTQNV

>comp12706\_c0\_seq2; 219 161 652 LEN=937; translated  
MKTVERDADTNRNKNLREYNESEIEAIMDNYVIHCASVPKPLLDSSQAAKAPENPFMKKL  
PPYLQEVDRVPCDLGKQYVYFQEFFNHQKKAETTGVIVMSRKRRLPEPVYLRNFRKKLP  
SVTPEKRKRKRDNSTSKSISISISTNKNSNYNISQLSTQNV

>comp12707\_c0\_seq1; 844 1 3530 LEN=3641; translated  
XSLLRSELMSPKRLAASDASRGGETSPLSVKYTEADANRDKRDEPCSEGVDMNALSVST  
NLSKAPQPEESVSAEACRHGSGINSNKTGVDPTTAGGVGSPSPSSIQNDVEPKNSSLAPM  
ESGIDHSTALREQRSTGVAPNTVSSSSASLTGDTLCQSPLESSAIQSPPMTWSQQSCPM  
LTPQGIAQKPIYHQSSSLDRSSSYGSHFPYSGMPTRDPAPFSNWKSMVVNTAFSNENYGP  
LGSFAWIPPPPPPPQRVPLQQTAKRCRTTSVTRRPKTPKPIQVPMLCKPMEAPSPFANQG  
RHLVTILVVRDPRTKESFGVNLKIHTESALVDREWIDAQQKSKARKPKPDETGSTIINTK  
PEVMGASVPXKSLEVVPKTHQPPLIHTSGQSKQLTGKLLPKTDTILSSAVHAKREPKAN  
GDDQDKTFMAMCHNAEIKTAIARNHTLIRADKEKKEPIQTTCSVTPTKNEMPTNLNSNA  
NIDCGKSDSNDIRAVIKNCVEFLVSSVSSSQKEADKQTVSMDTRNIVQKRKRKRVRNFSV  
MMVTDAEKQNSRRPDVDSKEKLRSGDIVVTIQGHKLDGMSFRDACVVFVFSREAESMNDLI  
QTRVVVARKPEMTAPVNTLSADTSNSVTLNPVVTSLSSSTPSAPLPPENTSMVFSPEEL  
ATLSNCFNLNLSKRIILGQDIQDSSWQLHSLIFRMGSALEDTGLTPRGITTLTNKWGDL  
TRLIDYELVEKGNHWTKKFRQEFGNEKLPFSSDVERNAMRHLRPLKGCRCCKKDDHEYV  
SDPKCILYRDLQQLSKEELKELRLHTKNKFIKPKSKDLNAVESAFKNRMLKLNATENE  
SIEARFVDKMEEIQVKELHQAVFAPNLTTIVLSTIFELQREFHVSVEEDKDEDMNYNAN  
EEQEDDVPLECLGKRGSDVQSAADTRKQKQVDGGGPNFCMEYLVRMLNYSVKTWGHCYRE  
PNTDEYAWRWELFHAVHSDHDQWEAHATNPRVPDSFPFENVRFGLNSSKSTDNKLSSFPK  
TIRQFEDSILSNAPLALDVPNKTLEQFSIAVHLLSPARSGFDELIALKMGIIQVSASGI  
PILTGDWWTKIDIVVLDMLCSWSTKADPDSRYCVNEELRDTLEEQVWVKSQDYGWALLENP  
KELIFDFTVLDEWRETFEGRLEEKANLSEGIGLFL

>comp12707\_c0\_seq2; 427 1 1445 LEN=1445; translated  
XTNGKCHTIYSVYRSVSGSSQHERRFKEVPPRLRSXVARHGSSKSTRPFRVRQLPACREM  
VIVNPYLKPKKPLSGGSGASGSGRARPPSIPHVPNKHKAHAASSRGTSQAPPPRVTPNGK  
KTVPVAAANRKTETSANPKASPSPLAYNKNAANRPRVSPQTSSTKVERKISDSSRGSNS  
AGNGGRSSPPQRKAAPYRAGSSSRSSKTKLTVKQRLKQEI AALKKQKQLQKQKAEER  
RRRLAEQKAEERKTALLAEKEKVKQKQAEERERLARLKEERTRKQLERERKQREKEL  
ERERKQKEKLEKKEERLRLLEQKMEEQKQKAEAKYQRDLIWKI HQQRWMEQQQRIHYFQ  
QQQLLQQRQTHHP SHNQYQFFPNQQRQQLYQYEGQHHQONQHQYKIEKFSAGKSPLFP  
RTPTQSLPKGESVEDPNHRTVVETKPCVPVDTIPGQKVCQSTHSTSSEPI SPLDSPTAL  
AIX

>comp12708\_c0\_seq1; 374 151 1254 LEN=1292; translated  
MASNWSNPYLRFGPFAFAATILVAMIPNAIAFSADSRSNPLTRMVSNNLDLYSPKSERKL  
ARCNP LSAAGVDAPVTSSKGAVGLYKFFADHAVEQLLGT EWLQIDDKVPTDLSEKQAPAR  
GSKIESTVRITTKALIPSTKFDGKPLVRYARITLLETVPVSCVDDAVSVEGIQVLNFV  
VLPNADTTLPVLGIDLVSPLPGKHL LLLDAQPMVAVPNPHE SHWEEWYSMHVANNTDNPEKD  
GDEPLKYAWGGDFPDPVKTYVSKYALWTR LQNI AVSSISDDNASDESVAATPAIQRDIFD  
AFQAH LGAYLELLARYAEDMKAVEGENHQ SAYLDYRRNNDPAK PMLNALYGP EWQTLLD  
NVLFPRE

>comp12709\_c0\_seq2; 274 142 1339 LEN=1339; translated  
MRFPD TIATASVAPLLLLLLVQQLPTAEACPGGLNPPDPMSTANGQPCS YQQCLY YAA  
TPVVNCR CNASTSNPNGRFVCSPLEFFGPTPAQPVP PPTPYPTLPPVAPT DAPTAAPT TG  
PPTAGPTSGPTAGPTASPTTADPTGAPTAGPTRDASC SAVSACAGLVGNCCPTDQGEFLG  
CCDGLTSPSPDPVAVPTEAPTAAPTEAPTKAPTPPTPLPTEDPTGAPVEAPVVPATPE

PTQKEATSEPTAASLSQDIAALMGNPNSGAARRGFATALGAAALXRGGGLLATLLGTDWQG  
KDTPTISSYHPSDAMRFDAMRCDISIRFTPFMRMSAISSRNGTVCSAASMHWETSEPTRRS  
NGRRGRMSRSRNTLHNDTTRVRYNTIELKTQGRSQPTR  
>comp12711\_c0\_seq1; 449 75 1127 LEN=1127; translated  
MAQNPLLGNRISLISKKNIRYEGILYSINETDSTLALQNVRSYGTEGREKSDPSTAFVAP  
QEGVHVYLLFRGCDIKDLHVHEQQSETENTASAKGETAEETPNNDTSSPTTGGEAETAPP  
QTNADRKNPNTTNNGSNTTGDNNIASSDSDDKLPPPKVPSKPSRNQNPNGKNSQRRS  
GNSRRKGAAVGTGASLLNRKARGAVEGGPGPQNPEGEFDFQAKLEEFDKESDDTAVNEED  
NDEAGDEIAYPQHNSNSLSSSSSHYEKQDFFDSSISCDTLDKQSGIDNRLRGKAERSLNTET  
FGATALDRTEDAPGADVAVATVGEVEAEDAGEDVAGDAAEEEEAEADTTX  
>comp12711\_c0\_seq2; 345 882 1819 LEN=1819; translated  
MSGRTERKAXEKSDPSTAFVAPQEGVHVYLLFRGCDIKDLHVHEQQSETENTASAKGETA  
EETPNNDTSSPTTGGEAETAPPQTNADRKNPNTTNNGSNTTGDNNIASSDSDDKLPPPK  
KVPSPSRNQNPNGKNSQRRSGNSRRKGAAVGTGASLLNRKARGAVEGGPGPQNPEGEF  
DFQAKLEEFDKESDDTAVNEEDNDEAGDEIAYPQHNSNSLSSSSSHYEKQDFFDSSISCDTL  
DKQSGIDNRLRGKAERSLNTETFGATALARTEDAPGADVAVATVGEVEAEDAGEDVAG  
DAAEEEEAEADTTX  
>comp12711\_c0\_seq3; 324 75 1308 LEN=1308; translated  
MAQNPLLGNRISLISKKNIRYEGILYSINETDSTLALQNVRSYGTEGREKSDPSTAFVAP  
QEGVHVYLLFRGCDIKDLHVHEQQSETENTASAKGETAEETPNNDTSSPTTGGEAETAPP  
QTNADRKNPNTTNNGSNTTGDNNIASSDSDDKLPPPKVPSKPSRNQNPNGKNSQRRS  
GNSRRKGAAVGTGASLLNRKARGAVEGGSCVELVEFELSFLFAPSDVCERRIELHLVDNLF  
WNQLSSVYKFVLSIAIELMMAILAIEGPGPQNPEGEFDFQAKLEEFDKESDDTAVNEEDN  
DEAGDEIAYPQHNSNSLSSSSSHYEKQDFFDSSISCDTLDKQSGIDNRLRGKAERSLNTET  
GATALARTEDAPGADVAVATVGEVEAEDAGEDVAGDAAEEEEAEADTTX  
>comp12711\_c0\_seq4; 147 882 2000 LEN=2000; translated  
MSXSYGTEGREKSDPSTAFVAPQEGVHVYLLFRGCDIKDLHVHEQQSETENTASAKGETA  
EETPNNDTSSPTTGGEAETAPPQTNADRKNPNTTNNGSNTTGDNNIASSDSDDKLPPPK  
KVPSPSRNQNPNGKNSQRRSGNSRRKGAAVGTGASLLNRKARGAVEGGSCVELVEFEL  
SLFAPSDVCERRIELHLVDNLFWNQLSSVYKFVLSIAIELMMAFCAIEGPGPQNPEGEFD  
FQAKLEEFDKESDDTAVNEEDNDEAGDEIAYPQHNSNSLSSSSSHYEKQDFFDSSISCDTL  
KQSGIDNRLRGKAERSLNTETFGATALDSTEDAPGADVAVATVGEVEAEDAGEDVAGD  
AAEEEEAEADTTX  
>comp12711\_c1\_seq1; 244 1 1145 LEN=1437; translated  
XNNNNNNMMILSIPTESIDQFEWSDPMLLEKYQDEILALEDYLQEQEKEEEEQEQELLN  
ESRGKAGEPAETRRAVDYDGRHSGAYVPSGEHRTGPNERTNRVGEHNRKISSSEDGGERF  
VSPSFLPVAATITPTSSSSPPRSTARGRRSDKVDPNNDNHPVHTNNFVRTHSEASDPKNE  
KDIPCNVSMETTSTRTEQQLRAEIEDLKVRCEKLKAERYMVEGQLKEARQKNHEIELR  
ALDHRKQGTVHKYQLQOTLRCGYCTRFRSNPSSPNAPIASQACGHSVCRNCCQARLAPA  
RRNEQRRRDGHSMTGSELLRSTMASDLFMCVMDMHVYSEAEQEQRREGESCPICSAAPRAF  
KDGRHLHVNESLCAVLRLLDPA  
>comp12712\_c0\_seq1; 265 69 1450 LEN=2154; translated  
MWTRAPCLKRLQCVASTGMGAAKILPSATAASRICRLLSAATIPDAATPHPPSGRDPLRR  
LPFSVASWYKRAMAVAPEPPCSHRCYHRSSSHDGTGFLPRSSLSPVATRHLVHAFRSRSL  
ATAKRSQRPRPAAPRPWQKKRQRMPIATVLRGMGISSADCSSALVRACSEVRGIPLNK  
RQRSKPWIMALLMHRYDRGIRCPNELNTDSVYYGDQQTQSTSTGEAIIAIDLREALTPS  
PSEVRGYLSLPKRAKADGKTTPSPRAAEALRTEKLALLATEARRIVVDRRIPLGEMAS  
LGTEANARRLSKQDPASFLAIFSRVAVAEVEGRTAAETRPADFSHRRFRPPSLRKSIVYRA  
RKREQRGAEAAAXAKRREGRIPEGPPPVVFGANETGRDQPAVTRSGRRRAGSGDQQRCH  
RANHEQRRVTAAANQLLSVNDRRKAKRGGNESLSVKPN  
>comp12713\_c0\_seq1; 319 127 879 LEN=1008; translated  
MISSLCERSLALAWITYTFSVMSTSAASTTMPEVDRQLNGIPVKRPRIHGGWDTVEDRYS  
YAQVSLQWGEKGHCQGGSLVAPDMVLTAAHICIGSFNKIEIGKYMKNIDILDESETFVSFSE  
TMHPDYDEETTRFDVMVLKLNESKMGKPVIEINRNDYVPSDGTILTUVGMGYNGDWELPQ  
AVQETTVEYDVNSECEIIDEHGITLDGDLYPDMLCAGSPGKDCYGDSGSPILKGVTE  
EYDRQIGLVR  
>comp12713\_c0\_seq2; 251 127 1002 LEN=1002; translated  
MISSLCERSLALAWITYTFSVMSTSAASTTMPEVDRQLNGIPVKRPRIHGGWDTVEDRYS  
YAQVSLQWGEKGHCQGGSLVAPDMVLTAAHICIGSFNKIEIGKYMKNIDILDESETFVSFSE  
TMHPDYDEETTRFDVMVLKLNESKMGKPVIEINRNDYVPSDGTILTUVGMGYNGDWELPQ

AVQETTVEYDVNSECSEIIDEHGITLDGDLYPDMLCAGSPGKDSCYGDSGSPLILKGVTE  
EYDRQIGLVSWSGYECAGTLPVYSRLSYWRVYEFIEEHVCLHSVEPPSYMHC  
>comp12713\_c0\_seq5; 319 127 879 LEN=1146; translated  
MISSLCERSLALAWITYTFSVMSTSAASTTMPEVDRQLNGIPVKRPRIHGGWDTVEDRYS  
YAQVSLQWGEKGHCQCGSLVAPDMVLTAAHICIGSFNKIEIGKYMKNLILDESETFVVSFSE  
TMHPDYDEETTRFDVMVLKLNESKMGKPEINRNDYVPSDGTILTUVVGMGYNGDWELPQ  
AVQETTVEYDVNSECSEIIDEHGITLDGDLYPDMLCAGSPGKDSCYGDSGSPLILKGVTE  
EYDRQIGLVR  
>comp12714\_c0\_seq1; 348 1 549 LEN=790; translated  
KGSATNNAANESKNHSTNAGHNANHENNNHKGKNTDNTNDKSENHEADHSHNNMVIYVGFN  
SSIYSRNATEISNQDATDAKTTTAPSSDSKPVTLFVSVATAVLVVLMAFVAGRIKLT  
VRKWRGKHVPPPGMAFPTDIGVIEGAEPNLRHYHDDVNHDDDYHDDVNDGDYHGVKRT  
LV  
>comp12714\_c0\_seq2; 341 1 602 LEN=843; translated  
XSENNKANTSQSVTNGNKGSAATNNAANESKNHSTNAGHNANHENNNHKGKNTDNTNDK  
ENHEADHSHNNMVIYVGFNSSIYSRNATEISNQDATDAKTTTAPSSDSKPVTLFVSVATA  
VLVVLMAFVAGRIKLTVRKWRGKHVPPPGMAFPTDIGVIEGAEPNLRHYHDDVNHDDDY  
HDDVNDGDYHGVKRTLV  
>comp12715\_c0\_seq1; 433 164 1750 LEN=1806; translated  
MTVGTQGWDNHGMFYNNNEHLRRWQSTSLHQLKTLAGVMGNVLEWYDFAVFGFFSDII  
GEVFFPKGQSEDRSVMESFAVFGGAFLMRPVGGMLIGYIGDTSGRKNALIEISIFLMASAT  
TLMGCLPTYSQIGNGAILLLMVRMLQGLSVGGQLMSSLVFTLEGRPTDRWGLYGSFVMG  
AANIGTFLGGLVAYGLRSLTEKQLFQGWRIPIFISGIMISFCGLYLKYVCTEDESIPGH  
AVVSSSDCQHDDSPAILTTDVEEIIIDIVIEDENLDENSTEASSDARQQQTGLDTSIDI  
KRPSNPLRLAFSQENRRSLLASAMVPLMWSSGGFYVSFVWMAIFMQDLIDPPVPSAFLVNS  
FGILMLGIWFPLAGLLSDFVGRRSVMTAGGLTFACLGPIFVLLIGNMGSKSLWIAFFSQM  
GLGISLAMWGSMPMAWLVESFEPQARLTSVSIYGNIAQAFAGGMSPLVATLLMDEIGLGA  
PGILLTTLGILSLTGLVWVAPSNGYNRQPQGDCCNAIGTFNMELSEIT  
>comp12716\_c0\_seq2; 124 50 196 LEN=1602; translated  
MEEKKSSMKRACEGSRGEITSENDDMSSDKGCERHPRRKSCKGSKLKI  
>comp12716\_c0\_seq3; 120 50 185 LEN=1602; translated  
MEEKKSSMKRACEGSRGEITSENDDMSSEKGVDRDLAESPRVPA  
>comp12717\_c0\_seq1; 280 186 1160 LEN=1486; translated  
MSTVSPSTILLDEYHALLVAAEESESSSDGEGSPLNIGTISWSNQGANTDIPPISPLDT  
LVVVDMQHDFLPGGAFGVDEGDAVIEGICELIQRFHEAGATVLASRDYHPTDHCSFQSHG  
GPFPTHCVMGTRGSFFHPRIAETLQPLLALAQNGRDGDDKSNTNRNTHVYKGFYKGVES  
FGGFYPNSNDKWKERLSHQSDDAVDWTGGYALKASNIGADANASPDVLSFLDKKPSSSL  
LPTSNEGEGRVFCCLAMDYCVLDTAVNFVQTVQNNNSCFLVQDLTRAARIPLGLGAFGSG  
FLTDPSVLLLESLKANKIGLVRFTD  
>comp12717\_c0\_seq2; 199 426 1016 LEN=1342; translated  
MGTRGSFFHPRIAETLQPLLALAQNGRDGDDKSNTNRNTHVYKGFYKGVESFGGFYPNS  
ENDKWKERLSHQSDDAVDWTGGYALKASNIGADANASPDVLSFLDKKPSSSLPTSNEGE  
GRVFCCLAMDYCVLDTAVNFVQTVQNNNSCFLVQDLTRAARIPLGLGAFGSGFLTDPSV  
LESKANKIGLVRFTD  
>comp12718\_c0\_seq1; 146 600 863 LEN=1810; translated  
MLLSYYILIGRDEISQTQQQGYNSIDSQSPDISSLTDTKYGGEPSPSFQQDPNLQARQQ  
LQALGPQQNQHGYSYPEKTAGGKIMSV  
>comp12719\_c0\_seq1; 314 589 1158 LEN=1395; translated  
MSEESKTPDGDYVMMGSGAATPGGAKMSMNIDDPNLSQEDKDHRLAIALQQEENAAVYAA  
HKDKHQKAVAANSNRTARSGTFTRLA AVRQKDHGMLSVPADYTPNAYVKD TDYVAHQDK  
SESLAGMTPQQIADYQLAKELQKVEQVQVAGTVQEMSKIQT EEEDEAKAQHRVERSNYHI  
NQHGLRKP  
>comp12720\_c0\_seq1; 972 158 4320 LEN=4968; translated  
MGIDNTHGVGLNHQPASKDLFSPLQPQKRKKNRNRQASVGAHREANGPPASGFFSAGLT  
GAGTTSAGDIMIASIQQNAYELAAADLAMGIPEEREDNATSKEAVGPAREVATVEQP  
GFLAMFAFSTFHEQMWMLLGTAMAALAGLAMPWLLLLLADSLNTFNEIGAIVAAGDVS  
LIDQMQLINSFAIVGAATLVGTGVYVSIWSYVGENQTLRIRKAFVKSALRQEAAWFDTT  
GGGDPQELPVLATNALSRITQALGRAVADTFANLLSAIGCLLVSIGLDPPLAIFMLCVLP  
VIGIAIGIVSCFMRKSSGRALSEFSAAGAFASEVLTGIKTIASLRAETWAVDRYTDHALE  
AQKHSIRSQVLSKLAAGVMGLLFYATYTC AFLIGTEQAAQRVEVEATYVSPFACYLRTDC

GIHGSEVMVCIYGVILCAQFIALMNPGLNAINLGRATAAVDIYSAIRRTPSIDGINGDKGT  
KLGKDYDGSMELRNVTFYSYRPGDMI FANFSLNIKAGTAVALVGPSPGSGKSTLSKLLLR  
LYDPLGGHVLVGGXPLTELNLKWWRSQIGYVPQEPSLFPGTIWDNIASGKANGVATDEEV  
IKAAVAASAHDFIMDLDPGYDTFYSGSSIQLSGGQIQRIAIARAMIRNPVILLLLDEATSA  
LDTHSERMVQEALERIREARKLTTITVAHRLSTIVHSDQIAVVAEGAIQELGTHKELIQE  
GGIYALLCEGQGLTADAADVKESSLPEVRTQPKGPIETNM SHMPKGNYYDDIEAGKISD  
CEEEDKDDSDTNLSGVT SRLWAYNKKDVCYMLIGYIGGIIVGALPACEAILFGFITGNFF  
IITDAEELRSTNFTLSLWFLLLAGASFVANIAMGVGFGVSGFRLTRMRVLFVEKIMRHS  
MGWFDFPEHSTGELTTRLEEDSEAVSNVTGWQQQQRVQVFANLIIGMLVAMIYSWQIGII  
AICCIPIFILGASIMQAKCASRKPIQKHAENHVSAAATQLERAFHDIMVLQAYNLQDDVSTK  
YAAALNPDAAYEKKQAFYNGLAFLGSQFSVFSTFALIFWAGIQLMINGKLAFTDFVALL  
AVMFSAFGAGQTGADFS SHRTGLEAAARLFELIDGSVDEDDPLSTVGEKPRKLQGS LKFS  
SCHFAYPTRSNAPIYYQKGGRDGFSLQISAKQSVAF TGRSGCGKSTALQLVLRFYHVD SG  
TVELDGKLI SDFNLGWL RDQIGYVGQMPVLFKGTIIDNIRLGKPTATEAEIVEAAKAANA  
HNFISKLSGDYNTDIDAGGSLLSGGQQRVAIARAVVKDPKILVLDEATSALDNESETIV  
QAALDNMHQKNPRTTLVVAHRL ETVKNC DKIVVLDRGGVKEEGSHSELLRQKGLYHTLWS  
KQGGKVN

>comp12720\_c0\_seq2; 891 158 4420 LEN=5068; translated

MGIDNTHGVGLNHQPASKDLFSPLQPQKRKKKRNRRQASVGAHREANGPPASGFFSAGLT  
GAGTTSAGDIMIASIQQNAYELAAADLAMGIP EEREDNATSKEAVGPAREVATVEQP KKI  
GFLAMFAFSTFHEQMWMLLGTAMAALAGLAMP AWLLLLLADSLNTFNEIGAIVAAGGDVSI  
LIDQMQLINSFAIVGAATLV TGT VYVSIWSYVGENQTLRIRKAFVKSALRQEAAWFDTT  
GGGDPQELPVLATNALSRIQTALGRAVADTFANLLSAIGCLLVSIGLDPPLAIFMLCVLP  
VIGIAIGIVSCFMRKSSGRALSEFSAAGAFASEVLTGIKT IASLRAETWAVDRYTDHALE  
AQKHSIRSQVLSKLAAGVMGLLFYATYTCAFLIGTEQAAQRVEVEATYVSPFACYLRTDC  
GIHGSEVMVCIYGVILCAQFIALMNPGLNAINLGRATAAVDIYSAIRRTPSIDGINGDKGT  
KLGKDYDGSMELRNVTFYSYRPGDMI FANFSLNIKAGTAVALVGPSPGSGKSTLSKLLLR  
LYDPLGGHVLVGGXPLTELNLKWWRSQIGYVPQEPSLFPGTIWDNIASGKANGVATDEEV  
IKAAVAASAHDFIMDLDPGYDTFYSGSSIQLSGGQIQRIAIARAMIRNPVILLLLDEATSA  
LDTHSGKTDYVLSLVLFXNMLSSFFQISNDAEYFLNKNEWXQEALERIREARKLTTIT  
VAHRLSTIVHSDQIAVVAEGAIQELGTHKELIQEGGIYALLCEGQGLTADAADVKESSL  
PEVRTQPKGPIETNM SHMPKGNYYDDIEAGKISDCEEEDKDDSDTNLSGVT SRLWAYNKK  
DVCYMLIGYIGGIIVGALPACEAILFGFITGNFFIITDAEELRSTNFTLSLWFLLLAGAS  
FVANIAMGVGFGVSGFRLTRMRVLFVEKIMRHSMGWFDFPEHSTGELTTRLEEDSEAVS  
NVTGWQQQQRVQVFANLIIGMLVAMIYSWQIGIIAICCIPIFILGASIMQAKCASRKPIQK  
HAENHVSAAATQLERAFHDIMVLQAYNLQDDVSTKYAAALNPDAAYEKKQAFYNGLAFLGS  
QFSVFSTFALIFWAGIQLMINGKLAFTDFVALLAVMFSAFGAGQTGADFS SHRTGLEAA  
ARLFELIDGSVDEDDPLSTVGEKPRKLQGS LKFS SCHFAYPTRSNAPIYYQKGGRDGFSL  
QISAKQSVAF TGRSGCGKSTALQLVLRFYHVD SGTVELDGKLI SDFNLGWL RDQIGYVGQ  
MPVLFKGTIIDNIRLGKPTATEAEIVEAAKAANAHNFISKLSGDYNTDIDAGGSLLSGGQ  
KQRVAIARAVVKDPKILVLDEATSALDNESETIVQAALDNMHQKNPRTTLVVAHRL ETVK  
NCDKIVVLDRGGVKEEGSHSELLRQKGLYHTLWSKQGGKVN

>comp12720\_c0\_seq3; 946 158 4436 LEN=5084; translated

MGIDNTHGVGLNHQPASKDLFSPLQPQKRKKKRNRRQASVGAHREANGPPASGFFSAGLT  
GAGTTSAGDIMIASIQQNAYELAAADLAMGIP EEREDNATSKEAVGPAREVATVEQP KKI  
GFLAMFAFSTFHEQMWMLLGTAMAALAGLAMP AWLLLLLADSLNTFNEIGAIVAAGGDVSI  
LIDQMQLINSFAIVGAATLV TGT VYVSIWSYVGENQTLRIRKAFVKSALRQEAAWFDTT  
GGGDPQELPVLATNALSRIQTALGRAVADTFANLLSAIGCLLVSIGLDPPLAIFMLCVLP  
VIGIAIGIVSCFMRKSSGRALSEFSAAGAFASEVLTGIKT IASLRAETWAVDRYTDHALE  
AQKHSIRSQVLSKLAAGVMGLLFYATYTCAFLIGTEQAAQRVEVEATYVSPFACYLRTDC  
GIHGSEVMVCIYGVILCAQFIALMNPGLNAINLGRATAAVDIYSAIRRTPSIDGINGDKGT  
KLGKDYDGSMELRNVTFYSYRPGDMI FANFSLNIKAGTAVALVGPSPGSGKSTLSKLLLR  
LYDPLGGHVLVGGXPLTELNLKWWRSQIGYVPQEPSLFPGTIWDNIASGKANGVATDEEV  
IKAAVAASAHDFIMDLDPGYDTFYSGSSIQLSGGQIQRIAIARAMIRNPVILLLLDEATSA  
LDTHSERMVQEALERIREARKLTTITVAHRLSTIVHSDQIAVVAEGAIQELGTHKELIQE  
GGIYALLCEGQGLTADAADVKESSLPEVRTQPKGPIETNM SHMPKGNYYDDIEAGKISD  
CEEEDKDDSDTNLSGVT SRLWAYNKKDVCYMLIGYIGGIIVGALPACEAILFGFITGNFF  
IITDAEELRSTNFTLSLWFLLLAGASFVANIAMGVGFGVSGFRLTRMRVLFVEKIMRHS  
MGWFDFPEHSTGELTTRLEEDSEAVSNVTGWQQQQRVQVFANLIIGMLVAMIYSWQIGII  
AICCIPIFILGASIMQAKCASRKPIQKHAENHVSAAATQLERAFHDIMVLQAYNLQDDVSTK

YAAALNPDAAYEKKQAFYNGLAFGLSQFSVFSTFALIFWAGSKFPFGNSNCSLEAVIPDI  
NFTFCILFSSSLPSAXNLNEVQLMINGKLAFTDFFVALLAVMFSAFGAGQTGADFSHRT  
GLEAAARLFELIDGSVDEDDPLSTVGEKPRKLQGS�KFSSCHFAYPTRSNAPIYYQKGR  
DGFSLQISAKQSVAFTRSGCGKSTALQLVLRFYHVDSGTVELDGKLI SDFNLGWL RDQI  
GYVQMPVLFKGTIIDNIRLGKPTATEAEIVEA AKAANA HNFISKLS DGYNTDIGAGGSL  
LSGGQKQRVAIARAVVKDPKILVLDEATSALDNESETIVQAALDNMHQKNPRTTLVVAHR  
LETVKNCDKIVVLD RGGVKEEGSHSELLRQKGLYHTLWSKQGGKVN

>comp12720\_c0\_seq4; 865 158 4536 LEN=5184; translated  
MGIDNTHGVGLNHQPASKDLFSPLQPQKRKKNRNRQASVGAHREANGPPASGFFSAGLT  
GAGTTSAGDIMIASIQONAYELAAADLAMGIPEEREDNATSKEAVGPAREVATVEQPKKI  
GFLAMFAFSTFHEQMWMLLGTAMAALAGLAMPWLLLLADSLNTFNEIGAIVAAGDVS I  
LIDQMOTLINSFAIVGAATLVGTGVYVSIWSYVGENQTLRIRKAFVK SALRQEAAWFDTT  
GGGDPQELPVLATNALSRITQALGRAVADTFANLLSAIGCLLVSIGLDPPLAIFMLCVLP  
VIGIAIGIVSCFMRKSSGRALSEFSAAGAFASEVLTGIKTIASLRAETWAVDRYTDHALE  
AQKHSIRSQVLSKLAAGVMGLLIFYATYTCAFLIGTEQAAQRVEVEATYVSPFACYLRTDC  
GIHGSEVMVCIYGVILCAQFIALMNPGLNAINLGR TAAVDIYSAIRRTPSIDGINGDKGT  
KLGKDYDGSME LRNVTFSSYSPRPGDMIFANFSLNIKAGTAVALVGP SGSGKSTLSKLLLR  
LYDPLGGHVLVGGXPLTELNLKWWRSQIGYVPEPSLFPGTIWDNIASGKANGVATDEEV  
IKAAVAASAHDFIMDL PDGYDTFYSGSSIQLSGGQIQRIAIARAMIRNPVILLLDEATSA  
LDTHSGKTDYVLSDLVSLFXNMLSSFFQISNDAEYFLNKNEWXQEALERIREARKLTTIT  
VAHRLSTIVHSDQIAVVAEGAIQELGTHKELIQEGGIYALLCEGQGLTADAADV KESSTL  
PEVRTQPKKEPIETNM SHMPKGN YDDIEAGKISDCEEEDKDDSDTNLSGVT SRLWAYNKK  
DVCYMLIGYIGGIIVGALPACEAILFGFITGNFFIITDAEELRSTNFTLSLWFLLLAGAS  
FVANIAMGVGFGVSGFRLTRMRVLVFEKIMRHSMGWFDPEHSTGELTTRLEEDSEAVS  
NVTGWQQGQRVQVFANLIIGMLVAMIYSWQIGIIAICCI PFILGASIMQAKCASRKP IQK  
HAENHVSAAATQLERAFHDIMVLQAYNLQDDVSTKYAAALNPDAAYEKKQAFYNGLAFGLS  
QFSVFSTFALIFWAGSKFPFGNSNCSLEAVIPDINFTFCILFSSSLPSAXNLNEVQLMIN  
GKLAFTDFFVALLAVMFSAFGAGQTGADFSHRTGLEAAARLFELIDGSVDEDDPLSTVG  
EKPRKLQGS�KFSSCHFAYPTRSNAPIYYQKGRDGFSLQISAKQSVAFTRSGCGKSTA  
LQLVLRFYHVDSGTVELDGKLI SDFNLGWL RDQI GYVQMPVLFKGTIIDNIRLGKPTAT  
EAEIVEA AKAANA HNFISKLS DGYNTDIGAGGSLLSGGQKQRVAIARAVVKDPKILVLDE  
ATSALDNESETIVQAALDNMHQKNPRTTLVVAHRLETVKNCDKIVVLD RGGVKEEGSHSE  
LLRQKGLYHTLWSKQGGKVN

>comp12721\_c0\_seq2; 362 1 2057 LEN=2146; translated  
RVRGKALIVSLLVASYFAILLIVKSTIMPTPRDLIFLDHRNVKPF TKSTSSKHSLPKNET  
DQLVRQAQFVLPKVERD TENRNYTLHRNKVDDRDTKNNDHPQNHG ISVCFVSSQFS  
STKDKTDHLYDVRQTPVLHESPLFHFFAFSNLADLKAPGWKVVVKDLREYNRWITQSRW  
AKFMAFRDATIKETCQVVFYIDGILSPKNDEL FQTEAKKIMESNVKFAQRLHPVGGGAE  
AEFDRIRLKKKDIKRNVAAASLQWLREQPDYNKNCTLYENSMFGYAIDSIAFQKSADFFWN  
HYSKEQDSWRDQPLWCYTLHHFGITPLQLTGNGKIDILFDQEDQRTAKGSHKYKSESVISA  
ANYYESLSHMVSLANSCWLDNSNSTASNSSLKPAEITHE SPLTPVCPDQFRRAMAP TERTN  
PGLTISIPYSAQPALLLQQLRN FATYPKNIQT KLNIIVVDNGSPSGLRAMDHLNISTGGS  
ITSQFLNTNQTGPAIPYHYLLSVVRVNHNI DWNEEGSHNLAFXFGQNEIGLILDIRMLVP  
METIRDVFTWETTRANNETKRNPFAHKFNRMKPN GERKHQQTCALVEIPEFWNSGGMDE  
DFSGNYGYGTS PHFWHKWEQGG RATQIHDSVYLLEQETKACDSRWLYSSEKVTECKITRS  
NMANPSKEGKRNRKLWKEKSSGKRAW

>comp12722\_c0\_seq1; 261 108 1301 LEN=1432; translated  
MEDANCNQDDKRRQKPSYVSWWEENLRETI RNLNREGIECMEHRKFAAAVKLFANALDRHD  
RLKTEVQCMMSPDGDSGDIIVSAADKNTTAAGAENCADADTPNRNHGA AVPNNKTFDKFF  
FHSDLFVQQDHQQGDIDL VFC EPIRIPATIEDVEVLISETCRGSNNSSSACEAASSSPRT  
LSEWVSTANDLLSSYHTYNFAISHHLRGIELMREDKDRN NP GVS PERSLYKNYLETAYSC  
YKLTIRLEQKRQKNK NIGGERLCTRVDP RVVLA CLN NLADLDYRDSQNSSVT AIRVGAFMA  
STARCRSCYRHLQIITRRMWEALEHLDHKNRKSRLLEE HVSQLEVSRSYIQIFARNARQ  
GFFRLWRSTVSKRRNDGDEDKEHPNLYVLESTTAGAA

>comp12722\_c0\_seq2; 268 268 1461 LEN=1592; translated  
MEDANCNQDDKRRQKPSYVSWWEESLKETIRLNREGIECMEHRKFAAAVKLFANALDRHD  
RLKTEVQCMMSPDGDSGDIIVSAADKNTTAAGAENCADADTPNRNHGA AVPNNKTFDKFF  
FHSDLFVQQDHQQGDIDL VFC EPIRIPATIEDVEVLISETCRGSNNSSSACEAASSSPRT  
LSEWVSTANDLLSSYHTYNFAISHHLRGIELMREDKDRN NP GVS PERSLYKNYLETAYSC  
YKLTIRLEQKRQKNK NIGGERLCTRVDP RVVLA CLN NLADLDYRDSQNSSVT AIRVGAFMA

STARCRSCYRHLQIIITRRMWEALEHLDHKNRKKSRLLLEEHVSQLEVSRYSYIQIFARNARQ  
GFFRLWRSTVSKRRNDGDEDKEHPNLYVLESTTAGAA  
>comp12723\_c0\_seq1; 241 198 931 LEN=968; translated  
MSTSAEGPETGYVRQADEGTGHEPGTAPGQSTAGSTTSGTATASTHRNRRSQLFFGLCDM  
RTATVVLIDILNIFLFTLLVAIVLAVLFLGLDKGSSYGAQSVFRTLFGALAVAGVSALGLHSA  
MNWSVDGMLAATAGIGCVLLFRLAKGEWIDVLVNLGLLLYPHAVLTREMSEGIMTPETFEE  
EYVAEXGPGVVRGDGPQLRLAGELDGVAEEQMRNRKGSRAGPGVCDRSRTVREGSKLGT  
MSSQ  
>comp12724\_c0\_seq1; 743 1 2375 LEN=3373; translated  
XPGEAYVRLRSLIETVNAACAAMLVSKRAKREDGDGERGHDEEDEREERWTFEPQSG  
NIIIFASALFGWGFTVPSLARSFLKSKVLPKPAALQHYLFGDFYKKEEQKMMKLKANPG  
QDHQEPFLFAEYGLRPLWEIYEGVAAAASACGLGSTIFSDGRTGSSATDHNSNNNAKIQAD  
TPGMDRVLRAMQTGGTSTAGDLAMPHSLQQVMTRTGSASSEAVLRSLRRFRPLSEIVL  
NSLYELCPPPEASAVVRPRALALAAPGTNGGEAGGEAGEAFQRVKEAVRVCDVSTEAPA  
VAYVCKFMATDQSHIRDPGSTNDNDTIVILGLARVLSGRLKTNSSYHVMGPKHKFHDPGT  
IKSRP IRLFLLMGSSFVLVDEVPAGHLCAIQNLENAQYKTATICDSPYGMPLLGFSLEI  
RPLVKVNVEAVDPSDTSVLEKGLVKLSLADAAVEVTATAKGERILACLGELHLEQSILDL  
QKVYCDKKEIRLR ISEPIVEFGETTAWFGDNEFDGFLSEKSNVPLRQLTIPPYNEE  
EGNEFAKLGRSRTIVSGRVAAVTLRVIPLDRLVYNSLRGAQVSEDSLDAIKSLGRALGFA  
EDLDPELIVKALTDLSVSDSGNALVVSSALESGLTVAGVASENDEVYVPDKFATLDAQ  
NDGEEYDKDEEQKTEACGVREYESVRREIRGNGLPKTCEREARTPGPCDAAALETWKNQ  
MKGSLVAGFQMAMRAGPICEEPVRSVLVVLEGLEVALKEDQGSEGGFKTANTLSGGMMAA  
ALRIGIRSALL  
>comp12724\_c0\_seq2; 880 1 2834 LEN=3217; translated  
XPGEAYVRLRSLIETVNAACAAMLVSKRAKREDGDGERGHDEEDEREERWTFEPQSG  
NIIIFASALFGWGFTVPSLARSFLKSKVLPKPAALQHYLFGDFYKKEEQKMMKLKANPG  
QDHQEPFLFAEYGLRPLWEIYEGVAAAASACGLGSTIFSDGRTGSSATDHNSNNNAKIQAD  
TPGMDRVLRAMQTGGTSTAGDLAMPHSLQQVMTRTGSASSEAVLRSLRRFRPLSEIVL  
NSLYELCPPPEASAVVRPRALALAAPGTNGGEAGGEAGEAFQRVKEAVRVCDVSTEAPA  
VAYVCKFMATDQSHIRDPGSTNDNDTIVILGLARVLSGRLKTNSSYHVMGPKHKFHDPGT  
IKSRP IRLFLLMGSSFVLVDEVPAGHLCAIQNLENAQYKTATICDSPYGMPLLGFSLEI  
RPLVKVNVEAVDPSDTSVLEKGLVKLSLADAAVEVTATAKGERILACLGELHLEQSILDL  
QKVYCDKKEIRLR ISEPIVEFGETTAWFGDNEFDGFLSEKSNVPLRQLTIPPYNEE  
EGNEFAKLGRSRTIVSGRVAAVTLRVIPLDRLVYNSLRGAQVSEDSLDAIKSLGRALGFA  
EDLDPELIVKALTDLSVSDSGNALVVSSALESGLTVAGVASENDEVYVPDKFATLDAQ  
NDGEEYDKDEEQKTEACGVREYESVRREIRGNGLPKTCEREARTPGPCDAAALETWKNQ  
MKGSLVAGFQMAMRAGPICEEPVRSVLVVLEGLEVALKEDQGSEGGFKTANTLSGGMMAA  
ALRIGIRSALLSRPARLVESHKLTLNSSFAGLGSYPVLSKRRGKVLDSMVDGTDLLL  
ISANLPHAESFGLAPELFRLLTSGEVTAPELIFSHWEILDQDPFWIPTSLEREDFGEISQ  
SGDVSTGMDNTALNYIRKVRERKGLLVDSNKTVAEAKQRTIKR  
>comp12725\_c0\_seq1; 433 1 1424 LEN=1529; translated  
XAVGVAPQTTLSSWCONGLDPDESFLDHDLSVDVSQNSYDIKTCEPYAQRMRGLRPRNLS  
PDRCPFEVPGAAPCEVCEAGFNSGYFFGGESRKKKPPPKMSDECVR SIVRHCDRYFKQEE  
SDGGGACSDFLDLIIIGGECNYEGLSTTARRSISNGIRLGRNGLGVVYVFASGNSFLEGDD  
TNLKGYTNSRHTISVGAVGKDR IHTYYSTGGASLFLSAPAGDSEDLSKHVVARAGGGCTT  
TGIGTSFASPVSVALVLETNRELGWRDVQILAKSAKPVHEDSFDRSAVVNGGLWH  
SNLYGFGIVNANDAVEMAKTWTNYGPERVIAIDSGPLDDPILDKSSGSAPSTSSIAVAPK  
EEEDRYFVVEVELLLDVVHISRGLKITLRSPSGTESVLHPGKLPENVQLDPEDEGKFW  
KLMTVRNREESPFGEWTLTVADEKPGQFDECVDAPGFALQYAGVKVRKNKGR LV  
>comp12725\_c0\_seq2; 693 1 2279 LEN=2572; translated  
XAVGVAPQTTLSSWCONGLDPDESFLDHDLSVDVSQNSYDIKTCEPYAQRMRGLRPRNLS  
PDRCPFEVPGAAPCEVCEAGFNSGYFFGGESRKKKPPPKMSDECVR SIVRHCDRYFKQEE  
SDGGGACSDFLDLIIIGGECNYEGLSTTARRSISNGIRLGRNGLGVVYVFASGNSFLEGDD  
TNLKGYTNSRHTISVGAVGKDR IHTYYSTGGASLFLSAPAGDSEDLSKHVVARAGGGCTT  
TGIGTSFASPVSVALVLETNRELGWRDVQILAKSAKPVHEDSFDRSAVVNGGLWH  
SNLYGFGIVNANDAVEMAKTWTNYGPERVIAIDSGPLDDPILDKSSGSAPSTSSIAVAPK  
EEEDRYFVVEVELLLDVVHISRGLKITLRSPSGTESVLHPGKLPENVQLDPEDEGKFW  
KLMTVRNREESPFGEWTLTVADEKPGQFDECVDAPGFALQYAGVKIDCRYLEDYINVCGSL  
ESTTAEGSAIRIKPEYWFNLNTLADAKGRGVSDACCVCGGMNQESLGNLLRHWTLAIYG  
RHDPFAFATDAPTPPATPSPTRLPTDPSGLPTTVAPT NAPSTGPTTTEELANLPASVPR

TQEPSASPTPLVTLRPTDVATTATTTTTTTTTTTATTNATSAPSHSPSEPLDTDALLLDGE  
NPGLDDDSAEETYSVGGRKSNSGSGEAEPLPDSSSSGATIDADVDRDGGNDGDDPAPQS  
GPGAAPKSGPASSASGRALGVRSPAIGAATVIAILFGL

>comp12726\_c0\_seq1; 586 321 1955 LEN=2802; translated  
MTSSKTSASKLELLRARMEELSLDCYLVPDTPHLSYAPAAAYMRRKFLTGFSGSAGTAL  
ITKEEALLWTDSTRYWNANMQLDSSLWSLIKQGQPKVPTIVEYLSKKAGKEQEAATTNGH  
KAEVKPLRVGIDPYVFASSFADEFKEGKMKVAKKEELDDESLEIGELVPCYDNLVDP I WED  
ERPPVPYNPFRVHPLEFAGVSVADKVKIREEMETKKATMAVFCTLDDVAYLLNVRMGMG  
VDTCPVGIAYVTVTKDDVYLYCDERKVESADVQEHLSVETMKPYESIVEDIKEHANEKDS  
NNKVVWIDKSRNLALVSVIPKALINSQNAITPMKACKNEQELEGMRRAHIVIDGAAMAKF  
IAWLEDKVVVQGESVSEVEIDEVLTAYRAEQPGFLECSFPTIAGVGSNAAI IHYSAKPGD  
LMKYLNTSEPIILIDSGGQYTYGTTDVTRTWHTGATDRFKEIFTRVLKGNIGVDTMIFPE  
NTPGFVLDVMARQSLWEGELDYGHGTGHGVGAALNVHEGPMSSISPRFGNLEGLKNGMVVS  
NEPG

>comp12726\_c0\_seq2; 593 321 2270 LEN=2715; translated  
MTSSKTSASKLELLRARMEELSLDCYLVPDTPHLSYAPAAAYMRRKFLTGFSGSAGTAL  
ITKEEALLWTDSTRYWNANMQLDSSLWSLIKQGQPKVPTIVEYLSKKAGKEQEAATTNGH  
KAEVKPLRVGIDPYVFASSFADEFKEGKMKVAKKEELDDESLEIGELVPCYDNLVDP I WED  
ERPPVPYNPFRVHPLEFAGVSVADKVKIREEMETKKATMAVFCTLDDVAYLLNVRMGMG  
VDTCPVGIAYVTVTKDDVYLYCDERKVESADVQEHLSVETMKPYESIVEDIKEHANEKDS  
NNKVVWIDKSRNLALVSVIPKALINSQNAITPMKACKNEQELEGMRRAHIVIDGAAMAKF  
IAWLEDKVVVQGESVSEVEIDEVLTAYRAEQPGFLECSFPTIAGVGSNAAI IHYSAKPGD  
LMKYLNTSEPIILIDSGGQYTYGTTDVTRTWHTGATDRFKEIFTRVLKGNIGVDTMIFPE  
NTPGFVLDVMARQSLWEGELDYGHGTGHGVGAALNVHEGPMSSISPRFGNLEGLKNGMVVS  
NEPGYKDGAFGIRIENLLEMQYVNPEHNEPKEESETSAEKKYLKFAKLTLP I QKNLID  
LELMTTKELDWLDAYHEVVFEKVSPLLEAGSPAMKWLKKSCEKIDRGN

>comp12727\_c0\_seq1; 416 118 936 LEN=1263; translated  
MRIHRSIVSALAATAGFASYSEAFAPRLAGSALAAPGLAARPSTPLFSTTEDAEAAPCD  
APSGVEKAVLENASALTGATLTNHKGETVVLGDLQKDTSNVVFSLGTWGDPTAGXYAND  
WEDVREQLKRSNVGGPFFVVSIGDEEKLGAFLQNP AIDPGSMLVDGYGFDA YEAAAGFGKF  
TDVDPETAKQVKMEAPGLSFGQWGMGYFRAVGKTSPIPKGMGFGEIPEGVLRLLGGTFVVRN  
DEVLYQWSDRLPGDHPDLTEVVTLAVAKAGKXW

>comp12728\_c0\_seq1; 1819 142 4083 LEN=4158; translated  
MGGKSSSSKSTKPSRIEVDLEDKSSRVRKSRVGDDEKSNRSSTSKSTRSTASRSATSA  
KTSSKASSTTTFHIEVDFDEGSRARRKSRIEDEQSNRRPARESTILNTRTKENKTESR  
LTDDEISIRSKTKKSDDETSIISNRKSKKKKSKIIIDEYDDDDSVLTIQSSRSIASKSR  
KKSSKKKKKGTLSGEGENPSCASREGHSLQADLRINALLEENAVLLDETVALRRQLRQVE  
QFSKQSSLGQKSI ESSNVEVNDLKMELEEYEVAVIEKDELIQKLTAVDAQVDKVEYLEA  
KLVRAEEEFCTMEDELADMEELVHELNDSPRKYKNHTEEYNSRRRKELEKREITIEEKE  
KNLEEKEAKLLEKEKILEKMHQSFSSDIEINDEDEDEDNTRGKQELLNELNKTKKTIQI  
IEAENNELWEENEILRESNSKLKEKDTAEEDDSIEQKTSIEVKELTAKLLEMKAEENNL  
RKETESLQKNNVMMKEKEDVAIQNASREKALAKVEEIKAKMLVIRLENDLKYKENDLLR  
RNSERKKGKENATVQODDSGEQELKNEVEELKAKILEIRLEKDGILKEYESLRQRNEQGA  
LKEREMANKVEELKSNILEVQAQEKDDVWKENESLRQQNITAEKKAFKEQEMQNEINKLKA  
KVIETEA INNNLRKDNESSLFNAEIKEKEKMAQQDALRTKEMSNEIEELKAKIEEVES  
KIDLLKKNESLQRESEMKEEKKAEIQRNKELRIIRDSIDKQMDMDLEKEILRKELNE  
MKQRKNADNEALRQDIEELRKQKNHLEAISNHSKRLETIRSMDSVQIFEDTDSAKSFEDD  
CQLELEIEIAELREKIVQEGHFKKQKQIEAAILKANKDLKEDVRERERELDELENQLNT  
SKESSMKMEQKDETI AFMQNEIMNITQENQQLANRLRELNL DQTERELVGNTVENEAEK  
KNAETGNDHLRQLEEKNRRLLEDELKQTRYNNSLRQKEKQSIILELQDELDRDAKWELGARD  
KGADYITLLKERREGKLLVEARNELMRSREKVTELNLAIIDEAISHKKDLEKEVESLNL  
MDSSAHRSSLKRQIKSLKQHNAALERRLEIQTRESQENVQEKEAKVRILQFELDKVRS LG  
PKATKGVFSDFLFATSTKSAVDETSQSENNTYKSNKEFDEINFEYQFKNEISSPCTNSE  
NEDCEGTTTDTVWNLF SRSSRRESLQENEQKEYDGSNPSIMDSAVPTGDVTDIVDTFLRE  
SPPIAHNSLGDNDAAEKEADAVIDIAKTKVHGDELVITGGAANVNIKNESDKITN

>comp12729\_c0\_seq1; 495 141 1874 LEN=2134; translated  
MTNMRKPTPAVSFGSRVLGTTALSTRISAMLLLAVSFGYSPRTTTS GFVVSPPRTATTSL  
QSTEPVTREICTSADLESSWGDANEAACLAARGNTQIIGSPDHPGVTHPVIRVLHDKR  
RRQQAAAVATEKKEEDGGKEPKIALVIEGGGMRCV TAGMVCAIDYLGLRNCVDVYVYSS  
AGSII GAYFITGQLPWFPGPEVYDQLTTAGKSFIDTGRLRLALGLGVFYPKLLRDVITRR



NSGKPVNLNDFLLQETMQRTPLDWATFEERQQTNTQPLKIVVSGLKREEMVLEYGDRH  
FGSLEEMSRMHASALLPGIAGPVVNLVNEADAKDRKPRFVLRNNLGDDEYEPLADALVY  
APIPYEAAMADGATHMVVLRSKPDGGDVIKGGSIGERLVWSRFFLRKNKLPGIYRRLRK  
QLHKKLYARSVLELNEAAHEDTKASNLLPPTLTVAIPPEIPEIARLEVGREAI FEGVRTG  
FARAYDALVEDPSQRGRGETVARLYFPDEILDYSPAEMLALQRDKPEHASRSAFEIYLEE  
SGVWPKAWEGCPSPLGESSDRALAGGKGAAPSGVP  
>comp12731\_c0\_seq1; 512 131 1843 LEN=1843; translated  
MSLRHPPKVPAGVVPATDVESGSDNDPSKKKKSTLALVMADSIWIIRTAGRFWRT  
LGYAVVGGTRIFRRTVAMIMNTVGFVYSAGVELLLTSRNEYKNQWLPLVEELNLFQTS  
IAVELERGLANYRFLSNVAVLARIQDVLLKWCWATRESPLDQRQLASIDAATTTQARVT  
ELKTSIVEDGRRFVKYATAAYGISMIDAAEMEYVHSGIKTSKRRSSTTAIEAGTKLLSSLK  
SSKTVSQQIKELQNSISLYDEDWLLGRISEHIEIPEDDIYPMNLSDNRVESLRFVAVDH  
ANKEVVLIRGSLTVKEILIDIAGFSRPFCEGGEAHSEMANTAEEKIWEESADLVLELLRQN  
PGYGLVVTGHSLLGGAAACLLNILLHENNRERAGGRAVRCYAYASPPVYAGNLSSEDAKRAC  
TNYLHGADVVPFLSVDSVRRIFAALHAVEESKVTGWKRVLVLWGQTEVLDAPTLQRVGSA  
LHDSPPATEGAPELLVPAHANVWMRSTAPELPKDLAMKELRQLHSLLPDFVFLADSEKL  
ARMGITFHPSMVTDFHPNAYECALQSLKESP  
>comp12732\_c0\_seq1; 248 777 2180 LEN=2294; translated  
MSKPHRCPHIAAYTGNVCVYCPGGPDSDFEYSTQAYTGYEPTSMRAIRARYDPFSQVKGRV  
TQLKAIGHVVDKVEFIVMGGTFLSLDKEYKDFIRNLHDALSGYASNSVQESIRYSEQAK  
TKCIGITIE TRPDYCLKPHLEEMLSYGCTRIEIGVQSIYESVARETNRGHTVAAVCHSFQ  
LAKDCGFKVVTHMMPDLNMGWERDLAGFEEYFENPMFRSDGMKLYPTLVIRGTGLYELW  
KTGRYQNYTPDQLVELTAKILSLVPPWTRLYRIQRDIPMPLVSSGVEHGNNLRELALQKLQ  
DWDLPCMDIRTREVGMKQIHSSVTPDQVEMIRRDY TANGGWETFLSYEDPTQDILIGLLR  
LRKPNTSSAFLPEITERPCSI IRELHVYGTAVAVSARDPTRFQHGFQFGILLMEEAER IAR  
EEHGSEKILVISGVGTRHYRKLGYELDGPYMSKILIDEDNCEELKQ  
>comp12732\_c0\_seq2; 295 304 2007 LEN=2121; translated  
MAAPAQASAIASATPNDHKT KYALAVQLVVQDLIKAYDAGDTLNFTKLKGTAACKYKLO  
GIPKLADILQALPISYRTKLLPFLQTKPVRASAGVAVVAVMSKPHRCPHIAAYTGNVCVY  
PGGPDSDFEYSTQAYTGYEPTSMRAIRARYDPFSQVKGRVTQLKAIGHVVDKVEFIVMGG  
TFLSLDKEYKDFIRNLHDALSGYASNSVQESIRYSEQAKTKCIGITIE TRPDYCLKPHL  
EEMLSYGCTRIEIGVQSIYESVARETNRGHTVAAVCHSFQLAKDCGFKVVTHMMPDLN  
MGWERDLAGFEEYFENPMFRSDGMKLYPTLVIRGTGLYELWKTGRYQNYTPDQLVELTAKI  
LSLVPPWTRLYRIQRDIPMPLVSSGVEHGNNLRELALQKLQDWDLPCMDIRTREVGMKQIH  
SSVTPDQVEMIRRDY TANGGWETFLSYEDPTQDILIGLLR LRKPNTSSAFLPEITERPC  
SI IRELHVYGTAVAVSARDPTRFQHGFQFGILLMEEAER IAREEHGSEKILVISGVGTRHY  
RKLGYELDGPYMSKILIDEDNCEELKQ  
>comp12732\_c0\_seq3; 177 777 1625 LEN=1654; translated  
MSKPHRCPHIAAYTGNVCVYCPGGPDSDFEYSTQAYTGYEPTSMRAIRARYDPFSQVKGRV  
TQLKAIGHVVDKVEFIVMGGTFLSLDKEYKDFIRNLHDALSGYASNSVQESIRYSEQAK  
TKCIGITIE TRPDYCLKPHLEEMLSYGCTRIEIGVQSIYESVARETNRGHTVAAVCHSFQ  
LAKDCGFKVVTHMMPDLNMGWERDLAGFEEYFENPMFRSDGMKLYPTLVIRGTGLYELW  
KTGRYQNYTPDQLVELTAKILSLVPPWTRLYRIQRGKFEVVF  
>comp12732\_c0\_seq4; 224 304 1452 LEN=1481; translated  
MAAPAQASAIASATPNDHKT KYALAVQLVVQDLIKAYDAGDTLNFTKLKGTAACKYKLO  
GIPKLADILQALPISYRTKLLPFLQTKPVRASAGVAVVAVMSKPHRCPHIAAYTGNVCVY  
PGGPDSDFEYSTQAYTGYEPTSMRAIRARYDPFSQVKGRVTQLKAIGHVVDKVEFIVMGG  
TFLSLDKEYKDFIRNLHDALSGYASNSVQESIRYSEQAKTKCIGITIE TRPDYCLKPHL  
EEMLSYGCTRIEIGVQSIYESVARETNRGHTVAAVCHSFQLAKDCGFKVVTHMMPDLN  
MGWERDLAGFEEYFENPMFRSDGMKLYPTLVIRGTGLYELWKTGRYQNYTPDQLVELTAKI  
LSLVPPWTRLYRIQRGKFEVVF  
>comp12733\_c0\_seq1; 660 163 2610 LEN=3286; translated  
MNYRKKGKGNTERNTNAVNFAGLVEETENQSCDNDSTSNDETGGSCVQSKTSETPVADQ  
RQQKEQQUETIMADQQEELPQQQPKQOSESFLQTPKTTNTRRLSEPSPLSPIISPRSRAD  
GSGHGRSINRPETEKPLLD EIREVLAQSYLSFLLADLRHLSGTGQIMTKYENLAIDSDVC  
ERWTSQIAGLCEGNGIGKRPGLSPVIMALLILEIRDTYVMTAEERKRMKPKQGDSCRN  
LYATSVDIDTDVHFVAYENNKTKKLLTEESMESLMRCYSRMVSEDLVTEIPNVRRRRTTM  
NLDSNRGEGGLPQFLQNTGRKIRFRRSMQSGSASSGDGASSGSFSSSI SGAFTI PRPR  
RGTRGSSSPLPRQSSNPLGSLQEETDSDLGFVVRQVGSKDSVSSSYEKGNDRVAISKED  
SCSTINNKDSNSTISYSMKDSVVPISPIAEHEEDKDGEYSAKYSELSDTLVGENDEHFDD

STKQPSSLRS AISDQSGRPTNRS GAVTFRLNHENEHREDSRSSMQQFFSPRRRRQTIGH  
GPGDSPHHMSLRDTMAISRQKSQH FVDKLTDFNDQVENLLPTNREGNTGKEFEELTNA  
FFDQQTNE DVRTSLGVTYTRKELVGVLRHAVETRDES LQFLSKFFKDGTVSRLLVESH  
SRVVMNDWYPLKELTYSITVDALQRRVMVFRGAI TPEDWKS AVNFKFHNIRNPVKEEF  
DGKKDVL RVFSGLYTYLFRKRKDTGTTKYDE IANMCHKYGLHHIGPDYKLFVVTGHS LGGAL  
LTHFFSFFASTEERFTKNGPVKAI AFASPYIGGHSW

>comp12733\_c0\_seq2; 579 586 2823 LEN=3499; translated  
MADQQQEELPQQQPKQQSESFLQTPKTTNTRRLSEPSPLSPIISPRSRADGSGHGRSINR  
PETEKPLLEIREVLAQSYLSFLLADLRHLSGTGQIMTKYENLAIDSDVCERWTS DQIAG  
LCEGNGIGKRPGLSPVVMALLILEIRD TYVMTAEERKRMKPKQGDSKRNL YATSV DIDD  
DVHFVAYENNKTKKLT EESMESLMRCYSRMVSEDLVTEIPNVRRRTTMMNLD SNRGE  
LPQFLQNTGRKIRFRRSMQSGSASSGDGASSGSFSSSISGAFSTIPRPRRGTRGSSSPL  
PRQSSNPLGSLQEETSDSLGFEVRQVGSKDSVSSSYEKGNDRVAISKEDSCSTINNKDS  
NSTISYSMKDSVVPISPIAEHEEDKDGEYS AKYSELSDTLVGENDEHFDDSTKQPSLRS  
AISDQSGRPTNRS GAVTFRLNHENEHREDSRSSMQQFFSPRRRRQTIGHGPGDSPHHM  
SLRDTMAISRQKSQH FVDKLTDFNDQVENLLPTNREGNTGKEFEELTNAFFDQQTNE  
VRTSLGVTYTRKELVGVLRHAVETRDES LQFLSKFFKDGTVSRLLVESH SRVVMNDWY  
PLKELTYSITVDALQRRVMVFRGAI TPEDWKS AVNFKFHNIRNPVKEEF DGKKDVL RVF  
SGLYTYLFRKRKDTGTTKYDE IANMCHKYGLHHIGPDYKLFVVTGHS LGGAL THFFSFFAS  
TEERFTKNGPVKAI AFASPYIGGHSW

>comp12734\_c0\_seq1; 307 122 982 LEN=1116; translated  
MKLVEIVRGSATSMETVCVMQH LTKRIGKIGVVVGNCDGFVGNRLLISYGAETLLLEEG  
VASVSSVDKAF LKFGIALGPFQ MADLAGLDIGYNIRKQRGWVSSSGKASKNK PARYPEVA  
DVIVSDYKRLGQKTGKGWYDYDKNIGKGRKALPSKEVDSLIRKYAKSGCAPFSDQQM IER  
VLFPMVNEGFKCLEEGIAMQPSDIDVVVYGYGWP IYRGGPMYWADHDVGLKYVLRRLQD  
FSRQFPD TDYRPSNLLKQCVMMDLTVEEFFNLGLMKKRRGQLSKL

>comp12734\_c0\_seq2; 589 56 2384 LEN=2518; translated  
MIASNTTLVNFSSAASNPLNPLGLNLRRLIWEALDKAETDDSIRSVILYGGSRNFSAGA  
DLTEFGQLVDDPI SGGAKKKS FPLIEVVKRIENFPKPVVAAISGNALGGGLEVALSCHYR  
ITDESGKFGLPEVNVGVI PGAGGTQRLPRLVTVVKALEMILTGK SIGAKKAKKVGLVDHV  
AARSEGTVLA AAKKFASWAELMPLGDRCVGNRAIKESKQ ELEMIVQGAAAKLPPVEMGGE  
SVWAAL EAVKACSLPIEEGSAI ELAQFFKTL SGKQGVARRHAF FAVRKAGKMLGSI SNKS  
HPLLQKSFRNQTA AVVGAGLMGSGICMVL LQAGFTVHLVDI YKESLDKGVAF LKGTIQRY  
LKRGRISKNAENMMKSLKPTQKFEDLSSCVLVVEAVIENMNIKKKIFGTLDKITPPGCI  
LLSNTSTLDVDEMASSVLSRRPLFAGWHFFSPA HIMKLVEIVRGSATSMETVCVMQH L  
TKRIGKIGVVVGNCDGFVGNRLLISYGAETLLLEEGVASVSSVDKAF LKFGIALGPFQMA  
DLAGLDIGYNIRKQRGWVSSSGKASKNK PARYPEVADVI VSDYKRLGQKTGK VSLRNGRL  
FWSRMPKSN SQFIFDVFIYIPDMIEGLDDYDKNIGKGRKALPSKEVDSLIRKYAKSGCAP  
FSDQQM IERVLFPMVNEGFKCLEEGIAMQPSDIDVVVYGYGWP IYRGGPMYWADHDVGL  
KYVLRRLQDFSRQFPD TDYRPSNLLKQCVMMDLTVEEFFNLGLMKKRRGQLSKL

>comp12734\_c0\_seq3; 261 122 1082 LEN=1216; translated  
MKLVEIVRGSATSMETVCVMQH LTKRIGKIGVVVGNCDGFVGNRLLISYGAETLLLEEG  
VASVSSVDKAF LKFGIALGPFQ MADLAGLDIGYNIRKQRGWVSSSGKASKNK PARYPEVA  
DVIVSDYKRLGQKTGK VSLRNGRLFWSRMPKSN SQFIFDVFIYIPDMIEGLDDYDKNIGK  
GRKALPSKEVDSLIRKYAKSGCAPFSDQQM IERVLFPMVNEGFKCLEEGIAMQPSDIDVV  
VYGYGWP IYRGGPMYWADHDVGLKYVLRRLQDFSRQFPD TDYRPSNLLKQCVMMDLT  
VEEFFNLGLMKKRRGQLSKL

>comp12734\_c0\_seq4; 635 56 2284 LEN=2418; translated  
MIASNTTLVNFSSAASNPLNPLGLNLRRLIWEALDKAETDDSIRSVILYGGSRNFSAGA  
DLTEFGQLVDDPI SGGAKKKS FPLIEVVKRIENFPKPVVAAISGNALGGGLEVALSCHYR  
ITDESGKFGLPEVNVGVI PGAGGTQRLPRLVTVVKALEMILTGK SIGAKKAKKVGLVDHV  
AARSEGTVLA AAKKFASWAELMPLGDRCVGNRAIKESKQ ELEMIVQGAAAKLPPVEMGGE  
SVWAAL EAVKACSLPIEEGSAI ELAQFFKTL SGKQGVARRHAF FAVRKAGKMLGSI SNKS  
HPLLQKSFRNQTA AVVGAGLMGSGICMVL LQAGFTVHLVDI YKESLDKGVAF LKGTIQRY  
LKRGRISKNAENMMKSLKPTQKFEDLSSCVLVVEAVIENMNIKKKIFGTLDKITPPGCI  
LLSNTSTLDVDEMASSVLSRRPLFAGWHFFSPA HIMKLVEIVRGSATSMETVCVMQH L  
TKRIGKIGVVVGNCDGFVGNRLLISYGAETLLLEEGVASVSSVDKAF LKFGIALGPFQMA  
DLAGLDIGYNIRKQRGWVSSSGKASKNK PARYPEVADVI VSDYKRLGQKTGKGWYDYDKN  
IGKGRKALPSKEVDSLIRKYAKSGCAPFSDQQM IERVLFPMVNEGFKCLEEGIAMQPSDI  
DVVVYGYGWP IYRGGPMYWADHDVGLKYVLRRLQDFSRQFPD TDYRPSNLLKQCVMMD

LTVEEFFNLGLMKKRRGQLSKL

>comp12735\_c0\_seq2; 264 164 595 LEN=989; translated  
MADTKSDVVEATKVDVAVDPEPIVATTQGGKAGVIAVGGPTAVATPERKSHICCGCCCDVR  
RATIIVDIIFVIFSVIDFALSWTGVGIANSMVVEDDEVQNALDVASPYFLALAIVSSLNI  
VFAIIGIIGGAKFNKFLVLATGVW

>comp12736\_c0\_seq1; 250 363 1292 LEN=1363; translated  
MVLSSLSTSTSSSSMIPNHHPSKVHNDNCNKISDTSSSLSHLAESILRISETHEVTRF  
YNNYNSVHDSKTIKGTGGLYSNGLLRMMTGERNYSDNGKEFPAPTLNNTVIAPPSSGMLSG  
WSGDVDWESKRRAEFSQLESSNNNTANKQRQLRKVIRARRKSVNQRFKVASLRRQLR  
LERLHSKNMKSLESNVPLSQCLRDCSDSSVSSSRGSAVSNKGGLRRRASRFGSGDIAKGR  
LEWKQKEQNEEQDRDRELRSRNCSSRRTLITSLDNNKDNRLQLRFLREQKKSQRALLDL  
QVGLKHMGL

>comp12737\_c0\_seq1; 327 1 841 LEN=1343; translated  
XLAASICTEQNTSDTTISRYNRRKHKIESDLSKEETKKNQLPTMRTDIVSVVLPILLGI  
SCLPHSSKAFVRSNNPHLERLSLSSFPQGFKLSGKCSSTPNSLPSSTTSQVRNAALRGRK  
IDDDFDDANIDENNNVAFAMLSTPRDNKPNQGNFFYNDEVISHLYGYMYLVGFFAAQDGL  
FLGSFFVSSLAAGATQEGLLPCNPRI PALVAALTLVSTLVLRVYVIGFEPPLDALLGDSY  
EGPTESSMLFELAIICALNIGWGFSGSWRTKEQVNGATYGF

>comp12738\_c0\_seq1; 720 104 1507 LEN=1661; translated  
MSSNDLEGDDIWDSSGGAEESKEESKQADASDSAAAAAQPEPDEDETRTMSNSELRQ  
RIHLLGNDIRVMKSDVQRITHE SRGQRDRIRENQEKVKLNKQLPYLVANVVEIILEPDAED  
GLEEEEEKESGDALDEDANRKRTRSAVVRTSTRQTIFLPIGLVDSDELNPSDLVGTNKDSY  
LILEKLPAEFDSRVQAMEVDERPTEEYSDIGGADQQIQELIEAVVLPMTHRDMFQTIGIR  
PPKGVLLHGPPGTGKTLARACANQTNAIFLKLQAGPQLVQMFIDGAKLIRDAFELAKAK  
IEKGVSAAGAILFIDEIDAIGTKRFGDQSGDREVQRTMLELLSQLDGFSNEMIKVIAAT  
NRPDVLDPALLRSGRLDRKIELPHNEEARARILKIHSRKMQVNADVVFEEIARSCEDFN  
GAQIKAVCVEAGMLALRRESLEIMHEDFVEATTVVAAKKKGSLDYFA

>comp12739\_c0\_seq1; 108 193 858 LEN=1510; translated  
MAGSTGKPTVNLNFVTFQAYVIGMISQIGSRVTMDTVRPLNMFGLITGPSFCFSPAAFNA  
PVTKIDKSTYEKFTSRLRLNFAFFISNYALLTMGVGVV TALMHPGMVSVGVMYSLWALH  
RFLISNELILFGRNIGTLVSIHRSTALTILTGLVVAWKCLRPTIKVVSISGGIIMLHAL  
LRDP SHVTS GDFRSGGSSKSSGSDDESAGNSDDSEVLVETP

>comp12740\_c0\_seq1; 672 373 1899 LEN=2069; translated  
MLPSAASDASATISTLDTATIDATLTMTMSGKNQKDTWAATTTTRIPSSIVSAGSSNLE  
YLKENLEDASSDNTNRQRRELQQTGYVPGFEGYVSIASFVHVFPWQLMLDDLEQERLES  
LVMLFLCSQGVEMVSTDPSTLFPVPCPFNDIGSDVYKTQTATAMKRSATNAVAAGDDQ  
AEP IIVWNLPKFETATMPFEKVLNMATNKTFGQTLAPHSNEPQQYYTQLNVYTPVYQ  
WGSEDP SVAGELQDEFDTSVIDTGTLDLLPWPNAQTAPIGEEP YVFDAPLPVEPGA  
TTIPSGVGSLLQSLGVSLLVINTLVVALSIVARIQSKRAELLQKQRKEEYRQRM TG VWS  
NGKDGSNGNEYLDTEAGVSAI LLESSQYALTKSGGYSVSGSDTGVEVIGTSMRSLSSSPKE  
KENKLLARAKLQTKPSSYMTTILSTDRASSDSPAWYTGTHSSGNALGNYNEDDEEAENLR  
ADLQILNLSAGTSSGSAGKNGSTFSQTR

>comp12741\_c0\_seq1; 375 1 1359 LEN=1489; translated  
KRPERRSRGTSETPNKRRSR SKNPIAERESSKASEKRRSTSKPTENLNKSSSYKSPRP  
VAKTTTPEIGYEGASSLSKSLHEAAKNAGMANKGGLS QSLHTAKKVPRKVKEESVGLSQS  
LHAAKKVPKASNVKSVGLSQSLHETKMKSPRPKKKRVANLEKVNEITREGMHETKKVPR  
KDRKATTELSQSVHRPKSHEEQSLRSIEQQPKPKSKASLWSIVI PKAPMYQQNMKARKED  
PPGIPSPKTRKSMIDQQRQKKS VVRDDATVETNVSSSSKRRKPRRKDSSSVGFADVSAGT  
NKPPRRGKRNAV PNDGGEAVWCTDNGDDNSCATNSTASSIQSQCTRGLVPAKQKSNRKG  
GISRTRSAAGSVKSTGTKTTAASSSCDALSPRTPLKRSDSFSNRSTASTIFSTGRSLNRS  
RQWTKDLLKRKPSLATS KAAYAYHANPFVDAQ

>comp12741\_c0\_seq2; 306 404 2016 LEN=2016; translated  
MTLKSFRKNLKGINSRITGARRKNESSQENEGRDNDNDDEDEDEIYEQFAMNMSTRSVD  
YDNFFESASKPWSVDLAKELSTHTNSVRDMSSAGQRTVEPSTRSVGTILTRAMYMESVRT  
IEEEDGSDSCDDRQKLGIPTRYATARQA AHKTTKSKRLSQSSMAKIPKSAVMNVSTLL  
SSERSSLPNITKFEDLWSAGEPQKSSDGKNSRALPANTHKSPTKTHKPPTKTNKQPPKSH  
TPPVKMATIPDSTCSI SECTFQCDPVAPKKKTTHRGPCKHRTASNKSKTTTTQSAINKG  
ESTAKKSKSAISDASAGYSEDAARKPRTSLHTSTSLPVGSIKRRSDKTCKSMPTTMDK  
KTHKLAQQFEDDLQSLLNHVGNAGVSSSTLSECASPRIGNRSVNPKITPKAIPRKKDA  
GPEKSGVDRSRKSPDVQTRASSTK PERRSRASSVKPERRSRSSSKKPERKPRSRNRPE

DGLEVHQGIQRGHPEAPRRDQINNEAARRGRRGDRGARQEILRGNPEAAPRIPTKNEX  
>comp12742\_c0\_seq1; 163 1 621 LEN=2346; translated  
XNEEKLQRTLLRYRLYLEDAKNSALESDLASTSAVASASLRIGDHPPVGGSSSRKRTLQ  
DSMLMLERERILRRARQEEQLIAEILASERRKRDGDMIFNLLSQQNPMASGTSRSTHVAT  
HSDDXFKDDFVQQLVIVAICIAIIESSAPDGHGFNLIHPWKTDVFRNLGFSLYGTTTV  
YDEPFTLRRKRTRGCNNPKKPSHLVV  
>comp12742\_c0\_seq2; 163 1 621 LEN=2302; translated  
XNEEKLQRTLLRYRLYLEDAKNSALESDLASTSAVASASLRIGDHPPVGGSSSRKRTLQ  
DSMLMLERERILRRARQEEQLIAEILASERRKRDGDMIFNLLSQQNPMASGTSRSTHVAT  
HSDDXFKDDFVQQLVIVAICIAIIESSAPDGHGFNLIHPWKTDVFRNLGFSLYGTTTV  
YDEPFTLRRKRTRGCNNPKKPSHLVV  
>comp12742\_c0\_seq4; 163 1 621 LEN=2527; translated  
XNEEKLQRTLLRYRLYLEDAKNSALESDLASTSAVASASLRIGDHPPVGGSSSRKRTLQ  
DSMLMLERERILRRARQEEQLIAEILASERRKRDGDMIFNLLSQQNPMASGTSRSTHVAT  
HSDDXFKDDFVQQLVIVAICIAIIESSAPDGHGFNLIHPWKTDVFRNLGFSLYGTTTV  
YDEPFTLRRKRTRGCNNPKKPSHLVV  
>comp12742\_c0\_seq5; 163 1 621 LEN=2499; translated  
XNEEKLQRTLLRYRLYLEDAKNSALESDLASTSAVASASLRIGDHPPVGGSSSRKRTLQ  
DSMLMLERERILRRARQEEQLIAEILASERRKRDGDMIFNLLSQQNPMASGTSRSTHVAT  
HSDDXFKDDFVQQLVIVAICIAIIESSAPDGHGFNLIHPWKTDVFRNLGFSLYGTTTV  
YDEPFTLRRKRTRGCNNPKKPSHLVV  
>comp12742\_c0\_seq8; 215 134 499 LEN=1351; translated  
MWVKRQRHQHNLAEKKPSTLTGERIKLLESIGFIWNCLDSAWEKNFQDLRAFAICHGHF  
SVPHTYEKNTKLSWVNVQRQCKLVEDGKPSMTKHRFEKLEQIGFPVVKRKRARST  
L  
>comp12742\_c0\_seq9; 248 1 1114 LEN=2374; translated  
XNEEKLQRTLLRYRLYLEDAKNSALESDLASTSAVASASLRIGDHPPVGGSSSRKRTLQ  
DSMLMLERERILRRARQEEQLIAEILASERRKRDGDMIFNLLSQQNPMASGTSRSTHVAT  
HSDDL SRMTLYNRDSLQSLQSSNLPAPLTDASTSSILGKRSTFATSASPSMARRLS  
TMNRLPCEGNGLGDAITQRSQAPTSLCDPIGSRDVNSVYASMLRSVAPLPTTAPSPVDFI  
RSSTLHTAEAPSFAGVSLHQAPDEADDISKRFNKHQCKQWTVKFHELIAKHHGHCNV  
PHLYKENRGLAMWVKRQRHQHNLAEKKPSTLTGERIKLLESIGFIWNCLDSAWEKNFQD  
LRAFAICHGHL  
>comp12742\_c0\_seq10; 163 1 621 LEN=2724; translated  
XNEEKLQRTLLRYRLYLEDAKNSALESDLASTSAVASASLRIGDHPPVGGSSSRKRTLQ  
DSMLMLERERILRRARQEEQLIAEILASERRKRDGDMIFNLLSQQNPMASGTSRSTHVAT  
HSDDXFKDDFVQQLVIVAICIAIIESSAPDGHGFNLIHPWKTDVFRNLGFSLYGTTTV  
YDEPFTLRRKRTRGCNNPKKPSHLVV  
>comp12742\_c0\_seq11; 297 1 1297 LEN=2149; translated  
XNEEKLQRTLLRYRLYLEDAKNSALESDLASTSAVASASLRIGDHPPVGGSSSRKRTLQ  
DSMLMLERERILRRARQEEQLIAEILASERRKRDGDMIFNLLSQQNPMASGTSRSTHVAT  
HSDDL SRMTLYNRDSLQSLQSSNLPAPLTDASTSSILGKRSTFATSASPSMARRLS  
TMNRLPCEGNGLGDAITQRSQAPTSLCDPIGSRDVNSVYASMLRSVAPLPTTAPSPVDFI  
RSSTLHTAEAPSFAGVSLHQAPDEADDISKRFNKHQCKQWTVKFHELIAKHHGHCNV  
PHLYKENRGLAMWVKRQRHQHNLAEKKPSTLTGERIKLLESIGFIWNCLDSAWEKNFQD  
LRAFAICHGHF SVPHTYEKNTKLSWVNVQRQCKLVEDGKPSMTKHRFEKLEQIGFPV  
VNKKRKRARSTL  
>comp12742\_c0\_seq12; 248 1 1114 LEN=2571; translated  
XNEEKLQRTLLRYRLYLEDAKNSALESDLASTSAVASASLRIGDHPPVGGSSSRKRTLQ  
DSMLMLERERILRRARQEEQLIAEILASERRKRDGDMIFNLLSQQNPMASGTSRSTHVAT  
HSDDL SRMTLYNRDSLQSLQSSNLPAPLTDASTSSILGKRSTFATSASPSMARRLS  
TMNRLPCEGNGLGDAITQRSQAPTSLCDPIGSRDVNSVYASMLRSVAPLPTTAPSPVDFI  
RSSTLHTAEAPSFAGVSLHQAPDEADDISKRFNKHQCKQWTVKFHELIAKHHGHCNV  
PHLYKENRGLAMWVKRQRHQHNLAEKKPSTLTGERIKLLESIGFIWNCLDSAWEKNFQD  
LRAFAICHGHL  
>comp12743\_c0\_seq1; 256 214 1153 LEN=1547; translated  
MTSESLGYDVVENDFTTADPDLEALSSPQVSNPDFNPRIFWSVNALILLLILLSGIWC  
WVQRFYNDVGMRRSDEIYRARLRRQQAERNECPEKRRQKLLKSFSTHKVQMVSAIV  
SLIFDIACFGDTGYFYRMEYPLFLSFIVDVLDRDARTAINFSFISFLQTVKEEDLIATD  
LNDGGTTDNSSATGELNGCNDIERGHATGTSLDNEETGHLRLRDGTGRLVPNCCAVCLSE

YEVGDIVTWSSNPSCIHAFHRECVVDWLIKMQPETPCPCRQEFDTLEIIRQERKVKWLG  
TIAFDFSAIKLW

>comp12743\_c0\_seq2; 244 214 990 LEN=1384; translated  
MTSESLGYDVVENDFTTNADPDLIEALSSPQVSNPDFNPRIFWSVNALILLILLISGIWC  
WVQVQRHFYNDVGMRRSDEIYRRLRRQQAERNECPEKRRQKLLKSFSTHKVQMTVKEE  
DLIATDLNDGGTTDNSSATGELNGCNDIERGHATGTSLDNEETGHLRLRDGTGRLVPNCC  
AVCLSEYEVGDIVTWSSNPSCIHAFHRECVVDWLIKMQPETPCPCRQEFDTLEIIRQER  
KVKWLG TIAFDFSAIKLW

>comp12744\_c0\_seq1; 807 143 1417 LEN=1541; translated  
MTRIFSFIAFLATFSVSNNGFVSPLRSGLSASKSASLLMNKFDPNYAKSMSAAAIDQMKN  
LKPEDIDKMMAEEDNMNPIQKNALKAMNMDPDVMKKTMMMRDNPAMVANAQKVMETMSP  
DELLEQSRKAQEQLKNMTPDELEKANKVMQSIPEQMNAAVETLKAQNSANVVDAVADDD  
EDADMVTGPGSSSDSNVIDAMFRVAEFMSSPPTDGGVFTGFYSLPTIQLLSGDREFDLS  
MSELKECWADGSLGATRVDRAFERVWIEVQYFEQDIMTEARKEARKKTTKKKVRGGAK  
SVSATPTTTIGDNLSDKELEEVNQRVKNLSDDEVGSVLDMMEQMDPAQEARKLQAMGVDPR  
MMQQTAAMLKDNSQMRQAKQMMQNMSPEDMLKASQQAQEQMKNMSEDDVKNAMDQLKNS  
PPSN

>comp12745\_c0\_seq1; 980 202 2205 LEN=2549; translated  
MKFATTAVVALLMGEQAAAFSPYTPVRTNFYKYSTGSLSMAADVDPVVIQKSQYGPSPDVR  
YSDFLKLVADAKIEKVTFADGTQLLGVVDVDTGRLKIEALPNPGLLTQLTDHKVDVTVL  
PQQEASGLGELAQSLIFPAALFAGLFFLSRRAGGEGGMGGMPGPMGFQKSKAEIQM  
VPDTGVTFFDDVAGCDGAKLELCEVDFLQPEAYTNNGCRI PRGVILDGPPGTGKTLLAK  
AVAGEAGVPFISISGSEFVEMFVGVGASRVRDIFGQAKKNAPCIIFIDEIDAVGRQRGAG  
FAGGNDEREQTVNQILVEMDGF DGNPGIITIAATNRVDILDQALLRPGRFDRKVTVDLPD  
FKGRTRILGVHSRQKPLEPDVLEAISRRTPGYSGAQLLENLMNEAAISAARANKSTIGWE  
QIDGAVDRMLVGLKQGGNQEMKSKEMVAYHEAGHAVV GALVPDYDQVQKISII PRSNGA  
GGLTFFAPQESRLESGMYSKQYLESQLAVALGGRLAEI IYGEDRVTTGASNDIQQVASI  
AKRMVAEWGMSEKVGSLCLDES GSPQFQGLAMLQGR TLWGTDKMKDVEEETERLVNNSY  
IIAKTVLLENRDLFEHLTKALMEQEVVSAEEFQMMMLVDFNAKTIDYKLI GEERNREALPF  
KLLPDSV

>comp12747\_c0\_seq1; 753 1 1828 LEN=1888; translated  
PTAVPYLVPSQHNNLLKSVVHRLFKEDKEGKMRFFRASLV TALALASLETTTAFTPRHGV  
LKQSSSAF IGRSTPTLVERRQRSSPQLSMMFDQLSNAISTVVKDFGKQRITEESIKPAL  
RSVRRALLDADVNIDVADALIDGVKRSLSGETVIEGVSADQQFIKAMYDELVDMGGDSA  
AKSDTSAMGPAALAPPASTLALGSPGDPVAVLLAGLQAGKTTAAGKLALYLKEREVDYS  
VNLDEIEENRTAARLPKRNKRVLLAAADV RPAAITQLEILGKSV DVEVFVSMGTEADPV  
DIAQKALAKAKAEGFDTLIVDTAGRQI IDDDLMVELKNIQETVKPDETLLVVDAMTGQEA  
ASLTAAFD SAVGLTGAILTKMDGDSRGGA AVSVRGVSGKPIKFVGTGERTPDLEFPYPR  
MASRILGMGDVLSIVEKAQEEMTDKEAKLMEEKVKNAEFD FDFLQAKMVSKMGS LGGV  
AKMMPGMSVQSQELIAAEKRLKNEAMIAVMTEEERKNPDLLIKDSKSRERLQRIAKFS  
EMDIKDVRFMFSEFQKMR TMMSRMSKANDKMN PAMAGGGDGPMPGNRAARRAAKKQKKG  
RGGGGGFG

>comp12748\_c0\_seq1; 202 1 470 LEN=606; translated  
XSCPLCLSHYFHIFLLASGLFAAVYLATFLISNVVTNNAALIFPIAMDAAEQGTGTDV  
ILMSYCVMLGASASFMSPFYTTNLM IYGPGGYKYNDFLVIGTPMQVVLWFLSVALLATT  
TTSNFYISWLISLGVLLFVMGV TSCNFGNFKLARK

>comp12748\_c0\_seq2; 1438 294 4133 LEN=4269; translated  
MTGRNAAI LSLKSTNETCPCAATRLDSSLVTAIATAATDRLLQQTDDMTYSGDGT PQESE  
NGLFQVIYTCVVLFLMFAALISDRIGADSVMMASLTF FMAANIITIEEGLEGFANEGLLT  
VLVLFVVADGISKTGALDWYMSRLLGRPATVAAAQTKLMIP IAIISAFLNNTPVVAVMIP  
IVQKWSKNIGQSAQQLLVPLSFASILGGTCTLIGTSTNLV VAGLLEKQYPEIKLGLFDLS  
IYGVPIAMVGIYVLLASPCLLPGGKGASCRGGTGTGAIDITGGSGNDSEQD LLLGAKL  
MPWSPAAGRSVKRSGRLDTGGIYLVSVHRAATGNVHRAVQDFVLNVGDVLYFTGLVEEF  
GEFCEDHAMEVLTNELEEQEDTENE GSNLSQNVPTDIASNTEQTFYTQVTKERQSNTQ  
LVTVLEGEVEEHPNTERSSNAMPVVEVGF TKESSLQADEAERSRIITRMIDTVRGVAREE  
PTQQEHTYLNIDVREGRGKYAQHGAHKVVVTSEHG FVVVGVDARDRPGLLLDI SKGLLRL  
NLTLRHSEASVVGSRISISWRCEVIEAALPDLEEIWTVMNGLLESFDQGGSQAMKRGGLR  
VIRAVVTATSSLNGKNMNNVDFRDRYKAAVVAIQKGGRNVPVTGVVFGSDVVLV LKANDN  
SPLLKPPPPDFYKRGVNDGAKGETGSRSGSSVNSFIKRMKRKVS NATLNTLNSRNSEAEF  
RESKQNNADEGLDLEAARIKTEADV SFDNAEDYLIGNGQIDDDDYDNDDDDYDINENGN

GVKLVIDNIQASMKAITAEETWKDLQVIFVDKDQQRADDGAREFLTAMEIAPKSKLADR  
TVAETGLDKLPGVFLVSI DRPTGETHKTTRAVKTGTMR AFRAVASDARSVEESD HESHVS  
SLPTVDP IYRTIPDPVPLVVG DVLWFAGGAQSVGDLR KIPGLISHEKEEVEK IDEKMHDR  
RLVEAVIARRGPLVGKTVKQVRF RTRYGA AVIAVHRDGSRIHEHPGRIRLQAGDVLLLEA  
GPTFIKGSYDNDKSFSL LAEVEDSAPPRLKLLIPALFLTVAMLAVYTAGVASLLVCSLVA  
SMCMVAVGILSEQEARDAVNWEV FVTIAAAF GIGTALVNSGVAGG VASFLVTVGT SVGRG  
SSGLFAAVYLATFLI SNVVTNNA AALIFPIAMDAAEQ TGTDVILMSYCVMLGASASFMS  
PFGYTTNLM IYGP GGYKYND FLVIGTPMQVVLWFLSVALLATTTT SNFYI SWLISLGVLL  
FVMGVTSCNFGNFKLARK

>comp12748\_c0\_seq3; 1373 294 4237 LEN=4373; translated  
MTGRNAAILSLKSTNETCPCAATRLDSSLVTAIATAATDRLLQQTDDMTYSGDGTPEESE  
NGLFQVIYTCVVLFLMFAALISDRIGADSVMMASLTFMAANIITIEEGLEGFANEGLLT  
VLVLFVADGISKTGALDWYMSRLLGRPATVAAAQTKLMIPAIISAFLNNTPVVAVMIP  
IVQKWSKNIGQSAQQLLVPLSFASILGGTCTLIGTSTNLVAGLLEKQYPEIKLGLFDLS  
IYGVPIAMVGIYVLLASPCLLPGGKGASCRGGTGTGAIDITGGSGGNDSEQDLLLGAKL  
MPWSPAAGRSVKRSGRLD TGGIYLVSVHRAATGNVHRAVGQDFVLNVGDVLYFTGLVEEF  
GEFCEDHAMEVLTNELEEQEDTTENEGSNLSQNVPTDIASNTEQTFYTVTKERQSNTQ  
LVTVLEGV EEEHPNTERSSNAMPVVEVGF TKESSLQADEAERSRIITR MIDTVRGVAREE  
PTQQEHTYLNIDVRERGGKYAQHG AHKVVVTSEHG FVVVGVDAR DRPGLLLDISKGLLRL  
NLTLRHSEASVVGSR SISISIWRCEVIEAALPDLEEIWTVMNGLLESF DQGGSQAMKRGGLR  
VIRAVVTATSSLNKMNNDVFRDRYKAAVVAIQKGGRNVPVTGVVFGSGDVVLKANDN  
SPLLKEPPDFYKRGVNDGAKGETGSRSGSSVNSFIKRMKRKVS NATLNTLNSRNSEAEF  
RESKQNNADEGLDLEAARIKTEADV SFDNAEDYLIGGNGQIDDDYDND DDDYDINENGN  
GVKLVIDNIQASMKAITAEETWKDLQVIFVDKDQQRADDGAREFLTAMEIAPKSKLADR  
TVAETGLDKLPGVFLVSI DRPTGETHKTTRAVKTGTMR AFRAVASDARSVEESD HESHVS  
SLPTVDP IYRTIPDPVPLVVG DVLWFAGGAQSVGDLR KIPGLISHEKEEVEK IDEKMHDR  
RLVEAVIARRGPLVGKTVKQVRF RTRYGA AVIAVHRDGSRIHEHPGRIRLQAGDVLLLEA  
GPTFIKGSYDNDKSFSL LAEVEDSAPPRLKLLIPALFLTVAMLAVEFFSSEKRTNSFKIP  
DQSNIRRF AAFVLTNFGHRYTAGVASLLVCSL VASMCMAVAVGILSEQEARDAVNWEV FVT  
IAAAF GIGTALVNSGVAGG VASFLVTVGT SVGRGSSGLFAAVYLATFLI SNVVTNNA AAL  
LIFPIAMDAAEQ TGTDVILMSYCVMLGASASFMS PFGYTTNLM IYGP GGYKYND FLVIGT  
PMQVVLWFLSVALLATTTT SNFYI SWLISLGVLLFVMGVTSCNFGNFKLARK

>comp12749\_c0\_seq2; 265 426 1715 LEN=2083; translated  
MERQKTRTKKKKTQKPPMGFKKAPQAPKRFKSPYILFSISKMQEYRVLNKN TKVTCFSSL  
ISKEWRGLSEHEKKKWKAI AEKDKLRYNAEKS LYKGPWQVPTERPRKDPNAPKRPPSAFL  
NYSRTRRTALIEENPHMKNTDISKLLGKEWKAAPQOVRQPHIDKELYEREVYHKKITAWR  
TONLEASVATKSKQQLSAIGDQKRLPEEARPGPLQPSPLRAIVP SLSFSPVSPRPEL  
SGSIQEPERKIYVWGSSSPVEGPAPSDAMALDNYRLTNQGM LLPVSPSEKRQGTSSAGDV  
HTGQQSSTDYSDRAFVSQQPPLLPSPMLWPKPAMMTPNRCQSITNPSQPPNNAYAEKI  
KLP EMLLPPPKQLVPVSTVPVAPVTPMQQPRNRSTTDFQNLFFPAIFDDYDSANNNIVEN  
TDL D L L L L T D

>comp12750\_c0\_seq1; 425 141 1460 LEN=1790; translated  
MLSCRILRNSDIPRGLRKL CGFR TNPSGKNVVKQHNL LMKNTTVKTQVRTSII SRKSIH  
GGKGLASQSTPVKKE SAITLAR IAYAVKLARLPFL LVAISTIGYERGATDAIRNPLKLQQ  
GKFEALLDEF AVESEDEVTI ITERGVLSRLDTP LSSLKSGKNTKHPRAEKIASVGKEIL  
VSAKAYVRAKFAEAVAKAKDEIMKDDVYIKERMLERLLNEDPEVKKWITALEHIEGASLQ  
GIENWSYVLISSIPNAFVTEMLPQKIFVTTGLFDQYVKNDELAMILGHEVSHLILGHM  
SASSFYESVVRGAEIILMLDPTEGLLSLGLASFLSNSREAVVASFSRAHEREADELGCR  
IAAMACYDTRKGI EVL RKMQEREHNSGTASQHNLKSSHPPSKERYDDLQALVETQNFSEY  
SYCNTLRRRINRALQRKEY

>comp12750\_c0\_seq2; 372 141 1019 LEN=1029; translated  
MLSCRILRNSDIPRGLRKL CGFR TNPSGKNVVKQHNL LMKNTTVKTQVRTSII SRKSIH  
GGKGLASQSTPVKKE SAITLAR IAYAVKLARLPFL LVAISTIGYERGATDAIRNPLKLQQ  
GKFEALLDEF AVESEDEVTI ITERGVLSRLDTP LSSLKSGKNTKHPRAEKIASVGKEIL  
VSAKAYVRAKFAEAVAKAKDEIMKDDVYIKERMLERLLNEDPEVKKWITALEHIEGASLQ  
GIENWSYVLISSIPNAFVTEMLPQKIFVTTGLFDQYVKNDELAMILGHEA

>comp12751\_c0\_seq1; 315 284 1168 LEN=1168; translated  
MDMRSAINWDV NKQVEIDAGVGS AVNWN AKKKVK INADEGSPSADR KPEEKVQVDAKKDS  
KDTNEKENYFLTHSSPYHTIFSTGCSIYQDWQSYVFFHHVKRSGQEGHVTRIASGCSAND  
EVKFQEVFEAEIESMNP GKHHLHFTPDFSRVPKVGKPKYK YFNKPYGVRHWM EHTLGYPH

NHKLHDDSIIILMDDQIMLRPFTNDFNNSSELWKLKKKRKLVGHGSPFAQAYGYGIQW  
LKGKKIKKIDHEYVFQDGRLEPTVSNMTFEEARQYYSGMGPVSEHEVILIAKAK  
>comp12751\_c0\_seq2; 386 284 1231 LEN=1337; translated  
MDMRSAINWDVKNQVEIDAGVGSVAVNWNNAKKVKINADEGSPSADRKPEEKVQVDAKKDS  
KDTNEKENYFLTHSSPYHTIFSTGCSIYQDWQSYVFFHHVKRSGQEGHVTRIASGCSAND  
EVKQVEVFAEIESMNPQKHHHLHFTPDFSRVPKVGKKPYKYFNKPYGVRHWMHEHTLGYPH  
NHKLHDDSIIILMDDQIMLRPFTNDFNNSSELWKLKKKRKLVGHGSPFAQAYGYGIQW  
LKGKKIKKIDHEYVFQDGRLEPTVSNMTFEEARQYYSGMGPPIATAKDMWAIISNTWAD  
IAPKVHDKYPHLLAE  
>comp12751\_c0\_seq4; 312 284 1685 LEN=1685; translated  
MDMRSAINWDVKNQVEIDAGVGSVAVNWNNAKKVKINADEGSPSADRKPEEKVQVDAKKDS  
KDTNEKENYFLTHSSPYHTIFSTGCSIYQDWQSYVFFHHVKRSGQEGHVTRIASGCSAND  
EVKQVEVFAEIESMNPQKHHHLHFTPDFSRVPKVGKKPYKYFNKPYGVRHWMHEHTLGYPH  
NHKLHDDSIIILMDDQIMLRPFTNDFNNSSELWKLKKKRKLVGHGSPFAQAYGYGIQW  
LKGKKIKKIDHEYVFQDGRLEPTVSNMTFEEARQYYSGMGPPIATAKDMWAIISNTWAD  
IAPKVHDKYPHLLAEMFAYNFAVAHLGLRHTIANSFMLSDVVFSEMEGWKLIDKVNETHNIC  
KNFPKGQRPHVIHYCQTYIIGSESLYDWWVFGKRKLRKDFISCEAPLLKVPDPNLDAYEX  
IPPKMIGNNANIEKEVWERKYAKRESFMVCEMIRALNDAAIFFKDEX  
>comp12751\_c0\_seq5; 149 249 650 LEN=1145; minus strand; translated  
MAKASTGAGRKAGTANYSHNELHNLMSMILERLPISTDDWHLNVFEHTKNWPFRRSQSV  
RTKYSSVKRIKSSTGNPIMPDYLMASKAHILIGQKANLGTGEEDFDLDQGFIKSELHWC  
LLANAVDSMPGPP  
>comp12751\_c0\_seq6; 87 598 725 LEN=725; translated  
MIGNNANIEKEVWERKYAKRESFMVCEMIRALNDAAIFFKDEX  
>comp12752\_c0\_seq1; 381 60 1187 LEN=1901; translated  
MLATSDPYPSPHAKPEANVEYGNVQRFVPEIDDGyraQDQRKNRNSYRPLFITLYVMLLL  
ATAGLAFVTRYVQTVKNKHKSPPSQDTSDDGSDVDSSSPATLAEVDPDRDLIAYRSDI  
EYILFTEMDEGLSTDFVEGPKRAIDWLVSDDLVLNSTEVRAMAEYIKNGDEDSVSTVPL  
VQRYALMVLFFATNGELWSDSSWRELNVNPECFMGI ECDLEGHINTLDVGYRKLGRRLP  
GEVGMLSMLTSLNVE SNNLEGTIPSFLYNKLTCLERVDMRNNGLSTISSDISKLTNLKA  
LYLGELFLTGEVPTDAMKSLSSLEEISISHATEMTGPLLEFSEHWPNLTYFDILRSTFTG  
TIPTTIGTNTNLKYM  
>comp12752\_c0\_seq2; 342 60 1284 LEN=1998; translated  
MLATSDPYPSPHAKPEANVEYGNVQRFVPEIDDGyraQDQRKNRNSYRPLFITLYVMLLL  
ATAGLAFVTRYVQTVKNKHKSPPSQDTSDDGSDVDSSSPATLAEVDPDRDLIAYRSDI  
EYILFTEMDEGLSTDFVEGPKRAIDWLVSDDLVLNSTEVRAMAEYIKNGDEDSVSTVPL  
VQRYALMVLFFATNGELWSDSSWRELNVNPECFMGI ECDLEGHINTLDVGYRKLGRRLP  
GEVGMLSMLTSLNVE SNNLEGTIPSFLYNKLTCLGTNTEQGFCAMSIDTDSFLVHRNISP  
SLFWILERVDMRNNGLSTISSDISKLTNLKALYLGELFLTGEVPTDAMKSLSSLEEISIS  
SHATEMTGPLLEFSEHWPNLTYFDILRSTFTGTIPTTIGTNTNLKYM  
>comp12752\_c0\_seq3; 436 60 1717 LEN=1877; translated  
MLATSDPYPSPHAKPEANVEYGNVQRFVPEIDDGyraQDQRKNRNSYRPLFITLYVMLLL  
ATAGLAFVTRYVQTVKNKHKSPPSQDTSDDGSDVDSSSPATLAEVDPDRDLIAYRSDI  
EYILFTEMDEGLSTDFVEGPKRAIDWLVSDDLVLNSTEVRAMAEYIKNGDEDSVSTVPL  
VQRYALMVLFFATNGELWSDSSWRELNVNPECFMGI ECDLEGHINTLDVGYRKLGRRLP  
GEVGMLSMLTSLNVE SNNLEGTIPSFLYNKLTCLGTNTEQGFCAMSIDTDSFLVHRNISP  
SLFWILERVDMRNNGLSTISSDISKLTNLKALYLGELFLTGEVPTDAMKSLSSLEEISIS  
SHATEMTGPLLEFSEHWPNLTYFDILRSTFTGTIPTTIGTNTNLKYIWLEQTSMNNTSILP  
TELGLLPNLKEFILDNLVDDTTGTIPTELGNCQALTSLHVDFRGP IPTELGRLTNLKF  
LSMTEGGLTGSVPSELGLLTNLNEMYLYNNRLESSLPSALGNVQGLKILDISMNNLTGSI  
PEGIVEVPQLE  
>comp12752\_c0\_seq4; 475 60 1620 LEN=1780; translated  
MLATSDPYPSPHAKPEANVEYGNVQRFVPEIDDGyraQDQRKNRNSYRPLFITLYVMLLL  
ATAGLAFVTRYVQTVKNKHKSPPSQDTSDDGSDVDSSSPATLAEVDPDRDLIAYRSDI  
EYILFTEMDEGLSTDFVEGPKRAIDWLVSDDLVLNSTEVRAMAEYIKNGDEDSVSTVPL  
VQRYALMVLFFATNGELWSDSSWRELNVNPECFMGI ECDLEGHINTLDVGYRKLGRRLP  
GEVGMLSMLTSLNVE SNNLEGTIPSFLYNKLTCLERVDMRNNGLSTISSDISKLTNLKA  
LYLGELFLTGEVPTDAMKSLSSLEEISISHATEMTGPLLEFSEHWPNLTYFDILRSTFTG  
TIPTTIGTNTNLKYIWLEQTSMNNTSILPTELGLLPNLKEFILDNLVDDTTGTIPTELGN  
CQALTSLHVDFRGP IPTELGRLTNLKF LSMTEGGLTGSVPSELGLLTNLNEMYLYNNRL

ESSLPSALGNVQGLKILDISMNNLTGSIPEGIVEVPQLE  
>comp12753\_c0\_seq1; 197 116 553 LEN=1316; translated  
MGSSTVDFLSMLLVGALWGCTNPLLRKGSDDAESSSAKRPDASDDGSSGSSSSFLVSS  
LRSFANVGVVLPYVLNQSGSIVFYVLLANSDISMAVPICNAMALLFSFLTSSLLGEP IQK  
PLRTGAGAF LIMVGV AICVSSQEH  
>comp12754\_c0\_seq1; 812 128 2569 LEN=2638; translated  
MSNPPDEASSGSATQPDES AVKADASVSKPEVNAAVKNEEE IAASNSNSGEEEDDDEKSIQ  
SEGADEEDALFTTLEKNEEQEEASHPQSQPSDAKQAPMLLQSAIAKGDVKTEAKPKEDEE  
KKGEESDNQIIHQQRQNQLDFLLSKASEYSNFI SNDLEELQNAMA EKARQKA EKA EKRRR  
KSSKGGKSSKKGKNSGEALKSAFEKDAEARTGSKPIFTQPPNLTGKCVLKD YQLE GVR  
WLASLYENGVSGILADEMGLGKTIQVIGLVAHLLTQEVTPFLVVA PLATLPNWVREFEK  
WLPSPKPV MRYHGAAPDREAMLRG PLNPK EKRD KKFV VVTSFETAIRDQK KLGKLGPFAY  
VIVDEGHRLKNHRCMLIRSLKQLDASNRLLLTGTP IQNTLDELWALLNFVNPQIFDDL SV  
FQSWFGFKDIGQKSHNGTSEEDIMLEQRKNKT VTKLHEILRPFLRRVKVDVLKEMPPKK  
E VVVYSGMSK LQLGYAELIEKGVLRD D L L R Q G I M D G K N L S Q T N K M M N H R K N V N H P F M F G E  
PLDPTTGS HIGTLYPHLLIRASGKFALMDRMLNRLHKDGHQVLI FSQMTKVLNII EDYLN  
YRHWKYCRIDGSTNIDDRQAAMDFVNAEKTGGKNGERNLADDRYFVFM LSTRAGGLGINL  
TSADTCIIFDS DWNPHADSQAMDRCHRLGQTRPCA IYRLLTNN SVDIEMMEKQVSKKKLE  
RMTIAGGDFRKAGRRSQGEMTFDKLQNL LQSDIQDLQGRGQDIEDIRISDEEFELIMDR T  
KLFAEGKDAI PTEGKMYNVINAAGDMLGAMTT  
>comp12755\_c0\_seq1; 240 140 1063 LEN=1379; translated  
MVEIHTGRNRSARRTTSLAAYMMALVVVVSCLTYRRHSSVVRTAGLQQKD HHLAYPDPEQ  
EQQQSPALNSNNRREDTKHQRGALRQPSAALSSERTQRQLRLRYDWTNLSPSLDLTKNI  
LRHQSNCSVPVGTFTYRNRFG LGS DLHTYALALGN GIEANRRIRTVGNWTWMDRDECGRE  
GSGATDTPGRGREPFGTPLGSPMRCYFVASELNCPGDLEHALANPAFDPEHGLSRPNGNV  
LVPSGDYASAILPSKKDGGEQKLATAVVE SLFVRTAPRVVREAERQLNLVFGGRDGV PKD  
LITVHIRW  
>comp12755\_c0\_seq2; 98 1 496 LEN=557; translated  
XTHFMLFFQCRKKVGISDYIQAVRQILDKRTSSSKSATHTNFTSTEETANIYLATEDPRA  
VDEFRKALPKGWNLFVDQFLVDTSDHRVDEYNGVPKMAKSLNGRLGLLALGSLLVGMEAN  
DFXANDSKQLEPVDERIEAVDFGSALRRMYVRDRFETAIERQTVI  
>comp12755\_c0\_seq3; 397 140 1728 LEN=1789; translated  
MVEIHTGRNRSARRTTSLAAYMMALVVVVSCLTYRRHSSVVRTAGLQQKD HHLAYPDPEQ  
EQQQSPALNSNNRREDTKHQRGALRQPSAALSSERTQRQLRLRYDWTNLSPSLDLTKNI  
LRHQSNCSVPVGTFTYRNRFG LGS DLHTYALALGN GIEANRRIRTVGNWTWMDRDECGRE  
GSGATDTPGRGREPFGTPLGSPMRCYFVASELNCPGDLEHALANPAFDPEHGLSRPNGNV  
LVPSGDYASAILPSKKDGGEQKLATAVVE SLFVRTAPRVVREAERQLNLVFGGRDGV PKD  
LITVHIRWGRYRSIDWIGLDWSIARIFPLPSGAVPSRIEINF EWRSFKSSFFFFFSTGDK  
VTTYQGKKRRLPEMKKVGISDYIQAVRQILDKRTSSSKSATHTNFTSTEETANIYLATE  
DPRAVDEFRKALPKGWNLFVDQFLVDTSDHRVDEYNGVPKMAKSLNGRLGLLALGSLLVG  
MEANDFV LND SKQLEPVDERIEAVDFGSALRRMYVRDRFETAIERQTVI  
>comp12755\_c0\_seq4; 249 140 1232 LEN=1232; translated  
MVEIHTGRNRSARRTTSLAAYMMALVVVVSCLTYRRHSSVVRTAGLQQKD HHLAYPDPEQ  
EQQQSPALNSNNRREDTKHQRGALRQPSAALSSERTQRQLRLRYDWTNLSPSLDLTKNI  
LRHQSNCSVPVGTFTYRNRFG LGS DLHTYALALGN GIEANRRIRTVGNWTWMDRDECGRE  
GSGATDTPGRGREPFGTPLGSPMRCYFVASELNCPGDLEHALANPAFDPEHGLSRPNGNV  
LVPSGDYASAILPSKKDGGEQKLATAVVE SLFVRTAPRVVREAERQLNLVFGGRDGV PKD  
LITVHIRWGDKVT TTYQGKKRRLPEMYVNNTDQCATT D I L L L V V R A M E K R T K L R V C S H L  
TIHCX  
>comp12755\_c0\_seq5; 387 140 1581 LEN=1642; translated  
MVEIHTGRNRSARRTTSLAAYMMALVVVVSCLTYRRHSSVVRTAGLQQKD HHLAYPDPEQ  
EQQQSPALNSNNRREDTKHQRGALRQPSAALSSERTQRQLRLRYDWTNLSPSLDLTKNI  
LRHQSNCSVPVGTFTYRNRFG LGS DLHTYALALGN GIEANRRIRTVGNWTWMDRDECGRE  
GSGATDTPGRGREPFGTPLGSPMRCYFVASELNCPGDLEHALANPAFDPEHGLSRPNGNV  
LVPSGDYASAILPSKKDGGEQKLATAVVE SLFVRTAPRVVREAERQLNLVFGGRDGV PKD  
LITVHIRWGDKVT TTYQGKKRRLPEMKKVGISDYIQAVRQILDKRTSSSKSATHTNFTST  
EETANIYLATEDPRAVDEFRKALPKGWNLFVDQFLVDTSDHRVDEYNGVPKMAKSLNGRL  
GLLALGSLLVGMEANDFV LND SKQLEPVDERIEAVDFGSALRRMYVRDRFETAIERQTVI  
>comp12756\_c0\_seq3; 95 1 292 LEN=516; translated  
XILRGTTLNGVGRDAPLPGPDTVRMPGGTDGAGECYHRGKARWY Y Y F P T F R S L P T R S D P P T



HTENGDGSIGMVSVSVAQGSTGCGYIRRRSGHDTTRN  
>comp12757\_c0\_seq1; 632 67 1419 LEN=1559; translated  
MRECISIHGQAGIQGTGNWCWELYCLEHGISPDMGEMANEAGGPTDDSYNTFFSETSSGK  
HVPRAVFDLEPTVCDEVRTGAYSKLYHPEQIIISGKEDAANNYARGHYTAGKEVVDQVLD  
RIRKLADTCTGLQGFLVFHATGGGTGSGGLSLLERLSVDYGRKSKLSFAVSPSPQVSTA  
VVEPYNSVLSSTHALLEHTDVTFCLDNEALYDVCKRQLGIQKPTYTNLNLIAQVIVSSSLTA  
SLRFDGALNVDVTEFQTNLVPYPRIHFMILTYSAPVISADKAFHESLSVAEITSTVFEPNT  
MMTKCDPRHGKYMCCMLMYRGDVPKDVNAAVASIKTKRTVQFVDWCPTGFKCGINYEPP  
KNVPGDLAEVKRAVCMVANTTAIAEALSRIDHKFDLMYAKRAVHVHYVGEEMEEGEFSE  
AREDLAALEKDYEEVGAETDAGEGYTEDEY  
>comp12758\_c0\_seq1; 110 1 183 LEN=825; minus strand; translated  
QGKAAALSQSHQFAIDEETLAQTSFSLGIGGLASKKKAKKRVRKGLSLAEYLEEKAAGTL  
>comp12758\_c0\_seq2; 211 511 969 LEN=1352; translated  
MRSLFVLLLCVFAVSGADLEITNWIVPPDSDPYYPNMDADVGDITITFTWPEGITDVHIHP  
TGTCDEKGAIVLVGYASGASYTFTAEDAGNELFFATDVGRRCESGQNRVAVSGVSPSPEV  
NAVESSINSAASENKL SFVLSLAVGVVATMNL  
>comp12758\_c0\_seq3; 211 540 998 LEN=1381; translated  
MRSLFVLLLCVFAVSGADLEITNWIVPPDSDPYYPNMDADVGDITITFTWPEGITDVHIHP  
TGTCDEKGAIVLVGYASGASYTFTAEDAGNELFFATDVGRRCESGQNRVAVSGVSPSPEV  
NAVESSINSAASENKL SFVLSLAVGVVATMNL  
>comp12759\_c0\_seq1; 334 53 931 LEN=1060; translated  
MRSQTSYSIYACAAFLSLVTSGSAESTGKQPMSHATVRRLLQQTQKQKQQQTIQVDADDEN  
DSKTCIIDGDVRCSTSTYYVYKEFEDGGVTFAQARAATGYDADLESCVLAPIYSYQDLLDI  
SDVIPPCKAAYTAAYKDLPTVYRESKTCLEDDGRIPFNCFSTLGGTLGALWGDEYRSVTT  
QKMGEFGSCSLSEWFGDGEF IAGGHVWCPALRQNWFLNGKKEGGAIPPEVWNEGDSSFC  
GDGPIQNAAAFATDYTSSKPTAALKAVNSGEYLPGAVYKCCQDVVTCYEGK  
>comp12760\_c0\_seq1; 916 1 2684 LEN=3236; translated  
XSSLVVPVAVVASVGLALGLGLVLLALEAYHRAVEDRQRKLLRLADRAGAIVGSMPFEGIQ  
EKLLAMTDHGTNDDEPGRGGSPATTTTTSCGRDQVQPGAGTPCGGTAETPAFPVNV  
RTAKTPDPGGADTDAALESDDLVDADMHLHAPSHRDSFLNKSGSFRWHSPPSSPRPGQD  
RKSIPRGAGSRTGFRKPPVPSVLPPLPPPPPPQGNLLSRYGRKKPVADFPSTSVLMCD  
IAGFTAWSSARAPSDVFWLLETIFGAFDDIALASEVFKVETVGD SYVACAGLPNAQPKHA  
SIMARFARRCLRRYKSLIKKLEVYLGPDVTDLGLRMGIHSGPVTAGVLRGDKTRFQLFGD  
TVNTASRMESTGTVDKIQVSETTADLLAGEGHANWVARRENLVAVKGKEEMQTYWLHRSI  
PSSRSAGKPALSSGSSQWCSGGSSALNNLRTKSMSSSSLASFDLSIDTFSGDSTLSPPI  
RMKSWARNERARNPKEQRLIEWIVETLMQSLKKIEADRRGRRTDRWSFGKGD TGLPDDGG  
PSLGSFDPDGPFLIEIQEAI SIRQETNPP IKMSKVPEGETDLSSDEMEAVEISCIVEDQL  
RRYVTAVSLLYHDHTFHNFEHCAHVLMSVSKLFSRITESKTNETGHDNSDNYAYGVASDP  
LVEFSCFLSALVHDVDHTGVPNAQLVKENTATADYYKNRSVAEQHSIAVAWSVLTEPLYK  
DLRHSIFQTTAELKRFRQLVNVNSVMATDILDKDLKLLREDRWEKAFATEKDSAEPGSTER  
SNRIATVVEIQIIQASDVSHMQHWHVYLFNERLFRETHRSYKEGRGETDPSTYWYEGE  
LRFRRFYI I PLAMKLKECGVFGVSSDEYMHALSNOSEWARKGREIVSGYMESI  
>comp12762\_c0\_seq1; 262 1 1419 LEN=1678; translated  
PSPVEEPPVEEPPVEEPTPPPTSDPTAVPTKKPTETPTASPSAAPTPTTPEQTVGAIGAFP  
DATPISVIASGFQATAEKIGEATSDPNRRILRPREVLD AIEIEVLVEVIPCDPEL FANL  
DSTIACFSILITITAPVWTGVNPSATTEELEADVESGDLAENLEDFGLPDAVIVLPPSEQ  
PSSMPSAPPSVSAAPSSVPSLPSRIPSSSTPSVLPSESPSMQPSGVPTKSASPTAT  
SSPTDSPSLSFRPSLSLIPSTMPK IPTSTPSVAPSISSDAPT PNCVDDDSYRLNGFEK  
KDCAWVGKKTCKRCRTKDKRFEKRVDRFCPMTCNDCRSEAPTGAPTTYGQFLCGRDD  
ANYRFKGPNDNSCSWVAKSPLKRCRKKDPTTKKKVVFHCPSSCELKCACVNTAKRFKTEE  
NPDSRTKCSKITTDQCNEKAFRGEATVETTTMVEDFCPKKCNACLTADPIPF  
>comp12762\_c0\_seq2; 167 681 1493 LEN=1493; minus strand; translated  
MGQKSLTLFFSNLLSFVRHLFLVFFLPTH AQSSFFSKPLRRYESSTQLGVGASDDSIDGA  
TEGVEVGIIVLVGIVLGIKLDGLKESEGLSVGLEVAVGLALFVGTPLGCIDGLSDGKTLGV  
EEGVEEGIRDGRVDGTELGA AETDGGALGIELGCSLGGRITITASGNPKSSRFSARSPTST  
SANSNVVADGFTPVHTGAVIVIRIEKHAIVESRFANNSGSHGITSTSTSIASSTSLG  
LNILLAGLGLGSEVAGLGSEVASPIFSAVAC  
>comp12763\_c0\_seq1; 116 335 865 LEN=1534; translated  
MAPVLRRSFPRLRAVAAGLWLLLPAPRRSGTFHRCHGFSVPDPPAGLPHRLEDWEASHV  
GDWLRVSGFGRYASGFASDFGGTGVDGDRLVYLGTEDQLDHIEYQLELVGVADRSDQAVL

GAAIVGLVALERTTPGDLEALARGVLRPGGTTQAGGGPPEPEDPAAPGSVVGHYDI  
>comp12763\_c0\_seq2; 116 335 865 LEN=1448; translated  
MAPVLRRSFPRLRAVAAGLWLLFPAPRRSGTFHRCHGFVSPDPPAGLPHRLEDWEASHV  
GDWLRVSGFGRYASGFASDFGGTGVGDRLVYLGTEQDLHIEYQLELVGVADRSDQAVL  
GAAIVGLVALERTTPGDLEALARGVLRPGGTTQAGGGPPEPEDPAAPGSVVGHYDI  
>comp12763\_c1\_seq1; 355 59 747 LEN=747; translated  
MATNTKTDPRHYLNLYNGEDGSEESSIEDMSRDIGHGGDCEAISYEMISDIEMSGVDAS  
GIDAVADVDESFFAEKDDGSRGLLDDVSLGSHHSLGHAGHASSASSHSGSILAPPPGN  
GHESLVDLDSIEGTDGDSEAEQEALQDDDDDEEEVEDYENIYENVYEPQDERRTYLNLNLN  
PNPNPNTNTNPNLANAQTLSVVQRLLPNEAEEMSVSSIPRSALPRITG  
>comp12764\_c0\_seq1; 1831 1 6528 LEN=6646; translated  
NRTKQNRTSARYVRMRTRTSYTGSYSEYSCALCNTNVSPTAMKNNESSRITADSGWVKRVD  
PGTGRVIFYANHITRKTQWEPDGDWVGESPPTRPFQSRNNEEPLPSNWETMHPDSTGKPFY  
VDHERKITQWTRPRAEKRQEKQLRPWQQPASAEP RPSPHSHKGTSCGSRNTYSEEAAYNQ  
RLHSGVSSDVLDSGSMPELEFSVRKVADKHLNCAHCAVLFTVSKRRHHCRLCGDVFCD  
CSSHRVDLPLPGPEFDKPVRI CDFCNEDVRQGNFFSLRRYLTPALFDPNLPDGDGDFD  
DVHGVASSSNVNAALCALTSDLDEVMRNTNGFEKRVTI PPSVLVPSITKHLTSKRDTADR  
AVRALSSLLTIGSMVGKNDFAHAVYLYGGNTVFDSILTILERSGSDERTLFVQEQAARAV  
FYLTDAEVLSTLMQTHSQLVAKQTSSTRSSGSTDDDEGIGDLDLSDIQRSLANFLDHASS  
KKNPNLQRWSAATVRNLVVEDQRRSCLAINVAACFATGETTASLGYESLIDQMVS SGGI  
MILCSLVGTDDSDTRTHAIAALGAVISATRAVDEALASLYEMTGGVVGRDTKKDGDI LRA  
ISASGGCGSSVSQLLLSADNSVASTGCQFLASLVRPLLLDPLGCATLPPQYDWRNDDSGM  
GACREAAIEIASESCLPALESLVREKGRTSRPAELRRLAMETLAATVMAVGEMGKSWAGG  
KYEEGMENNGSPATLLRAVASLNDEGLIDMALEI LESSSMQSLGSKDTPARIRECAGI  
VLGSLTSCSAEAIMELHSRHLSSSLVLAANDDSMAAPSNLRGDTSPRCLGMLEAASAVLM  
FAWQHPSGASSELLDRLIELLDAGTITYLFRMMTSKIDWESRDKSSGGMKARSAACRLVC  
CLFGIAMTDKTAIGMRRLMDACDEDEAQRMVNRGNPRNIMEAVLTVLQKSLVEAHKVLVGG  
ASRGPYQAALLDLVECSILATGSICGSVAVPDGGDGTMIKGDAMLSMRVDEFESRRKEV  
CSVACDVVVRGGRSGPALLPTLLVGGFGEVSPASLRALALAIQNGNDDQHSKLALSGLL  
VPVSDLLRVSLARGDLYKFSAAALVRFVCGPHVAAGGRGGVQSVREAIRVATNVLTLPNY  
SDASTGQIENWEALKSECINALESLSKNAALWSAISTDALPSIVTYLHDSFEAEHNPET  
KSSALRAILQIAQVP SHAVSAAEVGLARP IGLLLKSNNALCARGQVRDRNMQALGMEVLH  
VLIARPESSRRHCNLLQGDILRAVCAVVALSVTDASNYQSETMEKITVGLGLEILLFALGEV  
ESSGNEDTAVVLQSQGAI AFLDAVSSEGLFVRTLCSTLLTKTGMKIMSHESGCGDKETID  
VPDLYGDPLL FVEQKCAFNDTYDAAASILFATMAFACAI ESHTSEILWKYILLQDLHEE  
REVNECVRTSSTFCAIYLRLLMEDFVGFI PKRAAGKRDYENLTRPLIRYRLLES LKTA  
ELTSESVLGHREIDAYMLSLLVHFNVPIYICLLVWRDPALLELSFQLIKVMVEADPDEVIH  
LFVESKEAITSFLDLLNDRSTETHIEVDEIQRFLAMTLEKLAQGGVLADAVEKFDVRSI  
AITALATACLNEEDQAADDEEELTSSKLASDLMHTLVELCTVSNGEEEEKIELTPGEAEA  
IAVSLGETICKMVIARFLERAKLQOYEIEEDENIMNTPDVAMLCAISQHDIALQNLRSFG  
GLHAIAMIAGEGEITAILALQKCKEDPSELLIEADTYASILSFLSLEKDHL LFKRDKLLG  
CKVETAAFELLAQLCVASSKGR LAVAGARDFQNSLDTALRI ISEVLRINDEPAAEEDKK  
LNEIEDEEKEGEGSRDCQNA PKSMGDPKRLGAAYSFLSAMTP IPSARITLLNNEKFVQAS  
STFISDNDRNLQFAALRAVVKLAPYSTGNGPLSTDNVGDLLQSALAAEPKFS DASSTGW  
NRNLFHVQAAEGILSVFDSL PASKQECIFKDVIRRYIKLLKSHSIARSTKM SERAHAGEL  
AYNLTTLIMVARGKDCIARLFDSDATVLLVNTVQWRYDPKTVVEPDAATFWDATTTQCLQ  
ILAQLLCSDISSSRKSGINVRSLKNSVFMVARVGVKAPRKAIDFISALKLVSKNGEAAAKV  
ASQRILSYMNNNNTS  
>comp12765\_c0\_seq1; 310 216 1541 LEN=2190; translated  
MASANSGGGASKPFEWLSGGLFFGGGNKEGGIESIDSEKNIKTLLEGIQENLGATANSA  
PADDEKSARAPLSPSQSAPLAARLARLRFLLYDERRVTSQQSDQSHRLGNPSVALDTVES  
LADKSGDNNGGLIPDLINNLQSLPFESRKHVA AIFNYLLVCGFDGIDRDVYIPVMKRF  
DYVALNFEVIVSAIVNGHNVSSGPGCGNTT DVVLHCGSMYRSCFRHVHLYGQLVVTTRRV  
EQFVFPFIDKYALLPNFDVSSDAMESLKLVMTAGTTS GSDSGSDSI IMTP IDEKSQQQMA  
ELAATFLIRDYEAVWIRRFNSKLLSTDANYMTRVALQILSTVLLTRSNTVMIKYVNSR  
TNLILVMKLLRDTSPHITLDAFHVFKVFVANPNKIPEVEKILRDNSRKL CAYLET LHYDK  
EASDQQFADEKRLIIATIRDL  
>comp12766\_c0\_seq1; 409 356 1519 LEN=1754; translated  
MLSIASKRTIPVARSVGLRTPGKERRARLATSTASASQSANNRRRVSRRAWLEIKESRG  
IKRKPDPDSKRPLSADEKWPWRNLQIAGYAASAVAPYIILWTTITSNPTLREWFPGY MPL

EKLRIYFGTLEWDAQSYTDQMEDAKKKLKEGKAPDSVDES LIGYYQFPEEEPFHVREQQK  
AIETL NESDLVVTMSAS PSSLQIEDVVTKSVAAKTIANEKNLSELFYSSSASTQSDNTA  
VAVDFLDQNNLEDTVNKSN AEMRQPLSGGSLMTDVE SMASNYGTS DSSSSASQRLARDTQV  
ASKWTYTQSQQQASGKPSQEGISGASSISQLTDVEMRMGQLEHNI SELEASLRDPNSTR  
IDDMTTDLRNAKRELSKLRWKRFRGLV

>comp12767\_c0\_seq1; 70 1 630 LEN=1356; translated  
XVRKAIP SATIENCSDSDPTLSRNERNCIFETFFTHSLIHSLLRQGPSEEF CYADIDAA  
YKFLRYDL DVQAQNI VLYGRSLGSGPSCHLAAGTSQAEDPDSGGPVGGLILHAPFLSVYR  
IVLETGCTVYGD KFPNIDCAPLIKSP TILVHGTADQIVPFNH SERLYEALPTDSRARPLY  
IEGMGHNNVH SVVRPMFVARLNEYLDEEVW

>comp12767\_c0\_seq2; 162 266 1093 LEN=1819; translated  
MGDTVSTLLFQPPPPTKLKENKIIWLKTPHGKRIPGFYIHYGKFNGEYASRSLTVKELQA  
ANTSEGITILYSHANAEDL GSIYPWCKFLSKMLRVNLFAYDYTYGGMAYDQGKPSSEFCY  
ADIDAAYKFLRYDL DVQAQNI VLYGRSLGSGPSCHLAAGTSQAEDPDSGGPVGGLILHAP  
FLSVYRIVLETGCTVYGD KFPNIDCAPLIKSP TILVHGTADQIVPFNH SERLYEALPTDS  
RARPLYIEGMGHNNVH SVVRPMFVARLNEYLDEEVW

>comp12768\_c0\_seq1; 747 156 1549 LEN=2056; translated  
MKIHGAAVLAICGIPSTVAFVRNTHKATNTHLNLQKENGNDKMWGPAVTGLAGLTLASQ  
MAVAADVPSAVA AVPKFNEATPIVRGQDLTTNTQMMNVENSFKSAISGSSIQ LADDFLDF  
SLPSYGD SSSSSAKAKAGDNAPS FANPFADDFSKRSEEEAPAAAPAAAPDTSAEDKAA  
AEA AKQAEKEEAQRKANXKAAAREAEKAAEKQAAA EKKLAEAEVARKKAEKEARREAEK  
EKQRLAVQRANEEKEEKAAA SAASSAPAETESPSFAIPDFKAPEFKAPEFKAPEYNLDI  
PEIKAPDIKMEVSLPKFSMPKMPKMPKIETPSTSSETPKAPSF SAPTFEAPKAPSF SAP  
SFETPKVPSFSTPSFSSSSSSGEYTS LDDVNTVDDQEERDQKAKEARTAFNEADSNAREL  
ENKAKQLRAIADDDKKIAKEAKDAACATRFGGKILCIRPFGIGY

>comp12769\_c0\_seq1; 316 81 683 LEN=1770; translated  
MNPEYDYLFKLLIGDSGVGKSCLLRFADDTYTESYISTIGVDFKIRTIELD GKTIKLQ  
IWDTAGQERFRITSSYRG AHGII VVYDVTDQESFN NVKQWLHEIDRYAAENVKLLVG  
NKSDLTGKR VVSTEQGKEFADSLGIEFLETS AKTSTNVEQAF LTMASQIKARMKTQPTAA  
QGGKSLPLTGEKIKNNSGCC

>comp12770\_c0\_seq1; 741 513 3377 LEN=3442; translated  
MGIEHIETYSYKCDILS NSNLP IPSVNILSDIDDRSVENTNANGSKDERASCNMVTLATL  
STHEGLPFRGGYEEALAVRLAIKHLNDGDGSLIKEVEGLD KKCNI DFNVDITDKYNPGE  
TLQSVVKRIE SDSLGPFFLGAQPSFVTGPVAALVNMYGYPQISSE NVAQLTRQSVGRPL  
LTINFDDVTTTKAFVWYLK KKKIKHLAVLVVNDQYGLGFLDRLQRQVAIEKDVLDVKPF  
YLNVDGSNLEETMIDIRNSMYRFILC LQHGT LIRVHTMMKNAVQNNVAGNGKHNWFFIYD  
LPEELFDSIQNDFSLYKAYHGVGFFGPAGGKPSNHDS PSLYESFHKQLLALKEDEELIS  
SLVADNGNTSPPTQRNETIQFLNDESFLDLP SRDMLP YLYESAILAGLTACSTARDGIH  
LTGKEFNKAVRKNNFQSITGHVRFDANTGRRCDNSTYFSMVNHIGKHYDYFDDSN TSHSE  
GRFDFEWVTTDVLNEGKWE E IAPFTYSSNSTDL PDAVEPFEEKSEVMSSGFKVFAYVLCT  
VSVTISIGLAIWTLIHRKERIIRASQPFFLLAICCGTILLAATIIPMTFDVAPSHFMNEN  
GEFYDVSERNCRDWNVI EEEKQCVEMPQSTDRMMFACTSIVWLATIGTTIIISALATK  
TYXASEIPP GYIVLTLSTPFSNHTFCFNVGYRINKIMQA AKRFKRVQVRVRDVVWPMVAF  
WVFNVVILSLLTAFDPVHYDVAVNFDAFGRPSTSNAYCDFNVYNH SKYFAPIILLNSAV  
LWFALYQSWLARDLSTEFQSEHIYKAVMVMLVVT FVGM PGVFIARRNLNANLFLGSAVI  
FVMCISVSLMLFYPKIRYIHGTENQRFTDSKKE LIRSKTLVFNASR SSMVFPKPGEKDAD  
GEI IYSAKSRRELI IENNK LKDELKNLEESVQLEEI KEQTSYSDDLLSNSSELE

>comp12770\_c0\_seq2; 783 513 3291 LEN=3356; translated  
MGIEHIETYSYKCDILS NSNLP IPSVNILSDIDDRSVENTNANGSKDERASCNMVTLATL  
STHEGLPFRGGYEEALAVRLAIKHLNDGDGSLIKEVEGLD KKCNI DFNVDITDKYNPGE  
TLQSVVKRIE SDSLGPFFLGAQPSFVTGPVAALVNMYGYPQISSE NVAQLTRQSVGRPL  
LTINFDDVTTTKAFVWYLK KKKIKHLAVLVVNDQYGLGFLDRLQRQVAIEKDVLDVKPF  
YLNVDGSNLEETMIDIRNSMYRFILC LQHGT LIRVHTMMKNAVQNNVAGNGKHNWFFIYD  
LPEELFDSIQNDFSLYKAYHGVGFFGPAGGKPSNHDS PSLYESFHKQLLALKEDEELIS  
SLVADNGNTSPPTQRNETIQFLNDESFLDLP SRDMLP YLYESAILAGLTACSTARDGIH  
LTGKEFNKAVRKNNFQSITGHVRFDANTGRRCDNSTYFSMVNHIGKHYDYFDDSN TSHSE  
GRFDFEWVTTDVLNEGKWE E IAPFTYSSNSTDL PDAVEPFEEKSEVMSSGFKVFAYVLCT  
VSVTISIGLAIWTLIHRKERIIRASQPFFLLAICCGTILLAATIIPMTFDVAPSHFMNEN  
GEFYDVSERNCRDWNVI EEEKQCVEMPQSTDRMMFACTSIVWLATIGTTIIISALATK  
TYRINKIMQA AKRFKRVQVRVRDVVWPMVAFWVFNVVILSLLTAFDPVHYDVAVNFDAF

GRPSTSNAYCDFNVYNHSHKYFAPIILLNSAVLWFALYQSWLARDLSTEFQSESEHIYKAVM  
VMLVVTFVGMGPVFIARRNLNANLFLGSAVIFVMCISVSLMLFYPKIRYIHGTENQRFTD  
SKKELIRSKTLVFNASRSSMVPFKPGEKDADGEI IYSAKSRRELI IENNKLKDELKNLEE  
SVQLEEEIKEQTSYSDDLNSNSELE

>comp12770\_c0\_seq3; 468 513 2095 LEN=2095; translated  
MGIEHIETYSYKCDILSNSNLP I PSVNILSDIDDRSVENTNANGSKDERASCNMVTLATL  
STHEGLPFRGGYEEALAVRLAIKHLNDGDGSLIKEVEGLDKKCNIDFNVDTIDTKYNPGE  
TLQSVVKRIESDSLGPFFLGAQPSFVTGPVAALVNMYGYPQISSENAQLTRQSVGRPL  
LTINFPDDVTTTKAFVWYLKKKKIKHLAVLVVNDQYGLGFLDRLQRQVAIEKDVLDVKPF  
YLNVDGSNLEETMIDIRNSMYRFILCLQHGTIRVHTMMKNAVQNNVAGNGKHNWFFIYD  
LPEELFDSIQNDFSLYKAYHGVGFFGPAGGKPSNHDSPSLYESFHKQLLALKEDEELIS  
SLVADNGNTSPPTQRNETIQFLNDESFLDLPSRDMLPYLYESAILAGLTACSTARDGIH  
LTGKEFNKA VRKNNFQSITGHVRFDANTGRRCDNSTYF SMVNHIGKHYDYFDDSN TSHSE  
GRDFEFWVTTDVLNEGKWEIAPFTYSSNSTDLPAVEPF EASGKKSX

>comp12771\_c0\_seq1; 275 154 945 LEN=1858; translated  
MATICLQLGSATASDTSSYSRAVAKNADDIASAKNGIVASSLEKLDVFDIGSELGVSYN  
PMELANWAPFLSPTS SVVTIQIRGSNSTKIDLQPIINTSFLLAGLVGASERREADGSRVLT  
TKPKVIPKIGAAPLRKKNNAVTVNLGNFELDGGDDDDVIDEDGLLDDDDVLAPPPAMGASTK  
DDDCAGRKPCDNCSCGRKEIYEAEQAGERGAADSSRQRPQVPSSDCGKCNLGD AFRASC  
PFLGKPAFKAGEEHIVLQMTDDL

>comp12772\_c0\_seq1; 572 80 1270 LEN=1669; translated  
MANDGKGPNERKRSPHLLSSVARSNSSSTPVASGGSQSPSPSPSTTTLYHPSIFRYTCTG  
KLALDSRNGGQSKASAGVCHGIQSKLEHIDHWRLSTREEAIKQFEYKSAMDYSSGAPEDD  
YNSGGDQAGASSAHAEQAVYLSNVLLYPPPPSSGSGTDDDEAEDGKDGRSKRIETMAM  
TSRKNSDGSTTIRPKEDKIDCYGSTEVLLVLRPQNAKDESIAGVASFCAPGMTLRDVAI  
SPTNIGIGSETGGRERTTTIRLGILEIVYASVLEGLEEDEPGNKDDDKNQGPNTANADPD  
QKSGPGVGEPLSKGWLFSGAPERFVSSGEKILKHSINGKLLYNSVQDDFPTRTYEASKR  
VTNEFHKTWDRTTGLMKKVASFALFGEDWDDDDNDE

>comp12773\_c0\_seq1; 200 1 996 LEN=1114; translated  
XAVDNVSSALRAECARGDGR IKRKEDDRRKNIKPSDTL FVVRK LQSCII LAVFSMNIDFA  
DDVFVRCSRCMREIFWLRIHLALI IASNYXALQVNFQEETTKREDLKMLFEPFGELVRI  
DMKRNYAFVQFGSVDEATRAKSATNGGRLEQSVLTVEYVARQRNRNDNGRRGRNRDD  
RGGGRYRDDRYDRDRGRRDRDFRMGDRGGSSMDYDDRGRGRDDFRGGRDDFRGGRDRSPY  
RGGSPGRGGDYRRRSRSRSRSPPRGDYRRDDRGGGYSRSPPRGRYDDRDRGRNDDYRDGG  
RGGGRYDDDRGRSPEMYRGNDRGRDDRGYRY

>comp12773\_c0\_seq2; 931 313 3222 LEN=3264; translated  
MFFSPAILLPLLSTLLAANKNRRTNSNYLKNTHHMLHGFVDQKQKQSDSDQLPSIFES  
TSAVWIDMENVRGKSGFALSHKEVLDKTELWTKHFLENRVI VVDHGGSKPTAFFKEDQ  
NLAVVFSGNCKADDVIAKGVGAPCF PFFGWQDADESADSSGTSSPRGKQRRAGGVGKTI  
VVTADNELMSRCRRAAKNEYHLVNPQTFLDLDLEWVANEVREKREREREQQQESDSNDEESS  
VSTATSEALSLEEEFKLSRLDTEIKLRGQLIDAEVQLGDRKRKGNITNKRRKKLEARVK  
SLKRKLALRGPSLLDQLTRAASEEVGSEESDEQDANRLLREQQDLLLEKWRELQYRPPRK  
EQTGDRVIYAERLRRLEADEQVTTDMIEIGSNESESEAKKSLSSARL FVQHVNDGELFA  
TTKQQRSTARATI INLEDAVLAKQNALLSSPAPKLTKEQRLALMTSGPVEQPEASSNRS  
ENESTYNLPPDVTVPLSPEMSTKERLQFKVDKDLQTLDIVVSDTHGFEGQLGDDL PKGD  
VLLHLGDFALEGSTEKESRGLAAFDKWLAKQPHDYKIVIRGNHDPFKVHFPTSKALYVTN  
PTSISVGGFECALVPHCNARKLSATKGLPPTCDLVASHVPPFKVLDRTYSGKHVGSFLN  
NFI RGMALGPPKLWLVGHIHEGRGVAKRTFAKNAKYARETTVINASNANMGCATHLEHGP  
IVVQINKEDSEVKILQMDKINRSIASEANA AFFRHPPAAADATKNDTTKATENSLGY  
NQLLMAVDLGLKSGVSLFDDRGNLLRYEQFLFDRENLOEDFEDI IYQWEKEAGGSGDDQE  
SSSSKITHIAIEGGDTALLDTWAQAAPYHSILRVSP EEWSELLSKKESQNGGTAK EAS  
RLIARQVVADFGTMDQHVGKFP TDVAESVCLGMVARRLGWI ERPAVRRYTNGNIVTPK  
KVKQPVL T

>comp12773\_c0\_seq3; 511 78 1325 LEN=1443; translated  
MDDRAVTS EDPVSENKDP TVGGDSADADGNANANKEAEGKESAENDGKEESTENGGVSSA  
AMRPIFLGNLKNYQADDITSIFHKPLDPPGSEPGA FKP I PVERLDQKRGYCFVFLKDAE  
NAADKDNAERYVAAISGMAVDNVSSALRAECARGDGR IKRKEDDRRKNIKPSDTL FVNF  
QEETTKREDLKMLFEPFGELVRI DMKRNYAFVQFGSVDEATRAKSATNGGRLEQSVLTVE  
YVARQRNRNDNGRRGRNRDRDRGGGRYRDDRYDRDRGRRDRDFRMGDRGGSSMDYDDR  
GRGRDDFRGGRDDFRGGRDRSPYRGGSPGRGGDYRRRSRSRSRSPPRGDYRRDDRGGGYS

RSPPRGRYDDRDRGRNDDYRDGGRGGGRYDDDDQGRSPEMYRGNDRGRDDRGYRY  
>comp12773\_c0\_seq4; 274 78 494 LEN=1029; translated  
MDDRAVTSSEDPVSENKDPVGGDSADADGNANANKEAEGKESAENDGKEESTENGGVSSA  
AMRPIFLGNLKPNYQADDITSIFHKPLDPPGSEPGAFFKPIVERLDQKRGYCFVFLKDAE  
NAADKDNAERYVAAISGM  
>comp12773\_c0\_seq5; 500 78 1763 LEN=1881; translated  
MDDRAVTSSEDPVSENKDPVGGDSADADGNANANKEAEGKESAENDGKEESTENGGVSSA  
AMRPIFLGNLKPNYQADDITSIFHKPLDPPGSEPGAFFKPIVERLDQKRGYCFVFLKDAE  
NAADKDNAERYVAAQWNEDYTNYDAFISSLPVLSHQCRARRINQSFRFTSGILDIVFA  
GRISCSFTDHYGCTHILLPPFANISSYHSTFSSIVSSALPIIHLYGIFHLHTYRNAIRI  
FLFLPTSSPSSSSFASLSTMYHNTSLNSTTDSYIAMVPCNCYEXAVDNVSSALRAECARG  
DGR IKRKEDRRKNIKPSDTLFFVNFQEETTKREDLKMLFEPFGELVRIDMKRNYAFVQF  
GSVDEATRAKSATNGGRLEQSVLTVVEYVARQRNRNDDNGGRRGRNRDRDRGGGRYRDRY  
RDDRGRDRDFRMGDRGGSSMDYDDRGRGRDDFRGGRDDFRGGRDRSPYRGGSPGRGGDY  
RRRSR.SRSRSPPRGDYRRDRGGGYSRSPPRGRYDDRDRGRNDDYRDGGRGGGRYDDDDQ  
GRSPEMYRGNDRGRDDRGYRY  
>comp12774\_c0\_seq1; 471 318 1130 LEN=1388; translated  
MMNRRAPVKEQKPPMNEEVPVGDIVTATNAKGDPEPLGIMSRDEALAKAKEMGGDLI  
LLNPNSDPPVCKIADYSKYRYMKEKKAKEVKKNSKATEIKEVKMSYKIDVHDYEVRRKNA  
LKFLKQGNRVKCSVMFRGREVQHDKLGYLELKLAEEMEDMCTREGRPKREGRNLSMIVT  
PRPEVVKQVNADRRANEKAKKKKKEQRLKKKKEVAEAAAAASAVPASIEVSKDENVNGKS  
GDDLLDLEKDISSLDDLFGSDDLTDLLFS  
>comp12775\_c0\_seq1; 719 1 2315 LEN=2454; translated  
RDLNTDFLIILKDLLARRKNLKLVLMSATLNADSFSSYFGGCPVVSIAGRAYPVQENRL  
EDILELTGYSVEEGDYALKTGPNRPVKMSKSALRRLYPKYSKETIHSLSIVDENVINY  
ELIAELLEHISLNQEGEAILVFCPGAFAEITKTIEEMYKKEYFQGNVVIYPLHSSLSTDE  
QVAIFEIPPEGVRKIVVSTNIAETSITIEDVVFVVDTRGVKENRRDEVNETPTLEECWVS  
RASAKQRRGRAGRVRPGIAYHLYSSHTHDDMLEYQLPEMLRVGIEDLVLQILILDGEP  
TSFLKKALDPPSNLALSNSLKLLEELGAVDCQWKNRKSMAFSSKKEKENAEDDLVSSSEL  
TALGFHLATLPVDPVGVKMMIYGALFGCVDPLLTFAAAMSARSPPFVSPFDARDQADAARK  
TFAVAGSDHLTILNAFNQWSELRRTEGNRVVNEFLKENFLGRLLTFQMEDLRKQFHSLLT  
DIGFLPRKFRKSDSDHACNNNSEIKXLIKAVLCAGLYPNIIVAPRSVVAKPGLAPKSNK  
KVGENAFRSHSKGEVYLHPSTIAFDESKLESRYCCYHELIRTSKTYVRDCTTVSPFALLL  
FGGTLEVFQTHGVCSVDGWLKFKIDAKPATLIKYLGRKMERLLFQKIVSPHEDVIESEEG  
KALIQSISRFLFETEEQQRKVEAAKIPDRRGGEIVRPWTGIEDENERLRDIQEEANRRNSG  
NRNGTHNSRRSKNTEESCNGRDNPNPSREGRGGRGRGGKKGGRSGMGRGSR  
>comp12776\_c0\_seq1; 184 759 962 LEN=1128; minus strand; translated  
MTHRYLPLSRPMRLTLTSLPLSALLTSFRAIKLVDEESLLVAIEPTGDSGVLYPRRKPLI  
RVVPVKA  
>comp12776\_c0\_seq2; 184 609 812 LEN=978; minus strand; translated  
MTHRYLPLSRPMRLTLTSLPLSALLTSFRAIKLVDEESLLVAIEPTGDSGVLYPRRKPLI  
RVVPVKA  
>comp12777\_c0\_seq1; 1109 81 3530 LEN=3537; translated  
MGVPAFFRWLTEKYPKVLQDVEEERVKLVGGDGNVRAPFDSTRPNPSGLECDNLYIDMNG  
IIHPCSHPEHGPQPKTEEMEYENVCHYVDRLFRIMRPRKLLYLAIDGVAPRAKMNQQRSR  
RFRSAQEARENLEVEENIRNELIKNGQKVPKAWDSNVITPGTFMRLRLADFI RYIR  
KRISTDKAWQNIRVIFSDASIPGEGEHKIMSHIRLQRSQPGYSPNLVHVLHGLDADLIML  
ALATHEAHFYISREEVMFGRKSQEMAERRQNESGFRDRQRQFDEEAGDMAMQLIENKQTP  
ICRVSIPIREYIAVDFAQCIDSRLPFAPSLERLIDDIVFLGFFVGNDFLPHLPSLDIR  
DGAMDYLFNVIKRLPSLGDYITNHGGQVNLSHVDVILA EVGSI EDYVFTMKHENEMREK  
ERREQFKARKKHANGRSLDDPRNALQKKTKVMGRAARILEKEKAERSLKKEVKGKFNIS  
HMSKDNLKAVALKESFKKSATKNEEDHDKVKNVLDLDPDKKDQDNKHEVCTESKKKRK  
INEVNGDAEVIKDTNTSGIGEVGNI DEEFEDDGEDEDESPSDIAAAFKERVKDEQKKLD  
EYARTVEDKVKLHEKGWKDRYYSKCKADDVANHGGRHLFRSYVMGLCWVMKYYYEGCP  
SWKWYYPFHYAPFASDLRNIERYQKDVMSFELSTPFSPVEQLMGVLPDSSSHAI PKAGR  
LMSDLESPIIDFYPPSEVPVDPNGKAMPWLWVLLPFIDE DRLLAAMTPTMSKWKQELLC  
NARGLDDGYVFLHSSHPLAPKFHVHLEQEGKTAKASKQKISDAASYGCPGFTGFLRPPLGN  
EIIPESEVVAPPEISSKAVMTSEDNLF TDGISKNMCLCAAFSEPPKLSHKSILLPGTILP  
QPVLLDEDKRISRPLNRGGQSIAFMGGDQRQSHQSGRGS MNISSYERDLAQRNGRGGDM  
NKAGTRSWGSFEPTPKRQFTARNPFHGNARGPPPPPPRRPPFQQHQDPRHGYRQNYNQOR

NQRNQQQHARHPNYNNNLPPFQQNPNQGYQNQQYQGHQMPPRGGHAGGYHNYSFNQRQQQ  
PRGSNQYNSRGNHQQQSQQRFDGRHNTAGPSIGGRNASGAVTNNVMNSLKAQLKNTLK  
QNRREGNDRR

>comp12777\_c0\_seq2; 663 81 2084 LEN=2084; translated  
MGVPAFFRWLTKYKPKVLQDVEEERVKLVGGDGNVRAPFDSTRPNPSGLECDNLYIDMNG  
IIHPCSHPEHGPQPKTEEEMYENVCHYVDRLFRIMRPRKLLYLAIDGVAPRAKMNQQRSR  
RFRSAQEARENLEVEENIRNELIKNGQKVPKAWDSNVITPGTFMRLRLADFIREFYIR  
KRISTDKAWQNIRVIFSDASIPGEGEHKIMSHIRLQRSQPGYSPNLVHVLHGLDADLIML  
ALATHEAHFYISREEVMFGRKSQEMAERRQNESGFRDRQRQFDEEAGDMAMQLIENKQTP  
ICRVSIPIILREYIAVDFAQCIDSRLPFAPSLERLIDDIVFLGFFVGNDFLPHLPSLDIR  
DGAMDYLFNVYKRILPSLDYITNHGGQVNLSHVDVILAEVGSIEDYVFTMKHENEMREK  
ERREQFKARKKHANGRSLDDPRNALQQKTKVMGRAARILEKEKAERSLKKEVKGKFNIS  
HMKSKDNLKAAVALKESFKKSATKNEEDHDKVNEVDLDPDKDQDNKHEVCTESKSKKRK  
INEVNGDAEVIKDTNTSGIGEVGNIDEEFEDDGEDEDESPSDIAAAFKERVKDEQKKKLD  
EYARTVEDKVKLHEKGWKDRYYSKCKADDVANHGGRHFLFRSYVMGLCWVMKYYYEGCK  
LFHLVVVP

>comp12779\_c0\_seq1; 218 211 1106 LEN=1106; translated  
MWQRTRTAAGPWIGVLCAAAIAAGRHSKSDGTPSESQSTGQGTHTALAEALSPVVRGLHG  
SGAGALLFPGDRPAPAFGAPLRARDHPGGDGEAYQNHPPTRSRSSPLLLATSSASPRRDP  
VATPGRGTAPGHAIFGTWGGGAIERYDVYRPASPEAARETAGERNRRETEREKQRLGRR  
GKSKSKSNNHAKSKSTTDHEELVVEADVRFVTRNLNGHTGIVHGGILSLVFDLDMGFACDE  
MRGSGVPRGMPVTANLSVDFRAPVPEGTAVKVEIFLDRREGKLFWKAYMLGDNDDDDX

>comp12780\_c0\_seq1; 444 1 1525 LEN=1853; translated  
XKKPTDGSEERYTYRYPYDRFGKVLNSRWTTERTVKEAVSRVYVSECDNAANEVASILSGLA  
KTLQDDGHIPAIVQSSHLNVLVSTAFHHAIKATNSGWQLATTIETSSSEAQFVDVFPYW  
MHESRAVKNTFDLSSMILLTAPNMSGKSTLMRSTAAAALLTVCGLCAPLSSGSRISRFDT  
LFLRGASSDVPTEDKSAFGAEMGDLAALFRCSGPKSFVVFDELGRGTSPRDGTLAGAVL  
ESMADRGMGIFATHLHGVLDPKRDRIILTKRIKIDRDERGTGTVEWTHELEDGFCTDSM  
ALVTAERFGLPEDILRRARELTVSVPGMIQGQDNCGAQSTENDRDPRAVLSPSDDQVAGH  
ASPEAVTTDNQWKEFKNLCHQEFRDVVGGLASELLVEANVTSTVEVPPRHPPPSLSNRSCL  
YILQLVPKSRSSITGVRYVGETDSISKRLSQHRKKGAWGCSGAFVFPGLGNKSQARYYE  
SALIGELARAGYSLESIVDGRTLHRMRD

>comp12781\_c0\_seq1; 209 1 1044 LEN=1111; translated  
RALSYRTQWQSLRKNVSRRTTILIKHAQDINLIMYLQRLNIGDEATKQQSCIFMNKEDGSN  
ARDRETKANTGISSRNHRVTSSGSEVRANRFLRVHLQVLKALYQODTSSDSSFEDHLVEE  
KHWEFIKCFKERDECAALVQRAQRMSGIYNEAMEFQKNADQFPLIDDEITAHFRFGSPQF  
NRFNSQKRNMKGTSSSLPRSSALVLITQPSPRYQSNRPYHTWTRTGNRSGSKSKQLDHDV  
DKDTGNAFGIVSGLLKRKHLASKHLSQRTKLRALKKESQSRIEFLNSRLVAIKAREKS  
LLSDFGASREDFLKGKEECEDCQVRIETKRLRLWKLHLLHDLIGTILIK

>comp12782\_c0\_seq1; 405 216 2341 LEN=2730; translated  
MQQRWDHRTTLACRLRVVFFFLTVLGAIVSEYQEQRALLFHGVEISKGSISPREDW  
LLDQPIVTRPTEGKPAEILFGGVTTTIKNI STNATTSIESGIAEKASQGATSLRTPSA  
NKTISKEMITKLSQKALPTNLQARRMPLEQMPNHQNMVSASLVKNFSEPPPTENNTAV  
VLVAMGKVSNNMVERCVRSIRVGGKFGGTIVVITDGDGYARYSETLLGNTVAAANASTA  
TNRIGRHIDSKQRQIIVMENREEDRTPKTKDGTVDVKHYKKRVNMYKRYKTLVLKYIEQA  
FEYAYTHDKTDHSNRVLPKHALYLDVDNIVTRPLSGFFEDYDYSVRLQLVNSIQQGA  
TSSKNTFDNETTETVESSGEFSFWSFWRDPHIRTCKATEHLWQSGQIMLSTEHSSQCLDA  
WRYEMDHTPHNMDQAVLFQMYAKNSTNKFCRFFELPSGGSKEQESDGSNSNPSKNSKPKN  
RHFQLLSLELAGGIHRSYPTIVHVTRSRLEFRDCKKSHFRFLENSLYLNGNASSENEPNP  
RQSTGTIDPHTIDSGMTLKGNGVTWKIIDSFVEVDLRQKRKDKRRKKREHNKRKQENL  
DHRKENTNKXKEEKEKEALRGDGLKEAKQKTKDKE TMDGAI TERKRRGLRSRTNNQMS  
NFVVSVDSDSIFLPWMRVVGCIEQASLNENCSSQNEQFLPARETQYSP

>comp12783\_c0\_seq1; 203 19 827 LEN=1436; minus strand; translated  
MFVSSGFFIGFNPSNNLGNDRDGTXLILAAEFASPPERALPRATKSGGEKRAPARTDLF  
FLLLSFRLLTDFPGPLYEREDLAEAVPHRGIDHLPEAALLERKHGAGFLVFEVAVVLCV  
LYEGRPVRKEFKELVVEDCHLLGVLVLEAAGQLVQHVGPEEDRLLGNLDPVWRWFGAR  
VLSAPQQSALLVAPAEQHDVVARRQKSRGLFERSHRVRCRRQQRSGRFSRCPVLDARELD  
RLNGFPPPVVHLAVVVVPPFLTENNHFRA

>comp12783\_c0\_seq2; 1004 1 4422 LEN=4644; translated  
XATTRISTASVETAEIVFQSFAGFLGGIRPVIRLHESPEVREGATQIRDWLVQTLATSNG

LGEVLVYYATAPVSLGLVAKMEETITDQSI AEQVAKDDVSES AKKYGAWYSFSSNYKGQS  
SGIALSKSRVLEFLSGMTPGDFDLEGIQARGVVKDSNPNGVATLDAAWSSIRLLSEWASH  
VEDIAETHLETPLCTKQEFPLEGEANDIITKLSPOQLLCTAASMPILPYSDSRLSSLWQS  
LNLSAFDLLLPHLHSTEGEQDPNPLSIVLNLLNTCIAQATFTLPKAKMADSLLLRILV  
QSARFPSLLKDIVERGIRLAGEGDPKRLAETNKQDFLNAFLGLQILSCCVASAPTVDVV  
LNLKESGLVDKLVGALFAPGVLDLSGSQAI FSTEGSILRMRMAAGCASVLSLWKNIR  
FLSQGTASDKESLWKEVDQRQSVFISKLVFVVSQYANTDNLDKRIDVSNETEFARVSTM  
SFMTSAFEIITNAHVYESSKEGQATSSTTDVLKFKSKCRRLIRAENYSMSVRSTKEIWEI  
AKDAGLKQQDPAALLSSFPVAVSSTLQPNNFYRKENSFDLSSLAKWLCIGGAEMDDDDYI  
NDALDKASLLHHLTASESSLMEAWKHFL EIAIFNVYYSNGCVITGSNMQILKNMTLETFL  
SLNDNLASGAAQTSSTPFMSREICQMSSSLGDLFLFQLEIGAFDLLPLDELKIALAL  
SESMKSLQDVSCPRLTGESESNPLLQEYCTQHQTLLSCALVICGLIEKHECSRDPDHGEQG  
DIYTSLCLTNCTFVRAFSQLCNKKNISAKTNTTIIRSCASLFTFLVIGYQSDHSSDSSYT  
NLLSKSFHEYEVLKLLMQYATYLSFVKEKLNSSSKNQIPSEEDRDILEAIKAVFNLLYAI  
ADTNDPEIISTLYAVEFSQLAVRNPLFNLRGPSWSQQDQMQAQRGYIFKRETVMISNEQ  
SSIYVGSSEDSVYEIWLASMQVLGACVRTSSHYLNKSGSNDLSTGFLEMAIEFLRVHRSPL  
LACLQSCVQPSKMTLALREAKELLAMVAELCKRNVRKSFVSSNLDLCEEFEIHTKVVT  
SLSKFLGAVGTSCELFATIEEYESTDQDRFDDLKSAPLSQLRLLSLLSIGLPMKQKAMRL  
SNFAASRLEKISQDDFQAATVVPDHFKSLCQKRVYSESESERICRQSVSNEFSLDLVKASA  
ECICQALSLLVRTHAMSKSFYVFEADRAIDVMNLVEPGIVIGYRPNVQIMLFGSSGFG  
SLRFRVLSVDTFSRTWEVVLRQEGNNDYSEVHDGRRETQAVQLAGIEDRSARKPSTS  
LLSPAPDTMASFEKAPGFLTTGNYIMLLRWCHQQSTLLRGGEDASSEPPPYVRQIAEQAS  
ILLGADLVHELTSFEHKDPKEMAILDDQLFELFADGTALVENAKNDSLENEEPSAVF  
XVPGGPPQGGDRFLGVERPPGPGPPVRKAGLESP

>comp12784\_c0\_seq1; 380 157 1194 LEN=1267; translated  
MRSFSDIGSLSLVLSFAVLAMMPSATATTVAIPAFEQPWGAVAKASTMGMSTSKQTLFEL  
RGGGIFGGGKSTSQIYRESLEDQVILLNEQLRQARTEVTTLRENAKQRQESVAAERSAA  
RAANPETKLSKEDEKAQKQQKQERLEKDRQEKETLKRLEREIGQLEKMKAELESLL  
ETSAKKIEELEEQLRSQDSL TAKLEETYQKKIAALEQQLSDLQASQLEKLVNQQKLD  
AVKEALKAQEI KFLDRMEETTQRLTKEHAKAMEQEKLRSSKAVDAERKKMRKLVRALALR  
EKKLKLSDDQAEKETASKTTATMTMRTGSSSFANPIKPPTRGTI

>comp12785\_c0\_seq1; 301 1 1075 LEN=2020; translated  
XNSSSDVCGINRSNRFILWYCTMYNPIQSSGTTQDNIDVPEPNNILPFDIDADEIDGV  
CDNDNDDGGSWSREDLVISNRVLSRQLWLYLSHFFALFSEDYWQFSVVLFLSAISNFQS  
ILYISTFGLSLNVGSLFATPWIGSWIDRRPAGHKLGVTLVLAAKHVTTIIMLAVLSWMIL  
RIALPLPQPGEDNTTSSDSNVESIPIGGMFVIFAIIVFGTVARVLDQTFNNIIIERDVV  
VLSECAGGTEQSQTWLSKTNAALERISLVAKIVVGFVFEENYQLTCLCIGIVATIAWI  
VQYICARIFQLVPALEHLKDDGLPYVDNMDAVGTL DVERDFNLEDEQEDIAVPKNRW

>comp12785\_c0\_seq2; 443 1 1726 LEN=1875; translated  
XNSSSDVCGINRSNRFILWYCTMYNPIQSSGTTQDNIDVPEPNNILPFDIDADEIDGV  
CDNDNDDGGSWSREDLVISNRVLSRQLWLYLSHFFALFSEDYWQFSVVLFLSAISNFQS  
ILYISTFGLSLNVGSLFATPWIGSWIDRRPAGHKLGVTLVLAAKHVTTIIMLAVLSWMIL  
RIALPLPQPGEDNTTSSDSNVESIPIGGMFVIFAIIVFGTVARVLDQTFNNIIIERDVV  
VLSECAGGTEQSQTWLSKTNAALERISLVAKIVVGFVFEENYQLTCLCIGIVATIAWI  
VQYICARIFQLVPALEHLKDDGLPYVDNMDAVGTL DVERDFNLEDEQEDIAVPKNRWS  
ISIYLEQSFVPAGISLALLYSNCVTFGNGMLSSYLLNRKIHVRTIGVLRGISSGVLLGT  
FGYTLMLRFCSLETTGLWGVAVQALSGLASIFLSVNHKDTLTNDIFLQLFIILVISSR  
LGLWIFGISVIQLQQETPEKYRCLVGGVQESLNALLNMIANGIGLIFTHPDDFVYISTS  
GFISVTLAFFFFLGIPLPRRNATRELQTCNNGKN

>comp12786\_c0\_seq1; 297 403 1139 LEN=1207; translated  
MDTANQSLSSRWELALIFECEGLVKSSERAVGILKELANITIDRTTGKPSIPEENE  
LYETNSSESKYQTFAMKKIAKCYLEGEVGPXDTNVAVAWMKAFLVKGKDCDAADLAVMF  
EYGHGIEIDVVAAEWFERGATGGNIESMVELGLCYELGCGVEQSDELALAWYTA  
GNPTAKYSVGEIFEEARGVPPQSDDEACLWYYRAALVGCDDSKLALRRLYDIARIVVPGVT  
AIIISD

>comp12787\_c0\_seq1; 1171 76 4044 LEN=4277; translated  
MSQPTCSPDPISKSVISIVKEIRSSLFLATSVIGDNVLLGSISSCGNCRKSSTFQFECG  
RLKYSHVKGKWSILHRPIPCNDPDDIEEPKLSNSKKNGVAMVVASLWPASKEHAGKPIR  
KKSSQKRKRRLYDEEKNTLCAMDENNVGCVSDLEDDHSMTEASTQPLPSRSRSGEVQRNE  
QMMPPIELVRCLLYLAEFVSYLNCARREVETSIQTSTHDENDVLNVNANRNGSEKRNIG

NLNDAEMNFTRTAKFRPRQFTKKMKHGSINLQPLLIASMVHDSTFSSPKSSSLSAIIRLK  
EDGTNVARPPRGAIVLQLIDECIRFAHTHTLDLIDSWSSSWETRITYLQSEIMEEIVDNEN  
QLLSMAGTKTVASKSRVERRLHKTGKISSEAKAVITGFVRSCLAHPLEETSESNRTLGS  
TVPSQSNHNEKNKEFGNIESTLSSKSKRKSMLRRSFISAHEPSDSLATTISITERRNKCDH  
RLRANLLL SKKTTGLTTDKEGHSRRRSSCNISRPSPSVLETTKTRISRRMIRKALTNSNS  
ERKIAAQLGKGIKTHRSNEGSTTHIGKPSVVNNSDYGGHNPDFTVKCKTGVSDKTSAGS  
LNVFSENEDEENGNDILNLTKEKKCSNNSGCVASPSKQESKNRNVEPTLSRTFRWDGVVT  
SPLVGNQKKIENKNISFESSVLDPKLNGRNGDDTSLGEYCMVKDQCRHEDNAAKKQSSIG  
IKERSLKLSPPRELCEILKLFQSSVEKQDIHTESSANNHHSNHCEVDGGRVKNKDEN  
NRTKYIGAETLNALAEPLPWVRLTHVGHISDYHGYKRRYEHIAPLHFGTIDDIRKQIG  
RTLVENSGDNEENDED IKENADYERAIKEHELLAEKERSVRAKVKNESNQEARKSKEE  
VQNSMSVMFSLPTNAPNAMISLSTKDSAHDRINNIFFDFESELQPPAKFKFFDEEDSILF  
NVDENSKDDSRTRSRS AQMVAQKKTISIQLNQLMLHSLDFIEKYNRKPKVEVTKLRNEKRE  
EVVAIESKTEKETTVAFTMENVESENSENEHEGDFSAKKCERTAKCDRRESSDENTDP  
VEFKPLFVPLPTAHLENYKALQKQYSCFRPLKAKGDI EGVIDEIRSILNEDDLLYEYLK  
QKEFVLEEKELSRCIRGYSNKADQEKIEKKNFEEEQKLRQHEFEYYHQHKFKKNTPENIE  
WKKMFTRRIRYVGSNAPLPTSFERCRLKPRCLICDPILRDKSPDESVIYFPGFRQVKEDI  
YIPCAIDSSKESTVRRNTSYKRRVKLASSLKLLELFFHTFEFIRDYNNGMIVSRKKRRKKV  
FF

>comp12787\_c0\_seq2; 749 76 2481 LEN=2598; translated  
MSQPTCSPDPISKSVISIVKEIRSSLFLATSVIGDNVLLGSISSCGNCRKSSTFQFECG  
RLKYSHVKGKWSILHRPIPFCDNDPDDIEEPKLSNSKKNGVAMVVASLWPASKEHAGKPIR  
KKSSQKRKRRLYDEEKNTLCAMDENNVGCVSDLEDDHSMTEASTQPLPSRSRSGEVQRNE  
QMMPPIELVRCLLYLAEFVSYLNCARREVETSIQTSTHDENDVLNVNANRNGSEKRKNIG  
NLNDAEMNFTRTAKFRPRQFTKKMKHGSINLQPLLIASMVHDSTFSSPKSSSLSAIIRLK  
EDGTNVARPPRGAIVLQLIDECIRFAHTHTLDLIDSWSSSWETRITYLQSEIMEEIVDNEN  
QLLSMAGTKTVASKSRVERRLHKTGKISSEAKAVITGFVRSCLAHPLEETSESNRTLGS  
TVPSQSNHNEKNKEFGNIESTLSSKSKRKSMLRRSFISAHEPSDSLATTISITERRNKCDH  
RLRANLLL SKKTTGLTTDKEGHSRRRSSCNISRPSPSVLETTKTRISRRMIRKALTNSNS  
ERKIAAQLGKGIKTHRSNEGSTTHIGKPSVVNNSDYGGHNPDFTVKCKTGVSDKTSAGS  
LNVFSENEDEENGNDILNLTKEKKCSNNSGCVASPSKQESKNRNVEPTLSRTFRWDGVVT  
SPLVGNQKKIENKNISFESSVLDPKLNGRNGDDTSLGEYCMVKDQCRHEDNAAKKQSSIG  
IKERSLKLSPPRELCEILKLFQSSVEKQDIHTESSANNHHSNHCEVDGGRVKNKDEN  
NRTKYIGAETLNALAEPLPW

>comp12788\_c0\_seq1; 372 266 1606 LEN=2436; translated  
MKNRKS GVS KAIWGSVLLMAVTATVTNALPEIHTKPQDTTASGLLYPWLTRDRGDESSP  
LLVLNEADVRNNDLDDIFISRIVGGDAASVGEYPYFVQPLAVGCGGVLIANEVLSAAHC  
GDFSKRFDYNTGREKQMQVIGNTQRTSINNGVAQVRYCMEYVINPGFEFRGDSIDADNF  
NAPFHYDYALCKLDVPVYVDDR TVVLKLHTDSSNAFPVGSDVTAVGFGTSMGGDVSQ  
DLLKVTVQVNSNQCATTSPGATDKIERLTRDIYNENSITEDNICASVRGGGKDSQCQGD  
SGGPLVKKGEVPAGSKLRRIDTHVGVVSFGLGCALDHFPGVYARTSFAIDFINRTVCGQS  
RSPMCKEWRDGPVVCDPSTEQLLLIQVVT DANPDQTSWSLSSTNSGSDDVLQPILRSADDY  
DQPPFFVYEVRLFIEVFVCPTSASVFV

>comp12788\_c0\_seq2; 372 199 1539 LEN=2106; translated  
MKNRKS GVS KAIWGSVLLMAVTATVTNALPEIHTKPQDTTASGLLYPWLTRDRGDESSP  
LLVLNEADVRNNDLDDIFISRIVGGDAASVGEYPYFVQPLAVGCGGVLIANEVLSAAHC  
GDFSKRFDYNTGREKQMQVIGNTQRTSINNGVAQVRYCMEYVINPGFEFRGDSIDADNF  
NAPFHYDYALCKLDVPVYVDDR TVVLKLHTDSSNAFPVGSDVTAVGFGTSMGGDVSQ  
DLLKVTVQVNSNQCATTSPGATDKIERLTRDIYNENSITEDNICASVRGGGKDSQCQGD  
SGGPLVKKGEVPAGSKLRRIDTHVGVVSFGLGCALDHFPGVYARTSFAIDFINRTVCGQS  
RSPMCKEWRDGPVVCDPSTEQLLLIQVVT DANPDQTSWSLSSTNSGSDDVLQPILRSADDY  
DQPPFFVYEVRLFIEVFVCPTSASVFV

>comp12788\_c0\_seq3; 223 805 2222 LEN=2395; translated  
MKITIIYKVQPLAVGCGGVLIANEVLSAAHCGDFSKRFDYNTGREKQMQVIGNTQRTS  
INNGVAQVRYCMEYVINPGFEFRGDSIDADNFNAPFHYDYALVSYIARQIVSPRIFRFSC  
MSRRTIWLFRSLMHCARTINTVLNLT LRNFQCKLDVPVYVDDR TVVLKLHTDSSNAFP  
VGSDVTAVGFGTSMGGDVSQDLLKVTVQVNSNQCATTSPGATDKIERLTRDIYNEN  
SITEDNICASVRGGGKDSQCQDSSGGPLVKKGEVPAGSKLRRIDTHVGVVSFGLGCALDHF  
PGVYARTSFAIDFINRTVCGQSRSPMCKEWRDGPVVCDPSTEQLLLIQVVT DANPDQTSW  
SLSTNSGSDDVLQPILRSADDYDQPPFFVYEEVCLERGSYTFDIQDEAGDGLNNSRFA



GGLDMTQAGGFYSLRLDGIQYRES DIGXSAYKGHQYLTITTTAIRSDSSAR  
>comp12788\_c0\_seq4; 355 199 1689 LEN=2256; translated  
MKNRKS GVS KAIWGSVLLMAVTATVTNALPEIHTKPQDTTASGLLYPWLTRDRGDESSP  
LLVLNEADVRNNDLDDIFISRIVGGDAASVGEYPYFVQPLAVGCGGVLIANEWVLSAAHC  
GDFSKRFDYNTGREKQM QVVIGNTQRTSINNGVAQVRYCMEYVINPGFEFRGDSIDADNF  
NAPFHYDYALVSYIARQIVSPRIFRFSCMSRRTIWLFDRLMHCARTINTVLNLT LRNFQ  
CKLDVPVYVDDRTVVLKLHTDSSSNAFPVGS DVTAVGFGTTSMGGDVSQDLLKVTVQVN  
SNQECATTSVPGATDKIERLTRDIYNENSIT EDNICASVRGGGKDSCQGDSSGGPLVKKGE  
VPAGSKLRRIDTHVGVVSFGLGCALDHFPGVYARTSFAIDFINRTVCGQSRSPMCKEWRD  
GPVVCDPSTEQLLLIQVVT DANPDQTSWSLSTNSGSDDVLPQILRSADDYDQPFVYEVRL  
LFIEVFVCPTSASV FV  
>comp12788\_c0\_seq5; 259 872 1948 LEN=2515; translated  
MKITIIYKVQPLAVGCGGVLIANEWVLSAAHCGDFSKRFDYNTGREKQM QVVIGNTQRTS  
INNGVAQVRYCMEYVINPGFEFRGDSIDADN FNAPFHYDYALCKLDVPVYVDDRTVVLKL  
HTDSSSNAFPVGS DVTAVGFGTTSMGGDVSQDLLKVTVQVNSNQECATTSVPGATDKIE  
RLTRDIYNENSIT EDNICASVRGGGKDSCQGDSSGGPLVKKGEVPAGSKLRRIDTHVGVVS  
FGLGCALDHFPGVYARTSFAIDFINRTVCGQSRSPMCKEWRDGPVVCDPSTEQLLLIQV  
TDANPDQTSWSLSTNSGSDDVLPQILRSADDYDQPFVYEVRL LFIEVFVCPTSASV FV  
>comp12788\_c0\_seq6; 197 872 2278 LEN=2278; translated  
MKITIIYKVQPLAVGCGGVLIANEWVLSAAHCGDFSKRFDYNTGREKQM QVVIGNTQRTS  
INNGVAQVRYCMEYVINPGFEFRGDSIDADN FNAPFHYDYALVSYIARQIVSPRIFRFSC  
MSRRTIWLFDRLMHCARTINTVLNLT LRNFQCKLDVPVYVDDRTVVLKLHTDSSSNAFP  
VGS DVTAVGFGTTSMGGDVSQDLLKVTVQVNSNQECATTSVPGATDKIERLTRDIYNEN  
SIT EDNICASVRGGGKDSCQGDSSGGPLVKKGEVPAGSKLRRIDTHVGVVSFGLGCALDHF  
PGVYARTSFAIDFINRTVCGQSRSPMCKEWRDGPVVCDPSTEQLLLIQVVT DANPDQTSW  
SLSTNSGSDDVLPQILRSADDYDQPFVYEE SVCLER GQSYTFDIQDEAGDGLN NRSFKA  
GGLDMTQAGGFYSLRLDGIQYRES DIGARRTRVINTLPSLLPQSDPTP  
>comp12788\_c0\_seq7; 317 805 2264 LEN=2508; translated  
MKITIIYKVQPLAVGCGGVLIANEWVLSAAHCGDFSKRFDYNTGREKQM QVVIGNTQRTS  
INNGVAQVRYCMEYVINPGFEFRGDSIDADN FNAPFHYDYALCKLDVPVYVDDRTVVLKL  
HTDSSSNAFPVGS DVTAVGFGTTSMGGDVSQDLLKVTVQVNSNQECATTSVPGATDKIE  
RLTRDIYNENSIT EDNICASVRGGGKDSCQGDSSGGPLVKKGEVPAGSKLRRIDTHVGVVS  
FGLGCALDHFPGVYARTSFAIDFINRTVCGQSRSPMCKEWRDGPVVCDPSTEQLLLIQV  
TDANPDQTSWSLSTNSGSDDVLPQILRSADDYDQPFVYEE SVCLER GQSYTFDIQDEAG  
DGLN NRSFKAGGLDMTQAGGFYSLRLDGIQYRES DIGXSAYKGHQYLTITTTAIRSDSC  
KHKQLASLHNPTLFL LASDSGLTEHFIFPCHFLFIKLCPTFTVTD SNDLMITSFPM DMAL  
LHELIN  
>comp12788\_c0\_seq8; 353 199 1730 LEN=1903; translated  
MKNRKS GVS KAIWGSVLLMAVTATVTNALPEIHTKPQDTTASGLLYPWLTRDRGDESSP  
LLVLNEADVRNNDLDDIFISRIVGGDAASVGEYPYFVQPLAVGCGGVLIANEWVLSAAHC  
GDFSKRFDYNTGREKQM QVVIGNTQRTSINNGVAQVRYCMEYVINPGFEFRGDSIDADNF  
NAPFHYDYALCKLDVPVYVDDRTVVLKLHTDSSSNAFPVGS DVTAVGFGTTSMGGDVSQ  
DLLKVTVQVNSNQECATTSVPGATDKIERLTRDIYNENSIT EDNICASVRGGGKDSCQGD  
SSGGPLVKKGEVPAGSKLRRIDTHVGVVSFGLGCALDHFPGVYARTSFAIDFINRTVCGQS  
RSPMCKEWRDGPVVCDPSTEQLLLIQVVT DANPDQTSWSLSTNSGSDDVLPQILRSADDY  
DQPFVYEE SVCLER GQSYTFDIQDEAGDGLN NRSFKAGGLDMTQAGGFYSLRLDGIQY  
RES DIGXSAYKGHQYLTITTTAIRSDSSAR  
>comp12788\_c0\_seq9; 300 805 2414 LEN=2658; translated  
MKITIIYKVQPLAVGCGGVLIANEWVLSAAHCGDFSKRFDYNTGREKQM QVVIGNTQRTS  
INNGVAQVRYCMEYVINPGFEFRGDSIDADN FNAPFHYDYALVSYIARQIVSPRIFRFSC  
MSRRTIWLFDRLMHCARTINTVLNLT LRNFQCKLDVPVYVDDRTVVLKLHTDSSSNAFP  
VGS DVTAVGFGTTSMGGDVSQDLLKVTVQVNSNQECATTSVPGATDKIERLTRDIYNEN  
SIT EDNICASVRGGGKDSCQGDSSGGPLVKKGEVPAGSKLRRIDTHVGVVSFGLGCALDHF  
PGVYARTSFAIDFINRTVCGQSRSPMCKEWRDGPVVCDPSTEQLLLIQVVT DANPDQTSW  
SLSTNSGSDDVLPQILRSADDYDQPFVYEE SVCLER GQSYTFDIQDEAGDGLN NRSFKA  
GGLDMTQAGGFYSLRLDGIQYRES DIGXSAYKGHQYLTITTTAIRSDSCKHKQLASLHN  
PTLFL LASDSGLTEHFIFPCHFLFIKLCPTFTVTD SNDLMITSFPM DMALLHELIN  
>comp12788\_c0\_seq10; 242 805 2031 LEN=2414; translated  
MKITIIYKVQPLAVGCGGVLIANEWVLSAAHCGDFSKRFDYNTGREKQM QVVIGNTQRTS  
INNGVAQVRYCMEYVINPGFEFRGDSIDADN FNAPFHYDYALVSYIARQIVSPRIFRFSC

MSRRTIWLFDRLMHCARTINTVLNLTLRNFQCKLDVPVYVDDRTVVVLKLHTDSSSNAFP  
GVGSDVTAVGFGTTSMGGDVSQDLLKVTVQVNSNQECATTSVPGATDKIERLTRDIYNEN  
SITEDNICASVRGGGKDCSQGDSGGPLVKKGEVPAGSKLRRIDTHVGVVSFGLGCALDHF  
PGVYARTSFAIDFINRTVCGQSRSPMCKEWRDGPVVCDPSTEQLLLIQVVTANPDQTSW  
SLSTNSGSDVLPQILRSADDYDQPPFFVYEVRLFIEVFCPTSASVFFV  
>comp12788\_c0\_seq11; 242 872 2098 LEN=2481; translated  
MKITIIYKQPLAVGCGGVLIANEVLSAAHCGDFSKRFDYNTGREKQM QVVIGNTQRTS  
INNGVAQVRYCMEYVINPGFEFRGDSIDADNFNAPFFHYDYALVSYIARQIVSPRIFRFSC  
MSRRTIWLFDRLMHCARTINTVLNLTLRNFQCKLDVPVYVDDRTVVVLKLHTDSSSNAFP  
GVGSDVTAVGFGTTSMGGDVSQDLLKVTVQVNSNQECATTSVPGATDKIERLTRDIYNEN  
SITEDNICASVRGGGKDCSQGDSGGPLVKKGEVPAGSKLRRIDTHVGVVSFGLGCALDHF  
PGVYARTSFAIDFINRTVCGQSRSPMCKEWRDGPVVCDPSTEQLLLIQVVTANPDQTSW  
SLSTNSGSDVLPQILRSADDYDQPPFFVYEVRLFIEVFCPTSASVFFV  
>comp12788\_c0\_seq12; 372 199 1539 LEN=2369; translated  
MKNRKS GVS KAIWGSVLLMAVTATVTNALPEIHTKPQDTTASGLLYPWLTRDRGDESSP  
LLVLNEADVRNNDLDDIFISRIVGGDAASVGEYYPYFVQPLAVGCGGVLIANEVLSAAHC  
GDFSKRFDYNTGREKQM QVVIGNTQRTSINNGVAQVRYCMEYVINPGFEFRGDSIDADNF  
NAPFFHYDYALCKLDVPVYVDDRTVVVLKLHTDSSSNAFPGVGSDVTAVGFGTTSMGGDVSQ  
DLLKVTVQVNSNQECATTSVPGATDKIERLTRDIYNENSITEDNICASVRGGGKDCSQGD  
SGGPLVKKGEVPAGSKLRRIDTHVGVVSFGLGCALDHFPGVYARTSFAIDFINRTVCGQS  
RSPMCKEWRDGPVVCDPSTEQLLLIQVVTANPDQTSWSLSTNSGSDVLPQILRSADDY  
DQPPFFVYEVRLFIEVFCPTSASVFFV  
>comp12788\_c0\_seq13; 310 266 1936 LEN=1936; translated  
MKNRKS GVS KAIWGSVLLMAVTATVTNALPEIHTKPQDTTASGLLYPWLTRDRGDESSP  
LLVLNEADVRNNDLDDIFISRIVGGDAASVGEYYPYFVQPLAVGCGGVLIANEVLSAAHC  
GDFSKRFDYNTGREKQM QVVIGNTQRTSINNGVAQVRYCMEYVINPGFEFRGDSIDADNF  
NAPFFHYDYALVSYIARQIVSPRIFRFSCMSRRTIWLFDRLMHCARTINTVLNLTLRNFQ  
CKLDVPVYVDDRTVVVLKLHTDSSSNAFPGVGSDVTAVGFGTTSMGGDVSQDLLKVTVQVN  
SNQECATTSVPGATDKIERLTRDIYNENSITEDNICASVRGGGKDCSQGDSGGPLVKKGE  
VPAGSKLRRIDTHVGVVSFGLGCALDHFPGVYARTSFAIDFINRTVCGQSRSPMCKEWRD  
GPVVCDPSTEQLLLIQVVTANPDQTSWSLSTNSGSDVLPQILRSADDYDQPPFFVYEEES  
VCLERGSYTFDIQDEAGDGLNRSFKAGGLDMTQAGGFYSRLDGLIEQYRESDIGARRT  
RVINTLPSLLPQSDPTP  
>comp12788\_c0\_seq14; 336 199 1880 LEN=2053; translated  
MKNRKS GVS KAIWGSVLLMAVTATVTNALPEIHTKPQDTTASGLLYPWLTRDRGDESSP  
LLVLNEADVRNNDLDDIFISRIVGGDAASVGEYYPYFVQPLAVGCGGVLIANEVLSAAHC  
GDFSKRFDYNTGREKQM QVVIGNTQRTSINNGVAQVRYCMEYVINPGFEFRGDSIDADNF  
NAPFFHYDYALVSYIARQIVSPRIFRFSCMSRRTIWLFDRLMHCARTINTVLNLTLRNFQ  
CKLDVPVYVDDRTVVVLKLHTDSSSNAFPGVGSDVTAVGFGTTSMGGDVSQDLLKVTVQVN  
SNQECATTSVPGATDKIERLTRDIYNENSITEDNICASVRGGGKDCSQGDSGGPLVKKGE  
VPAGSKLRRIDTHVGVVSFGLGCALDHFPGVYARTSFAIDFINRTVCGQSRSPMCKEWRD  
GPVVCDPSTEQLLLIQVVTANPDQTSWSLSTNSGSDVLPQILRSADDYDQPPFFVYEEES  
VCLERGSYTFDIQDEAGDGLNRSFKAGGLDMTQAGGFYSRLDGLIEQYRESDIGXSAY  
KGHQYLTITTTAIRSDSSAR  
>comp12788\_c0\_seq15; 355 199 1689 LEN=2519; translated  
MKNRKS GVS KAIWGSVLLMAVTATVTNALPEIHTKPQDTTASGLLYPWLTRDRGDESSP  
LLVLNEADVRNNDLDDIFISRIVGGDAASVGEYYPYFVQPLAVGCGGVLIANEVLSAAHC  
GDFSKRFDYNTGREKQM QVVIGNTQRTSINNGVAQVRYCMEYVINPGFEFRGDSIDADNF  
NAPFFHYDYALVSYIARQIVSPRIFRFSCMSRRTIWLFDRLMHCARTINTVLNLTLRNFQ  
CKLDVPVYVDDRTVVVLKLHTDSSSNAFPGVGSDVTAVGFGTTSMGGDVSQDLLKVTVQVN  
SNQECATTSVPGATDKIERLTRDIYNENSITEDNICASVRGGGKDCSQGDSGGPLVKKGE  
VPAGSKLRRIDTHVGVVSFGLGCALDHFPGVYARTSFAIDFINRTVCGQSRSPMCKEWRD  
GPVVCDPSTEQLLLIQVVTANPDQTSWSLSTNSGSDVLPQILRSADDYDQPPFFVYEV  
RLFIEVFCPTSASVFFV  
>comp12788\_c0\_seq16; 413 199 2072 LEN=2316; translated  
MKNRKS GVS KAIWGSVLLMAVTATVTNALPEIHTKPQDTTASGLLYPWLTRDRGDESSP  
LLVLNEADVRNNDLDDIFISRIVGGDAASVGEYYPYFVQPLAVGCGGVLIANEVLSAAHC  
GDFSKRFDYNTGREKQM QVVIGNTQRTSINNGVAQVRYCMEYVINPGFEFRGDSIDADNF  
NAPFFHYDYALVSYIARQIVSPRIFRFSCMSRRTIWLFDRLMHCARTINTVLNLTLRNFQ  
CKLDVPVYVDDRTVVVLKLHTDSSSNAFPGVGSDVTAVGFGTTSMGGDVSQDLLKVTVQVN

SNQECATTSVPGATDKIERLTRDIYNENSITEDNICASVRGGGKDCSCQGDSSGGPLVKKGE  
VPAGSKLRRIDTHVGVVSFGLGCALDHFPVYARTSFAIDFINRTVCGQSRSPMCKEWRD  
GPVVCDPSTEQLLLIQVVTANPDQTSWSLSTNSGSDVLPQILRSADDYDQPPFFVYEEES  
VCLERGOQSYTFDIQDEAGDGLNRSFKAGGLDMTQAGGFYSLRLDGLIEQYRESDIGXSAY  
KQHQLTITTTAIRSDSCKHKQLASLHNPTLFLLASDSGLTEHFIFPCHFLFIKLCPTFT  
VTDSNDLMITSFPMDMALLHELIN

>comp12788\_c0\_seq17; 430 199 1922 LEN=2166; translated  
MKNRKSQVSKAIWGSVLLMAVTATVTNALPEIHTKPQDTTASGLLYPWLTRDRGDESSP  
LLVLNEADVRNNDLDDIFISRIVGGDAASVGEYYPYFVQPLAVGCGGVLIANEVLSAAHC  
GDFSKRFDYNTGREKQMQVIGNTQRTSINNGVAQVRYCMEYVINPGFEFRGDSIDADNF  
NAPFHYDYALCKLDVPVYVDDRTPVVLKLTDSSSNAFPVGSVDVAVGFGTSMGGDVSQ  
DLLKVTQVNSNQEATTSVPGATDKIERLTRDIYNENSITEDNICASVRGGGKDCSCQGD  
SSGGPLVKKGEVPAGSKLRRIDTHVGVVSFGLGCALDHFPVYARTSFAIDFINRTVCGQS  
RSPMCKEWRDGPVVCDPSTEQLLLIQVVTANPDQTSWSLSTNSGSDVLPQILRSADDY  
DQPPFFVYEEESVCLERGOQSYTFDIQDEAGDGLNRSFKAGGLDMTQAGGFYSLRLDGLIEQY  
RESDIGXSAYKQHQLTITTTAIRSDSCKHKQLASLHNPTLFLLASDSGLTEHFIFPCHFL  
FIKLCPTFTVTDSNDLMITSFPMDMALLHELIN

>comp12788\_c0\_seq18; 259 805 1881 LEN=2448; translated  
MKITIIYKVQPLAVGCGGVLIANEVLSAAHCGDFSKRFDYNTGREKQMQVIGNTQRTS  
INNGVAQVRYCMEYVINPGFEFRGDSIDADNFNAPFHYDYALCKLDVPVYVDDRTPVVLKLT  
HTDSSNAFPVGSVDVAVGFGTSMGGDVSQDLLKVTQVNSNQEATTSVPGATDKIE  
RLTRDIYNENSITEDNICASVRGGGKDCSCQGDSSGGPLVKKGEVPAGSKLRRIDTHVGVVS  
FGLGCALDHFPVYARTSFAIDFINRTVCGQSRSPMCKEWRDGPVVCDPSTEQLLLIQV  
TDANPDQTSWSLSTNSGSDVLPQILRSADDYDQPPFFVYEVRLFIEVFCPTSASVVF

>comp12788\_c0\_seq19; 240 805 2072 LEN=2245; translated  
MKITIIYKVQPLAVGCGGVLIANEVLSAAHCGDFSKRFDYNTGREKQMQVIGNTQRTS  
INNGVAQVRYCMEYVINPGFEFRGDSIDADNFNAPFHYDYALCKLDVPVYVDDRTPVVLKLT  
HTDSSNAFPVGSVDVAVGFGTSMGGDVSQDLLKVTQVNSNQEATTSVPGATDKIE  
RLTRDIYNENSITEDNICASVRGGGKDCSCQGDSSGGPLVKKGEVPAGSKLRRIDTHVGVVS  
FGLGCALDHFPVYARTSFAIDFINRTVCGQSRSPMCKEWRDGPVVCDPSTEQLLLIQV  
TDANPDQTSWSLSTNSGSDVLPQILRSADDYDQPPFFVYEEESVCLERGOQSYTFDIQDEAG  
DGLNRSFKAGGLDMTQAGGFYSLRLDGLIEQYRESDIGXSAYKQHQLTITTTAIRSDSS  
AR

>comp12788\_c0\_seq20; 430 266 1989 LEN=2233; translated  
MKNRKSQVSKAIWGSVLLMAVTATVTNALPEIHTKPQDTTASGLLYPWLTRDRGDESSP  
LLVLNEADVRNNDLDDIFISRIVGGDAASVGEYYPYFVQPLAVGCGGVLIANEVLSAAHC  
GDFSKRFDYNTGREKQMQVIGNTQRTSINNGVAQVRYCMEYVINPGFEFRGDSIDADNF  
NAPFHYDYALCKLDVPVYVDDRTPVVLKLTDSSSNAFPVGSVDVAVGFGTSMGGDVSQ  
DLLKVTQVNSNQEATTSVPGATDKIERLTRDIYNENSITEDNICASVRGGGKDCSCQGD  
SSGGPLVKKGEVPAGSKLRRIDTHVGVVSFGLGCALDHFPVYARTSFAIDFINRTVCGQS  
RSPMCKEWRDGPVVCDPSTEQLLLIQVVTANPDQTSWSLSTNSGSDVLPQILRSADDY  
DQPPFFVYEEESVCLERGOQSYTFDIQDEAGDGLNRSFKAGGLDMTQAGGFYSLRLDGLIEQY  
RESDIGXSAYKQHQLTITTTAIRSDSCKHKQLASLHNPTLFLLASDSGLTEHFIFPCHFL  
FIKLCPTFTVTDSNDLMITSFPMDMALLHELIN

>comp12788\_c0\_seq21; 353 266 1797 LEN=1970; translated  
MKNRKSQVSKAIWGSVLLMAVTATVTNALPEIHTKPQDTTASGLLYPWLTRDRGDESSP  
LLVLNEADVRNNDLDDIFISRIVGGDAASVGEYYPYFVQPLAVGCGGVLIANEVLSAAHC  
GDFSKRFDYNTGREKQMQVIGNTQRTSINNGVAQVRYCMEYVINPGFEFRGDSIDADNF  
NAPFHYDYALCKLDVPVYVDDRTPVVLKLTDSSSNAFPVGSVDVAVGFGTSMGGDVSQ  
DLLKVTQVNSNQEATTSVPGATDKIERLTRDIYNENSITEDNICASVRGGGKDCSCQGD  
SSGGPLVKKGEVPAGSKLRRIDTHVGVVSFGLGCALDHFPVYARTSFAIDFINRTVCGQS  
RSPMCKEWRDGPVVCDPSTEQLLLIQVVTANPDQTSWSLSTNSGSDVLPQILRSADDY  
DQPPFFVYEEESVCLERGOQSYTFDIQDEAGDGLNRSFKAGGLDMTQAGGFYSLRLDGLIEQY  
RESDIGXSAYKQHQLTITTTAIRSDSSAR

>comp12788\_c0\_seq22; 355 266 1756 LEN=2139; translated  
MKNRKSQVSKAIWGSVLLMAVTATVTNALPEIHTKPQDTTASGLLYPWLTRDRGDESSP  
LLVLNEADVRNNDLDDIFISRIVGGDAASVGEYYPYFVQPLAVGCGGVLIANEVLSAAHC  
GDFSKRFDYNTGREKQMQVIGNTQRTSINNGVAQVRYCMEYVINPGFEFRGDSIDADNF  
NAPFHYDYALVSYIARQIVSPRIFRFSMSRRTIWLFDRLMHCARTINTVLNLTLRNFQ  
CKLDVPVYVDDRTPVVLKLTDSSSNAFPVGSVDVAVGFGTSMGGDVSQDLLKVTQVNS

SNQECATTSVPGATDKIERLTRDIYNENSITEDNICASVRGGGKDCSCQGDSSGGPLVKKGE  
VPAGSKLRRIDTHVGVVVSFGLGCALDHFPGVYARTSFAIDFINRTVCGQSRSPMCKEWRD  
GPVVCDPSTEQLLLIQVVTANPDQTSWSLSTNSGSDVLPQILRSADDYDQPPFFVYEVRL  
FIEVFVCPTSASVVFV

>comp12788\_c0\_seq23; 259 805 1881 LEN=2711; translated  
MKITIIYKVVQPLAVGCGGVLIANEVLSAAHCGDFSKRFDYNTGREKQMQVIGNTQRTS  
INNGVAQVRYCMEYVINPGFEFRGDSIDADNFNAPFHYDYALCKLDVPVYVDDRTVVLKL  
HTDSSSNAFPVGSVDVTAVGFGTSMGGDVSQDLLKVTQVNSNQCATTSSVPGATDKIE  
RLTRDIYNENSITEDNICASVRGGGKDCSCQGDSSGGPLVKKGEVPAGSKLRRIDTHVGVV  
S FGLGCALDHFPGVYARTSFAIDFINRTVCGQSRSPMCKEWRDGPVVCDPSTEQLLLIQV  
TDANPDQTSWSLSTNSGSDVLPQILRSADDYDQPPFFVYEVRLFIEVFVCPTSASVVFV

>comp12788\_c0\_seq24; 317 872 2331 LEN=2575; translated  
MKITIIYKVVQPLAVGCGGVLIANEVLSAAHCGDFSKRFDYNTGREKQMQVIGNTQRTS  
INNGVAQVRYCMEYVINPGFEFRGDSIDADNFNAPFHYDYALCKLDVPVYVDDRTVVLKL  
HTDSSSNAFPVGSVDVTAVGFGTSMGGDVSQDLLKVTQVNSNQCATTSSVPGATDKIE  
RLTRDIYNENSITEDNICASVRGGGKDCSCQGDSSGGPLVKKGEVPAGSKLRRIDTHVGVV  
S FGLGCALDHFPGVYARTSFAIDFINRTVCGQSRSPMCKEWRDGPVVCDPSTEQLLLIQV  
TDANPDQTSWSLSTNSGSDVLPQILRSADDYDQPPFFVYEVRLFIEVFVCPTSASVVFV  
DGLNNRSFKAGGLDMTQAGGFYSLRLDGLIEQYRESIDIGXSAYKGHQYLTITTTAIRSDSC  
KHKQLASLHNPTLFLASDSGLTEHFIFPCHFLFIKLCPTFTVTDSNDLMITSFPMDMAL  
LHELIN

>comp12788\_c0\_seq25; 259 872 1948 LEN=2778; translated  
MKITIIYKVVQPLAVGCGGVLIANEVLSAAHCGDFSKRFDYNTGREKQMQVIGNTQRTS  
INNGVAQVRYCMEYVINPGFEFRGDSIDADNFNAPFHYDYALCKLDVPVYVDDRTVVLKL  
HTDSSSNAFPVGSVDVTAVGFGTSMGGDVSQDLLKVTQVNSNQCATTSSVPGATDKIE  
RLTRDIYNENSITEDNICASVRGGGKDCSCQGDSSGGPLVKKGEVPAGSKLRRIDTHVGVV  
S FGLGCALDHFPGVYARTSFAIDFINRTVCGQSRSPMCKEWRDGPVVCDPSTEQLLLIQV  
TDANPDQTSWSLSTNSGSDVLPQILRSADDYDQPPFFVYEVRLFIEVFVCPTSASVVFV

>comp12788\_c0\_seq26; 372 266 1606 LEN=2173; translated  
MKNRKSQVSKAIWGSVLLMAVTATVTNALPEIHTKQDPTTASGLLYPWLTRDRGDESSP  
LLVLNEADVRNNDLDDIFISRIVGGDAASVGEYYPYFVQPLAVGCGGVLIANEVLSAAH  
CGDFSKRFDYNTGREKQMQVIGNTQRTSINNGVAQVRYCMEYVINPGFEFRGDSIDADNF  
NAPFHYDYALCKLDVPVYVDDRTVVLKLHTDSSSNAFPVGSVDVTAVGFGTSMGGDVSQ  
DLLKVTQVNSNQCATTSSVPGATDKIERLTRDIYNENSITEDNICASVRGGGKDCSCQGD  
SGGPLVKKGEVPAGSKLRRIDTHVGVVVSFGLGCALDHFPGVYARTSFAIDFINRTVCGQ  
SRSPMCKEWRDGPVVCDPSTEQLLLIQVVTANPDQTSWSLSTNSGSDVLPQILRSADDY  
DQPPFFVYEVRLFIEVFVCPTSASVVFV

>comp12788\_c0\_seq27; 240 872 2139 LEN=2312; translated  
MKITIIYKVVQPLAVGCGGVLIANEVLSAAHCGDFSKRFDYNTGREKQMQVIGNTQRTS  
INNGVAQVRYCMEYVINPGFEFRGDSIDADNFNAPFHYDYALCKLDVPVYVDDRTVVLKL  
HTDSSSNAFPVGSVDVTAVGFGTSMGGDVSQDLLKVTQVNSNQCATTSSVPGATDKIE  
RLTRDIYNENSITEDNICASVRGGGKDCSCQGDSSGGPLVKKGEVPAGSKLRRIDTHVGVV  
S FGLGCALDHFPGVYARTSFAIDFINRTVCGQSRSPMCKEWRDGPVVCDPSTEQLLLIQV  
TDANPDQTSWSLSTNSGSDVLPQILRSADDYDQPPFFVYEVRLFIEVFVCPTSASVVFV  
DGLNNRSFKAGGLDMTQAGGFYSLRLDGLIEQYRESIDIGXSAYKGHQYLTITTTAIRSDSS  
AR

>comp12789\_c2\_seq1; 470 123 764 LEN=1204; translated  
MATVVDPSKAPVEMIEDIEAAEEAGDTEQILAYLRFASSEDRRNEEGEDEEYVWTEVSEE  
ALDAFYRLVKASKELGASAALSHLADVFAALGAWKEEEAIVEVALGCIVAVASRAGKDEG  
DGSNSDDRAGAVSVGLVLDTMKEFADEPTIQEQACLAIEGLALWRDDWKAALGEAEGIQD  
ELAAARGERITNERNKAYPLRAAKALGIELDEA

>comp12790\_c0\_seq1; 974 223 1986 LEN=2097; translated  
MSEDLTKSVTIQRNTKKKSGYSVSENDDAYYLETTPARARANPGDRVVRINGVPADEFHD  
EEYANDLIESIRIVVVPKDKLDEYDEEEGCKEADRSRGNMNNVSLMSPATVSNLARIYHC  
DHCGFDNEDLSLDEDGDYVCEECHVIDSVSPFENNEADCDDRNPKMSTYVCPECKHENI  
NPQPDEGDRVCEECEGCILPEKKTIECDVCKHETIDPKLNKRGFVCENCGSALDVEDDY  
RRSAAQQLNELQDDSDGPGGGQRFDENGMPIITNAKGGKLTADMFEPGDVITVSVTKSN  
AKQDAGMKIEERNKGYVCKVPSGGHFSKTPVIAGDKILELNGIDSHDFKDVNELKILK  
SEKKISVVVERKDPDASESSASSIDYEGLRRAIEVNSTPADDIKGSVDDMEDAIDDETDD  
KIDDDTDDDESRSKPNKPEDDSVASSVDHDMRAVKLNTADDVKNNGYDDLDDGIDDY

VDFDDLNEQMRRALESKPETVGDDEQNEVGGGNKYDSETDSDDDGNKNNNNNISRAVRP  
NPALAAAYDSGKNDNGDNDTRETVDDDTASYNGEDCGVSWCPHCRPYS  
>comp12790\_c0\_seq2; 865 223 2069 LEN=2180; translated  
MSEDLTKSVTIQRNTKKKSGYSVSENDDAYYLETTPARARANPGDRVVRINGVPADEFHD  
EYANDLIESIRIVVVPKDKLDEYDEEEGCKEADRSRGNMNNVSLMSPATVSNLARIYHC  
DHCGFDNEDLSLDEDDGYVCEECGHVIDSVSPFENNEADDDRNPKMSTYVCPECKHENI  
NPQPDDEGDRVCEECGCILPEKKTYECDVCKHETIDPKLNKRGDVFCENCENGSALDVDVSR  
MIHPEIGEKKLFHSSDGYFFRYVIGGLSKEAAQQLNELQDDSDGPGGGQRFDENGMPI  
NAKGKLTTPADMFEFGDVITVSVTKSNAKQDAGMKIEERNKYYVCKVPSGGHFSKTPVI  
AGDKILELNGIDSHDFKDVNELKKILKSEKKISVVVERKDPDASESSASSIDYEGLRAIE  
VNSTPADDIKGSVDDEMEDAIDDETDDKIDDDTDDDESRSKPNAPEDDSVASSVDHGD  
MRAVKLNTADDVKNGNYDDLDDGIDDYVDFDDLNEQMRRALESKPETVGDDEQNEVGGGN  
KYDSETDSDDDGNKNNNNNISRAVRPNPALAAAYDSGKNDNGDNDTRETVDDDTASYNGED  
CGVSWCPHCRPYS  
>comp12790\_c0\_seq3; 814 223 2146 LEN=2257; translated  
MSEDLTKSVTIQRNTKKKSGYSVSENDDAYYLETTPARARANPGDRVVRINGVPADEFHD  
EYANDLIESIRIVVVPKDKLDEYDEEEGCKEADRSRGNMNNVSLMSPATVSNLARVSTM  
PNSRPMFNLLLSLTLQKSCVVRFIIVTTXGFDNEDLSLDEDDGYVCEECGHVIDSVSPFE  
NNEADDDRNPKMSTYVCPECKHENINPQPDDEGDRVCEECGCILPEKKTYECDVCKHET  
IDPKLNKRGDVFCENCENGSALDVDVSRMIHPEIGEKKLFHSSDGYFFRYVIGGLSKEAAQ  
LNELQDDSDGPGGGQRFDENGMPIITNAKGKLTTPADMFEFGDVITVSVTKSNAKQDAGM  
KIEERNKYYVCKVPSGGHFSKTPVIAGDKILELNGIDSHDFKDVNELKKILKSEKKISV  
VVERKDPDASESSASSIDYEGLRAIEVNSTPADDIKGSVDDEMEDAIDDETDDKIDDDT  
DDESRSKPNAPEDDSVASSVDHGMRAVKLNTADDVKNGNYDDLDDGIDDYVDFDDL  
NEQMRRALESKPETVGDDEQNEVGGGNKYDSETDSDDDGNKNNNNNISRAVRPNPALAA  
YDSGKNDNGDNDTRETVDDDTASYNGEDCGVSWCPHCRPYS  
>comp12790\_c0\_seq4; 923 223 2063 LEN=2174; translated  
MSEDLTKSVTIQRNTKKKSGYSVSENDDAYYLETTPARARANPGDRVVRINGVPADEFHD  
EYANDLIESIRIVVVPKDKLDEYDEEEGCKEADRSRGNMNNVSLMSPATVSNLARVSTM  
PNSRPMFNLLLSLTLQKSCVVRFIIVTTXGFDNEDLSLDEDDGYVCEECGHVIDSVSPFE  
NNEADDDRNPKMSTYVCPECKHENINPQPDDEGDRVCEECGCILPEKKTYECDVCKHET  
IDPKLNKRGDVFCENCENGSALDVEDYRRAAQQLNELQDDSDGPGGGQRFDENGMPI  
ITNAKGKLTTPADMFEFGDVITVSVTKSNAKQDAGMKIEERNKYYVCKVPSGGHFSKTP  
VIAAGDKILELNGIDSHDFKDVNELKKILKSEKKISVVVERKDPDASESSASSIDYEGL  
RAIEVNSTPADDIKGSVDDEMEDAIDDETDDKIDDDTDDDESRSKPNAPEDDSVASSVD  
HGMRAVKLNTADDVKNGNYDDLDDGIDDYVDFDDLNEQMRRALESKPETVGDDEQNEV  
GGGNKYDSETDSDDDGNKNNNNNISRAVRPNPALAAAYDSGKNDNGDNDTRETVDDDT  
ASYNGEDCGVSWCPHCRPYS  
>comp12791\_c0\_seq1; 173 279 616 LEN=700; translated  
MKKMLERVNAETKNVEDAIEDLKRAQAESEGGIDSQLVLDLKSGLVKQAALTGALLFTFR  
GGVETIAFLGGDP SHALPALIQGAI AIALHRGFCFPLATAASAQRLILIGNK  
>comp12791\_c0\_seq2; 247 133 625 LEN=625; translated  
MEIFIAVLALTALSLSDFHISSTRSTGNSVGSFPRSLQEHNTIKKRQNGVRLYVGGND  
DELNKGAGMEDAFRELEALQSLGDEDDPERPTSKPKEKDAFAKAIDELNLKDI LSQADA  
ESSVESPSQPQSEVELYKDMASELDVADSQEDLIAADFKTDLEMAX  
>comp12791\_c0\_seq3; 382 44 783 LEN=867; translated  
MASELDVADSQEDLIAADFKTDLEMADSSDDEGLPTIDTEKFMDKAIKEA IQEAKQONQN  
VDIADAKESFLDNQEIMSEIEKIFDKANEDLLKELDEIRAEQASLAKEQAERN SKASLEK  
TEEYKQRMEVAQGNMKKMLERVNAETKNVEDAIEDLKRAQAESEGGIDSQLVLDLKSGLV  
KQAALTGALLFTFRGGVETIAFLGGDP SHALPALIQGAI AIALHRGFCFPLATAASAQRL  
ILIGNK  
>comp12794\_c0\_seq1; 912 137 2158 LEN=2387; translated  
MPSSGRRSEELQKKLQTRSNFLKASDFTKEHTLLNHESKPKDPVEKSKAALS DLKRKINE  
RKKMSMINNQQHREGREESTPEMTAIGGKDSPALEREDHFANDDALAQTIMRSTQKQKPP  
SILRNSPKKNLRNHYADPCRYRRDMIGEDERRAPPSQIEVGAEDDDRTEVSEITTDIRIM  
STKGAAYAERLAGKQLMRLSKPSLSGPPGRYLETDMNINVSNLRH LGKAVEKAKMDLKQ  
EMIPTETRRHGLPYEDTDYRASIDEDEEGDSWEDAIQVKRQDRRYMAELNTRKNPPKPEI  
GSENQIMIRTSPTKKLQHLTKEAFSHEGDVFI DATEIREEDLDDAPNVLIDEAHDLRKEG  
GNHEAPINVETA AFNAPIDVEDEEFFVGVQEEKSDIPSNLKKESVQQFQEKEDGESGLST  
TSDKDKVVEENCV GSEKASGPTSMASDFYNSSVGLFKSFSNQVASQIEAIQERGLISKSD

MDRMLGVLQHDVNETSTKLPEDNDDMVIMFGDELEVAACGTGLKAVEDDNENKTNESNLC  
QVEKVEAADENKDEHVGVADENGDRADESDSAPVEKMLESLKQSYNSGISKCGVHGDLIK  
ENKKAIEEIVATLTKKAPGCGLDGNPKDGEQVSSKAPSESPQEGKIDESQLKELSAQGLE  
EMLKTPIPTSSK

>comp12795\_c0\_seq1; 784 247 2410 LEN=3065; translated  
MDETGSRAVLPPATPDEGTAAASSRPPSIGYVSSSESSGSVPPSSSTISSRSGDTWCQAQV  
QSSSQSQSHCRADSI PGSVSISIEKRGNPCRSRDKIESKTETRSFGSREHHPSEILCASQ  
RRPGVPAQNNPSEPVSRRLEEKVVSLMDRIWVLEAEREGTQAAQTMDGKGTLLPPASAL  
ASLRDTEPPLHTEITSRCAAVPASVEAVRELRIQNETLRAELAVSETVVRGSMRDALVTLR  
AKDKISRELI EELTNELALHSAGEDGEDDDYGEAGCGGATEEEQGPSGEEPLGPLVRSEN  
TTTTNVAATEPPSGVCGTQYHTAAYVRRLESSVETASQLVADLSNELKLT LEREAALEE  
RLRRLQQQQEVARETTATPTSGETSSATAVSRTRGNVSSIKNKDQGI RLVVGDCLANK  
LENSNDGNALVSAAGRKGHLFSSKIRREEHQGEDALLGNRRSKAVLPKEQAHATMKPYRP  
KSGSPACANRNLESVFWNRRTTQRQQWQLQRQQPIEQRQPVSDSDSDDEYSGVDFDEFEL  
LWNEDHDDAICEHKPSESKVRRSPTGRPSEAIHTRGQGTGSRSAFDAYGRGPTAKHRVPP  
NGRYQRGVS NATTKAAVRSPGPVASARLSDPSESPFDHATATGFCTGMAAANQKRDAG  
AEEQKPGEMGFVGDGKRWGSNFGGASGSLHIAHRRLS CATSEKEVLDVRCIPHLLLIGP

>comp12797\_c0\_seq1; 402 142 1467 LEN=1467; translated  
MASDDYGIQHFNIGDTLRHKGFYDDSI AELFHAMTLL ETRLGTKSKEVAATSYS LGLAYR  
ATKDYKQALKHLNRAQEVYKQKGDKSEFADNIKDCKLN IARTHHSRGVMYQRNGDYNLS  
VSEHRKAI AIREALLGRSHLETARSYYVLGCALSDRGDFDEALGDLRRALRIRLKVFGKD  
HIDVVEVASNIATVMAAKGVDAESVDEYKMOVIRSLEYETE GDIRSRKGDLD DAI ILYKK  
ALSLEIQYLGDLHPTTCDLYLRMAVKLRFIQNVIHPVRLHVCKSHPYFSRWFRNDLWDSQ  
DALSESGDLEGLSVEYKSAIT IYERIMGKFHV KMANIYTRLAGVLM DKG EYETALS FYAK  
AYGIFDGTGLGHDDTKQALMNVKLA AEKNRAAVTSM EILVKA EEEFKKRHP ELTASVASE  
SDEDGEDDENGSDDEK KKKKKKX

>comp12797\_c0\_seq2; 402 120 1445 LEN=1445; translated  
MASDDYGIQHFNIGDTLRHKGFYDDSI AELFHAMTLL ETRLGTKSKEVAATSYS LGLAYR  
ATKDYKQALKHLNRAQEVYKQKGDKSEFADNIKDCKLN IARTHHSRGVMYQRNGDYNLS  
VSEHRKAI AIREALLGRSHLETARSYYVLGCALSDRGDFDEALGDLRRALRIRLKVFGKD  
HIDVVEVASNIATVMAAKGVDAESVDEYKMOVIRSLEYETE GDIRSRKGDLD DAI ILYKK  
ALSLEIQYLGDLHPTTCDLYLRMAVKLRFIQNVIHPVRLHVCKSHPYFSRWFRNDLWDSQ  
DALSESGDLEGLSVEYKSAIT IYERIMGKFHV KMANIYTRLAGVLM DKG EYETALS FYAK  
AYGIFDGTGLGHDDTKQALMNVKLA AEKNRAAVTSM EILVKA EEEFKKRHP ELTASVASE  
SDEDGEDDENGSDDEK KKKKKKX

>comp12797\_c0\_seq3; 486 120 1338 LEN=1338; translated  
MASDDYGIQHFNIGDTLRHKGFYDDSI AELFHAMTLL ETRLGTKSKEVAATSYS LGLAYR  
ATKDYKQALKHLNRAQEVYKQKGDKSEFADNIKDCKLN IARTHHSRGVMYQRNGDYNLS  
VSEHRKAI AIREALLGRSHLETARSYYVLGCALSDRGDFDEALGDLRRALRIRLKVFGKD  
HIDVVEVASNIATVMAAKGVDAESVDEYKMOVIRSLEYETE GDIRSRKGDLD DAI ILYKK  
ALSLEIQYLGDLHPTTCDLYLRMADALSESGDLEGLSVEYKSAIT IYERIMGKFHV KMAN  
IYTRLAGVLM DKG EYETALS FYAKAYGIFDGTGLGHDDTKQALMNVKLA AEKNRAAVTSM  
EILVKA EEEFKKRHP ELTASVASESDEDGEDDENGSDDEK KKKKKKX

>comp12797\_c0\_seq4; 486 142 1360 LEN=1360; translated  
MASDDYGIQHFNIGDTLRHKGFYDDSI AELFHAMTLL ETRLGTKSKEVAATSYS LGLAYR  
ATKDYKQALKHLNRAQEVYKQKGDKSEFADNIKDCKLN IARTHHSRGVMYQRNGDYNLS  
VSEHRKAI AIREALLGRSHLETARSYYVLGCALSDRGDFDEALGDLRRALRIRLKVFGKD  
HIDVVEVASNIATVMAAKGVDAESVDEYKMOVIRSLEYETE GDIRSRKGDLD DAI ILYKK  
ALSLEIQYLGDLHPTTCDLYLRMADALSESGDLEGLSVEYKSAIT IYERIMGKFHV KMAN  
IYTRLAGVLM DKG EYETALS FYAKAYGIFDGTGLGHDDTKQALMNVKLA AEKNRAAVTSM  
EILVKA EEEFKKRHP ELTASVASESDEDGEDDENGSDDEK KKKKKKX

>comp12798\_c0\_seq1; 723 1 2213 LEN=2367; translated  
XTNRLIQDASHGRYPEISPTRGNVAFSSAIHGWLFTLKSMT EYVLEHSAEESVGTNLTSA  
QFASRLWGDWYDPDKTRFVDDPAECSSPQRHRSFVTF CLEPIYKIYAACLGESEEDVAA  
TLKPLGVHLTKAQLRSSARPLLR TALS RFL ETASCGFVDMVVKHVPPSSAAKGVARCY  
SGPLDAPFVRDMVHCTAAKAEKLIMHATKLYSSSDGRSFDVFCRIYCGTCKPGQVRVRLG  
EGYAPGEDDEDTSVATIESIAIPGRSRTRVTLATAGNWLLKGVDA AIAKTATIVGING  
GTEDGDSGYGDDDEDVDEEHPVHIFSP LKFPFAGGESTMKLAL EPLNPAELPKMVQGLRS  
VSKAYPMVKTRVEESGEHVLYGTGELYMDCV LHDLRHVYGDVEVKVADPSVALRET VVET  
SSLKCFSETTNKKNKLT FIAEPMDDGLAERLES GKVR IHDWDK RKTGRFFQSQYGDWLLS

SRSVWAFGDSPTCGTNLLDDTLTPSEVDKTLDDSCSSIVQGFQWATREGPLCEEPVVRGT  
KLKILEVTLADKAIYRGGGQIIP TARRTVHSSLLTATPRLMEPIYKVQIQCPGDMVAAIQ  
PVLKRRRGHIVQDRPISGTLNVRGFVPLLD SFGFETDLR TYTQGGAMVHAVFDHWAIV  
PGDPLDKNILLHPLESPPHVLARELLKTRRRKGLSEDV SIDKFFDAAMKEQMAFTNAE  
DSGKLVEEMEDGEEMAD

>comp12799\_c1\_seq1; 231 1 616 LEN=941; translated  
XHLPFELLSSVLSASSHALGAAATNLVDKLGGLRAVGESLFGGLPCQRLGELSSELLERA  
TDRFGAMGSSAREWFS AVPLRALERLSSELLEAATARLGWASALGETNAGVKLQELARL  
TSGALEQTRIRWRILNEFLSDGALRVEELGSRVVASLAGMHALPFETQRKQYFDKASKGY  
ESLNHSLARFAFWLEDLLGRMAGII

>comp12799\_c2\_seq1; 580 1 1825 LEN=1825; translated  
XPTATGGGPSEPSSRSLYLAPLGRSSLSFGGRNPTTRRCSQHSMAPVGNRWAALAPAST  
ATAVWCGDRSQRHCHYHSRQKQERQQQQQPMRKNTFAGGTTGHGIFSSSEGQGTLRHHG  
GTFCYCLASPLRGHLSAQHHLWPPCGVRENATTLHSARSFSSVPPASLLHRKAGIYLPET  
YPLLGNPAAAGRIGRIGFRKHSNGNSSNNSNGTKEKAPQSTPPPTTVNPSESNNNKIQE  
FMDSTVSTVRTNVGSAEATIKKAVEELSTGDLLSVYGIVFLIVLIGVMPSLVRRMQSSDH  
YDSKSEDPLLELARMIRGEFLENVNRIQEDISEADGDGSDTDAGDAEGRKRSSGLDR  
IVADLLRSPQIQEAATTLVTKVLQSQQFKAACALLRELLRDLDDPD TLDQLVHLLQTA  
IADEKIREAAIGLATDVF GDDRVLDELVVLVQRLGMEGQVMAATQALLVESAHNALNDPE  
ILDHSMEFATDVVGDDVVQQTAGEALYNTMSYAFRPALS VFLALTGVGLIFVVISAFRNL  
AQTPSDAADRAFLGAIETYTSRLLKVLFLPLDFLVACKDALVAIALFPFRFLSSSAARAG  
DLGKALLGA

>comp12800\_c0\_seq1; 269 1 1286 LEN=1434; translated  
XHDAMTSVFSLQQISSKFHFFHEINADVEEDYEIIFCSVDKSEEEYNDYTSDFSFWCIPY  
ALPTLPKLIANLQANGMPHLVVIDKEGKIITKDGVNALKQDPMGKQFPWRPNRIVDILPE  
SYISGGEESTPTLLSTDALDEKYILLYFASHADALCKEFTPWLKKACHILKKKRADFEEV  
AANFLPMQMFVVEECDFLKNLVGSRICRKFSCHSLFSXIFVSGDASEASYETFLSETNFC  
SFSFEETEVRREALKRLDITSYPTLIMLGPRPIDEDDNFGDRPIINSEVRAVIENGDIYIT  
DFPFYPKPWGDLCKTTDDINTHKCLVVFHEGGDEDEQMEVEYAVRDAEEYRSGDELVKF  
YWAFNPDAPLSANIRACDLGPIGDLPSMVLLDIPNDGTYYLSEEQDITEDTILEFLTNY  
KDCTQGTI

>comp12800\_c0\_seq2; 401 492 1880 LEN=2028; translated  
MAEFDFTLLGDVIVK PATGESADPLQVLTNKGVVLYFGAHWSESCNKFLPKFHFHEINA  
DVEEDYEIIFCSVDKSEEEYNDYTSDFSFWCIPYALPTLPKLIANLQANGMPHLVVIDKE  
GKIITKDGVNALKQDPMGKQFPWRPNRIVDILPESYISGGEESTPTLLSTDALDEKYILL  
YFASHADALCKEFTPWLKKACHILKKKRADFEEVAANFLPMQMFVVEECDFLKNLVGSRIC  
RKFSCHSLFSXIFVSGDASEASYETFLSETNFC SFSFEETEVRREALKRLDITSYPTLI  
MLGPRPIDEDDNFGDRPIINSEVRAVIENGDIYITDFPFYPKPWGDLCKTTDDINTHKCLV  
VFHEGGDEDEQMEVEYAVRDAEEYRSGDELVKFYWAFNPDAPLSANIRACDLGPIGDL  
PSMVLLDIPNDGTYYLSEEQDITEDTILEFLTNYKDCTQGTI

>comp12800\_c0\_seq3; 319 1 1169 LEN=1317; translated  
XHDAMTSVFSLQQISSKFHFFHEINADVEEDYEIIFCSVDKSEEEYNDYTSDFSFWCIPY  
ALPTLPKLIANLQANGMPHLVVIDKEGKIITKDGVNALKQDPMGKQFPWRPNRIVDILPE  
SYISGGEESTPTLLSTDALDEKYILLYFASHADALCKEFTPWLKKACHILKKKRADFELI  
FVSGDASEASYETFLSETNFC SFSFEETEVRREALKRLDITSYPTLIMLGPRPIDEDDNF  
GDRPIINSEVRAVIENGDIYITDFPFYPKPWGDLCKTTDDINTHKCLVVFHEGGDEDEQME  
VEYAVRDAEEYRSGDELVKFYWAFNPDAPLSANIRACDLGPIGDLPSMVLLDIPNDGT  
YYLSEEQDITEDTILEFLTNYKDCTQGTI

>comp12800\_c0\_seq4; 451 492 1763 LEN=1911; translated  
MAEFDFTLLGDVIVK PATGESADPLQVLTNKGVVLYFGAHWSESCNKFLPKFHFHEINA  
DVEEDYEIIFCSVDKSEEEYNDYTSDFSFWCIPYALPTLPKLIANLQANGMPHLVVIDKE  
GKIITKDGVNALKQDPMGKQFPWRPNRIVDILPESYISGGEESTPTLLSTDALDEKYILL  
YFASHADALCKEFTPWLKKACHILKKKRADFELIFVSGDASEASYETFLSETNFC SFSFE  
ETEVRREALKRLDITSYPTLIMLGPRPIDEDDNFGDRPIINSEVRAVIENGDIYITDFPFY  
PKPWGDLCKTTDDINTHKCLVVFHEGGDEDEQMEVEYAVRDAEEYRSGDELVKFYWAFN  
PDAPLSANIRACDLGPIGDLPSMVLLDIPNDGTYYLSEEQDITEDTILEFLTNYKDCTQ  
GTI

>comp12801\_c0\_seq1; 744 1 1553 LEN=1553; translated  
NDNDNEHETNTNTNTSFSWIELDFSWEITKPESQSQSNDNANNPAHLQPPTSHLLAADGTK  
HVDITSETMLLDDDIRSCTDDDDDDNDNKLCSYHSELSSLGEDNVSSVDGGFGWLSSL

DGVQLPDQYDDDSAPGILNDSLDLSIIIEIGACGLLSSGEGEEKDDDDHGEGCDEIKEGDH  
QHKETETATATVRSRCSRTVAIHHELLGSEVETTTTTNQTATPCKPEKHPPRRKLKKQSS  
SGAANDTNANTSSEQDTSNDNVEEELYEILCRGAGESTATTASKNGDQGRDETEPVGSK  
QPGGEEPAPQRTSSTRSKKKTSKADQNATGEMGPKRSSKPKPQRLRRISSMPEKREKEDK  
TKIALGSSSLYHTTTSKSKQKHQRKSMPEREKDKISLEGNDSPQPSKPLQRRRRRTSID  
FDRDRATKQEEEDMPPGSSHKKTCSRQRPKQRKSSSSSRKLPREDVEKREKNGIGGHT  
ASTNDSQRKQTRRRKRSESKQMIQSETIPVDEDEDEX  
>comp12801\_c1\_seq1; 615 1 2829 LEN=3022; translated  
XEDEDDGLTVRSSRTTEDIGSFKSKSLLRGRSSSLAKRTTKESDREDSEVLDDGSKQKPE  
LSSRRSARNGAAVKGPSEKDDLGSCHTNGDVNPFKTRPLFLRRRSSFRMRMGQDSTDDDE  
GDELASVSCHTTGSLPLFRRRHSTSTRRTRDRRAQEVGRIISESSHTRTSKPLFRRKQS  
LSTERTKRDIKEDGRTTSSGQHAIGDGINGILSRTLLRRKRSIAKRNTTKEADAVEKA  
NGPGTKQPPENNASSKEDEDEAEADGRSCHTTGDIADASSNRQQLRRRKKSLSKQTSTKE  
NNGLVEADDGIATLGSYHTTGDIPDSTKRKQKLRRKKSVPHEITSKKKKPSVSVLEQDSK  
SLAMSASLSGKPKRILGKSNPVANPVAKQVDFNSQSDEKKNKDTKSASKDNEDRQTLSP  
SLGSFAQLSITEVHHLNICDDEDGATALPKPQGIGGALSQFESSSLPRTASLTMKPVRR  
GRRESLEKKNPKSDQASDEVDRDEKKHRSHSLDSISALTYISSESPSIGERKTKRQKSK  
KRKEGFLLLSSRTKYNGHTASAHRSVVVSANDEISGISSTPVRRRKSTHSRSAFEVTKD  
ISSITKSNHTTRRRSISSEKDEPSVTKSNHSRRRRSTSTKADSSATKSNQSRQSSISACSPS  
ISISTKDAPLGISSNKSEQRGSSDSRLIEKEGPLVVLSSNTNVSPMSLDDGVSVMKAEAE  
TLLDSLEVADAIGIGRSDRQQASDDGDSHEDLSVSPGLSQSYLPAGLQKLKRLASFRNGP  
LSSSPGRAQARSGEIAISRVSKPVDKDFVQTSGLAIGSFQRDSADPLRRAQNASLRMKF  
LTKAKSTIHGFGNSSDDVRRKRSRPGSYIPSSKELRKKQDESNYRKDLVKNNAVYACMEED  
EDGDINNFILGTTDPDITPPEESREEHSLFQQNTPDICLDRLD  
>comp12801\_c1\_seq2; 155 1 1209 LEN=1402; translated  
XLPICFLLSSRTKYNGHTASAHRSVVVSANDEISGISSTPVRRRKSTHSRSAFEVTKD  
ISSITKSNHTTRRRSISSEKDEPSVTKSNHSRRRRSTSTKADSSATKSNQSRQSSISACSPS  
ISISTKDAPLGISSNKSEQRGSSDSRLIEKEGPLVVLSSNTNVSPMSLDDGVSVMKAEAE  
TLLDSLEVADAIGIGRSDRQQASDDGDSHEDLSVSPGLSQSYLPAGLQKLKRLASFRNGP  
LSSSPGRAQARSGEIAISRVSKPVDKDFVQTSGLAIGSFQRDSADPLRRAQNASLRMKF  
LTKAKSTIHGFGNSSDDVRRKRSRPGSYIPSSKELRKKQDESNYRKDLVKNNAVYACMEED  
EDGDINNFILGTTDPDITPPEESREEHSLFQQNTPDICLDRLD  
>comp12801\_c2\_seq1; 187 1 1525 LEN=1719; translated  
XIDQVSTNSSLAPPDADQILSEMMKLSMKERTNFQEEIHGVRCLAPEESPLFLRESLRK  
LDLKLNDPITPIDQRKGYLKSQELFVKRNLPTYVNTDKFRLRFLRCETFDVEIAAQRIK  
YLNVLLELFGNVALQRP IRMTDFSKELRIFRKGRYQFLPYRDRSAGTHGRILAVFPDE  
EWEAATSALRTKIWLMTYVAGEDLEAQKSGIVVLVWFDSSWKNISKNPHANTDSRRFVT  
LGTRASSVHLCTPDSHLYRRRRSAIVMRAGKEKSRVKIHVGHSMIERYILQGFIPIDYI  
PISFTGTVKEKYVKEWIRLRLVLEEKQDQTGIYDPINSIIESPYLQDIIFRNGTSLTSH  
ANATLRLSLVAKCNEKGYANKKATELVVDIVDELKQQNASRRQHEVAIGRSDSGWWSGCR  
FLIWNKEKCYWKPVEPENEEKEIHKKITRMVRETRSVMSKNDEEKGEETMSSSSKRASKS  
MMLQEQQVDPSPFLFVEGQGELSCKRQRV  
>comp12802\_c0\_seq1; 191 353 1043 LEN=1203; translated  
MRRVFAHPLHFLLLGEDIVDYPSTLKIASLSAEPAPPEVSVFAAAFEVVLDDAQREAFRR  
EPEYKIDTTPFYALDGKDGSEALGEGVVCLASRDADIDLARMPDGMKTVWDWPRDSGLLP  
FSMYLRHCLLAVQKAGGAAHESFLNDTYLVDRKTTLAQYLDECGDEVMGSRPPPHLKNL  
VGERQATAARETNSTSNGLDKYTDLELWTKILHVFVIGILFPPLGHQE  
>comp12802\_c0\_seq2; 133 1 877 LEN=1037; translated  
LQRYPIYNIQLAALKVQAMKFPALQPSRVTLGYGALLSESSRLTFPHLTFNFRHVRV  
RCMRRVFAHPLHFLLLGEDIVDYPSTLKIASLSAEPAPPEVSVFAAAFEVVLDDAQREAF  
RREPEYKIDTTPFYALDGKDGSEALGEGVVCLASRDADIDLARMPDGMKTVWDWPRDSGL  
LPFSMYLRHCLLAVQKAGGAAHESFLNDTYLVDRKTTLAQYLDECGDEVMGSRPPPHLKN  
DLVGERQATAARETNSTSNGLDKYTDLELWTKILHVFVIGILFPPLGHQE  
>comp12803\_c0\_seq1; 1287 152 2422 LEN=2491; translated  
MKFSASTVLALAAIATTGTTAFAPLSRPAKSVVASNNQYSNNALFQRPATFLKSTATEDA  
ETFEFTSDVGRVMDLIINSLYSDRDI FLRELI SNAADACDKRFLSITEDSEEAPPSIKI  
KCDESANTVTIEDSGVGMTKDEIINN LGKIAQSGTRAFVQALGDGNADVNLIGQFVGFY  
SAYLVADKVTVVTKSMQDSSKAYKWESEADSNYSIASASPDEIEGSSGTKLILQLKEDAS  
AYLEASKMEELLNRYSEFIEFPISVWKEKTEYKQVPDEEANKDLAEGEEPMMKTVPETIE  
GYETVNNQKPVWLRSPRDVTEEEYKEFYKTAFAKSSYDDPMKSTHFVLEGQVECKAILYVP



GMLPFELSKDMFDENARNIRLYVKRVFINDQFQDLMPRWLKF I KGVVDSDDLPLNVSREI  
LQKSKVLSI I NKRLVRKSLDMIRDIS EDDTDEGANYIMFWNNFGKYLKVG I I EDDKNRNE  
IAEYLRFFSASSGEEYTS LKDYVAKMPENQKAIYYVTGEGKERAAMSPVAEKLKKGKGFV  
LYATEPLDEIMFESLTKFGDYDIK DAGKDTLKLDDDDDEEATKKKEELNRENV DVINYLET  
ILNDEVEKVSVDLLTDS PAALVQ GAYGMS PSMQRYMKAQTVASGQELSGMDSMNKVCME  
INPNHP IVKDLARMVKEDKVAQETEDFARLIYDVAGMTSGYDI EDMAGFAKRV MGLMNTQ  
ASADGTADAEVEAEKPAEEKKDDDDDEEEAVVPEVL

>comp12804\_c0\_seq1; 344 1 1288 LEN=1606; translated  
XDFS DKKRNPQTSSVIVVVVIVRR TENLSAEYLLFQINALFSTKMASFQERLHHAISEY  
GGVYDPMRRSFQTVLMFEANRCLKDKLPSLRPFQ RKLAVFDQAKYLLEEISGES SMVGL  
DTQ GKREEIMWRTGTSREPLNPESMWARASRLSKDVEKVAEQVEEFMKNTKVSSTSTHD  
EIYRSFVENIYDKAHPNIEPGSEPIPIQFEYTHSHLFLAYKIYYRKGELDPYFPEPCARE  
ISVPREKPAGGLESYNPILPAASTTSSLGATMNRTPGRSTSKVARSQPAAI VLRESPLIV  
AAGQKASAASAAHTTGTSLNNGRVGDARRYQQQNHMRQDVPTIQQENERSRRDLLREVK  
DHMELLSQFEGVIDSATLKKRKRALFYSLPPPPPNEKEKRKASKKLGEGQSGSETESD  
DDKKADLAA

>comp12805\_c0\_seq1; 598 76 1521 LEN=1850; translated  
MESLLDQADALILIAGEEGPERPNFEIPEELAHHTVPNGDWLEVRENPSKGGKWFTRDI  
PAGSVVLVAKAIACALDLEYIEGDSADGNIDDEDDDDNQMEQEEEDQGSTVNELLVLDL  
LQHILDNPSIWSQQLTNLYPRETVDIEASPVWISKDDVFSQFEAMIEKIETVPGLAGKS  
KEISKRLPLIVRYNVL SIETCPELLSHPGLHGHSLSGVGLYLLPSFFNHDSRPNIARYA  
VGDIMWFVANQDIGAGQELCISYLEQDVLCENTYRRNCMLTLD FKEEDAYRATIDEESP  
CYPVVDVEVQNELMSMNPFERLEAIDQLMQQAAGEALPEGEDIEGEDGDRMEANGSAWF  
ECDVQNLRI LKAITLEGCDKSEMALQLWEECIGFTESKMPNDENSIVMRVQAALCCLNL  
NEEARAAQHAAIALQKHNL MFGGGVRRFRRRYRQEFRLNLRPKSSGGENDKSFEEMLWPY  
E

>comp12806\_c0\_seq1; 217 1 1066 LEN=1784; translated  
XRNKFEGTQNTNNRACGEALSLSNDLRS LPTVRMVDNKEFWGCQVTISPICKKNLEYDF  
VYQSMLEICGAF LRIGENCSFYDEIYRSWVYNDVGGCKKNEGKTSILGNSLRHP IPRLC  
DPINNSFSTHRAVEIVESHDTGEEDHHHVQDERQQNNEYKFMTPGNPGLASVISQGLKS  
LDQTAEDIRYKTRNDTL SRAHKKPSFRNGRAAEMDPRQLAEGQRILDVALDCLEQLALKE  
EQNKTRQQRGGGSGNGLVLFGEPIV LLECEVNRNRQAKIYWTLPYGILLDNRI NQGLYQ  
EIMVKVQRQLVENGGAKLLARDVHTRL SHYPPRIKLF PATDEM VQKAI EEFMM

>comp12807\_c0\_seq1; 1108 187 4479 LEN=5119; translated  
MQSTYEEKAPSPNAGGIGDAKTLVSPSSHNNQTEPPELPAVIGRTDNKNLQSNGDQHSV  
THSSKDTVMFANDGHASIK EEKCVLETEPSPTVLPKQPPRANGIDESTAQRGTSKVVADS  
SSPNNQVSI NQKEGTAISSPADTKQQLVEQN HASNKVPRVETEGDSEPSSGDGPKSTPC  
PPISSRVPSSEGMAADPCGWGGEQQHNQEPVSV DQKHCE TKIHDTRGSYENGT TENDVIL  
VEIGAGSYETSIFNTAGNKKWKEMVKECVQDFRLSDEGLTENNGQSEKELRIALEIVKQV  
RGLGGRFLVQND DICQKYSV DGERAMGATLQC FR LCLTEADARQNMGVRPKENPLYFSN  
TREVKDTEREKKREREVELPQEIQA KRIQSV DVEKELEN CHEVGP KSSNSVSFLHPVIY  
YGRVGD TNHRNARMAKRILIDASVEKI PENAF LDCNELFEVAF AEGCAVKAIEKCAFQQT  
SIASIEIPASVKEVGN EAFCDCAKLHKVGF GTDDCRLR KIGDRAF CGTSLSYVVIPSSVE  
TIGYEA FYDCMRLVSVTFDHGVKCRLEIIGDCAF SHAP ISTIEIPSSVEKIGCRAFHKCR  
ELVRVDFTDANCRLEEIQNEAFSETSICAIMIPFSVKEITLRAF YKCHKLTNVDFAKNGQ  
MEKIEHEVFFETPISTITIPWSVKAIEYGAFANC SRLETVRFE PGNCQLTTIGDFSFS  
SISAI EIPATVREIGKHAFYQCRQLTDVKFPLENCQLEKIGSSAFRDT SCTIAIPPMVKE  
IGKYAFYRNGVFLKRRIQQQSAVDLQNGI DEKYGDKSIQGREFFKKQRMEDCQTCSNNAK  
VSAASMIATEQQANDLRLKVKGETGSQSF TETSAE IYDLGRR IKQPHDYEKKE SMANTSP  
SVTKQGESDDEIVKPRQIRDIGKGEINDHDVLSGKGAHGNHHTGNKLYKEMVKRRQNEY  
SCKRFEKALIAQDIVREVR SKGGRFLQKNMDDTKYDDVGDKCAIKKTSQLFRDTAKNREV  
DHKTGFSAQSATSE SMAEHAKIKKENDNTMCSEQGLAALQHFQHFHNQPN SMNRTRKLF  
IDKTEINEHDVLSGKGAQGNQH HGKLYKDLVKECQNKYHNGKRFEKAVTARYIVDEVK  
RGRFLKDSVSGKYNDVGD D TARIKTSQLFRDLYRDSKAEREQEGRSLGMELTDSKHDD  
ERLKS KPN SITQALATPPKASQANQSEAPGDES RSPFYIEKPR TNDVLCGRGAHGNHH  
GNKKWKALTNMQAGAYFSSQRHEKRTIAESIVRQV RAYGGRFLKRDDRTGKYMDMDKTA  
TMKTSQLFRDISYVVKKQGEKIGEAQTPLNRGWPQYPEVESSEIRLGGDDYRKKDAGIG  
DATGRIPQGLSSLANSATHRKPSFHNT EQASRISEELAVSEVLMSLQKK

>comp12808\_c0\_seq1; 825 111 1622 LEN=1725; translated  
MSSAEFVEERVAFAADPKKENRFLPRISVTKTVGMGSTGTSGNVEKSFRPFETEDVSRVL

DFENVDP PPPDGPLMHCENETDFPSRHFALRGGFLLYFGLGDVSGTGRSHYVITYHGPPKG  
VIPLDKVKIELPPGRRVFRHSQTNARTGYELAILHNERPPAFVVAESMAQRDKWAKAI  
MARSGIEEPTKLRAVSTFSAEDPSLLTKPAELLQQSMKKRASLADNGSDMNPSRRSMKEV  
GKHKSTRKGKMSRRDKNNGNVSEDVTIQEVLQDFGKKNFSEEAWIDNYFETYNEVDSAD  
RCRLMEKQQEAIKRGLKAAVLEQYEFVEASGEMTNMGREVVLDKTLVETQVETIKEMKE  
IDFSGAILDPAEDENASDGGDLFQERRKGARRKKGGRYGGDHDSDTSSVSSDEDEALRNV  
HNSATFGRVPIPEKITIEIPPHLDDVVEEILAYVKESTRYSEGTDLWAKTKQEVAEMLQL  
VSKWVLEPNGKLCYGGGLQGAHNN

>comp12808\_c0\_seq2; 254 1 845 LEN=1083; translated  
LLLLERYVQPGFCSVGRVFLRACSGNFR LAPRTATTSDSLSPFFLCRVFXLQTVALLGT  
SIHERPLTGTGNVDLVIYAAQLSQSFFSCLAGAIIEGFLDLFLSSAPTSEKSARSDEMSFD  
ANSINSNALTMRNLPAGALASIVLWCDGELAKFAAAF GGTRVLGNLALSPPSRETATARR  
GPRVLGQNGKGTGDGPGAGGNKDRQSAIEVAAQCVEQAFQYAAENLDVVGLPLSPRLAES  
LRKRLKGCEAEVAKLLDEQWRP I VLEWSISRNDHHPMDER

>comp12808\_c0\_seq3; 1159 111 2525 LEN=2763; translated  
MSSAEFVEERVAFAADPKKENRFLPRISVTKTVGMGSTGTSGNVEKSFRPFETEDVSRVL  
DFENVDP PPPDGPLMHCENETDFPSRHFALRGGFLLYFGLGDVSGTGRSHYVITYHGPPKG  
VIPLDKVKIELPPGRRVFRHSQTNARTGYELAILHNERPPAFVVAESMAQRDKWAKAI  
MARSGIEEPTKLRAVSTFSAEDPSLLTKPAELLQQSMKKRASLADNGSDMNPSRRSMKEV  
GKHKSTRKGKMSRRDKNNGNVSEDVTIQEVLQDFGKKNFSEEAWIDNYFETYNEVDSAD  
RCRLMEKQQEAIKRGLKAAVLEQYEFVEASGEMTNMGREVVLDKTLVETQVETIKEMKE  
IDFSGAILDPAEDENASDGGDLFQERRKGARRKKGGRYGGDHDSDTSSVSSDEDEALRNV  
HNSATFGRVPIPEKITIEIPPHLDDVVEEILAYVKESTRYSEGTDLWAKTKQEVAEMLQL  
HEKPTDQKLTKKQYNQMOTL TEKLGELSEMISNRVVENLRRKNEALKQASKRERADASAH  
MVPSVSPCCLNDDSI SLRLLV LKGSQEAATAYSARRSLLLLES IHERPLTGTGNVDLVI  
YAAQLSQSFFSCLAGAIIEGFLDLFLSSAPTSEKSARSDEMSFDANSINSNALTMRNLPAG  
ALASIVLWCDGELAKFAAAF GGTRVLGNLALSPPSRETATARRGPRVLGQNGKGTGDGPG  
AGGNKDRQSAIEVAAQCVEQAFQYAAENLDVVGLPLSPRLAESLRKRLKGCEAEVAKLLD  
EQWRP I VLEWSISRNDHHPMDER

>comp12809\_c0\_seq1; 195 30 341 LEN=686; translated  
MSGRGKGGKGLGKGGAKRHRKVLDRDNIQGITKPAIRRLARRGGVKRISGLIYEETRGLK  
VFLENVIRDSVITYTEHARRKTVTAMDVVYALKRQGR TLYGFGG

>comp12810\_c0\_seq1; 584 183 2008 LEN=2205; translated  
MKFLPSLLLAQLSTVSPFVLPHEPQH ALASNGTPLQALASDDAEARSFTNLGINPSVL  
NAIWSRSDWERPTPVQQLAIPRLLER GATDHFGXEAPT GSGKTA AFLIPL LQNILIDRTQ  
TKKQKGERVTALILCPTREL CVQIGGVLDQM VDDIVSMDRRNKYEGFSTMVLHG GVPLEP  
QIARLADCVRHHTTIDVLVATPGR LIDVLT SYDEKRGNSNAKDAAMERRLLAAIDNSDDG  
EVSLEELQMLGLD TIHRDDDENDDGSDGRS QLRNVLNGLRYLVFDES DRLLGNGFKAEVD  
SVLNLMSSTPATWLF SATFPKSI EPRLDNVLSSIGATKSPVRLVCANS DRKSEG DSTIST  
SLKKKLEQSKT VTSASKYQQVGPAST IRLRNIRMEKTDR TQVLRK LLEDYRDEWDRVLV  
FVSTRYASQHVSRKLRRYGIR SSELHGKLDQDARMRRLDDLKKGKI QVLLCTDVASRGID  
ISGLPAVVNYDLPRSTSDFVHR IGR TGRAGQEGVAVSFVTPSVA AHMDLIEKRHLASPE  
REVLPGFEPNEERWKIEAEGARTS I PGTQHSSKGLEHDKMFGGIKGHRKSKDKKREAAA  
RAAALKQK

>comp12811\_c0\_seq1; 624 51 1664 LEN=2650; translated  
MSNSSNFPNVVTIGLACSLTAAFSYVAAKEAEKKV LLEKKKAYDRELMLKEKTIAAREL  
TGEPKGKLIADVTIDKVYLWECEDLKKRFSPCNVHNMKNIPSPNENPYFP SLEKKTLA  
AHKESTKPT EFNKLITNHEC ILGEIVRKPNQQTYSRAYVRAGPRKELHFDPRNTNAAIVT  
CGGLCPGLNNVREIVNTLYSSYIGGVVWGIQGGYRGFWDFDNYRPVQLTPDLVANIHH  
EGGTVLGSSRGGFDLEKILDFLKS KKITCLFVIGGDGTHRGA FRIHEGCM EKGMNVAVAG  
IPKTI DNDVDYIDRSFGFESAVEAAQVAIRSAKIEAICNMPNGIGIVKLMGRSAGF IAAH  
ATMASGDVDLCLVPEVP I VLTGEGC LPHIMRRVKDQGYAVIVVAEGAGEELLGTS AETD  
AGGNKLPPIGDFMKKQVEEYFKENGATATVKYIDPSYTVRSVPANAQDSLYCMQLGQNA  
VHGAMAGFTGFSVGLCNNRMVFLPIPELVSTSPRSMNPHGRTWERILALTRQPNTAE

>comp12812\_c0\_seq1; 187 90 1645 LEN=1645; translated  
MALLPPRFLFPFPFRLPFRFLLPVLVATLASHPFLLAGGFLPLSVSLSLPRGGGWNRDL  
LGAGAGLLVMPPPAEARAGEDPPQAVVRWGVIGLGDVARVKS GPPFWKCEGSELVAVVR  
TPGKAAEFAGKVPVGPVGVPCVGYEDLDRFLEHPGLEAVYVCTRPGTHASVARRVAGAGL  
ACYVEKPVGRCASEASELTELFRSKGLPLYTAYISRAYER TLAVRRLLDGDVLDRLERV  
SYVLKGTGGARDLDAGGSLPWRLDAAQSGGLITDVGCHLIDRIDALCGPLVGVESAEH

APAPGDRWGEVAFAAVENRCSATATIGASEWASMPNGGCAGASVDLSWDFAIIDDPARAV  
DELRFFGSNGRSLKMQGMSPSGPIEVLERDGATVLEILSFVPEHTGQGLIQAVTNDXDR  
PKERRAKQEPQRPRAAGPAVLWRERGPAAAGDRHDAGFLLRKRDRVLGPNGLLAGASGT  
EATGVVATVATELFFRPPARNQRFQARSRIDRKRFRKDP

>comp12813\_c0\_seq1; 395 186 1873 LEN=1886; translated  
MTKAKSIRAMLTSSRRSPPRNAPSSGGSSQQTQTSVTLPRTLVSSANGSSTSTARNDERQ  
GREADSHTGEAESNFDVSIQSYSHYQEMEIKVPGPFVVLQGNAGDGLSNTVDGPLPVLAR  
TRRTRQRVQAAAAAATATQTSPEEEEEEFQHVSTNAAAGIVNGPRFAVTVGAVAAAAAVD  
AGVQSSASSDEYVVVVDDANTNGTPTNHLEEEQQEQQHQHEDQVAIANWESSRRQSELQOK  
RDWEDSLYQVPPAIIAEHVMMNQSPVTHVSNDPESRSWWQRNGEVAVLREHPTKLFDSV  
TVSRIGTLPFGSTVMAMDLELNSGTLLEIPLKPTRQGIQDHNGASSSSSLTSPTSHRE  
RTFSQGRIGIIQMIKLETKEGRTGYTCLSLDGYPLLGPLPNAYVDPASSTRDRDQHTPG  
GPSRASESWIWRVTCPSGAFVREGLDLHTRHIETLPYGSILRVVTRRCINNQGLSRLRTSG  
YLSLKTHEGNSRVLVTGWCELLNPLSGQRXDRRTTSPISGPGDLSNAADGVSLPFLAQ  
KVQSKESSSSKTAATDILLRIL

>comp12813\_c0\_seq2; 493 186 2360 LEN=3045; translated  
MTKAKSIRAMLTSSRRSPPRNAPSSGGSSQQTQTSVTLPRTLVSSANGSSTSTARNDERQ  
GREADSHTGEAESNFDVSIQSYSHYQEMEIKVPGPFVVLQGNAGDGLSNTVDGPLPVLAR  
TRRTRQRVQAAAAAATATQTSPEEEEEEFQHVSTNAAAGIVNGPRFAVTVGAVAAAAAVD  
AGVQSSASSDEYVVVVDDANTNGTPTNHLEEEQQEQQHQHEDQVAIANWESSRRQSELQOK  
RDWEDSLYQVPPAIIAEHVMMNQSPVTHVSNDPESRSWWQRNGEVAVLREHPTKLFDSV  
TVSRIGTLPFGSTVMAMDLELNSGTLLEIPLKPTRQGIQDHNGASSSSSLTSPTSHRE  
RTFSQGRIGIIQMIKLETKEGRTGYTCLSLDGYPLLGPLPNAYVDPASSTRDRDQHTPG  
GPSRASESWIWRVTCPSGAFVREGLDLHTRHIETLPYGSILRVVTRRCINNQGLSRLRTSG  
YLSLKTHEGNSRVLVTGWCELLNPLSGQRGIVAQPLFPVPAIYRVTLPMGAVVRRDIE  
LMSPQIEILPFGSTIKVVARAFSEHPVERCIERLQLAGGGGWISVRLNLPQPDDLVEL  
VDIDSDFDPENPGLYHLNAQRAVRAERERERAEHNPSDLSSVDENEISDDSANHEEENCN  
IDGTQQHSAKCVVCLTSERNATIVHGETGHVVCCLVCARILKARGDKCPVCRDLIDLVIQ  
HFYA

>comp12813\_c0\_seq3; 206 94 645 LEN=1330; translated  
MSPQIEILPFGSTIKVVARAFSEHPVERCIERLQLAGGGGWISVRLNLPQPDDLVELV  
DIDSDFDPENPGLYHLNAQRAVRAERERERAEHNPSDLSSVDENEISDDSANHEEENCN  
DGTQQHSAKCVVCLTSERNATIVHGETGHVVCCLVCARILKARGDKCPVCRDLIDLVIQ  
FYA

>comp12814\_c0\_seq1; 186 1 275 LEN=4299; minus strand; translated  
XLDNLMNIAAKGWRASINNILGDAKNKDDYSTDGGSSMMESESAFTSASSRSGPSHFS  
TGTSQLLNPLEFNDDFSSVPDEEQTAIASF

>comp12814\_c0\_seq2; 186 1 275 LEN=4472; minus strand; translated  
XLDNLMNIAAKGWRASINNILGDAKNKDDYSTDGGSSMMESESAFTSASSRSGPSHFS  
TGTSQLLNPLEFNDDFSSVPDEEQTAIASF

>comp12814\_c1\_seq1; 178 1 966 LEN=966; translated  
XKHGTTQVSKGYKEDPKLATWVQTQRSRCRRKDRIDRLNRIGFLWKVEPARNTNLPDVLQ  
SSLPPPEGPENQTQVKGTGHEASEFSKRVEEPSVSSLLSLSLPAQGPPEMKPEAKAKSRKDE  
DDLCAEVSTDWTPGCFCWLPDLAASDLEAPERVKRKRQGNDDDDDEENAMDDNKEDVH  
STEDNKDRPRFSGSRHCYFRCDQSNHFSDDDDASCWEIDSESDNDSQISTFETNCCR  
GNERHDHPPNSIRFQSRPCQKEWGATGESKWEIMYQRLTEYKQKNGSTRVPHLCKADPQL  
ADWVSSQRKFCRRPDLVDRLNEX

>comp12814\_c1\_seq2; 242 1 978 LEN=978; translated  
XKHGTTQVSKGYKEDPKLATWVQTQRSRCRRKDRIDRLNRIGFLWKVEPARKTNPPDLLK  
SSSSSSPPPEGSENQTHVKTGAHEASESPKKVEEPSISSQLLSPAQGPPEMKPEAKAKS  
RKDEDDLCAEVSTDWTPGCFCWLPDLAASDLEAPEKVKRKRQGNDDDDDEENAMDDNK  
EDVHSTEDNKDRPRFSGSRHCYFRCDQSNHFSDDDDASCWEIDSESDNDSQISTFETN  
CRRSGNERHDHPPNSIRFQSRPCQKEWGATGESKWEIMYQRLTEYKQKNGSTRVPHLCKA  
DPQLADWVSSQRKFCRRPDLVDRLNEX

>comp12815\_c0\_seq1; 336 332 1198 LEN=1902; translated  
MEKADPEDLSVELTTFNEEESPLSIAEAETHRQQEQQLMQQLNSTISTSMPPPLQPTSLT  
AGDKTSSNGFLEETLKEIRQLPKEIRNILAGGLAGMIAKSFVAPFDRIKILYQVSSAEFH  
IKYVPGIAKRIIQTEGLSALWKGNTATLIRVFPYSGIQFMVFDRCCKTYLLKEQELNYRE  
KALHPDTPKPIWGLSPLESLCAGMAAGAVSVVATYPLDLTRSQAVLKTCKGRSSSNVGF  
GAALLSNYRDRGAVGLFRGITPTLMGILPYSGLAFSFEQAQRKVRGI

>comp12815\_c0\_seq2; 436 332 1618 LEN=1726; translated  
MEKADPEDLSVELTTFNEEEESPLSIAEAETHRQQEQQLMQQLNSTISTSMPPLOPTSLT  
AGDKTSSNGFLEETLKEIRQLPKEIRNILAGGLAGMIAKSFVAPFDRIKILYQVSSAEFH  
IKYVPGIAKRIIQTEGLSALWKGNTATLIRVFPYSGIQFMVFDRCCTYLLKEQELNYRRE  
KALHPDTPKPIWGLSPLESACAGMAAGAVSVVATYPLDLTRSOLAVLKTCKGRSSSNVGF  
GAALLSNYRDRGAVGLFRGITPTLMGILPYSGLAFSFNEQAKRKIQNMTGRDLTTIERMQ  
CGALSGLFAQTVTYPLEVTRRRMQTIGIVPTSGKDAAVDVVGKGPSHPVAATVIREVVP  
DRPPSMSSIVKELYQEQQVGRGFFKGVTLNWFKGP IAFSISFTCFDTIQNSLATEAERRFL  
FPRRKS RV

>comp12816\_c0\_seq1; 533 160 2283 LEN=4414; translated  
MSISGKTAICAI FIANLMFSSGNKTFITTSNILSDIVIPL ENEHWSLSSSDLVFTNLTA  
K VPGDLLSDLIANGLIDDPYIDRNFLTQRFVWTGENQWGPTDGYNASSIESEKHND SNGKI  
FQQKRTWIYSTTFKLSTRHSEKVS WKLVLEGIKMGAD IYVNNVQIGQAVDQFLRYDFQIE  
DYILEKGLPLDHSRHHNLT VVFDPTIQVNGRFSGCSSGWDWSPYTKVRDAQQLDIFTLGI  
VKPVYIIGVGIQQFVYVSHVVPKIYYLGKYP AKPLRKA EADFRLTVDVHLEFVTTNFNRFA  
SNSSVILKTNFAEQVETIIPIPAPKSFKELSQVISINLIVRKDSIDLWWPNGMGKQPLYN  
IYVGTTFIHC RWIKRRVGFRTSALVTINESKNIDITAAHQESTEGSGQFGMYFRINGATL  
MARGANFIPMDQLEGR L TGEGHKIGIQTASKANMMIRVWGGGMVPPDPFYDACDEEGIL  
IYHDMMFVEEGGHRPFKTITISNEIRHLVRS LASHPSLLVWNGCNECEVIMGTPSEIYAN  
FVME TVAEEDDTRPIW PSSPSKHGWKSGVRRIDSRPLPNNRNLTTWEPDAFSTHLESHGP  
YMRSF SHSYPGVNGLDVNFYPYRNTPEL RKNVIGYDHPNQFASEFGSSTMS SFESMKGTI  
STKHWSLHGGGDPDDCEIDYGNKNRCKGTNIMAERVRARDQLFSFAF

>comp12816\_c0\_seq2; 719 160 3159 LEN=4453; translated  
MSISGKTAICAI FIANLMFSSGNKTFITTSNILSDIVIPL ENEHWSLSSSDLVFTNLTA  
K VPGDLLSDLIANGLIDDPYIDRNFLTQRFVWTGENQWGPTDGYNASSIESEKHND SNGKI  
FQQKRTWIYSTTFKLSTRHSEKVS WKLVLEGIKMGAD IYVNNVQIGQAVDQFLRYDFQIE  
DYILEKGLPLDHSRHHNLT VVFDPTIQVNGRFSGCSSGWDWSPYTKVRDAQQLDIFTLGI  
VKPVYIIGVGIQQFVYVSHVVPKIYYLGKYP AKPLRKA EADFRLTVDVHLEFVTTNFNRFA  
SNSSVILKTNFAEQVETIIPIPAPKSFKELSQVISINLIVRKDSIDLWWPNGMGKQPLYN  
IYVGTTFIHC RWIKRRVGFRTSALVTINESKNIDITAAHQESTEGSGQFGMYFRINGATL  
MARGANFIPMDQLEGR L TGEGHKIGIQTASKANMMIRVWGGGMVPPDPFYDACDEEGIL  
IYHDMMFVEEGGHRPFKTITISNEIRHLVRS LASHPSLLVWNGCNECEVIMGTPSEIYAN  
FVME TVAEEDDTRPIW PSSPSKHGWKSGVRRIDSRPLPNNRNLTTWEPDAFSTHLESHGP  
YMRSF SHSYPGVNGLDVNFYPYRNTPEL RKNVIGYDHPNQFASEFGSSTMS SFESMKGTI  
STKHWSLHGGGDPDDCEIDYGNKNRCKGTNIMAERNYPCDSHIRAYFGVEEEELS AVGKA  
AFIKQLYMCLISQTLWMKGEIESRRSQNYLGLLIWQLNEVWPTGGWGLIEYGRKTKDGSQ  
ISGGRWKPLMHLKSSFLDQISACGKGM CYVRNDHFETVNFIVSFEAWDIEHVAPIRT  
YEYTNELEGGSIDWFDLPLDFTLETQIILIQ LKVQLPSSLVFPDHRVSETIFLEDMPKRL  
KGLQSPVNI EILD IYETNNGDAAIILASDKLALFVLLTTRAEGIFSDNCFFLRPLENKIV  
ILQSLEKRGTVNVEVLKATLRVEHLGLYVASAGKVNEAR

>comp12816\_c0\_seq3; 471 160 2423 LEN=2750; translated  
MSISGKTAICAI FIANLMFSSGNKTFITTSNILSDIVIPL ENEHWSLSSSDLVFTNLTA  
K VPGDLLSDLIANGLIDDPYIDRNFLTQRFVWTGENQWGPTDGYNASSIESEKHND SNGKI  
FQQKRTWIYSTTFKLSTRHSEKVS WKLVLEGIKMGAD IYVNNVQIGQAVDQFLRYDFQIE  
DYILEKGLPLDHSRHHNLT VVFDPTIQVNGRFSGELSTILIKLFRHANKAQSI SGHAIAR  
RKISIDNKNSFDTVFI SFEGCSSGWDWSPYTKVRDAQQLDIFTLGIVKPVYIIGVGIQQF  
YVSHVVPKIYYLGKYP AKPLRKA EADFRLTVDVHLEFVTTNFNRFA SNSSVILKTNFAEQ  
VETIIPIPAPKSFKELSQVISINLIVRKDSIDLWWPNGMGKQPLYNIYVGTTFIHC RWIK  
RRVGFRTSALVTINESKNIDITAAHQESTEGSGQFGMYFRINGATLMARGANFIPMDQLE  
GRLTGEGHKIGIQTASKANMMIRVWGGGMVPPDPFYDACDEEGIL IYHDMMFVEEGGHR  
PFKTITISNEIRHLVRS LASHPSLLVWNGCNECEVIMGTPSEIYANFVME TVAEEDDTRP  
IWPSSPSKHGWKSGVRRIDSRPLPNNRNLTTWEPDAFSTHLESHGPYMRSF SHSYPGVNG  
LDVNFYPYRNTPEL RKNVIGYDHPNQFASEFGSSTMS SFESMKGTI STKHWSLHGGGDPD  
DCEIDYGNKNRCKGTNIMAERVRARDQLFSFAF

>comp12816\_c0\_seq4; 471 160 2423 LEN=4724; translated  
MSISGKTAICAI FIANLMFSSGNKTFITTSNILSDIVIPL ENEHWSLSSSDLVFTNLTA  
K VPGDLLSDLIANGLIDDPYIDRNFLTQRFVWTGENQWGPTDGYNASSIESEKHND SNGKI  
FQQKRTWIYSTTFKLSTRHSEKVS WKLVLEGIKMGAD IYVNNVQIGQAVDQFLRYDFQIE  
DYILEKGLPLDHSRHHNLT VVFDPTIQVNGRFSGELSTILIKLFRHANKAQSI SGHAIAR  
RKISIDNKNSFDTVFI SFEGCSSGWDWSPYTKVRDAQQLDIFTLGIVKPVYIIGVGIQQF

YVSHVVPKIYYLGKYPAPKPLRKAADFRLTVDVHLEFVTTNFNRFASNSSVILKTNFAEQ  
VETIIPAPKSFKELSQVISINLIVRKDSIDLWWPNGMGKQPLYNIYVGTTFIHCRWIK  
RRVGFRTSALVTINESKNIDITAAHQESTEGSGQFGMYFRINGATLMARGANFIPMDQLE  
GRLTGEGHKIGIQTASKANMMIRVWGGGMVPPDPFYDACDEEGILYHDMMFVEEGGHR  
PFKTITISNEIRHLVRLASHPSLLVWNGCNECEVIMGTPSEIYANFVMETVAEEDDTRP  
IWPSSPSKHGWKSGVRRIDSRPLPNNRNLTTWEPDAFSTHLESHGYPYMRFSHSHYPGVNG  
LDVNFYPYRNTPELARKVNIQYDHPNQFASEFGSSTMSSESMKGTISTKHWSLHGGGDPD  
DCEIDYGNKNRCKGTNIMAERVRARDQLFSFAF

>comp12816\_c0\_seq5; 471 160 2423 LEN=4052; translated  
MSISGKTAICAIFIANLMFSSGNKTFITTSNILSDIVIPLNEHWSLSSSDLVFTNLTAK  
VPGDLLSDLIANGLIDDPYIDRNFLTQRFVWTGENQWGPTDGYNASSIESEKHNDNSNGKI  
FQQKRTWIYSTTFKLSTRHSEKVSWKLVLEGIKMGADIYVNNVQIGQAVDQFLRYDFQIE  
DYILEKGLPLDHSRHHNLTVVFDPTIQVNGRFSGELSTILIKLFRHANKAQSSISGHAIAR  
RKISIDNKNFDTVFISFEGCSGGWDWSPYTKVRDAQQLDIFTLGIVKPVYIIGVGIQQF  
YVSHVVPKIYYLGKYPAPKPLRKAADFRLTVDVHLEFVTTNFNRFASNSSVILKTNFAEQ  
VETIIPAPKSFKELSQVISINLIVRKDSIDLWWPNGMGKQPLYNIYVGTTFIHCRWIK  
RRVGFRTSALVTINESKNIDITAAHQESTEGSGQFGMYFRINGATLMARGANFIPMDQLE  
GRLTGEGHKIGIQTASKANMMIRVWGGGMVPPDPFYDACDEEGILYHDMMFVEEGGHR  
PFKTITISNEIRHLVRLASHPSLLVWNGCNECEVIMGTPSEIYANFVMETVAEEDDTRP  
IWPSSPSKHGWKSGVRRIDSRPLPNNRNLTTWEPDAFSTHLESHGYPYMRFSHSHYPGVNG  
LDVNFYPYRNTPELARKVNIQYDHPNQFASEFGSSTMSSESMKGTISTKHWSLHGGGDPD  
DCEIDYGNKNRCKGTNIMAERVRARDQLFSFAF

>comp12816\_c0\_seq6; 533 160 2283 LEN=3885; translated  
MSISGKTAICAIFIANLMFSSGNKTFITTSNILSDIVIPLNEHWSLSSSDLVFTNLTAK  
VPGDLLSDLIANGLIDDPYIDRNFLTQRFVWTGENQWGPTDGYNASSIESEKHNDNSNGKI  
FQQKRTWIYSTTFKLSTRHSEKVSWKLVLEGIKMGADIYVNNVQIGQAVDQFLRYDFQIE  
DYILEKGLPLDHSRHHNLTVVFDPTIQVNGRFSGCSGGWDWSPYTKVRDAQQLDIFTLGI  
VKPVYIIGVGIQQFYVSHVVPKIYYLGKYPAPKPLRKAADFRLTVDVHLEFVTTNFNRFAS  
NSSSVILKTNFAEQVETIIPAPKSFKELSQVISINLIVRKDSIDLWWPNGMGKQPLYN  
IYVGTTFIHCRWIKRRVGFRTSALVTINESKNIDITAAHQESTEGSGQFGMYFRINGATL  
MARGANFIPMDQLEGRLTGEGHKIGIQTASKANMMIRVWGGGMVPPDPFYDACDEEGIL  
YHDMMFVEEGGHRPFKTITISNEIRHLVRLASHPSLLVWNGCNECEVIMGTPSEIYAN  
FVMETVAEEDDTRPIWPSSPSKHGWKSGVRRIDSRPLPNNRNLTTWEPDAFSTHLESHGP  
YMRFSHSHYPGVNGLDVNFYPYRNTPELARKVNIQYDHPNQFASEFGSSTMSSESMKGTI  
STKHWSLHGGGDPDDCEIDYGNKNRCKGTNIMAERVRARDQLFSFAF

>comp12816\_c0\_seq7; 533 160 2283 LEN=4584; translated  
MSISGKTAICAIFIANLMFSSGNKTFITTSNILSDIVIPLNEHWSLSSSDLVFTNLTAK  
VPGDLLSDLIANGLIDDPYIDRNFLTQRFVWTGENQWGPTDGYNASSIESEKHNDNSNGKI  
FQQKRTWIYSTTFKLSTRHSEKVSWKLVLEGIKMGADIYVNNVQIGQAVDQFLRYDFQIE  
DYILEKGLPLDHSRHHNLTVVFDPTIQVNGRFSGCSGGWDWSPYTKVRDAQQLDIFTLGI  
VKPVYIIGVGIQQFYVSHVVPKIYYLGKYPAPKPLRKAADFRLTVDVHLEFVTTNFNRFAS  
NSSSVILKTNFAEQVETIIPAPKSFKELSQVISINLIVRKDSIDLWWPNGMGKQPLYN  
IYVGTTFIHCRWIKRRVGFRTSALVTINESKNIDITAAHQESTEGSGQFGMYFRINGATL  
MARGANFIPMDQLEGRLTGEGHKIGIQTASKANMMIRVWGGGMVPPDPFYDACDEEGIL  
YHDMMFVEEGGHRPFKTITISNEIRHLVRLASHPSLLVWNGCNECEVIMGTPSEIYAN  
FVMETVAEEDDTRPIWPSSPSKHGWKSGVRRIDSRPLPNNRNLTTWEPDAFSTHLESHGP  
YMRFSHSHYPGVNGLDVNFYPYRNTPELARKVNIQYDHPNQFASEFGSSTMSSESMKGTI  
STKHWSLHGGGDPDDCEIDYGNKNRCKGTNIMAERVRARDQLFSFAF

>comp12816\_c0\_seq8; 533 160 2283 LEN=4331; translated  
MSISGKTAICAIFIANLMFSSGNKTFITTSNILSDIVIPLNEHWSLSSSDLVFTNLTAK  
VPGDLLSDLIANGLIDDPYIDRNFLTQRFVWTGENQWGPTDGYNASSIESEKHNDNSNGKI  
FQQKRTWIYSTTFKLSTRHSEKVSWKLVLEGIKMGADIYVNNVQIGQAVDQFLRYDFQIE  
DYILEKGLPLDHSRHHNLTVVFDPTIQVNGRFSGCSGGWDWSPYTKVRDAQQLDIFTLGI  
VKPVYIIGVGIQQFYVSHVVPKIYYLGKYPAPKPLRKAADFRLTVDVHLEFVTTNFNRFAS  
NSSSVILKTNFAEQVETIIPAPKSFKELSQVISINLIVRKDSIDLWWPNGMGKQPLYN  
IYVGTTFIHCRWIKRRVGFRTSALVTINESKNIDITAAHQESTEGSGQFGMYFRINGATL  
MARGANFIPMDQLEGRLTGEGHKIGIQTASKANMMIRVWGGGMVPPDPFYDACDEEGIL  
YHDMMFVEEGGHRPFKTITISNEIRHLVRLASHPSLLVWNGCNECEVIMGTPSEIYAN  
FVMETVAEEDDTRPIWPSSPSKHGWKSGVRRIDSRPLPNNRNLTTWEPDAFSTHLESHGP  
YMRFSHSHYPGVNGLDVNFYPYRNTPELARKVNIQYDHPNQFASEFGSSTMSSESMKGTI

STKHWSLHGGGDPDDCEIDYGNKNRCKGTNIMAERVRARDQLFSFAF

>comp12816\_c0\_seq9; 651 160 3272 LEN=4313; translated  
MSISGKTAICAIFIANLMFSSGNKTFITTSNILSDIVIPLENEHWSLSSSDLVFTNLTAK  
VPGDLLSDLIANGLIDDPYIDRNFLTQRFVWTGENQWGPTDGYNASSIESEKHNDNSNGKI  
FQQKRTWIYSTTFKLSTRHSEKVSWKLVLEGIKMGADIYVNNVQIGQAVDQFLRYDFQIE  
DYILEKGLPLDHSRHHNLTVVFDPTIQVNGRFSGELSTILIKLFRHANKAQSI SGHAIAR  
RKISIDNKNSFDTVFISFEGCSGGWDWSPYTKVRDAQQLDIFTLGIVKPVYIIGVGIQQF  
YVSHVVPKIYYLGKYPAPKPLRKAADFRLTVDVHLEFVTTNFRNFASNSSVILKTNFAEQ  
VETIIPAPKSFKELSQVISINLIVRKDSIDLWWPNGMGKQPLYNIYVGTTFIHCRWIK  
RRVGFRTSALVTINESKNIDITAAHQESTEGSGQFGMYFRINGATLMARGANFIPMDQLE  
GRLTGEGHKIGIQTASKANMMIRVWGGGMVPPDPFYDACDEEGILYHDMMFVEEGGHR  
PFKTTITISNEIRHLVRSASHPSLLVWNGCNECEVIMGTPSEIYANFVMETVAEEDDTRP  
IWPSSPSKHGWKSGVRRIDSRPLPNNRNLTTWEPDAFSTHLESHGPMRSFSSHYPGVNG  
LDVNFYPYRNTPELRKVNIGYDHPNQFASEFGSSTMSSESMKGTISTKHWSLHGGGDP  
DCEIDYGNKNRCKGTNIMAERNYPCDSHIRAYFGVEEEELS AVGKA AFIKQLYMCLISQT  
LWMKGEIESRRSQNYLVWPTGGWGLIEYGRKTKDGSQISGGRWKPLMHLKSSFLDQIS  
ACGKGGMCYVRNDHFETVNFIVSFEAWDIEHVAPIRTYEYTNELEGGSIDWFDLPLDFTL  
ETQIILIQLVQLPSSLVFPDHRVSETIFLEDMPKRLKGLQSPVNI EILD IYETNNGDAA  
IILASDKLALFVLLTTRAEGIFSDNCFLLRPLENKIVILQSLEKRGTVNVEVLKATLRVE  
HLGLYVASAGKVNEAR

>comp12816\_c0\_seq10; 657 160 3299 LEN=4593; translated  
MSISGKTAICAIFIANLMFSSGNKTFITTSNILSDIVIPLENEHWSLSSSDLVFTNLTAK  
VPGDLLSDLIANGLIDDPYIDRNFLTQRFVWTGENQWGPTDGYNASSIESEKHNDNSNGKI  
FQQKRTWIYSTTFKLSTRHSEKVSWKLVLEGIKMGADIYVNNVQIGQAVDQFLRYDFQIE  
DYILEKGLPLDHSRHHNLTVVFDPTIQVNGRFSGELSTILIKLFRHANKAQSI SGHAIAR  
RKISIDNKNSFDTVFISFEGCSGGWDWSPYTKVRDAQQLDIFTLGIVKPVYIIGVGIQQF  
YVSHVVPKIYYLGKYPAPKPLRKAADFRLTVDVHLEFVTTNFRNFASNSSVILKTNFAEQ  
VETIIPAPKSFKELSQVISINLIVRKDSIDLWWPNGMGKQPLYNIYVGTTFIHCRWIK  
RRVGFRTSALVTINESKNIDITAAHQESTEGSGQFGMYFRINGATLMARGANFIPMDQLE  
GRLTGEGHKIGIQTASKANMMIRVWGGGMVPPDPFYDACDEEGILYHDMMFVEEGGHR  
PFKTTITISNEIRHLVRSASHPSLLVWNGCNECEVIMGTPSEIYANFVMETVAEEDDTRP  
IWPSSPSKHGWKSGVRRIDSRPLPNNRNLTTWEPDAFSTHLESHGPMRSFSSHYPGVNG  
LDVNFYPYRNTPELRKVNIGYDHPNQFASEFGSSTMSSESMKGTISTKHWSLHGGGDP  
DCEIDYGNKNRCKGTNIMAERNYPCDSHIRAYFGVEEEELS AVGKA AFIKQLYMCLISQT  
LWMKGEIESRRSQNYLGLLIWQLNEVWPTGGWGLIEYGRKTKDGSQISGGRWKPLMHLK  
SSFLDQISACGKGGMCYVRNDHFETVNFIVSFEAWDIEHVAPIRTYEYTNELEGGSIDW  
FDLPLDFTLETQIILIQLVQLPSSLVFPDHRVSETIFLEDMPKRLKGLQSPVNI EILD I  
YETNNGDAAIILASDKLALFVLLTTRAEGIFSDNCFLLRPLENKIVILQSLEKRGTVNVE  
VLKATLRVEHLGLYVASAGKVNEAR

>comp12816\_c0\_seq11; 684 160 2957 LEN=4509; translated  
MSISGKTAICAIFIANLMFSSGNKTFITTSNILSDIVIPLENEHWSLSSSDLVFTNLTAK  
VPGDLLSDLIANGLIDDPYIDRNFLTQRFVWTGENQWGPTDGYNASSIESEKHNDNSNGKI  
FQQKRTWIYSTTFKLSTRHSEKVSWKLVLEGIKMGADIYVNNVQIGQAVDQFLRYDFQIE  
DYILEKGLPLDHSRHHNLTVVFDPTIQVNGRFSGCSGGWDWSPYTKVRDAQQLDIFTLGI  
VKPVYIIGVGIQQFYVSHVVPKIYYLGKYPAPKPLRKAADFRLTVDVHLEFVTTNFRNFA  
SNSSVILKTNFAEQVETIIPAPKSFKELSQVISINLIVRKDSIDLWWPNGMGKQPLYN  
IYVGTTFIHCRWIKRRVGFRTSALVTINESKNIDITAAHQESTEGSGQFGMYFRINGATL  
MARGANFIPMDQLEGRLTGEGHKIGIQTASKANMMIRVWGGGMVPPDPFYDACDEEGIL  
YHDMMFVEEGGHRPFKTTITISNEIRHLVRSASHPSLLVWNGCNECEVIMGTPSEIYAN  
FVMETVAEEDDTRPIWPSSPSKHGWKSGVRRIDSRPLPNNRNLTTWEPDAFSTHLESHG  
PMRSFSSHYPGVNGLDVNFYPYRNTPELRKVNIGYDHPNQFASEFGSSTMSSESMKGTI  
STKHWSLHGGGDPDDCEIDYGNKNRCKGTNIMAERNYPCDSHIRAYFGVEEEELS AVGKA  
AFIKQLYMCLISQTLWMKGEIESRRSQNYLVWPTGGWGLIEYGRKTKDGSQISGGRWKPL  
MHLKSSFLDQISACGKGGMCYVRNDHFETVNFIVSFEAWDIEHVAPIRTYEYTNELEG  
GSIDWFDLPLDFTLETQIILIQLVQLPSSLVFPDHRVSETIFLEDMPKRLKGLQSPVNI  
EILD IYETNNGDAAIILASDXIGLICPPDNES

>comp12816\_c0\_seq12; 533 160 2283 LEN=4304; translated  
MSISGKTAICAIFIANLMFSSGNKTFITTSNILSDIVIPLENEHWSLSSSDLVFTNLTAK  
VPGDLLSDLIANGLIDDPYIDRNFLTQRFVWTGENQWGPTDGYNASSIESEKHNDNSNGKI  
FQQKRTWIYSTTFKLSTRHSEKVSWKLVLEGIKMGADIYVNNVQIGQAVDQFLRYDFQIE

DYILEKGLPLDHSRHHNLTVVFDPTIQVNGRFSGCSSGWDWSPYTKVRDAQQLDIFTLGI  
VKPVYIIGVGIQQFYVSHVVPKIYYLGKYPAPKPLRKAADFRLTVDVHLEFVTTNFNRFAS  
SNSSVILKTNFAEQVETIIPAPKSFKELSQVISINLIVRKDSIDLWPNMGKQPLYN  
IYVGTTFIHCRWIKRRVGFRTSALVTINESKNIDITAAHQESTEGSGQFGMYFRINGATL  
MARGANFIPMDQLEGRLTGEGHKIGIQTASKANMMIRVWGGGMVPPDPFYDACDEEGIL  
IYHDMMFVEEGGHRPFKTTITISNEIRHLVRSLSHPSLLVWNGCNECEVIMGTPSEIYAN  
FVMETVAEEDDTRPIWPSSPSKHGWKSGVRRIDSRPLPNNRNLTTWEPDAFSTHLESHGP  
YMRFSHSHSYPGVNGLDVNFPYRNTPELKRKNIGYDHPNQFASEFGSSTMSSSFESMKGTI  
STKHWSLHGGGDPDDCEIDYGKNRCKGTNIMAERVRARDQLFSFAF

>comp12816\_c0\_seq13; 578 160 2436 LEN=2479; translated  
MSISGKTAICAIFIANLMFSSGNKTFITTSNILSDIVIPLNEHWSLSSSDLVFTNLTA  
KVPGDLLSDLIANGLIDDPYIDRNFLTQRFVWTGENQWGPTDGYNASSIESEKHND  
SNGKIFQQKRTWIYSTTFKLSTRHSEKVSWKLVLEGIKMGADIYVNNVQIGQAVDQFL  
RYDFQIE DYILEKGLPLDHSRHHNLTVVFDPTIQVNGRFSGCSSGWDWSPYTKVRDA  
QQLDIFTLGI VKPVYIIGVGIQQFYVSHVVPKIYYLGKYPAPKPLRKAADFRLTVDV  
HLEFVTTNFNRFAS SNSSVILKTNFAEQVETIIPAPKSFKELSQVISINLIVRKDS  
IDLWPNMGKQPLYN IYVGTTFIHCRWIKRRVGFRTSALVTINESKNIDITAAHQES  
TEGSGQFGMYFRINGATLMARGANFIPMDQLEGRLTGEGHKIGIQTASKANMMIRV  
WGGGMVPPDPFYDACDEEGIL IYHDMMFVEEGGHRPFKTTITISNEIRHLVRSLS  
HPSLLVWNGCNECEVIMGTPSEIYAN FVMETVAEEDDTRPIWPSSPSKHGWKSGV  
RRIDSRPLPNNRNLTTWEPDAFSTHLESHGP YMRFSHSHSYPGVNGLDVNFPYRNT  
PELKRKNIGYDHPNQFASEFGSSTMSSSFESMKGTI STKHWSLHGGGDPDDCEIDY  
GKNRCKGTNIMAERNYPCDSHIRAYFGVEEEELS AVGKA AFIKQLYMCLISQTLW  
MKGEIESRRSQNYLGTTKQNSG

>comp12816\_c0\_seq14; 622 160 3097 LEN=3894; translated  
MSISGKTAICAIFIANLMFSSGNKTFITTSNILSDIVIPLNEHWSLSSSDLVFTNL  
TAKVPGDLLSDLIANGLIDDPYIDRNFLTQRFVWTGENQWGPTDGYNASSIESEKH  
NDSNGKIFQQKRTWIYSTTFKLSTRHSEKVSWKLVLEGIKMGADIYVNNVQIGQAVD  
QFLRYDFQIE DYILEKGLPLDHSRHHNLTVVFDPTIQVNGRFSGELSTILIKLFRH  
ANKAQSIGHAIAR RKISIDNKNSFDTVVISFEGCSSGWDWSPYTKVRDAQQLDIFTL  
GIVKPVYIIGVGIQQFYVSHVVPKIYYLGKYPAPKPLRKAADFRLTVDVHLEFVTT  
NFNRFAS SNSSVILKTNFAEQVETIIPAPKSFKELSQVISINLIVRKDSIDLWPNMG  
KQPLYNIYVGTTFIHCRWIKRRVGFRTSALVTINESKNIDITAAHQESTEGSGQFG  
MYFRINGATLMARGANFIPMDQLEGRLTGEGHKIGIQTASKANMMIRVWGGGMVPP  
DPFYDACDEEGIL IYHDMMFVEEGGHRPFKTTITISNEIRHLVRSLSHPSLLVW  
NGCNECEVIMGTPSEIYANFVMETVAEEDDTRPIWPSSPSKHGWKSGVRRIDSRPL  
PNNRNLTTWEPDAFSTHLESHGPYMRFSHSHSYPGVNGLDVNFPYRNTPELKRKN  
IGYDHPNQFASEFGSSTMSSSFESMKGTI STKHWSLHGGGDPDDCEIDYGKNRCK  
GTNIMAERNYPCDSHIRAYFGVEEEELS AVGKA AFIKQLYMCLISQTLW MKGEI  
ESRRSQNYLVWPTGGWGLIEYGRKTKDGSQISGGRWKPLMHLKSSFLDQIS  
ACGKGMICYVRNDHFETVNFIVSFEAWDIEHVAPIRTYEYTNELEGGSIDWFDLPL  
DFTLETQIILIQLVQLPSSLVFPDHRVSETIFLEDMPKRLKGLQSPVNIEILDIYET  
NNGDAA IILASDXIGLICPPDNES

>comp12816\_c0\_seq15; 471 160 2423 LEN=4697; translated  
MSISGKTAICAIFIANLMFSSGNKTFITTSNILSDIVIPLNEHWSLSSSDLVFTNL  
TAKVPGDLLSDLIANGLIDDPYIDRNFLTQRFVWTGENQWGPTDGYNASSIESEKH  
NDSNGKIFQQKRTWIYSTTFKLSTRHSEKVSWKLVLEGIKMGADIYVNNVQIGQAVD  
QFLRYDFQIE DYILEKGLPLDHSRHHNLTVVFDPTIQVNGRFSGELSTILIKLFRH  
ANKAQSIGHAIAR RKISIDNKNSFDTVVISFEGCSSGWDWSPYTKVRDAQQLDIFTL  
GIVKPVYIIGVGIQQFYVSHVVPKIYYLGKYPAPKPLRKAADFRLTVDVHLEFVTT  
NFNRFAS SNSSVILKTNFAEQVETIIPAPKSFKELSQVISINLIVRKDSIDLWPNMG  
KQPLYNIYVGTTFIHCRWIKRRVGFRTSALVTINESKNIDITAAHQESTEGSGQFG  
MYFRINGATLMARGANFIPMDQLEGRLTGEGHKIGIQTASKANMMIRVWGGGMVPP  
DPFYDACDEEGIL IYHDMMFVEEGGHRPFKTTITISNEIRHLVRSLSHPSLLVW  
NGCNECEVIMGTPSEIYANFVMETVAEEDDTRPIWPSSPSKHGWKSGVRRIDSRPL  
PNNRNLTTWEPDAFSTHLESHGPYMRFSHSHSYPGVNGLDVNFPYRNTPELKRKN  
IGYDHPNQFASEFGSSTMSSSFESMKGTI STKHWSLHGGGDPDDCEIDYGKNRCK  
GTNIMAERVRARDQLFSFAF

>comp12816\_c0\_seq16; 690 160 2984 LEN=4536; translated  
MSISGKTAICAIFIANLMFSSGNKTFITTSNILSDIVIPLNEHWSLSSSDLVFTNL  
TAKVPGDLLSDLIANGLIDDPYIDRNFLTQRFVWTGENQWGPTDGYNASSIESEKH  
NDSNGKIFQQKRTWIYSTTFKLSTRHSEKVSWKLVLEGIKMGADIYVNNVQIGQAVD  
QFLRYDFQIE DYILEKGLPLDHSRHHNLTVVFDPTIQVNGRFSGCSSGWDWSPYTK  
VRDAQQLDIFTLGI

VKPVYIIGVGIQQFYVSHVVPKIYYLGKYPAPKPLRKAADFRLTVDVHLEFVTTNFNRFASNSSVILKTNFAEQVETIIPAPKSFKELSQVISINLIVRKDSIDLWPNMGKQPLYNIYVGTTFIHRWIKRRVGFRTSALVTINESKNIDITAAHQESTEGSGQFGMYFRINGATLMARGANFIPMDQLEGRLTGEGHKIGIQTASKANMMIRVWGGGMVPPDPFYDACDEEGILYHDMMFVEEGGHRPFKTTITISNEIRHLVRSLSHPSLLVWNGCNECEVIMGTPSEIYANFVMETVAEEDDTRPIWPSSPSKHGWKSGVRRIDSRPLPNNRNLTTWEPDAFSTHLESHGPMRFSFSHSYPGVNGLDVNFPYRNTPELKRKNIGYDHPNQFASEFGSSTMSSESMKGTISTKHWSLHGGGDPDDCEIDYGNKNRCKGTNIMAERNYPCDSHIRAYFGVEEEELSAVGKAAFIKQLYMCLISQTLWMKGEIESRRSQNYLGLLIWQLNEVWPTGGWGLIEYGRKTKDGSQISGGRWKPLMHLKSSFLDQISACGKGGMCYVRNDHFETVNFIVSFEAWDIEHVAPIRTYEYTNELEGGSIDWFDLPLDFTLETQIILIQLVQLPSSLVFPDHRVSETIFLEDMPKRLKGLQSPVNIIEILDYETNNGDAAILASDXIGLICPPDNES

>comp12816\_c0\_seq17; 690 160 2984 LEN=4283; translated  
MSISGKTAICAIFIANLMFSSGNKTFITTSNILSDIVIPLENEHWSLSSSDLVFTNLTAKVPGDLLSDLIANGLIDDPYIDRNFLTQRFVWTGENQWGPTDGYNASSIESEKHNDNSNGKIFQQKRTWIYSTTFKLSTRHSEKVSWKLVLEGIKMGADIYVNNVQIGQAVDQFLRYDFQIEDYILEKGLPLDHSRHHNLTVVFDPTIQVNGRFSGCSGGWDWSPYTKVRDAQQLDIFTLGIVKPVYIIGVGIQQFYVSHVVPKIYYLGKYPAPKPLRKAADFRLTVDVHLEFVTTNFNRFASNSSVILKTNFAEQVETIIPAPKSFKELSQVISINLIVRKDSIDLWPNMGKQPLYNIYVGTTFIHRWIKRRVGFRTSALVTINESKNIDITAAHQESTEGSGQFGMYFRINGATLMARGANFIPMDQLEGRLTGEGHKIGIQTASKANMMIRVWGGGMVPPDPFYDACDEEGILYHDMMFVEEGGHRPFKTTITISNEIRHLVRSLSHPSLLVWNGCNECEVIMGTPSEIYANFVMETVAEEDDTRPIWPSSPSKHGWKSGVRRIDSRPLPNNRNLTTWEPDAFSTHLESHGPMRFSFSHSYPGVNGLDVNFPYRNTPELKRKNIGYDHPNQFASEFGSSTMSSESMKGTISTKHWSLHGGGDPDDCEIDYGNKNRCKGTNIMAERNYPCDSHIRAYFGVEEEELSAVGKAAFIKQLYMCLISQTLWMKGEIESRRSQNYLGLLIWQLNEVWPTGGWGLIEYGRKTKDGSQISGGRWKPLMHLKSSFLDQISACGKGGMCYVRNDHFETVNFIVSFEAWDIEHVAPIRTYEYTNELEGGSIDWFDLPLDFTLETQIILIQLVQLPSSLVFPDHRVSETIFLEDMPKRLKGLQSPVNIIEILDYETNNGDAAILASDXIGLICPPDNES

>comp12816\_c0\_seq18; 471 160 2423 LEN=4471; translated  
MSISGKTAICAIFIANLMFSSGNKTFITTSNILSDIVIPLENEHWSLSSSDLVFTNLTAKVPGDLLSDLIANGLIDDPYIDRNFLTQRFVWTGENQWGPTDGYNASSIESEKHNDNSNGKIFQQKRTWIYSTTFKLSTRHSEKVSWKLVLEGIKMGADIYVNNVQIGQAVDQFLRYDFQIEDYILEKGLPLDHSRHHNLTVVFDPTIQVNGRFSGELSTILIKLFRHANKAQSI SGHAIARKISIDNKNNSFDTVVISFEGCSGGWDWSPYTKVRDAQQLDIFTLGIVKPVYIIGVGIQQFYVSHVVPKIYYLGKYPAPKPLRKAADFRLTVDVHLEFVTTNFNRFASNSSVILKTNFAEQVETIIPAPKSFKELSQVISINLIVRKDSIDLWPNMGKQPLYNIYVGTTFIHRWIKRRVGFRTSALVTINESKNIDITAAHQESTEGSGQFGMYFRINGATLMARGANFIPMDQLEGRLTGEGHKIGIQTASKANMMIRVWGGGMVPPDPFYDACDEEGILYHDMMFVEEGGHRPFKTTITISNEIRHLVRSLSHPSLLVWNGCNECEVIMGTPSEIYANFVMETVAEEDDTRPIWPSSPSKHGWKSGVRRIDSRPLPNNRNLTTWEPDAFSTHLESHGPMRFSFSHSYPGVNGLDVNFPYRNTPELKRKNIGYDHPNQFASEFGSSTMSSESMKGTISTKHWSLHGGGDPDDCEIDYGNKNRCKGTNIMAERVRARDQLFSFAF

>comp12816\_c0\_seq19; 533 160 2283 LEN=4667; translated  
MSISGKTAICAIFIANLMFSSGNKTFITTSNILSDIVIPLENEHWSLSSSDLVFTNLTAKVPGDLLSDLIANGLIDDPYIDRNFLTQRFVWTGENQWGPTDGYNASSIESEKHNDNSNGKIFQQKRTWIYSTTFKLSTRHSEKVSWKLVLEGIKMGADIYVNNVQIGQAVDQFLRYDFQIEDYILEKGLPLDHSRHHNLTVVFDPTIQVNGRFSGCSGGWDWSPYTKVRDAQQLDIFTLGIVKPVYIIGVGIQQFYVSHVVPKIYYLGKYPAPKPLRKAADFRLTVDVHLEFVTTNFNRFASNSSVILKTNFAEQVETIIPAPKSFKELSQVISINLIVRKDSIDLWPNMGKQPLYNIYVGTTFIHRWIKRRVGFRTSALVTINESKNIDITAAHQESTEGSGQFGMYFRINGATLMARGANFIPMDQLEGRLTGEGHKIGIQTASKANMMIRVWGGGMVPPDPFYDACDEEGILYHDMMFVEEGGHRPFKTTITISNEIRHLVRSLSHPSLLVWNGCNECEVIMGTPSEIYANFVMETVAEEDDTRPIWPSSPSKHGWKSGVRRIDSRPLPNNRNLTTWEPDAFSTHLESHGPMRFSFSHSYPGVNGLDVNFPYRNTPELKRKNIGYDHPNQFASEFGSSTMSSESMKGTISTKHWSLHGGGDPDDCEIDYGNKNRCKGTNIMAERVRARDQLFSFAF

>comp12816\_c0\_seq20; 713 160 3132 LEN=4173; translated  
MSISGKTAICAIFIANLMFSSGNKTFITTSNILSDIVIPLENEHWSLSSSDLVFTNLTAKVPGDLLSDLIANGLIDDPYIDRNFLTQRFVWTGENQWGPTDGYNASSIESEKHNDNSNGKIFQQKRTWIYSTTFKLSTRHSEKVSWKLVLEGIKMGADIYVNNVQIGQAVDQFLRYDFQIEDYILEKGLPLDHSRHHNLTVVFDPTIQVNGRFSGCSGGWDWSPYTKVRDAQQLDIFTLGIVKPVYIIGVGIQQFYVSHVVPKIYYLGKYPAPKPLRKAADFRLTVDVHLEFVTTNFNRFASNSSVILKTNFAEQVETIIPAPKSFKELSQVISINLIVRKDSIDLWPNMGKQPLYNIYVGTTFIHRWIKRRVGFRTSALVTINESKNIDITAAHQESTEGSGQFGMYFRINGATLMARGANFIPMDQLEGRLTGEGHKIGIQTASKANMMIRVWGGGMVPPDPFYDACDEEGILYHDMMFVEEGGHRPFKTTITISNEIRHLVRSLSHPSLLVWNGCNECEVIMGTPSEIYANFVMETVAEEDDTRPIWPSSPSKHGWKSGVRRIDSRPLPNNRNLTTWEPDAFSTHLESHGPMRFSFSHSYPGVNGLDVNFPYRNTPELKRKNIGYDHPNQFASEFGSSTMSSESMKGTISTKHWSLHGGGDPDDCEIDYGNKNRCKGTNIMAERVRARDQLFSFAF



DYILEKGLPLDHSRHHNLTVVFDPTIQVNGRFSGCSGGWDWSPYTKVRDAQQLDIFTLGI  
VKPVYIIGVGIQQFYVSHVVPKIYYLGKYPAPKPLRKAADFRLTVDVHLEFVTTNFNRFAS  
NSSSVILKTNFAEQVETIIPAPKSFKELSQVISINLIVRKDSIDLWWPNGMGKQPLYN  
IYVGTTFIHCRWIKRRVGFRTSALVTINESKNIDITAAHQESTEGSGQFGMYFRINGATL  
MARGANFIPMDQLEGRLTGEGHKIGIQTASKANMMIRVWGGGMVPPDPFYDACDEEGIL  
IYHDMMFVEEGGHRPFKTTITISNEIRHLVRSLSHPSLLVWNGCNECEVIMGTPSEIYAN  
FVMETVAEEDDTRPIWPSSPSKHGWKSGVRRIDSRPLPNNRNLTTWEPDAFSTHLESHGP  
YMRFSHSHSYPGVNGLDVNFPYRNTPELKRKVNIGYDHPNQFASEFGSSTMSSESMKGTI  
STKHWSLHGGGDPDDCEIDYGNKNRCKGTNIMAERNYPCDSHIRAYFGVEEEELS AVGKA  
AFIKQLYMCLISQTLWMKGEIESRRSQNYLVWPTGGWGLIEYGRKTKDGSQISGGRWKPL  
MHLKSSFLDQISACGKGMCYVRNDHFETVNFIVSFEAWDIEHVAPIRTYEYTNELEG  
GSIDWFDLPLDFTLETQIILIQLKVQLPSSLVFPDHRVSETIFLEDMPKRLKGLQSPVNI  
EILDYETNNGDAAIILASDKLALFVLLTTTAEIGIFSDNCFFLRPLENKIVILQSLKRG  
TVNVEVLKATLRVEHLGLYVASAGKVNEAR

>comp12816\_c0\_seq21; 713 160 3132 LEN=4426; translated  
MSISGKTAICAIFIANLMFSSGNKTFITTSNILSDIVIPLENEHWSLSSSDLVFTNLTAK  
VPGDLLSDLIANGLIDDPYIDRNFLTQRFVWTGENQWGPTDGYNASSIESEKHNDNSNGKI  
FQQKRTWIYSTTFKLSTRHSEKVSWKLVLEGIKMGADIYVNNVQIGQAVDQFLRYDFQIE  
DYILEKGLPLDHSRHHNLTVVFDPTIQVNGRFSGCSGGWDWSPYTKVRDAQQLDIFTLGI  
VKPVYIIGVGIQQFYVSHVVPKIYYLGKYPAPKPLRKAADFRLTVDVHLEFVTTNFNRFAS  
NSSSVILKTNFAEQVETIIPAPKSFKELSQVISINLIVRKDSIDLWWPNGMGKQPLYN  
IYVGTTFIHCRWIKRRVGFRTSALVTINESKNIDITAAHQESTEGSGQFGMYFRINGATL  
MARGANFIPMDQLEGRLTGEGHKIGIQTASKANMMIRVWGGGMVPPDPFYDACDEEGIL  
IYHDMMFVEEGGHRPFKTTITISNEIRHLVRSLSHPSLLVWNGCNECEVIMGTPSEIYAN  
FVMETVAEEDDTRPIWPSSPSKHGWKSGVRRIDSRPLPNNRNLTTWEPDAFSTHLESHGP  
YMRFSHSHSYPGVNGLDVNFPYRNTPELKRKVNIGYDHPNQFASEFGSSTMSSESMKGTI  
STKHWSLHGGGDPDDCEIDYGNKNRCKGTNIMAERNYPCDSHIRAYFGVEEEELS AVGKA  
AFIKQLYMCLISQTLWMKGEIESRRSQNYLVWPTGGWGLIEYGRKTKDGSQISGGRWKPL  
MHLKSSFLDQISACGKGMCYVRNDHFETVNFIVSFEAWDIEHVAPIRTYEYTNELEG  
GSIDWFDLPLDFTLETQIILIQLKVQLPSSLVFPDHRVSETIFLEDMPKRLKGLQSPVNI  
EILDYETNNGDAAIILASDKLALFVLLTTTAEIGIFSDNCFFLRPLENKIVILQSLKRG  
TVNVEVLKATLRVEHLGLYVASAGKVNEAR

>comp12816\_c0\_seq22; 657 160 3299 LEN=4340; translated  
MSISGKTAICAIFIANLMFSSGNKTFITTSNILSDIVIPLENEHWSLSSSDLVFTNLTAK  
VPGDLLSDLIANGLIDDPYIDRNFLTQRFVWTGENQWGPTDGYNASSIESEKHNDNSNGKI  
FQQKRTWIYSTTFKLSTRHSEKVSWKLVLEGIKMGADIYVNNVQIGQAVDQFLRYDFQIE  
DYILEKGLPLDHSRHHNLTVVFDPTIQVNGRFSGELSTILIKLFRHANKAQSISGHAIAR  
RKISIDNKNSFDTVVISFEGCSGGWDWSPYTKVRDAQQLDIFTLGIVKPVYIIGVGIQQF  
YVSHVVPKIYYLGKYPAPKPLRKAADFRLTVDVHLEFVTTNFNRFASNSSSVILKTNFAEQ  
VETIIPAPKSFKELSQVISINLIVRKDSIDLWWPNGMGKQPLYNIYVGTTFIHCRWIK  
RRVGFRTSALVTINESKNIDITAAHQESTEGSGQFGMYFRINGATLMARGANFIPMDQLE  
GRLTGEHKGKIGIQTASKANMMIRVWGGGMVPPDPFYDACDEEGIL IYHDMMFVEEGHR  
PFKTTITISNEIRHLVRSLSHPSLLVWNGCNECEVIMGTPSEIYANFVMETVAEEDDTRP  
IWPSSPSKHGWKSGVRRIDSRPLPNNRNLTTWEPDAFSTHLESHGPHYMRFSHSHSYPGVN  
LDVNFPYRNTPELKRKVNIGYDHPNQFASEFGSSTMSSESMKGTI STKHWSLHGGGDP  
DCEIDYGNKNRCKGTNIMAERNYPCDSHIRAYFGVEEEELS AVGKA AFIKQLYMCLISQ  
TLWMKGEIESRRSQNYLVWPTGGWGLIEYGRKTKDGSQISGGRWKPLMHLK  
SSLFLDQISACGKGMCYVRNDHFETVNFIVSFEAWDIEHVAPIRTYEYTNELEGGSIDW  
FDLPLDFTLETQIILIQLKVQLPSSLVFPDHRVSETIFLEDMPKRLKGLQSPVNI EILDY  
ETNNGDAAIILASDKLALFVLLTTTAEIGIFSDNCFFLRPLENKIVILQSLKRGTVNVE  
VLKATLRVEHLGLYVASAGKVNEAR

>comp12816\_c0\_seq23; 471 160 2423 LEN=4025; translated  
MSISGKTAICAIFIANLMFSSGNKTFITTSNILSDIVIPLENEHWSLSSSDLVFTNLTAK  
VPGDLLSDLIANGLIDDPYIDRNFLTQRFVWTGENQWGPTDGYNASSIESEKHNDNSNGKI  
FQQKRTWIYSTTFKLSTRHSEKVSWKLVLEGIKMGADIYVNNVQIGQAVDQFLRYDFQIE  
DYILEKGLPLDHSRHHNLTVVFDPTIQVNGRFSGELSTILIKLFRHANKAQSISGHAIAR  
RKISIDNKNSFDTVVISFEGCSGGWDWSPYTKVRDAQQLDIFTLGIVKPVYIIGVGIQQF  
YVSHVVPKIYYLGKYPAPKPLRKAADFRLTVDVHLEFVTTNFNRFASNSSSVILKTNFAEQ  
VETIIPAPKSFKELSQVISINLIVRKDSIDLWWPNGMGKQPLYNIYVGTTFIHCRWIK  
RRVGFRTSALVTINESKNIDITAAHQESTEGSGQFGMYFRINGATLMARGANFIPMDQLE

GRLTGEGHKIGIQTASKANMMIRVWGGGMVPPDPFYDACDEEGILIIYHDMMFVEEGGHR  
PFKTTITISNEIRHLVRSASHPSLLVWNGCNECEVIMGTPSEIYANFVMETVAEEDDTRP  
IWPSSPSKHGWKSGVRRIDSRPLPNNRNLTTWEPDAFSTHLESHGPMRSFSSHSYPGVNG  
LDVNFYPYRNTPELRLKVNIGYDHPNQFASEFGSSTMSSESMKGTISTKHWSLHGGGDPD  
DCEIDYGNKNRCKGTNIMAERVRARDQLFSFAF

>comp12816\_c0\_seq24; 471 160 2423 LEN=4444; translated  
MSISGKTAICAIFIANLMFSSGNKTFITTSNILSDIVIPLNEHWSLSSSDLVFTNLTAK  
VPGDLLSDLIANGLIDDPYIDRNFLTQRFVWTGENQWGPTDGYNASSIESEKHNDNSNGKI  
FQQKRTWIYSTTFKLSTRHSEKVSWKLVLEGIKMGADIYVNNVQIGQAVDQFLRYDFQIE  
DYILEKGLPLDHSRHHNLTVVFDPTIQVNGRFSGELSTILIKLFRHANKAQSI SGHAIAR  
RKISIDNKNSFDTVFISFEGCSGGWDWSPYTKVRDAQQLDIFTLGIVKPVYIIGVGIQQF  
YVSHVVPKIYYLGKYPAPKPLRKAADFRLTVDVHLEFVTTNFRNFASNSSVILKTNFAEQ  
VETIIPAPKSFKELSQVISINLIVRKDSIDLWWPNGMGKQPLYNIYVGTTFIHCRWIK  
RRVGFRTSALVTINESKNIDITAAHQESTEGSGQFGMYFRINGATLMARGANFIPMDQLE  
GRLTGEGHKIGIQTASKANMMIRVWGGGMVPPDPFYDACDEEGILIIYHDMMFVEEGGHR  
PFKTTITISNEIRHLVRSASHPSLLVWNGCNECEVIMGTPSEIYANFVMETVAEEDDTRP  
IWPSSPSKHGWKSGVRRIDSRPLPNNRNLTTWEPDAFSTHLESHGPMRSFSSHSYPGVNG  
LDVNFYPYRNTPELRLKVNIGYDHPNQFASEFGSSTMSSESMKGTISTKHWSLHGGGDPD  
DCEIDYGNKNRCKGTNIMAERVRARDQLFSFAF

>comp12816\_c0\_seq25; 651 160 3272 LEN=4566; translated  
MSISGKTAICAIFIANLMFSSGNKTFITTSNILSDIVIPLNEHWSLSSSDLVFTNLTAK  
VPGDLLSDLIANGLIDDPYIDRNFLTQRFVWTGENQWGPTDGYNASSIESEKHNDNSNGKI  
FQQKRTWIYSTTFKLSTRHSEKVSWKLVLEGIKMGADIYVNNVQIGQAVDQFLRYDFQIE  
DYILEKGLPLDHSRHHNLTVVFDPTIQVNGRFSGELSTILIKLFRHANKAQSI SGHAIAR  
RKISIDNKNSFDTVFISFEGCSGGWDWSPYTKVRDAQQLDIFTLGIVKPVYIIGVGIQQF  
YVSHVVPKIYYLGKYPAPKPLRKAADFRLTVDVHLEFVTTNFRNFASNSSVILKTNFAEQ  
VETIIPAPKSFKELSQVISINLIVRKDSIDLWWPNGMGKQPLYNIYVGTTFIHCRWIK  
RRVGFRTSALVTINESKNIDITAAHQESTEGSGQFGMYFRINGATLMARGANFIPMDQLE  
GRLTGEGHKIGIQTASKANMMIRVWGGGMVPPDPFYDACDEEGILIIYHDMMFVEEGGHR  
PFKTTITISNEIRHLVRSASHPSLLVWNGCNECEVIMGTPSEIYANFVMETVAEEDDTRP  
IWPSSPSKHGWKSGVRRIDSRPLPNNRNLTTWEPDAFSTHLESHGPMRSFSSHSYPGVNG  
LDVNFYPYRNTPELRLKVNIGYDHPNQFASEFGSSTMSSESMKGTISTKHWSLHGGGDPD  
DCEIDYGNKNRCKGTNIMAERNYPCDSHIRAYFGVEEEELSAVGKAAFIKQLYMCLISQT  
LWMKGEIESRRSQNYLVWPTGGWGLIEYGRKTKDGSQISGGRWKPLMHLKSSFLDQIS  
ACGKGMCYVRNDHFETVNFIVSFEAWDIEHVAPIRTYEYTNLEGGSIDWFDLPLDFTL  
ETQIILIQKLVQLPSSLVFPDHRVSETIFLEDMPKRLKGLQSPVNIIEILDIYETNNGDAA  
IILASDKLALFVLLTTAEGIFSDNCFLLRPLENKIVILQSLEKRGTVNVEVLKATLRVE  
HLGLYVASAGKVNEAR

>comp12816\_c0\_seq26; 516 160 2576 LEN=2619; translated  
MSISGKTAICAIFIANLMFSSGNKTFITTSNILSDIVIPLNEHWSLSSSDLVFTNLTAK  
VPGDLLSDLIANGLIDDPYIDRNFLTQRFVWTGENQWGPTDGYNASSIESEKHNDNSNGKI  
FQQKRTWIYSTTFKLSTRHSEKVSWKLVLEGIKMGADIYVNNVQIGQAVDQFLRYDFQIE  
DYILEKGLPLDHSRHHNLTVVFDPTIQVNGRFSGELSTILIKLFRHANKAQSI SGHAIAR  
RKISIDNKNSFDTVFISFEGCSGGWDWSPYTKVRDAQQLDIFTLGIVKPVYIIGVGIQQF  
YVSHVVPKIYYLGKYPAPKPLRKAADFRLTVDVHLEFVTTNFRNFASNSSVILKTNFAEQ  
VETIIPAPKSFKELSQVISINLIVRKDSIDLWWPNGMGKQPLYNIYVGTTFIHCRWIK  
RRVGFRTSALVTINESKNIDITAAHQESTEGSGQFGMYFRINGATLMARGANFIPMDQLE  
GRLTGEGHKIGIQTASKANMMIRVWGGGMVPPDPFYDACDEEGILIIYHDMMFVEEGGHR  
PFKTTITISNEIRHLVRSASHPSLLVWNGCNECEVIMGTPSEIYANFVMETVAEEDDTRP  
IWPSSPSKHGWKSGVRRIDSRPLPNNRNLTTWEPDAFSTHLESHGPMRSFSSHSYPGVNG  
LDVNFYPYRNTPELRLKVNIGYDHPNQFASEFGSSTMSSESMKGTISTKHWSLHGGGDPD  
DCEIDYGNKNRCKGTNIMAERNYPCDSHIRAYFGVEEEELSAVGKAAFIKQLYMCLISQT  
LWMKGEIESRRSQNYLGTTKQNSG

>comp12816\_c0\_seq27; 533 160 2283 LEN=2610; translated  
MSISGKTAICAIFIANLMFSSGNKTFITTSNILSDIVIPLNEHWSLSSSDLVFTNLTAK  
VPGDLLSDLIANGLIDDPYIDRNFLTQRFVWTGENQWGPTDGYNASSIESEKHNDNSNGKI  
FQQKRTWIYSTTFKLSTRHSEKVSWKLVLEGIKMGADIYVNNVQIGQAVDQFLRYDFQIE  
DYILEKGLPLDHSRHHNLTVVFDPTIQVNGRFSGCSGGWDWSPYTKVRDAQQLDIFTLGI  
VKPVYIIGVGIQQFYVSHVVPKIYYLGKYPAPKPLRKAADFRLTVDVHLEFVTTNFRNFA  
SNSSVILKTNFAEQVETIIPAPKSFKELSQVISINLIVRKDSIDLWWPNGMGKQPLYN

IYVGTTFIHCRAWIKRRVGFRTSALVTINESKNIDITAAHQESTEGSGQFGMYFRINGATL  
MARGANFIPMDQLEGRLTGEGHKIGIQTASKANMMNIRVWGGGMVPPDPFYDACDEEGIL  
IYHDMMFVEEGGHRPFKTTITISNEIRHLVRSLSHPSLLVWNGCNECEVIMGTPSEIYAN  
FVMETVAEEDDTRPIWPSSPSKHGWKSGVRRIDSRPLPNNRNLTTWEPDAFSTHLESHGP  
YMRFSHSHSYPGVNGLDVNFPYRNTPELKRKNIGYDHPNQFASEFGSSTMSSFESMKGTI  
STKHWSLHGGGDPDDCEIDYGNKNRCKGTNIMAERVRARDQLFSFAF

>comp12816\_c0\_seq28; 628 160 3124 LEN=3921; translated  
MSISGKTAICAIFIANLMFSSGNKTFITTSNILSDIVIPLNEHWSLSSSDLVFTNLTAK  
VPGDLLSDLIANGLIDDPYIDRNFLTQRFVWTGENQWGPTDGYNASSIESEKHNDNSNGKI  
FQQKRTWIYSTTFKLSTRHSEKVSWKLVLEGIKMGADIYVNNVQIGQAVDQFLRYDFQIE  
DYILEKGLPLDHSRHHNLTVVFDPTIQVNGRFSGELSTILIKLFRHANKAQSSIGHAIAR  
RKISIDNKNSFDTVFISFEGCSGGWDWSPYTKVRDAQQLDIFTLGIVKPVYIIGVGIQQF  
YVSHVVPKIYYLGKYPAPKPLRKAADFRLTVDVHLEFVTTNFRNFASNSSVILKTNFAEQ  
VETIIPAPKSFKELSQVISINLIVRKDSIDLWWPNGMGKQPLYNIYVGTTFIHCRAWIK  
RRVGFRTSALVTINESKNIDITAAHQESTEGSGQFGMYFRINGATLMARGANFIPMDQLE  
GRLTGEGHKIGIQTASKANMMNIRVWGGGMVPPDPFYDACDEEGILYHDMMFVEEGGHR  
PFKTTITISNEIRHLVRSLSHPSLLVWNGCNECEVIMGTPSEIYANFVMETVAEEDDTRP  
IWPSSPSKHGWKSGVRRIDSRPLPNNRNLTTWEPDAFSTHLESHGPLYMRFSHSHSYPGVN  
LDVNFYRNTPELKRKNIGYDHPNQFASEFGSSTMSSFESMKGTISTKHWSLHGGGDPD  
DCEIDYGNKNRCKGTNIMAERNYPCDSHIRAYFGVEEEEELSAVGKAAFIKQLYMCLISQT  
LWMKGEIESRRSQNYLGLLIWQLNEVWPTGGWGLIEYGRKTKDGSQISGGRWKPLMHLK  
SSLFLDQISACGKGMCYVRNDHFETVNFIVSFEAWDIEHVAPIRTYEYTNELEGGSIDW  
FDLPLDFTLETQIILIQKLVQLPSSLVFPDHRVSETIFLEDMPKRLKGLQSPVNIILDI  
YETNNGDAAIILASDXIGLICPPDNES

>comp12816\_c0\_seq29; 719 160 3159 LEN=4200; translated  
MSISGKTAICAIFIANLMFSSGNKTFITTSNILSDIVIPLNEHWSLSSSDLVFTNLTAK  
VPGDLLSDLIANGLIDDPYIDRNFLTQRFVWTGENQWGPTDGYNASSIESEKHNDNSNGKI  
FQQKRTWIYSTTFKLSTRHSEKVSWKLVLEGIKMGADIYVNNVQIGQAVDQFLRYDFQIE  
DYILEKGLPLDHSRHHNLTVVFDPTIQVNGRFSGCSGGWDWSPYTKVRDAQQLDIFTLGI  
VKPVYIIGVGIQQFYVSHVVPKIYYLGKYPAPKPLRKAADFRLTVDVHLEFVTTNFRNFA  
SNSSVILKTNFAEQVETIIPAPKSFKELSQVISINLIVRKDSIDLWWPNGMGKQPLYN  
IYVGTTFIHCRAWIKRRVGFRTSALVTINESKNIDITAAHQESTEGSGQFGMYFRINGATL  
MARGANFIPMDQLEGRLTGEGHKIGIQTASKANMMNIRVWGGGMVPPDPFYDACDEEGIL  
IYHDMMFVEEGGHRPFKTTITISNEIRHLVRSLSHPSLLVWNGCNECEVIMGTPSEIYAN  
FVMETVAEEDDTRPIWPSSPSKHGWKSGVRRIDSRPLPNNRNLTTWEPDAFSTHLESHGP  
YMRFSHSHSYPGVNGLDVNFPYRNTPELKRKNIGYDHPNQFASEFGSSTMSSFESMKGTI  
STKHWSLHGGGDPDDCEIDYGNKNRCKGTNIMAERNYPCDSHIRAYFGVEEEEELSAVGKA  
AFIKQLYMCLISQTLWMKGEIESRRSQNYLGLLIWQLNEVWPTGGWGLIEYGRKTKDGSQ  
ISGGRWKPLMHLKSSLFLDQISACGKGMCYVRNDHFETVNFIVSFEAWDIEHVAPIRT  
YEYTNELEGGSIDWFDLPLDFTLETQIILIQKLVQLPSSLVFPDHRVSETIFLEDMPKRL  
KGLQSPVNIILDIYETNNGDAAIILASDKLALFVLLTTAEGIFSDNCFLLRPLENKIV  
ILQSLKRGTVNVEVLKATLRVEHLGLYVASAGKVNEAR

>comp12816\_c0\_seq30; 684 160 2957 LEN=4256; translated  
MSISGKTAICAIFIANLMFSSGNKTFITTSNILSDIVIPLNEHWSLSSSDLVFTNLTAK  
VPGDLLSDLIANGLIDDPYIDRNFLTQRFVWTGENQWGPTDGYNASSIESEKHNDNSNGKI  
FQQKRTWIYSTTFKLSTRHSEKVSWKLVLEGIKMGADIYVNNVQIGQAVDQFLRYDFQIE  
DYILEKGLPLDHSRHHNLTVVFDPTIQVNGRFSGCSGGWDWSPYTKVRDAQQLDIFTLGI  
VKPVYIIGVGIQQFYVSHVVPKIYYLGKYPAPKPLRKAADFRLTVDVHLEFVTTNFRNFA  
SNSSVILKTNFAEQVETIIPAPKSFKELSQVISINLIVRKDSIDLWWPNGMGKQPLYN  
IYVGTTFIHCRAWIKRRVGFRTSALVTINESKNIDITAAHQESTEGSGQFGMYFRINGATL  
MARGANFIPMDQLEGRLTGEGHKIGIQTASKANMMNIRVWGGGMVPPDPFYDACDEEGIL  
IYHDMMFVEEGGHRPFKTTITISNEIRHLVRSLSHPSLLVWNGCNECEVIMGTPSEIYAN  
FVMETVAEEDDTRPIWPSSPSKHGWKSGVRRIDSRPLPNNRNLTTWEPDAFSTHLESHGP  
YMRFSHSHSYPGVNGLDVNFPYRNTPELKRKNIGYDHPNQFASEFGSSTMSSFESMKGTI  
STKHWSLHGGGDPDDCEIDYGNKNRCKGTNIMAERNYPCDSHIRAYFGVEEEEELSAVGKA  
AFIKQLYMCLISQTLWMKGEIESRRSQNYLVWPTGGWGLIEYGRKTKDGSQISGGRWKPL  
MHLKSSLFLDQISACGKGMCYVRNDHFETVNFIVSFEAWDIEHVAPIRTYEYTNELEG  
GSIDWFDLPLDFTLETQIILIQKLVQLPSSLVFPDHRVSETIFLEDMPKRLKGLQSPVNI  
EILDYETNNGDAAIILASDXIGLICPPDNES

>comp12816\_c0\_seq31; 533 160 2283 LEN=4557; translated

MSISGKTAICAIFIANLMFSSGNKTFITTSNILSDIVIPLENEHWSLSSSDLVFTNLTA  
VPGDLLSDLIANGLIDDPYIDRNFLTQRFVWTGENQWGP TDGYNASSIESEKHNDNSGKI  
FQQRKRWIYSTTFKLSTRHSEKVSWKLVLEGIKMGADIYVNNVQIGQAVDQFLRYDFQIE  
DYILEKGLPLDHSRHHNLTVVFDPTIQVNGRFSGCSSGWDWSPYTKVRDAQQLDIFTLGI  
VKPVYIIGVGIQQFYVSHVVPKIYYLGKYPAPKPLRKAADFRLTVDVHLEFVTTNFRFA  
SNSSVILKTNFAEQVETIIPAPKSFKELSQVISINLIVRKDSIDLWPPNGMGKQPLYN  
IYVGTTFIHRWIKRRVGFRTSALVTINESKNIDITA AHQESTEGSGQFGMYFRINGATL  
MARGANFI PMDQLEGRLTGEGHKIGIQTASKANMMNIRVWGGGMVPPDPFYDACDEEGIL  
IYHDMFVEEGGHRPFKTITISNEIRHLVRSLSHPSLLVWNGCNECEVIMGTPSEIYAN  
FVMEVVAEEDDTRPIWPPSSPKHGKSGVRRIDSRPLPNNRNLTTWEPDAFSTHLESHGP  
YMRSSFHSYPGVNGLDVNFYPYRNTPELKRKVNIGYDHPNQFASEFGSSTMSSSFESMKGTI  
STKHWSLHGGGDPDDCEIDYGNKNRCKGTNIMAERVRARDQLFSFAF

>comp12817\_c0\_seq1; 1032 111 3245 LEN=3368; translated  
MKESETRRRSGATRRGSITLIQDANSHFQEHIKGLSTPASATPRSSARDSLAGANAMRR  
AVRELVNTVADRRAKRSVYDPRGYVSVRDPHSLTSSTKSKNHTIDDISHASNEEMVSILS  
GNALNDEDPDIMTTGKLTYGSMNDGGRNSKTIGSERSGSGVPTPSRLSILIEQVSAVAVV  
ALLNMMMAIPFGASYFP IGWRAAEAEHGASGSDDDDDADGIDGPFPLAGKQNLGLRMFML  
ATI IAQLVYTYKSKFVNAVGLQMVENIPFMHALAKTVIQHQGYGKDALSTLFFFLGLSSV  
IVGLVIFYGLGKLLGKIVYFFPNHVLVGCIGGIGLFMILTAMEVSTDTTDFDIKKPRASIQ  
NTIVDRWYLLWVVVAFEVSLRFLMHSTKDPATGRPKFQLLSPIFYILITPVFYIGMQFVF  
GMSIEEGRDAGYFFPAVDSSSHEEGSTNFFTDPNLWDIFHIIDFSAISWMAVAESMGTVV  
ALAAFSLIHVPINIPAFAISTDVETDMAELIAHGWSNGLSGLFGGLQNYMTYSNSVLYA  
KIGGKGRIGSLTIVVVTMTLFFVVGPSITNYLPRCMAGTLLLHMGVDLTLEGVYDSIGQFD  
NFEYAGIWLITIVMTVWGMTAALIAGVITALSTYAAQSINYHDP IRQILTATSLRSSEWT  
RCSQARSILSNSKTGRSRILIFQLQGHLFFGNIALLTDTIKDILKEKADEGLPIVVIVD  
FTLVLGMDSSAAHSVAKLKKLLHRLYHVEISVFCTGSDRGGFPCEFALSKALSESPKNVG  
CLEQQVLDASTSTSKPNEQDEISINDFQLLTPQGISNLSFRGTISVSSNTDSRKSTDTLT  
TRMESRVCESLDEALHFAEDMLICRQDGGRGYLSKKHLLNDAPDCKMTLHEERSRAKMFL  
RNILMDDSSSEAFKEQSADMIVSMMAREEYHRSDILWDQGADSNLSKVVVSGELLSLVDET  
GASEIVKTGSFVGELGLVHGTSRLTTLACSSPTAVLYSLNIDSWRKLKDDHPKVASLIDG  
IVIRYLAHRVQHVSNRYFHHTLPV

>comp12817\_c0\_seq2; 406 1 1771 LEN=1894; translated  
XAFAISTDVETDMAELIAHGWSNGLSGLFGGLQNYMTYSNSVLYAKIGGKGRIGSLTIV  
VVTMTLFFVVGPSITNYLPRCMAGTLLLHMGVDLTLEGVYDSIGQFDNFEYAGIWLITIVM  
TVWGMTAALIAGVITALSTYAAQSINYHDP IRQILTATSLRSSEWTRCSQARSILSNSKT  
GRSRILIFQLQGHVAATEAQRNDLPVIXFVFKSTMI FHPHPHQHTFEYFLQLFFGNIA  
LLTDTIKDILKEKADEGLPIVVIVDFTLVLGMDSSAAHSVAKLKKLLHRLYHVEISVFC  
TGSDRGGFPCEFALSKALSESPKNVGCLEQQVLDASTSTSKPNEQDEISINDFQLLTPQG  
ISNLSFRGTISVSSNTDSRKSTDTLTTRMESRVCESLDEALHFAEDMLICRQDGGRGYLS  
KKHLLNDAPDCKMTLHEERSRAKMFLRNILMDDSSSEAFKEQSADMIVSMMAREEYHRSDI  
LWDQGADSNLSKVVVSGELLSLVDETGASEIVKTGSFVGELGLVHGTSRLTTLACSSPTA  
VLYSLNIDSWRKLKDDHPKVASLIDGIVIRYLAHRVQHVSNRYFHHTLPV

>comp12817\_c0\_seq3; 991 111 3216 LEN=3339; translated  
MKESETRRRSGATRRGSITLIQDANSHFQEHIKGLSTPASATPRSSARDSLAGANAMRR  
AVRELVNTVADRRAKRSVYDPRGYVSVRDPHSLTSSTKSKNHTIDDISHASNEEMVSILS  
GNALNDEDPDIMTTGKLTYGSMNDGGRNSKTIGSERSGSGVPTPSRLSILIEQVSAVAVV  
ALLNMMMAIPFGASYFP IGWRAAEAEHGASGSDDDDDADGIDGPFPLAGKQNLGLRMFML  
ATI IAQLVYTYKSKFVNAVGLQMVENIPFMHALAKTVIQHQGYGKDALSTLFFFLGLSSV  
IVGLVIFYGLGKLLGKIVYFFPNHVLVGCIGGIGLFMILTAMEVSTDTTDFDIKKPRASIQ  
NTIVDRWYLLWVVVAFEVSLRFLMHSTKDPATGRPKFQLLSPIFYILITPVFYIGMQFVF  
GMSIEEGRDAGYFFPAVDSSSHEEGSTNFFTDPNLWDIFHIIDFSAISWMAVAESMGTVV  
ALAAF AFAI STDVETDMAELIAHGWSNGLSGLFGGLQNYMTYSNSVLYAKIGGKGRIGS  
LTIVVVTMTLFFVVGPSITNYLPRCMAGTLLLHMGVDLTLEGVYDSIGQFDNFEYAGIWL  
TIVMTVWGMTAALIAGVITALSTYAAQSINYHDP IRQILTATSLRSSEWTRCSQARSILS  
NSKTGRSRILIFQLQGHLFFGNIALLTDTIKDILKEKADEGLPIVVIVDFTLVLGMDSS  
AAHSVAKLKKLLHRLYHVEISVFCTGSDRGGFPCEFALSKALSESPKNVGCLEQQVLDAS  
TSTSKPNEQDEISINDFQLLTPQGISNLSFRGTISVSSNTDSRKSTDTLTTRMESRVCES  
LDEALHFAEDMLICRQDGGRGYLSKKHLLNDAPDCKMTLHEERSRAKMFLRNILMDDSS  
AFKEQSADMIVSMMAREEYHRSDILWDQGADSNLSKVVVSGELLSLVDETGASEIVKTGS  
FVGELGLVHGTSRLTTLACSSPTAVLYSLNIDSWRKLKDDHPKVASLIDGIVIRYLAHRV

QHVSNNRYFHTTLPV

>comp12817\_c0\_seq4; 939 111 3340 LEN=3463; translated  
MKESETRRRRSGATRRGSITLIQDANSHFQEHKGLSTPASATPRSSARDSLAGANAMRR  
AVRELVNTVADRRRAKRSVYDPRGYVSVRDPHSLTSSTKSKNHTIDDISHASNEEMVSILS  
GNALNDEDPDIMTTGKLYTYSMNDGGRNSKTIGSERSGSGVPTPSRSLILIEQVSAVAVV  
ALLNMMMAIPFGASYFP IGWRAAEAEHGASGSDDDDDADGIDGPFPLAGKQNLGLRMFML  
ATIIAQLVYTYKSKFVNAVGLQMVENIPFMHALAKTVIQHQGYGKDALSTLFFLFLGLSSV  
IVGLVIFYGLGKLGKLVIVYFFPNHVLVGCIGGIGLFMILTAMEVSTDTTFFDIKKPRASIQ  
NTIVDRWYLLWVVVAFEVSLRFLMHSTKDPATGRPKFQLLSPIFYILITPVFYIGMQFVF  
GMSIEEGRDAGYFFPAVDSSSHEEGSTNFFTDPNLWDFHIIDFSAISWMAVAESMGTVV  
ALAAFRYXIANDALNKSCFHFYSYRNHRARSPSPHPVVSLHVPINIPAFAISTDVETDMD  
AELIAHGWSNGLSGLFGGLQNYMTYSNSVLYAKIGGKGRIGSLTIVVVTMTLFFVVGPSIT  
NYLPRCMAGTLLLHMGVDLTLEGVYDSIGQFDNFEYAGIWLITIVMTVWGMTAALIAGVI  
TALSTYAAQSINYHDPHQILTATSLRSSEWTRCSQARSILSNSKTGRSRILIFQLQGH  
FFGNIALLTDTIKDILKEKADEGLPIVIVVDFTLVLGMDSSAAHSVAKLKKLLHRLYHV  
EISVFCTGSDRGGFPCEFALSKALSES PKNVGCLEQQVLDASTSTSKPNEQDEISINDFQ  
LLTPQGISNLSFRGTISVSSNTDSRKSTDTLTTRMESRVCELSLDEALHFAEDMLICRQDG  
GRGYLSKKHLLNDAPDCKMTLHEERSRAKMFLRNILMDDSSSEAFKEQSADMIVSMMAREE  
YHRSDILWDQGADSNLSKVVVSGELLSLVDETGASEIVKTGSGFVGLGLVHGT SRLTTLA  
CSSPTAVLYSLNIDSWRKLKDDHPKVASLIDGIVIRYLAHRVQHVSNNRYFHTTLPV

>comp12818\_c0\_seq1; 784 198 2116 LEN=2350; translated  
MKLQFNLWVWSIHVGAISAFTPNLSRPSFSKRNRFAGSRNEKTQLFESDSPHPPEYPPPD  
YPTVPDYPPRVDEQLELDLIDSERVMLEYEKEVEMIREQLDLKQMEELLEEQNIFRDEKRS  
LMNTIAEFTSILARRDEELSEAIEKREEPVVDLEKQKELEDTIKALEQKLQEKTDLSLEFE  
KQSSNELRNRFEDAADALEYEQMNFEEKERKVLQDLVTQERLQVKALEEKYEENGKSFETA  
QKELLKIKDEETKLSDTKANWKATQEQKLTVKQRLEASLQEKIKLKSQMKLDTENAA  
LSTQIAGLKEELKNERVKMEEIKSGLEKENQEFASKSTLQSQIETEEKLIANLKNQMD  
EKVRYESERSTLNQAIIEGITKNLTSVEKQLADERVNF SKEKKMLEQKLADIRVGRLLKK  
QMKVRYDEIRREMTDLWQSSKRQARQEQDRLRKKYGRKLDTVQAQVSRLEGDLVTEKKRL  
VEGQAKMEARHAAEIKSRDLMVTELEGSVTALRKVIVDKDLIIKEKSEIQRYETSFRQL  
ARLGLVVTGNKIKKVAGPLKRLIENSPPDEIEXVSGLLIRRRRGVNAAEVEYFCFTNETS  
AVDGFTKVCAAIKNGIFDMTTDLWYRQGVVSVSAYAVK

>comp12819\_c0\_seq4; 190 1 914 LEN=1338; translated  
XCTGITSLSVYYRYINDRAPVERTLLRFPQAHSMVNDHHEEGSGEADDGSEVDADDTA  
DEEDQGEATGGGDI GNASGSVLP IQAVSNLDTLYGLREIGKEALCWQLSSAKPNGVEQ  
IRDQSTDTYWQSDGVSQPHLIQVHFARRVAISHICLYLDFNLDESYPKNI SVQVGMTTQ  
DLVPAIYAASVELNEPVGWCIIPLTSPDPDLDIAEDVTESGAPPRSKRIVRTHLVQIE  
ICSMHQNGRDTHVRQVQLYGPRRTMSTLQTEPSNDIISSAAEIKKRNRDDEFSTISMSQF  
SVMR

>comp12820\_c0\_seq1; 493 148 1815 LEN=1978; translated  
MPDYPKDSPEENALYVFNRLVVMSTEDDLSTWKQNVNFRHLDQVDEILELSDDFGRTI  
LDNACISGNLRFVQLLLPKNAKMHKARVTMALVCAHIHVLVDYLLTEKPEYAETEVEVYGV  
ITETMPLLNCAKIGNERALSIVLRHAYQSPESIVTSLDKAGNTPLHNARKEEVAAMLLK  
RAGDLSVLKVTNKRQVPIQAVMERFNTVQOSIKYGNNSDQFQIDSALLEKTIIFYQSIM  
KRNNNASDTAQPSGRVNFADGRGRQVAEETMQSILQRRYNQILP RRNNMNL SNPYSEQ  
HFLSAVAARKRAMQQQQQRDRRFP RNMMGRGSTPSMQQQQQFLHETPFNQSYSMGEGACM  
DNYKKMATMNRQERIKDTAIALTEYAREWDP IREQQQHQQQQDFFSEMKMGNLPPFPK  
SHGGGSSVTRSTGRGHP IPHQLSSRGPAIPAXEFQDGTGRHAPRVAAPPEHHPGRPGPAF  
PRGGRGQYAHLTHDKTDQSKPTTEGTTAAAAAVFTALVDDEEQLPPTTATPLLGGQGG  
VSGSMERSVASEHAY

>comp12821\_c0\_seq1; 291 151 783 LEN=1568; translated  
MVTSPNTNDVLSMSNSDGDENLKKACTVDGTMHKKPSQDAGMDSGLARSNDSGDGAEAS  
APSSVATKATEAKETTVKRRRVSFHTDCTTKIFEIPLLAEYDDEDSNGGGSIRNVLFYSQ  
SDYDRFKASEQRNEKMIAKKLQKLVQEQMOPRINEAVANGATLEDIEAMMPKTHEEMVA  
MLGYNPSVARGGPHNPENHTVGS SRCPNAV

>comp12822\_c0\_seq1; 447 231 1844 LEN=2166; translated  
MVCSDAGSGDCVGLKPKNSGPHKLQRRPSLRARSSINNFRFSSELSTEELHCAQGEDR  
NRVCGPFAHLRRLILSKSDFYKNYSREREWLQDAIVEDFLDNVEDPNMCITPSEPWLIFT  
VGARGAGKLHTIHDLVTTGRLPILSFVEVDPDKISRRLPEFQTYDKLLVNELTKKEAGFI  
AQLLLLAAVQNGRNVVFD SAMRDSAWFLKII EHIKCLNCSSFKFAVLHVIAPNELIFERA

KKKALDTGREISKESILKSLAAIPVSLKVIRPKVDFDFCCIENAESYSLEDGMDWDWTFRGT  
FLQSCWLKRGMRGNQKMSTETFTSRQVDDINLSVQKAKKRRASFVLLSSTENNQSDDM  
NFYGKYSHIRRTLDSYHSNYTFERQKLHDAIITDMLNEAYISDEDGNVGLAAKDPWIVF  
TAGAMGAGKSHTMLVLVEQERFPLPAFVIIVDPDQIRRLLEPYHMYVAKNPEMVGKLTQKE  
ERALLTGRVVPEEILEQAIQEVPKSVKILAPLVDYAAEISNPPDANDVELVKPEGSNW  
>comp12822\_c0\_seq2; 467 231 2036 LEN=2261; translated  
MVCSDAGSGDCVGLKPKNSGPHKLQRRPSLRRARSSINNFTRFSSELSTEELHCAQGEDR  
NRVCGPFAHLRRLILSKSDFYKNYSREREWLQDAIVEDFLDNVEDPNMCITPSEPWLIFT  
VGARGAGKLHTIHDLVTTGRLPILSFVEVDPDKISRRLPEFQTYDKLLVNELTKKEAGFI  
AQLLLLAAVQNGRNVVFD SAMRDSA WFLKII EHIKCLNCSSFKFAVLHVIAPNELIFERA  
KKKALDTGREISKESILKSLAAIPVSLKVIRPKVDFDFCCIENAESYSLEDGMDWDWTFRGT  
FLQSCWLKRGMRGNQKMSTETFTSRQVDDINLSVQKAKKRRASFVLLSSTENNQSDDM  
NFYGKYSHIRRTLDSYHSNYTFERQKLHDAIITDMLNEAYISDEDGNVGLAAKDPWIVF  
TAGAMGAGKSHTMLVLVEQERFPLPAFVIIVDPDQIRRLLEPYHMYVAKNPEMVGKLTQKE  
AGYIAEVLTLAALQSGKNVLQDGSRLDHGWYKVLFHRLREAHQPVRQAI IHVTAPKQAIL  
DRAAERALLTGRVVPEEILEQAIQEVPKSVKILAPLVDYAAEISNPPDANDVELVKPEGS  
NW  
>comp12822\_c0\_seq3; 384 231 1954 LEN=2179; translated  
MVCSDAGSGDCVGLKPKNSGPHKLQRRPSLRRARSSINNFTRFSSELSTEELHCAQGEDR  
NRVCGPFAHLRRLILSKSDFYKNYSREREWLQDAIVEDFLDNVEDPNMCITPSEPWLIFT  
VGARGAGKLHTIHDLVTTGRLPILSFVEVDPDKISRRLPEFQTYDKLLVNELTKKEAGFI  
AQLLLLAAVQNGRNVVFD SAMRDSA WFLKII EHIKCLNCSSFKFAVLHVIAPNELIFERA  
K VSGVATVVVFN SPQYI SATYVEKKLFP RSCFLSTRKKKALDTGREISKESILKSLAAIP  
VSLKVIRPKVDFDFCCIENAESYSLEDGMDWDWTFRGTFLQSCWLKRGMRGNQKMSTETFTS  
RQVDDINLSVQKAKKRRASFVLLSSTENNQSDDMNFYGKYSHIRRTLDSYHSNYTFE  
RQKLHDAIITDMLNEAYISDEDGNVGLAAKDPWIVFTAGAMGAGKSHTMLVLVEQERFPL  
PAFVIIVDPDQIRRLLEPYHMYVAKNPEMVGKLTQKEERALLTGRVVPEEILEQAIQEVPK  
SVKILAPLVDYAAEISNPPDANDVELVKPEGSNW  
>comp12822\_c0\_seq4; 447 231 1844 LEN=2069; translated  
MVCSDAGSGDCVGLKPKNSGPHKLQRRPSLRRARSSINNFTRFSSELSTEELHCAQGEDR  
NRVCGPFAHLRRLILSKSDFYKNYSREREWLQDAIVEDFLDNVEDPNMCITPSEPWLIFT  
VGARGAGKLHTIHDLVTTGRLPILSFVEVDPDKISRRLPEFQTYDKLLVNELTKKEAGFI  
AQLLLLAAVQNGRNVVFD SAMRDSA WFLKII EHIKCLNCSSFKFAVLHVIAPNELIFERA  
KKKALDTGREISKESILKSLAAIPVSLKVIRPKVDFDFCCIENAESYSLEDGMDWDWTFRGT  
FLQSCWLKRGMRGNQKMSTETFTSRQVDDINLSVQKAKKRRASFVLLSSTENNQSDDM  
NFYGKYSHIRRTLDSYHSNYTFERQKLHDAIITDMLNEAYISDEDGNVGLAAKDPWIVF  
TAGAMGAGKSHTMLVLVEQERFPLPAFVIIVDPDQIRRLLEPYHMYVAKNPEMVGKLTQKE  
ERALLTGRVVPEEILEQAIQEVPKSVKILAPLVDYAAEISNPPDANDVELVKPEGSNW  
>comp12822\_c0\_seq6; 467 231 2036 LEN=2358; translated  
MVCSDAGSGDCVGLKPKNSGPHKLQRRPSLRRARSSINNFTRFSSELSTEELHCAQGEDR  
NRVCGPFAHLRRLILSKSDFYKNYSREREWLQDAIVEDFLDNVEDPNMCITPSEPWLIFT  
VGARGAGKLHTIHDLVTTGRLPILSFVEVDPDKISRRLPEFQTYDKLLVNELTKKEAGFI  
AQLLLLAAVQNGRNVVFD SAMRDSA WFLKII EHIKCLNCSSFKFAVLHVIAPNELIFERA  
KKKALDTGREISKESILKSLAAIPVSLKVIRPKVDFDFCCIENAESYSLEDGMDWDWTFRGT  
FLQSCWLKRGMRGNQKMSTETFTSRQVDDINLSVQKAKKRRASFVLLSSTENNQSDDM  
NFYGKYSHIRRTLDSYHSNYTFERQKLHDAIITDMLNEAYISDEDGNVGLAAKDPWIVF  
TAGAMGAGKSHTMLVLVEQERFPLPAFVIIVDPDQIRRLLEPYHMYVAKNPEMVGKLTQKE  
AGYIAEVLTLAALQSGKNVLQDGSRLDHGWYKVLFHRLREAHQPVRQAI IHVTAPKQAIL  
DRAAERALLTGRVVPEEILEQAIQEVPKSVKILAPLVDYAAEISNPPDANDVELVKPEGS  
NW  
>comp12822\_c0\_seq7; 404 231 2146 LEN=2468; translated  
MVCSDAGSGDCVGLKPKNSGPHKLQRRPSLRRARSSINNFTRFSSELSTEELHCAQGEDR  
NRVCGPFAHLRRLILSKSDFYKNYSREREWLQDAIVEDFLDNVEDPNMCITPSEPWLIFT  
VGARGAGKLHTIHDLVTTGRLPILSFVEVDPDKISRRLPEFQTYDKLLVNELTKKEAGFI  
AQLLLLAAVQNGRNVVFD SAMRDSA WFLKII EHIKCLNCSSFKFAVLHVIAPNELIFERA  
K VSGVATVVVFN SPQYI SATYVEKKLFP RSCFLSTRKKKALDTGREISKESILKSLAAIP  
VSLKVIRPKVDFDFCCIENAESYSLEDGMDWDWTFRGTFLQSCWLKRGMRGNQKMSTETFTS  
RQVDDINLSVQKAKKRRASFVLLSSTENNQSDDMNFYGKYSHIRRTLDSYHSNYTFE  
RQKLHDAIITDMLNEAYISDEDGNVGLAAKDPWIVFTAGAMGAGKSHTMLVLVEQERFPL  
PAFVIIVDPDQIRRLLEPYHMYVAKNPEMVGKLTQKEAGYIAEVLTLAALQSGKNVLQDGS

LRDHGWYKVLFHRLREAHQPVRQAI IHVTAPKQAILDRAAERALLTGRVVPEEILEQAIQ  
EVPKSVKILAPLVDYYAEISNPPDANDVELVKPEGSNW  
>comp12822\_c0\_seq8; 384 231 1954 LEN=2276; translated  
MVCSDAGSGDCVGLKPKNSGPHKLQRRPSLRARRSSINNFTFRSSELSTEELHCAQGEDR  
NRVCGPFAHLRRLILSKSDFYKNYSREREWLQDAIVEDFLDNVEDPNMCITPSEPWLIFT  
VGARGAGKLHTIHDLVTTGRLPILSFVEVDPDKISRRLPEFQTYDKLLVNELTKKEAGFI  
AQLLLLAAVQNGRNVVFD SAMRDSAWFLKII EHIKCLNCSSFKFAVLHVIAPNELIFERA  
KVSGVATVVVFN SPQYI SATYVEKKLFP RSCFLSTRKKKALDTGREISKESILKSLAAIP  
VSLKVIRPKVDFCCIENAESYSLEDGMDWDTFRGTFLQSCLWKRGMGRGNQKMSTETFTS  
RQVDDINSLSVQAKKRRASFVLLSSTENNQSDDMNFYGYSHIRRTLDYSYHSNYTFE  
RQKLHDAIITDMLNEAYISDEDGNVGLAAKDPWIVFTAGAMGAGKSHTMLVLVEQERFPL  
PAFVIIVDPDQIRRLLEPYHMYVAKNPEMVGKLTQKEERALLTGRVVPEEILEQAIQEVPK  
SVKILAPLVDYYAEISNPPDANDVELVKPEGSNW  
>comp12822\_c0\_seq10; 404 231 2146 LEN=2371; translated  
MVCSDAGSGDCVGLKPKNSGPHKLQRRPSLRARRSSINNFTFRSSELSTEELHCAQGEDR  
NRVCGPFAHLRRLILSKSDFYKNYSREREWLQDAIVEDFLDNVEDPNMCITPSEPWLIFT  
VGARGAGKLHTIHDLVTTGRLPILSFVEVDPDKISRRLPEFQTYDKLLVNELTKKEAGFI  
AQLLLLAAVQNGRNVVFD SAMRDSAWFLKII EHIKCLNCSSFKFAVLHVIAPNELIFERA  
KVSGVATVVVFN SPQYI SATYVEKKLFP RSCFLSTRKKKALDTGREISKESILKSLAAIP  
VSLKVIRPKVDFCCIENAESYSLEDGMDWDTFRGTFLQSCLWKRGMGRGNQKMSTETFTS  
RQVDDINSLSVQAKKRRASFVLLSSTENNQSDDMNFYGYSHIRRTLDYSYHSNYTFE  
RQKLHDAIITDMLNEAYISDEDGNVGLAAKDPWIVFTAGAMGAGKSHTMLVLVEQERFPL  
PAFVIIVDPDQIRRLLEPYHMYVAKNPEMVGKLTQKEAGYIAEVLTLAALQSGKNVLQDGS  
LRDHGWYKVLFHRLREAHQPVRQAI IHVTAPKQAILDRAAERALLTGRVVPEEILEQAIQ  
EVPKSVKILAPLVDYYAEISNPPDANDVELVKPEGSNW  
>comp12823\_c0\_seq1; 647 757 2793 LEN=2846; translated  
MDLICILAHGEMTPQLIRITHSLIRAWAQRADIQSSNAPHVVEKLLKRLLTEKKA IETN  
RDDGADNENYRIEISTDEYNYLLEAWSCSKETGSADRAEEILLQMEKEDGPKPDSRSYNA  
VIKALVKNGNRQSAASKVEDLVMKMESTGDLGVMPNRRSYNFFLLYALANSNLDDAAERAT  
RHLERMILRYHSNTPEENSICQIQPDLNSFNQVIGAWARGKSPNYLIEMQKTYNLFLELS  
TEYGIQPDVDTYNNLMGGWLKSNDDKALREIQQLFSTMEESYKKGNELAQPDVSVNSLQ  
TAFNKFSGGSNATKQIELETEYGLPPNSHSQNILMGSIIKSGVDDAPERALRILIEMENN  
LRSGESSLKPDCSYIAVIKAHVYKRYKNTERRTEELLNRMWDLNRKHGGVAPDVALYNC  
VLNAYASINSYRVLKVKDLKMKMENGEIDGLPKPNLITYNTVIKAMRNGNKEKEAIFAE  
QILSKLERLSKDDPELLPDNYSYTSVITAYARSSLSNKADKALEIIQRMKAQINGNGSA  
VMSAHTFNAALNACAFVKGCVEAKARAFETATKLDKLRMESGQAGDSTWYGTMLRACSSL  
IAPSKYREDMVDLFFREACDNGCVGILVLQQLTFAATKDQQRLLNHKFDGEDYIGMLKK  
LPKEWTCNAHEWQPHHLR  
>comp12823\_c0\_seq2; 740 422 2698 LEN=2751; translated  
MSTVKIGGNHVDNVGKVKTRNSRIVSSNNISFTSSVKNLYKPSGRVYVKNRNRNSLVQDM  
RDYEEQRTQLDWIVRNTAKVLGEDAPPHGEMTPQLIRITHSLIRAWAQRADIQSSNAP  
HVVEKLLKRLLTEKKA IETNRDDGADNENYRIEISTDEYNYLLEAWSCSKETGSADRAEE  
ILLQMEKEDGPKPDSRSYNAVIKALVKNGNRQSAASKVEDLVMKMESTGDLGVMPNRRSY  
NFFLLYALANSNLDDAAERATRHLERMILRYHSNTPEENSICQIQPDLNSFNQVIGAWARG  
KSPNYLIEMQKTYNLFLELSTEYGIQPDVDTYNNLMGGWLKSNDDKALREIQQLFSTMEE  
SYKKGNELAQPDVSVNSLQ TAFNKFSGGSNATKQIELETEYGLPPNSHSQNILMGSIIK  
SGVDDAPERALRILIEMENNLRSGESSLKPDCSYIAVIKAHVYKRYKNTERRTEELLNR  
MWDLNRKHGGVAPDVALYNCVLNAYASINSYRVLKVKDLKMKMENGEIDGLPKPNLITY  
NTVIKAMRNGNKEKEAIFAEQILSKLERLSKDDPELLPDNYSYTSVITAYARSSLSNKAD  
KALEIIQRMKAQINGNGSAVMSAHTFNAALNACAFVKGCVEAKARAFETATKLDKLRME  
SGQAGDSTWYGTMLRACSSL IAPSKYREDMVDLFFREACDNGCVGILVLQQLTFAATKDQ  
QERLLNHKFDGEDYIGMLKKLPKEWTCNAHEWQPHHLR  
>comp12824\_c0\_seq1; 511 365 2107 LEN=2142; translated  
MSMNTTKLEDIHQEEEEIEDDDT TDVINWSGTHKVTVKKNKFFEPESIEDVEKIVEDCQKR  
GQTVRPLGSSLSPNGVALNKDGMISMANLDRVLNIDTENKTVTVEAGIPVREVVEALRPY  
NLTLPNLASIAEQMGGFTQVGAHG TGKRIAPVDHYVTKLKMVTPGKGTIELTRDKDGR  
FELARLALGCLGVVVEITMECIPAHKLI EHTFVMTREEVMSKKAELLENHKHTRFMWIPY  
TDAVIVVTNDEFDPAEHSAPDMSASDKEKGNPLRDLLQQLYVESGRNFPEDDVKGMGFG  
ELRGRMRYYSRIMSGIWTSHTFYLFIFIGTDSL LAFAPLDVAHVKRCNKAEAEFWKQNEG  
YQIKPSDELLQFDCGGQVNICATRQCGRQSGRKKLKMVLLFLISEMNQIAMGLRSLLFN

GTQDENNNNDMIFMEELLRKIEENDIPAHSPIEQRWTSGSSSPMSPASGSEESLHTWVGI  
INYLPSEDLKQRDITHLFNTKYTDLVRQIGRPLKSVSHWSKLEKPLSVWKAVELKSLYL  
ERFPLAEFNTLRGIYDPDNILSNPLLDLVLGNPIPSDEE  
>comp12824\_c0\_seq2; 566 365 2025 LEN=2060; translated  
MSMNTTKLEDIHQEEEEIEDDDTTDVINWSGTHKVTVKKNKFFEPESIEDVEKIVEDCQKR  
GQTVRPLGSSSLSPNGVALNKDGMISMANLDRVLNIDTENKTVTVEAGIPVREVVEALRPY  
NLTLPLNLASIAEQQMGGFTQVGAHGTGKRIAPVDHYVTKLKMVTPGKGTIELTRDKDGR  
FELARLALGCLGVVVEITMECIPAHKLI EHTFVMTREEVMSKKAELLENHKHTRFMWIPY  
TDAVIVVTNDEFDPAEHSAPDMSASDKEKGNPLRDLLQQLYVESGRNFPEDDVKGMGFG  
ELRDSLLAFAPLDVAHVKRCNKAEAEFWKQNEGYQIKPSDELLQFDCGGQVNICATRQCG  
RQSGRKKLKMVLLFLISEMNQIAMGLRSLLFNGTQDENNNNDMIFMEELLRKIEENDIP  
AHSPIEQRWTSGSSSPMSPASGSEESLHTWVGIINYLPSEDLKQRDITHLFNTKYTDL  
VRQIGRPLKSVSHWSKLEKPLSVWKAVELKSLYLERFPLAEFNTLRGIYDPDNILSNPL  
LDLVLGNPIPSDEE  
>comp12824\_c0\_seq3; 648 365 1924 LEN=1959; translated  
MSMNTTKLEDIHQEEEEIEDDDTTDVINWSGTHKVTVKKNKFFEPESIEDVEKIVEDCQKR  
GQTVRPLGSSSLSPNGVALNKDGMISMANLDRVLNIDTENKTVTVEAGIPVREVVEALRPY  
NLTLPLNLASIAEQQMGGFTQVGAHGTGKRIAPVDHYVTKLKMVTPGKGTIELTRDKDGR  
FELARLALGCLGVVVEITMECIPAHKLI EHTFVMTREEVMSKKAELLENHKHTRFMWIPY  
TDAVIVVTNDEFDPAEHSAPDMSASDKEKGNPLRDLLQQLYVESGRNFPEDDVKGMGFG  
ELRDSLLAFAPLDVAHVKRCNKAEAEFWKQNEGYQIKPSDELLQFDCGGQWVYEVCFST  
GTQDENNNNDMIFMEELLRKIEENDIPAHSPIEQRWTSGSSSPMSPASGSEESLHTWVGI  
INYLPSEDLKQRDITHLFNTKYTDLVRQIGRPLKSVSHWSKLEKPLSVWKAVELKSLYL  
ERFPLAEFNTLRGIYDPDNILSNPLLDLVLGNPIPSDEE  
>comp12824\_c0\_seq4; 593 365 2006 LEN=2041; translated  
MSMNTTKLEDIHQEEEEIEDDDTTDVINWSGTHKVTVKKNKFFEPESIEDVEKIVEDCQKR  
GQTVRPLGSSSLSPNGVALNKDGMISMANLDRVLNIDTENKTVTVEAGIPVREVVEALRPY  
NLTLPLNLASIAEQQMGGFTQVGAHGTGKRIAPVDHYVTKLKMVTPGKGTIELTRDKDGR  
FELARLALGCLGVVVEITMECIPAHKLI EHTFVMTREEVMSKKAELLENHKHTRFMWIPY  
TDAVIVVTNDEFDPAEHSAPDMSASDKEKGNPLRDLLQQLYVESGRNFPEDDVKGMGFG  
ELRGRMRYYSRIMSGIWTSHTFYLFIFIGTDSLAFAPLDVAHVKRCNKAEAEFWKQNEG  
YQIKPSDELLQFDCGGQWVYEVCFSTGTQDENNNNDMIFMEELLRKIEENDIPAHSPIE  
QRWTSGSSSPMSPASGSEESLHTWVGIINYLPSEDLKQRDITHLFNTKYTDLVRQIGR  
PLKSVSHWSKLEKPLSVWKAVELKSLYLERFPLAEFNTLRGIYDPDNILSNPLLDLVLGN  
PIPSDEE  
>comp12825\_c0\_seq1; 607 2650 4308 LEN=4441; translated  
MFIARSNYFTAKQSTHTRPVADLESSLPLLVQEDHSAGSEATVAEKVFHLEKRVLNEAT  
NSTKLYGGSSKLRPSKSATEERLLALAAKVAKKRSWQQSQVREENKPKVGMRLRERMNQLN  
QIAKKQKTFENGLESAEKRDEREFDVGNFTSTGRDRHLTMKKYLKGIKKEEPLFHVGH  
FSTGRDHHKTAKNYLEGIKKQRKLEDRLGVAVKQEEPVLKVGKISSPGHDRHG VVNKDD  
KIVTEKQILVERRPDVTGKRNEVGLSVSERLRPGRDRHSSVQMDLEIPAMKERTDTMYNA  
FQTDHSGDEFVFPVQQLSENISKTT EEEAGEELEKPENEANKSLCTNDSQTESFNGKEESF  
SADDGLLHDATRDRVRCSSIDVEEKVTSNIPIDSGDESNSVSHDTLPRWNQRTIVDDLADDI  
GDFESASDSEYSQVGYENGLAIVDDSVHKNLSDSDVSSVEVEWKDLLDLDEVGSDRQYD  
AEEDLKLPAIQSAFTDWSKSI VDDLVDVDAQSDDASRMGYGSDTDTDASNDDERTEDP  
NNFASKFMRLFF  
>comp12826\_c0\_seq1; 165 1 708 LEN=1030; translated  
NRRTRQKGTMALSKSPSHQLSSLLLIYLLYIQSLLGTSGALTTKTPVYTPQNSQHANSFQ  
VRLNEFFKGPVPDPLKTSFSIFREDTSGEEILDLEDAVTLTAAAPGAPGVPRLWLVMVG  
SFLTGLLWYGYYKFVVEEELLQMELDAGKKPRGFGGYGTLGPFTYGMLLGPLASTLHIPG  
GLYWSSLGVIFLYTTQFLLYDRVNELYKDEENCRLATVEDNIDVGNGQRSLPLQVW  
>comp12827\_c0\_seq1; 1578 493 4506 LEN=4759; translated  
MGCSASRDLDQAQMKEDFFGITSGGVEAAASGSSNNSPGNSSKHAPNLDTQPTASPSTSDH  
FEKQATSSATAPATAPASLPTSSESSGTPKPKGKPKAVNNVYVKNPKKERTSSSSSSGN  
KIFQTLVTSDFSFPNFLDEAVQKEGKTKTTTPAPTQAEAPSSATEKDTPAAPTSSEDI  
VGPLPSQAIMAVAIPKKTKESTKKSNGAKNDGTAAESESASEEAIPIPPPPPFVSLVND  
NIRQNSVDVVSPIALDDDDFSVAPSLDLEKRSIVTVSNKRTNSQYSSYSDEKTVITSMA  
FDDIYSRGKELGFAGANVFVATHKPTGATYAVKEVDRSSMIWNEKDHLKHEIENMFKVR  
EGPNIVQLYEVYSTHDPDEEEEEESKNRAAAESKSKKQRRRRKPNICHLVIELMEGGEL  
FDR IIEKRNF SEREARDSIRCVLEALKYMHERRVVHRDLKPENLLLKSRDKSKLTPVKLA



DFGFAKSIESKNGCRSLCGTPGYLAPEILERFPSYDVQCDIWSVGAILFLLLGGYLPFDD  
DNEERVFDRTRNAAYDFHPRCWGRVSFGAKDLVSRCLTIDPRKRFTADECLAHSWVSE  
DAMDAQLDGVVDKLAQRKMRAAVQTLMAADRLKRLNEDFSTYLEKKRQDSTVSHMSYMT  
TGTRYGHAKFIADAPTGKSFETFYDVGDLLEGDDYCSVHRCTRKQTHLCYDVKHVDLDQL  
ETDARKTVEDEIASLKLRRGGPHIRLLDVFEKNNPGHKYLVFEAMKGGNLLTRIVEKE  
VYTEREARAVCKTVFTAIDYCHRKKVAHRDIKPQNVFLNEEGDDTSVRVANFGFAKKVTH  
ENCLQTLCGTANYVAPEILDQRVQGYDLTCDIWSLGVFTYVLLGGYPPFEGVHQNLATEI  
LCGQYEFHEEYWDSISDSAKQMI SYMLEVDPRQRITAAEALSCKWMETEERLVLRLDSL  
AQSSIRDITIEPAAKMKAAVNAI LARNKFMSIAGMFQNDNASGVS VATPVRQPTISEIEDE  
HFHDLFSWGSQIGAGSFSVVHEVAMKSDQVYAAKRIDRNNLHPSDALALHDEIAALQEV  
SNCEQIVRLHNVFDEPDYTYLVLDCKMGGDLIDRIIEKHNYTEFDAKEVSRKLLMGVAYC  
HKKKIANRNLKPENLLLSANS DTDVKISDFGYAKKVTFPNSLRTQCGTEGYVAPEILEHR  
PAYDVSCDMWSLGVIMYIMMGYRPFREGEEVMKQIRYGEYKFKRYWNHISDDAKNLI  
TRMLTVDPMKRITA EKALNRWIQADRNSLQGVLSKNMQDLKLNLRNAKRKIKAAATAAII  
ATKKLQSIGGFRAYQDF

>comp12827\_c0\_seq2; 1255 493 3669 LEN=3743; translated  
MGCSASRDLD AQMKEDFFGITSGGVEAAASGSSNNSPGNSSKHAPNLDTQPTASPSTSDH  
FEKQATSSATAPATAPASLPTSSESSGTPKPKPKGPKAVNNVYVKNPKKERTSSSSSSGN  
KIFQTLVTSDFSVPNFLDEAVQKEGKTKTTTPAPTQAEAPSSATEKDTPAAPTSSEDI  
VGPLPSQAIMAVAI PKKTKEGAKNDGTAAESESASEEAIPIPPPPPFVSLVNDNIRQN  
SVDVVSPI TALDDDDFSVAPSLDLEKRSIVTVSNKRTNSQYSSYSDEKTVITSMFDDIY  
SRGKELGFGAFANVAVATHKPTGATYAVKEVDRSSMIWNEKDHLKHEIENMFKVREGPNI  
VQLYEVYSTHDPDEEEEEESKNRAAAESKKGQRNRKPNICHLVIELMEGGELFDRII  
EKRNFSEREARDSIRCVLEALKYMHERRVVRDLKPENLLLKSRDKSKLTPVKLADFGFA  
KSIESKNGCRSLCGTPGYLAPEILERFPSYDVQCDIWSVGAILFLLLGGYLPFDDDDNEER  
VFDRTRNAAYDFHPRCWGRVSFGAKDLVSRCLTIDPRKRFTADECLAHSWVSESDAMDA  
QLDGVVDKLAQRKMRAAVQTLMAADRLKRLNEDFSTYLEKKRQDSTVSHMSYMTTGTRY  
GHAKFIADAPTGKSFETFYDVGDLLEGDDYCSVHRCTRKQTHLCYDVKHVDLDQLETDAR  
KTVEDEIASLKLRRGGPHIRLLDVFEKNNPGHKYLVFEAMKGGNLLTRIVEKEVYTER  
EARAVCKTVFTAIDYCHRKKVAHRDIKPQNVFLNEEGDDTSVRVANFGFAKKVTHENCLQ  
TLCGTANYVAPEILDQRVQGYDLTCDIWSLGVFTYVLLGGYPPFEGVHQNLATEILCGQY  
EFHEEYWDSISDSAKQMI SYMLEVDPRQRITAAEALSCKWMETEERLVLRLDSL AQSSI  
RDTIEPAAKMKAAVNAI LARNKFMSIAGMFQNDNASGVS VATPVRQPTISEIEDEHFHDL  
FSWGSQVSCRAAGVCLAETACADLVAVLRAVTRFGSF

>comp12827\_c0\_seq3; 498 141 2273 LEN=2526; translated  
MAADRLKRLNEDFSTYLEKKRQDSTVSHMSYMTTGTRYGHAKFIADAPTGKSFETFYDVG  
DLLGEDDYCSVHRCTRKQTHLCYDVKHVDLDQLETDARKTVEDEIASLKLRRGGPHIRL  
LDVFEKNNPGHKYLVFEAMKGGNLLTRIVEKEVYTEREARAVCKTVFTAIDYCHRKKVA  
HRDIKPQNVFLNEEGDDTSVRVANFGFAKKVTHENCLQTLCGTANYVAPEILDQRVQGYD  
LTCDIWSLGVFTYVLLGGYPPFEGVHQNLATEILCGQYEFHEEYWDSISDSAKQMI SYML  
EVDPRQRITAAEALSCKWMETEERLVLRLDSL AQSSIRDITIEPAAKMKAAVNAI LARNK  
FMSIAGMFQNDNASGVS VATPVRQPTISEIEDEHFHDLFSWGSQIGAGSFSVVHEVAMK  
SDQVYAAKRIDRNNLHPSDALALHDEIAALQEVSNCEQIVRLHNVFDEPDYTYLVLDCKM  
GGDLIDRIIEKHNYTEFDAKEVSRKLLMGVAYCHKKKIANRNLKPENLLLSANS DTDVKI  
SDFGYAKKVTFPNSLRTQCGTEGYVAPEILEHRPAYDVSCDMWSLGVIMYIMMGYRPF  
REGEEVMKQIRYGEYKFKRYWNHISDDAKNLI TRMLTVDPMKRITA EKALNRWIQADR  
NSLQGVLSKNMQDLKLNLRNAKRKIKAAATAAIIATKKLQSIGGFRAYQDF

>comp12827\_c0\_seq4; 1275 493 3684 LEN=3758; translated  
MGCSASRDLD AQMKEDFFGITSGGVEAAASGSSNNSPGNSSKHAPNLDTQPTASPSTSDH  
FEKQATSSATAPATAPASLPTSSESSGTPKPKPKGPKAVNNVYVKNPKKERTSSSSSSGN  
KIFQTLVTSDFSVPNFLDEAVQKEGKTKTTTPAPTQAEAPSSATEKDTPAAPTSSEDI  
VGPLPSQAIMAVAI PKKTKESTKKSNGAKNDGTAAESESASEEAIPIPPPPPFVSLVNDN  
NIRQNSVDVVSPI TALDDDDFSVAPSLDLEKRSIVTVSNKRTNSQYSSYSDEKTVITSM  
FDDIYSRGKELGFGAFANVAVATHKPTGATYAVKEVDRSSMIWNEKDHLKHEIENMFKVR  
EGPNI VQLYEVYSTHDPDEEEEEESKNRAAAESKKGQRNRKPNICHLVIELMEGGEL  
FDRII EKRNFSEREARDSIRCVLEALKYMHERRVVRDLKPENLLLKSRDKSKLTPVKLA  
DFGFAKSIESKNGCRSLCGTPGYLAPEILERFPSYDVQCDIWSVGAILFLLLGGYLPFDD  
DNEERVFDRTRNAAYDFHPRCWGRVSFGAKDLVSRCLTIDPRKRFTADECLAHSWVSE  
DAMDAQLDGVVDKLAQRKMRAAVQTLMAADRLKRLNEDFSTYLEKKRQDSTVSHMSYMT  
TGTRYGHAKFIADAPTGKSFETFYDVGDLLEGDDYCSVHRCTRKQTHLCYDVKHVDLDQL

ETDARKTVEDEIASLKLLRGGPHIIRLLDVFEEKNNPGHKYLVFEAMKGGNLLTRIVEKE  
VYTEREARAVCKTVFTAIDYCHRKKVAHRDIKPQNVFLNEEGDDTSVRVANFGFAKKVTH  
ENCLQTLCGTANYVAPEILDQRVQGYDLTCDIWSLGVFTYVLLGGYPPFEGVHQNLATEI  
LCGQYEFHEEYWDSISDSAKQMISYMLEVDPRQRITAAEALSCKWMETEEERLVLRLDSL  
AQSSIRDITIEPAAKMKAAVNAI LARNKFMSIAGMFQNDNASGVSVPVVRQPTISEIEDE  
HFHDLFSWGSQVSCRAAGVCLAETACADLVAVLRAVTRFGSF

>comp12827\_c0\_seq5; 346 141 1451 LEN=1525; translated  
MAADRLKRLNEDFSTYLEKQRDSTVSHMSYMTTGTRYGHAKFIADAPTGKSFETFYDVG  
DLLGEDDYCSVHRCTRKQTHLCYDVKHVDLDQLETDARKTVEDEIASLKLLRGGPHIIRL  
LDVFEEKNNPGHKYLVFEAMKGGNLLTRIVEKEVYTEREARAVCKTVFTAIDYCHRKKVA  
HRDIKPQNVFLNEEGDDTSVRVANFGFAKKVTHENCLQTLCGTANYVAPEILDQRVQGYD  
LTCDIWSLGVFTYVLLGGYPPFEGVHQNLATEILCGQYEFHEEYWDSISDSAKQMISYML  
EVDPRQRITAAEALSCKWMETEEERLVLRLDSL AQSSIRDITIEPAAKMKAAVNAI LARNK  
FMSIAGMFQNDNASGVSVPVVRQPTISEIEDEHFHDLFSWGSQVSCRAAGVCLAETACA  
DLVAVLRAVTRFGSF

>comp12827\_c0\_seq6; 1558 493 4491 LEN=4744; translated  
MGCSASRDLDAQMKEDFFGITSGGVEAAASGSSNNSPGNSSKHAPNLDTQPTASPSTSDH  
FEKQATSSATAPATAPASLPTSSESSGTPKPKPKGPKAVNNVYVKNPKKERTSSSSSSGN  
KIFQTLVTSDFSVPNFLDEAVQKEGKTKTTTPAPTQAEAPSSATEKDTPAAPTSSEDI  
VGPLPSQAIMAVAI PKKTKEGAKNDGTAAESESASEEAIP PPPPPFVSLVNDNIRQN  
SVDVVSPI TALDDDDFSVAPSLDLEKRSIVTVSNKRTNSQYSSYSDEKTVITSMFDDIY  
SRGKELGFGAFANVAVATHKPTGATYAVKEVDRSSMIWNEKDHLKHEIENMFKVREGPNI  
VQLYEVYSTHDPDEEEEEESKNRAAAESKKGQRNRKPNICHLVIELMEGGELFDRII  
EKRNFSEREARDSIRCVLEALKYMHERRVVRDLKPENLLLKSRDKSKLTPVKLADFGFA  
KSIESKNGCRSLCGTPGYLAPEILERFPSYDVQCDIWSVGAILFLLLGGYLPFDDDNEER  
VFDRTRNAAYDFHPRCWGRVSGAKDLVSRCLTIDPRKRFTADECLAHSWMVESEDAMDA  
QLDGVVDKLAQRKMRVAQTLMAADRLKRLNEDFSTYLEKQRDSTVSHMSYMTTGTRY  
GHAKFIADAPTGKSFETFYDVGDLLGEDDYCSVHRCTRKQTHLCYDVKHVDLDQLETDAR  
KTVEDEIASLKLLRGGPHIIRLLDVFEEKNNPGHKYLVFEAMKGGNLLTRIVEKEVYTER  
EARAVCKTVFTAIDYCHRKKVAHRDIKPQNVFLNEEGDDTSVRVANFGFAKKVTHENCLQ  
TLCGTANYVAPEILDQRVQGYDLTCDIWSLGVFTYVLLGGYPPFEGVHQNLATEILCGQY  
EFHEEYWDSISDSAKQMISYMLEVDPRQRITAAEALSCKWMETEEERLVLRLDSL AQSSI  
RDTIEPAAKMKAAVNAI LARNKFMSIAGMFQNDNASGVSVPVVRQPTISEIEDEHFHDL  
FSWGSQIGAGSFSVVEVAMKSDQVYAAKRIDRNHLHPDALALHDEIAALQEVSNCEQ  
IVRLHNVFDEPDYTYLVLDLDCMKGGLIDRIIEKHNYTEFDAKEVSRKLLMGVAYCHKKKI  
ANRNLKPENLLLANSDDTDVKISDFGYAKKVTFPNSLRTQCGTEGYVAPEILEHRPAYDV  
SCDMWSLGVIMYIMMGYRPFGEGEVVMKQIRYGEYKFHKRYWNHISDDAKNLI TRMLT  
VDPMKRITA EKALRNRWIQADRNSLQGVLSKNMQDLKNLRNAKRRIKAATAAI IATKKL  
QSIGGFRAYQDF

>comp12828\_c0\_seq1; 510 1 1300 LEN=1371; translated  
XATLAAEAALKISRKNKELDCSNDVAVGPEPAVKSSKEETPAIALEITEEKSPADDIPVIS  
IDVTEESSEKLVSNIDITSKASPNI GIIAAQATEGSADASGA AHLPRPTPQEMRSEILRQNH  
DDSSVAVMAEDLEKEAMSSDTKNWDEGEGISDYMGWANQAIKASDTE SVRGFEATQSIV  
DHCDYDDESTIATNFDDGTIATNFDDGTIATNFDDAS IATAMTSAHNHPQEGNEFYDAE  
EQHDDYAGDTNDPYNPMATDAMQSPYQGDVINMPLDFHQDEGLDLGLSFGGEEGFDGPG  
EYGSNELMQQSGFGDGVYDNSGLGGFGDAGLGGFGLASPTLKRDLQNDYSAHPAGHAEND  
LSXALGGVCLPGPERKQAGRRPARSAVGGLLDGKTERGNPPKEEEMVLVDREGPGVCAG  
NNPKPGWECVPCY

>comp12829\_c0\_seq1; 471 612 1952 LEN=2340; translated  
MERAMMEQTLEAARQSDLVLLLWDARVGVTDQLMITARWLRKLGKLSNVAVVANKLEGDS  
WAQNEDSPVL DHLHDVLRRLGLGEAIPISALQGDGLADVAILIEKKA EKQVDTEAIEDDK  
SLAINKDNEDVKPLQIAIIGRQNVGKSTLVNTLVENNRVLAGPTPGLTRDAIAVEWDWEG  
RRVQLVDTAGIRKLTKRIDDSIEDMAVADALRAMKVAEVAVLVLDAAEMYIQRQELALCN  
AVLDEGRALVIAANKMDLLEMSSDYSPRDFAINVREQIEERIPILRNIPVVPMSGLSGKG  
VSELLPTVLDARNRWSRTMSTGLLNRWLAEVTTGSRPPVVEGVRAKLKYIIQTKGRPPTF  
ILFSNVSKLPDPYLRYLTKHFQDSFQLFQGMVRLVVKSSSKGNPYNEKSKKKRGGFGLGG  
RKARFQRRIKEFKAKSRQKQKRLFHN

>comp12830\_c0\_seq1; 1682 304 2571 LEN=2799; translated  
MVKRNRVSM LTLVCFAAFLFEPNESLIPKWD SAAAKNRVHINSKNNDRTGSSELGLSSI  
RPAAFFRPRRSLVAAAASGSDSDSDETTSTNPSPVFFADADNGNNAEDEKAARLADMAA

EAIKAAEAQHGEEDTKKVEKATEKLEPELTTAEKEKAEQERIAAEKERVAKLEEEIRIAE  
EERQKQIEEIKTNISEAAKESYEKFIKPLGEIKEGVSADRIGKGAALAAATAVTFMASKGVI  
ASSAVGLSAAYSISKTVAGDVMRTVGELTWDVTESAANLAEKMGLSGPKFGEVDRTVVN  
KYKYKYYRPPSQVKLDRIDEVELAYIEAEDEEDLARVLKEAETVIGEADAVIAKAEATQK  
EKELKTNQDEEEDIIEVVAAPEPEDEEEVEELVPEMEDEEEETVEDEEDDNDIFFDDDEFM  
AAVELAQEGIEGKIVGVEDVITDSFAKAEWDAAGDLASELSETANSADAVEVEVEDEDED  
DEDFDFGDIDVEALGEMARAAVEKFESEENVAYEAVLNQKQEWADSMIEEDDDDDDFEDDD  
EDGLFLSEDSMEELAAAARAADAVNTDDIPGDDVAPDDLFPESVVTNWSSLKVADLKIE  
LKSRLKTSKGLKADLVARLEQNDLEMLGQDDEEEDDTILDDDVDSDSDDDDDLGL  
EEFDIEELGRQARAAVEMFQTTGGDFDEEPTEDMLAQLESEMEINGDFLAEPEEESVDIS  
SMTVVQLKDECRKRLKVGKADLIERLQASSAE

>comp12830\_c0\_seq2; 469 304 945 LEN=1100; translated  
MVKRNRVSMMLTLCFAAFLFEPNESLIPKWDSSAAAKNRVHINSNKNNDRTGSSELGLSSI  
RPAAFFRPRRSLVAAAASGSDSDSDETTSTNPSPVFFADADNGNNAEDEKAARLADMAA  
EAIKAAEAQHGEEDTKKVEKATEKLEPELTTAEKEKAEQERIAAEKERVAKLEEEIRIAE  
EERQKQIEEIKTNISEAAKESYEKFIVSALHPN

>comp12831\_c0\_seq1; 1174 130 3420 LEN=3466; translated  
MVTSSLSSSNARASRKHLFGLRLVLWLCFLILLVLLVWVWMEPEPLQAFELAAKVITYKAD  
FWGTSEENTLKKKQTSSASILTDDDQTMANRIQNAEGDDDDNLFSENEGPHYRRKKGKNV  
YIYKDMQKKRGNSEYEWTKKNKYKENKLLRRHQTTNEKFQAFPVQNTDDNIPSAAGGSI  
VHAADVLLCRDSVMDYVINATDLKDECDGLKKAYTQTCASDEQLEPESQLDTSAASTRQR  
RLQTTTKGKTNGVAYWRLELLHWSHKLRLSLWSKSRIFLTKEKIPEVWDETALEIELKTQL  
LSNGSRGSRRRALGKGVDDYEDGRISDASYDEIEIIMKDDDDGYEPSKSEMIRTSQRRIK  
DQVRNNQDGDNSDREWEESLEGKKNPTSRVPGDGFKTSYDPPANGVLEVQLQAPLQEGR  
NTTIKAKESGTTKPLANLALPVTAKHVSGKMLSETLMLQQDNKLMKAVANQNTTEAKNDA  
AASSKAVADAASMISNVLNDPTSVEARTCCTSILNAFHEICSVGEDEELSDRWLLVGVAV  
IACCGLVKSLIRYFQIRWLPEAAGCIMVGVSAAGYISTFFPHHDISFDGKWFLRIMVPPV  
FEAALSIDKRSFRRHIVPILYAVIGTLIATCVTAIIVSEGSKLLNCETIHYPEALAFGS  
LISSIDPIAVLSVLSNMGMTDQDTIYVVFGESELLNDGVAIVLFETLVHFLDDDMVVDVH  
AVSAATIHFLVVFVIGSLLVIGYGLCCTLYWIMFGCQTPLEVLVLMFCCWALLPYYVCDG  
IEWSGIVAVVAAGFIMDMYVVGTEKLDKDTVNDETDSDNLDSDSDKGGKERRRQARVRRP  
IFSKEGLLSNKAKTHITFVTEI IATMMETAIFAYLGLFLFSSRYHWNFNHVFISILGCSLSRA  
IMIPSLSFTANWITKLQQSGEVCLVKEIPQQSHQIDTPSNRPNQAAGVIDSKMQLVLF  
AGLRGAMSFALVEHIPQYDAVSGEGTRLKSELKAMTSACIIFTVFLVGGGTYYMMEALGL  
SPKSSTEGALELETEMVGLLSSTSTIESNDIRDNANGKDWMQNNENDMEI IKRKPSTNA  
LRRPGKPVRRQRNSLN

>comp12831\_c0\_seq2; 480 1 1615 LEN=1661; translated  
XSSIQPRSLVAVSAGYISTFFPHHDISFDGKWFLRIMVPPVFEAALSIDKRSFRRHIVP  
ILYAVIGTLIATCVTAIIVSEGSKLLNCETIHYPEALAFGSLISSIDPIAVLSVLSNMG  
MTDQDTIYVVFGESELLNDGVAIVLFETLVHFLDDDMVVDVHAVSAATIHFLVVFVIGSLL  
VIGYGLCCTLYWIMFGCQTPLEVLVLMFCCWALLPYYVCDGIEWSGIVAVVAAGFIMDM  
YVVGTEKLDKDTVNDETDSDNLDSDSDKGGKERRRQARVRRPIFSKEGLLSNKAKTHITFVTE  
I IATMMETAIFAYLGLFLFSSRYHWNFNHVFISILGCSLSRAIMIPSLSFTANWITKLQQ  
SGEVCLVKEIPQQSHQIDTPSNRPNQAAGVIDSKMQLVLFAGLRGAMSFALVEHIPQY  
DAVSGEGTRLKSELKAMTSACIIFTVFLVGGGTYYMMEALGLSPKSSTEGALELETEMVG  
LLSSTSTIESNDIRDNANGKDWMQNNENDMEI IKRKPSTNALRRPGKPVRRQRNSLN

>comp12832\_c0\_seq1; 141 224 649 LEN=1114; translated  
MKNHVLYILGYLACILCSYPNGVSVSVDGLDYPTKKRKVETASRQTNRQVWRVGNIRLDP  
QSANDETPDLKTNDNSNGESKKAIPSDGVGSARMMTGGRNLLQOKIWNRLDAMDKMIVG  
NTLPLVGLTSIVPIVSSIDLFW

>comp12832\_c0\_seq2; 388 224 1900 LEN=2128; translated  
MKNHVLYILGYLACILCSYPNGVSVSVDGLDYPTKKRKVETASRQTNRQVWRVGNIRLDP  
QSANDETPDLKTNDNSNGESKKAIPSDGVGSARMMTGGRNLLQOKIWNRLDAMDKMIVG  
NTLPLVGLTSIVPIVSSIDLFWVNQLGDALSVAQSAANTVYQFSFGLFSFLPSVTATLV  
SKSYASNDMEKTENI IITAFYFGLVAISIMSMSIFTNPSRFLGTVIKNGSPALAISEKYM  
RIRSLSLIPQMVTYICFSAFRGMLVFNPCIKITLIAAAINVVLTPLLIHTFKFGILGSAI  
SAFVCDISIAAILYMELMASKGFFAGKLLRLPSWKEMSPILKGTPLQARSFAMQFINLMV  
ARKIQSLDDTGVAPAAFTLAMQTFFTGGVLIWALGMSTQTLYPSSVAKCEEQERRVFKT  
LIKRLLTRGFVGTALISCIQAALIPFILRSTPVVEVREAAFFPILVVVVVTQGIQGMVSVG  
EGIMVGDGKFTLASTVLIVASIGYIGCLQFFPQSWGINGVFVALGVFTLLRLTGFFVFLP

SIMNHHTLSKTTTPGKKAA

>comp12832\_c0\_seq3; 277 215 1111 LEN=1339; translated  
MFSTVFNPCIKITLIAAAINVVLTPLLIHTFKFGILGSAISAFVCDSSIAAILYMELMASK  
GFFAGKLLRLPSWKEMSPILKGTPLQARSFAMQFINLMVARKIQSLDDTGVAPAAFTLA  
MQTFFFTGGVLIWALGMSTQTLYPSSVAKCEEQERRVFKTLIKRLLTRGFGVGTASCIQ  
AALIPFILRSTPVVEVREAAFFPILVVVVTQGIQGMVSVGEGIMVGDGKFTLASTVLIVA  
SIGYIGCLQFFPQSWGINGVFVALGVFTLLRLTGFVVFLPSIMNHHTLSKTTTPGKKAA

>comp12833\_c0\_seq1; 554 186 2035 LEN=2521; translated  
MRPKNPLLTLLTILLFAYALFTNVNVAIQILSDHKLSAAEIDDTPALDAWQSPAIEGGRVS  
YKGVKVPDISMSAPATSKNFEDGIGDVLDIKRLAKILTRSFVSENGIPIDDQLGFDLTFIN  
LNSPTHSTCNCVVSIDCLNTIACLPRNPQYRNALVWIGLEMRAIKAASIFDGKIFAEP  
KLPLGKSLQYSTIEVWEYWRKHNILPDKFDANSEIFVEETWYPCNVEFRKYYRGSSCF  
YQGLKASEDELEGAVVENEAIQWVNDVMKNDTDKRRIRKLLKFFVVIIXPYLKAETGDFR  
NFADVAQTERQLSPLGSLLMFAHMVMMFNRRPFLDKIYQEKLASVGRDGYESLSSSKNV  
GTTSSMNKHNEFPNVALHIRRGDSCGDTKPSSEYEISASELDSPAQTGSDRKCYKTNVYVD  
VLSQIRRLVPKTRPLHVYLATDDVGDVLDLILNKKVKDRKDSAAEEEIDVEHWHFLNYSR  
HYFDYNADSI EAEENSANQPILGETAVVDLWHLSHGHVVFVGHLSRFGKVAWLLATARQN  
FFVVPFYTVDGHSFCCEIDEACGRMKPFVTVDNCLTFGHEYARFDHNRNGTYWAEGLAR  
KTIFLERQKEKNEAKK

>comp12833\_c0\_seq2; 490 186 1846 LEN=2686; translated  
MRPKNPLLTLLTILLFAYALFTNVNVAIQILSDHKLSAAEIDDTPALDAWQSPAIEGGRVS  
YKGVKVPDISMSAPATSKNFEDGIGDVLDIKRLAKILTRSFVSENGIPIDDQLGFDLTFIN  
LNSPTHSTCNCVVSIDCLNTIACLPRNPQYRNALVWIGLEMRAIKAASIFDGKIFAEP  
KLPLGKSLQYSTIEVWEYWRKHNILPDKFDANSEIFVEETWYPCNVEFRKYYRGSSCF  
YQGLKASEDELEGAVVENEAIQWVNDVMKNDTDKRRIRKLLKFFVVIIXPYLKAETGDFR  
NFADVAQTERQLSPLGSLLMFAHMVMMFNRRPFLDKIYQEKLASVGRDGYESLSSSKNV  
GTTSSMNKHNEFPNVALHIRRGDSCGDTKPSSEYEISASELDSPAQTGSDRKCYKTNVYVD  
VLSQIRRLVPKTRPLHVYLATDDVGDVLDLILNKKVKDRKDSAAEEEIDVEHWHFLNYSR  
HYFDYNADSI EAEENSANQPILGETAVVDLWHLSHGHVVFVGHLSRFGKVAWLLATARQN  
FFVVPFYTVDGHSK

>comp12834\_c0\_seq1; 636 1 1585 LEN=1868; translated  
XHADSEPYKACQAILDWSRQSKAMPFMEVPDVALGIPTYPDIVKHPMDISTMAKKLEN  
GAYSSIPPGQSVGNLSVCRMLNGPFRKDVLEIFDNATLFPNPPDDWIAVAATALKKSVTTK  
IDAAAAYAAEKKNAGGDGNQRGSLYVDESDVDMYEYETDHDDEFGTTRRGKRKRATARTK  
GSKDEAAARPMHPIKLNCLRDGNDLRGRFSGPLNRAAGTYAMPPGWSCRAATRGOGA  
KAGGEENDNDNENESQNGSDGEEDPPAASEEDREHAREMEDLLALHKQLGEAETSGLRRS  
SRESRPTSARRSSAKKKDSVPKTEGLEYYPIHAHAHASGDAGVEKTKTKPSSSRLDVEIA  
QEKLHEDYYAGLYQKHEKDLVGGEGGHAVYSSGSFPPYLGRVLP SRNQKGSSEIRSSFV  
VPALRWVIRGLVRSGLTATEPMSGGAGASNHDTSAGSILTNVYRDPAAVPFGVLDL  
RGLHRKKRAGNQSGDSSSEDEVEMSEYEKLAERVARNAERLKLGLA

>comp12835\_c0\_seq1; 306 1225 1605 LEN=1605; translated  
MGKKSKNKAKKNQPTPEAEDPAPEAEAEAPAAEETSEVAEAAEATPDPEPAPSAEETAPE  
EEPEPVEDEPEPDIDEATEAEAEAAKAKAEAVAKAEFEAAAAAKAEFEAAAAKAEFE  
AAAAKA

>comp12836\_c0\_seq2; 514 1 1155 LEN=1335; translated  
AVHPPSNGGGNTSGNTSHGGVERMLVVAGRHIARVWTPETDRHRPTEEDDSPRAQRGYLD  
WMERRRALVKEDDEDEKEKENENDGDGEEQETEHDGHQHPRGRSFSRSEPREPPPSRP  
DRRSNSCVDNDDNHNSKDDNHNDTGRDPVVVFGGSEHREGMTAMSALMTMGIDATGTQ  
PGGSQGEFPGAGEGASNGRPRPQSPGFATQRDESERFSPQRTSGSERRKKKKRRRKHND  
KDDDDSNRRAPARGGASDRRPHQRRNGQRPADAAETKSPKRAEASVWNTPDPSVLELL  
LSEEAGERAEFEEREARTLVVGPSTSSSLPATEEPLTHEDRGETPEAYGGRASAAALFE  
PSSWAGMDLDAFGEDDEEDGSDDG

>comp12836\_c0\_seq3; 443 1 1189 LEN=1189; translated  
AVHPPSNGGGNTSGNTSHGGVERMLVVAGRHIARVWTPETDRHRPTEEDDSPRAQRGYLD  
WMERRRALVKEDDEDEKEKENENDGDGEEQETEHDGHQHPRGRSFSRSEPREPPPSRP  
DRRSNSCVDNDDNHNSKDDNHNDTGRDPVVVFGGSEHREGMTAMSALMTMGIDATGTQ  
PGGSQGEFPGAGEGASNGRPRPQSPGFATQRDESERFSPQRTSGSERRKKKKRRRKHND  
KDDDDSNRRAPARGGASDRRPHQRRNGQRPADAAETKSPKRAEASVWNTPDPSVLELL  
LSEEAGERAEFEEREARTLVVGPSTSSSLPATEEPLTHEDRGETPEAGDPPEACGRAS  
AAALFEPSSWEGMDPDAFGEDDEEDEATDDGGLAH

>comp12837\_c0\_seq1; 437 182 1189 LEN=1302; translated  
MNLNYPQRRVFRGQGGATDRRLPKHRARRRQTHELNSSDHHTEDTHQNPENIGLDGIG  
DEACGSLTIIHTGGGGGGGGDGERWTGLAREQQNHISRDRCTADSSCNNNNEQQATAD  
GDRSESHIDDNSHTARNPGEIEEGPPPYLAEIKHLKRRIRNIQELSIQASRDSIASDV  
TKYQDNVLNATQNCVNEWRSIARHYSKSNDDGEDETCLPASTRTEVGLIVFQLIQLSVQS  
GPLSSARPGYFKRCGASVARVVLDFLEEVVPQHEALGIDCMGFSTKQLEAMRKWKVDAQK  
AVANNKPPSKSVLKKMQQQQRQQPKKGGKKKKK

>comp12838\_c0\_seq1; 423 129 971 LEN=1456; translated  
MCIPCCFTIISTSEVGVIEQWGFKRLANPGLGFILCPMEQLVGRLSFRVQQIDVRVETKT  
LDNVFLTAVVSVQYQVLRNVFEAFYALTNPAQQITAHVYDVMRATLPTLELDAAFEAKE  
ELATSVKNALSESFTSYGYQILQTLITDLDPDQRVKNAMNEINSSKRLKFAVAERAEGDK  
ILQVKSAAEGAEALYLSGVGVSRQRKAIVDGLRASIVEFSGKTSAPKDVMDLLLLLTQYF  
DMVRDVGSAAKHCRTTFVPGSKTSADQMRASLLQVDAATSK

>comp12839\_c0\_seq1; 327 1 754 LEN=1041; translated  
XNTTKRHNSIAIVSFDTSHNIQPNRFGPDTTTETTMMASKILPKPIVICGPGSGVGKGTLI  
EMLFKRFPNDQGFVSHTTRKPRPGEVDGKDYNTSVEAIKKEIDEGKFLEYAEVHGNY  
YGTSVRAVESVQKQNRVCILDIDIQGAMAVKSSLEPYFFISPPSIEALEKRLRGRGTE  
TEEAIQKRLANSKKELDYGHEAGNFDRIFVNADLKETFEELASVVKEKYPHLDDEVAPDDE  
QKNCTTKCSVS

>comp12840\_c0\_seq1; 1958 1 4324 LEN=4324; translated  
KNRKGRRRGILAKLEVSNTSLLSERTGEYVEKPKKNAVTSQSSISFTIRDQQRKHLVEHG  
RYLNRQQEHRKGHQGRNDSRETLSTFERRMKAHRRSGMSMARAVFFYCMVATVYTVCL  
LSSDAFLQTNVANAFKLPKPPRIASDIINRGRSNDGKPIAPILQDWSFNKQLTQDGT  
IKYSLKGTVRGHPAIPDGDVMTTAPLEGKALEIATNMLFAETKGNACKNPTYIIKQRSSK  
YSKLVTTIAGTKYALLPPNIRIGDAPLLSQVKGGVGSTDGQLSKSLPYKDQVVYLEEQI  
DVVRLLAEQEDELKELEEKQATAEITRNAGIIVTAALTGAFFAGDDTNMVTTTTDPDV  
IQNTIVDPVIVKPSASSTKIDNIEEIEESVEKAGEIQFAQPAKAVLPYLEERIRALEEALQ  
EQQQQQQNEINEINKDKQQRNQDEVENDDYLKIAGGISDNVEHEEKSPVIEPTKFENERP  
RIETTKKVQEGNKAVSSSTKSISTAESTVTSMTTPEGESPKENSKQTHGSKNGLSSFSQS  
GDNKSNNKVIIEEADAAPATITTYEAEESTIIIPDEKKKIDERELGSSSKASMGMGITKML  
TDVKEASNQQTQGGSNIEDDSTLIWGSSTTTKDETKTSKPDQVEEESVHVANGDNTIRME  
ENSAPSSDITSKIILDKDSSEESVSKSGDFGHEGDSEIAKFDTLILEKVKEEGEKNVDPN  
NSLDASNKERMAKELKNNNESTQKTNAESSDAGTNIDVGMTDIHVPVSENDPKSTQKQK  
QQETTIDIKLEEMNQEKRLARNGIDIERLESRTEDSPERDKIQLKRSVEGADEEFGEVI  
ENEMKESFDELDSENTEVVTRGERKVLTKQQTGDITETDILNNDKEDKMGNGMQSEDMKEEID  
SQQTMQEETRKKGLADLKEVTKQEI EYDKGSELI EDNKEEGKLFQEETKEDLAQNEDTN  
IEIEASTSEEIEQEEIKNGPMFRNESTEASMDITPEERKDSLQGDMEGPVANSALIELESQ  
DGENLKSDFHIFSPVKEINKLATEMSQIRQNGSNFEKLLDLALAGTQVIKGEVDKSDVD  
IDLSDDIVSKLTSTALSIFGEDGVMLNQISMDEMKKLSDTLSLNQLWAQLVEFCSKAKL  
LEDPSISELLKEYSDDDVQKIELVSAASFVAIVGGTIAISVRSKLTSEADGYSSDDYGN  
WDEESQYSSSWESIESDFEQNDYNPNTDSPFPFATSNGWDSSTTDPESEVESHDYETE  
YYPSTPEKNPSAANDHQYTDVEKAQSQEMYRDQAFDQKGLDIPKLQGNVDVYEKKTDSPE  
PSNTQRNEEGGATGTTTSRFSASSKLGDRSTNGASPPFNESSTFQKTEQGNFPKSTSP  
F

>comp12841\_c0\_seq1; 1127 200 5271 LEN=5516; translated  
MKNESFASFKSWVTSLNREELLDAMAFTFKQNTNRSGTRTPKSGISFGGSNSIEMDSHE  
YELLLSMVRLQPPPTPVHPRATGYKRSQKGAKLDFHYKEEYLRWTKPRLFQLSEKEN  
QSSFLNNSNNGRLNAGRLRNRNGQRYNSSNGGTTIDSRRFNVFARKKIAPWGDYISLGC  
QEQINADFELIQGTRLGRHRIDGRYLATGCFVCSRERENSREGDVAVGKGSKNRRND  
AFTSGPTAASILKMLKIASRGQLFHQHTTLYSKTSLSSFEAEISFCAPWLQPTERWFL  
GMYLASRYQVALWDSYQKYNQVQQQKHTVHPGRIGTKGSASNDFGEAVLKDALLRAIRL  
SLKEIQEEQESQHLDFLRDVTLSILNGNPTLRGQILSQAIPPTQIPDPNTKGYWKLAA  
QEWSTPLVEIHSFLNRRFKCLVHEKLEELAAHIERTIFEEDELEIQNLRKPHVIDTRS  
NQTNRRARTNKKKKRRKKAPKTRMLSAIKSNTITPTVPPFRDINGDRVDRMSDSSSGDD  
QKTTIIVSKSVIDFPKNLTTARERNRNIIFVLGILEELTENAFKAVGLQVTSEPEEPKRE  
HTIVGGDINSQLHTTYIQPPEEVIDLKRKTCIDGTESELPTGNQMSENCLSRVVFERQRS  
RGMQDQFLTHSDGNFSLYSRQTDSSDIYSLPFRDSDYVLGFGGAETNNLPFVNHYQ  
STERSILSSFFLSQSEQVNGKDFDDEERLMAASTAASIASSSYKDTTYVAEREEDIPIV  
IEEQIPVPKEMSAIREIDDGSSKSSSTAMKEIDHVIEVGRNRSRASSISSSENSDLDRNL

KIEEEFNKKTQEMARSDHANDSSDVISDCRSQTLQAPVTPPPTLSPIFVTLGDLKMK  
YSSSLKRFPSLDFETMKPGSGPGLPPASPAKDKLVSSWSREDLRIESFRDDHNIKNS  
WRDRIQTHQESEAPTYKSI AFKKT LAQPI PRSGGDTESLDHGMHLSASSRRKQDHHKEYC  
AQSETAMDIHGHGHDWYREEGENQSLVRDETTTII SGI SHRGEAEELADVQEERNYFRD  
MYLTLGAEVAKLVMLATQQTVAATPVDFQDSSSLAYPKMYGHSSFDPHGIQHSFRGTIKG  
ALPGPMSDAGFGFHRSGDYESI ISEDDIHDSVSKPRDVRDPAQRIASSQTVAESDASMD  
FTSIKVPLSGLLVPGTMHSHFNGFQSRVTKDILQFVHVTNLKMRKLDGRRKLAVERXVN  
RRTVELCFNLFTRGIFAPMLPTFTPLNLPWRMRFFLSPGF SRLVNTIWPRAQVKLYGSYI  
SGLCLPSSDLDFVCLPAVHKKDLALAPGVLEGRNAINETSQKLLARELKGESWIDPRSI  
KVIERTAIPIKVVSTKDTRARMIKLDISFDGPEHHGLEANRMVSQTLEELPLLRPLMLVL  
KQLLSHRGLLTAYTGGLSSYCLFLMLARYLQEQPLSNSDYGSLLMGFLDFYGNHFDPRAM  
GISVGGRYFARAKSHTAAAGYEPTSQPFWKGNRPPHQHVVINNLPQILHTSSSGNIST  
STTTATNHKAADFRRRNSFSDAGSVDDSHRMNRVYHCPSPPSGQVTSKSKSHRFVSRNS  
KANCHRNGNGSSETTTNQTNGHSHTHAHNFSGFERPSTFDPLFVEDPLSATNNVGTRELF  
PMPIGPWWPAW

>comp12841\_c0\_seq2; 1231 200 5266 LEN=5416; translated  
MKNESFASFKSWVTSLNREELLDAMAFTFKQNTNRSKGT RTPKSGISFGGSNSIEMDSHE  
YELLLSMVRLQPPPTPVHPRATGYKRSQKGAKLDFYKEEYLRWTKPRLFQLSEKEN  
QSSFLNNSNNGRLNAGRLRNRNGQRYNSSNGGTTIDSRRFNVFARKKIAPWGD IYSLGCT  
QEQINADFELIQGTRLGRHRIDGRYLATGCFVCSRERENS NREGDVATAVKGKSKNRRND  
AFTSGPTAASILKMLKIASRGQLFHQHPTTLYSKTSLSSFEAEISFCAPWLQPTERWFSL  
GMYLASRYQVALWDSYQKYN CNQQQKHTVHPGRIGTKGSASND FGEAVLKDALLRAIRL  
SLKEIQEEQESQHLDFLRDVTLWSILNGNPTLRGQILSQIATPTQIPDPNTKGYWKLAA  
QEWSQTPLVEIHSFLNRRFKCLVHEKLEEEELAAHIERTIFEDELEIQNLRKPHVIDTRS  
NQTNRARTNKKKKRRKKAPKTRMLSAIKSNTITPTVPFGRDINGDRVDRMSDSSSSGDD  
QKTTIIVSKSVIDFPKNLTTARERNRNIIFVLGILEELTENAFKVLQVTSEPEEPKRE  
HTIVGGDINSQLHTTYIQPPEEVIDLKRKTCIDGTESELPTGNQMS ENCLSRVVFERQRS  
RGMDDQDFLTHSDGNAFSLYSRQTD SFSSDIYSLPFTRDSDYVLGFGGAETNNLPFVNHYQ  
STERSILSSFFLSQSEQVNGKDFDDEERLMAASTAASIASSYKDTTYVAEREEDIPI DV  
IEEQIPVPKEMSAIREIDDGSSKSSTAMKEIDHVI EVGRNRSRASSISSSENSDL DVRNL  
KIEEEFNKKTQEMARSDHANDSSDVISDCRSQTLQAPVTPPPTLSPIFVTLGDLKMK  
YSSSLKRFPSLDFETMKPGSGPGLPPASPAKDKLVSSWSREDLRIESFRDDHNIKNS  
WRDRIQTHQESEAPTYKSI AFKKT LAQPI PRSGGDTESLDHGMHLSASSRRKQDHHKEYC  
AQSETAMDIHGHGHDWYREEGENQSLVRDETTTII SGI SHRGEAEELADVQEERNYFRD  
MYLTLGAEVAKLVMLATQQTVAATPVDFQDSSSLAYPKMYGHSSFDPHGIQHSFRGTIKG  
ALPGPMSDAGFGFHRSGDYESI ISEDDIHDSVSKPRDVRDPAQRIASSQTVAESDASMD  
FTSIKVPLSGLLVPGTMHSHFNGFQSRVTKDILQFVHVTNLKMRKLDGRRKLAVERFSR  
LVNTIWPRAQVKLYGSYISGLCLPSSDLDFVCLPAVHKKDLALAPGVLEGRNAINETSQ  
KLLARELKGESWIDPRSIKVIERTAIPIKVVSTKDTRARMIKLDISFDGPEHHGLEANRM  
VSQTLEELPLLRPLMLVLKQLLSHRGLLTAYTGGLSSYCLFLMLARYLQEQPLSNSDYGS  
LLMGFLDFYGNHFDPRAMGISVGGRYFARAKSHTAAAGYEPTSQPFWKGNRPPHQHV  
INNLPQILHTSSSGNISTSTTTATNHKAADFRRRNSFSDAGSVDDSHRMNRVYHCPSPPS  
GQVTSKSKSHRFVSRNSKANCHRNGNGSSETTTNQTNGHSHTHAHNFSGFERPSTFDPL  
FVEDPLSATNNVGRNAFRINQVQRAFSDAHRALVASLDWDLQSADPSDKYPLLKCLLGNQ  
REDVFFGL

>comp12841\_c0\_seq3; 1206 200 5146 LEN=5391; translated  
MKNESFASFKSWVTSLNREELLDAMAFTFKQNTNRSKGT RTPKSGISFGGSNSIEMDSHE  
YELLLSMVRLQPPPTPVHPRATGYKRSQKGAKLDFYKEEYLRWTKPRLFQLSEKEN  
QSSFLNNSNNGRLNAGRLRNRNGQRYNSSNGGTTIDSRRFNVFARKKIAPWGD IYSLGCT  
QEQINADFELIQGTRLGRHRIDGRYLATGCFVCSRERENS NREGDVATAVKGKSKNRRND  
AFTSGPTAASILKMLKIASRGQLFHQHPTTLYSKTSLSSFEAEISFCAPWLQPTERWFSL  
GMYLASRYQVALWDSYQKYN CNQQQKHTVHPGRIGTKGSASND FGEAVLKDALLRAIRL  
SLKEIQEEQESQHLDFLRDVTLWSILNGNPTLRGQILSQIATPTQIPDPNTKGYWKLAA  
QEWSQTPLVEIHSFLNRRFKCLVHEKLEEEELAAHIERTIFEDELEIQNLRKPHVIDTRS  
NQTNRARTNKKKKRRKKAPKTRMLSAIKSNTITPTVPFGRDINGDRVDRMSDSSSSGDD  
QKTTIIVSKSVIDFPKNLTTARERNRNIIFVLGILEELTENAFKVLQVTSEPEEPKRE  
HTIVGGDINSQLHTTYIQPPEEVIDLKRKTCIDGTESELPTGNQMS ENCLSRVVFERQRS  
RGMDDQDFLTHSDGNAFSLYSRQTD SFSSDIYSLPFTRDSDYVLGFGGAETNNLPFVNHYQ  
STERSILSSFFLSQSEQVNGKDFDDEERLMAASTAASIASSYKDTTYVAEREEDIPI DV  
IEEQIPVPKEMSAIREIDDGSSKSSTAMKEIDHVI EVGRNRSRASSISSSENSDL DVRNL

KIEEEFNKKTQEMARSDHANDSSDVISDCRSQTLQAPVTPPPTLSPIFVTLGDLKMK  
YSSSLKRFPSLDFETMKPGSGPGLPPASPAKDKLVSSWSREDLRIESFRDDHNIKNS  
WRDRIQTHQESEAPTYKSI AFKKT LAQPI PRSGGDTESLDHGMHLSASSRRKQDHHKEYC  
AQSETAMDIHGHGHDWYREEGENQSLVRDETTTII SGI SHRGEAEELADVQEERNYFRD  
MYLTLGAEVAKLVMLATQQTVAATPVDFQDSSSLAYPKMYGHSSFDPHGIQHSFRGTIKG  
ALPGPMSDAGFGFHRSGDYESI ISEDDIHDSVSKPRDVRDPAQRIASSQTVAESDASMD  
FTSIKVPLSGLLVPGTMHSHFNFGQSRVTKDILQFVHVTLNLMRKL DGRKLAVERFSR  
LVNTIWPRAQVKLYGSYISGLCLPSSDLDFVVCLPAVHKKDLALAPGVLEGRNAINETSQ  
KLLARELKGESWIDPRSIKVIERTAIPIKIVSTKDTRARMIKLDISFDGPEHHGLEANRM  
VSQTLLEELPLLRPLMLVLKQLLSHRGLLTAYTGGLSSYCLFLMLARYLQEQLSNSDYGS  
LLMGFLDFYGNHFDPRAMGISVGGRQYFARAKSHTAAAGYEPTSQPFWKGNRPPHQHV  
INNLPQILHTSSSGNISTSTTTATNHKAADFRRRNSFS DAGSVDDSHRMNRVYHCPSPPS  
GQVTSKSKSSHRFVSRNSKANCHRNGNGSSETTTNQTNGHSHTHAHNFSGFERPSTFDPL  
FVEDPLSATNNVGTRELFMPPIGPWWPAW

>comp12841\_c0\_seq4; 1152 200 5391 LEN=5541; translated  
MKNESFASFKSWVTSLNREELLDAMAFTFKQNTNRSKGTRTPKSGISFGGSNSIEMDSHE  
YELLLSMVRLQPPPTPVHPRATGYKRSRQKAKLDHFYKEEYLRWTKPRLFQLSEKEN  
QSSFLNNSNNGRLNAGRLNRNRNGQRYNSSNGGTTIDSRRFNVFARKKIAPWGDIIYSLGCT  
QEQINADFELIQGTRLGRHRIDGRYLATGCFVCSRERENS NREGDVATAVGKGSKNRRND  
AFTSGPTAASILKMLKIASRQQLFHQHTTLYSKTSLSSFEAEISFCAPWLQPTERWFSL  
GMYLASRYQVALWDSYQKYNQKHTVHPGRIGTKGSASNDFGEAVLKDALLRAIRL  
SLKEIQEEQESQHLDFLRDVTLSILNGNPTLRGQILSQIATPTQIPDPNTKGYWKLAA  
QEWSQTPLEIHSLFNRRFKCLVHEKLEELAAHIERTIFEDELEIQNLRKPHVIDTRS  
NQTNRARTNKKKKRRKAPKTRMLSAIKSNTITPTVPFGRDINGDRVDRMSDSSSSGDD  
QKTTIIVSKSVIDFPKNLTTARENRNIIFVLGILEELTENAFKVLQVTSEPEEPKRE  
HTIVGGDINSQLHTTYIQPEEVIDLKRKTCIDGTESELPTGNQMS ENCLSRVVFERQRS  
RGMDDQDFLTHSDGNAFSLYSRQTDSSDIYSLPFTDRSDYVLGFGGAETNNLPFVNHYQ  
STERSILSSFFLSQSEQVNGKDFDEERLMAASTAASIASSYKDTTYVAEREEDIPIDV  
IEEQIPVPKEMSAIREIDDGSSKSSTAMKEIDHVI EVGRNRSRASSISSSENSDL DVRNL  
KIEEEFNKKTQEMARSDHANDSSDVISDCRSQTLQAPVTPPPTLSPIFVTLGDLKMK  
YSSSLKRFPSLDFETMKPGSGPGLPPASPAKDKLVSSWSREDLRIESFRDDHNIKNS  
WRDRIQTHQESEAPTYKSI AFKKT LAQPI PRSGGDTESLDHGMHLSASSRRKQDHHKEYC  
AQSETAMDIHGHGHDWYREEGENQSLVRDETTTII SGI SHRGEAEELADVQEERNYFRD  
MYLTLGAEVAKLVMLATQQTVAATPVDFQDSSSLAYPKMYGHSSFDPHGIQHSFRGTIKG  
ALPGPMSDAGFGFHRSGDYESI ISEDDIHDSVSKPRDVRDPAQRIASSQTVAESDASMD  
FTSIKVPLSGLLVPGTMHSHFNFGQSRVTKDILQFVHVTLNLMRKL DGRKLAVERXVN  
RRTVELCFNLFTRGIFAPMLPTFTPLNLPWRMRFFLSPGF SRLVNTIWPRAQVKLYGSYI  
SGLCLPSSDLDFVVCLPAVHKKDLALAPGVLEGRNAINETSQKLLARELKGESWIDPRSI  
KVIERTAIPIKIVSTKDTRARMIKLDISFDGPEHHGLEANRMVSQTLLEELPLLRPLMLVL  
KQLLSHRGLLTAYTGGLSSYCLFLMLARYLQEQLSNSDYGSLLMGFLDFYGNHFDPRAM  
GISVGGRQYFARAKSHTAAAGYEPTSQPFWKGNRPPHQHV INNLPQILHTSSSGNIST  
STTTATNHKAADFRRRNSFS DAGSVDDSHRMNRVYHCPSPPSGQVTSKSKSSHRFVSRNS  
KANCHRNGNGSSETTTNQTNGHSHTHAHNFSGFERPSTFDPLFVEDPLSATNNVGRNAFR  
INQVQRAFSDAHRALVASLDWDLQADPSDKYPLLKCLLGNQREDVFFGL

>comp12843\_c0\_seq1; 226 1 1579 LEN=1726; translated  
LWNVEHIPSRQETQDRGHQTWSHKTVRSIAYFFKTS GTTTATRESIGILRTAVKVENLSF  
HEQIMPASLAPSLQSSKRQMIQRDADHRLGHKKRQRARNKELKRLACQEVLDRLPPYQN  
LPFAIVDNVHNDEGADLSVTNTDTKKS KGISDLYRPIPRPETAFRKFWDRIPIICSPHKA  
VLEGEISDKRELEMDRYHSEKYRRKLQYKKERGITQAELEELWEKHGKRTKHGPAKKQG  
ENEENGNASNTGEGISLLSNDRGQRKAWQVENFVSI LWDRLSSFTVEQKGN TNKNFYF  
TVVDFGSGSNLCLALAPYF SNVRFVLVDKPYPLKLAERRANQAGLKNVQTLQYSFSPS  
NLDDFSIPMPMSKTDLFLPPGTEMT PASTPQVSSAQMSKEFDIAIGLHCCGSFTDMVM  
SLAKIKGADCIVCPCNGAMT SKTTCGYKYPRSSYIGKLMNQDEYLSMSKAAEDSGIYEA  
KCLIEYDRALWAKENGYHVQLLKMSPDNCTPKHHVLYLTNSEEKV

>comp12844\_c0\_seq1; 295 396 1079 LEN=1458; translated  
MVDCTVEQYNDERLQSFVVS NKRRRYKRRGGRCPSMLSALAAMQSDMEVEREQDDNSSE  
PSDVFEGRSQPSITQPAQNTTIT SCLASRLSSVKRDLGGANAHTSTEAVFDDIASNHS  
HSDTYKTPNSNPSRYLS DALSDIDNNAANHHNCNINNRSS TDCKTNNFMRNNRASRRH  
SIPDCLMQLPDDFDNNIFTIPLNDSTDTALNIVRHALTL SRGVRQSE

>comp12845\_c0\_seq1; 334 108 704 LEN=1188; translated

MVKHNNVVPNIHCHKKWAASSRGPLKIRLALNEAPRKKARRLARAKKAAAFFPAPVQKLR  
PIVQCQTQKYSKQKLGKGFLEELKAAGLNARYARTIGIAVDHRRNTKSEESLELNTQR  
LKTYLAGLVILKKGQDASGLSQFKGTIQPLDHSKGEIEMADVDELKSFKAYTTMRLAKK  
ETKVAGFRVAVANRKEKK

>comp12846\_c0\_seq1; 226 270 1385 LEN=1560; translated  
MASGNRCGVLAIAAVGLRFWFVLGSLPTTSAFFPPGNEGMPPPPPPPARGRIETGEPRSG  
AGGTSAGDGSLPEEATHRGGLQDTEGLVFEGTFRCKSDLVPMPASLAPPGAAGDLFEFFS  
DPGNRDLVLKGGGNRCERVPLTPELREEWISQSRIVRSTPPVGNARAGAGGGHHRNEEVL  
AVYSEVPIAPGLSLRAVSYTGCKTMRDATTALPYEFTLLKETRYPVGGKAMTWIFDRVM  
GSHGDIRRGGGAGVPGETGTDVRRQAPEPGGSGSERGASGDDGGPKAYALSRVTLEPLPG  
DGGCKICYGHVRLSLSKRFLHMLPLPIGVVRSRVNRSIKRQLERECTRSIEKQFQALCE  
WNETNNAHQQR

>comp12847\_c0\_seq1; 377 159 1967 LEN=2585; translated  
MGKSKKRKNRTKALYEAAAAAAKRRKQEHEEEYSRCSGTALAKEKEPKWLPEPLCNGD  
KTETDAIDTNPARKPSASDLRTTLRTIRYLLASEDNLDDFLHSKEHKPLRAALHLLVTER  
LKSVDKGVDRYTKVTHHLSKKRWASALSSQLASRDFRQVVKQGTVQRWVRDIDGCTEPAV  
KIQLLTLVLSSSGRNITPGSDASNATKQNDDDNEKDNHDNDGINKHDPSSLALLEAQSE  
YRKNTRNGNHQPGESSPTCSEVQVLKGSIPSQPCAAAQAGFDMAAAQALETRKIDSKI  
VYRENASERTPPNHYDLLLHATEHDALKPFDPGSPNHKPKGDHRSVATVRPHPVPFVKG  
AFVLENVLSPECLGLVQTASALGYRPDHPALPKPTGIDSCEWVFNDSIHDIVYDRVRE  
HLPSTLLPVMGKNGTSADETNNGDDKEMKAPVLCGINRRWRFFRYGQGCVYRPHIDGSW  
PAGRLSEDGASYERDPTNGTTRS YLTFVLVYLNDDFEGGETRFYYPDQDVYATDDENELS  
SNARERDENTMAPSLVARGIIPKMGSVLVFPQNSASLLHEGSVMSGTYVVRDQVYR  
HG

>comp12848\_c0\_seq1; 796 111 2132 LEN=2311; translated  
MASAGKGTKRKGGDIDNTKSEDARLKRSTNTTTTTSATKKRRGQLEEIPASSHYQVSFM  
HKATVTHVSSARYGFVITACDEGIVKFWKRSSTVLD SHGREANAKKNSYRKS KDDLHSA  
TPCLEFVKSFHTAHIGPLAALCIDESDDTIASIGRNDGMIKFYDVSTFDAKSMIKAKSDSS  
SFGRAATFMEDESKELLLAISHAADGNISISVANLQLIQTL SLHSPVTALAYNRQHKC  
CISGDMGIIIEIWDSTRGTTGDQIAGGPCSMQTNKLEYP SKIDTDLYKLAKKKTYP RCIV  
VSKNYFVVYGADHKVRI FNLSTAKIEVKYDERLSVYASKNFANYGMSDIEFGKRAATERE  
IEDQDKRPALLPSKVMGMDPSEQYLLVSTMIGIKIIDWKKNKLVKVIKSDASQYRFLSF  
CLCLGDAKMNQMQQLARGTGNATAVGEKEAEVNNSIVVALAYQRRFYVFSHVDPMLEQQ  
DGSADSANNRDIWNEAPTAEDQLLVSETGRGGGGVQSKIVSKAILRTTKGDIHIKLFQEV  
SKTLENFTEHARSGYYDGVLFHRVISSFMLQTDPLGDTGGESI WGGFEFEDEFVRDLRH  
DRPFTVSMANAGPNTNGSQFFITTVATPWL DNKHTVFGRVTKGMDVCKLIENVHTDKNDK  
PIDDIRILSV DLE

>comp12849\_c0\_seq1; 206 358 1032 LEN=1922; translated  
MNEYIGGGVSVFGQPNFTDVFSEEEQKKYHDSPLSDVGEQAKSLNCLLRDLKHNKASDP  
DALGMVRKLGAPRHENISTFTD TDFLHDLDLVVV SPLTRALET FEMSLKEHIDSREDDQP  
GVRVLAMAAAAERLYLVSDLGKPRSELRLRHPSIDFD TAFAYSHNCGIQSSCDAKDSLDA  
WHFQVSDSIADCYEEWRPNQGQVYACFGEPSEYFDRRMTDFYYW

>comp12850\_c0\_seq1; 638 97 2304 LEN=2891; translated  
MNSSMINITYDTTACKSIDVTEQRPRKLRPEPSSTSDAVLLLLTEIGIANHYLGHHNKAE  
QFFSQALCRVDRKFIVDQTI STSVESGSLRVTKCQGEQLKLFDDR SRIPPSPKAVKSD  
KASRIEYDEGMRVYESPALDDISNPDLIASTLYYNI GQTYTRQKLYDDAI PWFHEHSIAL  
CNRADDFTIRHVSLLVFKTLHCLGYCNHRLGNDEKATVYEQALSIVSESKLGS PVHLAA  
SLNCIGVLHFNSQTCNNTEVALEM FHESLNIYRTMTNTNRSNKTAIATVCNNIGRVYYLQ  
SKFQESLDVYEEQLRIRREILGSDSVDVAATVYNI GQTC HQVQQLDES LDYYKEFLRIAT  
SGVMP IESASKDMALVFKGIAE IYQEKTDLKMALHYFSQALELQKNFDTVYSTDVATTLN  
KLGNICYEMKNFTTAMNHYYKGLEIERRVLPANHPHTIITLVNIAHIHKQLGEHESALKA  
YMAACKMQMTAFGRESLSVAETLSSIGLMQYHIRDYESSFESYQEALRIRRSYGTDEHL  
DVASTLNSIGLVLFKQDFDLAKKCFGESLRIRSKILGKDH RDVAILWYNIATIH FETGE  
DDTAVEMYKETLRVEKKALGNDHPDVVLT LQHLGQVHQMGQIDEALRYFNEALDIDTEN  
LKSQADVHKSGSMARLLNLLGNVYLQMGKTKEMMKCYIEASRIYEANQRPGEALVIAGYN  
FYGLSKTNPPCAAVA

>comp12851\_c0\_seq1; 1784 562 6839 LEN=6987; translated  
MEVNQQVWLRRESSHWGVPVAVIVRKEELGDDIELTLVNDRSSVEVDNGEPDYFSDEAEF  
TQVMRIDKDQIKSADHNDIKLRNLPASFLDELGSCGRNSNGKSESRRKSNSM TVRGS GSP  
RMNGDSMPIGGVDDLIGLTHLHEPAILHALRLRYDSDI IYTSTGPILIAVNPFPKMP SLY



QSETMEQYRIQGENSKKAKSDTTNSSIKSYSTPRKGVRRRAATEQDTGRLAPHVYQTADDA  
YRQMLHGLDNAKMMEMKQPNAMGLKRGESRIEDSSPSDQSILVSGESGAGKTVTTKIVL  
DYFAMLSKKRSDSDGNRRRTSGGKRNQSVSIXTAGLAVESILEAFGNARTIRNDNSSRFGK  
YIDISFTSKGKLVGASIEYILLEKVRLIHPGPGERNYHVYQFLKAANASDRQDFFLNSK  
TCRDFRLLSDSGTFDRRDGVDDCETHHEMLQAMKTIGFSEETVYSLMRLVSAILFAGNMS  
FTPSQDGESCKLTKAALACAALLGITDGLATALTKRSIKAAGETVMKLLTIEESGKA  
CEALIKAVYGAADFDFIVEQVNASIQAKSEARRSLGGSGDRKAAASIGVLDIFGFETFEYN  
SFEQLCINYTNEALQQQFNRYVFKLEQQEYEKEGIMWKFI EFPDNQDVLDLIDVKHTGIM  
ALLDEQCMLPKSTDNKFTRYLYARCDRHRPFSASSAQRVYVFSIEHYAGLVEYSTEGLW  
EKNKDQLPAAASDLIKSSDFELLLDINRFIRAEDRGGRGAVATKSVSFQFAKQLRTLRSR  
IDITVPHYIRCLKPNDELCPDYFEPKNIVEQLRCGGVLEAVRVSRAGYPTRYPHDVF SAR  
YYILGNRHNSSPSYSPALNSAQGPEELRKLISKISLDLWQIDHDIYLAQQALERKRRESH  
QFYDEVVTKPHPTAIGNLLTGQKRTSNLAATHKDKNLVVESSAMAPEFQRKQLRKTTLTNV  
HKVPPGGKKAKMKNHRVIRPESREDFLALDFPSRCVAVAGLQLGRTKVFLRREA FDRIEGL  
RSEKFFNAAAMIQKIVRGRQCQIWYEDMRSAAIMIQC FMRIKIAERKLSATRLRKA AVAI  
QCAWRV FVSRMYVFEMQLARRTA AVI IQRQWRLYKNGPVIPT EEEI IYCITRIQAMYRGK  
VGRVRF AFEQQKREREHRMRLEEEERQKRREQKEIARQRQRHQEEERRRQAQKALSPVK  
EQEPVVRERQLTPVVQEQKMNVD SARLEDLFHEITENNWAVVENILDKQPELAEAE DPK  
TGEVALHKISRQSSAWTLLIDMVLVLYPKAL IHRDRMGALPIH HASAHDNLSALEI IYSA  
YKEGINDTDKMGRLPIHVAANYDAVDAIKFLLSMSPEGAYTMVYRPPHNSGGGLPLHIAC  
RNHGSIGVITALLAENFASAKRTDENGDLPLHLLLR CGEVVDPVVVKTLTLCFSGAVSRT  
DMNGDLPLAIAIKHQCTPSVTNAILMHFPDAAAVLDSEGHSPHLHAFSHNADDR TLMGLL  
NHAPNLATQVDKKTGLLP IQVATEKEHSHFIVHNLLKRDLPIDVKEKVRAQLTPHHYSWN  
HLVANTEDLYYQVVTQVLSCTQPQVLA LAHIEGPDGKIALAAATPVCKHEMRVMLR LFN  
TLEVVNQRPAYTNPVSDTQIFYALRYDPPPQANGGAFTILHEEKTDSHPGDDYVEDFDN  
TIMSMASKISTRALTSRTQHS IDEKLRLIRREKQQVI AKLTSKSEIVERELKVRKDYH  
LSRHVYPAVISVHHTVQHAAAYSEAMAEPGYCITMEGADTTAENLMLDMRKNGKQFPQKAV  
KRIGISLLHLHEHGLVHGDFGTHNIGKFGSRWKMLGVGGS IPLRRPTDPSRGFYHPPEAI  
RLEQRRGNNPMGKKSYNASVVSVAHPTYDIWAYGVV FYEGIAGLPLGPYACRGK RPMST  
SEVSKIGLWDDNSLRKALRHIPDDDNGMARELIRFMLHPDPNKRATSMRQVLEHPYFTAT  
QQATSVTGNDDHQQQQRQYQGGQDERFASFDPFPVVEETAPESFHNRQQPMTNHPEVQKTA  
SNSTDYSIENRENGVRGRRSGESMKSSK SFGGFRKLKNTIRNGMSTSGKEQF  
>comp12852\_c0\_seq1; 337 211 1185 LEN=1521; translated  
MIVGAPPALQQQIIPDQDQPGQQHQHQLAPPPAVQTQGDPTAVFVNHQTYNQAVHHQA  
HTMNAQAQAQHQLRQHMQAASAASAVPPQGVPAQAQPNNGPVPAPGPTAGVPGQAQSNP  
TQMAWHQAAASHMEQMAMAYAMSAGMPATQESLHAAAHSQAALQAAAAVQQHQKAVGQ  
TSQPATTQRAQMGA VPAQPQQPTHQQQHFQSVQQH MVAPAPRPTFVNAKQYRRILK RREA  
RAKMEYLSKKRELIRKQRQESDASGGKKPYMHESRHRHAMKRPRGPGGRF LTKDELVAY  
YRDHPDEDPNRQQEKKAKTEETNQ  
>comp12852\_c0\_seq2; 477 101 1075 LEN=1411; translated  
MIVGAPPALQQQIIPDQDQPGQQHQHQLAPPPAVQTQGDPTAVFVNHQTYNQAVHHQA  
HTMNAQAQAQHQLRQHMQAASAASAVPPQGVPAQAQPNNGPVPAPGPTAGVPGQAQSNP  
TQMAWHQAAASHMEQMAMAYAMSAGMPATQESLHAAAHSQAALQAAAAVQQHQKAVGQ  
TSQPATTQRAQMGA VPAQPQQPTHQQQHFQSVQQH MVAPAPRPTFVNAKQYRRILK RREA  
RAKMEYLSKKRELIRKQRQESDASGGKKPYMHESRHRHAMKRPRGPGGRF LTKDELVAY  
YRDHPDEDPNRQQEKKAKTEETNQ  
>comp12853\_c0\_seq1; 561 91 1140 LEN=1817; translated  
MPLTTAISNYMNRNAELVETEEDDEALRRDISDNNSITDDHGEEGEFVGTNTGSSNQ  
SRTVSDEGGQRTPMLEQVPDDEDIDMNRSSSNNDNPTVQEATTASTAPPTTSASRPRMQ  
HGFTLRDLEERELVQRRTSACVLLSSFILLRLWIQALMTGDFGLLLLCLFCTSWVSKFV  
RYTRDREGGELNRMINDWDENAE EEPSTITDARLRMSFQSQLALAIMQSQIQLMEGGYGH  
PDGGERGAGVGD DAKSHWDRFVYNSAGSLSQRGRYGTVAEEKDAAAKTV DDEEPTCSICL  
CEYEKGDNLVSLPCGHVFHEDCITSWTDHNRKRCPLCNADLES LRRDEIV  
>comp12853\_c0\_seq2; 365 296 769 LEN=1446; translated  
MINDWDENAE EEPSTITDARLRMSFQSQLALAIMQSQIQLMEGGYGH PDGGERGAGVGD  
DAKSHWDRFVYNSAGSLSQRGRYGTVAEEKDAAAKTV DDEEPTCSICLCEYEKGDNLVSL  
PCGHVFHEDCITSWTDHNRKRCPLCNADLES LRRDEIV  
>comp12854\_c0\_seq1; 254 176 631 LEN=795; translated  
MAPRQITSTILLASFLGLSSTTQAFTAAPAPGFRAATSLAAANNEPTPSVSRRLLE RAG  
AFAAAAVFAPVTAASALDMEAFANSQIEADIKNCDPKRDPKCI PKLNADEALCKYQSGS

ARGEACKRVKAAGGDISQKPQKALGGAYAM  
>comp12854\_c0\_seq2; 254 176 631 LEN=747; translated  
MAPRQITSTILLASFLGLSSTTQAF TAAPAPGFRAATSLAAANNEPTPSVSRRLERAG  
AFAAAAVFAPVTAASALDMEAFANSQIEADIKNCDPKRDPKCIPKLNADALCKYQSGS  
ARGEACKRVKAAGGDISQKPQKALGGAYAM  
>comp12855\_c0\_seq1; 302 909 1703 LEN=2020; translated  
MKFLEEHLWSATKAKHNYGLFANSNDTNDGELVAVATFSTRRKVVRLGKPHRSHELLRF  
CSKRDTNVVGGISKLKAFIKEKKPDDIVTVIDRDWGSWSLGFENVATMEPIVMVA  
RLFDEGRTSRRHLVGAGIKSADITMENNTVSLNKNDRGLPTDILQELDALDSVGDVLET  
LSNYGFFPIYDTGVERLMKTMSYDKNGNLIGAKRASITDLWQNSQPTYAKEYYSSNVGIA  
ALLKHTSSTPSALSQLVANTLMDR  
>comp12855\_c0\_seq2; 302 909 1703 LEN=1960; translated  
MKFLEEHLWSATKAKHNYGLFANSNDTNDGELVAVATFSTRRKVVRLGKPHRSHELLRF  
CSKRDTNVVGGISKLKAFIKEKKPDDIVTVIDRDWGSWSLGFENVATMEPIVMVA  
RLFDEGRTSRRHLVGAGIKSADITMENNTVSLNKNDRGLPTDILQELDALDSVGDVLET  
LSNYGFFPIYDTGVERLMKTMSYDKNGNLIGAKRASITDLWQNSQPTYAKEYYSSNVGIA  
ALLKHTSSTPSALSQLVANTLMDR  
>comp12856\_c0\_seq1; 288 154 1200 LEN=1267; translated  
MVDGTFRLLVTGMLGFSSSFLFRDNL SHPGTKIPVSKTTKKRAANNGLVYLADFTDID  
SASSTQQHNSYSLREKTATDSNDKSDTKNTLTFRSSFQRQSNPLAKSFRPEALDEFFLDP  
DHLLSAGKSVHSEIVPTTHDLFREWEAACDHAGASPPSADHGVMVTRTAGISIPGLSVE  
WSAVVGTNLVHRGRREGGQPHQRFPELEFVLIKDENKVSSGAKPIVWIFNKLTRARKTNA  
SRDEGKRGSSGTRNTKLFTRLG VYKNDDSDSWVIRCAGTMEMKFRIPSLVGNLVFSSDA  
ESQKADVERKISNLITRQIEKDTEQNVMRWEENFRSWTSSAAEEHRGEE  
>comp12857\_c0\_seq1; 328 210 866 LEN=1055; translated  
MMKISASLIFLLSAESAAAASFMSFTNLLFMLHASDKPPDCNGPLRPKHFCDNICPETV  
SSSRRQLQPYHDYNWTASACEYIHHNPWYSKCLEGSLTSCDDVDANATYVAADAYVDAAT  
YSDETSIIQGGIVSMSKTSFLPYIIAATVATMFLALYIWKKKREEQELLNESLMDDEESFH  
GSVARRIGERRIAEATASAAAEPPIPEVQFVSTTGYAMA  
>comp12858\_c0\_seq1; 1330 1 5188 LEN=5371; translated  
XTAFVEELVRNGVTQFYICPGSRSTPLVAIARTVRSNLGVNALSVDHDERGAAFRALGY  
ARGVGRPAAVITSSGTAVANLYPAIEAGMDAVPLLVLTADRPYESRDTGANQAIDQVKV  
YSQSYVRWFRDILPPHDDVPI SVALADAAGVRLSRRCMGPVHLNIQFREN LAPDAGPIR  
NDGRMGSVTKFDSLRF TDS PGFSRWSSGGDNWLLSRSNMGNVDPRSLLETIRLISESKRG  
IIVVGQIRKPSGENQENDPSRTMQLITNFAQAIGYPVFAAGVQSGNLRFESSAVVPFAEHL  
LRFPLVKKNLKPDLVIQLGAPLISTEIPSI IKQTLHDGYLNHVLVHPHPHPTERHDPEFTM  
SHVFDSDIDSFLIETMKVLDIKGGISLGSQLAPMVKLGRLLREEMPSIVKEAGTKI REED  
SDFHGMTEPEVVM SLSKLF TSGSIPYSSFFLSNSMPVRDSEAFLYPTCGNCKSSVADIAV  
NRGASGIDGIIASAAGFADSTGRPTSLMIGDVAALHDINSLHALQTDPSAKDNQSNKVHP  
LTTIILNNGGGIIFSFLPIAKHGS DVAFEFFGTPTNTFSFEKGAQAFDLPYTNVNSES  
FENAYKMSAKSEESSIIIEVEVATREKNVVHREITTLTKKFLSGIISTDTPKVDELELLP  
LKHTRSGDS DGCLPTGLGKKTIVLLHGWMGDNTEWDDVESNLVESLPEEWSIISVDLPGH  
GKSKLWTSSDYL SIQEALGLTGKNDRTSRGGLGLDEMALAVCRTLSYGVKIDSLAGYS  
LGGRVALAMKRLAMTPSDRNYADTANIVNEETKMILISTYPGEIVGTRSDSPYDLDDENI  
ARLLKDDRLAQKIEFLSRRGSLSPSSPDVAPQIWSEFLNRWYAAPLWGQLR THEAYTDMV  
SRRTSTMSKRGDDIASVLRSCSPRCSNEDWRGVTAKNLTFIAGELDKKYCNI GRQWFDI  
EPSLSYVEVYRKGHALLVEAAKDVAIAIDQFSLQEQDEASPLGRNDTKIWEANFIPSVKK  
TELASKSEQIDPPSICSIGSLDFESFNINLMNERAEKPGISGIGWGLGADSKNEGLKRL  
GFVIQVASKNGLQVGI GEVSPLDNLHTESFEDAGNQLETIANKLSNIQSESIPSF DVERI  
LAVD GALDYIESLCSVLSMDDLFSVRSGLEMAILSLASSKVRSPIHQALVSNAPNSRY  
VSSHISTLPLNGLITRDQPTSTGTKDQKTRYSSWKIKVGHQSLATDIQVFRNTLLDLNGD  
DGRIRADANRGNQSSFFDFASALNSLEIAPSGGQLEYIEEPELEKQIEEGRDWVLENQVA  
ALERSFDEYSIPYALDESIYD LLLVHRNNFSAMKEDLLNVFREGTRGCAAIILKPSLLGL  
EMSLRLARFVRAELGMGAVFTSSFD SGIGLAYASFLATVSDASPKTDTHQYPHGLSTFE  
VTASDIISPSFGSYVSQKGVNLVNASLRAFFGLGLDEIQSVSPTPLARDLPLVEKPISTT  
TIPAEASEPVALSSVDPASEFMADEFEASTSASSTGRDIVLVASLPLPFAEVACARFT  
DLPQQPRWSPWLASVAYMDNREETEWT LKVRGV SFRWRAKSELVSTPYSGIRWESTSGLK  
NKGVVQFIPTRGDRTASGSCSINVQMAFVVPRLSSSLFRGTIVEDFLRNKIMKWSLEMFR  
DVVKGD LALEEGNLELGDALFGAVEGKASAI EATLASSSLPSSSNDQEQ  
>comp12859\_c0\_seq1; 393 173 1667 LEN=2246; translated

MDEVLDDADSELPWDRLEAANPIPFPIQLKRRRDSVLVFCPERDDFVEAKNVLFQDFS  
REYGESTEKALSRVREAYWPIPYKKSIRTIMGHVEICHVVTRSKSERGDDDDSDVSDSSC  
DDSSKSYDDDDDEDVVFQLTPRLVAVKVNMMRRVERYRDRHAENPVQEI CAMQLIGNNAH  
VIGILETLFEGSSITVVMPIYAASGDLFDWLQRAQEQGQGMPEAEARYLFRQVMDGLQYLH  
QKGI CHRDLSPENIMLDNNSIIIDMGMSIRVPYTDNRNDPSAVTDIVNGTEKRLIKPQGA  
CGKLSYMSPEIYRNRNPFDDGAVDIWTAGTILFCMVTGNRSYERPCSND AQFYWMSRNLG  
MLLENWNINLSVECVDLLKGMLTIDPRHRFTMEQVLNHPWFQGEDIANPISFVTDRINAS  
FALLGLQATAMHVTSKRYLWRSWAKNLKTSRNDYGGAF LISTVIHKVSFTIIKFVDVHY  
LALLLMFLSHNGVSRLE

>comp12859\_c0\_seq2; 364 62 1151 LEN=2010; translated  
MGKSN TDILLDAGVVELLSSMDAFFIQQRIRMVEAVTQGCIEQANVYDVFNKETNKRVMI  
IKEESDGC SRCFCAPNHSIFVKFYMVGSDAPEIKPGEKIDWSYEPSGAPFMTFFEREGCDC  
CFKGACPKPCIGCYACTEGCRDIGTLHAGDL DGKPGEKDGKRERVS LIGESI QPKGGGGF  
KPVMMQMDRADPSDGAEGKTELF AASRGPCVTGGCSALCCSSPFGVAVADQSMYENSSKL  
HKQNF GDYATITKIRPKKFSQAMREVF TDSIDFVTFQAQKSVSAQQKANILAHIIHL DYM  
FFERDGMCGNDEKDLTSTFAIGSATDASVHASATASPAASSSTE CFVYFKAYMSFSSSLF  
RE

>comp12859\_c0\_seq3; 383 173 1679 LEN=2258; translated  
MDEVLDDADSELPWDRLEAAGEPANPIPFPIQLKRRRDSVLVFCPERDDFVEAKNVLF  
QDFSREYGESTEKALSRVREAYWPIPYKKSIRTIMGHVEICHVVTRSKSERGDDDDSDVSDSSC  
DDSSKSYDDDDDEDVVFQLTPRLVAVKVNMMRRVERYRDRHAENPVQEI CAMQLIGN  
GNAHVIGILETLFEGSSITVVMPIYAASGDLFDWLQRAQEQGQGMPEAEARYLFRQVMDGL  
QYLHQKGI CHRDLSPENIMLDNNSIIIDMGMSIRVPYTDNRNDPSAVTDIVNGTEKRLIK  
PQGACGKLSYMSPEIYRNRNPFDDGAVDIWTAGTILFCMVTGNRSYERPCSND AQFYWMS  
RNLGMLLENWNINLSVECVDLLKGMLTIDPRHRFTMEQVLNHPWFQGEDIANPISFVTDR  
INASFALLGLQATAMHVTSKRYLWRSWAKNLKTSRNDYGGAF LISTVIHKVSFTIIKFV  
DVHYLALLLMFLSHNGVSRLE

>comp12860\_c0\_seq1; 278 1688 2542 LEN=2635; translated  
MALTPIGPFCPFRSTAVTELEPEVMDANKETTPGFAERFSRIQSOMQLGQIP SADTLRKV  
AGMDLAIDRWDLNFARLQSTPDFQTMEYAKIAEAHLASHGTSTRVISLLVRWQSACLRA  
FADNR PAPVPPPGLDLNAMMEDAKRTALSSSPASNKTPSISAMQAAERIT ALPFGTEAFE  
SDTVRKEYTRLVRDHSSLIEAGATYNEFD SAEKLSFLEQIETIADRWDSFFF RFELMGSL  
NRDYIDQCEAYLSSMNLTEDEYRQLK DTHLLMREDAEKEMLDS

>comp12861\_c0\_seq1; 416 314 1651 LEN=2090; translated  
MALASAAADNDLASVSNFVRSVKQRVVGINSSCDATTVGLPHLVIGNEAGDADSILSAIG  
LSFVRALRNSIDSGSKNGELIVPIVSI PADTLKFLRPETTFLLNCAGVDNLKDDVNDLI  
AIDQIDFLPKKATLTLVDHNF FRGKEAHDWTVTEIVDHHLDEGKHMETCPPSNRNIPFRD  
AQALVASTTTLVAEEFYASSGIGKMPPSLA ILLGLTILLDSVNMSPKAGKGT PRDAAMIN  
KLLSETDWSQISLPDEILKIDDDGQKVETPD TTKLFDLQNAKFS PKFWNGLTAEQAIRM  
DFKSFSIPGETPTSSPSSGLASILLEMNH YFDLHGDSL VETLPRVMLEDQSELFGLMFC  
TFGAQRRRQLALASYDKPTFDCLIDHL TVDSTTSPDLELEVLKREEVKAAKKEKTLFIVR  
MEQHNLKASRKQVAPILKEFFENRR

>comp12862\_c0\_seq1; 1787 1 5152 LEN=5152; translated  
XQSEKSYTEQDHESEFSEEGVPNDEADNSYSDH SKPISAMDGDQSEKSHTEYSRLRSDMGD  
SEHSSF IHDKIIDSQFQDGANKNDVGH SRSRSLRPIGDGDVSYTENTR SSSRSYREEDG  
DSYSEKSRSTTSRDDAEKSFTDDSI SRSHCDDPYESYADGSETR PCDHEENDSSSGHLRS  
VLEIKDDSEGSRSRVEDETRNPSEFPLDN IKRAGSILEDDKVTDLDDARPRSVSDEASG  
SSDSNSFVTDDHSGSRIDEYEKEEPLSGGSVSR SFDDASSTEYSRQTSAMDEAGSPASMS  
HPDCVEDLILKSIDSKLDRQDTS HSKPNSAMDEEKT PVGLISTSLKNETGEEVTLHSRSV  
VVMDKNEGSRSNHPAPTSGSDKSEVSDECDG EKSLDDDNAPAANANIDGNSVNESNH TKS  
IKDWESFAEASMTFGEVFGQPNELFDNSK QCSIKSAESTQSKLTKDDHAQSSSLASHQK  
EALNIVETDSQNSQEEGQSTGGE EQGELSEIKPKKAKKYISEKERIKREKRRRRMRKN  
EAKSPALLDFAANVNETILYLEDQNDGNEEIPDTSANSL LHGF DALLGIFLQLSDELELI  
VTFSGIKSTKDEEAGVHVHALKAILS FADTFDQLFADLKPIILDCEDDPDDYVDELLYR  
LNALIDLICETTHRUGERQEWTERAEITYVT LLELIERDSL DLI CYFDDVDPDEGVSEN  
LHEVWLATGHVEELKALQYDNDPEVFRQI CYEVMVSTDQWCPDTTVLMDICSIDPELLEE  
EPDQEYIDEDELAPVQA AEHVLDKVN GDTL PRLDVFASIMRRILPPRAILDELLLDHFT  
SIRNTLESPLGLSSTNIVSISSEIPEVMDDPDALGVSGVGKTTLAAMVAEHPDVRRYFIDG  
VWLYIGEAELNRYNTQCLRELVAQLDFYDGVPLFAELLHTPGESLSKRKRREEGFMIY  
ARDTIAGLLEDRSILIIILDDVCWEPDMDWFD FAPMPDESIDGEGDNCALVITTRCRSLLP

AADTVEIDMLEESDAISLLIQESGQLSDSLMAESKEARSVVRECAHHPLAVKSVGRWLNL  
KHATAGVDSSIEEIHSEVIKSMKILKAGNNTKTDMMYEILSTSLSPAINGGPTNIKFC  
FAAFITVFCERKHISEFALTEPYPIIPMDMAELLFQTLLETYEVSLKKGSLFYAQKKEA  
AVLIPEALSALGVLKVITFSDEDEEEEIPDDEQKFLQVMHSIHHEYGEYLAHDDISLRF  
TKDAEGQWNRALVDAYLSRVKEWDTGIKDAAQSYALEMISHMIRGSMYSVAADLLAECT  
FIRGRLLCLGRENATKRHIKDCEMLF TALKERQSRDSKLDPRSIMKYACQALGRQLSINT  
EQITEDTRTKQVDVGRCHYEIGFTLAERRCWDGAIHWEKSYELLLASLGRVEVVAGILY  
NIGVVYSEVNDYKRALSSLRCLVIRGSIHGEEHILYAKAIQKIGDIFLNMSDYQEALES  
YNWALDVMYKEPDHHHIEIGEILDNKGVIHYSKGEIDEALKCHQEALRSKLEDLGEDHPE  
LSTTYQHIGNCLSDQGNVDEAILHFDEAIRLKELDPEGGPEGDADILTIEGILNNLEGNQ  
EQGLQCYERSLQILVTKVPRKEKIASLLHLIGCVYLMMSGEQKKAMKLFEEESLQARRKVL  
GFVHLDVASTLFNMAFLHQTRNRDLKALRCLEGKSADF

>comp12862\_c0\_seq2; 2154 1 6307 LEN=6392; translated  
XQSEKSYTEQDHESEFSEEGVPNDEADNSYSDHSKIPISAMGDQSEKSHTEYSRRLRSDMGD  
SEHSSFHDKIIDSQFQDGANKNDVGHRSRSLRPIGDGDVSYTENTRSSRSYREEDG  
DSYSEKSRSTTSRDDAEKSFTDDSI SRSHCDDPYESYADGSETRPCDHEENDSSSGHLRS  
VLEIKDDSEGRSRSVEDETRNPSEFPLDNIKRAGSILEDDKVTDLDDARPRSVSDEASG  
SSDSNSFVTDDHSGSRIDEYEKEEPLSGGSVRSFDDASSTEYSRQTSAMDEAGSPASMS  
HPDCVEDLILKSIDSKLDRQDTSKSPNSAMDEEKTTPVGLISTSLKNETGEEVTLHSRSV  
VMDKNEGRSRSNHPAPTSKSDKSEVSDECDGKSLDDNAPAANANIDGNSVNESNHTKS  
IKDWESFAEASMTFGEVFGQPNELEFNSKQCSIKSAESTTQSKLTKDDHAQSSSLASHQK  
EALNIVETDSQNSQEEGQSTGGEEQGEELSEIKPKKAKKYISEKERIKREKKRRRRMRRN  
EAKSPALLDFAANVNETILYLEDQNDGNEEIPDTSANSLHGF DALLGIFLQLSDELELI  
VTFSGIKSTKDEEAGVHVHALKAILSFADTFDQLFADLKPIILDCEDDPDDYVDELRYR  
LNALIDLICETTHRVRGERQEWTERAEITYVTLELIERDSL DLI CYFDDVDTPDEGVSEN  
LHEVWLATGHVEELKALQYDNDPEVFRQICYEVMVSTDQWCPD TTVLMDICSIDPELLEE  
EPDQYIDEDELAPVPQAAEHVLDKVNQDTPRLDVFASIMRRILPPRAILDELLLDHFT  
SIRNTLESPLGLSSTNIVSISSEIPEVMDDPDALGVSGVGKTTLAAMVAEHPDVRRYFIDG  
VVWLYIGEAELNRYNTQCLRELVAQLDFYDGVPLFAELLHTPGESLSKRKRREEGFMYY  
ARDTIAGLLEDRSILIIDDDVCWEPDMDWFDFAAMPDESIDGEGDNCALVITTRCRSLP  
AADTVEIDMLEESDAISLLIQESGQLSDSLMAESKEARSVVRECAHHPLAVKSVGRWLNL  
KHATAGVDSSIEEIHSEVIKSMKILKAGNNTKTDMMYEILSTSLSPAINGGPTNIKFC  
FAAFITVFCERKHISEFALTEPYPIIPMDMAELLFQTLLETYEVSLKKGSLFYAQKKEA  
AVLIPEALSALGVLKVITFSDEDEEEEIPDDEQKFLQVMHSIHHEYGEYLAHDDISLRF  
TKDAEGQWNRALVDAYLSRVKEWDTGIKDAAQSYALEMISHMIRGSMYSVAADLLAECT  
FIRGRLLCLGRENATKRHIKDCEMLF TALKERQSRDSKLDPRSIMKYACQALGRQLSINT  
EQITEDTRTKQVDVGRCHYEIGFTLAERRCWDGAIHWEKSYELLLASLGRVEVVAGILY  
NIGVVYSEVNDYKRALSSLRCLVIRGSIHGEEHILYAKAIQKIGDIFLNMSDYQEALES  
YNWALDVMYKEPDHHHIEIGEILDNKGVIHYSKGEIDEALKCHQEALRSKLEDLGEDHPE  
LSTTYQHIGNCLSDQGNVDEAILHFDEAIRLKELDPEGGPEGDADILTIEGILNNLEGNQ  
EQGLQCYERSLQILVTKVPRKEKIASLLHLIGCVYLMMSGEQKKAMKLFEEESLQARRKVL  
GFVHLDVASTLFNMAFLHQTRNRDLKALRCLEEALKIRQLR LRPDSEKVAVTHEKIGSLAK  
GVGKAKKAQIAFEEALRIRKLIHGQEHEAYASVLQELGDLMDLGEYESAMGFYIDALDI  
RRSRLGLDDIAVSETLYSMGYTLNNEEPQRAMVCFVESLSIRRYQLGDDSREVGD TLM  
MGFLKAKSKSLDDAL TLLWDALRIRKLGEEHVKVSETLRNIGNVHKEKGEPELAI ECYEE  
CLRIRREELGPNHEKVADTLIAIGNIRCDMDNTDEAIKSYQEALKIR TLLFGEDDES LAT  
ILEYMGTFLEFRINNYDEALD L L TEFIRIRRDNKTEKDADYVNVLSIIGNIHKIDGNEAEA  
RVCWREAYDIFQELGLTDEKPEIAAAIKNLLLAE SQDKQESEQQAKKSLFGLVVEKIQGL  
QT

>comp12863\_c0\_seq1; 777 824 3544 LEN=3713; translated  
MDDSWYGLVSKYPRDKADVSGNLTNKKQNCVEEKQPDVARIEASEVSGELN CNNNLND  
ILRRRRSSSPSSLQVSTASIDVILPEKDYNPSLEILRSFSSSESMRAISKSQSADPDFDR  
GLRSKAASVTVEPVPIPRRNLTEAFEELYIKPSKSWANSVTDSPNLKNLSGLVVGKSN TSG  
SSNIISPTGVAELETAASSASMGTTLSPTSTSNLITPIKSDPTEKDEAIVEKKTQFR L  
HPQLQRDMSDALVRRVCFYSI IHDINKEATTMASNDDSGYNRNPDEIDEKFDPLVMAVHG  
RSRSEFTGSSSIINVALIDEEEWLLEAINSRNPDEARSVNACPP TFLQAIGERDYENPLT  
SLSSGSRTQLWKPSRSWWEAKSGKNPWIEPN SHNKRWRYLWPLIHYHKFLAKCIKKLKR N  
SVCVKNSVSPVAVFLREEVCAVSDHLASVSLFDSEQWMDCLQHFEGWVESSEEA AKSSRE  
FVSKLRLRSLNEPGDVDSTLLRNQIDEQLLRAIVNAREQLAGKDISKEERRSSKQPMRRR  
ERNQTGSVKSSLSVSSVDAEAPCPRHISTHNSKGRQGLQRNWQGYPHHGWWQNGWQH HHHH

PYPYGDDVSVHSTLSCDTSYSHGYLNGYNHGAVPAHPQYYSSMMYAPHHAIHGPHGSPYSSAVPPNPPVYPGETYDPQHLDPTGWMRHHSVDQYHNPDSQAVPGTPDGHNESQNSSLEADQEPTTELPESSENPNESFDTHTPTYPKPRTNHVPMSPYWGHLQDHATLMMGLSSPPGSPVPTPHRNVDSFSQEDMSTVEMKNNMNAQPLLLRQQYYGYGYSREGYAPPSPATQFMMSPQASFAYNYGYGFSRSTSTQTKLLNTSISEEEIDALHSMPEGGNAIPEATNGKDDQLEKDHVAKG

>comp12863\_c0\_seq2; 671 824 3633 LEN=3802; translated  
MDDSWYGLVSKYPRDKADVSGNLTNKKQNCVVEEKKEQPDVARI EASEVSGELN CNNNLNDILRRRRRSSSSPSSLQVSTASIDVILPEKDYNPSLEILRSFSSESMRAISKSQSADPDFDRGLRKAASVTVEPVP IPRRNLTEAFEELYIKPSKSWANSVTDSPNLKNSGLV GKSNTSGSSNI ISPTGVAELETAASSASMGTTLSSTSTSNLITPIKSDPTEKDEAIVEK KTFQFRLHPQLQRDMSDALVRRVCFYSIIHDINKEATTMASNDDSGYNRNPDE IDEKFDPLVMAVHGRSRSEFTGSSSI INVALIDE EEWLLEAINSRNPDEARSVNAC PPTFLQAIGERDYENPLTSLSSGVELNFGSHHGAGGKPKAGRTLGSNQIVTIRDGGELICVVYSXVNNKFI SFLLDSPPTFFF SIDIYGHXIH YHKFLAKCIK KLRNSVCVKNSVSPVAVFLREEVCAVSDHLASVSLFDSEQWMDCLQHFEGWVESSEEA AKSSREFVSKLRLRSLNEPGD VDDSTLLRNQIDEQLLRAIVNAREQLAGKDISKEERRSSKQPMRRRERNQTGSVKSSLSVSSVDAEAPCPRHISTHNSKGRQGLQRNWQGYPHHGWWQNGWQH HHHHPYPYGDDVSVHSTLSCDTSYSHGYLNGYNHGAVPAHPQYYSSMMYAPHHAIHGPHGSPYSSAVPPNPPVYPGETYDPQHLDPTGWMRHHSVDQYHNPDSQAVPGTPDGHNESQNSSLEADQEPTTELPESSENPNESFDTHTPTYPKPRTNHVPMSPYWGHLQDHATLMMGLSSPPGSPVPTPHRNVDSFSQEDMSTVEMKNNMNAQPLLLRQQYYGYGYSREGYAPPSPATQFMMSPQASFAYNYGYGFSRSTSTQTKLLNTSISEEEIDALHSMPEGGNAIPEATNGKDDQLEKDHVAKG

>comp12863\_c0\_seq3; 667 1 3009 LEN=3178; translated  
XGKVLWVVLGTSSALPYIGWFLLATISQRKQRGDTNGVTSIMITTAATTHATMF DNSPHNMRIDIEEEKKDQSLDVRGNDNF IHVSGNLTNKKQNCVVEEKKEQPDVARI EASEVSGELN CNNNLNDILRRRRRSSSSPSSLQVSTASIDVILPEKDYNPSLEILRSFSSESMRAISKSQSADPDFDRGLRKAASVTVEPVP IPRRNLTEAFEELYIKPSKSWANSVTDSPNLKNSGLV GKSNTSGSSNI ISPTGVAELETAASSASMGTTLSSTSTSNLITPIKSDPTEKDEAIVEK KTFQFRLHPQLQRDMSDALVRRVCFYSIIHDINKEATTMASNDDSGYNRNPDE IDEKFDPLVMAVHGRSRSEFTGSSSI INVALIDE EEWLLEAINSRNPDEARSVNAC PPTFLQAIGERDYENPLTSLSSGVELNFGSHHGAGGKPKAGRTLGSNQIVTIRDGGELICVVYSXVNNKFI SFLLDSPPTFFF SIDIYGHXIH YHKFLAKCIK KLRNSVCVKNSVSPVAVFLREEVCAVSDHLASVSLFDSEQWMDCLQHFEGWVESSEEA AKSSREFVSKLRLRSLNEPGD VDDSTLLRNQIDEQLLRAIVNAREQLAGKDISKEERRSSKQPMRRRERNQTGSVKSSLSVSSVDAEAPCPRHISTHNSKGRQGLQRNWQGYPHHGWWQNGWQH HHHHPYPYGDDVSVHSTLSCDTSYSHGYLNGYNHGAVPAHPQYYSSMMYAPHHAIHGPHGSPYSSAVPPNPPVYPGETYDPQHLDPTGWMRHHSVDQYHNPDSQAVPGTPDGHNESQNSSLEADQEPTTELPESSENPNESFDTHTPTYPKPRTNHVPMSPYWGHLQDHATLMMGLSSPPGSPVPTPHRNVDSFSQEDMSTVEMKNNMNAQPLLLRQQYYGYGYSREGYAPPSPATQFMMSPQASFAYNYGYGFSRSTSTQTKLLNTSISEEEIDALHSMPEGGNAIPEATNGKDDQLEKDHVAKG

>comp12863\_c0\_seq4; 773 1 2920 LEN=3089; translated  
XGKVLWVVLGTSSALPYIGWFLLATISQRKQRGDTNGVTSIMITTAATTHATMF DNSPHNMRIDIEEEKKDQSLDVRGNDNF IHVSGNLTNKKQNCVVEEKKEQPDVARI EASEVSGELN CNNNLNDILRRRRRSSSSPSSLQVSTASIDVILPEKDYNPSLEILRSFSSESMRAISKSQSADPDFDRGLRKAASVTVEPVP IPRRNLTEAFEELYIKPSKSWANSVTDSPNLKNSGLV GKSNTSGSSNI ISPTGVAELETAASSASMGTTLSSTSTSNLITPIKSDPTEKDEAIVEK KTFQFRLHPQLQRDMSDALVRRVCFYSIIHDINKEATTMASNDDSGYNRNPDE IDEKFDPLVMAVHGRSRSEFTGSSSI INVALIDE EEWLLEAINSRNPDEARSVNAC PPTFLQAIGERDYENPLTSLSSGRTQLWKPSRSWWEAKSGKNPWIEPN SHNKRWRYLWPLIHYHKFLAKCIK KLRNSVCVKNSVSPVAVFLREEVCAVSDHLASVSLFDSEQWMDCLQHFEGWVESSEEA AKSSREFVSKLRLRSLNEPGD VDDSTLLRNQIDEQLLRAIVNAREQLAGKDISKEERRSSKQPMRRRERNQTGSVKSSLSVSSVDAEAPCPRHISTHNSKGRQGLQRNWQGYPHHGWWQNGWQH HHHHPYPYGDDVSVHSTLSCDTSYSHGYLNGYNHGAVPAHPQYYSSMMYAPHHAIHGPHGSPYSSAVPPNPPVYPGETYDPQHLDPTGWMRHHSVDQYHNPDSQAVPGTPDGHNESQNSSLEADQEPTTELPESSENPNESFDTHTPTYPKPRTNHVPMSPYWGHLQDHATLMMGLSSPPGSPVPTPHRNVDSFSQEDMSTVEMKNNMNAQPLLLRQQYYGYGYSREGYAPPSPATQFMMSPQASFAYNYGYGFSRSTSTQTKLLNTSISEEEIDALHSMPEGGNAIPEATNGKDDQLEKDHVAKG

>comp12864\_c0\_seq1; 545 113 1582 LEN=2026; translated

MPVSLGDDSDDDSDMDFLLQPPVFARPKKPEKKRPEPRPILSLEQMLSERRNKANARTKK  
EFAGGRKRKQNHQAAREGKAKRNSGKDDKAVRPRAQRRTDPEWIEKQARMTVEEELKL  
DMADRIDDLDGIGWYRESKKRKADVFPAILSGKNSSEARILLKNKNTSSSKTRNKIRIQ  
YIGATYRYTSHHQEVASSRWIPLSKSTDLENEKRLQGFKAISPDKKNLLDLKIEELAI  
RKIWEKVRTRTEERRAREKEERAARATAEAFPPVPVTQSDSNSQNSGADAHAAAGSDIDS  
DCSDCDNASSCDESLPGSSETRQESRKPPLRVGDEVEFYDVMGTHGDPSSLRRATVVG  
QSGDSRFPLLLSNTLAPLPANHMVRRLPDGRWRPVSGFALRSEGGQTLAATNNFREIRAQ  
VIKAANDFWKNDGKGGNDIGAKEEKAGNFDRKKTQKKRTKDGKVKNGDRVSKNRRASL  
RIRRKGDTG

>comp12865\_c0\_seq1; 560 474 2775 LEN=2787; translated  
MPTLPNEKSSLLPSTTGISDEDDNNEGEYRISGYEGDYEDSSFPTLVKRRDSFSQMKMVT  
HNDPLLLSTHKYESAEDFSKFLGSTSLLKNGIEQGLAAKDKKNSFHRSRSSSFTMTLEVS  
PEAGNGDGSKKDSSSDIAQPVIEYINSSQSKTKFKTTPNQHTRKEPPGMHESERQLSHN  
SEVFRQVSIYVQQQIKKPTNVYLKIKKNFFEDAKSLAEGTIPQSVVLAIIIGIVCGIAC  
YLYYSVLFVFGLEYLWHTLPETYVVPNWDP SLHHLWIPLVCFMCTLVGLTVVYMGEPEGDL  
PYTISR VHCEAYIPMDHVSPMVFASMF SILGGGSLGPEAPLVAICGALGGFVSRRIFRQS  
STNVVRKHFTFMGMAGALAAFFGIPLGGSLFALEVCSRFGVEYFEHLVESIFCGEICLWVF  
RSLAGLP IEP IWNLTSIANPRMMECEPHLIVLGALIGLYGALLAYIFASFHWKNMEFFSK  
LDLLDNKNAVSRAWLGMVFI VMVSVFI PHTAFWGEEEEIQIVATMGPSKDL PNIWPPTGLI  
GFEMDGP FKVFLVGCFKLISISFTVAGGLRGGYIFPLMCSGSAFGRLLYFVLPETIPMQV  
AVLCTAAAMNVAITRTSLATTLILAMLPGEPMAVPPILMASLCSLFATSYWYVAPRQGAQ  
PSPESRSCSPLFCFGLLQRDSCGLVYGSDFSVSQNQIYFVFYFSSLDALCHLAAIQTNHK  
PQPFIKSQITRSDIDHSLFHHEHNIDIDSVFTDNEDEMSLYSMQ

>comp12865\_c0\_seq2; 206 474 880 LEN=880; translated  
MPTLPNEKSSLLPSTTGISDEDDNNEGEYRISGYEGDYEDSSFPTLVKRRDSFSQMKMVT  
HNDPLLLSTHKYESAEDFSKFLGSTSLLKNGIEQGLAAKDKKNSFHRSRSSSFTMTLEVS  
PEAGNGDGSNKKDSSS

>comp12865\_c0\_seq3; 539 474 2561 LEN=2573; translated  
MPTLPNEKSSLLPSTTGISDEDDNNEGEYRISGYEGDYEDSSFPTLVKRRDSFSQMKMVT  
HNDPLLLSTHKYESAEDFSKFLGSTSLLKNGIEQGLAAKDKKNSFHRSRSSSFTMTLEVS  
PEAGNGDGSKKDSSSDIAQPVIEYINSSQSKTKFKTTPNQHTRKEPPGMHESERQLSHN  
SEVFRQVSIYVQQQIKKPTNVYLKIKKNFFEDAKSLAEGTIPQSVVLAIIIGIVCGIAC  
YLYYSVLFVFGLEYLWHTLPETYVVPNWDP SLHHLWIPLVCFMCTLVGLTVVYMGEPEGDL  
PYTISR VHCEAYIPMDHVSPMVFASMF SILGGGSLGPEAPLVAICGALGGFVSRRIFRQS  
STNVVRKHFTFMGMAGALAAFFGIPLGGSLFALEVCSRFGVEYFEHLVESIFCGEICLWVF  
RSLAGLP IEP IWNLTSIANPRMMECEPHLIVLGALIGLYGALLAYIFASFHWKNMEFFSK  
LDLLDNKNAVSRAWLGMVFI VMVSVFI PHTAFWGEEEEIQIVATMGPSKDL PNIWPPTGLI  
GFEMDGP FKVFLVGCFKLISISFTVAGGLRGGYIFPLMCSGSAFGRLLYFVLPETIPMQV  
AVLCTAAAMNVAITRTSLATTLILAMLPGEPMAVPPILMASLCSLFATSYMPFIKSQITR  
SDIDHSLFHHEHNIDIDSVFTDNEDEMSLYSMQ

>comp12865\_c0\_seq4; 345 729 2311 LEN=3185; translated  
MPTLPNEKSSLLPSTTGISDEDDNNEGEYRISGYEGDYEDSSFPTLVKRRDSFSQMKMVT  
HNDPLLLSTHKYESAEDFSKFLGSTSLLKNGIEQGLAAKDKKNSFHRSRSSSFTMTLEVS  
PEAGNGDGSKKDSSSDIAQPVIEYINSSQSKTKFKTTPNQHTRKEPPGMHESERQLSHN  
SEVFRQVSIYVQQQIKKPTNVYLKIKKNFFEDAKSLAEGTIPQSVVLAIIIGIVCGIAC  
YLYYSVLFVFGLEYLWHTLPETYVVPNWDP SLHHLWIPLVCFMCTLVGLTVVYMGEPEGDL  
PYTISR VHCEAYIPMDHVSPMVFASMF SILGGGSLGPEAPLVAICGALGGFVSRRIFRQS  
STNVVRKHFTFMGMAGALAAFFGIPLGGSLFALEVCSRFGVEYFEHLVESIFCGEICLWVF  
RSLAGLP IEP IWNLTSIANPRMMECEPHLIVLGALIGLYGALLAYIFASFHWKNMEFFSK  
LDLLDNKNAVSRAWLGMVFI VMVSVFI PHTAFWGEEEXNTDRGNYGAV

>comp12865\_c0\_seq5; 560 955 3256 LEN=3453; translated  
MPTLPNEKSSLLPSTTGISDEDDNNEGEYRISGYEGDYEDSSFPTLVKRRDSFSQMKMVT  
HNDPLLLSTHKYESAEDFSKFLGSTSLLKNGIEQGLAAKDKKNSFHRSRSSSFTMTLEVS  
PEAGNGDGSKKDSSSDIAQPVIEYINSSQSKTKFKTTPNQHTRKEPPGMHESERQLSHN  
SEVFRQVSIYVQQQIKKPTNVYLKIKKNFFEDAKSLAEGTIPQSVVLAIIIGIVCGIAC  
YLYYSVLFVFGLEYLWHTLPETYVVPNWDP SLHHLWIPLVCFMCTLVGLTVVYMGEPEGDL  
PYTISR VHCEAYIPMDHVSPMVFASMF SILGGGSLGPEAPLVAICGALGGFVSRRIFRQS  
STNVVRKHFTFMGMAGALAAFFGIPLGGSLFALEVCSRFGVEYFEHLVESIFCGEICLWVF  
RSLAGLP IEP IWNLTSIANPRMMECEPHLIVLGALIGLYGALLAYIFASFHWKNMEFFSK  
LDLLDNKNAVSRAWLGMVFI VMVSVFI PHTAFWGEEEEIQIVATMGPSKDL PNIWPPTGLI

GFEMDGPFKVFLVGCFLKLSISFTVAGGLRGGYIFPLMCSGSAFGRLLYFVLPETIPMQV  
AVLCTAAAMNVAITRTSLATTLILAMLPGEPMVAPPILMASLCSLFATSYWYVAPRQGAQ  
PSPESRSCSPLFCFGLLQRDSCGLVYGSDFSVSQNQIYFVFYFSSLDALCHLAAIQTNHK  
PQPFIKSQITRSDIDHSLFHHEHNIDIDSVFTDTDNEDEMSLYSMQ  
>comp12865\_c0\_seq6; 345 955 2537 LEN=3411; translated  
MPTLPNEKSSLLPSTTGISDEDDNNEGEYRISGYEGDYEDSSFPTLVKRRDSFSQMKMVT  
HNDPLLLSTHKYESAEDFSKFLGSTSLLKNGIEQGLAAKDKKNSFHRSRSSSFTMTLEVS  
PEAGNGDGSKKDSSSDIAQPVIEYINSSQSKTKFKTTPNQHTRKEPPGMHESERQLSHN  
SEVFRQVSIVYQQQIKKPTNVYLKIKKNFFEDAKSLAEGTIPQSVVLAIIIGIVCGIAC  
YLYYSVLFVFGLEYLWHTLPETYVVPNWDP SLHHLWIPLVCFMCTLVGLTVVYMGEPEGDL  
PYTISR VHCEAYIPMDHVSPMVFASMF SILGGGSLGPEAPLVAICGALGGFVSRRIFRQS  
STNVVRKHTFMGMAGALAAFFGIPLGGSLFALEVCSRFGVEYFEHLVESIFCGEICLWVF  
RSLAGLP IEP IWNLTSIANPRMMECEPHLIVLGALIGLYGALLAYIFASFHWKNMEFFSK  
LDLLDNKNAVSRAWLGMVFI VMVSVFI PHTAFWGEEEXTDRGNYGAV  
>comp12865\_c0\_seq7; 345 729 2311 LEN=3399; translated  
MPTLPNEKSSLLPSTTGISDEDDNNEGEYRISGYEGDYEDSSFPTLVKRRDSFSQMKMVT  
HNDPLLLSTHKYESAEDFSKFLGSTSLLKNGIEQGLAAKDKKNSFHRSRSSSFTMTLEVS  
PEAGNGDGSKKDSSSDIAQPVIEYINSSQSKTKFKTTPNQHTRKEPPGMHESERQLSHN  
SEVFRQVSIVYQQQIKKPTNVYLKIKKNFFEDAKSLAEGTIPQSVVLAIIIGIVCGIAC  
YLYYSVLFVFGLEYLWHTLPETYVVPNWDP SLHHLWIPLVCFMCTLVGLTVVYMGEPEGDL  
PYTISR VHCEAYIPMDHVSPMVFASMF SILGGGSLGPEAPLVAICGALGGFVSRRIFRQS  
STNVVRKHTFMGMAGALAAFFGIPLGGSLFALEVCSRFGVEYFEHLVESIFCGEICLWVF  
RSLAGLP IEP IWNLTSIANPRMMECEPHLIVLGALIGLYGALLAYIFASFHWKNMEFFSK  
LDLLDNKNAVSRAWLGMVFI VMVSVFI PHTAFWGEEEXTDRGNYGAV  
>comp12865\_c0\_seq8; 345 955 2537 LEN=3625; translated  
MPTLPNEKSSLLPSTTGISDEDDNNEGEYRISGYEGDYEDSSFPTLVKRRDSFSQMKMVT  
HNDPLLLSTHKYESAEDFSKFLGSTSLLKNGIEQGLAAKDKKNSFHRSRSSSFTMTLEVS  
PEAGNGDGSKKDSSSDIAQPVIEYINSSQSKTKFKTTPNQHTRKEPPGMHESERQLSHN  
SEVFRQVSIVYQQQIKKPTNVYLKIKKNFFEDAKSLAEGTIPQSVVLAIIIGIVCGIAC  
YLYYSVLFVFGLEYLWHTLPETYVVPNWDP SLHHLWIPLVCFMCTLVGLTVVYMGEPEGDL  
PYTISR VHCEAYIPMDHVSPMVFASMF SILGGGSLGPEAPLVAICGALGGFVSRRIFRQS  
STNVVRKHTFMGMAGALAAFFGIPLGGSLFALEVCSRFGVEYFEHLVESIFCGEICLWVF  
RSLAGLP IEP IWNLTSIANPRMMECEPHLIVLGALIGLYGALLAYIFASFHWKNMEFFSK  
LDLLDNKNAVSRAWLGMVFI VMVSVFI PHTAFWGEEEXTDRGNYGAV  
>comp12865\_c0\_seq9; 560 775 3076 LEN=3273; translated  
MPTLPNEKSSLLPSTTGISDEDDNNEGEYRISGYEGDYEDSSFPTLVKRRDSFSQMKMVT  
HNDPLLLSTHKYESAEDFSKFLGSTSLLKNGIEQGLAAKDKKNSFHRSRSSSFTMTLEVS  
PEAGNGDGSKKDSSSDIAQPVIEYINSSQSKTKFKTTPNQHTRKEPPGMHESERQLSHN  
SEVFRQVSIVYQQQIKKPTNVYLKIKKNFFEDAKSLAEGTIPQSVVLAIIIGIVCGIAC  
YLYYSVLFVFGLEYLWHTLPETYVVPNWDP SLHHLWIPLVCFMCTLVGLTVVYMGEPEGDL  
PYTISR VHCEAYIPMDHVSPMVFASMF SILGGGSLGPEAPLVAICGALGGFVSRRIFRQS  
STNVVRKHTFMGMAGALAAFFGIPLGGSLFALEVCSRFGVEYFEHLVESIFCGEICLWVF  
RSLAGLP IEP IWNLTSIANPRMMECEPHLIVLGALIGLYGALLAYIFASFHWKNMEFFSK  
LDLLDNKNAVSRAWLGMVFI VMVSVFI PHTAFWGEEEQIVATMGPSKDLNPIWPP TGLI  
GFEMDGPFKVFLVGCFLKLSISFTVAGGLRGGYIFPLMCSGSAFGRLLYFVLPETIPMQV  
AVLCTAAAMNVAITRTSLATTLILAMLPGEPMVAPPILMASLCSLFATSYWYVAPRQGAQ  
PSPESRSCSPLFCFGLLQRDSCGLVYGSDFSVSQNQIYFVFYFSSLDALCHLAAIQTNHK  
PQPFIKSQITRSDIDHSLFHHEHNIDIDSVFTDTDNEDEMSLYSMQ  
>comp12865\_c0\_seq10; 345 775 2357 LEN=3231; translated  
MPTLPNEKSSLLPSTTGISDEDDNNEGEYRISGYEGDYEDSSFPTLVKRRDSFSQMKMVT  
HNDPLLLSTHKYESAEDFSKFLGSTSLLKNGIEQGLAAKDKKNSFHRSRSSSFTMTLEVS  
PEAGNGDGSKKDSSSDIAQPVIEYINSSQSKTKFKTTPNQHTRKEPPGMHESERQLSHN  
SEVFRQVSIVYQQQIKKPTNVYLKIKKNFFEDAKSLAEGTIPQSVVLAIIIGIVCGIAC  
YLYYSVLFVFGLEYLWHTLPETYVVPNWDP SLHHLWIPLVCFMCTLVGLTVVYMGEPEGDL  
PYTISR VHCEAYIPMDHVSPMVFASMF SILGGGSLGPEAPLVAICGALGGFVSRRIFRQS  
STNVVRKHTFMGMAGALAAFFGIPLGGSLFALEVCSRFGVEYFEHLVESIFCGEICLWVF  
RSLAGLP IEP IWNLTSIANPRMMECEPHLIVLGALIGLYGALLAYIFASFHWKNMEFFSK  
LDLLDNKNAVSRAWLGMVFI VMVSVFI PHTAFWGEEEXTDRGNYGAV  
>comp12865\_c0\_seq11; 345 474 2056 LEN=2745; translated  
MPTLPNEKSSLLPSTTGISDEDDNNEGEYRISGYEGDYEDSSFPTLVKRRDSFSQMKMVT

HNDPLLLSTHKYESAEDFSKFLGSTSLLKNGIEQGLAAKDKKNSFHRSRSSSFTMTLEVS  
PEAGNGDGSKKDSSSDIAQPVIEYNSQSKTKFKTTPNQHTRKEPPGMHESERQLSHN  
SEVFRQVSIVYQQQIKKPTNVYLKIKKNFFEDAKSLAEGTIPQSVVLAIIIGIVCGIAC  
YLYYSVLFVFGLEYLWHTLPETYVVPNWDP SLHHLWIPLVCFMCTLVGLTVVYMGEPEGDL  
PYTISR VHCEAYIPMDHVSPMVFASMF SILGGGSLGPEAPLVAICGALGGFVSRRIFRQS  
STNVVRKHTFMGMAGALAAFFGIPLGGSLFALEVCSRFGVEYFEHLVESIFCGEICLWVF  
RSLAGLP IEP IWNLTSIANPRMMECEPHLIVLGALIGLYGALLAYIFASFHWKNMEFFSK  
LDLLDNKNAVSRAWLGMVFIVMVSFIPHTAFWGEEEXNTDRGNYGAV

>comp12865\_c0\_seq12; 345 474 2056 LEN=2959; translated  
MPTLPNEKSSLLPSTTGISDEDDNNEGEYRISGYEGDYEDSSFPTLVKRRDSFSQMKMVT  
HNDPLLLSTHKYESAEDFSKFLGSTSLLKNGIEQGLAAKDKKNSFHRSRSSSFTMTLEVS  
PEAGNGDGSKKDSSSDIAQPVIEYNSQSKTKFKTTPNQHTRKEPPGMHESERQLSHN  
SEVFRQVSIVYQQQIKKPTNVYLKIKKNFFEDAKSLAEGTIPQSVVLAIIIGIVCGIAC  
YLYYSVLFVFGLEYLWHTLPETYVVPNWDP SLHHLWIPLVCFMCTLVGLTVVYMGEPEGDL  
PYTISR VHCEAYIPMDHVSPMVFASMF SILGGGSLGPEAPLVAICGALGGFVSRRIFRQS  
STNVVRKHTFMGMAGALAAFFGIPLGGSLFALEVCSRFGVEYFEHLVESIFCGEICLWVF  
RSLAGLP IEP IWNLTSIANPRMMECEPHLIVLGALIGLYGALLAYIFASFHWKNMEFFSK  
LDLLDNKNAVSRAWLGMVFIVMVSFIPHTAFWGEEEXNTDRGNYGAV

>comp12865\_c0\_seq13; 539 775 2862 LEN=3059; translated  
MPTLPNEKSSLLPSTTGISDEDDNNEGEYRISGYEGDYEDSSFPTLVKRRDSFSQMKMVT  
HNDPLLLSTHKYESAEDFSKFLGSTSLLKNGIEQGLAAKDKKNSFHRSRSSSFTMTLEVS  
PEAGNGDGSKKDSSSDIAQPVIEYNSQSKTKFKTTPNQHTRKEPPGMHESERQLSHN  
SEVFRQVSIVYQQQIKKPTNVYLKIKKNFFEDAKSLAEGTIPQSVVLAIIIGIVCGIAC  
YLYYSVLFVFGLEYLWHTLPETYVVPNWDP SLHHLWIPLVCFMCTLVGLTVVYMGEPEGDL  
PYTISR VHCEAYIPMDHVSPMVFASMF SILGGGSLGPEAPLVAICGALGGFVSRRIFRQS  
STNVVRKHTFMGMAGALAAFFGIPLGGSLFALEVCSRFGVEYFEHLVESIFCGEICLWVF  
RSLAGLP IEP IWNLTSIANPRMMECEPHLIVLGALIGLYGALLAYIFASFHWKNMEFFSK  
LDLLDNKNAVSRAWLGMVFIVMVSFIPHTAFWGEEEIQIVATMGPSKDL PNIWPP TGLI  
GFEMDGPFKVFLVGCFLK LISISFTVAGGLRGGYIFPLMCSGSAFGRLLYFVLPETIPMQV  
AVLCTAAAMNVAITRTSLATTLILAMLPGEPMAVPPILMASLCSLFATSYMPFIKSQITR  
SDIDHSLFH EHNIDIDSVF TDTDNEDEMSLYSMQ

>comp12865\_c0\_seq14; 539 955 3042 LEN=3239; translated  
MPTLPNEKSSLLPSTTGISDEDDNNEGEYRISGYEGDYEDSSFPTLVKRRDSFSQMKMVT  
HNDPLLLSTHKYESAEDFSKFLGSTSLLKNGIEQGLAAKDKKNSFHRSRSSSFTMTLEVS  
PEAGNGDGSKKDSSSDIAQPVIEYNSQSKTKFKTTPNQHTRKEPPGMHESERQLSHN  
SEVFRQVSIVYQQQIKKPTNVYLKIKKNFFEDAKSLAEGTIPQSVVLAIIIGIVCGIAC  
YLYYSVLFVFGLEYLWHTLPETYVVPNWDP SLHHLWIPLVCFMCTLVGLTVVYMGEPEGDL  
PYTISR VHCEAYIPMDHVSPMVFASMF SILGGGSLGPEAPLVAICGALGGFVSRRIFRQS  
STNVVRKHTFMGMAGALAAFFGIPLGGSLFALEVCSRFGVEYFEHLVESIFCGEICLWVF  
RSLAGLP IEP IWNLTSIANPRMMECEPHLIVLGALIGLYGALLAYIFASFHWKNMEFFSK  
LDLLDNKNAVSRAWLGMVFIVMVSFIPHTAFWGEEEIQIVATMGPSKDL PNIWPP TGLI  
GFEMDGPFKVFLVGCFLK LISISFTVAGGLRGGYIFPLMCSGSAFGRLLYFVLPETIPMQV  
AVLCTAAAMNVAITRTSLATTLILAMLPGEPMAVPPILMASLCSLFATSYMPFIKSQITR  
SDIDHSLFH EHNIDIDSVF TDTDNEDEMSLYSMQ

>comp12865\_c0\_seq15; 539 729 2816 LEN=3013; translated  
MPTLPNEKSSLLPSTTGISDEDDNNEGEYRISGYEGDYEDSSFPTLVKRRDSFSQMKMVT  
HNDPLLLSTHKYESAEDFSKFLGSTSLLKNGIEQGLAAKDKKNSFHRSRSSSFTMTLEVS  
PEAGNGDGSKKDSSSDIAQPVIEYNSQSKTKFKTTPNQHTRKEPPGMHESERQLSHN  
SEVFRQVSIVYQQQIKKPTNVYLKIKKNFFEDAKSLAEGTIPQSVVLAIIIGIVCGIAC  
YLYYSVLFVFGLEYLWHTLPETYVVPNWDP SLHHLWIPLVCFMCTLVGLTVVYMGEPEGDL  
PYTISR VHCEAYIPMDHVSPMVFASMF SILGGGSLGPEAPLVAICGALGGFVSRRIFRQS  
STNVVRKHTFMGMAGALAAFFGIPLGGSLFALEVCSRFGVEYFEHLVESIFCGEICLWVF  
RSLAGLP IEP IWNLTSIANPRMMECEPHLIVLGALIGLYGALLAYIFASFHWKNMEFFSK  
LDLLDNKNAVSRAWLGMVFIVMVSFIPHTAFWGEEEIQIVATMGPSKDL PNIWPP TGLI  
GFEMDGPFKVFLVGCFLK LISISFTVAGGLRGGYIFPLMCSGSAFGRLLYFVLPETIPMQV  
AVLCTAAAMNVAITRTSLATTLILAMLPGEPMAVPPILMASLCSLFATSYMPFIKSQITR  
SDIDHSLFH EHNIDIDSVF TDTDNEDEMSLYSMQ

>comp12865\_c0\_seq16; 560 729 3030 LEN=3227; translated  
MPTLPNEKSSLLPSTTGISDEDDNNEGEYRISGYEGDYEDSSFPTLVKRRDSFSQMKMVT  
HNDPLLLSTHKYESAEDFSKFLGSTSLLKNGIEQGLAAKDKKNSFHRSRSSSFTMTLEVS



PEAGNGDGSHKKDSSSDIAQPVIEYYNSSQSKTKFKTTPNQHTRKEPPGMHESERQLSHN  
SEVFRQVSIYVQQQIKKPTNVYLKIKKNFFEDAKSLAEGTIPQSVVLAIIIGIVCGIAC  
YLYYSVLFVFGLEYLWHTLPETYVVPNWDPSSLHVLWIPVCFMCTLVGLTVVYMGEPEGDL  
PYTISR VHCEAYIPMDHVSPMVFASMFILGGGSLGPEAPLVAICGALGGFVSRRIFRQS  
STNVVRKHTFMGMAGALAAFFGIPLGGSLFALEVCSRFGVEYFEHLVESIFCGEICLWVF  
RSLAGLPIEPIWNLTSIANPRMMECEPHLIVLGALIGLYGALLAYIFASFHWKNMEFFSK  
LDLLDNKNAVSRAWLGMVFIVMVSFVIFHTAFWGEEEEIQIVATMGPSKDLNIPWPTGLI  
GFEMDGPFKVFLVGCFLKLSISFTVAGGLRGGYIFPLMCSGSAFGRLLYFVLPETIPMQV  
AVLCTAAAMNVAITRTSLATTLILAMLPGEPMVAPPILMASLCSLFATSYWYVAPRQGAQ  
PSPESRSCSPLFCFGLLQRDSCGLVYGSDFSVSQNQIYFVFYFSSLDALCHLAAIQTNHK  
PQPFIKSQITRSDIDHSLFHEEHNIDIDSVFTDTDNEDEMSLYSMQ  
>comp12865\_c0\_seq17; 345 775 2357 LEN=3260; translated  
MPTLPNEKSSLLPSTTGISDEDDNNEGEYRISGYEGDYEDSSFP TLVKRRDSFSQMKMVT  
HNDPLLLSTHKYESAEDFSKFLGSTSLLKNGIEQGLAAKDKKNSFHRSRSSSFTMTLEVS  
PEAGNGDGSHKKDSSSDIAQPVIEYYNSSQSKTKFKTTPNQHTRKEPPGMHESERQLSHN  
SEVFRQVSIYVQQQIKKPTNVYLKIKKNFFEDAKSLAEGTIPQSVVLAIIIGIVCGIAC  
YLYYSVLFVFGLEYLWHTLPETYVVPNWDPSSLHVLWIPVCFMCTLVGLTVVYMGEPEGDL  
PYTISR VHCEAYIPMDHVSPMVFASMFILGGGSLGPEAPLVAICGALGGFVSRRIFRQS  
STNVVRKHTFMGMAGALAAFFGIPLGGSLFALEVCSRFGVEYFEHLVESIFCGEICLWVF  
RSLAGLPIEPIWNLTSIANPRMMECEPHLIVLGALIGLYGALLAYIFASFHWKNMEFFSK  
LDLLDNKNAVSRAWLGMVFIVMVSFVIFHTAFWGEEEXTDRGNYGAV  
>comp12866\_c0\_seq1; 601 1 1918 LEN=1948; translated  
QVFAGMEGDWASTTSSAKKSRFLSLSVPSDSSTRSLPCCVLHQKNGSSGTADAFD TSA  
DDNTDAPKVL SYESFGKCLDLHQAWLRNVIQNVNASIATNYDNLSSPLGPSDDIVIAIYIT  
KNLPDALLSVLACTSSGLRPVIPALLNTRWTPSEMIQSLRSYGDKNNTSSYRVDGSG  
SLGKVARQVADGLRQAYNQHLFCLAIPSYSCDYFSNRATITRKPRHIDNDRSOLLRERMR  
TVRKKGSTTDALILFTSGTTGGSKGVRLSHRALLVQSLAKLDVPCGYMETAMLATTVPL  
FHVGGSSFLAVLLARGQLVFPVREGGNASSSSSFQVQDIPRSIQDTFIPANTLVVVPAML  
ASFFSSNNAKRQQQYLNTRFILIGGQSASKMIKKIQFTFPNARIAQTYACTEAASSMTF  
LSLTKDSLDPDSTIPTPALSGDRVGRPPNHIEIRLYSRDANS AKKTITKPYELGLIATS  
GPHVMNGYWKRGAPTSRGALRKIGSNQVVFSSDLGFWDHQGLCFGGRAKDVIRTGGETV  
LAQEVKVLLEHSHKVI ECAVFP RKDDRYGEAVACAVVAKDDGLPLQTIKTWCQQKGLAGY  
KRPKFIFSVDSLPRNSSGKVLKHKLVAKFGASEIQSKL  
>comp12867\_c0\_seq1; 200 1 569 LEN=838; translated  
XKTKNIQTKTTTTIMNLLKKIIPASTPLPRPPVPEGLTRICVSGFGKSHHTGRARAIADAI  
VEAYPDKYETWFYFDTFHFRPEFLSSIKAEIMDSGAEFPEGHKSSPFCWMEESVDGTTKFF  
TALGGRDRLVDWAVATFDES SKNDKILTYCKTVPDHWVKEINFDNTTPGTANADATKKC  
ALKEALQKK  
>comp12867\_c0\_seq2; 183 502 798 LEN=1067; translated  
MDSGAEFPEGHKSSPFCWMEESVDGTTKFTALGGRDRLVDWAVATFDES SKNDKILTYC  
KTVPDHWVKEINFDNTTPGTANADATKKCALKEALQKK  
>comp12868\_c0\_seq1; 228 281 601 LEN=888; translated  
MNP AFHWNVKQLFVYVVASYETSSKEINDVVIWDKIIENIDSVEDKH IKQENVFVKYALV  
DQGNELRGKDVSLRLMWDHMPITGFVYMDSQAKDTTTSFSLPLEYK  
>comp12868\_c0\_seq2; 287 83 613 LEN=900; translated  
MHTVWVRLNAVVFGLTVLLGLSCLAAFSKIGHSYIHQPIINTLELNTLRSLKSHGGVDR  
ALLSFNIDADMNPAFHWNVKQLFVYVVASYETSSKEINDVVIWDKIIENIDSVEDKH IKQ  
ENVFVKYALVDQGNELRGKDVSLRLMWDHMPITGFVYMDSQAKDTTTSFSLPLEYK  
>comp12869\_c1\_seq1; 95 1 340 LEN=813; translated  
XARACHWLELHGCP LGEERESGSPTDLVGTDFLLGVMERREAI EDHEGD AEALGALAGEV  
EGLRASCEAALEDLMDEGEGRGSESVLERARRLTAQLQYWNRL EEALEEAEP  
>comp12869\_c1\_seq2; 105 1 367 LEN=840; translated  
XARACHWLELHGCP LGEERESGSPTDLVGTDFLLGVMERREAI EDHEGD AEALGALAGEV  
EGLRASCEAALEDLMDEGEGRGSEHQGEHQSESVLERARRLTAQLQYWNRL EEALEEA  
EP  
>comp12870\_c0\_seq1; 521 209 1405 LEN=1539; translated  
MPPLPLPEAATPGHAQAPVALGLNVLIDHAKKDLKAKANPPFLSHYRVLPENVRTAYDLF  
LTGAQLVRATATKYALVGAASKKDQVTLGNDLLRGCELIGAAVHATVADASGCSRAVRHY  
NQKAALAVY LATRLV EAFHPELQRTSKDGSVRGSGGDPASRAVPAASDNTVGAQKTGAV  
WEACDHILNKMLPQGNRSAIRREIFTWTRECNDTLEEFDEM VQLGPREGGGDDAEGEED

DDDDGFCGFGGDDDKYTEDDLPLAEACVKLLKNSRGNMRVALETCEALGERLAGSGSDKD  
DETILDAILRVHEHAKNVGEGVTDFGSLLYPPLVPSTAHLEAGVRRQAALIREFQDCVLG  
LEHLPTKTMELARTLRATADTREKDFDALAAYKNKAC  
>comp12871\_c0\_seq1; 165 1 515 LEN=1164; translated  
XAIEHNKENKEALKLSCSTLVKMSFRRFLATMVFLAACTKPELAASLGLNHHKRRKSTDL  
AGSILYSERNAVSPKTLATKTQTLRSELQSKHTDGDGDDGDDGNDNSVLMDFLWITDF  
LALILASQLIGLLNILNSPEFVRNGGWFPPIPAIPSTLDDLIKRIASAFGILW  
>comp12872\_c0\_seq1; 835 189 3848 LEN=3951; translated  
MAIVVDAVRKQSHLAGLWMTKLQSVRARLQNALKAYLEARAEIRRHETGSEEFYFAADAKA  
KDLEETVASMIPPPSGASPAPERHAVLEKFHSSKDKRVFLVLGTITNPSHSSKCRAKAI  
DDLPKRVKATAGDAVSAWVKSALAKRCAMGDFVNLDVVHHCVLLAQECFHEGDLDATLKF  
VCVQMAVESFPLSCASGEVFENLSELFQDCNGSSQKNQTEGPAIVTALSAILASVAPYRD  
PSDDSSLEDDLYKKLVLNLCRNGTPEQARHAVATITSLKPKNGAELTQEETKTFLPLLE  
TLATPSRLAIASSTKLVCVLAALTELANAPQVFESSSRGKALKFALEMVLMGRAR  
VDVTSGDDDDYDEADDTRTPKRGRNRKSSSAKSRHLSPKATDTSLVEDQNLSPICRTIC  
AAIELLSAFIRSSVFAKKSRSSTFTQTTQDIIIEQSFKIFSQILRDQGLPPSSRDRDVCSE  
RQDRAALRQCAAHLFRLCDTRLGLDQKHLTTERWHTLASSLLDDEPVVRKAAMEEFGML  
ITGHGKFSTAYGMGVMAPRLRFVAMSVFCIDGSQGSKANGNSANIGKAIHNQKGNIA  
CITDLRKVYESYAVQCRAQGPEAEKQFETFTKLTIMPEYAVPYSFHLLTCRQETPSSTGP  
STGKSRKANDDDESQRILRKLKALYDPLVLQLGTSADNISFLLRMAEMLAKSFQPIGC  
SLSSPGSDNSSRDGDKLKNICATAREVLLSYVKTDANLDTHPGAIRMPGNLFRKRQSRKR  
PVQEDSITTDTSPIIDMMITTQDSEIQNQKISSNLNRKRPASSKEHEKHTQDHPFGNNNT  
KQEQTTRSTRSATKHVDGSKTTAKTDEASRNSHDTQASIADTSRRRRSLRISTRASIG  
STNTYGDGDSRVSSSTDEISGYSVDGNVGITRKNQIAPRRSTRSTRSTKFDDSRDSST  
SGSISIEHGNSTENGTTIESTPSSKDVSTVTSTRGIMLSTEGEDDPSSSRLGSGSNK  
KRRSDASKSISADSRVHFSPEIDFGGLSPINRRSSRNSKNEELLSSSETKTRGTPPSS  
LRNASFPATASASVAIGSPRPHENRDSKSPTTVSESTAKSSIGRVSSQGNEKTKPLGDKK  
AEVAHNRRRKSSRKLAVDDKENATAIKKGGPKDIKIVRSKQSSKFKAKKVVKKTALASV  
GKRGRKSSKPIDSFDFEG  
>comp12873\_c0\_seq1; 375 208 1911 LEN=2163; translated  
MPSPSNMELAPNSNESIQKRAERFSQALGLCGNEYLQLKRMHTVIVLSLLSWSLLATPAP  
ARSPSHSSDSYRRSPSSSQSSRQRSSSSSTTRSAPRSGRGLVHRPSSSRKKGSSVSVS  
KTSSTSTITNAKSTLEKAKVPSETTTDLRNTPRSQRSSKEVNTGYTAQESHTSPNMAPKV  
TSLSIIENKKTDTGSSSIQKRYSSLKTSSLEVRPGQASPAPMSNTPKSSTKHRIDRRKMS  
STRPHSSMKAVRSSSKKESNPDVAVPISRLQSSVTSGSLTEETFSTNVIKRNVPSPST  
AKPSIMSGTRSPIAPIARSESSQKVSALLRKTSTSTHTTAASTKTSTISENSRYPI  
TSGKTKQKDLHTEAKSVPQTSVDSSTEQSNAFYKRRSGRRIGGRADSEKRNQRYTNAENR  
SAVTTPTSTSPATQRHNTKRRVSRVDYNPGYCCYDLPYFPTRNIGSFYYYDDYAPPLH  
ADEAYPPYRRIVSPNRPLATSTASLPSDKTCTVDLPSENETVDVLDVDPQKGIYVQGYVTS  
RDLKKCDFMVTYSSSNGDVLVAKSFHI  
>comp12874\_c0\_seq1; 158 481 657 LEN=1173; translated  
MTSSIFFSYSAKTTKLVARGHLESNYERAIMRFMSDSTDYNKDNKTLGAEVWIPLMGL  
>comp12875\_c0\_seq1; 197 1 886 LEN=2058; translated  
XTSSLPPNEFVRSLLLEYEGDGKWRNKWSNETIIPVTIDKVVPTMKEKQLETSFVIAAMY  
SFTIAVFFCIGSSIFVYHYRKNPVISISQPRFLWLIFGGAALIASSGYFLLFAEIMGDYA  
KGKVLNGMCATWIWIYINIGINIVYMAIFGKLWRIQRVVSQFRRRQNVSVNQTIWPLRVMFF  
VNLILSVWTFENPPKYRKLDSSEKNNFVLGTCDVFVQLPYFVPSQLILLVAVALGLWMAYK  
TRKLPRELNEGGQIFYYIYLCNTVTFVFFVVLMMGWLLRNLVVMNASVVRVVGQV  
>comp12876\_c0\_seq1; 608 138 2807 LEN=3704; translated  
MATLSQVYTNVGVGAVVSAVCYLGFGTAVLTEQNWNLTTPRAWARPVEVIRNCLSPPYSL  
WIYWAMSLRYIDLDDGIPGTGTRMKGWSGPPKTNLDGIVLLRYHALQFKVSAFATILCM  
TLLLPLYYSQCDPLRYGYAFCEEHGMHTDFEQLTIVNLLPLVRSEIFYSNGTVVDYSYG  
NRTYNTNSSFFRPYYNESLSGVVDVIRSSKIKWSPGITERYLAVVLVTALVSMYTCYLLWH  
EWWQCLALRRVYYLESEHYEERLDELDDVRTNSDPENPFQKVRPPFLPHELRETVPNIS  
LYSALYKLPENLELKADPSCEKSLVELQLEAAVEFLDQCVPNQPGYTSSIAAITMLPDAK  
KLTKVWGKWAYACGNMRYLRYVKAQLERRREMKKAGQLGLHDILVAAPATMAKATVKATA  
ETFDVVKDKAVEGMSTIKKYTTEKIGEGILAVKGLGNQDESIDEKETDLGDTEVVFVSCRE  
HAQSSQIEIMIKDIDVVFVSCKATNSCDSEYHRNEEDKVI GNDVKNEEKTNNDSNANTVL  
LDIEKGNVRSASQQSPGDSANTQSHDLELGDATRSEVATKSAFDVVS GEMNADDKGKE  
EGKSFSSSKLAKTIVPGFNQESVGGHFYDEFDPVTFKWLGYSEETELEQVIDTLDIEQ

LSVYAREMSQSASNCCVYGCTPKTLSFLSIEQLEVLVEDTWTSAHEANAMLLARANMFK  
EHQKREAEINTKIEVATSKKDDATNDEKSQSVKKTQSEDASTRFSRKRPPASSNLDLSS  
KDERTASANPSDLPSNLDHNVLMKMSGLRQRGKRAGRTQSTRAKYNVAQKLVTEINDISTP  
MREDAEDEIGHGAKKGVLDHPDYCVVTFSTRQAAIAGRQCLIDGKGTRAW

>comp12876\_c0\_seq2; 651 138 3427 LEN=3427; translated  
MATLSQVYTNVGVGAVVSAVCYLGFGTAVLTEQNWNLTPRAWARPVEVIRNCLSPPYSL  
WIYWAMSLRYIDLLDGIPTGTRMKGWSPPLKTNLDGIVLLRYHALQFKVSAFATILCM  
TLLPLYYTSQCDPLRYGYAFCEEHGMHTDFEQLTIVNLLPLVRSEIFYSNGTVVVDYSYG  
NRTYNTNSSFFRPPYNESSLGVDVIRSSKIKWSPGITERYLAVVLVTALVSMYTCYLLWH  
EWWQCLALRRVYYLESEHYEERLDELDDVRTNSDPENPFQKVRPPFLPHELRETVPNIS  
LYSALYKLPENLELKADPSCSEKSLVELQLEAAVEFLDQCVNPQPGYTSSIAAITMLPDAK  
KLTKVWGWKYACGNMRYLRVKAQLERRREMKKAGQLGLHDILVAAPATMAKATVKATA  
ETFDVVKDKAVEGMSTIKKYTTEKIGEGILAVKGLGNQDES IDEKETDLGDTEVVFVSCRE  
HAQSSQIEIMIKDIDDVVFVSCATNSCSEYHRNEEDKVI GNDVKNEEKTNNDSNANTVL  
LDIEKGN SVRSASQQSPGDSANTQSHDLELGDATRSERVATKSAFDVVS GEMNADDKGKE  
EGKSFSSSKLAKTIVPGFNQESVGGHFYDEFDPVTFKWLGYSEETELEQVIDTL D IEQ  
LSVYAREMSQSASNCCVYGCTPKTLSFLSIEQLEVLVEDTWTSAHEANAMLLARANMFK  
EHQKREAEINTKIEVATSKKDDATNDEKSQSVKKTQSEDASTRFSRKRPPASSNLDLSS  
KDERTASANPSDLPSNLDHNVLMKMSGLRQRGKRAGRTQSTRAKYNVAQKLVTEINDISTP  
MREDAEDEIGHGAKKGVLDHPDYCVVTFSTRQAAIAGRQCLIDGKGTRAWAQVHSIPMHP  
LADAPPRTPCFRCRCCRPVTLTISNKEKRSRTTFTWTFYVLWCMVYTIPLTMVSQLLNPT  
LLAEVFPDVEVLQNPDTFFFKALAGISTGYIYTLFFSILPQIFKLLAFSEGSSSSKPAE  
EYAMRFYWFMLVTAFTGQSLVQMLLDGILQASSNVAQLDYRSHRNHFANGVPTAIQHFS  
LRVLQNSMAQSRHARRX

>comp12876\_c0\_seq3; 682 138 3377 LEN=4296; translated  
MATLSQVYTNVGVGAVVSAVCYLGFGTAVLTEQNWNLTPRAWARPVEVIRNCLSPPYSL  
WIYWAMSLRYIDLLDGIPTGTRMKGWSPPLKTNLDGIVLLRYHALQFKVSAFATILCM  
TLLPLYYTSQCDPLRYGYAFCEEHGMHTDFEQLTIVNLLPLVRSEIFYSNGTVVVDYSYG  
NRTYNTNSSFFRPPYNESSLGVDVIRSSKIKWSPGITERYLAVVLVTALVSMYTCYLLWH  
EWWQCLALRRVYYLESEHYEERLDELDDVRTNSDPENPFQKVRPPFLPHELRETVPNIS  
LYSALYKLPENLELKADPSCSEKSLVELQLEAAVEFLDQCVNPQPGYTSSIAAITMLPDAK  
KLTKVWGWKYACGNMRYLRVKAQLERRREMKKAGQLGLHDILVAAPATMAKATVKATA  
ETFDVVKDKAVEGMSTIKKYTTEKIGEGILAVKGLGNQDES IDEKETDLGDTEVVFVSCRE  
HAQSSQIEIMIKDIDDVVFVSCATNSCSEYHRNEEDKVI GNDVKNEEKTNNDSNANTVL  
LDIEKGN SVRSASQQSPGDSANTQSHDLELGDATRSERVATKSAFDVVS GEMNADDKGKE  
EGKSFSSSKLAKTIVPGFNQESVGGHFYDEFDPVTFKWLGYSEETELEQVIDTL D IEQ  
LSVYAREMSQSASNCCVYGCTPKTLSFLSIEQLEVLVEDTWTSAHEANAMLLARANMFK  
EHQKREAEINTKIEVATSKKDDATNDEKSQSVKKTQSEDASTRFSRKRPPASSNLDLSS  
KDERTASANPSDLPSNLDHNVLMKMSGLRQRGKRAGRTQSTRAKYNVAQKLVTEINDISTP  
MREDAEDEIGHGAKKGVLDHPDYCVVTFSTRQAAIAGRQCLIDGKGTRAWAQVHSIPMHP  
LADAPPRTPCFRCRCCRPVTLTISNKEKRSRTTFTWTFYVLWCMVYTIPLTMVSQLLNPT  
LLAEVFPDVEVLQNPDTFFFKALAGISTGYIYTLFFSILPQIFKLLAFSEGSSSSKPAE  
EYAMRFYWFMLVTAFTGQSLVQMLLDGILQGNVKGKFEKILSSVAASIATSQAPTWNW

>comp12876\_c0\_seq4; 802 138 4127 LEN=4192; translated  
MATLSQVYTNVGVGAVVSAVCYLGFGTAVLTEQNWNLTPRAWARPVEVIRNCLSPPYSL  
WIYWAMSLRYIDLLDGIPTGTRMKGWSPPLKTNLDGIVLLRYHALQFKVSAFATILCM  
TLLPLYYTSQCDPLRYGYAFCEEHGMHTDFEQLTIVNLLPLVRSEIFYSNGTVVVDYSYG  
NRTYNTNSSFFRPPYNESSLGVDVIRSSKIKWSPGITERYLAVVLVTALVSMYTCYLLWH  
EWWQCLALRRVYYLESEHYEERLDELDDVRTNSDPENPFQKVRPPFLPHELRETVPNIS  
LYSALYKLPENLELKADPSCSEKSLVELQLEAAVEFLDQCVNPQPGYTSSIAAITMLPDAK  
KLTKVWGWKYACGNMRYLRVKAQLERRREMKKAGQLGLHDILVAAPATMAKATVKATA  
ETFDVVKDKAVEGMSTIKKYTTEKIGEGILAVKGLGNQDES IDEKETDLGDTEVVFVSCRE  
HAQSSQIEIMIKDIDDVVFVSCATNSCSEYHRNEEDKVI GNDVKNEEKTNNDSNANTVL  
LDIEKGN SVRSASQQSPGDSANTQSHDLELGDATRSERVATKSAFDVVS GEMNADDKGKE  
EGKSFSSSKLAKTIVPGFNQESVGGHFYDEFDPVTFKWLGYSEETELEQVIDTL D IEQ  
LSVYAREMSQSASNCCVYGCTPKTLSFLSIEQLEVLVEDTWTSAHEANAMLLARANMFK  
EHQKREAEINTKIEVATSKKDDATNDEKSQSVKKTQSEDASTRFSRKRPPASSNLDLSS  
KDERTASANPSDLPSNLDHNVLMKMSGLRQRGKRAGRTQSTRAKYNVAQKLVTEINDISTP  
MREDAEDEIGHGAKKGVLDHPDYCVVTFSTRQAAIAGRQCLIDGKGTRAWAQVHSIPMHP  
LADAPPRTPCFRCRCCRPVTLTISNKEKRSRTTFTWTFYVLWCMVYTIPLTMVSQLLNPT

LLAEVFPDVEVLQNPDTFFFFKALAGISTGYIYTLFFSILPQIFKLLAFSEGSSSSSKPQAE  
EYAMRFYWFMLVTAFTGQSLVQMLLDGILQGNVGKEFKELSSVAASIATSQAPTWLNW  
IIVRTGTTPLPMVYLLQFNFTLYGCFRIPWLNVRVMRGGGPGPPYRIYIDSGVVMCLTS  
LAPACPIIAPFCLLYAVFIPILRWLHVVFYRPFYDGGNRMPVIHEIIISSLILSQQLL  
GTVLLKQSFIFGITTTIMTFTLLFSELTKEKFQRAYNDAGLWQTSKLDGLTNKETIKG  
REKYRRWLVDVHKASYVPICLSGGEDFLTSQPAVVVPIERELKAEGGRRSIDRQPTQKGA  
IFRRYDLES

>comp12876\_c0\_seq7; 673 138 3362 LEN=3573; translated  
MATLSQVYTNVGVGAVVSAVCYLGFGTAVLTEQNWNLTPRAWARPVEVIRNCLSPPYSL  
WIYWAMSLRYIDLDDGIPGTGTRMKGWSPPLKTNLDGIVLLRYHALQFKVSAFATILCM  
TLLPLYYTSQCDPLRYGYAFCEEHGMHTDFEQLTIVNLLPLVRSEIFYSNGTVVDYSYG  
NRTYNTNSSFFRPPYNESSLGVDVIRSSKIKWSPGITERYLAVVLVTALVSMYTCYLLWH  
EWVQCLALRRVYYLESEHYEERLDELDDVRTNSDPENPFQKVRPPFLPHELRETVPNIS  
LYSALYKLPENLELKADPSCEKSLVELQLEAAVEFLDQCVPNQPQGYTSSIAAITMLPDAK  
KLTKVWGKWAYACGNMRYLRVKAQLERRREMCKAGQLGLHDILVAAPATMAKATVKATA  
ETFDVVKDKAVEGMSTIKKYTTEKIGEGILAVKGLGNQDESIDEKETDLGDTEVVFVSCRE  
HAQSSQIEIMIKDIDDVVFVSCKATNSCDSEYHRNEEDKVI GNDVKNEEKTNNDSNANTVL  
LDIEKGNVRSASQQSPGDSANTQSHDLELGDATRSERVATKSAFDVVS GEMNADDKGKE  
EGKSFSSSKLAKTIVPGFNQESVGGHFYDEFDPVTFKWLGYSEETELEQVIDTLDIEQ  
LSVYAREMSQSASNCCVYGCTPKTLSFLSIEQLEVLVEDTWTSAHEANAMLLARANMFK  
EHQKREAEINTKIEVATSKKDDATNDEKSQSVKKTQSEDASTRFSRKR PASSNLDLSS  
KDERTASANPSDLPSNLDHNVLKMSGLRQRGKRAGRTQSTRAKYNVAQKLVTEINDISTP  
MREDAEDEIGHGAKKGVLDHPDYCVVTFSTRQAAIAGRQCLIDGKGTRAWAQVHSIPMHP  
LADAPRTPCFRCRCPVTLTISNKEKRSRTTFTWTFYVLWCMVYTIPLTMVSQLLNPT  
LLAEVFPDVEVLQNPDTFFFFKALAGISTGYIYTLFFSILPQIFKLLAFSEGSSSSSKPQAE  
EYAMRFYWFMLVTAFTGQSLVQMLLDGILQGNVGKEFKELSSVAASIATSVS

>comp12876\_c0\_seq8; 608 138 2807 LEN=2978; translated  
MATLSQVYTNVGVGAVVSAVCYLGFGTAVLTEQNWNLTPRAWARPVEVIRNCLSPPYSL  
WIYWAMSLRYIDLDDGIPGTGTRMKGWSPPLKTNLDGIVLLRYHALQFKVSAFATILCM  
TLLPLYYTSQCDPLRYGYAFCEEHGMHTDFEQLTIVNLLPLVRSEIFYSNGTVVDYSYG  
NRTYNTNSSFFRPPYNESSLGVDVIRSSKIKWSPGITERYLAVVLVTALVSMYTCYLLWH  
EWVQCLALRRVYYLESEHYEERLDELDDVRTNSDPENPFQKVRPPFLPHELRETVPNIS  
LYSALYKLPENLELKADPSCEKSLVELQLEAAVEFLDQCVPNQPQGYTSSIAAITMLPDAK  
KLTKVWGKWAYACGNMRYLRVKAQLERRREMCKAGQLGLHDILVAAPATMAKATVKATA  
ETFDVVKDKAVEGMSTIKKYTTEKIGEGILAVKGLGNQDESIDEKETDLGDTEVVFVSCRE  
HAQSSQIEIMIKDIDDVVFVSCKATNSCDSEYHRNEEDKVI GNDVKNEEKTNNDSNANTVL  
LDIEKGNVRSASQQSPGDSANTQSHDLELGDATRSERVATKSAFDVVS GEMNADDKGKE  
EGKSFSSSKLAKTIVPGFNQESVGGHFYDEFDPVTFKWLGYSEETELEQVIDTLDIEQ  
LSVYAREMSQSASNCCVYGCTPKTLSFLSIEQLEVLVEDTWTSAHEANAMLLARANMFK  
EHQKREAEINTKIEVATSKKDDATNDEKSQSVKKTQSEDASTRFSRKR PASSNLDLSS  
KDERTASANPSDLPSNLDHNVLKMSGLRQRGKRAGRTQSTRAKYNVAQKLVTEINDISTP  
MREDAEDEIGHGAKKGVLDHPDYCVVTFSTRQAAIAGRQCLIDGKGTRAW

>comp12877\_c0\_seq1; 211 229 1146 LEN=1259; translated  
MVVAFNRMFLPLIITFTLTTCCLAFEDDLVLSFLIWSPPMLDFDFVEEAVSEALRTFLC  
HDAKVILLDDRFRNVICYQQGVGETALFSNVAKLSMLDFIKQTDVVRTYLA AETT NVLVSH  
NYDANGTAQGTEDVDVNYEVLQMG MNEVEKVKASNATDETF SLEDRIQHLLNESITKGLMR  
YRLWGTGILMFQLGQKLEDLPENSLTFEENINADPELDYKQVAIVLRYIGIVMIVGSFS  
VSTALTYLARRCRRDRYNKEMMATRELADQRLVTEQGVNMLMLDMGRRESERISSTSTDY  
FSAAC

>comp12878\_c0\_seq1; 382 53 1033 LEN=1479; translated  
MTSCSRIGRSGRRYSSLVVGREQRISRRPGFQRRFSGASGNGSERVATEIDPSTGICRV  
QLARPDKLNAFDIPMFEAVAETATRLKTDRSIRVVILSGQGRAFSTGLDVKSVLKDGDPR  
KKIKHLIERRSRPSVPWNEDQDKQITSNLAQDVSILWRELDAPVVAVLQGM CYGAGLQ  
VALGADFRYSTPDCRLSVMEGKWGLIPDMGASILLPELVRIDVAKELTMTARIVGGSEAA  
DLGLVTRVCEDPMREAELFAEELVERS PDAVAAKRLYQRTWTASDEESLRMETELQERL  
LVSWNQLAASGRAALGLGVPTKRKR

>comp12879\_c0\_seq1; 379 1 2172 LEN=2215; translated  
DTGKKRKSVDKFSVLSGFKAPSVHELTKEEEEAYMSATKEANETTERWIRQFRLTHESF  
WRQKERQEYGLTQTRAGFYLRSDLAIQKPRCQGCDAE EKERLLRNPSKNRKKERRPFAG  
DELMQC LDCGFIGCSPPSLNPNTKNYMLRHMLVTGHKFAVSCGEKALVFCFPFGDFVYHE

VFEQEKIRIACARKLPHMAWNEHAVLRSFDPFQFLKTADSGI IWKGLVATYPPLVPKEHF  
CAVQLTLRRQALFEGNSSDRWILPKPNALYFAASQHARDEKERFQIAAPVGIYNLGNCTCF  
MSAILQCLISCRPLQOYFLRDSGHHFKSCEVFRHKEELLAATAAAAASGPAKRNLVKS  
SGAVSTVKKKTKVRSEVCLACEMDRFLSYYGATVGNDVFPVIEESSRNLVGNLDQCDP  
VTLHEVVVPIEKGDPLIISDLLTSAWKSGGMNHLTGYDQHDAAHEFLNSFLELLGKHILMF  
RQRTAAATKVYKENALMPDFDPKKNDLIKSLFEGSLRSVLLCETCGVKRVQLEPFMNV  
LSLSEEVERMQERKGMQKLDMSVESCLQHFVTPEQLGDLVYCNACRKKTRTKKQHTFAK  
LPKILCLHLKRFDATKNKKIENFVSFSPSHGLNMGGLLSHWCEVTRLESSKRGNDVSTPSA  
KPKILYDLFGTVNHVGNMQSGHYVANVKVEDTWHYCNQDQHSYEKEESVLKAEGAYVLFY  
IRR

>comp12880\_c0\_seq1; 949 202 1992 LEN=2227; translated  
MTGIWRLNLPFGLLLSLWCMTLRPSQAFSTKGLTERKISTLDKKNPSFSGSIYRSSPPL  
RVYNDDEEREQIEEARLRIWNNRGEVRSMLKGAESLRNFRLANGFTPELDEDGNPTKAD  
GKTAVTLTAFAVAAGAIVLRVGGRAALVSAVGLDFVNDNPEMQEQINQVLQYAESVDPVL  
KTGLFWLWTFVKTLCFDAGGIVLAFASGILFGGVLQGAIMSALGATIGSSVAFALAKAD  
TPVREKAI EIVEENPSLRGLEKVVVADEGLKAVLTFRLAPVLP IPLGMYNYVYGITNVRFV  
DFAGGIFLGS LKPYFLDSYLYGKSLVDGSASEGGLQDYVLIGVLGLSVLIGVFASQLA  
SETWEAIQKEQEAEDRENK LKETGGEDDDGVTTEVFGFELPQWVMVGFQYGLQDADERM  
NRLVLQEYDAKVWNCTEDSSFFGIEVSKKNLDPNKNPALVDPASPEITDRYEGVDFGATT  
CDGLVLSPI LFSYFLKIQDPLFDERSLREEDWDRGSGATAET TAAQPLASTDAPPVAQTS  
AVAVAAEDESTPVRSGSGPSPEFVEGIFLNQLQALKDETQQRIDETNRKLSEMSDE

>comp12880\_c0\_seq2; 947 202 1980 LEN=2215; translated  
MTGIWRLNLPFGLLLSLWCMTLRPSQAFSTKGLTERKISTLDKKNPSFSGSIYRSSPPL  
RVYNDDEEREQIEEARLRIWNNRGEVRSMLKGAESLRNFRLANGFTPELDEDGNPTKAD  
GKTAVTLTAFAVAAGAIVLRVGGRAALVSAVGLDFVNDNPEMQEQINQVLQYAESVDPVL  
KTGLFWLWTFVKTLCFDAGGIVLAFASGILFGGVLQGAIMSALGATIGSSVAFALAKAD  
TPVREKAI EIVEENPSLRGLEKVVVADEGLKAVLTFRLAPVLP IPLGMYNYVYGITNVRFV  
DFAGGIFLGS LKPYFLDSYLYGKSLVDGSASEGGLQDYVLIGVLGLSVLIGVFASQLA  
SETWEAIQKEQEAEDRENK LKETGGEDDDGVTTEVFGFELPQWVMVGFQYGLQDADERM  
NRLVLQEYDAKVWNCTEDSSFFGIEVSKKNLDPNKNPALVDPASPEITDRYEGVDFGATT  
CDGLVLSPI LFSYFLKIQDPLFDERSLREEDWDRGSGATAET TAAQPLASTDAPPVAQTS  
AVDVAEDVRS GSGPSPEFVEGIFLNQLQALKDETQQRIDETNRKLSEMSDE

>comp12881\_c0\_seq2; 368 1 1003 LEN=1003; translated  
QQQQQPIGSP IANT IATSPPKRDKMAALAARSNSPPKRDKMAALAARSNAAGGGEHQQQE  
TPAPGTPSPGPKRDKMAALNARQNNASSVENSSLAEDPKDATMAIESPPRRDKLAAMASRS  
MNSTADAAPASSRNSKLARLVASGTTGGGTSEVNTKSRDEIAEAAAAREKHLAKLKERL  
SKRKGMLDSLDR AETLTCRLKIAAQTTALQDLNFSSNLSRLSTAYRATLQELHPLLT  
GTEDLIKPYQNHTEETKQSMYAARVEMRLAKERLDVLTFTLELREEKKEAEAAAATADP  
NGNPATDGDETAENENDETTRKNNKIIDEKLCHG

>comp12882\_c0\_seq1; 429 164 1539 LEN=1668; translated  
MVRDYFLSRSSSEQKSSDSSSLGVIFSLVALGAVVGATITFRISTADAKDNERYQNETEDM  
VPRCTCDAITKRERLPLLVILVRHGESEGNVDKTAWWRKADHDIELTDKKGQQAADAGKR  
IEAIF SAYDNNCDS ENLVGISTIEDEANENENKTNVPRIPGQTRRRRSVIRHVHLHVS  
PFERTKQTAKYARPF FDYRVTKYKLCPRLREQEFGNLQGETFQDYRQEQSKLDASGT  
XFPTG ESGADVLDRVKSWEYNI IQTNNHNCNPFDDYEWDFGKNDHHCDAVVVFSHGL  
TLRSILCQLFKW S ISTFHSVYNAKNC DLYVLKRDLNKP GHSPYVLDGIHGDLPKSS  
IDVCVTLSR KKPKNRNNIDRGRNIDSNERDDKGNWKEEENS IQEVKIYKLLDYL  
SIPAPRMSHTKEVKN KLVEQYPEQFKGGSADIESVSFLPFHLCNSPKRSPQE

>comp12883\_c1\_seq2; 670 301 2253 LEN=2486; translated  
MDGIEDDAAA AWWVWALLWICALASFWSQATVTEERLVPALNVISSHYKIPPIAGATLM  
AAGASSPEL FSSIVALFVTHSALGLGTVVGSEIFNQLIICAGAVFASKGKILDKTILA  
REVGFYALGI ILLYLALRDTKPLGDDPDGPNYIFISFSEATMVFSGYILYVVVCSNFNAI  
VGH LTKAKKKVRLTLASLSTKKFYGTAVSTKNLHPGKMDFLIEEKNLSKEPVENWESIEY  
YMPAIASSADDGASIRSDENLLDSSRRASLANSVRSSIFSMNNTVLRKLVASERPT  
EIFSLHDVQINDFKNEISCF LQRSIFYNKAYFGQNAWQLRWF TISPLKVSSVPDSCDPN  
HRLKYPHFTAIEIDEKHLI INMINPVEGKRNFLLMAPSKPIFDKIEKME LFMQRN  
STTNAE DLIKDNSSDEIEDDEFEGASGHESLIELSV DSTNLETVFFLLFPLRLLIQVT  
IPDVRML DEEGEVAATVGRAYLSTFSCLVWLIFGSYTMVASLEALGELMNI PDAV  
MGFTVSAAGTSL PNYVASKVAAENGFGNQAVSNAFGSNTFNIMVGLGLPWMLYISL  
GLGFEPYHGLKDDHIL DSILILFGFLAVFVAFMLVSGFV MYKWHGMMFIMGYGGYI  
VYAIGAGLSG

>comp12884\_c0\_seq1; 263 1 1725 LEN=2037; translated  
XEHDALERHTPTGSGTRFTLISRITYQCHYVPKEKDRDKLKXGIQLIGSSQTKANQTEGN  
QYDVIFMTAENGLRQRSSVETTNNSKLNLSLKSSTIEDDNANENNSSSNRIIPKGPRSAMS  
GDQVQKDEKRKSKFLVRVVSFGFLISVFSSCIFLGHLYVCGIVALAEFLLFRELVKVRYN  
TYFAQVKNNTVPLFRTTQWAWFSVAIFYTYGDFACEVIQNSNDLHYLVPYAQYLNTVAFG  
LYSGVFVLTATMQNGHIKQFNQLCWTIVVLCITVGMKYIMHNI FNGLFWFTFPFLLV  
VVNDIMAYFCGMSMGRKFIKRPFIWFSPNKTWEGFIGGVCTMIVAWYLSRFLAKFTWMT  
CPVNDFDLFPDLDLCIGSDNSTSDSVHHIFVEAHSIIPGQVFDILPKSLVQLIPGIVDVC  
VSNNGADSDASTFSPCGSIGDLNDHEETFHHFELVVKNVYPIQIHALWLGLFASLVAPFG  
GFLASAIKRAYGIKDFDSLIPGHGGVTDRLDCQFLMALYTWWHYNSFCRLTTISVPKLVY  
HYNLLSAMEQQQFLEAAILAAGGSALDPKLLRRVRQ

>comp12884\_c0\_seq2; 253 1 1861 LEN=2173; translated  
XEHDALERHTPTGSGTRFTLISRITYQCHYVPKEKDRDKLKXGIQLIGSSQTKANQTEGN  
QYDVIFMTAENGLRQRSSVETTNNSKLNLSLKSSTIEDDNANENNSSSNRIIPKGPRSAMS  
GDQVQKDEKRKSKFLVRVVSFGFLISVFSSCIFLGHLYVCGIVALAEFLLFRELVKVRYN  
TYFAQVKNNTVPLFRTTQWAWFSVAIFYTYGDFACEVIQNSNDLHYLVPYAQYLNTVAFG  
LYSGVFVLTATMQNGHIKQFNQLCWTIVVLCITVGMKYIMHNI FNGLFWFTFPFLLV  
VVNDIMAYFCGMSMGRKFIKRPFIWFSPNKTWEGFIGEHTIHELLVGGRAILSTRRALVPH  
GVFLFIPSPCTLCNGSQHNIAGGGVCTMIVAWYLSRFLAKFTWMTCPVNDFDLFPDLDLC  
IGSDNSTSDSVHHIFVEAHSIIPGQVFDILPKSLVQLIPGIVDVCVSNNGADSDASTFSP  
CGSIGDLNDHEETFHHFELVVKNVYPIQIHALWLGLFASLVAPFGGFLASAIKRAYGIK  
FDSLIPGHGGVTDRLDCQFLMALYTWWHYNSFCRLTTISVPKLVYHYNLLSAMEQQQFLE  
AAILAAGGSALDPKLLRRVRQ

>comp12885\_c0\_seq1; 375 247 1329 LEN=1508; translated  
MNEGKMIMALTEQEKMRAAAKLHLSTGEALLAAAGGSETSSLFPQESSVFGRNAGYSSMV  
NPMAARGLPSSMYDGLGSSFTDRSLLMGMSGSI SNPSNPLSDMGNSLGMGMGGIGMGG  
MGSVLGPGHRDLFSGADILSAVDRNQMRMERMMLMRQRESMMLASRAEAWQLGMKMRSVS  
TSVVTGSELDSESTLAALGNSMRKSSPYIDASAMADPPEFELARRRTRGGVTEPFPEK  
LHRMLLEIEKEGNHVISFFPHGRAFGIHDSDAFESKIMPKYFKQSRLSSFFQRQLNLYGF  
TRIVSGPDSGGYHELFLKGRPALCTHMRRVGI PKGVDRRIKATLNKKEPDFYSMRPSL

>comp12887\_c0\_seq1; 238 540 1289 LEN=2164; translated  
MVAGPLTPALGKHFNLVGSLSFGALTSAYPLGMMIGIFIWPSLSDRLGRRKILSLSLLGS  
GLGLMAQALVIDRGGSLIQFLLARSLTGLTAGSSPVGKAYLADIGAKDGKLPYLSLKDA  
SSTLAFIIGPAAGLLFDVLGASEKISKAEVLDSSRSLAFVIAISGVASILASLIAALLV  
QESIGPKRVTGGSPDDKKAHGDIGATKIIENDQDEDLISCPGRNLWAGVASVCAVSFFF  
NVGDSTFHA

>comp12887\_c0\_seq2; 312 596 1771 LEN=1962; translated  
MIGIFIWPSLSDRLGRRKILSLSLLGSLGLMAQALVIDRGGSLIQFLLARSLTGLTAGS  
SPVGKAYLADIGAKDGKLPYLSLKDASSTLAFIIGPAAGLLFDVLGASEKISKAEVLD  
SSRSLAFVIAISGVASILASLIAALLVQESIGPKRVTGGSPDDKKAHGDIGATKIIENDQ  
DEDLISCPGRNLWAGVASVCAVSFFFNVGDSTFHAFSTFLRNQGIPTADIGFLFTSLA  
CVSFLVSSSLT SKILRSLGPVLT CAGGLTLVGSLLFMGLAASGASLIQPSFTILGAI  
IYFCGVSLSYGP TIPTMLLRVPPNKRGFIMGLDGFINTLARIMTPIVSGEYRRYNAGTA  
FAAAGSAVVC GAFIALFRFRFSTLRDRKETQL

>comp12887\_c0\_seq3; 69 1 333 LEN=2165; translated  
ISFDNPDELLNMSMSKITLILVFMVLNLSARKNKASAFIRTTDLYERVNKNSPSLSLSPI  
GRTSDNVMRQRPGLDRMRVAVSRPSSRVINDGSGDNMSDSHSRQSSGYINW

>comp12887\_c0\_seq4; 238 540 1289 LEN=2092; translated  
MVAGPLTPALGKHFNLVGSLSFGALTSAYPLGMMIGIFIWPSLSDRLGRRKILSLSLLGS  
GLGLMAQALVIDRGGSLIQFLLARSLTGLTAGSSPVGKAYLADIGAKDGKLPYLSLKDA  
SSTLAFIIGPAAGLLFDVLGASEKISKAEVLDSSRSLAFVIAISGVASILASLIAALLV  
QESIGPKRVTGGSPDDKKAHGDIGATKIIENDQDEDLISCPGRNLWAGVASVCAVSFFF  
NVGDSTFHA

>comp12887\_c0\_seq5; 248 727 1377 LEN=2252; translated  
MIGIFIWPSLSDRLGRRKILSLSLLGSLGLMAQALVIDRGGSLIQFLLARSLTGLTAGS  
SPVGKAYLADIGAKDGKLPYLSLKDASSTLAFIIGPAAGLLFDVLGASEKISKAEVLD  
SSRSLAFVIAISGVASILASLIAALLVQESIGPKRVTGGSPDDKKAHGDIGATKIIENDQ  
DEDLISCPGRNLWAGVASVCAVSFFFNVGDSTFHA

>comp12887\_c0\_seq6; 302 540 1814 LEN=2005; translated  
MVAGPLTPALGKHFNLVGSLSFGALTSAYPLGMMIGIFIWPSLSDRLGRRKILSLSLLGS

GLGLMAQALVIDRGGSLIQFLLARSLTGLTAGSSPVGKAYLADIGAKDGKLPYRSLKDA  
SSTLAFIIGPAAGLLFDVVGASEKISKAEVLDSSRSLAFVIAISGVASILASLIAALLV  
QESIGPKRVTGGSPDDKKAHGDIGATKIIENDQDEDLISCPGRNLWAGVASVCAVSFFF  
NVGDSTFHAFSTFLRNQGIPTADIGFLFTSLACVSFLVSSSLTSKILRSLGVPVLTCAAG  
LTLVGSSLLFMGLAASGASLIQPSFTILGAIAAIYFCGVSLYGPTIPTMLLRVPPNKR  
G FIMGLDGFINTLARIMTPIVSGEIYRRYNAGTAAAGSAVVCGAFIALFRRFSTLRDRK  
ETQL

>comp12887\_c0\_seq7; 224 1 1158 LEN=1961; translated  
ISFDNPDELLNMSMSKITLILVFMVLNLSARKNKASAFIRTTDLYERVNKNPSLSLSPI  
GRTSDNVMRQRPGLDRMRVAVSRPSSRVINDGSGDNMSDSHSRQSSGYINWKKDPRNRA  
VSGVLISSFLSLLGFTMVAGPLTPALGKHFNLEVGSLFGALTSAYPLGMMIGIFIWPSLS  
DRLGRRKILSLSLLGSGGLGLMAQALVIDRGGSLIQFLLARSLTGLTAGSSPVGKAYLADI  
GAKDGKLPYRSLKDA SSTLAFIIGPAAGLLFDVVGASEKISKAEVLDSSRSLAFVIAI  
SGVASILASLIAALLVQESIGPKRVTGGSPDDKKAHGDIGATKIIENDQDEDLISCPGR  
NLWAGVASVCAVSFFFNVGDSTFHA

>comp12887\_c0\_seq8; 248 596 1246 LEN=2049; translated  
MIGIFIWPSLS DRLGRRKILSLSLLGSGGLGLMAQALVIDRGGSLIQFLLARSLTGLTAGS  
SPVGKAYLADIGAKDGKLPYRSLKDA SSTLAFIIGPAAGLLFDVVGASEKISKAEVLD  
SSRSLAFVIAISGVASILASLIAALLVQESIGPKRVTGGSPDDKKAHGDIGATKIIENDQ  
DEDLISCPGRNLWAGVASVCAVSFFFNVGDSTFHA

>comp12887\_c0\_seq9; 312 727 1902 LEN=2093; translated  
MIGIFIWPSLS DRLGRRKILSLSLLGSGGLGLMAQALVIDRGGSLIQFLLARSLTGLTAGS  
SPVGKAYLADIGAKDGKLPYRSLKDA SSTLAFIIGPAAGLLFDVVGASEKISKAEVLD  
SSRSLAFVIAISGVASILASLIAALLVQESIGPKRVTGGSPDDKKAHGDIGATKIIENDQ  
DEDLISCPGRNLWAGVASVCAVSFFFNVGDSTFHAFSTFLRNQGIPTADIGFLFTSLA  
CVSFLVSSSLTSKILRSLGVPVLTCAAGLTLVGSSLLFMGLAASGASLIQPSFTILGAI  
AAIYFCGVSLYGPTIPTMLLRVPPNKRGFIMGLDGFINTLARIMTPIVSGEIYRRYNAGT  
AAAGSAVVCGAFIALFRRFSTLRDRKETQL

>comp12887\_c0\_seq10; 69 1 333 LEN=2034; translated  
ISFDNPDELLNMSMSKITLILVFMVLNLSARKNKASAFIRTTDLYERVNKNPSLSLSPI  
GRTSDNVMRQRPGLDRMRVAVSRPSSRVINDGSGDNMSDSHSRQSSGYINW

>comp12887\_c0\_seq11; 210 540 1220 LEN=2077; translated  
MVAGPLTPALGKHFNLEVGSLFGALTSAYPLGMMIGIFIWPSLS DRLGRRKILSLSLLGS  
GLGLMAQALVIDRGGSLIQFLLARSLTGLTAGSSPVGKAYLADIGAKDGKLPYRSLKDA  
SSTLAFIIGPAAGLLFDVVGASEKISKAEVLDSSRSLAFVIAISGVASILASLIAALLV  
QESIGPKRVTGGSPDDKKAHGDIGATKIIENDQDEDLISCPGRNLW

>comp12887\_c0\_seq12; 250 652 1344 LEN=2219; translated  
MVTHSHSPLENTGMMIGIFIWPSLS DRLGRRKILSLSLLGSGGLGLMAQALVIDRGGSLIQ  
FLLARSLTGLTAGSSPVGKAYLADIGAKDGKLPYRSLKDA SSTLAFIIGPAAGLLFDV  
VGASEKISKAEVLDSSRSLAFVIAISGVASILASLIAALLVQESIGPKRVTGGSPDDKKA  
HGDIGATKIIENDQDEDLISCPGRNLWAGVASVCAVSFFFNVGDSTFHA

>comp12887\_c0\_seq13; 222 652 1275 LEN=2132; translated  
MVTHSHSPLENTGMMIGIFIWPSLS DRLGRRKILSLSLLGSGGLGLMAQALVIDRGGSLIQ  
FLLARSLTGLTAGSSPVGKAYLADIGAKDGKLPYRSLKDA SSTLAFIIGPAAGLLFDV  
VGASEKISKAEVLDSSRSLAFVIAISGVASILASLIAALLVQESIGPKRVTGGSPDDKKA  
HGDIGATKIIENDQDEDLISCPGRNLW

>comp12887\_c0\_seq14; 288 1 1683 LEN=1874; translated  
ISFDNPDELLNMSMSKITLILVFMVLNLSARKNKASAFIRTTDLYERVNKNPSLSLSPI  
GRTSDNVMRQRPGLDRMRVAVSRPSSRVINDGSGDNMSDSHSRQSSGYINWKKDPRNRA  
VSGVLISSFLSLLGFTMVAGPLTPALGKHFNLEVGSLFGALTSAYPLGMMIGIFIWPSLS  
DRLGRRKILSLSLLGSGGLGLMAQALVIDRGGSLIQFLLARSLTGLTAGSSPVGKAYLADI  
GAKDGKLPYRSLKDA SSTLAFIIGPAAGLLFDVVGASEKISKAEVLDSSRSLAFVIAI  
SGVASILASLIAALLVQESIGPKRVTGGSPDDKKAHGDIGATKIIENDQDEDLISCPGR  
NLWAGVASVCAVSFFFNVGDSTFHAFSTFLRNQGIPTADIGFLFTSLACVSFLVSSSLT  
SKILRSLGVPVLTCAAGLTLVGSSLLFMGLAASGASLIQPSFTILGAIAAIYFCGVSLYGP  
TIPTMLLRVPPNKRGFIMGLDGFINTLARIMTPIVSGEIYRRYNAGTAAAGSAVVC  
GAFIALFRRFSTLRDRKETQL

>comp12887\_c0\_seq16; 248 727 1377 LEN=2180; translated  
MIGIFIWPSLS DRLGRRKILSLSLLGSGGLGLMAQALVIDRGGSLIQFLLARSLTGLTAGS  
SPVGKAYLADIGAKDGKLPYRSLKDA SSTLAFIIGPAAGLLFDVVGASEKISKAEVLD

SSRSLAFVIAISGVASILASLIAALLVQESIGPKRVTGGSPDDKKAHGDIGATKIIENDQ  
DEDLISCP LGRNLWAGVASVCAVSFFFNVGDSTFHA  
>comp12887\_c0\_seq17; 211 195 965 LEN=965; translated  
MWLPHIGSSPVGKAYLADIGAKDGKLPYLSLKDASSTLAFIIGPAAGLLFDV LGASEK  
ISKAEVLDSSRSLAFVIAISGVASILASLIAALLVQESIGPKRVTGGSPDDKKAHGDIGA  
TKIIENDQDEDLISCP LGRNLWAGVASVCAVSFFFNVGDSTFHAFSTFLRNQGIPTADI  
GFLFTSLACVSFLVSSSLTSKILRSLGPVLT CAGGLTLVGSSLLFMGLAASGASLIQPSF  
TILGAI AAIYFCGVSLY  
>comp12887\_c0\_seq18; 314 652 1869 LEN=2060; translated  
MVTHSHSPLENTGMMIGIFIWPSLSDR LGRRKILSLSLLGSGLG LMAQALVIDRGGSLIQ  
FLLARSLTGLTAGSSPVGKAYLADIGAKDGKLPYLSLKDASSTLAFIIGPAAGLLFDV  
LGASEKISKAEVLDSSRSLAFVIAISGVASILASLIAALLVQESIGPKRVTGGSPDDKKA  
HGDIGATKIIENDQDEDLISCP LGRNLWAGVASVCAVSFFFNVGDSTFHAFSTFLRNQGI  
IPTADIGFLFTSLACVSFLVSSSLTSKILRSLGPVLT CAGGLTLVGSSLLFMGLAASGAS  
LIQPSFTILGAI AAIYFCGVSLYGPTIPTMLLRVPPNKRGFIMGLDGFINTLARIMTPI  
VSGEIYRRYNAGTAF AAAGSAVVC GAFIALFRFRSTLRDRKETQL  
>comp12887\_c0\_seq19; 250 783 1475 LEN=2278; translated  
MVTHSHSPLENTGMMIGIFIWPSLSDR LGRRKILSLSLLGSGLG LMAQALVIDRGGSLIQ  
FLLARSLTGLTAGSSPVGKAYLADIGAKDGKLPYLSLKDASSTLAFIIGPAAGLLFDV  
LGASEKISKAEVLDSSRSLAFVIAISGVASILASLIAALLVQESIGPKRVTGGSPDDKKA  
HGDIGATKIIENDQDEDLISCP LGRNLWAGVASVCAVSFFFNVGDSTFHA  
>comp12887\_c0\_seq20; 228 195 689 LEN=1052; translated  
MWLPHIGSSPVGKAYLADIGAKDGKLPYLSLKDASSTLAFIIGPAAGLLFDV LGASEK  
ISKAEVLDSSRSLAFVIAISGVASILASLIAALLVQESIGPKRVTGGSPDDKKAHGDIGA  
TKIIENDQDEDLISCP LGRNLWAGVASVCAVSFFFNVGDSTFHA  
>comp12887\_c0\_seq21; 222 783 1406 LEN=2263; translated  
MVTHSHSPLENTGMMIGIFIWPSLSDR LGRRKILSLSLLGSGLG LMAQALVIDRGGSLIQ  
FLLARSLTGLTAGSSPVGKAYLADIGAKDGKLPYLSLKDASSTLAFIIGPAAGLLFDV  
LGASEKISKAEVLDSSRSLAFVIAISGVASILASLIAALLVQESIGPKRVTGGSPDDKKA  
HGDIGATKIIENDQDEDLISCP LGRNLW  
>comp12887\_c0\_seq23; 69 1 333 LEN=689; translated  
ISFDNPDELLNMSMSKITLILVFMVNLNSARKNKASAFIRTTDLYERVNKNPSLSLSPI  
GRTSDNVMRQRPGLDRMRVAVSRPSSRVINDGSGDNMSDSHSRQSSGYINW  
>comp12887\_c0\_seq24; 224 1 1158 LEN=2033; translated  
ISFDNPDELLNMSMSKITLILVFMVNLNSARKNKASAFIRTTDLYERVNKNPSLSLSPI  
GRTSDNVMRQRPGLDRMRVAVSRPSSRVINDGSGDNMSDSHSRQSSGYINWWKKDPRNRA  
VSGVLISSFLLSLLGFTMVAGPLTPALGKHFNLEVGS LFGALTSAYPLGMMIGIFIWPSLS  
DRLGRRKILSLSLLGSGLG LMAQALVIDRGGSLIQFLLARSLTGLTAGSSPVGKAYLADI  
GAKDGKLPYLSLKDASSTLAFIIGPAAGLLFDV LGASEKISKAEVLDSSRSLAFVIAI  
SGVASILASLIAALLVQESIGPKRVTGGSPDDKKAHGDIGATKIIENDQDEDLISCP LGR  
NLWAGVASVCAVSFFFNVGDSTFHA  
>comp12887\_c0\_seq25; 196 1 1089 LEN=1946; translated  
ISFDNPDELLNMSMSKITLILVFMVNLNSARKNKASAFIRTTDLYERVNKNPSLSLSPI  
GRTSDNVMRQRPGLDRMRVAVSRPSSRVINDGSGDNMSDSHSRQSSGYINWWKKDPRNRA  
VSGVLISSFLLSLLGFTMVAGPLTPALGKHFNLEVGS LFGALTSAYPLGMMIGIFIWPSLS  
DRLGRRKILSLSLLGSGLG LMAQALVIDRGGSLIQFLLARSLTGLTAGSSPVGKAYLADI  
GAKDGKLPYLSLKDASSTLAFIIGPAAGLLFDV LGASEKISKAEVLDSSRSLAFVIAI  
SGVASILASLIAALLVQESIGPKRVTGGSPDDKKAHGDIGATKIIENDQDEDLISCP LGR  
NLW  
>comp12887\_c0\_seq28; 69 1 333 LEN=820; translated  
ISFDNPDELLNMSMSKITLILVFMVNLNSARKNKASAFIRTTDLYERVNKNPSLSLSPI  
GRTSDNVMRQRPGLDRMRVAVSRPSSRVINDGSGDNMSDSHSRQSSGYINW  
>comp12887\_c0\_seq31; 248 596 1246 LEN=2121; translated  
MIGIFIWPSLSDR LGRRKILSLSLLGSGLG LMAQALVIDRGGSLIQFLLARSLTGLTAGS  
SPVGKAYLADIGAKDGKLPYLSLKDASSTLAFIIGPAAGLLFDV LGASEKISKAEVLD  
SSRSLAFVIAISGVASILASLIAALLVQESIGPKRVTGGSPDDKKAHGDIGATKIIENDQ  
DEDLISCP LGRNLWAGVASVCAVSFFFNVGDSTFHA  
>comp12887\_c0\_seq32; 314 783 2000 LEN=2191; translated  
MVTHSHSPLENTGMMIGIFIWPSLSDR LGRRKILSLSLLGSGLG LMAQALVIDRGGSLIQ  
FLLARSLTGLTAGSSPVGKAYLADIGAKDGKLPYLSLKDASSTLAFIIGPAAGLLFDV



LGASEKISKAEVLDSSRSLAFVIAISGVASILASLIAALLVQESIGPKRVTGGSPDDKKA  
HGDIGATKIIENDQDEDLISCP LGRNLWAGVASVCAVFFFNVGDSTFHAFSTFLRNQG  
IPTADIGFLFTSLACVSFLVSSSLTSKILRSLGPVLTACAGGLTLVGSSLLFMGLAASGAS  
LIQPSFTILGAIAAIYFCGVSLYGPTIPTMLLRVPPNKRGFIMGLDGFINTLARIMTPI  
VSGEYRRYNAGTAAFAAGSAVVCGAFIALFRRFSTLRDRKETQL  
>comp12888\_c0\_seq1; 441 212 1558 LEN=2019; translated  
MSQKRRNQVRVQGGEISDRCLLVNRNLPRGIPQDDFIAWFTNTFEFPEEDDKANKDHQITR  
VVYCNHTKSQSPTSAGSYMVEFASSRRDQITIDVRRQEKHHESPSSETEVQITEKAPKK  
WVFGIKIQIERFRSEKVLKFLQAPTAVDEAPEDSKENNSAPEQENGIPQPPPSSTLSSR  
CILVRNSSLISNNDTGIAVISQIVEGCLGEKIHRSAEYTLGKRHSKVLELNLEESVDRIL  
EACHSDDPNTTSEENSSKKSGRVLEIPVQIHPVKSENYAKECLGYVAEPSGTTNGRDKSA  
TKDTKIDSDTRKDSKESNGTNGTPRRSKNSSKNAPREGRKNDETSKELQILKQQNISLW  
ELVEQSKERTFLQEEKINMLSLQVSGLDKEIAKLRATNAELESRVYADQSEKESEENAPKE  
AQKEDEDESPSVTVQSEKEEENTAEFIGS  
>comp12889\_c0\_seq1; 324 189 1002 LEN=1311; translated  
MNKFLVFLSLAGLGLSQAFAPSPSIVVNSMEQSRNRIIVANMAPLDFNVADAVDTASTFW  
TAAADNYIPGTSGEVTYSKASYVILGLYLFSFPGLWSTIKRSTKAKLKKDYVSDGANAP  
DGKGLREQAGEIMAYMKANNYEVDAGETITFQGVVQRSISQACFLVFCFVGLASLALV  
LQIQFNNLVLVPVIGEPNWYYLCLLSPYAGVYYWRSQDRVDEFQIKLESNDEDTENSISVL  
GSEEEIERMWRAMEWQEKGMVKVPSLLNGE  
>comp12890\_c0\_seq1; 121 514 873 LEN=1073; translated  
MASNPPNKSPKPGDPGAGESGEKPTTATRESPGGNGSSINGRAARQVRRSFASRDCFFV  
DRHHEMLVLYGPAYKEFVLPAPSLQEARSPRGSSADTKNAHRPTRRGFAPSEIVLRKK  
>comp12891\_c0\_seq1; 760 47 964 LEN=1190; translated  
MKFSLIALAAVVASAEAVARPSLSISVTDGNFDGVDGLDPTLSWSGASSAGDMDLEYGIE  
AAARPPTDIASLPKKVFGTLKTNLGGWGVTAGATKDMGSGDTEIEVSAANDDADLSVKVL  
ASADGGVDSISATKNMDLDGASLTITPTYSLASEDADVVTYDNGDTNVELTASADSQEV  
VVNHDMGDTKVKLTASKDAQEVVLDHTMDNTNIVLTASADNQEVTISQQLDDDNIISPTI  
NRNGDISVAWERSLGDNDLSLTATLTPDESIDVEWKDDNWTANINAGLSGTDIGDVSISAK  
RDVTF  
>comp12892\_c0\_seq1; 333 132 752 LEN=1027; translated  
MTSALNRAAATVGRRAMRPRGFPTAVGSSVSSGSPVAPLSSVAGRALPRGRWFSAGTVE  
TDAANAGADPLSSPKLQGLYDRVVTLPVEEVNVLGAMVLQLLGRITFPGEFGTPGGAAAP  
VDGAAGAAPEEAVEEKTQFDVRLGFDASKIKVIKEIRAIAGLGLKEAKDLVEAAPKVI  
QKDLKREAADELKEKMEALGAQIEIV  
>comp12893\_c0\_seq1; 224 326 1261 LEN=1446; translated  
MVDDDRIRSQKESSLSDTSGFATSKSLHSASREELSDSINTALLYSDTDISKGCTHTIP  
WDANILIGLQKCPITMEPVGMVCDGLVASVEKENRDKNNNGVHRIVRFKFGKKIYQLTTI  
GEKTEQQKTQQDPLTTGWFEYFSGTKSATTKDNCITTTMLAQKRIAQALNLASLKILHKG  
KVVYPPPQCSEPMQETSISLELLRISDEHWFGSRNNNRKKVALVVMGTSKDGHLKESKN  
SQGYKKKSIPQLLQOSIWFVPVRFWSLQMSWHLVTSFFAPFLPSYLLGGEGDGRNSIGN  
GNTEHSRPHQD  
>comp12894\_c0\_seq1; 632 195 1829 LEN=2849; translated  
MYNDEMNVGTGRDLREVGVVEIDAGDNITVEVDVTRCGDMIENIDGPNTSNLPGDAFGEEDW  
IRQLQGNQLQEGNLIGQGS DNGLIHPQKPQYHLAYDQNI SLTGALSGSGNSNRNGPQPEP  
LQNTGKLSIQEPQPI SQFQVFDGLPQLQHGDADNIGVLDNLFQQQQQQQCFPLGNNTIQR  
ESSSETNQAQEQQIRCLQQQQEQQLQQQT PAPI LQQSLIELQKLQEQQQHLQEQQQILK  
NISNAGLIDANAFANPLGTLGTLIGQNGNGGGSSNSHNTGNAAILGACTWGQIPGLQV  
QINNNTSPNPIATIPNLDPQIQALPVGFGEKFDPIQDSRQKQFHEQVPLAESQHAPDKSH  
ISIEDKSHVIGTNENNAHISAVMNPSPAIRKTDKKREP NPF PKQLWEAMMTDGYSNHDAY  
EWLPDGGKSFVVVDSTKFCTEILDRHFKQSKYGSFVRKLRWGFIRLTSGTGTDFHHPMF  
QRNNRDLVTKIKCNTRNGKNGKEKGHNPYARGDIMHSAQPSLMGVEKFTRTKVVPDSAE  
DIMA  
>comp12894\_c0\_seq2; 632 195 1829 LEN=2742; translated  
MYNDEMNVGTGRDLREVGVVEIDAGDNITVEVDVTRCGDMIENIDGPNTSNLPGDAFGEEDW  
IRQLQGNQLQEGNLIGQGS DNGLIHPQKPQYHLAYDQNI SLTGALSGSGNSNRNGPQPEP  
LQNTGKLSIQEPQPI SQFQVFDGLPQLQHGDADNIGVLDNLFQQQQQQQCFPLGNNTIQR  
ESSSETNQAQEQQIRCLQQQQEQQLQQQT PAPI LQQSLIELQKLQEQQQHLQEQQQILK  
NISNAGLIDANAFANPLGTLGTLIGQNGNGGGSSNSHNTGNAAILGACTWGQIPGLQV  
QINNNTSPNPIATIPNLDPQIQALPVGFGEKFDPIQDSRQKQFHEQVPLAESQHAPDKSH

ISIEDKSHVIGTNENNAHISAVMNPSPAIRKTDKKREPFPFKQLWEAMMTDGYSNHDAY  
EWLDPDGKSFVVVDSTKFCTEILDRHFKQSKYGSFVRKLRWGFIRLTSGTGTDCFHHPMF  
QRNNRDLVTKIKCNTRNGKNGKEKGHNYPYARGDIMHSAQPSLMGVEKFTRTKVVPDSAE  
DIMA

>comp12895\_c0\_seq1; 452 1 1881 LEN=2179; translated  
IDNTNRSFSHLPEGEQVVRNHPFIPFGSPSLCVMAFYTSGDVNAIVADLGSYASKIGYA  
GEDHPRSFRSNVGLREESSDERSARRRPIQKVNYDALNRPADPASDTDGDWEVANPV  
NLTTGLWYEPGTSSTASGSSSYNANDPKDGGRGFQNDNADWSDLIPTFLRHGYSTALS  
IESSGSDSDITSQNPLLMIERSYNPPAIRQQLLEILMEECRVPATFFGRDATMACYACG  
RTTSTVIDIGYSGTTVSPVYEGYVEQRGVRRTPIGTEAMDELCLKQLHKLKMKELQIRKKI  
RKKDHRPLTPFWQVRHPEAERKDSFKRLSLLQIAKDCRESGAGQAINTLASAALQVPSMS  
YCLPDGSVVDVPSTARFSVSELAVGSKAALDEKEDLTNLRDEHLERIRREFEELLEIASA  
DDDDANENNNNGNRKGTDRDDGNDQKRQAAYTEATAVGLSNSRRGTRKRGRKATTTDEADK  
QQAQNQTKVRFDRILQRACAPYLEATFEQLTASPVANMVDAAYRCDREQQAGVLGNVI  
LAGGGACIGPTDQSVPLSKEQIETIIHAHTPGWRVKMLSPGMQERAIASWLGGGILGSL  
GTFHEMWISKAHEYDEWGCIVNRKCP

>comp12896\_c0\_seq1; 237 122 1849 LEN=2010; translated  
MEGKGQTKANRTVDGSPARRPTLLGNDCLKAI IYSAVVLHALKSAAKSWNDPPSDSESDD  
GNSYFRYSLPINLLVAAYGYALVQELRFLLCVLPYLPPLPGSLGIPFLGNILEVIFKHNGV  
IFLHLIEQKTLRKSRSKSAADVFFTTVLNQLRLVTLADSAGISWVWNQDRKSTTEVAWPP  
NISALLGPNSAANASGGHHRALRRLMEPFYAPLVVQNYASVITTTTGDGELSRWHSMTSSD  
RNSFVSGEVFKLYALRFLAASFGEVDEAVVKS LHDDTKIYIQGFVVVTGTLRIPGMAFD  
DAMKARERMQDTCRILLAKFIEEHPKGSHLAETTVMGKMVYSKTS DGVGLTTDEILDNLI  
LLIFAGHDTTYASINTVLYYLTHDPFAMEALKEEVSAFAEPLEYDKLKNEAPILNAIMHE  
AWRMSPPISAGFRKFIANHRPGSKKPSTLEFCGYRFSSTGTVFNYNINLATQDDNLYPSAD  
SFRFQRF LPKGHPLYDPDWKSDVDP AQGRADYPIFGGGTHVCLGKNFAKMELRILLARIF  
MHYTIETRNPTKIHAPVNGWALEFRLEKERKERGRKS

>comp12897\_c0\_seq1; 279 118 705 LEN=1047; translated  
MSSRPGRNRRSVAMAFELRQFSNTTKNRLMMLRLDNSVLSRRRAVAQGSEGGNKPPAPRG  
IVLNTAVGGLTFAGGVMGYVTKGSKASLVAGSMFGGLLMVSAILVAKASERKSARGNILG  
SSVSAMLGVMGKFFVSKKFM PAGLLTILSAAGFLYNLIEAKVLVSWKGDDETTSTPSD  
EDHSKDSTDATSTTE

>comp12899\_c0\_seq1; 419 179 1645 LEN=1845; translated  
MTIAEHLKQLCIDIFHNQPKTLAYFRLSNPSILKDLQDFAADSNANGQPKPLNEVLN  
LFKLLNQHMAEQEHFFLAASKDSVSPSLPFTSVPTAISVVFGGKYSKEPASISEKLVSKL  
VPRSKLVFTVSRSTCPEGGLPTNIKHF SKTNLDACHGESSLDPSVSNDDGGGSFSTIGVD  
EFYDVMSMARDEWLQTPPPTTLVFYFTLGQHKGINPFARNLQAAENFHRALQKLSFSYSG  
VDGVLPSSETDSKSSVPRSCRTRWRVLTGTDTLPSVHPPSEMTLRMDNNTMQLLTVPT  
YKISNNNFVYAMSKLGQYYRIANSVARLVLKQTLGAHCSERDRSKYEEIVCETKEIHGKI  
LKHVNVAGEDGAYHGDDTAPIDYGRISIEELDIISTDMSLRLEELKEHFLIAKQISICY  
TPLHANPWTEDAIQNSTLDINSNPLEQLSPSLAVTSLQRAFILEQVVKRLKNAISIDSA  
SSHLVQY

>comp12899\_c0\_seq2; 407 179 1666 LEN=1866; translated  
MTIAEHLKQLCIDIFHNQPKTLAYFRLSNPSILKDLQDFAADSNANGQPKPLNEVLN  
LFKLLNQHMAEQEHACPTWGDFFLAASKDSVSPSLPFTSVPTAISVVFGGKYSKEPASIS  
EKLVS KLVPKLVFTVSRSTCPEGGLPTNIKHF SKTNLDACHGESSLDPSVSNDDGGGS  
FSTIGVDEFYDVMSMARDEWLQTPPPTTLVFYFTLGQHKGINPFARNLQAAENFHRALQK  
LSFSYSGVDGVLPSSETDSKSSVPRSCRTRWRVLTGTDTLPSVHPPSEMTLRMDNNTM  
QLLTVPTYKISNNNFVYAMSKLGQYYRIANSVARLVLKQTLGAHCSERDRSKYEEIVCET  
KEIHGKILKHVNVAGEDGAYHGDDTAPIDYGRISIEELDIISTDMSLRLEELKEHFLIA  
KQISICYTPLHANPWTEDAIQNSTLDINSNPLEQLSPSLAVTSLQRAFILEQVVKRLKNA  
ISIDSAASSHLVQY

>comp12901\_c1\_seq1; 379 1 1041 LEN=1063; translated  
CHQKNRIGFGAQGSTTTFATITTTTTTTTFFETLHRENYPRSNKTMGSRRSEFDAESNSKAAL  
SDRECSNLP TSEFDGA EVDQF DDEYGERTRRRRKRKTYLTVPTRSPAEGDHQNASETT  
VDGDGDVDGAAGFIDHGAVRELAGDVRELRRLAIVLVLFVLVAGLIALDDYFNRYIDA  
TVADGTDTKPEAETDPEARGNPENNTSNTSADGAYHGPPYPRMGHKLRLINASAFTANDF  
ECLRLDTGNWPSERVHCELLPGSGDERYEFVVEHFDEGCQTPNAQNPVVRHTASGCFY  
DAYNHSYNDLCHPNRTFTVSAFFGRGCLDMPVTVAVNLLPEGEGAP

>comp12901\_c1\_seq2; 350 1 1029 LEN=1051; translated

CHQKNRIGFGAQQSTTFATITTTTFETHHRENYPRSNKTMGSRSEFDAESNSKAALSDRE  
CSPNLTSEFDGAEVDQFDDDEYGERRRRRRKRKTYLTVPTRSPAEGDHGQNASSETTVDGD  
GDVDGAAFGIDHGAVRELADVRELRRGLAIVLVFLVAVGLIALDDYFNTRYIDATVAD  
GTDTKPEAETDPEARGNPNENNTSNTSADGAYHGPPYPRMGHKLRLINASAFTANDFECLR  
LDTGNWPSERVHCELLPGSGDERYEFVVEHFDDDEGCQTPNAQNPVVRHTASGCFYYDAYN  
HSYNDLCHPNRTFTVSFAFFGRGCLDMPVTVAVNLLPEGEGAP

>comp12902\_c0\_seq1; 372 602 1669 LEN=2259; translated  
MSKSPSLRRIQADIRELALDPSDQYFAAPLEHDMFEWHFTIRGAEGTDFEGGIYHGRILL  
PAEYPYKPPHIMFLTPSGRFETNTKICLSFSAFHPELWQPAWGIRLILEALISFLPTPGD  
GAIGALDYSPEERRRLAKLSQWSCPTCGPIAKLLPELDPEKKKSKSAFSKEIAELQRLQ  
QTSEGRKKGTAAEAKKADDDNASGSTRKNDKTLSELAEATDDGEKAAASATTDSDIKN  
DPTTVEDEKEPIQQQSSNSNEGPASDLANESTAVEEEEEAVNPVPADTLSQLYDPLMNVSI  
LLMICICILLQKGLDLSRELAQLREMPLEVEQGFAGGAAASSVASVASVASEEL

>comp12902\_c0\_seq2; 372 845 1813 LEN=2403; translated  
MFEWHFTIRGAEGTDFEGGIYHGRILLPAEYPYKPPHIMFLTPSGRFETNTKICLSFSAF  
HPELWQPAWGIRLILEALISFLPTPGDGAIGALDYSPEERRRLAKLSQWSCPTCGPIAK  
LLPELDPEKKKSKSAFSKEIAELQRLQQTSEGRKKGTAAEAKKADDDNASGSTRKNDKTL  
SELAEATDDGEKAAASATTDSDIKNDPTTVEDEKEPIQQQSSNSNEGPASDLANESTA  
VEEEEEAVNPVPADTLSQLYDPLMNVSIILLMICICILLQKGLDLSRELAQLREMPLEVEQ  
FAAGGAAASSVASVASVASEEL

>comp12903\_c0\_seq1; 305 127 1044 LEN=1312; translated  
MSGTVTEPERGSDLVSIKTKCFVHDFSTSSADGSSPKALIVLYHGFLAHGNYPTVRYAAE  
FFAEAGYAVVAIDFPGHGKSEGLRGYLSADDLIEDGIAMAQHAQSLYSNFENLPLVLCG  
SSMGGAIALSVAHRMSQLQDGVTKPASAVPLVILLAPMLKLNVSLLERTALAFLAYVAPT  
VHLIPSSATDSSKQYRDEKKRQECESDPLAPPKLCVASALTCVDTTLKIAEAFESIA  
NPYLLLIADDEVVVKNEGSEVFHQKSTSQDKTKKNYPALHGLLCEPSPLFDTIKSDILDW  
LDKRV

>comp12904\_c0\_seq1; 547 128 2206 LEN=2295; translated  
MSISIVLIPSDASKSLQTSISWDEKCNVNSGPFASKLHHRILSLLHNGERDEEIANSEL  
SEIDDRIEVPLLRPLGDSPLYAYFTSSGTPNLRQELATPNIRATRLAMACGLMKLRFY  
NVVIARSNPSGRPRWSDVTIEDIWGPCEVSPDLRPKIQIELAVGLIDESSRKYRITKEDI  
GAAPEWIKNAAEQNYHDAAVVARMAEVMNTEENKDDDDNDSKSDSVYGHNFDMVMKKN  
EERSSIEFSVAAKSPLCLHCRRPNTNHLCEGCGGAYFCPPPLNCREVGVSHSCQCRTWKTY  
VAHREELSAFDYLDPEWQAPLTTREFQLSEEPYRKFLTSRLMIKQTMNSINDSDNETEND  
DSSSSFSWWSTETDVGWAGGDSISARQVDITLSSFEFGFAPIPWNQLPPPQRCVSEDYE  
RAGLLERENSKNTVGLWRLTSWEDYRRLNIPPEPVALCTFPLTIYHAITEFGDVPVT  
VARMLQRPLRIHVVGTEKELNFDLDFQELGFLPEELKVELIFIAREDMLPTKCRITNSR  
SDKDDDRFLLRVEMTSNLTVGVGTYGGERKNDSCSSTINKSKSATILDPNFDGCGSP  
PDMVIAMNAGLYAYESWRSVVDVFLSHNKGVGVFTDYNEYSVHCAGLGGAESRESL  
CINPFRQPLAMPVYSMNLPQFSNGFFVFNQAQELD

>comp12904\_c0\_seq2; 463 128 1809 LEN=2427; translated  
MSISIVLIPSDASKSLQTSISWDEKCNVNSGPFASKLHHRILSLLHNGERDEEIANSEL  
SEIDDRIEVPLLRPLGDSPLYAYFTSSGTPNLRQELATPNIRATRLAMACGLMKLRFY  
NVVIARSNPSGRPRWSDVTIEDIWGPCEVSPDLRPKIQIELAVGLIDESSRKYRITKEDI  
GAAPEWIKNAAEQNYHDAAVVARMAEVMNTEENKDDDDNDSKSDSVYGHNFDMVMKKN  
EERSSIEFSVAAKSPLCLHCRRPNTNHLCEGCGGAYFCPPPLNCREVGVSHSCQCRTWKTY  
VAHREELSAFDYLDPEWQAPLTTREFQLSEEPYRKFLTSRLMIKQTMNSINDSDNETEND  
DSSSSFSWWSTETDVGWAGGDSISARQVDITLSSFEFGFAPIPWNQLPPPQRCVSEDYE  
RAGLLERENSKNTVGLWRLTSWEDYRRLNIPPEPVALCTFPLTIYHAITEFGDVPVT  
VARMLQRPLRIHVVGTEKELNFDLDFQELGFLPEELKVRNKLXDEQNHEKDSVTINFYA  
LMGTDGFFLVWCASIVYCTE

>comp12905\_c0\_seq1; 386 653 1150 LEN=1401; translated  
MIDIAKEILAAAEKNGVKLLLPVDAVATTSFSPGMSRDDTKTFDLVPGSGIDDDFMGLD  
VGPKTRALYKEGLSEATKIIIFNGPMGVFEIEPFDDGTKALVDALEENTKNGAITVVG  
GDSVAALAEKFGKTDVSYVSTGGATLELLAGDVLPGVAAIADFTSE

>comp12905\_c0\_seq2; 368 178 1044 LEN=1295; translated  
DEESNVESFAEGLASIAADAYINDAFGTAHRAHASVAGVPALLPKEKCGIGCLVASEVAYL  
DFSQADGKVAIIIGSKVSTKLPVIKGLINQVQILVLGGGLAYTFSKAKGINIGTSLC  
EDDMIDIAKEILAAAEKNGVKLLLPVDAVATTSFSPGMSRDDTKTFDLVPGSGIDDDFM  
GLDVGPKTRALYKEGLSEATKIIIFNGPMGVFEIEPFDDGTKALVDALEENTKNGAITVVG



VFFFEFDTPFHQNSEQEPCIHVFGGVEMYAKNTTYSVFLVPENDPIARIDVWSDNLVTGLQ  
FTMASGAVSQVYGSISPTKSSKSSFEPKDDSLWQLVGIHGSCGTVVDSLGLFTFGRVSEVV  
NKDDEIGRRGFNSERVAKDDEENCQ  
>comp12913\_c0\_seq1; 247 104 685 LEN=1685; minus strand; translated  
MNSKDKKTAWDWHAVFADQGLLYWTKYVKNVSVIVGKDIEQWSSTGDGGDIVHIENIV  
SGDPLKPHSCFRKGNLSPPYRDFHHFTGRTPWEQDLRVNVSKGEYTRYDGIKISDSQA  
EMINLWRIGLLKAQQHTPHYNF'FLFHPETDIEPPMGRYSTYNEMLHHIESKKDSNWTHYN  
ERSQTLNHNHNEE  
>comp12915\_c0\_seq1; 561 82 1539 LEN=1656; translated  
MTGSSDANTGSGPAAAAGASTTKEIADVLEERLIDSEYKIWKKNTPYLYDTVMTHSLEWP  
SLTCQWLPTSCKLNKGNDSKGGDACELSLLLGTHTDGGEQNYLMVANTVVATYDPVVAG  
VDDDDNAVPPQVAYDEEKGEVGGFGNTVGFDDNGSGTNAGFTIGKVDYKMKVRFPGEINR  
ARAMPQNHFIVAARGPDPNIYIIDRSKHPQRPVEGGNFSPQITCTGHTAEGYALAWSTLK  
EGHLVSGGDDNVVCLWDVNVKGIASNSSSITATATATFKGHTATVEDVDWHAKDPNLFASVSD  
DRSIRLWDIREKNNQHIVENAHTADVNGVAFNPKLEYTLATASSDHTVGIWDMRNLKNKV  
HTCQGGHTDEVYVVEWAPFDESVLGSAGARRVAVWDL'SRTGREQSPEDAEDGPPPELLFV  
HGGHTAKVSDFSWNAQHPVWVASVSEDNVLQVWQMAEELYVDDDEEEETEEDRKNDKTLG  
DDDLLE  
>comp12916\_c0\_seq1; 267 142 1260 LEN=1329; translated  
MRVYVAGTFLFQSFPTLFCSGFLLPSETQVGGRRKPSVSGGGT'TVTNGPQGSIAFARQR  
KLSVSSQSEDTGEGSPQRRRYLSEEQVHDLLSGSLSIGKQPSYPAWRSKQKRKQLSEMGE  
WATSDESNRPIICEYEYEPDALWLWTRWRGTVLSMTYIPIAFNIGIGILVNWYVHSHTQETW  
TFFQVPPQEEPVVQELAGLKT'LWEYQLTLCTFILAFFTSQAYTYWRQVYFTTTRAIQGRIN  
DICLIVTTNAEREAGRASDGSEVTGYSERASDLVATCTRLIRVSHTFFWAAMSTNSNGVS  
DKGWGNRTYRVKTS'GEGGDGKNAIGPVLLSSSGLRYLERADELTHAEAQALLDSDLPPS  
QYTYMLMQWVAM  
>comp12916\_c0\_seq2; 153 142 1005 LEN=1073; translated  
MRVYVAGTFLFQSFPTLFCSGFLLPSETQVGGRRKPSVSGGGT'TVTNGPQGSIAFARQR  
KLSVSSQSEDTGEGSPQRRRYLSEEQVHDLLSGSLSIGKQPSYPAWRSKQKRKQLSEMGE  
WATSDESNRPIICEYEYEPDALWLWTRWRGTVLSMTYIPIAFNIGIGILVNWYVHSHTQETW  
TFFQVPPQEEPVVQELAGLKT'LWEYQLTLCTFILAFFTSQAYTYWRQVYFTTTRAIQGRIN  
DICLIVTTNAEREAGRASDGSEVTGYSERASDLVATCTRLIRVSHTL  
>comp12916\_c0\_seq3; 392 142 1755 LEN=2291; translated  
MRVYVAGTFLFQSFPTLFCSGFLLPSETQVGGRRKPSVSGGGT'TVTNGPQGSIAFARQR  
KLSVSSQSEDTGEGSPQRRRYLSEEQVHDLLSGSLSIGKQPSYPAWRSKQKRKQLSEMGE  
WATSDESNRPIICEYEYEPDALWLWTRWRGTVLSMTYIPIAFNIGIGILVNWYVHSHTQETW  
TFFQVPPQEEPVVQELAGLKT'LWEYQLTLCTFILAFFTSQAYTYWRQVYFTTTRAIQGRIN  
DICLIVTTNAEREAGRASDGSEVTGYSERASDLVATCTRLIRVSHTFFWAAMSTNSNGVS  
DKGWGNRTYRVKTS'GEGGDGKNAIGPVLLSSSGLRYLERADELTHAEAQALLDSDLPPS  
QYTYMLMQWVAIYATEGFRDGVLVGGDGAERELMRRITDLRAEYFSIGDLCAGRMP'IAVY  
QLIQILVDILVWLAPFSLYSGLGCLSIPLCAVLTHFFKGLLELSKSFLDPFGNDGYPNQ  
IRVDVLVSELNFGAASRWKEAAHTVPVPPRSSSATDRKKRNRGSDADHRSNFHPL  
>comp12916\_c0\_seq4; 372 142 1886 LEN=2422; translated  
MRVYVAGTFLFQSFPTLFCSGFLLPSETQVGGRRKPSVSGGGT'TVTNGPQGSIAFARQR  
KLSVSSQSEDTGEGSPQRRRYLSEEQVHDLLSGSLSIGKQPSYPAWRSKQKRKQLSEMGE  
WATSDESNRPIICEYEYEPDALWLWTRWRGTVLSMTYIPIAFNIGIGILVNWYVHSHTQETW  
TFFQVPPQEEPVVQELAGLKT'LWEYQLTLCTFILAFFTSQAYTYWRQVYFTTTRAIQGRIN  
DICLIVTTNAEREAGRASDGSEVTGYSERASDLVATCTRLIRVSHTFFWAAMSTNSNGVS  
DKGWGNRTYRVKTS'GEGGDGKNAIGPVLLSSSGLRYLERADELTHAEAQALLDSDLPPS  
QYTYMLMQWVAIYATEGFRDGVLVGGDGAERELMRRITDLRAEYFSIGDLCAGRMP'IAVY  
QLIQILVDILVWLAPFSLYSGLGCLSIPLCAVLTHFFKGLLELSKSFLDPFGNDGYPNQ  
XTVRNAQTRATEFCVHSLGSCRAECTACHGTLFLTILASQSFVPCSDVLDVSELNFGAAS  
RWKEAAHTVPVPPRSSSATDRKKRNRGSDADHRSNFHPL  
>comp12917\_c2\_seq1; 610 1880 3502 LEN=4569; translated  
MEAIERVAAMVFGDHHKDTVLYLLGVVA'AVVVFATANNWINFFAGERGGTTEKRTKPNPS  
PPPPPTGSGRRSGGNPPLRRRNGTGRLLLLGAAAFLLPRIYQTACSSPGFVDGLDRVLDGF  
QARLREAVASTATTMDALLDSIDGVL'DGIQLRVRRELRAVMELEAERAAAEDXAGNHVT  
ETDDCRRGWDSSRVESSRVAPRNHHGKHRSS'EDVGRPPQALRRDPPAKNKRRAARESEQ  
APGTNAHGQQDVMDRFFSFAEAAFCSPRHS'DLASLAKEPVPEPDVLDYVFEHVESFTCAD  
DDEHDYKHERQGGSPSKASAKKHLEYEDY'YGADASHHKLHHQQNLEAFSLQRDNSLIVETG

PAGTPQKLGPHASAAEASPSPHCAMGHEGDLDDYCFETVESYTCADHGDGQTSEALRKSR  
KQQALEARAEAAIAAQLKARQDYRGRRIRQSASGDWLRKQQQQQHRPPQRDHPREERDL  
PRRSSIPTEISTYPKKPWRNRSSGSNTSFHKNISFNKNYYEDPYDEEDNIMLYYRPNQLT  
W

>comp12917\_c2\_seq2; 6 739 1185 LEN=1185; minus strand; translated  
NIGEP LRGFAPLRASRPPVPKACVGVGVGLLRFDSIRCGFVRSRSGSPDATTTCETVQRNAD  
LGFRIESPRI DRSDCITPHHTAPHFSRLRDADAASAALAPRLLVPLG SVPLPFPAGPHQG  
RKVRVVGKVEVADAGPANVPDRRHGGRR

>comp12917\_c2\_seq3; 426 198 1208 LEN=2275; translated  
MASTAAARMSDARRRRFVVTPPRKTNGAPPKAGSKLREPHAHGQDVMDFRFFSFAEAAF  
CSPRHSDLASLAKEPVPEPDVLDYVFEHVESFTCADDDDEHDYKHERQGGSPSKASAKKHL  
EYEDYYGADASHHKLHHQQNLEAFSLQRDNSLVETGPAGTPQKLGPHASAAEASPSPHCA  
MGHEGDLDDYCFETVESYTCADHGDGQTSEALRKSRKQQALEARAEAAIAAQLKARQDYR  
GRRIRQSASGDWLRKQQQQQHRPPQRDHPREERDLPRRSSIPTEISTYPKKPWRNRSSG  
SNTSFHKNISFNKNYYEDPYDEEDNIMLYYRPNQLTW

>comp12917\_c2\_seq4; 97 532 801 LEN=801; minus strand; translated  
MRCDRHQHSTAFALHCITPHHTAPHFSRLRDADAASAALAPRLLVPLG SVPLPFPAGPHQ  
GRKVRVVGKVEVADAGPANVPDRRHGGRR

>comp12917\_c2\_seq5; 610 1649 3271 LEN=4338; translated  
MEAIERVAAMVFGDHHKDTVLYLLGVVAVVVFATANNWINFFAGERGGTTEKRTKPNPS  
PPPPPTGSGRRSGGNPPLRRRNGTGRLLLLGAAAFLLPRIYQTACSSPGFVDGLDRVLDGF  
QARLREAVASTATTMDALLDSIDGVL DGIQLRVRRELRAVMELEAERAAAEDXAGNHVT  
ETDDCRRGW DSSRVESRVPARNHHGKHRSS E DVGRPPQALRRDPPAKNKRRAARESREQ  
APGTNAHGQDVMDFRFFSFAEAAFCSPRHSDLASLAKEPVPEPDVLDYVFEHVESFTCAD  
DDEHDYKHERQGGSPSKASAKKHLEYEDYYGADASHHKLHHQQNLEAFSLQRDNSLVETG  
PAGTPQKLGPHASAAEASPSPHCAMGHEGDLDDYCFETVESYTCADHGDGQTSEALRKSR  
KQQALEARAEAAIAAQLKARQDYRGRRIRQSASGDWLRKQQQQQHRPPQRDHPREERDL  
PRRSSIPTEISTYPKKPWRNRSSGSNTSFHKNISFNKNYYEDPYDEEDNIMLYYRPNQLT  
W

>comp12918\_c0\_seq1; 534 367 1398 LEN=1820; translated  
MGRGKSKASKKQKGIASASEKVN GKEKPTKFSAAALARHAKWQADAKKLG VNRIVVKKEE  
AKKV VFDALYDAFRPMNINGIYMTLKKMVPSPVLNAALEDMSMTFDGGNVFDGSDDEDND  
KEKEGKGAPEKKPELKESYSGSLVFKAGR NAKSNLYYVDYTKMKEMDGDVRQELASKTAI  
AEGEYKDLTF AFKQAATR SKQLLSEPTNDELVCLLIEAEKAVVALTDSVNDAKALLVNEG  
HKNKLRRIQSMAGHYRKRKQLCCSFLCALEEVSDGAI SKKCLSGDGQIPLDSDESI IK  
SAIAYAKSKKHQKTRKATLADDKFIGVILDSQGMVKRSYVDEK

>comp12918\_c0\_seq3; 550 367 1524 LEN=1946; translated  
MGRGKSKASKKQKGIASASEKVN GKEKPTKFSAAALARHAKWQADAKKLG VNRIVVKKEE  
AKKV VFDALYDAFRPMNINGIYMVSTVQFNGSLPKAKQAVFLSFLILACLILPVASFPIC  
ASLLQTLKKMVPSPVLNAALEDMSMTFDGGNVFDGSDDEDNDKEKEGKGAPEKKPELKES  
YSGSLVFKAGR NAKSNLYYVDYTKMKEMDGDVRQELASKTAIAEGEYKDLTF AFKQAATR  
SKQLLSEPTNDELVCLLIEAEKAVVALTDSVNDAKALLVNEGHKNKLRRIQSMAGHYR  
RKQLCCSFLCALEEVSDGAI SKKCLSGDGQIPLDSDESI IKS IAIAYAKSKKHQKTRKAT  
LADDKFIGVILDSQGMVKRSYVDEK

>comp12918\_c0\_seq4; 624 424 1566 LEN=1988; translated  
MKDDQNASVLNNEEEERKKNQE QDRESEPIIALK AINTGKSENQGHGEEGIASASEKVN  
GKEKPTKFSAAALARHAKWQADAKKLG VNRIVVKKEEAKKV VFDALYDAFRPMNINGIY  
TLKKMVPSPVLNAALEDMSMTFDGGNVFDGSDDEDNDKEKEGKGAPEKKPELKESYSGSL  
VFKAGR NAKSNLYYVDYTKMKEMDGDVRQELASKTAIAEGEYKDLTF AFKQAATR SKQLL  
SEPTNDELVCLLIEAEKAVVALTDSVNDAKALLVNEGHKNKLRRIQSMAGHYRKRKQLC  
CSFLCALEEVSDGAI SKKCLSGDGQIPLDSDESI IKS IAIAYAKSKKHQKTRKATLADDK  
FIGVILDSQGMVKRSYVDEK

>comp12918\_c0\_seq5; 954 424 2517 LEN=2939; translated  
MKDDQNASVLNNEEEERKKNQE QDRESEPIIALK AINTGKSENQGHGEEVNTATADSDS  
GTPPSNDYGRSNNDEDQDEETSEVWDI IRVIPTAE EKIVCRYENCTNQAVATWASNLAPD  
DKWSLCEKQLED FGGWPEGVDPIERKSDLSNFEMEDTTKNGKSIVATIDGNFYSEDHKE  
SPSQGESIDDTSIPIISTPSAAVCMSTQDEPEEMNSGEEAFELSRIVSLQKLLGNPIKCH  
DQDCNLPACSVYTSKADPKK WYCVDCQERDFGGWPPPKELPVDYLEPKYLQIIATKCSK  
KRNPAMP SFNSHCVTPLPISP HPPKGIASASEKVN GKEKPTKFSAAALARHAKWQADAKK  
LGVNRIVVKKEEAKKV VFDALYDAFRPMNINGIYMVSTVQFNGSLPKAKQAVFLSFLILA

CLILPVASFPICASLLQTLKKMVPSVPLNAALEDMSMTFDGGNVFDGSDDEDNDKEKEGK  
GAPEKKPELKESSYSGSLVFKAGRNAKSNLYYVDYTKMKEMDGDVRQELASKTAIAEGEYK  
DLTFQAFKQAATRQKLLSEPTNDELVCLLIEAEKAVVALTDSVNDKALLVNEGHKNKLR  
RRIQSMAGHYRKRKQLCCSFLCALEEVSDGAIKSKKCLSGDGQIPLDSESIKSAIAYA  
KSKKHQKTRKATLADDKFIGVILDSQGMVKRSYVDEK

>comp12918\_c0\_seq6; 640 424 1692 LEN=2114; translated  
MKDDQNASVLNNEEEERKKNQEQDREESEPIIALKAINTEGKSENQGHGEEGIASASEKVN  
GKEKPTKFSAAALARHAKWQADAKKLGVRIVVKKEEAKKVFDALYDAFRPMNINGIYM  
VSTVQFNGSLPKAKQAVFLSFLILACLILPVASFPICASLLQTLKKMVPSVPLNAALEDM  
SMTFDGGNVFDGSDDEDNDKEKEGKGAPEKKPELKESSYSGSLVFKAGRNAKSNLYYVDY  
TKMKEMDGDVRQELASKTAIAEGEYKDLTFQAFKQAATRQKLLSEPTNDELVCLLIEAEK  
AVVALTDSVNDKALLVNEGHKNKLRRIQSMAGHYRKRKQLCCSFLCALEEVSDGAIKSK  
KCLSGDGQIPLDSESIKSAIAYAKSKKHQKTRKATLADDKFIGVILDSQGMVKRSYV  
EK

>comp12918\_c0\_seq7; 938 424 2391 LEN=2813; translated  
MKDDQNASVLNNEEEERKKNQEQDREESEPIIALKAINTEGKSENQGHGEEVNTATADSDS  
GTPPSNDYGRSNNDEDQDEETSEVWDIIRVIPTAEKIVCRYENCTNQAVATWASNLAPD  
DKWSLCEKQLEDFFGGWPEGVDPIERKSDLSNFEMEDTTKNGKSIVATIDGNFYSEDHKE  
SPSQGESIDDTSIPIIISTPSAAVCMSTQDEPEEMNSGEEAFELSRIVSLQKLLGNPIKCH  
DQDCNLPACSVYTSKADPKKWWYCVDCQERDFGGWPPKELPVDYLEPKYLQIIATKCSK  
KRNPAMPSPFNHCVTPLPISPHPPKGIASASEKVNKEKPTKFSAAALARHAKWQADAKK  
LGVNRIVVKKEEAKKVFDALYDAFRPMNINGIYMTLKKMVPSVPLNAALEDMSMTFDGG  
NVFDGSDDEDNDKEKEGKGAPEKKPELKESSYSGSLVFKAGRNAKSNLYYVDYTKMKEMD  
GVRQELASKTAIAEGEYKDLTFQAFKQAATRQKLLSEPTNDELVCLLIEAEKAVVALTDS  
VNDKALLVNEGHKNKLRRIQSMAGHYRKRKQLCCSFLCALEEVSDGAIKSKKCLSGDG  
QIPLDSESIKSAIAYAKSKKHQKTRKATLADDKFIGVILDSQGMVKRSYVDEK

>comp12919\_c0\_seq1; 1054 46 2790 LEN=2823; translated  
MGMASKDKKAKKAGPKGKARRQAKLENRWGETAQVDANTGEEIRKKTRRGYDTDGKLS  
ALGNINKNLAKHSNEGREGFYSRVRACTEKELQKMLREQSSRRRRRKRVEYVDESEDSM  
DSSDDDDGGQDDYSDSIGNKNPMGDLGMIKKSTTNRVEDNIEKEEESNSDSSDSYDD  
SGSDEDDDEEMVDDDETSIAEDPVNVVETSLDNCVDFFKCRFGRSPLNQVEMTKLEPRT  
KPIMRKIPCGKYADLQFTLPQVCDASDSNDDCENDSKNGGNKNNMCDLLELKTPEAW  
QASAKDTYSNTTREVLRHWTASNKNSKASCNNILSDAQAPVYSFLARYADVLDATAAT  
GKGNKSGTDRRNQRDQHLQTLHVLNHLVTSRSRIGRNNRHLKEVEKREAEKDAEEEK  
KQETVPKMSANPMDTTMEERDVRDQGFTRPSVLVLLPTRGTCYQFVKDLYKLSGAKMLE  
EQEDRFADADYGELIEEDDNDGTQLKHEIAQKVAEKERRRKAVLESKGEWKNKFFGDQANQ  
DDDFKIGISLIPKSATAKSSSNVSIKLYSDFFKSDIIVASPLGLKMLITPEVGGNDDDED  
DDEEENTGTTKGNCDYLSSIEICLLQHSEMILMQNWDHVNDILSMLNHEPKNNNTDFSR  
VRNYLLEGQGARWRQLILSSKYWDPNLLSTFKRFGKSLSGQVKVRRKIRDGDASISSVLV  
PIKQVFQKIPTGNFAQQSKARVDYFVKNLPLQLERNDQKHTLVFIPSYFDFCSLRNAFLK  
LEKKHIFVSVTEYSRGTIEGRGRARFLQGRKPIMLYTGRAHYFHRHAIKIRNIVFLGLP  
EHPEFYSDYVNLIQTAASGRSDEMGLGDDIANDNETSCLTLFTKYEAHALERVVGSANAI  
RILGSENSVFMFSS

>comp12920\_c0\_seq1; 762 70 1701 LEN=1848; translated  
MAGGEGAKERRRLKRLAAQEAKNKLESTKSPQKTAHVQNEKKYSKDHSNGHTTNDSTRN  
SNGWGKQKFNKKNFNQKNSNGKNNAKLNKPKIKKPKHLKRKLEQAAHQDVKMRETIQKE  
IEEFESKKLYSKNGSHKRQKTTHKMSAENDNGNEDAVERLNRINTKRTYRQTNEVAND  
DAAIKQPAVIENEGSSRMEIEETVDPKAENKNDKIDSSTSDSEGDSSDLESTEEITIKNS  
SVSITSDASGDRSDQSSVEEENDDTGNVEDASDSSDSDNDEPIQHRQGRRRRGRQ  
DTAKKIEEMEALEKSRAAVSADSKLEDSKEGKIFDKEKKRYCIGRKPVTDFVIGQSYSGK  
VVYVVPFGVFFDIGCHSDAFCHVSRLSDDYIEKPEKFKEGDEIPSVRIVEIDRKQKRIT  
VSLQSEIRMKDERKSIEDRQLRREKMKKAKKVVAAARQPQLSSKINSFGQNP SRSQGN  
FHDETTLASKRKESIYNKAPGAPPKRNTDLSKMTPAELKRARKLARRAERRAKAESEAQE  
DTK

>comp12921\_c0\_seq1; 646 1 1974 LEN=2586; translated  
QSHFDSWDINWKIQTANFPVMKSNNIEEKGFDRLIEVSNKRAEWATLALTEKLIKILEEI  
LVTITKEIEYDDWKSFGKSTAEMMGYDRETIEGLIATKEVLAMSLTAKTETENLIMAY  
KIRAGLTPPKFKFTKGNFETRTAINGQVVVKTHTPIIPEDKAGFLPHFEAEVWMDASKIKD  
ASQVEAFAFDKAWEHVSGEEGLMMLFGAGNQAILTFVDIMEGLFKRNYVGYVKQHP IRN  
FTNDFFSRLMAPLISRGLAIEAHTSIERASALVYHPLVDAFHITGGKSTHDLVWGADP

KEREENLKANTPKIKVATSELGAVSPWVVVPGNYTTAEMKSQVAVKANFIHNSNASCNCMA  
PKCIVVADEWDQKDEYLLQLLDELAAHSLPVAYYPGIQQRWEKFSSEYPDSKKIESKSGM  
GITERKLSAGGVNKEALLLPYIKIETEVLDKSDVGKEAAKNEYIFNNEPFPVYAIITLK  
DTSQTSLMEFAKTASTFCNDYLFGTLSGSITTPPSLLEDDSVQTLIAEMKYGCVAVNNAN  
GLGYVIRHAGMWGAFPPGETLDAVKSGIGKVGNVFAIPYFEKMOVVSPIIHPGNLVLEDDF  
VKDKRKQEAAKSYFLYGGVGNFIELISAATGVELVKVGMIAATSIAVAAGAYLFRLLDK  
>comp12922\_c0\_seq1; 508 148 2084 LEN=2647; translated  
MALQNGKSKNTRSVRNTSDGETDPYRVNVSLRFMVLSMVSCLLLAFVAVGRIARMLLIVGP  
QQAIVELHAALREHQEQQERDEGRKDIMKLPNPTLKNKPIPIITVYTSMNFD TARSTTINS  
RWVVSEQDEEENKVKGTMSGKNDCQAEPEIDLRAEQQPANGTEGDDELHLPAGQHLLM  
DIRNVAADFLASEERLANAMLDVVGDCGLTLLSYHCHGLTPSGVSCVGVLLSHVVSFHTW  
PSEGVVTLDFLFTCGSQSLLPIVERVERLFGVPRNADGPETVWAYKVRGFGDETEEELTDL  
FTFP IGTMEYKKEKELVSI EKTSQNNNRIDVYDVL RPV FQNYEQYKRSLDDG SYESRYKE  
IFQPDRILFVNGVLQSRSSAEVPYHEALVHPAMMAHKSPSRVLLNCGGGAALREVLKHK  
GVEKVTLEEEPEIVRVSKKFFPGYHDCSGIQGIPSNCWDDPRVELIYDDVYDWAEAQYE  
DDTDEEFDXDHPRHVSTNRTELRTCAAARCVCVCAVGILDRPRDAHSPAPSFLFCSYV  
EEFSEDEGDGDLAELLSDLLAPDGI LAAQVGDVPTLETAALGNPDMQGRFDFIEDLESNG  
FVRIVDYEEVRIVYGFGRGPVRHRRTKHATGRRCLFGIETTIGALAF  
>comp12922\_c0\_seq2; 529 148 2127 LEN=2328; translated  
MALQNGKSKNTRSVRNTSDGETDPYRVNVSLRFMVLSMVSCLLLAFVAVGRIARMLLIVGP  
QQAIVELHAALREHQEQQERDEGRKDIMKLPNPTLKNKPIPIITVYTSMNFD TARSTTINS  
RWVVSEQDEEENKVKGTMSGKNDCQAEPEIDLRAEQQPANGTEGDDELHLPAGQHLLM  
DIRNVAADFLASEERLANAMLDVVGDCGLTLLSYHCHGLTPSGVSCVGVLLSHVVSFHTW  
PSEGVVTLDFLFTCGSQSLLPIVERVERLFGVPRNADGPETVWAYKVRGFGDETEEELTDL  
FTFP IGTMEYKKEKELVSI EKTSQNNNRIDVYDVL RPV FQNYEQYKRSLDDG SYESRYKE  
IFQPDRILFVNGVLQSRSSAEVPYHEALVHPAMMAHKSPSRVLLNCGGGAALREVLKHK  
GVEKVTLEEEPEIVRVSKKFFPGYHDCSGIQGIPSNCWDDPRVELIYDDVYDWAEAQYE  
DDTDEEFDVILDDIYYVEEFSEDEGDGDLAELLSDLLAPDGI LAAQVGDVPTLETAALG  
NPDMQGRFDFIEDLESNGFVRIVDYEEGHLGFSHPWQFVIAFKTGEPNEAWDSTYSSWHN  
MHVDQRTLPTPTGDSLLHFDGAVMKGYSYPSKASGVVFCRGYPESRFCKEGRGIETQR  
>comp12922\_c0\_seq3; 578 148 1959 LEN=2522; translated  
MALQNGKSKNTRSVRNTSDGETDPYRVNVSLRFMVLSMVSCLLLAFVAVGRIARMLLIVGP  
QQAIVELHAALREHQEQQERDEGRKDIMKLPNPTLKNKPIPIITVYTSMNFD TARSTTINS  
RWVVSEQDEEENKVKGTMSGKNDCQAEPEIDLRAEQQPANGTEGDDELHLPAGQHLLM  
DIRNVAADFLASEERLANAMLDVVGDCGLTLLSYHCHGLTPSGVSCVGVLLSHVVSFHTW  
PSEGVVTLDFLFTCGSQSLLPIVERVERLFGVPRNADGPETVWAYKVRGFGDETEEELTDL  
FTFP IGTMEYKKEKELVSI EKTSQNNNRIDVYDVL RPV FQNYEQYKRSLDDG SYESRYKE  
IFQPDRILFVNGVLQSRSSAEVPYHEALVHPAMMAHKSPSRVLLNCGGGAALREVLKHK  
GVEKVTLEEEPEIVRVSKKFFPGYHDCSGIQGIPSNCWDDPRVELIYDDVYDWAEAQYE  
DDTDEEFDVILDDIYYVEEFSEDEGDGDLAELLSDLLAPDGI LAAQVGDVPTLETAALG  
NPDMQGRFDFIEDLESNGFVRIVDYEEVRIVYGFGRGPVRHRRTKHATGRRCLFGIETTIGA  
LAF  
>comp12922\_c0\_seq4; 459 148 2252 LEN=2453; translated  
MALQNGKSKNTRSVRNTSDGETDPYRVNVSLRFMVLSMVSCLLLAFVAVGRIARMLLIVGP  
QQAIVELHAALREHQEQQERDEGRKDIMKLPNPTLKNKPIPIITVYTSMNFD TARSTTINS  
RWVVSEQDEEENKVKGTMSGKNDCQAEPEIDLRAEQQPANGTEGDDELHLPAGQHLLM  
DIRNVAADFLASEERLANAMLDVVGDCGLTLLSYHCHGLTPSGVSCVGVLLSHVVSFHTW  
PSEGVVTLDFLFTCGSQSLLPIVERVERLFGVPRNADGPETVWAYKVRGFGDETEEELTDL  
FTFP IGTMEYKKEKELVSI EKTSQNNNRIDVYDVL RPV FQNYEQYKRSLDDG SYESRYKE  
IFQPDRILFVNGVLQSRSSAEVPYHEALVHPAMMAHKSPSRVLLNCGGGAALREVLKHK  
GVEKVTLEEEPEIVRVSKKFFPGYHDCSGIQGIPSNCWDDPRVELIYDDVYDWAEAQYE  
DDTDEEFDXDHPRHVSTNRTELRTCAAARCVCVCAVGILDRPRDAHSPAPSFLFCSYV  
EEFSEDEGDGDLAELLSDLLAPDGI LAAQVGDVPTLETAALGNPDMQGRFDFIEDLESNG  
FVRIVDYEEGHLGFSHPWQFVIAFKTGEPNEAWDSTYSSWHNMHVDQRTLPTPTGDSLL  
HFDGAVMKGYSYPSKASGVVFCRGYPESRFCKEGRGIETQR  
>comp12923\_c0\_seq1; 7 1 628 LEN=628; translated  
XNNGTRCYGGSDIDGPSGXSSVARDSGSGRRRTI SSSRLIAGLV AIFLMSAYMIWNE  
STVIQLREHEDSVRREDYI IWSHPSNHSGMGI SNGNSTHTVRSSPKLVVSTGEGEIDNHQ  
ITLSEWISPSNIVDPTYKVPETRNHLNLSAYNF DGESLKNAYVYRPGPWDGAGIVIEQ  
YKLVFFFTQGVSRQIPQQF IGIPSEKGRNQX



>comp12923\_c0\_seq2; 199 1 1287 LEN=1677; translated  
XNNGTRCYGGGSDIDGPSGXSSVARDSSGGSGRRLTISSSRLIAGLVAIFLMSAYMIWNE  
STVIQLREHEDSVRREDDYIWSHPSNHSGMGI SNGNSTHTVRSSPKLVVSTGEGEIDNHQ  
ITLSEWISPSNIVDPTYKVPETRNHLNLSAYNFDGESLKNAYVYRPGPWDGAGIVIEQ  
YKLVFFFTQGVACTVFKQLFRMMGAEDWMTDSAHLPHPNPKKNGLTYLYHYSIADALTIL  
THPEWTRAVFVRDPKERTLSAFLDKAARKNGKYVQRHCCNTKNATCGEEANSSFLGFLRI  
IEDTCCCDPHWRPQTKRIDKAFMPF INFVGNFHLRQEDTKKLLQRLQSSNRDKFFVDGNS  
DLWRSFGASGWGKYGNESIFSKDTKAKHQ TSAIAKLRHYNASSEVLVEKIFSDDYDDPI  
LNLTRFSIA

>comp12924\_c0\_seq1; 826 9 3497 LEN=5852; translated  
MANPASLLVFLFVFFDSIVNALAAVVEYNFTIGYFVASPDGTPPTTVLGINNQIPSPSIVL  
KQGDTLVVNLFNNDPVHSHSLHWHGLTQKGSPEMDGVVGLTQCGLPPSQNMTRYRFVNDH  
PGTYWYHGHSGLAKVGTRGIAGMLTVKPKESSYNPHEDLYNAERELFLQDWSHEAPGDSY  
LKSMGSLHPPVGVSANAHYVALFPWVSGLMNGKGKIGHSATTSTVKYSVINIDAAHENQN  
YTKSTDQLTTPPTTGTRLRIVNGGEVYALKISVDRHKLLIISTDGTDTDPLEVDVAVVAH  
VGERFDAVLLPRELEDTYDYSKDNNGFWIRATTLETDEGVQIPNENQILGILRYEGSPDV  
VPQTHSYPAEEVVLNCFDSYSRPSLDKNSKCLPITALRTHSSISRHYDALIQHEPDETH  
EVAFEHPRSGKYFSHFTRIRQNVYDTEVPSRDSHF DGAYTQFVLP SRPEYVEDEDIGDYV  
NHEHTLYLEINNGSRVQLIWNHQQRVANPIHIHGKVFVAATHEADVLESCSISDCQDEN  
DWFAPWINKKVVNDTIRDFGVVVDTVVLPAGGYVVTRLIADNPGDWLAHCHIDFHFSDGL  
GLI IREKTLHNETVPMRPPGFPLCSGSDYEAFDLGAMSARQPACRCLVDPPELVTRSPTE  
EWRCSKDHLRHEAVKKENSPKTSKSANEQKNGDKIRGVRHARTFKKLGFEITLSAVIGA  
TLLLGIVFINPSDRKVPNESNMQSLIRLIFYDEWKKMTVVYFVQVFLALLGGAIYFDT  
GYNTEERVFREKIAFIWMSAFWSISSVYSSIVTYSDAWTTDGYCMVHIKSTKSLNEMT  
GVGEVGESQAGVDIIDKPLPRGASARTLEVMSLGAAPLFRNDSMIVDGDGKENHKDDRL  
RVSIHSYHITRWFIGTALSSPFLFFALVVDLSLTQLAPSIAAVFLTGLVLLLTQQAFDSM  
GRLSAECAGRKSIGRAVCLGTIVSQTIVAGGFYRTVHPVISAIGPIRYSFSAISKLHFS  
SSDSFWCTPDRAMAWYGITWCPLLESGAVEDLK YRGINIIDSYTTPRILPDAVALVSIIT  
LLRAMCYGVACFRAGKKAASNVL RQENESPRIHEQNADEDTVARNHSRHTIISIPEYEC  
ASSTSENVSNSKANINDNFVQ

>comp12924\_c0\_seq2; 257 1013 2083 LEN=2924; minus strand; translated  
MVTVPASSRDNAFFHDPHRHRYGQGLRVPCPPRSRVVAYALRHFAMVVVFFGGIMVGVTL  
SNGTIVDSSAHSTGLLRQDLTAQEPGYRPLLEPTLAVRDHREGWKTMEVFYGSADSDESL  
SPGHKTFFSQARQDEAILSM LRNKTNNGFFVDLAANDATMLSNTYALEKHFGWTGLCIEPN  
PKYWYNLTHTRENCQIIGAVVGRSRMEPVHFNF DGLDHGGIAGNGFDNGPRFKRSSTKAY  
TVTLL EIFQKFRVPKVIDYLSLDVEGAEEFIMSGFPLKEYQIRILTIERPKENLRTYLES  
HGKQVLRRLSRWGETLWIHGAF EKSMDLTNIQDFHGKKQYAEQKARQQQQQQQLSS

>comp12925\_c0\_seq1; 538 45 1520 LEN=1637; translated  
MSMNSLVKDATAVDSAGGDDDFESLRKQQSKNDGVKEEKRQOMNIVDNTPI TMVLDTE  
YDQHS DIPELIENISPTSVDASIS TSI SID EYTSKDSTRCVNETMDSKISDEKRYHKTNL  
LSSII LIVLLALSMDLNNVDWLSDEPRISKPIGITSKIT TGNISERFEIPVRKQSQKEI  
RQDSTQLQEKGQTQGEKKKKESAILPHHLNLSAATESQSSGNQGGFLVAQIQQREHQEI  
HDQQHKLKAQSQEDFGVQQQNNASNKKGHDEL RDDFHTRDRKHNETESAESKQNRETHSHV  
IYEAGLTGEDKGVSTSSSEKTNA DFKSDRVIIEDISKPPQQDCPEANDTHGNFNLRERFLR  
LTYALRSNQIKCQFEVLKSMKWVSVVKYTTVRIISVSKDFARRLNHTIQDLKSTVDRFQ  
AKSCVDGQKSVKQLMDGIARFAAHANDVTKVLA STKNQIQAKSQARRRRGINETRSHFHL  
ETSIKDYVSQT

>comp12926\_c0\_seq1; 904 483 2603 LEN=2976; translated  
MDRRRSSGRDRGRDRSANFTRARDRFERKRKTNSY EYNGNNNYTLTGASGGRGYDVSGG  
NRSDSRMDYDDDDMRGGGRQRRSRSPVRWERGKKQKKTQTDVPPDRELFVGNIPSDIDD  
KFLNLFNGAMRQAKLCARHETPCLSAQINSGSFAFVEMVNAEYANKCLNINGVLF LNAR  
IKVGRPKKYTGPFMVQSSWQELTGSELTIDAVLDGESEKVNRELFIGNTTPEMTDKMLKD  
FLGTVMGQVGLSIMDGNPITLCEMFGKYAFIELRTPRET TNALNLNNEIFMNSKLQITRP  
AKYQGFEDHLNWEQVLARYGVKPEEFKLGEVLNPTALLTSAASAEPIDGEDIKVVKAE  
LAQVKQALEITRHQLDECNKKSEARKEQLISLNKKWSEGKSELTDHKNELDQVRDQLRNN  
SQSVTRITVDMDSRMEAEVLKKKHEETQGM LRGVTESELLKATEKLQNERKARKSLEQKFV  
DANFSLNLSADGNAPAAVAAPSGGGIDFAGLRSEVSTDAAIKTENADAAASGMEIDTAM  
EDDEPKMESLKEFLAKTPKTNIDWGANALITPGATTPGGVSSAPRSRDRAGVRLCRLLI  
RTNSLNDNAKEVQGMAGKYNLGGFIKTKPGVIVVEGLEFNCDIFMDNLERQKQTYVNV  
GKVSESRGSRFPMLTLLSGDSAASDFAKACETVGLKEKLDALS

>comp12926\_c0\_seq2; 904 330 2450 LEN=2823; translated  
MDRRRSSGRDRGRDRSANFTRARDRFERKRKTNSYEYNGNNNYTLTGGASGGRGYDVSGG  
NRSDSRMDYDDDDMRGGGRQRRSRSPVRWERGKKQKKKTQTDVPPDRELFVGNIPSDIDD  
KFLNLFNGAMRQAKLCARHETPCLSAQINSGSFAFVEMVNAEYANKCLNINGVLFNAR  
IKVGRPKKYTGPFMVQSSWQELTGSELTIDAVLDGESEKVNRELFIGNTTPEMTDKMLKD  
FLGTVMGQVGLSIMDGNPITLCEMFGKYAFIELRTPRETTNALNLNNEIFMNSKLQITRP  
AKYQGDFFEDHLNWEQVLARYGVKPEEFKLGEVLNPTALLTSAAASAEPIDGEDIKVVKAE  
LAQVKQALEITRHQLDECNKKSEARKEQLISLNKKWSEGKSELTDHKNELDQVRDQLRNN  
SQSVTRITVDMDSRMEAEVLKKKHEETQGMLRGVTESSLKATEKQLQNERKARKSLEQKQFV  
DANFSLNLSADGNAPAAASVAAPSGGGIDFAGLRSEVSTDAAIKTENADAAAASGMEIDTAM  
EDDEPKMESLKEFLAKTPKTNIDWGANALITPGATTTGGVSSAPRSRDRAGVRLCRLLI  
RTNSLNDNAKEVQGMAGKYNLGGFIKTKGKPGVIVVEGLEFNCDIFMDNLERQKQTYVNV  
GKVSESRGSRFPMQLTLLSGDSAASDFAKACETVGLKEKLDALS

>comp12927\_c0\_seq1; 765 1 2198 LEN=2306; translated  
XRKRHRNGGVLKGGEMRFGNPDGVFGRSGSSPSSRKRPLVVFVRTGSNVLGGNANNPNSS  
GSSAGSVSGSAPNAPNATATNAPGGMYSSAPSSVSGRSTGSEPDYDSAQYECDEGTS  
ATTNSEISLRKTNRHKRSASTQGAQINSGVDTWTDGTMGDGEDETNSVDGSNAIPGS  
PYKTLQTAFRGALGLVLDHFYQNRGSGYKLSPAEKKRNERFAETAGANSNGSSGRGDSAMK  
SDKLASLLSSEYVFQRRQRLMAMLLPGTSPHSGHDSVPDEPPFTIQRIAEVLIAAPDRYYT  
QPHKLCNCKLEKLLLVSSTDSFGGSSGGDTSQRRREEREELAALADEKGRQEHNLQRRLS  
NNRKTPIDELVEGGNAESFFPLQKTSEQVPI SREEPSTVHNNNNNDNTAYEAKSRASPEK  
SGNVNEPIGGSNHEATNTGQKAGVAAAPDASTSREMLEALARASLRTRFDQDGINSHNP  
SNAKNEQDVRAIAENRGMTNSPPLPSLNMASAAGIALPHGGVNGMARQYLSQPPQNSD  
HPSIARAGSPI LFPNGESHLDTTATNMHMLQLHHAAMAGASLNRTNNTPTLDNLMTID  
ANTISQMRSHGTATGTGPGSESTDGRSSASNSDIDSEDDISFDDASDRSDGSDSGSAS  
AHYEPFTAARAMALNRMQQQQLQSRVLTSLGTSFQGEYRPPADSEYQSGSDSIDSTRAE  
DSGSDSSDMDT

>comp12928\_c0\_seq1; 661 54 2113 LEN=2950; translated  
MAATKFRILPLVLLGSFLCFLLLPSETLGRVGGTVSRNDGVLDDDEANDGNTSHNKRHLGG  
GYGGHKPTRYNNNHPGKHHGHYETRNVEYFRPITKPKHHGSYYYIKRPVEDPRKPKPQPTA  
IHKPSHQPTATPHHNDHEYGHDEPEPNQPSFGLSFIPISDRDKEEQSGFPVASPVEA  
ETPTPTQSPSESKALTPPEPTAVVPSPTPDLTGTSVGDSSIPIDGESDQQQNEQSTNIDV  
GEPSEIQRRIAALALGGGAEFEDPSSYQSAALRRVEQQDGANAMSDAKLMQYFSLYCIFA  
STNSKSNDFIRQSRAFDGEEIPGWTSNSGWLETNSDPCVGDGWWGITCFDDKVINLDFD  
NGLTGNFPPEVVYLAGDGPSTGAGELVALDVFNRLMSNNGDNSWMDLGSQLGAYIPM  
DTVREFGAGSCLEAPDYTFEFESMMPIFPQRDL SHXFLNRFRI SGYLYIQNTVFSGQLPT  
KFPEGLVELDIANSMITGGLDGAFAEGLDSLRFLLMDGIQVNGTIPAEIARLPNLEYFFA  
TDSMITGDL SYMESMSVIFEHWVDRNPGLGTTIP SFLGDLTTLQSF SIAECSFTGTIPET  
IGNLELMQQMWLYGNQLSGEIPASVGD LKFMRI FEVEGNLSDSMPQSVCDNFQQGMLQV  
LGADCDRINCPCTCCSIDECRKPTV

>comp12928\_c0\_seq2; 667 54 1964 LEN=2801; translated  
MAATKFRILPLVLLGSFLCFLLLPSETLGRVGGTVSRNDGVLDDDEANDGNTSHNKRHLGG  
GYGGHKPTRYNNNHPGKHHGHYETRNVEYFRPITKPKHHGSYYYIKRPVEDPRKPKPQPTA  
IHKPSHQPTATPHHNDHEYGHDEPEPNQPSFGLSFIPISDRDKEEQSGFPVASPVEA  
ETPTPTQSPSESKALTPPEPTAVVPSPTPDLTGTSVGDSSIPIDGESDQQQNEQSTNIDV  
GEPSEIQRRIAALALGGGAEFEDPSSYQSAALRRVEQQDGANAMSDAKLMQYFSLYCIFA  
STNSKSNDFIRQSRAFDGEEIPGWTSNSGWLETNSDPCVGDGWWGITCFDDKVINLDFD  
NGLTGNFPPEVVYLAGDGPSTGAGELVALDVFNRLMSNNGDNSWMDLGSQLGAYIQ  
NTVFSGQLPTKFPEGLVELDIANSMITGGLDGAFAEGLDSLRFLLMDGIQVNGTIPAEIA  
RNPNLEYFFATDSMITGDL SYMESMSVIFEHWVDRNPGLGTTIP SFLGDLTTLQSF SIAE  
CSFTGTIPETIGNLELMQQMWLYGNQLSGEIPASVGD LKFMRI FEVEGNLSDSMPQSV  
DNFQQGMLQV LGADCDRINCPCTCCSIDECRKPTV

>comp12929\_c0\_seq1; 1166 163 4758 LEN=4899; translated  
MSLRSPGELQGEPRGDRRVSSWALFVLSMLFLGVSMVSNI RHAARALPGTPGEGFRN  
GMHESFLGDGSSKGSAPAEARRASPRDGPPARGAPKVFRA SPPSLPPLSEVVPNSNNTVIS  
IVSMGKLVDTYLVERCIRSVRRRGLFTGTILVFTDAIGYEHYRKSVPWPDSRTLILGRD  
EDMAPRTGEEPGAPRIKYLQEKMIFKRFKTHH SKYLEQELSRSPVVGTTGGSEVRYVYID  
ADNVVGAPLAGFFEGYANAVATEYQRALEEHRAWRQSANANDTRTATPRDDEDDDFGVG  
MFRDKHLRTKMHSIGIIVYDLAFEDRCVNGWRNEMDTFLHASDQTI FLRVLENYDRYRCRA  
FALPHEYMAFASKRVMTGAMEARQNKRTKPLTLP TFVHITNFRVRRVNNAMLHDEFVRYV

LDLQDGEELMDGVRWEDVVASDARRAGATKXIKDGPLKVLEPTSNDKQWTFAAAAMTHRE  
YFHRYQYLVLVLLVVIDQIHEELEISVAVGASWQQYEPTVLVNLFILLLVLVLEEIDEGLV  
PMNDEP IVPFPKAVVMKPAYYYYVALIMRSVVDNTITTVVSKHRKSGERNHSYGTRTTGT  
YVLLRVHGFVDVNSRDRDP IVALDRREKLGQNSRXLDESNLSPQPSDLCLTVPI IKIMLF  
LSRKLMEHSSLTAPKSFGEHYTEYRPSLPSITVALFFATQHNSIKNNPVKHSSSLHTPSR  
FVPPPAXEMFVGRFDPKEDARNSTGSRKKKSRTKDDQAESKDRKKRKRKKTSPGAER  
DGTEGSSSSPVGSETPPLPAAAATAKGTSEKQPQRQKSTDAMVEEKGTKEAAAFHVIAP  
ETDGALSSQKNLAGKITAEAFDDLDTDDAWLATTKEQRNDNHKNDGGDSASPPGFDPGD  
EIERALEMTRLPIVEAARRWGMADFLVRNLVSNNGHEHFFPIQALVIPDVIVAERHMMSLR  
VRDVCCAAPTGSKTLAFVLPVLNALAARRVRLRALVILPSRDLAQVYEVFDAYSKGS  
KNDLRIGLAIGQTFKAEQKKLIFGSDENEDGNNWTRLQNSLDPGNLELALDAMREQLE  
NDNDIGDETKDWKSNNAKSKIPAGGISAVDVLVCTPGRLVDHLDNTPGF TLQHLRWLVID  
EADRLLSQSYHGWIQRVLDVHAPPAPTSRTAEYKTDEGTISIDPVTHRRSENSSFVTGM  
GPEKDNQSSSDVGVHSNICQRIQLRKLLYSATLTKDPQKLSALRLINPKYFNAHDLKRRQ  
NAMLVHKDSSASNLYRMPEQLKECTVECTAEQKPIVLLALILERLKEYRELEELAASSSS  
GKPKKNTIVVFASSLESTHRLTRLLQLLWQAADYGTSPVEFSSALNQHQRSKLMRRCNDP  
TDRSVSVLVCSDGMSRGM DLASCRAVIHYDVPMAKTYVHRCGRTARAGQDGTAIALLKG  
KGQAGQFARLRLIALPERVTRASVKTSLVRDAIPLYKHCVSRLRDVLAADRNELKPTD  
PDLTRWLPGNEQDSGDESDSDSVTSASSM

>comp12929\_c0\_seq2; 721 1470 3881 LEN=4022; translated  
MFSVGRFDPKEDARNSTGSRKKKSRTKDDQAESKDRKKRKRKKTSPGAERDGTEGSSS  
SPVGSETPPLPAAAATAKGTSEKQPQRQKSTDAMVEEKGTKEAAAFHVIAPETDGALSS  
QKNLAGKITAEAFDDLDTDDAWLATTKEQRNDNHKNDGGDSASPPGFDPGDEIERALEM  
TRLPIVEAARRWGMADFLVRNLVSNNGHEHFFPIQALVIPDVIVAERHMMSLRVRDVCCA  
PTGSKTLAFVLPVLNALAARRVRLRALVILPSRDLAQVYEVFDAYSKGSKNDLRIGL  
AIGQTFKAEQKKLIFGSDENEDGNNWTRLQNSLDPGNLELALDAMREQLENDNDIGDE  
TKDWKSNNAKSKIPAGGISAVDVLVCTPGRLVDHLDNTPGF TLQHLRWLVIDEADRLLSQ  
SYHGWIQRVLDVHAPPAPTSRTAEYKTDEGTISIDPVTHRRSENSSFVTGMGPEKDNQ  
SSDVGHSNICQRIQLRKLLYSATLTKDPQKLSALRLINPKYFNAHDLKRRQNAMLVHKD  
SSASNLYRMPEQLKECTVECTAEQKPIVLLALILERLKEYRELEELAASSSSGKPKKNTI  
VVFASSLESTHRLTRLLQLLWQAADYGTSPVEFSSALNQHQRSKLMRRCNDPTDRSVSVL  
VCSDGMSRGM DLASCRAVIHYDVPMAKTYVHRCGRTARAGQDGTAIALLKGKGQAGQFA  
RLRLIALPERVTRASVKTSLVRDAIPLYKHCVSRLRDVLAADRNELKPTDPDLTRWLP  
GNEQDSGDESDSDSVTSASSM

>comp12929\_c0\_seq3; 1079 163 4629 LEN=4629; translated  
MSLRSPPELGQGEPRGGDRRVSSWALFVLSMLFLGVMSVSNIRHAARALPGTPGEGFRN  
GMHESFLGDGSSKGS PAEARRASPRDGPARGAPKVFRASPPSLPPLSEVVPNSNNTVIS  
IVSMGKLVDTYLVERCIRSVRRRGLFTGTILVFTDAIGYEHYRKSVPWPDSRTLILGRD  
EDMAPRTGEEPGAPRIKYLQEKMIFKRFKTHHSKYLEQELSRSPVGTGGSEVRYVYVID  
ADNVVGA PLAGFFEGYANAVATEYQRALEEHRWRQSANANDTRTATPRDDEDDDFGFV  
MFRDKHLRTKMHSGIIVYDLAFEDRCVNGWRNEMDTFLHASDQTI FLRVLENYDRYCR  
FALPHEYMAFASKRVMTGAMEARQNKRTKPLTLPFTFVHITNFRVRRVNNAMLHDEFVRYV  
LDLQDGEELMDGVRWEDVVASDARRAGATKXIKDGPLKVLEPTSNDKQWTFAAAAMTHRE  
YFHRYQYLVLVLLVVIDQIHEELEISVAVGASWQQYEPTVLVNLFILLLVLVLEEIDEGLV  
PMNDEP IVPFPKAVVMKPAYYYYVALIMRSVVDNTITTVVSKHRKSGERNHSYGTRTTGT  
YVLLRVHGFVDVNSRDRDP IVALDRREKLGQNSRXLDESNLSPQPSDLCLTVPI IKIMLF  
LSRKLMEHSSLTAPKSFGEHYTEYRPSLPSITVALFFATQHNSIKNNPVKHSSSLHTPSR  
FVPPPAXEMFVGRFDPKEDARNSTGSRKKKSRTKDDQAESKDRKKRKRKKTSPGAER  
DGTEGSSSSPVGSETPPLPAAAATAKGTSEKQPQRQKSTDAMVEEKGTKEAAAFHVIAP  
ETDGALSSQKNLAGKITAEAFDDLDTDDAWLATTKEQRNDNHKNDGGDSASPPGFDPGD  
EIERALEMTRLPIVEAARRWGMADFLVRNLVSNNGHEHFFPIQALVIPDVIVAERHMMSLR  
VRDVCCAAPTGSKTLAFVLPVLNALAARRVRLRALVILPSRDLAQVYEVFDAYSKGS  
KNDLRIGLAIGQTFKAEQKKLIFGSDENEDGNNWTRLQNSLDPGNLELALDAMREQLE  
NDNDIGDETKDWKSNNAKSKIPAGGISAVDVLVCTPGRLVDHLDNTPGF TLQHLRWLVID  
EADRLLSQSYHGWIQRVLDVHAPPAPTSRTAEYKTDEGTISIDPVTHRRSENSSFVTGM  
GPEKDNQSSSDVGVHSNICQRIQLRKLLYSATLTKDPQKLSALRLINPKYFNAHDLKRRQ  
NAMLVHKDSSASNLYRMPEQLKECTVECTAEQKPIVLLALILERLKEYRELEELAASSSS  
GKPKKNTIVVFASSLESTHRLTRLLQLLWQAADYGTSPVEFSSALNQHQRSKLMRRCNDP  
TDRSVSVLVCSDGMSRGM DLASCRAVIHYDVPMAKTYVHRCGRTARAGQDGTAIALLKG  
KGQAGQFARLRLIALPERVTRASVKTSLVRDAIPLYKHCVSQRNI SQT

>comp12929\_c0\_seq4; 664 1470 3752 LEN=3752; translated  
MFSVGRFDPKEDARNSTGSRKKKSRTKDDQAESKDRKKRKRKKKTSPGAERDGTGSSS  
SPVGSETPPLPAAAATAKGTSEKQPQRQKSTDAMVEEKGTKPEAAFHVIAPETDGALSS  
QKNLAGKITAEAFDDLDTDDAWLATTKEQRNDNHKNDGGDSASPPGFDPGDEIERALEM  
TRLPIVEAARRWGMADFLVRNLVSNNGHEHFFPIQALVIPDVIVAERHMMSLRVRDVCCAA  
PTGSGKTLAFVLPVLNALAARRVRLRALVILPSRDLAQQVYEVFDAYSKGSKNDLRIGL  
AIGQTDFAEQKLLIFGSDDENEDGNNWTRLQNSLDPGNLELALDAMREQLENDNDIGDE  
TKDWKSNNAKSKI PAGGISAVDVLVCTPGRLVDHLDNTPGFTLQHLRWLVIDEADRLLSQ  
SYHGWIQRVLDVHAPPAPTSRTAEYKTDEGTISIDPVTHRRSENSSFVTGMGPEKDNQS  
SSDVGVHSNICQRIQLRKLKLLYSATLTKDPQKLSALRLINPKYFNAHDLKRRQNAMLVHKD  
SSASNLYRMEQLKECTVECTAEQKPIVLLALILERLKEYRELEELAASSSSGKPKKNTI  
VVFASSLESTHRLRLLQLLWQAADYGTSPVEFSSALNQHQRSKLMRRCNDPTDRSVSVL  
VCSDGMSRGMDLASCRAVIHYDVPGMKTYVHRCGRTARAGQDGTALIALLLKGGQAGQFA  
RLRRLIALPERVTRASVKTSLVRDAIPLYKHCVSRQNISQT

>comp12930\_c0\_seq1; 217 1 1099 LEN=1419; translated  
RMSFTRTIPEVDGSIANWDHETPKTRLTTPSVTTIRRTMRKNIWNLATTRLLMSAVV  
ISLSTLLFSSSSSALVTDTFSSDPSRMIGNNSIGPSIHLGKSVGFLKKRCSISASAAK  
PGFIPENQEDGDDNHDNRNCGAREEIQRRTTARSTNISVPSLAPSKMGATMGRRTLFAM  
AGAALGLVVGNTGNSVASQAAQRVSNVALASRKFLYDRVLSFGKRYGARAVASEELSEW  
IVSQNLAI EYPEIAAWLAAQETMREGMTVSMMLAAEASEAAAATVAAATAVAVAKDREDAS  
SEKENDGMLAKATGDGSTSAIEQKDNVCGSEVSSSHVASRASQPILPTEQTTRRTVDNEE  
DTKSV

>comp12931\_c0\_seq1; 359 126 920 LEN=1016; translated  
MAVAAKEPLYDSSVGNQGTDVATSYASTGNRTVTSKLDSRQLPSISIFLKMTFKEQATA  
FVAVASIFLSLAAMIAESSTSAVIAGILQIIMGSYAFYQQTQITTMVISKQKIMKLEKDV  
VRLKGENTRMSYVDEL DGRVEDLLDVEDALEMIAASENQSV EEEKDAYLNRQIAAKIE  
HCAETSAIETLISSIIYSRQDSEIAFSEEEVATMIQKFRAIKGLTVNEDRLRDAVLSKTE  
SIIDMLQNLVDEDIPLKKQIFRFY

>comp12932\_c0\_seq1; 515 1 1305 LEN=1519; translated  
QNRFTIKGRVTTKSDIKHWSNSKGEGLSSLEVL DAGGTDIRITMFKEAVDKWQNYFEVG  
QVYTITGGRLKVANQKWNCTCKSNYEMTIDVNTEIAKCEDSDAIQKQSFDFCKIGNLEEKE  
EGSYVDVIGIVQDIGEVQSLVSKKTGQELKKADLTLIDDTGVQVRLTAWGRQAEAAASKL  
GGNGPDKPVVAFRRARVSDYGGKTLGGDPFPEPDCPETEEVRSWSSQGSRAAPVRSLS  
SAGGGAGRMDSFADRKT IADIKGQQLGEHSEKGDFLCFKAHFTFLKKDKEGGAWYTACPN  
KEEPCRNRCINQTTDGSYHCDRCNGTYPNCRKWI FSGTVGDSTSNWVSVFDEQAQQM  
LGRTADEMHEHYQTNQPLYDACFAKAAFSEWVLKCRVRKEQVND EYRTKVQVVRMEPVDY  
AAECREMIQALERM

>comp12932\_c0\_seq2; 515 1 1305 LEN=1499; translated  
QNRFTIKGRVTTKSDIKHWSNSKGEGLSSLEVL DAGGTDIRITMFKEAVDKWQNYFEVG  
QVYTITGGRLKVANQKWNCTCKSNYEMTIDVNTEIAKCEDSDAIQKQSFDFCKIGNLEEKE  
EGSYVDVIGIVQDIGEVQSLVSKKTGQELKKADLTLIDDTGVQVRLTAWGRQAEAAASKL  
GGNGPDKPVVAFRRARVSDYGGKTLGGDPFPEPDCPETEEVRSWSSQGSRAAPVRSLS  
SAGGGAGRMDSFADRKT IADIKGQQLGEHSEKGDFLCFKAHFTFLKKDKEGGAWYTACPN  
KEEPCRNRCINQTTDGSYHCDRCNGTYPNCRKWI FSGTVGDSTSNWVSVFDEQAQQM  
LGRTADEMHEHYQTNQPLYDACFAKAAFSEWVLKCRVRKEQVND EYRTKVQVVRMEPVDY  
AAECREMIQALERM

>comp12933\_c0\_seq1; 839 150 2486 LEN=2524; translated  
MLRTRDIFALIATLVLVRLAWNNGTENLSAGVDLAFLLPREGVMAISPMDLDGDGSKEAL  
VVAKAVERKESFRLEIHD LKPLHGFRKTYLEPFRPDVIFTSEEINDDNAHP IHMTTGQLL  
IKKHGQSKKDGKPRKFNLS PDLQINDQNRHYFCGTTWDDASNKCKTPCPGGQANECPSD  
ERCFADTPCDILNDDFDSDESEKNSFVLT PGGGMP SVVSLWSNGALMFHSLTNTKKEEDS  
TKKVKKALALREMWRYGIFPADKVNDMQDILWEEINVVLLDAYSSMEAGANHGMVVVSA  
SYYMDGNPESHRESTMTVAIDAFKGTVLWESHSDIALEQEEKPLPLPLATRGQTSFARRRS  
SVARSMQGLQTYTSSALPNCMSLLKAVKNEVFPYSYWGPE DAVAAIHLNRKKHARNN  
GNHRASKPHEDHGIAQH HHHHHK KKKKWHHKFHPRKKSNNHHHHHYGPIQGRPNALVTQTR  
GGLQIRSLKNGKALCHLALLEENLYSDLNNDGVLDQVQVALHTKTLKPDDKFVWKLGRLL  
LQNHEKIKSDGAAMEDVVD SKPKLCHVLALSGIPAREEIFSAPICGKPSERAKLDR IKAL  
DAVNPLVVESLGRAGGKHDI VVAVNNGMVHRIHGSKGQRMWGVSGAHKTEDFPFWYEKNN  
HLALLTRLQSNLVAPP IRPLLLLAGENSLSVL SVKTGSILATAPFPQTSEAKPILADLSGD  
GSTDMVLT KDGIWGYQIFVHRGSPVAQRILVGLLLMILMMATIRNQYMKGNKRSTDR

>comp12934\_c0\_seq1; 250 158 979 LEN=995; translated  
MLDGRQKQEEMDCQSVRKEMSSDAIQWSSDSSGTLPLTSSSSSFFSSSSSISGHISASAG  
LVGNADMTANDEDKPREITARPDVAVSAELRPVLRGTGRWTPDEKILFLYGLRMFGKGRWK  
KMSVYLPQRSVLQIKSHAQVLRQAEAGENIFRRLEENYGEIDNLVVQAARQORDAMRMAG  
IKVHTPKAKATKSIKPKKKRQQSQAGTPGIPDQTTEEPSSELLNNDTTAFRTNSTNDSSVL  
AAAALCQLSSVGGRRWDQNKNRNTDRGNDKQTTL  
>comp12935\_c0\_seq1; 294 294 1235 LEN=1421; minus strand; translated  
MLDIRYGVLRVIRLELVSLSKSCSCHHRDGERLLLRLRLRSRFFFALESVFRGGDLDRDLL  
RLLLDGPRRSPFSRLVGGRRRFFRLLSLLLLLLLLLLLRDDDLLEDLRLPRFLFLARFPV  
SVRLSFLGGDLLLRLDNEGDRLADLRLRGSSFFEEIALGGDLLLLLLLLALRLLRLLPL  
LAFLLPLGGDLLTERLRLDRSRFSFVFEVMTFGGDRDRSLRLLLLLRLSLPERLRSF  
LVVLLDDDDRDLRLADPPRRCLESSLLTLVMTLGGDRDRERRLERRPPFFLFRSLDRD  
SLEPEDDEYDES  
>comp12936\_c0\_seq1; 656 845 3929 LEN=4418; translated  
MSNVCKFCDQTFGSRNALFRHLRSSRNCFEQVTKLQDGTNNGVKNVLDFFEKLDKRRVAI  
QFGYCGSEQCNDDCDENIPDKATERTNEIAATIVCKTFFLALKDEYPTSTPVIRQDGDKR  
EPIFTLASGAILRHPSLVQESNCSALADVVGISYEWGASKGTRDDTESLVHRMQIRIDEL  
IAERRNTGSLSCISVLGIESLAASSNFHAEKDCTQRAYQYLVPVHWIDKSTDTREWIHSK  
LRVTTDGGQEVQDRGTPSSLIKFKKTLKLAESRDVTQISSSSAAVVSSPGRYGLLWKKER  
RSFHNFCDPPLGSGSMASPSNENVWRTIDRCRLHSFVIDEMNSNEPFVIEIRGDGFVAQ  
QVRRIVATLVAISNDWLPVGF LDSATRADIETPIAPAE LMYFSSARFHF LLDLILPSSL  
FETKFAYDRGSSWR TSLH SKVLRRWGKKVEEDARWISKLINNTSPRIRSELKEQTKAASS  
QLVETEDSQHKSIDEVIPRAIAPEPYRKVLSLLHNICDNEKWPRTPDAKSRFIRSPYRIL  
YGENQKHNTCSNRRSRPISSEFQGFQIGSFTVVNPKIFGGKSVGINAEPPELVEAVFD  
LETYCLSRSTEIFYDKKPVACPLGRSSHCMISRNAEFTPHFLNGQGGEESCTMIVGLGDY  
IDGDFIIDGKHFDIRYQPLQYNGWRQIQSTGCFRGERFSLVWFTPKTRIDSMSNKNMSFE  
DSLAKALTKKHDL LPSYPQLRFR LKSTDSL VINEILDSESGCTYELSEKAWSSMVGNKN  
GKKGARS GFFVIGHESVLDIGAHIGVFSXVYAQVGCKKI IAYEPELENAKLLEHNLKPI S  
CDESESKWNEGGHIIRNFAVAHGEPEGQC NFVNARNRSDGTLNSWRHSLEKYSSYVDRKGA  
NLVSRQQNAVLDRSRVQTIPFFGDAGALEPGITFVKMDCGAEIDILLAAEASRSADWLD  
VTHLVFEWSFTKERRVAKFHKAVANLTVAGFEVVYQGGQGSWWDTEPNMWPYHNDLVVFA  
RKRNDTCS  
>comp12936\_c0\_seq2; 388 1 2591 LEN=3080; translated  
XKGTSVHRMQIRIDELIAERRNTGSLSCISVLGIESLAASSNFHAEKDCTQRAYQYLVPV  
HWIDKSTDTREWIHSKLRVTTDGGQEVQDRGTPSSLIKFKKTLKLAESRDVTQISSSSAA  
VVSSPGRYGLLWKKERRSFHNFCDPPLGSGSMASPSNENVWRTIDRCRLHSFVIDEMNSN  
EPFVIEIRGDGFVAQVRRIVATLVAISNDWLPVGF LDSATRADIETPIAPAE LMYF  
SSARFHF LLDLILPSSLFETKFAYDRGSSWR TSLH SKVLRRWGKKVEEDARWISKLINNTS  
PRIRSELKEQTKAASSQLVETEDSQHKSIDEVIPRAIAPEPYRKVLSLLHNICDNEKWPR  
TPDAKSRFIRSPYRILYGENQKHNTCSNRRSRPISSEFQGFQIGSFTVVNPKIFGGKS  
VGINAEPPELVEAVFDLETYCLSRSTEIFYDKKPVACPLGRSSHCMISRNAEFTPHFLNG  
QGGEESCTMIVGLGDYIDGDFIIDGKHFDIRYQPLQYNGWRQIQSTGCFRGERFSLVWFT  
PKTRIDSMSNKNMSFEDSLAKALTKKHDL LPSYPQLRFR LKSTDSL VINEILDSESGCT  
YELSEKAWSSMVGNKNGKKGARS GFFVIGHESVLDIGAHIGVFSXVYAQVGCKKI IAYEP  
ELENAKLLEHNLKPI SCDESESKWNEGGHIIRNFAVAHGEPEGQC NFVNARNRSDGTLNSW  
RHSLEKYSSYVDRKGANLVSRQQNAVLDRSRVQTIPFFGDAGALEPGITFVKMDCGAEI  
DILLAAEASRSADWLDVTHLVFEWSFTKERRVAKFHKAVANLTVAGFEVVYQGGQGSWWD  
TEPNMWPYHNDLVVFA RKRNDTCS  
>comp12937\_c0\_seq1; 257 489 1397 LEN=1487; translated  
MTAIGCSQVQVARNYVGEDDAAGDLIVSSDLGKIRIWVLPEDMDNGLSQIEAGSSDGA  
EVSPEVSQEFCEVENATGTCIKIMPPNVSGVDILLAVPCLDGTVALVATGLTTPKSQSDS  
TTAGVVDRWSKAATSIALSGAWHPLKKS FVVGRQDGLIEIFGERSHRLIQHEAPVRGVA  
YTPDGSLMITSSDDGMICMWDTSRSPVLVQHVVQAHATWVLGLASLSDSRRFISCGADR  
QIHVWSAGQMDQAQHSFTSDDVVWTIDSLTTAGKNTASFSQTQSRLISGSEKGLHIYTL  
ES  
>comp12938\_c0\_seq1; 849 1 2071 LEN=2161; translated  
XTPQQHRASANLNHRNTNYRIISYRARQGSNMSTPSHVTESVSDRKAARELAEARASGAVA  
PAVDVNTNKIINPHNPEFITKRPWYLGNNQGPSLDHQALDPNTSGDKAFLSMKSADELV  
KQERRLEKEKRKKQQFEVGMWVEALKGNGTYKICQI IKLGKKDTLFDLKYEDGSIEKKV  
KFKAKAKKGMFKPRIRMTKSGTRTLKIDAKEYGKESYDAKRDKYMGYDADSHTKKVEEVF

QAREKLRRLKREEQKLMQRDQEKQKDGAVDGTAEQQLSDVSDVSDAEGSGDESAD  
FVQKEEKLFTTTLARQGGVGAQMKVTARNLR IREDTAKYLRNLDTNSAYYDPKSRSMRD  
NPNPEVPPEESQFAGDNFTRISGDAIHLAETQLFAWDAADKGVSELHPQANPSQAEMLKT  
KFKSKSAEIQQLQKKKKVLDKYGGQEYLDGSGGLAGAI EEKKTPSAQSSSTAEGRKIRFGVS  
MAKEEYSRDGRMLNGQGSKNMVAQKSKYEEDVVTNGHTTVWGSYFHVGAWSWGYADDH  
SLMKNSYCTGAVGRKANDEANEMQYGTGLAGSALAQAARGMLKAQSKSNNSSTLGNAMPD  
PSSRSKLYGEADQKARLDKDKVMAAMAKLDREEKESMSAARGDKKNKRKYNSLNAETDVT  
EEEMEAYRLRKENRSDPMNKISSDEILEYK

>comp12939\_c0\_seq1; 484 1 1868 LEN=1952; translated  
XCRMDRVRPTARQDKISGPATRMTTNNPISISLSSSRGWKKAERVTKDVAPT KIRSAKAV  
GTTRQNDECSGSGSDSDSGP SLPRSHQSTNSRQNRSESLVGHCSVCGENEARYTCPRC  
SIPYCSAECYRSHTSGETGTAHSCTERFFREKVASLMKLESLEKGETHRALNRYHHDCH  
YQTNPLEEEPVKHSPGGRQHAGDEDLYDLHRLHSELEALENDGEELSRRELARILPPALR  
AVFENDLRSRVRADMVLD RWHPWRRDFVDGNETGADQSDGRRGAGIDDREDGAVACS  
RTLDERLLRVPGFAGFGRKDNHKSNNVDLFFNLLDILCATCRTL RMYHGVENASQQAPVE  
AATTLIAASSVLANDTRFAALSQVLDHYYCTMGP GHGTIAKMDPKGEIIEPGESTSNKQ  
PNTAGWYVCMEDTASLVTSPRLVGRAILEACDVLKAAAKELKTNRVSTKVPNNSTSTNAT  
PSASKEANESYDNETKLYQIRRLRKKLQFYLSWALHRPSAANSYLGVHAKKEEIVAWINER  
KQMITEYECGEWNTNDNNIEHCGGVGDTTITTLNFPASAASGTTRSMFQLNSLHNGDKEH  
SSPAESITDQPFMIEVQSRRRQ

>comp12940\_c0\_seq1; 335 198 946 LEN=1439; translated  
MIAGLYESIANDDDSMNRGNKWKQVTTTCRRRIGNSFGKSKLWSKSYSVSLDIVMAFLVI  
AVMVGYASALATENDPEGIVRRGKDGVIYRYPHISQDVEVIHESDFYAAGGGY WENEDVA  
TGLEERVVIGSKNIQDNQRGSLESGNSNSNFSDDTQTS GDSWVQDGGVEPTVPAAXFND  
VEETPDITYYFEKRAQIWA VWPNGQDMFAEERQHHPMLDEAEKSTEATGRTEDKRQGRF  
QYPVFSFIHR

>comp12941\_c0\_seq1; 1007 1 2484 LEN=2638; translated  
ETNENENDHNGTSIPRSPTGQSSDSSSPIPTSPNSIMLSFGPNTRVDDLKYFAERGCIVA  
LLQALNTPRLVTLGTRMLADYAKMSHRRVAVASNRRILEFVQRTMLHVSDHNQEWLGREY  
AVETIRSLTATEESDKYLMGTYGILNTLALVARGGPFVPSQTGNTPSIPLASEKARLHAC  
IAIMNLS CGKANKIEIAKIPDVLEAMRDVMLNSGDEARLKATTCIKNLSNADANDAALLG  
TPGLVAALGRMATATCSAETGATPCTTNAACLALMNL SISKANKHRVFRTPGVMTALMTVL  
ERTTAQGSSTEARIKACSALS NLAIGYDNKIPMFNYPGFVDAILNVILTDRGEARTKACS  
ILWSFAAEMKNQVPVVRGDILPVLVRVAEEDGTTEARFKCVAALTL LAESLDNAIPLLE  
SGALAPLMDILHEAGPDPTQWKGQTASWCVGF LMNIAQSDEAVPSLREAGVVELLAPLLT  
LDHYQSLKAAMAVTFVCRYDEGDECYDLLRKTENVIPKII SLLHNTLSGRGGNGYKYGVF  
TLRSSVGCISALALGPDFMKER IATGPVFESLLRVLSDFSVDGGTPGAI VGGRRDDVLSA  
TLAVRALQSLTAHLIPIAGSSALPFGQSMEDRLLTALIALEESTHEELKEDTRQLAIDAK  
VRIQGSQKAGRAGHLRNGSVDIDMADVASLASNCCGLDSIPGFGDKFLHALTLPSEESK  
ATPDLAPSSSMVEDAAEPAALAPPQPVRTFLLADV RTGRRFAVPTDPSSGGRAFNDPRRWC  
YRRGRFCQPGEDPDPNFVWTDLQRAYETALANVDQQQP NPSQAAAP

>comp12942\_c0\_seq1; 908 466 4107 LEN=4201; translated  
MDDDDSYEDTSSAAVLKNYTDVSPKPYHDDPAATVPPPPPPFPA AHDGLGSFQHRISDV  
TMEDHTDRSVFEYSDTSDDADAYFMPQNDGQFQNSP PSLDNFYLMGKNHPSSATYNNNG  
GSINKQYASSGKAKTNHHYKKNYNPHDHSNRSGSSGESAFRDLKKN GSKSTKIVRFSPRR  
SGECEEHGFRDDDEESTIISRIMSTSPASTT DSETKGENNPLLGGFMKHVANVFNTPTGL  
ETTRRSSRINTKKNSESSGTGHRKDSHMVTEY P YLMVMNRNTSSGSSALKDLNRNSLENS  
PLLPTAQRQSIYGAGQDIATPEYYRTIQTATTSASVNSNKIPKPEAMERMHSSENSYSAID  
NNSGNPMVESSRRPSVVR SRLKAAQVAAYFLMDYEASRV TSLPCTFETITSNQLVMYKIY  
FSWQWR YFVNLAII LLF LSHTRDTLTTAIMTTLVIAVLGVEIHIRERMYGTDARTDKHL  
DRRLVRSMVAFLFILGLETWMWYFISP EMAMYEPSNPPLFSSFFKPLVLFYVSAKARDSL  
EAIFRISQIVIRILLLEFFIILIFASVGNRVFGKDFDDFIDLQTSWLSLFLKSTTVNNPS  
LWMP IYAKAASNSIFFVVFIIITCVFYYHSLVLSVVFQTYIQAITDIHERTASDRNDAIRL  
AFLALLKDGQSEYISTSSVRKCLQVVRPHYNSLKMNALLEIFDPTNENI IDYPTFRNKIR  
RALNSSVRTARTATPLAMGVEFIAVFAATNCFYVTGKALYGRNDLGFETHGYVGSAITL  
FGLLELTIRFNPLKIPNFAPITRLDVFFDGMALLAALISCYGIIQYAMGYETLIESGDMF  
DYLRLGRDIDMIRVLRFSPIFRDIVRRSSDVLP TLAGPMMLFLSVIHTFVYVGVIVLWDGA  
IDVALLSKNEALTPLYCLNFNNSYTGGLITM FNVAVVNDWHAI AEVYTQAERNNSDAIVY  
SFFVSAICFIVYIMINVIIAFFVET FVTKTNEPADES NPAEETTANLNNSFRIQNSENTN  
VRRIRSCDKFYFSDEDAEDEALLDQNASVISATSSSTNSEVFAAFDIYEREGFDQIMRTVA

GSSDDEQEAFARSVCNYLERFESLTFGREKVGVMVCCQQSMNRFGNRRFQTSARSFLTEE  
MLHKVVSDMHAELLVLTSTRKNSFGNRCLVRTFPETSGTTSQHLEIAATLLRHQPAATLF  
SSRIRPNKATGDK

>comp12943\_c0\_seq1; 783 334 3264 LEN=4080; translated  
MESSNDEVTKAGADKNTAGSATTDRRQQLSQTKIPPKRRPKIAVLPRAVVDQIAAGEVVQ  
RPVSVIKELLENSLDAGATQIVIQYDGLSKFSIADNDRGIPADLNLCTRHATSKLASV  
DDFSDLSTFGFRGEALASTSMVSRLLTVVTRLRVGEYDDDDDESASVVAYAQSYQH GKPLQ  
LKPKPCARKVGTITVNDLFYNVHHRQKAFSNSKREAEYGR IHKLIQDYAVHYPTVGFV  
CQRQMATRAKAKANKQLVVDCNTGQIPAVRALLQSRASAAKLAQAQKTNKDNSGQKAKVV  
EATKQILTHVLGSNLANHLLYMECSSDNDKVP TENDCGNGSGNTKENADRYKFRYAAEI  
YFTTPTYNVSGGGGSARKGNSSKQONTKTTQGKFVLF LNHR LV DLPPLKRALEDIYADLG  
NPNRSKSSSTNNSNVGKPV LVVNLSIPGCQVDVNVHPSKRQVALMYQEDVIRDLAVNVKER  
LEDHGQAF LAQSVATPAAKKANVRNPYAKTPSSQKRKRSSPNKESSEEAVIDDKEE IET  
MSHCENDIAEKKRKR DENFDSPPHENARGKIDGKRNPRSGSSEKKIAPSKLVRTNL  
AARAGAI EPFLVSTQ GASQLS QSSTQDNNDENDNPSSSQRPLSQPEQSSMVHIPPCPLA  
NPLTLKDIDITQPGAFALILKQEKCTCPTDVIDMSRRTVFPNTVVRPKRVVPTPSKYTS  
IASLRKRVGKQQCHETTKRIRTAFFMGVLSHQRS LVQCGEEMVMINHFELAKELFYQLAL  
ARFNGGAKLARLGGGGICVQTVVAQALQHEDELTLASSTKATSKTSVNNGASCSDMLQVN  
DSNQNLAEHIAARLVESAMLEEFYSIRIELQPSIGGNDMKSDDNKD GKSDPCDYDHRHE  
NAGNAILTGLPVLLDGHSPQPRKCFRNETTLFERYYIVSSSLKLPAYTRRIAHFFASTC  
NPGRLDQRKALFPRSL

>comp12943\_c0\_seq2; 806 334 3360 LEN=3995; translated  
MESSNDEVTKAGADKNTAGSATTDRRQQLSQTKIPPKRRPKIAVLPRAVVDQIAAGEVVQ  
RPVSVIKELLENSLDAGATQIVIQYDGLSKFSIADNDRGIPADLNLCTRHATSKLASV  
DDFSDLSTFGFRGEALASTSMVSRLLTVVTRLRVGEYDDDDDESASVVAYAQSYQH GKPLQ  
LKPKPCARKVGTITVNDLFYNVHHRQKAFSNSKREAEYGR IHKLIQDYAVHYPTVGFV  
CQRQMATRAKAKANKQLVVDCNTGQIPAVRALLQSRASAAKLAQAQKTNKDNSGQKAKVV  
EATKQILTHVLGSNLANHLLYMECSSDNDKVP TENDCGNGSGNTKENADRYKFRYAAEI  
YFTTPTYNVSGGGGSARKGNSSKQONTKTTQGKFVLF LNHR LV DLPPLKRALEDIYADLG  
NPNRSKSSSTNNSNVGKPV LVVNLSIPGCQVDVNVHPSKRQVALMYQEDVIRDLAVNVKER  
LEDHGQAF LAQSVATPAAKKANVRNPYAKTPSSQKRKRSSPNKESSEEAVIDDKEE IET  
MSHCENDIAEKKRKR DENFDSPPHENARGKIDGKRNPRSGSSEKKIAPSKLVRTNL  
AARAGAI EPFLVSTQ GASQLS QSSTQDNNDENDNPSSSQRPLSQPEQSSMVHIPPCPLA  
NPLTLKDIDITQPGAFALILKQEKCTCPTDVIDMSRRTVFPNTVVRPKRVVPTPSKYTS  
IASLRKRVGKQQCHETTKRIRTAFFMGVLSHQRS LVQCGEEMVMINHFELAKELFYQLAL  
ARFNGGAKLARLGGGGICVQTVVAQALQHEDELTLASSTKATSKTSVNNGASCSDMLQVN  
DSNQNLAEHIAARLVESAMLEEFYSIRIELQPSIGGNDMKSDDNKD GKSDPCDYDHRHE  
NAGNAILTGLPVLLDGHSPQPHALP I FLLRLATQVDWTREKHCFHGVCKEIGNFYAMLPS  
EWGDLNPHYVQHTIFPALS YLLLPSKNQASNGYFTAMTKLSTLYKVFER

>comp12944\_c0\_seq1; 589 707 2506 LEN=2687; translated  
MASPFSFHCMI CYEEFDIEKRFPVVLPCGHTYICNVCAHRLDRCMECRTSLYELVLPQSQE  
CTKVAEQ L PGWSTRSLGVNNSRNAAAARNQPKKPPPPVKRRLVLPKNVVLMSLIEATELA  
TENVNGQEHEPSLQDSPMIKPSVMDLEYDEEEKIKTGTSLAISDCGYAVSAKDGLEIFP  
NKPDSL VQQSEEDVDTLVRFY NKDLAANGGDKRTAEGDFQREQTAPPGRPSGRLSWGDRV  
QIVSAQNGWAKMARGYGYVRAGHQQLVKVGGSVDRSCKLEAMLRLMSTRRKKLREEQKKI  
DNQFIAFMNELQVSLMSDEDLTVIAADTFHKNLENNDP SGGGSTNSQTVRTRNQDVTPLD  
ATRSANAPEPARSNNAGVVVPEAIRPTNTYEDSTPLKPRFNERPMTPPGSSRGSFFCSS  
SDVLNAFAPLSSSETQTPALPNVAPTPAIAREFNMSVQERNQLQQNAYPQTPRHDHRGQ  
HYVEDTPTRILTSASHPSALRAGARAWREMHGRQASNGIDFRTGMSGHSALFSSSAHT  
HDYLASSKGF FAGMSNHTGLTMWKAPKFPYSLTTSYTADEGTEAEAPS NLTFPPSGSSV

>comp12944\_c0\_seq2; 367 707 1702 LEN=1702; translated  
MASPFSFHCMI CYEEFDIEKRFPVVLPCGHTYICNVCAHRLDRCMECRTSLYELVLPQSQE  
CTKVAEQ L PGWSTRSLGVNNSRNAAAARNQPKKPPPPVKRRLVLPKNVVLMSLIEATELA  
TENVNGQEHEPSLQDSPMIKPSVMDLEYDEEEKIKTGTSLAISDCGYAVSAKDGLEIFP  
NKPDSL VQQSEEDVDTLVRFY NKDLAANGGDKRTAEGDFQREQTAPPGRPSGRLSWGDRV  
QIVSAQNGWAKMARGYGYVRAGHQQLVKGASRLVCCAFVTLPPCLLALSLDRSLAFVVFV  
GSSGLACVTSLSVLSDPHRRVLVSVLCFPRIT

>comp12945\_c0\_seq1; 172 300 708 LEN=1173; minus strand; translated  
MDRRRYFRYRRSLPHKRPAPPSSVSNASQSYVSTTRTRNSYEKLVSDQQLV SIRVADMI  
RVPNAEELPVRVAETLRIAAMERVSDIMIPGLRFFQNNLSVKNTGRTRSTGII LHRTPM

DPSKRGIDYRLKESK

>comp12946\_c0\_seq1; 1130 638 3439 LEN=5499; minus strand; translated  
MPSLKQLFGSPLGKSKHKKKPNKDRYNGMDILINDHKKKYTTTTPKFLATENSEVTVSLFK  
EEEEETERGTLIESTACHSEEVREDEEITIDFRNYKDCVGDALKKSGMKTKATTKEIQDH  
LHEESEKDETIYFEQRDHYDNRCGDDEDFRTAAMPSSKSKESPTTKNFWADKELHLPNCK  
DINCENADIWCDNDDNFRIIVVPATASLSKPEEEQEKREKAKKHESLAESHHRQQQQNE  
FSMDEDGI EYDKVDDFRTTIMPTPRISSFAREEKEKSSSAKESSESNKEIYVPQQQQQLQH  
ELLVHQNDDFQTTVPDLQGMGESEPRSKESGNLKRVARDDNRYQVSPVNSVEFENHIHTT  
LNANEGATNSRSSRKEYSNKNDKTSSAIYPIPSHLNNTGYHLDLDDGDDEKENLIDDFDD  
YQSTISALTEATNYNSK SINQNYTSSKTFVIVPPSSPANHSCQTSSTSKSSSRHLEDF  
LKTETESLRKLLATVESGDESTVVEESVRGANEAEERMAKEMERETQLLLIGDHHGDNES  
MVEEEACCEGHSSSLKNDEMVOVVRPTSMESSSSYHYRNLSPESNEFLADIRSVMHVPV  
CGESNKGKNSNTPLSNEQRLENSTDGRTSSPTGTVPQSLSCSRDLFRKRSNLYQVKSSE  
KCYSNSSANRVAKQNRRRRQRRVLRKRIRTVGSTIVLILLCTWTTLLGHWQWNPQEHFG  
TVLQNTASRIHQGVVVLNDVKHTREKAVALLATTTKVTRSYIRDVLPPLADDTKVLVAQ  
TIGNGVSFADQAFACIPLARRAKTSALESIRDTTSLFATQAPSIARWVKTRTMNGLRIT  
FAFFSDQLKHYDYSNGVILPYLKDRWEYAFTDRAEQEQRIREEEKLKELLAAAAAAAAAAKE  
AAEHQQMLWTQTMVAGACAFAGSVATTILWSVL

>comp12947\_c0\_seq1; 311 616 1979 LEN=2041; translated  
MLLVXQLFSNLAWNYAIKAIQGLGPVAIKFCQWAATRRIFFPTLCKLSILHDDGYPHS  
LEWTHQVLKKAFGDYERKGLVIEEVIGCGSAAQVYRGTLTTIDAVESKDRHTTRDVAVK  
VLHPRFQKMOVDRDLDFIMIVANALHSLPFDPMKMLNLPRAVEEFVSVLDRDQADLTTEAEN  
LRIFRTNFFKDSKEREDQSTISFPQPIDGWTAPDVIVEDYVNDVAVPITDFLLDSSQEGMR  
KRMELAGPLLRAFLKMFVFNDFIHGDLHPGNVLVKTTQETASSSIWNNFWELLQTEGDEE  
SQKNITETKRSIVFLDAGIAISLTPNDQRNLIDLFRVAVFNNGERAGRLMVERAKYERCS  
QIPGGTDMFAQGIGEIVSEFHRRKEGLTLGAVRIGTLLRRVLDLRCRVHGVEIDPAMASV  
VISTLVLEGLGRSLSPDLDLLTFARPFMHPGKI

>comp12948\_c0\_seq1; 1171 264 3164 LEN=3207; translated  
MPSKSKQNDDDEFREEGNQKLQAVVLADAVFGAKVTARGDNQSFGLKPWSSDASTSSQILC  
RLNNVPLVDYVLDFLASNGVEQVILVMGACNAGNESPLEEYLLGSRGKNKHTRHSHKLELL  
FLKDTSLTNAGDALRELYKRNWIRASKQAKPFFLVSGDVVADLREALERHGERSRHDS  
AAVMTVVLKPVGPSGTHGGSASDVRRPSIVPRASDLVVGVPALAKTFATVDSQGGTAQN  
SGVDEEDGNSSSQSPSSAGDYRIMYYDNGSSETVGTTPVCSLLTQCQSRQGGGFSLRHDL  
MDTGISICSPDVLGRLEDNFYLDLAHDFVTNSVAEEEDGLQTRIFAHVLEPSSLRNYAA  
RVVDFQTYHAISKDLLQRWAYPTVLDQMTLVGSEEGVTESNRRYKLCCKVADYHYKAAGGS  
NRTSSGSNNWLSPPRYGTRPKPLQSLTETDASDPADGASSKNHYNYQYKESLHPAKVGR  
TSVVHGPMMGSHVVVGEDCLLKHCVVGVDSVLI GDGAELVDCHVLEGAVIEKGAKLRACV  
IAKGGI IREGAILETGCFVGEKCVIGSGVRLPAFSRVTLAKDDDDDDWGDYDGYSDSSS  
DSEEGDRPEADSGDTEQDIVGLDGKRLWKPTLSDSDYSIDSDNLCLQVNRNNDPLAVLM  
QLQSIGDPTSYYRQRERRLRNLEAEFENDDDFSDFEDEDDVVKLAFNELTGGTVVFG  
DEDDDG FENLNYVGGAAVASSDEPAIGRQKGVVVKEMTEICMEFDDECHPIENLSIELN  
SFKFSQ NATYSDCASACLALMRKMKVSPAMSDGRLVSSLKAKLETFTWTGMLQKLCRGIE  
EEIAVVKALEHAATVDQPPQAQASSDPYATDVLQITTEIAQKLRSGMAFRFVLQTLHDQ  
EVLSEDAI L AWANERRSDGEDNENDPKQMLFRMESVQAFLEWLEEDSSDDDDSDSDSDS  
DEDDSE

>comp12949\_c0\_seq1; 688 263 2092 LEN=2239; translated  
MSSQSECTPRVRLTRLPESSVSDCVRHEIGVIERQLEECYENDNKNKNTNNIENKEN  
QNKNDNIQTESLEDAIDDGFMCDLRLVLERKLRWHRLFSPAFCNSKNRSGHDYTVTPFF  
AIKCNPDVVVQWLSRTASLWNLPLGFDCASIAELELAKAQIEAYKLNETTGRNGSVPTT  
RIVYANPQRAEADLMRALELFATKVPLEPDSSAPAATTTTAEELWLTLDGIEEVYKIAI  
AREQFLEKHDPKATNGTKHCRVVMPRIRIVLRIWVPDGHVQVPLGKFGMRLEIDILV  
GACLEAGIDHSDIIGISFHCSGCESVETYLEALEMGR TAMKAIDQNLAVVSPQSSLEPP  
PRCWLLDIGGGFPGLDGLDGDVGRFAVGDAEAEANCTEIPAGEVTGHPGKESAPQTTVADI  
AMAVRPVMRSLDSETHSNDEHTNPHLTLIAEPGRYFVEGAFALASRIYQKQLSRPIDDE  
VNTEDENKDDKNIRVYRIPHGVQGVFKDVLLCGESFVPPQLQTEAGEGQEHKLYPSRVVG  
PSGDDSEDVVCDSCLLPELKVDDWL VFD RMGAYTLSIASRAGR PVMRYVLGGDGTTPPQA  
ENPDPKAFW

>comp12950\_c1\_seq1; 813 272 2884 LEN=3311; translated  
MATVKMTISCGTEEKLEPETEGDDSSQLDNSALEATIDLLERSTIYGGGSLCSISHHHLH  
SFCVSPFLLLVPYACAGCGEKLQPYVLGGTSSGAAAVKCMACGVYHRKCAFSTIKWET



KCSSAKQDDCIGVNGDGGQIGSDVSSEEVDDAETLIGATRSQQIILEEILEDSSNTGSHF  
VPKNAQESIFRRPSTRTDEMLARQDFSVVRKAASVDNIFKTPKDVQOTRANFPFLSSAS  
LLPSRHTYTNKENLSITMQKCNWDGVIVKSSPVDEEDQTCNSALEVKHESDDEDTQRE  
ADHRDDASTSTKIDIAHETAAPLYFASHGFQAVSQVLQENI IANFSRLILKEDSTQGKDT  
HEITDNGGELDSNINDSQSPADPTSKNDEKIPDKTTMDDNNDSEAHSLLETSEPEQNSTM  
DRKRLGLATVAGSIVGGVVVGLAGPVGGMIGVKCGQTAGMLGLLLEGSVTASVWASGIT  
VGMAAGQRIQERHETHVLAIGEGTKQRALLMVRPTIQPPEPVWDEIYREAGRSYSDSNSG  
LVNRLLPTESQAARKRERYEREVDIVETGEDELAISDKVLLLVSRILSNKDSLPGHIYRKL  
IEAFNRNCREVNLQDLYRTKQDQRRNDVETIETEKNLKSETIGNEDQNEENHLSLMHQRR  
RDAHAVIKYVTTSLLLTRPGFGHTSSLTEKTATAVESLIFGEIYDLVIEEIEREYQNQDN  
LLEKIADEFERRQNQGLCSIETPGNCYFGSASYISEAALEALCCLPQTHSAVDKLRVCV  
FLEQISEKYSKAATSSMGADSLKLMVCQHILLAKVIGINCQIAFLLEEFARDEQLLRGRE  
GYALVTLQASLHFLNASTNFESDIFGEDSD  
>comp12952\_c0\_seq3; 256 34 459 LEN=506; translated  
MLEENKIDTIVREPEPVVSEINIVVSKEEVEMDREMMQKCRDLCDERILLNHRLEVELQH  
ELIKIRKEDSVLKMKSTVTLGNMQLEFDSIREDKQFFIEKRVLDLEKKLRAFEDSSRLKEV  
ELDALQSAIDETRVIGTIDCR  
>comp12953\_c0\_seq1; 496 140 1622 LEN=1622; translated  
MRQLFTSESLVDRCADESKCLSTGLAPPNDADAESEQLFNCWAQGPGLTFPYMCADGYTGV  
PVPGWESDSNDGVHYFTCCPGSGNPDPPPVRCEGNTRALDAGDSNYRDDQSPADVLETLC  
STSAGLPYGRFMTFLPGLPRSYLCCSVLDLDEGSSQDKMPGVNAIGMDGTNSTGPGSDDV  
GGGLDPNEYSGLGSSDCMANVFCGDCTVTNTFGNIQVMNCYSVYRFPVIVETDGNTAT  
YECCMSDPSAATQPCVFFVDSAAAYRATVWTQFALAVVASAMSVLLITAVGRSLLRARRSA  
KTKPNAAKHSGSDYSSYNLYLVLLAIPDLAYNVFLMGIVSVHFQNGWIPQLDPIITFCAT  
SNQYLNVAIAREVLVLLQTTKACRKHSPPTLARAGLQFLAVSVYASLLAIAWYFLLYHDS  
DGTERSTVSI PMRRLTVPIFYVLVVAIPAVYLIWVCFVIWRQQLLPKGQIGWTKQATTTA  
AAAIPSNRKTNSNX  
>comp12953\_c0\_seq2; 490 140 1661 LEN=1661; translated  
MRQLFTSESLVDRCADESKCLSTGLAPPNDADAESEQLFNCWAQGPGLTFPYMCADGYTGV  
PVPGWESDSNDGVHYFTCCPGSGNPDPPPVRCEGNTRALDAGDSNYRDDQSPADVLETLC  
STSAGLPYGRFMTFLPGLPRSYLCCSVLDLDEGSSQDGSSQDEMPEGPVGESATVGTDRAN  
STGLESSTYGGDDVGGGLDPNEYSGLGSSDCMANVFCGDCTVTNTFGNIQVMNCYSVYR  
FPVIVETDGNTATYECCMSDPSAATQPCVFFVDSAAAYRATVWTQFALAVVASAMSVLLIT  
AVGRSLLRARRSAKTKPNAAKHSGSDYSSYNLYLVLLAIPDLAYNVFLMGIVSVHFQNGW  
IPQLDPIITFCATSNQYLNVAIAREVLVLLQTTKACRKHSPPTLARAGLQFLAVSVYASL  
LAIAWYFLLYHDS DGTERSTVSI PMRRLTVPIFYVLVVAIPAVYLIWVCFVIWRQQLLPK  
GQIGWTKQATTTAAAAIPSNRKTNSNX  
>comp12954\_c0\_seq1; 282 144 1175 LEN=1315; translated  
MSQPCLPTSSCRGRSPTIEDGLSKQ NATETRPVAFDELESM DASDYL SRVMHEAKGMPDI  
FVADATPSEPDEKLQVESSEIHGTQPSQSSFPIDGSAASLSYLLSNRSSLTPPPSIYHL  
PSQGNLNEWTKAVVSNFERLRDYLERSKAQGFQGGKQTNRIPLPTMKDRASWHSFCVGDDE  
ASGNPGAYFAPDYNDTYNDGKRKQVNDQVSDQSRDLPWRVNLPTDGYEPSVRLLLQMDQ  
VMIRRVLAHL SHYVHLGWSIAAGKGRKGEWIYALLSRLEKPIHRDDAAILFGLLKD LTLA  
RSKIDFSGGDKDRRNLAKLNVLIIVIGVYFEQGGPLSRIMNCE  
>comp12955\_c0\_seq1; 191 1 929 LEN=1014; translated  
XESDVHGVSSSESTLRAELLTDETLGFPAVRLERRPRAPSP EERPSDGNARTRTDGATE  
KVVNDRTRTWVKRILVEQGICPFTRSDRMSGQLLDLGVVGSIA YHASFERHPVGLFAD  
TWRAIDAMIKAGPEGRGTGVSSILLAAPEFDEDFDLWAGPVFAMLEAGVVAAGAESEVGVV  
CFHPRYATPDGKSWPGFGHMHSVPRLEK WYRETYESASRQAPGPEGEAESGPLLLSTEQ  
IAAGGAWQRRTPHATINVL RADQLEAAESRRVSGKMYTENIDKLVGVNGIGNEKLAMDLE  
RERQQGTGS  
>comp12956\_c0\_seq1; 856 103 2409 LEN=2586; translated  
MPDVKDVCEELLPDLDDEDIFDYVVGML EDIDFTDDDDTDDTAEMISGLLESAEYCSSDEDA  
LALAKLLSRLKDQNGGGDSTSGDMPLKTIKALKIQDTIQEAPIDPPKTKTNSMIKELK  
EGDEAISKKAQRLASRRGGGASGGSSTASSKTKSNKPTALELA EKETAELEAELAAARVA  
SVRERTRLGAYRGLDAASFTLPNPGGGMPLLEDAACRFVWGRRYGLIGRNGVGKSTLLR  
AMAARRVGDVPANVTVHYVSQEVLSSEQRKKTPEVCVVDADIERNLLTEELKVLEQLAS  
EGELDIDGSKRHGDILSRLDEIEADSAPRRAKELLDNLGFSEELQSRSLSELSSGGWRVRT  
MLAAAIFAKPDL LLLDEPTNHL SILAVMWLARELSTSETWKERIVVLVSHDRHFMDDEVCT  
DCLHVS GAARKLTQSKGNYS LWAKRRKDEQALFAKEQAKRQEEIDRLREYAGHGFKYGGG

SSQINKMSMKAKLADKLEQEHAEHATELAALQEDIELPLKISAGGEIDGFVVQLKDVGF  
YPGATPERLFRHCEFGITSKSRIVLLGENGNGKTTLVKLTIGSLEPCEGEILRNHHARFA  
LVNQHHADQIDLSTPLQFLRSKFPDGSYEHMQTLRGLHSSCGVTSGSSNNASGKRVD  
LQNTPASALSGGQRSRVALAAVSFARPHVLVLEPTNNLDLESVAALAEVKNFEGAVIC  
VSHDQFFVQSVVNEAWVVSGGVVKQVESFAAYRAAQFKVLSKDKQKGR  
>comp12957\_c0\_seq1; 378 376 1368 LEN=1658; translated  
MPESFASASTSSRNKRRSSGFLPPTTLDVEPEDDTSTTVRSETETEEESVVIAPTRHQ  
MRQVSGLEDPVFGGRETSIKEEHFSFIFEDMGCNDVPEGMRDMISLASDRTDEVEIVD  
KDGQYIEESKFSKLTDKIPSGYSHSQTSSSHRRCVSSFPPLGLDPAATASSLCSKKIPR  
DLTLNNSQTSSVISGLSPVPPSGSHQRKPRQRSSCASTSIVLSDKYLAQVNAMLSMG  
ESSRGLSSTSHVRNTHRKKKESQRMSKGRDDRSSTSSKYAPPSLPLPSSTKVKDRERY  
LPESMDEIFSSKRSFTSRRQPEVDEIFSK  
>comp12958\_c0\_seq1; 774 203 2170 LEN=2604; translated  
MGSSSSEEAELVATIRGEHVVMKNWFNTDCSDEAAALRKKYGAYPGLWKEVLNWWGWKE  
ARKTYLKHTQKGASTTTTTLKSEATETSSEKAPRKRRSRWGSVPESNDNNNQGAAATKT  
TANKRRSRWGREDSTSTATAMSTTATSVPGHYGPSGGSGPAMGIPGLALPGMPTNLTP  
QQKDMAKFQARLREINTKLDNLEAEARVDALPRGHRERSPPPIYGADGKRKNTRSVR  
WRQRYTAERHDVLEKLMNMPATRQSSLFKRKRKTKIRIPIEDHPQYNFIGLIIGPRGKT  
QKELERKTGCKIAIRGRGSVKEGARGRRDGKVMESDDEPLHVITGDDQRSVDAATDMIE  
QMLVVIDDEKNVHKQQQLRELALLNGTLKEDEYCPICGEKGHRAFECPKRFSMKKNAMLV  
KCAICGDSSHPTRDCPLKPKVKQADAKEMDSYMSFMAELDGKKVEKSTPGVPPGAPPK  
PEGIKNLPPPPTSLPPPPSGNLAAPLPHGLPPPPPPVAGNNPVPPPPPPHQTGLPPPP  
PAFPPQPPSGSSNNNGHQFGNSGSSNNNNNASNQYHHQQQNQHYGNRNDNYRNGSHQGG  
NYDQGAQQQYPMQNHQNYGGHQQASYGNESQTDYTAAYGQNGNGEGAGGFKW  
>comp12959\_c0\_seq1; 224 133 981 LEN=1678; translated  
MVPKSRIAVVTGANKGIGYFIALQLGLSGLFSDIILGCRDSGRGTAARNAIQETIESSLG  
AGGKGAPTIHSLPLTIGDAESHSSFSRMEKEFGGRVDVLVNNAGFAYKGADPTPFRDQT  
QKTLETNYGLLGFTQSMLPLLRGTDPRIVNVASAGRLSQQVSPKLQQRFSDPALTIEE  
LNGLMAGFEDAVLRGTHRGEGFSNSNYGMSKLGVIATKVLAREEKANGIAVNCCCPCGYC  
DTDMTSHRGPSPAEAGARNAFLPATMENPPTGAYFANERVARW  
>comp12960\_c0\_seq1; 428 87 1463 LEN=1702; translated  
MSTTTAILSQPSAAAAATRAAMEVRVWVQLQQRKESEFLNLRRFVXSILNSSYPCIRIGNG  
MVGFLFFFLSLDSPWLVVSSGVVASIQNGLLTAATIKALSQATFTILLPMFLGTSIVKT  
ITSYGLTRSSLVPAIAALQSFLLYVITTRVLYPLFLTQDERATDEASGAAVCASFGNGG  
VLP IIFCDLSLFRQRQNDLALSTGYVSMFLVWSPFFWAFGRSVLMGGNDAGAQNRRPS  
AKHSTGHVLSLAKKMPVPPVGMVLLGMVATVPIILRSFVGTASGDSRARAPLGVVFDTA  
QNFGKAASPLSLLVVSSLAMGAGFGKAPPAPAREQGGSHQPAAPAKCTLPFYKRWAI  
SFSRCVVS PALMLGLLKAASSDLLRNSIGSPLEQPMWVFCLESCMPAQNQVVMQLVA  
NKMEQANEMATFLFGVYATSMVPLTVIVSLALDRLGLM  
>comp12961\_c1\_seq1; 463 128 1141 LEN=1244; translated  
MVATVTLQWRASMLTRFRSCITSVPAHRGAGARKLRVAPRSFSSSSLVPEKNKIVDLRS  
DTVTLPSQSMIQTSLSAALGDDVMGEDPTVLELEGF MADKFGKEKGLYVPTGTMANLVAL  
LSHCDRTRASEIIIGSGSHINLWEGGNASSIGGIHTRQVKEDDDTAELLEDDILDCVRHG  
RDDHWPVTSLVCLENSHNMCGVALPKEYFDRIGRLAHGPKMGNVGVHVDGARIFNASVA  
LGT SVGDLCEHVDSVSVCLSKGLGAPLGSVLVGGESFIELAKRARKRCGGGMQVGVVAA  
MGMF AVEHNVERLAEDHARARKVRKATNNRWRHRWMMG  
>comp12961\_c1\_seq2; 621 128 1366 LEN=1489; translated  
MVATVTLQWRASMLTRFRSCITSVPAHRGAGARKLRVAPRSFSSSSLVPEKNKIVDLRS  
DTVTLPSQSMIQTSLSAALGDDVMGEDPTVLELEGF MADKFGKEKGLYVPTGTMANLVAL  
LSHCDRTRASEIIIGSGSHINLWEGGNASSIGGIHTRQVKEDDDTAELLEDDILDCVRHG  
RDDHWPVTSLVCLENSHNMCGVALPKEYFDRIGRLAHGPKMGNVGVHVDGARIFNASVA  
LGT SVGDLCEHVDSVSVCLSKGLGAPLGSVLVGGESFIELAKRARKRCGGGMQVGVVAA  
MGMF AVEHNVERLAEDHARARKIGLALKEYGCMFRDGDIDTNIIVYFGLPETANLSRNEF  
VERLNRDYGVKLTGGYSKGGKLFRIVTHFDIDDEGTDRTIEAIGSLGASSS  
>comp12962\_c0\_seq1; 540 215 2947 LEN=3035; translated  
MPWGVKATIQLLSILFVCMVDAAALESDGVVSLYRTIEEGTDCDFAGTMVIGNFFSLGP  
DDKFFALGSGQRTAFNIMIDHINRHKCGVRLDGLDGNYAIELRTYDDLSTGSSAVAYK  
LANDSSVDVLTAGYSSTLTQPYVEIAHNESDKLV LAPGAASKVFLDKPLAFGMLPPTQK  
YLLQAVKALATISGAKTMATVWEDASFTRGVCAAAPGLAEQYGMTMTSMTEVVNTPNVT  
LEPIAATLQAENPDVVIITCVYDCAPWVRAMRKVWSPKAQVFTVCVGQEKFSNEIGTDTA

YLMGVTPWDASLQIEDAVTGWTPSEFASLYRTVLGEEETADVAYQSAMAGALISVLYQAV  
EAVGSFQDNGPELAEYISNNSFETMGGNFSFDENGQSMAPSLMVQYDAEQLVHTIYPLET  
ASGPILYPMPSWDHRDCTILSTCEQQADNITDYLPMGNCNDEGICVCGDSINFKSVGSG  
STANCIPLEEMNYINASLKTLSWVSVGFLLAFCISALAWIWWYRENTLVKVSQPLFLGLI  
VTGSILSSSSSIIPMGVEASYREDTDNIKAVDAACMAIPWLWGMGFAVTYSALFAKVWRVR  
KLYSLAARMKRQSVVDYKDVYYIIAIMLSAELIVLVVFQVISPHTWERTIISDVDGYAIES  
VGRCESQKGWWCFAALVGMNVICLFFALILCWMTKDIPSDFAESNYIFLSVMFMFQILVL  
AVPVSAMVRDNNVFFFIRGAAVFFQNFVSLALIFMPKMRRIYIGEDTTSTVKRAMRSSM  
RSSMPNVHDKRSGVDGSADLGPYRRRRKSGSKNVSIDSVSRDRSRSHGEVSI GFDSLAP  
GDFSDTPSPQMI AEDSSSSDFQTVDTSNKMAGKNGDANESVAFERGKLSNERIEMGIDA  
NTDGVIDIKS

>comp12962\_c0\_seq2; 361 215 1978 LEN=3149; translated  
MPWGVKATIQLLSILFVCMVDAAALESDGVSLSYRTIEEGTDCDFAGTMVIGNFFSLGP  
DDKFFALGSGQRTAFNIMIDHINRHKCGVRLDGLDGNyaiELRtyDDLgSTdGSSAVAYK  
LANDSSVDVLTAGYSSTLTQPYVEIAHNESDKLV LAPGAASTKVFLDKPLAFGMLPPTQK  
YLLQAVKALATISGAKTMATVWEDASFTRGVCAAAPGLAEQYGMTMTSMTEVVNTPNVTV  
LEPIAATLQAENPDVVIITCVYDCAPWVRAMRKVWSPKAQVFTVCVQEKFSNEIGTDTA  
YLMGVTPWDASLQIEDAVTGWTPSEFASLYRTVLGEEETADVAYQSAMAGALISVLYQAV  
EAVGSFQDNGPELAEYISNNSFETMGGNFSFDENGQSMAPSLMVQYDAEQLVHTIYPLET  
ASGPILYPMPSWDHRDCTILSTCEQQADNITDYLPMGNCNDEGICVCGDSINFKSVGSG  
STANCIPLEEMNYINASLKTLSWVSVGFLLAFCISALAWIWWYRENTLVKVSQPLFLGLI  
VTGSILSSSSSIIPMGVEASYREDTDNIKAVDAACMAIPWLWGMVRTV

>comp12963\_c0\_seq1; 409 194 1185 LEN=1199; translated  
MARPRISVGIQPQIALYSVILGSVCAFQWYTEKYRRDEGLDGHIKKMYLRDAQEAHSKI  
PQLSAAIRGQTTDL DGRMDKMVWGGKARLQSGSGGGGSPAGVVGVPREDGGGDDDDTTI  
TTTVSTTEATGSTPGGEEPPKRKRKRKRKQKAGEATDDETSRRRDEEESRRQKLVLQ  
SSVAGIavgXGGGGGVRAAGGRLRERREAVTASADASAKTADGARCDECAFRRTCLPR  
PHAWFALRKAATNATLPCAAQERAARILMESLVLVIRKQIRIRCGVEATICVGYGEPVG  
SILSTIKYRNNGAERLLQRFTGPMLLSNGS

>comp12963\_c0\_seq2; 412 444 1483 LEN=1497; translated  
MHGSSSRGDWFGSRCDGVRDGSVRPRILSKHPPRALVLP LLTPGWYTEKYRRDEGLDGH  
IKKMYLRDAQEAHSKIPQLSAAIRGQTTDL DGRMDKMVWGGKARLQSGSGGGGSPAGVVG  
VPREDGGGDDDDTTITTTVSTTEATGSTPGGEEPPKRKRKRKRKQKAGEATDDETSR  
RRDEEESRRQKLVLQSSVAGIavgXGGGGGVRAAGGRLRERREAVTASADASAKTADG  
ARCDECAFRRTCLPRPHAWFALRKAATNATLPCAAQERAARILMESLVLVIRKQIRIR  
CGVEATICVGYGEPVGSILSTIKYRNNGAERLLQRFTGPMLLSNGS

>comp12964\_c0\_seq1; 361 339 1046 LEN=1621; translated  
MMRHLMHKSRRTDFGAEIGRRVMNHPMGTRATSRASAASAI SREDLVNEAAFLTKSLYRN  
CIRSVRLIRWGNFDEKEFQKREEFQNP TAGGVMSMAPPPNKEDELRSRAEYYSFTRE  
YFTQESDSLNDP LLERDIRRYLYLRKGEKDRKWL LGDMMFDPYKNSLDQDRINRFET  
MSKKYLG TDEEETKNPLFEDDSNDKNHDEATFGGDDGFIEDEDPEWFQKYPHLR

>comp12964\_c0\_seq2; 338 339 1154 LEN=1808; translated  
MMRHLMHKSRRTDFGAEIGRRVMNHPMGTRATSRASAASAI SREDLVNEAAFLTKSLYRN  
CIRSVRLIRWGNFDEKEFQKREEFQNP TAGGVMSMAPPPNKEDELRSRAEYYSFTRE  
YFTQESDSLNDP LLERDIRRYLYLRKGEKDRKWL LGDMMFDPYKNSLDQDRINRFET  
MSKKYLG TDEEETKNPLFEDDSNDKNHDEATFGGDDGFIEDEDPEWFQKVRKTQKISMVY  
HLHTNKLSLEFWIQWSDARTWTDRLIRLHV L

>comp12965\_c0\_seq2; 234 1 720 LEN=1621; translated  
PRCPRSPVLTALFAKKNKKKGGDATASSKMVQVLLQH IPGTGQAGDVIMVSPVFFSNK  
LRPQKLARKITDEEVQKDL EEKQEKSAALQAEARALKELIDDEGPAPSFFLEFADNQ TGP  
DGKCLFGGIGPKKLM DALRTSCKEFDSYSKFKTKQV SITDIEEREVEVERETA AEPEAAGA  
YKDYSKPDSLENAETEKEISVSYSSLPKKDKMTIKNTGIFRMKISL TNDLFVVKV VVS

>comp12966\_c0\_seq1; 243 199 1019 LEN=1019; translated  
MSSASKWEENPDQAKEARDDLGIWPLDEHNAKLLNEVHPRSFVTSMEETPAPEYDLIAI  
GSGAGGLVSSKQTGRRGGKSAMVSEHLAGGDCLNSGCVPSKALIQSARAVSNIRRAELG  
VDVGGDITVDFPRVMARLRQKRAAIAPADGHPGTEAAGARV FQGRGRLTGPN TVEVNGQT  
LKFKTCVLATGGRPWIPEGIPGLKEAPFTTNEQLFNLEELPPKMVILGAGVVALEMAQAF  
SLLGTKVTVVNRSSRLFESKAGDPEAAEIIQTEL

>comp12966\_c0\_seq2; 553 199 1890 LEN=1995; translated  
MSSASKWEENPDQAKEARDDLGIWPLDEHNAKLLNEVHPRSFVTSMEETPAPEYDLIAI

GSGAGGLVSSKQTGRRGGKSAMVSEHLAGGDCLNSGCVPSKALIQSARAVSNIRRAEELG  
VDVGGDITVDFPRVMARLRQKRAAIAPADGHPGTEAAGARVFQGRGRLTGPNTEVNGQT  
LKFKTCVLATGGRPWIPGPIGLKEAPFTTNEQLFNLEELPPKMVILGAGGVRNIHAARV  
LARFLNCFVPPNLTFFVLRLAGRLHLVIDGKXVVALEMAQAFSLLGKVTVVNRSSRLFES  
KAGDPEAAEIIQTELEKDGVTFLSNSKIDSVETVSEGKEGLPLMKVVVGEQELECECLLI  
AAGR VANVEDCGLEAGGVFEVVGKGVIVDDYARSVSNPNVFAVGDCAGVPRLTHVAGEM  
AKLAVQNSMANDDWKLSSLVIPA VAYTEPELATVGISSEEQARKEGIDCEVYRAGLEHND  
RALLENRNVGFCIVVKKGTDEILGATIVADRAGEMVNEVSLAMKNNLGLYAIGRNIHSY  
PTTGEAVMCGGVQYINKHLPRFD

>comp12967\_c0\_seq1; 848 145 2178 LEN=2266; translated  
MRILEVAIALFLAPSEAFTTSSSSLSSSDATSQQFDSLFSPLTALRVSKLRDEEFSTAND  
DDISEQDKALLRETKKSELVSLCDQFDLSATGTKEELLLRLRAYANSKVESERQRLKDRK  
RRIEEGGDQDDREKYEVIINGEEEEGEDDDDEPFVYFETKAPIPYFEDNSMKVDGDKTKK  
DDTNNNVFDQQRNNNKPIITPGMLTAPPPPPGVEPNENGERVVTVYSTTDQNDLTGVAAAQ  
PGSATANDPMTGPVVEPENTPWFENNQNNPNGNQKSEASSEEELEAAKEEVIELVQSLLA  
MTGAPGFVHNDGSDDDNEVLSSVGI FRQKSSSLGTSSFEAPEGFGVFDPTKVPIDSLTK  
VNSNLRMGRGSVLQDVCREFELRAVGYDGAFGDDEKRGGGHYRQVSLVRSFLEGYRRAEV  
RRVARETATMLLDRLVQDGI EGLDNTLSAMTRVGDDTTREAGELNDSLLDYLNDAIRQQE  
RKVEQILD TVKKVEELERSVEEFDGDQLENLWTVGDEDEGKRIETFDPKDPKSKIALQDEY  
EKDHKERSLKLKAMLPKSPQERLLLLLKLRLRERVKIEAAFSQDEKARNLRVLAYCLNLN  
SDELRKELIVKEFGSSLDRLDSFSELVSSSIEYGESTAHQVQPNKVVTLNIPLLERILVV  
TKKVIDEQSWKAAAGRS

>comp12968\_c0\_seq1; 289 167 1006 LEN=1243; translated  
MGFYSNRFLRCHNILLFVLVSTRISRVESFATGKRVC RQSPGTRTVANRECLGVDGA  
VRTTSTPTESRLYSSDSENDTSSSGGIRFLGRGPDAIVRPGVVLLAPAE EFHHYLRESAL  
FIYSMGIDDNDEYVIRGVIIDNPTPFAIGEMMEVDENSGENSGGIFDNL IYRGGEGAGQE  
AVFCLHSVDSMGLLEEIGTSGVYQGGDLEVIN EQEDATKKVKFFFNYMEFLEQELEDMLEI  
THDDGDAWTSVEISPEAVLDNDCKSEIWSRLRN FVRGK

>comp12969\_c0\_seq1; 566 1 1762 LEN=1814; translated  
XPPMLQEPLL RNP TCWSTRGFVDVSKLQEMVREGFDCDYRTEETMPDLSPTNYWDP RNAD  
KFNVILTRPSHDAWGIGKIVLVFSDDFLTRVYRFPWWKDFEKALEPIIGAI FFPQAGNQKG  
VLVRALLASLPPGSTIPVHHDSGEWVKQTHR VHVPILVEDPSRVVFRGCPSTELLERISC  
EPGHVFEINNQAKHAVSNCDRVHRVHLILDYVVQD TTAGNGANANASANANASVKQQQKS  
TLEPIQLDPGEKLVQTRRSVDRVKNMTPRPTPSFIVLGAQKAGTTSLYHYINEHPWV FKA  
RRRETHCLDWRWDGALKTKAGQRKHCQKFFFTTEEMKLRPSCMTGDSTPSYLLDSRRV IPR  
LKR VF EWSHTAPDKSNRNSKMRFFVM MRDPVQRAASHHAMVTS PDGTPAQLKTRGTEWRG  
KTLWEVVKLELAKMDGCGLIPYWNIEEGTLDKESFARFAGSPGEAEAWNRYLQQHVPLYT  
GSYGLLTRGMYALQLRPWLQSFDRDQFLCLKLESMKAANGVQDTMQRVWAHL DLPNHP IQ  
DESAKNSRSYDATDPGVRDYLR RFFEPHNKILASVLGETSTEEWRDPW

>comp12970\_c0\_seq1; 1458 343 4905 LEN=4958; translated  
MWVTSTIGEPYRKFLEKADREGFEVMEGSTKLRAELEHAFADINDPNRRTKKIGMFDWMD  
MDIEELAAEKKKDKESVLDLSPKNMRVPSRYATEFTPTLILGIIAILHALVLLMQYWSV  
AFLVWINYREIDADASELPEEMMELDLEDEIKLAAWKKKAKKSEVMMDRAITNIPSNLP  
THARIVPAKGRHVLVPLEYHPTLGMTFEYHRRRYVYDPDTSEWSKIRC GTTFGKEFLETW  
TGFDSEMHLVSGQIRYGPNAFSVKQPTFIDLYKAQLLSPFTVFQIFCVILWMLDEYWQYS  
FFTLMVLTFEATVVF SRIKSLSALRGMGNQPRPVLVYRLNNWVSVETTELLPGDIMSLT  
RVKPHFATANDGKKKKIVSKKVEDEGGDLIPADLLLLRGSTVVNEASLTGESVPMKEGL  
SEMEDGEHLNMKGRNKMNVAYAGTKMLQCKGAAEIDSQVGETKSFTPSIPNPPDNGCVCF  
VLRTGFSSQQGLVRMIEGSEQEKVKGHEKETGLLLLLLLFFFAITSSGYVLYHGLQSDKRS  
KFELLLHCIMIVTSVIPPELPMQMALAVNNSLMTMLKHLHIFCTEPYRVP IAGKLDACLFD  
KTGTLTDELAVAGVCQPLKLRVPTGKEDEDLKF LTPMIQIHDEAALVLAGCHSLVHIEG  
ETTGDPLESAPLKS MRWELSKENGNVPSAATEKRPEGMPINVFSEKNITEIEVLTRHFF  
SSKLQRMSCV IKS L TSGKHYSVLKGSPEAVGRL LAVK PQGYDEKAAYLSKEGYRMIALAL  
KPLGSNDEIAAAQDSRASCEKDMRFAGFIAFTCRVRKDTAAVLLRLKEGGMSIAMVTGDA  
LLTAIHVAKEVSIIEPLGHKSESDYLLTEQNEEIRKLIQKRGVVKEVSKKKKEFHPILL  
LKE SKGSLY WENYETGEKVDDFDASLI PNL SKSNHLATTGKCLALALESDDTTRSVLGYF  
KVF SRMTPDAKETVIECLH SVGSTCLMCGDGANDVGALKGADVGVALLTGFGDINVDKTD  
EKSDKASGKKENEAQFTA IMSQDQLNQIRALPVSLKMKIRSIGVDPKYPPELVEKEDLV  
QLYQIKVREGALKRHQAKNAKDKNM TAAEKRQESQRVTRERQEKLLKR TAELEAQGVSW  
ASFKAMKEIIAEETAATRANGIVKGGGVEASAGLMAQQFDDLDSGELPMVKLGDA SIAA

PFTSKMPSIKSCVDIVRQGRCTLVSSIQMYQIMALQCLISSYSLSVLYLDGVKYGDTQMT  
AMGMLGSI SFMSVSRSKPLDRLSNVRPLTSIFHPALFISLLGQFTIHLATMMIAVYYAKQ  
NLPPDYDADLDGAFKPGILNTVVFLVSNVQVTVFVNLQGRPFMTGLTENRPLLWSLVC  
TFILTFMFASESIPSLNKYFQLVFPPEESFRDFVLKLLMFDVAGSFLFDRLMKFIFAPQI  
LFASLKGTTIKDALGLGRTVGVIFFLMYSLLGNEQWHEELMLQEGRFEELGLNSTENITN  
ATENLLDDVTEVMETVYDEF  
>comp12971\_c0\_seq1; 476 17 1129 LEN=1340; translated  
MNALKNLVVVGRRNRASSVVSDDDDDDDRDFCCHRRDAKTEGGGAGERVAGTAPTGTAG  
RRDDNARRRASLSLYGRRCSDSLMAVVTSNKFESDQAFATVARTMLHRYEVEGASEREA  
IDAVLCTAEDKRAFIEALDSKHATLVRADTDSFDGERNAMDDDAVSEIVHQTRSVFDAAL  
KTMWREELASSAATPGRAERDAEAMIEQQRSDNDREYRRQHQPKTPKNLRMSPMQTSFRY  
KKNHYGDISRSDSCDSTSTTGSNIFQPLKRRRRWFFAENGGKPPQSERPVTPPSPQTKPFP  
IKAVLPKFHFDFGGSIGGSSKKTQLVWTRQVRSLELDGTSSSSSSALCYMPPTSPIRKV  
SVEWNANSGS  
>comp12972\_c0\_seq1; 485 173 976 LEN=1294; translated  
MASALMQGLVNKKLVNDPSSISCSVDYKPSVEYALEKGYNATESNLEVCKTAKDVVVI  
KPNVVQNVCADIASVSDAVIISIAAGITLATLEGYLPGRRIVRVMPNTPCLVGEAASGY  
AMGTHCNSNDEEIVEKLLNAVGVAKKIKEILLNAVTVGSGSPAYVYQFIEALADGGVRS  
GLPRDVAMELAAQTVKGAAMVLESGNHPGKLLKDDVTSPGGTTIAGVEALENGGFRSAAI  
SAVKAATRSMQLGGISEEDIKHVHNL  
>comp12973\_c0\_seq1; 501 1 1261 LEN=2061; translated  
XVQRYPWSIPIIIIVDDRSFAFLSLVSKMEANNDGNGNAAAAEDNIADDNNNNNDN  
EAGENENENNNNNNDNNNNNMVHVVDVIEEGDGDGDGDNVLDGGVAVNSEDDASKAK  
KLSENCDLLLYIHCEEPIARAPDHPVMPRGVTVSIGLDKTTKLRAVFQRYVDYCNKFVEG  
DGETSVYPTISTRDLDFAFQCQLLNENDTAETSALMKNDRIKVRNNRATERAKEAEQKRL  
RDADREYFRQMRHLLPESCPARIADVILDCQGLVDKNGRNQRLSTTVRAHSSFIGKRC  
PWLMAIILQARQKAKREALERENAQKSETPDHSQMRAAEIENDEEAENGDCITKCAAND  
TEKEIGHVEEGISAPAQINMVDVSSDDGKVNVISVDDDDDDVVKIHKKKSSAVLDDDE  
>comp12973\_c0\_seq2; 266 1 445 LEN=582; translated  
XVQRYPWSIPIIIIVDDRSFAFLSLVSKMEANNDGNGNAAAAEDNIADDNNNNNDN  
EAGENENENNNNNNDNNNNNMVHVVDVIEEGDGDGDGDNVLDGGVAVNSEDDASKAK  
KLSENCDLVSSTTRHIIICHVVLRRISTQ  
>comp12974\_c0\_seq1; 471 1 1325 LEN=1420; translated  
XFATAEAGATATAFPHDEPKQTESPSKDTACHPTFDCCPKPFAEGADPNDSVASSNKYI  
MSNLQIPEGFEDEYQPNQQNHQNYQQNLEKARASPALADDAEDSMLHSSFGA  
DRGAVLASYSYGRTKSRKPGASSGNSLVGYLRSSRRFRWAMAVCCLLHVVLIGLVIAF  
VRSMDEAALASASASAGASASETASSGAASASEPPQAAPPATESIAGTFAGSASTAQN  
PANATEEPPVATTDDDDAEGGSPSASAVAVELPGNANATQAPAEAPPVDTLELSAACV  
AGDDL VVFFEACSPPLGDWVAIYASADDSQNL DGDALGWYTCGDRFCGTAVERENLSF  
ARAVERAGPGVYRAHLIRGSEGPLYQAFASSGEFTVVGPAGAAPPGRKEERQAGATEGRA  
KAPHRTGRVHRSSIQCSTIL  
>comp12974\_c0\_seq2; 461 1 1307 LEN=1402; translated  
XFATAEAGATATAFPHDEPKQTESPSKDTACHPTFDCCPKPFAEGADPNDSVASSNKYI  
MSNLQIPEGFEDEYQPNQQNHQNYQQNLEKARASPALADDAEDSMLHSSFGADRGA  
VLSYSDSYGRTKSRKPGASSGNSLVGYLRSSRRFRWAMAVCCLLHVVLIGLVIAFVR  
SMDEAALASASASAGASASETASSGAASASEPPQAAPPATESIAGTFAGSASTAQN  
PANATEEPPVATTDDDDAEGGSPSASAVAVELPGNANATQAPAEAPPVDTLELSAAC  
VAGDDL VVFFEACSPPLGDWVAIYASADDSQNL DGDALGWYTCGDRFCGTAVEREN  
LSFARAVERAGPGVYRAHLIRGSEGPLYQAFASSGEFTVVGPAGAAPPGRKEERQAG  
ATEGRAKAPHRTGRVHRSSIQCSTIL  
>comp12975\_c0\_seq1; 543 172 1497 LEN=2223; translated  
MGSTSIEHEEFCSEGTPEGEKGNLAVPKSPFITTSDIINRLNSQLSELSTFANETDLAS  
SQQQQPRFELQKRLPDGSAIPATQDETDAANFKTKLDQSAKFVSQLESPADRQYWAEQQR  
LIGNGFFQQGDYKAAMDIYLTCLVVKENTSGFLRDTLLPVLNNLAQCTLQLGMYAKTIL  
FCEMAL EEVSKAKQQGWVEGIDAKEKQNEQEVPAGEKSTARRDLEDAIVLCKIYFKRGK  
ALRLKGYHKEAREAINCSLDCLAGKDGKPSASSFSATDGDAGNVDSISLTPYRKAIKK  
EFRFLDIAEKEGKRNRDREKRAMQTVLSLSPTTSLELDPSTSQGKSRKSAPPLYQKSS  
EPRQFSRLRARKSPSTFKQDDPNVLVGDSPMAYYSRYWSMVARVAKALLVMLGDGDD  
ANGMETSNSATKQANTRKKG  
>comp12976\_c0\_seq1; 534 1 1251 LEN=1251; minus strand; translated

XFVRSFVLTFLVSVPEPGLKLAVEEHFSTALFLGGVSKFLSGMAGIYEPLGNNLLRVSRMI  
SPQQLPFKTSIDDDFRSLNEAIFSMGSGFRDSAQCYRSELVVS LQRILATVGNEREKTFK  
WYKEAKQGSVDARTIALSNYSKGTNAVETAETEIKLWFSNLRQKQINRTNEETE EGEVGI  
EIQETDMPWEKSLKTIGTTENEVDSTCLLINKLRLVQSCEQAYIASVKKENECVQSSQEK  
EGLALNKIQKGEEDQINFFVNDILAKIFPENSGDGSKSTS QASLKMSDKDKQFGIQEKGN  
NLLSTLNLFKTQSTPYEEGMGIMDAETLGLSQDLGVLRLDKMKSASSFSKHWD RRKAASDA  
KASGSFVASQSGSIWETILKIFEDEAKLVSEVAFKITKLEKWFSSCKRALEIENDADX  
>comp12976\_c0\_seq2; 579 1 1159 LEN=1273; minus strand; translated  
XFVRSFVLTFLVSVPEPGLKLAVEEHFSTALFLGGVSKFLSGMAGIYEPLGNNLLRVSRMI  
SPQQLPFKTSIDDDFRSLNEAIFSMGSGFRDSAQCYRSELVVS LQRILATVGNEREKTFK  
WYKEAKQGSVDARTIALSNYSKGTNAVETAETEIKLWFSNLRQKQINRTNEETE EGEVGI  
EIQETDMPWEKSLKTIGTTENEVDSTCLLINKLRLVQSCEQAYIASVKKENECVQSSQEK  
EGLALNKIQKGEEDQINFFVNDILAKIFPENSGDGSKSTS QASLKMSDKDKQFGIQEKGN  
NLLSTLNLFKTQSTPYEEGMGIMDAETLGLSQDLGVLRLDKMKSRYFDNQTHHLPFPNIGI  
DEKLLMLKLRDPSLLLSLDLFGKQY  
>comp12976\_c0\_seq3; 470 1 1177 LEN=1447; minus strand; translated  
XFVRSFVLTFLVSVPEPGLKLAVEEHFSTALFLGGVSKFLSGMAGIYEPLGNNLLRVSRMI  
SPQQLPFKTSIDDDFRSLNEAIFSMGSGFRDSAQCYRSELVVS LQRILATVGNEREKTFK  
WYKEAKQGSVDARTIALSNYSKGTNAVETAETEIKLWFSNLRQKQINRTNEETE EGEVGI  
EIQETDMPWEKSLKTIGTTENEVDSTCLLINKLRLVQSCEQAYIASVKKENECVQSSQEK  
EGLALNKIQKGEEDQINFFVNDILAKIFPENSGDGSKSTS QASLKMSDKDKQFGIQEKGN  
NLLSTLNLFKTQSTPYEEGMGIMDAETLGLSQDLGVLRLDKMKSRYFDNQTHHLPFPNIGI  
LFEEITNVTAKASFRMRSHITNQRYPVPIFRTL  
>comp12977\_c0\_seq1; 312 188 610 LEN=655; translated  
MMARGDAADTFGPGDHASTYGGNPLACAAGLAVAKYICDHDVLTNVQERGEQLSKGLEAM  
AEKYPTILGDVRGWGLLKGVEICIAEDITAGELVAAAMEEGLLLVPAGANVVRVFPPLIIT  
EEELATALDRLEAAVKAKAN  
>comp12977\_c0\_seq2; 789 127 1521 LEN=1566; translated  
MKTTSVACLAATAAALVPSATSFVVSSASASASSTSLGVASSAQQLSPPKSI AEVSETS  
EDTYDANVQKTYGRYKLTIDSGEGCFLKTTDCKTYLDCVSGIATCALGHNNKELTTAIEE  
QMKRVHHVSNLYFIPEQAALAEWLCANSGADKAFFCNSGAESNEAAIKLARRHASNRGID  
KPVIVSAHQSFHGRTLAALSATQQPKYHKGFYDGMVQGF EACTYNDIASLEEAVAKAT  
SDGRGLAAIMLEPLQEGGIIPGDPAFFARARELCDEAGALLMIDEVQAGMGRTGTLWGH  
ENLGVVPDVFTSAKALGGGVPIGAMMARGDAADTFGPGDHASTYGGNPLACAAGLAVAKY  
ICDHDVLTNVQERGEQLSKGLEAMAKEYPTILGDVRGWGLLKGVEICIAEDITAGELVAAA  
MEEGLLLVPAGANVVRVFPPLIITEELATALDRLEAAVKAKAN  
>comp12977\_c1\_seq1; 360 1263 2450 LEN=2564; translated  
MSDRKRKAVDIVSVGTPPKIVGESQTI R FVIYDFEKHPEKRDEWISSPILCAHGHSWKI  
RVYPRGCSESSKGEYVSCFLDFPYNREGGPTVKFYLR CRKVTTRSRLQEFGE EWNWGW  
DWVERENILKDCLEPDGSLVVEADIRMCVDSKVWYPKELQREETLVALYRNTPSETADVT  
FTVGKTNYEAHSFILSMKARALFELSKEYKNDVPVPIPEIRPKIFRSVLEFMYTVRTPNI  
EDEEIALEILVAANRFECTQLKLYAESVIVDKFLAGSNAAEMLMFADSHSCALLKEAAIN  
VYMSDTRKVRRSQGWTKVKE SKRLLSELLEHTPLLNIEVGL EYWSDDVDQMDVACL RDHL  
QDANQEIDGSREMLVERLKEITCVPGYHPENRQEI  
>comp12977\_c1\_seq2; 360 1392 2579 LEN=2693; translated  
MSDRKRKAVDIVSVGTPPKIVGESQTI R FVIYDFEKHPEKRDEWISSPILCAHGHSWKI  
RVYPRGCSESSKGEYVSCFLDFPYNREGGPTVKFYLR CRKVTTRSRLQEFGE EWNWGW  
DWVERENILKDCLEPDGSLVVEADIRMCVDSKVWYPKELQREETLVALYRNTPSETADVT  
FTVGKTNYEAHSFILSMKARALFELSKEYKNDVPVPIPEIRPKIFRSVLEFMYTVRTPNI  
EDEEIALEILVAANRFECTQLKLYAESVIVDKFLAGSNAAEMLMFADSHSCALLKEAAIN  
VYMSDTRKVRRSQGWTKVKE SKRLLSELLEHTPLLNIEVGL EYWSDDVDQMDVACL RDHL  
QDANQEIDGSREMLVERLKEITCVPGYHPENRQEI  
>comp12978\_c0\_seq1; 570 52 1341 LEN=1494; translated  
MSSYVDATSGSLEYCRGMAARFPDLAEAYNKIESFCQQLWHQLTVLILEFCSEDEKPK  
TLRPVPGGADTFRGLYTEVVSVAKKINQLSLARIASAVAFSGMETGSSSLEESRAVLED  
LLDKLNGSGSATNTAPVLYLQSRIGLLVLQAGTESEGSAGDGEARKETLDQIYTVIKANG  
PLLKQLVSDTPEAIVVNSAHYETSMTYYKIVGPPEAFYNEAVDYLNYYQPKEGAAAATDT  
KSQALAVDLCLAALTGEGVYNLGQVVSNPILGVLETPQAWLVDLLRACARGSVRDFQRL  
CTETYPAQIASQPALVNMGQQMREKITLLGLVELVFAKPATERNLFAEIASGLDVPLDQ  
VEWVMRAFVSGLMEGSMDQVEGVSVHVTWILPRALDGDQMTDLAGKFATWAAKVTSTKEI

MEETDICPQ

>comp12979\_c0\_seq1; 129 1 369 LEN=872; translated  
SSSSNSILALGGSSARKPNSRGAATLGGEPOHDAHPSVGTGDHCSNPLWMHQLGYGCDS  
DCESDHGLQDEWNNHGPDLSLGTACAYDKFRYMGGDYFATQDTAITAAEEMALILSLRLG  
AE

>comp12980\_c0\_seq1; 488 54 1508 LEN=2607; translated  
MAQELERRFIWHQFRRCILLVLFATWGWCDFADAKTVSGKFRLSGLDTEYVVLGSAFVSP  
RKMGTLLKVEFKAKEPEYVSNEKVFVRVFRDDKWDEYKKAPSCTQKVPLSLRNEQVTLKKNM  
GHYVGEVAMELNNHKDERAHYYYFVITDCSLEFYMHDEMVPKMSYTVTTWNDGSHVSADE  
IHLENLHTIASLVSGLLALTLCCVIGIQLYEKSTVHAAVFLVMAAAASDSFSSMFELIHL  
SLYAHNGIGSYAMDALSAHLEAVCDLSVALLLLSVAAGWTLPSDVVAVKQONATAIQKLLD  
GFQSPFEALSALSPTAFLAIAIFLCHVVLAQWGRMYNDDFDSYHDLEHLPGKFLMLNRII  
LGFCMMACCLSTRMRCTPSLRSFYQLTIIGTLWFLSLPLLTWVFNALIPYHKRHRVVGW  
WAAVFQTSGITLLSWLVTSHSTSYHKLSHLSSTSDNLTDALSRRSSGKGEARTWMFGKNK  
VRLD

>comp12980\_c0\_seq2; 488 54 1508 LEN=2714; translated  
MAQELERRFIWHQFRRCILLVLFATWGWCDFADAKTVSGKFRLSGLDTEYVVLGSAFVSP  
RKMGTLLKVEFKAKEPEYVSNEKVFVRVFRDDKWDEYKKAPSCTQKVPLSLRNEQVTLKKNM  
GHYVGEVAMELNNHKDERAHYYYFVITDCSLEFYMHDEMVPKMSYTVTTWNDGSHVSADE  
IHLENLHTIASLVSGLLALTLCCVIGIQLYEKSTVHAAVFLVMAAAASDSFSSMFELIHL  
SLYAHNGIGSYAMDALSAHLEAVCDLSVALLLLSVAAGWTLPSDVVAVKQONATAIQKLLD  
GFQSPFEALSALSPTAFLAIAIFLCHVVLAQWGRMYNDDFDSYHDLEHLPGKFLMLNRII  
LGFCMMACCLSTRMRCTPSLRSFYQLTIIGTLWFLSLPLLTWVFNALIPYHKRHRVVGW  
WAAVFQTSGITLLSWLVTSHSTSYHKLSHLSSTSDNLTDALSRRSSGKGEARTWMFGKNK  
VRLD

>comp12980\_c0\_seq3; 449 54 1596 LEN=2695; translated  
MAQELERRFIWHQFRRCILLVLFATWGWCDFADAKTVSGKFRLSGLDTEYVVLGSAFVSP  
RKMGTLLKVEFKAKEPEYVSNEKVFVRVFRDDKWDEYKKAPSCTQKVPLSLRNEQVTLKKNM  
GHYVGEVAMELNNHKDERAHYYYFVITDCSLEFYMHDEMVPKMSYTVTTWNDGSHVSADE  
IHLENLHTIASLVSGLLALTLCCVIGIQLYEKSTVHAAVFLVMAAAASDSFSSMFELIHL  
SLYAHNGIGSYAMVSFVMENHEKKIVTWFAWQRHFTQLISIPDALSALHLEAVCDLSVALL  
LLSVAAGWTLPSDVVAVKQONATAIQKLLDGFQSPFEALSALSPTAFLAIAIFLCHVVLAQ  
WGRMYNDDFDSYHDLEHLPGKFLMLNRIIILGFCMMACCLSTRMRCTPSLRSFYQLTIIG  
TLWFLSLPLLTWVFNALIPYHKRHRVVGWAAVFQTSGITLLSWLVTSHSTSYHKLSHLS  
STSDNLTDALSRRSSGKGEARTWMFGKNK VRLD

>comp12980\_c0\_seq4; 449 54 1596 LEN=2802; translated  
MAQELERRFIWHQFRRCILLVLFATWGWCDFADAKTVSGKFRLSGLDTEYVVLGSAFVSP  
RKMGTLLKVEFKAKEPEYVSNEKVFVRVFRDDKWDEYKKAPSCTQKVPLSLRNEQVTLKKNM  
GHYVGEVAMELNNHKDERAHYYYFVITDCSLEFYMHDEMVPKMSYTVTTWNDGSHVSADE  
IHLENLHTIASLVSGLLALTLCCVIGIQLYEKSTVHAAVFLVMAAAASDSFSSMFELIHL  
SLYAHNGIGSYAMVSFVMENHEKKIVTWFAWQRHFTQLISIPDALSALHLEAVCDLSVALL  
LLSVAAGWTLPSDVVAVKQONATAIQKLLDGFQSPFEALSALSPTAFLAIAIFLCHVVLAQ  
WGRMYNDDFDSYHDLEHLPGKFLMLNRIIILGFCMMACCLSTRMRCTPSLRSFYQLTIIG  
TLWFLSLPLLTWVFNALIPYHKRHRVVGWAAVFQTSGITLLSWLVTSHSTSYHKLSHLS  
STSDNLTDALSRRSSGKGEARTWMFGKNK VRLD

>comp12981\_c0\_seq1; 335 153 1435 LEN=2037; translated  
MRSNDLHENNSAEDANSTIEVDMPEGTSRLSVLDGLSLSSIFDHQEQSFILSPDVLNGME  
NTRANSNVDFEQRTIVSSHPSEGSIVGPDQFVVDKTSILTTNTEIFELDAVDQMENG  
ETIFPSTSSNGLSHESIKLSKGNQSGLALFEDGIFERIGAALSSDAKDCVIRLLSEPNA  
RESSLPSIPLEVSSPGISASSINFQNSGYRAEVDLPPHLICGVCNDVVVGACILDNCCKS  
SVVCTPCWENRGRNQDDSKSNRCPSCQSNALKAYCHALDAAIHIIESLPADSEDITL  
KQGYARLSDWRPAVSDRNDRQTRMVHVENELSTRRSREENADRKHPPKKKATAFMRF  
ASLKVIAIVFAPLIAAAAAACGFKKNKENDTLMRVYIGFKDSSNTSSRFLEIEENSDEYF  
EKNEYDN

>comp12982\_c0\_seq1; 130 175 969 LEN=1147; translated  
MGQVGDTPGPADMFNALPIITRYWFGATVVVTLTSNFGIISPYQVIWSWENVTSMEIWR  
FLTPFCYAGDFSFNTLIAMYMLVQFSKQYESGGPFNTGAGGGTADYAFICILLGALGMLAT  
YPFLVGLGFPIPPIFSKNLIYYVLYVWSKRNPNTQANIWGFPIQAIYLPFAYLALTVFMG  
NPYFDMLHGLVIGHLFYFAVDVIPAVYGKDFLHTPAFLIDYFGVGEYQEPAPQANRGGFG  
RNAPAAAPSGGHNWGSNGNRLGTS

>comp12983\_c0\_seq1; 417 1 1039 LEN=2030; translated  
XEDMSSNTDPPKAHPETETTEGRTARHSTDCSTHPIQSNPSPVLPHTTQHNATPQHTMP  
YYPQSQERSSIGVLASLADRQAKLKANLEEAESMSSGIALRIARGQRFEELLGAETTEA  
LREELLSAKENIAVERNIRAYSDATRVVCGRATEAMNQASASGTDGGSNSNPKPHRFQ  
QETAAYRRASEAIAAGSGPIAGEPAYAKLCRLGEEESGDEELAVVGDHIGLSDIRCP  
LTLAPMEVPPFRSSVCGHVFEKAAILQLLKKSRKCPKPGCANNVMSASEFAEDPDTARKVR  
RYKKREEATQVRARAAIDMDDDDDEEDGGSFLRDSFAPSAMPR  
>comp12984\_c0\_seq1; 1088 1 2351 LEN=3285; translated  
XPAGDASAEPAATVAEPSTKRRRIKVVLGKTGLGGSSSNTAAPAALAEQETPASGEPVSLA  
AGSKKDAAVEEAPLAPPVQPPAAEPKPKKKKADRAKSPRPLSPLPRAGEAETAQPEASK  
EKAQAGSSRAGATEKKSRRDDGQASAKATGNPDAVLPAAEAAAHRSGRKAAVDAKEKMSAKQ  
KAKKEKEDAPPPEESGKPKKRRRQEDTEELKLDSDNEPNEWVQCDSCCKWVLPDNRAS  
SLPDQWYCHMNIYDKKRNNCQAPEQNNKEVLKERKERKRRRLKPKKARREAEAEESQQPQ  
QQQGGKKGKQQQQLSGQDDEVAASAPPSKKKAKLEKLNADKQTPRSTSPKPTGKTVKSK  
GSESKKIAEAKRNAAESGKKS VKSDDGVNPTDSGSDTKKETKPKKAKKEAQESSHS  
QDAETGADGKKRKRGRPARNQAIASGTSSPNAGFVEDQADEDNVEWVQCDKCKQWRKLP  
HISSDELDPVWNCAMNTWNPDSASCEAAEDKTDQHQEINGTSEWQLRQTHAGKYSYRQM  
IFGAAARKPNRPPSERARAAESLFVAQSTDEENPVPTTQYTKSSVFLPRVSNFNKNNATE  
EKALGIFDILKNSNLWDELRRMDPNPKVLSTACGNIPGYPASTKMIKTYDSLTVKHA  
MQDAVLQTLFGLSSDEVVAKAQWFPFETSVVRAYCNPDIIVHTLLDLVRDGLVETNAV  
RNPFLPLSEWVPRYRRVGTRRAIEAVEAIKASRCIKISKPKWQRGTPKSALEEWVTGAGP  
QRS  
>comp12984\_c0\_seq2; 1088 1 2351 LEN=3165; translated  
XPAGDASAEPAATVAEPSTKRRRIKVVLGKTGLGGSSSNTAAPAALAEQETPASGEPVSLA  
AGSKKDAAVEEAPLAPPVQPPAAEPKPKKKKADRAKSPRPLSPLPRAGEAETAQPEASK  
EKAQAGSSRAGATEKKSRRDDGQASAKATGNPDAVLPAAEAAAHRSGRKAAVDAKEKMSAKQ  
KAKKEKEDAPPPEESGKPKKRRRQEDTEELKLDSDNEPNEWVQCDSCCKWVLPDNRAS  
SLPDQWYCHMNIYDKKRNNCQAPEQNNKEVLKERKERKRRRLKPKKARREAEAEESQQPQ  
QQQGGKKGKQQQQLSGQDDEVAASAPPSKKKAKLEKLNADKQTPRSTSPKPTGKTVKSK  
GSESKKIAEAKRNAAESGKKS VKSDDGVNPTDSGSDTKKETKPKKAKKEAQESSHS  
QDAETGADGKKRKRGRPARNQAIASGTSSPNAGFVEDQADEDNVEWVQCDKCKQWRKLP  
HISSDELDPVWNCAMNTWNPDSASCEAAEDKTDQHQEINGTSEWQLRQTHAGKYSYRQM  
IFGAAARKPNRPPSERARAAESLFVAQSTDEENPVPTTQYTKSSVFLPRVSNFNKNNATE  
EKALGIFDILKNSNLWDELRRMDPNPKVLSTACGNIPGYPASTKMIKTYDSLTVKHA  
MQDAVLQTLFGLSSDEVVAKAQWFPFETSVVRAYCNPDIIVHTLLDLVRDGLVETNAV  
RNPFLPLSEWVPRYRRVGTRRAIEAVEAIKASRCIKISKPKWQRGTPKSALEEWVTGAGP  
QRS  
>comp12985\_c0\_seq1; 110 431 1217 LEN=1217; translated  
MTIRSLQCWRIIAALASLSMGATSLDSLNLQFEAPGSTDLSALGTPNLKHYDGTIELTLD  
DDGAERGCLYKLEVEFDVNAEDITVGEPPGFRKNCAPVNRGTAPDGLPFHTARRHWIRFP  
PYVFDTTGFDHVSVEWLPCGRRPSGFKKARYDLNFYTVTPVYRAYMLCQTFKTPAVCQYN  
QTSHIGRAQFTVPRLARSVSRPLPYSVVHARASLHRVVS LTIARQLATNPNSNLGIPGLFL  
VSFHFIRFVLFSLFDGTPNSNRX  
>comp12985\_c0\_seq2; 179 510 737 LEN=870; translated  
MMALPSNYSTSFSDGRMTVTLEGAASMCGNFLEAKAEQEDMDLESIEQYDLIFEGDIES  
AVNATSSNFSDFALN  
>comp12985\_c0\_seq3; 187 431 1507 LEN=1640; translated  
MTIRSLQCWRIIAALASLSMGATSLDSLNLQFEAPGSTDLSALGTPNLKHYDGTIELTLD  
DDGAERGCLYKLEVEFDVNAEDITVGEPPGFRKNCAPVNRGTAPDGLPFHTARRHWIRFP  
PYVFDTTGFDHVSVEWLPCGRRPSGFKKARYDLNFYTVTPVYRAYMLCQTFKTPAVCQYN  
QTSHIGRAQFTVPRLARSGAYLANMPVRFQDAAEPEAFEHDGLISYDARTTPLTPEEWE  
LPAFLMSTHDGSVSWRSMPDFDFMGKATATHSAYQYMYQTMALPSNYSTSFSDGRM  
TVTLEGAASMCGNFLEAKAEQEDMDLESIEQYDLIFEGDIESAVNATSSNFSDFALN  
>comp12986\_c0\_seq1; 269 488 1324 LEN=1499; translated  
MSCSAAGTASATLAPADLAREDNMAAVASGASQNAIANANAI PNTTTDPGRAKATTFEG  
VELPGFKTVDGVHLYRNGHGIRRI PFFGMNINIYVAAMYSAEPLLSTAQALGETPLRANR  
GAIDAGRSGGGHGPLQLDFTFLRYVSQSRVSAWTQQLDHSVTHREYEGYEDRALFVRL  
ASGGPIQYLGTSVQLVGDETRI IDQGVKGVVRGRNFQRAFLSMWFGSMAVSEDLSSNL  
LRGDEHHPASAVEVEQWLRELEEQALESSEEGQVPVAA  
>comp12987\_c0\_seq1; 573 251 910 LEN=910; translated



MSVYQKIFQATTRRAAASAAFSAGNIAKSAKSSVPMKMAIWAVPGGVAASWFI FGAL TDEI  
KESLGMYYDPLADVNRVEMERVKRMDEREAIKAAKAAAKASSSGDDDEEDDDDDDDDEVS  
AAVSKAVASAMDDDDDEEEEEEVSVEEEVVVEVMVAPIVDEEEEEEETEDVQEEEEEEENES  
SKKTKPSKKKFEDMTTQERWDAFLEKSIVPGEDDDDDDDDD

>comp12987\_c0\_seq2; 663 131 1186 LEN=1543; translated  
MIPAVHTTILPLALLAVVLQSGGTCVAFVIPPAGTACTAAGRSCAVGSFSPFFTSRLFST  
PEDESTDEEGASLASEFFKMAQAKGVSIDESDFEDDDDEEDDDDDDFDYNIEGDALDDRSNY  
ADDGYDEEDDDDDDEAEPNIPQGAIDAFVGYDSKDASANPSVDIPNAQLYGEVKDRVLDTA  
GGFVDMISGPGNDDDEDGDGDAKVEYSPPSTVDPPELTAGEVVLLVLDALKNNNDNPYTN  
KGVIELFGYSSPGS QIKQEEGLTPAEYGEFLKETEKALFEHLEATIEKGEYSFEGKKGF  
FTARLQTGLAPSDCISVNFILSGSGPDDDEAAWLIDSILIRPASVRRRRRR

>comp12987\_c0\_seq3; 178 208 585 LEN=792; minus strand; translated  
MNGWSSQSTASVSSGPRLSFPAFGPILSQRFLPSSDWFLCLALPCLALLRLSPTPAADRG  
GADEDAVDEPGRLLVVVRAGSAQDKVDRDAVRRGQAGLQPRREEALLALEGLVALLLYRLRE  
PAARV

>comp12988\_c0\_seq1; 378 198 1088 LEN=1534; translated  
MILWLWNIQNVLAQSSNNQTI AENNGGNERFERQKIYTYFERIDISNRTTGMMADDDK  
LLRFWKERWHAAGYMPVVLTA KDVWKENGQKHLTQSRYESVQSRLDALKLDDFSRVVFK  
WIAMTVAGGGWFSYDYSFPLPSLYRENGGDIIRGDEL PNNGHITVYDMI SPTLASGSANS  
WIDVLEALLDDAEHCRQTEGSKTYHRYDLDCFYTD SLAIHSLRKKQHKLAPHTERKIAT  
PFDKHDPVSNDDTGLCSSEK FVKKWTVHF GPGILQRS GHIPRARRPKYRLNVAEDW

>comp12989\_c0\_seq1; 603 3709 6081 LEN=6729; translated  
MDHSQEFSSSPVGNHNNGGIQDQRYRDGLIRLDPCHVQEDPQSLAQPTRYHPSTGNDEIT  
PQQIAMA AIEIPHSSSTTYITGPGVALSETTVSLPPI LRLLFGLNGLALSLLTLPIMYIL  
NTRVEVPLPYLPAYGAI AFLPYSLKPMYAYASGLLAVEAPNEETGSPTTFAESNANSNSQ  
YRNGYRHLRFLSALLTCNSVCTLLFACIPKGGVIAVLVVAFFRGITDSWAEFCLGLTLID  
HARARASEETSSPYDTTVSKLQAEAATAGNLGAWLASFVTCLLFAVRYAVAHNDDGGDE  
HSQQLSGGVANALVFVTASMQMGAFVFLYNNGR LASTRLFVTNLVGGYRELRTTASAQ  
FTSEDDTENDRIGLFTNHLTAAPTELD SLRDEESSHPSYSSLEDLAHNEDSLSSTSTGNS  
NSVSAPDIVSATSYSISGTAGRSPTKLFHWILVLLQ CILV IALKGP IVEWSSHFLWSVS  
MGTLLCCIILT VLALFCGKAKNGNSQQT LRVG LYLVLRNAVPSDSAI IASFFYSLFGESQ  
PFVLQLLGFLGMVGSLSSLSYTKFFSTRFSTGRPLLCLMGGTVLMASVASLLNIAVFRE  
YQHTVAHAGTEDSDAFSPTSPTSTKLF LIAVLAKFATAFFEWAFLPELV LATT SVNIP I  
VPPTEQSAQVSNHNRSNRQEDTGSNNEE LELSPI SPTTTASRHP SNLERNSSSKREDDKR  
IAMEYGTLVSCIDFGDQLGSLMAAPLVAALS VSRDNNFLNMDRLILICAVANVIVTIGLL  
PLLTHKKTPK

>comp12989\_c0\_seq3; 603 3340 5712 LEN=6360; translated  
MDHSQEFSSSPVGNHNNGGIQDQRYRDGLIRLDPCHVQEDPQSLAQPTRYHPSTGNDEIT  
PQQIAMA AIEIPHSSSTTYITGPGVALSETTVSLPPI LRLLFGLNGLALSLLTLPIMYIL  
NTRVEVPLPYLPAYGAI AFLPYSLKPMYAYASGLLAVEAPNEETGSPTTFAESNANSNSQ  
YRNGYRHLRFLSALLTCNSVCTLLFACIPKGGVIAVLVVAFFRGITDSWAEFCLGLTLID  
HARARASEETSSPYDTTVSKLQAEAATAGNLGAWLASFVTCLLFAVRYAVAHNDDGGDE  
HSQQLSGGVANALVFVTASMQMGAFVFLYNNGR LASTRLFVTNLVGGYRELRTTASAQ  
FTSEDDTENDRIGLFTNHLTAAPTELD SLRDEESSHPSYSSLEDLAHNEDSLSSTSTGNS  
NSVSAPDIVSATSYSISGTAGRSPTKLFHWILVLLQ CILV IALKGP IVEWSSHFLWSVS  
MGTLLCCIILT VLALFCGKAKNGNSQQT LRVG LYLVLRNAVPSDSAI IASFFYSLFGESQ  
PFVLQLLGFLGMVGSLSSLSYTKFFSTRFSTGRPLLCLMGGTVLMASVASLLNIAVFRE  
YQHTVAHAGTEDSDAFSPTSPTSTKLF LIAVLAKFATAFFEWAFLPELV LATT SVNIP I  
VPPTEQSAQVSNHNRSNRQEDTGSNNEE LELSPI SPTTTASRHP SNLERNSSSKREDDKR  
IAMEYGTLVSCIDFGDQLGSLMAAPLVAALS VSRDNNFLNMDRLILICAVANVIVTIGLL  
PLLTHKKTPK

>comp12990\_c0\_seq1; 887 176 2665 LEN=2786; translated  
MSAHYPAQHSSAPHGAPSGGHPQGGAPVPDSYFTESKKGEVNELRNLLRNFAFERNPKRK  
RDIKKVIA YMTLGIDVSRFLTEMM LAIETRDLVIKKMVLYLCNYAYSHPELAQMCTNT  
LQKDCGNEDPMVRGLALRSLCSLNL PQMVEYI SEPLRKS LQDHHAYVRKTGVMGILKLFY  
LDQQAFQE CNFTDILYDMLRDVDPTVVANCIRVLNEVMAKTENGGMAINRAIMLHLLNRI  
HEFTEFDLVCVLELVPRYIPANAEEGYQIMNLLDPVLKSSSATVLATVRAFLSMVESIA  
STPEEMQEIKQQIVARVKAPLVTLV ASGSNESCYVLLKQVETLVELCPGSFDDEYRQFYT  
RFSEPTNVKYLKVQILPLL TNPD SAPDIVAE LAETVNDNNKHL SRLAIQSMAKIACRNTG  
GPGAAESIAQRMVDFLDFNVQHIQSEAATGLTLMVRKHPDLKPVCCQSLARSLRYVEEGE



GGGRGRGRNNFDSNNGRGRGRGRNNFDGHNKNNRGGQNNKGSNHQRIVIKDVQLELT  
GIGSTPSQQAVKRISAKILMMARTKYIEAPTPDANGVEVFNPHHEECQWTDENRAETINQS  
SMRVMELGDVSKNPNSKSKNKETAPPLEECKPLEINEETRWKSKAMNNSADRKSX  
>comp12996\_c0\_seq1; 419 1 1233 LEN=1472; translated  
XKDALLPQIQHDVRSKPVDTTMPMPMPTPTPSVSGMRAWALACVSVVLFSSPFCRPIDAA  
QARRRVTFRRDGVAYDREITTFTEDEGRLAQVEYGLEASLRGSTVGAMRVGIPAAATVTTD  
QTGDGNGDDGDDDDNGEPDGSASSPPKKTQQSAPSSSCIVVCIHSSFGKMHRIDDHIWM  
LTAGLSGDARMLAGMARRSCQNHRLRYGEAPTQVQAARITAEFHHRLTRTGGCRPMGCTA  
ILLGVDRHGGSGGSHTARLFRTPGGGFEECRCCAAGKSRDAVAKELAAALVDAQGYGLDN  
DNGHDNDNDNGGSSPKRQSGGDREALSSESRGGAIARTAAAMAGRVLRLLLDPGSHSKRGG  
KAPPASAAVTVDVWTIEPRDGCRCGMLATCYSDVRKDNAERIVSVQDALA  
>comp12996\_c0\_seq2; 394 1 1215 LEN=1466; translated  
XKDALLPQIQHDVRSKPVDTTMPMPMPTPTPSVSGMRAWALACVSVVLFSSPFCRPIDAA  
QARRRVTFRRDGVAYDREITTFTEDEGRLAQVEYGLEASLRGSTVGAMRVGIPAAATVTTD  
QTGDGNGDDGDDDDNGEPDGSASSPPKKTQQSAPSSSCIVVCIHSSFGKMHRIDDHIWM  
LTAGLSGDARMLAGMARRSCQNHRLRYGEAPTQVQAARITAEFHHRLTRTGGCRPMGCTA  
ILLGVDRHGGSGGSHTARLFRTPGGGFEECRCCAAGKSRDAVAKELAAALVDAPGYGQDN  
DNDNGGSSPKRQSGGDREALSSESRGGAIARTAAAMAGRVLRLLLDPGSHSKRGGKAPPAS  
AAVTVDVWTIEPRDGCRCGMLATCYSDVRKDNAERIVSVQDALA  
>comp12996\_c0\_seq3; 419 1 1233 LEN=1484; translated  
XKDALLPQIQHDVRSKPVDTTMPMPMPTPTPSVSGMRAWALACVSVVLFSSPFCRPIDAA  
QARRRVTFRRDGVAYDREITTFTEDEGRLAQVEYGLEASLRGSTVGAMRVGIPAAATVTTD  
QTGDGNGDDGDDDDNGEPDGSASSPPKKTQQSAPSSSCIVVCIHSSFGKMHRIDDHIWM  
LTAGLSGDARMLAGMARRSCQNHRLRYGEAPTQVQAARITAEFHHRLTRTGGCRPMGCTA  
ILLGVDRHGGSGGSHTARLFRTPGGGFEECRCCAAGKSRDAVAKELAAALVDAQGYGLDN  
DNGHDNDNDNGGSSPKRQSGGDREALSSESRGGAIARTAAAMAGRVLRLLLDPGSHSKRGG  
KAPPASAAVTVDVWTIEPRDGCRCGMLATCYSDVRKDNAERIVSVQDALA  
>comp12996\_c0\_seq4; 394 1 1215 LEN=1454; translated  
XKDALLPQIQHDVRSKPVDTTMPMPMPTPTPSVSGMRAWALACVSVVLFSSPFCRPIDAA  
QARRRVTFRRDGVAYDREITTFTEDEGRLAQVEYGLEASLRGSTVGAMRVGIPAAATVTTD  
QTGDGNGDDGDDDDNGEPDGSASSPPKKTQQSAPSSSCIVVCIHSSFGKMHRIDDHIWM  
LTAGLSGDARMLAGMARRSCQNHRLRYGEAPTQVQAARITAEFHHRLTRTGGCRPMGCTA  
ILLGVDRHGGSGGSHTARLFRTPGGGFEECRCCAAGKSRDAVAKELAAALVDAPGYGQDN  
DNDNGGSSPKRQSGGDREALSSESRGGAIARTAAAMAGRVLRLLLDPGSHSKRGGKAPPAS  
AAVTVDVWTIEPRDGCRCGMLATCYSDVRKDNAERIVSVQDALA  
>comp12997\_c0\_seq1; 276 73 669 LEN=1616; translated  
MSESSAGSFWPHREAQAALGKDNGLKPFFSTKVFYAAAQGF TAGTAFGAFQMAYYPDKFIF  
AQKGSISSGPARGMAYLKHVFRPALIFSAVTVTYAGAESFLSEVRGTTSKDPWNASMAG  
AAAGLVLGGFVTRRFDIATTTAIGTGLVMGLLEFNGPSMICDPETKRSRSFPTEVPNSFE  
ESEELQGLKQKYPAYKQN  
>comp12997\_c0\_seq2; 251 223 600 LEN=1547; translated  
MAYLKHVFRPALIFSAVTVTYAGAESFLSEVRGTTSKDPWNASMAGAAAGLVLGGFVTR  
RFDIATTTAIGTGLVMGLLEFNGPSMICDPETKRSRSFPTEVPNSFESEELQGLKQKYP  
AYKQN  
>comp12998\_c0\_seq1; 497 59 1129 LEN=1500; translated  
MQQRQQNPWILALVVVAATFALGGNTVSGFSSSSLLAPSTPSSPVSTLVLHGTEEDSVDG  
FLTTRREAMSQAASSMLAAATANSLGFFSPDSALAADGPITQVEIFSKLARIPTFCLVNG  
PGAGKDLEGVPFDIYNKDTASATGYFFLSHETAEEALKAASGLDSARGDGNIWMTAKIMV  
VPLSVALQLSLTKRRRVAVNEEQGVNGILVDTVHQLIPSDSGNVDAQTLDTKRKKNPKKW  
ETKGRVPLFSIPEGKSGKKKYFETTELLADYKRNHASEDPTMAFVPEI ELDGEMGYFFRQ  
ALQSNDFGALKDFVDTIQPLPEAREAAIKILKEDAASKTPVAPYNFDKTFVLVLAAK  
>comp12999\_c0\_seq1; 402 132 1958 LEN=2363; translated  
MTEVGVSLALRRHRNLI GSKDEKRNNTVAKTHKRNEKRKRLRSQSSRHSSSDSDHGENDGF  
VEIGNSGERTKRKSRITGETLPSYSSWRILFEGGTLYIFCMILPTLLRFIVRLGHAIWIE  
GGSLCFQIAGYICRSRWLLEYQICRKYLPDNITHGLATNPSVLAPDAGISDLAIVILLSL  
SMAVTRVALVHFLVPNYKQPKRLEALVRCKSIHLLSSSYSGSVTPTKVMKLKHFDTNSES  
DLSELRI PDLNSGKGDASSYDSDQORELAHDEIEIRPRFP PGPLSDLDQGSGETDLVVD  
SRIRKNEDGNDWLFHDEEEDERLFQAPAVSSGLLTNSAQNLQALLEQAAPLASNSVEKP  
ERGAYKKKQKPERMFAAPKYATAVFRILFCSISCLIGLCYFLAADFWPPSVGGTGNTKNC  
WDLSSIGVTLMHTDFDKIVDSDFDSYNPVLRRYYLIQASYHFHSAVFHVLT SILLWFVSK

SSKKKEASAPKFFGFIPMSMFTLLNVRIFQHVFSVLVILGTYLFSSTRRLGAIAMFSFD  
ASSLFLHLLQLGINAPQNQRETPGRIGLSRKSMLVLRHFLVIPAYCYARFYVFPPLVVG  
SALEESQDW

>comp13000\_c0\_seq1; 403 1 1248 LEN=1267; translated  
YRSLYWDLAKQKIEGLLGVGKQLASELAMKEFYARSVWEERQRRPRNGEHNNDENDQW  
ESRRRLDQDCLDLVLALETWNTNTITDNKMEAINRVRTGLKVFRLGDAAGSLGDEYGA  
VEACFSEERQRYFSWLLSSVRLAHGVKDTMRLVEMDDVVGLATGVVLMWKHVRIVQGRLD  
RCLRWSCAPRSAATGPRQRLPLSLQRWILEERAGTGACSESPETINRGELARQFYVWLQE  
QCNEWKAELASLELLTDLDRHSSSSSLVPHDPAPGPGTHGAGKKAKKKKNKKKNLHSGAIG  
GPARVPSSEHGRPAPAENTPSNTNPETDGIPISSDKGIPPALPPTPTRAGNEDGIVGGGG  
GAAGSTSGVCSGSIDVEAVVEDEESGCTIPAMDFLTDRLVELMRLAEDDSVLIID

>comp13001\_c0\_seq1; 331 43 1409 LEN=1618; translated  
MKLALGLSLEAVILASSVASAFVVSVPVRKPNFSASTLSVAAEENDLFIDETRASVSNYYG  
KELSSDDLKTNACCTAGAPPQYIQDCIKNIHPEVVSKYYGCGCLCPQYPLEGANVLDLG  
SGSGRDVYIASQLVGPTGKVVGVDMTDEQLDVAKKHLDYHAEKFGFANVEFKKGYLENLK  
DLNLEPGSFDVVIISNCVINLCTDKEAVLKECLNLLKPGGELYFSDVYANRRVPKTLQEDE  
VLWGECLSGALYWYDFSSEMNRKLSKGLLCSCHRCPIAHSVSQNTSSSILHFSRNDFE  
NMARKVGF TDPRLVEDAPITVQNAEVERAISESGNDSLKIFYSATYRLWNLDLEPHCEDY  
QAVIYKEKSCCGAIDRYPSGWLLDKHHYFEAGKIHPVCGNTYKMLHDTRLKEHFDFIGT  
WDNHYGIFEGCGSTIPYDTEEAASGKGASTGGCC

>comp13001\_c0\_seq2; 448 43 1278 LEN=1487; translated  
MKLALGLSLEAVILASSVASAFVVSVPVRKPNFSASTLSVAAEENDLFIDETRASVSNYYG  
KELSSDDLKTNACCTAGAPPQYIQDCIKNIHPEVVSKYYGCGCLCPQYPLEGANVLDLG  
SGSGRDVYIASQLVGPTGKVVGVDMTDEQLDVAKKHLDYHAEKFGFANVEFKKGYLENLK  
DLNLEPGSFDVVIISNCVINLCTDKEAVLKECLNLLKPGGELYFSDVYANRRVPKTLQEDE  
VLWGECLSGALYWNDFENMARKVGF TDPRLVEDAPITVQNAEVERAISESGNDSLKIFYSA  
TYRLWNLDLEPHCEDYQAVIYKEKSCCGAIDRYPSGWLLDKHHYFEAGKIHPVCGNTY  
KMLHDTRLKEHFDFIGTWDNHYGIFEGCGSTIPYDTEEAASGKGASTGGCC

>comp13002\_c0\_seq1; 582 111 1337 LEN=1366; translated  
MNHSSILSALWLFQLVARVEVAEGFSPLHRGSPRIAGSKSARAQSTGRSGGLFASDNTD  
PHAVEDFEDWSEERKSSLFQFLLRDLEVEGVPLLGCDGVAANMTLQATWTVAGQLSENE  
YERKVCLVLEDIPVKDIKMFVSGFSELKTQQPMDVLHDLRRFSLSLVGNIGIPALILET  
ANKTASEIAQYSTMVENTAAPNEEQWRAATESFVKRSFPELEEAPIAYRFLGSSDVCIL  
SGYWNCICELESSDPTQCNSIVLSFPPSSETETHDRFVAISTLLNAINLKYNDYRYELK  
HLHPSYDRDDIEPKDEPVPGLAPSSLLRDAIRENGGEELSDEQLALRNYQRRSPLPGVV  
IRRVSEESHGADTQMOPDCDSAVRLANE GEGKLRREALSREISLISESA

>comp13002\_c0\_seq2; 595 111 1319 LEN=1348; translated  
MNHSSILSALWLFQLVARVEVAEGFSPLHRGSPRIAGSKSTRGGGLFASDNTDPHAVED  
FEDWSEERKSSLFQFLLRDLEVEGVPLLGCDGVAANMTLQATWTVAGQLSENEYERKVC  
LVLEDIPVKDIKMFVSGFSELKTQQPMDVLHDLRRFSLSLVGNIGIPALILETANKTAS  
EIAQYSTMVENTAAPNEEQWRAATESFVKRSFPELEEAPIAYRFLGSSDVCILSGYWNC  
ICELESSDPTQCNSIVLSFPPSSETETHDRFVAISTLLNAINLKYNDYRYELKHLHPSY  
DRDDIEPKDEPVPGLAPSSLLRDAIRENGGEELSDEQLALRNYQRRSPLPGVVIRRSE  
ESHGADTQMOPDCDSAVRLANE GEGKLRREALSREISLISESA

>comp13003\_c0\_seq1; 97 1 667 LEN=786; translated  
XRAELEYQVVVDLLYYLLLVLCILVPAHISCRVLIYLGASXPKRLLSPIHRLLPYVQFCA  
STVIQEALARS LDRAELPYEGHASYYDYLKHKYTRKRDL LAEALTSAGFAVPDYERTPGG  
GFFILARAGPEIQKVLPERYVLAENEAAPGGIARQDWALCQWMAEEIGLLCIPSSPFFSL  
DRVKEGVSDSFIRVAFCKTDEIEAAAQALKQLKVPEAVVAE

>comp13003\_c0\_seq2; 374 292 1988 LEN=2107; translated  
MVGVSERRRSIPGLSICVGLIIVSCFSDIRAFVPSVHQGNQNHLLHQRQAGPAASGGQQ  
RFTVSNRPLAATNGESGREDDNAFR TANRSDGQMNQTTGGLASGSPGQAIQRLGGNPGP  
TVWTEFGRIAQEHPVNLGQGFDPDWLPPKFAVDSLVEAVLDSAQSPHQYXAACGPPQPGQ  
PAGAAVFDPHAKGDRSMDEVAVTVGASQALYLSLQTLVQPGDEVVLFEPFFDLYVNQVKL  
AGGTPVFVPLRFEAYNDDDDDDASGGEWKLDRDELKVVSPRTKAILNSPHNPTGKIFS  
KSEMEVIAESLDLAGPDCVVLSDDEVYKYIVHAPPKESDSSDTSPLCPGHTHFASLPGMWD  
RTITISSAGKTF SATGWQVWCIGPKRLLSPIHRLLPYVQFCASTVIQEALARS LDRAEL  
PYEGHASYYDYLKHKYTRKRDL LAEALTSAGFAVPDYERTPGGGFFILARAGPEIQKVL  
ERYVLAENEAAPGGIARQDWALCQWMAEEIGLLCIPSSPFFSLDRVKEGVSDSFIRVAF  
CTDEIEAAAQALKQLKVPEAVVAE

>comp13004\_c0\_seq1; 228 1 1291 LEN=3738; translated  
XDRENRTSTMKFGSSKRVRNQSWFWARNTRDACHKVASLGMITWVAYAVSHSFSLSRQQE  
ELGAI VVQRNSHSDTPEIPLLP EAKRNEGSKVARQMGARPPDR TLLRPDYLERGSDDLWI  
DLLEHGRTIVSGEGSNKPLVAMEIGVHSV KQCKAAAIRHIHAHCFE P SPAS FQRITGQVR  
NDRELE EYKDYHLHLYNVAAGNV TGGTLEFHTSKGGSTGDHVG N ANMYSMEANAPDGDVVH  
VPSVR LDDVVL DSSSYRNKI QPVSVD T SQPSK SAPK IDEVYAIKVDT QGFEP SVFAGMS  
ESIRRHKFQHILFEFWPKAMDLMAGSVGGSSDAS ICNKAVE ILELLD GAGYKLYPLTIGY  
HPKQVATAKERMQLKKL NDRPLHDFRAH C MYLRLELEERRVSETDCKMGFWTDFLAIAPNV  
DSFLEHPKGR

>comp13005\_c0\_seq1; 195 432 1263 LEN=1500; translated  
MTAVGSRP I VPRNQAI GCSSTTPKVILVT TLLCVLLHTATGFV VSGSTADATRC SRCSS  
PRVHRLRTNASKNSDGGEGSASSEDEEEDEYDY EYEREPALCSDVRGRPAGVVLEDLN  
WRIEKLRLLEEANKRRFLKSGPRFLPYEECQKWVQAWGNRWESAE EWCVRQHESGETD GVA  
AVRDCPGNQCCNASMHRVVVIDL FVITYPDFFGG GYPLVRVRSVVCNRKD WIASGEKRNA  
YIPSRPDEYFKRTGDWISWEHFLGVPEKEQDDESDA

>comp13005\_c0\_seq2; 199 432 1076 LEN=1313; translated  
MTAVGSRP I VPRNQAI GCSSTTPKVILVT TLLCVLLHTATGFV VSGSTADATRC SRCSS  
PRVHRLRTNASKNSDGGEGSASSEDEEEDEYDY EYEREPALCSDVRGRPAGVVLEDLN  
WRIEKLRLLEEANKRRFLKSGPRFLPYEECQKWVQAWGNRWESAE EWKD WIASGEKRNAYI  
PSRPDEYFKRTGDWISWEHFLGVPEKEQDDESDA

>comp13006\_c0\_seq1; 798 71 3253 LEN=3464; translated  
MPPQFAGF ASSGERTTAT TTSFGLLDLFLGTTGIRTPDAAWEFLTARELANLRCISKSYR  
ENLERRFEYLCCRDGRDYIVPFPGF PGLLRHAEGESATPTGT VANGNSVSRNEHN RAGLY  
PHQLASLRAMHELESRTDAFGALRGGV LGDAPGLGKTITTLALLSSTAGRRPLDPPEFWD  
SDGIKEGW RAMRGNPAAREEVLRCLKPV RHVVSKEELDYLSPPYFEPGSLRKRQANTYPN  
REDLFP SLESFRKHLHKL LRKGFIRPRASRSEWELVRQNLKGLQMGMDKRN RKL IASKE  
GRRLTWERQLIPTTATLLAVPDALFEHWFQ QIREHLCLSVFAEDGGWGDTKTAEAVPRGV  
VYLDGLGDLADVTTGAKALKNTSALTEPVLN AAGLSGYLIVIVTF SRCRRDFKSEHDSMS  
HNDDKSRAGTKRKRWGCCAAEALARIGRTTQSS SLLQLRWLR LLMVDEGHQLETDDALAKF  
IHKVAAERRWVISGTPLTGNEDNPEYNSAALDQLQRILYFLRHPRYGVSKSE DVVEAWET  
EVKKPFLARQSREKLLAVLREIMVMHRKEDLKLPEPVFLQIEREVS VPLDVEAAI LQQAM  
DSPFGSLSIPYGLNQYLHSP EFQSLV DAAQATYVLET LQRARKALVHNNNQSTST DTRPI  
KGVVYSSSNKDLLSVADQILRAVAPESVAELYGNSTIADM SSELERFRHG NRMYRTCPVC  
GGENAT TDLRCRRILMEVVSSVTGERFLIEPERVLSTRNVSLVRLQGEPLKNYPANRKF  
RVRDLLEVDVRGCHPLLSE RKP HGVDGYGA EKCRK KALAHRYEGRD WFFGPLPDVSPDA  
DHSQVPMEVILKKWQRCGDFHNSWYAGPGLADSPVMRRKEDV FLLCLDADLGHGLDLS  
FVTHIFLLEPINDAALLEQVTSRAHRLGATGPVSIETINTFYKCSDEFQKRVDGSMVLNQ  
NKEQGSQSSSGKSDRHNDQLSLLHNAHRKASLTRV VCHHCYRQFDSYAEAE DHEKRLCL  
RNPKNAAVADKFHLS SVYKEIRPPLPMESS SITEGCIDAS

>comp13007\_c0\_seq1; 820 1 1958 LEN=2078; translated  
XNDFVEDSLTGKPFEDFY EIGDELGEGGYAFVYRCNHKTTRKVYAVKEV IISKMESGGEN  
TLKDEIAALKLLRGGAH IIRLYDVFYEGDHCFMIMEEMRGGD LLSRICDKEVYTEREARG  
VCKILFEAVLYCHQK KIAHRDIK PENLLMVEADDDTSIKLADFGFAKR VVGELSLSTLCG  
TAQYVAPEILD FQVDGYDERCDMWSVGVVTYILLGGYAPFEGEPDELAQFIIRGDYEFHD  
KYWADISESAKDMIANMLQVDPWKRLTAVEALSCEWMGLSPEELACKDLGGAKEQMEEQE  
DRKKKMSKESIAGKKALQALITTNKFLSLGPMVGGATSKDPASDPDKLGVEKAAEYDFE  
DCYDWGRQIGVGTFSVVHEAIQLDDGD TYAVKRIPRVDLWEDDAVALQSEIMCLQQVSDC  
ECIVQLREVFDETDFTYMVLELLPGGYLIDK IIEKHFYDERKGLVVAKR LITAIIEFCHYH  
RIALRDLKPENILLVDGSDTEVKLSDFGHAKVVYQPN SLTTVCGTEGFVAPEIEHSPQY  
DVECDIWSLGVVLYILLGGYRPFREGEDCLEKIRYGYQFHRKYWSHISDDTKDLIAQM  
LTVDVGHRITAEALDCDLIRETPDREQQRKRSGKSKIKYKSSSHANDKWG

>comp13008\_c0\_seq1; 1514 404 4813 LEN=4975; translated  
MTTVLWLQIIFLQLPPVVVGAVGEGSGRIKPPPPPPPRHMSQKLVDATISLETKTLLR  
NENREAQDAIPKVEHV TMARLNKDSNIVPPPPPRV VPEQASVGRASQKAEQDASPKQA  
ISKNFLVGNDFKPPPPPRRSTERKEEVQYHGQAPEGAASTSVSISQEI EQKEILRYGE  
KEKDEAKKDGYLLATTG SVRAPRQRGPASLATHMDV GQAQHTKERHAGHVQRQSEPSDR  
WQQEDQNKYQCKSQNTKSNYQNASSYQPQPRGHLEERHQHRQPQRPSQPSGVPSSA  
VTSAFKGLWGKVEQRLDDLANLEDTVSGRAQRLVNTAITTASTASRISPSRIRLLAESGA  
AAAARATPASMGN IARKKNASPSVLGATS VPLKSYGQKFQVAIQEKERQRNDQINQASHL  
ANDKSKSISAKGGATSSPYHPPQHPSPPTSSSSPPGNPNTDSAASSPEKKDSANQNVNVN

GNQGRNSYDLRSSSWEARPPISQTDGRNVAPPSETTASTPSGGKGTFFVPPNANSNANNGS  
SQGNRDGRYNSGNYGSSSGPGMNSRQFSNPSRSNEQQQSSHSRNSRIPWDTSEKSLSPPAR  
SVQSLPNRSGLVHRFDYDTPSWKRALEKLVPIPSLPNIGKMI PRFRRGNIRYSSANLD  
AWDAAYGEDSNSRGGIFGFFKSKAGSGSLPSSSTPFRQDRRDKNDDQPPLIASMLSRC  
NGKKTSLCEADV RAGNAIGRYKAALDILFILSSILGCKLLPGLGDITSLPTSFOEATEA  
VLTIGRSILSELSMGSWALFAFLYAYLFKYAQEVFLDQKTESLASSVASSVKEESEYAQL  
YLRLTAATPMNRNLPDRLA AISKNQVSVVSKARLNSFVWIVLTS LTVMTVSAVGPILLA  
FSSAFTKIIVMKEWRQWPIEWQSLFGSSILMQDLFHTLESHGTRAFSAFVEKPMQFSFH  
LCMFGCLIISTLLPRLEERRALASKRDEDEDLEEDDALSSSFESAEEWSRLGTSSASRLS  
MLSENGSVENALARWRGSHLSNIEESASRGPLLSLVRVAVYTLAVLVTGLPVAVSYFLA  
DDTSSSSNIMSFFRWDSLFDLSFIQLFLFGLVYRALQKVMESVTDASMVKNFQEDLVS IK  
NEIEESNRGNTDFQVMGSVSPSAGIAVRDLWAAHVTKRAWAVRGANLQCKNGEIVAILGE  
DGNGKTRLLTSLAESLTFPPKRTVTTNKVRGFI SIGGLEISKWNRKMLKRRLGILLSDVR  
VVADSASLFSGWTMEEIILEPIDGVRLYNNDSLQRTYTSAEKSAMLLALKLTGLYGTLLSR  
LPSKSSSTIFTANEEDLRPTTLKPRSTLLSPGEWSKLILARVLSQTIYDNDNALSSNDKIE  
NSMLGSILLLDEPTTMHSEVDEGQLFRDLRLTGAATVITTNKWATGRFADHICVMKNGSI  
VEMGNHNELLARGPQOSLYAAKWHAMTMQ

>comp13009\_c0\_seq1; 709 199 2367 LEN=2542; translated  
MTDIDPAMLEKFKQFQAMLADSP EIVEALNSPEILAMAALAAKKNQAGPSATPAPVPVVK  
ADDAAPAEPSPYPMVGHGVSDDVSVFSEMTTPTVMTRQTVEEEEYYPEIDDSGVSSSGLGG  
APRRIGMKIGVAADANGVLPPPPPKPNRVRNPLVAARSRGLARPAKQMSKISEHTTNTN  
EGSVSSESTEP ELPRLKRPSLVAKKSNWRPRTASSSVLARSSSQDKHPFGGSVSPTRRNT  
SGSNRGRVGRNRSM PANMKRPEAKKPGSSSLHTPIKTGSSSHSLKTGSSSSHHSRKGVS  
DEGSQASFEDDAESSISHDAVDRAVSAALKPKSASKVTQPPPRTS ENRGRSHGGAARQSR  
GRSVPRTRKSSNSAGARTPATNSSSKIDRIKARGRSVANPGGKAKAGPGREARAE TGNE  
AKADPGKEVLAEP AKEAKVEAEXP SKTASTTPSTVEKEPVAILVWDDEKEEDNDSKDSNR  
GESAEVPLATDNNPTEDSSESHSRSSVKIPAVFLKSSSSATSSYNSSRF GKGTNGSIKS  
SASLFS PKSKKANATVETTEPIVISDDETSSPTSSNSRDHSPSPSPK PSSSRNSSEEQK  
KTNTTSTDDDEEEDYVPRKIRKPAKQAKPVATSTA EKISNGDKAAV PNL DHLKACLTPVG  
DAFSRQADPSRPDDCLMGDGTFAATRKKKEKRFGGTGIDRSDDWLGGSGKTAKRTWKVK  
GT

>comp13010\_c0\_seq1; 480 151 2251 LEN=2341; translated  
MTTLDNH HIVNSHSSVGAIQVTGNDT SIKTENGVVVDEEIDSCEGEDYDEKKMFQVALV  
NSVMDKGGNGNGNCLPQPEAPGEMSPRSKARYALRKR RRPGE EAAPAPEMDIAIKTQQDT  
VTDFDPLNELQHVQDRRGVTSTSLQTIQLPLPPP I KIKQEQLPVHPV NAMTHTSITIKQE  
PKQELCTGASAGRLAQPGTISKPLNTSQALLPCLAA TIPQQNRQQSLMKSTNVSYPAKPS  
VTKKKAPRKRKPKAQKVTAQTKVAERLSTPVPNPLLAASTPPAHP SMNH CARQDAAISST  
SSVPCPLPVPSPDLGNSIQVKAPKTTSYIPFDPTKLT KVSETSVSRMDPPP IQSRTRV  
FSVDLDR ELFYISLWLNDDSSLFXLLISLFLCDFVIFVPLASTFDFSDLSSITGGNPK  
ASADSDLP IFQGRDRAF SFEVFN FAGGDDL LPNPV SSTPMLQAPSLGPVSVEAQISRPRG  
DSIIFDPASFQDGGIHEKNALEKARFKDLLQVAPPQQPLPH PARRVSAPSGGGITGTYST  
SQSNNPLPLMLPPGSSLNHTNTVIGGQNRVSHPVQSSNIIVTGSKSRSMPTNASSGGRIT  
SSNRNLSLSNSAQMATLPSSLSGGNSSNAQSPPTFQ MELLNKDGRIGIYLP EARRLR IARF  
HAKRKMRIWRKRIKYDCRKKLADSRPRIKGRFVKRSDMD

>comp13010\_c0\_seq2; 580 805 2799 LEN=2889; translated  
MTTLDNH HIVNSHSSVGAIQVTGNDT SIKTENGVVVDEEIDSCEGEDYDEKKMFQVALV  
NSVMDKGGNGNGNCLPQPEAPGEMSPRSKARYALRKR RRPGE EAAPAPEMDIAIKTQQDT  
VTDFDPLNELQHVQDRRGVTSTSLQTIQLPLPPP I KIKQEQLPVHPV NAMTHTSITIKQE  
PKQELCTGASAGRLAQPGTISKPLNTSQALLPCLAA TIPQQNRQQSLMKSTNVSYPAKPS  
VTKKKAPRKRKPKAQKVTAQTKVAERLSTPVPNPLLAASTPPAHP SMNH CARQDAAISST  
SSVPCPLPVPSPDLGNSIQVKAPKTTSYIPFDPTKLT KVSETSVSRMDPPP IQSRTRV  
FSVDLDPSTFDFSDLSSITGGNPKASADSDLP IFQGRDRAF SFEVFN FAGGDDL LPNPV  
SSTPMLQAPSLGPVSVEAQISRPRGDSIIFDPASFQDGGIHEKNALEKARFKDLLQVAPP  
QQPLPH PARRVSAPSGGGITGTYSTSQSNNPLPLMLPPGSSLNHTNTVIGGQNRVSHPVQ  
SSNIIVTGSKSRSMPTNASSGGRITSSNRNLSLSNSAQMATLPSSLSGGNSSNAQSPPTFQ  
MELLNKDGRIGIYLP EARRLR IARFHAKRKMRIWRKRIKYDCRKKLADSRPRIKGRFVKR  
SDMD

>comp13010\_c0\_seq3; 580 151 2145 LEN=2235; translated  
MTTLDNH HIVNSHSSVGAIQVTGNDT SIKTENGVVVDEEIDSCEGEDYDEKKMFQVALV  
NSVMDKGGNGNGNCLPQPEAPGEMSPRSKARYALRKR RRPGE EAAPAPEMDIAIKTQQDT

VTDFDPLNELQHVQDRRGVTSTSLQTIQLPLPPPIKIKQEQLPVHPVNAMTHTSITIKQE  
PKQELCTGASAGRLAQPGTISKPLNTSQALLPCLAATIPQQRQQLMKSTNVSYPAKPS  
VTKKKAPRKRKPKAQKVTQAQTKVAERLSTPVPNPLLAASTPPAHPSMNHCARQDAAISST  
SSVPCPLPVPSPDLGNSIQVKAPKTTSYIPFDPTKLTKVSETSVSRMDPPP IQSRTRV  
FSVDLDPSTFDFSDLSSITGGNPKASADSDLP IFQGRDRAFSFEVFNFAAGDLDLNPV  
SSTPMLQAPSLGVPVSVEAQISRPRGDSIIFDPASFQDGGIHEKNALEKARFKDLLQVAPP  
QQPLPHPARRVSAAPSGGGITGTYSTSQSNPLPLMLPPGSSLNHTNTVIGGQNRVSHPVQ  
SSNIIVTGSKSRSMPTNASSGGRITSSNRNLSNSAQMATLPSSLSGGNSSNAQSPPTFQ  
MELLNKDGRIGIYLPEARRLR IARFHAKRKMRIWRKRIKYDCRKKLADSRPRIKGRFVKR  
SDMD

>comp13010\_c0\_seq4; 480 805 2905 LEN=2995; translated  
MTTLDNHHIVNSHSSVGAIQVTGNDTSIKTENGKVVVDEEIDSCEGEDYDEKKMFQVALV  
NSVMDKGGNGNCLPQPEAPGEMSPRSKARYALRKRFRGEEAAPAPEMDIAIKTQQDT  
VTDFDPLNELQHVQDRRGVTSTSLQTIQLPLPPPIKIKQEQLPVHPVNAMTHTSITIKQE  
PKQELCTGASAGRLAQPGTISKPLNTSQALLPCLAATIPQQRQQLMKSTNVSYPAKPS  
VTKKKAPRKRKPKAQKVTQAQTKVAERLSTPVPNPLLAASTPPAHPSMNHCARQDAAISST  
SSVPCPLPVPSPDLGNSIQVKAPKTTSYIPFDPTKLTKVSETSVSRMDPPP IQSRTRV  
FSVDLDRELFIYISLWLNDDSSLFXLLISLFLCDFVIFVPLASTFDFSDLSSITGGNPK  
ASADSDLP IFQGRDRAFSFEVFNFAAGDLDLNPVSSSTPMLQAPSLGVPVSVEAQISRPRG  
DSIIFDPASFQDGGIHEKNALEKARFKDLLQVAPPQQPLPHPARRVSAAPSGGGITGTYST  
SQSNPLPLMLPPGSSLNHTNTVIGGQNRVSHPVQSSNIIVTGSKSRSMPTNASSGGRIT  
SSNRNLSNSAQMATLPSSLSGGNSSNAQSPPTFQMELLNKDGRIGIYLPEARRLR IARF  
HAKRKMRIWRKRIKYDCRKKLADSRPRIKGRFVKRSDMD

>comp13011\_c0\_seq1; 426 54 1232 LEN=1774; translated  
MARLSSTSVSTSPIQEEEGKEEVSARWRDPSESSFDWTIRVIRSSNENAVVTGVTNFDGG  
SSCDVNDRTDTSSLSNALDSEGLGDSHCDDDEEVTYHVHRVYLASGPRKSEYFRTLFLSLTT  
NTQEKVSRTTTLPESSCSIFPVLLDYIYSGETEENTVLCGHFGDSIDVAVLREAVALY  
FLADYLQIQKLIPITKKLQVNLSDVNVHFLCREALMYGIDWIIDDCIMVASWSPRDFFA  
PTTETGSPASCSPSTHPNTPLSHTAPPASQTFDMLPLERQAELLKLSLSHTLRELGRFKR  
VPSRWKDDIDDVVATHMPTLMLSKEGENENRIRDYRLPAQGCGLPFPDNRMCP LFYFDR  
DRDHTTPVASPLAQSQPSGQAAINVGSNSFET

>comp13011\_c0\_seq2; 426 54 1232 LEN=1667; translated  
MARLSSTSVSTSPIQEEEGKEEVSARWRDPSESSFDWTIRVIRSSNENAVVTGVTNFDGG  
SSCDVNDRTDTSSLSNALDSEGLGDSHCDDDEEVTYHVHRVYLASGPRKSEYFRTLFLSLTT  
NTQEKVSRTTTLPESSCSIFPVLLDYIYSGETEENTVLCGHFGDSIDVAVLREAVALY  
FLADYLQIQKLIPITKKLQVNLSDVNVHFLCREALMYGIDWIIDDCIMVASWSPRDFFA  
PTTETGSPASCSPSTHPNTPLSHTAPPASQTFDMLPLERQAELLKLSLSHTLRELGRFKR  
VPSRWKDDIDDVVATHMPTLMLSKEGENENRIRDYRLPAQGCGLPFPDNRMCP LFYFDR  
DRDHTTPVASPLAQSQPSGQAAINVGSNSFET

>comp13012\_c0\_seq1; 599 275 2395 LEN=2570; translated  
MPTTKSFASDASSRAGNTVSDFMRRIGYDFSNILGSNNSCTDDSSCDDDFIFDPIDFNSP  
QHSHKKNLHREEDSAWLFSGNELTAIDNCAYNEGEVGVLDNLGIESVPAYLNQFDQISERR  
RELSHKNNRRPAPRKYRRTKQVYCDKTTYRLAILCFLLTIIILATLLFVGRPFPRKSTNGV  
AENSNFVFTAPTQSPVNIGAITSSFP ISEPIVTTQEP IADATYKPIATRVPVSKPSTRPTS  
PVSVHSRTARPTLSPTKEEFVTPRAPPLTAASDKKDEEITTESAQAAARQPTVPPLSMG  
PMVGHTTHDSVTLWAYHAFEDYTM EILLYDSVTNGLIRTIDLVA PRKDRNNVMIETITGL  
APSTSYKFGMHINGHRVKGGSFATAPLPQQSAKFDYILASCMNYRQYKNQIVWKEIVDNN  
AGKFPDFSILAGDTVYLLQEGVDVTVRDGVIFERLWFRNKEQRNEKHFSEFIGNTPTYATW  
NDHEYGSNNANRNQKGNNSLRAWELWANPGYGEESNDGVYFSYYWGDVHYLITDDHW  
YRYPAGNRLGQKQTMWLREELKNSNGTFKIIIVIGSDIMERNWTS DLNNIGDIVRENKID  
GVLFHAGDIHRNEFKQMETGGFPYVPTQITSSGI AKVWRRPYVHIKIDTTVDDPFI DAHF  
YGASSTADKTTWTNDSNLRCTSI VEEDRSKEHTCTETIRLSDLRAM

>comp13012\_c0\_seq2; 599 291 2411 LEN=2586; translated  
MPTTKSFASDASSRAGNTVSDFMRRIGYDFSNILGSNNSCTDDSSCDDDFIFDPIDFNSP  
QHSHKKNLHREEDSAWLFSGNELTAIDNCAYNEGEVGVLDNLGIESVPAYLNQFDQISERR  
RELSHKNNRRPAPRKYRRTKQVYCDKTTYRLAILCFLLTIIILATLLFVGRPFPRKSTNGV  
AENSNFVFTAPTQSPVNIGAITSSFP ISEPIVTTQEP IADATYKPIATRVPVSKPSTRPTS  
PVSVHSRTARPTLSPTKEEFVTPRAPPLTAASDKKDEEITTESAQAAARQPTVPPLSMG  
PMVGHTTHDSVTLWAYHAFEDYTM EILLYDSVTNGLIRTIDLVA PRKDRNNVMIETITGL  
APSTSYKFGMHINGHRVKGGSFATAPLPQQSAKFDYILASCMNYRQYKNQIVWKEIVDNN

AGKFPDFSILAGDTVYLQEGVDVTVRDGVIIFERLWFRNKEQRNEKHFSEFIGNTPTYATW  
NDHEYGSNNANRNQKGNNSLRAWELWANPGYGEESNDGVYFSSYWGVDVHYLITDDHW  
YRYPAAGNRLGQKQTMWLREELKNSNGTFKIIIVIGSDIMERNWTSDLNNGIDIVRENKID  
GVLFHAGDIHRNEFKQMETGGFPYPVTQITSSGIKAVWRRPYVHIKIDTTVDDPFIDAHF  
YGASSTADKTTWTNDSNLRCTSIVEEDRSKEHTCTETIRLSDLRAM  
>comp13013\_c0\_seq1; 397 909 1853 LEN=3805; minus strand; translated  
MSHKRNSSAEKMDEKFIIFCGSGDRWISVWKIATDDDDVGTQVITRRLKFVQKLGPHGTW  
VKALVYDDESQLLHSIGCNCIESWNC SRLSDHLQDDNEDKLLPIFHSIKRTIENCPAVG  
TTLSSDLLCLCLVPPTVDSDEGLSRLLVSGGVDGRIHVWTSQYVVKRKEGNSYVDVRNPL  
HIALAHDGRVNAIAFSSAMDVIFTIGNDGVL SLFRVSFGKGFELISRVEIEDSSKETLLR  
LTAMEIVVDSREQNECLVAVGTS DGELHFVTTRIGDDGSLVSQLQDDHVKVAQNSMIYSI  
SCKEEEGTKSAPRVW  
>comp13013\_c0\_seq2; 397 909 1853 LEN=2420; minus strand; translated  
MSHKRNSSAEKMDEKFIIFCGSGDRWISVWKIATDDDDVGTQVITRRLKFVQKLGPHGTW  
VKALVYDDESQLLHSIGCNCIESWNC SRLSDHLQDDNEDKLLPIFHSIKRTIENCPAVG  
TTLSSDLLCLCLVPPTVDSDEGLSRLLVSGGVDGRIHVWTSQYVVKRKEGNSYVDVRNPL  
HIALAHDGRVNAIAFSSAMDVIFTIGNDGVL SLFRVSFGKGFELISRVEIEDSSKETLLR  
LTAMEIVVDSREQNECLVAVGTS DGELHFVTTRIGDDGSLVSQLQDDHVKVAQNSMIYSI  
SCKEEEGTKSAPRVW  
>comp13014\_c0\_seq1; 533 402 2496 LEN=2496; translated  
MDSXEPIDPHPAARIPVPVQHGGVWVSGPKAGRHEPDPAPPLD TDDANDKRNHPGGGGLPL  
FSHPSNRALLPNRAEARSHQEQLRGLPALSPHEPPVDGLLAALVLLAKPRLVIVAGL  
SNTVAGIDGIALRGSHHEDLTXTWDFATHHPPFLPTAASTPPLATAAAAAGTTPAKEEPL  
REPPPVP SHGGLNPDSLRLKLRWHKQLTSLLMGMEPKTLLSDTNASASANANSNVEPPPF  
LLENIVNGRLPGGSDEGDRHQKSSTPVRPTTGNHTVGNLRQPHDES RITILPGYNAVLSR  
LTSWLLFP LLFADGEYDYDDYVLKSGGPVATIGLKFLEDRSVQIDSDDDDDES DSGSGSDD  
ENCDETGDDSSSVSDCDYNPSTGGGSGSTGMDPETEREFFAEANVSLSEIAEAYYAHRL  
LEKQKKNPHRKRFRSDSEASEASAGLCPATSEG DDEGIAQR LDYEITQMDIARMTRNAS  
RHLDVDSILRLPTISYRKKRRPVPPRTPTPLAEGPEQSYHHVCTPIHEETRAARHTSSGT  
EDGWSFLMVSGVRSAAAEGPSGDLTTIADDDRSLSSSSSSSSSGCTSGGSGDDACVICLEA  
FKEGDRLRVLP CDHFSFHVGCIDRWLSGTHSHNECFTAGCPTCKKRPKCTPVLARAGDPEK  
ANDKGSNSERETS DGETDVSGSLPSWAFANLGSVMAMXS  
>comp13014\_c0\_seq2; 457 402 2373 LEN=2373; translated  
MDSXEPIDPHPAARIPVPVQHGGVWVSGPKAGRHEPDPAPPLD TDDANDKRNHPGGGGLPL  
FSHPSNRALLPNRAEARSHQEQLRGLPALSPHEPPVDGLLAALVLLAKPRLVIVAGL  
SNTVAGIDGIALRGSHHEDLTXTWDFATHHPPFLPTAASTPPLATAAAAAGTTPAKEEPL  
REPPPVP SHGGLNPDSLRLKLRWHKQLTSLLMGMEPKTLLSDTNASASANANSNVEPPPF  
LLENIVNGRLPGGSDEGDRHQKSSTPVRPTTGNHTVGNLRQPHDES RITILPGYNAVLSR  
LTSWLLFP LLFADGEYDYDDYVLKSGGPVATIGLKFLEDRSVQIDSDDDDDES DSGSGSDD  
ENCDETGDDSSSVSDCDYNPSTGGGSGSTGMDPETEREFFAEANVSLSEIAEAYYAHRL  
LEKQKKNPHRKRFRSDSEASEASAGLCPATSEG DDEGIAQR LDYEITQMDIARMTRNAS  
RHLDVDSILRLPTISYRKKRRPVPPRTPTPLAEGPEQSYHHVCTPIHEETRAARHTSSGT  
EDGWSFLMVSGVRSAAAEGPSGDLTTIADDDRSLSSSSSSSSSGCTSGGSGDDACVICLEA  
FKEGDRLRVLP CDHFSFHVGCIDRWLSGTHSHNECFTAGCPTCKKRPKCTPVLARAGDPX  
>comp13015\_c0\_seq1; 343 78 1985 LEN=2257; translated  
MTRIWSLEEYCSKQAHLLNDS ENGVPTTSAGDDYWSSFLGKNDLEANRKFFLDLELPTVH  
PFCLDSGEIFEFDASIPPMGSLNLLGEIWSAGHSNESATRMESFVTLWYMVAPALLAMAE  
LWLRFLAGLIGPIGIAYLAVSPPLKATKRTSFAIVLTVGSSLILMTDTLYVLHNGPSYGA  
TLFLASVIVCTRLCWKHNRLASVIVALLVILSAHLVHFHFDGELVFGSPVDEVKLEEGLY  
FDSKNTLVSRIVERWSENRYVDVEHGATTWMPGTGDSRTGLPFMIHKFHPDQYPSWNRV  
LKVQDDRDPVSEYVSLDVSPFKTTGHDSRKP IYFVLHGLSGGSQEEYIRDLTIRRNAEGS  
TVVVM IARGMMDTPIRGFRFFNGARTSDAHEAASVLRRLV LGSEQVLV GAGYSMGGIIISN  
YVATYGSDCALDAAVAVSGGLDMRYQEDAFRTQRLWQPLAGTLRDEFLLGKFGHRVKEK  
LTTIEYLKVLRSSHITEIDRYAVVPLNGFDDLDHYYREMSALGDI PHNPVTNLLLED TNKT  
SKIHSIAIPFLVVHAFDDPLITWRTTIQNTGFMHPANLTKSGSGYLMMLLTKAGGHVGP  
LGLWPTENKWKWMSDVVMSFAQSVHESKMEGKELS  
>comp13016\_c0\_seq1; 333 538 1809 LEN=2110; translated  
MPCNHILEETANDKKKIFPSYQCFVSKNRVQCQEDAIEGKIFCVECFLFRSRKHPSTFDL  
SENSGRSETEEDSSCCSSDTETSF GDSNDSEHSNGSDDYDSYCTAYTHQQFFNMWKNFE  
RKTERMDEIEDTKLIK RANNTIDPTD TDGQVKAQYGRVLP HAMKKLMKILELGPDDIFLD



IGHGVGNTCLHASFCIGCDSRGIEVVS DRHEIAEKFRGGMYAEHKGAVVSRPKVGSVDLRLGRLEDPSQKDFLTGKVTRAYVNNFNGVFAERSSSKNNDKWFLDDYIAGLFASMAPGAIMVTFHPLNLGLNRSSTNELRTRHELEQSEYASYHSEKILLGKAWNSVKWNKRSGNTNDIYIYKYRRLAQP NHDDAVFLCCNP TCKLAIDMKPI PATTLNEDGRCVINHCECRFSPKNLRKRNK

>comp13016\_c0\_seq2; 809 317 3865 LEN=4166; translated  
MNDIFGFVKSVGKSIFSPGNSSENSKTPSSPRDEGNSSDNLQAETTSPMRGPAHIPGITVPLSSQKVLKTNESPVIGLVSTKDQVIGGDGRCDGKEDTGRALRIHGRSLEANLKTIRKESAEERCNVTDLKTPTSPSTKSPSLATSDTSNVYFDEEGNGEGKENAAATTSVTTTSVTIISKPFEDPLETSTVTFGNTTDPKSSLLASTKPPPSATTTGVSQKRRRQLFMNDGRVSAFLSSSPSSSSNGIRVENQHDKKHPHQHTSKEIISISRSTLRLPRNETIHGDVFAFPVVEEGKDQQQLGKRRDPSPDVSIASKTSKRPRNDDSLKSLSESIKSGGPEENDLNSDKDDKPSVDDPVSGPEKTQHLPKVAEEKEAQVQSPEKIVPEFRLPELVPFNPNPGVCDYGVIRTSRLRNRTKKADTPEDILYQNIQGQRRCRATKDGLAMTGDLLVSNRCLNCAEGVFKYCHNHR ELDPDQKLYWERRKSTNANSNSCGKSWSTVKSNRKTKMKKKMPTSARTKEELSIKGEANSSHVINNLKQCVYIVGKGRQLKRCMRNSLNTHPGFCAWHYGSAPPHQGDKFFQEEPSTMR CIGITKAGTQCRYKALNRSVFCCKHINFPPPEKVSSAEILPEKCLKYGDRAQSSSERLGSITGSAKLSKGRGTGGNNAALSKNSECDSTTNSRSFFSGSGKVPKNI EFKREIKISTHKL ELATSAEERCNFIYNSKRCSYKCMEDSAICFKCRQCHEEKMPCNHILEETANDKKKIFPSY QCFSVKNRVQCQEDAIEGKIFCVECFRFLSRKHPSTFDLSENSGRSETEEDSSSSCCSSDT ETSFGSDSDNSEHSNGSDDYDSYCTAYTHQQFFNMWKNFERKTERMDEIEDTKLIK RANNTIDPTD TDGQVKAQYGRVLP HAMKKLMKILELGPDDIFLDIGHGVGNTCLHASFCIGCDSRGIEVVS DRHEIAEKFRGGMYAEHKGAVVSRPKVGSVDLRLGRLEDPSQKDFLTGKVTRAYVNNFNGVFAERSSSKNNDKWFLDDYIAGLFASMAPGAIMVTFHPLNLGLNRSSTNELRTRHELEQSEYASYHSEKILLGKAWNSVKWNKRSGNTNDIYIYKYRRLAQP NHDDAVFLCCNP TCKLAIDMKPI PATTLNEDGRCVINHCECRFSPKNLRKRNK

>comp13017\_c0\_seq1; 990 152 2701 LEN=2701; translated  
MSDAEIPPGNND EAEPEESLKEESDEASVDTVNKMTRCQR IWLGVIIAVVLLVAIAAICVAIVPEARRMKS LNKKKNKIPTVTTSDLFEIDESI FFSNSTEPYDSIEEVQKDI EGMVMSM VNKIILNEANGDEEY YDDDDGFMFRDALFALDSGAEFADFSSAASPAVSTEAI AVNRES DG VFEGITDFD TYQOEAGAVKNDLVKSNGDYV FVGTDNRI LVWNLEGNLTDEVEIESDTVSDDDDDDGFSRWISKPHIQALMMNEPGETKLIVVTDDPGSYRSRYANSESGDYLDIDV VSSYSKTRII VYSIAEGSLTELSQSKIDGEHSDSYTVGNVHI VTRMNMQTWEILKEPLSRWRI DPRYGMTDEEYATAAMRRAEEEEIIPQFVEKLVQFVTEDEDEILLSRFTSFPGSMADYDAIA QISSFDVSIIDSTNDIEVNASKSLILRPGTNGYVYATDDWIWVSDQASIFSVDEQKQVQQTMLLGFRLNGASSSFAAVGSVHGFLNQFAIDFVEDADSGKEYIRVATTQDFGSLPMMWLEMWRFDDLIVREEEEDMSRTKNEIVIFEV PNVEDSDQGIS ELIEVGSVEIGKKDETITAV RFFDNLSYVVT FERTDPFYVLDLSDPTNPEVLGELEVPGFSEFMHPI TDDNSMLITV GQNADEEDGVTTFGQISIFNSTVPTDPKLVDRFLLENQRGDSWSGSSASWDERAFRYVEVGD LGR LIIPVDIYFHGW DQFGNRLGDDFQGF MVFGIDL TQ TENMITREIEINHAENSASTGFPF EIFPARD CFCGFHNIYLPERSMLFDGKLM TMKGN SVINTDLVSGQSLWDL SLSHPEDNSC CDDMMFDDD

>comp13018\_c0\_seq1; 341 360 1511 LEN=2595; minus strand; translated  
MGTPNRDQQKRRKRHHNMLLRYFFF AVIVTRVLFLAFTQPLKVATDQRLESVWEGFP EVK TSTSPDIKEGAASALDGNKLLTAYLEPTESV TYTDKNQKLFVRNTSMSSLQLVTFPNVNN CSSLMKNFPVDEFPLGDPWLPWIHDYF PSLDGKSRLASSFEEATHNATRFQCRFHHVGTK ITTLSVFPFDY EYISWRKHKKAMIGPHGGKEQSMVWLSQLL FACPIPEEFQPLLLPPLTI ESSKKQSAVNNDQPALYVDLIPIRTPVRSNDELLSLCRRSSSLHLSPIKSPMQLSTIGAK ERNQP HRLVACTWVSAS YQRRGDIYTVSDSAKRLREWIHFHLMVGM DHIYVYDNTNRAL SGNSSVIYDVTRSF RPDQV TYKAW

>comp13018\_c0\_seq2; 341 360 1511 LEN=2792; minus strand; translated  
MGTPNRDQQKRRKRHHNMLLRYFFF AVIVTRVLFLAFTQPLKVATDQRLESVWEGFP EVK TSTSPDIKEGAASALDGNKLLTAYLEPTESV TYTDKNQKLFVRNTSMSSLQLVTFPNVNN CSSLMKNFPVDEFPLGDPWLPWIHDYF PSLDGKSRLASSFEEATHNATRFQCRFHHVGTK ITTLSVFPFDY EYISWRKHKKAMIGPHGGKEQSMVWLSQLL FACPIPEEFQPLLLPPLTI ESSKKQSAVNNDQPALYVDLIPIRTPVRSNDELLSLCRRSSSLHLSPIKSPMQLSTIGAK ERNQP HRLVACTWVSAS YQRRGDIYTVSDSAKRLREWIHFHLMVGM DHIYVYDNTNRAL SGNSSVIYDVTRSF RPDQV TYKAW

>comp13018\_c0\_seq3; 341 360 1511 LEN=2667; minus strand; translated  
MGTPNRDQQKRRKRHHNMLLRYFFF AVIVTRVLFLAFTQPLKVATDQRLESVWEGFP EVK

TSTSPDIKEGAASALDGNKLLTAYLEPTESVTTYTDKNQKLFVRNTSMSSLQLVTFPNVNN  
CSSLMKNFPVDEFPLGDPWLPWIHDYFPSLDGKSRLASSFEEATHNATRFQCRFHVGT  
ITTLVFPFDYIYSWRKHKKAMIGPHGGKEQSMVWLSQLLFACPIPEEFQPLLLPPLTI  
ESSKKQSAVNNDQPALYVDLIPIRTPVRSNDELLSLCRRSSSLHLSPIKSPMQLSTIGAK  
ERNQKPHRLVACTWVSASYQRRGDIYTVSDSAKRLREWIHFHLMVGMMDHIYVYDNTNRAL  
SGNSSVIYDVTRSFPRDQVITYKAW  
>comp13018\_c0\_seq4; 341 360 1511 LEN=2720; minus strand; translated  
MGTPNRDQQKRRKRHHNMLLRYFFFAVIVTRVLFLAFTQPLKVATDQRLESVWEGFPEVK  
TSTSPDIKEGAASALDGNKLLTAYLEPTESVTTYTDKNQKLFVRNTSMSSLQLVTFPNVNN  
CSSLMKNFPVDEFPLGDPWLPWIHDYFPSLDGKSRLASSFEEATHNATRFQCRFHVGT  
ITTLVFPFDYIYSWRKHKKAMIGPHGGKEQSMVWLSQLLFACPIPEEFQPLLLPPLTI  
ESSKKQSAVNNDQPALYVDLIPIRTPVRSNDELLSLCRRSSSLHLSPIKSPMQLSTIGAK  
ERNQKPHRLVACTWVSASYQRRGDIYTVSDSAKRLREWIHFHLMVGMMDHIYVYDNTNRAL  
SGNSSVIYDVTRSFPRDQVITYKAW  
>comp13018\_c0\_seq8; 320 360 1278 LEN=1278; minus strand; translated  
MGTPNRDQQKRRKRHHNMLLRYFFFAVIVTRVLFLAFTQPLKVATDQRLESVWEGFPEVK  
TSTSPDIKEGAASALDGNKLLTAYLEPTESVTTYTDKNQKLFVRNTSMSSLQLVTFPNVNN  
CSSLMKNFPVDEFPLGDPWLPWIHDYFPSLDGKSRLASSFEEATHNATRFQCRFHVGT  
ITTLVFPFDYIYSWRKHKKAMIGPHGGKEQSMVWLSQLLFACPIPEEFQPLLLPPLTI  
ESSKKQSAVNNDQPALYVDLIPIRTPVRSNDELLSDKLSAMRDIAIGSPYLNDVFGQHNI  
IPSMDNX  
>comp13019\_c0\_seq1; 337 1 1205 LEN=1227; translated  
XNKQNRNNRPAIVSRDEHHCPRGSAPFPFENDGNPAQRRPQRSTASAGAPKRPLAGFAEGSK  
ANPANDTTGGACPLGPFSGPPP IPALPPWEPSGPREKPGIAPLAAQRAFLLDHPDPATTA  
GGQEQSPFEAVVSLVVLVVPVPGPGQETAASALESRAAAEHHTTKTVATRASSAVRESAKK  
ATEKAQRAASETLEGTQRAARKAGEKAVKRASDTASAAKREGSRRLSEGAAGVSRAAGEA  
ISSRMGRAGQKLSEGLRNSTGETIARSTRAIGSGVEEQRRAAAAKAEI SESTKQLK  
ESVAVTGKKALSFWFWWSLAAVVFYGVASTLPMAI IKYTMEEKRRKWRERPESETNDEGGE  
GSGQDAHRTDRSQHIQE EPSINAVGWDTFFGASDQSESKKD  
>comp13020\_c0\_seq1; 385 1 1816 LEN=2163; translated  
XNRRRNSLTGGTCHTRSSDPNPNHRSTKSLPLRELTDGGSSSSSSNLSQRSSRSTRSTR  
TNRSSKPPTHRRSSTMGEEDKDKSRAGEEEHDEDCSYEEEEAEETGELELNDGDDEPRD  
SSRKEGRRSARRKYRNESPSRLKRRSVTRDQRKAMLRSRSRDSNDEDSILSAPPERARS  
RSKGSTRAGRTAEGGSGNAGTKLRVRSKASLAGGDEAPSHSESEDEGTTSAHSRRHRSQSR  
HRHRSQSRSRNDGDGEGGRGRSSESDDDKDHSTHRMRRARSTSKGHSATVRRDRSKSRTA  
EGTGERRRTRSGTGRVRSAAARSRSQDVGDRDRSYRSCDFSCDGEDTRSVASSKAGTTR  
RGRRRQKAVSASPTRGGLSLGDQLNHLNANRPGGRSEGNDEL SHVTEESSLRSGSKAQPI  
LLQFDPTRDDMVHAVNQTRATKTSDTIHQADGKSSRLEISKLDGLLPTFEKPRSAKSDWN  
GTSDETESTTRFGSDGMESETNPGQANNKLSNLVQAKKSAFLQKVQKQKDEVKERIEKAK  
KSTDDVKEKLRNNPTIIRLGLKPKKDDSGQKDGDDSTAEDAALLAWKEKIQCRSREDQN  
SHLPI  
>comp13021\_c0\_seq2; 233 652 1116 LEN=1864; translated  
MGVAGILGGALLCAIHGATVENTLFEEDGAANTFRAFTPTQSEETYSMVTANRFWSQIFG  
VAFSNKRWLHFFMLFVPVTGMWTSAVGIVGLALNLRAYDFVSQELRAAEDPEFETFYTKN  
ILLNEGIRSWMAAQDQPHENFVFPEEVLPRGNAL  
>comp13021\_c0\_seq3; 233 652 1116 LEN=2367; translated  
MGVAGILGGALLCAIHGATVENTLFEEDGAANTFRAFTPTQSEETYSMVTANRFWSQIFG  
VAFSNKRWLHFFMLFVPVTGMWTSAVGIVGLALNLRAYDFVSQELRAAEDPEFETFYTKN  
ILLNEGIRSWMAAQDQPHENFVFPEEVLPRGNAL  
>comp13021\_c0\_seq4; 275 652 2469 LEN=2469; translated  
MGVAGILGGALLCAIHGATVENTLFEEDGAANTFRAFTPTQSEETYSMVTANRFWSQIFG  
VAFSNKRWLHFFMLFVPVTGMWTSAVGIVGLALNLRAYDFVSQELRAAEDPEFETFYTKN  
ILLNEGIRSWMAAQDQPHENFVFPEEYHVETPFNSSIAGRDIESTGFAWWSGNARLINV  
SGKLLGAHVAHAGLMVFWAGAMILFEVSHFVPEKPLYEQFICMQHLATLGYGIGPGGEI  
TTTVPYFAVGVIHLISSAVLGGFYGIIYHSLGPDTEESFPFFGYDWRDKNKMTTILGIHL  
CLLGCFAFLLVAKAMYIGGVYDTWAPGGGDVRMITTPTLNPIVIFGYVFRSPFGGDGWV  
SVNNMEDIIGGHIWVGVLCITGGIWHIFTKPFAWARRAFVWSGEAYLSYSLAAISLMGWT  
AALYAWYNNTAYPSELYGPTGPEASQSQAFTFLVRDQRLGANVSSAQGPTGLGKYLMSRSP  
SGEIIFGGETMRFDLRAWPVEPLRGPNGLDINKIKNDIQPWQERRAAEYMTHTAPLGSLN  
SVGGVATEINSVNYVSPRSWLCCSHFVLAFFFLVGHWWHSGRARAAAAGFEKGINRANEP

VLSMRP

>comp13022\_c0\_seq1; 299 83 853 LEN=1454; translated  
MVRFRPPIVLFGDSITQFAHGESPLGTPVTVGWASLLGSAYQRRADVLERGFSGYNTRHA  
LGVLPRIFFPGGGGSARPLFCTVFFGANDAVLPSSTSDSGRQHVPLDEYAENLRAILAAIR  
EATGAAGGEEDAPVVPVIVVVTPPPVAERWREVLGAYDHCDRNLAAARRYGAEAKKVASS  
MEDCPVVDWELLGGDDPGVYRQHLC DGLHLSDSGNRLVYEGILEILRTGYPHLCPAEDG  
EAVGIRAE EAPWSDL C

>comp13022\_c0\_seq2; 285 270 1046 LEN=1064; translated  
MASGRNNATRNAFEDDTIPESILSFSK DARYVRQCQELLQNALEALLERKESL FASGTGG  
RERHHELQQMRKQLAWLISCILYFMASIRSGRTL GMEALALTF SDDKN SPVGKSELVARF  
GRSLFPGLLIMLTATGGLAWDYFKIATPNNVSSNNHGRDSQQQQQYQERLRGRERLLVHE  
RLRQQMLQRVADANETSTSP TREQQRQE QSGTAQTDANTSRNSAANLNLSTRVLSVCREV  
SKVRLRFCLQVLP LNAMA

>comp13022\_c0\_seq3; 250 270 1774 LEN=1819; translated  
MASGRNNATRNAFEDDTIPESILSFSK DARYVRQCQELLQNALEALLERKESL FASGTGG  
RERHHELQQMRKQLAWLISCILYFMASIRSGRTL GMEALALTF SDDKN SPVGKSELVARF  
GRSLFPGLLIMLTATGGLAWDYFKIATPNNVSSNNHGRDSQQQQQYQERLRGRERLLVHE  
RLRQQMLQRVADANETSTSP TREQQRQE QSGTAQTDANTSRNSAANLNLSTRVLSVCREV  
SKFVFRVCSHLDGPHDNVDTSDNNDERNENDRTS IAYSVARWIVRLHLAHFLWTGKYPTL  
VHRCLGLGHKHEQRMVGGATTSTASVTP IVS RPNTNRVIALAIILQASTSLAGATFHRFA  
RTVANYLEARALARAERGDRAERARAXGRGGPDETGCPLWNREQQSARADQGVQAADRGG  
RRNQVSSASKAGGLHHLPHGSQAPRRSHGLWTRVLELPGPMGLHGPPRVSALSSALQR  
EGHYCPAQLRTGTKTRSAVAS

>comp13023\_c0\_seq1; 894 357 2813 LEN=2917; translated  
MTLDLGFSCFFMDLPDRLRKQLEDKKS SSGSKTPKATTTNAPKYLQMTLVDCPGHASLIR  
TIIGGAQI IDVLLVVDAYKGWQAQTTECLVLAELTAPHIVVALNKIDMF PKEERAERLA  
EAKARVRERLRHSSKFSGREVPMIGVSACTGGEKVA AVRGEDESGSASASAGSASA HDLVK  
QQTINVDKLIDLLKETMPAPRRHLSFESGSNSGNSKAGNFYFAIDHCFPIKMGTVLTGT  
CLNGSVKVNEMIEFP SLGNLQRKIKSMQMFKRKTNAIQQDRAGICVSNFDASSLERGIC  
ASPGSVRWVSGAIALVRKIVPHYKGAF LKNRARYHVS VGHSTVMATVTFWGAKELWTETQ  
KLAAARNQSKEGSRAATGTESSATSSSETTATA CLGGDADQAGLPCLEFDWKKDYLLQDG  
LLDSL PNE SIDFPGETKDQSQTHSTHGANGGTNGSSNTVNSGGEQEALLHWA ILDFQTPV  
YCPLQSLVIGSRLDAAVEGNSHRQQGKSSNKNHGKNNSNAKGGGGNHSTGDADGDDSGG  
DSASSCRLAFCGRLIERVDPKEDIKRIRWYTPKERRGLVSRLGDPHKRQDDGKTVRYELY  
GGDLFKKETLLRPFLGMKLVTHPGGDV GELQSGFGTSGKFRVTFPAGTMAREGDVLR LPF  
KRFLNDPEKKMRQDDILLPAARQGSRIDPPKSSGSKKRVESTGTVDKVKGDPLPEPPP  
KGGANS DKKKNVTKYPTAIVSGLFTPDIDIRLMVGRKIWISSSTREEGVIAGPFGKAGKC  
KVSFIDSGDDSSSSSTSTNLRGISEQAVGTKAELLKP

>comp13023\_c0\_seq2; 981 1 2804 LEN=2908; translated  
ITSTGSSAIPGANTPSGSQQPGGLDDNAXWNNNNNNNNAATSSSSSGTKASSGSGKGNH  
ASSSAKPPMPKPEDVININVGILGHVDSGKTSLVKTLSTLLSTAALDKSKQSRQRGMTLD  
LGFSCFFMDLPDRLRKQLEDKKS SSGSKTPKATTTNAPKYLQMTLVDCPGHASLIRTIIG  
GAQI IDVLLVVDAYKGWQAQTTECLVLAELTAPHIVVALNKIDMF PKEERAERLA EAKA  
RVRERLRHSSKFSGREVPMIGVSACTGGEKVA AVRGEDESGSASASAGSASA HDLVKQQT  
INVDKLIDLLKETMPAPRRHLSFESGSNSGNSKAGNFYFAIDHCFPIKMGTVLTGTCLNG  
SVKVNEMIEFP SLGNLQRKIKSMQMFKRKTNAIQQDRAGICVSNFDASSLERGICASPG  
SVRWVSGAIALVRKIVPHYKGAF LKNRARYHVS VGHSTVMATVTFWGAKELWTETQK LAA  
ARNQSKEGSRAATGTESSATSSSETTATA CLGGDADQAGLPCLEFDWKKDYLLQDGLLDS  
LPNES IDFPGETKDQSQTHSTHGANGGTNGSSNTVNSGGEQEALLHWA ILDFQTPVYCP  
LQSLVIGSRLDAAVEGNSHRQQGKSSNKNHGKNNSNAKGGGGNHSTGDADGDDSGDSAS  
SRLAFCGRLIERVDPKEDIKRIRWYTPKERRGLVSRLGDPHKRQDDGKTVRYELYGGDL  
FKKETLLRPFLGMKLVTHPGGDV GELQSGFGTSGKFRVTFPAGTMAREGDVLR LPFKRFL  
NDPEKKMRQDDILLPAARQGSRIDPPKSSGSKKRVESTGTVDKVKGDPLPEPPP KGG  
ANS DKKKNVTKYPTAIVSGLFTPDIDIRLMVGRKIWISSSTREEGVIAGPFGKAGCKV  
SFIDSGDDSSSSSTSTNLRGISEQAVGTKAELLKP

>comp13024\_c0\_seq1; 362 141 1430 LEN=1651; translated  
MVTISLTNETIESANGRSRNTNSSATSSNPSDKKIVEILNTTRGPASVLRNKEYEKRLLT  
FSASTYYAKPPSLSPLFCARFGWENVDKDMLVCSSCGAALAITLNSKLSAKTFDKLCHAY  
RTKIVCNHDTNCPFRLSSVDELHSLSESSEELDSVEVENDEDDSEHASLDVPVYMGQVLP  
E DSVRLLECYRPAKIMKQKSKVLIDAIRSLSCATNIGTTDENGNAGDDRNTWGYPR LQIP

TKIRQIDSDSKLTKALGCGDISILALSLLGWNPIPNKTGKKSAGTVSLGCPFCLSIMTVN  
PEHQQQQQQPQPQQLQEELEGSNDSDARQSDRTTKRQRMSCRNLNPLEAHRHYCPYKVG  
PKKSSDSNPVWKIILERLRKECHENDVHKCTKIREEATGVPATGFDKSIKVRRLRAGI  
APKEIDLNA

>comp13024\_c0\_seq2; 302 268 1290 LEN=1511; translated  
MLVCSGCGAALAITLNSKLSAKTFDKLCHAYRTKIVCNHDTNCPFRLSSVDELHSLSE  
ELDSVEVENEDDSEHASLDVPVYMGQVLPEDSVRLLECYRPAKIMKQKSKVLIDAIRSL  
SCATNIGTTDENGNGAGDDRNTWGYPRQLIPTKIRQIDSDSKLTKALGCGDISILALSLL  
GWNPIPNKTGKKSAGTVSLGCPFCLSIMTVNPEHQQQQQQPQPQQLQEELEGSNDSDAR  
QSDRTTKRQRMSCRNLNPLEAHRHYCPYKVGFPKKSSDSNPVWKIILERLRKECHENDVH  
KCTKIREEATGVPATGFDKSIKVRRLRAGIAPKEIDLNA

>comp13025\_c0\_seq1; 963 1 3209 LEN=3247; translated  
XVSNDSFSCSCTAPLKDITNTTIFLSIEDTEVHRALDLSQRIDGMNGHAAGTSAYS  
SPKYGEPQTFNMLEASMVKTI PVGSPAPVARDPTVRQYRVESEPHAKPHAKPLLSNGV  
GNINGSRSGIYRKDRETTPIGATAATKQIPTGFYYPERSRETQVLRVSEALLRRSLR  
KIDLSQRSLQASDAKLVKMALANANLTELKLGYNLSLGDGSKVKTAAAGIVAHKSLNLL  
DLGFNNIGDEGIRALAHCMQEASEEQHKRWKDHPLNLCNGSSKKNNTVGNNYGGG  
STLHTLYLAGNLIGEDGAMAIADFLRRGSRLRKLFLTGNRIGGEGVKAITNAIVEQ  
QKEMAEP SAAAVFSSEKLAVETIEGGIQEENEMYTKQTRMQHTTSSSPQSLSPSS  
STRGEGKRRHHNNHHNNNFHGMQELYLGGTGMELTGCRAVSRLLEKTSYLKVL  
SLPNCDIGDEEVCMFALS IKANKDKLPLESLQLSFNNITHHGLEAMANALWGS  
STLRELKVDNMIIGDRGAHQMAAII PAMKVIEWLDVGFNSITTQGLTVLMKSV  
AESKMLLSLSLSGNAIDATAAKSVAYALAYNCSLRSFLVHCSIGH EEQRHIAAG  
IVSNSRKTLDQLNGFEIGREWHKTFCLLSVFHSLKFSGFGVLQGKCVFYRDL  
CXVSYNETLFFSFLSAILLTLGFPEPLKNWTNEQVFKFIHLMWNKH DENKNF  
HSDLERDLPLSFLSDPMSGVDDSCSNDAQGLEASVVVEVARRYFDSL VANGIDV  
TSRRPSNLNHP SIGSPLATDAII IESSPDNSRSLNPSNDEDK GSMQVKS  
FVAPPEAKTKKQEMQDPARKKIIVEWLC SNTRPLKELANAPFNSHELWKLH  
QFYFTPVVKE SGGSSGQEQEADCNLI ISSVPEVHRMNNNGSANLPPTPS  
VDDCPTVPMSDPALSGPATSSSTLLKRKVS YRCLGDANSNTEPQLVRS  
GTSNNISVAKI IENRHS GHSLAPKSKRARRNRTRISFLPRVKAKLDSCL  
DADHEKALVTMRQLYFVERAILSGKISPAEVDSSPRTHLSGTIAAEAEMILV  
DLM

>comp13025\_c0\_seq2; 998 1 3063 LEN=3101; translated  
XVSNDSFSCSCTAPLKDITNTTIFLSIEDTEVHRALDLSQRIDGMNGHAAGTSAYS  
SPKYGEPQTFNMLEASMVKTI PVGSPAPVARDPTVRQYRVESEPHAKPHAKPLLSNGV  
GNINGSRSGIYRKDRETTPIGATAATKQIPTGFYYPERSRETQVLRVSEALLRRSLR  
KIDLSQRSLQASDAKLVKMALANANLTELKLGYNLSLGDGSKVKTAAAGIVAHKSLNLL  
DLGFNNIGDEGIRALAHCMQEASEEQHKRWKDHPLNLCNGSSKKNNTVGNNYGGG  
STLHTLYLAGNLIGEDGAMAIADFLRRGSRLRKLFLTGNRIGGEGVKAITNAIVEQ  
QKEMAEP SAAAVFSSEKLAVETIEGGIQEENEMYTKQTRMQHTTSSSPQSLSPSS  
STRGEGKRRHHNNHHNNNFHGMQELYLGGTGMELTGCRAVSRLLEKTSYLKVL  
SLPNCDIGDEEVCMFALS IKANKDKLPLESLQLSFNNITHHGLEAMANALWGS  
STLRELKVDNMIIGDRGAHQMAAII PAMKVIEWLDVGFNSITTQGLTVLMKSV  
AESKMLLSLSLSGNAIDATAAKSVAYALAYNCSLRSFLVHCSIGH EEQRHIAAG  
IVSNSRKTLDQLNGFEIGPILLTLGFPEPLKNWTNEQVFKFIHLMWNKHDE  
NKNFHSDLERDLPLSFLSDPMSGVDDSCSNDAQGLEASVVVEVARRYFDSL VANGID  
VTSRRPSNLNHP SIGSPLATDAII IESSPDNSRSLNPSNDEDK GSMQVKS  
FVAPPEAKTKKQEMQDPARKKIIVEWLC SNTRPLKELANAPFNSHELWKLH  
QFYFTPVVKE SGGSSGQEQEADCNLI ISSVPEVHRMNNNGSANLPPTPS  
VDDCPTVPMSDPALSGPATSSSTLLKRKVS YRCLGDANSNTEPQLVRS  
GTSNNISVAKI IENRHS GHSLAPKSKRARRNRTRISFLPRVKAKLDSCL  
DADHEKALVTMRQLYFVERAILSGKISPAEVDSSPRTHLSGTIAAEAEMILV  
DLM

>comp13026\_c0\_seq1; 783 126 2579 LEN=2681; translated  
MTTIVTNQPVPPGGDIGLSLTI EHDHLD DTDSDNPKPAAGNDQQVGTGGMVSGGPTM  
KNI TSTPSSFIPI SVDASPIAF EKQACDEDEGSFTIHHIAELDDPPTVPSIMRQ  
PSSAEKGPDEKKNQCAPMQPYDGSVAAL EDRVDLEEKLSTLSMLLLQQNQKQQQSPRS  
ISPPTTFRS IDTSLATIPSSNPVLESPTPNFDSFDISQPYEERRHRNQTRNGLAN  
FKLRNNLSYHILHAPDLELNRRSSDDDGSNLGDGENQVSNLNASDGSVGGTLHSI  
HHDEEY EKSTRVPSLDLSPGSSRTSPIQS QNPVVAKVLSSENFLSIDAAKNAKY  
SKDNSDFVGRDSLEIDTAIMDKDHKENS GKSASTTVITRTRMNSISSNANGSVCT  
SDTPKHQKKKSNIKSKWLDYLN SVQESNYDTDKQMEEFVKVPKAVEALLGFGFWI  
SVDSFLYTLTMLPIRFAYSIALLLVWVYRKIAGR PAGSFQFHRHNSYHVIQVSI  
IYI IYK FVLKPINXKHPVSLDSFSEHGQALLGDCGSIRSTDVFPRTGLPGFL  
VLEYHAAAEKLEIASVGTGTRGTCLYGIALFFAVRARGNTEC SNELGRPGTAE  
PVDWGKFRRNQ EYCLQKIQQGQFVQNCRLRHLRAIQALSVPDPGPDAER

LAGNGPENALQLPVDVRDHLVAEWLSDWLKHSFITKFNFIASSVYSEYSLLLAGDVSFGF  
HEGENLDKSHAVVKRLGLAQIPLVCMVTKYLKEAYKYQTYQNQPQTWVLFVGVFSIWLVL  
LVCKLSLATFLQRLSKIKLEAAPDYSKNNATVAKKNN

>comp13027\_c0\_seq1; 369 1 1537 LEN=1581; translated  
XRPPLGRRRSTLGALRELVRSEALRPDRAQEKVAKRLDRLQAALVDYDNSVLFRETGGP  
EPADGPGRKRDERK GKASTGDERSEDPTVADPGARPPVPALKIPRGLYVYGNVGTGKTML  
MDSFYENARVPGEGRKQRFHFHDFLSQIHATVHRLKQKDLEENGRSFSVDTSLSNPIHK  
AGLKIASRLSLLCLDEFQVTDIADAVILSQLFSVLFVRHGTVVVATSNRPPKDLYEGGLNR  
SYFLPFIDLLEHHCITYHIPSERDYRRLLSNCSFFFIRLDSGTDGRIDTEKVDALVKELA  
AECVSKGGCRGAKTQPRSVLELVGFNRSLTIRQAYYGDEGRLPPRMARLSFEELCDADL  
GAMDYRAIANAFEIVVVENLPAMDLEGNRRARRFITLIDELYEGKCALVCSALDAEAPTD  
LFRACAQPLPTPHDGDSDHGETDSERGAPLEPLGIDVAQEGGTPVGALASVRELSFAFERS  
SSRIFEMCSRSWWERVLDPSPANETGAPRLPS

>comp13028\_c0\_seq1; 620 31 1029 LEN=1260; translated  
MHSSVAKKSQKRGSTSLAFLGNNRKGSKKSTIKNVFGDDDESSDSSDDINENKSKSRREV  
VNEQISKEQAVRRRRAQAALASVKDNSAYDYDGAYDSFQTTNTKLMNDGGNEKETGRKSK  
YIGDLMKAAKIRERERDAIFERKNALEQAEDAQGDYLGKEKFVNTNSYKRKLQERKLWEA  
EQEERNREEIANDVTKKSAGTAFAGFYGNLTRSTMMEQTCDDDEENTVIDGGNASRSSEVG  
NGRSDAIDDDNFDPRQDFLGGFERSSASGGNVVDVDIKDQPHGQDDSTENTKDKDSNMNAS  
SPKQSLRSIRERKVAEARERYLKRRKALILDQ

>comp13029\_c0\_seq1; 474 219 2005 LEN=2005; translated  
MTKDSGMNRAKFLVLVLTILLSTQPSDGEPLVSSQSALPCDSGLFRFGAAQSNNGYSRR  
TSIHRGQYSLVSDRRQRQRYFARSSNGIRMRSLLSRIGSMLGSKESLNAKTQNFRRFAST  
SQHVRPDRSIPALTSEDAFSSQSMVHGKIRKRPRWLRFPKVTSDQIRKFSVVQYTAIA  
VICFELFFVLKDFVDEVLNDLQDLENRDAHSRKTNSGSGDFGNNRKLVSLSKHSVKKIVDWL  
EQKGADRLPPPSVAPAWTLAMAQELYKCNLSLAGVERILLQITNAEAEFLGSCLLSSDN  
MADVNDDIGGLFAAKSAYHQLLVSSLSAWRSDCDDPSVNRNNSPYTKFVAKGNSNNGMVL  
WGPPGSGKSLLLRAIAKSSGLPTLMVTPALMQRTKSLEVLFLSLIETLGSCAVVLDLGL  
FLVPPQGNENASTRNRNEWLQRWDDVSARPSDDGRGLSKRCVLTVAATNRPWDVDIAAW  
RRLPNRIYIGLPNAEDRCMDLKKWSRDLPPIDDSVLQELVGATEGYLPSDLYQVLHYACQ  
VGPVARRDKQLTIEDVRVGLSGLMPSRYSSQYVQQLQEFVGGGNGSAGRAQQQQX

>comp13030\_c0\_seq1; 868 152 3248 LEN=3291; translated  
MEQNSESEPFPTAPYKRSARPOFNIFYGSTATSVTPPSSVHTDEQDSLVEELISTDNEC  
DIQTNGDDRITYQRESFIDGNGVTQRTNHSATPSSAKSSSRKFLPLNPILTFVLTGAFVAV  
AVALLIPTKQNNVSI LSQSFMPPFTVDRGDYDGPVEGFIDTNLFAPHLVRDGGAVVSAL  
SNDGESGQPQHSQSFSFPFTGAFWTLNVVDPQGNKMSYPIAVYPFAYRWSPSSLRVSY  
PAAHRLKDSKSVVDAFLPELTLTTHEEITKRHIVDYDPLSVSLEFLSSGNKSWETSIVQ  
SPYITIVYTKQTPVFTPLSIFSDVQCPGDDVEDFASFVEENEDSDSRKLFVCSIDRSDT  
KRTTMRGVQVFVFKTPEGVSWFMFASEPINLVFDKLTMTTISTAAPITGVIRLAYIPKTD  
EKSVKTSTAIKRLTYHSDIYPIGGDLSYELHRSGSSLSLSSGSEHGVDAAKNHATITFKF  
ETRSMSRDTLTGQTTKNLLMLALPHHAEVI SE SDKLEDENFDIN YKCIKGPMTPI LGSTW  
TFDEPLYDMKFDAPIQKVDDNIKSLILQQVQDDLKQVLPNPNENVYGYGKQVARLAQLAH  
IADQYETKNDQARNVTDGKDDTSVLSQATIQLSKYLEKYLSSDVSLSLFDFTNIGGLCSK  
DGLLDTGEDFGNGRYNGE FIVHFSDFP IPTKTLYDLNSMMLLFNKDHHFHGYFLYAS  
AVMARIDPSFIDRFGSHVDAIFHDIAYSSNGSSRGAKLQSTFFPMSRHKSWFDGHSFATG  
LFPFANGKSQESSSEAINCYYGAYLWSLVRHKEIDSEVTGFSQLLLSTEIRSAKTYWHML  
PPSAMDNSTDLYLHLYPSKFEENYMGVNLGMLDVNSNTWFGNDPLYVHMINAIPITAASN  
LLFEADVFVNHEYPFLMNGRGGVEMAWRGYTVSIHSIIDPNKAWEDANSLMSNQLDSALSK  
SQVLYFISQQPGFNVTLDAEQSIGGSDTIPSSQSTSSPISSCENNSGCAELNLRGECPT  
VSGITLGCNN

>comp13030\_c0\_seq2; 907 152 3154 LEN=3197; translated  
MEQNSESEPFPTAPYKRSARPOFNIFYGSTATSVTPPSSVHTDEQDSLVEELISTDNEC  
DIQTNGDDRITYQRESFIDGNGVTQRTNHSATPSSAKSSSRKFLPLNPILTFVLTGAFVAV  
AVALLIPTKQNNVSI LSQSFMPPFTVDRGDYDGPVEGFIDTNLFAPHLVRDGGAVVSAL  
SNDGESGQPQHSQSFSFPFTGAFWTLNVVDPQGNKMSYPIAVYPFAYRWSPSSLRVSY  
PAAHRLKDSKSVVDAFLPELTLTTHEEITKRHIVDYDPLSVSLEFLSSGNKSWETSIVQ  
SPYITIVYTKQTPVFTPLSIFSDVQCPGDDVEDFASFVEENEDSDSRKLFVCSIDRSDT  
KRTTMRGVQVFVFKTPEGVSWFMFASEPINLVFDKLTMTTISTAAPITGVIRLAYIPKTD  
EKSVKTSTAIKRLTYHSDIYPIGGDLSYELHRSGSSLSLSSGSEHGVDAAKNHATITFKF  
ETRSMSRDTLTGQTTKNLLMLALPHHAEVI SE SDKLEDENFDIN YKCIKGPMTPI LGSTW

TFDEPLYDMKFDAPIQKVDDNIKSLILQQVQDDLKQVLPNPNENVYGYGKQVARLAQLAH  
IADQYETKNDQARNVTDGKDDTSVLSQATIQLSKYLEKYLSSDVSDSLLFDTNIGGLCSK  
DGLLDTGEDFGNGRYNDHHFHYGYFLYASAVMARIDPSFIDRFGSHVDAIFHDIAYSSNG  
SSRGAKLQSTFFPMSRHKSWFDGHSFATGLFPFANGKSQESSEAINCYYGAYLWSLVRH  
KEIDSEVTGFSQLLLSTEIRSAKTYWHMLPPSAMDNSTDLYLHLYPSKFEENYMGVNLGM  
LDVNSNTWFGNDPLYVHMINAIPITAASNLLFEADFNHEYPFLMNGRGGVEMAWRGYTV  
SIHSIIDPNKAWEDANSLMSNQLDSALSQSQVLYFISQQPGFNVTLDAEQSIGGSDTIPS  
SQSTSSPISSCENNSGCAELNLRGECPTVSGITLGCCNN  
>comp13031\_c0\_seq1; 494 1 1349 LEN=1393; translated  
XCRNRVDLGLLQERILYGERPRAQRSESANRDGPVLPANASISSNLGNDQPRPGPTLEG  
ENETFEAMVEEDMEDLPFGSKLRSGGGANMERRPVPNLRDLYHKFEAMETKESEQPSYV  
QFYNAIDLLKKEKRARRAHPRNESTRADGGAPPKEGKKTGRVRRFRGGSVETERATSKAI  
QERHENLRRLWKYPPSLLRMGALVALLVCSFVWVGFVYGVYTFVHKVVYVDRDPVSI  
PSFPVVVDPIHELGVPEWQHQHHTHVMGDPLQQHEVESDQQQLNQQEQQQQKQHHQPQRQQ  
TAEQQQQQESYGFHDATNVAQGNANHGSCGCEEGSQKTTSPNELVIRIVKEVVHVREDGS  
RIEDYQIRKPLHRTSKDLLHPQEDSKKYGREIKDHEVDETMDLNFVGEIDDSKIEDCMVD  
ETADALDYFANDFTLEEIEKVTKCVTENI  
>comp13032\_c0\_seq1; 515 167 1858 LEN=1940; translated  
MNNIRQSHIIVIVFGCITIASMCHNLVSMRRMISSAEFFYTGNSSITTNPNYISSSTLD  
YMRDEQLEWRYSTTHQKTRGEFSLILNDNDEHTGNNDFQHKGILRKSTEKQGWKKAIRH  
ARPDTTFFVAGETVRKAGTNYSKFVDDMRFVIETNQTIIYRSLAANINSTSHNDGNFGDN  
NHLCSVLRQMTGQKSLDTPVPRGIPITLADIAADCNAMNEQMKGGQSTVLALYGVRMITA  
LAKVDFEFHCSNSYDGNNTTKNLNFMKEKDRKLRWVFPWFASYQSATDSNEPWPFLGN  
APTQDQVCSSSNINADYTSNKMPLEKMAADLMRNDVRKMALQLIGSRTDVPKRVHPLIPLD  
VEPWIPDISVDDVIIHLPCHNDAHGRGLNSIRRIDRVGILQFREYTKYINEDVKSIGIIT  
DSQGEVEESSNQDIYGECEYASNLSEYLOEFYSGQSVNISLYNNDTFPLQYARIAMAKQ  
SFSSSFSTFGMVPIIGSFGEGYFQPSVSITEGNDYIENKIIRRIISGKYKGFENIRLMSGN  
VLSPKNISTMKLNEIAEWSASS  
>comp13033\_c0\_seq1; 506 435 2552 LEN=2677; translated  
MSSIHHRGRANKRRRKHQPSRAAGVHALTSNEERLLHQTVQNSKLGDNRGTRAGDNIDVP  
FGPVFYPTIEDMEGSPLDYIDKIRHIAQHYGICKIVPPKAWKEKDFFAGKMETPQRFPTK  
LQDLHRIQEGVSRFDGEEYNPGSYLRYASTFTKEYKKREYPLHDEIIQDQETKESVNQES  
NNVADKKDVTKNGDATIGSRQRFIPENLEQDYWDLVENRNKEFCVEYGNVDVTHEFGSGF  
PLSQRGRSVYGTLDPQKANLPDPQFGSDEYFRETWWNLNIPWTPDSVLRHVKVGINGIN  
VPWMYGALFTSFCWHNEDNYLYSINYHHKGAPKQWYGVPGAEEKHANGLEKVFKSYLSMK  
MRDVPDLLHHITTFSPRLLQNAKVPICKLLQHEGEYVVTFPRAFHHGGFSMGPNI  
GEAVNFATHDWIYHGSANERYRSFARPAVFSHDLRTFTMAHHLDEQKSYKNCSLL  
LQEVERVDEELRLRKDLYEQGVRDVSVDVIELPPNRLDQLEDSDADYDDKRLCHACK  
HICFFSAVACECSRSKVSLRHSYMCRCPSERRYLMMVWSPEEELTKTCERVRNRCE  
ALKSQDQNGSSVDSSELQEDDSYPLPVAVGVEKDLEDHKNDTIKVDYVPPPKSTRN  
LKTDLMSKDISLVGEVTADEDRDEYSNNRDVVVTLDGSDSDDDEVEVVAVIGGNK  
SPEMQS  
>comp13033\_c0\_seq2; 326 150 905 LEN=1030; translated  
MAHHLDEQKSYKNCSLLLQEVERVDEELRLRKDLYEQGVRDVSVDVIELPPNRLDQ  
LEDSDADYDDKRLCHACKHICFFSAVACECSRSKVSLRHSYMCRCPSERRYLMMVWS  
PEEELTKTCERVRNRCEALKSQDQNGSSVDSSELQEDDSYPLPVAVGVEKDLEDHK  
NDTIKVDYVPPPKSTRNLKTDLMSKDISLVGEVTADEDRDEYSNNRDVVVTLDGSD  
SDDDEVEVVAVIGGNKSPEMQS  
>comp13034\_c0\_seq1; 2608 114 10232 LEN=10342; translated  
MTVLTVEGPDNGGRLLSVRSIFQIKNRTTHSVKLNHFHPDPKHKPDIIGTQDTTEKLE  
NVS EHFDIGPGCDFQLPTLLVESSLEMKGSHLGSVWVRPDTSRTEFSFRDFSKPTAT  
IEEFDTSYCSRVPQLAKIVHETSVIFNNGGGEDVQSDATSGVQVSCPTHRSRGNIRTP  
FCYAI EICRSPIVKANVDQNKPFLLKNKKEKSKRSSLVHAPVAYSLVIHSPLVIVNLL  
PEGGRFELMHAIRKTVVWYADLEPGQVPHVSLGLDPLLLLVNLGFCRTPVGEALVHHG  
GESVEH SKEQNAGLKSFGKAIKGTQKIGKRLTNLAESDPDKRAQERVAKMFSPQSI  
EKRRRKGNKQKRLSIAGRSLGLDLGETGTDGIHGKIHAIKADSYSAEDIANETTVVDG  
VGQRLRLRIENVRGGGQRRISLYCPYWIVNTTEHALRYKQEKDSRYVSGTVISPEKNG  
SLPVDGSRNRYRSRYEMQSKRSAIRSNOQLGRNTNLFSSVPINQETVVFAGTNGALAT  
FPGQCTLSPEDISSLIDEDMPLQKLAKIAFMYNFFEESIGVEKLIVQLYDGLHSNANAG  
YVSGWSAGFALETVGFVSQVIGLPCCKDGRVLELSATVNVAPGFLSGYTKIVRFCPRY  
AIYNRLERPRLWQDSSII RSLAEDRSDATNQLEDQSDSRKWRYDFEDEQYACKIGQY  
ESLFRHATINDKLSVMSAEP

QIALPEGTAAHRSALYI SSVGSSQLVPFFLPDTRSESQLRIDVGGPWNLTS SFASNVPGE  
HVLDISRAKDTRLLSHVCIRDAPKYKLILPPPKEAGGSNWDGELGAYFETEDWNQGDRKI  
LVKGTGRGKYAFNHTDMRVGDELLRINGISVLKMTFEEAMMKIKDKLSEIRDYHDKLKL  
ESGTMKNKKGVLRRLSMGGRYISSTNYDGGNGASRVLRRLSLGVKKRDTSQIEEELVEP  
APLTMFRTOEERLRKMRKAI RARNSAFSYGANTIGNFDLESPGIESIDALTVETKAIH  
NTMFIILRNAEKENPPFKLQNRSLKYCLFYRQRNCEEHEWNI LMPGESRSYAWEEPMSK  
KLTIRIATNPHESLKDDYSKEKSSDSMSTTAEQKSGNEIEPEEYASAVRADRLRQILAYQ  
YVNEERGGFSIPTTVRLEEIGFNILVPVPSFAEGQDNETKYLNCEVDTDGGTRLLVLS  
LYGGHDERAIMHRNIESLQKQIENEENRIGLKSQYALSTPIPKAEGEKLEYSVEDKTA  
EIEREKMIENELREVAEDFPEGNAVTKRCQVVVQVLEAVGLISSDFVGTCPNYCEIFYKG  
RSRSRKHFQKRRNRKRYFIEKTSNPKWNDQYFVFDVPEEAIGVTRGHSIQIVVRDFRI  
MGQHPILGQASMHCASIRNQQELVGGWVPLVGRYSNGTEVDTGRGSIKLRVQWIYTL  
SAMI  
DYYSLLSQRRLQVLIKTEKGMQEQLKSANDSFERKRESMNKLPGRHIANLVKQKKNFLQ  
KENSTKREQP NREKNSKAKLNGPLNTNFLHLKETLKSRTQSLKALTIKTVESRRKRRVE  
SDEIDYDDIKL NESNRI LKMGQHSKSRSDSSQSAEHTPPTPRNKRTKSLGDDFAQQRSSV  
RTRRGTK EWNVSQHI SHRKLSLDLDESSILESVIMDASNQRQSMGRWHDLES DPGTSDLL  
SMNTDTQE QARRNDIARLNILGFVFKSGDFFHEDHLPNHFRLLFAGSTEQRQSOLLY  
RRRQFVGTSSVIRHFKNWQAAQALLWDPEVEVIRVESGFHVGLIHEGNRNQSEETKNMS  
NSNKSVISKNLCPNEAPRVTIERSKDRIETMHL SRNLFRSCRRI LGCVLNPGGWLTVR  
PIAAMNLPDSYTGMYVKVTHGTEVQISETVDAKVSPKWSSTRLAHKGRRKTSLTQLPDTT  
AAADFEFCENDLHLQVEPQQTGG SIRLSVVAERYKTKVELGVVHIPLGAAIAACIDTAQS  
IEITGCGKENEIPLYTRWFPLQEPQLIVPVAGDMGLCTRSREQE QPRDNMFQQYFAPCIQ  
LSLMWWPYDQNIENQNP GDVKNGTPTVSDANSSIIISRI TRIPTIKTYFNADINVSVAL  
IDSVRAVELLNLSLREIDMKYAVTRAKTRICLVVGIQLDQDDNSREP VVFAPTSEYP  
QPTLQFLALRDNLRTKSNIMSYEYVGLALQEMDLTVEEPRVYELWDFFMVLSRKRKMKR  
ALRGRRHKDVISQKRNI FDSVEQDDSKLSLFEIIRSVGDRGALSHKQKIYVEQLILGLVK  
INLSYVKGKKQNFELSENSMYDMHDFTMANGGGQDSRNDLKKNDQSEIFMKWSQLTSDQD  
TALGTAGLHNLPGIIAAVFPVSDAPIRLQGLVQHVFE SPVEIVSSLKNYYTNETLQV  
YKIIGSLDFVGNPTILLSSFM SGVKDLVSAPTA AFMKSPSDVKQVIGVKGKTVSFLSHS  
ASGFFGF TARLFSQAGQIAALVSFDSYRQWHRDRVNEATNLERVWKRGRMPKVEEIML  
RPIADVVLGFTLVGSGVVVAPYRGAQKAGAKGFFT GAGLGIAGLVSKPIVGVFDALMHGS  
QSVHDI AKTINFLERRYQPI LKLRLPYVFGPMKILAPFD PNSARSVYLLR LFPKTKLKY  
RKDKGQEFHIHSEVLEMEPGVETFTIITIRIVLIKVKRESTKATTTLSPYFGWEVDLSS  
GATISSQIADHGNGVALTITK CDDGPRTKGGRRDSKTQTERTRNLLPTLGEGDEENEIT  
REMGEDFQEAELDSMPRNSSTLVKPLSESVTSGIKQQGNKYLEWYAVLAEHQQRKQLNRI  
HNAISCMVGAYDEIIPDRPIVSQKYVGN DAGNTSFGIYNFEKGLPDGAAQLSNMKLIAS  
LEDLYWIEDDLVQRI SNIESPSRRQRALDKVRQTWNFSSAMIVSKNIGGPQWLVRARAKA  
MSVP SDAKNVAEHIDGAPLSNR TLNEVFKGYSFDHDMTSSTSGKMSSETLDKMLQGSTQS  
SVDQLSGQGSSIEV KRKQDSIDSSNVIENEETEEHFPGDSGALTYSNNSLGHSSSKEQLV  
EDSIRRNESENVFCSPDALGLPMS SVDQSNEQSNQSTRDDGTNINRMDEVDFYSPINGV  
IKDDGHVDLFRSCNSLNIHPPPPVASLNI PQDNVSSNLS SHEAERHVS NLGTASEKNNI  
SATDSNDTTRIDRLEGILEQLVILNAAQVRREEMAAAESMYSRHHTNVSEAQSVTDHLR  
QELGEIREK VDERAREDDSLRNEISMLRSQLADRRAPERRSWASTIGLHEIANRNARSNF  
DRQRPPPINTSLFPNKKKKK LIRGILSGHNKAKTQEQE QTEEHPRMLEESFDDTPEPPLG  
LDDDDGNSAVYF

>comp13035\_c0\_seq1; 139 1 447 LEN=928; translated  
PNIFLDKSNKLTGHRPIFCVKAHYPPLEMLVKKHMAEYYELSTHQCSREQQAFNNYMVD  
LVKDVA DQQEWFADSFCDKSLRDRIRCYYKTHIQNAKKRLRTMVRNPTKKANARHLCEH  
LDLIQKHRVEEGTSKAKPEQGNEKNKKK

>comp13035\_c0\_seq2; 592 93 1868 LEN=2349; translated  
MSGNSILARASEGDNKTGTEDEVENELCLSSKYNHDLVLT PRTEASTPEYLDPKTNSVSS  
SDGINCVIKSPRDASSESSADEEQDLKLQRHMSQTDNHICMLDRNGDLNEVAGSQSMLS  
QELMDHGNDHSDSNNSGDEEATETSTAPCLLEDLGLKKGSP ESSI GI AKRLGLLPHTQE  
EGGEESQDEDEGLYARHKTQSHRVQVLKAVDDNKQVEEDQHV GSTKTS PRNDIVDKDYE  
FQFQKTEAARATRAISSQRLLDSSRKTPI SGLELLTQVGIKEANKAAAMT SNGHAIDN  
ENVSNAKIAVAAMISIPKTTVYPNEGFGSLLDAVAKITEQEASGLDCSMDWVSSQASNDA  
PTRTKRVKRRKPPVDSKGSTTKVQRKSETQKLKEKIRREKIELENERAQATAKRAAIVA  
EHTTTDPVIAKLLLSMALARENPRSI PKTLPKGHVQKSF FWAHYPPLEMLVKKHMAE  
YYELSTHQCSREQQAFNNYMVDLVKDVA DQQEWFADSFCDKSLRDRIRCYYKTHIQNA  
KKRLRTMVRNPTKKANARHLCEHLDLIQKHRVEEGTSKAKPEQGNEKNKKK

>comp13036\_c0\_seq1; 441 1 1737 LEN=2334; translated  
QLQLQLQLIAPQHFASCLNTEELECASLFEMGNSKTKSPVTAPRGRRATMIAFLLGLSVG  
KVFFSFSTSMSSFREERSTVDFAPPQTSQGLQKQTQKQTQVQTQVQDASESMHVRPFD  
EGNIGIVSKKDPSPFFRAFQEQIDSMDDEARCDRYQFKLKSKEFRRKRPRRIFFGALVA  
TETWELFDIVSTEAYGIYDGIVLVESNRTQNLHPRNLTHYNQEKHEAIIIGELFGVPSHS  
AKIRFWSNEDEDLSDLPRESAQRDDVLNGWRELGMQPDDVGILSDMDEVLTRDFLRAIQV  
CDVIDEIDYRSHGCRPDKMGLRVTQIYEGSPECVTDERYGFQPSVFSGHCIIEGIGDPSV  
HKSPPRNREGDRLGGWGQSDWDDSKPYTPSANGGDFRTTGGARNINLIVPERQLKTKRHY  
NVYTAYHFHNFSSKGSTIRFKYKTYGHPNEDANLVPLQELQSDLAIMVYCAKNEADPEEA  
EFHRVVGGFESLDPFTPIYFQDAEYRFRRQEFIQKLVRRDENDQKKRREEMEERKTAAL  
ANRLQRFGNHLRMAQTPTNLDLAIQKPAYPESTKVS  
>comp13037\_c0\_seq1; 539 1 1423 LEN=1494; translated  
XSVQAPVPERTLPIRKRQTPASDPGRRTTQRGRWSKASKRTTATGHCSKXASKSDEEPA  
LRSQPVGVGQQFLPLASVPRIAMPTPGDARTGAEPVVRDRVEETFELLQSAKKLESESNY  
WLATENFVKAHELLTLLAGEETAGAEPSTGAERISHLYATKAEEYKKSRSKCLIRAMEQD  
QSGDDRVREADTEKNLLGDDEARARNHSFVLFVSRPVAVSVSASVSEGPAGGDPLPATND  
HGASGPLGPPERDTRPHIGDEGLDLEARLRALNQLPSGYKSTDERVSDVKKGLGKLGLSL  
YAEQPFSSRFEDVPEKSEDEQIDDIQAEEDEAAAFERRSRGGDTDTVPASGGRAESCEP  
CGDDCSSSEDDGDGEEDLLDDQLAMKTIQKQKVASAQAKLAELAALLDRARSKKAMDEA  
DEEEVFRNDFDSEDDDEDDSCRVDVRQHDVAFLMGTGRKLLKSAQRDMRKAMAEW  
>comp13038\_c0\_seq1; 422 126 1592 LEN=1767; translated  
MTTLYPSFLSAVSILTLLGVNCSCFIIIESQINFRKHVRQQTHIVTSSSTKNGEPPFFAPNR  
NEEDEGVPAKEYRRLSFDSELRELMYGEDDNSQKTLFGSTFKMVVPSSSSMEFDFLVSGI  
RDAQRRTLLNRRFYTAREPFQQKNIFEPCCLEDLKAPPSEIKDAIWIWVVPYRLLSFLVP  
YFIFPYFIDFLDRFVTMAPEQLSGITDKFGPGVAILYGTFFISLTLAILYERQORDIQKVA  
VEASLLALITRNILHIFRDNEALAKRAGQGCADQIRLLSVASRGSELLSIVYADPYSIIL  
ETIEEHERALMEENAGVLDGESGMIDGCRQTLQELFTIRGIRLSDESLALPQTHFLIMTI  
LTSFILLGYAINVLPVAVTLGGASAESC VVFGLLTAIYIIFYNFAQDLNPFSGIYQIRR  
SSTA AHL LQAKWLLVNPLTKDHVDFDGPDPDEGEVVLVHTPGIGEVVFP RDEIYPELKH  
AMRKLEKE  
>comp13038\_c0\_seq2; 422 126 1592 LEN=1809; translated  
MTTLYPSFLSAVSILTLLGVNCSCFIIIESQINFRKHVRQQTHIVTSSSTKNGEPPFFAPNR  
NEEDEGVPAKEYRRLSFDSELRELMYGEDDNSQKTLFGSTFKMVVPSSSSMEFDFLVSGI  
RDAQRRTLLNRRFYTAREPFQQKNIFEPCCLEDLKAPPSEIKDAIWIWVVPYRLLSFLVP  
YFIFPYFIDFLDRFVTMAPEQLSGITDKFGPGVAILYGTFFISLTLAILYERQORDIQKVA  
VEASLLALITRNILHIFRDNEALAKRAGQGCADQIRLLSVASRGSELLSIVYADPYSIIL  
ETIEEHERALMEENAGVLDGESGMIDGCRQTLQELFTIRGIRLSDESLALPQTHFLIMTI  
LTSFILLGYAINVLPVAVTLGGASAESC VVFGLLTAIYIIFYNFAQDLNPFSGIYQIRR  
SSTA AHL LQAKWLLVNPLTKDHVDFDGPDPDEGEVVLVHTPGIGEVVFP RDEIYPELKH  
AMRKLEKE  
>comp13038\_c0\_seq3; 320 126 1306 LEN=1339; translated  
MTTLYPSFLSAVSILTLLGVNCSCFIIIESQINFRKHVRQQTHIVTSSSTKNGEPPFFAPNR  
NEEDEGVPAKEYRRLSFDSELRELMYGEDDNSQKTLFGSTFKMVVPSSSSMEFDFLVSGI  
RDAQRRTLLNRRFYTAREPFQQKNIFEPCCLEDLKAPPSEIKDAIWIWVVPYRLLSFLVP  
YFIFPYFIDFLDRFVTMAPEQLSGITDKFGPGVAILYGTFFISLTLAILYERQORDIQKVA  
VEASLLALITRNILHIFRDNEALAKRAGQGCADQIRLLSVASRGSELLSIVYADPYSIIL  
ETIEEHERALMEENAGVLDGESGMIDGCRQTLQELFTIRGIRLSDESLALPQTHFLIMTI  
LTSFILLGYAIVKFSVSVFFSMLHVRFSFIDDQ  
>comp13039\_c0\_seq1; 123 794 979 LEN=1132; translated  
METARDKREEGVDDVKSSWPLRVGLHTCYNGGDNGLIPKSHLSSDWGLQLDPMKSESLVI  
A  
>comp13039\_c0\_seq4; 16 1 215 LEN=982; minus strand; translated  
XLPCYDFTLVNSTLDILLQKVRVTASGITSFHGVTGGVYKARERIH RAMADARLLAIPA  
SWSRVADSNPN  
>comp13039\_c0\_seq7; 16 1 215 LEN=506; minus strand; translated  
XLPCYDFTLVNSTLDILLQKVRVTASGITSFHGVTGGVYKARERIH RAMADARLLAIPA  
SWSRVADSNPN  
>comp13039\_c0\_seq8; 123 794 979 LEN=1131; translated  
METARDKREEGVDDVKSSWPLRVGLHTCYNGGDNGLIPKSHLSSDWGLQLDPMKSESLVI  
A



>comp13039\_c0\_seq10; 49 1 216 LEN=507; minus strand; translated  
SYTFPYSYLVSTSSKLPISQWILLKSSSETDSLQVTGGVYKARERIHRAMADARLLAIPA  
SWSRVADSNPN

>comp13039\_c0\_seq13; 49 1 216 LEN=983; minus strand; translated  
SYTFPYSYLVSTSSKLPISQWILLKSSSETDSLQVTGGVYKARERIHRAMADARLLAIPA  
SWSRVADSNPN

>comp13040\_c0\_seq1; 426 191 1477 LEN=2535; minus strand; translated  
MTKFPSTIVQALAASAFFSGTSLSLSPFSSKSSTTSAKT TSAITDLMHEAAVAETERL FQ  
FYSSNGNYNTENTENNNYPTKIEASPVITSPPTVWRSSEEAVTYIRDNI DTVLFD CDGVL  
YRTTSLCPGASECIRELMEIHKKRVLFVTNNAGVNRRELREKLSRLLRIDSLTNDQMISS  
SYSSAQYLKSELMAASKELGSTTTASSTPPRVHVI GSSGLCEELVAAGFNVTGGPSTSSP  
EHDECCSMSREELAAYDFEQ LHPIDALVVGHD TDLNFRKLCIAENLLLRNPEALFVATNK  
DSFDVVDGNNNDRHIMNGATVVALEYSSKRTAINVGKPSKELFGLIRNQDSSGAKKPS  
GNVFDDPSRCLFVGDRLD TDIRFGKDNGMKSL LVMTGVTSAKTMEELANGTEEEPLDFI  
LPHVGMLK

>comp13040\_c0\_seq2; 426 191 1477 LEN=2407; minus strand; translated  
MTKFPSTIVQALAASAFFSGTSLSLSPFSSKSSTTSAKT TSAITDLMHEAAVAETERL FQ  
FYSSNGNYNTENTENNNYPTKIEASPVITSPPTVWRSSEEAVTYIRDNI DTVLFD CDGVL  
YRTTSLCPGASECIRELMEIHKKRVLFVTNNAGVNRRELREKLSRLLRIDSLTNDQMISS  
SYSSAQYLKSELMAASKELGSTTTASSTPPRVHVI GSSGLCEELVAAGFNVTGGPSTSSP  
EHDECCSMSREELAAYDFEQ LHPIDALVVGHD TDLNFRKLCIAENLLLRNPEALFVATNK  
DSFDVVDGNNNDRHIMNGATVVALEYSSKRTAINVGKPSKELFGLIRNQDSSGAKKPS  
GNVFDDPSRCLFVGDRLD TDIRFGKDNGMKSL LVMTGVTSAKTMEELANGTEEEPLDFI  
LPHVGMLK

>comp13040\_c0\_seq3; 418 191 1387 LEN=2459; minus strand; translated  
MTKFPSTIVQALAASAFFSGTSLSLSPFSSKSSTTSAKT TSAITDLMHEAAVAETERL FQ  
FYSSNGNYNTENTENNNYPTKIEASPVITSPPTVWRSSEEAVTYIRDNI DTVLFD CDGVL  
YRTTSLCPGASECIRELMEIHKKRVLFVTNNAGVNRRELREKLSRLLRIDSLTNDQMISS  
SYSSAQYLKSELMAASKELGSTTTASSTPPRVHVI GSSGLCEELVAAGFNVTGGPSTSSP  
EHDECCSMSREELAAYDFEQ LHPIDALVVGHD TDLNFRKLCIAENLLLRNPEALFVATNK  
DSFDVVDGNNNDRHIMNGATVVALEYSSKRTAINVGKPSKELFGLIRNQDSSGAKKPS  
GNVFDDPSRCLFVGDRLD TDIRFGKDNGMKSL LILFFPM

>comp13040\_c0\_seq4; 418 191 1387 LEN=2331; minus strand; translated  
MTKFPSTIVQALAASAFFSGTSLSLSPFSSKSSTTSAKT TSAITDLMHEAAVAETERL FQ  
FYSSNGNYNTENTENNNYPTKIEASPVITSPPTVWRSSEEAVTYIRDNI DTVLFD CDGVL  
YRTTSLCPGASECIRELMEIHKKRVLFVTNNAGVNRRELREKLSRLLRIDSLTNDQMISS  
SYSSAQYLKSELMAASKELGSTTTASSTPPRVHVI GSSGLCEELVAAGFNVTGGPSTSSP  
EHDECCSMSREELAAYDFEQ LHPIDALVVGHD TDLNFRKLCIAENLLLRNPEALFVATNK  
DSFDVVDGNNNDRHIMNGATVVALEYSSKRTAINVGKPSKELFGLIRNQDSSGAKKPS  
GNVFDDPSRCLFVGDRLD TDIRFGKDNGMKSL LILFFPM

>comp13041\_c0\_seq2; 181 1 978 LEN=1119; translated  
PLAKTVYPNFIDKFFRRPTHQGEESKMVFFVVTGIPRRSIRIYRGRRIDFLRKRWHSSSS  
PQASKKPSPEM VQPKSFAIGALAGTCGSLAGMGGGFIM IPLMTSKRLMGLTQHQAHS  
LFAVATTGTAGALSYSGQVDYEVAAAIAFCGMATASLGAYASSKMSQAALKKALGIFMLL  
IAPTIPAKKEYLLSKKEATERSRETSFVGRYIVPAGIGCCSGFLAGVFGVGGGAVVVPALS  
FFTDMHYQALGTS LCAMVPTAVVGTATHMSKGTVMVRVAPALAVGAFSGAYFGGKLGLT  
IPEQQLKYGFSGTMVVLGLR TLLKL

>comp13042\_c0\_seq1; 132 1 1136 LEN=1411; translated  
LVGNIALGHSWKKSIFLMKFEIEFPCIWFCRVHRDFTTXPDSAKAKFCVEGKQSLYQYCE  
ERGIAHRRCGKLVVATSKRQLAEELPFLRDQAFRNDVTDIRLLSREDIQVLEPAVECFGG  
LFSPSTGVLD SHSFYTNLLADCEDGGATVVLHSEVNGADLVDGKLC LSADGALLSADTIV  
NCAGLHAYEVASKLHRRESEHDPPTPPACPWQPPRHFFAKGTYFRLDGTSPFRHLIYPVP  
EPGGLGIHATIDWSGTGTFKFPDVEWLDSDTRPGDINYPDPAAVDKFAVAIEKYYPELP  
RERLQPDYVGVPRPKLRHPSIVPISTCTPSTPSKNVAFDDFLIVEKTVAKSQIFHLFGIES  
PGLTSSLGIADYVKRAIG

>comp13042\_c0\_seq2; 119 1 935 LEN=1092; translated  
LVGNIALGHSWKKSIFLMKFEIEFPCIWFCRVHRDFTTXPDSAKAKFCVEGKQSLYQYCE  
ERGIAHRRCGKLVVATSKRQLAEELPFLRDQAFRNDVTDIRLLSREDIQVLEPAVECFGG  
LFSPSTGVLD SHSFYTNLLADCEDGGATVVLHSEVNGADLVDGKLC LSADGALLSADTIV  
NCAGLHAYEVASKLHRRESEHDPPTPPACPWQPPRHFFAKGTYFRLDGTSPFRHLIYPVP

EPGGLGIHATIDWSGTGTFKFGPDVEWLSDTRPGDINYDPDPAAVDKFAVAIEKYYPELP  
RERLQPDYVGA  
>comp13042\_c0\_seq3; 248 91 1104 LEN=1261; translated  
MLASRASASFHSQVVVIGAGVVGLAVTRALAKAGKEVLLLEKASHICTETSSRNSEVIHA  
GLYYPDSAKAKFCVEGKQSLYQYCEERGIAHRRCGKLVVATSKRQLAEELPFLRDQAFR  
NDVTDIRLLSREDIQVLEPAVECFGGFLFSPSTGVLDSSHFSFYTNLLADCEDGGATVVLHSE  
VNGADLVDGKLCLSADGALLSADTIIVNCAGLHAYEVASKLHRRESEHDPPTPPACPWQPP  
RHFFAKGTYFRLDGTSPFRHLIYPVPEPGGLGIHATIDWSGTGTFKFGPDVEWLSDTRPG  
DINYDPDPAAVDKFAVAIEKYYPELPRERLQPDYVGA  
>comp13042\_c0\_seq4; 261 91 1305 LEN=1580; translated  
MLASRASASFHSQVVVIGAGVVGLAVTRALAKAGKEVLLLEKASHICTETSSRNSEVIHA  
GLYYPDSAKAKFCVEGKQSLYQYCEERGIAHRRCGKLVVATSKRQLAEELPFLRDQAFR  
NDVTDIRLLSREDIQVLEPAVECFGGFLFSPSTGVLDSSHFSFYTNLLADCEDGGATVVLHSE  
VNGADLVDGKLCLSADGALLSADTIIVNCAGLHAYEVASKLHRRESEHDPPTPPACPWQPP  
RHFFAKGTYFRLDGTSPFRHLIYPVPEPGGLGIHATIDWSGTGTFKFGPDVEWLSDTRPG  
DINYDPDPAAVDKFAVAIEKYYPELPRERLQPDYVGVVRPKLRHPSIVPISTCTPSTPSKN  
VAFDDFLIVEKTVAKSQIFHLFGIESPGLTSSLGIADYVKRAIG  
>comp13043\_c0\_seq2; 498 509 2502 LEN=2694; minus strand; translated  
MPLPMHSQPSLAAGTASRSRMALGQNKRPYSKFASGASSGASKSNASGSGSGKEGIVQRL  
QRALVDVRRDRDHEHRLCEIAREKLRRAAKQAFREEQSSFEEDKKKVIESQTELTKEEEEI  
VRIQARIQELQKQSVEXIMSRGSSTKCPILCCRDLRLSRAAAIVYHALCAVYIARSLLL  
CAVLPCPILLDDPLIGAKTEIHRFIVLYLVSYFYHCVTVSIPDDDLIRKREKIQQNSAQ  
EAATSRRNKSLLAARRCLDQQRDQYQKFERMQDHNKELIGAIASDALAKHRRITSARRQ  
HDGTEKESSTTTPALVDAGTKEGRDSTNQEFQGGSTDGDFSFDFEKYQEALGIKQEEILA  
REFKTIDDYAVLPKMILSKAETLRMESELLRAEATRLEALIVQQQELPTSSNRLYPRCQQ  
EQKERNSSNARIDKFEFSIGTHTSTDAGSSSTSESIHTATMDARDNANIEGKDGSRRI  
LDTMDLIESTTENS KPKGTQRKESQTVLPNDATILNTESLHPESSEMEGEKSNDARPACTP  
KITLMDTTLDSNQVQDSNKAKGSSDPSLDGNAAGDQSEGRDVNISGTSKASALKFAMNP  
EHEGDGSTASALTTNANSIEIPTGIQVGGNDSSEDFPPPTLQNTPINVIKRHKGSGSEDE  
NRTM  
>comp13044\_c0\_seq2; 266 99 458 LEN=526; translated  
MAKTPSKKAAPAKNAPKKAATGGKKKRVE SYSTYIYKVLKQVHPDTGISKKGMSIMNSF  
INDIFERIAGEAGKLATYNKKATLSSREIQTAVRLMLPGELAKHAVSEGTKAVTKFSSA  
>comp13045\_c0\_seq2; 159 1 475 LEN=1237; translated  
XAATTQCRSFYQLSLKIYIMSDAAKAFITFLRCEAKQAEDRAQSLRTTAAIIEANSLEAQ  
RKHSKTRKRSRTPD SKAQCSGYSLFFQEHESAKKSKNANESIDEVLKDRWENLSDGKKR  
AWESRAEDEQVSQCRQNCCKIHLNESEDGDEDPKKSIS  
>comp13046\_c0\_seq1; 212 175 864 LEN=1269; translated  
MTPIGGRSFLVLVLLASRGR LVRALLLDTGGVGPAAASACPGARWGRHRPLPFRGIRGT  
GHHRGAIQRASLLWTS PRSGSDGDSL AGDGTGSDGND SNGNESNSDNDHDP SNGDSRLFR  
DLGRPTGSGDDPAQQRAILDELAWRTQKVRLEEQNDRRFGAALRSRPRKLSYKEAGKWVR  
ANLGADTREEFEDLVLNGLRTPYIPKDPERYYTANGTWGGWEDFLRGG  
>comp13047\_c0\_seq1; 842 167 1408 LEN=1474; translated  
MKFSLLA VFFAASSIDAFSPKTAGSRGASALRSSTTDAPPMARSQTKVPVFDEVCDTGTG  
TLTRFMNEVAMLNPELSELTTFLGAIDTACKAMTNLVKRSQLPSSETLGYQGEVNVQGED  
QKKLDVITNDLLKRALRFTGRLGVLASEEEDVPVDLIGDTASDSQEIVIEEGEKYVAVFD  
PLDGSSNVDAGIPTGTIIGIYEHSENCDDVPEICIGDECTEQEAQCLANTLQPGTNLVAAA  
YCLYSSSTFLSLTLGNGVYIFTLDETIGEFVLSKPDVKIPEDCSIYSMNEANFDKWDKPL  
RDVVVTGWREGTGASGRFSSRYIGSMVGDVHRTLTYGGVFGYPGDTKNPNGLRLLYEGA  
PMSFIMEQAGGISSTGKERVMEITPEYVHQRI PVVMGSKNAVQEVLDAYAAEE  
>comp13047\_c0\_seq2; 724 89 1306 LEN=1396; translated  
MKFSISALVLVSLAGVSDAFVARSQKVSVP TKLVATEPPTVKVPVLDEV CETTGVT LKR  
YMNEVAMLNPELTELTTFLGAIDTACKAITNMVKRSQLPSSETLGYQGEVNVQGEDQKKL  
DVI TNDVLKRALRFTGRMGVLA SEEDVPVDLVNTDKDAVFTETNKYVAVFDPLDGSSNV  
DAGIPTGTIIGIYEHDENCSMDESCIGEDCTAQELNCLTNLQPGTSLVAAA YCLYSSST  
FFVLTIGAGTYGFTLDENLGEFVLSHPNMKIPETSSIMSFNEANTHMWDEPLQKVVDGWK  
NGTGKSGKTFSSRYVGS MVGDVHRTLTYGGVFGYPGDAKNPNGKLRLLYEGAPMSFIMEQ  
AGGVSTTGKERVMDIKPDYVHQRVPMVMGSKNDVEEVIEAYKNAE  
>comp13048\_c0\_seq1; 307 523 1155 LEN=1331; translated  
MTETFQRYDDEFQSLTRQIKAAFNANS GGYRDEEAGETANPGEAIEQCEELLQQMALEAR

SVPDASRKRELLVQVRNYKSDLQTLKDEDNKRSLMASARGNGAGSGSDEHRERMRKQQEM  
LQNQNSQLDSARRVLQETEQVALEIGEELSNNRATIESAHGRVRSVASMAGRARRVVASM  
NQRAAQKMLLYGLAVGVVILFFVSVRFLK  
>comp13049\_c0\_seq1; 777 196 2262 LEN=5765; minus strand; translated  
MGTCFSQEERQOTHERLYEYDEDYFTKVEKRNSIDDKRTRWRRYINSIDSNSSAQLTSHS  
FETNQWNFPVDHWTIQTSESESPSAKTDAFSDISFSLSSPPSLYNIPSPFTFLQPILFSE  
TSTSSPMQNMPNQGHVRKWNKGKHKGRALKLRLEKHRHIQIAVTKHHTPNGSPIAQLAMAS  
QFPAAVDAQFQTENDVSESSVSSPVSSIPSLGSKSSSTGESSISSNSGGSIWKEVMNETN  
ITALAINRVFPDSSFTELASSMLATGDESGTIIITQITDEEMQKIGDEESADSLLESIMD  
LGGGALEFSVESRVRSLHFSGSEHLVAGGDGCYAWISAIMVDQSSKTLQEIKVIQKIERI  
DRIYAVRFSPKRNFLAVGGFDGRVATVPTTAMWKKEDAKTKEDGSDDSFSSQVMNDSIIEL  
DRPGLIYCLDWSPEGDYLAIAAGSDKVCGIYDASTFQLVHETASRSSAIEALQWSDHGKYF  
AIGDREVAIVDGKPPFEIQCEISHPPKSSVMAQFRYRITSLCWCPSGSFLAIGGSDGRCL  
IVEKNSWTLVYEHNRETCINALEWFQQYLIVSDNNHTLAFIKIGEETQSSEALGDHASVT  
SSSYFSQSTTSSNWVLREDEFDRDLEEVTKAPKALNSRANITSVAFSKVGKASKTSPYLA  
YAADDCSLTIMTTRDWKAVYVSANLTII  
>comp13050\_c0\_seq1; 278 427 1209 LEN=1754; minus strand; translated  
MPFLFRLTHLTLFVQNSNYLPTHEQTNNQHFSGIVAIEFAKIFSNLGCDDVTLLIRDKS  
PKNALMKIGLDKDIAATLVADLVRSGIRIERDCEVGTIEVPTAAASAANKKKDYIVPLKI  
GLKTKGGIDDRPQSSLQEIIRCDAYIAAVGRIANTENLNLEAAGVEVDEYGGITVDSHLKA  
KGVEDGNVYGAGDVLGRPFPLASTGVAQGVATVKNMFDLSLPLDLVDCDESSDSCGAEDLL  
LMKAAACDPTSLAANPVSSR  
>comp13050\_c2\_seq1; 569 260 2152 LEN=2168; translated  
MRNSFRFRPLILLSSLGVVIPPASVLSFRAQWQEPVRNRWNSPIKPVGTVFGTTEAHTT  
ICRPPSALRAEGIDHPYEDLAVIGAGPVGVQAAIVAASTAKKKVVLIDAPRASGQLMNE  
ETNEDLSIGGPTGLFSKALRDAKRIKVP TLRGMNLRREDSIWNEITSSCVELASFNANDV  
KRQLEYAGVTLIEGYAKFSDVGGSHHLTVCQTGDTVTSTISTDKVLIATGSRPFRPDNIP  
FDGVRVFDSDSINGLKFPLPKSLVITGSGIVAIEFAKIFSNLGCDDVTLLIRDKSPKNALM  
KIGLDKDIAATLVADLVRSGIRIERDCEVGTIEVPTAAASAANKKKDYIVPLKIGLTKG  
GIDDRPQSSLQEIIRCDAYIAAVGRIANTENLNLEAAGVEVDEYGGITVDSHLKAAGVEDG  
NVYAGDVLGRPFPLASTGVAQGVATVKNMFDLSLPLDLVDCDESSDSCGAEDLLMKAAA  
CDPTSLAANPFAPVGVWSSPEAAYYGLSLAQANEMGIEAGEGISLYAECLRGLVFSFDG  
LLKLVFQKSTGVVGVVHICGDDACELIHYGMELVKTRRTITDIANSMYSAVTYHEMYRIA  
ALSCMDPKAARKSRAAAGRALAERRRNNKQ  
>comp13050\_c2\_seq2; 337 1 1116 LEN=1132; translated  
QTNNQHFSGIVAIEFAKIFSNLGCDDVTLLIRDKSPKNALMKIGLDKDIAATLVADLVR  
GIRIERDCEVGTIEVPTAAASAANKKKDYIVPLKIGLTKGGIDDRPQSSLQEIIRCDAYI  
AAVGR IANTENLNLEAAGVEVDEYGGITVDSHLKAAGVEDGNVYGAGDVLGRPFPLASTG  
AQGVATVKNMFDLSLPLDLVDCDESSDSCGAEDLLMKAAACDPTSLAANPFAPVGVW  
SPEAAYYGLSLAQANEMGIEAGEGISLYAECLRGLVFSFDGLLKLVFQKSTGVVGVVHIC  
GDDACELIHYGMELVKTRRTITDIANSMYSAVTYHEMYRIAALSCMDPKAARKSRAAAGR  
ALAERRRNNKQ  
>comp13051\_c0\_seq1; 645 307 2361 LEN=2478; translated  
MVLVATFSSCLLRESAILVSGWSIASRNANGAVWHIQSCKFSRNSRLRLSASSAFKTDQS  
TYGTNARTSFSCYKNWNSNRDRSISHTQRRHRSKKNRNFSTDLKATEEEDQAPTIEDSNNI  
QNENSTMPSSSLNSNEASTHPDADSNTSGKSEDENARKEPLLNVL SIDPRLVDIFERKDE  
FLNGEEDSKGDILNGNIFGNRNF IEMFRGSANYIATHRNALAVFHIPGDLMDENPAGFR  
DLMNDISL TWLLGMRIVIVAGCRYQINKRLKEQSQSSEGRRREHMGMVVTDEESLRIVKE  
EAGYVRFEVERQKLARALKSGHSNKNNGGNENEVGEGNVVSGNFFSAQPFGLVDGVDYK  
YSGFVRMETNKI HQVHKNRDIVLLTTLGFSPTGEVFNVNSEYLAAYAAGTLGASKVIYF  
LERDAGLRHKIHGSI IQHLRVNDGRNLLDLNGIRTEKKGFVYLD DCPYDYGAERSFFIKM  
GWMNALEAGVKRVHLVSPYHGALLQELYTRDGSMTISNDLYDGIQPATVNDANAIFEV  
ITPLVKKGTLVERTKAELERDIEQYHVYTRD DLIACGQLKMFENGFAEFGLVVNPLYR  
SKGRGDAMLGYLERICVKNGATNMFVLSQTMEWFVERGFDEVGVECLPPSRQATYNHDR  
RSKIYMKKVN SDRDL DASELFWDR  
>comp13052\_c0\_seq1; 102 800 1020 LEN=1020; minus strand; translated  
MSFLNLDGGSGSAHIVERLNLERTRAAKSIGFDAVDVDEAVLHAAVILFRERQQESAQP  
PTSSKQHQPQHRX  
>comp13053\_c0\_seq1; 469 1 991 LEN=1616; translated  
XSNNNNNNISHPPVLLLEDGTISFECPESEFIEILGPEADAESYAVVSEQLTRDRKEFLATFR

ETTFDEWDQTYTFVKKGLSPFKKKYYPKYLTNGAHIYESAMGIGLNLYMTLEILSEADPP  
VSGITVYGN DYVAASAARANDLVLAEGVLPENRKGVL CAGNSLDLGHVPTGAFDLVYTG  
YVSP LMDPLGMSDGT VGS IADDDASYWGWYDEICESFRRKADASTRTRNRDWMGAYLWEK  
LVV PKQREWF GKWVGEMARIAKPGVPVIVESVSQNYCDYDNDWGGVAKSFWKEAATENTY  
GWNVDPDSIEMDDTVNEERYHVFMIKKKQ

>comp13053\_c0\_seq3; 279 1 945 LEN=945; translated  
XSNNNNNNISHPPV LLEDGTISFECPESEFEILGPEADAESYAVVSEQLTRDRKEFLATFR  
ETTFDEWDQTYTFVKKGLSPFKKKYYPKYLTNGAHIYESAMGIGLNLYMTLEILSEADPP  
VSGITVYGN DYVAASAARANDLVLAEGVLPENRKGVL CAGNSLDLGHVPTGAFDLVYTG  
YVSP LMDPLGMSDGT VGS IADDDASYWGWYDEICESFRRKADASTRTRNRDWMGAYLWEK  
LVV PKQREWF GKWVGEMARIAKPGVPVIVESVSQNYCDYDVRETSCAPSCGALCRTCRTV VHC  
VALRCVFFALFPLSHG

>comp13054\_c0\_seq1; 351 386 1786 LEN=1994; translated  
MSSVSFGI IAGSSATLTPPDDATQSVVIKKA EYMNSLEDRGAKQSLAIGKYPNPFKDPSS  
DITVHQIYEPSMLEAYVIENGR TNERLGYDREM KLLRDEGNKQILRTHMEEMPSGCELWT  
DPTVSVAAANGAWGAKDNLIYQGLQVYRAELEEYDRLLANWKWNYQIGDDNVDGTKHDLRN  
YLPASSGNNEDETHNRAVCD SLEVHPDGLRGVFKSEASLSKLPWTSRNNGANESVHKQH  
GGFIEPFLPPLRHPEFCFGPSTSNMFGINTSELLSLGYLIHDFATLCKNHISKYSRTV FV  
DFGAALDFHNTE DENPTPSIELLELYQRF GIVFDHIYAYELET KDPALVYEAIPDNFKAA  
YHWYNGVESDWKSYRNPLRMIADTFGPEDFIVVKLDIDTSSIEIPLAKQLLED PDLAGL  
VDVLYFEHHVTMKE LAFPWKYTMGSMQDSLEFFTSLREHGIAAHYW

>comp13055\_c0\_seq1; 292 115 1254 LEN=1947; translated  
MDPFGAKTILLATATSSFLSLRAYKRKSLTPEGSVA AFVAFFLVGSGLRGMNLLTFYFI  
SMKATKYKVR LFCVSRFGTIGRGVETKPIDTVDR LACLAFAVHSHCDALNPSQPWRCL  
ECRFGTTPPHRTASVRKKKTGRALRXKEIKKTIDGTIASHEGSTTRGTSQVLACSLLATI  
LSVVHAFYCGPERAVVFPQDGGDGALLSSRLTCGILAHHATCLADTLASEMGILSRSP  
RLITQPWKTVP SGTNGGVTP TGF FWSAAGGAI IGLSTLLLDGISGIGGAGPFYAARMVLY  
SLACGLVGSVLD SLLGATVQQSYVDPDTKMVYQEE DRRPKSTKLVVGH SVNLLTNELVNL  
VSVAITTLLGATVIGPLFF

>comp13055\_c0\_seq2; 324 115 1020 LEN=1713; translated  
MDPFGAKTILLATATSSFLSLRAYKRKSLTPEGSVA AFVAFFLVGSGLRGMNLLTFYFI  
SMKATKYKKEIKKTIDGTIASHEGSTTRGTSQVLACSLLATILSVVHAFYCGPERAVVFP  
QDGGDGALLSSRLTCGILAHHATCLADTLASEMGILSRSPRLITQPWKTVP SGTNGGV  
TPTGF FWSAAGGAI IGLSTLLLDGISGIGGAGPFYAARMVLYSLACGLVGSVLD SLLGAT  
VQQSYVDPDTKMVYQEE DRRPKSTKLVVGH SVNLLTNELVNLVSVAITTLLGATVIGPLF  
F

>comp13056\_c0\_seq1; 320 52 1788 LEN=2218; translated  
MWDDL FRAAAGEDDIAEPMVPT RLEAQRNPRKHEASTSAERNPKRKKRARRHRNRGKSSQ  
SALERVLESRTDPIGEQIWSR LPAWLVP GSSLRGSAYCGQWDQ EADC SLDAKCKKCKETL  
LHHSVELSSSTEQTSAGEVLTAFSLVRDIRCCCSILNESYGCNDQNKCIKSEL DVFAIT  
ALKKSDHLDIVVSSVLD PGEADILIGKIDNIKNAAIKLSKMKHWNVGSQIKNSKFKLRG  
IFNEVIKLI IHCDAA YFRLYYLQNSGNLPIEKEEVYI PHPPTYFGSKNVAWNVFDSTTGL  
ADTMRKKYQGISDERWDILMQELGISRSSQELDPLSFMHKNR LSESIFIFHNSSWIHSKE  
TKLHYTESMKQRSKFLDRESAFYSIHETPAPDIVKEWRDSCRDL LCNLYAYATISPRMIY  
DTKGVL RKEAFACKSLIEMGAGTGYIANL FVKADFSVKA FDVAPTNGDNVQNRNSDVSNE  
YHGSSPPFCRVEYADSKSLRLDTRDTALLSYPPPLSTMAEDSLKSFVKQGGRII IHVGE  
FSGLTGSSKFESFLGRRFDLKYRTPCLNWGSDAAELTIW

>comp13056\_c0\_seq2; 320 52 1788 LEN=2270; translated  
MWDDL FRAAAGEDDIAEPMVPT RLEAQRNPRKHEASTSAERNPKRKKRARRHRNRGKSSQ  
SALERVLESRTDPIGEQIWSR LPAWLVP GSSLRGSAYCGQWDQ EADC SLDAKCKKCKETL  
LHHSVELSSSTEQTSAGEVLTAFSLVRDIRCCCSILNESYGCNDQNKCIKSEL DVFAIT  
ALKKSDHLDIVVSSVLD PGEADILIGKIDNIKNAAIKLSKMKHWNVGSQIKNSKFKLRG  
IFNEVIKLI IHCDAA YFRLYYLQNSGNLPIEKEEVYI PHPPTYFGSKNVAWNVFDSTTGL  
ADTMRKKYQGISDERWDILMQELGISRSSQELDPLSFMHKNR LSESIFIFHNSSWIHSKE  
TKLHYTESMKQRSKFLDRESAFYSIHETPAPDIVKEWRDSCRDL LCNLYAYATISPRMIY  
DTKGVL RKEAFACKSLIEMGAGTGYIANL FVKADFSVKA FDVAPTNGDNVQNRNSDVSNE  
YHGSSPPFCRVEYADSKSLRLDTRDTALLSYPPPLSTMAEDSLKSFVKQGGRII IHVGE  
FSGLTGSSKFESFLGRRFDLKYRTPCLNWGSDAAELTIW

>comp13057\_c0\_seq1; 774 99 1832 LEN=2001; translated  
MTSFP SKTPFNNDVGRNQRLAEAVLAPQAVVEDATSNLFRDDPCGIHLAPNPNPSDNDLSH

EEASVDLANHHEALIGDEFNRPNKNI TKQPTLATLGEDPFTNDGEEIEHHRIVATEIVKDP  
LQFEPDNILQNAIVLIDPRIPDCIHLIEASKRRGLMVMVAVLPKPNDDGTKHVSYYPTAEA  
LLEAGIRQVYEPMPGKTKFDIVECASNLKTIESQQNLRFLGVLPCEAAVDFSDILGALLG  
LAVVNDLGLASARRDKGLMKVAVANAGLRVAKYARLTQGDGRDVVAAVEGLELEYPVVVK  
TPRGMGTQDVFCNTEEEA VAAASKIVRNVGPDGRKTQYALLEEFLGGEEFAVNLVASPT  
TPRGVQVTDIWMYHKVNTDGTMVNTYQEMMDSNDKAYASLVKYAEGVCRAVGIKYGMAHC  
ELKVKFDERKKAWVDPVMI EVAGRLAGGRKAIMAEATIPGWHPFDAMVDAHCGFPVRMPP  
SFRPAKKAIQAYIASDKSGVLTAMEGDDFERLPTHHAHSMRLKVGDRIVRARELMSFAAY  
VWFIGDADDVKRDALRARVEFQVEVEDEPIPPANKKQ  
>comp13057\_c0\_seq2; 468 1 1332 LEN=1501; translated  
PKTSSRIPDCIHLIEASKRRGLMVMVAVLPKPNDDGTKHVSYYPTAEALLEAGIRQVYEPMP  
GKTKFDIVECASNLKTIESQQNLRFLGVLPCEAAVDFSDILGALLGLAVVNDLGLASARR  
DKGLMKVAVANAGLRVAKYARLTQGDGRDVVAAVEGLELEYPVVVKTPRGMGTQDVFCN  
TEEEA VAAASKIVRNVGPDGRKTQYALLEEFLGGEEFAVNLVASPTTPRGVQVTDIWMYH  
KVNTDGTMVNTYQEMMDSNDKAYASLVKYAEGVCRAVGIKYGMAHCELKVKFDERKKAWV  
DPVMI EVAGRLAGGRKAIMAEATIPGWHPFDAMVDAHCGFPVRMPPSFRPAKKAIQAYIA  
SDKSGVLTAMEGDDFERLPTHHAHSMRLKVGDRIVRARELMSFAAYVWFIGDADDVKRDA  
LRARVEFQVEVEDEPIPPANKKQ  
>comp13058\_c0\_seq1; 253 202 729 LEN=1471; translated  
MPPKKRKRTRSSSPNRVLPPELDIDESRRKEILLCFKTALESYNNENDETSNEFLPNS  
FLKKPLKLLKLSGLKLDGKISYFDDENLEALDADMFLRFAADKSIQMEKSNRAFQLIDNA  
GKGVVVLEDLQRACSVLGEDMTENELIEMIDFADSSGEGLLYPKMHMFRIANKVNL  
>comp13059\_c0\_seq1; 247 672 1235 LEN=1656; minus strand; translated  
MIVTVAIPMAVCAFEPSNCVIRDGGYRSRGRWTVCVRLLEFSKIGIGIVALVLDVMDIVAD  
DVGAAVLPMAVPAFSPVPHDIFIPNGREQHFAQLGIGRGTATARRVSMRFGDGFDFVGE  
VNAVVMYFFVRLGLDDAVVFALVIPRMLLWRLDLDVVLVITVVYDAVVKDRRVRDRYGC  
GMLAHP  
>comp13060\_c1\_seq1; 243 44 529 LEN=628; translated  
MPGMIAANHYDASRNAIAVLLGGTRRYVVSRAQCRNLGLFPPGHPSARHSRVDWTTAPAD  
YEDLVRTVDERSDAEPLSPPSSSDNTVPWKEYNESLSLLANQARSTEVVLEAGDVLYLP  
SYWFHYIVSLDTNMQCNTRSKGKDGREDQTMDCGFRPKKR  
>comp13060\_c1\_seq2; 297 1 1113 LEN=1212; translated  
AAETNRGTTVHRAERA VTNQILFRHGPKKKAPKTNTYAKMPPNRKREKTGPVVRGKKLPP  
PTKLIQMTYENWYELAMEKERRLVSNQTS LAEGGDGLPRHGYETKPDRA SDSYFFFRLV  
GCGEKEGCEKNSTEYLFDEL PFFQPRKSRGPS DPRSGKRSKPTKPRRGS PRGQTHPASPE  
STEPAPWDHRENLYLVELDKQRGIHCRFGMPGMIAANHYDASRNAIAVLLGGTRRYVVSRA  
AQCRNLGLFPPGHPSARHSRVDWTTAPADYEDLVRTVDERSDAEPLSPPSSSDNTVPWK  
EYNESLSLLANQARSTEVVLEAGDVLYLPSYWFHYIVSLDTNMQCNTRSKGKDGREDQTM  
TDCGFRPKKR  
>comp13061\_c0\_seq1; 704 183 1475 LEN=1748; translated  
MSLSCEISGEPLPVNGDGSNEVVVTPSGHICIKRLLLT KLAENGGVDPFETAKNLP LSED  
QLVTLQATNSGSVHSSSVVPPRPQATSLPGMLGLIQKEYDALVLELFDTRKALEETRREL  
SQALYQNDAAIRVVARVAQERDAAKQOLEQWNASANANS GATAVASAPSAQEEEEATVAAP  
PTGDQPSAKRRRILEPTAEVLENDLPEDDLQAMTEVWTQLNKVRKPTLKAAAAEAPSPQN  
LASCAFLDKKAWHKSTNRGISCIASDNHLTATAGKDKHVVVYNEADQVVQHTFNFVGSVAT  
CVGIGKTVVAVAGNAKGISVFSMDGGGGKADIDIGAEVVDVRVHPTDQHICAATADGRLI  
VAYWMAEEKRLQQIATFRTKDSEGYTAACLHPDGLIYVAGTKMGKLVHVDWDFKNKVL AATL  
QVSTVGGHGCW  
>comp13061\_c0\_seq2; 944 183 1847 LEN=2320; translated  
MSLSCEISGEPLPVNGDGSNEVVVTPSGHICIKRLLLT KLAENGGVDPFETAKNLP LSED  
QLVTLQATNSGSVHSSSVVPPRPQATSLPGMLGLIQKEYDALVLELFDTRKALEETRREL  
SQALYQNDAAIRVVARVAQERDAAKQOLEQWNASANANS GATAVASAPSAQEEEEATVAAP  
PTGDQPSAKRRRILEPTAEVLENDLPEDDLQAMTEVWTQLNKVRKPTLKAAAAEAPSPQN  
LASCAFLDKKAWHKSTNRGISCIASDNHLTATAGKDKHVVVYNEADQVVQHTFNFVGSVAT  
CVGIGKTVVAVAGNAKGISVFSMDGGGGKADIDIGAEVVDVRVHPTDQHICAATADGRLI  
VAYWMAEEKRLQQIATFRTKDSEGYTAACLHPDGLIYVAGTKMGKLVHVDWDFKNKVL AATL  
QDGEISDGITTI AFSNNGYHIAAGHDSSTVRFWDLRQKQVSASIKCDEGELSVKSVESVA  
FDKAGKYAAMGGKGVKITTVKEWGVGTGCFETKNPVSGI VWSNSSLLEVSFGENERAV  
QLYGVASSDAKMEE  
>comp13062\_c0\_seq1; 82 1 833 LEN=1639; translated



XHVSGSITCDTMNDCCCESFQLSKCLNWWYKGIANCNVNFHNETFASCHSFGNPDDLFFCE  
VSDHCPRTYPDKLAWIQYEDLRWWGWICLLVITPAALILGIVGTAFYTWGWDCIQRKEK  
EKEITNNELFCSNLLNFGNKFVSGMLMVINISISILILAYSQEYKTYGVIQGLQALG  
PLFFLVAKLFPFLFKNDKWYSEKNTTTTITAINVYQDLTSGYVVIATAICQLALLFLYL  
YALIRSGPPDFSEKSTYGFYGLGSFIQIAMALKRRTTASTDPTFTQMFVEYNFWRVHKMR  
NDEKKVEFRLEDDDMADRGRVRSVIIRSYRTIRDMSIRYIPRKEKESDGKENKKGRDRSR  
PSIGSERDRSSGIIKAPDGVKEFVNNAHAVLRDWQTLGSFRIKLRIFLSFLINYCGLTVV  
LFLLPQLAHSESAMEFILNSVAAGFIIEMDDYGEKGIIVLRKESPGEEHRPFLEHNATD  
RTQKDSMSNMKYAGGGSEREESEVAENGRSEDDDEKNEGVLDYDVPSTGRQPCSDNIN  
ALGEVADENDLETGGGGYESQHRVPEGSEVLNSSGGTVVEEIKAEIQMFHQGVEDAMKDVR  
EICE

>comp13066\_c0\_seq2; 688 1 1856 LEN=1882; translated  
XHVSGSITCDTMNDCCCESFQLSKCLNWWYKGIANCNVNFHNETFASCHSFGNPDDLFFCE  
VSDHCPRTYPDKLAWIQYEDLRWWGWICLLVITPAALILGIVGTAFYTWGWDCIQRKEK  
EKEITNNELFCSNLLNFGNKFVSGMLMVINISISILILAYSQEYKTYGVIQGLQALG  
PLFFLVAKLFPFLFKNDKWYSEKNTTTTITAINVYQDLTSGYVVIATAICQLALLFLYL  
YALIRSGPPDFSEKSTYGFYGLGSFIQIAMALKRRTTASTDPTFTQVFGYNFWRISKME  
NDQKKVKFKLEDDSKALPRKSAIVRSARRIRDKMNGYIQRNEKESDDEEDKIRDCSHSS  
SGCPRSRSSGIALEEDSLHDNNEKERDRRESLKPQAIADSARAFAFDWQTLGNSCIKLRI  
FLSILINYCGLSTVFLLPQLAHSESAMEFILNSVAAGFIIEMDDYGEKGIIVLRKES  
GEEHRPFLEHNATDRTQKDSMSNMKYAGGGSEREESEVAENGRSEDDDEKNEGVLDYD  
VPSTGRQPCSDNINALGEVADENDLETGGGGYESQHRVPEGSEVLNSSGGTVVEEIKAEI  
EQMFHQGVEDAMKDVREICE

>comp13067\_c0\_seq1; 641 166 1902 LEN=2334; translated  
MDELLVSWLGSDDVYENVLKLIEKYDEESKVTGDQSPDSIPNKFVPSKYPKLESSTTA  
RQPIPPFYPLKTSSGITLQRRRRLPRQSETWDPLLDSESRNGSLSKSNATKNSEGKTPNS  
VTGHAAGHEEENSSVDPASNICVRDQIYKLLNELQILPQILGNDSSNADNAVSIIGLDV  
FVRITKEICHFPSPFNGLYQRIQMLWNIDHPHENITTVTLSTIEWYWKKEPEFDASER  
FFRLVKQPDEDCILRDDFLPYIKALLNDHPGLEFLSNHAEFQEKYAVTVITRIFYSVNC  
HSGRITSRQVRRSDDLDSFSQVDEEEDINKVTRYFSYEHFYVLYCRFWELDHDRDYRITR  
QDLLKYGDCLSHMIVDRIFDSAPRPFQDKVDREHLSYEEFIYFMLSSEEDKSNEVSVRY  
WFNCVDVDGDGKLNMEMRSFYAVQLHRMQCMGHEIVPFEDMLCQMMMDIKPKNSDHLIV  
EDFLQAECQVSGALFDALFNLNKYLLFEQRDPFVERQKREDEFETDWRDFACIDYNRLA  
MEEEAREEEAMEIDWVTVDDEEEEPQFNCAITSEAPF

>comp13067\_c0\_seq2; 587 166 2029 LEN=2461; translated  
MDELLVSWLGSDDVYENVLKLIEKYDEESKVTGDQSPDSIPNKFVPSKYPKLESSTTA  
RQPIPPFYPLKTSSGITLQRRRRLPRQSETWDPLLDSESRNGSLSKSNATKNSEGKTPNS  
VTGHAAGHEEENSSVDPASNICVRDQIYKLLNELQILPQILGNDSSNADNAVSIIGLDV  
FVRITKEICHFPSPFNGLYQRIQMLWNIDHPHENITTVTLSTIEWYWKKEPEFDASER  
FFRLVKQPDEDCILRDDFLPYIKALLNDHPGLEFLSNHAEFQEKYAVTVITRIFYSVNC  
HSGRITSRQVRRSDDLDSFSQVDEEEDINKVTRYFSYEHFYVLYCRFWELDHDRDYRITR  
QDLLKYGDCLSHMIVDRIFDSAPRPFQDKVDREHLSYEEFIYFMLSGKNKEXDDVIG  
ITPRISLSCGFIEIRXAHFPILYNFVVDQHLEEDKSNEVSVRYWFNCVDVDGDGKLNME  
MRSFYAVQLHRMQCMGHEIVPFEDMLCQMMMDIKPKNSDHLIVEDFLQAECQVSGALFD  
ALFNLNKYLLFEQRDPFVERQKREDEFETDWRDFACIDYNRLAMEEEAREEEAMEIDWVT  
VDDDEEEEPQFNCAITSEAPF

>comp13068\_c0\_seq1; 507 1 1226 LEN=1592; translated  
XRNKHIRVHVNTDGSTLDAGDEEIEVEDRYYSNGASSVASTTVYDEEQLRERERERLDKE  
YATSLRPMGLAPTHGKNSNTVEEHHHHHHGHETSFDSEGRASQHLDDYHDEDLGG  
PNASPNASPRSTTGSNHKKTCLPGIRKKRKKKNRYDDDGDLSTYSVPLQDANGSRGIDL  
PRGVDLTTSDDRQTGRPSREPWRNDARLGEETEASSDMTASERLKFVRYMQSGMTLEQAS  
SHVLSERKAAAEQLQQQQQEEQQRQLSRQRSSPRLFRKSRSPRTGASGTGSGPLDCLS  
GDASLSPATAQQTLESEVVMEDGETTIHIPDRFYSSPSPGDGHGGVVRTNNNIYRRATRT  
GRSDRSESDGGTPQAMVLTEASSCASSFDNDFAAIGEAAPRSKEAFA

>comp13068\_c0\_seq2; 508 1 1214 LEN=1580; translated  
XRNKHIRVHVNTDGSTLDAGDEEIEVEDRYYSNGASSVASTTVYDEEQLRERERERLDKE  
YATSLRPMGLAPTHGKNSNTVEEHHHHHHGHETSFDSEGRASQHLDDYHDEDLGG  
PNASLGRSTTGGNHKKTCLPGIRKKRKKKNRYDDDGDLSTYSVPLQDANGSRGIDLPRGV  
DLTTSDDRQTGRPSREPWRNDARLGEETEASSDMTASERLKFVRYMQSGMTLEQASSHV  
LSERKAAAEQLQQQQQEEQQRQLSRQRSSPRLFRKSRSPRTGASGTGSGPLDCLSGDAS

LSPTAQQTLESEVVMEDGETTIHIPDPRFYSSFSSPGDGHGGVRTNNNIYRRATRTGRSD  
RSESDGGTPQAMVLTEASSCASSFDDNDFARAIGEAPRSKEAFA  
>comp13068\_c0\_seq3; 310 160 852 LEN=1380; translated  
MWDCDRKQQQEQQQQLHAKRRRLSNEDDFSLPLDHLSSPLPSKSATTRSTSRVFLPPS  
PSPKSTTATESQFPSRNTENHANANTVYHSHDEEDGVCPPPLPLQLVHTDEQDEEDGVL  
PPPTPSDLATAHTIPRFIDSPLTSEHIDRALGLLDRNTSYKRNSDELLOVVFHDLYRWSR  
SSNPAQKQFFQHEFVWRWSGVSRVRRFLKAHNMADDFLSQLLQSNLPLQE  
>comp13068\_c0\_seq4; 312 160 681 LEN=1047; translated  
MWDCDRKQQQEQQQEQQRQQQQQEEQQRQLSRQRSSPRLFRKSRKPRGTGASGTGSGP  
LDCLSGDASLSPTAQQTLESEVVMEDGETTIHIPDPRFYSSFSSPGDGHGGVRTNNNIYR  
RATRTGRSDRSESDGGTPQAMVLTEASSCASSFDDNDFARAIGEAPRSKEAFA  
>comp13069\_c0\_seq1; 204 86 409 LEN=1559; translated  
MAKSGYAKGANS GHVLTTERPKVKP SHRKG SASKRTLLCRELAREVVGLAPYERRILDMI  
KTGSAADKRIYKFAKRRLGSHKRALAKREDIKELNSKMRARAAGAN  
>comp13069\_c0\_seq2; 204 86 409 LEN=1576; translated  
MAKSGYAKGANS GHVLTTERPKVKP SHRKG SASKRTLLCRELAREVVGLAPYERRILDMI  
KTGSAADKRIYKFAKRRLGSHKRALAKREDIKELNSKMRARAAGAN  
>comp13070\_c0\_seq1; 563 207 1883 LEN=2254; translated  
MPPRAATEGGAGELPSKPIKRVGSMGDISVESKDEKVSNDYTTRKSTLIGMINWVHVLST  
DAPAILMFLIVLVGQIIYQVVNDLFPEDGATLSIETITVVANATKQLFVRLYKAI AES  
EGFDIFSPAVQTTALILVVAAMVRRDSPIYLLSFETFKAPDDWKCNDQDEIMEMMKRQEC  
FSQESLNFRLRILDRSGTGPATAWPPGITKCLKPDDPSKYQKTDRSIEASRQEAQTVI  
FDIVEKALKKANVKPREIDVLIINCSLFSPTPSLCAMVVSEFGMRSDVETYNLSGMGCSA  
SLISVDLAKKLLGRKGSRKALVVSTEVITPNLYHGNERGFLIQNTLFRCGGAALVLSNNW  
MDGRRAWYKLLHTVRVQGSGEAAAYQCVFETEDENGERGVRLSKDIVKVAGKTMEKNFTML  
GPSVLPLSEQAKVWWSIILRYVLKSVGKMVGPDAAAKLPKVKPFVPDFKRGIDHFCIHAG  
GRAVIDGIEKNLKEEYHTEPSRMALYNYGNTSSSSIWYELEYIHYHQNNPLKKGDRIM  
QVAFGSGFKCTSGVWLKV  
>comp13071\_c0\_seq1; 488 367 1800 LEN=2458; translated  
MSSPSAGFLFFANHWNDPIVESLDEGYRGLSLDLNCNGDLTFCHGGSEVGCIGRRDPL  
ETFTQIN EWVTENPNNIWMIWLQINESAGDPI SLNDVERLVQDVPMGNAGREFVDRLYRP  
ENDDGWPTMSNLIQDEKQILFFYMGGPDGTEESTIGINYFYEYGMSTDWSYTSVPLRET  
LIDGCEIQRDSETTRDFFMINTFVTKELFGYNVRPSRTAAEEINKGEFLLPLLEVCEEIQ  
QSKVNIISVDFWKSGDLIAFINDQNSKLAVTLSSSNSTPTSSSTYFQQSEYPTPLQNFTH  
QPVFMSVPTSDDGDSIPSIKSPWSYSTRMPNHNELSRTEVP SDYNDRVDIPSSLPSFEPL  
PFEKIEYEIGDQRSSKPKKLNHLGEDTLGQSSEERSHTDPDQSTNSSPASSLDSNLYSL  
SEQQNEEKTFSPIAPSTFLLGDDHLEGLPSSDAVACIFSFTQVAVAISIFIAMTV  
>comp13071\_c0\_seq2; 436 281 1480 LEN=2138; translated  
MIWLQINESAGDPI SLNDVERLVQDVPMGNAGREFVDRLYRPENDDGWPTMSNLIQDEKQ  
ILFFYMGGPDGTEESTIGINYFYEYGMSTDWSYTSVPLRET LIDGCEIQRDSETTRDFF  
MINTFVTKELFGYNVRPSRTAAEEINKGEFLLPLLEVCEEIQQSKVNIISVDFWKSGDLI  
AFINDQNSKLAVTLSSSNSTPTSSSTYFQQSEYPTPLQNFTHQPVFMSVPTSDDGDSIPSI  
KSPWSYSTRMPNHNELSRTEVP SDYNDRVDIPSSLPSFEPLPFEKIEYEIGDQRSSKPK  
KKNLHLGEDTLGQSSEERSHTDPDQSTNSSPASSLDSNLYSLSEQQNEEKTFSPIAPST  
FLLGDDHLEGLPSSDAVACIFSFTQVAVAISIFIAMTV  
>comp13073\_c0\_seq1; 311 38 457 LEN=1555; translated  
MAGKASAVANALKKGISKKGTRIHTSVHFYKPKTLKATRKPKYERKSTPKKTGLDTFSVI  
KYPLTTESSMKLIEDSNTLVFIVDIKANKRQIKA AVRELYNIECEKVNTLITPRGLKKS  
YVRLSKDYDALDVANRVGVI  
>comp13074\_c0\_seq1; 743 266 2653 LEN=2685; translated  
MDDPKKSEELKDITQILEDVSSLLTFESPMLHSAFNLQDSMAALEIMDKKMDCEVPYQ  
KEEILVLGDSIGVDGNEKREDQTPEQRLLIFPRPAPTGLDDEVDPLPWNELTLDDAVYIAM  
EHLIRLESFLNEGSSIVESTYTCLYAHSSVMADMKDRLEPLSLTEQMAMMIAATKGTLP  
QHIVYSSTLMI IQLTDLRCGII LNADIYEEEDFTGSTYSIQVFQDRDDES VVSVGRRVIE  
MIQKQEESENQDGTSSLNALRAANLILGFELDMIGVITSMAGLSGLDSIKEELKKSQTI  
ARAAVAKASQISTAMTELKVKTESINVLIKRTFDSNVNCP LVGNAPLRKIVFREAEESL  
SLLQKIIRELDQVVC SILLKANTLGRIRHMMRNL SAATTNILTRSLVVLNLYFDEKIFGQ  
YLLPEMIMNHLKQLSGVPDSIFTSTKEVPAFLNRLCKPVYDTLKVLT LNKNRQORSYIDVM  
LGDWASLREEAYIVDVAYHQESNASLPELQPYFSLYVLCVTIDLMDHYVDLGVELQLHCN  
EEELGIVFWYRDFLTSSLLSQIT TMRQTKMLAKKMEVAEQVKRQQQQTQKQANNKTQKSG



KKKKGKQKSSNSGGGNAGSIAMPITNPEDIEDDFDLLLLTLKRNMCRCGMVRRFFAAVRQAG  
LVPEKKYEFTTTSQRIFEKRFELFSCIQQPPPLSYEDYLSGSDFSKVSQGDWASTADSR  
LSRSIIERLLAQIPLIDPDYSAVKEEELRQLAKVCVGNISYILQKMIQAVNGKGESMPKIK  
IDNKTNRQFCMIKIE

>comp13075\_c0\_seq1; 387 344 1473 LEN=1473; translated  
MEGIRLRSDSTGSTKNAFYQGTIVSDSRHDSNDRQSLSSDDLGGGPRRRKKGKRNATG  
KHPPLPRRSLAYSSVGSNDEPNDFLNEMMTPDNSNSNTEDDHPIFEFSAGNDDLRYIGDR  
DRRSVDSQRDSLMSNSLFGTNNLLIDDVSRDSGGDSYGGPITGMSMLGDSNANPDATLE  
FVGTGNGQSRRI SMLSTSSGVYFHQSAPPGPLLQAF AIGGNSQSAEAPLLNNMPLNFY  
PTQQASNILQYPPQYGSVDVAPNQKTPYSTSSASKPPTIKEDDESSIKSRNTYFWNEVT  
GRFDVSGWLSKDAVYDDEGIPYFESTVNWTIAGTIRWLFYNPIYPEFTSLQQFCWAVILG  
VFMGIFTAGWKLLIDAX

>comp13076\_c0\_seq1; 332 1 1050 LEN=1134; translated  
XTFPSSMISQCHLNSTRMDDRLEEIFNFPQVQMIASIQLLFFSTTAALGALSILVKPLGG  
NAFLFNECMIKSTTPTTVFSSDFASPAEWDRFYQRIEKNDKENTVTKIATEWHSSVPLD  
DIASITPSNGTCLLIGCGNSYLPDRILQRDAPPRSLALLDTSQAACLDQLRDRFQITISAV  
DGSDSIDGNTATCGTKVEYICGDATQLSKYFVTDDENDERHNRTSERMTDENQCAQNNVS  
KESVLFDIIDKGLTDAILCGEGWDGPLEKLLYESAKVLSLGTGRYLLISYSLPSSTKEF  
LVTAGKTVGLEWDFDLPSGTKSSEESNRKPNERSIAMAQRNHKVVV

>comp13077\_c0\_seq1; 558 78 1579 LEN=1579; translated  
MASDASVSMQKWGIPEDETVSAEVTLLERLVWVYRDQWVWPALLYSGYRELHAHLFNELD  
TVLKAQFAVAIMREMNEPQKIRVARLLGREILEVVEVDDQYAEFYWHLPKVLPMACQRS  
RYGSDIKLYLDFHSALDQVEELIRDISERSFNLFPGEEKTWVERAFETLTASERLSHTT  
TQTSSRRTRDIFESNAKTMARIKKEANQQLLRKKKADDEEDANFLFSALDGMMENLNKT  
YDCVSGDTAQKIIETSVKAKPKSASSVNAYSQTIKQKETRDALRKVIAKQREIRHSGNS  
VSSSNHVQYDDRNTSHDIKRSSSSVEVLPGLEADDIIPGIGERGILSFLNSKDEDETKYV  
PDRPRARSHHEWYGSRRGPETMEFVTSKTRKAVNLDRAQGHFTVPRQOSMDAREDDQFDE  
RQAIMAAARAATVELDISFWDHLFAMQQISSLHLQQFVVKTLTITHSVTESMSGSGTKYR  
NKTTAFITMSSLEHYFPYCX

>comp13078\_c0\_seq1; 1360 233 3505 LEN=3533; translated  
MTMARISGPKASSVVVLFVVISVALSITRNSAFVSPPSIVNFALPNQQLQOQTYVEGYDRS  
IGNGRSSPLYASTASGSLDVIDSWKLLPDGRIQGVISGSGDKVLTSPKRRKRLKEAST  
VRTVSGSRYKLGTPATADGGDKMSPAQMGTPRATVAGVNLPGGFNGRATQPLRSTPTASQ  
DRVLNDYVANKGRATMPVGSSTGSDSNEKKKIKFLVFPVGGASALAVGAAIGSGVVSD  
KGVNLDKLPDASKVLESTKSLGLPDIKSLKAPAI PSPGISLPKFEGVPSLPTPKLPEIGM  
KLPDVKLPDVKFPEVKLPDGPKLPNLP SVNIN VADGVKNL GDAAGGAIGGALESTGIKLP  
ESPLSNKPKAPPSVGMGPYKVPMPYLDEKIVQARKEAAAEEAERIAKVKAEEEARQKAA  
DELLAQAREREQAMKMRAEEEARIRQEAEEERIQKAEQEKALLDAEAKKEAAILRAEVEK  
SKAEIEKTKAEVEKARQDALEKEKAAEEAARLKEADAALLKEQVARDEF TLKLQAAEM  
AQLKQAKDFAAKLEEAQEA AAKERALAVESAAA EKLAEEAAVKEAAAIAQVRKMSIGANA  
ARKATYEQPSMSTYEEWQNRQKLAYQARIKEAASGMSKQEA VVLTSTTSPSSQDNLSTYKR  
WQQRVVAQVVSMSAEPVTA AFVTGAPAPLSNQLVSGSTKLSDFATTLN GALGYTIAGSS  
ALIAGLTYGYSYQKLQDELASVEETAPPATTRSTSPPVTS SVTVKPPPI SKKVSPQPTTT  
SPAPVQSKPESTTSVTMAIDAKPDDKIASITKEVSSRPATTSTSVTTEVASPPPVASSS  
PQVNNNGGSYLESMSSVSTDKPSLKT SYSPFNSKKA VSNNSLYDPPLSKSAEMEEINEE  
PCAPEFPETSQVGASYLESMSSGNDGLKESYSPFGTPKVAANDSLYGPVVKVKEAQSKIEV  
APVVDEANDFNEVDESPVNGGSYFDSLSTNGGSGESSKASYSPFGGTSWQTTSDSLYD  
VPVTVNADTTTSEASTADIPTAANS SRGSYLNGLSDDSN SPVVKKSYSPFGTKPKAVRD  
GGLYSPGNSY

>comp13078\_c0\_seq2; 1946 233 5146 LEN=5405; translated  
MTMARISGPKASSVVVLFVVISVALSITRNSAFVSPPSIVNFALPNQQLQOQTYVEGYDRS  
IGNGRSSPLYASTASGSLDVIDSWKLLPDGRIQGVISGSGDKVLTSPKRRKRLKEAST  
VRTVSGSRYKLGTPATADGGDKMSPAQMGTPRATVAGVNLPGGFNGRATQPLRSTPTASQ  
DRVLNDYVANKGRATMPVGSSTGSDSNEKKKIKFLVFPVGGASALAVGAAIGSGVVSD  
KGVNLDKLPDASKVLESTKSLGLPDIKSLKAPAI PSPGISLPKFEGVPSLPTPKLPEIGM  
KLPDVKLPDVKFPEVKLPDGPKLPNLP SVNIN VADGVKNL GDAAGGAIGGALESTGIKLP  
ESPLSNKPKAPPSVGMGPYKVPMPYLDEKIVQARKEAAAEEAERIAKVKAEEEARQKAA  
DELLAQAREREQAMKMRAEEEARIRQEAEEERIQKAEQEKALLDAEAKKEAAILRAEVEK  
SKAEIEKTKAEVEKARQDALEKEKAAEEAARLKEADAALLKEQVARDEF TLKLQAAEM  
AQLKQAKDFAAKLEEAQEA AAKERALAVESAAA EKLAEEAAVKEAAAIAQVRKMSIGANA

ARKATYEQPSMSTYEEWQNRQKLAYQARIKEAASGMSKQEAVVLSTTSPSSQDNLSTYKR  
WQQRVVAQVVSMSAEPVTAAFVTGAPAPLSNQLVSGSTKLSDFATTLNGALGYTIAGSS  
ALIAGLTYGYSYQKLQDELASVEETAPPATTRSTSPPVTSVTVKPPPI SKKVSPQPTTT  
SPAPVQSKPESTTSVTMAIDAKPDDDKIASITKEVSSRPATTSTSVTTEVASPPPVASS  
PQVNNNGGSYLESMSSVSTDKPSLKTSSYSPFSNSKKAVSNNSLYDPPLSKSAEMEE INEE  
PCAPEFPETSQVGASYLESMSSGNDGLKESYSPFGTPKVAANDSLYGPVVKEAQSKIEV  
APVVDEANDFNEVDESPVNGGSYFDSLSTNGGSGESSKASYSPFGGTSWQTTSDSLYD  
VPVTVNADTTTSEASTADIPTAANSRRGSYLNGLSDDSNPSVVKKSYSPFGTKPKAVRD  
GGLYSPGTIHETSKYDAPESKYDLPFESERDAIPVSNYLDRLLISITSKTSSIKKSFSPF  
GNGKPKAPDNDSLYRAPALDVSLPSEDERDTPVSNYLQRLIVPLSGSSNSKKSFSPFGL  
ERGKPKANTSKSASLYSPPNQESTPSHELPSSEERDATPVADYLDRLIVPVSPSASIK  
KSYSPFGSTREKSKSPLTSGCDLDETPASSNGLPSEGERDTTQVANSSEPPSEVSTSM  
ITDFIFDTPPHDHDALYEEPSTDVAYAAIDDTTTIVNNDTDQETSQEKDVSNYLQALSH  
IASPLKSSYSPFGSWKKERFLSSNSALYQPPELMSLDSIQTSRVAEDLKEDTESPNTPS  
KDAVNGNFLESHGGSVSPFVENSCESSRESLPSEATNSLYSSLRDVGDNTEVTSENNRIK  
KAYMEWCTFYNKESDLRFDIFSAHFKAKEKFKHENGAGLMLNEFSDLTEEEYKATTNTN  
ADQSIFESVIDGRIVSAYRQWCDWYQKDYSEERLQIFSSNFLILERYHGGEGDPSPLVFN  
EYSDLTEEEYNELNDTK

>comp13078\_c0\_seq3; 542 1 1302 LEN=1561; translated  
GGKPKASRNDSLYGPVVELAPSHHELPSEERDATPVADYLDRLIVPVSPSASIKKSYS  
PFGSTREKSKSPLTSGCDLDETPASSNGLPSEGERDTTQVANSSEPPSEVSTSMITDF  
IFDTPPHDHDALYEEPSTDVAYAAIDDTTTIVNNDTDQETSQEKDVSNYLQALSHIASP  
LKSSYSPFGSWKKERFLSSNSALYQPPELMSLDSIQTSRVAEDLKEDTESPNTPSKDAV  
NGNFLESHGGSVSPFVENSCESSRESLPSEATNSLYSSLRDVGDNTEVTSENNRIKKAYM  
EWCTFYNKESDLRFDIFSAHFKAKEKFKHENGAGLMLNEFSDLTEEEYKATTNTNADQS  
IFESVIDGRIVSAYRQWCDWYQKDYSEERLQIFSSNFLILERYHGGEGDPSPLVFN  
LTEEEYNELNDTK

>comp13078\_c0\_seq4; 223 233 907 LEN=1199; translated  
MTMARISGPKASSVVVLFVVISVALSITRSNAFVSPPSIVNFALPNQQLQOTYVEGYDRS  
IGNGRSSPLYASTASGSLDVIDSWKLLPDGRIQGVISGSGDKVLTSPKRRKRLKEAST  
VRTVSGSRYKLGTPATADGGDKMSPAQMGTPRATVAGVNLPGGFNGRATQPLRSTPTASQ  
DRVLNDYVANKGRATMPVGSSTGSDSNEKKKIKFLVVSTLMD

>comp13079\_c0\_seq1; 67 1 294 LEN=294; translated  
QEMFDTACTIPGPLTDMFGEACKEAGCWGVFSLTGEQHEHDPKNPNYNTLVLINDEGEIV  
QKYRKLWPPIEGWTPGNLGTIVTEGPKGMKVSMIIF

>comp13079\_c0\_seq2; 236 147 602 LEN=1055; translated  
MAWCNQVYVAVANASGFDGVYTYFGHSAIIGMDGRTLGEATEDNGIQFAQLSISGIRDA  
RANDQSQNLFKLTHRGYTGVIYANGDGEKGVAECPFDYHTWVNDPLKAQQMAEKVTRST  
IGVTCCPVAGIPPPREEEDEELALEHELNLQ

>comp13079\_c0\_seq3; 411 213 1292 LEN=1745; translated  
MSRHGDISSPDTVGCVFQYPMRHLHTNEEVIANAEKICEIVKGVKKGLPGMDLIVFPE  
YSTMGIMYDRQEMFDTACTIPGPLTDMFGEACKEAGCWGVFSLTGEQHEHDPKNPNYNTLV  
VLINDEGEIVQKYRKLWPPIEGWTPGNLGTIVTEGPKGMKVSMIICDDGNYPEIWRDC  
AMKGAELIIRPQGYMYPAKEQQVQVSKTMAWCNQVYVAVANASGFDGVYTYFGHSAIIGM  
DGRTLGEATEDNGIQFAQLSISGIRDARANDQSQNLFKLTHRGYTGVIYANGDGEKGV  
ECPFDYHTWVNDPLKAQQMAEKVTRSTIGVTCCPVAGIPPPREEEDEELALEHELNLQ

>comp13081\_c0\_seq1; 709 319 2394 LEN=2525; translated  
MCMKWGSQSGGEYRPPPLPTLVLTQSSWSHQDDVASYDEHFGLNNTNTESDNGEHGDDFL  
DLTTDATPMKPLLALRRGGGGSNAQNGGVLKGGKAVITRAASFVKSTVGGAVDSVKSKF  
RSEDSKREALLQALEVMVPRQVVVPNSTVLPPDVVVRTAVKRSGIIGGPLKMDRVQELAR  
NLKRWYMRQGYVLHVSVTGASLDPDATASISVEEPLVSGLPVDIVFCKEMVVDDDDTGLV  
TFKKYRAKLLSELEKKRPAGLFRAPDLKIDRSQNLNTTLVPTTGRDPTKIAKAMKLVKPG  
TPFRWLDTRWGKIASGIFSKVLKASPEPTTDGGVCLQVYAMEPPPRHLEYGIGKSVWNTN  
SWEGEVDFDWRNIFGGGESVGMVRRGTDSSPSIRLRYGDDKFGLEGGYDVEAFSDFLG  
DTGSKKEDSEEKQESDSSDFEDSLLSRRGTTFRRLRNPI SPSVVANSVASASLERTSTTT  
GQLENIGSASLTLGPFRRFMPMDGKTSVSTTISGGARLVGKESDGGGVGSI SFACTGLLP  
YSSASATTKQILPITLSSSRDKNNDKVPI SLALQHTVSASTPNLPRHEAKAMGNSAQIRG  
AVADDSATTVVKGTTEIRVPAAPKIGSGSVLFGDWFCQAQKDMNSPFYKSSIGVGLRK  
NIQGLPLKYDVCYSSEGGKIKTMFGMGADFV

>comp13082\_c0\_seq1; 365 224 1546 LEN=1615; translated

MEFSSLNSAPALVPHAI SLSLQDWFHSSSSVLPQVLLMDGGVSTHLENI I SPKSFCNRS  
WSSSLLLSEGRDFIVRGHQDWLSSGCDILTTVTYQCHYGLVQADVPQNPSITRGCKNNL  
STAIAATATEAAQGLNKEEGIGSDEMQLDATKPTQFKMREMMVDGIFLARKAIKERTEP  
RRLTSFSTPFVALGPFVFASTGPYGAAMADGSEYTGKYPHVTRREALVCFHSRKAHTLLV  
EGKPDGIAVETIPNLQEVGVVCEVLRDLQQRREDREPPVACWVSLACRNGNELNDGHTIE  
EALRLIQLHDPNGKWITAVGINCCDSAFIASLVRTLIRVDGGRRSIVIYPNSGENWDAAN  
EDWTEGSGAADHQIADRLMEAISIIIRDAFQTERTSEALAEATNKEAPKHRVPKIVIGCCR  
TNPATMVLLREKIDSMNIDT

>comp13082\_c0\_seq2; 214 613 1648 LEN=1717; translated  
MPFGLVQADVPQNPSITRGCKNNLSTAIAATATEAAQGLNKEEGIGSDEMQLDATKPTQ  
FKMREMMVDGIFLARKAIKERTEPRLTSFSTPFVALGPFVFASTGPYGAAMADGSEYTG  
KYPHVTRREALVCFHSRKAHTLLVEGKPDGIAVETIPNLQEVGVVCEVLRDLQQRREDRE  
PPVACWVSLACRNGNELNDGHTIEEALRLIQLHDPNGKWITAVGINCCDSAFIASLVRTL  
IRVDGGRRSIVIYPNSGENWDAANEDWTEGSGAADHQIADRLMEAISIIIRDAFQTERTSE  
ALAEATNKEAPKHRVPKIVIGCCRNPATMVLLREKIDSMNIDT

>comp13083\_c0\_seq1; 367 119 1126 LEN=1415; translated  
MTLPSPIPRPQHYQPAASVLNQFRKWRKIGLVWSCHFTASILLVCGSSYSEDRKYV  
PIDASVASVALGGNTKCFKAYANVLASGINDDGAIICCTAQEESNDGICHPTPWYLFAT  
RLVKLPEAWLIPVFPLVLRGLVQLITRRSGAGTAASSSDGAETKRQRQINRFAMRRFWLY  
FGLIQLRGWVLYLLFDTIENHVVEPAGDSCWYDNMSRGNQGSCKATDFSDHVVLFFAQ  
ILPITLLEVLFSFVAPFWRGDETLRKIVPTLLVAALLYLYGISFLKIYKTAVYFHTQLEI  
IIGYLITLIVQIPLFLVLTSLLLPTRDYFFGPGN

>comp13084\_c0\_seq1; 770 122 2067 LEN=2130; translated  
MDELFKVLSSARLDKRRKRRQRDEESFDEDNNNDTGLHQNEVSTRATPSRDRTGKRD  
TSESKRQAVHKERMAAFRRSMSIRIANKQDPDLDPISKFDELEAPCWWRGKRSSTNSNN  
EDDGASDDDSADSDVTAVSSFGQISKAIQRNVEAGRWKEPTPIQMOSIPTLLERRDLI  
GAAPTGSKGSAFILPAIFLSGTPYHIFYSNKNTATDENDNTKSKKKAKKQSWNVGSKQ  
GEIRSLILAPSRELAQAQLYREVERLGLGKPGGISSLLLSKSNAAQVIAGTAGGKGLDAL  
VSTPLRLVDAIEKGLRLDSVRLVVLDEADRLDAVDGKSTKRRESKHKQSKKDDSDSSEG  
EDDGEAITQSSGSDQSHTFLVQMDRILSSIPSTAVRALFSATVTPVTKSLAENILRNPVD  
LKIAAAGSYGGANTDIEQELMFVGREEGKLLAMRQLKQRGDLKPPTIVFVQSQRATALF  
SELLYEKMHVDVITQDDRXTARDNAVAKFRRGETWVLICTDLVARGVDFRAVNMVINYDL  
PTSGITYVHRIGRTGRAGRKGKAITLFTESDFDNLRTIANVMKQSGCKVEDWMLQLKRRP  
RNQKVLPRRGRIDTSSYDKKMHKKQMIQESKKRKRRIESKDDVQN

>comp13084\_c1\_seq1; 339 1 1208 LEN=1208; translated  
XTCLAFQLTGIVQDYLVDYSKIYKPVKEQPKKEKARVSSFMAQPENPEDDVKPEFALEFVE  
KRFVWFQNMLETEIQQKFPVFPYWNLEYHLTKNFLRRTHGHLLALFNGPTKDPDANNAT  
ILLKTLQKTIIFEKDVSSALQREYGVKFRDPKSKDVKDNVAVNAGLTSKGVSSMNQKTPK  
NRDEQSSANDGDGRAPTLQEEVDPLLGVASGAFDKYMRPYIALEEKSMDEQLVSALEDRT  
VDTRGNQPVYTSSTKLFVYIKGSITRCTALTGNFTYLLHRAFQDSLRYKTVVLSRKLPP  
PLAEKSVGPLNMPVPVFAASKQIQEPTPAQVASYRVPPGEEVTVCHVIGTCEYCAETVEAL  
EDLIRDVTVDDEFKSKIDMMGTQEGFRFLCLFNSIFPNFVVTKR

>comp13084\_c1\_seq2; 721 156 2306 LEN=2306; translated  
MKSVAATKKNPAIPKATRAVLPPLSTTTTTAALSQDPTRLLDAFDSYVSTRRSSGAHPDP  
IDFINQHYSESLLVAQLPEIRDAISERMNRLDDRISNALQRQSESAEATQRHVEEAKVN  
VASLEKIRIQVQTKASQSEKTVREITKDMKRLDCAKRHLQRTITTLKRLHMLIHAVEGLR  
QSCLLQPHPDYKSASHLVDAATRLLLKHFDAYKHKVEPLGLLSNKVDDLQGELKFRLVRGF  
RIVGFGVEKTRFEKSKSLKSLVDPEDDPFWQAEKEQEDDSSEGNETTEEFELPPTMT  
DAMSGGILLIDAIGKEARIEFMTGIVQDYLVDYSKIYKPVKEQPKKEKARVSSFMAQPEN  
EDDVKPEFALEFVEKRFVWFQNMLETEIQQKFPVFPYWNLEYHLTKNFLRRTHGHLLAL  
FNGPTKDPDANNATILLKTLQKTIIFEKDVSSALQREYGVKFRDPKSKDVKDNVAVNAGL  
TSKGVSSMNQKTPKNRDEQSSANDGDGRAPTLQEEVDPLLGVASGAFDKYMRPYIALEEK  
SMDEQLVSALEDRTVDTRGNQPVYTSSTKLFVYIKGSITRCTALTGNFTYLLHRAFQDS  
LRKYTVVLSRKLPPPLAEKSVGPLNMPVPVFAASKQIQEPTPAQVASYRVPPGEEVTVCHV  
IGTCEYCAETVEALEDLIRDVTVDDEFKSKIDMMGTQEGFRFLCLFNSIFPNFVVTKR

>comp13084\_c1\_seq3; 1099 156 3017 LEN=3174; translated  
MKSVAATKKNPAIPKATRAVLPPLSTTTTTAALSQDPTRLLDAFDSYVSTRRSSGAHPDP  
IDFINQHYSESLLVAQLPEIRDAISERMNRLDDRISNALQRQSESAEATQRHVEEAKVN  
VASLEKIRIQVQTKASQSEKTVREITKDMKRLDCAKRHLQRTITTLKRLHMLIHAVEGLR  
QSCLLQPHPDYKSASHLVDAATRLLLKHFDAYKHKVEPLGLLSNKVDDLQGELKFRLVRGF

RIVGFGVEKTREFEKKKSKLKS LVDPEDDPFWQAEKEQEEDDSSEGNETTEEFELPPTMTP  
DAMSGGILLIDAIGKEARIEFMTGIVQDYLVDYSKIYKPVKEQPKEKARVSSFMAQPENP  
EDDVKPEFALEFVEKRFVWFQNM LTEIQQKFPGVFPPYWNLEYHLTKNFLRRTHGHL LAL  
FNGPTKDPDANNATILLKTLQKTIIFEKDVSSALQREYGVKFRDPKSKDVKDNAVNA GLT  
SKGVSSMNQKTPTKNRDEQSSANDGDGRAPTLQEEVDPLLGVASGAFDKYMRPYIALEEK  
SMDEQLVSALEDRTVDTRGNQPVYTSSTKLFVYIKGSITRCTALTKGNTFYLLHRAFQDS  
LRKYTVVLSRKLPPPLAEKSVGPLNMPVPV FASKQIQEPTPAQVASYRVPPGEEVTVCHV  
IGTCEYCAETVEALEDLIRDTV DDEFKSKIDMMGTQEA FHEITAKCIRILVSGMENRLEE  
PLKTMSSSTNWATFAEVGEE SDYVRDIHKEIQPFVSTARGLIPKSYFQNFCDKFALGFTST  
YYDNLVRLKAVSEPGSQQLLLDVYNLKT LILKLPVLEKSPVSTSTTRKVTGSTIAPAMYT  
KMOVQKQFKKIELLLKMTATPVNLLVDVFKDQWPGGTVNDFQQVMSLKGIQRTHQVKMFEK  
FGLDPAQARKGAVASVTS AKIVSERFQAVQDQASRV DMSQMKQRVSDFRNAFR  
>comp13084\_c1\_seq4; 717 1 1919 LEN=2076; translated  
XTCLAFQLTGIVQDYLVDYSKIYKPVKEQPKEKARVSSFMAQPENPEDDVKPEFALEFVE  
KRFVWFQNM LTEIQQKFPGVFPPYWNLEYHLTKNFLRRTHGHL LALFNGPTKDPDANNAT  
ILLKTLQKTIIFEKDVSSALQREYGVKFRDPKSKDVKDNAVNA GLT SKGVSSMNQKTPTK  
NRDEQSSANDGDGRAPTLQEEVDPLLGVASGAFDKYMRPYIALEEKSMDEQLVSALEDRT  
VDTRGNQPVYTSSTKLFVYIKGSITRCTALTKGNTFYLLHRAFQDSL RKYTVVLSRKLPP  
PLAEKSVGPLNMPVPV FASKQIQEPTPAQVASYRVPPGEEVTVCHVIGTCEYCAETVEAL  
EDLIRDTV DDEFKSKIDMMGTQEA FHEITAKCIRILVSGMENRLEEPLKTMSSSTNWATFA  
EVGEE SDYVRDIHKEIQPFVSTARGLIPKSYFQNFCDKFALGFTSTYYDNLVRLKAVSE  
PGSQQLLLDVYNLKT LILKLPVLEKSPVSTSTTRKVTGSTIAPAMYTKMOVQKQFKKIELLL  
KMTATPVNLLVDVFKDQWPGGTVNDFQQVMSLKGIQRTHQVKMFEK FGLDPAQARKGAVA  
SVTSAKIVSERFQAVQDQASRV DMSQMKQRVSDFRNAFR  
>comp13085\_c0\_seq2; 621 1 1095 LEN=1184; translated  
KASVMLVGCQPKGPIKSMGAYHAIQILDDRVPDAELALVVEPWYMSEVARSMDPK PAGF  
DEFNAWKEEMETEKGIAFYATVSEVPPPGEDELRLAII SARTADNPALLEACVKSGCTAI  
FLEKPGATTVGELERM RGIAEAA NVGVFMGFNKNVSSYLT KTRDFVEKSSKCDVTF LHNN  
NYKDTEEELSECFERNSEGMLKNMAIHELAI CVTYYGVTVD TIAKVEADKEYSCLKTLGN  
FTDFVRLKFKLVTTDGVEISVAADRCGGDDSVGIVTDAETGKEMARFAMPDEDTIANIPS  
LQEKYGDAMPYFFTQDPDY LK LKELVVDVAVVHGRPATGVADIGVAIETLKV AEHLTPILQ  
EQLK  
>comp13085\_c0\_seq3; 355 116 1065 LEN=1196; translated  
MGAPRDTNPPQEELRAIHLATNQKMVEKYHAQFPKIPSM TSEELVERWRKIDEQEDRRDD  
ASKNGDDRVSFEDEVGPLLLIDVRSKEERSVSMISGGLAMDELETTWINHYVHNVDGSY  
TPESKAIPTIVFYCTIGYRSGREARQLVDDL SGTFGIEVGKTV EVKNLDGILAYSFVEDA  
PPLMSSNKSTQTS SDFSMTKRIHSFGKEWSEANPSFEVVYFKSKPRLAKHLLQVGVASA  
VRSIQHTISKTTAWAKDXQGGFENVCRAARGLGKRQGGTPVRQPNLGH RVHVGQRCD E AAL  
PAHFLEAEC DATNAMP  
>comp13085\_c0\_seq4; 427 1 1060 LEN=1060; translated  
KASVMLVGCQPKGPIKSMGAYHAIQILDDRVPDAELALVVEPWYMSEVARSMDPK PAGF  
DEFNAWKEEMETEKGIAFYATVSEVPPPGEDELRLAII SARTADNPALLEACVKSGCTAI  
FLEKPGATTVGELERM RGIAEAA NVGVFMGFNKNVSSYLT KTRDFVEKSSKCDVTF LHNN  
NYKDTEEELSECFERNSEGMLKNMAIHELAI CVTYYGVTVD TIAKVEADKEYSCLKTLGN  
FTDFVRLKFKLVTTDGVEISVAADRCGGDDSVGAYNAXFDEF EAIDKNSAQSFVHGRIDK  
LMLQQASAANIEEYQRMRTNENPMTNCFVFLF LSLLATATRLMFLHDHIKTQES  
>comp13086\_c0\_seq1; 218 233 915 LEN=1033; translated  
MSTSVTSAMRRAATRNIQRASRTIANGNSSFHQCRLMVAAQHESVAPSSSR CYGSAAIN  
DDNGGNSSYVSPFQDIFDTIDEGKTF LGTKEFQFPDVKYLKCGVPEHQLKYKTTTYGRLL  
EPPFVRPNEHRVILQVAVRHIPLTDVQKMVLKEIVGNRLNDETGILQLSSAQFGSRIENK  
RHVVSMLERAVESAKTLAAKLVD E XEEINESGVSTVTGDVERGEEFK  
>comp13087\_c0\_seq1; 451 161 1003 LEN=1379; translated  
MVAVEEITDEESPPPPS QERLWDAEDIEKIVSQLTRPTAKMQVESLIKKIRKEASALKAL  
ESSASSSSASSSPAPSSKAAEPVKPAASPAPAAPVAKPINTAAPIHTPSATYNAIDRFA  
FDAGTSSDKFVTLYLPLPGVGSVPDKKEQIRCVFGKDSFDVTVTNLNGKNYRLKREDLEH  
DIVPEKSKHIVKADKIVVKLQKVKGEYGSFDYWSKLTDPNKKTKKRNADPSAGLMDMMK  
DMYDSGDDNIRKIIGETMMKQRNGELNKDKPGGLD LGGI  
>comp13088\_c0\_seq1; 434 1 1532 LEN=1532; translated  
XDGDGDHSSVVLKLLH THHDFDEYSYSIHEMDAIVMEALTASEYVVD SYGFCGQSVLTE  
AATESGRSFIKRKEWSWRDR IKMARDLARGLADLHAF AAHPYGDRSNGNRKKEQPPPLPL

VFAHHDVNPANVIAVHPGRIRWDFNLGILNRYRKPDPSSSTAPETNSSHKQAGSRLPS  
DYKECPTPIRYEQLLWRSPEECYNQGTLLLDPENSGRNTAAQAADVYSLGNILFYVLAR  
HQPWSHLEEDTHPPSGNETTEMASNSTPSAKLDTGSTLQNKKDSLASIGRAKVGGLPNL  
PERYLARTEARLLWKAVQRCYEHDPTRLRPTALEVAGILGDAYEKALAYHDRDKXETEPEI  
QETKTEILSKSRRIDPQGEHRALPLSPGRLFWRWRREQEPQTILYGVQPPNPNQWRSLARR  
KSFVCAFDEAVCSTMQRLLLLLYGFPAVEYKDKAKHGCNNIRDRDSTSRNDLLDCTSLCSS  
I I IDVMQANDVRINVAARHNCFGDGDKIKSSX  
>comp13089\_c0\_seq1; 1238 165 2570 LEN=2570; translated  
MRFHPLAVSVAVGALASSTNVDAFVIPNSSTSSQTATAKSRLASAWMAGNDNQYVNLEEN  
LFKPNSKVNDA TSANTKDATTIESSSMAPIENEKPKKPKNVNKRAEKIRAQLEADLAAAE  
ESRTRTAKQLADAEANRLALEAEAGKAAKEAEALEAKFNAFQAKEAARAAGGGGLSAA SI  
VGEIAGPLVGGFATFGGLAIARDSLASRSKKAEEERLEREEAERQAEKAAKRQAAQEAQS  
KNTLP IVSGLAGLGAFGAFLGSGSFGGGGQVDGSDASSKQQPNISKGNDVESVTTAVPD  
PYANVELPYLEKEI IAKAETKNKPKLSRPKSKKQLAREAAEEQRATEARLEQKLAEAPELA  
RKAAEAEAKAVAEQAQAEQAKIEAEKKAEEERSLAEQAQAEQARIEAERMAAEAKAAEQA  
RIEADKKAEEAKAVEEARIQAEERKAADLKAEEAKIKAERERALEKRALDAKLAAEKKA  
AEEMAAAEKAKAEKIAADKLA FEKMQAEAAEKAKAEKLAADKLA FEKMRVEEEAKAQAK  
IKAEQAALLELLKQEEESKGF LPKVPAVAEMLFGNLKPSQITDKGLSMLFTPN TLVVG  
VALAGVAVTAAVVAAGESPEVKSTFKVTGKTPKEFLESKGPAGSQAPSPKKTIRIPKSKE  
PENQPSVRKTQISPVAGSKEALREQLAKQRDNINRQASEKLAKASTDGQNPTPPSSLPNT  
DSLSTIESTLENVENTEPAFVPSSTKKSYS PFGGGKPKAVGNDSLYAPPVTETSSVD TNL  
VKPTSSPEAQGFDSASTAAVPK  
>comp13089\_c0\_seq2; 1203 165 2541 LEN=2541; translated  
MRFHPLAVSVAVGALASSTNVDAFVIPNSSTSSQTATAKSRLASAWMAGNDNQYVNLEEN  
LFKPNSKVNDA TSANTKDATTIESSSMAPIENEKPKKPKNVNKRAEKIRAQLEADLAAAE  
ESRTRTAKQLADAEANRLALEAEAGKAAKEAEALEAKFNAFQAKEAARAAGGGGLSAA SI  
VGEIAGPLVGGFATFGGLAIARDSLASRSKKAEEERLEREEAERQAEKAAKRQAAQEAQS  
KNTLP IVSGLAGLGAFGAFLGSGSFGGGGQVDGSDASSKQQPNISKGNDVESVTTAVPD  
PYANVELPYLEKEI IAKAETKNKPKLSRPKSKKQLAREAAEEQRATEARLEQKLAEAPELA  
RKAAEAEAKAVAEQAQAEQAKIEAEKKAEEERSLAEQAQAEQARIEAERMAAEAKAAEQA  
RIEADKKAEEAKAVEEARIQAEERKAADLKAEEAKIKAERERALEKRALDAKLAAEKKA  
AEEMAAAEKAKAEKIAADKLA FEKMQAEAAEKAKAEKLAADKLA FEKMRVEEEAKAQAK  
IKAEQAALLELLKQEEESKGF LPKVPAVAEMLFGNLKPSQITDKGLSMLFTPN TLVVG  
VALAGVAVTAAVVAAGESPEVKSTFKVTGKTPKEFLESKGPAGSQAPSPKKTIRIPKSKE  
PENQPSVRKTQISPVAGSKEALREQLAKQRDNINRQASEKLAKASTDGQNPTPPSSLPNT  
DSLSTIESTLENVENTEPAFVPSSTKKSYS PFGGGKPKAVGNDSLYAPPVTETSAVD TPL  
VEPTPPIVEQSF X  
>comp13089\_c0\_seq3; 301 1 617 LEN=883; translated  
XDNASVAAPKKSYS PFGGGKPKAVGNDSLYSPPQGT FSSFEETE QFSTNNSNAQSSDSF  
FQDEQISDIPEESPLTYNVSP PAPKSYS PFGGTKPMAAMSDPLYRPTADQLNEQTITSPN  
PSSSPSNYS PFGEVESFDSSD NSLYAPP SDDSSSTTL DVEETSSIPETNTSDAPPAKKS  
FSPFGWK PQAPSDAGGNSGGYLDGL  
>comp13090\_c0\_seq1; 251 76 684 LEN=1897; translated  
MKLLSNLLILSAIAGASEGFSVVPAGTKATASSTELRAETGRREMVAATLAAGAAVLPFG  
QAAVAAYVPQVNDMKQIYFLGESLDKLI AKLEDPSQMEAAAL TGVKQFNKDPDFYSTYTRN  
FILKSIKKGADSDPRVGYIKQASALISSLEGVLTGGDALMNEKSTS AEA VARVKKQAQALI  
AKFIDECGVEDPKLAAFVSSH K  
>comp13090\_c0\_seq2; 192 581 988 LEN=2201; translated  
MLSLYIEHVGTVL GESLDKLI AKLEDPSQMEAAAL TGVKQFNKDPDFYSTYTRNFILKSIK  
KGADSDPRVGYIKQASALISSLEGVLTGGDALMNEKSTS AEA VARVKKQAQALI AKFIDEC  
GVEDPKLAAFVSSH K  
>comp13091\_c0\_seq1; 324 1 1007 LEN=2201; translated  
XKQKTPIMNLSSEQSVEISRMRREQEEVGYSVSDYLSLPAVATALETPIDASCRYAMAK  
WCNEIADFCNYKKTVAIAMNCLDRFMSTPSGREILLDRNLYQLAAMTALYSSVKIHEQE  
AMDPKLVSSLSSGRHSPQAVEAMEFRMLCAIQWKVNPPTAMSFVRSMDLLPVDFIKSCE  
KKTILDISEHQTEL VVKEYNFCTYDQSSIALACMLNALESLTEDDVFC AQVETEARKIIP  
IDSAAVRELRIAIYELMKGSSPDIQDTGKALQRKWVHVS VGPLRRKAAVFTRVHGQLQLQ  
HQLLKGDAYHSSNDDERDKYEAYFIVYIKDEEYNC  
>comp13092\_c0\_seq1; 1066 1 4615 LEN=4797; translated  
ELEEKYEVLYLTRDDRELEVQKIRENEGYGAGILRFIRTHLGDHTVNRASPQQHYKYATM

DWDMNQELFESEEFDDVSEISEIDLVTETVTKLNFEIDDEITKLNFCVCDIESDNEGDYC  
EDIDAGSSAVLATNYDTITPCKNGRNPRTSNRHQNEASRNGFEIKGPLVLWDDDDDDVY  
GSFPLSSANASGCNAHGVVHVRLLRARNLPCVGVSSVGATISLNPYKGVKSSRSKAFPG  
NLLDHGVCVRWGREPRQPRAFTEHYRNGSNHNSQYRDSILRDDDDGEEEDDENILSMVNAW  
NGPSSPVPSINIDLTFSPGLGLIFDFTMASIELSSEVLIQRPRVWRTRWCPMKVNASSLS  
QTSYHHNYNDPFLRIQALFEPVSSGGPLEHKVLPVLSQTVSSSTKQRTNEQKSATIS  
PSPPLSGRLLIENETDPNEIATDTSNGLLSVYQPGETHQEKEAKKSDEQSQKQDTGSFW  
DTKELALMNIETTSLEEDIISTVASKKTTASQKTARAAAFAVKPHLLRTERYLVPTRCAVC  
SKLLVGFIFGKIGFRCEVCHIDCCSDCRLHVDLKVPCGSELATDIVEASFQNKMSPSGFL  
SYIAPDEAYEQKRQSMLEGEAEFVQPSGRMNPSSAIIASKQSLAMTGYTKGSQSPMAQNG  
GTRSAIEGIGRCRFEIVSACLFLKNTKTWSDYGTDAETQPLRRGDYVVRVSMTSDRSAR  
TPTLQKTGMPHFRSAEMRFVSHYGVAFRIDVVEADRDTIIGSALLTTQGILQEQRDAY  
IAEHGISLLQFLNGPIPWMGTRKMKLPLQSGIKVGAKTDDFYALNSKSSSQKGLISGW  
VDVYVGVVEEFYSRMYGSNPIECPKRPPADLNMAVFSNCITRITAIMDDLNYAISLYQYMW  
SWENPVWTAFTLIVFQWLCRRFNSEYIGSLPILFFVFLGYCAFQRNQGKIKGRIKKEI  
ETMQKVEGNSVGYEIIYRPRGTITVTVSKGRNLLSQEFGIAGKTSCKVVDPLRFADDTK  
ERIVQSDKSADGSFEMGNTPTIYTSDDPNELEESGIAKRLNQLLPSTANDFFESSAID  
TSSEVKLSLFPILQSTNTADLRDGETLEPWESSQGAIVIQVRFQDFFNIPGFDYVMG  
EVVFSIRELATEVEVKGWYQILDVGT'TNVRLEDHEVDGEDAFCGTTLNPPRIYVHLKWD  
PPAESSVDDPTETDREMSHAIQEELVRSSILMKENKVNLDSSIGSVSKAFGIGGTIQVV  
QNTLGSIIIDLVEGVMNLLNFTDPYKSSITFVGSFLVWVFCIIPTRYLILSAGLVQYGV  
FVDYRKGALGIIGKTPVESTLQIEHDKSSNEEDKNGKGSFPAIKVANAIIRSIPTNEDLR  
KAYFWESRQLGTAKAKKYTVEKRESRLKKLWAKWHSTMKILVQDNEMDNNQQPVFQWDS  
GFAVVQGHFIIWKS VNDFDGELPSGKIVMSGHAGLGGPSPIEMRKLKKEKELPLCLTI  
FGRGSGGQERITMLLPERSVKQNLNTILHSASFKRD

>comp13093\_c0\_seq1; 257 338 841 LEN=1090; translated  
MANAYNTLTDEDREVRVFLAVGQNDYSMSNQNFQCGFAACADESGSPWVNDVAAAQRDVI  
FYMKTDPDSSWEFYCHYSMNTGRGEFADTIQEMLSITANAMDLDESDFLNGTDFVFG  
NETMFEPDELSSNSITAMSSVSSSSSMTSTFLLSIMVSGSILVWSMQ

>comp13094\_c0\_seq1; 292 98 805 LEN=1515; translated  
MTIKENDPILKGETALIDVGEPNETSQPDVQAAVTDENNDANDNGDGPTFSSDSPIDAAR  
ELKIKHWEDSDFAVGCVNVTWEDDHPSWWCLNSRKNGEDSAHVVDQYFVSSIVCGCLGA  
GRVGNMAVLAQTTEVEEQFVDPESEGEMTTRRKRKPKLLWVCGPYWTVNLFITFPLILGV  
SGWMCYSSVIESGLVVIITWSIGTFLMIFSLCMISCRNPGILYRHSQIPANTDEDW

>comp13094\_c0\_seq2; 327 98 1042 LEN=1571; translated  
MTIKENDPILKGETALIDVGEPNETSQPDVQAAVTDENNDANDNGDGPTFSSDSPIDAAR  
ELKIKHWEDSDFAVGCVNVTWEDDHPSWWCLNSRKNGEDSAHVVDQYFVSSIVCGCLGA  
GRVGNMAVLAQTTEVEEQFVDPESEGEMTTRRKRKPKLLWVCGPYWTVNLFITFPLILGV  
SGWMCYSSVIESGLVVIITWSIGTFLMIFSLCMISCRNPGILYRHSQIPANTDEDWRWND  
QARTYRPASSRFDTECQVVVEGFDHTCPTGTAIIGSANMFWFRMFVGMIVVMLIYTLMLA  
TFGSFLRMFFGSDV

>comp13095\_c0\_seq1; 561 261 1844 LEN=2215; translated  
MSIDSPTNVDELACSLQEP LLTRGCVDEGQRDSNTDTT'TTNDGNP I IYDNEGRADGQEM  
RRLYDGLHLKDSLLIKFLYFLDALGSSAWGRFSAIYYNNHGLNTQQIGLIEGLRTFTPTI  
SMVFWGFIADRFRQCRKQVWIWTKSGATSILLMLALPWVTKSFFRILWVSVGAQLFVNSGA  
ILDSYTTLELLGTENKDLYGRYRLYASLSWGFGSIVMGWITDNYGFDWNFIMFGALSILMI  
VLVAYFIPDTINNEADQDPLAADNRATGEINIENESLNDVDEDDQIGDISDLLFLITKP  
RVLFFVFEVIVMGAAMATVERLLFLYMINDLHSSTLLCGMSVGVNVLCELP IFWYASSIL  
NFLGSDGMFLLSMTCFVVRVYGYTLLTPSTKHWILALELMHGVTFATFWIVTTDVSKVLI  
DKSRGDFWSTTIPSIQVMSYNAVGATIGSVFGGFAMHRYGSRQMYLFI AVSVLCMLFVHL  
VGSILVRTCRPELGSVLPGCRCPTSNNGNEEEENEQGEQDGEVGD

>comp13096\_c1\_seq1; 575 84 2115 LEN=3097; translated  
MVGLAPQPEYFFVFFGIVLVFNILMSELLFIFSTFASTSSMVQTASACIVFIFMLFCGFF  
IPPTTIPSYFQWLYWYNPLAWAYRALI INAFRNGDYMEEEADAILKRTGFVYADNKPDR  
DWITWAYIFMCGHILLSVVTSAIILSSVRVHKKPPPSFESIEMKDTDLKQSQNEETSNS  
QDVSI PFKPITLSFENICYDVKASTGDEDIRLLHNINGHFRAGRMCALMGESGAKTTLM  
DVIALRKNSTVAGDIRINGFPQEQSSFRRCSGYVEQFDIQSPQLTVRETVIFSGLLRLD  
STKVKTNKEKEQFCDTVIKILELTPLAHCLVGSDEEGGLSFEQKKRLSIAVELAASPSIL  
FLDEPTTGLDARSASLVKLLRKIADQGR TICATI HQPSSAVFELFVSI AVSTKQSDRW  
ALTSSIIACLQDDLLLLKKGGRSVYFGEFGSRTLIKYFEAYGATKIKPGDN PANWMLR

VLPECEDEFADVYIQTSEYSKLTNEIAAAKVDPPKELKVAYLTEFAVPRSERQKLANKRL  
RTIYWRSPAYNLARLMVCVIAF ILGSV FVTERNLQVLTEDKMRAYFSITFLSFIIVGILS  
IVSVLPVMLAIRDV F YKQLAAGMIDNDAVGWALGVAEMGFIVLASFLFCLVYLSTAGSF  
PVTFMRAFKFWVRIGK

>comp13096\_c1\_seq2; 1099 111 4298 LEN=5280; translated  
MSSGEV PKVEKAADENSPPFTTPGESSIRCSSNSSRSSFGLETEDSASSGSXKTKGQGGD  
GRFFLYASNSWGKNQDDHKADVT PRQTRRQSHLSSLVLEKKAVNKYVDKLSGLTDKTPP  
NEAVAARITNDGKFSGMEKGV M KSFDSRSSEESKLILSDVQKKAENTSKGILLLQKAF  
DDYSHLIKKFPVEVRIENLNF SVPYTEASTKITTVYNSSPLYKGIETL KSLAKTAREPKS  
ENITYTKHVLSKISLYLEPGKMYLLL GPPGSGKTSLLKAIAGR LYHKGKEELKGSVTYNG  
MELYDSKGFYNRPGIHYENAI S I IDQLDRHAPRYTVEETFNF GFRCKRRNGTHIDFRFQE  
DTHENRELAKRADNKNLLVD TYIKLLGIDHVRDTFVGND EIRGVSGGQRRRVTIGEMLMN  
NTP I ICGDEISNGLDAGSTFEI ITAMSYIGKIREKLQVISLLQPSPETVSLFDEVILLGE  
GKILYAGSILRVESYFASLG YVAPVHMDVGD F LQLISTPDGADLYNPPPAIAEVRPNAFT  
LDELAEEFRKSRLGERINMHLQEPSNYVWGSSRRNEHQSTKDMDDKEYLDDRKYVAKYQN  
SFAVCFWLNLRQLTLWRRDKRVL IANAVKNSIMGVSVGGV F YQTDDVISILGVLFQGML  
FVMLGGMVTAPSFV SERLIYYKQNDANYYGAFS FVFAKAVSKLPQTTL DCTIFGTILYYM  
VGLAPQPEYFFVFFGIVLVFNILMSELLFIFSTFASTSSMVQTASACIVFIFMLFCGFFI  
PPTTIPSYFQWLYWYNPLAWAYRALI INAFRNGDYMEEEADAILKRTGFVYADNKPFRDR  
WITWAYIFMCGHILLSVVTSAI ILSVRVHKKPPPSFES IEMKDTDLSKQSQNEETSNSQ  
DVSIPFKPITLSFENICYDVKASTGDEDIRLLHNINGHFRAGRMCALMGESGAGKTTLM D  
VIALRKN SGTVAGDIRINGFPQE QSSFRRC SGYVEQFDIQSPQLTVRET VIFSGLLRLDS  
TKVKTNKEKEQFCDTVIKILEL TPLAHCLVGSDEEGGLSFEQKRLSIAVELAASPSILF  
LDEPTTGLDARSASLVV KLLRK IADQGR TICATIHQPSSAVFELFVSI AVSTKQSDRWHA  
LTSSI IACLQDDLL LKKGGRSVYFGE LGFQSR TLIKYFEAYGATKIKPGDN PANWMLRV  
LPECEDEFADVYIQTSEYSKLTNEIAAAKVDPPKELKVAYLTEFAVPRSERQKLANKRLR  
TIYWRSPAYNLARLMVCVIAF ILGSV FVTERNLQVLTEDKMRAYFSITFLSFIIVGILS  
IVSVLPVMLAIRDV F YKQLAAGMIDNDAVGWALGVAEMGFIVLASFLFCLVYLSTAGSF  
PVTFMRAFKFWVRIGK

>comp13096\_c1\_seq3; 1221 111 4754 LEN=5206; translated  
MSSGEV PKVEKAADENSPPFTTPGESSIRCSSNSSRSSFGLETEDSASSGSXKTKGQGGD  
GRFFLYASNSWGKNQDDHKADVT PRQTRRQSHLSSLVLEKKAVNKYVDKLSGLTDKTPP  
NEAVAARITNDGKFSGMEKGV M KSFDSRSSEESKLILSDVQKKAENTSKGILLLQKAF  
DDYSHLIKKFPVEVRIENLNF SVPYTEASTKITTVYNSSPLYKGIETL KSLAKTAREPKS  
ENITYTKHVLSKISLYLEPGKMYLLL GPPGSGKTSLLKAIAGR LYHKGKEELKGSVTYNG  
MELYDSKGFYNRPGIHYENAI S I IDQLDRHAPRYTVEETFNF GFRCKRRNGTHIDFRFQE  
DTHENRELAKRADNKNLLVD TYIKLLGIDHVRDTFVGND EIRGVSGGQRRRVTIGEMLMN  
NTP I ICGDEISNGLDAGSTFEI ITAMSYIGKIREKLQVISLLQPSPETVSLFDEVILLGE  
GKILYAGSILRVESYFASLG YVAPVHMDVGD F LQLISTPDGADLYNPPPAIAEVRPNAFT  
LDELAEEFRKSRLGERINMHLQEPSNYVWGSSRRNEHQSTKDMDDKEYLDDRKYVAKYQN  
SFAVCFWLNLRQLTLWRRDKRVL IANAVKNSIMGVSVGGV F YQTDDVISILGVLFQGML  
FVMLGGMVTAPSFV SERLIYYKQNDANYYGAFS FVFAKAVSKLPQTTL DCTIFGTILYYM  
VGLAPQPEYFFVFFGIVLVFNILMSELLFIFSTFASTSSMVQTASACIVFIFMLFCGFFI  
PPTTIPSYFQWLYWYNPLAWAYRALI INAFRNGDYMEEEADAILKRTGFVYADNKPFRDR  
WITWAYIFMCGHILLSVVTSAI ILSVRVHKKPPPSFES IEMKDTDLSKQSQNEETSNSQ  
DVSIPFKPITLSFENICYDVKASTGDEDIRLLHNINGHFRAGRMCALMGESGAGKTTLM D  
VIALRKN SGTVAGDIRINGFPQE QSSFRRC SGYVEQFDIQSPQLTVRET VIFSGLLRLDS  
TKVKTNKEKEQFCDTVIKILEL TPLAHCLVGSDEEGGLSFEQKRLSIAVELAASPSILF  
LDEPTTGLDARSASLVV KLLRK IADQGR TICATIHQPSSAVFELFVSI AVSTKQSDRWHA  
LTSSI IACLQDDLL LKKGGRSVYFGE LGFQSR TLIKYFEAYGATKIKPGDN PANWMLRV  
LPECEDEFADVYIQTSEYSKLTNEIAAAKVDPPKELKVAYLTEFAVPRSERQKLANKRLR  
TIYWRSPAYNLARLMVCVIAF ILGSV FVTERNLQVLTEDKMRAYFSITFLSFIIVGILS  
IVSVLPVMLAIRDV F YKQLAAGMIDNDAVGWALGVAEMGFIVLASFLFCLVYLSTAGSF  
PVTFMRAFKFWVRIGK

>comp13096\_c1\_seq4; 1141 111 4222 LEN=5204; translated  
MSSGEV PKVEKAADENSPPFTTPGESSIRCSSNSSRSSFGLETEDSASSGSXKTKGQGGD  
GRFFLYASNSWGKNQDDHKADVT PRQTRRQSHLSSLVLEKKAVNKYVDKLSGLTDKTPP  
NEAVAARITNDGKFSGMEKGV M KSFDSRSSEESKLILSDVQKKAENTSKGILLLQKAF

DDYSHLIKKFPVEVRIENLNFVSPYTEASTKITTVYNSSPLYKGIETLKLAKTAREPKS  
ENITYTKHVLSKISLYLEPGKMYLLLGGPPGSGKTSLLKAIAGRLYHKGKEELKGSVTYNG  
MELYDSKGFYNRPGIHYENAI S I IDQLDRHAPRYTVEETFNFNGFRCKRRNGTHIDFRFQE  
DTHENRELAKRADNKNLLVDTYIKLLGIDHVRDTFVGND EIRGVSGGQRRRV TI GEMLMN  
NTP I ICGDE I SNGLDAGSTFEI ITAMSYIGKIREKLQV I SLLQPSPETVSLFDEVILLGE  
GKILYAGSILRVESYFASLG YVAPVHMDVGDFLQLISTPDGADLYNPPPAIAEVRPNAFT  
LDELAEEFRKSRLGERINMHLQEPSNYVWGSRRNEHQSTKDMDDKEYLDDRKYVAKYQN  
SFAVCFWLNLRQLTLWRRDKRVL I ANAVKNSIMGVSVGGVFYQTD DVI S I LGVLFQGML  
FVMLGGMVTAPSFVSRERLIYYKQNDANYYGAFS FVFAKAVSKLPQTTL DCTIFGTILYYM  
VGLAPQPEYFFVFFGIVLVFNILMSELLFIFSTFASTSSMVQTASACIVFIFMLFCGFFI  
PPTTIPSYFQWLYWYNPLAWAYRALI INAFRNGDYMEEEADAILKRTGFVYADNKPFRDR  
WITWAYIFMCGHILLSVVTSAI I LSSVRVHKKPPPSFES IEMKDTDL SKQSQNEETSNSQ  
DVSIPFKPITLSFENICYDVKASTGDEDIRLLHNINGHFRAGRMCALMGESGAGKTTLMD  
VIALRKNSTVAGDIRINGFPQE QSSFRRC SGYVEQFDIQSPQLTVRETVIFSGLLRLDS  
TKVKTNKEKEQFCDTV I KILELTPLAHCLVGSDEEGGLSFEQKKRLSIAVELAASPSILF  
LDEPTTGLDARSASLVVKKLRKIADQGR TICATI HQPSSAVFELFDDLLLLKKGGRSVYF  
GELGFQSR TLIKYFEAYGATKIKPGDN PANWMLRVLPECEDEFADV I IQTSEYSKLTNEI  
AAAKVDPPKELKVAYLTEFAVPRSERQKLANKRLRTIYWRS PAYNLARLMVCV I IAFILG  
SVFVTERNLQVLTEDKMAYFSITFLSFI I V GILSIVSVLPVMLAIRDV F YKQLAAGMID  
NDAVGWALGVAEMGFIVLASFLFCLVYLSTAGSFPVTFMRAFKFWVRIGK

>comp13096\_c1\_seq5; 1263 111 4678 LEN=5130; translated  
MSSGEVPKVEKAADENSPPFTTPGESSIRCSSNSSRSSFGLETEDSASSGSXKTKGQGGD  
GRFFLYASNSWGKNQDDHKADVTPRQTRRQSHLSSLVLEKKAVNKYVDKLSGLTDKTPP  
NEAVAARITNDGKFSGMEKGMKSFDSRSSEESKLI LSDVQKKAENTSKGILLLQKAF  
DDYSHLIKKFPVEVRIENLNFVSPYTEASTKITTVYNSSPLYKGIETLKLAKTAREPKS  
ENITYTKHVLSKISLYLEPGKMYLLLGGPPGSGKTSLLKAIAGRLYHKGKEELKGSVTYNG  
MELYDSKGFYNRPGIHYENAI S I IDQLDRHAPRYTVEETFNFNGFRCKRRNGTHIDFRFQE  
DTHENRELAKRADNKNLLVDTYIKLLGIDHVRDTFVGND EIRGVSGGQRRRV TI GEMLMN  
NTP I ICGDE I SNGLDAGSTFEI ITAMSYIGKIREKLQV I SLLQPSPETVSLFDEVILLGE  
GKILYAGSILRVESYFASLG YVAPVHMDVGDFLQLISTPDGADLYNPPPAIAEVRPNAFT  
LDELAEEFRKSRLGERINMHLQEPSNYVWGSRRNEHQSTKDMDDKEYLDDRKYVAKYQN  
SFAVCFWLNLRQLTLWRRDKRVL I ANAVKNSIMGVSVGGVFYQTD DVI S I LGVLFQGML  
FVMLGGMVTAPSFVSRERLIYYKQNDANYYGAFS FVFAKAVSKLPQTTL DCTIFGTILYYM  
VGLAPQPEYFFVFFGIVLVFNILMSELLFIFSTFASTSSMVQTASACIVFIFMLFCGFFI  
PPTTIPSYFQWLYWYNPLAWAYRALI INAFRNGDYMEEEADAILKRTGFVYADNKPFRDR  
WITWAYIFMCGHILLSVVTSAI I LSSVRVHKKPPPSFES IEMKDTDL SKQSQNEETSNSQ  
DVSIPFKPITLSFENICYDVKASTGDEDIRLLHNINGHFRAGRMCALMGESGAGKTTLMD  
VIALRKNSTVAGDIRINGFPQE QSSFRRC SGYVEQFDIQSPQLTVRETVIFSGLLRLDS  
TKVKTNKEKEQFCDTV I KILELTPLAHCLVGSDEEGGLSFEQKKRLSIAVELAASPSILF  
LDEPTTGLDARSASLVVKKLRKIADQGR TICATI HQPSSAVFELFDDLLLLKKGGRSVYF  
GELGFQSR TLIKYFEAYGATKIKPGDN PANWMLRVLPECEDEFADV I IQTSEYSKLTNEI  
AAAKVDPPKELKVAYLTEFAVPRSERQKLANKRLRTIYWRS PAYNLARLMVCV I IAFILG  
SVFVTERNLQVLTEDKMAYFSITFLSFI I V GILSIVSVLPVMLAIRDV F YKQLAAGMID  
NDAVGWALGVAEMGFIVLASFLFCLVYLSTAGSFPVTFMRAFKFWGFFTFNLAIYSYFGQ  
AFMCLVPTMATAQILCSVFI GLNNFSGLIVRPQYMRNIFAFTYWITPGHFVYEG L ILSQ  
YWGDRKVIATEGSDFYIWLRCRIDRETCEGSVEQYVWVFFGEKFNNNDNTYQDVLILA  
LFLVLARVATFFALKKFQYNT

>comp13096\_c1\_seq6; 617 84 2039 LEN=3021; translated  
MVGLAPQPEYFFVFFGIVLVFNILMSELLFIFSTFASTSSMVQTASACIVFIFMLFCGFF  
IPPTTIPSYFQWLYWYNPLAWAYRALI INAFRNGDYMEEEADAILKRTGFVYADNKPFRDR  
DWITWAYIFMCGHILLSVVTSAI I LSSVRVHKKPPPSFES IEMKDTDL SKQSQNEETSNS  
DVSIPFKPITLSFENICYDVKASTGDEDIRLLHNINGHFRAGRMCALMGESGAGKTTLMD  
DVIALRKNSTVAGDIRINGFPQE QSSFRRC SGYVEQFDIQSPQLTVRETVIFSGLLRLD  
STKVKTNKEKEQFCDTV I KILELTPLAHCLVGSDEEGGLSFEQKKRLSIAVELAASPSIL  
FLDEPTTGLDARSASLVVKKLRKIADQGR TICATI HQPSSAVFELFDDLLLLKKGGRSVY  
FGELGFQSR TLIKYFEAYGATKIKPGDN PANWMLRVLPECEDEFADV I IQTSEYSKLTNE  
IAAAKVDPPKELKVAYLTEFAVPRSERQKLANKRLRTIYWRS PAYNLARLMVCV I IAFIL  
GSFVTERNLQVLTEDKMAYFSITFLSFI I V GILSIVSVLPVMLAIRDV F YKQLAAGMI  
DNDAVGWALGVAEMGFIVLASFLFCLVYLSTAGSFPVTFMRAFKFWVRIGK

>comp13096\_c1\_seq7; 697 84 2571 LEN=3023; translated



MVGLAPQPEYFFVFFGIVLVFNILMSELLFIFSTFASTSSMVQTASACIVFIFMLFCGFF  
IPPTTIPSYFQWLYWYNPLAWAYRALI INAFRNGDYMEEEADAILKRTGFVYADNKPFD  
DWITWAYIFMCGHILLSVVTSAIILSSVRVHKKPPPSFESIEMKDTDLKQSQNEETSNS  
QDVSIPFKPITLSFENICYDVKASTGDEDIRLLHNINGHFRAGRMCALMGESGAGKTTL  
DVIALRKNSGTVAGDIRINGFPQEQSSFRRCSGYVEQFDIQSPQLTVRETIVIFSGLLR  
LDSTKVKTNKEKEQFCDTVIKILELTPLAHCLVGSDEEGGLSFEQKKRLSIAVELAASPS  
ILFLDEPTTGLDARSASLVVKKLLRKIADQGRITICATIHQPSSAVFELFVSIIVSTKQSD  
RWHALTSSIIACLQDDLLLLKKGGRSVYFGELGFQSRITLIKIFYEAYGATKIKPGDNPANW  
MLRVLPECEDEFADVYIQTSEYSKLTNEIAAAKVDPPKELKVAYLTFEAVPRSERQKLAN  
KRLRTIYWRSPAYNLARLMVCVIAFILGSVFTERNLQVLTEDKMRAVFSITFLSFIIVGIL  
SIVSVLPVMLAIRDVYFKQLAAGMIDNDVAGWALGVAEMGFIVLASFLFCLVYLSTAGSF  
PVTFMRAFKFWGFFTFNLAIYSYFGQAFMCLVPTMATAQILCSVFIGLNNFFSGLIVRPQ  
YMRNIFAFTYWITPGHFVYEGLLISQYWGDRKVIATEGSDFYIWLRCRDRIDDRETCEGS  
VEQYVWVFFGKFNNDNTYQDVLILALFLVLARVATFFALKKFQYTNT

>comp13096\_c1\_seq8; 739 84 2495 LEN=2947; translated  
MVGLAPQPEYFFVFFGIVLVFNILMSELLFIFSTFASTSSMVQTASACIVFIFMLFCGFF  
IPPTTIPSYFQWLYWYNPLAWAYRALI INAFRNGDYMEEEADAILKRTGFVYADNKPFD  
DWITWAYIFMCGHILLSVVTSAIILSSVRVHKKPPPSFESIEMKDTDLKQSQNEETSNS  
QDVSIPFKPITLSFENICYDVKASTGDEDIRLLHNINGHFRAGRMCALMGESGAGKTTL  
DVIALRKNSGTVAGDIRINGFPQEQSSFRRCSGYVEQFDIQSPQLTVRETIVIFSGLLR  
LDSTKVKTNKEKEQFCDTVIKILELTPLAHCLVGSDEEGGLSFEQKKRLSIAVELAASPS  
ILFLDEPTTGLDARSASLVVKKLLRKIADQGRITICATIHQPSSAVFELFDDLLLLKKGGRSVY  
FGELGFQSRITLIKIFYEAYGATKIKPGDNPANWMLRVLPECEDEFADVYIQTSEYSKLTNE  
IAAAKVDPPKELKVAYLTFEAVPRSERQKLANKRLRTIYWRSPAYNLARLMVCVIAFIL  
GSVFTERNLQVLTEDKMRAVFSITFLSFIIVGILSIVSVLPVMLAIRDVYFKQLAAGMI  
DNDVAGWALGVAEMGFIVLASFLFCLVYLSTAGSFVTFMRAFKFWGFFTFNLAIYSYFG  
QAFMCLVPTMATAQILCSVFIGLNNFFSGLIVRPQYMRNIFAFTYWITPGHFVYEGLLIS  
QYWGDRKVIATEGSDFYIWLRCRDRIDDRETCEGSVEQYVWVFFGKFNNDNTYQDVLIL  
ALFLVLARVATFFALKKFQYTNT

>comp13097\_c1\_seq1; 276 1 790 LEN=1139; translated  
XSIVSPAAGATIVRAVYRTVNPSPMKFCASLLAAAVLVSSGESFLPVTTPTKHTSNNNKSI  
GSRNIDSNRRNSINIIQRTNLPPLKSNNDMDVDAQEREARKICLIPIPEDPTATFEAA  
MADSGGPQRDFDREEGVTETVVGYSGSTSRDTETPADQNPTYRNVQDYAESIRVTYNKDK  
WTYEQMLDYFFAVHTPADPRWAGTQYRSAIFYHTEDQKQMAEAACKRKGALGKYVSVVEKA  
SDFYRGEYHQKYVEKQVSGAYY

>comp13098\_c0\_seq1; 319 146 673 LEN=1155; translated  
MLTLQVFLFFLAHHAIFPYLESASAFLIVTTTRARKSQTAPSTTRSPSSHFLTNHPVPN  
AFVLNAGFEQLPGESNTDFIKRITSQSDDFMDQKAKAKKMTMPSTRGKSSSNESITEEG  
ESDKPKGKYQRIEEDAEKANGELAWEQKVQFDGQRFQNGVKQDSILRRHLGTF

>comp13099\_c0\_seq1; 1066 254 3628 LEN=3902; translated  
MTRLFPPEEANSVLSDETIHEAPEEFDSDDISSENESEDVMDGIDDDDEEDDDSDCSAST  
VSTSPLLKLIPTALASPQQHRSSLLDNGKSGMPLPPGSHLSANEPREPEKGVDRLLLMAR  
YPNADESQIQQALQRKELQORAAKIAATKKAQLFREQKDLDAERWRLOQEREQKQLEQL  
RNEYRQHQQNQLQKFQQQQQLQFHQQIEQFQMQSAQASNNGSGAERFVGTTEEERVQEN  
RLTNLNDQHHPKGSFGHAASPKNILPKRSQSGTDEDEEEDQDASYMWVSGMARSSYES  
ENSNYRNSNDGGSSGEDHADYYSRAVLSNSGGDTDESDDVEKAGNYFYHRTKSGGRES  
PNHSQRSSPIRKNLRESMSKVAKAFSSATAKTRPVPLGSSMDHPAKTAAASNSSGDHGAN  
RNTSNAHQAHQQKQRLNSGNNIDDTDENLPTDGSSSFDTDRDHNNNTNKYSVSSSTSSY  
YRNDQSKQVKGFHQYNDGGFGHADDEDEDASERKRLNGSRCCVWMKRNKLLVVISFLLV  
LVAI LATALMVAKKNTRNSPMSTESSPSGDEMMVDLPTDFGNDLESNDADGNSFSGEGET  
STGDI AVATPWDMPRVPPPSIAPESFPTENQSEFGEIGIPSRPPFLSQPTDQPTTSSEVP  
FLDW TWDVVGSGETIIKGTQIDQRFGESVAISEDGNTLVVGSPPNALGSGIVRIYQK  
DAGNDNG GDFSWKPIESLLGRQQGDGFGTTVALSKDGRVLAVGEPESDGSSTGDKAGN  
VRTYVYSPFG YVSRGPDLEGTGATDHFLGLLALSGDGSRLAIGAPYQDNSFVQLSTA  
AKQRGSGDRIGGG GSSLRSGSNGSVGSNGNRLVSGAVIVYEWSEKDRKWIPMGAPLMGE  
SNLDWFGKSLDLSN DGSLLCVGSPRNIQSGGHVRCFKESEDYAVPSSSDGSKLIETEF  
SVRWKPLGDP IRNTEP PVRSDDNFGASVSVSTDPGKRYVAIGAPGKNGANSEEIDRGE  
VTYVEFNPETSERGWI RLGREVLTPTNEGRDFRMGHSLLDHHDKLVGMPGADMAEVFE  
FEQDNWRWIRHPRLFEGGNRSGSAVNEYGAAVSMTFPFGDFIVGSPLAGGGNGSVQYQ  
RD

>comp13099\_c0\_seq2; 1066 254 3628 LEN=3918; translated

MTRLFPPEEANSVLSDETIHEAPEEFDSDDISSNESEDVMDGIDDDDEEDDDSDCSAST  
VSTSPLLKLIPTALASPQQQHRSSLLDNGKSGMPLPPGSHLSANEPRPEKGVDRLLLMAR  
YRNADESQIQQALQRKELQQRAAKIAATKKAQLFREQKLEDAERWRLQQEREQKQLEQL  
RNEYRQHQQNQELQKFQQQQQLQFHQQIEQFQMQSAQASNNGSGAERFVGTTEEERVQEN  
RLTNLNDQHPKGSFGHAASPSKNILPKRSQSGTDEDEEEDQDASYMWWVSGMARSSYES  
ENSNYRNSNDGGSSGEDHADYYSRVLSNSGGDTDESDDVEKAGNYFYHRTKSGGRESN  
HSQRSSPIRKNLRESMSKVAKAFSSTAKATRPVPLGSSMDHPAKTAAASNSSSGDHGARN  
TSNAHQAHQQKWQRLNSGNNIDDTDENLPTDGSSSFDTDRDHNNNTNKYSVSSSTSSYYRN  
DQSKQVKGFHQYNDGGFGHADDEDEDADSERKRLNGSRCCVWMKRKLLVVIFFSFLLLVAI  
LATALMVAKKNTNRSPMSTESSPSGDEMMVDLPTDFGNDLESNDADGNSFSGEGETSTGD  
IAVATPDMRPVPPPSIAPESFP TENQSEFEGEIPSRPFLSQPTDQPTTSSSEVPFLDW  
TWDVVGSETI IKGTPQIDQRFGESVAISEDGNTLVVGS PNALGSGIVRIYQKDAGNDNG  
GDFSWKPIESLLGRQQGDGFGTTVALSKDGRVLA VGEPESDGSTGDKAGNVRTYVYSPFG  
YVSRGPDLEGTGATDHFLGLLALSGDGSRLAIGAPYQDNSFVQLSTA AKQRGSGDRIGGG  
GSSLRSGSNGSVGSNGNRLVSGAVIVYEWSEKDRKWI PMGAPLMGESNLDFWFGKSLDLN  
DGSLLCVGSPRNIQSGGHVRCFKES EYAVPSSSDGSKLIETEF SVRWKPLGDP IRNTEP  
PVRSDDNFGASVSVSTDP TGKKYRVAIGAPGKNGANSEE IDRGEVTVYEFNPETSERGWI  
RLGREVLT PPTNEGRDFRMGHSLLDHHDKLVGMPGADMAEVFEFEQDNWRWIRHPRLF  
GGNRSGSAVNEYGA AVSMT PFGDFIVGSPLAGGGNGSVQVYQRD  
>comp13100\_c0\_seq1; 152 84 857 LEN=1200; translated  
MDPDYSSLLTTPMLMRGGLLLLVVLFQWFVARAPNVQKETKRRFQHALTGHALVQISYV  
LPKSI SLLMLLIGSIGMYLAKTFFFEQFLKAFGGLLRPKELSGEVLPGAFYFLIGTAITI  
SGLVTS DIRIARYAVECLALADPMASWIGSSIRSPRLYTIETDQNGGTRTSSVAGCLACF  
GTALVIGWGMMLLVGDNDNGNGNEADGNPVEFTLSTLTFAGALACTIAEGLPFGNDNLNIPV  
ITAFVVDTVASASAPSR  
>comp13100\_c0\_seq2; 366 136 797 LEN=1140; translated  
MFGGLEIKGASSPDAGDAPDNTPTDKGPEAGEQPPAVSSFGFMNAGPAAPGPAPAAPVSS  
FSFMNSAPAVAPEKQSSPPGAAAGSSFSFMNASPAAPEPTMSPANAAAPAAAPASGFS  
FMASEPTPKAEPVVEVEXPLGGSPGQPGNGNGNDNGNNDNGNGNEADGNPVEFTLSTL  
FAGALACTIAEGLPFGNDNLNIPVITAFVVDTVASASAPSR  
>comp13100\_c0\_seq3; 423 1 1853 LEN=2291; translated  
XGNGSGNSSGNSNNSNDNGNGNTTFSNWFVQTPVCCASRAELLTGKMYHNLRVKEGAKH  
QGCMHVDVEDDPRHPFWRDRFFSNHFASSSSGNSQNPKHQNNLNNLDYTI GIGKLLNTH  
NPTRFVPNGVDEMLINGGGDYLDPAFTHGTRTGGGCDATDATTANVERVVFDNCTESTGM  
PCYSTAVIGNASLSWIEKQVLETKRGRSGSCGSSLDKGRPRPFALVSVKAPHIQDNGGFP  
VATPAPWYRDADIPEAEAPRTPNYNATDAPGSSGHHLVVRTQPPLTETEAAARVDELYVSR  
LKTLLSVDDLVEGLVETLERLGLVLDQTYVLF TSDNGYRLGQFRMPQCKLHPYENDVRVPM  
MVRGPGIPSGRGGKTESETERGGTLF SHIHLVPTLLGLATGKHGSQDILPGAMDGTNLA  
SAML DGGGHRRAERPVRQTSETTAANKTSASSSAVLSPMRQSATSLLIEYTS LGNVVRYD  
HLIDTYNHSFVALRILPRRPTVAPAPGLAHNATPQGGRAGGAGRSPERRRAIVKGSTASA  
NLKYIEFRDSRFDWTRNKTPLERELYDLSDPYELDNLIGDAPVPLQKALADKTRLLA  
CSGEACRREHSTGLSMP  
>comp13100\_c0\_seq4; 85 1 734 LEN=1077; translated  
XLFRSLLLVLVLFQWFVARAPNVQKETKRRFQHALTGHALVQISYVLPKSI SLLMLLIG  
SIGMYLAKTFFFEQFLKAFGGLLRPKELSGEVLPGAFYFLIGTAITISGLVTS DIRIARY  
AVECLALADPMASWIGSSIRSPRLYTIETDQNGGTRTSSVAGCLACFGTALVIGWGMMLV  
GDNDNGNGNEADGNPVEFTLSTLTFAGALACTIAEGLPFGNDNLNIPVITAFVVDTVASA  
APSR  
>comp13101\_c0\_seq1; 248 88 1103 LEN=1103; translated  
MIKPNVFP GSKAVLLMLTTVTALLQNAAFSSTEIPEFP TKRFIPWSQLNWVEQHDARFLL  
YTSESWNSFLVADIERLSYKHVAEALGSTDEVTSEGLKRAHNALWHIAIDQLTWDCWINH  
YIGNSWHEELVDEHNVSWAFAELGWSEYTWGSENPDWPESEEKQYNELTPAERHAADRIC  
LPQQWLWDGVP LTHWNFVDGRSDVELTYEENYINPRIDVIHNI EAAEEDVDIVPVA AE TI  
TEHPSSVPSAAPTKNPSMRPTLRPTFSPTSPSVTPSVVPTESPSYHPSLRPTVSPSSP  
SDGPSLQPSAGPTSSPSSLPDGP SMEPSTAPTSTPSTX  
>comp13102\_c0\_seq1; 133 1 1619 LEN=1668; translated  
XSSNSNNGSSLIEPAIAARKTLLDHLQTAPGVKHEEDALRDRAIHYILVRATDPKIRA  
MAGALREHQFPSTRKHGGTF DSCGAWEDRTLGRVVFVEHGGEKDFLGAWTRQ NAYAMVGA I  
KTGVPLVPVLP SVWARVYRFEGCGQPEDTGHNAFGCGFLPAYGGECLSRRIEHDLECLSA  
MKVGPLQAMALPRHGIPSSVCGEARDQLPAPEVGASFDPETYQYGE GPPDALREWCPSCN

PPFRYESESKNPLLGWSIDSADPDLPMGMEDVSALGRAFPPELLPLWRHSASGGDRSSDI  
NSSDSDGPKTLCALEVPPVLCGDPDRRVCCFDELTI PKRFLPTGNGDPLSKETNLRDPAL  
SAFLTRFGRASRRRIAALHRPWWESLDDAWRDALSTGSCATLHIRRGDNISRCRDEGMTE  
FCSMDKTLDDYMERAVPMLLEALGSSKHVFMVMTDDPGEVTTARLAPWREREGYSIEAISGHN  
QYDSEYSDWDPFLES LHIAPSCRALVGHHISTVSDLVRRRLSCFRWGECPLSDMFEKEG  
>comp13103\_c0\_seq1; 427 1 1337 LEN=1467; translated  
DGSKVSKELLVIFLDASNQEEPEGANPSSCNVAQIVGTLPGTAVAAATADHDHRI GLRRR  
LPAKRSRRCRWQDSPHLPGAARDVVFAMLDMGAPFAKSDQSLIRTVNASKNSKLQAVAFD  
FKVLINTTTNDANANIDGNPKENGAAPEWSRTDRSTTRQSPPLPPPPTTPPTGEP SAT  
ANFIDTDRIKQVASLLNVKLGSSPEETDPVPTKKAPPKPKDYDPSAADIRAKYASKLKGG  
LAGIELAKSQVSETLT KGDAAGHLAARKIALMGDTTAAGATGGGSKKWLPSQAATQLLTL  
LTHRSIRVCLLPILSAGPGGADGSGEPRMEDFGAQLKNVVIDNMVPSLGSGGDGEDNED  
GIENALRKGVLEDELDPNRVLLVSDRDAYLRAGRDMGMNICRIRARNARRGNITAYTYI  
ESVEEVRDVVNEINGISFNVLNR  
>comp13103\_c0\_seq2; 429 1 1322 LEN=1452; translated  
DGSKVSKELLVIFLDASNQEEPEGANPSSCNVAQIVGTLPGTAVAAATADHDHRI GLRRR  
LPAKRSRRCRWQDSPHLPGAARDVVFAMLDMGAPFAKSDQSLIRTVNASKNSKLQAVAFD  
FKVLINTTTNDANANIDGNPKENGAAPEWSRTDRSITQQSPPTTPPTGEP SATANFID  
TDRIKQVASLLNVKLGSSPEETDPVPTKKAPPKPKDYDPSAADIRAKYASKLKGGLAGIE  
LAKSQVSETLT KGDAAGHLAARKIALMGDTTAAGATGGGSKKWLPSQAATQLLTL LTHRS  
IRVCLLPILSAGPGGADGSGEPRMEDFGAQLKNVVIDNMVPSLGSGGDGEDNEDGIENA  
LRKGVLEDELDPNRVLLVSDRDAYLRAGRDMGMNICRIRARNARRGNITAYTYIESVEE  
VRDVVNEINGISFNVLNR  
>comp13104\_c0\_seq1; 561 612 1793 LEN=1883; translated  
MPYTSTDKIANEAILDQAIQHTRKLSVVLRCQENDRNAPSLARLRRYVGEVYSTLWDAVA  
LTDNQDDGTIYDGGDDGGDFCDVVVYPQNLNPAAPESWINDIAEDLDSVISHDSICGWVS  
SSAMGRGKQFQFSEGMGSGGLDAHVSAINADREDRNLSPVVAIHVDPWPKGALKKEWQAE  
SVVFLDDSTEDTARGENLHPNGEDEDDETSFGGMIGGARIPSGSLFQKVAVAGTFDGM  
HYGHRKLLTLAISSVSPLSGELLIGVTVDEMLKHKSFSEDI PNLEERMAGVRDFVYRLAP  
GIKNRVRFIPIANEYGGPGTAE EGPNF DALVLSHETLENGHKLNEHRTQTGLGLEPLTLLC  
TRRTEPHGMSSTALRRRRRERILRREKAAQRSA  
>comp13105\_c0\_seq1; 273 65 1009 LEN=1462; translated  
MNKLFNLFQFSFLFCGYDMIGVVRAGSLRGRFDD SITASSSETNLSKKGYS SSGKFGS  
ENQIRSPTRRALTSNATIENNARQQSRGSIPLV SSTEDGLASDNYN SDFILDWVEYKSG  
ATSAEKLESEPI LTRKALFNGNRARSTRSVPLEWSPKLDRI FDN SATNSNAASDINRLPN  
DGT LIVKGISDPAPSATGLKPPDISRQGPLDHIP IASSPELDRVFDNSPSSPSIMFEIDE  
KPEDENRRVIDKFS DPSTKGTSLTEISRQQTSYQNIYKVPKRDNIFLRSSKRNP LPPYR  
GTSPEREALPDGYS  
>comp13106\_c0\_seq1; 378 125 799 LEN=1331; translated  
MEVLTNSKLSNPVLLPNAQLMEMLEGDV KRNEKALQMQQRKRKPRKSRFENRDWIQQHV  
LDYLKGTPCVNIPTAKLGELKARC MKKESVSSPIRKKRKAPSKGSSSPSPKHASRSSKQ  
AQKGCYALTEAETLQVLNFMFPQEMVEIHLMVEDLHDMSEAKQEEFLEMIRS YNTSVETM  
EKDSSNDVEEDEEEVVEDSIELLEKAGNDNDDGLPAMKVKKER  
>comp13107\_c0\_seq1; 334 189 1208 LEN=1273; translated  
MAVHHSHGRQYLTEVTYLNGESRAKETGSSFEMMGITTPSNDAMIEQQRKA EHQDFLVLA  
KKTNTDKVKGYTEL PKCLENSTCLYSTAERPSCR PWGHYYDTMYNRWLGEYSTPDAKPI  
QFLEIGFYQGWGFEAFSNFLPTAEKHSMEYS CAEPGPFKEGKWPYENPAQKHSWYESLLK  
GNRLHCGDASSYSFLKKTWDTYMNRTDAPPLMVVIDDGSHFADHMATSLFFWFPRIQPGG  
ILVVEDIQPISMANKFRTHIVPQLMKDLHWC GGEGKASVKN DPLCFPTISPLLQGIHCEM  
HICV FVRNNEPAYEPT ELLSKMPPNAFKGAQKCLFGPHN  
>comp13108\_c0\_seq2; 268 75 800 LEN=826; translated  
MASANELSSPPI SNPEATTDASEWTSFDPSSDLTVSAAYHLCISAVTPRPVAVITSRDPD  
SNILNCAPYSYTS LAGHPVVVTHGFTVSRAAGKRD TLRNIEKCGEWVYNVLSKEYLEKA  
NACSASLPYEEDETEHSGL EVL RDCSNASGVPR LKNALVAMECKLIDKKEITNDEGRHTS  
TIVMGRVTRFHLHSSVLK KDRAQNEPRVDIEAIQAVGRAGDITYWPIGTTPETVLP LTRP  
P  
>comp13109\_c0\_seq1; 1064 221 2995 LEN=3003; translated  
MTLQNSPYIGQQKIAVVVDPYSTGCCVAQEIQKRGYLLIAVWTIGFAEEMKTHVPKSCGR  
MDYFAEIDEAQTLKQTKARINEAAQGREIFCCFAGGEAGVDAADALSEYLG LRTNGTGIA  
NRRDKYVQQELIRKVGLRAVRQAGGPIFSDVEAFLTTEAYPVVLKPTESAGSDGVKLCYT

YEEAKQHFELKLMSSQMVNGGECPSVLCQEFLOGDEYVVDHVS RDGVHKTVMIVWYDKRKA  
NGGDFVYFGMKPVDPTTDVAKILIN YTRRTLDVLQITNGPTHSEIMMTSEGPCLVEVNCR  
AHGGDASWTP LARALTGGYSQVEVSADAFCDPGAFDKIPERPAYPFKASGQEVKLVSYSK  
GKVKSTPGYEV LKMLPSFVHMDGIVSVGDHVDYTHDLITAGAVIISHPDAEVVKRDI EF  
IRLMEQINGFFVYESQPTQLTNPDDKVRRTKAGTKNHRRLLSADGPNLLRMSNDRPELC  
RPLVRHMTTIDSSKEAVVITDPYSTGCVVASEVMKRGFSVIALWTKDISDELRYHTPLSC  
SGMNEFFATIIEEKDDL MATMEEIYNVAGTKKIVACFAGGEIGVDLADRLSERMKLRTNGT  
KHFNR RDKKVQOEIIRKHGLRSVRQAGGAEFSEVEEFLKTESYPVVLKPNEAAGSEGVKL  
CNSFEEAKEHF EALMASQLQVGGPCPSVLCQEF LRGKEYVIDHVS RDGIHKTTMLWSYDK  
RPLNGSDFVYFGTLPVDANSPEAKILIPYVRGILDAMEIANGASHAEVMMTPNGPCLVEM  
NVR AHGGDGNWVPLASALTGGYTQVDATVDCYLDKQKFATIPDVYPSPFNAAGQEVYLV S  
RGRGKVRFTPGFEVIRSLPSFVYLETGVMPPGGYVDFTVDLFTAIGSVMLMHKDP AVVDAD  
IKKIREMEANNEIIEYEPQLATLK

>comp13110\_c0\_seq1; 408 86 1213 LEN=1329; translated  
MDSEVETARIECLVQQGFTPSLARNVLLARSKENLPLTIWICDNSTSMNASDGRRLVSTA  
SQDDVRVQGC TRWHEELKETITYHAQLAALLDAPTKFIMLNKPSDEDDNPYPQEMGIAERG  
SEWIEDDMEFFTD SSVRIHPRGATPLTDHLRRIHKS LQHMETKIVLVLATDGRPTDGF GF  
VSPSVDRDFEMALRQVQSKAWIVVRLCTNDDAILKYYQRLDEQMELSLEVLDDYTDEARE  
VGEHNPWLTYGLGLHRCREMGMSCHA AFRFLDWLDERSLTRDEIRNTLRET FGLIDGSFG  
DTGSLLESD EDWAVFCDLVQKDQEKLAARCDRDKDAELRSFFPWNPKKKRTTHWIDVRS L  
KRHGCKTQFYMDQRIW

>comp13111\_c0\_seq1; 763 39 2663 LEN=2763; translated  
MNSQLYAHLEAYNDNDVNQDCNGGGDEASPSG SNGDKKGRNDSNIASVIPACKNDPKDA  
DHKSFGLDIGMWR LALIPVGLAVLVASDEARIVMLTLTCLIIWQH QKDTDVGTQSLWF  
RQGHRNHPREQLAYETSKGNTEHEL SMRNLYE CRKEASRLGLIGAPPMGGFEPTEKNGE  
RQFY PQNQIIGIGDNDS DLSFCQNSSKEDGNKPLLRMF EIDTVDSRATNSVVRFL EAH SQ  
LVLTIDKALYWLKISSGLHWGLGAHSQSVERVERAAMSRAFRVATREAVKEKDNPSKHSD  
NALANVSTSSKSMISAATAIATKTTNVAVPTTSPSVSGKHERKGGPQRKVDTSSILALAS  
TRRNIAQVIVHEAQSIVDV FVAVEDDLARRRQKRREDKTRSDGEIVDDCGVETNSVNHE  
EDHDSVVKYGTLTMP EVIDLVWIKKSRKHIAILLTDCAEF CGWSALGALSSVASDETQT  
ISTLQSRSYDLLNESTRTAMN LREYLASNLLDESSTSSSSTLSSTSVFPISSRTTENNY  
CEFVLPLLR YRQQLDALDAALWSFQMHTNHQCAINTLDAPSEAASSVNESDPTLTRQNP  
SHFDEDDPNIDSMIITSRLAWWKQVKQLSATCQTLEYQIESR LFP LTHEHDENQNASEGDS  
GSNSNNLSKININNANEAQSYEHGNDKELPDPDQRKAKSTKTLVFSGEGAKKKQSAKKAR  
KNSRV DGETSNPLGKSSSSTMYMPAARDPFSEQLLVRELQNR IEAVAALREEYPQEDSSS  
VGSTREPLEEYEGKESPKNTPSTNPKMNNVT KRKTEVATSIFLGASGSLLD ELKMTIGPT  
LQADENSEDNMVG VYAGIDTFTGAEKSCDLAPEE

>comp13111\_c0\_seq2; 760 39 2648 LEN=2748; translated  
MNSQLYAHLEAYNDNDVNQDCNGGGDEASPSG SNGDKKGRNDSNIASVIPACKNDPKDA  
DHKSFGLDIGMWR LALIPVGLAVLVASDEARIVMLTLTCLIIWQH QKDTDVGTQSLWF  
RQGHRNHPREQLAYETSKGNTEHEL SMRNLYE CRKEASRLGLIGAPPMGGFEPTEKNGE  
RQFY PQNQIIGIGDNDS DLSFCQNSSKEDGNKPLLRMF EIDTVDSRATNSVVRFL EAH SQ  
LVLTIDKALYWLKISSGLHWGLGAHSQSVERVERAAMSRAFRVATREAVKEKDNPSKHSD  
NALANVSTSSKSMISAATAIATKTTNVAVPTTSPSVSGKHERKGGPQRKVDTSSILALAS  
TRRNIAQVIVHEAQSIVDV FVAVEDDLARRRQKRREDKTRSDGEIVDDCGVETNSVNHE  
EDHDSVVKYGTLTMP EVIDLVWIKKSRKHIAILLTDCAEF CGWRSSVASDETQTISTLQ  
SRSYDLLNESTRTAMN LREYLASNLLDESSTSSSSTLSSTSVFPISSRTTENNYCEFVL  
PLLR YRQQLDALDAALWSFQMHTNHQCAINTLDAPSEAASSVNESDPTLTRQNP SHFDE  
DDPNIDSMIITSRLAWWKQVKQLSATCQTLEYQIESR LFP LTHEHDENQNASEGDSGSNSN  
NL SKININNANEAQSYEHGNDKELPDPDQRKAKSTKTLVFSGEGAKKKQSAKKARKNSRV  
DGETSNPLGKSSSSTMYMPAARDPFSEQLLVRELQNR IEAVAALREEYPQEDSSSVGSTR  
EPL EEEYEGKESPKNTPSTNPKMNNVT KRKTEVATSIFLGASGSLLD ELKMTIGPTLQADE  
NSEDNMVG VYAGIDTFTGAEKSCDLAPEE

>comp13112\_c0\_seq1; 418 155 1204 LEN=1288; translated  
MGLDPSRKYLKSDAEMSPARMT ECVVQPKISREGPLEDLTEGFDLGEMEQUIIFRMREKES  
NVYHTNCKERRDIANDELVSLWRQMLVDWMFFVVDCCDLQRHSVAAATYFLDIAILRGLC  
KTR EEHQLAAATSLQ MALKTFDTAVIKL DKLKVLGRGGFTENDVAIMEMEIKSLDWNLH  
PPTVYCYVRQFGRMIPRGTRNSTKEVIDDMAKLI AEELVLDERYIRYNPSVQGYSCVLVA  
LYFIPDYDFPQDLREIFFMRLTKTMNL DNNSPLISKVMRKIYKSLKHKDKLQKIIDISMA  
KTNR IELLEEDLGNDEEKEKNSKSGRGSKVAQEHHS PRDVKQKLRITL

>comp13113\_c0\_seq1; 591 187 1843 LEN=2375; translated  
MEDLGEGLVPTSSKHQVQSLVVAFEQGELPHFDPPFYAVAEAGEEKSVEEERKSPGEEERKT  
PEDENSNAFDSLSDLSNSLKPFPNF IATSDSANTPKSRQGTIIEVSPRTPKATGKSCSDP  
ARKDLERNNNSSQVLNSGDNNDKSLQGLTSHEINFNVENNVDSTKVQITEGARSNDTE  
NNRDENLEASVTEEFNVETIDKNNDKFEVSI TDEFHYDYIEKNDYGNPELSITDDFNFD  
SADDENMEMSITDDFNSTTEKSDDEYLEDFIEEINQENIEISITGEFLFDVEAQEQSSI  
ISSLRESRDPGGPSISSFNPSLETFDREDDAAQKSDSEERKVPKRGLTKSQWAKSVAADI  
TSTPSANSLNSEIRRPSSKSDGNDDIYSATSVLNFRLKKAQRNSFVRRNMKDPRETSSN  
ASSQQVSSEGEVSSGKNKPRTREELRNSLQKQVTARLKKSNNGDENGSTDDVKRSILG  
IVKEGNSDGEDEEKEKGEVVEGSATSEDNKENEGDEDEGEGDEEKGLKRQSECLKDMKG  
RALHGVDTSV

>comp13114\_c0\_seq1; 276 98 985 LEN=1385; translated  
MNTIREIEKINQQELDRGIAGTSASWHSQFANSAWVYVGNLDHQLTEGDVLCVMSQYGEV  
EDIHLVREEDTGKSRGF AFLKYEDSRSCILAVDNFCGMKVLGRSIRVDHVEQYRLPKKLQ  
EEEAFRTEGSVNTDGGAGHAYKGI ELENKYNVHQMDLFAPPSPTRHDNAEQNKTKAE  
LKTEKMKRKEERQRKRQEKEERHQRRQERKEKREKRRRKRARKQRDHSEDNSREEKEKI  
RDNSDGEKEERERGRNRKHNSDASPDDDYHKTERKDREHRSHRHEKRRNRSPN

>comp13115\_c0\_seq1; 897 914 3989 LEN=4084; minus strand; translated  
MRPLLLFLAAPIVAVSGDVPSENPFRAFANERPQLWNLADSDRHNGRQELVRALEGE  
VDCATACPSDRPEIGVSGDAFQNLVKECEVSSCPHPLPINCWDTSKVSNMDRAFYLMQK  
FDSPLHCWDTSKVTSMQSMFHKAIFNQPIGAWDTSKVKYMNMFFAARKFNQPVESWDT  
SGVQNMFGFLSRAVSFNQPVGKVVVTVNVYMERLFNSAYAFNQPINSWDTSNVYMKHMF  
FDSIFNQPIESWDITHVTAMNMMFGKAAVFNQPIGKWDTSHVNNMRGMFSNATAFNQPLD  
SWDISKVKNTMDMFAEANSFNQCLYLWPSEVAGRSKPPKTNRMFTNSGCPNKSAAANSLET  
WCQTKDDSCAAPTAAPTSPSTVSSRPSFKGETWEPSNSPTETPQTEIQFTVQVIIPPDEV  
DAYLETYIKNMRKFLIEQFLAENGRRQLEPELEIAADQEAIDEDVDVLDLIVELVRCDTL  
EDQQNADPGAMCLVTTFRLLVASPESGVVNEIASNIEDSIATGDFEKDLKTKADIGGEIL  
GVSVPPEEPSSAPSVVNASNAPSVGPDPAEGNINTWELLGVGKPEENKPSAIVVSMDFPF  
VGXVPQQMMSCDVVWCGIRRIKGLVQSFSDSVLPRDSRNSSHLNQNPFPFRSPGEVYFE  
ANPKKLSDNPGKPLYGKIYANAPAYGGCDQGTMLGFGTLDSDLDEDMVMTLLPRAFDEYSS  
LYRFPQFPQTKNGRIGKTVFNMTDPFAFGESSGDSQIWFNPENTQALTKANDEANSKG  
VGXTTELMVDFGTGTPGDPDPNVIDTVSFVDTRFVVVDVIIRSRFGSIFTRVSI EQTDATS  
AEAKVSESDVTAFCVDENGERFDDSTIQFTIGQYFRLCVSVLNDDDETNEFKYLP SRFE  
EVICKNDGLSRYLVDDYADGLTEVDLSKAASNILSLKSVITAGYFAKDETTFDCSGTVS  
LTTTNNRRRRRAEERNKTAATEASFGRTFQLAPTNNKMPPLPSPSANRSFRVLYGWLI AF  
VLVLL

>comp13116\_c0\_seq1; 312 120 1076 LEN=1198; translated  
MIFYHTDRSSLSLLIFFLATLLLLMADLI IANEGSDECSKFKAPNNDTDEYLVKEWKAAD  
DTLWKYVNEKVPVLEHTGSAAFDEHLKGVQAVLRYWGSVHLTNAGLFHSIYGTEGFQG  
FSLPLSERSAIKELIGEKAEKLAYVFCMVDRSTVDET VFAWKEEDSMSNASIYSFRARPE  
LGRFDITLNKEEWLDFIELSLADWLEQVEGAATKPNPLFLWEKGEAYAYRRLAYRKMNEI  
LSVERKERLGSRPRKTLEAVMSTEPSETRHLVQARNPPVSAAAALALDALRANGENIPID  
LRPQPSSGETFPGLNEL

>comp13117\_c0\_seq1; 16 1 409 LEN=865; translated  
XRCDAMRCDGACCDVPNFFLWRRGTFPIGVCKYLFAPGTNW INRMTSTHHLWTIPLVLWV  
SGGALHPVALPLSFCVVGTSALVSFCLTPVAIRAPHGSDPDIYLVNLSHEMVSGLGFG  
VLLAAACFAPRGAAAE

>comp13117\_c0\_seq2; 217 124 1096 LEN=1189; translated  
MWWFFQEGPDAKHKTWVHPVATFLFHYAVVGTSVPFLHDALVGAVYGPGLRCTVPPETE  
ELRKRVMVLAAYFALYFCVRLALRRKEKAYRFYSEFYGITFTCSVTIPMSALGFYTNRP  
LVAQAFCLAAGIDQLLWYVDIAGFLVVGTFPIGVCKYLFAPGTNW INRMTSTHHLWTIPL  
VLWVSGGALHPVALPLSFCVVGTSALVSFCLTPVAIRAPHGSDPDIYLVNLSHEMWAD  
VQWDIFRIGEERIPYLLRLVCWWSITNAIAFVVLFGISWPFAGGAARAFADATKQMW MRN  
TSAGFRPSRTMPTGATTSITHFY

>comp13117\_c0\_seq5; 58 1 599 LEN=692; translated  
XRCDAMRCDGACCDVPNFFLWRRGTFPIGVCKYLFAPGTNW INRMTSTHHLWTIPLVLWV  
SGGALHPVALPLSFCVVGTSALVSFCLTPVAIRAPHGSDPDIYLVNLSHEMWADVQWD  
IFRIGEERIPYLLRLVCWWSITNAIAFVVLFGISWPFAGGAARAFADATKQMW MRNTSAG  
FRPSRTMPTGATTSITHFY

>comp13117\_c0\_seq6; 175 124 906 LEN=1362; translated



ERGSGLAQALKLAGGVLVVLVALVAGFNASNGLL

>comp13121\_c0\_seq1; 725 290 2671 LEN=2854; translated  
MPPLQDISPFSSDESSENSRAELSTTSSLHEELHEELHEEHVDLEVP SGVV TANDATTTT  
KGSSSTDSSIHGQEIADSGNDNDNDNNNDNNNDGIHLKWSRITKTVTIRADNSGLLRGSI  
AAPTPQSREDFRKM MKKQLS I GNSNGDRQRKKTILSDVSGYAAPGEILAMMGPSGSGKTS  
LLNCLSGRNPYNAGVVS VNGKPLGGADMKRLMAKIAYVKQADIFFEHLTVRDQLGYTAML  
RLPQKWTKEKKLDEVEEII RLLRLTKVAESKITMLSGGEKKRVNIGTELLTDPVALLLDE  
PTSGLDSTSAVALIRMLQKLARSSHKTIITSIHQPSSALFHSFDRLIMLAEGHV VYFGRP  
RDSLQYLRRHKLDPCPDGYNAADHWMDLLVQDSAIEHENEDEDDCAVHVDSSPLTASSTVE  
CDVPSE RQNKMKTTNDNSRKRSTAQPRPDRKRGIGMTKRERLIGVWDGEAVAEQIDLFVE  
QRQTNNRLSQELVLADTNKKKTAQTQKSKYNTKWGFQYKTLVHRSLKNSQSAIFTPINLV  
KSCALGLLSGLLWFRMSYTE SRIFDRSSYFFFTMTFWVFDAMFQSFLLP SERAVVLKER  
ASGSYQLSAYFMGKTTSEMPARLVPLIYMVISFWMASISDQFSMFLGTTFISLLSVMAG  
EAIGLLVGATIYDTEKGMTAMTVIALFLALVGGFFVENVPSFLVWSKYLSPFKYSFDASL  
QLVFDKVPVPCDGSVGVESICHGSDEGTITPDEVLEFLGVQGSVGFNVGILVTIGLVP RYL  
AYLALRGKKEGDR

>comp13121\_c0\_seq2; 722 290 2635 LEN=2681; translated  
MPPLQDISPFSSDESSENSRAELSTTSSLHEELHEELHEEHVDLEVP SGVV TANDATTTT  
KGSSSTDSSIHGQEIADSGNDNDNDNNNDNNNDGIHLKWSRITKTVTIRADNSGLLRGSI  
AAPTPQSREDFRKM MKKQLS I GNSNGDRQRKKTILSDVSGYAAPGEILAMMGPSGSGKTS  
LLNCLSGRNPYNAGVVS VNGKPLGGADMKRLMAKIAYVKQADIFFEHLTVRDQLGYTAML  
RLPQKWTKEKKLDEVEEII RLLRLTKVAESKITMLSGGEKKRVNIGTELLTDPVALLLDE  
PTSGLDSTSAVALIRMLQKLARSSHKTIITSIHQPSSALFHSFDRLIMLAEGHV VYFGRP  
RDSLQYLRRHKLDPCPDGYNAADHWMDLLVQDSAIEHENEDEDDCAVHVDSSPLTASSTVE  
CDVPSE RQNKMKTTNDNSRKRSTAQPRPDRKRGIGMTKRERLIGVWDGEAVAEQIDLFVE  
QRQTNNRLSQELVLADTNKKKTAQTQKSKYNTKWGFQYKTLVHRSLKNSQSAIFTPINLV  
KSCALGLLSGLLWFRMSYTE SRIFDRSSYFFFTMTFWVFDAMFQSFLLP SERAVVLKER  
ASGSYQLSAYFMGKTTSEMPARLVPLIYMVISFWMASISDQFSMFLGTTFISLLSVMAG  
EAIGLLVGATIYDTEKGMTAMTVIALFLALVGGFFVENVPSFLVWSKYLSPFKYSFDASL  
QLVFDKVPVPCDGSVGVESICHGSDEGTITPDEVLEFLGVQGSVGFNVGILVTIVSFCNIS  
F

>comp13121\_c0\_seq4; 314 290 808 LEN=1026; translated  
MPPLQDISPFSSDESSENSRAELSTTSSLHEELHEELHEEHVDLEVP SGVV TANDATTTT  
KGSSSTDSSIHGQEIADSGNDNDNDNNNDNNNDGIHLKWSRITKTVTIRADNSGLLRGSI  
AAPTPQSREDFRKM MKKQLS I GNSNGDRQRKKTILSDVSGYAAPGEILAMMG

>comp13122\_c0\_seq1; 875 1 2351 LEN=2500; translated  
XDPLGFGTVRTGMRIGIPHVEQESIDTGTHTVQHREERLRSGVAVANTGPRVSNTRLRELT  
DDRS AFLGRILVRNSISTKHDCFSFENGAKD GWH SQPADPC SATATGDAIGFCGPPGSSM  
RPIASANDSSGGIPFC SVPISIDAAADGPVAADNHTAVDVGSGAHQDTVESRSEIGIGVD  
TAHAPSSSPDDATGSKFTAGNVTTGPASDKDSKGNKNALADDSNGDSETKGGLLP SYKQ  
LIVFTATTIL IWLSEPLLSLVDTTIVGLTASAESA VVQIAALGPATTLFDSLVTYTYFLA  
IATTNQLAPGLAEAAATETGAAASACGSKNPWRDLRKSASHLLGLAIVFGSLVSAITVFV  
GRGIEIYMVGAGSTNMGAAEAGAI VPLATNYARIRAAVAPVSILGFVAQSFCLVNLDIAT  
PAIAVAAA SVNVVGD LALSARYGIQGA AVATAMATVTS CAILLRKRKTTNRWKMKQED  
LERRVAASSNHGANEVATRNDADAGTDTDTKTPPATNEVPTETTNMSTGSSERKSTEQIL  
DNKNKNNNIPFWSIPDR TSMVNLFKLAGPIFFVMMAKVACYNIMTIRATTLGIVPLASHN  
IMMRVFFF FACFGDLSQAAQSFYPQVEAKERGKLI RRLFWIASFVGLSNNQSSQLILKK  
LGRFLAKDASIIDLMAQHAPWVGCAVLLHPFIMLLEGTVLANRDLVFMVGTYSLSLLHL  
SFVFSPISSFTTGLWRALFGFQLIRLVQFALRVWIKSRASTGSSTNYSSIGNADQEGIP A  
PPL

>comp13123\_c0\_seq1; 986 266 2870 LEN=2870; translated  
MTSCVAFGKNGPTVNHRQQQQLYHHQRITRIEDSPSLK TASEKNFVPIPYQPSLTARQLR  
RLRQDRLVGFS LMSLPLPLSQLETSN ILRHIPEENEAVFCNDPPNSFHLDRVIQDIYKEI  
DGDHV KHKENSITLNNQIKKNQSDDGTVAVRRC DGE SSSNKVNIIFEDSDSDCSTVG  
QENGASIFFDSSI SEISSRNLINKYLGTSNSRGNPVDLDDSF SHDTNIDGEDGTGNEPV  
EDSSIASASSGKIDTDRLEVMKAEFRTIWK RHEDEFLVWKEVIKTTTERPAPKTKVSTFRK  
QSYRDDSNHYMEKVNTLYGGLTVPVSGSNGVHNQEDSVQEDSVTLVSCSSTDTFGYDRE  
KKEEDFAMVENLSSGGSTDQPDTRSVTESVDLKSQATSRSLDTFGFSINNVTMNPLEETS  
ESP NHNDANSFAAAKDNQH GKEQNEEDPIQSHYAVESDRCILRRQDKQEA VSM AAKARRL  
RTYRLRAGNRERNEAAKNANGPHRPIIVVDEEAKPRHCGMLNVVKVNINDKQNSCQSVIS

DLTNISEKLQFNIDHEPDGRWDKRSLKRLSVGEQQGISVAVGDGNNHGMIEVKSCTRKES  
ISLREQMCPSEVEPELYKFDESVKTPPPYFKNSEIRAQLEHTSVFATQRNNGWKYSDESK  
WDDVSSIGLVGVETISTQFNQKHGSKFHIQSIRSVNPSIPFAIQTRPEEDGTSSDEELGS  
PKGICHIFRNQLATIDHNEKDEDSSASLTFSALWAEDDSSRIKKKEEKSSTRKAHPQLKL  
NPTFSTVFTEDCDSSGDSSSSSETTDVKMQQLLDVLYENKKMSGHRLCFVSPCWRIGTND  
EDVGGEDDKKTDTTKPSLSIHADASCK

>comp13123\_c0\_seq2; 1024 266 2791 LEN=3029; translated  
MTSCVAFGKNGPTVNHRQQQQLYHHQRITRIEDSPSLLKTASEKNFVIPYQPSLTARQLR  
RLRQDRLVGFSLMSLPLPLSQLETSNILRHIPEENEAVFCNDPPNSFHLDRVIQDIYKEI  
DGDHVKHKENSITLNNQIKKNQSDDGTAVARRCDGDESGSSSNKVNIIFEDSDSDCSTVG  
QENGASIFFDSSISEISSRNLINKYLGTSNSRGNPVDLDDSFSDHTNIDGEDGTGNEPV  
EDSSIASASSGKIDTDRLEVMKAEFRTIWKRHEDEFLVWKEVIKTTTERPAPKTKVSTFRK  
QSYRDDSNHYMEKVNTLYGGLTVPVSGGNGVHNQEDSVQEDSVTLVSCSSTDTFGYDRE  
KKEEDFAMVENLSSGGSTDQPDTRSVTESVDLKSQATSRSLDTFGFSINNVMTMNPLEETS  
ESPNHNDANSFAAAKDNQHGKEQNEEDPIQSHYAVESDRCILRRQDKQEAVSMAAKARRL  
RTYRLRAGNRERNEAAKNANGPHRPIIVVDEEAKPRHCGMLNVVKVNINDKQNSCQSVIS  
DLTNISEKLQFNIDHEPDGRWDKRSLKRLSVGEQQGISVAVGDGNNHGMIEVKSCTRKES  
ISLREQMCPSEVEPELYKFDESVKTPPPYFKNSEIRAQLEHTSVFATQRNNGWKYSDESK  
WDDVSSIGLVGVETISTQFNQKHGSKFHIQSIRSVNPSIPFAIQTRPEEDGTSSDEELGS  
PKGICHIFRNQLATIDHNEKDEDSSASLTFSALWAEDDSSRIKKKEEKSSTRKAHPQLKL  
NPTFSTVFTEDCDSSGDSSSSSETTDVKMQLASRCALRKQKDEVSNNTNTVKCTTTPGDY  
F

>comp13123\_c0\_seq3; 1004 266 2913 LEN=2913; translated  
MTSCVAFGKNGPTVNHRQQQQLYHHQRITRIEDSPSLLKTASEKNFVIPYQPSLTARQLR  
RLRQDRLVGFSLMSLPLPLSQLETSNILRHIPEENEAVFCNDPPNSFHLDRVIQDIYKEI  
DGDHVKHKENSITLNNQIKKNQSDDGTAVARRCDGDESGSSSNKVNIIFEDSDSDCSTVG  
QENGASIFFDSSISEISSRNLINKYLGTSNSRGNPVDLDDSFSDHTNIDGEDGTGNEPV  
EDSSIASASSGKIDTDRLEVMKAEFRTIWKRHEDEFLVWKEVIKTTTERPAPKTKVSTFRK  
QSYRDDSNHYMEKVNTLYGGLTVPVSGGNGVHNQEDSVQEDSVTLVSCSSTDTFGYDRE  
KKEEDFAMVENLSSGGSTDQPDTRSVTESVDLKSQATSRSLDTFGFSINNVMTMNPLEETS  
ESPNHNDANSFAAAKDNQHGKEQNEEDPIQSHYAVESDRCILRRQDKQEAVSMAAKARRL  
RTYRLRAGNRERNEAAKNANGPHRPIIVVDEEAKPRHCGMLNVVKVNINDKQNSCQSVIS  
DLTNISEKLQFNIDHEPDGRWDKRSLKRLSVGEQQGISVAVGDGNNHGMIEVKSCTRKES  
ISLREQMCPSEVEPELYKFDESVKTPPPYFKNSEIRAQLEHTSVFATQRNNGWKYSDESK  
WDDVSSIGLVGVETISTQFNQKHGSKFHIQSIRSVNPSIPFAIQTRPEEDGTSSDEELGS  
PKGICHIFRNQLATIDHNEKDEDSSASLTFSALWAEDDSSRIKKKEEKSSTRKAHPQLKL  
NPTFSTVFTEDCDSSGDSSSSSETTDVKMQLASRCALRKQKDEVSNNTNTVKCTTTPVVT  
GFXFVSPCWRIGTNDDEDVGGEDDKKTDTTKPSLSIHADASCK

>comp13124\_c0\_seq1; 607 153 2340 LEN=2501; translated  
MKSTVASNGNDGFWKPADEANDETTGATAVFNFSAPLAQQRMLLP IHKHKRQILYALEN  
FGVVVIVGETACGKSTQIPHYLMSNGWCDNGFQIVCTQPRR IAAQTLAARVAKEVGRGSL  
GATVGYTFRFDEHQKVP IVYVTDGILLREATLSDPLLSRYSVVMVDEAHERNLNSDALL  
GLLKKIRRRKPLRI I ICSATIDAEAFLDFFAPKAGKPEKVLSKRRRRRWDNVDGGRATTT  
SLPTKLNKGTIIISVDGRQHSVDIFYLDKPPSSNYLRSTVETALHICKISSKSDGDIILCFL  
PTGEDVDIAIRMAEEVVDSQEPHLAHDVVFLPLYSNLFPNLQARVFRVNGRRGDGNGFVK  
KKRIIFSTNIAETSVTVPGITHVIDSGLVKLPYFDPETGFDRLIVVPSSQASAKQRAGRA  
GRIQAGQCRLTYTESFFTDKMEISTPPEILRTNLSSFILTLKALGVDNILGFDVMDLPGV  
DALSHGLESLYALGAIDDDTNMTVLGMDMSSFPTEPRVSRMLLESREECSTEVAGIAGA  
LQVRSLFLTRGSSAGRQQRQLDYDNAISEFADSSGDHVTYVNVLSELDDRRLDREECTL  
KFLDYVALKRVVEVRDQLLRHLKFKGRIRSLGMATVEERRESILKSLTSGFFFNVAKLHN  
DGKYYTIRGTNHILVTPSSSSIFHTYGSHAHEYIIFCETHDGVRGGIELRAVSAIDPRWLR  
ELAPHYWH

>comp13125\_c0\_seq2; 616 104 979 LEN=1267; translated  
MKLSIAAGLMMALATTEAFAPSSIHKSAHSTALNAEESNNNFLPKIDAKAAASFVAASVF  
AFSTVGVTTTALPGFVEPAHAASKTVKQEAKKLSKEEKEYKKAQDNIDLCKKTLKAYEKL  
NSDAKSADKKASSALDSATKNLASAKKAYQATADKLAAAKSQKMPASAVKELTADAAGLK  
EVLKGEKIYSDASKAASATSQEVKSSAKGIDESKKALKKAESIKKAEKTYNKYQKKVK  
KQLKEQQNKLKKLENEASKLKSMAKAREAKELAGKQKAI ESESKNLEALKQL

>comp13126\_c0\_seq1; 529 424 2041 LEN=2246; minus strand; translated  
MKTKTVDTMKQDDDNISSNNKVENSDKKKKKKSKKKKKGEEKSKGINNDRDTESENDEK



SGYDSAIQSTGDGRLVASSAIEFYDDDSNILEYTKALRQLRPKEFCNTEFKLTTDLPLAQ  
KFGELKVLVKEIVRYGLDGEKAPPIQQYSGVHLEPKDYHKKLAESNTVIIDVRNHYEAA  
IGRFVPPTKDDSGAQTDTKATEGPKWIDPKMRKSTEFPAWLKDETKEMMKGKQVLMYCT  
GGIRCERASALLKYKMETDES VKDLGIKGVFQLQGGIDKYFKFEPDGGYWKGNVYVDFDR  
FAHAPPKIDGELHGRVIDKDDENDSKLPANAHVMGKCEACHKPWDMYRGKRRCPCTCGVPS  
LICKDCFLADKEGRKKGKEVRC DLCVEQGI FSKRQYRENDERFIQDYESKMTAKGLLLP  
NAAAQDPEVDSAVMAPNPKGITRLV LKNMCRKKMTEDALMEALPGITHI VVNTQRNRKNP  
SAEPIFTGMGWEMATPDDAARAVAKNNQLKVFGRITIGIAFQAPDGKDVWPAPNSRVV  
>comp13126\_c0\_seq2; 654 424 2434 LEN=2639; minus strand; translated  
MKTKTVDTMKQQDDDNISNNKVENSDKKKKKKSKKKKKGEEKSKGINNDRDTESENDEK  
SGYDSAIQSTGDGRLVASSAIEFYDDDLKKRAKQRKVTLSNKITTDNAENDTGLEEAL  
KKQRSKSKKKRHRDDDKAEREKELKQRDELDKVLIPEKKHHSLSLTLFFYQYIEPEWDD  
ETHEKMLRNLQKIGTTLELTGRMCAKEGLNCTLTGTHSNILEYTKALRQLRPKEFCNTE  
FKLTTDLPLAQKFGELKVLVKEIVRYGLDGEKAPPIQQYSGVHLEPKDYHKKLAESNTV  
IIDVRNHYEAAIGRFVPPTKDDSGAQTDTKATEGPKWIDPKMRKSTEFPAWLKDETKEM  
MKGKQVLMYCTGGIRCERASALLKYKMETDES VKDLGIKGVFQLQGGIDKYFKFEPDGGY  
WKGNVYVDFDRFAHAPPKIDGELHGRVIDKDDENDSKLPANAHVMGKCEACHKPWDMYRG  
KRRCPCTCGVPSLICKDCFLADKEGRKKGKEVRC DLCVEQGI FSKRQYRENDERFIQDYE  
SKMTAKGLLLPNAAAQDPEVDSAVMAPNPKGITRLV LKNMCRKKMTEDALMEALPGITHI  
VVNTQRNRKNPSAEPIFTGMGWEMATPDDAARAVAKNNQLKVFGRITIGIAFQAPDGKDV  
WPAPNSRVV  
>comp13127\_c0\_seq1; 991 278 2877 LEN=2902; translated  
MSTEEPTKNEDELGGLPPASSGVEAKRKHMIKSSSARVKPTKDNANAKKFANVQNSFSA  
DSPYFLSYVENEMKSMEIMRQTLNDIAARTKTFGKCGSLMAQSTRRLALACQLRQPRYAD  
EEDFDYAERRREMEVAERRRAIGEDMASLLAVMSGML EEAQAQMDMTRSFEATMVNALE  
HFARTEQSV AIDLKRNAEQATESADDMLAKYLN GRHATALAEDGGTESWNKFSEQVDNQG  
SGFLSRFSNNGKNQSRQKSESEDPVVRMAATAANMRLTLEQVRLAQATAELKRFQLLKHI  
VAHKQRRKFEIGEHLVTL SLHGVRAYFHHCSDLVTGLVPTMTRFQVDQSSARDTLENRLGP  
SWKAREEDIKGTIDGLKEVTRSAGIIVDAISNGDKMIERQVTSLQQIEDQVKIWELPNL  
LADSTRLQRDPTPGIFVEGWLYRKS D K I I SLKEWRKRFMMDAVGIYFYSNDESKKNE  
GFSYSNTLERVKMCDVVLCTVKEGTGKGGPRFCFEVHSPMSQKPLVLQARGPDEFKQVVDI  
IRKGI EHQ LASGNTTHITPKRGMPARSDSNESFQDETENVDMPELHDIDNQLCHEELDAK  
NTSLTPKLMKANPTCADCGAENPDWVSLNLGVLICIDCSGVHRS LGVHVS KVRIDRGSIQ  
ACFFIHS LIQRHKFFXLPVMKIKVRS LKLDALTEFEANVILAIGNENANGIWE EGVLMQK  
GWKKPIASSNRKTKEEWIKSKYLWKGF LNVSDDQGKTPEERE E IASKAMYRAAKEGNVLG  
IARSLAQGAVVTWINVDEGSKTALHACTQLK DDEDDDSKAI VCAELLIQNGAKMDTRDGL  
EQGVLDSALLANVDRSMIEYLS TKVT  
>comp13127\_c0\_seq2; 1020 278 2782 LEN=2807; translated  
MSTEEPTKNEDELGGLPPASSGVEAKRKHMIKSSSARVKPTKDNANAKKFANVQNSFSA  
DSPYFLSYVENEMKSMEIMRQTLNDIAARTKTFGKCGSLMAQSTRRLALACQLRQPRYAD  
EEDFDYAERRREMEVAERRRAIGEDMASLLAVMSGML EEAQAQMDMTRSFEATMVNALE  
HFARTEQSV AIDLKRNAEQATESADDMLAKYLN GRHATALAEDGGTESWNKFSEQVDNQG  
SGFLSRFSNNGKNQSRQKSESEDPVVRMAATAANMRLTLEQVRLAQATAELKRFQLLKHI  
VAHKQRRKFEIGEHLVTL SLHGVRAYFHHCSDLVTGLVPTMTRFQVDQSSARDTLENRLGP  
SWKAREEDIKGTIDGLKEVTRSAGIIVDAISNGDKMIERQVTSLQQIEDQVKIWELPNL  
LADSTRLQRDPTPGIFVEGWLYRKS D K I I SLKEWRKRFMMDAVGIYFYSNDESKKNE  
GFSYSNTLERVKMCDVVLCTVKEGTGKGGPRFCFEVHSPMSQKPLVLQARGPDEFKQVVDI  
IRKGI EHQ LASGNTTHITPKRGMPARSDSNESFQDETENVDMPELHDIDNQLCHEELDAK  
NTSLTPKLMKANPTCADCGAENPDWVSLNLGVLICIDCSGVHRS LGVHVS KVRSLKLDAL  
TEFEANVILAIGNENANGIWE EGVLMQKGWKKPIASSNRKTKEEWIKSKYLWKGF LNVSD  
DQGKTPEERE E IASKAMYRAAKEGNVLGIARSLAQGAVVTWINVDEGSKTALHACTQLKD  
DEDDDSKAI VCAELLIQNGAKMDTRDGLEQGVLDSALLANVDRSMIEYLS TKVT  
>comp13127\_c0\_seq4; 296 278 763 LEN=799; translated  
MSTEEPTKNEDELGGLPPASSGVEAKRKHMIKSSSARVKPTKDNANAKKFANVQNSFSA  
DSPYFLSYVENEMKSMEIMRQTLNDIAARTKTFGKCGSLMAQSTRRLALACQLRQPRYAD  
EEDFDYAERRREMEVAERRRAIGEDMASLLAVMSGVSGTTY  
>comp13128\_c0\_seq1; 513 167 1807 LEN=3455; translated  
MTTRPTLVEVATTKSPTKNRVSIVSCRRATSLVRVPLRGGDGSRDATLFKKS WKIVSTP  
WKYAVEKVTPQTSNIRVSHGTNV DENRVAEQGAEITSESLTTSKSSHYSPLQMYASC MG  
IVTLWMMTGTLFYSFVNDWPI PQSFFYAVDAGMSIGFCTDVVETKLVSKSFTIIFIVLGA

SVVGGALALFMQDLVEGVIDRERKNNSSILTKGYELMIEKETQKFDADNSGTLRSRSEFS  
KLLRATSSNVKISEDIDVLWTKFDGIEDGAIRFEEFVGTSRGINELIASLNDKTTAFHQ  
DELGGGKQSTATTLGSLSRSTSSVPSRLKAIWQSENRIYGVFIWVLLGIIFGMIDQHW  
DPITSTHFAISALATGGLTGPVNSDGILPARPSIFCGCYCLFGIPLMAITFGHFAQRLV  
ANHVAAMEEWGLTRPMTATDYK IARQYL TREITTS PPLK WIRKHGRQQQSSLPSSSGK  
PSSGLRLSDFVVLQLLRQGKISVRTLDILRNEFDLLDKDGTGLLTLEEATTWSTDGREEK  
PMVGPL

>comp13128\_c0\_seq2; 513 167 1807 LEN=3545; translated  
MTTRPTLVEVATTKSPTKNRVSIVSCRRATSLVRVPLRGGDGSRDATLFKKSWKIVSTP  
WKYAVEKVTPQTSNIRVSHGTNVNENRVAEQGAEITSESLSTTSKSSHYSPLQMYASCMG  
IVTLWMMTGTLFYSFVNDWPIQSFYAVDAGMSIGFCTDVVETKLVSKSFTIIFIVLGA  
SVVGGALALFMQDLVEGVIDRERKNNSSILTKGYELMIEKETQKFDADNSGTLRSRSEFS  
KLLRATSSNVKISEDIDVLWTKFDGIEDGAIRFEEFVGTSRGINELIASLNDKTTAFHQ  
DELGGGKQSTATTLGSLSRSTSSVPSRLKAIWQSENRIYGVFIWVLLGIIFGMIDQHW  
DPITSTHFAISALATGGLTGPVNSDGILPARPSIFCGCYCLFGIPLMAITFGHFAQRLV  
ANHVAAMEEWGLTRPMTATDYK IARQYL TREITTS PPLK WIRKHGRQQQSSLPSSSGK  
PSSGLRLSDFVVLQLLRQGKISVRTLDILRNEFDLLDKDGTGLLTLEEATTWSTDGREEK  
PMVGPL

>comp13129\_c0\_seq1; 297 1 1238 LEN=1598; translated  
XSHKRNQISPSFEILLEVFLSTDFLIFDTRADNFPTHSEERERAFTILMGYRSECRSSRR  
IFGLLFSLVVFFVDFQCLQNVQASSNGRGGVGRSSYSPNPSYDVLGVSKSADQKEI  
KKAYRKLALRLHPDKGGDEEKFKEVSKAYETLSDEERRKTYDIYGEAGVENGSAPNGFSG  
ANPFGSSSNGNAFENFFSSTNFRGSRQSFSGDATGNIDLSEI IKEMMGGEAVGTDQFE  
KRSGRGPSSSEGKMKSYTHRVRTLEELAVGKSKKFKIKFQGKEKVDINLKPWKDGT  
KVIFQGNKIPTMIFVIEELPHEYLRRREGDDLHYTCFFSEGQAQQEIKLNLPLPSGEDWS  
QTVNLHDESSTPLPLNGKILVIPSKGMPKGGPEHGNLVVEFRRRRSPPKKH

>comp13130\_c0\_seq1; 1224 99 4458 LEN=4458; translated  
MEEGTGDSSTPVQWEGKIXILRRGDLARILGIQKGLNDHKGDLSRVVRSHLNPDWSAGL  
EQNGHAYLYDIELVLGGKLNQVPRCELLYTFAFEEMGTGDSRQRKRKQNPPEKKNDK  
NAKNASSSSGMKKKTATGKVAATKSIGNNRKRKGVITISATTSSTNRNNTTNGTGIGM  
FEKRRREFERCLNRLEKLDVYLFSEHDIPPEFDECYDRQDPVSENESSAASPTTEKKQ  
IPDDMHMQPPSPSSSTEVPDKEGKSASVLPNHPYNFIVLRKRLEQNYIIDRQRLT  
EAEENFHADGTTVDASDATKKGSSNFSQQHPFGINWELFRDDVIGMCNAAVERNKGNFDD  
GTPGTLNSAEKIKSSMEQIYEKTGRRQVQEMEVSNDALRF SKIMEATENKEAMQKGW  
RKRAFPERQYERLTTDAVCAGLSELDERIATYELQTNLKDSF IGLSYTYNDTGQSEGMK  
TIISEGDDKNEQEKAARALSTDDGV IKAQVMASMSQLLIAVQDRVMTENGVLQKELRSA  
SWAIGIEKVGEQIVSSKQLSDASQPEIVEQPVWGMDCYTRKNISICLGTKFDKDVVLF  
IEKWLLPAINACPVDLAYNLSNAARILEGLPLDTASSLNQRKATTELWSTTLGKALLK  
KIEETGPPWLHCAARILRKAIESMGHDFFRVHPKGGHSIVLSPKIAPNRLVTFYRGEVYP  
SWRWGEKMDAISLIQQRNLLKPRLPDFYNMALERPQQDPRGYGLLFVDASRKSQYGSMLS  
HSCNPSCVAVVAVNGKLTAMTTLRELITIGDEVTFDYNVAVTESLHEYQAAVCLCGQVHC  
RGSFLHFATADCYQVNLNRNSP IAVRLAQLIKGCTKRVMSDDDI AILERHGFQTAAFGAV  
SVNRRKTNSDFERSLSDSMDVFP IWLRTHVADILRYIEYERRALPIALISNQISNHKSV  
DDSGTNDKRRVNVANVKEASQSNAAKSIDDKPVKGSKPQPTFFYYLQRKRESFISQLL  
EERKNESMTGGEIEREMKKLASAEWKSFDDEMKGHWKEQAI AEWEKNGGKKAQVLEQQRL  
KRLSQSKNSKNKHNTCEPKKSTNTKTQESPAGNDGLETKKISFQAADAEGVTAMEQRIQ  
QLTQSLSRVGRVLDHRHREELLRQKQSEKSTEVHSPAELRELAHSPLAIMSDEHVVAFMW  
NHENGIIRTLRMAKQEVCSVSPQLNSALEDVESNYTSLAGFGRPWEEKGADIDFMPPPQK  
RELLNEALLKFRITLLDGIIDMATDIKNLRASARENAREKREERKQRAEKISKISTS  
CSDTEIRSAIKFVLNGLIDTIEGDDSDSEVSDNDPNI SEPWLNNYNKRFRKMEKAADLLLL  
YRRTSTFFRLVPYESLQSSPIEVYAREVGNVXAFCDMIKETSEGMDRDELKPKDQDIEM  
ADENHNKAKPSTEV

>comp13130\_c0\_seq2; 796 1 2929 LEN=3090; translated  
MDIKETSEGMDRDELKPKDQDIEMADENHNKAKPSTEVKRTGVCEPEDIISEVVVDYQGD  
YIFSQILQWYNAGIGQKPGIPDIIGCALLPSMSGCWTIDTTKGSNAATGTRTKYQSNIRP  
KLVEWFKDPFKRGPWTEDLRRGFVDKDDDSIEKASKFWLPIGSPVLDLVTGDDCNLMD  
ALRQLGTDPFVENSQSDGLLSSVDHGRPAQAVCNWVQCEKPDCKKWRKIPWHVDIDIIS  
KSFVCADHIWGLDPPSCDAPEDVWDETTDACVEADGSVKPKGVKSTSPVVCSDQFPKVS  
RDIKDFKIGDRFDILRPGKEKWSIASVVDVALDSKKIQHFHVKTQSKNDVWLEEHSYRIA  
TLHTHTSQSKQKAPTQIQLPSISETSEKASKLEKLIKASQNNQRIAKQLSKSNESSEK

DVQFRSTTNKTENRKTNFR IEDDDDDDEGLFDV I SSEDEDDDEENHEMEHETEITDIRSN  
GGSDKERVEKRSTVTDHSSSDSSFKKETNVVRSEHSDVENDCTKLSAKTKSAFTIPKKEK  
GKRSSSIVIPKKNAIIPKKPQSSSSVGTSLISKAMLEGKVKKKSRSPAKKSLLSLSPSATK  
ERSNHRKHEISGTSSSPLKRKTFSEMSKTTTTLTSPPTRVTKRDQIEINNGNKSRSPLSKA  
MVNPRRSYNDRYSIEQRRERELYRDSNEYSVRRSSDHYRDSSDTNDYSARRTNDSSNNLSQ  
RGSSMDRRRVHDSDQNI SPRRNYDSRGHDEYGDDEYR.SRHS.DHSRYKHEDDVYR.SRQYDS  
YHNEDNVERSRNKSSDYSPRRISYRREGKHEQYSDEYFHDRRMSGSDRRRSEREGYDYD  
GRIVDDSDPYVSRRPEAEYRRRGTDIDRDVNRDEYRHLRLEEDERSFRSHFDAEDYRRVD  
DVKVSVDGVMIRLHDERKGEGEHLMVATNIHDACKATIFRKNMIIRMKILDIEIGAVDRPH  
SDNKKSNRYNLKRCY

>comp13131\_c0\_seq1; 1301 191 4093 LEN=4228; translated  
MAMKALLALVLLLASTAVQA FDSNECDVYVFR TMENALWHCGDPLPFDP I PGQWTALYCD  
HSQGDWNNWPF AWASTHPDDWCD FMVATVRRVNNQDI EGRYPLSQDIALGNTPGPNEHFF  
SSIKDWGCYMVDEIYNENTGLMENRTTASYLVNSMAGETASDVNQQCERWYGMFDYWNLS  
EDIRNLMWGHIPGADYEPQRNKWGRCHYDHSF MSPNYNREIGVEYKECDPGYICELKYQ  
DYAACFPDPAADHECCVSWNNKCENVGDC CAGSECNEWGFCDTEVPMVFE DPPPICDHRD  
QKTDRALWSRCYDTENNDCAEGYKCEGNW WFAQCEVDPTVKTDCC LWDFDTNFPRPGDCC  
TGWYAHCHEYSEEDGECLWSQCIPGRE TGVDENGNSMLGVSDGLCSSPPIPMTFNEHINEC  
TGAVCGMWGDPHIITCDDLHYDCQAVGLF TLMKNHMFDIQANFVSIETPWGGASITNDLA  
IDYIKDQYDETNPNVPTFQVSPNFDRM SPDNPEYDPKSRFIGNCPVLFYVDQELVDIS  
NVADDGFMYGDMHSDYSAQIIADWSQINF KHLAGIDENGQKYSSHIVWIEGSGPFTEWS  
CILSYFICLPREEEGEFIESSLG LLGTPTKDTRDDWMAPDGQTLV I PDHDRIEASFKYCV  
ENWCVTQDQSF LAYEEGLTFEDYKCEEQVFEAFDVYACPDPAVIEQCKDSDQMIACQME  
ACAGNPEIDREIEVIDELTKNSGEEENL LEFPDVETDYGD CANLGAGLSASTGKGSYSL  
AYPQINAIYDGGFTVGHDNSLSVLVGGNFHCKSGAGFEGRGVFMKDAKLDEGACGR LAA  
TIHGSLIQPFENTVCI EVGRDLEIDASFAESKMIMYEFDNSHR SCHLLYGRGCTLNGVEC  
GTNMTVLEENHVHTHGDFKRDP ELDLSRWKELTLLKQKTNYWSGLPANGVATVEGDVLT  
FDAGPDHNPVQIFKIDPISSDVIGVVF SKGLIGKTIMIIVKGS GDFNVPAMCFHPADAMT  
TDAPICGKDTFPSSLTSSIAWVFPTRRTITMDGYYEFQGS IIMPRGDLI FKADGHSGRMI  
VGGSLTIDGYAELHNYEFD PASGPLPLPKNDLDQICEV VHPACDET IKPLTSTTACPS  
RPDGVVKLLKSSAPIPENEPILYDIIIEDPKDMSSAKTVKFKVDNPFANFTDIYVKHVKK  
VGKHFMDPVCE SMPFTPGCNTEAPEIEVGCHEYPNVDPFALVSIYFASKKDETVLGLHSD  
EVAIDKCCRAPQ EYENGNYGIVEYTFEIQCTCPEGIAQGR

>comp13131\_c0\_seq2; 1221 191 4287 LEN=4422; translated  
MAMKALLALVLLLASTAVQA FDSNECDVYVFR TMENALWHCGDPLPFDP I PGQWTALYCD  
HSQGDWNNWPF AWASTHPDDWCD FMVATVRRVNNQDI EGRYPLSQDIALGNTPGPNEHFF  
SSIKDWGCYMVDEIYNENTGLMENRTTASYLVNSMAGETASDVNQQCERWYGMFDYWNLS  
EDIRNLMWGHIPGAGKRQRSQLSRGG LFACLLVCLCCGSIRMTQHSLGFDXNSWVEHDD  
DKLAFFLMYLCIRSIYRLSPDYEPQRNKWGRCHYDHSF MSPNYNREIGVEYKECDPGYIC  
ELKYQDYAACFPDPAADHECCVSWNNKCEN VGDC CAGSECNEWGFCDTEVPMVFE DPPPIC  
CDHRDQKTDRALWSRCYDTENNDCAEGYKCEGNW WFAQCEVDPTVKTDCC LWDFDTNFPR  
PGDCC TGWYAHCHEYSEEDGECLWSQCIPGRE TGVDENGNSMLGVSDGLCSSPPIPMTFNE  
HINECTGAVCGMWGDPHIITCDDLHYDCQAVGLF TLMKNHMFDIQANFVSIETPWGGAS I  
TNDLAIDYIKDQYDETNPNVPTFQVSPNFDRM SPDNPEYDPKSRFIGNCPVLFYVDQ E  
LVDISNVADDGFMYGDMHSDYSAQIIADWSQINF KHLAGIDENGQKYSSHIVWIEGSGP  
FTEWSCILSYFICLPREEEGEFIESSLG LLGTPTKDTRDDWMAPDGQTLV I PDHDRIEAS  
FKYCVENWCVTQDQSF LAYEEGLTFEDYKCEEQVFEAFDVYACPDPAVIEQCKDSDQMI  
ACQMEACAGNPEIDREIEVIDELTKNSGEEENL LEFPDVETDYGD CANLGAGLSASTGK  
GSYSLAYPQINAIYDGGFTVGHDNSLSVLVGGNFHCKSGAGFEGRGVFMKDAKLDEGAC  
GRLAATI HGSLIQPFENTVCI EVGRDLEIDASFAESKMIMYEFDNSHR SCHLLYGRGCTL  
NGVECGTNMTVLEENHVHTHGDFKRDP ELDLSRWKELTLLKQKTNYWSGLPANGVATVE  
GDVLTFDAGPDHNPVQIFKIDPISSDVIGVVF SKGLIGKTIMIIVKGS GDFNVPAMCFHP  
ADAMTTDAPICGKDTFPSSLTSSIAWVFPTRRTITMDGYYEFQGS IIMPRGDLI FKADGH  
SGRMI VGGSLTIDGYAELHNYEFD PASGPLPLPKNDLDQICEV VHPACDET IKPLTST  
TACPSRPDGVVKLLKSSAPIPENEPILYDIIIEDPKDMSSAKTVKFKVDNPFANFTDIYV  
KHVKKVGKHFMDPVCE SMPFTPGCNTEAPEIEVGCHEYPNVDPFALVSIYFASKKDETVL  
GLHSDEVAIDKCCRAPQ EYENGNYGIVEYTFEIQCTCPEGIAQGR

>comp13132\_c0\_seq1; 448 254 2041 LEN=2309; translated  
MISLSGAGGSFAESPASGKAKTHGGXLQQPMP SQKDSAEKKQRKTPPRKAAQRQALQAVV  
PAAEDPGMPRNRLRLRFATDRCCQRVALLDGGPANGRPEGARGTAAGPVALSAPPSRAEGR

GRARDPPPKPLVVPRLFLGGRRGKRTGPREQKRGGLDPDRGEAAGGPPGLGAARRRG  
AFVGAVLDRSGEAMGAVGEHGSHFQNNLTGHTNGVDAYATAFGANDSNNEQSNHQSSDT  
GHGYGKNGGSIKTDDDNEPRSYGDI EDGIRLVVRVQHALKEKSLGLTDGADLAELAAAKD  
NPYARSGGLIGDEAGNLALEDLRLTLLEKKIQMDQNKKIRKEFSWQHKGNSKRDSAAA  
ETESSQGRSEEHQTPAGDPSDADRSSSDNHAGALDPDRVLSESI AKLXGAERPEQEKDG  
RRDRRLNRAFRWTHGTDYGRNPRTRAVALPTATHQSGRGTKRSDVECYGGIHTARQTSL  
CGCLGKMVPIRTSFRQLQRRVTAVRPKQKDGALRFHFHP IPSQSTQSTLVSQVPAMLVAIA  
FGLFIGLYEEEEQEHLSPQSSPLAERFKPIATHVWEEQMERDGGVERFDVPINKES  
>comp13133\_c0\_seq1; 303 177 1976 LEN=2347; translated  
MTNYLSCALLFFLANAISSLTNSVGLSVYVASAAAVPTIKKQHANITNESIAISSDVVRG  
TSIFGAGYTYNSCSSLNLTAKIAPARIRATGASRQKAATLVEAFTVAPGEAPAAMDPPNQR  
TTQPAPKQPATIVPWRPASATGANTTMRVTQLEAVLDARSASTVIPTIGAEGXEAELP  
QPSSP INAVLDRVPTGALTAILLVGGVCVACLVCVCRHRRRICCRSHHTTSSRGTDARAAA  
GPNEDDHFYTRLPDISMEVDATVEEENQPSVDSDTTAISNGDGGNDEVRADGGDIVAEET  
SRPPEEAGDQGNALRSVQSEQNENREQQNQVQANEESNPNYHLMQEAQNHNNTDRNQ  
GNRENEAAPLLHPSFNGDIDIDSADQPRQSQRSNRCCSMLHWSIFITILFFVGTSLFFFP  
QIPVYNVCNDEVAWSEIVKKIVTFRIDAGLEILTSLSNPNRIAAALDEGKGTFSFQKQF  
GTYPVIPPMTVQPMSITDFMIIVHITPADRHQAFQLAEAFYHRTLILEAEFEGTIRVPA  
LFLNTQDVSANITVDINEISDRSLCHCPTWDGDKNHSIDSLKLMEDQWSIHFNQWNPYR  
>comp13134\_c0\_seq1; 994 209 3088 LEN=4782; translated  
MATQGATPTTARDDASIHNEESIRVPKTMVEALEFDDPYKALMALSQNSQEKATDLSHKL  
ISEIKENLSLDGGGHLNNGSSSHKDGNRLSDILPDLKRLPNTKDADSHPVATAIACSDS  
ILHSLTKIASGGSQASQEI VQLEQEKRELEQNAIDVETALRLRKASDLAAQSLSAQR  
YEQASAAIQDYTQLQKKHRLTKRAKAYAGEYTVTQLDTSKATLRKLLQDYQQAVQSSDLQAL  
GKLT PMLQMV EYEKEALALYLRLKLGILKSELVKAASNSIVNNNNKQRPSGPPPPYIRMG  
RVYNSAFTILRHHLPMVSHCLYRAEGDAAVVQLVNVQIEDTVLPLFE EYISSRQLGRSSR  
NSQRIYGVLESRLVSEGVGGNGGGIGGVPVGGSSGSPSFDDAGFSTEIGSLADVDTSMEE  
AVLCLQHAESYTRFIQHTCREVNKARALRFQSEQEEHRVERERRQWTMGMKNADEAKDDD  
GFSEEKEYVPLEILPAHTSLQEKVAEVGGYYATIESCLLLASMQRAFSISDDARQYSAL  
GMVTSSSSAGRPGMNMNTSGPLKTSIVESSLYAARRGAQRAFATGHTGTASAVTNYFADC  
LRDVL AQHLIRRTEDLGVNPLKPGEGGLEGSAGIFGTVGLTGRQAHQSVMGHGSSIDEMQ  
REREIQLGISRACATMNDLEVAANHTKELERLLTKSVDQGFPPNTPETEQLRMCVQSLGP  
VAGTFTLASDQSVESLLSVLKPRIRAI VTDVAVGSDHGASHGGGASGFSSVIVGGGITKTS  
TDRHSVRMNYELDEDAYQLLEVSQS YVSR LCTLLDEMLVPLCRYLAPRLADSLVLGVLGT  
VSKRLEVSLKCRFTALGALS L DSDIRDLIHYAKDRLVSPDFNSSNAVLCNACTPLSRLL  
QIAKLMNLDLLEDVLDLISSSKRKGHWDLKMEDSKAYLSLRVEFDAEIVGRLLKGVDEE  
>comp13134\_c0\_seq2; 994 209 3088 LEN=4999; translated  
MATQGATPTTARDDASIHNEESIRVPKTMVEALEFDDPYKALMALSQNSQEKATDLSHKL  
ISEIKENLSLDGGGHLNNGSSSHKDGNRLSDILPDLKRLPNTKDADSHPVATAIACSDS  
ILHSLTKIASGGSQASQEI VQLEQEKRELEQNAIDVETALRLRKASDLAAQSLSAQR  
YEQASAAIQDYTQLQKKHRLTKRAKAYAGEYTVTQLDTSKATLRKLLQDYQQAVQSSDLQAL  
GKLT PMLQMV EYEKEALALYLRLKLGILKSELVKAASNSIVNNNNKQRPSGPPPPYIRMG  
RVYNSAFTILRHHLPMVSHCLYRAEGDAAVVQLVNVQIEDTVLPLFE EYISSRQLGRSSR  
NSQRIYGVLESRLVSEGVGGNGGGIGGVPVGGSSGSPSFDDAGFSTEIGSLADVDTSMEE  
AVLCLQHAESYTRFIQHTCREVNKARALRFQSEQEEHRVERERRQWTMGMKNADEAKDDD  
GFSEEKEYVPLEILPAHTSLQEKVAEVGGYYATIESCLLLASMQRAFSISDDARQYSAL  
GMVTSSSSAGRPGMNMNTSGPLKTSIVESSLYAARRGAQRAFATGHTGTASAVTNYFADC  
LRDVL AQHLIRRTEDLGVNPLKPGEGGLEGSAGIFGTVGLTGRQAHQSVMGHGSSIDEMQ  
REREIQLGISRACATMNDLEVAANHTKELERLLTKSVDQGFPPNTPETEQLRMCVQSLGP  
VAGTFTLASDQSVESLLSVLKPRIRAI VTDVAVGSDHGASHGGGASGFSSVIVGGGITKTS  
TDRHSVRMNYELDEDAYQLLEVSQS YVSR LCTLLDEMLVPLCRYLAPRLADSLVLGVLGT  
VSKRLEVSLKCRFTALGALS L DSDIRDLIHYAKDRLVSPDFNSSNAVLCNACTPLSRLL  
QIAKLMNLDLLEDVLDLISSSKRKGHWDLKMEDSKAYLSLRVEFDAEIVGRLLKGVDEE  
>comp13134\_c0\_seq3; 994 209 3088 LEN=4637; translated  
MATQGATPTTARDDASIHNEESIRVPKTMVEALEFDDPYKALMALSQNSQEKATDLSHKL  
ISEIKENLSLDGGGHLNNGSSSHKDGNRLSDILPDLKRLPNTKDADSHPVATAIACSDS  
ILHSLTKIASGGSQASQEI VQLEQEKRELEQNAIDVETALRLRKASDLAAQSLSAQR  
YEQASAAIQDYTQLQKKHRLTKRAKAYAGEYTVTQLDTSKATLRKLLQDYQQAVQSSDLQAL  
GKLT PMLQMV EYEKEALALYLRLKLGILKSELVKAASNSIVNNNNKQRPSGPPPPYIRMG  
RVYNSAFTILRHHLPMVSHCLYRAEGDAAVVQLVNVQIEDTVLPLFE EYISSRQLGRSSR

NSQRIYGVLESRLVSEGVGGNGGGIGGVPVGGSSGSPSFDDAGFSTEIGSLADVDTSMEE  
AVLCLQHAESYTRFIQHTCREVNKARALRFQSEQEEHRVERERRQWTMGMKNADEAKDDD  
GFSEEKEYVPLEILPAHTSLQEKVAEVGGYYATIESCLLLASMQRAFSISSDDARQYSAL  
GMVTSSSSAGRPGMMNMTSGPLKTSIVESSLYAARRGAQRAFATGHTGTASAVTNYFADC  
LRDVLAQHLIRRTEDLGVNPLKPGEGGLEGSAGIFGTVGLTGRQAHQSVMGHGSSIDEMQ  
REREIQLGISRACATMNDLEVAANHTKELERLLTKSVDQGFPPNTPETEQLRMCVQSLGP  
VAGTFTLASDQSVESLLSVLKPRIRAIVTDVAVGSDHGASHGGGASGFSSVIVGGGITKTS  
TDRHSVRMNYELDEDAYQLEVSQSYSVSRCTLLDEMLVPLCRYLAPRLADSLVLGVLGT  
VSKRLEVSLKCCRFTALGALSLSDSIRDLIHYAKDRLVSPDFNSSNAVLCNACTPLSRLL  
QIAKLMNLDDLEDVLDLISSSKRKGHWDLKMEDSKAYLSLRVEFDAEIVGRLLKGVDEE  
>comp13134\_c0\_seq4; 980 209 3213 LEN=5124; translated  
MATQGATPTTARDDASIHNEESIRVPKTMVEALEFDDPYKALMALSQNSQEKATDLSHKL  
ISEIKENLSLDGGGHLNNGSSSHKDGNRLSDILPDLKRLPNTKDADSHPVATAIACSDS  
ILHSLTKIASGGSQASQEIIVQLEQEKRELEQNAIDVETALRLRKASDLAAQSLSAQRYEQ  
ASAAIQDYTQLQKKHRLTKRAKAYAGEYTVTQLDTSKATLRAKLLQDYQQAVQSSDLQAL  
GKLTPLQMVYEYKEALALYLRLKLGILKSELVKAASNSIVNNNNKQRPSGPPPPYIRMG  
RVYNSAFTILRHHLPMVSHCLYRAEGDAAVVQLVNVQIEDTVLPLFEEYISSRQLGRSSR  
NSQRIYGVLESRLVSEGVGGNGGGIGGVPVGGSSGSPSFDDAGFSTEIGSLADVDTSMEE  
AVLCLQHAESYTRFIQHTCREVNKARALRFQSEQEEHRVERERRQWTMGMKNADEAKDDD  
GFSEEKEYVPLEILPAHTSLQEKVAEVGGYYATIESCLLLASMQRAFSISSDDARQYSAL  
GMVTSSSSAGRPGMMNMTSGPLKTSIVESSLYAARRGAQRAFATGHTGTASAVTNYFADC  
LRDVLAQHLIRRTEDLGVNPLKPGEGGLEGSAGIFGTVGLTGRQAHQSVMGHGSSIDEMQ  
REREIQLGISRACATMNDLEVAANHTKELERLLTKSVDQGFPPNTPETEQLRMCVQSLGP  
VAGTFTLASDQSVESLLSVLKPRIRAIVTDVAVGSDHGASHGGGASGFSSVIVGGGITKTS  
TDRHSVRMNYELDEDAYQLEVSQSYSVSRCTLLDEMLVPLCRYLAPRLADSLVLGVLGT  
VSKRLEVSLKCCRFTALGALSLSDSIRDLIHYGXVIWVSFCGVCLEKDYIHRSVYMSWIV  
SILGTVFFTFQNSLAKDRLVSPDFNSSNAVLCNACTPLSRLLQIAKLMNLDDLEDVLDLI  
SSSKRKGHWDLKMEDSKAYLSLRVEFDAEIVGRLLKGVDEE  
>comp13134\_c0\_seq5; 994 209 3088 LEN=4854; translated  
MATQGATPTTARDDASIHNEESIRVPKTMVEALEFDDPYKALMALSQNSQEKATDLSHKL  
ISEIKENLSLDGGGHLNNGSSSHKDGNRLSDILPDLKRLPNTKDADSHPVATAIACSDS  
ILHSLTKIASGGSQASQEIIVQLEQEKRELEQNAIDVETALRLRKASDLAAQSLSAQRYEQ  
ASAAIQDYTQLQKKHRLTKRAKAYAGEYTVTQLDTSKATLRAKLLQDYQQAVQSSDLQAL  
GKLTPLQMVYEYKEALALYLRLKLGILKSELVKAASNSIVNNNNKQRPSGPPPPYIRMG  
RVYNSAFTILRHHLPMVSHCLYRAEGDAAVVQLVNVQIEDTVLPLFEEYISSRQLGRSSR  
NSQRIYGVLESRLVSEGVGGNGGGIGGVPVGGSSGSPSFDDAGFSTEIGSLADVDTSMEE  
AVLCLQHAESYTRFIQHTCREVNKARALRFQSEQEEHRVERERRQWTMGMKNADEAKDDD  
GFSEEKEYVPLEILPAHTSLQEKVAEVGGYYATIESCLLLASMQRAFSISSDDARQYSAL  
GMVTSSSSAGRPGMMNMTSGPLKTSIVESSLYAARRGAQRAFATGHTGTASAVTNYFADC  
LRDVLAQHLIRRTEDLGVNPLKPGEGGLEGSAGIFGTVGLTGRQAHQSVMGHGSSIDEMQ  
REREIQLGISRACATMNDLEVAANHTKELERLLTKSVDQGFPPNTPETEQLRMCVQSLGP  
VAGTFTLASDQSVESLLSVLKPRIRAIVTDVAVGSDHGASHGGGASGFSSVIVGGGITKTS  
TDRHSVRMNYELDEDAYQLEVSQSYSVSRCTLLDEMLVPLCRYLAPRLADSLVLGVLGT  
VSKRLEVSLKCCRFTALGALSLSDSIRDLIHYAKDRLVSPDFNSSNAVLCNACTPLSRLL  
QIAKLMNLDDLEDVLDLISSSKRKGHWDLKMEDSKAYLSLRVEFDAEIVGRLLKGVDEE  
>comp13134\_c0\_seq6; 980 209 3213 LEN=4762; translated  
MATQGATPTTARDDASIHNEESIRVPKTMVEALEFDDPYKALMALSQNSQEKATDLSHKL  
ISEIKENLSLDGGGHLNNGSSSHKDGNRLSDILPDLKRLPNTKDADSHPVATAIACSDS  
ILHSLTKIASGGSQASQEIIVQLEQEKRELEQNAIDVETALRLRKASDLAAQSLSAQRYEQ  
ASAAIQDYTQLQKKHRLTKRAKAYAGEYTVTQLDTSKATLRAKLLQDYQQAVQSSDLQAL  
GKLTPLQMVYEYKEALALYLRLKLGILKSELVKAASNSIVNNNNKQRPSGPPPPYIRMG  
RVYNSAFTILRHHLPMVSHCLYRAEGDAAVVQLVNVQIEDTVLPLFEEYISSRQLGRSSR  
NSQRIYGVLESRLVSEGVGGNGGGIGGVPVGGSSGSPSFDDAGFSTEIGSLADVDTSMEE  
AVLCLQHAESYTRFIQHTCREVNKARALRFQSEQEEHRVERERRQWTMGMKNADEAKDDD  
GFSEEKEYVPLEILPAHTSLQEKVAEVGGYYATIESCLLLASMQRAFSISSDDARQYSAL  
GMVTSSSSAGRPGMMNMTSGPLKTSIVESSLYAARRGAQRAFATGHTGTASAVTNYFADC  
LRDVLAQHLIRRTEDLGVNPLKPGEGGLEGSAGIFGTVGLTGRQAHQSVMGHGSSIDEMQ  
REREIQLGISRACATMNDLEVAANHTKELERLLTKSVDQGFPPNTPETEQLRMCVQSLGP  
VAGTFTLASDQSVESLLSVLKPRIRAIVTDVAVGSDHGASHGGGASGFSSVIVGGGITKTS  
TDRHSVRMNYELDEDAYQLEVSQSYSVSRCTLLDEMLVPLCRYLAPRLADSLVLGVLGT

VSKRLEVSLKCKRFTALGALSLSDIRDLIHYGXVIWVSFCGVCLEKDYIHRSVYMSWIV  
SILGTVFFTFQNSLAKDRLVSPDFNSSNAVLNACTPLSRLLQIAKLMNLDDLEDVLDLI  
SSSKRKGHWDLKMEDSKAYLSLRVEFDAEIVGRLLKGVDEE  
>comp13134\_c0\_seq7; 980 209 3213 LEN=4979; translated  
MATQGATPTTARDDASIHNEESIRVPKTMVEALEFDDPYKALMALSQNSQEKATDLSHKL  
ISEIKENLSLDGGGHLNNGSSHKDGNRLSDILPDLKRLPNTKDADSHPVATAIACSDS  
ILHSLTKIASGGSQASQEI VQLEQEKELEQNAIDVETALRLRKASDLAAQSLSAQRVEQ  
ASAAIQDYTQLQKKHRLTKRAKAYAGEYTVTQLDTSKATLRKLLQDYQQAVQSSDLQAL  
GKLT PMLQMV EYEKEALALYLRLLKGIKSELVKAASNSIVNNNNKQRPSGPPPPYIRMG  
RVYNSAFTILRHHLPMVSHCLYRAEGDAAVVQLVNVQIEDTVLPLFEEYISSRQLGRSSR  
NSQRIYGVLESRLVSEGVGGNGGGIGGVPVGGSSGSPSFDDAGFSTEIGSLADVDTSMEE  
AVLCLQHAESYTRFIQHTCREVNKARALRFQSEQEEHRVERERRQWTMGMKNADEAKDDD  
GFSEEKEYVPLEILPAHTSLQEKVAEVGGYYATIESCLLLASMQRAFSISDDARQYSAL  
GMVTSSSSAGRPGMNMNTSGPLKTSIVESSLYAARRGAQRAFATGHTGTASAVTNYFADC  
LRDVL AQHLIRRTEDLGVNPLKPGEGGLEGSAGIFGTVGLTGRQAHQSVMGHGSSIDEMQ  
REREIQLGISRACATMNDLEVAANHTKELERLLTKSVDQGFPPNTPETEQLRMCVQSLGP  
VAGTFTLASDQSVESLLSVLKPRIRAI VTDVAVGSDHGASHGGGASGFSSVIVGGGITKTS  
TDRHSVRMNYELDEDAYQLLEVSQSYVSR LCTLLDEMLVPLCRYLAPRLADSLVLGVLGT  
VSKRLEVSLKCKRFTALGALSLSDIRDLIHYGXVIWVSFCGVCLEKDYIHRSVYMSWIV  
SILGTVFFTFQNSLAKDRLVSPDFNSSNAVLNACTPLSRLLQIAKLMNLDDLEDVLDLI  
SSSKRKGHWDLKMEDSKAYLSLRVEFDAEIVGRLLKGVDEE  
>comp13134\_c0\_seq8; 980 209 3213 LEN=4907; translated  
MATQGATPTTARDDASIHNEESIRVPKTMVEALEFDDPYKALMALSQNSQEKATDLSHKL  
ISEIKENLSLDGGGHLNNGSSHKDGNRLSDILPDLKRLPNTKDADSHPVATAIACSDS  
ILHSLTKIASGGSQASQEI VQLEQEKELEQNAIDVETALRLRKASDLAAQSLSAQRVEQ  
ASAAIQDYTQLQKKHRLTKRAKAYAGEYTVTQLDTSKATLRKLLQDYQQAVQSSDLQAL  
GKLT PMLQMV EYEKEALALYLRLLKGIKSELVKAASNSIVNNNNKQRPSGPPPPYIRMG  
RVYNSAFTILRHHLPMVSHCLYRAEGDAAVVQLVNVQIEDTVLPLFEEYISSRQLGRSSR  
NSQRIYGVLESRLVSEGVGGNGGGIGGVPVGGSSGSPSFDDAGFSTEIGSLADVDTSMEE  
AVLCLQHAESYTRFIQHTCREVNKARALRFQSEQEEHRVERERRQWTMGMKNADEAKDDD  
GFSEEKEYVPLEILPAHTSLQEKVAEVGGYYATIESCLLLASMQRAFSISDDARQYSAL  
GMVTSSSSAGRPGMNMNTSGPLKTSIVESSLYAARRGAQRAFATGHTGTASAVTNYFADC  
LRDVL AQHLIRRTEDLGVNPLKPGEGGLEGSAGIFGTVGLTGRQAHQSVMGHGSSIDEMQ  
REREIQLGISRACATMNDLEVAANHTKELERLLTKSVDQGFPPNTPETEQLRMCVQSLGP  
VAGTFTLASDQSVESLLSVLKPRIRAI VTDVAVGSDHGASHGGGASGFSSVIVGGGITKTS  
TDRHSVRMNYELDEDAYQLLEVSQSYVSR LCTLLDEMLVPLCRYLAPRLADSLVLGVLGT  
VSKRLEVSLKCKRFTALGALSLSDIRDLIHYGXVIWVSFCGVCLEKDYIHRSVYMSWIV  
SILGTVFFTFQNSLAKDRLVSPDFNSSNAVLNACTPLSRLLQIAKLMNLDDLEDVLDLI  
SSSKRKGHWDLKMEDSKAYLSLRVEFDAEIVGRLLKGVDEE  
>comp13135\_c0\_seq1; 165 136 1191 LEN=1587; translated  
MADTAQEGSMERSASQALSSTEGDRSPKRSSTTVKNKSKSVWSDVPRRLTTICVGIPLVWK  
LLERPATAYLFFF GAHAISAW EFTMLEPASTTSASTPTAPRPLSRLLFCAASLLAAIPE  
SSSSLYCFGSSLAAGVFCLANSHHCVVGLMVVTLPFRAWCQLALGNSDGTFLSTVAVLL  
TVWNADTGALVAGRLLGRRRSTPGCLPEWIRRVSPAKTAEGFLGGILGGIATALWLVPML  
VRVFSMETTPGIRSLWGLDADDGLGAVKRITLGFVLSVLAAILGDLVLESSVKRLSHSKDSG  
SVLPGHGGILDRFDSSLLAVLFYRVVLDQATELTYGTSGDAIMESGEKEEL  
>comp13135\_c0\_seq2; 165 136 1191 LEN=1612; translated  
MADTAQEGSMERSASQALSSTEGDRSPKRSSTTVKNKSKSVWSDVPRRLTTICVGIPLVWK  
LLERPATAYLFFF GAHAISAW EFTMLEPASTTSASTPTAPRPLSRLLFCAASLLAAIPE  
SSSSLYCFGSSLAAGVFCLANSHHCVVGLMVVTLPFRAWCQLALGNSDGTFLSTVAVLL  
TVWNADTGALVAGRLLGRRRSTPGCLPEWIRRVSPAKTAEGFLGGILGGIATALWLVPML  
VRVFSMETTPGIRSLWGLDADDGLGAVKRITLGFVLSVLAAILGDLVLESSVKRLSHSKDSG  
SVLPGHGGILDRFDSSLLAVLFYRVVLDQATELTYGTSGDAIMESGEKEEL  
>comp13136\_c0\_seq1; 302 287 1219 LEN=1618; translated  
MVTAYDFPSAAHVGRAGIDMVLVGDVAMVELGHETTQNVSIDSMIHHCQSVKRGLELAD  
SGSMLVGDMPFGTYEYEDTDVALRNAYRFVKEAGCDAVKLEGGSIHRAKTAQKIVDGGVA  
VMGHVGLTPQAI SVIGGFRAQGR TAVRARQLDDALRLQDAGCF SVVLECV PANVAAAIT  
ETLEIPTIGIGAGGDTSGQVLVFDMLGMLSHPHHQFVPKFCKKYAQVGHAIQDGLSRF  
KAEVESETPFGTEYSPYLMSDGEKEAFDALLESDAEERRIKHDVAATKLSQADEYETLKL  
YGANKNDKTH

>comp13136\_c0\_seq2; 302 287 1219 LEN=1591; translated  
MVTAYDFPSAAHVGRAGIDMVLVGDVAMVELGHETTQNVSIDSMIHHCQSVKRGLELAD  
SGSMLVGDMPFGTYEYEDTDVALRNAYRFVKEAGCDAVKLEGGSIHRAKTAQKIVDGGVA  
VMGHVGLTPQAISVIGGFRAQGR TAVRARQLLDDALRLQDAGCF SVVLECV PANVAAAIT  
ETLEIPTIGIGAGGDTSGQVLVFDMLGMLSHPHHQQFV PKFCKKYAQVGHAIQDGLSRF  
KAEVESETFPGTEYSPYLMSDGEKEAFDALLESDAEERRIKHDVAATKLSQADEYETLKL  
YGANKNDKTH

>comp13136\_c0\_seq3; 215 1 743 LEN=1115; translated  
DGGGXDKLKLKLYQSACSVCCRLITTQERKIPSHVVVSTYLLLR TLFGSFQITCATVAVMG  
HVGLTPQAISVIGGFRAQGR TAVRARQLLDDALRLQDAGCF SVVLECV PANVAAAITETL  
EIP TIGIGAGGDTSGQVLVFDMLGMLSHPHHQQFV PKFCKKYAQVGHAIQDGLSRFKAE  
VESETFPGTEYSPYLMSDGEKEAFDALLESDAEERRIKHDVAATKLSQADEYETLKLYGA  
NKNDKTH

>comp13136\_c0\_seq4; 118 287 610 LEN=707; translated  
MVTAYDFPSAAHVGRAGIDMVLVGDVAMVELGHETTQNVSIDSMIHHCQSVKRGLELAD  
SGSMLVGDMPFGTYEYEDTDVALRNAYRFVKEAGCDAVKLEVRVCTI

>comp13136\_c0\_seq5; 215 1 743 LEN=1142; translated  
DGGGXDKLKLKLYQSACSVCCRLITTQERKIPSHVVVSTYLLLR TLFGSFQITCATVAVMG  
HVGLTPQAISVIGGFRAQGR TAVRARQLLDDALRLQDAGCF SVVLECV PANVAAAITETL  
EIP TIGIGAGGDTSGQVLVFDMLGMLSHPHHQQFV PKFCKKYAQVGHAIQDGLSRFKAE  
VESETFPGTEYSPYLMSDGEKEAFDALLESDAEERRIKHDVAATKLSQADEYETLKLYGA  
NKNDKTH

>comp13137\_c0\_seq1; 252 85 774 LEN=1013; translated  
MMIFTKKHNGPFLSTTAIVSALLLVLLALSQASVAVATEETSSMSVCLSLNKKRECRD  
HPECHWVIHRFATKNPDELARTVRCVDAMTDEQCSPFTDKENAKIKCRFNGCKWNREDNT  
CIGRLDHVNRVDNDGGDLSLEDLLKPEKNLVDRFLMEFIGTDAAEVETAIIEAYPRYAG  
EGGVYVAVCTQNMGLYVGEPA CIQRNYNVHRIKLIVDANNKVNEIIFG

>comp13138\_c0\_seq1; 235 1 1130 LEN=1433; translated  
XAE EIRGRDPIPAVEHLETIVLEHLSEVVGLSRRGCGSEDP AQNR TKTSYHHDFTDDELK  
RMMAISSNPMDVLDPDHGESACLAYSAXLAQLNKDAGXVFLWLLHLILRWIVVTVSSPTA  
ECTVPVASTIGQKTDCVPVSGAIRIYLNTTDIPSHSLEDLKL SIQSGFQRLIRFGMQHGL  
YLSDDSEDDDRHGDGVVSHVSFIGTRIPASNNE SGEVAPAAETKAENSRPQSTSSLFMD  
QSEDLANGDKSTTNAV LVVVASLGVIFA AIIA AFGSRRKRNGFGPVDAGR DGVEETG  
LVATAGEAVPPVLAGMDLLADNAEIASVSGGFVKNGT P S I S S DATVADAEVYDDNEDDDD  
DGPFFSTEPKAVLYTMN

>comp13138\_c0\_seq2; 251 1 1006 LEN=1309; translated  
XAE EIRGRDPIPAVEHLETIVLEHLSEVVGLSRRGCGSEDP AQNR TKTSYHHDFTDDELK  
RMMAISSNPMDVLDPDHAECTVPVASTIGQKTDCVPVSGAIRIYLNTTDIPSHSLEDLKL  
SIQSGFQRLIRFGMQHGLYLSDDSEDDDRHGDGVVSHVSFIGTRIPASNNE SGEVAPAA  
ETKAENSRPQSTSSLFMDQSEDLANGDKSTTNAV LVVVASLGVIFA AIIA AFGSRRKR  
NGFGPVDAGR DGVEETGLVATAGEAVPPVLAGMDLLADNAEIASVSGGFVKNGT P S I S S  
DATVADAEVYDDNEDDDDDGPFFSTEPKAVLYTMN

>comp13139\_c0\_seq1; 258 107 1437 LEN=1437; translated  
MLDFDGGEEEFLLHRRVSLAVISLSPIVVFILLGIRPPTYGKHLVAKNAEANT IYDSSDT  
TLPPPPKNAVETLSPSLRRRMRPSVVSNSREEETD TDPRQQRQQKQKQQDQHQQKTHH  
TRHWLGPLLP TKWSWVFFESPNC LWIACVLD RSYRSGA INSDNANASTNTALPAANKI  
LLAWFFFHYLYRSVWYPLVAMNYKTNH I DRGMPLGIVLIAWFYCAANGYLQARGLTRFQ  
TSVPIRYEGDDGFSSLLACRFWVGVS CMVGGFCITVTS DRILLALKQKQKRRQRHNRH  
GYAIPYGGFLFRWVSSPHYFGELVEWTGFFVASGGSLAAF SFVVWTAANLVPRAILTHEWY  
LDTFCAANGGTNNGDKNISDGAKEENHRDDYSKLG RKAIVPFLLEQHAMASKMYSMDHKK  
SLGLSVMSTFQRIGTRYLLCCNVX

>comp13139\_c0\_seq2; 369 107 965 LEN=1143; translated  
MLDFDGGEEEFLLHRRVSLAVISLSPIVVFILLGIRPPTYGKHLVAKNAEANT IYDSSDT  
TLPPPPKNAVETLSPSLRRRMRPSVVSNSREEETD TDPRQQRQQKQKQQVCSASAAMN  
RQYFGPPYDVLLLEAKSGAVGIDDAGTVVEGNNDNETEEEAAREEAATTSLEESLQ TWKGT  
VQKGF LRPSPGKHPFDADTSTR IESTGFLVDNESLGAFSLERALSAA S I IRHGRRGQRR  
TAGGEDDRRLER GSEPT EPDRQGGE SDGTF FLPHSSDDGVLQ

>comp13140\_c0\_seq1; 483 164 1874 LEN=1874; translated  
MPVGT RSPAAEEGETNWA EAAAA SVGPPGA AFRFTPREYDEDNEDDDEEWNDDAVDDH  
GDEAE EAAAVASGRGTEKNLRLPWILKVAIPGSRMAHGS DGDNETEESLASIYIDAGMNA

DRLGRCIVQAASVSVGPSQTAASRERKRSFLGYSEDEGDDGRGRTLVLGLFGRHDGVFYSL  
ECILALNPMDGERRTFCVEKPVPPAPVVPAAEKEWNALFLSSLATTERTIGLGVAGLVLS  
VFVVPKILRYFTNCRRFVGRRVEDVTLVSSALFWIPSDLPMSWRMISDVLDPAREIYR  
YGPFAVWEGRDLDIVCVQMNRRYFAGLGTGSEYEEREHWVRNPEACESIYRMKEESF  
VRMCRPVWYIAVAVVGFVLVQLVAAAFADPSARLDRTDRALLETYRAVQSSSGNINDT  
KGGDASRKGDPSNSKRLRSTIYYKTRHGKIDATENILATVCYPQTSYFSMPNVALLYP  
DNAVFLHSRLVASVVVGYTLQGGQWLVLELLLFHNSNPCLARTSLAAASRTYSASSDAAFPPH  
FPATAAAFCRASSQALSRIITFHSLKTGFG

>comp13141\_c0\_seq1; 305 80 1227 LEN=1408; minus strand; translated  
MDVALASVVRRCSLAWIWLPLNIANRVFVFRVWLKLLPFRLVSSRVGAAESLRKTLNNT  
ASRVLVSRGVLFSGSVRFSTSSRVRAAWFHELSETDTPPIGRVGVQTPGPPFAFCVCHS  
LHGAIGSMAVAIALHRYGPFVGFGLVWFGLSRTVSRFKERFTPGHRERLFPQGIGGPPDH  
PKEDDDHGRNDDRNVDVPPALFHVHHQRRVPRRVHVQQRRPPGGWSHAGGVFVAVCP  
EALAGLHRVLAALRPVEELLDVLFVLLVDRPVAIADEVDDDEADSETVEESMWWYEEEEETS  
GRAAVPGSAVGKQGEKSIFGFEGGQMVGGTTSVGRIDSIRLFFVAGVCDRTGFGVVRSLAS  
FRRWGAQSGRQSVVLCGR

>comp13142\_c0\_seq1; 698 277 1515 LEN=1910; translated  
MTALTCDDGQTRVRFHNRVQFKTIRHVSDFLDQEIIDGWYDKDDFNQMSDDVSKIAALIG  
DGKTSINGEELCVRGLEHIVEEELADFAQKMINSIDAVLDEQEDQWDEGIEDPEAIAEM  
YAEYAKPLLKEAHEIIGLKDAEEGYKTWDDLDFEDPLYRRQTENQTKTKPEKKENTETNNEE  
EKSKPKKKKKNNKKQKAQKQDENSEKDIPTTSFSDRSEDPTTVSPSSVRSIKESPLRQP  
KPVSSIRSLQSFVAVTLHDSVDLDMEEGEEKGQSDDELKREVEVDGDHKKDASPSKQK  
TKPRRTLADRKHGSELSPFYRRDGTAFKHKHVEKARREKQEKRKNVSESLSGLLKDD  
DEDDFLAGILSGKSRPSSAADEDDFLAGILSSKPKRPLSSTTRRVFRNR

>comp13143\_c0\_seq1; 888 154 2577 LEN=2659; translated  
MSYSDDEKRLRMGCSSTTMGSILSARNNDLGEAEYMEYDQKEASMSVNEEGEEFSGHKND  
VGTRDRDVINHLVDNDESI EVDDEIVEETSPPVCEDAVVNSDGNNRDQQRVSVFSKSIAS  
IDTLERGHPSRKTNNMDKSPRKNARTSSARLSAQSKKAASPASQPKSYIARILANHQRV  
PGGAAAKLIGRPDDNEGDYYQFVNDGDDALEVAAPLDELMSRDMAKAEFEKGPQNKRY  
HAAVKEDSRASAISSVTDGTVPRILDRDEVFHENAEALHSILTPAKKPEPELDEIVEFR  
KKLKKKKKTENPSKDQIVRNLLTSKTERHLATLKERMTDPSKSLTELMEAIASPKDGVF  
DRHYMVRKNACGAMKVLTSNASHRVNICWTLGVLPAALTSVLEDSGPAALDEQYDPKII  
LEYTEARNRAVSALIHAMPQNNKLPFHCPRLVPSLVRVIEQDDGEARRGCCLVLAHLS  
KSKENRLIMAQIPGLLDALVAVIEPKENFARSESSEDSMSCRSSHDTSDIDIHDRLSQED  
NIDLNLSQKSTVQSLSDPAELSVRYDEDPQPFHGHARQNVFACLGYLVEKENAYVLR  
HVQLVNTLVFITRLQESSQEHAVKILANFSRHRNSKFLVFKIRGIVQAVVSATYSENT  
ESRKYACYTLQNFSDHKPCRQQLALIDNLLAVCARIREPASGDEKMAALHALKNTDEP  
ANLIPMTNTPCEFATLMQVAHADSHSITEEMQYIACDALATLSHWFRSIATSGQIRGMTH  
PEENANRFAKDELFPVSLRVLTWEPWQ

>comp13144\_c0\_seq1; 330 1 1614 LEN=1792; translated  
LNLTVRTVTVSPTYVVILSINCQHDGNESSVDDNATNTSKGDGNPGVEKYSDEAVV  
QSFVDAIPHEDRRSLDLELDSFVVRHASHHRPIALVSSGGAADLEINSVRCLDNFSTGK  
RGAISVEEFKRGYAVIHLWRKGSASPYGRVLSQLIMGKKSMPNEGISMASLGKLFATGD  
LDEDQEDQLVQAVLDAEQNGDPWLSDPSSVDTGNNADGANRMLRRSNNSSGNTKRSSYRG  
GVQLHRRILNSTPLLTALNERKSALEEGRILTIPFRSVEDYLAKLQLSSESLRNSQALAI  
FYLAAAVSDFYVPLAERSQHKIQRSIPDKNSGSALSKEKNECLNKLWVPKVMGLLR  
SKWAPDAFICFKLETDKAILRQKAEGAIDKYGCHVVIGNLLATRHDQVWILAPADMERF  
VLENSQKSADSIKADWPMHEISRPKSSETEVLEGMIIENVVQTHFEYISTSLSGSFDKSG  
TASVMQAHYELQRKKKEIENELFWNQVKVALDWAGVFAGAALSIVISAALRRRIDA

>comp13144\_c0\_seq2; 334 563 1708 LEN=1886; translated  
MGKKSMPNEGISMASLGKLFATGDLDEDQEDQLVQAVLDAEQNGDPWLSDPSSVDTGNN  
DGANRMLRRSNNSSGNTKRSSYRGVQLHRRILNSTPLLTALNERKSALEEGRILTIPFR  
SVEDYLAKLQLSSESLRNSQALAIFYLAAAVSDFYVPLAERSQHKIQRSIPDKNSGSAL  
SKEKNECLNKLWVPKVMGLLRSKWAPDAFICFKLETDKAILRQKAEGAIDKYGCHV  
VIGNLLATRHDQVWILAPADMERFVLENSQKSADSIKADWPMHEISRPKSSETEVLEGM  
IENVVQTHFEYISTSLSGSFDKSGTASVMQAHYELQRKKKEIENELFWNQVKVALDWAG  
VFAGAALSIVISAALRRRIDA

>comp13145\_c1\_seq1; 710 1 1608 LEN=1608; translated  
XVDRHPLVAEGAAFASPPRASPSLAPTPSRSDPRGVAPSLAPSAAPTPTPTQSAKAKKQ  
KKEAKGHRGDAATKPARRTGSSGGGKQRSPAFGLGKQRRREGAPPRDGRDGGAGPSRPR



KRRRTEGAEDRNPERAAAAFVRSHGAAAGGKPAKDPKRRTAEKSSKAGKKNKTKGRKAFHAA  
PNGAVRGDRERDLPASSLERPRSSPGRPSTPRKPAGSLPQRKKHKSJKPRSHKCDRDLPT  
RKMEKSSRKKRRKPKTIGSNGNVGAARPEQTKLKPPDSLHTAATKPDPESSGSEPA  
TKTRKKKRRKKIASSAKAAAKAEASTSLPAPSADGSSDKESKQQQKHAEEEDSIEQ  
TMDPTTAAANI PKAPKSKRKKRRKKPSTDRREEAGVEKDESASSSTPPPTTTIDAP  
LPLSNV EATERDASSTEPQAEEDIDGLELSPAPAVEEDEDQVNTASPDESERLAE  
EVQGDSP TEMAEEAKKVNEDESVDNIREDENKEEDSVAEGIDADEQCKDERECQ  
KEDENKEEX  
>comp13145\_c1\_seq2; 1276 1 2385 LEN=2385; translated  
XVDRHPLVAEGAAFASPPRASPSLAPTSPRSDDPRGVAPSLAPSAAPTTPTQRS  
AKKAKKQ KKEAKGHRGDAATKPARRTGSSGGGKQRSPAFGLGKQRRREGAPPRD  
GRDGGGSAGPSRPR KRRRTEGAEDRNPERAAAAFVRSHGAAAGGKPAKDPKR  
RTAEKSSKAGKKNKTKGRKAFHAA PNGAVRGDRERDLPASSLERPRSSPGRP  
STPRKPAGSLPQRKKHKSJKPRSHKCDRDLPT RKMEKSSRKKRRKPKTIGS  
NNGVGAARPEQTKLKPPDSLHTAATKPDPESSGSEPA TKTRKKKRRKKIASS  
AKAAAEASTSLPAPSADGSSDKESKQQQKHAEEEDSIEQ TMDPTTAAANI  
PKAPKSKRKKRRKKPSTDRREEAGVEKDESASSSTPPPTTTIDAPLPLSNV  
EATERDASSTEPQAEEDIDGLELSPAPAVEEDEDQVNTASPDESERLAE  
EVQGDSP TEMAEEAKKVNEDESVDNIREDENKEEDSVAEGIDADEQCKDEREC  
QKEDVDVENDGKD ESTVDDNEGISNASDDATFDEQKSSEKTESQEV  
DGEPEVIMVVAIEESEGSTKNDAAEET EIEQEGTPAECEILSVEKNMEED  
NAETKESMEDGNVNPDDVGEESSEAKVEEDEVAA DENPVVSDQNSEGDDESD  
GGDNENPGNAEEDLSQAKVQEDETA VSKENYEEDHDEKENS DDREPDQ  
EATSSKNEGSVDPEQDVVSFIEEVLQENVSSWIDDTSTDSNVENVV  
NKTRGG HSDDLDEVD DDDDDDDX  
>comp13146\_c0\_seq1; 177 232 1251 LEN=1396; translated  
MSFEDPIASLVPLAGCKKPRLSPLDGGTGG SARHDS CVLHPSAC  
SALQEFVNPLDLDAV DHPTCSSVGSVPIGHCGSHLLGHKRVCAVTPH  
GCRDPGTWVRPSQGQSEYINADGGCTIL RDRNYRDDHHDYGTGGAL  
TRYVGCNGRSLASLAFGAVTEDGSICVAVVSECLGLAGDDSF GGD  
TIDVTVDVAHPGDCSKTRTGACFKVEDALNQDVNGPVLNRYFC  
AVDETVCDPDLGL TYQSVGQLMRFTDIDCRLCDARTVEDYLLSV  
SAAGGGGGAYGVSIGAAVIGISAGLTLG LVALAAVCWYRRTSKGAG  
TLFPAGAPGESGTQVHAAEFS  
>comp13147\_c0\_seq1; 74 1 410 LEN=768; translated  
XYWGNLENVSAEGYDPSASVYNSQLWALHNFISDEPMAILSLTTDN  
RAASTTTYPMQVV KSRIQQPSSSIELTNTGDVRRVVKRNYAGLI  
STVQKMWRQEGTVGFFKGAIPNAVRVAPSA AVTFLVYESAMDFLES  
>comp13147\_c0\_seq2; 342 230 1402 LEN=1760; translated  
MNGGTTKKGKETEGSWKPLAGFFGGAVSTVLLLPLDNIKVRLQV  
NEGASTKVMPTSSPV RRMEVKTSAKLFSETNSGSSTKNHQN  
SHTRLGAIRMLRGVIKYEGRGLYQGLVPAIIG SAVSWG  
GFFVYKMKHRLREFKSRNEDVTCYKHGNDAGRTRREQLPQ  
PATLNSWDNFL LGTASGVVMVFTNPIWLIKLRQLQMKRTSD  
HLHLKNVTQYDGF LDALRKIVRS DGILG LYRGTGPALIL  
TSHGGVQFVVYEF LRKH FHYAKAQRSTESSVMKRFEN  
SLGYLTIGAIS KMAASTTTYPMQVVKSRIQQPSSSIELTNT  
GDVRRVVKRNYAGLISTVQKMWRQEGTVGFF KGAIPNA  
VRVAPSAAVTFLVYESAMDFLES  
>comp13148\_c0\_seq1; 223 1 826 LEN=1557; translated  
XSSHRITPHPSNRMEPNRSIMERRSLALGCRSALPPLVAMAV  
AWYACSPSPGGGENQAAA LARWSFWLAAEASKTYMEVLE  
DWPVATKALTTGVIQLMGDGM AQWFEQRGERAETKTETK  
TETPGNRRRYDSRRGASLFAEGLLLSGPLLHYCYESMEE  
AWPTSTVDAAPRPLATLCHVF VNDYFIDSAYIAFSIAFT  
AIGEGHTMGEVGEIFSKDYWDTLKASWATSACLLPLEI  
YCFG FLSLSLRVLAMNFVDLLWGAVVSFYSHRSRREAAG  
>comp13148\_c0\_seq2; 223 1 826 LEN=2011; translated  
XSSHRITPHPSNRMEPNRSIMERRSLALGCRSALPPLVAMAV  
AWYACSPSPGGGENQAAA LARWSFWLAAEASKTYMEVLE  
DWPVATKALTTGVIQLMGDGM AQWFEQRGERAETKTETK  
TETPGNRRRYDSRRGASLFAEGLLLSGPLLHYCYESMEE  
AWPTSTVDAAPRPLATLCHVF VNDYFIDSAYIAFSIAFT  
AIGEGHTMGEVGEIFSKDYWDTLKASWATSACLLPLEI  
YCFG FLSLSLRVLAMNFVDLLWGAVVSFYSHRSRREAAG  
>comp13149\_c0\_seq1; 210 182 778 LEN=1194; translated  
MKLFLTIAATALLCLHSVAAFSPASRNAAVPAAGYSTALSMG  
KEDEDLRKRASSRQAGN DDTVVLMRPLGLVLNQDEKGNV  
YETVAPRGNAAARSGIKEGDIVTMC SATFGDDMWST  
RGVGLTRVLAAIRVRAGTYVKLAVETPAQYKTKAATSTK  
QRKAAADARAAAQAKKDQLLE QLERDEKKLTKGKFFGLF  
>comp13150\_c0\_seq1; 1019 127 2754 LEN=2923; translated  
MTAQVDTTDDLNKYGPYPNAVVPVPI SKDEKTPPKEEIAKAT  
SYMDLQKFPDHRDVGTPD

EWLPRDGRVLVRLTGRHPFNVEPPMSELRKTRFLTPSSSLHYVRNHGACPRLTWEEHTEIEIG  
GLGVSXKPMELSMDELVALAPARELPVTLVLCAGNRRKEQNQMRQTI GFNWGPCGVSTNVVK  
GVMLRDLALLAAGVKETNMRGQHVFEIGVEDLPNKVGPFPKDEPWGKQVKYGTSLPLTRA  
MNPAYDVI IAYEANGKELQPDHGYPVRLIIPGYIGGRMIKWLKKINVIPHETKNHYHYHD  
NRILPPHVTAEQSLKEEWYRPEYIFNELNINSAMASPLHNEELPIAKNIDKTYNVSGYA  
YTGGRMITRVEVSTDDGGVNWNLATLDRKEEPTDHGMYWCWTTWDFELKVADLVGCKEIM  
CRAWDESNMTQPNPTWNLMGMGNNQVFRLLKVMEMNAADQHVFREFEQPTQPGQLKGGWM  
TRLADKPDASAGYGRLLLETAVAGEVPVAAAPAKKSTEKKIFSKAEVAKHNTEHDTWIVNN  
RVYDCTEYLELHPGGVDSITINAGDDATEDFVAIHSKATKMLERYIIGDLEASAAGEEE  
KKEDELVDQGRKLLALNPRKKT PFRLLQNKVLSRDSFMLDFALPTPDHVLGLPTGKHM  
LSAKINGETVLRRTPISSNYDVGCVKFVIKAYPPAPPRFPNGGKMSQYLDLKLIGDFLD  
FRGPFVGELEYHADGKFLVDNEPQTATAFNMIAGGTGITPVMQIASEILRHPKDPTKISLI  
FACREEGDLLMRSTLDEWAVQFPHKFKVHYILSDAVPEGWKYSKGFVVKALFETHLYPKG  
DDVWNLKMGPPIMLDRGCTPNLVALGHKDRFLSF

>comp13151\_c0\_seq1; 719 193 2817 LEN=3024; translated  
MVDFEIKLQDNKVAEWSHYIDYAALKKILKRAKISQSKYVDLKKRRLVESGKDTSSSTNK  
NNGDWDGISVDTSLPTIYSQDDFVSVSTEETALMSRSQNAFDDMTGRRFFVKNALGNISG  
LLTDDIESRYARRENLKDLDDRIAVFDELFRQEKVKSFYYETLDDLEERLEFMTTS  
VARAFSIDINENTGETMTSPPTQRGSPFVAQHKGRKAI SMDDVMGVFLQAI VGDETGNS  
THNYVREGTSRKHFKRKNFDRSQNMIPRHSVSRIGNNDAMS DKNITRHSHEEKSHVRS  
VTNLQLGHLLQDDDEEELHFQSIGSHGEMDASTISNMELEEKRAADAEMIKRFLISQYRI  
AKYLHNYAMLNITGFVKIAKKFDKTIPSHAGKFKCSLESRNMMDDACDVEALTKRYEAY  
ANWFCEGDVRAAKVQMLSKKGDLETDWSQLQLGYRMGVCVAVLAVWVCWDCVWGVVKS  
STIAERSAFPIFRACGGLLLLQWFWGCSIFIWTRYRINYIFLDFIPSTVSTPFDTFCAA  
VDNTLIFLTLMLLYKAGVNDIPEVIPTEMYPLFLMFI TLFRLAFPLRQRLPMWRSIYKV  
VSSPLHSPFFQTYVGDILTSMVKIFQDIAWSISWLWAGEYMASKDSGVSTTQMWCNTYW  
YKSVVIPLITMMLVIRFNQNLRFKFDWTDGERFPHLANASKYVLSLLPLFGIFHPLYLEY  
DRGAEENRFFKTFWTLIFVTSSVYSFLWDVYMDWGLGRHKYSFLNQLSLVFPKRWYYATI  
GIDLVLRFVLWVTLVPPDSGASFDLQYLTTLSMALELFRRTLWGGFRLEHEHRNHEHDY  
RRKGFVPLHLLTLVTYTSIKTKKNEQVLKSYVRLY

>comp13152\_c0\_seq1; 487 626 2173 LEN=2267; translated  
MKSALSEQTVTTRYRTAPKTTTSTVAAALHRYHQSNVAVANTTSSNLPVANTANPIVGP  
SAGDAKNYRHPSPKGETNNGNEISQSSEVETTNDNDLSNLDAANSKSFVVPDHYDWQRST  
EENYDIKGGQTEDTNHNQONPGNSTNAPCYFGQFFEQNRNLDLSYHAIYVPERQAFQDSI  
VASMLHLAPSMVDRTLRSRSGSTSPVAIGTAATD TDCTTKPQEEYRENTLVGRDPRPPQW  
IVFTAGVYGAGKSHIRKQLQSHGCFPGPGTNRDHEPSNPNASVEPPTQNKNIQSEEFHNN  
NFVVVDPDLIRKLEPEFEGYGAQVGAATQKEAGMMAELLTDAALSRGLSVLVDGSLRDA  
AWHTEYFARLRARHQQTQVRTQTQTMGNTGVSPALRIGILYVTAPQEEIYERVRSRQQT  
GRGVPIRDLEESTVEVPIAVHQLKPLVDFVVEIHNSQKQNHQHQQEQKQENENKRQDHG  
TAKDGDGDDHDFQRSEAEKLLFSKRCVSIKHN

>comp13153\_c0\_seq1; 352 58 1836 LEN=2986; translated  
MAFRGRTSGGISSCGSGSHGKTNLDEASRILPRPEHNRERRQKRKHTFCGVPVFFFIVA  
VWLELQWNANTHTHCEGFPISARGARRSHHGLVGSKPMGRSWSGLGATATERDNSSHSIS  
SILDPGEGEPIPEGCSTKSTTFLSALSPTKLSKRKRAWRFLSQTLGRSKPSGLENKEAAS  
TTTTTTTARTARTLDFAYDYDI IEMEAPIPATAASTSSGAQEPTTTGVLLVHPIGVIGR  
WYYQRLVRSLLAKQTGSSSGTSGSNHQHRMVLVADLLGSGSACNATLSEDGVAPSDP  
PIVANKFPLFNISDWTQLEDLMGTIEKDRGPSNEIDRWCVVANGGCSPIALQLAERSQR  
PGWNHAGVENLVLSVPRLPFFLENPENDPQKVAKSYRTLSGIPGSLFWWYSCRNEGAFI  
QSFSEKNLIADPSNLGPFWRSNCYRTAVSHNKRGRYATFSFLAGTLQDGCQTS LDAVRGT  
SLRIDIIKADTRRNRAKSWFWQKKKKKADTTTEESRQLNAADFPSADAVAANVTETEQ  
KTNKTFREYVERNNGGREIVIGRISLAHEDPDGYADAVLEFLDSESTYDE

>comp13154\_c0\_seq1; 490 64 1134 LEN=1231; translated  
MYFNKRTLALFVAASSSVTAFSPAATGNRLALQSSGAVVQQSVSCPARCNCPCAGRLTK  
LFADVAEETEVEPAEVEAMEGVESADEAHNLERPARAALKKKKPSGKDLSEFTEGTTVKGT  
IKSIAASYGAFVDIGASTDGLLHVSQLSAGFVSDVSEVVSEGGQEVDRIVNIDSAKQIGL  
SMMTEEEAAAAPARRSGGNKRQGGRRDSDAVL GALREKGWDEATMVEGTVVSTVDFGAF  
VKVDASTLNSECEGSFDGLVHISALKVGRVGSVTDVNVANDTVKVRCKSIDGNKVS LTML  
SVEEEEAERASGARSSGPTFNDPFDEGEGAKDWKESVAAIDEEQPVYKNTPLIRK

>comp13154\_c0\_seq2; 505 189 1028 LEN=1125; translated  
MEGVESADEAHNLERPARAALKKKKPSGKDLSEFTEGTTVKGTIKSIAASYGAFVDIGAST

DGLLHVSQLSAGFVSDVSEVVSEGQEVDRIVNIDSAKGQIGLSMMTEEEAAAAKPARRS  
GGNKRQGGRRDDSAVLGALREKGWDEATMVEGTVVSTVDFGAFVKVDASTLNSECEGSFD  
GLVHISALKVGRVGSVTDVVNANDTVKVRCKSIDGNKVSLTMLSVEEEEAERASGARSSG  
PTFNDPFDEGEGAKDWKESVAAIDEEQPVYKNTPLIIRK  
>comp13155\_c0\_seq1; 1298 1 4119 LEN=4621; translated  
RDRDRDRDRPDYHSSNAPGKPWSSKMDRGGSLNAGNTNNSMCKTNASQQLQNSSMGGDLQ  
RSSSQQMSSSSQSSQAWNWDPRLKRTDGSIPNNNAGSDSTHHRQETSGSSEPPASGGHNR  
PNPQAHVPDFGRSRGWGQANRQIRRTVSAGDNLRSASSQAPLGTNSTNNATSAAAKPS  
VEPEPCAPLSVSSLGNSEVVKRAETVLSHLREVVPAMKTKTGANELPSKNDIMKAMSEID  
KLVKSTESEAADAGQEI IKTKEEEEAKKI QESTLLEEKKNQRELKIKERKEERRKEEHS  
KILAEQEAEDQSEIRYQAELEKRRKASLDEELTKAKEAKKVLQELGVKIKEASGAMDES  
IDTARSDMDRSKLAADINKKLAKAEKQYKLITENEKKKKQKQKKKVVAKRESIPLDIV  
NSISLENKRKAKEAHALSLSIANPQFGTSTYNFQSSILQONAPHEAIDPKYKKTYYEWAIM  
ANQVTGLSNSLYSEPSETPYEQNEKTHASIGPLVKEFVRDKQKRLNKQWLMLAEYEV  
RRLYEKQQRKLAKRAQRVSVTSRKSILGGKKEKEKPSDKGSKPIESGGRSSNNPYRRARR  
GNEVRSEYEQEQIIAEIAAREAMEKRITHGGSKLPRQVIPLERELTATYVNTFTSRRID  
PFREAEDKLTNIWTDMEKCVFLDRFLQFPKDFRIASF LKNKTTKDCIAFYYSKQTV  
YK GALKEHMMRRKRKGDYQVWDASIQASISVGARITAGVNKEKPIINFTVPQNDLTYNTRL  
LHPLQREVLDSMEIDKAVAAEHDDADRSEDSRWKSRKRGRDPLFLSLDKKHMFLRESSQD  
SMAIQRNKTKDEIKPETLREEIGELDSDAVASAPSRKAPEKWTAAEKEIFLATLEEHEGKN  
WATLSRAVGTKTESQIKNFYDYK KKKTKGSSAKSEKKS GAKQGDSNAQKSKTNDPVRKK  
GKNQONDEAMKRGRTPPPPATQLAHQTTASNHRLLASSQTAASTQPSTQEANTAVEQDAIG  
QHETMPPQSMVENLMAEQHGQNRVQDSIIRDAENTLSSRSRSGSPVPRSDLAEMIASRSGE  
FPGKTNAEIMQLLEQHTQYQRLELQLLQHQQQRHHQQQQQHHHPAPSALHQILSRHQHQ  
IEQQHHSQQSHEDARRILGQQSQQQSMPGLFQAWSPASQLLHQQAQNRMHARLPAAF  
QQDGGGAGSHESGAKSDAPADLAAIQRIQLIQQLRQNPMLALGQSNHGSQSSSLIGLNAA  
PGPGLAQGLLALLESLSNANRNQPQADQQAIMNAQSLG YAGSGGSSNGGGSIRSGGVQGNP  
LYHHSNSGGGNPGSTEGTHSSHDVSNALALLRAMQREGGNSQHGFGGPNLQG  
>comp13156\_c0\_seq1; 626 245 2017 LEN=2071; translated  
MHDEPAVAAPASAESATTAPSTDPADGPPPQGDASKKAFCSRLGRFARDSIGSKAVLAAF  
AVTTLSSFSIALTVGIVPEVLTDRYARLYHGYGSSEAGGGGNPPAAPCWEFDKSFMEAC  
VKGADDAQTGAAWAAFLQNTFTFFNAVVGSYTDVHGRRLLVAAVFANALVPAALLAMQ  
LLPAMPDPAWYYCSNASTGILSYTALVFAALSDGCPPEYLAGRFATNMAGFYVGFAAAPTL  
AVWMGSHLRASGWSFALAAAALVCSVAFLPETLPEPVAVRNRGAVEEERPPAVPLPAESE  
AHGNTNTNGPLAADSSSGSTPRARAASCLEATGTVAAKPLRDMTILGRDAVMKLLALGSF  
LAAAVYSTDASLILFYIEEYFDVRENDIAFMFVVHGTMGVVLQIGLQPLVYALGEHGLL  
VLCFLSGTLHNFLYGAAKSKTTLTVALSLSQLTKLGYPVLSLASSRVRGANEQGVQVQAL  
LALNALGGAVGPVSMNWIYERTKEAGSGLGPGAMFLFASVLYLLGAVVVAIIPSAARRVE  
RRDTSGGEGPGASGAAATTTDASGGTEPSPRDDGDLEEPLLLRLGVTSTI  
>comp13156\_c0\_seq2; 641 262 2046 LEN=2100; translated  
MDHALHDEPAVAAPASAESATTAPSTDPADGPPPQGDASKKAFCSRLGRFARDSIGSKAV  
LAAFAVTTLSFSIALTVGIVPEVLTDRYARLYHGYGSSEAGGGGNPPAAPCWEFDKSF  
MEACVKGADDAQTGAAWAAFLQNTFTFFNAVVGSYTDVHGRRLLVAAVFANALVPAAL  
LAMQQLPAMPDPAWYYCSNASTGILSYTALVFAALSDGCPPEYLAGRFATNMAGFYVGF  
AAAPTLAVWMGSHLRASGWSFALAAAALVCSVAFLPETLPEPVAVRNRGAVEEERPPAV  
PLPAESEAHGNTNTNGPLAADSSSGSTPRARAASCLEATGTVAAKPLRDMTILGRDAVM  
KLLALGSFLAAAVYSTDASLILFYIEEYFDVRENDIAFMFVVHGTMGVVLQIGLQPLV  
YALGEHGLLVLVLCFLSGTLHNFLYGAAKSKTTLTVALSLSQLTKLGYPVLSLASSRVR  
GANEQGVQVQVQALLALNALGGAVGPVSMNWIYERTKEAGSGLGPGAMFLFASVLYLLG  
AVVVAIIPSAARRVRRDTSGGEGPGASGAAATTTDASGGTEPSPRDDGDLEEPLLLRLG  
VTSTI  
>comp13157\_c0\_seq1; 479 308 1966 LEN=2129; translated  
MQPEAQQRNNDCCNQGDDEDEYTSLTICKQTESPTENDTEQETTMI SNQHPNVQCLNVDE  
PQKCLKLIVRSQYWRGLKGRTRCNVHTKLNKAPRVISSQAVLYHTDGFWGCCPNHGKRV  
LELQYEHF SVVGCDDWLDLYLVGTWVSPGQHIHDFLLPQQQDSVDIRHNEYNRWSFVGT  
C KKDNIQSGIDGLLRNLLEQNNTGHRYHHAHIDIMMDEAYDRETPRSRKLNNKLAERR  
NSTNSTPKDCERQESSVSSDGTASTEQATTDHESPPSTTSQTSNKNQHG MKTIGAPP  
IP RVINNDSTMVSGSYPLQAPHSLPTPEATYRDAGWTAEPYWNHERGTVSSLYEMHNGR  
SA TVATDCNAQHVVYQSGKNMAFSGGLPPHPYPCWQTFPAPVPHPPYPVPDLHHIYNH  
QNHQ TTFVYPGMHHMYHQHPMGGEMHQYFESMHLHPHYPHTTSPSLHSNNGVEAVV  
ANDFNQY PGTQVDATSEVANQNLPLPANKGSALPVSSSSPSASDAAE TVPPDGDSV  
NGEPVDDKSTAK

VSECNTAEARQQ

>comp13158\_c0\_seq1; 578 533 3142 LEN=3750; minus strand; translated  
MGTFPAATMLKQLCLVVALLWPLSMVASRGLTHEEGFIEELVASQRAFTGAFIPNLQGPD  
TLPPMLLLSMKRGLVHVMRNPDESMETEQILDLEHQCTNGERGFQSIVPHPNFAENHWL  
YIFYTAYSDECLLEDEVFGPRNRLSRMLMDPKTLRIRNETEEVLMEGAPTHYFFHNGGAIK  
FGNDGKIYVTTGDGGGDGAGTSQDMTNLHGAILRLNDDGSVPTDNPFTFQGGYNGVPCGQ  
TGGVLPDAPSDAVCSEIFSYGFRNPFRIVMDPHETEKTRFFVNDVGGSKWEEISEAGTD  
FAGKNYGWPRYEGPCKFDKTEDCPLFDPSAVANRDSFQNPFFYYGHVSDREGGCIAGGA  
FVPEGIWPAKYKYVYADFIHFSIFNLVEDADVECQTCIPPIPKYKNETLYTSEKREDQHA  
NYARIVDIFFGPYKDTQALYVFKMGNGNNVWRIRYTGSDNIPPVAKIEIDGSTTVDVGEI  
VAFDGRLSFDPEELGLEYEWFDDSFREPNPIHAYTEPGQYTVRLGVTD SAEHTQTTS  
VDIVVGTTPPALHITSPLEGADFFVGEILLSGTATDADGNLLEDSQISWEVRKHHADHWH  
PFLDEKAGNDIDLFPAPEPEDYLAATNSYLEVIMYATDANGLVSTTSRNIYPRIVELCID  
SEPQGLEVYVDEYPVVTPLRITSWVNHNLRLRTPINQELNGTNIQRTFTSWSGDVVSDDR  
EIRLLPKENTGLVASFCVQGDTCIAEAQTRVSGNLLVARCPTTPPTPEPTMADTQSP  
KPTASSTDKQTSFPTTEEEVDWPLDEDVVRIDDQDSEPGMKDPMSDRDQILDLLDEKNSLD  
SGASAKIISTRILAVALSLPVAILALFVGI

>comp13158\_c0\_seq2; 578 533 3142 LEN=3641; minus strand; translated  
MGTFPAATMLKQLCLVVALLWPLSMVASRGLTHEEGFIEELVASQRAFTGAFIPNLQGPD  
TLPPMLLLSMKRGLVHVMRNPDESMETEQILDLEHQCTNGERGFQSIVPHPNFAENHWL  
YIFYTAYSDECLLEDEVFGPRNRLSRMLMDPKTLRIRNETEEVLMEGAPTHYFFHNGGAIK  
FGNDGKIYVTTGDGGGDGAGTSQDMTNLHGAILRLNDDGSVPTDNPFTFQGGYNGVPCGQ  
TGGVLPDAPSDAVCSEIFSYGFRNPFRIVMDPHETEKTRFFVNDVGGSKWEEISEAGTD  
FAGKNYGWPRYEGPCKFDKTEDCPLFDPSAVANRDSFQNPFFYYGHVSDREGGCIAGGA  
FVPEGIWPAKYKYVYADFIHFSIFNLVEDADVECQTCIPPIPKYKNETLYTSEKREDQHA  
NYARIVDIFFGPYKDTQALYVFKMGNGNNVWRIRYTGSDNIPPVAKIEIDGSTTVDVGEI  
VAFDGRLSFDPEELGLEYEWFDDSFREPNPIHAYTEPGQYTVRLGVTD SAEHTQTTS  
VDIVVGTTPPALHITSPLEGADFFVGEILLSGTATDADGNLLEDSQISWEVRKHHADHWH  
PFLDEKAGNDIDLFPAPEPEDYLAATNSYLEVIMYATDANGLVSTTSRNIYPRIVELCID  
SEPQGLEVYVDEYPVVTPLRITSWVNHNLRLRTPINQELNGTNIQRTFTSWSGDVVSDDR  
EIRLLPKENTGLVASFCVQGDTCIAEAQTRVSGNLLVARCPTTPPTPEPTMADTQSP  
KPTASSTDKQTSFPTTEEEVDWPLDEDVVRIDDQDSEPGMKDPMSDRDQILDLLDEKNSLD  
SGASAKIISTRILAVALSLPVAILALFVGI

>comp13159\_c0\_seq1; 397 489 1583 LEN=2681; translated  
MNTNAYQSPLLIITCKRPNYLNRTLHVLATIPQPCGFGCPVVVSEDGDRKENEELLSF  
RERFKAKGIPLLLHIHKKKLNLRQANSYVKLARHFQWAISSVFDGTALSSDALPERIMIL  
EEDIEVAPDFFSYMESTSTLLDTPDLLAVSAFNDNGHLKYGDPKRLLRSDFFPGLGMM  
TRNLWTEELQSKWPYKNGYWDWLRETEQRKNRQIIRPEVSRTYHFGSKGGASQNEFGNI  
LERVKINKDPIRWERENLSYLESSAFEAEYERLVSSSKLVKTVKDAKEVVEDLNARIEYE  
DFSDFQLLAKELGIMDDEKAAVPRTAAYRGIVEVRVGTNLLFLTQKGEFNGYKPVLLRGKY  
KPKN

>comp13160\_c0\_seq1; 348 21 893 LEN=2239; translated  
MEEQKCPVQGMKMSINDSIGNDNGNPVSSPVRTNGTAGNENGNSNPTSGTTPGQLSLSR  
RVGRNKSGLGRMMKGTTRAPPKRSQSSKIGRPTFDPLGDSPPHVEHTMQVKRRGVGRSQ  
SSRVKWSTRKAPGRSGSFQRRRAPDRTNSSASSRRRTQKSTNVGTIETDDVSITDSVYTS  
VTFQTMSITIRKKQMPNQAQKGNEMSI EFDHSDNWIDHDDGETYDYEDLSVFSSEW  
SSTESCEVLSDFEEGEMDGAIMEDDEDEMERNQNTTTIASTEYEKKERE

>comp13161\_c0\_seq1; 43 1 406 LEN=406; translated  
XPTTGPTTGYPTTGSSTTAPTSGDDCSNDPRFEWRNKEKLTCDRWAGKGKHKLPRPKVK  
HRIKKRCKQQDGTKVWDFAPRRAPWWAWGGVLLPGAAGGDSGGRRGPIERRCAASERGT  
QHSTAQRNTAQHKTKX

>comp13162\_c0\_seq1; 384 103 1310 LEN=1393; translated  
MIPVEPGQAPVGEKDLSHVPPFLFQPATGQPLPIGESSEPTTEIEADVHQRVETDSKQSDH  
PETLNQGHRRQQKSHQKQKKSATGPETSTGXKFFVKWLETFDLEESRSRITIDPTA  
TTSCGGTNATGPEQNAGESTGRSSAFETDDRVVDEVVGVVSEDEDEDNNTTERPRQOM  
HILDVAGGKGEVSARLTMCHQQQVIMVDPRPADIVDCYERIVLPKIPNKWQRQLERKREA  
NPNFVKDVVGARFRQLVTTFFDEHKVVTKSACYSAKTTNPLVSPSSPSTVPLEAKPTDL  
QLAVRNATLIVGLHADGATEAIVDAALEYKPKFVVVPCVFPNFFPMRRIILVDDPEDGSS  
PKLVSVRTHEQFCTYLLRKDPRFVMEELPFEGRNIAIWWNGK

>comp13163\_c0\_seq1; 770 659 2326 LEN=2445; translated



FGFTAHDNDNSVTSLSNFSNHDGYEVEEDPAEWELNPEMYFAEKESVRNLLDSFRSNAKSL  
GSFNDIDPDLFSPDEQSKNWGGKESSAPARNLVRMGTKMSLYSSGDFSQDLDLDSLSQDQ  
>comp13167\_c0\_seq1; 271 282 896 LEN=1108; translated  
MDAAADTSSDRNDEVDQEMLDLFAIMNSTVVELQIEIDRLESNKYKHSFKGYDSGSNSDD  
RDDNEKEKRNQKPHVQEKERVQQRQCCLQTHVMKGSVSSSKVYVSGKERCAAQKEGEEK  
EGIAIMTMTLDDDDGGTNGIHWDR IKPVVAGDPDYVVAAPTAFHDRIEPAKAGDPDYV  
PVTDYTPAPTAPFLRRLSTKFRSWLQ  
>comp13168\_c0\_seq1; 1504 200 5613 LEN=5931; translated  
MVWNNLPLFNGIVLALYVLSIPNAANGRFMDARKVPLSALTAPGNFYFLEFPVNEYDSQL  
NPICADGTPYSFAFRRTDEHVSKLLIEFEGGSACWDDNIGSSCCDVAGSTGRRHVPWLD  
YMSFFKRQVLLKFTPELGSCKGVP SGFVSEGAEFILADNNGINGFIDGDLPI SLRRDEG  
WWDRLGGEGSDIRDWSYILLPHCSLDWHLGHKKHPQLIEGCSDDP SKVDAVYHRGGTNVD  
AVMNIWIRKQFPAGLDALVTTAGGKVGCCDDMDAATPSS IAPAIMASNLAKTKTKSSPSL  
PSTLVVTEGSKMWDPTLPSPEIMTDRWNTQDLPSGGGFPEAMQSLVESSTEDIQYIWMAS  
YEGTASDEETLWFMKQANDHPQKFHVFEPTAPEAFLEGNQTKLDGNETIPEWCPLYTFPD  
YDVDVSDFFSDVINRMSWSSPSLPYTDTESTVPKVSSSLPDVEFDNSRSRSL SFFSIFVML  
GGFVLLAWGIYYVMKRDSAQKGGKAPLSPSDLWFIALTKYPVTFFIIISLLIPITLSVVG  
SNTTPSINMDFDYSYLQVDTDLLENVKNRNFVDVARENQEASLEIEQANCNLYGKNILIRRLSE  
EDVGNRISEAAPFIEDSIFGSQALLDELGLEFEIEQNIPFETLPRTHRELSLANLNYFS  
GGEWMSIMYQNREGGNVFEFDPVLKAIHEFESSIYDFPGFQQYCYGLSSCVPIDSLISRFF  
RNGELVSNIESVLRSLFTDRPALWKLQYFGPENLASNVTRSFVFLRNVGGDQSATHPWL  
RSFYRDFLAKHDRKRTYPEFVHTWNNFIMKTTEADDALFHDSLWAIGSLVFVALMILYKV  
RSLFVVFVSMGLMVLAFAVSYYWLSVHFFVKDITLIWIAGL FVMLGIAADDIFLMVDSFD  
HTKNEFDEELSNRMTEINSGSDPDDEKLRDAKLQILRKRIIVAYHKAGSMMLVSSVTTS  
ICFFSNGFGVLTVIQEFGIFMGMVVLVNYLHVMTILPSSILVNEIYVASEEKRLTWCKS  
LFIANKLGNQRDAQCADYNHVDTDTEKCLENYVNGGKEESKGIIGKTSNLDPAERYLI  
ETYAPFVNKRAYYILVSTVILAILGICGAINFAVNDGSIVLYSPKYNLGRLEKLVNSYY  
SESEDVYTTIEKDTAPATFPNPAPTVPAPTTPMPTKSSGTSVITAVGFSSPEEAET  
PDDHTVVEPSDLGTEPPESLESSSANQGSNTIDNDSVAGSGVNSGPNYVVS GSGNGIG  
GSGSGETVTGTGGSTTSNIGGAIKSPASPIKPSSTTGMRRETIVHKLIVGVD AEGTD  
SSLWVTNKQKSTNFEHDRALLDLAEPSTQEWLLEVVKMAKSKPELFVVRQDKVTWIERLR  
DFAAYAGVEFPIPKHLFTTYVELLKLQDEESREMIIEGIGTSAPGLAGDFTYASITMRVD  
SVEVANTAEAAGRMMSDLYRVWTFATETNGLSPSGIPRVVAQSAIFL DAYRVEAMYS  
TIFTWFVANGLCLLVIVIFIQNLALSFVMVMTITLILLCLGGFLFAVYRIPFGPVEALGV  
SIFIGLSANXFVSI IHLMDRELTFAYEKGVN LQONLFFNYQYVDKSLHVHAYHHSRRN  
NRGEKIKEAIFAVGSPIIASALSTMGASAF LFGCRTWVFIELGILIC SITGMALLYTMTF  
LFSWLSIAGPLPVNEDSRDLSHRWDLKVMCWDTCR GDKKMI PDQRADDDKSVFSIEVVEE  
LKGSLSVSGM DATDLDAEAKDDSDYSIEI IEDGDGDIQESEKEVEEPTVAIEKKNSQET  
GRVN  
>comp13168\_c0\_seq2; 1445 200 5592 LEN=5910; translated  
MVWNNLPLFNGIVLALYVLSIPNAANGRFMDARKVPLSALTAPGNFYFLEFPVNEYDSQL  
NPICADGTPYSFAFRRTDEHVSKLLIEFEGGSACWDDNIGSSCCDVAGSTGRRHVPWLD  
YMSFFKRQVLLKFTPELGSCKGVP SGFVSEGAEFILADNNGINGFIDGDLPI SLRRDEG  
WWDRLGGEGSDIRDWSYILLPHCSLDWHLGHKKHPQLIEGCSDDP SKVDAVYHRGGTNVD  
AVMNIWIRKQFPAGLDALVTTAGGKVGCCDDMDAATPSS IAPAIMASNLAKTKTKSSPSL  
PSTLVVTEGSKMWDPTLPSPEIMTDRWNTQDLPSGGGFPEAMQSLVESSTEDIQYIWMAS  
YEGTASDEETLWFMKQANDHPQKFHVFEPTAPEAFLEGNQTKLDGNETIPEWCPLYTFPD  
YDVDVSDFFSDVINRMSWSSPSLPYTDTESTVPKVSSSLPDVEFDNSRSRSL SFFSIFVML  
GGFVLLAWGIYYVMKRDSAQKGGKAPLSPSDLWFIALTKYPVTFFIIISLLIPITLSVVG  
SNTTPSINMDFDYSYLQVDTDLLENVKNRNFVDVARENQEASLEIEQANCNLYGKNILIRRLSE  
EDVGNRISEAAPFIEDSIFGSQALLDELGLEFEIEQNIPFETLPRTHRELSLANLNYFS  
GGEWMSIMYQNREGGNVFEFDPVLKAIHEFESSIYDFPGFQQYCYGLSSCVPIDSLISRFF  
RNGELVSNIESVLRSLFTDRPALWKLQYFGPENLASNVTRSFVFLRNVGGDQSATHPWL  
RSFYRDFLAKHDRKRTYPEFVHTWNNFIMKTTEADDALFHDSLWAIGSLVFVALMILYKV  
RSLFVVFVSMGLMVLAFAVSYYWLSVHFFVKDITLIWIAGL FVMLGIAADDIFLMVDSFD  
HTKNEFDEELSNRMTEINSGSDPDDEKLRDAKLQILRKRIIVAYHKAGSMMLVSSVTTS  
ICFFSNGFGVLTVIQEFGIFMGMVVLVNYLHVMTILPSSILVNEIYVASEEKRLTWCKS  
LFIANKLGNQRDAQCADYNHVDTDTEKCLENYVNGGKEESKGIIGKTSNLDPAERYLI  
ETYAPFVNKRAYYILVSTVILVKLALFNQFFLSSQFFKSILTGCALXTFLGDILGICGAI  
NFAVNDGSIVLYSPKYNLGRLEKLVNSYYSESEDVYTTIEKDTAPATFPNPAPTVPAP

TTMPTKSSGTSVITAVGFSSPEEAAETYPPDDHTVVEPSDLGTEPPESLESSSANQGSNT  
IDNDSVAGSGVNSGNSPNYVVS GSGNGIGGSGSGETVTGTGGSTTSNIGGAI SKPASPI  
SKPSSSTGMRRRETIHVKLIWGVDAEGTSSSLWVTNKQKSTNFEHDRALLDLAEPSTQE  
WLLLEVVKMAKSKPEL FVRQDKVTWIERLRDFAAYAGVEFP I PKHLFTTYVELLKLQDEES  
REMIIEGIGTSAPGLAGDFTYASITMRVDSVEVANTAEAAGRMMSEDLYRVWTFATETN  
GLSPSGIPRVVAQSAIFL DAYRVEAMYNSTIFTWFWANGLCLLVIVIFIQNLALSFMVMV  
TITLILLCLGGFLFAVYRIPFGPVEALGVSIFIGLSANYSLHVHAYHHSRRNNRGEKIK  
EAI FAVGSP I IASALSTMGASAF LFGCRTWVFIELGILIC SITGMALLYTMTFLFSWLSI  
AGPLPVNEDSRDL SHRWDLKVMCWDTCRGDKKMI PDQRADDDKSVFSIEVVEELKGSLSV  
GKMDATDLDAEAKDDSDYSIEI IEDGDGDIQESEKEVEEPTVAIEKKNSQETGRVN

>comp13168\_c0\_seq3; 1555 200 5506 LEN=5824; translated  
MVWNNLPLFNGIVLALYVLSIPNAANGRFMDARKVPLSALTAPGNFYFLEFPVNEYDSQL  
NPICADGTPYSFAFRRTDEHVS KLLIEFEGGSACWDDNIGSSCCDVAGSTGRRHVPWLD  
YMSFFKRQV LLEKTFPELGSCKGVP SGFVSEGAEFILADNNGINGFIDGDLPI SLRRDEG  
WWDRLGGEGSDIRDWSYILLPHCSLDWHLGHKKHPQLIEGCSDDPSKVDVAVYHRGGTNVD  
AVMNWIRKQFPAGLDALVTTAGGKVGCCDDMDAATPSS IAPAIMASNLAKTKTKSSPSL  
PSTLVVTEGSKMWDPTLPSPEIMTDRWNTQDLPSGGGFPEAMQSLVESSTEDIQYIWMAS  
YEGTASDEETLWFMKQANDHPQKFHVFEPTAPEAFLEGNQTKLDGNETIPEWCPLYTFPD  
YDVDVSDFFSDVINRMSWSSPSLPYTDTESTVPKVSSSLPDVEFDNSRRLSFFSIFVML  
GGFVLLAWGIYYVMKRDSAQKGGKAPLSPSDLWFIALTKYPVTFFI IISLLIPITLSVVG  
SNTTPSINMDFDSYLQVDTDLLENVKNRNFVDVARENQEASLEIEQANCNLYGKNILIRRLSE  
EDVGNRISEAAVPIEDSIFGSQALLDELGLEFEIEQNI PFETLPRTHRELSLANLNYFS  
GGEWMSIMYQNRREGNVFEPDVLKAIHEFESSIYDFPGFQQYCYGLSSCVPIDSLISRFF  
RNGELVSNIESVLRSLTDRPALWKLQYFGPENLASNVTRSFVFLRNVGGDQSATHPWL  
RSFYRDFLAKHDRKRTYPEFVHTWNNFIMKTTEADDALFHDLSLWAIGSLVFVALMILYKV  
RSLFVVFFSMLGMVLAFSVSYWLSVHFFVKDITLIWIAGL FVMLGIAADDIFLMVDSFD  
HTKNEFDEELSNRMTEINSGSDPDDEKLRDAKLQILRKRIIVAYHKAGSMMLVSSVTTS  
ICFFSNGFGVLTVIQEFGIFMGMVLVNYLHVMTILPSSILVNEIYVASEEKRF LTWCKS  
LFIANKLGNQRDAQCADYNHVDTDTEKCLENYVNGGKEESKGIIGKTSNLDPAERYLI  
ETYAPFVNKRAYYILVSTVILAILGICGAINFAVNDGSIVLYSPKYNLGRLEKLVNSYY  
SESEDVYTTIEKDTAPATFPNPAPTVPAPTTPMPTKSSGTSVITAVGFSSPEEAAETY  
PDDHTVVEPSDLGTEPPESLESSSANQGSNTIDNDSVAGSGVNSGNSPNYVVS GSGNGIG  
GSGSGETVTGTGGSTTSNIGGAI SKPASPI SKPSSSTGMRRRETIHVKLIWGVDAEGT  
SSLWVTNKQKSTNFEHDRALLDLAEPSTQEWLLEVVKMAKSKPEL FVRQDKVTWIERLR  
DFAAYAGVEFP I PKHLFTTYVELLKLQDEESREMIIEGIGTSAPGLAGDFTYASITMRVD  
SVEVANTAEAAGRMMSEDLYRVWTFATETNGLSPSGIPRVVAQSAIFL DAYRVEAMYN  
TIFTWFWANGLCLLVIVIFIQNLALSFMVMVTITLILLCLGGFLFAVYRIPFGPVEALG  
SIFIGLSANYSLHVHAYHHSRRNNRGEKIKEAI FAVGSP I IASALSTMGASAF LFGCRT  
WVFIELGILIC SITGMALLYTMTFLFSWLSIAGPLPVNEDSRDL SHRWDLKVMCWDTCRG  
DKKMI PDQRADDDKSVFSIEVVEELKGSLSVSGKMDATDLDAEAKDDSDYSIEI IEDGDG  
DIQESEKEVEEPTVAIEKKNSQETGRVN

>comp13168\_c0\_seq4; 700 200 2191 LEN=2309; translated  
MVWNNLPLFNGIVLALYVLSIPNAANGRFMDARKVPLSALTAPGNFYFLEFPVNEYDSQL  
NPICADGTPYSFAFRRTDEHVS KLLIEFEGGSACWDDNIGSSCCDVAGSTGRRHVPWLD  
YMSFFKRQV LLEKTFPELGSCKGVP SGFVSEGAEFILADNNGINGFIDGDLPI SLRRDEG  
WWDRLGGEGSDIRDWSYILLPHCSLDWHLGHKKHPQLIEGCSDDPSKVDVAVYHRGGTNVD  
AVMNWIRKQFPAGLDALVTTAGGKVGCCDDMDAATPSS IAPAIMASNLAKTKTKSSPSL  
PSTLVVTEGSKMWDPTLPSPEIMTDRWNTQDLPSGGGFPEAMQSLVESSTEDIQYIWMAS  
YEGTASDEETLWFMKQANDHPQKFHVFEPTAPEAFLEGNQTKLDGNETIPEWCPLYTFPD  
YDVDVSDFFSDVINRMSWSSPSLPYTDTESTVPKVSSSLPDVEFDNSRRLSFFSIFVML  
GGFVLLAWGIYYVMKRDSAQKGGKAPLSPSDLWFIALTKYPVTFFI IISLLIPITLSVVG  
SNTTPSINMDFDSYLQVDTDLLENVKNRNFVDVARENQEASLEIEQANCNLYGKNILIRRLSE  
EDVGNRISEAAVPIEDSIFGSQALLDELGLEFEIEQNI PFETLPRTHRELSLANLNYFS  
GGQ

>comp13168\_c0\_seq5; 1394 200 5699 LEN=6017; translated  
MVWNNLPLFNGIVLALYVLSIPNAANGRFMDARKVPLSALTAPGNFYFLEFPVNEYDSQL  
NPICADGTPYSFAFRRTDEHVS KLLIEFEGGSACWDDNIGSSCCDVAGSTGRRHVPWLD  
YMSFFKRQV LLEKTFPELGSCKGVP SGFVSEGAEFILADNNGINGFIDGDLPI SLRRDEG  
WWDRLGGEGSDIRDWSYILLPHCSLDWHLGHKKHPQLIEGCSDDPSKVDVAVYHRGGTNVD  
AVMNWIRKQFPAGLDALVTTAGGKVGCCDDMDAATPSS IAPAIMASNLAKTKTKSSPSL

PSTLVVTEGSKMWDPTLPSPEIMTDRWNTQDLPSGGGFPEAMQSLVESSTEDIQYIWMAS  
YEGTASDEETLWFMKQANDHPQKFHVFEPTAPEAFLEGNQTKLDGNETIPEWCPLYTFPD  
YDVDVSDFFSDVINRMSWSSPSLPYTDTESTVPKVSSSLPDVEFDNSRRLSFFSIFVML  
GGFVLLAWGIYYVMKRDSAQKGGKAPLSPSDLWFIALTKYPVTFIIISLLIPITLSVVG  
SNTTPSINMDFDSYLQVDTDLNVKRNFDVARENQEALEIEQANCNLYGKNILIRRLSE  
EDVGNRISEAAVPIEDSIFGSQALLDELGLEFEIEQNI PFETLPRTHRELSLANLNYFS  
GGEWMSIMYQNRREGNVFEPDVLKAIHEFESSIYDFPGFQQYCYGLSSCVPIDSLISRFF  
RNGELVSNIESVLRSLTDRPALWKLQYFGPENLASNVTRSFVFLRNVGGDQSATHPWL  
RSFYRDFLAKHDRKRTYPEFVHTWNNFIMKTTEADDALFHDSLWAIGSLVFVALMILYKV  
RSLFVVFVSMGLMVLAFSVSYWLSVHFFVKDITLIWIAGLFLVMLGIAADDIFLMVDSFD  
HTKNEFDEELSNRMTEINSGSDPDDEKLRDAKLQILRKRIIVAYHKAGSMMLVSSVTTS  
ICFFSNGFGVLTVIQEFGIFGMVVLVNYLHVMTILPSSILVNEIYVASEEKRFITWCKS  
LFIANKLQNEQRDAQCADYNHVDTDTEKCLENYVNGGKEESKGIIGKTSNLDPAERYLI  
ETYAPFVNKRAYIILVSTVILVKLALFNQFFLSSQFFKSILTGICALXTFLGDILGICGAI  
NFAVNDGSIVLYSPKYNLGRLEKLVNSYSESEDVYTTIEKDTAPATFPPNPAPTPVPAP  
TTPMPTKSSGTSVITAVGFSSPEEAAETYPDDHTVVEPSDLGTEPPESLESSSANQGSNT  
IDNDSDVAGSGVNSGNSPYYVSGSGNGIGGSGSGETVTGTGGSTTSNIGGAIKSPASPI  
SKPSSSTGMRRRETIHVKLIWGVDAEGTSSSLWVTNKQKKSTNFEHDRALLDLAEPSTQE  
WLELVKMAKSKPELFRQDKVTWIERLRDFAAYAGVEFPKHLFTTYVELLKLQDEES  
REMIIEGIGTSAPGLAGDFTYASITMRVDSVEVANTAEAAGRMMSEDLYRVWTFDTEFN  
GLSPSGIPRVVAQSAIFLDAIRVEAMYNSTIFTWFVANGLCLLVIVIFIQNLALSFMVMV  
TITLILLCLGGFLFAVYRIPFGPVEALGVSIFIGLSANXFVSIHLMRELTFAYEKGVV  
NLQQNLFFNYQYVDKSLHVHAYHHSRRNNRGEKIKEAIFAVGSPIIASALSTMGASAF  
FGCRTWVFIELGILICSITGMALLYTMTFLFSWLSIAGPLPVNEDSRDLSHRWDLKVMC  
DTCRGGDKMIPDQRADDDKSVFSIEVVEELKGSLSVSGKMDATDLDAEAKDDSDYSIEII  
EDGDGDIQESEKEVEEPTVAIEKKNSQETGRVN

>comp13169\_c0\_seq1; 445 181 1242 LEN=1481; translated  
MPREFLIPKPSQLLLVILAVNLPLVSAFQSNFCANRPTLQKSSTTSRSVSEDQISDFDRP  
STFLDNEDDDLNVLFIDEDEEAPAKGKGRSRWENLKPSIKKRLIAKGQAKAVA  
NKKKREPAAEKRRMMMKFKELQREKKKDSRIKRPLGFDERAPLTAFFPGMEVTGTVISL  
TNYGAYVDVGTECDGLLHISQMTRDFFVEHPRQVVTPGDEVTVKIRSTSPELKKMQLTML  
DAAEQSESNSWGNNAIEDDEERTSLSEFELDELWELRRVTSFGAYVEVGAEVDAFLHF  
MDHPLWEDGKTPSEFMERGQVRVWVADLDMEKKRIRVTACRPEDLPGRMEF

>comp13169\_c0\_seq2; 401 181 1218 LEN=1457; translated  
MPREFLIPKPSQLLLVILAVNLPLVSAFQSNFCANRPTLQKSSTTSRSVSEDQISDFDRP  
STFLDNEDDDLNVLFIDEDEEAPAKGKGRSRWENLKPSIKKRLIAKGQAKAVANKKKREPA  
AEKKRRMMMKFKELQREKKKDSRIKRPLGFDERAPLTAFFPGMEVTGTVISLNTNYGAYVD  
VGTECDGLLHISQMTRDFFVEHPRQVVTPGDEVTVKIRSTSPELKKMQLTMLDAAEQSES  
NSWGNNAIEDDEERTSLSEFELDELWELRRVTSFGAYVEVGAEVDAFLHFMDHPLWED  
GKTPSEFMERGQVRVWVADLDMEKKRIRVTACRPEDLPGRMEF

>comp13170\_c0\_seq1; 397 417 1937 LEN=2077; translated  
MKDEHRTSPEATVLQNRDHYERIEDGEYVYQFVRKGSAAANTIDSIKTFSYDSDDDFDLCT  
SFDLHNNCFIDAIDEGDSWVATGLKQKQSIQERKASVMNTVHSPIVVTPEKSKTSIAVETS  
LDCLPTGFDVLRGSNIANDGYFYDHTELVATRDKDSSLFPSIDDPESSETRVAAPGIRPS  
LSHFHHTICRGKSLDGECDISKATDSLKYVEIPHDLDHSDAYRLLRPSLPLPDSLRLATC  
LLLQMEFWHSDRTDQLECACIEVHEKLRQHKSDFRCNRKRDNKRNENDIEAAKSTQK  
SISGDIIDAMVERIGSSIDLAILFEASAELNNTLTATYDRRLDIFFRGLNNASLEHQK  
RLTLRELGTGNQISNKLGSTSGKTAPHDACFARKKRKASVHSDENDCDIVTYSEFVPTKLQ  
LAIASFACSKMVTTPKSRDLSLEDYVKGASKDLEDMSKNEIINSWNTLVNIWDGRARE  
MRPHIEYKCKSKSSTNGGNSKQRRYN

>comp13171\_c0\_seq1; 338 1 1443 LEN=1629; translated  
XGRGWNHHRNGKGGKNGRWDLSKPLVRAAPLVAIGIVRTVANKELDYQEHASEYGVHWN  
FFFTLGVLAVVQPLRKRILLGLGGRGGFAAVAVAWAPVVAMLAYQHGLSARGWQSLVETA  
PRGPPPLGGGSTAERFFFANREGILGICIGYVFLHASGEWIGRCFVVDNRNEDKDERGG  
STQKQKPSMGKLAIALWVLWVWLSGRGGTEPLGGGGNHEDEDDGYDYDYFYEPLVSRRS  
TNLAFCVWALAHNVALLWAFGALETWLRRTSGRRENNAPVVVPPTWAAVNRHGMI AFLVA  
NLLTGLVNLTVPTIDTGDGPALCLLVAYLAGIGAASTCATGAWEGPRAGIPSNATEATRC  
DAMPSTRTNSPGGLDRRAPNGSPPAGREGNPRQEAASGRSGEEHSPVSVSVSYGCTHAGD  
GAGRFLFLGTRRTAQWYECARGWVGSARLGLSTLKSPTPTQQQNMEFQPKTEQNELSRERC

>comp13171\_c0\_seq2; 325 1 1455 LEN=1641; translated



XGRGWNHDHRNGKKGNGRWDSLKPLVRAAPLVAIGIVRTVANKELDYQEHASEYGVHWN  
FFFFTLGVLAVVQPLRKRILLGLGRRGGFAAVAVAWAPVVAMLAYQHGLSARGWQSLVETA  
PRGPPGGGGSTAERFFFANREGILGCIGYVFLHASGEWIGRCFVVDNRNEDKDERGG  
STQKQKPSMGKLAIALWVLWVLSGRGGTEPLGGGGNHEDEDDGYYYDYFYEPLVSRRS  
TNLAFCVWALAHNVALLWAFGALETWLRRTSGRRENNNAPVVVPPPTWAAVNRHGMI AFLVA  
NLLTGLVNLTVPTIDTGDGPALCLLVAYLAGIGAASTCATGAWEGPRAGIPSNATEATRC  
DAMPSTRTNSPGGLDRRAPNGSPPAGREGNPRQEASGRSGEEHSPVSACVCVCVSVYGCT  
HAGDGAGRFLFLGTRRTAQWYECARGWVGSARLGSTLKSPTPTQQQNMEFQPKTEQNELS  
RERC

>comp13172\_c0\_seq1; 399 1 1148 LEN=1253; translated  
XPNGLYTHKIDRVANKVESFRVSSALEEGFVAQPVGLTSFGGEQIAEVAYPLRHEDMQSM  
STILGDNLLLLKYINPHMVVVVVMLSEAEQQSTTDVARALSESSSKPRKPAGAAAPGSSS  
TATSPQPLPNMFVNLVDTVSGRVLYRHGHSVDPGKKVSVVSENWVVYSYVSEKTRRTE  
IGVLTLEHEGMIEPKGLTYFSRPEQSSSFSSFDARESKPVVLSKVYAFPKTVTALGVTRTR  
QGISRQNILVAASDGLSTINKMMLETRRPVGEAKPEEKKEGLVPYQELIPATPLFSLNY  
NQTMEPFTSIVSSTTSLESQSLVFGFGGPDFFTRTSPTKGFDLLPETFNKVLVAATTVG  
IVAALLTVQRMGQRKALKQSWA

>comp13173\_c0\_seq1; 1518 355 4863 LEN=4921; translated  
MRRSFKRRSSSIGSACDGSIDL TNNQLEGSTSKAEDFEAARQLLSLLYMKDASGRSYL  
HSDFKLSWAKALLGRARKLDDGTEQFMNFYTNGIDQYKNGRNVKGS SHHRPSKESTHVRN  
STLMQRRFLLQRDQESGYTPFHRAILEGNLGAILLFLRHATAEDSSTERLTQRPMVLLHG  
AEANHGHNNPNRNRHQNNLLLLDMASATDYEGMTPLRLLGRLQQSELFLCRNHLQSFRRS  
VDRNATMLRTRHRLSSFDNGTNSDDDENIDFFSENADLFEEDSDKDDNCSKVDKSSY  
ACEVVTFRPNHICALGVIQGTGSSSSTFTSSSKDNSNQTYSHGSAFCPQRVQEFQAQEVV  
GRPGSAMAIAAATHHTLVVTKKGHL YAFGLEKGGRLGLGDDQPKQCPLPKRILGPLQRRQ  
VVSVAEAENHSLCVTARGDVYSWGSNRFQGLGNATSNASSTPCGSRVPRRVEELRQHP  
CVAVAAGEKHSVALSRKGEVYVWGDNTSGQLGVARRSGVQKVQRVEALWGSSATQGSVNR  
KPPKIAIAIAAAEQSTLVLTGSPASTLNNVNAIYEWGHGNHVP IRVHFESCSTEARKKD  
SNRSTSFASSFSRIPNPTAIS CARYHNAAITSDGLVYTWGLRAELLGREKGNANTSKPQH  
QRRNCTPQLVTGMLSEKGGGFVAIDASGSHTAVVCDGALFTWGT TDGNNVYNLGHGEGV  
RWQPKPKRVPGVHRAVDVAVAKEHTILLIGTSFPSISKNDVLP SLEVLAAKKTAEYVDLF  
NVNIPILTMARTESSFLTKYCSDFVYRNL DGVLNVGKKRDMNQYLNDMLAETTYRAGKRY  
RDDNHHFPVFDVLAAGNVGRPTFDREWFSDIEEWVGGCKQLADSPVVRRLLEVAAREYE  
EDSAGLNSKSRLGSSCQEEYDEFKERSHSLSESTPTAAAKEGNLDRICIKRTATMNLSTLE  
LANENSEWLAKERIGVRKKLKQINNLLDTETREGMLSPEQKAKVARRPTLETELS IYESA  
VVEVETRIKELKDNKINVKPLSSTRDCDYPQEKGSIKTRKNTTTDDDESVRCSVQKQK  
IGHKFGSSPTVMDNKTYFCDT CGVRCTDEANFILHQNGRKHNRVAQLAEKEKETSASI  
RQQQIQMMKSPPVYTPPEPKKIVKNAWGTPSPQPNYKLP PPHVLAQVALNPSPPSTKN  
VRSAPRKVPTASPANFKLLGDEGT KKKMAFGANNLSSSFTNILSEQEVTKKKMKQSSK  
PAVWDASPTSTRCVPLSMYATTRPVFSPEKSEMNPQRSQSI SIADFLT PKKKQTSSPAVA  
PWINDPAKKSALPSTKT LAQIQAEETLRSKQDKSYGKGGGSWYVERRERAESVLQIQ  
KIAEEDLAHRLLEVEQLRIEAQIKEECERRQKAAKEKKKGGPKRNKTAKRTNDSNKTPI  
DPSKPNGKTSNASKSNRSRGRNHPANKGAKKPSKKSPPNNGSKETQKPVKNLKAQAVKNS  
GE

>comp13173\_c0\_seq2; 1366 355 4966 LEN=5024; translated  
MRRSFKRRSSSIGSACDGSIDL TNNQLEGSTSKAEDFEAARQLLSLLYMKDASGRSYL  
HSDFKLSWAKALLGRARKLDDGTEQFMNFYTNGIDQYKNGRNVKGS SHHRPSKESTHVRN  
STLMQRRFLLQRDQESGYTPFHRAILEGNLGAILLFLRHATAEDSSTERLTQRPMVLLHG  
AEANHGHNNPNRNRHQNNLLLLDMASATDYEGMTPLRLLGRLQQSELFLCRNHLQSFRRS  
VDRNATMLRTRHRLSSFDNGTNSDDDENIDFFSENADLFEEDSDKDDNCSKVDKSSY  
ACEVVTFRPNHICALGVIQGTGSSSSTFTSSSKDNSNQTYSHGSAFCPQRVQEFQAQEVV  
GRPGSAMAIAAATHHTLVVTKKGHL YAFGLEKGGRLGLGDDQPKQCPLPKRILGPLQRRQ  
VVSVAEAENHSLCVTARGDVYSWGSNRFQGLGNATSNASSTPCGSRVPRRVEELRQHP  
CVAVAAGEKHSVALSRKGEVYVWGDNTSGQLGVARRSGVQKVQRVEALWGSSATQGSVNR  
KPPKIAIAIAAAEQSTLVLTGSPASTLNNVNAIYEWGHGNHVP IRVHFESCSTEARKKD  
SNRSTSFASSFSRIPNPTAIS CARYHNAAITSDGLVYTWGLRAELLGREKGNANTSKPQH  
QRRNCTPQLVTGMLSEKGGGFVAIDASGSHTAVVCDGALFTWGT TDGNNVYNLGHGEGV  
RWQPKPKRVPGVHRAVDVAVAKEHTILLIGTSFPSISKNDVLP SLEVLAAKKTAEYVDLF  
NVNTNIDNGAANRGMIVEQFNGVSVNEFILLMPSPFXLIL ISEIXLQSSFLTKYCSDFV  
YRNL DGVLNVGKKRDMNQYLNDMLAETTYRAGKRYRDDNHHFPVFDVLAAGNVGRPTFD

EWFSDIEEWGGCKQLADSPVVRRLLEVAAREYEEDSAGLNSKSRGSSCQEEYDEFKE  
RSHSLSESTPTAAAKEGNLDRICKRTATMNLSTLELANENSEWLAKEIRGVRKLLKQINN  
LLDTETREGMLSPEQKAKVARRPTLETELSIYESAVVEVETRIKELKDNKKINVKPLSST  
RDCDYPQEKGSIKTRKNTTTDDDESVRCSVVQKKKIGHKFGSSPTVMDNKTYFCDTCGVR  
CTDEANFILHQGRKHRNRVAQLAEEEEKEKTSASIRQQQQIQMMKSPVYTPPKKIVKN  
AWGTPSPQPNYKLP PPPHPVLAQVALNPSPPSTKNVRSAPRKVPTASPASNFKKLLGDEG  
TKKKMAFGANNLSSSFTNILSEQEVTKKKMKQSSKPAVWDASPTSTRCVPLSMYATTRPV  
FSPEKSEMNPQRSQSI SIADFLTPKKKQTSSPAVAPWINDPAKSPSALPSTKTLAQIQ  
EEETLRSKQDKSYGKGGGSWYVERRERAESVLQIQKIAEEDLAHRLLVEEQLRIEAQIKE  
ECERRQAAKEKKKGGPKRNKTAKRTNDSNKT KPIDPSKPNGKTSNASKSNRSRGRNHPA  
NKGAKKPSKSPNNGSKETQKPVKNLKAQAVKKNSGE

>comp13174\_c0\_seq1; 756 298 2559 LEN=2618; translated  
MFMNEDDEDEDEPEVDIRNFRYPSSADASGSSKNSTGTSSSFSSFGLGRGRSSPSQRKA  
MGTSSKTTTTVYVCSNCGGESVQWRGRCPTCKEWNTFQEVAVQRSSESIGSSQNLFQGL  
GRNHQRGRRKPTTKNKGDYGSDDMPEDSFGGQSWLDGIPTGSSSAFSYENPSSRPISISD  
IDLNAPGSARLKI PNDEEMNEVLGGGLMKGSLILLGGDPGVGKSTLALQMAAQVASLSVP  
PSGIGMGPSPARSEAVGPVWYVSGEETLEQIASRAQRLVASNDEIDAGRASLADKSRMDS  
LPKQLFLLSETNLNSLVDDEVVQTWIDSNNNSIPEDHDALGEISSPMPSRNLPPSLLVID  
SIQTMVCEAGSSSAGGISQVRESMALLLRLAKTTQIPILTIGHVTKTGDVAGPRMVEHM  
VDAVLYLEHSQSSASASQNNGNFRWLRAQKNRFGSCQTAGLYDFQAGILVPLPEGESAL  
APPSEDELEGAMGICVEGPHRAMTVEVQALVTLPSGSFGKKTVEGGLSAARLNLLLGLIQ  
KHCQLPIAGGGKIGRDVYVNVVGC DGAVSKSQLALATISL DLAVTVALTSSYLGI PVRGD  
TAF LAQVGLL GELRSLPSLESRLQAQRMGFSRVIVASTKSSSFSSKFKRKEKKTSSFS  
PKGTNEESGTRRIRKYDL DVYECSTLKEALDLALISSIPVARRRSNRPRTNESKSVIKKN  
TAKRSSPESIRDLKLDSDYDI ILDDEDEYDLM

>comp13175\_c0\_seq2; 548 146 1891 LEN=2735; translated  
MAEQYGNNSNKDRADDFGVAVKSVVSSGSTKSIELQPLTSRKLVTADAFGDEPTTSSEYD  
MDGII SENDQKNSDGPNGPWNLQDWLYPPQLPPELQLLRRENIAIPACYLLVGLIQGLSG  
PLINVYPLDLNATEAQOTTIATLKSPLASLKLIFGFI SDNFPILGYRRKSYMLIGWMSA  
AAYGSLLFTSDLT LSEEEYTKDDGSIGTETVAPPNAPSIPYLCLMTFLFGTGFWLADVMG  
DSVVAEKARLEPSFAKATQSSCYSYRFFGYMCAGPLSTALYKWRGPGSVIFLLSALPLS  
VLPFVYYLGEVRYSAVASTRDQCHEIWTTVCSRSVWQPMFVYIYNVLQIGNAAWNQYLK  
TTLEFTSTQINLIYIASSVLLYLGIITYKYFMMNWSWRLVYVICTLLNGVFSALQILLIL  
GITFGIPNFALGDDAFAEFLAGVQFLPSTIMMVHLCPEGSEGASYAMFTTIHNSAGQV  
SRAISTHLLGIWVSKDALADHELTMVNLLALTSIAQLSGILLVRMLPRTKDEL FELRD  
SEYSSRTGGLIFLVITFASILYAMIVGILNVVVPGWSGES

>comp13176\_c0\_seq1; 202 1 1077 LEN=1574; translated  
XCTFSSQNSIHEIALTRDYDPEAAKSPGYDQPFDFNYISHGYRDVWVIHQQTPVDVKT  
LKITRYKHDYDKRTYWN TLADAMVMERLTASPRI IDIYGHCGTSVWVEVRDQLIMDWRLF  
VNDFXLFRGSALYLTQITILSIQAI PNEVEEVI IHGKGMKQEDLYNDGFKPFNNYTV  
EELDMALSMAESLADLHGFRDGVIVHDDVQLCQWLRTKDGRKLKLGDFNRAEVMEFNLKKE  
YCRYNGHCYGNRAPEEYAKDYLNEAIDVFSFGNNIYGLLTGLWVFDYD TDDPSVQSMV  
INGTRALIDPRWRERSFIESKLVDVMEQCWKS DIHERMDIFQAVQKLREVKKEYEKKKT

>comp13176\_c0\_seq2; 502 153 2059 LEN=2556; translated  
MEETDAPFTKSF IQNHRRRRAKPNQPNENLPPLSVHPGGEKSGSVQYYYD DSAGDDKGH  
RHNE DRIFQGS CSFGQFVLN PCLCMFNAAYS CIHGWRFRREKKMARALFFVVGVTIAI  
YSLSDAESQFTRRSLGFSTPGRPLTDEM VNQIPVTIPILDFR KDIGGWSHLRRFFHPTLD  
LNSVGMPDFGDL DVMLKRESDTVKVEDVDESQMLFSSSLHSTQLLAKARTINPDDEKLAL  
AHWEESYSDYYVHTYDRFPEEREDEKRKCRQPNWAKRYYPQCNSIHEIALTRDYDPEAA  
KSPGYDQPFDFNYISHGYRDVWVIHQQTPVDVKT V LK ITRYKHDYDKRTYWN TLADAMV  
MERLTASPRI IDIYGHCGTSVWVEVRDQLIMDWRLFVNDFXLFRGSALYLTQITILSIQAI  
PNEVEEVI IHGKGMKQEDLYNDGFKPFNNYTVEEKLDMALSMAESLADLHGFRDGVIV  
HDDVQLCQWLRTKDGRKLKLGDFNRAEVMEFNLKKEYCRYNGHCYGNRAPEEYAKDYL  
NEAIDVFSFGNNIYGLLTGLWVFDYD TDDPSVQSMVINGTRALIDPRWRERSFIESKLVD  
VMEQCWKS DIHERMDIFQAVQKLREVKKEYEKKKT

>comp13176\_c0\_seq3; 525 153 1955 LEN=2452; translated  
MEETDAPFTKSF IQNHRRRRAKPNQPNENLPPLSVHPGGEKSGSVQYYYD DSAGDDKGH  
RHNE DRIFQGS CSFGQFVLN PCLCMFNAAYS CIHGWRFRREKKMARALFFVVGVTIAI  
YSLSDAESQFTRRSLGFSTPGRPLTDEM VNQIPVTIPILDFR KDIGGWSHLRRFFHPTLD  
LNSVGMPDFGDL DVMLKRESDTVKVEDVDESQMLFSSSLHSTQLLAKARTINPDDEKLAL

AHWEESYESDYVHTYDRFPPEEREDEKRKCRQPNWAKRYYPQCNSIHEIALTRDYDPEAA  
KSPGYDQPFDFNFYISHGYRVDVVIHQQTVPDVKTVLKITRYKHDYDKRTYWNTLADAMV  
MERLTASPRIIDIYGHCGTSVWVEAIPNEVEEVI IHGKGMAKQEDLYNDGFKPFNNYTV  
EKLDMAESMAESLADLHGFRDGVIVHDDVQLCQWLRTKDGRKLGDFNRAEVMFNLKKK  
EYCRYNGHCYGNRAPEEYAKDYLNEAIDVFSFGNNIYGLLTGLWVFDYDTPSVQSM  
VINGTRALIDPRWRERSFIESKLVDMVMEQCWKSIDIHERMDIFQAVQKLREVKKEYEKKKT  
>comp13176\_c0\_seq4; 225 1 973 LEN=1470; translated  
XCTFSSQNSIHEIALTRDYDPEAAKSPGYDQPFDFNFYISHGYRVDVVIHQQTVPDVKT  
LKITRYKHDYDKRTYWNTLADAMVMERLTASPRIIDIYGHCGTSVWVEAIPNEVEEVI  
IHGKGMAKQEDLYNDGFKPFNNYTVEEKLDMAESMAESLADLHGFRDGVIVHDDVQLCQWLR  
TKDGRKLGDFNRAEVMFNLKKKEYCRYNGHCYGNRAPEEYAKDYLNEAIDVFSFGN  
NIYGLLTGLWVFDYDTPSVQSMVINGTRALIDPRWRERSFIESKLVDMVMEQCWKSIDI  
HERMDIFQAVQKLREVKKEYEKKKT  
>comp13177\_c0\_seq1; 331 1 1286 LEN=1947; translated  
XPNYKIDGRPVLYIYISRKLEQLGTLEKALLTMKSAASKCGHNLYLIGDAVFAKAPDAD  
EPFVSFLYFDAVTNYDVYSSGASKRENPYAGKEAVDAYYAEQEKWRKLALQNCRYIPP  
VSPGYNDRAVRFKDNPPLSRRLNEASEEGSLFMYQLQKALPLVDPADNMILVNSFNEW  
HEDTQIEPARGVNFDEDAVGMNDVASEPMSLTHGLEVYGYGEKYLDILRSMTDRPKDDD  
DTANGVYEPSYVEIKDVHACNNGKHGITFFIIDNNSNGKTSSELIFTPGEGILSCQNQDFD  
IKLHGGGDIDILVSSSSSEKTVVGNSSRTVPGAYKTSTASGWTWWSGASRAAADTEISSRG  
PAPSWTTTISIERRPAKAGSWAGPPNESPGDRWILGHRKKEKPISGDLIRFDSTRTKDEP  
KPTPSMVP  
>comp13177\_c0\_seq2; 357 1 1199 LEN=1922; translated  
XPNYKIDGRPVLYIYISRKLEQLGTLEKALLTMKSAASKCGHNLYLIGDAVFAKAPDAD  
EPFVSFLYFDAVTNYDVYSSGASKRENPYAGKEAVDAYYAEQEKWRKLALQNCRYIPP  
VSPGYNDRAVRFKDNPPLSRRLNEASEEGSLFMYQLQKALPLVDPADNMILVNSFNEW  
HEDTQIEPARGVNFDEDAVGMNDVASEPMSLTHGLEVYGYGEKYLDILRSMTDRPKDDD  
DTANGVYEPSYVEIKDVHACNNGKHGITFFIIDNNSNGKTSSELIFTPGEGILSCQNQDFD  
IKLHGGGDIDILVSSSSSEKTVVGNSSRTVPGAYKTSTASGWTWWSGASRAAADTEISSRG  
PAPSWTTTISIERRPAKAGRPGTGGSSDTGRKRNPRAI  
>comp13178\_c0\_seq1; 2119 125 7175 LEN=7245; translated  
MDISSNNRDESSSSPSGADASSASDVSGQRWTCACGCNTNRDSRDTCSICGTRRESGT  
SILRRAGYAARASGLFGRNAIMRRNILNDNTDGSARELAFRVDYDASLVRRNVLN  
DNNGGSNSDQFNFNFEGVLMDDYVDFLEGMDDTIQLGPPDPDEDEHEGLSMAEVAAGA  
GGDSSNNNVANYRSAAIRFRVAAAMRRARADNRVAPSAESTQGLSPEDLLHAANNND  
SAYQPKWMDLSQIGGRMRTGNGIEVGEQVAYLPLGSGEGRALRALEAFPRSLPFAS  
FSSVSSSTMSATNSSFASTSNQERRIRRVFGKVAFVSHPWKKEKLGGRYLIGVTTTTF  
SSFSEKNALHQSPFFYGIEDSGKKEGTRNIASSSSSREGFRARRRSSYALELTEDAPR  
NKDGALFGSREVVTCVIDLESRTMTFWRDEDGESKLI GTLVKNI PRSGQLYPIVVPYHAG  
SSVSITGMLGEPLPLLTAFAAATWKQAQLEKDLLRREQIRKARSIMIQNRCFTPSLITALK  
EIFSRYNNASAKELTEIEASRLWYRCGMRLSSLKEVLAETPNKNTIRFEDFRLLLQRI  
DDEKHYPLSDSSEKSSPLSDFCIGDKVELTNNYARFGDAAGKPLLPGNRGTIIELQGAEG  
SRQAIRVKYNARRWYQVQALVREGSGLTDSPIWFLKGI LRSHAYDENIQLLVGKQVLS  
SSWKIGDLVAPKMKSLDHGANQHTYIDQSIGRIVYDNSTSGTFPMRGRGSGVVTFEVI  
RKAFEAESTCLKGSSSFMQDSVSLEKRKVSTSLIVHTSTFHGLSVSKKPRKVLSSSSKMTA  
RDDDDDDDESEGMDIDDETSNNISSDFRGLKDLDPASAIERILKEFDKTSTSLVSLVEAG  
LFKCALEALDCLLQKVQLMNNNDGSLAQATAALGKLALYVAERTFFNKSNNSTQEYCRDQ  
LKTSEGSNQSDLLNHESSGPHEMNTSSVDVSSEHGARTSSLQQRRLMLLSLMSQVRRSD  
RNSPEDEIQALPSVEMSAGAAEALFFATRSDGNLEDDNGRLENSRPSASASSTNMTSRK  
NSSKITLFDVFRGRNDYDYPGNTSERRIVLLNSVKNI VCMGILGNLPLWLSFLQSF  
KEAQKIDASDIGILKQATDDDDGMPLELAI TLGCSESIIEELIHHGAPIRDIEIRLANF  
DLPEILSVLLTHQIYCDGMI ELESQAI AEVVLKAKERQDTQRQKMLAEADSFVLAFTQ  
KLLQVCLKRRQQQKENDVCGRAIACALIGSIELCALRRNENAASSLNPLVNDGNSFQS  
GRQINGTVDPCCGLLQVPLPSILGRALAEPPASLTNLLLLIEDYLC SKGINDACIGLTMFL  
TLLQRFPQLRKSQEMERYGFTELIYSHDALALNRLTEISSRLAKRSLAEDKSEKDILSGH  
EVTFCPQKHRAKLHVTKHSSFRCDLGVGVECGAIMHGCRKCDWDACESCTDKAEGGILK  
WKYVRQFSSRCQRIFRIDDGLKEDGSEWSSRMLENLKLMDNTSEVNTLSIKLLQQDPDS  
IQVLARMLSEKGRITIIYQFFMVL PALHATLMGKALCNEDMLGRRPKKPRVADIRFPDNE  
VKKDANGEERLLFAKEILKSLVYDSTSHDGWKDGLIDNDTDEDHHEYNVNDDEHEEHDEN  
PSYQKNVKVPVKQLPEILRRLHQVLALHEEVKTLEVDKYKKKSRVSPDLRSLKQPIKLR

LTQLRHSKCEKKQPRDVTIFCEPLVSVHDLNQLKASSNTHPHYIDFCQKLANDSSII  
LERSLSSNENVWRIAKIESYNEKSGFHCVRYASGVVKSFDGDFNDFRKGEDFACLEYELT  
TTKLILSTRKFLVHRECSHGKSAFDMEQFLAEGMVGQIDESLVDTKSDDTFNVIGALVE  
SDVKSSSWALYTIIVAIIDISEDTKYDLVSEDGDVICGVPANRINGIDQKQKKNVEAARSE  
DRISRLHSAARRSLEARGNLSSALPFLIANRRQATDALGAESNELRRKKKENFLLKRTWS  
ALALVESMCPADVSAKSQLDHERSSNPNAIKFTCSVSDSRIVIVDESLLQYSPCLQVKF  
SPTHIYNPTLVSSPSETTLISLLQKLNNGEICDFFCDKGHQIFYVTFQWSNAQIDATNF  
ELRRNNTFVHQEGWAKGDQPCCKMTDFSRIPTYELGSKYEGLDEICVQCMEVIEFLARVN  
AKLLRDSKCDTESVFNQELSQKLTQKQIEDPLFVVGRITPEWCFAIPSLTPNIFSYDSRK  
LFLDRVAFGVSRSTLRQQDSKVDVGRIRQRMTTLRARAVELVGEAFSAGAEDPTALQLQA  
DELYGMEEV

>comp13178\_c0\_seq2; 2451 125 8777 LEN=8877; translated  
MDISSNNRDESSSSPSGADASSASDVSGQRWTCEACGCNTNRSDRSTCSICGTRRESGT  
SILRRAGYAARASGLFGRNAIMRRNILNDNTDGSAGSARELAFRVDEEDYTASLVRNVLN  
DNNGGSNSSEDQQFNFNFEGLVMDYVDFLEGMDDTIQLGPPDPDEDEHEGLSMAEVAAGA  
GGDSSNNNVANYRSAAIRFRVAAAMRRARADNRFVAPSARESTQGLSPEDLLHAANNND  
SAYQPKWMDLSQIGGRMTGNGIEVGEQAEQNVAYLPLGSGEGRALRALEAFPRSLPFAS  
FSSVSSSTMSATNSSFASTSNQERRIRRVFGFKVAFSHPWKKAGEKLGGRYLIGVTTTTF  
SSFSEKNALHQSPFFYGIEDSGKKYEGTRNIASSSSSREGFRARRRSSYALELTEEDAPR  
NKDGALFGSREVTCVIDLESRTMTFWRDEDGESKLIIGTLVKNIPRSGQLYPIVVPYHAG  
SSVSITGMLGEPLPLLTAFAAATWKQAQLEKDLLRREQIRKARSIMIQNRCFTPSLITALK  
EIFSRYNNASAKELTEIEASRLWYRCGMRLSSLKEVLAETPNKNTIRFEDFRLLLQRIVR  
DDEKHYPLSDSSEKSSPLSDFCIGDKVELTNNYARFGDAAKGPLLPGNRGTIIELQGAEG  
SRQAIRVKYNARRWYQPQALVREGSGLTDSPIWFLKGI LRSHAYDENIQLLVVKQVLS  
SSWKIGDLVAPKKMKS LDHGANQHTYIGIDQSIGRIVYDNSTSGTFPMRGRGSGVVTFEVI  
RKAFAESTCLKGSSSFQDSVSLEKRKVSTSLIVHTSTFHGLSVSKKPRKVLSSSSSKMTA  
RDDDDDDDESEGMDIDDETSNNISSDFRGLKDLDPASIAERILKEFDKTSTSLVSLVEAG  
LFKCALEALDCLLQKVQLMNDGSLAQATAALGKLALYVAERTFFNKSNNSTQEYCRDQQ  
LKTSEGSNQSDLELNHESSGPHENTNSSVDVSSEHGARTSSLQRRRMLLSLMSQVRRSD  
RNSPEDEIQALPSVEMSAGAAEALFFATRSDGNNLEDDNGRLENSRPSASASTNMTSRK  
NSSKITLFDVFRGRDNDYPGGNTSERRIVLLNSVKNIVCMGILGNLPLWLSFLQSFQAK  
KEAQKIDASDIGILKQATDDDGMPLELAIITLGCSESIIEELIHHGAPIRDIEIRLAANF  
DLPEILSVLLTHQIYCDGMIELESCQAIAEVVLKAKERQDTQRQKMLAEADSFLVAFQ  
KLLQVCLKRRQQQKENDVCGRAIACALIGSIELCALRRNENAASSLNPLVNDGNSFQS  
GRQINGTVDP CGLLQVPLSILGRALAEPPASLTNLLLLIEDYLCSKGINDACIGLTMFL  
TLLQRFQRLRKSQEMERYGFTELIYSHDALALNRLTEISSRLAKRSLAEDKSEKDI LSGH  
EVTFCPQKHRAKLHVTKHSSFRCDLCGVGVECGAIMHGCRKCDWDACESCTDKAEGGILK  
WKYVRQFSSRCQRIFGRIDDGLKEDGSEWSSRMLENLKLMDNTSEVNTLSIKLLQQDPDS  
IQVLARMLSEKGRITIIYQFFMVI L PALHATLMGKALCNEMLGRRPKKPRVADIRFPDNE  
VKKDANGEERLLFAKEILKSLVYDSTSHDGWKDGLIDNDTDEDHHEYVNDDEHEEHEN  
PSYQKNVKVPVKQLPEILRRLHQVLALHEEVKTLVVDKYKKKSRVSPSDLRSLKQPIKLR  
LTQLRHSKCEKKQPRDVTIFCEPLVSVHDLNQLKASSNTHPHYIDFCQKLANDSSII  
LERSLSSNENVWRIAKIESYNEKSGFHCVRYASGVVKSFDGDFNDFRKGEDFACLEYELT  
TTKLILSTRKFLVHRECSHGKSAFDMEQFLAEGMVGQIDESLVDTKSDDTFNVIGALVE  
SDVKSSSWALYTIIVAIIDISEDTKYDLVSEDGDVICGVPANRINGIDQKQKKNVEAARSE  
DRISRLHSAARRSLEARGNLSSALPFLIANRRQATDALGAESNELRRKKKENFLLKRTWS  
ALALVESMCPADVSAKSQLDHERSSNPNAIKFTCSVSDSRIVIVDESLLQYSPCLQVKF  
SPTHIYNPTLVSSPSETTLISLLQKLNNGEICDFFCDKGHQIFYVTFQWSNAQIDATNF  
ELRRNNTFVHQEGWAKGDQPCCKMTDFSRIPTYELGSKYEGLDEICVQCMEVIEFLARVN  
AKLLRDSKCDTESVFNQELSQKLTQKQIEDPLFVVGRITPEWCFAIPSLTPNIFSYDSRK  
LFLDRVAFGVSRSTLRQQDSKVDVGRIRQRMTTLRARAVELVGEAFSAGAEDPTALQLQA  
DELYGMEERLATRVRASFETQGWEEMLTQVAKAAVHRESLLSDALSIMDQYSCNANLGRR  
RLEVRFDGESGFDAASGDEAGVTRGFYADIAEALMSCDTVAGVIFSTCPVDPGLNSGVT  
FPIKSSRPLKLPWIPDIDSSGQVIVPTPRAAAAGIFGVFPRPISEVHPQF SHVMKYFR  
FMGRLFAAAMRDGFI FPLPLSSSFLKLVQYSGETSLPHFDPDHAFRGRIDGGKQEEYILS  
SNDLPRPGFLGGEVYAVEAYICCRDLRIDRMEPPLNDLEREREYSNLASDVQFARVALGK  
SYDCSFNEYFQDRFTVDPLDPTQGF TAHP L CSNGFN RV TI YNIREWVALAKYFMLHEGV  
IEQAAAFRAGVDDFFPCDYLR LFTSEELQRDGC GMDDVDDWDEDAIKLLKLDTKGVTE  
ALVAVAAIGGNTEAVGRRFPASTTIKYVVRALLEASPKRRRQFLSFVTSVPIVTPGLIE  
IIPIVSSSGKFLPMQDPGCLPRANTCARRLYLPKFESYESFSQVIWAVVRAESKHKGFFE

WNL

>comp13179\_c0\_seq1; 143 784 1192 LEN=1634; translated  
MAMRC DAMQRDFLPPLSAAPDANPNHDTTDDQFRMISKAYEVLSDPTKRRKYNSQRYHHGC  
APDTPNFIIDGLEQY GAGPNDQHQP RKSTSNTPVERYRRPVVELEPNNEFNGLSLNNVQDL  
TKEEDGTYTIRSLDP

>comp13179\_c0\_seq2; 201 176 898 LEN=1340; translated  
MRGNQNXDNNNGTEFHPLPAAATNNDLAYQQAVLPSQASGKDCNPRLVPGAVICVFAAAGT  
DASLCLLRDPLLLSEFLALAGEDGNNDQHRKQRAPDYDVLGVAKGAGREDVKNNAFRRLV  
KKFHPDANPNHDTTDDQFRMISKAYEVLSDPTKRRKYNSQRYHHGCAPDTPNFIIDGLEQY  
GAPNDQHQP RKSTSNTPVERYRRPVVELEPNNEFNGLSLNNVQDLTKEEDGTYTIRSLDP

>comp13180\_c0\_seq1; 157 1 459 LEN=664; translated  
VLIDL PTRNESFHKRRIALHRYDPVDLRESFAATQEV LKAESQDVSRSTPTGAEKPAMTV  
KEMEIANSGLQNLVQVTPNSKDKDNCNSPSRQLELFSPTVSSPKENNSLGTWQGGLLSEL  
NRWETKRQEEEEIVFFSGGEDDDNDSDDDLL

>comp13180\_c0\_seq2; 189 134 523 LEN=645; translated  
MGISAKLNNPRHNEKTS DLSQLSSSATKGN YQKVGSNLKKIKFHSKSCEDALKQERVFH  
KLDPKNPQH AHKINQRRKAI AKGKNTIGYDIY CRTIPKDKRQKRSMITPSTPDHKL DIPN  
KKWNGMVR SW

>comp13180\_c0\_seq3; 312 134 937 LEN=1142; translated  
MGISAKLNNPRHNEKTS DLSQLSSSATKGN YQKVGSNLKKIKFHSKSCEDALKQERVFH  
KLDPKNPQH AHKINQRRKAI AKGKNTIGYDIY CRTIPKDKRQKRSMITPSTPDHKL DIPN  
KKWNGMVR SWRIALHRYDPVDLRESFAATQEV LKAESQDVSRSTPTGAEKPAMTVKEME I  
ANSGLQNLVQVTPNSKDKDNCNSPSRQLELFSPTVSSPKENNSLGTWQGGLLSELNRWET  
KRQEEEEIVFFSGGEDDDNDSDDDLL

>comp13181\_c0\_seq1; 536 105 2396 LEN=2812; translated  
MDSASNSANTTSANIPHEASSDPERRIPTPIESENGTPSPANND ETIQDDLELQEQHE  
SLLSTSNTRPAINTLRQLANFAMA AASTTTT SALYSTNSDSRNNSENPMPSGYPTLAQ  
SGSVPLWAKLLVPFLCLACQLIFFY GQTEPMWKLHV NADIDVWANATEYTARRTFDILGL  
DYHIPIVLEEKKDVQTF TYMYAIKELW TAKDLPGLLLPRLAAVLLIIFSGI WPHLKLAML  
NLTWFFGRHRTRRTKTLAWLSGLGKWSLADVLVVCVMVGV LNLDWIVDPGAIKEGVINDL  
PSILEIAETLVTEE QVCDKLLKLNCAHERRVARI AKCKACKGLVSEAFGHPEWARSTGRK  
IVNGISTSGGKATLRVVGMSGIYYFCGAVILSIFLSLVVDIFDHRAKVYERRREEEARG  
IERGYRERGGLLLGERPVRR LISERGDSNYNYNNTNHQYTSV SDEDRLDAPLLGHGTDNV  
SLEIEVSENIEAEINRINRRSGNGKLFPPWFLMVAFP TAIIVYLA AEMYTMERIVYGAGP  
KLLHEVLGMDWQKPYSFQ TLMWTTGAAGGMDYMLMGTFGLFCVVGPPVRAVLLFFTIVLD  
QCHVQISNVAIVNFLG SFCAWEVFAIATIMVQMLMPSITDTIIRNPACASISDDG SCLK  
IEFNLVPIAFSMVLIGGSTLVGLSWIT TGRAMISDKEYEHDSVRTSSGGN VASNAITNER  
GPSPLSRVMRRNH DYERLQGI EEGNSGSTGGEMEELVFETNQL

>comp13182\_c0\_seq1; 1677 117 3503 LEN=3559; translated  
MRFTA AAVA AVCLLSATENIKY GDAFTVTAPMV SQSTQMGRASSLAPLNFKIPNGGEP SG  
GMEELLELTENKMTSALEKQVQKSPSFWKLAGYATIPVSAALGFGIVPSRRLAAHAAGAI  
ITGVAGAVGKSKLDAVTEAAALPAIAQAIIDHGI ED PATTYGYVKS LQESHGIVDSEDFQ  
LLCADVYSKYLLGMVKFNPM PKSSPEKELGK LKASLGLDNLVGEA HAAAAD EWR T TCL  
FTPEEDLEDPDHPDRQAMDKFLFLTERALKQGN ETDEAFRFEMTRVAKSMKLSLMDAMFR  
VADVQQPFYARALVSTRAKLGEGK VSGAMLERARQTLGIDDDTAHDMHVACFNDEVRDQL  
GLPASTDDDDEEDSDPDFDFSKAKFGAEAKEELALLAEILGLSENDAAYEIVAETTPSYQ  
ETALSAMNAVLAGVLTAD EAWEKIDVRRQELLLPEDRCDELLSSMVIQSLGGPLEQANKF  
SKVNNEVAVYENLLEVLNAKEALIGILAKSGWDDVDNFDSVFCDPWEEDSAISFIDATVR  
NKLYDIFLKRTRLRNSPDGKISDEMHSRIKAIQGVLSISDDQSEYAYNVAFGPELQKACL V  
ASDEISKDYTP ELAEKMSSNINQIVADFKLSE SFLKNEGSSCYNRAVKEISAKCPGGIPT  
KELNEALEALRDMYHLDKEDTYQPHLEYFGEVYKKSILESMGSTGIITPKLQEGLAELRN  
RLGVREEDTKDLYLSAIEKKFVPMMEWINNEMERTQLTQKQLSERRGKDMGEDV FQTGKA  
ADGSLGLGAEVNIMGDIINLVDFY TENNIAEEVEIGTKEVDGEEVPVLETSYPITGIDTE  
VVDQQMAEYLYRQFVVGAFSAQPEQSSRYEAARASFGGILGLTTEKMEEINDSIGSAVYD  
NFVTRSM TTKGALDQDMMFLANIQT KGLSSEAGEKLMMD SQRKFLTEELSNIIDDDTP  
VRIKAFREKCNMGGLDLS EDLGITKHQLVDIFEKEITPALKAGEITDDNQDSLTEIQESL  
NLDTEECEAVFFKTVLRLAQEALNEVEAELMRGREENAVELIAMITRYAAFFGGELDFEV  
EEPTAWSIFNVYDAVDFSGEDPEAVEEKKELLQVALGLMDAEDEEEEE

>comp13183\_c0\_seq1; 200 1 456 LEN=616; translated  
SSLPSAMPSNIPSSIPSNIPSSKPSLMPSLMPSNTPSNT PSSMPSSLPSARPSNIPSLMP

SSEPSQNPSLKPSYDPSENPSGIPSAMPSEMPSSFFPSGSPSGVPSGMPSVVPSSVPSEVP  
STTPSIMPTTRLDSIIDQFLSRLCAWNIRFC  
>comp13183\_c0\_seq2; 132 1 372 LEN=372; translated  
SSLPSAMPSSNIPSSIPSNIPSSKPSLMPSLMPSNTPSNTPSSMPSLPSARPSNIPSLMP  
SSEPSQNPSLKPSYDPSENPSGIPSAMPSEMPSSFFPSGSPSGVPSGMPSVVPSSVPSEVP  
SFEP  
>comp13183\_c0\_seq3; 105 1 384 LEN=384; translated  
SSLPSAMPSSNIPSSIPSNIPSSKPSLMPSLMPSNTPSNTPSSMPSARPSNIPSLMPSSEP  
SQNPSLKPSYDPSENPSGIPSEIPSEMPSSVPSGSPIGVPSGVPSAVPSEVPSSVPSEVP  
SFEPSSMP  
>comp13183\_c0\_seq4; 107 1 396 LEN=396; translated  
SSLPSAMPSSNIPSSIPSNIPSSKPSLMPSLMPSNTPSNTPSSMPSLPSARPSNIPSLMP  
SSEPSQNPSLKPSYDPSENPSGIPSEIPSEMPSSVPSGSPIGVPSGVPSAVPSEVPSSVP  
SEVPSEVPSSMP  
>comp13183\_c0\_seq5; 130 1 360 LEN=360; translated  
SSLPSAMPSSNIPSSIPSNIPSSKPSLMPSLMPSNTPSNTPSSMPSARPSNIPSLMPSSEP  
SQNPSLKPSYDPSENPSGIPSAMPSEMPSSFFPSGSPSGVPSGMPSVVPSSVPSEVPSEVP  
>comp13183\_c0\_seq6; 198 1 444 LEN=604; translated  
SSLPSAMPSSNIPSSIPSNIPSSKPSLMPSLMPSNTPSNTPSSMPSARPSNIPSLMPSSEP  
SQNPSLKPSYDPSENPSGIPSAMPSEMPSSFFPSGSPSGVPSGMPSVVPSSVPSEVPSTTP  
SIMPTTRLDSIIDQFLSRLCAWNIRFC  
>comp13184\_c0\_seq2; 363 211 1438 LEN=1681; translated  
MRTSMNRGIIGCYFSLFTTISTTTTLTTRVLPVAGFHSRVLVPSALRSSTGRSSSSMD  
ALSADLAEGAENLFAETPLIHSQPLSALVGKPVYKLDALQASGSFKDRGMAHLCAATFQK  
AGTTELISSSGNAGLAVATVGGRLGLDVSIVPETTKPLVVAKLES LGAKVTIHGVNWN  
AADGLARERVDKPVGAAEYVSPYDNPLLWTGHSTLVDEIADQLEDEGGLSPGAIIVSVG  
GGGLLCGVLEG CARRK LSTKVIASETDGASC FQSWEDGTPVTLPGIDSIATSLGATSCT  
PVALERARSHDGGFDALACTDREAVDACVRFARDHRMLVEPACGAALAVAYSERLRDKYL  
GDVDGPVIEVCGGSGVDIDLMOGWKNDYLDYRMDTAEAMEATVLRÆ  
>comp13185\_c0\_seq1; 839 66 2255 LEN=2533; translated  
MRNCSRCMHPYLWVAIGAAANLFLVFRREGSFCFAFVIGGAARATTADYGFDIRSSKIPMR  
ASSTSEAPFPPLSKDDSSRMSSSKRDTIRPIHQNWVPVASISMLKCDKPNVAVTLLNQKLV  
VFRSVVANSKGVGDGNDDEPTEDRWTVMDDRCSHRFVPLSEGRLVESPASSFSSASGCA  
SCHKNIQ CAYHGWEFDGSTGACTKIPQKQRVDSQKDGTEKKHKTSPGVRCPVKIAAGMV  
FVWADPESYETLGKSI PVPVPSYVDEWYKSRGSRTLFQRDLPGYGYELLGENLVDLAHLPY  
SHHG VGLDRFMSGNPLPFRMLQDAQKTRDEAVDYQDTPVVPVATTDNNIKPLYEVELD  
DATNNDPIFQSMKVMRGPDAVPD GSTV RVGFYQPC HVRYTRTVASLGTKPGSQSRVVLYL  
CPTSSTKSRVFLINMF GAAEKKAEETTTTDESGPSPLLSASLRTRVGAALSGCNASIKKA  
FQAILLNLILKFKFTPVAGHMIAHEIFDGDGIFLAMQGRMQRGGAAATKQSRARNGNGG  
DNDGGEQRQQQHRKPLSYRDIYQTPATSDILVHAFRRYVEQAAKRTDPDPSTVDAIEPTSV  
TYNPD SVLRSQLLDRYESH TKDCLFCRTALEKGRAL EAKLELAKTALVGASGASLAAALI  
GWICGRVLETSTP ASSMLRAC TTTVVRMGLRIALFSGGFARLAFVLRERVATNNQKFVF  
VDYVHAERG  
>comp13187\_c0\_seq1; 204 425 1140 LEN=1574; translated  
MATVQPEATGPPEPPNAAADNDHQKVD RITSLQEGIDGLSLSLFEALRGLRDAVAPESGN  
LGGVQQQQAQASNAGETNGNKNSGNSESPNGSPEDDFEEFCLAYQNRDPDTLALVQKHA  
KGAHPGEGLPDPRADPGGKRRRPRPGRRGDGPGEERRHRPKGLGAARDAPDAERAAGA  
DRGADRKEQGHRRQARGRLPAGGAPADEGPRLCPGPHVPVGDHRGLARASAATDRTQ  
>comp13188\_c1\_seq1; 126 1 584 LEN=584; translated  
NDNDNDNDSGD CSTIPSLDDSSASTTLEDEDSTDL ELS PWRNEME QDYSTYSYNTYSFE  
TFDQDVLALSDKIIIDDHYSWFD TLLGCIICRNDWWDPTLSWIPFQNSSVCSTQGGTT  
VSSRSRAMSWDQATNNGTDGPN DKPVETISQQDEEPLPMVRIVLSQLPNREEGSDKTKKN  
SSTSQDEPEKEKPAP  
>comp13188\_c1\_seq2; 164 1 583 LEN=1403; translated  
XSIARFIATQDEPEKEKPAPVSAKISLKHNOQKPNPELGERLARLETFMRSSTFGREK P  
DGESDKDLTRTDGADTSSTSKIDGSGDNPEGVPGYISRTLSDDKSKEYGLRRLLTNRKNS  
KDQSKLQLLYVVEEIVAPKKVQSEANSAPKKLLPNKWERKSSKRWN GRAPKLLRVEESVL  
VGSKDDQMPNRITT  
>comp13189\_c0\_seq1; 208 1 812 LEN=1621; translated  
XLDAKKLENVSKVVLIN EIKNFVDQFMVLEVEKVKLKE SCRIYSGIHLRQEILRLMPK

SSTYTTERYEGGAKERALERVEVGIGDTNDIAAILVGTKCAYCGEDLSKVSRLPGLISTYC  
SRECTEQGRLKRGGMGNQLRAQVFALEGGICQICGVDGYALFTRVLGLEPAERLNALCNA  
NWKLPKSAKALDRLLQNPREGDFWQADHIRAVSEGGGGCGLDNLRLTLCVPCHTGETEKL  
SRLKLRNEDEHSNKTPDIRTMFKMTATIK  
>comp13190\_c0\_seq1; 494 70 1647 LEN=1744; translated  
MMNDVVVGLLLDEESEADNKKARFHNGNSWVNVVKEKHPAEATITNKKPVYLVVRSALS  
SSKDETPVSPVLGDNGKILVAIQSFRDGEQCGDALVELFKNAKDPDNVVVSLVEQQNEDD  
PYCVEVYCKISAGVEVIERSDSMIYSIDENKENCPRINQIRTVRVQDIYSKGGPPWARALG  
RRSLGNEEFCLQTVANSFAFVENWDEKVRKEWISVKNEFGIISNPPQPRDKTGAYEVPRTC  
TIEFLEEEELPHYNPEPDGKVEFLEEPILLSHTWSPGFSFSKCHLEETAPADGFLPYVSSD  
IEAFARYARFWTRGYDVYTPQNIVYLQSGGTSEHSQEWITNHGRRKSIVREKSLKRIRS  
FLEIQSQDDDDSVMEKPNNLGIYGIGKRRSLSQLNAFVGITLNEQVSRSSSEIPCGNFHWV  
PYNSEISPMNNLYSNPNNLDPQPEYPLRTNQTFFQGTFFEQSGQNLDANDKEPFAPSIRKDS  
DDLPGYTVFIFWVIGLVVWCSVFGIMAPKRPKRRKKRQNTIKNK  
>comp13190\_c0\_seq2; 386 486 1823 LEN=1920; translated  
MKNPDVDGEQCGDALVELFKNAKDPDNVVVSLVEQQNEDDPYCVEVYCKISAGVEVIERS  
DSMIYSIDENKENCPRINQIRTVRVQDIYSKGGPPWARALGRRSLGNEEFCLQTVANSFAFV  
ENWDEKVRKEWISVKNEFGIISNPPQPRDKTGAYEVPRTCTIEFLEEEELPHYNPEPDGK  
VEFLEEPILLSHTWSPGFSFSKCHLEETAPADGFLPYVSSDIEAFARYARFWTRGYDVYTP  
TQNIVYLQSGGTSEHSQEWITNHGRRKSIVREKSLKRIRSFLEIQSQDDDDSVMEKPNNL  
GIYGIGKRRSLSQLNAFVGITLNEQVSRSSSEIPCGNFHWV PYNSEISPMNNLYSNPNNLD  
PQPEYPLRTNQTFFQGTFFEQSGQNLDANDKEPFAPSIRKDSDDLPGYTVFIFWVIGLVVW  
SVFGIMAPKRPKRRKKRQNTIKNK  
>comp13191\_c0\_seq1; 180 544 969 LEN=2484; minus strand; translated  
MKVIEGASRVAFLAFLSHIPITLFDVAQGLFGPLYPKLLTDLIAWYCGLFGDVL MKNAP  
SGEYAWFSSLIGCEILFQLPFFIVAARTIMTAGKCNSSSTNPSDGGSTPQESYPEWFRI  
ACIVYGSHVSTTLVPILSCFVW  
>comp13191\_c0\_seq3; 180 544 969 LEN=2454; minus strand; translated  
MKVIEGASRVAFLAFLSHIPITLFDVAQGLFGPLYPKLLTDLIAWYCGLFGDVL MKNAP  
SGEYAWFSSLIGCEILFQLPFFIVAARTIMTAGKCNSSSTNPSDGGSTPQESYPEWFRI  
ACIVYGSHVSTTLVPILSCFVW  
>comp13191\_c0\_seq4; 180 154 579 LEN=2094; minus strand; translated  
MKVIEGASRVAFLAFLSHIPITLFDVAQGLFGPLYPKLLTDLIAWYCGLFGDVL MKNAP  
SGEYAWFSSLIGCEILFQLPFFIVAARTIMTAGKCNSSSTNPSDGGSTPQESYPEWFRI  
ACIVYGSHVSTTLVPILSCFVW  
>comp13191\_c0\_seq5; 277 282 1133 LEN=2768; translated  
MSVDPPKANLQSMALGGCSACFAVNFTHPIETVKTRMQVSGLGIGETASSLYTKEGIGA  
FWKGLGFAWGREIFYTSIKLGAYAPVRDFLGAGGDAPFYMKFFAGALTGGVGSVVGPNPFD  
VLKTLAQTNKASAPLSTMVGAMYKDQGVAGFYRGVEANILRACVLNATKMGVYDLTKGY  
VTDATGWARKDVRTSFCSSSFVAGFFMTCTVSPFDRIRTNLMSQPTDKKIYNGFVDCAVKT  
VRNDGVASLWRGFIPiIWARFAPQATLQLLTLEFLYTSFGFKSI  
>comp13191\_c0\_seq6; 180 154 579 LEN=2064; minus strand; translated  
MKVIEGASRVAFLAFLSHIPITLFDVAQGLFGPLYPKLLTDLIAWYCGLFGDVL MKNAP  
SGEYAWFSSLIGCEILFQLPFFIVAARTIMTAGKCNSSSTNPSDGGSTPQESYPEWFRI  
ACIVYGSHVSTTLVPILSCFVW  
>comp13191\_c0\_seq7; 277 282 1133 LEN=2378; translated  
MSVDPPKANLQSMALGGCSACFAVNFTHPIETVKTRMQVSGLGIGETASSLYTKEGIGA  
FWKGLGFAWGREIFYTSIKLGAYAPVRDFLGAGGDAPFYMKFFAGALTGGVGSVVGPNPFD  
VLKTLAQTNKASAPLSTMVGAMYKDQGVAGFYRGVEANILRACVLNATKMGVYDLTKGY  
VTDATGWARKDVRTSFCSSSFVAGFFMTCTVSPFDRIRTNLMSQPTDKKIYNGFVDCAVKT  
VRNDGVASLWRGFIPiIWARFAPQATLQLLTLEFLYTSFGFKSI  
>comp13192\_c0\_seq2; 262 130 696 LEN=2083; minus strand; translated  
MLCAIYNDGSACISGEMSSSDQSDRDEGFLRYCAQLRNQETNAVAYRMA TRVFVWYRGL  
APAFCSCLIHCHISNLLYNI IASQSVFYTSSICHLYETSSASSRTDCVEELGCKEQSATG  
TIFANELLSGVVPPHEGDRTKEDWALVCRWPLGQHATSTTLPPNVGRFQTSVDDLGGT  
WHCKHESKW  
>comp13193\_c0\_seq1; 418 1 1141 LEN=1181; translated  
XAESTHAVDESESQSCDSMMQLQMGRMIRNPIAIVASCIVILAI AEAWSAIPNQRALN  
SFSGKHASSTQYNNIDEDGCVPEPQKDNLSRRRFFQKGMVATTTFFTVTDPGFARAAIAQTE  
QQTEEKQGLMTASAVADLLRPVPTFTTIVDEKGIPTTVVGEDAKVTGYFFTTYKEAQRILE

LAKSSADRAIAKAKADKTDEDIGTNPWKRARISTVPLDYAVTVVTKSMRMSGKGVYFKMA  
PADDIEDALTVTGDDDLAEKVPFLFYEDFKVADGEGKEKTPLYFRKDELEKEWRRLNP  
GKEAPKINVELLSLIAELLRPGGSDEELKNLAFVLPKESESKRKECLKKGGKEPAFVVG  
KRIIVLDENDLDRSIFRRKK

>comp13194\_c0\_seq1; 261 60 911 LEN=1018; translated  
MSTDLRKPTLIESIALGGASCVFTVNFTHPIELVKTRMQVSGNALGATVVGSTYAKEGLAA  
FWKGIQWAWGREGSYASIKLGAYAPVRDAIGAGNKDSPFYLKFAAGAMTGGAGSLVGNPF  
DVLKTMATNSGKSESLGKTLSDFHAKNGVAGFYRGIQANIMRACVLNATKMGVYDIAKG  
FVTKSTGWERKDLRTTFCSAMVSGLAMTCTVSPFDRI RTALMNQGDKNINYNGFIDCATKL  
AKNDGPLSFWRGFVPMWARFAPTATIQLVTIEALYGLCGLKSI

>comp13195\_c0\_seq1; 654 101 2143 LEN=3038; translated  
MNTGTILSTIDTLLVCESDAEGNRDGNKQTLTLLPSQATEY EYENERFLVAWVLLTRLPQE  
DLVDVWAGKHSVTL SNFAAGLLVDADTDNAAATDVQ TGHVAETDRCSASSGGDNDNMRGN  
SSLDTCYIRLVTQVTARLTTSPENLKRIIYTAWKRAQSTVAAASPGILKLNVDVFNFL  
SWIHHDDDFLSSDALALTDIWKVYARARAPSSPSEQKEPNVISSVSTVEQTQSTNCHDAA  
AMISVLKSVLDSTGGTDHESNNADEMAGDDFYTVGNLERLVLGIFELRDSKRMPEELIC  
AVLRWIAEEDGEVGF SRDLVMIWHGWLMKNIETILSKKRKNNAKLLSDPKTMDAVNTIVM  
AHVVSPEDEGALRPMWQCIARIARAYGWSWGKATSRSQAICTWCRLACGEWKIQLEEAGD  
LTAASPD RKSILDGCASLMTSVVQYLVGFDERPDKRMP LDPDGLLHLQESLEETISITST  
FLNNSLDNCDHTSYSMI INVWSQLFSEVDLLMLGGAENVIGCLPKLLSVSNEEGLLNALV  
HLITTAQAENKILELVGDLDSGPFVDSIVIYMKRFWKTAANGGWL TQND AHEHIQWACIA  
IDILVEKSPNSVRRYTD PMLPAMEFLIEYSPMQRDGE LLLSLRLLVDSYVDAIGECHEA  
SSTIKESHIVSRAIEILEK

>comp13195\_c0\_seq5; 654 101 2143 LEN=3017; translated  
MNTGTILSTIDTLLVCESDAEGNRDGNKQTLTLLPSQATEY EYENERFLVAWVLLTRLPQE  
DLVDVWAGKHSVTL SNFAAGLLVDADTDNAAATDVQ TGHVAETDRCSASSGGDNDNMRGN  
SSLDTCYIRLVTQVTARLTTSPENLKRIIYTAWKRAQSTVAAASPGILKLNVDVFNFL  
SWIHHDDDFLSSDALALTDIWKVYARARAPSSPSEQKEPNVISSVSTVEQTQSTNCHDAA  
AMISVLKSVLDSTGGTDHESNNADEMAGDDFYTVGNLERLVLGIFELRDSKRMPEELIC  
AVLRWIAEEDGEVGF SRDLVMIWHGWLMKNIETILSKKRKNNAKLLSDPKTMDAVNTIVM  
AHVVSPEDEGALRPMWQCIARIARAYGWSWGKATSRSQAICTWCRLACGEWKIQLEEAGD  
LTAASPD RKSILDGCASLMTSVVQYLVGFDERPDKRMP LDPDGLLHLQESLEETISITST  
FLNNSLDNCDHTSYSMI INVWSQLFSEVDLLMLGGAENVIGCLPKLLSVSNEEGLLNALV  
HLITTAQAENKILELVGDLDSGPFVDSIVIYMKRFWKTAANGGWL TQND AHEHIQWACIA  
IDILVEKSPNSVRRYTD PMLPAMEFLIEYSPMQRDGE LLLSLRLLVDSYVDAIGECHEA  
SSTIKESHIVSRAIEILEK

>comp13195\_c0\_seq6; 407 344 1171 LEN=1654; minus strand; translated  
MSDRNLF SNLRSPLAKNDEYGVTELLREVSKRNSSLSDEERKEVSEMVKRVEQHNAKPSP  
MDKMKKKFAELSVVNDMGSNRRTKNSTVGESDDNGDDPRADKSVKKFANDLFQKFSNMD  
TISAGQPKDPVFDGNRGKEFFRSLSMKGIQSPLKMTNSASTEQQTPSRAEGDRRPEILKA  
FEQSSQSGKELLRNLSKKIQSPLSSVPNKDPPPSAAETA AVSEAFRDIQKIHPNIADL  
PQKEAIDISNEDQKKNATNLNSIQTP TIVDFPEEE

>comp13196\_c0\_seq2; 99 296 743 LEN=743; translated  
MIIFLLVLVAVACNVGTAEGTLFPIFRHEIRAAGNGSEEPYGEIEQLEPLRGKIIIEAH  
PDAFGSEMTEGKIVTKLFSGVANGERCVTGEVIESTVDNSLETTDCYVIENGLYALQ TWD  
GQIGACEFTLQNYRGPFFASGVDPDIFSATDX

>comp13197\_c0\_seq1; 271 21 359 LEN=1062; minus strand; translated  
MKYAGGGSERESEEEVAENGRSEDDDEKNEGVL DYDSVPSTGRQPCSDNINALGEVADEN  
DLETGGRGYESKHRVPEGSEVLN SSGGTIEEMDPIEQMLNQVEDEM KDIRKM

>comp13197\_c0\_seq2; 410 1 954 LEN=1657; minus strand; translated  
XSGPPDFSKESTYGFYGLGSFIQIAMALKNTTASTDPTFTQV FVGYNFWYRISKMENDQK  
KVKFKLEDDSKALPRKSAIVRSARRIRDKMNGYIQRNEKESDDEEDKKIRDCSHSSSGCP  
RSRSSGIALEEDSLHDNNEKERDRRESLKPQAIADSARAAFWDWQTLGN SCIKLRIFLSI  
LINYCGLSTVFLFLPIQLAHSESAMDFILNSVAXKNEEHVGGGSEERESEEEVAENGRSED  
DDSV PSTGRQPCSDKINAVGEVANENDLETGGRGYESKHRVPEGSEVLN SSGGTIEEMD  
IEQMLNQVEDEM KDIRKM

>comp13197\_c0\_seq3; 501 1 1072 LEN=1775; minus strand; translated  
XSGPPDFSKESTYGFYGLGSFIQIAMALKNTTASTDPTFTQV FVGYNFWYRISKMENDQK  
KVKFKLEDDSKALPRKSAIVRSARRIRDKMNGYIQRNEKESDDEEDKKIRDCSHSSSGCP  
RSRSSGIALEEDSLHDNNEKERDRRESLKPQAIADSARAAFWDWQTLGN SCIKLRIFLSI



LINYCGLSTVLFLLPIQLAHSESAMDFILNSVAAGFIIEMDDYGEKGNILLGKDDSGEES  
QPFLQONATDRTQKNEEHVGGSEREESEEVAENGRSEDDDSVPSTGRQPCSDKINAVGE  
VANENDLETGGRGYESKHRVPEGSEVLNSSGGTIEEMDPIEQMLNQVEDEMKDIRKM  
>comp13198\_c0\_seq1; 425 65 1003 LEN=1172; translated  
MTDAKEQDSKIQKSESSAVAEAAVDTSFNKLNFINLIAYILNSIATYSIQFGWIDRPNG  
DISDKYQTIITPFGTSFLIWSVIFMWQLFWVCWQFLPSQRNSEGVKAWYYYYPIFTVFQA  
GWTFSFSWEIMWLSLIFMYAILATLISASMSLQTYKKTWKGYLLWQGPFSIQTGWIMAAS  
ALNTNVLVPVYEAESTTVKIVVSSLSLVVLVVTAFWTWSSYPVDFAIPLVIVWALGGVYAE  
LQSPMPMILEEFSTKQINGVQNGVLAGLVVIGTGIIAKAAYVILKQRPETMKLAAQAEVP  
KSVSDSAEDSV  
>comp13199\_c0\_seq1; 145 1 1104 LEN=1104; translated  
XRLVVSGLTAVDRDQVTFYFLHEGQFLSEMGLHAGLGLRGGVVSCSVTALIEEILPGEHE  
DKADASRQPLGQQQQQRQDQRPQPVQLVAWDRTELMDLLEQHKSIERALRAVLSDIVS  
KLKSQRVLLASGHKIDPEVWTLKRREQSLAXVQGHTEPHAGGGRAAAPAAAAQPAARAAA  
AAMEKTEGGPGLHETTTSHSTNKQLLAKYREIHQVSDGDHSSALEQIGWTPSEFESGRRV  
GAATTTATRATAVATAIKTTHGEGVGAEDRAPNATNPSPKGAGGSRAAPRENRFGIRDENT  
HTRGGKLGIAREPSTARTAPRDRVDRGKRFWSWEDALAFRCVPSVETPVLGLGKPSRQFFK  
SAQNKCGA  
>comp13199\_c0\_seq2; 568 1 2091 LEN=2282; translated  
GLVARLERAEPASGGTPNVDGGGGESDRLLVQKYICDEMTYGDRKFDVRFVFMVASVDP  
LIVFYHTQQNYVRIGHAVYDESNFNSNSTRALHTTHTFGSAETKATWDEFRELVERHVLDP  
GSRFLGRFDAGSSSNNGDSEAPLLLTI EAIRDPFGHVQKQMKTILAHLVDAFRNTTF  
HGQSTATENGFSWHAADMIIDNNLDVYIIEGTDGPGKDEDYDFRIKMHEELLGSMVDILE  
EVVDRQEEGRPLDVAEMKEKGI LGGYEVIYDDGRAFDYXAHAAAPPVVRTLAGEATKPEG  
RRGCGNTGSPDANRGTGNFQGARDEPQGNPPDLLDEEPDEAAVEPAARALRRNGWTPVD  
RPEEAQLVYLSGGDDLVLPGKELPYEPARWQLVNEFP SQHEFFEREYLKHLDASTVLSYK  
DSREHDDGGACRPVVHRGRP IRVHAYWLVLVLSPLTVLYRDGYVGM DYSDRHEDEF LAPQ  
PRGLDGKVEGKRVWEGSWTALEHYIHKARGLVPPPPQGAVQNRSPWKNGAATVAVEIRSD  
PVLHVKNQMKRALVSI AEGFRDHARGEKPAYRPFALFHADFEVDRDLNVFFRDAYHSYV  
RGEDHSEVVLDLHADLYGSAFRMLEHLNATSNGTLDLPGGKSMGNYEWLIRPSGLRDGLSR  
AEAATGGVATEDNPRDHDGLSKFTYDWNQKARECFA  
>comp13200\_c0\_seq1; 239 1 1010 LEN=1180; translated  
XKNKTSGLIQRRGAKTHRSDTKPQKDRSIPDCATMFRDNELENGWTGLSEKTAGKD  
CRLLRKLAALRENRAALKEERSGEIERLESVFQSTKERLARLLERTHNAAYRQHLRHY  
HEERPVEDQQPGDPTPTTRGIGYRGAGGGVPSVSNYVVKHETPLLSALHRSFLVLPNQIE  
VCEGEYERNLYPFFRDEIQALHIESLETLDWRMRRLSAQA EKNEALYESYRKECETKEE  
INKLKI RLQQQRDQKGYCDES IASGTECSSDSDSEI SPGREAGVGLKLLFTPTQKIER  
ERSHPKVSCGGPDVQIATRRKFRLPFGQRNDDTKIK  
>comp13201\_c0\_seq1; 380 38 997 LEN=1227; translated  
MSSAYLIAVATLFLVIGMASALTTGPKRVVSVGAGGQTGKSLFRQLLEDDDFDPIGLVRT  
ETSKVAVLEDCGASKAPSLIVCDVTDEAAVKAALDWTSDALCICTSGTTPRPTGETTEEG  
RPIFGYPEGGDPEIVDWIGQKHQIDAMAGVASDSVRHVVCSSMGGTDPDNMLNTLGRTK  
DPETGKETGGNILLWKRKSEKYLIEKAGASVDCNLRYTIVHPGGLINETGGERELIVGVD  
DDRVGYGEGSPRTVPRDDVARVMMEACRSVDIFGNRSFDLRAHEPAAGDEAPAVATDFS  
KLLDPLEGKNCDYSLGKSM  
>comp13202\_c0\_seq1; 420 262 1494 LEN=1957; translated  
MEKLELLSQTAILKQIDRTGGSEEEKTSSDEKYENAVLVDSSNHMVTGLPSFSHTQHLL  
SAAVAAGTSGSVPPGYTGDKRNRTPKLRPFPVGTAAVGRNIASPVSTDGEDEEEEPGAI  
LRGTSTTSNRIKLSTHNAKACIVESRSPITTTLEYGHQVAVGSSPPYPSSPATYGFGLVQN  
HSHSLNQHQPEHQEYQVSLYHNQHRSI IRTLSEASFAPPYSNNAMAANSHAGAASTNS  
EIGAAFQPPQQQAAPRLELQPRHSSSEDMARQIRELKEQLSEKDVLVSTLQNRVNCLEN  
QIHELRLPTGKISHIPVDDMIRIMQVYGSEVSNQTLPPQQRKQNIKKASIVRQFRRWPNP  
FFRFFVHHNGDWVPKLGREGELRRRVEKRLLLLIAKQONQAGVPGVPRSK  
>comp13203\_c0\_seq1; 672 189 1769 LEN=1967; translated  
MKPTPSLPAAWFAGLSILFGHLSPANAWVCPAQGGTIRKNEGSLAIGKGRFGGGSALS  
SSGFSDERAGNSNSTSPVLERLRINGVSVSPKGFHVLEPTTARKTGTEHAGATDPACG  
EGEGKPSPIELGQPPKRQIVPGASDAAIAPGASDGETQRESAENGAGGLLLPLKVTNDPA  
DAFAATSPESLTLQLLSGVDMAGAILPELLGKIVVSHVEDKVDSMYDDDEEEQEODN  
AAVFPVPLSPIEGKLWFLKNEEALSREQQASASLYASSPVPPRIPQLPEVTLDQLTLVP  
AHHREGKAAGGSHPSWLCRLECALPQWKDFLTVDVRADLLASLAYNYDPESSPLFTICIAL

ALRYKAPIVLEEELRQDAPSGGGHAGKETETKGEAKAKKAPTETEGGSGKSNSNSSSSTNT  
NTHNGGYWSSPDDLDRDFPQRTTLRSLRQSSRVTONIERGFEIHKLTGALEIARRLGDD  
AAAEKIRAKLDEYDSMEGLPTLGDASGGRTTGGDDRLDDLEQNILQ  
>comp13204\_c0\_seq1; 151 409 977 LEN=1151; translated  
MVTPXVPKRQGQLGGWVNKLQRKDRLLLEERLERLNEIGFCWDARDGKRRERQTRWWKQL  
ESLPKKQGQLSNPATKSGGETTSSRDTELSQTSRQSSLLSFDNMTTSSQKTWLRQRMA  
YIDAGYKPSQKLDEEQIQALNNIDRDWWKTARERKWDQAQYSALKAFKCLKHGTFFLTQQILN  
TARLFSSRYW  
>comp13204\_c0\_seq2; 190 409 971 LEN=1053; translated  
MVTPXVPKRQGQLGGWVNKLQRKDRLLLEERLERLNEIGFCWDARDGKRRERQTRWWKQL  
ESLPKKQGQLSNPATKSGGETTSSRDTELSQTSRQSSLLSFDNMTTSSQKTWLRQRMA  
YIDAGYKPSQKLDEEQIQALNNIDRDWWKTARERKWDQAQYSALKAFKCLKHGHCNVMATHN  
EKKLFNW  
>comp13204\_c0\_seq3; 151 409 977 LEN=1452; translated  
MVTPXVPKRQGQLGGWVNKLQRKDRLLLEERLERLNEIGFCWDARDGKRRERQTRWWKQL  
ESLPKKQGQLSNPATKSGGETTSSRDTELSQTSRQSSLLSFDNMTTSSQKTWLRQRMA  
YIDAGYKPSQKLDEEQIQALNNIDRDWWKTARERKWDQAQYSALKAFKCLKHGTFFLTQQILN  
TARLFSSRYW  
>comp13204\_c0\_seq4; 198 409 1103 LEN=1354; translated  
MVTPXVPKRQGQLGGWVNKLQRKDRLLLEERLERLNEIGFCWDARDGKRRERQTRWWKQL  
ESLPKKQGQLSNPATKSGGETTSSRDTELSQTSRQSSLLSFDNMTTSSQKTWLRQRMA  
YIDAGYKPSQKLDEEQIQALNNIDRDWWKTARERKWDQAQYSALKAFKCLKHGHCNVMATHN  
EKKLFNWVQNTKSYRAVKFHKEDGLRSDGSPKLSMQIELLDRIQFTWDPW  
>comp13204\_c0\_seq5; 119 409 924 LEN=924; translated  
MVTPXVPKRQGQLGGWVNKLQRKDRLLLEERLERLNEIGFCWDARDGKRRERQTRWWKQL  
ESLPKKQGQLSNPATKSGGETTSSRDTELSQTSRQSSLLSFDNMTTSSQKTWLRQRMA  
YIDAGYKPSQKLDEEQIQALNNIDRDWWKTSSALSRSRNFNLRIVVDEETAX  
>comp13205\_c0\_seq1; 196 1140 1749 LEN=1749; minus strand; translated  
MAAIADYVGTNISAQRDANLRIESRRDITCAGGLEAIIKGMADFERNLAVQVAGCRALA  
NLSHRGGYECKDYFGQSSNRQMLIARSGGIDIVLKGALGTHSYAVDDYNHTVACNTDLQE  
HACRALWALSFNPKVKKAIIVFKGGISSIQTVVNTARKEARSRAVFWARLALKNLVNER  
GGGCLSKLVVILGFLSGVGFAYX  
>comp13206\_c0\_seq1; 584 1 2159 LEN=2285; translated  
XIAVGTDISILVMTTREIDLERQLLKSSFGSNNKNQSKLVDILDDTTRSYYSTGTTTTA  
NSSSPHSIQSKSTSSSLGKTRKTPKPVSKDDRSVLTAASRSSRLTANTGNSSRSIAPN  
RSDPSRLPATTTSKSKRLSFDGVSYPSPSAHPDIQLRSAKGRSATNGKSKNTHSLPSAS  
SELPVESAPSNPKKHQHKDSTKRNQKIRNSKTMSNYGKVPENRIEHSIEVPHDEGEAQ  
DTSSSGPSSKLIWLSVICFVVVVTAVAVPCALLLGGSGGNTNFPNLSKAGNGDIVALLSE  
SICNEGIPHSCTPERTAEENLGGELCNLLAKAMINTTVPGDIAIVNAGVCEKDLLAPE  
LKAGDIKKAIAAGEKLVAVDISGVDLSNLVTEAATASFGPSGNSKAYPYASGIRYDIEANL  
PPSERVSNIEVNRGLSNDVWEPIDLRKFYTVITTESLAKGDMGYDSFAKVIDDWDKPLNI  
KTGDADFYYYAMNNGEDPSWSVLPSSSEYSTQYFLGENDEAKLGVVPQRICHALMPGQPTSP  
SCTAADVANGGGVCNMVAWAVYDQNLSDIVMIKGTCKNDIEDGLLVEKIDSALSAGDN  
TMHTFEVVGSGVVKYLDDELVSEAIDDGIEGSYPYAGVRFVKNKSTPKVTNVEVLSPSG  
NWEPI SLNKNYMAQPTGTGSADSQLMKKTMKENIISYADEWNTMYPPPAKASTQSFA  
>comp13207\_c0\_seq1; 355 162 1097 LEN=1504; translated  
MPSDPLVFGFWKVPNEVCSSVCYEAIKSGYRRLDCACDYGNEIEVGEGIARAIEDGLCKR  
GDLFVTSKLVNTYHKPEHVRMAFQRSLKDLKLEYLDEYLIHFPI SLEFVFPFGKKYPPEWI  
NLDGKMVVVPMNDMCAWKEMENLVRDGIARSIGVSNFSVQLLRQIFSTCEIRPSTLQIEV  
HPHNSQEKLVRFAHENDMKVTSFSTLGSTSYVELSMASDEDSLLSNCIITDIASAKQKTS  
AQVLI RWALQRNIFPLTKTVSGNRMKENRDVDFSLTSDDMKKINDLNENRRFRNDPGVFC  
ESMGTFCPIYE  
>comp13208\_c0\_seq1; 404 505 2760 LEN=2942; translated  
MVDVQRVGAQRSLAPQAALPRKAPSSKSPQQPPQTRDNPFALSHPLVYAVRVEDRVRGL  
GGFIRDEIAPKVSRLQREHGCIEHQLOQRTAMMIGSNNQTTSSSKQKMKHQAWLYKRTSK  
KRELNRMETFLELATNLYRISNELNPAILYTTVLWQRSQSIAPRDFVAAEVDRDVVCCDS  
NSNNSDND CERRRSEQRLLQAYRNAACLENVRLSKAVWERLDRLDGTEQHSSAASAVSS  
LSTSTVASSNNGESSIGVASREDASILSSLRIFCNSFFVCSSCRGMFHRDYYQALVVRLP  
DHQKTLDPSPSFPYICIHWCNTWAREQRQERNR KALGRTTNLPQRTAGSTNQSLGNSGK  
LEEDRN GRGCAHTKVLPAIQVPSTSGTSLCNSNKKEFVPQKTTTTITPPAKSHENAKNSK

FESARYKARKKVIQDRISMARSQNCASAKNHEPVHAKVEISVTNITTPRSQKESTEGNWS  
ELGSSLSLSSCLHPALKQSLKKKATLSIPLEPTCPLKLAEQPPRRRTTSRTDRI STMKLM  
NSCAVLSDNSHCADTAAAEKQSSKSSWSRFGSSSESSICSN SIAECESLHSTACTPSPQK  
QRVRTNPIRKSTASEVSDHAIHSIAESLCSDFSIPASVDLHKSFGKQFLKSAMKTKTLL  
DSIASVSGGCSPTKVQDFPFTTKPTKVTPSCKKKNVRFRTPLVEYSRKDQTTFIEDSSIL  
DTSAEIMEATEYFCTCDTLMSAFEKNKYRMK  
>comp13209\_c0\_seq1; 663 141 1448 LEN=1562; translated  
MKFSLALFLACAATAEAFAPTSSRVSSITAKGGMSDDIGIPCEDECAIEKYPNLPESV  
HPGVLSGQAMMDLLDHAKENGYAIPAVNCVSSSGINACLEAARANDAPIIIQFSSGGSQF  
YGGKGLDNTDYRAAIAGAVSGAFHTRTMAEQYGVVILHTDHCSKQLLPWVDGLVSASER  
YFKTHGEPLFSSHMIDLSEEPLEENLEICAEYLSRMEKIGLLLEMELGITGGEEEDGVDNS  
DRPVEDLYSKPEEIIYQTYEELKKVSDMFTVAAAFAFGNVHGVYSPGNVKLDPKILNKAQEYI  
SDKLGDDAPENKMPVSFVFGGSGSDVSDIQEAIIGYGVIKMNIDTDTQWSYWEGIKNFEA  
KYHDYLQGGQIGNPDGEDKPNKKYDPRECMRAAEVNTVKRLETAFAADLKQCQNILGLGESK  
LASNVLGPRRGGLPV  
>comp13210\_c0\_seq1; 322 364 1137 LEN=1460; translated  
MVRQNGGKVAKDFYKILRVSSEATKAEIKTAYRKLAMTLHPDRHDGDEGKTKAFKEATEA  
YNILSDNERRRQYDVSLGRSSPSGWYNKNRRRPPPSGYRKVYAPHAPPDGKWHDAQRHVD  
MHYGDGQYHDALKSAYKRAKENGFEFDYHSPIGKGFTESTRKKANSKDFNPYSKADQGP  
ASSGYEYEEAYISEAKQVMKRKTGVVNMLYERRRQRLQFQEQQTHTNAAATTDQGGTGQA  
MHDPFQQQSPVGNCTIM  
>comp13211\_c0\_seq1; 463 33 1226 LEN=1293; translated  
MGTLFENNETRQAFANLSTGSESSPLHKKKQKALQQEKTfMDEMTPSISEHGYNSVSKR  
SPVSTQRSIYEEKIDFSFPLSHSSDTVDNPLALSVTATTNFSTIIIEEDEEMLAQSQT  
NSLSDSFPREDIEGVHKYEURKHFVSPEQAENDNRDEYAKYGYGEPSPMAMMIDNEDDKEV  
EENSKYDCGETVIPSPSIAPYSSLNDGSRKAFCEPERMPRRSSMKCTSSPRSDSIRSSEE  
FEIFLFPQIDPVQRRRSIAFDNTVLIQTIIEPVRSLVADSQSLWFQDIEYETIKMKTLSLL  
DRVDHASGFMDGKCYCTRGLEKFMapeateEVKKHQAWDCVLNEQFLQRRDGEFDEDSIAN  
IYKYSTKRSRKEASIRGSQDAQVAQTIHQTTFRSMPI  
>comp13212\_c0\_seq1; 149 177 890 LEN=1792; translated  
MSNTGHDEFDRLASELSATIKEIEVALRERASGDSKNDKESRSGTNKLIVKASSILSKLS  
SVTKSVSEREPEGLKQELVDIYKAYKMQMKTfKSLHQPELfkNKIGTKASCTEKLESEK  
LTLFSSSGKTVGSDEQSSRWHDTSGTRKNNFSRNGHSRDGIVSNTQGRVGKQNSRLQDA  
LKSLAESEQVAQEISGELQGGRETLOKAHGRMDQFSAMTEYSKTLNLSMNKPWWRWK  
>comp13213\_c0\_seq1; 447 84 797 LEN=1006; translated  
MVAANDRPQKQATLQOGEKDESGGERPLIEVDVSIKRLTKGLMEMEISEEQAHSAGGI  
FRGIAAAARAKLPVLKQASTQAVRSIGSNRPLAFASEGAVAGNAMMPRWMYGAWGLSGA  
AIGADITTRTWDAPGDKKWEATAAYWTAHFVPASLVVPAV I IHKIVHAAEHSMEHHSYAKK  
IPVGARPFVPLGALLSVIPIVPAVDHAAELIMEPTLGDYLGLEFHGHGHEHEKED  
>comp13214\_c0\_seq1; 1348 359 5328 LEN=5328; translated  
MGDSEDLNGSSSSIMIDEAFTAHLQELGLSSTIIVDDKNAYDDADGNENCDYYGYHSDL  
YGGDDGDESYLADLLQQRDRRTVQREEIMEEALERFNAVPNINEETGKQKTDRLFLKLV  
EEVEKEMEEEFQRRNDLQDERIARELLSKAKDQQRKLEEEKEKEFEKNRDYYHDGHTDD  
DSYEIELPQGVADDEFRLEMDGVAKVNSHKSRCRRFMESQPSVPTVDNSPFESSYKSSI  
KSLDWEASETFKSARSFDRRFISDDAMSSSCSESLCSDESDDGNSSTSVSISTNGSIESE  
RERRNDGLKIKKGKSEDETDQFGDDFSDDESPVSVTEGGSERHQSSLLKEKPPKSNFWR  
NKELNSLKSSFLSATATAARRNRINPSATAPRHVWIKGIQIGKSSLVESFLQDDILRT  
KPFVCRGIFEDNWIDRSKPFSAIVSCFSDLFGSFYKGNDTVKWVEVIQNCLDDDDNDIAVL  
VLLIPALGTLDDVNVDTKYSFDRDNFSFERLSSTLGRVLSICEYSTTIFCIDNVHWA  
GDDSLQLLKAILMTENLENFFFICGYRSGVTKSLSKVKTDLSSLFVADIELGAIDEESK  
SIVRSQLRRLNKFPIDTKMMNSLMDSCFTHSSSNPLFLKHLVHFLYEQKI IKCTGKRWK  
IDSHSELPSLNLINDRMEGLSSTHDMIMQSAALLEVNNFRDITLMVAVTTLSQSRELD  
IGITEIESDLSILVNMMIEERPKNHAFADGTIRTAATSRIPVVNKKRNSALHWDLATN  
FEKLRGTAVMKPELNGDGTSLLI VNLNKGIASVEDKDKIKMVVIRNLEFGEALMKRSA  
FVTAIGILETGMAALDKKKKWEDSYTVTLQTHLALARCLYCTGEPDQAKSLLNTI IANGR  
RPRDAIDAFALLISIRSKMQYEQAKQCTLKALTDIWDNVSQYNVEDKFSKVRMLVQNR  
SDADLLVLPSEHKKSTKMPFLLQLAEISGLCRAYKLQDLASLRMIELTLKYGSCENL  
TGLAFALCGLCVARRHLHGEAYRYGRLEAEMMSEGENPYGRQAI AHHHYSMRHWRSSMKNS  
RATLDDLCRASIKANEVDNLSFQVGTYISSIFYSGSAFDCEDTLLKLYDEKRAQHDLPEC  
WNVTAPYRTLMLKLSGEIPKLVKKKHTDTRAIQYDLFFQMVTSIFMQDMEKADSLNAKVVV

KPGGCWGPYRVFMQGLVATHFVQMTTGRKKISHQKQAANLVGILTAWTKKGMNNTAHMAN  
ILKVELTIASDRGTTTPKQSRILLDTAITFAYQDGFTHHAALASERAGLYFIHQDDKKMAS  
LYLSRAFSLYKEWGANAKTEQLERRYKNYLGITSEPIRGIQKGNMFTDSNRRPRDR  
SRGEIVRTASRRHGVRFSHDEMINQRNQSSRNMMFARGSPSAPNIGRTYSFSENRNST  
WDKTSNSSRRLDRLSATKGLSSTRSKSQFLSTNDKNARTPDSTKSI PRNKTKRPALLRNL  
SSSLTMSVASMLTKPSLASRKEAEDTKAARQERRSSSRLHAMEKKTNSLSYFPSNEGRKP  
FAASPRPTERLERRLSQKPKTSRRKFLDPGVYGYSAEPYSAKSDVEDLSLEEELETLK  
VIKKKKRMSKIVSSHLTKSDVEDSSSEEELETPKAX

>comp13214\_c0\_seq3; 315 1 487 LEN=1048; translated  
XXXXXKMSKIVSSHLTKSDVEDSSSEEELETPKAXXXXXXKMSKVVGSHPSKSDVEYSSSG  
EEELQTPKAKKLSKESKSKKSKKNEKKEPQSPTSEKVVSLDKKEKTSKKEKTKK  
ASSAETPSESTSEDRMPSYEENGLGKSARAKKKAKNRTATL

>comp13214\_c0\_seq4; 190 1 1246 LEN=1246; translated  
KKKKGDLVKGSMGPHFFAITCXVELTIASDRGTTTPKQSRILLDTAITFAYQDGFTHHAAL  
ASERAGLYFIHQDDKKMASLYLSRAFSLYKEWGANAKTEQLERRYKNYLGITSEPIRGIQ  
KGNMFTDSNRRPRDRSRGEIVRTASRRHGVRFSHDEMINQRNQSSRNMMFARGSP  
PSAPNIGRTYSFSENRNSTWDKTSNSSRRLDRLSATKGLSSTRSKSQFLSTNDKNARTPD  
STKSI PRNKTKRPALLRNLSSSLTMSVASMLTKPSLASRKEAEDTKAARQERRSSSRLHA  
MEKKTNSLSYFPSNEGRKPFASPRPTERLERRLSQKPKTSRRKFLDPGVYGYSAEPYSA  
AKSDVEDLSLEEELETLKVIKKKKRMSKIVSSHLTKSDVEDSSSEEELETPKAX

>comp13215\_c0\_seq1; 368 263 1204 LEN=1406; translated  
MVLNRRACNVRSDFI PMKSRLALFSTSSSSSPNKKKEFAKLRLEDANPKRITGIQVN  
PDSLGYGVLPGNLTYKTYKWSGNTRKIPLELAHGYFWMVRDLKQTNQKPTLSNETLIPES  
EAQLFPTLEGLTTLDDLDTLDDLPLFFLEKAHQPKKSKQRIGGKITLVAVTYRDNQFKM  
IPSWIDPFEQAFQKKVGEDESSSRVQTFTVSITESWALYPIRNTVKRVMKRNNPEDKHSST  
LAYFGTKEVMDFRDILRMHNIMTSYVFLDDLGRVRFAGSGEASEDEVTRLVRFKELR  
ETDGPRRKAPKKQ

>comp13216\_c0\_seq1; 559 1 2213 LEN=2271; translated  
XHTTPHHSKPELQEPSTLPYRAMALLLETTVGDVIDLDVEGSPALCKNVLKLAKARY  
YTGSLVYNVQPNRFFQLGDPGCGDTGGACIYGLLDAHDKARKSNGGAKPDVLASQRRFLR  
SDMGRALTEGECRQKGRVVATEMNGIQNTIGSQLLITVDEGPERALDSFRNDTNTSGNRN  
RNRNNDAGEAGFAPSEGQFPVPTFRSVGTVAEDSDVLGKINAAYCDADGRPYADIRVL  
RALVIDDPYEDPEGMDQLLEDRGVRVSTTALAIEKPSPPGGGETSGGSAAALRQRVASPE  
YERPEERVEIRISASEVDQDGATEEEDRKLRLQEEERLKRDDKSRAMVLEMLGDLPSA  
DIKAPENVLFVCKLNSITEDDDLELIFSRFDEKVSVEIVRDHKTGASLQYAFAEFTTKEQ  
AAEAYFKMNNALIDDRIVKDFSQSVSKVWDRFNQRNRKGSFSPGAMPRDPFHEQKRHGN  
RGREQKAGAMAAVAETIEGAPTAGPATIIRRAGTTKATTTGTIGTAIRQRGTGIATAVQTT  
ARETTTGTETKTETETGIDRGPATAMAVTHTTTGIAVIAIARTIAASTRGGPTKTEIAE  
VPTTAEAVRDRGTTNTTAGGGKNNRRIIEPRENGGKTAMPTMALMATTETARGRLKGGGG  
TVATGGVAATAAAVEAATITRHPGAVATERAKGVATEKATTKDETTSATDGI GNIVITG  
LDRIVTDVVEAILDHRR

>comp13217\_c0\_seq1; 1010 211 3108 LEN=3163; translated  
MTTPIASRGLSSYAGRVMGSRTPTFKTATRSLSSFAEPGLFNSDVMKMRTKDADKDS  
PLRADIRAMGSILGQIVKDHGEDI FQKIEELRGLSKEWRAAGAGRNPEQAQDADKIFAE  
LTKACAKLSNEEILTIVRAFNGFLSIANAGESHHRIRRLNMATREEALPDRFDS CGGALK  
ALLQDGHSP EAIYDALTSQQVELVLT AHPTEVNRRTILEKQRRVQRLLLTKADYLRERNIP  
STGYDQTELDRLSKREIASTWQSDEVAREKPTPVNEAERGTLVVETVLWEALPGFLKRLN  
SVMKSLGKSLPLDACPVIFSSWMGGDRDGNPNVTPDVTVREVNLNRAQAASLLKRFER  
LKSELSIMECNEELRAVACETKEPYRVILAKMIEKMSRTKTWAEEQLESANNQSQYGVDD  
VYTTKQEVVDELMMIHRSLLETDNEIEADGFLTDIIRNVHAFGLTMVTLDIRQESDRHEE  
AIDSITRYLGLGSYSDWDEDTKLTLWLQQQLASPRPLIRAGEWNDHPKFFSPTAVDTLET  
SMIADQLHEGSLGAYVISQATSASDVLAVLVLQKDAGVKKALRVAPL FETLDDLNGAADTM  
KKLFLSLPAYMGAIDGKHEVMIGYSDSAKDAGRLAASWAQYETQEALAKVARNANVEMTFF  
HGKGGTVGRGGNPQTFQAILAHAPDTINGRFRVTEQGEMINQNFQYQDRAERTMDIYTAA  
VLAEKLTTHVRPTDEWRGLMKTISDVSCDAYRSIVSEDPFRVFPYFRSATPELELSNLNIG  
SRPAKRKPTGGVESLRAIPWNFSWTQTRLNLPWLGVGEAFEKILASDDGDKLREMYREW  
PSFRTTVDMVEMVLAKSEPKIAQHYETVLSDEKAKELGAEIRALHVQTEDAVLDLTGHE  
ILSEENKVLMLQLLEVRNPYVDVNLVLTQETLQIRKFEDEEDKVLKDCLLTTITGVANG  
MGNTG

>comp13218\_c0\_seq1; 244 307 1622 LEN=1837; translated

MRPXETPLLFNLSVFYFPVKTFWVQAQRKDKESNGSSTGSSDDKNVNEIDDNSKKTGT  
NTKSVAERTKQFEAINKNGEKDTPAFVTETQVMATTRYWLNWQLYAVVQAVGHCFAMIP  
IVGRFLIAHPIFSFLTGECKLFFFLWVFMVEKILGSATSTSGDAFMTDARPLKLVQTFVT  
PLVLNLHGVSNAITPELWHKGVVSKTKRFLDAAVFVRLLESEERRDWLVHMVEEARVLT  
PSITLLMPGFVTQVGVAVVRYAVPSAKSAEAKSKATKLVYLQYWVLHCCMAGLLAYLEGI  
IWWIPFSTHMVFLWLCYLILPKAIRHIYAMLES DLVAFGLLPKIDDPAGAKKEISETRIA  
RFFDWCLSWLPAADMSTSDNKKQIDGARGKEDQPEAVASDSEDSKPEKASETAESGPLSP  
KQSTPEVDVGEIGIKDKDV

>comp13218\_c0\_seq2; 264 285 2237 LEN=2452; translated  
MASEFVSTISEVVTISKIGNPLEYFNQQYYGVFLPQYHFALTRLEIQQWAVYQTALHACAT  
DSWKALSSTYKLCYLILRPF SILSWIVAQHAGRFIGE HGGKSLQSLAVSSKRLAIA CVRF  
QMSLNRIQLLGEAGLVGLCVALYLRKWLKQTYWARMVAWYRAKKKNAIQSVNHFFDKL  
ARVSKILLALTIPLHIFVGLSVGIRLVFPEAVRYATYETPLLFNLSVFYFPVKTFWVQAQ  
RRKDKESNGSSTGSSDDKNVNEIDDNSKKTGTNTKSVAERTKQFEAINKNGEKDTPAFVT  
ETQVMATTRYWLNWQLYAVVQAVGHCFAMIPIVGRFLIAHPIFSFLTGECKLFFFLWVFM  
VMEKILGSATSTSGDAFMTDARPLKLVQTFVTPLVLNLHGVSNAITPELWHKGVVSKTK  
RFLDAAVFVRLLESEERRDWLVHMVEEARVLTLP SITLLMPGFVTQVGVAVVRYAVPSAKS  
AEAKSKATKLVYLQYWVLHCCMAGLLAYLEGI IWWIPFSTHMVFLWLCYLILPKAIRHIY  
AMLES DLVAFGLLPKIDDPAGAKKEISETRIARFFDWCLSWLPAADMSTSDNKKQIDGAR  
GKEDQPEAVASDSEDSKPEKASETAESGPLSPKQSTPEVDVGEIGIKDKDV

>comp13219\_c0\_seq1; 415 22 1250 LEN=1536; minus strand; translated  
MAHEATEVSMPEVRRGGPXF AFISSGMRDPPSGHGATSTGTTFQAAITGRKPWLEKDTLL  
LFFFFL LLLFLVVLPRGPPVREAE TVLAYGSDNFHARRQIRHVADLDRQAPLPEDGGRAS  
GDFPSSDSFGISCEWAVVVVVAWTPFAVFTVWKWIDLTLNRISAPSSISNPSVSSSFSS  
SPVFCSSGGDSFSSSFTFVAEAGPASSIL TSAAGVRAFAVVA AAFPVLVVLVAVVRRP  
HPQPEFLAVPAGPEHPVGRYENVVVEVSQADLDALRGR LDDLPHADLV DKGPEDEPEEA  
LVVRAPVPRHARTVRDFQAGTVP AHDQPNVHQH AVGV LQVDLVVEGRQR RERQHVCRHPD  
AIGHGGQDEHPVLF RSVLCCSVL CGKGVVVRWFSGD DSIRSDPAGSGCCLWWQE

>comp13219\_c0\_seq2; 414 22 1265 LEN=1551; minus strand; translated  
MAHEATEVSMPEVRRGGPXF AFISSGMRDPPSGHGATSTGTTFQAAITGRKPWLEKDTLL  
LFFFFL LLLFLVVLPRGPPVREAE TVLAYGSDNFHARRQIRHVADLDRQAPLPEDGGRAS  
GDFPSSDSFGISCEWAVVVVVAWTPFAVFTVWKWIDLTLNRISAPSSISNPSVSSSFSS  
SPVFCSSGGDSFSSSFTFVAEAGPASSIL TSAAGVRAFAVVA AAFPVLVVLVAVVRRP  
HPQPEFLAVPAGPEHPVGRYENVVVEVSQADLDALRGR LDDLPHADLV DKGPEDEPEEA  
LVVRAPVPRHARTVRDFQAGTVP AHDQPNVHQH AVGV LQVDLVVEGRQR RERQHVCRHPD  
AIGHGGQDEHPVLF RSVLCCSVL CGKGVVVRWFSGD DSIRSDPAGSGCCLWWQE

>comp13220\_c0\_seq1; 236 135 557 LEN=1532; translated  
MTTNTKSTIFALACVALASSSEGF SVSENSSSSRRQAIGSILGGGA AVVASTLLPQKSVA  
VETTDIDDFLRTGGVSMMPMGVSGQAGKSKPETGVLLREGTEISRDSKSGNVLA EILVNEK  
GSGEKMAVVT SFQSPWSLGK

>comp13220\_c0\_seq2; 219 135 1022 LEN=1314; translated  
MTTNTKSTIFALACVALASSSEGF SVSENSSSSRRQAIGSILGGGA AVVASTLLPQKSVA  
VETTDIDDFLRTGGVSMMPMGVSGQAGKSKPETGVLLREGTEISRDSKSGNVLA EILVNEK  
GSGEKMAVVT SFQSPWSLATGAVYDVECRDTKTGDGAFLAVTPGLNGASLADVKDQFLIK  
SLFGPRGRFSFYGQPTDVKVKKSSLSGDG SYKVL DVSFSTLSQATQTEVPRRSRIVATLP  
KGSDQAVMLVGSASASRWSKGADKTVGA AVDSFRATAAPQSNLKMRAVSKERNAL

>comp13221\_c0\_seq1; 287 118 774 LEN=815; translated  
MAPDADKLRQRRSQVVAGDLSVNVSEPETVDRVVTLKGLSGDEICIDGIVYDISAFQHPG  
GDSIKIFGGNDVTLQYKMIHPYHTEKHLEKMKAVGKVPDYAPEYKWDTPFEREIKKEVFK  
IVRRGKEFGTYGYFFRAFVYLA VFFYLQYLWMQKSSYTLGIIYGISMGLVGLNVQHDANH  
GAASKRVVNDILGLGADLIGSKWLWMEKHWTVSALI

>comp13221\_c0\_seq2; 474 118 1512 LEN=1637; translated  
MAPDADKLRQRRSQVVAGDLSVNVSEPETVDRVVTLKGLSGDEICIDGIVYDISAFQHPG  
GDSIKIFGGNDVTLQYKMIHPYHTEKHLEKMKAVGKVPDYAPEYKWDTPFEREIKKEVFK  
IVRRGKEFGTYGYFFRAFVYLA VFFYLQYLWMQKSSYTLGIIYGISMGLVGLNVQHDANH  
GAASKRVVNDILGLGADLIGSKWLWMEKHWTTHAYTNHREKDPDGLAAEPFLLFNDYD  
LSNPKRAGYHAYQAFYLVLLCGYWLSAVIDVPVIWNLKDRGTLDVGI RLDNDWIASQRK  
YAI SLRIFVYMCNIVTPLW NDFSWTTLSHINVMGISGSLTLG LFTLSHNFENADRDP TK  
ENRETGEPVCWFKAQVETSSTYGGTISGWL TGGLNFQVEHHLFPRMSSAWYPYIAPKVRE  
ICKKHGVR YAYYPWVWQNMISTLKYTHEVGTGAHWLDNPFK GEM

>comp13222\_c0\_seq1; 113 1 1222 LEN=1376; translated  
XIPRLSLGFGKSDANRADSCETPMDADGCAAPPDGEPSPTPASYRLLGARIHGDHAEVLE  
FQSPTAGVGFRLMRPNDDLVEVCFSDANPVDLQKLRGRRSDAGRPFDPAPPVPGCGGSGR  
VAAVGTAVPNEDGRWAIIGTPVCFADPTRPGSYATHLAVDANCVAPIRSSAPGGDALQAT  
MRSCASIGVAGLTAYESLQKCGLSGAGRYGSLLVVGAAGGVGSWTLVLARALNPSLEIVA  
TASTPDQHEWCTALGANRVIRHDEIGAKLGGGREGSVDSIVCLAEPAPGLFGALSEVIRP  
YGSICLVSAGESIKSLDLGFCFFKCVVDKTTETVVFSSIRTGYRKIVPAEELGFVAXPGDER  
EDKRAPVPDAESGRVSESEFRDALSQKGVLEALSRTGKRGNFVMRID

>comp13223\_c0\_seq2; 506 21 1190 LEN=1298; translated  
MVEFLFHSFAFLGSLINCNDVSAFVLQPLAPTGTADVAGSGSTELFLAKKQKKKPKKVAAS  
SGGFVKVDASVKPKPDNDYAVFPALETKVRETLVPTPPSMVEEIESTGSIPNEIYHRLDQ  
IYGFDPFNYETALVEEVSDDDGDDGGGSFSLLEDLMAAPESPSATEKKKGSTTDALDFNELI  
AAATGGPVEASASAMDNDVDSETTAANAEMKNAISSLPPEKINVLHLDPLVLSIDDF  
TEEECDRYVEMSLAPVTDEGSQKTMDSEFKTRSKTVGKDKNAKSQRTSTTWFFHYYKNVPEL  
MSKASRLVGLDITDRWEEPQTVRYKRNEKFTWHLDALAPDQSTAEEKGGQRLATLLVYLKD  
LESGGATIFRDLTPATGETDDNASGFLKV

>comp13223\_c0\_seq3; 494 21 1415 LEN=1522; translated  
MVEFLFHSFAFLGSLINCNDVSAFVLQPLAPTGTADVAGSGSTELFLAKKQKKKPKKVAAS  
SGGFVKVDASVKPKPDNDYAVFPALETKVRETLVPTPPSMVEEIESTGSIPNEIYHRLDQ  
IYGFDPFNYETALVEEVSDDDGDDGGGSFSLLEDLMAAPESPSATEKKKGSTTDALDFNELI  
AAATGGPVEASASAMDNDVDSETTAANAEMKNAISSLPPEKINVLHLDPLVLSIDDF  
TEEECDRYVEMSLAPVTDEGSQKTMDSEFKTRSKTVGKDKNAKSQRTSTTWFFHYYKNVPEL  
MSKASRLVGLDITDRWEEPQTVRYKRNEKFTWHLDALAPDQSTAEEKGGQRLATLLVYLKD  
LESGGATIFRDLTPATGETDDNASGFLKVQPKKGSALMFFPAAGGIPGAPFDIRTLHCGE  
VVPGASETDKWLWLRATPYTPTAPPGNLHHEALDRVKEYCQ

>comp13223\_c0\_seq4; 166 1 710 LEN=817; translated  
XLTTTTSVQFYQKIKECDRYVEMSLAPVTDEGSQKTMDSEFKTRSKTVGKDKNAKSQRTST  
TWFFHYYKNVPELMSKASRLVGLDITDRWEEPQTVRYKRNEKFTWHLDALAPDQSTAEEKG  
QRLATLLVYLKDLLESGGATIFRDLTPATGETDDNASGFLKVQPKKGSALMFFPAAGGIPG  
APFDIRTLHCGEVVPGASETDKWLWLRATPYTPTAPPGNLHHEALDRVKEYCQ

>comp13224\_c0\_seq1; 221 69 1085 LEN=3248; translated  
MPVRDEDVAQLVCMGFPEEQARNALQTTAGNLEMAVNLLLSGDAIGSAGNENGALLSPTA  
IPAVPVATESPAAVVIKSSSQYSHGPDGRSACTCIALTAADILASSCTAKSRDSDEQTS  
ITTSFLNRAIEEGVSRYRILRQRCDAGGSSNSSIEHLSAEVLLKDEQGAAPGKHLFGV  
RVVAIGGGLGVRQGALS RDPGHPLGLPSVLNGLVGDVREQRKREWNQTGNTNGSANGRPS  
PMIYILMTKSPETVLLCLPCDDCKKVNKGRYWLVDVSHRPHLQRAEHAYAKPHDTMDS  
LLQSLRCIFPLTDLGPDIPPMADMYNMF DLYALEVRA

>comp13226\_c0\_seq1; 100 272 448 LEN=1175; translated  
MDPLAGIGSGALPAPDASDDKDVFVDTTLRYNLQHVDTVRSVMNIASGCVAGICGLTGW

>comp13226\_c0\_seq2; 91 104 552 LEN=760; translated  
MDPLAGIGSGALPAPDASDDKDVFDXDHAPVQPAARGYGSIGNEHSLRLCCGNLWFNMA  
GTGFIFAAPSRGPNLYLGHKDEF SATVLYTAIGMVVCDGKRITTKWPVVHAVLDSVLWVGL  
PILARKETIWFNGSSHRIHGSQYLQHNGK

>comp13226\_c0\_seq3; 91 272 720 LEN=928; translated  
MDPLAGIGSGALPAPDASDDKDVFVDTTLRYNLQHVDTVRSVMNIASGCVAGICGLTGW  
GTGFIFAAPSRGPNLYLGHKDEF SATVLYTAIGMVVCDGKRITTKWPVVHAVLDSVLWVGL  
PILARKETIWFNGSSHRIHGSQYLQHNGK

>comp13226\_c0\_seq4; 100 104 280 LEN=1007; translated  
MDPLAGIGSGALPAPDASDDKDVFVDTTLRYNLQHVDTVRSVMNIASGCVAGICGLTGW

>comp13227\_c0\_seq1; 443 12 611 LEN=822; translated  
MKTAVFCSLIASAAAFSQDSSRREALAGIAAGAALIPAAANAAAGESPRFSVFGVLGD  
GTSYSEGAAYGSDQSSATYSPYSVYGEAGENS LYKAGASEYVAKKAVLAETSKRLGKLE  
GYSAKKEWFNQEEEMRRYMYETRG AISYLATTKEQKAAAKFYKAIEDTSLAATQKNEAA  
CTAAAQSAVSTFADLTSIL

>comp13228\_c0\_seq1; 606 1 1937 LEN=2241; translated  
XKSDREIVQWQYSLSIMSGVAGPKVLHVAGYSSCGFYTRITKCLSSMSILFPNRLRVVEH  
EFEDRSKFREWLVDGFRSNFMETDGKGHATSPLVWISKTQSEGGPDPADIEKYLGGHDA  
TLDWCREFMQPAEMRNVAEPVMVDDGHSADHG YDYDLIVIGGGSGMAAAKEAALHGAK  
VALCDFVKPSPQGTWGLGGTCVNVGCI PKKLFHIGATLRESVHADANFFGISSVGA KPD  
DMMGQLPAIETETHWDVAKSNIQNYIRGLNFKYRVRLREKSVNYLNKLATFKDAHTVEVK

DKKGVVSEITASRFLVAVGGRPTPLDCEGGDLAISSDDVFFLNKDPGKTL CVGASYISLE  
CAGFLAGLGKDVTCAVRSILLRGFDRECSERIGNYMKAHGVNFKMQVTPKKLEKVDGDR I  
KVTFSDGTDDVYDVTVAAVGRTADTAKLGLEAVNVETNPKNRKIVTKLEQSSCPNIYAVG  
DVMDGCPPELTPVAIQAGVILARRLFAGSKEAMDYINVCTTVFTPIEYSCVGLSEEDAIEK  
FGEDRIEVFHREFVPLEWLSQARHDSNSFTKIVVDKQDEERVVGIHYVGP NAGEVMQGF  
GVSMKNRLTYSQLVETVGIHPTSAAEIVTLSITKSSGEDAAAGGC

>comp13229\_c0\_seq1; 696 447 3044 LEN=3352; translated  
MTKSIFLPLWSFAVLNLARLAWAVHSPSPSSLLSKAIVGGSTVIRSPPEASTLFGVST  
KNVDSQDELIYVEKRNGSKEPLERIKILERLKRMAATFPAEDEKTLMTKLDLES LAESIL  
RGTYPGVSSYEIDILAAETAASMATQHVLARLARILVSLNHKYTPPTFS DAVEAIDEE  
IQYIDPSIVDLVRRRGDEISQRIRNERDLEFSYFGFKTLERSYLLKTNDGKFLERPQYLL  
MRVALGIHCTERISGKVTPEEEDLRLQAAFETYDYMSEGYFTHASPTLFHSGTTHPQLSS  
CFLVQMSDDDISIGIYDTLKRCAVISKSAGGIGLSVHNIRARGSPIKGTGRGTSNGLVPM LR  
VYDVTARYVDQGGGKRP GAFAYIEPWHSDFDVLNLLKKNHGKKEEQ RARDLFYGLWIPDL  
FMKRVENDENWSLMCPDQCPGLPECSGKEFEELYEKYEKEGKYVRQMPAREVWSAILE SQ  
IETGTPYMLYKDAANEKSNQKNIGTIQCSNLCTEIIQYTDEEEVAVCNLASICLPKYVVS  
DRGSYGSVDPDSDGRAYFDHEALHRTTKIVTRNLNRIIDINSYPIPGAKKSNRRHRPIGLG  
VSGLADAFIRLGLPFTSDQAKELNEAIFETIYHAALEASVELAAEDGHYDTFPGSPASRG  
EFQFDLWNTPADDLPSKRAKKGKPYLGKYAEPYQSEGYDWGKLRSSMMEHGLRNSLLLAP  
MPTASTSQILGVNECFEPFSSNLYLRRVKAGEFIMANPHLLQDLTDRGLWTPEVRNQLMR  
DGGSVANIDVIPS DLKEVYKTVWEIKMKEIIDMAADR GKFDQSQSLNLFIANPNMDKLT  
AMHFYAWKKGLKVRTTLEIERSAND

>comp13229\_c0\_seq3; 693 447 3137 LEN=3261; translated  
MTKSIFLPLWSFAVLNLARLAWAVHSPSPSSLLSKAIVGGSTVIRSPPEASTLFGVST  
KNVDSQDELIYVEKRNGSKEPLERIKILERLKRMAATFPAEDEKTLMTKLDLES LAESIL  
RGTYPGVSSYEIDILAAETAASMATQHVLARLARILVSLNHKYTPPTFS DAVEAIDEE  
IQYIDPSIVDLVRRRGDEISQRIRNERDLEFSYFGFKTLERSYLLKTNDGKFLERPQYLL  
MRVALGIHCTERISGKVTPEEEDLRLQAAFETYDYMSEGYFTHASPTLFHSGTTHPQLSS  
CFLVQMSDDDISIGIYDTLKRCAVISKSAGGIGLSVHNIRARGSPIKGTGRGTSNGLVPM LR  
VYDVTARYVDQGGGKRP GAFAYIEPWHSDFDVLNLLKKNHGKKEEQ RARDLFYGLWIPDL  
FMKRVENDENWSLMCPDQCPGLPECSGKEFEELYEKYEKEGKYVRQMPAREVWSAILE SQ  
IETGTPYMLYKDAANEKSNQKNIGTIQCSNLCTEIIQYTDEEEVAVCNLASICLPKYVVS  
DRGSYGSVDPDSDGRAYFDHEALHRTTKIVTRNLNRIIDINSYPIPGAKKSNRRHRPIGLG  
VSGLADAFIRLGLPFTSDQAKELNEAIFETIYHAALEASVELAAEDGHYDTFPGSPASRG  
EFQFDLWNTPADDLPSKRAKKGKPYLGKYAEPYQSEGYDWGKLRSSMMEHGLRNSLLLAP  
MPTASTSQILGVNECFEPFSSNLYLRRVKAGEFIMANPHLLQDLTDRGLWTPEVRNQLMR  
DGGSVANIDVIPS DLKEVYKTVWEIKMKEIIDMAADR GKFDQSQSLNLFIANPNMDKLT  
AMHFYAWKKGLKGTMYLRTKPAVNAIQYTVDKGSAPSGSVAIVDDSQDVCVSCQA

>comp13230\_c0\_seq1; 303 82 1104 LEN=1299; translated  
MINILTFCLIPIGFAFIDQCHFRPKGRTSQSKCRISSSRRFLTPLAEFDESISFFSES  
EKYRCCIDDKGFFSARHGSSDGS DRYELGLVEEEELPDLCKFIITAFGAEAIQLASDMNS  
FERMLLNPAAEFLNGYSGLVAFAEVFSGTKQRLADRFOENPSLVDISAPDLKGLSREEQI  
RKAERDSLVLILGKPSNDASRSIEVIASIELRLQPCDAKIPFSIPWLD RVERRIGSLIGL  
GNNGNGAGTNDMQPYLSNLCVDEKFRGQKIGRGLVRCVENIAKNSWGYNRMYLHVDEDNP  
AALNLYKSEGYSVDVGHWRWPFWSGGASEIGYVYKSLSSTP

>comp13231\_c0\_seq1; 343 41 1005 LEN=1005; translated  
MKLQVVLALALFETAIADES PSSLLEQVGKRISLPPFPNEHRILGIGGLGYDSVFNSWLAS  
SENIASATSHPGNEEDLALPRIFHMDLDFQKGRIDFILEESIVVQPKEFLKLEDLAILPD  
NFSRNTTDRHLHQS IWLASESHSHAQTSKFFSKDFGPTDLTSFDRETFS SSSLVRLVINGAT  
GEILEEASLPEYVYWD MVFDWESTECIGERPFAGLHALSIVEPSRENKFYGLYDKLMFAA  
YQAALYQDGS SPTDFSESSTRILLFGLNLDLKGEDKDNNTASYLTSFRYDTSKLSLNSNQ  
KDSRYVFKHMEFLDIRICLTIX

>comp13231\_c0\_seq2; 1415 41 4228 LEN=4376; translated  
MKLQVVLALALFETAIADES PSSLLEQVGKRISLPPFPNEHRILGIGGLGYDSVFNSWLAS  
SENIASATSHPGNEEDLALPRIFHMDLDFQKGRIDFILEESIVVQPKEFLKLEDLAILPD  
NFSRNTTDRHLHQS IWLASESHSHAQTSKFFSKDFGPTDLTSFDRETFS SSSLVRLVINGAT  
GEILEEASLPEYVYWD MVFDWESTECIGERPFAGLHALSIVEPSRENKFYGLYDKLMFAA  
YQAALYQDGS SPTDFSESSTRILLFGLNLDLKGEDKDNNTASYLTSFRYDTSKLSLNSNQ  
KDS SHFNALFAILALDDRSLVAECEDLTGVGKAGQKIVNRIYYVEIDFDESVDHCHSLL  
YCDVDAPSKRLVWEQEGDSQLDGMSWGPI LDNGRRTVALSFENDDKVG VHFELYAIDEET

LTNGNQIGIVYDPVDYRDILMRNRI IAVSVASGLLVLI F I L Q F V G I R Y L Q N R K K S K N D F E  
VIDADNKEKTTRTSLTFLFANYALATAMMNSFVVGGLTFGYSGMVLMLRKEGVYAEFCSCG  
SFCAMQKEQLALISTLGFSTAVGSRLFVGLFMDVQGPKLTAICSTICLAGFSILAASQS  
ESLSSSTFLPAWILLSLGGSLHITGFHFTSLFPGDGKKKASAMISAAFAGASSAVFPIMQI  
FNQFLGVTMVSMRFRYTFVLVSLIVINNFLVQPSKVKKGEDFKPSFNFVKKTWKRDFTGQ  
RPTLSSIKRDVVKFNFFGEAMIFSIILLFFLTHYLSTSSQLMYEKGDIPFTSRPNDWSDFM  
IARMAGIFNAIGFXLVAYSQVCVDITAVVSVLNFNPLHLEFDRDGNSSIEKLEIQILGFAM  
LSFGRLMLFSCHHAYLIDVFGITSFGLTLNGISSFIAASVGLCSYPLQLFALQSSYIAIAFL  
PIGVLLLLLSLFPFLMWKEHKKSKELSRGTSGDFETEEIDRCDKNTVMNWAETVSVDPNT  
FRYPETVDEVIALVTSHKKIRCAGALHSCAPLIKSEGIIMSLTKLEKIIHIDPQNMTRVC  
QAGARIHDICTAIAPYNMAMGTIGTIDWQTI SGAVMTGTHGGALSIPSMHAFINSYTLVK  
PDGSMVTITKEKDPTLFSAMAPSMGVFGCVVELEVQCVPLEILEAKLKMVEFADLEDTFE  
DYMQRHKYVVRVVYPSIGKATVFTGNPVASRADAIKRGAIDSPGYANFRNKKEKQMLEQY  
LELCNVGDYDKADEVLEGLVDSQLGRMHYVYGQYNHVLCKERNNGIPHADIEFNFDMEKN  
KEVLRVTVKEYSDKKRMPYNYFEIRTTKRDDAMLSCCQGRDAMWIDFQAKADVSREFFGEM  
EEILKPIGFRKHAKGMDNTDPEYVLRQFSQVRKFLSLMTEIDPEGKFRNTQSEGFQMM  
DSAIANENREEVVEC

>comp13232\_c0\_seq1; 599 92 2251 LEN=2438; translated  
MEKIREVISSRSRERSTRSDNYDEYYIHERNNESQESYDNLGIEMNQYRSFPERISAKIS  
RSFKRRDHAPEDYRGFSTSIADMWRNPDIYERIDCCSIACFGCIQADRNRYLVTGKPPGL  
CRRICVHIFVPICILGLALFVAFNVPDPWLNEMLCYGFLLIAFVLYFFSQCDKGAWKRRHV  
RRNLLWAKHQKLASGRFQQRMSRGSDDTDDYSYEGEEGDDEEYLRGQTYSDVKSSHASC  
CYAVDRPHGFQYGPDEKITCCTKLFDCFTNLCCAKLCCRYVCCGYCAVAQEAREIETLL  
RPGMLSIDYITMQPMMEYYPKIEARCSIGRPTSWWYTRLSTFSRTAVNRSIVMLVLLLG  
WLLSRRLNHSFGIKNFVILFLTLLQSFVLLAVVYWKHTRDVSIDALIKFFAAGFCLSTT  
LAIFFELVFGMLVRLTMAIVMALSGIELVEESGYSLSKAESLSTMTAAQEVNYSQVGYRE  
YLKAYSNDHPVVYTLVLFVLSFLLAAMIEETCKYFGYRMIDHDPDFYTQSKIKEAAKCYES  
KDGDETSLPSFSHQDRSFQSRGAAVTVSMVAVGAGFACCENLVYIFIIYGKANYTSEIFVL  
LARSLEFPIHPIAALQSIGVCKRDLENDGRRLGKIIILPGIIFHGAFDFMLNWIYYIGSRK  
GNYVDEDDGIQTENGSDKISNVVSILII F SGLLYYFRESRKQRKRLASLDGESENSNWA

>comp13233\_c0\_seq1; 196 1 890 LEN=1686; translated  
XGSKRTDDVIELTNDDEKGD SILEKSQWTQALKTFRTRKRDPRNLLRPRSRLFGTKAGTHD  
DSISTGIEQHVRPDIAFILEHYRIHRREKEGTNGTSREYLLLPDVYVPQVIQDPSLPAA  
ALFAHSNIFLGARSFHGYDMADVCLPLVRAALEESESEMVHGGQQPQAVASLTGLSEWVATC  
LDNDRYGESQTLMLRAGHDVASENEKKGNSVLSLEAVRAIATGVPRPGHSSVVGQGTFRDGG  
EAWKELAKEFAGLGLSEEVNLYEKQGGNLVIGIEHLADRSPDNMKNAGGAMARLFFL

>comp13233\_c0\_seq2; 196 1 890 LEN=1541; translated  
XGSKRTDDVIELTNDDEKGD SILEKSQWTQALKTFRTRKRDPRNLLRPRSRLFGTKAGTHD  
DSISTGIEQHVRPDIAFILEHYRIHRREKEGTNGTSREYLLLPDVYVPQVIQDPSLPAA  
ALFAHSNIFLGARSFHGYDMADVCLPLVRAALEESESEMVHGGQQPQAVASLTGLSEWVATC  
LDNDRYGESQTLMLRAGHDVASENEKKGNSVLSLEAVRAIATGVPRPGHSSVVGQGTFRDGG  
EAWKELAKEFAGLGLSEEVNLYEKQGGNLVIGIEHLADRSPDNMKNAGGAMARLFFL

>comp13234\_c0\_seq1; 333 212 1480 LEN=1684; translated  
MSTIRLYCGRDREQMLRNLERALTSDEPVSSVEVRKTLLEDEVIDAIINLVWKGVSVEKVY  
LDDCGAHLNKPAVRMSEALGNCKHVHLSESTFLSKFFLESLLVSATKMRSLRIQDSSLSE  
QVEALTKGLRSNNTLRTLDLRSRVENFSLAKGLRGSCAKTLKLRISIGLQNHVHVEFLLS  
SLESCPSLESLLDFNYLQDTSPIGRLLRNNCKLKLQIGYQNLWQEYRMDISAIKAL  
TVNKRKLTLDLPRNELDDSCALGFGTALAKNCTLENLDIRENNITDFGVTVLAETAMTSK  
SLRKLKLGSNPFGTIGSLALLEAVSKNYNLF EIDGNSKVNDEDINRHMNYHTILNRGGRK  
LLEEPPLALWPCVIGNSCQDLHENVDVDAEATIAKGNKYDINVSADLI F YVLRQNPRI F  
FH

>comp13235\_c0\_seq1; 428 1 1526 LEN=1702; translated  
VWYNCIENEELTASSDTRSVVASAPFSPLAETYLGVLEHIGLFISSQSKSLQDVSASKGE  
NGAEATTDRVSDEQSILHFQYNYTKQTNVAKSSWDDNSTDKLSPVVSPPMEALASTNFNS  
SFPNYTESIQIGERNVSLADRTLDFPSKTKQELFGSNERTNYSIGIQRSVSDAEGSRELN  
SQSFQETKSTNATTTTNSVGNFNPQYYSNSGTTESPNSISGSNIDGGREERNNSNATPE  
TAASLESESYSDLKTNLPYENYDSQTSSFDWSSQDTNSTATTGYPTENKFPQALSDTMSE  
LSYGTSDSQPYSLDQSDQTNFPAFGSENKYSHPFSVYRTPTSQTSSPNQSSKGWADAAEP  
NFSNGNLDQSYSDDQTPAQEKTIIDTYGFPNENTYSQPDSLNTQNPSSQONQDLVTAYAE  
SLLSDQRGDPRREADFQRQPQNTGASSAATTYAEYIQQRQSESNDELGLPPSDITSGDD



YNTGVQSGTPASPGAGGSTFDYGGTFEI

>comp13235\_c0\_seq2; 798 210 3221 LEN=3397; translated  
MSVLRLLSRLWLFYRSTPMIMIAFSSISISAFSFRFPKTNMQREGRRNNVGMGYRIR  
QSGAPSSKLSAPRISHRSFQHVSLLPFSSALYSARGPFKEKTKCRDMGSLSDWARRCEVV  
LADGIELAEDALGDWSLRSTKFI EQGNAIITVPAQVIFTSDITGDSFLPYYSEIDMQNVC  
AWIETELEMGSQSNQDYLPEYTLVYKLIQEVYLDNSNRWYEWKSLPSEFSTGLYLDEVE  
RNYVERMTGDFLRIQSLQFQACLELFEKLLSTQGTNGGKPLIPTDFHQWLVLGLQKSNNEE  
LSFCDLVKWAYTIVFTRSWRSPDRKDAQIVPLGDLANHDSQFNLKPGFRKMDGAFQFFV  
TSDIDAVGPAPPLYLSYGLTYAPARYLVIFGFCDVTAGYIDANLDFLQONSDSNWATTLEP  
SQLVISTTNGALSEEVWVAFLYNFLQKEEPEVLDQIQKTF AEDGKEQGDRLLLEKLLDWE  
LEVGMRIQSHYQRLLDVEFAPISVTENDLMKHPNLSMVVNYNLFIRETYLGVLEHIGLFI  
SQSKSLQDVSASKGENGAEATDRVSEQSILHFQYNYTKQTNVAKSSWDDNSTDKLSPV  
VSPMEALASTNFNSSFPNYTESIQIGERNVSLADRTLDFPSKTKQELFGSNERTNYSIG  
IQRVSDAEGSRELNSQS FQETKSTNATTTTTFNFSVGNFNPQYYSNSGTTESPNSISGSNI  
DGGREERNNSNATPETAASLESESYSDLKTNLPYENYDSQTSSFDWSSQDTNSTATTGYP  
TENKFPQALSDTMSELSYGTSDSQPYSLDQSDQTNFPAPFGSENKYSHPFVSVYRTPTSQTS  
SPNQSSKGWADAAEPNFSNGNLDSQSYSSDQTMPAQEKTIDTYGFPNENTYSQPDSLNTQ  
NPSQQNQDLVTAYAESLLSDQRGDPRREADFQRQPQNTGASSAATTYA EYIQQRQSESN  
DELGLPPSDITSGDDYNTGVQSGTPASPGAGGSTFDYGGTFEI

>comp13236\_c0\_seq1; 111 1 342 LEN=1573; translated  
KKTSCSQAKSSATLAATAAGATSNVTVPAAGIWGSWFGFTTSTSVSWLSLHPMAIPGLAC  
YAAITVGVPAIMYAKASKKWKETSQRLCDAFWDSAAENPDVFAECLTHWSDKE

>comp13236\_c0\_seq2; 434 6 1223 LEN=2454; translated  
MDSKTTRDNEEGQDSEDI LENTSDFSLIDSFQEV RMTTSKKELSPKFVKGNSRASNGTET  
MTMTAKGTESCQAEVIPELESPDLQVGDH VYQWRSLCGVPYMFQHHGIVMDIIKDEDGNP  
TRLTIADFSNVETKPSQKSKTKVDTTKTD AKRFDNSEIVIEPEPEIGIEHSSQONEAE  
EETANTNDGRSTKSSSRRLSLEQEGIMRTYTD TDKWHKVHYQSGWWRQLCRSGTATKAK  
SDPVGLVLRVNFIMQYPEQLPDYHVVHANCECVAFWCKTGRWSTLQASSFLELTAAGQA  
KSSATLAATAAGATSNVTVPAAGIWGSWFGFTTSTSVSWLSLHPMAIPGLAC YAAITVGV  
PAIMYAKASKKWKETSQRLCDAFWDSAAENPDVFAECLTHWSDKE

>comp13236\_c0\_seq3; 111 1 342 LEN=1456; translated  
KKTSCSQAKSSATLAATAAGATSNVTVPAAGIWGSWFGFTTSTSVSWLSLHPMAIPGLAC  
YAAITVGVPAIMYAKASKKWKETSQRLCDAFWDSAAENPDVFAECLTHWSDKE

>comp13236\_c0\_seq4; 434 6 1223 LEN=2337; translated  
MDSKTTRDNEEGQDSEDI LENTSDFSLIDSFQEV RMTTSKKELSPKFVKGNSRASNGTET  
MTMTAKGTESCQAEVIPELESPDLQVGDH VYQWRSLCGVPYMFQHHGIVMDIIKDEDGNP  
TRLTIADFSNVETKPSQKSKTKVDTTKTD AKRFDNSEIVIEPEPEIGIEHSSQONEAE  
EETANTNDGRSTKSSSRRLSLEQEGIMRTYTD TDKWHKVHYQSGWWRQLCRSGTATKAK  
SDPVGLVLRVNFIMQYPEQLPDYHVVHANCECVAFWCKTGRWSTLQASSFLELTAAGQA  
KSSATLAATAAGATSNVTVPAAGIWGSWFGFTTSTSVSWLSLHPMAIPGLAC YAAITVGV  
PAIMYAKASKKWKETSQRLCDAFWDSAAENPDVFAECLTHWSDKE

>comp13237\_c0\_seq1; 512 353 1399 LEN=1542; translated  
MEDEQRCMADLPPTRELIGLKL PFGAWEPDTLITD TYGNP IFSVLDVQHQA MGAFAEAI FG  
DENGHKLCYVKRRLITK PALDGWDFCTYAPNFPDQPKYKERDMYGKSVY PFSFLSIRPMK  
CRYAYS VHNEDEM ERVDTLLEAMHGWLGTMTVCCTPMVRF GKWQLDFHRPGAGDPEINIDQ  
SKNLLEVERGNDLLAALCIA YAFDKALCQPMVTIVGYAEKEHVDDDDDD SLEDFDPAVVA  
SSSKHLVSQYRSLNSGGYAKDGSIRDLNKGDIDGYEEY PDDDEDGDGYDENGEYIGY  
DNNGDYDGE GGEYNEYGDYNEEYDDDAEDES VDSADESYEEYIKRRR

>comp13237\_c0\_seq2; 507 153 1178 LEN=1321; translated  
MADLPPTRELIGLKL PFGAWEPDTLITD TYGNP IFSVLDVQHQA MGAFAEAI FG DENGHKL  
CYVKRRLITK PALDGWDFCTYAPNFPDQPKYKERDMYGKSVY PFSFLSIRPMKCRYAYS V  
HNEDEM ERVDTLLEAMHGWLGTMTVCCTPMVRF GKWQLDFHRPGAGDPEINIDQSKNLLE V  
ERGNDLLAALCIA YAFDKALCQPMVTIVGYAEKEHVDDDDDD SLEDFDPAVVA SSSKHLV  
SQYRSLNSGGYAKDGSIRDLNKGDIDGYEEY PDDDEDGDGYDENGEYIGYDNNGDYD  
GEGGEYNEYGDYNEEYDDDAEDES VDSADESYEEYIKRRR

>comp13238\_c0\_seq1; 247 163 867 LEN=1455; translated  
MKITTSVAGLTISTLSSIGIPLVFL LSCSVVDAGSPYPSSTQIHSFDATRRC SKIIRKN  
TSGIFNGGINYEGNSLNR LQQPERKKSSQIEILHRLRGGDTP PCKVGLLIEILDICGTAV  
FAFSGALKAGRKGMDI IGMIIASITSMGGGTLRDVL MVGSHHEHVVFWMKTPLYLEISL  
LTALLTFYSWPVIEKRFLDADS AAPICTAGRCFIAPSPSATITENFDRASRLF

>comp13238\_c0\_seq2; 286 163 1119 LEN=1305; translated  
MKITTSVAGLTISTLSSSIGIPLVFLLSCSVVDAGSPYPSSTQIHSFDATRRCCKIIRKN  
TSGIFNGGINYEGNSLNRLLQQPERKKSSQIEILHRLRGGDTPPCKVGLLIEILDICGTAV  
FAFSGALKAGRKGMDIIGMMIIASITSMGGGTLRDVLVMSHEEHVVFWMKTPLYLEISL  
LTALLTFYSWPVIEKRFGLDADSAAPICTADALGLAAFCIVGVESAACKKLAPTLWIVSG  
LMTATFGGIIRDVICGEKPRVMYPHRTLYALGPTLALTYTILNHLKTKQSWPLNSSSIT  
LVSFVAVFLVRIASFNRPW

>comp13239\_c0\_seq1; 388 98 1267 LEN=1754; translated  
MSPIIIQENNLKTRFTTKLTPSRKNNLGIILLNNPKALHALTRDMVDRIDDVLEWKNDP  
SLIAILVKSSSKGIKRAAFCAGGDVKAVYIECLDYQKRGKGTRSSLPEDFFRYEYKVN  
EIASCIATTPIIISLWDGLVMGGVGISIHGKYRVATEKTIIFSMPECRIGFFPDVGSTWWM  
TRLLKQRAIANYLALGTQQMTPADLIYTGLATHYIPSNRLEEFHEHELAEATKRNNDEDV  
AGILESFHQLIQIDHCNIATNRKTIETTFNGETLEEIFRNLKRSNSEFARSALSILEKLS  
PTSMKVTMEGLKRGARCISIEECLQMEFRMAKACIRPGCDFHEGIRSVLVKDNAPAWN  
ASIEEVTDMNVQEFFRPIENEWTSTIHRTL

>comp13240\_c0\_seq1; 356 114 1340 LEN=2374; translated  
MSTDAYGRPRSRSRERETPSAAIPQQSMYPGGSGLPPVGLYGGMSAPRAIPSLSHLPA  
LSNAHLAAQEKINRELFVGNTPPGTSEMLLLQFLNGAMRRVKLCGEQETPILNCRVNSKF  
AFVELVSAEMANKALNMNGIPFLGAVLKVSRPSKYAGPHVPARTWQQLTGQALPAGTVLD  
AEQEKINRELFVGNTPPEMTERMLREFLGNAMQVGLNVMPGNPITSCRVSQKFAFVELR  
SPEEAANALNLNIPFMGAQLRVGRPSKWSGPPDSDHGNWEDVLAKYMSGELQAGNTAPGQ  
GAAAMNSNVKATRVVVELKNMLTKEDLSVEEYNELVEDTEQECKQYQQLLVYIPKKGEP  
GATKVFLEYASTEDASKAIAKSLEGRTFDQQRVEATFFDETKFMNKTFD

>comp13240\_c0\_seq2; 356 114 1340 LEN=2444; translated  
MSTDAYGRPRSRSRERETPSAAIPQQSMYPGGSGLPPVGLYGGMSAPRAIPSLSHLPA  
LSNAHLAAQEKINRELFVGNTPPGTSEMLLLQFLNGAMRRVKLCGEQETPILNCRVNSKF  
AFVELVSAEMANKALNMNGIPFLGAVLKVSRPSKYAGPHVPARTWQQLTGQALPAGTVLD  
AEQEKINRELFVGNTPPEMTERMLREFLGNAMQVGLNVMPGNPITSCRVSQKFAFVELR  
SPEEAANALNLNIPFMGAQLRVGRPSKWSGPPDSDHGNWEDVLAKYMSGELQAGNTAPGQ  
GAAAMNSNVKATRVVVELKNMLTKEDLSVEEYNELVEDTEQECKQYQQLLVYIPKKGEP  
GATKVFLEYASTEDASKAIAKSLEGRTFDQQRVEATFFDETKFMNKTFD

>comp13241\_c0\_seq1; 601 551 3001 LEN=3128; translated  
MDLRSAAARSDPRRAQIILDMEGLYQKDPTNSSLVEPNAVS YMTVIEGWYLHKIDRTPQN  
GSGGDKNSVDPDGMTKVNRDMDEIAAKAEQCNFTRAAASSAQSLDRMIQSDRLKPGAS  
TFLLVQCQKWAECSSSTDTTGVYMEMAQSVLDVYQKTLIQEGANETQQQMSSDSGNILSKL  
YTTVFEGWCRLIGKVPQAMVIAEALLQDMENLAHDERRRQEEGPVENNWGGSKNSSWFHR  
RRGFIGPNTLTYSNIVGISQSKRHNMARKADAMIDRMKRNGVEPDVVVYTSVLNCWAKA  
TSRKEREMASRRALDILQVMEDSYTKEKNYLLKPSLITYTTAIIKAIGYSLDFRAPDLAES  
VLKRMYNLTENGLIHVPPNVATYNVINALSTSGSNRKKGAYARKAEALLVEMIRSRM  
DGETSLEPSVSVWSVLRAYSLSGMPDCGEQAQRIVDMLEEWYESGNTNVRPNVVCYTTV  
MSAWARGKAPGKVALQKANEILSKLEKLYEETLDESFRPNKVITYITAMDVYCRKCPDVAG  
SMSQNLVDHMLELYAKDIGYDRPTRIVFNTLISAWRSQEPNAAENAEIFGWLESDES  
IKPDEVTLCAVLNAWANNAVDGGAMRAQQIMDHTEKLTAEQRGFDRTIVPWNILIKAWGR  
SKTEDSVQRAETILVNLENQYRSGESNVKPDITTYSSVINCCAYTGPTDGKTAFAFEVAV  
RTFHKIKRSDDLNVNNVYGTFLFKAIGKLTSRGQKQEDMIKDLFLDCCQAGQVCNFVLGQ  
VRTSSPRELFRSLVPKSIEDRDARNLEKILKMPKKW

>comp13242\_c0\_seq1; 834 232 2754 LEN=3046; translated  
MSRKEGKSGNGGKSAAPTNAWTRPLRTEPPGFTKSSAAPSQSSFVSPSVIVQNRKRLI  
DLSLTLVGQKVVLLQQTNGAIVEGIFHTFTPFSSLPDQRNRYVLKEILIRQQPKGTGEMK  
DGITLIVPASKVEYLHAKDIASSLTSRNMNGASSGMMSKGAFATDTQISGNASGSKQEL  
VAAGNAWTAGGNSGGYRNQPGMMKGTNSRAAALAGDSSGGNNQOGLAASAAMGAIGG  
SIGVWDQFEANQDLINVKPSYNEENLYTTELDKSQIDSKQAAAERIAREIESKATTNIIHM  
AEERGFVETDFDEEDRYSGVLT KD GKQRHAKIYSKQASSEEEESKSGSKPSKQAI STSVA  
PKKIMNYAAAAAKADTTKDKMAPPGFSDNNAAVATSTTKDKDSKVEDKVEDSAKAIATPE  
KNNLENATKQKNKS SKEEKANSKKTVEVKTEASESKSTKDEESPKDKPEPAGDKKEKDS  
ETKGEKKEKDKVSSKLNANAKSFTFNPAAKTFTPSFGTPTPPAPSQHTGGDPGMQMYGG  
GHPMQPPHYMPTGPMGQPGMMSMNPQYAGMRYASSYGMQHMMSQMHQGHVQAQATPS  
ISSAPNSGNAPTPTTGGGSSGNANASEEDPARPSREGDEGSQSQTQSGSQQQPPQRSQQ  
QQPDQPVQPQGPQQQQMPVQFQPNAYFTPGMAMPPRPGGYAQFVGGPQQIGGRPQV  
YGIYPMQPGMPPNMQMRGPNGAPYYSATPNGHMPYPPSSHMGYPIMDDAGRGRGRNNN

GGRGGRGRSGRTGPRGGRGRSNYNNSNSNNGSKNTQQQYSQQSQQQPPQSSNDSSNKSD  
>comp13243\_c0\_seq1; 300 203 886 LEN=1117; translated  
MRAAF TLREAKKHEQEPFLEATLAAMAMHPERKRS LDGMALGLQQRNKKKIRAPNSLVFG  
SSAAAQIQMARENTVLEDQKLQARQLEEARIQREREERRKRMEIEIQNKRTNSGEGGSNS  
NLQKVFNKYWDMEFPNLGNMNPFRIVIDRKSAPQIAPTYFDVITTPMNLTYIRDKVKGGK  
YLTYYQQFFADIDL MIDNALKFNQGEDN PYRIAAEDLKKKHAKIAKRVW  
>comp13243\_c0\_seq2; 382 169 1221 LEN=1452; translated  
MSEVAAPP GATASAAAAGNSKLNPD SGASSSGPSSAAAL SEDNLQKELKSALETLDNRKL  
NPTYKKMLERNPLTRRAATIPKNK FYERIGSRLRERVEVY TREMQGKDPFDRI SQRKPLD  
EAGMRAAF TLREAKKHEQEPFLEATLAAMAMHPERKRS LDGMALGLQQRNKKKIRAPNSL  
VFGSSAAAQIQMARENTVLEDQKLQARQLEEARIQREREERRKRMEIEIQNKRTNSGEGG  
SNSNLQKVFNKYWDMEFPNLGNMNPFRIVIDRKSAPQIAPTYFDVITTPMNLTYIRDKVK  
GGKYLTYQQFFADIDL MIDNALKFNQGEDN PYRIAAEDLKKKHAKIAKRVW  
>comp13244\_c0\_seq1; 551 1 1286 LEN=1415; translated  
XTTSE RAGGTKDASGRGSGTFFREEEQSDCGDDDDDEVSIYGGTADGSPSKTPLPLLLERIS  
RGYETSKRMNRSYREQMERQRETVRNLNLLLLSKEEELVRLRKTSGADKAALAVANDKID  
QLAVLHRSALAKLARVKDEADSWKRRETEANRKL SFSEERRRKLQEKRLQEGVQALIASLGS  
LNDFGNETDSEDDENENENENGASVRVRGETNDGGEP TTAGETKRACPGSTRTTNEEGLATE  
RTTAERTAGGFRDGKCSSSSTPMGPRKADPSEEPAVEAAIANERHGS GADAIIMVSCDKR  
IGSVTGRGTTPTTPQSATVATTALFGEANSTEGSSPRVLP SIDGDGEDTPSSPTVPKASN  
RTVSMGTPMTVSI RTVT TAAAGSGGDCTVEASVPHTPPLPEHVGGYHSGKGGREDEGC SPL  
ATPKLESR  
>comp13244\_c0\_seq2; 352 1 846 LEN=846; translated  
XTTSE RAGGTKDASGRGSGTFFREEEQSDCGDDDDDEVSIYGGTADGSPSKTPLPLLLERIS  
RGYETSKRMNRSYREQMERQRETVRNLNLLLLSKEEELVRLRKTSGADKAALAVANDKID  
QLAVLHRSALAKLARVKDEADSWKRRETEANRKL SFSEERRRKLQEKRLQEGVQALIASLGS  
LNDFGNETDSEDDENENENENGASVRVRGETNDGGEP TTAGETKRACPGSTRTTNEEGLATE  
RTTAERTTGGGRDCQRTPRVRCRCNYGVLRQKDRLCYRERX  
>comp13245\_c0\_seq1; 311 164 775 LEN=1185; translated  
MGCCNAKEQDVVQPGNENNVTPNKQKRSSSESSNGAPKKGGLFGSGKMF EKKS KKPSEP  
APPPNSIPADGPQAPPPGWWGTPEVEEEDEYSADRSSGPRDINDIAGEHGYISGTRKDH  
EISNAVKDKIKTLEKLGVKTKKKMDRKM LTPRIITDVKETWDKEGNITRYMTHYVEDPDG  
RKYTKKETVHIAAGEPDPLAASE  
>comp13246\_c0\_seq1; 201 71 928 LEN=1395; translated  
MTITANTKPTRKCKCERHLGKESYSTRRWKRKISECKE CFAPSQNIRLPQNKSKSSVSV  
PCSDAIQAAP EIRSKKRKMSTKGDGAAGASEKI IDTEEIKSMLKQRIESIPTSEQKII  
RII WISKSISARDEKAVANKVVLNGCYGPIDEQQMGHIQKQIKSTQVSLFQAITIRAAYL  
KQKTMYRTASLRNLGSSVFNKYRVGHSVVDLSRSFDQPPMNVFRTILSEM KWSKNAIKKA  
LRDPKQFGQREKFLAAESADIVSMVNQIDIQVNSEEFEDALSVW  
>comp13247\_c0\_seq1; 540 56 2291 LEN=2442; translated  
MKLSFRSISLQWLLSSIAATTRGEAFAPSFAFAARHEPAISQQRLHMAEEGSSGQIEPVYA  
AKTISNFD RYKKVHAESIKDPAKYWGDLAKKELDWFSPFDENKILQGD LTKGDVRWFEGG  
KLNAAYNALDRHNPDDLAI IWE GDEPDDIRKITFGEMLGKVS KIANALKAKGVKKG DVVT  
IYMPMIPELAMTMLACARIGAVHSVVFAGFSAEALASRVKAANCGTVVTGDYGMRGGKKI  
GLKAIVDNAMDLIEDKDLVKNVMVWERGFKEGVTTVEDEVEYEAREKDIRMDLLVADQRP  
FCAPEPMDAEDNLFILYTS GSTGQPKVRR LFWQKEPKKRIYSLSNIPSHFEILIVLFLF  
NDXGLVHTTGGYSLYAAQT VKN TFDLAPDDIFACVADCGWITGHTYV VYGPLFNGCTTFM  
FESTPVYPDEGRYSWDMVHERHKITQFYTAPTAIRLLMKYGV EPTTKYDLSSLKVLG SVGEP  
INPEAWRWYYENVGKSECTVVD TYWQTETGGHIVTNLPGITPMKPGSCTLP CYGIDTVVL  
EPSSGEI VEPDESGVEGLAIRQPWPGMARTCLGDHSRYLTVYLKPYEGYFTGDSVMR  
DAEGNHFITGRVDDVINVS GHRIGTAEVESALVAHPAVAQA AVVGKPHDIK GQAICAFCM  
LRNGFEESDDL IKELRLQVRTEVGGFCSPDMI VVTPSLPMTRSGKIMRRI LRKIVCDEKD  
TLGDTSTLAEPAIVDVLIEKVESY  
>comp13247\_c0\_seq2; 674 56 2179 LEN=2330; translated  
MKLSFRSISLQWLLSSIAATTRGEAFAPSFAFAARHEPAISQQRLHMAEEGSSGQIEPVYA  
AKTISNFD RYKKVHAESIKDPAKYWGDLAKKELDWFSPFDENKILQGD LTKGDVRWFEGG  
KLNAAYNALDRHNPDDLAI IWE GDEPDDIRKITFGEMLGKVS KIANALKAKGVKKG DVVT  
IYMPMIPELAMTMLACARIGAVHSVVFAGFSAEALASRVKAANCGTVVTGDYGMRGGKKI  
GLKAIVDNAMDLIEDKDLVKNVMVWERGFKEGVTTVEDEVEYEAREKDIRMDLLVADQRP  
FCAPEPMDAEDNLFILYTS GSTGQPKGLVHTTGGYSLYAAQT VKN TFDLAPDDIFACVAD

CGWITGHTYVYVYGLFNGCTTFMFESTPVYPDEGRYWDMVERHKITQFYTAPTAIRLLMK  
YGVPTTKYDLSSLKVLGSGVEPINPEAWRWYYENVGKSECTVVDTYWQTETGGHIVTNL  
PGITPMKPGSCTLPCYGIDTVVLEPSSGEIVEPDESGCVGLAIRQPWPGMARTCLGDH  
SRYLTVYLKPYEGYFTGDSVMRDAEGNHFITGRVDDVINVSghRIGTAEVESALVAHPA  
VAQAAVVGKPHDIKQAICAFCLMRNGFEESDDLKELRLQVRTEVGGFCSPDMIVVTPS  
LPMTRSGKIMRRILRKIVCDEKDTLGDSTLAEPDIVDLIEKVESY  
>comp13248\_c0\_seq1; 394 186 1343 LEN=1548; translated  
MLRSVAGIVFGRLLPALVGLAVFLGWCNLDDESAPWEGRFFVVLIPLLKGYLPPILFGHG  
RLGAKETPPVPPGLVPPRPEGELFATLAGTGDLMPRNLGMCCRPTAYDDVSVERSVEV  
FLLKGGRHIDGAHLYLNHAAIGRGIRNAMAKGVPRSEIFLTTKIWPSDFGYDRALSKVPT  
YLEELGLDYVDMMLMHFPVRMTMTLPSDCKAAGRNISECRQDTWRALSELRASGIVRVNG  
VSNFSRPQLEEILELEGVAPISNNQISWSPWVPSEWLETVAFCKEQNIATIGYSSLGGSL  
EHHKAQTVSTLIEAIEGHNRSAQVMLRWALQTGAAVIPGTGNPNYMEENLSIYGFEITD  
GEMEAIESLRESDEAKKFIAMKPLE  
>comp13248\_c0\_seq2; 398 174 1331 LEN=1536; translated  
MLGSVAGIVFGRLLPALVGLAVFLGWCNLDDESAPWEGRFFVVLIPLLKGYLPPILFGHG  
RLGAKETPPVPPGLVPPRPEGELFATLAGTGDLMPRNLGMCCRPTAYDDVSVERSVEV  
FLLKGGRHIDGAHLYLNHAAIGRGIRNAMAKGVPRSEIFLTTKIWPSDFGYDRALSKVPT  
YLEELGLDYVDMMLMHFPVRMTMTLPSDCKAAGRNISECRQDTWRALSELRASGIVRVNG  
VSNFSRPQLEEILELEGVAPISNNQISWSPWVPSEWLETVAFCKEQNIATIGYSSLGGSL  
EHHKAQTVSTLIEAIEGHNRSAQVMLRWALQTGAAVIPGTGNPNYMEENLSIYGFEITD  
GEMEAIESLRESDEAKKFIAMKPLE  
>comp13249\_c0\_seq1; 211 68 809 LEN=1254; translated  
MNKDNRDEGVGEDEGEFGAGDIGADVEDGVEDGNNGGDEDPQEPRTTLHSMELSSDGD  
PAANRSIFSIHAADISSELRAKTRLTCLGCATVFAAGKPRAWWCTGTALAPLGTTRTC  
VILLDRDPKTSHEYKSRKEFLFYACFFGMLAGIGLVMAGIFLVEVYGPWWSAIHSEKW  
KCGQRTASGHYPGSDRGGCWQQRYRHQQGSASGAATIEPATDDDRYFGGKPRTFQVR  
KRFFED  
>comp13250\_c0\_seq1; 339 252 1730 LEN=1757; translated  
MIQSMFILSSTGEVLIERHFRDAPVSRVCDYFWDKASKGVNHHGGLSTTTSLLTNEEQ  
LLLPLDVLPMVEVPETNHGTYIISILRDGLSYLAVVPEVSPMLIEFLHRVADIFVDY  
FGDPADES AVKENFSTVYQLLEEMVDYGWPLTTEPNALKAMIRPPSIMSKISSAVFANT  
VSDALPSGTISNMPWRAAGVYTYTQNEIYMDIVEEIDAIDAASGNIVQSDVSGKIRCQC  
LSGIPDLLLFTDPKLIDDCSFHPCVRYGRYERDNVVSFVPPDGNFELMKYSISADRKS  
FSPPLECHSQWNIFKPPKNSNSGSSSVEIEYSARLMVTIRVRSLSLITSASRNKVRMM  
VEDVAVTIPFPKQLRTASFQVSTGSVVYDEAGKVAKWKLGLKGLADDPTQPRVQLVATL  
KMNPPKKHRKDHGDEDEDEKEIIRSPNLSLHWKIPLTSVSGLTVSGLSITGESYQPYK  
GVRNVTKSGLYQVRYS  
>comp13251\_c0\_seq2; 420 1 1050 LEN=1350; translated  
QQQQQTYRNNNTTGGVHRQRTPYHNKSYNNDHAKIFVGGLSWQTTEESLRFHFQFGP  
ASVDVMDRNTGDPRGFVVFQDPATIDVVMSEGKHEINHKIVDKRAQARGQAPPSIH  
VGDGNQATGDASHGGKQNSQHNGNQOSELTPQLHNKVFGGIPPNIDKEGLKEIFEFF  
GPVVDAIVMIDQVTNRSRFCGFVTFENGNGAQAIAERQPLSIQGRHVEVKLATPKAEQR  
RMP SAAGPKHVGLRAGISGTTHGKYAGFAVAYGRSGWKAGYGTFAFGQSGWGVK  
GWEDVGGIPVPERAGFSFMSLEEEPGSTDHSVSVQQQERHDHPSSSSPPPSKRARH  
>comp13253\_c0\_seq1; 437 95 1804 LEN=1885; translated  
MSLAAKLFSLAPATGGAAALSAASAVHPHPLVVQALKPLRSHNIYSRWAFLMPRNSQRN  
AATAEYLDKLIARWRKNFSRIYARRILELAAASAAAQVMRSAAEANTISKPLEWQWEQK  
NWEETALASVGSTKFAFWMATKRNVNLAAILASPFIALAPLSLVSDQAYKISWNYALWGI  
EKAGPTWIKLTQWASTRQDLFSPEFCQHF SKLQDDTEGHSWEETKKVLKEQFGEKGM  
EAL EINSTPIGSGCIAQVYQGRLEASVRYPKDTKVAIKVQHPGIWNKVCVDFYIFNKI  
AKFL EDLPRNLQFLSLVDTVHQFRDIMIQDLDSIEASHLNRFNQNFANDEQVAFPRP  
LEELT TSKVLVETFCETPIINPVKGNRPIEEKELLARIGLRMTLQMI FLHDFI  
HGDLHPGNILVSGTYPDLYQVLDCLALEMGPQKHENIVKVLGAFTRKDGRTAGSTMVDMK  
SESQASPEG RELFIEGIEQICILDGDQNFIEENVGDYITDICSLACIHRVKLEGA  
FVNAALAVEIMEGLA SALDPKLVQVALPLVKAEMMHR LGFQ  
>comp13254\_c0\_seq1; 677 276 1862 LEN=2139; translated  
MVTRRGRSGLFVA AVAVSLALTSISSHNAGILQVEADAIKANLVGPGSLRGGQQQNVV  
VTGVTSRKLEDGQQQEEDDQDENQEQQEQAEEENVEEQQEVEEQEENEEGPEEE  
ENDMNYDYQNDDGQYGTSEMVDKVKDTAQGLMDRFDEDDVNMWSTSPSEWDDEFW  
KVFGI IAGVV

TVVLSFIVYIFCCCCCGSDSDDRDFLVATKSEADRRRSHRGRFIGRTNTGNTGETDTVG  
VGSYSERSNDWESPFVLIEDVEKDDNFGQDTVAQDTIAQDTLATCPGDTTSPVYGRGGIS  
AMSGEFPFSANSTLGPFGFSTRAVAHTQSKEIGYGASMDNETQISNGKEIKENPSGGIIN  
ETLEVWSEFLGFKKSKYNMPPPRPQDEDEDINLTDDERTRRSNRSRGSKSSKKKSSRKN  
GIPRPTNGARSSNTQLHGAGYNPSPANASPAAFVDESVAETPISSNASASARMTKVNSPR  
RTALLKTKNLLKSFGNKQKPPPTGNKRDPKKEETLLEDSEINDEDRIA  
>comp13255\_c0\_seq1; 579 98 2092 LEN=2294; translated  
MKFSVAGIALGSGVGSAGAFGLASSARETSTALRMTATQTEAPVEIGASEEDEPEPQLGD  
GSTLTERMFNKIPTENQAGGAGGASTLEAFKRAEQNWERLQKQFEGFDYDTKQLRWTQDNH  
GPPPPQFVSTDGAFGNPKCWQLRDSAGFRELDYDVVVCGGTLGIFYAMYLQLQGHRVCVI  
EAGKLRGREQEWNISMDDELDELMLNVIQEDVDAVITTEFPACRSFGKNTVEVTPLEGGY  
FENGETGYECLTPDVLNLGVTPSLLLKRVSDFRYIIGVVIKEETRLSGVCVSELVGS  
AIDLGEAEPIITRLVLDLDCMGNASPIAQQRYGQKADGICCVVGSAGGYDKETNLYGDI  
IYT  
NQPIKTRKDRGSNQYFWEAFVVGIGRGNPEGTSVKTFTYMDADENRPSLLQLFEDY  
WKLLEPVYQNSIENPETDLDIKRILFAYFPTYRDSPLKPEFSRVLAVGDASGIQSPLSFGG  
FGALTRHLDRIGGAISEGLENDCLHKDDLGLINDYQPNLSAAMWFQKAMSVKMGQTVDPK  
FVNRLLATNFVMDNMGEKTMRPFLQDVVRFDGLVGLAGSFLADPTFMPQIVATVGLPE  
LIKWLGHVGNMGKYTVLVDVAAAIVSSVVDNFVKNPRQKFKWRRRMESWKYGS  
GGDYKFP  
PEEK  
>comp13257\_c0\_seq1; 625 1 2511 LEN=2566; translated  
SNPIPASKASRSREDPPHHRIFRKQGTRTAGDNRCGFWLAVPNTPHPPTEQNRESATTAT  
PHRYNKTRFVLRRETMTSVDGSRYAHRDGACVWSERDAVTENEIRCKDMLECKRQIEFWN  
EKLRVLEREHTTKIKLARLRDAVATWRCLSKKDRRDKTLVLAAMESEELPTVLDDFPSG  
NLPPCLRWDKIDILLARIARDDFRDKYSGEERFFVPRQLRGDKEVMLALLAKHPSAIECAS  
DDLRDDPEIFRAVLEAGQELPPYVLQHFSEIRSDRNVLRLCAHPNGITSLGFAASELR  
NDKLLFFLEAIRVSHGGTGEGREASQNLVLRYSQRLQDDPEVVLEAVRKC  
GPNLKHASYH  
LRRDFAVVSAIEETGAAFRYCLPGEARDLLSDRELVLRRILGPSAHKXVRES  
PAHSGT  
VRACLERYGTDREILEKALLHGIEWSWLPALRSSDGFVLDAIARTPSIYYALPGQMR  
SR  
PEFARAVLRSEDVDAALFEYVAEECPWLDREAMVAFARSGCKGVLDKTLRFASPEILGN  
KEIMLEAIATDPVAYEYCTEELSADRDIAAA  
AVRSSPACLGCLPDAVQLGHPEIVVSAIE  
SFDPSEPHLCYESVCELSWDRSIALAWIQRFSDWIDDHFLDEFKADDEICLAVAEHNWK  
QFCVASVSLRSNKEFMRAVERDARVIRYAKNSEDDSDSDNDEHHFGE  
EEEQRLRHDD  
DLALLAFSRDKRAIQSYTGGEDFGYVVAFTERIRKCLRWDTYR  
DVFLQVLEGLQTVGES  
ENENGTGSPCLTLLNQPHTEVHHSRLIASFVGLPSGEEVAMLR  
RASANLVHWGF  
>comp13258\_c0\_seq1; 820 1 1671 LEN=1816; translated  
PSSVRALGSHAPSPATNNLLPATT  
FESIMAESSSTFFTKLNARVSQVDSLLCIGLDPH  
GAEILGDGFASATEEAKCDA  
AFTFCKTIIDATLPYAACYKPNAAFF  
EALGAKDGNATLVR  
VLKEIPDEVVLLDVKRGDIGSTAA  
AYAASCYDHCNADGVTLSPLMGWDS  
VAPFITDKYS  
DKGAFLLCKTSNPGSNDLLALDLAG  
GETVYERIAKLAQQWSVKSGAASS  
NLGLVVGATDS  
IALSKARKAAGEDVWILAPGVGAQ  
GGNLEEAFRAGCNAQGSAMLVPV  
SRGISRAEDPGAA  
AKGLMENINAVRNKLKEKSPSSD  
ADGTSDSIEPYQKEFLFSLSQNV  
LRFGEFTLKS  
GRT  
SPYFFNAGLFASGAALFKLGTAY  
ASAIMNSPELLDGKGGVSFDIV  
FGPAYKGISL  
GAVVC  
AALYNDYGIDVGFAYDRKEAKD  
HGEGKLVGASMSDGKRVLVDDV  
ITAGTAIRQ  
SHTML  
ESIGAKMMGVVIALDRAEKRS  
LDDPVSAVQAVQRDLNVSAISIV  
SLPQLQVFL  
EKSP  
EYGE  
EETLNKVREYRREYGV  
>comp13260\_c0\_seq1; 444 47 748 LEN=819; translated  
MKFSTTALALATMAGSAFAGEETLTFETPIAFTQYSDSCEGDVLYDGEVLSIKKMAFGKF  
CLADNIMAEDGSKTVAYSMVNVVSC  
EHDAIYENWLKCSDEDCNDCEGEY  
EAYTTWDNINP  
LAGLSHCYDYHFSTDPVAKTVRDAK  
GIFKNTVAIYHFHDEE  
ADEDDVSAYNKLWDS  
NSCIVNGQPAAPAASVDEEPVTE  
MGDVSEETETEVSGASGLATTA  
AFAAAGVAALFL  
>comp13261\_c0\_seq1; 274 153 1043 LEN=1375; translated  
MATAAAMRAGPNLYSSVKSFRAFR  
RSLLLTIRVGFVPTMGALHEGHL  
SLVKQAMSQNDLV  
VASIFVNPTQFGEGEDLDVYPRQL  
ERDTELLSNLGVDMFV  
PKLEDMYTKDFATYVECKS  
FDDIPESIVRPGHFRGVATIVTKL  
FNIVKPTNAYFGQK  
DAGQCVLIRRI  
VQDLDM  
EVNIV  
VGETVRES  
DGLAKSSRNAYLSETERPAAAIYK  
SLLAAKDAWVRNPLIESSELISIT  
RDV  
LESEPLVSEIQYVS  
VESMATMKAVTKP  
SECEDGTTISLGCIVGS  
VRLIDNIVLKNE  
>comp13262\_c0\_seq1; 232 143 745 LEN=1117; translated  
MRKFI  
PVP  
SWSRFGQHRVKAISTSRNQYFFSTKREIPKPVYPRAAVAATI  
QWTCPKTNLN  
HYLLVQRKNPPDKNKWSFPGKIELGEETLLAAKREILEETQLRGCLW  
HSDPFLTTDAIV  
VDNEDKDLASYAFHYVIAHCFARIPACESDSTPTVIASDDALNAK  
WWTVEKLHTIDCSA

HTIKVIERAEELSRFGVLSV

>comp13262\_c0\_seq3; 186 1 681 LEN=1053; translated  
AQCSSFVIEYEVDNLAESGVTFNVHMRKFI PVPSWSRFGQHRVKAISTSRNQYFFSTKR  
EIPKPVYPRAAVAATI QWTCPKTNLNHYLLVQRKNPPDKNKWSFPGGKIELGEETLLAAK  
REILEETQLRGCLWHSDFLTTDAIVVDNEDKKDLASYAFHYVIAHCFARIPACESDSTP  
TVIASDDALNAKWWTVEKLHTIDCSAHTIKVIERAEELSRFGVLSV

>comp13263\_c0\_seq1; 117 1 824 LEN=945; translated  
GYDNTMVSEMYCGDAGKVDFSDAFPTKSRI FALFSNXINYKTFWATDNGPEMNCPPDGI  
CKRANTKPQRPEEGPGSAGRLRGRKRDIYEGGHRVPGIVSY PSEVKDTNTISWETIT TMD  
FLPTVMEVLNVDRPKEQKSWAFDGRSILPLL RNATDFKWRDTVAGPRSVGYQYHDPKLDL  
AHGWGYRFGRWKYVEGSSSCTISDCQKPQLFDLEADIGERHDLSTEYPDILADLQLKFRF  
WHDSVMKSRREESKCRKTEELGMPPSLVLSAATE

>comp13263\_c0\_seq2; 398 204 2015 LEN=2136; translated  
MKNILDSFSVTPALPSFLFLLADDIGWADFSYNNGTALTPNIDTWARAQGSVVLQDFHSG  
GSVCSPTRATVLTGRNHLRDCVDYVYGCSDIRSCPTLAFEFAPSETFTVGDVAVRTAYPED  
YDSKGGAYFAGKWHLSFFND SKAYGGIPSSPITHGFTKMNATIEVAPTATTNCQCKAEW  
VDSCDFGHYKEPNHCFPEGECCFNYWDDPLVHRFMNNLFVDHVCEDVFGSXS MHVLTVM  
VCCETEFPC LSSVFLFLLAVAPHGVTNLTWPTPPDDSLYLADAFSRYLKDRSAQQKPF LAQ  
ISFHNCHIPF IGSKAKE SCARGETCQLPQNGEEPFTDEELDY YACLVELDNAVGTILAA  
LKNHGYDNTMTWFATDNGPEMNCPPDGI CKRANTKPQRPEEGPGSAGRLRGRKRDIYEG  
GHRVPGIVSY PSEVKDTNTISWETIT TMDFLPTVMEVLNVDRPKEQKSWAFDGRSILPLL  
RNATDFKWRDTVAGPRSVGYQYHDPKLDLAHG WGYRFGRWKYVEGSSSCTISDCQKPQLF  
DLEADIGERHDLSTEYPDILADLQLKFRFWHDSVMKSRREESKCRKTEELGMPPSLVLSA  
ATE

>comp13263\_c0\_seq3; 465 204 1871 LEN=1992; translated  
MKNILDSFSVTPALPSFLFLLADDIGWADFSYNNGTALTPNIDTWARAQGSVVLQDFHSG  
GSVCSPTRATVLTGRNHLRDCVDYVYGCSDIRSCPTLAFEFAPSETFTVGDVAVRTAYPED  
YDSKGGAYFAGKWHLSFFND SKAYGGIPSSPITHGFTKMNATIEVAPTATTNCQCKAEW  
VDSCDFGHYKEPNHCFPEGECCFNYWDDPLAPHGVTNLTWPTPPDDSLYLADAFSRYLK  
DRSAQQKPF LAQISFHNCHIPF IGSKAKE SCARGETCQLPQNGEEPFTDEELDY YACL  
ELDNAVGTILAALKNHGYDNTMTWFATDNGPEMNCPPDGI CKRANTKPQRPEEGPGSAG  
RLRGRKRDIYEGGHRVPGIVSY PSEVKDTNTISWETIT TMDFLPTVMEVLNVDRPKEQKS  
WAFDGRSILPLL RNATDFKWRDTVAGPRSVGYQYHDPKLDLAHG WGYRFGRWKYVEGSSS  
CTISDCQKPQLFDLEADIGERHDLSTEYPDILADLQLKFRFWHDSVMKSRREESKCRKTE  
ELGMPPSLVLSAATE

>comp13264\_c0\_seq1; 772 729 3566 LEN=4201; translated  
MSATPSRNNSSGGDSKRS AFLIGSFLFWCDFISTLTILYDLSFVNRSRFSITEMAIDVTM  
GVENPESSSPYILNRLALNGVECNV IIVILRTSRCARFVQSRAAINAGNRIDWYGIYQLS  
KWLNP CSYYYSMCRKQRKSPYQSDIGKDHQNL SLVEPTANATKHNSKGNNGGTVALAAVHA  
ESKRKRGERNLRRSSSVWKNLKF NFKRSDPEMINKYDAASKIQRARNRVQFGACADEE  
QSNPAFEPNRLSVRNPPERRSTNIAVLGTL SQARSRFQSKAGKEHGESQVRSDMRELLGN  
RVAIGTLIMLIFTVLCTYTRHSTTQIKTMIVLHSQTRKPAYAKPSLTA AVNTTAPTLYQY  
SPSIGSVTWFPNPRYGNSTDLTERNIVKITVTD SLLYGTSTGWFDNSRTVKRAA ILDIVA  
TIF I I FWYAGVLSFSGPVMLLV IAPVEQMVRLLGMLTV DPLGYQSTARYKEFLRDDDEL  
SRNTRWSREVLKGMETSFLKSTILRIGSLMKVGFSGSAGVEI IQNNLEKGHQKNMLILNSQ  
GTTVSCIFLFS DIRQFTDATEQLQE EVFVFTNRIAAVVHSICNSYGGAANKNIGDAFLLS  
WSLDDNGASGGDALKADKKSQADKALLSVIKI CIALTYDNFFLEPLSDAARGRLKSKLKD  
RTGSVVQMGFGLHAGKAVQGAIGSQRKIDATYVSESVERAEFLESSTK KYGLKMMMSGEF  
HRLHLSRTQGRCKIDHILIRDKDDGYFEDYDRQGEFMDLFTFDMDVD AIQQADATLHN  
TMGESDKLSNSSLKQTI RKRKRGRSRTSLMNARDLMGNSNNSQQSHVEPSSNSRLGHF  
DDNRNFLQEHRELVLPSGPALYAQN VWQSPDMRKIRDKYIKSFFFQKYKSGLDAFYKKD  
WHHAKRCFRDILEHFDGSPRYFLRKINENKGVPPKGFKGYGIAD

>comp13264\_c0\_seq2; 746 729 3614 LEN=4249; translated  
MSATPSRNNSSGGDSKRS AFLIGSFLFWCDFISTLTILYDLSFVNRSRFSITEMAIDVTM  
GVENPESSSPYILNRLALNGVECNV IIVILRTSRCARFVQSRAAINAGNRIDWYGIYQLS  
KWLNP CSYYYSMCRKQRKSPYQSDIGKDHQNL SLVEPTANATKHNSKGNNGGTVALAAVHA  
ESKRKRGERNLRRSSSVWKNLKF NFKRSDPEMINKYDAASKIQRARNRVQFGACADEE  
QSNPAFEPNRLSVRNPPERRSTNIAVLGTL SQAPVGRMNSAETI IPTKSRSRFQSKAGKE  
HGESQVRSDMRELLGNRVAIGTLIMLIFTVLCTYTRHSTTQIKTMIVLHSQTRKPAYAKP  
SLTA AVNTTAPTLYQYSPSIGSVTWFPNPRYGNSTDLTERNIVKITVTD SLLYGTSTGW

DNSRTVKRAAILDIVATIFIIIFWYAGVLSFSGPVMLLVIAPVEQMVRLLGMLTVDPLGY  
QSTARYKEFLRDDDELSRNTWRWSREVLKGMETSFLKSTILRIGSLMKVGFSGSAGVEIIQN  
NLEKGHQKNMLILNSQGTTVSCIFLFSDIRQFTDATEQLQEEVFVFTNRIAAVVHSICNS  
YGAANKNIGDAFLLSWSLDDNGASGGDGALKADKSQADKALLSVIKICIALTYDNFFLE  
PLSDAARGRLKSKLKDRTGSVVQMGFGLHAGKAVQGAIGSQRKIDATYVSESEVERAEFLE  
SSTKKYGLKMMMSGEFHRLLSHRTQGRCKRIDHILIRDKDDGYFEDYDRQGEFMDLFTFD  
MDVDIAIQADATLHNVTMGESDKLSNSSLKQTIKRRRKGGRSRTSLMNARDLMGNSNNS  
QQSHVEPSSNSRLGHFDDNRNFLQEHRELVLPSGPALYAQN VWQSPDMRKIRDKYIKSFF  
FFQKYKSGLDAFYKKDWHHAKRCFRDILEHFDDGPSRYFLRKINENKGVPPKGFKGYGIA  
D

>comp13265\_c0\_seq1; 553 243 2465 LEN=2999; translated  
MQEERRIATDEEHLPCAEEKEQPSVSSPKSKSKAKTKSKATKKKLTNDEPLSSVLTSE  
SNVKSTRTKTKSTKTKMKRKKHSDGGESLGNSSSTHSTVTPTIAKSSSYLPRPQGTCKN  
NKNTTKKGGVSRTKSLEQSSTPKRDVERSKSLDLADKIDRSTLSIAHLSTNQNPGRGRGS  
RGRGSLSPVGGRRGRVQQPSRRGPPRTSRSSERKPSSDRSRASRSRSGDSVSSMTSRES  
RGRRRPGETIYKAPSPLSQKTTSYRQGILRHSSHHSPHSPKSKYKRSVCINEHNLHSNFD  
SDIESDDNDDDRSIYMEGEGEKSQKTVSRTLVRSLSNSMKKSIRNFMTMDMSGHSRGLG  
TGSSPQKSATLSRTPSSASIAMLQHPEFEGENRFIRALRYIHILAPHPNEHPKKNIRIV  
TLALFMDFLNALVAIITYGGKTTQCCGKSIMS AFFGGKIDWDKTILVITSVYMALIFME  
VLPVMDTFFPNLLNPFVGF LITFAVFFSDSIMEAIIMWIVEGF AVGCEVLSYRLRVKLY  
GERKAKLKQAKKDIQEFRKIKRKVKNQYENGKSSKISIRPGSDDALSIGPESDSMIGDDS  
VFDEAEMQQSSTIASRSSHEQTTMSDIGDLRETRLLRERRELITSQSEDERDLHIHLIGV  
SINVSLVILSLLMIVIIGKNGGMCIRGMKFGNIFKNDQLDKCYTYKACVDPAECEEYCPT  
DEDGELTEESQCYYPYGVGK

>comp13265\_c0\_seq2; 328 68 937 LEN=1256; translated  
MSAFFGGKIDWDKTILVITSVYMALIFMEVLPVMDTFFPNLLNPFVGF LITFAVFFSDS  
IMEAIIMWIVEGF AVGCEVLSYRLRVKLYGERKAKLKQAKKDIQEFRKIKRKVKNQYENG  
KSSKISIRPGSDDALSIGPESDSMIGDDSVFDEAEMQQSSTIASRSSHEQTTMSDIGDLR  
ETRLRERRELITSQSEDERDLHIHLIGVSINVSLVILSLLMIVIIGKNGGMCIRGMKFG  
NIFKNDQLDKCYTYKACVDPAECEEYCPTDEDGELTEESQCYYPYGVGK

>comp13265\_c0\_seq3; 553 243 2465 LEN=2784; translated  
MQEERRIATDEEHLPCAEEKEQPSVSSPKSKSKAKTKSKATKKKLTNDEPLSSVLTSE  
SNVKSTRTKTKSTKTKMKRKKHSDGGESLGNSSSTHSTVTPTIAKSSSYLPRPQGTCKN  
NKNTTKKGGVSRTKSLEQSSTPKRDVERSKSLDLADKIDRSTLSIAHLSTNQNPGRGRGS  
RGRGSLSPVGGRRGRVQQPSRRGPPRTSRSSERKPSSDRSRASRSRSGDSVSSMTSRES  
RGRRRPGETIYKAPSPLSQKTTSYRQGILRHSSHHSPHSPKSKYKRSVCINEHNLHSNFD  
SDIESDDNDDDRSIYMEGEGEKSQKTVSRTLVRSLSNSMKKSIRNFMTMDMSGHSRGLG  
TGSSPQKSATLSRTPSSASIAMLQHPEFEGENRFIRALRYIHILAPHPNEHPKKNIRIV  
TLALFMDFLNALVAIITYGGKTTQCCGKSIMS AFFGGKIDWDKTILVITSVYMALIFME  
VLPVMDTFFPNLLNPFVGF LITFAVFFSDSIMEAIIMWIVEGF AVGCEVLSYRLRVKLY  
GERKAKLKQAKKDIQEFRKIKRKVKNQYENGKSSKISIRPGSDDALSIGPESDSMIGDDS  
VFDEAEMQQSSTIASRSSHEQTTMSDIGDLRETRLLRERRELITSQSEDERDLHIHLIGV  
SINVSLVILSLLMIVIIGKNGGMCIRGMKFGNIFKNDQLDKCYTYKACVDPAECEEYCPT  
DEDGELTEESQCYYPYGVGK

>comp13265\_c0\_seq4; 328 68 937 LEN=1471; translated  
MSAFFGGKIDWDKTILVITSVYMALIFMEVLPVMDTFFPNLLNPFVGF LITFAVFFSDS  
IMEAIIMWIVEGF AVGCEVLSYRLRVKLYGERKAKLKQAKKDIQEFRKIKRKVKNQYENG  
KSSKISIRPGSDDALSIGPESDSMIGDDSVFDEAEMQQSSTIASRSSHEQTTMSDIGDLR  
ETRLRERRELITSQSEDERDLHIHLIGVSINVSLVILSLLMIVIIGKNGGMCIRGMKFG  
NIFKNDQLDKCYTYKACVDPAECEEYCPTDEDGELTEESQCYYPYGVGK

>comp13265\_c0\_seq5; 553 243 2465 LEN=2596; translated  
MQEERRIATDEEHLPCAEEKEQPSVSSPKSKSKAKTKSKATKKKLTNDEPLSSVLTSE  
SNVKSTRTKTKSTKTKMKRKKHSDGGESLGNSSSTHSTVTPTIAKSSSYLPRPQGTCKN  
NKNTTKKGGVSRTKSLEQSSTPKRDVERSKSLDLADKIDRSTLSIAHLSTNQNPGRGRGS  
RGRGSLSPVGGRRGRVQQPSRRGPPRTSRSSERKPSSDRSRASRSRSGDSVSSMTSRES  
RGRRRPGETIYKAPSPLSQKTTSYRQGILRHSSHHSPHSPKSKYKRSVCINEHNLHSNFD  
SDIESDDNDDDRSIYMEGEGEKSQKTVSRTLVRSLSNSMKKSIRNFMTMDMSGHSRGLG  
TGSSPQKSATLSRTPSSASIAMLQHPEFEGENRFIRALRYIHILAPHPNEHPKKNIRIV  
TLALFMDFLNALVAIITYGGKTTQCCGKSIMS AFFGGKIDWDKTILVITSVYMALIFME  
VLPVMDTFFPNLLNPFVGF LITFAVFFSDSIMEAIIMWIVEGF AVGCEVLSYRLRVKLY

GERKAKLKQAKKDIQEFRKIKRKVKNQYENGKSSKSI SRPGSDDALSIGPESDSMIGDDS  
VFDEAEMQQSSTIASRSSHEQTTMSDIGDLRETRLLRERRELITSQSEDERDLHIHLIGV  
SINVSLVILSLLMIVIIGKNGGMCIRGMKFGNIFKNDQLDKCYTYKACVDPAECEEYCPT  
DEDGELTEESQCYYPYGVGK

>comp13265\_c0\_seq6; 303 243 939 LEN=1625; translated  
MQEERRIATDEEHLPCAEEKEQPSVSSPKSKSKAKTKSKATKKKLTNDEPLSSVLTSE  
SNVKSTRKTKSTKTKMKRKKHSDGGESLGNSSTHSTVTPTIAKSSSYLPRPQGTCKN  
NKNTTKGGVSRKTSLEQSSTPKRDVERSKSLDLADKIDRSTLSIAHLSTNQNPGE GEEV  
EEEDLCLQWVVGAAEECSSQVVEDPPELRDPLKENQAVTDREQVGVVREIR

>comp13265\_c0\_seq7; 328 68 937 LEN=1068; translated  
MSAFFGGKIDWDKILVITSVYMALIFMEVLPVMDRTPFNLLNPFVGFLLITFAVFFSDS  
IMEAII MWIVEGFAVGCVEVLSYRLRVKLYGERKAKLKQAKKDIQEFRKIKRKVKNQYENG  
KSSKSI SRPGSDDALSIGPESDSMIGDDSVFDEAEMQQSSTIASRSSHEQTTMSDIGDLR  
ETRLLRERRELITSQSEDERDLHIHLIGVSINVSLVILSLLMIVIIGKNGGMCIRGMKFG  
NIFKNDQLDKCYTYKACVDPAECEEYCPTDEDGELTEESQCYYPYGVGK

>comp13265\_c1\_seq1; 243 456 1383 LEN=1383; translated  
MVGTSKPKRNKEFVLVIIMPQLGDFDSA EYAELLSYVKEDLRRARITLRIIGIGNANSAR  
RFANFSGLDLESIRVDPQGELHRALGLHRGNWDVPSFVPEFSLSWFSDYVGVDDD IKRD  
SKAIFRSWLN YMAMCAGIASPDTLPEILRGYIGDKKSPERLRSDEIVTVGGTDPAINNED  
SKDPFIAITGTTDVKLGLPKYQQAWKDESGYQRPLELATVRLRVMIEVLSNFAEYVPDQR  
HLDLRGATYLF EWADKSNGNENDIATLIYEHADTGVLSSYKTMGRPLSFLEPYIGKKALN  
PLELGDIAVX

>comp13266\_c0\_seq1; 226 1 864 LEN=1685; translated  
KNVVDEETEAKADTYEKEYPKLEVEKLEQIRAKEYSEKSNDERESLLNELHGVSSRAVPE  
NPEMIHAALLLFQLELDKCSLEHEKRAYLRACSMKSTYVH SVGFRLKFLRAEFFHVRNAT  
LRYLQNLNMYLMDKFGEIALMRQLYMSDLNNE DIRFLKKG YMQILPFRDRAGRRI LASLGS  
LGGFEYSMETKERVAIYI CHAILSE DVVSQRKGAVMLGLLNEEAIESIRMIKMSNTHKFM  
QAMPLRFSGLHSCLPDDFRFRVIKAMVLLMNKGDNRHLTRIHIHGKFL

>comp13266\_c0\_seq2; 376 1 1464 LEN=1554; translated  
KNVVDEETEAKADTYEKEYPKLEVEKLEQIRAKEYSEKSNDERESLLNELHGVSSRAVPE  
NPEMIHAALLLFQLELDKCSLEHEKRAYLRACSMKSTYVH SVGFRLKFLRAEFFHVRNAT  
LRYLQNLNMYLMDKFGEIALMRQLYMSDLNNE DIRFLKKG YMQILPFRDRAGRRI LASLGS  
LGGFEYSMETKERVAIYI CHAILSE DVVSQRKGAVMLGLLNEEAIESIRMIKMSNTHKFM  
QAMPLRFSGLHSCLPDDFRFRVIKAMVLLMNKGDNRHLTRIHIHTQIECDYKLSRFGIPT  
EFIPRSYTGKIKDSYHKTF LKIRMAIDAHRRAEARN DYRFYAAATSRITPFP AIECPENN  
CFLVRKHGVAWNNP GNIELRVFLEEKERENGRKRLKGEFISGIVDEISARNINILVFDEQ  
HCWYTKVTEKDEIQKHILQTLRDIRKRNKKNRQVSTNTSNTNEFRGLDGNIPQNGCLC  
DTTMDEG

>comp13267\_c0\_seq1; 602 1 1962 LEN=2131; translated  
ALTKALKQRRFTA AAPHRPNQIKRTVASCEQATMKRNPSV DSE DGSTLYVQGEQH QEQQQ  
QQQQAIEQRQPQHRVFDSSKLIHMIDKKS NKNQAWFQNNQPSVNGGTDPLSQTGNEAFIE  
SQVLRRLTNDCLRFQEPREVSSDADGGAI AHSGSPALFHRHEIQT SWNMLGN GAFSEVYT  
IQKFYLQDKGFVDPEQRAARERLQNNCIEGRPEPSGIEEHVQCLQLEGNFQFHQCQSTQP  
YNYVIKHLRRDL MADRKRFIHAAGDLVMEAMYLTKFNHPNI IKLRGCAVGGSSAYGN GKH  
DGFFLIIDLRLNTTLSQQIQEWRYQAGPEQQKMMYSNR TIDFREKLEIARQIASALEYLHG  
RDIVYRDLKPDNVGLLYSGPTGKLLVQLFDFGLCREVPEASPPEDKVFHMSGVGT RRYMS  
PEVYLGQYYNFKADVSWAIVLHSMITLQRPFEMYDAQLHKL LVCTEGIRPTIHRQWPRS  
IQELLGRGWAPNSSDRPTIREVCAFVDDILKDADVPCCSDDDEESASSRYVRTSATCCS  
YDPYPDPSPDEPKEDDEPKPMP SRTSTIEASIANFMEEWTQLLCTGPTDVECNDAKKQPT  
KKSLLR TLEAHLMADAAGTPLLTMQNR YNNPSNRYKPGDGYPHLKR LRSSYL

>comp13268\_c0\_seq1; 222 277 1074 LEN=1414; translated  
MPVATASSPGLSALQSIATVAGVVVLHALAVATVRQRKTSEAGGTTLKQGTRKASSSKS  
CKEKLIGDFPTCVVITLPEWTD DDFYNQRKDKVYKSEAEMMQVAMELSKINVQMKTGPPFG  
TAIF EYDPSTDQCTLFSIGVNRVPLGNSTLHGEMTAIQFGQQKIGNFSFSSAGSKAGKE  
YHLYTSCAPCCQCLGATMWSGVSKLVCGATKD DAEAIGFSEGPVFDPPQSYDALEDAGCRV  
VRDVLREECKEVL DWYGRNGEIYNP

>comp13269\_c0\_seq1; 294 1 1207 LEN=1323; translated  
HPTPPFLLRSRSTSYIILCLWVPVVALVPPNDDDPQAKKARSNRAGTFRGRCP PPGPLR  
RIGSEAFPSEAPEPAGSFARPD RRREEGPEGGPGGGVHDALSARIVQQQSGLLACGGRVG  
LFVSGFGVSASRLGRPDASILTRSEIEDAARNVVRVSNTHATGLPPPVLVDGDTGFGG



AANVRETIRRTASIGAAAITIEDQVFPKRCTYLAGSGIGVVSRAEATDRIGAALAAARDEA  
LEADGNPIFVVARTDCRMALGLDEAIERCLAFQDMGADVVAENLQSGEEYLALRRAVTG  
GSAASEARGVAPMVLAQFQTGAENQRLYSADEVGAMGYEMALYGVVGLQATVSALRSVAVS  
ELLGEGSGGIVRSTPLSALDEIKEVVGFSDDLDDFERKHGCT  
>comp13270\_c0\_seq1; 105 1 431 LEN=878; translated  
XPLLSLAVEKVRARLLRGPNMARYEYDYATGTSYEYRAKTRGHCNTGFWKLKCGAWSLPRD  
HDRMPALLAAMEPVSFLCASSHALKSTTNGVGTGVKMRNSVPCRAEIHAEKGKVRRTHSP  
QEDVSARPNGLVFQQQWIGRGRYR  
>comp13270\_c0\_seq2; 105 1 431 LEN=821; translated  
XPLLSLAVEKVRARLLRGPNMARYEYDYATGTSYEYRAKTRGHCNTGFWKLKCGAWSLPRD  
HDRMPALLAAMEPVSFLCASSHALKSTTNGVGTGVKMRNSVPCRAEIHAEKGKVRRTHSP  
QEDVSARPNGLVFQQQWIGRGRYR  
>comp13270\_c0\_seq4; 199 167 340 LEN=518; minus strand; translated  
MSTDQPAMAGGEHLHHGSEVCHHKGRNGSDEVLDPMEDFIQCEEIGDDSLVRFVASK  
>comp13270\_c1\_seq1; 1361 1503 4862 LEN=5260; translated  
MSSNNSSLRPGWFKGSGAGGGKGFQPPPTASDRGDKGRSNSNGSGDNEIGGRRDSNIFAA  
LLDDEDAAGSGVGDGNGVVHASESSKPPPVISSSRSEAFRSSFNRSSSSSGSRRSLADLA  
ARVPELSSSSGHGRRRHSSGGLGGSGRFSHIHSHDGGSGGPSGSSEGYKADPKVIRYTRE  
KLLSLRFAPRGEDPGPPEELKAVEGSV IISSTAQDPVCWDTFDAEEIWEMAREQRRSSSA  
ISGKSMGGLEDQRRRTAPSSGRWSRGLALPPPEDGSKRKGVDVNPNELWDDPVGGVIGAA  
SDFSSFGALPTENGEAFDFDKMAEASAKLELELHGDRSSGDDADHNSNKKIDVSRPLASA  
GTTLISGSGNDVNVFEDFDTPVTS DSEGENNAVVTNEDKETVAVRGGDEDPNASSRLMKM  
IGVSRDPTVDSANHEAKPLEPSSNPWGSSTNLDLASKTTTPTDPIIGGIAGVPSNAGGTS  
ISLNPWGDPIISASTPSQQTGASGSGMTLGGIHI SAFSAEKNREAQIAAEREK IARHEA  
ELLARRRHEEEKEQRLLLAQQQQQNNPPRQSQIELVLMERIC TILENSWGRSDLMSILRT  
LHSEDARVIQLLRHIDALRALIARSPQRVSLRRDPSLAGEIAVLVMTNAQWQEQQQQQQH  
IQARMQQEELRRRHMEEEAKARLQAQNQLTQS IKKDVPWYYSDPQNNIQGPFRGEEMRQW  
LEAGYFKGDLPI SQLPNGPFHQLSNWF PNLSTAFTAEGSEGRSDRDDGAVLEQQQRKNAEA  
AAEAERQRAAEEMEAKKAE EEEEEAAAAAQKEAQKEAARSREIALQNEEVQAPANGGNQSS  
NQLKMMLGLSSGEKSDTLNK ISETSNGAVDKANKTSSKGALKKSSPKTARPSGAGSQP  
EPSNQPVDPDIAPAPAPVPVAPAVPAWGGVANNNPKKSMSEIQKEEAAAAAILAAKRGNM  
AQTNSSGWANVAAGSTGWSSGAIRTVVQNPAVTVSVRPGQAPSKPQTKKVVSSSTQKAAPA  
SSSTPAEEFGTTMSPALEKWKCEKMQLINGSDDLTLVAF CMTLNDASEIRQYLTTYLGST  
SQVNNFATDFINKRGLGSKQEEWETPGSAKKGRKKKSGR  
>comp13270\_c1\_seq2; 247 69 638 LEN=1755; translated  
MKLAVTLLLALFAVATGQTTNTKVFDFIDIGGTAAGRIVMGLFTEDVPKTTENFRALCTG  
EKGVGKTGKPLHFKGSTFHR IIPNFMIQGGDFTNGNGTGGESIYGEKFADENFKLKHEGP  
MYLSMANAGPNTNGSQFFITTVKTSWLDGRHVVFVKVLEGEDVVKAEAVGSGSGAPSS  
VTISDSGEL  
>comp13270\_c1\_seq3; 1361 2007 5366 LEN=5764; translated  
MSSNNSSLRPGWFKGSGAGGGKGFQPPPTASDRGDKGRSNSNGSGDNEIGGRRDSNIFAA  
LLDDEDAAGSGVGDGNGVVHASESSKPPPVISSSRSEAFRSSFNRSSSSSGSRRSLADLA  
ARVPELSSSSGHGRRRHSSGGLGGSGRFSHIHSHDGGSGGPSGSSEGYKADPKVIRYTRE  
KLLSLRFAPRGEDPGPPEELKAVEGSV IISSTAQDPVCWDTFDAEEIWEMAREQRRSSSA  
ISGKSMGGLEDQRRRTAPSSGRWSRGLALPPPEDGSKRKGVDVNPNELWDDPVGGVIGAA  
SDFSSFGALPTENGEAFDFDKMAEASAKLELELHGDRSSGDDADHNSNKKIDVSRPLASA  
GTTLISGSGNDVNVFEDFDTPVTS DSEGENNAVVTNEDKETVAVRGGDEDPNASSRLMKM  
IGVSRDPTVDSANHEAKPLEPSSNPWGSSTNLDLASKTTTPTDPIIGGIAGVPSNAGGTS  
ISLNPWGDPIISASTPSQQTGASGSGMTLGGIHI SAFSAEKNREAQIAAEREK IARHEA  
ELLARRRHEEEKEQRLLLAQQQQQNNPPRQSQIELVLMERIC TILENSWGRSDLMSILRT  
LHSEDARVIQLLRHIDALRALIARSPQRVSLRRDPSLAGEIAVLVMTNAQWQEQQQQQQH  
IQARMQQEELRRRHMEEEAKARLQAQNQLTQS IKKDVPWYYSDPQNNIQGPFRGEEMRQW  
LEAGYFKGDLPI SQLPNGPFHQLSNWF PNLSTAFTAEGSEGRSDRDDGAVLEQQQRKNAEA  
AAEAERQRAAEEMEAKKAE EEEEEAAAAAQKEAQKEAARSREIALQNEEVQAPANGGNQSS  
NQLKMMLGLSSGEKSDTLNK ISETSNGAVDKANKTSSKGALKKSSPKTARPSGAGSQP  
EPSNQPVDPDIAPAPAPVPVAPAVPAWGGVANNNPKKSMSEIQKEEAAAAAILAAKRGNM  
AQTNSSGWANVAAGSTGWSSGAIRTVVQNPAVTVSVRPGQAPSKPQTKKVVSSSTQKAAPA  
SSSTPAEEFGTTMSPALEKWKCEKMQLINGSDDLTLVAF CMTLNDASEIRQYLTTYLGST  
SQVNNFATDFINKRGLGSKQEEWETPGSAKKGRKKKSGR  
>comp13271\_c0\_seq1; 273 105 1406 LEN=1580; translated

MPP IARRRSSRRLVNGLRQQDRIDTSSSSDSSRKSNERDCTGYHSGSEATDAHRLSSAAS  
SSKQKKQKRRRSSRGHSCLAKLAEIIVTNRKRVLITGAGMSVASGIRPFRGKSNHHNEA  
LWTQHIWTTATRETFRKDPLEWYNRFWLPFSSLPSPVQPNAAHRAVQWLLDQSSSTGGSES  
LNIKMITQNVDGMLPPNP IHTIEAHGRLGLYKCI PDVDSDTDSESDDDDGRSVHLGHRK  
WKRRRDPQRECSNSRRQRHSGSKS INRSQKCRQCPYQNLESVTIAQIEPSRVQETLRLG  
KGRLFETPKCPHCKNTLAPQALLFDEGYHSHDFYEFQKMEEWLAEAEVIVFVGTSTFAVRL  
PEVTLEHARAKNIPVYNINTHDMLAPTSILDAYNIRGPAEETLPLLAHEVAELQRNSNIR  
RTSTRLRKRKICT

>comp13271\_c0\_seq2; 254 105 1232 LEN=1732; translated  
MPP IARRRSSRRLVNGLRQQDRIDTSSSSDSSRKSNERDCTGYHSGSEATDAHRLSSAAS  
SSKQKKQKRRRSSRGHSCLAKLAEIIVTNRKRVLITGAGMSVASGIRPFRGKSNHHNEA  
LWTQHIWTTATRETFRKDPLEWYNRFWLPFSSLPSPVQPNAAHRAVQWLLDQSSSTGGSES  
LNIKMITQNVDGMLPPNP IHTIEAHGRLGLYKCI PDVDSDTDSESDDDDGRSVHLGHRK  
WKRRRDPQRECSNSRRQRHSGSKS INRSQKCRQCPYQNLESVTIAQIEPSRVQETLRLG  
KGRLFETPKCPHCKNTLAPQALLFDEGYHSHDFYEFQKMEEWLAEAEVIVFVGTSTFAVRL  
PEVTLEHARAKNIPV

>comp13273\_c0\_seq1; 833 155 1966 LEN=2031; translated  
MTTEGEKIEVPVKANEATGDPMAYASSYDSEEFKRSFASNYELKKKPKVLFAMALGFPEF  
DGILDRPPISTIKRKELDQYIPKAEDYKNEIKRRAHYFMNDVEESNYITDQLKRPHPLK  
TKRSSIVLPQPNQWLNTQLKKWLTERPLNPNDNDVKFLRYQIKRALDFLTSDVTNTVNGQ  
DVLQEFVPLPTPADAPLDGPAITGGIGDGEAKVSIPITQTIMASNPSSSNVSLSLGEIQ  
TEGFIYATEHDSADYKLSAADTFLKKGKQPRILFAMAHGIPQLQSMIEKVTQNLVKKRKEV  
TEEFMPRAEDFRYIEIKRRANYFMNMEEQKNYYLQDLELKNPLENMRGIVTLPQPAQWKVH  
ALKQWLAERPLKPDERDMKFLNTS I KQCTKALTEAVMKDPTLTQHSVKRSASMMMLSTDLS  
SALEGGTLGGPLMQVLAKQDA I LGAVKKQNNQQSILNKITVLTQSIMGYNQEI SIKQSTH  
SEIQNRILTVMKIAENPSAEALKKIMSTHEENKTEVESQIKQLEEKIAEVRGQIDTHN  
EELKAIDSEEPAVEVETPVEETVEFEPKPKMKLDHESAEPMEEAAENPPAVEQTAAQQ  
VEV

>comp13274\_c0\_seq1; 781 268 2322 LEN=2322; translated  
MAVLGQLALFAKQTSFFAGHVSVSRRFFSRQTGARKAILGSRLVETVSGSSLAFAFAPCKNS  
HEHKASYRSASSHRKMADEKTVPEPPVARRDETGCVLGRLRPTDKIYWADEKKTPLIR  
QSIGSEEPDLLDPPVQISDPYGWMRDESRTSPEVLDHLEKENQYTEEMTSHLGLRAELR  
EMVAGIRETDHTVPSARTSDGFFYYTRTFAGKSYKSF CRAP I SENPDWIETCRSWDGED  
SPVLRGEVAYLDVNALAEKTYCATGNVKSPLHPGGRSESEGEASQSQSOLLAYTVDFS  
GNEVTELYVKDMDSGLLDVHDHPDLECYGTIQWGADQTTLFYVKMDDQKRPYQVYRKTIGS  
DKPDELLYQEDDELYWVGLSKSFDGKYIFVSSGSKETSETHYLDLLDPAEELRCVAKRRK  
KVLRYRTHRAGYWYITTNVGGSPNMKLMVSEAVADSQDLWEDLKVNGEKLFDGGYERSIS  
GITSFGSHSVATGREDGLPQVWIIAFEDSSTGVRDFVRLKFD EEA YDVGLGANLDCTSD  
SVVVAYDSLVTPLSYLRIPLDAPTDLGARTILKEQLVPGYDKSKYSCKRVTVKSRDGETE  
IPVSIYRSDVMDKVASGATVPHTLYGYGSYGACIEASFRATRLLTLLDRGMVYIAIAHVRG  
GGEMGRQWYEEPKGAKYLCKKNTFN

>comp13274\_c0\_seq2; 781 286 2340 LEN=2340; translated  
MAVLGQLALFAKQTSFFAGHVSVSRRFFSRQTGARKAILGSRLVETVSGSSLAFAFAPCKNS  
HEHKASYRSASSHRKMADEKTVPEPPVARRDETGCVLGRLRPTDKIYWADEKKTPLIR  
QSIGSEEPDLLDPPVQISDPYGWMRDESRTSPEVLDHLEKENQYTEEMTSHLGLRAELR  
EMVAGIRETDHTVPSARTSDGFFYYTRTFAGKSYKSF CRAP I SENPDWIETCRSWDGED  
SPVLRGEVAYLDVNALAEKTYCATGNVKSPLHPGGRSESEGEASQSQSOLLAYTVDFS  
GNEVTELYVKDMDSGLLDVHDHPDLECYGTIQWGADQTTLFYVKMDDQKRPYQVYRKTIGS  
DKPDELLYQEDDELYWVGLSKSFDGKYIFVSSGSKETSETHYLDLLDPAEELRCVAKRRK  
KVLRYRTHRAGYWYITTNVGGSPNMKLMVSEAVADSQDLWEDLKVNGEKLFDGGYERSIS  
GITSFGSHSVATGREDGLPQVWIIAFEDSSTGVRDFVRLKFD EEA YDVGLGANLDCTSD  
SVVVAYDSLVTPLSYLRIPLDAPTDLGARTILKEQLVPGYDKSKYSCKRVTVKSRDGETE  
IPVSIYRSDVMDKVASGATVPHTLYGYGSYGACIEASFRATRLLTLLDRGMVYIAIAHVRG  
GGEMGRQWYEEPKGAKYLCKKNTFN

>comp13275\_c0\_seq1; 490 1 1985 LEN=2425; translated  
XSNQNKPKTFHCIMHIQSSKLSLPSGDDVLDTESTIRRKNSLDNSGLFLRWSRLKKTVTV  
PAAAYDPRVSFGKPSVAPGQVKGANAKKVI LSEVSGFAAPGEILAMMGPSGSKTSLNCL  
SGRMSPESSGLSINGNPLSQQDMKQLKANIAYVKQSDIFFEYLTVRDQLGYTASLRLPQT  
WSVEKKSAEVDRTIELLRLSKVADSQIRMLSGGEKKRVNIGTELLTDPDIVLLDEPTSGL  
DSTTSVELVKMLQQLAREEKKTVIMSIHQSSALFHSFSKILFLAEGHAVYFGPKDSL I

YLKDHDMACPDGYNAAADHWMDLLVQDKSTTQRCDETMSTRHLLIDTWDNETIAREVDHS  
VNMGEEQSVVNKDKNYKYNTSWGQQYKILVNRSLKNSKSAIFTPMNITKSILLGLVTGA  
LYFQMDYTEASIHDRGSYFFFTMTLWVMESMFQSFTTFFPTEREVVLKERSSSGSYRLSAYF  
LAKTTSELPALIILPCLYMTISFWMASISTSCLVFISTVGITLMSVMAGEALGLLVGSTI  
YDMEKGATVLTVALFLALLGGFFVQNVPSWLAWGQYVSPYSYAFFSVLPIVFSVSEP  
IPCDGSDIIPQCDSIEGTVSPDIVLDFRVKNTVAFNTSMLFLFALWPRIIAYFALRSKKEGY  
R

>comp13276\_c0\_seq1; 998 83 2537 LEN=2537; translated  
MTTPSTRAAPMELESIHADCNKSDAGSLLRTGAKRIRGGGGVYNPYTAKKKTTPSSSSGGS  
GSPYSPNPKTSQGASGGGDHEEDLIDDYHEEHEDEDALPEDEPHEPMEPNPAEDGPTT  
AALPFFSDVTEATFQRWRPNDRCRNSRDLQWLDMDMIGGTALRENPLEPGRRVV  
GAAEQVPIIRAFGVTEAGNSATVVFVHGFTPYGYFALPQGS SFDHTEENLARIRLYNSR  
LEGQARGGKLHEYCFAVSYETGYKSIMGYESPHTHFFRVVAMPTLIPTLKRIMEDGVLDL  
PGVETPEGNEYSAFECNVPFVLRMYMIDHEISGAGWITLPPKTYQLRDPSSRRKTNSQVEVD  
ITYRDIISRKPEGEWNKIAPLRTLSDIECQGRKGYFPEAEKDPVIQIANAVTVYGEKTP  
MVQNVFTLKGCLPIVGAQVISSDNEVDMLMKWRAFLEACDPDVTGYNVQNFDPYLLDR  
AETLKGKGYGNQTIKGAQWGRILNSKAKMKETTFQSAAYGKRNNIETTIEGRVIFDMLP  
YMQRNHLKSSYSLNSVCAEFLGQQKEDVHHSIISDLQNGSDEDRHRLAVYCLKDAVLPQR  
LMDKLSVMVNYVEMARVTGVPMSFLISRQQIKVLSMILRKRNEKLLVPTLKKGGFNPD  
DANYEGATVLDPIKNYYQVP IATLDFASLYPSIMQAYNLCYSTLIGPKEVHRYDPEIYKK  
SANGHVFVHSTVKKGILPTILSELLAARKRAKMDMKNAPTEFERAVQNGRQXALRCVESR  
RVGFVLFVCFGLGVAVAVVVFVCSAGTERLTYGFFSSLDG

>comp13276\_c0\_seq2; 223 1 1328 LEN=1409; translated  
LFFHPWTVVFMVFFFVSSXALKISANSVYGFATVGQLPCVPIASSTTSYGRELLEK  
TKEYVEKNYTVANGYKHDAQVVYGD TDSVMVKFGTKTVEETFPLAIEAAEKCSKIFPSP  
LLEFEKVFYFPYLLMNKKRYAGLMYTRPDKYDKMDQKGLETVRRDNCALVRDVIQTSLDKI  
LIEQDVEGAIGYVKKQISDLLQNKMDISRLVITKSLNKGAEYALGIGGKKEDYKVKQAHV  
ELAARMKKRDAGSAPQMGDRVPYVITGAKGASTYERGEDPIYVLENGLAIDCKWYLSNQ  
LSKPLTRIFEP IIEDVTKSLQGEHTRKIFIPTPAARKGSLMMFAVKTAKIGCKAPVNS  
KNGYLCKHCSPRQAEIYLEKLECLRVAEKSYDELWSTAQKIHNSFHSDIMCTGDGCACQF  
YRRKKVQADIRLAQEVLDFKFR

>comp13276\_c0\_seq3; 1440 83 3664 LEN=3745; translated  
MTTPSTRAAPMELESIHADCNKSDAGSLLRTGAKRIRGGGGVYNPYTAKKKTTPSSSSGGS  
GSPYSPNPKTSQGASGGGDHEEDLIDDYHEEHEDEDALPEDEPHEPMEPNPAEDGPTT  
AALPFFSDVTEATFQRWRPNDRCRNSRDLQWLDMDMIGGTALRENPLEPGRRVV  
GAAEQVPIIRAFGVTEAGNSATVVFVHGFTPYGYFALPQGS SFDHTEENLARIRLYNSR  
LEGQARGGKLHEYCFAVSYETGYKSIMGYESPHTHFFRVVAMPTLIPTLKRIMEDGVLDL  
PGVETPEGNEYSAFECNVPFVLRMYMIDHEISGAGWITLPPKTYQLRDPSSRRKTNSQVEVD  
ITYRDIISRKPEGEWNKIAPLRTLSDIECQGRKGYFPEAEKDPVIQIANAVTVYGEKTP  
MVQNVFTLKGCLPIVGAQVISSDNEVDMLMKWRAFLEACDPDVTGYNVQNFDPYLLDR  
AETLKGKGYGNQTIKGAQWGRILNSKAKMKETTFQSAAYGKRNNIETTIEGRVIFDMLP  
YMQRNHLKSSYSLNSVCAEFLGQQKEDVHHSIISDLQNGSDEDRHRLAVYCLKDAVLPQR  
LMDKLSVMVNYVEMARVTGVPMSFLISRQQIKVLSMILRKRNEKLLVPTLKKGGFNPD  
DANYEGATVLDPIKNYYQVP IATLDFASLYPSIMQAYNLCYSTLIGPKEVHRYDPEIYKK  
SANGHVFVHSTVKKGILPTILSELLAARKRAKMDMKNAPTEFERAVQNGRQLALKISANS  
VYGFATVGQLPCVPIASSTTSYGRELLEKTKEYVEKNYTVANGYKHDAQVVYGD TDSV  
MVKFGTKTVEETFPLAIEAAEKCSKIFPSPILLEFEKVFYFPYLLMNKKRYAGLMYTRPDK  
YDKMDQKGLETVRRDNCALVRDVIQTSLDKILIEQDVEGAIGYVKKQISDLLQNKMDISR  
LVITKSLNKGAEYALGIGGKKEDYKVKQAHVELAARMKKRDAGSAPQMGDRVPYVITGA  
KGASTYERGEDPIYVLENGLAIDCKWYLSNQLSKPLTRIFEP IIEDVTKSLQGEHTRKI  
FIPTPAARKGSLMMFAVKTAKIGCKAPVNSKNGYLCKHCSPRQAEIYLEKLECLRVAEK  
SYDELWSTAQKIHNSFHSDIMCTGDGCACQFYRRKKVQADIRLAQEVLDFKFR

>comp13277\_c0\_seq1; 257 182 925 LEN=1176; translated  
MSKTTRSQMTSPSPSPFRFFFTVVLGLLLVTSSSTLGASAACVDEFEPCTDRDCCGR  
YNQGYLGVKCVVEGHANQTDHGLTCKSKRSWALDQMSYDNNYDLHSVAFFLEFYFFSRPDI  
KKKYSGDREWEEIVDRHYFFDMAGNHTNKFAKLITLLEKEYNIKDLTEVPKLI RDFISWR  
DGVNIKALFEGKYDGERIIMNYDKKGGHYDDGEDHEVEKRFESQVDQEMSDTAEGDGYN  
DNEENEL

>comp13278\_c0\_seq1; 417 1 999 LEN=1114; translated  
SNNNNPTPVYAGMSFEEALESNPHRAIVTLLRTHSNLFKEFNHMPVLAKKI QGAPSF

DKAVETWRKEMVSSSIRSAAARTDAFHRERTFRERLQRNPNDDEAKAYFEKKDNLLLVNE  
QYRQAMQEYEPESMGRVLMYINASINQHPLQAFVDSGAQTTIMSKSCAGRCGIFHLLDTR  
FHGTAVGVGTGRILGRIHIVQLQIGDYHFPCSVTVMDAAIPTAQAGAGASASAKPKDMD  
LLLGLDMLKRFNCSIDLDDSKLKFRLGGTVLETPFLHEKDLDETKGGTKGFDAAEANRRL  
EELQRRHHEGGSTGNGGGGETNDDDEENDQMYD

>comp13278\_c0\_seq2; 388 270 1156 LEN=1271; translated  
MQQHDNHSNSXVLAKKIQGAPSFDAKAVETWRKEMVSSSIRSAAARTDAFHRERTFRERLQ  
RNPNDDEAKAYFEKKDNLLLVNEQYRQAMQEYEPESMGRVLMYINASINQHPLQAFVDSG  
AQTTIMSKSCAGRCGIFHLLDTRFHGTAVGVGTGRILGRIHIVQLQIGDYHFPCSVTVMD  
DAAIPTAQAGAGASASAKPKDMDLLLGLDMLKRFNCSIDLDDSKLKFRLGGTVLETPFLH  
EKDLDETKGGTKGFDAAEANRRL EELQRRHHEGGSTGNGGGGETNDDDEENDQMYD

>comp13279\_c0\_seq1; 604 410 2253 LEN=2350; translated  
MEAQVVNQEQSQHVTFEADKKAFFADSSEGKNRFGKVSNEKKGYNLLSSKQWYVAMIAM  
TLIFLVLVGYGFGSGLFLLKRGNAALNNDPAKDGSTPNGSDPSSISDSSNTVQDRQDYKY  
SIVTLLGLPMVMERTSPQARAVEWLAYQDEPLFDVTKETSAEDQDRHHEILEQRYALVWV  
YFDQGGPTVWKTINRDESAGWVEFGAGVHECDWKGVD CDYENGNTETGTVI GLRLSPALG  
LVLTGTHLSTELGMLTALRRVDFSDQRLQGTIPDEWASMTNLKSVILSKNQLQTTVPEWI  
GRSSEEGGWQNLQALDDNFLYGLSPSSMRNLRKLT HLELQVNPQLEGRFDELLFLEK  
EDEATGLPGQNL EILDLSNTRLKGFKPKITLPSIRSFRLWNLPGFSGTLPPDIGNWSNLE  
IFSIKEMPGLTGTLPTEFGSLEKLEILEVLDSNFMSGELPKELGNLSSNLKTINFRYTNQ  
TGTLPVEWSSLVNLNLLQNKYLTGTIPTEYGYMTSLRSLDLRGTSLSGEVSQEVCAI  
DSMETLQADCSYKNDKSVGXDSL SLLL VVSRCLALSGFEHEDYVDQTKELARAI RQGNTE  
LHRRTIETYWILA

>comp13279\_c0\_seq2; 458 410 2414 LEN=2511; translated  
MEAQVVNQEQSQHVTFEADKKAFFADSSEGKNRFGKVSNEKKGYNLLSSKQWYVAMIAM  
TLIFLVLVGYGFGSGLFLLKRGNAALNNDPAKDGSTPNGSDPSSISDSSNTVQDRQDYKY  
SIVTLLGLPMVMERTSPQARAVEWLAYQDEPLFDVTKETSAEDQDRHHEILEQRYALVWV  
YFDQGGPTVWKTINRDESAGWVEFGAGVHECDWKGVD CDYENGNTETGTVI GLRLSPALG  
LVLTGTHLSTELGMLTALRRVDFSDQRLQGTIPDEWASMTNQVSXNNAVTDTDLRRIIVQ  
FLCDVHF I KSGSGWNKAKHGVYILTF LSPSHLFATESVILSKNQLQTTVPEWIGRSSEEG  
GGWQNLQALDDNFLYGLSPSSMRNLRKLT HLELQVNPQLEGRFDELLFLEKED EATGL  
PGQNL EILDLSNTRLKGFKPKITLPSIRSFRLWNLPGFSGTLPPDIGNWSNLEIFSIKEM  
PGLTGTLPTEFGSLEKLEILEVLDSNFMSGELPKELGNLSSNLKTINFRYTNQTGTLPVE  
WSSLVNLNLLQNKYLTGTIPTEYGYMTSLRSLDLRGTSLSGEVSQEVCAIDSMETLQ  
ADCSYKNDKSVGXDSL SLLL VVSRCLALSGFEHEDYVDQTKELARAI RQGNTEFLHRR  
TIETYWILA

>comp13280\_c0\_seq1; 608 64 1959 LEN=1959; translated  
MGKATRRKKNRQKRKDDQTP LHNGDSASLSSVISNPQSAVHRLRHTDPRIRHEALVALQ  
ASVLSQIRCGGSRQVSLKVLQAVREQVTSSDLECSAVAAECMAQYLS DASSSGISDQQK  
QTTASWTLVLLGRLDDCRKALVEQQQSQSTKSI SENQRKKA EKIRKQWYAISAPCFIAL  
CQLIESNGHALNQINLQKKT FVDIAFGLLSLGLYNTGSSQVLDQASKMGEDTAMNDSLEE  
GGLDAKTIAHDAIFEKLKKTTELYAARSLHSALDDNWELAEVLKNGECMNAWKTL LGGIA  
EKKVDHDGSTS DATLFPVTT RHLIGCLVNLYQLALYSDDRSASLLWQEELLMEYGLKIG  
GDERSQGLLTQILLSRETQPDVFR TKLSTQEHKFR EAQALLEKQK DDEKLEAEVDAQVRE  
RKEPAKLIARRQKKMKELKREKMR EQQKARMI AEAE GAMDDTMDMDTND DVGDK EHTSSQ  
IIDREQDGEEAVNEAMLEWNTTGTGQIQ LALEILTNLVSTWISAPEGPRPASKLFHLMNTI  
DTTSRLRGVLQTF SQFLREGKIRNQ QNDMDDDESKSTFC EYERDDPIRMDIEETIGKISA  
CLINCILSGIVVTRNDIASSSCPVKDLVWNP

>comp13281\_c0\_seq1; 244 104 688 LEN=992; translated  
MVNVAGMALMVVSNNAVSHAVAKSLRSLDLLRSVVWKIALFYALWALYNRL LGNSRELG  
HVMGMLLVLSCLATAHSPSSCSPGAARAALVASCGLVVLNFAAVLPMIVGAGGPAGFAKK  
VRYSGDASALVAAWGYTFAAYIASNVGMWSLVFARFATLPMNGRSGFAPGHSDPGFDYPT  
IEEGAYQPVTADL

>comp13282\_c0\_seq1; 316 129 965 LEN=1409; translated  
MTNDNDGTIDKDAKGDSTSFVITGFGPFGVDENPTTCIVRQLDSHLRSSNPDCPSSAS  
NNTNGCNVALADCVKEYIVLETS AEDVNKTMDRVKREYIEAPKAKEQERPQKIVLLHLGV  
ARSSCFRLEACAYNEATFRIPDQKGYQPMATPIVPSHELKCYETTLDLEGLKQ TLEKEF  
PAISTSLSTDPGRYVCNYVYCKSLEISLPYSMDNSAATEAAQT TTTATTNPTIENDGGEDY  
ENNTICSSFLHVPHFVSVSKEDQLAYVSGVLRALAK

>comp13284\_c0\_seq1; 211 629 1405 LEN=1545; translated

MPMVSAKLVSKLNIFSRKRHLRHVPVPDIDSDSEPNCETDDCGDAKSSAKEGAQDFRTRG  
SAILLEAISAEAGLTTTSSVSTTTGQDENNGGGNHKSTIDGISSSDIEMNWKETIEQFR  
RQKREQEIQKQTKGDGNEENRDTGVLNKVQRLKLLKRALERRRKLDSKGSFAINMVTLR  
DEDEACGREVARGARSNLNCSKNKYKYNKNSGKSGETMGCDRSTITTSVSNLTL  
KVIDEESYCPVPGKNNK  
>comp13285\_c0\_seq1; 674 70 1473 LEN=1688; translated  
MKLSIALSSLLLATGSAFAPSRQSRSSALQASIQSIQAREILDSRGNPTVEVEVTTEQG  
LFRASVPSGASTGAYEAVELRDGGSRYLGKGVLKAVANVNDVLPVAVKGMVDVTDQQGIDD  
AMLAIDGTPNKANMGANAILGVSLAVSKAGAAAKNVPLYQHAYELAGNGEEKYTMPVPCF  
NVINGGSHAGNKLAQFQYFVPTGAETFFSEAMQIGCEVYHTLGKIIKRKFGGDATLIGDE  
GGFAPPDNRCEGELIMEALKEGKCTIGLDVAASEFKVKGEDGYDLDFKYDGNVIT  
GEALGNLYQELAADYPIVTIEDPFDEDDWASWSQFTAKNSEQFQVVGDDLTVTNIEKIGR  
AVEENSTCCLLLKVNQIGSISESIAAVKAKQAGWVMTSHRSGETEDTYIADLAVGLCT  
GQIKTGAPCRSERLAKYNQLLRIEEEELGAENTVYAGKGFRTTAWMGN  
>comp13286\_c0\_seq1; 241 294 1078 LEN=1176; translated  
MGPAAEQHNNGFPAASAVVPPAAFPPTLAGEAPPTNAGTGCSSGLRTPRRPPGDEEREAE  
HAFEASAASAPAEAPAAGSPRDQERLPTEGSTKDAKRRAGGKQDAARGVPRSDSTADPL  
VLALSKPVRSYLASIGVTTAAQLLLAXDDRPRGGPPLLEAREGHGPAPGPRDALVGEV  
EEQGPEKGGRRGGPRGGGERGNQRQDSAEAAASVSPARKGQGTVVYGNLDREKNRILQWC  
TATGEILAAATMERVLGGMERN  
>comp13287\_c0\_seq1; 156 1 795 LEN=1379; translated  
RNRTRNRKGAPLSRTIGRNRSPRSPSFALAFASSASSASLSRFFRGILGRAASQDES  
EQEHESEGEHRSQGTGTTVSCESDHPWEQGPVSVSGSVGSGVGVPHRVSPIGPDTLD  
EARCPNATIQFRAPINPSKTGKGGMGNHSRARYHLAPDMDTDVDIDIDTDADTDMDTD  
MDTVTDTVTDTDALLCDFLFHTEDYVSYPRSRILTILLRARAPSTRDEAKALGDLRALLE  
DAASGQGEQEREQERQAERGAALGAS  
>comp13287\_c0\_seq2; 107 1 654 LEN=1238; translated  
SLSRFFRGILGRAASQDESEGEHRSQGTGTTVSCESDHPWEQGPVSVSGSVGSGVGV  
PHRVSPIGPDTLDEARCPNATIQFRAPINPSKTGKGGMGNHSRARYHLAPDMDTDVDIDI  
DTDADTDMDTDMDTVTDTVTDTDALLCDFLFHTEDYVSYPRSRILTILLRARAPSTRD  
EAKALGDLRALLEDAASGQGEQEREQERQAERGAALGAS  
>comp13287\_c0\_seq4; 107 1 666 LEN=1250; translated  
SLSRFFRGILGRAASQDESEGEHRSQGTGTTVSCESDHPWEQGPVSVSGSVGSGVGV  
PHRVSPIGPDTLDEARCPNATIQFRAPINPSKTGKGGMGNHSRARYHLAPDMDTDVDIDI  
DIDIDTDADTDMDTDMDTVTDTVTDTDALLCDFLFHTEDYVSYPRSRILTILLRARAP  
STRDEAKALGDLRALLEDAASGQGEQEREQERQAERGAALGAS  
>comp13287\_c0\_seq5; 156 1 807 LEN=1391; translated  
RNRTRNRKGAPLSRTIGRNRSPRSPSFALAFASSASSASLSRFFRGILGRAASQDES  
EQEHESEGEHRSQGTGTTVSCESDHPWEQGPVSVSGSVGSGVGVPHRVSPIGPDTLD  
EARCPNATIQFRAPINPSKTGKGGMGNHSRARYHLAPDMDTDVDIDIDIDIDTDADTD  
MDTDMDTVTDTVTDTDALLCDFLFHTEDYVSYPRSRILTILLRARAPSTRDEAKALGDLR  
ALLEDAASGQGEQEREQERQAERGAALGAS  
>comp13288\_c0\_seq1; 207 403 849 LEN=1060; translated  
MALISAAAGTSSVIAGTIMGLTWKEKSRCSPTLETDDYFDDYWRSTNSTDQEPYFRSE  
GNDACPEEFLTIVALLTGGLWYAVAICIAIFVATGRHAKWEARHGPYSNDRAISSAEVVV  
IEMGTDPGDIGASDVSPVAVASATLLRDD  
>comp13288\_c0\_seq2; 172 712 1098 LEN=1309; translated  
MALISAAAGTSSVIAGTIMGLTWKEKSRCLPYTLETNDDYVDDYCPEEFLSIVALLTGGL  
WYAVAICIAIFVATGRHAKWEARHGPYSNDRAISSAEVVVIEMGTDPGDIGASDVSPVA  
SATLLRDD  
>comp13288\_c0\_seq3; 207 712 1158 LEN=1369; translated  
MALISAAAGTSSVIAGTIMGLTWKEKSRCSPTLETDDYFDDYWRSTNSTDQEPYFRSE  
GNDACPEEFLTIVALLTGGLWYAVAICIAIFVATGRHAKWEARHGPYSNDRAISSAEVVV  
IEMGTDPGDIGASDVSPVAVASATLLRDD  
>comp13288\_c0\_seq4; 208 403 789 LEN=1000; translated  
MALISAAAGTSSVIAGTIMGLTWKEKSRCLPYTLETNDDYVDDYCPEEFLSIVALLTGGL  
WYAVAICIAIFVATGRHAKWEARHGPYSNDRAISSAEVVVIEMGTDPGDIGASDVSPVA  
SATLLRDD  
>comp13289\_c0\_seq1; 543 257 1546 LEN=1571; translated  
MGKKISKGSSGGKGGSDVCWSSNHHLRKAQQRKMRVSDEKREERERTAVLTRGSK

QKREEGKNRLHMKHTQRKLDKLERLEKWDDIEEALLLKKEEEERRQKEKEEELDPPKKG  
RKGPEWKLKGAARPAHLVYDFDTRYVDPHMKAAHEEAKKKASRCRNIFVLCKGRFGTEND  
KDVPQPHCREYLSLLMQLGNLSMHSKQLKTARKSFLECMELDSSESPITPARCQLMRLYM  
EANRPDSARRLWEKLSPTDPSVWIRYSAVLIEYVSNLLEEEGSSEQNCIDRMVEAIKSN  
IFCAYYIAFFDDFYQVMEYVDEIEDAHESPLEEAIEYCNSEQLGAWKGTGAMWAKRF  
LLRLVNDSTHGRYGISASDLDRKAI SDTREMHPSSSSVSDDESVDVEIIQICLRRL  
WKCSKILAL

>comp13290\_c0\_seq1; 667 167 1582 LEN=1893; translated  
MLAASSTVNVKTEDSQPTVPLLPVGANGAPAHRIQALAPTSIPPPSSAPVAPPASAAPP  
PASAGVGAPGNPQHPHVAEFLYQLTKMLTDDNNEIEWVDGRIKVFHFERLESEVLHKY  
FRHSKFASFQRQLNYFGFRKIAGKGMSPCSYVNESATSDIRSLLLIKRKTNGSAARKAM  
AQRALNLGGGMNPAIGLPLAGTGGFALGVGAVAFPMVNQQLQFQKQLGLGVGLVD  
NNPNNVLSQLLIQNQRQSLQDLQQLGLKTSAPSIEQLQAQIATLTKKQSEAGVNNP  
AAALNLASGGAASAAMGLSQFQQTSDNPATAALNASVNAPP SAMPATAAMNINAAAQSN  
NFFESATNLKALIGNDLSMNDQKQLGPASALNNLIPNGASMGNLLASSNRLSSLLSLNS  
FLSREPSLADLAMIPNGAAQFAVLQQQANAAAPTVAHDMSQTQANANNPSS

>comp13291\_c0\_seq1; 258 202 1428 LEN=2083; translated  
MVEDRFMKTPPRSQQKCHASITRSPFRTPARTPSRNLRSSHRKLRMTSPSTISRYPST  
QRITPTGSSYCGTSGGDRFIPSRRLNIDICRKKLLSADDDNVKGKNSVNDTNDVSGDG  
GEEKAQKPAETPVQKEYKRRMLSSLCNVPLDMLDDDAQPRGILNFGAQNSSTTKENNPSS  
CERSPWQKNRIRLEDPYSHDSLRLVQHFESIDDRFSSAIRSADV INRKIPSQPCRILDAP  
DLVDDYYLNLISWSADNILAVALAHCVYLWNAAGSGEIHHLTTIEGDDDYVTSVSWCTIPG  
QSKYLAIGTNSHKVQLWDTQASRLVRI LRHSGRVASMAWNQNLWSSGGRDSMILQHDVR  
SGNHVVARYKAHEQEVCGLKWNMGFFLTSFVFGDFLGPIDFAPYTHIF

>comp13291\_c0\_seq2; 289 202 1920 LEN=1992; translated  
MVEDRFMKTPPRSQQKCHASITRSPFRTPARTPSRNLRSSHRKLRMTSPSTISRYPST  
QRITPTGSSYCGTSGGDRFIPSRRLNIDICRKKLLSADDDNVKGKNSVNDTNDVSGDG  
GEEKAQKPAETPVQKEYKRRMLSSLCNVPLDMLDDDAQPRGILNFGAQNSSTTKENNPSS  
CERSPWQKNRIRLEDPYSHDSLRLVQHFESIDDRFSSAIRSADV INRKIPSQPCRILDAP  
DLVDDYYLNLISWSADNILAVALAHCVYLWNAAGSGEIHHLTTIEGDDDYVTSVSWCTIPG  
QSKYLAIGTNSHKVQLWDTQASRLVRI LRHSGRVASMAWNQNLWSSGGRDSMILQHDVR  
SGNHVVARYKAHEQEVCGLKWNEDGTNLASGGNENFLCIWDASMSRRSRSNMFSSDISPR  
WVLKQHKAAVKALDWCPFNRLASGGGTADRSIKLWNSNSGAMLKSIDTGSQVCSILWS  
KHQRELCSSHGFSENQLILWKYGSRSSTLTKVKELTGHTRILSLACSPDGSTVVSAAADE  
SLRFWNIFGSAPSRSSVLPMGDLAFGMPTIR

>comp13292\_c0\_seq1; 531 1 2567 LEN=2841; translated  
XISSSCSFRTQTF CRTIGCLVVAKWMKSLGYGVVETYSPTDGRNGRVDSCGLYFREESWK  
CSTNVTIFLDDLAAILRSSTSSENESQAQLPEAIAKKRKGKGGSSSTNSGSLKGLERSFVR  
KNVALLASLEHKNTGRKVAVVVAHLFWNPAYEYVKLCQAHYIAKRADTFCKDNGIDCLVW  
AGDFNSQPQGIHVQYLTKGVANAKEAAPWYTL SNVKDSLDMNAKQLQRMNISDNTVDNNI  
ELNGNSPPNRYLLDYTLNRF CRWLRILGIDAALTEEEEEKERTRDSKITIFORCKDERR  
SLVTTASKLLHRKDCPPGTYYLLDTKSLKNLESAIVHLLRSHGVTIEPKMLSRCVVCNGS  
IKPVFDVDRRQEIFQTYKAPPEVNI EGMEVYQCNSCSQGYWWSEKPTSSASRVKSRATHL  
LELCIRGGVPI SGLDGYFNHIDVKKIVSTRTESSKDI CVDEHQLDVVKWLQKELKNPLP  
EMSSVYASKRTRNESLFTFNVTDFVGHLDYILCQTKAMEVSELLYVPKTFEELNDLNIA  
NGHLLPSYDWP SDHLAIGCRLSLSPKQSFADNGQDETFFKKDLGHKSAISSFVSGPPSPQ  
KTVNHS LDDDQYNRGHDHHDNDHGHGHHTGHTTEDDGNQDSDHDHRHDHEIHHYSERDV  
DHDHKSIIKDGTDHGADQDIGHHNHYNQLDVHQHSHRINQDVYD TDGCRDHHHDHHDH  
DHHHDHHDHGHHDHHDHHDHHDHSSATERPIQLQNGERCVF FEKPKSGPIPFPPGPPST  
VAWCSFIDESKVDKSDLP SQPGPTTKLEIICPLTGQRCTCYGMGCLPKVPSLFEAEL  
RRQYRLKQQNSNASR

>comp13292\_c0\_seq2; 738 70 3075 LEN=3349; translated  
MKKIKPKTAAQKRRAKAKAKAEDQKRGWVEDRLGWVEAADYHSASEDTAQHLDVDSDS  
ENHDDASLISQSEVNSLNEEGRNGHTRHTRQDL SII SWNVLADSYCSRSSQKKLPSKFQ  
SRVFNKQRQHHRVQILRLFH TKLSPDLVALQEVDPPELVAKWMKSLGYGVVETYSPTDG  
RNGRVDSCGLYFREESWK CSTNVTIFLDDLAAILRSSTSSENESQAQLPEAIAKKRKGKGS  
SSSTNSGSLKGLERSFVRKNVALLASLEHKNTGRKVAVVVAHLFWNPAYEYVKLCQAHYI  
AKRADTFCKDNGIDCLVWAGDFNSQPQGIHVQYLTKGVANAKEAAPWYTL SNVKDSLDMN  
AKQLQRMNISDNTVDNNI ELNGNSPPNRYLLDYTLNRF CRWLRILGIDAALTEEEEEKE  
RTRDSKITIFORCKDERRSLVTTASKLLHRKDCPPGTYYLLDTKSLKNLESAIVHLLRSHG



FHGERWSVHNVSNDPALEHLGEVVANATLGDIIHSVVLFGEDGGEAGGEL  
>comp13293\_c0\_seq1; 565 189 1856 LEN=2105; translated  
MAERSQSNFKMMAMVVFVAVLSMLSIVRDTSTLRKYHGDDSI LGNTTISHPRVTYSQSIP  
PAEQ LINPKNIPSFMTNYFKWHRRLQLEQIHDDEEKVAENGI RADDHDFLENYRFLVLRCA  
GNDRCGGLSDRLKAFPLFIWYAATTNRILFIRWGS DRPAPIETFMKPGNFWNWTVPDALM  
RKIKMLDENDNNNGNSRGRFTRLYFESGNKSGRKNMNRISDQSIWMVEGNEYSSGGQYLYQ  
RALSEALKGESSLSSENNSPHTSDFL SASKLQPRVDYKNFYHDLFHATFRPSSSVSKH  
LDAYFYNRADYTVDDNNGIGNKTLEETGDDALFSLASKSWLP I PLQRNQYAVAHYRAKYP  
GEPFRETQNR TVLRETTI HAVECAKTRVGH SRTQDNSQNNRHSSSVASERVS AVYMASDT  
ALVVEAAREAYVSLNDSGSKDGDHEKDSLNVWTYLDLQSYDTDY NIAASDGIGQIKTKNT  
IALAEDPPHLNFAKPDHLSTFFYSIFVDLFLMSYSNCVVY GAGGFGR LGSLVSYRPRCGMA  
FTENQGV LQQCDPYD  
>comp13293\_c0\_seq2; 462 189 1457 LEN=2249; translated  
MAERSQSNFKMMAMVVFVAVLSMLSIVRDTSTLRKYHGDDSI LGNTTISHPRVTYSQSIP  
PAEQ LINPKNIPSFMTNYFKWHRRLQLEQIHDDEEKVAENGI RADDHDFLENYRFLVLRCA  
GNDRCGGLSDRLKAFPLFIWYAATTNRILFIRWGS DRPAPIETFMKPGNFWNWTVPDALM  
RKIKMLDENDNNNGNSRGRFTRLYFESGNKSGRKNMNRISDQSIWMVEGNEYSSGGQYLYQ  
RALSEALKGESSLSSENNSPHTSDFL SASKLQPRVDYKNFYHDLFHATFRPSSSVSKH  
LDAYFYNRADYTVDDNNGIGNKTLEETGDDALFSLASKSWLP I PLQRNQYAVAHYRAKYP  
GEPFRETQNR TVLRETTI HAVECAKTRVGH SRTQDNSQNNRHSSSVASERVS AVYMASDT  
GE  
>comp13294\_c0\_seq1; 450 112 1413 LEN=1446; translated  
MNIATGTRSSKFL LQSRSSSSIVATTGGTRTPESSAGAKEKRSTIRSM DRSTARLSRAL  
FFWTTCSVHCF SATNSPPMGGSFYLS CSIGPKRTAGTTL LRPAWSRHGNRNDGDLV LSS  
LFAPRTAATIYRQSTRNTKRFSSSSSTTTSSSKDNEDKLSAEVLADQLSKSRYSKIVALV  
GAGASCSAGIPDFRTPGTGLYDQLSEYNLPFPEAIFDLGYYKKNPMPFVDLCKAIWPGQE  
SGPKPTLSHNFLKLLLEEKDLLHRIY TQNI DGLEALAGVSTDKLVECHGHFRSSSCVACGA  
KMPTGECRDSMVAQ GKAPRCGEGCSLVKPDIVFFGEEMPQRF CERIDGDVAGCDLLLV LG  
TSLMMPVAGIPSWVAPDCPRVLLNRERVGGIGGGRSRTSDFL FLEGDCDDSVRKLCDLA  
GWTEDLERLGGVQ  
>comp13294\_c0\_seq2; 448 112 1413 LEN=1466; translated  
MNIATGTRSSKFL LQSRSSSSIVATTGGTRTPESSAGAKEKRSTIRSM DRSTARLSRAL  
FFWTTCSVHCF SATNSPPMGGSFYLS CSIGPKRTAGTTL LRPAWSRHGNRNDGDLV LSS  
LFAPRTAATIYRQSTRNTKRFSSSSSTTTSSSKDNEDKLSAEVLADQLSKSRYSKIVALV  
GAGASCSAGIPDFRTPGTGLYDQLSEYNLPFPEAIFDLGYYKKNPMPFVDLCKAIWPGQE  
SGPKPTLSHNFLKLLLEEKDLLHRIY TQNI DGLEALAGVSTDKLVECHGHFRSSSCVACGA  
KMPTGECRDSMVAQ GKAPRCGEGCSLVKPDIVFFGEEMPQRF CERIDGDVAGCDLLLV LG  
TSLMMPVAGIPSWVAPDCPRVLLNRERVGGIGGGRSRTSDFL FLEGDCDDSVRKLCDLA  
GWTEDLERLGGVH  
>comp13295\_c0\_seq1; 436 201 1163 LEN=1353; translated  
MAVMALQMLKDMGPMARYLTVEELDIPWLRLLSGAAQCETGRRKGDIQPCEGLAESVELP  
CNLAYSVLSAMSSFPSDNDDLIYEALSNCLVRRVLFITGAVDMKGLPPPDRGEAVF IGRS  
NVGKSSLVNMITNRKSLAYTSKTPGKTQQFNFFAVNDKPGREKEIRYGDKVDGKKDDDSF  
YLVDLPGFGFAKVPDEQKQWSSFMGEYLNQRKNLKVVFH LIDSRHGPIDEDNNIMKQVG  
ENLPANVAYVVVLT KSDKNVKGSSSKNRKAGKVSVDVMNRLRDVMRENNV GKAPVLLTSA  
ETKLGRDDIWRYLRRAAEGK  
>comp13295\_c0\_seq2; 635 431 2275 LEN=2465; translated  
MTLEKLFISRLVVT L AVLVLHINALSNHDAFSTSGSSIGH SVGTNSIHRSTTRSASIV  
RRQANVASEILMSQIKDEEERKASAAAATEVPASPSTESKPQKRRRPRSERKALEREKK  
ARKQNNKKNKQKYYKLHSTAVS QLTQSSTADEVVQAIKRAQKNHDDHDLRVIANFLID  
ECDVGFAYGIRGSL LARLAVAAALRWENHEVARRAIDIRRL EYRASMQPMESAALIRGLLR  
VHNVTDALGMIADELSLPM DGS DLETDENHEKIKHRARSLASVASRH LFE GEP SMAVMAL  
QMLKDMGPMARYLTVEELDIPWLRLLSGAAQCETGRRKGDIQPCEGLAESVELPCNLAYS  
VLSAMSSFPSDNDDLIYEALSNCLVRRVLFITGAVDMKGLPPPDRGEAVF IGRSNV GKS  
LVNMITNRKSLAYTSKTPGKTQQFNFFAVNDKPGREKEIRYGDKVDGKKDDDSFYLV DLP  
GFGFAKVPDEQKQWSSFMGEYLNQRKNLKVVFH LIDSRHGPIDEDNNIMKQVGENLPAN  
VAYVVVLT KSDKNVKGSSSKNRKAGKVSVDVMNRLRDVMRENNV GKAPVLLTSAETKLGR  
DDIWRYLRRAAEGK  
>comp13295\_c0\_seq3; 635 468 2312 LEN=2502; translated  
MTLEKLFISRLVVT L AVLVLHINALSNHDAFSTSGSSIGH SVGTNSIHRSTTRSASIV



RRQANVASEILMSQIKDEEERKASAAAATEVPASPSTESKPQGKRRRPRSERKALEREKK  
ARKQNNKKNNKQKYYKLHSTAVSOLTQSSTADEVVQAIKRAQKNHDDHDLRVIANFLID  
ECDVGFAYGYRGSLLARLAVAALRWENHEVARRAIDIRRLEYRASMQPMESAALIRGLLR  
VHNVTDALGMIADELSLPMDSLETDENHEKIKHRARSLASVASRHLFEGEP SMAVMAL  
QMLKDMGPMARYLTVEELDIPWLRLLSGAAQCETGRRKGDIQCEGLAESVELPCNLAYS  
VLSAMSSFPDNDLLIYEALSNCLVRRVLFITGAVDMKGLPPDRGEAVF IGRSNVKGSS  
LVNMI TNRKSLAYTSKTPGKTQQFNFFAVNDKPGREKEIRYGDKVDGKKDDDSFYLVDL  
GFGFAKVPDEQKQWSSFMGEYLQNRKNLKVVFHLIDSRHGPIEDNNIMKQVGENLPAN  
VAYVVVLTKSDKNVKGSSSKNRKAGKVSVDVMNRLRDVMRENNVVKAPVLLTSAETKLR  
DDIWRYLRRAAEGK

>comp13296\_c0\_seq2; 425 392 765 LEN=765; translated  
MPQTKRRFADDDPSDEVDSEEDYQVPMRGGGKGFMRPGGKGMGKQLRYAPPDDDDSD  
DDDDSDDDDDSDSEEEAPAPIRPVQRGGGKALMRPSGGKQLRPPQDDSDDDDEELED  
DDDDX

>comp13296\_c0\_seq3; 725 520 3145 LEN=3145; translated  
MPSSELCYPGSGRPSAPESGRSGSPKRRSRARPPVSYGTTISNGGVPTVVALKGGVVRGGH  
SVVASYKPRNVQQPLGLSPGDYTSSGDGRLQAGGNGNININSNSGSQSGSRGTVHPEFW  
PKGLTNVGNTCYANAALQCLLSTALTSALLDPKTMPI LRRYSSNP NLLAMSGSVSDSSDD  
ENDDSDDDGCLSIDNDIDEEEDGIFLDSKGVALSFSPTQGASKSDLARKTEKRAAK  
AKKKKKREARKAKAENAARKEREQRMEETCKWLTRELTSIAQEYTESSTSLRQSPVG  
GSSIGKTSFVGLWSSYSQTLGIGGQEKQDSHGVMNPGSITRHPNRLSQCLNPYQQEDA  
HEFMRALLSNLVMNGHNRQLSSLF DGLLESSVTCQTCGRASLTRDRYMDLSVDINDVDIT  
TLDDALFEFTKDELLEDNAVFCQRCRKKQSVTKGLRLATAPSILVVHLKRFAFN DYGR  
VRLHKRIEFPQRLEIGDYMSNLNKARPPAYELVGVLVHQGQTCASGHYLSFVKKMEWFK  
CNDSEVSKVEESTVMMQQAYILMYEVS GMRENTCFRPKTLRKESSIMSTIESSDDATLPR  
EDFSVCGTHWSASDKTSSGRSGSNREGLGTYGNPF GTDHPKSIIRGKHESTTESILRVLSE  
AGGRLISDICCDSGMREPEAHVLEDRHFHKHSDDFNFN LGHRRHFNSGRYAHECESVDT  
QDSLIRRQALLSGRAPNPINVLEVQPKRKRTRGSHRSQTAPRQRGETHPASRYSSFTPRLD  
ANGQPPFRKFP SNGNLVALDD SXVDLLAEHADEAEQGLAPVPAVQGLVQAGESRGRFCFC  
FGRLSTAEPREDAPQALAAAVGKAQGT HARTHSPPP

>comp13297\_c0\_seq1; 341 213 1406 LEN=1442; translated  
MPRPPEPPVPGRPNRSANRGTRAEELFAAALSSLAEDAAAVRQLSDVANLLAAGGADAG  
EQRERLTGLDRAIAAVETRVGALRQILNEEKA AVARFETILAQEASSQAELIGALLATMD  
RKRREEEQDGHGQHRDSDAKTPGKEVGS DQNHGARHFN GADGSLIGSNSGEHHSYSGAP  
QPRSGRRALHARSPGVANAAPNSNS SRHPSQRIRNHARKKPNSSIETKNSSRDGENVNPT  
ETGSYESEDGGDHP SFLPVTEELRLQLRFGPHLCRYDINEALEEIREVV RKKTALDRSL  
GAGHQHGR TTNSLQRRFEYLRQRQRQ NAGSSLEECETDAHRGHDWVSEQELRENC AFFRH  
GESTARATLQLLCSLKR LRQVPGRGSGVVTYLCLFAR

>comp13298\_c0\_seq1; 582 185 1750 LEN=1750; translated  
MKGKASLSVLHSLAMLAI AASSSTGAVVETETLPSTSRRLVQTIGTLKTLVIRIVDADG  
IAPKADVEQLVNDIFEDDACLSQIEACSYQK LKIEPFSGLTDTNVSITNGVVEVTVDHQ  
ISINNNAGDLRGAAMTAATAKLG NLETNDKYNLIMYCMPPGTYEKGNELNIAYPK KSSF  
YNDESCSSVSSQLQSVGMNMLAPSGYIMDGT LKKWGDKSGAMGSSNMEDDQRLCYNPAK  
SYQLGWYDDQVDTIDPLGVELGPVRSFV FNGVADYDLEKTS LIVLRLEQTALLDY IGYN  
RQHGINKDTMEDGD RITIVRKE SDGKSTKVASLFPGQSYTIEMFNDDR DVEIRFSGLKNG  
LRDAIVEVIDIQNRDIVEDLPCANYTIEFTTDDY PKDTAWYIVKEDDSGGEIALASSPEF  
EGQKNLTSTQVCLPYGSKCNFVLDI WGDGLQGGSYRALDPDGT VVFSYEGRVQFKR KIE  
SFEVEGTTTPSPDSEKPS PPSPDQGTDFDPTSGNRTPMPTL

>comp13299\_c0\_seq1; 284 338 1042 LEN=1256; translated  
MSAGWWSLPQNPAPWTTALGVLAALWYSGVFRSVSFR RATLGPCVFFYRTGRGPYSGVG  
PMFAEVEALWKQWEGRAGFGGEQDHEQDHEHHPAGIYYDDPKTSPPSDLRYAVGFLWTG  
GTRRASAI REELGRSEESSSSVSNKNHKT PWNRLDIPATPTVAAAFPNRLGVGSVVL SAI  
KTYAAFERQKEFSLESGAVEVYWPDRIV THFPQGNHDLFCPRDEPQAATAGKAN

>comp13300\_c0\_seq1; 1037 48 4248 LEN=4248; translated  
MKA VRASSGIRKNDARDITGPGASASS EAKRSVTPAVTPPTTVELRGISIHFFPKPYKC  
QEDYMAKVL DALIRSENALLE SPTGTGKTLCLLCSTLAWQREQARILKSQSGRDTIPAAT  
QPGLTSSSAQETQNQRKRRVPTIIYASRTHS QLSQVVRELRNTRYRPHAVLGSREQMCV  
NPKVKPNGTSNASAINHDCSVLIKDRRCKFKNNLEGFKAPSNESSSQGAWHGTQPVMDM  
EDLVTMGKTHQVCFYYTRGQTEDAELVLLPYNYLFDKDSRATTLADIPWDNSVVI FDEA  
HNLESFASASFDLSSKDIAGCMNEIDKALAL SEAYPDRFMNIKTQNLRLKTLFLNLE

EYLLKKLPQQSTAYQGERIMEIFRQGASVNYNNYTLVLDEIKKIFDMFMEIRGGNSKGAP  
MLEHFSQCVRVFGETTESRCLAKAQSRYVHLTQTNNVALNNTTSGSKGKYEKAGNGGRI  
LSYWCFAPEAMRELANLNVRSILVTSGLTSPLESYALELDIPFNRLNPHIIAPHQIH  
VRVMGRGVS NKVLTSSYERRQNDYVELGNTLASLSRVIPCGMLVFFPSYGVMEITSIER  
WGGPASSRSQNTNPNPFFAARKKNGGGSGNTTRYSPRLATGYNQTHSTPWKRLLSHK  
AVVVEPRSTSDLPDAIDEFHKFLNLPNSKGVALFGVCRGKISEGIDFSHDMCRAVIITGL  
PFAPSFDPKVKMKREFLDQKKAKQNTKASTNGGFGSRGETNANSLSLGHWDWYTQQAHRV  
NQAIGRVIRNKRDYGAVLLMDSRFGLPGNQGLSKWVRPHILPDEGFGRANQNLAQFYIK  
ARENAKKEAELAIQQSANADPTNVSIIILKYEDEGKENDQLQAMANDDDITKVAFIRKDS  
VAIESGENTVSNDENYVDPQRIIVRVMDKMSSEEDVSSALAASSAKSIQKIKPNPVQKPS  
EPSSTSDKHKPKIISGKNPPVSTAVQFFHLVKSSTTPDEFDSIKKSTILLKKYEQMKFRK  
DFICAARSIIGIILNHEQLNNCSTRYKPKILLLLKLIPKHFVKDVEQVTVDLTFRKSI  
RKELKSNVSKKYMKFHMEFVMLLQKAWFGESSRKNDEHFVQNLGKLIGNIVESHRVTTL  
ALTQLIDVVPYELQRLSKALIEEVIASSNSVKIRAGEKARMGEDSVKVEYFRKNYLTEKG  
KSLSTTQDEGGEGHATSSTSMKPESQIHRSKTLKSEVDSRSNSQVSTKMKAVNPNYAKPN  
RKKRPQPSTTKNPTKSAGSITGHGKPNISLTKRKGILEQRKDAPAVMSSPSSLKSIILIQS  
RADTFAGQTKMKRSTSFPTNAPKDVTCGICDMPLEENVYISECGHMACLQCWKRWLKGNAS  
CPTCRKPTTMKSIALAVFKGX

>comp13301\_c0\_seq1; 321 1 1280 LEN=1471; translated  
XDELIEMARLRDGEARGGLLSSVLGPVGSLLSAVASLALADDGSGVVYNEGTVQLICADS  
IAHNILLPPEVLAARAGETRANGGGGNEGSDSDSEGRGGSFDEGDCDGGSEDQTPILRI  
VSPGDSVYHKILAVFGDRDILDPTGRIDRLKLGAIIFSDRNERRKLNKITHPRILSVLL  
KKLVRSVFFGYADITMGDLPLLFESGKLSWLFVGTICVTTSEETQLARLVERNPELPREE  
CLARIASQMSLSRKETLADIVIDNNGDLDDLREQVEEARRDVMGRLYXDRDPAADAPPD  
RGLDLDRGVVQXSIPTGSNDEPGENVPAKGRNTRDRRCGFWETKRNETTMLAHSTKRISD  
PVGLATKFDSWLCFERIEIVQTVSGFVIVLCERQTQSAKEKEPNIFATQPQLGVLHEKR  
ARFQQRI

>comp13302\_c0\_seq1; 479 309 2051 LEN=2320; translated  
MLSFSSEQSPLLKSSKDQGRGLGSVKNKPNKKDFQEPTKEKTVVRDKSTTHNKSADNA  
TIYTLAFVVFVQAYLLEGVFPYAGFLTMRLLSCKNNGYENDSSCSTKHAIDEENVGKYAG  
FVACCFMVGRTVTAVAWGKIADTYGRVFLVKVSLVASAITSIGFGFAKTYWEALLWRFLM  
GFANGITGTIKLLSEIRASSGSQTKETKTMAIVYGMRGYGFLICPGITGYLSDPIKQYP  
STMASVMRPIKSLRAYPFVLPNILACGLCILACLLVKNHVDETLPNEKCEPFPSFFTAA  
QGILCRYLPGCNDNTTGSCHKDSVQRELHGHTILPDTDKMSGGNI IETGVQEMNSEPSITTK  
DLLWNSKHGSAKRKIRCRWYHLYAYWMSYFLNIATDELFPFLFCLSKLSGLGLKEKQISF  
LLAGSTVYFGLLQYLLLTGLVRLNGLYPTLRVGI FWSIPLGFLIPLASRLIKKDNVTGS  
CYKGDQDPAQSIAGPLLILYLCLFLIAVIKSFSSVVSALNMAINRTVDTIDQRATLNGI  
ASLGGSLAKACGPLFAGFLFSFLAGDTKDLTFATSTEIR

>comp13303\_c0\_seq1; 196 404 803 LEN=1354; translated  
MCVSRKNTVGGRWLGGGLGVGDSAWLNSASSSLELRAVLNQLHLPGSVVPCCACTANPKY  
PNNNKTLGSMHAVLVSSGFLSVASKKNGAVNLPVMPPTPEEDPHGAAAEDRGGSSNEKE  
CPCFCLDGKPGA

>comp13304\_c0\_seq1; 96 1 741 LEN=1379; translated  
XFYFVPPYFTQLQDIEHVISDVERYAIAIVTDDRKCSEYDTGNLVLHRTTLLGVRKCRKN  
GRINSLAXENLIMEIQSGMLIPIGTIIILVILLQISFWFPTAERKERVSEDEKTKTTANTTS  
IAPDDPRVASPSSDEKSSTPQETTDEKQGRGIITRIIPQKNIAPENFQCVFITDDKPGEQ  
TLSPENGNKLTPRSNDRGQNNVSTLGKRSVWKCSCELGFPLPAGMLKTFGNAEAIMRLGVG  
QCYHKKS

>comp13305\_c0\_seq1; 356 174 773 LEN=2113; translated  
MIVTNRSRFFHRQYVFLAVGCLLHAHRIGLDSFFTEAAPDKSSGGNEWSHTNYPPHNRL  
RQKEEGFLSKDYDPNVDNSNRNSGGEGEDDENLLIQIIESEVWDTTENRWKGAAVGDGTG  
GGNRWTNEKGHLSPSPTAIVPPDGFLEFLGEWKIVVSSSSNNGSNSAGNNGMAGGGAVGGD  
SKGWGYQFQYLQPPIRRIW

>comp13306\_c0\_seq1; 536 77 850 LEN=1424; translated  
MKSSLQSTLRASAIAMVMANPTVGFAPTKPVATRIPPARGASLVPRNALLNLPDANEL  
STAPFMKQVGYGSEMAATLRALNENGEDVSAYDTIKTSLEAQLSHSDGIRGFMVAYLTAT  
DGDDIEDEKDPKLLLETLHGLLASSSSSEDLVSLMCMNVMPVAMITMHQDPALSEASRM  
TAARGRLLASVLESSPSIRANAEAIGKAASGERGFDAAEPKLVVDYWKEFFGKWGYEDPQ  
KQDIAATMKELLAAPPQ

>comp13307\_c0\_seq1; 286 1 1158 LEN=1341; translated

QPHQRTKKQMVPMLLLGIFTRGAAIASLIVISADITGAFSAGGLRGALRTSADSCTLRS  
LSQSTTESPEGETASASGTRERKIAILLCPAQFCVPEDYSDLWERLPPHIELGGRDGDS  
TTTRIVIDKDRSTVVPLSRRDWIKVAKQLPTQDFIDANLRVHKTLDWYFEAIEDGLKEII  
DGSSDVGICLVGHSIGGWVGRAYLGLARSSTAVSRIVKDTNMISFITLGTPHESP  
ALVDQTRGLLREIAETPDCSSAALADERGIDITCVCSSSLPGNFFTTNVEEFVAASSYLP  
LLGKTDGVSVKGDGIVPLDLAFMEEPARKVVVSECPTTGRPIRHIHVLPTPWNLWDASAKS  
IPLDDTDATSYTATEIVA EWAKFIR  
>comp13308\_c0\_seq1; 323 79 1299 LEN=1299; translated  
MAPDSSSTGGLETSLLAESIIVCGGESNDGNSNRGNADGSSSEIPQGCRFSPDGTCLLTAR  
GSRLEIYNTPYEGEVCTEGDGDKNDDGNEKRPRWTPAITCHSGESVRSYAWYPHMKSSDP  
ATCCFLGASRDSPVHLYDAYDGSIRATYRPNGLDEMESPITLCAESGRKIVTGGLRTD  
RVLHVFDVNRPGREHSQPLIRLKGTRRSRDGQKGLGSAMAYS DATGVLALGTYS PGSIYL  
YDLRTYTKSAVAEIVVSPSATSGGTVCVSGHGKKGTTTRKKNKRKRFAAPASEGVEEALPS  
IDFSAAKLRWYQSRTRGGVTQVEFGDGGTSLFSASRRSGAVLQWDLRKLSSSNACPGIAS  
FATDNDTNQRIEFAVYGGSGLDGGQGRVRTGVLAPGIEREQQQQQQQX  
>comp13309\_c0\_seq1; 1112 16 2427 LEN=2903; translated  
MVKMVSAPMISYRLISKIFLCVIVVAITGVVTGESTLNDYEHEVELAVKTATKALQHEID  
SLQGQIDLFEMKHETLQAASEHFRVQSRSLKSKLDDERSRYESLESEKRSLEASIESKIA  
SALQGQKARFEDTIAAEHTDQKLRKEIQELGEKLRSEYNFMSLEE QMKEKMMVVESKR  
YELLLGKKKISEEKLSTEINDLTERLSFSEKQAKSFEESLKRAILEVEEKDDFLQKESEN  
RMEEADRWEKRMKKQIAESQKLYKEKQSKEEFIESEKLRKSLLEKVQTS EGAIKKMERK  
VRALT TENKELQDELVDGSFELESSRKKTKQLIEENSEMTKAYNAALEKLSTKNSSLQNE  
LVEMKFESEESHTE TELLKKRIKEEIVKKEKMQEELLLVEFQLDKNKELEDRLNNKNKEL  
QQMYNQIEERLEEREMKMLDYKQQQSSLN YAEKLEGTIQDLERKVEDLTEQLESRLNHQ  
INATESRSIELSRMYESMKEKN DALSRDLYTANEKLINVQSSHQNQVDSFSQNLK FVSLQ  
LEEKNKALKECDNELRDTQAKYPEIIQDNAAEKKGPVEKEQKLVVEEPVADELKTEAEFE  
ENQSAEQDIDETEIKIEQKPLL NKTAVVDETSAKEEDATSDSETSSGFDMIFTVFRWLD  
YSLYKILRVIVDSALFLANILWKISSHFDTGRLAGPFKPFELISWALNEFRIIHYALVS  
LFEFEMTFVSSLSVREKDRTGFAFLINHSEMMVMLGEAIAALLCVDFV FSSIKNQQRVRR  
QRRPQTIPVPPKATTSLLRKANM  
>comp13310\_c0\_seq1; 214 1 1057 LEN=1092; translated  
XNPFTHPIQTPHQTKPDERRQQRSDPMASLAVAAAGNAGRRALCGAGLLRTAAGRKNN  
ASVAFDAVVAPAGPAPLRVRRRASAHQAQSQSHTRPLPDP SLVDDREPPFGYHHHQRP  
VVPYGVVTKEEAAAIEGHV LGGPSMRRKRYEAGHWDSVISLYKETELHGLEGAAGNDTSA  
ELSGVFARIRSLLEEDHLSALYDQSEPVRWLPCHAIDLKREGELRAHVDSVRFSGHLVAG  
LSLRSTAVMRLVPDPDAKSDAKSDARDGGRVDLLLP RSLYVLTGAGRYEYSHELLPDGA  
AFGEGTNKEXPRPEGPAAEHHL SGRQARPGGEHPLTRRPGSAAPRLLAQEA  
>comp13311\_c0\_seq1; 243 138 1133 LEN=1443; translated  
MNHRTIFRQCSRFLPANLSFPSRRKVRVRLDVP SRFSRQFSSLVSWDVEESSDKKTI  
GIITLRS PETYNLSSEEMADEFRDLMFQLEDDLSDTEGNSINKNVGAI VLRGEGDKAFSA  
GGNLKFLQSKKENS VHANVDGMLRFYKSF LCVREKIPVPVIGALHGPVAVGAGACLALACE  
MRVVASGDRPILGF PFSKLGIP TGMGALHLLQNSSKLSNTQAGEILFLGKTLTGEEALDC  
GLANRLVPKERVKEEAKQLALEIARTGHPVAIRSMARSMRLATDHGSGSLADCMYRDAHA  
QAMCYNREDWGEGLRAAKTKRDP SFADYHSK  
>comp13312\_c0\_seq1; 276 857 1480 LEN=2079; translated  
MPLSVLQ TILEAICWGLLALMVALSMEMTSKCILILVPSTQWKRRLSL FNKAVGPMLISC  
FAYAARSIWLALACFDRDRRDSWAWWISFTWGPTVIVSVMLLYSTRKRDSVAEEVVS IEN  
NVTGSIDDETTTHSLQQSLLRPQPPEEAFRAFHRFRHGEDEMND SFSLSSPTPRRNILDT  
EMEDQELHSSVDNAHSIDDEANGSEV  
>comp13313\_c0\_seq1; 380 315 2291 LEN=2291; minus strand; translated  
MISYVLVPEAGIADLIKAIHQ RPSGCSCVCSFCNFDRFVSR LRFHFWLAIWTVAVLII  
ASNEIMDVFLNFAAMNFASDIDEKAFELAQKGVFGEK LKKEAKSIADGEAEPEEQKEVKA  
HRTGMALVGTFFSLMFLLDASPV TLMGVLRVLPYPIFMEEKWPSIEDKQKRSAAITLVI  
EKGF DASSDAKYGNVQVGATVEDFWPLLT KXVIASISPD SLAPTSSEQ LGSVDPNFP EE  
TAGLRIVLIAIDIAIAIAIAGFAARSGSLVAEEVVVSQRQAPAPRRRVL PAVQDRPDP  
VQGQASGRVAKVDQADPFLPRGAHHPVPRGRPGDQGIGVVVLVVLVVLAPVAFAGRGG  
AGVGAAEDEARHVAHVDDAPPAMALSPYGG LCFGFGFTDVPDPAVGRPAVGLQPADGVLP  
NHRQATPVGVLTPEGRGRRC SLLTRHG VVKDAEQVERLARVQGE GIRGKLQHDAANP  
VCDPRKRPAEGLHGPLVALAGERVAVRRILAVRQPD LQALFWLHRSLAGSALG GNIDNVS  
EFVGA VPDPLVSTTKNPEYFFLGRRGTRGVGHNDRAPAMDSQVSYEDVPAGFVTAIAGVA



EAQKQASLDLWNQELDYLDLLVTTALKGVSAFCEVGNRISAFFVSVXLHRNVFQPVCVLMR  
CTTPTETNHRPSSWSHRKYVLRHLLRGIQKSSQPPNKTKKEELFSREVRTCTEVAEKFPKN  
YYAWTHRRNLWDLFAFDEMDTGNGADGGDAEQPVGSERKREMQQEGKRRHQRYTELLET  
ELVVGLWQDWLPKHPADHSAVHYSCQVLDLVLGAI AAMPTEGTGERDARIESISIAALET  
VRSLLSKHSSNDYESLWILRRLTCKTLWERQPCRPEEERTAAAETPGRRLVRDDLALVL  
SSTLGANGDKRPPLEEAQRQAGPSGAVEGTPIDDKNDSMHAWTFLAWCLGNLSGINERDD  
EHVFTKCVGAAISGHLTATAQGRATSTPQHNVLMYTSASSP LLEMLKEGTV

>comp13318\_c0\_seq2; 715 78 1907 LEN=1941; translated  
MAGGKEEGRSHQDYETEPSAAAGDIANNSSNNHDSSTHPGASTDLITKLLVKR VVGFL  
QKPSDFAITLLPDSEPSVAGTEKVRNESPVASDSLASLSSEERTLLEASTALMTPEPNR  
DAPSKHIGHLGLDARHLPQIARILRTAYFRARETFRTASLASSAPS RKT PARYWSEAE  
LFRITSCLLLIQPDHVTAWADRRRCLLRLQYRGVNALDPVAYGCDNDGCVQSQTDDSEIG  
EAQKQASLDLWNQELDYLDLLVTQHSKAPSSWSHRKYVLRHLLRGIQKSSQPPNKTKEE  
FSREVRTCTEVAEKFPKNYYAWTHRRNLWDLFAFDEMDTGNGADGGDAEQPVGSERKRE  
MQQEGKRRHQRYTELLETTELVVGLWQDWLPKHPADHSAVHYSCQVLDLVLGAI AAMPTE  
GTGERDARIESISIAALETVRSLLSKHSSNDYESLWILRRLTCKTLWERQPCRPEEERT  
AAAETPGRRLVRDDLALVLSSTLGANGDKRPPLEEAQRQAGPSGAVEGTPIDDKNDSMH  
AWTFLAWCLGNLSGINERDDEHVFTKCVGAAISGHLTATAQGRATSTPQHNVLMYTSASS  
P LLEMLKEGTV

>comp13319\_c0\_seq1; 711 1 3722 LEN=3907; translated  
XVNIIVISTNASSQIHFNLSECRPQLTARRLRLEIELFNNDFGLEEKATARTGEEKIPRYN  
PEGGAFSLVDAVSPGPTIYPSPKNRERDDIHDRNSLVFSNDHNSPVSSPKNNLPKEPSWK  
RVDFVLPRAKGGKKNFVFDQKPKTNLDENLLPSVSGSNDNSQKAIK LKKSETIEDIFGNKR  
HKEHNSQHQPDLFPDKETDSRKKARRGDGNELNGETESSCRKLEDAFEVANGESKNPPIDN  
FVDVAIKEENLSPGSTKETSASPRNDDIKKSDEKRKSKEKARSKI SMQPTSPGQITGRT  
VKEAVRDKRGLRPRANSTDGELNLPQGGLCDERMILEAHKWKSDRKYMNHSLPRGFHNLG  
NTCFLNATLQCLTYLPPLCQTLIAISEDKMRNGQNGGKKKVPQGQKITSSLC SLFQQARG  
LNNNSKGGEGPFAPRKVVSHLPNIGSCSRNGYKFR LGRQEDAHEFLVHLLDAMNDGELR  
AAGINQNTSGWRDL PVSRLDETTFVHRI FGGYFRSQVRCRCNYSNTYDPFLDLSLEV  
SKKSSTSVLKALSEFTRKETLDAANQWKCSGCKKYVCATKQLTVFRPPLTL CIQLKRFAF  
DNFGFGQKYSKYSHGYGGGSKI TKPIEFPGTLQLPLSDNRSCQYTLTGIVIHVGGSSQSG  
HYTAYVKKPVKNGTSQWYHMDDSEVQPV SERTVLKQRDAYVLFYCRTEVKLEFPDPPSRS  
MTALEATEFGRNRARARADSF SMETSREGLKGNVNHKKECMAEELLLAESIPQPQEHETS  
ERNMKDENS KKLKTTNMNPLKKIHTENIGRPTTVEKTEGTLT SPLSNGEAHSFSKVQD  
DPNDSSDDSSYKSSSGNSNSADSESINGDFSDGSTE GSSSRKCHVKKTI DNKESRSASS  
DDSESEMDSDDDLTS DGKMAI IDKNQSGCMSSSSKRS AK EASEYSESDNDDDDVSVSNDK  
KTTE DHKQDRSYRPS THFQGSIESPDSESDRENKSSPNDKKKALGSINGKIDVHSHKSA  
KNETEFSESEIDSRAESSKNGKKERSGERDMVGPAQMSQNPSPITKNANKTTVVVNNTDS  
RGKVKVMLGPRKRKIWASKASALP SKAPDFQLLGNMKVSQWGD DDDDTNKNGDKPIAPTK  
KSEASQVHCKRKTII DKIDKQNRVRKRKMHLDRWDSHLDQ GKQKVKSEKSAPIEASSM  
DPKKNVFQRIQSSVQRM SRGKQKGS SSVFRRKSKKTRARF

>comp13320\_c0\_seq1; 152 453 1551 LEN=1551; translated  
MTLATRFSGGLLFLCLLCCALPPAAHSYVPPRSPLAF AKAAPTPTAGNKSRSRRKSPL  
SVGAGADYFGEREDPPAPAADPSIEAALGNPQHLHASEYERDAEFYRKRNEAYS KSL LKA  
AKANEANS GPAPSSYGMPEGELQGASPASKGQENPLKASF DHVEASTNSLLTGRPLVALAI  
FGATGMLVAYLSGFFFFLEGYIENWNPAENDQIPYWD DAEIHTIQRAVQWWGPAADGYRGN  
RRALQGCSRATPEAGNEG VVQRRRLRPEVLRNRWPGPGSAGLDPIRSTEQIPMLLRFGIV  
PTGKPTHVHNTVYTCTHAHIH THKRKDLRCCILGATQRVPTTDESKRGGYDLASCKNSI  
IFNDYQ

>comp13321\_c0\_seq1; 230 331 1314 LEN=1624; translated  
MWALSTILCLLAAALFWTTNALEIVIGVQKAGFWGSASKAVYLQLLPDNIMNEWVERE  
GIRGLEFAAGIINGIFWIVFCIPVIEMAWTL SHNGTRSIGVNSAIMIFVLAGTWTKWF S  
NVFWNGMYLSFMMLAMNFNLENWNPEIQDLQYRVDGEDGIGWRAL EMNYLVYKGLVWL  
VNAVEWFLAGIFTL SFISVLRWRRQDETTFGAKWNSLGLF IGLIGVINFASEIIGAK  
GHRVAWI FVVLYASLTRLVLIPLWII VLG FQLPNASSKSFDSAALAELELVENQPEE  
SDHN PASFTI DDDDAVVVPKGPSSPPPEAFSPSSTKL

>comp13322\_c0\_seq1; 347 161 940 LEN=1336; translated  
MSRRGPSSPTKHVFLFLACCCCR L AVLAVLSGPPTLGVLAFAS TSTSSTSTRPGS  
FSTLGMTPTE TPPVPSEATTSGDMRFGKFLIPNASVFCRTPASSTGLPSPSAAAF  
AFVNL RP IVP GHVLVAPIRVVPHLSDLTEEEYT NLWGLVRTVQSVLKKAHAGTTAF  
NVAVQDGRAAGQSV

PHVHVHILPRNSKDFERNDDVYDALEAWAPTEAMASAKKDEPSTDMEVPDDADRMDRTVQ  
AMADEAAVYRGLLDGDTSE

>comp13323\_c0\_seq1; 397 382 2328 LEN=2710; translated  
MDAQYAYRNDTPLLRLDGLLSQDEQRTKIALSQIEKLDPSFRYLHFFVRTVQANANEYSS  
HASSGSNSNENGNCLLDCSPLRSASALETIVRRLTLTIQPHLAQVSSKSDGSLPLHFAASI  
GNIRIAALLDCYREALTHNTKGIPLHYAAREGRTEMVNFLLRIVPSCAAVLTKKSKL  
ALHFAAGEGHVAVARSLLRVYPAGAILPSKKGKIAIHFAARWGHIEIARDLYRLYPESIQ  
TQDYDGSNPLHDATREGQLEMAKFLVEVCPAVMTKSNLRGEIPLFSAIRSGNLQLCAFLI  
RVWPESEGKRVLETISDPDDVTSWELPILDCLRGAVANFNLSLSPQERSYIEDSGSGIFSR  
GHNESNNNIDGESVNYQIFGHGVLIIHQHQNGGLIYCSQRPNLQTQEFPRDSGDRMSRI  
ASETSLEVASISDASNYITTI PPPRLPTDLDISLPRSKSPVLNTEACFKKRSASNGKNGN  
KRQRLGSIIDDDDEGDDCATTFFGLQNKTFYQVHAALECSATTSVLNLCVLERYPEQQKLADD  
YGRPLPHIAISHCRSEGSVDLVLERIWKPNPHASFTTRDKFGRPLHLALMARADARLVRV  
LLEANPSSAVEKFGHRMPIHMAASNKCDLSTIFMLVRGDPAMVQSWKS

>comp13325\_c0\_seq2; 2106 1 7168 LEN=7182; translated  
XFAETQESGPEKTETGQSETSLPVATEETPIPAGQGDFKQKSTFQGDRGGDAHDEELLAL  
LRGVSSNTGKTSDRFAETLDAELQPPEPKQVPAHKPPTTPQPSQSFSSPTSMLSPFPTG  
EGEPEIVVTLDDLPFAFSDTNAKVRKESYRVLNNAILEASKGKTPGSIIGDSIVPGLDDL  
MPTLFAEKNAFALEVALQAGTEYANACQGASSEDMAAAIANSLKGNGLSSPRPNSAKFA  
TAFVLKLMVEVGSTPESLKTIASILVQKGWVSKKPKVVQLSASLILDATHSFGAVNPLPAA  
IVSTLPKILSHSNKKIRDTGIEIVAFCRSFGSKDPLESIEKMQKSRVKELDALLSKRA  
DPIILPKTGLRCQSTSAAGTGASCAEDVFAALKAGSEEQRKQEFANRPAVKLMVEISKYNY  
SSQLQEAQWSKKVAALDMVMKCGGKEPYKLAQPSSSNYVPLIIDMKGLLTHTHFAVVS  
AMGVLGMLAQGVGKLYPNLRPLLPKLLQLTKDKKLTKAVSACLDAFFGNVLYGHEHLLDD  
KDSSIPPEATNERKEKNALARTSALDYLDRCVSRGALAGPRASLSPGNANACAKLASHKLD  
DSDANVRKSALKILTSLQKVDDDEVQTAMHRIVDNLQKSNPRAYKTLKNGSKAPAKSAI  
PKATSAAVAKKAPKTAQAQAPSTPRDTKTPLIQTHATAAPKTSAPRAMNTTTTQGNVSAAG  
SNDEDMSYEEAMTRCKSLGIPLWDEPDENEGGVLVGMQSSKWQSRNNSIQEIMGFVKTC  
PPHEDHAKVQNDSNALLFVVKSHTKNFKESNIVLARSILELFSALCEYHERSRCQFARSS  
VIDATALAVGKIADRKLSVFSKTLLSALCVVHPPEDVLVSACDNIKQRSPLAHEEFVW  
MTDFCNDGATSIASSLKEIVAFCLSECKSKNIKVKRAAFTVMKTLHVQLGPIKAVTLA  
SIKDAASLREEFEKIFSENPFDSLSSTKEWPRSYILSSAGEDNHGEQCITGPGMQFEIPKM  
DLISELPSDCLSRMGSNEGNTAWKARKAALEDVEKALKGSSGLLDTSKMRPLADLLRAMR  
DRLSDSQSNLKPAAKLIIGLVLSIDGEAQKLGRIYVGPILNAAMNDRKVMNDAAMEA  
LRRSTSIPELNGEGLNQRSLEPFVVALTAELDGSEYKSAGIAGILAMTEPFAPHLPDLEK  
ISSQRGETVGSRFASVLVNGLSSSKADIRSAAESLLSECITNNVFSMQTAKKCVSRMIPA  
KORSVGMVLARISSSFTSGQVLQPTVEPSPTKPSRATKMRPSLGERAYSKSMHKSIAIHES  
KPAFQPSTTRKSMPLPAVAQQTDFDEEEAFHNEGSSHPLVHDTSTTGIQKSRAAMRSLTWP  
EYPEEPSSGGLYSGLKKAWAPIPPDSIKKLPDRGIRNQSDVMEAFGLLRQAIDMDKQE  
QGSVVVEQLHFILRWSVFMGCKESAVGLTGLLDMLSELISYLNGLIYEFSDSEVALFVT  
FLFERASVAKGRFKDITYMDLISSIKSDALILDKRLGPNVCVPLMESSSQAKARLLACQNC  
YQCVEAIGLSGIGKRGVLVAAKALSTDKLPENRAALLDMLVLLVSRMHNDVQRLSKICGS  
SLSHHARGLIEEQMKKAPSPGKIPSTKIPSPQKASRLPRPGLSSPTSKMNLSTSVRKIET  
DYNFSTPAVFEDELPAALDRLRALREKESPRSTPTKLPQMSFSSSAQGLPLRSSYKDNSSA  
AVKADLFNSNLGSASEESDLSSTLGSSGNQKSVSPVGAASLRARLLKIRESNRQIT  
VKPSETITIPMTDAVAKVNTQHSQDFHPHTSQIAGDSFMSFDQDNGPILETMLEKVRSL  
EKPCPIDEMDEDLIYCTDILKNIHAAVSKQANLAVMISMNGVANLREEIREKASEVVGIL  
TQLIPFGFHCHSRNVSAGMSVPLLSVNLVAGLMAIFRSGDLATLVNVDDLTMLIKESGTAL  
LDPRLAQSSRSAGEKPTPQIDDATSTQMVRAINLAVQAATGTARANSFQALILLQDQLSS  
NTNPSMDFQFKNRLSRVVTKLTRVVIKAEDSSLQPFSSASSMDVEAVLCCLEDTLGAWRKA  
DYPEGVSTKVNAKLIVLAVLKARGETKSLQEELSGLEIDPHSSAVGELVASCALGMA  
PSSPPRKSTQKDDVASLVSAVVSATQGPDRATAINALKRYNEIHGDEELKNHLQDVSPAF  
RSYLLKELSEGRSPPSPKTSNVMSERIKNLRSKLNVPEPSALQSSDEPPPSQLALKLRA  
KRNGTQAALSHVASDNPPPTNPGQKPSDPDGSQAQRNEAMSFTVGDNEAPPNPSVNAFR  
ERLAAAKEKQDAKSSADVLSMPATSATSRAAALRARLQAVKMQTEL

>comp13325\_c0\_seq4; 1232 1 2579 LEN=2579; translated  
PAPASAPEPEPMPAAPEPKPPARTSRRGVSSRPNTLPPWKRGRKPRNVQPFGENDDAD  
IVVASPPPKRASPAKAAAPTELPSEVPSESPRSALPPSTGIGSGTRSTFTGERGGDAHDE  
ELLALLRGVSANSGAADRFSGGEEENDVNVNGNDNGDNSVLENSNEILPKREIRRPTSQ  
LPTVTTKSPSPRKRNNNEIPPWKRKGAAPSPNTESPFGSASNRDITVVAAPKPKPSPAKAV



MTTLSADAVSMAALLAALTQPDTEGIRQAEVALKPIILKDNRCVPAFVEILKAKDTQPPAN  
RHVAGILLRKRPLPGHYDSFDAATRALKAEILTILSQEPERSVRNGLIGVAASLGKLECT  
AGGTSWPELQFQIAAAGAEQQPDAREMAFGLLQEMTDTIGMHLKSQFAP IAGLFANALVP  
TEDAKVQKSAVKAVGQLLSFLADEPEIDVFAGLIPSI LEVAARNVNDDELMAVVLVDVLYD  
LAYSQSVSVTVHMQPIVRFTLQCIQTQDLEMVGRVDSALVIATMAEAKPKTFGKEEAMLS  
QILETLFTLIENSPDSAAGALFESNPAWRELDLENGGDEFDGDLDSPSTETSMAQGTLDMLA  
CEVPKKYIFQPVVSRVQRLNSPQANHRKAGIASLGVIAEGCQEPLSDHLSLMPYVLKC  
AQDPDSQVRECAFCFLGQISEHCQPAVLEYSEQILPIVFNLLDDKTVAVQATSCYVLEMF  
CERLEPDAVRPLLDLVLKLAGMLGSSDKRSVQEMAVAALAATAVAEEEEFTPYVGGVAT  
LMTKYMGLTDENLFSLRGRALECMGHMAI AVGRETFRPFYQVTMECACEGLTRDSTDLHE  
FAYAVFANLSKVMKEEFAPALPELVPHLVSIGTDEGSLEPAEEAEKSGQFGALDDSDDE  
DEDGGNYVLHVRTALLEVKKGALTAIGELASHTGAAFAPFLESVIQVLQKAATNWHPLIK  
CEVADALPNMIVPSVAAYHNGEIQWTKGDTTCPNPLSQHTQALVTAVLGELMGLTKDDDS  
NTVAKACEGIQSVIELCGPHALLPVANDCLTTAHAILTKSSPCQASEEFLGEAPEDDDDH  
DVVTQAACDLVGGFCRVMGAQFGQYLPQFLPAVCEYAKSSRPARDRSMAIGWLSEVAQEL  
EGTIFEHWKT VFLPATLAGLGDPAEEVKRNAAF CAGVCCEVLKESIVGDYPQILQGLEPL  
FGMDASNGDATAACVDNAAACVARMIMAQPASVMPQVLPAMLRLPLKTDMTENETIYN  
CLLGLIQMGQPDALAQAELQRIFTAATASGSKVDQEIQAQKLAQAAPALQ

>comp13329\_c0\_seq2; 1203 72 3320 LEN=3463; translated

MTTLSADAVSMAALLAALTQPDTEGIRQAEVALKPIILKDNRCVPAFVEILKAKDTQPPAN  
RHVAGILLRKRPLPGHYDSFDAATRALKAEILTILSQEPERSVRNGLIGVAASLGKLECT  
AGGTSWPELQFQIAAAGAEQQPDAREMAFGLLQEMTDTIGMHLKSQFAP IAGLFANALVP  
TEDAKVQKSAVKAVGQLLSFLADEPEIDVFAGLIPSI LEVAARNVNDDELMAVVLVDVLYD  
LAYSQSVSVTVHMQPIVRFTLQCIQTQDLEMVGRVDSALVIATMAEAKPKTFGKEEAMLS  
QILETLFTLIENSPDSAAGALFESNPAWRELDLENGGDEFDGDLDSPSTETSMAQGTLDMLA  
CEVPKKYIFQPVVSRVQRLNSPQANHRKAGIASLGVIAEGCQEPLSDHLSLMPYVLKC  
AQDPDSQVRECAFCFLGQISEHCQPAVLEYSEQILPIVFNLLDDKTVAVQATSCYVLEMF  
CERLEPDAVRPLLDLVLKLAGMLGSSDKRSVQEMAVAALAATAVAEEEEFTPYVGGVAT  
LMTKYMGLTDENLFSLRGRALECMGHMAI AVGRETFRPFYQVTMECACEGLTRDSTDLHE  
FAYAVFANLSKVMKEEFAPALPELVPHLVSIGTDEGSLEPAEEAEKRDLOSLLF TTPQS  
GQFGALDDSDDEDEDGGNYVLHVRTALLEVKKGALTAIGELASHTGAAFAPFLESVIQVL  
QKAATNWHPLIKCEVADALPNMIVPSVAAYHNGEIQWTKGDTTCPNPLSQHTQALVTAVL  
GELMGLTKDDDSNTVAKACEGIQSVIELCGPHALLPVANDCLTTAHAILTKSSPCQASEE  
FLGEAPEDDDDH DVVTQAACDLVGGFCRVMGAQFGQYLPQFLPAVCEYAKSSRPARDRSMA  
AIGWLSEVAQELEGTIFEHWKT VFLPATLAGLGDPAEEVKRNAAF CAGVCCEVLKESIVG  
DYPQILQGLEPLFGMDASNGDATAACVDNAAACVARMIMAQPASVMPQVLPAMLRLPL  
KTDMTENETIYNCLLGLIQMGQPDALAQAELQRIFTAATASGSKVDQEIQAQKLAQAAPA  
LQ

>comp13330\_c0\_seq1; 372 465 1037 LEN=1984; translated

MARPPSSAIPHRVFVAIAVSLVLKPRAAATNAFTASFP LLKSSATTTTRLLVIPNYDGFHEE  
ETGGGNSNDIDSEFYRDLQRAKEKQPGCGSQPPFEENNDGSDTEFYRDLQRAKLDKLGSR  
IPPDQVKQSAQAQAEADFLRAMSETKDEFQKAKDELGSDGAIDLFLFKIREEDKRREEEKE  
DNDKDEDEDE

>comp13330\_c0\_seq2; 372 465 1037 LEN=1997; translated

MARPPSSAIPHRVFVAIAVSLVLKPRAAATNAFTASFP LLKSSATTTTRLLVIPNYDGFHEE  
ETGGGNSNDIDSEFYRDLQRAKEKQPGCGSQPPFEENNDGSDTEFYRDLQRAKLDKLGSR  
IPPDQVKQSAQAQAEADFLRAMSETKDEFQKAKDELGSDGAIDLFLFKIREEDKRREEEKE  
DNDKDEDEDE

>comp13331\_c0\_seq1; 287 184 936 LEN=1848; translated

MLGNHSERKTWNGERNSSRSTIASRISASGIIENIESPKKGGEAPKFKGILRNRNEMRLQ  
TKSSDVEERDEKEHNRTGGSGQNKDSIRVDHFIEAHCDRMAMNVPNLLGKILSSSTSYSF  
DDDETYKPRPSMSSFDSINQISTDIESATVVSWSRSPRFAEEIETVRVIPRKNQNGFLN  
ANTTTHHEDETETTTDPSVRKKWNLKQESDSMSFDSYGTMPFYQVGVAVSFGFTILGLL  
SVLVYFLAKE

>comp13332\_c0\_seq1; 1177 25 4113 LEN=4179; translated

MTMSGSSSTVEIDTQTFNKSSSTNDDKIQNESNNETKLNELQKNGKRTPMIGGDKIEPCP  
HNFTALSKIVDVLSSDRTRSNSMIDWLN GTTDQIAIRERKLLSCGKRFQCRYRYGTSFA  
ILRAIRDACAPFQAVATKPGKTAVNNNDNRSTESVRRSANRDNMPSKIKSLNKTENTV  
LVASYDQSFPPQLQHPGFSNITPPFQKEEKAQSGKPYGGSVAVGNTCGKESGATSVINTL  
QARKKSKRRIQPQQIPTTVSE SISTLAEKKLSGSTWSNVPPSSIMGPPTISNQSKGRS



MTATSSDTRQPVASTGSSNTVVINILQARKQKPVRLQVKETSMMFDVASESNSTPIGAF  
RTPPRNTNNDNSNKHQDSSAVKYEKHNMAVSPSKPSTNVSKATVEQMERLTDIYIALIEN  
MLVPSTPLEVHLLIELLSIDTNLASSNFSGHGSIQQDHSDEERRANKSRNEALGAPTGSTL  
FFQPIFYSPERICFAQSAALMKMEKGIQLRSLPFLIKALLQDGNFSQRCPALAERLNRVL  
LESTTAADWTPPSSDLVTGTHAIFSLPFEPDRDRNRHNFKTPVEIAVYQNREVTRDAFLSE  
LRVFMATAKSKVFLPQEVNDIRETAKYESRKIIGNITPQNILWFAQFFCDLLVQVGLAPVD  
EMDQELLLKIAADDKDKLQKLHKRFSKIPSRPSRRRAGFASGATGGNRRNERYRTHNANN  
NHTHGTTPTFQQALSYPGYQEFFIFLYSVNSYNFGIHLLHQVVKMSDMVSNQSSSGL  
EKRTLELALLGRFLGFLVFSNPWQEEGIDLNLKPKCICSSDNGLNQLESVGLHLPITIVQE  
AWDGGYTFLTIPWVTELLKMSKWDSISQSSMNYRQILANLRLVQRHASQPSSDENKVHGS  
HMQLLSFHLETFHGTFSLPKLTSLPHATIAPISQAKTDSLDRRIRLSTAAIYASSPDM  
EDLCDVITNVAKASTRQEIKRKLRSIVSTAVGTEARSYFIAESPGEKVMSPLSKATWTK  
SPLDKSAHGKKIHAKNKLAEFFHQHRDLKRICDFAVDQTLKTLAVEEVYVFSQVSEEL  
QIGIESTETEIEEMQTRAFELSRFCFVSKMLMKNLTSSLELFCHPDMQRRVIDVATNLSIV  
RGISSQSIVRGLITSSTNMVLKDKQNKENSQKTKRVEVKTEIDHAI EAATISIRNLQHG  
YSRVMSTCDTILIEALERVKTVTKSVSIPRETLLREFFECILDLEPIVESIIDQLKES  
NTQELWIIKAFLLLENIGFISVYWRGRLHRLYGKEFVALVKNPKLPSPVAREKILYQL  
TRSSTGKRNSSDTDRSIGNDDAESSCTGLIEPIAIRFSKFLS

>comp13332\_c0\_seq2; 471 1 2200 LEN=2266; translated  
XVLFIRSTPQNILWFAQFFCDLLVQVGLAPVDEMDQELLLKIAADDKDKLQKLHKRFSKIP  
SRPSRRRAGFASGATGGNRRNERYRTHNANNHTHGTTPTFQQALSYPGYQEFFIFLY  
SVNSYNFGIHLLHQVVKMSDMVSNQSSSGLKRTLELALLGRFLGFLVFSNPWQEEGID  
LNKPKCICSSDNGLNQLESVGLHLPITIVQEAWDGGYTFLTIPWVTELLKMSKWDSISQS  
SMNYRQILANLRLVQRHASQPSSDENKVHGSHMQLLSFHLETFHGTFSLPKLTSLPHAT  
IAPISQAKTDSLDRRIRLSTAAIYASSPDMEDLCDVITNVAKASTRQEIKRKLRSIVS  
TAVGTEARSYFIAESPGEKVMSPLSKATWTKSPLDKSAHGKKIHAKNKLAEFFHQHRDL  
KRICDFAVDQTLKTLAVEEVYVFSQVSEELQIGIESTETEIEEMQTRAFELSRFCFVSK  
LMKNLTSSLELFCHPDMQRRVIDVATNLSIVRGISSQSIVRGLITSSTNMVLKDKQNK  
NSQKTKRVEVKTEIDHAI EAATISIRNLQHGYSRVMSTCDTILIEALERVKTVTKSVS  
IPRETLLREFFECILDLEPIVESIIDQLKESNTQELWIIKAFLLLENIGFISVYWRGR  
LHRLYGKEFVALVKNPKLPSPVAREKILYQLTRSSTGKRNSSDTDRSIGNDDAESSCTGL  
IEPIAIRFSKFLS

>comp13333\_c0\_seq1; 479 1 2119 LEN=2246; translated  
XPRKDDSKPEVEDHSDLETQLQLPYLDEATWRHLPGTKRRRQGXERMVTAAGGNLGVGI  
FSHSSPILSLGSITRAVCFLGILVLLVLGDGNGKPPTSRRKERGAGNHTNVIIVFLADNLGY  
DDVGVFQQTHRPPMTDGNINADRKNKRKPSRTPNIDKAAMEGRLLNWNNSPAVLCASRA  
ALLTGKYPVRTGIYPRVFEPDAAHGLPPTETTLADHLRALGYATKIVGKWHLGQRPEYLP  
TQRGFDEWFGIPYHMSGGSLDGHLCTGKDPGGARDLWLPYQGDSDIVEQPVVLEDLAQRY  
VDESVKFLRQHTSNGKNAKTSNEDDDDDQGSRPFFLYLAFSHVHQLCAPKHSECQWASN  
KAGRDGYHATFGDAVEEMDWIAGRVLAEALAELENTLVLFVTSNNGPWTAEQECSGSKG  
PFLGTWLAHSDPTCTACPSEYVPSPLLPDRPHRCVFPVGSSSSSSSINGNGNGGPHVYEV  
DGVPCGQDTGLGSAWEANVRMPAFVVRWPGGVEAGSETMETVSTLDVVPTVLGLLGEDPP  
CGLDGDVASSVFLGQSGGTGDRVLFVWRDGFASGPLPQPFGRFDVAMKIGPFKLFWFTK  
SSHYNADPEVFHDPPLLFHVLDDPAEAFPLDPEEHSSLVVEARRLLQEHKESVDKAEPLC  
LERDAAFLPCADKARGCRTHGGAPGGGSSSSSNRLAEGETGWSREE

>comp13334\_c0\_seq1; 602 185 1441 LEN=2075; translated  
MAMSLSMVSRWIAALLLSQLLPRGIVADSKGSVFDKKEKNEEKLI EWIRSRGGYWNPGQ  
ELRYDETVPGLYGVFASEPIERHAVLAKIPWECVIYPDDEDESEDQDHPDRFDENCRMVQ  
RLADELQTERDAGAGGVVRSDFSHYVEGLIQTATEHSLKLLPAHWSEGGKLLSRVLFDDD  
ETGEPVQVLPPEDEVFIHDDWKHRCEARVDPVATLLVTTTHGEDFGMVPLTDKFNRRGGNW  
TGAFVSVENGDPVIALEIRALRDLAAGEQIYTDYHDYQIGTPELLRDYGFVEAYPQRWI  
FHRHGIAFDVLEKHGPREAAGDDRFOIEWHDIRINSVRYVGKPSSSGVEILRRHLDRLDQ  
TVVPALEAAAAPETKDAFGRPTELERETVLRFCCHDLASALELAIRDAAEAASATPDPEL

>comp13335\_c0\_seq1; 451 120 854 LEN=915; translated  
MFISRSFVPIVMACLLITNDAFSTHSLPQAAIRSRQGSVAHSSLYAGKGDATLKRVS  
EEDEGVPIPFLDRSQNSFIECYADSIITVDGVEYTI GVPDVCYVALCYFEGENLLPVELD  
DDLMDIFPIAENIVEEEFEELTLQRTPTTLVGELEDDDEELEDDEDDDDDDSDDEEQV  
EVLMTFDHRGKEFNLRLLDPVLLVVGKPDADRDLRMLLTPKESEKIMPILEKTFLNFHD  
DVL P

>comp13335\_c1\_seq1; 330 1 440 LEN=788; translated

XDDDDDDDDDDDEEELMDREIPLPNVKSEVLAKVIEYCVHYTMEEPMEPIQTPLKSSKI  
EDLVQPWYADFKVEQSLLFELTTAANFMDVKPLLDLSCLAVSVSIGKTAAE LRDMFNI  
NVFSPEEEAQVREESQWTKNDSSTNE

>comp13335\_c1\_seq2; 289 1 425 LEN=578; translated

XDDDDDDDDDDDEEELMDREIPLPNVKSEVLAKVIEYCVHYTMEEPMEPIQTPLKSSKI  
EDLVQPWYADFKVEQSLLFELTTAANFMDVKPLLDLSCLAVSVSIGKTAAE LRDMFNI  
NVFSPEEEAQVRCERGVACSDW

>comp13335\_c2\_seq1; 1079 1 3890 LEN=3890; translated

XPEYQRRQAENHHGAQSFCYHFINSYLSTSLVIVPSFPFFASNNQHLYLLTFLLAEKQHPQ  
IRQPLLFIEPEGDRSVITEAGLTSKLPINNLPGSSNLNRLIHEGTSGGGCSPILDQVKVEF  
GDRPHIYNEFLDIMKTFKTQQIDTPGVIRRVSNLFGQNRRLVLFNTFLPEGYRIELPDG  
DGPPVAVFRAPGEMAVRHDLSPGNI PPVRHHEPPQTQPPSHAGMPPGPAGMQVPPGQQQQ  
QQGRVGGPPGFEGMMAGRGGPVGPPPPQQQQQQQLHHKHNGAMMDRVAGAPGGLPGQPTMHA  
QQMSDPHGQQQLTQQQQQHLTQHHTNASLARVGLPPPGRPGLAVGQPQPQQVMRQQQA  
MGNGSNAASPNAANGAGNAQQPGQPLEFDHAINYVTTIKKRFADEPETYKKFLEILHTY  
QKEQQRGIKEVLEEVSVLFEEHPDLLKEFTFFLPDAVQAEAKQQLAIVVKEAEERRARKLA  
AEKHAALPKQPKRYVAPTAPPPPVERRPTSATIAFGATAPRSVEREKEIHRSTVYGTVS  
FGPPRPPRKNMPTVAEAAKKEGRPTTLPCCPPQPTTPEMAFFDRAKRHLSRRELAPDKPT  
GRARHTPYAEFLKCLHLFGSGVLNKDELVLRLRGLFVQGHAPKSGVNAGGGASNPATD  
AHNLLNEFQEILIGRGPYADQLANQKDKSKYGSKRCDVELSAKLSPSYAEYPKDYPHDL  
FMTHTGQTSSEDSQVLNSTLVSVDNDTTGICSIATRNTYEEAMFRIEDERFEVDMAIERN  
ANAMRKTEPIAAEVQMLREGEKDGQPIGRLQYKLNARTLNSIHINAIGRIYGENGDEVI  
QYLSRNPLAVLPIIYQRLRQKDLERKQKSDLMSQWKAATEANYEGSLDHTCFFKRRALE  
RRFGLEQLRDECKQARQYCSNQNKRDSPVSFGLSVPDRSAVFYQPYASVEMKPSSSVHH  
NAVGF LINHIRYRCHIGDKIRPPNTDAREKVGRIWTEFMLPFFNYPSPFWVLEESRQSYQG  
KISNAVQYAVGERVMTAFGEGTIQAFDDGLDSEEGPRYRVKLPFGIGNLQPYAILHNVD  
AGDGSKYARRDDEMIKETNNSMSEESASASSVVVDKFKLLFGSDSIYFLRLYGF LISL  
LDDIKEHLNRNPTTADLSQSYNPMKSAEDTKKLEEKLNFDVAVAKLSGVVSKKTSLNDF  
ETFARRVNRDITYKIAALPKLVERCGDMMIKMSEEDLLPGIFDSSQYSGQCPVTLRSTCM  
GMSSTAERYIQYNTKLGRIYFSYLPDEELSTTLPGD

>comp13335\_c2\_seq2; 229 30 850 LEN=850; translated

MSVYFTPIYCVFLSKTDSLNPQFYRFQPADAVGERVMTAFGEGTIQAFDDGLDSEEGPR  
YRVKLPFGIGNLQPYAILHNVDAGDGSKYARRDDEMXXGNELSIYFLRLYGF LISLDD  
IKEHLNRNPTTADLSQSYNPMKSAEDTKKLEEKLNFDVAVAKLSGVVSKKTSLNDFETF  
ARRVNRDITYKIAALPKLVERCGDMMIKMSEEDLLPGIFDSSQYSGQCPVTLRSTCMGMS  
STAERYIQYNTKLGRIYFSYLPDEELSTTLPGD

>comp13335\_c2\_seq3; 1089 155 3745 LEN=3745; translated

MREL RVEDALLYLDQVKVEFGDRPHIYNEFLDIMKTFKTQQIDTPGVIRRVSNLFGQNRRL  
LVLGFNTFLPEGYRIELPDGDGPPVAVFRAPGEMAVRHDLSPGNI PPVRHHEPPQTQPPS  
HAGMPPGPAGMQVPPGQQQQQGRVGGPPGFEGMMAGRGGPVGPPPPQQQQQQQLHHKHNGA  
MDRVAGAPGGLPGQPTMHAQQMSDPHGQQQLTQQQQQHLTQHHTNASLARVGLPPPGR  
PGLAVGQPQPQQVMRQQQAMGNGSNAASPNAANGAGNAQQPGQPLEFDHAINYVTTIK  
KRFADEPETYKKFLEILHTYQKEQQRGIKEVLEEVSVLFEEHPDLLKEFTFFLPDAVQAEA  
KQLAIVVKEAEERRARKLAAEKHAALPKQPKRYVAPTAPPPPVERRPTSATIAFGATA  
PRSVEREKEIHRSTVYGTVSFGPPRPPRKNMPTVAEAAKKEGRPTTLPCCPPQPTTPEMA  
FFDRAKRHLSRRELAPDKPTGRARHTPYAEFLKCLHLFGSGVLNKDELVLRLRGLFVQGH  
APKSGVNAGGGASNPATDAHNLLNEFQEILIGRGPYADQLANQKDKSKYGSKRCDVE  
LSAKLSPSYAEYPKDYPHDLFMTHTGQTSSEDSQVLNSTLVSVDNDTTGICSIATRNTYE  
EAMFRIEDERFEVDMAIERNANAMRKTEPIAAEVQMLREGEKDGQPIGRLQYKLNARTL  
NSIHINAIGRIYGENGDEVIQYLSRNPLAVLPIIYQRLRQKDLERKQKSDLMSQWKAAT  
EANYEGSLDHTCFFKRRALERRFGLEQLRDECKQARQYCSNQNKRDSPVSFGLSVPDRS  
AVFYQPYASVEMKPSSSVHHNAVGF LINHIRYRCHIGDKIRPPNTDAREKVGRIWTEFML  
PFFNYPSPFWVLEESRQSYQKISNAVQYAVGERVMTAFGEGTIQAFDDGLDSEEGPRYR  
VKLPFGIGNLQPYAILHNVDAGDGSKYARRDDEMIKETNNSMSEESASASSVVVDKFKL  
LFGSDSIYFLRLYGF LISLDDIKEHLNRNPTTADLSQSYNPMKSAEDTKKLEEKLNFD  
DAVAVAKLSGVVSKKTSLNDFETFARRVNRDITYKIAALPKLVERCGDMMIKMSEEDLLPG  
IFDSSQYSGQCPVTLRSTCMGMSSTAERYIQYNTKLGRIYFSYLPDEELSTTLPGD

>comp13335\_c2\_seq4; 311 30 926 LEN=926; translated

MSVYFTPIYCVFLSKTDSLNPQFYRFQPADAVGERVMTAFGEGTIQAFDDGLDSEEGPR  
YRVKLPFGIGNLQPYAILHNVDAGDGSKYARRDDEMIKETNNSMSEESASASSVVVDKFKF

KLLFGSDSIYFLRLRYGFLISLLDDIKEHLNRNPTTADLSQSYYNPMKSAEDTKKLEEKLNFD  
DAVVAKLSGVVSKKTSLNDFETFARRVNRDITYKIAALPKLVERCGDMMIKMSEEDLLPGIFDSSQYSGQCPVTLRSTCMGMSSTA  
EYRIQYNTKLGRIYFSYLPEDDEELSTTLPGD  
>comp13335\_c2\_seq5; 1007 155 3669 LEN=3669; translated  
MRELRVEDALLYLDQVKVEFGDRPHIYNEFLDIMKTFKTQQIDTPGVIRRVSNLFGQNRRLV  
LVLGFNTFLPEGYRIELPDGDGPPVAVFRAPGEMAVRHDLSPGNI PPVRHHEPPQTQPPS  
HAGMPPGPAGMQVPPGQQQQQQGRVGPFGFEGMMAGRGGPVGPPPPQQQQQQQLHHKHNGA  
MMDRVAGAPGGLPGQPTMHAQQMSDPHGQQQLTQQQQQHLTQHHTNASLARVGLPPPPGR  
PGLAVGQPQPQQVMRQQQAMGNGSNAASPPNAANGAGNAQQPGQPLEFDHAINYVTTIK  
KRFADPEPTYKKFLEILHTYQKEQKGIKEVLEEVSFLFEEHPDLLKEFTFFLPDAVQAEA  
KQQLAIVVKEAEERRARKLAAEKHAALPKQPKRYVAPTPAPPPVERRPTSATIAFGATA  
PRSVEREKEIHRSTVYGTVSFGPPRPPRKNMPTVAEAAKKEGRPTTLPCCPPQPTPEMA  
FFDRAKRHLSRRELAPDKPTGRARHTPYAEFLKCLHLFGSGVLNKDELVLLLRGLFVQGH  
APKSGVNAGGGASNPAAIATDAHNLLNEFQEILIGRGPYADQLANQKDKSKYGSKRCDRVE  
LSAKLSPSYAEYPKDYPHDLFMTHTGQTSSEDSQVLNSTLVSVDNDTTGICSIATRNTYE  
EAMFRIEDERFEVDMAIERNANAMRKTEPIAEVQMLREGEKDGQPIGRLOQYKLNARTL  
NSIHINAIGRIYGENGDEVIQYLSRNPLAVLP I IYQRLRQKDLERKQKSDLMSQWKAAT  
EANYEGSLDHTCFFKRRALERRFGLEQLRDECKQARQYCSNQNKRDSPVSFGLSVPDRS  
AVFYQPYASVEMKPPSSSVHNAVGF LINHIRYRCHIGDKIRPPNTDAREKVGRIWTEFML  
PFFNYPSFWVLEESRQSYQGKISNAVYQYAVGERVMTAFGEGTIQAFDDGLDSEEGPRYR  
VKLPFGIGNLQPYAILHNVDAGDGSKYARRDDEMXXKGNELSIYFLRLRYGFLISLLDDIK  
EHLNRNPTTADLSQSYYNPMKSAEDTKKLEEKLNFDVA VAKLSGVVSKKTSLNDFETFAR  
RVNRDITYKIAALPKLVERCGDMMIKMSEEDLLPGIFDSSQYSGQCPVTLRSTCMGMSST  
AEYRIQYNTKLGRIYFSYLPEDDEELSTTLPGD  
>comp13335\_c2\_seq6; 997 1 3814 LEN=3814; translated  
XPEYQRRQAENHHGAQSFCYHFINSYLSTSLVIVPSFPFFASNNQHLYLLTFLLAEKQHPQ  
IRQPLLFPIPEGDRSVITEAGLTSKLPINNLPGSSNLNRLIHEGTSGGGCSPILDQVKVEF  
GDRPHIYNEFLDIMKTFKTQQIDTPGVIRRVSNLFGQNRRLV LVLGFNTFLPEGYRIELPDG  
DGPPVAVFRAPGEMAVRHDLSPGNI PPVRHHEPPQTQPPSHAGMPPGPAGMQVPPGQQQQ  
QQGRVGPFGFEGMMAGRGGPVGPPPPQQQQQQQLHHKHNGAMMDRVAGAPGGLPGQPTMHA  
QQMSDPHGQQQLTQQQQQHLTQHHTNASLARVGLPPPPGRPGLAVGQPQPQQVMRQQQA  
MGNGSNAASPPNAANGAGNAQQPGQPLEFDHAINYVTTIKKRFADPEPTYKKFLEILHTY  
QKEQKGIKEVLEEVSFLFEEHPDLLKEFTFFLPDAVQAEAKQQLAIVVKEAEERRARKLA  
AEKHAALPKQPKRYVAPTPAPPPVERRPTSATIAFGATAPRSVEREKEIHRSTVYGTVS  
FGPPRPPRKNMPTVAEAAKKEGRPTTLPCCPPQPTPEMAFFDRAKRHLSRRELAPDKPT  
GRARHTPYAEFLKCLHLFGSGVLNKDELVLLLRGLFVQGHAPKSGVNAGGGASNPAAIATD  
AHNLLNEFQEILIGRGPYADQLANQKDKSKYGSKRCDVELSAKLSPSYAEYPKDYPHDL  
FMTHTGQTSSEDSQVLNSTLVSVDNDTTGICSIATRNTYEEAMFRIEDERFEVDMAIERN  
ANAMRKTEPIAEVQMLREGEKDGQPIGRLOQYKLNARTLNSIHINAIGRIYGENGDEVI  
QYLSRNPLAVLP I IYQRLRQKDLERKQKSDLMSQWKAATEANYEGSLDHTCFFKRRAL  
RRFGLEQLRDECKQARQYCSNQNKRDSPVSFGLSVPDRSAVFYQPYASVEMKPPSSSVH  
NAVGF LINHIRYRCHIGDKIRPPNTDAREKVGRIWTEFMLPFFNYPSFWVLEESRQSYQG  
KISNAVYQYAVGERVMTAFGEGTIQAFDDGLDSEEGPRYRVKLPFGIGNLQPYAILHNVD  
AGDGSKYARRDDEMXXKGNELSIYFLRLRYGFLISLLDDIKEHLNRNPTTADLSQSYYNPM  
KSAEDTKKLEEKLNFDVA VAKLSGVVSKKTSLNDFETFARRVNRDITYKIAALPKLVERC  
GDMMIKMSEEDLLPGIFDSSQYSGQCPVTLRSTCMGMSSTA EYRIQYNTKLGRIYFSYLP  
EDEELSTTLPGD  
>comp13336\_c0\_seq1; 633 1 2032 LEN=2316; translated  
XGVTQSQRRIKLYQTLNQLVMGFVKAGKEPRDKLFRWFADCQKVN LGATAMRPDYQSK  
VSSPGLLLNVSVLLKLSEPFVADEAKHGLIDPLFVLSAGDNRGTFPIRTEGGGDDSLPR  
LGDEGTSTGDDSTTPLYKPKNAFIPQCFFYTARSLNLGIVPLLSQHESSLRHLSHRHVEL  
NNSNTDIFSDPQFRILLSRQRSHEVPLFQEEMVTDTLRFCDLMAKTLYQMENDDILRKMP  
EHFVDDLCEILMGVAKLQPKLLRGLQFKHVFLLMVKLLSPKYAPMIRNYNLRATLGDVLY  
ELYLPADGERARRRRDVPESIALDPSRGGRSYLLSDESAQESLAPSLLLLYGEVEYTGHY  
EKMSHRAKISSLLKYLWESKEHRPAFQQITQNKDSFIK FANGIINETNQLISTVMTKLP  
IKTAQEQMADAAWGRLETEEQSDVTSRLDDNEREVKSALPLCNKTMQMFYLN TDREIR  
DLFLLPELCPRLVNMLIHVLGKLVGSKGVELKVKDPEQYEFRPKEMLRDLCAIFAI FASA  
RDFQRECAKSGCNPKTLREAVKNCQKFNLLTGDSIAAFESLPDLVEQELDVVKADEALME  
DAPDEFMDQIMATFMRDPIILPSGHVVD RATITQHLLNDPMDPFNREPMTIDDIKPAVEL  
KAKIDGWLEQKRSAQ GK

>comp13337\_c0\_seq1; 705 250 2025 LEN=2556; translated  
MKNLSANKMVALAACAASATSTSTTTASALSTAPSTTEAGVSHWVARIARGGAGKNNQD  
DDNDDGNSTANKPKKSSSSNKKKSAKSKREEKASNKTKSKTKGKSDAAGETTKKNANPL  
LEEIGHDDFYDVLGVTNTASEREIQKAYRKRCVQTHPDKTGGDRRAFDKVAEAYAVLSEP  
SKRQIYNRYGKEGLDPTSAAGSGAAFGGGGAAADMFRSMFQQQQQQRQARRNQTLRYQLE  
VTLEDLYFGRTRSVTVSSPYSRYHQTSNYQRQKQKQVEVNIQKGMVSGQSIVMSGEVDFN  
DDNSPPGDLVLFILTEAPHSTFTRKGHDLAMELTITLLEALCGLRRPIRHLDGSELWIESA  
TKTRSQKGDKTKAEHDRVHDDVDDSSNSGDDIPTSIPITIQTDVQVLKGRGMPKRN  
SGEFGDLYIQYRVEMPKNNSQKSPSGNALTNDEYKELARLLSKLGETTSSKDSTTRRTN  
SRTGTKDEEQTRREQLPPPEIHSQAQASEYGTASGTVEWEHDEAGSGFHEDHGDEYHP  
FASSFFGGQFGGGARTYSQSFHFGGGAGGNPFGGNPGDDDGNVQCQM  
>comp13338\_c0\_seq1; 490 1 1211 LEN=1436; translated  
XSRSEHGLRRPTKLTVAIGTGPPLYRNTTCFEMTKLAPLVRLLWFLVRCILVGAAATEGD  
DFAIAGYLPDYRLRTRYLDQTTQWNGNSKKPNPKRRDSGSSVFTDLVFLSLQPHARGFIG  
CCLQEDHYDLVEEFLNSTLPSPPFEAPTTTGTQSPFVWVTLGGGGRTGAFPELCTSSRSR  
QRLIGSVLALASRRSFLGGIDLDFQPRTIQERDNYVSFLNEAIPQWNNHGLRVSLTLHP  
YQGRMIPPDVYQKLDRIHFMTYDMVGESSDSNYHASLAKVRRAVEDLLQPGGGLSQTP  
VLLGIPAYARHTGNPSRVKTFGEIYDDVSPDEAAKGRSRDGYEWESPSRIRAKIDLKEL  
KLGGIFFWELGQDKITTEHPGGVLEAAFAAASVGLAPEAEL  
>comp13339\_c0\_seq1; 224 103 1173 LEN=1994; translated  
MTMRTTAVSRAVACNIYVSAGGNQLHKDLLARLLTETQEHCRRSNRNHETQGHGSDQRP  
QHQRVAVVHAFRDGPYDRSSFHLAGSPALVADVSSLADRAIRALAGFVTARGNTSEDGA  
VTETSAGQRHPTVGLVDHVSVLPLEEAAAAAATTGVSARDIGETMKALGADVLYGYAHP  
SGKELAAVRRESTRFFDSSDASTLVATATHAPGQATVGAPPRFVENFNIRLKPVTARRVA  
RTLTESVRERSGQGLPCVEALTLKYGRDKYEACNLLDPGVTSATDIEKMRVWETQQQQ  
QEGDINESFGLIETAYRVGTTTEMCLKALRDVSTEDGEKTHNTIVLRQLEADFGTG  
>comp13340\_c0\_seq1; 337 385 1365 LEN=1769; translated  
MTHSPPPKHRRQPSLASSSTSSSTSSSSCSSEHVFVTEVDGTMGSLSRCQELDLGSEL  
QQSSWNDDDTDSFVSKREKAEMLVTECGDEQQLQQLQQLTMSPAKQLVDYRIRVRSRPE  
SSFLSSQSSWMIQNSRSPSNVFFSSHISSSSREDAEYQIKNTIDALVGSISAAINFCHRHS  
GVPKPSILQLERNLKMRYFAVLSRIQHYIGCVRSETMDDLQAKIYLAVTAWALCRYKA  
LEYKLAYKSVSRLRNAAAATVEQSGSSFLSSSSAVLSRTSGGKIDESEIERAIQLQIKY  
GEQATMCQKKLYLVQRWRQVLSRGS  
>comp13341\_c0\_seq1; 1776 183 5090 LEN=5268; translated  
MQESPEVTQDAVTASSLVSDENEATGEQDKAEKLDGEEKQEVVEEAAAGTNAQEEVSLPA  
KTEAGGTTNAAGDTTSTRIETASVENTPELGPENDDGKPEALATNQSDQKEEDKVDQESA  
VSNEETEFSAVTDVPKSESNGLKTDNNSNGVPGVQSKGAKILMNRFFSTWRKTANEKL  
NTQAPVLSENAKQASEYAQRVLKSNLSVMPMSMNLASRFASQKPKPTPNPVDEKMETAL  
DVEAKSENIIDSKKKEEDAVIDGRREAEGEAESTSNLELKPVSQGSLLDNDEDDHDENN  
IGNETTQKSEGVAVGSATIITAESRERVRAVFSKASTMAESVATGFRGRYKRDVSATTK  
PTESTNADLNDQAKTIQETSQMALILKSRAGEYMQEILDKLEPYEFAMLLGRGMLGVNLK  
QCYLKNRGIFVDYLDVGGQAAQSGLVCSGLMVRGDSDFRKGTIKDIPIKIGQAKRPV  
LVLATGTQVALERINFVDVAVAMHRARKFYIDSGKLSVFPSEKKTTSVTPVITDNDKE  
TIATPLFEKEEKNDPDSSETSESICDVTIEANDTVDAYMSPWPPTLAVRKEFIDETFLR  
SLDNFVSDLCDVLDIDSNFRSAIRNAFLVCALDSRRLPFLARHFSDEVMISSKNQGSA  
EEENNNMTPSAQLMLFLELSSFLDLYDVTPTRLKDVASRIAYKFFLPTKIGNGIQPPL  
FDFHQIVPYSSLRHLEFALNGKSEIPRDLFLDFQKSIVDSLSGAPFLSFLASADCSRMR  
AYLRDTAPFVNLFRNMMDAMAKGTETAKDTAAAHNSFSYILLYLICRMEKECSGEYDFG  
IENEANRRLGATNDICCALFIKRTLLPTIDSIMKEGDNFSQSSSEKLMVVEQFWSLYL  
DESLELSTRNAEIEGIVKVRNIQTVSAEFHESDLPRTCVSLILKSKLAEAEATVLAD  
EIFYDYAANTNSKFRDHKFEHWCSEFAKALGGDPYWRYTQSVVPLPPGCLKRRFLRRVEL  
PNGVSSHKPYQVTPKEELERNYHNADWAVVFGSSVGTTELASQMAVPGLDSPDIRRYTCLP  
VALDCDHTDYDDFRPEQVLPATFESYAFVPPSKPKPFQSVVDAGRVTDDGWEVSLVFTTI  
PNADSSSGDATESALYGVSLCLQRISDGDLDIVTKLVSKEGELKEKDETWNSPISF  
EKESIDGSEKYVRKVRVSSKLPYERHLQEKTWVERVEEEEYRDQTKPISMGIALVSRRN  
VIFSMRDSLRLFFDYSRSPGQSLEVAKASTTCNALVEILGALSQDHEGSVLRDLLAPY  
LRVASNPWLERPFDEQEKMFESHALRQLTDCLPPTSLALLFVTALLEQKIIIFSSGRRSVL  
HAASLGLATLLRPLKWSHLLVPMVPGALANDLIQYPAPFILGVPSEADASMDLLGNLPRD  
VTLVDLVDVGRVILAPDFGQDNEMCRKTADTKATARALRSQVLYLAQGLGEVFGKSLRPDS  
WVSDEPSLCAMAPGKIRNDEMSTARLDQLRLSAKSFIDEILAGSVSCCYWIEELTPTYG

SSVEPTVLFDEDEKFFEIKNHRANMAPTPLFNRIIPSKTGSLSLVLDLDFDLVLESFLRCQSM  
SIYISSRPKKDMFYF  
>comp13341\_c0\_seq2; 205 1 801 LEN=979; translated  
RYCSSGRRSVLHAASLGLATLLRPLKWSHLLVPMVPGALANDLIQYPAPFILGVPSEAD  
SMDLLGNLPRDVTLDVGRVILAPDFGQDNEMCRKTADTKATARALRSQVLYLAQGLG  
EVFGKSLRPDSWVSDEPSLCAMAPGKIRNDEMISITARLDQLRLSAKSFIDEILAGSVSCC  
YWIEELTPTYGSSVEPTVLFDEDEKFFEIKNHRANMAPTPLFNRIIPSKTGSLSLVLDLDFDL  
VLESFLRCQSM  
SIYISSRPKKDMFYF  
>comp13343\_c0\_seq1; 655 48 1265 LEN=1386; translated  
MIFLCSVAALRNTATRTSVSAFSSSSSPVARRSIASNQQLKVSFLEDLTRGFSNMAGSGS  
KSKYYTVGITGASGLIGTAFQNELQAAGTVNGKPVVVFQRGNEAEAVDEEALSDDSFT  
STKSITWNPSPGNEASVDSVQLQSLDALVHLSGENISTGEGLLAPLGIRPWTDSKKEEII  
SRTTTTSALAGAI AASGNKNCDFLVASGVGVYGPDFVGPNAAPAADESADVSSTGGFLAE  
VSRVWEASTKSAQAAGNRVVMRNGVALSTKGGALAKLYPIFFLGGGGVGGGDQYFPFV  
SNRDMARAMVHLLLETPSIKGPVNMCAPEPATNADFTDAMGTVLKRPTLLPFPGFAVSLLF  
GEMGEEVLLGGTRAAPKLLDLSGFQFLHPTVEDAVRSVAVDEESRI  
>comp13343\_c0\_seq2; 655 114 1331 LEN=1452; translated  
MIFLCSVAALRNTATRTSVSAFSSSSSPVARRSIASNQQLKVSFLEDLTRGFSNMAGSGS  
KSKYYTVGITGASGLIGTAFQNELQAAGTVNGKPVVVFQRGNEAEAVDEEALSDDSFT  
STKSITWNPSPGNEASVDSVQLQSLDALVHLSGENISTGEGLLAPLGIRPWTDSKKEEII  
SRTTTTSALAGAI AASGNKNCDFLVASGVGVYGPDFVGPNAAPAADESADVSSTGGFLAE  
VSRVWEASTKSAQAAGNRVVMRNGVALSTKGGALAKLYPIFFLGGGGVGGGDQYFPFV  
SNRDMARAMVHLLLETPSIKGPVNMCAPEPATNADFTDAMGTVLKRPTLLPFPGFAVSLLF  
GEMGEEVLLGGTRAAPKLLDLSGFQFLHPTVEDAVRSVAVDEESRI  
>comp13344\_c0\_seq2; 266 1 976 LEN=1346; translated  
XKRNTKPNQQRIPARITNIPGGSNEMISATTALRSASGGAGLLGSLFSVAGKNVLV  
TGGSRGIGLMIAKNFTAAGANVLLTSRSEDACMEASEAIAGTISASGSGAPAPMYVASNV  
SSRKGCEELADHAARVFGERGLDVLVNNAGASWGEPLDRTSGRANWGFDKVLDLNVKGVF  
YLTRACLPLLEKAATPESPSRVINVGSI VGMVPPAATHAYDASKAAVHSLTLKLSADLA  
PR SITVNALAPGFVSTRMSKGLGTWGATEDKIARGIPLGRMGTEEDMAGACLYLSSRAGA  
WCTGVILNVDGGSVGGNQIDLGSSL  
>comp13344\_c0\_seq3; 108 1 604 LEN=974; translated  
XRACFFLSRSTSQRCSVLRSLLPVPGPTKRAPTMLSDLRMRSCLPACPPAQNVKGVFYLTR  
ACLPLLEKAATPESPSRVINVGSI VGMVPPAATHAYDASKAAVHSLTLKLSADLAPRSI  
TVNALAPGFVSTRMSKGLGTWGATEDKIARGIPLGRMGTEEDMAGACLYLSSRAGAWCTG  
VILNVDGGSVGGNQIDLGSSL  
>comp13345\_c0\_seq1; 691 252 2003 LEN=2074; translated  
MGTQVKQRRRTILLAVFPVVPSTLFFLALVCVAARSVSASAVNGDNNCVDDPSVLFK  
NKNRSCAWLSNKPRSKRFVCKKRSTILGQEDTARVKRFCRSACSEWNKNCQTNNGNACT  
DDPDFVFLWKNKRERKCSWLSRVEDSSEHKAVACGKHAESCQSACNFENCRNRTHAPSPT  
RSPSASPSSGSPSAFAGTTHPSAPPTGIESGSAFPTDSNNGGPPVPLVSPSPSRAPASEL  
PTGGPPEALFSGKKGACWTLREAGKNGSYQENIPKARALDPHMYSWGQAPPEGVPTVPG  
EKG GIRIPNPSGTPPLMDFVPMWGYYPDIFEEFTDQILDQNPRIVLGFNEPDAREQSDL  
SVDAAIEGWSRLVAKTTGESRNEDVLLVSPSAVNPMGWSWFEFMDRTEQEGIRVDAIGVH  
WYGGASPETFVQKLNVAVRDKYQRPVLVTEFAVADWEATS VETNRFSEDRVLEFMRAVLPW  
MEDQDWILGYSWFSFERTNPYGTSSALFYEDASADGTPVLTPLGEYAAAYRKNEQNGINP  
TTTTTPSPGDKELPGGSQENSRNFAFATTMVSMLTPSNLLVR  
>comp13347\_c0\_seq3; 236 1 1453 LEN=1581; translated  
XKCINPSGTATVFEKAIHIVRHHTTTPRSETFTNLSQQTASVAGETIYRIGRLQAPS YRLQ  
GARMAS TTI ANGLKSTGNVLINKLSLPGVTSSTQNIYAPTGWMLGTACSVVGMIVHGGV  
TRLTQSGLSMTTWSPLGTLPPITKEEWEIEFERYKTFPEFQQRKSMELSEFKFIYGWEYG  
HRMLGRAVGLAFVLPWAYFSAKKLI PKGYQKRMLGLLAMGGTQGLVGVMMVKSGLGSDF  
GDKKEIRVRPIRLTAHLTMAVATYGALLWTGLDILGLPHQKT LAEQASKFFNKGTLHRAL  
RLRSGSIFVTSLTGLTIVSGALVAGNDAGRAYNTFPKMDGEWIPSEIADLTPWHRNLKEN  
TATVQFNHRVLGMSTAI AAVGLTGLGLALPFKKGKSGVLF TPQVRMGLYAIGSSSVAQMLL  
GITLLQYVPLSLAAAHQVGSIVVFSGGIYLTHSLRYVRPALTRLNRDAIANTNVKNALS  
RKIK  
>comp13348\_c0\_seq1; 452 217 2599 LEN=2898; translated  
MTHSFWLEDEFEV SANGFLLMKEPRGYLLDEEQVLLHTTTVLLRSLYPLLDMNEIFLHS  
GYREEGAYNESRSKIVHESEVSSGNDNVIVPIPKTEEKSONGETTLGKTQTAIPSKYQSY

QKLERIENLSNQIQLALQDIRTFRHRTDGGRSDDSLSEESVRVRLQYQQRRLLQLNPGKH  
PESVTKEEIPRNEKRLSRNSICYSVESKGGHEEESIALTLARTLNSIRALFPHLLPILNHP  
RRNDKLVIGKTRYKTRRNGPWCWLLGTSFGSSTSKQSIAAQENVKWILEAFIGIERAV  
QLSKDPKGAPLFWPKLWLEHVTKRNTPNILSPIEVLAAGTGFSEEDFQVTAACDAIING  
QDQLASDEIYEYQYRQVVKRIHHRLSNVLTSRFPGARLSIYGSCLSNLSIGKGSVDVMSLW  
IPEADKLKRGFQDGSVHARQYEQSIKNLVYKVFRLKLNKAEFRSMTPIITKARIPVITGT  
YIYAHNPFTEDEGSINFDICFLDIAVANSSLLRDYSLVDPVRVQLMIAVKQWAKEHKINSA  
KDKCLSSYAWMNLVVFYLCIGFLPNLQSHALMKAAGIVDPARNYWHFIDNLDCTCLEW  
ETVRSaelwTPPREFEKLPLSLLLYGFFEFYSSRFPGIYAVSIKRASVSLPKLAARKAN  
LFFSIEDPFETYDShCPHDLGSVNDYASKKIRNCISEAEDHVRKVLCSSEKSHEGKLWPS  
PPFVEPEPTRRANKSGFRFFECVPVPTARNTVPHNFESDLRPMRRSRSHRTTASRNTRG  
GLSGNTDQESQNR

>comp13348\_c0\_seq2; 477 217 1704 LEN=1722; translated  
MTHSFWLEDEFEVSAANGFLLMKEPRGYLLDEEQPVLLHTTTVLLRSLYPLLDMNEIFLHS  
GYREEGAYNESRSKIVHESEVSSGNDNVIVPIPKTEEKSONGETTLGKQTAIPSKYQSY  
QKLERIENLSNQIQLALQDIRTFRHRTDGGRSDDSLSEESVRVRLQYQQRRLLQLNPGKH  
PESVTKEEIPRNEKRLSRNSICYSVESKGGHEEESIALTLARTLNSIRALFPHLLPILNHP  
RRNDKLVIGKTRYKTRRNGPWCWLLGTSFGSSTSKQSIAAQENVKWILEAFIGIERAV  
QLSKDPKGAPLFWPKLWLEHVTKRNTPNILSPIEVLAAGTGFSEEDFQVTAACDAIING  
QDQLASDEIYEYQYRQVVKRIHHRLSNVLTSRFPGARLSIYGSCLSNLSIGKGSVDVMSLW  
IPEADKLKRGFQDGSVHARQYEQSIKNLVYKVFRLKLNKAEFRSMTPIITKARIPVITGT  
YIYAHNPFTEDEGSIK

>comp13349\_c0\_seq2; 246 1 1047 LEN=1263; translated  
LIVILSSGKRILHLSFGFIHADRIAVIMNNISRRFVSSGSLFTKRIQSVVGTNGGSVTS  
VRFPSLREHQCQHRRGFSGVGIHRQGFVGMVSNLASSLSSFRISRGFSSNATPESN  
DNDDQQQQEQQLQNLILSPTTPTMFTDRDSGEQYGVVLDTRKLPKPKPSVVRRLDKCKT  
YVGREQSIRHSPWKLNRICQLAAGLTLEEALQKFLDKKNADLVAKVLKRTSNLADIRD  
GLQISQLEVAECFATRSLMLRRIKPMGRGRHGMVHHKFSHIRVVLREIDFPLRIYQQKSL  
NQKKKWMHLHQQAQNDAAQAMAKREELERLEKQQQAQLEERKKAARKQ

>comp13350\_c0\_seq1; 235 358 834 LEN=1163; translated  
MIRLSMAEGETTPTPADPMDAAIEEEEEMDDATREOLEKVRRAQELREQEVFMKLSTGKH  
KCTNCDWEYDETKGDSMMIGMIKPGTKFDEMPADWRCPVCRASKDAFAEVVEEIPGFV  
NQGYGFGSNSWTSQKNLAIFGGLAGFFLLFLSGYAMS

>comp13351\_c0\_seq1; 965 396 3224 LEN=3559; translated  
MSLEPTPGPATAAPTGLRDDSANQSETGVIGSLGDAFSGVTLGSSTGNSGTFVSGNPF  
NASSHPTSTDNNGWGGFSNREASRNSFARPGATTNOKGRDDQTSEPHTPDHAERKKSID  
LFLSRDPSEMLGNDVFKELSTGNLPLGLAIPEDTNNPSTNFRGPGGQTSVLHPGVATGSVQ  
SGHPEQQRISPSSNVTGTTASNTTGSRSNSPYESSGNSHTIQAYQSYDQNKNDVSAPSPY  
QATPTSNSMSPRSPSSYSNTNNSNAALNQHYSSPAPEKQSNLSLPPQQPQQQIILYMAVPTPD  
GRQVLQPVQMVQMPGKPYAYVLPGTGMPAMQGAIPGMQAGAQPMMVMPTMVPQQQTQMAS  
PVGVPQRQQPGFQGHQSDVMNGLIGGTGSGGRNHSQHKNMIGGGYQSSVNDISGPGYG  
NTLSGLRADDYNPMQGGQNI GGGDPHYLNQPTDPELASLYSTPQRPLDALLGQVRKLSR  
DQVGCRLVQQALDEEGPMAATLILNEGLPFWGEAMVDPFGNYLFQKILEKITAEEERIMLV  
KSVSTRLVNASLNLHGTRSVQKIVELCTMDEKNSRPPNSENDGDAKEETAADVLTALTP  
AAARLCIDSHGNHVIQRILLKLGHKHSKFVFDVAVAESVGDVARHRHGCCVIQRCLDSSPPG  
PARSNLVCRIVDKSLELMQDAYGNYVVQYVLDVCSDDDVHAVCESVIGKVNLLAIQKFSS  
NVMEKCLERCITDRVKEHYMQELSDPERIRELMDPFGNYVVQRALSVATHTQAVRLVEAM  
RPHLIAQTPGTPNGQRNGGVRNTAGRRIMAKICRRFPNFNLNSTGTREELYSQNRGRHH  
HNNHHHQATAAVPPMYGAVPQLAPGPIHVLQQQQPQQQQLYTSNLTDYNTAQLGINPVN  
MGGLQFDQRQTYDPSADASYFQQQQQQQTPHFGQAYQSGL

>comp13352\_c0\_seq1; 1023 107 2911 LEN=3082; translated  
MASFLEQNKEFVLKLYIKTSDGETRIRRVCLPRIADKYGTSVSYEELVGLVLFVTFPEED  
SSTRDTKKYLVSLLTYDDEKDLITVGSSTEELMDAIELFAGQKFMRIITTCVKPKKSCHGSP  
TSASSANVSDGASPPDRGSDVKHLPVPPVPMILETFSGILAKAAHELPEMATHFQPG  
SSHRSNKKTQTPSSAPKEAEFVDETNTPSSSTKRPPVPSFSSSTRKPPPTSCSAFD  
GKPPPKSSRKKVREDNKGTQVSKGARGSKAPPSSRDSAISTPKTNASKEGASSKRASPHSK  
NVGRCGSPGTTKEPSPKAGAEKPFHGRHTCDGCLTTPIVGNRYRATNLPDYDLQHCYH  
NYKGSEIKFKPMELRRDVAFQARWHRYEMNVTAMKRRNRRRHSRSGKDRCGAHECTNP  
GSERSPTSLPVSNDCTGVIRDETNSSESPVDAAGFDDFDLLKEAIRSLDDVVQNSFS  
GKSEESSELEKETAEFSNEECALGDQSRKGSLLVKGEISPSLEMVELKTTISKDEHTACT

ANIVSRKPSKDTEDESISICKYQGSKNNESSNAKGDIPFLDFTVESKTSDCVDTACDVENKVE  
GENVEKTTKKEECERGERKEESAACQSSNEENSFAKGDIPRSVEIEEQDTTGKETPPCDES  
TLDNSSEVEKANIVKTMERAMDATSVDSEKLLAETRGNDASPSVAKTSKNKHSESPFSK  
RSLRDESFASDAVIGIGDVAEMVGKTLDMVAGEISEMLCDDDEGSVFDGDESATSSKCTND  
ETERGELIILNPGDETTTEEKADEDDWSVVKSVGTNGTTESQRIGQATQMLGSALFNSDIQT  
SEENASSMMASGSSFSVSPSSVPTDLGTVHSSVSRPRHATRWAGELEKLELRELGFNDNEEKCI  
RILERLEGLSDTKLKSIEETTELIGMVVSEILAE

>comp13353\_c0\_seq1; 272 163 1191 LEN=1438; translated  
MILQSRNLTLFATLAYPVITILLLSILAPSEAFATATATRAITTTAPFNLLLVAPHRGSCDDR  
NCNGHFRTTSLVRLDASRADVDPQPRESEAEALKAEEALKAERAEQLRSEIEQGTSHQKK  
NGKDEEGSGTGGSTAASVSPQAAASPVAVVSGDSNEEGDRGYRLYVDIGREEGSMWDPWA  
ASGKRIEFALDIKLLANSLATPEASQKMKVDNTVGSSSPVFALKTAPFARLRDGFDRMEC  
NDGAYRIDSGKNGMNTLRMYVEVEGTVRADQSYVYGDVSI PAGRLYFSLPCFGTGIDNLS  
IKEGVVSVRQMGWHTGWRREESRICGVFTAKSLQEAKKRDY

>comp13354\_c0\_seq1; 168 189 1071 LEN=1638; translated  
MDHFSYQNERQSMALPSGAEAI VSLRSDDEILMSSREKSTKSTIIIGRLNIPMMVALMLW  
VMLITVELSPFALIIRGGNDPHAAGAGKGSVVSQEDDDDEYSVKGLWGSTASLSDLVFGI  
RPCSLEECVSSPCEDSKTTRFACLSLQHDQARGGCGAVPWTKTICADQCDASGCSWLLR  
EKIDASQLQPGSDENVVEDCDTECPKHWERNLRCGAEAPYQCTAGLSIYGCADMYD  
GPSDPPTPIVLRRAIRTSAREKPKYKLLGQNWVTPQEI RNGTNDDMHFLFQ

>comp13355\_c0\_seq2; 65 1 1126 LEN=1761; translated  
XNIPYLDAGHEYQYNRITPFAWRDTPTRSTKHDESETKRWGPFWPALGKTRNDRQDYRLG  
RRLYSQWLQREQGADGIRSAPIDAGPGGGGRKRSRRTGGCHVLQRVEAGVWGEYVRKED  
IDRVPAQDPQDPGSPDTTAHDDRHLAARVTRAFFRERCAHLLAGDWDNVHGVSVVVIASG  
VGDSVRYHIDYAEMFRFRNTVIYPPMYGGTLHLTPTRDMKGGFEFCANLGGLDHYKRFYK  
CPIEKFDLDGTGGGGDGDWIKVPYRYNRATLCDGDLPHFSAPVRSIPDGKKRVIVGFNV  
CNHEIGPIVEEYPEHSAKFNRVFKLSQTAVKFGGGLTIEAVKKNPNLAAFVKLLAKKME  
KQRLEEKENEADRDA

>comp13356\_c0\_seq1; 434 1 2013 LEN=2525; translated  
XKLLPTFIKMSNNASEFPCEATRCLL TEVEMGLRLTVNALPNGTKRGYSNDLQNSHTVA  
FSKRRSPKQEWYLHLDP SRGSDGKGS GKHRS LQLRHSESGQYLS CDETG RVNCAESS  
PSTYWWLEPVHEMESPETATGLSSTSGSFDESTEGQYILTSKKYPSRRLTYTADKFGASD  
DGIQLIASNKSEPSVWTIKFTSGELCFISNPVVHCQLRCNTGGTISLNSGSHGWVFRFI  
EVNGELYISSWTHYTRFLTSDTDGKVTSIDSTSRDLSYSERWRIEVPEGGRGLYIQNVA  
SRRYLSVGREANEQLWTTTKPNDYALWHLNAAHSHIYYLTSLFASTKNEKGVDESSKDSE  
EVPEVEDEVKDEEEKPEVEEDI PKSSGATDYNQIYSKRGVSDMHISSSKNGPFLLTKKKQ  
KWEWQIELTPEGDVTFSSIAHEKYLGCNSKGDVHTTTTSGAWTLWEKKISPNGGVMFLS  
REHLRFLAVSDVDGSLHTTPGDEETNLCHSWRMDPRLPRISGGKIAGRSSIPPTLLLC  
CSFVFGVGLSFLVLLVEISSFLFLNGCXNLTILLALVAGAMGLAMAVAMPFAVLGA  
IETVGAATEIAILGTSVEVLAGAVAGAALGAGVVGTAKLVSNNGNGKEQSNGDDDDLLD  
KKFACQRPLSAW

>comp13356\_c0\_seq2; 310 1 1642 LEN=2627; translated  
XKLLPTFIKMSNNASEFPCEATRCLL TEVEMGLRLTVNALPNGTKRGYSNDLQNSHTVA  
FSKRRSPKQEWYLHLDP SRGSDGKGS GKHRS LQLRHSESGQYLS CDETG RVNCAESS  
PSTYWWLEPVHEMESPETATGLSSTSGSFDESTEGQYILTSKKYPSRRLTYTADKFGASD  
DGIQLIASNKSEPSVWTIKFTSGELCFISNPVVHCQLRCNTGGTISLNSGSHGWVFRFI  
EVNGELYISSWTHYTRFLTSDTDGKVTSIDSTSRDLSYSERWRIEVPEGGRGLYIQNVA  
SRRYLSVGREANEQLWTTTKPNDYALWHLNAAHSHIYYLTSLFASTKNEKGVDESSKDSE  
EVPEVEDEVKDEEEKPEVEEDI PKSSGATDYNQIYSKRGVSDMHISSSKNGPFLLTKKKQ  
KWEWQIELTPEGDVTFSSIAHEKYLGCNSKGDVHTTTTSGAWTLWEKKISPNGGVMFLS  
REHLRFLAVSDVDGSLHTTPGDEETNLCHSWRMDPRLPRISGGKIAGRSSIPPTLQLL  
RRDMWNA

>comp13356\_c0\_seq3; 410 1 1849 LEN=2361; translated  
XKLLPTFIKMSNNASEFPCEATRCLL TEVEMGLRLTVNALPNGTKRGYSNDLQNSHTVA  
FSKRRSPKQEWYLHLDP SRGSDGKGS GKHRS LQLRHSESGQYLS CDETG RVNCAESS  
PSTYWWLEPVHEMESPETATGLSSTSGSFDESTEGQYILTSKKYPSRRLTYTADKFGASD  
DGIQLIASNKSEPSVWTIKFTSGELCFISNPVVHCQLRCNTGGTISLNSGSHGWVFRFI  
EVNGELYISSWTHYTRFLTSDTDGKVTSIDSTSRDLSYSERWRIEVPEGGRGLYIQNVA  
SRRYLSVGREANEQLWTTTKPNDYALWHLNAAHSHIYYLTSLFASTKNEKGVDESSKDSE  
EVPEVEDEVKDEEEKPEVEEDI PKSSGATDYNQIYSKRGVSDMHISSSKNGPFLLTKKKQ

KWEEWQIELTPEGDVTFSSIAHEKYLGCNSKGDVHTTTSTKGAWTLWEKKISPNGGVMFLS  
REHLRFLAVSDVDGSLHTTPGDEETNLCHSWRMDPRLPRISGGKIAGAMGLAMAVAMPF  
AVLGAIETVGAATEIAILGTSVEVLGAVAGAALGAGVVGTTAKLVSNGNGKEQSNQNGDD  
DDLDDKKFACQRPLSAW

>comp13357\_c0\_seq1; 209 234 494 LEN=1409; translated  
MAIEDEIRLRNNPETSFGDVTREQILETRNRRKRQLKVMLVDARKKLADHSAGEKPLTE  
EAKAILVNSIDVYRRKIESMEGELEEW

>comp13357\_c0\_seq2; 210 234 605 LEN=1279; translated  
MAIEDEIRLRNNPETSFGDVTREQILETRNRRKRQLKVMLVDARKKLADHSAGEKPLTE  
EAKAILVNSIDVYRRKIESMEVELEEWIEIERLIARETEAANRRKKRSRDSRKSRSR  
REL

>comp13358\_c0\_seq1; 440 1 1513 LEN=1589; translated  
XHTLAISAKEKTTKLKDKRMKMKSSARSGLTPCRRYSIVAALALVSLTLPVQYGHAFVP  
PLQSGVRESNLSLCRDATNGISEEKLKKIVGENEATIGNDHPTRNSNFVAAMASLSLAT  
TLFLGPLTPEPAHASSYAAFTPEQKLVTEAWRTVDSTYVDRTFNGQDWFKMRQDLVKKKY  
RSMDEAQDAVAKMMSTLGDKYTKYLTPAKYQSLVDATGTLAGVGVIEIATNKDEIPIVSD  
VEPNSPAQKAGLLPKDVFVEGGGAKFDKSSTPDDVALRLRGPVGSKVGITVLRDGTGKDF  
IIERAPITVTSVRSYIAQSNKNVGVIRIKSFSGTTSSSTVKEAVQELKKKGAKQILIDLRS  
NPGGLLPGGVETAQLFLESNKQIVYVSNKGVILAEESTFEDGFDTETKLTILVDHNTASA  
AEVFTAAMKENGRATVIGEQTFGKGI IQTIRELSDGNGLSVTVARYETPNHNNINKSGI  
AVDKAVDVECPKDNALACLPSGYF

>comp13359\_c0\_seq1; 138 103 608 LEN=1060; translated  
MDSSFVDDDLVYPNLRACKLKTIGPAAATSSPPVRLPSAVREAVEAPPYGSVRGGNRLDG  
CALGXVTQSKTRTGRAEATGGTGEGMCAEGGHLEGGAGACDRLQDEERHGGRRLHRHS  
QATQVRRDGSRRGLPRRPNAIKGNNGRTMDNNDSSSTRIPNKMDEWMEG

>comp13359\_c0\_seq3; 228 103 501 LEN=1036; translated  
MDSSFVDDDLVYPNLRACKLKTIGPAAATSSPPVRLPSAVREAVEAPPYGSVRGGNRLDG  
CALERAVLKRQEERARECVLRGATSREELVHATVSKMRSVTGAEEDVCIAILKRHRDYDT  
EAVEAYLDGQTR

>comp13360\_c0\_seq2; 943 491 3069 LEN=3069; translated  
MDISDEENESGKDVGANDTPEEEKESVIDDPANDNSEEEKQSGFFVPANDLARLITIMND  
EKEDLDKNGKDLVEEHAYLVTKSRKRKSAQRHLSFAKRIGQRGQKDIMPQSLVRFVVDG  
EDCDNLGLDKPSIDLDRILEQDSVHYDGITYKKNRCYKHKVDGDRVFGIKHFLREINTDS  
EPESCVSAYCVEIIPFNRTVLETVNPTSELKFIQRGGSEREIHLSFEFEKEIQKSPPLPQF  
MYHERQSGSSHLLFGLEDASKAKQRNGPRDLKKSPLRGIDFYAGAGLMSNGFQAVGLNIV  
IAVEKNEDAISKYGIHGAKVSKVSKVSEISSHECKQILSTREGKIAFHDTVETFLQRC  
QDFSFKEALGTIDFVVTCSPCQGFQSKQNVFKQGNVEQNNNESLRILNAAELLQPKLFVFE  
NVLGMWEERNIKGYLQKMNGLTFDFGYNVVKVGLCAADFGDPQLRPRILILIASLSHIGV  
PVFPNPTHSPSYLCNTVSGGLFPYVTAKDALIMEEKKYPESELLINDDGKVRDPNPKPTT  
VLASKSSAHYNLNRFYLSSENAILMGQSSDFVSKLVGTNKSQRQIGNGVSMGMAQAIAR  
SCFEVFRWCWKEAPKPRTTLPKRSEDEELDWLVTDDDESNGEVDVKDLRKETSIEMNK  
TDDKGPGEESPFPVPGISHEVVIVEAGSKKSGEETSVMNRMKSELDGKPKGKETSINMLVMSK  
NEEIVEAFSNQPDKKTSTLFEIMSDEEDVKCESGGNEPSKEIPSSSKMVDKGVKKEAARKT  
DLFNMSDEDVSSEADRKKISRERSILLVTSNEDVAPTRADLRRFLDIKDTHALLERSDND  
VSPKAVGKVS GGKDRPVLLX

>comp13361\_c0\_seq1; 485 83 1846 LEN=2304; translated  
MNYESSLRRHVNTNIGEATPLPSSYDAPLATTDKMRRRKEKNKKSIMPLSCQRAFVRF  
LTLQKTSQVLVLMVISFIFLLPPTIYLMRSPSRYLKNEIYQSKRQKRREGDGQKTKH  
LPIKDSQFVNVDNFQNFANVTKEHESERNIYDIKNNKLLKEFIERKTFPSLEPRVVKLTD  
RDHSFQFQVAPGSSSSLTPEKGLKTLKSKYIPIQADSLKQLNPADPLGKGDCKPIAPDW  
QLAYHPTCNQIHELSSGWQTYRLPAGFSSRNKSSDLESFQLGATLDDEAIAPDVHHRREQ  
TRLVNVQGAFRHVWMIRDSDGITKRAMKTLRSLKRKEKKFDLRNHDRHRRDAMSFEQLHN  
SSLVVVDLYASCNTAIFDYADRGLRRIFESSEESQTFNLHLMEIAYNVSLSVHDAHFF  
DEEGRATMAHTDIKVNQFIYQDGYKLSDFNRVRFLTWNNKVNKGCDFVAKNGGEYRSP  
EEYAYEKETEKVVDVYSLGNVLYFLLVRHEVWVEKPVKQVYELVKLGHPRKPIPEKIYNSK  
IFERAMVRAIEMAWQPEPEGRSSALEVAKVIKEGLDMLSEGAKNYHR

>comp13362\_c0\_seq1; 523 1 1611 LEN=1684; translated  
FQPYHPRRLQMLRDRDGNRSGDPDDTDNRFIPLRREFERWMRQHSKAYHSDEEKERRFS  
IWSQNHERTAENRRHGPCTLTQHVFGSNHFKDLAPEEFRAKFLTGYKGAHADVLEEKL  
GAMSPGERKLRKDAGIGVVLDPKLHKVDYHESVLRKQRHLKQETSSYKPKVMTASAMYCK



WYDASCILRYIWLSTGIQFGMIGTMEPKFDADAFPNVSDWRDSGAVTYVRTQGECEGACWA  
ITAVETVESAYFLATGTLYTLSESEIIVCDDSCEMCSGGWPQNAFEWVMDHGGLPLQNTL  
PYDSYTLIALTAGAEGDSEYYSEEALSYRNQVCPASDAGSHDGSNSNDESYWNGAENK  
NYADYSDQGRYGNIRGYGYATDRCLCYTDGSGCDCDDQDEDTAVRNIATYGPAVVCLEAS  
TWQDYSGEIMTDEIGCGHEFSDMNHCVQVVGYAFTDDSDCGEGDAGDEGEKGDANCGGGS  
NDGSGSGSNSGSSDSREGYWIWRNQWSSWGMNGYAYVAMGGNTCGILNDMTVAYA  
>comp13363\_c0\_seq1; 513 1 2211 LEN=2467; translated  
XERKRITRTGTPNNNNNNINLSNSMSSLPFALLLLVAAVSFATYSVYLLLPLANLRCTGP  
EIEIPGKENQHTQNDAESNNKPSTKKNILLLLTDDQDVELGSFDTQSYMPKLHSFLKQQG  
ITFEKGALVHVPICCPSRSSLTGTGKYLHNKKVGGTNTRESNQEDNLYRLAVNNSLAGNCY  
GDTWRKHTEKEDTIAVYAKAAGYTTLYAGKYLNQYKHSSTSSSGSHSDIDPDSIPAGWD  
YWYGLEGNSRYNYTIVERTPNPENEGTVDNDGRGGTIRLHAHGDSYPGDYLPVLKDYT  
LSTLPGLTEPWLA VVAWPTPHGPFTPEPKHAGDYPDVAAPRTPNWNASGTGSSPSQRKH  
LLRQLGAI SERTASQIDAIYRNRLRALATVDDHVGALVEWLGRP ETNASSGSGNATSDES  
ENKEDLNTTMLDRTVIMYTS DNGFQFGQHRLAIDKVGTXSKSMQSVFGSLIWISSILWVL  
FLSTQNXQRHLYEHDVVRVFPVVRGPFVFGSGAKSISVPQEQIISLVDIAPTMLDIFLEAIQH  
NDNNDNTDASLVHRLRGAMDRMDGVSFWDFLRTIGGDENHLPMTTRDYHNGHKTRPSDP  
FLQRNDLLIAYHGE G D PRCGLSECPAPLNGLWMPDSYNNTYHCVRTMTANAIQNTNQRN  
REGIREDAGAADASDRATNSKAANNENSIYCVFYDNE DFVEYYDLNKNPFQLGNDYHAL  
SDFQVQRYEKRLQELLS  
>comp13363\_c0\_seq2; 654 79 2142 LEN=2398; translated  
MSMSSLPFALLLLVAAVSFATYSVYLLLPLANLRCTGPEIEIPGKENQHTQNDAESNNKP  
STKKNILLLLTDDQDVELGSFDTQSYMPKLHSFLKQQGITFEKGALVHVPICCPSRSSL  
TGKYLHNKKVGGTNTRESNQEDNLYRLAVNNSLAGNCYGDTWRKHTEKEDTIAVYAKAAG  
YTTLYAGKYLNQYKHSSTSTNTSSSGSHSDIDPDSIPAGWDYWYGLEGNSRYNYTIV  
ERTPNPENEGTVDNDGRGGTIRLHAHGDSYPGDYLPVLKDYTLSTLPGLTEPWLA VVAW  
PTPHGPFTPEPKHAGDYPDVAAPRTPNWNASGTGSSPSQRKHLLRQLGAI SERTASQID  
AIYRNRLRALATVDDHVGALVEWLGRP ETNASSGSGNATSDESENKEDLNTTMLDRTVIM  
YTS DNGFQFGQHRLAIDKRHLYEHDVVRVFPVVRGPFVFGSGAKSISVPQEQIISLVDIAPT  
MLDIFLEAIQHNDNNDNTDASLVHRLRGAMDRMDGVSFWDFLRTIGGDENHLPMTTRDYH  
NGHKTRPSDPFLQRNDLLIAYHGE G D PRCGLSECPAPLNGLWMPDSYNNTYHCVRTMTA  
NAIQNTNQRNREGIREDAGAADASDRATNSKAANNENSIYCVFYDNE DFVEYYDLNKNP  
FQLGNDYHALSDFQVQRYEKRLQELLS  
>comp13363\_c0\_seq3; 578 1 2114 LEN=2370; translated  
XERKRITRTGTPNNNNNNINLSNSMSSLPFALLLLVAAVSFATYSVYLLLPLANLRCTGP  
EIEIPGKENQHTQNDAESNNKPSTKKNILLLLTDDQDVELGSFDTQSYMPKLHSFLKQQG  
ITFEKGALVHVPICCPSRSSLTGTGKYLHNKKVGGTNTRESNQEDNLYRLAVNNSLAGNCY  
GDTWRKHTEKEDTIAVYAKAAGYTTLYAGKYLNQYKHSSTSSSGSHSDIDPDSIPAGWD  
YWYGLEGNSRYNYTIVERTPNPENEGTVDNDGRGGTIRLHAHGDSYPGDYLPVLKDYT  
LSTLPGLTEPWLA VVAWPTPHGPFTPEPKHAGDYPDVAAPRTPNWNASGTGSSPSQRKH  
LLRQLGAI SERTASQIDAIYRNRLRALATVDDHVGALVEWLGRP ETNASSGSGNATSDES  
ENKEDLNTTMLDRTVIMYTS DNGFQFGQHRLAIDKRHLYEHDVVRVFPVVRGPFVFGSGAKS  
ISVPQEQIISLVDIAPTMLDIFLEAIQHNDNNDNTDASLVHRLRGAMDRMDGVSFWDFLRT  
IGGDENHLPMTTRDYHNGHKTRPSDPFLQRNDLLIAYHGE G D PRCGLSECPAPLNGLW  
MPDSYNNTYHCVRTMTANAIQNTNQRNREGIREDAGAADASDRATNSKAANNENSIYCV  
FYDNE DFVEYYDLNKNPFQLGNDYHALSDFQVQRYEKRLQELLS  
>comp13363\_c0\_seq4; 637 79 2127 LEN=2383; translated  
MSMSSLPFALLLLVAAVSFATYSVYLLLPLANLRCTGPEIEIPGKENQHTQNDAESNNKP  
STKKNILLLLTDDQDVELGSFDTQSYMPKLHSFLKQQGITFEKGALVHVPICCPSRSSL  
TGKYLHNKKVGGTNTRESNQEDNLYRLAVNNSLAGNCYGDTWRKHTEKEDTIAVYAKAAG  
YTTLYAGKYLNQYKHSSTSSSGSHSDIDPDSIPAGWDYWYGLEGNSRYNYTIVERTPN  
PENEGTVDNDGRGGTIRLHAHGDSYPGDYLPVLKDYTLSTLPGLTEPWLA VVAWPTPHG  
PFTPEPKHAGDYPDVAAPRTPNWNASGTGSSPSQRKHLLRQLGAI SERTASQIDAIYRN  
RLRALATVDDHVGALVEWLGRP ETNASSGSGNATSDESENKEDLNTTMLDRTVIMYTS D  
NGFQFGQHRLAIDKRHLYEHDVVRVFPVVRGPFVFGSGAKSISVPQEQIISLVDIAPTMLDIF  
LEAIQHNDNNDNTDASLVHRLRGAMDRMDGVSFWDFLRTIGGDENHLPMTTRDYHNGHK  
TRPSDPFLQRNDLLIAYHGE G D PRCGLSECPAPLNGLWMPDSYNNTYHCVRTMTANAIQ  
NTNQRNREGIREDAGAADASDRATNSKAANNENSIYCVFYDNE DFVEYYDLNKNPFQLG  
NDYHALSDFQVQRYEKRLQELLS  
>comp13363\_c0\_seq5; 572 79 2224 LEN=2480; translated

MSMSSLPFALLLLVAAVSFATYSVYLLLPLANLRCTGPEIEIPGKENQHTQNDAESNNKP  
STKKNILLLLTDDQDVELGSFDTQSYMPKLHSFLKQQGITFEK GALVHVPICCPSRSSLL  
TGKYLHNKKVGGTNTRESNQEDNLYRLAVNNSLAGNCYGDTWRKHTEKEDTIAVYAKAAG  
YTTLYAGKYLNQYKHSSSTSSSGSHSDIDPDSIPAGWDYWYGLEGNSRYNYTIVERTPN  
PENEGTVDNDGRGGTIRLHAHGDSYPGDYLPVLKDYTLSTLPGLTEPWLA VVAWPTPHG  
PFTPEPKHAGDYPDVAAPRTPNWNASGTGSSPSQRKHWLLRQLGAI SERTASQIDAIYRN  
RLRALATVDDHVGALVEWLGRP ETNASSGSGNATSDESENKEDLNTTMLDR TVIMYTS DN  
GFQFGQHRLAIDKVGTXSKSMQSVFGSLIWISSILWVLF LSTQNXQRHLYEHDVRVPFV  
RGPFGSGAKSISVPQEQUIISLVDIAPTMLDIFLEAIQHNDNNDNTDASLVHRLRGAMDRM  
DGVSFWDFLRTIGGDENHLPMTTRDYHNGHKTRPSDPFLQRNDLLIAYHGEGDPRCGLS  
ECPAPLNGLWMPDSYNNTYHCVRTMTANAIQNTNQRNREGIREDAGAADASDSRATNSK  
AANNENSIYCVFYDNEDFVEYYDLNKNPFQLGNDYHALSDFQVQRYEKRLQELLS

>comp13363\_c0\_seq6; 530 1 2226 LEN=2482; translated  
XERKRITRTGTPNNNNNNINLSNSMSSLPFALLLLVAAVSFATYSVYLLLPLANLRCTGP  
EIEIPGKENQHTQNDAESNNKPSTKKNILLLLTDDQDVELGSFDTQSYMPKLHSFLKQQG  
ITFEK GALVHVPICCPSRSSLLTGKYLHNKKVGGTNTRESNQEDNLYRLAVNNSLAGNCY  
GDTWRKHTEKEDTIAVYAKAAGYTTLYAGKYLNQYKHSSSTSTNTSSSGSHSDIDPDSI  
PAGWDYWYGLEGNSRYNYTIVERTPNPENEGTVDNDGRGGTIRLHAHGDSYPGDYLPVL  
LKDYTLSTLPGLTEPWLA VVAWPTPHGPFTPEPKHAGDYPDVAAPRTPNWNASGTGSSPS  
QRKHWLLRQLGAI SERTASQIDAIYRNRLRALATVDDHVGALVEWLGRP ETNASSGSGNA  
TSDESENKEDLNTTMLDR TVIMYTS DNFGFQFGQHRLAIDKVGTXSKSMQSVFGSLIWISS  
ILWVLF LSTQNXQRHLYEHDVRVPFVVRGPFGSGAKSISVPQEQUIISLVDIAPTMLDIFL  
EAIQHNDNNDNTDASLVHRLRGAMDRMDGVSFWDFLRTIGGDENHLPMTTRDYHNGHK  
RPSDPFLQRNDLLIAYHGEGDPRCGLSECPAPLNGLWMPDSYNNTYHCVRTMTANAIQNTN  
QRNREGIREDAGAADASDSRATNSKAANNENSIYCVFYDNEDFVEYYDLNKNPFQLGN  
DYHALSDFQVQRYEKRLQELLS

>comp13363\_c0\_seq7; 595 1 2129 LEN=2385; translated  
XERKRITRTGTPNNNNNNINLSNSMSSLPFALLLLVAAVSFATYSVYLLLPLANLRCTGP  
EIEIPGKENQHTQNDAESNNKPSTKKNILLLLTDDQDVELGSFDTQSYMPKLHSFLKQQG  
ITFEK GALVHVPICCPSRSSLLTGKYLHNKKVGGTNTRESNQEDNLYRLAVNNSLAGNCY  
GDTWRKHTEKEDTIAVYAKAAGYTTLYAGKYLNQYKHSSSTSTNTSSSGSHSDIDPDSI  
PAGWDYWYGLEGNSRYNYTIVERTPNPENEGTVDNDGRGGTIRLHAHGDSYPGDYLPVL  
LKDYTLSTLPGLTEPWLA VVAWPTPHGPFTPEPKHAGDYPDVAAPRTPNWNASGTGSSPS  
QRKHWLLRQLGAI SERTASQIDAIYRNRLRALATVDDHVGALVEWLGRP ETNASSGSGNA  
TSDESENKEDLNTTMLDR TVIMYTS DNFGFQFGQHRLAIDKRHLYEHDVRVPFVVRGPFGS  
GAKSISVPQEQUIISLVDIAPTMLDIFLEAIQHNDNNDNTDASLVHRLRGAMDRMDGVSF  
DFLRTIGGDENHLPMTTRDYHNGHKTRPSDPFLQRNDLLIAYHGEGDPRCGLSECPAPL  
NGLWMPDSYNNTYHCVRTMTANAIQNTNQRNREGIREDAGAADASDSRATNSKAANNEN  
SIYCVFYDNEDFVEYYDLNKNPFQLGNDYHALSDFQVQRYEKRLQELLS

>comp13363\_c0\_seq8; 589 79 2239 LEN=2495; translated  
MSMSSLPFALLLLVAAVSFATYSVYLLLPLANLRCTGPEIEIPGKENQHTQNDAESNNKP  
STKKNILLLLTDDQDVELGSFDTQSYMPKLHSFLKQQGITFEK GALVHVPICCPSRSSLL  
TGKYLHNKKVGGTNTRESNQEDNLYRLAVNNSLAGNCYGDTWRKHTEKEDTIAVYAKAAG  
YTTLYAGKYLNQYKHSSSTSTNTSSSGSHSDIDPDSIPAGWDYWYGLEGNSRYNYTIV  
ERTPNPENEGTVDNDGRGGTIRLHAHGDSYPGDYLPVLKDYTLSTLPGLTEPWLA VVA  
PTPHGPFTPEPKHAGDYPDVAAPRTPNWNASGTGSSPSQRKHWLLRQLGAI SERTASQID  
AIYRNRLRALATVDDHVGALVEWLGRP ETNASSGSGNATSDESENKEDLNTTMLDR TVIM  
YTS DNFGFQFGQHRLAIDKVGTXSKSMQSVFGSLIWISSILWVLF LSTQNXQRHLYEHDVR  
VPFVVRGPFGSGAKSISVPQEQUIISLVDIAPTMLDIFLEAIQHNDNNDNTDASLVHRLRG  
AMDRMDGVSFWDFLRTIGGDENHLPMTTRDYHNGHKTRPSDPFLQRNDLLIAYHGEGDP  
RCGLSECPAPLNGLWMPDSYNNTYHCVRTMTANAIQNTNQRNREGIREDAGAADASDSR  
ATNSKAANNENSIYCVFYDNEDFVEYYDLNKNPFQLGNDYHALSDFQVQRYEKRLQELLS

>comp13363\_c1\_seq1; 330 403 945 LEN=1193; translated  
MTASSATKDPLQLLMDCTSSFC SWIKNDVASQSDGDSNP TLLMPELKKNQHESLTPSTNL  
KVAFLIAIPLIGILFLLYCSKYFNYVEQPRIYTYSGDTVDTCDLLERESSFDDDEEYI  
DKDSLEGTIEVQKL RARDIPRVPIENNGTEKMVEDNKTCGEDRDTCDLSQIEKQDDHSV

>comp13364\_c0\_seq1; 361 1 2236 LEN=2236; translated  
TETSLSFGWSAPSQIELGGDQRQLLTGGSQQGRDSIGIIRMAVSLPRSRLIVFFLNICNA  
VAFSRKMGNPKSPNSISIGGNEGPKWCEASQIYIGGVPENEEVQKLI EESNGSVKIFGYG  
SLCWNPGADGGLSKASQTLGRVKGYKR VWSQRST DHRGT VQFPGIVCTLLTKDEYHSVVE

SVAKGSGSDEGALSPIDGTHDNETKDYAESMVTEGVIFSVPPPELVQETLAELDFREKGGY  
ARDVCEVVEEGSDKTYRALLYRGTDPDNPAFSSRCLVDLPFSAAIMSASVGPSPNDIYLN  
NLDGFLDRIKNSAAQDDTKTLANMVRSFQKGYQLYFLTGGGSNQHNQLMLNRPGIPSLI  
AAEDAHRTEIVLPTPLLTNDSSGSAPKSI FAGGGHSALLTKNGRFLFLWGWNKDLQCGAE  
RTGIEEHPPDLPLPFVEPLPDIVVESAAALGFSHTLVVERQTGRVYAFGNDRERGQVTGRQN  
VPLSEIATHPITPEFLKDEDVDIVKAGLFHSALVTCKGELITFGCDRFGQC�NLPKQDGAT  
AESLSNSMHTHCRWKPIDADRIVDVSCGRRHTVAVDLSLNRVWTFGENKYGQLGRKTDQKK  
GCGPSVDMMEGKIRKDDKVHVHCGWSHTILHVEGAEGSKFFGFGRNDKGQLGNGSNLQVD  
SPIEIFSGKEIKRIHCGSESTMVIDEEGQLWGCGWNEHGNLGTGNQDDAFALRLSQRITC  
TPPDIHNSEIALAVGGAHYIVA AVEX

>comp13364\_c0\_seq2; 297 199 2328 LEN=2328; translated  
MGNPKSPNSISIGGNEGPKWCEASQIYIGGVPENEEVQKLI EESNGSVKIFGYGSLCWNP  
GADGGLSKASQTLGRVKGYKRVWSQRSTDRGTVQFPPIVCTLLTKDEYHSVVE SVAKGS  
GSEDEGALSPIDGTHDNETKDYAESMVTEGVIFSVPPPELVQETLAELDFREKGGYARDVCE  
VVEEGSDKTYRALLYRGTDPDNPAFSSRCLVDLPFSAAIMSASVGPSPNDIYLN NLDGFL  
DRIKNSAAQDDTKTLANMVRSFQKGYQLYFLTGGGSNQHNQLMLNRPGIPSLIAAEDA  
HRTEIVLPTPLLTNDSSGSAPKSI FAGGGHSALLTKNGRFLFLWGWNKDLQCGAERTGIEE  
HPPDLPLPFVEPLPDIVVESAAALGFSHTLVVERQTGRVYAFGNDRERGQVTGRQNVPLSEI  
ATHPITPEFLKDEDVDIVKAGLFHSALVTCKGELITFGCDRFGQC�NLPKQDGATAESLSN  
SMHTHCRWKPIDADRIVDVSCGRRHTVAVDLSLNRVWTFGENKYGQLGRKTDQKKGCGPSV  
VDMMEGKIRKDDKVHVHCGWSHTILHVEGAEGSKFFGFGRNDKGQLGNGSNLQVDSPIEIF  
SGKEIKRIHCGSESTMVIDEEGKCRNSVLAKHTVLSLSFGLFFHSSFLLFRQVNSGVVGG  
XEHGNLGTGNQDDAFALRLSQRITCTPPDIHNSEIALAVGGAHYIVA AVEX

>comp13365\_c0\_seq3; 223 462 893 LEN=1125; translated  
MLQIPGFMNQFGCPYSKDPNSSRSGTGGPMQKTAFKNCNGESMLRNHDGCIPDEIGDGHP  
RISNSVGTLSMANTGRPNSSGGSQFFINVS DNTFLDWFDSQTPAAHPVFGKVVENMDLAFK  
ISNVPTRNDNPVTPIKMISVRVA

>comp13365\_c0\_seq8; 263 163 723 LEN=955; translated  
MSIATFTTSMGTFAELYTDRMPITCGNFIDLANS GFYDGLHFHRVIPGFMNQFGCPYSK  
DPNSSRSGTGGPMQKTAFKNCNGESMLRNHDGCIPDEIGDGHPRISNSVGTLSMANTGRP  
NSGGSQFFINVS DNTFLDWFDSQTPAAHPVFGKVVENMDLAFKISNVPTRNDNPVTPIKM  
ISVRVA

>comp13365\_c0\_seq9; 223 462 893 LEN=1139; translated  
MLQIPGFMNQFGCPYSKDPNSSRSGTGGPMQKTAFKNCNGESMLRNHDGCIPDEIGDGHP  
RISNSVGTLSMANTGRPNSSGGSQFFINVS DNTFLDWFDSQTPAAHPVFGKVVENMDLAFK  
ISNVPTRNDNPVTPIKMISVRVA

>comp13365\_c0\_seq12; 263 163 723 LEN=969; translated  
MSIATFTTSMGTFAELYTDRMPITCGNFIDLANS GFYDGLHFHRVIPGFMNQFGCPYSK  
DPNSSRSGTGGPMQKTAFKNCNGESMLRNHDGCIPDEIGDGHPRISNSVGTLSMANTGRP  
NSGGSQFFINVS DNTFLDWFDSQTPAAHPVFGKVVENMDLAFKISNVPTRNDNPVTPIKM  
ISVRVA

>comp13366\_c0\_seq1; 709 243 1515 LEN=1539; translated  
MPSVSYLPPTIAQIYAKALYDPRPTTTTVAQKQLAYALGYPM DWRVERTIVEEGGGDGDG  
TSKNENEKKPATIVIKDRIHALGGKRNQTKYT WLNHEAAQKAALLFEKEGTLDPRAIEAN  
NNNTGGSKAGSNDTGSHLLPATALFQKGDVVMVRYEGEWWSATVTKKPKKKNDDEFFYSV  
LYHGDDATQDEIAEEDLKPGE DPSEVAVSLGLDATWTATRNGSRFVITAPCGTVFSSKKA  
ARKHLRELANKKGGGGGSAK KKRTPKEEDAGDPPWRTGGHDWIGRRVFWTFKHKASA  
RRQIAIEQIGTIEGYIDASDTDKDGNPGFVSEKTGEPANLFHV VFGDDPGHPYAQYLLHN  
TDVEEFEIAECLLPEVAAAPSGGGGGGSKSPSKKKGAGSRDDEQGVSDAGWMDVQFHCIY  
YNY

>comp13366\_c0\_seq2; 746 243 1763 LEN=1787; translated  
MPSVSYLPPTIAQIYAKALYDPRPTTTTVAQKQLAYALGYPM DWRVERTIVEEGGGDGDG  
TSKNENEKKPATIVIKDRIHALGGKRNQTKYT WLNHEAAQKAALLFEKEGTLDPRAIEAN  
NNNTGGSKAGSNDTGSHLLPATALFQKGDVVMVRYEGEWWSATVTKKPKKKNDDEFFYSV  
LYHGDDATQDEIAEEDLKPGE DPSEVAVSLGLDATWTATRNGSRFVITAPCGTVFSSKKA  
ARKHLRELANKKGGGGGSAK KKRTPKEEDAGDPPWRTGGHDWIGRRVFWTFKHKASA  
RRQIAIEQIGTIEGYIDASDTDKVTE SCSTAPGSAFLLRFGAYQKRKAETPWVEQFGRNV  
IPSRVLLRLAFVAHALLDWHDSP LKLDFFLYFAFSFVSFGSLSFAQDGNPGFVSEKTGEP  
ANLFHV VFGDDPGHPYAQYLLHNTDVEEFEIAECLLPEVAAAPSGGGGGGSKSPSKKKGA  
GSRDDEQGVSDAGWMDVQFHCIY YNY

>comp13367\_c0\_seq1; 410 77 1534 LEN=1534; translated  
MPSAFRRSGGSNKRRVLP SGIAESAIPNGPLTSSQSSSGTQNTTRSSIRPLLRGVKWPWQG  
GSYLTSVGLNDLNDNILGGGQVLGTSILLEEDRLWTRDLAITLVKYWCAEAI SQDQLLLAP  
TFSTSI LLKDDDDENASLSFLFGDDNCLEDGDQPSNHSREELHDLLSSLPRNLHWKQKK  
KQEKAKREQEASNNATDITSTLGS MNLEPIAILEEED EEEDEEKEADDGLQVAWQYKTSVQQ  
ERLAKSKSNTATASVATNVF SHSYDLSARMMDQTKLDLSAYIVPLSLTTGTNDSSRQNG  
YSFFCELVHMLKERMATNNEKAVRLLLLYHPLELLLI ALPLFLAHIRKESLPVVIMICTT  
PSADVKS RVGLSRACDVVLSTEGFASRKEYPPPPEFRHLQGV LKISKTTTRKRIEMAAAIY  
GFKRDRRKLHIPL LHIPPEDYAEGGGSVTGGVRS GAGRPVDSKPGKTSSGGMGCSNMSG  
LLDFXKX

>comp13368\_c0\_seq1; 386 341 2053 LEN=2097; translated  
MCKSIKEVYAETGDFPCVAAGYCTADDDEYGGEVTCQKGPFFSCEPKKFCRKTRPKFGYR  
YSCDLK PGLGRWMMHMQSAASRHTAAIASGLLKQKRCGEPDAGPYCIAKPSGFGRIAEFVG  
WILSFFYGGYQSIMAIETPGGDDDQQLTFWVIFVGSMSFEHAFARVLLSKFPLYQFKL  
VAITWLIFFDGAN YLYRKFRRSISEWSPNFVDALDDFNHKN AQNLDSMVQIGGKV VSDK  
IALLESNLKSNPAQRNCFLYTKSSKVTPWEYDYTDTKRGVNRISLTA EESLFLQLSKWMLG  
SEGMEELEHKLRSNEVAMLLERAAPVVSFQPKFLNIHLIGTRPGRLGQLPVM DANGKADC  
YVKFSV VNETSYSTFDCTQAREQKGSFRNFSAMTQREISTVTSRIAYRTLDPEWNQRLEM  
PLKGG SLEKSGIYINSDFNSQILLVEAWDADCGAWGITLEIFRFSGCSLVCALIAAYVLG  
AIDFFFHETLTTEQWWWKTAI IATTCVVVGFALTYMKS VVLRADDEFIAHAAAPLEILK  
DQMT HSLFLTLSDKWKQRCVLR IKLR LSEN

>comp13368\_c0\_seq2; 338 863 2176 LEN=2220; translated  
MAIETPGGDDDQQLTFWVIFVGSMSFEHAFARVLLSKFPLYQFKLVAITWLIFFDGAN  
YLYRKFRRSISEWSPNFVDALDDFNHKN AQNLDSMVQIGGKV VSDKIALLESNLKSNPA  
QRNCFLYTKSSKVTPWEYDYTDTKRGVNRISLTA EESLFLQLSKWMLGSEGMEELEHKLRS  
NEVAMLLERAAPVVSFQPKFLNIHLIGTRPGRLGQLPVM DANGKADCYVKFSV VNETSY  
TFDCTQAREQKGSFRNFSAMTQREISTVTSRIAYRTLDPEWNQRLEMPLKGG SLEKSGIY  
INSDFNSQILLVEAWDADCGAWGITLEIFRFSGCSLVCALIAAYVLGAIDFFFHETLTTE  
QWWWKTAI IATTCVVVGFALTYMKS VVLRADDEFIAHAAAPLEILKDQMT HSLFLTLSD  
KWKQRCVLR IKLR LSEN

>comp13369\_c0\_seq1; 264 436 1311 LEN=1859; translated  
MYNPTT MPQSLSKPNNLSSTQSPMSNASHRVSWSTIMDAKKANSDFLREGSLSPYHDP  
GYARSAI IGRKSEYDILQSGRRLSSMAPALIPDSAYRSHLSGRPAVKQKPSGIDKIVVAK  
IIGYVAIVGFAL TIVGILIDTQPMYLGILEKNQEVSSNGAKVKT FYAVS INDRLEPAK  
HAYRAGLLY LMTAII CFGYAQN VHHHLFKKGWQQYRDID DGDSTVPTFGGIDGYLPTSKA  
VHRKAYEERYGFIVRTWHSTFVTFQRLGIYLT SIWQDRRRNR RRFSGAKDV

>comp13370\_c0\_seq1; 289 366 836 LEN=836; minus strand; translated  
MQETIKVLFPPWAGGTSRVYQSLCEETRKH LVREESSVSSLVGPQPYDALTYFKDLKPIL  
SQFNVEFLAIDLPGRLIRPNPESQEILSDFASLSRVLIHEIFLDAADGDANQQNTVKKGE  
SYVLF GHSFGAMLAFEIAKQVGT YGLPPPLALFVSAS

>comp13370\_c0\_seq2; 982 1 2463 LEN=3086; translated  
SKQRDRNRMEDSKMEDAPAAVGSMDRKPDEAPAADVTE SFPDQKRKTDDSENNTKAEVQE  
MLLLKPYFESKGVSKDDIQT TIRVLA AITDLSSSRK DSTSKHSRMRDYHPSSK KRKISS  
GEDDNNTTAAVEEKKEDENDATEEKETKSN SGNPESPPLSLLLNEYRTVKELRPFRKALM  
QCYAKIVKPTLFDGHSSLGNYQKHENLSLSK KRKMAENHQQRKHLANTMLRKGRIDKLN  
AKLEEGKDEEQTKLQARMMI PDGHVDTDT TTTTTLAIENGSCNKPPSKNDASGQSRATDAK  
CSTPPEVETVDESGEASDGKANAATHAGNATELPKLRSCYVCKSRFRILH HFFYDQLCPTC  
ADTNW TNRHKTRDLTGKVAVVTGSRVKIGYQ TCLKLLRAGCFVIATTRFPNAAAAS YRVE  
PDFESW KDNLEIYGLDLRDV TGLELFCRYLQHKLG ISSSADGDNGNSGCGLDILINNACQ  
TIRRP TAYYLPACQREAGELWKSSDP THKALLKGCMEYEKLRRLHL TNKNHHSVSSSSSS  
GIAAPMMLGGTDHEATQETTTISG TSGTTS AVPE SNGNTGNTSPNATNTTITTSATSAVA  
TTSSSPNSNPFESTGM SHSAAASQMIICPEDVGVDES VLPKGLSDINGQQLDLRKTNSWL  
LKMDQVSTPELMECMFVNAIAPFV LNSRLQPLL VHRGKNKNNNATV PNR YIVNV SAMEGK  
FYRYKMANHPHTNMAKSALNMMTRTAAEDLARNHSVYMNSIDTGWINDENPLEKAAKTAK  
VNNFQTPIDEIDAAARILDPI LSDSKVY GKF LKDYRETEW

>comp13370\_c0\_seq3; 167 1 678 LEN=1304; translated  
ITTSATSAVATTSSNPFESTGM SHSAAASQMIICPEDVGVDES VLPKGLSDINGQQLDLR  
KTNSWLLKMDQVSTPELMECMFVNAIAPFV LNSRLQPLL VHRGKNKNNNATV PNR YIVNV  
SAMEGKFYRYKMANHPHTNMAKSALNMMTRTAAEDLARNHSVYMNSIDTGWINDENPLEK  
AAKTAKVNNFQTPIDEIDAAARILDPI LSDSKVY GKF LKDYRETEW

>comp13371\_c0\_seq1; 439 213 2078 LEN=2193; translated  
MKSIAVGLSASLWAAAVLQLHSGWNVLDAEAFVVIPIYSHSLDRGANSVGVGRRRSPSHCR  
RATTGTVATNRHKNSRFFSTTENSKDDNTSTSTILQEHKSNLSSTRTNTTLEFPPFCNL  
MDVRPGDFVASEAFVCSAPIDASNDQNDNSNKPRQHRFRVKLFPRGGGSDGTGSRSKPQES  
VGLYLEYLGLGGEDDSHKSEEDSDSVQATFALRLKGRQQRRFDVEWRAGMSFVENPEN  
SDLNQGVSTEFGAPLMQTGLFQEFGLIANKDQAYSDERPVMVEAEVVIHDAENILSKD  
SSSADANI EVQEKEPSSPMSWNKDIRLVEEGTNEHNTESVRVGKVVVPVLSRLSQRPK  
MFEQAYPGVEYRILRILDRDGRERFTSCPGADYELKPVYPLVAQLERPWPVVRVNERDIP  
KLFTPSMYNLLSAFGSLFTAASGLFVAFLLSQAISLFFIPSKSMDPTLKVGDVLLVDKVS  
SRTPFKNEVGMVLFSPPSRLQEIVAKNGGNLSSRDLFVKRIAASPGDRVTVYKDGKVD  
VNGQDVVAGRRDLCEAEPLRLIEKYIEPREDKIIDQKEVFVMGDCSSVSVDSRVWGSLEA  
ENIVGRPIVRIWPLDRFGKVE

>comp13372\_c0\_seq1; 471 180 1976 LEN=2002; translated  
MREEAHKQRRAGVARNRHGMLGLLILLVYTSSETVRTDAFVSPVALSDTARRNSEIVRQG  
FSGKNTPRQVLLRSTTSSSQSSLSASSPSFSSSLKEFNAHLETLVSKCSSSNEPVIIVRAA  
QCQELWENAKENESNFEPDSDSFQFVLSAWNQCTQTLVRSRRNSQTLPSEKGMSSVEVYTP  
LDAAKRATLLFAYPDPDLTAYNTVVETWSKSRVSESPAAERLLRRMMDDESIENPTNT  
YNFLIDAWANSNKPNSLDKATQIYRHMEKISKDDTKGNVKPTIRTINAVLHAYARKSAQF  
TSQNDQEGFEKAAECAASLDLLEETTKRYKETHDLNWQPDIAITYTSMVDVHSRCATYRT  
TRIAGELLAEVKKLYEKTGNRHKPNFRITYTALVTAWSRTRSDSPRQVEAIMNEMKQAG  
ERPNTRTYTSAVQCWARSRDPYKAKRVLKLMMAMRDEYKKSSEHIRPTTLTYNTAIDAC  
ARCQGSQDKTESLKI AFAFLKTELMDEEVEPDSTTYSTLIRALNFLMPSGDERNGVATA  
VFEKAKKAGLVELLTVKNLRMVLDETMRTALEGKLERNGEFNYGNLPASWKKNANKD

>comp13373\_c0\_seq1; 313 90 788 LEN=990; translated  
MTVSESDTIVSPSTMQGDWTTIRNLPQYAPKKAAPLHSEAVCSSKMENEDCHVNKATPLR  
GELGPRSPFPPLLPYFDNDSKSVTQPLTPKLLKRSQRSSRSKNYVLPHTFHPKPSYR  
KNDSFITPVTLANKFALSPSVEGRDSTQENLKCESSSNLIVMGKSLKGSVMIWPKA  
NRAQRLNSVGNRLSSKPGRASQSKKHKRYFPSEKKQPSTSSSPRELPLSL

>comp13374\_c0\_seq2; 279 104 1218 LEN=1377; translated  
MRFSNPSTVASLFLLCNVARGSLLEKRFSINGPEYKYEDLQFSMDFEISDFVQDSMIGYS  
LYDGMACKDGGDNDITENSGYLLSRIRTDQTPPGDGNVRIKIQSELNSKLIKASPIYQ  
EDEDGNVTVEYCMRFGVYNTDKTNAFAMETNFLEIPVKLVIDLNAGFEVDAAVSNADGVL  
VESEQVAVEAYICDDDENIVPIVGFQEQQTVRVVCSPTPSNLAAGALMRQIESFTFRRL  
SPLLVEQPAINPQTGGDAADDLTIVSCQPGSTVCAFETLLYADFFVEEGQVIGAGTAFLO  
LGTGASATSRRLQETPNQILSENPTKFGVTLNLVTVESSYQMANTSGAAPAALTAFVGL  
ASLATALVLF

>comp13375\_c0\_seq1; 683 345 2468 LEN=2534; translated  
MPVYNFKKMSVPVPAAPDFIDIVLMRTQRRPTIIHPGYKITRIRGFYMRKIKFTQQTISE  
RLSKILTDFFRLNDIHPFYADLCNTLYDKDHYKLALGQLNTARSLVDQIARDMIRMV KYA  
DSAYRCKCLKRAALGRMCTVLKRQKASLAYLEEVKHL SRLPALDPNTRTILMCGLPNVG  
KSSF MNKITRGNVDVQPYAFTTKSLFVGHCDYKYL RWQVIDTPGILDHSLEERNTIEMQA  
IALAHLTCSVLYFCDI SEHCGYTI EAQCSLFRS IKPLFANKQLILVVNKVDEQPWETLD  
PEKKEMIEALAKDANCSLMTMSNKSEHGVSEVKASACEKLLASRV DARVSGKKIEGVMNR  
LQVFHPTPRDNVERGAHIPD TVKDAIAEGRIGSV DHPKRSRSGYAQTKGDTGGDDDEM  
NGSYRKTARDLMWENGPGVWAPDYREQYELKEDEWKFD AIP EIDGKN IADYVDPDIEK  
KLADLEMEEQQLLKQLEAERMGEPESDLDSEEEAAVDAIRDRKKI IRKMSQVNRSENKP  
VIPRTARGRTKDKHQPGDRSEDVVKAKMDKLGVDASKMI ERGRTMDRERGRKRERSRKR  
SRDTEAIESDDEM QDATMSKTQAKKKR SKSEARREASVTRGH SKPRDPSQVGLYSESA  
VKA AKKLERLGRKGWHGASGEGDNRKSEHLVKWMNTGKKRMGTHDWR

>comp13376\_c0\_seq1; 151 625 1237 LEN=1237; minus strand; translated  
MPRIQKQALQLRCVFGVPIV TIAAPAAAAAASAVAVSVSGAVAVVLPVAVGPAGRPPATEH  
CTTIAGTSSRPRTARFPEFLDPLPGHYQWLWQQLLLNGSPSEFLLSADGPSESFRELLPG  
MTGLHQDDARSEGSNIRTGWVCMCFRDRAPANKRPWLFDDFVRRSLTPQSKFDVVVFL  
RASVLFVFLVSSDFDADADADA

>comp13376\_c0\_seq2; 77 563 1195 LEN=1976; minus strand; translated  
MTSADSVSACRGIMSKELMRLSRNKRTALEEEIHGVRSLAPEETPSLVEDSLRRLAIELE  
KVLPN SKKQAYLTAQKQSDASRKYVGDPEFRLRFLRAELFDVQRAALRMTKSLECLLHMF  
GPYALERP IKLLDFTFTELKAFRDG SVQILPHRDRAGRRIVFFSPNVSLDADTNKNWSKM  
RILRVKIALYLSYVLSERVEDVESQRNGIVILLW

>comp13376\_c0\_seq3; 77 563 1195 LEN=2111; minus strand; translated

MTSADSVSACRGIMSKELMRLSRNKRTALEEEIHGVRSLAPEETPSLVEDSLRRLAIELE  
KVLPNSSKKQAYLTAQKQSDASRKYVGDPEFRLRFLRAELFDVQRAALRMTKSLECLLHMF  
GPYALERP IKLLDFTFTELKAFRDGVSQILPHRDRAGRRIVFFSPNVSLDADTNKNWSKM  
RILRVKIALYLSYVLSEDVESQRNGIVILLW

>comp13376\_c0\_seq4; 734 39 1613 LEN=3551; translated  
MAIFAAGFRKAGILLLLGFLLLILHKDVDDRSRCSLFCYAKEIEATKEWQRVEGNDTIPAG  
AHVRMDMTTGEKWKLMDDDDDAEVKDVHIKKNADGSGESSVAMAVVDNDGSVTVNEVKK  
EDITQPQNSTNYNFEMMHRTLSKLPPEEIVAMGGLPELPDSKEGPLRLAFEERMLEIWNE  
RQADLLEAELNFPEILKARIAAGIKEYLANPETELKSIDLEADYDDDIVTDIVSLLKDLEF  
QLSDIDMARDFHTMDGWPLLVKLVAAEESHVPIQRIDGLSRVNQAKIRTIQSHAAWVIGT  
AVKNTEEFFPYAVEPVALKNEKLVTAIDLLVDVFCQKYDDPSSWEIRTLTLLTKGIYAIGAL  
LRGNAVAQKHVAEFKGFDRLGQKFKKLSQEGFN SANTKLIQRLAGLSADLVEDLSVYLEL  
SEERMDSEIILSLSSSFCKAICELFSSDVFPVTVQETLVRGIGVLGPHCQDSSCAVNDL  
HSIIEKILADWVEKKETFDEDFHFKELQDMVTGALKSLNGQAKED

>comp13376\_c0\_seq5; 741 368 2749 LEN=3567; minus strand; translated  
MRLIGATIVALSLRLCAAADKISGLPWSELKERVGDRLIDTIPQDFIDQCLPEYYKPYHQ  
RTLYELIDQPSGLCTAHLFCGGFQQCAPNQEYLNQINGFENWESLRAFNNFFTAQIGSP  
PTSTAEDYDKAHNTSYAKSLQEWLNPANQYFSPPKVLFPTSAGDVVAAVDFAKTYGVEI  
SIKNSGHSYSGSSTKANTLLINMNKYKRYASDDKENKGIIECNDAEVGKGMITTSVDLDT  
ELCRLVRARGKPAAIRVGGGENFNKAFSSVKEINERKINEPGGKYKYHLVGGAVGTVSPM  
GWTWMGGLGGTAGGRLHGFVGDQVLQIEAVLPSGEHVRFGPTDWEDSDGYLQPKTTKVSG  
VCNTNPQDEEEQVWVGACPEETDVLFDLWFAFRGGGGGTWGVVLSVYLQLHDYMPVNI  
EKTSDVCSSNVDLATI IAKFVVDYLLDPGALNITREQSNMCAAANENLGTLCYSDNPAM  
GENLISLYQDFVSKNSEGLTEELAAIAPSCLSATNHTDWSEIVKISEGPHEGKMSGTFFP  
SYVVDLTLTLLNLLVPKSWVLDKKNSETKTKNDILVDWYFQNPFTYWAFFGGDSEFSDHQ  
TSSSLTAHREAGVMVLYLDSGSSSPKIPNPWLPSYFMPSTYWPPLPEMYDFTSGDIPPH  
IGSNHLGPNLHGPLRDNPCKPCTWDLSSLEADSMCHSAQEAVWGKTKTLKRLESIKTAVD  
PNGMFDCFHCIGNEVTRDEESSSSLDNDESAGGANEIVDSEIEETAEESSSVAVDAFEFP  
MVAVSVFAAMVLF

>comp13376\_c0\_seq6; 734 39 1613 LEN=3613; translated  
MAIFAAGFRKAGILLLLGFLLLILHKDVDDRSRCSLFCYAKEIEATKEWQRVEGNDTIPAG  
AHVRMDMTTGEKWKLMDDDDDAEVKDVHIKKNADGSGESSVAMAVVDNDGSVTVNEVKK  
EDITQPQNSTNYNFEMMHRTLSKLPPEEIVAMGGLPELPDSKEGPLRLAFEERMLEIWNE  
RQADLLEAELNFPEILKARIAAGIKEYLANPETELKSIDLEADYDDDIVTDIVSLLKDLEF  
QLSDIDMARDFHTMDGWPLLVKLVAAEESHVPIQRIDGLSRVNQAKIRTIQSHAAWVIGT  
AVKNTEEFFPYAVEPVALKNEKLVTAIDLLVDVFCQKYDDPSSWEIRTLTLLTKGIYAIGAL  
LRGNAVAQKHVAEFKGFDRLGQKFKKLSQEGFN SANTKLIQRLAGLSADLVEDLSVYLEL  
SEERMDSEIILSLSSSFCKAICELFSSDVFPVTVQETLVRGIGVLGPHCQDSSCAVNDL  
HSIIEKILADWVEKKETFDEDFHFKELQDMVTGALKSLNGQAKED

>comp13376\_c0\_seq7; 666 487 2660 LEN=3478; minus strand; translated  
MRLIGATIVALSLRLCAAADKISGLPWSELKERVGDRLIDTIPQDFIDQCLPEYYKPYHQ  
RTLYELIDQPSGLCTAHLFCGGFQQCAPNQEYLNQINGFENWESLRAFNNFFTAQIGSP  
PTSTAEDYDKAHNTSYAKSLQEWLNPANQYFSPPKVLFPTSAGDVVAAVDFAKTYGVEI  
SIKNSGHSYSGSSTKANTLLINMNKYKRYASDDKENKGIIECNDAEVGKGMITTSVDLDT  
ELCRLVRARGKPAAIRVGGGENFNKAFSSVKEINERKINEPGGKYKYHLVGGAVGTVSPM  
GWTWMGGLGGTAGGRLHGFVGDQVLQIEAVLPSGEHVRFGPTDWEDSDGYLQPKTTKVSG  
VCNTNPQDEEEQVWVGACPEETDVLFDLWFAFRGGGGGTWGVVLSVYLQLHDYMPVNI  
EKTSDVCSSNVDLATI IAKFVVDYLLDPGALNITREQSNMCAAANENLGTLCYSDNPAM  
GENLISLYQDFVSKNSEGLTEELAAIAPSCLSATNHTDGHLLGGIPNFPMTKXSSSLTAHR  
EAGVMVLYLDSGSSSPKIPNPWLPSYFMPSTYWPPLPEMYDFTSGDIPPHIGSNHLGPN  
LHGPLRDNPCKPCTWDLSSLEADSMCHSAQEAVWGKTKTLKRLESIKTAVDPNGMFDCFH  
CIGNEVTRDEESSSSLDNDESAGGANEIVDSEIEETAEESSSVAVDAFEFPMVAVSVFAA  
MVLF

>comp13376\_c0\_seq8; 741 487 2868 LEN=3686; minus strand; translated  
MRLIGATIVALSLRLCAAADKISGLPWSELKERVGDRLIDTIPQDFIDQCLPEYYKPYHQ  
RTLYELIDQPSGLCTAHLFCGGFQQCAPNQEYLNQINGFENWESLRAFNNFFTAQIGSP  
PTSTAEDYDKAHNTSYAKSLQEWLNPANQYFSPPKVLFPTSAGDVVAAVDFAKTYGVEI  
SIKNSGHSYSGSSTKANTLLINMNKYKRYASDDKENKGIIECNDAEVGKGMITTSVDLDT  
ELCRLVRARGKPAAIRVGGGENFNKAFSSVKEINERKINEPGGKYKYHLVGGAVGTVSPM  
GWTWMGGLGGTAGGRLHGFVGDQVLQIEAVLPSGEHVRFGPTDWEDSDGYLQPKTTKVSG

VCNTNPQDEEEQVWVGACPEETDVLFDLWFAFRGGGGGTWGVVLSVYLQLHDYMPLVNI  
EKTSVDCSSNVDLATIIAKFVVDYLLDPGALNITREQSNMCAAANENLGLRCYSNDPAM  
GENLISLYQDFVSKNSEGLTEELAAIAPSCLSATNHTDWSEIVKISEGPHEGKMSGTFPF  
SYVPDLTLLTNLLVPKSWVLDDKMNSETKTNKDILVDWYFQNPLFTYWAFGGDSEFSDHQ  
TSSLSTAHEREAGVMVLYLDSGSSSPKIPNPWLPSYFMPSTYWPPLPEMYDFTSGDIPPH  
IGSNHLGPNLHGPLRDNPCKPCPTWDLSSLEADSMCHSAQEAVWGKTKLKRLESIKTAVD  
PNGMFDCFHCIGNEVTRDEESSSSLDNDESAGGANEIVDSEIEETAEESSSSVAVDAFEFP  
MVAVSVFAAMVLF

>comp13376\_c0\_seq9; 77 563 1195 LEN=2020; minus strand; translated  
MTSADSVSACRGIMSKELMRLSRNKRTALEEEIHGVRSLAPEETPSLVEDSLRRLAIELE  
KVLPNSSKKQAYLTAQKQSDASRKYVGDPEFRLRFLRAELFDVQRAALRMTKSLECLLHMF  
GPYALERP IKLLDFTFTELKAFRDGSVQILPHRDRAGRRIVFFSPNVSLDADTNKNWSKM  
RILRVKIALYLSYVLSSEVDSQRNGIVILLW

>comp13376\_c0\_seq10; 734 39 1613 LEN=3484; translated  
MAIFAAGFRKAGILLLLGFLLLIHKDVDDRSRCSLFCYAKEIEATKEWQRVEGNDTIPAG  
AHVRMDMTTGEKWKLMDDDDDAEVKDVHIKKNADGSGESSVAMAVDNDGSVTVNEVVK  
EDITQPQNSTNYNFEMMHRTLSKLPPEEIVAMGGLPELPDSKEGPLRLAFAEERMLEIWNE  
RQADLLEAELNFPEILKARIAGIKEYLANPETELKSIDLEADYDDDIIVTDIVSLLKDLEF  
QLSDIDMARDFHTMDGWPLLVKLVAAESHVPIQIRIDGLSRVNQAKIRTIQSHAAWVIGT  
AVKNTEEFFPYAVEPVALKNEKLVTAIDLLVDVFCQKYDDPSSWEIRTLTLLTKGIYAIGAL  
LRGNAVAQKHVAEFKGFDRLGQKFKKLSQEGFNANSANTKLIQRLAGLSADLVEDLSVYLEL  
SEERMDSEIILSLSSSFCKAICELFSSDVFPVTVQETLVRGIGVLGPHCQDSSCAVNDL  
HSIIEKILADWVEKKETFDEDFHFKELQDMVTGALKSLNGQAKED

>comp13376\_c0\_seq11; 734 39 1613 LEN=3680; translated  
MAIFAAGFRKAGILLLLGFLLLIHKDVDDRSRCSLFCYAKEIEATKEWQRVEGNDTIPAG  
AHVRMDMTTGEKWKLMDDDDDAEVKDVHIKKNADGSGESSVAMAVDNDGSVTVNEVVK  
EDITQPQNSTNYNFEMMHRTLSKLPPEEIVAMGGLPELPDSKEGPLRLAFAEERMLEIWNE  
RQADLLEAELNFPEILKARIAGIKEYLANPETELKSIDLEADYDDDIIVTDIVSLLKDLEF  
QLSDIDMARDFHTMDGWPLLVKLVAAESHVPIQIRIDGLSRVNQAKIRTIQSHAAWVIGT  
AVKNTEEFFPYAVEPVALKNEKLVTAIDLLVDVFCQKYDDPSSWEIRTLTLLTKGIYAIGAL  
LRGNAVAQKHVAEFKGFDRLGQKFKKLSQEGFNANSANTKLIQRLAGLSADLVEDLSVYLEL  
SEERMDSEIILSLSSSFCKAICELFSSDVFPVTVQETLVRGIGVLGPHCQDSSCAVNDL  
HSIIEKILADWVEKKETFDEDFHFKELQDMVTGALKSLNGQAKED

>comp13376\_c0\_seq12; 741 426 2807 LEN=3625; minus strand; translated  
MRLIGATIVALSLRLCAAADISGLPWSELKERVGDRLIDTIPQDFIDQCLPEYYKPYHQ  
RTLYELIDQPSGLCTAHLFCGGFQQCAPNQEYLNQINGFENWESLRAFNNFFTAQIGSP  
PTSTAEDYDKAHTSYAKSLQEWLN PANQYFSPPKVLFPTSAGDVVAAVDFAKTYGVEI  
SIKNSGHSYSGSSTKANTLLINMNKYKRYASDDKENKGIIECNDAEVGKGMITTSVDLDT  
ELCRLVRARGKPAAIRVGGGENFNKAFSSVKEINERKINEPGGKYKYHLVGGAVGTVSPM  
GWTWMGGLGGTAGGRLHGFGVDQVLQIEAVLPSGEHVRFGPTDWEDSDGYLQPKTTKVS  
VCNTNPQDEEEQVWVGACPEETDVLFDLWFAFRGGGGGTWGVVLSVYLQLHDYMPLVNI  
EKTSVDCSSNVDLATIIAKFVVDYLLDPGALNITREQSNMCAAANENLGLRCYSNDPAM  
GENLISLYQDFVSKNSEGLTEELAAIAPSCLSATNHTDWSEIVKISEGPHEGKMSGTFPF  
SYVPDLTLLTNLLVPKSWVLDDKMNSETKTNKDILVDWYFQNPLFTYWAFGGDSEFSDHQ  
TSSLSTAHEREAGVMVLYLDSGSSSPKIPNPWLPSYFMPSTYWPPLPEMYDFTSGDIPPH  
IGSNHLGPNLHGPLRDNPCKPCPTWDLSSLEADSMCHSAQEAVWGKTKLKRLESIKTAVD  
PNGMFDCFHCIGNEVTRDEESSSSLDNDESAGGANEIVDSEIEETAEESSSSVAVDAFEFP  
MVAVSVFAAMVLF

>comp13376\_c0\_seq13; 666 368 2541 LEN=3359; minus strand; translated  
MRLIGATIVALSLRLCAAADISGLPWSELKERVGDRLIDTIPQDFIDQCLPEYYKPYHQ  
RTLYELIDQPSGLCTAHLFCGGFQQCAPNQEYLNQINGFENWESLRAFNNFFTAQIGSP  
PTSTAEDYDKAHTSYAKSLQEWLN PANQYFSPPKVLFPTSAGDVVAAVDFAKTYGVEI  
SIKNSGHSYSGSSTKANTLLINMNKYKRYASDDKENKGIIECNDAEVGKGMITTSVDLDT  
ELCRLVRARGKPAAIRVGGGENFNKAFSSVKEINERKINEPGGKYKYHLVGGAVGTVSPM  
GWTWMGGLGGTAGGRLHGFGVDQVLQIEAVLPSGEHVRFGPTDWEDSDGYLQPKTTKVS  
VCNTNPQDEEEQVWVGACPEETDVLFDLWFAFRGGGGGTWGVVLSVYLQLHDYMPLVNI  
EKTSVDCSSNVDLATIIAKFVVDYLLDPGALNITREQSNMCAAANENLGLRCYSNDPAM  
GENLISLYQDFVSKNSEGLTEELAAIAPSCLSATNHTDGHLGGIPNFPMTKXSSSLTAHR  
EAGVMVLYLDSGSSSPKIPNPWLPSYFMPSTYWPPLPEMYDFTSGDIPPHIGSNHLGPN  
LHGPLRDNPCKPCPTWDLSSLEADSMCHSAQEAVWGKTKLKRLESIKTAVDPNGMFDCFH

CIGNEVTRDEESSSSLDNDESAGGANEIVDSEIEETAEESSSVAVDAFEFPMVAVSVFAA  
MVLFF

>comp13376\_c0\_seq14; 666 426 2599 LEN=3417; minus strand; translated  
MRLIGATIVALSLRLCAAADKISGLPWSELKERVGDRLIDTIPQDFIDQCLPEYYKPYHQ  
RTLYELIDQPSGLCTAHLFCGGFQQCAPNQEYLNQINGFENWESLRAFNNFFTAQIGSP  
PTSTAEDYDKAHTSYAKSLQEWLNPNANQYFSPPPKVLFPPTSAGDVVAAVDFAKTYGVEI  
SIKNSGHSYSGSSTKANTLLINMNKYKRYASDDKENKGIIECNDAEVGKGMITTSVDLDT  
ELCRLVRRARGKPAAIRVGGGENFNKAFSSVKEINERKINEPGGKYKYHLVGGAVGTVSPM  
GWTWMGGLGGTAGGRLHGFVVDQVLQIEAVLPSGEHVRFPTDWEDSDGYLQPKTKVSG  
VCNTNPQDEEEQVWVGACPEETDVLFDLWFAFRGGGGGTWGVVLSVYLQLHDYMLVNI  
EKTSVDCSSNVDLATIIAKFVVDYLLDPGALNITREQSNMCAAANENLGTLCYNSNDPAM  
GENLISLYQDFVSKNSEGLTEELAAIAPSCLSATNHTDGHLGGIPNFPMTKXSSSLSTAHR  
EAGVMVLYLDSGSSSPKIPNPWLPSTYFMPSTYWPPLPEMYDFTSGDIPPHIGSNHLGPN  
LHGPLRDNPTKPCPTWDLSSLEADSMCHSAQEAVWGTKTLKRLESIKTAVDPNGMDFCFH  
CIGNEVTRDEESSSSLDNDESAGGANEIVDSEIEETAEESSSVAVDAFEFPMVAVSVFAA  
MVLFF

>comp13376\_c1\_seq1; 49 921 2450 LEN=2810; translated  
MTSADSVSACRGIMSKELMRLSRNKRTALEEEIHGVRSLAPEETPSLVEDSLRRLAIELE  
KVLPNSSKKQAYLTAQKQSDASRKYVGDPEFRLRFLRAELFDVHRAALRMTKSLECLLHMF  
GPYALERP IKLLDFTFTTELKAFRDGVSQILPHRDRAGRRIVFFSPNVSLDADTNKNWSKM  
RILRVKIALYLSYVLSERVEDVESQRNGIVILLWTDTRMPEWPGGRHPGVSKHQGLKASSVFF  
VRCSALHICTPNTPRFRVLRISIVLLGLGRQLWARIIHLGDQAELEYYLQGFQIAADAI PK  
SCTGKAKLQYVRQWLTIRQYLESSSIYTDGSVKRVGVDYPSAPIEAPGLKDVLFFKKGASA  
FYNPGNESFRSMIQDRYEIERSRAVLGGDQGFQSMYPYGAVESGGGSGIKRRVAAHVMDDEF  
RQGNLRALIWNEKQSWWYVLSNETQIQRKVDRAVNYWTAMPGERSSSWGLLREANRGKRG  
SQELEDNLPANKQMKPYHQAAEDHSLVNGW

>comp13376\_c1\_seq2; -37 921 2601 LEN=2961; translated  
MTSADSVSACRGIMSKELMRLSRNKRTALEEEIHGVRSLAPEETPSLVEDSLRRLAIELE  
KVLPNSSKKQAYLTAQKQSDASRKYVGDPEFRLRFLRAELFDVHRAALRMTKSLECLLHMF  
GPYALERP IKLLDFTFTTELKAFRDGVSQILPHRDRAGRRIVFFSPNVSLDADTNKNWSKM  
RILRVKIALYLSYVLSERVEDVESQRNGIVILLWTDTRMPEWPGGRHPGVSKHQGLKASSVFF  
VRCSALHICTPNTPRFRVLRISIVLLGLGRQLWARIIHLGEYKKHEHNDIVRMYATVSSK  
SAKSFVATSPHCSYAFHDNNGLIFXGSGDQAELEYYLQGFQIAADAI PKSCTGKAKLQY  
VRQWLTIRQYLESSSIYTDGSVKRVGVDYPSAPIEAPGLKDVLFFKKGASAFYNPGNESFR  
SMIQDRYEIERSRAVLGGDQGFQSMYPYGAVESGGGSGIKRRVAAHVMDDEFRQGNLRALI  
WNEKQSWWYVLSNETQIQRKVDRAVNYWTAMPGERSSSWGLLREANRGKRGSSQELEDNLP  
ANKQMKPYHQAAEDHSLVNGW

>comp13376\_c1\_seq3; -37 753 2433 LEN=2793; translated  
MTSADSVSACRGIMSKELMRLSRNKRTALEEEIHGVRSLAPEETPSLVEDSLRRLAIELE  
KVLPNSSKKQAYLTAQKQSDASRKYVGDPEFRLRFLRAELFDVHRAALRMTKSLECLLHMF  
GPYALERP IKLLDFTFTTELKAFRDGVSQILPHRDRAGRRIVFFSPNVSLDADTNKNWSKM  
RILRVKIALYLSYVLSERVEDVESQRNGIVILLWTDTRMPEWPGGRHPGVSKHQGLKASSVFF  
VRCSALHICTPNTPRFRVLRISIVLLGLGRQLWARIIHLGEYKKHEHNDIVRMYATVSSK  
SAKSFVATSPHCSYAFHDNNGLIFXGSGDQAELEYYLQGFQIAADAI PKSCTGKAKLQY  
VRQWLTIRQYLESSSIYTDGSVKRVGVDYPSAPIEAPGLKDVLFFKKGASAFYNPGNESFR  
SMIQDRYEIERSRAVLGGDQGFQSMYPYGAVESGGGSGIKRRVAAHVMDDEFRQGNLRALI  
WNEKQSWWYVLSNETQIQRKVDRAVNYWTAMPGERSSSWGLLREANRGKRGSSQELEDNLP  
ANKQMKPYHQAAEDHSLVNGW

>comp13376\_c1\_seq4; 49 753 2282 LEN=2642; translated  
MTSADSVSACRGIMSKELMRLSRNKRTALEEEIHGVRSLAPEETPSLVEDSLRRLAIELE  
KVLPNSSKKQAYLTAQKQSDASRKYVGDPEFRLRFLRAELFDVHRAALRMTKSLECLLHMF  
GPYALERP IKLLDFTFTTELKAFRDGVSQILPHRDRAGRRIVFFSPNVSLDADTNKNWSKM  
RILRVKIALYLSYVLSERVEDVESQRNGIVILLWTDTRMPEWPGGRHPGVSKHQGLKASSVFF  
VRCSALHICTPNTPRFRVLRISIVLLGLGRQLWARIIHLGDQAELEYYLQGFQIAADAI PK  
SCTGKAKLQYVRQWLTIRQYLESSSIYTDGSVKRVGVDYPSAPIEAPGLKDVLFFKKGASA  
FYNPGNESFRSMIQDRYEIERSRAVLGGDQGFQSMYPYGAVESGGGSGIKRRVAAHVMDDEF  
RQGNLRALIWNEKQSWWYVLSNETQIQRKVDRAVNYWTAMPGERSSSWGLLREANRGKRG  
SQELEDNLPANKQMKPYHQAAEDHSLVNGW

>comp13377\_c0\_seq1; 185 1 595 LEN=854; translated  
XVISILSRSLSLFCFQEEETLRGAKTRAMSAYKAYRDAYDCFPHLFSFGLGGLWSSSLALD



HDGNETLWCMAWMAVYGKRESLLLKTIASREASVSQKDSNPIFSLSKTGSFMLPSAMNDL  
IKKGMELGDADDKISGRKMSKKGSGTVGYLTDNLMGRSEYYEHALILALVPWIMPDAYSANGSPDLADGVGIDEEVER

>comp13377\_c0\_seq2; 311 115 870 LEN=1129; translated  
MAELKLNKGVENDMQLLRIVAGTKNPKIDSVENAIKQSIKADSISDLEVHIEGFGVDS  
GVDPDQPFQDEETLRGAKTRAMSAYKAYRDAYDCFPHLFSFGLGEGGLEWSSLALDHDGNETL  
WCMAWMAVYGKRESLLLKTIASREASVSQKDSNPIFSLSKTGSFMLPSAMNDLIKGMEL  
GDADDKISGRKMSKKGSGTVGYLTDNLMGRSEYYEHALILALVPWIMPDAYSANGSPDLA  
DGVGIDEEVER

>comp13378\_c0\_seq1; 158 492 1262 LEN=2045; translated  
MRMHYHRPFLFLQTLALVAIIVRGRVREADGLIQKPKVLQPGPSTAKWAANHPNRNSQKD  
KMAFPHVRPLGQRHRSDEVLPMLRSMANNGDIVFRKNSAVPRNRVLLATALTVTLLKPR  
ILSLLANTLYNPYQNALVQNPVVTKVITGAILAVAGDAMAQASSGAGEGYEYDKRRALSF  
AVFDSCYRMFQHNMFLVIRAGRGNFVVGKLLPMLAPAAPAIEQTAIYQFLVVPVSGVELF  
LFSILVELVSCGAWID

>comp13378\_c0\_seq2; 181 492 1439 LEN=1745; translated  
MRMHYHRPFLFLQTLALVAIIVRGRVREADGLIQKPKVLQPGPSTAKWAANHPNRNSQKD  
KMAFPHVRPLGQRHRSDEVLPMLRSMANNGDIVFRKNSAVPRNRVLLATALTVTLLKPR  
ILSLLANTLYNPYQNALVQNPVVTKVITGAILAVAGDAMAQASSGAGEGYEYDKRRALSF  
AVFDSCYRMFQHNMFLVIRAGRGNFVVGKLLPMLAPAAPAIEQTAIYQFLVVPVCLYYPVF  
FAFTGFIQGLTVKQAVDRMKAQFFRCWRRNLMFVPMQMVLFGLIAENWQIPFAFLAGMV  
WSTILSKTAGNTKKR

>comp13378\_c0\_seq3; 159 492 1217 LEN=1856; translated  
MRMHYHRPFLFLQTLALVAIIVRGRVREADGLIQKPKVLQPGPSTAKWAANHPNRNSQKD  
KMAFPHVRPLGQRHRSDEVLPMLRSMANNGDIVFRKNSAVPRNRVLLATALTVTLLKPR  
ILSLLANTLYNPYQNALVQNPVVTKVITGAILAVAGDAMAQASSGAGEGYEYDKRRALSF  
AVFDSCYRMFQHNMFLVIRAGRGNFVVGKLLPMLAPAAPAIEQTAIYQFLVVPVCLYYPVF  
L

>comp13378\_c0\_seq4; 158 492 1262 LEN=1934; translated  
MRMHYHRPFLFLQTLALVAIIVRGRVREADGLIQKPKVLQPGPSTAKWAANHPNRNSQKD  
KMAFPHVRPLGQRHRSDEVLPMLRSMANNGDIVFRKNSAVPRNRVLLATALTVTLLKPR  
ILSLLANTLYNPYQNALVQNPVVTKVITGAILAVAGDAMAQASSGAGEGYEYDKRRALSF  
AVFDSCYRMFQHNMFLVIRAGRGNFVVGKLLPMLAPAAPAIEQTAIYQFLVVPVSGVELF  
LFSILVELVSCGAWID

>comp13378\_c1\_seq1; 483 40 1173 LEN=1547; translated  
MVAVKTKRAGRSNHKAKAKAKANPGSCSLPPSPAIEKRWSLSFSSAAVCLAALALVASGC  
LALSRSVLRPFWNLPEREAWHSMTHDERREALGCGAEAKAKAGAETSLAIHPPSTWAGM  
REAYASVVGAEALSTLEPAVASLSLSATDTVTDSVTDTDHTAPLDPTDTAFRVPEYVRLS  
EGRGRGVFAASFVPAGSLVYDFSRSAQFFKGEDFVEFLRILRPDLACDVLWMSYVQAFPG  
GRDSIVTDLDPGSFCNGGGNASSNGSADAGAPNLGWVPEGGGNEDEDEDEDND  
EYDDEYDDDEYDDDEYERPPAEPVRLAHAALFGEGTGFGRDAVKSAFPVALRDI SEGE  
EFLCSYDALGDLSEVLG

>comp13379\_c0\_seq1; 165 646 882 LEN=898; translated  
MLSMRSSSKKAEVQDVVKNVKENFFAIGRTAIRKDEDGCRKLPVVGSSGLEGYWKLPLS  
EHGAMTFRALIRMTLCKA

>comp13380\_c0\_seq1; 1622 421 3531 LEN=3767; translated  
MGRKSPDGDGASSGSDSKRKTCSKSTSCSKSKTKSKEKDSSKSFPLSIRKQPYGEAFW  
IEVEPSTRISSCKKKIQKLRGIPSSNIRLAIVSSSPDESSFWVIDNDKSGYDNDDFQERT  
LKSLGITGGDDSLGKSRNESVFLAIAISLYVRTPSGQIFLEDSDVECTVDHLEELIA  
SRLISDGVQEYTEHVAESKRLMLSFDGSPLNRGHAI SKFCIQDRGVLEVAFVNRDYEDGD  
FVPPIEIKVSNASHSDDEARPTLTKKKSKRVKANANEDARPTLTKKKSRRIDSDDSESQPT  
IPKRKSKKESAKNNSDEEERPTLAKKSKRGGSKTKADEEERPSLTKKKSKRAGKSDSD  
DEARPALAKKSTRQGRSKNRDEDSLDSKLLKRSKRRRTKDDSKRKAGKEQAKEVKT  
MDDEQLESDAEAEFEAKMRMAAEIKSQIRATTEEDCEILEAKAEAKSNAEADAAISQADA  
EAKAAAEAEAIAAAVAKRKE TERKIREAEAKAKVDAEAADAKKAKAE EASKAKAAAKAKE  
KAEKRRKKAEEEEKLLKKKAVAERRRRAEEAEERRRVEAEAKDIAGDAVDIAEEVK  
EEAGSDTDIAKQAEEDAAAKAAKARAQAKAKIAAAMKAE EEA AAKAAAEAKKAERVWG  
RVEAKAKAKAEAAA KAEIKAAAKAKAEAGADALRKIDSRTVIAPAGKLGMLLADKIDS  
TGCVVLVGQASSAMKDKLSVGDWIVAIDGESVTRKTYDDIIDIICNKGEYDREFTVVP  
SPSATFYELEYDDEEEESDECDGENTQSGVGLVWDYISSMHSREGYFPSLQSLHIGHEDG

SDSSAPSTSKSNSTAVTENCSEMTSDRSLVEDNDIDTNSDIDSQVGDDLDSFYVMTSDLS  
PLSIQIDSASVSDVKDQISRVSGIPVSNLRLVSHEDIPIVTDSFNPSTGDILTAKPSTV  
HVALPDHSEMHLSAFPNAQIGDVKDFIEGKTHLNRSKQVICFLETDCELDDATLIENDTS  
LQLTTRSYPQKRKMAI

>comp13381\_c0\_seq1; 1263 89 3064 LEN=3189; translated  
MWSNLAKELGAPDINATLEKIGNAVAPREDDDDDEYYDDDGYDDDEYYDDDEDYDDEQDYD  
DGNEVDVGMKMSVANASPFRLAGMLAKSLDARPVETGNEGDSKKNYELEGVNRQNEYNT  
QETSQNFERAFPPQASLPKLDEAVRPGDKTDAGNYSLTEGREKIFKQVDPIDQLPNQSLG  
VGEAHTIGKSDVFETAPLENSNQPKDKASPSRLECDEPTPHRSNVAQIAVNIPEQIAAQ  
SQKARRDKNEPFFLSEKTATETKLLSTKKSNNVVDTKTIGDAAKANS SVMKTPFTTNPKE  
KQHKQKKNFEHPIAPINGLNGQEEHLRKTKEATI QSVQKATPKERDTRKVRRLQPK  
NNNSIEMEAKALESVVSIDDDHKNIIKNDVANSTGFIKNETTIKPTNVIIEVVPSTSSQD  
HKISCDGVERLEAKVKTSKSSKDIEYVLPSTSPQNHSISRVAVQDASGLQTNKGGPKRSS  
QREDIYPNEDYKQKLSKAELDQKELQIQLENARKEIKTLQYQATVDKEKAESEKEDLLLQ  
FQKKETRLQATSEDNHNQTLRLRQECAAQTQHLEQLLAKEQRESQDEKEEYKRLQESY  
ANFDRVENQLKANAKKYEIDIAQAKKQEERALKVDDRMAQTMAVLDERDEEISRLKKAL  
KDMESKVSEHKEGEEEADELEELHHENDALQKTVETLELERDRLREQVATLRTGSEELS  
GLQMELTMLKEERARERSKSQAADSALEFRTQIDSERLNALSELKDSKQKLAALGDLE  
IARSDNARMMANDNLQSALEAFQDERQAEMEMIEEQQRESEEAIKSAHATSTNALKQIH  
QTEMDAIQRASDDAVRNVNMELVEGTIETLKSENNQMRRSLDEAIKRLQTTQEDVIDR  
NVMKNILVDWCTLNDKSKRNQVLEVMANLLHFSEEEKEKVHITSNNLDTIRAKVVGALAV  
PLPPP KADVEHLEGSNVQEKWINFLMAETDS

>comp13381\_c0\_seq2; 1250 89 3046 LEN=3171; translated  
MWSNLAKELGAPDINATLEKIGNAVAPREDDDDDEYYDDDGYDDDEYYDDDEDYDDEQDYD  
DGNEVDVGMKMSVANASPFRLAGMLAKSLDARPVETGNEGDSKKNYELEGVNRQNEYNT  
QETSQNFERAFPPQASLPKLDEAVRPGDKTDAGNYSLTEGREKIFKQVDPIDQLPNQSLG  
VGEAHTIGKSDVFETAPLENSNQPKDKASPSRLECDEPTPHRSNVAQIAVNIPEQIAAQ  
SQKARRDKNEPFFLSEKTATETKLLSTKKSNNVVDTKTIGDAAKANS SVMKTPFTTNPKE  
KQHKQKKNFEHPIAPINGLNGQEEHLRKTKEATI QSVQKATPKERDTRKVRRLQPK  
NNNSIEMEAKALESVVSIDDDHKNIIKNDVANSTGFIKNETTIKPTNVIIEVVPSTSSQD  
HKISCDGVERLEAKVKTSKSSKDIEYVLPSTSPQNHSISRVAVQDASGLQTNKGGPKRSS  
QREDYKQKLSKAELDQKELQIQLENARKEIKTLQYQATVDKEKAESEKEDLLLQFQKKE  
RLQATSEDNHNQTLRLRQECAAQTQHLEQLLAKEQRESQDEKEEYKRLQESYANFDRV  
ENQLKANAKKYEIDIAQAKKQEERALKVDDRMAQTMAVLDERDEEISRLKKALKDMESK  
VSEHKEGEEEADELEELHHENDALQKTVETLELERDRLREQVATLRTGSEELSGLQMEL  
TMLKEERARERSKSQAADSALEFRTQIDSERLNALSELKDSKQKLAALGDLEIARSDN  
ARMMANDNLQSALEAFQDERQAEMEMIEEQQRESEEAIKSAHATSTNALKQIHQTEMDA  
IQRASDDAVRNVNMELVEGTIETLKSENNQMRRSLDEAIKRLQTTQEDVIDRNVMKNI  
LVDWCTLNDKSKRNQVLEVMANLLHFSEEEKEKVHITSNNLDTIRAKVVGALAVPLPPP  
KADVEHLEGSNVQEKWINFLMAETDS

>comp13382\_c0\_seq1; 277 1 612 LEN=726; translated  
EIAATEPVEEPTPPPLGPTLNGWTPDADKDCFGLPGAIAPLGYFDPLGLCKDRNLIGVKR  
FREAEIMHGRVAMMATVGYLIGENTPTIAYGFDHPTIANNQIPEVPLFGVMFPFFLLINI  
SEALRANKGWVEPGMGELFSLREQYYPGDLGFDPLGLKPTKAEDFANMQAKELSNGLLAM  
LAAAGMCVQELVNGKPVLEDLPF

>comp13382\_c0\_seq3; 335 1 756 LEN=870; translated  
QAKQTKSPKMFASASIIAAVAAPSATAFAPVSTNGASTMLKAAEVSEIATEPVEEPT  
PPPLGPTLNGWTPDADKDCFGLPGAIAPLGYFDPMLGCKDRDLIGVKRFREAEIMHGRVA  
MMATVGYLIGENTPTIAYGFDHPTIANNQIPEVPLFGVMFPFFLLINISEALRANKGWVE  
PGMGELFSLREQYYPGDLGFDPLGLKPTKAEDFANMQAKELSNGLAMLAAGMCVQELV  
NGKPVLEDLPF

>comp13383\_c0\_seq1; 402 248 1807 LEN=2663; translated  
MIHPEGAGTFSNNEAKLAQFAAIAEAVSQKLDATDKNPVIRADFQECHGGMNASSGPRR  
ICLGVPNFSEAHASVLPSTSKYGLPSTMLRTGSI SDLQSSRAKKRQRTMCSLSGEEQQLSV  
ASTKLGQTDHKEQQLKCGIVRGYSPGMKDRSSLSESVRGVFRFRGYQAEWSEKFEELC  
AFRRAHGHCHVTHRCLEHENLAQWVKRQRYQYKLEKRSGLSDERICLLNNGIFWNS  
HDAVWEERLQELLEFKRIHGHCNVPTNYEANPPLAVWIKRQRQIYKKHQDGEQNSMTQYR  
ITQLETIGFAWEFRKNAANDTQRNPPYACSFTTTTAGHGPGVDLVNGLGTTMGDVHEVT  
NRSTISIQSSFLEKITTGENERSLASCFTTECPSSSHSVHAMPNNAGYSLGRSTIDRMGGM  
ELPTSRSRMSRQEYENS DIDSTGQGIQITTSPLGEETARSEESKIIGRSSDNPRDLLQH

QHRQYQKQKKHDELLKTTTRCDFLSFSQRFTYSPRKVKKS  
>comp13384\_c0\_seq1; 808 169 1989 LEN=2409; translated  
MIKQRNLVVLVGLFIVTVVAVNLFYLPISIGISGLEFAPLTNYAAALEAFKPTTDISS  
NLYLQGQESRGEAEESLPLSSPLSTDQAEADSSASAKADVQREETAPAGGAPGERIAGLNC  
DRFGGPPETAEMVYWRDIPSDAHFTSPYASYGDDPKYLTFEPDEGGFNNIRMSMETAT  
AMAHAMGRILVLPPEQEIYLLGNDEKKHNNRFTFKKFFPFDAISVEHKAVEVISMEEFME  
REVSTGRLKDENGNAVFPFRNQTSFEGHIRRGQEMWHWLRSVTVSSTCDFSQGPYVFPKQ  
PGPEGVKEMQDLFNSMDMNIQNHKLWKKYVGNPTPVDAPAKERLSEMLSFRSKVCLYDDH  
MQKAKVMHFMGDNASGARLLVHFYAFMFFEDWKQDLWTKRYVRDHLRYIDEIQCAAARIV  
AAVRERAIANGNPDGEYDSMHIRRQDFQYKQTRIDAKRIYKNIKHLFPANATVVFVATDER  
DKSFFFEPLRKHYNVLFDDFAHLVADVKNKYGMLDQRIASRGRTFAGAYYSTFTGYINR  
MRGYHSQKNKLEGEYEEGRLNSFFYVPKDLQDEISVYSSLKGPLWGREFPVSWRDIDHDLS  
PSQLLA  
>comp13384\_c0\_seq2; 334 1 1047 LEN=1467; translated  
VCSSDLFEGHIRRGQEMWHWLRSVTVSSTCDFSQGPYVFPKQPGPEGVKEMQDLFNSMDM  
NIQNHKLWKKYVGNPTPVDAPAKERLSEMLSFRSKVCLYDDHMQKAKVMHFMGDNASGAR  
LLVHFYAFMFFEDWKQDLWTKRYVRDHLRYIDEIQCAAARIVAAVRERAIANGNPDGEYD  
SMHIRRGDFQYKQTRIDAKRIYKNIKHLFPANATVVFVATDERDKSFFFEPLRKHYNVLFDD  
DFAHLVADVKNKYGMLDQRIASRGRTFAGAYYSTFTGYINRMRGYHSQKNKLEGEYEEGR  
LNSFFYVPKDLQDEISVYSSLKGPLWGREFPVSWRDIDHDLSPSQLLA  
>comp13385\_c0\_seq3; 173 230 955 LEN=955; translated  
MNHPIELTRFSDYGDTRWRGLNEVLLNPRQNTIVASTAKLNQYYLDFEGNDQKLYTCHE  
LGHGFGPLPHWDESFNKNLDGNCMDYTQRPDRNMRPDDSNFLYLAQLYGGREVATGKDL  
SAKDVRDMVWAEKEAGPKDPSPFFRSGAXEEDADVELWEQEPGGEKRKLGLRGGWQRGRRL  
FYRTKRVLASDDVEVHLVESDGFPGGLVLRHYLLVRDDDDYYAANESRSPQRSANEYYST  
TT  
>comp13385\_c0\_seq5; 468 1 2453 LEN=2453; translated  
XTTRSIVASVESIPYTSCFDATTQQESDDEAYARALQEEYRKEFLRRQAEHSTPPDGDSNS  
NSNSNRNTKGSPRNSPRNTDTNTRNTSKKKKSSGKNGNPGKGTTSKGAATGEKNRHRKP  
PSPTGAGAASASAXVEPESEKRNSEKSEPQEAHREPRRSHPPPEEQRGRREEPPGAEQER  
REKEEEQRKHQHEHQREPEHQREDRLAEERQRQEPLAEQQAVVLEVLGRGRLALPALPG  
RGRQTPGPVVPGLSPKGAPEARGGALEGPERERAAPRALEAQAPTVVVVGRPVVEAPW  
PSEGAYGEASWGASQEDLDAEYARRVQAEC SYLDQQQRLEEVQAASALGSPGREDAGGS  
LEPSWSTGTGTGTGIGIDNEPLAAASGYHDDDEAVARRIQQELADA EYARRIGLAEQNL  
ASQTALREAQAHLLEASQNSRKHCVLRWMPGTGICLAVAVAVPLLFDFVDFDPSDVPFFG  
DLFGDDWVGNPWSGTNMTIDVVNGT SVPRLP PGAYGWATLGGKETGKGLSLDLLNACSD  
DYQVFVQEAIRNWDEGSPIDSLTLYSNRIDYESECTTVTGKMKICNGDYGDTRWRGLNEV  
LLNPRQNTIVASTAKLNQYYLDFEGNDQKLYTCHELGHGFGPLPHWDESFNKNLDGNCMD  
YTQRPDRNMRPDDSNFLYLAQLYGGREVATGKDL SAKDVRDMVWAEKEAGPKDPSPFFR  
SAXEEDADVELWEQEPGGEKRKLGLRGGWQRGRRLFYRTKRVLASDDVEVHLVESDGF  
PGLVLRHYLLVRDDDDYYAANESRSPQRSANEYYSTTT  
>comp13385\_c0\_seq6; 563 1 2505 LEN=2505; translated  
NSESNSESSVGEDQWTGNENPSNEQESVVSGLTTTNSTAGASSTTSGTQSSSLVTDPTFA  
GTKLDGNDRTNSNSNSNSNSNRNTKGSPRNSPRNTDTNTRNTSKKKKSSGKNGNPGKGT  
TSKGAATGEKNRHRKPPSPTGAGAASASAXVEPESEKRNSEKSEPQEAHREPRRSHPP  
EEQRGRREEPPGAEQERREKEEEQRKHQHEHQREPEHQREDRLAEERQRQEPLAEQQAVV  
LREVLGRGRLALPALPGRGRQTPGPVVPGLSPKGAPEARGGALEGPERERAAPRALEA  
QAPTVVVVGRPVVEAPW PSEGAYGEASWGASQEDLDAEYARRVQAEC SYLDQQQRLEEV  
QAASALGSPGREDAGGSLEPSWSTGTGTGTGIGIDNEPLAAASGYHDDDEAVARRIQQEL  
ADA EYARRIGLAEQNLASQTALREAQAHLLEASQNSRKHCVLRWMPGTGICLAVAVAV  
PLLFDFVDFDPSDVPFFGDLFGDDWVGNPWSGTNMTIDVVNGT SVPRLP PGAYGWATLGG  
KETGKGLSLDLLNACSDDYQVFVQEAIRNWDEGSPIDSLTLYSNRIDYESECTTVTGKMK  
ICNGDYGDTRWRGLNEVLLNPRQNTIVASTAKLNQYYLDFEGNDQKLYTCHELGHGFG  
PLHWDESFNKNLDGNCMDYTQRPDRNMRPDDSNFLYLAQLYGGREVATGKDL SAKDVRDM  
VWAEKEAGPKDPSPFFRSGAXEEDADVELWEQEPGGEKRKLGLRGGWQRGRRLFYRTKRVL  
EASDDVEVHLVESDGFPGGLVLRHYLLVRDDDDYYAANESRSPQRSANEYYSTTT  
>comp13386\_c1\_seq1; 95 208 825 LEN=1207; translated  
MISARVYRASLSVLVILIGSSFYNGKGTGIAMTGVESFAPLAKQRRSGARTEFQKPGP  
SWLPQSLASSPSSLAASPPRTELSVPSQAQCESLGIREWPPQSKSGSWTEAVAPGNSLV  
RYVLEGGSGSLEIVTDGETERQSVRPGTLVEIESSESSGVQLEWACDASCPEMVLTPGFE

EGGVFLGVLAGILVLFVLLSGALG

>comp13388\_c0\_seq1; 568 153 1751 LEN=2263; translated  
MNGPKQFMLLAASFCLFASTSAEII PKKSWSVIGYEAFNKKKGTA KAVVTSAREAKEKSD  
APSGIAKAVVGVGVAFAFATVGGQALAGDQRPEMALVEALRKPVVAVRKNVAGGADVTPA  
ATTTEGASIPNEVFNLVKGIVGVVLSLPAGVAAFSGSAPSAFIPAGILITIIIGILSGYGF  
ALIGKVCAYTGAQSYREAWSKTVGESSWIPAWSVTFKTF LACLAFSMVLADTFSSLEET  
TRNPTLLVVTGLVLLPLCLLKNLKSLAPFSL LGVMGMAYTAVAMTLRFLDGSYAMGDETQ  
GKFI EQVASSLRPKFGNLGAESVFSNALILVCMLSTAYMAHFNAPKFYLELKNNTIPRF  
NSVVKYGFGISIFLMGFISMVGF LTFGKACDGLVLN NYAGSDILMGFSRVAVAVSLVFSY  
PLAFTGCRDGF LDLANIPVEKRSRILNLMTFGLLG VITFFACALKDVSFVLA FGGATLG  
NALTYVYPALMYRAVVAQQGRNEKFGVSVSLASAVLGIVMGAIGAQMALRSL

>comp13389\_c0\_seq1; 159 228 683 LEN=1303; translated  
MAPTVIELRKTAE EAI AAVTQSNKDPASATENQSRAGS NSLNSSSNTGTEHKPTY SKRRK  
KPRLS DCEAKLAQLKAENEQLKRHLQNVSNKAHKFDMEKEMASKQIAQLMYDPNASPRDM  
GVAVRKFSDMYSDYGVNRQQELSFHLEQLQR

>comp13389\_c0\_seq2; 777 167 2101 LEN=2721; translated  
MYHQHHEHQIQRH PQQQPQQPQQSQQQCPNRRNGYAPGSDG SNGGPTAAAEGASSAS  
HLDHALLES LFYNEMVMLENSTAGQEAASSL DSPCLPTEHDT PHTILEKEILRDFGVGG  
GRTLFPPTTASPAMDASAAPGVVATAAASPTQYGSHTSPSYTT SNHAVASSYSDAML PPT  
VSQDQPHQKPTTNP IHHHHHP LLGHPQAPDVSAAMP RYENTPVNQAYNVQSGAVV NNGSS  
TGNLVVAGQQQQQQS QLGGIVCADPQATATAAAAAA MF SQPGKNNRNNNSNGGNRTS  
GIKRQSSAIPMMSAPNNGVTAAAPHPSSAPAI VSSSNAP IANGAGGQQSLQATHADSPSS  
GSSPLQVPQDRARQLVDQFATLASRLGIDL PDSVLQSLT SAAKNDPTLLLNTQQQQQQK  
RQDDHQQQYQQQQTKGTFK FATPARSTAALVGKGT TAATSNSVINSFKTKQKPAVSTGDTI  
RDETS CVSTELTAMAPT VIELRKTAE EAI AAVTQSNKDPASATENQSRAGS NSLNSSSNT  
GTEHKPTY SKRRKKPRLSDCEAKLAQLKAENEQLKRHLQNVSNKAHKFDMEKEMASKQIA  
QLMYDPNASPRDMGVAVRKFSDMYSDYGVNRQQELSFHLEQLQR

>comp13389\_c0\_seq3; 765 167 2476 LEN=2530; translated  
MYHQHHEHQIQRH PQQQPQQPQQSQQQCPNRRNGYAPGSDG SNGGPTAAAEGASSAS  
HLDHALLES LFYNEMVMLENSTAGQEAASSL DSPCLPTEHDT PHTILEKEILRDFGVGG  
GRTLFPPTTASPAMDASAAPGVVATAAASPTQYGSHTSPSYTT SNHAVASSYSDAML PPT  
VSQDQPHQKPTTNP IHHHHHP LLGHPQAPDVSAAMP RYENTPVNQAYNVQSGAVV NNGSS  
TGNLVVAGQQQQQQS QLGGIVCADPQATATAAAAAA MF SQPGKNNRNNNSNGGNRTS  
GIKRQSSAIPMMSAPNNGVTAAAPHPSSAPAI VSSSNAP IANGAGGQQSLQATHADSPSS  
GSSPLQVPQDRARQLVDQFATLASRLGIDL PDSVLQSLT SAAKNDPTLLLNTQQQQQQK  
RQDDHQQQYQQQQTKGTFK FATPARSTAALVGKGT TAATSNSVINSFKTKQKPAVSTGDTI  
RDETS CVSTELTAMAPT VIELRKTAE EAI AAVTQSNKDPASATENQSRAGS NSLNSSSNT  
GTEHKPTY SKRRKKPRLSDCEAKLAQLKAENEQLKRHLQNVSNKAHKFDMEKEMASKQIA  
QLMYDPNASPRDMGVAVRKFSDMYSDYGVNRQQELSFHLEQLQRLVNPTNFTKMGLWTLG  
HTNQGT KKNPIAGILVKELDITPQQGRKILDQSEKIRQLCENLKEAHS LLVKKHLCEKK  
TRTFQDHMNKCTEILTSKQVVKLI IWINGHTQLLDSVCPGWGTEHIHSK

>comp13389\_c0\_seq4; 625 167 1612 LEN=1612; translated  
MYHQHHEHQIQRH PQQQPQQPQQSQQQCPNRRNGYAPGSDG SNGGPTAAAEGASSAS  
HLDHALLES LFYNEMVMLENSTAGQEAASSL DSPCLPTEHDT PHTILEKEILRDFGVGG  
GRTLFPPTTASPAMDASAAPGVVATAAASPTQYGSHTSPSYTT SNHAVASSYSDAML PPT  
VSQDQPHQKPTTNP IHHHHHP LLGHPQAPDVSAAMP RYENTPVNQAYNVQSGAVV NNGSS  
TGNLVVAGQQQQQQS QLGGIVCADPQATATAAAAAA MF SQPGKNNRNNNSNGGNRTS  
GIKRQSSAIPMMSAPNNGVTAAAPHPSSAPAI VSSSNAP IANGAGGQQSLQATHADSPSS  
GSSPLQVPQDRARQLVDQFATLASRLGIDL PDSVLQSLT SAAKNDPTLLLNTQQQQQQK  
RQDDHQQQYQQQQTKGTFK FATPARSTAALVGKGT TAATSNSGSVMAFVVHSIVQVLDNNN  
AG

>comp13389\_c0\_seq5; 117 228 1058 LEN=1112; translated  
MAPTVIELRKTAE EAI AAVTQSNKDPASATENQSRAGS NSLNSSSNTGTEHKPTY SKRRK  
KPRLS DCEAKLAQLKAENEQLKRHLQNVSNKAHKFDMEKEMASKQIAQLMYDPNASPRDM  
GVAVRKFSDMYSDYGVNRQQELSFHLEQLQRLVNPTNFTKMGLWTLGHTNQGT KKNPIAG  
ILVKELDITPQQGRKILDQSEKIRQLCENLKEAHS LLVKKHLCEKKTRTFQDHMNKCTE  
ILTSKQVVKLI IWINGHTQLLDSVCPGWGTEHIHSK

>comp13390\_c0\_seq1; 120 113 595 LEN=784; minus strand; translated  
MTSCAEKSTTYDFINVPAGVCNAQALNTPSSFXDALDFDF FALDSGGMPEAIGPLSFQVPG  
VVALSRFRPFDRAPADPETFLGTAVGFHPRLVAQGRQQV VHGAGDGAGDAASDSEAPRT

GAAAGPGPDRIDRERPLPAASGAGDRRRRLFAPQFQSSDMW  
>comp13391\_c0\_seq1; 458 1 1356 LEN=1475; translated  
PRSPRATIQQGAMGQWTKSPAPRKHHVADVAEALYGTAPEDLSAPATGSGYYYYQHTTIND  
HIGGGSNVSRRRFRSSSANNEPHRHGGPVPCAEEKPLDESTSSGGGSFSNGFDYDYDEHD  
DDEEDERDRYGGGMRHRDGGPGEASSHRRRKRHRPPTKPPPVPVKENWKEKEDRLRSSSA  
YGHHPGWRLLPVLIKSNDLRLQEQQLASQLIQRMALILARDKIGVWLCPNELALEANGGI  
IEAIPDTISLSALKKNDPDYTDLNGFFFEQYFCEDDALADAKASFCESLAAYSIVCFLLQI  
KDRHNGNILLDNRGHIHIDFGFFFLSSPGKNTGFESAPFKLTREFVGVGGPDSHLFAV  
FRNLCTYRTFLSLRKHCHHEIIVLVEMLQLGNEELACFRGRPEDAIEHLRQRFRLLDNDRAC  
LEYVNALIDESLENWRTNWDYQRYCVGV  
>comp13392\_c0\_seq1; 204 569 1393 LEN=1783; translated  
MAPARTLRRRNFGHGGFARWSSAVVVAFLAASAPPVAEARPTPLFHGSPVHRIAPAHRR  
VSLWFPHPTTEHHRQPPPSLWSPDRLVAPARAFAERVRSRVSDLGPRDVFRLVVRMARAW  
VFWYFVKDCMDSIYEDRWHAERDPEDFFGSGGMWISRGAHKNVVKRRIQRSKRNRQWVGL  
GYTPRLVWLVGVLLRGTFCQTSIPKVFNPRLTGWGAGTVLGAKCTHQEWISAFMLGWFGT  
EHYWKFLFGCDGPPHPGRDGFDPITINKVRLF  
>comp13392\_c0\_seq2; 108 1349 1665 LEN=2151; minus strand; translated  
MEAAAAGGVRWDAGTTATRAYAPERSGGXGDPWKSGLASATGGADAASKATTTAEDH  
RAKPPWPKLRRRRVLAGAMLPAETIGLPIELSCTLVPLLLIIDS  
>comp13393\_c0\_seq1; 720 368 2599 LEN=2714; translated  
MPASRNSAGNTTSSDWATFNPYGETGTADNTSSSSNSWPLDEIMDDIEQQMDQQSDAM  
GGMARQLEGIEVSLSDARTRHSKKKKIPLSSSRHTLSYNKRNTYTSRGNENDEGTSVCF  
GENVNRVSYTSSHQHSINQILQRTSELREKSGDRARNTMPQDFPPTHVQHSRRSIVRA  
ELSSSRPRASKNRGNPKRIRSSSTWEESDSSNLSGSPDDVSELGETTFYSDKSSGCLRS  
TKLKYFLAVLAAILVLLIGALTGQLVQRGNQONSTSQFSPQEQETEQLTNAEENASSIVKD  
VPENTPTVAFEDSVDETEEMTVVGNAKEPPFEGTISSSALPVPKPTIAPTANEPPIEVAP  
STSGVVNQNPVNSDLKHDYTANSDFLVGVYYPWHGERFHNDRDGYMRKELEPPHVPVTLG  
EYNDSDPKVIGQHMKWFRQANIGLLVTSWGWPNRLEDSNTKDVIMQHEDIGNLNIAIHYE  
TTSRLGAGKEKLPNAKTDIKYMCENYFDHPNYKIDGRPVLFVYISRKLHEVGTLEEALL  
TMRSTASKCGHNIYLIGDSVFESAPDPNEPHVFPWFYFDAVTNYDVYGSAGRPEGHVGMG  
VDKYRQSQWKEQASRDECYIPAVSPGYNDRGVRMQSDHPPLSRRIGSNTQEGSLFHY  
QLKQAKELVDPKVDNMLVNSFNWEHEDTQIEPVMGAPSSKPFNFTKGLEVYGYDELYLD  
ILGAATSKDESRSMSFDYLFSGR  
>comp13394\_c0\_seq1; 601 247 2204 LEN=2294; translated  
MIETLTVPTGKSKSVKRKNSTTKERRQKKMGIPPPFHLIQQSEESLGNPAGASVNDVLEG  
VSNLLLGKKNIVLVGAGISTSVGIPDFRSKDKGLYNTLDAEALGLSCPEDLFCIEFFRD  
NPSPFYKFATHLYPNKEKEEESKSIKNNNNRTSNSKNTRRRRSKHVEPVRAPARKSRRIE  
TKGELHKQQRGEEEKQRNQVHSDVANHGMLPDSHKLALLLEKKKMLLRVYTQNIIDGL  
ESIAGVSDSKIVYCHGSLKSMCTKCSRKKLPLDSEILASIEGTGNVPLCQAAIKRPKGSN  
NVKEQERDSPAPKPSPARTSNRRRKRPRSFATTMGEESDVCNNCTDGDIDGGDTKNSFNK  
NRTGNVCGVLPKGITFFGETLDNSVARKIESDQHKADALIVIGTSLSVAPISKVIEYLP  
PTIPRILINRTIVHPKKATTTVSENKHGTNDFRTNYVFDAYLLGFCDVTRALGKQLSL  
GFDIGEGETRKENQERKANNKRTAIQSKSNNHASAMAALTSVANDVEPSLAPSSSLV  
SSRSASSASNEWSSVTPKERVILFPGALSNASGSAASDNEVAEEVYNEIAHCDGXFET  
DSTGEADLQVLQVFRFRSVPEVLSKGIKTALQRRAYVSKRMRQIATRDFIGQ  
>comp13394\_c0\_seq2; 601 247 2204 LEN=3598; translated  
MIETLTVPTGKSKSVKRKNSTTKERRQKKMGIPPPFHLIQQSEESLGNPAGASVNDVLEG  
VSNLLLGKKNIVLVGAGISTSVGIPDFRSKDKGLYNTLDAEALGLSCPEDLFCIEFFRD  
NPSPFYKFATHLYPNKEKEEESKSIKNNNNRTSNSKNTRRRRSKHVEPVRAPARKSRRIE  
TKGELHKQQRGEEEKQRNQVHSDVANHGMLPDSHKLALLLEKKKMLLRVYTQNIIDGL  
ESIAGVSDSKIVYCHGSLKSMCTKCSRKKLPLDSEILASIEGTGNVPLCQAAIKRPKGSN  
NVKEQERDSPAPKPSPARTSNRRRKRPRSFATTMGEESDVCNNCTDGDIDGGDTKNSFNK  
NRTGNVCGVLPKGITFFGETLDNSVARKIESDQHKADALIVIGTSLSVAPISKVIEYLP  
PTIPRILINRTIVHPKKATTTVSENKHGTNDFRTNYVFDAYLLGFCDVTRALGKQLSL  
GFDIGEGETRKENQERKANNKRTAIQSKSNNHASAMAALTSVANDVEPSLAPSSSLV  
SSRSASSASNEWSSVTPKERVILFPGALSNASGSAASDNEVAEEVYNEIAHCDGXFET  
DSTGEADLQVLQVFRFRSVPEVLSKGIKTALQRRAYVSKRMRQIATRDFIGQ  
>comp13394\_c0\_seq3; 599 247 2186 LEN=3580; translated  
MIETLTVPTGKSKSVKRKNSTTKERRQKKMGIPPPFHLIQQSEESLGNPAGASVNDVLEG  
VSNLLLGKKNIVLVGAGISTSVGIPDFRSKDKGLYNTLDAEALGLSCPEDLFCIEFFRD

NPSPFYKFATHLYYPNKEKEESKSKIKNNNNRRTSNSKNTRRRRSKHVEPVRAPARKSRRIE  
TKGELHKQQRHEEEKQRNQVHSDVANHGMLPSDSHKLALLLEKKKMLLRVYTQNI  
DGL  
ESIAGVSDSKIVYCHGSLKSMCTKCSRKKLPLDSEILASIE  
TGNVPLCQAAIKRPKGSN  
NVKEQERDSPARTSNRRRKRPRSFATTRGEGSDVCNNCTD  
GIDGGDTKNSFNKNRRTGNV  
CGGVLKPGITFFGETLDNSVARKIESDQHKADALIVIGT  
SLSVAPISKVIEYLPPTIPRI  
LINRTIVHPKKATTTVSENKHGTNDFRTNYVFDAYLLG  
FCDDVTRALGKQLSLGFDIGE  
GETRKENQERKANNKRTAIQSKSNNHASAMAAKLLT  
SVANDVEPSLAPSSSLVSSRSAS  
SASNNEWSSVTVPKERVILFPGALSNASGSAASDNEVA  
EEVYNEIAHCDGXFETDSTGEA  
DLQVLQVFRFRSVPEVLSKGIKTALQRRAYVSKRMRQI  
ATRDFIGQ

>comp13394\_c0\_seq4; 599 247 2186 LEN=2276; translated  
MIETLTVPTGKSKSVKRKNSTTKERRQKKMGIPPPFHLI  
QQSEESLGNPAGASVNDVLEG  
VSNLLGKKNIVVLVGAGISTSVGIPDFRSKDKGLYNTL  
DAEALGLSCPEDLFCIEFFRD  
NPSPFYKFATHLYYPNKEKEESKSKIKNNNNRRTSNSKNTRRRRSKHVEPVRAPARKSRRIE  
TKGELHKQQRHEEEKQRNQVHSDVANHGMLPSDSHKLALLLEKKKMLLRVYTQNI  
DGL  
ESIAGVSDSKIVYCHGSLKSMCTKCSRKKLPLDSEILASIE  
TGNVPLCQAAIKRPKGSN  
NVKEQERDSPARTSNRRRKRPRSFATTRGEGSDVCNNCTD  
GIDGGDTKNSFNKNRRTGNV  
CGGVLKPGITFFGETLDNSVARKIESDQHKADALIVIGT  
SLSVAPISKVIEYLPPTIPRI  
LINRTIVHPKKATTTVSENKHGTNDFRTNYVFDAYLLG  
FCDDVTRALGKQLSLGFDIGE  
GETRKENQERKANNKRTAIQSKSNNHASAMAAKLLT  
SVANDVEPSLAPSSSLVSSRSAS  
SASNNEWSSVTVPKERVILFPGALSNASGSAASDNEVA  
EEVYNEIAHCDGXFETDSTGEA  
DLQVLQVFRFRSVPEVLSKGIKTALQRRAYVSKRMRQI  
ATRDFIGQ

>comp13395\_c0\_seq1; 961 301 2835 LEN=2955; translated  
MVSYLDIMADEAKEVKSITSKFKSKEAEDGTTVTVT  
LKNAMTSVTTNDALLEGIPVQRMT  
SRSVWKS RVITLSDDKQAFFITHSKVPSGLTSQ  
LASTLALPMFSLRKGLRWSNDSE  
RFIR  
YLDIADIDGWQVGAIGVQKLENAKKPISESE  
REKLVTIYHHGFKSMCF  
SIADENRQYLI  
EAIKGMKARYNLMPWINNDQ  
LLRYIYYDIDKDKNGT  
VSASEFRALCKRINYNAPSD  
VG  
KTYAEFAKDKKEISIHQTKD  
LLYAVAIGDDVMPA  
EGLWDKLFKEDKPVGPKK  
FLQKFLHK  
CQGESDLTEADAERFILSMK  
SMGNGKSKKITKTEFV  
HFLHSKYNAAYDPAATA  
PLSPTT  
KLDKPLSNYWINTSHNTYLM  
GDLRSNSSVEAYQNALNR  
GCKCLEFDCWDGHIDKE  
TNEC  
VPVIYHGHTITSKMPFRNA  
CLVTNNYLKANPTSYP  
IILSLENHCTLDFQK  
VMAKDMNEIF  
GKKLFPTEKQCKGSDLP  
SPESLRGMVIKGR  
PPEPDEGASVTQ  
NLEDDYDDGFNS  
SDE  
DSGDDASNSPATDTGSK  
HSRTGSKHSR  
KKEKPKKKIQ  
SELRKVTL  
LHGAFHKEFE  
KSID  
QNPTTMHSIGETKITKIV  
SKAEENADK  
WREYNHHM  
TRTYPAGTR  
VDSSNYP  
VLA  
WAMG  
CQLVALNFQTS  
DSSLLNDGL  
FRQAGEIGYLL  
KPSLLGGPK  
PGKTKV  
KITVLSAR  
CIPK  
PNGEKTGELV  
DAYIQVDLH  
DVRVGEDG  
TEEHVKE  
SNKTSTV  
NNNGYN  
PVWKK  
GNAFTY  
EV  
HNP  
DVAMI  
HFRIID  
DDLGV  
DDKI  
ASSAV  
PFS  
CLRK  
GYRNV  
QLYD  
MHSRT  
GPFES  
STL  
FV  
KIEH

>comp13396\_c0\_seq1; 1069 433 2819 LEN=2860; translated  
MGAALAVEEVASEEDVEMVAEEETVVDEGVAE  
VXGGGRGGGRT  
PMLKLENPLKIQ  
RVQA  
EPPQREYNDRREDGGRGRGGRGGRSGGRGSS  
QSSSDG  
GKKERS  
SSGNKFS  
SAGSGSD  
SGPSSGDFGRNDRRKRNTGARRAPAEGRGD  
GKNRGKTS  
LRLGTS  
GRRQRRT  
SSR  
GSLR  
KRDRTS  
EREARAEAAEIRNTV  
SLPEGPI  
SVQALAE  
IIDEK  
PVAVIK  
FLMTD  
CGVMA  
SMTQ  
NLDPST  
CVAVVEGF  
GKIVGGD  
DEDEDE  
EDDDY  
DDDSAL  
AMGFV  
VEDE  
DEALM  
QPRP  
PVVT  
IMGHV  
DHGKTS  
LLDAIR  
NTRVT  
AGEAG  
GITQH  
IAAYQ  
VDHEG  
QSIT  
FIDTP  
GHAA  
FTDMR  
ERGANIT  
DIVIL  
VVAAD  
DGVKQ  
QTADS  
IVCAR  
QAGV  
PLIVA  
INKID  
LETSD  
PNR  
VMTE  
LTYD  
ILTEEL  
GGDVL  
SSQIS  
AKEK  
TNLND  
LLDK  
IMLQ  
AEIQ  
DFKAN  
PDR  
NAEAF  
VVEAN  
VE  
TGLGT  
VATSL  
VKKGT  
LKVGD  
IFAAG  
ETHG  
KVRA  
LIST  
NDGK  
TRLK  
E  
VGP  
STP  
V  
RIVG  
FEG  
IP  
SAGD  
SLVV  
DDEQ  
TART  
LAES  
RQRI  
AREK  
SSNS  
YQNA  
LMDS  
VSLQ  
FGAT  
KEQR  
FMY  
VL  
VKAD  
VKG  
SAEAL  
TRAL  
QELK  
LEN  
DEAV  
VT  
VKV  
LVSD  
AGEV  
SKSD  
IAIAS  
VTP  
GTT  
VIA  
FNV  
VAAS  
MAAM  
DDARI  
QNI  
PLEY  
YSIV  
YDAI  
ESVE  
SRM  
QEV  
LSPT  
PTG  
EFT  
GAAE  
VQE  
VFN  
IG  
GT  
NIAG  
SRCT  
EGIL  
RKGG  
NVR  
VMR  
GDK  
ILTE  
STIK  
TLRN  
FKA  
ETD  
TIE  
AGNE  
CGI  
GLAD  
FED  
FTP  
GDV  
IECY  
VE

>comp13396\_c0\_seq2; 1078 433 2831 LEN=2872; translated  
MGAALAVEEVASEEDVEMVAEEETVVDEGVAE  
VXGGGRGGGRT  
PMLKLENPLKIQ  
RVQA  
EPPQREYNDRREDGGRGRGGRGGRSGGRGSS  
QSSSDG  
GKKERS  
SSGNKFS  
SAG  
SGSD  
SGPSSGDFGRNDRRKRNTGARRAPAEGRGD  
GKNRGKTS  
LRLGTS  
GRRQRRT  
SSR  
GSLR  
KRDRTS  
EREARAEAAEIRNTV  
SLPEGPI  
SVQALAE  
IIDEK  
PVAVIK  
FLMTD  
CGVMA  
SMTQ  
NLDPST  
CVAVVEGF  
GKIVGGD  
DEDEDE  
EDDDY  
DDDSAL  
AMGFV  
VEDE  
DEALM  
QPRP  
PVVT  
IMGHV  
DHGKTS  
LLDAIR  
NTRVT  
AGEAG  
GITQH  
IAAYQ  
VDHEG  
QSIT  
FIDTP  
GHAA  
FTDMR  
ERGANIT  
DIVIL  
VVAAD  
DGVKQ  
QTADS  
IVCAR  
QAGV  
PLIVA  
INKID  
LETSD  
PNR  
VMTE  
LTYD  
ILTEEL  
GGDVL  
SSQIS  
AKEK  
TNLND  
LLDK  
IMLQ  
AEIQ  
DFKAN  
PDR  
NAEAF  
VVEAN  
VE  
TGLGT  
VATSL  
VKKGT  
LKVGD  
IFAAG  
ETHG  
KVRA  
LIST  
NDGK  
TRLK  
E  
VGP  
STP  
V  
RIVG  
FEG  
IP  
SAGD  
SLVV  
DDEQ  
TART  
LAES  
RQRI  
AREK  
SSNS  
YQNA  
LMDS  
VSLQ  
FGAT  
KEQR  
FMY  
VL  
VKAD  
VKG  
SAEAL  
TRAL  
QELK  
LEN  
DEAV  
VT  
VKV  
LVSD  
AGEV  
SKSD  
IAIAS  
VTP  
GTT  
VIA  
FNV  
VAAS  
MAAM  
DDARI  
QNI  
PLEY  
YSIV  
YDAI  
ESVE  
SRM  
QEV  
LSPT  
PTG  
EFT  
GAAE  
VQE  
VFN  
IG  
GT  
NIAG  
SRCT  
EGIL  
RKGG  
NVR  
VMR  
GDK  
ILTE  
STIK  
TLRN  
FKA  
ETD  
TIE  
AGNE  
CGI  
GLAD  
FED  
FTP  
GDV  
IECY  
VE

TELTGYDILTEELGGDVLSSQISAKEKTNLNDLLDKIMLQAEIQDFKANPDRNAEAFVVE  
ANVETGLGTVATSLVKKGTLKVGDI FAAGETHGKVRALISTNDGKTRLKEVGPSTPVRIV  
GFEGIP SAGDSL VVV DDEQTARTLAESRQRIAREKSSNSYQNALMDSVSLQFGATKEQRF  
MYVLVKADVKGS AEALTRALQELKLENDEAVVTVKVLVSDAGEVSKSDIAIASVTPGTTV  
IAFNVAASMAAMDDARIQNI PLEYYSIVYDAIESVESRMQEVLSPTPTGEFTGAAEVQEV  
FNIGGTGNIAGSRCTEGILRKGGNVRVMRGDKILTESTIKTLRNFKAETDTIEAGNECGI  
GLADFEDFTP GDVIECYVE

>comp13397\_c0\_seq1; 960 20 2380 LEN=3171; translated  
MARNNNTKRMWTRTGTGKGLVPSIYALVFFVSTGKGRFANSK GATSSLMVDAFAQNSA  
SSITASPWLPSAPLLCLSTRIP LARLGGRIGNPALAQHPQATNDVVCYSDLVDLVSGADY  
MDPETKDRLLRSLDDR FVHKASPAGGVNPTIEARMQTQTQNMEPERRTEDGIVPTIEGSW  
TDSGDRFHATGAWQSTPLLMKGAFLDDVNMEPTSKEYPFP TWEEVAELACIGGGNNYNEA  
LGNNDDGDDHDL PGLDPNGEYFGQLGEGNDADDLDAWIDEDDDDEDGGEAYVWDDDDDEI  
DDD VAPSRVIQYSWPSRKGEDGVSDSYQADVNTNWLDTFEIKQFGPFS DPSSLEALLRI  
EDGVDETDQITRNANENIARTLLVNDVDRWIPKLS EWMDRRFNSNGSGGSVL PARWRRDD  
AQISLSYPAGGIGPHVDDYDVF LIQVAGERTWDILWADEEDGDERSESCGVANRVGKVS  
RDETD SILPESSMNGVRIVNVTKLEALEEQRFGRPRTKMTRLYLRPGDCLYLP PRVLHCG  
TALKSETNGECMTLSVGCRA PSALELLDGLSDLMKKSAVAPTSGSKAGAAPLFP SDVSVQ  
SFHKRYTNSEMRGEQPSDGSNPRGRTSSKTS HSPSSWLSPVVKDEMRA LVLDVRIAL  
DDENVLDP LVGRFVTRSNRLEEDDFGGDDSSSLPSFSY PKPLRTLANDGADVWANATTA  
LEE IFCAPKKNGLS NSFLKRAEGIAFAWSCVCDQKRQVRKYRLYAQGRPPFEV FESLDD  
VVVGEKW

>comp13398\_c0\_seq1; 792 279 2174 LEN=2733; translated  
MGGTISFSLGRSRPGNSRRQKDKLRI EEEEEERRRQRRKQRLDDYGVLI PPVFVANQNN  
DVPLSVKAHQRMWEEHSFATAADGAPNSNTSGGVGLGSDLLLWACCSARNGGLSSG PLLG  
DRLL E EYIRPGLFVALPIANASASMVDDNNKIGIQVAVLPPSSSLPSFVFLTKSLHSRLR  
AEGFLSQPLATAMTTGGSQEENFVGLPWSLRLLADISRDISSSSSHKRNQTRITWTTTPA  
SGVAPPPSAAAFQ RMLRNSWIEAEAVRPDWRYSGINFKLATGTTLDALAEGLDASRLVH  
EAYLERNALE INGGNFLSDWTNQRKQQQTRADNSGDHQRHVRFRVAAECRESILAASA  
NIPLRSALAGGNWGSVTNTLLS INLNGGGAGQTRLVSLPPPLWLTLKQSMGCGGLGSSSS  
WMLHLSQVVA FDRDIWNILEERAPVRNHIGWVCQVERRRDGTPSAGGKNAETNAAAAYS  
NSSTFALGASAQFN RNVA AKAVLESTFHDGTLRTSSSSSSSASSGNHDKNSAVLKFALI  
FKRWLQPRASLSIVHAVDLRSGRLSFLGLGVEIEQSGTSSSSH SAGRTTGQQTASNRGISV  
EYRDTTDVNAERAPPTRVEVQLPQGGSGDKR

>comp13399\_c0\_seq1; 404 1 1396 LEN=2011; translated  
XREVL PKYDTC PVL LSNDSP IDNSIRWGVRYGIFLLPTTVTKIQTMSLANMSSYALGLVF  
IFLVAVIWSVASIVVQYLYSQSFDAPFL LTYIGTSLFV VQLPLNWLYNRLITWQSTCSGD  
SNYESIPTREEPRQGNFDADITRIANPGGDNNAAEEQSSANQSENHWTGKDHMIAAAKLSP  
FWFISNYAYNASLEHTSITSSTVLVNTGSLFTFLIALFMKDERFSCWKLLGVLFGMTGCI  
LTARHDAREGEDGNVRRVRFLSGIVVDDDSRGT VAGDDSDDLHLWGDILSVISALFYGVY  
AVMIRVICPRDESLMSMQLFLGYVGLWNMVALSPIAIYQLGIAKSVTVSSWVLS CVVING  
LFNNVISDYLWARSVVLTSATVATVGLGLTIPLAFASDVFLGEEDVLNLESILGAA FVLF  
GFVLVNIQQTQVDSKDENDPNREQSRGDDGLQSI SMQEVSL ENDS

>comp13400\_c0\_seq1; 326 250 1579 LEN=1752; translated  
MKESTRNEAA SESTYDEKQNCNLQDSEFTVDSSETEHEASGSGWLGGMGTEFLTCLTEN  
SPVVS G VATLVHKTAVAVANEIAQLERDGELEAEALAAAEELSRDSL GAGGRNQYKETGD  
KNLSSSS FDSNTSEAECLSLPWEVETPRNSTENKEKDGI PVYITDIKMMKQIFALS RQES  
TFLEPF S NDSPENDVSPCSLS SFSK FAMSEPR LKLISRLLDIDKNLQAVHSRLTGELY  
FLFISLDSFIQTKVVWNSIFYPXNRKRPNCLRLARVRNAELDFIFEVGXIMKSHQLTESTL  
YFFVQKIYKEGAQQGSTPIFWKNYFFHCEKVR AEELDRREAGRATSPSLGILDSFGFASL  
NTDLES AKDDSVNDGGNDGNDGESLVPVESDVEGQND DSSYVIQSAPNTGESFATTRS  
IDDDIIIVDTQEKLRVIRENKKH

>comp13400\_c0\_seq2; 441 250 1362 LEN=1535; translated  
MKESTRNEAA SESTYDEKQNCNLQDSEFTVDSSETEHEASGSGWLGGMGTEFLTCLTEN  
SPVVS G VATLVHKTAVAVANEIAQLERDGELEAEALAAAEELSRDSL GAGGRNQYKETGD  
KNLSSSS FDSNTSEAECLSLPWEVETPRNSTENKEKDGI PVYITDIKMMKQIFALS RQES  
TFLEPF S NDSPENDVSPCSLS SFSK FAMSEPR LKLISRLLDIDKNLQAVHSRLTEGAQ  
QGSTPIFWKNYFFHCEKVR AEELDRREAGRATSPSLGILDSFGFASLNTDLES AKDDSVN  
DGGNDGGNDGESLVPVESDVEGQND DSSYVIQSAPNTGESFATTRS IDDDIIIVDTQEK  
LRVIRENKKH

>comp13401\_c0\_seq1; 179 1 734 LEN=1467; translated  
XSVDLCKLPSRFKSSYKWP SLAEAYGFVTKGQKGELENAHDALADSEACLEIFRYLVEHG  
YVSLLEDESPTSSTKSGVAKAEKEPQIIPGPDHGGTGDPLSSLFSSIESTLSMDDGLSSP  
NSIHEIQHSDGEWNGGIDRSMEIEEMAASWSPEDSWNSSQKTDVISPNNNIRSNDSDSISK  
IGDFHAPTGESFRVRGNTYAHKEMIKQLGGRWDGRSKEWVFRDNANASKLKS YKDLEIVF  
KAGE

>comp13402\_c0\_seq1; 210 182 1381 LEN=2363; translated  
MQERDQEHFSQFVTGEPFLRYIARTRRDGVHGNNS EIQASSELFNRPIEVFT PQNGAVPL  
NIFHAEYKTGDVPIRLSYHDGNHYNVIDPLAPTAGLGLGLPGLQPPGYADKMQMTRAVA  
ESIATQEELALRRVMDESRS EYLKRTGRGTSENDSDDDLQRAIKESRLSAEQVSFSKNGK  
LAATSPKAGVCLSAXPASMSAYLPTYP SNYLPLSLC SERLPCFYLDEQNNALSLSMDMAT  
YFDLEQAALENS LQSLGQKEEGKKQRASTGKAASQNINSRKSSSNGNTLDPK PATRGDRK  
VAASLPKSTSVDSLPCPSRENI PKAATASAAA STAARMPANVGASSQQPLLPLEQYPSV  
REMVSNGFHPRCAANAYELVGDNFDDMLS LCLSTNDLYK

>comp13402\_c0\_seq2; 577 359 2737 LEN=3719; translated  
MRVLLARRFR ENRNAQQSQEEEGGEEKVDGLQGWDETRSERQDKEGGEGDNHPTALKP  
KQPNQQQLPTASSL TRKRKAQS QSGPKKEKTNGSSSSEDTAEILPEIRPVVREPTDSVS  
ENKSRINNGKSKNSSQTGGIELKTSP ISSQEAPGAAERLVEKDLATSRPDTSLDSKTS  
RYSTKDKKANCTMVSAGGRQNHYRGNRNIRDAEEEDKWR YRNNSDIDAELHRVVLRRTDN  
PSESHACEDQQCFENDPASARGDTACFSSERLADHTRIQSNGRCSSATNGATGN YAVPER  
EGPFRGVSGSASAPLCS DNGKRRASEHGDGAAEGSGPNHLTKEEIRFRNV LKRERGLEIR  
EQAGDGNCLFRAISLQVYGDPSMHTEVKRRCMDHMERDQEHFSQFVTGEPFLRYIARTR  
DGVHGNNS EIQASSELFNRPIEVFT PQNGAVPLNIFHAEYKTGDVPIRLSYHDGNHYN  
VIDPLAPTAGLGLGLPGLQPPGYADKMQMTRAVAESIATQEELALRRVMDESRS EYLKRTG  
RGTSENDSDDDLQRAIKESRLSAEQVSFSKNGKLAATSPKAGVCLSAXPASMSAYLPTYP  
SNYLPLSLC SERLPCFYLDEQNNALSLSMDMATYFDLEQAALENS LQSLGQKEEGKKQRA  
STGKAASQNINSRKSSSNGNTLDPK PATRGDRKVAASLPKSTSVDSLPCPSRENI PKAAT  
ASAAA STAARMPANVGASSQQPLLPLEQYPSV VREMVSNGFHPRCAANAYELVGDNFDD  
MLS LCLSTNDLYK

>comp13402\_c0\_seq3; 653 359 2578 LEN=3560; translated  
MRVLLARRFR ENRNAQQSQEEEGGEEKVDGLQGWDETRSERQDKEGGEGDNHPTALKP  
KQPNQQQLPTASSL TRKRKAQS QSGPKKEKTNGSSSSEDTAEILPEIRPVVREPTDSVS  
ENKSRINNGKSKNSSQTGGIELKTSP ISSQEAPGAAERLVEKDLATSRPDTSLDSKTS  
RYSTKDKKANCTMVSAGGRQNHYRGNRNIRDAEEEDKWR YRNNSDIDAELHRVVLRRTDN  
PSESHACEDQQCFENDPASARGDTACFSSERLADHTRIQSNGRCSSATNGATGN YAVPER  
EGPFRGVSGSASAPLCS DNGKRRASEHGDGAAEGSGPNHLTKEEIRFRNV LKRERGLEIR  
EQAGDGNCLFRAISLQVYGDPSMHTEVKRRCMDHMERDQEHFSQFVTGEPFLRYIARTR  
DGVHGNNS EIQASSELFNRPIEVFT PQNGAVPLNIFHAEYKTGDVPIRLSYHDGNHYN  
VIDPLAPTAGLGLGLPGLQPPGYADKMQMTRAVAESIATQEELALRRVMDESRS EYLKRTG  
RGTSENDSDDDLQRAIKESRLSAEQMNRNNALSLSMDMATYFDLEQAALENS LQSLGQKE  
EGKKQRASTGKAASQNINSRKSSSNGNTLDPK PATRGDRKVAASLPKSTSVDSLPCPSRE  
NIPKAATASAAA STAARMPANVGASSQQPLLPLEQYPSV VREMVSNGFHPRCAANAYELV  
GDNFDDMLS LCLSTNDLYK

>comp13402\_c0\_seq4; 286 182 1222 LEN=2204; translated  
MQERDQEHFSQFVTGEPFLRYIARTRRDGVHGNNS EIQASSELFNRPIEVFT PQNGAVPL  
NIFHAEYKTGDVPIRLSYHDGNHYNVIDPLAPTAGLGLGLPGLQPPGYADKMQMTRAVA  
ESIATQEELALRRVMDESRS EYLKRTGRGTSENDSDDDLQRAIKESRLSAEQMNRNNALS  
LSMDMATYFDLEQAALENS LQSLGQKEEGKKQRASTGKAASQNINSRKSSSNGNTLDPK  
PATRGDRKVAASLPKSTSVDSLPCPSRENI PKAATASAAA STAARMPANVGASSQQPLLPL  
EQYPSV VREMVSNGFHPRCAANAYELVGDNFDDMLS LCLSTNDLYK

>comp13403\_c0\_seq1; 1139 417 3170 LEN=3408; translated  
MDMLEALQEAVEMALASLPPQKNSGIDLAVVSVSSLYDGNSSPSLVVPTVLSAASNYGK  
GIQHLVGSTCGGFIGSTLGGGSESAEFESNDNSNENDEDLDTQKKKKVSPACVPVEREG  
VPGVSVILSILPDVQLGTFHVTGDEVPDDYENMPSEQWKKSIGLSSSQSGDENDGSGPAV  
MAFPSPAMSNELDDFLRGMEMHIPGCNIFGSVASTVSSLSRARLFRYDAKMENSGDSVVQ  
TLADGCVGVVMDGDI TVQTMMAK GAKPVG VYNI VKGEGSTISAVALDEAATELVVAEE  
LDEEEEEEDDEDYGD DERKAKRAKMAAAYAKARIPKPVLAEANFVMKTLSDDDQAFMRK  
FILVGLERPGSRAGTPSELTRLTEGKGHG YAVHQV ASASMKDGSVTL SLGSVDIEQGTRM  
RFFVRESDFAKKEVEALWRGYKKRRSKSDGSASASSPTGCFIFPTLDRGSKFFSGKPGF  
EGSTVSKFLPSVPCVSGFFGNGVIGSMSADPELPSVAEEATMSG SATGYFLIGSKSNRPI



YSPGKSGAYDTEEEKESDATEELMEERKSLDLKEKKAPRDENGELILRRREVSSGRAMT  
VSTVEWSVAENMATPTSSLEGFMWDKETEVDVFRFRERVPLANLLSQCKLSMVDPSKPKPRD  
WIGPVKDAASKNRFVVLPDFKRTPEGSGSLRKRYDVSKLAREFTAKGVSAISVNCDPVLF  
GGSLLEDLTKVREASAKAAIESSTLDDGVNAPPILASDLILYPYQLYKMRLAGADAVNLIV  
GALATKDLVYLTKIASSLQMQSMLTVTSVTQVENLKVLP TGSIGGLLVSNRELEDFSFDM  
TGRQALDILQSSALRELKEKHGDDIPILVEGRVGIIRMKDENGKESSEAYIKELRDAGAT  
GAVVGGGLVSDEFDLPF

>comp13404\_c0\_seq1; 349 102 1445 LEN=1581; translated  
MMEDESSFASKENFPVHYHLEVVLASSLMEWQDVAFQNRVWVWMKSHREDLKIGKYGEIY  
FSDDISTPTVPGGTDVVKMRVMTDYEDIKMNPSDFFSPENLLPIYTFELSHDEICTEEIQ  
PSGGDEWTAGCDSLTLPHVTL DGLWESLIFNSNIKRKLL EYAKSAIRFSEKQVFQHI VH  
WNRILLHGGPGTGKTSLCRALAHKLSIRLRDRFPRTTLEI HSHSLFSKWFSTSGKLV S  
ALFSMVRDMVEDDPERLICVLI DEVESLASSRSNTGNGDPSDAMRAVNSLLTSLDRLRPF  
PNVFMATTNITGRIDDAFVDRVDLKMHI GMP IIRARYEILKSCLEELMRTGIVDLHEFA  
EFASLAEKETGEGSHANGNVDVSSKLLLDCAQRAEGLSGRSLRRLPLQAHAQFLPPTNDI  
YEKKSQVQSFLKALS LAVDSEQESRLKL

>comp13404\_c0\_seq2; 259 982 1581 LEN=1717; translated  
MVEDDPERLICVLI DEVESLASSRSNTGNGDPSDAMRAVNSLLTSLDRLRPF PNVFMAT  
TNITGRIDDAFVDRVDLKMHI GMP IIRARYEILKSCLEELMRTGIVDLHEFAEFASLAEK  
ETGEGSHANGNVDVSSKLLLDCAQRAEGLSGRSLRRLPLQAHAQFLPPTNDIYEKKSQVQS  
FLKALS LAVDSEQESRLKL

>comp13405\_c0\_seq1; 353 1 718 LEN=1050; translated  
XSHPTFQSNNSTETNTTMKSSCSVLLLLSCLVAGTHGFFQNAAKKASPKNSVLTQEAVDI  
YGARYPFDRKPLESGVLDSISKFGIPTTDIDGTKI ISENSTPGKRITDRSAQDVAAAFNK  
LAAIYGEERAIEMVKIFP ICLSFDPNAFAGSFGVWSEIFGEEETKDMVCRNPGLLAVKEK  
DAGKNSDNTMAFSYIVAATRP I GILGPVIGIGSLLSVPVIEGTTGIAIKQPFDFALGNIF

>comp13406\_c0\_seq1; 692 612 3272 LEN=3722; translated  
MKSSKRQSQQAMF SKRPYMYKTAEQTISSSPSPVPY PNGKRNRSRKTNKSRNANTKQQIT  
VFANANPVPCFDWVESGMDFLGCGTI ADASQKSKDSKRNNASPNRHGHGQLYSPLREEDIL  
ANKMRHL DLMGRDYMQLHEDFFDSLLKEEGDRILATMAASAVSSQQNKSFSKKSNNQKN  
AVHRSSTSVASENTNCDTHSSLDNYSNGNSNSNTNSGHTRTSLKTISSKTTSSKTI STTK  
TSGTKTVSSIKSVRLGRCGSFCKKKKSSDKEIEKYDEIYNPDKDGNNAKPI SASNGHPST  
PLAPSSD TTANNAKKLSSSNLSIRDIMSKTHLEAPSYLHMECKLQKDKGKGETLGNSVS  
AEGRELT TLKLRDKMKLIVEVSGELETSPNKNKDDTFKSMSAGMKRRRAKIALIENNNRC  
TTGEDDGSYIIETRSMI EFQLGFLSMQYGLLLRWDAYRSGQIVFVCLRKMCHDSFYTKIP  
SPPPI ISTSVKSPNTSPTARRDGATSQYPKS IMKKSSQERIP LNTNHTDVGRSGRIPDTV  
GAMKKREITPPFVIRSPKGGNHAIYQRSSGATEVVLVDAPYRVPHPKVFAPSILSLDVHR  
LTGLDPKSRWTLIMTFDGDTEIAHLRYNRREGVVFETTRSAPCTWELDMMPHGAAAAASF  
VVTGLEIRLFEQRPKHRLRGVANGVAGMVGGRSSSSSSSYVPAGSDPFSMSSPSNSYVIQ  
NQRLTYYSGSGNHNNGNRIYRTNSESSLGNSNGTSSLKKSTSRLASTMTVPLGGLVCQ  
PSTSQTTLWKLTI PFTHNENAEVTTLMHQSEYAHWLYQELRARRKEEVAASRVSPLWRS  
LVSPRKKHGHGDRVSDDDDFTFADPSDDTDDMNCIECIYFCCVDPR

>comp13407\_c0\_seq2; 708 161 2845 LEN=3107; translated  
MNGNGNATGDLKAVAWDPKSPASLLVPTVIDGSGDDDDAGQKEDSIERISGMVMNYKSCD  
DGAGCN SFESSAIMNMLDARDDYLEKVSSDASMI GSNHHRALLSLSKAYRKALSNCLEVE  
SEDI EKQKLESQETENGTEVELQE QERDLLTMTCSFLHLSSIFLLLPSRQGDSSMDLDGG  
FMYEDEIMGLPGAATADTVRYLRHLHFLGDAAELVDPVVLDELYEVLAPDMYGEYDGTDD  
GGRGNLYWELIEGYVVRGCL EEA WALLSHSLVGVQFKELEEEEDT LSDYRANSLAQDREG  
FRALKNILLSGPLPGGRNNRFDEGDFD DARSAGAGDAEEEEELFDGI STFAYRLWETSSEH  
DGSIDVRAGDYAVRFEPNARQVHYWKQAIDGLPALKRRLRQRI PQLNRLLTMMCGNFRD  
INFGSQHEEFCAELLYKNPTIRLEDIHVRVAALMQKHKADDDANRFDETILT IMKGNAGE  
AVSAMHVS VGGNSGAALPAVMTSLLLQLLADAKVLEYNTENTNYSTELLIRASSAIRSSLG  
MEGHCDL GTRLAVRLLLPHEI DSDLRITATLVNALEHHFPKTDSEAKILLSL CRNLVER  
KNVRVLDGCVSICLARHLFYIGKNI PGGAVHWLLTGIEFESLVLCDRPKRSGDWQKALAS  
GVCYRKL VAYFTGTSQSFLKLLGEEKGASLYYARSGEMIAATKEDSPNHINNLASFVPA  
VNVLENIFLIAGAI VEGKDDSVVASSIVSCLERPDEDDG VVSSLARSLNWDLFR LGVD  
ILKRDAENANNR S I S S F D P R G I G V L L S V F T V E T K A R E L T S Q N E V L S E A E D K E L R N T R L I  
L A E G L K R A F V A E N S M K K T A M N R R K K A S V E G I C S P N F S K Y S R E Q Q E E A V Q R M L E Y

>comp13408\_c0\_seq1; 1168 1 2142 LEN=2226; translated  
DDDDDDDDENDQMMTAAAPDEEDPEDEEEEEKPKPAAGADKGKEKEDDGEDDMDVDSDDDD

DEEEFQAETEPKKTGRPTRRAASQKAAPEPDDMDESDDDESSEEEFDMDMETLDQTQLIKD  
EGDRKYLESLPEIEREAILAERFEQRKNEHDMRKALRETKREREEKKALDQKNDKKRKA  
PASAKSKKSKDEATSKDAEVAQALATSSRRSSTRDRDATGKKDSKAKALAALREERKKV  
VAKESSEDESDFGEDSDDDSDDDYEETLAPWQKKAQETRAKKKTKSQLDQYKDEDEDE  
FEETRKPSTSTKVVKPAELDDYLLVTISRMRLEGEWCNEPYFEKAVLNCVVKLFIGENDEGK  
RCYRLCRIVAVDKSKQPYSLPKTKKKKPVTTDKMLKLDFASTRKVFPLRLISDNKVTQAD  
VTQYEAMKTARKQDELLGKLEANKLRRKRDELIDNFYTTEDIERKLEKMKMGPSTTN  
LGLEQTRAANAIQAARGALQDAKARLEDAKGGAEIQDAKEEVKLAENLEIRLEQEKMIL  
KKVKWRRERNKNRSNNWVDVNERANKMNRLADVGLDKAKNKAASKSPSGTVAFNPNYARRK  
VKPKNLWQVGQDEKKNENDEKNETEEPPTTKDGAGQSNGLNSSSTPPLVQEQQKAAAL  
SQSHQFAIDEETLAQTSFSLGIGGLASKKKAKKRVRKGLSLAEYLEEKAAGTL  
>comp13409\_c0\_seq1; 272 1 1036 LEN=1036; translated  
XPVPVVPVKQGAFFSMESTQQGRKFSQSPNMKAQQQHQQHQSFMHQLAGQYDQKLDQSSST  
LAPDNQAQQLASGNALQPYQNMMLGRQDQQPAYQQMQQTGIQNQNFQSYPPNMQSHGALF  
GNSNGNRQASGGTYTGNILSHQSPI SNQHAAQHLSNDRQNQSPFSVRGVANQLQHHVQSH  
NDQYAHGGMNYLNPPMSMSRAYDPSYGVKLANPDSHRHQAKSLPQPQTISRPAVAMGYQQ  
TQAQEVGNQQGVYLFSAQRSVQQPNNFAQFDFRQPSQSSSNTQSMHPVMAMASQHQELNQ  
TSYQGHQQSKLQPPQHGFHHSLLQNNEMYGAQQQRQQQQNTQTQGX  
>comp13410\_c0\_seq1; 826 111 2885 LEN=4249; translated  
MTSCVRVLSTQTLDSPPSILLVAPNGKKTLVNCGEGCQRIFLEFGQKVSTIDRVCLTHLG  
YETIGGLPGMILTASDVLKQATDHAKQAAAVKVNKQEQHQHKKKGRKSDDASDLSLPIQPG  
LKLLGPDGTHRFRSLRHFMRRESFRIDIQEGAYVERESHDSAINTKKKKKKHDSNEDF  
QVQSIVACLRTDPFTNKYTF SNADTESNLDSVEDTALSPSKKRPKITGDEHSTPPAPPVE  
VETPTPTENPLRKRQLONDQTSREILSFLFTTPIQGKFLIEKAKALGVKGPPLYGQLKAG  
KTI TFTSPPDNGGESTT VTVESHQVVEPGSPGVVVAI LCYPNFSVLDQLRTSKELQQFKC  
QTQEKSTVIEDSAQKKKQPSSEKFPIMELVVHMTTDDIFNSESCVSWRKSFFEGSVRHMFL  
CAETSHTASMNSEENRGSMSAFQSAHIGAFVRSQVCSHVYKAPTELDVANDNNTPNSSIS  
EENKFVRKEERETNDELSSVAIAKPLLEYVLLPRSRRGFCNHDLFYHKWKRMQEEARNL  
LDSSGCIDRAEKILDNTNLLTEATMVKDASGRSNIAGEILFTGTGSAIPCKHRNVSGIYV  
RMDNGNAMLLDVGEGTIGQLLRAKQREESLSNVVKGKIKAVWISHPHADHHLGIIRLLEER  
QRLVSDHDPLVLIAPRNILGFLREYESVESRIADSYIFLDCQDLKTESGGNFHGDVNHNA  
AALQKLDQDLGIVSCTAIPVAHCANSFAVFRGTSFGLAYS GD CRPSRNFSRIAYGADL  
LIHEATFADGMEADAVVCRHCTVGEALTVAKDMNAKTIILTHFSQRYPKIPVLADADDAQ  
TKEVPACTDVSSLSSSHDMNVIHAFDFMAITASNIPVASKITPALQLLYPDKPEDAKEN  
SPVEMSDARAALVPLFAQSELL  
>comp13410\_c0\_seq2; 826 111 2885 LEN=4130; translated  
MTSCVRVLSTQTLDSPPSILLVAPNGKKTLVNCGEGCQRIFLEFGQKVSTIDRVCLTHLG  
YETIGGLPGMILTASDVLKQATDHAKQAAAVKVNKQEQHQHKKKGRKSDDASDLSLPIQPG  
LKLLGPDGTHRFRSLRHFMRRESFRIDIQEGAYVERESHDSAINTKKKKKKHDSNEDF  
QVQSIVACLRTDPFTNKYTF SNADTESNLDSVEDTALSPSKKRPKITGDEHSTPPAPPVE  
VETPTPTENPLRKRQLONDQTSREILSFLFTTPIQGKFLIEKAKALGVKGPPLYGQLKAG  
KTI TFTSPPDNGGESTT VTVESHQVVEPGSPGVVVAI LCYPNFSVLDQLRTSKELQQFKC  
QTQEKSTVIEDSAQKKKQPSSEKFPIMELVVHMTTDDIFNSESCVSWRKSFFEGSVRHMFL  
CAETSHTASMNSEENRGSMSAFQSAHIGAFVRSQVCSHVYKAPTELDVANDNNTPNSSIS  
EENKFVRKEERETNDELSSVAIAKPLLEYVLLPRSRRGFCNHDLFYHKWKRMQEEARNL  
LDSSGCIDRAEKILDNTNLLTEATMVKDASGRSNIAGEILFTGTGSAIPCKHRNVSGIYV  
RMDNGNAMLLDVGEGTIGQLLRAKQREESLSNVVKGKIKAVWISHPHADHHLGIIRLLEER  
QRLVSDHDPLVLIAPRNILGFLREYESVESRIADSYIFLDCQDLKTESGGNFHGDVNHNA  
AALQKLDQDLGIVSCTAIPVAHCANSFAVFRGTSFGLAYS GD CRPSRNFSRIAYGADL  
LIHEATFADGMEADAVVCRHCTVGEALTVAKDMNAKTIILTHFSQRYPKIPVLADADDAQ  
TKEVPACTDVSSLSSSHDMNVIHAFDFMAITASNIPVASKITPALQLLYPDKPEDAKEN  
SPVEMSDARAALVPLFAQSELL  
>comp13411\_c0\_seq1; 665 147 1556 LEN=1759; translated  
MAIVLSTLDPEKREEIDAQKAEALIASWKEQLLAEQSKATESGVLCNKVDLSGKTYKPEA  
ATI IANFLTSTDDFNPSVASGVTCAKIDDI IASQNTEDGLSVLQTI SDAFRESRLTEVDL  
SDNAMGTQGV DACRTVLCGPTAINTLESLSLNNGLSKDTMEVTA VLLTQEEDGACVANN  
LKKIHFFNMSDNEGCE SFRKVIAQTSKLEDIRMSGTRAKAPGSLHIAAGLKDLATAGSL  
GNLVRDLADNSFGDCYQDLANSRLRVCKKLEYLDLSECTMGEEGVAAVCEALIEAGSPLK  
YLSLGGNDLGEDSNGKAIGRTIGKLINSVQSSIEFFSASENEMKSPGIRSIARALKSSTI  
KEIYLNQNDIGSMGANELIAMASKTPNLEKIELDLNGFLPDVVEGLTEAFGDKLAEMEDN

NDEDDYDEELDEEDLEEDIGVDGEDDEVEEDPDAQVDALADELQKLGVP  
>comp13412\_c0\_seq1; 218 210 681 LEN=1057; translated  
MAETSNDLSAATDKIKNFCTNKIDDANYYVEKKKKQFEISDAKGGDRTKADTKNWIDRQ  
TRELGLLRDKTREGLDKAAKDLGFAAESNENQNQENENETRPRGEADEPGCGTTENFRMIA  
PAADCSPRSNSGDAMGVCAQGCRAADRQASKQEGSVW  
>comp13413\_c0\_seq1; 934 79 1839 LEN=1938; translated  
MKLSLTHVLAALATSSAAFAPAMKPKAASTALEAKNVSFREESRRALVEGINQVADAVK  
VTLGPKGRNVVLERNYGAPEIVNDGVTIAREIVLKDPEENVGAKLIQEVAQKSDNKAGDG  
TTTSTIMTQAITNNGMRAVTSGINPVALNRGIRKGANLVTEKIKELAKPVGSIDDLKDVA  
TIASGSVDMGRIIAQAADKVGETGSTVVEESQTLFDEIEFTEGLTIDRGIISPYFVKDQE  
RQIGELINPRILVTDKIDNVNDVPLLEQLVKSKDPLLI AEDVTGEALSALVVNKMGRG  
VLDVVAIKAPGFGNRRREYTDIAIATGASFVAEELGITLDSVTLDMMLGTADRIVVAKES  
TTIVTDGKHQEDINARIKQLRREQDNADTDFDRDKFTERIASLGGGIARIKVGAAATEL  
KDKKLRVEDALNSVQSARELGVVPGGACLAHIQLKYGDEILDAMESDDERAGAQIILLNA  
MGAPCMQVAENAGIEGAVVLSKVQTLGEEKGFQGWWDAGSMEYCDLYERGVLDPAKVTIN  
AIENSASVAGLVLTTECLVTEIPIEMTEEDKQRLFDQQAMGAGMQA  
>comp13414\_c1\_seq1; 1091 1 2343 LEN=2411; translated  
PPRRNNNSGGNSSESSGGQWARGKAPPPQQRNGRGRGRGRGRGQPPYFDGPVPLVK  
SENGWRPQKNTGPLVIATKKVKSILNKMTKEKFDRLSQQIIDIPVKSyatLAMMISNVYE  
KAIDEPYLGDMYGLCVRLSQHVQSNFSIHIIESDEEPPTEDEGEAPPSTDGDAASKFSV  
FRWSNDISTEDSDIVGPFDSIESGTKMALSSDEQQAPVSRGDLELELVKLQIKSGVFIKT  
MKVKKTTTEGEEKEEGQVTEEDKFYTVFFPVKDHEQCQQLSKIFLSEREGISDANKQNS  
FKRSLLNKCEDEFNKQDIYEDWKKEEAAYKANKGSLSAKEQAEKEEDLAFRRMKIKKQML  
GNIKFIGQLYKKNLIKEKIMRFCIASLLNLETKDVKSKLPVYFDTGNDDMDEEDHEAISN  
MFTTIGKTIDKPATEPFMKVCFGKIKKLSDKKELPARSRFMYKDLLDLRSSNWVPRRKEE  
KAKTIAEIRKDVEREERQQAQESAAANQGNRYGNNYGGRRGGGRGGDYRNNRSNYGNSNRQ  
RSQRPVETDADGFTTVKGGSSLGQGPSSQKQRIILQSKPKQAAAAPSYPALDEEKFK  
RRVKTIRNEYIQDPKNVKELLSVDELGTGKDYGSKFVSQADAMMDCKENERAAMYLLL  
EILVKEKISSNDVKTGLVDIEFIDSFVCDAPFAFDYLGRMLATMIRCEAIDVTWIGQE  
AEKTKITDDSNPEKIRALMKAIDADKIEAIGAFGPHQNAMEKLLGKDKWVALKKELA  
>comp13415\_c0\_seq1; 1580 1 4207 LEN=4991; translated  
GPVPSNWTNKEREGISPAYEENEMQMFMHSSSLKMLDQAVLTGFESNSSGEGTMTKEEV  
ERLLRHGAYDIFNEDKAGSAEASNDVFQQDIDSILSRRSRKIVHGNTGSGSSAAGGTF  
KASVVKTPSKEGEQASADIDINDPDFWTKMVGEAKPEEESILKPRKRQANYNEKNWD  
KNLQKALKYDSEFSDSDDDDDDESAEGDVQERTRWGGPKPEHWKRDQVEAVVARIKCGY  
GLIPPDEFAGLPGKFGKFPKEEILRMSWSLVLMAICEVATSNVGEAKRSKLRAERKRD  
TEGGDGEGLAEQSNEATVTPKSTGEMKEICFKRLWESHSSWAALGDVAVSFARIHDP  
VDDSSDNQEKIREVFKNQLWPSLQGRGWKIEDEDEDGMEYIYGKREFSSPSIVMNEV  
IRIHPELQKNVVELLNMIQSRLQIDQQMDHQKAQDLALASNVTLKNLQNLLEYSMPQ  
ILYDRSRKANRISLRLKLLVSCNYIKTAIAIVTAVDKESSASNIEIPTGDDKCLDVLGVD  
ARSGLPHPLWTKKHDAILIRSVAKHGWDVDANLNKIVNDKIKWGFPPFEASNNAPVQRI  
GEQEMKNMRETAGRAASILNEKPKILEILTFGNKLVIDSYGLTQQSEDDENDEMDDGK  
KWRVDNRMLHQASKKSEPVEKAVDLPKAKDFVKRAKIVIQKTFAKLRSEGTNSKSISSTK  
AIDEDVKSNEHSHGYIVIDQGSRCNILLAEMIRALVKGSTKVSQIRHMWQMSHMEAKALI  
KMLSESQDKKKEVEELNRTGQIALAKWACSKRSTTQGNVLRVMLGEKPQVPRNETIQD  
KIFPAEKTVPPIPGTRTKAPGKRKVKRNDPAIGERAIMKAMKKAHDHNSGKVFVGFVKTNE  
LGIQLTLIESYILSVFCCEGIPLNFDLDSKKSDDLGIKSTWEDISKSLVDLARQQDHAK  
VTVLCKAALSKGTSQNLEEKQIKMLAENLSRAESDFAVKEEAARLVNDFTHKPNERSLKK  
SIMLMEKVRAYGTAKVSTGKVTTKYENYLGPKIPRWFGEKELARAAATHEILDDENKQSW  
TTADISETIQNNPEYNKSIIVSAFLDKTSARQVTSQISMLSRILVQCSEKEFRSKLSR  
AIRQSKRNDDDWEKKPSWWEDSTEEHSFLLLTKLSEYGFVAKIMTAVKARDGFGAAGEDYD  
NMTALKLTKPSIQTRANQVRELHAIEDHESMLQMVAKRRKSSQKIDSLAVLKGSGKTG  
SGLKNPSPNTNGSSSTTPTSGGKSKKGTVQTGLKAFFSATPSSSGKKKTSNAVDNGSTGSS  
NHNPSVESKRRKESATPSPPTFVIRSSSGSGSSNHEGENGAVTPPAEKKLKSTSDDDSS  
SIENPMVEVEQSNNGVEVVVID  
>comp13416\_c0\_seq1; 491 33 1073 LEN=1653; translated  
MSNRNHFSFLALVFVAQTANEIVGFLQSNNGRASSDRKLLNANLITFDLDDTIFPVG  
PVVADANKALFEHMKALGCGTNQOEYKTTKQIRSELSAENKVITYTELKRAIRTELQK  
FLGENDVDDSVVFRSYDLWEHRHIAAETHLYPDTVSMLEELKINHPDAVIGAITNGKGN  
PLMMDSIRDYFDFCVSGEDENVFPQRKPSSEGIYKVALERFKELSEERTAEPINMENQCWI

HIGDDLANDVGASAKCGAKAIWVDLDDTYDQSASSRDASKEQPAWSTATKEELEKRIMMN  
EKAQENVSERVATLTMIPAAVNSITNSVVQTSKIELPMQSFQDSR  
>comp13416\_c0\_seq2; 494 33 1094 LEN=1895; translated  
MSNRNHFSFLALVFVVAQTANEIVGFLLQSNNGNRASDRKLLNANLITFDLDDTIFPVG  
PVVADANKALFEHMKALGCGTNQQEYLLKTTKQIRSELSEAENKVITYTELKRAIRTELQK  
FLGENDVDDSVVFRSYDLWEHRHIAAETHLYPDTVSMLEELKINHPDAVIGAITNGKGN  
PLMMSDIRDYFDFCVSGEDENVFPQRKPSSEGIYKVALERFKELSEERTAEPINMENQCWI  
HIGDDLANDVGASAKCGAKAIWVDLDDTYDQSASSRDASKEQPAWSTATKEELEKRIMMN  
EKAQENVSERVATLTMIPAAVNSITNSVVQTSKIELPMQSFQDSSTVLMKCC  
>comp13416\_c0\_seq3; 494 33 1094 LEN=1575; translated  
MSNRNHFSFLALVFVVAQTANEIVGFLLQSNNGNRASDRKLLNANLITFDLDDTIFPVG  
PVVADANKALFEHMKALGCGTNQQEYLLKTTKQIRSELSEAENKVITYTELKRAIRTELQK  
FLGENDVDDSVVFRSYDLWEHRHIAAETHLYPDTVSMLEELKINHPDAVIGAITNGKGN  
PLMMSDIRDYFDFCVSGEDENVFPQRKPSSEGIYKVALERFKELSEERTAEPINMENQCWI  
HIGDDLANDVGASAKCGAKAIWVDLDDTYDQSASSRDASKEQPAWSTATKEELEKRIMMN  
EKAQENVSERVATLTMIPAAVNSITNSVVQTSKIELPMQSFQDSSTVLMKCC  
>comp13416\_c0\_seq4; 491 33 1073 LEN=1973; translated  
MSNRNHFSFLALVFVVAQTANEIVGFLLQSNNGNRASDRKLLNANLITFDLDDTIFPVG  
PVVADANKALFEHMKALGCGTNQQEYLLKTTKQIRSELSEAENKVITYTELKRAIRTELQK  
FLGENDVDDSVVFRSYDLWEHRHIAAETHLYPDTVSMLEELKINHPDAVIGAITNGKGN  
PLMMSDIRDYFDFCVSGEDENVFPQRKPSSEGIYKVALERFKELSEERTAEPINMENQCWI  
HIGDDLANDVGASAKCGAKAIWVDLDDTYDQSASSRDASKEQPAWSTATKEELEKRIMMN  
EKAQENVSERVATLTMIPAAVNSITNSVVQTSKIELPMQSFQDSR  
>comp13417\_c0\_seq2; 28 1 134 LEN=532; translated  
XGSGSLRHNAVERILIGRAGYPGAEAMSDEYQAVVSMQNGPRNQW  
>comp13417\_c0\_seq3; 354 529 3199 LEN=3199; minus strand; translated  
MEPLYHLANESVSDFRICSVLGYESLSAKEFLDILQSCGFLKDAQNFENLFDRLVSMCR  
EAEAVAKENGSLIASEVSENGTSCSFDWRLTQCNLISAPSHCTTHCDTIVTLVSSSTNLLCL  
TTCASPSFVFATGPRVRSPLGRSSESVQISSFIYYCKDQIETARALTGFLKELFEISTI  
EQLEDDFSTDGLSLSRHGTRQFVKRLSLCSKNSSRDNTERSTSSSTPDIVPVMSDSSSS  
EYDSEEDTMLDES VHKLIAQSQHLEADGLDLETLAATLLRYNKGATATDCVDHKTLSGKL  
AERIFDPLHTTPNEFVSALDAAVLGHDALHHVLD SFSVGSFGCGFKGNVSR LADFMQAY  
RHFTSTFCTHLEATIEMVGEADPTGKHKRKTLEENVEEEQGRSIKTSDISASPHLSYAHSS  
DVL SLLFSCFPVYGIYGEEDIAMI ELLGLDADRLRNVP HQELYVRCYEGLRRI SGNSTSF  
TEEQCGFIAEPLVNAFAAACDP SLGATAATAIASMYL GSELIVSKMYGKLSNYVTAIAKE  
DNEESPLITEDDLAFLHLHIDMDVDHADKMRAIVVDLASDEATR LRITAAVHAILEARKI  
VWDRFLETVPPTGHGGEDSAKLYNKQSKNWRNGATCLSDFTGRPIVFEACAPWVIGAH  
VLVDVCGEGYGARRLVAMGAKSVLGLDISGEMIERAKANPQKSDKETYEACDAEKVVETL  
FKDKPASLGLVPGRM LQQGCFDLATAIFL FNCELVASALPVAIF SXPFGSPLPHTLLFMN  
PSDTSIGKMNICEQVYTT LKPGGHFVFSVPHPFMLHAHGSSSSSKTKSNGENEPSTFSF  
SSGEASSGAYFSLRDRRFAGVIRTL DGNLNVKMF FKAISDYTETLDRKX  
>comp13417\_c0\_seq4; 929 857 3917 LEN=4210; minus strand; translated  
MDDNR ISETEDKIVENFLREQEESFGYDGTNGTNDGNDRSEVFN FEDDTALTEDIRKMAR  
ALAPQMSELEDVLKDFSEVETTDALDVIMHNNNASANDVSRSMLEAEDDDLDDEMEQLAM  
SEQALREELEFAAGISLLGTPMGFCFNDGDDNYSSESNLPSPVNLNDQLEEQQP SKPA  
LPVAEESEPGAPPMYTLQDHA EYLHLKTERLGRWYYCDMTSKLMP SALSSEPSVSVGGMT  
KDLVKDYCLPIPRKLR LYGGLVFYDTWETKRLKESQRPPSSTSATPAETPSRTP LKNR  
LLGTPGIVTPSGFPTVPVTPASTTTDASAQ TPLQTPVK TPLKEINS AKI AKKNVVAEEP  
LPVRTISIRIRPDVLCGAVMDAAH HAFEILSTNHTSDVIKRQGGHLRGSVY MADNQ LAYV  
VDMQLCTQKNDGLERRLLRFYHIHDDPDALQELGQVLMMEKKRKRERQKQETAPP I PQD  
SVAPSTSIATSSSSSVAQENNTIAARHLKQTC SLIQRVMAAEKQEGG IKKMSPYSNPG  
ALCINCVSXESLSALGF AVNCVFRFDLVMAQCDYYHLSLILFVNGN NFWKTNLPCLTMK  
VLGIEGGHYDTKSEMQSTVASHLESSFKSCPSVREENK KASAVIRRLTLP SLSKRDPVIV  
EIAWSLTNHIVEELDTRDCSYNTL ATLPFGQFP SLP TLDVQFCSQLRRLSRENMITQ LLLK  
SAKDLEVYASRAEYKCAVCIALLDPMVERYGIPPLSLPKAKSLDEYPLDYEPPTICPPW  
GGLVSEALNKVA AKTPTGDIDVKSAMLLVYRAFARQDDEEKGVRLGRKNAQV MERLANMQ  
SHQRSIVQNIRDSLH SSEKSEKSASGFLDYCEKALNKGDEGCPSTISLEVPLLNLIKISLG  
ASQYGRCYITSKNILFVTTYI PLLGSSRSMAFDLSLIK FQVKANPTSSLMNPF PNTMEVV  
LKSNKTVF SFRPAIGPARLHTFIHI IQAFASEKKPSEYSQVGEDSDEELAKEEPELSV  
>comp13417\_c0\_seq5; 145 1 653 LEN=723; translated

XSSDLGFGIVANGLEKHFHVEIFPVQGSNHPGEEAISKRKVGARRGLATGKRKGGRLVLA  
VRFGLAATAAVARNMATHDAFQPD SARLPFSLSHSPCLFSLPFRLLLFPASWHMSMLSDA  
IRLNSIRNNTNQAPTALQAPTGD KYCAILCKPGGLGGGDCGSPMNCAPVPGADGFGLCV  
YPVADDRSPGVFLRSAENKRMVAAAFSPLADTAASSA  
>comp13417\_c0\_seq6; 663 529 4379 LEN=4492; minus strand; translated  
MEPLYHLANESVSDFDRICSVLGYESLSAKEFLDILQSCGFLKDAQNFENLFDRLVSMCR  
EAEAVAKENGSLIASEVSENGTSCSFDWRLTCQNLI SAPSHCTTHCDTIVTLVSTNLLCL  
TTCASPSFVFATGPRVRSPLGKRSESVQISSFNTSCKDQIETARALTGFLKELFEISTI  
EQLEDDFSTDGLSLSRHGTRQFVKRLSLCSKNSSRDNTERSTSSSTPDI VPMDS DSSSS  
EYDSEEDTMLDES VHKLIAQSQHLEADGLDLETLAATLLRYNKGTATDCVDHKTLFSGKL  
AERIFDPLHTTNEFVSALDAAVLGHDAALHHVLD SFSVGSFGCGFKGNVSR LADFMQAY  
RHFTSTFCTHLEATIEMVGEADPTGKHKRTLEENVEEEQGRSIKTSDISASPHLSYAHSS  
DVL SLLFSCFPVYGIYGEEDIAMI ELLGLDADRLRNVP HQELYVRCYEGLRRI SGNSTSF  
TEEQCGFIAEPLVNAFAAAACDPSLGATAATAIASMYLGSELIVSKMYGKLSNYVTAIAKE  
DNEESPLITEDDLAFLHIDMDVDHADKMRAIVVDLASDEATRLRITAAVHAILEARKI  
VWDRFLETVPPTGHGGEDSAKLYNKQSKNWRNGATCLSDFTGRPIVFEACAPWVIGAH  
VLDVGC GEGYGARRLVAMGAKSVLGLDISGEMIERAKANPQKSDKETYEACDAEKVVETL  
FKDKPASLGLVPGRMLQQGCFDLATAIFLFCNELVASALPVAIFSVLSXSPLPHTLLFMN  
PSDTSIGMKMNICQVYTTLPKGGHFVFSVPHPFMLHAHGSSSSSKTKSNGENEPSTFSF  
SSGEASSGAYFSLRDRRFAGVIRTLDGKNLNVKMFFKAI SDYETLKA VGFDIQDMKECR  
VLQEHVGEHPEFFESVKDSPLHIVFDVVKPATVNSGKIPKALKWSALEKANADKILVANL  
PAPVFAELREFTASTYSEGITHE TFAPTARDAEKLQTVAAFARELRDKLSKSGAVRVTG  
LDL GALGGKTDQDTEGMAKLAYFVLSLIGRVDGGSRGKLF DVRDKGLDTSQDNVLF SVS  
SKAATHHTDGASADKAHDAVGLMCLVPSFRGGTLHLSSATNALEV LKQRLPKFLLHELLR  
PLPRDVLES GGGTGVHSTDHLLQLSRNPQLLAHRIRHNAYPVFEQDEGASRLRFRYMRQW  
IESGHQKAGLGS DLPPLLETALDALDDALREETIASLDLQPG EIIYCNNASLAHARDAFV  
DGDSAKRRHMVRVWIKLGASDN  
>comp13417\_c0\_seq7; 218 56 487 LEN=557; translated  
MKAFLAFSLLASVSAVHYESPCCGSDEKAIQVMGIDGVFCSPECTPECPTDVPEGVTAAP  
TCALQAPTGD KYCAILCKPGGLGGGDCGSPMNCAPVPGADGFGLCVYPVADDRSPGVFLR  
SAENKRMVAAAFSPLADTAASSA  
>comp13417\_c0\_seq8; 500 1 1903 LEN=2016; minus strand; translated  
TGSSDQYPFY SIVSQRAAAERATSXAEDA AVSARGEKAAATILLFSADRRKTPGDRSSAT  
GYTQRPKPSAPGTGAQFIEGPQSPPPRPPGLQRI AQYLSVPGACRAHVGAWLVLFRIEFN  
RIASESIECQEAGNKSKRNGREN RHGEXREREREPSRVGLECVVCCHIPGDSSSSSSSKTK  
SNGENEPSTFSFSSGEASSGAYFSLRDRRFAGVIRTLDGKNLNVKMFFKAI SDYETLKA  
VGFDIQDMKECRVLQEHVGEHPEFFESVKDSPLHIVFDVVKPATVNSGKIPKALKWSALE  
KANADKILVANLPAPVFAELREFTASTYSEGITHE TFAPTARDAEKLQTVAAFARELRDK  
LSKSGAVRVTGDL GALGGKTDQDTEGMAKLAYFVLSLIGRVDGGSRGKLF DVRDKGL  
DTSQDNVLF SVSSKAATHHTDGASADKAHDAVGLMCLVPSFRGGTLHLSSATNALEV LKQ  
RLPKFLLHELLRPLPRDVLES GGGTGVHSTDHLLQLSRNPQLLAHRIRHNAYPVFEQDEG  
ASRLRFRYMRQWIESGHQKAGLGS DLPPLLETALDALDDALREETIASLDLQPG EIIYCN  
NASLAHARDAFVDGDSAKRRHMVRVWIKLGASDN  
>comp13418\_c0\_seq1; 822 266 1702 LEN=2745; translated  
MSRMASCNP SHSDVPSQSTQIRKPRSDRRQMN LHAKRTSESSAISSGDKVKEMAAFLSVQ  
LLEKVM AEAMKPEGESKMDLEVVERITKALQMSSQPSSDASATLPEETAMKDKETTATPE  
TSASTPTDDKENETDDARDLIIEDDDSSATETDMPEEPTMESEEEIPVAKKEETVAQVA  
ESLQPSPIEIKVKPLEVIQSGIPALRPESIPQRQKNTEEVTVVVTQSN DGSVVDESSE  
ESEKDEEECTP EEVAEVQEASSSEEIDSVA AIAERSEATEL FQRLLQOKLEYDSARAV  
RIENEKDTGSKVGTEVDEKPESSDLEGACDEETEESKEALIEPETTNVSSAIESKEDTQD  
TDEEPTKGESNDVNTDISSELI EGKGEDVSPVTSVTT PPPPTISDRRVETIVALRQPKSS  
DEESKLAEKYAQMESLED RAYAVLCDLGMIEEHQNPNNPSYDHSRDQEYCEQRFLPRL  
>comp13419\_c0\_seq1; 652 125 2032 LEN=2390; translated  
MMKVSLIALIALLGNVSAASASD TDDEKRRLNKYYPVHSPTYHYQNYVTPYPTHRPPTPY  
PTGRRPTPRPTPRTPHHPYKPKQNPYKPKQNPYSDNADPYGKFTPFPTYRPTSRPTPH  
PTRNPTQQPTFSPTRNPTDRPTMEPTNPTQPPTDAPTRTPTPPPTGAPTQTPPPSRKPT  
PAPSPAPTREPSAEP TGYPSAEP TNAPSGEPS SNPTVSAEPSSLEPTQSEAPSDNPTASE  
EPSDNPTQSEEPSDNPTQSEEPSEFP TQSEEPSADPTGSERPTFIVTETSSNFIPNPTLY  
DVICARANRQVLGVLCQLINLFPDVVEALGGPPAPLVFPVIVLAEIRIQIRSILPMPVV  
VVPGGRKLEEPGQKSLVTAAL EHENQRQANINVG SALQEVGLNRGAPILQIDRTVFGPTN

FAFARLAEDDSFGTDGLFFFFLLSEENLAILKDLLLFFHVFNKQVPFNQLECDKFLKMANGE  
TTQTICRDGFKFQVGPENDSGDEPRIVVANQFAYNGVIHVVEVILPLNGTTVPSQTPM  
ATTTFFPTTTFFPTTTFEPTTSPTGPTDVPSVAPSAAPSGSPTVLTSGEASESSSLTSSEIV  
NAKEAPEEAQEAAPKQSRKQARKESTKDSTPDSQ

>comp13419\_c0\_seq2; 353 175 1755 LEN=2094; translated  
MKLSFGLFFLVAGSQTGFVSALETRRNLRQSSAVEERKLEHHGVHFPAPAPRPGHNQHGG  
GGYGHAPKGYHEPAGYHEPEGYHDPYGGQDPYQKRVGPPPTPNPSPDRPTPKPSRPTNPPT  
PRPTPRPTPRPTFTPTPRPSNRPTNNPTPVPTTLMPTPRPTFRPTTAPPTAEPTPAPSPA  
PTREPSAEPTADPTREPSALPSSSPSARPTISAQPSSVEPTQSEEPSENPTQSEEPSDNP  
TQSEEPSDNPQSEEPSENPTQSEEPSSEFPTLSEPTMGDLLTIAEVVCAPRNANVFANL  
CTAIQAAPGIYDLLDDNLGDFDFINGIFVIGIPDRIPVVDGRGGRKLQGNARGLTLFAPNN  
EAFTRLLRRRINTLNFQAVPEVVIYFQGLGVDIVVDTGIVEDFFFVSDGQFFLRQLLLEH  
IVGRELPMEKLT CNRVI TMLSNGETATQC IHNNNNKIVRKNQVGEENNQRNAPRI INADV  
GALNGVIHVNNVILPQRFLLPDVSNPGEDEFPIPFLLPPIVNSGPLP

>comp13419\_c0\_seq3; 659 125 2074 LEN=2432; translated  
MMKVSLIALIALLGNVSAASASDDEKRRNLNKYYPVHSPTYHYQNYVTPYPTHRPPTPY  
PTGRRPTPRPTPRPTPHHNPYPKQNPYPKQNPYSDNADPYGKFTPFPTYRPTSRPTPH  
PTRNPTQQPTFSPTRNPTDRPTMEPTPNPTQPPTDAPTRTPTPPPTGAPTQTTPPSRKP  
PAPSPAPTREPSAEPTGYPSAEPTNAPSGEPSSNPTVSAEPSSLEPTQSEAPSDNPTASE  
EPSDNPTQSEEPSDNPTQSEEPSSEFPTQSEEPSADPTGSEPTFIVTETSSNFIPNPTLY  
DVICARANRQVLGVLCLINLFPDVVEALGGPPAPLVFPVIVLAEIRIQIRSILPVMV  
VVPGRKLEEPGQKSLVTAALAEHENQRQANINVGSAEQEVGLNRGAPILQIDRTVFGPTN  
FAFARLAEDDSFGTDGLFFFFLLSEENLAILKDLLLFFHVFNKQVPFNQLECDKFLKMANGE  
TTQTICRDGFKFQVGPENDSGDEPRIVVANQFAYNGVIHVVEVILPLNGTTVPSQTPM  
ATTTFFPTTTFFPTTTFEPTTSPTGPTDVPSVAPSAAPSGSPTVLTSGEASESSSLTSSEIV  
NAKEAPEEAQEAAPVAPGSTPRPTKASAKQSRKQARKESTKDSTPDSQ

>comp13420\_c0\_seq1; 640 262 1559 LEN=1559; translated  
MLPSRAAASTFATHRESSPPQPSTAVADSTTAVTVEPTTAATTAAVTKAPSVKVEETAV  
EKIAETAALVADSANAKGAMAAVSAVYDGNVLPSSGDRNNPTATAAPSNDAAELQTSSAS  
STAIHGGKTAATSNATTAVSNNIPAPGSSNGSESNANVNACDKQQINKRKERLEQNRIS  
ARESRRKKSMEELQRTVIALTSENKDLNSRNQSLRSNLAGIGQKYPNSVSIQAILSGV  
PNPSPQQQRHHPSPQPHRSMPSTVAAPGAPHIQIGGPTMTTNFLQLSQQQQHQLTAAAA  
ASVPQVIPNMAVAPPQMLPYIYHIPQPQHPAHTLQQGAPSTVQMMAPSAMVQATHSLAL  
APIPHVVGQIPSAAPTTTIVGQQQPIAIAQPSPSHVIPPQQQQQLVTLQTLQAIAPLPP  
QHQQQHQQQQQQX

>comp13421\_c0\_seq1; 464 268 990 LEN=1141; translated  
MTECLGQKVNLEAREHALDSENAATEAADTALPSATDGTETEVESEKDGDEPTTVVPGEG  
EALAAEKEEPTIESSAKQEESEQSGDEREAVVSEEEESTTESKQVQEPGPSELELR  
EKMIKDTVKQLIEDSNKYELRPEKPFDDDSAECLLKAALKICHLLKFFYDATNDKIVYFPS  
PVHACFDYSLMEAAEFYEEYPSDLCRALRNVAFGMIQKEGDDTYDEEYMALVATDVEI

>comp13421\_c0\_seq3; 2518 1 4983 LEN=5121; translated  
PIDDDTETMQDAGNNAMYTSVKLKKVKPVVEEGVEDDTSMAEDNSLLNISRPSLASSLY  
SAASASLRVGTVPENKWKASKSELDEDEMQDSRKNLMYTSVRLKVKAAAPIIEEED  
DGDDNIESEENSPSTEASTGSTKHNIITEISDEKSPQDKVQRNEVEPSVGDDTKADTLE  
ILNEKPPHPEVQVDEVEASSEDDVKNVDAEATENNSAHEVQLDEIKPSIEDDAHNDNSQ  
APGVNLLYTAVKLLKVKPTPTLDEELTKNRPSLASSLYSSASASLRVSGAPPENKWKAS  
KSNEDEDDPTQDPSKNSMYTSVRLKVKVPVAPVIEEDAQYDPSETSEEHSLYTSVQLKKV  
GSTPDDEESPTSRPSLASSLYSSASASLRNIGTPVEHKWKESKTIGLIEEDDVGKLYSSQ  
HQLLRVAPPVEEKS IATDNEDAELHSELQVTNRKILMLISTVSGSQEQKTAQDRALTI  
LKGMHISPEQLEQVDGADPANLERRNELFAVSGIRAKYPQFFVNVANDKIEYLADWESFE  
MMNEVGSLSSESMNLDVSLSDASPLGKEDDIADDLNSENIDREGDVENYGRNVDSENEAEV  
KDVEDGESALDKDDTGTSSVSTGIKEETNLTQDFEGGDDEVKNEVQSVIAPTSECQDEGE  
KPENSVSETKAFFEDGSVRSDSEKEIEKGVVENLAPDSEDEDEIENVQSVASVNSQIEK  
DNLRTAEYPI TETEVS SDSAERIEAENNESESGKIKSSDDNIENEDSNVGNVEADGEE  
TADQESHVSETNKNPQVEENHLEESTAPDVVAEYNSGRSEDSSEEALPPRDTEATNVID  
ETQEEESSALANPKDIDIVIDGDEDPAGSTGVSVEPTPEDEDELSPAKYLQDGN EETD  
PVEEVSPHPVVDAQGEKQSTDMKPERKSEIVFGDTSDDPISPVDTDNNDIGTNVEEQD  
SKGGDQAEEDNGAEHDDSVADNPHVESINEATEEILSTEQNAEDENIADPPSESSPGPKE  
VETYHIETLEVESEQRSYESTAGDTKDAIDVPEEEDDTEIVAIQEEDTKDNETFIDENL  
KQNRADTSEATTSNRNDDHEKDGKGDNSASKDQILSENEGSTPVEDEVEADNIEETED

FGSPSNKESEVDTHGDGMEPQAKTEDEDRATEDVGFDRDSFVQETGVLSEFLGEETPSKGD  
EKCDGEEEEEEKDEEQKEEEEEQNKEQKDQDQKQNEEQKDEEQKDQDQDEKLDKDEEQKGED  
QEQKEQEREEDDKFTSDLELQKASFASKNSNHQPTMMRYSDDSEEEASDGGWSDDDSATI  
KSEYTELSYATFGSAVVFDGRAMTSKDEGTTKLSLVTAQAQEHQNPTPPKPKAKPVAQP  
LTTTASKNNNQDILFTPMSADNKAGDDKSAANEKEKDKKKKSKKEAKEPPPSPLEGN  
DIAIDVDDPPAMKKEKKKDKARNISIQEDIVLDFGEQDTKNETPSQESVGNSEADETQSQS  
KKKKKKKSKEEKENKKNKRKSAEASSKQVQEPGPSESELREKMIKDTVKQLIEDSNKYEL  
RPEKPFDDSAECLLKAALKICHLLKIFYDTTKDKIVYFPPSPVHACFDYRLMEAAEEFYEE  
EYPSDLCRALRNVAFGMIEKEADDDYDEEYMALVATDVEI

>comp13422\_c0\_seq1; 221 180 1332 LEN=1625; translated  
MVFRSIYETLRSLADSLWKALGFFEGKEGSLVVLGLDNAGKTTMLHRLRTGGDVRSFPT  
DRPQQTETFATPGGVSFRAWDLGGHEAVRHLWEDYVCESSAVLFLIDASDTARFEEAGFE  
LDALIGEKVVEDLPVAILLNKCDLENAASSAEVCKQIHFDDLREMQGEDKIEVFRMSVLR  
GEGYQAAFRWVAGFLYLRRSIDPRGPMRQDGMRLRVI PRHASMNDRAPSHANGMCHAT  
GTNP SGMGWPLAHQTPVSTKLQKRCVPQRFDGLGRHQMRANTLRRFCAPFTNAQYEDAM  
DPFSRNGFRCPRTLKWTAVLFAIAIETNGKVPVDARTFQQALCELWGERSFGSDANLQTT  
TTEYSAFSXKEIYELKALDSYKR

>comp13423\_c0\_seq1; 211 141 839 LEN=1338; translated  
MQQQKPALRYKEGSTVVPGRIGTVRQATPGDGTYYRGGHIYA CLVGLSLALEEKRAPEKD  
DDDESNI DDDDESNNKARSLPGFVCSVVSPKPPAASQVLSVGQRIVGRVSRITPQNALVE  
IRVAEGAGALRPPYREGAIRLEDARFSVSSREGSSGAAPVLGDCFRPGDLVACRIVSMGD  
QRRYFLSTAETELGVVRAERHGVP MIPVSWKEMECPETGVREPRKCAKPVAL

>comp13424\_c0\_seq1; 1188 255 3938 LEN=4503; translated  
MEQTTITEVRSRLRMSALGFAAAFILDADESSGSTTGGTGMNIGGNSRVLSPALLTPQQQ  
RQLLRF SMASPNAAAAHAHTGASTNPASTKRSLETTIATDLDVVLGRKKSCPSRKEFRRLI  
GAYAPEYQSAGTSTPRRNAIVEEIRDRFRNGNGKEPKRRFLRPLPKQQQPKRKKTSKGQH  
QQEPQAEELCVELDEREFATKIRQALKEKRSAINKSYNLPSSKPNQHSPKRRHSGYNPAG  
QGGSSASSRSNQKTSQKSGAGTHRDNNGFGSEEEEDDHDHFEIGD TVFAVGLTGDRAC  
YEGKGTILFRRGKNSSGAGSEGN DNEPTRAEVPVFGVDFGGKGAKKFNNGTKDDTNKST  
TVVLEGNLVRFLAIGATVKVQKPGRDNESSPPPQGSRDPSWRCHGWQGSTV SFELNVTP  
SRRPPSSGSNTTGSRRFDLVYKVV FSHSNEVELSSKRLRAV TAGSSEEEAGGATKNKT  
EGGTGDSGDQRRDSEGGNGDTGKGPSRDSKGDKSSN NAGIKTSANNSDSDNNDSSKSKD  
NQNEKNCANDSKE SDSGVTDESTEARKR PSSSSSSSSSISSPPAKKRLPPRPTSETTEAL  
PEASSSAAAGANGSQNNSTENNSNP DNDSTKQRDYELYP IGTTRTKKFFPQVRAWFQGTIK  
SYNPESGFY SIEYEDGDREEL EHYEVATGLLPPHKYDIGFSYQME LFSKIDG SNLGFDA  
TVQGKCYVSQ GKARGWRYQVVYSDGDEEDVIEKLLTKRFREARH HKNEGASNAIKKNT EV  
NPENIDAT TERGLETPPNKVVEERVKND ESDSSSSCDK DENVEEDLDEDED DSEESS  
SGSEDNSDQPNKSHEKVKTRIP HWSGKEHDFVGLLE YGYGNLEDIHEAGCIPSR SFRE  
LVRYWRWFRADLEQKIDIDFDRRGT VNGKGTKFD PADLKEQSKP SEDDHETPRTGPWS  
EWEKQAVVKAFAFHGSSYKEMSEFMKTRT ANQIASYCCHNKAKIKKEVQK CHEQACKQAN  
SPGGKRGSP TSENGTRNGNRVRRRADA AVDEADDKGYRSWTS GEHEALVSAMASYGHQ N  
YDKQSLYVKS RSPDQIRKYVRRNTDRLTKA ANSLARENRR LQATKAHLSRQWSDTELGLL  
VEAHALYGNDCEMI SAYVGT RSVDQVKT VLENYEDYGF DLGYLTFPDEL YHVLNVAPFE  
NLDHILSWSSDGKSLIHDEGKSL SFP

>comp13424\_c0\_seq2; 1389 255 4151 LEN=4290; translated  
MEQTTITEVRSRLRMSALGFAAAFILDADESSGSTTGGTGMNIGGNSRVLSPALLTPQQQ  
RQLLRF SMASPNAAAAHAHTGASTNPASTKRSLETTIATDLDVVLGRKKSCPSRKEFRRLI  
GAYAPEYQSAGTSTPRRNAIVEEIRDRFRNGNGKEPKRRFLRPLPKQQQPKRKKTSKGQH  
QQEPQAEELCVELDEREFATKIRQALKEKRSAINKSYNLPSSKPNQHSPKRRHSGYNPAG  
QGGSSASSRSNQKTSQKSGAGTHRDNNGFGSEEEEDDHDHFEIGD TVFAVGLTGDRAC  
YEGKGTILFRRGKNSSGAGSEGN DNEPTRAEVPVFGVDFGGKGAKKFNNGTKDDTNKST  
TVVLEGNLVRFLAIGATVKVQKPGRDNESSPPPQGSRDPSWRCHGWQGSTV SFELNVTP  
SRRPPSSGSNTTGSRRFDLVYKVV FSHSNEVELSSKRLRAV TAGSSEEEAGGATKNKT  
EGGTGDSGDQRRDSEGGNGDTGKGPSRDSKGDKSSN NAGIKTSANNSDSDNNDSSKSKD  
NQNEKNCANDSKE SDSGVTDESTEARKR PSSSSSSSSSISSPPAKKRLPPRPTSETTEAL  
PEASSSAAAGANGSQNNSTENNSNP DNDSTKQRDYELYP IGTTRTKKFFPQVRAWFQGTIK  
SYNPESGFY SIEYEDGDREEL EHYEVATGLLPPHKYDIGFSYQME LFSKIDG SNLGFDA  
TVQGKCYVSQ GKARGWRYQVVYSDGDEEDVIEKLLTKRFREARH HKNEGASNAIKKNT EV  
NPENIDAT TERGLETPPNKVVEERVKND ESDSSSSCDK DENVEEDLDEDED DSEESS  
SGSEDNSDQPNKSHEKVKTRIP HWSGKEHDFVGLLE YGYGNLEDIHEAGCIPSR SFRE

LVRVYRWRFRADLEQKIDIDFDRRGTVNGKKGTKFDPADLKEQSKPSEDDHETPRTGPWS  
EWEKQAVVKAFAFHGSYSKEMSEFMKTRTANQIASYCCHNKAKIKKEVQKCHEQACKQAN  
SPGKRGSPSTSENGTRNGNRVRRRADAADDEADKGYRSWTSGEHEALVSAMASYGHQN  
YDKQSLYVKSRSQDQIRKYVRRNTDRLTKAANSLARENRRLQATKAHLSRQWSDTELGLL  
VEAHALYGNDCEMI SAYVGTORSVDQVKTVLENYEDYGFDLGYLTFPDELYHVLNVAPFE  
NLDHILSWSSDGKSFLLIHDEEKFRVTVFPVRYSRKGTSSDRFYGSLKRFGFSREEPDGGAE  
QVAQYSHPSFRGQYKVKVLEMPHQVYSSSITGNKAKT

>comp13425\_c0\_seq1; 289 200 820 LEN=1200; translated  
MFSSRGISSAAARLLASQRGRLLSSGTNYNGGKTWKVYLSGEIHSWREVI AEGLAEKD  
LPVVL SAPNTSHEDSDDCGAMILGMEERPNWDHIGASMNAIRTQTLLKEADV VVVRFE  
KYRQWNAAFDAGFASALGKPVVTIHPAISMLKEVNASAKAVCEDPQQVETLAVYIRG  
DLPSTPRDGDKWIPIADRLGKGNPNP

>comp13426\_c0\_seq1; 429 220 1383 LEN=1580; translated  
MTTLSAENEDNLFPSLALSEIKTGRIVGQGGFCMVCKVEKLDLNDVFDTSDDSAKKNRND  
VASLQENQYVMKTLRDLPEEEYVKGIVDLAIEAEFLSVLSHPNII SMRAMANS DPHEK  
FFVILDRLVMTLDRKFNQWRREVEGENSGYWLGPFGYCCAKEHYLYKTWLDRTASRDIAN  
AIYYLHKSISIVYRDLKPDNLGFDVTGTLKLFDFGLAKRMDTVEKAGDGLYRLTGNTGSLR  
YMAPEVAKGEPYNQRVDAYSFGMLFWQICSLQTPFAGMSARTHADRVIQKQRPKPDRSW  
PLSWVDIMTRSWDPDETEKRPDFDEITNFDLGQVEDMDGNDGEVPSRAKEIKAKKKNPKA  
TERLDIDTRIATADDGPNVKIHDQEV L

>comp13426\_c0\_seq2; 389 448 1512 LEN=1709; translated  
MVCKVEKLDLNDVFDTSDDSAKKNRNDVASLQENQYVMKTLRDLPEEEYVKGIVDLAIE  
AEFLSVLSHPNII SMRAMANS DPHEKFFVILDRLVMTLDRKFNQWRREVEGENSGYWLGP  
FGYCCAKEHYLYKTWLDRTASRDIANAIYYLHKSISIVYRDLKPDNLGFDVTGTLKLFDF  
GLAKRMDTVEKAGDGLYRLTGNTGSLRYMAPEVAKGEPYNQRVDAYSFGMLFWQICSLQ  
TPFAGMSARTHADRVIQKQRPKPDRSWPLSWVDIMTRSWDPDETEKRPDFDEITNFDLGQ  
VEDMDGNDGEVPSRAKEIKAKKKNPKATERLDIDTRIATADDGPNVKIHDQEV L

>comp13426\_c0\_seq4; 396 220 1490 LEN=1687; translated  
MTTLSAENEDNLFPSLALSEIKTGRIVGQGGFCMVCKVEKLDLNDVFDTSDDSAKKNRND  
VASLQENQYVMKTLRDLPEEEYVKGIVDLAIEAEFLSVLSHPNII SMRAMANS DPHEK  
FFVILDRLVMTLDRKFNQWRREVEGENSGYWLGPFGYCCAKEHYLYKTWLDRTASRDIAN  
AIYYLHKSISIVYRDLKPDNLGFDVTGTLKLFDFGLAKRMDTVEKAGDGXVPSDRKYVWVK  
VYGSRGEGELVTP EASHVACNESITAIASVLNFLTFLFLIDKQGE PYNQRVDAYSFGML  
FWQICSLQTPFAGMSARTHADRVIQKQRPKPDRSWPLSWVDIMTRSWDPDETEKRPDFDE  
ITNFDLGQVEDMDGNDGEVPSRAKEIKAKKKNPKATERLDIDTRIATADDGPNVKIHDQ  
EVL

>comp13426\_c0\_seq5; 356 448 1619 LEN=1816; translated  
MVCKVEKLDLNDVFDTSDDSAKKNRNDVASLQENQYVMKTLRDLPEEEYVKGIVDLAIE  
AEFLSVLSHPNII SMRAMANS DPHEKFFVILDRLVMTLDRKFNQWRREVEGENSGYWLGP  
FGYCCAKEHYLYKTWLDRTASRDIANAIYYLHKSISIVYRDLKPDNLGFDVTGTLKLFDF  
GLAKRMDTVEKAGDGXVPSDRKYVWVKVYGSRGEGELVTP EASHVACNESITAIASVLN  
FLTFLFLIDKQGE PYNQRVDAYSFGMLFWQICSLQTPFAGMSARTHADRVIQKQRPKP  
DRSWPLSWVDIMTRSWDPDETEKRPDFDEITNFDLGQVEDMDGNDGEVPSRAKEIKAKKKN  
PKATERLDIDTRIATADDGPNVKIHDQEV L

>comp13427\_c0\_seq1; 266 107 1515 LEN=2066; translated  
MAKNKVLERFLRTGSFRRLPRTVEDTLQVKTSVRRPYQKHSSKRQPTFLKGVGRDGNFY  
RLRIPPRKRLLPDIPKLPKGQNTQPPLTAPHRPESAADIKSFKKKLI EWLQGNIPVLVL  
NFGSMCTLLAFTRSDILELRTL SVTGNLCFITYALRQNI ILWPNIFWSGLFASVNSWKIY  
QILDERNASVSMTTKEEKTFFVDFMPHGGTLFIYWESQI IDEKFDLRNIDCEKKFRKFC  
VFSVFLPFSLEXLVTPKQFERIQASARVYNLKKGEFVIQKGEKPHSVYLI IEGSTNALI  
LGRRVTAASTTIETKGIQMKGGDSGAWAGEMAFLKQFWEKEQKSITPQNEAKVASIDPSE  
SVDAKATVKSCLTTGGIADAYIYSIVVTEDECTVMSWSHEEMEKLKMSSTDLSALTRAMS  
SALVGKVINLTI SRSDGKMPWSEWLKEWNSKDGTSVEVQNDFRLAEDR

>comp13427\_c0\_seq2; 232 1195 1650 LEN=2201; translated  
MKGDSGAWAGEMAFLKQFWEKEQKSITPQNEAKVASIDPSESVDKATVKSCLTTGGIA  
DAYIYSIVVTEDECTVMSWSHEEMEKLKMSSTDLSALTRAMSSALVGKVINLTI SRSDG  
KMPWSEWLKEWNSKDGTSVEVQNDFRLAEDR

>comp13427\_c0\_seq3; 244 614 1513 LEN=2064; translated  
MCTLLAFTRSDILELRTL SVTGNLCFITYALRQNI ILWPNIFWSGLFASVNSWKIYQILD  
ERNASVSMTTKEEKTFFVDFMPHGVTPKQFERIQASARVYNLKKGEFVIQKGEKPHSVYLI



IEGSTNALILGRRVTAASTTIEETKGIQMKGGDSGAWAGEMAFLKQFWEKEQKSITPQNE  
AKVASIDPSESVDAKATVKSKLTTGGIADAYIYSIVVTEDCTVMSWSHEEMEKLMSSTD  
LRSALTRAMSSALVGKVINLTISSRDGKMPWSEWLKEWNSKDGTSVEVQNDFRLAEDR  
>comp13427\_c0\_seq4; 295 107 1378 LEN=1929; translated  
MAKNKVLERFLRTGSFRRLPRTVEDTLQVKTSVRRPYQKHSSSKRQPTFLKGVGRDGNFY  
RLRIPPRKRLLPDIPKLPKGQNTQPPLTAPPHRPEASAADIKSFKKKLI EWLQGNIPVLVL  
NFGSMCTLLAFTRSDILELRTL SVTGNLCFITYALRQNIILWPNIFWSGLFASVNSWKIY  
QILDERNASVSMTTKEEKTFFVDFMPHGVTPKQFERIQASARVYNLKKGEFVIQKGEKPH  
SVYLIIEGSTNALILGRRVTAASTTIEETKGIQMKGGDSGAWAGEMAFLKQFWEKEQKSIT  
PQNEAKVASIDPSESVDAKATVKSKLTTGGIADAYIYSIVVTEDCTVMSWSHEEMEKLMS  
STD LRSALTRAMSSALVGKVINLTISSRDGKMPWSEWLKEWNSKDGTSVEVQNDFRLA  
EDR  
>comp13428\_c0\_seq1; 161 1 2710 LEN=2788; translated  
XLIQSHWRAFQSSIEYMLCRVAAISIQAFVRGFFVRKEMHLAKARQQRDEERKCIKAAES  
STLIQSQWRGSRQRYKYMLCRVAAISIQALVRGYVVRKQIYLDKARQQRDEEALKTEELKY  
WKATESSLMIQSNWRGSLRRTFEMTFKVA AISIQALVRGFVVRKEIHLDKARQQRMEELK  
YKEYNESSILIQSHWRASQRRSGYMQYKVAAIMIQASARGAFIRTQYKYKSNRGSIIIFIQ  
KMVRAHLCKRHLIELHAAAIQIQRVWKGNAVVRMYRKVTESTTMIQSQRASKTRGEFAA  
MI IQAMTRGAQVRSQWRVFRMLSKRKKIFNVSARRIQVAFILWRMNIALWEVKSLAVLLK  
RGIRGQLARSVIHYALIHMNLSLRNSMIESFDRVLRNKD TYRGISGMIAWHTAVSDIRTS  
ASILIQSYVRTFMTRNQVMEEFGFVFDKRFVYETPTAISEHAAIAIQSFREWLKLRSSS  
AVLIQKSARGWISWITYNNVILPAHHESTRAMAATKIQT IHR YRKQRYRFTLRKGAI VQIQ  
TVWRGFQARKLLKNYEAQRCLMLKAFAILKLQALYRARKQVRFLVQRKGLKIQNFWR  
VFTRKSF IKWKTAA GIIQMTYRYRQRKAHQYMLVSCVVKVQSLARKLTARRMFLERRM  
FEIQAE LSLNHFLEQTRDVSASIAEDLLTNSDSMTNGPCMRRLADRVNDTLREAKLASDE  
VVPDFVHRFRAVIPLPSTARKPASPALLRSKSTDTDT PVRGNRAVPNKAAPETKIDHTST  
SSKPVSPVASSSGGRNVFRTAGGAGNVLANHEFELLRERTTRKNRADASLPQRTPKPASP  
DRNGRASSLFGREEKPGVPGGDPHGRASSEESGPDDFGERSNMPSPIRSKETEPGWDWS  
SSW  
>comp13429\_c0\_seq1; 373 219 1055 LEN=1396; translated  
MNSAYNPRSDDEEKCTDRHHHNLIEAVVFSAYDFSFRSSQYVCGDMHCQQMRWDPQAI  
GLLDDTTT NAGAVFRRRRSP LSSGAAREIRNNRTREQDDLGGITNNLSRDFDTASTCPST  
NPSAGGGTTGKTNWHR YDHRNRKNNSKTC SRTPRKSI AHNCRAGDND DDKGDDDSWPDFL  
KGLTFNES CVRKRK KLVIAFP TSLPSTSSSYFSPRPSIEGGHYQCQIEMTMENEKDPDG  
VERKKALGNNLNCFHFRRLGRRAKKFLKKIVSFRRH  
>comp13431\_c0\_seq1; 609 1 2064 LEN=2328; translated  
EKDNTKSTWSQMEEGSLKAALEHAKTLHNSSACESLLKNCIHL DLYTLGDRSRQVEDHL  
LDLAE LAENCRFFQKKNHLWHYGADGPVFGVHIDHSEAVPHLRAYCRYGPSVQDGWIAI  
HYVVEFMQSLRENSKKQKIVASAWDVQDGQVILIQ LADLLP PWDADPTDNHRYACWIDQ  
NGDLQLLRQPHISLNDALKELRGRLLSTVKFSSNPKMQQALTYWLDLNAQAASVHQ RAPM  
VLPRKVALAFRERPELLRTAIQAFCE SIQONGPVAPTISR PDLAKYEDVWVTVQTLPRTN  
YAMARSVSSVQDEWTS SPDSIPTLVGAEVKRYRRQCKVEAMGHLKHAVALGVRVIGLEE  
LMDANDKQYGTFFSSSPLSSLEERIMYWSRIQOTSCGLDKNENSKTILES FQMGPN TANL  
DLTNI LRCPVYPEEAENWTSYSKAQVSLQNVKNIMRSQNHKNVNDVEAFWVPRPDQVD  
PEDWMDYEHAKIEMVDELKSEHDVDNLLSRFQSFLQQKSNVDGINSNKTNGNGGRDTNKS  
SSKDICPRVFLTILHSVLKGGKLD FRRADPFFYEEDYDLIEQDGDSESSNNNDRAHEAFE  
TADGSFSMNDIMSAMDNELEGRTESRRI PSSLNVSDIYPKNSKGKDTVKGLVQDAHILS  
NLMESLDASGGGSGPVRNIKEME GEA  
>comp13432\_c0\_seq4; 38 1 719 LEN=801; translated  
KTKKKVSFFCPRVCNPACKTPSPSPTKAPSPSPTNKCPPDDPEFKFRGDYDKDCGWAGEN  
PEKRCKLIDQAKKEKVEKFCPYSCNRRCTCRDSTTPFRVGDGPFTTCEGLD TDGTEKCDT  
AAFRSKQNTAADFCPXKMWGLRSSRD LGSQPQOEHSILRTPEMCEAALEVAPFVGFWSLG  
GIEPFCPTLMDSCTYVKMIGEVCLPSQSSRQRPRFAGARWPACCTKLTSGFISSGR TN  
>comp13432\_c0\_seq7; 267 225 865 LEN=865; translated  
MKRMVSSVDKKNREL TANDCDACSESTRPIVTESGDDFQQMISNCL EGSCPYSLPLNC  
WNVSRVQDMSYAFANNSNGHFNDQLYCWDTSRVTSMEGMFEGALEFNQPIGSWDTSSV  
DDL SYMFYDAESFNQCLISWPSKFATQPQLTGIFLGS GCPSESTPSDENG PWCQTEEQCE  
GIVVSLPPTIQPTHVSEEPSSTPTEEPSSEPSTX  
>comp13433\_c0\_seq1; 683 121 1941 LEN=2178; translated  
MSSLFGKKHKSHHTGSKERNAKLLLKRKQEEISAVSKEENGSGERAAEKSDTSFDDVPAL

SPWAGFEDLGLTDPLVETCKALGFKRPTPVQRHIIPFLLRNESAHVLALASTGSGKTAAF  
VLPILNRLSADPYGIYAVIVSPTRELAKQIHQOVLALGSSYNIESTLVVGGMDMTKQSSA  
LEHRKPHFVATPGRLAELLRGPSPKQLQHVRFVLVDEADRLLTANSGFVKDVAELLLHC  
NRNKRQCQTLTFSATMTRSLESVEEIIAGAGKGRPLPKKFVIKSDESNKNKRQKLGAE  
NETSEESDDEEDGVVECGNDESDSAENEVERKKRIEEALTPRI PAGLKQEYIFMPSRVRDAY  
LLTTIRNLSNGGRAKDSKGRHAWRGGRKVSLSGRGEDENSDDDEEGKSRSIVFVATCER  
AALVSGILNEVGVENVALHSLLTQNRRLAALGKFKSQQVRVLVATDIASRGLDVPSVDLV  
INSELPRNPTSIVHRIGRTARAGRGRRAISLVSEQDVSLVHAAEEITGRPLEKCSEITDE  
AAIRMLGPVTKAARLAKIKLMDIGFDELVKKFKERKARDKERQRIERSLRKQAKKAERK  
KQAEATA

>comp13434\_c0\_seq2; 740 1 1397 LEN=1646; translated  
EEEEEEEDPEDDPYVGMVPYEFGDDPGSSSLSSSSSLSTTTGSASVSTTAMTTGMDWGGAL  
GALRTRVDDLESXQGGDPSQALFRMSADSPSELIGRFVKTADPQVVQAMSGAVTSLGG  
LSNPAMGVDVLRASGEKIGSLCFQLQMTGYMFRNAEYVLALKQLMCLKGNASQLTLEDY  
KEAFNRIDRDRSGYIEASEIQELFKEAYGGRDEDVPAFEVKAFLEFFDTNEDGRISWEEF  
EKGLTTTATAARARSKKDDFADRLLAGMEAGGPGAYGDGDGDDDDTDDDDASSGGLSETI  
SGSIEIEMDDGKVEVDAKEYMDSLREEARKLKLALRDEQGSSSSSNNAGGAGDPMAGLNL  
PSNPSGADEMVDIAGYIASRKGDVRSLTEGIKPEIVDTMCKLVDFVLEGGDNNKGNSSGSG  
ASGADRDKEMELPGSALQQLALWQLVVLGYKLREEEAKGDYINLLK

>comp13435\_c0\_seq1; 664 304 1752 LEN=2517; minus strand; translated  
MTKTTAEDNISAPERKRQRTASNDVSYDDGNVASTQQDKKTNQYTGWTVPHANFQIPVIS  
TEGDGLTPESFYADYIRQRRPVILRGILPSELMNLNRWRSSNEHMIARAGDESIMVEKRS  
SSGESFGRGNEIAISFRQFMKLEEGDTMHYLTTQDVAASNDGRPDLMSFMMKLLQGQGT  
DQDFPLRPKLAGNLVQPNINLWIGNSRDASSSGLHHDYHDNFYIVLRGKTFRFLFSPADT  
EKLYTRGQLVKVHKNGRINYEGEIT'TAYGADMQSNAALAEKAKNDAEERLVKAEKAVRE  
GLPGAEEELERAEILLDEAMEA ILDAETGSMGDGNEEEFHLEAAKEEDIKIEVDQLSSS  
SEEEEAIGIDENTFRLVDKTVKNPNFNSKIDPYLLDNDKLSDFPSILDATPAFCTCR  
SGDLLYLPASWFHEVRSSSDSSGKTKGHMAFNWFHPPDAENDFKNPYSTDFWPNDFKDR  
FE

>comp13436\_c0\_seq1; 344 252 1721 LEN=1924; translated  
MATDPTIPVNTGTNYVSMSEEGNDGPAGVFKDSEAAAPGGEQDDDLDDILSLAPSIASSV  
LTADGIHDPVGFVAVCLVILVGDMMARGVFFPTMWPVLEELGGSTVALGYSVASFSFGRIL  
VSPKFGGWSVTHGYSKTLLFSCSILWVGTILYTQAQNVGHVGFLLIFSQIVLGLGSGTLGV  
TRAFVADVTAQRSRTTYMAWITAVQYGGFTVTPFVGSFFTKVLKDKEYRFGFLFRFNQYTA  
PAYFMNLVITVTIILMLKYFRDRVRMSALKNNKKKSAKRMTIEDAANRVTVTGLTVYDCC  
ILGCMLLNSTKGSISAFETLGVSIAQSQFDMPSQAGVIVASCGSIGVIALLSMGQMAR  
FLTDIQLICGMAIMCCGVLSLGFLEADVTPNSWKFCITAFIYISVGYPIGHTAVIGLFS  
KIVGRRPQGELLGWFAAGSLARLFCFIMAGYLTNFFGISAIFFVLLIVLSVSIITMYS  
RHTLEFLSQ

>comp13436\_c0\_seq2; 290 252 1433 LEN=2087; translated  
MATDPTIPVNTGTNYVSMSEEGNDGPAGVFKDSEAAAPGGEQDDDLDDILSLAPSIASSV  
LTADGIHDPVGFVAVCLVILVGDMMARGVFFPTMWPVLEELGGSTVALGYSVASFSFGRIL  
VSPKFGGWSVTHGYSKTLLFSCSILWVGTILYTQAQNVGHVGFLLIFSQIVLGLGSGTLGV  
TRAFVADVTAQRSRTTYMAWITAVQYGGFTVTPFVGSFFTKVLKDKEYRFGFLFRFNQYTA  
PAYFMNLVITVTIILMLKYFRDRVRMSALKNNKKKSAKRMTIEDAANRVTVTGLTVYDCC  
ILGCMLLNSTKGSISAFETLGVSIAQSQFDMPSQAGVIVASCGSIGVIALLSMGQMAR  
FLTDIQLICGMAIMCCGVLSLGFLEADVTPNSW

>comp13437\_c0\_seq1; 681 67 1170 LEN=1238; translated  
MMKTGVVLALAGTWCLGALSTVGAFLSMSSASVGEKGTAIAGATGYIGKSVVRESVRQ  
GYKTIALVRDSEKVNKQGGALYQGFEGAEVIECDVCDPAALTKTMEKIKADGGDIEAV  
ISCLASRSGIKKDAYAIDYQATKNCLDSGIATGARHFVLLSAFCCKNPWLQFQQAKLKF  
ADLVAAQDKITHTIVRPTAFFKSVSGQLEVVQOGAPFVMFGDKVTRCNPIAEADLATYL  
VDSITDESRLNRNIDLGGPDEPLTMLKQGEMLFDVAVGKEPNFFAFPLWLFDVIIIDSLQWV  
SDTFNSEKFNAAELGRIGKYAYVEDMLTTDPDEKFGTITLQEHYDRIAVEGQYDPTT  
MFAKAPE

>comp13438\_c0\_seq1; 667 200 1819 LEN=1896; translated  
MDDSTRFSTGFASLPATASTAGENENDQDLLPDPDEGFVLPPEDEPSGDPSTSFDPATK  
DHYYPSKQCAHGDDDEEQHILGTIIVRVVAARGLDEPPHQRETGGLRGVFRQSQAPAT  
NPYASLKFSTTQRTSELYSTLDPVWRPEVFFMDVSLPVSQVLTHTSAETPLSSSSSSSEE  
VHEDAAPALDDPFYSYQKPDNTALTVAIFHSESGSNNLKGKHKHKLKLGEGGTVSGDSD

DAFLGMASIDLAALFTGMVPELDEWVPLHGTASDHHHVGHQEHYRSSNRHRTTRGAAVRI  
VCEYEPDAPPKPGDICRFTKFCRDLRDLVPLEPSRSYKVDTVRGNGTAVILSYESPEGWL  
LSFQAHRNMLFTEERHVSPLNTAQDELQTLGERLAVSPLIAAVTETAERVLDDGLVGIAG  
EIVKGSFAFVDRWFRGGVDTVIRDLRDLVPLNDGRHNQDAIGESLEIGLGSSASLDDASDD  
GVDNAESCAEHEPAALDPIEEQEALPNMPPCPITGFFPMVRKQKKIRWVAPITSIVVCW  
>comp13438\_c0\_seq2; 773 200 2038 LEN=2181; translated  
MDDSTRFSTGFASLPATASTAGENENDQDLLPDPDEGFVLFPEDEPSGDPSTSFDPATKP  
DHYYPSKQCAHGDEEEQHILGTIIVRVVAARGLDEPPHHQRETGGLRGVFRQSQAPAT  
NPYASLKFGSTTQRTSELYSTLDPVWPRDEVFFMDVSLPVSQQLTHSAETPLSSSSSSSSEE  
VHHEDAAPALDDPFYSYQKPDNTALTVAIFHSESGSNLKGKHKHKLGGGTVSGDSD  
DAFLGMASIDLAALFTGMVPELDEWVPLHGTASDHHHVGHQEHYRSSNRHRTTRGAAVRI  
VCEYEPDAPPKPGDICRFTKFCRDLRDLVPLEPSRSYKVDTVRGNGTAVILSYESPEGWL  
LSFQAHRNMLFTEERHVSPLNTAQDELQTLGERLAVSPLIAAVTETAERVLDDGLVGIAG  
EIVKGSFAFVDRWFRGGVDTVIRDLRDLVPLNDGRHNQDAIGESLEIGLGSSASLDDASDD  
GVDNAESCAEHEPAALDPIEEQEALPNMPPCPITGFFMVDVVAADGHTYERRAIRRW  
LGTSDKSPMTGSVLLHKLVPNYGLLSSIEEAATREDNNRESYLASSFDTHVLVDSDDER  
KPPNTDANAHA  
>comp13439\_c0\_seq1; 537 165 1652 LEN=2018; translated  
MKISALSALTVALGLFIPSEGGFSRDMGLRKPSSVEPGLDDKLRKAIPLLEEKKNVNA  
KGYQLGGDDGARKLANDGNDQVYENEDDYVNEYNMVDFTGYSFKYAKCQPVQRFSDAI  
EAGEYSPMINDIVLRLCDSMYCSDNRAYGCNSDFVEYAIELTDYVRIMLRHEMDKKEQ  
LCNWCDSCLNGKQGRRRDSMRYYSYDENGNLVVNEEYVDDDDFWSNLDCTDYQQYCYDD  
YGNVSCENDDDNMYTAENYLDVIDCSQVNGGYFLRPRCDASSNTLSMGVFHDKFCTHYAG  
NEVSIIEYFNLGINQTYFDEFADAGCQDCSVSYPPNLKSNLNLNRLDIESARCTSGTS  
NEMLVQNTSSSSNAIQCSFMDGIRYGTDEEDGNLYAGSVFGMRRVTTGQKFLGLSMLIC  
GALAVYSCYLHHAITNLLIKSLSHTDLLPPTKYRRRSNGSGNKKRGVRRFRRPTKGRDDK  
DEEKPTMKSNEATIA  
>comp13440\_c0\_seq1; 382 111 1109 LEN=1473; translated  
MTSPRIFRGRRLVLRVLRRLREVEPGHSSVFRSSPLSDSSTNKTLRYRTPCGTKPRAFRFP  
SQADSYHRQRRFGLTNDGERKRSEGGQSLVLSITETPLDSTVIEKPYTIVLMEDQVAVSP  
LLSTEGDENHSYDCAEHPVGNQATTSWIDTFRSKVPSYHGMFSFASISLSWQRNPSVADGV  
LALKSCQLSSINDAILVTRGPVASLCAQYYLESFPLQGLVMIDPILIDDEDACGDGEAV  
SSLVSRMYRCQDDADKDRFRSGRLLVEPNAVPMVVVTAQDDKAWNESSRFVAAARHGDD  
NGPYGRVPIVDLANIDGTEKNSAVTVLDVIGEW  
>comp13441\_c0\_seq1; 735 271 2947 LEN=4340; translated  
MMAHNNAEYFHNLSLNNQMNARNVDVIFSAANGVQLNHPGNIVFDKMIRNFQARYRVN  
DDPVMKRTIAESITRAIQERNRFLKEPMLGMWITYSEISPAEAMIRTASLLSGTNLGGSI  
NVNGNDAANSNILAAVAEEQKRSVVAHHLQLKQEQKILENEIMIRMRQKMMMP SAMQTGS  
GTNFLSTLNQASSSVLQGTERLRTRQAVSNVFMARKIDQEIINNI EKLSAMEQLMKFRMRE  
REQKAVDDLKIKKQQLMEHKQNHQGVQPPQRQKQPSTTTLDDEQRRQEDPWP IKNHDFTEW  
DVFVSDASSGKWSVGNKYFRKILLEKELLPSCLDYTRLKDMSONIVSTIRDHNGRF  
LQKRPFKLENGTVMESLWHDVGNVEAVTWIMGLMKLLFNRGKGFCKNPKPGSFLLDLVSSG  
TFFVEMKSTTTPPTIPGPEDILWAKGYNEHPGNVFRKILVHSLQDQIVLDWDESKLAELS  
RSIVITVKSEPNARFLVKIGSYQSPSDESTKSVMTWEWKEISKEDAEIRTLGALRESLEK  
LRRCVSEKEPTKLQKQQHQQQQKQHGPKQKPHQPLDEHSHALPAAGNAGFGHLQPLA  
RLFVPDLPGDQHHPLVNYVNFVVEAHPDLPEAEPVDDTVYHLVEFWATFFFAIVECL  
ALANTPKSLYSMIGGGSNQSKGLNPLFLRMVLCFNIVATAVPVAVMVSFSIETFEIVSHEI  
EYINELTMSFIDVILLVSLWKSRTPPQKQRRKDPSSVSCGKLGGGTGGGEDNLSGWATSG  
IAMLVAVVQLGVYNGMGRTPDGMVGEVPGHFLEFSFEIISLIAFWFCMDNKYVADKEI  
GLILYGADHDLDCQICEAKAGEFALEHSGAGVVAAGTEECVPCCTTQYQTV  
>comp13441\_c0\_seq2; 733 271 3138 LEN=4531; translated  
MMAHNNAEYFHNLSLNNQMNARNVDVIFSAANGVQLNHPGNIVFDKMIRNFQARYRVN  
DDPVMKRTIAESITRAIQERNRFLKEPMLGMWITYSEISPAEAMIRTASLLSGTNLGGSI  
NVNGNDAANSNILAAVAEEQKRSVVAHHLQLKQEQKILENEIMIRMRQKMMMP SAMQTGS  
GTNFLSTLNQASSSVLQGTERLRTRQAVSNVFMARKIDQEIINNI EKLSAMEQLMKFRMRE  
REQKAVDDLKIKKQQLMEHKQNHQGVQPPQRQKQPSTTTLDDEQRRQEDPWP IKNHDFTEW  
DVFVSDASSGKWSVGNKYFRKILLEKELLPSCLDYTRLKDMSONIVSTIRDHNGRF  
LQKRPFKLENGTVMESLWHDVGNVEAVTWIMGLMKLLFNRGKGFCKNPKPGSFLLDLVSSG  
TFFVEMKSTTTPPTIPGPEDILWAKGYNEHPGNVFRKILVHSLQDQIVLDWDESKLAELS  
RSIVITVKSEPNARFLVKIGSYQSPSDESTKSVMTWEWKEISKEDAEIRTLGALRESLEK

LRRCVSEKEPTKLQKQQHQQQQKQHQHGPKQKPHQPLDEHSHALPAAGNAGFGHLQPLA  
RLFVFDLPDQHPGLVNVNFRFVEAHPDLPEDAEPVDDTVYHLVEFWATFFFAIVECL  
ALANTPKSLYSMIGGNSQSKGLNPLFLRMVLCFNIVATAVPAVMVSFSIETFEIVSHEI  
EYINXIVSATVTEAATRCNGMRSMTAEIAAFWFVSHSVVCSAMLVSSVCFVSLRFAPLRL  
ASRLNLFPSRTMSFIDVILLVSLWKSRTPOPKQRRKDPSSVSCGKLGGGTGGGEDNLSGW  
ATSGIAMLVAVVQLGVYNGMGRTPDGDVMGEVPGHFLEFSFEIISLLIAFWFCMDNKYVA  
DKEIGLILYGADHDLDCQICEAKAGEFALEHSGAGVVAAGTEECVPCTTQYQTV  
>comp13442\_c0\_seq1; 324 1 681 LEN=962; translated  
AMRCDAMRCEALRRKTKRALDAMQNVVFLWLCPTPRLRALPVLPFASRLSARPIRCTCT  
YTRTRSANTFVGASTGGDPSAIDVPVIGGHAGITILSLFSQVPGYTPGAEELDAITHRT  
QFGGDEVVQAKAGAGSATLSMAYAGYLFDTKVLQAMNGADDIVQCAVASDVTASFFSS  
PCKFGPEGVEEVRGFGAISEYEEGWLNKMLPDLKAQIQKGIDFANQ  
>comp13442\_c0\_seq2; 587 1 1167 LEN=1448; translated  
PIERLFRTRGLCREQNQPSQCHRSAPPCPTVPSNMFASSTSRRLVNAALSATHHKNNRF  
YSSTAAMGKKVAVLGAAGGIGQPLSMLLKLSENVTLSLYDIVGTPGVAADLSHIPSKAS  
VTGSVPSSPTWPPSGDSGLETALTGADVVPVIPAGVPRKPGMTRDDLAFATNAGIVKTLVEG  
CAEHCPCGAVLAIISNPVNSTVPIAAEVLKKGKGVYDPKCLCGVTTLDVIRANTFVGASTGG  
DPSAIDVPVIGGHAGITILSLFSQVPGYTPGAEELDAITHRTQFGGDEVVQAKAGAGSAT  
LSMAYAGYLFDTKVLQAMNGADDIVQCAVASDVTASFFSSPCKFGPEGVEEVRGFGAI  
SEYEEGWLNKMLPDLKAQIQKGIDFANQ  
>comp13442\_c0\_seq3; 376 1 1037 LEN=1194; translated  
XPSNAYFEHEAFAENRIVSPETEAGWGVPRIEQREAPNGALPHGRTRGEETLDRGTGCR  
FRNCQDHLKLGARFAPRGFEIRHRHLFCEKQSKAKQSKAIQSEPSQNDGTPRGSPPPPQP  
PPPAAGAAAALGLDVEYGPVYVWGDDEEDGALDSDDDDDGDALRDVVLGVLQASSETHSDD  
EAAWIDLLEKIAEANKLDAGLRREAREQHLRETCTKMEEDLARAKLEEKEKAGVEKEEEK  
KSSHVDEETKRRLMQQYGYDEPAEDEAASGPAASGGGGKKGKAKASGAVSNKDLARAAHAE  
KTKEMRNANKTTKAEERKKTKEQKASKADLKEARRKRAQKGERRA  
>comp13442\_c0\_seq5; 643 93 1154 LEN=1435; translated  
MFASTSRRLVNAALSATHHKNNRFYSSTAAMGKKVAVLGAAGGIGQPLSMLLKLSENVT  
ELSLYDIVGTPGVAADLSHIPSKASVTGSVPSSPTWPPSGDSGLETALTGADVVPVIPAGV  
PRKPGMTRDDLAFATNAGIVKTLVEGCAEHCPCGAVLAIISNPVNSTVPIAAEVLKKGKGVYD  
PKKLCGVTTLDVIRANTFVGASTGGDPSAIDVPVIGGHAGITILSLFSQVPGYTPGAEEL  
DAITHRTQFGGDEVVQAKAGAGSATLSMAYAGYLFDTKVLQAMNGADDIVQCAVASDVT  
DASFFSSPCKFGPEGVEEVRGFGAISEYEEGWLNKMLPDLKAQIQKGIDFANQ  
>comp13442\_c0\_seq6; 444 78 800 LEN=957; translated  
MTEPSPEDHHRPNLHRLRLRERLPALGLDVEYGPVYVWGDDEEDGALDSDDDDDGDALRDV  
VLGVLQASSETHSDDEAAWIDLLEKIAEANKLDAGLRREAREQHLRETCTKMEEDLARAK  
LEEKEKAGVEKEEKSSHVDEETKRRLMQQYGYDEPAEDEAASGPAASGGGGKKGKAKAS  
GAVSNKDLARAAHAEKTKEMRNANKTTKAEERKKTKEQKASKADLKEARRKRAQKGERRA  
>comp13443\_c0\_seq1; 543 222 1505 LEN=1899; translated  
MQMLSRPTGSSNAFLAAIYVAACSMPLPTTESLAPVPLASTPASATSTTLWIQSENSKH  
NGRSRGRQGGYPQGGGGQYDYSGGNLKYGTGKYTQRENDGYQGGVNI SKNGRSMQDG  
VYREDRLNVDRARGRPRGGNDFDSRMDEIEDLERGLGRGIPMGPPREGMRDRMMNRNRNG  
PLDGDMDYMGDDYGPSGGVNRNMGGGGLLRDLQEAAGRNRDGYDDFGSRGGGYSMGGSGG  
GKVMGSSSHGRGGGYRSSQFQSDLSNERRRFEYGFREMEDYLDEQDLIDETGRKVRMNG  
RRRNGYGMNSNFRDRRDNADDFYDDEFYGMDRQQGENRGMGGVDSLRLQQGSRGGMSDSY  
RQGSRGMGSNGMDSFRERHNGRGGSRGGRRGGRQGSYNDYDGYGDDYGDYGDYRGGSGG  
GLLRDRR  
>comp13444\_c0\_seq1; 342 118 1071 LEN=1305; translated  
MNLAVMTGQONQNPMLMGQSQQFGGGRTLIVQGANMQNQLLQGLMMNQKQQONGIGSI  
RNLFSQMARYAGGNHVGFGGDKSTVLGAPGVAGSSSFLNPLPESIFSKDGSRRMKGGVI  
EPFPEKHLRLLMEVESIGRTDVISFVANGRAFIAHKADNFFKEIVPLYFRQSRLSSFKRQ  
LNLYGFELINTGPARGGYHEMFVKERPELRCQMRRVAIKVSGGKEAAKSKAEKSIDESE  
SRPNDDAVASYKNQEKKPREVTKGNAEGSTAIGKASQKVEEGVANEIRSANGTQEDRVV  
IDGATEKPEQNDRASD  
>comp13444\_c1\_seq1; 86 1 789 LEN=1472; translated  
XKNNTGIFLLETCPMOPDPEWISVRDDKRYWKTTHRDEFLSKVKKPKKLLVLASCETAIAL  
FPIAVWAHDSLSLRCVRGSSMEPALFDGDVVVVRKSDGFWRFRTRPIGNDSQGRQADRH  
KHQRWAAERERVLSYEREHCNSNGSIGLLRKPATPITGDIVVFKDPEKYPDRWNIKRVA  
LGGQIARASVLPVPPFCIWVEGDNLANSSTDSRTKSHGPVSKLLLVGIVEYRVVPPWRFEL

ENSNSTAITNTDSSVIRNNDAS

>comp13445\_c0\_seq1; 393 118 1194 LEN=1404; translated  
MTIPRTNSRGQWLLALTTLCVCFESSVGFLLTSNSLSSRTSIDKIFLFFVENGTGGQGGDI  
ANGLKKYSKEVIESSKSNEWGIPSTDITLDPLAASPQEKLENGGRVTLVGSGBPDPPELLTI  
KAYNILQDPDAVVIADRLVSQEILDVKGKIKVARKLPGCAENAQAEIYWWTYQGLASGQ  
HVVRLKIGDPFVFGRGGEVLQFRKFGVESKIVPGVSAAFSAPLLANIPVTHRGYSNQVV  
MCTGYGREGSSPDLIQYHEEQTIVFLMAVGRLRVLCEERLISLAGYPKETPVGIIERAGCP  
NQRTVIGDMQTIADIAEKHKIQAPSTIVVGKVVNVLLLEKDESGMVTQGLLRNATAISV

>comp13446\_c1\_seq1; 351 233 1168 LEN=1361; translated  
MSGRGYGRGGGRGGGRGGFGRGGGRGGGRGGGRGGGRGGGRGGGRGGGRGGGRGGGR  
GGGMKGGSKVVVEPHRHEGIFVARGKEDALVTLNSTPGVAVYGEKRISVETPSKEPGGAA  
VKTEYRVWNPFRSKIAAAVLGGVDNIWIKPGSKVLYIGAAAGTSVSHVSDIVGKDGAVYA  
VEFSHRPGRDLLGVAKLRTNIIPIVEDARHPLKYRMLIGMVDCVFADVAQPDQARIVALN  
SHHFLKNGGHAVIAIKASCIDSTAAPAEVFRREVSKLQKENFKPLEQLTLEPYERDHAVV  
IAEYRPQKKKQ

>comp13446\_c1\_seq2; 883 1 1307 LEN=1307; translated  
XVEYLLRGYNRAISPLTLCGSNESPAAGTDPEEVSVSLEAMMDVMERFHQEGEMYMQLRK  
EALGFINSANSSDSSSSSSSSSDSDSDSDEDEDTKKKPVATKKEESDSSSDSDSDSDDE  
EEKKVETKKEESDSSSSDDSSSDEEEAAPAKSKAVAKADDGSSSSSDSDSDSDSDEED  
KKEADKMEVDKSSDSSSSSSSSSDSDSDSDDTAASDPENNAESKKRKEVEEETAEP  
KQAVEDGGESVTKLYIRGLPWRATEDAVRDYFAKCGSGPKSVLPLQDDGRSSGTAIIDF  
HDADSAAAAMELNGADFEGRWLSIKYSTPKPILAPRQTTPKQEGCCTVFVGNLAWEIDED  
SLRAAFAECGEITQIRFSTDRETGDFKGYGHIEFAQTESTDAAIKMAGTDIFGRAVRVDY  
ANDRRQSFGGGGGGGX

>comp13446\_c1\_seq3; 112 1 485 LEN=706; minus strand; translated  
XLVATAEGQGRNRAVIAPEQVFHRSPDSLATAYASSRSSFGGEGVVFAPLVPWQNKDPMGV  
SNSSCVSSPSSVASRHTGGGALEECRVGMILWGRSGGCAGCCGSLSLLVFCLAVVDKDRR  
GVPLALGGIVRIKPFENFKHFLPLLCKTVRTEEKVMSVSL

>comp13446\_c1\_seq4; 291 1 894 LEN=1087; translated  
XAEFEVAAAAASEAVVAVEVVAEEAVAVGDVAEAAVVEADEEAEVAXGGGMKGGSKVVVE  
PHRHEGIFVARGKEDALVTLNSTPGVAVYGEKRISVETPSKEPGGAAVKTEYRVWNPFRS  
KIAAAVLGGVDNIWIKPGSKVLYIGAAAGTSVSHVSDIVGKDGAVYAVEFSHRPGRDLLG  
VAKLRTNIIPIVEDARHPLKYRMLIGMVDCVFADVAQPDQARIVALNSHHFLKNGGHAVI  
AIKASCIDSTAAPAEVFRREVSKLQKENFKPLEQLTLEPYERDHAVVIAEYRPQKKKQ

>comp13446\_c1\_seq5; 1060 1 2134 LEN=2327; translated  
XVEYLLRGYNRAISPLTLCGSNESPAAGTDPEEVSVSLEAMMDVMERFHQEGEMYMQLRK  
EALGFINSANSSDSSSSSSSSSDSDSDSDEDEDTKKKPVATKKEESDSSSDSDSDSDDE  
EEKKVETKKEESDSSSSDDSSSDEEEAAPAKSKAVAKADDGSSSSSDSDSDSDSDEED  
KKEADKMEVDKSSDSSSSSSSSSDSDSDSDDTAASDPENNAESKKRKEVEEETAEP  
KQAVEDGGESVTKLYIRGLPWRATEDAVRDYFAKCGSGPKSVLPLQDDGRSSGTAIIDF  
HDADSAAAAMELNGADFEGRWLSIKYSTPKPILAPRQTTPKQEGCCTVFVGNLAWEIDED  
SLRAAFAECGEITQIRFSTDRETGDFKGYGHIEFAQTESTDAAIKMAGTDIFGRAVRVDY  
ANDRRQSFGGGDRGGGRGGGRGGGRGGGRGGGRGGGRGGGRGGGMKGGSKVVVEPHRHEGI  
FVARGKEDALVTLNSTPGVAVYGEKRISVETPSKEPGGAAVKTEYRVWNPFRSKIAAAVL  
GGVDNIWIKPGSKVLYIGAAAGTSVSHVSDIVGKDGAVYAVEFSHRPGRDLLGVAKLRTN  
IIPIVEDARHPLKYRMLIGMVDCVFADVAQPDQARIVALNSHHFLKNGGHAVIAIKASCI  
DSTAAPAEVFRREVSKLQKENFKPLEQLTLEPYERDHAVVIAEYRPQKKKQ

>comp13447\_c0\_seq1; 619 119 1189 LEN=1380; translated  
MELLPALAKLPEQRLHCSLELCCSAAKLATENNTLMACNDNKITSSNAFACADSIEEILT  
ENQTSRYIKSGSKSQGGCDDNDDDEDISLNTYASTLTTYGETLNGDVKSLEFQYTIESSR  
FFVLQNGCGANISGILDEDGFNEEIVLVRDGAALTSENEDEIMIKIDNQKDLAAKAAT  
TILRYRLPVDTKPGRNKILLKSKLSNDSVPNTTTPVGLSFTPTWTGSVDEVDSRKDIVP  
NHEESCAVGVQSDDESTINTDGTTKDEGDDCKGARQTTKKPNAAGRNGAAIASEVSVIEVIG  
KGIKKKKKNTAKSVHRMIERMVSNLRSNDEKNVKKNSGEKNKERGSSRVISRGSF

>comp13448\_c0\_seq2; 210 225 932 LEN=2068; minus strand; translated  
MDCNQGIYLERLLQQQLCQRKNGNINSTVNKNISDGNSSFGNCSAPSGFIATNTTSIGV  
SNTGIGLGMHQQHFQNRMIAFLKERQQQRQLVANGIICAPCDMTSNPSIPGLSNIAGLG  
HQLVGRDCGGIGQTIPTSAIDGISSGGRGARNVRGLGNRGLYFSTEQDFLSSSNPYTA  
VGEITGEHNTKLRNNGSVGAGSLNSSMGGLSQFSIQHQALTQAALNSYQKANERG

>comp13448\_c0\_seq3; 210 225 932 LEN=2770; minus strand; translated

MDCNQGIYLERLLQQQLCQRKNGNINSTVNKNI SDGNSSFGNCSAPSGFIATNTTTSIGV  
SNTGIGLGMHQQHFQNRMI AFLKERQQQRQLVANGI ICAPCDMTSNPSIPGLSNIAGLG  
HQLVGRDCGGIGQTIPTSA LIDGISSGGRGARNVRGLGNRGFLYPSTEQDFLSSSNPYTA  
VGEITGEHNTKLR SNGSV GAGSLNSSMGGLSQFSIQHQALTQAALNSYQKANERG  
>comp13448\_c0\_seq4; 210 225 932 LEN=2041; minus strand; translated  
MDCNQGIYLERLLQQQLCQRKNGNINSTVNKNI SDGNSSFGNCSAPSGFIATNTTTSIGV  
SNTGIGLGMHQQHFQNRMI AFLKERQQQRQLVANGI ICAPCDMTSNPSIPGLSNIAGLG  
HQLVGRDCGGIGQTIPTSA LIDGISSGGRGARNVRGLGNRGFLYPSTEQDFLSSSNPYTA  
VGEITGEHNTKLR SNGSV GAGSLNSSMGGLSQFSIQHQALTQAALNSYQKANERG  
>comp13448\_c0\_seq5; 210 225 932 LEN=2166; minus strand; translated  
MDCNQGIYLERLLQQQLCQRKNGNINSTVNKNI SDGNSSFGNCSAPSGFIATNTTTSIGV  
SNTGIGLGMHQQHFQNRMI AFLKERQQQRQLVANGI ICAPCDMTSNPSIPGLSNIAGLG  
HQLVGRDCGGIGQTIPTSA LIDGISSGGRGARNVRGLGNRGFLYPSTEQDFLSSSNPYTA  
VGEITGEHNTKLR SNGSV GAGSLNSSMGGLSQFSIQHQALTQAALNSYQKANERG  
>comp13448\_c0\_seq6; 210 225 932 LEN=2797; minus strand; translated  
MDCNQGIYLERLLQQQLCQRKNGNINSTVNKNI SDGNSSFGNCSAPSGFIATNTTTSIGV  
SNTGIGLGMHQQHFQNRMI AFLKERQQQRQLVANGI ICAPCDMTSNPSIPGLSNIAGLG  
HQLVGRDCGGIGQTIPTSA LIDGISSGGRGARNVRGLGNRGFLYPSTEQDFLSSSNPYTA  
VGEITGEHNTKLR SNGSV GAGSLNSSMGGLSQFSIQHQALTQAALNSYQKANERG  
>comp13448\_c0\_seq7; 210 225 932 LEN=2672; minus strand; translated  
MDCNQGIYLERLLQQQLCQRKNGNINSTVNKNI SDGNSSFGNCSAPSGFIATNTTTSIGV  
SNTGIGLGMHQQHFQNRMI AFLKERQQQRQLVANGI ICAPCDMTSNPSIPGLSNIAGLG  
HQLVGRDCGGIGQTIPTSA LIDGISSGGRGARNVRGLGNRGFLYPSTEQDFLSSSNPYTA  
VGEITGEHNTKLR SNGSV GAGSLNSSMGGLSQFSIQHQALTQAALNSYQKANERG  
>comp13448\_c0\_seq8; 210 225 932 LEN=2895; minus strand; translated  
MDCNQGIYLERLLQQQLCQRKNGNINSTVNKNI SDGNSSFGNCSAPSGFIATNTTTSIGV  
SNTGIGLGMHQQHFQNRMI AFLKERQQQRQLVANGI ICAPCDMTSNPSIPGLSNIAGLG  
HQLVGRDCGGIGQTIPTSA LIDGISSGGRGARNVRGLGNRGFLYPSTEQDFLSSSNPYTA  
VGEITGEHNTKLR SNGSV GAGSLNSSMGGLSQFSIQHQALTQAALNSYQKANERG  
>comp13448\_c0\_seq9; 210 225 932 LEN=1943; minus strand; translated  
MDCNQGIYLERLLQQQLCQRKNGNINSTVNKNI SDGNSSFGNCSAPSGFIATNTTTSIGV  
SNTGIGLGMHQQHFQNRMI AFLKERQQQRQLVANGI ICAPCDMTSNPSIPGLSNIAGLG  
HQLVGRDCGGIGQTIPTSA LIDGISSGGRGARNVRGLGNRGFLYPSTEQDFLSSSNPYTA  
VGEITGEHNTKLR SNGSV GAGSLNSSMGGLSQFSIQHQALTQAALNSYQKANERG  
>comp13449\_c0\_seq1; 721 83 2923 LEN=3384; translated  
MSGIPSESQPREPLEGESGGHSLGGGAGSKQLTSQELREQLARFGGGSSTPKGQAKKI  
LPKSAPRMKGVHPADKISKQPPIYTDSTPKNKR SVTGFANESCTKPSMTAEETTP IPSQN  
RIEPPVASKGDNYKREDDQTVKHSNIRSNIKDNKTLDSDSIVSFDDQLALLMQEEDLQ  
RAIAMS MGAPIPSSTGPMNCGDIDPLPVS DGI TEKGQSQT TISNDMLATAAMVVATAPAT  
TTPITPTTPMQIDEENHDVVMKNE DRES PMVESKANADPTTAPASPSRICLKDPRHLSGR  
VLTWYMTAAPFNVLDFHDCMWDKDVTVEHDQKRWLAQGIQFKHEHGDGNTSSTRVAAGTL  
TATNETTDTSSLLAAIISGPGVWCLTQQHGGPCGVLASIQAELLA ILLFGPRTVHPLSMI  
SIDFPTSLS TEFTMAAPDMSRSKMRQVLALSMGMILARASLKPSAALEDDTNREN RNNEN  
VDAKENDSHPMCLSRPEPTVTLILPKNELWKTTSHLEWEHLEPWN DKEGGGLSEHLLKY  
TISLNKNPSTGEIDKTAVKRQKHNSDIDMDETCRELAHATAEFLETTNSLDWDFQ RSGGVL  
LMVMSLAASRGIPMLQGDMDDVTRKLTTRFGYCSQELINLLLAGQGVSNVFDHTQRLSEE  
MVF RGIQS QPSIGYLTQVEATGHLEVGGFYKTPRFPVWVIGSTSHFSVMFGDGSALKEST  
SDVLLDKVRRAFKRMGGGAAENGVMQSNQLGEFFKKNVGLNNISDNEVQMLA AFMDRFGQG  
IILWDDLWKRTSRLLTGASIGSILDGTD DTHDCNRSSSNASAVTGD SNAATIHPVTRDRP  
LSDEELARKLQAEWNGTSIENVASPFKPSVTKGKNDIPVAREKFGRTFQLYHYNGLRGG  
YFKPFRVTRLSADEAIGASISLGGSNQMSFGAGGFEEGLDSVLR TKW  
>comp13449\_c0\_seq2; 642 83 3016 LEN=3477; translated  
MSGIPSESQPREPLEGESGGHSLGGGAGSKQLTSQELREQLARFGGGSSTPKGQAKKI  
LPKSAPRMKGVHPADKISKQPPIYTDSTPKNKR SVTGFANESCTKPSMTAEETTP IPSQN  
RIEPPVASKGDNYKREDDQTVKHSNIRSNIKDNKTLDSDSIVSFDDQLALLMQEEDLQ  
RAIAMS MGAPIPSSTGPMNCGDIDPLPVS DGI TEKGQSQT TISNDMLATAAMVVATAPAT  
TTPITPTTPMQIDEENHDVVMKNE DRES PMVESKANADPTTAPASPSRICLKDPRHLSGR  
VLTWYMTAAPFNVLDFHDCMWDKDVTVEHDQKRWLAQGIQFKHEHGDGNTSSTRVAAGTL  
TATNETTDTSSLLAAIISGPGVWCLTQQHGGPCGVLASIQAELLA ILLFGPRTVHPLSMI  
SIDFPTSLS TEFTMAAPDMSRSKMRQVLALSMGMILARASLKPSAALEDDTNREN RNNEN

VDAKENDSHPMCLSRPEPTVTLILPKNELWKTTSHLEWEHLEPWNDKEGGGGLSEHLLKY  
TISLNKNPSTGEIDKTAVKRQKHNSDIDMDETCRELAHATAEFLLETNSLDWFQRSSGVL  
LMVMSLAASRGIPMLQGDMDVTRKLTTRFGYCSQELINLLLAGQGARGHVKMVEKIALSL  
ILFSTSFQYVFAPFKKKSPFTSITRNDXSEEMVFRGIQSQPSIGYLTQVEATGHLEVGGF  
YKTPRFPVWVIGSTSHFSVMFSGDGSALKESTSDVLLDKVRRAFKRMGGGAAENGVMQSNQ  
LGEFFKNVGLNNSDNEVQMLAAFMDRFGQGIILWDDLWKRTSRLLTGASIGSILDGTDD  
THDCNRSSSNASAVTGDSNAATIHVPTRDRPLSDEELARKLQAEWNGTSIENVASPFKPK  
SVTKGKNDIPVAREKFGRTFQLYHYNGLRGGYFKPFRVTRLSADEAIGASISLGGSNQMS  
FGAGGFEEGLDSVLRITKW

>comp13449\_c0\_seq3; 607 83 3086 LEN=3547; translated  
MSGIPSESQPREPLEGESGGHSLGGGAGSKQLTSQELREQLARFGGGSSTPKGQAKKI  
LPKSAPRMKGVHPADKISKQPPIYTDSTPKNKRSVTGFANESCTKPSMTAEETTPIPSQN  
RIEFPVASKGDNYKREDDQTVKHSNIRSNIKDNKTLSDSIVSFDTDQLALLMQEEDLQ  
RAIAMSMGAPIPSSSTGPMNCGDIDPLPVSDBGITEGKQSQTTSNDMLATAAMVVATAPAT  
TTPITPTTPMQIDEENHDVVMKNEPRESMPVESKANADPTTAPASPSRICLKDPRHLSGR  
VLTWYMTAAPFNVLDFHDCMWDKDVTVHEHDQKRWLAQGIQFKHEHGDGNTSSTRVAAGTL  
TATNETTDTSSLLAAIISGPGVWCLTQQHGGPCGVLASIQAELLAILLFGPRTVHPLSMI  
SIDFPTSLSSTEFMAAPDMSRSKMRQVVALSMGMILARASLKPSAALEDDTNRENRRNEN  
VDAKENDSHPMCLSRPEPTVTLILPKNELWKTTSHLEWEHLEPWNDKEGGGGLSEHLLKY  
TISLNKNPSTGEIDKTAVKRQKHNSDIDMDETCRELAHATAEFLLETNSLDWFQRSSGVL  
LMVMSLAASRGIPMLQGDMDVTRKLTTRFGYCSQELINLLLAGQGGTSGTLDMITIGIH  
GLISLYSIEARHVKMVEKIALSLILFSTSFQYVFAPFKKKSPFTSITRNDXSEEMVFRGI  
QSQPSIGYLTQVEATGHLEVGGFYKTPRFPVWVIGSTSHFSVMFSGDGSALKESTSDVLLD  
KVRRAFKRMGGGAAENGVMQSNQLGEFFKNVGLNNSDNEVQMLAAFMDRFGQGIILWDD  
LWKRTSRLLTGASIGSILDGTDDTHDCNRSSSNASAVTGDSNAATIHVPTRDRPLSDEEL  
ARKLQAEWNGTSIENVASPFKPKSVTKGKNDIPVAREKFGRTFQLYHYNGLRGGYFKPFR  
VTRLSADEAIGASISLGGSNQMSFGAGGFEEGLDSVLRITKW

>comp13450\_c0\_seq1; 697 254 2782 LEN=2978; translated  
MGLDHHARHLEELRSNILAGIPRSLIGTSDNKHYKITDPLSEAKEFLETQACDAAWKHS  
LAKFIVLKETLQSGAPNGSCGAIPSSVSRLEIPDLLQEMLVADGPTGGNWPRAEIIYEE  
IQRESDAVSDTEDHPVLHRLAIAISLVHATPVAQTNPANAGDEDCDNPEDVVDPVRRYL  
NYEIAYLEGELYPPFTLTTWELRFVVDGDESDEVAAWGRSALRNYPDHVLSDNPSWFC  
ASIVQTDVPYGSRRVKDDPKLHKYQNILRNGGICGRRAFFGRFVLRAGVPTTARPSKG  
HAALCHWTGPGVSDSWAVNLGAGWGKGTWTRYSKDLDFLATTRARRRNPARFSSVALAR  
CLGDLFGEPKVGIYDPKEKKGCKEGVPLDLGDRSVIGLWYRSLALQESILAAPPSPALL  
PNSGPDETLIDTARKKPSHIGSCSYGTDEKGRATICLPAASFADPRGTDKDVSTMKGFFRS  
KCNTQIHLPPFPQGTTLIRGGSWKEEPTGLCQSGARLLSGGKGYEDWGLRVALSCDED  
NPEPTRTVALTREVTFMEFVYIPPGSFVMGGKTSDSRFRCEVPHHPVAITKGFYMGKFP  
VTQAQYEAVRGTNRSKSTRHPSCPVDNVGVEDALAFCLDASAKSGSDIRLPTEAEWEYAA  
RGSTSGDSAGQSWFFGSDASAMDDYAWYKANSKSGKSHVPVQKKNPFGLCDVYGNVWERV  
SDTYKKEYYAELAGQVAEDPAGPSQGNKSRFRYDMRNVPEEGSYALTARACTVTVNQTL  
KVSPNDNGEEFKVELPYTLGEWKDSSPPVVLPLKQGHNTLSVWRDAPPQYGVSLREFRLTK  
VD

>comp13451\_c0\_seq2; 559 712 2127 LEN=2371; translated  
MASTIGAISDNVSDRDLTLGAYANSRNDQLININGGTSHSLLPALTAWQQQPETSASV  
PMQTFVTPNTTQHPAMVQQISAARTQQQIMNNLQPMIPAIGIPIVPTDALQQNLVQQQ  
QQQQQHHTMGDTKHIASVVATYWFVSI SMVYLNKILMSSEAVSIEAPLFTWFCIVTAL  
ICWAAGRLSMSIKGASNPDMPLTGDGKNGKSNFFAQFPKAEYKPSVGQKILPLSVIFV  
GMITFNCLCKWVEVSFYNIARCLTIVFNVLSHLILGTPTSMRTAACLLVVICGFFMGA  
KGEVNFYVGTAFGLCSSLFSVLSNIFTKKALPMVDNDHWKLTFFYNNVNASVLFPLIAY  
LEAGVLYNALDKQMVSGLFWGAMMVAGVGFSGSIGIVTVMQIKATSPLSHNISGTAKAAFQ  
SMMAFYIWKNPATFMGIAGLFFVVLGGSLLYTVVKMREGKKAPPSSEMEMKK

>comp13452\_c0\_seq1; 455 119 1498 LEN=2668; translated  
MTTSYKKAIVKDMQLASVDVLRKTARDVFGEKILGSNLTRNVLQNGNSEAATNEIHEAGN  
LNGNHQDNSDGGDGCGLLIINERDVVGRVVGRAFVQVQECYSYSLPEGNKKSTEK  
VGIRLGYFGRKILGRRKRMNGSCNGSRSTSGSYSSSTDRSNQDGKCRPTRQLNGTGNRAR  
YGYVLKQLSPDLKRADKINFLKGTVDLAMESTRFLASLDHENIICLKGISSNDAFSDGYFI  
MLEKVNETLGRRVKGMMDMRQCKGITGVFTGSKKKARRLQSERISAACNLVAGMKYLHR  
RNIVFRDLKPDNIGFTYDGVLIKFDGFLAKELRDDRERDGLYNMTGCTGSIRYMSPENV  
KGKPYNQKTDVYSWAMIMWNILALEPPFALYTELMIIDRVCGRGYRPKLFSTWSTRISRI

ISLSWSADISERPNEEISAEELISEAEEINSNDTDTGD  
>comp13454\_c0\_seq1; 618 546 2228 LEN=3021; minus strand; translated  
MNSSKKYKLFSEKNAEGGKATCAFYQSPAGCRNGDNCKFLHEKAPSTTAVKVELSDDSSM  
SSESEDEAPVKVQTQVKKEKTPQKHETEQRNKKKKRSMDDGDI FSAPKNANHGKPRKQQ  
APSSNKLLKPSTPSSKPTTPATPKVKVEKQPPAASTNSFSFVSNLPVAAF SIPGVTPV  
KKEPEVVAPTKAPEEKKTPKKKGI LPTSTAVGRKWQKSI IETRKHDRYDNSHNFDRYKE  
LDAENNI EATWFKAKPYGPWCESNPQAIAIDCEMCETQDPLTGGKNSKALCRISVVNAEN  
PEEVLLDTLVKPAWPVTDYRSR INGIKKEHL DIVEFTLRHAQAFMLKLC SQETVIVGHAV  
SNDLVSLKMEHDVISDSSFLFRAKDAPTASPSLKDCVKTILKKDMPETHDSVNDARKALE  
CVLEWIKNDGKVEEIER TAKFPKTHQFLFIHRIPKECKEEHLTSMFLKHTTIEPIDIEEI  
QFAGNSGKTHVSFKSPRANLAFETLDGNAEEEEKSGRLQKKVYL RNGNYIRVRKMHAKR  
PNNNNKKNKATDGNNITKPSP  
>comp13455\_c0\_seq1; 246 208 993 LEN=993; translated  
MRKTALLSFAVIAFISHKHVTVYNALNYDVLGRSISTTKIHDSGHRRQLPEAYEGEP SHK  
EKSDGSDKQDKTDRNKVEY PSSSPSALPKEDKLD RKKVEFPTSSPSVPPPPDWARPWNT  
ASPTSLPPKWARPWNTASPTAMKTTNAPISTGTPSSNREVA STITPSFKSSPLLDPTSHV  
EPVLMISPTAIP TTISSMKELPTLTTVSKTPTPTLKPFPPEPAAESPTMDPTLKPISIFLK  
PPTIVPSVISSPTLDPTSHIEP  
>comp13455\_c0\_seq2; 711 208 2028 LEN=2238; translated  
MRKTALLSFAVIAFISHKHVTVYNALNYDVLGRSISTTKIHDSGHRRQLPEAYEGEP SHK  
EKSDGSDKQDKTDRNKVEY PSSSPSALPKEDKLD RKKVEFPTSSPSVPPPPDWARPWNT  
ASPTSLPPKWARPWNTASPTAMKTTNAPISTGTPSSNREVA STITPSFKSSPLLDPTSHV  
EPVLMISPTAIP TTISSMKELPTLTTVSKTPTPTLKPFPPEPAAESPTMDPTLKPISIFLK  
TPTLFVD TTTPLASEP SFSNSLKEASPFLLLAELSER YVTD AKQPSSEPTKNFLVAEN  
LKQIVSPSFLNKTSQPSIKPSEHATKSPSFRPSSEPTTDTTSDPTSF PSSKITNTPTTGH  
SDIVKPDEGE SIVAREKI QPVTFDILVDRVSRNTNVTKLNSLFTGLIDDFLNMRS DATW  
YASHPKSFSNM TIESILGRSVREVHMKDGDQSVLIQFIINGFVSVETKNGDSDIVTASVR  
TTSHNEKEADLNENGREASFTEFFDHNVL LLYFSLWGADSLQVELGKVGL ENPILKSVSVG  
ERELIAFGVDKDDNYLYEGEHS LQDSTTQPIAGSVDGGI ESSASPSIFDLLPATSIMILK  
GLILLLF  
>comp13455\_c0\_seq3; 674 208 1902 LEN=2112; translated  
MRKTALLSFAVIAFISHKHVTVYNALNYDVLGRSISTTKIHDSGHRRQLPEAYEGEP SHK  
EKSDGSDKQDKTDRNKVEY PSSSPSALPKEDKLD RKKVEFPTSSPSVPPPPDWARPWNT  
ASPTSLPPKWARPWNTASPTAMKTTNAPISTGTPSSNREVA STITPSFKSSPLLDPTSHV  
EPVLMISPTAIP TTISSMKELPTLTTVSKTPTPTLKPFPPEPAAESPTMDPTLKPISIFLK  
TPTLFVD TTTPLASEP SFSNSLKEASPFLLLAELSESEHATKLP SFRPSSEPTTDTT  
DPTSF PSSKITNTPTTGHSDIVKPDEGE SIVARQKI QPVTFDILVDRVSRNTNVTKLNS  
LFTGLIDDFLNMRS DATWYASHPKSFSNM TIESILGRSVREVHMKDGDQSVLIQFIINGF  
VSVETKNGDSDIVTASVR TTS HNEKEADLNENGREASFTEFFDHNVL LLYFSLWGADSLQV  
ELGKVGL ENPILKSVSVGERELIAFGVDKDDNYLYEGEHS LQDSTTQPIAGSVDGGI ESS  
ASPSIFDLLPATSIMILKGLILLLF  
>comp13456\_c0\_seq1; 324 174 1004 LEN=1369; translated  
MNTEVLLKTSMPGLPSEFVTPPASP NKRRDRFLTQNEPPSLKRKRTPSFDDGAFSLSRDT  
GSIPFLDCAKFG RDPADKYLHRLRNNSASRATPLPNI ILRPRQKKS RHRSLPSFPEEELP  
MVLNREDNSDLPLRRKRTRKLTIPSTR IKDNDITSNAIASDPPANSLQATLSTDSSCTM  
PNISSLNMRSLSLQVNMSLLNLAAAASSSSIASTN ILPQRKSL LHVPSSSLQE SSSRS  
NETEEP RRSRSPVATTL DYLATAMRFPDGAMGLSI  
>comp13457\_c0\_seq1; 854 83 2071 LEN=2220; translated  
MADEARAQRQRALEEKKRLEELKARRQQRATNSISAQDAAKAKIAAASNLDKYIDGLLK  
VPNNHVASTSSETVASSHHPMENG TAGVDSSSKKSESTSSSETKAVGVSAPIQQTMAPVV  
KTETFEMGTQTSVEEFPSTGLSEAE EETQPPLASGDLQGLDPVEATKSNEMGAEEVSKEA  
KVLSTEEVEKELSSEAFSSFLNVT SKKVERVLGSDLLSNLLADYDGGIDDKDRDAKKISD  
GSKFLSSRQMYECPKWTASRDVTDMDWSPLHRELMLCGYHMPSS TSSLGQPVGSSAVKVV  
SPDDTPSDSLAPRNGELLSDGLALVWNLAMPNRPEHIFT CGSPVTTVRFHPTESTLVI GG  
CQSGQVVVWDIRAGRMPVQKSVLTTTVSGNSKGHTHP ICAMEVIEGGAGLVTAATDGRVN  
FWSLANLRDPVESLQIGDSV SCLAVSPESGNIICGDDTGS IYTVQSPNASLGAGGQRRR  
QVRKLESGDESHFGMVT SVATKHLKSAPRAGLSKGF LRGTGGLFLSSGVDWTIKLWAPAY  
TDKSLLSLVSHSYDYMSDVQWNPSHPALMATASSNGTIGLWNF SHSMEEPITGLDGIVVE  
PDGGSGRGLNKLKWS SDGRRLLAASADRVHVLVLS EDVVRQKGEDESRMMNHLTSRGLLD  
RE



>comp13458\_c0\_seq1; 716 367 2714 LEN=3078; translated  
MNEEDDHFVAVDSLSPSACSSLLKHNGSNLLNESATTASSASSYNAHNLVGCRRNYLAKNF  
RKNDINTANSNMSSKNQSVRRKNNLQNI INSLKRDGSKNSRGKSKAPSCSGDVNSSFHS  
NTNFNANA ISSSNVENSIRSSARSENKSNQCQLQQRIGNRSSQTSRSMFRLICSSDAKND  
DYKDMEACDYDNSMYKSDDVSSLHFDEYGYDVP LQSRQIDDSNDQDDDDVSDFFKAPTQW  
ELSAE IFRLLEPNVEVSEALKSIGKIKMWGLVAESDPITAKNFVEYKVVSTLLIFVQFLV  
KIRRLKLNKHRQHVSEHEQKYGVKCSSTIKDYMDGIDDEVLI STHHRDFVDASANIELSLH  
QAMQVIHYCVCLDDDSRGDNNSKSNSHLAPSVKEAFVMQLVETDGDVILVTLLEELLADQ  
MDRMI STNPSCCNDNPLSTAAANSNITTWDTTIGQYGHISKSIW GILMSVGTSETAVRV  
LKRTKSSLSSTSLTGDGSMQQLLAGILIGLNHRFYVEK FYRNCDCPNRLEFYRSQCIM  
PSDFGRSVGNKNKNNYFTNFNSSSWMEDL FVALCRLVGSKHADDENDDCHTDCSGEDHL  
GKSNPDSNYGNNNCENRAPHYANKPHRNSHIASTEMPLRRQHDEIRFVVI ELCLVKKT  
ALVDEPNAVLGRDPFVTTLAMSFYACLRF GILRYPQLRKQENEQQRKEGAGKTTNPGK  
RPRAE RMVSRSLDYXPLGSFYGYEPELSLASSHTGQWLSHSGVDPQALQAVMDEPPCDE  
LD

>comp13459\_c0\_seq1; 344 1 604 LEN=1070; translated  
XSSSSSSSSSSSSSSSDESVRRRDKKSKPNEDDVKDHEKAVDFEGLRDS DLKEAHAFKQA  
VQGTKDDEDEEEGPMPLQQAAGNSGGGADGNASYGGALLPGEQALAQYVQONLRIPRRGE  
IGFSSDDIDKWENSGYVMSGSRHTRMNAVRIRKENQVYSAEEQRALALLTMEENQQKESQ  
LMEDFRTMLKERKKLREQEK

>comp13459\_c0\_seq3; 881 1 3673 LEN=4066; translated  
XKKGKLIQSSRFGGLEGRKMGTTRLLLLSSPSWLP LLLLLL TALLAFDESCLGRVGLVEASG  
QHRYWRASSINNIRNNR NAHIHGWLKGSKTPAGITRVDNPEARSELVNNI SRGGATVVG  
VAEPHSTVEDPGSKPIDTILEKWL VQVQNLQENGRQSSSSDRIFADASVIKTHGLTSD  
SRLLA IYGNKNEIKEIPPPSWFELIAEQFQDR LVRILMGVAVLSALLECSSSGAI  
TESFLH RFAEPLVISSLLVNASVGVWQSKSAGNSIEALKAMQPSVCTVLRREAENDNTIT  
SEEI AEYPSDDLVPGLDVLKGTGDKVPADCRVVRYYQGRRLSVDETCLTGESI  
AVEKLLGKEG LAPQKAPVQSQTGMVFSGTTVVSGAAIALV VVATGESTEFGRIO  
SGVLEAKRDSHDQKTPL ALQLDDFGNQLTGLIGFICAGVWLASIPKMMVKDSTIF  
NSPFEGMVYYAKVAVALGVAAI PEGLPAVITLCLSLGTRRMAQRNVI  
VRNLPSVETLGCVSVICSDKTGTLTTNEMTVTSLV LLEKIKTGPIVEHFVEGVS  
YSPFGRIEGLSGKKEFTDNPLISDVAVAALCNDARIEGND HSDDESSNHPDFERT  
GEPTEAALCVLAEKLGALQNP DGEKQETDIDRAEGKPNSEMASQF VDQWRGM  
HPRMATLEFHRIRKSM SVLAKFKDKENGSKARNLLVKGAANMVLDRCTHVK  
YSDGSVAKISGSLRRQLERKITNMATRPLRCLALAVKDESKLQSSLRHFEP  
RNDNDVRKH PLLKDP SKYEDIESGLTGLVGLVGIKDPARPEVADSIRKCTDAGIR  
VIMITGDARDTAVAI AKD VNI FDKDSSTDEKPLKAFEGQEFLKSREEQIKIL  
SEDNIVFCRAQPSDKQALIKML QHDLGEIPAMTGDGVNDAPALQQA  
AIGVAMGTGTAVSKEADMVLADDDFSTIVSAVEEG RTIYANMQAFICFLIS  
CNIGEICAIFFATLLGFPEPLTAMHLLWVNLVTDGPPATALGFN PPS  
PDSMKEKPRPSNEPIMTKWLLIRYMLTGLYVGVATIGVFAQH YLKQGISL  
KQLSNWS NCGTAWTPPGSSWL TETSACSDLFRDAGRTL PQTLSLTTLV  
VMEMLKALS AVSMNDSLL KVAPWRNKWLLMGVAGPFLHLHLSVLYSSAL  
GVPGFGKAFGLVSLTKEHWRTVLLWSAPIV LVDEILKLI GRLLRREQSGSSDK

>comp13460\_c0\_seq1; 176 1 1081 LEN=1236; translated  
KQFALSVCSCGAFPVQRNTHIHRIRVLNHLSSSVAIGAVVTIGGVEFLLP  
AAGPPLFVR LAAQRGADSDPMEASDHFVHVVP SGSPCDTSRSSDAKGSICDS  
FQSVQTRDGLHRRRTIY LIRHGAEHNVREKIAQKKAEEEAKELNLSPE  
ETHERMEEARKSVLQDKSLRDAALTEKG RQQARETSQKLRRELIANKTI  
HHPTEAMCSPLSRCL ETCKIILEDQDLKAHIRPEIAERT LYPPDRPK  
PLDQLLRCTREDDRF SIENMEQLLPHKIEDEALVRESKEMLRERAGEM  
FDLL MECDRHVLV VSHKGFLELERGLFGIPDSPLFDNCELRVYRVI  
FTQGDRELFHLERMA

>comp13461\_c0\_seq1; 896 1 2568 LEN=2621; translated  
GLDHRPSVRAGPTHTGTNRMKIAPVMKTI SLSQLTSSCMDAGWQGCQVIR  
SFHEAHSK GGLKIGGDARSVVTQCDIDAQAKI IAA LRSTWGEELLI  
IGEEDETEAGALSSGADAPP LRTDILFDREVQKTMAPGLDEEIPLEELAL  
FVDPVDGTREFVEGR LGNVA CLIGIARN SRPVAGIIGVFP  
GGDLSCGAEIH YAIADQKDFAGVWSQKETPPSGAGEGASASASTNSD  
AAEQASNDESSDRDGHAA GTTVLSGDSGNPV LQIATTTAVSLAPGGDARR  
VIVGGTAAKL RMVATSTSP TVAVLHFD TQLWDTCAPEALLKCRGGKIT  
DMFGASLVHCPKRTMGNVFGVV ASSKGASVLHDEL CRSMRADRDSVMAI  
FQQWIGEGMPPPGVSQSID IARDLDGMPYGLDH LQELLRDENPTD  
SKLVGYSVPEEDAWRGLMSNGVRFQLQWEEGANPSGNSPPSDFYKRI  
VMANLDHARDKKTAPHKLV RDVKS YQVETSFLTSYACKYLVNDTGMK  
INKVLSDDL RPV AGDNPKE LLSSFSIFLEYFQNSDGWEQH WLLPREET  
KASLEELAKMHAYFWQGSDFWKK

DGGKAGSDLENMVWPNGGYMQPKLQGYEQKKVRSWEARYPSFRDDLEKVAELKGVDCV  
PLGERLEEVAPIVGGKAHPFADKDAATNADFARYRTLHGDPKHANFFFRKKQESGIEVG  
LIDFQWSGFGLAATDVAHHITSAVSSSALCFSGKEEGELLDHYYSCLTRELVKYGVGKDA  
EEIETSIFPRETLQQQYEVAFLDICRIVFAYAWRRRWAEDPSEESFNRNAYNKSLDSVL  
WLI TRCHVYLSKYQS

>comp13461\_c0\_seq3; 122 438 901 LEN=1094; translated  
MVANRSDVRVXNNQEINNNTDRAAVCITFICHSKDDCDDDDDEAGLGRFLAYDCLCQGE  
ASYELRSVNVHIGSSVNCGHYTADALRTIGPWHDAREGGGAPRAGGGGSESERETDGHQRW  
TRFNDCYVTKISSKEAVEDASQTAYMIMYELVGE

>comp13461\_c0\_seq4; 245 638 1789 LEN=1931; translated  
MNAFVEALPEYTKESIGDPEPQSKALQWMSTYDNAETFSMARKLQRFALMTLNFVAGD  
DLASATLMFYTALNECDWYKSTCVDGMFTELTLSKATYGTIVPELALLSSLELLGLNQ  
NSLAGTIPTLGLMTSLREINMNGNRFRGTIPTFGRLTNLEYIDLGNLLSGPIPTIIG  
SWNKLLYLNVGTGNDLTGDIPSEIGRITDLASISLSFNKLGSLPPEFGLLGKIKVFDVVK  
NYLTGDFVSAVKSSKFTLETLDVESNKFSGLSPAIGDLTKLSRLDVSANGLTGVLPREI  
GGLTDLVALDVSSNELRGTIPSELGMLTNAGSMLLQFNLFSGTVPEEICDLTDSLFTKLV  
QENLVVDCTNECDCCQYPPKCFL

>comp13461\_c0\_seq5; 1325 97 2823 LEN=3016; translated  
MAAVLRIQKEIDYYSVNCQNEEEKEAQLQHPDQENEQTKQCALVPKTDVVENAIAGCGD  
DVMRDACNVNAGDVDEPSNCCNNNGDSSCNKNQSGSSDTDDGQDVPCKRIEIGEVVIE  
NEAGSSTEEKAIDALETSDGDALPIDPDGGGVAIASSCAAPDRSPLPPPREEGIGDGGDS  
LPIVEAAIVAMETSPDPQCDVVSMEIEIERTKDEPTPTDEIVPAAVAVSPPPRESPYGG  
ENLGNTCYMASAIQLLALDSFPESELRRMLPRDVGNEESKDDGDPESTSQQORLLPQLS  
NNSLRGALIDTMDRLEKGETVRPDKLRKCVDSRTSLFLGYHQDAHEFLTKLLDVIDEY  
KAKPKADKIEEEKEESEPATSSATIVVEDDEREAVAESGDCDKDVSSMDEGSVQSRRE  
DEDSTGSITISEEEDTGLSKSSDFVLNADEGSLEPREEDYENFAIAEVYGEKPPPNEDV  
ASMAESSIHCNENNSGDQDWPQDSPFKRQKVKEDHGSVDSEIAKDLRNPEESNDTDT  
TLIPKSKSFSEFKFSDIEGLLNGQEKESSETGTPDHSSHPEKPTSRIIEPKCKLAGGRMN  
MVGVELTGLVEDEEDVQHTDASLSKATPEQQVVEDERFDEEEEFSPVTSNFTTKVRV  
CLTCECKFRRSIETYHLHLSLEISNDSDDDGIGGFPLSTGSIDDGLRKFFAPEKREI  
KCEKCFHTSAIQTTEITQLPRNLLFHLKRFIVDVSPDYTSVSYRKDHSPVSFDERIDLEA  
SRERKSDRHSCDDDDDEAGLGRFLAYDCLCQGEASYELRSVNVHIGSSVNCGHYTADAL  
RTIGPWHDAREGGGAPRAGGGGSESERETDGHQRWTRFNDCYVTKISSKEAVEDASQTAYM  
IMYELVGE

>comp13461\_c0\_seq6; 151 132 570 LEN=570; translated  
MHKSDSCQQTdGVQDVFPFVVSIGSITVFSQTNLDETEVLQIENSIRQFTFTNGDLVDADN  
RMLDISWSGLDDARNDNAVPTMSPLFPQPTDSPAETDQKKGLLGLGLQWWAFALIGVGV  
LVLLIIWVCFRRRRRPSGASVRPTGAX

>comp13461\_c0\_seq7; 520 576 2214 LEN=2214; translated  
MVTLAKTILLTPGALS LVKTSASATPTSLLPKQRNSSNKNNGIRKGLQRRKTSKGR  
NLARGQEWYDWERQOQOPQPKVYHNI F DHTGNTPTIGTRTANGTNC SCHGNRRRRRLG  
GASAHVCDEENKDKNNNVGSSQTNGKGGTSY Y Y Y Y Y V D D D F V N D D Y S Y Y Y Y G K K D K N G K  
KSKKSDKKAYKGGYSYDDDYVYPSRKPTAIPTSSKPTAGEPTAAPTFFKQPTPVGRETTD  
APSI SKPTDSPTQEEPIPPPSTNDPSRTSCSVSDGGLYGADVGLATEFWFFFYQVWVIPS  
TVPELNTDILPKVEVASGNDVLPVLPNECEPTATASMEASLLGEKPSPTKAKQNSNMN  
TNQYGDVTVFTMDDDGGLVRHLQSSSSSIAGLSIKPRD TVLQTDSCQQTdGVQDVFPF  
VVSIGSITVFSQTNLDETEVLQIENSIRQFTFTNGDLVDADNRMLDISWSGLDDARNDNAV  
TMSPLFPQPTDSPAETDQKKGLLGLGLQWWAFALIGVGVLLVLLIIWVCFRRRRRPSGAS  
VRPTGAX

>comp13462\_c0\_seq1; 292 265 1164 LEN=1350; translated  
MTSKAPPALTMDRLGDRDEFIIAQSTSQCRTACLQPSINWVIAEGNNFHPGSNPFSLN  
IGWVHEESSFFGRLCSGCAPGFRAIKYVQHS GTPPKSLTAENKDWCTCQCDEKPALLSEE  
ELASNVILTHEKNKSCGVSCCIPVCVNPCGLPYLETKDASGKVLGRTQYICDICCFFPK  
FDILDSAGTQKFRLRPDTVCVGLCVMCRGGEKKGCCRVPIILRDPSTLEPIQSSATLDG  
KPIDAMVDVLSGWKNECCSQRNAYHVTFPSGISAEKAVLIGSTLLVDVAFLEQENDD

>comp13462\_c0\_seq3; 243 265 1151 LEN=1337; translated  
MTSKAPPALTMDRLGDRDEFIIAQSTSQCRTACLQPRSQAITSTXGSNPFSLNIGWV  
HEESSFFGRLCSGCAPGFRAIKYVQHS GTPPKSLTAENKDWCTCQCDEKPALLSEEELAS  
NVILTHEKNKSCGVSCCIPVCVNPCGLPYLETKDASGKVLGRTQYICDICCFFPKFDIL  
DSAGTQKFRLRPDTVCVGLCVMCRGGEKKGCCRVPIILRDPSTLEPIQSSATLDGKPID

AMVDVLWSGWKNECCSQRNAYHVTFPSGISAEKAVLIGSTLLVDVAFLEQENDD  
>comp13463\_c0\_seq1; 504 1 1437 LEN=1878; translated  
QQQQQQQPAVVTNSIGNYQINKAPLPATTSTIPSIQQQQQQQLLLLALLLQQQSNSNNNT  
GAAMVDLNLALSMALSSPEGIRLLNSFAIGQAGVSGTQQNPHVNRQGGQPQHDTPSIAQT  
RMAVHNIMPLATTMIASSQQGDALANNQPSLFLSPQSIQQPQLLLQAPPTLPSAQSQPAL  
QLHENANATGGASAGMFPATAAAAINQHLATRAAPPPLHPSSAVSTAATNPSCSSTSRNS  
GAMGSMLTVNNVNSQTGCEKNVDRNVRNLLKKRDKNSSTMKRVNTSNSSYKPATKSRFPR  
ILYNEADDGILGEYQTLRLRQQLELFEADGQDVINGTFRQGRTPKIKLGQIGLRRCRHCAS  
TVSIRSKGSVYFSQTIKGMQIAQNMSKVHLCECVRVPEDIKKRMIYLRRRRARASGGR  
AYWIRHLREMGIIYEDGKVLRRARPEGWKKPKNLLHNEMTKPNTEQPPAPSGGDLATTG  
>comp13463\_c0\_seq2; 429 1 1180 LEN=2251; translated  
QQQQQQQPAVVTNSIGNYQINKAPLPATTSTIPSIQQQQQQQLLLLALLLQQQSNSNNNT  
GAAMVDLNLALSMALSSPEGIRLLNSFAIGQAGVSGTQQNPHVNRQGGQPQHDTPSIAQT  
RMAVHNIMPLATTMIASSQQGDALANNQPSLFLSPQSIQQPQLLLQAPPTLPSAQSQPAL  
QLHENANATGGASAGMFPATAAAAINQHLATRAAPPPLHPSSAVSTAATNPSCSSTSRNS  
GAMGSMLTVNNVNSQTGCEKNVDRNVRNLLKKRDKNSSTMKRVNTSNSSYKPATKSRFPR  
ILYNEADDGILGEYQTLRLRQQLELFEADGQDVINGTFRQGRTPKIKLGQIGLRRCRHCAS  
TVSIRSKGSVYCKYQMMKIVTEAIMCEYDDSA  
>comp13464\_c0\_seq1; 515 260 1553 LEN=1650; translated  
MMVARHNELLKKIEDSPDEGYLHGKEMASLTHAVALHEKKINLESEEKSIHELLEELDAD  
GGGDDETIREFKDELQOIKSSQKRLEAKIRVAILPKDENDYHSDAIVEIRAGTGGDEATL  
FASELRQAYEKTAKAMKWECDIMSESTDLGGIKEAVLSVSGRASGGGSAMQFAMEEDDD  
EDENITANLGPYGLFKYERYGQQQKYDPNAINCEEIFSSFSTSVGLSDPCSILLTTNAFI  
NSGVHRVQRPVNDTRIHTSACSIAVLPSKQDDGKSGELLPMSSELKIDTMRSSGAGGQHV  
NTTNSAVRITHIPTGITASIQDERSQHKNKAKALKLVAARVRDKEREEEEERKHGEARSSL  
LGGDRSERIRTYNYPQDRVTDHRCKHTTHGISKLLDAGSDDGLVVTFFYPFLQKLVNDEQ  
IAALEKEEQN  
>comp13464\_c0\_seq2; 516 260 1423 LEN=1520; translated  
MMVARHNELLKKIEDSPDEGYLHGKEMASLTHAVALHEKKINLESEEKSIHELLEELDAD  
GGGDDETIREFKDELQOIKSSQKRLEAKIRVAILPKDENDYHSDAIVEIRAGTGGDEATL  
FASELRQAYEKTAKAMKWECDIMSESTDLGGIKEAVLSVSGRASGGGSAMQFAMEEDDD  
EDENITANLGPYGLFKYESGVHRVQRPVNDTRIHTSACSIAVLPSKQDDGKSGELLPMS  
ELKIDTMRSSGAGGQHVNTTNSAVRITHIPTGITASIQDERSQHKNKAKALKLVAARVR  
KEREEEEERKHGEARSSLGGDRSERIRTYNYPQDRVTDHRCKHTTHGISKLLDAGSDDG  
LVVTFFYPFLQKLVNDEQIAALEKEEQN  
>comp13466\_c0\_seq1; 727 326 2898 LEN=3011; translated  
MAENSKDGQNKPTNGSHSESGKRTSLTKIKRKKKKSEGGKSKSTKKNSGDWDWNPEDL  
RAQKDRTFNNGSDQKNQPHRVRTSLTLTDGSSEQRKSFPIXGTPSNGLIHLRRKRKLK  
GIHFLPAFLFKTDNPTAGVQKEQRGSRKNIIEKPHSSNKFAAENTDRTASTGEYEEKETNR  
SSSRLGNRAQDSNGRKEDSRPCVPPRGSDRQVRVCGKSMDKPPSKPKKRTSSIKKQKSD  
EMDITYISDDKQPEKPKRKSRSVSPKNNI EDEHDDDLGLRTFHNLRIDSDPKSKNSRTRK  
ATSGERSGRRKEKAPDRSKSLPAGQNTESDDVGSTSEVDVEDEGNIQPERMRSSRERR  
NNQKRLDSNDSFRNSGKVDITNSNDTRVSRSSHSLRRSGVRRSRSERWKNKAVEIMDSGT  
DDHHSINRAQESLNRVNDGFSRSGHSRIRRHHSAGLTKMSRSMRSYSHHDIDYKRLNSI  
DGKRSSRRAMRHRHETDSEESFLDDNIDTATLESIDDEYEDYEEDVYRMELQTPGMIDFE  
EEMFDLMQRANPEVTDHLDRRVHRKREMFVAFDHNMPMMTRQALLTRQASSRLRRQFLDGS  
NVDKKRLLLRNDSMSSDGLAMSNHRQMRSAHKRRVPPRAKSSGLGGMGRVGYSDSFKSD  
SVDRRGAFRSQSIHGSHPASFNQYYQNKPNRIRSLRRASGDLINPHSMRGSRRPNSQLA  
HQRAIQRTTSSTSRRRSASSDQTLRSKQDSKIYTEKNQRSSNTRVFPDEDQDIDNFDEQL  
EHEISKGNSSSTSSFLTGKSNKSNFNDKNDMANKRNRSKLHLLLYKTKMAIDMDVLLRKR  
KGDTPRLPIDSLRMPSP  
>comp13466\_c0\_seq2; 749 326 2770 LEN=2883; translated  
MAENSKDGQNKPTNGSHSESGKRTSLTKIKRKKKKSEGGKSKSTKKNSGDWDWNPEDL  
RAQKDRTFNNGSDQKNQPHRVRTSLTLTDGSSEQRVQKEQRGSRKNIIEKPHSSNKFAAEN  
TDRTASTGEYEEKETNRSSSRLGNRAQDSNGRKEDSRPCVPPRGSDRQVRVCGKSMDKPP  
SKPKKRTSSIKKQKSDDEMDITYISDDKQPEKPKRKSRSVSPKNNI EDEHDDDLGLRTFHNL  
RIDSDPKSKNSRTRKATSGERSGRRKEKAPDRSKSLPAGQNTESDDVGSTSEVDVE  
DEGNIQPERMRSSRERRNNQKRLDSNDSFRNSGKVDITNSNDTRVSRSSHSLRRSGVRRS  
RSEWKNKAVEIMDSGTDDHHSINRAQESLNRVNDGFSRSGHSRIRRHHSAGLTKMSRS  
MRSYSHHDIDYKRLNSIDGKRSSRRAMRHRHETDSEESFLDDNIDTATLESIDDEYEDYE

EDVYRMELQTPGMIDFEEEMFDLMQRANPEVTDHLDRRVHRKREMVAFDHNMPMMTRQAL  
LTRQASSRLRRQFLDGSNVDDKKRLLLRNDSMSSSDGLAMSNHRQMRSAHKRRVPPRAKSS  
GLGGMGRVGYSDSFKSDSVDRRGAFRSQSIHGSHPASFNQYYQNKPNRIRLSRRASGDL  
INPHSMRGSSRPNSQLAHQRAIQRTTSSTRRRSASSDQTLSRKQDSKIYTEKNQRSSNT  
RVFPDEDQDQTDNFDEQLEHEISKGNSSSTSSFLTGKSNGSKNFDKNDMANKRNRSKLHLLL  
YKTKMAIDMDVLLRKRKGDTPRLPIDSLRMPSP  
>comp13467\_c0\_seq1; 152 171 443 LEN=1402; translated  
MASKEIYHNGLDIKSLAINLATLLLFFLPFAMYFYPEFKNEEMIAVAVGMVVAYFVPPIG  
SLRPHPYSDIPSNKPFAPRMTFTEHAIKQS  
>comp13468\_c0\_seq1; 607 288 1703 LEN=2021; translated  
MPGICTSSLDKKEWKRCCAESMGFEWVDCFDDDDENDTVLSPKSEIESNLQVTNLLDN  
DNEHDFEDYYCNYRDEDDRTHRRNQKGTKSSDTWTDNALRIQADLNRMSSQWIQSKKREYV  
GLDMKDEEAGLIQSTVTSFAATTASDLETLRNMI STNTATGASNYNLANHRAGVVQILFS  
QLQEQVTKPFASLQKQRTREAVQLWQNPLQCKLYYDVPKQSRQGGQEMVFNDDDEGYGDE  
QPPKEQRFLPQRSYQQRSDNRESGDFFISKYANKPKTSIPSTKPDFLRRLTQRQYVPR  
DESDSSSTVSPSTDERKRTFSNPPTDNIPSSFGDNVIATEQTSEGFQSSSQGRHDVNPDL  
YRQQLEEDLRTESVQLTTTLIASNDLDSVHQMEKRMVEITTLIGQF SNLVQEQEQVQLQV  
HESAKETKDNMDKGQENLIDAAERTKKS KHYKAWSILAMAILVFFHLVRN  
>comp13469\_c0\_seq1; 512 175 1098 LEN=1308; translated  
MTSNATD TDTATDTATTASSDPKPRSFRI RFASAQDDPSQRS AWKSTSRSMRPPPCVER  
RDTIFAPESDVDPPELLLADAAA GKEGGEREFEREFERKTITETETEAPRVV GILKDS SP  
EАНHQRTDAIDSFPSGDLPAIVEDG PVL RKKNTNDDTSTNEDDDEYEDDD DASLEPTEC  
LRGAEDEDEDEEDHHEPMGRSAWGSREIRSSLRSMRVLVPPVRKPSAGVSLESATTVSRE  
FELAVGEAAEEEGTDQWADGFAGSVSVFSSSKVSTKDRTE TETETGIEAKRNGRTKRTKRTK  
KWFSFFS  
>comp13469\_c0\_seq2; 815 175 1416 LEN=1716; translated  
MTSNATD TDTATDTATTASSDPKPRSFRI RFASAQDDPSQRS AWKSTSRSMRPPPCVER  
RDTIFAPESDVDPPELLLADAAA GKEGGEREFEREFERKTITETETEAPRVV GILKDS SP  
EАНHQRTDAIDSFPSGDLPAIVEDG PVL RKKNTNDDTSTNEDDDEYEDDD DASLEPTEC  
LRGAEDEDEDEEDDDEFEAGSDEDDENDDDEEDFREGPEKGKKKQTKKKGSGAEGNDGGDE  
YNEEEENMEEKRKRLLRERAEFEERRKREREEEEQVLRVSVVERFVVPEVLF R P M D A G L Q P D  
LVGLSQAI VQSV EACPEAYR PALYRTVYLVGGVARLPNLRDRLEREL RSLVPSEYELSVS  
VADSPIDRAWMGAKAYFEKEPYTKYTVSRQEWEQSSKRKAYTKLLIENGGCYA  
>comp13469\_c0\_seq3; 752 1 1820 LEN=2120; translated  
XARKTKQGASAKTDPAGASGAASSLPATPRPSRMLLV DNGGDSLKYGWM DHAHDP TEDGT  
STPFP HSLPNASARLMHQFTTLV GDELHQVQNPNSLMPRTRSTERGVICNLENQTRVWKR  
MLDLLGVAVPLHTVTARC MGWNATAAAKKKAGKLAGAGAAVRPPTVPPHALGV LLLLPP  
HCPRILLDQIATVWMEDFGVSHVGFGISSACASHDQSLRTPWKTSCTVDL GWSSTLVVPT  
FRSRLVQGAAAGGATPPV NANA NAGSTTTIRRI PVGGRHM INMLKYYMSYRQYNLMDQE  
VLMRDVFERLSFFSMDMGADLKLARRKPPGQRIYDRDFLLPDYTN TTKGEIRIPFALQKI  
LEREKQQKAKGGGEQKEEEDEDEEDDDFEAGSDEDDENDDDEEDFREGPEKGKKKQTKK  
KGS GAEGNDGGDEYNEEEENMEEKRKRLLRERAEFEERRKREREEEEQVLRVSVVERFVVPE  
VLF R P M D A G L Q P D L V G L S Q A I V Q S V E A C P E A Y R P A L Y R T V Y L V G G V A R L P N L R D R L E R E L  
RSLVPSEYELSVSVADSPIDRAWMGAKAYFEKEPYTKYTVSRQEWEQSSKRKAYTKLLIENGGCYA  
>comp13470\_c0\_seq1; 1381 86 2602 LEN=2715; translated  
MKLFLPLSVVTLWLAKSND AFHLPATTRTLNRYTSESRTTDATLSVLFANQSNEANDNEQ  
RAVGQKRRRLMAKMKKSLAFLVPVAIAGSSLVANPEAVHAGAPVMAIPKAKPNDPVQKAF  
DRQESKDMMEAQQELSAFQAKARAI EKESGPEARDFEKEYKESQKRRAE EKAEGLEQLK  
RDLLDQGI DHDLDI EGKRQMTLYTRGVDLGQVDGTPHNVEQRYLEQGS DKAFAVQKKAHR  
EIIKAMVQDLKNRGMDPLKYFNLNKEKTEMILNLPTEKAEELAVKYNSNLELYGQISVPK  
EGEKSAKELMAESGKGNVSKEEQKRLKAEAKAKAAA EKA AAKAAKAKKDAEKAELAA  
KEAAKVEKEAAKEAAKAEKEAMKVA AAAAA SAAA STAVAVDAVPVPETGGGIIGDDAGLG  
ETAVVESAEETK PQGSKIVKTSAVLVTVGGGAYAFKMVRDNAADEEERQRQLQMLMGQ  
SAVEESSDAGVAGIDFYEDAGDNEKAAEPVVEPPK KKKKRRGLKSVFNKKKNSRETNIE  
NLVAPGVATADFSKTLAKILTFGAPGRFPDVTGLPGMPLETFDLDNASSILVEAQTAAG  
VTKEESAEIFANVNCMLIDIVDLASTSLKEKDEKVTIDAIGIVITFMDLAASLYGSIAD  
GVVIAPVTYGGDISKSKLEQMFTAYAMSGMADFASMDKFDKRVSL LQDV FQINAKKAEG  
LMMKAMQKNMEMMKGGEMPAGMEEMMKGMGDMGAMGMPGMGDGEEPDPPEQLKEMLRALK  
DLKDSGALPDSELA EVRKQFKEAFGSSIDDVMKGATDSGDELGAQDKELLDL MKDILE

>comp13471\_c1\_seq1; 418 419 1489 LEN=2122; translated  
MSKRNPDDKGSPTSLSGSENKHIQQEDWGELYRLDATESYSTEDYSDSSDEDEFDINS  
RYLRVKIENEGETNKNKINFFPKTNMRRFSSSVLLNQQIKTNSSTNQEEHFTRADSAPIL  
RPAADGALPAFLANRIRNAELVVGEIPSKTNSLQSTTVQSTVGPATEALKQEDPRQVYSK  
ILEKHGLCSSVKKGEELGDDFFIKMGQANVTGYTMDIVA AVRSEVDALRTMNSKGQTLQV  
CNRFGESI IHSACRRGLAKVLRFLVDEARVSLAVKDDYGKTPAHDACWTIKPNFEVVKIV  
VMACPDLLLIADKRGSTPLDYTQ RSLWSDWCVFLKENEDILIPKQLKNDLKQKKDT  
>comp13471\_c1\_seq2; 224 1 755 LEN=1388; translated  
XFTRADSAPILRPAADGALPAFLANRIRNAELVVGEIPSN GDSKTNSLQSTTVQSTVGP  
TEALKQEDPRQVYSKILEKHGLCSSVKKGEELGDDFFIKMGQANVTGYTMDIVA AVRSEVD  
DALRTMNSKGQTLQVCNRFGESI IHSACRRGLAKVLRFLVDEARVSLAVKDDYGKTPAHD  
ACWTIKPNFEVVKIVVMACPDLLLIADKRGSTPLDYTQ RSLWSDWCVFLKENEDILIPKQ  
LKNDLKQKKDT  
>comp13472\_c0\_seq1; 743 98 1771 LEN=2358; translated  
MVTENEGYAPSCPNSTKQRRDLAKMHHCRRGNRLTILLFLGILCGFDGVFSFVVVENHN  
PAFSGDPNTGRQRRERCNRHPRRHVLLGSAPVQKGLDEGTDSTGTSPTSQLEDSTPEKPP  
GGLVALGWQAHFASQLEGFQGSSEEGRSAPLVPMRITEVRSKTIHAVGAREDTAGGAN  
QARDAAGEDWLIPVTPGQKI INRNEEKVVVAGDWILVEKQERTRSGGQQAPEEEPPRIRA  
VLERRSVLKRRAPGRNTRKAQLIAANLDTVFVSSCNQDFNVARLERYIAMVLETDNVEP  
VVVLTKKDLLEMGDGVEDEDTDEDFDDEDFDDEDFDSSWLLDYYTEEATS IAGGSVPV  
VCLDARNRQDATSL LAPWLGPGQTVAFVGS SVGKSTLAN TL CGTRVAATGDIHTDSGQG  
RHTTTRRQLHFIRGDCGDAGAGADSFNGAVLDT PGLRELQLVDAARGLDLVFADLVDSLK  
SCRFRDCKHRDEPGCAIRAAVENEVDQDRVARWFKLVAAEQ LNSSEVAEGKKERERKR  
LKKRQKEKQRRQKKKFE  
>comp13473\_c0\_seq1; 417 81 1544 LEN=3391; translated  
MSTHESPTQREWDLVIYGATGDAGMAIATYVSNHIDSYPNHRHQSESGSDAPAPPSVF  
RWA IAGRSEAKLNR LRSGI I VGRSKAPLRGDEIGVLVADAGSPSELGDLARSARLVLSAA  
GPYTALGAALYGACVQHGHYADITGEVDWVGNMRTLHAKTAGETGATLCSFAGYDSVPS  
DLSLYAARRALAECD AIDHPGGTEPRGDTAAEASLSSAETIVLLEGGAFPRGTLRTMISK  
LHDGRSFCNGLLRFA SPGGGVHKN TAVAMIRWLLPRWSPDYGAFTLPHFMGWCNIPVAYN  
SSSSCIDCAYHDRFAIPYSKGC MATGYLLQTLVVYSFLLATAPFGLFFQVFVALVPSTS  
ALLLMVFD SLN YRGNTQRN QKHLDESTCSFWTYATSAYS SKATVYLHVKG DAGIRCTAL  
FAVETAFSML ELDDAGRLPKGTIGSPSMIAGDALVDRLQDEDAIGSLCTFTVEVSDGDDG  
GSTKKED  
>comp13474\_c0\_seq1; 3826 424 13536 LEN=13756; translated  
MAPIFPSIGITPQIIDDGRRLRVLKSSLESII FDTPLSSAFQGIEEIRAPLDIERLVVLE  
PWQSWGFE EQVDLQEWVEPLNR IDASLSFYIQKYPFLLLISPVERTTSKGASKLAKCIVS  
KPARSIEEVNGVTD SVRNILVILKFLSGLLTNSSNKS VFN SVEELVDLLAAADDN IASA  
SLETLCALAMP PSLHKQVPEIQQHSSALHISKTTSHKRLTALARGWGTRGSGGLGYACA  
VSDDSVFGQGS LPPQAGELNFSFRDKAYEENRKG ENEESSLVHVNL PANSFTEDSEMM  
FEATLKN SDESDDSTGSKQRRRVALPMKVDRTIRSTADLFFQCLRQAGGVERIPADRLF  
PLLADIRL TRSFHCQASRVAAIERRLRALITILHANPSQEVMSGYFQAQPELCELVDLL  
RPTVSSGAVSASSAAPKSSKIPRQNRDHIVT LSN SPIVPYQIRELALQSLTALAARREGG  
NGSLTGFARHSN ILTELGVGKGQYLGLLPTLIRYSLASLGS LVSTPSCRDI ESNETMASS  
IEKSKVDATAMDIGLAFIEATSTPTVPRFEQLEKALLFMDSVLTLTSAIVSTPSGTSSLT  
ECGLVPALN TVSIDAEVASMKIMPDSSESEIFRIQSLRFIT AQAVQILEGAI VTHSN  
ALS AFHNLKGV EVL TARLSKEVLGAREKSTKNGSDNDCTTMEIDKADSASIGGVELRASQ  
RVVLFVVTCLTVVFHQESTSSSVATPSGTAEIQKPELTKALIEILDNDVLYGGHLASLI  
STLLSDVMNSDPHVVKYVHENG LARSFLKMLDVGPSGVP IPPVPELIMS IPTVLAALAL  
TEAGAKL EENPF PGLLR LRFHHPKYAMPRSRCLLNEMTSIVGTGLDEIMRHVPSLSKSI  
CKAIANAMMDV VAFGDQVALKEHNETAADTQCPQALDV DHERTCLVQYGLNFGQILEQIL  
HNEEHCGPFLESGLDAILKMPYLMPTSDRFLAHISCLSCPSLSTITHSSTEETLTLAF  
KCIALRCDP SKIIRKTLGVTKENLNILKATQCEMKSAPFSENHKKENDFDASFILNGLPC  
LSIYDITDPSFN YKKLLARYLRAAVTIQWLSGLLSAVIQASCQRNADAGLSPWNRSERE  
WIKFSSPDFKEVFDCLTSYFQSAILEVCRISEDSFEERELKRQRGNGSDHVRYKLRIV  
CAEGAVVRD GIEIDSCASVSMEMGEIVESFDRCVNSGVLRYRTRRGWLSEQTRGHGRE  
PIAEVLSVWKSQIDNDEKAERNVKGRIEDGIPDIRSSGANVLARIQP VYVELYSSLLRL  
VQQLPRLFSGKGTSSMVTDLMKMLGSGIKKGF EKSEVLCAIRQSPESTCTINKFGIALY  
LGSLLSHLQTCVFEEKKERQTVNMPLLLILVANEHLDTTGQLCHDSETTKINFFDAIKFIF  
ELCLSD FQSRASKMSTGEANKE SPRQSLDRTTASFLPPAIALLRRLISSPLCTSSQTIEA

LERLKESALFVIIIGAEDQVRYSSDDDKNKNFSSQDFFQRLCKTSDIIIRPWSDSRFVHA  
PPHVVHPFTTLVSETIVALEDSTIRAPSNSTASQEEENLPDAYRDTIARFRRARSNVEQF  
TAAMNGALGRDNFEPSEEVI SRMMEMGF SRDHAWDAIDRTRSNTIQVAMEYALSHPPASA  
EDIARRRSRDRERRHRQRDEQGGESMQGTSEAGEGSQPNSGVKQADSNI GAMEIDHVESKG  
GEKSDTEVLVDMVASRIKSWKAESTRVVYNFLSERKSDVDRNTVGDGEREATTTVLSSFL  
LDVCQRYPGDRDQIAENLFRCLKKQLEKKDRENVYWNVLSGHESMASFCHCAVLFIRA  
LPKTRPLVLRAGLVGPIISVISTYLQQPRLKEQAIQNRWPSWLP SALLMLDIMAQPIVAF  
ATKNSSGDAIESEQSGDDKEFHEVKKDHEKQTRDLSALAHRLF SALNDQIQTDNNLKTR  
TADTSKSKLGSQGEEMI STTSNGEESTSKLVGNGLTFESVPAYFPLIP SQLAETCANICL  
TIIIGDSSASPPPGIIHATL LLLMLRLR SSKMSTYCLKAGAGPKIILNLGRRCRFNGHSGLV  
EFIFRRLLEDEINLQSSMETEIRNCILKLD SKKDDKVPGNKDVISVPRKAFVKAITPILC  
RDPACFVKAMAVSIVFEKSNSNSDGRVVLVTSTQRSKNLEIVSETLNLKQTHVLNSRVSM  
SRRSSSSKTKRLSNASSGTRSKTPTRSGKRSQTTKR SKKEKAESKDSISDDNPRRPTSHT  
SPIQHITGLLLNQVVQIGVEKICGESESKELQRDAFDFGYETSFLWTANILEILADLVLA  
IPACATAIHKFKPSRRNRDSAFATLNNALHGCPSPRPTFVSFLLHGLLSQDRWNQKSRRO  
DNEASLDVECASEKQRKKMGFLR TKVVRSTARLLVALVARPGEGRRRVIVELVFALSGGQ  
LGLSSASSFRPAK SCLHPLSELHALQSWGELCIGFAAPK SNGNNYDSNNSLSSEVIKIM  
LENGMAHALLVAVHRVPLYHPMASNALGV LILPFEIMTRASVANSVK SIVEKEARIREDK  
ESAKSNRQAMSKEKNSDLSHRRDSFVADDDHLEDAFAAEIPRGQGS PDESFDDEIVVDGE  
VMVDGDDDDDDGMDVDNENYLSDDDEMSDSNSDGSDDVEDSDEGDSDDDEESDDSDDDS  
DDDSDEESILDDMAESEDVYSRGEFEDDAFNLD SRVDQLVEDENEF EAVNEGGRDHDIEE  
GWTRIESNGINGMVLGSRRTGQHLSGPGTGRGNRGFM DAAEAMIGTLLRTGEIRSEALA  
EIEGTLGIQIMP SGERNRRVASGRRP INSGAFGNFISRQGRTEGNRSSTLSRELVTIPL  
ISQRNQPDFGYSSMGRGTRWNDVNSMEYVYGGPCITAGNRHYDLISPLVEPNENDFFSSS  
SGLIDAQLFPEGPAATHARTRHCTHPLLGDVILPPVNAIVSDLESHDIVARRMIQPTAR  
RLEEWTS PFSFSSGRFFVSNNGAIVRSNR TVGNHRHRSMEGRSSLSGWTDH DGLPFDASV  
EEFRSAFENALGETFPASSFTNSAEP AVASNQENSNSERNGEPAGNIHTENDS NSPTQED  
VAMTEETPNQAGPLSGNQNEHEEHDGDGVASSLAVGLRLSPPINPASEQQISSNNNQAG  
NTSVASGGEQDNENEVSGEAVGQETEPVSAQETVTGSGDREPNQSGLVCPSGMDPEVFDA  
LPIEMQQEVINQARETSALADQLDAGSSLDPEVLAALPEDMRREAIEQEQQERRLRDQAP  
ADPSNAEAEMDNASFIASLAPELRNDILLTADESVIQSLPPNIIAEAQVLRERRARAEQA  
HRRNFAENSTQGNQRTSTNANNVVRSNIQSGQGRDQVSSRRKQRTGKIRVDS DRKEIAF  
IPTRGHVSSTIIAKSDLKALIRFLYLLSPIRPHRILQKVFQNIATNCNLRLILSSTFLNL  
LNDKKS GALYALNTTNSLYSGAEDWREKIDGLFEGSLQDFPPALLIGAAPEVLENDGLNP  
NIVLIRRKQTSDTAASIAANLP ISSRGSQHEHFLPPVVSTRMLDTLLQMCKNSLRFCLDL  
LVKRMIVGVESESSQPPTGFESLDDLLEKPRYSKSSSTNLEQLLNLELVVSPLSHIPRLG  
EESVDVSQKDIDEASSQGEVHVPRVVVSQHRLQLLCSILRMETCKDTSFAKVNTIARR  
LCRVDDNRGYVLTELASVARALGVDATRDLTALNIRICATIDENENRLSKTASLGPDPNS  
MGKGASTSVAVSTSTSELKLLRVLQTLQSLCTETSDDGPMKKNEGVVVTEELVQLLDAMN  
LDKLWSELTSCLKVVQVLEGVNIEEDANKEADGNNTDEF GDEIEMGAKKLENSVAGLLT  
RFLPSIEAFFVANGCFTRVTKDIRNNTQSEGT TTD RRSTQLVGGKKLDFDFVEANKVLLNA  
LVRNNSLLEKGFKALIIYLPRCRMLLDFDVKRHWFKLHVRRLRQQANRRYGSIRLHIRRD  
YVFEDAYLQLSPRNSEEMRGR LHITFRNEQGV DAGGLSREFY GILAKEIFNPNYALFTST  
EDGCTFQPNPNSSVNP D HLSYFRFVGRIVGKAVADGYLLDSHFTRSLYKHMLGKEPTHHD  
MEAIDPDYYKNLKTILEYNLGDLCCLDLTF SVEDHSFGRNHVVDLIPNGRNIPVTEENKAK  
YVSLVCKNRMTTAAISSQIKSFLDGFHELVS KDLIQIFTPKELELLISGLPDIDIHDLKKN  
TDYNGWKATDRQIEWFVWVLFSLSRNEKASFLQFVTGSSKVPLAGFGELPGMRGVQKFSI  
HKTGGSAGSLMSAHTCFNSLDLPVYKSEQELREKLIYAINEGAVGFLMA  
>comp13475\_c0\_seq1; 434 135 818 LEN=1133; translated  
MAILAVAAHSTEAFAPASSALS GVRPSALSPLFAEESPEAVFKPPAESEGEPAEEGEIDL  
GTVEMLGRGA AKAKRGKRKGGPVAKNVGKDKASVTLAPEEVHYEGPPAITETI IPTVSIL  
TVVGIIPAIASWSRQAWVRYKITTRRIRVTSIGIGKDMAEIVYDPDITELRTVNRLF GDGD  
LVAFRLRDGAKFEMRNIPDFENTVKFILEQVNP DVKKLYLEKGDVTQP  
>comp13475\_c0\_seq2; 434 135 818 LEN=1147; translated  
MAILAVAAHSTEAFAPASSALS GVRPSALSPLFAEESPEAVFKPPAESEGEPAEEGEIDL  
GTVEMLGRGA AKAKRGKRKGGPVAKNVGKDKASVTLAPEEVHYEGPPAITETI IPTVSIL  
TVVGIIPAIASWSRQAWVRYKITTRRIRVTSIGIGKDMAEIVYDPDITELRTVNRLF GDGD  
LVAFRLRDGAKFEMRNIPDFENTVKFILEQVNP DVKKLYLEKGDVTQP  
>comp13476\_c0\_seq1; 1035 1 1896 LEN=2213; translated  
PKLDLMSPEVKFGRLLAGTDQRKRHAAVKKLKAYLKARS DISEVVDGDGLESTSGGISEL

DLCLKLWKALWYTTYLMADKKAVQEELSKQLVQLLWCVVGTETEEDEYAGRAYLEMTEAEEQE  
LEEGDEDDSDGEEEDDHEVTLLEEIENTIKEELSDDDNGEIEEEDEDEAMEEEDPEGSDE  
IMELNDEEIPHCRAHLASIFVRTFFRTIRRDWGTMDKYRIDKFYTLIRLMMHEIYEYMS  
VRSWNYGIVLLLNDVAFEEILKHPPNGLRYHLIDLCLLEELAKVNAKAKIQLTEATFLDVL  
EPFFGLCQTGRNDDTVQERVMEKVMDFLENYSIISDRALKEAEDEEDNGTISIIFSNVHV  
KTIAEFFFTLGSDPATKQFRKSLYDMHKKYMRRLKKGKDVETITDEDGNEIYEGEEED  
AVVDDVNINNIDESIRFLEAETGENQEDSEDDDDMGDDGEEPVAKVEAEKPKKESKSKKKK  
RKSIDPEPESEDNSAPASAEAEAGDKKKKKKKKKRKSDFVESAAEEEEIVITLLEQQDAKKK  
DRDAKKRKEEEREKAGDENASKGSRVVSFGKKNRAKSHKASKALRTTEAPDTRETV  
PEKGLLRKEPRHKSSSLKNPSKNARKKAVNYF

>comp13477\_c0\_seq1; 852 91 2253 LEN=2450; translated  
MADDAAAQRQAEIEAETEDLYNDGYFSDTSLDLNPRYPKLKESFETAIVVLNLPKVPEAK  
VGKLTKVVMKIIISRLGNLASNETGFTGFVMPFNAEAGATEGFAICEYETPEEAQNAVEV  
LNNYKFDKNHMLVVTPYTRAKKLNLEEKEFVEPERKPFVEKPNAMSWLEDPQRSDEFVI  
RQNETVVSDFGKADPVVDYDGEREKEAGVNWCEYYCHWSPKGSYLATLVPARGVILWS  
GSTYEKVGFRFVAPDVKNVLFSPQENYMLTNNMRYDDEQAIVYNIQTGKLLRAFPLFPNN  
IERKEDVPPPPFQWSHDDAYLARMGKDLISIYSTPSMGLLDKKSLLAEGIHEFQWSPKAN  
ILALWSPEQKNSPAHVDLIELPTRKLRQKNLFNVTNCSMVWQNDGDYLAVKVTRRHTKSK  
KTFYNNIELFRLNETGIPVEMLDKDAVMSLVWEPRGSRFAMIHAENPSSTKVDVSFYDM  
MKKSESTGGKKGKKSAPKQTTIVPELNKVETLSGKQCNCLEFWSPAGSTILLASLGDASAG  
TLEFYVNDKSLTVKEHYRSNQVLWDPDGRSVATCVSQPVEGGHFKFAMDNGYILWSFQG  
KQLYQQSFENFYQFQWRPRAKLLSKPEIEKVRKDLKKYEQFEKADKERARALYLEETKG  
KRLQRKKIRDIISDLRKLREQKARHVEMLDGYDSEDEFNYVVREVSIIETILSTKEEVVN

>comp13478\_c0\_seq1; 433 138 1091 LEN=1216; translated  
MSSSIGFIGLIGIMGEGMAARLLSEGVAGTESAPLVVWNRKSKCEALKEKFADKNIVVKD  
TAKEVVAECGITYSMLSTPEASKMVFEGESGVLSGIKEGSSIVDCATLAEADMVRMDEAI  
RGKGGRFLEAPVSGSKGPAHQGSLIFLCAGSEELFNEVKDNLKAMGKASHFFKTEVGYG  
TRAKLVVNSLMGTMLAAFGEGGLALSEGMLDPKTMIEVIGQGAIQSPMFNLKGPKMVVKD  
HAPNFPLKHAHKDMALACDMAQAAGVEYSVMNTAEKLFREAREDEPELKLADDFSAVFET  
VHKKSTSEFSKRRKLND

>comp13478\_c0\_seq2; 433 416 1369 LEN=1494; translated  
MSSSIGFIGLIGIMGEGMAARLLSEGVAGTESAPLVVWNRKSKCEALKEKFADKNIVVKD  
TAKEVVAECGITYSMLSTPEASKMVFEGESGVLSGIKEGSSIVDCATLAEADMVRMDEAI  
RGKGGRFLEAPVSGSKGPAHQGSLIFLCAGSEELFNEVKDNLKAMGKASHFFKTEVGYG  
TRAKLVVNSLMGTMLAAFGEGGLALSEGMLDPKTMIEVIGQGAIQSPMFNLKGPKMVVKD  
HAPNFPLKHAHKDMALACDMAQAAGVEYSVMNTAEKLFREAREDEPELKLADDFSAVFET  
VHKKSTSEFSKRRKLND

>comp13478\_c0\_seq3; 433 549 1502 LEN=1627; translated  
MSSSIGFIGLIGIMGEGMAARLLSEGVAGTESAPLVVWNRKSKCEALKEKFADKNIVVKD  
TAKEVVAECGITYSMLSTPEASKMVFEGESGVLSGIKEGSSIVDCATLAEADMVRMDEAI  
RGKGGRFLEAPVSGSKGPAHQGSLIFLCAGSEELFNEVKDNLKAMGKASHFFKTEVGYG  
TRAKLVVNSLMGTMLAAFGEGGLALSEGMLDPKTMIEVIGQGAIQSPMFNLKGPKMVVKD  
HAPNFPLKHAHKDMALACDMAQAAGVEYSVMNTAEKLFREAREDEPELKLADDFSAVFET  
VHKKSTSEFSKRRKLND

>comp13479\_c0\_seq1; 839 724 4158 LEN=4347; translated  
MASRRESRSRTTLPSPATATTTALFGIKGFRAWFQDQFPNSVKKIDVRKHNDRFDHVLVD  
MNQILHVILRRSRNTEQATKLLMVELDILIERCKPTHSLVLAIDGSPAACLATQRKRRF  
SILKNTQFKMKHSDKLRMSKQKRARRIRNYNKEQLSLQLTPGTECMQTMEAAIYAWAQ  
LQSQGRPNRLLPRVQIYISSSLVPGEGEIKLLEWINNYRRHLSRRPGQSIALVGGDADL  
LLEAMVIPPSTHNVFLRPGVATDNPVPPKENPEDNSNNSNKGVMKKNRKNRNDKYNRKNLM  
HCTSLWEMTSLDDYVFNPKQYDPEPNEDQNLILQIRTDMLVLMFMLNGNDYLPV  
AVGFQGVLTYYLALLEESIKQNFSSQNVGLVDPNTLNFRTFCAAFFGKLGGLNAPSEQQR  
WRSVKHSVRRTYQSILNDMSAIGFLPSPVKFTFVGDSDNDAYNDGKGTRELRRDPTLAQE  
DEEDMIYDDEDEDDDEMDVLEDQDSLEDNTGMELLQLSLGKINEADYHEYTVKVNVS  
GGIQKAKSSSRKALKEFSLLDYVNMVDGNDMGTDYEWIISKPADANVERYLAGLLWTL  
QTYQDGVCPSTYRYNGKCLAPSGRVIKFFEKAVEENRDVGAELLRDFEPGGSVSAGAA  
CLAALPISVKHLVPKPYSIDDEQVEDFYSQCMDPVDNFFQLKKFETLVDAEVERILREE  
SDDDEEGEVADESANFFAGRRIILGDHYWTVMKRTKDAIQHPFKPPPPPAENFSQLRPN  
NRKIVSRIISIDLSPRPSINYTMPDSSPDNTYPRKIMERNNIKIDHSSFGSLISGEKS  
SILEIPFKIAFSSSRDMHRGKASSKRKISFKLLKSEKPDVLLQGNTRKQSQIEDKPKSVP

QTVLNPDKQNALVILKQLCDIRMLQGFEDQSSYGEITLIVSTDESPDGLLAKDLSFSYT  
SGISKRSLTPIKQHLASLALDAIMYSRETKNLDGGDSSRGKRKKTRWYDLTFHQLKEFLE  
LYHPATKKASTKNFNLEKQTSVLVILKQLWDTGMVSYEFYETPASDEGPETHSLISISGSK  
FSPEILFFERTRNSESKKWIRQQLASEALNTMIKDERRNPTALNWDLTTFNDTKDLILGG  
GISQ

>comp13480\_c0\_seq1; 113 1 481 LEN=898; minus strand; translated  
XFFERDFLAGLEAALVALARLGISRGFLAMVWGWGWI AEEEEERERERERVEDRGVLEAMP  
RHKEIKRKRTSSKKNHGNQKHAGISRKEPNPVLNVRGAGYGIAERTIHSIRSFSQGIIA  
VEPIPIQYGTVYKLA VLFETVLI GLVLSFEFLIVEERKGF

>comp13480\_c0\_seq2; 242 180 1124 LEN=1541; minus strand; translated  
MALMVAMIFXVPKGLGVLVAEFLGHGGNAVFLSVLQNVDPGGELVGTALALLREPLEEAV  
VEVPEGGRLFGRLAGDPEGAQNERPPGGAFFREALVAHEVLEALGKLFGLWVPKADGAC  
QLRPGPLGHPVGVLLAHEAKDGVADLPGVLEPGGGAALFFERDFLAGLEAALVALARLGI  
SRGFLAMVWGWWWFAAEEEEERERVEDRGVLEAMP RHKEIKRKRTSSKKNHGNQKHAGISR  
KEPNPVLNVRGAGYGIAERTIHSIRSFSQGIIAVEPIPIQYGTVYKLA VLFETVLI GLV  
LSFEFLIVEERKGF

>comp13481\_c0\_seq1; 409 638 1625 LEN=1671; translated  
MGLRTNPKDRGFYVSGVKRQAGQERNLVTGSSTSLGNGNDNGTYDRRSIDQLERAAVTR  
MEKAREMTEIEQLEQIRKLN EVVSASVNDADTNASIRKSFRKDRTEKRSRLREATDKGWR  
NGMVVLP TND D D I L A A N E T C Y G R P A E D E K R N L S A V R K S S I F S S Q R A A K R K K S R R M R S R P  
SDHRAEVTSGRIVTASPVRSDNF S I S N R N D T T N L G V V L P G K T E T T E P I A T K H T P A H P C S P  
SFLVTDGTIQNAAKKRRKKT L Q L Q R G E R G L S V I E K E K E T E A K T E F D T G G G I S D K N C L E N S  
PSSRGKSAGPTSSSFEMMAAYDSDTDSY

>comp13481\_c0\_seq2; 476 110 1456 LEN=1502; translated  
MSSLAATQSDGYLPEYFDSGAYRKQSRNQFAAGASAANSNSGSKCLSNKKQKKKSGHN  
QWLKNGVRFELPEKAVCLGCHQSVGRGTRFNAKKITTDQCYFSTKIYEFQLSCRNCQKP  
WVIRTNPKDRGFYVSGVKRQAGQERNLVAGSSTSLGNGNDNGTYDRRSIDQLERAAVTR  
MEKAREMTEIEQLEQIRKLN EVVSASVNDADTNASIRKSFRKDRTEKRSRLREATDKGWR  
NGMVVLP TND D D I L A A N E T C Y G R P A E D E K R N L S A V R K S S I F S S Q R A A K R K K S R R M R S R P  
SDHRAEVTSGRIVTASPVRSDNF S I S N R N D T T N L G V V L P G K T E T T E P I A T K H T P A H P C S P  
SFLVTDGTIQNAAKKRRKKT L Q L Q R G E R G L S V I E K E K E T E A K T E F D T G G G I S D K N C L E N S  
PSSRGKSAGPTSSSFEMMAAYDSDTDSY

>comp13483\_c0\_seq1; 717 1 1900 LEN=2200; translated  
XSSVLPSTARAEAMQVLSMADNRTATADPNQPFQVRRTESGGFRASAFDPSVEEPSTYRF  
QRSSNSRRTPSALKGLGMGSGSASGGSAGKPDWKSARYSFRDPQFRDDDCLEEEDEIVG  
PAAEAFEDVEVRPKDSFRGDFPARTSAWSSRYSDDPKLSVLD RYDRSHSGSHSGEHS  
QRTGARGMLVSTAA NVSDSVRNF GDSVSSRI SEARENANTGFGSGKFSFKKNRIKKQQQ  
MQMQGLVGSPSRPGATGSTNLR TVWQDGS DGI GYHDDGDQGITGGSGKHSWEQVMREK  
KRRRVVGLSVLCALVAVVIVGVSVSQTAWRWKYKNLWNGNTQLEVTIFYATSNSPLGYGT  
SEEQLAADLANLPGDAD FVAHLGNLQDASVNMCPASRMP EMGSLLRSRMPENVPLFIVPG  
EHDWIRCPNQLTALARWMEVFATSPLEDQAASDDDYTAEP AIAALQALEFDRPKTSPDIF  
SKLHHGVLVFGHLVQGTVTDGMGMQE QVVRDEKMSIFVKGTLSRLEGQYRAIVMLGNAR  
PGPRQQGF FDSISEPLANARVPVAYVHAGSSLSGKSDPGGVVHYFPFGKKKRGDGLSGMV  
AIRAPSGGNHEPPLKITVGF GKHLFGVGSDDQ

>comp13484\_c0\_seq1; 364 64 1242 LEN=1969; translated  
MDRSRFRSSSIISMSPPRGVRPQQYSHDDNKSDSNSNSDKEKDSERDYQHRHFRSAGRK  
RSRRD TTDHRS GCEDDEVQVVDAPPLPILPITACLSDTGDVEVLGSRGGQNALSDFP HAR  
EDCVVHPFANDGRAQTNRTFCPN CYVCDLPASGCGEWSAHCQASRAVPNWKKLRDETR  
GRTGTPERQKQRRRERHRRSLPRWSE RWCRPSAGAPAA NRNEEPAEADPDCPAIPGRPLP  
SLLAENRARFLRERERQGSARERNVLEQQVLLRRRLQQQREQHIRT HEQEQQQRHQHQ  
HGTPSSSSGRAPVRSEGPVPGSNNSRPPATAAAQR SNRSFSLGSLFTKQRADQARRE  
KERRELEWERHQEEKEREQK KAWKRLRRKLPG

>comp13485\_c0\_seq1; 459 1 762 LEN=1161; translated  
EDEPAGGRKLSSEDGVESESESLDSDSEDEPAARGRGLGSLRVRKLEASSDSEDGV  
ESESADSDSDDEQV RGLEPTK KKRKNK KKKNRKRNKQGNAPAPAEDPVEEPEE  
EPSLSEDGPEFEDSPSEDGPESEDSPSEDGPEEDPEENP VLLRRRNQEVAPEENSSSEDG  
EDSASEDGASASLDGEEENGEQPVVGTDLQLLRASASLGADELGVGSGALAMPRLGGL  
AGLAAAALVAAFL

>comp13485\_c0\_seq2; 459 1 762 LEN=1125; translated  
EDEPAGGRKLSSEDGVESESESLDSDSEDEPAARGRGLGSLRVRKLEASSDSEDGV



ESESADSDSDDEQGVRLGLEPTKKKKRRKNKKKKNRRKKRRNKQGNAPAPAEDPVVEEPEE  
EPSSLSEGDGPEFEDSPSEDGPESESDSPSEDGPEEDPEENPVLLRRRNQEVAPPEENSSSEDG  
EDSASEDGASASLDGEEEEENGEQPVVGTDLQLLRASASLGADELGVGSGALAMPRLGGL  
AGLAAAALVAAFL

>comp13485\_c0\_seq3; 222 300 568 LEN=568; translated  
MAVSPAFSHRSTQVRSSVRSGEDLVLGSAEKRFDADRKDKQNI FGRKLETSSESEDGVES  
ADSSDSEDEPAVDEPAGGGGRKLSSESDGV

>comp13485\_c0\_seq4; 475 1 783 LEN=1182; translated  
EDEPAGGGGRKLSSESDGVESESESLDSLSEDEPAARGRGLGSLRVRKLEASSDSESDGV  
ESESADSDSDDEQGVRLGLEPTKKKKRRKNKKKKNRRKKRRNKQGNAPAPAEDPVVEEPEE  
EPSSLSEGDGPEFEDSPSEDGPESESDSPSEDGIPSEDGPEEDPEEDPVLLRRRNQEVAPPEE  
NSSSEDGEDSASEDGASASLDGEEEEENGEQPVVGTDLQLLRASASLGADELGVGSGALAM  
PRGLGGLAGLAAAALVAAFL

>comp13485\_c0\_seq5; 475 1 783 LEN=1146; translated  
EDEPAGGGGRKLSSESDGVESESESLDSLSEDEPAARGRGLGSLRVRKLEASSDSESDGV  
ESESADSDSDDEQGVRLGLEPTKKKKRRKNKKKKNRRKKRRNKQGNAPAPAEDPVVEEPEE  
EPSSLSEGDGPEFEDSPSEDGPESESDSPSEDGIPSEDGPEEDPEEDPVLLRRRNQEVAPPEE  
NSSSEDGEDSASEDGASASLDGEEEEENGEQPVVGTDLQLLRASASLGADELGVGSGALAM  
PRGLGGLAGLAAAALVAAFL

>comp13486\_c0\_seq1; 653 173 2431 LEN=2522; translated  
MAKSSAPAEVGDANNNVPRADDDSSFSKDPDVPTEEDNILGFVWISICSYFIYRIIYYS  
YLIRMSAIDEYGPVIEHFDYFNF RATEYLYEHGSRKFFQWFDYMWVYPLGRPVGTIYYP  
GMQFTAVYIKRYLLDNWSLNDVCCYIPAWFGAIASALVGLLTYECTIPENSSSNVIKWVV  
DLAQDQSDREASSRRSKSVMFGFFSPAMECACCAIAMMAIVPAHLMRSVGGGYDNESIAN  
TAMIMTFYFWVRSRNPQSAWMGAIAGLAYFYMVASWGGYIFVLNLIGVHA AVLVP MGRF  
SPKVYLSYTLFYTIGTALAIQVPVVGWAPLKSLEQLGPCAVFLGYQILRVCD SIKGDRKM  
TRAEFFLLRVKAFVAVAGITAMILVSLVAPSGYFGPLSSRVRGLFVQHTKTGNPLVDSVAE  
HQPASSRSYFYQLLHVCSLAPIGFLMVTNLNLS DSSSFLLVWGVAAYYF SHRMRVRLILLTA  
PIGSILGGIAAGRIFTWCLRQWWE TETSVPVLKENSNT RANKVNKKGTFRKPKKPSYA  
ANTEYEENDDALDGLLKS AFDGALTTSEAVLMKR FMAATLLLMGYILSINFTHYCW RVSQ  
DLSNPTIIVKARLRDGTIIKLDDYREAYW WLRDNTPEDSRIMAWWDYGYQITAIANRTTI  
ADGNTWNHEHIALLGKALTTDEEEGYQIARHLADYVLVWGGGGDDLAKSPHLARIANSV  
YRDHCPAGDPTCRAFGLMVSFSSKLF SYTCGQ

>comp13486\_c0\_seq2; 875 173 3136 LEN=3668; translated  
MAKSSAPAEVGDANNNVPRADDDSSFSKDPDVPTEEDNILGFVWISICSYFIYRIIYYS  
YLIRMSAIDEYGPVIEHFDYFNF RATEYLYEHGSRKFFQWFDYMWVYPLGRPVGTIYYP  
GMQFTAVYIKRYLLDNWSLNDVCCYIPAWFGAIASALVGLLTYECTIPENSSSNVIKWVV  
DLAQDQSDREASSRRSKSVMFGFFSPAMECACCAIAMMAIVPAHLMRSVGGGYDNESIAN  
TAMIMTFYFWVRSRNPQSAWMGAIAGLAYFYMVASWGGYIFVLNLIGVHA AVLVP MGRF  
SPKVYLSYTLFYTIGTALAIQVPVVGWAPLKSLEQLGPCAVFLGYQILRVCD SIKGDRKM  
TRAEFFLLRVKAFVAVAGITAMILVSLVAPSGYFGPLSSRVRGLFVQHTKTGNPLVDSVAE  
HQPASSRSYFYQLLHVCSLAPIGFLMVTNLNLS DSSSFLLVWGVAAYYF SHRMRVRLILLTA  
PIGSILGGIAAGRIFTWCLRQWWE TETSVPVLKENSNT RANKVNKKGTFRKPKKPSYA  
ANTEYEENDDALDGLLKS AFDGALTTSEAVLMKR FMAATLLLMGYILSINFTHYCW RVSQ  
DLSNPTIIVKARLRDGTIIKLDDYREAYW WLRDNTPEDSRIMAWWDYGYQITAIANRTTI  
ADGNTWNHEHIALLGKALTTDEEEGYQIARHLADYVLVWGGGGDDLAKSPHLARIANSV  
YRDHCPAGDPTCRAFGLMDRQGT P SPMERSLLYRLHGHEIKDGVVAD PDKWKEVYRSKY  
GRVRIYKILGVDEESKTWVEDSTNLICDVPGSWFCPGQYPPGLSDILARKTDFPQVEDFN  
RDGADEEYRKQYFENLNNPKKATAKARKREREMKLNEMGNEDNSEAPPRDQTHAKKGVDE  
IYNTWEDTEDTTLMWTLISSNQVDDL RMWLEEDPTIAFIRSRDGRGPMWWAF EKRNEDIT  
KILMKAGVPHTDRDAKGLTPVDLLE GK

>comp13487\_c0\_seq1; 130 109 756 LEN=1303; translated  
MSAAETKSGVIGDEIDNFRDRRWQWHNGVPDHSIADGKLTVRPTPNKDYWCRTFYDPLL  
KTDAETFLAWIEAGDEATIATSFTLEPRSQFDQGGIMVLVDEDTWVKAGVEYTDGIPRLS  
CVVTNEGFSWSTQEIGSKESTGSSSVSVHVR LSKLNRPGSAQGPCLVFEVGNASGDKNS  
SAALKWTQIRIASLRSGNKPWGMGLFAICPIENKD

>comp13488\_c1\_seq1; 1324 181 2679 LEN=2720; translated  
MATTRTSTTTASGTSRESQSGKRHRALFLSSLLCHFC HSYTVVSALQAKNVR RQAPQNS  
FPSARLSSVSSSSSSTTTNPRRRQRTCLSLASSSSEEIDRGGPSSLLRMPQSM TVNTNM  
NRREVFSNSAKALFGGLATPFMLAADPANALLLRFPVDDPNTQPLKNKYHFIRAGTSELE

LEGIYSTNALFLTNRDNALSQQGYDCLRDSISALKKTSLPPTVVYHSLAANGMDTGDI  
RELRLGRDRLLPEFTYLDQRGIGLWDSDETVVVRPAVWAMDAMEAGVEGFGARPPANTDG  
TPNDTLHDQFTRLRQFLSLQESRTAGEIILVIFPDGTGPALLSCMIAGIPFRDVHALEFQ  
PGE LRQDITPESVRALYEERKNDPSYLAKIEDGKEKLGAPDPKAKDFSVSFKDSRANDK  
QEEDNQAYYQKQVEVAVAQAKAEERRAAMQEQRLRSRERAKAKEEQKKQEALAIQERKE  
QRLREQALADQKKAKEEAAYAARKQALQEKADSAKA EKSSVAPGAAPAAPFGLSP IVLG  
AAGVGVVGMMAAVLGGNQEEDSDASAAVPAKNGNDGGDQSVAA SATDL SAVLAGELETP  
ATVDAVAHNASALAAETKATSTDSKADVDGDAVGDAEAPAPVSSTKAVERN ETPETPRE  
TSTAAAATKTAQPERPKDAEEEFATKLQAAEQEMKDALVEAAGVKERKQKKQQQRQKAN  
RPKSQPPATGKKATSSLFNNDPPVTITAAAKTTNLVYEDDQDDSAWLQVLSEIRDEVED  
EEDEDFGMVDYASLVSNDTDFYTNSTSTTQTYRSSKPQEATAVSAYSTE  
>comp13489\_c0\_seq1; 445 57 1475 LEN=2307; translated  
MMRTEHSDLSPRLSLEVAGHPLSSLGFDGNRSSSSPQEHRRGVGLGERRVGVLSLSSPPA  
AIASPAGTGTGTTALVIKEEDLRLLSDAVGGVLEGADETLRCLLETDRALLPSAILRKCNE  
IADGLASLAAELEGQSPEERNRLADAIGHDLRLCDEALLGAQGGGAEAEIDAGNPASASD  
AFVVGNERDEVLRALS GASTLLRDMETS FREIGDEEAEEIADAALITARLFLLSLESFYS  
NLVENLDRGDDRGRCGEPIASGVFIEELAGGDGDGSDGDGGAEPLEEHRAGR TRESRRH  
AHRMRVLWLPALGPGVDTAMAWTREEATRPF LAVALGLTLWPVALSTALLGTSVALIDG  
AVQEA YDRFKDGPWISALEHGAAQAYQAGRLSVATGRLVGRQGLRVAARQIERRGGLGPV  
ALDLGGMALDKIAHPIDTIGKAWDGLHWGFGAVRDTAEFFLSVRRERRESMV  
>comp13490\_c0\_seq2; 250 92 1137 LEN=1197; translated  
MEVVLGYGACSAE SLGRILFTP VATGGRSEGDVAKEEDNDSCSSLSAIGIEVNANGDAT  
VETTTTRANTS AKKATIEVDDASVVPVEDAHSYDSPWGR LKARRRSPQKNPHPLSMIDT  
IVIPSHSASSSTASTSSSTIFDSADSSTSGSIHESVADSLQHTARRPSAPSIEVTLCTGR  
SPQSSSYGGLPHTSLSSSSFCSSSSSVVYLSSPLSSSQDAHPRHKMSTQTNSRFLGRTSR  
IRRVRELLKEDEDTGSGARKNCSIESGAKKMAEKARGTSPEKRS PVS RMDLQQVAGNPGT  
NPSATLAPDATGSLVHETKRNGAPLRFLLLPFYCCDIVVPTTLANNY  
>comp13491\_c0\_seq1; 1294 1 3598 LEN=3798; translated  
XLVQQTHSCNLAPCSHSPTRALADCLGCIHDRIDRYPTTLLQYDRISQYGTPENGTMSSA  
TPGAAMKASNASGAAAGASPEGTTKVPAAVKSPVALTDKVMEYLYKSKGMGKAVLELQQK  
IKDEEQERQKGDTRSGTPASPKEAVPKITREQLDADEETSRTQRTILMKSTGGGYGYDR  
DAAAP IAQWGI PDSLAVGKGNPNASPS SARGGRQ RWAAGAMGEREAKSYLDAFVALQLW  
ILSLPDDSAGIVGWQPKTTNVI AKAKALIDVASKVTSKLEKDKTNKEKENENSSNDAA  
KEGKSGDDKVEPKATGSE DGAPMEVDGEEESDEKPKQDEKES EGKKDEEQNKDDGNT  
SNGNKDGTNGGADEPKAPPSDSNILAAVISELTKPTAPKKTADDPDTNGVSRSAVYPIPP  
SAKAELLSVSFALLVHTYCELELVGMESTAHVLRDAFKPIYEPLPSGYGSQYKDLNVCVT  
TEDMVKLNTHNSQHMEALGHLK TILIQVASIQAKKRELENDIANASSRGGNIDPARQKKL  
QEYDHTIAL LHQKHTESSQRATHAFDRMCDMPFLRRARAVRWQLTLSTTSYGMLCQFLNS  
NVGAGGSNDT SLLAMSTLLQTKCELHVEQRDPLPFTPVVVLEDKYATAGLPESDKSATKP  
VSKQKETPVQWAAPVKGLSKQDPNRPFPKFHLEDEYENEQEAKEGKQSVGFNRSL LINGF  
RRLEALERKRDFQAMSSKAKDTYVNESTVRARRVLANPLEPSIMFSTLCANQTRRRDDAD  
RSQNDSSSTNNSSSFLWEEESGIGITCAKLCSPDGRR IAVGCCD SAIRVWNLMNDNQSKGS  
NSNGGKQMSVGDAGQVLLGHKNGFPVFDLSWNRDGRSLLSAGGDG SIRLWDTSAQGPFG  
VVQSSSILGTVGGPPVGIATGGSQTAKKPLVSTAVAKETLTKATENLRKDPDLSVPGLRPE  
SKAYTSGAALAVYRGHAPNTP IWSVAFSPSGYFASGGS DATARLWTTDRSVPVRLFTGH  
TSNCIHSVVFHPNCNYVLSGSEDKTVRLWDIQTGQCVRL LN GCPVGIYKVEIDPSGQYAF  
GADLYGTVHVWDLATGKKVTELRSPRHGNVIHPPGPDQRRQSVEMIHGF AFSPCGKALA  
TGGDDRTVRIWDINKAIKSPVPVLSDPVKSF TTRRAVVM DLQYTKRNL LLSIGKYISAI  
>comp13492\_c0\_seq1; 376 80 802 LEN=965; translated  
MAKLFKIFRSQKRRSSSKSSSQLVNHKSLGIFRSNTSKDFTEKTETESPVIEAAITYSLS  
EDEESCEPFLFQDHD IENQLIIDDVSPEREVRGVSVLRSNDNKTDNFEQQNTEERNEIE  
SSTINSKTEKFLTFTHIEVMRNE LAHMMQIANKDKEIFQLQQAEDMKLQANALASKDD  
EIANIKKKILELESSSLAEDKLAAEVMEHSKTIKVLMETQYDYHQAKGNSWFRSFCYA  
>comp13493\_c0\_seq1; 552 111 2007 LEN=2212; translated  
MTTTRGLPGFLRRSLRRDDFYTTS EDDTDDDDGYDGENSIEDTTNNSGSQNSSVAESTG  
RSGSSKREANNTNKHRMGSVARTKGPAAANRSSLLSSTSSILDPSPLADVSAREDNAGW  
TNSNDATSNGNNSYNNNSITHEYYDDEDGQNSVSTMGESVSGIRRASSFAANSSSEGGSL  
FRGTSKRASAKSYRELQFEKILGTAPNGETSTNTNSNHNVVKMSELKQLAWNGIIPPQY  
RAMSWKIMLGYP TNAMRRQQT LERKRAEYKDAIQQHYYIDDNSRTIQEQETLRQVLVDV  
PRTAPDIQLFRNEKVKRALSRLLYI WAMRHPASSYVQGINDLATPLFAVFLAE EYDGED I

LDGSIMMVLEDERIDEVGRCLVSRSSLCRVSYVSVCEIPLHSMVFYAIRIVLYYAVCX  
VWKSLSLSPASTDSFRVCNQFIYVTNDILDLSLTHLSFMQVEADVWCLTNILAGIQDHYTA  
DQPGVQRMVMRLEELVNRIDGDLYKYIHSVGIQFMQFAFKWMNCLLLREFNLKCVIRLWD  
TYISEENGNFEDFHVYVCAAFLSQFSGQLQQMDFDELQFMQQVPTEDWGETEIEMLLS  
HAYVLSTLFEGSDAHLTSNHSSINAGGLPGP

>comp13493\_c0\_seq2; 625 111 1760 LEN=1965; translated  
MTTTRGLPGFLRRSLRRDDFYTTSEDDTDDDDGYDGENSIEDTTNNSGQNSSSVAESTG  
RSGSSKREANNTNKHMRGMSVARTKGPAAANRSSLSSSTSSILDPSPADVSAREDNAGW  
TNSNDATSNGNNNYSNNSITHEYYDDEDGQNSVSTMGESVSGIRRASSFAANSSSEGGSL  
FRGTSSKRSASKSYRELQFEKILGTAPNGETSTNTNSNHNHVVKMSELKQLAWNGIPPQY  
RAMSWKIMLGYPNTAMRRQQTLERKRAEYKDAIQQHYYIDDNSRTIQEQETLRQVLVDV  
PRTAPDIQLFRNEKVKRALSRLLYIWAMRHPASSYVQGINDLATPLFAVFLAEEDYDGED  
LDGSIMMVLEDERIDEVEADVWCLTNILAGIQDHYTADQPGVQRMVMRLEELVNRIDGD  
LYKYIHSVGIQFMQFAFKWMNCLLLREFNLKCVIRLWDTYISEENGNFEDFHVYVCAAF  
LSQFSGQLQQMDFDELQFMQQVPTEDWGETEIEMLLSHAYVLSTLFEGSDAHLTSNHSS  
INAGGLPGP

>comp13494\_c0\_seq1; 457 194 1836 LEN=1874; translated  
MLALVLFSLIHVPINIPAFALSSKVDVDMNKELVAHGISNMLSGAGGGLQNYLAYTQSVL  
YDKSGGKGRVSGLAVAVVSVGLFFVGPASIASHIPRCMAGALLLHVIGIDLFLEGVWDSYGK  
FDLLEYSGIWLIVIVMSVYGMEAMVAGGIAAVSTYAVQNVAYLSPIRGVMPATTLRSSH  
WNR IAASEAILVDSDVGRSRILVVQLQGHLFFGNMAFFTDQIHGLLSPPSGQSSKSNIGI  
TIDEIDKKSPLVIMDFSLVLGIDSSAAHGIVKLNNTILNEYGIQLCLYVTGSTEGFPTE  
FDLRGQLSSNKGSDPAISLPDEETSLLDRCQDSPYTGSRVCDSLDVALMEAEDAMIARQ  
SPSLVKQDELLSKLKLDTQSGTLSREEEKEEFVSTLKEICPGDLGDDDADALFSLFHREA  
STMGELIWRQNDESDCVKILILGQLIAELENEAGTTEIIPSGCIIGELGLVNGDPRMSTV  
KCSSKEAILYSMSRTSFERLISTQPRRLARYIDLICVKYLALRVQHVSNIIFXNKMSPNL  
TSGFSIK

>comp13494\_c0\_seq2; 750 160 3047 LEN=3085; translated  
MVLNSDPPQDQKSPGTPRSRRQSFLLRKS SIDASSCTNLAATVPSSRNMDLGTFNSSF  
RSHSYTALASSRRVNFDDQTNEEVNRVATAKPDEGFSRKGFFSMAFICKVLGQIPAIAL  
IGIFHLMVGIPIFGVSYFPMYWTSHPGDASSPGAIASDSVGDADFHEEGQFP IPGKEAFGI  
RMFLFSTFIGQVFAFFSGFKNP IGLQMVENIGFTKELATIAISHQGYGLEALSTVMVMF  
AISSVLVGLVFFLLGKFKQMGKVYFFPPTHVLIGLIGGIGILLCKTGLENTISKSVSMITL  
IESRNLWSVVLFLLEMLRLLEYMTADSKGNPRFALLSPIFFCMITPCFYLTWLWIKIPVA  
DSKDAGYFFPPLSNVEDTDESMPFNENFGTPWDLWKVIDFSSVSWKAILDLSLPTMLALV  
LFSLIHVPINIPAFALSSKVDVDMNKELVAHGISNMLSGAGGGLQNYLAYTQSVLYDKSG  
GKGRVSGLAVAVVSVGLFFVGPASIASHIPRCMAGALLLHVIGIDLFLEGVWDSYGKFDLLE  
YSGIWLIVIVMSVYGMEAMVAGGIAAVSTYAVQNVAYLSPIRGVMPATTLRSSHWNR IA  
ASEAILVDSDVGRSRILVVQLQGHLFFGNMAFFTDQIHGLLSPPSGQSSKSNIGITIDEI  
DKKSPLVIMDFSLVLGIDSSAAHGIVKLNNTILNEYGIQLCLYVTGSTEGFPTEFDLRG  
QLSSNKGSDPAISLPDEETSLLDRCQDSPYTGSRVCDSLDVALMEAEDAMIARQSPSLV  
KQDELLSKLKLDTQSGTLSREEEKEEFVSTLKEICPGDLGDDDADALFSLFHREASTMGE  
LIWRQNDESDCVKILILGQLIAELENEAGTTEIIPSGCIIGELGLVNGDPRMSTVKCSSK  
EAILYSMSRTSFERLISTQPRRLARYIDLICVKYLALRVQHVSNIIFXNKMSPNLGTSGFS  
IK

>comp13495\_c0\_seq1; 380 1 958 LEN=958; translated  
XNSMTGETAWERPIQSSATVDNHNLDGQDQTFETSGVDSVAVALEEVPSIDDTLDALNLEF  
QVDSEGANSEEVAVTVGSKTEDDTPVLESVQSSEQSI SNQEHSEL PENWMSKLDSSSGK  
EYYNTSTMETSWERPSNSLEVELKIKDENSTTYEVTNDATTVDPEYTDTA EVTNEISIE  
SERIDTAAIVDETTILNNETI INNEG DWVETKDPSTGQPFYNEITGESSWDRPPEMHP  
VKTETSEDQVGRQREIEAEPTEVQEEAETVTEGAVEAQTKEAAIEAETKDPTLPENWTE  
VEDPNSGNIYFYNTL TEETR

>comp13495\_c0\_seq2; 1031 1 2410 LEN=2410; translated  
XNSMTGETAWERPIQSSATVDNHNLDGQDQTFETSGVDSVAVALEEVPSIDDTLDALNLEF  
QVDSEGANSEEVAVTVGSKTEDDTPVLESVQSSEQSI SNQEHSEL PENWMSKLDSSSGK  
EYYNTSTMETSWERPSNSLEVELKIKDENSTTYEVTNDATTVDPEYTDTA EVTNEISIE  
SERIDTAAIVDETTILNNETI INNEG DWVETKDPSTGQPFYNEITGESSWDRPPEMHP  
VKTETSEDQVGRQREIEAEPTEVQEEAETVTEGAVEAQTKEAAIEAETKDPTLPENWTE  
VEDPNSGNIYFYNTVTEETRWRDPTDGEGLAKESANIPIDDAQPELVMNTMNDTQK DSEH  
EELITPSDSKSYDALHPLPEHWIEAIDPSSGQTYHNTISGITSWERPTSNEISNIDDKD

PQEDELQTEPETPVQVEASSISLRDDGPESQVEPEGEDGGIVSGENSDVDGLPDGWIEAI  
DPSSGQSYFYHSESNTVSWERPTVEQDNSKVIITDNDKKEEVEAVEANQKSDVDSTAVHNN  
DIEPEVSAHGVDNVEDTKPLPNGWIESIDPTSQQVYYNSLTGDVSWERPSSMPEDKEVS  
ELGMDIAQEEEEKSEIEPEVSRSDNESNNLGDTELLDDGWIESFDDKTEQVYYNSISG  
QVSWERPISKMTSVDKHEDEAMDAKVSTLAESNSTEIEPKNSSASSSIKSASLNPKSEKE  
VQQENSDNHEDNNETDDKLPDGWKEMEDPTSGEVYYNAESGETSWEKPVLPKEASSVDEP  
AGEVPEVGNKAGDVNGSVGEVVPV

>comp13495\_c0\_seq3; 333 1 623 LEN=623; translated  
DTLPDGWEEMEDPTTGEVYYNTDSGETSWERPIEKGASDIGEPVGKILVEDKTLMDAN  
DVSPSEDVLSNGSKELNPSSGEGCGSNAESGETSRGSPFSGGESDDMLLQNNAEADGVA  
NLRETLPGEWEEIKDPSSGEIYYNAESGETSWEKPVLPNETNDADTVDEPVGEDALEESE  
EAEDVDDVSNKDALPEGWEEIEDPSNG

>comp13495\_c0\_seq4; 1096 1 2455 LEN=2455; translated  
XNSMTGETAWERPIQSSATVDNHNLDGQDTFETSGVDSVALEEVPSIDDTLDALNLEF  
QVDSEGANSEEVAVTVGSKTEDDTPVLESLSVQSSEQSI SNQEHSEL PENWMSKLDSSSGK  
EYYNTSTMETSWERPSNSLEVELKIKDENSTTYEVTNDATTVDPEYTDTA EVTNEISIE  
SERIDTAAIVDETTILNNETI INNEG DWVETKDPSTGQPFYNEITGESSWDRPPEMHP  
VKTETSEDQVGRQREIEAEPTEVQEEAETVTEGAVEAQTKPEAAIEAETKDPTLPENWTE  
VEDPNSGNIYFYNTVTEETRWRPTDGEGLAKESANIPIDDAQPELVMNTMNDTQK DSEH  
EELITPDSKSYDALHPLPEHWIEAIDPSSGQTYHYHTISGITSWERPTSNEISNIDDKD  
PQEDELQTEPETPVQVEASSISLRDDGPESQVEPEGEDGGIVSGENSDVDGLPDGWIEAI  
DPSSGQSYFYHSESNTVSWERPTVEQDNSKVIITDNDKKEEVEAVEANQKSDVDSTAVHNN  
DIEPEVSAHGVDNVEDTKPLPNGWIESIDPTSQQVYYNSLTGDVSWERPSSMPEDKEVS  
ELGMDIAQEEEEKSEIEPEVSRSDNESNNLGDTELLDDGWIESFDDKTEQVYYNSISG  
QVSWERPISKMTSVDKHEDEAMDAKVSTLAESNSTEIEPKNSSASSSIKSASLNPKSEKE  
VQQENSDNHEDNNETDDKLPDGWKEMEDPTSGEVYYNAESGETSWEKPTQLGAE EIDEP  
TTEASQTMSESKAEPTEVEVEDKEVMDTLPDGWEEMEDP

>comp13495\_c0\_seq5; 1633 1 3723 LEN=3795; translated  
EEAEDVTDVSNKDALPEGWEEMKDPSSGEIYYNAESGETCWEKPM SERTAEADGVDQP  
VGEDALEDMDIEEDDAALNAGDLLPDGWEEMLDSSSGDIYFNAESGETSWKRPT EADGA  
TVVEGDEPVAGEAQDSDGMDTLPHGWEEMEDPSSGEVYYNVMSGETKWERPMVQTETFS  
RDNKLENIDSSVNI GEIDDGDEPHSEKAADGSQFDLNGEGVEAEDSISVSGPLPEFWVEA  
NDPTSGKIYYNTLSQQVSWDRPREIEEPTTVLESKINGTVLRNDKSVDDVKEDGDCIES  
ENESTGSVLSPLPEGWVESTDPNSGETYYYNVKSEETSWKR PVLTSQSLDNNKSRNEVD  
AQSEHVVASNEGGVEAEESIENNF SNGNRKTGSTESDLPENWVKVDDSPNDVVNICDDWV  
DVQDPLTQNEKSDKVEDDGI GANESMHALPTGWVESTDPSSGKIFYWN ESTGETSWDRPD  
RNNSSSKNGDDDSRPTPIVEVGNVCDIESEKFKFGISGPLILCDERIVTEYIKTKAKSKD  
ILWQLIAIAARSKGRLRSYGVVDKSGPEAAIVQLLLNDPEYPSQKRKSKNDVVIEEKIG  
DEIEGKDSIVRVQDLLIRGDRENAIEEAIAIGDFATALLVASMCDADTYKVALQYARSK  
FRSDSPMYTTTMLFSGKMESPSKRQSNWGVKPEELRKNWKMHLAAIINNRTFGWDRIVL  
SLGDRLNEIGNITEAHFCYMVCGYPITSPTDEETRVLVGSSSHSVSQNKLLTRESLVAY  
ERTEAYEWAKRLGNPHAYFAAFQPFKLIYAMLLADNGELVQAKKFVESIQISLDRGRLTA  
SDISEVSMKEMFNDVAFEVAYCEIKQRLFSTDGPKSKYRDEVLSGG SLEVVT LKGHIDS  
SNDGLGRDMKLGKSVSVLHPGESQQQRSSHLNQLDETFTAKTNLMDRSDYSIGATDNDR  
STGLGIASKAEVNVTAAPPE SKAKDQSKFAKNPTATAEMTAKQKQPAEPVAETNAPGLK  
TQPQNPERPKAAPSTAPAVMTGKGKEKEKQLK KAPVSSGTPKKAPGSGSFGGMKSKLIK  
WLNPNAKECHLPENEEQPYFDKDLKRWVFPGD DPAELAKPAPPPMVIKKEEEVKKEEPK  
DAISSMAPPKSRFSAKKNPVLGGPPGGGMPPMMGGMMMPGASPSGMITPMGGGP GGA  
SGTPKFATFTPKPAVFTPKPADEASSKEDPAATTKGQSEE

>comp13495\_c0\_seq6; 1670 1 3804 LEN=3876; translated  
SWEKPVLPNETNEADAVDEHVCEDKLENKHEVKDGAVLNAEDALLEGWEEMKDPSSGEIYY  
YNAESGETCWEKPM SERTAEADGVDQPVGEDALEDMDEIEDDAALNAGDLLPDGWEEMLD  
SSSGDIYFNAESGETSWKRPT EADGATVVEGDEPVAGEAQDSDGMDTLPHGWEEMEDPS  
SGEVYYNVMSGETKWERPMVQTETFSRDNKLENIDSSVNI GEIDDGDEPHSEKAADGSQ  
FDLNGEGVEAEDSISVSGPLPEFWVEANDPTSGKIYYNTLSQQVSWDRPREIEEPTTVL  
ESKINGTVLRNDKSVDDVKEDGDCIESENESTGSVLSPLPEGWVESTDPNSGETYYYNVK  
SEETSWKR PVLTSQSLDNNKSRNEVDAQSEHVVASNEGGVEAEESIENNF SNGNRKTGS  
TESDLPENWVKVDDSPNDVVNICDDWVDVQDPLTQNEKSDKVEDDGI GANESMHALPTGW  
VESTDPSSGKIFYWN ESTGETSWDRPDRNNS SKNGDDDSRPTPIVEVGNVCDIESEKFK  
FGISGPLILCDERIVTEYIKTKAKSKDILWQLIAIAARSKGRLRSYGVVDKSGPEAAIV

QLLLNDPEYPSQKRKSKNDVVIIEEKIGDEIEGKDSIVRVQDLLIRGDRENAIEEAIAGD  
FATALLVASMCADATYKVALQYARSKFRSDSPMYTTTMLFSGKMESPSKRQSNWGWKVP  
EELRKNWKMHLAAIINNRTFGWDRIVLSLGDRLNEIGNITEAHFCYMVCGYPIITSPTDEE  
TRVALVGSSSHVSQNKLLLTRESLVAYERTEAYEWAKRLGNPHAYFAAFQPFKLIYAMLL  
ADNGELVQAKKFVESIQISLDRGRLTASDISEVSMKEMFDNDVAFEVAYCEIKQRLFSTD  
GPKSKYRDEVLSGGSLEVVTLKGHIDSSNDGLGRDMKLGKSVSVLHPGESQQQRSSHLNQ  
LDETFMTAKTNLMDRSDYSIGATDNDRSTGLGIASKAEVNVTAAPPESKAKDQSKFAKNP  
TATAEMTAKQKQQAEPVAETNAPGLKTQPQNPERPKAAPSTAPAVMTGKGKEKEKQKLNK  
KAPVSSGTPKKAPGSGSFGGMKSKLIKWLNPNNAKECHLPENEEQPYFDKDLKRWVFPGDD  
PAELAKPMAPPPMVIKKEEEVKKEEPKDAISSMMAPPKSRFSAKKNPVLGGPPGGMMMP  
MMGGMMMPGASPSGMITPMGGGPGGASGTPKFATFTPKPAVFTPKPADEASSKEDPAAT  
TKGQSEE

>comp13495\_c0\_seq7; 1013 174 2644 LEN=2644; translated  
MWSQFGTDGGPPPPPPQPGFQPGFQPPPTNNQQGGFHRPPPLQNEPARSFDESENFNDNS  
DDDDGGGLGMTVMNMTSAASMLFGAARPLQNVGSAFAPPPPPSEQQQPPPPPKPQLFAP  
PPAPAPIEQFASMLDEEDEDMTEVDMDAPPSSETAGDVFAFPPTPPVDAAGAGGTFKPP  
PSPAGGFRPPLGATAPAQRAPSPRPATPPLPPTNAAKDLFAKPPTPNRTAASTAPAFPPP  
APQTPPNVFAFPPTPNSSSRTPAPVFAQTTPGSSSRSSQGPPVFPLASVAPGTASHP  
PPAFGASAPATPNPPPPETLFSKPPPSKPSTPVLPHASAAARTPPTPDRPALFSQPPPSKP  
PTPVAPPKAVAVFAHPPPQTPTPPPREALFSQPPPTPVDVPTESASRSVSNTAKSTSDN  
ALQTIISGCSNVMSNSKSVEGTVTGAAAAQSLHRITPPASPSPSIGSNQAKKTIEQSAPEV  
ASSSASKKAPSKTKIVPVAASPPNIRKRLRGPPPLSSSLTSGRTTRSFKLPTPRKSRS  
RTPVRNPRANDSNQTPTRNLPSPSANKKSGIVSPTMGTTTGRPPATAAAKTLPISSMGDA  
KTISNDTVDTTASLSIPPMDHSAKRKETEAAATNAVSAVPETSTGGSDVTEEAPTTAKEE  
PEVEVETSETIPDDAGPEVVPPTDERDPTAHGNIDNKLPEGWSEATDPATQKIYYNSMT  
GETAWERPTQSSTTVDENTLGDGQETLEKSAEAAAGAEETNAEFPAVDKALSTPAADFNAE  
NPPEYTTATMNATEEPAEGMGNNGLEPEGWSEATDPTTQKIYYX

>comp13495\_c0\_seq9; 363 1 554 LEN=554; translated  
KNGNEAEDVNDVDFSNVEDTLPDGWEAMEDPSSQEVYYYNAKSGETSWERPVIQEAGSVDET  
VGEVPEVNGNETGDVNGSVGEVPEVNGNEAEDINDDSNAEYALPDGWEEMEDPSSGKVYY  
YNAESGETSWEKPVLNENETDADTVDEPVGEDALEESEEAEDVDDVSNAKDALPEGWEEIE  
DPSNG

>comp13495\_c0\_seq12; 545 1 819 LEN=819; translated  
XEVYYYNAESGETSWEKPTQKDTKETDTVDEPVGGDALGDKVEAEEVDLTLSEEDTLPEG  
WEEMRDPSSGEVYYYNAESGETSWEMPILEKAGNPDETVSDAPVETGNEAEDVNDISNVE  
DVLDPDGWEEMEDPSSGEVYYYNAESGETSWEKPILNETYDADAVDEPVVEDSVEDEYEIE  
ETGPSLSKEDALPEGWEEMKDPSSGEIYYNAESGETSWEKPVLNENETDADTVDEPVGED  
ALEESEEAEDVDDVSNAKDALPEGWEEIEDPSNG

>comp13495\_c0\_seq13; 401 1 568 LEN=568; translated  
XEVYYYNAESGETSWEKPTQKDTKETDTVDEPVGGDALGDKVEAEEVDLTLSEEDTLPEG  
WEEMRDPSSGEVYYYNAESGETSWEMPILEKAGNPDETVSDAPVETGNEAEDVNDISNVE  
DVLDPDGWEEMEDPSSGEVYYYNAESGETSWEKPVVEEATSVDEPIGEDSAEKEEVEGAL  
QEGWEAMEDP

>comp13496\_c0\_seq1; 506 467 1963 LEN=2066; translated  
MSSTNNSSTIEHTQSQENSPFLVRLQFMDNIQELRSFCRKQYKIGDRIDFLRSDQGRWEK  
SSSSKMETTDRSLYGNTEENLGMVRESWSQKPRWVVDLFSASEASTFVALRESRVWNMKDC  
QQYQIRYIPKKKQQKQGTSKSRKSDKENKSDSSASKSASSFLKDNNDNNSRNDSHHGCG  
KEKRLQAQELINFFMSVIRSKIVANREELGKNGDDLVMSSQRGDIEQVRVDWFNRGDGVL  
DVAGGCGHVSMLGMNGILSTVVDARSSVGKLPGRDRKIWKRRMLMNKPTRQRRARQVPNG  
ELPKPITLVGFYEYCKPVVEEPLAVPFKSQQAWFGSKPDGYDASFRHPEEEDIPLMIATAI  
PNHDIEDHQRCLENISSNRLDGDFTSTQKIEGSMSSQPPSPSMTLRRQASALVALHPD  
EATGEIVQQAVKHRIPIFVVVPCCFARLFPHRKTKNRGRGVSTYEDLLDFLQEQDPSIQRT  
KLSFGGKNHALWSTFPDG

>comp13497\_c0\_seq1; 229 234 719 LEN=855; translated  
MIKTALERDYSSDAESKPRYAMESALESILTNTDWELEQFTSCQKSGGARHLECIVIGWQ  
ESWSQALQYAYTKNSPWVTDSDRIIEVAPGDEIDEAYRSRIPIVEEQLIAGAIRLAATL  
EDIFGHKEDMNGCNGSKPGMVQQTSMRMEGIRTWSYISLLRY

>comp13497\_c0\_seq2; 213 340 1002 LEN=1731; translated  
MNSNTVLFRAFSSSTASRAAPTRRHGNNGRHPNNLHDPDNKAVAPGSSATPMRLFSGRNP  
ADGEDGPGAGLPALGPAGTTRDDGGQNDTGSRCSDRSAHIDPATMPESHKNNTVATFVNP

KFSLQYTCNICETKNRVLVSRQAYREGMVAVCKGKCNKHWIADNLDPTLKETPNIEDYL  
ESKGMGNTIHRVSKIEIYEIERVWGLKEGVLTDDDEGNPMLE  
>comp13497\_c0\_seq3; 414 167 1453 LEN=1589; translated  
MLFRAFWTCLLLVIGVDIVTSWGEDGHIIIANLAWRRLSTQVQVQVSTILNIANATQVE  
DLGSPMAVVANWADHVRPFLPWTGPMHFIDVRDDLIIEGGCHFHYESLRTGGNDSSATS  
DLCEFYHRDCVNEICVAGAILNYSTQLIEGQQQKLGTKDEQNFRISSSSRHLRQGFETE  
PVTIDYSMKYMRQALMFLIHFVGDHQPPLHVSRTSDRGGNDIPIKYNPINENTTSYAGEH  
NQRKNLIEQYSTTHYHAHNHLSVWDTAMIKTALERDYSSDAESKPRYAMESALESILT  
NHTDWLEQFTSCQKGSARGHLECVIGWGQESWSQALQYAYTKNSPWVTDSDRIIEVAP  
GDEIDEAAYRSRIPIVEEQLIAGAIRLAATLEDIFGHKEDMNGCNGSKPGMVQQT  
SRMEGIRTSYISLLRY  
>comp13497\_c0\_seq4; 213 340 1002 LEN=1514; translated  
MNSNTVLFRAFSSSTASRAAPTRRHGNGRHPNNLHDPDNKAVAPGSSATPMRLFSGRNP  
ADGEDGPGAGLPALGPAGTTRDDGGQNDTGSRCSDRSAHIDPATMPESHKNNTVATFVNP  
KFSLQYTCNICETKNRVLVSRQAYREGMVAVCKGKCNKHWIADNLDPTLKETPNIEDYL  
ESKGMGNTIHRVSKIEIYEIERVWGLKEGVLTDDDEGNPMLE  
>comp13497\_c0\_seq5; 213 340 1002 LEN=1792; translated  
MNSNTVLFRAFSSSTASRAAPTRRHGNGRHPNNLHDPDNKAVAPGSSATPMRLFSGRNP  
ADGEDGPGAGLPALGPAGTTRDDGGQNDTGSRCSDRSAHIDPATMPESHKNNTVATFVNP  
KFSLQYTCNICETKNRVLVSRQAYREGMVAVCKGKCNKHWIADNLDPTLKETPNIEDYL  
ESKGMGNTIHRVSKIEIYEIERVWGLKEGVLTDDDEGNPMLE  
>comp13497\_c0\_seq6; 393 465 1556 LEN=1692; translated  
MAVVANWADHVRPFLPWTGPMHFIDVRDDLIIEGGCHFHYESLRTGGNDSSATS  
DLCEFYHRDCVNEICVAGAILNYSTQLIEGQQQKLGTKDEQNFRISSSSRHLRQGFETE  
PVTIDYSMKYMRQALMFLIHFVGDHQPPLHVSRTSDRGGNDIPIKYNPINENTTSYAGEH  
NQRKNLIEQYSTTHYHAHNHLSVWDTAMIKTALERDYSSDAESKPRYAMESALESILT  
NHTDWLEQFTSCQKGSARGHLECVIGWGQESWSQALQYAYTKNSPWVTDSDRIIEVAP  
GDEIDEAAYRSRIPIVEEQLIAGAIRLAATLEDIFGHKEDMNGCNGSKPGMVQQT  
SRMEGIRTSYISLLRY  
>comp13497\_c0\_seq7; 393 306 1397 LEN=1533; translated  
MAVVANWADHVRPFLPWTGPMHFIDVRDDLIIEGGCHFHYESLRTGGNDSSATS  
DLCEFYHRDCVNEICVAGAILNYSTQLIEGQQQKLGTKDEQNFRISSSSRHLRQGFETE  
PVTIDYSMKYMRQALMFLIHFVGDHQPPLHVSRTSDRGGNDIPIKYNPINENTTSYAGEH  
NQRKNLIEQYSTTHYHAHNHLSVWDTAMIKTALERDYSSDAESKPRYAMESALESILT  
NHTDWLEQFTSCQKGSARGHLECVIGWGQESWSQALQYAYTKNSPWVTDSDRIIEVAP  
GDEIDEAAYRSRIPIVEEQLIAGAIRLAATLEDIFGHKEDMNGCNGSKPGMVQQT  
SRMEGIRTSYISLLRY  
>comp13497\_c0\_seq8; 213 340 1002 LEN=1502; translated  
MNSNTVLFRAFSSSTASRAAPTRRHGNGRHPNNLHDPDNKAVAPGSSATPMRLFSGRNP  
ADGEDGPGAGLPALGPAGTTRDDGGQNDTGSRCSDRSAHIDPATMPESHKNNTVATFVNP  
KFSLQYTCNICETKNRVLVSRQAYREGMVAVCKGKCNKHWIADNLDPTLKETPNIEDYL  
ESKGMGNTIHRVSKIEIYEIERVWGLKEGVLTDDDEGNPMLE  
>comp13497\_c0\_seq9; 412 1732 3321 LEN=3629; translated  
MEKKGDPGIPDDEKKVVEKERDTAADLDKEKEDTESVSSTKPVNEPVIEDKTHKSIQST  
NSGNATNQPAGAFVNNPLFRSDNERSSTDSTPSVLPLASAVASDQAVVTPVAVRTERIFV  
ATAVDFDEEEQEQEKQRTKSSAWGTWWKYCVAAIVLLLITGIIIGVVAFQRNNKSEQSERQ  
EEAPKSDHEVVAFRNRNSILEIVSPLSGAEAFDPAGPGASADRIAALWLVETDPARIPVP  
GANETDRVYDLRQRYVLALLYFALTDGQWDRFNFLSGSDACDWNTIRRQEEGVFRES  
D TDVIRGVVVCNADGKVSIIKSYWNRMSGTIPHELFFFSDSLEELNLGGGSI  
SGSIPTSFSQLKLDLWLNCLTGLSPDTRLLSLYVNNNDRLVGLNQCYNATSGSRKDG  
VATLADCDADPAAPGGGSIIECDCCFCDPGTCTDLVAGASWPSYFLNDFSPGGGLE  
ILAKPCVTEAQTDFRSEPCVVNVSTDLVQEPFQGGQCTKNCTEPGAVPSVDLDRFR  
>comp13497\_c0\_seq11; 350 1732 3515 LEN=3823; translated  
MEKKGDPGIPDDEKKVVEKERDTAADLDKEKEDTESVSSTKPVNEPVIEDKTHKSIQST  
NSGNATNQPAGAFVNNPLFRSDNERSSTDSTPSVLPLASAVASDQAVVTPVAVRTERIFV  
ATAVDFDEEEQEQEKQRTKSSAWGTWWKYCVAAIVLLLITGIIIGVVAFQRNNKSEQSERQ  
EEAPKSDHEVVAFRNRNSILEIVSPLSGAEAFDPAGPGASADRIAALWLVETDPARIPVP  
GANETDRVYDLRQRYVLALLYFALTDGQWDRFNFLSGSDACDWNTIRRQEEGVFRES  
D TDVIRGVVVCNADGKVSIIKSKSEELXLTSLVGTVMVRSFPNEHDDLVLQALDGGGDFQ  
TNSYSLTVYRNRFDLVILAHNLLQIGTGCLERFLXELFFFSDSLEELNLGGGSI  
SGSIPT

SFSQLLKLDSLWLNNDNCLTGLSLPDTTRLLSLYVVNNNDRLVGLSLNQYCNATSGSRKDGVG  
ATLADCDADPAAPGGGSI EDCCFCCDPGTYTCTDLVAGASWPSYFLNDFSPGGGLEILA  
KPCVTEAQTDFRSECPVNVSTDLVQEPFQOCTKNCTEPGAVPSVDLDRFR  
>comp13498\_c0\_seq1; 536 455 1681 LEN=2113; translated  
MARIDEMEKKI HGRQRDAQSLFATDKADEARFVGLHEPIRLAKGNKIDGAQWTGVVTGIA  
LSMLESKNVDVAVCIANS DSSGNGSNFASPEPILARTTADVLKGRGVKPALAPSLRVLDQ  
IQNDPTIRRLFCGVCQAFRAIQSDLDLEEVYVLTNCADNSPTPEARNFISEGVQ  
IDSNIISDVQGYEFMQDFQVHVKSKEAYVTKPYFTLPGTIAEASIAKSCRACFDYTNALA  
DVVVG YMGAPLDGSGQAARMDKSSQTLTIRNERGAEMVDIALKASRLNLGERAVGDGSHE  
AMASATVASDAIVSAMVGNVPEKGMGWLQIMAFGMQRLGPKGINFAKYSIDYHILRN  
YLFV LKTKGDLESAMMALPQNARDIVKYYHENDKEFASLVSKIQKADE  
>comp13499\_c0\_seq1; 860 80 2419 LEN=2711; translated  
MPSCPSGLCKDPIQPDGRAKWYPENPSNLPDLKVHNSLTDDLDFTPRVGRTVTVWYTCG  
PTVYDSCHMGHARAYLTFDILRRIMEDYFHYD LLYQVNI TDVDDKIILRARQNKLL EDYT  
KKSLEAKDLQAVEAYVETAMAGFRQKLEKKVSELKEPLPEGTPSKQIEKREEALKEAEFK  
ESQFC EVELAVKSVKEKEGRTIEDLIAASRDALAAQLDKEHGSSVTDRKIYEDHARKFER  
EFFEDMAALGVREPDVVRVTEYVPQIVDFIQKIIDNGCAYESKGSVYFNTNDFKSVGHE  
YRKLKPGVDTTAEEMAEGEGALASGDTEKKHPNDFALWKASKPGEPSWESPWGPGRPGWH  
IECSVMASDVIGDNIDIHGGGADLMFP HHDNEMAQSEAFHQCCQWVNYFLHAGHLHIKGL  
KMSKSLKNFITIRQALQEHTPRQLRLMFLMQSWDKPMNYS DQTVDDAKAKEKYFKNFFGS  
VKSVL RNDVFVKEFQGYTTADRTLMTILHDTQAKVHAALKDNFN TSAVIQYLVELVQECNK  
YLNPETKPKNLMVKKVAIYLTKILRVLGVVQGS DIIGFGESGTEGGASKEDTISPFVDAF  
VDFREQVRVTAKSKGSPGDFLKHCDIRDETLANLGIRIEDSADKSIWKLDDPKVIRKEI  
EEKRRMALEVAQKLVAKFDRLTTDLKSKQASVPPAELFKVGENAEKWGT YDDDGKPLT  
TKDGKELSKSQKSLKKE SNHEKAHQKLLKAAGEDGIEKYIAGIEQQLAELKIQLESN  
>comp13500\_c0\_seq1; 742 1 1488 LEN=1500; translated  
GHDIYEMSADVGNSSGLAEDEIHAMIADRLMAKLSRDFGTADGIQTDLVARGV FVHDGIK  
EWRWDGVPYGD FSERRGHDRRGNPGKTEGSRSSYDIAYIKSSF SANAEGVVD EMIKLV  
ERLRFKLD RNFDKADAI REGLRTRY NVLIDDR LKMWSVGGDFGEEHNKRRELAHQFATRG  
YIKSKSSLSVSPGDETYIQEQIDERFLAKRDRDFRTADDIRQHLL EDDYDVSINDKLMWS  
VGGAFDE DGGNNKPRGVYSRRGGGNLSDEAVEEIQGLLAERYTHKKNRDFDAADAI RDDL  
EARYDVRIDDRSSEWRVDTNEYFAAYTGSLSDADIEYVSSKLRERFQCKRDRDYDAADAI  
RDELGDSFGVSVDDRTKEWKVETVQEDQHSMPYNKQOEDDGFDFGQDFELSVDDFEEDDE  
EEGDNDDEADIEIVSEEEDEEEIEEAVEE DEESSL TEEELSKLTVVILKEKLRDAGLPV  
SGKKSELVARLLAS  
>comp13501\_c0\_seq1; 611 33 1871 LEN=2004; translated  
MKSC LSSFI FVVLCTRYETHALGVAKPKKVVVIGGGWAGFSAADAL SEIQQSDGEGGAS  
APAFQVEILDASPRGPGLAAGWRTPKLNRPVEAGLHGF WREYKNTFAA IERIGLELDDV  
LTPFTPSILVSKSGKVALSPVLGDGYDTQKDEGEKKDNSIFGGSLPTDPESFVTSKLAEL  
LPPPLDLALLSEFEGDNPLKVVDRLSGIGALGAWADFEQEDAKSWERYDKISAENLFKSV  
AGVTPVLYDELVSPLLHVLPMP TPGYDCSAAAALSCLHVFALQTRGAFDVRWCRGSI TEKI  
FDPWSQKLQKRGVSLRGGAKVTGIVALEDN DTDAIATNPTFRITLNDEDNTLDADC VVF  
AIGGTS LKRLLPACPLAKIPQTKNWEKFRGVTCVAVRLFFEREPILLKEAMKDSPVVVC  
GAAIGEIP ELSETGF CIYDLERLQDSNDVVS AFEIDFFRADPLTNLADEEVVRITLKA VT  
AALNISP I HESAVADLSVVRARDAVSHFCVGSASWSPDVK LSEGMYICGDWIDRTGHASW  
STEKSVVTGIQAASALASDFNTKTGISVIPAAPDTPQLSALRQFSRTVTRGRIPPPFEDIK  
PQAPWTLARRFF  
>comp13502\_c0\_seq1; 715 133 1788 LEN=2094; translated  
MAVGPSIEPSEVGVSGLIWLF FSYGALFYAANLIGEGSEL LLLVPSMAGLVGSVVLPLL  
GAVPDAAILFSGLSIEMAQESLSVGIGALAGSTIMLLTIPWAF TVFVGRVNIEN GKPT  
YWGSPKLT PGKTIEETLDHTGVVVSSEIRRGFLMAIT TPIPYFLIQFPALFMHGSTG DIA  
KGEHWSILALVVCV FGLVYYMRLQLEF SERGEADRR IAI AKKTLQAGKMSLSGVLKSTI  
KSI ESSEHPTSNGADYGSVGLRQPSPESTRILKDL LKDAFSAYDDDKNGLLEKKEIRVFL  
KDFHET FDEDEIDKLLQKIDSNNDKVICLDEFVVL CYHLI IDESDHNGNHQVNHAFKRSV  
QNAITSVDSSEGELEVEEIPEDFC DLSPEEQTAIKFRAF KMLAAGTLMVIYFSDPMVD  
VMQEIAVKANIP SFYVSFVLAPLASNSSEVVASMFFGAKKTRKSMTVALSALEGAACMNN  
TFCLSVFMGLIYFRGLAWRYTAETASIVIVQFIMAYFVQKKVMTIRVALYV LLLFPSSLV  
FVAFL EHLGFD  
>comp13503\_c0\_seq2; 419 1 1508 LEN=1508; translated  
NSEPATKRTIPANNAEAEFEETKDNLR FQDPYVDELIEEEDVVDDEDMEDEEDGEVDM

KPGASSGGRKMNVGGDLGDDVEVIQSWHPLMGHRDGDNDDEELELEMDPSAYKMYQTLTPE  
WPSLSFDLLRDNLDGDRQRFPHSLQAVFGTQADNPAANQVTVLKLSDLSKMAQDRDEEED  
ILGDPYDKEDNGDSDSDEDDQDLDLDPILHEHYSLEPHYGGVNRRLRAMPQNQNVVATWSDV  
GKVNLYDIGELRERFEVSEGRGRGPASKQNNNTNGPFFTYNGHSTEGFAIDWSRTRKKGTLA  
TGDNDGNIHLWSPHEDGTSYTVTPSYETPGVSIEDLQWSPSEETVVCAAESNGHAAIYDT  
RAPNRAMLRPNLHPNTDINVLSWNKLVSNLLATGADDGTL CVWDLRHFHGGKDPKPLAR  
FTCHRTPVTSVEWHPTDESMIVMSDEVGVYIYDLSVEEDIATQEKEKQTDMEQLVADIP  
PQLLFCHSGSKQFKECHWHPQIS

>comp13504\_c0\_seq1; 261 150 1073 LEN=1203; translated  
MVMIQVLLSMLFGTAAGNHGTDRTRSSRRHGTAGCQAAVTDASVSPDQKAGILVRWLR  
PARGDRWEENTCGSERGSERRRRRTTAGTTGTTTPGGYRPGPGDTCVRYDCYVVGVPVPAE  
RTGGPFVRHRRARTWVDGNFPGRWSGSEGSSEGRSTTTTETRRPLVLEATAPVVPALS  
FVVGAGEVLRGLEVAVQRMEEGAACEVVVPWAYGYVPGPLPIPPFSDLVLVVVLEGIE  
PTDQNRERHEEGHARPREGPAALVAVVRDAVAVAAVAGLLVVGFSALLQRYEDTVVGIL  
RAIADEL

>comp13504\_c0\_seq2; 297 1 1008 LEN=1057; translated  
TTATMGSKHESKRKNTGTDKHPIDRLMVLVAALFGFRHLLLLAVSFAAFDRAYRTDVLQA  
NERKALLLRGGATGAAPSSSTAQN PALRPPGLLPDREAWHEMTMAEMDENLGCYDRGLP  
IHGPEIWTGMREAYVSVVGRHRSTLASVGRDAFSTGLLVPFVRYSDGRGRGIFAKEAVD  
KGRVLYDFSQSAQFETGTDFAEFLRILAPELACDVLLWSYAQDLGTETGNQTRSERRETT  
KGARLRIVTDLPGSFCNDGGYEGGNTGWMQDQERGGASEGGRHPPHVAVLRREEASSGSG  
FVRSAPLVALKDIKGEELSCVYDQFNEGLGLMID

>comp13505\_c0\_seq1; 199 1 1075 LEN=1657; translated  
XNATEPLYTRYQPRGCMASARNFKATKNTTACLRAADRSRFRPYAFRWREDGPLSNLKP  
YLSLIPRDRAAVPGESHGRSEDSTERNHQHVCFVGSSSHRTLRKCESLVRRTKERQHR  
QEQQQQQGPRSPPLDLKCSFVDVKFPFQILRGCPLRLSPEECRRKVPPAATNPNQGP  
SEQASAWATEHVGNRKCTHVVLGFFQWPFSLYQTEPKLTFRRWKQDMVDLVDADRASVA  
SRHPGESGLFPGAIVLRSVHANGWKEHVSDCPPTDFRTPYNARVCNRMLGEIAESFGAGG  
GPNGNDTAAEVFFVDTGFVTDVWDS AEDWSHHGGEVGTQEI KYLLYEMFKKDYGFAA

>comp13506\_c0\_seq1; 320 1 1075 LEN=1327; translated  
XNYNNYNNDGNNYNNDYNGGRRLNDDAWSAYNSYNNYGSDDAAQGGDDYHNYQYNQNS  
FYNYGNYGDQNNQNNQNNQNDQGCDEYACSNYQSACQDYSNLNNDLSDYFGCAEFN  
IGNSAGYLGPHCASDGKTI SMGIFSDDESCNDYTADLSEVSSYMSVNENGLSYSDNCIS  
CLASDGYTLEIGNNDDGYNAVSDICGTYGDSAKCNRYMGNDDYASSNQESQEDIVCNF  
IENLLTNSYDEFGEIVLREEGWKTYIPNAETIGEMAQWQKFALAI SILSTIGMFTYACYL  
YREVKRRRYTWYPRGRKGYSTGPGVDPTAISGRMHSGIIQGRSQSSGNFEMKHGGLLS

>comp13506\_c0\_seq3; 240 1 1185 LEN=1437; translated  
XNYNNYNNDGNNYNNDYNGGRRLNDDAWSAYNSYNNYGSDDAAQGGDDYHNYQYNQNS  
FYNYGNYGDQNNQNNQNNQNDQGCDEYACSNYQSACQDYSNLNNDLSDYFGCAEFN  
IGNSAGYLGPHCASDGKTI SMGIFSDDESCNDYTADLSEVSSYMSVNENGLSYSDNCIS  
CLASDGYTLEIGNNDDGYNAVSDICGTYGDSAKCNRYMGNDDYRYEKIFAVDNKDFTC  
LNPPAVTPFDPLTNLSNSSSLQSSNQESQEDIVCNF IENLLTNSYDEFGEIVLREEGWK  
YIPNAETIGEMAQWQKFALAI SILSTIGMFTYACYLYREVKRRRYTWYPRGRKGYSTGPG  
VDPTAISGRMHSGIIQGRSQSSGNFEMKHGGLLS

>comp13506\_c0\_seq4; 1064 222 3956 LEN=4188; translated  
MSLNRRAKSKGARLGDIGDVTSPQGVIASSASSIPSRVKDMFGRKRKPATPIAMPKRHQ  
ERQSPPSLRQKRPRLSHRNDDGPLARAQKIQDEQSGYNRNNFSKRRDKFRRSTSQSESP  
LVTSSRPPSSMESRTQSRNKNFTYQYPQITVDLCEENDSETSEEGNKNKKASNETSCT  
PRFSSPSPSRQRLQSPCSLAKGNSAPRESKTKYRSGRSR IREHTEKERIKQPPGCPAY  
PTTRCSEPVVSTPTKEGAMDDGTDIVSQAGFAVRSLSQLIDLQGGQPEEMVHDCHSKQNG  
RKPLSLNGTGDNGRAAKKQSI CKTINTQNTTEGGKEGSSDFHVESSTDEREKPIPRKRL  
PPKNTSFPMAQMQIPELKKKIMHRQKXHRGRQSSTMKSYEDIDDTNEVVHDQEDGGCGR  
SQTRWIDNMNDVVKSAEQSDAGDFRRV IPRSTRASNCCADSF LDCNTTNSFNSLNLVK  
ANNKKRAQKPNRKTAKKIVPGAALQKERAQDREGDSQQRHWRDKGYQDES AVNWNPTAG  
DYYKTATHRKRTRSDTARQRRQYGALSGASVDASMDPSPSAGAFSDTGGRAFIRRSKRKK  
QKTPETIDIVSSEDDPSVTSKEEPRIVKLPKRLVVDQNKILRHEDVKPFVRINTEK  
LQLTISFFNSKDRSKGNQEMII EWSDVEEMTYFYTDGMNVDDIDLNFVSLRCDARFVKG  
TQRSENVSLTLEFQNDQHQGFIDSVVESTSDVSASPGKIHQQQPLDAQPIAAPLIED  
SKKQYNLRNRVAPHKTDSTAGRKSDEILLVYPFCAEKKKIEAAKDLNELAWRAAPESE  
ILDTAEQSKSHYIEIRVEDYEKLNKEWLNDSLVDLWMQWISRDISCKQSSNVHFFTSHF



YTTLASEGAEGVKSWTARKQINIFDKRLIFIPINKSLHWSLCVVVNP GAI I PAVDIDDAN  
DRPLPCILFFDSDLIHRKAKFHKDIMKWLNYEWKRVKNETQEPFNKSTCKIYDPQVPRQS  
NGWDCGVFVCRYAFAMFQLRAQKFSAREAGIDELDQATSPRARKAFRSRIFSDLVTRGDS  
FRFDGSDIKRIRSEFQTLIRNLEPLYKEAKVDKIRAEREKKSRRRELRRKEKQKTTAPSN  
PKDSSRESANDSSSDAKENHLSDEEKTTKKTEGPNVVKSELVYGTVLPKSGKHLFIDDTA  
AEPKDESESEASSIPKRSTKIDGEGTQTSKAENEAESESESDVVII  
>comp13506\_c0\_seq5; 742 1 2268 LEN=2500; translated  
XVGWLLPWFQTTQSKAADTTIQHDCFPFSVPAXIVVDHLDES AVNWNPTAGDYK TATH  
RKTRSDTARQRRQYGALSGASVDASMDPSPSAGAFSDTGGRAFIRRSKRNNKQKTPETID  
IVSSESEDDPSVTSKEEPRIVKLPKRLVVDQNKILRHEDVKPFVVRINTEKLQLTISFF  
NSKDRSKGNQEMIIEWSDVEEMTYFYTDGMNVDDIDLENFVSLRCDARFVKGTQRSERNV  
SLTLEFQNDQQHQGFIDSVVESTDSVDSASPGKIHQGGPLDAQPIAAPLIEDSKKQYNLR  
NRVAPHKTDSFTAGRKSDEILLVYPFCAEKKKIEAAAKDLNELAWRAAPESEILD TAEQS  
KSHYIEIRVEDYEKLN SKEWLNDSLVDLWMQWISRDISCKQSSNVHFFTTSHFYTTLASEG  
AEGVKSWTARKQINIFDKRLIFIPINKSLHWSLCVVVNP GAI I PAVDIDDAN DRPLPCIL  
FFDSDLIHRKAKFHKDIMKWLNYEWKRVKNETQEPFNKSTCKIYDPQVPRQSNGWDCGVF  
VCRYAFAMFQLRAQKFSAREAGIDELDQATSPRARKAFRSRIFSDLVTRGDSFRFDGSDI  
KRIRSEFQTLIRNLEPLYKEAKVDKIRAEREKKSRRRELRRKEKQKTTAPSNPKDSSRES  
ANDSSSDAKENHLSDEEKTTKKTEGPNVVKSELVYGTVLPKSGKHLFIDDTAAEPKDES  
EASSIPKRSTKIDGEGTQTSKAENEAESESESDVVII  
>comp13507\_c0\_seq1; 478 60 1940 LEN=2408; translated  
MKKPTFIILASLYLSVANAAQDGSSPLRGNAQNRHLLQDDAECVLYLKDI EYEGHREGS  
IWTCEFSRKEAETFGGQEI MAIEGLSKEIIE SMNAVSGESILKTKGAFVEHFLGSHQVKM  
MIPRQAAFGEIPMSENDPRKHRQPIRRNLAGSRPGTLR TLVVRVIDGSGTEPTANAARLR  
DDIFEDRVSLKTQYAACSKDQAIIEPAAEGNGGIVDKISTRVTDNISNIQFEMENEARQ  
KAEQLYGGNGLQSKYDLVMFCMPPGTGSWLAAYINRWDSFYNDEWCQSVSAQMHEVGH  
NLGLGHS GTDGNPYGDES GMMGYSYFEDDGPEKCFNAAKNYQLRWYERQSKSV DPLTMGD  
AEKFVFN VDDYKTS SNTGDKLITLRLKQYGD TFRGSDYF IGYNRASGPNRGVNEEADRV  
TIYRKESGGEYGYGESTRVAALAQGQNYRISNFKNSGTSVYIYVMSISNDQTDASVILSR  
GELVTSLEPPVPSPT EAPGCADANNWTFRGRPNKDCKWVAKGPALTTFKRCNKLDRNTR  
VYDQCKETCGDVGLGSCAKTITCEDDLSFRFENNN SKGCENWVVKSKNKRQAKTRCNKKV  
GNKGFRVYDYCNRTC GMVGLGSCDQF  
>comp13507\_c0\_seq2; 405 60 2054 LEN=2522; translated  
MKKPTFIILASLYLSVANAAQDGSSPLRGNAQNRHLLQDDAECVLYLKDI EYEGHREGS  
IWTCEFSRKEAETFGGQEI MAIEGLSKEIIE SMNAVSGESILKTKGAFVEHFLGSHQVKM  
MIPRQAAFGEIPMSENDPRKHRQPIRRNLAGSRPGTLR TLVVRVIDGSGTEPTANAARLR  
DDIFEDRVSLKTQYAACSKDQAIIEPAAEGNGGIVDKISTRVTDNISNIQFEMENEARQ  
KAEQLYGGNGLQSKYDLVMFCMPPGTGSWLAAYINRWDSFYNDEWCQSVSAQMHGXVE  
QKHTNMRSSI FRFKFIIAII SFLSLTF SFIDSPPEVGHNLGLGHS GTDGNPYGDES GMMG  
YSYFEDDGPEKCFNAAKNYQLRWYERQSKSV DPLTMGDAEKVFN VDDYKTS SNTGDKL  
ITLRLKQYGD TFRGSDYF IGYNRASGPNRGVNEEADRV TIYRKESGGEYGYGESTRVAAL  
AQGQNYRISNFKNSGTSVYIYVMSISNDQTDASVILSRGELVTSLEPPVPSPT EAPGCA  
DANNWTFRGRPNKDCKWVAKGPALTTFKRCNKLDRNTRVYDQCKETCGDVGLGSCAKTIT  
CEDDLSFRFENNN SKGCENWVVKSKNKRQAKTRCNKKVGNKGFRVYDYCNRTC GMVGLG  
SCDQF  
>comp13508\_c0\_seq1; 581 95 2093 LEN=2614; translated  
MPLSPPAAHRRVTFSLNVTLGYGADNKTEDALNRACSKSAFPLSLNEMASSFFSGTSPAK  
AASSSSLLPSISSTLGLKHDTVGDTC SLGSDHDRFFVASASPSSGSSFWIDPPSSGNFA  
QDLLPKIHPTALSGYKIRGIVLTSIAADNAPAEMLLLENSKGM SIPDNVLRPTSGSIIAG  
DPDHGVLKLLPMTTIEFSQEGDDSEHNAIMGQALGGANTSDDSERGCSYVSALSSLQTVP  
PQIPACAVCIHRIDP IRLGLPAPSVHQLCNKYCQSPSLKHNSCGSEDEACHKQRL LHKWS  
APARCKACQVIHFWKYDDD IRVEDEEGRXGILQGMFHAQDTLGLGDFVLQCDDMSSSPL  
KIPCLSIDFVFPKTALPVDLWVAEDTVNKHSHFAHF EKTRHPYSLELATLRIWDYCHGDS  
GGFVHRADLLECPSSPPLLYPWLTLGLNMNDSNASRST DGFHNQNTD GSSYNTSQNAIL  
ANGPEKSSKVTMIGEEYEALLQSALEEQAQHYDAEITRLQAEHTSCLVDKNSLSPEETK  
EIEALKIEIKSSRDKIGQVSKELVEAQAE EAGLREVSQQLLSEQQEANELLKKIQEEHRR  
EKEEGERKVQDLEQQIADLDANLRMRQQFSQNI ELCNAQIFGTTAAPERKQSASRKGKKK  
GRFFRK  
>comp13508\_c0\_seq2; 676 95 2128 LEN=2649; translated  
MPLSPPAAHRRVTFSLNVTLGYGADNKTEDALNRACSKSAFPLSLNEMASSFFSGTSPAK

AASSSSSLLPSSISSTLGLKHDTVGDTC SLGSDHDRFFVASASHVRLSVNPAEKFWKASTS  
HMVLA FVPPKMISSTLETHFS PKRLASGSSFWIDPPSSGNFAQDLLPKIHPTALSGYKIR  
GIVLTSIAADNAPAEMLLLENSKGMSIPDNVLRPTSGSIIAGDPDHGVLKLLPMTTIEFS  
QEGDDSEHNAIMGQALGGANTSDDSERGCSYVSALSSLQTVPPQIPACAVCIHRIDPIRL  
GLPAPSVHQLCNKYCQSPSLKHNSCGSEDEACHKQRL LHKWSAPARCKACQVIHHFWKYD  
DDIRVEDEEGREVF CRECSMHKTLWVCLTCGFVGCGRYSNKHSFAHF EKTRHPYSLELAT  
LRIWDYCHGDSGGFVHRADLLECPSSPPLLYPWLTLGLNMNDSNASRSSTDGFHNQNTDG  
SSYNTSQNAILANGPEKSSKKVTMIGEEYEALLQSALEEQAQHYDAEITRLQAEHTSCLV  
DKNSLSPEETKEIEALKIEIKSSRDKIGQVSKELVEAQAE EAGLREVSQQLLSEQQEANE  
LLKKIQEEHREKEEGERKVQDLEQQIADLDANLRMRQQFSQNIELCNAQIFGTTAAPER  
KQSASRKGKKKGRFFRK

>comp13508\_c0\_seq3; 617 95 2001 LEN=2522; translated  
MPLSPPAAHRRVTFSLNVT LGYGADNKTEDALNRACSKSAFPLSLNEMASSFFSGTSPAK  
AASSSSSLLPSSISSTLGLKHDTVGDTC SLGSDHDRFFVASASPSSGSSFWIDPPSSGNFA  
QDLLPKIHPTALSGYKIRGIVLTSIAADNAPAEMLLLENSKGMSIPDNVLRPTSGSIIAG  
DPDHGVLKLLPMTTIEFSQEGDDSEHNAIMGQALGGANTSDDSERGCSYVSALSSLQTVP  
PQIPACAVCIHRIDPIRLGLPAPSVHQLCNKYCQSPSLKHNSCGSEDEACHKQRL LHKWS  
APARCKACQVIHHFWKYD DDIRVEDEEGREVF CRECSMHKTLWVCLTCGFVGCGRYSNKH  
SFAHF EKTRHPYSLELATLRIWDYCHGDSGGFVHRADLLECPSSPPLLYPWLTLGLNMND  
SNASRSSTDGFHNQNTDGSSYNTSQNAILANGPEKSSKKVTMIGEEYEALLQSALEEQAQ  
HYDAEITRLQAEHTSCLVDKNSLSPEETKEIEALKIEIKSSRDKIGQVSKELVEAQAE EA  
GLREVSQQLLSEQQEANELLKKIQEEHREKEEGERKVQDLEQQIADLDANLRMRQQFSQ  
NIELCNAQIFGTTAAPERKQSASRKGKKKGRFFRK

>comp13508\_c0\_seq4; 398 95 1126 LEN=1241; translated  
MPLSPPAAHRRVTFSLNVT LGYGADNKTEDALNRACSKSAFPLSLNEMASSFFSGTSPAK  
AASSSSSLLPSSISSTLGLKHDTVGDTC SLGSDHDRFFVASASHVRLSVNPAEKFWKASTS  
HMVLA FVPPKMISSTLETHFS PKRLASGSSFWIDPPSSGNFAQDLLPKIHPTALSGYKIR  
GIVLTSIAADNAPAEMLLLENSKGMSIPDNVLRPTSGSIIAGDPDHGVLKLLPMTTIEFS  
QEGDDSEHNAIMGQALGGANTSDDSERGCSYVSALSSLQTVPPQIPACAVCIHRIDPIRL  
GLPAPSVHQLCNKYCQSPSLKHNSCGSEDEACHKQRL LVSIMK

>comp13508\_c0\_seq5; 257 489 1036 LEN=1114; minus strand; translated  
MMLPLVGRRTLSGIDIPLEFSNNNISAGALSAAMLVKTIPRILY PDKAVGWIFGSRSCAK  
LPLEGGSIQKEDPDDGKQTPQRTD HDRFRGYXVSPTVSCFKPRVDDIDGNNDDEDDAALA  
GDVPEKKLEAISFKLKGKADFEHALFSASSVLLSAPYPSVTFRENVTRRCAAGGDNGMTT  
TY

>comp13508\_c0\_seq6; 640 95 2220 LEN=2741; translated  
MPLSPPAAHRRVTFSLNVT LGYGADNKTEDALNRACSKSAFPLSLNEMASSFFSGTSPAK  
AASSSSSLLPSSISSTLGLKHDTVGDTC SLGSDHDRFFVASASHVRLSVNPAEKFWKASTS  
HMVLA FVPPKMISSTLETHFS PKRLASGSSFWIDPPSSGNFAQDLLPKIHPTALSGYKIR  
GIVLTSIAADNAPAEMLLLENSKGMSIPDNVLRPTSGSIIAGDPDHGVLKLLPMTTIEFS  
QEGDDSEHNAIMGQALGGANTSDDSERGCSYVSALSSLQTVPPQIPACAVCIHRIDPIRL  
GLPAPSVHQLCNKYCQSPSLKHNSCGSEDEACHKQRL LHKWSAPARCKACQVIHHFWKYD  
DDIRVEDEEGRXGILQGMFHAQDTLGLGDFVLQCDMSSSLKIPCLSIDFVFPK TALP  
VDLWVAEDTVNKHHSFAHF EKTRHPYSLELATLRIWDYCHGDSGGFVHRADLLECPSSPPL  
LYPWLTLGLNMNDSNASRSSTDGFHNQNTDGSSYNTSQNAILANGPEKSSKKVTMIGEEY  
EALLQSALEEQAQHYDAEITRLQAEHTSCLVDKNSLSPEETKEIEALKIEIKSSRDKIGQ  
VSKELVEAQAE EAGLREVSQQLLSEQQEANELLKKIQEEHREKEEGERKVQDLEQQIAD  
LDANLRMRQQFSQNIELCNAQIFGTTAAPERKQSASRKGKKKGRFFRK

>comp13509\_c0\_seq1; 301 763 1188 LEN=1430; minus strand; translated  
MNTQYLVDVICGEDRNLTSLCGFLSDEIEQELSIGNWTVFAPLNDIPENVTIVEEEDITD  
LAWFHIFEEVLTKE DLPDNEGDNTTLITMANGRDTRIKCDDDIPIGQKGRGNNGTISNF  
IEFDIEACNGMIHIIENVLLP

>comp13509\_c0\_seq2; 301 763 1188 LEN=1470; minus strand; translated  
MNTQYLVDVICGEDRNLTSLCGFLSDEIEQELSIGNWTVFAPLNDIPENVTIVEEEDITD  
LAWFHIFEEVLTKE DLPDNEGDNTTLITMANGRDTRIKCDDDIPIGQKGRGNNGTISNF  
IEFDIEACNGMIHIIENVLLP

>comp13510\_c1\_seq1; 237 29 592 LEN=898; translated  
MILMIVRSFPTTVWRKEVLRRI DQLSLRRHSRKLRSRAQVISAMSVFNI SNVKASLLGL  
VLVLA AVPRGAQAFAPCQVSHRCRSDNNNNNLLFSSTDDDSVGSSEDSVASDSPPTPV  
KCPNCDLDCGSGRIEGGIGTVLKF WPIKAYRPCPNFIENGGFYTRSGQGLDEIAFGRDSK

YDPMNDL

>comp13511\_c0\_seq1; 420 1 1504 LEN=1611; translated  
XGKYAATASQDSMVCIWVAKNRMVSTLKGHDVKEYECLRVDWASREWAEVLDRSSGFAN  
LIVSGGADGKVKIWKCKDGEARDKNGKTIIGSEWKCEYTLDHANLLTRGIKEEAPDEKED  
VDPGKAEIIEKERDKPQVYALQFIDDWKVFTRNMGQQQHCHARHAAQEEEEKQPEPQKPEP  
DKNAFLMTSSDEFIHLWEIVPHSWDQQLALDGQKIRILQEKMKLKEVMSLHFGNLDQYSY  
GVTACSITGEGQLQLPPPATSSKAPEGTTPFGGEGRNPDNHVVFDAAYSPGSGLLGVAL  
ADGSLRLVNGRGMCI SVVNLPGNQSHLTSFCWDATGNRLATCVGTGHLITWSLDPEHQG  
GNQHTIATCTAIFEGGHEPGRPLFGTFCFCGGDENLLLSWGVGKLCVWYSKARGNIYDP  
VAVLRDDEKYPIFDVEISPTGRHALIAGGNEGGFIGVPLHFYNLPPRAEAKEDERNIAVD  
GSDKPGVGESDTNQKGVTKND

>comp13512\_c1\_seq1; 148 558 844 LEN=844; translated  
MEDGYNGDNGRLSPWCDINSDQQHQHDQQAHQHQYHQHQHEELMSPNRSMFNTEESSR  
SNIDASRQSLSPAPPQQQEEESLRQQNYSTHQPGQX

>comp13513\_c0\_seq1; 351 259 1059 LEN=1207; translated  
MTDIQPQQPPPPPTVAVLYATTGGMGDVGKFAVALATKRGLRVRPVALCFGTGETDGPSN  
SSNSTTTTTVDVEDTALKDETEAVLEGLEGGIPTIDVAAGASADRELEGALGGATSVVSC  
LGNRQPGMERWCEKGTAVLAAMKASGAERLVCLSSMGIGRDFLKTTPLTCLWAAMLRTV  
LRSARRDLSSMEDTVRGSGLDYLLVRPVGLTPSEPPRGSCDVLLERGDHGGRLAFMLSKQ  
DAAGFLLEEALSPTLRNRAVTIGYAG

>comp13513\_c0\_seq2; 351 259 2120 LEN=2482; translated  
MTDIQPQQPPPPPTVAVLYATTGGMGDVGKFAVALAXEAGPPRPPGGPLFRNRGNRRSEQ  
QQQQQHQPFPFQQQTLPPAHRKIPHSSTPKNTSPLRSGRNQRQGSRQSSGGQLS  
SPHQSTQRSSEVLKTLRKKACLYEPDTSRSVALVTWLVRILALEFGFFSRQQLQSGV  
HACVSSKIEAGTITRTKVNRCMQIILNSCFHYIIPRSDGSEEKGDYFRDSFSETVQNDV  
LLQELPKPWNLDVDRDVTIHA I LNETDEKMKIRSPLSSPRHSPKFGSINA EKTSEKYGM  
DGEKEEASKRAVLLCFNENVRS AEDVFRCHHDFIRDTANASSLQLTAQEW A QFFGHEGSQ  
DPHLLGNIGASMQAGASLGRPPLQPDVLRMSDELGKFRTTWCTKRYEHDHDL CGFAHI  
EANSGLRRDPLVYSYKNEMCKFVTYVGEEMVLPGTPANFFLNECPNGLACGYAHSTEEI  
NYHPDSYKRVKVCASPYLRSGGCR LGDVCNVHPIDSNRPLKKSFPESRSPDKRGKKNYEQ  
VKLNARTCHDILPSGLPIVYAS PAPI SKFEQQLGMPGLQNL YRRQSEVV RAYARSSGKYK  
FPYSLFGDRMTTSSPESISK

>comp13513\_c0\_seq3; 324 1 1690 LEN=2052; translated  
XQQQQQQHQPHFPFQQQTLPPAHRKIPHSSTPKNTSPLRSGRNQRQGSRQSSGG  
QLSSPHQSTQRSSEVLKTLRKKACLYEPDTSRSVALVTWLVRILALEFGFFSRQQLQ  
SGVHACVSSKIEAGTITRTKVNRCMQIILNSCFHYIIPRSDGSEEKGDYFRDSFSETVQ  
DSVLLQELPKPWNLDVDRDVTIHA I LNETDEKMKIRSPLSSPRHSPKFGSINA EKTSEK  
YGM DGEKEEASKRAVLLCFNENVRS AEDVFRCHHDFIRDTANASSLQLTAQEW A QFFGHE  
GSQDPHLLGNIGASMQAGASLGRPPLQPDVLRMSDELGKFRTTWCTKRYEHDHDL CGF  
AHI EANSGLRRDPLVYSYKNEMCKFVTYVGEEMVLPGTPANFFLNECPNGLACGYAHST  
EEIN YHPDSYKRVKVCASPYLRSGGCR LGDVCNVHPIDSNRPLKKSFPESRSPDKRGKKN  
YEQVKLNARTCHDILPSGLPIVYAS PAPI SKFEQQLGMPGLQNL YRRQSEVV RAYARSSG  
KYKFPYSLFGDRMTTSSPESISK

>comp13513\_c0\_seq4; 351 259 1059 LEN=1227; translated  
MTDIQPQQPPPPPTVAVLYATTGGMGDVGKFAVALATKRGLRVRPVALCFGTGETDGPSN  
SSNSTTTTTVDVEDTALKDETEAVLEGLEGGIPTIDVAAGASADRELEGALGGATSVVSC  
LGNRQPGMERWCEKGTAVLAAMKASGAERLVCLSSMGIGRDFLKTTPLTCLWAAMLRTV  
LRSARRDLSSMEDTVRGSGLDYLLVRPVGLTPSEPPRGSCDVLLERGDHGGRLAFMLSKQ  
DAAGFLLEEALSPTLRNRAVTIGYAG

>comp13515\_c0\_seq1; 230 250 897 LEN=1164; translated  
MSDASATAPTGTQVVRAMALIAVLAGCTWFSPAPNPAGGGHGLVLLHLLAFSSWFGCSV  
WVSFVAGIVMFKTLPRHTFGRLQSR LFPAYFVFS AVSVLVAIATSGALASPGGEEASAPY  
SLVVILVLCILANLFCFEPATTRVMYQRH AVEKRLGTGHEIGKIRPDDPKKANDPELRALS  
KTFGMLHGVSTLLNLLALGFGCAWLSRCAEQIVVA

>comp13515\_c0\_seq2; 230 250 897 LEN=1088; translated  
MSDASATAPTGTQVVRAMALIAVLAGCTWFSPAPNPAGGGHGLVLLHLLAFSSWFGCSV  
WVSFVAGIVMFKTLPRHTFGRLQSR LFPAYFVFS AVSVLVAIATSGALASPGGEEASAPY  
SLVVILVLCILANLFCFEPATTRVMYQRH AVEKRLGTGHEIGKIRPDDPKKANDPELRALS  
KTFGMLHGVSTLLNLLALGFGCAWLSRCAEQIVVA

>comp13515\_c0\_seq3; 230 250 897 LEN=1317; translated

MSDASATAPTGTKQVVRAMALIAVLAGCTWFSAPNPAGGGHGLVLLHLLAFSSWFGCSV  
WVSFVAGIVMFKTLPRHTFGRLQSRLFAYFVFSVAVSVLVAIATSGALASPGGEEASAPY  
SLVVILVCILANLFCFEPATTRVYQRHAVEKRLGTGHEIGKIRPDDPKKANDPELRALS  
KTFGMLHGVSTLLNLLALGFGCAWLSRCAEQIVVA  
>comp13515\_c0\_seq4; 134 250 977 LEN=1384; translated  
MSDASATAPTGTKQVVRAMALIAVLAGCTWFSAPNPAGGGHXARPPPPAGVFLLVRVQR  
VGQLRCGDRHVQDPPETHLWEAPIQALSRLLCVLRGVRPRRNRHERRPGESGGGGGFRPL  
FLGRDSGVHSCQPLLFRTGDDEGHVPEARRRKTAGNGARNRKDTPGRSEEGKRSQAQ GAL  
QDLWDAPRCFDAPQPVGAGLWLRRLAEQVCRANS GGIGRQTNAITGWEYWTSHLEFSNEKW  
EQ  
>comp13515\_c0\_seq5; 230 250 897 LEN=1144; translated  
MSDASATAPTGTKQVVRAMALIAVLAGCTWFSAPNPAGGGHGLVLLHLLAFSSWFGCSV  
WVSFVAGIVMFKTLPRHTFGRLQSRLFAYFVFSVAVSVLVAIATSGALASPGGEEASAPY  
SLVVILVCILANLFCFEPATTRVYQRHAVEKRLGTGHEIGKIRPDDPKKANDPELRALS  
KTFGMLHGVSTLLNLLALGFGCAWLSRCAEQIVVA  
>comp13516\_c0\_seq1; 660 141 2294 LEN=2515; translated  
MSICYFTRRDTEEIAQHIRQKTHGDPTFKFSNDAIHGF SFYEITFDQQLASAVINYFQS  
SVSKKIITDEPKDHQLLYQKQVDRKVNNPGFLLFSLYSCPGNNYLDQVLRSAI ELDVVQ  
HYRIRGDSNFDSIQESRNPNGTGQEQRQQLRRVRRWMSIPP SERPLELQQYVQPSLQPF  
GGCQNKIGNGVKSDTNLRGFSLSHFRVTREDMKLLREVILSSRSGLETLSFVNVAFLE  
DEAVHELSESLALLSQQMQLNQNDIDHNSKIARDLSTGLSASRKYLR ELSLVRCDLTDE  
QLELVVRSLMTTIRNNCGTLPSPSHGIMKSSLSKLNISSNRCGELSLKALGTWLLNLD S  
KSTPNALCSCSLESLEISNNIENDNIDTLSNSLQLRSWTQLMENKGDQGN YDETATDIAL  
AVDSSKLR TNKTLKQLRLNGNTHLGGRNEEGVVNLECLGRFVSNCLVGLKELDL DSSGVT  
DDGFARFAGASHILPCSVTLDKATSSKSSSITSKAGSLISSASPNI SLRLLRLSGNYEIS  
SRSAQAMVEVLNRYPMLKSITFGCYKKQNVWKRTIHEKQIRHLLTIN ESGRVLLSSGNH  
EKYPSGEFVPLSLWAVVLERINRRFWNNAWSKDSQIQAA DAIFFLIRRNITIAIQRSKHD  
SGRTTAVISSPSDIEPGNTKDDASVGTQCPQLRLATNGNKRTRDCNA ETRDFKRKSQ  
>comp13517\_c0\_seq1; 776 396 3095 LEN=3422; translated  
MTDQSTKAKPGDTPATTDAPLPGDQCASTAAVAEE SVASETIPKPDAGPTSTATGNSAV  
STASSVVSSTSDAVSTTKTSAAA AVAGVPPPAKSTPPSTTKYAHPIPSKGAPHLPHVPMH  
HPYAHHHYAYHQHIAANASAADPKKSGGTTKPTNPNSVPVPPY NPAKYMKPGAGGES A  
AARGKQAGPPPMYPPPPPHHAYHAWAAYRYAQQAQYHGGPPPPPPPGPPPPWNAESYA  
AAHQAYAAAASQA AVGGAKGNKNGKSPGEKGAATGATSAPLI PPPQPHPPIFPPPPSHA  
GPYRFSDCTLRREALARSVAENVAKKNKYPTPGTSSNNSPSSSI PPHSTIPSSPPTPV  
SSLPKNGPVGAMMVANQNSPDAATLHMLELEARAEGATSPSQIED FHKEEVATMGCTC  
KTKCLKLYCQCFAVKIYCGANCRCMSCNNNPEHESE RQDAIGTILARNPAAFDTKFQKN  
NRKFGTGMVPGALMAVGGARGPQSGILSTMDIPHQRTISHKVGCKCRKSACMKKYCECY  
ASNVKCSATCRVCGCKNPLGGFGPPPSTNNAATTQAPSAKTTPTKN VITTPVKKEPAWMM  
NAAHNLAFLKHGSAEKPKRIISRAPSESGSMPSNESSEESPVAGSSKIRTVQNSNRGMP  
IPSTAERA AVNALQSSEKTAVNALLMAAMAMTEMSGQDQ TGNHTSGTSSAATTPPLNLA  
NNNNRHYSPEGTVRGADDFETPQRNLLKFKFMSPKRKVSDRNA ETIPSTKNTNSDDHVES  
RNLEYS DAYQNGDEDSPKREHPGDGTPSLLQKVKSRLGSLKKGARLLERVKSNGDQHVT  
ETTTTETNSEVLP MEMATPAKEKGAKIAALTPVSARCIDFKNMRVNDSSSDRAV VDSIN  
>comp13518\_c0\_seq1; 380 184 1530 LEN=1778; translated  
MVSFSTLYGITFVLAGLFLFPTTLNKA AEVDAFVAQSPA FRCSQKTTFNPGP SERIASL  
NSSRNNDSAGNANNNVDKGFNLL EVASKVVPQGNIVKTAKFFWKFIWLR FMTELAPRDK  
TTGDYKRPTYGFDNVI SEDDSA EFPVEAGRYHLYVGNPCPWCHR VRLVVYLLGLESTLDG  
VTVLIDNPEKASRGWIFD DSRNGKASSTSSIQPEEFKDLRELYDYLS PGYTGRCTAPLL  
VDWKTRRIVSNE SKDIVRMLPLLLRAESAETGPSSETTTAQT VVALDPASIPADLQAVVD  
ERNEWIYELVNNGVYRCGFATTQ GAYDSASRDV LKGMGMLEEILSEQTFVSDDELFTESD  
LMLLP TMLRYDGVYGPLFNAGGTHLRLQC DYPSIFRWMKQCWNEVPGVRESIDISDACES  
YYRQLFPLNPGGIVPSITSKSLNLD C  
>comp13518\_c0\_seq2; 380 153 1499 LEN=1747; translated  
MVSFSTLYGITFVLAGLFLFPTTLNKA AEVDAFVAQSPA FRCSQKTTFNPGP SERIASL  
NSSRNNDSAGNANNNVDKGFNLL EVASKVVPQGNIVKTAKFFWKFIWLR FMTELAPRDK  
TTGDYKRPTYGFDNVI SEDDSA EFPVEAGRYHLYVGNPCPWCHR VRLVVYLLGLESTLDG  
VTVLIDNPEKASRGWIFD DSRNGKASSTSSIQPEEFKDLRELYDYLS PGYTGRCTAPLL  
VDWKTRRIVSNE SKDIVRMLPLLLRAESAETGPSSETTTAQT VVALDPASIPADLQAVVD  
ERNEWIYELVNNGVYRCGFATTQ GAYDSASRDV LKGMGMLEEILSEQTFVSDDELFTESD

LMLLPTMLRYDGVYGPLFNAGGTHLRLQCDYPSIFRWMKQCWNEVPGVRESIDISDACES  
YYRQLFPLNPGGIVPSPSITSKSLNLD  
>comp13519\_c0\_seq1; 1387 155 4450 LEN=4688; translated  
MKSSDLESAVGNDANTDSSSFSSNAHASTVEHLASDTVSAVRAFVEALRIEFQADARLPTK  
LRPTMIPLYTRMKERGIVEQVRAICLREQUIEMSPSLKPVQKKECIDCDKHEENEDIRE  
GQSDSFRERHSIMLEVALPLAEVLARCYNVLDALPDEKPVHSNDPKKPSIPKARHRN  
NRNRPKPPRGMLSIQDYTDVACLLFEMVCTGILPSFDELKWESESGMGTECTNKNQATTPT  
SSSIIEERIRTKLPKSLAGRIPKNALRWGILLPSLSRSSMSKRASNDLSLLVHTTETVAK  
LVLLDRFRPMLFPRHVVDLYEAFWAEFHAANGIGSKQGRTSQRESSEEDVTTDNAGQKNS  
MHKKNIVDTEFYRVLGLSLPSFSCPPSTEGRTKITAAVVDPTVRASAYQTLLSPSCSLSQ  
GTKSQNTWLRRIISALLTELATRDVRGLAAIVTVFVVPVSSNDQTSLSISGAARKLGRTL  
VAMTSFSSSSNEQEQRKAMQGSGLCHQLLALLTSAFPVITETAGTSTMSRNMVIPP  
AVIQTAWAVLEQLSQVIDDHILGAWANRLFYSDDMRVNMTCGNSIQGTFIHQSIQIGI  
LCAFPVPHSSALRILQQMFLDRNSFPNKISISSCDNKNDKSNCNILGQILRVAMLTSPS  
LGETSPSASKDAEWTLWLTLQALYGDDEKFRDRIVDAWISALVPTEWDLEGFVFRTRRA  
PKALNSGIGAEFLEIKHHRLDRSEIEDFAALVESTTERAEFFVNNVLLVPLAPNTSIKC  
TDNSDAKMKPSQSTPLSQGLPSRIFRLLREYISCEEKHHTGMSSSSATSRLVATILLPI  
LCEKCPQEQLLFGENRENMIGLVSLIREVLSKLAAPSDLCSTGTDEKSNEEYTNRYEF  
LKSIASILLSMLIAVMELGSKLWSLEEEELLRSFLPILKPLSLPIDKHDRNNKDEMREYA  
AMADMAAYAMAMIACRGSNNSELQEGDMDTTTQKILSHSKEDRLRNILKDAEADLGSTQP  
PIRARGMVSLGKLARGFAGTLSSTQTIKLVMELEDEAGEVLGGDRAHDFWVYEVLRLSMI  
ALGDSESYVYLAAVQTI VAVGDLCPRHILPLIASAIVVGELDSL SVSKNSINATP IRLSQ  
EQI IKL TEALIFI IRRRAVTDEYVPI I VNLMLHGTAI IEKDEAVKAARITEKEKKLIHRE  
TAKYFETSVSDELNQKELWEERDVLLKTGGPVFDVEETEVRSLRISILSELLAESSA  
AFAPFLKAI VRLVVDALQLQSHSRAVTRSAALLAREVYAKVLSSEGWDLSNALAAGGVDR  
SSCAVIPVSVVALVASGEEVLCAILKKGSSDSISKATDPTLVSRCREALDLRVQAEETGI  
FTAAILVLEEDKKLGELPGIFRELISVGGESSLGIDGKNI FQLNPIEMLE  
>comp13520\_c0\_seq1; 269 45 413 LEN=504; translated  
MSGKKGGRGEKKSTTASAKAGLQFPVGRIGRYLRQKGYATRMGAGAPVYLA AVLEYLCA  
EILELAGNAARDNKSRIVPRHITLAVKNDEELNKL LGGVTI AAGGVLPNIHA ILLPKKS  
GK  
>comp13521\_c0\_seq1; 227 60 344 LEN=440; translated  
MFKGAGESTEGLPRI FVEASELEGDGKRFADLFMELELSKSKKEARRLIAGGGAKLNGEK  
IENEMGSLTTGDFDGKTEVVLRAGKKRAGVVELK  
>comp13521\_c0\_seq2; 574 156 1610 LEN=1706; translated  
MASAFQQGVSRRSIAAYRPSRFVSRLASTTAEAPAVEEEEDVVGESSSIYVQEA EALDA  
LKSDFLK TMRDRGFLHQCTGITELDAKFMAEEGVVTA YLGF DATADSLHVGSL LQIMILR  
HLQKSGHRPIVLIGGTSKVGDP TKGDES RKLDDDEGVARNTAGISKVFKTFLDFEKEGS  
DDNAPNAAVMVNNDWLG NLYLDFLRDYGTQFSINRMLS FESVKQRLSREAPFSFLEFN  
YMILQAYDFLELFRRYNAVLQLGGS DQWGNMVS GTELGRCDGAQLFALTAPLITKSDGT  
KMGKTAGGAIWLNQDKLSEYDYWQFWRNTSDEDVIKFLKLFTELPLEEIAKFENLDGSAI  
NQAKIVLADEATAMLHGRDSLVEIHKTVENMFKGAGESTEGLPRI FVEASELEGDGKRFA  
DLFMELELSKSKKEARRLIAGGGAKLNGEKIENEMGSLTTGDFDGKTEVVLRAGKKRAGV  
VELK  
>comp13522\_c0\_seq1; 117 1 334 LEN=489; translated  
XAALLEEGPPALHHRLSFLVNWGSCCSGVDSTYEIRVGRSRNPMGPYVDKKGQPMMEGGG  
TLFQKSSKRGFVVGPGHTGIWKKNHKKEFVSFHYYDKRRGGAAWIAEKRLRW  
>comp13522\_c0\_seq2; 519 119 1219 LEN=1374; translated  
MPIPPFLSKAAQLLWLAALPPMATAADDSLLSVYESMSVEVDS SDYVIHDP SRIITVGN T  
QMIAVTGKAQEDGYDCGL ETWWRNPQT DGGGW RP GQCLFRKQDKPSWAVEAPANDGAFW  
APELDYDEENGLTLLYSVSEMDEGEFFPNTCVGVAVSVDGLQGFPNELTWEDAGKPVMC  
ITGSDYEEERSAIDPSVFWGFGDDEKRLFLVTGGGRIIGTELDPATYMQKDGEWFDLDRD  
DWTELSTGPRWEDDTWVEAAFVHPNPQTGHYYL FVNWGSCCSGVDSTYEIRVGRSRNPMG  
PYVDKKGQPMMEGGGTLFQKSSKRGFVVGPGHTGIWKKNHKKEFVSFHYYDKRRGGAAWI  
AEKRLRW  
>comp13523\_c0\_seq1; 1040 1 4253 LEN=4315; translated  
XHNKTKQNKHGPAEPNPVQYHVGGVRNFLPLPLRH CYQVRMEFPVDPQGLEQAAERPEE  
RLKEAQNLRVHQLLPLYMVHMG RPAQLSPGDGGHPRNGNPGRWLERADHEDESRRDHPAQ  
VPQDALQDRDFCLTPGLRNIAPVYTSSVCDPLVVG ER ECQRLASL TDFENLTISYVPEVR  
ISTEGSLPSNATNNNWDEEEERE GNDEEDG TDSAKASG SRLGFLRSKSSGTAAPTQAF L

RNNNNKPKQLIDEDGNI I IPPEPIATQHTANSKWVPGISWRHLTTAVCSVLIYAYTCYLLW  
HEWIDNLALRRVYFLESDHYVHRMQELDDIANLQTKPEDPVIKRPPFVPHPEMREVP  
VSLYSVLYQLPVSLTDFDGDGATQMDRQLVATVRRFFNECVPAQPGYTSSVVAATI IPDAA  
RVAKCWTWKWYRMEKKVVMVRYIRKILLKKQKLEEGTTDIYDDVKQALKNSNHSMKTVAQ  
RAYRRVSR TASAALKNNSSMDPSGNMETNSTTTTLEMTSLVGEHTEEKIPLVSPGSPH  
VNENGRDN SPAVETNPLPGSDAETLEAFSGISFAAGEEVGDEDKAGSDVDGGFWQNF  
GNSDGEAAIADDRDRIQHDSEEFLEGSFVGDDSATDIETKGSQSLELDQSMNSSLDRR  
ISRSSSGKFCGAL THGFKYEDYDVKQYAKTVSHGEESELIDIVDGLGIEELSVFAREYAQ  
SSSSPCPLGCFPNLSKFLDMDELREIEESLWAEIKILNEELIEARENVIKLDDDFEVEPT  
MISSAAFNDNDQTVGSQGIDESISNDSILFDSPPSRKTRCLKLRNRAAVTTNHQQWEKA  
KEVAKSMKEIIPQTTFPKRISVVFKPIMPPIARAFASCGGRYNPCFKETLNSLPKYQGOM  
KGAGRAFVTALDHPYAVVTFSSRQAAIAARQCLADGGANNSWQQIDEIPIPLADAPPR  
NILFCRGCRRPVTTLTINYKEKKCRRWSIYLFMLFFCCFYTIPLAFISLLLLNPRWLVKFFP  
NSRSLNDPNDVLYRALAGPASGLCTTFLMALLPQIFKLVAYSEGTSSSLEMAERKALLFM  
WYFMLITAFFGQYLATMLIQWYHAGVTHITQSLWSTVNTVATLIPSHIAPQWLNWIIIR  
YGF IWPGGYFFQMNFTLTKISGLTCLNRVARGGGAGGPTPYRIYVDSGIVLLCIVGLSPM  
VPIVAPIATIYFIVVQPMRLWLLIFVYRPRYDTGGEMWPLCHQIVISSLIMAQVRIIGSS  
FFAADFVLFLLIDCFVFWVQILTSVTLALKGSLGGAVLVGCCTFPTFMFGLWTEERFLR  
PYKDTALLQTSRLDGGQESYNESQREEFRRLVDCHKASYVPTCLLGSKENLLTVEPAVV  
IPKDLGNGDEVAHSVTNTKGPKRRRQKGGIYHRKDR

>comp13523\_c0\_seq3; 1035 1 4169 LEN=4231; translated  
XHNKTKQNKHGPAEPNPVVQYHVGVRNPLPLRHCYQVRMEFPVDPQGLEQAAERPEE  
RLKEAQNLRVHQLLPLYMVMGRPAQLSPGDGGHPRNGNPRWLERADHEDESRRDHPAQ  
VPQDALQDRDFCLTPGLRNIAPVYTSSVCDPLVVGGERECQRLASLTDNFENLTISYVPEVR  
ISTEGLPSNATNNNNWDEEEEREENDEEDGTD SAKASGSR LGFLRSKSSGTAAPTQAF  
RNNNNKPKQLIDEDGNI I IPPEPIATQHTANSKWVPGISWRHLTTAVCSVLIYAYTCYLLW  
HEWIDNLALRRVYFLESDHYVHRMQELDDIANLQTKPEDPVIKRPPFVPHPEMREVP  
VSLYSVLYQLPVSLTDFDGDGATQMDRQLVATVRRFFNECVPAQPGYTSSVVAATI IPDAA  
RVAKCWTWKWYRMEKKVVMVRYIRKILLKKQKLEEGTTDIYDDVKQALKNSNHSMKTVAQ  
RAYRRVSR TASAALKNNSSMDPSGNMETNSTTTTLEMTSLVGEHTEEKIPLVSPGSPH  
VNENGRDN SPAVETNPLPGSDAETLEAFSGISFAAGEEVGDEDKAGSDVDGGFWQNF  
GNSDGEAAIADDRDRIQHDSEEFLEGSFVGDDSATDIETKGSQSLELDQSMNSSLDRR  
ISRSSSGKFCGAL THGFKYEDYDVKQYAKTVSHGEESELIDIVDGLGIEELSVFAREYAQ  
SSSSPCPLGCFPNLSKFLDMDELREIEESLWAEIKILNEELIEARENVIKLDDDFEVEPT  
MISSAAFNDNDQTVGSQGIDESISNDSILFDSPPSRKTRCLKLRNRAAVTTNHQQWEKA  
KEVAKSMKEIIPQTTFPKRISVVFKPIMPPIARAFASCGGRYNPCFKETLNSLPKYQGOM  
KGAGRAFVTALDHPYAVVTFSSRQAAIAARQCLADGGANNSWQQIDEIPIPLADAPPR  
NILFCRGCRRPVTTLTINYKEKKCRRWSIYLFMLFFCCFYTIPLAFISLLLLNPRWLVKFFP  
NSRSLNDPNDVLYRALAGPASGLCTTFLMALLPQIFKLVAYSEGTSSSLEMAERKALLFM  
WYFMLITAFFGQYLATMLIQWYHAGVTHITQSLWSTVNTVATLIPSHIAPQWLNWIIIR  
YGF IWPGGYFFQMNFTLTKISGLTCLNRVARGGGAGGPTPYRIYVDSGIVLLCIVGLSPM  
VPIVAPIATIYFIVVQPMRLWLLIFVYRPRYDTGGEMWPLCHQIVISSLIMAQILTSVTL  
ALKGSLGGAVLVGCCTFPTFMFGLWTEERFLRKYKDTALLQTSRLDGGQESYNESQREEF  
RRLVDCHKASYVPTCLLGSKENLLTVEPAVVI PKDLGNGDEVAHSVTNTKGPKRRRQK  
GGIYHRKDR

>comp13523\_c0\_seq4; 929 1 3521 LEN=4332; translated  
XHNKTKQNKHGPAEPNPVVQYHVGVRNPLPLRHCYQVRMEFPVDPQGLEQAAERPEE  
RLKEAQNLRVHQLLPLYMVMGRPAQLSPGDGGHPRNGNPRWLERADHEDESRRDHPAQ  
VPQDALQDRDFCLTPGLRNIAPVYTSSVCDPLVVGGERECQRLASLTDNFENLTISYVPEVR  
ISTEGLPSNATNNNNWDEEEEREENDEEDGTD SAKASGSR LGFLRSKSSGTAAPTQAF  
RNNNNKPKQLIDEDGNI I IPPEPIATQHTANSKWVPGISWRHLTTAVCSVLIYAYTCYLLW  
HEWIDNLALRRVYFLESDHYVHRMQELDDIANLQTKPEDPVIKRPPFVPHPEMREVP  
VSLYSVLYQLPVSLTDFDGDGATQMDRQLVATVRRFFNECVPAQPGYTSSVVAATI IPDAA  
RVAKCWTWKWYRMEKKVVMVRYIRKILLKKQKLEEGTTDIYDDVKQALKNSNHSMKTVAQ  
RAYRRVSR TASAALKNNSSMDPSGNMETNSTTTTLEMTSLVGEHTEEKIPLVSPGSPH  
VNENGRDN SPAVETNPLPGSDAETLEAFSGISFAAGEEVGDEDKAGSDVDGGFWQNF  
GNSDGEAAIADDRDRIQHDSEEFLEGSFVGDDSATDIETKGSQSLELDQSMNSSLDRR  
ISRSSSGKFCGAL THGFKYEDYDVKQYAKTVSHGEESELIDIVDGLGIEELSVFAREYAQ  
SSSSPCPLGCFPNLSKFLDMDELREIEESLWAEIKILNEELIEARENVIKLDDDFEVEPT  
MISSAAFNDNDQTVGSQGIDESISNDSILFDSPPSRKTRCLKLRNRAAVTTNHQQWEKA

KEVAKSMKEIIPQTTFFPKRISVVFKPIMPPIARAFASCGRYNPCFKETLNSLPKYYGQM  
KGAGRAFVTALDHPYSYAVVTFSSRQAAIAARQCLADGGANNSWQQIDEIPIPLADAPPR  
NILFCRGGCCRPVTLTINYKEKKCRRWSIYLFMLFFCCFYTIPLAFISLLLLNPRWLVKFFP  
NSRSLNDPNDVLYRALAGPASGLCTTFLMALLPQIFKLVAYSEGTSSSLEMAERKALLFM  
WYFMLITAFFGQYLATMLIQWYYHAGVTHITQSLWSTVNTVATLIPSHIAPQWLNWIIIR  
YGF IWPGGYFFQMNTFLTKISGLTCLNRVARGG

>comp13523\_c0\_seq5; 929 1 3521 LEN=4416; translated  
XHNKTKQNKHGPAEPNPVVQYHVGGVRNPLPLRHCYQVRMEFPVDPQGLEQAAERPEE  
RLKEAQNLRVHQLLPLYMVHMGRPAQLSPGDGGHPRNGNPGRWLERADHEDESRRDHPAQ  
VPQDALQDRDFCLTPGLRNIAPVYTSSVCDPLVVGGERECQRLASLTDNFENLTISYVPEVR  
ISTEGSLPSNATNNNWWDEEEEREENDEEDGTDSAKASGSRGFLRSKSSGTAAPTQAF  
RNNNNKPKQLIDEDGNIIPPEPIATQHTANSKWVPGISWRHLTTAVCSVLIYAYTCYLLW  
HEWIDNLALRRVYFLESDHYVHRMQELDDIANLQTKPEDPVIKRPPFVPHPEMREVP  
VSLYSVLYQLPVSLTTFDQMDRQLVATVRFNECVPAQPGYTSSVVAATIIPDAA  
RVAKCWTWKYRMEKKVRMVRYIRKILLKKQKLEEGTTDIYDDVKQALKNSNHSMTVAQ  
RAYRRVSRTASAALKNNGSSMDPSGNMETNSTTTTLEMTSLVGEHTEEKIPLVSPGSPFH  
VNENGRDNSPAVENTNPLPGSDAETLEAFSGSISFAAGEEVGDEDKAGSDVDGGFWQNF  
GNSRSDGEAAIADDRDRIQHDSEEFLEGSFVGGDSATDIETKGSQSLELDQSMNSSLD  
ISRSSSGKFCGALHTGFKYEDYDVKQYAKTVSHGEESELIDIVDGLGIEELSVFA  
REYAYQSSSSPCPLGCFPNLSKFLDMDELREIEESLWAEIKILNEELIEARENVIKL  
DDDFEVEPTMISSAAFNDNDQTVGSQGIDESISNDSILFDSPSSRKTRCLKLRNRAAV  
TTNHQQWEKAKEVAKSMKEIIPQTTFFPKRISVVFKPIMPPIARAFASCGRYNPCFK  
ETLNSLPKYYGQMKGAGRAFVTALDHPYSYAVVTFSSRQAAIAARQCLADGGANNSW  
QQIDEIPIPLADAPPRNILFCRGGCCRPVTLTINYKEKKCRRWSIYLFMLFFCCFYTI  
PLAFISLLLLNPRWLVKFFPNSRSLNDPNDVLYRALAGPASGLCTTFLMALLPQIFKLV  
AYSEGTSSSLEMAERKALLFMWYFMLITAFFGQYLATMLIQWYYHAGVTHITQSLWST  
VNTVATLIPSHIAPQWLNWIIIRYGF IWPGGYFFQMNTFLTKISGLTCLNRVARGG

>comp13523\_c1\_seq1; 397 173 1216 LEN=1835; translated  
MTSPTNVSKVAGARNDCDYDGDASADEIQRQLEESTSSSVFDPDFCFRSTAPRSLKVT  
CYGSSSSKTPARYLNEARLLGYILAKRGHVCINGAGSYGCMAMNDGVHAGDGHVVRGVI  
HEMFLADNGYFDVDPKTNQRTLLRRASSHRVFNENAVVLSRHKQKQRQQTDDGARDE  
QSNKEESEKSIPIREILVAGGDDLQERKKFLVTNTDALIVLPGGPGTWDELWEMACAR  
HLELNALPIVCVNVDGYYEPPFREMLDRAFEDKLIRLEPEAIVRFADSAAEEAVRFV  
EDPVSHNKEDDDKLAARRKTRNKRTNNNKDDSSRGNLLLSFFVGSFLGIAVARSAAL  
RRG

>comp13523\_c1\_seq2; 418 173 1412 LEN=2031; translated  
MTSPTNVSKVAGARNDCDYDGDASADEIQRQLEESTSSSVFDPDFCFRSTAPRSLKVT  
CYGSSSSKTPARYLNEARLLGYILAKRGHVCINGAGSYGCMAMNDGVHAGDGHVVRGVI  
HEMFLADNGYFDVDPKTNQRTLLRRASSHRVFNENAVVLSRHKQKQRQQTDDGARDE  
QSNKEESEKSIPIREILVAGTWSIFWVRSVMRGQKLVKDEKTOHADTLFVWFVSYLV  
GLCLNFITQHNATNMIQHNTTHPPKSHLGGDDLQERKKFLVTNTDALIVLPGGPGTW  
DELWEMACARHLELNALPIVCVNVDGYYEPPFREMLDRAFEDKLIRLEPEAIVRFAD  
SAAEEAVRFVEDPVSHNKEDDDKLAARRKTRNKRTNNNKDDSSRGNLLLSFFVGSFL  
GIAVARSAALRRG

>comp13524\_c0\_seq1; 542 226 1497 LEN=1583; translated  
MTLGAPRRGLKAFSSGYPTCIDSQKNDTPSYDIIIPKEDFGQFKEYSVIHTNRSNLMS  
DPFQKVMRDLNSLLKATYNADKVAIIPGSGTFGMEAVARQFATDEHVMVIRNGWFSYR  
WTEIFEMGNIPKSHTVLKAKPIDLATDQHNYQYAPCPVDEVVAKIYEERPATLFCAH  
VETSTGMILPDDYIRKVSAMHDVGGFLVLDCIASGTIADMEDLGVDDVVISAPQKGWT  
GPCCAGLVMMSDRAKQKMETTKETSFAMSLKRWSAIMDTYEAGGFYHTTMTPTDALR  
DFHEISVETLKVGLPELKEGQYKLGKRARAMLDERGLTSSVAPGFQAPGVLVYHSPAT  
VENAEMMTKFKKKGLQIAMGVPWKLDEPEGMRTFRGLGFLDKIGDIDETVNTLTVALD  
PILGEMENNI AF SK IAV

>comp13525\_c0\_seq1; 1317 162 3301 LEN=3475; translated  
MADSIARTDDLPPSHGNAADAPFATDAQIIPVLLVNPEYVGNASDMDPSGEEKDKDETR  
VKHQTEPPEVDDPIIADGDENKRGNSEMMPLPVVTTTPQPAKGENPSDEELSASETVE  
AP EDEKXQGGNPPSEKISQDDDDTGVAATTTT SVSDEDETDEHEGEFPADEEKPEARE  
KEGSPSDDSDNDSPLVDADTIPEPTASDGDSDAAEKPIPTPSYNEEKTV AQVTFVSP  
IDEGTTDS PMEIDACDEISTVEKGDTPSNKTDSGFEESEN LGQYSATQEALVDDSV  
EEGGSENEQEEGNTAAAPEKEDQPTLEEMASETIADSEAEEDSEAEVPEETQEAQEDQ  
DEKLAMDVAASEAEATTEEEAAPNDNPGDETPEALIVSGQRPLAEAHSQEVDRLLANKE  
KNTDTASDSTD KASNTAAETEEPRPSPKPAPAPLTIITPRSDGISFAEAFGSAQSKKRI  
ITPRRTPSHSIV

PPLRRSNSDGSSETTATTTTTPLAMPELKHTAASHSALSASRNRRASGLISKYQEKVAHEAL  
PGDSVPIKSSSNHSRRSFEDNYSPATEKSIVRDRIAVSTVELEHLPMNSVRAKFEKTSR  
RSTKNFEGESFRQKKRHEQLSEKEQKEEAKVAIRGFNEKVLNQGKTASGEIDTSNLPKS  
FTFEMCSSAAIIVPNDGVCRVDYKTADFFAKVFFVHRTRGMLILRSKIPSPSKSRKTKIV  
PGGKISEVEFLSAAEQSGSASVQLQIAAREAVARQLYEATGLDVREEVERFKPAVLNSDP  
PINNARGFYLRNEKDNKLYYFLQVDDADFEKLKEAQVEIRATEHQVSRPSEDSGEGSEA  
TITKQTMKRSEDSGEGSEAIITKQTTKRPSSEDAGDEPLELRLSDGYVGFVQDPVIAS  
KVLKKEKSDESTALSMIMNSAAQEIRQTNLETSSSEDKQGPDAKATVHERKSILDDDDSNE  
QISNSGNIRTIELKKAETDAIETNDTTKDDAAAQKEI IETSVVAGKSAEKKAESTFYSD  
AKLKMKTSNDTAEEMAGVSCCSLWW

>comp13526\_c0\_seq1; 290 120 980 LEN=1302; translated  
MPLFTDRRSSASISYSVPLNDTSSEEEPESTVQEVPCGTVQEVNTRSKRRNLGGLGR  
LRCFQKPPQINPGDYHNHNFMPPIPREITTRQHRRAAVFCGFCDMRIASVLLNLVLM  
SVAIIVEISEASKWGNRNYFEEPIILLMVLACSGVGMGLGALHFGPSAVLFFSSIGLCGLS  
YLYFAEMKLLGLVLACSIIAAQLVLFLEMMCGIMTPDITYAMEEYIDDDGRKILETVHGLS  
VDIGETAVEFAEEVAIAMDQKQPDSSSSSTSSASSSSSMRRDGNNEC

>comp13527\_c0\_seq1; 331 609 1427 LEN=1641; minus strand; translated  
MVTATTFSRVLLAAPLLAGSHAFHTVGTSSLASRPQNELQTLATTRSPSSPRTPKIVL  
HSSDGENEAASETKNDDENDTDKTAATAVATNTINERLMAELKAAEQTEKYGSKGKTMS  
LVDGYGRPRKTDAEIQQAIAEARDLNGVNPVIAIVGSFFAFGVAAALWVATNKLGGYFAL  
HPPETEYVYFVLRSAQVFRNVVMGMISLASGFFGVTGLGIFGMGVRVAYGVMTGELDPTPI  
KTKTPTKETVDLGNMMDLMMNKKPGRGGGKK

>comp13528\_c0\_seq1; 922 89 2116 LEN=2131; translated  
MTNPLAGLERTVKGEMFQKIQTANILCVGAGGIGCELLKDMALSGFRRVQVVDLDTIDVS  
NLNRQLLFRGQHVGMKCTVACEVATDMVPLNIPSGDEKTDGNSPTDNAIELPPVSYQA  
HHGNVCDTSKFNVPFIKEFDLVNALDNVEARRRVNRLCLAADVPLIEAGTTGYLGQVTV  
IHKSSGVACYECTTQETQKVYPICTIRSTPMPVHTIVWSKELYKLLFHSKVDESMLYED  
PQGEESTYMDAVSVLRKFLKSDVIEDNGESLNTAIHRLLEDLYSVEIKKQLDMGRYKAA  
KKTPTCLKGSILESGMASSTAPPTSTTNIWSPEESVAALAACLA EAVKTPNDILLEEFDK  
DDHLAMRFVTAASNLRSSVFGIEPLQSLYSAKGIAGNIIPAIATTNAICAGLQILQAFAI  
LKRQIEKGVSDPEGAESKGLDLKSCYVNCNLRNRTRNGLYLTASPLEKPNPNCVFCKN  
AIIPLALNVEEWTLEDFLKRVKGRGLGFEEPTLILEGDFIWEEDGADEDEFKMNLPKLL  
SGLPCGGIKHGTVLEIDDNSQNLSIQVAVTHKDVWEGDEVDPDFPFTVGALPPATHQHKP  
GVAANSSSTSATDERSKTAVDDDDDDVLLIIDEDDEQEKGKRSIGDVAGDEEKPGKRAKT  
NSSGDVDVDIIEIED

>comp13528\_c0\_seq2; 525 89 1314 LEN=1314; translated  
MTNPLAGLERTVKGEMFQKIQTANILCVGAGGIGCELLKDMALSGFRRVQVVDLDTIDVS  
NLNRQLLFRGQHVGMKCTVACEVATDMVPLNIPSGDEKTDGNSPTDNAIELPPVSYQA  
HHGNVCDTSKFNVPFIKEFDLVNALDNVEARRRVNRLCLAADVPLIEAGTTGYLGQVTV  
IHKSSGVACYECTTQETQKVYPICTIRSTPMPVHTIVWSKELYKLLFHSKVDESMLYED  
PQGEESTYMDAVSVLRKFLKSDVIEDNGESLNTAIHRLLEDLYSVEIKKQLDMGRYKAA  
KKTPTCLKGSILESGMASSTAPPTSTTNIWSPEESVAALAACLA EAVKTPNDILLEEFDK  
DDHLAMRFVTAASNLRSSVFGIEPLQSLYSAKGIAGNIIPAIATTNAIX

>comp13529\_c0\_seq1; 313 337 1578 LEN=1649; translated  
MAPE SRKGPGRKRNRPRFCCHGTTFLAVALLLLL ASPHPLGPRHSGTPRFANAFSVAVHG  
RWQRLRAVQGHFEGEPPRHAF TAQRTRLRPLGASIPFFLETESRGPKKAEGGVAAPPFLI  
ESISTKKPSGD AIYKAI SDLCIDVFFKELLDPSGQGRVNFLKEWQINYLKNLQAADLERR  
RDYEDTNE MFLAYEVKRTTGVT DVLSQPLLMEDELEGAYNMDGLRSLPAQEQTGTSRNP  
AGGRDDSECYVRGDL LGFVEITQRPYGLGQATESSSESSSDVASVLEGF SFNERPMPRI L  
TNLAVLKAARKY GIGSKLLEACEEHVRKGNMNEIVLEVEDYNTKGLEFYRQRYEVLFS  
DPASRRYDIEGFWLNKVR CRREIMRKVFSKFDKRPASLVESADSLIRRIVASF

>comp13529\_c0\_seq2; 313 354 1595 LEN=1666; translated  
MAPE SRKGPGRKRNRPRFCCHGTTFLAVALLLLL ASPHPLGPRHSGTPRFANAFSVAVHG  
RWQRLRAVQGHFEGEPPRHAF TAQRTRLRPLGASIPFFLETESRGPKKAEGGVAAPPFLI  
ESISTKKPSGD AIYKAI SDLCIDVFFKELLDPSGQGRVNFLKEWQINYLKNLQAADLERR  
RDYEDTNE MFLAYEVKRTTGVT DVLSQPLLMEDELEGAYNMDGLRSLPAQEQTGTSRNP  
AGGRDDSECYVRGDL LGFVEITQRPYGLGQATESSSESSSDVASVLEGF SFNERPMPRI L  
TNLAVLKAARKY GIGSKLLEACEEHVRKGNMNEIVLEVEDYNTKGLEFYRQRYEVLFS  
DPASRRYDIEGFWLNKVR CRREIMRKVFSKFDKRPASLVESADSLIRRIVASF

>comp13529\_c0\_seq3; 282 337 1785 LEN=1856; translated



MAPESRKGPGRKRNPRFCCHGTTFLAVALLLLLASPHPLGPRHSGPTPRFANAFSVAVHG  
RWQRLRAVQGHFEGEGPPRHAFTAQRTRLRPLGASIPFFLETESRGPKKAEGGVAAPPFLI  
ESISTKKPSGDAIYKAISDLCIDVFFKVRVCGVQSGCAGVCCVDMRLQTNDVSEHGLESS  
ISSQLYSIRFDSRVPVAVLHCRLLTFFVVFQTDXNIRQELLDPSGQGRVNFLEKQWQINYLKN  
LQAADLERRRDYEDTNEMFLAYEVKRTTGVTDVLSQPLLEMEDELEGAYNMDGLRSLPAQ  
EQTGTSRNPAGGRDDSECYVRGDLLGFVEITQRPYGLGQATESSESSESDDVASVLEGF  
SFNERPMPRILTNLAVLKAARKYKIGSKLLEACEEHVRKGNMNEIVLEVEDYNTKGLEFYR  
QRGYEVLFSDPASRRYDIEGFWLNKVRCCRREIMRKVFSKFDKRPASLVESADSLIRRIVAS  
SF

>comp13529\_c0\_seq4; 250 337 1908 LEN=1979; translated  
MAPESRKGPGRKRNPRFCCHGTTFLAVALLLLLASPHPLGPRHSGPTPRFANAFSVAVHG  
RWQRLRAVQGHFEGEGPPRHAFTAQRTRLRPLGASIPFFLETESRGPKKAEGGVAAPPFLI  
ESISTKKPSGDAIYKAISDLCIDVFFKVRVCGVQSGCAGVCCVDMRLQTNDVSEHGLESS  
ISSQLYSIRFDSRVPVAVLHCRLLTFFVVFQTDVDRNSWIRADRAGLSKXVIEGGTKFGC  
ALGLPMPCSAAAKPAVAHYFLSFLFRHHSFLKEWQINYLKNLQAADLERRRDYEDTNEM  
FLAYEVKRTTGVTDVLSQPLLEMEDELEGAYNMDGLRSLPAQEQTGTSRNPAGGRDDSECY  
VRGDLLGFVEITQRPYGLGQATESSESSESDDVASVLEGF  
SFNERPMPRILTNLAVLKAARKYKIGSKLLEACEEHVRKGNMNEIVLEVEDYNTKGLEFYR  
QRGYEVLFSDPASRRYDIEGFWLNKVRCCRREIMRKVFSKFDKRPASLVESADSLIRRIVAS  
F

>comp13529\_c0\_seq5; 227 354 1718 LEN=1789; translated  
MAPESRKGPGRKRNPRFCCHGTTFLAVALLLLLASPHPLGPRHSGPTPRFANAFSVAVHG  
RWQRLRAVQGHFEGEGPPRHAFTAQRTRLRPLGASIPFFLETESRGPKKAEGGVAAPPFLI  
ESISTKKPSGDAIYKAISDLCIDVFFKELLDPSGQGRVKKLXIEGGTKFGCALGLPMPCS  
AAAKPAVAHYFLSFLFRHHSFLKEWQINYLKNLQAADLERRRDYEDTNEMFLAYEVKRT  
TGVTDVLSQPLLEMEDELEGAYNMDGLRSLPAQEQTGTSRNPAGGRDDSECYVRGDLLGFV  
EITQRPYGLGQATESSESSESDDVASVLEGF  
SFNERPMPRILTNLAVLKAARKYKIGSKLLEACEEHVRKGNMNEIVLEVEDYNTKGLEFYR  
QRGYEVLFSDPASRRYDIEGFWLNKVRCCRREIMRKVFSKFDKRPASLVESADSLIRRIVAS  
F

>comp13529\_c0\_seq6; 227 337 1701 LEN=1772; translated  
MAPESRKGPGRKRNPRFCCHGTTFLAVALLLLLASPHPLGPRHSGPTPRFANAFSVAVHG  
RWQRLRAVQGHFEGEGPPRHAFTAQRTRLRPLGASIPFFLETESRGPKKAEGGVAAPPFLI  
ESISTKKPSGDAIYKAISDLCIDVFFKELLDPSGQGRVKKLXIEGGTKFGCALGLPMPCS  
AAAKPAVAHYFLSFLFRHHSFLKEWQINYLKNLQAADLERRRDYEDTNEMFLAYEVKRT  
TGVTDVLSQPLLEMEDELEGAYNMDGLRSLPAQEQTGTSRNPAGGRDDSECYVRGDLLGFV  
EITQRPYGLGQATESSESSESDDVASVLEGF  
SFNERPMPRILTNLAVLKAARKYKIGSKLLEACEEHVRKGNMNEIVLEVEDYNTKGLEFYR  
QRGYEVLFSDPASRRYDIEGFWLNKVRCCRREIMRKVFSKFDKRPASLVESADSLIRRIVAS  
F

>comp13529\_c0\_seq7; 282 354 1802 LEN=1873; translated  
MAPESRKGPGRKRNPRFCCHGTTFLAVALLLLLASPHPLGPRHSGPTPRFANAFSVAVHG  
RWQRLRAVQGHFEGEGPPRHAFTAQRTRLRPLGASIPFFLETESRGPKKAEGGVAAPPFLI  
ESISTKKPSGDAIYKAISDLCIDVFFKVRVCGVQSGCAGVCCVDMRLQTNDVSEHGLESS  
ISSQLYSIRFDSRVPVAVLHCRLLTFFVVFQTDXNIRQELLDPSGQGRVNFLEKQWQINYLKN  
LQAADLERRRDYEDTNEMFLAYEVKRTTGVTDVLSQPLLEMEDELEGAYNMDGLRSLPAQ  
EQTGTSRNPAGGRDDSECYVRGDLLGFVEITQRPYGLGQATESSESSESDDVASVLEGF  
SFNERPMPRILTNLAVLKAARKYKIGSKLLEACEEHVRKGNMNEIVLEVEDYNTKGLEFYR  
QRGYEVLFSDPASRRYDIEGFWLNKVRCCRREIMRKVFSKFDKRPASLVESADSLIRRIVAS  
SF

>comp13529\_c0\_seq8; 250 354 1925 LEN=1996; translated  
MAPESRKGPGRKRNPRFCCHGTTFLAVALLLLLASPHPLGPRHSGPTPRFANAFSVAVHG  
RWQRLRAVQGHFEGEGPPRHAFTAQRTRLRPLGASIPFFLETESRGPKKAEGGVAAPPFLI  
ESISTKKPSGDAIYKAISDLCIDVFFKVRVCGVQSGCAGVCCVDMRLQTNDVSEHGLESS  
ISSQLYSIRFDSRVPVAVLHCRLLTFFVVFQTDVDRNSWIRADRAGLSKXVIEGGTKFGC  
ALGLPMPCSAAAKPAVAHYFLSFLFRHHSFLKEWQINYLKNLQAADLERRRDYEDTNEM  
FLAYEVKRTTGVTDVLSQPLLEMEDELEGAYNMDGLRSLPAQEQTGTSRNPAGGRDDSECY  
VRGDLLGFVEITQRPYGLGQATESSESSESDDVASVLEGF  
SFNERPMPRILTNLAVLKAARKYKIGSKLLEACEEHVRKGNMNEIVLEVEDYNTKGLEFYR  
QRGYEVLFSDPASRRYDIEGFWLNKVRCCRREIMRKVFSKFDKRPASLVESADSLIRRIVAS  
F

>comp13530\_c0\_seq1; 1459 1 3448 LEN=3448; translated  
XNKILNEEQPKDKVENSNSALIMASEEQEETEGPVMASPDFAFVYKQELSPDDKKSIV  
HVVVDSTLVIPETAFAKCEFLLTSSIVIPEGIKRIGDKAFSGCESLSSIDIPVGLSIGVH

AFFGCQSLTSINIPKSVTTICDFAFCKCSSLKSIAIPEGVETIPEGAFFRCEELSSIHIP  
KGVKSIGRGAFAGCYWLSSIGIPKGVTSIGKRAFKGCELSLTSIYIPSGVKEIGSGAFSGC  
LQLLVVAIPKGTKDIDSSTFEGCKLRRFSISHETPDEIEGDNATVRTEGDASTVRNIAD  
RLHLRFKDLPLHLACYRANGQNI EAL TASPKE DARTDMYNLTPLHILAGNPNASERMI  
RNVVEKCPDAVTRIDNALGMSPLHFASINPGNNVVKIISNMENKAPETGKLSCTLRSKD  
LKTPTILSILHNYENEEAQRLLYKCQPCSESQFAERSHKNRVNSLEQWYVNECIPSLTSE  
NLQVSPQTQNGWVYFVSNVSNPDSINSICKFFEHCPEQLLKDLRSKADDEGKEAIDVAVH  
GIKAAFNKRLYFLGRYEIIGGPAIHKSEVCIVIGAIMDCDGMSLNSDEDRKVAIKFVKD  
EKQFLTEISFREDLQKNSGKVEKGEQAVISINESYNATENEFFKSAMQSLPIPGSNEDEK  
MFDHFKYAIIVMPFADRNLDTIARSEQLDPM TIRSDLHQI AKKLQILHQCNTIHCNLKMQN  
IVRRGENLFLTDFDGS AKVKHGNAETELAKFFVGGKFFSSGILPPEMVYNFKNSEELNQFE  
AYYKHLDAKSLKWKGIKHQT PRATNDYYCLKTFDTEMKEGNPDIDTGKVD AVE SVKEGLP  
YDPVVATEAIDLWSLGTILYFLCTKRSLFRVDTNDNLADGDAMEQLYYWNDETMMKRVNS  
KDIIDPGAKKILLKLLSREPGRGTLEELLNEPFFGKLSAEVMEEIQNAKENAVEDTKV  
IINATNAADEAQTFCPTTFVVLKEKLPYDSDQMIANRCKEMCELVGAVGDMTEAADAI  
PKQEPDALFETMKGKLDVVTDDSKTMYFYLVDDEL TGKPV TGGKYP I EITNPAEVVPTLL  
PYIKVGMTSM AVYDGTAGVLGLFGLSAPQVSTKTQSKLGKSIDILKQKSSNATEGDDDAS  
SGARGESLRG

>comp13530\_c0\_seq2; 1592 1 3862 LEN=3862; translated  
XNKILNEEQPKDKVENS CNSALIMASEEQEETEGPVMASPD AFVYKQELSPDDKKSIV  
HVVDSTLVVIPETA FKECFLLTSIVIPEGIKRIGDKAFSGCESLSSIDIPVGLSIGVH  
AFFGCQSLTSINIPKSVTTICDFAFCKCSSLKSIAIPEGVETIPEGAFFRCEELSSIHIP  
KGVKSIGRGAFAGCYWLSSIGIPKGVTSIGKRAFKGCELSLTSIYIPSGVKEIGSGAFSGC  
LQLLVVAIPKGTKDIDSSTFEGCKLRRFSISHETPDEIEGDNATVRTEGDASTVRNIAD  
RLHLRFKDLPLHLACYRANGQNI EAL TASPKE DARTDMYNLTPLHILAGNPNASERMI  
RNVVEKCPDAVTRIDNALGMSPLHFASINPGNNVVKIISNMENKAPETGKLSCTLRSKD  
LKTPTILSILHNYENEEAQRLLYKCQPCSESQFAERSHKNRVNSLEQWYVNECIPSLTSE  
NLQVSPQTQNGWVYFVSNVSNPDSINSICKFFEHCPEQLLKDLRSKADDEGKEAIDVAVH  
GIKAAFNKRLYFLGRYEIIGGPAIHKSEVCIVIGAIMDCDGMSLNSDEDRKVAIKFVKD  
EKQFLTEISFREDLQKNSGKVEKGEQAVISINESYNATENEFFKSAMQSLPIPGSNEDEK  
MFDHFKYAIIVMPFADRNLDTIARSEQLDPM TIRSDLHQI AKKLQILHQCNTIHCNLKMQN  
IVRRGENLFLTDFDGS AKVKHGNAETELAKFFVGGKFFSSGILPPEMVYNFKNSEELNQFE  
AYYKHLDAKSLKWKGIKHQT PRATNDYYCLKTFDTEMKEGNPDIDTGKVD AVE SVKEGLP  
YDPVVATEAIDLWSLGTILYFLCTKRSLFRVDTNDNLADGDAMEQLYYWNDETMMKRVNS  
KDIIDPGAKKILLKLLSREPGRGTLEELLNEPFFGKLSAEVMEEIQNAKENAVEDTKV  
IINATNAADEAQTFCPTTFVVLKEKLPYDSDQMIANRCKEMCELVGAVGDMTEAADAI  
PKQEPDALFETMKGKLDVVTDDSKTMYFYLVDDEL TGKPV TGGKYP I EITNPAEVVPTLL  
PYIKVGMTSM AVYDGTAGVLGLFGLSAPQVSTKTQSKLGKSIDILKQKSSNATEGDDDAS  
SGARGESLRG  
LEMEERENEIQEMRTREKKLEEMRTMX

>comp13530\_c0\_seq3; 225 1 379 LEN=793; translated  
XKKLEDEKIEYEMEMIKRESKIQELTMKEKKLEDKKELEFELQKQEQNLKDEKKEHELE  
MRKRDLEVQEMKVHEMKLENEKKDLELEMLKQEKKYEDEKKALQDQIRQLSEQDSSRWCA  
PRSKTS

>comp13531\_c0\_seq1; 382 210 1235 LEN=1264; translated  
MGNVVSAGMGQAPTRQAVLYAGLPETTICTTINKVCASGMKSVMMASQALKCGQRGAILA  
GGFESMSNI PHYLKASRSGTKLGNTLVDGVVYDGLWDIYNDQHMGMCGEKCAKDYAFSR  
EDQDEYAIESYRRAQAALVEGVFEEVIPVEIPQRRGNQLVNEDEEPPGSMKLDRIASLKP  
AFDRNTGTITAAANASSLNDGACAMVLMTEQDALDKGINPIAKIRGFGDAAQAPVEFTTTP  
SLAVPVALQNAGVEASDVYHEINEAFSVVALANMQLLNLDQSKVNVFVGAVSLGHPIGM  
SGARIIGTLYNVLKHKDG NIGCASICNGGGGASAI VIERLQ

>comp13531\_c0\_seq2; 375 436 1329 LEN=1358; translated  
MASQALKCGQRGAILAGGFESMSNI PHYLKASRSGTKLGNTLVDGVVYDGLWDIYNDQH  
MGMCGEKCAKDYAFSREDQDEYAIESYRRAQAALVEGVFEEVIPVEIPQRRGNQLVNVNED  
EEPMSMKLDRIASLKP AFDRNTGTITAAANASSLNDGACAMVLMTEQDALDKGINPIAKIR  
GFGDAAQAPVEFTTTPSLAVPVALQNAGVEASDVYHEINEAFSVVALANMQLLNLDQSK  
VNVFVGAVSLGHPIGMSGARIIGTLYNVLKHKDG NIGCASICNGGGGASAI VIERLQ

>comp13531\_c0\_seq3; 375 779 1672 LEN=1701; translated  
MASQALKCGQRGAILAGGFESMSNI PHYLKASRSGTKLGNTLVDGVVYDGLWDIYNDQH

MGMCGEKCAKDYAFSREDQDEYAIESYRRAQAALVEGVFEEVIPVEIPQRRGNQLVVNED  
EEP GSMKLDRIASLKP AFDRTNGTITAAANASSLNDGACAMVLMTEQDALDKGINPIAKIR  
GFGDAAQAPVEFTTTPSLAVPVALQNAGVEASDVYHEINEAFSVVALANMQLLNLDQSK  
VNVF GGAVSLGHP IGM SGARIIGTLYNVLKHKDGNIGCASICNGGGGASAIIVIERLQ  
>comp13531\_c0\_seq4; 375 664 1557 LEN=1586; translated  
MASQALKCGQRGAILAGGFESMSNI PHYLKASRS GTKLGNT ELVDGVVYDGLWDIYNDQH  
MGMCGEKCAKDYAFSREDQDEYAIESYRRAQAALVEGVFEEVIPVEIPQRRGNQLVVNED  
EEP GSMKLDRIASLKP AFDRTNGTITAAANASSLNDGACAMVLMTEQDALDKGINPIAKIR  
GFGDAAQAPVEFTTTPSLAVPVALQNAGVEASDVYHEINEAFSVVALANMQLLNLDQSK  
VNVF GGAVSLGHP IGM SGARIIGTLYNVLKHKDGNIGCASICNGGGGASAIIVIERLQ  
>comp13531\_c0\_seq5; 375 551 1444 LEN=1473; translated  
MASQALKCGQRGAILAGGFESMSNI PHYLKASRS GTKLGNT ELVDGVVYDGLWDIYNDQH  
MGMCGEKCAKDYAFSREDQDEYAIESYRRAQAALVEGVFEEVIPVEIPQRRGNQLVVNED  
EEP GSMKLDRIASLKP AFDRTNGTITAAANASSLNDGACAMVLMTEQDALDKGINPIAKIR  
GFGDAAQAPVEFTTTPSLAVPVALQNAGVEASDVYHEINEAFSVVALANMQLLNLDQSK  
VNVF GGAVSLGHP IGM SGARIIGTLYNVLKHKDGNIGCASICNGGGGASAIIVIERLQ  
>comp13531\_c0\_seq6; 435 282 1463 LEN=1492; translated  
MSNSVVIAS IARTPIGRFCGSFAGLRGSELASSAIRGALAKVPDDL LVSECI MGNVVSAG  
MGQAPTRQAVLYAGLPETTICTTINKVCASGMKSVMMASQALKCGQRGAILAGGFESMSN  
I PHYLKASRS GTKLGNT ELVDGVVYDGLWDIYNDQH MGMCGEKCAKDYAFSREDQDEYAI  
ESYRRAQAALVEGVFEEVIPVEIPQRRGNQLVVNEDEEP GSMKLDRIASLKP AFDRTNGT  
ITAAANASSLNDGACAMVLMTEQDALDKGINPIAKIRGFGDAAQAPVEFTTTPSLAVPVAL  
QNAGVEASDVYHEINEAFSVVALANMQLLNLDQSKVNVF GGAVSLGHP IGM SGARIIGT  
LYNVLKHKDGNIGCASICNGGGGASAIIVIERLQ  
>comp13531\_c0\_seq7; 382 325 1350 LEN=1379; translated  
MGNVVSAGMGQAPTRQAVLYAGLPETTICTTINKVCASGMKSVMMASQALKCGQRGAILA  
GGFESMSNI PHYLKASRS GTKLGNT ELVDGVVYDGLWDIYNDQH MGMCGEKCAKDYAFSR  
EDQDEYAIESYRRAQAALVEGVFEEVIPVEIPQRRGNQLVVNEDEEP GSMKLDRIASLKP  
AFDRTNGTITAAANASSLNDGACAMVLMTEQDALDKGINPIAKIRGFGDAAQAPVEFTTTP  
SLAVPVALQNAGVEASDVYHEINEAFSVVALANMQLLNLDQSKVNVF GGAVSLGHP IGM  
SGARIIGTLYNVLKHKDGNIGCASICNGGGGASAIIVIERLQ  
>comp13531\_c0\_seq8; 382 553 1578 LEN=1607; translated  
MGNVVSAGMGQAPTRQAVLYAGLPETTICTTINKVCASGMKSVMMASQALKCGQRGAILA  
GGFESMSNI PHYLKASRS GTKLGNT ELVDGVVYDGLWDIYNDQH MGMCGEKCAKDYAFSR  
EDQDEYAIESYRRAQAALVEGVFEEVIPVEIPQRRGNQLVVNEDEEP GSMKLDRIASLKP  
AFDRTNGTITAAANASSLNDGACAMVLMTEQDALDKGINPIAKIRGFGDAAQAPVEFTTTP  
SLAVPVALQNAGVEASDVYHEINEAFSVVALANMQLLNLDQSKVNVF GGAVSLGHP IGM  
SGARIIGTLYNVLKHKDGNIGCASICNGGGGASAIIVIERLQ  
>comp13532\_c0\_seq2; 649 410 2200 LEN=2459; translated  
MTVPQHEFEQEQQPEVP RPQPLNVKEQLEATASRFWSSVTKTGRSQESDES MRVPGVPIG  
LFSQRSCGT YDDEEDDILSRPSTAQHSLQFVNVAMFSSCTTGGPFTDDDGSSDEALKKT  
TRSQSGTLPTAGTTVTPDSSFDPERVVSQPQRKERRPLPRPVATARSALQETSKNLFKNN  
HEIAEEAIKHLRRQQQRELSKQNNSTVFAS TVAVDLERDDSSPPKNHPSAITPEPKPAL  
PQQPDPQSKSFLPRSVLSKQK GAVASPPGKVTPTRSRKGHSFFPASRPRDPPGRTRREQ  
RAREKKERIKGVPKEVEKASSP PRLFRKRTKQKRVLDGVPGTKGTAWDGTES EDSRSSVS  
WDINNDGISEITQTTVDRMVFAISQQLLVFPEEADNLNR IHSDLTDPAPNRQHTFESDYE  
TSVEGSVAQDYFPMVGGVLDGFKDDFGRMVTPPRVRDASEKGMSPSLLEFTCTAGSVGTR  
SFFT KTTHSSQTTFASAWRRDEQQFWDKEVAKEQ GKREPPTKVSKPGRTGSGSSRKSWT  
KFKGRRSGATTATTSITTATTPSRHARKLQQLPHQGHDR LMDDLVLRELEHAEI  
>comp13533\_c0\_seq1; 1054 1 2884 LEN=2932; translated  
XIRRRRQHGLHSCR SFKFVAF LLLLALQSSCYCVSVFQQVAASETADEGASAENEDLADR  
QGWS TSDAIEDSMFDPLTADPSCSATGDNDCHAPPQSTIEVEEIEKLDPTCFKGAGDADL  
EDDGKQQQKQQCAATGGKTKTKRDKHWGDNPKTIAMRDHLREQSKHWINDSRPPIFLVP  
GLASTRLVAWKFKKAGALSSDIKVQDNVWLNINLVRMGT TIDIDCLKQCLSLGLNQTD  
TDDWDSGCKLRADEGLDSIASLAPGGIGADLLVGGTNTVYAWLIQWLADNLGYDVTNMIG  
FPYDWRLTPSVM EKRDGFLSMMRKRIEGAVAASKKPGILVAHSMGNLIFRYFIEWLRIEL  
REEAFDGYVKRAKKAQSMKKQQHQQNYKKHQEQLEQKKVKQKIASKQEQKIAENDSWM  
PGWVTSTLEDVSAEVD EWYDWLTNDASDGPESGTNKQTNEPEEEEEEEIDYRQTQLWELA  
KLEGEDEKWI EWLQTHVWTVYVGLSAPMLGGINPLRAVISGENMGLPLNDDIAREMELTFGS  
THTLNPVSTDTGFCDERNVDDWAEDPRGNSDEHESTLACLDDIATDIEYSSGDRDPWKDF

PALKALMRDRIDWTTGKPMIDIEISHC NNTNANSCEATGEFIKIGPKNVEDGSI FQIFDD  
LWKEEGKPLIVKKEQLEDSFVNSKVRNINL NHTWDRPLIKHVIMGYGV DIPTVEVGYIYSKK  
YNVKHS DGVT SVSDRNETG PLPSLKTALWENPRGVM TTELIDSPRGGIG EYFIKKKPKRE  
PLEVTVPEARLEHCGDGSVPYLSLSWAQTWLLHAARARRFTEDKYQMSGETKNALDHIAI  
SHRPQGESEWIEGPPPESLTILGGDEQKADS DTGISHPHGTRYKPLMKRYHNI GVS RKTG  
IEYTTSVIEAIGIEHKETTRNF DILAAVFTEVL DYM HDDLGLI PDNNSGAVDADSGVNET  
E

>comp13533\_c0\_seq2; 1008 1 2761 LEN=3029; translated  
XIRRRRQHGLHSCRSFKFVAF LLLLALQSSCYCVSVFQQVAASETADEGASAENEDLADR  
QGWTSDAIEDSMFDPLTADPSCSATGDNDCHAPPQSTIEVEEIEKLDPTCFKGAGDADL  
EDDGKQQKQQCAATGGKTKTKRDKHWGDNPKTIAMRDHLREQSKHWINDSRPPIFLVP  
GLASTRLVAWKFKKAGALS SDIKVQDNVWLNINLVLRMGTTIDIDCLKQCLSLGLNQTD  
TDDWDSGCKLRADEGLDSIASLAPGGIGADLLVGGTNTVYAWLIQWLADNLGYDVTNMIG  
FPYDWRLTPSVM EKRDGFLSMMRKRIEGAVAASKKPGILVAHSMGNLIFRYFIEWLRIEL  
REEAFDGYVKRAKRAQSMKKQQHQHQQNYKKHQEQLEQKVKQKIASKQE QKIAENDSWM  
PGWVTSTLEDVSAEVD EWYDWLTNDASDGPESGTNKQTNEPEEEEEEEIDYRQTQLWELA  
KLEGDEKWI EWLQTHVWTVVGLSAPMLGGINPLRAVISGENMGLPLNDDIAREMELTFGS  
THTLNPVSTDTGFCDERNVDDWAEDPRGNSDEHESTLACLDDIATDIEYSSGDRDPWKDF  
PALKALMRDRIDWTTGKPMIDIEISHC NNTNANSCEATGEFIKIGPKNVEDGSI FQIFDD  
LWKEEGKPLIVKKEQLEDSFVNSKVRNINL NHTWDRPLIKHVIMGYGV DIPTVEVGYIYSKK  
YNVKHS DGVT SVSDRNETG PLPSLKTALWENPRGVM TTELIDSPRGGIG EYFIKKKPKRE  
PLEVTVPEARLEHCGDGSVPYLSLSWAQTWLLHAARARRFTEDKYQMSGETKNALDHIAI  
SHRPQGESEWIEGPPPESLTILGGDEQKADS DTGISHPHGTRYKPLMKRYHNI GVS RKTG  
IEYTTSVIEAIGIEHKETTR

>comp13533\_c0\_seq3; 650 1 1830 LEN=1830; translated  
XIRRRRQHGLHSCRSFKFVAF LLLLALQSSCYCVSVFQQVAASETADEGASAENEDLADR  
QGWTSDAIEDSMFDPLTADPSCSATGDNDCHAPPQSTIEVEEIEKLDPTCFKGAGDADL  
EDDGKQQKQQCAATGGKTKTKRDKHWGDNPKTIAMRDHLREQSKHWINDSRPPIFLVP  
GLASTRLVAWKFKKAGALS SDIKVQDNVWLNINLVLRMGTTIDIDCLKQCLSLGLNQTD  
TDDWDSGCKLRADEGLDSIASLAPGGIGADLLVGGTNTVYAWLIQWLADNLGYDVTNMIG  
FPYDWRLTPSVM EKRDGFLSMMRKRIEGAVAASKKPGILVAHSMGNLIFRYFIEWLRIEL  
REEAFDGYVKRAKRAQSMKKQQHQHQQNYKKHQEQLEQKVKQKIASKQE QKIAENDSWM  
PGWVTSTLEDVSAEVD EWYDWLTNDASDGPESGTNKQTNEPEEEEEEEIDYRQTQLWELA  
KLEGDEKWI EWLQTHVWTVVGLSAPMLGGINPLRAVISGENMGLPLNDDIAREMELTFGS  
THTLNPVSTDTGFCDERNVDDWAEDPRGNSDEHESTLACLVSVTNNTISGFSRESKDG  
AKSFFHAF LPA

>comp13534\_c0\_seq1; 109 99 588 LEN=1412; translated  
MQSSTVPKQPLHQRPQPTQSKQRQPAQTAKQEPRHRKVWRRVGS AVVNCLDTAESASAAA  
AKASLAPSQAANQDAFAKKCRLDRTVAYFMEARREFHRMLSLTEAKLQKKEEMQSLETY  
VGRNPG LAAANGSGDTVLEPRAKLVSGSGVLSVSDAFELETG

>comp13535\_c0\_seq2; 266 724 1611 LEN=2808; minus strand; translated  
MKRPPSVEILCDESLKVK SALPMDSSSHKDNEKEYSQVQLRSARQYFFAILGGSCGIMYT  
LKILSTIGPLVVQPPSEYETNIISLVSWICALGLLISAVLNGFGSVSLPYANLCGFFLQ  
VRPDYITNLESELK SIESALS KRRMEKELKVEIPSLSPSKATNRTGSSSNAFSMSSILT  
LKTTSNGFSELGDELRI RRQILQTEISFMEDLLRETKLDLEELKESQV TAAAARSSMGKN  
KSYVGILFSVILLVRLLIAGFSIFRSYGTLLTKGYASDHHRHKKPHSDIVTII LLW

>comp13536\_c0\_seq1; 549 1 2134 LEN=2526; translated  
XRKRKLSPLALPAMRSVDGEGEHVS SVKVFLPPFLPEEVPEPEIDALLGKPSEGSGVRNA  
FGDELASNPNGSAGDTVESILSNVSPKIRKHLSGIYETTTTNP RRFLKNYYYVEWLQGRAA  
RKREVAKIRRQRVYDELVALQTLKKRQAASKQTPKQGLSGDAAPPEM GFALVTGASRGIG  
RAIAVEIARWEIPLVLVARDVDK LARLASDLEACYGVKCCVLEADLSKADAAERIKQATD  
DAGISVDILINNAGVATEGLAVDADTSDIERMVLNLSLTYTKLSVLYGRDMKKRRGRML  
MSSMAGLCNGAPNTAVYGACKAFGKSLALS MAREMESYGVGTCLMPGAVLDTDFR RSS  
GTRRALVWYLPFYSRSPDMVAHQGVMSLLDGDTRSVPGWQNRVFANIVRPIIPQRVEIML  
VQLAFSPLSLPSIKSLWQRNPNND SGAETDSPPPYSPGPSHGSSWLSLKPRHSTQPPP  
RFLKLP EEEVPEIAREDKVANHEILEEEASSPSPVTANGTNFTTAATSPREVDEVEDVPI  
AQSHRTPEIPDSMHFVNSNR TVDRDELHSIEQNSQPLERQEEDHHRNTETYN SNQKSQTG  
ERKIPLKPEKRN SVPRERNASVPIYEKSQEHSTAKKPRHSRDQHDGMIREGAGVGK LQSS  
QWPQWFDDEYDDDDDETFSTR LRPISMKGNEFLYSNQSGKVGQTPIITV

>comp13537\_c0\_seq1; 1317 1 3412 LEN=3502; translated

XKKVTVNIISRFVSTHRRLTPQIRIEYDETMPSNQELHDLAEDFKAKGNKAFQNSEADAA  
VKAYSNGLVQVDRMTTVPILLKATLLSNRAACYLKQAKLQECQEDCTSSLALLDGLGANN  
ADDKSRSLRSKLLYRRAKALFLKFNMPHKKEEEDLNIAAKDLLNLLSFDPSNKEATKLLN  
TIRAQHAAEQKKNVSNTPMAKTLQEIKKKDGNNLRNIKVLMGLLTSDDVSSSMEFGRRG  
GVDLLIGIVNAENEDKERVATNEDFHKIRKISLQICISAGSYPLFCRTFLNDSVDVQKML  
SDLIMKACAVDCINDQIASSAFTIFIRLILHLDRDDPEKIDIDGKTHLLYDPLIQSMISAF  
KSKDAAIVRAAVDVLSSWTAGKNREMAIRASLSDGMSDDLPTLTKYEMHQLKPREFSAY  
KQRLHRINTRNEAWAFERSTLFCQNGGLQALLNFAVECEDANLRREITAVLGKVL ECLAD  
EDKMKDVARPILGSVKTNKDSNEEGGEEPRLGPIIEEIDDDDEEVEIGKVEDVDEDKNEPI  
VEVSLLEV LKQRAELATALLMANGEVGGWSMGSGWPGCSNDLNILVSSDINALRIVAELL  
SGAASVKETRQMVAVYLDNDSMKALVTHEDRNVRTAAASAVTKLGLGEDQTEDFEVMGLL  
EAACFMLEDWEETNAASKEREKSKSKTEALAS IPTSSGAKSSVERGVEAMAYLITKTIK  
EEVAHGFKSSPKSKYSAIELLVKISEDSGSGETVSAFGIASIFQLMAVTPLTLRKEAFEG  
KEISMEEYDEIQKMQKTEEAKEMDKSDELKDDNDQCAERVVKMTNAGVPRALVQLAEG  
SSDRSLEQIVLALNRMANVQSVRGTM IQQGVLSALIKLEKDEKNPSDIRKKIVRNIRHCM  
AKLLVTTNPNLLTSAQSMGAIKPLIQLVREVESNDLQKFEALMSLTNIASLSDSTKNKLA  
SEKGIHAVKFCMFS DHPMVQRAATECACNMVGNQFMKLLLEDVDELRLFLALASDYEENY  
ECARAAAGCLAMATGYPNVAKTITISNFKERMDTCLSSGSLEILYRMEVVVNLNVEHGG  
EMKMAAIENSLVAFCDAYVESYHDGKKEELDLADAQIPMFNTTVDIAKQIVRAAEK  
>comp13538\_c0\_seq1; 378 199 1233 LEN=1921; translated  
MNDQERQQSNLLPISEVTGKHQADIGIERCAGNENTTQTQKTMTAQKEYYEDSSKDPFNS  
DKEKLVNLSPKKENADDIASMISHIVGRVCEDSVASDVSGLTADIFRTEDFHSSPTNAH  
SVETVVQNESLSSSKNKNFKSVVRRAPNAPAVSGALTDIESENTSTTVSSSHEEKTPKS  
RKRSVSFCDVQVRNYERVLELNPSVTS GPALGIGWKYSVEQEYSVENFEDSRENFRHSM  
KELAVSRDEREDILRSLGYSQKEIAGSVRAIRAKNQRKQTIHNLHVSSMEEFMEKATRK  
VKRVLLFPLHNRKAKALYSYPTQSPLSAKTL DSCALKKTSLRA  
>comp13539\_c0\_seq1; 1276 67 3594 LEN=3713; translated  
MSSLPPALNFPDAEVKICEKWKEEDSFRQQNRLSEERGDEEFVFFDGPFPATGLPHYGHI  
LAGTIKDTVTRYAAMTGKRVDRRAGWDCHGLPVEQEIDKMLNIKFRDQVLEMIDKYNEK  
CRSIVQRYTSEWETT VTRLGRWIDFENDYKTMDLTFMESVWWVFSQLWEKDMVYQGFKVM  
PYSTGCSTVLSNSEASSNYKDVSDPAVVVAFPIVGDDEDMKGVSLIAWTTTPWTLPSNLAL  
CVNPKMEYVQFLDKKSGNRYVMAKTRLPQIYPI MNKWKPKMADDLYAIEKTM LGAEL  
KKGQYQPLDFDFEGPEAYFQVVTDTYVTD DAGTGVVHQAPAFGEDDFRVC MANGI IQKGV  
DFPCPVDADGLFTDEVSITKGVHVKEADNTLIANIKERGRVLVQKDMLMHSYFPCWRSNTP  
LIYKTVSSWFIKVEEIRDITVDNKNVRWVPEHVGKVRFNWLNK DARDWAVSRSRFWGTP  
LP IWTNEDFSEMICIGSIAQLEELSGEKVTDLHREFVDKLTIPSQKNPDGPR LKRVD E V F  
DCWFESGSMPIYAQKHYPFENKDSFENGFPADFIAEGLDQTRGWFYTL MILSTALFGKQAM  
NNVIVNGLVLAEDGKMKSKSLKNYPDPTIVINKYGADALRMYLINS PVVRAEELKFKEG  
VLGVVKEMFLPLYNAFRFFLQNLERWESDSGRKFVPSLNIVKSTANPTDIWISAATQGLI  
KYVREEMEA YRLTYVLPALVTYVTQLTNWYVRLNRDRLKGLEGEGDAAEKEAETGLQVLY  
DVLLDVTIVLGPFTPFLAEFFYQHLRKLQPSYAEAAANGGGSANPVKVGKSDSVHFLNLPE  
YDESRLNTEAVEAMEALQ TIVEQGRNVREKRTISLRTPIKSVVA I LRKPPSHVIDGLTGP  
LKKYILSELNAWDFQVIPEEEQHNVVTLALTPNFKVLGKKVGGKMKAITAAVKKMTHTEA  
VKCLEEGKLVVDDVELDTASELISKLSFSKEGDHWESIASADGATVVAIDATQDDA ILSA  
GMAREVINHIQQLRKAAGLELKDVEVFFHEEDGVTTTENAVSNNVATLDAKFKGS I PLP  
KRFAPSWSVL KADTVDVGGSKVTISVCRPAIAVKDSLDEM VANV LATKEP SDFAKGASF  
TCSVDGKSYELKEGEDFWLSTVAKARSTKAVSWIA  
>comp13540\_c0\_seq1; 333 278 964 LEN=1373; translated  
MSSPSASNTDPLDDVRKSKQELRRKLR SAMKTLTSEDINEQSKLVWTSIFDLPIYQSAKS  
VGLFLSMP LGEINTDLILQHCVQH GKEIYVPEVGKNFELCDMELRKVVLD DGASGESIEG  
MFHKTWPKNKWKIPEPPNDMPTITAKPGDIDLMI V PGLGFDRSRNRLGQKGYYDRFIAK  
MTKDGHDLPLVAVALRPQLVVDSSIPTATYDRQMDMVVLPDEVIVPTN  
>comp13541\_c0\_seq1; 562 109 1407 LEN=1454; translated  
MIFTRILVALLTIGLPYRQYKFSYSFVVTAFIGSPQRFSRAPTLFGRSEQESEHLSHDL L  
LDESILLYSQISRQIGVENNTDIETLRKNELTSLITDIVFDERGSVDLEKRKKS VQND E D  
DRELETLDEISSALDQQILLGYQSTFTEEELAQWVGGIDALYEKLSQVRALPPASSGTE  
KSVPKAVATTLTPLDQLQSRLES MRILIDPTGNARWRPPLAQSAVQTVPSITPAHTKPD T  
KKEDEITAEFFIDETLSKTSQPDVVEGKLDINNP IETPNTQNPTANNNSTIQSMGGEK  
WIEVPADADYIKANTFARDNDDGTSAGFANVTVGVD D P SDDHTAPDHSETPERSTR TVDV  
VSTVTTAALGAAAVTKLPLFAAGVAFGPVIRDSISYAKGRMANSTKTTNPENDTNSTSV

EKDKGESDSVED

>comp13542\_c0\_seq1; 98 101 619 LEN=1326; translated  
MRSLLWSTVFLMLIELAVTLILVIVPVRKIRNWICLRVSKLELKKRLRVPLVLIVSALL  
FALADTIGYLSQIYAKEVRDAERIENVLDRHLIKEKEYRAGRNLVYLVGFALTLIFVIGRI  
TELMQEHAELEGTVENLRLAVSMMETKDRGKRSGETPGEGIEMKPMQSKKKE

>comp13543\_c0\_seq1; 371 108 977 LEN=2092; translated  
MAGKRKSPAFAAATKGRSRKNDEQTVGDDSDSSGESPLRKKQNTSTSSAPRVSINVERKSST  
PKGGRNNAIAVGRDFHTPIECSPRSDAEENLVLHLAPPIENSLIKPVSVSTAIAPAP  
APATITTKTEKLIETLGSIPTPQKSTDENLDCENDLTFVDPKPKDKTGNLLKILFWIGFL  
CFANITVFSVVTWSGMLLNERSLFQLELSSCKERLRQVHHVMGISDSEDNNGDIDNSGTN  
KRLQEQLFYWQELQVQYWKKEAKRHQQYGEIGIQQCEEDLRRLVSEL

>comp13544\_c0\_seq1; 335 1 984 LEN=1363; translated  
NNNNNSGSHGGSSFLAALVELVDLTLCFHWKKTGGLYDASLSDPPLTCRYRRKHTFAVS  
RSRSNKGVEATLWDVPQWSEGGVDSRSGTEATEMPRRDTGKNKSKSSRHKQLLVFNTHLD  
PWHPSNRKKQIGELLRFVEDTLSSIERASGNARGCYDWSQTAVLVLGDFNVKAGSEEYME  
LLGAGSSEPSLPSADGPPCRDDAPCLGWIDYFALDHGAHESPPSSRGNSTHEQEQQHRQ  
QQEQQHQQHTYALQNSMVEYPGDCGRIDYVFGIHLRWARGGAEGPSNRPREFLRRLAVVD  
RSVRKEPVGDESSDHYALVLELVPVAVR

>comp13545\_c0\_seq1; 302 531 1586 LEN=3042; minus strand; translated  
MAQSLTRIDDSRDILQLMIRQEESSYKCPHYLSLEERSTQTLVFTPVPSVLQVVEEMASL  
VTDIRAEPSPMCKGDDHCASPGSSTCDLYGDLRAPLRAFLPNSRSEQFQEVLSLSSWRHR  
MLEWGNVAVCVTFGIDASVLESFAFNILDRIYAVEISHSNDAFENLSLTREDFQLFSMVSIIY  
IAVKMFSRNQNLRVHDLLEMAQGFYTADHITTTTERDILEALNWHVNPPTVMDYCDVYLT  
FPQHLYGCGYNDAYSPASQWSSSKRVGEEKQRRKCRRCQSMVGIVLQDLFFVDKPNFLTA  
LAAVLLAADAFAFGCARDNSFVLEHFLRNIQGVVNIQKEEFDSIIRRLECYC

>comp13545\_c0\_seq3; 302 1041 2096 LEN=3552; minus strand; translated  
MAQSLTRIDDSRDILQLMIRQEESSYKCPHYLSLEERSTQTLVFTPVPSVLQVVEEMASL  
VTDIRAEPSPMCKGDDHCASPGSSTCDLYGDLRAPLRAFLPNSRSEQFQEVLSLSSWRHR  
MLEWGNVAVCVTFGIDASVLESFAFNILDRIYAVEISHSNDAFENLSLTREDFQLFSMVSIIY  
IAVKMFSRNQNLRVHDLLEMAQGFYTADHITTTTERDILEALNWHVNPPTVMDYCDVYLT  
FPQHLYGCGYNDAYSPASQWSSSKRVGEEKQRRKCRRCQSMVGIVLQDLFFVDKPNFLTA  
LAAVLLAADAFAFGCARDNSFVLEHFLRNIQGVVNIQKEEFDSIIRRLECYC

>comp13546\_c0\_seq1; 328 154 1565 LEN=1565; translated  
MPCIIIEPTSLRLTDTENDNDCNTRDNDKMNDSAKLYLAPMRHGDLLLPLSSPLSTHPG  
NQSSSNRTRKNVHEIPRGWISLHSSHRRCSHRGKLDGKSFIPSHKSAIFLGRSDFLS  
SMFSACGCSKNWRSSRNKCKECSRVLWAGNLSRRTLKINSSSNGANQPAQIQLSFRGCL  
AAIVI IKKDCRGEIEDTEYHRRCKCHRCNDYWDTGDTDVSVAPIASALEEIEETDDTGMR  
DPRKWSKPKRIGIGTRISLRYGEENLDFMVVSQEDLQNSVNTHDHCYEKRRDRIGTCGGS  
IPNNLKRAPSYSSGSSITKVLKDLADGHNQSNRKNTRPLQEQQKNRHILNDSNQQLQPS  
QAAVENSNSDSCHSPIVTRIWFCPRGQDMPKRIDILADRLLSLINSRVVSSSSSRPIH  
VQVVDRCFDATHWIVSERVPDLASVAKALPSTANSTEEALTKFLDENNVEX

>comp13547\_c0\_seq1; 1087 135 3782 LEN=3853; translated  
MEGFSYTPNATMASIRNPYRSSNSINSYRSSSSPSSSSSSSSASVSTSSLPRNPMGPSEFH  
GAAASSSGTETMVRDLIRSAEHSAGGVPSLSLVKGLLERVQLQRSEFFHWSPELAQGFGR  
IVVGCVRSFGLWRDESNEETGNSDSSITDAPNRNSESVGVMVME LLANVIRDWEDHVLVA  
ALVQDKSISQRGSAVQSTHETLLDALTLVSPSDNRRRLRLKKEHRERIRQTSTMCLATA  
WRSLDRLEYLTTLTNGDHTRSTWWISDERAMNSLAVRSFQSLFQLYGCSKHYSHADQQR  
SNEHQISAASSPDQERQKVASLTILVILLRHQVNLVSTSPSISRSSTNEDCVLPESI  
LTELISKLIKGIQILNHSILPPSSSEHTLPIAMLSMSALSLLQRSLTISEHASLFRGVDQ  
TIQSTGLVENLVQFTFFSTSRWVSMASNHFKDRLQSFGLHLFSCWKFCDGAAWRAVVVN  
LEPKIRSIVAAFWSNLLQGTGSHDNLSSGDCSNLRGIWLYITVRNHARYSLDSVLEDM  
HADPIEATHSFPSQNRSSSHRSVNKMVLRKIIYSLFGLRLSSGASYSTRLMTSRLRLRI  
MLTDRRFASSNDELRSIWRADQSVIEDHLETVLEHADTDDTNQPLLLTLVDTMETLLE  
YEEKRNYFVDNLAHNLLETILYLIKPRDVRDYDFSLGGDDVVGINTETPPLHNL SRMDETS  
ICIEHEEIKEPKGFDHPVRLSVATSLARLAYSSSTAPPNESIALLSRIS SAVNDFIVEY  
HTRIEGGEIERNIANKTITTTPLSDQTKRFMRLQACATPENEEFLSSIMFTGMSLHRKQ  
ISFLVDAQKETEYNLQMTLEREKIAQEEKVKHIQRLGVQSVIFQRELSRAKLNMEQDSRQ  
LISMHASERASAEERLNLVQQAHEHDKSELERVKSEAESTIEELQKTKSKIEELDGTIGT  
LQOELKDEKAKAKEITQELETNRARIQAFEEKCGDMRSTVEEKEDTISRME DTNHQLQDN  
LEDLFADMCSLAQIHEHNENEENSQKLNAAEIEAVNQKLTTERQRNEELVSKMKDVQEE

NDKLYRKLAKYKERLELEERRSRDDQNKKEEDDRRKRSGPVSYINSLHTSTTSDMTQSR  
SKSMRSSRTSSQRAPTQSSQYKSRDRSMRDMSMRGMSIREHSIRGNSDKSIEHEKENS  
SHAS  
SNHPRSSRSQRRLES

>comp13548\_c0\_seq1; 760 1 2380 LEN=2441; translated  
NNNDNDNDSCVDTPVAMETVDTPLLERTKDFDARSDFRGGVSHSGKLQAEYHNLNDWRH  
VLFKIPNNETEILSKSANSIEKLLHSIFDRISRKNEGTQCFDHKSNSQSFQKNHYFQPPP  
TLRDDVTTGIYAWGRTAVNDSSSPLRAEALFQKFEKNCKISRSSNSICRPTSDIYSALVY  
CWSQAQANQIASQKALYWFRKIEENKAMVVTSEAWNALLRIHVRQGNVDKNLLTKHSIL  
NDGYTYASLVEGWMDSELPYSSKNAYNELQRGIAAYCIDKEDQMPALRQLILTYLVKNIEK  
GNILEYEQVMNQASILQENHPELDFDAKHFLAVMNAFGARGSDKVIQLYQELQIDYEQ  
GSERFKPSYQIVVAVLSALAKKQNLKSLAACESSLSEIESYLLIDGVSAAGITNHAYNIV  
LDCYIRFPHVKNRRRERVEKLIERMEKLASKHNNPLLRPKLSFAAYIKSIMQEDKPGSVL  
EIDKILQRMENSHLLSIQPDRIYITIVLEAVLARGEKTAILQAKDVMGRMGRVNLDPDR  
IMYTIILMKIHSLVGDVQGSDDVLNEMIEAYEKGRADCCPNEKAFVTAISSLKQLNREDVP  
DEAFRIFNKMVALYNNGIEECPKSMKTFGMLMVILAKSNHKSQKQMAQRLIYEMEKYGVN  
PDLTLLNWMYRVCTTITSSDLRQHRESWTEILLTFNTLQERGIANSYNSVVFHACDRFV  
LDPDERYSFFRDTYYKCRKDGQVDRKILTSLRRFLSPKVYRHLTKLDPSDNTIKMKVYRQ  
LNRLDPDDNDKM

>comp13549\_c0\_seq1; 456 240 1539 LEN=1539; translated  
MKFSTTTLMMILCGQNVARAFASFSSGSRVAARSGARVLSSAATEEAAEATTAAPLQEIP  
DMEEIVSLCKRRGIIFPSSEIYNGYAGFFDYGPLGAELKKNLKDVVWNHFVTQREDVVGL  
DSSIIHNPTTWKSSGHLDFSDPMVDCKETKLRADQLFFSPVILQGEDDKNIIGYVCV  
QEGNDEMVKAAKTMSKLLKEKDLKGNRIEAFSFKELVEATEEEFAQIPSPASGKPTLT  
QPRDFNLMFETRVAADVSENIAYL RPETAQGIIFINFKVNLN SSRQKIPFGIAQMGKAFR  
NEITPRNFIFRSREFEQMEVEYFIPPGDDVWPEYHQKVIDSSKDFLVDKIGLREDLMGWD  
VHEGDGLAHYARACTDVTFTFPFGTQELMGIAARGNYDLTQHTEGSGKNLGEYYDEETKE  
RYIPHCIEPSLGVX

>comp13549\_c0\_seq2; 636 240 1937 LEN=2150; translated  
MKFSTTTLMMILCGQNVARAFASFSSGSRVAARSGARVLSSAATEEAAEATTAAPLQEIP  
DMEEIVSLCKRRGIIFPSSEIYNGYAGFFDYGPLGAELKKNLKDVVWNHFVTQREDVVGL  
DSSIIHNPTTWKSSGHLDFSDPMVDCKETKLRADQLFFSPVILQGEDDKNIIGYVCV  
QEGNDEMVKAAKTMSKLLKEKDLKGNRIEAFSFKELVEATEEEFAQIPSPASGKPTLT  
QPRDFNLMFETRVAADVSENIAYL RPETAQGIIFINFKVNLN SSRQKIPFGIAQMGKAFR  
NEITPRNFIFRSREFEQMEVEYFIPPGDDVWPEYHQKVIDSSKDFLVDKIGLREDLMGWD  
VHEGDGLAHYARACTDVTFTFPFGTQELMGIAARGNYDLTQHTEGSGKNLGEYYDEETKE  
RYIPHCIEPSLGVDRLMLAVICSAEADEVGGEKRNFLKFNPRIAPIKAVVLP LLKNKPA  
LVEVARDLFEKLQARGYNV MYDAAGAVGRRYRRADEVGIPFAITVDFETIEDDAGVTIRD  
RDSTEQIRLPIDDVIPYLSKKIDGY

>comp13549\_c0\_seq3; 189 240 632 LEN=843; translated  
MKFSTTTLMMILCGQNVARAFASFSSGSRVAARSGARVLSSAATEEAAEATTAAPLQEIP  
DMEEIVSLCKRRGIIFPSSEIYNGYAGFFDYGPLGAELKKNLKDVVWNHFVTQREDVVGL  
DSSIIHNPTTW

>comp13549\_c0\_seq4; 538 92 1360 LEN=1573; translated  
MVDCKETKLRADQLFFSPVILQGEDDKNIIGYVCVQEGNDEMVKAAKTMSKLLKEK  
DLKGNRIEAFSFKELVEATEEEFAQIPSPASGKPTLTQPRDFNLMFETRVAADVSENIA  
YLRPETAQGIIFINFKVNLN SSRQKIPFGIAQMGKAFRNEITPRNFIFRSREFEQMEVEYF  
IPPGDDVWPEYHQKVIDSSKDFLVDKIGLREDLMGWDVHEGDGLAHYARACTDVTFTFPF  
GTQELMGIAARGNYDLTQHTEGSGKNLGEYYDEETKERYIPHCIEPSLGVDRLMLAVIC  
AYADEVGGEKRNFLKFNPRIAPIKAVVLP LLKNKPALVEVARDLFEKLQARGYNV MYDA  
AGAVGRRYRRADEVGIPFAITVDFETIEDDAGVTIRD RDSTEQIRLPIDDVIPYLSKKID  
GY

>comp13549\_c0\_seq5; 358 92 962 LEN=962; translated  
MVDCKETKLRADQLFFSPVILQGEDDKNIIGYVCVQEGNDEMVKAAKTMSKLLKEK  
DLKGNRIEAFSFKELVEATEEEFAQIPSPASGKPTLTQPRDFNLMFETRVAADVSENIA  
YLRPETAQGIIFINFKVNLN SSRQKIPFGIAQMGKAFRNEITPRNFIFRSREFEQMEVEYF  
IPPGDDVWPEYHQKVIDSSKDFLVDKIGLREDLMGWDVHEGDGLAHYARACTDVTFTFPF  
GTQELMGIAARGNYDLTQHTEGSGKNLGEYYDEETKERYIPHCIEPSLGVX

>comp13550\_c0\_seq1; 1335 1 4243 LEN=4288; translated  
XSNTGQIQQLAVNGWVSSTLSTAYNSIVTANQWPFKLSVQLD GARFTPLDATTWFVVL  
RRGQVYLLQRDKDLDSGRWSFMPLYQTVGAVGECSSGLSCCPMGVYSALSATKDKGLFYSP

PKAGEAEQQLHDIGLLFVASRLGDSLLGYALGKTSVAEALKTEPGLGDPGETVKTEQTI  
RPRNGTNESEDANSKTEATAEDGGTPVGGDDDYERILQLEEEALYGNATTSDGNVGPDLV  
PPSDDDDDDENGARSNSRQSGRKRARFNNLLVVRTLHVLDLSTALGPLGPACSGPLSPS  
PEVAIDPTMSTSNNTSSVATTGHVFCGCGYSSGGIALLSIPGRDDRNLAEADCVNAKAL  
FSLPRRGLVLMAMLPEDGGTKVFRIGAADSATKGGLEEIDLADWCPSSEDRDFFTTCHLL  
AASDLTEDSFLVLAASPNDENSKSYFVITLREQQQQGGQSTTTIRMAAAYQLDIPQSEIIT  
RAKTVEDRESGQVFLSYTLTTGEAKVAVISSDGSVDTKHSFPSIETAQMDTSTDLEEDAE  
LSEEEKFYAGRTIVSVMFKAPRSFFVSEAAGDPEKNEDTIVSDQEMEDGNHLAEAEAGDD  
YLDEDDRDLVYQGTPTDGGSEKKKESDDNGCDEAMTSDVWVYFATSRQSGELDVFLFS  
DLETPVWSCIGFGHGAPSLDTHDPSSFRNPIGHKVCTREIKFFFCGPPSSDEWKNRQGLVG  
PRPFCVMLETNDGDVQIYEAKIHHRSLKLLSFRRIPKDVSRQSQUESTKHFSLRRKKIV  
SAKDATESSGDFQYNRLFPPFRDISGQDGVFALVTRPFWLVAERGRPTVLHHRCKHVAPT  
AKPRPITGFCGLKFSNSDQNNFVTLHERVGRVGSQRMFLFDGILNLASKNSLLPGGMF  
VEKIPFGVTVRKIQFIDDDHASTGSRPLYAVLVSREYEADLSELNDDGMTDEERQRLAE  
KESAKIQRQVEADLGGFDVEQEWVEEIERENCFKINRNLLGGAPPVPSSAYSLWIVDVANG  
WQVIDSYELECEHGTSMVMTLTKFLAEPGTDYNTSEEELESKLFIAVGAGTINKDGED  
VACKGRVLLFEVTRPKESGVLP IAE LN FVY EK K I F H G P V T T L S C L N I E G K S R L L I G A G A D  
INVEQWGNKLTQVGFFRATMQVLDIKLKFNFIVLSDAYDSLYFLVWRESDKSLTMLAKD  
YDPIPVYCSGIIISRGGSLDFVCHDDRQNLQFFQYAPGDPAARGGNKLVCRADFHLGSQTT  
DLRSHFCRSSLINSSTPSSALAAALKQQDTFFGKADDDQRFALTFGTTDGGYHVVPLSE  
PVYWRMTALQSVLANALESDCALSRRARLYRRSSRRGGCRNDRKKGVIDGDLVMQYTD  
LSKADQEDLASAIGSTVDLILDNLLELRCSTMVI

>comp13551\_c0\_seq1; 1482 63 4158 LEN=4158; translated  
MRKREVEEEEDSEMEVDNEEGKVDAGELEGGVDDDEGVESADGAEQDDDAENERNPVLDN  
TFLDSFYGLSAADPKERSREAQAMLHHCLLGASANSKDAAYAFRLLNGLCSGRAAAARQG  
NASALASFLKIAFHGLGKMDERSEATKSPDDGTSSLLNYVRDRLSATDPQRTDGGKKGS  
EERDYQFGRFLGHIHGVVRSIGILLPSDDDEIRDVASSLVSDLIELFWEKNWMREPAAHGI  
TALLKSFLVSTNEVSQKIGREIVEKIVIPKILIIISQKDRSVESDFESLLQTYLPEQVIGIG  
VYVQSLYQSADLPFPLNEPIVSTKTIPIWIGQALSETSAIVQPRTHFVWDTLWCYLTMEVE  
NENSSKKKTGKSTSPSKYGIRETIPCGEDTVLSVIESIMQIVVEQKLLRMEEGTSVSKTS  
HERRSLALCIVRNLAGAPFVSSISGPTQILMDCDAIENIILTPGIIRSLFINVICAGKNK  
RESSHLKPLALDILSSLVESAAAASGDTDRQFACLKAISNCDPRFDARTKTNAISNLLSS  
SNDPVDAAQFNWLGKYLTHLESKILDLCNTEDSSAEANGYVELMYACAKHVHXTKYGE  
KNKDAELAKWKETTANRVIGFFISTAFFDCSSVTRPTKTKKGGKGVNMSPSGNLAVESAV  
KVQKCLQDGGQIGSGIRAILAARFFNLVSDALATTLRESKDDYSLAVLKIVCESWVELE  
SRKAKRFESTEKDDEEASPEIINELVGKLNELRKSPDDNEQSQARCITGITALAMTLQ  
IHLNCGSDSDEMDDDPDADEEEDENICSAIEELDAISKDFVKAEEAESNPLLGLAEVC  
ANILSSPLGSGDIGRGAAPKLVREAVRCALWGLNLASKIATKEKSLLDKTVVNLDDGI  
GASASDDANPEDDDEADANAEDDESDDSDDDDIIVFSKAANALDDDDMETEEPENS DRD  
DDES D I E L D P S K L H S M L E D D N L D D V D D I V L E H H E G A D A A L K L I K L Q E A R K A G I E A R E K  
I ELANQLRCVFLIELMLTKADSWSNL F Q I N T I Q E L V V P L L D R R K R I G K S T Q K A I E S G G K S  
G T D L R K Q L L Q R V T N L I K Q K L T K I R L T S M P L T C P I D S D A A T S A I R Q I M K E A K N S K D K E Y Q S  
C C S S S L I F L F R M M P T S D D L I S F A S T E Y G D I V Q K W S T K R G S G A S L L E D F I S H I P A L A Q A S L  
H G P L I R A A E D A R K P I L K M E V F R L L S L L F A N K S N A E G E S E I E T Q S R A K I H E A Q D G L L S M I Y  
K T L Q D E E M A T P K R A R G V F I A L E K M L P F L S S P A S N Q A L D S M A S I K I E I S G L G E K H D G L K V I  
A S K L I E Q I N V K L E T F K A A P P A I P Q G E K G T K Q S S S T K K S K K K K K K X

>comp13552\_c0\_seq1; 586 175 1977 LEN=2059; translated  
MTGDYVGDYGESFLGIGYEYCHPTLATTSSWSTPGDIAIPTGKTMTMSVEWSKANGIGG  
VNVKSSATTADIIDFHPYAAGSENNSGVFFVAAKRMKGFNGPSSVQTLDCGELRAQQER  
EANIARSKAMDIVRNILQNDGENSAAINTTANMDAEKVS IENNNNFNIHCP SNFTK TMLG  
QQSTPHPPSTASIESDAQNARMKALEIRKFKQSKPENGYHNEIGAAVNQSENSANS AWGQ  
SSEQPASTSGSDDRSFFGPQETLSIRTN SKHVTTHP IPT EQCAPSYFQAQQPPTPIMVDK  
TQVVAATTPPWELGRRRRECLERDEARKKRALFKNLEYVARLEEARLVQELDQVQQARTL  
EEQIDERYRQKLEKRSRNRNDGRNDINTSGAGIGTKQRKAECKRQRTALPQSLRNYTN  
ASNHKKDDANGTGGGSRSAIYVSNIPDGSVDDETIRALFASYGSLRKVHFYVHKSSGR  
RKGDALVIYSLNGEDDEASLTESVCSQVNGCELPGGSILCVQPSDPYHEVTKKQGLNGSA  
TALYSKVGVPPTITKESLQTTGIAEHPTHITKSEGIEEQRNGDEPDGEEDLDDFFASLE

>comp13552\_c0\_seq2; 536 175 1917 LEN=2416; translated  
MTGDYVGDYGESFLGIGYEYCHPTLATTSSWSTPGDIAIPTGKTMTMSVEWSKANGIGG  
VNVKSSATTADIIDFHPYAAGSENNSGVFFVAAKRMKGFNGPSSVQTLDCGELRAQQER



EANIARSKAMDIVRNILQNDGENSAAINTTANMDAEKVS IENNNNFNIHCP SNFTKTMLG  
QQSTPHPPSTASIESDAQNARMKALEI IRKFQSKPENGYHNE IGAAVNQSENSANS AWGQ  
SSEQPASTSGSDDRSFFGPQETLSIRTN SKHVTTTHPI PTEQCAPSYFQAQQPPTPIMVDK  
TQVVAATTPPWELGRRRRECLERDEARKKRALFKNLEYVARLEEARLVQELDQVQQARTL  
EEQIDERYRQKLEKRSRNRNDGRNDINTSGAGIGTKQRRKAECKRQRTALPQSLRNYTN  
ASNHKDDANGTGGGSRSFAYVSNIP TDGSDVDE TIRALFASYGSLRKVHFYVHKSSGR  
RKGDALVIYSLNGEDDEASLTESVCSQVCSMFLLLSNTPTMTREKARSSTALKNEIVGKN  
GTSVFFVGS HCCDVTNFHTTMSAAKVSLADQFKQSPISTV  
>comp13553\_c0\_seq2; 136 2466 3318 LEN=3318; translated  
MATKFPKFSQALAQDPATRRIRWYGIATAHDLEAHDGMTEENLYQKIFASHFGHLAIFLW  
TSGNLFHVAWQGNFEKQVANPLKVKPIAHAIWDPHFGDSALKAFSKGNAYPVNIAYSVY  
QWWYTI GFRTNQELYAGSIGL LLLSCALLFAGWLHLQPKFRPSLSWFKNNESRLNHHLSG  
LLGVSSLAWTGHIVHVAIPVSRGVHVGWDNFLTTPPHPAGLTPFFTGNWTVYAENPDSAT  
HVYGTSEGAGTAILTFLGGFHPQTQALYLS DIAHQLAIAVVFIX  
>comp13554\_c0\_seq1; 458 355 2115 LEN=2731; translated  
MIRVSPEDLIDPNNRECCICLEDNKLDEIVIRLPCAHI FHKSCIVDWLVNHMCTCPVCRY  
ELPTDDPSYEAGRKERMKLRKPRYAMHELKRMVPVSGLLELLRRPLSGVFEKNDLIQDLIK  
ENWIVIIIPSEPEVEYELEVLKRMKIRELKQAMENAGVFFRREDVVEKSDMITV FENSRL  
LLVESKPEDGDVPIEDKTSLDETEAPDPTSTEARTSQQSEPEESEIATDDGTSVDPSPS  
DAALSQKSVEREKRKT PDDGESAFGDGTPWDASEASGSSPSGGTEPQSEDDPMIVETIP  
NDDVSRTE DIPGANETMDENRTASPIVMFPNLNHGMDKESGESLLSTDAIQTTLGSP TSE  
NSTGREAGALPTDS DMQHSVEEEFPTQRNSETQSTPVDMEISGLEENRTG SVGGSCVQME  
TDKCDPTLEATIDSVD RGTDLRRSFDHYTITDLHTLAKDLQADLSNCIVREDMVDVFVNA  
GITGNPDASALMPRMFSSYSVSQ LRFIGSKIDIDLSQCSTGEEMIEKIVQVGNVERPYLR  
DYLRLSLAPLTTMSLSNLRAVARELRINISDCLEKDEIIQLLASRRN  
>comp13555\_c0\_seq1; 243 131 838 LEN=1225; translated  
MIMASIIKVI VYSDLA VTLVLR RPATSTQSNKFFYD GSPSRKVDVEWKPFQIDPQT SPLG  
ETVDDYCNRRWGGAGWTNHLKSEGRKD GAYFGNWKWPNTSKAHQLIQYCESNGISSTDR  
MNALLFQAEYEEGLNISLV DVLARIGQEASDENINGSNVNLDDLRRFLTRNEGKSQLETD  
IALGRQRYGIKSV PFFIVSAEHGSRKQRRPYGFSGAQSSDTFLEVFEIEERASS  
>comp13556\_c0\_seq1; 792 1 1740 LEN=1924; translated  
PAPAPGGLFGSTPAPAPAAGGLFGASAPAPAAGGFFGSAPAAGGLFGAKPAAPAPATGGL  
FGAPAPAPAFGAPAPSTGGLFGAPAPAPSAFQG PAAAPASNLAGYMPYSSLPQDQKNNID  
TVYQAIMNHKRTILAVSSMAPRLLNTSTEPADVAGGGEVPLSITVKRLTGNAQQLEQEL  
RSLWGSMMHTKQMYETSTTQAIRDAKW PTEFVATRVGATLTGNSQQKSSNERGAQAAAASA  
SSTKDDTKKAEDFNRLKELL DREM VHADQIYRMPSSYLWQCVEEMEGRARQLQGQLQSL  
QETLEISNQVSSEQFDVVGVIQLQEQT IWKVAADL TEVHNK VDEL RHLYNLHEKGINVLE  
EARQEEIRHQQQVNQQMRTL MVKTLPTTAPAAGGPAPAASGGLFGSTTPTASAGGGLFGK  
SPAPASGGLFGAPAPSTGGLFGSAPAPAPGGLFGKSPAPAPGGLFGAPAPAPAFGAAPAS  
GGLFGSSTPAPAPAAGGLFGSTTPAPAPAAGGLFGSTPAPAPAFGAPAPAAGGLFGAPAP  
AAPAFGAPAPAAGGLFGSAPASATTPKSKSRSRGSSRRR  
>comp13556\_c0\_seq2; 802 1 1782 LEN=1966; translated  
PAPAPGGLFGSTPAPAPAAGGLFGSTPAPAPASGGLFGASAPAPAAGGFFGSAPAAGGLF  
GAKPAAPAPATGGLFGAPAPAPAFGAPAPSTGGLFGAPAPAPSAFQG PAAAPASNLAGYM  
PYSSLPQDQKNNIDTVYQAIMNHKRTILAVSSMAPRLLNTSTEPADVAGGGEVPLSITV  
KRLTGNAQQLEQELRSLWGSMMHTKQMYETSTTQAIRDAKW PTEFVATRVGATLTGNSQQ  
KSSNERGAQAAAASSTKDDTKKAEDFNRLKELL DREM VHADQIYRMPSSYLWQCVEEM  
EGRARQLQGQLQSLQETLEISNQVSSEQFDVVGVIQLQEQT IWKVAADL TEVHNK VDEL R  
HLYNLHEKGINVLEEARQEEIRHQQQVNQQMRTL MVKTLPTTAPAAGGPAPAASGGLFGS  
TPTASAGGGLFGKSPAPASGGLFGAPAPSTGGLFGSAPAPAPGGLFGKSPAPAPGGLFG  
APAPAPAFGAAPASGGLFGSSTPAPAPAAGGLFGSTTPAPAPAAGGLFGSTPAPAPAFGA  
PAPAAGGLFGAPAPAAPAFGAPAPAAGGLFGSAPASATTPKSKSRSRGSSRRR  
>comp13557\_c0\_seq1; 150 102 617 LEN=1105; translated  
MEQFKKQESCGPYLDNAYGYAIFPTITKVGVA VVGAGGKGDVYVRKEDGVEKTGT SKMF  
QASFGPQFGGQVYAMI IFFEREIDYQRFVVDGF EFGADANAVALTASAGAKVSTIDNNIG  
VQANVTGTKYNITKTSNTLMYTKGMAVFTSAIGGLMYEASLSGQKYQFQPL  
>comp13557\_c0\_seq2; 150 102 617 LEN=1350; translated  
MEQFKKQESCGPYLDNAYGYAIFPTITKVGVA VVGAGGKGDVYVRKEDGVEKTGT SKMF  
QASFGPQFGGQVYAMI IFFEREIDYQRFVVDGF EFGADANAVALTASAGAKVSTIDNNIG  
VQANVTGTKYNITKTSNTLMYTKGMAVFTSAIGGLMYEASLSGQKYQFQPL

>comp13558\_c0\_seq1; 226 1 864 LEN=1608; minus strand; translated  
CKDETPMVRVAAQSLGIMVENVVDATGRASLEEGMVTTTLLIPLYETLSSNEQPDSVRL  
QTTENCVVFGFRVIGKLVSDGKILTENERSLVQRLLPLIVATIDDRSWRVRWTAATAAKFADI  
IKAYNPIPGAMDTLIPAYEKLLQDPEAEVRTAASFNLAVVAGGCDSMILPLGSDELDEAA  
AANFTGKRVSAAERLVKRVTSLETEDDSEHVRAALAMVATELAPVLGRDGTITHLVPPILL  
LLRDAASEVRLNLISSLESLSNMVIGVDLLSQSLLPAILDLAQDGKWR  
>comp13558\_c0\_seq2; 167 260 1008 LEN=1752; minus strand; translated  
MMYFVCKNHLVSVQTNRRILCGCKRQKTASSVGVIGKLVSDGKILTENERSLVQRLLPLI  
VATIDDRSWRVRWTAATAAKFADI IKAYNPIPGAMDTLIPAYEKLLQDPEAEVRTAASFNLA  
VVAGGCDSMILPLGSDELDEAAAANFTGKRVSAAERLVKRVTSLETEDDSEHVRAALAMVA  
TELAPVLGRDGTITHLVPPILLLLRDAASEVRLNLISSLESLSNMVIGVDLLSQSLLPAIL  
DLAQDGKWR  
>comp13559\_c0\_seq1; 227 317 727 LEN=853; translated  
MGSMIVKPNVAVKIQRFLFKGGLGSTVENKEEDEQKATLVGFAGATADAFTLLERLEGKLD  
EYPGQLSRSCVELAKGWRTDKYLRRLEASLIVADERKTLEITGNGDVLEMTDGVVSSIGSG  
SPYALGKCDLWRWENE  
>comp13559\_c0\_seq2; 315 317 850 LEN=1154; translated  
MGSMIVKPNVAVKIQRFLFKGGLGSTVENKEEDEQKATLVGFAGATADAFTLLERLEGKLD  
EYPGQLSRSCVELAKGWRTDKYLRRLEASLIVADERKTLEITGNGDVLEMTDGVVSSIGSG  
SPYALAAARALMSVDDMDAEDVAQKAMDVASDMCVYTNKNFLSYSLEDIGDTTEEDV  
>comp13560\_c0\_seq1; 543 1 1723 LEN=2016; translated  
XTFVLECCPGDVKIPNAKVLLNTMPSQQQQRQQLPWKNVERHYCAVCNVWVGSDRQSIM  
LHENGKXKHNLERALHEKRVKKEQEKAQKFLSDSLKMEQSALASTGVVTTNNIIQLQ  
NHNQKRPRPVPATSVQLPSSDWNRYPNLPTRYSNHGHNSLPPQGI PRGGYSIADSLQSGV  
QNYREPQIPTPQTAASQTLPPNHSRISQFEQEKIDWQAQKARRQEDNIKKRKNAGADHDTK  
EDNEQDVTKRPKITILPGEYYSYDDAKHKDEVKHESSVRDQVDKTNKTSPIYLEGEIYF  
GLLEEDMTIQLWTGPSSSRTEKQQVENIRHWKNALIAAVVNRRTKPVAGESEDKLQPPVI  
HVSYLSSPDDAEETIEKKVPLDRIRIILGGDEKIPDNLEEARLLAMGGEEIHVSSNKNKG  
SVAMSDQQQDICESTGLSGWSTVTIKKTLRQHQHREEKERFSEMKVQAAQKREAEKKRIV  
ERRLEEARASNADDSALGAYDVWGMKMDYKGVDISKEIHCSVEDTAKRLAPVASSQSSDKE  
SGSCATVTGKVAFFKKRGGKKKQKAARRRSTADDD  
>comp13561\_c0\_seq1; 579 120 2222 LEN=2222; translated  
MLPYQLRELRVGEKKGANRRRSEASKEETKDGECCGTVQRAMTKDLINLREKFRKQVLRD  
SDCRTEPBGHQKAGTAFSMFKDIFGSSKTAVLHLIPPARCDREAYSQLIYASCLALFKES  
FERYSWGTTENLVDRDDSDNCSHYDDACFAVFLFALFETNPLPRDFKGDNPMELLPVS  
VRSSSDPESSHRRFFLKNIRIDRRHFALFLGLREASLAKICDCERSYYTSKRSLHGSRH  
DEQGLWRCSCAMATDSLEILDRIFLLELSEYTGPGVGAFAFAGHVEYPYRSRSLGQESA  
CQSGKRIPESFHGPKIGGDTKRSVSSIDYSTEIRTLIGKYKKIVAEIRIPSSKLKSVRH  
LRGELESLSAISAKRQSTRSVLVDQSVETKRHQNDSNELPGASIRTEISQAYQIILGG  
KIPDSLKTQLRASVMALLRRDEPIPLPSDLDDHRSKPSLERDDISSIGCGGISLAMGQGR  
AGIRSLFSCGGRESVPKNSYQKNEMKIITSSAFANEFLTTNEEIDSAGSSDENSIDSEIS  
VLSYSSSEGIIDDQISMATSTFGRKALDDLQKVAHEGDRGVRLKRKSKALSSNKKIGE  
RQGNNTLSSSITNSKYRHEYEDDDSAATSAFGKRALDTLLKTVTQERTSSLKGGVNNRK  
GKNQKQVSTNTSREKRGQQEDTTKLCSSLNINDEDEDSIAT  
>comp13561\_c0\_seq2; 738 120 2684 LEN=2785; translated  
MLPYQLRELRVGEKKGANRRRSEASKEETKDGECCGTVQRAMTKDLINLREKFRKQVLRD  
SDCRTEPBGHQKAGTAFSMFKDIFGSSKTAVLHLIPPARCDREAYSQLIYASCLALFKES  
FERYSWGTTENLVDRDDSDNCSHYDDACFAVFLFALFETNPLPRDFKGDNPMELLPVS  
VRSSSDPESSHRRFFLKNIRIDRRHFALFLGLREASLAKICDCERSYYTSKRSLHGSRH  
DEQGLWRCSCAMATDSLEILDRIFLLELSEYTGPGVGAFAFAGHVEYPYRSRSLGQESA  
CQSGKRIPESFHGPKIGGDTKRSVSSIDYSTEIRTLIGKYKKIVAEIRIPSSKLKSVRH  
LRGELESLSAISAKRQSTRSVLVDQSVETKRHQNDSNELPGASIRTEISQAYQIILGG  
KIPDSLKTQLRASVMALLRRDEPIPLPSDLDDHRSKPSLERDDISSIGCGGISLAMGQGR  
AGIRSLFSCGGRESVPKNSYQKNEMKIITSSAFANEFLTTNEEIDSAGSSDENSIDSEIS  
VLSYSSSEGIIDDQISMATSTFGRKALDDLQKVAHEGDRGVRLKRKSKALSSNKKIGE  
RQGNNTLSSSITNSKYRHEYEDDDSAATSAFGKRALDTLLKTVTQERTSSLKGGVNNRK  
GKSQKANKKKRKTQDYANKLTSPIKVNQGEDEASVATSAFGKRALDKLFEKVRQEGARNP  
GEGVQTRKRKRQAVSMKKKRSMEENAANKVHPFLTGRSDTNSSEDELSVATSAFGKRALEE  
LLHTATQENSGIQKKGKGNPDLETQQRIGKKKDDTSSATRKLGENDNDEISVGTSAYGEMA  
LGDLLKVATQEDVV

>comp13562\_c0\_seq1; 637 1 2331 LEN=2369; translated  
ARNREAFDGCPCSEEAVNQTAHVHLVSKWSDVMVDEFEFQVRMAPDXQKGMQLQTEVSHAF  
STYNPICLDSVGISYSKKIQQYLERTKASMIEMNVSSTISVQSLVGVFSDPRCRNIVCSF  
HDSCCSSEWEDTCDEIAENLCKPDVEEIPISIGGDCPFGMTCSYEQMANCTELVTHYNDTM  
YLGNVLGGIYCGGGEADFYGIQNCPRGSYCPDPETKLPAGYFCPYKTLDPDTPCARCK  
EGALELERDLYGWIGLLIILVLA VAYIAWGLLNRYNKR VADHVSDLEQRALNRIENLKSD  
MTGNDSEQSREIEQLRPKLELIKIRLANMERTDESARDVKVLGSSKKIIDGSKAVELDGE  
RIRFDAIRLFDVLDIDGSGDLSFDELNAILGLSEVELKEFIRRMNEMAADSSSDKNTVTR  
PVFAKYFLQVLTDTNHIAISYEEAEAFDVSFVDGNKSTNEINMNK FYSSSMSEFLSDSQI  
LQLIKAFKALKTDVDILVQDPHDDLQGTGSEQLSRTINRRGSL SALRASRRPSTMALEAI  
ITAE EATDQKITSSLRGATPTTKTSGGKSTMMIGRKL FIEKYPQLLMDIMLKEEDGDDHT  
ELIDICGVDLCKFDLSLSIKVGKQTVDVVNNVTGRIRGKTMTALMGGSGAGKTSLLNALC  
GRAHYGETTGTVYLNHGHETDIESHVDCIGFVPPQDDIVYAELTVRENFI FAGKFR LPKGTS  
DKEVQELVDETIANLGLARVANS PVGDV KRRGVSGGEKKRVNIGLELMGMPSICKS

>comp13562\_c0\_seq2; 787 1 2775 LEN=4335; translated  
ARNREAFDGCPCSEEAVNQTAHVHLVSKWSDVMVDEFEFQVRMAPDXQKGMQLQTEVSHAF  
STYNPICLDSVGISYSKKIQQYLERTKASMIEMNVSSTISVQSLVGVFSDPRCRNIVCSF  
HDSCCSSEWEDTCDEIAENLCKPDVEEIPISIGGDCPFGMTCSYEQMANCTELVTHYNDTM  
YLGNVLGGIYCGGGEADFYGIQNCPRGSYCPDPETKLPAGYFCPYKTLDPDTPCARCK  
EGALELERDLYGWIGLLIILVLA VAYIAWGLLNRYNKR VADHVSDLEQRALNRIENLKSD  
MTGNDSEQSREIEQLRPKLELIKIRLANMERTDESARDVKVLGSSKKIIDGSKAVELDGE  
RIRFDAIRLFDVLDIDGSGDLSFDELNAILGLSEVELKEFIRRMNEMAADSSSDKNTVTR  
PVFAKYFLQVLTDTNHIAISYEEAEAFDVSFVDGNKSTNEINMNK FYSSSMSEFLSDSQI  
LQLIKAFKALKTDVDILVQDPHDDLQGTGSEQLSRTINRRGSL SALRASRRPSTMALEAI  
ITAE EATDQKITSSLRGATPTTKTSGGKSTMMIGRKL FIEKYPQLLMDIMLKEEDGDDHT  
ELIDICGVDLCKFDLSLSIKVGKQTVDVVNNVTGRIRGKTMTALMGGSGAGKTSLLNALC  
GRAHYGETTGTVYLNHGHETDIESHVDCIGFVPPQDDIVYAELTVRENFI FAGKFR LPKGTS  
DKEVQELVDETIANLGLARVANS PVGDV KRRGVSGGEKKRVNIGLELMGMPSILFLDEPT  
SGLDASSALLVMKSLNHLVERDGVTVVSVI HQPRKF IYDLFDSL ILLGVGGEIMYHGPTE  
GAEPYFDR LNYKLPKGESVSDWLDIDISSGRLEPENNISLTKGESK KKKGKDSKVGGKEHIL  
PQPGVINDDNCVGGKGVTTGKVVR

>comp13562\_c0\_seq3; 667 1 2364 LEN=2427; translated  
ARNREAFDGCPCSEEAVNQTAHVHLVSKWSDVMVDEFEFQVRMAPDXQKGMQLQTEVSHAF  
STYNPICLDSVGISYSKKIQQYLERTKASMIEMNVSSTISVQSLVGVFSDPRCRNIVCSF  
HDSCCSSEWEDTCDEIAENLCKPDVEEIPISIGGDCPFGMTCSYEQMANCTELVTHYNDTM  
YLGNVLGGIYCGGGEADFYGIQNCPRGSYCPDPETKLPAGYFCPYKTLDPDTPCARCK  
EGALELERDLYGWIGLLIILVLA VAYIAWGLLNRYNKR VADHVSDLEQRALNRIENLKSD  
MTGNDSEQSREIEQLRPKLELIKIRLANMERTDESARDVKVLGSSKKIIDGSKAVELDGE  
RIRFDAIRLFDVLDIDGSGDLSFDELNAILGLSEVELKEFIRRMNEMAADSSSDKNTVTR  
PVFAKYFLQVLTDTNHIAISYEEAEAFDVSFVDGNKSTNEINMNK FYSSSMSEFLSDSQI  
LQLIKAFKALKTDVDILVQDPHDDLQGTGSEQLSRTINRRGSL SALRASRRPSTMALEAI  
ITAE EATDQKITSSLRGATPTTKTSGGKSTMMIGRKL FIEKYPQLLMDIMLKEEDGDDHT  
ELIDICGVDLCKFDLSLSIKVGKQTVDVVNNVTGRIRGKTMTALMGGSGAGKTSLLNALC  
GRAHYGETTGTVYLNHGHETDIESHVDCIGFVPPQDDIVYAELTVRENFI FAGKFR LPKGTS  
DKEVQELVDETIANLGLARVANS PVGDV KRRGVSGGEKKRVNIGLELMGMPSILFLDEPT  
SGLVVRTN

>comp13562\_c0\_seq5; 1037 1 4056 LEN=4240; translated  
ARNREAFDGCPCSEEAVNQTAHVHLVSKWSDVMVDEFEFQVRMAPDXQKGMQLQTEVSHAF  
STYNPICLDSVGISYSKKIQQYLERTKASMIEMNVSSTISVQSLVGVFSDPRCRNIVCSF  
HDSCCSSEWEDTCDEIAENLCKPDVEEIPISIGGDCPFGMTCSYEQMANCTELVTHYNDTM  
YLGNVLGGIYCGGGEADFYGIQNCPRGSYCPDPETKLPAGYFCPYKTLDPDTPCARCK  
EGALELERDLYGWIGLLIILVLA VAYIAWGLLNRYNKR VADHVSDLEQRALNRIENLKSD  
MTGNDSEQSREIEQLRPKLELIKIRLANMERTDESARDVKVLGSSKKIIDGSKAVELDGE  
RIRFDAIRLFDVLDIDGSGDLSFDELNAILGLSEVELKEFIRRMNEMAADSSSDKNTVTR  
PVFAKYFLQVLTDTNHIAISYEEAEAFDVSFVDGNKSTNEINMNK FYSSSMSEFLSDSQI  
LQLIKAFKALKTDVDILVQDPHDDLQGTGSEQLSRTINRRGSL SALRASRRPSTMALEAI  
ITAE EATDQKITSSLRGATPTTKTSGGKSTMMIGRKL FIEKYPQLLMDIMLKEEDGDDHT  
ELIDICGVDLCKFDLSLSIKVGKQTVDVVNNVTGRIRGKTMTALMGGSGAGKTSLLNALC  
GRAHYGETTGTVYLNHGHETDIESHVDCIGFVPPQDDIVYAELTVRENFI FAGKFR LPKGTS  
DKEVQELVDETIANLGLARVANS PVGDV KRRGVSGGEKKRVNIGLELMGMPSILFLDEPT

SGLDASSALLVMKSLNHLVERDGVTVVSVIHQPRKFIYDLFDSLILLGVGGEIMYHGPT  
GAEPYFDRLNKLPKGESVSDWLIDISSGRLEPENNI SLTKGESKKGKSKVGGKEHIL  
PQPGVINDDNCVGGKGVTTGKVVRALED AKLRRTWLCEEWLKYFDNMGDKKTKLYEPPEK  
YDLPIDIEKPSFSFQFVNQVKRALLVAVRDRRLTRIIITATIIVGSVIFITALDGVTSVSI  
LNPDLPFDVLRPQERDQENIFNALFAYVHRQIQYPMKVGIVLCIIVGLTATTNLT  
MEFFRESGSGYDINAYFFAINIISTIEFSIQVLI AALFATWIRNPIASYISYYIHFLLLT  
WVTVSWSMFFPMVCSPTVPLVAGFFFFTCGLVFSGAFSPFGYEAIIYEEGGFKEVLV  
SPTRFFF EALTVGEYRCLPEQSGFTIASSSSNRNSTNTMMRKMGYAGRDLQAVRWS  
CDGWYWSVAPAILIGITVRYLAFGAMHACFRAQQA KKLPHKQLKQRKTCFPEIFYVAG  
FILLVSTTVVFIVDQPFDENVPRTTELQLLNDFGFFD

>comp13563\_c0\_seq1; 509 110 1225 LEN=1514; translated  
MTATNTSRAAFAAAVALLSSADNASAEFRQIAFDYDATDPVGVVLP  
SICIGDVTVPKTM  
YTI EPADPGETKVKILTEPQDLVETGYDEVNKQIYFKFIPEIAAVAENAGVLIQFP  
SDKLESVDVCCSQSVQIKEGFTNFQSM TASTGASVNAIFGVEQDKDLAVGVFSGSE  
VNLEVTGTS GAKAGSRVITVARDNSKLSVDGDVTTLS CNDGSSCKIAGSISDPAD  
SKARGNATIETSSCEDVLTTESVCLSQEPNVTVTTDAPLMISGEKEDCVQGESL  
VVVTGRPVKTGSPTVSPQPTAEPVPTVAPTIAPTKESEPTNENTPTLKPTRATYI  
PPTRAPTSGAASKQSGVLATVAI GAAALCFLLAQ

>comp13564\_c0\_seq1; 202 432 780 LEN=780; translated  
MPTSSNNSCTAKDSCRKTEDEHEPSLVPPHRVPPSPLAPTTSAFLEAAARPPPLR  
STAREPTVPGAVSVPGLLSRFFENEHDDPEDNFLDASVGDDDPWATVVHHNTN  
SSGTS GSGX

>comp13564\_c0\_seq2; 211 432 792 LEN=792; translated  
MPTSSNNSCTAKDSCRKTEDEHEPSLVPPHRVPPSPLAPTTSAFLEAAARPPPLR  
STAREPTVPGAVSVPGLLSRFFENEHDDPEDNFLDASVGDDDPWATVVHHNTN  
SSSGTSSGTS GSGX

>comp13564\_c1\_seq1; 600 1 2052 LEN=2328; translated  
XSGSGTSGTASGNSSRSPPLSPRSPSFSFYGRSSTTDESRTDLSSIPAAELAPTR  
SYNERDVEDRVAERLEAQIDAQISARLTREVDRLSRDPRQHAIAEVVGS SSGV  
EDRVAERLEAQIEAQINERLQEVDRRLF LERACNAGSGDRHGFGEPEKKENDN  
FEICGIRRRCWGLILCVLVLLVGGVAGARVWFARERKAQTGGSDPSVSRATLPP  
AVATDPEASAVPSADPTTRTSSPKPSPAGSAGLDEGPGSTEDPPLVANPTQSPT  
PSPMDSNASTTERRDQLLARIGPYIVPEDFVNDPETYFAAGAGAFRGAALDWM  
AGGDVETDVLATSVEVLVERYALAVLYFSTGGDRRWTDSFFLTPGTVCWNN  
DRRSQTEIIGNDSTAAKGESSPARED TDAIGTKKGI FCAGGSPFATTIAMS  
DNALRGEIPWELSLRLSVKIDFDANQLTGTIPSKLGR LGR LQAL WLNTNDL  
TGGLPREFANATRLASIDVENNSLSSTMPAEWGSLSDFYASLR LNDITGTL  
PPEWRGLGMLEILDVSDNRLEGLTPEGLGELTEIESLYLESNRFEGPLPPSL  
GNLTKMANL FVDGNRLTGTVPAEYSALENLEYFWFHGNMLTGTVESTLCAS  
DLLWTSNGTDLASDCLGSD EFPAQMSVRVALGAATAVGKT VV

>comp13565\_c0\_seq1; 639 169 2100 LEN=2565; translated  
MNIYTLHKEGSFQPPPEGDNEILGLIQSTIRNGNNSSSNLPTVVEETTNOGK  
SSSHTSKTGRSGESVSSSGDKTAH HKNNSARNGNRRLDDTYGIDGDQGAENT  
AVPKTNSLGGASPS SSGKRESGSR LANKLNNSAKDLRNSLYSANNYGNHKKFV  
SSLIEIQAKNEFMVFDNDTDLVSHLTNPPEIRTSPLEDEILIVDLEEF AEL  
DDQVSAVSLPKALKKRKSKKKGSSSCKSR SNSSRQNFDE DGNRLDRRKS  
IKKSSSKRKSSTKSLSVTGQDTKETKKSSTARQAKGKVE RKLEVSREIKSVK  
SLPTMEAEDTEGIYQANSHQELSATDRMIRSVNSEP IMGGEENELPQ IRPPT  
FCRGENSIPDKNDS SHKSHASSGKVSSKTLGSTRRGGRHKQKSKETLQEDS  
DDVQNLGQSLFRKTSSKKKSLAGATDETKTGGEYIETIGTIDQQLVHSTLNG  
TNAMEDDQRSF GMLNEANETS KTHGERSTQDEYLMF DSEGNEKKNLSNEEY  
PLSPCNSNLRDHSNASRS SYHEDNIYDAEEDYSVDEIQGQENHIKSGDIHQE  
FGPTLGAQTTQSLPSSTSDKTLLK KWWQRSSKTI FKKKKKDRTTTT EIGR  
PSDHSQQHLIKHAVRSW

>comp13565\_c0\_seq2; 639 169 2100 LEN=2584; translated  
MNIYTLHKEGSFQPPPEGDNEILGLIQSTIRNGNNSSSNLPTVVEETTNOGK  
SSSHTSKTGRSGESVSSSGDKTAH HKNNSARNGNRRLDDTYGIDGDQGAENT  
AVPKTNSLGGASPS SSGKRESGSR LANKLNNSAKDLRNSLYSANNYGNHKKFV  
SSLIEIQAKNEFMVFDNDTDLVSHLTNPPEIRTSPLEDEILIVDLEEF AEL  
DDQVSAVSLPKALKKRKSKKKGSSSCKSR SNSSRQNFDE DGNRLDRRKS  
IKKSSSKRKSSTKSLSVTGQDTKETKKSSTARQAKGKVE RKLEVSREIKSVK  
SLPTMEAEDTEGIYQANSHQELSATDRMIRSVNSEP IMGGEENELPQ IRPPT  
FCRGENSIPDKNDS SHKSHASSGKVSSKTLGSTRRGGRHKQKSKETLQEDS  
DDVQNLGQSLFRKTSSKKKSLAGATDETKTGGEYIETIGTIDQQLVHSTLNG  
TNAMEDDQRSF GMLNEANETS KTHGERSTQDEYLMF DSEGNEKKNLSNEEY  
PLSPCNSNLRDHSNASRS

SYHEDNIYDAEEDYSVDEIQGQQENHIKSGDIHQEFGPTLGAQTTQSLPSSTSDKTTLK  
KWWQRSSKTIFKFKKKDRTTTTTEIGRPSDHSQQHLIKHAVRSW  
>comp13566\_c0\_seq1; 291 1104 2111 LEN=2387; translated  
MESFVGVLYSGFCGAILFGKVLRIQSHAQVIFSDAIVIRYGSGLQEKHDDHSHDDDIGE  
DGSEEKIPCPVLEFRIVNRLFDEPGGEIMDASLNVVANINARDADPVLVDALNSSQRSK  
KLRRYTYRSDDFYGSNSYGHRHLNTSDSLMSDTMSESGRSLDSRRSKKSISFVSSLIS  
RNHRTVDEDPSSRLVGKRIFSKMYFEQCEHPFFKRVWVGRHILNGESPLVRPRVKRLIRK  
NDGFWPEKLNLDYTSVRRSLLFNQILVSLNGVSNLNAHEVYAQKIYDFVDMNVGYQFVNTL  
YKDVDGRLKVDTDLINDVREQYGGGGEPLILEEKS  
>comp13566\_c0\_seq2; 405 102 2006 LEN=2388; translated  
MVAIDIEVRPEQNAGDGNDESSGSSAIVPKLRPRAGSARQLGREQLNSDDFRSSLRRSQ  
SAFLRSKNEVVAMPQKERVQVQIKNFFKRVKSAISDDSIDAPADLEKADVDFPVKSSSP  
QYRLETTTKRSVLCCFRGAVTAAELSDIKPNKQLASFLHWMFRSNFFILFCVMCLCFFGL  
IVFFACFI IAASEMNEDCVRAGEKERFYFISRRGDAQLQLFFLNVP IHMNI SFVIGNFCL  
SLANFXIHLVGGDPGKTFGDAFTLSWTTTFSTVGYGSLYPALSHENDSPDNCIFITFICSM  
ESFVGVLYSGFCGAILFGKVLRIQSHAQVIFSDAIVIRYGSGLQEKHDDHSHDDDIGED  
GSEEKIPCPVLEFRIVNRLFDEPGGEIMDASLNVVANINARDADPVLVDALNSSQRSK  
LRRYTYRSDDFYGSNSYGHRHLNTSDSLMSDTMSESGRSLDSRRSKKSISFVSSLISR  
NHRTVDEDPSSRLVGKRIFSKMYFEQCEHPFFKRVWVGRHILNGESPLVRPRVKRLIRK  
DGFWPEKLNLDYTSVRRSLLFNQILVSLNGVSNLNAHEVYAQKIYDFVDMNVGYQFVNTLY  
KDVDGRLKVDTDLINDVREQYGGGGEPLILEEKS  
>comp13566\_c0\_seq3; 469 102 1859 LEN=2241; translated  
MVAIDIEVRPEQNAGDGNDESSGSSAIVPKLRPRAGSARQLGREQLNSDDFRSSLRRSQ  
SAFLRSKNEVVAMPQKERVQVQIKNFFKRVKSAISDDSIDAPADLEKADVDFPVKSSSP  
QYRLETTTKRSVLCCFRGAVTAAELSDIKPNKQLASFLHWMFRSNFFILFCVMCLCFFGL  
IVFFACFI IAASEMNEDCVRAGGDPGKTFGDAFTLSWTTTFSTVGYGSLYPALSHENDSPD  
NCIFITFICSMESFVGVLYSGFCGAILFGKVLRIQSHAQVIFSDAIVIRYGSGLQEKHDD  
DHSDDDIGEDGSEEKIPCPVLEFRIVNRLFDEPGGEIMDASLNVVANINARDADPVLV  
DALNSSQRSKLRRYTYRSDDFYGSNSYGHRHLNTSDSLMSDTMSESGRSLDSRRSKK  
SISFVSSLISR NHRTVDEDPSSRLVGKRIFSKMYFEQCEHPFFKRVWVGRHILNGESPLV  
RPRVKRLIRKNDGFWPEKLNLDYTSVRRSLLFNQILVSLNGVSNLNAHEVYAQKIYDFVDM  
NVGYQFVNTLYKDVDGRLKVDTDLINDVREQYGGGGEPLILEEKS  
>comp13566\_c0\_seq4; 405 102 2006 LEN=2282; translated  
MVAIDIEVRPEQNAGDGNDESSGSSAIVPKLRPRAGSARQLGREQLNSDDFRSSLRRSQ  
SAFLRSKNEVVAMPQKERVQVQIKNFFKRVKSAISDDSIDAPADLEKADVDFPVKSSSP  
QYRLETTTKRSVLCCFRGAVTAAELSDIKPNKQLASFLHWMFRSNFFILFCVMCLCFFGL  
IVFFACFI IAASEMNEDCVRAGEKERFYFISRRGDAQLQLFFLNVP IHMNI SFVIGNFCL  
SLANFXIHLVGGDPGKTFGDAFTLSWTTTFSTVGYGSLYPALSHENDSPDNCIFITFICSM  
ESFVGVLYSGFCGAILFGKVLRIQSHAQVIFSDAIVIRYGSGLQEKHDDHSHDDDIGED  
GSEEKIPCPVLEFRIVNRLFDEPGGEIMDASLNVVANINARDADPVLVDALNSSQRSK  
LRRYTYRSDDFYGSNSYGHRHLNTSDSLMSDTMSESGRSLDSRRSKKSISFVSSLISR  
NHRTVDEDPSSRLVGKRIFSKMYFEQCEHPFFKRVWVGRHILNGESPLVRPRVKRLIRK  
DGFWPEKLNLDYTSVRRSLLFNQILVSLNGVSNLNAHEVYAQKIYDFVDMNVGYQFVNTLY  
KDVDGRLKVDTDLINDVREQYGGGGEPLILEEKS  
>comp13566\_c0\_seq5; 291 1104 2111 LEN=2493; translated  
MESFVGVLYSGFCGAILFGKVLRIQSHAQVIFSDAIVIRYGSGLQEKHDDHSHDDDIGE  
DGSEEKIPCPVLEFRIVNRLFDEPGGEIMDASLNVVANINARDADPVLVDALNSSQRSK  
KLRRYTYRSDDFYGSNSYGHRHLNTSDSLMSDTMSESGRSLDSRRSKKSISFVSSLIS  
RNHRTVDEDPSSRLVGKRIFSKMYFEQCEHPFFKRVWVGRHILNGESPLVRPRVKRLIRK  
NDGFWPEKLNLDYTSVRRSLLFNQILVSLNGVSNLNAHEVYAQKIYDFVDMNVGYQFVNTL  
YKDVDGRLKVDTDLINDVREQYGGGGEPLILEEKS  
>comp13566\_c0\_seq6; 469 102 1859 LEN=2135; translated  
MVAIDIEVRPEQNAGDGNDESSGSSAIVPKLRPRAGSARQLGREQLNSDDFRSSLRRSQ  
SAFLRSKNEVVAMPQKERVQVQIKNFFKRVKSAISDDSIDAPADLEKADVDFPVKSSSP  
QYRLETTTKRSVLCCFRGAVTAAELSDIKPNKQLASFLHWMFRSNFFILFCVMCLCFFGL  
IVFFACFI IAASEMNEDCVRAGGDPGKTFGDAFTLSWTTTFSTVGYGSLYPALSHENDSPD  
NCIFITFICSMESFVGVLYSGFCGAILFGKVLRIQSHAQVIFSDAIVIRYGSGLQEKHDD  
DHSDDDIGEDGSEEKIPCPVLEFRIVNRLFDEPGGEIMDASLNVVANINARDADPVLV  
DALNSSQRSKLRRYTYRSDDFYGSNSYGHRHLNTSDSLMSDTMSESGRSLDSRRSKK  
SISFVSSLISR NHRTVDEDPSSRLVGKRIFSKMYFEQCEHPFFKRVWVGRHILNGESPLV

RPRVKRLIRKNDGFWEPEKLNNDYTSVRRSLLFNQILVSLNGVSNLNAHEVYAQKIYDFVDM  
NVGYQFVNTLYKDVVDGRLKVDLTLINDVREQYGGGGEPLILEEKS  
>comp13566\_c0\_seq1; 113 102 523 LEN=523; translated  
MVAIDIEVRPEQNAGDGNDSSESSGSSAIVPKLRPRAGSARQLGREQLNSDDFRSSLRRSQ  
SAFLRSKNEVVAMPQKERVQVQIKNFFKRVKSAISDDSIDAPADLEKADVDXSSQKQLA  
TISTRDNNQKVCLVLRDDSID  
>comp13567\_c0\_seq1; 201 231 731 LEN=1422; translated  
MSSPSGSKTIYGVPNNGWTSPEWNWGYASGTGHDCAAICRRKYSARGERSALIDELVSAS  
PATDLEEVLKVMALAWQSGRWDGSDGGPGGYGDVLAAMADARRYEDEKTGNLSLLRDMKE  
RFGLLNPTNDDRIAMENLTDNGDDVDSALRTCSGLVVKAMGFVESG  
>comp13568\_c0\_seq1; 603 127 1659 LEN=2139; translated  
MTAPSGLEQWDLTSKTSLFLDRHMMFPLLEYLDGLIEADKISYSSKDVAARLSLLRPTH  
MVDYAVDTYKSVHGDSAEIPAEMEEQKTQVFKQLEEELESGCKPLTDLNNEEEKTKLVSS  
GKWSIAALSQEADLNITPEVLEIYRKTAKQFECGNYQRARDMLENYISLLAKPPGPD  
GDEEMDDYKTNKQSSDKKEDVGNPTIYYLKSVDKLLQVLWGRRLACEILVEQWEAASV  
ALDAVKAALSLVSSKRMSAIEALSERTWLLHWSLFFVYWNNSAKGGLEQLVELFHTEYK  
QAITTNAPHLLRYLTAAVLLCKRRITKAAAGSTAEARRLMKNLINVMQDCDYSDPIVEF  
VNCLCVKFDVFESAQIKLQECEKVLADFFLCKQTGLFMEEARVVFVFNENYCRHKNIDLQA  
LGKKLAMNEDEAEHWIVDLIRNADLDAKIDSEEGCVVMGGSVQSVYEQVMERTRDLNRS  
ATMAQNLNKLVDARKNKAKAEALAREEAE  
>comp13569\_c0\_seq1; 318 1 1224 LEN=1611; translated  
XTEWHPLRSHDNETASDSSRLAWQLDETALERGRLVANTSPAKMPTMDHSSMADYANVY  
EPSDDTYLLIDALKYDLFSGYSADENDGEVGESEVEIVEKAALIEYHGSAGSNDDNKVV  
GNDRSGNEQHRTRIILEETIRKEGCEEVQSKKIALRLEQLKRLERIQLVMEIGTGSVPI  
TYLSKRLKREKPRHPHNGDETTTAGEGFSVATDLNSLALEFAERTAKENGVPVPGADD  
GKHECQTPKARIRSVFVECDLAEPLLERLGGTADVVLFPNPPYVPTDDSEICNGIEISW  
AGGKDGRVIDRALPQIAELLRKPDPGACYMITVDDNLPCELAEMEESHGXEDGTAGAAE  
GAERVPIGPKDHMAVKLVLFGLNQREERGMSIAPVRQRPFPPARTEWS  
>comp13570\_c0\_seq1; 455 180 1670 LEN=1757; translated  
MTFLFVLVSTFLVSHDESPLTEQPRNEDAKMDKSNVVKEDIEPGSDTRLIHATHATAPVP  
VKKGRIDWIDHLKVLILSLVVVGHANSIVGAPGFIISLGEVQPENEGTSSNSNYAVV  
LCGYFLLKPAIVPLFFFVSGYFSAASRIKHGPNKFLKKTFWRLGPPAILWVLPVNSY  
LGYALVKPTNMSYSYSPGQAATWFLTWLMVFNCCYASINVDQDGSIGGRKDIPKFMQIMK  
VALSASIVQVIVGALVLFNSGGSFAEMPCFLVGDGYFNALGYASGILARTHGWLIRDNS  
DESCHDDDDNLVKKSKVCVVVTLFTIAVCFLYAPGAPFSSVGESAMGFLVNNLLLFIP  
AALYSPCSWVCLLSFFQSRSLASQQERSSESSSGDTDENNNKRSLFSKFLSGGAFVY  
LIHYFVTLTYLYLQILDDETQDIQVQFVNTTSTAEPALGDGNKFAGFAFVSTLSLVTSF  
LLGGLLKMIPGLGKFV  
>comp13571\_c0\_seq1; 102 771 1653 LEN=1653; minus strand; translated  
MFSGYHGVMVWKRRLFLALFRFVFGGPTTPDPWCVPLAAAPLRCLHALFLDRVPGGQSRD  
RGRDHHRHRLGLSLFPAGPRLAPALLPPRVAPARNKPGDASRDHEPHGGEDKGDNGVGH  
GAVVALSVGGIGIVFPRVPGKGVTPRHVLPDQEHVDSAPQPGQRRGRSRNHRGQESASV  
AAAPDDLQDHDNGAHDKGDPPHPGHQHGDIYDLCGNDVSVVREADAGRAALASAAAFV  
HIDVGVVGVGLSSIRVVAAPHPVVGCVGSFLLCCDVKVERKGTDWVLTSCX  
>comp13572\_c0\_seq1; 641 1 1966 LEN=2136; translated  
XDAPKQDDDDAKASKAHPGDGLNPVVEKKGTGPTNVGYVKDFVNERKNPSYRNLETPAK  
DPSRTVAEMVNEKSVIACEKKGDGMINPKCLDSDTPLVAYNSESFARTWCGQEI  
GPKSAV  
VMTTHCTDPIAHLFPMEVPPITGDHMPPIIKSRADKAIKHGDVEKVECNIPCEIEKGF  
LKDRTDSFIHGERWKVSTIQNQNNIKLERNAFRNDHYYSTQSLWSAVPLSTFDEKNLDF  
THRTAVDFDAVKDAIYLVDSKCSKTKETKRNRWFVAVQEKMDVDAYGQCGHNI  
EVPEGMT  
TATPEGRIALMAQYRVLAFAFDEVKAKDHISSMVWEALASGAVPVIIGAENIAERLPPNSF  
LNGNNFNAFSDLAEMVVTISSDKAKWQSYQKWRDDKDAIAEFKQYGFTTIDPTCRMCRW  
AYAKKYGLGWHTNQKRSIPKLPKDQLCLTADHALVSKPFSEEYVSKNPSSEAEAILT  
EDSEGESCSLDTGGDIVSGAFRGRKVVYQHDGVTDLVVTEWSTDAENVETALRLKFP  
GVRNP  
RNPDGSCFYNTHTLVSTEKGPNISSASIQDDTVKVTILANWDTTIKSTEEGIMEVSI  
IQD  
TNSGSKDGSAPRRRVVIEEVNVVHDKMTEFYPSTYCCQMTKDFINPIGVFFVDS  
>comp13573\_c0\_seq1; 290 1 785 LEN=1036; translated  
ALAAATDPSQEGGSVDASPPGGSYTVRDCQYRELKQVADLVVESFYDKATTNIVARNLY  
KLAELNRLQQNYAYPESRTKHRMLVVVEASERANNAGGDEGAIVGFCDVDARPCRTKLR  
LPRPYLSDLAVDPNHRKGLARKLVEESERFVSGLEGNNGNEDENEDQNENDHCWLWIRVE

ATNEAALGLYRDGMGYSRTPWSVTDASLPVDTQARIEAKGSGNAFAGQPSGEPXGLDPEE  
GPSEPGMIGFNLEWTRLVFLD  
>comp13574\_c0\_seq1; 489 1 1610 LEN=2011; translated  
XPLQGPLLRIGALLLLTILSNTEADLVKALEEGTTLNATENVCTVDEHNQTPNGHSRAQM  
QDNNNIAIMQSDPQFSDTTNEADLVKALEEGTTLNATENVCTVDEHNQTPNGHSRAQM  
RLNRMWHRATYIVIRHDSAGGDGASSSSPDENMDDQFLLVQRRTKIKDYCPGKLDPTPG  
GVVGFGESYLLNATREMMEEMNIDLSESGSNEMNELFRFPYEDDKVRVWGGMFEVIYRKP  
LEEIKMQPEEVDEVLRLSIREIRTMAVEDPGDWMPDGLHAIRLYLQYRRDHSLKRRLKLG  
YNSGDLERYRLRPKPSVIFFDCCDCLYFDGWQLASKLTAKIEEWCTSKKNLPEGEAYELY  
KKHGTALKGLLMEGHMEDCEKEIDEYLDKVDHVPVAEHLTIDNELRDMILKIDPSPKYI  
FTASVRDHAERCLRALGIEDLFVDI IDVKSCNLATKHSEEAFAALKIANVEDPETVFLFL  
DDSVKNIRVARSMGIRSFLVGRVGRDCGQPITTEHAEYEIDRIHDFPKVPEIFER  
>comp13575\_c0\_seq1; 397 293 1610 LEN=3955; minus strand; translated  
MNDQKHRGMVQYSSSSIMGSFSRRTRICVVGLLFASGRNAEALQNLFNAIQGGGSSAPAP  
LCKRVDVGTLSVSPMGLGTLNPLDKEVDDDANDVLKAAVECDINFVDTAEAVSSCLHYV  
GDXDELSRSNSLALVAIRWGKLMFKNIAFLWFQLIDESSTQYGFQKSETLLKNACDGSKL  
TIGSDTGSSGSIAAATKFAPVPWRTESSQTVDACKASASRLGVEQIPLYQIHFPDI IQPL  
KAFGRENRKDELYWEGLAECYQSGLAANVGVSNYGPETLLRAQDALSKKGVPIVSNQINL  
SLLHYRSSEKTLKICDELGIKVLAYFPLANGLLAGKYSIDSPPSFPKSLTMKKYYEDAEP  
VLVVMRRIAERNKTVAQVA INWVMMKGAIP IPGARNSDMARDNFGSMGWALSPTTEVAEL  
EMVASKTGEFSNGGFELV  
>comp13575\_c0\_seq2; 399 722 2084 LEN=4298; translated  
MIKDYSENVDPNIDRKTILFFVTLVGSTMTVLSSILINILLGAFASMLIQISLVLPPISLF  
VTAVVSLVTFNVPVAFFSFIMSVMGYFAMVWNKIPFAANLKIALLSAIGDNHGLWILA  
YAVSIKAYIWVLLWFAAVTEIVEYHTFWVQDSNDRVSTQGYVVAFVMILSLCWTNQVLNN  
IFHTTIAGVVGTTWFDPEQRIQRRPGHCGCSPAIFDSWFRSSFYSGSICFGSLLVGLIQ  
VLHLIVRCGRKNRNEQRLRGRDQPNSTDFLFCLEFLVEKMEFMMEYFNNSWAFVYVGLYG  
YDYWSAGKKVTTLFRERGWSVILNDQLVVRSLSMMSLLIGLLAGLFGVVLGFFVLDLTGA  
LSSAIAIFFFGAMLGRASCQVLFVVTSVAVDTVVVCFEAESPQLKNHHDPELFRDLVDAW  
RKAYPEDVGSQEEGSIISGEGDDEYQISHSNC  
>comp13575\_c0\_seq3; 388 722 2193 LEN=4296; translated  
MIKDYSENVDPNIDRKTILFFVTLVGSTMTVLSSILINILLGAFASMLIQISLVLPPISLF  
VTAVVSLVTFNVPVAFFSFIMSVMGYFAMVWNKIPFAANLKIALLSAIGDNHGLWILA  
YAVSIKAYIWVLLWFAAVTEIVEYHTFWVQDSNDRVSTQGYVVAFVMILSLCWTNQVLNN  
IFHTTIAGVVGTTWFDPEQRIQRRPGHCGCSPAIFDSWFRSSFYSGSICFGSLLVGLIQ  
VLHLIVRCGRKNRNEQRLRGRDQPNSTDFLFCLEFLVEKMEFMMEYFNNSWAFVYVGLYG  
YDYWSAGKKVTTLFRERGWSVILNDQLVVRSLSMMSLLIGLLAGLFGVVLGFFVLDLTGA  
LSSAIAIFFFGAMLGRASCQVLFVVTSVAVDTVVVCFEAESPQLKNHHDPELFRDLVDAW  
RKAYPEEXWVLIHKRKRVALAAKEMTVIIFISNVSLLAWKDHLINNGSTILITYISPHEY  
NNYRISNQPQ  
>comp13575\_c0\_seq4; 360 293 1577 LEN=3953; minus strand; translated  
MNDQKHRGMVQYSSSSIMGSFSRRTRICVVGLLFASGRNAEALQNLFNAIQGGGSSAPAP  
LCKRVDVGTLSVSPMGLGTLNPLDKEVDDDANDVLKAAVECDINFVDTAEAVSSCLHYV  
GDXDELSRSNSLALVAIRWGKLMFKNIAFLWFQLIDESSTQYGFQKSETLLKNACDGSKL  
TIGSDTGSSGSIAAATKFAPVPWRTESSQTVDACKASASRLGVEQIPLYQIHFPDI IQPL  
KAFGRENRKDELYWEGLAECYQSGLAANVGVSNYGPETLLRAQDALSKKGVPIVSNQINL  
SLLHYRSSEKTLKICDELGIKVLAYFPLANGLLAGKYSIDSPPSFPKSLTMKKYYEDAEP  
VLVVMRRIAERNKTVAQVA INWVMMKGAIP IPGARNSDMARDNFGSMGWALSPTTEVAEK  
NSATVCS  
>comp13575\_c0\_seq5; 397 293 1610 LEN=4071; minus strand; translated  
MNDQKHRGMVQYSSSSIMGSFSRRTRICVVGLLFASGRNAEALQNLFNAIQGGGSSAPAP  
LCKRVDVGTLSVSPMGLGTLNPLDKEVDDDANDVLKAAVECDINFVDTAEAVSSCLHYV  
GDXDELSRSNSLALVAIRWGKLMFKNIAFLWFQLIDESSTQYGFQKSETLLKNACDGSKL  
TIGSDTGSSGSIAAATKFAPVPWRTESSQTVDACKASASRLGVEQIPLYQIHFPDI IQPL  
KAFGRENRKDELYWEGLAECYQSGLAANVGVSNYGPETLLRAQDALSKKGVPIVSNQINL  
SLLHYRSSEKTLKICDELGIKVLAYFPLANGLLAGKYSIDSPPSFPKSLTMKKYYEDAEP  
VLVVMRRIAERNKTVAQVA INWVMMKGAIP IPGARNSDMARDNFGSMGWALSPTTEVAEL  
EMVASKTGEFSNGGFELV  
>comp13575\_c0\_seq6; 499 251 1970 LEN=4184; translated  
MGGPVEPMTTDTVFATAVTEATGDSTNAVEDGLDSLQEP LLPQVVSLDENTEDIPDALPV

DDSNANLEAPIFAGPIEFDESEWDHGEAQPEGFRDCFWGII FLLQLVGVVLVLSVMGIQNM  
IKDYSENVDPNIDRKTILFFVTLVGSTMVLSSILINILLGAFASMLIQISLVLPPISL FV  
TAVVSLVTFNVPVAFFSFIMSVMIYFAFMVWNKIPFAAANLKIALSAIGDNHGLWILAY  
AVSIKAYIWVLLWFAAVTEIVEYHTFWVQDSNDRVSTQGYVVAFVMILSLCWTNQVLNNI  
FHTTIAGVVGTTWFDPEQRIQRRPGHCGCSPAIFDSWFRSSFYFSGSICFGSLLVGILQV  
LHLIVRCGRKNRNEQRLRGRDQPNTSDFLFCLLEFLVEKMEFMMEYFNNSWAFVYVGLYGY  
DYWSAGKKVTTLFRERGW SVILNDQLVVRSLSMMSLLIGLLAGLFGVVLGFFVLDLTGAL  
SSAIAIFFFGAMLGRASCQVLFVVTSAVDTVVCFAESPNQLKNHHDPELFRDLVD AWR  
KAYPEDVGSQEEGSI SGEEDDEYQISHSNC

>comp13575\_c0\_seq7; 397 293 1610 LEN=4414; minus strand; translated  
MNDQKHRGMVQYSSSSIMGSFSRRTRICVVGLLFASGRNAEALQNLFNAIQGGGSSAPAP  
LCKRVDVGTLSVSPMGLGTLNLPDKEVDDDANDVLKAAVECDINFVDTAEAVSSCLHYV  
GDXDELSRSNSLALVAIRWGKLMFKNIAFLWFQLIDESSTQYGF GKSETLLKNACDGSKL  
TIGSDTGSSGSI AATKFAPVPWRTE SQTVV DACKASASRLGVEQIPLYQIHF PDI IQPL  
KAFGRENRKDELYWEGLAECYQSGLAANVGVSNYGPETLLRAQDALS KKGVP I VSNQINL  
SLLHYRSSEKTLKICDELGIKVLAYFPLANGLLAGKYSIDSPPSFPKSLTMKKYEDAE P  
VLVVMRRIA AERNKTVAQVA INWVMKGA IPIPGARNSDMARDNFGSMGWALSPTEVAEL  
EMVASKTGEFSNGGFELV

>comp13575\_c0\_seq8; 363 463 1741 LEN=3837; translated  
MVLSSILINILLGAFASMLIQISLVLPPISL FVTAVVSLVTFNVPVAFFSFIMSVMIYF  
AFMVWNKIPFAAANLKIALSAIGDNHGLWILAYAVSIKAYIWVLLWFAAVTEIVEYHTFW  
VQDSNDRVSTQGYVVAFVMILSLCWTNQVLNNIFHTTIAGVVGTTWFDPEQRIQRRPGHC  
GCSPAIFDSWFRSSFYFSGSICFGSLLVGILQV LHLIVRCGRKNRNEQRLRGRDQPNTSD  
FLFCLLEFLVEKMEFMMEYFNNSWAFVYVGLYGYDYWSAGKKVTTLFRERGW SVILNDQLV  
VRSLSMMSLLIGLLAGLFGVVLGFFVLDLTGALSSAIAIFFFGAMLGRASCQVLFVVTSA  
VDTVVCFAESPNQLKNHHDPELFRDLVD AWRKAYPEDVGSQEEGSI SGEEDDEYQI  
SHSNC

>comp13575\_c0\_seq9; 399 722 2084 LEN=4180; translated  
MIKDYSENVDPNIDRKTILFFVTLVGSTMVLSSILINILLGAFASMLIQISLVLPPISL F  
VTAVVSLVTFNVPVAFFSFIMSVMIYFAFMVWNKIPFAAANLKIALSAIGDNHGLWILA  
YAVSIKAYIWVLLWFAAVTEIVEYHTFWVQDSNDRVSTQGYVVAFVMILSLCWTNQVLNNI  
IFHTTIAGVVGTTWFDPEQRIQRRPGHCGCSPAIFDSWFRSSFYFSGSICFGSLLVGILQ  
VLHLIVRCGRKNRNEQRLRGRDQPNTSDFLFCLLEFLVEKMEFMMEYFNNSWAFVYVGLYGY  
YDYWSAGKKVTTLFRERGW SVILNDQLVVRSLSMMSLLIGLLAGLFGVVLGFFVLDLTGA  
LSSAIAIFFFGAMLGRASCQVLFVVTSAVDTVVCFAESPNQLKNHHDPELFRDLVD A  
WRKAYPEDVGSQEEGSI SGEEDDEYQISHSNC

>comp13575\_c0\_seq10; 499 251 1970 LEN=4066; translated  
MGGPVEPMTTDTVFATAVTEATGDSTNAVEDGLDSLQEP LLPQVVS LDENTEDIPDALPV  
DDSNANLEAPIFAGPIEFDESEWDHGEAQPEGFRDCFWGII FLLQLVGVVLVLSVMGIQNM  
IKDYSENVDPNIDRKTILFFVTLVGSTMVLSSILINILLGAFASMLIQISLVLPPISL FV  
TAVVSLVTFNVPVAFFSFIMSVMIYFAFMVWNKIPFAAANLKIALSAIGDNHGLWILAY  
AVSIKAYIWVLLWFAAVTEIVEYHTFWVQDSNDRVSTQGYVVAFVMILSLCWTNQVLNNI  
FHTTIAGVVGTTWFDPEQRIQRRPGHCGCSPAIFDSWFRSSFYFSGSICFGSLLVGILQV  
LHLIVRCGRKNRNEQRLRGRDQPNTSDFLFCLLEFLVEKMEFMMEYFNNSWAFVYVGLYGY  
DYWSAGKKVTTLFRERGW SVILNDQLVVRSLSMMSLLIGLLAGLFGVVLGFFVLDLTGAL  
SSAIAIFFFGAMLGRASCQVLFVVTSAVDTVVCFAESPNQLKNHHDPELFRDLVD AWR  
KAYPEDVGSQEEGSI SGEEDDEYQISHSNC

>comp13575\_c0\_seq11; 488 251 2079 LEN=4182; translated  
MGGPVEPMTTDTVFATAVTEATGDSTNAVEDGLDSLQEP LLPQVVS LDENTEDIPDALPV  
DDSNANLEAPIFAGPIEFDESEWDHGEAQPEGFRDCFWGII FLLQLVGVVLVLSVMGIQNM  
IKDYSENVDPNIDRKTILFFVTLVGSTMVLSSILINILLGAFASMLIQISLVLPPISL FV  
TAVVSLVTFNVPVAFFSFIMSVMIYFAFMVWNKIPFAAANLKIALSAIGDNHGLWILAY  
AVSIKAYIWVLLWFAAVTEIVEYHTFWVQDSNDRVSTQGYVVAFVMILSLCWTNQVLNNI  
FHTTIAGVVGTTWFDPEQRIQRRPGHCGCSPAIFDSWFRSSFYFSGSICFGSLLVGILQV  
LHLIVRCGRKNRNEQRLRGRDQPNTSDFLFCLLEFLVEKMEFMMEYFNNSWAFVYVGLYGY  
DYWSAGKKVTTLFRERGW SVILNDQLVVRSLSMMSLLIGLLAGLFGVVLGFFVLDLTGAL  
SSAIAIFFFGAMLGRASCQVLFVVTSAVDTVVCFAESPNQLKNHHDPELFRDLVD AWR  
KAYPEEXWVLIHKRKVALAAKEMTVI IFISNV SLLAWKDHLINNGSTILITYISPFHEY N  
NYRISNQPPQ

>comp13575\_c0\_seq12; 488 251 2079 LEN=4300; translated



MGGPVEPMTTDTVFATAVTEATGDSTNAVEDGLDSLQEP LLPQVVS LDENTEDIPDALPV  
DDSNANLEAPIFAGPIEFDESEWDHGEAQPEGFRDCFWDGIIFLLQLVGVLVLSVMGIQNM  
IKDYSENVDPNIDRKTILFFVTLVGSTMVLSILINILLGAFASMLIQISLVLPPIISLFV  
TAVVSLVTFNVPVAFFSFIMSVMIYFAFMVWNKIPFAANLKI ALSAIGDNHGLWILAY  
AVSIKAYIWVLLWFAAVTEIVEYHTFWVQDSNDRVSTQGYVVAFVMILSLCWTNQVLNNI  
FHTTIAGVVGTTWFDPEQRIQRRPGHCGCSPAIFDSWFRSSFY SFGSICFGSLLVGLQV  
LHLIVRCGRKNRNEQRLRGRDQPN TSDFLFCLLEFLVEKMEFMM EYFN S WAFVYVGLYGY  
DYWSAGKKVTTLFRERGWSVILNDQLVVRSLSMMSLLIGLLAGLFGVVLGFFVLDLTGAL  
SSAIAIFFFGAMLGRASCQVLFVVTS AVDTVVVCF AESPNQLKNHHDPELFRDLVD AWR  
KAYPEEXWVLIHKRKVALAAKEMTVIIFISNV SLLAWKDHLINNGSTILIT YI SPFH EYN  
NYRISNQ PQ

>comp13576\_c0\_seq1; 664 313 2034 LEN=2156; translated  
MASTPPIVKRREHEENSTPADLEDASANRKL PFEPKVDGKPTSKCPKQQSSSKLALIPMR  
SVAFSKNAKQQQQPLEAKQFP IVLGRANLSQWYQSCDCQQYYCRLHCRPVAQNIGSLS  
KVMIQIDTKGTAHIVGKNPHLVTIITPERGNNNY NKSSSNDAKCAAGTDQECNDNSQSN  
KDDHHQPIALRPNDILSIGRRDREPWMRFQIVENNFSTSGAGGLTKSSLMNHTNTKSDDS  
KNEHLKPINDITVEVPTKGASPEAWRQTQLSRNDHQAENPPQSLAVAAPVPNTSVQERSV  
HHDSQLPEWITTTTTTSTGQKKRKKASSGYQNYGITDSKQQQHHAMAATLTKAAVAAGA  
AADADERNRSKKNRYNTYYNYNHGN YDVFNAQRRRRYSSSSLAPYGLSSHNNK PVI  
RSAEELYNRGTSRRGRLQGHNDPQIHLVFDYETSARLLRAGTRRGRIEMRPSKETNR  
DCNYNNDGGNTPPSGGEHLCSRKIRRFARTDRNF IGKPREESKSSSASAPNASSTTYGKS  
MGLLSQNYVAALLDESTPAVSGSTKQRVDESTV

>comp13577\_c0\_seq1; 176 222 1484 LEN=1827; translated  
MGRWEVARVGS DSGNGDDGALPYAIVDSLEPLTGEVYFEVNKDNFEDTDP I IYVEVFAR  
VSEGAPCHTGYLVEGSHRFTITTFGEFYDDYAYPKYSNGRVGRAMYTISPSPFDMGERQR  
IFFEKDERRQLLYCVRVSTKVD FMGDSELD PVGYIDTFMKVNVQMVGKFSTTLSTDVEVD  
SSDSSNAQTSILARIPLASYLCDSERNPILEGTKYIMGQVFRYVRERDRGSKIRACRILS  
YSSRMLASC SFFPDPLFFPSFFFLWPLPCFAYETFRVCVTPAENLSDNRRSLQEGDIEYS  
VVGFD SIHCSNNGVYRELVEKELPGTRTTVDPVPDAIGSLSFASVVDSEFFVEGESSFWC  
DGRVKIRYNGDTIGMRSRFLREDGDEYGTFDLELEIDQDPLGSPPARPLTLWEMVLGN

>comp13577\_c0\_seq2; 186 222 1322 LEN=1665; translated  
MGRWEVARVGS DSGNGDDGALPYAIVDSLEPLTGEVYFEVNKDNFEDTDP I IYVEVFAR  
VSEGAPCHTGYLVEGSHRFTITTFGEFYDDYAYPKYSNGRVGRAMYTISPSPFDMGERQR  
IFFEKDERRQLLYCVRVSTKVD FMGDSELD PVGYIDTFMKVNVQMVGKFSTTLSTDVEVD  
SSDSSNAQTSILARIPLASYLCDSERNPILEGTKYIMGQVFRVCVTPAENLSDNRRSLQE  
GDIEYSVVGFD SIHCSNNGVYRELVEKELPGTRTTVDPVPDAIGSLSFASVVDSEFFVEG  
ESSFWCDGRVKIRYNGDTIGMRSRFLREDGDEYGTFDLELEIDQDPLGSPPARPLTLWE  
MVLGN

>comp13578\_c0\_seq1; 347 91 654 LEN=1474; translated  
MKLFIYFILAI FIGPKEASAFVVS NANNAFASSSESQAMP AVNIVLRMVGGRGWDNDDFL  
SSLSGDEDERKKSREDYDDFSDRRASFNARQAEIMKSPQAQAFMKQRQEQQMRYLEEEQG  
QGDLSGDGTF LGVDVPEGSGGGTRMGRMMEQAKRMQGQRGQSNMIGGLHHQQLLGPLDED  
DDEEKEV

>comp13579\_c0\_seq1; 923 197 2518 LEN=2560; translated  
MACCSTAFVPVAPSRFRGRVHRILDPTNASPTTNAVSGT PRTRTGMVSGSTSDGCGDLEM  
ETETATAIAKQWIRDFSGALSEGRIDDAVDL FVEDPGEESPDPGATPKKFP AFWRDMVAY  
TWNIVTLEGRSTIRDMLRETLHDTETIGNGGDKRTTWKLANPRPSGRDPFPPLKVSIVP  
ASDHEDPAESSTCEFWCDIETAAGTGYAHVRLDLRTRKATLLTTL LLDLHDKPFQTHRKR  
SRGPIPGPVKGRDYFKDTREQRAQAAGAGNDDEEGEYHVAIIGAGQAGLSLAARLEAM  
DVPYVLF EAGDSPGSSWRNARYPSLHLHDPVWYQHMPYMEFPKTWPIFAPKDKLADWLDA  
YASLLDLNIRTNRTVQTATQDWDGSDGKKGWRLETVSRSEKDDRRREHQQQRRATVHAE  
HVVFATGNSSRPKIPDFPGASSVFRGTQLHTSQYNGGKPFAGKRVVVVGSNNSGFDVQCQD  
LWEQAGSVTMIQRTGSMIVSSKSVLDYGLFLFNEDPQYHHEADLLLLTTTPYRMLAEGG  
AWKSVTNKMKDND AELIARVEAAGYKFDYGYDGTGLFAKSATEGGGFYIDVGC AELLARK  
EVLVRNADVERLEPDAVVI FNKDRREERLPAEVVVYATGFDTMESYVEQICGQDVVDKV  
GKIWGLGLNYKPEKDPGPWTGELRNMWKPTNVDGLWFGGNLAQCRHYSKFLALQLAARY  
LCELGEGDGN TGGQTKRSNEGAVVSPRVYGI PPPAFTQKLPKKDGTASVASSI

>comp13580\_c0\_seq1; 381 528 1388 LEN=1553; translated  
MATDGAVARVEGDDND EVLVNALRAVSIAPAVGDGSTSGGKETENPILVLDAGYGFPRE  
KKVRKEKINAIACQIANFLVWQIGAADAGDCAAVKVVGCPEDEDTRV LLENRTIDRMKRAG



PPRAKYNMDQLGPPDFTFLGQRYRRDDVELLSSNVATNEPVEGEKTNAEGGATPTCSFLK  
MQASIWTRVGEQGDPPYSSCNHRGTQASGENGEEDPSESDGPPSPGKKRTMVVYLHGNA  
SARVEVVPNLSFLLGQVGVFVGVDFVTGSGKSDGDYVSLGYYERVDLECLIQYLKSVYG  
GPDGDDLELILWGRSMGASTALMHAGKKSFTATKHSRNHSNRDSDSTDEEDIVHDLRK  
KSSFGSMEDDIVTNSAQPSKNNNSILKGLICDSPFASLLHLCEELVERARAQGVVVPVGVV  
ISVAIAMIASVRNLAGFNIREITPIEDVFNIDVPALFVVGADDDFITPQHSERLVESYK  
QGVTTNLFMVPGGHNDARPPIVFEGILEFCRQRLSLGESPAPEVPPQMLSSIHQNPPWAY  
HRTVHFQAHSTREHNNTQFHRTNGNAAQDAAEHLGMTQERQDDIQNKIGLMMGGQGDVEK  
LRYSSDEENA

>comp13587\_c0\_seq2; 95 342 494 LEN=572; translated

MSNDGVQAPRRRISRNSSRSRSDGSMEQQAPRIGLGARISQNIEMAKKG

>comp13587\_c0\_seq3; 423 266 1717 LEN=2176; translated

MDQLGPPDFTFLGQRYRRDDVELLSSNVATNEPVEGEKTNAEGGATPTCSFLKMQASIWT  
RVGEQGDPPYSSCNHRGTQASGENGEEDPSESDGPPSPGKKRTMVVYLHGNASARVEV  
PNLSFLLGQVGVFVGVDFVTGSGKSDGDYVSLGYYERVDLECLIQYLKSVYGGPDGDDL  
ELILWGRSMGASTALMHAGKKSFTATKHSRNHSNRDSDSTDEEDIVHDLRKKSSFGSM  
EDDIVTNSAQPSKNNNSILKGLICDSPFASLLHLCEELVERARAQGVVVPVGVVISVAIAM  
IASVRNLAGFNIREITPIEDVFNIDVPALFVVGADDDFITPQHSERLVESYKQGVTTNLF  
MVPGGHNDARPPIVFEGILEFCRQRLSLGESPAPEVPPQMLSSIHQNPPWAYHRTVHFQ  
AHSTREHNNTQFHRTNGNAAQDAAEHLGMTQERQDDIQNKIGLMMGGQGDVEKLRYSSE  
ENA

>comp13588\_c0\_seq1; 369 1 1278 LEN=1461; translated

XYMPNLGLHGKEVKLKQKTTLENKSEAMEFLEDVPSPTKEEVENVPSNRQYSTSYQKQ  
GKKQDSGKNNNDNSDDIDNSIDKHKNNSRRRPPQNKKPAARNNSSSSRKVKDQTKTPS  
AVRKPDENLCADVAPDPRGDDPEHRMTKKSAGRNTESFDPGSTLVRPALRVKVGSPLSKC  
YNRFPPLRHDDVIVPEMFPEEDWKLYYQLVEEMTELQQQNVKGTIEWISWHEGAHLVAKN  
PSGSKTFQLIIDYLCDFRIEKKSIGTRFNWYKDSWDKPFHHSAAFNPSRAKTQNIIV  
GVSFGDCRELAFLRADDQSDCRLYFPQPNNGVFSFGRDVNIHWKHGINALSVEEQEAHGI  
NKGRISIIWGLATSVMEEDNSPPLLGDGKGPAAKNNHKYHGNNRNRGGRNKPQQKKT  
NGKTN

>comp13589\_c0\_seq1; 506 1 2158 LEN=3216; translated

DGENNDDDDSPSTSIRCIIRSTDPKSRNTDTGASTSVVIVVIGKSVRPRPLFALYLF  
SKNYADCNTTATDGVVIAVDDEKFISSGDSHGDSKTRGKIESESNPRVPRTATRNRSKKIKT  
ENNRELSQDLIEDRLLRSWINHSHADYHNFTEDRAAEIRSALLDWYSIHRRKLPWRGD  
PPPFDGSTSGINCNNKRSRGNANTTAATVNTTKKTRKANHDDRQKSIKHFFAKIKREKT  
QSGLKEIENDTEPSKDSLLEVPQAIPVTGYGVVWSEIMLQQTRVEAIVPFWINWMKSF  
TVYDLAAATEDEVNAHWAGLGFYRRARYLHQGAKFVVQELNGELPRTPKELSKIIGIGPY  
TASAIASIAFGVCVPPVDGNVCRVLSRLTGIANHIKNPILKDKLGWKLATQIVEAGDGSS  
PGLVNQALMELGATYCAPAGSGVDPRDPLRDYLLSTRLGRAYLAAVQDGTINGYEFRLS  
APENHCVLCNIDGIQTILOKFKESITANGMTTEQAAMVGHAAPADPPKKDKREEDLAVV  
VLFHHCETEGVNDCASIRYLMVKRPKEGLLAGQWEFNPVCIQTRKRDKKKNGITKNEPTT  
KIPKRAEREQALTKFLVDDLLLDYPNDEVATAVSNVSRIDFVANKQPMEHIFSHVKHYMW  
VEVGQLTEVCLEECDLEWRSPSGKDVRWMSKSDMAEVGITSVKKVLQAVEKASRPDC

>comp13590\_c0\_seq1; 343 216 1298 LEN=1877; translated

MAPLNPEMLPDDHCHVGDLSPEMPLLPITSDQTVRACRALKTSPSRDVFICSYPKSGTTW  
TQNIIVRLLWEIANAGRPLPEDWHLSSHAPFYEVDQYWKPIQPQNGSDNIDPAEQVMER  
LPVTRPIRHDGGRETDDDEYRVFNTHLRPNQLPANAKRVYVVRDPLDVMISFYHHLNQS  
VEDGGYTGTFGEFCEEFMGTILYKWKQDHI EAWLGEQPTSAEATRNFLLHLYEDMKND  
LEKETKRIAKFLLDNNSVSDHYLDKVVSRVPHCTFHAMKQERHRYTPLTVSWKTNPE  
TGKPYDKFVRSRVDGDECLQKNDSTSELDRWINRDVVIARARWLKAKVDAGVVERYL

>comp13591\_c0\_seq1; 171 1 927 LEN=1607; translated

XNNNKNKIKNNNQNNNSIEPGRNPYFVHEPSFTNQTLVNIKMWHSQDRVWNLMEEES  
SSRSLGKPFYGRVAMLRDLVYVYTPIDIYKIPLDPIPEDYNEDYMVGLKFPVKYQRKHKG  
KTIEHASAWKDPRFGHHCVLPGFKSFPVNDRYFSGPYSXDGGLEGGLFEGKEPRVLRPA  
GARAGAAGGPEGESGAPGGGDHLSERPLTDYGLHDERFVAHTILPAIRGLASGESDA  
DTNAGPMAIQVDRGLYFCRVRADGSIWLRDKPGFGRVEKSILEESALGRKCTGEPFEVDDG  
VLGEKSPGRW

>comp13591\_c0\_seq2; 45 1 318 LEN=998; translated

GGDHLSESRPLTDYGLHDERFVAHTILPAIRGLASGESDAGPMAIQVDRGLYFCRVRADG  
SIWLRDKPGFGRVEKSILEESALGRKCTGEPFEVDDGVLGEKSPGRW

>comp13592\_c0\_seq1; 599 234 1882 LEN=1922; translated  
MSSPSHIPRQAAEWIAHFYFPMRRYNPDFVDRLEENLGLKIKELKPLQARLYSMDAVRS  
EGGIEKCRLLSSAKKQQRVDFIRRAFFRDRACAIVNHRLMEDLRTEMSRSTDTLSAAANP  
CGANGYASAASAAHDPYATARSPPSGSRKRPNHQISSQASAALLRLQQYQQQRQQRPGGLP  
PNATGPNPEAEGADFFSSFFVHFVGDRRGVAAVQGSRVNTSTSSNPSSNHPNINVGSINNN  
THWATSTNSINNXPSNNNNNNNRNGSSSNTTTTTPPTAQSPATPAAPSSLDGTRLQAQPSQ  
NQNPPTAQVQVSSQNCASLQTGLQQQQQQQPHVAPPSTDNQGTVTYSTASGTTPTLEQQ  
RQQQVVQQLRQQYLQRQSQPIVPDSPLQQHQQQPHRLIPERTRLGYSTAPAVSETKGGQD  
QTNTSVGGPFAVALAAALSSMRNGTPVDSSRQEQEKQEEEQASPLISRGGTAPGAPAGTS  
VASAFLHASRTLAAATGETPAPVHSSIHATTNSDPSNSNTTQRLNSESAAATAPESVPV  
SSSSTNNK

>comp13593\_c0\_seq1; 456 147 1650 LEN=1650; translated  
MLFRIDVFPSSAKGGNGSSDGSTRPSQTLYCSPSTVANRLKGGNIDGGSNGKNNSDVVS  
GGLVVKIGRKGVDVDFLFGTDRSISREHAVLRLVGLPTNQKPNTPGAGKSRTSPRRSRRRTD  
STASVNDNNETVEQGGENSGWCVEPRNEHEAVACRNSPFKMCLVLENKKGKSGSYVASEDT  
SIDLDNENQNDNGDNAGGDGHDSDATTDGEDGGIGTYQNSQQQASHYGLATSVATQTGEI  
LASRNTMLHSTNPPSQGLPSLSAAIQHHFGSGTPIKLTCLDPGESQVLSFDGSEAVATK  
SKINSNRPHDDKAHRRDRSVLVQFGIAQLPTIQVTHIPMTAVFSSGIQASIKDSFRLCGG  
LVQETGTLPRRHSHEQTTTTTGNTHLITNSRAAVAKQLIAWCYEIPIVSPFVVMALGSH  
ASLKDPFPVPGDFPPVATDTSSFWESKPSQGLLSGYVVLSTDPCEAEALVEASGAKLEI  
IYDEQKRQKHTKASVGAFLHX

>comp13593\_c0\_seq2; 230 1 779 LEN=779; translated  
XVAAFLEHAEGLLKGNRAVLLAPMSKSKLSNANTVLLVKTLELDGIPTVTAKMLAKTI  
SKQESSIVGLQPPVGNHEKASRPSLKETSSRPSLTCDTTETRRRELESQTHHRGSQKRAW  
EESSTAGDLSSLYPDRHEESGFDLNSNGINEETTPERSSSQSQKRRMEQAMQPPLAEAT  
KTITADTASESSPTQLGGADANGWFRPAPRDDHRSRWWKRASEAYRIKTGAGLERSAST  
DIELLSVPAANPGVTAVNRAX

>comp13593\_c0\_seq3; 183 1467 2177 LEN=2408; translated  
MKSPGDLLPSDITVFERRIFLSNIIISGAASGVGAGAMSSLLTGRAPVASAATTDVIAPG  
TIKVTPIAHTFITSSSMKPIRENDATRLFTNARVVYIFEGENQESSGSLQDVVDLTKT  
RKAERGAGVTPGEVQLLLLQSKGKPVGSELANQVAGKARAMPDGDVLLVGPISGGTAAD  
GKILADTAAALDTFVGCRRKGVVSVLLNGPKENLKLIVESGFASDLLWYGLPSKN

>comp13593\_c0\_seq4; 684 147 2398 LEN=2398; translated  
MLFRIDVFPSSAKGGNGSSDGSTRPSQTLYCSPSTVANRLKGGNIDGGSNGKNNSDVVS  
GGLVVKIGRKGVDVDFLFGTDRSISREHAVLRLVGLPTNQKPNTPGAGKSRTSPRRSRRRTD  
STASVNDNNETVEQGGENSGWCVEPRNEHEAVACRNSPFKMCLVLENKKGKSGSYVASEDT  
SIDLDNENQNDNGDNAGGDGHDSDATTDGEDGGIGTYQNSQQQASHYGLATSVATQTGEI  
LASRNTMLHSTNPPSQGLPSLSAAIQHHFGSGTPIKLTCLDPGESQVLSFDGSEAVATK  
SKINSNRPHDDKAHRRDRSVLVQFGIAQLPTIQVTHIPMTAVFSSGIQASIKDSFRLCGG  
LVQETGTLPRRHSHEQTTTTTGNTHLITNSRAAVAKQLIAWCYEIPIVSPFVVMALGSH  
ASLKDPFPVPGDFPPVATDTSSFWESKPSQGLLSGYVVLSTDPCEAEALVEASGAKLEI  
IYDEQKRQKHTKASVAAFLEHAEGLLKGNRAVLLAPMSKSKLSNANTVLLVKTLELDG  
IPTVTAKMLAKTISKQESSIVGLQPPVGNHEKASRPSLKETSSRPSLTCDTTETRRRELE  
SQTHHRGSQKRAWEESSSTAGDLSSLYPDRHEESGFDLNSNGINEETTPERSSSQSQKRR  
MEQAMQPPLAEATKTITADTASESSPTQLGGADANGWFRPAPRDDHRSRWWKRASEAYR  
IKTGAGLERSASTDIELLSVPAANPGVTAVX

>comp13594\_c0\_seq1; 372 176 2050 LEN=2050; translated  
MPNVPGLFAFLTAITVGNLLHAAASAIRQGKSNEFRRHLVEDGTECIVYQKHTEFEDPLR  
NNESWGCEFSRDQAKRFVHDIIDIEGVSNDYFESRHIVSGEAVFSAGAIIEESMINNY  
AKLVVSNETMVRLLKPLAQDDPRHQHQRRRLRRNLGSSTPGIFRTLTVVKVIDGENKAVDASL  
SELNGRVFTDFANLKTQYEACSKGQMIIEPADVGNISGIVEVRI SARMSSDGITSVQNEAV  
DKAEELYGGSAGLKETFDVFMFCQPPGSPEPWIAAFINHWASFYNGDWCKQMSAQVHEV  
GHNLGLGHSGKDGNEYADTSDLMGYSYDLDDGPYMCFNAAKNYQLQWYAAQQDSIDPLDF  
AGDSKSFVLNGIDDYKKNPELITLRLREQHGDKKIDYIYGNRASGPNRGTSEANQVV  
IFEKTGSGPYGAKSSRIADLVVGDTHMIENFKDTIYNVGI RWDLSLSEDLKDATITVSTS  
DAWPTSAPTTSCGENSAGRFRLLKKTVDVYGETTWELRERNSGQVLEKSTEAYDSHQY  
VPEEGSICLEVGGCYEFQIFDSFGDGMCCDNGDGYRGLLEQKIFEGGDFGSNEKVRFC  
VKDKVLQFPPTAFPTGSPTTGPTTG

>comp13595\_c0\_seq1; 174 208 483 LEN=1345; translated  
MEVESSETTGNETSACASGAASSATANRKHACEIEVTFPTNLHAQQALNILQVDREPTD

RVSKSFRLVTTNETAEDSKGGVNETICNLKV  
>comp13595\_c0\_seq2; 203 208 588 LEN=1131; translated  
MEVESSETTGNETSVCASGAASSATANRKHACEIEVTFPTNLHAQQALNILQVDREPTD  
RVSKSFRLVTTNETAEDSKGGVNETICNLKVRVESKELKMRVAVSSFYDYLTVFLKTVQ  
EFDLAL  
>comp13596\_c0\_seq1; 613 183 1781 LEN=1921; translated  
MECHFLEKRVDRSGGGFSSSLHETTTALTIVPRMGSSAGGRRQQRTRHALGKSGKDSDDL  
PLSSRSPPRRSHRSRCFRHSWLLFAVFLLSNNSLATTMAADTFRTERTDAAEERNAYESSK  
HRDKASRAKVANS GGKIKLKRIRKFIHSTAAEEHRTPLPTTTTTTTPRLSSKRTRINHGD  
LNSDCEEIKNTIEVNPAGASSRKNIDAFHSYLLPANALPFLKRGLLFLSLTSLALLERN  
PSPIALTKISTIDDGVARLGSSLPLLMSPTFFFESAARQLGKLRFLDWAKIWSIPNEIL  
PSLTSALIFAWVPSLVMHQAWWELGFLTSLTSQPSLRQYFVAQVVPVSMGATLQKLVWSE  
FWKRAWDFMLEPFSHMLMPQVFHPLSFSSSQEGGEPKDTQTQSQRFSHFWKRVVSRID  
TWTKSSMKALLQKNVQGSINGLAEDSWEALVSAVASSVELSLFYAKDDATVHLHELPAST  
ADASGTGEDEAQMVELESDDASAREQDTAAPATCETAVDNDSDSTIGSSER  
>comp13597\_c0\_seq1; 502 313 1586 LEN=1882; translated  
MKYDTIASPPRPLLCTESTDGGGCAGRPLPCKPRETIVPEGNGGTSWGTRKDDASLDYGH  
RALHDSHSDSIDTAGLDAAGHDADYKACSSARFVCDDSVRSDDSSLVSAPTLCASPS  
MSFADSEDEETPLPGEPESSREEEQQQQEEADAESSPETNPEAGCESGVEKGRRKSG  
IWNHVVRDFDRSRGGDFKILRAIGRTAAVNAVVSATALVGGPVAGVAGYATGGAITAKRL  
FGDGIAREDHKEIAKSLAVFGGATTASLTGQAIAGAAMI GLVGASLPVAGAVAFSAGCVS  
GITAGALSEWGDVGMGEGREKQAAGSGSDPKGGKIDSGGNAETKHGLAGVVGAWVDRQ  
RQRRESRV DREAARIKKLV DQQTSAASEXQQTRMARERIDRRQALSGLGGVLIVGKYS  
DSVWV  
>comp13598\_c0\_seq1; 195 1 1203 LEN=1494; translated  
EPSNDVIDLSQSFNGI V PYSAVIAIEQDDMEAMRQQARSPDDKEGSSAAGHRTRTRHYI  
RRILRMAASKEELENEGEHAGSMGR LPIAVGLSLLLGG LVRPMDVALVACWTAYLTILNM  
TAQSPRDLGGAPVLPVAVPPQGHVPSVLSNPMGVRFGESALYRRWLALGAWLGLLGP IAWL  
LVATAVLP SLGPGRAGVGLGDARAVARPLFLLCCQATTEAVAKRNLVSDATR RNAGNRAS  
LWHGGARRPDKQNNPRACASIRDRKRTLVAEFGGKPRCGLDRNRNF SHRVCVFSLSL  
QIALPLRVLPILYNASRLIYLWSWATSTAATTTAVSRVGRCLGIANFAYWGINLFAFLI  
PIASIRYMR AHFFGVEAEVTTTRPGLEETVGIVPNNILLQ  
>comp13598\_c0\_seq2; 194 1 978 LEN=1269; translated  
EPSNDVIDLSQSFNGI V PYSAVIAIEQDDMEAMRQQARSPDDKEGSSAAGHRTRTRHYI  
RRILRMAASKEELENEGEHAGSMGR LPIAVGLSLLLGG LVRPMDVALVACWTAYLTILNM  
TAQSPRDLGGAPVLPVAVPPQGHVPSVLSNPMGVRFGESALYRRWLALGAWLGLLGP IAWL  
LVATAVLP SLGPGRAGVGLGDARAVARPLFLLCCQATTEAVAKRNLIALPLRVLP ILYN  
ASRLIYLWSWATSTAATTTAVSRVGRCLGIANFAYWGINLFAFLIPIASIRYMR AHFFGV  
EAEVTTTRPGLEETVGIVPNNILLQ  
>comp13598\_c0\_seq3; 167 1 690 LEN=690; translated  
XWRNDSINLDPKTTSSILPLHGSSRNGTNKRL ENAVQGI V PVDHRLGSLSGIP SX YDTSTA  
SPRPTDTTTFAPRRLQEFQPHDSPPV LHPDAGVLDRLVDFSTAARSFH SCLPAVENNW  
KRGVAARYGHASAILAGNKKSTGT FHTNCIHAYAYENL CENLCEHPPLVPVAAAATNNV  
YGKGADIWPEPSNDVIDLSQSFNGI V PYSAVIAIEQDDMEAMRQQARSPX  
>comp13599\_c0\_seq1; 377 1 2112 LEN=2214; translated  
AVFSSNSSIREDRINMPRINQMKKIVHHTIRGLALVFFVAALVHRSCCADALKPTRDP  
FLSKKCLARWKS PSL SLLSDGRPKIDYCCGNPLFVSGGKASNSHR SADTHSADNTD  
SESQSPPLSQIESLRS LAKSLNFFGNKPSLDNASKAPERVSDDTMQNQPLQKQIYAKS  
LAAGLAVSLAMIPEAISFSYVAGVSPVGLWTTVLLGFVAAAFGGRP GICSSASGASV  
VAPLCASMGAPYLSVCAVLTGILQIVFRKMGK F IRLVPHPVMLGFVNGLTVVMARACLGH  
FRDAGGAF LSLSSAEGRS M IGLSALTAALVRGIPKLPALASIPPTLGAVTVCSILQKILK  
LPGVKTLADVSGADTFRGGWSVLPKFSLWPSVPPF SLET LKIVL PYAVTMAAVGAI ESLL  
TMQLIDGIMEDGSSSTEQECTGQGLGNIAAGLTGGIGGCALLGQSI INVESSGSSR LSG  
MSVSI FLALGILAGAPLLANIP I AALVGV MFTVCQSTFSWSSLRILHKIPRLDV FVIFLV  
SFVTIRADLAKAVVAGTVASALGFAWKQSTEIVATVTEGKDSKGN NKKSKKSTTR LKSY  
HVKGPLFFGSVTSFSKLSNIKEDPSDVVVIDFTNSRVC DHSAL EAIHNIADRYNEAGKT  
VHLRHLSEDCRRLRLRLHGEKSPYELIIESDPRTDPVYSVATN  
>comp13601\_c0\_seq1; 610 23 2641 LEN=2641; translated  
MSDWDTPKDDMGHPDSAIRLASAVHRFRV PKINPGRRISFANSFR TTGKHEKTRRLMHKA  
DDQREKLLDAVLSDTISHERVVAEARRYQPYIHQILV SCKFQPEMARLDERLVFEWMSGV

ESKKNYFKSEAMMDLTCILCEGLGKAGVATESSMAGEFAAASREYAAAAGIFSFLAED  
HLPKWIARGSKTSETDLPVECCTTAKGLSILFQANAQQMAVATVLIKPGTPNYGLLAKL  
CKGIEEQLEEFVGLMRKDAFGQMARIEKDFFTLVSFQTVLQKSLSDYFYARSVWDQGDY  
LAIALLESEATVYLRTEDVSGTTPGMPDVARIPALQALLGDLNDRSHMGRLREWEKDNS  
NVFFETVPRSVPTTEKKLPGVRLNKVEPYHVADVDPVLLSLPENALVRTDSDLARELQEK  
LNAGEDLKRKPKRYENDTIRYHTIRRPQPTAKPWREAAAQTCTERPLFGPKARYSSCSIS  
SKKHRILHGTENSLFTFTLCAFCLFCVPSRSIAGGLEDRRGVLDLDDVLALDQPQFLGPHRR  
PLGLVGSPPDQGVHGVDDLFDHDERQVVGVLQVAQQERGGNVPGSRKGSGLGAIDPPQFL  
RPAGRLGGDDRNVPGFSAIAIAAAIAAALGSRLVLRPVRPAQDRARDKDHARGPHRVQGRA  
GRTGVGKGLHGDPRQLLRLELVRRHDVRPGDDNGLVDLHQLGGDVEPAVVAEDGVAEKAH  
PRVVGPDPEDEVQDGLQEGGAPDVPRQDGS DGVALGGGVGLVAPQQAVGLEALQDGFELV  
PVHDGSGVKVLVTGVTGKVHRVDYVHVEAQELEGKDGGPVAHVSVNDVRLDREDPLVAIA  
AAAVGCGGVIGHGGFFLFWLLRSVAEAGAIARX

>comp13601\_c0\_seq2; 610 46 2664 LEN=2664; translated  
MSDWDTPKDDMGHPDSAIRLASAVHRFRVPKINPGRRISFANSFRRTTGKHEKTRRLMHKA  
DDQREKLLDAVLSDTISHERVVAEARRYQPYIHQILVSCKFQPEMARLDERLVFEWMSGV  
ESKKNYFKSEAMMDLTCILCEGLGKAGVATESSMAGEFAAASREYAAAAGIFSFLAED  
HLPKWIARGSKTSETDLPVECCTTAKGLSILFQANAQQMAVATVLIKPGTPNYGLLAKL  
CKGIEEQLEEFVGLMRKDAFGQMARIEKDFFTLVSFQTVLQKSLSDYFYARSVWDQGDY  
LAIALLESEATVYLRTEDVSGTTPGMPDVARIPALQALLGDLNDRSHMGRLREWEKDNS  
NVFFETVPRSVPTTEKKLPGVRLNKVEPYHVADVDPVLLSLPENALVRTDSDLARELQEK  
LNAGEDLKRKPKRYENDTIRYHTIRRPQPTAKPWREAAAQTCTERPLFGPKARYSSCSIS  
SKKHRILHGTENSLFTFTLCAFCLFCVPSRSIAGGLEDRRGVLDLDDVLALDQPQFLGPHRR  
PLGLVGSPPDQGVHGVDDLFDHDERQVVGVLQVAQQERGGNVPGSRKGSGLGAIDPPQFL  
RPAGRLGGDDRNVPGFSAIAIAAAIAAALGSRLVLRPVRPAQDRARDKDHARGPHRVQGRA  
GRTGVGKGLHGDPRQLLRLELVRRHDVRPGDDNGLVDLHQLGGDVEPAVVAEDGVAEKAH  
PRVVGPDPEDEVQDGLQEGGAPDVPRQDGS DGVALGGGVGLVAPQQAVGLEALQDGFELV  
PVHDGSGVKVLVTGVTGKVHRVDYVHVEAQELEGKDGGPVAHVSVNDVRLDREDPLVAIA  
AAAVGCGGVIGHGGFFLFWLLRSVAEAGAIARX

>comp13602\_c0\_seq1; 496 25 1472 LEN=1652; translated  
MNRPLSILVCVVFIFNSLAAKSHSLDGSFSSYSQPSALTPLATDQENELERGAALKKNAT  
VTTTTYKGVPSIQRGNVNVPFWKQQLPFPLNKTDTLRRIVIPTDDHRQSYPPSSC  
EVEVFLGTAHVSKDSSRDVRLLESVKPDAIFLELCHQRLNLEPPNEEDRAQQEQEKK  
GPESNELKENGFLSKLRGMLRRGKKSERSENKRVDTRSLSSIASSLLTNMQGDFADSL  
EVELGGEFVAAYQYWKNTVPRDFGNFRRVERKKMSXMILGDRPVSLTLTRGWESLRVWGK  
IKLLVGLLISSLRKNPDELREWMDKILNGSDMLSESVAEAKHFPTLAEVVLKERDAY  
MACKLQQTCWKLLRQHSVHHKSQRRYRLVAIVGAGHVEGITRWLTKGGLKSLTTVPETT  
DSTLLSMRSGEAQLTPGSPADILSKLVQIKASIEKEDHDYLVHELTEVNPSFIDELDGEET  
R

>comp13603\_c0\_seq1; 628 859 2805 LEN=2954; translated  
MPSVSSDSPSWSFEPSPTRIPSVPTISPTISSILSDVSSIEPTSIIGEANSRFDYT  
KQPSSIFLRDVTGVP SHQPTLHQSLPATTVDVESVITTTDLWRTTISSLYMKRIASPMS  
PEITQIFSSSTVLQFLKKYSLLDIKTGTVDVIDVEVVGQGEFGNSTGLD SHIDGMHIYFE  
TIIAITGNDNVLDPLWIETIFKTNRNAFYLMLESNKFFAALSVEGHITQEKEVESLRA  
NSDFMNSWVIASLAIIVVCSVFITIMLMTRMVQGANPKNGFEQDTPKSAKHPFFALDNGS  
ISSETSTKSNKRRRTDHMTHVHDGSNSIVSNQRDEAKSRHVSKRNVFHSRKHLLTQPS  
ASGPFACKKDILKDLGDESLAGLRLLRNQSDSSSTYEYSKEYVGNKQEDLNIDTDTNEFD  
DIPPGQHARTRWQKPNQDNQIDGAKGGTSLETILKATSSFNTEEDGGCQNEVLGVEVVS  
GDYESQGENVLPTT SIMKRISGLFSGKRNKQYVGHLEPVRIMEEGESVLSYSPSTPARSID  
DVSNPFLQLSIGDMSNEGADLSISTNDALPAGDKYNNPTDRSSAFSPPIIFSPKPLSVDT  
NPQKQRPDSIKTAFLSSPISRLLRRAKTQEMNQSPESQGISKRIQYD

>comp13603\_c0\_seq2; 636 859 2688 LEN=2837; translated  
MPSVSSDSPSWSFEPSPTRIPSVPTISPTISSILSDVSSIEPTSIIGEANSRFDYT  
KQPSSIFLRDVTGVP SHQPTLHQSLPATTVDVESVITTTDLWRTTISSLYMKRIASPMS  
PEITQIFSSSTVLQFLKKYSLLDIKTGTVDVIDVEVVGQGEFGNSTGLD SHIDGMHIYFE  
TIIAITGNDNVLDPLWIETIFKTNRNAFYLMLESNKFFAALSVEGHITQEKEVESLRA  
NSDFMNSWVIASLAIIVVCSVFITIMLMTRMVQGANPKNGFEQDTPKSAKHPFFALDNGS  
ISSETSTKSNKRRRTDHMTHVHDGSNSIDILKDLGDESLAGLRLLRNQSDSSSTYEYS  
KEYVGNKQEDLNIDTDTNEFDIPPGQHARTRWQKPNQDNQIDGAKGGTSLETILKATSS  
FNTEEDGGCQNEVLGVEVVS GDYESQGENVLPTT SIMKRISGLFSGKRNKQYVGHLEP

RIMEEGESVLSYPSTPARSIDDVSNPFLQLSIGDMSNEGADLSISTNDALPAGDKYNNPT  
DRSSAFSPPIIFSPKPLSVDTSNPQKQRPDSEIKTAFLSSPISRLLRRAKTQEMNQSPESQ  
GISKRIQYD  
>comp13604\_c0\_seq1; 556 298 2888 LEN=2925; translated  
MTGTVEKRVTVNAATSDERRKSLTISDLSPITEGDVSDPDVSTNRRTSFAMVKQSDRFRI  
SNNPTEQKAERIEVFSTNHGMGIFLGVLYLVFNFLVAAHGAYQFTEVGGWTTDDDLIRIT  
LPIARAGGRLVTMNCAILLLTGCKYLWTLVRSIHVPVPIAFLTDNIMPKYHRYVALTII  
VCGCI IHTLPQIVNYATKSISMDDDGIRFWTFGDGFATKQLLFTGTLTIVFSTFFLTTL  
KCFRKSTTGFRWFVFFHMGGLALVYPLLIHVHTYRGHPLFFYVSLPLFIYLFXLFMRRN  
NATTVRVLKWKAHDDDGQQITELVIECPKNFKYCPGQYAEKFI PVSRSSEWHPFTIASAP  
NYEHDYEHDYEHDSDKGDSPKLVFCIKNAGRWTEAFFEYAKAFDLKKSAPVTIQLRGP  
HGAPAMNYFEYKHIVVIGSGVGVTPLLSIWKYLMKGRMTCQESPRKFNRRREPRPSLIEA  
LNGSTLQNKGAIGYGENSLGLGNSIRGLMGKSCPDPWEAEDVLKANKIRTFCLHLEKLL  
ESMTFSLILFVLFISGEAVSIALQLFRFDTAANVLGAVLSLIALVHVGITVIVSTIALGY  
SWYFRLLKCWLECSI IIVDSFALWLSIYSLTSEKGENLRIMDTAYLVVFGLVVALHAMRV  
FHTYHLILKPHDSSNDRKKALTRGDSNSVRFSTSDAKTSNSDVNEIRSIDGILINRMYSN  
MRFASRCLLPNIMEFGLSDVFSLEFYGTREKNNKASERTLIKKMMASRGRGIDVESSMAV  
HDHNPYFHPGRPDWKKIFKKALAKAHTTNP DGERVGVFFCGSPAIAKDLQIIASSVTAQH  
HYAVKHLEGGKACKCKVIVHSENF  
>comp13604\_c0\_seq2; 556 140 2730 LEN=2767; translated  
MTGTVEKRVTVNAATSDERRKSLTISDLSPITEGDVSDPDVSTNRRTSFAMVKQSDRFRI  
SNNPTEQKAERIEVFSTNHGMGIFLGVLYLVFNFLVAAHGAYQFTEVGGWTTDDDLIRIT  
LPIARAGGRLVTMNCAILLLTGCKYLWTLVRSIHVPVPIAFLTDNIMPKYHRYVALTII  
VCGCI IHTLPQIVNYATKSISMDDDGIRFWTFGDGFATKQLLFTGTLTIVFSTFFLTTL  
KCFRKSTTGFRWFVFFHMGGLALVYPLLIHVHTYRGHPLFFYVSLPLFIYLFXLFMRRN  
NATTVRVLKWKAHDDDGQQITELVIECPKNFKYCPGQYAEKFI PVSRSSEWHPFTIASAP  
NYEHDYEHDYEHDSDKGDSPKLVFCIKNAGRWTEAFFEYAKAFDLKKSAPVTIQLRGP  
HGAPAMNYFEYKHIVVIGSGVGVTPLLSIWKYLMKGRMTCQESPRKFNRRREPRPSLIEA  
LNGSTLQNKGAIGYGENSLGLGNSIRGLMGKSCPDPWEAEDVLKANKIRTFCLHLEKLL  
ESMTFSLILFVLFISGEAVSIALQLFRFDTAANVLGAVLSLIALVHVGITVIVSTIALGY  
SWYFRLLKCWLECSI IIVDSFALWLSIYSLTSEKGENLRIMDTAYLVVFGLVVALHAMRV  
FHTYHLILKPHDSSNDRKKALTRGDSNSVRFSTSDAKTSNSDVNEIRSIDGILINRMYSN  
MRFASRCLLPNIMEFGLSDVFSLEFYGTREKNNKASERTLIKKMMASRGRGIDVESSMAV  
HDHNPYFHPGRPDWKKIFKKALAKAHTTNP DGERVGVFFCGSPAIAKDLQIIASSVTAQH  
HYAVKHLEGGKACKCKVIVHSENF  
>comp13606\_c0\_seq1; 236 1956 2618 LEN=2814; translated  
MAGFLYRTWIYNRRYSVPDSFTFLHSRVKVFVSNFEGRGSRSRKNFPRIGSKNPFILGV  
SKTATYSEVKQRFLELALQHHPDHSSNNQDLNSDKPSNDFIMFRQAFESIEEDIDGTATE  
VENGSTLWTDEEFKAWYYEETGHADLNFRMDMKTRKEVIDVHNQQAQGGGLDRGGMWEMAR  
RMAEEEFVKKKNKNI GRKVSLLDNKAGNFNTIRRRRRKK  
>comp13606\_c0\_seq2; 236 1724 2386 LEN=2582; translated  
MAGFLYRTWIYNRRYSVPDSFTFLHSRVKVFVSNFEGRGSRSRKNFPRIGSKNPFILGV  
SKTATYSEVKQRFLELALQHHPDHSSNNQDLNSDKPSNDFIMFRQAFESIEEDIDGTATE  
VENGSTLWTDEEFKAWYYEETGHADLNFRMDMKTRKEVIDVHNQQAQGGGLDRGGMWEMAR  
RMAEEEFVKKKNKNI GRKVSLLDNKAGNFNTIRRRRRKK  
>comp13607\_c0\_seq1; 285 1249 1710 LEN=1710; minus strand; translated  
MIQQPNEISATPPTVAINDSSRIGKRRLSFGVSCDDSEAMIITKQRKLDALSIDDTFEAL  
DIESSHKVVSPHESMPTSEQEEIFEWMESVINGAVSENATGMPEAASSSTTTQMNENNV  
SEFNSSGKDTFEFDSFLVMNKS DPCYEEMISLLAD  
>comp13608\_c0\_seq1; 286 164 739 LEN=961; translated  
MASKEFEGDAGAPLPDFSGARNISLTTVPALGVKQQAQPDYLDQKGRGVVVTMFANA  
GLSYLMGIGAGGLYGLQRGIASTPSSKFKVQVNSVLNAGRYGSRAGNSLGVLAVMYSLI  
EGLGDTLELDRTYGTIESTAPPLAAML TGLTYFAPSGVRVAALGGAIGFVAVGATYAGYAA  
TGKAFGSATFLW  
>comp13608\_c0\_seq2; 282 22 597 LEN=819; translated  
MASKEFEGDAGAPLPDFSGARNISLTTVPALGVKQQAQPDYLDQKGRGVVVTMFANA  
GLSYLMGIGAGGLYGLQRGIASTPSSKFKVQVNSVLNAGRYGSRAGNSLGVLAVMYSLI  
EGLGDTLELDRTYGTIESTAPPLAAML TGLTYFAPSGVRVAALGGAIGFVAVGATYAGYAA  
TGKAFGSATFLW  
>comp13609\_c0\_seq1; 656 153 1898 LEN=1908; translated

MTASSPVAVEGTIAENADDDMAHDEGKTGARSAGTTIATPYASTANAVSPFKKQRQEEV  
FSPQLLKMYARLFPYSLCKWLSYDASFDTNSSLNANSNKASTHNNKKIFSRREFSFTL  
EPEPGEEIYIRYQFSFDLEGLKAAINRRQPRKIDIGAVFVSHPPKDKAAYVGGSSKNTGFR  
PVQRELVDIDLDLTDYDDVRRRCGCSGAKICRTCWTFMAAALKVLDQGLREDFGFEHIAWFY  
SGRRGIHAWVCDEEARNLSDEARSAVANYFEISLNKKNQGLLDSNNTSGCIHPLLSRSY  
DVLEPYFVRYVLPSEQDEDDSEDSGIHGHGLLASRDAWEDLVLDLTLPHRAKETVGNLKK  
KWSNPRDNDLSPVEKWKTLQHLRVKFDPPSWPSPSSVAAKEGNETTKSKKFKNFSP  
STLDDETRKYVMWPMFVFKYSYPRLDINVSKMQNHLLKSPFCVHPKTGRVCVPIDPNAM  
DTQNGGGDFPFSVPTLGLQALRELEDEYHKDESERTEDDDSDAQGENEIKPKKKKHALQHEWQ  
KTSLLKKYFDVQKNVGLGPLEKEWRREQDLAEQQAIRGEF

>comp13610\_c0\_seq1; 489 244 2033 LEN=2494; translated  
MKNSSSNGSLASRGDARISVAEKWANRRQQQLKGGHSNTAGPTVHRNSDVHHD SMP SQPK  
GGFSIPPLCVLLRRSWHQTINGFIQQQSDRNDKETASVPQKRSTNVCTKQENSKRVSFPS  
VLSILKANAVKLQVESILLEEDEDSEIFSVDNNTTEDRIGGVEKKSIGNGLSILPANVSD  
FTTSAVNHMSESRSAFHLLDFSAIVHTYTIWRKRMLLQKHHNVQMVYSARHNCNARLFQ  
LLRRLGIGFRVATKYDLTAVRESIVNCGTKPKTKSNTGGVESGEDEDSMIWDDTSILVKP  
NSFYRTL LLD RSSTNNEKGETTRTISP GTIPITVANAEEEMERIH IQMCKMHKRRRQGPSS  
TPKLAFVLRLENDTNDL TEWKS VVEQMYKKSLELIHSQFVGVALELAGRD TIMEKTFGT  
GDTDTITIEPQNRNTLLLEALS D LIEKWAKGSP PQVHLSNPITATEIESSVLEWIERHHK  
ICATITIDVSRLMANAAALCARIIGVKNNYNKLKSNEDASSIGKTD D TNRNQNAIQQHL  
YIDDGCYGSLSNYPNEGIXAALEKSKTHKIFISDQQATARNGTKYPREYHRLGPNL

>comp13610\_c0\_seq2; 485 244 2091 LEN=2299; translated  
MKNSSSNGSLASRGDARISVAEKWANRRQQQLKGGHSNTAGPTVHRNSDVHHD SMP SQPK  
GGFSIPPLCVLLRRSWHQTINGFIQQQSDRNDKETASVPQKRSTNVCTKQENSKRVSFPS  
VLSILKANAVKLQVESILLEEDEDSEIFSVDNNTTEDRIGGVEKKSIGNGLSILPANVSD  
FTTSAVNHMSESRSAFHLLDFSAIVHTYTIWRKRMLLQKHHNVQMVYSARHNCNARLFQ  
LLRRLGIGFRVATKYDLTAVRESIVNCGTKPKTKSNTGGVESGEDEDSMIWDDTSILVKP  
NSFYRTL LLD RSSTNNEKGETTRTISP GTIPITVANAEEEMERIH IQMCKMHKRRRQGPSS  
TPKLAFVLRLENDTNDL TEWKS VVEQMYKKSLELIHSQFVGVALELAGRD TIMEKTFGT  
GDTDTITIEPQNRNTLLLEALS D LIEKWAKGSP PQVHLSNPITATEIESSVLEWIERHHK  
ICATITIDVSRLMANAAALCARIIGVKNNYNKLKSNEDASSIGKTD D TNRNQNAIQQHL  
YIDDGCYGSLSNYPNEGIP L P L K S Q R L I R S L S A T S K Q L L E T E Q N T L V N T T V W G P T C D G L D  
KVCSNVALPRLSRDDW

>comp13611\_c0\_seq1; 225 249 1247 LEN=1841; translated  
MKLKC V V F C F I A G F Q R T S S W I L G G P T T S R S L S W P R S P S P R L K K S S W A I A S T I T G N T S N P  
P H R V V I V I P A Y N E E D R I E S T L K C Y Q D F L L G S L S S D T E F E I V V D D G S V D T T L D V V H D F P A  
K I P I H C V A M E E N R G K G A A L S R G M Q H V L E T A R T F S S R G D D V Y E K N T W I L T Q D A D G S G D L I Y  
L D G M I K K L E N L L H I P A K S D T T N G R G L V I G N R Q Y D I F S S R G I T R W G F Q T C V R I L T T N R L R V  
K D S Q C A Y K L M T L G T A K A L Y E D L H L Q G W S H D V E V L F R A T L L D I P I D E M S I E W E D M K G S K V T  
Q S G V V K V S L Q M L W D V L R L R W N Y S V V K A W K L E N

>comp13612\_c1\_seq2; 881 93 2156 LEN=2257; translated  
MSPFNKFTALATMLVAVTSASSHQGMESEDINRRQLLQDIDQRQLLEENGLVLFKKIS  
EYVTGESESKWCAQLPTSKFQMICDIKGISQKYIESFRPISGQSVMKIQGASLQSPDSN  
LRLDITDEASVRIERLPQNDARYQGQTLDEKPGRPFGTKKVLVARVTNNGVSHEADDAI  
LNATFQGSLSMKSQFAACSRNQLDLQPTAVTNSGLELSINIESSDGSSLEHAADVLYE  
QYGDAVSDSLIVLCLPPFVPEIAAYAFLLGGWWSFYNFHYCTDVPVTLHEIGHNFRLEHS  
GMGDNGYGDGIGVMGWSSPDGFRQCFFNAVKNFALGWFDNQVATVNPLDWAGSSRTFVFTG  
IEQYQAIGSANKLITLQLDAGSEG DWYIGYNEAVGANADTAEALNQVAVSYVYPLSDDEY  
RDLPSAKQSWRQAALAVGNVYGINNFGGTEYGVYVKFVSLVGT DATVEVITSTTPVLSCG  
GLGRFRIGLLTDAKGYETSWFLRDSNGTVIDHYDDGKYWKHQYYPYSAESSYCLPPGCY  
QFEIRDSGGDGLTDDAWDP IEGHGRYDGTLDGVEIFSGAEFGYNEVNDFCIEAAPVPTLE  
PTAEPVPTLVPAPTAPPSMGCEDDGTFFKFRGKNNKMCGRWMQKYTRNLNKRKRRLRRL  
CKKKSEKQVFTFCRATCALVDLGPCA

>comp13613\_c0\_seq1; 412 1 2031 LEN=2368; translated  
NNNNNCVGRKETDRVLTSSMEDAMR VMEENADDDHDMEEVFLPQLQRRSRTNNSDDDENK  
TEQRL LGIKRIHLSAEVVKWLKKGDP RYVGF FRKRMKQLSGGERSRILAKRLMGTSSKKV  
PIYETYLAQKSGFRILWTEKDDSM LVWYIAKHHRVSRLMRLIDDSKNR SERQRVSIHNCI  
DEVSR TADKSHD GIEEDSNQHQRHG DNGEIVLDPLGNVPLKIYDIGTSDEIDNIKKEDW  
TPALHLTDEERRVETKGTVLLLRSGTGKTVCICNRMEYDRQQHDQNHTIPKNSSTQI  
QLRDSFSQLFVARSPRLCAYVRNNLGERSGSKFVTFETLLIELEAVLPRVDGIRDSFPDE



LMMKFSVFKREFYHTLNSNSIDPLITWTNIRSFLKGSIEAFQSTKYFVSKKEYLSETNFG  
KKRCRLSTESRQRVYDIFGKYQDTMVETGAWDNCDRIVALIRRLIFAKTSYPELFGKES  
WCHWSKIYVDEVQDYTQVEILLFFHLSGAGNFLAGDPAQNVTKGVEFRFDDVRSVGYHI  
AGEVDRRRKLIPOKPMIVNVNFRSHAGILNAASAILSRLFAFFPDSAKQLGKDEGLFKGP  
RPGMLHKVKLETMADLVHQNMKGVVVLTHDDAVPKARAKLHGYKLVYGIQKAKGLEFKSV  
LVMDFFSSLPSELQKPW

>comp13613\_c0\_seq2; 563 1 2757 LEN=2907; translated  
NNNNNCVGRKETDRVLTSSMEDAMRVMEENADDDHDMEEVFLPQLQRRSRTNNSDDDENK  
TEQRLLGIKRIHLSAEVVKWLKKGDPYVGFRRKRMKQLSGGERSRILAKRLMGTSSKKV  
PIYETYLAQKSGFRILWTEKDDSMVLVWYIAKHHRSRLMRLIDDSKNRSEQRVSIHNCI  
DEVSRADKSHDGI EEDSNQHQRHGGDNGEIVLDPLGNVPLKIYDIGTSDEIDNIKKEDW  
TPALHLTDEERRVETKGTVLLLGRSGTGKTVCICNRMEYDRQQHDQNHTIPKNSSTQI  
QLRDSFSQFLFVARSPRLCAYVRNNLGERSGSKFVTFETLLIELEAVLPRVDGIRDSFPDE  
LMMKFSVFKREFYHTLNSNSIDPLITWTNIRSFLKGSIEAFQSTKYFVSKKEYLSETNFG  
KKRCRLSTESRQRVYDIFGKYQDTMVETGAWDNCDRIVALIRRLIFAKTSYPELFGKES  
WCHWSKIYVDEVQDYTQVEILLFFHLSGAGNFLAGDPAQNVTKGVEFRFDDVRSVGYHI  
AGEVDRRRKLIPOKPMIVNVNFRSHAGILNAASAILSRLFAFFPDSAKQLGKDEGLFKGP  
RPGMLHKVKLETMADLVHQNMKGVVVLTHDDAVPKARAKLHGYKLVYGIQKAKGLEFKSV  
LVMDFFSSLPSELQKPWRELLLNRRADSHTFQSTYPEVEGHLKVLYTAVTRCIDRLFFAET  
EDSVSGDAFLRFMTSTESVQEPGQPKTLSIATRNIKIGDIENMAMTEDEWLASGITNAEAA  
EAVFGSDHGHACSLMEKAIYCFQQTDKESFARKASSQLASFELRNEIATSRSFSGNPDSS  
LAASKLSEIEKNAALVSEKLLKENLLSEAIRLGRDVQHTILQRMYSSTFFERYILQQLE  
VEKEVRRIKRVVKSARLD

>comp13613\_c0\_seq3; 405 1 2322 LEN=3070; translated  
NNNNNCVGRKETDRVLTSSMEDAMRVMEENADDDHDMEEVFLPQLQRRSRTNNSDDDENK  
TEQRLLGIKRIHLSAEVVKWLKKGDPYVGFRRKRMKQLSGGERSRILAKRLMGTSSKKV  
PIYETYLAQKSGFRILWTEKDDSMVLVWYIAKHHRSRLMRLIDDSKNRSEQRVSIHNCI  
DEVSRADKSHDGI EEDSNQHQRHGGDNGEIVLDPLGNVPLKIYDIGTSDEIDNIKKEDW  
TPALHLTDEERRVETKGTVLLLGRSGTGKTVCICNRMEYDRQQHDQNHTIPKNSSTQI  
QLRDSFSQFLFVARSPRLCAYVRNNLGERSGSKFVTFETLLIELEAVLPRVDGIRDSFPDE  
LMMKFSVFKREFYHTLNSNSIDPLITWTNIRSFLKGSIEAFQSTKYFVSKKEYLSETNFG  
KKRCRLSTESRQRVYDIFGKYQDTMVETGAWDNCDRIVALIRRLIFAKTSYPELFGKES  
WCHWSKIYVDEVQDYTQVEILLFFHLSGAGNFLAGDPAQNVTKGVEFRFDDVRSVGYHI  
AGEVDRRRKLIPOKPMIVNVNFRSHAGILNAASAILSRLFAFFPDSAKQLGKDEGLFKGP  
RPGMLHKVKLETMADLVHQNMKGVVVLTHDDAVPKARAKLHGYKLVYGIQKAKGLEFKSV  
LVMDFFSSLPSELQKPWRELLLNRRADSHTFQSTYPEVEGHLKVLYTAVTRCIDRLFFAET  
EDSVSGDAFLRFMTSTESVQEPGQPKTLSIATRNIKIGDIENMAMTEDEVRCLE

>comp13614\_c0\_seq1; 372 587 1507 LEN=1969; translated  
MTWKEWASVSVPCGIVTALDIGCSNLALVTITLTFYTMVKASTPIFVLSWAYIFKIERIT  
WPLIGVVIVIAMGEFLTTFGEVDFVFHGFALCLLASVLSGARWTLVQLKLQNLDPPLKST  
LVTMKLLTPSMVWSMVFLSIVIEKPWVKLVEAQDNDSNELLKVFLLMIGGTFAIVMILC  
ELYLILKASAIILMIGGVIKELTTIFVGVSFDFGDRNLNMNTAGVCVVFSGVMYKVVFHL  
QKKENERSGMPEIQSEDFVDEDEQDFANESDEEFLDEDQETFVDEVPGVSNLNCESELLE  
EETILR

>comp13614\_c0\_seq2; 372 471 1391 LEN=1853; translated  
MTWKEWASVSVPCGIVTALDIGCSNLALVTITLTFYTMVKASTPIFVLSWAYIFKIERIT  
WPLIGVVIVIAMGEFLTTFGEVDFVFHGFALCLLASVLSGARWTLVQLKLQNLDPPLKST  
LVTMKLLTPSMVWSMVFLSIVIEKPWVKLVEAQDNDSNELLKVFLLMIGGTFAIVMILC  
ELYLILKASAIILMIGGVIKELTTIFVGVSFDFGDRNLNMNTAGVCVVFSGVMYKVVFHL  
QKKENERSGMPEIQSEDFVDEDEQDFANESDEEFLDEDQETFVDEVPGVSNLNCESELLE  
EETILR

>comp13614\_c0\_seq3; 364 587 1528 LEN=2071; translated  
MTWKEWASVSVPCGIVTALDIGCSNLALVTITLTFYTMVKASTPIFVLSWAYIFKIERIT  
WPLIGVVIVIAMGEFLTTFGEVDFVFHGFALCLLASVLSGARWTLVQLKLQNLDPPLKST  
LVTMKLLTPSMVWSMVFLSIVIEKPWVKLVEAQDNDSNELLKVFLLMIGGTFAIVMILC  
ELYLILKASAIILMIGGVIKELTTIFVGVSFDFGDRNLNMNTAGVCVVFSGVMYKVVFHL  
QKKENERSGMPEIQSEDFVDEDEQDFANESDEEFLDEDQETFVDEVPGVSNLNCESELLE  
EEVKLEMATRS

>comp13614\_c0\_seq4; 364 471 1412 LEN=1955; translated  
MTWKEWASVSVPCGIVTALDIGCSNLALVTITLTFYTMVKASTPIFVLSWAYIFKIERIT

WPLIGVVIVIAMGEFLTVFGEVDFVVFHGFALCLLASVLSGARWTLVQLKLQNLDPPLKST  
LVTMKLLTPSMVWSMVFLSIVIEKPWVKLVEAQDNDSNELLKVFLLMIGGTFIAIVMILC  
ELYLILKASAIILMIGGVIKELTTIFVGVSFDFGDRNLNMNTAGVCVVFSGVMLYKVVFHL  
QKKENERSGMEPIQSEDEVFDEDEQDFANESDEEFLDEDEQETFVDEVPGVSNLNCESSELLD  
EEVKLEMATRYS

>comp13615\_c1\_seq1; 344 89 445 LEN=707; translated  
MGETLLVKAQDEDEDAADTPAVADDGGDETETDTETDPAAEGDAEGDGDGDDGDGEEGDDGD  
EESDETGEEGDAEDDDEGFQVEDLLPGFENTDADNFVKGYILGNPEYYQELYVAVSLG

>comp13615\_c1\_seq2; 774 89 2290 LEN=3306; translated  
MGETLLVKAQDEDEDAADTPAVADDGGDETETDTETDPAAEGDAEGDGDGDDGDGEEGDDGD  
EESDETGEEGDAEDDDEGFQVEDLLPGFENTDADNFVKGYILGNPEYYQELYVAPKAVTK  
FNNLPRFGHSDDFSLLMGDYDPHYLGLLFGVTLILTIFFFWGIAIGIFKCIKPKHVGF  
AGFPFQVEGKKSAAGRVVFVSGAWMMIVSTIFLISLGLPRMQYLSDSIAFTADEIQIVEK  
EVKYIVTLLVVS AKTKPIRDELVDLKRDI CPLEPGSDTEDQVRSVGEDTYDAMTDLED  
FIEGYLLDVEDGVNTTNTFTSNILAVTDMAQFVGNPVVTAIVFPYFIIPILLVAVGMGW  
YDFYSETFYSFVTWLVVPLLVLVLLTILAFVTATTLVVAIQANADICVSSGAPEDSILGVLN  
NLDLEDDSGS QSKDDNGPSDNFFYDIMVFYTHQCTKPNPWEFMEGHYADLARGRNILGEF  
IRSIEDTTLLELSQECGMEYGP IVVLLKSLQDLITILSQT SIRAL TLMSCRNVVPLYTAW  
IYESTCTLAPVSLNLVFMCIVCIAFFGMVCITFRGAYYPIDFYDDATGRGDKQELYPTD  
EVGDSGLADTPCNEKVLEE QEDQCIDATEAMEESIEIQIYHDDEEKEYETDDDEQDHEKN  
FLLDKYGEPMEGPDAQAQHSVGTNGSYRGIDRNGDSHAVYSDDDDDEMTFHSTFDDEYEYNS  
AAEEEESETFSYVS

>comp13615\_c1\_seq3; 472 1 1877 LEN=2893; translated  
XTNHSQPKAVTKFNNLPRFGHSDDFSLLMGDYDPHYLGLLFGVTLILTIFFFWGIAIGI  
FKCIGPKHVGF LAGFPFQVEGKKSAAGRVVFVSGAWMMIVSTIFLISLGLPRMQYLSDSI  
AFTADEIQIVEKEVKYIVTLLVVS AKTKPIRDELVDLKRDI CPLEPGSDTEDQVRSV  
EDTYDAMTDLED FIEGYLLDVEDGVNTTNTFTSNILAVTDMAQFVGNPVVTAIVFPYFI  
PIILLVAVGMGWYDFYSETFYSFVTWLVVPLLVLVLLTILAFVTATTLVVAIQANADICVSS  
GAPEDSILGVLNLDLEDDSGS QSKDDNGPSDNFFYDIMVFYTHQCTKPNPWEFMEGHYA  
DLARGRNILGEFIRSIEDTTLLELSQECGMEYGP IVVLLKSLQDLITILSQT SIRAL TLM  
SCRNVVPLYTAWIYESTCTLAPVSLNLVFMCIVCIAFFGMVCITFRGAYYPIDFYDDAT  
GRGDKQELYPTDEVGDSGLADTPCNEKVLEE QEDQCIDATEAMEESIEIQIYHDDEEKEY  
ETDDDEQDHEKNFLLDKYGEPMEGPDAQAQHSVGTNGSYRGIDRNGDSHAVYSDDDDDEMTF  
HSTFDDEYEYNSAAEEEESETFSYVS

>comp13616\_c0\_seq1; 827 132 2183 LEN=2196; translated  
MKFSVLALAAATSSFLPYFASTEAFVPRACFI PRGGDQQQLSASAVSIAEVATSPIAGM  
KPGTSGLRKKVEVWQGTDDDEIKQEYYVENFIQSLLD TATENNKGVVPKTLIVAGDGRYFN  
KEAIQKICRVLAGNGVENIWPSSGIMSTPAVSAAIR TREGGSADGGIILTASHNPGGPG  
EDFGIKYNEFYGQPAGEDFTDALYEKSLKITKFMTVEGSTDIDVDAAPGTTFSLSPTSTV  
TIIDPFTEYIEVLKESFDFDAIREFAKRPEFSVLFDMHGAGGPFARRILLEELGFPES  
LMRCDPRPDFGKCHPDPNLTYAADLVKKMGLNPDGSMNESTVSSAPT LGAANDGDGDRNL  
IAGAGSFVTPSDSLAMICDNWKAIPHFAKAGGPKGVARSMPSAALDVVAEALDIPYFNT  
PTGWKFFGNLMGSKEQFGKTDYTPFLCGEESFGTGDHIREKDGLWAMLAWVSILIDANA  
DTPEGAPLVQVKDIVMNHWTYGRHFYCRYDYEGKDLACRQIALASTXVSKFVFFDGNLI  
FSLPHDISTVAVASDSANEMMDLIRNEYVSGDLSLSEDSASGIKLI GAEEFSYTD PVDGS  
LTSNQGLIILNFQYANGDDARVIFRLSGTGSAGATIRMYLEKYEKDKSRYGEAAPSALKTL  
ADRAIDL VQLEKLTGRESPTVIT

>comp13616\_c0\_seq2; 923 132 2072 LEN=2085; translated  
MKFSVLALAAATSSFLPYFASTEAFVPRACFI PRGGDQQQLSASAVSIAEVATSPIAGM  
KPGTSGLRKKVEVWQGTDDDEIKQEYYVENFIQSLLD TATENNKGVVPKTLIVAGDGRYFN  
KEAIQKICRVLAGNGVENIWPSSGIMSTPAVSAAIR TREGGSADGGIILTASHNPGGPG  
EDFGIKYNEFYGQPAGEDFTDALYEKSLKITKFMTVEGSTDIDVDAAPGTTFSLSPTSTV  
TIIDPFTEYIEVLKESFDFDAIREFAKRPEFSVLFDMHGAGGPFARRILLEELGFPES  
LMRCDPRPDFGKCHPDPNLTYAADLVKKMGLNPDGSMNESTVSSAPT LGAANDGDGDRNL  
IAGAGSFVTPSDSLAMICDNWKAIPHFAKAGGPKGVARSMPSAALDVVAEALDIPYFNT  
PTGWKFFGNLMGSKEQFGKTDYTPFLCGEESFGTGDHIREKDGLWAMLAWVSILIDANA  
DTPEGAPLVQVKDIVMNHWTYGRHFYCRYDYEA VASDSANEMMDLIRNEYVSGDLSLSE  
EDASGIKLI GAEEFSYTD PVDGSLTSNQGLIILNFQYANGDDARVIFRLSGTGSAGATIR  
MYLEKYEKDKSRYGEAAPSALKTLADRAIDL VQLEKLTGRESPTVIT

>comp13617\_c0\_seq1; 616 49 1923 LEN=2010; translated

MVFFYISKYITKWIASPLFRTRLRLRNRLSPTSTVGGAGAMTSTNNYWVDMACLIPIYSQK  
LLSLAVHDESKRLAVEFRQQYQKHKDQSKTAQTSMTSSSSSSPQEAAMTTTAMMTDPS  
AINRLSDMRKIVLDDFLRPSLI PNNVWSDVEQNWRYNLR I VAWARKEFLISKYGPYIQEA  
LVAYPQLRNSPQLSMSSAGGKNRQLLLDLVHRGEINTDNIGGASASKNSNMTSPFLQLP  
PSDI IANAFMRKRWANDKMDR ISNLLPVAETLGGTVFQQQLSSPKEGTATMTKHVDVP  
LDTDVSSASLEDVLEVATKGYLKNCGPLNALCQEANFYQLYSREYVQYLGDYLLKRTAVK  
RLAYDTQRRKRQPQNTNDIKNYLLEEGPLVSPETVVLDIGAGDGLMHCLRDYMQRKIMG  
LSLSDNKRGNQRKHDRKKNVQVHNHQPMPVPTMVATDDMSWRIFAKAEVEKLSVEQALEK  
YAANMTTANGDVSPSDQENNQDQSRPQVIVICSWMPMGQDWTALFRKAEVDEYILIGEAD  
NGSCGDNWL TWGNPEFYGSDAIENCGSNNDGDIKSSPTPPYAAEGYQRMDMDAATKYQF  
SSFDLNSKSSKTVSFRRILGRKA

>comp13618\_c1\_seq1; 430 276 993 LEN=993; translated  
MNKNINLHSMNSNANAIARSPISAVDAGYVVARPPLLRELPVNPADGNQTEVGGDDE  
YAFYDLYQSPCRGVLASNDLDFVLDGEMNDDAERNHITSYGSKTGIGATEAALLYQN  
YGYYYDDLEYCGATFYGGCDFGDRDELATRIRREEEALGNGGGGGEPFGGTPPSFVNWTV  
VYDYEIHYTGRGSGSTNRAQTAWFYSNETKAGVVSQDRQKARSSELLREQHPQQQQQQX

>comp13619\_c0\_seq1; 464 187 747 LEN=1107; translated  
MAKRNNDRTPVDVENPLTSMSSQLEKQQAGGDMVKNLASNFLKKEETTVCYDMGKAMSM  
QGGILFNMAFMWLLHFKMNQVQPLLVTSSINGFLQLAYNPLFQVYILGRNLERPFPKNPEVF  
KDPRAEEGSDDAETTKEETTETATDDSKLDDAENDVDEDESEDEISDDDDDESTDDEDESSDE  
DEDEDE

>comp13619\_c0\_seq2; 606 162 1493 LEN=1618; translated  
MSHSPTTNRSMSSFLLLAVLSMLVVEVASSSSSSSNFLSLPAFYNKVENRVSGKRETLTL  
LSSFHEIQKQKVLQFRGGADEADDGEKEEVAVKAAEDSDSDVENDEDEDEDAEEMETES  
KPLLTAKLEDESEENLSMQSMITADKFIGGNVATDIRNWWKSKIVKAVEEDEDIQGVME  
EIDEFALQLTEIAAKRGKTDGGNSGTPYLDLLGGI IEDSLEVHRADITGIFDHATLTNG  
AEVIYGGKRGTSKSLVDSLPIVNRILQASNLRFYGFGEAALPTPTYPNTPGQCWALRQT  
PLKELLKERELFEKFEVPPDDFKRGNFGTLTIRLDSPIVIVESVVIHPPRQFSKQMTSAI  
RSFRVVGIEDDMASSKAWNLGAFEYNINDNLEQNEYLQEFDVASTVFGKEIPPLQSI SLA  
IDSNYGHTYTCLYRFRVHGRTEE

>comp13619\_c0\_seq3; 1043 102 2474 LEN=2599; translated  
MAKKRAAGSDPEEEDDDQVMNGDHNDDEGGDGGSGSDDEEMQEVEEDDVEEISTASSPS  
PQKRKDMTLRSGRRKRRRSLQTTGLTPPESRKKSKRSRTSAKTSTIKKQQTAAASLTKPT  
ASNGDQKQPALS DRASPEIAPDPRRISYANASVIPSNIHEERSDEVSENGDDSEELNLP  
PKFGVQANGTAKNDVSGEEDQSAPHDESIPCANGAEHHEADADEQDEASKQPVTEEID  
AGEREKVGEITGEDSFIETKSTSIGVSILERLVI FVILGFVSLLLTMPEVIKLAIEIVVPL  
DESLLEAKSLPEIKIPNDDDAVDSEVEMSSSEELQSWNKKFLNNFQRLSRAKTAYRVSYE  
NFDELYTESIKEIDQLEELQTRQELAGKRLVNLNRLKKNLREKQKDNFEEIRDLAQQ  
LGKSVIETSSIPLWNVSKDLNACTSVNVRGDLDEDEDAEEMETESKPLLTAKLEDESE  
ENLSMQSMITADKFIGGNVATDIRNWWKSKIVKAVEEDEDIQGVMEEIDEFALQLTEIA  
AKRGKTDGGNSGTPYLDLLGGI IEDSLEVHRADITGIFDHATLTNGAEVIYGGKRGTSK  
SLVDSLPIVNRILQASNLRFYGFGEAALPTPTYPNTPGQCWALRQTPLKELLKERELFE  
KFVEVPPDDFKRGNFGTLTIRLDSPIVIVESVVIHPPRQFSKQMTSAIRSFRVVGIEDMA  
SSKAWNLGAFEYNINDNLEQNEYLQEFDVASTVFGKEIPPLQSI SLAIDSNYGHTYTCLY  
RFRVHGRTEE

>comp13619\_c0\_seq4; 793 162 1370 LEN=1730; translated  
MSHSPTTNRSMSSFLLLAVLSMLVVEVASSSSSSSNFLSLPAFYNKVENRVSGKRETLTL  
LSSFHEIQKQKVLQFRGGADEADDGEKEEVAVKAAEDSDSDVENDEDEDEDEYDNESTE  
EDSDEDEYDDEETDEESEDVSLAYQLKKKSASKEKSTEPFVEPYFVSPSLQMYTTFTGIL  
LSRKIDMFNPTVVKLLRSMFVHLIVQQAIFIVRIMAKRNNDRTPVDVENPLTSMSSQ  
LEKQQAGGDMVKNLASNFLKKEETTVCYDMGKAMSMQGGILFNMAFMWLLHFKMNQVQPL  
LVTSINGFLQLAYNPLFQVYILGRNLERPFPKNPEVFKDPRAEEGSDDAETTKEETTETAT  
DDSKLDDAENDVDEDESEDEISDDDDDESTDDEDESSDEDEDEDE

>comp13620\_c0\_seq1; 147 690 1031 LEN=1306; translated  
MIRAMMDCLLAKCIPCITDCVMAELEKLGKYLKIALRLAKDPRFERVPCNCAKKGYADDC  
LTNMQWQKCFIVATCDKELRGRIRKIPGVPCMYISGYKYTVERMPEAFGAAR

>comp13620\_c0\_seq2; 200 306 902 LEN=1177; translated  
MGKAKQTRKFAVAKRMSPNDTRVRKNMEDAKAKKLAKEKKEKEPRHIEQANTSLFFQYN  
EQLGPPYHVLVDTNFINFSIRKKLDMIRAMMDCLLAKCIPCITDCVMAELEKLGKYLKIA  
LRLAKDPRFERVPCNCAKKGYADDCLTNMQWQKCFIVATCDKELRGRIRKIPGVPCMYI

SGYKYTVERMPEAFGAAR

>comp13621\_c0\_seq1; 765 301 3155 LEN=3337; translated  
MGLLLKVGVPKTDWSSKDDLEYIRKAGIRQFVSTYNRVKDLKGDELLWGDEIEYGIFHLDP  
QTKQIRLSLRKDVMDLNRKEAEHSQISEGCNWWPEYGAWMVEATPNRPYTGFSTDLLR  
VERNMRLRRKRILTVLKETEIAPTVSAPFLGSLGEEGSVPPVPLGGPITCSEYIGDGII  
NPHPRFGTLTANIRQRRGARVNIKVPLFRSDTPEFEDFENVKPGNVGCGGSDSQQLWR  
YGKGDACEEYEGKEFVTVGCSSTYDDSTGMATMEKWLIDVKCDGCKGLFYRSAPNVIVPD  
ADWPRNGDVVMGYEIPNTPGWIRLQNGYYLPMHSDDGKVQFLSKVSKRAQTQNTMCRIG  
SNTPLFVAEENQESMATLLGGTVAVTDEANNGKIGGNQKANESNETLRAAVHMDAMAFGM  
GCCCLQITFQAKDIDESRFIFDQLAVMAPMYVVLHLEFQHDSISSMXLVSNYFLIPIFR  
HRMMALTASTPMLKGRLLDTDARWGIISESVDGRTLSEGRADPDAPYESYNAQGERRIY  
KSRYDSISTFIYQGGMTGARDTKGLKNRVLNMYNDIPIEIDETCYEDLRKAGVDPALSQH  
VAHLFIRDPLVIFNGAVEEVDDDETQTEHFESIQSTNWQTVRWKPPPPRDSNAPHIGWRT  
EFRSMEIQLTDFENAAFSIFVVLQRTILTFDLNLYVPLSKVDANMQRAHSRNSAARGKF  
FFRRHLAPLEEGDDGYGVKYVSMFAKAVSGDYNSTSEEIEAEDPDGVSHKRRSAPTAPGG  
VEENSFEEMTMEEIMCGKGDYFPGLIPLVRAYLDHISADSTSTARLHSYLDFIEKRATGE  
LITTATWLRNFVRSHPDYKNDISVISETIAAYDLMVACKEIGEGKLVPELLGDVRIKEITT  
DGAYQTKLDSKRVTNDRIVELLQRYKKRQSAFDTEFSSELAPDSTLSEVAI

>comp13621\_c0\_seq2; 739 301 2814 LEN=3345; translated  
MGLLLKVGVPKTDWSSKDDLEYIRKAGIRQFVSTYNRVKDLKGDELLWGDEIEYGIFHLDP  
QTKQIRLSLRKDVMDLNRKEAEHSQISEGCNWWPEYGAWMVEATPNRPYTGFSTDLLR  
VERNMRLRRKRILTVLKETEIAPTVSAPFLGSLGEEGSVPPVPLGGPITCSEYIGDGII  
NPHPRFGTLTANIRQRRGARVNIKVPLFRSDTPEFEDFENVKPGNVGCGGSDSQQLWR  
YGKGDACEEYEGKEFVTVGCSSTYDDSTGMATMEKWLIDVKCDGCKGLFYRSAPNVIVPD  
ADWPRNGDVVMGYEIPNTPGWIRLQNGYYLPMHSDDGKVQFLSKVSKRAQTQNTMCRIG  
SNTPLFVAEENQESMATLLGGTVAVTDEANNGKIGGNQKANESNETLRAAVHMDAMAFGM  
GCCCLQITFQAKDIDESRFIFDQLAVMAPIMMALTASTPMLKGRLLDTDARWGIISESVD  
GRTLSEGRADPDAPYESYNAQGERRIYKSRYDSISTFIYQGGMTGARDTKGLKNRVLNM  
YNDIPIEIDETCYEDLRKAGVDPALSQHVAHLFIRDPLVIFNGAVEEVDDDETQTEHFESI  
QSTNWQTVRWKPPPPRDSNAPHIGWRTEFRSMEIQLTDFENAAFSIFVVLQRTILTFD  
LNLYVPLSKVDANMQRAHSRNSAARGKFFRRHLAPLEEGDDGYGVKYVSMFAKAVSGDY  
NSTSEEIEAEDPDGVSHKRRSAPTAPGGVEENSFEEMTMEEIMCGKGDYFPGLIPLVRAY  
LDHISADSTSTARLHSYLDFIEKRATGELITTATWLRNFVRSHPDYKNDISVISETIA

>comp13621\_c0\_seq3; 363 301 1290 LEN=1327; translated  
MGLLLKVGVPKTDWSSKDDLEYIRKAGIRQFVSTYNRVKDLKGDELLWGDEIEYGIFHLDP  
QTKQIRLSLRKDVMDLNRKEAEHSQISEGCNWWPEYGAWMVEATPNRPYTGFSTDLLR  
VERNMRLRRKRILTVLKETEIAPTVSAPFLGSLGEEGSVPPVPLGGPITCSEYIGDGII  
NPHPRFGTLTANIRQRRGARVNIKVPLFRSDTPEFEDFENVKPGNVGCGGSDSQQLWR  
YGKGDACEEYEGKEFVTVGCSSTYDDSTGMATMEKWLIDVKCDGCKGLFYRSAPNVIVPD  
ADWPRNGDVVMGYEIPNTPGKPKVFMFAT

>comp13621\_c0\_seq4; 699 301 2909 LEN=3440; translated  
MGLLLKVGVPKTDWSSKDDLEYIRKAGIRQFVSTYNRVKDLKGDELLWGDEIEYGIFHLDP  
QTKQIRLSLRKDVMDLNRKEAEHSQISEGCNWWPEYGAWMVEATPNRPYTGFSTDLLR  
VERNMRLRRKRILTVLKETEIAPTVSAPFLGSLGEEGSVPPVPLGGPITCSEYIGDGII  
NPHPRFGTLTANIRQRRGARVNIKVPLFRSDTPEFEDFENVKPGNVGCGGSDSQQLWR  
YGKGDACEEYEGKEFVTVGCSSTYDDSTGMATMEKWLIDVKCDGCKGLFYRSAPNVIVPD  
ADWPRNGDVVMGYEIPNTPGWIRLQNGYYLPMHSDDGKVQFLSKVSKRAQTQNTMCRIG  
SNTPLFVAEENQESMATLLGGTVAVTDEANNGKIGGNQKANESNETLRAAVHMDAMAFGM  
GCCCLQITFQAKDIDESRFIFDQLAVMAPMYVVLHLEFQHDSISSMXLVSNYFLIPIFR  
HRMMALTASTPMLKGRLLDTDARWGIISESVDGRTLSEGRADPDAPYESYNAQGERRIY  
KSRYDSISTFIYQGGMTGARDTKGLKNRVLNMYNDIPIEIDETCYEDLRKAGVDPALSQH  
VAHLFIRDPLVIFNGAVEEVDDDETQTEHFESIQSTNWQTVRWKPPPPRDSNAPHIGWRT  
EFRSMEIQLTDFENAAFSIFVVLQRTILTFDLNLYVPLSKVDANMQRAHSRNSAARGKF  
FFRRHLAPLEEGDDGYGVKYVSMFAKAVSGDYNSTSEEIEAEDPDGVSHKRRSAPTAPGG  
VEENSFEEMTMEEIMCGKGDYFPGLIPLVRAYLDHISADSTSTARLHSYLDFIEKRATGE  
LITTATWLRNFVRSHPDYKNDISVISETIA

>comp13621\_c0\_seq5; 805 301 3060 LEN=3242; translated  
MGLLLKVGVPKTDWSSKDDLEYIRKAGIRQFVSTYNRVKDLKGDELLWGDEIEYGIFHLDP  
QTKQIRLSLRKDVMDLNRKEAEHSQISEGCNWWPEYGAWMVEATPNRPYTGFSTDLLR  
VERNMRLRRKRILTVLKETEIAPTVSAPFLGSLGEEGSVPPVPLGGPITCSEYIGDGII

NPHPRFGTLTANIRQRRGARVNIKVPLFRSDTPEFEDFENVKPGNVDGCCGSDSQQLWR  
YGKGDACEEYEGKEFVTVGCSSTYDDSTGMATMEKWLIDVKCDGCKGLFYRSAPNVIVPD  
ADWPRNGDVVMGYEIPNTPGWIRLQNGYYLPMHSDDGKVQFLSKVSKRAQTQNTMKRIG  
SNTPLFVAEENQESMATLLGGTVAVTDEANNGKIGGNQKANESNETLRAAVHMDAMAFGM  
GCCCLQITFQAKDIDESRFIFDQLAVMAPIMMALTASTPMLKGRLLDTDARWGIIESVD  
GRTLSEGRADPDAPYESYNAQGERRIYKSRYDSISTFIYQGGMTGARDTKGLKNRVLNM  
YNDIPLEIDETCYEDLRKAGVDPALSQHVAHLFIRDPLVIFNGAVEEVDDETQTEHFESI  
QSTNWQTVRWKPPPPRDSNAPHIGWRTEFRSMEIQLTDFENAAFSIFVVLLQRTILTFD  
LNLYVPLSKVDANMQRAHSRNSAARGKFFFRHLAPLEEGDDGYGVKYVSMFAKAVSGDY  
NSTSEIEAEDPDGVSHKRRSAPTAPGGVEENSFEEMTMEEMCGKGDYFPGLIPLVRAY  
LDHISADSTSTARLHSYLDFIEKRATGELITATWLRNFVRSHPDYKNDSVISETIAYDL  
MVACKEIGEGKLHVPELLGDVRIKEITTDGAYQTKLDSKRVTNDRIVELLQRYKKRQSAF  
DTEFSSELAPDSTLSEVAI

>comp13622\_c0\_seq1; 638 398 3482 LEN=4026; translated  
MEPAQLAQVEALCETLYTGVPTSGENGEQITRQDAQQLMSLQSSADFIPOCQYILENTK  
SQYARLVATNSLTELITTHWNSFTIPQRIDIRNYVLTYLANNGPQLENFVVVSLIKLVCR  
ITKLGWFDDPVHRELADDVTKFLQATIEHCILGLKILNQLVDELNIPTSGRTLTOHRKTS  
VSFRDVCLLKVFQGLTTLKQLQTRAI SADPQOEKILGEYALALTVRCLSFDFIGTNPDE  
STEDVGTIQAPTSWRALLQDSATTDLDFDFYANTTPPRSSKAMEAILLASVRRSLFPTD  
KDRAAFLGRLITGIRGMLSNTGLQHGDNYHQFCRLLGRLKANYQSELVKTGDGYMEWLE  
LAASFTVQSIRNWQYSTNSIHYLLSLWGRLVAAPVYVRPETGAQGHVQHLEKQVMLVVET  
YIESMLGSVETVLRSDGALENPLDDYGSREQMDRLPVICRFQYGPVAQILLAKFDPLLA  
QYRDI TGRMGNNSTSSAPNDVQQSMAVIEGQLTWLTYIVGAIIGGHSWSSAHMGEGEEAI  
DASLSRRTLQLAQGM DYRLTTSNGAGRAEPKLEQALLFYFGNFRRVYMFMDQMSGNNNS  
SVNTLGGDSL SVGMIVAKLDSAPSTKQKVYLRMF EQLAMGDHTVVANIIVTKMGNNLKYW  
PEDQEI VSKTLDLDFHDMAGGYSSSKLLLTLETVRFLAKNHTSDHFPFLSQPGNVRQRTTF  
HATLTRLLSPPNGEELGLTFDQFLEPIINVLGRLGTLAPADLRNENCRAPLIGVFRDLR  
GIAASLHNRKTY SALFEILHPQHPLCSKVADVWFDQTDVMISLLRFLHEFCHNKANRVN  
FDQSSPNGILLFRYTS DVVCA YGRRLMATPPPSKGDPEIYKKRYKGLALS LHVLSALGG  
NYVCFGVFELYNDMALQNALDVALNMA LSVPLDDINAYPKLSKAYYSFIEILFRSHKKRV  
FALDSNIFLQIMTTVHEGLQSSDQTIASF CANTIDHLTTYFNNQ GKDKVEMHNLNKVRE  
SDVNHEKW

>comp13622\_c0\_seq2; 742 398 3766 LEN=3929; translated  
MEPAQLAQVEALCETLYTGVPTSGENGEQITRQDAQQLMSLQSSADFIPOCQYILENTK  
SQYARLVATNSLTELITTHWNSFTIPQRIDIRNYVLTYLANNGPQLENFVVVSLIKLVCR  
ITKLGWFDDPVHRELADDVTKFLQATIEHCILGLKILNQLVDELNIPTSGRTLTOHRKTS  
VSFRDVCLLKVFQGLTTLKQLQTRAI SADPQOEKILGEYALALTVRCLSFDFIGTNPDE  
STEDVGTIQAPTSWRALLQDSATTDLDFDFYANTTPPRSSKAMEAILLASVRRSLFPTD  
KDRAAFLGRLITGIRGMLSNTGLQHGDNYHQFCRLLGRLKANYQSELVKTGDGYMEWLE  
LAASFTVQSIRNWQYSTNSIHYLLSLWGRLVAAPVYVRPETGAQGHVQHLEKQVMLVVET  
YIESMLGSVETVLRSDGALENPLDDYGSREQMDRLPVICRFQYGPVAQILLAKFDPLLA  
QYRDI TGRMGNNSTSSAPNDVQQSMAVIEGQLTWLTYIVGAIIGGHSWSSAHMGEGEEAI  
DASLSRRTLQLAQGM DYRLTTSNGAGRAEPKLEQALLFYFGNFRRVYMFMDQMSGNNNS  
SVNTLGGDSL SVGMIVAKLDSAPSTKQKVYLRMF EQLAMGDHTVVANIIVTKMGNNLKYW  
PEDQEI VSKTLDLDFHDMAGGYSSSKLLLTLETVRFLAKNHTSDHFPFLSQPGNVRQRTTF  
HATLTRLLSPPNGEELGLTFDQFLEPIINVLGRLGTLAPADLRNENCRAPLIGVFRDLR  
GIAASLHNRKTY SALFEILHPQHPLCSKVADVWFDQTDVMISLLRFLHEFCHNKANRVN  
FDQSSPNGILLFRYTS DVVCA YGRRLMATPPPSKGDPEIYKKRYKGLALS LHVLSALGG  
NYVCFGVFELYNDMALQNALDVALNMA LSVPLDDINAYPKLSKAYYSFIEILFRSHKKRV  
FALDSNIFLQIMTTVHEGLQSSDQTIASF CANTIDHLTTYFNNQ GKDKVEMHNLNKHFA  
AQPNNLSGFTMTLFLNLLFGPPSNHWAVMRPMLSLMLASESSFQYKHNLLSTQSAENQS  
KLTEILNKLLADVNRSLDSANRDRFTQKLTAFRVSARSFLTI

>comp13623\_c0\_seq1; 437 256 1761 LEN=1779; translated  
MPDTDTIWNESTQLIPNTEESKGTGPNIDGKEITRSCSFIGSLAATAGGFSEHISESMKR  
IGVLGSVSI AVNSLTGPAMLTLPATYQRSGLIPTTAVILFVCVLSAFCCCLHMSNVI SKVP  
NNQDFTYDIGYSECFRQLWGPRSYKFTQVLFCCVTC LNVSSIVDTAEVVD TFFGHVWPS  
GALAINFQLIDSQPVVRLTNWDYNICSEEVLSIGECVPLNEEGILLTLGYAITVLTFLP  
MAIMDLKENAAMQVIGFLVLLVTS LGFVILFLSSGFDLRNISFWGTEWGS LFGVVLFNFA  
LVIAIPAWLYEKEPGVNVPLVVHSSLLTSILYLSIGILGAITMPHASQNMLESLSMSGVF  
GTAMQLCASIFAFFI IGLGCPLFSILARMNLT DGN AFLSRGTANGLAVYFPFCFSWLFYQ

GDAVIQLLSWGGIIFTSLAFILPLLLALHSLERGDPCGSVNVYKPWKVASKRTQKLVLV  
ILLIFAVASIIAAIFGNVSLN  
>comp13623\_c0\_seq2; 289 256 1312 LEN=2053; translated  
MPDTDTIWNESTQLIPNTEESKGTGPNIDGKEITRSCSFIGSLAATAGGFSEHISESMKR  
IGVLGSVSIIVNSLTGPAAMLTLPATYQRSGLIPTTAVILFVCVLSAFCCLHMSNVISKVP  
NNQDFTYDIGYSECFRQLWGPRESYKFTQGGVSEGARVELLNMEFLLNRVLVIQFYSTFPN  
LSTSARNYTSKVLFFCCVTCLNVSSIVDTAEVVDVTFFGHWVPSGALAINFQLIDSQPVVR  
LTNWDYNICSEEVLIISGECVPPFLNEEGILLTLGYAITVLTFLPMAIMDLKENAAMQVIGF  
LVLLVTSLSLGFVILFLSSGFDLRNISFWGTEWGSLSFGVVLNFALVIAIPAW  
>comp13623\_c0\_seq3; 417 256 1891 LEN=1909; translated  
MPDTDTIWNESTQLIPNTEESKGTGPNIDGKEITRSCSFIGSLAATAGGFSEHISESMKR  
IGVLGSVSIIVNSLTGPAAMLTLPATYQRSGLIPTTAVILFVCVLSAFCCLHMSNVISKVP  
NNQDFTYDIGYSECFRQLWGPRESYKFTQGGVSEGARVELLNMEFLLNRVLVIQFYSTFPN  
LSTSARNYTSKVLFFCCVTCLNVSSIVDTAEVVDVTFFGHWVPSGALAINFQLIDSQPVVR  
LTNWDYNICSEEVLIISGECVPPFLNEEGILLTLGYAITVLTFLPMAIMDLKENAAMQVIGF  
LVLLVTSLSLGFVILFLSSGFDLRNISFWGTEWGSLSFGVVLNFALVIAIPAWLYEKEPGVN  
VPLVVHSSLLTSILYLSIGILGAIMPHASQNMLESLSMSGVFGTAMQLCASIFAFFIIG  
LGCPLFSILARMNLTDGNAFLSRGTANGLAVYFPFCFSWLFYQGDVAIQLLSWGGIIFTSL  
LLAFILPLLLALHSLERGDPCGSVNVYKPWKVASKRTQKLVLVILLIFAVASIIAAIFGN  
VSLN  
>comp13623\_c0\_seq4; 309 256 1182 LEN=1923; translated  
MPDTDTIWNESTQLIPNTEESKGTGPNIDGKEITRSCSFIGSLAATAGGFSEHISESMKR  
IGVLGSVSIIVNSLTGPAAMLTLPATYQRSGLIPTTAVILFVCVLSAFCCLHMSNVISKVP  
NNQDFTYDIGYSECFRQLWGPRESYKFTQVLFCCVTCLNVSSIVDTAEVVDVTFFGHWVPS  
GALAINFQLIDSQPVVRLTNWDYNICSEEVLIISGECVPPFLNEEGILLTLGYAITVLTFLP  
MAIMDLKENAAMQVIGFVLVLLVTSLSLGFVILFLSSGFDLRNISFWGTEWGSLSFGVVLNFAL  
LVIAIPAW  
>comp13624\_c0\_seq1; 185 486 887 LEN=1804; translated  
MRAFMSTKSCNEMQRNPPPKRFFSSRRVAEANPEVKSKGISRKKIWNSSNAKQKGES  
ATIEKLLKQLSEQNRMAEERTRKAEARAEEKAEARAEEKAEERALKAEQRAKRVEAKLENIL  
DNVSSINSRSIFC  
>comp13625\_c0\_seq1; 410 1 1148 LEN=1236; translated  
XPRLRGLSKAGASPSVAAAAGRDPDFSPPPAKKTKRTRSTAASGATPASGEKKGATK  
SGEGEKKRGATKTKKAGAKTTSARGKTKEPASAGSARGGADCLPRTEETRLLSETQAS  
GSKRRPGGHPVRFVVMGVDEAGRPLAGPVVAAAAIVPVDLDGITDSKKITREEQREDLYA  
AITESEGVRWAVAVMDAPFIDRVNIIQATLRGMAAAATALAVDNGDAIVLGEDLTIPIVP  
GASIEQKGCYVVTNGSSSTSTKNNDKDAPAPAAAAASAEDYYALIDGNRVPPDMPCESTSI  
VKGDGREYCIAAASILAKVTRDRLMRGYHELWPHYGLEQHKGYPTAAHMRAVKTHGASPI  
HRRTRFRPLKDMAFDEDGNIVAD  
>comp13625\_c0\_seq2; 392 1 1112 LEN=1200; translated  
XPRLRGLSKAGASPSVAAAAGRDPDFSPPPAKKTKRTRSTAASGATPASGEKKGATK  
KTKKAGAKTTSARGKTKEPASAGSARGGADCLPRTEETRLLSETQASGSKRRPGGHPVR  
FVMGVDEAGRPLAGPVVAAAAIVPVDLDGITDSKKITREEQREDLYAAITESEGVRWAV  
AVMDAPFIDRVNIIQATLRGMAAAATALAVDNGDAIVLGEDLTIPIVPGASIEQKGCYVV  
TNGSSSTSTKNNDKDAPAPAAAAASAEDYYALIDGNRVPPDMPCESTSIKGDGREYCIAA  
ASILAKVTRDRLMRGYHELWPHYGLEQHKGYPTAAHMRAVKTHGASPIHRRTRFRPLKDMA  
FDEDGNIVAD  
>comp13625\_c0\_seq3; 378 1 1100 LEN=1188; translated  
XPRLRGLSKAGASPSVAAAAGRDPDFSPPPAKKTKRTRSTAASGATPASGEKKGATK  
KTKKAGAKTTSARGKTKEPASAGSARGGADCLPRTEETRLLSETQASGSKRRPGGHPVR  
FVMGVDEAGRPLAGPVVAAAAIVPVDLDGITDSKKITREEQREDLYAAITESEGVRWAV  
AVMDAPFIDRVNIIQATLRGMAAAATALAVDNGDAIVLGEDLTIPIVPGASIEQKGCYVV  
TNGSSSSSTKNNGKDAPASAEDYYALIDGNRVPPDMPCESTSIKGDGREYCIAAASIL  
AKVTRDRLMRGYHELWPHYGLEQHKGYPTAAHMRAVKTHGASPIHRRTRFRPLKDMAFDED  
GNIVAD  
>comp13625\_c0\_seq4; 396 1 1136 LEN=1224; translated  
XPRLRGLSKAGASPSVAAAAGRDPDFSPPPAKKTKRTRSTAASGATPASGEKKGATK  
SGEGEKKRGATKTKKAGAKTTSARGKTKEPASAGSARGGADCLPRTEETRLLSETQAS  
GSKRRPGGHPVRFVVMGVDEAGRPLAGPVVAAAAIVPVDLDGITDSKKITREEQREDLYA  
AITESEGVRWAVAVMDAPFIDRVNIIQATLRGMAAAATALAVDNGDAIVLGEDLTIPIVP

GASIEQKGCYVVTNGSSSSSSTKNNGKDAPASAEDYYALIDGNRVPPDMPCESTSIVKGD  
GREYCIAAASILAKVTRDRLMRGYHELWPHYGLEQHKGYPTAAHMRAVKTHGASPIHRRT  
FRPLKDMAFDEDGNIVAD

>comp13626\_c0\_seq1; 298 367 1521 LEN=1885; translated  
MTTGEEVAIKLESVTKKHPQLLYESKIYRILHGGLGIPNVRWYGIEGDYNMVLDDLGPS  
LEDLFNYCGRRFQLKTVLMLADQLLSRLEYVHTKSF IHRDVKPDNFLIGLGKRQSVIHII  
DFGLAKKYRDPSSHQHIPYRENKNTGTARYASINTHIGIEQSRRDDLESGLGYVLMYFIR  
GSLPWQGLKANTKKQKYERIMDRKMSTSTEQLCKGYATEFRSYFEYCRSLRFEDRPDYAY  
LKRLFKELFYRKGQYDNMFDWTVLNLQQERSRAPQERPVLNSQQGGSGDQPSQRASESQ  
GKGGRESYHPDGSQDRKQPPGVGNADEKERSRSGNGNNDQSRSGRGGYANSQSHGRQQQ  
QPQLSDHNRSQQNVSAQGSNQGGR

>comp13627\_c0\_seq1; 513 297 1388 LEN=1682; translated  
MRDFISRVLVEEVAKATATPTESDTAETGAGDEGSDSAAIAEDVTGLERWMDLGFIAFLV  
TAIFAARKMSWTRQQGAETTVTAFYSLILVTSIFRSTWFLIPATVWTPSYTPVAIFAW  
DTEHPAWVGAFLSEFVLTAGSLSLFSIFILILVYWADILKKYFHPASRRTIPMVTFGLV  
SLLIVLEIINIAAFGFGLYTTEGMILFNSILLATVSVICVVEISIFSHRFRTVLKTLGAI  
NQVSTDSQVKRIVWITATGNLFFFTRAFLESVFCGYLYVYWKDHTVARFSHPWWDTFV  
GIKFVSEVIILSLMLYLQSRFSSSATGDGGASGETSGNGRPTGYVSVNPNTDEAAPAPAA  
ISV

>comp13628\_c0\_seq2; 224 733 1590 LEN=1879; translated  
MWAFFQTSNDDSRQTHAKIVVGCPCPNHAASSTNLDSAAWALLQEAVGTPTGTPHTGMQV  
PFGTKINPQTRRQVFVSRDIPKGYELWKPIHYHTFHSEEGYTDFLRELPHNLRCVALEW  
THPSSHDNDIYVDVTLDEGTFIQEAELPEQVNIIDICVALRDIKAGEFVYMNTTEHFSLS  
GDVEWLEAIRTDALKRTGLGSGRRRNQYLNHNHTRMLPNNHEDDTTVVAPVIAALSAL  
YFVVKLVRRGNASKPYDFGCDYGGDCHNGCTFGSFFYGSQKTKIA

>comp13629\_c0\_seq1; 289 686 1583 LEN=1891; translated  
MKYDPSKIDDIQKNKQTEVVTTGSPQNFSSWLDLHRNRTYGGFVDAVCDKAFVVPWCWIA  
LLNVVPQTSHARWLQYFVLFLLILAEVASGCIRFKAYFTSVAVASPKVEGFDFSTSAVKA  
DHVGKAKQTFEMVGTALFILPWVRYLGLAFLFLAVPLAYESVRRKITKRVLYVNAGHKLE  
KLDHSTLKFWMQAKAMGSKLVVGFPMQTANDDNNYNKKAEMGKIFNALACSCVDEAVAE  
APEKLDLMLFLEKQKIDYVISKVAEPQFVTDEVVNAGRCLQIGEDGIVRLFQLKSAKKE

>comp13629\_c0\_seq2; 458 87 1337 LEN=1645; translated  
MLLQDTIHKLFALIDSIVELYLGLTLVKPFLKLHETFYAALNRTLRLKLLDDHRSQIPEWFT  
ANWITYARTVLVVPVTLVLSWGYSILPSILVLFVDFGDFLDGVVARFWVDVRTEIETKLS  
EKEKALSPENSDDSEFEVVTGSPQNFSSWLDLHRNRTYGGFVDAVCDKAFVVPWCWIAL  
NVVPQTSHARWLQYFVLFLLILAEVASGCIRFKAYFTSVAVASPKVEGFDFSTSAVKADH  
VGKAKQTFEMVGTALFILPWVRYLGLAFLFLAVPLAYESVRRKITKRVLYVNAGHKLEKL  
DHSTLKFWMQAKAMGSKLVVGFPMQTANDDNNYNKKAEMGKIFNALACSCVDEAVAEAP  
EKLDLMLFLEKQKIDYVISKVAEPQFVTDEVVNAGRCLQIGEDGIVRLFQLKSAKKE

>comp13630\_c0\_seq1; 561 309 1346 LEN=1922; translated  
MSSSSCGPPISTTGTGYLNAVDAAALDVELMSTPGFSLEQLMELAGLAVAEAVYQVIKPP  
LNPEDPKRKILLVCGPGNNGDGLVASRHLYFFGYDCVVVYPKKSKKQHF INLVKQCEDV  
GIPVLDEMPDTESEFDSIVDAIFGFSFKGEPREPFATILNQLKEVQEQADNTVQMVSDVP  
SGWNVDEGDVANTGFVPDVTISLTAPKFCTKEFTGRHF IGGRFLPPKIANKYQVQMPPE  
GVSQVMEVTREHIEGKSQTMKESPTAASDDSWREEYAAAYLAEKYQDSEANPATPPHLKEP  
DDQDKKESSEETWEMQYAAAYCQEKEARLAEEDAMRKESIRKERSE

>comp13630\_c0\_seq2; 561 309 1346 LEN=1909; translated  
MSSSSCGPPISTTGTGYLNAVDAAALDVELMSTPGFSLEQLMELAGLAVAEAVYQVIKPP  
LNPEDPKRKILLVCGPGNNGDGLVASRHLYFFGYDCVVVYPKKSKKQHF INLVKQCEDV  
GIPVLDEMPDTESEFDSIVDAIFGFSFKGEPREPFATILNQLKEVQEQADNTVQMVSDVP  
SGWNVDEGDVANTGFVPDVTISLTAPKFCTKEFTGRHF IGGRFLPPKIANKYQVQMPPE  
GVSQVMEVTREHIEGKSQTMKESPTAASDDSWREEYAAAYLAEKYQDSEANPATPPHLKEP  
DDQDKKESSEETWEMQYAAAYCQEKEARLAEEDAMRKESIRKERSE

>comp13630\_c0\_seq3; 561 309 1346 LEN=1746; translated  
MSSSSCGPPISTTGTGYLNAVDAAALDVELMSTPGFSLEQLMELAGLAVAEAVYQVIKPP  
LNPEDPKRKILLVCGPGNNGDGLVASRHLYFFGYDCVVVYPKKSKKQHF INLVKQCEDV  
GIPVLDEMPDTESEFDSIVDAIFGFSFKGEPREPFATILNQLKEVQEQADNTVQMVSDVP  
SGWNVDEGDVANTGFVPDVTISLTAPKFCTKEFTGRHF IGGRFLPPKIANKYQVQMPPE  
GVSQVMEVTREHIEGKSQTMKESPTAASDDSWREEYAAAYLAEKYQDSEANPATPPHLKEP  
DDQDKKESSEETWEMQYAAAYCQEKEARLAEEDAMRKESIRKERSE

>comp13631\_c0\_seq1; 755 75 1581 LEN=1581; translated  
MAEPKNGEDSTVMPTIDRQEAENQNTDDVGAKDDPSQQLFKNLAILPPLQKDTSGKDRRK  
QDLIDAVPLPPIRAEPEVSSIRAALGEICGYAHLTNYRFVLERGDENDTATDSLGRGGS  
SSKQGPVSPYTGNAVISTKEIVKSFLNEVDPVTATNKMDTEKAMVLDEFGLTSLLCD  
DGLKDGSGFRIVLERYDIALIRDHIARLRTLDDGNAPNSTSLDESSGEAVAPDSSSPSP  
ETEKESDTNASSATQGVKESQPELAIKKEKNVANNKEEQQKGSNQKKKADAPSVPPKDM  
PVFSPEKSLSPDSNDLKNFFYYACGEDPSLYLDGPDANKKGMGGGGVAKSKKKGKKNKSK  
TSSEEGDKADEESKDQLIKRVIPLLNEIEERTRISCHIRFSGFHPPPQSRQFMGDLAYLE  
VTLPDGEVVSISATPLGFFVNQCSLNRGDYKFDPSPAEKSCFSHELLDCLLQYSKSFSDA  
WSDALVAAKSRAELMLKINEDGX

>comp13632\_c0\_seq1; 318 203 1909 LEN=1934; translated  
MVPSHPTAGVAVVISIAAVFVLMWNRAPAPLKLFFYDSGPLEIVDFENTDACSAYIPEK  
KQHAKNSIPLFAHDDGGGQGSNTIKVVELNSSFSLEECAGFAASWRDSNGALCRTCACWF  
NHQAAASDNTVENRCFLTDPIWMPQHQVHNHIEGRVDSARLVWTCRENSDCSYNGHCSDT  
DHRCHCREGWKGLFCDELYLLEPMTKDRLGFEVDTSGRNVSSWGAPILFDESSKRWHGFV  
SEIQAGCGINAWQTNRSRIVHVVGDSYPYGPFERKEIVFPVFAHEASVVRGPRGEWVMLFSF  
FHYNETGLAAVICSNCRDGVTPPEISPKCFPQRGSPKLRHKFRQMMSLAESPDGPWSTPL  
EIPQLSQNWWDNTDLTINRDGSAVALIRCGMTWHAQNYSDPTTWHPVGSKHGKGGSEGPCW  
TGAAIEDPYIWQEEGVYHALAHAFSPFIGVHAFVPIPTADFDTLPLNWTVTGVAYNNTV  
RFTDGSSSHLPFRERPHLVWEPSETKAGKTTGANLKPVALSSGVQYSGRPNESYSYSDGVFT  
LLQPMGSIAQEIAKVIDFEETESHQNK

>comp13633\_c0\_seq1; 715 369 2234 LEN=3293; translated  
MTYRRRSDVQTRTDESTKRHGKMSGESSVDSSSYDATENLTDTDSSAQIKSFSRRMSSSD  
YNHNHVDACRSINSTSCRSLNSSSEIDRDTDRVRFALNALRFHEVESHNNTAKERSK  
YWWSDREKDRMMAKHERLVAKYEQKAGAGSKSASSKKSNTKAIQSYRGLESWTAAGSLK  
LDYTIEQCITAVMDEQDRQWAENADDAEIIAQMSMAVTEDESARRARLNGLQDAQEALKVR  
SEMWGKVTGDDMSVGSASVSTGTAALVKKKKRSKLLARLDDSAKLLKNSNSVDDDDVLSK  
KSKDKKKKKKNSKSKKQSSVTKEKKKSSKAKSSSTKKSPSIGDEQKATEEVAKESLDVA  
DDNATATPKSGLLSAFTAGPEVPI SPLSTHIYAGPSSANSNECPLLATLRRQQEQLRQE  
SGVRNDNKNLTSARSITHLRQYEEEEEDENDLSVSPLLQTLRRQKKQASARADPSSAG  
ALQKSRNSRDDHGSRTGDSEADSSDPPGRRPRRLVSRHVESGIPEEFLASSGDKSSLER  
IKESSDDRSRKSRRERSSSKPRERSRSRSKQLISSFSLGSPTTTDETTPANPKSPI  
RSLGRLRSSAKTLFKKSSKNI

>comp13633\_c0\_seq2; 718 369 2246 LEN=3305; translated  
MTYRRRSDVQTRTDESTKRHGKMSGESSVDSSSYDATENLTDTDSSAQIKSFSRRMSSSD  
YNHNHVDACRSINSTSCRSLNSSSEIDRDTDRVRFALNALRFHEVESHNNTAKERSK  
YWWSDREKDRMMAKHERLVAKYEQKAGAGSKSASSKKSNTKAIQSYRGLESWTAAGSLK  
LDYTIEQCITAVMDEQDRQWAENADDAEIIAQMSMAVTEDESARRARLNGLQDAQEALKVR  
SEMWGKVTGDDMSVGSASVSTGTAALVKKKKRSKLLARLDDSAKLLKNSNSVDDDDVLSK  
KSKDKKKKKKNSKSKKQSSVTKEKKKSSKAKSSSTKKSPSIGDEQKATEEVAKESLDVA  
DDNATATPKSGLLSAFTAGPEVPI SPLSTHIYAGPSSANSNECPLLATLRRQQEQLRQE  
SGVRNDNKNLTSARSITHLRQYEEEEEDENDLSVSPLLQTLRRQKKQASARLQEQRADP  
SSAGALQKSRNSRDDHGSRTGDSEADSSDPPGRRPRRLVSRHVESGIPEEFLASSGDKS  
SLERIKESSDDRSRKSRRERSSSKPRERSRSRSKQLISSFSLGSPTTTDETTPANPKSPI  
NASKRSLGRLRSSAKTLFKKSSKNI

>comp13634\_c0\_seq1; 292 403 1127 LEN=1127; translated  
MSPVSKGTSAAAANAASSTYRGALIFMHGLGDSAPAGWSSLEHQLPRLKPRLNAGDVKYVF  
PAAPTIPLTINGGMKMPGWFDLFDWPIGVGSKDDPAGLMKGVEQIKAEDVRLQTEDGIPP  
SKIIVGGFSQGGAVALLSCYHQNLGGDAPKAFAGCVGLSAWLTLPKEVAELTEDGKKDAR  
KEIPLFWGHGTYDDKVLFEQQQFGIEKLSNDFGLDWSKITSTQYPMGHQSCEQETRSEE  
RR

>comp13634\_c0\_seq2; 259 403 1179 LEN=1548; translated  
MSPVSKGTSAAAANAASSTYRGALIFMHGLGDSAPAGWSSLEHQLPRLKPRLNAGDVKYVF  
PAAPTIPLTINGGMKMPGWFDLFDWPIGVGSKDDPAGLMKGVEQIKAEDVRLQTEDGIPP  
SKIIVGGFSQGGAVALLSCYHQNLGGDAPKAFAGCVGLSAWLTLPKEVAELTEDGKKDAR  
KEIPLFWGHGTYDDKVLFEQQQFGIEKLSNDFGLDWSKITSTQYPMGHQSCEQETRDLAD  
FLDRALFGDEGDDAKADL

>comp13635\_c0\_seq1; 250 1 1533 LEN=2767; translated  
KILLELVHIPLISYPCLAENRNPSTSNQIFQKEKRTITQTNQKMNVSISEAFDGGNIKIF  
ISTRPNENDPVNTTDLVLLHIKPDVYTVLEKIGHMQYFSFRATIGGLGFPPSNQTHKIRYV



VVNAEASSYPEAWVGSTVCYTTNIEDPDSWRRNQDTVYSNGALCWEHEHTQNGSFYFSYF  
PPYSYSRHLGLVSRCSQFADTISLGQSLDGRDIDCITLGGQKTVCWIIHRQHPGETMAEY  
YAEGLLNRLGLDSNGKVDGEVPKLLEMYTFYIVPLMCPDGAVRGHLRTNACGANLNREW  
ATKRFYEAPSLERSPEVFSVLKKMDETGVDFLDVHGDEELPFNFISGAEKTPKWGVRME  
SLHGAFVAAYQRVNSDMQQRIGYPAPETTEAALEYMNVATNQIADRFDCLSMTEMPFKD  
CLSNSDPERGWSPERSRKLKASVLAFLAYIHPYLRAGEGEFWTQLPSEDAYVPTTDDYEAE  
LRASTGGFVPMSSKRFYSVDVHACHPSKQQ

>comp13635\_c0\_seq2; 282 454 1278 LEN=2541; translated  
MAEYYAEGLLNRLGLDSNGKVDGEVPKLLEMYTFYIVPLMCPDGAVRGHLRTNACGANL  
NREWATKRFYEAPSLERSPEVFSVLKKMDETGVDFLDVHGDEELPFNFISGAEKTPKWG  
VRMESLHGAFVAAYQRVNSDMQQRIGYPAPETTEAALEYMNVATNQIADRFDCLSMTEM  
PFKDCLSNSDPERGWSPERSRKLKASVLAFLAYIHPYLRAGEGEFWTQLPSEDAYVPTTDD  
YEAE LRASTGGFVPMSSKRFYSVDVHACHPSKQQ

>comp13635\_c0\_seq3; 282 454 1278 LEN=2512; translated  
MAEYYAEGLLNRLGLDSNGKVDGEVPKLLEMYTFYIVPLMCPDGAVRGHLRTNACGANL  
NREWATKRFYEAPSLERSPEVFSVLKKMDETGVDFLDVHGDEELPFNFISGAEKTPKWG  
VRMESLHGAFVAAYQRVNSDMQQRIGYPAPETTEAALEYMNVATNQIADRFDCLSMTEM  
PFKDCLSNSDPERGWSPERSRKLKASVLAFLAYIHPYLRAGEGEFWTQLPSEDAYVPTTDD  
YEAE LRASTGGFVPMSSKRFYSVDVHACHPSKQQ

>comp13635\_c0\_seq4; 250 1 1533 LEN=2796; translated  
KILLELVHIPLISYPCLAENRNPSTSNQIFQKEKRTITQTNQKMNVSISEAFDGGNIKF  
ISTRPNENDPVNTTDLVLLHIKPDVYTVLEKIGHMQYFSFRATIGGLGFPPSNQTHKIRYV  
VVNAEASSYPEAWVGSTVCYTTNIEDPDSWRRNQDTVYSNGALCWEHEHTQNGSFYFSYF  
PPYSYSRHLGLVSRCSQFADTISLGQSLDGRDIDCITLGGQKTVCWIIHRQHPGETMAEY  
YAEGLLNRLGLDSNGKVDGEVPKLLEMYTFYIVPLMCPDGAVRGHLRTNACGANLNREW  
ATKRFYEAPSLERSPEVFSVLKKMDETGVDFLDVHGDEELPFNFISGAEKTPKWGVRME  
SLHGAFVAAYQRVNSDMQQRIGYPAPETTEAALEYMNVATNQIADRFDCLSMTEMPFKD  
CLSNSDPERGWSPERSRKLKASVLAFLAYIHPYLRAGEGEFWTQLPSEDAYVPTTDDYEAE  
LRASTGGFVPMSSKRFYSVDVHACHPSKQQ

>comp13636\_c0\_seq1; 855 288 3433 LEN=7836; translated  
MSMNTTLDLQNSKVEELRTAIGSSLYFGIACLI GCMIFFGVVIQFDFIEDLTPRAANRP  
KSVIKNAIMHGIPNNTSKHKNQFYYPYIAWINWAYKLT YRDCMFGIPGTGTRKDGWEGPL  
LKTNLDAVILLRFHALLFKIGLLVAVLCTFIILPVNMTAGCDPEVFGKGT CMIHEHRSHG  
FLLTTISHIPDKFYYESLDGISDEGPDISTG SILASVLRPNKDN YTDLSDDDRFE EK  
RSTQLARDWWVANQ TWRIWATMLSCLAIYGYTFYLLTKEWVEVINXAE DFFLEANHYGQR  
MRELNKLENE LFSKRNKSD EANPKRLNDGENSYRRWMT HPEIREVPPSVSTYSVLYQLPK  
SMVTCGNDGDTQVDRQLEATAKFFDDIVAPQPGYSSSVAVTVIPANARLV AIAWNKWSA  
CERLIQLIRHIRSLIEEKQSKKCCCPNGSEGEESKKGLEAETNGDDIDVESGDNEGDEPT  
HPEAVNNSDDDDDDGGGHNADTEL VQSDESAANSLDHDASMKKKE SRIDQEPDLVQNP A  
REQKLARFRYDDFDIAKYAKSLGFIAEVDYMTDFVEGMGVEEF SVFAYMCALMAGGPGLK  
KKLVNICSIEKLEAE EADAKEALRKAHEELLEARLDVNVNVEDDVKLDSDEYNAIITV GSG  
ENIEMEHE SVPKFGLSLNDSNQLGLSKHELQAMLPSTEAKTAPTGMVQKVI FHMKR VYFG  
IDDAAPSLEYGYGVEDHSRGNVAYKTDVEHPAYAVVTFTSRHS AVIARQCLADGGATNSWR  
QIDDIPYPLADAPAMMCFPRGCMRPVTPTISFTSKKIRRGICTFLVLF TSYFVWPINK  
INSLIMNEKVIVGRFGISP ELYQKYAPSVSGLTQALLFSVCPMIFRFVASC EGSASSMQK  
AEQRALIFFWYFYLIARFMGQILFEAITKFLQGQTSSVEKVVTSALS DLAKTVPERLGP F  
ALSYVIFISTISWPLLYFLQLNNYLTTFRLGWINRLLKGGGPAAEIPYRIYVDHGYILA  
CMTSLAPLCPLLGPFALMYVILAPMLRW

>comp13636\_c0\_seq2; 763 288 2731 LEN=7596; translated  
MSMNTTLDLQNSKVEELRTAIGSSLYFGIACLI GCMIFFGVVIQFDFIEDLTPRAANRP  
KSVIKNAIMHGIPNNTSKHKNQFYYPYIAWINWAYKLT YRDCMFGIPGTGTRKDGWEGPL  
LKTNLDAVILLRFHALLFKIGLLVAVLCTFIILPVNMTAGCDPEVFGKGT CMIHEHRSHG  
FLLTTISHIPDKFYYESLDGISDEGPDISTG SILASVLRPNKDN YTDLSDDDRFE EK  
RSTQLARDWWVANQ TWRIWATMLSCLAIYGYTFYLLTKEWVEVINXAE DFFLEANHYGQR  
MRELNKLENE LFSKRNKSD EANPKRLNDGENSYRRWMT HPEIREVPPSVSTYSVLYQLPK  
SMVTCGNDGDTQVDRQLEATAKFFDDIVAPQPGYSSSVAVTVIPANARLV AIAWNKWSA  
CERLIQLIRHIRSLIEEKQSKKCCCPNGSEGEESKKGLEAETNGDDIDVESGDNEGDEPT  
HPEAVNNSDDDDDDGGGHNADTEL VQSDESAANSLDHDASMKKKE SRIDQEPDLVQNP A  
REQKLARFRYDDFDIAKYAKSLGFIAEVDYMTDFVEGMGVEEF SVFAYMCALMAGGPGLK  
KKLVNICSIEKLEAE EADAKEALRKAHEELLEARLDVNVNVEDDVKLDSDEYNAIITV GSG

ENIEMEHESVPKFGLSLNDSNQLGLSKHELQAMPLPSTEAKTAPTGMVQKVI FHMKR VYFG  
IDDAAPSLEYGVEDHSRGNVAYKTDVEHPAYAVVTFSTRHSAVIARQCLADGGATNSWR  
QIDDIPIYPLADAPAMMCFPRGCMRPVPTPTISVR

>comp13636\_c0\_seq3; 763 288 2731 LEN=8119; translated  
MSMNTTLDLTLQNSKVEELRTAIGSSLYFGIACLI GCMIFFGVVIQDFDIEDLTPRAANRP  
KSVIKNAIMHGIPNNTSKHKNQFYYPPIAWINWAYKLT YRDCMFGIPGTGTRKDGWEGPL  
LKTNLDAVILLRFHALLFKIGLLVAVLCTFIILPVNMTAGCDPEVFGKGT CMIHEHRSHG  
FLLTTISHIPDKFYYESLDGISDEGPDISTG SILASVLGRPNKDNYTDDLSDDDRFE EK  
RSTQLARDWWVANQTWRIWATMLSCLAIYGYTFYLLTK EWVEVINXAEDFFLEANHYGQR  
MRELNKLENELEFSKRNKSD EANPKRLNDGENSYRRWMT HPEIREVPPSVSTYSVLYQLPK  
SMVTCGNDGDTQVDRQLEATAKFFDDIVAPQPGYSSSVVAVTVI PANARLV AIAWNKWSA  
CERLIQLIRHIRSLIEEKQSKKCCCPNGSEGEESK KGLEAETNGDDIDVESGDNEGDEPT  
HPEAVNNSDDDDDDGGGHNADTELVQSD ESAANSLDHDASMKKKE SRIDQEPDLVQNP A  
REQKLARFRYDDFDIAKYAKSLGFIAEVDYMTDFVEGMGVEEFSVFAYMCALMAGGPGLK  
KKLVNICSIEKLEAEEADAKEALRKAHEELLEARLDV VNVEDDVKLDSD EYNAIITVGS G  
ENIEMEHESVPKFGLSLNDSNQLGLSKHELQAMPLPSTEAKTAPTGMVQKVI FHMKR VYFG  
IDDAAPSLEYGVEDHSRGNVAYKTDVEHPAYAVVTFSTRHSAVIARQCLADGGATNSWR  
QIDDIPIYPLADAPAMMCFPRGCMRPVPTPTISVR

>comp13636\_c0\_seq4; 763 288 2731 LEN=8117; translated  
MSMNTTLDLTLQNSKVEELRTAIGSSLYFGIACLI GCMIFFGVVIQDFDIEDLTPRAANRP  
KSVIKNAIMHGIPNNTSKHKNQFYYPPIAWINWAYKLT YRDCMFGIPGTGTRKDGWEGPL  
LKTNLDAVILLRFHALLFKIGLLVAVLCTFIILPVNMTAGCDPEVFGKGT CMIHEHRSHG  
FLLTTISHIPDKFYYESLDGISDEGPDISTG SILASVLGRPNKDNYTDDLSDDDRFE EK  
RSTQLARDWWVANQTWRIWATMLSCLAIYGYTFYLLTK EWVEVINXAEDFFLEANHYGQR  
MRELNKLENELEFSKRNKSD EANPKRLNDGENSYRRWMT HPEIREVPPSVSTYSVLYQLPK  
SMVTCGNDGDTQVDRQLEATAKFFDDIVAPQPGYSSSVVAVTVI PANARLV AIAWNKWSA  
CERLIQLIRHIRSLIEEKQSKKCCCPNGSEGEESK KGLEAETNGDDIDVESGDNEGDEPT  
HPEAVNNSDDDDDDGGGHNADTELVQSD ESAANSLDHDASMKKKE SRIDQEPDLVQNP A  
REQKLARFRYDDFDIAKYAKSLGFIAEVDYMTDFVEGMGVEEFSVFAYMCALMAGGPGLK  
KKLVNICSIEKLEAEEADAKEALRKAHEELLEARLDV VNVEDDVKLDSD EYNAIITVGS G  
ENIEMEHESVPKFGLSLNDSNQLGLSKHELQAMPLPSTEAKTAPTGMVQKVI FHMKR VYFG  
IDDAAPSLEYGVEDHSRGNVAYKTDVEHPAYAVVTFSTRHSAVIARQCLADGGATNSWR  
QIDDIPIYPLADAPAMMCFPRGCMRPVPTPTISVR

>comp13636\_c0\_seq5; 855 288 3433 LEN=8014; translated  
MSMNTTLDLTLQNSKVEELRTAIGSSLYFGIACLI GCMIFFGVVIQDFDIEDLTPRAANRP  
KSVIKNAIMHGIPNNTSKHKNQFYYPPIAWINWAYKLT YRDCMFGIPGTGTRKDGWEGPL  
LKTNLDAVILLRFHALLFKIGLLVAVLCTFIILPVNMTAGCDPEVFGKGT CMIHEHRSHG  
FLLTTISHIPDKFYYESLDGISDEGPDISTG SILASVLGRPNKDNYTDDLSDDDRFE EK  
RSTQLARDWWVANQTWRIWATMLSCLAIYGYTFYLLTK EWVEVINXAEDFFLEANHYGQR  
MRELNKLENELEFSKRNKSD EANPKRLNDGENSYRRWMT HPEIREVPPSVSTYSVLYQLPK  
SMVTCGNDGDTQVDRQLEATAKFFDDIVAPQPGYSSSVVAVTVI PANARLV AIAWNKWSA  
CERLIQLIRHIRSLIEEKQSKKCCCPNGSEGEESK KGLEAETNGDDIDVESGDNEGDEPT  
HPEAVNNSDDDDDDGGGHNADTELVQSD ESAANSLDHDASMKKKE SRIDQEPDLVQNP A  
REQKLARFRYDDFDIAKYAKSLGFIAEVDYMTDFVEGMGVEEFSVFAYMCALMAGGPGLK  
KKLVNICSIEKLEAEEADAKEALRKAHEELLEARLDV VNVEDDVKLDSD EYNAIITVGS G  
ENIEMEHESVPKFGLSLNDSNQLGLSKHELQAMPLPSTEAKTAPTGMVQKVI FHMKR VYFG  
IDDAAPSLEYGVEDHSRGNVAYKTDVEHPAYAVVTFSTRHSAVIARQCLADGGATNSWR  
QIDDIPIYPLADAPAMMCFPRGCMRPVPTPTISFTSKKIRRG ICTFLVLFTSFYVWP INK  
INSLIMNEKVIVGRFGISP ELYQKYAPSVSGLTQALLFSVC PMIFRFVASCEGSASSM QK  
AEQRALIFFWYFYLIARFMGQILFEAITKFLQGQTSSVEKV VTSALS DLAKTVPERLGP F  
ALSXVIFISTISWPLLYFLQLNNYLTTFRLGWINRLLKGGGPA AEIPYRIYVDHG YILA  
CMTSLAPLCPLLGPALMYVILAPMLRW

>comp13636\_c0\_seq6; 755 288 2623 LEN=8104; translated  
MSMNTTLDLTLQNSKVEELRTAIGSSLYFGIACLI GCMIFFGVVIQDFDIEDLTPRAANRP  
KSVIKNAIMHGIPNNTSKHKNQFYYPPIAWINWAYKLT YRDCMFGIPGTGTRKDGWEGPL  
LKTNLDAVILLRFHALLFKIGLLVAVLCTFIILPVNMTAGCDPEVFGKGT CMIHEHRSHG  
FLLTTISHIPDKFYYESLDGISDEGPDISTG SILASVLGRPNKDNYTDDLSDDDRFE EK  
RSTQLARDWWVANQTWRIWATMLSCLAIYGYTFYLLTK EWVEVINXAEDFFLEANHYGQR  
MRELNKLENELEFSKRNKSD EANPKRLNDGENSYRRWMT HPEIREVPPSVSTYSVLYQLPK  
SMVTCGNDGDTQVDRQLEATAKFFDDIVAPQPGYSSSVVAVTVI PANARLV AIAWNKWSA

CERLIQLIRHIRSLIEEKQSKKCCCPNGSEGEESKKGLEAETNGDDIDVESGDNEGDEPT  
HPEAVNNSDDDDDDGGGHNADTELVQSDESAANSLDHDASMKKKESRIDQEPDLVQNPA  
REQKLARFRYDDFDIAKYAKSLGFIAEVDYMTDFVEGMGVEEFSVFAYMCALMAGGPGLK  
KKLVNICSIEKLEAEEADAKEALRKAHEELLEARLDVVNVEDDVKLDSDEYNAIITVGS  
ENIEMEHEVSPKFGLSLNSNQLGLSKHELQAMPLPSTEAKTAPTGMVQKVI FHMKR VYFG  
IDDAAPSLEYGVEDHSRGNVAYKTDVEHPAYAVVTFSTRHSAVIARQCLADGGATNSW  
>comp13636\_c0\_seq7; 763 288 2731 LEN=7939; translated  
MSMNTTLDLTLQNSKVEELRTAIGSSLYFGIACLI GCMIFFGVVIQDFDIEDLTPRAANRP  
KSVIKNAIMHGIPNNTSKHKNQFYYPPIAWINWAYKLT YRDCMFGIPGTGTRKDGWEGPL  
LKTNLDAVILLRFHALLFKIGLLVAVLCTFIILPVNMTAGCDPEVFGKGT CMIHEHRSHG  
FLTTTISHIPDKFYYESLDGISDEGPDISTG SILASVLGRPNKDNYTDDLSDDDRFE EK  
RSTQLARDWWVANQTWRIWATMLSCLAIYGYTFYLLTKEWVEVINXAEDFFLEANHYGQR  
MRELNKLENELEFSKRNKSD EANPKRLNDGENSYRRWMTHPEIREVPPSVSTYSVLYQLPK  
SMVTCGNDGDTQVDRQLEATAKFFDDIVAPQPGYSSSVAVTVIPANARLV AIAWNKWSA  
CERLIQLIRHIRSLIEEKQSKKCCCPNGSEGEESKKGLEAETNGDDIDVESGDNEGDEPT  
HPEAVNNSDDDDDDGGGHNADTELVQSDESAANSLDHDASMKKKESRIDQEPDLVQNPA  
REQKLARFRYDDFDIAKYAKSLGFIAEVDYMTDFVEGMGVEEFSVFAYMCALMAGGPGLK  
KKLVNICSIEKLEAEEADAKEALRKAHEELLEARLDVVNVEDDVKLDSDEYNAIITVGS  
ENIEMEHEVSPKFGLSLNSNQLGLSKHELQAMPLPSTEAKTAPTGMVQKVI FHMKR VYFG  
IDDAAPSLEYGVEDHSRGNVAYKTDVEHPAYAVVTFSTRHSAVIARQCLADGGATNSW  
QIDDIPIYPLADAPAMMCFPRGCMRPVTPTISVR  
>comp13636\_c0\_seq8; 755 288 2623 LEN=7930; translated  
MSMNTTLDLTLQNSKVEELRTAIGSSLYFGIACLI GCMIFFGVVIQDFDIEDLTPRAANRP  
KSVIKNAIMHGIPNNTSKHKNQFYYPPIAWINWAYKLT YRDCMFGIPGTGTRKDGWEGPL  
LKTNLDAVILLRFHALLFKIGLLVAVLCTFIILPVNMTAGCDPEVFGKGT CMIHEHRSHG  
FLTTTISHIPDKFYYESLDGISDEGPDISTG SILASVLGRPNKDNYTDDLSDDDRFE EK  
RSTQLARDWWVANQTWRIWATMLSCLAIYGYTFYLLTKEWVEVINXAEDFFLEANHYGQR  
MRELNKLENELEFSKRNKSD EANPKRLNDGENSYRRWMTHPEIREVPPSVSTYSVLYQLPK  
SMVTCGNDGDTQVDRQLEATAKFFDDIVAPQPGYSSSVAVTVIPANARLV AIAWNKWSA  
CERLIQLIRHIRSLIEEKQSKKCCCPNGSEGEESKKGLEAETNGDDIDVESGDNEGDEPT  
HPEAVNNSDDDDDDGGGHNADTELVQSDESAANSLDHDASMKKKESRIDQEPDLVQNPA  
REQKLARFRYDDFDIAKYAKSLGFIAEVDYMTDFVEGMGVEEFSVFAYMCALMAGGPGLK  
KKLVNICSIEKLEAEEADAKEALRKAHEELLEARLDVVNVEDDVKLDSDEYNAIITVGS  
ENIEMEHEVSPKFGLSLNSNQLGLSKHELQAMPLPSTEAKTAPTGMVQKVI FHMKR VYFG  
IDDAAPSLEYGVEDHSRGNVAYKTDVEHPAYAVVTFSTRHSAVIARQCLADGGATNSW  
>comp13636\_c0\_seq9; 763 288 2731 LEN=4270; translated  
MSMNTTLDLTLQNSKVEELRTAIGSSLYFGIACLI GCMIFFGVVIQDFDIEDLTPRAANRP  
KSVIKNAIMHGIPNNTSKHKNQFYYPPIAWINWAYKLT YRDCMFGIPGTGTRKDGWEGPL  
LKTNLDAVILLRFHALLFKIGLLVAVLCTFIILPVNMTAGCDPEVFGKGT CMIHEHRSHG  
FLTTTISHIPDKFYYESLDGISDEGPDISTG SILASVLGRPNKDNYTDDLSDDDRFE EK  
RSTQLARDWWVANQTWRIWATMLSCLAIYGYTFYLLTKEWVEVINXAEDFFLEANHYGQR  
MRELNKLENELEFSKRNKSD EANPKRLNDGENSYRRWMTHPEIREVPPSVSTYSVLYQLPK  
SMVTCGNDGDTQVDRQLEATAKFFDDIVAPQPGYSSSVAVTVIPANARLV AIAWNKWSA  
CERLIQLIRHIRSLIEEKQSKKCCCPNGSEGEESKKGLEAETNGDDIDVESGDNEGDEPT  
HPEAVNNSDDDDDDGGGHNADTELVQSDESAANSLDHDASMKKKESRIDQEPDLVQNPA  
REQKLARFRYDDFDIAKYAKSLGFIAEVDYMTDFVEGMGVEEFSVFAYMCALMAGGPGLK  
KKLVNICSIEKLEAEEADAKEALRKAHEELLEARLDVVNVEDDVKLDSDEYNAIITVGS  
ENIEMEHEVSPKFGLSLNSNQLGLSKHELQAMPLPSTEAKTAPTGMVQKVI FHMKR VYFG  
IDDAAPSLEYGVEDHSRGNVAYKTDVEHPAYAVVTFSTRHSAVIARQCLADGGATNSW  
QIDDIPIYPLADAPAMMCFPRGCMRPVTPTISVR  
>comp13636\_c0\_seq10; 855 288 3433 LEN=7926; translated  
MSMNTTLDLTLQNSKVEELRTAIGSSLYFGIACLI GCMIFFGVVIQDFDIEDLTPRAANRP  
KSVIKNAIMHGIPNNTSKHKNQFYYPPIAWINWAYKLT YRDCMFGIPGTGTRKDGWEGPL  
LKTNLDAVILLRFHALLFKIGLLVAVLCTFIILPVNMTAGCDPEVFGKGT CMIHEHRSHG  
FLTTTISHIPDKFYYESLDGISDEGPDISTG SILASVLGRPNKDNYTDDLSDDDRFE EK  
RSTQLARDWWVANQTWRIWATMLSCLAIYGYTFYLLTKEWVEVINXAEDFFLEANHYGQR  
MRELNKLENELEFSKRNKSD EANPKRLNDGENSYRRWMTHPEIREVPPSVSTYSVLYQLPK  
SMVTCGNDGDTQVDRQLEATAKFFDDIVAPQPGYSSSVAVTVIPANARLV AIAWNKWSA  
CERLIQLIRHIRSLIEEKQSKKCCCPNGSEGEESKKGLEAETNGDDIDVESGDNEGDEPT  
HPEAVNNSDDDDDDGGGHNADTELVQSDESAANSLDHDASMKKKESRIDQEPDLVQNPA

REQKLARFRYDDFDIAKYAKSLGFIAEVDYMTDFVEGMGVEEFSVFAYMCALMAGGPGLK  
KKLVNICSIEKLEAEEADAKEALRKAHEELLEARLDVVNVEDDVKLDSEYNAIITVGS  
ENIEMEHESEVPKFGLSLNSNQLGLSKHELQAMPLPSTEAKTAPTGMVQKVI FHMKR VYFG  
IDDAAPSLEYGVEDHSRGNVAYKTDVEHPAYAVVFTTSRHSAVIARQCLADGGATNSWR  
QIDDIPIYPLADAPAMMCFPRGCMRPVTPTISFTSKKIRRGICTFLVLFTSFYVWPINK  
INSLIMNEKVIVGRFGISPELYQKYAPSVSGLTQALLFSVCPMIFRFVASCEGSASSMQK  
AEQRALIFFWYFYLIARFMGQILFEAITKFLQGQTSSVEKVVTALSADLAKTVPERLGP  
ALS YVIFISTISWPLLYFLQLNNYLTTIFRLGWINRLLKGGGPAAEIPYRIYVDHGYILA  
CMTSLAPLCPLLGPALMYVILAPMLRW

>comp13636\_c0\_seq11; 755 288 2623 LEN=4167; translated  
MSMNTTLDLTLQNSKVEELRTAIGSSLYFGIACLI GCMIFFGVVIQDFDIEDLTPRAANRP  
KSVIKNAIMHGIPNNTSKHKNQFYYPYIAWINWAYKLT YRDCMFGIPGTGTRKDGWEGPL  
LKTNLDAVILLRFHALLFKIGLLVAVLCTFIILPVNMTAGCDPEVFGKGT CMIHEHRSHG  
FLLTTISHIPDKFYYESLDGISDEGPDISTG SILASVLGRPNKDNYTDDLDSDDDRFE EK  
RSTQLARDWWVANQTWRIWATMLSCLA IYGYTFYLLTKEWVEVINXAEDFFLEANHYGQR  
MRELNKLENE LFSKRNKSD EANPKRLNDGENSYRRWMTHEIREVPPSVSTYSVLYQLPK  
SMVTCGNDGDTQVDRQLEATAKFFDDIVAPQPGYSSSVAVTVIPANARLV AIAWNKWSA  
CERLIQLIRHIRSLIEEKQSKKCCCPNGSEGEESKKGLEAETNGDDIDVESGDNEGDEPT  
HPEAVNNSDDDDDDGGGHNADTEL VQSDESAANSLDHDASMKKESRIDQEPDLVQNP  
A  
REQKLARFRYDDFDIAKYAKSLGFIAEVDYMTDFVEGMGVEEFSVFAYMCALMAGGPGLK  
KKLVNICSIEKLEAEEADAKEALRKAHEELLEARLDVVNVEDDVKLDSEYNAIITVGS  
ENIEMEHESEVPKFGLSLNSNQLGLSKHELQAMPLPSTEAKTAPTGMVQKVI FHMKR VYFG  
IDDAAPSLEYGVEDHSRGNVAYKTDVEHPAYAVVFTTSRHSAVIARQCLADGGATNSW

>comp13636\_c0\_seq12; 855 288 3433 LEN=8104; translated  
MSMNTTLDLTLQNSKVEELRTAIGSSLYFGIACLI GCMIFFGVVIQDFDIEDLTPRAANRP  
KSVIKNAIMHGIPNNTSKHKNQFYYPYIAWINWAYKLT YRDCMFGIPGTGTRKDGWEGPL  
LKTNLDAVILLRFHALLFKIGLLVAVLCTFIILPVNMTAGCDPEVFGKGT CMIHEHRSHG  
FLLTTISHIPDKFYYESLDGISDEGPDISTG SILASVLGRPNKDNYTDDLDSDDDRFE EK  
RSTQLARDWWVANQTWRIWATMLSCLA IYGYTFYLLTKEWVEVINXAEDFFLEANHYGQR  
MRELNKLENE LFSKRNKSD EANPKRLNDGENSYRRWMTHEIREVPPSVSTYSVLYQLPK  
SMVTCGNDGDTQVDRQLEATAKFFDDIVAPQPGYSSSVAVTVIPANARLV AIAWNKWSA  
CERLIQLIRHIRSLIEEKQSKKCCCPNGSEGEESKKGLEAETNGDDIDVESGDNEGDEPT  
HPEAVNNSDDDDDDGGGHNADTEL VQSDESAANSLDHDASMKKESRIDQEPDLVQNP  
A  
REQKLARFRYDDFDIAKYAKSLGFIAEVDYMTDFVEGMGVEEFSVFAYMCALMAGGPGLK  
KKLVNICSIEKLEAEEADAKEALRKAHEELLEARLDVVNVEDDVKLDSEYNAIITVGS  
ENIEMEHESEVPKFGLSLNSNQLGLSKHELQAMPLPSTEAKTAPTGMVQKVI FHMKR VYFG  
IDDAAPSLEYGVEDHSRGNVAYKTDVEHPAYAVVFTTSRHSAVIARQCLADGGATNSWR  
QIDDIPIYPLADAPAMMCFPRGCMRPVTPTISFTSKKIRRGICTFLVLFTSFYVWPINK  
INSLIMNEKVIVGRFGISPELYQKYAPSVSGLTQALLFSVCPMIFRFVASCEGSASSMQK  
AEQRALIFFWYFYLIARFMGQILFEAITKFLQGQTSSVEKVVTALSADLAKTVPERLGP  
ALS YVIFISTISWPLLYFLQLNNYLTTIFRLGWINRLLKGGGPAAEIPYRIYVDHGYILA  
CMTSLAPLCPLLGPALMYVILAPMLRW

>comp13636\_c0\_seq13; 763 288 2731 LEN=8207; translated  
MSMNTTLDLTLQNSKVEELRTAIGSSLYFGIACLI GCMIFFGVVIQDFDIEDLTPRAANRP  
KSVIKNAIMHGIPNNTSKHKNQFYYPYIAWINWAYKLT YRDCMFGIPGTGTRKDGWEGPL  
LKTNLDAVILLRFHALLFKIGLLVAVLCTFIILPVNMTAGCDPEVFGKGT CMIHEHRSHG  
FLLTTISHIPDKFYYESLDGISDEGPDISTG SILASVLGRPNKDNYTDDLDSDDDRFE EK  
RSTQLARDWWVANQTWRIWATMLSCLA IYGYTFYLLTKEWVEVINXAEDFFLEANHYGQR  
MRELNKLENE LFSKRNKSD EANPKRLNDGENSYRRWMTHEIREVPPSVSTYSVLYQLPK  
SMVTCGNDGDTQVDRQLEATAKFFDDIVAPQPGYSSSVAVTVIPANARLV AIAWNKWSA  
CERLIQLIRHIRSLIEEKQSKKCCCPNGSEGEESKKGLEAETNGDDIDVESGDNEGDEPT  
HPEAVNNSDDDDDDGGGHNADTEL VQSDESAANSLDHDASMKKESRIDQEPDLVQNP  
A  
REQKLARFRYDDFDIAKYAKSLGFIAEVDYMTDFVEGMGVEEFSVFAYMCALMAGGPGLK  
KKLVNICSIEKLEAEEADAKEALRKAHEELLEARLDVVNVEDDVKLDSEYNAIITVGS  
ENIEMEHESEVPKFGLSLNSNQLGLSKHELQAMPLPSTEAKTAPTGMVQKVI FHMKR VYFG  
IDDAAPSLEYGVEDHSRGNVAYKTDVEHPAYAVVFTTSRHSAVIARQCLADGGATNSWR  
QIDDIPIYPLADAPAMMCFPRGCMRPVTPTISVR

>comp13636\_c0\_seq14; 755 288 2623 LEN=7926; translated  
MSMNTTLDLTLQNSKVEELRTAIGSSLYFGIACLI GCMIFFGVVIQDFDIEDLTPRAANRP  
KSVIKNAIMHGIPNNTSKHKNQFYYPYIAWINWAYKLT YRDCMFGIPGTGTRKDGWEGPL

LKTNLDAVILLRFHALLFKIGLLVAVLCTFIILPVNMTAGCDPEVFGKGTTCMIHEHRSHG  
FLTTTISHIPDKFYYESLDGISDEGPDISTGSIASVLRPNKDNYTDDLSDDDRFEFK  
RSTQLARDWWVANQWRIWATMLSCLAICYGTYFYLLTKEWVEVINXAEDFFLEANHYGQR  
MRELNKLENELEFSKRNKSDANPKRLNDGENSYRRWMTHEIREVPPSVSTYSVLYQLPK  
SMVTCGNDGDTQVDRQLEATAKFFDDIVAPQPGYSSSVVAVTVIPANARLVAIANWKWSA  
CERLIQLIRHIRSLIEEKQSKKCCCPNGSEGEESKKGLEAETNGDDIDVESGDNEGDEPT  
HPEAVNNSDDDDDDGGGHNADTELQVSDESAANSLDHDASMKKESRIDQEPDLVQNPA  
REQKLARFRYDDFDIAKYAKSLGFIAEVDYMTDFVEGMGVEEFVVFAYMCALMAGGPGLK  
KKLVNICSIEKLEAEEADAKEALRKAHEELLEARLDVVNVEDDVKLDSDYNAIITVGS  
ENIEMEHEVSPKFGLSLNDNSQLGLSKHELQAMPLPSTEAKTAPTGMVQKVI FHMKR VYFG  
IDDAAPSLEYGYVEDHSRGNVAYKTDVEHPAYAVVTFTRHS AVIARQCLADGGATNSW  
>comp13636\_c0\_seq15; 755 288 2623 LEN=8020; translated  
MSMNTTLDLQNSKVEELRTAIGSSLYFGIACLI GCMIFFGVVIQFDFIEDLTPRAANRP  
KSVIKNAIMHGIPNNTSKHKNQFYYPYIAWINWAYKLT YRDCMFGIPGTGTRKDGWEGPL  
LKTNLDAVILLRFHALLFKIGLLVAVLCTFIILPVNMTAGCDPEVFGKGTTCMIHEHRSHG  
FLTTTISHIPDKFYYESLDGISDEGPDISTGSIASVLRPNKDNYTDDLSDDDRFEFK  
RSTQLARDWWVANQWRIWATMLSCLAICYGTYFYLLTKEWVEVINXAEDFFLEANHYGQR  
MRELNKLENELEFSKRNKSDANPKRLNDGENSYRRWMTHEIREVPPSVSTYSVLYQLPK  
SMVTCGNDGDTQVDRQLEATAKFFDDIVAPQPGYSSSVVAVTVIPANARLVAIANWKWSA  
CERLIQLIRHIRSLIEEKQSKKCCCPNGSEGEESKKGLEAETNGDDIDVESGDNEGDEPT  
HPEAVNNSDDDDDDGGGHNADTELQVSDESAANSLDHDASMKKESRIDQEPDLVQNPA  
REQKLARFRYDDFDIAKYAKSLGFIAEVDYMTDFVEGMGVEEFVVFAYMCALMAGGPGLK  
KKLVNICSIEKLEAEEADAKEALRKAHEELLEARLDVVNVEDDVKLDSDYNAIITVGS  
ENIEMEHEVSPKFGLSLNDNSQLGLSKHELQAMPLPSTEAKTAPTGMVQKVI FHMKR VYFG  
IDDAAPSLEYGYVEDHSRGNVAYKTDVEHPAYAVVTFTRHS AVIARQCLADGGATNSW  
>comp13636\_c0\_seq16; 763 288 2731 LEN=8029; translated  
MSMNTTLDLQNSKVEELRTAIGSSLYFGIACLI GCMIFFGVVIQFDFIEDLTPRAANRP  
KSVIKNAIMHGIPNNTSKHKNQFYYPYIAWINWAYKLT YRDCMFGIPGTGTRKDGWEGPL  
LKTNLDAVILLRFHALLFKIGLLVAVLCTFIILPVNMTAGCDPEVFGKGTTCMIHEHRSHG  
FLTTTISHIPDKFYYESLDGISDEGPDISTGSIASVLRPNKDNYTDDLSDDDRFEFK  
RSTQLARDWWVANQWRIWATMLSCLAICYGTYFYLLTKEWVEVINXAEDFFLEANHYGQR  
MRELNKLENELEFSKRNKSDANPKRLNDGENSYRRWMTHEIREVPPSVSTYSVLYQLPK  
SMVTCGNDGDTQVDRQLEATAKFFDDIVAPQPGYSSSVVAVTVIPANARLVAIANWKWSA  
CERLIQLIRHIRSLIEEKQSKKCCCPNGSEGEESKKGLEAETNGDDIDVESGDNEGDEPT  
HPEAVNNSDDDDDDGGGHNADTELQVSDESAANSLDHDASMKKESRIDQEPDLVQNPA  
REQKLARFRYDDFDIAKYAKSLGFIAEVDYMTDFVEGMGVEEFVVFAYMCALMAGGPGLK  
KKLVNICSIEKLEAEEADAKEALRKAHEELLEARLDVVNVEDDVKLDSDYNAIITVGS  
ENIEMEHEVSPKFGLSLNDNSQLGLSKHELQAMPLPSTEAKTAPTGMVQKVI FHMKR VYFG  
IDDAAPSLEYGYVEDHSRGNVAYKTDVEHPAYAVVTFTRHS AVIARQCLADGGATNSWR  
QIDDIPIYPLADAPAMMCFPRGCMRPVPTPTISVR  
>comp13636\_c0\_seq17; 763 288 2731 LEN=8029; translated  
MSMNTTLDLQNSKVEELRTAIGSSLYFGIACLI GCMIFFGVVIQFDFIEDLTPRAANRP  
KSVIKNAIMHGIPNNTSKHKNQFYYPYIAWINWAYKLT YRDCMFGIPGTGTRKDGWEGPL  
LKTNLDAVILLRFHALLFKIGLLVAVLCTFIILPVNMTAGCDPEVFGKGTTCMIHEHRSHG  
FLTTTISHIPDKFYYESLDGISDEGPDISTGSIASVLRPNKDNYTDDLSDDDRFEFK  
RSTQLARDWWVANQWRIWATMLSCLAICYGTYFYLLTKEWVEVINXAEDFFLEANHYGQR  
MRELNKLENELEFSKRNKSDANPKRLNDGENSYRRWMTHEIREVPPSVSTYSVLYQLPK  
SMVTCGNDGDTQVDRQLEATAKFFDDIVAPQPGYSSSVVAVTVIPANARLVAIANWKWSA  
CERLIQLIRHIRSLIEEKQSKKCCCPNGSEGEESKKGLEAETNGDDIDVESGDNEGDEPT  
HPEAVNNSDDDDDDGGGHNADTELQVSDESAANSLDHDASMKKESRIDQEPDLVQNPA  
REQKLARFRYDDFDIAKYAKSLGFIAEVDYMTDFVEGMGVEEFVVFAYMCALMAGGPGLK  
KKLVNICSIEKLEAEEADAKEALRKAHEELLEARLDVVNVEDDVKLDSDYNAIITVGS  
ENIEMEHEVSPKFGLSLNDNSQLGLSKHELQAMPLPSTEAKTAPTGMVQKVI FHMKR VYFG  
IDDAAPSLEYGYVEDHSRGNVAYKTDVEHPAYAVVTFTRHS AVIARQCLADGGATNSWR  
QIDDIPIYPLADAPAMMCFPRGCMRPVPTPTISVR  
>comp13636\_c0\_seq18; 763 288 2731 LEN=4180; translated  
MSMNTTLDLQNSKVEELRTAIGSSLYFGIACLI GCMIFFGVVIQFDFIEDLTPRAANRP  
KSVIKNAIMHGIPNNTSKHKNQFYYPYIAWINWAYKLT YRDCMFGIPGTGTRKDGWEGPL  
LKTNLDAVILLRFHALLFKIGLLVAVLCTFIILPVNMTAGCDPEVFGKGTTCMIHEHRSHG  
FLTTTISHIPDKFYYESLDGISDEGPDISTGSIASVLRPNKDNYTDDLSDDDRFEFK

RSTQLARDWWVANQWTWRIWATMLSCLAIYGYTFYLLTKEWVEVINXAEDFFLEANHYGQR  
MRELNKLENELFSKRNKSDKANPKRLNDGENSYRRWMTHPEIREVPPSVSTYSVLYQLPK  
SMVTCGNDGDTQVDRQLEATAKFFDDIVAPQPGYSSSVAVTVIPANARLVIAIWNKWSA  
CERLIQLIRHIRSLIEEKQSKKCCCPNGSEGEESKKGLEAETNGDDIDVESGDNEGDEPT  
HPEAVNNSDDDDDDGGGHNADTELQVSDESAANSLDHDASMKKESRIDQEPDLVQNPA  
REQKLARFRYDDFDIAKYAKSLGFIAEVDYMTDFVEGMGVEEFVVFAYMCALMAGGPGLK  
KKLVNICSIEKLEAEEADAKEALRKAHEELLEARLDVVNVEDDVKLDSDEYNAIITVGS  
ENIEMEHEVSPKFGLSLNDNSQLGLSKHELQAMPLPSTEAKTAPTGMVQKVI FHMKR VYFG  
IDDAAPSLEYGVEDHSRGNVAYKTDVEHPAYAVVTFSTRHSAVIARQCLADGGATNSWR  
QIDDIPIYPLADAPAMMCFPRGCMRPVPTPTISVR

>comp13636\_c0\_seq19; 755 288 2623 LEN=8108; translated  
MSMNTTLDLTLQNSKVEELRTAIGSSLYFGIACLI GCMIFFGVVIQFDFIEDLTPRAANRP  
KSVIKNAIMHGIPNNTSKHKNQFYYPYIAWINWAYKLT YRDCMFGIPGTGTRKDGWEGPL  
LKTNLDAVILLRFHALLFKIIGLLVAVLCTFIILPVNMTAGCDPEVFGKGT CMIHEHRSHG  
FLTTTISHIPDKFYYESLDGISDEGPDISTG SILASVLGRPNKDNYTDDLSDDDRFE EK  
RSTQLARDWWVANQWTWRIWATMLSCLAIYGYTFYLLTKEWVEVINXAEDFFLEANHYGQR  
MRELNKLENELFSKRNKSDKANPKRLNDGENSYRRWMTHPEIREVPPSVSTYSVLYQLPK  
SMVTCGNDGDTQVDRQLEATAKFFDDIVAPQPGYSSSVAVTVIPANARLVIAIWNKWSA  
CERLIQLIRHIRSLIEEKQSKKCCCPNGSEGEESKKGLEAETNGDDIDVESGDNEGDEPT  
HPEAVNNSDDDDDDGGGHNADTELQVSDESAANSLDHDASMKKESRIDQEPDLVQNPA  
REQKLARFRYDDFDIAKYAKSLGFIAEVDYMTDFVEGMGVEEFVVFAYMCALMAGGPGLK  
KKLVNICSIEKLEAEEADAKEALRKAHEELLEARLDVVNVEDDVKLDSDEYNAIITVGS  
ENIEMEHEVSPKFGLSLNDNSQLGLSKHELQAMPLPSTEAKTAPTGMVQKVI FHMKR VYFG  
IDDAAPSLEYGVEDHSRGNVAYKTDVEHPAYAVVTFSTRHSAVIARQCLADGGATNSW

>comp13636\_c0\_seq20; 755 288 2623 LEN=7579; translated  
MSMNTTLDLTLQNSKVEELRTAIGSSLYFGIACLI GCMIFFGVVIQFDFIEDLTPRAANRP  
KSVIKNAIMHGIPNNTSKHKNQFYYPYIAWINWAYKLT YRDCMFGIPGTGTRKDGWEGPL  
LKTNLDAVILLRFHALLFKIIGLLVAVLCTFIILPVNMTAGCDPEVFGKGT CMIHEHRSHG  
FLTTTISHIPDKFYYESLDGISDEGPDISTG SILASVLGRPNKDNYTDDLSDDDRFE EK  
RSTQLARDWWVANQWTWRIWATMLSCLAIYGYTFYLLTKEWVEVINXAEDFFLEANHYGQR  
MRELNKLENELFSKRNKSDKANPKRLNDGENSYRRWMTHPEIREVPPSVSTYSVLYQLPK  
SMVTCGNDGDTQVDRQLEATAKFFDDIVAPQPGYSSSVAVTVIPANARLVIAIWNKWSA  
CERLIQLIRHIRSLIEEKQSKKCCCPNGSEGEESKKGLEAETNGDDIDVESGDNEGDEPT  
HPEAVNNSDDDDDDGGGHNADTELQVSDESAANSLDHDASMKKESRIDQEPDLVQNPA  
REQKLARFRYDDFDIAKYAKSLGFIAEVDYMTDFVEGMGVEEFVVFAYMCALMAGGPGLK  
KKLVNICSIEKLEAEEADAKEALRKAHEELLEARLDVVNVEDDVKLDSDEYNAIITVGS  
ENIEMEHEVSPKFGLSLNDNSQLGLSKHELQAMPLPSTEAKTAPTGMVQKVI FHMKR VYFG  
IDDAAPSLEYGVEDHSRGNVAYKTDVEHPAYAVVTFSTRHSAVIARQCLADGGATNSW

>comp13636\_c0\_seq21; 763 288 2731 LEN=4180; translated  
MSMNTTLDLTLQNSKVEELRTAIGSSLYFGIACLI GCMIFFGVVIQFDFIEDLTPRAANRP  
KSVIKNAIMHGIPNNTSKHKNQFYYPYIAWINWAYKLT YRDCMFGIPGTGTRKDGWEGPL  
LKTNLDAVILLRFHALLFKIIGLLVAVLCTFIILPVNMTAGCDPEVFGKGT CMIHEHRSHG  
FLTTTISHIPDKFYYESLDGISDEGPDISTG SILASVLGRPNKDNYTDDLSDDDRFE EK  
RSTQLARDWWVANQWTWRIWATMLSCLAIYGYTFYLLTKEWVEVINXAEDFFLEANHYGQR  
MRELNKLENELFSKRNKSDKANPKRLNDGENSYRRWMTHPEIREVPPSVSTYSVLYQLPK  
SMVTCGNDGDTQVDRQLEATAKFFDDIVAPQPGYSSSVAVTVIPANARLVIAIWNKWSA  
CERLIQLIRHIRSLIEEKQSKKCCCPNGSEGEESKKGLEAETNGDDIDVESGDNEGDEPT  
HPEAVNNSDDDDDDGGGHNADTELQVSDESAANSLDHDASMKKESRIDQEPDLVQNPA  
REQKLARFRYDDFDIAKYAKSLGFIAEVDYMTDFVEGMGVEEFVVFAYMCALMAGGPGLK  
KKLVNICSIEKLEAEEADAKEALRKAHEELLEARLDVVNVEDDVKLDSDEYNAIITVGS  
ENIEMEHEVSPKFGLSLNDNSQLGLSKHELQAMPLPSTEAKTAPTGMVQKVI FHMKR VYFG  
IDDAAPSLEYGVEDHSRGNVAYKTDVEHPAYAVVTFSTRHSAVIARQCLADGGATNSWR  
QIDDIPIYPLADAPAMMCFPRGCMRPVPTPTISVR

>comp13636\_c0\_seq22; 755 288 2623 LEN=4077; translated  
MSMNTTLDLTLQNSKVEELRTAIGSSLYFGIACLI GCMIFFGVVIQFDFIEDLTPRAANRP  
KSVIKNAIMHGIPNNTSKHKNQFYYPYIAWINWAYKLT YRDCMFGIPGTGTRKDGWEGPL  
LKTNLDAVILLRFHALLFKIIGLLVAVLCTFIILPVNMTAGCDPEVFGKGT CMIHEHRSHG  
FLTTTISHIPDKFYYESLDGISDEGPDISTG SILASVLGRPNKDNYTDDLSDDDRFE EK  
RSTQLARDWWVANQWTWRIWATMLSCLAIYGYTFYLLTKEWVEVINXAEDFFLEANHYGQR  
MRELNKLENELFSKRNKSDKANPKRLNDGENSYRRWMTHPEIREVPPSVSTYSVLYQLPK

SMVTCGNDGDTQVDRQLEATAKFFDDIVAPQPGYSSSVAVTVIPANARLVIAIWNKWSA  
CERLIQLIRHIRSLIEEKQSKKCCCPNGSEGEESKKGLEAETNGDDIDVESGDNEGDEPT  
HPEAVNNSDDDDDDGGGHNADTELVSDESAANSLDHDASMKKKESRIDQEPDLVQNPA  
REQKLARFRYDDFDIAKYAKSLGFIAEVDYMTDFVEGMGVEEFVVFAYMCALMAGGPGLK  
KKLVNICSIEKLEAEEADAKEALRKAHEELLEEARLDVVNVEDDVKLDSEYNAIITVGS  
ENIEMEHEVSPKFLSLNDSNQLGLSKHELQAMPLPSTEAKTAPTGMVQKVI FHMKRVIYFG  
IDDAAPSLEYGVEDHSRGNVAYKTDVEHPAYAVVTFSTRHSAVIARQCLADGGATNSW  
>comp13636\_c0\_seq23; 763 288 2731 LEN=7682; translated  
MSMNTTLDLTLQNSKVEELRTAIGSSLYFGIACLI GCMIFFGVVIQFDFIEDLTPRAANRP  
KSVIKNAIMHGIPNNTSKHKNQFYYPPIAWINWAYKLT YRDCMFGIPGTGTRKDGWEGPL  
LKTNLDAVILLRFHALLFKIIGLLVAVLCTFIILPVNMTAGCDPEVFGKGT CMIHEHRSHG  
FLTTTISHIPDKFYYESLDGISDEGPDISTG SILASVLGRPNKDNYTDDLSDDDRFE EK  
RSTQLARDWWVANQTWRIWATMLSCLAIYGYTFYLLTKEWVEVINXAEDFFLEANHYGQR  
MRELNKLENELFSKRNKSD EANPKRLNDGENSYRRWMT HPEIREVPPSVSTYSVLYQLPK  
SMVTCGNDGDTQVDRQLEATAKFFDDIVAPQPGYSSSVAVTVIPANARLVIAIWNKWSA  
CERLIQLIRHIRSLIEEKQSKKCCCPNGSEGEESKKGLEAETNGDDIDVESGDNEGDEPT  
HPEAVNNSDDDDDDGGGHNADTELVSDESAANSLDHDASMKKKESRIDQEPDLVQNPA  
REQKLARFRYDDFDIAKYAKSLGFIAEVDYMTDFVEGMGVEEFVVFAYMCALMAGGPGLK  
KKLVNICSIEKLEAEEADAKEALRKAHEELLEEARLDVVNVEDDVKLDSEYNAIITVGS  
ENIEMEHEVSPKFLSLNDSNQLGLSKHELQAMPLPSTEAKTAPTGMVQKVI FHMKRVIYFG  
IDDAAPSLEYGVEDHSRGNVAYKTDVEHPAYAVVTFSTRHSAVIARQCLADGGATNSW  
QIDDIPIYPLADAPAMMCFPRGCMRPVPTPTISVR  
>comp13636\_c0\_seq24; 763 288 2731 LEN=8211; translated  
MSMNTTLDLTLQNSKVEELRTAIGSSLYFGIACLI GCMIFFGVVIQFDFIEDLTPRAANRP  
KSVIKNAIMHGIPNNTSKHKNQFYYPPIAWINWAYKLT YRDCMFGIPGTGTRKDGWEGPL  
LKTNLDAVILLRFHALLFKIIGLLVAVLCTFIILPVNMTAGCDPEVFGKGT CMIHEHRSHG  
FLTTTISHIPDKFYYESLDGISDEGPDISTG SILASVLGRPNKDNYTDDLSDDDRFE EK  
RSTQLARDWWVANQTWRIWATMLSCLAIYGYTFYLLTKEWVEVINXAEDFFLEANHYGQR  
MRELNKLENELFSKRNKSD EANPKRLNDGENSYRRWMT HPEIREVPPSVSTYSVLYQLPK  
SMVTCGNDGDTQVDRQLEATAKFFDDIVAPQPGYSSSVAVTVIPANARLVIAIWNKWSA  
CERLIQLIRHIRSLIEEKQSKKCCCPNGSEGEESKKGLEAETNGDDIDVESGDNEGDEPT  
HPEAVNNSDDDDDDGGGHNADTELVSDESAANSLDHDASMKKKESRIDQEPDLVQNPA  
REQKLARFRYDDFDIAKYAKSLGFIAEVDYMTDFVEGMGVEEFVVFAYMCALMAGGPGLK  
KKLVNICSIEKLEAEEADAKEALRKAHEELLEEARLDVVNVEDDVKLDSEYNAIITVGS  
ENIEMEHEVSPKFLSLNDSNQLGLSKHELQAMPLPSTEAKTAPTGMVQKVI FHMKRVIYFG  
IDDAAPSLEYGVEDHSRGNVAYKTDVEHPAYAVVTFSTRHSAVIARQCLADGGATNSW  
QIDDIPIYPLADAPAMMCFPRGCMRPVPTPTISVR  
>comp13636\_c0\_seq25; 755 288 2623 LEN=8016; translated  
MSMNTTLDLTLQNSKVEELRTAIGSSLYFGIACLI GCMIFFGVVIQFDFIEDLTPRAANRP  
KSVIKNAIMHGIPNNTSKHKNQFYYPPIAWINWAYKLT YRDCMFGIPGTGTRKDGWEGPL  
LKTNLDAVILLRFHALLFKIIGLLVAVLCTFIILPVNMTAGCDPEVFGKGT CMIHEHRSHG  
FLTTTISHIPDKFYYESLDGISDEGPDISTG SILASVLGRPNKDNYTDDLSDDDRFE EK  
RSTQLARDWWVANQTWRIWATMLSCLAIYGYTFYLLTKEWVEVINXAEDFFLEANHYGQR  
MRELNKLENELFSKRNKSD EANPKRLNDGENSYRRWMT HPEIREVPPSVSTYSVLYQLPK  
SMVTCGNDGDTQVDRQLEATAKFFDDIVAPQPGYSSSVAVTVIPANARLVIAIWNKWSA  
CERLIQLIRHIRSLIEEKQSKKCCCPNGSEGEESKKGLEAETNGDDIDVESGDNEGDEPT  
HPEAVNNSDDDDDDGGGHNADTELVSDESAANSLDHDASMKKKESRIDQEPDLVQNPA  
REQKLARFRYDDFDIAKYAKSLGFIAEVDYMTDFVEGMGVEEFVVFAYMCALMAGGPGLK  
KKLVNICSIEKLEAEEADAKEALRKAHEELLEEARLDVVNVEDDVKLDSEYNAIITVGS  
ENIEMEHEVSPKFLSLNDSNQLGLSKHELQAMPLPSTEAKTAPTGMVQKVI FHMKRVIYFG  
IDDAAPSLEYGVEDHSRGNVAYKTDVEHPAYAVVTFSTRHSAVIARQCLADGGATNSW  
>comp13636\_c0\_seq26; 755 288 2623 LEN=8194; translated  
MSMNTTLDLTLQNSKVEELRTAIGSSLYFGIACLI GCMIFFGVVIQFDFIEDLTPRAANRP  
KSVIKNAIMHGIPNNTSKHKNQFYYPPIAWINWAYKLT YRDCMFGIPGTGTRKDGWEGPL  
LKTNLDAVILLRFHALLFKIIGLLVAVLCTFIILPVNMTAGCDPEVFGKGT CMIHEHRSHG  
FLTTTISHIPDKFYYESLDGISDEGPDISTG SILASVLGRPNKDNYTDDLSDDDRFE EK  
RSTQLARDWWVANQTWRIWATMLSCLAIYGYTFYLLTKEWVEVINXAEDFFLEANHYGQR  
MRELNKLENELFSKRNKSD EANPKRLNDGENSYRRWMT HPEIREVPPSVSTYSVLYQLPK  
SMVTCGNDGDTQVDRQLEATAKFFDDIVAPQPGYSSSVAVTVIPANARLVIAIWNKWSA  
CERLIQLIRHIRSLIEEKQSKKCCCPNGSEGEESKKGLEAETNGDDIDVESGDNEGDEPT

HPEAVNNSDDDDDDGGGHNADTELVSDESAANSLDHDASMKKESRIDQEPDLVQNPA  
REQKLARFRYDDFDIAKYAKSLGFIAEVDYMTDFVEGMGVEEFSVFAYMCALMAGGPGLK  
KKLVNICSIEKLEAEEADAKEALRKAHEELLEARLDVVNVEDDVKLDSDEYNAIITVGS  
ENIEMEHEVSPKFGLSLNSNQLGLSKHELQAMPLPSTEAKTAPTGMVQKVI FHMKRVIYFG  
IDDAAPSLEYGVEDHSRGNVAYKTDVEHPAYAVVTFSTRHSAVIARQCLADGGATNSW  
>comp13636\_c0\_seq27; 763 288 2731 LEN=8297; translated  
MSMNTTLDLTLQNSKVEELRTAIGSSLYFGIACLI GCMIFFGVVIQDFDIEDLTPRAANRP  
KSVIKNAIMHGIPNNTSKHKNQFYYPPIAWINWAYKLT YRDCMFGIPGTGTRKDGWEGPL  
LKTNLDAVILLRFHALLFKIGLLVAVLCTFIILPVNMTAGCDPEVFGKGT CMIHEHRSHG  
FLLTTISHIPDKFYYESLDGISDEGPDI STGSILASVLGRPNKDNYTDDLSDDDRFE EK  
RSTQLARDWWVANQTWRIWATMLSCLAIYGYTFYLLTKEWVEVINXAEDFFLEANHYGQR  
MRELNKLENELEFSKRNKSD EANPKRLNDGENSYRRWMTHEIREVPPSVSTYSVLYQLPK  
SMVTCGNDGDTQVDRQLEATAKFFDDIVAPQPGYSSSVVAVTVIPANARLV AIAWNKWSA  
CERLIQLIRHIRSLIEEKQSKKCCCPNGSEGEESKKGLEAETNGDDIDVESGDNEGDEPT  
HPEAVNNSDDDDDDGGGHNADTELVSDESAANSLDHDASMKKESRIDQEPDLVQNPA  
REQKLARFRYDDFDIAKYAKSLGFIAEVDYMTDFVEGMGVEEFSVFAYMCALMAGGPGLK  
KKLVNICSIEKLEAEEADAKEALRKAHEELLEARLDVVNVEDDVKLDSDEYNAIITVGS  
ENIEMEHEVSPKFGLSLNSNQLGLSKHELQAMPLPSTEAKTAPTGMVQKVI FHMKRVIYFG  
IDDAAPSLEYGVEDHSRGNVAYKTDVEHPAYAVVTFSTRHSAVIARQCLADGGATNSW  
QIDDIPIYPLADAPAMMCFPRGCMRPVTPPTISVR  
>comp13636\_c0\_seq28; 755 288 2623 LEN=7583; translated  
MSMNTTLDLTLQNSKVEELRTAIGSSLYFGIACLI GCMIFFGVVIQDFDIEDLTPRAANRP  
KSVIKNAIMHGIPNNTSKHKNQFYYPPIAWINWAYKLT YRDCMFGIPGTGTRKDGWEGPL  
LKTNLDAVILLRFHALLFKIGLLVAVLCTFIILPVNMTAGCDPEVFGKGT CMIHEHRSHG  
FLLTTISHIPDKFYYESLDGISDEGPDI STGSILASVLGRPNKDNYTDDLSDDDRFE EK  
RSTQLARDWWVANQTWRIWATMLSCLAIYGYTFYLLTKEWVEVINXAEDFFLEANHYGQR  
MRELNKLENELEFSKRNKSD EANPKRLNDGENSYRRWMTHEIREVPPSVSTYSVLYQLPK  
SMVTCGNDGDTQVDRQLEATAKFFDDIVAPQPGYSSSVVAVTVIPANARLV AIAWNKWSA  
CERLIQLIRHIRSLIEEKQSKKCCCPNGSEGEESKKGLEAETNGDDIDVESGDNEGDEPT  
HPEAVNNSDDDDDDGGGHNADTELVSDESAANSLDHDASMKKESRIDQEPDLVQNPA  
REQKLARFRYDDFDIAKYAKSLGFIAEVDYMTDFVEGMGVEEFSVFAYMCALMAGGPGLK  
KKLVNICSIEKLEAEEADAKEALRKAHEELLEARLDVVNVEDDVKLDSDEYNAIITVGS  
ENIEMEHEVSPKFGLSLNSNQLGLSKHELQAMPLPSTEAKTAPTGMVQKVI FHMKRVIYFG  
IDDAAPSLEYGVEDHSRGNVAYKTDVEHPAYAVVTFSTRHSAVIARQCLADGGATNSW  
>comp13636\_c0\_seq29; 755 288 2623 LEN=8198; translated  
MSMNTTLDLTLQNSKVEELRTAIGSSLYFGIACLI GCMIFFGVVIQDFDIEDLTPRAANRP  
KSVIKNAIMHGIPNNTSKHKNQFYYPPIAWINWAYKLT YRDCMFGIPGTGTRKDGWEGPL  
LKTNLDAVILLRFHALLFKIGLLVAVLCTFIILPVNMTAGCDPEVFGKGT CMIHEHRSHG  
FLLTTISHIPDKFYYESLDGISDEGPDI STGSILASVLGRPNKDNYTDDLSDDDRFE EK  
RSTQLARDWWVANQTWRIWATMLSCLAIYGYTFYLLTKEWVEVINXAEDFFLEANHYGQR  
MRELNKLENELEFSKRNKSD EANPKRLNDGENSYRRWMTHEIREVPPSVSTYSVLYQLPK  
SMVTCGNDGDTQVDRQLEATAKFFDDIVAPQPGYSSSVVAVTVIPANARLV AIAWNKWSA  
CERLIQLIRHIRSLIEEKQSKKCCCPNGSEGEESKKGLEAETNGDDIDVESGDNEGDEPT  
HPEAVNNSDDDDDDGGGHNADTELVSDESAANSLDHDASMKKESRIDQEPDLVQNPA  
REQKLARFRYDDFDIAKYAKSLGFIAEVDYMTDFVEGMGVEEFSVFAYMCALMAGGPGLK  
KKLVNICSIEKLEAEEADAKEALRKAHEELLEARLDVVNVEDDVKLDSDEYNAIITVGS  
ENIEMEHEVSPKFGLSLNSNQLGLSKHELQAMPLPSTEAKTAPTGMVQKVI FHMKRVIYFG  
IDDAAPSLEYGVEDHSRGNVAYKTDVEHPAYAVVTFSTRHSAVIARQCLADGGATNSW  
>comp13636\_c0\_seq30; 763 288 2731 LEN=8207; translated  
MSMNTTLDLTLQNSKVEELRTAIGSSLYFGIACLI GCMIFFGVVIQDFDIEDLTPRAANRP  
KSVIKNAIMHGIPNNTSKHKNQFYYPPIAWINWAYKLT YRDCMFGIPGTGTRKDGWEGPL  
LKTNLDAVILLRFHALLFKIGLLVAVLCTFIILPVNMTAGCDPEVFGKGT CMIHEHRSHG  
FLLTTISHIPDKFYYESLDGISDEGPDI STGSILASVLGRPNKDNYTDDLSDDDRFE EK  
RSTQLARDWWVANQTWRIWATMLSCLAIYGYTFYLLTKEWVEVINXAEDFFLEANHYGQR  
MRELNKLENELEFSKRNKSD EANPKRLNDGENSYRRWMTHEIREVPPSVSTYSVLYQLPK  
SMVTCGNDGDTQVDRQLEATAKFFDDIVAPQPGYSSSVVAVTVIPANARLV AIAWNKWSA  
CERLIQLIRHIRSLIEEKQSKKCCCPNGSEGEESKKGLEAETNGDDIDVESGDNEGDEPT  
HPEAVNNSDDDDDDGGGHNADTELVSDESAANSLDHDASMKKESRIDQEPDLVQNPA  
REQKLARFRYDDFDIAKYAKSLGFIAEVDYMTDFVEGMGVEEFSVFAYMCALMAGGPGLK  
KKLVNICSIEKLEAEEADAKEALRKAHEELLEARLDVVNVEDDVKLDSDEYNAIITVGS



ENIEMEHEVSPKFGLSLNSNQLGLSKHELQAMLPSTEAKTAPTGMVQKVI FHMKR VYFG  
IDDAAPSLEYGYVEDHSRGNVAYKTDVEHPAYAVVTFTRSRS AVIARQCLADGGATNSWR  
QIDDIPIYPLADAPAMMCFPRGCMRPVPTPTISVR  
>comp13636\_c0\_seq31; 763 288 2731 LEN=8033; translated  
MSMNTTLDTLQNSKVEELRTAIGSSLYFGIACLI GCMIFFGVVIQDFDIEDLTPRAANRP  
KSVIKNAIMHGIPNNTSKHKNQFYYPPIAWINWAYKLT YRDCMFGIPGTGTRKDGWEGPL  
LKTNLDAVILLRFHALLFKIGLLVAVLCTFIILPVNMTAGCDPEVFGKGT CMIHEHRSHG  
FLLTTISHIPDKFYYESLDGISDEGPDISTGSILASVLGRPNKDN YTDLDSDDDRFE EK  
RSTQLARDWWVANQ TWRIWATMLSCLAIYGYTFYLLTKEWVEVINXAEDFFLEANHYGQR  
MRELNKLENELFSKR NKSDEANPKRLNDGENSYRRWMT HPEIREVPPSVSTYSVLYQLPK  
SMVTCGNDGDTQVDRQLEATAKFFDDIVAPQPGYSSSVVAVTVI PANARLVAIAWNKWSA  
CERLIQLIRHIRSLIEEKQSKKCCCPNGSEGEESKKGLEAETNGDDIDVESGDN EGD EPT  
HPEAVNNSDDDDDDGGGHNADTEL VQSDESAANS LDHDASMKKKE SRIDQEPDLVQNP A  
REQKLARFRYDDFDIAKYAKSLGFIAEVDYMTDFVEGMGV EEFVVFAYMCALMAGGPGLK  
KKLVNICSIEKLEAEEADAKEALRKAHEELLEARLDV VNVEDDVK LDSDEYNAIITVGS G  
ENIEMEHEVSPKFGLSLNSNQLGLSKHELQAMLPSTEAKTAPTGMVQKVI FHMKR VYFG  
IDDAAPSLEYGYVEDHSRGNVAYKTDVEHPAYAVVTFTRSRS AVIARQCLADGGATNSWR  
QIDDIPIYPLADAPAMMCFPRGCMRPVPTPTISVR  
>comp13637\_c0\_seq1; 173 104 870 LEN=939; translated  
MEEQRASIGDLSRLEELGYNKRQRGRSGVPSFIDVNIQSSRLLTSLGLIWLTLVIAVIQ  
NKFENSKRYTVRHRITDFVLM AVLRLRFLSAVLKTLTASYS SDTVYALSTVSLFLHLLACD  
YDANGLN SAGEGNGE EENEENKDP TSYSEKNLDRPTFKGGMVSLTSAFFAT TLLASRL  
ENNAAVYL FVCF SVVLFALYPAARHLVAVKARRV GKWVPLFVSGILTYALILLLEPGETI  
VVLAITSFIFVPIW  
>comp13637\_c0\_seq2; 214 104 1165 LEN=1234; translated  
MEEQRASIGTYHVSTNSKISSNVPDNTKRRLWLSPEEFTKLTSNETITSDADGNSNNANG  
RRTATDSYDTIFRKFSSKPPRKS LAVFLSNSVGLLQEFVLTCLLLAGHRAARLEELGYNK  
RQRGRSGVPSFIDVNIQSSRLLTSLGLIWLTLVIAVIQ NKFENSKRYTVRHRITDFVLM A  
VLLRFLSAVLKTLTASYS SDTVYALSTVSLFLHLLACD YDANGLN SAGEGNGE EENE  
NKDP TSYSEKNLDRPTFKGGMVSLTSAFFAT TLLASRL ENNAAVYL FVCF SVVLFALYPA  
ARHLVAVKARRV GKWVPLFVSGILTYALILLLEPGETI VVLAITSFIFVPIW  
>comp13638\_c0\_seq1; 428 1 1020 LEN=1691; translated  
RPPCVLAFPLLAHPDAGLHYHLTEAQVLELLQAFGKVKAFHLVKNEPDAITSKGYCFVE  
FADPAATPVAVMGLNGMDMGGGKVL TARVAGHRGQPTAAAVPQYPQVPVPGSATIGASAG  
DRLIVTGYDIEDLVDAAMGLKPMPTAPTHVDQFGMPITKMGGGLPPPTPVTRAPVVP SGA  
YSSGVPPPPPPQIAAAAALPPGSSALDIANAALDAAFGPGAAAAPAPPPAPGTQKTRI  
LVLLNMVENEDLETDEEYAGLREEVEEVEVKKFGKLLSMQIPRKASGSIEASAVGKIFLEY  
ATTQDAANA EQELSGRQFGPNVVQANYHDEQEYAGL KLR  
>comp13638\_c0\_seq2; 520 1 1165 LEN=1836; translated  
XMTTACMSLDGININKKGVKVKRPNDYNPMMAPRVHPSAVPVL DVSKLGI INSNVQDGP  
NKVF IGGHLHYHLTEAQVLELLQAFGKVKAFHLVKNEPDAITSKGYCFVEFADPAATPVAV  
MGLNGMDMGGGKVL TARVAGHRGQPTAAAVPQYPQVPVPGSATIGASAGDRLIVTGYDIE  
DLVDAAMGLKPMPTAPTHVDQFGMPITKMGGGLPPPTPVTRAPVVP SGA YSSGVPPPPPP  
PQIAAAAALPPGSSALDIANAALDAAFGPGAAAAPAPPPAPGTQKTRILVLLNMVENED  
LETDEEYAGLREEVEEVEVKKFGKLLSMQIPRKASGSIEASAVGKIFLEYATTQDAANA EQ  
ELSGRQFGPNVVQANYHDEQEYAGL KLR  
>comp13639\_c0\_seq1; 539 1386 2909 LEN=3116; translated  
MISAGRKLAVTTWNIAAINNNPFYWITYKENPDYEKLMINIENFLQNPGENDV PVKDV F  
TEEMFTKLD SRTLGVGWT SVRPYWESDFQNRKIVSGFMKDPLL GSKRLASMPDRITNTIN  
VEGGGQVFRPTVINMFAGDLATLDLWAAWESFMFDNKLT YKGNKNGIESKAPYEM LQKIK  
KAKYPDITEQEETDSLPLQTMCGAIFDAILVHMNTVSTPEIWQTLKQTMVENLNK KVP  
HTLEILKSTYGDADITLQEVSSSIDQARASSLGKTFHIVAPADLDAVRDQNSVIFLKK  
ELFPKGPVEITKLVEAEFPKGSKMVARGDILAITATNKYGLDLVVASFHGDTNGLATKP  
VVDATMKALKSESTLKNHRLVFGMDANTYEHAKPGKQDVLDFAKNVVSHDLTSCWGDVP  
NPSNYTTYNARTYLQPLNKACKSTEKREKGDVNP KDFIIFPKRDFKVVKTWKDNTGRKE  
YIEDMAFP TLEFP SDHGLLSTILEPIE  
>comp13639\_c0\_seq2; 622 371 2113 LEN=2320; translated  
MAYTRRSIATPFPRGNSNVLLNNRSLTSYRKKFIIILAATSFYTAFLYQ RGGASTYL G  
SSPETS VHNPM SKMISAGRKLAVTTWNIAAINNNPFYWITYKENPDYEKLMINIENFLQ  
NPGENDV PVKDV FTEEMFTKLD SRTLGVGWT SVRPYWESDFQNRKIVSGFMKDPLL GSKR

LASMPDRITNTINVEGGGQVFRPTVINMFAGDLATLDLWAAWESFMFDNKLTYKGKNGI  
ESKAPYEMLQKIKKAKYPDITEQEETDSLPLQTMCGAIFDAILVHMMNTVSTPEIWQTLK  
QTMVENLNKKKVPHTLEILKSTYGDADIITLQEVSSSFIDQARASSLGKTFHIVAPADLD  
AVRDQNSVIFLKKELFPKGPVEITKLVEAEFPKGSKMVARGDILAITATNKYGLDLVVA  
SFHGDINGLATKPVVDATMKALKSESTLKNHRLVFGMDANTYEHAKPGKQQDVLDFAKNV  
VSHDLTSCWGDVPNPSNYTTYNARTYLQPOLNKACKSTEKREKGDVNPCKDFIIFPKRDFK  
VVKTWKDNTGRKEYIEDMAFPPTLEFPSDHGLLSTILEPIE

>comp13639\_c0\_seq3; 622 932 2674 LEN=2881; translated  
MAYTRRSIATPFPRGGNSNVLNLRSLTSYRKKFIIILAATSFYTAFLYQRRGASTYL  
SSPETS VHNPM SKMISAGRKLAVTTWNIAAINNNPFYEWITYKENPDYEKLMINIENFLQ  
NPGENDVPVKDVFTEEMFTKLD SRLTG VGWTSVRPYWESDFQNRKIVSGFMKDLLGSKR  
LASMPDRITNTINVEGGGQVFRPTVINMFAGDLATLDLWAAWESFMFDNKLTYKGKNGI  
ESKAPYEMLQKIKKAKYPDITEQEETDSLPLQTMCGAIFDAILVHMMNTVSTPEIWQTLK  
QTMVENLNKKKVPHTLEILKSTYGDADIITLQEVSSSFIDQARASSLGKTFHIVAPADLD  
AVRDQNSVIFLKKELFPKGPVEITKLVEAEFPKGSKMVARGDILAITATNKYGLDLVVA  
SFHGDINGLATKPVVDATMKALKSESTLKNHRLVFGMDANTYEHAKPGKQQDVLDFAKNV  
VSHDLTSCWGDVPNPSNYTTYNARTYLQPOLNKACKSTEKREKGDVNPCKDFIIFPKRDFK  
VVKTWKDNTGRKEYIEDMAFPPTLEFPSDHGLLSTILEPIE

>comp13639\_c0\_seq4; 581 130 2004 LEN=2211; translated  
MRRRQAASPQKPPTDQTEASFDPESSPRTNNIMVKSSAQSSQKMAVATEFEVESGSARDY  
PKSFSFFPRNYTGRRKLAIAVCCFFAVLLVVVKNKSGGASTYLGSSPETS VHNPM SKMIS  
AGRKLAVTTWNIAAINNNPFYEWITYKENPDYEKLMINIENFLQNPGEN DVPVKDVFTEE  
MFTKLD SRLTG VGWTSVRPYWESDFQNRKIVSGFMKDLLGSKRLASMPDRITNTINVEG  
GGQVFRPTVINMFAGDLATLDLWAAWESFMFDNKLTYKGKNGIESKAPYEMLQKIKKAK  
YPDITEQEETDSLPLQTMCGAIFDAILVHMMNTVSTPEIWQTLKQTMVENLNKKKVPHTL  
EILKSTYGDADIITLQEVSSSFIDQARASSLGKTFHIVAPADLDAVRDQNSVIFLKKELF  
PKGPVEITKLVEAEFPKGSKMVARGDILAITATNKYGLDLVVASFHGDINGLATKPVVD  
ATMKALKSESTLKNHRLVFGMDANTYEHAKPGKQQDVLDFAKNVVSHDLTSCWGDVPNPS  
NYTTYNARTYLQPOLNKACKSTEKREKGDVNPCKDFIIFPKRDFKVVVKTWKDNTGRKEYIE  
DMAFPPTLEFPSDHGLLSTILEPIE

>comp13639\_c0\_seq5; 539 825 2348 LEN=2555; translated  
MISAGRKLAVTTWNIAAINNNPFYEWITYKENPDYEKLMINIENFLQNPGEN DVPVKDVF  
TEEMFTKLD SRLTG VGWTSVRPYWESDFQNRKIVSGFMKDLLGSKRLASMPDRITNTIN  
VEGGGQVFRPTVINMFAGDLATLDLWAAWESFMFDNKLTYKGKNGIESKAPYEMLQKIK  
KAKYPDITEQEETDSLPLQTMCGAIFDAILVHMMNTVSTPEIWQTLKQTMVENLNKKKVP  
HTLEILKSTYGDADIITLQEVSSSFIDQARASSLGKTFHIVAPADLDAVRDQNSVIFLKK  
ELFPKGPVEITKLVEAEFPKGSKMVARGDILAITATNKYGLDLVVASFHGDINGLATKPV  
VDATMKALKSESTLKNHRLVFGMDANTYEHAKPGKQQDVLDFAKNVVSHDLTSCWGDVP  
NPSNYTTYNARTYLQPOLNKACKSTEKREKGDVNPCKDFIIFPKRDFKVVVKTWKDNTGRKE  
YIEDMAFPPTLEFPSDHGLLSTILEPIE

>comp13640\_c0\_seq1; 641 267 2018 LEN=2399; translated  
MERLLFNLVQERNERETLPFVAIHDSNATLLKEADAWQYKCEELERQVVAKQEYLESVAA  
NSGISNHAVSDGDNGDDEERREEKLVHLYAESAAKNERKMRREELERLRGQVKTQEERH  
EKDAQEAEAEQSHSDLNERYKAQEONLVALQEKNGRQERALEYLSTKVNDSEQRANLAE  
HQCIGLKDTIRLLQEETDKLKKDYRNLETRFIEEKSRLSSEVNSLNEILERLKGGETENLQ  
SIKKQEEKRQSWFGFASSSSKENKVEAMSQTMARATTVNPSDTRTAIHNRFEKDECGTDY  
RRKKVVPVSVVVP SKPKHVIQ AHRHEASCVRSDDSGMIVSCGLLDGTVKIWNASDGSMIA  
SLKGGSGNSIVSCDVENGRAAGGNDKTCRVWDIQTQRLMHQLVGHTNIITCVRFVSGGR  
GVVTASKDRQIKVWDISKQTYRESTNIVLTSSANSIDISENSYTMVSGHTDGGLRFWDIR  
TGQRNAEIKTIHKFAVTSVKFHPLDCSKVLTINGMDSKIKIIDIPCKVMQEFYHKDFNTS  
YNWSSAVFSPNGKRFYPVLQCNSTCTYSPYLMLAIGLLFQIML

>comp13640\_c0\_seq2; 686 267 2096 LEN=2270; translated  
MERLLFNLVQERNERETLPFVAIHDSNATLLKEADAWQYKCEELERQVVAKQEYLESVAA  
NSGISNHAVSDGDNGDDEERREEKLVHLYAESAAKNERKMRREELERLRGQVKTQEERH  
EKDAQEAEAEQSHSDLNERYKAQEONLVALQEKNGRQERALEYLSTKVNDSEQRANLAE  
HQCIGLKDTIRLLQEETDKLKKDYRNLETRFIEEKSRLSSEVNSLNEILERLKGGETENLQ  
SIKKQEEKRQSWFGFASSSSKENKVEAMSQTMARATTVNPSDTRTAIHNRFEKDECGTDY  
RRKKVVPVSVVVP SKPKHVIQ AHRHEASCVRSDDSGMIVSCGLLDGTVKIWNASDGSMIA  
SLKGGSGNSIVSCDVENGRAAGGNDKTCRVWDIQTQRLMHQLVGHTNIITCVRFVSGGR  
GVVTASKDRQIKVWDISKQTYRESTNIVLTSSANSIDISENSYTMVSGHTDGGLRFWDIR

TGQRNAEIKTIHKFAVTSVKFHPDLC SKVLTNGMDSKIKIIDIP SCKVMQEFYHKDFNTS  
YNWSSAVFSPNGEFVASGSSSTGFVFWNANDGKLVRLM LEGAHQYAGVCGI VWGDEGAQS  
VDKTGKLV LW

>comp13640\_c0\_seq3; 550 267 1262 LEN=1373; translated  
MERLLFNLVQERNERETLPFVAIHDSNATLLKEADAWQYKCEELERQV VAKQEYLESVAA  
NSGISNHAVSDGDNGDDERREEKLV ELHYAESAA LKNERKMREELERLRGQVK TQEERH  
EKDAQEAEAEQSHSDLNERYKAQE QNLVALQEKNRQERALEY LSTKVNDSEQRANLAE  
HQCIGLKDTIRLLQEETDKLKKDYRNLETRFIEEKSRLSSEVNSLNEILERLKG ETENLQ  
SIKKQEEKRQSWFGFASSSSKENKVEAMSQT MARATTVPNSDTRTAIHNRF EKDECCTDY  
RRKKVVPVSVVVP SKPKHVIQAHRHEASCVR

>comp13640\_c0\_seq4; 660 267 1862 LEN=2388; translated  
MERLLFNLVQERNERETLPFVAIHDSNATLLKEADAWQYKCEELERQV VAKQEYLESVAA  
NSGISNHAVSDGDNGDDERREEKLV ELHYAESAA LKNERKMREELERLRGQVK TQEERH  
EKDAQEAEAEQSHSDLNERYKAQE QNLVALQEKNRQERALEY LSTKVNDSEQRANLAE  
HQCIGLKDTIRLLQEETDKLKKDYRNLETRFIEEKSRLSSEVNSLNEILERLKG ETENLQ  
SIKKQEEKRQSWFGFASSSSKENKVEAMSQT MARATTVPNSDTRTAIHNRF EKDECCTDY  
RRKKVVPVSVVVP SKPKHVIQAHRHEASCVRSDDSGMIVSCGLLDGTVKIWNASDGSMIA  
SLKGGSGNSIVSCDVENGRAAGGNDKTCRVWDIQTQRMLHQLVGHTNIITCVR FVSGGR  
GVVTASKDRQIKVWDISKQTYRESTNIVLTSSANSIDISENSYTMVSGHTDGG LRFWDIR  
TGQRNAEIKSMLFYLILVKNFYIYNLTPAQPI LSLFSSSALICVDHCD SYP

>comp13640\_c0\_seq5; 660 267 1862 LEN=2517; translated  
MERLLFNLVQERNERETLPFVAIHDSNATLLKEADAWQYKCEELERQV VAKQEYLESVAA  
NSGISNHAVSDGDNGDDERREEKLV ELHYAESAA LKNERKMREELERLRGQVK TQEERH  
EKDAQEAEAEQSHSDLNERYKAQE QNLVALQEKNRQERALEY LSTKVNDSEQRANLAE  
HQCIGLKDTIRLLQEETDKLKKDYRNLETRFIEEKSRLSSEVNSLNEILERLKG ETENLQ  
SIKKQEEKRQSWFGFASSSSKENKVEAMSQT MARATTVPNSDTRTAIHNRF EKDECCTDY  
RRKKVVPVSVVVP SKPKHVIQAHRHEASCVRSDDSGMIVSCGLLDGTVKIWNASDGSMIA  
SLKGGSGNSIVSCDVENGRAAGGNDKTCRVWDIQTQRMLHQLVGHTNIITCVR FVSGGR  
GVVTASKDRQIKVWDISKQTYRESTNIVLTSSANSIDISENSYTMVSGHTDGG LRFWDIR  
TGQRNAEIKSMLFYLILVKNFYIYNLTPAQPI LSLFSSSALICVDHCD SYP

>comp13641\_c0\_seq1; 557 216 1921 LEN=2115; translated  
MGDKYDITRLPIDAVKSVAKIGAWPIHFGKTIATNVTD TAFKVI GTNTEDKPSK TPLKDD  
SIYEMAESNL DIIAII YYYTEL RSETRRL LKKYTVEK GMTWEASNPEEPSQLVIL RNAVK  
LVEKRSKTIQSPETTASVHVLKDYQDSVMQLEGLRKKFKLDEGDLDIFKTYFDILSEPKT  
LSDVKSDTILFDNYISP AFRV SFGGTKYNRRIENLIGDDKEAYIHEIDDDFNATSLRPL  
GIIKGFTSEIVWAI VVCDK KKTITV VFRG SVNASDWIKNLQCNMTNCKLPGFTSENAKGG  
DVYQQVHEGFYKYLFEKTKVGMNGSNKSKGEEIMGKLGDFFSKPRFSDYSLYVTGHS LG  
GALSXVSLIVSAVCLMLFLCFSSII SKHSEQVHP SHFHETS LFAFRAATEKNFNVPITNV  
SFASPFVGNDEFREK FVDLERLKKIRHLRISNYQDLVTLIPATTFPLPNGVQTYKHTGMN  
IRLYEGRDLLAPSYRRFY PKMGSITNGLRNAMHANIPLGLSVSPIGNHLCPEYTKRLTNE  
KTKEELSKLSLDGLYGDKSITGWDYIKN

>comp13641\_c0\_seq2; 589 216 1814 LEN=2008; translated  
MGDKYDITRLPIDAVKSVAKIGAWPIHFGKTIATNVTD TAFKVI GTNTEDKPSK TPLKDD  
SIYEMAESNL DIIAII YYYTEL RSETRRL LKKYTVEK GMTWEASNPEEPSQLVIL RNAVK  
LVEKRSKTIQSPETTASVHVLKDYQDSVMQLEGLRKKFKLDEGDLDIFKTYFDILSEPKT  
LSDVKSDTILFDNYISP AFRV SFGGTKYNRRIENLIGDDKEAYIHEIDDDFNATSLRPL  
GIIKGFTSEIVWAI VVCDK KKTITV VFRG SVNASDWIKNLQCNMTNCKLPGFTSENAKGG  
DVYQQVHEGFYKYLFEKTKVGMNGSNKSKGEEIMGKLGDFFSKPRFSDYSLYVTGHS LG  
GALSTLFAFRAATEKNFNVPITNVSFASPFVGNDEFREK FVDLERLKKIRHLRISNYQDL  
VTLIPATTFPLPNGVQTYKHTGMNIRLYEGRDLLAPSYRRFY PKMGSITNGLRNAMHANI  
PLGLSVSPIGNHLCPEYTKRLTNEKTKEELSKLSLDGLYGDKSITGWDYIKN

>comp13642\_c0\_seq1; 310 919 2157 LEN=2184; translated  
MTRPKSRISSPQRQARLRMKKANKSKT P STPLLTRDEERQITYKIRDLRRVVQIRDEL IQ  
EKQEWSSLRPSFDIDAYND DFP TENDWARACDL DVSELRKVMDEGQESRLLV SANAGLV  
TSIAKRHYHVLKQMTNAGGGVGTILT LQDMIQEGNLGLMKA AERFEPERGWRFSTYATYW  
IRQRI LQSITDTSRVIRLPAHV TATLQKFNKARREMAAEIGRMP SDAELAHYMEIPVEKL  
RKINEKARSVVSLESPLRVGSNHKAEVDRRTIGDFIASDAPTPEEDAQQKSLQDIRAVV  
NELADREREVLMIRFGLDSGDP MSTSQ TATQLGITDRVRYIETRALNKL RSPQRNYRLK  
DYLGDGHHAAVDNKRKAKLSGLNSQIPDSKHRSNQSKRQKPPSPEEKFWFF

>comp13642\_c0\_seq2; 233 919 2276 LEN=2303; translated

MTRPKSRISPPQRQARLRMKKANKSKTPSTPLLTRDEERQITYKIRDLRRVVQIRDELIQ  
EKQEWSSLRPSFDIDAYNDDFP TENDWARACDLVSELRKVMDEGQESRLLV SANAGLV  
TSIAKRHYHVLKQMTNAGGGVGTILTLQDMIQEGNLGLMKAERFEPERGGGLVPTPIG  
FGSGFSNRSLIRPELSVCQHMVCSGKESIPMSRSEPILPFRDSHFLNNEFCGFLTFFRIL  
VTATLQKFNKARREMAAEIGRMPDAELAHYMEIPVEKLRKINEKARSVVSLESPLRVGS  
NHKAEVDRRTIGDFIASDAPTP EEDAQQKSLQORDIRAVVNELADREREVLIMRFGLDSGD  
PMSTSQTATQLGITTDVRVYIETRALNKLRSPPQRNYRLKDYLDGDGHAAVDNKRKAKLSG  
LNSQIPDSKHRRSNQSKRQKPPSPEEKFWFF

>comp13643\_c0\_seq1; 66 1 742 LEN=750; translated  
XKATVGRVLSDAQDGDGIHLLITRPVWXS LAYTVFIHGFESRLYQWAKVFSKIWPEGEQK  
SEEDALAE LRASGDAERAGIEEESWEE LMVATCRSKFSVRPRAGRAVL FYSQLPDGREDP  
MSLHGGCPVLKGDKWAANLWVWNTPRE SFEGAPKREDMTSEERKRLEESSRQTAKQITAS  
FINSGNDPAMKNAMLYYDEAQFWGNFGHDDPQLGANTFEGHRWNVKVDGQVVKTWVISAE  
QQQEFII

>comp13643\_c0\_seq2; 560 123 1862 LEN=1870; translated  
MMKFHRLSSTVACLAVFFVACHTVACQETNEGGDWYSNLALVIHRNGEADPCGATEAGSI  
DSGFVETLTTAGDKYEMETRLTDGI AKMLDDAPSASRCGREDEKEKLNPDFHKLYRHCDR  
GRKKTPIILLDHEKLVRTTTDKLPCR FYTREGRLIQNLEQLKTMAEKARTAPAQSCANPQE  
GDDGLKSCEAPEVHLYAVPAGRVFHFAPAFVGETFELDHLKLLPDASKPIVLKVLATSPK  
VFDILHVFTPEEAASIVERALAE TSPTHMKMRSTTGAGSASSVFSKRTSDNGFDTHGKVA  
LAIKKRIFEV LGYDEYWDGHDDGLQVLRYNLTQAYVPHMDYLPVSTKSAFDYNSPRKGGN  
RYATVLLYMTDIEEGDGGETVFSKI WPEGEQKSEEDALAE LRASGDAERAGIEEESWEE L  
MVATCRSKFSVRPRAGRAVL FYSQLPDGREDPMSLHGGCPVLKGDKWAANLWVWNTPRE S  
FEGAPKREDMTSEERKRLEESSRQTAKQITASFINSGNDPAMKNAMLYYDEAQFWGNFGH  
DDPQLGANTFEGHRWNVKVDGQVVKTWVISAEQQQEFII

>comp13644\_c0\_seq1; 183 15 1509 LEN=1727; translated  
MHGSMVQRPYGIGTRTHEMMDVKSINRFRHSSRISTIGDTNSNNIDSCRNERQPGNHKCD  
SRIA AAKRNHSSSSFP MTRKIGLGFFAII IAYLYLFKVS IENFGAGEDKTSTKVPHGVLPP  
TESVGVGRPV RKEQLVPSGGPSTNSHNSLAKLRPIDREQYTVRINTWRRPEQLIESVRHH  
ASCPGAKQIQIVWCDKENDPPRELVD MTRDEDEQSDGSSDRSVA AKVVI EHHENSLNER  
FNVLIETPTL GILSIDDVLRPCDAIDSGFFKWVRS PHRMVGF DARTHVENDDGSKYGY  
LSTTKKENRYSLSLTRYCF LHKDYMARYTKGLPQTILDTVAKNFNCEDIAMSFMVSSQTR  
GQPPLLADLWAIKSQIKLDVPSGISGTNTHKELRDECVDTF AAYFGLKENGGDNHRMQK  
AAWIHKTKKTWGFACGAEEDDES DSTYPKSERETSLERTWERM RHAGKQEDLNRYLVKLV  
YEAGEEARAKGLLAKKK

>comp13646\_c0\_seq1; 393 166 893 LEN=1380; translated  
MISLSSATRRAVVSSTTRRSRTTLG SALS GSPILSATPSAQYLRRPATTVGKASKNRSL  
SSSSAPPSSKPTGASSSSSSGPN SGGGSETQKTGTTELVPNMLLASVLGGFVVS VFSYS  
MNAVGRGDGEDPLAQLKAEAEQEAR DHRD GAGVGGPGGRMTPEEIEALESGMGASLDADG  
ERVVLDVAVAAPADIAAIEEEANLRVFRQKQQQGEEXEKEALVEVWILMDTARNGTEHR  
SN

>comp13647\_c0\_seq1; 471 459 2165 LEN=2298; translated  
MTRSRSQQPRALQNAHFLDGFNVADCF DVRAIPDPPSPRNIKSCHRRRVSSAVLRP MSSR  
DITNRGNQNTATTDVGVCTKSSSSVRRKRKTL SHVPSTMISGWEQNNATNAARSAGDK  
EVKDETVKPKTLEINLCYDDSSRMARDYAKRRKKRQSLV IPTDLPFEEQNDTSINISPK  
PSQTSSKVGKAFFPGDFRSMQKLRNLVRGYCSLSSEAERGVSNEGREIELLTGYGLPRKM  
ETDQVGDKSKAMLSNRRLVIQKIAPVLTQMEKRKERDIKHWENVTRCHVKKSERSGRYRY  
YDVQSNERVGSQEYKRYI SHLED CRPERLEM AKVWMNKVSRVDEYTA EHHNECAINDDS  
IGIFQQDCNYMDYCAIQKEAFSPPRDKNLRIERRDAGSSDTMDICDMSMSLDCGEEQQSS  
DPSILSSNSNVAAPSSVFERSEIAEISEASSED TDDNPQESRSPSPTMDVLP TKLT TMEV  
NGTIIRAVDNHEKGSILLEARDDDGVKGGNNDTNNHTLLPFPARDES IDPEIAAAEER  
LWDKIDLALHEYSNEVMNIEKRKQNR LA

>comp13648\_c0\_seq1; 1011 247 2700 LEN=2770; translated  
MSSESTQMASSSRGGDQSNILSSKVFRALEVRSDTPAMKAALDAL THLPDHQDDLFTVDS  
RSVRVAIEQDALQOALLLQDELRSLLQTVTKL GQVAETA AIAHRVDEVIHSNVVTKSGS  
GVSGLINGDKQGVGGISGAITSNDDHKDSNALSGNGFSTSGRNSDDSALEEEQRLAFVLN  
NCFTRRNIARKRVEAVHEFLERFDLSEEDSRLLEHYAFEDVETS NVNGIAFLNALERVLV  
IRKELGQTVGSLDMLHHQKQSHGLSEI PSFSTSFADDNRLGASSALRMMETLAQKQERAY  
ERLYHWLQKYLHLHSHEQHNPGL EQHDGDR LDEVLAHPFVRRSLRVLQNP AFYSHLLEL  
IAQSRSEETRFLAL TSGHNGLPPIEMRAHDSVVYVGDMLAFCFRAFSVEADVARGLY

SLEESGEEGMRVKDAKIDNNVSTEDDTDFLVEKPLTRTEMLALSMGGISRPLKSRILQV  
ISNLARHPGDDDDVESDDGMDNLDEEGAFIRSNLSQLYDICGLLLFYAAAVNKSMAKLSS  
SDEGAARGSKTLVEAGENPIIDVILHCLGEATNAYEASLRVYASMLEQLQLLTGDSSESL  
AHIMIVRIVEARKESPGFATDVDCPKMYRQILSLDWPCNILIEAALPACKTLDDTVTLKQ  
SISVARQGNLTASVAMSLEQRLSEKEGTLIDDLVGKETTEVLDFCGLGRLVVAWDYKAV  
QVEGTMASFPGMTPEAEIAMKEFFSSLYSPPIPSFENTIKDPTLRKLARNKIAKRVC  
RYASMYDAMLKPETGGYDDTSFLGHTPEQVNTLFTV

>comp13649\_c0\_seq1; 244 475 1176 LEN=1275; translated  
MTLIKLYDVFETFCSHLKDATYSNVQKACMVL DSTIVAVSPIHSEPSSPAAIVGSPSSYR  
SSSPRSPITSWLMGTYDSQSCSQTRFEKFCNPLIIFAGLEAIYSACTHMESNDQAHNLT  
KLYEKSIEDLRWIREILCDFVSSAVQESSTRDGMNSSYQEKARILADSIEAIMLLCEIR  
CNLIEQQRKMCSTEIVDVKMIGSFRLV LQNAITAENSKATRLVQSAVQDVLDLW

>comp13649\_c0\_seq2; 354 475 2400 LEN=2677; translated  
MTLIKLYDVFETFCSHLKDATYSNVQKACMVL DSTIVAVSPIHSEPSSPAAIVGSPSSYR  
SSSPRSPITSWLMGTYDSQSCSQTRFEKFCNPLIIFAGLEAIYSACTHMESNDQAHNLT  
KLYEKSIEDLRWIREILCDFVSSAVQESSTRDGMNSSYQEKARILADSIEAIMLLCEIR  
CNLIEQQRKMCSTEIVDVKMIGSFRLV LQNAITAENSKATRLVQSAVQDVLDLW CNLLKT  
YSSLG NWEIGNIVLLTPCILSEFLDTIICQKIKLGLNLSNTCIQKWMCKVFQSFVSI  
SSIFYDFS SSIIGQYGF LPSFPEKPGEDRFGPNLDLEAKLEEFRLHNRNGTSLAVAV  
VVDISDLRSLRSKPETYPLVIARERS SSKSKQFLYESSDIFSSFP AIYLASSMQNNLQSR  
LANRRISTRKETSDTMLENDLNGLISSREMDFWPYTSWNNLIPLLRSTTSPLSMK PDS  
VGNHWSQIDSETMAFVSWISESIWFVAMEKTADENRWSRRNGEY PKKEHQFLVDLSNSL  
RLRKAFESCLEVRHLELN SPTIALGNILSQGRILDDDYRLVELLQK KLGFGSQTNKFSFR  
KGKQNLTESPKHLKGISNLVSDNRSHFAFFLGSTLMNYISK

>comp13649\_c0\_seq3; 235 475 1002 LEN=1112; translated  
MTLIKLYDVFETFCSHLKDATYSNVQKACMVL DSTIVAVSPIHSEPSSPAAIVGSPSSYR  
SSSPRSPITSWLMGTYDSQSCSQTRFEKFCNPLIIFAGLEAIYSACTHMESNDQAHNLT  
KLYEKSIEDLRWIREILCDFVSSAVQESSTRDGMNSSYQEKARILADSIEAIMV

>comp13649\_c0\_seq4; 444 475 2355 LEN=2459; translated  
MTLIKLYDVFETFCSHLKDATYSNVQKACMVL DSTIVAVSPIHSEPSSPAAIVGSPSSYR  
SSSPRSPITSWLMGTYDSQSCSQTRFEKFCNPLIIFAGLEAIYSACTHMESNDQAHNLT  
KLYEKSIEDLRWIREILCDFVSSAVQESSTRDGMNSSYQEKARILADSIEAIMLLCEIR  
CNLIEQQRKMCSTEIVDVKMIGSFRLV LQNAITAENSKATRLVQSAVQDVLDLW CNLLKT  
YSSLGKLGFLDTIICQKIKLGLNLSNTCIQKWMCKVFQSFVSISSIFYDFS SSIIGQ  
YGF LPSFPEKPGEDRFGPNLDLEAKLEEFRLHNRNGTSLAVAVVVDISDLRSLRSKPE  
TYPLVIARERS SSKSKQFLYESSDIFSSFP AIYLASSMQNNLQSRLLANRRISTRKETSD  
TMLENDLNGLISSREMDFWPYTSWNNLIPLLRSTTSPLSMK PDSVGNHWSQIDSETMAF  
VSWISESIWFVAMEKTADENRWSRRNGEY PKKEHQFLVDLSNSLRLRKAFESCLEVRHL  
ELNSPTIALGNILSQGRILDDDYRLVELLQK KLGFGSQTNKFSFRKGKQNLTESPKHLKG  
ISNLVSDNRSHFAFFLGSTLMNYISK

>comp13649\_c0\_seq5; 354 475 2400 LEN=2504; translated  
MTLIKLYDVFETFCSHLKDATYSNVQKACMVL DSTIVAVSPIHSEPSSPAAIVGSPSSYR  
SSSPRSPITSWLMGTYDSQSCSQTRFEKFCNPLIIFAGLEAIYSACTHMESNDQAHNLT  
KLYEKSIEDLRWIREILCDFVSSAVQESSTRDGMNSSYQEKARILADSIEAIMLLCEIR  
CNLIEQQRKMCSTEIVDVKMIGSFRLV LQNAITAENSKATRLVQSAVQDVLDLW CNLLKT  
YSSLG NWEIGNIVLLTPCILSEFLDTIICQKIKLGLNLSNTCIQKWMCKVFQSFVSI  
SSIFYDFS SSIIGQYGF LPSFPEKPGEDRFGPNLDLEAKLEEFRLHNRNGTSLAVAV  
VVDISDLRSLRSKPETYPLVIARERS SSKSKQFLYESSDIFSSFP AIYLASSMQNNLQSR  
LANRRISTRKETSDTMLENDLNGLISSREMDFWPYTSWNNLIPLLRSTTSPLSMK PDS  
VGNHWSQIDSETMAFVSWISESIWFVAMEKTADENRWSRRNGEY PKKEHQFLVDLSNSL  
RLRKAFESCLEVRHLELN SPTIALGNILSQGRILDDDYRLVELLQK KLGFGSQTNKFSFR  
KGKQNLTESPKHLKGISNLVSDNRSHFAFFLGSTLMNYISK

>comp13649\_c0\_seq6; 444 475 2355 LEN=2632; translated  
MTLIKLYDVFETFCSHLKDATYSNVQKACMVL DSTIVAVSPIHSEPSSPAAIVGSPSSYR  
SSSPRSPITSWLMGTYDSQSCSQTRFEKFCNPLIIFAGLEAIYSACTHMESNDQAHNLT  
KLYEKSIEDLRWIREILCDFVSSAVQESSTRDGMNSSYQEKARILADSIEAIMLLCEIR  
CNLIEQQRKMCSTEIVDVKMIGSFRLV LQNAITAENSKATRLVQSAVQDVLDLW CNLLKT  
YSSLGKLGFLDTIICQKIKLGLNLSNTCIQKWMCKVFQSFVSISSIFYDFS SSIIGQ  
YGF LPSFPEKPGEDRFGPNLDLEAKLEEFRLHNRNGTSLAVAVVVDISDLRSLRSKPE  
TYPLVIARERS SSKSKQFLYESSDIFSSFP AIYLASSMQNNLQSRLLANRRISTRKETSD

TMLENDLNGLISSREMDFWPYTSWNNLIPLLRSTTSPLSMKPDVSGNHWSQIDSETMAF  
VSWISESIFWFVAMEKTADENRWSRRNGEYPKKEHQFLVDLSNSLRLRKAFESCLEVRHL  
ELNSPTIALGNILSQGRILDDDYRLVELLQKKGFGSQTNKFSFRKQKQNLTESPKHLKG  
ISNLVSDNRSHFAFFLGSTLMNYISK

>comp13650\_c0\_seq1; 522 1 1544 LEN=2126; translated  
XQLVEEEFIIENRKKKTNYVVDDAAQWLINLLSFIYRSDDHRTNCDVRKQPAPAVPSRK  
VWCIARENEESQNAVAVVATVLTASATVSVSAFAGTGLQRRTRPSLRTDILRIPGAQQRI  
RRFRNGAVLSGNVGAIRCAGESIRSSRTRVDGASKNLWSIQDCLEQWNSLDGNTSTATKDG  
EGAGTQQEQQRQIRIVFVDATWYHKGERNGRDEFEAGPRLPGAFHWDIGDLATTGELFPED  
NPKGLKNVFPPEWLVSALERMVLPDATTVSGGGPDATGGPSAASPVTLVVYGRDGR  
FAPRVWYMLQKYRGGPVRLQGSLEEWIERGGPVDRGPLKSDDGSAVLQAHDLAEGSE  
PPSLHPWISSEARNRLVDMTFVLECLKDEQQQEQGQKTDANLPSVIDTRGSSFAKKGHI  
PGAVHVPIYASLTLPEDFTTLSKRELEKVLKAMGDERYDRLGEPPLLTCTGTGVSCTT  
ALVLDELGLPEPWIYDGSWNEWGGDPTTPKAGVP

>comp13651\_c0\_seq1; 110 991 1621 LEN=1870; translated  
MPLPKRWKSKPPPAGFEAIEATLEAIEHELDRDIKETNERKPTESMWPVHQIGWQKSR  
VYDMFYTYKRISRVPVYCYLRLQKLVDAALIAKWKKPCYERLCSTYVINPTNYKFGTTSIC  
RVPMKDRSPEQRTATDPTTGCLGCASGPGAGPRNIFGNKYGQYLATVQVAREARIAGAKE  
QRKKEEEERTGNDETNDSDTDSGGDDGVW

>comp13652\_c0\_seq1; 309 725 1543 LEN=2233; translated  
MAFGRKGPKIVEAPPVEDIADPTAWILDNEFANFVLMNTHAIKYMCMIGYTFLHGCKVFK  
KFKPDAPFSYKLVNLAAMACTGGGILVPIFLNTVPVTLSDAYPIAIMISYLLHTYIPSLR  
EVLELSGIFKAVVILFYESIRAYVVTFLTGLAASTIAASQFSFPVFGPIICGTIGGCGGA  
FLPLDKGLAPLHDGLPAPVFSFAFVGATFFHLFTQLYAEVVDCKKKKGVIVALWFIYAY  
VKAGLFSAPSTKAPEAPKTEVKEAPIKVEKTE

>comp13653\_c0\_seq2; 128 1 507 LEN=507; translated  
XPSLYPYIIIESQRMLDQLAANPAGTLLTSFNHYHSQILVEMSDGSGWIDEISLPDVSTGAYD  
GVTLMTVTVGGLSVQVSDLQGDLSVTLDYGLFVVSNGQWLGPESSSSFVSDYPVVISVKT  
IGQPDGLSGLPPDELSQFFQFHRWVIFQWDFNWVREIILPPNAPEGSMX

>comp13654\_c0\_seq1; 248 1411 1983 LEN=2357; translated  
MTVGKPFNGMSLGAVVTTRAIADHFHSMGVEYFNTFFGGSPVAAAAGLAVLDILEDEEELQ  
EHAFAMGQYLKDRFLAMQKERWENDSAAPLNVCIGDIRGSGFLGLIELVRNRQTKEPAAI  
ETSYICTLLKQEHNILTSIDGLHENVLVIKPLAFSREDADYFVESFSSASEQVNSMTKT  
ELAAISKPT

>comp13654\_c0\_seq2; 262 165 1805 LEN=2179; translated  
MMRCSTSGQSDLRMTHTVGAASQAHRNGPVQAETVINGNNTCNKQRVQEQRQKHFMSVS  
VSYNNSGGLMIMKKGKGSILIDETGRSYLDTRNNVCHVGHCHPRVVEAVSRQLATLNTNTR  
YLHPNVCELAERLCAKCPDSLEIVVFNVSSEANDLALRLARAYTRSKNTIVVDGAYHGH  
TLGVLEVSPYKYEHSKEFDLTAQNGIGPYKTPGNHIWKVPCPDVYRGPHSDRNAGEKYA  
SYVKAACDYKSKGETVGAFFMESGMSSEGELIVSLLFTLYAGDLKRNQMIRNPKFICFSL  
NGVILPPDEFVQRQSVDAVRKSGGVFIADEVQTFGFRGLGSSFWAFQHGHDGHIIPD  
IMTVGKPFNGMSLGAVVTTRAIADHFHSMGVEYFNTFFGGSPVAAAAGLAVLDILEDEEELQ  
EHAFAMGQYLKDRFLAMQKERWENDSAAPLNVCIGDIRGSGFLGLIELVRNRQTKEPAAI  
ETSYICTLLKQEHNILTSIDGLHENVLVIKPLAFSREDADYFVESFSSASEQVNSMTKT  
ELAAISKPT

>comp13654\_c0\_seq3; 395 165 1706 LEN=2080; translated  
MMRCSTSGQSDLRMTHTVGAASQAHRNGPVQAETVINGNNTCNKQRVQEQRQKHFMSVS  
VSYNNSGGLMIMKKGKGSILIDETGRSYLDTRNNVCHVGHCHPRVVEAVSRQLATLNTNTR  
YLHPNVCELAERLCAKCPDSLEIVVFNVSSEANDLALRLARAYTRSKNTIVVDGAYHGH  
TLGVLEVSPYKYEHSKEFDLTAQNGIGPYKTPGNHIWKVPCPDVYRGPHSDRNAGEKYA  
SYVKAACDYKSKGETVGAFFMESGMSVGGVILPPDEFVQRQSVDAVRKSGGVFIADEVQ  
TFGFRGLGSSFWAFQHGHDGHIIPDIMTVGKPFNGMSLGAVVTTRAIADHFHSMGVEYFNT  
FFGGSPVAAAAGLAVLDILEDEEELQEHAFAMGQYLKDRFLAMQKERWENDSAAPLNVCIG  
DIRGSGFLGLIELVRNRQTKEPAAIETSYICTLLKQEHNILTSIDGLHENVLVIKPLAFS  
REDADYFVESFSSASEQVNSMTKT  
ELAAISKPT

>comp13654\_c0\_seq4; 325 875 1884 LEN=2258; translated  
MVTXLGVLEVSPYKYEHSKEFDLTAQNGIGPYKTPGNHIWKVPCPDVYRGPHSDRNAGE  
KYASYVKAACDYKSKGETVGAFFMESGMSVGGVILPPDEFVQRQSVDAVRKSGGVFIAE  
VQTFGFRGLGSSFWAFQHGHDGHIIPDIMTVGKPFNGMSLGAVVTTRAIADHFHSMGVEY  
FNTFFGGSPVAAAAGLAVLDILEDEEELQEHAFAMGQYLKDRFLAMQKERWENDSAAPLNVC  
I

GDIRGSGFLFLGIELVRNRQTKEPAAIETSYICTLLKQEHNILTSIDGLHENVLVIKPPLA  
FSREDADYFVESFSSASEQVNSMTKTELA AISKTPT  
>comp13655\_c0\_seq1; 167 297 803 LEN=1115; translated  
MAGFSGRPDRFLGVHFFNPVQLMKVVEVIETNETDPTVLEKGMKWVEEIGKVSVLCKDTP  
GFIVNRILVPSLMQSMVDRKEASVKDQVDVAMKLGCGHPMGPLHLADYIGLDTCHSIVQ  
GWTENFPDEPAFFIPACLQEKIDAGDLGRKTGKGFYHWEGRRGDPVE  
>comp13655\_c0\_seq2; 309 645 1352 LEN=1664; translated  
MTLDFANDAMGRIEFTTMDALKDQVDFVVEAVVENIDLKLDLYTSLGDLCKPETIFASNT  
SSLSIAEMAGFSGRPDRFLGVHFFNPVQLMKVVEVIETNETDPTVLEKGMKWVEEIGKVS  
VLCKDTPGFIVNRILVPSLMQSMVDRKEASVKDQVDVAMKLGCGHPMGPLHLADYIGL  
TCHSIVQGWTFENFPDEPAFFIPACLQEKIDAGDLGRKTGKGFYHWEGRRGDPVE  
>comp13655\_c0\_seq3; 340 281 1219 LEN=1531; translated  
MAVTATRSTASPADGSGFDTVGCVGLGLMGHGICQVAAMSGVHASKVIAFEQEQQFLDS  
GQDRILKSVKLEKVKMTLDFANDAMGRIEFTTMDALKDQVDFVVEAVVENIDLKLDLY  
TSLGDLCKPETIFASNTSSLSIAEMAGFSGRPDRFLGVHFFNPVQLMKVVEVIETNETD  
TVLEKGMKWVEEIGKVSVLCKDTPGFIVNRILVPSLMQSMVDRKEASVKDQVDVAMKLG  
CGHPMGPLHLADYIGLDTCHSIVQGWTFENFPDEPAFFIPACLQEKIDAGDLGRKTGKGFY  
HWEGRRGDPVE  
>comp13655\_c0\_seq4; 151 597 977 LEN=1289; translated  
MKWVEEIGKVSVLCKDTPGFIVNRILVPSLMQSMVDRKEASVKDQVDVAMKLGCGHPM  
GPLHLADYIGLDTCHSIVQGWTFENFPDEPAFFIPACLQEKIDAGDLGRKTGKGFYHWEGR  
RGDPVE  
>comp13656\_c0\_seq1; 759 179 2163 LEN=2398; translated  
MPLADFLQKRRSGTHSHSPGQSPWCLVPSQACLVSARGQVANVDRLWTTAIDGSVDRVD  
FASTAGDGVLDSPRGENYENELHTSYNRNNTNGNVGLYIHIPYCRQRCRYCDFAIPIGY  
HGATNTSTRSNMIDLEANPSSADNNKNGGQLDRREQGFRKMNDRYVSAIIVAEKHIAAES  
NYKTNNNEQDGLICQKIPLRSIYFGGTPSLAPIDSIEKILYHACGSDNPDPFRIVQNG  
GACTAAEATEITMEMDPGTFDQNLHSSLRDLGINRISLGVQSFDDLLAAMGRTHRRADV  
LQAVCDIASVFGGADHGASNTTAYDDVNYSIDLISGCPGLTPAKWAETLQEATAGVQAXK  
IESATTAEEEEANMELVSENFEQSQLLLLSSLPSSHISVYDMQIEEGTVFGKWARARAD  
AATKAKEEEQTQTSQEGKDVDNDDDDDDPSRKFTVAVPIDGRQQNPNKAKRILRLPTEE  
ECGFMYKYAAGYLRKANYEHYEVSSYAANCVSKKEQSIYDGEDSSKQIIPSSSTKRSR  
NQIYWEYVQWHAVGLGATS FVGKLVARPREMSDYLDWVFLNDDFTNINAEDDGDGED  
FLSDLLLRLRTIDGLDLTWLESHYGSVVKDVIDGAALGLELGLAERTEDNVLRLTDPD  
G  
>comp13657\_c0\_seq1; 254 311 1448 LEN=1448; translated  
MTMRSRFRKFRVASALVIAIESFFVLEVMTFQPFTRIGRITSSSPSSSSPLIAYNHLTEPK  
PTQAPSILGWIPSSSFHPLKSIERGEKNEDHVDSLVLKDDGDVNSFSGTSQKVDDILA  
LLDSVPSNLPTSRSLTDKILAAVQTLDECEPSTNESVLSSELGNWELLWTAQDRSSEQYV  
KGLANRFINPLENQSYNNPFRGQNPLRRQNDDEDDSSNNGRANPILPREIQDVLERTGI  
LEAAGGTTLAPIRSSQGIDLRRSRVRNVVNVQIQRPLPVKGSVVDIDFKPNDRDQRRID  
VKFDSRFRVFNARIDQTFNLGIFGPGDGCPTSMTEYESREVTKEACLFCLGLPRENL  
CSIKVKPTNETDRNDAARG  
>comp13657\_c0\_seq2; 310 311 1396 LEN=1954; translated  
MTMRSRFRKFRVASALVIAIESFFVLEVMTFQPFTRIGRITSSSPSSSSPLIAYNHLTEPK  
PTQAPSILGWIPSSSFHPLKSIERGEKNEDHVDSLVLKDDGDVNSFSGTSQKVDDILA  
LLDSVPSNLPTSRSLTDKILAAVQTLDECEPSTNESVLSSELGNWELLWTAQDRSSEQYV  
KGLANRFINPLENQSYNNPFRGQNPLRRQNDDEDDSSNNGRANPILPREIQDVLERTGI  
LEAAGGTTLAPIRSSQGIDLRRSRVRNVVNVQIQRPLPVKGSVVDIDFKPNDRDQRRID  
VKFDSRFRVFNARIDQTFNLGIFGPRGWLRTGYIDDRIRVTRGHKGSVFILSR TAKRKS  
V  
>comp13658\_c0\_seq1; 574 1 1011 LEN=1329; translated  
MDDDGVVVLRINDPTARLRVWAGWATGHSVRLVPLVLEPGEASASTEGRREEQIAQLE  
EAVEEIEEDI EGMEELKEEEFRNSGQEKLLRDQEKLEKLEKLLGDPGGDANKHNEHEAD  
NDAGAKPKAAEATTDATTCKQRSKLKRKRKNMLEKPGNVPDGLLESDKGGKKDLGLE  
ILPASGSNADQNANGDAKPKTMPQKLEQTLNLPSEQTDETTKGKHLTDHTSRGRRDR  
HPVVYDGIIDGGTDDDLPEMLPDSVNDDELPEDEGTGDDDVVVVPEHTPTPGSRVAGERG  
HHDVKQHLLACAFFAFASTGLILVVF GKRRDKGRRDL  
>comp13659\_c0\_seq1; 259 73 678 LEN=1505; translated  
MVL SNVKVIDGRDHLGLRLASVAKELLAGQKIVIVRCDEMCSISGLVRNRVKYAQFRNK

AMNTNPRKGPYHYKAPAMMVWRTIRGMVHQKTARGQAALARLSTFDGIPAPYDKQKRVV  
PAALRSMLKQGRKYTVIGVLADSVGWKHKELLGRLEAKRKADAKEFYEAKKAKAALRRQ  
AEEACAGELAKVNEVLAASGY  
>comp13659\_c0\_seq2; 259 73 678 LEN=1426; translated  
MVL SNVKVIDGRDHLLGRLASVVAKELLAGQKIVIVRCDEM CISGSLVRNRVKYAQFRNK  
AMNTNPRKGPYHYKAPAMMVWRTIRGMVHQKTARGQAALARLSTFDGIPAPYDKQKRVV  
PAALRSMLKQGRKYTVIGVLADSVGWKHKELLGRLEAKRKADAKEFYEAKKAKAALRRQ  
AEEACAGELAKVNEVLAASGY  
>comp13659\_c0\_seq3; 259 73 678 LEN=1493; translated  
MVL SNVKVIDGRDHLLGRLASVVAKELLAGQKIVIVRCDEM CISGSLVRNRVKYAQFRNK  
AMNTNPRKGPYHYKAPAMMVWRTIRGMVHQKTARGQAALARLSTFDGIPAPYDKQKRVV  
PAALRSMLKQGRKYTVIGVLADSVGWKHKELLGRLEAKRKADAKEFYEAKKAKAALRRQ  
AEEACAGELAKVNEVLAASGY  
>comp13660\_c0\_seq1; 317 1 1428 LEN=1551; translated  
TTI ICKQSTKRTSQPIHEIHTPLPLELEPIGEKQKINNPLED SHRTMYHHRPVSFTGRAN  
SHGR TMQSSSIGLQDENLMVRRASQHKPSGGSHGSAKKSVLGARSSGASNGLSRTPAG  
KKNSTTRRRAFGD ISNKKGSSGSGRGGFGRDLSAKGQAASSLQKPHAGDVLKPRSVNLLP  
RPARAQSSQTSRFLVLP EAPRPSGAKPAPQVRPAKQQTVRQTRNPPPAATTRMRTRALAR  
AESVPDIELPAGRTWKQQL EHELKHEDDFASTLSLDSILDLDGCPTPREQWEREMELEWE  
RQKDEAGEDERRLEDQLRAMADRDRKETEEGLVRLYETIDDLAIFSDDDGIDLGVSEALG  
DGRSLSDSSGLDLDSSD DDDYLLLXDL SVGSEKQRCARAIGATSVPLTATANAELQGP  
QRRCRDHDQCLVSSQIPGIEDSRINLVFVGLFDGRRRAESIESGNTEQNFVRSFGF  
>comp13661\_c0\_seq1; 773 1 1740 LEN=2454; translated  
LRSLVQRITYYP AQYKNKNLSFTMADNTKFEDRKNAFKKTVD AEEGRRRREETT LQIRKS  
KKDARLAKRRQMPTGGLSNPTAAGMAAANMLMNSGDNTYANLAMQONTSSQAGRAMA QSK  
LEQLPAMVQGVGMNDPTLQTECTTQFRLLSIEKNPPIQNVIDAGVVPRFVEFLQRDDNP  
ALQFEAAWALTNIASGTS DHTKVMEVGVAVPIFVRLLLSPNDDVREQAVWALGNIAGDSP  
PCRDLVLQAGAMQPLLQQLHQNSKLSMLRNATWTL SNFCRQKPPDFEMVRPSLPTLSQL  
IFSPDEEVLTDACWALSYSLDGPNEKIQAVIEAGVCRRLVE LLLNPSPAVQTPALRTVGN  
IVTGNDLQTQFI INNNALPCLLALLSSPKKIRKEACWTISNITAGNKEQIQAVVENNII  
PPLIQLLTNAEFDIRKEAAWAI SNATSGGNSQIKFLVQQGCIRPLCDLLTVNDPKIVTI  
ALEGLENILKVGEESAAATGQPN SMAV FVSEAEGLNKIEDLQQHSNNDIYEKCIKILEAY  
FGVEDEEEMAALAPQMEGNTFGFGMDQQQTQGTDFDFTQS  
>comp13662\_c0\_seq1; 306 1 783 LEN=959; translated  
PIRYVTFPQLLDPVQCRTIVEDSRADV VVWCATDFNGSTPRALSGGSGPLSGLPFLFRAV  
ADPDKGRVEVEGLRNMLGALKNSKREAIQRRRQMTAFTGRPRESPMDDAGPPAGRDEAEG  
PEAEAAGIDFLLVSSCPDALGNFETPFGTFLDIKROGEDMIPMEFPSLGYSVLQFATFED  
NFVGEDLELKL MVVENEAPRV PPTDGP PREEEQQPQPQKRQRKVRRI NRRDAARAVGDA  
LVDPDYHNKKIQVWTNEVGN  
>comp13662\_c0\_seq2; 529 1 1467 LEN=1643; translated  
SSASAPAPGRPRV VSLALAAALVACSACRESAAAFSSQ GALPAHARSAPAASVLF AEPPER  
NSGDESENE NENENQ NENDAEKDAEKWRAQAEELREQIRRM EGDLPDRPLSDERAAALDAA  
KKLAEEQRTAREEQASLLDGKRVLLV GANGLGSMVCRRI LREYPEIEEVVAMVHV VGEN  
SETSRGYGRLAYE VEGAEDGRG SIGPAWSADDRVATFEYDEERMGSYNLQKLRVVECELLD  
PVQCRTIVEDSRADV VVWCATDFNGSTPRALSGGSGPLSGLPFLFRAVADPDKGRVEVEG  
LRNMLGALKNSKREAIQRRRQMTAFTGRPRESPMDDAGPPAGRDEAEGPEAEAAGIDFLL  
VSSCPDALGNFETPFGTFLDIKROGEDMIPMEFPSLGYSVLQFATFEDNFVGEDLELKL M  
VENEAPRV PPTDGP PREEEQQPQPQKRQRKVRRI NRRDAARAVGDALVDPDYHNKKIQ  
VWTNEVGN  
>comp13663\_c0\_seq1; 622 124 1638 LEN=1972; translated  
MKKFGRLKLLKSSSSDVADTENRSSSETAESNGLDESSPVDKLC SNNLVENE EHRKQLF  
GFIGK KKKVRGGERKDGEETIKSKTANDDGE EENENDNGEEDVHKLLEEMDIIDFNMSM  
SLDYDVEDKVGV TETSQNRLEREEVFSQRYHPSKLETKELKELAQRLGVNSSSMRLTAC  
QKNLHEL LYGNSH IILKQGPISFNYQNCDLILLTDGFVSAYQNYNIY NPLEGRYETCQLW  
SDVKFVELPNFGTLKI QMSSGESFEIRCP SDGADLKRWLKAI EHVA IILSTMHSSDPPSMV  
TDQLGWQYILIRKPAYTAAVTGDMKLMGNPENLNELDEYNRSSPLHYAIQAEPCNVDMVD  
ALLRGGADPNLVDGEGRSAMY YAQRNKSLDIEQMLINCGGKKSQ LIETELRGELFGGVDQ  
AAKNT EKREIEQAVKDNKAAEAAAKVQSAQS QMSQNMAMAERGEKIKAMDDKAQQQLND  
EAREYGNLASQLNNHMKNKKWYQF  
>comp13664\_c0\_seq1; 430 329 1836 LEN=2092; translated



MNKNEGSAPIXSKKRPEKNKDKKRRGGRQSYRFVDRTRVQVSGGSGGNGSRSMHHLGRKR  
KRKPDGGHGGNGSVLI IADPKEQSLRWTRPHLTAESGAHGGSNKGHRNGRNTILRVPC  
GVVVRVLEHDEYYDDETKTIQKVSDALVVQTNDEESYELWETKSPSPTETRVRDGYEQT  
LEDLNRNRQAGGYLASLDYDSDDDDCNDESDDDERVFYNYDGS DSGLNVDQIEPTMNF TA  
WGEKEKVEIADLDQPGSHIVVARGGRGGYGNSSFASINGPLPSPEIMEKYAEPKPGECR  
LELELKL IADIGLVGFPNAGKSSLLSATS RATPYIAPYPTTLNPLVGYIEYKDGFRVCA  
ADVPGLIAGASEGKKGHDFLRHLERTKALLYIVDAAGIDGRDPVEDFEVLVQELSAYGD  
GDMLNRRCLLVANKIDLLEDEREEVFANLQERAEELGIRIETDVIIGISAGATGENLPLL  
TKSIRKTVLSSDNDKASEYGYG

>comp13665\_c0\_seq1; 443 223 1902 LEN=2469; translated  
MQSISCVLFLITAILS SVQVDARLKGTYKEQATTDGQNNKGKKSTRIVGGAEVPTNQDYPF  
FVNLGACAGALIHGDIVLTA AHCTFVVGSTAQVGAHERGSTTDDSVYVQVLKEKTHPEYN  
TETHEYDFRLLKLERWVNKPLASLN RDSTIPRNENSGPLTVLGMGRTEEDGNVSSTLLSA  
EVYQINSMECQDLYPEFLINNEVVCAAGQGRDSCDGD SAAPLLSADGSVIGLVSWGLGC  
AREARPGVYSRLSAGYEWIQETICYFSEKPP LSCGVSKEFGNSTFFGLDGDVSVSTDSMA  
GQDSTPSGKATKQHELSSEPF TFQSPSPSPLGSSLEKSLVPSISLPGTPTFSPTIHPAY  
TYAPHTSGNFFMPVSTTSNIKEVTTLSISPRSP TTKPTFGSAPERITLLPIASPSNMPI  
ESEHTIDLRPPP ISTPFVVPVTEQPTWDQTI EPTPFPTAIPRTLDPGNRNSNIDGGQLNGD  
SSLTTQWVPLGVYIFIPRVENPFVGVWEVIQGN TIARRKPF GSYQVSSVYHEL VYVKADS  
DFTFYMDMNSNR SRGKSK

>comp13665\_c0\_seq2; 371 617 2073 LEN=2517; translated  
MEAPLSLEALRRLEPMSXGSTTDDSVYVQVLKEKTHPEYNTETHEYDFRLLKLERWVNK  
LASLN RDSTIPRNENSGPLTVLGMGRTEEDGNVSSTLLSAEVYQINSMECQDLYPEFLIN  
NEVVCAAGQGRDSCDGD SAAPLLSADGSVIGLVSWGLGCAREARPGVYSRLSAGYEWIQ  
ETICYFSEKPP LSCGVSKEFGNSTFFGLDGDVSVSTDSMAGQDSTPSGKATKQHELSSE  
PFTFQSPSPSPLGSSLEKSLVPSISLPGTPTFSPTIHPAYTYAPHTSGNFFMPVSTTSNI  
KEVTTLSISPRSP TTKPTFGSAPERITLLPIASPSNMPIESEHTIDLRPPP ISTPFVVPV  
TEQPTWDQTI EPTPFPTAIPRTLDPGNRNSNIDGGQLNGDSSLTTQWVPLGVYIFIPRVE  
NPFVGVWEVIQGN TIARRKPF GSYQVSSVYHEL VYVKADSDFTFYMDMNSNR SRATMAL  
RWRGTW

>comp13665\_c0\_seq3; 471 223 2013 LEN=2393; translated  
MQSISCVLFLITAILS SVQVDARLKGTYKEQATTDGQNNKGKKSTRIVGGAEVPTNQDYPF  
FVNLGACAGALIHGDIVLTA AHCTFVVGSTAQVGAHERGSTTDDSVYVQVLKEKTHPEYN  
TETHEYDFRLLKLERWVNKPLASLN RDSTIPRNENSGPLTVLGMGRTEEDGNVSSTLLSA  
EVYQINSMECQDLYPEFLINNEVVCAAGQGRDSCDGD SAAPLLSADGSVIGLVSWGLGC  
AREARPGVYSRLSAGYEWIQETICYFSEKPP LSCGVSKEFGNSTFFGLDGDVSVSTDSMA  
GQDSTPSGKATKQHELSSEPF TFQSPSPSPLGSSLEKSLVPSISLPGTPTFSPTIHPAY  
TYAPHTSGNFFMPVSTTSNIKEVTTLSISPRSP TTKPTFGSAPERITLLPIASPSNMPI  
ESEHTIDLRPPP ISTPFVVPVTEQPTWDQTI EPTPFPTAIPRTLDPGNRNSNIDGGQLNGD  
SSLTTQWVPLGVYIFIPRVENPFVGVWEVIQGN TIARRKPF GSYQVSSVYHEL VYVKADS  
DFTFYMDMNSNR SRVRF E IYSWLKRRWHYVGGGLGKGQMYDYPHIETF SVGENSL

>comp13665\_c0\_seq5; 371 455 1911 LEN=2355; translated  
MEAPLSLEALRRLEPMSXGSTTDDSVYVQVLKEKTHPEYNTETHEYDFRLLKLERWVNK  
LASLN RDSTIPRNENSGPLTVLGMGRTEEDGNVSSTLLSAEVYQINSMECQDLYPEFLIN  
NEVVCAAGQGRDSCDGD SAAPLLSADGSVIGLVSWGLGCAREARPGVYSRLSAGYEWIQ  
ETICYFSEKPP LSCGVSKEFGNSTFFGLDGDVSVSTDSMAGQDSTPSGKATKQHELSSE  
PFTFQSPSPSPLGSSLEKSLVPSISLPGTPTFSPTIHPAYTYAPHTSGNFFMPVSTTSNI  
KEVTTLSISPRSP TTKPTFGSAPERITLLPIASPSNMPIESEHTIDLRPPP ISTPFVVPV  
TEQPTWDQTI EPTPFPTAIPRTLDPGNRNSNIDGGQLNGDSSLTTQWVPLGVYIFIPRVE  
NPFVGVWEVIQGN TIARRKPF GSYQVSSVYHEL VYVKADSDFTFYMDMNSNR SRATMAL  
RWRGTW

>comp13665\_c0\_seq6; 377 617 2055 LEN=2622; translated  
MEAPLSLEALRRLEPMSXGSTTDDSVYVQVLKEKTHPEYNTETHEYDFRLLKLERWVNK  
LASLN RDSTIPRNENSGPLTVLGMGRTEEDGNVSSTLLSAEVYQINSMECQDLYPEFLIN  
NEVVCAAGQGRDSCDGD SAAPLLSADGSVIGLVSWGLGCAREARPGVYSRLSAGYEWIQ  
ETICYFSEKPP LSCGVSKEFGNSTFFGLDGDVSVSTDSMAGQDSTPSGKATKQHELSSE  
PFTFQSPSPSPLGSSLEKSLVPSISLPGTPTFSPTIHPAYTYAPHTSGNFFMPVSTTSNI  
KEVTTLSISPRSP TTKPTFGSAPERITLLPIASPSNMPIESEHTIDLRPPP ISTPFVVPV  
TEQPTWDQTI EPTPFPTAIPRTLDPGNRNSNIDGGQLNGDSSLTTQWVPLGVYIFIPRVE  
NPFVGVWEVIQGN TIARRKPF GSYQVSSVYHEL VYVKADSDFTFYMDMNSNR SRGKSK

>comp13665\_c0\_seq7; 377 455 1893 LEN=2460; translated  
MEAPLSLEALRRLEPMSXGSTTDDSVYVQVLKEKTHPEYNTETHEYDFRLLKLERWVNKP  
LASLNRDSTIPRNENSGPLTVLGMGRTEEDGNVSSTLLSAEVYQINSMECQDLYPEFLIN  
NEVVVCAAGQGRDSCDGDSDAAPLLSADGSVIGLVSWGLGCAREARPGVYSRLSAGYEWIQ  
ETICYFSEKPPPLSCGVSKEFGNSTFFGLDGDVSVSTDSMAGQDSTPSGKATKQHESLSSE  
PFTFQSPSPSPLGSSLEKSLVPSISLPGTPTFSPTIHPAYTYAPHTSGNFFMPVSTTSNI  
KEVTTTLLSISPRSPTTKPTFGSAPERITLLPIASPSNMP IESEHTIDLRPPPISTPFVVPV  
TEQPTWDQTI EPTPFPTAIPRTLDPGNRNSNIDGGQLNGDSSLTTQWVPLGVYIFIPRVE  
NPFVGVWEVIQGNIIARRKPFQSYQVSSVYHELIVYVKADSDFTFYMDMNSNRSRGKSK  
>comp13665\_c0\_seq8; 377 1 1851 LEN=2231; translated  
XFLLELVPNDGDMLIETPLLFSTISCVLFLITAILSVQVDARLKGTYKEQATTDGQNNK  
GKKSTRIVGGAEVPTNQDYPFFVNLGACAGALIHGDIVLTAAHCTFVVGSTAQVGAHERG  
STTDDSVYVQVLKEKTHPEYNTETHEYDFRLLKLERWVNKPLASLNRDSTIPRNENSGPL  
TVLGMGRTEEDGNVSSTLLSAEVYQINSMECQDLYPEFLINNEVVVCAAGQGRDSCDGDSD  
AAPLLSADGSVIGLVSWGLGCAREARPGVYSRLSAGYEWIQETICYFSEKPPPLSCGVSKE  
FGNSTFFGLDGDVSVSTDSMAGQDSTPSGKATKQHESLSSEPFQSPSPSPLGSSLEKS  
LVPSISLPGTPTFSPTIHPAYTYAPHTSGNFFMPVSTTSNIKEVTTTLLSISPRSPTTKPT  
FGSAPERITLLPIASPSNMP IESEHTIDLRPPPISTPFVVPVTEQPTWDQTI EPTPFPTAI  
PRTLDPGNRNSNIDGGQLNGDSSLTTQWVPLGVYIFIPRVENPFVGVWEVIQGNIIARRK  
PFQSYQVSSVYHELIVYVKADSDFTFYMDMNSNRSRVRF E IYSWLKRRWHYVGGGLGKGQ  
MYDYPHIETFSVGENSL  
>comp13665\_c0\_seq9; 343 1 1758 LEN=2202; translated  
XFLLELVPNDGDMLIETPLLFSTISCVLFLITAILSVQVDARLKGTYKEQATTDGQNNK  
GKKSTRIVGGAEVPTNQDYPFFVNLGACAGALIHGDIVLTAAHCTFVVGSTAQVGAHERG  
STTDDSVYVQVLKEKTHPEYNTETHEYDFRLLKLERWVNKPLASLNRDSTIPRNENSGPL  
TVLGMGRTEEDGNVSSTLLSAEVYQINSMECQDLYPEFLINNEVVVCAAGQGRDSCDGDSD  
AAPLLSADGSVIGLVSWGLGCAREARPGVYSRLSAGYEWIQETICYFSEKPPPLSCGVSKE  
FGNSTFFGLDGDVSVSTDSMAGQDSTPSGKATKQHESLSSEPFQSPSPSPLGSSLEKS  
LVPSISLPGTPTFSPTIHPAYTYAPHTSGNFFMPVSTTSNIKEVTTTLLSISPRSPTTKPT  
FGSAPERITLLPIASPSNMP IESEHTIDLRPPPISTPFVVPVTEQPTWDQTI EPTPFPTAI  
PRTLDPGNRNSNIDGGQLNGDSSLTTQWVPLGVYIFIPRVENPFVGVWEVIQGNIIARRK  
PFQSYQVSSVYHELIVYVKADSDFTFYMDMNSNRSRATMALRWRGTW  
>comp13665\_c0\_seq10; 437 223 1920 LEN=2364; translated  
MQSISCVLFLITAILSVQVDARLKGTYKEQATTDGQNNKGKKSTRIVGGAEVPTNQDYPF  
FVNLGACAGALIHGDIVLTAAHCTFVVGSTAQVGAHERGSTTDDSVYVQVLKEKTHPEYN  
TETHEYDFRLLKLERWVNKPLASLNRDSTIPRNENSGPLTVLGMGRTEEDGNVSSTLLSA  
EVYQINSMECQDLYPEFLINNEVVVCAAGQGRDSCDGDSDAAPLLSADGSVIGLVSWGLGC  
AREARPGVYSRLSAGYEWIQETICYFSEKPPPLSCGVSKEFGNSTFFGLDGDVSVSTDSMA  
GQDSTPSGKATKQHESLSSEPFQSPSPSPLGSSLEKSLVPSISLPGTPTFSPTIHPAY  
TYAPHTSGNFFMPVSTTSNIKEVTTTLLSISPRSPTTKPTFGSAPERITLLPIASPSNMP I  
ESEHTIDLRPPPISTPFVVPVTEQPTWDQTI EPTPFPTAIPRTLDPGNRNSNIDGGQLNGD  
SSLTTQWVPLGVYIFIPRVENPFVGVWEVIQGNIIARRKPFQSYQVSSVYHELIVYVKADSD  
FTFYMDMNSNRSRATMALRWRGTW  
>comp13665\_c0\_seq11; 405 455 2004 LEN=2384; translated  
MEAPLSLEALRRLEPMSXGSTTDDSVYVQVLKEKTHPEYNTETHEYDFRLLKLERWVNKP  
LASLNRDSTIPRNENSGPLTVLGMGRTEEDGNVSSTLLSAEVYQINSMECQDLYPEFLIN  
NEVVVCAAGQGRDSCDGDSDAAPLLSADGSVIGLVSWGLGCAREARPGVYSRLSAGYEWIQ  
ETICYFSEKPPPLSCGVSKEFGNSTFFGLDGDVSVSTDSMAGQDSTPSGKATKQHESLSSE  
PFTFQSPSPSPLGSSLEKSLVPSISLPGTPTFSPTIHPAYTYAPHTSGNFFMPVSTTSNI  
KEVTTTLLSISPRSPTTKPTFGSAPERITLLPIASPSNMP IESEHTIDLRPPPISTPFVVPV  
TEQPTWDQTI EPTPFPTAIPRTLDPGNRNSNIDGGQLNGDSSLTTQWVPLGVYIFIPRVE  
NPFVGVWEVIQGNIIARRKPFQSYQVSSVYHELIVYVKADSDFTFYMDMNSNRSRVRF E I  
YSWLKRRWHYVGGGLGKGQMYDYPHIETFSVGENSL  
>comp13665\_c0\_seq12; 405 617 2166 LEN=2546; translated  
MEAPLSLEALRRLEPMSXGSTTDDSVYVQVLKEKTHPEYNTETHEYDFRLLKLERWVNKP  
LASLNRDSTIPRNENSGPLTVLGMGRTEEDGNVSSTLLSAEVYQINSMECQDLYPEFLIN  
NEVVVCAAGQGRDSCDGDSDAAPLLSADGSVIGLVSWGLGCAREARPGVYSRLSAGYEWIQ  
ETICYFSEKPPPLSCGVSKEFGNSTFFGLDGDVSVSTDSMAGQDSTPSGKATKQHESLSSE  
PFTFQSPSPSPLGSSLEKSLVPSISLPGTPTFSPTIHPAYTYAPHTSGNFFMPVSTTSNI  
KEVTTTLLSISPRSPTTKPTFGSAPERITLLPIASPSNMP IESEHTIDLRPPPISTPFVVPV

TEQPTWDQTIETPFPTAI PRTLDPGNRNSNIDGGQLNGDSSLTTQWVPLGVYIFIPRVE  
NPFVGVWEVIQGNIIARRKPFVGSYQVSSVYHELIVYVKADSDFTFYMDMNSNRSRVRFEI  
YSWLKRRWHYVGGGLGKGMQYDYPHIETFSVGENSL

>comp13665\_c0\_seq13; 349 1 1740 LEN=2307; translated  
XFLLELLEVPNDGDMLIETPLLFSTISCVLFLITAILSVQVDARLKGYKEQATTDGQNNK  
GKKSTRIVGGAEVPTNQDYPFFVNLGACAGALIHGDIVLTAHCTFVVGSTAQVGAHERG  
STDDSVYVQVLKEKTHPEYNTETHEYDFRLLKLERWVNKPLASLNRDSTIPRNENSGPL  
TVLGMGRTEEDGNVSSTLLSAEVYQINSMECQDLYPEFLINNEVVVCAAGQGRDSCDGD  
AAPLLSADGSVIGLVSWGLGCAREARPGVYSRLSAGYEWIQUETICYFSEKPLSCGVSKE  
FGNSTFFGLDGDVSVSTDSMAGQDSTPSGKATKQHELSSEPFQSPSPSPLGSSLEKS  
LVPSISLPGTPTFSPTIHPAYTYAPHTSGNFFMPVSTTSNIKEVTTLSISPRSPPTKPT  
FGSAPERITLLPIASPSNMPIESEHTIDLRPPPISTPFVPTVTEQPTWDQTIETPFPTAI  
PRTLDPGNRNSNIDGGQLNGDSSLTTQWVPLGVYIFIPRVENPFVGVWEVIQGNIIARRK  
PFGSYQVSSVYHELIVYVKADSDFTFYMDMNSNRSRGKSK

>comp13666\_c0\_seq1; 136 1 186 LEN=496; translated  
GAVPGGATAFCVGMQASVYQHQKQHEQEQQSPPMHRGYAMRGDAIIVVDTNARKPWLVPK  
R

>comp13666\_c0\_seq2; 261 1 883 LEN=1051; translated  
EIPLPNVKSEVLKVKVIEFCQHLEDPMTEIEKPLKSNMADVVQAWYATFVDVEQVLLFE  
LILAANYMDIKPLLDLTCATVASMIGKTPEDIRSTFNI TNDFSPPEEAQXPGGEQMVVRG  
GLEEKHNTAQHSREKHSTAQHNTMNRNRNRSRAGNKTNLDDLDGALTSMIGSHNEVKLT  
TDPSQETRFMTMHESNHRNDASRGVFASSLRKQPIDLSGSSFTHTSDFEKHQVNYSATKY  
XQAVTNGDQVPGAPSPDRPQAEELGEGGEELPVLQHQVGRAVGVPGSFAGWSRD

>comp13667\_c0\_seq1; 95 1 1356 LEN=1667; translated  
RKQYNHFITAKTIITAKMSRLVFGTIALAIIDPLACSGFSTGGIRPRTSADKAIISHSHS  
PRSASRQLLQSRIPQPSQSRGATLNSEQGNKLLPSSVYRTIEEGKIAVVPNLFNEADI  
LPLRQDAQQWLWLDNRFDALAGYGSKGSFDPKDRAVLKLQWKRDPDYGNFELRSKFKF  
NLMASVRQELASNLNRPLGAAADSAAVNKYGIGSTEISYTRFGPGAFKLRHVDEHHEELK  
GRDGWAQPTRRSISWLIYLNEDWNSSRDGGQLRCFERTRRPLGRIGATTGGDLQIGWLS  
ASMQGEIPVYLDAKNHDHGDSCMYFLERDGRRAYITKPFKTNPILYVAGSEQLVKKVLIQ  
SPDIASRFRLIEPPKSKLNDVLRGDDAYLQGEPSRNIIEELEDVDPHGGTLVMFDSVS  
LPHEVLATRNGRERWACSGWYHEDQOEIALS

>comp13668\_c0\_seq1; 882 1 2341 LEN=2369; translated  
XKNTFWICFRTPASDVMARYWRMTGHDVLPVIGWDSFGLPAEQFAVQTGTQPAETTGNKI  
ANFRRLKMLGFSYDWDKELATTDYAVKWTQWIFLQLYKKGLAEQSEVSVNWCAALGTV  
LANEEVINGLSERGDHPVQRLPLRQWVVKITEYADRLESGLDGLNWPSGMTMTSQQQWIGK  
SVGCEIVFDVEGSDES SVKVFTRPDTLLGVTYVTLAPEHPLVSSITTPQKDSVDKYVLE  
TSSRSDLRTSSKVKVTGVFTGAYVTHPISGDRVPVWVGDYVLSYGTGAVMAVPAHDSRD  
FEFAKKFDLDMKVVVEPKKGEKLNKDEAFTEPGVAVNSGEFDGLATKNCKKAITNKLEEIN  
KGAQITYKLRDWFVSRQRYWGEP IPIYFPVDFPEGVDPSTSDPKNDCEHTIRYDQPI  
VDEADLPLELPHMENFEPGDDPAGCLARAKDWRYFEKDGKWFARETNTMPQWAGSCWYF  
RFLDPSNTEEAFSQQMDKDWMPVDLYIGGAEHAVLHLLYARFWHQVLFDLGYSEHPEPFE  
KLVHQGMILGSDGEKMSKSRGNVNPDDVSEQGADALRLYEMFMGPLEAVKPWQTEQVP  
GVVRFQNRLYNVVNAAAKSKTTDMDEETARILHKTMMKVTEDIESMSFNIAISAMMVLTN  
HLVSLGDKVPLEAAENLALMVSPLAPHLGEECWSILGHKDSLAYAPWVEYDEALCVDNEV  
TIGCQVNGKMRGQITIPAEADEETAVSAAKEMENVQSQIDGKTIRKIIYVPGRILNIIAN

>comp13668\_c0\_seq2; 1100 276 2906 LEN=2934; translated  
MLTFTSLQRMANAFVTPSAKNNANFGISRFRATPFRLYSTATDEESTVAAKTGYPFQVE  
PKWQKYWEENNTFKTPERDTSKPKKYVLDMPYPYSGAGLHVHPEGYTASDVMARYWRMT  
GHDVLPVIGWDSFGLPAEQFAVQTGTQPAETTGNKI ANFRRLKMLGFSYDWDKELATTD  
TAYVVKWTQWIFLQLYKKGLAEQSEVSVNWCAALGTVLANEEVINGLSERGDHPVQRLPLR  
QWVVKITEYADRLESGLDGLNWPSGMTMTSQQQWIGKSVGCEIVFDVEGSDES SVKVFTRP  
DTLLGVTYVTLAPEHPLVSSITTPQKDSVDKYVLETSSRSDLRTSSKVKVTGVFTGAYV  
THPISGDRVPVWVGDYVLSYGTGAVMAVPAHDSRDFEFAKKFDLDMKVVVEPKKGEKLNK  
DEAFTEPGVAVNSGEFDGLATKNCKKAITNKLEEINKGAQITYKLRDWFVSRQRYWGEP  
IPIYFPVDFPEGVDPSTSDPKNDCEHTIRYDQPIPVDEADLPLELPHMENFEPGDDPAG  
CLARAKDWRYFEKDGKWFARETNTMPQWAGSCWYFRFLDPSNTEEAFSQQMDKDWMPVD  
LYIGGAEHAVLHLLYARFWHQVLFDLGYSEHPEPFEKLVHQGMILGSDGEKMSKSRGNV  
NPDDVSEQGADALRLYEMFMGPLEAVKPWQTEQVPGVVRFQNRLYNVVNAAAKSKTTDM  
DEETARILHKTMMKVTEDIESMSFNIAISAMMVLTNHLVSLGDKVPLEAAENLALMVSPL

APHLGEECWSILGHKDSLAYAPWVEYDEALCVDNEVTIGCQVNGKMRGQITIPAEADEET  
AVSAAKEMENVQSQIDGKTIRKIIYVPGRILNIIAN  
>comp13668\_c0\_seq4; 361 276 1185 LEN=1185; translated  
MLTFTSLQRMANAFVTPSAKNNANFGISRFRATPFRLYSTATDEESTVAAKTGYPFQVEVE  
PKWQKYWEENNTFKTPERDTSKPKKYVLDMPYPYPSGAGLHVGHPEGYTASDVMARYWRMT  
GHDVLPHPIGWDSFGLPAEQFAVQTGTQPAETTGNKNIANFRRLKMLGFSYDWDKELATTD  
TAYVKWTQWIFLQLYKKGLAEQSEVSVNWCAALGTVLANEEVINGLSERGDHPVQRLPLR  
QWVLKITEYADRLESGLDGLNWPSGTMTSQQWIGKSVGCEIVFDVEGSDEVRLTLCYSG  
VSGX  
>comp13669\_c0\_seq1; 775 255 2633 LEN=2808; translated  
MSQYRMHVGNRSYRDYPKLRELHEKRLSSLNVSATTRSSHLKTAANGDYSRRLFENNFI  
SINNNTASHGPFHHQMQQYRTFFNVANVLNDKVETVQLKSLEATANSRPADANAQFEFLN  
RLLHNNHPQAVVDRVSNKMFNRFAVDSRIATLYLQALMQTGKYNQFNMDLLSRLQERDP  
SILNDDNIQEIIQNQRQLTKQEQVNAMNLLASGGGAIMAGSSRVGGMLGGPGGLSGGAG  
AAASGRGLDPKNPLFVQLHNPTSARSALISLTGRVLI AFVVVSAISALLDEKGVGRGLGM  
NSGTKHIQQAQDTSDFDDVKGVDEALAELEKEIVMYLENPTKFTRLGGKLPRLGLLLTGP  
PGTGKTLAKAIAAGEAGVPFFFSSGSQFEEVYVGLGAKRVRELFEEAKKSPCII FIDEI  
DAVGGSRKLDQSAKMTLNELLVQMDGFEDNNGIIVIGATNFMESLDQALLRPGRFDKH  
ITVSLPDVGGRKEILEMYAKKTKLSPDVDLNLARGTTGFSGAELYNLMNQAALKASVDG  
LASITMSVLEYAKDKILMGAERKTAVITEETAKCTAYHEAGHALVAVMTDGAMPIHKATI  
MPRGQSLGMVTMLPEGDQTSQSQKEMKANMDVAMGGRVAEELIFGKEEITSGASSDIANA  
TNVARNMVTKFGFSEEIGLVRYGGSTGQEHASEETRKKIDTEVKRLTDSSYKRAKELLIK  
YQKQHLLAKTLLLEYETLTGDEVDRDLVKKGIKPKRSIINTQGGARGNREVLSTGSSGKSR  
IPGLGKDSSTR  
>comp13669\_c0\_seq2; 754 473 2757 LEN=2932; translated  
MSPLPADPXHLKTAANGDYSRRLFENNFI SINNNTASHGPFHHQMQQYRTFFNVANVLND  
KVETVQLKSLEATANSRPADANAQFEFLNRLHNNHPQAVVDRVSNKMFNRFAVDSRIAT  
LYLQALMQTGKYNQFNMDLLSRLQERDPSILNDDNIQEIIQNQRQLTKQEQVNAMNLL  
ASGGGAIMAGSSRVGGMLGGPGGLSGGAGAAASGRGLDPKNPLFVQLHNPTSARSALISL  
TGRVLI AFVVVSAISALLDEKGVGRGLGMNSGTKHIQQAQDTSDFDDVKGVDEALAELE  
KEIVMYLENPTKFTRLGGKLPRLGLLLTGPPGTGKTLAKAIAAGEAGVPFFFSSGSQFEEV  
YVGLGAKRVRELFEEAKKSPCII FIDEI DAVGGSRKLDQSAKMTLNELLVQMDGFED  
NNGIIVIGATNFMESLDQALLRPGRFDKHITVSLPDVGGRKEILEMYAKKTKLSPDVDL  
NLARGTTGFSGAELYNLMNQAALKASVDGLASITMSVLEYAKDKILMGAERKTAVITEET  
AKCTAYHEAGHALVAVMTDGAMPIHKATIMPRGQSLGMVTMLPEGDQTSQSQKEMKANMD  
VAMGGRVAEELIFGKEEITSGASSDIANATNVARNMVTKFGFSEEIGLVRYGGSTGQEHA  
SEETRKKIDTEVKRLTDSSYKRAKELLIKYQKQHLLAKTLLLEYETLTGDEVDRDLVKKGI  
KPKRSIINTQGGARGNREVLSTGSSGKSRIIPGLGKDSSTR  
>comp13670\_c0\_seq1; 1483 229 3477 LEN=3801; translated  
MSFELDVERFYSRLRKLHGSFVKHKNFWNGAKCLSFQRAGSDEENPYARSVVLQHWLFG  
YELPDTIMVLTDDGNLWVCATKKKCEFIRSAVGKDKDFQIHLLLRDKEDGNAANYATLLK  
QATGEDTGD SATKVGVL MKERAINKEAGDKSIVQSYETKLDENVEAKKIELVDATHGVAL  
VMAVKDQSERDLLKSSILSNKVMKHGFVKRLEDIIEDIIGEDGKIGDTKVSHESEFASEI  
EAI IENPKKIKLEVPADDVQPCYFPIIQSNGKYELKVSAQSTSDSLSPDIIMVSLGAR YK  
LYCSNIARTFLVDPPKKVSKNYEILLEVQEACLEVMQPGNPLKSVYKAAVSYLKKNGHEK  
LVEKLPKNLGFAGLDFRDSTLLLSPKNSVILRKGMVFC LAVGFQNLLEL TESHLSNTPKD  
SPVKKLRTYALMVSDMVSITDKGGEVMTKMSKAITNVAYNVNDVDDDEDDDED DAKLAR  
KLANENDNGRRSKRLARDPNELAEVAEGVAERERRQIALMERRNEDRVREIARQNSKKR  
GKGAEEDQAELEAYRTPRDYPPNVQPNQVKVDMANQCVLLPVFGNPIPFHISTIKNVVL  
PDPDNATLLRINFYTAGIALGKDAPQNMAKLVQKYAPYASFIREMTFRSLDGNNLVAAFR  
QISELRKRARAKEILETEEQNLVKQEKLVRTKNERVPRLSDLTMRPVFAGRKTQGNLEAH  
TNGLRFISTRGEVVDIMYNNIKYAI FQPCENEIMVLIHFHLKNAIMVGKKKHIDIQFFTE  
VVDASQAVDNGRRSMYDPEMDDEQRERTLRKRLNSAFKDFCKKVDMTAKKNNYELEDVDV  
PYRDLGFTGNPHKEMVNVLP TLNCLVNL TETPFFVVDLDDVDHVHFERVTYMSKAFDCIL  
INKDFTKMPWRVDMIPNGDKDAIQEWLTDMDITYTEGPMNLNWKSI LNTAKDDDRFYMNT  
EDDEFKKEAGWEILRMFGNDDDDDEDEDDESEFGEEESAEEEELEEDDEEDYDSVDDD  
ESDFDADEDLEEQGMWDDEMEEQAAIADKKRSRGGEDFEPQRIKRRGGGRDGGSRNQKRR  
RR  
>comp13670\_c0\_seq2; 1060 1 2188 LEN=2512; translated  
XSSDLEKLVKLPKNLGFAGLDFRDSTLLLSPKNSVILRKGMVFC LAVGFQNLLEL TESH

LSNTPKDSPVKKLRITYALMVSDMVSITDKGGEVMTKMSKAITNVAYNVNDVDDDDDEEDDD  
EDAKLARKLANENDNGRRSKRLARDPNELAEVAEVAERERRQIALMERRNEDRVREIA  
RQNSKKRGKGAEEEDQAELEAYRTPRDYPPNVQPNQVKVDMANQCVLLPVFGNPIPFHIS  
TIKNVVLDPDPNATLLRINFYTAGIALGKDAPQNMAKLVQKYAPYASFIREMTFRSLDGN  
NLVAAFRQISELKRARAKEILETEEQNLVKQEKLVRTKNERVPRLSDLTMRPVFAGRKT  
QGNLEAHTNGLRFISTRGEVVDIMYNNIKYAI FQPCENEIMVLIHFHLKNAIMVGKKKHI  
DIQFFTEVVDASQAVDNGRRSMYDPDEMDDEQRERTLRKRLNSAFKDFCKKVDMTAKKNN  
YELEFDVPYRDLGFTGNPHKEMVNVLP TLNCLVNLTE TPFVVDLDDVDHVHFERVYMS  
KAFDCILINKDFTKMPWRVDMI PNGDKDAIQEWLTDMDITYTEGPMNLNWKSILNTAKDD  
DRFYMNTEDDEFTKKEAGWEILRMFGNDDDDDDDEDEDDSEFGEEESAEEEELEEDDEED  
YDSVDDDESDFDADEDLEEQGMWDWEMEEQAAIADKKRSRGGEDFEPQRIKRRGGGRDGG  
SRNQKRRRR

>comp13672\_c0\_seq1; 639 551 2113 LEN=2238; translated  
MQNLEKLRGFVNYQRNPEPYRPPLERLKDWEIINPVPDRDVAHTALERKVQAARCMDC  
GTFPFCQTYTGCPVNNLIPEWNNLVFEDAWDEAIERLHSTNNFPEFTGRVCPAPCEGSCVA  
GLVDNPVTIKNIEYSIIDRAFRDGTKITPRIPEERSGMSVAVVGS GPAGLACADQLNQMGH  
KVTVFERADRIGLLMYGIPNMKLEKETVDRRVNLLREEGIEFVTNADVGNIDVNELNS  
QFDALCLTLGATKPRDLPVPGRELKGVHFAMEFLTANQKLLMTKEGKLESQWEKDNWIT  
AEGKDVIVIGGGDTGTDCIGTSMRHRCNSVTNFELMPQPPMERASDNPWPQWPRVFGIDY  
GHAEVRAATGKDPVYSVMTKELVGDDEGNVKALVTQDVEMTKNGPKAIEGSEREW PADL  
VVL SMGFLSPEAYVTEELGLNVDQRNNIQAVYGDYRTSVEGVFAGGDCRRGQSLVWVAI  
EGRGTADACHQYLNQKRFDVDDSSQLTGAFANLSSLSPTM

>comp13672\_c0\_seq2; 379 1 866 LEN=991; translated  
XGTGRMIFVFSLD SMRADGLMFMFCFFVPSPKHTGFQEF LTANQKLLMTKEGKLESQ  
WEKDNWITAEGKDVIVIGGGDTGTDCIGTSMRHRCNSVTNFELMPQPPMERASDNPWPQW  
PRVFGIDYGHAEVRAATGKDPVYSVMTKELVGDDEGNVKALVTQDVEMTKNGPKAIEGS  
EREWPADLVVLSMGFLSPEAYVTEELGLNVDQRNNIQAVYGDYRTSVEGVFAGGDCRRGQ  
SLVWVAINEGRGTADACHQYLNQKRFDVDDSSQLTGAFANLSSLSPTM

>comp13672\_c0\_seq3; 139 1 522 LEN=522; translated  
LASAHKFLDRRTKDPTMLSRNIVSRPTAVLRRAIRAKSTQVQVEESSASPIASDGRHVHK  
ESFDDIKVQRDGS MQNLEKLRGFVNYQRNPEPYRPPLERLKDWEIINPVPDRDVAHT  
ALERKVQAARCMDCGTFPFCQTYTGCPVNNLIPEWNNLVFEDAWDEAIERPNNL

>comp13672\_c0\_seq4; 644 1 1785 LEN=1910; translated  
LASAHKFLDRRTKDPTMLSRNIVSRPTAVLRRAIRAKSTQVQVEESSASPIASDGRHVHK  
ESFDDIKVQRDGS MQNLEKLRGFVNYQRNPEPYRPPLERLKDWEIINPVPDRDVAHT  
ALERKVQAARCMDCGTFPFCQTYTGCPVNNLIPEWNNLVFEDAWDEAIERLHSTNNFPEFT  
GRVCPAPCEGSCVAGLVDNPVTIKNIEYSIIDRAFRDGTKITPRIPEERSGMSVAVVGS GP  
AGLACADQLNQMGHKVTVFERADRIGLLMYGIPNMKLEKETVDRRVNLLREEGIEFVTN  
ADVGNIDVNELNSQFDALCLTLGATKPRDLPVPGRELKGVHFAMEFLTANQKLLMTKE  
GKLESQWEKDNWITAEGKDVIVIGGGDTGTDCIGTSMRHRCNSVTNFELMPQPPMERASD  
NPWPQWPRVFGIDYGHAEVRAATGKDPVYSVMTKELVGDDEGNVKALVTQDVEMTKNGP  
KAI EGSEREW PADLVVLSMGFLSPEAYVTEELGLNVDQRNNIQAVYGDYRTSVEGVFAGG  
DCRRGQSLVWVAINEGRGTADACHQYLNQKRFDVDDSSQLTGAFANLSSLSPTM

>comp13674\_c0\_seq1; 475 97 1953 LEN=2105; translated  
MVLDEL PYSALKKLADQCTTVVSYFCGNSISKFNDEERDMRVLEES ETPVMSSWQPT  
LRMLSICTYNF AVACNVSLFSGWESEEF TMKVLKRKQQLRHFGVHIGDRRLSGCLPDVI  
EDELNRQWNLLSKIQPSYPKLDFAEKMKSIKQSEWFQSESKTRQETLRHAPIASYAEEDA  
LQVFLAYTAICIHLSRSETDKRLSTRSQQLALSVLVPLSQFCLDETLWDSDIGEAATTLA  
SYEEWQIMAGRAHYQPVGEREGVYQKRIRKSMKREAGKRILYDKKVQEWIEGALSPTS  
DKDFIQIPNTELMKMLWAHADCSKETLVGMQSEGAEEQMRIVHKAMNGLRACYTYAAAEKACL  
LSVALLEMAAVSDCNDPFSCLQQAALFASQATKSGNSDTQYRQSLPEMTKCSPTALII  
GRADCLQAVYFPNEAAYLCSFVARVCR LHRDSREVNFKWNRWKIVGIYAYNVSMIRIT  
VSNILNQTMQAFMAAWERDVVEELERGRDRGRSWINALSRNVKDIGLESGLKLDPSRAK  
NVEKLGADSVGRLELDEQSGVDLASQRTQMQLHTNYDSNVQFEPEELKKKVRQLLGTQ  
IDDGDDGKKVKDIVQYSV

>comp13674\_c0\_seq2; 1118 156 3857 LEN=3879; translated  
MDENDDNDVSIPLR TCGLRSNGKTNSGKKNRLRREIESLHQEMEVTGYAKGLGHRQR  
KVPRDVS KVRTQKRKMLEKIDN ERALLGEEEEPENDNIGDNKSGKKRLRGSRAAAEESV  
IRGSLIFQTAVGVEDDAVDREEEGEEEEEDCDIEIGEMHTKTRNEKDNKFEDKEQSSKKS  
QKTPHHRKTPKSSRSGGPSTKRRKMYRLRNFSFKMAQKHGDALAAHARGQPGLAIEQL

KEVARGAPSAPQVYSSGLMVYEDMLKESRKRHRHEMELSGATSSVESTKQKTEVIQAEES  
DQGESKEESIPDRFLANQCILATKAYGSHHVAAILCKKDFTLWVRAGDSAIDIADVHDEV  
MKLPHLSEKLCCEYHSMKRRWQDEALRDFIVADNLKPAGIDVPAKLALMHMQLGNLSEAL  
TILTDLKNRAGYDFHCSYRAWMLYSDLMLRLGHCEIQWNKGIQTNENYMFRRWLRKFSKI  
FDWQERRLQALSLAFEEAAAGTENVKIFLDWIRNRIVEKTKCAKEVNSKALSSEISTRNQS  
EQLNAESSLPGFPEKLRQDSTESIKESKQAGKNENTEKGKTTLHENEKEGFQVTKEKKLM  
ELNHSRELEAFDKTTTEMNLPVGLAAAKERDLARSVLLKSHDAALSKLLKEYAEKQEDYV  
SNAKGEEKIIGMNAGPLPISGSIRKVCISIASELMKHLGLLELYDGAKLVGDAVSFYMKQ  
RACRYEVKIEAKKKADEWQRKILDSPPFFIDSYDDGNVSNDEIDLPLYSDDETLLNDVEDS  
PLIESLRKALTPEIRVLYGLALIGEGGRNFIAAKALEAIDDLEQESEEWFSEDESKRKH  
MVEPFWVLFRRAMTEELRRTGAYAFIADVLKTNKEYEWGFHFAPLFRRHLESLKHKGSV  
DKLLGLENVTPNMTFKKNQLLKVILEACKFEMYIIDEPLETKYAFNKLPLSLRKKRTDI  
AQSVLASIVNIIPLAWCIEGNGNLPPICAEIVKVLAKCIGWLSTMVDELPHYALKKLAD  
QCTTVVSYFCGNSISKFNDEERDMRVLEESSETFPVMSSWQPTLRMLSICTYNFAVACN  
VSLFSGWESEEFMTKVLKRKQGLRHFGVHIGDRRLSGCLPDVIEDELNRQWNLLSKIQP  
SYPKLDFAEKMSIKQSEWFQSESKTRQETLRHAPIASYAEEDALQVFLAYTAICIHLSR  
SETDKRLSTRSQQLALSVLVPLVSVTIQYSLES

>comp13674\_c0\_seq3; 1334 156 5024 LEN=5176; translated

MDENDDNDVSIPLRTRCGLRSNGKTNSSGKNRLRREIESLHQEMEVTGYAKGKLGHRQR  
KVPRDVSQVTRQKRKMLEKIDDNERALLGEEEEPENDNIGDNKSGKRLRGRSRAAAEESV  
IRGSLIFQTAVGVEDDAVDREEEGEEEEEDCDIEIGEEMHTKTRNEKDNKFEDKEQSSKKS  
QKTPHHRKTPKSSRSGGPSTKRRKMYRLRFQSFKMAQKHGDALAAHARGQPGLAIEQL  
KEVARGAPSAPQVYSSGLMVYEDMLKESRKRHRHEMELSGATSSVESTKQKTEVIQAEES  
DQGESKEESIPDRFLANQCILATKAYGSHHVAAILCKKDFTLWVRAGDSAIDIADVHDEV  
MKLPHLSEKLCCEYHSMKRRWQDEALRDFIVADNLKPAGIDVPAKLALMHMQLGNLSEAL  
TILTDLKNRAGYDFHCSYRAWMLYSDLMLRLGHCEIQWNKGIQTNENYMFRRWLRKFSKI  
FDWQERRLQALSLAFEEAAAGTENVKIFLDWIRNRIVEKTKCAKEVNSKALSSEISTRNQS  
EQLNAESSLPGFPEKLRQDSTESIKESKQAGKNENTEKGKTTLHENEKEGFQVTKEKKLM  
ELNHSRELEAFDKTTTEMNLPVGLAAAKERDLARSVLLKSHDAALSKLLKEYAEKQEDYV  
SNAKGEEKIIGMNAGPLPISGSIRKVCISIASELMKHLGLLELYDGAKLVGDAVSFYMKQ  
RACRYEVKIEAKKKADEWQRKILDSPPFFIDSYDDGNVSNDEIDLPLYSDDETLLNDVEDS  
PLIESLRKALTPEIRVLYGLALIGEGGRNFIAAKALEAIDDLEQESEEWFSEDESKRKH  
MVEPFWVLFRRAMTEELRRTGAYAFIADVLKTNKEYEWGFHFAPLFRRHLESLKHKGSV  
DKLLGLENVTPNMTFKKNQLLKVILEACKFEMYIIDEPLETKYAFNKLPLSLRKKRTDI  
AQSVLASIVNIIPLAWCIEGNGNLPPICAEIVKVLAKCIGWLSTMVDELPHYALKKLAD  
QCTTVVSYFCGNSISKFNDEERDMRVLEESSETFPVMSSWQPTLRMLSICTYNFAVACN  
VSLFSGWESEEFMTKVLKRKQGLRHFGVHIGDRRLSGCLPDVIEDELNRQWNLLSKIQP  
SYPKLDFAEKMSIKQSEWFQSESKTRQETLRHAPIASYAEEDALQVFLAYTAICIHLSR  
SETDKRLSTRSQQLALSVLVPLVPLVPLVPLVPLVPLVPLVPLVPLVPLVPLVPLVPLVPLV  
VGEREGVYQKRIRKSMKREAGKRILYDKKVQEWIEGALSPTSDFIQIPNTELKMLWAHA  
DCSKETLVGMQSEGAEQMRIVHKAMNGLRACYTYAAAEKACLNLSVALLEMAAVSDCND  
PFSCLOQAALFASQATKSGNSDTQYRQSLPEMTCSPTEALIIIGRADCLQAVYFPNEAA  
YLCSFVARVCLHRDSREVNFKWDRWKIVGIYAYNVSMIRITVSNILNQTMQAFMAA  
WERDVVEELERGRDRGRSWINALSRNVKIDIGLESGLKLDPSRAKNVEKLOGADSVGRLEL  
DEQSGVDLASQRTQMQLHTNYDSNVQFEPEELKKKVRQLLGTQIDDDGDKKVKDIVQY  
SV

>comp13674\_c0\_seq4; 259 97 786 LEN=808; translated

MVDELPHYALKKLADQCTTVVSYFCGNSISKFNDEERDMRVLEESSETFPVMSSWQPT  
LRMLSICTYNFAVACNVSLFSGWESEEFMTKVLKRKQGLRHFGVHIGDRRLSGCLPDV  
IEDELNRQWNLLSKIQPSYPKLDFAEKMSIKQSEWFQSESKTRQETLRHAPIASYAEEDA  
LQVFLAYTAICIHLSRSETDKRLSTRSQQLALSVLVPLVPLVPLVPLVPLVPLVPLVPLV  
PLVPLVPLVPLVPLVPLVPLVPLVPLVPLVPLVPLVPLVPLVPLVPLVPLVPLVPLVPLV

>comp13674\_c0\_seq5; 907 156 3144 LEN=3144; translated

MDENDDNDVSIPLRTRCGLRSNGKTNSSGKNRLRREIESLHQEMEVTGYAKGKLGHRQR  
KVPRDVSQVTRQKRKMLEKIDDNERALLGEEEEPENDNIGDNKSGKRLRGRSRAAAEESV  
IRGSLIFQTAVGVEDDAVDREEEGEEEEEDCDIEIGEEMHTKTRNEKDNKFEDKEQSSKKS  
QKTPHHRKTPKSSRSGGPSTKRRKMYRLRFQSFKMAQKHGDALAAHARGQPGLAIEQL  
KEVARGAPSAPQVYSSGLMVYEDMLKESRKRHRHEMELSGATSSVESTKQKTEVIQAEES  
DQGESKEESIPDRFLANQCILATKAYGSHHVAAILCKKDFTLWVRAGDSAIDIADVHDEV  
MKLPHLSEKLCCEYHSMKRRWQDEALRDFIVADNLKPAGIDVPAKLALMHMQLGNLSEAL  
TILTDLKNRAGYDFHCSYRAWMLYSDLMLRLGHCEIQWNKGIQTNENYMFRRWLRKFSKI

FDWQERRLQALSLAFEAAAGTENVKIFLDWIRNRIVEKTKCAKEVNSKALSSEISTRNQS  
EQLNAESSLPGFPEKLRQDSTESIKESKQGAGKNENTEGKTTLHENEKEGFQVTKEKLM  
ELNHSRELEAFDKTTTEMNLVPLGLAAKERDLARSVLLKSHDAALSKLLKEYAEKQEDYV  
SNAKGEEKIIGMNAGPLPISGSIRKVCISASELMKHLGLLELYDGAKLVGDAVSFYMKQ  
RACRYEVKIEAKKKADEWQRKILDSPPFFIDSYDDGNVSNDEIDLPLYSDDETLLNDVEDS  
PLIESLRKGALTPAIRVLYGLALIGEGGRNFIAAKALEAIDDLEQESEEWFSEDESKRKH  
MVEPFWVLFRRAMTEELRRTGAYAFIADVLKTNKEYEWGFHFAPLFRRHLESCLKHKGVS  
DKLLGLRENVTPNMTFKKNQLLKVILEACKFEMYIIDEPLETKYAFNKLPSLSRKKRTDI  
AQSVLASIVNIIPLAWCIEGNGNLPICAEVSDTVGX

>comp13675\_c0\_seq1; 503 1 1325 LEN=1729; translated  
XDDQTTIWLEHSLDVSSNNLYIPFVAVSRGGFPSIHQAHSFAFSSYGSRRNGTTSKSLFP  
QQERGWISGTTTRKIPTTAMASLTSSALSSANDSSTAAPVVRFDIGANLLDSKYTEGVYF  
GKKRHEPDFDEVLSVRQGVTHIILTAGTLAESREAVSVVQYRRTKWQEEDAPPPFLG  
CTVGVHPTRCQQEFIDNLDGETAQETEPRTADHVLDDLFALMSDAFDRGYIVAIGEIGLD  
YDRLEFSRQVQIEFFRRQLDRFLYGDRPEMGSPLPLFLHNRVSGTDVLDILKENRARVNS  
HSQAPVPIKGVVHSFDDSLLELAREFIDLGLYIIGLNGCSLKTENLAVVKELPLERILLET  
DCPYCEIKATHAGHQYVKTTFPKKADKKFELGTMVKGRNEPCQIVQVAEVIAGVKGITVE  
EVAERCYANSMELYGNAFGKA

>comp13677\_c0\_seq1; 359 1 1080 LEN=1142; translated  
RIENHCLYFTGSCILWTRLSGATGFGNDLTNASARSTSSQARYGQANMVAGRETAGPDGG  
GNSNSNSDSNSSENSGRDGLSFVARHHDPEQWPHLVLVGPEANLSALRGTDEQTRWTFEE  
RNRVVSPLPEGLGPLVMESSLSVNATVASPSSTGAEETDGEDSPAELSTTTVSGEVFT  
NRQVLFVATDPDESSDLAIGAACIVLHAMAEPEVPGVYLQLSAESGSGSAPPAEVTLP  
IPGKNGGGDAGDPFQELFDALCRLVSLHPLEPDSGDDGGLFGAGGVIGGGFGDDGAADY  
GEHDFVWAGGDSLAASAAPAGSPEREAMLHDLRLLVPPGLEVGEDGQFDDAADETP

>comp13678\_c0\_seq1; 292 158 754 LEN=1471; translated  
MTRLSFLLFIVIFSAFNVFAENEAESTAMDLNYSVDAYECDSEFHALEEKYKKKPNVYR  
ICFEPSKIAKAAGVAIKSIDSWEWSSKHAQGEAKQKAVIGGEGLDGLSIFECLDEGRKCF  
LDTYLGSDFYTNAASVVGEGTATMTAGRGTVPVTKNLFASFELKDDDLKAQLEGQQA  
LAAENDGARSDNSTKEEL

>comp13679\_c0\_seq1; 221 751 1545 LEN=1653; translated  
MDRLQMPGTD FENKELVNLI GELVKIDKDWIPSGEGYSLYIRPTVIATHQFLGVAPPESI  
LLFVICSPVGPYYKTGFDP IKLTADTDCVRAWPGGTGNAKVGGNYAATMKPAAVAAAKGY  
SQILWLYGENDEVTEVGAMNFFVYWINKDTNRPELV TASLDRGDILPGVTRDSILELTRE  
WGDFDV SERSITMNEIKEASQENRLLLEAFGAGTAAVVTPVSCIQYKGEDIAIPAVGDLTR  
RVWDEIVGIQYRKIDGPPGWIVEL

>comp13679\_c0\_seq2; 185 1280 1750 LEN=1858; translated  
MKPAAVAAAKGYSQILWLYGENDEVTEVGAMNFFVYWINKDTNRPELV TASLDRGDILPG  
VTRDSILELTREWGDFDV SERSITMNEIKEASQENRLLLEAFGAGTAAVVTPVSCIQYKGE  
DIAIPAVGDLTRRVWDEIVGIQYRKIDGPPGWIVEL

>comp13679\_c0\_seq3; 260 519 1436 LEN=1544; translated  
MRTTFLGLECFEGMKAYRSEDEDSINLFRPDKNMERLTNSMDRLQMPGTD FENKELVNLI  
GELVKIDKDWIPSGEGYSLYIRPTVIATHQFLGVAPPESILLFVICSPVGPYYKTGFDP  
IKLTADTDCVRAWPGGTGNAKVGGNYAATMKPAAVAAAKGYSQILWLYGENDEVTEVGAM  
NFFVYWINKDTNRPELV TASLDRGDILPGVTRDSILELTREWGDFDV SERSITMNEIKEA  
SQENRLLLEAFGAGTAAVVTPVSCIQYKGEDIAIPAVGDLTRRVWDEIVGIQYRKIDGPPG  
WIVEL

>comp13679\_c0\_seq4; 308 95 1312 LEN=1420; translated  
MNSRVVSLVSSSERLLALRRASHRCNFRGRSKTSVRFISSDLIVNLKTRDRSHFENRPKK  
EDLVFGHTFTDHMLTIEWDTKSGWGPKKISPYQNLQISPAASSLHYGLECFEGMKAYRSS  
EEDSINLFRPDKNMERLTNSMDRLQMPGTD FENKELVNLI GELVKIDKDWIPSGEGYS  
LYIRPTVIATHQFLGVAPPESILLFVICSPVGPYYKTGFDP IKLTADTDCVRAWPGGTGNA  
KVGGNYAATMKPAAVAAAKGYSQILWLYGENDEVTEVGAMNFFVYWINKDTNRPELV TAS  
LDRGDILPGVTRDSILELTREWGDFDV SERSITMNEIKEASQENRLLLEAFGAGTAAVVTP  
VSCIQYKGEDIAIPAVGDLTRRVWDEIVGIQYRKIDGPPGWIVEL

>comp13679\_c0\_seq5; 185 1171 1641 LEN=1749; translated  
MKPAAVAAAKGYSQILWLYGENDEVTEVGAMNFFVYWINKDTNRPELV TASLDRGDILPG  
VTRDSILELTREWGDFDV SERSITMNEIKEASQENRLLLEAFGAGTAAVVTPVSCIQYKGE  
DIAIPAVGDLTRRVWDEIVGIQYRKIDGPPGWIVEL

>comp13679\_c0\_seq6; 185 1047 1517 LEN=1625; translated

MKPAAVAAAKGYSQILWLWYGENDEVTEVGAMNFFVYWINKDTNRPELVLTASLDRGDILPG  
VTRDSILELTREWGDFDVSERSITMNEIKEASQENRLLLEAFGAGTAAVVTVPVSCIQYKGE  
DIAIPAVGDLTRRVWDEIVGIQYRKIDGPPGWIVEL

>comp13680\_c0\_seq1; 524 1 2695 LEN=2695; translated  
XGFELDNQEKDLTSSGASLASSNASTLAASRLQLDRLTEDCRQNLTTGGATISSKSSNRAI  
LPSIHDI ELESRLDDDDDDNNYTDGDEDSFFVVGADLSIDDTTATTHSKKNDWLLRMNRRL  
TEVAVGDLDPSTTPIPAIMNAWAKTKSSHGASMVEKWLNRQAEEYDAGNIKVVPTNKMFT  
MAVDAWAKSGEGVSAAQRAETILQHMKKYQTTGLDDLRLPTTGI FNAVINAWARSKDKIA  
PSRAEQILKWMNDLHKSNSPSIQPKYTFNTVIHAYAKSGGAGAAKKAQELLNKMHYMYKQ  
GNDLAKPDTITYNVVINSLAKSGGKNAAREAEKLLGKMDILYENGDVNVKPNVVTYGAVI  
DAYAKSGEKHAAARADALLAKMIHLNQIDPTTHSDLSPNTYVFNTVINAHAKSKEHDAAS  
KAEEMLLAMNRLHLQGLPNLKPDAFTYTAVIDAWAKSGYRGAAARADQLLDTMESKYL  
LAGDIGLKPNTFTYNAVINALAKSGEPSAAARAERVLHNMVNRHKHGGSDDVKPTTINFNSVL  
DAWAKSGGGRKAAERAEIELEWMDRLYKSGNYSVKPDTITFNAVLDAWARSCKMAAHRA  
EQILDHMEDELRYRAGNEGVPDITYNTLINAHAKSSEKGSAAAEHVLQVMKQRYLDGDG  
DFKPNTRTHTSVIDAWAKSGERGAARRAEQILNSMIATFEESGDYDSKPNVHTANAVCNA  
CAFTKREEDRLGALQISFRVYDWLAAQPDIEPDAYTYTILLSVCSNLLPREDRSSRFSHA  
KSFFEKCCESGHVNDYVLRKLRQTVSEQEYLLVNFQAGTLP PPGHGKLVTEIGAF  
LIPLVVGKVGVRTVHGRIIPEEETTAHEIIFRDFHHDFFSHSEYTVKRIRTQFIFHLFSEVX

>comp13680\_c0\_seq2; 880 213 3910 LEN=3910; translated  
MNEKFVNSGEEEREELNFSFQSSNNNIRRHDFDESVPQWDMRAAPPGSVDNEVHLGIEQNA  
STNQHRYQNFHPSEVNNQWINYSAQSGFSQKNRDAKSQNIWSQKQLLPKASDLSFHSSSA  
GPSIGAFSADTRNSQFQTSKAESYDSSIRDISESISQFHLKGTGDDAKTAIASISSNNTY  
GSNVIPGVVAASSGSTGGTGETSLTGQRYQQIYSHGRRNAQSTMNSNAQIYYPKAHSLQQ  
QPPPGFESHVLEDSIFPRYQNDVRHGNRSRQKTNNRRGWQKKEKPKAEENLNNGKGM  
MYRKNRQKQPTPQTGFELDNDSYATI QDSSTTSSRAIRVIMNPQEKDLTSSGASLASSNAST  
LAASRLQLDRLTEDCRQNLTTGGATISSKSSNRAILPSIHDI ELESRLDDDDDDNNYTDGDD  
EDSFFVVGADLSIDDTTATTHSKKNDWLLRMNRRLTEVAVGDLDPSTTPIPAIMNAWAKTK  
SSHGASMVEKWLNRQAEEYDAGNIKVVPTNKMFTMAVDAWAKSGEGVSAAQRAETILQH  
MKKYQTTGLDDLRLPTTGI FNAVINAWARSKDKIAPSRAEQILKWMNDLHKSNSPSIQPKY  
TFNTVIHAYAKSGGAGAAKKAQELLNKMHYMYKQGNDLAKPDTITYNVVINSLAKSGGKN  
AAREAEKLLGKMDILYENGDVNVKPNVVTYGAVIDAYAKSGEKHAAARADALLAKMIHLN  
QIDPTTHSDLSPNTYVFNTVINAHAKSKEHDAASKAEEMLLAMNRLHLQGLPNLKPDAFT  
YTAVIDAWAKSGYRGAAARADQLLDTMESKYLADIGLKPNTFTYNAVINALAKSGEPSA  
AARAERVLHNMVNRHKHGGSDDVKPTTINFNSVLDAWAKSGGGRKAAERAEIELEWMDRL  
YKSGNYSVKPDTITFNAVLDAWARSCKMAAHRAEQILDHMEDELRYRAGNEGVPDITYNT  
TLINAHAKSSEKGSAAAEHVLQVMKQRYLDGDGDFKPNTRTHTSVIDAWAKSGERGAAR  
RAEQILNSMIATFEESGDYDSKPNVHTANAVCNACAFKREEDRLGALQISFRVYDWLAA  
QPDIEPDAYTYTILLSVCSNLLPREDRSSRFSHAQSSFFEKCCESGHVNDYVLRKLRQTVS  
EQEYLLVNFQAGTLP PPGHGKLVTEIGAF  
LIPLVVGKVGVRTVHGRIIPEEETTAHEIIFRDFHHDFFSHSEYTVKRIRTQFIFHLFSEVX

>comp13680\_c0\_seq3; 257 1 975 LEN=975; translated  
XGFELDNQEKDLTSSGASLASSNASTLAASRLQLDRLTEDCRQNLTTGGATISSKSSNRAI  
LPSIHDI ELESRLDDDDDDNNYTDGDEDSFFVVGADLSIDDTTATTHSKKNDWLLRMNRRL  
TEVAVGDLDPSTTPIPAIMNAWAKTKSSHGASMVEKWLNRQAEEYDAGNIKVVPTNKMFT  
MAVDAWAKSGEGVSAAQRAETILQHMKKYQTTGLDDLRLPTTGI FNAVINAWARSKDKIA  
PSRAEQILKWMNDLHKSNSPSIQPKYTFNTVIHAYAKSGGAGAAKKAQELLNKMHYMYKQ  
GNDLAKPDTITVSKLVYAVLSPSNX

>comp13680\_c0\_seq4; 912 213 4003 LEN=4003; translated  
MNEKFVNSGEEEREELNFSFQSSNNNIRRHDFDESVPQWDMRAAPPGSVDNEVHLGIEQNA  
STNQHRYQNFHPSEVNNQWINYSAQSGFSQKNRDAKSQNIWSQKQLLPKASDLSFHSSSA  
GPSIGAFSADTRNSQFQTSKAESYDSSIRDISESISQFHLKGTGDDAKTAIASISSNNTY  
GSNVIPGVVAASSGSTGGTGETSLTGQRYQQIYSHGRRNAQSTMNSNAQIYYPKAHSLQQ  
QPPPGFESHVLEDSIFPRYQNDVRHGNRSRQKTNNRRGWQKKEKPKAEENLNNGKGM  
MYRKNRQKQPTPQTGFELDNDSYATI QDSSTTSSRAIRVIMNPQEKDLTSSGASLASSNAST  
LAASRLQLDRLTEDCRQNLTTGGATISSKSSNRAILPSIHDI ELESRLDDDDDDNNYTDGDD  
EDSFFVVGADLSIDDTTATTHSKKNDWLLRMNRRLTEVAVGDLDPSTTPIPAIMNAWAKTK  
SSHGASMVEKWLNRQAEEYDAGNIKVVPTNKMFTMAVDAWAKSGEGVSAAQRAETILQH  
MKKYQTTGLDDLRLPTTGI FNAVINAWARSKDKIAPSRAEQILKWMNDLHKSNSPSIQPKY  
TFNTVIHAYAKSGGAGAAKKAQELLNKMHYMYKQGNDLAKPDTITYNVVINSLAKSGGKN



AAREAELKLLGKMDILYENGDNVVKPNVVTYGAVIDAYAKSGEKHAARADALLAKMIHLN  
QIDPTTHSDLSPNTYVFNTVINAHAKSKEHDAASKAEEMLLAMNRLHLQGLPNLKPDAFT  
YTAVIDAWAKSGYRGAAARADQLLDTMESKYLADIGLKPNTFTYNAVINALAKSGEPSA  
AARAERVLHNMVNRHKHGGSDDVKPTTINFNSVLDAWAKSGGGRKAAERAEIILEWMDRL  
YKSGNYSVKPDTITFNAVLDAWARSGCKMAAHRAEQILDHMDELYRAGNEGVPDITYTYN  
TLINAHAKSSEKGSAAARAEHVLQVMKQRYLDGDGDFKPNTRTHTSVIDAWAKSGERGAAR  
RAEQILNSMIATFEESGDYDSKPNVHTANAVCNVCFVTFEFVVLFPHL

>comp13680\_c0\_seq5; 613 213 2190 LEN=2190; translated  
MNEKFNVSSEESREELNFSFQSSNNNIRRHFDSEVPQWDMRAAPPGSVDNEVHLGIEQNA  
STNQHRYQNFHPSEVNNQWINYSAQSGFSQKNRDAKSQNIWSQKQLLPKASDLFSHSSSA  
GPSIGAFSADTRNSQFQTSKAESYDSSIRDISESISQFHLKGTGDDAKTAIASISSNNTY  
GSNVI PGVVAASSGSTGGETSLTGQRYQQIYSHGRRNAQSTMNSNAQIYYPKAHSLQQ  
QPPPGFESHVLEDSIFPRYQNDVRHGNSRKQTNNRRGWQKKEKPKAEAEENLNGKGMKMY  
RKNRQKQPTPQTGFELDNDSYATIQDSSTTSRAIRVIMNPQEKDLTSSGASLASSNAST  
LAASRLQLDRLTEDCRQNLTTGGATISSKSSNRAILPSIHDIELESLRDDDDDDNNYTDGDD  
EDSFFVVGADLSIDDDTTATTHSKKNDWLLRMNRRLTEVAVGDLDPSTTPIPAIMNAWAKTK  
SSHGASMVEKWLNRQEEYDAGNIKVVPTNKMFTMAVDAWAKSGEGVSAAQRAETILQHM  
NKKYQTTGLDDLPTTGIFNAVINAWARSKDKIAPSRAEQILKWMNDLHKSNSPSIQPKY  
TFNTVIHAYAKSGGAGAAKKAQELLNKMHMYKQGNDLAKPDTITVSKLVTYAVLSPSNX

>comp13680\_c0\_seq6; 556 1 2207 LEN=2788; translated  
XGFELDNQEKDLTSSGASLASSNASTLAASRLQLDRLTEDCRQNLTTGGATISSKSSNRAI  
LPSIHDIELESLRDDDDDDNNYTDGDDDEDSFFVVGADLSIDDDTTATTHSKKNDWLLRMNRRL  
TEVAVGDLDPSTTPIPAIMNAWAKTKSSHGASMVEKWLNRQEEYDAGNIKVVPTNKMFT  
MAVDAWAKSGEGVSAAQRAETILQHMKKYQTTGLDDLPTTGIFNAVINAWARSKDKIA  
PSRAEQILKWMNDLHKSNSPSIQPKYTFNTVIHAYAKSGGAGAAKKAQELLNKMHMYKQ  
GNDLAKPDTITYNVVINSLAKSGGKNAAREAEKLLGKMDILYENGDNVVKPNVVTYGAVI  
DAYAKSGEKHAARADALLAKMIHLNQIDPTTHSDLSPNTYVFNTVINAHAKSKEHDAAS  
KAEEMLLAMNRLHLQGLPNLKPDAFTYTAVIDAWAKSGYRGAAARADQLLDTMESKYLAD  
DIGLKPNTFTYNAVINALAKSGEPSAARAERVLHNMVNRHKHGGSDDVKPTTINFNSVLD  
AWAKSGGGRKAAERAEIILEWMDRLYKSGNYSVKPDTITFNAVLDAWARSGCKMAAHRA  
EQILDHMDELYRAGNEGVPDITYTYNTLINAHAKSSEKGSAAARAEHVLQVMKQRYLDGDG  
DFKPNTRTHTSVIDAWAKSGERGAARRAEQILNSMIATFEESGDYDSKPNVHTANAVCNV  
CFVTFEFVVLFPHL

>comp13681\_c0\_seq1; 910 127 3252 LEN=3275; translated  
MEAEVARAALALVQPTTDPVSRREASRFLEEWTPDQALDVYTKWLASYRHQDKSKPGSG  
AAGYEMPMQMLCLTMLQSRRLRQEMLRSSSTNPNAMAALRVELWEYLRQQPDLDRSLIGPC  
CICNAITIVRNKDGSLAEFLANARKNAVGLPETVLRLLGCIPEMEARQDLTTAQAME  
ALQLHLEVTLDLIGKGLVGGFILPACQALIAWIETSQVLSQINTPTCGGSMALLPILIK  
LLSSSDANFDEVTLQTVSRALTAAGITSDYGTPTRQAAAAAFWMAIPQGGFIVNPLQVA  
AANEWDASHALASMLATFLVENAEAVGQPADIGLRVLEIQSHPSTSVALIPLCWLTV  
VQEIPTAERNEQWSKPLFRNLVEILLRRMAYPVNFTTWESDDELVDSSDFSEFRRMVADV  
LVSCYYLLRVEMIQILVQQVRVATDWRMSEVALFALAQIAKDVCAARCRSHAAEGTSIARD  
RQATQQEQLLQLEQLIAVGAHTMASQHKYLLGAVANFCGNYS PAWN SMECPPQAILQLLV  
YLQSAFATMPLDTAKATRAIYVSVCLVK SMPNLEDLYANS GTANAGNENSPASSFLPLVLK  
SVRNSMEAAALSTTDEEAMTTVAEGATRLITKLNPEMARQAMTTDLIQPVNTRIDAALNV  
LPKSNITQEWMTVPVQSATESLARYLAVRVI SRFC DAPHI PAMGEWMLHLLDPCLQTLQ  
QRTSSTPAQSILLSKWSIHQQILRKTLPQQNMMVAIFTNTIPLIVQALEQTRDPATLKY  
ITTAVEVFGGQTIEMDKSFQDLLVHVTTVMTSQNNLCEEMELLESYFECLHRFILYCPRA  
LCYNPKISDIVNIAVGSVSAIDSKDSTRAALVFLSQLFGWNSLRLSNDTINVLREAWNLSL  
ILKELLLRNGQELIQSCFVLGAGSQMLWPAYSDCVFSIVQAITLNEKEGLATQTNPGDG  
ISPQLNEELLKQWLFSSMTLNKSNVETPLNPEISNQIIPILLTLARNGSKSRPKGMILLI  
DYAKIRKGEMLTLESLSISLS

>comp13682\_c0\_seq1; 645 86 1585 LEN=1768; translated  
MSNAEKFLAAAEEFPEDALDAEKKLYEHPLVKRYATKEMSFVWSPA KKF TTRK LWTALA  
TAEQELGVEISDEQLEEMRAHLFDIDFELAGKKEAEFRHDMGHVHAFGEVAPKAMPIIH  
LGATSCYVGDNTDIVQIRDALFLIKRKLVTLAAILKDFAVEHKDLPTLGFTHYQPAQLTT  
VGKRCCLWMQELMMDYERVVLEIENLPMRGVKGTGTQATFLELFEGDHEKVKALNKRVC  
ELMGFDKSI PVSGQTYTRKIDFTVLSVLSGISQSAYKMGDIRLLANLKEVEEPPAKTQI  
GSSAMAYKRNPMSERCCSLARYVMGLPNAAANTAANQWFERTLDDSAIRRIILPEGFLA  
VDVILTLTNI GDGLHVWPEVVAHVMAELPFMSTEVILMECVKAGGDRQELHEAIRVHS

MDAGAVVKGEGKPNLDMERIAKDPLFAAVHDKLDTLVDPKLFVGRAPQQVDEFIKDEIQP  
ILDANKDLISQESVDSVNV  
>comp13685\_c0\_seq1; 352 1 596 LEN=1084; translated  
XAAAAAGFNPMIAAMQQOHTQHHPANPMMGYHPMPGGMTPQQQAMMQAGMMAVMQQQQQQQ  
SAAAATAGGPPPPPHHPSPYSYSQQHPPPNPYAYSQPPP IPGQAAAAATSPSSASGFSPS  
AAYAQAAGIAGGFAMPPQQTQQAAQQSPGGASEAASAHHPSSSTAPAAPASDRANAVPGGS  
AASPASKREGDTGNNEIV  
>comp13685\_c1\_seq1; 489 210 1243 LEN=1243; translated  
MSPEEGATNEDVVTNTGSEPDIKPGSKDTEDDSDAGKDKDNKSTEAASDAKPNNDGNETKD  
EAAVATPEIATTTVPVGKEEAPAASAEKEDGSKEEETGTIEGDAKDEKEDKDPATPAIDGN  
YEPKSELVMQAEHAKNNKDQPAPCDTAVRPNNDVLFGRGKPFQNHHPGNRKMGLIDQY  
KRQYNESPRDQKRPIVEEIIIGILTRDGGFRFLRRYNEDTNSTWWTEVVKQVAFDKVSHAFR  
SRGRSKASDAASAKASLAQARAAAAAVGQHTQMHHPRHPQQPAHHAPQHGHPPPPHQY  
YHPHHPGAPHHHPHHPGQYGTTPAGQFVTGQFGQYGMPPPGTAAV  
>comp13686\_c0\_seq1; 322 35 1415 LEN=1415; translated  
MKFTTDSGGAPQATPPGAGAFGAPRGPPAPGGFRAPAPPGGPGAPPPPAPMMQQRSPAPG  
GMPGMPQGMAPQQNVYQDNIDFNITIPDRFFRMTCDKVPATSNIAMQSKVPLGGVVRPL  
APCGPDDDEIPTIQPGTAGIIRCKRCRTYINAFVNVDHGRSWRCNICAIQINNTPSAYFC  
HLDDNGFRSDRFRPELSQGIVEFIAPQEYMVRPPQEPTYFFVIDVSAQAIHSGMLECAV  
NAIKRSLDDLPGGKRTKIGFITFDNSVHYFNLAPDLAQPQMLVISSLKELFVPLPDNLLV  
NLRESRHVVDSFLXQPSGMFVKNPVPQAQSLGPALKAAFTVMKPVGGKMLVFQSIQPNMG  
DGALKPRENPSVMGTNKEVGLLRDNEWYQVTAVEFSRQQISVDMFLFPYSYIDIASLGE  
LPKYSSGSLHSYVMFDRDKDGPRFEEQLHKTLVAETAFAEAX  
>comp13686\_c0\_seq2; 1011 106 3259 LEN=3259; translated  
MGFPPPPPPNSNQFKAPPPPPAAGGFAPPPPPGGSGFAPPPPGGAFGARPPPPGPPGG  
GAFGARPPPPGPPGGGFAPPPAPDAGVKQLNQGMANMSFQPPPPGGGAPQATPPGAGA  
FGAPRGPPAPGGFRAPAPPGGPGAPPPPAPMMQQRSPAPGGMPPGMPQGMAPQQNVYQDN  
IDFNITIPDRFFRMTCDKVPATSNIAMQSKVPLGGVVRPLAPCGPDDDEIPTIQPGTAGI  
IRCKRCRTYINAFVNVDHGRSWRCNICAIQINNTPSAYFCHLDDNGFRSDRFRPELSQ  
IVEFIAPQEYMVRPPQEPTYFFVIDVSAQAIHSGMLECAVNAIKRSLDDLPGGKRTKIGF  
ITFDNSVHYFNLAPDLAQPQMLVISSLKELFVPLPDNLLVNLRESRHVVDSFLXQPSGMF  
VKNPVPQAQSLGPALKAAFTVMKPVGGKMLVFQSIQPNMGDGALKPRENPSVMGTNKEV  
LLRRDNEWYQVTAVEFSRQQISVDMFLFPYSYIDIASLGE  
GPRFEEQLHKTLVTETAFEAVMRTRVTKGMKISNYYGNFNIRGSDLMALPNVNSDSVFGF  
DLAHDGENLASSYVTIQSALLFTNGDGQRIRVMTQAFPTTTVTSELVSGVDPFATFNLL  
AKQAIQIDVSLKTSLDNARMRLQQTCVDLIRSAKGGGVRTVSGYAVPQAPQSGESEDDSLPP  
SLELFLPLYTLALMKNVAFRGGTDVHPDERLQAFFNINQMWLKSRAYVYPSLFLSHDMEP  
NAGYPSERDTDDAVDDSFAGRNRVLLPSALPLTIDSLSSDGIYLVNDNGVEFYLWIGRETD  
PNYVNELFVPSLENVDPMLNLEGGGKFSERIATIIISALREDESDPYSVSSKIFVVKEGD  
LHAEARFFWFVVEDRASFGGTFYSYEDFMNFVMNPAGPGAPGGPAPPQAPQGRDPM  
QHRGGPPGGPQPPGRQQYQAPSKPGPPQPAYGQPPPPHPMGGRGPPAPQQQYQAPPQP  
GPPMAGRPPPPQQQYQAPPQQGPPPSAYGX  
>comp13686\_c0\_seq3; 316 35 1439 LEN=1439; translated  
MKFTTDSGGAPQATPPGAGAFGAPRGPPPPGQFPAPGGFRAPAPPGGPGAPPPPAPMM  
QQRSPAPGGMPPGMPQGMAPQQNVYQDNIDFNITIPDRFFRMTCDKVPATSNIAMQSKV  
LGGVVRPLAPCGPDDDEIPTIQPGTAGIIRCKRCRTYINAFVNVDHGRSWRCNICAIQIN  
NTPSAYFCHLDDNGFRSDRFRPELSQGIVEFIAPQEYMVRPPQEPTYFFVIDVSAQAIH  
SGMLECAVNAIKRSLDDLPGGKRTKIGFITFDNSVHYFNLAPDLAQPQMLVISSLKELFV  
PLPDNLLVNLRESRHVVDSFLXQPSGMFVKNPVPQAQSLGPALKAAFTVMKPVGGKMLVF  
QSIQPNMGDGALKPRENPSVMGTNKEVGLLRDNEWYQVTAVEFSRQQISVDMFLFPYSY  
IDIASLGE  
LPKYSSGSLHSYVMFDRDKDGPRFEEQLHKTLVAETAFAEAX  
>comp13686\_c0\_seq4; 839 35 2889 LEN=2889; translated  
MKFTTDSGGAPQATPPGAGAFGAPRGPPAPGGFRAPAPPGGPGAPPPPAPMMQQRSPAPG  
GMPGMPQGMAPQQNVYQDNIDFNITIPDRFFRMTCDKVPATSNIAMQSKVPLGGVVRPL  
APCGPDDDEIPTIQPGTAGIIRCKRCRTYINAFVNVDHGRSWRCNICAIQINNTPSAYFC  
HLDDNGFRSDRFRPELSQGIVEFIAPQEYMVRPPQEPTYFFVIDVSAQAIHSGMLECAV  
NAIKRSLDDLPGGKRTKIGFITFDNSVHYFNLAPDLAQPQMLVISSLKELFVPLPDNLLV  
NLRESRHVVDSFLXQPSGMFVKNPVPQAQSLGPALKAAFTVMKPVGGKMLVFQSIQPNMG  
DGALKPRENPSVMGTNKEVGLLRDNEWYQVTAVEFSRQQISVDMFLFPYSYIDIASLGE  
LPKYSSGSLHSYVMFDRDKDGPRFEEQLHKTLVTETAFEAVMRTRVTKGMKISNYYGNFN

IRGSDLMALPNVNSDSVFGFDLAHDGENLASSYVTIQSALLFTNGDGQRRIRVMTQAFPT  
TTVTSELVSGVDPFATFNLLAKQAIDVSLKTSLDNARMRLQOTCVDLIRSAKGGGVRTVSGY  
YAVPQAPQSGEEDDSLPPSLELFLYTLALMKNVAFRGGTDVHPDERLQAFFNINQMW  
LNKSRAYVYPSLFLSHDMEPNAGYPSEEDTDDAVDDSFAGRNRVLLPSALPLTIDSLSSD  
GIYLVNDNGVEFYLWIGRETDPNYVNELFGVPSLENVDPMLNLEGGGKFSERIATIIISALR  
EDESDPYSVSSKIFVVKEGDLHAEARFFWFMVEDRASFOGGTFSYEDFMNFVMNPNAGPG  
APGGPAPPQAPQMGQRDPMAQHRGGPPGGPQPPGRQQYQAPSKPGPPQPAYGQPPPPHP  
MGGRGPPAPQQQYQAPPQPGPPMAGRGPPPPQQQYQAPPQQGPPPSAYGX  
>comp13686\_c0\_seq5; 1005 106 3283 LEN=3283; translated  
MGFPPPPPPNSNQFKAPPPPPAAGGFAPPPPPGGSGFAPPPPGGAFGARPPPPGPPGG  
GAFGARPPPPGPPGGGGFAPPPAPDAGVKQLNQGMANMSFQPPPPGGGAPQATPPGAGA  
FGAPRGPPPPGQFQPPAPGGFRAPAPPGGPGAPPPAPMMQQRSPAPGGMPGMPQGMAP  
QQNVYQDNIDFNITIPDRFFRMTCDKVPATSNIAMQSKVPLGGVVRPLAPCGPDDDEIPT  
IQPGTAGIIRCKRCRTYINAFVNWVDHGRSWRCNICAQINNTPSAYFCHLDDNGFRSDRF  
ERPELSQGIVEFIAPQEQYMRPPQEPTYFFVIDVSAQAIHSGMLECAVNAIKRSLDDLPG  
GKRTKIGFITFDNSVHYFNLAAPDLAQPQMLVISSSLKELFVPLPDNLLVNLRESRHVVDSF  
LXQPSGMFVKNPVAQSCSLGPAKAAFTVMKPVGGKMLVFQSIQPNMGDALKPRENPSV  
MGTNKEVGLLRDNEWYQVTAVEFSRQQISVDMFLFPYSYIDIASLGELPKYSSGSLHSY  
VMFDRDKDGRPFEEQLHKTTLVTETAFAEAVMRTRVTKGMKISNYGNFNIRGSDLMALPNV  
NSDSVFGFDLAHDGENLASSYVTIQSALLFTNGDGQRRIRVMTQAFPTTTVTSELVSGVD  
PFATFNLLAKQAIDVSLKTSLDNARMRLQOTCVDLIRSAKGGGVRTVSGYAVPQAPQSGE  
SEDDSLPPSLELFLYTLALMKNVAFRGGTDVHPDERLQAFFNINQMWLNKSRAYVYPSL  
FSLHDMEPNAGYPSEEDTDDAVDDSFAGRNRVLLPSALPLTIDSLSSDGIYLVNDNGVEFY  
LWIGRETDPNYVNELFGVPSLENVDPMLNLEGGGKFSERIATIIISALREDESDPYSVSSK  
IFVVKEGDLHAEARFFWFMVEDRASFOGGTFSYEDFMNFVMNPNAGPGAPGGPAPPQAPQ  
MQGRDPMAQHRGGPPGGPQPPGRQQYQAPSKPGPPQPAYGQPPPPHPMGGRGPPAPQQQ  
YQAPPQPGPPMAGRGPPPPQQQYQAPPQQGPPPSAYGX  
>comp13686\_c0\_seq6; 477 106 1785 LEN=1785; translated  
MGFPPPPPPNSNQFKAPPPPPAAGGFAPPPPPGGSGFAPPPPGGAFGARPPPPGPPGG  
GAFGARPPPPGPPGGGGFAPPPAPDAGVKQLNQGMANMSFQPPPPGGGAPQATPPGAGA  
FGAPRGPPAPGGFRAPAPPGGPGAPPPAPMMQQRSPAPGGMPGMPQGMAPQQNVYQDN  
IDFNITIPDRFFRMTCDKVPATSNIAMQSKVPLGGVVRPLAPCGPDDDEIPTIQPGTAGI  
IRCKRCRTYINAFVNWVDHGRSWRCNICAQINNTPSAYFCHLDDNGFRSDRFERPELSQG  
IVEFIAPQEQYMRPPQEPTYFFVIDVSAQAIHSGMLECAVNAIKRSLDDLPGGKRTKIGF  
ITFDNSVHYFNLAAPDLAQPQMLVISSSLKELFVPLPDNLLVNLRESRHVVDSFLXQPSGMF  
VKNPVAQSCSLGPAKAAFTVMKPVGGKMLVFQSIQPNMGDALKPRENPSVMGTNKEVG  
LLRRDNEWYQVTAVEFSRQQISVDMFLFPYSYIDIASLGELPKYSSGSLHSYVMFDRDKD  
GPRFEEQLHKTTLVAETAFAEAX  
>comp13686\_c0\_seq7; 471 106 1809 LEN=1809; translated  
MGFPPPPPPNSNQFKAPPPPPAAGGFAPPPPPGGSGFAPPPPGGAFGARPPPPGPPGG  
GAFGARPPPPGPPGGGGFAPPPAPDAGVKQLNQGMANMSFQPPPPGGGAPQATPPGAGA  
FGAPRGPPPPGQFQPPAPGGFRAPAPPGGPGAPPPAPMMQQRSPAPGGMPGMPQGMAP  
QQNVYQDNIDFNITIPDRFFRMTCDKVPATSNIAMQSKVPLGGVVRPLAPCGPDDDEIPT  
IQPGTAGIIRCKRCRTYINAFVNWVDHGRSWRCNICAQINNTPSAYFCHLDDNGFRSDRF  
ERPELSQGIVEFIAPQEQYMRPPQEPTYFFVIDVSAQAIHSGMLECAVNAIKRSLDDLPG  
GKRTKIGFITFDNSVHYFNLAAPDLAQPQMLVISSSLKELFVPLPDNLLVNLRESRHVVDSF  
LXQPSGMFVKNPVAQSCSLGPAKAAFTVMKPVGGKMLVFQSIQPNMGDALKPRENPSV  
MGTNKEVGLLRDNEWYQVTAVEFSRQQISVDMFLFPYSYIDIASLGELPKYSSGSLHSY  
VMFDRDKDGRPFEEQLHKTTLVAETAFAEAX  
>comp13686\_c0\_seq8; 830 35 2913 LEN=2913; translated  
MKFTTDSGGAPQATPPGAGAFGARPPPPGQFQPPAPGGFRAPAPPGGPGAPPPPPAPMM  
QQRSPAPGGMPGMPQGMAPQQNVYQDNIDFNITIPDRFFRMTCDKVPATSNIAMQSKV  
LGGVVRPLAPCGPDDDEIPTIQPGTAGIIRCKRCRTYINAFVNWVDHGRSWRCNICAQIN  
NTPSAYFCHLDDNGFRSDRFERPELSQGIVEFIAPQEQYMRPPQEPTYFFVIDVSAQAIH  
SGMLECAVNAIKRSLDDLPGGKRTKIGFITFDNSVHYFNLAAPDLAQPQMLVISSSLKELF  
VPLPDNLLVNLRESRHVVDSFLXQPSGMFVKNPVAQSCSLGPAKAAFTVMKPVGGKMLVF  
QSIQPNMGDALKPRENPSVMGTNKEVGLLRDNEWYQVTAVEFSRQQISVDMFLFPYSY  
IDIASLGELPKYSSGSLHSYVMFDRDKDGRPFEEQLHKTTLVTETAFAEAVMRTRVTKGMK  
ISNYGNFNIRGSDLMALPNVNSDSVFGFDLAHDGENLASSYVTIQSALLFTNGDGQRRIR  
VMTQAFPTTTVTSELVSGVDPFATFNLLAKQAIDVSLKTSLDNARMRLQOTCVDLIRSAK

GGGVRTVSGYAVPQAPQSGESEDDSLPPSLELFPPLYTLALMKNVAFRGGTDVHPDERLQA  
FFNINQMMLNKSRAVYVPSLFLSHDMEPNAGYPSERDTDDAVDDSFAGRNRVLLPSALPL  
TIDSLSSDGIYLVNDNGVEFYLWIGRETDPNYVNELFGVPSLENVDPMLNLEGGGKFSERI  
ATIISALREDESDPYSVSSKIFVVKEGDLHAEARFFWFVVEDRASFGGGTFSYEDFMNFV  
MNPNAGPGAPGGPAPPQMQGRDPMQHRGGPPGGPQPPGRQQYQAPSKPGPPQPAY  
GQPPPPHPMGGRRPPAPQQQYQAPPQPGPPMAGRPPPPQQQYQAPPQQGPPPSAYGX  
>comp13686\_c0\_seq9; 75 1 243 LEN=364; translated  
QYQAPPQQGPPPSAYQPPGPPVAARGPPSAPYSGGEPAPPKPSMPPPPGRAVQHSAN  
RRAPPPPPRGRGPPPPPPR  
>comp13687\_c0\_seq1; 269 533 1123 LEN=1689; translated  
MIYSLFFKAVLIGINYEGQQGELSGCHNDVHNIKRYLTKEQGFREKDMLILMDDGRHNQP  
TRDNILGAFDRIVQYSQAGDVVFIHYSGHGGSIRDTSGDEADGYDETLIPVDFKRAQII  
DDVLYERLVRKMPAGVTVVVLMDCCHSGTALDLPYEINATQSEMSLNSGFNYGLIGNVDT  
ALTCCFLLTCLFSLE  
>comp13687\_c0\_seq2; 269 95 685 LEN=1251; translated  
MIYSLFFKAVLIGINYEGQQGELSGCHNDVHNIKRYLTKEQGFREKDMLILMDDGRHNQP  
TRDNILGAFDRIVQYSQAGDVVFIHYSGHGGSIRDTSGDEADGYDETLIPVDFKRAQII  
DDVLYERLVRKMPAGVTVVVLMDCCHSGTALDLPYEINATQSEMSLNSGFNYGLIGNVDT  
ALTCCFLLTCLFSLE  
>comp13687\_c0\_seq3; 269 475 1065 LEN=1631; translated  
MIYSLFFKAVLIGINYEGQQGELSGCHNDVHNIKRYLTKEQGFREKDMLILMDDGRHNQP  
TRDNILGAFDRIVQYSQAGDVVFIHYSGHGGSIRDTSGDEADGYDETLIPVDFKRAQII  
DDVLYERLVRKMPAGVTVVVLMDCCHSGTALDLPYEINATQSEMSLNSGFNYGLIGNVDT  
ALTCCFLLTCLFSLE  
>comp13687\_c0\_seq4; 353 74 973 LEN=1539; translated  
MDAKIQQAIPANFVMISGCEDKQTSADVGNVGTFSLPDPKGKAGGACTSTLLKVLDENQG  
RQMSWIDLLHRMRSVLKSKGFDQVPQLSSSRMMDVNNQFEIVPQESRGRRAVLIGINYE  
GQQGELSGCHNDVHNIKRYLTKEQGFREKDMLILMDDGRHNQPTRDNILGAFDRIVQYSQ  
AGDVVFIHYSGHGGSIRDTSGDEADGYDETLIPVDFKRAQIIDVLYERLVRKMPAGVT  
VVVLMDCCHSGTALDLPYEINATQSEMSLNSGFNYGLIGNVDTALTCCFLLTCLFSLE  
>comp13687\_c0\_seq5; 209 1 567 LEN=1133; translated  
AVLIGINYEQQGELSGCHNDVHNIKRYLTKEQGFREKDMLILMDDGRHNQPTRDNILGA  
FDRIVQYSQAGDVVFIHYSGHGGSIRDTSGDEADGYDETLIPVDFKRAQIIDVLYERL  
VRKMPAGVTVVVLMDCCHSGTALDLPYEINATQSEMSLNSGFNYGLIGNVDTALTCCFLL  
TCLFSLE  
>comp13687\_c0\_seq6; 342 16 915 LEN=1481; translated  
MDAKIQQAIPANFVMISGCEDKQTSADVGNVGTFSLPDPKGKAGGACTSTLLKVLDENQG  
RQMSWIDLLHRMRSVLKSKGFDQVPQLSSSRMMDVNNQFEIVPQESRGRRAVLIGINYE  
GQQGELSGCHNDVHNIKRYLTKEQGFREKDMLILMDDGRHNQPTRDNILGAFDRIVQYSQ  
AGDVVFIHYSGHGGSIRDTSGDEADGYDETLIPVDFKRAQIIDVLYERLVRKMPAGVT  
VVVLMDCCHSGTALDLPYEINATQSEMSLNSGFNYGLIGNVDTALTCCFLLTCLFSLE  
>comp13688\_c0\_seq1; 394 1 1533 LEN=1647; translated  
PEIFADLDLDPGCLLYKLVQRQCDGGLFPDMVESLDWFFENFDCDKAASGQFVPRGTDP  
IYDEACDTIDRIEADLESYKQEMIREELTPRHVAGRAWKYINTKPSKDKYLIELPVTVK  
VPHDFHVKAKRSGSQKQVNYRTPLVAGLVSELERALEVQQTRRAKGMQIIFARFDSQRS  
LWAAAAHATAILDALGSLAVLAGSQYSRPEILSCDAGTQP SLSIVQGRHPVENTFHSS  
EFIPNDLELPGETEAGKPARLLLLSGPNMGGKSTMLRQTCLISILAQIGSYVPAESCQL  
TPIDCIFTRLGASDRILLGQSTFFVELAETAALRGATRSLVIMDELGRGTSTFDGTAI  
ASATVKHLVERSQCLSLFATHYHSLLEDEWKNAPNVRLGHMQCIVDDETDAGSSIGNSNIT  
FLYTLGPGACPRSFGINVAKLGLPNEVLNAPNRVSAEFEEEMACGGSGAEANSNEDDAK  
EKMQNILKLIADENYSDLLTLWQSVQAKSD  
>comp13688\_c0\_seq2; 368 1 1625 LEN=1739; translated  
PEIFADLDLDPGCLLYKLVQRQCDGGLFPDMVESLDWFFENFDCDKAASGQFVPRGTDP  
IYDEACDTIDRIEADLESYKQEMIREELTPRHVAGRAWKYINTKPSKDKYLIELPVTVK  
VPHDFHVKAKRSGSQKQVNYRTPLVAGLVSELERALEVQQTRRAKGMQIIFARFDSQRS  
LWAAAAHATAILDALGSLAVLAGSQYSRPEILSCDAGTQP SLSIVQGRHPVENTFHSS  
EFIPNDLELPGETEAGKPARLLLLSGPNMGGKSTMLRQTCLISILAQIGSYVPAESCQL  
TPIDCIFTRLGASDRILLGQSTFFVELAETAALRGATRSLVIMGESALKQPNSLLAVS  
DGLGQILQTTXVLLFADELGRGTSTFDGTAIASATVKHLVERSQCLSLFATHYHSLLEDEW  
KNAPNVRLGHMQCIVDDETDAGSSIGNSNITFLYTLGPGACPRSFGINVAKLGLPNEVL

ANAKRVSAEFEEEMACGGSGAEANSNEDDAKEKMQNILKLIADENYSDLLTLWQSVQAKS  
D

>comp13689\_c0\_seq1; 464 163 1680 LEN=2059; translated  
MSDTIVGKKERTETIKGNLRWAALFLGELRDGLTMINMQSAFLIVAKGYSEKQVGIILFFV  
FGMSQFLFQAPAGYLYDYTEQKLLWLSAAGVLTTMLTVFTAMFASDNNFILMVLVKFVQG  
GVTSFIPPGLNSITQGI VGSVGMTQQVSVNEMMNLGTAI LVL LGSIVAYLLYPNIGLLF  
VVSPIACVLFVFFLNKIKPGDIDHDAARGLKKEAGGSDKKDTPYVPPGAEESIGGASSA  
TGSAKNVKHNPSFNFGFANPEEGTNGESQADTPLQVLRDPILLFLI AVCFLFHTSNGTVL  
PLVMQTLAIGNDGLGILMSGLCITIAQVVMVFAAKICGTYSGKYGRKWLFLI GLGIVPIR  
CAILAGLLTLKGDGEATFLWQTITLSTQILDGVGAGIFGTM YILVTSDISGGTGRFGLTL  
GLTTAAMSIGGTVSGYLGQAFAEDYGYLRAFWILCVMSTVPALLYLFFMPETLSMIEKEG  
LIPAI AEDEEHNYSSEKDKKYVELT

>comp13690\_c0\_seq1; 414 69 1247 LEN=1556; translated  
MKNRVRKNDGLPIVNGKKITPRSLYRRKEEDSPWSLRLTVFLCVLLLFFPSNGGEPEAST  
VAKPEKKIATENKQATQQAAPQATPQNGEFPSFCSPEQLEMISKHLRPNARAATLTSKYA  
RNPILARKFYASDNFKLKPHEHTFFGVSLGWNNNDVPADTLRVGSRDPKHNPTEWATKGL  
GMRLNPVSIEGAATRP AKFLAVDWPKSYMPVPAVSLEKLKEQSGYTDELA IETMGLEKM  
PTALENLIRS QMPKTNGKVAADQPIHYLDIPLTDGADY MILKILMRSLIKDIRFMMFEYN  
DKGSWGGNASPENAFRELTRDLKQKGMVCYWTGKEETK FPLWRITDCWKPMYDHQHWALV  
SCVSVKHDDTKELALRMEQN FQATLRRGDLQL

>comp13691\_c0\_seq1; 313 1 1098 LEN=1276; translated  
NESRWLVGHKRNRSRYRTAFSDTEVDFDSVSHRTDSRLQMLQQIHGSLEENEARQQQQQ  
IQIQIPIQIQFRRSTLDGLKMGSDARNGYGKPTGDRKARWGFLLRLLVSLVAALALSGAT  
AAAF CGNGLPDAGRRRTPPLPRSTPYPSPCRADPALGLFRPDWMRRHGR ISEKRKEYREV  
HEALRKRREELGIALLEEGPSSPGRDKIARGGGGPF PKRYRVVSWFRNGSSDRADCGSS  
SSGNSSIDETTGENRSEN DPLKIYLMVPENEVEATDES NVLDYLEHGEVITAVGKRRVA  
PSDPVRPEVLAASIIYNAGDPSVLRKHREVLWIEHDKGGWSPCAIDGVTRLVPIEDDGGG  
GGDPG

>comp13692\_c0\_seq1; 496 115 2161 LEN=2270; translated  
MNPSSSFSSNRRKTI SGNKTDATRKR IERMEEEREERRKEMIQRKQYRKAKCEKLLAAGN  
PGDVDFIGMVEEWREEQDERHKKRSSKTS PRNSNIIVAVRKRPMFKKEREKLDHDSVSCY  
DPKVIHSAKFKVDGITKYLTHTFQFDHAFGEESTTDQIYLATTMPLVDHVVRTQGRAT  
VFCYQGQTGSGKTHTMNGIQQILAHDL YEEMKEKGDNIELRLAFFELYSGF IQDLLHDRKR  
CKLLEDGKGEVNITGLQEVCASTAEFLRVIEEGHSQRTTRSTEANDSSSRSHAICQVFL  
REIGTGKLGKLTLDVLAGSERGSDTKCHDSKR RSESAEINTSLLSLKECIRALGQKGAH  
VPYRGSKLT LILKDCFS PNSKTTMIAMVSPGASSTDHSLNTRL YADRIKEQREAYEMISS  
DDLCLHRV SCLTVIQKNNLKFAKISSSRKTMGREGSKANTTPCLEPSNQRLARITAALNW  
ERDASRDSELVFSVPDRSEQETHVEQNHFSESLVEHDQPRNAERFSFKVPYEEEEKETGLI  
ETENIDEIDLLCDEEAEMRRTVEVLFELEESL LDQHISNIKEVAFSYQICVSSLSPLTIC  
LFDPSQGNAEMLRHEDSLLQGIEQIDDP TDDEMDNYAIQLAEFLDRKEELI LSLQSKLDE  
YKMY SARERELAEEMQN LTC

>comp13692\_c0\_seq2; 358 787 2251 LEN=2360; translated  
MNGIQQILAHDL YEEMKEKGDNIELRLAFFELYSGF IQDLLHDRKRCKLLEDGKGEVNIT  
GLQEVCASTAEFLRVIEEGHSQRTTRSTEANDSSSRSHAICQVFLREIGTGKLGKLTLD  
VLAGSERGSDTKCHDSKR RSESAEINTSLLSLKECIRALGQKGAHV P YRGSKLT LILK  
CFSPNSKTTMIAMVSPGASSTDHSLNTRL YADRIKEQREAYEMISSDDLCLHRV SCLTVI  
QKNNLKFAKISSSRKTMGREGSKANTTPCLEPSNQRLARITAALNWERDASRDSELVFSV  
PDRSEQETHVEQNHFSESLVEHDQPRNAERFSFKVPYEEEEKETGLIETENIDEIDLLCDE  
EAEMRRTVEVLFELEESL LDQHISNIKEVAFSYQICVSSLSPLTICLFDPSQGNAEMLRH  
EDSLLQGIEQIDDP TDDEMDNYAIQLAEFLDRKEELI LSLQSKLDEYKMY SARERELAE  
EMQN LTC

>comp13692\_c0\_seq3; 518 787 2079 LEN=2188; translated  
MNGIQQILAHDL YEEMKEKGDNIELRLAFFELYSGF IQDLLHDRKRCKLLEDGKGEVNIT  
GLQEVCASTAEFLRVIEEGHSQRTTRSTEANDSSSRSHAICQVFLREIGTGKLGKLTLD  
VLAGSERGSDTKCHDSKR RSESAEINTSLLSLKECIRALGQKGAHV P YRGSKLT LILK  
CFSPNSKTTMIAMVSPGASSTDHSLNTRL YADRIKEQR ISSSRKTMGREGSKANTTPCLE  
PSNQRLARITAALNWERDASRDSELVFSVPDRSEQETHVEQNHFSESLVEHDQPRNAERF  
SFKVPYEEEEKETGLIETENIDEIDLLCDEEAEMRRTVEVLFELEESL LDQHISNIKGN  
AEMLRHEDSLLQGIEQIDDP TDDEMDNYAIQLAEFLDRKEELI LSLQSKLDEYKMY SARER  
ELAEEMQN LTC

>comp13692\_c0\_seq4; 423 787 2174 LEN=2283; translated  
MNGIQQILAHDLYEEMKEKGDNIELRLAFFELYSGFIQDLLHDKRCKLLEDGKGEVNIT  
GLQEVCASTAEFLRVIEEGHSQRTTRSTEANDSSSRSHAICQVFLREIGTGKLGKLT  
VDLAGSERGSDTKCHDSKRRSESAEINTSLLSLKECIRALGQKGAHVYPYRGSKLT  
LILKDCFSPNSKTTMIAMVSPGASSTDHSLNTRLRYADRIKEQREAYEMISSDDL  
CLHRVSVCLTVIQKNNLKFAKISSSRKTMGREGSKANTTPCLEPSNQRLARITAALN  
WERDASRDSELVFSVPDRSEQETHVEQNHFSESLVEHDQPRNAERFSFKVPYEE  
EKETGLIETENIDEIDLLCDEEAEMRRTVEVLFELEESLLDQHISNIKGNAEML  
RHEDSLLQGIEQIDDPDDEMDNYAIQLAEFLDRKEELILSLQSKLDEYKMYSA  
RERELAEEMQNLTCLAEFLDRKEELILSLQSKLDEYKMYSA  
>comp13692\_c0\_seq5; 656 115 1989 LEN=2098; translated  
MNPSSSFSSNRRKTIISGNKTDATRKRIERMEEEREERRKEMIQRKQYRKAKCEK  
LLAAGNPGDVDFIGMVEEWREEQDERHKKRSSKTSPRNSNIIIVAVRKRPMFKK  
EREKLDHDSVSCYDPKVIHSAKFKVDGITKYLTHGTGFQDFHAFGEESTTDQIY  
LATMPLVDHVVRTQGRATVFCYGGTGSKTHTMNGIQQILAHDLYEEMKEKGDNI  
ELRLAFFELYSGFIQDLLHDKRCKLLEDGKGEVNITGLQEVCASTAEFLRVIEE  
GHSQRTTRSTEANDSSSRSHAICQVFLREIGTGKLGKLTLDLAGSERGSDTKCH  
DSKRRSESAEINTSLLSLKECIRALGQKGAHVYPYRGSKLTLLILKDCFSPNS  
KTTMIAMVSPGASSTDHSLNTRLRYADRIKEQRISSSSRKTMGREGSKANTTP  
CLEPSNQRLARITAALNWERDASRDSELVFSVPDRSEQETHVEQNHFSESLVE  
HDQPRNAERFSFKVPYEEEEKETGLIETENIDEIDLLCDEEAEMRRTVEVLFE  
LEESLLDQHISNIKGNAEMLRHEDSLLQGIEQIDDPDDEMDNYAIQLAEFLDR  
KEELILSLQSKLDEYKMYSA  
>comp13692\_c0\_seq6; 561 115 2084 LEN=2193; translated  
MNPSSSFSSNRRKTIISGNKTDATRKRIERMEEEREERRKEMIQRKQYRKAKCE  
KLLAAGNPGDVDFIGMVEEWREEQDERHKKRSSKTSPRNSNIIIVAVRKRPMFK  
KEREKLDHDSVSCYDPKVIHSAKFKVDGITKYLTHGTGFQDFHAFGEESTTDQI  
YLATMPLVDHVVRTQGRATVFCYGGTGSKTHTMNGIQQILAHDLYEEMKEKGD  
NIELRLAFFELYSGFIQDLLHDKRCKLLEDGKGEVNITGLQEVCASTAEFLRV  
IEEGHSQRTTRSTEANDSSSRSHAICQVFLREIGTGKLGKLTLDLAGSERGSD  
TKCHDSKRRSESAEINTSLLSLKECIRALGQKGAHVYPYRGSKLTLLILKDC  
FSPNSKTTMIAMVSPGASSTDHSLNTRLRYADRIKEQREAYEMISSDDLCLHR  
VSVCLTVIQKNNLKFAKISSSRKTMGREGSKANTTPCLEPSNQRLARITAALN  
WERDASRDSELVFSVPDRSEQETHVEQNHFSESLVEHDQPRNAERFSFKVPYEE  
EKETGLIETENIDEIDLLCDEEAEMRRTVEVLFELEESLLDQHISNIKGNAEML  
RHEDSLLQGIEQIDDPDDEMDNYAIQLAEFLDRKEELILSLQSKLDEYKMYSA  
RERELAEEMQNLTCLAEFLDRKEELILSLQSKLDEYKMYSA  
>comp13692\_c0\_seq7; 453 787 2156 LEN=2265; translated  
MNGIQQILAHDLYEEMKEKGDNIELRLAFFELYSGFIQDLLHDKRCKLLEDGK  
GEVNITGLQEVCASTAEFLRVIEEGHSQRTTRSTEANDSSSRSHAICQVFLREI  
GTGKLGKLTLDLAGSERGSDTKCHDSKRRSESAEINTSLLSLKECIRALGQKGA  
HVYPYRGSKLTLLILKDCFSPNSKTTMIAMVSPGASSTDHSLNTRLRYADRIK  
EQREAYEMISSDDLCLHRVSVCLTVIQKNNLKFAKISSSRKTMGREGSKANTTP  
CLEPSNQRLARITAALNWERDASRDSELVFSVPDRSEQETHVEQNHFSESLVE  
HDQPRNAERFSFKVPYEEEEKETGLIETENIDEIDLLCDEEAEMRRTVEVLFE  
LEESLLDQHISNIKEVAFSYQICVSSLSPLTICLFDPSQGNAEMLRHEDSLL  
QGIEQIDDPDDEMDNYAIQLAEFLDRKEELILSLQSKLDEYKMYSA  
>comp13692\_c0\_seq8; 591 115 2066 LEN=2175; translated  
MNPSSSFSSNRRKTIISGNKTDATRKRIERMEEEREERRKEMIQRKQYRKAKCE  
KLLAAGNPGDVDFIGMVEEWREEQDERHKKRSSKTSPRNSNIIIVAVRKRPMFK  
KEREKLDHDSVSCYDPKVIHSAKFKVDGITKYLTHGTGFQDFHAFGEESTTDQI  
YLATMPLVDHVVRTQGRATVFCYGGTGSKTHTMNGIQQILAHDLYEEMKEKGD  
NIELRLAFFELYSGFIQDLLHDKRCKLLEDGKGEVNITGLQEVCASTAEFLRV  
IEEGHSQRTTRSTEANDSSSRSHAICQVFLREIGTGKLGKLTLDLAGSERGSD  
TKCHDSKRRSESAEINTSLLSLKECIRALGQKGAHVYPYRGSKLTLLILKDC  
FSPNSKTTMIAMVSPGASSTDHSLNTRLRYADRIKEQRISSSSRKTMGREGSK  
ANTTPCLEPSNQRLARITAALNWERDASRDSELVFSVPDRSEQETHVEQNHFSE  
SLVEHDQPRNAERFSFKVPYEEEEKETGLIETENIDEIDLLCDEEAEMRRTVE  
VLFELEESLLDQHISNIKEVAFSYQICVSSLSPLTICLFDPSQGNAEMLRHED  
SLLQGIEQIDDPDDEMDNYAIQLAEFLDRKEELILSLQSKLDEYKMYSA  
>comp13693\_c0\_seq2; 274 782 1411 LEN=2502; minus strand; translated  
MVLVSRISSGVSAIARVAVCFYTGSCLLSNPPAEAQTYDASDNVLRPCPSDKNCV  
SSNYGEPNRYVSPSLVKSSDIAFRQAVRDLADQKQQQFFSIANIDPKHRYIHL  
TTPGTSPGSIDDIELLFSDSSSIVSLRCEAEVTLPPPPFCLQKNCINGNLDQRR  
RVERVAKVLGLPNTDSTLMKDAKWTPIFFNSDRVPGFDFDEV  
>comp13694\_c0\_seq2; 268 604 2124 LEN=2479; translated

MRRGESFVDQISWLGEQAQTQFLDLNLENHEARSLGGSPFQRLSSYNSLDDLQKHTI  
RHQVIVWSVGIPDVKSHTVTIMFRVTLFWNDPPRNLIAPSLATGRSRSNSNASSSYGDV  
PSMDAPGAAKEPASGYASNNGTNGVIGNDAGEQEDYFWEMDGRRKAIARRSRSTSFNAIN  
TNAPGASAI PRGNINISSGGNDFEKETIDVPPISIIAETFFETVGKPDVTLLRRKSRLM  
RFSCMYRARLMOESMNVAQFPDSDHDLVCLKGILSQRQPGGRWDRRKWKLGLANESDTQG  
SVRVFPFVLDHVAVPGRFISDRGLEFEMAPIEFGHSNAAAGWNNNSNNKHHRAQDQFC  
VKTKIRVKRNSAYYDRNIMPLLDILNLVSIISILVSLDANNFFQRGLLCLNIAFVEVGLRT  
SLDARLPTVGYEIKMQKLLNSFFFSSILYIVLESAAMKVLINHDWPVQRTRIVDRVWAFLL  
LVNQLYLRIVYKDFSEVEFSDWR

>comp13694\_c0\_seq3; 273 604 2136 LEN=2491; translated  
MRRGESFVDQISWLGEQAQTQFLDLNLENHEARSLGGSPFQRLSSYNSLDDLQKHTI  
RHQVIVWSVGIPDVKSHTVTIMFRVTLFWNDPPRNLIAPSLATGRSRSNSNASSSYGDV  
PSMDAPGAAKEPASGYASNNGTNGVIGNDAGEQEDYFWEMDGRRKAIARRSRSTSFNAIN  
TNAPGASAI PRGNINISSGGNDFEKETIDVPPISIIAETFFETVGKPDVTLLRRKSRLM  
RFSCMYRARLMOESMNVAQFPDSDHDLVCLKGILSQRQPGGRWDRRKWKLGLANESDTQG  
SVRVFPFVLDHVAVPGRFISDRGLEFEMAPIEFGHSNAAAGWNNNSNNKQSYHHHRAQD  
QFCVVKTKIRVKRNSAYYDRNIMPLLDILNLVSIISILVSLDANNFFQRGLLCLNIAFVEV  
GLRTSLDARLPTVGYEIKMQKLLNSFFFSSILYIVLESAAMKVLINHDWPVQRTRIVDRV  
WAFLLLQNQLYLRIVYKDFSEVEFSDWR

>comp13695\_c0\_seq1; 460 205 1568 LEN=1568; translated  
MGYDPEHFCHASNNGRGLDESLICVCHSVYDTPMVLDPCGHSFCRGCVASLLDSGHEH  
CPVCRTPMIEGVGVGPPNRALKEIDNLEVRMCMVSEETKESGTTTNDGSEGERNNSK  
SKSKHPSVGCSTWTKLSEFEAHARNECPLRRVSCPIEGCCWEGPHCGLAQHNAESVALHT  
ELLVASKMDQIRAE LLRHQQNQSNNGPSGTFGNGIGSDGDVRRSRKGLTEDNDDNSDNA  
RNNASEAHPNPNNGTTDNDAGSAVAIVNRLDAMERRLS QKDREIHTL KARLLDNWLS DHFF  
RSWILSKPPYFRDFCVYRPIQH LTGPV SQIIAGIPGPGSGTDWEGGLYPLLVTWTAEGYER  
KEPPKCDFPDDFFHPNVYEGNVHVSTLLEFEGSWDPSITLPELFFCIQQLLVHPNHRGSM  
SSSGEAIYDPDEYKLA VLRQAKRYEYQSSSSSNTX

>comp13696\_c0\_seq1; 432 228 1313 LEN=1691; translated  
MEFGKCVAEPCADDATDCADRAAGGRPKKTSCTILTGFLGAGKTTLINHILES RDHGLRV  
AIIENEFGEVGVDDALVIETEEEFEMNNGCVCTVRGDLMRILEKLARDGAGFDHVLIE  
TTGLADPAPVAQTFFVDEEDVKQNYELDAIVTVVDAKHVLP HLRREEKPEGVENETVEQVAF  
ADRIVLNKL DLTDEEKA EVLGELRKINEFCEILETEHSRVDVPSILGIGAFDLSRVLQE  
EEDFLNTDAEHEHDTSVSSVGI EFGGRLDLHRLNTWLTILLRDHGVDIFRSKGILCIDGS  
DARFVFQGVHMLMSISSDDGVGRPWKDGEARTNRLVFIGRNLDREKLNARFRECLVAGS  
Y

>comp13696\_c0\_seq1;a 432 351 1486 LEN=1691; minus strand; translated  
MVVCARWKFVSSFLPPGTPGTAVEFLPVQVPPDEDEAVGPGGLAVLPGPSHAVVRAGNAHE  
HVDAL EDEAGVRSVDAEDALGAEDVHAVVPQQYQPGVEPVEVEPAPELDSHAGNGGVVL  
VLGVRVQEVFLLLEDPEVKGPDAQDARNVDPGVLRL ENLAELVDLAEFPEDLGLFLVRN  
QIELVEDDPVKGDL DRLVLDALRFFFPEVRQDVLGVDDRHDGVQLVVL DVLVDKEGL  
GDRGRIGQPRRFDEHVVKARVPVPGQLLEDPEVPPDGTADASVHLEDLLRFDHQRVVD  
ADLPELVLDGHAEPVPALEDVVDQGRLSGAEKARQDREEVFLGLPPAARSAQSVASSA  
QGSATHFPNSMVAWYVP

>comp13696\_c0\_seq2; 432 541 1626 LEN=2004; translated  
MEFGKCVAEPCADDATDCADRAAGGRPKKTSCTILTGFLGAGKTTLINHILES RDHGLRV  
AIIENEFGEVGVDDALVIETEEEFEMNNGCVCTVRGDLMRILEKLARDGAGFDHVLIE  
TTGLADPAPVAQTFFVDEEDVKQNYELDAIVTVVDAKHVLP HLRREEKPEGVENETVEQVAF  
ADRIVLNKL DLTDEEKA EVLGELRKINEFCEILETEHSRVDVPSILGIGAFDLSRVLQE  
EEDFLNTDAEHEHDTSVSSVGI EFGGRLDLHRLNTWLTILLRDHGVDIFRSKGILCIDGS  
DARFVFQGVHMLMSISSDDGVGRPWKDGEARTNRLVFIGRNLDREKLNARFRECLVAGS  
Y

>comp13696\_c0\_seq2;a 432 351 1486 LEN=2004; minus strand; translated  
MVVCARWKFVSSFLPPGTPGTAVEFLPVQVPPDEDEAVGPGGLAVLPGPSHAVVRAGNAHE  
HVDAL EDEAGVRSVDAEDALGAEDVHAVVPQQYQPGVEPVEVEPAPELDSHAGNGGVVL  
VLGVRVQEVFLLLEDPEVKGPDAQDARNVDPGVLRL ENLAELVDLAEFPEDLGLFLVRN  
QIELVEDDPVKGDL DRLVLDALRFFFPEVRQDVLGVDDRHDGVQLVVL DVLVDKEGL  
GDRGRIGQPRRFDEHVVKARVPVPGQLLEDPEVPPDGTADASVHLEDLLRFDHQRVVD  
ADLPELVLDGHAEPVPALEDVVDQGRLSGAEKARQDREEVFLGLPPAARSAQSVASSA  
QGSATHFPNSMVAWYVP

>comp13696\_c0\_seq3; 432 430 1515 LEN=1893; translated  
MEFGKCVAEPCADDATDCADRAAGGRPKKTSCTILTGFLLGAGKTTLINHILES RDHGLRV  
AIIENEFGEVGVDDALVIETEEVFEMNNGVCVCTVRGDLMRILEKLARDGAGFDHVLIE  
TTGLADPAPVAQTFVDEEDVKQNYELDAIVTVVDAKHVLP HLRREEKPEGVENETVEQVAF  
ADRIVLNKL DLTVD E EKA E V L G E L R K I N E F C E I L E T E H S R V D V P S I L G I G A F D L S R V L Q E  
EEDFLNTDAEHEHDTSVSSVGI EFGGRLDLHRLNTWLTILLRDHGVDIFRSKGILCIDGS  
DARFVFQGVHMLMSISSSDDGVRPWKDGARTNRLVFIGRNL DREKLNARFRECLVAGS  
Y

>comp13696\_c0\_seq3;a 432 351 1486 LEN=1893; minus strand; translated  
MVVCARWKFVSSFLPPGTPGTAVEFLPVQVPPDEDEAVGPGGLAVLPGPSHAVVRAGNAHE  
HVDAL EDEAGVRSVDAEDALGAEDVHAVVPQQYQPGVEPVEVEPAPELDSHAGNGGVVL  
VLGVRVQEVFLLLEDPEVKGPDAQDARNVDPGVLRLENLAELVDLAEFPEDLGLFLVRN  
QIELVEDDPVGGKDLLDRLVLDALRFFFPEVRQDVLGVDDRHDGVQLVVLDDVLVDKEGL  
GDRGRIGQPRRFDEHVVKARVPVGGQLLEDPEVPPDGTADASVVHLEDLLLRFDHQRVVD  
ADLPELVLDGHAEPVPALEDVVDQGRLSGAEKARQDREEVFLGLPPAARSAQSVASSA  
QGSATHFPNSMVAWYVP

>comp13697\_c0\_seq1; 1044 220 3099 LEN=3526; translated  
MDDNR ISETE DK IVENFLREQEESFGYDGTNGTNDGNDRSEVFN FEDDTALTEDIRKMAR  
ALAPQMSELEDVLKDFSEVETTDALDVIMHNNNASANDVSRSMLEAEDDDLDDEMEQLAM  
SEQALREELFAAGISLLGTPMGFCFNDGDDNYSSESNLPSVNLNDQLEEQQQQSKPA  
LPVAEESEPGAPPMYTLQDHAEYLHLKTERLGRWYYCDMTSKLMPSALSESPSVSVGGMT  
KDLVKDYCLPIPFKRKLKRLYGGVLFYDTWETKRLKESQRPPSSTSSTPAETPSKTPLKNR  
LLGTPGIVTPSGFPTTVPVTPASTTTDASAQTPLQTPVKTPLKEINSAKI AKKNVVAEEP  
LPVRTISIRIRPDVLCGAVMDAAHHA FEILSTNHTSDVIKRQGGHLRGSVYMADKQLAYV  
VDMQLCTQKNDGLERLLLRFYHIHDDPDALQELGQVLMMEKKRKRERQKQETAPP I PQGD  
SVAPSTSIATSSSSSVAQEENNTIARHLKQTC SLIQRVMAAEKQEGGIKKMSPVQQSR  
WLGIEGGHYDTKSEMSTVASHLESSFKSCPSVREENK KASAVIRRLTLPSLSKRDPVIV  
EIAWSLTNHIVEELDTRDCSYNTLATL PFGQFP SLPTLDVQFCSQLRRLSRENMITQLLK  
SAKDLEVYASRAEYKCAVCIALLDPMVERYGIPPLSLPKAKSLDEYPLDYEPPTICPPW  
GGLVSEALNKVAAKTPTGDI DVKSAMLLVYRAFARQDDEEKGVRLGRKNAQVMERLANMQ  
SHQRSVLVQNRDLSHSSEKSEKSASGFLDYCEKALNKGDGEGYPTISLEVPLLNKISLG  
ASQYGRCYITSKNILFVTTYIPLLGSSRSMAFDLSLIK FQVKANPTSSLMNPFNPNTMEVV  
LKSNNKSVF SFRPAIGPARLHTFIHIIQAFASEKKPSEYSQVGEDSDEELAKEEPELSV

>comp13698\_c0\_seq1; 383 443 1705 LEN=2098; translated  
MFEKDGVG DATASGIHTFLPDSNLNFVAGISPMYWSYVRMTVIDVLNLKLDKGINWMSSP  
PAKEDFGTPVSKCLLVGYVVYATQRRDGS MAYVVDDGTGFIDCVHWCNSNSNDNTEDIYHL  
PSLSDDLDDHRDHGPFHVGEVPRVYVKIECVASTTKTSTKSHNGNGDEVLVVREIQSNLM  
ERVEDILLVESHWMQLCSIDPVDIRSCLEAVGPQIRSQIENRINLPAADDTSCSWRVFG  
MSCRCDLPYMEDLLYCHCQSKAEAMDPSYRFRDALLIALLSMQSKTASMLKFKYKDIRNN  
DSLELLALKELSQQKRTENNVSIDKIFLKTFRALRHDGILYLLNSNTDEYLFITRSKVL E  
PFVRTLVSN EIGASKPKNSNFVSYDKAPAFISRVHNERLLYIKRLINEGASTAYKTHGS

>comp13699\_c0\_seq1; 405 309 1271 LEN=1487; translated  
MSSTDADRADASTLRVALCQFHVGHDKDANEETARTYLA EAKEKGASMAVLPEIWN SPYA  
TSAFPDYAESLPDIDGLESADGSGDPKWSSASRLLMQAARDHGMWII GGSVPERVLE  
DGEEKIYNTCLVLNPEGVVVAKHRKVHLFDIDVPGGITTFESETLSPGSSVSHFATPFGE  
IGVGICYDIRFAEYAMLLRQKHNC SVLVYPGAFNM TTPAHWELLQKARALDNQCFV VTA  
SPARSEPPAGGETDAGYPHYTAWGHSTV VSPWGDVVAT TDETEGIVVADLDLGR LAEVR  
AGIPIQNQRRTDLYALEDLS

>comp13700\_c0\_seq2; 730 1 3037 LEN=3146; translated  
XDDDDDAIVAMGLRAISTWCTTTDL SLAQT KHIGSKVKINLSHLLGEALNTE SPKVM SAL  
ADLIESVVERHVVPQTLSTSNLHKELI SDARMTQTRYLMQVPDEISFRANVSQEQLHVIE  
TKELSDILRELAADVERQRF RFP LFGGVRKPEKAKQQSNAPQVESMFDDCVHSLGHSLAR  
IAAAVCSGYSKVMQGDISSRVPSTTPSLYQIPGAGFLQLLSKASHPSVAICGIVLPIIT  
PVLKTEVGLATEWLP TLQRRRAIIPHHSKNSVILSSSNIGRVKDNVYIPLLNASDVCFVE  
FEFVVDGFRD TVLADALNSCYMIHSEYYLASCTAAIEEFVGDVTTTEQTSFHLEAALFCL  
AAVSELVLP SVLVADKSSKPMGKVGKKTNFNASGYLLRCTAALAKKPKSLNNPLTMAQTC  
QFLRKYHKWFGSNQHPGILDIAADLILF ILSQCATTFFPDTALSKTIRKETGVTPYSEASK  
ALRCLLSNNSNHFLSNKAIAALGAGWESTFAACNRGDKLLTLEDKNTCIGICHVLAALP  
KEQQKTSLMALALAS IACLETMTERANSITSVEEKKTLSSILDRASDEIIIVATTARAFT  
NAASAGPLGTGNRVS LVEP SMTVLLRAWPTISILASKYSFHDSILDSLSVLFVECS PAG



KFTDVSTIFLQDVCTLAKKLI ESENVQRNNRFFSPVFDLVDALIQAHATVFEMITESKQA  
DEPKNQKYTSSYSSENAAKIYRCVETLMRETITVMTSQNLGSAWATIEKQNGQSAFETK  
RKPEYRPLDFCNVGLGPLFSVLRTCARLCPNFFFHIVDGDGNEGNYGYESTSNLSMMR  
TVLDSAVSSIVDSQSEISLQAI AFLETVATLVTFQFRSNKLTGEYNLGLRTNILNALGGM  
CGIFQPVVVPACRLLLQII STSNLSAGELKVLFLTSLGQDHFLLGFKAWGVVHESCHKR  
TNCNVSPASAEEMERMTEMWQLHRFENIDAIERSDDVHAFCRKFDPKKNSK  
>comp13701\_c0\_seq1; 422 199 1356 LEN=1644; translated  
MSINNGVVRVAHIGNSIQYYNDCPRLERMLRASLIDRKNFLDESVTSSISDLAKTLKIYQ  
DSCLRGGATLPSLWLDGNGMQKKFSSRPKSKLPGEDYYDIGAPTVRDLLLLDNNAKSNKDP  
RQRSDGIRYWFVVDHTQSPVRNESKQSMVALENLYLPTILNGMNKSVATPSSEPT  
KTTLVFVQTAAYKSHVKNSSDLGSFDDFTLLVQGYDEYVELVNKFCEDHQEPQKQSL  
KATVAPLGEAYRKIRQENFEMWSNLLYANDDFHPSPHGTLLEACLLYCIISGGTKFELFD  
DDNGGNDNHGSGFLM TYLWDTARYMQPQTYPDGQPQAPLPLPTREEANYLNDVAYC IYK  
QQKERDHERGRGKSRSLPTPSLCT  
>comp13702\_c0\_seq1; 304 1 1135 LEN=1782; translated  
XAVLLHGVASTTNAI AIPXATSPDLL EARMEQHSNPHLLP PPHGMYGSAFYHPPSPSTG  
SYGTGLPSPSPAKPRTVDTEGDGKDPSPG SATTGAACTEPPSPSKPSTTAEANATRNLKV  
YVKPKGIGVPEVLDRRARKNANSRARA AKHRALVAQIETKPREEWTEEEHKIVAKNYER  
RQHKNGRSRERALEKKA EIERILGKPEHERTKLEVQFLENALGAKARKNEGDRLRRRKLK  
ELGLATMGGRSHKAFLSKASQPPPQHHPAAGYPHPPPHYGYAGGYHHSPPPPYGMMAAPP  
SPYHGYAGPPPPMYPGSEGYPPPLDGSGDPYAPTHPPPPDLSNLGHHHPPHGEVDP  
RAQGVAPPGPQSSAGPPA  
>comp13702\_c0\_seq2; 512 1 1701 LEN=2348; translated  
KEGERKAKEGANPPSEGETPNTDQEEPKEEGGKNCTKEEESARTTPARAETETQPPPND  
GDAVPSGKQAETAPHPNSDADMDPDADAAAAYYQMQQYGYHPSMHPPPPYGGYPPPP  
PPHPSAAYHPHSPYGHPPPSQTESSEQQQLDGGSSDTPPIMSSSEPGNMHHYPPPP  
HYGGYPPPHQYAPYGPPTSPVKSPGNSNSVSGGGYPMQQHSNPHLLP PPHGMYGSAFYH  
PPSPSTGSYGTGLPSPSPAKPRTVDTEGDGKDPSPG SATTGAACTEPPSPSKPSTTAE  
NATRNLKVYVKPKGIGVPEVLDRRARKNANSRARA AKHRALVAQIETKPREEWTEEEHK  
IVAKNYERRQHKNGRSRERALEKKA EIERILGKPEHERTKLEVQFLENALGAKARKNEGD  
RLRRRKLKELGLATMGGRSHKAFLSKASQPPPQHHPAAGYPHPPPHYGYAGGYHHSPPPP  
YGMMAAPPSPYHGYAGPPPPMYPGSEGYPPPLDGSGDPYAPTHPPPPDLSNLGHHHP  
PPHGEVDPRAQGVAPPGPQSSAGPPA  
>comp13703\_c0\_seq1; 535 166 1996 LEN=2266; translated  
MNKNMDDSKSSTSTNRRANKYHVFDGSDRINGFDFKEGVRAVASSPSSSVNRRCKTENA  
EAETRNTVQTNSTSHSGNSDESSSLTDADADSFLEPISVWGVPTTDSESKPKPKTQTRT  
SISHPGNRKTIITPTTNDCDRHRHQPGATHDNRSNTSGAASTARAKTATASPLSSLNPTQ  
VMDYLLQRQRSIINSTITUTEAREQKQRESKINTSAAPSHSSDKMRKPPPQPPSPPTVQEV  
QDRINF EYFMDGRELEARNVVVDYDTRSYVYTTDLGYKFNLP EFLFLDVPNSTFAARACG  
QYITNKVFQDLKKMAKIKEGYARASTIAARRESAERLAKL CNKSVYSVEDIFVPSQTCAH  
PYQNRTHRDSTGIDVPVQAISARFRLRYLNKRAFLHKL RHNFMSHECNIGIMVFIPI  
MRRNTHADAFWGLGGVERLPCDEHFKTQTQGLTNSKMDKWCIEIAVRHGTYRGQDPESM  
GLASTDNRYGPFAYQNTDASADATNGNFKFSAQQLTKKPTASPNKNPGTKTKATKKANK  
AKKHRAAFRKAPPKKRYIPTAKDKTVSTKTTASKTTAPAKKSVMSLDPMRKYKDFIRFLS  
SKNQAEELME  
>comp13703\_c0\_seq2; 535 369 2199 LEN=2469; translated  
MNKNMDDSKSSTSTNRRANKYHVFDGSDRINGFDFKEGVRAVASSPSSSVNRRCKTENA  
EAETRNTVQTNSTSHSGNSDESSSLTDADADSFLEPISVWGVPTTDSESKPKPKTQTRT  
SISHPGNRKTIITPTTNDCDRHRHQPGATHDNRSNTSGAASTARAKTATASPLSSLNPTQ  
VMDYLLQRQRSIINSTITUTEAREQKQRESKINTSAAPSHSSDKMRKPPPQPPSPPTVQEV  
QDRINF EYFMDGRELEARNVVVDYDTRSYVYTTDLGYKFNLP EFLFLDVPNSTFAARACG  
QYITNKVFQDLKKMAKIKEGYARASTIAARRESAERLAKL CNKSVYSVEDIFVPSQTCAH  
PYQNRTHRDSTGIDVPVQAISARFRLRYLNKRAFLHKL RHNFMSHECNIGIMVFIPI  
MRRNTHADAFWGLGGVERLPCDEHFKTQTQGLTNSKMDKWCIEIAVRHGTYRGQDPESM  
GLASTDNRYGPFAYQNTDASADATNGNFKFSAQQLTKKPTASPNKNPGTKTKATKKANK  
AKKHRAAFRKAPPKKRYIPTAKDKTVSTKTTASKTTAPAKKSVMSLDPMRKYKDFIRFLS  
SKNQAEELME  
>comp13703\_c0\_seq3; 535 341 2171 LEN=2441; translated  
MNKNMDDSKSSTSTNRRANKYHVFDGSDRINGFDFKEGVRAVASSPSSSVNRRCKTENA  
EAETRNTVQTNSTSHSGNSDESSSLTDADADSFLEPISVWGVPTTDSESKPKPKTQTRT

SISHPGNRKTIITPTTNDICDRHRRQPGATHDNRSNTSGAASTARAKTATASPLSSLNPTQ  
VMDYLLQRQRSIINSTITEAREQKQRESKINTSAAPSHSSDKMRKPPPQPPSPPTVQEV  
QDRINFHEYFMDGRELEARNVVVDYDTRSYVYTTDLGYKFNLPFLFLDVPNSTFAARACG  
QYITNKFVQDLKKMAKIKEGYARASTIAARRESAERLAKLCKNSVYSVEDIFVPSQTCAH  
PYQNRTHRDSTGIDVPVQAISARFRLRYLNKRAFLHKILRHNFMNSHECNIGIMVFIPI  
MRRNTHADAFWGSLLGGVERLPCDEHFKTQTQGLTNSKMDKWCIEIAVRHGTYRGQDPESM  
GLASTDNRYYPFAYQNTDASADATNGNFKFSAQQLTKKPTASPNKNPGTKTKATKKANK  
AKKHRAAFRAPPKRYIPTAKDKTVSTKTTASKTTAPAKKSVMSLDPMRKYKDFIRFLS  
SKNQAEELME

>comp13704\_c0\_seq2; 451 325 1606 LEN=1606; translated  
MKAEEEEKKSADAADAVVKPVVSIKLNLFAYDPESGKKNIVGLDCRIEPPNSRIILVGANGA  
GKSTLLRILTGQIFMGLESEDEFDINGRKTANDQSNQVAYLGGTWKRRRTGFEGVCPYTM  
CAASEMMAKWQETHLERDELVRVLGINLNWRMHECSDGQRKKVRLMIKLLRPFRLCVID  
EFAADLDIFSRNRFKYLTKCECLERGASVYATHIFDQADAWATHVAFMQLDKTSLPIHK  
LSEYAPYQEILGRVGGKRAFCPMYVLVLEELERQYRSQTDVFGEGCYGGDNDGDDDDDDN  
VCLMDVIMAEQSRELADGRFENERAGDQTGWVSGRLTRQLAAAEQKVRREERFEKRRLEE  
AAGATARAPPRAESSRAETQPPSRPAAPPSAVSDDGGDASPGASAETRVGTAAVRRDL  
CARTGSV

>comp13704\_c0\_seq4; 469 325 1571 LEN=1571; translated  
MKAEEEEKKSADAADAVVKPVVSIKLNLFAYDPESGKKNIVGLDCRIEPPNSRIILVGANGA  
GKSTLLRILTGQIFMGLESEDEFDINGRKTANDQSNQVAYLGGTWKRRRTGFEGVCPYTM  
CAASEMMAKWQETHLERDELVRVLGINLNWRMHECSDGQRKKVRLMIKLLRPFRLCVID  
EFAADLDIFSRNRFKYLTKCECLERGASVYATHIFDQADAWATHVAFMQLDKTSLPIHK  
LSEYAPYQEILGRVGGKRAFCPMYVLVLEELERQYRSQTDVFGEGCYGGDNDGDDDDDDN  
VCLMDVIMAEQSRELADGRFENERAGDQTGWVSGRLTRQLAAAEQKVRREERFEKRRLEE  
AATGTTTXELSRVETQPPSRPAAPPSAVSDDGGDASPGASAETRVGTAAVRRDL

>comp13705\_c0\_seq1; 506 620 2449 LEN=2853; translated  
MSVPSPPSPSTSDVRCRVVPNKNEQAKEDCRDYLRTGRCKYGASCKYNHPLNVQSGGG  
MKAPINPSEPLFPIRYNEPVCQYYMKHGTCKFGQACKFHHPPEVAGKGTSLAINGNNSVL  
IGVPGGGGRKDDGGSNSQMWRSRSDAGAQLPQRPDEPNCIFFLKNGRCKYGATCRYHHP  
LNASRNRTFEDGRNNGANSRQQPDHRSAPKVHYVTALPPGSMQQGHFVVADGTVTFLSL  
DGNTPAHVVSIVGKDFTPGTGTIASSTSTSIASSFEASISNNDNLDISSGSLWNNRKS  
SGNPSNGYNLPGSVSTGNMQSDGAGNHSYESNTGPSTWRGHRSSSFDRTRTRSSSLSTQE  
DEMRRSASVHSALDKRIAGRPRSSMASAMSYYGGRNPNPRDNVHGNTAGVPRARLHPG  
EDDDGLSMMASALLTMIDTPADKAATQQQDQYHEINERRGVGSSRLDNQFYGRPHALNRA  
IVGPPEDLSRGRPSDDPSRGRYHSTHSTPSSYYEETQPQFLGQNNATADYQASDLSIPR  
HTAMNEPLNLFGGQTERQARMQQASRIQTWQGSATAGVIHENAQFSSINPSQPLPSNSSE  
PSTNIGLYY

>comp13706\_c0\_seq1; 1203 959 4857 LEN=5082; translated  
MVSRRMERPTKLFDIIFLLYKQCVFETQKGSFLAPKFVIKRNSSDDWEFRTLFAEISIL  
PVIFFLFLVSWWALNRNVRMKTTRGSSIPHREARANHEYWEDEDSDDDDSECISNIAD  
EHSNASSVERKRRKTSRLSAKRQKMQALLKAYRVIDEDERDDDTIITAESHIEESDYEE  
DDLPPFSKKSPTKTIIDHDPITRQMFLSKEKKNIWVLRREISIFSLNEEAIEMLNDLEY  
VDLSRTGDFLWKEGAFDGLSYVVKGRVRVNFDFQASFANSHARGPTSESSASIFHEED  
TVVTSQLALMEGMVRCHLQANNNSLGRFVGHVFORTTAQAVTDCTRLFRIPPSCFSKILD  
RYPETVLRILQTTLNRTQRVTVQTLVRCCLRQELLVPRKELKQNMMLASNSAEWKSQR  
ELSQIDDIWKQDFDSVSAEEDGPLMKNACALASVLNIEGSETIEILAEKCSLVTLNGTG  
DTKSRVLLLEAGSNHDSYLLQGAMEMGIHLPLGESSKQQQIDAGAWYFQRIETISPGS  
IFGTSALFTTDDIDLFEIRCVAATEKQEPAILLRIPKDVYAHLVVVKHPQAMTTSVLPVLS  
ALSPVHLLTWTTEWMNVKAEAGEIVRKGTPCNSLFFVNLNGLRANRSLIHQHALTVSS  
HAIPPQYGRGKIFGQVGLANVDWPFNVFAIRQSELAKIPIKTIEIVVQNFPHAGLSLA  
REVASDVGSLYFPNHGLSRSISSNQAVAGSVSDKSSTNENGTGTVFKTKPLPFHLPSPYGL  
NLATVAVVPLSYNIDLERFCKTLRNAMETIAPCKVLTFSFKQELGEKLYRNRDALHRVK  
MTRLLADLEENNRVVIYQADPKFTFWTRLCVQLQADCILLVVDVSKAPETSREVEQTLWAY  
EAMDVRIELVVVGEESKGVESAETNRSLSYLDEHYVSVSDQLNNWMESEKWI SGHHLVR  
APFGQHQLDFQRMCRVSGRSVGLVLGAGGARGIAHLGMYQIXSVETDDTKNFVFSKLI  
DXGVIRALKEAGVTVDIVGGTSQGAFCGALFARYPDNYDQVLSSCRVMAEDAASMEKLL  
DLTLPAMSMFAGRRFRNGIKKLLGELRIQDLVLFVFCVSVLDLQNSTVIHTKGQLWKNVR  
ASMGLTGYPPIAENGLLVVGGYLNLSLPADVMKYQMGARAVIAVDVSQECKREYFEGT  
HLSGWLLWNSWNPVKTQVPSMGDIQDMLIWSSEQHRKSVKIVSDLYLTPPIQDVGT

LEYDRFDEIVEKSYLYSKPIVDEWVQKHPWLVS SRNKVV

>comp13706\_c0\_seq5; 1246 959 4676 LEN=4990; translated  
MVS RMERPTKLFDIIFLLYKQCVFETQKGS LFLAPKFVIKRNS SDDWEFRTL FVAEISIL  
PVI FLFLVVS WWALNRNVRM KKTRGSS IPHREARANHEYWEEDEDS DDDDSE CISNIIAD  
EHSNASSVERKRRKTSRLSAKRQKM QALLKAYRVDIDEDERDDDTIITAESHIEESDYEE  
DDL PFSKKS PKTKTIDHDPITRQMFLS KEKKNIWKVLREISIF SFLNEEAIEMCLNDLEY  
VDLSRTGDFLWKEGAFDGS LYVVKGRVRVNFLDFQAS FANSHARGPTSESSASIFHEED  
TVVTSQLALMEGMVRCHLQANNNSLGRFVGHVVFQRTTAQAVTDCTRLFRIPPSCFSKILD  
RYPETVLRILQTTLNRTQRVTVQTLVRCCGLRQELLVPRKKE LKQNMLASNSAEWKS LQR  
ELSQIDDIWKQDFDSVSAEEDGPLMKNAC SALASVLNIEGSETIEI LAEKCSLVTLNGTG  
DTKSRV LLEAGSNHDS CYLLQGAMEMGIHLPLGESS SKQQQIDAGAWYFQRIETISPGS  
IFGTSALFTT DIDLFEIRCVAATEKQEEPAILLRIPKDVYAHLVVKHPQAMTTS LVPVLS  
ALSPIVHLLTWTTEWMNVEAAGEIVRKGT PCNSL FVVLNGLRLAANRSKI HQHALHTVSS  
HAIPPQEYGRGKIFGQVGS LANVDWPFNVFAIRQSELAKIP IKTIEIVVQNFPHAGLSLA  
REVASDVGS LYFPNHGLSRSISSNQAVAGSVSDKSSTNENGTHGVFKTKPLPFHLP SYGL  
NLATVAVVPLSYNIDLERFCKTLRNAMETIAPCKVLT KS FVKQELGEKLYRNRDALHRVK  
MTRLLADLEENNRVVIYQADPKFTFWTRLCV LQADCILLVVD SQAPETS RVEQTLAWAY  
EAMDVRIELVVVGKEESKGVESAETNRSL SYLDEHYVSVSDQLNNWME SKEWISGHHLVR  
APFGQHQLDFQRMCRRVSGRSVGLVLGAGGARGIAHLGVIRALKEAGVTVDIVGGTSQGA  
FCGALFARYPDNYDQVLS SCRVM AEDAASMK EKL LDTLPMASMFAGRRFN RGIKKLLGE  
LRIQDLV LNFVCVSDLQ NQSTVIHTKQLWKNVRAS MGLTG YLPPIAENGS LLVDGGYL  
NSLPADVMKYQMGARAVIAVDVSQE CKREYFEYGT HLSGWLLWNSWNP FVKTVQVPSMG  
DIQDMLI WVSSEQHRKSVKIVSDLYLTPPIQDV DLMKWL

>comp13706\_c0\_seq6; 1166 959 4749 LEN=5063; translated  
MVS RMERPTKLFDIIFLLYKQCVFETQKGS LFLAPKFVIKRNS SDDWEFRTL FVAEISIL  
PVI FLFLVVS WWALNRNVRM KKTRGSS IPHREARANHEYWEEDEDS DDDDSE CISNIIAD  
EHSNASSVERKRRKTSRLSAKRQKM QALLKAYRVDIDEDERDDDTIITAESHIEESDYEE  
DDL PFSKKS PKTKTIDHDPITRQMFLS KEKKNIWKVLREISIF SFLNEEAIEMCLNDLEY  
VDLSRTGDFLWKEGAFDGS LYVVKGRVRVNFLDFQAS FANSHARGPTSESSASIFHEED  
TVVTSQLALMEGMVRCHLQANNNSLGRFVGHVVFQRTTAQAVTDCTRLFRIPPSCFSKILD  
RYPETVLRILQTTLNRTQRVTVQTLVRCCGLRQELLVPRKKE LKQNMLASNSAEWKS LQR  
ELSQIDDIWKQDFDSVSAEEDGPLMKNAC SALASVLNIEGSETIEI LAEKCSLVTLNGTG  
DTKSRV LLEAGSNHDS CYLLQGAMEMGIHLPLGESS SKQQQIDAGAWYFQRIETISPGS  
IFGTSALFTT DIDLFEIRCVAATEKQEEPAILLRIPKDVYAHLVVKHPQAMTTS LVPVLS  
ALSPIVHLLTWTTEWMNVEAAGEIVRKGT PCNSL FVVLNGLRLAANRSKI HQHALHTVSS  
HAIPPQEYGRGKIFGQVGS LANVDWPFNVFAIRQSELAKIP IKTIEIVVQNFPHAGLSLA  
REVASDVGS LYFPNHGLSRSISSNQAVAGSVSDKSSTNENGTHGVFKTKPLPFHLP SYGL  
NLATVAVVPLSYNIDLERFCKTLRNAMETIAPCKVLT KS FVKQELGEKLYRNRDALHRVK  
MTRLLADLEENNRVVIYQADPKFTFWTRLCV LQADCILLVVD SQAPETS RVEQTLAWAY  
EAMDVRIELVVVGKEESKGVESAETNRSL SYLDEHYVSVSDQLNNWME SKEWISGHHLVR  
APFGQHQLDFQRMCRRVSGRSVGLVLGAGGARGIAHLMYQIXSVETDDTKNFVFSKLIF  
DXGVIRALKEAGVTVDIVGGTSQGAFCGALFARYPDNYDQVLS SCRVM AEDAASMK EKL L  
DLTLPMASMFAGRRFN RGIKKLLGELRIQDLV LNFVCVSDLQ NQSTVIHTKQLWKNVR  
ASMGLTG YLPPIAENGS LLVDGGYLNSLPADVMKYQMGARAVIAVDVSQE CKREYFEYGT  
HLSGWLLWNSWNP FVKTVQVPSMGDIQDMLI WVSSEQHRKSVKIVSDLYLTPPIQDV D  
LMLW

>comp13706\_c0\_seq7; 1283 959 4784 LEN=5009; translated  
MVS RMERPTKLFDIIFLLYKQCVFETQKGS LFLAPKFVIKRNS SDDWEFRTL FVAEISIL  
PVI FLFLVVS WWALNRNVRM KKTRGSS IPHREARANHEYWEEDEDS DDDDSE CISNIIAD  
EHSNASSVERKRRKTSRLSAKRQKM QALLKAYRVDIDEDERDDDTIITAESHIEESDYEE  
DDL PFSKKS PKTKTIDHDPITRQMFLS KEKKNIWKVLREISIF SFLNEEAIEMCLNDLEY  
VDLSRTGDFLWKEGAFDGS LYVVKGRVRVNFLDFQAS FANSHARGPTSESSASIFHEED  
TVVTSQLALMEGMVRCHLQANNNSLGRFVGHVVFQRTTAQAVTDCTRLFRIPPSCFSKILD  
RYPETVLRILQTTLNRTQRVTVQTLVRCCGLRQELLVPRKKE LKQNMLASNSAEWKS LQR  
ELSQIDDIWKQDFDSVSAEEDGPLMKNAC SALASVLNIEGSETIEI LAEKCSLVTLNGTG  
DTKSRV LLEAGSNHDS CYLLQGAMEMGIHLPLGESS SKQQQIDAGAWYFQRIETISPGS  
IFGTSALFTT DIDLFEIRCVAATEKQEEPAILLRIPKDVYAHLVVKHPQAMTTS LVPVLS  
ALSPIVHLLTWTTEWMNVEAAGEIVRKGT PCNSL FVVLNGLRLAANRSKI HQHALHTVSS  
HAIPPQEYGRGKIFGQVGS LANVDWPFNVFAIRQSELAKIP IKTIEIVVQNFPHAGLSLA  
REVASDVGS LYFPNHGLSRSISSNQAVAGSVSDKSSTNENGTHGVFKTKPLPFHLP SYGL

NLATVAVVPLSYNIDLERFCKTLRNAMETIAPCKVLTksfVKQELGEKLYRNRDALHRVK  
MTRLLADLEENNRVVIYQADPKFTFWTRLCVQLQADCILLVVDsQKAPETSrVEQTLAWAY  
EAMDVRIELVVVGKEESKGVESAETNRSLSYLDEHYVSVSDQLNNWMEskEWISGHHLVR  
APFGQHQLDFQRMCRrvSgrSVGLVLGAGGARGIAHLGVIRALKEAGVTVDIVGGTSQGA  
FCGALFARYPDNYDQVLLSSCRVMAEDAASMKELLDLTLPMASMFAGRRFNrGIKKLLGE  
LRIQDLVLNFFCVSDLQNQSTVIHTKGQLWKNVRASMGltGYLPPIAENGSLLDVGGYL  
NSLPADVMKYQMGARAVIAVDVSQECKREYFEYGTHLSGWLLWNSWNPfVKTVQVPSMG  
DIQDMLIWVSSEQHRKsvKIVSDLYLTPPIQDVGTLEYDRFDEIVEKSYLYSKPIVDEWV  
QKHPWLvSSRNKVV

>comp13708\_c0\_seq1; 597 137 1600 LEN=1836; translated  
MVVpSEserPSVTRSEHGTDGNPTVHsvrKHfLrKCNKEVETksQDGGIGKvGTFfRAQAV  
ARRyVNTsRRNLmKDMHTsVELGLSSGSVDSGIATEETNLVQqVKtSDLVGKKNEwKsF  
LDIwGKpISyFLIFtPFALASHyLNwGARwVfWLNfLTMiPLASILGDFTEEAALHTND  
VVGGLMNAsFGNAVEVVVAIQALMQDEIRVVQASmIGSIFSNLLLVLGCCFFFGGFYYKE  
QTFcGINAVAGMGLLALSSIALILPSPFAEYfETEDEDVLTISRVSACfMLLSYMQLLFF  
QLYTHHDSFESETEGADNEEEEEEEEEEEATVPMWmALLGLGITtGAVTIFSDYLVESID  
DFCTESGISrTFVGLIILPIVGNaveHITAVSVAMKNKMDLALGVAIGSCTQIALFVVPV  
TVIFGWGADKpMTLNFPTyEISLYVLSIFtVSVCLGTGKSNWLLGSVLITTYIMVAIGfW  
FEEVEDF

>comp13709\_c0\_seq1; 181 106 561 LEN=1186; translated  
MPIATATsSTVACIFGLCQEFFAKLVLEVfGAGGAVWGFSEVCGFRtesVestRFWRKLS  
LATAVfVfGVRWSQQLRRAWTLCTKARTRSDrSSDINDNDTNILLRETSPIAIQfNTQVY  
NTSKEHQDFLmKEEFsDESTALSSFSrSPPA

>comp13709\_c0\_seq2; 181 106 561 LEN=1174; translated  
MPIATATsSTVACIFGLCQEFFAKLVLEVfGAGGAVWGFSEVCGFRtesVestRFWRKLS  
LATAVfVfGVRWSQQLRRAWTLCTKARTRSDrSSDINDNDTNILLRETSPIAIQfNTQVY  
NTSKEHQDFLmKEEFsDESTALSSFSrSPPA

>comp13710\_c0\_seq1; 275 1 1380 LEN=1660; translated  
HAMAAREHEstETtKSPpVgKARRXPEPPPLREAGEpVAVGIHQDGLRALHRARDRpAFA  
PAGLDGGHGRRDGGPALAGVREGQGalPAPGLQVALLVAGfVWIPVSGSfSGSSEpGRKkG  
RGQGTARIVVSNHLSNIEILHLLTLPFVDGEGNPVLPcfVTKASVfGVPLIGTVARDVLG  
CIGVERRTKKANADADVNvNANTTNANANANTNANvREQQSAAVAATTTTTTTTTTARTa  
TEQILERVRAQSDPVTkTtKTRGPIVfVPEGTTTNGTCLLAFKQGAfAPMVEVLPiVYSF  
RKNGRLPQEDPDpKTPGSfLPTyESIWGPAYLWRLLSQPvHHLHCSVLEPVRPGGRGPEA  
fGENTRSTmADALGGLPLVPARYDYRHKLAYHRELMEAYKAHPSGPVWAMCFAPVEKVLH  
KIPGEDDGDPRpGEGRGYDTVEGRLPGPRTpCEGHQKEA

>comp13712\_c0\_seq1; 175 155 710 LEN=875; translated  
MQTPDWTPEKLDEYAIQqGRAQSWARRSRMGefVKDPFETSELPLGIQAYAVATAFFVAF  
AYGRATPRFLAEVLGVGSLDGARGLQDVLQVPGLALALASVGSSAVCAAVLAPGKNRNGI  
LWGVKGFLLGGPIAVVQLRGLDALITREQKEKEESASSSSSSGSSSEALGMGIRERAPARTE  
PERS

>comp13712\_c0\_seq2; 474 112 1420 LEN=1585; translated  
MKRIATERKpSHSGVGVTVAVTTLAVLCLACTPLPADSFVPPASTRKAAPVPAFGAGGF  
ERTRSQLSAASEPmSEDEIKRQLTEYLAKRKEANADAAAEEVKGTvVGGTRGNVLEFIS  
GAPARELVIERAPDVfDYDELskYgYsGLVKPIMDQVGGRRAVYDLMGMEPPPLVGPpPK  
KKVPKLMIDRTGEDDKARYTGLKMGQVLDDVDMGEALAAANEKAKEGKDLRPKLVEESYV  
QPFADKRNTSPMQTPDWTPEKLDEYAIQqGRAQSWARRSRMGefVKDPFETSELPLGIQA  
YAVATAFFVAFAYGRATPRFLAEVLGVGSLDGARGLQDVLQVPGLALALASVGSSAVCAA  
VLAPGKNRNGILWGVKGFLLGGPIAVVQLRGLDALITREQKEKEESASSSSSSGSSSEALGM  
GIRERAPARTEPERS

>comp13713\_c0\_seq1; 198 1 670 LEN=1234; translated  
XTSRYKLRMSrPFSIDVEKDSRKTIAIVNQSREETAIVGYASETLIEAALADLTLISTMA  
ERPVMYLEQEDWSPRYQDTfYTVRLDDFQRFASTPKTATSNNDSDSLPSSTLGGKTNfPA  
YYYKIQIFcGRHDPKVVfFRYSQfKWLYQNIPLSTTGDPSEEPiQfPPNGCLCSQND  
FAKNRTEQLREFLNEALVRRDVARDEAVAQfLELDSfVKTEKS

>comp13715\_c0\_seq1; 437 276 1664 LEN=1788; translated  
MTSPFRfSVLRALFFSYSCIhRAISCDVHYQqARQERRALDGSLWSDTDSTEGPINPHL  
LFHGKlKNDLQpVEGAQVQfWHADYNGNYLHPGDLDGNEYLRDSfSYFGTASTDNAGS  
FEFKTYRPGIYLSRPVTHIHfKVFYEGRELLTSQfYfSDEDVQMFYDEMLILTMEQTIDD  
DGNAVNHVSKDVVVNMNMGGfEKLTPWQMEGPfYPLVDfFDVSSDMTLGLMETYYDHIAV

DASSKKNISFVPSLVIAIFLAREMLSLTVLEVSTNKPTLVPSRPTRRPTAKPSSGSPR  
PVPDMGFGGPEFDNLDEFLAFLGEGDRNDIVTGEGNYTVNFGNDTDVDDSELANEI PLEL  
DGDVGEDEESPAAPGNATTAIDNGNGDDEGTATVDKDSSTETTLVSSFVETALSCKLLS  
NNHWDPATPGGEEAISAQEVAARLVLCQDELDRTRRSYNPA  
>comp13715\_c0\_seq2; 446 276 1606 LEN=1730; translated  
MTSPFRFSVLRALFFSYSCI IHRAISCDVHYQQARQERRALDGLSWSDTDSTEGPINPHL  
LFHGKLNKNDLQGPVEGAQVQFWHADYNGNYLHPGDDLDGNEYLRDSFSYFGTASTDNAGS  
FEFKTYRPGIYLSRPVTHIHFKVIFYEGRELLTSQFYFSEDEVQMFYDEMLILTMEQTIDD  
DGNVAVNHVSKDVVVNMNMGGFELTPWQMEGPFYPLVDFFDVSSDMTLGLMETYYDHIIV  
DASSKNPTSLAQLSTNKPTLVPSRPTRRPTAKPSSGSPRVPDMGFGGPEFDNLDEFL  
AFLGEGDRNDIVTGEGNYTVNFGNDTDVDDSELANEI PLELDGDVGEDEESPAAPGNATT  
AAIDNGNGDDEGTATVDKDSSTETTLVSSFVETALSCKLLSNNHWDPATPGGEEAISAQE  
EVAARLVLCQDELDRTRRSYNPA  
>comp13715\_c0\_seq3; 408 276 1691 LEN=1815; translated  
MTSPFRFSVLRALFFSYSCI IHRAISCDVHYQQARQERRALDGLSWSDTDSTEGPINPHL  
LFHGKLNKNDLQGPVEGAQVQFWHADYNGNYLHPGDDLDGNEYLRDSFSYFGTASTDNAGS  
FEFKTYRPGIYLSRPVTHIHFKVIFYEGRELLTSQFYFSEDEVQMFYDEMLILTMEQTIDD  
DGNVAVNHVSKDVVVNMNMGGFELTPWQMEGPFYPLVDFFDVSSDMTLGLMETYYDHIIV  
DASSKNPTSLAQRKWNIPFVPSLVIAIFLAREMLSLTVLEVSTNKPTLVPSRPTRRPTA  
KPSSGSPRVPDMGFGGPEFDNLDEFLAFLGEGDRNDIVTGEGNYTVNFGNDTDVDDSE  
LANEI PLELDGDVGEDEESPAAPGNATTAIDNGNGDDEGTATVDKDSSTETTLVSSFVE  
TALSCKLLSNNHWDPATPGGEEAISAQEVAARLVLCQDELDRTRRSYNPA  
>comp13716\_c0\_seq1; 525 750 1985 LEN=2151; translated  
MIVRSVINAIIDMAVKVSRGSLSDGTPVSKTEGREGDLVLLFVAVVRIFAERNLRMVP  
KGYQRYAINISLAYRDVQLNLEKIERGVHGYLRHHQSLREGDSKTSALPISSPTIRQLLQ  
FELETELHKKLRLRDPASAASGILWTKRQLHYQTALLANFLEIPQCYLTPKDAATAAYHI  
VYNDYHGWAVKGI FTTHSLGGSPPLDKVWLAIRPPTNMPVDRKRKYQTCGKSCDSNERSN  
YPPSLRPTS DLNSASIRSNSFSDSLGDKEDDNGLLAALDNFRDEIVEKWDDLRRMFNCGK  
EEKKKRMQNLILSSESHFNHLQMNTEMVETSLQNSSSTSDSSDINSVVTSSSTVASSSSSST  
ASTSLSRQQVNNHLIQQSKRDAEDFVRNVMPMADLGRMLDELNMNDPTKA  
>comp13717\_c0\_seq1; 367 1 916 LEN=1731; translated  
XAATALSLLSLLSCGSLALAF TTTTPGSQCAFRHPVRLQHP IKNVPFVSDSTVASLGLPT  
LPPQKFRGARTIASGSGDETNETTDDKLFDFKTTIALVGGQSLLI VVAIAAKFVGT  
FGLGPNIDFGLAAIGKILWLSLPLGALAVALDFVEDRFQALQDVTKATQSSVLSLLGGTF  
KPVLGGLTALALGIAAGFGEEMLFRGVLQADLASRTASEVAVGLSSVIFGALHAVTPLY  
AILATLASVFFGWLYLATGNLAVPIATHAFYDWAALLYAHWTVTNMSESEQSLLAWRYG  
SGDES  
>comp13718\_c0\_seq1; 316 317 985 LEN=1261; translated  
MIARTFYIVALLSCVFVCQSFTPPPPNSASAMNLANSDLNYQSDTTLGEATKIERPLPVR  
KSKPSSKPLIEEISSLDELKWFLEEDERPVVIKFKHAKWCKKQRLGLQFNRLAMDMDGRI  
IDQQLIDGDVRFASIEFTPKSQSFITEELQINGVPMQVYVGT  
RKLLEAGSSIKKIRTEL  
NLLEKMNHEDVLERAVEADDGVLANLIEDSFYDPSFLNEEW  
>comp13718\_c0\_seq2; 237 758 1087 LEN=1363; translated  
MDMGDRIIDQQLIDGDVRFASIEFTPKSQSFITEELQINGVPMQVYVGT  
RKLLEAGSSIKKIRTELNLLEKMNHEDVLERAVEADDGVLANLIEDSFYDPSFLNEEW  
>comp13719\_c1\_seq1; 836 347 2857 LEN=2931; translated  
MKKKRPRTRYIGDRLYGSGTSVESSSSTEEDDEEKDAVHAASARKRSANVTTRVVAYGGDA  
AGVYDLEDREWMAAIQQEQEEREREKTKAKASHIGTALMTVNSHRILFMLCFLTAFFPIL  
FLVNPVEVINPPGKDMVDFLQEINLQQGTLDDYFGGNYTLGCEYLFDSVQDWT  
KAMNPRG  
MRSRNDTRVLINLSIRPARCAEQFNNTRI FDVVFRVGEDCPAWAWPGSSSDTSDDSGCIY  
GSLWQIGTAYTTLDQVADKLDVRTGSI VTYRDTQGNNTWGVSA SYDETNI  
VEKGATFTFI  
LELLLVSSIMFYLQVLRNDTVNLVGLSLRSMKTVARYAKNPLAPT  
KNELFGGTKSSNAS  
DSGSNVSGVQDEDEDLMGTYTEQLVTA VSKITDLLRKCWGVAGADII  
STNLASRNGDFE  
VFNPTVRGKNVFAF  
AKIKDFHALKNLGGDMILINDVAVVLHGDVYRWALGDSGQC  
NKNLGASFFVVKIGFVKEVVEKLEATR VVFSTANGKATVKRRSKPRSRTI  
STRSAS  
VQDRSRVAPNFVEGLKTQLHGEKDVAMKAMAEAMQLPLKQIPGI  
STFVDRAVISMLKSFA  
GIHRDTQLRAW  
SRDYRLSSGDGNWSVDMVFGMDAGWAVEGAVGSEYKIDATYLS  
PHVNMA  
SRMMSACTHYGVTILVSEAVQELLSEPGKRKMRNLD  
RVTVKGSSEIQKIYTYDARSQAAD  
FFLYSVSDEQADHQAMS  
YEPNIWNDDPDLKAMRHHITEDFELEFSAGMKYYYYDGDWPSAI  
EKIEKANEIMVATALEEVGSFHGDVIDGNENEASDQ  
PCKYLINFMKSRGSKAPEDW

>comp13720\_c0\_seq1; 1182 196 5583 LEN=5816; translated  
MPVTSDDAMNTSNRKDETALTDSSRRPLLPHTRRLLKLIIEGSADHTRIAVTHLKKITV  
SVSPILILWEILGRLQGFLVSPENWTRSNAGIAMEGVAQHLSIADQESFLSQRTNSHSGLS  
ATDNTNGIDGNDSTSLKISDLEGNVTNLANGQLLVATAESRYQTEEYDDELELLDQCH  
QGDQAKFCMRLEMQRRIILTRRIGLSTILADHTTDCDQLKTQLIDREAVESSVSNNTNLNQ  
EKTPSTSRITYKKKKKDRKTSKKTRLAIGKLLTGIWRRGLQQQEHQGTENESSVTIHRNA  
QSILAGELIFRMFDPSWYVRHGSLIGILALVRAWKVHHRKSDDVDLGVWPQDILARSLCI  
LALDRFGDFSGASAEAISGGTVAPIREMAGQVFVAVVFLMAPNSLRQKVLHILNEMFYHDE  
WEVRHGVLIAIKYTMVLVTSAKTSNEDCQLDSQFLTSFMNHIVSGLRDRNDDIQAVAAQI  
LGFSPDPARGGEKNLIPHMVQSLWQSLQNIIRVVSSINDLVKLLSKLVRTNLSAVLDAVP  
NSNSFLEAWAQVFNRTKELLECELVSVKISILDVMASLSTRCIELVDAEKNESNKLTAAS  
SFCVVVKAIYNLSFETSKVLQEDNANSSDDTTDLRILKLSSETWAVLSEISCTVLGEHE  
SLQNDLHYYLLVKYFDSENILKTSCIASYIPIMDRAASLGRFLRPGKTPQEKETKQCNK  
RNDILEFFFLFSHMDSPIVHCEATCLLIQGLFKFDDRSSYTSENAHIPTIEACEKRLLY  
KLETGTISKLDHNSLHVTHDSGIIKAITTSLNIGYKMWCEEGVSGKVAGAAVVELWKEIE  
LFFDEDSTCNVTVDMSRLLSSHIVGTIAGGIQFLPQKMPVVRPLMTSVQNEHNDKWRMT  
VCSYIERFLTLISNEPKSSLRFEGRRTFSKVLANLCNLLIAGKEPSCISSSITIGLIVS  
KLQEKHSLRDLEAVWTFLLPLRESLLHLDFDATMNALKMMKAVCQFLNEKSSVTATIFDD  
YMHSLTNLGCCEQLVIRDLASTIIQRMCSVDISMALDKILPSLILFLQDGENDTRRYGAC  
MLLHKILDSAEFSVAVCPYIKALLPVMMSMIDPVKVAETSARTFSLLVQVAPLVNDSV  
PIVGSQINEEANLVIDHLIHGKLLKPCSMHPKIAQALREKGIIVLRNYQHEGLSWLRFQR  
INLNGALCDSMGLGKTLQATVAVSLAHMDNSDRRETKSLVICPSSIVGHVWNEIHRYPFR  
DLIFRPLAIEGNGQQRQYLLDNEMESYNLIVASYETLRSNIDSLSKVNWTYCVLDEGHLL  
RNPKTATAKASRRRLRARHKLILGTPIQNSVEEIIWATFFDFLMPFSLGSSSQFSKEFAKPI  
IKGQNLDAAPITIAAGLEKLLKLLHQVLPFILRREKEQVLELPPKVITRIPCPMSSIQK  
RLYSLFCGSLGKQSIISTLNSMIDMKHAPVGGDSTTFNTGAFKALLYLRLLCRTHPWLVRK  
KEDFIDPQMQUESLYDLQSSGKLIALKELLRDAGFAFRELTAADNDMSLIYCGRDEDQMSD  
TDDHEKILMPDCQDSSGDELQHQQLNRQESRCLIFAQFTQSLDIVEELLIKRYMPSMKYL  
RLDGKVPVPQRTIVVDKFNKRNDESFKLLLLTTKIGGLGNITGADTVIFLEHDWNPNSDLQ  
AMDRAHRIGQKRTVHVYQLVTMNSIEEKTMMQERKLAMSNAININTNNSMYSMGTDCLL  
DIFQFRSESASSAKSSHTDFDIDNTIDTLVERYQDEYKSLSLRDFLAGFEPTQKK

>comp13720\_c0\_seq2; 1182 196 5583 LEN=5935; translated  
MPVTSDDAMNTSNRKDETALTDSSRRPLLPHTRRLLKLIIEGSADHTRIAVTHLKKITV  
SVSPILILWEILGRLQGFLVSPENWTRSNAGIAMEGVAQHLSIADQESFLSQRTNSHSGLS  
ATDNTNGIDGNDSTSLKISDLEGNVTNLANGQLLVATAESRYQTEEYDDELELLDQCH  
QGDQAKFCMRLEMQRRIILTRRIGLSTILADHTTDCDQLKTQLIDREAVESSVSNNTNLNQ  
EKTPSTSRITYKKKKKDRKTSKKTRLAIGKLLTGIWRRGLQQQEHQGTENESSVTIHRNA  
QSILAGELIFRMFDPSWYVRHGSLIGILALVRAWKVHHRKSDDVDLGVWPQDILARSLCI  
LALDRFGDFSGASAEAISGGTVAPIREMAGQVFVAVVFLMAPNSLRQKVLHILNEMFYHDE  
WEVRHGVLIAIKYTMVLVTSAKTSNEDCQLDSQFLTSFMNHIVSGLRDRNDDIQAVAAQI  
LGFSPDPARGGEKNLIPHMVQSLWQSLQNIIRVVSSINDLVKLLSKLVRTNLSAVLDAVP  
NSNSFLEAWAQVFNRTKELLECELVSVKISILDVMASLSTRCIELVDAEKNESNKLTAAS  
SFCVVVKAIYNLSFETSKVLQEDNANSSDDTTDLRILKLSSETWAVLSEISCTVLGEHE  
SLQNDLHYYLLVKYFDSENILKTSCIASYIPIMDRAASLGRFLRPGKTPQEKETKQCNK  
RNDILEFFFLFSHMDSPIVHCEATCLLIQGLFKFDDRSSYTSENAHIPTIEACEKRLLY  
KLETGTISKLDHNSLHVTHDSGIIKAITTSLNIGYKMWCEEGVSGKVAGAAVVELWKEIE  
LFFDEDSTCNVTVDMSRLLSSHIVGTIAGGIQFLPQKMPVVRPLMTSVQNEHNDKWRMT  
VCSYIERFLTLISNEPKSSLRFEGRRTFSKVLANLCNLLIAGKEPSCISSSITIGLIVS  
KLQEKHSLRDLEAVWTFLLPLRESLLHLDFDATMNALKMMKAVCQFLNEKSSVTATIFDD  
YMHSLTNLGCCEQLVIRDLASTIIQRMCSVDISMALDKILPSLILFLQDGENDTRRYGAC  
MLLHKILDSAEFSVAVCPYIKALLPVMMSMIDPVKVAETSARTFSLLVQVAPLVNDSV  
PIVGSQINEEANLVIDHLIHGKLLKPCSMHPKIAQALREKGIIVLRNYQHEGLSWLRFQR  
INLNGALCDSMGLGKTLQATVAVSLAHMDNSDRRETKSLVICPSSIVGHVWNEIHRYPFR  
DLIFRPLAIEGNGQQRQYLLDNEMESYNLIVASYETLRSNIDSLSKVNWTYCVLDEGHLL  
RNPKTATAKASRRRLRARHKLILGTPIQNSVEEIIWATFFDFLMPFSLGSSSQFSKEFAKPI  
IKGQNLDAAPITIAAGLEKLLKLLHQVLPFILRREKEQVLELPPKVITRIPCPMSSIQK  
RLYSLFCGSLGKQSIISTLNSMIDMKHAPVGGDSTTFNTGAFKALLYLRLLCRTHPWLVRK  
KEDFIDPQMQUESLYDLQSSGKLIALKELLRDAGFAFRELTAADNDMSLIYCGRDEDQMSD  
TDDHEKILMPDCQDSSGDELQHQQLNRQESRCLIFAQFTQSLDIVEELLIKRYMPSMKYL  
RLDGKVPVPQRTIVVDKFNKRNDESFKLLLLTTKIGGLGNITGADTVIFLEHDWNPNSDLQ

AMDRAHRIGQKRTVHVYQLVTMNSIEEKTMMQLQERKLAMSNAIINTNNSMYSMGTDCLL  
DIFQFRSESASSAKSSHTDFDIDNTIDTLVERYQDEYKSLSLRDFLAGFEPTQKK  
>comp13721\_c0\_seq1; 829 1 2241 LEN=2664; translated  
KKDKSPKKAKDEPEEEEEVESSVDSSSARTKDRSLISMPTSVESDDDESEDTFSDADVSDS  
SDDSSSDSDSDNLDSEDNSTLETRGLLGSVNRDSATHLDDQLAPKVSEILNGAEGSALK  
SSPREAHSDEESDESGEDSSFDAESMLESARDHSDSGKKTGATSRRSARGESEASYDEFTY  
ASGAVWSALQDGQKDAAGDFNVDESVRTSAAGVGATGSVPSGTDLEQGMTNSEINQYVQ  
SQRERSGRSYERKSKPKPKVYDRDTTTRRKVGCVLIGVLLLLIGIGGGIGIGLAVFDF  
KKKDTSDNPMTFAPNPAPPILPPLPGTISPVEPPNEAPTQTPTISPPTLSPTSSEPVRAN  
IRASAPTTAAATFEDPDSAQSKALKWLLGNENLQFYSPEKQLYRWTLAVFYYSANGDAW  
RENNRWLSDFDECTWYTAGVNACNSDRFLANLVLGANDVVGTLPPPELGLLSNSLEAINIR  
GLSAQNVVGTIPTTFGLLTSLRELSLPGNSLSGAIPVELSETGLETELNLNGNGYKGTVP  
ALFASFSSQLLDVGDQFSGTVPEELGSISTLRSVLVEDNSLVGAVPGTIGDLRSLEVL  
KLDSNELTSLPRSLGDLKLNLRFTFSASNNKILGTIHTFEGKLVNLEGGFFISDNNFGFQIPS  
ELGQLTNLRDGFVSTNQLIGSIPEELGALTELQFRVSGNRIAGTVPNSLARLTKLRVF  
RIDVNDLTGQVPPAVCGIIDTNEATAW  
>comp13721\_c0\_seq2; 829 1 2241 LEN=2767; translated  
KKDKSPKKAKDEPEEEEEVESSVDSSSARTKDRSLISMPTSVESDDDESEDTFSDADVSDS  
SDDSSSDSDSDNLDSEDNSTLETRGLLGSVNRDSATHLDDQLAPKVSEILNGAEGSALK  
SSPREAHSDEESDESGEDSSFDAESMLESARDHSDSGKKTGATSRRSARGESEASYDEFTY  
ASGAVWSALQDGQKDAAGDFNVDESVRTSAAGVGATGSVPSGTDLEQGMTNSEINQYVQ  
SQRERSGRSYERKSKPKPKVYDRDTTTRRKVGCVLIGVLLLLIGIGGGIGIGLAVFDF  
KKKDTSDNPMTFAPNPAPPILPPLPGTISPVEPPNEAPTQTPTISPPTLSPTSSEPVRAN  
IRASAPTTAAATFEDPDSAQSKALKWLLGNENLQFYSPEKQLYRWTLAVFYYSANGDAW  
RENNRWLSDFDECTWYTAGVNACNSDRFLANLVLGANDVVGTLPPPELGLLSNSLEAINIR  
GLSAQNVVGTIPTTFGLLTSLRELSLPGNSLSGAIPVELSETGLETELNLNGNGYKGTVP  
ALFASFSSQLLDVGDQFSGTVPEELGSISTLRSVLVEDNSLVGAVPGTIGDLRSLEVL  
KLDSNELTSLPRSLGDLKLNLRFTFSASNNKILGTIHTFEGKLVNLEGGFFISDNNFGFQIPS  
ELGQLTNLRDGFVSTNQLIGSIPEELGALTELQFRVSGNRIAGTVPNSLARLTKLRVF  
RIDVNDLTGQVPPAVCGIIDTNEATAW  
>comp13721\_c0\_seq3; 829 1 2241 LEN=2679; translated  
KKDKSPKKAKDEPEEEEEVESSVDSSSARTKDRSLISMPTSVESDDDESEDTFSDADVSDS  
SDDSSSDSDSDNLDSEDNSTLETRGLLGSVNRDSATHLDDQLAPKVSEILNGAEGSALK  
SSPREAHSDEESDESGEDSSFDAESMLESARDHSDSGKKTGATSRRSARGESEASYDEFTY  
ASGAVWSALQDGQKDAAGDFNVDESVRTSAAGVGATGSVPSGTDLEQGMTNSEINQYVQ  
SQRERSGRSYERKSKPKPKVYDRDTTTRRKVGCVLIGVLLLLIGIGGGIGIGLAVFDF  
KKKDTSDNPMTFAPNPAPPILPPLPGTISPVEPPNEAPTQTPTISPPTLSPTSSEPVRAN  
IRASAPTTAAATFEDPDSAQSKALKWLLGNENLQFYSPEKQLYRWTLAVFYYSANGDAW  
RENNRWLSDFDECTWYTAGVNACNSDRFLANLVLGANDVVGTLPPPELGLLSNSLEAINIR  
GLSAQNVVGTIPTTFGLLTSLRELSLPGNSLSGAIPVELSETGLETELNLNGNGYKGTVP  
ALFASFSSQLLDVGDQFSGTVPEELGSISTLRSVLVEDNSLVGAVPGTIGDLRSLEVL  
KLDSNELTSLPRSLGDLKLNLRFTFSASNNKILGTIHTFEGKLVNLEGGFFISDNNFGFQIPS  
ELGQLTNLRDGFVSTNQLIGSIPEELGALTELQFRVSGNRIAGTVPNSLARLTKLRVF  
RIDVNDLTGQVPPAVCGIIDTNEATAW  
>comp13722\_c0\_seq1; 510 70 1659 LEN=1659; translated  
MTMDGSSSGVGTARTR SARNDAAARSDPPAIADIEDFHALHDEAMRKAESTYIDPSTGFMV  
FTELTHLKRGKCCGNRCRHCPYGFYKVRPAARGSWRRRRRAAVGSDPACASAVSVEPILE  
PIPGAPVAKLRSGDREKQNMVREILERAGKWNPGEDGEESTRGSSNAVVDSDDDSSAS  
ESSSSSSSSSSSSSSSSTESAAPVTTAVIEAAKDTPDSSSTSTSTASATSLNSSAESDGP  
DGNRPNPHATTNARTHAPATTTTKNVPYTRGGDQGTSQLGTGERRSKTDDAFEAMGSVDE  
LCSFVGVASHLLNHRHTTRIRRDITGVSYGELPVRLLDVMSRFLFDVGSIAKQPAKESCS  
HHAERKPSAVFVNGIGDGFDPNHVDDLEDWINEMTEDLPELTSFILPTGAPASAALHVA  
RTVCRRAERRVPIVITAGTCDPNALRYLNRLSDFFFVSARWVNFREGQEEIEYRLDLYDG  
ESGDGSDGDAGGVXAAFQDGRLSRPARTGPSLPELGNTTEMYNSSSSNX  
>comp13723\_c0\_seq1; 330 1 1356 LEN=1559; translated  
GFYSAHGSSSGSPEHKAFYNNQPPNRLGLQNHPCDDNVSPDVLSPAHFRASPPDTST  
VPPAPSKPARRPPLRKYTPIRRAPGPPRTPKPRMVRRFGEIGTGFGDDSSDESGGGGA  
NRHRSRHQGPETAVGDP RPSPRFHSDFDVIDELGSGSFGNVFKALSRLDGCMYAIKVAHR  
VAKGNSDRDRMLKEVYALSALSDQSDTATFHIVRYHQAWMEEQRLYIQTELCTTTLEAM  
QEAAPGRLDTTTTRFKCLREILLALEFIHGKMMVHLDIKPENIFLKNGLFKLGDFGLVSKV

SSHDVEEGDSRYMSMELLSGDHKDLTKSDIFSLGIAYEVCLGRTKALPPNGDEWRALRS  
GCIVLPPYTPNELFQIIKKMMNPTYPERPCATDLLKLPPELLSEEQKLLFEEREKVLQANQ  
ALEAQSKMNTLLHPFPKPRGLVRRNTWSAF  
>comp13723\_c0\_seq2; 200 102 626 LEN=829; translated  
MGRLVQLKNGFLFKLGFGLVSKVSSHVDVEEGDSRYMSMELLSGDHKDLTKSDIFSLGIAY  
YEVCLGRTKALPPNGDEWRALRSGCIVLPPYTPNELFQIIKKMMNPTYPERPCATDLLKLP  
PELLSEEQKLLFEEREKVLQANQALEAQSKMNTLLHPFPKPRGLVRRNTWSAF  
>comp13724\_c0\_seq1; 745 1 1104 LEN=2077; translated  
EEAVAEAEVAAEPPVTEDEPTAPLVDGVAEQVSPVVEEVAAKEIVTEEVAEKFAAEDELSV  
PLVDEGIGEQVAPVVEEVASEEVSVPVEEALGEELAAEDEPANPLVDEVVAEQVAPVAEE  
VAGEESAACKDEPTAPLVDDEVTVVPAGAAEPTAAVVTGEDVPVAPIVEEEIILQEDVADDE  
LPEDLDSVDDETNEKFGFDLDSGNNNGNDYLDAGIGLDGYGVDETMNESGFDEEDYDGT  
LYDDAQDGLDAFGVDEAQNAGEDYGGNYEFGADFDASDAEENVAGTNDNTFDTHSADLGD  
APNGILLTDDNWDYDDSSAAGPALLFLLFLLGVFLYRRKRRAAANDAYTGMRGGYRVPVG  
AEKQHVK  
>comp13725\_c1\_seq1; 875 210 1484 LEN=1690; minus strand; translated  
MAKLPNETEEVKIADVKAEKSEAKTEKRSGEKEKKTSTKKRKSCKGKGTVISTPAKKAIQ  
EKKDAVSNETKIAVDTPSQKANPTKKQTKKEEKDTKASDDVLSTPVKKEGKTSKKNKST  
EKKKPKVKSQEKKKKAEADGASVDPTPTKKAKKQEKKAEEESGIDATPTSTKVAAAEKEEQ  
KETKSDAAVSTPAKKGKGGSTVNEKPTETKANAVANKPNSTKKPKNAKTKAKAPAGKG  
AKPNTKAKAAKKQNPKPPLRQKQQQLKTLQKQKNAKDGSLSLQMRKALEKQQATSKPQ  
SPVGDVSKDKQPKPSSQLQEQKSLAKDEPSSNAVTPPTKKRQRPQKEMSQQPLSEQTE  
KKQVMNLARAKLELELKHVEKQREASLLKYHELKYEKFDNDIILAVCPHMGPIVDAVLS  
AKSQ  
>comp13726\_c0\_seq1; 413 513 1772 LEN=2127; translated  
MFFGGDPFAEHFGGSGRRPGRVPSANVDTTKLYETLEIEKDADQKAIKKAYRKMAIK  
HHPDKGGDEHTFKEINAAYEILSDPEKRATYDKYGLEGLEEGGGGGASADDVFSMFFGG  
GRGRRSAGPRRGEDVNHTIKVSLEDLYNGKTIKLAITRQVIVGSASVCSECDGHGVVLEV  
RQIALGMVQQVQRRCTACGGEGYNYQKKREREVLEVLVEKGMKHQQKIVFRGKADEKPNM  
EAGNINFIIQEKEHPVFKRKGADLLVHKTLSLNEALCGFEWKIEHLDGRDLVVRSKPGEV  
ILAEETDRKPFVKIIPNEGMPSHGNPFVKGNLYVLFVRFVEFPSEGELDENAVAALQKILPK  
PSTKSDTADVMDAETTEVVHLEAADVRHFGKGAASHSSTYDSDEEGGPQPVQCQOS  
>comp13726\_c0\_seq2; 532 151 1293 LEN=1648; translated  
MMMSPLLHSAYRWFASRVHSLYESTEPNPTPRHNYKTAYEILSDPEKRATYDKYGLEGL  
EEGGGGGGASADDVFSMFFGGGRGRRSAGPRRGEDVNHTIKVSLEDLYNGKTIKLAITRQ  
VIVGSASVCSECDGHGVVLEVRQIALGMVQQVQRRCTACGGEGYNYQKKREREVLEVLVE  
KGMKHQQKIVFRGKADEKPNMEAGNINFIIQEKEHPVFKRKGADLLVHKTLSLNEALCGF  
EWKIEHLDGRDLVVRSKPGEVILAEETDRKPFVKIIPNEGMPSHGNPFVKGNLYVLFVRF  
FPSEGELDENAVAALQKILPKPSTKSDTADVMDAETTEVVHLEAADVRHFGKGAASHS  
STYDSDEEGGPQPVQCQOS  
>comp13727\_c0\_seq1; 1121 480 1877 LEN=2026; translated  
MKSFSSTLVALNALLASSTVSSRLLEDSAIYPDGTPVSFFEDDKWYDGVVEKYEYGGIY  
TIKWEDDEFEEIEVGSSEMDQLVDDGMGDDDDAPPAGIVLSDGIAIGTPAFIWDNQNQWFDG  
AITDHSNGEYAVVWSDGDTDTYKDEGDDLKELQQAIEDAMGDDEITDDEIASLDNEEAA  
TTDSDDAEDVIEASEDVVEASEDVSEVSEDDSEDVYDDAPYDDAVENTDDASEDVADD  
DAAFDDDAESEDSESDAISVGTAVSIYDNDTWVDGQIIDHADGVYTVAWNQDQTDNEYIDT  
YDDEGEDFEELKLAVDNNSGDDDAAPTDEYEVPPAWEIGTPVSVNEDDAEWYGYIADYFN  
GEYSIAWDDGESEWIDDIIVAMLVADAKSSSEDMHISGQMLIGIGVGSVLLAAVALYN  
RHKKGSSNSSRRRALVPVPSGSAKDRPGRGEASYKKQEQLNRIV  
>comp13728\_c0\_seq1; 218 1 1000 LEN=1193; translated  
XRKQLVATPTTAKRDKPAKTNTPCENKTKQNKANQQTKPPTTMI PKHSCGPAMQSLLLCT  
ALVVLLSGVLVRATLVDGRNRGSLRKP TGKNGDGKVVVELYYESQCPGCREVLTGSFFEA  
FSTEGFLDMAEVVLPYGNVAVESGPDEPSGTFHFECQHGPSECTYNAMEACALDKIESPT  
KAFSFLYCVETS DENREPDQDYDAVATKCALSGLEGATEEAI RACYLGAEGNALVHSLA  
ERTAALDPPTYVPWIVADGVHSDDLQDRIGDSL LDYVCSAYGGPNPKPRACTPLAGRGE  
ARVRSDEKRGERRPRGSP LCHRGG LGEMARDE  
>comp13729\_c0\_seq1; 469 431 2290 LEN=2471; translated  
MVDIVDLLGDDSTDGERDDDDVVIDVPPPKPPKGLSAATGGRSRWQHCQFAMKGQRRGA  
PKGYSTTEKAESAIAKQRKRPGAATMAFDCNSDSDDEVFLSQIQPSGLTRSSK PANSP  
PSLHNC SHVSSKGLLMNDSRPM TIT TAPTHHKQQVDQLQGGSRATDAAWNAQAGASTTLP



SDMGRGKPLRASPKNPYAKPKNATPAALRRNSSLGRRSVASSGSRISITTPLSLSDKSRNKA  
LETPTRTGARGLSSLGDRSSASSRRTTGNISVISSTRRRP IVENPYRSSGKKITPKQSSSSSS  
LTIKSGHGVCYPRRLREKTKLWPDLRANIVLALWKFSSRNLTRDSYKSKQLDQYTGRIVDL  
TVTAAHDFPVRSLGEYAFRIRTHAVKRGCGGVSSADALKRLGDCLDSTGAMRKSQTI PVGA  
SGKGFSSIAEACL VAMKEVIVQRWNRMEQQQQQPMRFPTDEASQRALLSQRDSFVSLVE  
LIPEIDGRLRPECPAKLGRKSDSDYGAIFYLAQSTISAEFKQIEKLLAPIDVVL PNGSVA  
VTAYLKRSIGGKQHYELTTRGFEPPLVIEHKRRFRLSTTGDVSGLKLARAMHIWCHLKG  
ICRCIENGNAFQPETWTKL

>comp13729\_c0\_seq2; 319 277 1452 LEN=1638; translated  
MTVRSAPSFCLVTAAVISLFSSSSPFLIRSFPCPTRNDRCKRTPIASFHGGLGIWWQQPR  
DSVASSLTISFATGGDCSVVDVQTDIYSVKDCKSVSTAQGRRLVWQHLSECFQGFDFNY  
AQVVEDRKLGLSPREGGHEHFHCTLVPLTEKTRLAFFFDGNPDRIFRFRYYELISSPT  
NDEAVEMYLNTHLPDLERILKSQANDPLSWPSIFENFKPEVEDQPKVSLLNKCEISWSFE  
QDPVQHSYLTNAPEKDDEGLTTS LHAIMIHGPTIVNSTIVPGLQIRIIDQLSLYRNVFYI  
NDRGFDPKGGFIYGNQREVPYRLERVSTISSFSATKENGLRRQVENPGLLEWTIGPDYRT  
AEEYKCKLQAIGGPTAGMNKKNYKSDGPGK

>comp13730\_c0\_seq1; 397 1 727 LEN=1543; translated  
XPATAAMGASGTTAASEVTPSFFCVPMAAFAALFFVALACFLAAGANLGDDVRAGGGGGG  
GNSASGGDCAFVSAAGLAAGVGSFALGTGTGDKDAEEDAAGPLPLCRAAGPGADSPR  
RFSSLSVTGAFRTGTGALGGGCGCAFVCALLSCALFACALLGRCGGRGAGAPDEKPPPELC  
PSSVGSIGGTYPTDPPGAAAATTAALPFFGGDAARDKPAKRSFPEDEDEDMAIVCCLFLA  
GT

>comp13730\_c0\_seq2; 397 1 727 LEN=1383; translated  
XPATAAMGASGTTAASEVTPSFFCVPMAAFAALFFVALACFLAAGANLGDDVRAGGGGGG  
GNSASGGDCAFVSAAGLAAGVGSFALGTGTGDKDAEEDAAGPLPLCRAAGPGADSPR  
RFSSLSVTGAFRTGTGALGGGCGCAFVCALLSCALFACALLGRCGGRGAGAPDEKPPPELC  
PSSVGSIGGTYPTDPPGAAAATTAALPFFGGDAARDKPAKRSFPEDEDEDMAIVCCLFLA  
GT

>comp13730\_c0\_seq3; 397 1 727 LEN=1363; translated  
XPATAAMGASGTTAASEVTPSFFCVPMAAFAALFFVALACFLAAGANLGDDVRAGGGGGG  
GNSASGGDCAFVSAAGLAAGVGSFALGTGTGDKDAEEDAAGPLPLCRAAGPGADSPR  
RFSSLSVTGAFRTGTGALGGGCGCAFVCALLSCALFACALLGRCGGRGAGAPDEKPPPELC  
PSSVGSIGGTYPTDPPGAAAATTAALPFFGGDAARDKPAKRSFPEDEDEDMAIVCCLFLA  
GT

>comp13730\_c0\_seq4; 397 1 727 LEN=1523; translated  
XPATAAMGASGTTAASEVTPSFFCVPMAAFAALFFVALACFLAAGANLGDDVRAGGGGGG  
GNSASGGDCAFVSAAGLAAGVGSFALGTGTGDKDAEEDAAGPLPLCRAAGPGADSPR  
RFSSLSVTGAFRTGTGALGGGCGCAFVCALLSCALFACALLGRCGGRGAGAPDEKPPPELC  
PSSVGSIGGTYPTDPPGAAAATTAALPFFGGDAARDKPAKRSFPEDEDEDMAIVCCLFLA  
GT

>comp13731\_c0\_seq1; 1086 147 2762 LEN=3726; translated  
MADQSIIQQLAQLLLAAQQSNPDAERQLNEFKNSNLGNYFQGLVSVLATDGINTDPLARQ  
LAGLLVKNALKPLHSTEHALQAQYHNAWKALDPAVRDSIKGPLLQAMRNPETGVSHPAAQ  
AAAEEVAAVELPYEEWPAFLPSSLLENIRVAEYNTENVKVATLECLGYCCERISFLGGEVNQT  
STDSMLSAIVDGIGASRSNRMRHAAAGALKNSLMFAESNMEKQEERGAIMNALMEATRSE  
DAQVRIAAYEGIVQVACLYYAKLSEYMTNLYQLTTSTIQDNEEVAKMAIEFWTSLCEVE  
QDLIDEELEMRQGLPVERPCMRVYDAAMTHLVPILFETLMKQSEDPDNDFFILQMAGQL  
CLTISISQTVEDKIVGAVMPFVTPNIQDSNWRKRDAAVMAFISILDGPSSDAIGRYVTE  
SVPLLNMLNDENIIVRDSTAHICISRICFLHVDFIPNNQFKPLLEALTTKCSDGSPKVA  
TQAATAIFNLASAVSDRQEEDAPTNALESPYMQEILQQLLKMVDRPDSDDCNLRLAGME  
AISELISVSAQDNFGLLSQLLPAFVERFKQASAVAVLNEEDKNNKEQIQGLLCGVIQNL  
YRKLDKATLLPMTDDVMLLLLDALS VKNSSCHEECFTAVSAISDAIEDDFVKYMDAFAP  
HLVNGLRNFQAYQVCIVAVGTVDISRNIEGKIQPYCDTIMNALVDDLKDSIIHRSVKPP  
VLSFCGDIAMAGAAAYQPYLEFSVLMMLQASQTQVPDDDDDLIDYLNLLRESILEAFV  
GIIQGLKDGNNLGSFASYVSPILEFLK VIAEDKNRDSYVLNKA VGLLDLAQTMGPP  
IKNEINKQFAMKLIQDAMASGDSSLQEVATWASQAVTTVVQS

>comp13732\_c0\_seq1; 176 41 796 LEN=1113; translated  
MRRKPWHWPNHLSLFLPSAKNSSVDVKNHGSATSAPGESRGGGVSVQKSYVGHGALDWKE  
FVERPLFLEQEPGRDRAAAKPEHGGNAGASGPGLCQKGYPPGTVSPCRRNTNYVPDRL  
GGIPPVFLRHLPCGANDPVYELRPGGQREPFHELLQLRAAKIQNFLRIPEQWDLTAIGFV

RYESLLGNGLGSLTEEIIGRVLEGTGTSSSACPFLPPFEKTPYNISVEFRDWIERATRWDV  
ESLIGYHRDPS

>comp13732\_c0\_seq2; 285 1 1676 LEN=1993; translated  
XLETEGTDVPYGTHEPLLQAIARAMRPGDGGQSSTLSAKERPVRKAGKGATKGVPKQQR  
VPLPGQRRRPRAARLLLLCAAAGLGIPTVRIAFECAVLLGRNPVRDAPPVASSVEKEASG  
TGVPPPTTARPSGRDPANPATAVWKDLLRNGGTSEGGLPPARIGIHVLRRGHPATKIVV  
LGERHSGTTFERHLSECFPNTTVVDALFNRKHWFPDPEHLARAIAMEGAGGGGVGGQH  
HRHHDDDDHDDGSLPALWRRIAEQSTTSTNHDEQKHEHDPSSGSPPNHYFRDSL VVVVLF  
RNPYDWEAMRRKPWHWPNHLSLFLSAKNSSVDVKNHSGSSAPGESRGGGVSVQKSYVGH  
GALDWKEFVERPLFLEQEPGPRDAAAKPHEHGGNAGASGPGLCQKGYPPGTVSPCRNT  
NYVDPDLGGIPPVFLRHLPCGANPVEYELRPGGQREPFHLLQLRAAKIQNFLRIPEQWD  
LTAIGFVRYESLLGNGLGSLTEEIIGRVLEGTGTSSSACPFLPPFEKTPYNISVEFRDWIE  
RATRWDVESLIGYHRDPS

>comp13733\_c0\_seq1; 918 115 2146 LEN=2146; translated  
MSKQSALFCVLMASCALLAEGFLPWCPAQASTTQTATTTTTPVASKVALSLLGSSNNGE  
VKGDNWLEKSFVPGTDEKISPKSIEDYNVGVSGRDFQTGPLSKRMYDAISSMNNQMEMS  
DEIRQAFHLYAMDFTAKEATGAALRQNGLQMLMEEEEEDQGMWGDVEAVRLYDSSEKPG  
SKLYDSLEEAIVDWTGQTFDFVVRQVPAKMRELSVDELVQALDPEGKLRREEAKERRG  
DDEGE PDEEALLSIIIDGMTSLSDLASDNVRRVEEAPRGSTDAENAYGGADSRGYR  
VIKRS DLSRDSINDDGTENDQTVLHVMMNALVAHGVLVLDLTDGGASFKDAEVM  
SRMKTAD EFFEKASDPAVAEGLPGMTTVMETGSQHAMVGYSEYDSGSMKFL  
ETRRE RASGTILPEKTRD VVGEDGISALRSSFDLIAQAGKDVVRIA  
VAASSVENGAFFDSDAEDEEAERDQMIRASQGATLLANELVDDGKPLPSGVQIDH  
SEGKASMSPYRLCRYTDAREETGSSREVFGAHTDTSFVTAVPVAEISGLE  
VYDEAAEKWYRPEIRARRHWE EQAALGRDPSLQYDETS DGTQIPWHSRYLA  
IMPGENLQLATRNEIPAAIHRVVAVKGGPARVSAPVLLRGRPGTKFLTD  
RYIGGWLGDQLILDADGLSMEEIHEKNQX

>comp13734\_c0\_seq1; 141 168 437 LEN=663; translated  
MKFSLAALALASSAPNALGFSPATSGRRSSSALSSTVEPPERVAPDAGYVPEWENR  
PGLTPEEFMKSDMSKPDLAGMWECPLTRWDSEG

>comp13734\_c0\_seq2; 588 168 1532 LEN=1884; translated  
MKFSLAALALASSAPNALGFSPATSGRRSSSALSSTVEPPERVAPDAGYVPEWENR  
PGLTPEEFMKSDMSKPDLAGMWECPLTRWDSEGIDIEAAQKLAQQPHCPLEIRASA  
EDNAAGAKYFSDNKEMIREELLKYGAIWFRGFDMKSVSGHREMYEAIELQPCLDPL  
HSSGLRKFSSERDALYEEVNKPSLRGHYI GLHSESTTKRTAAYAAFVCFQKATE  
GGGRFLVADGAA ILAELDTNLLKLYERDLRISVSNIDIPPTFPQFAQDGIKEIV  
GATVAPKFDMDLEMMIGADGKEGRLQAVEKSESPINKHPVTGLPVWFNNAHN  
HARKLRDRRRCGVPVEVGMTEVFYADTMEPLSLEDCQEI KRASEKHITALAME  
PGDVLLVDNYRALHGRDVFQGD RYHAVSWFTWDDNEEWRGDERRIVEKNG  
LNKVINGMMDWLPKDFESDQS

>comp13735\_c0\_seq1; 1046 55 5840 LEN=5942; translated  
MTSNDYYANIKNAVDLASGGEERVEVNQRALIDKILARYASAGAVYRELLQNSN  
DAEATTAEIYFTTNREGKKNVDFVKTESLDKKIPSTVHLKNAGKDIVSNVTYR  
NGLLFRSQDWSRLKKIAEGNPDESKIGAFVGYATMFSICEEPMVLSGNAALAF  
FWKGDALWTKTIKTADRPKEDQAWTSFVLP SRDPYLMPLDVFGEFLCASLTFT  
KCLREIRVYVNRERRLSIVKTPLTEPTVVNIGSKTSSNWF SWTASNSKGGV  
TTSV PNLGFALRDDQSLEEKLYHIQVELDGNVAGVTARYLSAVARTNIPA  
EMIHRMERVTKKKPPSKVDVQIFL SHDQITIDGDDTKLRKDRDVRRIAKS  
FSPRVGEGRIFIGFRTSQTTGLAAHLAAPFVPTVERESIDLQDQTLRMFNS  
ELLDFA GIMRLTIEHSMALGIDYEKGASARREVEMLMREAQKIQIENNRK  
NEKDGETNHGQILSLNDSFVNDDLASSSGTSQVRTTKSLFGFAKFMAGV  
RKTIKKVVTNVSDFVDEAVG GELIHPDLRPLSTEEHQVILLMQSFCPQ  
QSTPDPLVGTILAQGF SRCIDRAPPVLRSGVVPGDQARLPNKGM  
EAFVDDVRSIIYQNAEEYHDVIAQCEKLTLLD LTLKLSKDVLEE  
SKLIRLIKWWVKFNKFPCTT TVQSSRLKDKVRFMLENENKYEKSDVLP  
VYWLKDFLFYVDKDIIRCGNGHNI EDLPMPDCVLP RRIQGEVTGRILSDK  
SLNAWFSPLPVELWIDFISQHP CMTSIRGEPEYEEVRLRVLSTLCNE  
YRNVSF GFKITTIKLFDXKMNQSFIVIVELHNLSSLCTKFR  
AVVVHLRQTNKIFSKFFTIFLDAVTNSHYLLQSFVTLN CIXLILLKRTS  
NHQKLFGNSCQVKLKDRCIPIDSSEP MRYADLPSNLYLCSAELKMFAN  
VGNFRKVSTSLQLAGVNDEFLLLLGVRKSVSVDLFFENLHTLKYTDD  
PKPLVEYLQSATLSKTDVKKLLKDSQYLP AENDASRMFAPAELYLPD  
PTFRIFPFIRLLQWPSEDDISERSLNGKFLVSMGVKPVPELLQILRY  
VSSEVPDGVTRLQCLDFVANRLGSGGTYQLEYSRLSRSDKSNL  
KFLPCLIASPLSGEEKQTCSTLNCCSNPAPGVMGFPILNIDGKNKLY  
GNLFQCAEESPAAALLQQLKLIVSLARRTLHSGAGEKORKEFSHKIF  
ATFLRIFNYMSSRSSEIDGSKLDFEDDFIPCLVDDQIQ

WFHPTEVFFRSKKSDETGDITRALFPVVEFSPFLASAGVRQEPSTRDIFKRMIKSPKEVF  
AAVQSEGNRALLRRIASHPPFTHVTDEIRESFLLAYSVTETTGVNEEMTYELAKATDI  
FVIDNSVFGRMFSVKRAPNESHLEEFYVLLGAEYISKVVRKKFDIVGAYEQGTNVSNLNM  
ERIQERTPLLIISAGSSSRSLLVHNAQALLDLTNLKVQAPDIKANYSLGKSVRTQKTTCC  
VRGGMFGKNSIVVTEDFDWFDVGYIIGELILKRCLLEDAFLISSLLETPLDQLKARGFPV  
DRIKPEPLPEYSGVSSPLRTKETEPNQESKIDNDSKSIDDHSENGLDQIEIRSSQNDHI  
FRLKQMPGINESYLQDKLGKNPNIDKVRSAEELATQGYPEEELDNQSTSKSSKLLGFK  
KLGKVLKNFGGLPNNLKRSQSLSLHKPSTGERYPVAPKDDAILHSDMERMLEKKVRSSPH  
VSAAGIKSAQESMDIPEGLGHGSTCEVIPSQDIIPFVGNNGKMESHNGIKLFYYRKEQSS  
KQYLRVNHDAVENFAVLERLCRVFELPLASVAIYHDPGKAI AFNSGGALYFNVRVYFFG  
LHYSKNVHRSKACYSYWYVVACHELAHNLEGPHNSTHAFYTESYTSLYLPKLMVLAGEI  
KEKILSAT

>comp13735\_c0\_seq2; 1131 55 5586 LEN=5688; translated  
MTSNDYYANIKNAVDLASGGEERVEVNQRALIDKILARYASAGAVYRELLQNSNDAEATT  
AEIYFTTNREGKKNVDFVKTESLDKKIPSTVHLKKNAGKDIVSNVTYRNNGLLFRSQDWSR  
LKKIAEGNPDESKIGAFVGVGAYTMFSCICEPMVLSGNAALAFFWKGDALWTKTIKTADRP  
KEDQAWTSFVLPSPRDPYLMPLDLDVDFGEFLCASLTFTKCLREIRVYVNRERRLSIVKTPLT  
EPTVVNIGSKTSSNWFSWTASNSKGGVTTVSPNGLFALRDDQSLEEKLYHIQVELDGNVA  
GVTARYLSAVARTNIPAEMIHRMERVTKKKPPSKVDVQIFLSHDQITDGDDTKLRKDRDV  
RRIAKSFSRPRVGEGRIFIGFRTSQTTGLAAHLAAPFVPTVERESIDLQDQTLRMFNSELL  
DFAGIMMLTIEHSMALGIDYEKGASARREVEKMLMREAQKIQIENNRKNEKDGETNHG  
QILSLNDSFVNDDLASSSGTSQVTRTTKSLFGFAKFAKGVKRTIKKVVTVNSDFVDEAVG  
GELIHPDPRPLSTEEHQICILLMQSFCPQOSTPDPLVGTILAQGF SRCIDRAPVLT RSG  
VVPGDQARLPNKGMEAFVEDDVRSIIYQNAEEYHDVIAQCEKLTLLDDLTKLSDVLEE  
SKLIRLIKWWVKFNKFPCTTTVQSSRLKDKVRFMLENENKYEKSDVLPVYWLKDFLFYV  
DKDIIRCGNGHNI EDLPMPDCVLPRIQGEVTRGRILSDKSLNAWFSPLPVELWIDFISQH  
PCMTSGEPEYEEVRLRVLSTLCNEYRNRSTSNHQKLFNGSCQKVLKDKRCIPIDSSEPMRY  
SADLP SNLYLCSAELKMFANVGNFRKVVSTSLQLAGVNDEFLLLVGRKSVSVDFLFENLH  
TLKYTDDPKPLVEYLQSATLSKTDVKKLKDSQYLP AENDASRMFAPAELYLPDPTFRIFP  
FIRLLQWPSEDDISERSLNGKFLVSMGVKPVPELLQILRYVSSEVPDGVTRLQCLDFVAN  
RLGSGGTQYQLEYSRLSRSDKSNLKFPLCLIASPLSGEEKQTCSTLNCCSNPAPGVMGFP  
ILNIDGNKLYGNLFQCAEPEPSPALLQQLKLI VSLARRTLHSGAGEKQRKEFSHKIFAT  
FLRIFNYMSSRSSEIDGSKLFDDEFIPCLVDDQIQWFHPTEVFFRSKKSDETGDITRALF  
PVVEFSPFLASAGVRQEPSTRDIFKRMIKSPKEVF AAVQSEGNRALLRRIASHPPFTHV  
TDEIRESFLLAYSVTETTGVNEEMTYELAKATDIFVIDNSVFGRMFSVKRAPNESHLEE  
FYVLLGAEYISKVVRKKFDIVGAYEQGTNVSNLNMERIQERTPLLIISAGSSSRSLLVHNA  
QALLDLTNLKVQAPDIKANYSLGKSVRTQKTTCCVRGGMFGKNSIVVTEDFDWFDVGYI  
IGELILKRCLLEDAFLISSLLETPLDQLKARGFPVDRIKPEPLPEYSGVSSPLRTKETE  
PNQESKIDNDSKSIDDHSENGLDQIEIRSSQNDHIFRLKQMPGINESYLQDKLGKNPNI  
DKVRSIAEELATQGYPEEELDNQSTSKSSKLLGFKKLGKVLKNFGGLPNNLKRSQSLSLH  
KPSTGERYPVAPKDDAILHSDMERMLEKKVRSSPHVSAAGIKSAQESMDIPEGLGHGSTC  
EVIPSQDIIPFVGNNGKMESHNGIKLFYYRKEQSSKQYLRVNHDAVENFAVLERLCRVF  
ELPLASVAIYHDPGKAI AFNSGGALYFNVRVYFFGLHYSKNVHRSKACYSYWYVVACHEL  
AHNLEGPHNSTHAFYTESYTSLYLPKLMVLAGEIKEKILSAT

>comp13736\_c0\_seq1; 738 234 1616 LEN=1771; translated  
MSSPSAPESSRVRDGKKREKDTAQFLVELGVEVGIL IATGVLASYVVNKIVKGLNAGNQD  
ADVEAAAASAAEKRLHTLMKEKGREIPPLTNYERQISQDVIDPTDISVRFADIGGLDEKKQ  
EIWELAVLPLQPELFAQSGLLQAPGGILLYGPPGTGKTMLAKAIAKEAQATFLAVKLSK  
IMNKWFGESNKLIDAI FSLANKLAPSIIFIDELDTFLNPRDGAENSAGNAIKA EFLTLWD  
GITTSGNSHESHGPMVLGATNRPNHVDNAILRRLPRIFRIDLPNVQGRQLILRLTLEKS  
KHPLGDSAKKYL PQLAKETQGYSGSDLKELLNCAALQAVREVMREKSRRAVGRIPESGVS  
EIDEAKDEGEKPAKQPRLRAMTADDLRLARTKVKRTGAESADYDERQNGYGGGARGPMI  
DPEQLMRLLASQLMHGSTNGHGNHAKRNNNNNGDDIPNL

>comp13736\_c0\_seq2; 738 234 1616 LEN=1799; translated  
MSSPSAPESSRVRDGKKREKDTAQFLVELGVEVGIL IATGVLASYVVNKIVKGLNAGNQD  
ADVEAAAASAAEKRLHTLMKEKGREIPPLTNYERQISQDVIDPTDISVRFADIGGLDEKKQ  
EIWELAVLPLQPELFAQSGLLQAPGGILLYGPPGTGKTMLAKAIAKEAQATFLAVKLSK  
IMNKWFGESNKLIDAI FSLANKLAPSIIFIDELDTFLNPRDGAENSAGNAIKA EFLTLWD  
GITTSGNSHESHGPMVLGATNRPNHVDNAILRRLPRIFRIDLPNVQGRQLILRLTLEKS  
KHPLGDSAKKYL PQLAKETQGYSGSDLKELLNCAALQAVREVMREKSRRAVGRIPESGVS

EIDEEAKDEGEKPAKQPRLRAMTADDLRLARTKVKRTGAESADYDERQNGYGGGARGPMI  
DPEQLMRLLASQLMHGSTNGHGNHAKRNNNNNGDDIPNL

>comp13737\_c0\_seq1; 1030 341 4384 LEN=4518; translated  
MTLSLSQLFQQSQSSQSPSIPKQEEVDSEHRSNNHGPPTKRFKNDPEQSAADTRDGDGSA  
SNKEQRDGTPEAKPVRIKTEAPGGTKRKIKEETIDEVVKNDANDDSGNHREEYEDEEDG  
SERDDVVDLSGTDIFYENYPQTARALYRFQDTRDNKESQPSDGHGGDESQADALGVIHS  
ALFPAKSKKALAMGNRRRLSGAFEDENHPSKSLTGRLRPRQKRVRVEGPGSGKKEVSLRLE  
TQEEVNERVQKMERWEEKIMQVRWRKRLVNFQAEDDVGNAFLARAEQDLGEGLRADLKE  
RRREEQRKREKLKREKEERNRLRELERNDHLEEDDEVKEQSQLLAQLTQQSDLPVNE  
DKESGKGDGAPSSAAFLEELDYWEKGYTYPERSLISYNLHRSVKKMVQGAPKTFSGARGK  
TAQHDAAGETDDKKTSLGSLMNEQFVHKSRYRFFFEFNKTSVTTANKTVRPGFRSGHVRH  
MVSMAVRSKCGGGGGVGSRRDDIALENHYIRLLCMRAFNKDDADTAVNPTICAEFRTRGY  
LAAASLEQGSNMLLYLQNTWDDPAKVARKLGILDCYQDSPKGNLLKHIRKHSKNLRSKI  
KRSHRISSADWCSNNDYEADHDLDEGSSATPEDKVTPEITTSGGVADAVTTETCLTIDK  
EKAINLSKNDRDALISPNLSYSHISGTSPPIQHPDLPSSCLFGPVDRHRSKFHHIGVKMD  
SSISKVMLSTLMKRVGRARITSNEPLSINTPKQILDVQEFADV NENKLYLRYTNYIQDP  
NDSDIPLVEFYRGLAEYCSFMANGYLEVNHSNTRPAEVQKTHDEREDFVTQASGMSLLAE  
KIWEFCRPKIHQNALIRFPKLIKITYGVALVCRSLPSSAAEILSRPTDDDDGFYTPDLDFKQ  
TLEDLETKKYISCTSDRHFDSDAIRAVELEFLLHDAAELEFHEAVKLDPINVDYQMWIIG  
CLASCLLVSSGNKISDNVHIYPSQKKGFSMNQYIANHEVRCRLKKYHEVRIELSNAIRVL  
FTLAKYQNSAKVHLAVYSLEWGVIGLLVGNVLDQFLQEINSLHAFHFKEWARRDPVAF  
LRQNQSKDRDFSDVPLYAQIILESDPEDIRNWRNFVQCLGHIPTKKDDPGWWGEDRSWWG  
DSLHLFTPEAVDRALINGDLHAVEIVITKLENVGHHLSIPDHLPLTKSELDTEHRNGM  
NCESFEWLPHTHSIMDQINKNVDDSKVVRSKCFAGSLPRKNGNFSETKLVGSDRGSPVSI  
HCESSVPLPELVSLSEEAQAYKIFIACHLFLGLDHPPIRQCMYHNLFRKCYKFENPEAVN  
ENCDEFRTLAWFLSLGMNLSEIMRSRF

>comp13738\_c0\_seq1; 829 51 2809 LEN=2819; translated  
MKITLCLFLFLFLLYQORTHGLPAGFRDEGVTFRSGTTGFAFVPTGEGESILLLCQRKGV  
FALLDPDNDPGKLEILDIQDRVCSQGERGVSQVQPHPNFLQNRVYVLYTYDYDKHGGCEF  
SDVNGPVNVVSRFRLDDDLKMDVEKIIILQTSPLPTKVHNAIDMKFGNDGYLYVTFGNGGK  
SNEYQNSQKSNTLLGSLVRIITDDGGIPDPNPFTEDDDRQCGSDGSTSSSGRCSEIWSIGL  
RNPFRLAMNPNEKDFTQFYVNDVGGATWEEISEVTSKAPGKNYGYREMEGPCRRGSKTDC  
KPNEKYEDPLYWYEHNDGEGDGCVSGGAFVPNGDLARGYDNKYMFADFIKKIFFLSENGD  
GCRECSPRPAFDRESFKSTSDTGQPVQLTFGPYKNTQALYYSLWSPDESFSIRRIVYEG  
GMNRENKIPDAEIMFKDKVFEINEDIVFDGTRSSDPDGDKLSFAWDFGDGDSSTREIITK  
SYNTTGKTYTVKLTVKDENGFEDESASKTIIIVGTTPPKVIVFPKEGTTFAVNDHDFVLFY  
TDAAGNSLSDEHLTWEVRQVHSTHYHPFLIETVGNIRIPPAPSPEDFHASTNSYLKILL  
TATDSGLTSTTTTRDIMPKTKKLYFNTPDPPGLELILDGFTLKTTPDDGPLEVLSWINHNLV  
IDVEDQGEMVFDWRNNGISSRHSEGVDDVFGDSVNTAIFSKLNSSTAFPVEADVPVSL  
TPIEGGEEAEETHGPIGENEKDQVSETTTTETSTKEETADEERETINEDECNSIYDTICED  
INLIGFCQAITDAGLKDVFDEGEWTIFAPDDAAIMKAPPEFHSLIRDHNTTDIEPLREHI  
LYHSSPNKELREDDLKCVDRTNLVEMGNGRYSRTLCEDDVPTFQKGRGNTDEKLPRIEF  
DIPSCNGVVHIVDQILML

>comp13738\_c0\_seq2; 613 51 2312 LEN=2312; translated  
MKITLCLFLFLFLLYQORTHGLPAGFRDEGVTFRSGTTGFAFVPTGEGESILLLCQRKGV  
FALLDPDNDPGKLEILDIQDRVCSQGERGVSQVQPHPNFLQNRVYVLYTYDYDKHGGCEF  
SDVNGPVNVVSRFRLDDDLKMDVEKIIILQTSPLPTKVHNAIDMKFGNDGYLYVTFGNGGK  
SNEYQNSQKSNTLLGSLVRIITDDGGIPDPNPFTEDDDRQCGSDGSTSSSGRCSEIWSIGL  
RNPFRLAMNPNEKDFTQFYVNDVGGATWEEISEVTSKAPGKNYGYREMEGPCRRGSKTDC  
KPNEKYEDPLYWYEHNDGEGDGCVSGGAFVPNGDLARGYDNKYMFADFIKKIFFLSENGD  
GCRECSPRPAFDRESFKSTSDTGQPVQLTFGPYKNTQALYYSLWSPDESFSIRRIVYEG  
GMNRENKIPDAEIMFKDKVFEINEDIVFDGTRSSDPDGDKLSFAWDFGDGDSSTREIITK  
SYNTTGKTYTVKLTVKDENGFEDESASKTIIIVGTTPPKVIVFPKEGTTFAVNDHDFVLFY  
TDAAGNSLSDEHLTWEVRQVHSTHYHPFLIETVGNIRIPPAPSPEDFHASTNSYLKILL  
TATDSGLTSTTTTRDIMPKTKKLYFNTPDPPGLELILDGFTLKTTPDDGPLEVLSWINHNLV  
IDVEDQGEMVFDWRNNGISSRHSEGVDDVFGDSVNTAIFSKLNSSTAFPVEADVPXEET  
HGPGENEKDQVSETTTTETSTKEETADEERETINX

>comp13739\_c0\_seq1; 166 1 751 LEN=1643; minus strand; translated  
GECVFGNKKTFKDERAGLNLKHNRFGLLSMGNSGKNSNSSQFFFTLDKAPQCDGKHVIFG  
EVS VGGQVLEKAESFGSSDGTPTAPIRIADCGVFTPLQTPGAGYWYDKPDSSESWNGISPT

FVVRPRIAIAAPEAARKKFEQAMSGLCSSVLSICVGGAGEAPEAASKLLESLSSFSVDI  
VVIAPVCKDVKSKMGQRLPVSWVNSNFSFEEVVIVSKPLDEYLRYILNLGYRATENIGSL  
MVDDDIESI

>comp13741\_c0\_seq1; 511 1 1355 LEN=1631; translated  
QQQQLLWLRSPAMFRRLRERVNDVAVSNAASSLSNAGNSSHVGVSELAAMGFGEERQAL  
RVADGDVARATEWLLAHGSPVGTAGNPIELPGRTGAAAAREDAELQRAIQESLRTEPGRT  
QTGGRQRRQRSAAASRNAGLAAASRNTEPKPKPKPTLSKTHPGVQMPKRLSQHDQEDIIV  
RCASRVAPYSLSDVDTLLRSLKTIQGDPFNRKYHTVDTTTAMFQRSLAPGVLDLFLKAVNF  
HPNYNNRRALTLSHFDAAAFYLGISALEQVQKNSPEYSKDRALRLFRKDLALALSAADND  
VEELSARKKFLSKLPSEPTKGGSQITVEYGIVSNTTNAEGTTNEKAPQSLTKITRFGDHD  
DTLDDVVNWLGQATAIPEKLEAGEWKLVDNRNRQGAGEDYNFHRDLDLGELEAQNPVRRV  
LAVGKARDRPEVVAVRSRPAQTETGLLQAL

>comp13743\_c0\_seq1; 779 1 1699 LEN=1988; translated  
XRNILSQQSTVSKMKFSSIVSNLILLASARFAVADDEMEETVYQPLLEAPVLLWSTTLKP  
DVTLGSIDIEAGNGVFMADPGKHAIVTTVGANVYAMNAYS GEEVWVYHPEAVGSS IARSH  
SGVTFAPTGDYMVYAVVDNENSLSPTRVVALGMDGSELWVSEDLEGVAAGCPQISSDGS  
FVFLTHNADGLTNGYFTILDGTTGTFYGGSSGEAGDSPTKRYGPLGIFHEPEEGNYDPV  
TSGSPVSEGEFNTNDMMWSQSPKPEDTTIEDGYLYGFQFPRDFAGNSSAISYFQIGSFI  
RDFQSITPPVMTNNGMSAYWGVSRSGFRGWTPKRF SRARDVSVGFTRNEDFPQPVWAPP  
TLDSDGLEPFLFGGSAAREFVKMSWDFRERIVVPTGGYVTKAIIDGDSRVVYME SDNG  
ILHSADFDDVDDIWTVPFNFTVDGEMALT PRSDVLI AADSKGAI TALQVADIPVTDAPSQ  
LPSDGP SLAPTMRPTISAAPSVYVAVPTEVP TAAPLAPDTEAPVTVQLPSATAAPVATPV  
VAPTSSSATLSCFIASAAVIVAAMLV

>comp13744\_c0\_seq1; 1080 769 3678 LEN=3861; translated  
MDDDVAINNPQNKGTESSGSDSVGEQHRQAARLLQVTIKGIDTEEKEVIGGTAVDQIA  
TDNNFSSCSPAPSIGGPTSTPSIAASASEDNPTEVATKDEENLDKKEEERQQLSEIDRQ  
RVDFDMRIRIGGKIQNHHLQKANS SV DSEIKLVPPPSVDVAALAMESDSL GRELTRLLEDP  
DEQKINPLFKSIAKVLSSADSSSYANSIGFRAKLLRAEHYDVKRAARMASYLTLLWES  
FGEELLGRPIRLSDLSATERQLQRKGYQQIFRFRDQSKPAQQGQSGPGHDHGIDTDAGR  
IAGSFDLCRCTSTGEPAIQNETSMVRVALYLMQVASDDEETQKQGIVFIFMLALRAVLGK  
SGPFTGSTSSAIKSTSLGAAITSKPSSPSASSSTSIQRTESENI FANDSASDSDPQLKEQ  
QQDILEFDPHERSHQHNTLTSLRILSKLFRCGPVRVAAIHVCSPNRPELDLIKSELFEA  
FHPFERTRTRFHNGTSMCECSLSLNKAGIPTDRLPLKYDGTIKTEDHLQWIAIQEAKELAS  
KQNRSEFKIVECPLNMDILSGRGLVRSHPGNVSRKDFIRARSARYDMAANREQKNAIAN  
EILEDISNLRHFLKQHOGAGYWMELDSKTAKEKVMMAFREFRKSQRSQQQQLEKKRHL  
QQQQQRASPPAYHVHPSQPAVPM SMRQHLSSQCQVKRTSSSLAHSQAQQR TSSSLSQ  
QSPKQDHEHHPMNSHQMPQQQQQDHEHYHRSYSAAVNPTAAGGVAGDGTLP RSGSSNS  
MLYHSQDQMAALQQQHHPVPPALAYYPHPPIPHLHHPYGYPTHPLPPLP PPHFPPP  
HLVHPPQETPRVRTGPDWKEQDGNSTPPTDNTSGDRNRLEAATAMGFMMGGPSAALSPTP  
VTYHRHHQHLAAISTELEPHSSSKQSSSQFRQHL SRQQAPEQRRGGANGGSVEDSSEPH  
QPYKRFRTS

>comp13745\_c0\_seq1; 686 178 2097 LEN=2516; translated  
MTNTKNNDSSFENSSLPTIASSFANDGRANDSSSGNQNSDVQAARRGLLKAIWQTAFAP  
RFSSRPIDLQTTNPSSASPFSSKPIDMEEYFLSNRTGGGSFVRQNSCVTVGTTGTGGDN  
SFGSRRPNEFQNSLQESSLLTPSERGYLQGLQSEDTE SIRRASARLS DKEIFPSATDS  
DDEAEATNEGSLDEAPQTTKRKSMPLPPTSTPPRRRDSQVQEQLLEWHEKTTIMP SVVL  
QRMSSNQSAKKVATI QPRTIPPNNSLTQDDTQESSLDYFPFSSDEMEDEKEGNDCTIEQE  
RVGTNDNCNQNEKTGKLGDTNDVPVNEQSWNSLPDLNTWMSRTEGVEVDEEGYPSETAN  
MTSNPFKILGTSADDVSVQPMVLSPLMEGLQNFMPESLQEHYWLKYSMVRDGPGLMKL  
LRHCRGSQHTILAIESTDGYVFGSFTSQPWRMTSPSKGTNQQYYSKESFVWRMRQSRFEP  
CESVVEQILMESKMDVFPFTSRNVRVQSCTKNGISLGHGEIKEEVDAEEIERDESSTKSN  
PEDCHYGHAITLDKTMATGFTSSSETFGNPLIERESRGKKFVVANVELWTMT PHE SVEN  
ADHAEMRALFLEENRQTDKNLNLIEILVGNHKSQKVTV A

>comp13746\_c0\_seq1; 690 178 2536 LEN=2657; translated  
MFCFRFSATKKKSFITVTNAVMISLIYCIIFSSGTTAQRAAVGIGSKLKKTFGGGASSD  
GFLFSGKRQKTYIEGEGNEDDEGFGTNWVLIETLCDVSRESIGIAATMLAMVFLLYLFL  
MGRPELERIEQKNTDEGEIIVQDDHIKTMKKMDLGFGRFMEKGGKQKNRLILDGSI  
RGRARPGRLAIMGPSGAGKSSVMHALAGKVNASPKIELEGSRYINGDTITGESQIPAAF  
VKQEFNFFPHMTVRETLAFRVELKLGSLISKKAQAERVEELINDLSLGRAADTIVGDAKV  
RGISGGERRRLAIACELVSNPSVIFLDEPTSGLDSTAAATLV TALARKLADSGETVVAVIH

QPSQHVFSFDDLLLVSEGKQMYFGETSKVRDYMDRHHVTRASGEMXVRFELKSRFIRCIM  
SVINQLIAVFPKITTXTAEHVLNCISRSAMPGESAEVSRRIDKLAASLAEQEIDLGEKS  
VSDNTVKSYPGDSNVRRANIFVQFKLLRRSLRENFRSKASLIKFKVQQISLGLIYGTIY  
HLGDDQASIMDRFGLLSLIAIGGSNMAMASTIRSFPEKAI VSGELGDHMYGTLPLYFIGK  
AISEIPLTAFFNSLFGVLVSSLTGLNNTLQKMKRFLGLVSLHGLAGQSAGLMIGAVAPNQ  
DAALALFPAIMVLNIIFDGKNI SEENTPRFLRWLPKVGLIKWGFEGMSLNEFEGLTFNTS  
GPRRGPVAKNGDDALARFGLGNNLSLSTVVKAQTLIIISTSWVMSYLGLTLTRQKFQTMKEP  
DKNNGD

>comp13746\_c0\_seq2; 758 178 2448 LEN=2569; translated  
MFCFRFSATKKKSFITVTNAVMISLIYCIIFSSGTTAQRAAVGIGSKLKKTFGGGASSD  
GFLFSGKRQKTYIEGEGNEDDEGFGTNWVLIETLCDVSRESIGIAATMLAMVFLLYLFL  
MGRPELERIEQKNTDEGEIIVQDDHIKTMKKMDLGFGRFMEKGGKQKNRLLDGSIR  
RGRARPGRMLAIMGPSGAGKSSVMHALAGKVNASPKIELEGSRYINGDTITGESQIPAAF  
VKQEFNFFPHMTVRETAFRVELKLGSLISKKAQAERVEELINDLSLGRAADTIVGDAKV  
RGISGGERRRLAIACELVSNPSVIFLDEPTSGLDSTAAATLVLTALRKLADSGETVVAVIH  
QPSQHVFSFDDLLLVSEGKQMYFGETSKVRDYMDRHHVTRASGEMGTAEHVLNCISRSAM  
PGESAEDVSRRIDKLAASLAEQEIDLGEKSVSDNTVKSYPGDSNVRRANIFVQFKLLRR  
SLRENFRSKASLIKFKVQQISLGLIYGTIYHLGDDQASIMDRFGLLSLIAIGGSNMAMAS  
TIRSFPEKAI VSGELGDHMYGTLPLYFIGKAI SEIPLTAFFNSLFGVLVSSLTGLNNTLQ  
KMKRFLGLVSLHGLAGQSAGLMIGAVAPNQDAALALFPAIMVLNIIFDGKNI SEENTPRF  
LRWLPKVGLIKWGFEGMSLNEFEGLTFNTSGPRRGPVAKNGDDALARFGLGNNLSLSTVVK  
AQTLIIISTSWVMSYLGLTLTRQKFQTMKEPKDNNGD

>comp13746\_c0\_seq4; 603 448 2265 LEN=2386; translated  
MDLGFGRFMEKGGKQKNRLLDGSIRGRARPGRMLAIMGPSGAGKSSVMHALAGKV  
NASPKIELEGSRYINGDTITGESQIPAAFVKQEFNFFPHMTVRETAFRVELKLGSLISK  
KAQAERVEELINDLSLGRAADTIVGDAKVRGISGGERRRLAIACELVSNPSVIFLDEPTS  
GLDSTAAATLVLTALRKLADSGETVVAVIHQPSQHVFSFDDLLLVSEGKQMYFGETSKVR  
DYMDRHHVTRASGEMGTAEHVLNCISRSAMPGESAEVSRRIDKLAASLAEQEIDLGEKSV  
SDNTVKSYPGDSNVRRANIFVQFKLLRRSLRENFRSKASLIKFKVQQISLGLIYGTIYH  
LGDDQASIMDRFGLLSLIAIGGSNMAMASTIRSFPEKAI VSGELGDHMYGTLPLYFIGKAI  
ISEIPLTAFFNSLFGVLVSSLTGLNNTLQKMKRFLGLVSLHGLAGQSAGLMIGAVAPNQD  
AALALFPAIMVLNIIFDGKNI SEENTPRFLRWLPKVGLIKWGFEGMSLNEFEGLTFNTSG  
PRRGPVAKNGDDALARFGLGNNLSLSTVVKAQTLIIISTSWVMSYLGLTLTRQKFQTMKEPK  
KNNGD

>comp13746\_c0\_seq5; 535 448 2353 LEN=2474; translated  
MDLGFGRFMEKGGKQKNRLLDGSIRGRARPGRMLAIMGPSGAGKSSVMHALAGKV  
NASPKIELEGSRYINGDTITGESQIPAAFVKQEFNFFPHMTVRETAFRVELKLGSLISK  
KAQAERVEELINDLSLGRAADTIVGDAKVRGISGGERRRLAIACELVSNPSVIFLDEPTS  
GLDSTAAATLVLTALRKLADSGETVVAVIHQPSQHVFSFDDLLLVSEGKQMYFGETSKVR  
DYMDRHHVTRASGEMXVRFELKSRFIRCIMSVINQLIAVFPKITTXTAEHVLNCISRSAMP  
GESAEVSRRIDKLAASLAEQEIDLGEKSVSDNTVKSYPGDSNVRRANIFVQFKLLRRS  
LRENFRSKASLIKFKVQQISLGLIYGTIYHLGDDQASIMDRFGLLSLIAIGGSNMAMAST  
IRSFPEKAI VSGELGDHMYGTLPLYFIGKAI SEIPLTAFFNSLFGVLVSSLTGLNNTLQK  
MKRFLGLVSLHGLAGQSAGLMIGAVAPNQDAALALFPAIMVLNIIFDGKNI SEENTPRFL  
RWLPKVGLIKWGFEGMSLNEFEGLTFNTSGPRRGPVAKNGDDALARFGLGNNLSLSTVVKA  
QTLIIISTSWVMSYLGLTLTRQKFQTMKEPKDNNGD

>comp13747\_c0\_seq1; 578 108 2624 LEN=2727; translated  
MTWETTPSTPHEGSSRSSHARSLSHNHSAPPEEGPRGSP LHHMQERERDQSQRHYSRHSP  
SEKKTLPAGRRSPHTPPQASMPRRPPQYYPYDSASSSSPSHHYPPPKFAPYPSPLPN  
PPLHRQNVPHYKYNTYAPMAPFHNNREMPFASIDQQQRQSISSNNISGGSCCTCKKSK  
CLKLYCQCFADSTTCGPKCRCSNCHNTPAHAEDIEMARRRVLERNPGAFEGKFQTLTGSVP  
SGPSGLATPTSYRSGGPFPSACPDPRGPVPHGHGPGSYPPPQMQAPPLGYRGPLPPFY  
YSSPYGSRPQHFPETTPHKEPVLASSQRVNKWGCKCRKSFCLKKYCECYQNNAHCGIHC  
RCINCKNLPPMQGPPPEPPSMTPMQAPTMMVVPCTPRKETSP LHSPPSAVLR TAVSESE  
ESGNSSESTPSGSATEASTKKTMVSPKSESEEEPEEMETMPLNKMAMKKQKMLLRKQK  
EEKQAQVPSPHVVPETPFKTE TASEQQNRPHSKKEEDRLAIMAAVAMTELLDGSRSNK  
LTEDYTTRREL SKRKSDEALSAPTISPDPRI SDSSIDGVEHDIQGVPKRPRATPIEGEE  
SPVRKLESRTPTSKTVGM PRAVSHGSFLPSLPPPPSHNTPYHHQHPGYRPSPAFHFFAP  
HPSYPQLRPPQAYPPSRDMGLPYYSNQYGGPPPPRPPYSSGPPRSHIQSYKDALKV  
SGLPKSLSFRKICSKGRTRAHEHGELGFGNKCTFETCGKCGAACSLHTSAKPKTQMGILC









ALGGGSGGWSSSDSWLSSSVNECDWFGVTCDSDYSGGAVVLSLDLSANGLSGTLPPELNLL  
GDLQILRLQNAIGGTLPPGYSDLGHLVTLNLSGNEIGGSI PWEYGGFGSFDLSLETLDLG  
HNHLEGLSPPELGGMSSLRALTVCSNRLEGTVPPELAAPGRLVALRLGGNSLTGAVPESI  
CDKVEESTGPLLLVSVDCSVDAGAAKAAAAAIIATRAADERTIRGHKKAGLLPMPMAMQ  
FQCNSNANTHFTILVPGTEGALLARGKHPFAY

>comp13752\_c0\_seq1; 552 536 2166 LEN=2371; translated  
MLGMLHDLAARILEGTTTWTKEADI PQMGEKRNRRVVLWMVVVEGDEDEGEGAAGGAVG  
EAMAEKGLXEQRKLERPPTPSLASRPTYFTCRHTYESALRQELQRSIAAQARAKSSDIAP  
NYKELVSFSKPHPGLVLVSTEDDAIASFLSTLRPTYALQTLNSCVVVAESIKGLAKAVL  
GSQIVEQGGLLRSELVSASRGLAVHALVPEMGRGMPEPNLPQYRRATKIGEEIAAQLQ  
KRCKAARKANADDECHEKWLLQIMLLEPQVVAASFRCRSREPSSPGPHWTWPSWNLPA  
LAYVEVDEGNDGGYDDDYDRSPREGGRDNTCSHVTVPSAYRKLLEAFWYLGERPPSS  
SPHPVIDLGACPGGWTGALRRMGCSVAVDRSPLDEGLMGDPRVTVYVGGDAFRYVPPWAR  
NENDHWP GKTLGEPVNTW MVSDIIAYPKITELLDHWCGRNWI SHAIVTIKFQSEIPWE  
DVENATAIVRGHGYDCRTVHFFNKNKEITFLAVKEGCSNDNNDSSNLLGKPMYSPILPNP  
KKK

>comp13752\_c0\_seq2; 1736 229 6744 LEN=6872; translated  
MEAILKVFDDERSVGGSVRERKKQSVLAKQRPPSAAERESISASLEALARALRDALPSL  
EGGETKTPEGDASGNASDVRWLLKTLRPLASDDHLSLIARLVWDACQSKDQSQQEEALF  
AALGASEEAMAALFEIVPRIPDLRREITAESLRDAGIAGGGSRTGGAADGSGGGFESTTT  
EDPAEAERRRLRQEAYEAAQIAAIAKAEAEAVTGRTSAHATHTVVRQSEKALIKAAQKAQ  
KQANQALQRAKAAGAILDESDLAFAPGGAAAEQGLGGLMNRSEDELRAIQAAALQPEGRM  
RHTDGTLPSTIREDDDVIGYEKVTIPPPRLDPGSLHERLKLDDIFVNAVEMDKRAFAG  
TKSLNPMQSTVFETAFRRENVLVCAPTGAGKTNVALLCVTAHFRDVGLIGNTGDDDYDY  
DSDGDSYGDEHDDGAVNKNKNNSSSGGILETGQKVVIAPMKALAQEVVEKFSKLLKPL  
GLIVRELTDGIQLTRAEAQSANVI VTTPEKWDVVTRKSGADDNSLGNQCGLLI IDEVHLL  
ADDRGAVIESVVARLHRLVETRQKQQRIVGLSATLPNYKDVAEFLQVPERGLFYFGPEFR  
PVPMQQTFVGVGTGNVKNRFLMNSKMDVCYEMVKDSLARGYQVMFVHSRKTGDAASAL  
AQRAQAAGELERFFTTQKENGGAAYKRYADRACKSRNREVTNHFYNGMGIHHAGMLRG  
DRKLTESMFADGAIKVLCCTATLAWGINLPAHTVVVKGTDIYNPEKGMVDLSILDVQOI  
FGRAGRPQYDISGEANLITTHQALNRYLDKLVRAVPIESTFIKQLADHLNAEIVGGTVTN  
LQEA VNWLSYTYLYVRMLKNPLAYGINADQKADDP SLRGRLELVREAATLSQEKMISF  
HPPTGNLSMTTLGRVAAHFYIQAESVATFNDQMEINPYPNDIDVLH MVSSANEFENLRVR  
QEEQKELDSLQKCP LTLGPNDSATKAFVLMQAFISSERPKGFTLISDTNYIASNAGR  
VARAIFEMCLHGKAGTALKLLRFKSIDNQFWWFQSPLRHFQSEIGMNSIKALESRHLG  
VGRNRYDSLSTLDLLEMTPEEVGQIVRSKATGAKIQRVGMIPKPIISCNVQPVTVNSV  
LKFQIEISPDFEWQGRWHGGAVFFWLWIEDAQSERIYHQEQVMFTTKKTYPESVNLEMYIP  
TFATSAQYLVRLVSDSWVGVEVVHPVSLQTRMPEQVVTNTDLMDLTP LPTTVLQNEKYE  
QLFSRIDTFNPVQTQLFHVLYHTDLPVLLGAPTGSKTVVGE LTI LRMKRLHKNGICVYI  
APLKSLARERLKEWGRFGGAPMHWKILELSGDTHHRRALECADILVCTPEKWDLISRG  
WRGSGDEKSSDDNNRRSFVKVRVLLVIDEIHLLGEERGAVLEAIVSRTRFISRSLQQNQ  
GSNRSTNDPEMIRIVGLSTAVANPLDLADWMGIDTTKKIGMYNFRPSIRPVPTYIHIQGY  
PGKHYCPMATMNKPCYAAIKQHSPDRPSLIFVASRRQTRLTAFDLISFAAGDQDPKVFL  
GCDDAYIDGIAASIQDEALRHTITFGIGLHHAGLSSGDRDIVERLYLSGEIRVLVATATL  
AWGVNLPARLVIVKGT EYFDGKVSRYVDYPLTDV LQMI GRAGRPGFDTEGTAVVLCESK  
KNFYKKFLYTPFPVESCLRDRLCENLNAE IATGTVNSKLDVAGYLIWTF FARRVKANPSY  
YGAKSSSEHVEEFLTSVANETLEKLEKEGCIERDDNDAVIASTLGKSTSEFYLNHRTAK  
QMQFGLRQCAKIILSENPAVDDIDDRTPTLRPLKRTGRLEEVSI AWLLYTLCTTHEFDEL  
PVRHNEEYLNEDLSKDVMWGPDTSAVLSKDGRAGYVDDEVYADSHTKGFLLVQAHLERVK  
LPI SDYINDSKTVMDSVPRLLAAMQFIAAREGGTDGSFVLCQLVVRTKQLISTRTPRMN  
PGTQLVGVNESSFNIIMNRINSKKGQSNSEKKRENTVWKLRRTP LKEVGEAIRNCRKG  
TFRAPPHKILTSLQVMPLITLKEGKVYHEIDKATGKSIGTLKVALQIEREKPHKDDFTTL  
SLVLGSFESQLLACSEVA VSRNGTWTVEKQLQFDWKTANADGGEDGGRVVLRLLLDSIR  
GLDSEIVFPIT

>comp13752\_c0\_seq3; 430 174 1727 LEN=1855; translated  
MSLIRFVHRPGFDTEGTAVVLCESKKNFYKKFLYTPFPVESCLRDRLCENLNAE IATGT  
VNSKLDVAGYLIWTF FARRVKANPSY YGAKSSSEHVEEFLTSVANETLEKLEKEGCIER  
DDNDAVIASTLGKSTSEFYLNHRTAKQMQFGLRQCAKIILSENPAVDDIDDRTPTLRPLK  
RTGRLEEVSI AWLLYTLCTTHEFDELPVRHNEEYLNEDLSKDVMWGPDTSAVLSKDGRAG  
YVDDEVYADSHTKGFLLVQAHLERVKLPI SDYINDSKTVMDSVPRLLAAMQFIAAREGGT

DGSFDVLCQLVVRTKQLISTRTPRMNPGTQLVGVNESSFNIIMNRINSKSKKKGQSNSEKK  
RENTVWKLRRTPLKEVGEAIRNCRKGTFRAPPHKILTSLQVMPLITLKEGKVYHEIDKAT  
KSIGTLKVALQIEREKPHKDDFTTSLVLSGFSQKLLACSEVAVSRNGTWTVEKQLQF  
DWKTANADGGEDGGRVVLRLLLDSIRGLDSEIVFPIT

>comp13752\_c0\_seq4; 1656 229 6820 LEN=6948; translated  
MEAILKVFDDERRSVGGSVRERKKQSVLAKQRPPSAAERESISASLEALARALRDALPSL  
EGGETKTPEGDASGNASDVRWLLKTLRPLASDDHLSLIARLVWDACQSKDQSQQEALF  
AALGASEEAMAALFEIVPRI PDLRREITAESLRDAGIAGGGSRTGGAADGSGGGFESTTT  
EDPAEAERRRLRQEAYEAAQIAAIAKAEAEAVTGRTSAHATHTVVRQSEKALIKAAQKAQ  
KQANQALQRAKAAGAILDESDLAFAPGGAAAEQGLGGLMNRSEDELRAIQAALQPEGTRM  
RHTDGTLPSTIREDDDVIGYEKVTIPPPRLDPGSLHERLKLDDIFVNANEMDCKRAFAG  
TKSLNPMQSTVFETAFRRENVLVCAPTGAGKTNVALLCVTAHFRDVGLIGNTGDDDYDY  
DSDGDSYGDEHDDGAVNKNKNMNSSSGGILETGQKVVIAPMKALAQEVVEKFSKLLKPL  
GLIVRELTDGIQLTRAEAQSANVIVTTPEKWDVVTRKSGADDNSLGNQCGLLIIDEVHLL  
ADDRGAVIESVVARLHRLVETRQKQQRIVGLSATLPNYKDVAEFLQVPERGLFYFGPEFR  
PVPMQQTFVGVGTGNVKNRFLMNSKMDVCYEMVKDSLARGYQVMVHVSRKGTGDAASAL  
AQRQAAGELERFFTTQKGKENGGAAYKRYADRACKSRNREVTNHFYNGMGIHHAGMLRG  
DRKLTESMFADGAIKVLCCTATLAWGINLPAHTVVVKGTDIYNPEKGMVDLSILDVQOI  
FGRAGRPQYDISGEANLITTHQALNRYLDKLVRAVPIESTFIKQLADHLNAEIVGGTVTN  
LQEAVNLSYTYLYVRMLKNPLAYGINADQKADDP SLRGRLLLELVREAATTL SQEKMISF  
HPPTGNLSMTTLGRVAAHFYIQAESVATFNDQMEINPYPNDIDVLHMVSSANEFENLRVR  
QEEQKELDSLQKCPPLTELEGPVNSATKAFVLMQAFISSERPKGFTLISDTNYIASNAGR  
VARAIFEMCLHGKAGTALKLLRFKSIDNQFWWFQSPLRHFQSEIGMNSIKALESRHLG  
VGRNRYDSLSTLDLLEMTPEEVGQIVRSKATGAKIQRFVGMIPKPIISCNVQPVTNSV  
LKFQIEISPDFEWQGRWHGGAVFFWLWIEDAQSERIYHQEQVMFTKKTYPESVNLEMYIP  
TFATSAQYLVRVSDSWVGVEVHPVLSLEQTRMPEQVVTNTDLMDLTLPPTTVLQNEKYE  
QLFSRIDTFNPVQTQLFHVLYHTDLPVLLGAPTGSKTVVGELTILRMKRLHKNGICVYI  
APLKSLARERLKEWGRKRFGGAPMHWKILELSGDTHHRRALECADILVCTPEKWDLISRG  
WRGSGDEKSSDDNRRSFVKRVRLVIDEIHLLGEERGAVLEAIVSRTRFISRSLQQNQ  
GSNRSTNDPEMIRIVGLSTAVANPLDLADWMGIDTTKKIGMYNFRPSIRPVPTYIHIQGY  
PGKHYCPMATMKNPCYAAIKQHSPDRPSLIFVASRRQTRLTAFDLISFAAGDQDPKVF  
GCDDAYIDGIAASIQDEALRHTITFGIGLHHAGLSSGDRDIVERLYLSGEIRVLVATATL  
AWVSMFGRMNISIIDGFLIFFSIFSYLGSKPSSTSRHRERKEYFDGKVSRYVDYPLTDVL  
QMIGRAGRPGFDTTEGTAVVLCESKKNFYKFLYTPFPVESCLRDRLCENLNAEIAATGT  
NSKLDVAGYLIWTFARRVKANPSYGAKSSSEHVEEFLTSVANETLEKLEKEGCIERD  
DNDAVIAS TLGKSTSEFYLNHRTAKMQQFGLRQCAKIILSENPAVDDIDDRTPTLRPLKR  
TGRLEEVSIAWLLYTLCTHEFDEL PVRHNEEYLNEDLSKDV MWGPDTSAVLSK DGRAGY  
VDDEVYADSHTKGFLLVQAHLEVRVLPISDYINDSKTVMDSVPRLLAAMQFIAAREGGTD  
GSFDVLCQLVVRTKQLISTRTPRMNPGTQLVGVNESSFNIIMNRINSKSKKKGQSNSEKKR  
ENTVWKLRRTPLKEVGEAIRNCRKGTFRAPPHKILTSLQVMPLITLKEGKVYHEIDKATG  
K SIGTLKVALQIEREKPHKDDFTTSLVLSGFSQKLLACSEVAVSRNGTWTVEKQLQF  
DWKTANADGGEDGGRVVLRLLLDSIRGLDSEIVFPIT

>comp13752\_c0\_seq5; 814 229 2160 LEN=2365; translated  
MEAILKVFDDERRSVGGSVRERKKQSVLAKQRPPSAAERESISASLEALARALRDALPSL  
EGGETKTPEGDASGNASDVRWLLKTLRPLASDDHLSLIARLVWDACQSKDQSQQEALF  
AALGASEEAMAALFEIVPRI PDLRREITAESLRDAGIAGGGSRTGGAADGSGGGFESTTT  
EDPAEAERRRLRQEAYEAAQIAAIAKAEAEAVTGRTSAHATHTVVRQSEKALIKAAQKAQ  
KQANQALQRAKAAGAILDESDLAFAPGGAAAEQGLGGLMNRSEDELRAIQAALQPEGTRM  
RHTDGTLPSTIREDDDVIGYEKVTIPPPRLDPGSLHERLKLDDIFVNANEMDCKRAFAG  
TKSLNPMQSTVFETAFRRENVLVCAPTGAGKTNVALLCVTAHFRDVGLIGNTGDDDYDY  
DRSPREGGRDNTCSHVTVPSSAYRKLLEAFWYLGERPPSSPHPVIDLGACPGGWTGALR  
RMGCSVVAVDRSPLDEGLMGDPRVTYVGGDAFRYVPPWARNENDHWPGKTLGEPVNTWM  
VSDIIAYPDKITELLDHWCGRNWI SHAIVTIKFQSEIPWEDVENATAIVRGHGYDCRTVH  
FFNNKNEITFLAVKEGCSNDNNDSSNLLGKPMYSPILPNPKK

>comp13753\_c0\_seq1; 313 1 1740 LEN=2599; translated  
HQRNLKDILLGLLSISPASDIMISNFMRVLLLLPSSCMHRMIGVYAGIPVPEEFFESQKI  
DHLGVTDDHGVWSQRYYSYGKHFEGPGHPIFLILGEGGISP DAGIVYPFVGDHLAKTFG  
AYVLQPEHRFYGKSRPIPGPTVHLRSTKHSNHYIDEEKEDPRVKLFTSEQALHDAMTLL  
HVRNDLGCSPSKDDPSLYCPVITVGGSYPGFLSAFARILFPEVVD MAYAASAPMKFYAQE  
TSVHAYYDHI TDVAEDT LSGCAAGVKLSLLEIERMIQNTKSRSEMESLAL EGVGICEGSI P

EYIFSSGDDGSSSFQTKMVHELMMVGYTFANDNMANYPPGKDTRLYKACEIFTYKDLSP  
KKVETLLTERLNLGSRTRQYRPLTYNNHDAPGSSSPPTCWSMNRQLPSGNATITGGD  
WSGDGTGPDGESWDFQTCTLLVEAIGFSEESMFARNWTMEWLEDHCMSRFGVNP  
VERFGFNDLISNNVTKILFTNGLKDGWSVSGIQTNLSESLIALNFENGAHSDLN  
HVGPS PRDSDDIQEGYRFVARLLGDWLGELRNDFGGPSTIGNIQ  
>comp13753\_c0\_seq2; 301 1 1551 LEN=2731; translated  
HQRNLKDILLGLLSISPASDIMISNFMRVLLLLPSSCMHRMIGVYAGIPVPEE  
FFESQKI DHLGVTDHGDVWSQRYYSYKHFEGPGHPHIFLILGGEGGISPDAGI  
VYPFVGDHLAKTFG AYVLQPEHRFYGKSRPIPGPTVHLRSTKHSNHYIDE  
EKEDPRVKLFTSEQALHDAMTLLHVRNDLGCSPSKDDPSLYCPVITVGG  
SYPGFLSAFARILFPEVVMAYAAASAPMKFYAQE TSVHAYYDHITDVA  
EDTSLGCAAGVKLSLLEIERMIQNTKSRSEMESLAEVVICESIP EYIFSS  
GDDGSSSFQTKMVHELMMVGYTFANDNMANYPPGKDTRLYKACEIFTYKDL  
SPKKVETLLTERLNLGSRTRQYRPLTYNNHDAPGSSSPPTCWSMNRQLPS  
GNATITGGDWSGDGTGPDGESWDFQTCTLLVEAIGFSEESMFARNWTMEW  
LEDHCMSRFGVNP RPKEL VERFGFNDLISNNVTKILFTNGLKDVSETTV  
GSTERK  
>comp13754\_c0\_seq1; 242 328 720 LEN=1170; translated  
MISFPKYVYVGDVGELEDQEAGETMLREYPEVVKAVFLHVVDQADVTP  
IIPAPKYINGRPLVFFRRTYVGAAVDAVQLGMMDLLGLKAVAEAAIEK  
LAGVPKTSKDWEDLQKDLARANILFEKNKDELKFW  
>comp13754\_c0\_seq2; 243 228 614 LEN=742; translated  
MIFQYVYVGDVGELEDQEAGETMLREYPEVVKAVFLHVVDQADVTP  
IIPAPKYINGRPLVFFRRTYVGAAVDAVQLGMMDLLGLKAVAEAAIEK  
LAGVPKTSKDWEDLQKDLARANILFEKNKDELKFW  
>comp13754\_c0\_seq3; 343 166 1188 LEN=1638; translated  
MHFCSSKLCCTFILVLFRRLEVVLSFWQSGFSRTRYQSKVLSSWWQLT  
DTRIDKRLFLSLIEPGTPRNSRFRPPFTQVISDVDDTLKSSGGVNVGG  
VALGGIDVQYERGFYPGVGEFMLGMSLYGLPKEDVTSKAKIAILTA  
RAEEFKAALIEKEDSKLAVALRSAGVKAGIDGWGIGPVLYGSVAEWI  
VQDRKGLRKFTNFERLIQQDPTGMIFQYVYVGDVGELEDQEAGETML  
REYPEVVKAVFLHVVDQADVTP IIPAPKYINGRPLVFFRRTYVGA  
AVDAVQLGMMDLLGLKAVAEAAIEKLAGVPKTSKDWEDLQKDLAR  
ANILFEKNKDELKFW  
>comp13754\_c0\_seq4; 243 228 614 LEN=1064; translated  
MIFQYVYVGDVGELEDQEAGETMLREYPEVVKAVFLHVVDQADVTP  
IIPAPKYINGRPLVFFRRTYVGAAVDAVQLGMMDLLGLKAVAEAAIEK  
LAGVPKTSKDWEDLQKDLARANILFEKNKDELKFW  
>comp13754\_c0\_seq5; 310 166 1294 LEN=1744; translated  
MHFCSSKLCCTFILVLFRRLEVVLSFWQSGFSRTRYQSKVLSSWWQLT  
DTRIDKRLFLSLIEPGTPRNSRFRPPFTQVISDVDDTLKSSGGVNVGG  
VALGGIDVQYERGFYPGVGEFMLGMSLYGLPKEDVTSKAKIAILTA  
RAEEFKAALIEKEDSKLAVALRSAGVKAGIDGWGIGPVLYGSVAEWI  
VQDRKGLRKFTNFERLIQQDPTGMIFQVSMFCFQRKCMKYTDMFAP  
KKLISINAGMISFPKYVYVGDVGELEDQEAGETMLREYPEVVKAVFL  
HVVDQADVTP IIPAPKYINGRPLVFFRRTYVGAAVDAVQLGMMDLL  
GLKAVAEAAIEKLAGVPKTSKDWEDLQKDLARANILFEKNKDELKFW  
>comp13754\_c0\_seq6; 242 328 720 LEN=848; translated  
MISFPKYVYVGDVGELEDQEAGETMLREYPEVVKAVFLHVVDQADVTP  
IIPAPKYINGRPLVFFRRTYVGAAVDAVQLGMMDLLGLKAVAEAAIEK  
LAGVPKTSKDWEDLQKDLARANILFEKNKDELKFW  
>comp13754\_c0\_seq7; 310 166 1294 LEN=1422; translated  
MHFCSSKLCCTFILVLFRRLEVVLSFWQSGFSRTRYQSKVLSSWWQLT  
DTRIDKRLFLSLIEPGTPRNSRFRPPFTQVISDVDDTLKSSGGVNVGG  
VALGGIDVQYERGFYPGVGEFMLGMSLYGLPKEDVTSKAKIAILTA  
RAEEFKAALIEKEDSKLAVALRSAGVKAGIDGWGIGPVLYGSVAEWI  
VQDRKGLRKFTNFERLIQQDPTGMIFQVSMFCFQRKCMKYTDMFAP  
KKLISINAGMISFPKYVYVGDVGELEDQEAGETMLREYPEVVKAVFL  
HVVDQADVTP IIPAPKYINGRPLVFFRRTYVGAAVDAVQLGMMDLL  
GLKAVAEAAIEKLAGVPKTSKDWEDLQKDLARANILFEKNKDELKFW  
>comp13754\_c0\_seq8; 343 166 1188 LEN=1316; translated  
MHFCSSKLCCTFILVLFRRLEVVLSFWQSGFSRTRYQSKVLSSWWQLT  
DTRIDKRLFLSLIEPGTPRNSRFRPPFTQVISDVDDTLKSSGGVNVGG  
VALGGIDVQYERGFYPGVGEFMLGMSLYGLPKEDVTSKAKIAILTA  
RAEEFKAALIEKEDSKLAVALRSAGVKAGIDGWGIGPVLYGSVAEWI  
VQDRKGLRKFTNFERLIQQDPTGMIFQYVYVGDVGELEDQEAGETML  
REYPEVVKAVFLHVVDQADVTP IIPAPKYINGRPLVFFRRTYVGA  
AVDAVQLGMMDLLGLKAVAE

AAIEKLAGVPKTSDKWEDLQKDLARANILFEKNKDELKFW  
>comp13755\_c0\_seq1; 579 67 1029 LEN=1165; translated  
MTAATLDTSMRLEGIQEKKHLNKTIAEAEALAAEALRMANEAKLAAARLAEVKKTLA  
MFSNKLESAELSVKKTPEKTI PAVVKEVSEGETEPAKEEVTAE DPVVDKDTIEVSVSVEE  
PVKKEAVVETPAEGPIDAPVETPVKTPVVEEPAAEPTKEQKSDPSGTISVASRKREEMKN  
RRVVFNAPQVFADVPEDRTPEAPLPLTQDRNIVEDFLDSLGVDKACGLDDETLGFTDRPK  
VAPAPKFENPTRHNYEISNDDVFLNSPSFKEQVVARQLQLKRSASKNSRSPVKDFPDDL  
FGPDHDDLVMCGKLADICDP  
>comp13755\_c0\_seq2; 592 67 1047 LEN=1183; translated  
MTAATLDTSMRLEGIQEKKHLNKTIAEAEALAAEALRMANEAKLAAARLAEVKKTLA  
MFSNKLESAELSVKKTPEKTI PAVVKEASEGETEKDKVSEPAKEEITAEDPVVDKDTIEV  
SVSVEEPVKEEAVVETPAEGPIDAPVETPVKTPVVEEPAAEPTKEQKSDPSGTISVASRK  
REEMKNRRVVFNAPQVFADVPEDRTPEAPLPLTQDRNIVEDFLDSLGVDKACGLDDETLG  
FTDRPKVAPAPKFENPTRHNYEISNDDVFLNSPSFKEQVVARQLQLKRSASKNSRSPVK  
DFPDDLFGPDHDDLVMCGKLADICDP  
>comp13756\_c0\_seq1; 388 94 2193 LEN=2263; translated  
MMRGSRAPRTTNNPHRLTYIAFSSIVIGSCVLWQLIWMRQTFVERERYRVEPHVNNANHNS  
NIDFGTKNNHVDEDRIISNKREEEKNQTTLQRVSQPGILLDASLIRDITLLREAPWAESHG  
ANHLSFLGAGMLYYSMAYSFRSQTI VVLGSGGGFVPRMLKQAQRDLVASGVRPIRDGSYD  
LYLVDAHLASAGWGSTFYAENENTTMRKEFS DINYVFLQTTDDAYENFFRPLYDNPRTNFT  
IDYLVHDADHGFEQSWKDFDNYSQLLSDRAVISFHDTCYDNVTRNCHGDGVPETIQKLV  
ESGKRGLQVMDMHYLYRGI AFVRETAPALETPRDRRINFCVNNADLLHRTADGFTKNGR  
VGS LPTLGFDMDCSNKFNETELLSKALMSNPFGPTNSIMIVPCPTQGFRNSVTGRCDK  
CIPGLTGND CQRSKYESFIKRVASGGTKDEARDENDDILNIARAWLRSLASNPGRSTL  
EVGPNGWKILRTKARESSDDFLTSTTSLFLNSLVTAPFILSDSSGQNI GNLVEDTIGDV  
IVVDPLLESPIWVDPTVSSRHRVLPCTLKDAMDFDEQERSKKHASNSVSSSF SPLDLS  
VDTLVCLSCDDLITMSSVSTTMKFLASKFPR LKTIIMGVKENEE SNAFVSRITASSVDDD  
GEGSDKGLATKFR LDRDLTISLGATKSRKRLMLLVARKK  
>comp13757\_c0\_seq1; 357 400 1710 LEN=1872; translated  
MTDLSGGXTIRNGELSLFATTKKHNTTDIETDSTKLGGSWTEESMLDVLQNGGKSTLPEP  
DYCCVDCDDISGPFVSRESDSSTFLQYTDG LILPAGPIGQLKESIANFLKEPSVEILIS  
LVVLLNSLLVALSTLDSLNAFLPMIRVVEI IIGTIFFADFAARWFSSSREELGFILDPQF  
VIDILVAI LPFAVITPSSFWQEVALLPSALAEPSGLFNLQLLRVLR LQRFLQDLDTFDR  
FMEQATGRTSATTYIVQDWQLQLARVGLSLFTLISVATGLIYTAHTVNPINNYFDALY  
FGLTTLTTVGFGDVTPVTSQGR LIVCGSILSGVAVVPAQAAALLEALLDREDIRNGRTKS  
MRNKITKSRESTVNARSGNENDLTLNTTFPAANAVHLSIGLRHNIVIAAEVKCNFESVTL  
GKPKYFSASGAYLNLE  
>comp13758\_c0\_seq1; 301 1 801 LEN=959; translated  
KNEVDYNGSSSTLPPAPIPRLEDLTKELLDSVMESSRKFVAERNEIKDRKEILEMGTIN  
SRLPSFHSTMAAERKEKTESKKNVRLPSFHSSITGERKESTETKRKNIRLPNYHFSSTV  
GKKESTETKNVNGRAPGLHFSIGGKQYNVITEEFSNTEVF EATPIFTSYSDVLNAPMKPL  
DNLTRYPTLMCAALTSASETFKGHLIDEKETS FEDNLNWEEHAYAMDFGGSNEYSNCDNY  
NGFASDSEAESEVYGGDGEFSGWYY  
>comp13758\_c0\_seq2; 510 55 1269 LEN=1427; translated  
MKYLFRA TIIIFVATKNVSAYIEESTAGRKSQPFATTDWSPQSFTPKIRIRPLGEP EIEEE  
KINVDRNADGIIRREYSAWTKRYGKVRDEKRFQIFKKNFVTQMEMNRKNGKFYLLNEFGD  
LTKEEYISVLQKGPNERGKNEVDYIGSSSTLPPAPIPRLEDLTKELLDSVMESSRKFVAE  
ERNEIKDRKEILEMGTINSRLPSFHSTMAAERKEKTESKKNVRLPSFHSSITGERKEST  
ETKRKNIRLPNYHFSSTVGGKKESTETKNVNGRAPGLHFSIGGKQYNVITEEFSNTEVF E  
TPIFTSYSDVLNAPMKPLDNLTRYPTLMCAALTSASETFKGHLIDEKETS FEDNLNWEEH  
AYAMDFGGSNEYSNCDNYNGFASDSEAESEVYGGDGEFSGWYY  
>comp13759\_c0\_seq1; 106 177 416 LEN=697; translated  
MTTTLSRKRPRKTYRIAMVCDFFYPRMGVEMHIWLSLQHLIRLGHKVIVITHSYADRK  
GVRYPENLKVYYCVSDKP  
>comp13759\_c0\_seq2; 507 177 1678 LEN=1888; translated  
MTTTLSRKRPRKTYRIAMVCDFFYPRMGVEMHIWLSLQHLIRLGHKVIVITHSYADRK  
GVRYPENLKVYYCPFIPMTDQDILP TLTATFPLWRNIMIREGIEIVHTHQATSVM SNES  
VYASAMGLKSVFTDHS LFQFDDVAGVVLNRVLETTLRPTLNAAICVSHACRDNLILRAK  
LDPSLIDVIPNAVDP SKFMPCEAGQSGKGACGRDGR IKVVVSR LVYRKGV D LLVGIIPR  
VCKLFPQVDFIVGGDGNKLLDLQEMVERERLQDRVSFLGAVPHKDVASVLRRGHVFLNCS

LTESFCIAILEAASCGLLVVSTNVGGVPEVLEPDMTVLCDPNVASLVNGVKAAIERQRGG  
SSVLPPLDPWDAHRRRIERMYSWHRVAVQTERVYDRIILDXAADLSPAATEIPDDGWALGD  
GGMRCVVYRGLDSVRGVVAAGVLDHRHRKSGSAAAAPSLAVFHNEEGSTIVAVILDRQSI  
LLPHPKGGEATLVSAYSASE

>comp13760\_c0\_seq1; 330 158 1063 LEN=1518; translated  
MTDSFIQSMFTSRPKDYLFAYDCDCNDIPPSIREFLNDRKRERMATGLVKRTQQRSLVS  
QRGQISLHSLFMPKYAEPVIEFGSSHRIVWIKRLVKRSMNQNDTTESVDSEGP IHNGDS  
ILQWIGKGIIGSSDEEKGRVSLNDWTGGSVLFPVPSNGGKAVGWIHTTGTTEINAETPSDG  
NVDSSSTNETEEVEIKKATETLESNDLAILYMASIPVDMLIKKREKSEETNQNWADTLI  
TCCREGVERCKKESNIPSYKFPAETALLLKEAMRELENTVEVQSDRSEPAKRVQRQSNPD  
A

>comp13761\_c0\_seq1; 607 203 1774 LEN=2494; translated  
MISVRPLPLRLFRGADSAAWRSCARTAGTVGGSTRVPVVGAVRNLHLHEFPSMELMRNHG  
IRTPGGYIASTPDEAEELFRTHFQKSSPSGDGSLFRDAVLKAQVLSGGRNSGTFRNGFEG  
GVHVVSDDPDQARDFAANMLGQKLVTKQAPEGVVCNQVLLVERLKLQREFYLSILMDRSSQ  
GPLLIGSPVGGSSGTSIVEIARSHPNLIFTEEIDIMDGLLELDQCERMAENIGLDPGSDPA  
TFDQAVDTMMKLYEVFEKRDCTQIEVNPLAEAVGFDQPGGKEATDMVVVDAKVRFDNAA  
FRQESIFAQRDYDQEDPREAEAEISHGIDYIGLDGSIGCMVNGAGLAMATMDLIHSGKGRP  
SNFLDVGGGADVDQIRAAFRILEADPRVSVILVNIFGGMLMRCDVASGILGAAETIGIRT  
PLVVRLQGTNYEEAKALIAESGAGHISMASDLDDAATQAVRTAERLAAGGGVGPPEELDGG  
GMGILLPEADGFDDDDPLSISPQIPGDAGGAARRAAIPRFEGFSI

>comp13762\_c0\_seq1; 332 131 856 LEN=944; translated  
MKTTTGRLSHGCLPIAIAVALLGLLSGAASFRPAAVPSRRGQQRPLAAATTGTGATLTEE  
TTWTMRMNLLENLPTTEKGRKRTSGIYVVQAKFIEEEGYEPPQGLLQQVFPEQEASASEDEGEA  
ASTVDTQMKIASGRWTLSEDPEDRKDSLWIWGLFKDPLYPFLLLQFEVEEMALPGEEKDS  
IKPFKLFQINHKREDGEVILASVTDLTVREKETYKADPFGAAKIDL FENVVVGKQLQLQA  
Q

>comp13763\_c0\_seq1; 559 1 1366 LEN=1464; translated  
XKTNTDQONQSTEDSKNKNDKNNTREKIRGYTFGALSPDPWLLPYTRFTVPSFGLQEANG  
KTSSTSNNAVHVWTPHGKQKLTPLYATAALEGLRSHHTLSLFDDDFGDEEFSSRRRSKAV  
SRNVAWFRDIASKNQSLAAASRDEAVASNNDSSAASSSVYSSFLWKPVLLPHKNEEGHKPE  
KPSDSNQNHNSKTKPVGTSPKTEGSKDGDGVEHNPSGLAFVGRWHSIGIOPHELIKHSNI  
PDPFILESIPWKAILATYSLKEILEVASTGTINVI GTNLPQKWAKEKLALGLDLAAIGQPP  
PSNEPVAMDATSTTSLDTQVKTNETALDQDPDKRQKTTDPSPGGAPQIAGGAAAAHANGT  
AALNDDGCMDSLDSVSYARDPRPLVPGCCGFVCKDARFSRAYIHHLVVAKEMVAEILLFGH  
NLHCLMLQLTRSFSSDPSRAAAVKDFVFSKLPSSVD

>comp13764\_c0\_seq1; 279 307 1407 LEN=1422; translated  
MYANVPNRRTFGGLLGTGILSLGTANRREAKAAEIKSKPLVDVPMVRLKLPKGGFGREYI  
ALKLKVQGGQPFDFMIDSGLTTELITPHLQHVLGINEGRSRLSGLAAGGQTTNSVVELS  
GASIDVADGSSSLNLPKLTAVITSFQEHIDPTHDPVEGMLGMELLSLFDVLDLDFPKNRI  
RLFEPGTVDTSSLAQLPAVVINESMLIGIRVSTPTQKNAQPILGFLDCGSTFSCINWCAA  
QALGLPKNPVPYRSGPVIAALGVDGRPLTLPTVEKQLSYAGNPVLDKSGRPVGFESPQ  
ADWNPWDPVQVAVGDIPAFSNIIGDSVTPYEGPAALIGLDVLAQRRVVVKAGKPNRRRI  
VAITTK

>comp13765\_c0\_seq1; 318 134 980 LEN=1172; translated  
MAHRRQLSGFNLNGSVTRGGVHDETTKKTTLHGHLHPRSYFTEFTAKKAIMYTMAWFYV  
VGCGLASMAEPFLHLECYVPEGEEPIAYPNASYDGSRCPPVRYGILLGMNKTECSFGRRL  
VMSILMGLIGWERRQADRPAGIRTM SLVSLGSCFLTINSFAFVDPGPETWDASRISAAI  
PSGVGFLGAGLIFKKTSDDDNMVHGLTTAASVWLSAAVGAHRWNANALIGLPVLRSDAC  
LDDR VHGCMDGLMHAWMDESSMTARRRADKIGFALSRRHRR

>comp13765\_c0\_seq2; 407 134 1358 LEN=2031; translated  
MAHRRQLSGFNLNGSVTRGGVHDETTKKTTLHGHLHPRSYFTEFTAKKAIMYTMAWFYV  
VGCGLASMAEPFLHLECYVPEGEEPIAYPNASYDGSRCPPVRYGILLGMNKTECSFGRRL  
VMSILMGLIGWERRQADRPAGIRTM SLVSLGSCFLTINSFAFVDPGPETWDASRISAAI  
PSGVGFLGAGLIFKKTSDDDNMVHGLTTAASVWLSAAVGIACGGELYFAASFGTCLMMLL  
LLRFGRPHDVEDDEDDEDEEEDDEKIDXLPGGGPSDGERRD TASGNHAAAALPGGAAAA  
GWHKRDEKGVLD EIPHVRLPPELGRAGTSHRPETEQESEPRKHRVGGHSGVAAPAPCPH  
PSFGGEFFAQHGTXVRQOGLRSTPAAFAGGTRSPGLVDGIRTPKRPRD

>comp13766\_c0\_seq1; 303 1 1262 LEN=1851; translated  
XVVQYNNDPQRLLRCHSQHTPSLALERRARTTRAPDATVA AVAMTEEIDFGGSETPTPS

LFGGPPRPVREEPEEIRLHARTQHTETHTETQTSTRAPPQLRLPRTGGGLQNRAAFLRDS  
IRSQIGEGLSRPHAAQLQKRKEQAGRLVLEGLGNGWNKIQAGANLGGGLIDRMERDQEL  
ADSLESLSNRMREEAERQELRREAESLSKKVITDHLSGFLEEHPQGTYE EWISDLHPENA  
NQGLLFSDIQQIDDRFYVQESDHRMLWNTAVENQHAGTEAGSYAHLVKARTQIWGKAPG  
AETSADTADQGRSNSNKKIMDGAIDLSSASIDFRNTKTATATTTTTTTSTDTTVEAHCGKG  
NDSGIEEIDFFAPVVG DAGSSSTSTSTTTGGGGGLFAPAAPQTTTEKKADDPFRDLISF  
>comp13767\_c0\_seq1; 122 92 385 LEN=1272; translated  
MTEESSSSPSTTAATPTPAGATPATTWELPAGIEDDIEQALIKTAAGALAGGLLGLVFLR  
SGKGRRSAAIATGIGTGLGSTYERVKFRYADATAQKE  
>comp13768\_c0\_seq1; 311 311 1006 LEN=2550; minus strand; translated  
MQVYSQKTGKLEALLLDEGILTELRTAAVGALAAKLLAPKIEAIGVIGSGVQARYQLDML  
SAVTECRNVLVWGRTPTNVDILISEMTAKGWNISAATSPDRLLEDVDLIITTTPSREPII  
GKSNLSTRNSGLTIIICIGSDAPGKHELSPALVAKADLLVADKCAQSIERGEFQHAVANGL  
VSKEESLVPLGDLIQNEDLHRKDDDDRFIIFDSSGVALQDCVVSSLVVGTPP  
>comp13768\_c0\_seq3; 140 1 588 LEN=681; minus strand; translated  
XRDPGPPIVVEWVGEGFGSNVRPGVAGVIMAEDPGLSGGTRIRYHNGSVEVPSGPGPL  
IPVRVCVCFVSVVVDQVVEESP RRERHRGIVQGDVDPNDVERRDGEERPAEDPDH  
TDDFAKRRPPWTLVLRPPVEPPVLSSIAANGRTPASTWLECLLIIVVVVVCSCRWSFW  
NDKRTIDENCDGAGP  
>comp13768\_c0\_seq4; 311 311 1006 LEN=2432; minus strand; translated  
MQVYSQKTGKLEALLLDEGILTELRTAAVGALAAKLLAPKIEAIGVIGSGVQARYQLDML  
SAVTECRNVLVWGRTPTNVDILISEMTAKGWNISAATSPDRLLEDVDLIITTTPSREPII  
GKSNLSTRNSGLTIIICIGSDAPGKHELSPALVAKADLLVADKCAQSIERGEFQHAVANGL  
VSKEESLVPLGDLIQNEDLHRKDDDDRFIIFDSSGVALQDCVVSSLVVGTPP  
>comp13768\_c0\_seq5; 311 311 1006 LEN=2727; minus strand; translated  
MQVYSQKTGKLEALLLDEGILTELRTAAVGALAAKLLAPKIEAIGVIGSGVQARYQLDML  
SAVTECRNVLVWGRTPTNVDILISEMTAKGWNISAATSPDRLLEDVDLIITTTPSREPII  
GKSNLSTRNSGLTIIICIGSDAPGKHELSPALVAKADLLVADKCAQSIERGEFQHAVANGL  
VSKEESLVPLGDLIQNEDLHRKDDDDRFIIFDSSGVALQDCVVSSLVVGTPP  
>comp13769\_c0\_seq2; 251 135 1193 LEN=1942; translated  
MKGKTATPLEKSRGNPFNNRSSIIYPLHPTGSKVLVRFSPDALTNYDRFVVAFFSLLFFVG  
GVFVWPVAVYAWLVKRIIRIPPEQKKRALYAALLLSATTIFAVGPHRNPRVGRFVKVHQW  
SLWKSWMRFIAFEVVADEYGSIEDLIHRQSILGISPHGIFPFGLAFAALSDKASEAFGSF  
RAVIATATQLIPWVRDVLRWVRACDASKSSVDKALSDGDRGLAPGGIAEMFLDPEPENE  
YAIIGKGI FRMAVKHQVPIIPTYCFGSSMLLKRKLKLPFLIEKLSMLRVSLVVFVFGKWL  
PIPFQRLLYVMGKPVHPPSQELVVGSTGYSSKDIINQRADLMHQYCRELIR  
>comp13769\_c0\_seq5; 253 135 1262 LEN=1822; translated  
MKGKTATPLEKSRGNPFNNRSSIIYPLHPTGSKVLVRFSPDALTNYDRFVVAFFSLLFFVG  
GVFVWPVAVYAWLVKRIIRIPPEQKKRALYAALLLSATTIFAVGPHRNPRVGRFVKVHQW  
SLWKSWMRFIAFEVVADEYGSIEDLIHRQSILGISPHGIFPFGLAFAALSDKASEAFGSF  
RAVIATATQLIPWVRDVLRWVRACDASKSSVDKALSDGDRGLAPGGIAEMFLDPEPENE  
YAIIGKGI FRMAVKHQVPIIPTYCFGSSMLLKRKLKLPFLIEKLSMLRVSLVVFVFGKWL  
PIPFQRLLYVMGKPVHPPSQELVVGSTGYSSKDIINQRADLMHQYCRELIRIFDRYKGS  
YASGWDQKSLKILSG  
>comp13770\_c0\_seq1; 443 45 1408 LEN=1544; translated  
MPPNIQPLSDFSFEYGSNRI RCAILGCGMMGQEHISYIMGYASQIRIDYLCDFDDSL  
QKAKKIMEDFRGDPVIKNSEPCFLT DENELLHVDNIDLLVIASPNYLHTPSLLQWGLHD  
ITILVEKPIAVSREQHDELRALSSSPEWKARVWVAMEYRYIPAI AKLISLIPDIGDLKMI  
TIRENRYPFLHKIGKWNDRAKTGVSTFVRLFFVFWRSVDYNNVLMQNLARTFTLLSFN  
SRDTLVEKCCFFDLFRLITQKEAILS KVKTLAQRGLNYQDEPSEFEIPIIDSAFVTMPF  
ENNP IQSATRPIGCELELCMFSEGRHQEIIIVTGTKRLEAYLPENKVYQFFRPSYELW  
RDRSIPPPLSAIRCEVDFCSNVREIHSIESEIPSHRGYHYNSTAVEWYHLLNEMKRYQKT  
GEFFPQVTLEDGLRAVEMGIEATARLAEDMDDVK  
>comp13770\_c0\_seq2; 364 45 659 LEN=1650; translated  
MPPNIQPLSDFSFEYGSNRI RCAILGCGMMGQEHISYIMGYASQIRIDYLCDFDDSL  
QKAKKIMEDFRGDPVIKNSEPCFLT DENELLHVDNIDLLVIASPNYLHTPSLLQWGLHD  
ITILVEKPIAVSREQHDELRALSSSPEWKARVWVAMEYRYIPAI AKLISLIPDIGDLKMI  
TIRENRYPFLHKIGKWNDRAKTG  
>comp13770\_c0\_seq3; 474 45 1295 LEN=1431; translated  
MPPNIQPLSDFSFEYGSNRI RCAILGCGMMGQEHISYIMGYASQIRIDYLCDFDDSL

QKAKKIMEDFRGDPVIKNSPCFLTDENELLLHVDNIDLLVIASPNYLHTPSLLQWGLHD  
ITILVEKPIAVSREQHDELRALSSSPEWKARVWVAMEYRYIPAIKLIISLIPDIGDLKMI  
TIRENRYPFLHKIGKWNDRDRAKTGDTLVEKCCCHFFDLFRLITQKEAILSKVKTLAQRGLN  
YQDEPSEFEIPIIDSAFVTMPFENNPIQKSATRPICGLELCMFSEGSRHQEEIIVTGTKG  
RLEAYLPENKVYQFFRPSYELWRDRSIPPPLSAIRCEVFDCSNVREIHSIESEIPSHRGY  
HYNSTAVEWYHLLNEMKRYQKTGEFFPQVTTLEDGLRAVEMGIEATARLAEDMDDVK  
>comp13770\_c0\_seq4; 403 45 971 LEN=1537; translated  
MPPNIQPLSDFSFEYGYGSCNRIRCAILGCGMMGQEHISYIMGYASQIRIDYLCDFDDSL  
QKAKKIMEDFRGDPVIKNSPCFLTDENELLLHVDNIDLLVIASPNYLHTPSLLQWGLHD  
ITILVEKPIAVSREQHDELRALSSSPEWKARVWVAMEYRYIPAIKLIISLIPDIGDLKMI  
TIRENRYPFLHKIGKWNDRDRAKTGDTLVEKCCCHFFDLFRLITQKEAILSKVKTLAQRGLN  
YQDEPSEFEIPIIDSAFVTMPFENNPIQKSATRPICGLELCMFSEGSRHQEEIIVTGTKV  
RRDIKTR  
>comp13770\_c0\_seq6; 77 1 313 LEN=449; translated  
XFFRPSYELWRDRSIPPPLSAIRCEVFDCSNVREIHSIESEIPSHRGYHYNSTAVEWYHL  
LNEMKRYQKTGEFFPQVTTLEDGLRAVEMGIEATARLAEDMDDVK  
>comp13771\_c0\_seq1; 593 365 1897 LEN=1924; translated  
MSDSNAGVTSSTGTHFTCVFKTFNDNVDEIGIGKISGKAILLPEEGKKSSYLLQPKQDVS  
QKSSDENEEESDYSPKPAHLVVERSMMNSNAPPANSKSHRPFFFGGLQIVFSAKNIEVYL  
TNLDEKETYLMTCKGIPFRVKKKEDNAIKSVPENPDGIEWRRAICVVPGGPRNISRLRIK  
PTGSSSETESKTIKHLKLTARIVNNSPNERTVTNPPIPTTTTSQRMEQSPRHILIPSMAT  
LGMGAVAPTQMPPEPPLTQSDLGAAMSGLSFMARKTEENMANLFRQQSTKMEEHMNSCF  
SGLEMQMCSLKHTLAAQYQLIQENQIIMKEQQGIIIEYQTAQIEKLANDNDELKEKMRSLQ  
EDISIFRLQGPCNNANKDEIKKTVEEKRMGAGGCGSMLYATEVDMMNGINEMISFHMSPL  
ITAQDSTIPLKDIRNNKDEEDYTHTSNIEVTLVEDDPVTVNEQVEDEDNNADDHDNYSGD  
DNNNNRRDDCEEASRKHESNGEPLPEGHVHL  
>comp13772\_c0\_seq1; 537 632 2122 LEN=2319; translated  
MASQAKDVEASSNRERNRENEPGLYENDWKTAVEQFKKSVLDASYLPVPIRGTSVNAAE  
LYPSSFPNQPLMPGSHKHLGGAYDSTDGCIYGV PANSSKILCMYPSKSGIDEGNPGVGK  
CGYEMTTIPLPNRIVNREMKWLRGIVAHGYLWAI PAWADSVLCVLDLDAFWGRRDLAEGQT  
DVVQLIALPDDHPKMRWQWHGAGINKEKTAIYCIPSNAEKVLKVDVGTKTTSFIDIEYD  
ETKYSDFTL DVKNK WYGGIVGDDNAIYGV PYRASGVLRIDSKSDTAKIIGPNYGVGNFYF  
HGGIKVNGKIYAHPSHAETVLVIDTTKDAEEDIISELTIHRAEYDSDDRKKYKWLGGCVG  
ADGNIYCPACDTSSILKITVATDHCETLGFAGKDKNKWQGGILGRDDCIYCI PADGLNIC  
RIATNVDIENGNPVQLIGNLSTHKDKWQGAAGKGDGSLYFIPENSYRVMRVTPPVNPPK  
ILNGKLEPGDVKVELM  
>comp13772\_c0\_seq2; 366 632 1659 LEN=1659; translated  
MASQAKDVEASSNRERNRENEPGLYENDWKTAVEQFKKSVLDASYLPVPIRGTSVNAAE  
LYPSSFPNQPLMPGSHKHLGGAYDSTDGCIYGV PANSSKILCMYPSKSGIDEGNPGVGK  
CGYEMTTIPLPNRIVNREMKWLRGIVAHGYLWAI PAWADSVLCVLDLDAFWGRRDLAEGQT  
DVVQLIALPDDHPKMRWQWHGAGINKEKTAIYCIPSNAEKVLKVDVGTKTTSFIDIEYD  
ETKYSDFTL DVKNK WYGGIVGDDNAIYGV PYRASGVLRIDSKSDTAKIIGPNYGVGNFYF  
HGGIKVNGKIYKGIYFDHHLNPRTECSLHRS DTAILFLLYFSX  
>comp13772\_c0\_seq3; 185 1 584 LEN=781; translated  
XFSDHNCITAHPSHAETVLVIDTTKDAEEDIISELTIHRAEYDSDDRKKYKWLGGCVGAD  
GNIYCPACDTSSILKITVATDHCETLGFAGKDKNKWQGGILGRDDCIYCI PADGLNICRI  
ATNVDIENGNPVQLIGNLSTHKDKWQGAAGKGDGSLYFIPENSYRVMRVTPPVNPPKIL  
NGKLEPGDVKVELM  
>comp13773\_c0\_seq1; 599 91 1812 LEN=2784; translated  
MANNQAGEQNGTGTIQHQSREGLEKSEAEHQDNDYDVANAEVEHILGTTKPKHIGEG  
LSSGIGYVLRGAVGACGALVLPVAVAGQEGKKEAGIIGGIAGASGGIVSGVVQSVNVLGG  
GLVTGVSQIAMGVAATPSAVIAPSRRFWWNGALGKWVQTYLLEERWIKGEPAYDEDILG  
EMALPEDVRPSSNRNINGDENQRKVVKDMYYDKLGLDCDVDQDTIKRRYFIVARKYAPD  
RCGANTAEAQGEFDEIGRAYAVLMNAALRAKYDRVGRELLWDESDDENEEPVDPMVLYS  
VLFGSEKFNHIGRLAAVSTRVGCEVESKLSLAQSRLQKRRVTRLALKLAERLSIWAE  
DNEHDTAIKNWEEEAFLCDASYGPKLVHVIGKVYFTTAIHFLGSMKSGIGMPSVSRWAK  
KQNEMLKLTMEVIKKTQCQIGK TENRELHMVSTAI EK SAGDEELEDLAMDALKRSHLQ  
QTAMELLWQQT VVDITSTVKEAAQMV LNDLSVSPEVRKARAEGLEVC GGIFERAERNSS  
DSCTYDEKDLEQVAFHAMLKTVWMQEAATKRK  
>comp13773\_c0\_seq2; 330 803 1660 LEN=3246; translated



MGVAATPSAVIAPSRFFWWNGALGKVVQTYLLEERWIKGEPAYDEDILGEMALPEDVRP  
SSNRNINGDENQRKVVKDMYYYDKLGLDCDVDQDTIKRRYFIVARKYAPDRCGANTAEAQ  
GEFDEIGRAYAVLMNAALRAKYDRVGRELLWDEDSDDENEPEVDPMVLYSVLFGSEKFN  
HIGRLAAVTSTRVGCEVESKLSLAQSRLQKRRVTRLALKLAERLSIWAEDNEHDTAIKN  
WEEEATFLCDASYGPKLVHVGKVRHLSIPFVFHCVASQGDCKVT  
>comp13773\_c0\_seq3; 433 91 1338 LEN=2924; translated  
MANNQAGEQNGTGTIQHQKSRGEGLKSEAEHQDNDYDVANA EVEHILGTTKPKHIGEG  
LSSGIGYVLRGAVGACGALVLPVAVAGQEGKKEAGIIGGIAGASGGIVSGVVQSVNVLGG  
GLVTGVSQIAMGVAATPSAVIAPSRFFWWNGALGKVVQTYLLEERWIKGEPAYDEDILG  
EMALPEDVRPSSNRNINGDENQRKVVKDMYYYDKLGLDCDVDQDTIKRRYFIVARKYAPD  
RCGANTAEAQGEFDEIGRAYAVLMNAALRAKYDRVGRELLWDEDSDDENEPEVDPMVLYS  
VLFGESEKFNHIGRLAAVTSTRVGCEVESKLSLAQSRLQKRRVTRLALKLAERLSIWA  
EDNEHDTAIKNWEEEATFLCDASYGPKLVHVGKVRHLSIPFVFHCVASQGDCKVT  
>comp13773\_c0\_seq4; 496 803 2134 LEN=3106; translated  
MGVAATPSAVIAPSRFFWWNGALGKVVQTYLLEERWIKGEPAYDEDILGEMALPEDVRP  
SSNRNINGDENQRKVVKDMYYYDKLGLDCDVDQDTIKRRYFIVARKYAPDRCGANTAEAQ  
GEFDEIGRAYAVLMNAALRAKYDRVGRELLWDEDSDDENEPEVDPMVLYSVLFGSEKFN  
HIGRLAAVTSTRVGCEVESKLSLAQSRLQKRRVTRLALKLAERLSIWAEDNEHDTAIKN  
WEEEATFLCDASYGPKLVHVGKVVYFTAIHFLGSMKSGIGMPSVSRWAKKQNEMMKLG  
MEVIKKTQCIGGKTENRELHMVSTAIKESAGDEELEDLAMDALKRSHLQQTAMELLWQQ  
TVVDITSTVKEAAQMVNLNDSVSPVVRKARAEGLEVCGGIFERAERNNSSDSCTYDEKDL  
EQVAFHAMLKTVWVMEAAATKRK  
>comp13774\_c0\_seq1; 314 88 1047 LEN=1799; translated  
MKDPSNRAADRMSALSASKRKGTPSLAKKKRKLKPPAKKKGTETPRSTRGSSSLWDLVPT  
SREAFVKRIPAPISTTALRRCAAHKAFPKDFQRSFSPMMEFYILMLERQCIFGKNKNATS  
SRVLRDYHFCNNYRELDRGTAFFRSQVLYFDAGDGGKRSHPPQDESNIFAQRVSSNGW  
TQLDWTEQVLAMSYYYRLCNRIDSFHKDNLPIPLGNMIPRLGQFTDEFAAYVRSFKTRK  
EVFFTAHQTTNYESYICWCQETNHKVDGDDKVNVRVGPSILRQLASDVLKATIANDGYD  
LQRACYVITKLGVRNFFAW  
>comp13774\_c1\_seq2; 289 102 719 LEN=942; translated  
MTFLKIAVVGSAIFLSVLQSSICSVTSLSLPSSTSTGSRRDILAHSAKVVAATAASSVLA  
LDASVAFAAQEQNGPEGLKYIITNEGSGPKPERGQKIETSYTLWINGFPGEETGEKAKQ  
IDSSKKPVFGDQPFKVRAGVSQVIRGWDLALIDMKEGESRKLVPPELGYGDKGVGGIPG  
KATLYFEMTLTKVGPLLEELPPEAKKW  
>comp13775\_c0\_seq1; 494 1 1593 LEN=2047; translated  
GLFRHEEGPSLLLLPQVYRDVFADCTGSEKTASDYGLDMVQCVPAYQVVFDDGDSILVGF  
PEGSSEGESELEAASRAKMESEYAGGAEKWDDYMAITAAAYLDAGLPNFIEERIDLGLPEF  
LVQSLKGFRAWPLKPHSDVLDLDELFECDKLRALASFQDLYVGLPYRNPGEELGGVLRST  
APAVFGLLAAIELHPSNKNAGVFAPLGGFHSVAGALEGLARDLGVEIRCDTTVLGVASDG  
VWTKSSNGGSEQEFVPADLVIVNADLPYAKKSLMNDKAPQQPTEESAPQPREQQLEE  
KFDWDDGFSSGVI SFYWSLDKPLDDLNTNHNFLSTKRSRQAEASWRVLRDPRDDSGSE  
DVDAPFNFYVHRPSKSDPSAAPPDCDTIMVLVPCRTLLRDEECAGLPKHEAMERYEQQFS  
PEVVSAREAVLKRFAAMESLGDLEDHIVHEEYRTPSTWADRYNLGAGTPFALS HGFAQL  
SITRPGPKSSGLPNVLYCGASTRPGNGVPLVLIGAKQVAEKAVQSLRSPG  
>comp13776\_c0\_seq1; 394 204 1292 LEN=1319; translated  
MTLFPQCKILCGTLLRRKGYPLCWKINRVSVSTITTKFSQPNSSYNGYKGVRRPHHPTSIF  
SCSHTTDERARGRTETTHRRSTSSIPTSTDDASASTAKTAAETPSNEKKSALRIPRTLAR  
HIWPSDDSPDSKSRKQVVLALSLMLAGKAVTIQIPYIFKTLVDTLQVDGTGAI EAAASL  
TSSAPDLTTVTTAAGVPVLVALLGYGMSRAAASGFQELRNAVFATVTQA AIRKVGTVFE  
HVHSLDMQFHLLTKNTGKVSRI LDRGNRSISYVLNAMVFHVAPT TIEVGLVTGLVYHQFGL  
SHAGVVLATIAAYTGFTGGITQWR TKFRRDMNRL ENQASGRVVD SLVNYETVQFFNNLPH  
EL  
>comp13776\_c0\_seq2; 582 204 2478 LEN=2675; translated  
MTLFPQCKILCGTLLRRKGYPLCWKINRVSVSTITTKFSQPNSSYNGYKGVRRPHHPTSIF  
SCSHTTDERARGRTETTHRRSTSSIPTSTDDASASTAKTAAETPSNEKKSALRIPRTLAR  
HIWPSDDSPDSKSRKQVVLALSLMLAGKAVTIQIPYIFKTLVDTLQVDGTGAI EAAASL  
TSSAPDLTTVTTAAGVPVLVALLGYGMSRAAASGFQELRNAVFATVTQA AIRKVGTVFE  
HVHSLDMQFHLLTKNTGKVSRI LDRGNRSISYVLNAMVFHVAPT TIEVGLVTGLVYHQFGL  
SHAGVVLATIAAYTGFTGGITQWR TKFRRDMNRL ENQASGRVVD SLVNYETVQFFNNLPH  
ELERYEDSLKGYQKAAIQAAQSL SLLNFGQAAILSVGMTGIMILTAQQIVDGTATVGDV

LVNGLLFQLSVPLNF IGSVYXVSDLFVGXFLLYHKPPNQLSTLSQLFCYSDRELSQSLLD  
MEQTFELIDTTTTPIYNDATKLNYPKMTMTNISFDRVDFAYPGKQDRQILNNLSLTIPQG  
KTIAFVGS SGC GKSTILRLLYRFYDPSNDTSSVSI GDHDLRDLNLESFRKNIAVIPQDTV  
LFHESIGYNIQYGNLESSWEDVIKAAKQAKIHNTIMSFPDGYDTVVGERGLKLSGGEKQR  
VAIARAILKDAPILLCDEPTSSLDSQTESDIMNHKQLGRDRTTIIIVAHRLSTIQDCDDI  
IVLHDGQVVERGTHKELADLRGRYAELLAVQTTTVGDK  
>comp13776\_c0\_seq3; 677 204 2387 LEN=2584; translated  
MTLFPQCKILCGTLLRRKGYPLCWKINRVSVSTITTKFSQPNSSYNGYKGVRRPHHPTSIF  
SCSHTTDERARGRTETTHRRSTSSIPTSTDDASASTAKTAAETPSNEKKSALRIPRTLAR  
HIWPSDDSPDSKSRKQVVLALSLMLAGKAVTIQIPYIFKTLVDLQVDGTGAIEAAASL  
TSSAPDLTTVTTAAGVPVLVALLGYGMSRAAASGFQELRNAVFATVTQAAIRKVGTVFE  
HVHSLDMQFHLTKNTGKVSRI LDRGNRSISYVLNAMVFHVAPTTIEVGLVTGLVYHQFGL  
SHAGVVLATIAAYTGFTGGITQWRTKFRRDMNLENQASGRVVDLSLVNYETVQFFNNLPH  
ELERYEDSLKGYQKAAIQAAQSLSLNFGQAAILSVGMTGIMILTAQQIVDGTATVGDV  
LVNGLLFQLSVPLNF IGSVYRELSQSLLDMEQTFELIDTTTTPIYNDATKLNYPKMTMTN  
ISFDRVDFAYPGKQDRQILNNLSLTIPQGTKIAFVGS SGC GKSTILRLLYRFYDPSNDT  
SVSIGDHDLRDLNLESFRKNIAVIPQDTVLFHESIGYNIQYGNLESSWEDVIKAAKQAKI  
HNTIMSFPDGYDTVVGERGLKLSGGEKQRVAIARAILKDAPILLCDEPTSSLDSQTESDI  
MNHKQLGRDRTTIIIVAHRLSTIQDCDDIIVLHDGQVVERGTHKELADLRGRYAELLAVQ  
TTTVGDK  
>comp13777\_c0\_seq1; 149 295 874 LEN=874; minus strand; translated  
MEAVSGPSPPTTSRRKDHQRRQQRLHPTSIRQSTSAATGTGTGTAAGTATVSVVPVSR  
NRHQ NIRA FRRRRVRVLFWTMLYGVIGTSGWFLAVSYRKILTSQMLTAPVPSALAPAAAR  
TGIKTKIDKNTNRNRNMSSNSTSNSKQSERRAGDQRGSKWTLQVGLVPLIVILLLLLLL  
EETIPLMVAGDRCX  
>comp13777\_c0\_seq2; 213 1 662 LEN=801; translated  
XYSALPTFFSLSSKSDRFARFDPSSRCQSTANLEDLVRD SGLGPSSVSKMICLPSIANHK  
GVALLCGETTGPTKDSLVLQFLGAMGGVVALDTEADLEACMVTTCTMGPLYGTMKNQRDW  
LLKKTGSLSKEDATFLVIKQFAGAISDAESATMSSGGGGENSLETRLEDLIEEQTPGGLN  
EQALKNYGRVLGGFENLQQPVMDAILSRIRGETDGNIEKK  
>comp13777\_c0\_seq4; 278 1 1187 LEN=1326; translated  
XTSIPGNHERNRRFFQKQKQKQNHQWHE SYLQRPFTPLVSGSPLALALLAGAVADRPGS  
VPLLSVPVPTPASPALRSEASSDKTSAVMARNDNDSASKPPPLSVGFIGCGTIIASSIARG  
LVLASKNGSGSVDLGSIVVSRSESRSEALARDHGELVSVTEDNQEILDRCDLVFLTVLP  
QQASPVLRLDLSFDPDRHVLVSLVSTANLEDLVRD SGLGPSSVSKMICLPSIANHKGVAL  
CCGETTGPTKDSLVLQFLGAMGGVVALDTEADLEACMVTTCTMGPLYGTMKNQRDWLLKKT  
GSLSKEDATFLVIKQFAGAISDAESATMSSGGGGENSLETRLEDLIEEQTPGGLNEQALK  
NYGRVLGGFENLQQPVMDAILSRIRGETDGNIEKK  
>comp13777\_c0\_seq5; 191 983 1348 LEN=1387; translated  
MLQDGVLDNDLGGHIQIAPFHPYFEFEGSGDNIDNLTNRSPFPIFHILREEEVGVAVDA  
LNGDSEKVVWRNVELLEEEQLGRDKATKVLSGEEDDIITSKKVKEVLKMMKKNRPVNI  
I  
>comp13777\_c0\_seq6; 258 1 928 LEN=1067; translated  
XNDSASKPPPLSVGFIGCGTIIASSIARGLVLASKNGGGSGSGSVDLGSIVVSRSESR  
SEALARDHGELVSVTEDNQEILDRCDLVFLTVLPQQASPVLRLDLSFDPDRHVLVSLVSTA  
NLEDLVRD SGLGPSSVSKMICLPSIANHKGVALLCGETTGPTKDSLVLQFLGAMGGVVAL  
DTEADLEACMVTTCTMGPLYGTMKNQRDWLLKKTGSLSKEDATFLVIKQFAGAISDAESA  
TMSSGGGGENSLETRLEDLIEEQTPGGLNEQALKNYGRVLGGFENLQQPVMDAILSRIRG  
ETDGNIEKK  
>comp13777\_c0\_seq7; 191 256 621 LEN=660; translated  
MLQDGVLDNDLGGHIQIAPFHPYFEFEGSGDNIDNLTNRSPFPIFHILREEEVGVAVDA  
LNGDSEKVVWRNVELLEEEQLGRDKATKVLSGEEDDIITSKKVKEVLKMMKKNRPVNI  
I  
>comp13778\_c1\_seq1; 81 93 431 LEN=842; translated  
MGVTKKEIIREGNSKPSKQEVTVHCTGYGKNRDLTKKFWSTKDPGQNVFKFTVGIGQVI  
TGWDEGVLGMSQGEIARLTCSPDYAYGSGGFPWAGIMPNSTLVFEIEELLSFK  
>comp13779\_c0\_seq1; 119 1 363 LEN=1048; translated  
HNHKS VTRYPT EYSTMAPTRFFTTILFTALAFSLASRSLAFAPASQRTSEIATRSSTNLMG  
IFDGEQERTALTRDSEPEEFFATNTDKMSDEEKIPIALAGLAGISLPFILGLIALYAAQG  
>comp13780\_c0\_seq1; 420 155 1495 LEN=1545; translated

MGQPFSLSTTKTFYSGLLYLCCGGGRHSPYKLNNESTISSLMIKPTDSKETSFLKQHAR  
IHLYSLSSVWFLYNKPHYRKGSYRDDLVNLRNVAIPGTGIPLSIVARSRYLGLMFLMTA  
YPAVSYVSAIHKWLKSGFKSSISEEYATRLLAPDDWFSYWRLNCNVVGMHSLLDNDVPKGY  
EMENKWTFLDEGSKLGVPPVSPYLKTSGIVVKHRNEEGMGIHFYKNATAGGDWIIQETIS  
NSDWVNTMLPPKAPLSTFRVITQSKASIDLEKKPVSEEDITALSCVFRAGREGAATDHDSI  
LFDVDVETGKIKGGTTNAHWYRLGLEALPGRCPWRSSDTERHQTHPDGGIPVSGNSVPD  
IKGMLALVEQSHMKMCPDVPLAGWDVVFSAASNVPICLLEVNLSCNFFRGSFDDKKVYLD  
VDESFAKVQDLRLAADAENKKFKVQK

>comp13781\_c0\_seq1; 1292 241 4368 LEN=4395; translated  
MTSTHRGYHSADGGGSDGNDDNYNQNGGHGRVRSSSWYDEDHDIRQYSLENQLLPINE  
HENERC FESDYRDSEYAYESNEHGAEP CNSDPQLDDARGDGDSDSFRRRRRRRRQ RSGTVL  
GKGWDLPSV SIMRRRRRFRNRVKTETAMHKRIVVGKDIRIYDDENDTNALTDGNDNIRSK  
HIINNTNTRIKKHARTTVVPNTISEMQQPNIVELLRDREVFGGGNRRGGIRSTLRRRPT  
TAAAITKRGS SGQKPRGSYSSGFITRSSISTLDPGSEDDDEMEYSSGEEKDASGSSKNK  
RRRHKRRKPKSPTTVTATDASATNGALGSSPHNNFYSKSNRSGDRNINCHRSTTDQLRTY  
AEEVCVTKFEGSYLGHLMHKKPEDNDIDREDNVENDDDDEEPQQTSKAVSTISIAFSPDG  
KTMAS THGDHTVKITCCLTGNLLQTLVGHPRTPWTVKYHPHAGEDDGMSNTPYTI IADSN  
SGSSSSSAANAPSGNGSDGANS LQQQLHNDXKKLVAKKAANPRLGVSRRPPGSDMGLDHR  
DLPADDTL GICDYQPELPSVWEPAGDCRHEAFLGLANS AVNNEESGDENGNDSDNDND  
TSTAAGTRESGDHIGSRNSSRRGTSTSMEMRHMLRCVHFLPDGKKVIVGGVNPQSRTELQ  
NQLLAAEERNRTFTPTMSFYLR LWDFDKRAAMGLPPIEATEPLPHGVNIENAGITPSHNY  
VDSTFRNNHG NRNNGSGSRSNPHQPPSILSNASAENMTRLATRRRRRPI SNRPFV PKALL  
YNDGGFDVSPDGKTLCA CAEYWLPEGV DNATDLLHPPQNDYDTDDSDYSESSSEDEID  
RVRSSNDNINVMNDGSGDAVNGNIKPQVDTSVNNEEKPAVAIEVDDSVSKEEKPTAAA  
IERDGSVDKEEKHAAVAIEGDDSVNKEEKHAAVAIDRPI TYASVVAGTVETRDANATKDD  
AAEDSKDENAEASTE AHTSPTRPPSSSSSIPSETPPRLAVRQ RVQISSPPPSIGTTTGT  
LSAPLAGALPTTPVQAGLTPQT PPPNVNPLNFP LSPSPGRRFPGLGSTSVRNAQSS  
QQDQTRQQNLWQNRSAQQSQHQPYPTPPQPQRTAPSSSTIGGSSENTEATIPAPPGITHR  
NDRQHRLRTQQTNGGVPR IYGNPFATSSRNSRGGIPKQKGRYVPHIVTISLDTEPYVETL  
QVVNGSVGGNSVEIHAGSGIRSAAGAATNVTKTSYVVP GKISGAFVATRPHARDRRPRLG  
QLLSACPLDRSKASAVTCVKFSPCTEFCLIGYGVREPHVERAVDIDDPD TYFHPVTAMYK  
VNIGGRMRHISTMLSDDDDVNIARFHPESGYGFVYGTKQGRIRILGPRPWNYNS

>comp13781\_c0\_seq2; 1227 241 4611 LEN=4638; translated  
MTSTHRGYHSADGGGSDGNDDNYNQNGGHGRVRSSSWYDEDHDIRQYSLENQLLPINE  
HENERC FESDYRDSEYAYESNEHGAEP CNSDPQLDDARGDGDSDSFRRRRRRRRQ RSGTVL  
GKGWDLPSV SIMRRRRRFRNRVKTETAMHKRIVVGKDIRIYDDENDTNALTDGNDNIRSK  
HIINNTNTRIKKHARTTVVPNTISEMQQPNIVELLRDREVFGGGNRRGGIRSTLRRRPT  
TAAAITKRGS SGQKPRGSYSSGFITRSSISTLDPGSEDDDEMEYSSGEEKDASGSSKNK  
RRRHKRRKPKSPTTVTATDASATNGALGSSPHNNFYSKSNRSGDRNINCHRSTTDQLRTY  
AEEVCVTKFEGSYLGHLMHKKPEDNDIDREDNVENDDDDEEPQQTSKAVSTISIAFSPDG  
KTMAS THGDHTVKITCCLTGNLLQTLVGHPRTPWTVKYHPHAGEDDGMSNTPYTI IADSN  
SGSSSSSAANAPSGNGSDGANS LQQQLHNDXKKLVAKKAANPRLGVSRRPPGSDMGLDHR  
DLPADDTL GICDYQPELPSVWEPAGDCRHEAFLGLANS AVNNEESGDENGNDSDNDND  
TSTAAGTRESGDHIGSRNSSRRGTSTSMEMRHMLRCVHFLPDGKKVIVGGVNPQSRTELQ  
NQLLAAEERNRTFTPTMSFYLR LWDFDKRAAMGLPPIEATEPLPHGVNIENAGITPSHNY  
VDSTFRNNHG NRNNGSGSRSNPHQPPSILSNASAENMTRLATRRRRRPI SNVSSLCLFVST  
FSLFSCWAHNK SALALYQKPV EFLLEENLSDNSQRREEQCKVLSYXTHFADYLRFNPS  
RSDRASNPMQGRPFV PKALLYNDGGFDVSPDGKTLCA CAEYWLPEGV DNATDLLHPPQN  
DYDTDDSDYSESSSEDEIDRVRSSNDNINVMNDGSGDAVNGNIKPQVDTSVNNEEK  
AAVAIEVDDSVSKEEKPTAAA IERDGSVDKEEKHAAVAIEGDDSVNKEEKHAAVAIDRPI  
TYASVVAGTVETRDANATKDDAAEDSKDENAEASTE AHTSPTRPPSSSSSIPSETPPRLA  
VRQ RVQISSPPPSIGTTTGTMLSAPLAGALPTTPVQAGLTPQT PPPNVNPLNFP LSPSP  
PGRRFPGGLGSTSVRNAQSS LQQDQTRQQNLWQNRSAQQSQHQPYPTPPQPQRTAPSSST  
IGGSSENTEATIPAPPGITHRNDRQHRLRTQQTNGGVPR IYGNPFATSSRNSRGGIPKQK  
GRYVPHIVTISLDTEPYVETLQVVNGSVGGNSVEIHAGSGIRSAAGAATNVTKTSYVVP  
KISGAFVATRPHARDRRPRLGQLLSACPLDRSKASAVTCVKFSPCTEFCLIGYGVREPHV  
ERAVDIDDPD TYFHPVTAMYKVNIGGRMRHISTMLSDDDDVNIARFHPESGYGFVYGTKQ  
GRIRILGPRPWNYNS

>comp13782\_c0\_seq1; 571 142 1101 LEN=1498; translated  
MKFETSALLLAIASANAFAPATTGFRSGVALRDGLSVDLPSIESQIAYQPGAADTDFAR

RFGGEKYVNADVVRTVGESFTAFTTEEYGYQVNALYKNMVTDLVGTIHLITVNARFVRDPVW  
SLGILSSLELLLKNYPEAGMYEKITSALFKSVNLDEASIRADATMLEEWAQGKTREEMEA  
ALKNGDDSPLGVVAQAVKADEYWMYSRYFGVGLLKLMEISGEMDKDEVYPVMENWMSDQ  
LGRSHLTACGSDLFFRVKEKLDMMETMMKEIEIREKKRMAERLEKKAEEAALRAAEREK  
MKVEIEKEAEANRERVASE

>comp13783\_c0\_seq1; 228 161 688 LEN=1323; translated  
MSSLQRALVNEAENRPSAAATKPIKFGSNGSGVRRGGAFENSFARGLDISSELLSTNTNEN  
AANKSNQTNAAEELLRIREGERRQRQIQEEEEAKMEEALRKRLVSLKDGNRKKGKERARSS  
FEDALVRMHGTDDKAASILSRKNTSGKSRKHSRNRNSKGNKSSLVAKKSRRSKF

>comp13784\_c0\_seq1; 740 159 2063 LEN=2063; translated  
MKAGAFALIASGAKATSILILAFASALVVVPMHVQAAGDEEKCGLWLGPPSSIKESSEEHGW  
GHSMTGKFI PKGTALLGSGVMDTQKGEKVFGLDFVPVYDWEALDMAAWARGNMDDNLS  
EEGKKEKDKQSEENGEQNLPPIFNEMWNGDIYDAQVLQSYESMRVFMPLVICPCSSE  
GFNLEQIQTVYYRDWRDVRGHSDETPPSWQAGSFSYLSNSMFVAARDIQPGEELVVECA  
DNSDEFNPSDYPLSKFTPKKEAGGYSICLDDKLEERLADHTPNVAGGGHGGQRGLFAKKKL  
ASGEVLTSSPMIPVHREEMTMDREKYNKLYEDQAELHGNYAKSGLPPKKEQLLLNYMYGH  
PESNLLWLP TAPLIHVSVNHANHDDKNVTPNAKIRWHS DKYTEAQAAGKPLTRRQEFHHE  
LLEMSLEVVKKHGMGLMVDLVATRDINDGEEILIDYGKAWDDALKQHKIDWDSAVESIK  
QEHARDKAKRKQTRKEMRQLENLKRSTHEKHLHRHKDVENAMTAIPLSSYVTAADYNEL  
HSHDEIRTVTEQHRNPYPSNLETACYFEGDWLDDHINEDEEAEAITYESWYDQMGHTEIL  
EGCLLPCIITERRQYVPDEENQKKTFLDDDDDDDD

>comp13785\_c0\_seq1; 474 1 1906 LEN=1997; translated  
XKYWILLPKSVKHLGASSIHSTKTNFAGFFVSNLLLRSHRYSFSLFTQQFGNRNSIRNVS  
THPITKSKGSKYNTSDMLNPNIVSDSHLKNPLGKSGRPKRRRTMIVATVSCFVLIQSLFL  
ETELMVD AFVSPSGTCKSVSSSFHKMNDNRNRKVP GTHVLQATFQEDISSEVMDDPSSTEE  
AETEHGDKISSVFWTADITDKISEKIGRVEESRIIYPEYETGEVSRVFS SSKYDRSDDGS  
TTASHDAGSVF GGASLVAGTMVGAGILALPAATADVGFIPSTGAMGIGWLYMTMSGLLIA  
ELSINRMGQSGLPQGMLDLYEDSLGDKWSKVGSAAYFGLHYCLLVAYIAQGGSNLNALL  
GFDAMGLPAGVPQVAFATTAATGLYLAKPAAIEAANNLFVSVLAVVFLGIIACGASTADF  
HALIDPANQHPDQVVDALPIIFLSLVYHNVPVTVVNQLEGDRSKITKAILYGTSVPTVMF  
LLWNAVVL SNVSPEASAAGVVDPVALLKASASSGGTGAILAKLVTTFSSLAVVTSLIGFV  
YGLLDAWTDVFNLPTEGPTYEKWKAPLFGLVFLPPLALS LTPDIFFTALDYGGAFGVST  
LFLVLPPVMVWKQRYGGEQQDLLTKPMGKSRLQL

>comp13785\_c0\_seq2; 507 1 1975 LEN=2255; translated  
XKYWILLPKSVKHLGASSIHSTKTNFAGFFVSNLLLRSHRYSFSLFTQQFGNRNSIRNVS  
THPITKSKGSKYNTSDMLNPNIVSDSHLKNPLGKSGRPKRRRTMIVATVSCFVLIQSLFL  
ETELMVD AFVSPSGTCKSVSSSFHKMNDNRNRKVP GTHVLQATFQEDISSEVMDDPSSTEE  
AETEHGDKISSVFWTADITDKISEKIGRVEESRIIYPEYETGEVSRVFS SSKYDRSDDGS  
TTASHDAGSVF GGASLVAGTMVGAGILALPAATADVGFIPSTGAMGIGWLYMTMSGLLIA  
ELSINRMGQSGLPQGMLDLYEDSLGDKWSKVGSAAYFGLHYCLLVAYIAQGGSNLNALL  
GFDAMGLPAGVPQVAFATTAATGLYLAKPAAIEAANNLFVSVLAVVFLGIIACGASTADF  
HALIDPANQHPDQVVDALPIIFLSLVYHNVPVTVVNQLEGDRSKITKAILYGTSVPTVMF  
LLWNAVVL SNVSPEASAAGVVDPVALLKASASSGGTGAILAKLVTTFSSLAVVTSLIGFV  
YGLLDAWTDVFNLPTEGPTYEKWKAPLFGLVFLPPLALS LTPDIFFTALDYGGAFGVST  
LFLVLPPVMVWKQRYGGEQQDLLTKPMVPLGKIPLGSMWKAAGTLILEQGADKLG VFDW

>comp13786\_c0\_seq1; 330 100 962 LEN=1148; translated  
MTVGTDAKTTSSSSTTTTTTGTGRKEPPLPSPAPRTYHSPNSVVD TAFKRLFGYSWGTT  
FDLSNSKVNQSPSVERQMVQIFGTARTARILNLPWEVVAPLSCDPKPKILKDSYNPAAILT  
TKIVTSDTASISMPVSSPAAAAAPASQSNKRIRLEKTDYEKIALPSHMLPSSSVAVASAP  
PAAAPATSADTSRTT SNIDSVLSQIAGKKQLN TVEKSSNDWEGFKETDKTLQDELERQAQ  
GKNAYLVKQDFLNRVDQRTFELEKEGRDXGALPTSSREQIDEVIARG

>comp13786\_c0\_seq2; 605 330 1747 LEN=1956; translated  
MGQQKTTRAGAAGHTPSSGKTLRPRQTI PPHRIQQLEEIGFEWRVRPPALKWEERYKELV  
EYKRAF GDCNIPQNYPPNRVLGKWMKQRGYYYDKVRSKKSPLTDDRQAKLEEIGFCWVA  
PHVAKTKAKLPLREHVVLEQRRARDALSAQPDGGGPKKGRGATPSTKDAKAAAAASAPRG  
GSKGGRSSSRKRAPLATAAAAATSSSSSTTTTTTGTGRKEPPLPSPAPRTYHSPNSVVD T  
AFKRLFGYSWGTTFDLSNSKVNQSPSVERQMVQIFGTARTARILNLPWEVVAPLSCDPKPK  
ILKDSYNPAAILT TKIVTSDTASISMPVSSPAAAAAPASQSNKRIRLEKTDYEKIALPSH  
MLPSSSVAVASAPPAAAPATSADTSRTT SNIDSVLSQIAGKKQLN TVEKSSNDWEGFKET  
DKTLQDELERQAQ GKNAYLVKQDFLNRVDQRTFELEKEGRDRERSRRAAESK

>comp13786\_c0\_seq3; 588 1 1543 LEN=1752; translated  
XQKHFRDLLAYKATHGNCNVPQKGYGRLSWVVKIQRELYVNTMGQQKTTRAGAAGHTPSS  
GKTLRPRQTIIPPHRIQQLEEIGFEWRVRPPALKWEERYKELVEYKRAFQDCNIPQNYPPN  
RVLGKWMKQRGYDYDKVRSKKSPLTDDRQAKLEEIGFCWVAPHVAKTKAKLPLREHVVL  
EQRRARDALSAQPDGGGPKKGRGATPSTKDAKAAAASAPRGGSKGGRSSSRKRAPLATA  
AAATSSSSSTTTTTTGTGRKEPPLPSPAPRTYHSPNSVVDTAFAKRLFGYSWGTTFDLSN  
SKVNQSPSVERQMVQIFGTARTARILNLPWEVVAPLSCDPKPIKDSYNPAAAILTTKIVT  
SDTASISMPVSSPAAAAAPASQSNKRIRLEKTDYEKIALPSHMLPSSSVAVASAPPAAAP  
ATSADTSRTTSNIDSVLSQIAGKKQLNTVEKSSNDWEGFKETDKTLQDELERQAQGNAY  
LVKQDFLNRVDQRTFELEKEGRDRERSRAAESK

>comp13787\_c0\_seq1; 240 166 902 LEN=902; translated  
MVEDYTPFSNNVVDGCGVPSVAVQWIVDNaFTNVELAILSNVCRGWREIAAQCIVDAAS  
LEMAKEKYSVSPTFSSLLLPsIVRHfYSVRTDLRARPSKSELEQEEEKQRDETYCVAWF  
HPDGIKFEQLSIVKPSPEsCEEDEQPNPGGTPKSQAEAMPSSSNHKLFTKSNLRLNQS  
LAASTRPESCPASDNIMDWGCSVLYQWDGYSEAIDVLSPFgyTRCFLRVSSVFNsRWIYD  
IFLfhG

>comp13787\_c0\_seq2; 721 166 2217 LEN=2405; translated  
MVEDYTPFSNNVVDGCGVPSVAVQWIVDNaFTNVELAILSNVCRGWREIAAQCIVDAAS  
LEMAKEKYSVSPTFSSLLLPsIVRHfYSVRTDLRARPSKSELEQEEEKQRDETYCVAWF  
HPDGIKFEQLSIVKPSPEsCEEDEQPNPGGTPKSQAEAMPSSSNHKLFTKSNLRLNQS  
LAASTRPESCPASDNIMDWGCSVLYQWDGYSEAIDVLSPFgyTRCFLRRILEKTQEKsFS  
ERPTGvKGDQRGLDvdQADILPSSSPWAFPTRCdSTYSSCAVRGATYARPEGYCQCWDND  
SFDPSHskDEAWTRKRNNRRKELQREVLpKVlWSKHDDKDMGGCGGIYRPCIQFLNIDST  
NAVRLFTPKFKTPVFTPLTIFCVAIATEDGCFfSGLEQRfEMGHMHPTKGNIEINDERSP  
ICLNAsYTnCKVCRlKDNlQGMdSTIKYQEMdVGRtDAIFLDpSCKCFRPSTNVSEEESE  
EESEEFDDDSFADFLLSANQEGDES MNDCDDDDDDSDCEHIVRGLGPGMWHCYVGVFD  
GIKSIIRIDGEEPTSGASAIPPSFQAclDGIMIGSDHVFDMTLCFGEGSDGEGEGAMSE  
LVLFKGRlQDADIKSLESHLMKKHGIPVpFRPRNERVNDdYYSRLAHTLMDQSPSTYVNR  
KRGGGVEGKSvPLRYMTELrhVAV

>comp13787\_c0\_seq3; 304 166 1162 LEN=1162; translated  
MVEDYTPFSNNVVDGCGVPSVAVQWIVDNaFTNVELAILSNVCRGWREIAAQCIVDAAS  
LEMAKEKYSVSPTFSSLLLPsIVRHfYSVRTDLRARPSKSELEQEEEKQRDETYCVAWF  
HPDGIKFEQLSIVKPSPEsCEEDEQPNPGGTPKSQAEAMPSSSNHKLFTKSNLRLNQS  
LAASTRPESCPASDNIMDWGCSVLYQWDGYSEAIDVLSPFgyTRCFLRRILEKTQEKsFS  
ERPTGvKGDQRGLDvdQADILPSSSPWAFPTRCdSTYSSCAVRGATYARPEGYCQCWDND  
SFDPSHskDEAWTRKRNNRRKELQREVRRLWtX

>comp13788\_c0\_seq1; 276 221 1357 LEN=1565; translated  
MLTHQDATKRALSsSEAPsSTfADIVVGNDDNALSSWQKSNWLTyLSTGLGAEKLFrsID  
KDSSGKISKTELRFfLDHsvHRRGvHPRsFKILDDlAKDHEVDLEEFKSWLIATKfGAD  
KNSHFahDYLNnyAHVGERyRRHEQKQDTEHGGPEAYHSWNKSTMSQAIRRMQYAVRGQI  
VMKADELQQQRDIIFTNIGNPHSVGQQPITFFRQVLALTDLNEADGIHHPNVGRMF PAD  
VIERAKSIRMLDGSgtGAYtGSQGalGFRKdVSKfIEDRDGHpAYPGNIFLSNGASSAI  
ESVLTtIMSTELCGVMVPIpQYpLYSALIakLTGTQVNYHLDEESNWAASKETLEEVlNN  
ARLDGvVVKGLVLINPGA

>comp13788\_c0\_seq2; 422 119 1764 LEN=7245; translated  
MSGDTKNSSANNDDESSDKfSGWtCDQITPDLCdLIVTEGRIPiREDGLyVHYWkySSA  
DNVNSVDNDNEQVPSPPPLYpVVVLHGgPGMPHNYMLPLKQLACRPDRYGRTRDIYfyDQ  
GGCGESVHPVSNRSTQNASNSQDHANTLVDEHPYLLDPMYYATVELPKVLDHLLGSNSNS  
GGYHLVANSWGTILAQYfVLDYyNPKREAAHQGGIDAGTDPSLFPeLAsMTLSGfLSDG  
DLyVRSQWADAEDGGYNNLgQLPPFVRNRIHGLEKGNAYGSAEYQAIDESLTGRFTCRIV  
PAPDCfAVSASgPLNEDVYVGIQGPSEFTLGGVLEGFNLtGRLPAIEVPVLLtSGAFDT  
MRPPVDALYQALPLAEWtMSEfSGHVtMIDDAGWtNGVDDfLGRVEGATtPLGSNGNG  
SSSFRPIPERCGPAGCVPKETAVRNARGIVGDATIDGTGIgDNpXDRLLSVPDRWPCDW  
EVPSSDQfQQQESSRRIRIDLAKRHAESSSSGAERFRNNATCQGGTDFSVsVMGVSyAAL  
YCAISKFA

>comp13788\_c0\_seq3; 508 110 2110 LEN=2165; translated  
MMHLHRCYSSSRFVAATASRLKfPNIGtQAKQSIPTAMlTHQDATKRALSsSEAPsSTfA  
DIVVGNDDNALSSWQKSNWLTyLSTGLGAEKLFrsIDKDSSGKISKTELRFfLDHsvHRR  
GVHPRsFKILDDlAKDHEVDLEEFKSWLIATKfGADKNSHFahDYLNnyAHVGERyRRH  
EQKQDTEHGGPEAYHSWNKSTMSQAIRRMQYAVRGQIVMKADELQQQRDIIFTNIGNPH

SVGQQPITFFRQVLALTDLNEADGIHHPNVGRMFPADVIERAKSIRRMLDGSSTGAYTGS  
QGALGFRKDVSKFIEDRDGHPAYPGNIFLSNGASSAIESVLTTIMSTELCGVMVPIQYYP  
LYSALIAKLTGTQVNYHLDEESNWAASKETLEEVLNARLDGVVVKGLVLINPGNPTGQV  
LSRQLELEVICKFCADNGIVLLADEVYQKNVYDPNKEFLSAKKVALETPGCEDLQLVFSHS  
TSKGLIGECGRRGGYMEHLNIDYVQSQLFKLASCSLCSTVSGQIMTSLMVNPPKPGDES  
YKLFAREEKDIFEGLQRRSRALVEGLNKVDGISCNPAEGAMYAFPRIDIPRAIAHAEAN  
DMTPDTFYCLSLLEETGICVVPVPGSGFGQKEGRYGFRTTFLPPDEQLMPAIDLFAHHVHF  
CARFAD

>comp13788\_c0\_seq4; 209 252 677 LEN=732; translated  
MTSLMVNPPKPGDESYKLFAREEKDIFEGLQRRSRALVEGLNKVDGISCNPAEGAMYAFPR  
RIDIPRAIAHAEANDMTPDTFYCLSLLEETGICVVPVPGSGFGQKEGRYGFRTTFLPPDEQ  
LMPAIDLFAHHVHFCARFAD

>comp13788\_c0\_seq5; 439 110 2263 LEN=2318; translated  
MMHLHRCYSSSRFVAATASRLKFPNIGTQAKQSIPTAMLTHQDATKRALSSSEAPSSTFA  
DIVVGNDDNALSSWQKSNWLTLYLSTGLGAEKLFRSIDKDSGKISKTELRFLLDHSVHRR  
GVHPRSFKILDDLAKDHEVDLEEFKSWLI IATKFGADKNSHFAHDYLNYYAHVGERYRRH  
EQKQDTEHGGPEAYHSWNKSTMSQAIRRMQYAVRGQIVMKADELQQQGRDIIFTNIGNPH  
SVGQQPITFFRQVLALTDLNEADGIHHPNVGRMFPADVIERAKSIRRMLDGSSTGAYTGS  
QGALGFRKDVSKFIEDRDGHPAYPGNIFLSNGASSAIESVLTTIMSTELCGVMVPIQYYP  
LYSALIAKLTGTQVNYHLDEESNWAASKETLEEVLNARLDGVVVKGLVLINPGNPTGQV  
LSRQLELEVICKVRFQSVLFXNF SIRAFNSFLCLYEKMNQQFSSQQKNDTLQTYSPRPRRS  
AQFCADNGIVLLADEVYQKNVYDPNKEFLSAKKVALETPGCEDLQLVFSFHSTSKGLIGEC  
GRRGGYMEHLNIDYVQSQLFKLASCSLCSTVSGQIMTSLMVNPPKPGDESYKLFAREEK  
DIFEGLQRRSRALVEGLNKVDGISCNPAEGAMYAFPRIDIPRAIAHAEANDMTPDTFYC  
LSLLEETGICVVPVPGSGFGQKEGRYGFRTTFLPPDEQLMPAIDLFAHHVHFCARFAD

>comp13789\_c0\_seq1; 921 109 2142 LEN=2239; translated  
MSHRAIQRLRREREAEILASVNNESDDDNEDDSSDEENIAATKKSNNVFAAAMFDDDDSDDD  
SESDSDDHPEENSFSNDEQGDREESTALPAVMKQGGNKQNTLEVEDLDTLLEEYKLDQK  
NHEVVTGVATSNEQAPCFYDIITSRMEVRDLIEHVRRSLFGGLDGAPASSARRNHRQH  
VFGTLIDNWPRPPHYVGGGIGMKSYPDNAASSSSKTLWPYCDMKEGDARCPP IKKWFIEF  
VYSDSYLRDYEDMKTIQASGDPNALALFVAHHPFVVEALLQLSIVMYQMNQSREGLSFLK  
RALWVFCAAPNSFLKVSERCALMDCQKDANKPFFSTLFRLLRVSYVGGGLTRTSLASAQF  
LLSLDPLCDPMNVLLSMDHFAVKCNTEESCNSWIVDFVESDKVSI MYRDDENHEVFECQLR  
DLPNWSFSYALALFNLYKSTSSSEAYSKERADNAIRTALCQFPVIGQLLEKNDVDIKSRS  
LRTDWPTVIEFIDDLICQFQKNLSNATKSDPAIRAYTSQAYDTIVRIFVQQNFKSWSSFA  
VMKWMYENLVALKEETKIGEGLKVSPPSPAMRYAKANPTDYEDKFQTMPAEANPFDPNI  
IALALNVDPNRRRLVQRNPRHAGADLMDMDGVAFANRNQYFAGPPTVLDLDPDLLELVF  
RSALPWVRVEGVPPPNR

>comp13789\_c0\_seq2; 368 1 972 LEN=972; translated  
YSDSYLRDYEDMKTIQASGDPNALALFVAHHPFVVEALLQLSIVMYQMNQSREGLSFLKR  
ALWVFCAAPNSFLKVSERCALMDCQKDANKPFFSTLFRLLRVSYVGGGLTRTSLASAQF  
LLSLDPLCDPMNVLLSMDHFAVKCNTEESCNSWIVDFVESDKVSI MYRDDENHEVFECQLR  
LPNWSFSYALALFNLYKSTSSSEAYSKERADNAIRTALCQFPVIGQLLEKNDVDIKSRS  
LRTDWPTVIEFIDDLICQFQKNLSNATKSDPAIRAYTSQAYDTIVRIFVQQNFKSWSSFAV  
MKWMYENLVALKEETKIGEGLKVS

>comp13789\_c0\_seq3; 907 109 2016 LEN=2320; translated  
MSHRAIQRLRREREAEILASVNNESDDDNEDDSSDEENIAATKKSNNVFAAAMFDDDDSDDD  
SESDSDDHPEENSFSNDEQGDREESTALPAVMKQGGNKQNTLEVEDLDTLLEEYKLDQK  
NHEVVTGVATSNEQAPCFYDIITSRMEVRDLIEHVRRSLFGGLDGAPASSARRNHRQH  
VFGTLIDNWPRPPHYVGGGIGMKSYPDNAASSSSKTLWPYCDMKEGDARCPP IKKWFIEF  
VYSDSYLRDYEDMKTIQASGDPNALALFVAHHPFVVEALLQLSIVMYQMNQSREGLSFLK  
RALWVFCAAPNSFLKVSERCALMDCQKDANKPFFSTLFRLLRVSYVGGGLTRTSLASAQF  
LLSLDPLCDPMNVLLSMDHFAVKCNTEESCNSWIVDFVESDKVSI MYRDDENHEVFECQLR  
DLPNWSFSYALALFNLYKSTSSSEAYSKERADNAIRTALCQFPVIGQLLEKNDVDIKSRS  
LRTDWPTVIEFIDDLICQFQKNLSNATKSDPAIRAYTSQAYDTIVRIFVQQNFKSWSSFA  
VMKWMYENLVALKEETKIGEGLKVSPPSPAMRYAKANPTDYEDKFQTMPAEANPFDPNI  
IALALNVDPNRRRLVQRNPRHAGADLMDMDGVAFA

>comp13790\_c0\_seq1; 617 210 2195 LEN=4192; translated  
MTKNYHENLDANKGKEPIKQSASSIEDESQEIKEAQDQKMVTPKTTSYLRGNGDVSSVE  
GKIPLRVQSSHSVLVGLVLEGHEDDSDEEFINTGASGITEEEEEEEAMDTLSPSTRTSLE

DETCVTTTPGSGVQPGILSLSPRLTTYSHGSATSASVAGSFALQPRSVLATQEYHLS  
RHSRSPVLVQQPHPSQPRSRPPRAPHHVSSIPVINNTSSGPILLRSVTVGSGPEPSTGTG  
VTCCGHTRTPDATNYSFLSSLTEATGGEYSAPRRRTLSWDYNGNNGKGGASVSGSKSMGG  
PSTAGSILQPIILSEEEISSRPPMSISASNLRRPSPTLPQPNMANPESSSPNSSTRQLAVP  
VPLSTQESLHPMIQKLQNLSSHGRKSSSTQPSPLPLPPKNSDADPHPLIQRFQQLSSTTLP  
LPHNVDNIPHPLIQKLQKSSSFKLNHKSSVTGHVPIAHVQDEKKDDSSFHRISSHHEEP  
ALRRRTTTDYSSSRCSSTTVSLQKISLTSKSPKSFSGNSGHTSFDLKTLTYITKESSVET  
EILKGVEDIIPVRKKSEFGDKDYCLHNLWPYFLLALGILKFLSRGLFQQHYAGGTFCLVL  
GIAVKVKRELSREFLDGRVMEHYDELPMLRKKLLLLLNAIATRLTKDKIESVSKEIDESAR  
C

>comp13790\_c0\_seq2; 775 210 3230 LEN=4086; translated  
MTKNYHENLDANKGKEPIKQSASSIEDESQEIKEAQDQKMVTPKTTSYLRGNGDVSSVE  
GKIPLRVQSSSHLVGLVGLGHEDESSDEEFINTGASGITEEEEEEAMDTLSPSTRTSLE  
DETCVTTTPGSGVQPGILSLSPRLTTYSHGSATSASVAGSFALQPRSVLATQEYHLS  
RHSRSPVLVQQPHPSQPRSRPPRAPHHVSSIPVINNTSSGPILLRSVTVGSGPEPSTGTG  
VTCCGHTRTPDATNYSFLSSLTEATGGEYSAPRRRTLSWDYNGNNGKGGASVSGSKSMGG  
PSTAGSILQPIILSEEEISSRPPMSISASNLRRPSPTLPQPNMANPESSSPNSSTRQLAVP  
VPLSTQESLHPMIQKLQNLSSHGRKSSSTQPSPLPLPPKNSDADPHPLIQRFQQLSSTTLP  
LPHNVDNIPHPLIQKLQKSSSFKLNHKSSVTGHVPIAHVQDEKKDDSSFHRISSHHEEP  
ALRRRTTTDYSSSRCSSTTVSLQKISLTSKSPKSFSGNSGHTSFDLKTLTYITKESSVET  
EILKGVEDIIPVRKKSEFGDKDYCLHNLWPYFLLALGILKFLSRGLFQQHYAGGTFCLVL  
GIAVKVKRELSREFLDGRVMEHYDELPMLRKKLLLLLNAIATRLTKDKIESDSDAEGICQF  
GRIVEYFLCAVDQKPFALGAQDATRENFIEASEIIFAQYTRKLYEIDFECLCRVAKR  
PNDSIDKAKVAMSELFFYPSRHGQVSKLDFIKATDRVYNTAILLIAKIENASQIQKSLDG  
TVNIVFYTMAFIFAPSVVGVDMNILLTALSVLVNFLLVFCFKNEEYKLGILRVITRYSY  
DIGDRIFANLRGVEDMEAEETGGPPCGWIVESLDLYNTTVRHGITGESRTLANSPLLE  
KSKIVNWKHSHRANLSFSLKLAGPRIGTDEVDLIHRKIMEWVEGRPHEWYSLASFRFAEC  
ENVKQQKYTELSIVLCHRESWHSYCAVQDSKSEFLLFLSELENHSR

>comp13791\_c0\_seq1; 780 1 2959 LEN=3606; translated  
XDDDEDDDLHFTLDHYDEENLPEYACRYCGIHDPACVAHCVETKKWFCNACVSGSGSHL  
VHHLVRSRSHQVQLHPESPLGDTVLECYNCTSKNVFVLGFPASSSSVVVLLCRVCVETV  
PALKDMDWELAQWHPLIQDRKFLPWLKVPSPDKLLRSRDIQSQMAKLEELWKNEPEAN  
FADLDRPDIIEDEEMQPTLLQYEDGFHYQNVLAPLVKIEADYDRQMKESTEHIHISVRWD  
KSLAGKNVATFTFHRLAVEQSRIMVGDELRLKLGDAQYLYNKPWEGIGYVKGISDGEVE  
LELRTSGNVPDSIHDDYVVEYIWKSTSFDRMQNALKTFIADDTSVTGYIYHKLLGHPVEE  
QVIATAKLPATEKDYAVPGLPSLNEEQIEAVATVLERPMSLIQPPGTGKTVTSATLVYH  
LTKQNMGGVLTAPSNAVDQLTEKIAATGLRVVRLASKTREASSSSVDHLCLHVMVPQA  
AGDEFNKLQRLKNEIGELSERDQKKYRSLNRTEREILQAADVICTCVGAADPRLKNFR  
FRQVLIDEATQAIIEAEALIPANGAKQVVFVGDHQCQLGPPVMCKAAAKAGLTQSLFERLV  
LIGTRPIRLQVQYRMHPALSEFFPSNMFYEGSLQNGVTEADRQLLSLPGFAGKEDFAWPVP  
SKPMPFFYSVNGMEEISASGTSYLNRTSEASYVEKVVTHLLRLGVTPSQIGVITPYDGQKKY  
VSEHMRRSGGLAHTLYEAEIVASVDAFQGREKDFILVTCVRSSETQIGIGFLSDPRLNVA  
LTRARLGVILIGNPRVLSKNALWAALLLHFKEYDCLVEGPLNQLPSYMTFARPRRNPA  
DSRYAFTALARGGWDGRWDDRRGTQTAPGFVKVGRRGYKDKQSDSRFDARYGSYEDGES  
TNGMNNGGSNGLPIPNFAPLPSYAGGDDASSVGGDSSYGGSQFGGSRAGMWSQKGGINGG  
SHEKDGPGGLGYFVGSNGNYFSDHGKP

>comp13790\_c0\_seq2; 194 1 826 LEN=1190; translated  
XDTAGQERFRTLTSYYRGAHGVVLYDVTRTDSFENLEQWLKEVKLYRYAQRNAAVLC  
CVELNCYWIVIDCRIXVALQFCVWRGVAVNRASKEMAPTQPVSAWFFLPRTHTRAARF  
PACSPNNGESVVKLLVGNKIDMERQVERERAEAWARSHGMLFLEASAKTRLGIKQVFMEV  
VQKILENPEALASAVPGKPKLQIKRPIESMDDDDDEDEGGAAREHHAARVPHETIGDGS  
AGARVGCAGCCAESCLRYRYQSVAAVGNHPLRWNR

>comp13791\_c0\_seq3; 184 1 602 LEN=966; translated  
XDTAGQERFRTLTSYYRGAHGVVLYDVTRTDSFENLEQWLKEVKLYSPNNGESVVKLL  
VGNKIDMERQVERERAEAWARSHGMLFLEASAKTRLGIKQVFMEVVQKILENPEALASAV  
PGKPKLQIKRPIESMDDDDDEDEGGAAREHHAARVPHETIGDGSAGARVGCAGCCAESC  
LRYRYQSVAAVGNHPLRWNR

>comp13791\_c0\_seq4; 385 227 424 LEN=424; translated  
MTNTPDDQDQPKAAFVESDDEEGEEEDDDDDDEEEDEEEEDSSDEDEDFSDVSEDEED  
DDEDED

>comp13792\_c0\_seq1; 1309 166 5300 LEN=5300; translated  
MNGASGSDEHRYHALPPREGGCDHDEEAGMEDAVWDQLNDQQSREVQQHESRFQTGDPYG  
RDNPLSIAWSMAHQTTSSAGDLLRQTAQRARVAVRDWQQVNHGNNDDLSPSHTNCSSYPY  
SRTRRGMSRPDDYAAVGFDFDLQFGISDLLRRGGESSLSLEAEGENHKKIIGNRRVLEGP  
LPPANHDKNDEETEAPAQPLQGYPFVVLKEGRDVPNRNNYLNQKSERDRWGMVGNLDVFL  
THLYKYYYHRGLTPMLCSFAVETCCLLFTIWLTRLLLLIGVDWPKLMAMKCDGIDVDEESD  
GGNHGGGDDDDVVNNACYPHLSSYARTDPLSWTSYLLIQGYTLLLLLVYAGFKIWMFYHDF  
GYAIQCRTILHDKLGLSERKLQGGALSWNDVVTKLVEGQESGSYKI IHHYSNTEPNSANG  
TIQNSYSPPQHNSKNNNITGERDRPSQTTPTNTKGGNASVPAAPPSAAFNL PANPSKLQH  
ANRSLLDPLQIAQRIMRKENFMVAFWNAGLLECTKVVPWNSSDGVQRYWCGVLEWSFY  
QCVLNFMFNHKYELRPAFCLDSALKRRLKVCVGHLCCLLPFLLVFVVLHFFLRHVYVAK  
SSSSSSSSGDGADGGGIMGHPRWSSAAAWQFREFNELPHAFEKMEPSYKEASKYCNLFG  
TSEYLAAGRLLVFFGGAI GIGILLVVGVVSDGFLLVHQLWGRNLVWYAGMAGIVYSIGR  
ALEPAKEATPSVTKNLFDMDVALKRVSQHTHYYPEHWKGRGWDSKVYSSFKMLFDSEVK  
LFLHELVALVLTPIYILFFRLSEKAPEICEFCLLSKTKLVLSANTSTTTGTGSI IAGDVCG  
FSTFDFTYGDDEAWEGRTLKGSALLERRRQEHQGGAESLTESILRGGNLEEATRLHPKPR  
ARHGKMEKSFFTFQEAHPNWESCFPPSGQSLVNRVEEYRLTTEQAKVAREREFHVQAATR  
QLEMLARIEEEQNSFNDRPQNHQQGLPLGKMGWNPAHHGRTKI PAADAGAGSQNQ  
PSSLSPLPTIHTPVYEPQQARKPGLQHRWPAATSGKNGVRGFAEHL SAHADHLSLENPP  
SVDTALPVAVSDSLASENRQQIAGNGGASYREEGRASAPSEPPRSAESRLFESRI IDSS  
LSPGVDVDVDSADSVACHQLQPGLALSSSSRSVLLMGRADRGSONQYHWLERFHEDLE  
KQQEDINLQORSYAGTSPPEELNPTANHASGATPLPEVRETDSL PADATPGGNASFDTE  
KGXTVRLRTPSRVCKNKAXVRSFSSRTVATPTQSKSNAPTEPRRAWMRQGSRLRCVGR  
SSLGPPSELYCTENSRKXGSGVLFVPLRYGTNRXKTI FEQKPAISVLNFEIVSATQSPV  
SSLAKQFTVTQKQATVIFPFLSCSSLHNSAVPYGWMQVCTRFDHAHETERGKDRCKPNHYK  
AHPAGVCSHCCTMGGNGGSPKTRKRKHNGDAEADAGADTDPNPPGDGSSCKDPEQDGEA  
LAQREALAQSEADDEDLLLI AAEAAALIEFDETTGRPVRIAGNASASGSASGDEGNAPID  
GLLKI SRRMLRNQAEDLFEDLKGIIHAI VKDRVRTHEMVPWAGTDGDTKRLRAFGLGSPA  
LERLDRSGAVRLHAPEKTGAELRDERANRAICVLDPAGEPLPAGANDRRERAAA VVRK  
RTVRPAEVADKLC AAILGSGSGNGDHHPLDPSLX

>comp13792\_c0\_seq2; 1335 166 5324 LEN=5324; translated  
MNGASGSDEHRYHALPPREGGCDHDEEAGMEDAVWDQLNDQQSREVQQHESRFQTGDPYG  
RDNPLSIAWSMAHQTTSSAGDLLRQTAQRARVAVRDWQQVNHGNNDDLSPSHTNCSSYPY  
SRTRRGMSRPDDYAAVGFDFDLQFGISDLLRRGGESSLSLEAEGENHKKIIGNRRVLEGP  
LPPANHDKNDEETEAPAQPLQGYPFVVLKEGRDVPNRNNYLNQKSERDRWGMVGNLDVFL  
THLYKYYYHRGLTPMLCSFAVETCCLLFTIWLTRLLLLIGVDWPKLMAMKCDGIDVDEESD  
GGNHGGGDDDDVVNNACYPHLSSYARTDPLSWTSYLLIQGYTLLLLLVYAGFKIWMFYHDF  
GYAIQCRTILHDKLGLSERKLQGGALSWNDVVTKLVEGQESGSYKI IHHYSNTEPNSANG  
TIQNSYSPPQHNSKNNNITGERDRPSQTTPTNTKGGNASVPAAPPSAAFNL PANPSKLQH  
ANRSLLDPLQIAQRIMRKENFMVAFWNAGLLECTKVVPWNSSDGVQRYWCGVLEWSFY  
QCVLNFMFNHKYELRPAFCLDSALKRRLKVCVGHLCCLLPFLLVFVVLHFFLRHVYVAK  
SSSSSSSSGDGADGGGIMGHPRWSSAAAWQFREFNELPHAFEKMEPSYKEASKYCNLFG  
TSEYLAAGRLLVFFGGAI GIGILLVVGVVSDGFLLVHQLWGRNLVWYAGMAGIVYSIGR  
ALEPAKEATPSVTKNLFDMDVALKRVSQHTHYYPEHWKGRGWDSKVYSSFKMLFDSEVK  
LFLHELVALVLTPIYILFFRLSEKAPEICEFCLLSKTKLVLSANTSTTTGTGSI IAGDVCG  
FSTFDFTYGDDEAWEGRTLKGSALLERRRQEHQGGAESLTESILRGGNLEEATRLHPKPR  
ARHGKMEKSFFTFQEAHPNWESCFPPSGQSLVNRVEEYRLTTEQAKVAREREFHVQAATR  
QLEMLARIEEEQNSFNDRPQNHQQGLPLGKMGWNPAHHGRTKI PAADAGAGSQNQ  
PSSLSPLPTIHTPVYEPQQARKPGLQHRWPAATSGKNGVRGFAEHL SAHADHLSLENPP  
SVDTALPVAVSDSLASENRQQIAGNGGASYREEGRASAPSEPPRSAESRLFESRI IDSS  
LSPGVDVDVDSADSVACHQLQPGLALSSSSRSVLLMGRADRGSONQYHWLERFHEDLE  
KQQEDINLQORSYAGTSPPEELNPTANHASGATPLPEVRETDSL PADATPGGNASFDTE  
KGXTVRLRTPSRVCKNKAXVRSFSSRTVATPTQSKSNAPTEPRRAWMRQGSRLRCVGR  
SSLGPPSELYCTENSRKXGSGVLFVPLRYGTNRXKTI FEQKPAISVLNFEIVSATQSPV  
SSLAKQFTVTQKQATVIFPFLSCSSLHNSAVPYGWMQVCTRFDHAHETERGKDRCKPNHYK  
AHPAGVCSHCCTMGGNGGSPKTRKRKHNGDAEADAGADTDPNPPGDGSSCKDPEQDGEA  
LAQREALAQSEADDEDLLLI AAEAAALIEFDETTGRPVRIAGNASASGSASGNASSASG  
DEGNAPIDGLLKI SRRMLRNQAEDLFEDLKGIIHAI VKDRVRTHEMVPWAGTDGDTKRLRA  
FGFLGSPALERLDRSGAVRLHAPEKTGAELRDERANRAICVLDPAGEPLPAGANDRRE  
RAAAVVRKRTVRPAEVADKLC AAILGSGSGNGDHHPLDPSLX



>comp13793\_c0\_seq1; 294 530 1471 LEN=2193; translated  
MKMSASPRGHTSREGPGFFAPSKLPITLKLPHAVPQSDTLGLASAPVTPDPNRSSKSSPS  
KSNCNSTGTANKIKSKRDSSHVRLNKFVRRLLHDMVLVREKHS GIVEWRRGLLVLFSTDAFS  
KRILPKYFNTRNFKTFRRQLNYGFVHVSFSATGNTTTALWINQNLAEDEANNDVSAVL  
KLRRVEPNVAKTVEGRRLRKE LAIYTVEEDI GLNSKTLQMDQIRSM AIRGEGLSGGCAN  
PHINASSRKTSEGLH LHSKDAYNCTTKAIP IHVVCYGSNDEKSVGFENSSSARTEEMANT  
DVAASVLLMLSRS

>comp13793\_c0\_seq2; 260 530 1585 LEN=2307; translated  
MKMSASPRGHTSREGPGFFAPSKLPITLKLPHAVPQSGRDEKINPRSNI SWLLSEQTSHV  
QPFXLSSIEQIHPDPDTLGLASAPVTPDPNRSSKSSPSKSNCNSTGTANKIKSKRDSSHV  
RLNKFVRRLLHDMVLVREKHS GIVEWRRGLLVLFSTDAFSKRILPKYFNTRNFKTFRRQLNY  
YGFVHVSFSATGNTTTALWINQNLAEDEANNDVSAVLKLRRVEPNVAKTVEGRRLRKE  
LAIYTVEEDI GLNSKTLQMDQIRSM AIRGEGLSGGCANPHINASSRKTSEGLH LHSKDAY  
NCTTKAIP IHVVCYGSNDEKSVGFENSSSARTEEMANTDVAASVLLMLSRS

>comp13794\_c0\_seq1; 330 49 1197 LEN=1289; translated  
MKDDSSPTPLIDVIVGGGLSGLMVARYLKNSTASWKLL EASSRIGGRLQNDVGS DGP SR  
NIDLGGAWVWPRHQRTIMAALVDSPLLGIKTF LQP GDDYRASETTRIVGGAVELAIKIYE  
ELQVTNNVQLKCPVVAIRKNSDRSIAVELKS GEVIRCRHAVLAVPPRILSEKVSFD PDL P  
NAKMAAMSQSETWMAGVTKVALVYKGPSFWPLIVSEADNIVSPRKRPAFQVYD GSPFS  
SLPSSNTENDDKVSVLTFFTLASLSNDTND DRLANDCAEQLCDSLSTEAIRKVPVLDK  
YIRSFDEFHVKRWPQEAYISHNTNPM TITPHQP IPELAKSEWDG TLLFAGTETDQRSPG  
VMEGAVGA AFRVISELKQKLSQ

>comp13795\_c0\_seq1; 1306 124 2574 LEN=2676; translated  
MAEKEAGFKRHLENAGATLYIPPAKRRQMLREKEEAEQKKLEAEQQT KAGTDGEGKGGEP  
GDDAGASSPAKDAAVVVPVGN AETNVGEQRESWQEQRK VINGTINRLNAGTIKPLIQDLF  
QKVNLRVLRGHLCKSVLSAAVSSPKYS DVYAAIIAVVNSKLP EVGELMVKRTILAFRRYY  
KQRDKASCQAVCVFIVHLFHQGVVHELIVLQMLS VLLD GARPTDD SVEVAVHVLQIAGQA  
LLEVSSPGV RACTERLRSLLHEGHLNHRVEYRVEELLKARKNGFKDFPSLAEELDLVEQD  
DQITFDTS LDDEDIQKEEELDRFSFDPEYEEHEAEWKAIRAEILGEGDSSDDSDSDGDD  
TTDDSS EDDSDDEEASASGENALAVVPGGGDAAAKQVAVVEDL TEADLVNLRRTIYLTIM  
SSATFECAHKLARIDVPPGRESELINMLIECCSQERTFLRYGLIASRFCLLDERWKTA  
FMESFAEQYNTIHRLETNKLNRVAKLFSHLLHTDSMPWSVMSVIHLNEDETTSSSRIFIK  
IVIQEMAEAMGIAKLRQRFETQDEEQKLWFAGMFPKDNVRNTRYAINFFTSIGLGPLTDD  
LREFLKNAPKLILAQAKAAALAKKQELSGDESSSVSSTSSSSSSSSSPTNALD TSGQTPL  
HLATDRGHIDCVKALILAGAHINAVDHDG ISILQTAVIGGDVECCRLLLALGADPDHADH  
DGDTPRSSAQDDASLKE LFRSCDENTLTPNDLSDQSFVEEFQKLKGPVA AEDPEDKNNSE  
EPPKQTEREEALDVKN DMKALDEQITVDFDDDDGDMF

>comp13795\_c0\_seq2; 527 62 1273 LEN=1375; translated  
MVSVKSP TSFFVTTALAVATVALALYTERSLRRRRKSKDDGDAEETKPNLDFREGSEAL  
VNERFQACVKAMGPQLSGLPQPTQLDYYGLYKQGT LGDCREYRPEPPPSYDLVGM AKYKA  
WARLAGMDRMTAMQTYIEKALHFEFVRSIGSSSTEDENYELEGDAAIDVMGLGDKPSTLV  
NDYDKEAMALED SRYP IHA AAREGDL DGLNKCLAEASGGPGDEPTSSSSSSSSSPTNALD  
TSGQTPLHLATDRGHIDCVKALILAGAHINAVDHDG ISILQTAVIGGDVECCRLLLALGA  
DPDHADHDGDTPRSSAQDDASLKE LFRSCDENTLTPNDLSDQSFVEEFQKLKGPVA AEDP  
EDKNNSE EPPKQTEREEALDVKN DMKALDEQITVDFDDDDGDMF

>comp13796\_c0\_seq1; 267 157 1137 LEN=1443; translated  
MNGHNRSL LLLL LLLASPPQATCLQQLLSEQVGNQYSRLTSTKWRVRLDVGLQPGTWM  
PRYPGWAESGARLVVDADIEFTD DLLPRTVPGEPLVGP RDQTGVLRVNH LGKDSGTTRR  
GSDRSDQKPYNPSTFVSEKGTQTVRF TDGGWCIKRP TADVKN AEGGRVQPGGILGFWLD  
CESGATRRDVEILPKTRIFFTTGVWDDPAGLQALEDEYRVALSDLEEIEDRTRETRDEG  
PSKNLLERFREFRMTFQDADAYDKLR LRKEELERRSP PRSSAVAKNGVKMAPNGSLVIK G  
GDPNRPDWLP TAEYLIFGTFSTKALS

>comp13797\_c0\_seq1; 659 261 2363 LEN=2826; translated  
MIARDTSQFSPREK GKPRGSNPRNLEWIFKCILWSVGVFYLGVYSGWNMQGLETEIT TSA  
GGGTEPSGCPCCECGSIRNPGVSSLRNEKVNWSVGRVSRK TMTNASDPVPPPPSEASE  
TSKNKTTTATEMETSAPTTSSTPEPKPAAKKEPQAQTQTQTQTKKPPRRFHADAFTIRHT  
GEFASGMEFVDRDEF GKVFETGMPFDASQHKNRAMILYS DP SAFPDQ NATAREYPKSGS  
ALS VADATKNCKNLHV VVTSDSRKQCIGIVGAYEGFHLQK FMRMTDGKMRDRNTDL SH  
PFRPVNRGMQLNGELSHNLPEKRH THKFWKLLTAYLTALPAVLEDL KPIARAVAANNPHE  
TIVVIVCNFGHTEMLLN FVCHARAQGLEGALKNILVLFSTDPETHALV TSMGLSSFYSEAV

FGETPSEAARDYGDNTYSQIMLSKVYCVHLVSQLGFDLLFQDADVIWYRDPLPWLNGNET  
TGSSSPLQRDFDLLFQDDGARTLFYAPYSANTGFYFARSNPKTRNFFNAILMNGDAVLTA  
GSHQSVLI SVLGEHASLYNLRVKTWNRETNEFPGGHAYHRRPGFMKELAESRRERVLGGN  
ATEGKGSAGSSGVGVDPYVVFHMSWTVSKDNKLKYFEQMGDWYLKDTCNTQQNGKSATVDY  
TPSSCCSARPFLTCHFRDKASLVP CRDAPASTKEELPSFW

>comp13798\_c0\_seq1; 548 1702 3249 LEN=4229; minus strand; translated  
MSPIEHGEVFLDDGGECDL DLGN YERFLSVFLTRESNLSTGKIYQQVIERERVGEYL GK  
TVQVVP HVSDAIQE WVLNVAKEPVAQSKETEDGNLPPEICIVELGGTLGDI ESMPFVEAL  
RQLQENVGYKNMCF LHVSLVPE INGEQKTKPTQHSVK TMMQLGLR PDLFCV RGSNP IEDG  
ARKKLSIMTSVPKSAIISLYDVSNIYRVPLVMMEQNIP SMLAQRLRLPLPQFEPPKGVAY  
HESEEELCNIENSKVIQDWKELADAVDTP ESECSI AVCGKYIEQGDAYLSVVKALTHAAI  
ATKQKLNIEFIDSSDLEENVEATLERFAACDGVVVPGGFGSRGFEGKVAAIRSARENKTP  
FLGICLGMQAAVVEFARSHADISNAHSAEFKDDLK PDEEDI IIFMPEGDRTRMGGTMR LG  
ARETTLREGSIAREIYGSKNIMERHRHRYEVN PALVDRLEALGLRFSGKNTDKSGERMEV  
IELDRSDHPYFIAAQFVSLETPQIPTSFVFRNHFF

>comp13799\_c0\_seq1; 555 145 1779 LEN=1874; translated  
MRDKYSIRTKVFRDEAMESTLLKEKAKAAQARYQSSG SNLPDRKENG PTRSKDHRRGTQP  
KKQSKYVSTMIEFLSSV ESSRGV EPQKQRPPAAQRLPPRARAAILPGRSKRAF EGRDS  
EGKAARGGLGEARDGDEL DQIEAEARRTFREKSTGSTIESSTKTNNNINKQLVENKLV DQ  
LLRSPDTKIDNTVLLLADTLVSNRYVFELLRENGFLSPELQTMALS FINEVDSQSKQLH  
DVLMGARRRSSMRATRVLVISCMTQILSVSNRFTGILDRGCKSVAAPGAAGAATNDRAP  
KQSESREPIGAGALDKYVHHTMNSDKRILASLISDIVSKRKQVSSALAE TFQKVMQEN V  
LYSDLVAKHITEDLKN TIQFLTDPERLSTFLSTANTLGTADAPIQPTRRAENNLVNHSM T  
DASSFLDFIDTSGLSVIFTEDEDVAAAAGKASNSMRGTRSSLD TILERMNLKLSKRSSH K  
RSNSQSSFDQKNKSRDPTKNGQRGQPSQDRQVIQHQPKNRAERQKPVPRDSGTDTKLTST  
MAEF

>comp13800\_c0\_seq1; 599 1 1627 LEN=1860; translated  
AFVIEKKRKRKQKRNASLYRIRLSVHLP SFLVDVTDDFQFGEEYFTSRERVYGF LMPED  
FRAADRILQAALNLTIRNDRIAAAADDEDDSDKDDDETRVMVWEDLYGLMQEISTNLVDG  
KSRVLNAFSDSFAVEDLLENGGTGRQDHNRSIRDLGWLEKHGQCADNINAGTSTIPDAG  
RGAFATRFIPSGGLVSPAPLVHVEDLDTMAMFTEHIYNEDDKLVPNRS GNYTWQLMINYC  
FAHEQSTLLLCPYGLLSSLI NHSPGKNANTRIQWSEKHRMRHPEWLGQPIEKWVGEYHTG  
LQIDFVATRDIEEGEEVLIDYGPLWQA AWDKHTAAFEFRKHRSEHYLPSYELNELL LAEE  
GDPSVPLRTEDDRDRYLDGVQLYCHGWYVARHGIGTRKMDEKTPMCSIIRKFDGDSYLVR  
IIDWYNDEDDRRTTKYEEDGT VWGLPRAAFVFDLLPYFRDIHQEWTFRHPMIIPNDMFPKV  
WKNANYASEDREFLEYVDKADGMEEHEDFDDEEEENDDYDYDETFDDDYDDGDDGQQELP  
S

>comp13800\_c0\_seq2; 883 1 2284 LEN=2517; translated  
XMIATKSVVSEKARAGTDSITSHTTAAIVPTSPGALLALQNRTP EEKYPCRNTHRTAPL  
RCHR NEMEEPLRSPTKRYHPPPFRALVLFASRAFLVLSAALAAA AHADHIRCGVYLAPSS  
IPGAGLGMVGNKTVAEGAVVTGEDVLP IVERS WHSAPHLQEKRRFLWDEYIWNADVFP  
FTDGEIGWDLMEEMVMASPGVGSAA NSYLSMVNVEDDVVRVGRAGLPRDSPGQGAFTIYH  
GRSFRAKRPMEPGQELFVDYGE EYFTSRERVYGF LMPPEDFRAADRILQAALNLTIRNDR  
IAAAADDEDDSDKDDDETRVMVWEDLYGLMQEISTNLVDGKSRVLNAFSDSFAVEDLLE  
NGGTGRQDHNRSIRDLGWLEKHGQCADNINAGTSTIPDAGRGA FATRFIPSGGLVSPAPL  
VHVEDLDTMAMFTEHIYNEDDKLVPNRS GNYTWQLMINYCF AHEQSTLLLCPYGLLSSLI  
NHSPGKNANTRIQWSEKHRMRHPEWLGQPIEKWVGEYHTGLQIDFVATRDIEEGEEVLID  
YGPLWQA AWDKHTAAFEFRKHRSEHYLPSYELNELL LAEEGDPSVPLRTEDDRDRYLDGV  
QLYCHGWYVARHGIGTRKMDEKTPMCSIIRKFDGDSYLVR IIDWYNDEDDRRTTKYEEDGT  
VWGLPRAAFVFDLLPYFRDIHQEWTFRHPMIIPNDMFPKVWKNANYASEDREFLEYVDKA  
DGMEEHEDFDDEEEENDDYDYDETFDDDYDDGDDGQQELPS

>comp13800\_c0\_seq3; 897 1 2520 LEN=2753; translated  
XMIATKSVVSEKARAGTDSITSHTTAAIVPTSPGALLALQNRTP EEKYPCRNTHRTAPL  
RCHR NEMEEPLRSPTKRYHPPPFRALVLFASRAFLVLSAALAAA AHADHIRCGVYLAPSS  
IPGAGLGMVGNKTVAEGAVVTGEDVLP IVERS WHSAPHLQEKRRFLWDEYIWNADVFP  
FTDGEIGWDLMEEMVMASPGVGSAA NSYLSMVNVEDDVVRVGRAGLPRDSPGQGAFTIYH  
GRSFRAKRPMEPGQELFVDYGE EYFTSRERVVFRSMLLLVLSVLQGNFSFFSFTFAFSH  
RTIFLSSHGHECHKMYKHCWIPISFVSFCFLSVEISVTSYIXLCFVVAQYGF LMPPEDF  
RAADRILQAALNLTIRNDRIAAAADDEDDSDKDDDETRVMVWEDLYGLMQEISTNLVDGK  
SRVLNAFSDSFAVEDLLENGGTGRQDHNRSIRDLGWLEKHGQCADNINAGTSTIPDAGR

GAFATRFIPSGGLVSPAPLVHVEDLDTMAMFTEHIYNEDDKLVPNRSNGNYTWQLMINYCF  
AHEQSTLLLCOPYGLLSSLINHSPGKNANTRIQWSEKHRMRHPEWLGQPIEKWVGEYHTGL  
QIDFVATRDIEEGEEVLIDYGPLWQAAWDKHTAAFEFRKHRSEHYLPSYELNELLLAEEG  
DPSVPLRTEDDRDYRLDGVQLYCHGWYVARHGIGTRKMDEKTPMCSIIRKFDGDSYLVRI  
IDWYNDEDDRRTTKYEEDGTVWGLPRRAFVFDDLPHYFRDIHQEWTFRHPMIIPNDMPFKVW  
KNANYASEDREFLEYVDKADGMEEHEDFDDEEEENDDYDYDETFDDDDYDDGDDGQQELPS  
>comp13800\_c0\_seq4; 541 406 1863 LEN=2096; translated  
MPEDFRAADRILQAALNLTIRNDRIAAAADDEDDSDKDDDETRVMVWEDLYGLMQEISTN  
LVDGKSRVLNAPSDSFAVEDLLENGGTGRQDHNRSIRDLGWLEKHGQCADNINAGTSTI  
PDAGRGAFAATRFIPSGGLVSPAPLVHVEDLDTMAMFTEHIYNEDDKLVPNRSNGNYTWQLM  
INYCFAHEQSTLLLCOPYGLLSSLINHSPGKNANTRIQWSEKHRMRHPEWLGQPIEKWVGE  
YHTGLQIDFVATRDIEEGEEVLIDYGPLWQAAWDKHTAAFEFRKHRSEHYLPSYELNELL  
LAEEGDPSVPLRTEDDRDYRLDGVQLYCHGWYVARHGIGTRKMDEKTPMCSIIRKFDGDS  
YLVRIIDWYNDEDDRRTTKYEEDGTVWGLPRRAFVFDDLPHYFRDIHQEWTFRHPMIIPNDM  
FPKVVKNANYASEDREFLEYVDKADGMEEHEDFDDEEEENDDYDYDETFDDDDYDDGDDGQ  
QELPS  
>comp13801\_c0\_seq1; 654 101 2493 LEN=2493; translated  
MPTHFSKLEGSPSHRKAQRRRRFDTPKLTITHDGCVSSTTNVWERNSPGVDESSIGQSS  
TNIPEFICVQNWRRLPQNEEPNEQQSRVPKNDRNYTAEIKRSAEYNSNNGITYRGRSSH  
HRFSGDSRISTISSSCPGRDGLGYSRASSSYPSNRGNVRFSTCHGNEEIQWNKCLSPR  
TQSSLQPSIRRDCIDMSRQONATRNDDSSNWGSVTKDRYTHFDPKVTHHLPNHREDKPS  
SAHSPRNTLINDADSNPTVEQQKLEHLHSVDSFDFESNSVADSFKSRNKATLRGEMTAN  
TINRVGNAGADSVISYSENSKGIYCEVRYRAKKSPPAKKVVVKEDKKPVKMWLCVCKEA  
RFGSYIEAFRHEIECKRIKAEMRESSRGGEDNNSNDDQSSMPGTEQRALRRGKIKMQLR  
EIELSSSRPMRCNVVTRGSMQRESVGLTATKWLCVCKKRSFDRYDADRHEKICQRRK  
EATAVMTKPKDEHRYDDNQFVEDLRHNNTVARESQRQENVCVAVYDNCTKGETCTSF  
GISHDRISQIRMEATADMTEQKSAWSFDDDVSFEEQRQNNIMVNGSRQRDVIYIQDNRTN  
KAC TTAETSHEKSFQTKTEATADMTEPKNELMYEGSHFVDKERRKIMSANESRQKNGAF  
CMQENSNANVRYNIFETQKSNRTGYSHFGISHEIGEVEFIDRYNAFKAIPEQDIKLSPL  
YNSKSRYEGDAYDRYISLASQAEDEEQREKYLALAKQTREEEMSCYRREENNEEAMFALL  
DVAQRMKLYPAADVICKQFFLLGDX  
>comp13802\_c0\_seq1; 295 146 1405 LEN=1728; translated  
MSTTASSREALPDLELCSDSSSSSDSAENSPVHFPEKGVSSPLSFDQTPEKDSLSNGPDV  
GAETSSVASESVGFTVRGLYTRYTPVEEEADLESEFVLCRRRMKTRPIGNHSPRNQEE  
S DNDQSDEAHSDGKSDDEDYETAMFEPVVGVLVGTKFWHEEDA EAKVVREDRAILFQ  
SQENYERLKSNDDFKGCYEGDYMEWPTFGEQVIVNGCQTS DLSIGDIFEIEGGLSPL  
LIEITAPRKPCS YVNIKHGTAMGSKGIQTHVHHNCLAGWFARVLVAGELREGMRFTRK  
SHPNPKWTLTFINKALYGEGRSQSMMNASSWNRDRAELEELVALPQLGEYEWKVEGR  
KRLLD FDFGIDWKTVRRDSIDPQFDWEKWKLAHPEDALQTGNSSSSFLSLACMTDL  
LHTITEALKHFSMMG  
>comp13803\_c0\_seq1; 439 179 1372 LEN=2479; translated  
MVKRDRWSSSSSEDEGTTKNKSQKITKPNIAPTINSSVCDGRKANGSKRLEDDN  
NLP LHNPLLQGCRSVYDITYDRIARLSEGTYGIVWKARDLATQEI VALKQIKFEDQ  
QQLQVQGFPTAFREINVLMA LSSHENIVSVKEMVVGSGADKVFVMEFFHKDLQEAM  
EKRYPNVLRQAELK GIMQQILRGM DYMHSKWFMHRDMKTSN ILVHKSAGRVALC  
DFGLARRFQDPPSTNL TQLVVT LHYRAPELLFGETRYTPSIDIWSIGCIFGELIQ  
QEAMMQGQ GELDQIDKIF TMLGGPTEEKWPGFSKLPNAKMFRWRS A EKQEK  
TIRLYELFPINPPPHFKQTF LDANGRDLLC KLLALDPAKRITANEALEHKFF  
FKEGVPPMNP DFFETL  
>comp13804\_c0\_seq1; 260 786 1760 LEN=1760; minus strand; translated  
MERNQMYNALLILFNLI FCYGYELHGSWIPLAPSLGASSRRIELGENGRMAVGT  
FDKSI IYDLVVRPSDSNVEALVWEFAGQLNGVDGVNFS LSSDGRFLASRHASSAK  
QVQVWEILS NRSH TASVAMNEKSA DFVFLNVGTFWCVADGQSVKLFKAKSKL  
VLAMIVKRGYRIVVKYK YLRDFSS LNIHDSEWNEFMTHL KGRNADDRFGSALS  
IADGYLEYDFQLAIGCPGYNRNQG LVLVYGVSLATSTGWKQIGNDLTGSNEGER  
FGSSLDMSANTQPYLLIGSPGWKVT KDVEGTSADDDVISEQESFESLGC  
GIVRLX  
>comp13805\_c0\_seq1; 142 1 293 LEN=724; translated  
XQQQQQQQGRQHQQPPGGRQENDFMSSIEALPYREEGYCWQTPGGNYYQFQIP  
VDSQVLEAIQTILLHRFEWGPGEEEWDASDCYDEEEDDDYDGL  
>comp13806\_c0\_seq1; 146 116 406 LEN=842; translated  
MADIEKRVAALENGGAFNATQAAIRAREEEFLATLRDIKASMLKDEQDGKNN  
GASSAELD ALRDENERLKAKVTQAYRIAHLVSGMEKMLESEKK

>comp13806\_c0\_seq2; 146 116 406 LEN=711; translated  
MADIEKRVAALENGGAFNATQAAIRAREEEFLATLRDIKASMLKDEQDGKNNGASSAELD  
ALRDENERLKAKVTKQAYRIAHLVSGMEKMLESEKK

>comp13806\_c1\_seq1; 334 300 1190 LEN=1762; translated  
MVFLRVIRGAVCIFAVKTAVEAFQPPISSRPSTIPVGLFSSPSSSQPSTMDVENDINAEP  
SVKVEVVSSNVVEAAAATAALTSGPSYLALENSVRPSKNDNHSSPKADVVPPTERTTSA  
RRPTRPTTSAKARKNRRTTKTGSVKIAESMEELLDTMDGKSNGENRTTNDGALTLILFHA  
HYCKICQRAGMQLNKAKEYPGVIFAKVESQVFPDPVADSLRTLGVSKFPFVQIYRRGQC  
VASFSTGPTHMFMRKVRDTLDLCLERDEECWDSFTTEFASEIESNRSARRTFGPMP

>comp13807\_c0\_seq1; 746 259 1791 LEN=1996; translated  
MIPLYPQRVDENDFRTPAASFTRCATATMTGEFIKSEWSEGGDSTKLSYLDVISSIIP  
FSKVNDQNLEEINSGTKDEPLAQAHRIQQAYQEWCEFYGKISNRERLGVFASNFLAVQEF  
HENTGRPLVLNQFADLTEEQYLKGEEQSKNDSKEATIAPEKEAEDRILVAYREWCEYYGR  
VWDENRPLIFASNYVAVEKYHEHTKMPLVLNEFADMNEQEYEEYIERTTEFTESESTGSM  
ASDNTPFQSQEDRMASYLDSEPVQNPVDFPQVNEVQSSVPSPTQTVQSDSRDLPESSHVW  
DASSSTYEVPVAVPNSMTQVVQSSDVEQFARLDTSSSIDEDFAALQQTVASLTAMVNDMAS  
ATQVVAPRTQAQPLDSLVIDVLQQQDHSISQLEMSIDGLHQIQMQSSDLIELVSNQKQM  
TDMMEAVQVEIAALEEERQLNENYALLLARIIEELEEAQVAKHSDDDPSLQKALVLAHATA  
TTGRMMVEVKPNIPAIGANPMFKPINLDPQ

>comp13807\_c0\_seq2; 685 259 1892 LEN=2097; translated  
MIPLYPQRVDENDFRTPAASFTRCATATMTGEFIKSEWSEGGDSTKLSYLDVISSIIP  
FSKVNDQNLEEINSGTKDEPLAQAHRIQQAYQEWCEVRTMQQNHTSYFEIEVNTYRFGIH  
TNLINQSNXKFKYKISNRERLGVFASNFLAVQEFHENTGRPLVLNQFADLTEEQYLKGE  
QSKNDSKEATIAPEKEAEDRILVAYREWCEYYGRVWDENRPLIFASNYVAVEKYHEHTKM  
PLVLNEFADMNEQEYEEYIERTTEFTESESTGSMASDNTPFQSQEDRMASYLDSEPVQNPV  
DFPQVNEVQSSVPSPTQTVQSDSRDLPESSHVWDASSSTYEVPVAVPNSMTQVVQSSDVE  
QFARLDTSSSIDEDFAALQQTVASLTAMVNDMASATQVVAPRTQAQPLDSLVIDVLQQQD  
HSISQLEMSIDGLHQIQMQSSDLIELVSNQKQMTDMMEAVQVEIAALEEERQLNENYA  
LLLARIIEELEEAQVAKHSDDDPSLQKALVLAHATATTGRMMVEVKPNIPAIGANPMFKPIN  
LDPQ

>comp13808\_c0\_seq1; 204 386 1324 LEN=2368; translated  
MGAKDAGTRNKMQQNQDIFVPNSSERGVSPILTISTSMMDMGPPLNPSYFGLSPSGTTDG  
TTASNLNDSINSATNSVASSLDDPAANGSTVSRQESRLHAVDATPPLINHGMEPIISIT  
QRLGLGRGSPPGTMGRTEREIKLLCLRARPIFLSQSMLLELEAPIKICGDVHGQYSDLL  
RLFYGGFPPVSNYLCGQDYVDRGKQSIETISLMLAYKIQYPENFFLLRGNHESAGINRI  
YGFYDECKRRYSIKLWKIFSDVFNCLPVAALVDEKILCMHGGLSPDLQDLQOIADLQRPC  
DVPDMGILCDLLW

>comp13808\_c0\_seq2; 271 386 1690 LEN=2184; translated  
MGAKDAGTRNKMQQNQDIFVPNSSERGVSPILTISTSMMDMGPPLNPSYFGLSPSGTTDG  
TTASNLNDSINSATNSVASSLDDPAANGSTVSRQESRLHAVDATPPLINHGMEPIISIT  
QRLGLGRGSPPGTMGRTEREIKLLCLRARPIFLSQSMLLELEAPIKICGDVHGQYSDLL  
RLFYGGFPPVSNYLCGQDYVDRGKQSIETISLMLAYKIQYPENFFLLRGNHESAGINRI  
YGFYDECKRRYSIKLWKIFSDVFNCLPVAALVDEKILCMHGGLSPDLQDLQOIADLQRPC  
DVPDMGILCDLLWSDPSPNIQGWAEENDRGVSYIFGSDVVENFLDRQDLDLIVRAHQVVED  
GYEFFAGRRVTLFSAPNYCGEFDNAGAMISIDENLMCSFQILKPSEKQHRYSHYHQRR  
GYENGRGENQPQLL

>comp13809\_c0\_seq1; 970 172 2172 LEN=2433; translated  
MAPPATQTKQIAARTTVPLGFVATCLLLCSGIAFTVGRVTRFCLVPDLDAALVQGPPPVV  
AARGKDGGLLPTPKAHAGKIIPQTIYTTKNFDTRLSALSASQWLQPADEEASTTPNASPT  
NNVVVPDPANEKLSLGEDGTADYDKDEEHLPAQHLVLDIDGLEAAFLDSEARLATAMI  
AMVDNSGLTLLSYHCHGMYPEGVSCAGVLLSHVSHFWPTTEGVTITLDFTCGATSLDLS  
MPLIEDLFFVPRDPDRKPNVMWAYKRRGFNEQSGKVGERTDFAYPLGVHGMEYKKELASL  
TTSSGKIARVYEMQEHHRPSPTRQVYLDGVLKSNVSGQAAAHESVHPPMLAHSAPKRVV  
IFGAGLGASTREVLKHAGVEEVTVVGADRAMVGFKEYLPEWSDCSYASKNGEPACCFDD  
DRVNFVYDQTPLEWIASYGGPAYDVALVDFMEEFAIEIMSNREHTLDQLLNRLSHDG  
VVSUNIAGSTKAVESMTKSGMTPTRKILQTTLAEEMKKTGFVEAYEYNEYKSGFSETRSY  
VVAFKDAATAKNWNAKQSETEIKLNNRIARDQSTGELALEFFDAATMATYSKFKSTKSSGG  
GPGEDRSGDVEEEEAVEEAELSEMAGGMAQTANSSCSSTEDEGECKNPSIDISEEQMRPH  
EVRRES

>comp13810\_c0\_seq3; 1159 663 2638 LEN=2784; minus strand; translated

MKISAVLSFAAVAGLRFQASDAKEAVTGRTLSAIQAESGSSLIRGSVAVSTSTLANNGKTQD  
ARVLQTKPTEDEVRSWFLWDEALATLNSTTVANMYGKGATLLPTLKDDVRTDFAGIKDY  
FDLFLQNEPRGRIVEGYVEIGDDWATDIGIYEFTFGTTGDVVQGRYSYFYEPQEDGTWMI  
LHHSSMLPEPTLPQPI TEEEVQALFGLWNDALKTKDPSQVAARYAKAGVLLPTQSDDR  
TDAAGIEDYFVKFLANEPTGEI LESHVAIGHDWAQDVGRSTVWLPLFXVEALSMSSSHNI  
SCLFSISIEGVYEFTFGTTGKVRGRYSFIYIYEDGEWKISHHHSSVMPESIEGLSQSIT  
EEVVRGLFDVWNEALQTLPEKVAALYSEKGNLLPTLSDKQRLNREEIADYFVKFLALKP  
TGKII SGDVLVGHNWAQDAGIYEFTMGDGSVARGRYTFVYIFENGKWMIAQHSSMLMPES  
SNNAKPTDGVTEDDVRNLFWLWNDALLTKDPDTVANRYTSDAVLLPTVSDVPRDTHELIE  
DYFVKFLQGEPSGEIIESFVHIGHDWVSDVGIYEFTMATDGSKVRGRYSFVYAMEDGEWK  
IAHHSSMMPEPMLAAAEPLAEPGVQISKMADVSSGASAI AIGNGVAFAAVAVAIAL  
>comp13811\_c1\_seq1; 162 1 1366 LEN=1629; translated  
XNSYTSYSYSYGSCHPIATKPDPLHRSIPLLTIVRCSEDRSPGPSDNTPLRIASHRLDS  
TRIDPTRSTSSLRIESHRSATGGTTPVVRTDSSPGKATMVPQRQRQRRRTRAPLRGCDTF  
VAYPPTTPDGCAFFGKNSDRPKGEAQSLRRYPAGRHPGSTLECTYLSIPQAAETFAVLV  
SQIDWMWGCEHGANEHGVCI GNEAVWTRVPFEAEPKTGRPASLLLGM DLVRLGLERSRSA  
RSALRTITELLEEHGQGGACAEGDPSFCYHNSFLIADAGEAYVLETAGKHVWAQRWASGG  
RNLSNGLTIRNAYDL CSEGLEDYARELGLWDGTGPLDFAAVFGEDGPGGLPSEDEDED  
DTRFGCGRALLEKHSGRFGKGMVAILRDHSSGICMHGGGFETTASMVSELHAGNPR  
NTHWTTGPHPCRSEFCRQEILEPPAAEANQGKRNE  
>comp13811\_c1\_seq2; 483 1 1419 LEN=1612; translated  
SNMNSNSNDHSESYEAFRTASGHRTAGESSSSSSPRSPSLPWFVEYWSTSFRRAPTVMFD  
QLCVCNTSSAVDVVVDNADYEYYPNSRSKPPQOTLEPSSSIVSIQRSNPVFDTSPTKISDS  
KWESLRSVVAHDDYEQYGHNSLLDLDLEEDDETASSSHIYPSKKPARKQSIHRRRRQG  
SPEADAGAAIATTHLSPRSATSTSTHLLATTLRTCYSFDQYFETGKYLCASSTIDEAGE  
SGSEGEESSPLDAPXPAGPPEAPPAAIALGVADEEEEPGPADASQPVAERRRYLHDGLALA  
QLCQGVRRRRRPRPGTTGATLPVHAEPPEVEAQAASHPAGDAGQRGDEERGRPLGIACCRA  
GSRFEPAPPHTDKTLPQGTQDQDQSSHDSSAYRYLIRMSPTNYRHEESKENLPPGCDG  
QFYENEQDDVFSNASSSVLLPLPHQRIMAPLGSDDSQRFRESVLVPRF  
>comp13812\_c0\_seq1; 547 1 1979 LEN=2511; translated  
XFIDEPNEIDPEQTQTATMSTPIVSKMVGKDRAAKTKTGGRSKNIGGKKGAGTGLNDW  
FIAIFGVAFVVSFLNVMHLTMSRANDDTNDIGGKGHSTKKEAARAALMRTLKDFRDSRE  
KRKRMRDELRAKKN SINQHEPDELMDLEYGAHGAGSDAMKLAHLNCKPWGVSDDIAQEM  
VYWQDIPTDSSYVPPFYE INHRPGTERRYMTFEPDGGWNNIRMAMESTIAIAVATGRTL  
VMPPQKKMYLLGQNKGGQKHHFNFDVFP IERMAQDNKA FEVISMQEYLEEEGMKGLIN  
KETGKPEFPGNRTDWDNINQEEYDEMRYLRRVSHTLEWRPPDCLPAFPSSGDHKDVEI  
LQKLALLEVKKPKGRVSTQELFRVDDPNRPRRLEGLSGRKSLCVYDEGDQNEKVIHFQMN  
HKERLRLLVHFYAFLFFEDWREDLWMKRFVRDHLIYNDQIQCAAANIVDKIRTRKAEATK  
GKSRDFITFHVRRGDFQFKDTRISIEDIMENTKDLLPPDALIF IATDERDKGFFAPMKKK  
YDVLFLDDFKKEELKGVNSNYFGMIDQLVASRGSKFFGCWHSTFTSYIMRLRGYHSTKDKA  
EGYEQGILPTTYYYTPKKNQLEMHHYSHIQGAFFNREFPASWRDIDKGIEELGSKSRQS  
>comp13813\_c0\_seq1; 915 536 2497 LEN=2576; translated  
MVSKRRISRGIASGKKRARKPDQVEKEDDEEFPEEEQAL TIDTTNECAPDDNGGDHDESN  
EGDEEEEEERKNKYEVQRVLARDEDGILYYATVRRKLYGLNQQKTISCLGIFDISPEDI  
LETSGTTNSKEGNGEENDKKTQDSEQSEWHYFVHYEGWKT IWDRVWSENYIWEVTPDN  
IERMKEISRSHKAIQLEFKEKTKARKIKNAGLFLQWKLRLDALNRRWDEKETQTNSDNE  
SKEKERAKKLA AAKRRRQEAKKKKGKSPQEVLRDQSNLAVQSCLVNRQASHIQAIPLSFG  
LKRILVEDWENLNNSNYTAKKSGDGDATDEAKNLDMVHILPAKVTIRDALSLYLKEKGI  
SWNGNDRDKSSTGKSRADQNSEEKSTEVGDVAMEKTDETNPTGLEENSEQNVAVEDASGV  
DSAHNDMGSNNGKMSDELVKEWTDMAEGIVLYFEQALMTRLLYPSETSQILVLEDNLE  
GKNDESTNKS PAMPLPKVDIYGCEHLLRLLSALPRILDQQLQESREKKLGQDRVRENKVG  
VGEDGPKTEDCPNGDDEDADQDAFAEIGSMILAKLQDLARFLQKNQTTLFGSMYRRKNEQ  
EIKRDLKIQRQERRLRNAMAMATPLNSVQQLLEDQGSCKVEPTDDENLRTIGN  
>comp13814\_c0\_seq1; 816 246 2012 LEN=2726; translated  
MSESQVPSSPIKQMNKVGTDSDKKAMKDDNRDDVLQRTSIIKDDQIFVNLAMADLMAYLQ  
VVANNSNNLPLTRRDDPELTRMVSNLSSEYARKSAAFIPADVRIAGSFLKYGNVWDLPL  
TSEYVASDGAQEPGRSYGGACSNMMLKVLVYDAASEAATNVDDVNACDALFDDDDDES  
LTLPLARNSTFASLDMNGQSNPSTMTWAELLRKMKSEINDIEYCQAPTIGATRKFDLNQPF  
SLVPETFDKATGKKRSL LIGCNYNGIEGAELKASHDDVCSMKDYIVNVHGFAETDDMMTV  
LLDDDKHKSPTFMNIVEAFKSLSEQSQPGDAVFIQFSGHGGRILDSPINNNVESYDEIIV

PSDYSTSGVIRDTLIFKTLAPMRYGVSVTIVIDSCDTGMVLDLPYSWSTRYDKLDTVAR  
MQQSENFVFRFLKVVKTLYESSTFTQLGRTVGTALGQQPTVEESFDEEDQEKVITEKGD  
STIERAKTEDVQSSFLDLCTPKGKPSRSGFGTVENNDRDALSLIEKMLGCNFLVHDIDD  
DFSDGETFANNTYNTFDDNQTMENASTFDSVSEGEYRRTSRRRSRKGR

>comp13815\_c0\_seq1; 650 266 2457 LEN=2993; translated  
MESGDEESFEDYVEATVPIDRTVALFVVGITTLTLLLLPAIELSLRPSDEIDCECEKDDG  
DEASSVSRSPRAEKLEGGESTPLLSNSSSIGDGIGYGGNSSERGRDDNIKIDARISIPKR  
PSSNSLHKLSPRKSIGIDTNSFFSTDETEDDEKGFNAARFSKPSTGAFEKLRITICHN  
TDSQTKAMLALGIPYLLQALVSAVSELIQMAIVGHYLGTAELSAWVVVDL FVVKLTSGAVA  
SVI ISSNIMISQIAEAEDEKSVHKIGMYIQFSILFYLVGMIPIVIFWSYCMKDILLFLKL  
DPTIADVGEQYVTPYIISIVLEGVVAAFQQTLDVVGFEVQSTICTILGEVGTVSMVAVAV  
VVGPLFAEVTGLDGLGWVYVAFVGCYLAGILTAIYCNGWLEDYKGFSSPLTMFAACGNG  
DNSSGTNVVSGAAIELLISNAFQLAFNDMLYNGDGNFLSLLGEFCMSFAIDKKGKPGYP  
LRAALAQDECRRKIEGKSEPIDRLTTLTFLIRLLLYSIPSSLGPAEVAAWSVLGVIWEE  
LEYLVTAIAEGCEVRVAVALGSGNIKNAKITSYKAIWICFVWGLIVSIGFYLFEDTIAAL  
VTTDSTLREIISFNLPMSLINMISGIGIMAEHVLWSQNRAPLSTVIASATSCLVTLPLA  
GLSSYYFNFNLIGQTASVALGASMFVAVSMYFVVSSDWKKISEDVVSLHLTTKDDSSNSE  
SDNDREADE

>comp13815\_c0\_seq2; 650 266 2457 LEN=2978; translated  
MESGDEESFEDYVEATVPIDRTVALFVVGITTLTLLLLPAIELSLRPSDEIDCECEKDDG  
DEASSVSRSPRAEKLEGGESTPLLSNSSSIGDGIGYGGNSSERGRDDNIKIDARISIPKR  
PSSNSLHKLSPRKSIGIDTNSFFSTDETEDDEKGFNAARFSKPSTGAFEKLRITICHN  
TDSQTKAMLALGIPYLLQALVSAVSELIQMAIVGHYLGTAELSAWVVVDL FVVKLTSGAVA  
SVI ISSNIMISQIAEAEDEKSVHKIGMYIQFSILFYLVGMIPIVIFWSYCMKDILLFLKL  
DPTIADVGEQYVTPYIISIVLEGVVAAFQQTLDVVGFEVQSTICTILGEVGTVSMVAVAV  
VVGPLFAEVTGLDGLGWVYVAFVGCYLAGILTAIYCNGWLEDYKGFSSPLTMFAACGNG  
DNSSGTNVVSGAAIELLISNAFQLAFNDMLYNGDGNFLSLLGEFCMSFAIDKKGKPGYP  
LRAALAQDECRRKIEGKSEPIDRLTTLTFLIRLLLYSIPSSLGPAEVAAWSVLGVIWEE  
LEYLVTAIAEGCEVRVAVALGSGNIKNAKITSYKAIWICFVWGLIVSIGFYLFEDTIAAL  
VTTDSTLREIISFNLPMSLINMISGIGIMAEHVLWSQNRAPLSTVIASATSCLVTLPLA  
GLSSYYFNFNLIGQTASVALGASMFVAVSMYFVVSSDWKKISEDVVSLHLTTKDDSSNSE  
SDNDREADE

>comp13815\_c0\_seq3; 701 266 2280 LEN=2801; translated  
MESGDEESFEDYVEATVPIDRTVALFVVGITTLTLLLLPAIELSLRPSDEIDCECEKDDG  
DEASSVSRSPRAEKLEGGESTPLLSNSSSIGDGIGYGGNSSERGRDDNIKIDARISIPKR  
PSSNSLHKLSPRKSIGIDTNSFFSTDETEDDEKGFNAARFSKPSTGAFEKLRITICHN  
TDSQTKAMLALGIPYLLQALVSAVSELIQMAIVGHYLGTAELSAWVVVDL FVVKLTSGAVA  
SVI ISSNIMISQIAEAEDEKSVHKIGMYIQFSILFYLVGMIPIVIFWSYCMKDILLFLKL  
DPTIADVGEQYVTPYIISIVLEGVVAAFQQTLDVVGFEVQSTICTILGEVGTVSMVAVAV  
VVGPLFAEVTGLDGLGWVYVAFVGCYLAGILTAIYCNGWLEDYKGFSSPLTMFAACGNG  
DNSSGTNVVSGAAIELLISNAFQLAFNDMLYNGEWQLLILFASSLGPAEVAXMECARSDM  
EELEYLVTAIAEGCEVRVAVALGSGNIKNAKLT SYKAIWICFVWGLIVSIGFYLFEDTIA  
ALVTTDSTLREIISFNLPMSLINMISGIGIMAEHVLWSQNRAPLSTVIASATSCLVTLPL  
LAGLSSYYFNFNLIGQTASVALGASMFVAVSMYFVVSSDWKKISEDVVSLHLTTKDDSSN  
SESDNDREADE

>comp13815\_c0\_seq4; 701 266 2280 LEN=2816; translated  
MESGDEESFEDYVEATVPIDRTVALFVVGITTLTLLLLPAIELSLRPSDEIDCECEKDDG  
DEASSVSRSPRAEKLEGGESTPLLSNSSSIGDGIGYGGNSSERGRDDNIKIDARISIPKR  
PSSNSLHKLSPRKSIGIDTNSFFSTDETEDDEKGFNAARFSKPSTGAFEKLRITICHN  
TDSQTKAMLALGIPYLLQALVSAVSELIQMAIVGHYLGTAELSAWVVVDL FVVKLTSGAVA  
SVI ISSNIMISQIAEAEDEKSVHKIGMYIQFSILFYLVGMIPIVIFWSYCMKDILLFLKL  
DPTIADVGEQYVTPYIISIVLEGVVAAFQQTLDVVGFEVQSTICTILGEVGTVSMVAVAV  
VVGPLFAEVTGLDGLGWVYVAFVGCYLAGILTAIYCNGWLEDYKGFSSPLTMFAACGNG  
DNSSGTNVVSGAAIELLISNAFQLAFNDMLYNGEWQLLILFASSLGPAEVAXMECARSDM  
EELEYLVTAIAEGCEVRVAVALGSGNIKNAKLT SYKAIWICFVWGLIVSIGFYLFEDTIA  
ALVTTDSTLREIISFNLPMSLINMISGIGIMAEHVLWSQNRAPLSTVIASATSCLVTLPL  
LAGLSSYYFNFNLIGQTASVALGASMFVAVSMYFVVSSDWKKISEDVVSLHLTTKDDSSN  
SESDNDREADE

>comp13816\_c0\_seq1; 702 71 1438 LEN=1557; translated  
MTDYAKRPKITVETMGKVHNPTGQGVKAVSSQVQAKAEKLSKKANGVKSNGDEAAAANKKH

SNIPTAITVNEQHATKTKEGTAKRNIQRKKT DGNFDSRNKKHGGHGKQWKEDI IYDDEI  
EPLDENDPLYDETEGKYVLGSTEDPESRHYDPNEGRVVYGPMLTLSEFKLQVHQNLEEFYF  
DSCDTDEVIRSIDELKCKEYHSNIVKAVSISL DKHPRERELVSRLLTCLHPTPLTDKDM  
EEGFEILLDSLDDLT TDV PDAKTMVANFLARAVVDEVLP PAF LSEQNNKRAGDIVIEKSI  
SLLSREHCTARLERVWGP GDGRPVAELKVEMDQMLQEYLLSRELDECARC VKELDTDHYM  
HELVKRGVKIAMEEDGKDLTTQHEKSAIDAMAALFGFLVKNAI ISEHQVSKGVDR LHRVL  
DDLKLDVPAAPTLLKDFEELKEE IPTIALDEATE

>comp13816\_c0\_seq2; 655 97 1720 LEN=1839; translated  
MHDFYNPKFELDIMGRIISGHRMGCIRNPKSVALLEFDVLT TNRTRSNWSEAFMANVFI I  
RDCSMLPTSQFDSTSEWYLFSS LQIRLTAYSGRPILHLNLGKVHNPTGQGVKAVSSQVQA  
KAEKLSKKANGVK SNGDEAAAANKKHSNIPTAITVNEQHATKTKEGTAKRNIQRKKT DGNF  
DSRNKKHGGHGKQWKEDI IYDDEI EPLDENDPLYDETEGKYVLGSTEDPESRHYDPNEG  
RVVYGPMLTLSEFKLQVHQNLEEFYF DSCDTDEVIRSIDELKCKEYHSNIVKAVSISL DK  
HPRERELVSRLLTCLHPTPLTDKMEEGFEILLDSLDDLT TDV PDAKTMVANFLARAVV  
EVLPPAF LSEQNNKRAGDIVIEKSI SLLSREHCTARLERVWGP GDGRPVAELKVEMDQML  
QEYLLSRELDECARC VKELDTDHYMHELVKRGVKIAMEEDGKDLTTQHEKSAIDAMAALF  
GFLVKNAI ISEHQVSKGVDR LHRVLDDLKLDVPAAPTLLKDFEELKEE IPTIALDEATE

>comp13816\_c0\_seq3; 636 71 1542 LEN=1661; translated  
MTDYAKRPKITVETMGKVHNPTGQGVKAVSSQVQAKAEKLSKKANGVK SNGDEAAAANKKH  
SNIPTAITVNEQHATKTKEGTAKRNIQRKKT DGNFDSRNKKHGGHGKQWKEDI IYDDEI  
EPLDENDPLYDETEGKYVLGSTEDPESRHYDPNEGRVVYGPMLTLSEFKLQVHQNLEEFYF  
DSCDTDEVIRSIDELKCKEYHSNIVKAVSISL DKHPRERELVSRLLTCLHPTPLTDKDM  
EEGFEILLDSLDDLT TDV PDAKVMKDCRSL SIALDFRLLFAH THQSSPFTTTTFMVQTMVA  
NFLARAVVDEVLP PAF LSEQNNKRAGDIVIEKSI SLLSREHCTARLERVWGP GDGRPVAE  
LKVEMDQMLQEYLLSRELDECARC VKELDTDHYMHELVKRGVKIAMEEDGKDLTTQHEKS  
AIDAMAALFGFLVKNAI ISEHQVSKGVDR LHRVLDDLKLDVPAAPTLLKDFEELKEE IP  
TIALDEATE

>comp13816\_c0\_seq4; 589 97 1824 LEN=1943; translated  
MHDFYNPKFELDIMGRIISGHRMGCIRNPKSVALLEFDVLT TNRTRSNWSEAFMANVFI I  
RDCSMLPTSQFDSTSEWYLFSS LQIRLTAYSGRPILHLNLGKVHNPTGQGVKAVSSQVQA  
KAEKLSKKANGVK SNGDEAAAANKKHSNIPTAITVNEQHATKTKEGTAKRNIQRKKT DGNF  
DSRNKKHGGHGKQWKEDI IYDDEI EPLDENDPLYDETEGKYVLGSTEDPESRHYDPNEG  
RVVYGPMLTLSEFKLQVHQNLEEFYF DSCDTDEVIRSIDELKCKEYHSNIVKAVSISL DK  
HPRERELVSRLLTCLHPTPLTDKMEEGFEILLDSLDDLT TDV PDAKVMKDCRSL SIALD  
FRLLFAH THQSSPFTTTTFMVQTMVANFLARAVVDEVLP PAF LSEQNNKRAGDIVIEKSI S  
LLSREHCTARLERVWGP GDGRPVAELKVEMDQMLQEYLLSRELDECARC VKELDTDHYM  
ELVKRGVKIAMEEDGKDLTTQHEKSAIDAMAALFGFLVKNAI ISEHQVSKGVDR LHRVL  
DLKLDVPAAPTLLKDFEELKEE IPTIALDEATE

>comp13817\_c0\_seq1; 588 194 1705 LEN=2171; translated  
MPSMVTADSVFPDSTSSQSNSNREALESAAVVGVSNSSSSVGRNDNTDDQVDQDKLV LWQ  
GIALLTADCMGVGILGLPNEIKVLGWAAGLTF LVVNCP INFYAGNLLSVLALKLEADDGT  
ERNGTDVCTDAMEVELAATANSAATGDSNVRTIRKRF SNKKQSYQGLPQQRQLDTGVAV  
VQESIFDEEEDVVI IENHDEPKHDGEDAEFSEGSFQDEMTPHDGEVDSETAAAGAIWIHT  
SNRDNDKQTS DLINITAALFSPDNTLAARTYTALVKILYVNLFLVLGDYILVMSRSVAA  
FIGEDI LCLPTAGAIASILMFGLCQFR TMANLGRSVSLASLLALLIVIIQCLFHRRKSS  
TENYATDVPETRSL LQDDEGNEDDDGIWGFSSLAGIGFAVGSQKLFNIRHELKHRDEA  
SRVLAGSLF TYGSAYVLVLLAGPDPSPSFLFDSIPDGWGRKMAGLLLWFHVAVSYAINSQ  
ALCASLDHSLTAGSSVRGTSMLPW

>comp13818\_c0\_seq1; 889 1 2745 LEN=2834; translated  
IDGGSGDADDERDSEAI SPATSHEDDITATDALDEGISSSDEESDSEVFLAKEMALAI A  
KNPNMSPNQLRDLQQQVQEKVEQM QKDRAQAKLQKKSGDNGSGKSSTKSNKKSSSLGSG  
SMASLARRASSSGKLVKETLKETKQTIKDTKAAIMETQEGMKEGVKAGAKAGAKVLKKEF  
KKGMSAMGLGTTSSKKHVVAALNTDVGAGESETAIASPRSSLEDDQKIRLAGI IWKRSG  
LGKYSMTASWERRRVLKGSKLIYYKTLQETMSNNSDAEDEDMGDFSESEGEIETAPSND  
FAPANWIHGINAFIDKAGVTPWETHSSSNVTAKPGARYMDLKEKASAAAASYGHTGAP  
TPFALSIVASITKYKFCFDTQQELMTWLTSITDVVSVGSVDDYNAEILEANPSSHGGG  
ETTPIGEDSISSTWQEPPIRNRSTDEGEKQGGHQLWTFEQYLVKSMNYPDSGIEENANV  
GTGGRDSQALAASAEDYYVDTSGGQEIWGVPM DYLPFFYLMNAVVL MARFHETLTDNMF  
WHILVFFDVLAVMVVDKAMTGGTVRLKPELDVKTTKKEKELPDGLQTAASADGTITSAAT  
DEL FVPPAGSTSIRINDPKDLPSIDGVIFAGWRQVDPGEIPLRGHAYKSDKKKVP CPDGL

YECIDLDVFESRKRYPD MAGRVVLP TPTFENDEGPKTWNAPDLFVI SVSLPTDPPKLYGG  
SADNNGGGFTITMYCAMRQKTRDILRRITAEAGYNPSDEEK PDDPKSWVNAARLLDEWCRR  
APSDDSWMARFKVIPQGNLAEIGLPAWISNYNGKPFLLIKRPGTTGFLYRHPDKSCMEFD  
VSLHFPFYLAKQAICYMKDGFNFKILATLAFICIEGRSEDELPECMIGLYQLCYPDP IHA  
QAEDFFAGKSARTK

>comp13818\_c0\_seq2; 842 1 2730 LEN=2957; translated  
IDGGSGDADDERDSEAI SPATSHEDDITATDALDEGISSSDEESDSEVFLAKEMALAI  
KNPNMSPNQLRDLQQVQEKVEQMOKDRAQAKLQKKSGDNGSGKSSTKSNKKKSSSLGSG  
SMASLARRASSGKLVKETLKETKQTIKDTKAAIMETQEGMKEGVKAGAKAGAKVLLKKEF  
KKGMSAMGLGTTSSKKHVVAALNTDVGAGESETAIASPRSSLEDDQKIRLAGI IWKRRSG  
LGKYSMTASWERRRVVLKGSKL IYYKTLQETMSNNSDAEDEDMGDFSESEGEIETAPSND  
FAPANWIHGINAFIDKAGVTVPWETHSSSNVTAKPGARGYMDLKKKASAAAASYGHTGAP  
TPFALS I KVASITKYKFCFDTQQELMTWLTSITDVVVSGSVDDYNAEILEANNPSSHGGG  
ETTPIGEDSISSTWQEPPIRNRSTDEGEKQGGHQLWTTTEQYLKSMNYPDSGIEENANV  
GTGGRDSQALAAEAEDYYVDTSGGQEIWGVPMDYLPFFYLMNAVVL MARFHETLTDNMF  
WHILVFFDVLAVMVVDKAMTGGTVRLKPELDVKTTKKEKELPDGLQTAASADGTITSAAT  
DEL FVPPAGSTSIRINDPKDLPSIDGVIFAGWRQVDPGEIPLRGHAYKSDKKKVP CPDGL  
YECIDLDVFESRKRYPD MAGRVVLP TPTFENDEGPKTWNAPDLFVI SVSLPTDPPKLYGG  
SADNNGGGFTITMYCAMRQKTRDILRRITAEAGYNPSDEEK PDDPKSWVNAARLLDEWCRR  
APSDDSWMARFKVIPQGNLAEIGLPAWISNYNGKPFLLIKRPGTTGFLYRHPDKSCMEFD  
VSLHFPFYLAKQAICYMKDGFNFKILATLAFICIEGRSEDELPECMIGLYQLVRFCSCHLR  
VEHDSRAFFW

>comp13818\_c0\_seq3; 288 288 770 LEN=770; translated  
MSSTDENTKKEEQVQPSPAVVEEDNNSNGSSNAVPTIRMSR SFDNSRFPNDAPRENQIESI  
GAEDEATDDAGTMELSYSNSTDNPSNDVLQINRSFSEGLDAASKKDHP IEPMGRRASTM  
TDLASSISAVSRVSTTVESVASGEI IMPKDES NKDLAVPTS

>comp13819\_c0\_seq1; 617 273 2231 LEN=2819; translated  
MGYRCFLRISIAIGVVCVSSSTFGFISDLSTKHHQGCCHHKRWQDVSKQFYPSVLSAEIGV  
GIDLGTNSAVAFLLDDNEPLIIEIPKNGRTVKSIVAFNEKSEPLVGNEALDWELQHKET  
AYRHVKRVIGTSFNLSDETRQVPHLVPDSCGAEDYGDNGGRKKGKSKKSKKGGPSLL  
KILDDADKYPTKLFYQNGSDEPDRAQLSPEEISSCVLQRLLSVAAEHTGDSITRAVIGIP  
AYFNDAQKEATVRAAKASGIEKVKLLKEPEAAALAYGFGKDNGDEEELVLFVFDLGGGYD  
VSVLTVGRGLTEIVCTSGNAQLGGTNFDRRIANHLSKLI NNCTSED SGKAMVLKAAEAI  
RISLSNNRAVNLALPMTEDGWLELGDGFV VVNPSETDGLSEADFAAGDQRNATHSFHQF  
SRREFEKLCAKEFQDLIRPIREVAIMAGAMLPGDTRPSVAESAIEREKELAELENFYEE  
ELDSATEPPPQQAANDFAIDVRSSKKAQQKGRKKAREVAKRERKYREESRKALKTQTD  
NNVKVRADGISGRPI SRIVLVGGATRMP TIGRILSSLTGVT PQRTPVDPDEAVALGCAVHV  
GVLDGKEEMGVV LNPMAALMKAVIDKERREGRISDFEDDDEEFTEVEILEF

>comp13820\_c0\_seq1; 668 168 2876 LEN=2991; translated  
MAPAVTQDCRIPNVPPFSQQQKQDVDR LWKVETNEAQNVGSVPDQIKPIPGDCIRYMARL  
HAFFLAF LKKHSTVQGSRQGTNNHKGPDEERIDFLKQNLRESCLEVFYLFK FIEKKS RMNE  
SNKGVRLNNGRTRITLHHEEF LSELNEYEFRGQFRSDSSTCMANCYGAYLYHRPLEALP  
AVNVSMALAVVTLWRLRENAFVAPGV DATYSNTNDTSSKVNTFLDSCQIDVRFVHVSPQI  
PMADIKTGLVKKFIAVKGHVVKARPRRLRVSTADFGCQKCAAIVHHVFAKGRFSLPTKCS  
DPKCKSRSFTLIRPTARYTNVQELRLQESQEESTSHAGRTPRQFEVELNHHLIDSCRPGD  
SILLACQVD AVNSAVAAGRAGKRAQETSTYKLF LQGH SITTLESENQVRDDKFSADSAQ  
EGGSQVYTYQQQLQITQLCHADHRCLGMVERRAFPFDLLVRS LCP SII GHHAVKAGILL  
CLLGGTPSVSEQIDRGNTIRSN SHILIVGD PGMGKSQMLLAATQLASRSVYVGGNTASTT  
GLTVTLTKEEGGETGIEAGALV LADQGVACIDELDKCKHLDG LLEAMEQQCVSIAKAGVV  
ASLPARCSIVAAANPKHGSYNMKSVAENLNMARPILSRFDLVF ILRDRADKDQDR LVSS  
NIMNL YRKPNGTGAETRDEFERLSNELSSRSNAQNENTGQITEPNRI PLEKRLAWVTGF  
NEPLPAGLVKDYIAYAREYCKPKLTSEAAVILKEYYMTLRYPANGRHHRDSVPITTRQLE  
ALIRLSQARAKACLREFVLKEDALDVVELLKR SVEQVHTDEF GMVDRSRAGARGQSNRKL  
RREFVRELHNIVGIGAECTYDDLRLVSNRVNCLP SDFNTI IDDMRNNGTLIKKSNMKYQI  
VS

>comp13820\_c0\_seq2; 578 168 3062 LEN=3177; translated  
MAPAVTQDCRIPNVPPFSQQQKQDVDR LWKVETNEAQNVGSVPDQIKPIPGDCIRYMARL  
HAFFLAF LKKHSTVQGSRQGTNNHKGPDEERIDFLKQNLRESCLEVFYLFK FIEKKS RMNE  
SNKGVRLNNGRTRITLHHEEF LSELNEYEFRGQFRSDSSTCMANCYGAYLYHRPLEALP  
AVNVSMALAVVTLWRLRENAFVAPGV DATYSNTNDTSSKVNTFLDSCQIDVRFVHVSPQI



PMADIKTGLVKKFIAVKGHVVKARPRRLRVSTADLKFSLDNVRFIQFCLDITFPMWNNFS  
DNQLIYSGCQKCAAIVHHVFAKGRFSLPTKCSDPKCKSRSFLLIRPTARYTVSTFSYLLF  
IPVSLFPFLFFPIYLSIERTSXLRLQESQEESTSHAGRTPRQFEVELNHHLIDSCR  
GDSILLACQVDAVNSAVAAGRAGKRAQETSTYKLFQGHSTITLSESNQVRDDKFSADS  
AQEGGSQVITYTQQQLQQITQLCHADHRCLGMVERRAFPFDLLVRSCLPSIIGHHAVKAGI  
LLCLLGGTPSVSEQIDRGNTIRSNHILIVGDPGMGKSQMLLAATQLASRSVYVGGNTAS  
TTGLTVTLTKEEGGETGIEAGALVLADQGVACIDELDKCKHLDGLLEAMEQQCVSIAKAG  
VVASLPARCSIVAAANPKHGSYNMSKSVAEENLNMARPILSRFDLVFILRDRADKDQDRLV  
SSNIMNLYRKPNGTGKAETRDEFERLSNELSSRSNAQNENTGQITEPNRIPLEKRLAWVT  
GFNEPLPAGLVKDYIAYAREYCKPKLTSEAAVILKEYYMTLRYPANGRHRHSVPITTRQ  
LEALIRLSQARAKACLREFVLKEDALDVVELLKRVEQVHTDEFGMVDRSRAGARGQSNR  
KLRREFVRELHNIIVGIGAECTYDDLRLVSNRVNCP L SDFNTIIDD MRNNGTLIKKSNMKY  
QIVS

>comp13820\_c0\_seq3; 627 168 2973 LEN=3088; translated  
MAPAVTQDCRIPNVPPFSQQQKQDVDRWLKQVETNEAQNVGSVPDQIKPIPGDCIRYMARL  
HAFFLAFLKXSTVQGSRQGTNNHKGPDEERIDFLKQNLRESCLEVFYLFKIEKSRMNE  
SNKGVRLNNGRTRITLHHEEFLESELNEYEFRGQFRSDSSTCMANCYGAYLYHRPLEALP  
AVNVSMALAVVTLWRLRENAFVAPGV DATYSNTNDTSSKVNTFLDSCQIDVRFVHVSPQI  
PMADIKTGLVKKFIAVKGHVVKARPRRLRVSTADLKFSLDNVRFIQFCLDITFPMWNNFS  
DNQLIYSGCQKCAAIVHHVFAKGRFSLPTKCSDPKCKSRSFLLIRPTARYTNVQELRLQE  
SQEESTSHAGRTPRQFEVELNHHLIDSCRPGDSILLACQVDAVNSAVAAGRAGKRAQETS  
TYKLFQGHSTITLSESNQVRDDKFSADSAQEGGSQVITYTQQQLQQITQLCHADHRCLG  
MVERRAFPFDLLVRSCLPSIIGHHAVKAGILLCLLGGTPSVSEQIDRGNTIRSNHILIV  
GDPGMGKSQMLLAATQLASRSVYVGGNTASTTGLTVTLTKEEGGETGIEAGALVLADQGV  
ACIDELDKCKHLDGLLEAMEQQCVSIAKAGVVASLPARCSIVAAANPKHGSYNMSKSVAE  
NLNMMARPILSRFDLVFILRDRADKDQDRLVSSNIMNLYRKPNGTGKAETRDEFERLSNEL  
SSRSNAQNENTGQITEPNRIPLEKRLAWVTGFNEPLPAGLVKDYIAYAREYCKPKLTSEA  
AVILKEYYMTLRYPANGRHRHSVPITTRQLEALIRLSQARAKACLREFVLKEDALDVVE  
LLKRSVEQVHTDEFGMVDRSRAGARGQSNRKL RREFVRELHNIIVGIGAECTYDDLRLVSN  
RVNCP L SDFNTIIDD MRNNGTLIKKSNMKYQIVS

>comp13821\_c0\_seq1; 547 182 1906 LEN=2069; translated  
MMMVTMVSVPNKQRNRATRAAAGFFATACLATVAFPVVLCSAWMLRNAPPVCRHRQPNR  
QLSTPGALCSTASSVATQETPNTNTRATGENSSDFVYRQLFPPTNASSNGTIQTETDGGD  
TGASVHTLYEIHGTGPLNALFLHGGPGAGCFPNHARFFDPSKYTVVLLDQRGAGRSTP  
RGCVEDNTLEHLVEDCELVRRTLLPEPRGGAAPWDCVLGGSWGATLGLAYAQRPHAMRS  
LVLRGICTLRPTEVDWLFAGAGGSARALPGAWKNFSETVVGAAAGASGREALHAYYDCL  
IGARTVANDTENNAILAAARSWMGWEMAATSSASSKQGSNTTQSSGAEKHLVLVSSP  
GKNNGEWRFFENPLGEPVAPGDDDCDSSPQAVASRLRKHIDDTAEGTASEPFAETHPRPVR  
SIDESSMPLLALGSETGNHQTAGRFKVPDYIPAQAMLCYYSVNDRYVMGQRNNLVRN  
AARQSAAGGFSRIRIIGIQGLDPICPPDTAMD L LEAVRNGRGESENEIIPGMELRVP  
LGS GHS MYDPGIRHELLKATDRIADELLELLEQHSY

>comp13822\_c0\_seq1; 3660 258 12311 LEN=12474; translated  
MAQPQTFLAKHPFQGDARQSLSFPKGATLNARPGQTGAWWWGSYNGKEGWFPPTYVQPM  
ASQGMAS PQSASSMTMQORMQSASF T P SVKQLQQQFAPSVATSFQGAGAYGQPQASPSA  
YGMQGGQALNQSFQGGYQQGNAGMARQSI P AP IDDPFAGLENMNTAPVPAPSMQQQVQ  
QPPPLSTTNQGMASVSQTMGQSTTSAPRPTMAAMPSPHTSASHSSHRSSTTPNAMSMNK  
ASQPAPMTSSASRPI SRSSSKSPTPMDSGS IKSSTSQPQAQRSAQESRSRSKSPQPMHTN  
PATSAKPVKLSKDEVEARKAREKEQAKIRAQMLKEKEEIRKEQE QVAVSGIGSSGVAILA  
GADGSGEIEVGIAGGSVGAHGGNEPTFNPYDFLAGTTGGLPTRKFSPIFRVPPFWALMDL  
ETYVRRFPLTKEQLADRNAAYQQLAKALS FVCHVVSQTEATRKGVRFAALRGRSSGVT  
EKSSPLAFLKWNHMACEACVKLISLLPHSAGASGEALDGLFLNFLNVFVSLIENLQDNQQ  
LVLPGGWQQPNYHHLCLYIVRNCGAGRF SFTVCNTGKDGLQYHPSTFDSETGQQLKQLAL  
TVWNI PSRRLMDSTFWTVLFRMQVYPSKNNTAEFLYTKLLPSLNSQPLRSNTDQGPTEYL  
KIPDP IAASTFHPLAKLVMTTSPQNGMRTSKYSSLLLMNAAVDLAYAEIEMAPPSSMDPE  
DTRILKLTGRNLSNFAS T IDANSVGDGSLGRSLSSTWDLLDKLHKKIGVTASKAVDQYSH  
GLSKSALNDDFSKGIKSLRTDAGSAAFPLFGRLRRDDYENVVKKLMGEPRPDPILIPAV  
LTDEKLP HVATDYMTASSLQRVADACSLLLQQRRLIKNAPAF AASAAQYAVTVMLPTPN  
SDPRYCFWRKSEMRRETQVNLFLIRRICRIYSAATAACVQQSRGLVAIRSITFASAACIA  
DAICRVKASDDPSAFALHYSGLCEGPTHFPAIEAGSFDTLGSLNLP IYDPNLCSLRFRC L D  
YMREMTFNEHGVRNTIFNF DNSMVPTEGDIVLATQLSIQLALVRPYPATDEALLNHTAK

LISGSNGSILEVLPEFGYFRDIVFHFKHAIISGKSQTVEDVPKNKTWLPSDATLHWAVKRR  
EKDKEDQRYYYNVRAFQGHPOEFVDKIAHEATSASQFKGFLALFGSKQRAVRSRLSAADP  
TTVVNSCGDKFLTKKQVSVRTEDDVLHLNKNKELPTFGNVLAPSDAEKVFQFLTPYIR  
IPLILDFFANGDPGRLSALRTRKSLQMIVDAAIFEPGRWKPADFADVINEIPVKNFDRLES  
LLATAHGTLFNEIAKSPDVVTSVVKILERSLDMVDGKYTKKSSSGPLILYSIRLAVRIE  
GYLKYASKKCVPGQPRPRGLESCLKIKIESALKKIRSMLDNQAIPTLEYWIDPSRNKVK  
IDSACLVAHLLYLKFNKYDYEDLDHRAVSIILSSQVFLTINLRFSNKVYDDLQDKNNPTQ  
PPPSIQIAQSEVFDTIQTHRYNILRFIRENKEKGNAMESVVRIATGTGGRDNKESLQK  
RHWQSIGHQTCYGRFVPDTEDIKLRDGSYRIPKPGQSYEEWMLYVTTKAVGIEVNVQLSD  
FTLQNHKMTLLDPNILEDRDFQPTRLMALGGTKDIACAEMHTTNRYYWRLVGRRYDVQS  
WGPDQQRNYHDLKEFKHPKYTRKFPNGLKSGESWIAAVLKDKLPLILPNVTLHMSNKDFSV  
EPYVVLGWIENKKNPNAISTHTLKEVVVWQHPPAITVFNVEYGRRLRVVEYASNI  
STSLHELQKGEYPDRVGGILAMSAGVPMDTIDASPLIVTRALSSELGTQTFLEPERFLAGL  
IPTSLVEKYMFWQSENDDIIGYEKVKTSSEEDDEDDDDPLKNKDDLSSTRLLKVTLSKDPG  
LDTTGFCNTEAEALVQRIPVLNADPLTELVDPNRPVLTLLNAVSAPPSSLLKRVGMMLSR  
LDNLAHVLVWSKSNVQTAHAHASIDLIELPRVNLSEFKPRVFTTTDGEKEFRIYSNDYDGL  
FIATSSEARMAETLLGDVSHFVVLQNAENDLFILMPGCALPRRLHTDGSRLSVQVLLDR  
RNQEWIENIGEVRCLYPIHNSRSLVTPSLASSLYLMLMHFITGSYQNVYKMMESC  
VSEELTPPEEQQIFNQLEFLGNDYHPDAHACRLKLSVVTVGLGEEESTMKCPWSVAEEMEEYSK  
HVFVSSACRLTTEEEMLLLQLCKPDDRGRSLALLNRKAFVAVSSLATLPDNKSLTVKL  
GSERPPTIENFDRGEDLTIINNPKKTMISAKLFGAAYSREPEEQVAYGGLRALGFINSAL  
NSGIELSSRYGFPLMYDLLTNTVAFKLNPSDRPHNWGRILFRLLPSSDFKNGSAEMSVL  
RILAENPNIASSPNIPKFHIDSGMNIKGMFQKDAVSRLLQLHAFMKQEAQKMMGNP  
SVLKEIPIRTAMILTRPVVTSYQHRWVVPRTIDYRSNFQLDIQNCAAVSIPLKQLQAF  
SRPLAPMKLEKYVNFTRHELGMMAVSGAIPFDVSGDRASNTHCSQATMSRVAVDVLKHA  
QKANSEKKPILIGFTPREVDSFHSNPAALSTAMGQLNNLIKGLNQAMAFDRKSLWNLNMR  
ALAIATSDERSDTPNSTGPNGEINFLKFRLGQVSEREPAAWFELLVASILSTADHDIRS  
LNPYMSGVAYKTVTSITIVAMLTISIRISQTHRALTSITKLMNLVRSVNQSKNDLGLRARV  
CQEIQLSQKQVATDITNERHYMRVNASNPFI EFDPRFLVFEFTYSILLRKSQVILVNF  
LHSLRNNQSMCHQMIMGAGKTTVVTPLLALMLADGQQVLTQVVPHALLEFSRSVMREK  
AAVVRKPIFTFSFNRTGPI TKDLYLKLCKARDSRAVICATPTS IKSFMLKFVEMMKVLEE  
AKFGRGTRQPVNNGVFGNFSLSAIARRFRDQSEIVEAQVNPEDVFYCTEILKLF  
RSGVLLDEVDLILHPLKSELNWP IGIKDPIDYSRSLKGVGIRWDMQWHILD  
AIFYYTERNMSVAFKDSREALSILESLSQVIEAGIANKDMQKTPHLVLLNRAF  
YHKQLKPLLARWQLVYLNRKRLPSVEDKHLLSYMMNGPLKDRQAASAVQVALDDEYMKMLNLS  
SHDLLRNFIPHVLSKINRVSFGLLTKQDIRNSSEQNISLARRLAAPVFIGKDI  
PSRASQFSHPDIVIGLITILAYRYEKM RMGDFENVLLELREKLD  
AEFGPYHKRPSALRYKAWVETAGGKVRGPREGEDSVATGSTANPAA  
YSLGPIGRGERGSDDIWPLHLLDLKDENHMNITFNLLRDQPNVIEY  
YLDAFVFPMTMEHHHEKISASGQDLGGEMLFSTRRLGFSGTPSDLLPEELGQCQYDEGVDGQILNTLTSEA  
IVSSRLMPADWNAKLLTDIATAKPPFHALLDCGALITGMTNFVAKYLLANGLSHDFEG  
VVFLDHKDRKMILMRHGMNVVRLNQSGLPPHKRFSFYDQIHTTGMDIHQCIDARAVLT  
LGKDMTFRDYAQGAYRMRGIGKQGTIEIFIPEVMRLITDQVTKLSKKQONPLHVQAPAPAG  
GYASDLLSLANPLAGAPSMQAAGSGRQLLVNVSAWLTINGMKSENMQFKMLCQOSIDNVS  
RKRGFMTLTANYRELTLQAFSARMKEFANLSSKSSASAQKDAATSGFEWIKGSTNLFA  
DDIDAIKTLVLPNSSGGSVARMKLVGIEKLQKSIDILSERLDFTVQNSIPVPVPLSDQLR  
NSVIQRREFIVSDYDTAVVDKILMVLVNSEGLAKNRSAGTVIEEVNDEDQDANLGKEQVS  
EEEEVLKEQEEEEEEEEEDNGEEPEAAEWQCQLIGEDSAVDLYDCDYEAPEQNDDEEQDDY  
VNSYEWYSFELTEEQIDDVSSVCAIYTGATAANAAYDEKSGSYQNYKPHTVYNGENEGL  
FNYEKASTKSGMSGGGVFGIILLIAVVGGAFLMNNGVMGDKKKPLISEAEGTMA  
>comp13823\_c0\_seq1; 452 146 1261 LEN=1648; translated  
MWRACKGSRVPLVPLAPTLGVAGLLLAHHLAGAFSHVRCQRRIRHDLVRIRRDKHEELW  
TLRANDNNGGGDGKIDWNPLKNPKISKLPSYSDDWLLKFHNKDQSEKQLVTNSLAAWNEA  
IRNEQATIVEWQDSFQRNDLADFTPPMSSSGLNCLMVGDFDVYESDDEFGRRRLKLPWE  
DIPEAKITSLRVLEDDSI VATNAVVEEEDDEEALTIAGNHNNKGRMVRETELIPSIDKDIE  
DDESASAGMRVRDPNKPVATYDCIVDQGLMERVLPRNKSNSNDYADLGEQTVRELLLEEAA  
LAMKEFGIYVLVTTTLTEESERLLEKHGLAAGLEWQFRLDGISNESQVSVARRFNTGEM  
PRVGRLSRYQP  
>comp13824\_c0\_seq1; 341 1 960 LEN=1157; translated  
XSLHDSIGQPVFLRTAGQPPVHLHLYHTREGPNRAQKAMAGALDVA AVADAVEAAAASSG  
NAGEGQQRQGRSHDPPRPLPRGWIMKESRSGPEYFYNYMNTGESTWENPANNTIENAE

QVADRLLGVVGTAGGSPQSSPQKQKDEGKEDPREAKRPRTEEPTSSASPKEVRLHLILK  
KHKDSKRPSSWRAPKITQTREESHEELEGLLEILQEEEGDLNELRATFQELARTESDCSS  
AKRGGDLGFFGRKRMQPAFEASFRLLKIGELTKSIVDTKSGSHILLRKNDFVVDWGIND  
DGDEELHHHHNDSHSPFLQ

>comp13825\_c0\_seq1; 964 223 3066 LEN=3406; translated  
MRNCGGKRRSRLRIIESDSDSDFEDDVDVVPDDDRYEIKSESENETVEKLSMSFQHSKI  
FDGESDDPFHSDSVSNPGSSYSMKNQSPSRGRGPHRLKDFSWSSSDEETIESDSISERAT  
NKKVRRRRDLSLVSSPKSSISRSPSSFVSSASSICDKKASESNKQIGMASSTTVNLKLP  
SAKGPYRYKSDLFSFSDSSLSSESDCPLERLKRNRKRMSEENFSWSFNKSRQEYTI  
GGNNKI PPFSISSNLYDKLYDFQKEGVAWMAGLHIPRIGGILGDDMGKTF'TTLTFL  
GGMMKAKTINKAVVVAVPVSVLRNWENEARKILPLCCHVKIQVLSDDVTVYNRQRL  
HKALEAQSPQLVITSFGLVANPNPGHFTQNVAGKQVWDYIILDEAHKIKNPNTKT  
SEAMEVIAKNQKTRRLITGTPIMNNLRELHALFTFATSGKILGTHKEFQNDFGKPI  
EAARSADADHFEVVRGEEAMQELQKLIQPYFLQRTKAEYLAESLPAKHEYV  
LWNLSSLQREMYTKYIQSEIVSSLLEGEAKSPLFAISWLQKLCGHPLLVEEKAV  
DLADGYDEYDAKELMATSACLEVAYNLLDALIRKGHRTLIFSQSTKVLDI  
IERVLKYKFKLLRIDGSTKEKDRQKYVDEFNESGSDIDIMLISTKAGGQGLT  
LTGADSCIVYDPSWNPAAEDAQAVDRCYRLGQKKEVQVFRLLITAGTVEEKRYEK  
QIHKDGI RR TILNTGNNTAKYFTKEELRKKVFLGNEGECEFLKLEMRGYGYDAR  
KNPAYSYCSHKGVVGGQSSHDIVYSLPESFYFDELITSYSHQPFSSLPTESTWIA  
NKSKPRPMPGRSSKVPSSKKKYNNEDKENKTKNSKMEGVRNFSETTKTDLSSDI  
GNLPSDSQIAFKKLILRVERLHRSGKREQAVGLMDLLDKNLGAHSQKVHEMSSV  
TNEIGWLDG

>comp13826\_c0\_seq1; 722 291 1997 LEN=2078; translated  
MRVAMNXHGTESDPNKIEVNSIFHDAHNTVFRFRFRMDDGDGWVVIADRGSDRIL  
PDRIEDDSVPKQSYAYRILAPAELSDSFPFAGRDAVQPVSAEETPAQTDTTKNNS  
SRFPAEKDGSQPPRAAAQPPKNNNSDNMNSKGNQDDAGVVGDWENLHGNWVLR  
PKLDPSNLDEFNASGSQPRAVIHFLGGALVVKAPHITRYMLEKLAAEGFLIVAT  
PYDLSFDHLSTCDDVLRTRFEAVAPTAKQYGALPVVGGIGHSCGALLQVLISS  
LFPDTPRAANALLSFNNKPVSDAVPFFEEFFAPLFFSSLAVGPELGGTDGGAS  
TGRGPSSNDSLVLGLKLAKAASQGRLPSEDELLEEAQRVLGGGF LAAAQTT  
SLFSPFPLPVPFFFGNDGNQGSFKIPTKARETYEKWAEPTVTALS EAGVLP  
VIYETIVSLEQIPRLIDEVADGARDFDPTPASVRSAAAGKAYRPRRTLIVGY  
EDDPIDESGEIEEVLKEARSITRMKRPMEIDVERKVLGGGHAAPLLAPPLDVA  
ERAEDLLGVETSKERLGYTEAAATVEDLVRWLEEGNL

>comp13826\_c0\_seq2; 138 1 392 LEN=473; translated  
XFIRLKVADGARDFDPTPASVRSAAAGKAYRPRRTLIVGYEDDPIDESGEIEE  
VLKEARSITRMKRPMEIDVERKVLGGGHAAPLLAPPLDVAERAEDLLGVET  
SKERLGYTEAAATVEDLVRWLEEGNL

>comp13827\_c0\_seq1; 216 450 1569 LEN=1635; translated  
MANFGDLVVLGDLHIPERANAIPENFKKMLVPNKMQHVIC TGNIGMEQYRELCAL  
VPGPNHFHAVKGDSDGADLFGNLPEARVVRVGGFSIGVVHGHQLLPSAGSGDAR  
SRMRRKLGVDVLITGHTHRNEVFS EDGCYYINPVGT TAEAEAAQGAPLVAGG  
GIVVRLCLVVKFFCVSNLVLIRIVLANYCIYQNPP IYQGSITGACSATTPDASP  
SFVLLAVQGAKLVCYVYEIGADGEVDVSKTEFSKPVRAVAPSSLPAGSGHPAL  
LQSL LAYTGGLGSAERNXNANEDNANNTEARNDASEGHGSVVR SVHTETLT  
TGRGASFADAFGVPLRGKIVGWESTRTIVFQQGPIGALITSFQRVVGEQKIN

>comp13827\_c0\_seq2; 175 269 1301 LEN=1367; translated  
MLVPNKMQHVIC TGNIGMEQYRELCALVPGPNHFHAVKGDSDGADLFGNLPEAR  
VVRVGGFSIGVVHGHQLLPSAGSGDARSRMRRKLGVDVLITGHTHRNEVFS  
EDGCYYINPVGT TAEAEAAQGAPLVAGG GIVVRLCLVVKFFCVSNLVLIRIV  
LANYCIYQNPP IYQGSITGACSATTPDASP SFVLLAVQGAKLVCYVYEIGAD  
GEVDVSKTEFSKPVRAVAPSSLPAGSGHPALLQSL LAYTGGLGSAERNXNAN  
EDNANNTEARNDASEGHGSVVR SVHTETLT TGRGASFADAFGVPLRGKIVG  
WESTRTIVFQQGPIGALITSFQRVVGEQKIN

>comp13827\_c0\_seq3; 204 450 1397 LEN=1463; translated  
MANFGDLVVLGDLHIPERANAIPENFKKMLVPNKMQHVIC TGNIGMEQYRELCAL  
VPGPNHFHAVKGDSDGADLFGNLPEARVVRVGGFSIGVVHGHQLLPSAGSGDAR  
SRMRRKLGVDVLITGHTHRNEVFS EDGCYYINPVGT TAEAEAAQGAPLVAGG  
GIVVRLCLVVKFFCVSNLVLIRIVLANYCIYQNPP IYQGSITGACSATTPDASP  
SFVLLAVQGAKLVCYVYEIGADGEVDVSKTEFSKPVRAVAPSSLPAGSGHPAL  
LQSL LAYTGGLGSAERNXNANEDNANNTEARNDASEGHGSVVR SVHTETLT  
TGRGASFADAFGVPLRGKIVGWESTRTIVFQQGPIGALITSFQRVVGEQKIN

>comp13827\_c0\_seq4; 163 269 1129 LEN=1195; translated  
MLVPNKMQHVIC TGNIGMEQYRELCALVPGPNHFHAVKGDSDGADLFGNLPEAR  
VVRVGGFSIGVVHGHQLLPSAGSGDARSRMRRKLGVDVLITGHTHRNEVFS  
EDGCYYINPVGT TAEAEAAQGAPLVAGG GIVVRLCLVVKFFCVSNLVLIRIV  
LANYCIYQNPP IYQGSITGACSATTPDASP SFVLLAVQGAKLVCYVYEIGAD  
GEVDVSKTEFSKPVRAVAPSSLPAGSGHPALLQSL LAYTGGLGSAERNXNAN  
EDNANNTEARNDASEGHGSVVR SVHTETLT TGRGASFADAFGVPLRGKIVG  
WESTRTIVFQQGPIGALITSFQRVVGEQKIN

GFSIGVVHGHQLLPSAGSGDARSRMRRKLGVDVLIITGHTHRNEVFSSEDCYIINPGSITG  
ACSATTPDASPSFVLLAVQGAQLVCYVYEIGADGEVDVSKTEFSKPVRAVAPSSLPAGSG  
HPALLQSLLAYTGGLGSAERNXNANEDNANNTTEARNDASEGHSVVRSVHTETLTGRGAS  
FADAFGVPLRGKIVGWESTRTIVFQQGPICALITSFQRVVGEQKIN

>comp13828\_c0\_seq1; 420 308 1093 LEN=1921; translated  
MKFSSATIATLLFTQALSHVAAFSPKAPVSSTTSLMGYLDDLSADLARPTAEESSPVPD  
EESREANAMAKDQIDRAGPGNWDADFVDFEEDFGDGGQMGVAGDGSNGKLESFDMTQMANS  
KQMSAKNAWGTNTGYADSLREKIDTARAQOLENWANQQEVLARRKEQRYMTEEFDNEKE  
DENWRNLAAFVERNQDFDLEETFGSVTADVIEGTIDLVGQMNMGFGTHEMNIRVRFM  
PGVFDTHCYDYEPTFARFLRQ

>comp13828\_c0\_seq2; 475 308 1231 LEN=1764; translated  
MKFSSATIATLLFTQALSHVAAFSPKAPVSSTTSLMGYLDDLSADLARPTAEESSPVPD  
EESREANAMAKDQIDRAGPGNWDADFVDFEEDFGDGGQMGVAGDGSNGKLESFDMTQMANS  
KQMSAKNAWGTNTGYADSLREKIDTARAQOLENWANQQEVLARRKEQRYMTEEFDNEKE  
DENWRNLAAFVERNQDFDLEETFGSVTADVIEGTIDLVGQMNMGFGTHEMNIRNPYMG  
FADFRAAFTPESPAFTVTPTEGSLRQREDTMFTVKFKAQKPGTVEGYLVIETEDFKKTW  
HVIGRTG

>comp13829\_c0\_seq1; 1327 608 5227 LEN=5431; translated  
MNREVSHYVVTAHPPNGVLHTVKCNFLAETSEDVVIIGKSRSLRQLRKSISKNVAEAMV  
GSNNSASSFPIMLTVPINGRITSLTAIQLDSKPTSLLFVTTDQHQAIVIGYDPLHTPYFV  
RTYASGSLKDEWNQLGQQSECGPLVTIDPYSRCIILHVYDGLVTVFPIRNTTVTAAGGR  
AGRDEKFLGPVFHARLEERTVLSMAVLHHADPIETPPHLCILHQDSRGNQHITTHVVDLH  
NSQVLNQASHSLMAQQEQRQSSSSALQPSKSPRNKRMGIPANACEWLKKSRLDGGSSL  
LIPVPPRQAIATAASAAALGAGNNRNKTNAASGGVVVLGQRQITYCARNHYKVLP IPPA  
LILSWDTLPPDASGMFRLLGDEYGNMMLTLITAGAAAAAKGIINTGSNENSNKIVALQ  
LDTLGSCTLTNCLQYLDHGLVFCGSTLGDSQLIQIHDTPIPEDEESMITDADDTRPSEL  
GNTTFLSAVEDYTHLGPVDFDLVPMAGSGGGSSGNFNSTSMHGQVQSQVVTASGSCK  
SGSLRVIRNGIGMKEYANVELSGIQSMWNLGRSFGDDQDQTYLVQSFVGETRVLVGVSND  
DPEFDDDDGMMDDTDDDEKLGANGIEKMDDDEYDDEVGGTLAEVVLPLGLDSNASTLHVS  
IVGNFFLQVTDQIRLVSSDGEVLDTFQPELNIITVAAGNESGQTLIALAGGKVLVYFEVKE  
SKLILRSSKQMDREVSCLNINPFLPKDTPPGSMDISVGHEKKTSSICSRHAHPATICAVG  
LWDDFTVRLALGDDALIEVLQIHLSENEDEIGDMTEGNVQKRRNRNMMARSLCLITLD  
FSSSGSTSPSSHTGSASSSNIGSAQGVNMLLVGLGDGTLVSVFAVIEDGRVRVQSKKEVSL  
GTQRINLIPLQNERGGNCVLATGDRPTVIYLAGMGGVSEANYNPKLCYSNVNLSPVDEG  
ESSDMNRPHAHESI AVNVAAPFSSPLLFDGTEGNEHYSLSIADDSNLRMGVIDDIQKLHVT  
TYRLGMSPRRIVRCPEGRMFAVGCIESGIKELGIEGGQMTMGNCIRFLDDSTFDDIHRID  
LEPTKGRILIIYSCNAEDIPVEDSTNRSVRLISEAQVRGGVYSISQFYDGTFLAAVNSKTQI  
YKMVSDGIGVVKLNVPVGVGHGQILSLFVSSRAPKGSANSPLASDEVSIIEKGSNYQKEKL  
AIVGDLMRSISLVQYYPQYETLEEVARDFNANWTSAVTMLTDDVYLGSENWNNLFLVLRN  
TKAQSEEARCLDTIGEFHLGEMCNKFMRGSLVMPNSSTDMSKANSGRSRRRALASPKKT  
LKDNLHGSSSGIRPKRPAVAIGSQTLFGTVDGLTVILGLDNATASFFSCLEKSMERVIM  
PIGNFHHQFRAFKAQEQRHPRHGFVDGDLVESFLDFDLSTMEKVVQMNKDGSWTSSNS  
RTHISGNSGDDGIDDDNENPQLCVDVLAVIEEMAMLH

>comp13830\_c0\_seq1; 506 1 1566 LEN=1729; translated  
AAAKPSPEDAERAMIEAALREADAKERRDEEAESLRLVMQLQQEELTLARQRHQERTS  
LTTGNVRTMTRAELEAEAYGGASAMPDDLDAYEDDDGDADTGFRMNQQRQNSSSGWYRK  
DRNTIVGPNEIRTKHDVRLQGGQTNASFLDLVVDVDDDTGLRTHVGNTAFNAFRKTVAGSY  
HSKGGHRTSKGVATHGTGRAGTDSDATKGGALDQHVRLHISRANAGI IERCNGVVKQG  
KEAVVYHVAVGGLLNDKVQDASSDDDDHADGSSSDSDSDSESLVAGDQPEKIPVGGND  
GHDVAVKVFKRIKEFKGRGEYVDGDPYRAGRPFPSFTDREQLVWTEKEYRNLVRAVYR  
VPVNPNIHYKENVIFMRFLGEDGWPAPQIREVQIRKGSKWAALYDQVMGVSRRRFRDAR  
LIHGDLSEYNILIIAPNSQVDHKSSEHVSSEKEDLQAVLIDFGQAVEVRHPNAEELLRRDLR  
VREFFTKRGVTTAMSDEEAMEFVVADHRFSINMNDVRMDGM

>comp13831\_c0\_seq1; 197 210 1298 LEN=2106; translated  
MLFFGTCLLSINLGSLLQNYLGYNSEPDFTFLREAVNVHEQFSWMDTTGVTLSHIQGDPTTC  
MDVIYTGSSSLNPFKTNNDDESDFI IQQGWKSLAYLVRNSPVLKGTTCFVFFKVDSPWID  
QSGRELHPVWGRLPATALVMSAFPKANVFLYMSDALLAFDPKTPPTMYNALAFDGYGEN  
ATMQHLTPGLIVNKPLTGWLCSQCENFGLGHGCFNTGALLWHRSKAEVVLRPWVESR  
NAE ESENFYDKKSSEYFHGWSGDEAGRIGDKMGQNRMLYIYGTNPVHRNVWPVPPQKSVAY

NSESCPNKVDEAHMPCLQSDFMVLVWNPSPGSCFINHYADEKKVIIDYAKTIMEHEHYHL  
RG

>comp13832\_c0\_seq1; 231 557 1594 LEN=1830; translated  
MRICFHSKYLLVAAAFAFSPPLAVHSFRSAGNSGILRASPNTTRATFPLGVSTSPGGEPEIT  
DMTAASPQSSSLSTPAEIEPVQVPGTTPSVSKSAATPPPARTMDEGIFGFNKLIDITVYDVI  
CFLYPVKGTERDFARFYVLETVARVPYFAYLSVMHLRETFGERYGSMSEMRMTHYAEADN  
ELHLLLIMESLGGNSNIIDRTLAQTMAFFYYWYVIAIYVWNEPAAAYHLSLIEDHAFNTY  
TKFTAEGDRLKNEPVPDIARKYYERDNPFLFDLCTVKSKTEDGVYSERRPQLSSLYDV  
FVNIRDDEKEHWKTLCNLVQYDDMNAVDATEVQSTAPSPSAEALS

>comp13833\_c0\_seq1; 127 1 1148 LEN=1304; translated  
XSGSVAPVVAIWLNRNTRIRTRPFAARSTEFLLPTMGGESDASPPPIRIALFTVMGVAVKT  
AVQKVIDLGRDLELALVVTCPGPRSRNSHLEVLLEALWEAGHHNTDVVVCNHSRKYADL  
MVLYEIDMILSMGYPWLLPAEILSPGKHPASPRLGALNIHNSLLPEYRGNPAGFWAIVNG  
DPEFGFCAHRMDGTFDTGPVLLTWTVPDEDINRPVFELLGPRLATVFPFEMIGRAIDKMLD  
GDPGTPQAGGGSHAPKFGDAFRWIDGSSSTALEVHRTVRAFYGGRDLPLGALASVGGTPI  
RVTRTFYRDPAGEPAAGREAGTAVVVVATDPARPQSAKGGPELPPFTFLRCKDITLLEVL  
EWTWHTDADTDDETDTDKGTEI

>comp13834\_c0\_seq1; 1306 114 3968 LEN=5066; translated  
MTAMLQQILQSRLESNALKTKQLAKIQELETSLTNSYTAIPKRPRETVRELDLDRINSLE  
RARTITSIPLAEKKILSEMASLTKTKRKEVEEYNTNEEIQSMKRELDNLREELKTTRTG  
TDEIQTALEKIKLANKLDGCTDEVEEKDIDCPSDKIGTVIGKNGSSFKRIQDTCKVFLKL  
DKTKEKITIAGSKEAIERAIMEIERIMRREEKTITIERRLVRYLTAKYVNVFEKLQTEYP  
DTWLEIYRKDGKLLHGDPKDLAEIEGKIFGLDLTTEKRQCIGKEIGTILGEKGITMDRL  
CSDYSIDIEIDNSKNNNNLDRSKMVDIIFTGPHDMVEAALNDAEKLIHDNGDACETIGIT  
RIMAEELLVGGSGRCLKKIKKRLAKRFPGGKWMMLLVNKNP INPELRLEAKKAVISEALQLV  
RNELKVFDDLKVFVDPKAIIPRIIGKKGKTIKQLIEGKPAYVQVEASSNEVWCAATSEE  
VLTNLRKELNEIEEKNSILRVHAEPAASMKQYFLELTRPEFKREMDICSLDADYSESCFIL  
RGSKQDVEKTKTVIDDYILHNKIREIPITDEERTALLSGGKNNKLAQLSNEMGVKLFHNR  
AKFCVVLRGEQKIDEATKKLDQYKGGGDYCLARLEINKKIIGSVIGKGGKLNQLLQK  
YDGLTIDVSKSSNVLTIRGLNDDVAGCRVEIEKIVASAQIMQSVPMSEEQMSTLKKGYTK  
KICQIEGVTMTTKEDEVVVRGRFQNVDRDAVSLNEMLTGVYTASIEVDALQFSRVNNATR  
DPHFERMEKTFGTKEIDAETQSILIRGKRSDVERTKNQMYGFLDFVLPNQLNRLKIAK  
PLYESIDSASVLSTISAEISGVSIYLDRLGIIVIRSSDESKVEKATELMNVKIKEAERL  
TYVFELEILDSSILQMSIGKGGIISVLRNSHPTCKIDFSIKSQTITILGDSPEVLQECR  
EDVVASFEEKARKEVLLCIPDEELPPFFGKGGSHVKGGLATKYGVEIRQVRTADHNFVIVG  
EESRVREAKEAIDKWLALRDESNPALITTLTLQRGKDIAITILGQKGVRTARSLEQDFCKI  
QIDKKTILIVTVRGQHGEKREAAVEKMKELIQNDRDAFRVESESAQIVTLTLERGNDIGAI  
LGQRGEVARSLIEDFECKIDIDKKTILIVKVRGQCEEQLEAVVQMKALIGDRNEKDNTGF  
LAATIDDVERRETAVDGSKESSNAKKSRSQSAKKENNEEAHFLTNTRGVSNEVSKSGDVKK  
EIEGDAPVSEGTETGNLFLATLMS

>comp13835\_c0\_seq1; 370 1 1417 LEN=1482; translated  
XNNNNNTRLVHVTAVIRHGARTPVHSKNCWKGHWDEPDGVWDCDLTTLSTRPNGNSDS  
RDDRQQLVLEKIYDAFLGERPPSPYRNRMNGTCQDQQLLQGYDQQISNGRHLRDAYVVS  
GSGDPNPDSRLELFGPSSLRTAVSQGTGDGSGGTGESFLEGLLRYSDDDQRTLASGQVL  
LSSMFAPELASYRAAHGGASPVILHHTADRPRDIMSSRKGTSCPSQEALIDRSYRSKDY  
KAFAESEESRTERMERLIENELEPEGVSFGLDCMMSICTDRSLPDVLADYGGNATGGRDE  
NDPHTKAYGPNRFQRLLDYVRVSLLVSGFGGVWRCSEACVVSFSPNDCGCSAMSMRVLPD  
HRADSSLHCSPHSMLSLFVRSMLSEPIIAVDCFFDNPAQAQLYRXVVENSTFASRFNDSSEL  
SKDDMGPFWAEMDYIIPVITKGEEEKAVKFALYSGHDSITLPMASLGRNVW

>comp13835\_c0\_seq2; 542 1 1915 LEN=2354; translated  
XNNNNNTRLVHVTAVIRHGARTPVHSKNCWKGHWDEPDGVWDCDLTTLSTRPNGNSDS  
RDDRQQLVLEKIYDAFLGERPPSPYRNRMNGTCQDQQLLQGYDQQISNGRHLRDAYVVS  
GSGDPNPDSRLELFGPSSLRTAVSQGTGDGSGGTGESFLEGLLRYSDDDQRTLASGQVL  
LSSMFAPELASYRAAHGGASPVILHHTADRPRDIMSSRKGTSCPSQEALIDRSYRSKDY  
KAFAESEESRTERMERLIENELEPEGVSFGLDCMMSICTDRSLPDVLADYGGNATGGRDE  
NDPHTKAYGPNRFQRLLDYVRVSLLVSGFGGVWRCSEACVVSFSPNDCGCSAMSMRVLPD  
HRADSSLHCSPHSMLSLFVRSMLSEPIIAVDCFFDNPAQAQLYRXVVENSTFASRFNDSSEL  
SKDDMGPFWAEMDYIIPVITKGEEEKAVKFALYSGHDSITLPMASLGRNVWVWATNFPAY  
YASMMIIEIHEITDRGSVDFASGYAFRLVYNGRVLTWLMGDCPEYSQLCDVSVFVDRVRP  
FATRKNMGCGIDEAEVTDSEGSPPDISPTPSKNGDGSLSFLILCMVASFVFGGLLTGAV

MQCCRWNPRNKQRDQSELIGSGRESSIDYTEEPDIVID  
>comp13835\_c0\_seq3; 551 1 1660 LEN=2099; translated  
XNNNNNNTRLVHVTAVIRHGARTPVHSKNCWKGHWDEPDGVWDCDLTLLSTRPNGNSDS  
RDDRQQLVEKIYDAFLGERPPSPYRNRMNGTCQDQQLLQQGYDQQISNGRHLRDAYVVS  
GSGDPNPDRLLELFGPSSLRRTAVSQGTGDGSGGTGESFLEGLLRYSDDDQRTLASGQVL  
LSSMFAPELASYRAAHGGASPVILHHTADRPRDIMSSRKGTSCPSQEALIDRSYRSKDY  
KAFAESEESRTMERLIENELEPEGVSFGLDCMMSICTDRSLPDVLADYGGNATGGRDE  
NDPHTKAYGPNRFQRLLDYVVENSTFASRFNDELSKDDMGPFWADEVMDYIIPVITKGE  
EKAVKFALYSGHDSTILPMMASLGRNVNATNFPAYASMMIIEIHEITDRGSVDFASGYA  
FRLVYNGRVLTLWMDGCEPYSQLCDVSVFVDRVRPFATRKNMGCIDEAEVTDSEGSSPD  
SISPTPSKNGDGLSFLILCMVASFVFGGLLTGAVMQCCRWNPRNKQRDQSELIGSGRES  
SIDYTEEPDIVID  
>comp13835\_c0\_seq4; 379 1 1162 LEN=1227; translated  
XNNNNNNTRLVHVTAVIRHGARTPVHSKNCWKGHWDEPDGVWDCDLTLLSTRPNGNSDS  
RDDRQQLVEKIYDAFLGERPPSPYRNRMNGTCQDQQLLQQGYDQQISNGRHLRDAYVVS  
GSGDPNPDRLLELFGPSSLRRTAVSQGTGDGSGGTGESFLEGLLRYSDDDQRTLASGQVL  
LSSMFAPELASYRAAHGGASPVILHHTADRPRDIMSSRKGTSCPSQEALIDRSYRSKDY  
KAFAESEESRTMERLIENELEPEGVSFGLDCMMSICTDRSLPDVLADYGGNATGGRDE  
NDPHTKAYGPNRFQRLLDYVVENSTFASRFNDELSKDDMGPFWADEVMDYIIPVITKGE  
EKAVKFALYSGHDSTILPMMASLGRNVW  
>comp13836\_c0\_seq1; 169 1 374 LEN=410; translated  
XQDKEGIPDQRLIFAGKQLEDGRTLSDYNIQKESTLHLVLRRLRGGGKRRKKKVYTRPK  
KTKHVHKAVPMQSLKYRVEADGKVTRLRKYSVAVAGICFMAQHHDRIYCYGKSHHTFLYD  
DMKE  
>comp13836\_c0\_seq2; 224 1 526 LEN=1227; translated  
XQDKEGIPDQRLIFAGKQLEDGRTLSDYNIQKESTLHLVLRRLRGGHCQVPCGIFDDPA  
MVEQLKEHAATIRKAMVQSKDLHSAGDLQSMNQIVRWINTKEEHCKIITTTIGEYCLCQR  
VKKDVFDCGDYVDALKAHAVMQAAMKAKQTMDTAGADALDHALVDFAKMYTKE  
>comp13836\_c0\_seq3; 133 1 299 LEN=1164; translated  
XQDKEGIPDQRLIFAGKQLEDGRTLSDYNIQKESTLHLVLRRLRGGVYDPSLAMLARKY  
NCEKAICRKCYPARLPPKASNCRKKKCGHTAQLRPPKKL  
>comp13837\_c0\_seq1; 157 1 1381 LEN=1431; translated  
XKRAFDDRGHALERIDALFEVHTRVFGWTTQQSTVHIIVKMRRANRPEPSSDLWDLVLD  
MNWQEVIVHAREQPQDANFVEGHWHETPLYLACQHEPPIEALSIIIEAHPESVRIASREN  
QDLPIHIACRYQASTAILEALLKHFETALVPTKWGRTPITTLCDARRKENKDATLIALC  
DDKEFWSKVLVLSAIARTHNGVPYMYSEISSRDANPGDAKMEFAPFLAPLEEEESTFFV  
HAAVSLGAQGCPEVLSVVMKKYPEQVFQDQWGRPLPHVGIQRITWSKHGKRRLLPKPEQ  
PFLSVLLDAFPLAAREQACNDNGRYPLHSAIANGHAWEGGIRDIFLAPEILSVRDPISG  
LFPFQLAALPAVAKISKEMDSFETSRYLLLRARTDIIDRIQPTGQGEKKSGLHDRTEVLM  
SRRGKRLSFSVIATFTRFIVGFVGNITIRNARKLRNRLDL  
>comp13838\_c0\_seq1; 277 1 774 LEN=1201; translated  
RGNNKSTSKSTSTGTSTGTDPKGRGKTNNGARNRERHETS RNPTGSEGLSKQRAAENE  
TWKAIRTEVLCVFAEKRRRAEKAAGTHQGNPAPAGTNPNGNEHQHKHEHKPAKAFDK  
DVLRGITVRPSGKFOAQLYFGGRSRYIGVFDQHEAASAYEMVREKIKKTTLPKGRAAA  
AAAGPTTDAAVVSPNLNQLLSAATSLSGHPGTTTTTRTAPNAAASATTTLSITPSPTRGD  
GTREAARGLALAPAPRE  
>comp13839\_c0\_seq1; 599 66 2049 LEN=2090; translated  
MGHRCIAQWGKVLSTIHEHLFRQPSIRRCGGLGVLSRHFMFQSGNMNEVDFSRFGSKIC  
GSVYQNVSHMKMTASRESIFFQQRKINSRGYHSIAGASPRQADLEERLWVIGANVV  
DPETELHLKGLWLRRLTVFQKSVDDQNPESSESSRLCSNSIAAAVTLAPYIRFAQID  
DEKEARQEIDQWVADSNLVTTSSESSNGGLQFEVDIKAVAKQPIPWTVQSGQSQEVEKSG  
LGPGLTNVSHFLAVYSCKGGVVKSTVAVNLAYELARLGGRVGLLDVDVYGPSPPLQVTPD  
DDAVRKSLSGSSMVCPIEHKGVKLLSLGYVSSNSGIPSGKNSDAAVLRGPMAGRVTQL  
LKGTEWGDLDVLIIDLPPTGVDVQLTVCQEVNLSFAVGVTTPSKLAIAADARKGISMFDTM  
GIETIAMVENMAYFECEGGGKHFPFGKGFAGTGNTIKESLGNIALKPENICQLPISEIAT  
IGNDTGIPICLSRPEEAKLELEAFEKLAKIVSRELFQLPHRTPSSEGMVALDGEHFDLST  
INLSEDKGSIVVRFSENGAIQKRVPSONLLRLDPMTGVDIKSSSPEKTEAKNDQEGVV  
VSVHKASSNACGHASEILPERIQEKGRVGFVETWSDGSRFIYRRSVIAIAAGGTFLENKL  
>comp13840\_c0\_seq1; 613 366 2144 LEN=2351; translated  
MPRRNQKKNRHRKGSYDGRGSQHVAENHNRNEATSLEEDLRQQRIRQQRQKVRERE

EEERKEKQQQGLVVLGEDDICNDDIGFQQPQKSSAMKKAKHLIMKGSLLPASIASLQQNGS  
HGSNCSHKSSMSSSSFPSSVITLPPSFLLRHIEQSSPILTIYKRNTLRKIWSTQHHLEST  
TIRSRAASLYCKTKWPQYMLEYSSNLKCSWDLCKHRLHPSARTFDVAVLDPCSEPPSP  
TIATIFQDQGWGLLRQSQHKINTIKAPSVYAIRMHESKTCGMIVRPASDTNDSFMSPYS  
FRWYPLPHATSYVEANLPRPVTDFCFGNEIALFSCPRHSTLSSESLNPLFLPLVEADGMR  
NTTYDPSVRTLNVRNFPQSDALRIEMMCKEQEKILGFGRNGQVSIIDL RATGTLC SIL  
QCELKNVGHPLGVSDFGFLSSGQQHQVLVKRSFGSCQLHDMRKSMSPPSPSPYEASYHT  
STTVVRNMTVPQDEINPIASANCNGFFIDPNSRQTMMSPIASSSGDARLGVVSLGTGRM  
VGSRLQKANKEYGAEQHSLSLHVEVCSKITPLVLSNQERKANDDFSSSAFGVW  
>comp13841\_c0\_seq1; 468 152 1453 LEN=1660; translated  
MTLIRTPGMVIVLAIATIMGFQFLTCVKETSIFYDVGTSMDVYEAI PAGLANVNDKGHDF  
VVDYKDDTAGPLNPAQITHVYHVGRRKRYGRSNNQIITILHAVDMALDEHGDPNNRAV  
IALSTWAFKVLKTIIFYNGLDGESEAEADQKFALELEQLRPVMLVHSDRLEALGLTDSHNK  
TQVNLKTQNYVYTGKEHENSLSKAQIVERRRRMLWGQLLVKHGVADKNLVLNAVRDVV  
EKRSRIYGDGSSGSRYATIHSRWLEGECCERRVGNILPAEDECWMTSPSYIKAIMGGTIDMP  
IVFIGDGQKLEVLNLKDPDIPALIVAGEITLPGVEAPWWTQPWNMMVAIMGDIFI  
GTRVSTFATMTGLSRVMRGADPGSNYIYARRSNSTEQIGNKQTQVEVVEVCKECLFYCNQ  
KQSNFCGNEVIFS  
>comp13842\_c0\_seq2; 64 1 344 LEN=1357; translated  
XQQQQQQQAAAAAPASDAYYEQFHRYAYYYGEDAARQYYGTWSPVGTNPYGVNPDGI  
SAPPVADTAGNGPTQAPASAPAPANTAQVDTARVRDSSVRKVSNLPAWMTKSK  
>comp13843\_c0\_seq1; 326 1 1333 LEN=1436; translated  
XALKDYILLSNTEVPPKFLIHTAPTALDDTISNIYQILQAXLVIIHLLFAVYVVKATSK  
PQSNSRCLRRNQIISDMTMSSDTIVVTSVSCSLQDNNTTLQELESAVVGTEVDSVSAFEV  
ELYYPSGTDSTTIVLADAGDGQEEIDDTETGTESLDEEDNSDADNPSESTDDEGSESVS  
DESLYKSYRKLVI GLFFLSIVLFFVIDSVFGKEYVRQVITIFLEWIRENPGMGVVAFLV  
YFAATLICVPGALLTLGAGVFVFSASFDGSLATGVILGTVAVFLGFSASAIVAFFLARYLL  
FDRVRKLSERYSIFEALDIALSQKGFRLMCLLRLSPITPFVLLNYIAGVTTVKFSSYALS  
TFCILPGAILYVFLGATAGSLTDKSENSTATIAAIVTGAVLGLLAIGLTSYYARKELNKE  
VDLGEVDYMFERLLEGGEYDTDEA  
>comp13844\_c0\_seq2; 269 1 879 LEN=1408; translated  
YWEATPERGLEKTLSTLDMSLMEANNPEEQKKKDSYWDAAAPVDRSLQGKTL SKLELSA  
LESNHPEKKEKND SYWDAPEERKLQKTLSTININTLETESTGEEPSSETAPSYWDDAP  
IERSLQKTL SQVDMSAMSKQHAGERSSSKSGDHPYWDWKMKGFKKTL SKLSLSNLRTGSR  
KDEIMVDDDFCVHGANNRSTNSMNSLDSSGVSNDGPRQPVKPITRKT HKLRDSWRKSFQK  
MSTNTLDLDESTSSGGRIMGSRIFKSRNLDVSGGRSSVSSSTGSDGGITF  
>comp13844\_c0\_seq3; 214 214 708 LEN=708; translated  
MPPQQEDTQAVGDEAGAMPNKEDTTDNGEGGASYWDAPKERSLEGKTLSTLDMSMLEKAN  
PDKDKEKND SYWEATPERGLDGKTLSTMDMAVF GAADKTTNGEDVKTSPSKSLPKTPICA  
EEPDT EPSYWDV PKERSLEGKTLSTLDMSMLEKANPDKNKGKND  
>comp13845\_c0\_seq1; 411 155 1294 LEN=1294; translated  
MSSETPHIRGSDGGNETPSLPCTNKSAANVTIGQQSQPQTKTDPVASQQQQQLYPKPHP  
TMPSPLYSNFASSSNNNGLPRANRSSQISASPASGTASHCPSTSNLHPRFTKGEVPE  
PRPTDVICGRGKMTASHPANRRFRELVD SHKASYQNSKRRDEKTRITCELVDKLRGEGRF  
VLFDPHTKLWYEVSEYAREKVS HSLRSRSDHRTISNTGTSSSNVPQKVPGSNGNND  
NTAVAIAPRSEGTSIGNSSSPAISVPVTSKNPASTSSSDAINYNQFVPNSGIGTVTKKN  
ASSTSGGSLSGSKTTGGKKTKTI PHKTT HSSRSLKASKNSLVSPDLDEIVKRLICDQ  
QELLRGM IQKETERFTSAAA  
>comp13845\_c0\_seq2; 411 188 1327 LEN=1327; translated  
MSSETPHIRGSDGGNETPSLPCTNKSAANVTIGQQSQPQTKTDPVASQQQQQLYPKPHP  
TMPSPLYSNFASSSNNNGLPRANRSSQISASPASGTASHCPSTSNLHPRFTKGEVPE  
PRPTDVICGRGKMTASHPANRRFRELVD SHKASYQNSKRRDEKTRITCELVDKLRGEGRF  
VLFDPHTKLWYEVSEYAREKVS HSLRSRSDHRTISNTGTSSSNVPQKVPGSNGNND  
NTAVAIAPRSEGTSIGNSSSPAISVPVTSKNPASTSSSDAINYNQFVPNSGIGTVTKKN  
ASSTSGGSLSGSKTTGGKKTKTI PHKTT HSSRSLKASKNSLVSPDLDEIVKRLICDQ  
QELLRGM IQKETERFTSAAA  
>comp13846\_c0\_seq1; 421 197 2120 LEN=2346; translated  
MNSRKMSSAVLLGIIQIFLLLYLTHKVRTFTPRSKRFVSPKYSNLEGKTNGDNRDDIGS  
NMGEIISDSNNNTISPGENSRKSSSSLPNTVM SAMTTPVASLNKKFPRNNGNERQN  
DRKMDLMWCQSDRCQDSL RERVGDHNTIVFN GPATGQVAYRWK KAYPISKSSSEKSHS

SSSSKENTPNKTPPFATPVRSKIASVLLLVKRDDDDLLQIAAHKVSTKLLWRDPTVSNIR  
FVNDDLGIILYQHGLACDESDKQREGLLIVAVFPCPAASDXAYALANFFRKVPELTEVGLID  
VLMAPELAAKLKHYYGVDDDERIHLFEPKDTNIDDKYVRYVEDDEEEWVRDMNYGNTFPD  
LICTLGGDGLLLYASSLFQGPVPLLAISGGSLGFLTAFAHEMTNAIRVALGMTMPIAE  
DGEDDGDDEENITTEVPFSSVEEEEQALQVFPNMPSPYEPYPLVSEKAPRFTFGLDEH  
ICMTIRMRLDCRIVNREGVVRGRYNVLEVVIDRGGSPYLAALECFCDVHLTTVQADGI  
IFATPSGSTAYSMSAGGSVVHPAVPCILVTPICPHVLSFRSMVFPDHVVLRCFVPPDARS  
FASVAFDGKHRSELQRGDSVQIQMSAYPFPTINKGDHSSDW

>comp13846\_c0\_seq2; 516 197 1921 LEN=2147; translated  
MNSRKMSSSAVLLGIIQIFLLLYLTHKVRTFTPRSKRFSVPKYSNLEGKTNGDNRDDIGS  
NMGEIISDSNNNTISPGENSRKSSSSSLPTNTVMSAMTTPVASLNKKFPRNNGNNERQN  
DRKMDLMWCQSDRCQDSLREVRVGDHNTIVFNGPATGQVAYRWNKKAYPISKSSSEKSHS  
SSSSKENTPNKTPPFATPVRSKIASVLLLVKRDDDDLLQIAAHKVPELTEVGLIDVLMAPE  
LAAKLKHYYGVDDDERIHLFEPKDTNIDDKYVRYVEDDEEEWVRDMNYGNTFPDLICTLG  
GDGLLLYASSLFQGPVPLLAISGGSLGFLTAFAHEMTNAIRVALGMTMPIAEDGEDDG  
DDDDENITTEVPFSSVEEEEQALQVFPNMPSPYEPYPLVSEKAPRFTFGLDEHICMTIR  
MRLDCRIVNREGVVRGRYNVLEVVIDRGGSPYLAALECFCDVHLTTVQADGIIFATPS  
GSTAYSMSAGGSVVHPAVPCILVTPICPHVLSFRSMVFPDHVVLRCFVPPDARSFASVAF  
DGKHRSELQRGDSVQIQMSAYPFPTINKGDHSSDW

>comp13847\_c0\_seq1; 281 72 1592 LEN=1878; translated  
MRDRQEDKNDSSINALALSRQARKLWLQSATSLEDLDRVEDLYRRALNSKRKVAGKHAEE  
AETGGKRRKSSDGKMKVAALSPEEYRKAGERLSLLYIQSGRPYKATMGLKYLGFECRLS  
ERILNYPLKLEIKNTKRNTTGKKNRDSNNVKSMPPEPPCCVDDFLSQSELNHLRKFVFG  
DVSSSYWSSHNYIIDEEPAPYFSYVIDLRQPGTKTSGAKKGFRLSVIDKILTCGPVSEK  
FQHLRRDARYVELWAHNRPHASGHQLHFDSDDDEGRSRQQEFPKHPIASTVLNLSHRSRVG  
GPTLVTTQRLRNPTTTNLSSVKGLVPSKPARLVCFDGSVLHGMIIPGKGTIPPPMTATDD  
NHGEDDRDGSRSYPPREHRPRRVTLMAFWKHKIKVRKGSKPGSARPPKKTVSCADVA  
AAPQTPSDLSSILPSWAVELDRTDIAVSAISSKRRKDETSRKVIPVPRVYERFDGNPVP  
KYHIGSDDSMGDGYMPEYDRVFQGF

>comp13848\_c0\_seq1; 591 163 2006 LEN=2079; translated  
MSTTNSGKDDNETSSSMHPTNNLVRALLTDLYQITMTYAHWRIGKADEPVVFFELFFRKNP  
FRGEYTVFCGLDECLKLLQTFRFSEDIRYLKSTPALSRAEPEFFDYLANIHKTSPLSLR  
VHSVREGTVVFPRLPLLIVEGPLALGHLLLETALLNLVNYPSLIATNASRMVLRAGGKPCI  
EFGLRRAQGPDGACASASKYSYLGGFVATSNVQAGKTFGIPISGTHARRNSTRCDAMRSEA  
VPCAQCKSPCWATLLHDNSGSTHLIRLLFAFPVLSLDSFIQSFTSLEDAAGLKLFFHKS  
QREEVFLDKALEYRSDAKASTNDELAFAFCAYACAFPDSCCLIDTYDTLSSGLPNFVVF  
ARALDDFGYAAKGVRLDSDGLCSLSLACKTAFEGVAAREPSRAPVFGNLTIVASNDINEE  
SLAEFENTKTNGLTAYGIGTNLVTCQAQPALGCVYKMECNKEPRIKLSQELVKVTIPGR  
KRVRVLYGGPDKRTPLADYMCLEDEDPPTTETADGILCRNPFPRPQERTRIFPGRVEALHG  
LVFADGRAASESPLLCGLSETRSYVLQQLSEEFPGSVTRYSNPERYDVAVSPGLYAYLH  
ELWESNAPIPERR

>comp13848\_c0\_seq2; 614 163 2216 LEN=2289; translated  
MSTTNSGKDDNETSSSMHPTNNLVRALLTDLYQITMTYAHWRIGKADEPVVFFELFFRKNP  
FRGEYTVFCGLDECLKLLQTFRFSEDIRYLKSTPALSRAEPEFFDYLANIHKTSPLSLR  
VHSVREGTVVFPRLPLLIVEGPLALGHLLLETALLNLVNYPSLIATNASRMVLRAGGKPCI  
EFGLRRAQGPDGACASASKYSYLGGFVATSNVQAGKTFGIPISGTHARRNSTRCDAMRSEA  
VPCAQCKSPCWATLLHDNSGSTHLIRLLFAFPVLSLDSFIQSFTSLEDAAGLKLFFHKS  
QREEVFLDKALEYRSDAKASTNDELAFAFCAYACAFPDSCCLIDTYDTLSSGLPNFVVF  
ARALDDFGYAAKGVRLDSDGLCSLSLACKTAFEGVAAREPSRAPVFGNLTIVASNDINEE  
SLAEFENTKTNGLTAYGIGTNLVTCQAQPALGCVYKMGSKETQHHCILFGWIGVGFDPD  
TSIPSYEPNPSSQIADFFDCLFLAISFSLSVHHTNLQHHHQCLWSAVECNKEPRIKLSQ  
ELVKVTIPGRKRVRVLYGGPDKRTPLADYMCLEDEDPPTTETADGILCRNPFPRPQERTRIF  
PGRVEALHGLVFADGRAASESPLLCGLSETRSYVLQQLSEEFPGSVTRYSNPERYDVA  
VSPGLYAYLHELWESNAPIPERR

>comp13848\_c0\_seq3; 690 163 2061 LEN=2134; translated  
MSTTNSGKDDNETSSSMHPTNNLVRALLTDLYQITMTYAHWRIGKADEPVVFFELFFRKNP  
FRGEYTVFCGLDECLKLLQTFRFSEDIRYLKSTPALSRAEPEFFDYLANIHKTSPLSLR  
VHSVREGTVVFPRLPLLIVEGPLALGHLLLETALLNLVNYPSLIATNASRMVLRAGGKPCI  
EFGLRRAQGPDGACASASKYSYLGGFVATSNVQAGKTFGIPISGTHAHSFIQSFTSLEDA  
GLKLFFHKSQREEVFLDKALEYRSDAKASTNDELAFAFCAYACAFPDSCCLIDTYDTLS



SGLPNFVVARALDDFGYAAKGVRLDSGDLCSLSLACKTAFEGVAAREPSRAPVFGNLTI  
VASNDINEESLAEFENTKTNGLTAYGIGTNLVTCQAQPALGCVYKMGGSKETQHHCILFG  
WIGVGFDPDTSIPSYEPNPNSSQIADFFDCLFLAISFSLSVHHTNLQHHHQCLWSAVECN  
KEPRIKLSQELVKVTIPGRKRVRVLYGGPDKRTPPLADYMCLEDEDPPTTETADGILCRNP  
FRPQERTRIFPGRVEALHGLVFADGRAASESPLLCSGLSETRSYVLQQLSEFFPGSVTRY  
SNPERYDVAVSPGLYAYLHELWESNAPIPERR  
>comp13848\_c0\_seq4; 667 163 1851 LEN=1924; translated  
MSTNSGKDDNETSSSMHPTNNLVRALLTDLYQITMTYAHWRIGKADEPVVFEFFRKNP  
FRGEYTVFCGLDECLKLLQTFRFSESDIRYLKSTPALSRAEPEFFDYLANIHKTSLPSLR  
VHSVREGTVVFPRCPLLIVEGPLALGHLLLETALLNLVNYPSLIATNASRMVLRAGGKPCI  
EFLRRAQGPDGACSASKYSYLGGFVATSINVQAGKTFGIPISGTHAHSFIQSFTSLEDAA  
GLKLFHKSLQREEVFLDKALEYRSDAKASTNDSLAFAFCAYACAFPDSCCLIDTYDTLS  
SGLPNFVVARALDDFGYAAKGVRLDSGDLCSLSLACKTAFEGVAAREPSRAPVFGNLTI  
VASNDINEESLAEFENTKTNGLTAYGIGTNLVTCQAQPALGCVYKMVECNKEPRIKLSQE  
LVKVTIPGRKRVRVLYGGPDKRTPPLADYMCLEDEDPPTTETADGILCRNPFRPQERTRIF  
PGRVEALHGLVFADGRAASESPLLCSGLSETRSYVLQQLSEFFPGSVTRYSNPERYDVAV  
SPGLYAYLHELWESNAPIPERR  
>comp13849\_c0\_seq1; 387 101 1063 LEN=1260; translated  
MPKTKTQGGVARTKNGSAHSGDRMCKKNDKNNNAQEKNAVSSNKNTKSKGKNSKDKDMDW  
IASLVKENASRDDGAGANTIPSKEDRKRKREMCKNRRMEQQQQKQQQRQONQRQVPVPS  
YTVEKSSKTKTSQRTSALHSAQQEARSAMLLKVKSKHRIRRLCRTLKVVQKSVSGEKGPSK  
VRFSPYYDLPKGSNPKAPRTSNGVPTKKRKRQKWESESIQPLRSDYSGIGMARESMYIEF  
VDPSYFPKLEEEFQEHIPGFFGKQRTKAMKRQMDGNMLWRRLANEKKKNGGSKKFKEMST  
DERLQAMLDSTDKSDLLGQN  
>comp13850\_c0\_seq1; 498 1 1525 LEN=1525; translated  
FGNSPSFYIDRNAAMSGNSFEEGWVDTIATSLLEEQLSTVYPQGPNGFDHSNDANGNDGED  
DVDESKIEVVLNRNCSLNMNMSDFAYMEDQEILQKAFARAVGEWKSKNASSVVGEEETAG  
GRQLSIGSGKTSNSTANSFSLFDQLQGGFALPVSLEEQEASTAQERLEVFRKVKYLEDL  
LMDWNEICPLLKDLSESVRSRDLALEIIALQRKWFDDQGRSSPEYGPVLYGICQNLLET  
LAEVARFEDPQRDGRDPLESNERTLIAALALNWREMWLWLDLQRDQYSEVLATEIEHLMVS  
IFLKDDSSARSRLARKAVDRADPCARWFEGWVRNLRTDDQLVSLLCGPTPEKAVLPDLWA  
RVRGDDPCTPAAVLSAVLCRTRLSEFPWGLAAPGAAPQSHGEGAARWDVPATAVDEMLD  
SFLLVVRLSLGDESTSGGGPGDEPKTVVNLNGVEAILAGSYDCRDGSDYDRRRGKIMSVL  
RQDENVRGDEAVARFLERQQTKDDDDDD  
>comp13851\_c0\_seq1; 148 224 814 LEN=2620; translated  
MTFLGQSPFVTNDTFIAPTASVIGEVNTNDQSSVWYGAVVRADSSHPITIGFTSSVGEVS  
VVTTLKNGTLKTKGFPPITSIGHYVTIGGGCVLKSCTIEDLVVIGEKCTILEGAVVESNV  
ILEPQTVVPPYTYIPSGQKWAGNPATFVATVTADEAEEDIKRTSLETHQRAKEHLTEFLPV  
GNTYVHLEDLEKQQA  
>comp13851\_c0\_seq2; 137 122 820 LEN=2626; translated  
MANMLKSVVSKGLREAGSVMRGEAGVLEIISRHRPKMTFLGQSPFVTNDTFIAPTASVIG  
EVTNWDQSSVWYGAVVRADSSHPITIGFTSSVGEVS VVTTLKNGTLKTKGFPPITSIGHY  
VTIGGGCVLKSCTIEDLVVIGEKCTILEGAVVESNVILEPQTVVPPYTYIPSGQKWAGNP  
ATFVATVTADEAEEDIKRTSLETHQRAKEHLTEFLPVGNTYVHLEDLEKQQA  
>comp13852\_c1\_seq1; 441 107 1150 LEN=1347; translated  
MTSEEEKSTKNNNHNETFEIHECFGKDIIDRYDGFILDQFGVLHNGAHGLEGAPELVQKL  
AGDYNKLVILSNSSSSSECKAKLPKLGFDPKNFCNAVTSGEEAGKYIRDQYAGTTTPE  
GAMKKALWFTWTKSSLSPLRFLLELCGNI PVTTPDSEADYVVLHGVDLLRGPADGEAEE  
VSLGDFFETGKLDGGSSESGDSPATTTIESILQACAKRGLPMVCANPDFIMVKPDGSTGYM  
PGTIARRYTELGGSCVEFGKPHASHFEACLRDLGLPREKVAHVGDLSLHHDIKGANDSRVD  
SVFVAGGVHRTTELGSALNEVPSRDALDALFEKHALMPHVPMFRME  
>comp13853\_c0\_seq1; 436 412 1764 LEN=1863; translated  
MVAASDYPRFVFLREYCGVDLTYTQMLLAKKFMADPVWRKAHLDLYETTDITNNLPLDPN  
SLHPSQIACIGDFDEDQORLQSLNLQPFRRREKSAPLMVQLAGDDVDTVVQTAIMIYEHTD  
GKLTGIDLNCGPCQQIASKGNYGAFLMERDPELVNEILAGLRKNLPSEVSVSAKIRLPLD  
DDTLRERIPRLMDTGINFMTVHGRTLKENKAKAKGAHIDRIRLAVKLAHELDPDFVIAN  
GGMEHYDDIQSILKSTGASAAMSSEGLETPDLFTKESMDPKTPEEQFDRQLSFAKNYLD  
VCSRVGPPPLPGVLGKGGSFNVVRGHFLFKFLHRYINSDHQDLRNKLAANGDDCMRTLGEAR  
SLVEELESRYDNISEEKWEKLGSSSPTASWYRRHRKPDRRVHERSIQGMGYSSSESELS  
VSERKQKIKERLAKMKARKLAQKGNKQFV

>comp13854\_c0\_seq1; 129 1 1400 LEN=1687; translated  
FALPSKMNEHAIRSHHIESEPIDCNGKDAREDIGFWLQPPPQLLQTQTQTQTSGLGSVS  
ASASFAAPRCDDGGGCLCFRPSVGNPGGVLVSSSGPRFPGSPGPHPLNRRRCPWGDGPLAA  
RGSRRSEKENKNHENESHEALRGAVEIGHTPAQQQQRGSGNQARAPAKQSRPRGKTATATE  
KITRNFLLDATEEALFRQQRAMDSLESERAKLVGSSDGSRAEGKTPGV DARQSELFRQR  
KDMETLRTELQRLPAKASPETAQLAXDRIEVSEHRLAAAEGPPHNHNNSHIQSKAFRL  
PDPGPPEGHLEDPNLGLHTGIQAVWPAPGILGPRLLLAPGRSDPGLRPVFFVRRRRRLPPE  
DAQGADLWFQVEDYDGSIVLLRRTSLVRGAKNSGKCLQAAADLAAHSVWGRKGGSSGFV  
PDTVPVYVYTD SRHVAKRGSKAGRMRKRKSFGRMLMGRPSEAVEDGDW

>comp13855\_c0\_seq1; 410 1 2046 LEN=2232; translated  
TEWYGSTTENAFVAHQQQRYWIVRNIPWFI PDRLIRTSNSFRSFPGCSRNTKQHKPVVGA  
ISIFPPGVSSRFLLPVVYFMTAGDGDSSCRNSDITLQAANRDAQGNMPPRAGTAMSF  
RTRGDREIAVYIQKIEQRKDDPSKQIEYMGLRALLQKQVQQQQVSDLGSLVGLVVDG  
MRHYPANEELIEECTCVLYLLSILDPTFKKGVARLFFKAMEDHRENVAIQRAACAAIRRVI  
SKNPDAIPRIIPSVSVILRSMGEHTENSKFLCSALEVLAIIASNVPKPIFVYRDGALNH  
VLAAMKKFPNDLSIQATALR TL SNLAYSGEEILESFGPTITVVIRAMKRHVMMHNKVQLY  
GCCTLHYIANSYKEQISECWGIPTILIAMKEYAHDIMLQEQQCATLSIILDEKLDNDIEA  
FIKDDGLKTIQSMQSPQNV EI QKYGLKILNSLKT TDNYELMLSAGGLDVIISNMNSFE  
HQADIAVQCCEILKNFTRMSLDFQRAVSAKGGIGLVLTMMRRHVNSHSVQDSSFACMRNI  
CLHRDNRLLEVAEGGIGTLLTHMAIYLEDAAIQAYGCDALGRLATETKNQVTITNDNGVG  
EVL RAMQEHPGHPGVQDRACFFLLAMTEYPPAVESMGDKNTLEIVRGARGKIPKKEVAKQ  
RLET LISRLEKEEGTGWFKRK

>comp13855\_c0\_seq2; 388 1 2279 LEN=2465; translated  
TEWYGSTTENAFVAHQQQRYWIVRNIPWFI PDRLIRTSNSFRSFPGCSRNTKQHKPVVGA  
ISIFPPGVSSRFLLPVVYFMTAGDGDSSCRNSDITLQAANRDAQGNMPPRAGTAMSF  
RTRGDREIAVYIQKIEQRKDDPSKQIEYMGLRALLQKQVQQQQVSDLGSLVGLVVDG  
MRHYPANEELIEECTCVLYLLSILDPTFKKGVARLFFKAMEDHRENVAIQRAACAAIRRVI  
SKNPDAIPRIIPSVSVILRSMGEHTENSKFLCSALEVLAIIASNVPKPIFVYRDGALNH  
VLAAMKKFPNDLSIQATALR TL SNLAYSGEEILESFGPTITVVIRAMKRHVMMHNKVQLY  
GCCTLHYIANSYKEQISECWGIPTILIAMKEYAHDIMLQEQQCATLSIILDEKLDNDIEA  
FIKDDGLKTIQSMQSPQNV EI QKYGLKILNSLKT TDNYELMLSAGGLDVIISNMNSFE  
HQADIAVQCCEILKNFTRMSLDFQRAVSAKGGIGLVLTMMRRHVNSHSVQDSSFACMRNI  
CLHRDNRLLEVAEGGIGTLLTHMAIYLEDAAIQAYGCDALGR  
LATETKNQVTITNDNGVGEVLRAMQEHPGHPGVQDRACFFLLAMTEYPPAVESMGDKNTL  
EIVRGARGKIPKKEVAKQ RLET LISRLEKEEGTGWFKRK

>comp13856\_c0\_seq1; 825 84 2933 LEN=3025; translated  
MPESTIESEQADGNKGDKAVRIASGLASHHLQPPASPTTETCNNDCLSEDSGHGEPNA  
TKPQNEQEE SRTKLQSSPLSSAALGIPTTKRAETPKRF SPTSPSPSVSFTSYAEAEIPES  
MSELSAEEDNPPSSPVR SFFYP SKQSPLQTIETGPIENLNGGWKATDDRGPGRRRVQSNM  
NGQTKVSP IPIKIPLRPSRGT PKLDS SREKETFEDEHDVSDVLSPRHVTSPPSSRDPSTLV  
SPGSSINDSSNVDYATQERQDKALVEKFWTAYDEILILSIFTQV GILCRLGAAFFQNF S  
DVFHSDSALFTNLPLNCLSCFVMGLLCSGESLMQIIGTRFTPPRLQRDLHRETILQCQET  
TLDDGESPYDQRI VDDDEEMIEMTTIETERKGWRRRRRKRRAKRKTNRNRRRNRLSNLS  
QQHRNKHAQNPD IYNELREVQLLAWERRIRASICLLLFVVKKEEVDIVETYFSEGYERER  
NFGGEEKTEESGTVLSPKFENQTS GCDAVFSDSGNTDMGGFDDLI FEEEIDHS PRKPPP  
RKLPHKTPEMKSTGKKRNQHIA TDTMNGLSREN RDTPEQGRMHARGNVHISARQYGQLEG  
GNI VDYGT HENPDLDQIISNVATNVATGVSNNISMI GRVNFANGWDVGTSPQEKSEDLTL  
GLRDGLCGALSSFSWISSMVNLF RAGEIGQGLVGLV LGIQLPMVAYRFGQHVSVYIFVW  
RCRREKGRDERRGYGIQVQTLDEEAPTDDLIGSPRSFRAGSFD SADVSSAGHSQRMTRTK  
GRRTVHDEENDVPSIRAI FTALFIMCLVAQLTSLTFFKKTEDRLLALSLLFSPLGVLARW  
RMMKFNSWRPSFPLGTFACNVTACALS GTLGTLLAGNPGPRERIALVSVIAGFGGTLSSV  
ARFIVEILSLVDPILFRFDGFY YAIASLGVGLLV SFLFAASVDWADSIE

>comp13857\_c0\_seq1; 1968 1 4544 LEN=4744; translated  
XGSIAGSVAASVTARTNNTKLG RPKLILPLADD CDD SAMGEHSVMTADLQSGPNMCSVM  
SLCQNKTKKKVDRPPPLVTTALSRDEEEDLLDRFFENLQNRCTCKNGKLNKLTDEEEEG  
LLRVFNPF LSRLET FDPVFEQMEELVCQKEHHSNHEKQDTCGNLNDKLVKTPVAFAAKF  
SELLDRVEHFDRCFATMEGTENTQDDSNMEQKETSFKKRKLEQMKQKWF AARLNFKLR  
ETMLAEVVKQNTAKAANATTKYMDSVVAKCTEPSAKKGDVSSDEQKNDTVETSKILNANK  
GQNKDCDGDSEIGDEASIDNSDFFSVETPSISIMTPSEHSNINSARDFRSFVMS PSTRTN

LTEVSKDESYS DHVLRSPVCLSPESRLAEDLSDFGGPSDEEENKIGVSTPGRLAVITEEV  
DASESSESILLKKKKSQTKSERSSSRSGGSKSPSNLKRWTYIPPDVSTFNSSEWLKKCQ  
ETVESVKETVESVYTVSERFILDKASCSSSSINLSDSESFEDDQONQNGRKSARRRIKQON  
SIVEEIEENGTTTGRKSEEWARNPQGSYEDDLSDFQTAVGTFSSSEPTDERPPMLRLQSRHE  
SRSCGSHSKEAPKYNAGAPSQMSELPGGYTLADSI RDAQAQTGGNGRKEPRGNKVKRD  
PSVHIRVSPSVHSRVSHSTVPQVEPEKPKEDPEPNPELQQKIRSPRSSETEDTARLTAQT  
TSSFEEIDTTTFEDIDTTFFGGIEGEEKSVIICVESPSAISQKAEDSVESPSAISHKRTVS  
KEFQDEDDKRTVSTSTDSFKDCMSRSTTMTEREVLNDNKTVFSINTTGTGSDSFKDCY  
QDAIPSLTMTDMTMEKAETSPTISDKNLLKENSNASTKVI PYSSAEASAQANLVTTSVA  
VLSVSAVILSATPSNRNRGDSKHNKTTPRVDNSTNAPRMKDTGTPDNLELELKGDPDKQ  
VLEAVEDSDAQSRANEADKSSSKCTDINLSQDDKNGEGESQQLSVVEDAAANEEVQIA  
EQEEGKEETLGHVDEIELGPPTNQGVVEEPSLKEDDNRVEEIDETKTKKQTIEDDNFVQDS  
PLEEEIQGDLDMQDSPLEEDNIDETREEKAMEETPSHIDVDEETMEEGPLEQASIEETQ  
EKQGEFEVMLKIQSSEESMKEESVEEDVVESGHVKGDMPEETETRSEPGILEVIEEEDDI  
ANTETLSSGTEVENEPESLSSFLKTMEEEECFVDDDQSFLEPKDDQYEDDEEVSKRKLGP  
NGEAEESLSTYLKAIIEEGEEEADETSVEARDDDDDEVNESISTFFRGMTEELGTSESKSLL  
EPKCIHDEALS AFLMDDTETRTSDDLRRDSDMNDESISKILEDLSMEEKQPPILEQMRACK  
SFQLENSYYFNQTGTIEKPKHRYKKALKKSRGETHDHNQHSGNATSAPLTVEDRRQRRLR  
QRRKFEKVLRGEDDSSAASSYASSGYNTASTKQSSSSVSEAEDFDNHEAKDFDAPNAP  
LFSSSFDTASVVREW

>comp13858\_c0\_seq1; 218 201 1232 LEN=1751; translated  
MVKVAPCSRWRVSVFVRLLAIAAYLAWTVLAFPSDYRWTRTCTATGSIASIPASRTTTS  
ARKHGGCARRLLFLQRGGEITASEHAASTKTPGTPYEDEISRYLASKGQVSLLLKRFEIQ  
GWRWHTKSLMRDARRLHRLAMRTDPKNADVLRDASDYVVGFNLMGLHKIEATLFFP  
WREKLTNNSMKNKPLERAFSSAMDVLEGRKTVARLGRSISDSARTACNTELPESLRSAA  
ISELATQSEELREVTQKMILLEDSFLAPAIGAMVPTREQKSFNKNVLRKLGILDSRLH  
LVGMYEAVWEDGKHSEKELFEQAIPGISRQMI PRWKRKLYQPKTYMLE

>comp13858\_c0\_seq2; 218 201 1232 LEN=1315; translated  
MVKVAPCSRWRVSVFVRLLAIAAYLAWTVLAFPSDYRWTRTCTATGSIASIPASRTTTS  
ARKHGGCARRLLFLQRGGEITASEHAASTKTPGTPYEDEISRYLASKGQVSLLLKRFEIQ  
GWRWHTKSLMRDARRLHRLAMRTDPKNADVLRDASDYVVGFNLMGLHKIEATLFFP  
WREKLTNNSMKNKPLERAFSSAMDVLEGRKTVARLGRSISDSARTACNTELPESLRSAA  
ISELATQSEELREVTQKMILLEDSFLAPAIGAMVPTREQKSFNKNVLRKLGILDSRLH  
LVGMYEAVWEDGKHSEKELFEQAIPGISRQMI PRWKRKLYQPKTYMLE

>comp13858\_c0\_seq3; 300 201 1426 LEN=1508; translated  
MVKVAPCSRWRVSVFVRLLAIAAYLAWTVLAFPSDYRWTRTCTATGSIASIPASRTTTS  
ARKHGGCARRLLFLQRGGEITASEHAASTKTPGTPYEDEISRYLASKGQVSLLLKRFEIQ  
GWRWHTKSLMRDARRLHRLAMRTDPKNADVLRDASDYVVGFNLMGLHKIEATLFFP  
WREKLTNNSMKNKPLERAFSSAMDVLEGRKTVARLGRSISDSARTACNTELPESLRSAA  
ISELATQSEELREVTQKMILLEDSFLAPAIGAMVPTREQKSFNKNVLRKLGILDSRLH  
LVGMYEAVWEDGKHSEKELFEQAIPGXITPDDPALEAKALSTEDVHARMMLRIDEVRN  
KLHRSFVQLVCRVLVCRVVHTSSARARTFTQLVRMFAVSLASLAL TISR DGFSEV

>comp13859\_c0\_seq1; 275 1 1687 LEN=2040; translated  
XTKANYENPLTKTHQYSTIKTSIIMFLALLSATVMVSLITCFRYCSHSNFVVAVSDHIL  
SHSVKVSTTVTTVGARKIDDEGNPMSDVTDVDHCITSADCAFNGECIKITQAETTLFDGR  
HKNKNYNTEARVDPEAPGLCDCFPGWKGRTCCEVLDDL PVPDKRIGLKL PDRNSSTWGG  
SVVYYEDQDKDNTNGLYHMFASEI IYNCGLSSWTTNSQVIRAVSESPYGPYRKVQVIL  
PTFAHDANI IRAPTGEFVLYVTALRGIAPKDCRHSSDAESVSRLSILHQMHGSNTTKMR  
HLREPLVNGSKNDHDHDI PPKD TYMLWAPKPEGPWSEPVMLNSTIYNSDYWKKFNKTAK  
CDSNLNGIILPSRSSGGDHNALHRHDDSGAQPFGLWRRCE TEDLLTIPHALLASDWKNAS  
TYAPLAETPLFVLAGSGAEDPSNIWTTQTSDMKPGEVAYHALFHDEQATR CMIGSCGGQ  
RHAVSLDGT TWKYANVNAYDRHFMVGSNSSVLTRADTRARPHIILAPSTATKSGTHRHR  
QRPVALSTGIKETDEEDGYVYTLVQPLNTE

>comp13859\_c0\_seq2; 225 83 1211 LEN=1564; translated  
MTYQSVSQLVDIVIASQFIRFLPCESYALVIRAVSESPYGPYRKVQVILPTFAHDANIIR  
APTGEFVLYVTALRGIAPKDCRHSSDAESVSRLSILHQMHGSNTTKMRHLREPLVNGSK  
NDHDHDI PPKD TYMLWAPKPEGPWSEPVMLNSTIYNSDYWKKFNKTAKCDSNLNGIILPS  
RSSGGDHNALHRHDDSGAQPFGLWRRCE TEDLLTIPHALLASDWKNASTYAPLAETPLFV  
LAGSGAEDPSNIWTTQTSDMKPGEVAYHALFHDEQATR CMIGSCGGQ RHAVSLDGT TWK  
YANVNAYDRHFMVGSNSSVLTRADTRARPHIILAPSTATKSGTHRHRQRPVALSTGIKETD

EDGYVYTLVQPLNTE

>comp13859\_c0\_seq3; 149 1 631 LEN=752; translated

XTKANYENPLTKTHQYSTIKTSIIMFLALLSATVMVSLITCFRYCSHSNFVVAVSDHIL  
SHSVKVTSTVTTVGARKIDDEGNPMSDVTDVDHCITSADCAFNGECIKITQAETTLFDGR  
HKNKNYNTEARVDPEAPGLCDCFPGWKGRTEVLDLLPVDPKRIGLKLPRNSSTWGGSV  
VYYEDQDKDNTNGLYHMFASEI IYNCGLSSW

>comp13860\_c0\_seq1; 787 145 1902 LEN=2309; translated

MMSDRTIDEEVRMAETMALAVASAPNLRAAAAKKMVSKTQKRLSASLNGSGSSSHKRSSLA  
RQRRSSEATATNVNASASANANQSQDRELNFSDLEVQRAREMALAVAALGTETKNGPMKA  
EDIRMAVANVLSDPNERRRKSRRTGSI RTQQSQQLQKHGMKLT PGREPPTKGAAGGAIK  
ETTTKSDNSQIRTMVEKMMRPPWILRNQSLFATIALANFLLLYVTLSSSEPSYTKISNAVF  
IFNTAVSFFCAMEKKNPQNLTAIDSSIVKDRTNADTDGACASDDEDSNNARIQKREELV  
DEMEKRLRPETSITLWLPDVHYSEVDLQALLDLQPESTLAERRRFLKARKGVKAASQA  
LGSYLQWRSANKIDEFFPSTFTTDEEDWALAARGAMEIANNTKGP SLAANGQRSLLPRIV  
SVFGGDDGLVLCKNGARIVHVLPSQLDTTIAPSTTYALALAMYLD RKLDRKHTEKVTVVI  
DIRSGKGWPNPSSVSLVFPFIKLVVGSLSNYFPERLSRCILFPLPMTATVLFNKAKAYLDP  
DTATKIQVCSGAGSVSAKVPTKVGQFIDEKSIAAMEERRLAMFLP

>comp13860\_c0\_seq2; 736 145 1754 LEN=2463; translated

MMSDRTIDEEVRMAETMALAVASAPNLRAAAAKKMVSKTQKRLSASLNGSGSSSHKRSSLA  
RQRRSSEATATNVNASASANANQSQDRELNFSDLEVQRAREMALAVAALGTETKNGPMKA  
EDIRMAVANVLSDPNERRRKSRRTGSI RTQQSQQLQKHGMKLT PGREPPTKGAAGGAIK  
ETTTKSDNSQIRTMVEKMMRPPWILRNQSLFATIALANFLLLYVTLSSSEPSYTKISNAVF  
IFNTAVSFFCAMEKKNPQNLTAIDSSIVKDRTNADTDGACASDDEDSNNARIQKREELV  
DEMEKRLRPETSITLWLPDVHYSEVDLQALLDLQPESTLAERRRFLKARKGVKAASQA  
LGSYLQWRSANKIDEFFPSTFTTDEEDWALAARGAMEIANNTKGP SLAANGQRSLLPRIV  
SVFGGDDGLVLCKNGARIVHVLPSQLDTTIAPSTTYALALAMYLD RKLDRKHTEKVTVVI  
DIRSGKGWPNPSSVSLVFPFIKLVVGSLSNYFPAAVEVHTVPAADDRD GALQQGGQ

>comp13861\_c0\_seq1; 1538 470 5992 LEN=6499; translated

MTDLQTTVQALPCMLPLHLIRAATKEFVSGLKGNVSEVKVFWGDPARRAKVKT DHKRKA  
LDQQEESYLELFCNHGTMISASKKKRKYVCEWKQDFPF SKLFP TCVRHALLEEGDFIET  
VECHEEADVELAKHASGDDRAYVAFDSDFYFFKNIQYIPLGKLAIEPSGIHACVARRSA  
LANLLGFENDDRLEVEMALLMGNDYVDPRESLNVPSVDITNVQSMVYYLQCHEDYQVSAK  
NKEGAEALS FVRSLYNLHLSLEAFPLVFNSTNIEKHDGI IARDANEQLLPEDFYVRDGI I  
RCLRKTLDLVDGADAKFPLSEYAVQAFEMSSMPMERHTIPTLQTRPTYQE IKAANFIERC  
IARFYRRTMNSSFLVRTTPPDALMSRLHFHAALASLRPTPIETDAMKEEKSAIENESEAV  
LIEEPLRLPIDEHESAI LENIRNHRVTI IHGETGCGKSSRPVPM LKAPPPDGLSQKVKF  
FISQPRRIA AKALVERVRSCEPEFKNFALRMGHGWKEYESKETQAYFVTTGYLVRLLAN  
NPERFEDCTHLVIDEVHERSVDTDILCLL CRRLLETNENIRLVMSATLATKMYREYFDV  
PNEPIHVGVRYPITEYFVEDLAQFGLPNQEAKAALAIQQENEKKRCITAPTSAEMKNRF  
GLAARLATLVGIPGSSVLI FVPGMAEIIAISECIEGFHTPGVRYTCFPIHGDI PFEDQME  
AFHAPAKDEVKII IATNAAESSVTLPNVDHVICLGLCRQII YNQASHRQMLTPAWISQAS  
AKQRAGRTRGRVPGNVYRLYTRRAHNNYFDEFEPGEMVR IPLDSVILMLKQILHEEVVPV  
FMDCLEPPPLDITDRSFQSLYHWNFITEPDD EADITSLGSGFVSALGVDLSLGSF IGLGIQ  
FGVAAEAIEMAAMMSLPKTPYQITSPMWLAPGKFNQNASQTFSAKCKFDCGLYSEPMGLM  
NALWDYEGVVGSSKKNVCHNNHLALKRWQALSSRNSLRKR VADFLGISEERLRIQLPP  
RDMPEGKILILRVLKVVVFSDSIVECAPSKLQLTHDGSVALSIK GSGVRLKEANLDRIL  
QPEKHPFRIVEHNELQQSGV FQEEGSFHFPSFVLGF EYRILSYASEMNVEI ILCYSSEEL  
YLYIEKGNSEKETRKLLEALPEGYEQWNLFAFDFTNVKRRGIQERACGLWTVLDNPRTD  
DSFARRKEFIRIKLTKKKIGNYFGEACAYI IPEVFGCKLNSKMIWYFLEQHS MKKKKAST  
TQPFVWNIIGECREI SKNSLEDLLARKNIRSSTSKKNSAQSI IVKRPTNTRATSSSEIAR  
PLFLDVPEGARILALLAKSQQRQKHTLRIPCDDTNLDSEETYDFAMSSEEIDVSKRWNR  
LSSNQVYVDDSVSTAIHTNRLYAVAANA LELQRGGMRVDGLTLLPPNPLFLVMSLLSF  
GLEINTPLRWAIQNDESAARKKI QKSYAWLIDRAITVFNKSSGGDRVVL SVAPLTDGES  
SQELIWEEQQLKDRLDQAI AFNERSMSMGEKLVCSPERIKELCEVFNGFDGYSVSTWESM  
TEESITMENLFDWRKERKYATNEGQKGQFRRLSKETNANCIASKDSKKVDS SNKKKIPPN  
DSKKSIPSKISASREKAAGEKKLQHGGTSYYGDQQLITSSNSWFSTTLNSGEAMPAPFST  
NILALLFKLFEAQVFAGD TVNHSEKFTVALNIENWDIADFKGKGKALYRAYFVNDNIPT  
LDVFGRGKNKLPKWIKKSRNRPTIEDAKQCVPPGVACVPLESESDGLLFESLEDALKM  
EAAFVWLNKQFCHAGKTSTRHWYTHSLEQMIDILRNNNNQC

>comp13862\_c0\_seq1; 487 325 1942 LEN=2214; translated

MANSSSVSIEKVCYGSEHRSAAAVSSRRRKSNGSLQENNTSNNTSSSNTSSNENDLH  
HPVFMEDNDAAMQWGSDDGGNSDKKDNEDNEDDNDSPPTTMGVRASSMDCEGLAEEGC  
GPGVWHARPLDHPNSARKPHRRDRRSEIHLRADQQAWVQLRLRTELKREAVAVAMETG  
QHQHDGYNGTNGTINGNINSNGNINGNHDTHHHTQNNNYYNHHHNYNYNHDPNDDDD  
DVSILTEYSMEEATGAACEGHPKRTSDSPSQTTVHTHTSWTCVTDGTMPPFGAEGDRKRRP  
AGGGQKGKTASAGGRTQDPGPTGSKETNHPTTHDTRHRDPCWLPASQPASHLLLFKIV  
GREGMIGPNIVFIANRCSFFSLPHSMKFYNASSRMTADRAAGKTMNAIEDNMASTTRSID  
NAIPTVLETGRRVAVTGVEVAKTVETGGKALMDDIAGFVEDNEIDNTIESATKRFAKTQP  
VYRDF TASVNDPNDLGKLDGKARAQVGTATKI QAMPGGTIAKETGDRSMTNVQSLNE

>comp13862\_c0\_seq2; 929 126 1844 LEN=1902; translated  
MTTQGHV L A T V L L L S E I V G G G R A F S T P V G F A S F Q Q R R K T R S A S E G H T N G D G S A F D G R S L R  
S A L F A A Q Y F H D D D Q W S E D V D A V Y Q Q E L F D Y N P T Q H H H H Q Q Q Q P S G F N P E F G Q A P E Q E Q T F  
E L P S K R A V F G G A A L G T M L V I N N A V G M S V G A E P A I A E P Q E P S S E V P H Q L Q T S V Q S Y S A I T D  
A Q P E V T L P Y L E E Q I K T A E E A I A Q A A F A D E S S A S V A V G E E M Q A P E T T F G Y S T P V V A S T E T A  
A P E T I A T Q A S P A Y Q S S A S V V A S V E V T A P K P V A D V A K T D A P S P S F V R Y T R E H M P E W I E R G Q  
R V Y D A A P K V V A G G T K I A A E F D K R V T P M I V E K E H E L L G D A N S A V L D K T L S N V A Y A G K M M A  
G M V G K V V S L G I E G G V Q V A Q A T P K V I K A G Q Q V Y N T I D Q K I M P E V A D T T R K M K T I V D K T V P E  
V A E A G M H A Y D T I M P E V M N A E R Q V A T T V K N G I D M A M P T L K E I E A R V M P V L N D I E H D V L G D E  
G A Y M L E K T V A D A A Q Q G K N A L D T V A R T V P E V T A S V Q K T V D G V A Y T G R T I S R A L P V I A E S G K  
Q T Y E S V D R G I S D A I A T T Q D I A S D I G T C S S L Q

>comp13862\_c0\_seq3; 1068 126 2241 LEN=2513; translated  
MTTQGHV L A T V L L L S E I V G G G R A F S T P V G F A S F Q Q R R K T R S A S E G H T N G D G S A F D G R S L R  
S A L F A A Q Y F H D D D Q W S E D V D A V Y Q Q E L F D Y N P T Q H H H H Q Q Q Q P S G F N P E F G Q A P E Q E Q T F  
E L P S K R A V F G G A A L G T M L V I N N A V G M S V G A E P A I A E P Q E P S S E V P H Q L Q T S V Q S Y S A I T D  
A Q P E V T L P Y L E E Q I K T A E E A I A Q A A F A D E S S A S V A V G E E M Q A P E T T F G Y S T P V V A S T E T A  
A P E T I A T Q A S P A Y Q S S A S V V A S V E V T A P K P V A D V A K T D A P S P S F V R Y T R E H M P E W I E R G Q  
R V Y D A A P K V V A G G T K I A A E F D K R V T P M I V E K E H E L L G D A N S A V L D K T L S N V A Y A G K M M A  
G M V G K V V S L G I E G G V Q V A Q A T P K V I K A G Q Q V Y N T I D Q K I M P E V A D T T R K M K T I V D K T V P E  
V A E A G M H A Y D T I M P E V M N A E R Q V A T T V K N G I D M A M P T L K E I E A R V M P V L N D I E H D V L G D E  
G A Y M L E K T V A D A A Q Q G K N A L D T V A R T V P E V T A S V Q K T V D G V A Y T G R T I S R A L P V I A E S G K  
Q T Y E S V D R G I S D A I A T T Q D I A S D I D R A A G K T M N A I E D N M A S T T R A I D S A I P T V L E T G R R V  
A V T G V E V A K T V E T G G K A L M D D I A G F V E D N E I D N T I E S A T K R F A K T Q P V Y R D F T A S V N D P N  
D L G K L D G K A R A Q V G T A T K I Q A M P G G T I A K E T G D R S M T N V Q S L N E

>comp13863\_c0\_seq1; 955 1 2722 LEN=2869; translated  
X L L K K H G F E A M L I Q R V H Y A V K K E L A L H K N L E F M W R Q T W D E T G E F D I F T H V M P F Y S Y D I P H  
T C G P D P S V C C Q F D F T R V M H P H E V K Y V A K C P W K I D A Q R I T E D N L E E R S M L L L D Q Y R K K A N L  
Y R T N V V L A P L G D D F R Y Q G T V E A N L Q F E N Y Q K I F D Y I N A E V D N V E I S F G T L S E Y F K T V M A E  
R P F S P P L L K G S F F T Y A D R E E D Y W S G Y F T S R I F D K A L D R K L E R V L Y A A S S M G A T K K Q M M E P  
R R A L S L F Q H H D G V T G T A T V A V V E D Y A K R I H G A I A F V Q D W I R K N L P A G A E S K L L S E K A G L E  
A C W Q S T A P R G L S Q N L C E K E G G G N S N I I V Y N P L L T D Q S C G S V V V P G R T I A H A T L P C E T P G P  
L P P P E V E S G D H Q Q P S G I K F D P N T G L M L Y P V R E E W M V W K V T Q G G A Y L F F P G E L G S Y N E L D L  
D I R E G G S I V I T K H W K R T V V E R K L S K N E S G G F G G V A I D F V Y E T N L Q T S N E E W F A R F T S P D I  
K N Q G I F H T D L N G Y N F D T H H F R S D M P I Q S Q V F P M P T L A S I E D S N K R M T V L S E H A Q G A A S L E  
E S A I D V W L D R R L A Q D D G R G L E S G V M D N V P T R T R L R V V L E E R T P E A S K A K E F E I T P F C K L Q  
W K E L N H P L E L F G T T G D D E T I P S I E L A S V E T R K A Q H K K G M I G S D Y V G H E H V P S P G D S P P G G  
S C R I S A V Y M V H D R V E Y L K Q A M D S L R D S D Y P K D A P V V I S H D G H V R E M V D Y V E S L K Q E F N I V  
Q I F H P Y S C A E H P N E F P M D D P K L N E N F E G D T Y G N P R D G K I T C C K H H F S W L I N T V F D M E E T K  
D A D G F L F L E E D Y I V A P T V Y Q T I Q K G F A Y I D T K N R R D D F F G I G L D P S N G Y A Y V V P K G V D W V  
E S K F V T G P V V I R R E I F S R I R A H A K E F C T W D D Y N W D W S I V H L M A M E Y I P F W G H P A D H E H C I  
K V F E G A R

>comp13863\_c0\_seq2; 992 1 2938 LEN=3085; translated  
X L L K K H G F E A M L I Q R V H Y A V K K E L A L H K N L E F M W R Q T W D E T G E F D I F T H V M P F Y S Y D I P H  
T C G P D P S V C C Q F D F T R V M H P H E V K Y V A K C P W K I D A Q R I T E D N L E E R S M L L L D Q Y R K K A N L  
Y R T N V V L A P L G D D F R Y Q G T V E A N L Q F E N Y Q K I F D Y I N A E V D N V E I S F G T L S E Y F K T V M A E  
R P F S P P L L K G S F F T Y A D R E E D Y W S G Y F T S R I F D K A L D R K L E R V L Y A A S S M G A T K K Q M M E P  
R R A L S L F Q H H D G V T G T A T V A V V E D Y A K R I H G A I A F V Q D W I R K N L P A G A E S K L L S E K A G L E  
A C W Q S T A P R G L S Q N L C E K E G G G N S N I I V Y N P L L T D Q S C G S V V V P G R T I A H A T L P C E T P G P  
L P P P E V E S G D H Q Q P S G I K F D P N T G L M L Y P V R E E W M V W K V T Q G G A Y L F F P G E L G S Y N E L D L  
D I R E G G S I V I T K H W K R T V V E R K L S K N E S G G F G G V A I D F V Y E T N L Q T S N E E W F A R F T S P D I  
K N Q G I F H T D L N G Y N F D T H H F R S D M P I Q S Q V F P M P T L A S I E D S N K R M T V L S E H A Q G A A S L E

ESAI DVWLD RRLAQDDGRGLESVMDNVPTRRLRVVLEERTPEASKAKEFEIITPFCKLQ  
WKELNHPLELFGTTGDDETI PSIELASVETRKAQHKKGMIGSDYVGHEHVPSPGDSPPGG  
SCRISAVYMHDRVEYLKQAMDSL RSDYPKDAPVVI SHDGHVREMVDYVESLKQEFNIV  
QIFHPYSCAEHPNEFPMDPKLNENFEGD TYGNPRDGI TCCKHHFSWLINTVFDMEETK  
DADGFLFLEEDYIVAPT VYQTIQKGFAYIDTKNRRDDFFGI GLDPSNGYAYVVPKGV DWV  
ESKFVTGPV VIRREIFSRIRAHAK EFCTWDDYNWDWSIVHLMAMEYIIPFRVLVPTTLQAA  
HIGLEGGMHEHEGDGIDEKQLELMRRYFPDEGGLKAFHADVGVPHIQIRPPEVKTKGFG  
GWGHPADHEHC IKVFEGAR

>comp13864\_c0\_seq1; 592 340 2208 LEN=2361; translated  
MSLQFQTASQIAESRPLPRDRK LGLFKRWALSIRRFQANGSFNNTNRDNNHISNNRNRRT  
DSNGTDSMTSSYSAPSLTTISRSSNSTTDSHSQCRKTKGNKSDNRDSIKHMATYCPNRI  
GSLPDFLSLAHSSDQKNIFQWMETDCPKDVLPLILAFSGPQKIAVIERTNRFWRQVMQOE  
STWRL LCEELYKWKDGETPKSWKYYEYNPCVPIDYSTIHRAIDDTVGKAGDDPYEPSA  
VRVLLRPGRYVLREAITIDEGTTARNNDNGGNSPTSITIE TMEYI PENCRSGDNNCCSF  
SIRSSSNKSKRKRKSSIRTFQ CRTVDVETEDEEEDILDHESLHEYLNPNSSVSDGRLLA  
LSRTDGEDGIPMGTPTVQGGTTDNRNDSEKYN SNKPVLNRATLVLTRRHNEPLLRI RQG  
HCVIRNVDLRHGSYGNDIWNGNAAIQIQPPLGPNEDPIDVPAPTAFLDRVDVTSSSSGRGV  
V SIDGGYLKITNSFVHDC AATGIYIGGSGSRATLEQTDVLFNGKGNKRNRRIAPGHSGI  
YMEQGHVTINDCNISSNTLTGISVINPDNALITLQESDLVSNGT FQLELPRLGVSVSHNNS  
VSTNNNIASDGIGRSRSGFVVQ

>comp13865\_c0\_seq1; 374 138 815 LEN=1025; translated  
MIINSTPKRGA FIVLEGVDRCGKTTQASLLVKHLIGIGLATVAMRFPDRTTMVGD LINQ  
YLQSKSELDDRAVHLLFSANRWEAAPT LRKTLDDGANIVCDRYAHSGVAFSSAKPSLEN  
DLDWCRACDIGLPAPDAIIFLDLSQEDAEQRGGYGGERYEKKEMQQRVRQRFSELQDMDE  
KDGQIPWYIVNAAQSI EDVQKEINEIVESTVDKVKNEELSVLWQK

>comp13866\_c0\_seq1; 1150 1 2442 LEN=2735; translated  
QQQNTATQQRQTTPPAKIPPPPPRRRPGSLEEKIAIEIKSAREEAD EEAASKAGAAPGET  
TGSKDEPGPEEDATAV LGGSGDEGSSDVPAAPEPPQGKTPSPDPKTEQTQQQQQPPPV  
ASWEEPSQANYDAWQGGGAQQQQQYDQYNQGPNSYPDQQHQQYESNLYYLEQFELSES  
LAREHSLVAQLDNLTTTALSLEQREVLHKKHQLDVLTERVVDVEARAADDRNLLVEYEANC  
TALGANILSMQEDLEEWQERCKEWSQKHEDDQEKLSLRLLIKEKVSEADLAIAMEELR  
ITEERRQUESTSKAKAKKGLISWVFLMGFSGGSAKTARYDEEVREDAFELAKSTLLRAL  
QSERSNVHELETAVASLQQNNSAISEMVESRDNI IDELNSRIAVFEEDKVV LKAALRQLQ  
KEMKEEPEKTQKLIDDLAEAEQEVERKADFHSI IETHQEELANLQNVMSQKEKSI TDAE  
SNLTAIGTYVDKLEERLTSFAITRRDMEEREKICKGIEKKAEESETQRKSMETKVEELEK  
QEDELKLLLEELV SERAGLQKENRKL YTEQEFRIAEQEKLT LHCETLQTEVASLREGIEE  
WKNKCESLVPDLEASRK CREDLERDVEAMAGA QKELNTLQIEHAVVVEKNEKLQEE TEAA  
IAEKQLLEAKLVELIKIIEEKEEA EKLAKE LAANEAKRLAKETEAKRQLPPPLPSKPKA  
NDVPLRSIRKTL SKATGIHGVLTPPSSAKKEANANTSRRPTARPPPVNFAPPEHVSEMNS  
SREEISR DGVNHNDSSPPQLPPPM AFQSETQQQ

>comp13867\_c1\_seq1; 720 376 2121 LEN=2121; translated  
MMNFSRQSLPLKSAPIKKRYGHKPTVNNCQLDHQDKGNP ISTASLSE DGKGGKASGNDQ  
ESKTLRSKTTGI AKKRKGS ELINESGKKKEMDFDRKEERKRNTDRNQT KRRLHLNRS GD  
KQRGGKNHLSARTRSSFEIKQRIIVPGHKQKVADYIQHIVGSRSLSKKKSCRKSASVTKQ  
PDPMTNTRTKIDCRTQSLMSMVGKIEVKSDKCDGTTKWHSGI IQSCSGDGSEAILVYD  
EDGSNPVLLNLRDPPKWRPMETASDQVSCSNTTTIEKYQQGRTTDHQLLLPAPRPKVI V  
SSDEDVRSMTSTDI AKQATSSENTIRKEKTKRRLKTQKLEQLNRYSS TLSQLIRQEKKK  
QHHKQDLESKLVKEARKEARAKHRKSREHIARRRQLPPP IKRSTITVLADIDAKTDIN  
LDEGKETYSACK EIPRNGCPVIMEDEQELSNKENKEKMNTS NSDSSKSTHNTHTTEVSNE  
VHETERNSHSTTSKNSNTITSEKSTLKT TTTNSVVDSTMVSTNDSNISVTNNSTNNIVN  
SSDKNNETSQ LQKLN DMPLLSMETIRSDRFRK KLSAVPLNY

>comp13868\_c0\_seq1; 698 94 1854 LEN=2664; translated  
MKFSTLCVSALAILSSAPQSNAEDAFCTADCSPFFVNP KLMIHGEITTKIDADDKSTMAV  
VDIRGCCTETLSDNNEGGTSTLARPIIGKLAQMSKEQTL SVLGDAEKAWDGGSGAWPQM  
TLRERIDAMERLMQDLETNQREK MVQVLMWEIGKNRDKDAESEFDRTISFAREVMQALKND  
DEFGGSWESV GSTMAFVRRAAIGIVLCLGPMNYPLNETYATLIPALLMGNVVVMKVPTVG  
GLVHSLTMEAFQKALPVGAMNFVSGRGRDTPVLMETGKIDALAF IGGSGAADTVIRQHP  
HPHRLKIFLQLEAKNMGIFLPDMFEKGM SKAEELSRAVDQSLLGALS FNGQRCTSLKLF  
IPKGF GASFSRKMAERIEKMNVGLPWQSWGDDPNESKPRYSDFTPLPNKSR TDLMRRLID  
DAVSKGAKIVNKKGGEIIGGPHSTLMVPAVLPVTPDMDIFLEE QFGPIVPI TEYDDLDT

VLSYGREGLYGQQVSI FVSEEEKSAAKLLDRFSTVFGKININSQCARSPTL PFSGRRS  
SAMGVMSVKDALREFSIPTVVAYKDSKLNNGIMQEIEASSAFLQPL  
>comp13868\_c0\_seq2; 288 617 1261 LEN=2071; translated  
MAERIEKMNVGLPWQSWGDDPNESKPRYSDFTPLPNKSRTDLMRRLIDDAVSKGAKIVNK  
KGGEIIGGPHSTLMVPAVLFVPTPDMDFLEEQFGPIVPI TEYDDLDTVLSYGREGLYGQ  
QVSI FVSEEEKSAAKLLDRFSTVFGKININSQCARSPTL PFSGRRSSAMGVMSVKDAL  
REFSIPTVVAYKDSKLNNGIMQEIEASSAFLQPL  
>comp13868\_c0\_seq3; 416 160 1179 LEN=1989; translated  
MEAFQKALPVGAMNFVSGRGRDTMPVLMETGKIDALAFIGGSGAADTVIRQHPHRLKI  
FLQLEAKNMGIFL PDMFEKGM SKAEELSRAVDQSL LGALSFNGQRCTSLK LFFIPKGF GA  
SFSRKMAERIEKMNVGLPWQSWGDDPNESKPRYSDFTPLPNKSRTDLMRRLIDDAVSKGA  
KIVNKKGGEIIGGPHSTLMVPAVLFVPTPDMDFLEEQFGPIVPI TEYDDLDTVLSYGRE  
GLYGQQVSI FVSEEEKSAAKLLDRFSTVFGKININSQCARSPTL PFSGRRSSAMGVMS  
VKDALREFSIPTVVAYKDSKLNNGIMQEIEASSAFLQPL  
>comp13868\_c0\_seq4; 628 94 1936 LEN=2746; translated  
MKFSTLCVSALAILSSAPQSN AEDAFCTADCSPPFVNP KLMIHGEITTKIDADDKSTMAV  
VDIRGCCTETLSDDNNEG GTSTLARPIIGKLAQMSKEQ TLSVLGDAEKAWDGGSGAWPQM  
TLRERIDAMERLMQDLE TNQREK MVQVLMWEIGK NRKDAESEFDRTISFAREVMQALKND  
DEFGGSWESV GSTMAFV RRAAIGIVLCLGPMNYPLNETYATLIPALLMGNVVVMKVPTVG  
GLVHSLTMEAFQKALPVGAMNFVSGRGRDTMPVLMETGKIDALAFIGGSGAADTVIRQHP  
HRLKIFLQLEAKNMGIFL PDMFEKGM SKAEELSRAVDQSL LGGTIQPESGFTCLFSGE  
DLVLSLYLSCLALS FNQRCTSLK LFFIPKGF GASFSRKMAERIEKMNVGLPWQSWGDDP  
NESKPRYSDFTPLPNKSRTDLMRRLIDDAVSKGAKIVNKKGGEIIGGPHSTLMVPAVLF  
VPTPDMDFLEEQFGPIVPI TEYDDLDTVLSYGREGLYGQQVSI FVSEEEKSAAKLLDRF  
STVFGKININSQCARSPTL PFSGRRSSAMGVMSVKDALREFSIPTVVAYKDSKLNNGIM  
QEIEASSAFLQPL  
>comp13869\_c0\_seq1; 681 743 3196 LEN=3597; translated  
MAITPSVLKMYETSHWFREYGNPSVYDKAKDWFGNPSL PFKQEI EDSKVLMRIYFFVLPY  
IAMIACLVL AHLLAKRMQNSTHSLTRGVFR CRTFLRLVPLPRFMVCCGAPERVSVGELLG  
IVVFLI LNLGTGVRLRRSLPRGTRKNLYLVGEGDAGKEPI PILSWPAVEVLGKTLGVIS  
IINL GWYLLMPIGRKSVFLEALGFSWDRAIKYHRWVGFYTI AIMFAHGFLYFVVL IYGDG  
HPIYDPHGMIEHNLLAWGCSSSEDESESEDEATGCDEDQKQLLRMNTYGI IALVLI LII  
AIFSLPYFRRYHF EWFYIHHLFV LVLFFVCLHYPGAVIYLI PGVAMY MIDKLMGMLAYK  
NYALAKVEMVSPDVLEVSFE IKDIDSIRYEAGQYVFNVPF ISHLQWHPYSLTSSPKVDP  
GKIFFHIKESGASPD SWTRQVIAAARAANGNGLPMRIDGFYGDYSI EMLSQKKAIALVGG  
GIGVTPMISLGM DLVATNPTLPVTI LWVCRTLQEF EIFATK LAKAMNKFNL SVKVIWIM  
SHPESKIRRSFIQELATDEEKCEMI IDLLSQTITEENDDASLEDGESYDTATLNNFLFT  
KSRPRSAPLGNATAMLVAVVFALVGYNTATKVS RNQEIQTENISTLV DIAFVTGMVSTSF  
IIAWAVH VILALWNHRNKQRITPATHQTTSIQNNTDEPLSFVGGCRGMELIVTMLKGRIG  
CRPDFEAE LGNLSRFHCPHVNSFEDEF EKAATRTSTSTR LGVLACGPKAMTDAINEAVQN  
TGPWWTF FNAGRLR NAK EKSHDVAATFEFIEEDWEW  
>comp13869\_c0\_seq2; 840 443 3754 LEN=7200; minus strand; translated  
MASRKATTRPVVFP SGIGSILELFRGTVMKLLPL LLLLVL PNPQSSNVALVRAFSCQRTKPS  
PIVPHTKNSCF SASSDDDG SNRM RHQTKRYSTTAKNTIGSTEEIDVDSTIGGKINGRLGL  
PTDGVTVTISPPPTPAELNHSGKCLALS LGGRQNPILLFDGLSPETWTAARPDEGSSSAP  
LPSSFSS LALQTRIPSTAI ESLCLGNFLPSSAPDN SHDSPQRRLQHPHKFLAASRLNRYW  
MGPKFGGTGVGDNSGETIPVDTQFLLVEIEPNEPGTSPADSSPPFYALMMPLVDGGFRSA  
LESTSDSIKDDNDNDNTSSTGDDRRKMTLVSYSESGEILPPQRTAGGENPRNALYVAVH  
NEPFELLKLGFRQVSELLGKSFETLDQKQVPTGFLNSFGWCSWDAFYSKVHPTGILEGVQ  
CLTDAGVPVKNVILDDGWQQVSPPYLHQQVEDEGKKTSSLAASLSLGS SDIMPDDHSD  
ISSSSLIKSVTSSILKNPLEM LSNIGGSIFGMIAGSVTKCYQKYVENAPVNSFPKRLWT  
FLARHSPLNYGLWKFDFSETDFGRQLDDFDPNWKFL ESTARDESEASEGNTKKNMALKEL  
VATLKN DWKVNRYCWH SIHG YWRGVSSSELGESIGIDVTQVKTRPSDHLRLRIEPEMAFDP  
PSLFGVGLIAKRDL SKFYKHLHEPLVAAGVDGVKVDVQSGITAAGMRGDNFDDCPPLAK  
IYTQAMEESVAMRFPSTTSSEATEC INCMCHSTENLYRYAKTSVARASDDFYPARPESH  
VHLVNVAYNSLFLGEICLPDWMFHSKHE SAELHAAARAIGCAVYVSDAPGKHDIPLLK  
KLVLPDGSV LRAQQPGRPTRDCIFADVGRDGI SALKIWNVNRSQQTSI STKQSLNIGSGG  
VIGTFNVQGVSWNFENNENEVL DASP PAVTAIVKPHDVIDLRQIVGPFVAVWSHRTQSMVI  
LPTGDSTIETVLQHREWEVHTVQPIQLNEDFNVQWAPIGLGKMLNSGGAILNAGRLIESD  
SCQEGNGNAFAQRKQLHADITTRGPGHFVSFCQPRPSYLLIRSGLT SKQLDFQHDEHSGL

LGFDLPTETLEGKAHHVTVIWEQ

>comp13869\_c0\_seq3; 840 400 3711 LEN=7157; minus strand; translated

MASRKATTRPVVFPSPGIGSILELFRGTVMKLLPLLLLVLPNQSSNVALVRAFSCQRTKPS  
PIVPHTKNSCFSSASSDDDDGNSRMRHQTKRYSTTAKNTIGSTEEIDVDSTIGGKINGRLGL  
PTDGVTVTISPPTPAELNHSKCLALSGLGRQNPILLFDGLSPETWTAARPDEGSSSAP  
LPSSFSLLALQTRIPSTAIESLCLGNFLPSSAPDNSHDSPQRRLQHPHKFLAASRLNRYW  
MGPKFGGTGVGDNSGETIPVDTQFLLVEIEPNEPGTSPADSSPPFYALMMPPLVDGGFRSA  
LESTSDSIKDDNDNDNTSSTGDDRRKMTLVSYSESEGEILPPQRTAGGENPRNALYVAVH  
NEPFELLKLGFRQVSELLGKSFETLDQKQVPTGFLNSFGWCSWDAFYSKVHPTGILEGVQ  
CLTDAGVPKVNILDDGWQQVSPPYLHQEEDEGKKTSSLAASLSLGSDDIMPDDHSD  
ISSSSSLIKSVTSSILKNPLEMNSNIGGSIFGMIAGSVTKCYQKYVENAPVNSFPKRLWT  
FLARHSPLNYGLWKFDFSETDFGRQLDDDFPNWKFLSTARDESEASEGNTKKNMALKEL  
VATLKNWVNRVYCWHSIHGYWRGVSSSELGESIGIDVTQVKTRPSDHLRLIEPEMAFDP  
PSLFGVGLIAKKRDLKSKFYKHLHEPLVAAGVDGVKVDVQSGITAAGMRGDNFDDCPPLAK  
IYTQAMEESVAMRFPSTTSSEATECINCMCHSTENLYRYAKTSVARASDDFYPARPESH  
VHLVNVAYNSLFLGEICLPDWMFHSKHESAEHLHAAARAIGGCAVYVSDAPGKHDIPLLK  
KLVLDPDGSVLRQQPGRPTRDCIFADVGRDGISALKIWNVNRSQQTSISTKQSLNIGSGG  
VIGTFNVQGVSWNFENNENEVLDA SPPAVTAIVKPHDVDILRQIVGPFVAVWSHRTQSMVI  
LPTGDSTIETVLQHREWEVHTVQPIQLNEDFNQWAPIGLKMLNSGGAILNAGRLIESD  
SCQEGNGNAFAQRKQLHADITTRGPGHFVFSFCQPRPSYLLIRSGLTSKQLDFQHDEHSGL  
LGFDLPTETLEGKAHHVTVIWEQ

>comp13870\_c0\_seq1; 550 183 2027 LEN=2500; translated

MNLELLDPFRKQIPDRIDSTLDLPTTFHFRKQIDSKEKGSKKVSVEEDWKAANHIAFNRR  
GSYIAVGYGSGTVGVFDVLSRTVSSLYRQEKFGPSSSASSSNTKGGKTKDLGADDHGVTS  
MSWSRRSRTLLVGLSLGSPVRLIDTTHPFGPEECCTGIQLSENKDGDDDNRSNSPAPID  
SKDVGKHSKQTPFKDKPGKDHYKKAARLKTRIIETQEGMPFPQSSFSENKIEETKSFE  
PANKSTKRRYPWVEFSFPRGIGNSLQIHPRNPACAGQAVLKDGLVAFVCPKAGFEGSKSK  
KHTSKTVDDVQMKESSEDEKSKHETPVVCVATLFGKDEYEVFCSTFDPOGEKIYAATKDG  
KILGFVKAIFDLLCSGCDTIPPLEPTFVIQIPGNAAWQIIVSRNGHHLVVNSNDAALR  
LYSTKECWERPAEVEKPLFVFQNIIVTKVKFVSYDLSGDGEYLVGGAQGNDAKYELYIWNT  
TTGALMDKLTGSNAQLYSVAWHPTRSFVAVAADDGLVDVWGPRINWTAFAFDQALPRNV  
EYVECEDEFDIVEDENGGSASKEEDSEENKVVDILTIEPVPVFQSDSENEEDVFTFEPAV  
GRPSGGKGGSDNAN

>comp13870\_c0\_seq2; 500 183 2121 LEN=2594; translated

MNLELLDPFRKQIPDRIDSTLDLPTTFHFRKQIDSKEKGSKKVSVEEDWKAANHIAFNRR  
GSYIAVGYGSGTVGVFDVLSRTVSSLYRQEKFGPSSSASSSNTKGGKTKDLGADDHGVTS  
MSWSRRSRTLLVGLSLGSPVRLIDTTHPFGPEECCTGIQLSENKDGDDDNRSNSPAPID  
SKDVGKHSKQTPFKDKPGKDHYKKAARLKTRIIETQEGMPFPQSSFSENKIEETKSFE  
PANKSTKRRYPWVEFSFPRGIGNSLQIHPRNPACAGQAVLKDGLVAFVCPKAGFEGSKSK  
KHTSKTVDDVQMKESSEDEKSKHETPVVCVATLFGKDEYEVFCSTFDPOGEKIYAATKDG  
KILGFVKAIFDLLCSGCDTIPPLEPTFVIQIPGNAAWQIIVSRNGHHLVVNSNDAALR  
LYSTKECWERPAEVEKPLFVFQNIIVTKVKFVSYDLSGDGEYLVGGAQGNDAKYELYIWNT  
TTGALMDKLTGSNAQLYSVAWHPTRSFVAVAADDGLVDVWGPRINWTGECSMGIQVWIPI  
LVQNLSSQYCHPCISSATAFAFDQALPRNVEYVECEDEFDIVEDENGGSASKEEDSEEN  
KVVDILTIEPVPVFQSDSENEEDVFTFEPAVGRPSGGKGGSDNAN

>comp13871\_c0\_seq1; 236 135 770 LEN=1299; translated

MRRPASPVPRNTRPALPPSGAKALQERLHILLTRLAKTTDLIKTWPDSEGDDASTHVKT  
TTKLI TAVLEVVKALQEVGVIQADAALKKSLQECKVPINLLDLLDHGNLNPDCFSRGL  
VKEALGQLAGLKRRIALKMLGAEIQAGLNKQEA V GKEGND CDPSSSTGSQKRKIVGSE  
DNKTSDEQQEQATDGAPEPTSKKMRIEASQP

>comp13871\_c0\_seq2; 188 655 966 LEN=1495; translated

MKTL LDCFSRGLVKEALGQLAGLKRRIALKMLGAEIQAGLNKQEA V GKEGND CDPSS  
TGSQKRKIVGSEDNKTSDEQQEQATDGAPEPTSKKMRIEASQP

>comp13872\_c0\_seq1; 606 806 2344 LEN=3105; translated

MNAGIKVSPPPITKNETTGSSSNVPSGFILKLYQMVNGAPNEVISWTPTGDAFIIGSDLN  
RLESETLPQYFRHNRQSLVRQLNFYSFRKINRERNVWIYKHNLFHRDHPEDLYQVRRRT  
CPGVDGRKQRF SRLSAQKLSKNSDLAGTSSSNTSDADNVENDSSSDEEDSIEEHEHRQGF  
FSSKRSHVEQMSSAKKPRILPQPEPDEFVDT SIVSNPAPSPTSVKALIFEPEETGDAST  
GGKNDKTEQMQLVSEVAIKLEEVKAMKKKGISRTRKGGSGIVTPPFGSSFTMTSR  
DLITYDDEYKQDTYKSDVVS DTDENSSQGGSNQRGCLNNADSDKDMLVAPVLDLNTVKHI



TSQIIQRSNPFNGEAMRACANVAFFMCTAPKEDPEQSSTKVLQLLATSKQLEAEFYFYR  
AALHPTLFLDTSRSQKGFNTAQSTALRTSLTRGAERLESREFKIFAVNLIYKLIKKTG  
SFANVESLSSSDNAILLHTAEVWSKSVGIGVC

>comp13873\_c1\_seq1; 1750 1 2985 LEN=3030; translated  
QLNRHLFDLIEDLRELHNDESFSIDDRVCCIQLVSNTSVLVAYLHQLSQSLLQDYLHFYM  
STAKLNYVVLRLFRSLVAKGYCSDKTAEEDGEGEGDIKGMTFDDNDGTGMGEGDGKKDV  
TDQIENEDQLAGLKSDTDNEDEKKQDESKQLNEEEEDQGMEMEGDFDGMFMDLPEKPDQE  
NEMEEQEGEELDTEMGEDTNQDDQVVDEKMWNSDDEDDINQDEEKFEEDGGVKGAELED  
MMRTKDEDEEGDEPDDGDKNPSSQDAEENNI EADPDEGEDKQDDQRINEDTEDRYEDDHD  
VNVVRGDENEEEPQEDGDDQMLDENLELDDDEDIDNGEDETGAEDTGGNDETGSVSDGPED  
YDETLGENSDSKEDENEIENEEAEDEKAANQAEGPMDLENEAGEEPEKDEDKTDEPPVDK  
SSEDPAAEEAHGIRSKDGTDAIVDDGDEVDEEEDANEENEAI GNPSGGKSDSNQADMDGN  
DGGGYSQVNNNDTNSKSDSSRDI PNPFKDPGDASKFWHRKLNII DTNDSPEPNSNI  
EMDDKDDSQNEKGDYEEYSGDPNDSTQVLGEVKEEEAVEMDLEDNADDKMDDEDKGEDQT  
EKVENEADMTKQKKNEKSQSRQKNPKSLMDQEEQINDNDLNEEGSIMDEAVKEESEGEDT  
VEEDEDSDNDNLGSRVVDLSKLMKEGEQPLAETSSRLVQDEYMSKLT SFEAEEARSHWL  
SIQGETQNLRRRLCEKLRRLVMEPLVASKLRGDYRTGKRINMKRVIGYIASGYRKDKIWL  
RTKPAKRNYRVLAVDDSESMNKSGAGEIALHAMATVAVGMNQLIEGELGVASFDDMKL  
VHPFHMFPFTSESGVSVVRNFKFEQQRTIAMCVESAMAALDDSGDQSSMQLVFLISDGR  
ERDSRAALKRLIREMMERNILLAMI IVEGKGGKKTILNMKEVTFEKGKPVVKRFMDYD  
FPYYIVLDDVASLPEVLGDSLKQWFEMLTQLQRS

>comp13874\_c0\_seq1; 320 1 1196 LEN=1417; translated  
XQQQQQQQADKKTASPAENDKQNKDKGQNSSKAATDDDDLF SHLPQYKEMDPYAPEYT  
ETLHPDVI ELGLKYASGEIQGDNERCRSMMQVFLQVLKDYVLP TTDKNTAADVDFRHFD  
HQVLKPSFQFWTVKCRPHSVSMGNAFTFLKTAVASLDREVSLEDAKLELEDTIQRYLQER  
LEYADRAIAQHAMDKI QDGDILLTFGHTEVIDVLLRTAHEERIDFYVWVVDARPDADGKK  
LLQSLREAGIPCGYIRFNALTYVMQVTKVFLGASALLVNGFIYKIGTACIALLAKSHH  
VPVLVCCETYKISNKVQLESITLNELGNPNL LLLASGYKENS KSKASRQPNLRAANLLY  
DVTDPDKFVSGIITELGIIPPTSVAVLLREMMANDTAY

>comp13874\_c1\_seq2; 347 1 1376 LEN=1376; translated  
PQPLPPHHHSPPPGYVTLHVQVPYQQLGPGREMLVQSPGGFPVQVVVPPNIPP GTILPV  
QVPSVPLHMMPKAAARGSSPGAYGGASRAAGVAYQQQLALQQQQQQYHQPFQQHLAYQ  
QPHPYHRGPPYQQQHRPQQXPKQPTLPQQAPAPASRAAAP TTPAAWKEKVRGKRAAREEA  
MRRNATQRNATPGRRGAPHGSGEEREQREGTTGEETKGCETKRYEPRRRHGGTTAARI  
RLESGSNQTNKQPTNQPLVAQSETRRSAPFFFFRSNLFRASPCLSSSTMREARYATQGLRV  
CGSVVLACVRIRVSRNTEGGRTPHTKHACMVI EHALFXNTMQMHREPLAANQTKPNLPWH  
APHRPGVVMGTDATPTGRPVENSSTGQQPPP VAGADLATGNCCSKRPVQWRTSSSSSSSTS  
TSIFLQQQHFIRTIHEKYKKYSALQHHQQIYSSQEFQFQX

>comp13874\_c1\_seq3; 390 1 985 LEN=1183; translated  
XNSNSNNYHSDDRNHAMGQPRRESLSSCYSRRLSLNSVGSNFHSLETATTATTASPTEDD  
EERQLMAE IHEVERQIRQKKLQQQQQQQHHRIGETRPRFFATDPEPSGARGSASHWCNGT  
SSIWEIDDCRSRGTGTANERVLDLWAGNRRLEDSINRLKNELSATNLSRAGSSRSNAGNN  
SADGNANNPNHGTTTNNANANANANHESSNRSSPCLLFSMVA PVTPEPSKQSMQMLPRIPT  
GAPGGFHRGCGPKGFHRYGAHPHANANAHGEGDHGVARGSSVRPQQDEADMDGGLDVPVFD  
EVFCSGNVDAKRRELISNLAHLDLFRLG

>comp13875\_c0\_seq1; 393 1 865 LEN=865; minus strand; translated  
XPTYISNIQQNQEQSKSKDKSSSTSNNNSVLGGVATLAAATTAATVTLGGQAGSEFLD  
GAKRQVEAQVPPQAKELIASVNTQVQKQSKVLPYLEEQIKAAEAKLEEHAHLEEKTKTAW  
NGLADYLNDQEI AKRETVSTTPTITSSEPEGAITSARISVGEAGTRMAAVEEGVTTAAIAT  
ASIPQSLVEEQTASKVEEVKIDRTQDEALRIDEVQKAEAEAEALRVQEAERAEAEAKAE  
ALRIEEAQKAEAEAKAEALRIEEAQKAERAEAEAKAEALRIEEAQKAEAE

>comp13875\_c0\_seq2; 1291 1 2449 LEN=2449; minus strand; translated  
XEALRVQEAERAEALRIEEAQKAEAEALRVTEEEKAQVEAEAFRI IKAQKAEAEAFQSQE  
AEKSDVFEGLQVEAPEVEDEVFRIQAAEKAEAEAEALRAEAAAEEQELADA AKIVAEQLE  
VARREVEEATKKSTETRTANSIPRSSEINTNSVEVIKDTGPVAKSAPSVVESFGGNFVVA  
QDEKDFGNAGVASTQSRETATGGVSKNNIEKPPPEKVKNAITVEVESVVESSTPEKEDSI  
LKEVPETSSPALSETLAASGAVIGSTEMNTVEVSKNSRNIVETATEIFESGKRTAQSIVK  
TGTEVVDTGKRTAETIVNTGREVVDSGKRTYNTVVD TGKEVIDSGKRTA AAVEETAQKAA  
IKGREMYETGQKYVTIVNENIPI IVEKGEKVI EAGKEIAQDEEKVKVIALGTAVVGA AVS  
AATTSYALQEKKGTGDGAVAGEWNEEDSGTEANAYVAPTNTTTFPKPKQKPI INSKPIPSQ

ASQNEFSSTSNPKSFSSTASSKKTAFPTPKSFPSKASSDPQRAKA AVSQTTRPSFGIPN  
QKAPSKQSFAGTEAGSPPSKITGVGKEVASPFGITPKKAPVRKQPSFGSPPPKKVGDKE  
GAAAFVSPSKQAPFGNEVGLGSSLSKNVPPKKQGAAPFGIAPKKVPFKKEPGFGSSTTKA  
TDSKTSTDEASIESRTKNQNSTSSIQPKFGIPSRITPTQQMETVKASKSGTAMPVSKKQV  
AGSTFGRAPFPQPPKNGIIEPTILKSTTEEEESADAETITPSLGESKAKMPFPKANLTK  
KPNFGISSNINSSAKEQNDEKKSMSFSGQAKAKMPFP

>comp13876\_c0\_seq1; 168 279 1328 LEN=1981; translated  
MSKTI RLLPRAATVLLMLVLFVSVGFVSARPTSSSSCKDDPDYRWKCKRQTCEWLGNOSEQ  
KREKLCNKTKTKKKKKQEWQPPSEGCPCETCGTCGIETEPAAACPAWKPRSGGACSPQE  
GIDCDYDFRWSGCVAEDLRCLPFAFLSCLRGQWFEAVVDPPFCREPPPPDLVLETCDPN  
SFCPPVPPEAGTKCRFTGTSEEDRLAGCPYNHVFLGCTFATGMLCTPIDIFYCDAEDGFW  
QRTSVMVPVPCPEIDPGFPRFGTCSPCPSVEPAGICPPEEPLSGTGCSGHYGANGDAPLD  
CYYDFLYRGCTTEGLTCQPGVVYCTGEEAQTVPWRKAPISYPPDCCAE

>comp13877\_c0\_seq1; 724 247 2148 LEN=2386; translated  
MSSQKCDAPFTTRSSLESDETIALVALQALQKQSGMMLDENEMSKSIPTSELVPLPSMDS  
AARVVSTQTNDSADESKSLPPLPSQAEKESTMPASKSPSAVTVLKSLDADPSADKPPLS  
TSVQSLPASSITPDNDIDSKKGNEDPLKPADFSAILS DPEGWLQQTENSFANLPPIDHSP  
IGHSNVVVKPNDVLCGRGGETNHHHPGNVQYRSLVKAYQKLYLLAKRRDKPKIAQCIVVSI  
RGVNGRFLKRMKNPKKVGGCYWVDVGNVKAREKTSQALREGAPDLRET VNNSTHATTSTT  
DHRRNHGMLPTEREETTSVSLTPMASRPPRQLEKLMGWSNSINANKPASPLSPTNNSSET  
DTTAVCEKAFAAGTKRLMQHPAFHTLDPVLQQQAVLYEFELAQSAASATAAKEEAASKALL  
PPTIQGTTSP IYPQEI PHELPHYAHNYFPHHFNYYPGEGLLDSHKASDIATGKTPATIT  
SGDIPYPPKCRANVEFYHLHLSFFDKAAASSGDHSMIARMNNKENGTAHTLTNDHKRNMN  
KRSAPSAPSVITSMDTAPSAKCSSHSSSPPTVVSDTGSESSSSSSSLASSCSSSSSAKITTT  
VENKKEIISSSVSRGRSVKRLKLRMQSDCKSE

>comp13878\_c0\_seq1; 671 153 1721 LEN=1842; translated  
MNYVFSVIRSI VLLSMLSVEAARKQRSKDLTSLEYSVFP RRTEEEAAVFEWGHSAIIS  
ALDASVAKFGPQTS DAALLEVECMPILASPVNGAMRGEDGEKEITALRNADDIHGNIVVM  
TNNGGLSGVEMAKIAKLSGAAALLVNIDEKRPDDINRLDILEGEEEDAEDIDIPVVMIS  
LNSANVLTATVEAHMEAKDIVNNGMPERIRLYAGGDRPFFEDVEPLNPTLYLIHNLITG  
EEADSLVDSAKSKVEPMKTGVIDNLQLNTQPENYPGVESVMLWKALASPAQKAVEERIE  
QVTGF PATHFSDFVVDKLES GAHWKPHYDKHSDAFDSTPVATIIVFLTQPGDSESGSIVY  
PGSKKDP I KILRQKGLAIVHHNMDNNSALDLSTLHAMMPVAEGETVYVARKYVFEQPISQ  
SRRVALP IFAFAFGGKLP AIVDFHDMLVENFGAE EGGIYFDKACVFLPLLVL LLLIAQFL  
VNYVKDQIMDTASDNQTNEKTRKKS AKSETKQAKKSKKGS D

>comp13879\_c0\_seq1; 518 1 2225 LEN=2367; translated  
XKIPFSLSAATELSWPTRTDE TQEEIYGRSREAPGYGYPDPNTMKHRKIGTSSKRLAKY  
RRDSTCFHVFLDRWPRLVAI IKCFFL FACLLLVTFLGGYAI SRLEFPHEIENNDSIMREK  
WFLQILPVNKT KNAIKELPAACL RYYGNLVETKNNISTDTIDKSELESSGIASNHSFVEQ  
ANADMFFLRFQSI FLSHANVT FEEFSNFTNSTIFSDSQASVSTDGIHNTMISANNIAHNS  
SSLSDSL LGVMDVCS DIVSELVTGLLDFTVEATNREQNSQDLTFNWIRCWNISDSGMDL  
YKATTQEQ INASQTPNQKRYFAQEWKNQKELFH HYLTELNCNENTTAMVFDGLNFSKCT  
WKAMKQSVLDASAGKGCYANTASASWFWFTVMTTLGYGNSVPNTVETRILVFAFGWLSV  
AFGGIMVVC SFTMTTIADDVLRVLRNMRWLRRIYSTPAWALITAAYSVLLAYQIQNYWNV  
QVPEFSYKTGDSYWF SYITLLTIGLGD FYLQSEGLFFYNVIVWSVMALTGFI FTTSFLSK  
FSELIVDCFPRDAESLEYHLARTDICGYGINTPISKSLET LRQLIDKERE EVVFGALIES  
QYDSHCNQEHSGKSYRSSFRRGRDDQAKTPDGKTINHHR IQILIEKKNILIRLLERNQSE  
MEDRMDSNI ILESSTEDKGRFGIY LK SQGARESLT TLEELRRDEEILESTLTRTKDI  
RRSLEAQCKNMVSDSSSWGSE

>comp13879\_c0\_seq2; 552 1 2338 LEN=2480; translated  
XLELLSRWCTVQRGENAQDITI QLEVDVEHXDDSRMSVLVGHDNSVAADNENGILNMDET  
QEEIYGRSREAPGYGYPDPNTMKHRKIGTSSKRLAKYRRDSTCFHVFLDRWPRLVAI IK  
CFFL FACLLLVTFLGGYAI SRLEFPHEIENNDSIMREK WFLQILPVNKT KNAIKELPAAC  
L RYYGNLVETKNNISTDTIDKSELESSGIASNHSFVEQANADMFFLRFQSI FLSHANVT  
EEFSNFTNSTIFSDSQASVSTDGIHNTMISANNIAHNS SLSDSL LGVMDVCS DIVSELV  
TGLLDFTVEATNREQNSQDLTFNWIRCWNISDSGMDLYKATTQEQ INASQTPNQKRYFA  
QEWKNQKELFH HYLTELNCNENTTAMVFDGLNFSKCTWKAMKQSVLDASAGKGCYANTA  
SASWFWFTVMTTLGYGNSVPNTVETRILVFAFGWLSVVAFGGIMVVC SFTMTTIADDVLR  
VLRNMRWLRRIYSTPAWALITAAYSVLLAYQIQNYWNVQVPEFSYKTGDSYWF SYITLLT  
IGLGD FYLQSEGLFFYNVIVWSVMALTGFI FTTSFLSKFSELIVDCFPRDAESLEYHLAR

TDICGYGINTPISKSLRQLIDKEREVVFALIESQYDHCNQEHSKSYRSSFRRG  
RDDQAKTPDGKTINHRIQILIEKKNILIRLLERNQSEMEDRMSNIILESSTESDEDKG  
RFGIYLSQGARESLTTLEELRRDEEILESTLRTKDIRRSLEAQCKNMVSDSSSWGSE  
>comp13879\_c0\_seq3; 248 237 1166 LEN=1308; translated  
MTTIADDVLVRLNMRWLRRIYSTPAWALITAAYSVLLAYQIQNYWNVQVPEFSYKTGDS  
YWFSYITLLTIGLDFYQLQSEGLFFYNVIVWSVMALTFITTSFLSKFSELIVDCFPRD  
AESLEYHLARTDICGYGINTPISKSLRQLIDKEREVVFALIESQYDHCNQEHSK  
KSYRSSFRRRDDQAKTPDGKTINHRIQILIEKKNILIRLLERNQSEMEDRMSNIILE  
SSTESDEDKGRFGIYLSQGARESLTTLEELRRDEEILESTLRTKDIRRSLEAQCKNMV  
SDSSSWGSE  
>comp13880\_c0\_seq2; 416 1 1429 LEN=1496; translated  
XRKLLQKWESIIRANHGVENFGKITHFDETKSPSSRLHNSRPVGLTSDSNKSTKTRNR  
SFGLSDVTNNLNTSPVSNFVRSDCAVAKSQTAKEAIKSRLSFGSSNFTKPTFTKSKD  
HTSNNNKFQPARERRSFGLSDFVEGLDTPSANRPDRNDTFFGETRNATNLRSSQSDSLVSK  
VTKIVSSTEQDKKLEKLVGMQNDRVIEENEISKRAGKSNSMKHTTSSHFPLOQSVNMF  
SLACSDNYQEKSKTKFKKTPVRALVILEHPKCDVVAGEAIQCNRDEGILMIKNLNTKID  
GAECECLSSVFSKDDLSIFFLPQMGMACGCRKRNRLVNPDDPTSLENILRPWQVEFLK  
SIGIYQGEFVKAHVRSGGITARAMRQWRKKRGMNSFKTSACATALQIWSKICKAHVRSI  
RRQALAGNENLECMPLDEALFREMSQFLEGLPAAPKRRDHFADGFDDFEPGSQVEV  
>comp13881\_c0\_seq1; 337 596 1966 LEN=2035; translated  
MDRTTALLAARFTSAIARLCLGPLLMLSLSLGFSEDSKPIILLSAYSSGYLLTQIGGGY  
LADRHGYAKIVSVTVGLSSLILFYVSSFATTSLAWIRAFFCLGLVAGPLFPAGSAAISAN  
VQADRRAASFAIIDASASAGTTVASLAPIVADYMGWRFIYRLTGICLLLVALGVISSVGS  
NNAPKMASLPSALLSQTSHHFKDDKNSSKSRMMLMINSVLLPVAVCAYLCHCCDNFT  
KYSINSWAATMLVNRHKASPAVVSSILAGQEAQVASKLLIGTMVVSFQSNMTSSSLFVK  
RGTISAFGFVLQGIALWYAFQAANPYQAGFFFIVSSIAAGTHSVGFPRPVYLEASPPHAGS  
ISGFGNSIASCASVLGPMVIGSSVYQITIDVKQINPFRRLGLGLHPRKESLTIREDWSKV  
AFYMICTNVLGAMAALVIGYSSMRRRQEKQRKEYTI  
>comp13882\_c0\_seq1; 343 1 1553 LEN=2102; translated  
TTTKRTAATKQLQYLLHFPQSKQMYNNHNSDNHDESFAYDAALLRSLHFSGVQFLRYCT  
VDAFNNIRCKAKPVEHLLRRKERGGNRARGPSRSRSHSRSHSVLDHQVSI AEICYAGLPS  
YADVAIAGTGLTASDVLLRPMGSRILPYAPRSAMVMGSSVDQYTHETSPLCTRSLLG  
MVVERARNEHNLI FSVGVELEFCLVDAKTHEFVDES VFAGTTILNEREDFVGELYDQLKR  
QYVPVELVHAESGPGQLEVVLEHSDDPVGLADSLLLARETIRALARSHGHKALFLPKYDA  
ARAGNGMHVHLSVSDATTGAPVFCEGDSLAQRGSSLVEGILHHLPGLLGLTMTPTANSFRR  
VGPWCWTSRVRGWALEDKEAGVRVCSNLATGEWDHVELKLF DASCNPYLGLAAVLSSGLD  
GIARGMELRPPLSKDQRGPLLPELTDALDHLEKDATLSETMGPRLAKAYLAVRRHEAER  
SSGMTLEDELEALAXVVAAGTRSEKEASDGSSWQSP  
>comp13882\_c0\_seq2; 341 1 1728 LEN=2277; translated  
TTTKRTAATKQLQYLLHFPQSKQMYNNHNSDNHDESFAYDAALLRSLHFSGVQFLRYCT  
VDAFNNIRCKAKPVEHLLRRKERGGNRARGPSRSRSHSRSHSVLDHQVSI AEICYAGLPS  
YADVAIAGTGLTASDVLLRPMGSRILPYAPRSAMVMGSSVDQYTHETSPLCTRSLLG  
MVVERARNEHNLI FVRVEVYFFWDPPAIAFFCPRSSEWQRSSRFFFGFARFVLVPLVLI  
CRGFVALRSVVQSVGVELEFCLVDAKTHEFVDES VFAGTTILNEREDFVGELYDQLKRQY  
VPVELVHAESGPGQLEVVLEHSDDPVGLADSLLLARETIRALARSHGHKALFLPKYDAAR  
AGNGMHVHLSVSDATTGAPVFCEGDSLAQRGSSLVEGILHHLPGLLGLTMTPTANSFRRV  
PGCWTGSRVRGWALEDKEAGVRVCSNLATGEWDHVELKLF DASCNPYLGLAAVLSSGLDGI  
ARGMELRPPLSKDQRGPLLPELTDALDHLEKDATLSETMGPRLAKAYLAVRRHEAERSS  
GMTLEDELEALAXVVAAGTRSEKEASDGSSWQSP  
>comp13882\_c0\_seq3; 344 1 1710 LEN=2259; translated  
TTTKRTAATKQLQYLLHFPQSKQMYNNHNSDNHDESFAYDAALLRSLHFSGVQFLRYCT  
VDAFNNIRCKAKPVEHLLRRKERGGNRARGPSRSRSLDHQVSI AEICYAGLPSYADVAI  
AGTGLTASDVLLRPMGSRILPYAPRSAMVMGSSVDQYTHETSPLCTRSLLG MVVERA  
RNEHNLI FVRVEVYFFWDPPAIAFFCPRSSEWQRSSRFFFGFARFVLVPLVLI VCRGFVA  
LRSVVQSVGVELEFCLVDAKTHEFVDES VFAGTTILNEREDFVGELYDQLKRQYVPVELV  
HAESGPGQLEVVLEHSDDPVGLADSLLLARETIRALARSHGHKALFLPKYDAARAGNGMH  
VHLSVSDATTGAPVFCEGDSLAQRGSSLVEGILHHLPGLLGLTMTPTANSFRRVGPWCW  
TGSRVRGWALEDKEAGVRVCSNLATGEWDHVELKLF DASCNPYLGLAAVLSSGLDGIARGMEL  
RPPLSKDQRGPLLPELTDALDHLEKDATLSETMGPRLAKAYLAVRRHEAERSSGMTLED  
ELEALAXVVAAGTRSEKEASDGSSWQSP

>comp13882\_c0\_seq4; 346 1 1535 LEN=2084; translated  
TTTKRRTAATKQLQYLLHFPQSKQMYNNHNSDNDHDESFAYDAALLRSLHFSGVQFLRYCT  
VDAFNNIRCKAKPVEHLLRRKERGGNRARGPSRSRSVLDHQVSAIEICYAGLPSYADVAI  
AGTGLTASDVLVLRPDMGSFRILPYAPRSAMVMGSSVDQYTHETSPLCTRSLLMVVERA  
RNEHNLI F SVGVELEFCLVDAKTHEFVDES VFAGTTILNEREDFVGELYDQLKRQYVPVE  
LVHAESGPGQLEVVLEHSDDPVGLADSLLLARETIRALARSHGHKALFLPKYDAARANG  
MHVHLSVSDATTGAPVFCGDSLAQRGSSSLVEGILHHLPGLLGLTMTPTANSFRRVGPWCW  
TGSRVGWALEDKEAGVRVCSNLATGEWDHVELKLF DASCNPYLGLAAVLSSGLDGIARGM  
ELRPPLSKDQRGPLL PETLLDALDHLEKDATLSETMGPRLAKAYLAVRRHEAERS SGM TL  
EDELEELAXVVAAGTRSEKEASDGSSWQSP  
>comp13883\_c0\_seq1; 548 308 2401 LEN=2619; translated  
MGAATRSMSKRRARTSHFKETDESPVNYWRNSSRKN SNEEQ LNKN S NSNLYSPPPHSNP  
ILYSSEYQWRRQTNLARRHRRMEYLTGDDDH I IREVPYEESEDEIDIEIFYHDYEEETR  
NAGSLVVDNGDREAYYQQRHVRGFDLDEHDTRTVTSNNKMEENNCN SSSSSSHQSPVGDSE  
TRIPTS VKNSSRRNRSRSRPRTKTKNAIHHGRGGSRSDSELDSL SAHKRALHEAKSRSP  
SILRKDNEPHSILWSENDPQRIRRTSSSSSLTLVDLEGE GSIANSSSHSDNLF RKALTRP  
AGTSTIATVSSQPFLLRKQSSRWKKNKILLWVLTGVSYAAGMVAIYYTHGQSYASLSFT  
LDQVIAHAQKERQAAAHFDFIEKELRDVRDQMLDLDPDGTFASENEEGLPGASVEKNGE  
ETNEAPQQRRRSATNGGSDG DENHLLHHQRETASELLGEIVAVKEKLRIETSQMSQLE  
KYIQASSLRDARRKYGTGIIRVQIDLDFPEDRINHNI IEDIIDNNMYNEEDHTS IGRRR  
LSSSLADASDTVLVLMAPLELMPHSVYTFLEMANAKLFDGCSFILNAMHVIKAAPLPYDG  
GSASKKVKAF TKLGLDSVAFREYSDEYPHEQFTVGF AADGSP SFYINTKDNT EHRGEP  
FASIVSGYETVERLMSAPTRNGMWFKRIGIKQARIL  
>comp13884\_c0\_seq1; 829 1 2660 LEN=3026; translated  
XPLSERSIELSQRRDMSCYYLAL TLLAFVSVGT SFSVPHFSKVSTTARMSSTSTTDAER  
GTQSSYLPTKEARPTSDGADAITFEDIAKYPGRAFLSRAGAPTKIRFGADNESLIYLGAG  
GEGGSLTQKLWKRTFIQEGI IAVEDTEDVITELAKPPEGVQEDTLSEEEKLRRETRQL  
ETGITNFEYSGNKQVILCPIGNDFVLREGGAEP SLPGDMGEPTLDGSNNSNNGNDSNEL  
VQIVDSTKLPGSVIDPHISDDGSI VVFCENEL YMASTVFDGDEI PAPVKLTHDAKNGIV  
NGLADF IAMEEMSRNEGFWISPDSKFVAFEQSDESHIPNYRIMHQGQADPARQEDHRYPF  
AGQPNPKVKLGLVLAN DGKGPVTWLDIHS PFGEDMYLARVQWGKSPFLEQQHLYVQVM  
NREQTELVLLRFDMTEGETNDAPLVGKELIRETAKEGAWHNLHDILVPLKSGGFVWASES  
DNGFRHLYLHDGDGNRI VPI TQDMERGPEYDNW MVDSCTPDMVNQERDAYYFTGT KDGAK  
ESHLYCTSIEMWGDGEKIRRVTPEGGVHSLA INTRTGIFVDSWSSINEHHKVAVRSLED  
GSILRMLHDGSTTDKRVHEL SLPAP EWFVDTSTAENENASGKESMTLHGAIYKPDPEIYG  
DGPYP AVSVYGGPHAQMVTDSYGMTVDLRAQRLRAQGYVVLKVDNRGSTRRGLDFETAI  
RYDMGNLEVEDQVEAVRHVWEKGVVDPKRVGIYGWSYGGYMSAMCLAKRPDIKVAVAGA  
MVSSWDGYDTCYTERYMGTPESNPEGYERSEVMPFVDQIEG SLLL VHGLIDENVHFRHTA  
RLINSLIKARKQYELLLFPDERHVPRGLDDKIFMEERISSFIERCL  
>comp13885\_c0\_seq1; 621 1 2137 LEN=2281; translated  
QQQQQQHQHSAQLSPRLQSTVPVVPKTQCVNQ SMLR DIAADSLAGNAIKRSDFDKRQFA  
QPRKEIPETAASTTKKRGRSSSKDTIDIESLGRKKAKGKKT KDGTTKVASKKESKIEN  
KGN SRKPSVQDLLDFATSTEPSTKSSDLSPSKTLDLASKSPRGSFGDLIEAARKETQND  
AAGILTSIKKDTTEWSDSEDERAE EEEEEERQIAVAKGDTIILPNFQSFLPQISEEPVLELP  
AGK KKKKHKYFLDGDDSSVETKPSGRKKDTKTIRDEEKKA FERVFGDLSYPIDPWWPTVT  
SIKREKSLGQTHNDDDDNLQKVG NENQFRANLEKIEERLKH DVEPGVLEKIPHCRCHRM  
AMKKRKNSSSQELVYCTQVTELYPNEVMVCCSHCGTWRHTSCGGHYKAYSVREAIEKPFK  
AICDRCYVEEKILSDKPLARKRIDRQRIEQLRRLSTSAAMRQHSFSKHGGTYKWPLGVS  
SATHIGGHTRSVHSRHDKAEKQWTDMATKLRGYGHRPKEKVKVRTKEFERLLISIEDAG  
KEV KRQATLTF CMYLMVSLTLFNFLVKSIVSEGH TDRHNMLVFLMQDTLRTDPVGF EKR  
RRNLFDPEDEDDQEEDT SNAEVLSGSEDESENKKPTVLAITEQKSRNNLEDSDKGANKD  
ACAICAKKGC SKLSRFDSIFCSDACGVSVLES DLLRTFFYSSDIHPSSLRH  
>comp13885\_c0\_seq2; 651 1 2037 LEN=2181; translated  
QQQQQQHQHSAQLSPRLQSTVPVVPKTQCVNQ SMLR DIAADSLAGNAIKRSDFDKRQFA  
QPRKEIPETAASTTKKRGRSSSKDTIDIESLGRKKAKGKKT KDGTTKVASKKESKIEN  
KGN SRKPSVQDLLDFATSTEPSTKSSDLSPSKTLDLASKSPRGSFGDLIEAARKETQND  
AAGILTSIKKDTTEWSDSEDERAE EEEEEERQIAVAKGDTIILPNFQSFLPQISEEPVLELP  
AGK KKKKHKYFLDGDDSSVETKPSGRKKDTKTIRDEEKKA FERVFGDLSYPIDPWWPTVT  
SIKREKSLGQTHNDDDDNLQKVG NENQFRANLEKIEERLKH DVEPGVLEKIPHCRCHRM  
AMKKRKNSSSQELVYCTQVTELYPNEVMVCCSHCGTWRHTSCGGHYKAYSVREAIEKPFK

AICDRCYVEEKILSDKPLARKRIDRQRIEQLRRLSTSAAMRQHSFSKHGGTYKWPLGSV  
SATHIGHTRSVHSRHDKAQKQWTDMAKLGGRYGHPRPKKVKVRTKEFERLLISIEDAE  
GHTDRHNMLVFLMQDTRLTDPVGFQKRRRNLFDPEDEDDQEEDTSNAEVLSGSEDESEN  
KKPTVLAITEQKSRNNLESDKGANKDACAICAKKGCCKLSRFDSIFCSDACGVSVLESD  
LLRTFFYSSDIHPSLRH

>comp13886\_c0\_seq1; 301 330 953 LEN=1553; translated  
MNSATAACLLRRVIVAQQSLRHGAAIERATRMAASKITKSAHPSSAATIIRFFGTPAKKV  
AESSSTAAVVTDSNDYKLVANIKKLLSDDSQEEVKPISNEDLEIRLEHYKRVFHEAE  
LCLSDLRETLFEADKQYREETKCAEGAVNNAFTAYVDLLEDLQRSSEEQLSVYGEVRNN  
HACNLRLRSELDKIIEVADNRVRASS

>comp13887\_c0\_seq1; 492 422 1339 LEN=1509; translated  
MPETSVKVIEETSILSVIKQIILNAQRDGCWQSGKGGVHRPPSDKYAAAALGNLPSVSVL  
NCAIDLWRALEIDDELLEVAIRDVSYQIQLKEDGGTDDSIQDEKTKCEPALAELDSWPT  
MNTSSSADDTYDPRHRFNPRVDPTVLFLEIKKLTFFNLENFLFRIEKHESKRITFDPVFE  
GTSSILVRNVLVIRVKCVKGYIPKPAGRFDIPVPVLQLSDDLVSLEEVKLEVQDTGADW  
LLNKIVDGFGRFAEIIISANLCDQVRKQMDALDSLNGYFEENPEFLLGVLDISLDDLEE  
MTIFV

>comp13887\_c0\_seq2; 1621 1 5082 LEN=5252; translated  
EEFIEQQYARLQRRKDSFRQQSRDRGDPKAVLERASSVVSLEDFRQEFVRDHPAADGG  
DVDEENENPRDDTDKVTGISLGLQEFLEGEDSLDESEEHHRSGSLGGCGTTASLPRRQGL  
RCSESRGAGDEKANNANANANSPHTNGEDDEGLSDDGTTTDMNWMVDVGHIEIGMKLLSS  
AVQNALASHDTVEKISTLKEKVDSHFGNGSHKPQPSALAPNTSVGEDSFPQARTDGS LHG  
GLSEASPVPREKNTFVAAGRDSAVHKRGGAAESSTQASEAAAPRHHCYQLDPYAEALP  
VHPMWTSAAAAATVSPHFSFATVETIGTTREPPPEDTHQKTTTGSSEGGGTVPAQTPSA  
AAF CANRIGPPGAGEDALSSAHLGRQVLRLLDDDLSELSPLSPPCVTKDAEWDGRRHCK  
ERSTSGKFEQNLPTIGPTHEGASKGKQSSGKLSSKIVSKISKTSSAVSKTIFPRRRK  
PSPEDKSDPNDSREILIEHLSPLASKPTRPLLLPGVKIAVPLIPIRPNPKERRSSRKR  
KERFHMATVVSCKRICVYEKNQMPKSGNRKSNCLSI TVHLDKCFLRNGHFATMTMRIMDD  
WGARYMPKHSLPMGSCVATSFGLGLVGVWRVEDDCHIVRSLWQHRGSGSACAYLQRDSI  
HATVEAAVGFVNTAVGHGTVVGYVNGGPDFRSGRYFVNISEEGRHHKQVLELNRTDLLS  
CPSAKFIPIVEHIRAAAQYQLQIDRYKKLQDEKTMDAEETNNRLWGEFSKHFNVLWKSFL  
RAIEEDEFDDGMNEFIQSCVNFNLKLLDDPNVGADGSENGGKDAQQLSLSDFSIIHATDSS  
KSQLSKSTSSAIAAGDKADRSDSGFWMNMFQIFQSTRNSSGKTDVDLGTGRGDVPVEGI  
EIQCTPRRQHLSAKNYTRAFALRTRTLRTVTIARAASADEPDFKIALSVCHEFLLFVKTV  
IKVQKQNMHDHSLIWRSAWSEIVSVFGPVQQLRRIEGEIAERMEKHGRRAKVRLLRFV  
DYILQDESLFLALEQGDWTCAEQIEIAMVNANIIDKQSRHYRKTAFQFLYNHFSATSR  
SNGAAARNNQKLAQFLLAIQLFAPRKAILELFLQDRVLEILERIFVRAFSKDELASRML  
SIHCSNFQTLRRFRMLKDFTIAGKLWIPLLDAADEEFSWAVSKLPANAQEYLSPISSLF  
LCVVQFHKMDEGLTKDWLDFMMEGEAANIIDHLDMLKILALEFSRDIKDTMVVLPYYP  
SIEDDFLNLVDDINVDEFVKEASIALEDEGLRDFIKEKATVAVERFLDYLKMSIPVEK  
RDLGEGWVLTCTRGAGGDLTTELNLKRENLTQVLLGGDSLLFPAADTLNELGTTSPGTS  
SILPMIRSMETSVKVIEETSILSVIKQIILNAQRDGCWQSGKGGVHRPPSDKYAAAALG  
NLPVSSVLNCAIDLWRALEIDDELLEVAIRDVSYQIQLKEDGGTDDSIQDEKTKCEPAL  
AELDSWPTMNTSSSADDTYDPRHRFNPRVDPTVLFLEIKKLTFFNLENFLFRIEKHESKR  
TIFDVPVEGTSSILVRNVLVIRVKCVKGYIPKPAGRFDIPVPVLQLSDDLVSLEEVKLE  
VQDTGADWLLNKIVDGFGRFAEIIISANLCDQVRKQMDALDSLNGYFEENPEFLLGVLD  
ISLDDLEEMTIFV

>comp13888\_c0\_seq1; 489 1 2510 LEN=3164; translated  
XKVLHSSPRIKMMLYTSWIAKAIIVILCLIWLIAPPLFGGAWGKGLFASWASESFLQDK  
KAGVILMLTFPILIASVASLFTSTRQSDRQONLQICGRFRSSWSTIHKRLRPLDQQ  
SVLIGLIVFFPCFVYVSSMGRKISLDMSVDTALSKSGNIFGMLAVVVLVSWQWIPVSRKG  
PIGKLFAWSIKVVNYHMWGGRIIVASIIHATEHSLRYALQKDVWKAFFFPPIGCWKN  
PQTYKPEICDRAEESSEEGCSCYDHFLPITGLTALLGLMLIGFSSREKIRRHYFATFATLH  
YTLTPLTFLAICIHYNKAILYASGSLLYLASNFPSWVELLLKRARPYGRESNIKVLTIE  
KLQSDGDSNKNNDNLLRRCIALTIEASEATVQCLPGAFIYVLVPSISKVSHPFVNRV  
LRKTNQIRVIFRVTGPFTRALENALFSLSTKMTETTAPLITGDQSDSGSEEEVLNVYSC  
AEKNSATTFPRLYLDGYYGSGSILNQISSHNRVLAAGIGITPYLSLFLDLKSSTSSGE  
MDGLMLRSNLGASQPKVILHWICRDP SLINCRKEYMNF LTDPDFQKKNHGQNSIR  
VIIHHTGKDDVIEESARPITTNLSRSNAIETSHHGGIPFELSSFSVSI GMLDCVRNFLV  
FSIISWGGLVCLWRWFGMQKDAYINRIYTLVIVALYGLIVALLANFLGYLSERRSRNYA

GYTADLSEDENEYLGKSSDVELSTFRDANDSSPPNSLDDVPNEDSARTPSVNFEMFRGRP  
NVESILQDLDGAMSPALFCCVDPDLAKLLRDGLNRNSRAGGMLMQNVSVYQESFEI  
>comp13889\_c0\_seq1; 203 1 813 LEN=996; translated  
NWSIFDILPEEPSPPWILGPPHTRNPMRQHPEPPHEQRRRRRPNAAGIFSAAALLSRTV  
LLLLAAGRSHALVARKAKRPAGLFAGCCGRRPVVGPFAFLPAVPGKIAPARALTERRLS  
TDEGDAAPATANKEGVPRSPDRPVLSAIDAGALLVFAAIGKASHSGPDGSLDLLAVGAT  
AAPFLAAWFLVAPLAGSYTPDATRDAKEAAVRAARGWILAVPLGCLLRGIKGYVPPLPF  
VVVTMVSTLFLCLGRVGYTVLSELYVEMF  
>comp13890\_c0\_seq1; 376 203 1282 LEN=1765; translated  
MLRRGGDPNNNTARPCGPPRRRTASDGGHSQGGRATTAVAAATIGSAPRRKPIRGLLKL  
IQGQIGKPTGAFPYGSGGERSANANPVENATVSVYRYHGETLRASQLELQKRRRRTR  
SMTHQTSVAHADEECGGTNNNAVQEQQLQLLQFSSASMPFADVNRHRFVAFVFIQGW  
RAGTKAGDTDGVDGFRFYSAHTLALRKLLATDYHDVMSTFVVDLTDGCGGGGDIPL  
PFCDEETGFCNSGSSNNNNNHKDSEGTSRFCRGTGFAVLPCTSGSNPRTGTLALLG  
GVGKVPVTVVDTVSGRRTLSGDAVLAIQRNDPHSVVNRWQRGSSGLTPCQAVCSAL  
VCESEARSCCAQQ>comp13891\_c1\_seq1; 396 1 1113 LEN=1318; translated  
GLQDLIRNTVAQIEEETAGAEPAEPASPLADGLHDLILETVGELDAGPSDPGAS  
PPTESLQDLVRETVAEIEEEEANKPPPEWIPEGVRDKLSELTIVAVASDVDTIIGAD  
QTIHPRTVRSINAALESPGLDWFPATGKTRWGAANSMPGELASFTRGPGVYNQGLY  
CLGRDGEVVEFKKLTTPALEAAERLVADAGAAVVAYDGDLLYTTDGTKEVVELHEK  
WGEPAAREIPSLVGHSPGVHKILVMDNDAEKLAASEVRPELEKVARETGSSVVTQAI  
PTMLELLPAGCSKAVGVQKLCEHLGIDPGTQLLTMGDAENDVGMLEISAIGVAVG  
NAGRDAKDAADIILPITSTDDGGVGMALNDILGV>comp13892\_c0\_seq3; 275 228 1295 LEN=1726; translated  
MSTFGSPAPTSGKPRSIAQGDCCVPQAGTDGISSLNWSPTANFLVSSNWDGVRV  
WEVQC NAPNQVAAQPKAQVNHENKMPVMDTCFSADGSTVFSAGADKAVRMWRL  
GETPPNNVAQQIGVHDKPKSVGFLSSSNLVVSGGWDNKLKFWDRSPTPAGEFV  
LPERIYDLVDVRGNLMVGTANRKLIVYDVSGQPREHSTMESPLKYQTRCVR  
CFPDQTFACGSLEGRVGIYVTKVANKDHFVAFKCHRQGNVYSVNDIAFQNTY  
GTFATVGADGVVTFWDKDNKQRLKAFNAIQQTISCAAFAQGNLFAYASSYD  
WSKSGSFGFYAPGSTPNEIFIHYTPDEEIKPKAAKKK>comp13893\_c0\_seq2; 181 57 422 LEN=1634; translated  
MVKAYELRDMSKEDLLKTLTDLRKELGELHVAKVTDGAASKIAKIKSVRKS  
IARVLTVHNQQQKAGLRKACEGAKYVPKDLRSKKTRAMRRALTKAERGKTLKAK  
RAAAAFPKMKYAIKA>comp13894\_c0\_seq1; 277 1 1336 LEN=1808; translated  
XISSIADNYEFVVRTHRRKPTTTSATALDADNQRVPVVESTLCKGTRGAMKTN  
STATTTTAAASRCGQVRLPLLLLLLVALHVPASGLPVRGSRHAARPQGLAAE  
ASARTEGWSRSLPRDVYASPLLDWSRSEWEAFREGPGQGEKPEADHLWEQV  
KLEALTRLRSEPEAGPQLYQSILSQGSLVEAIVGIIANEVETELIRATEIKK  
VFLDVLTDDEAEAIHCDAIAAATRSPSVELAVLAVLFHTGLHALVCYRAG  
HRLWTVQGRTGLAKYLQSTVSGRYSADIHPACEMGRGIYLC TASGVVIGET  
ATVGDDVSIHGVTLGGTGKELGDRHPKVGNGVVLKDCSTVLGNIVVGTG  
AVVSAKAI VNKPVPLAIVGGVPARVIDHRVLEVGSFRDDLEEHLASKYL  
DXVEGAGGEQ MTKRHGPKQKAERLPVCDASLRGIP>comp13894\_c0\_seq2; 285 1 1354 LEN=1826; translated  
XISSIADNYEFVVRTHRRKPTTTSATALDADNQRVPVVESTLCKGTRGAMKTN  
STATTTTAAASRCGQVRLPLLLLLLVALHVPASGLPVRGSRHAARPQGLAAE  
ASARTEAVGEREGWRSRLSRDVYASPLLDWSRSEWEAFREGPGQGEKPEAD  
HLWEQVLEALTRLRSEPEAGPQLYQSILSQGSLVEAIVGIIANEVETELI  
RATEIKKVFLLDVLTDDEAEAIHCDAIAAATRSPSVELAVLAVLFHTGLHAL  
VCYRAGHRLWTVQGRTGLAKYLQSTVSGRYSADIHPACEMGRGIYLC  
TASGVVIGETATVGDDVSIHGVTLGGTGKELGDRHPKVGNGVVLKDCST  
VLGNIVVGTGAVVSAKAI VNKPVPLAIVGGVPARVIDHRVLEVGSFRDD  
LEEHLASKYL DXVEGAGGEQ MTKRHGPKQKAERLPVCDASLRGIP>comp13894\_c0\_seq3; 285 1 1614 LEN=2086; translated  
XISSIADNYEFVVRTHRRKPTTTSATALDADNQRVPVVESTLCKGTRGAMKTN  
STATTTTAAASRCGQVRLPLLLLLLVALHVPASGLPVRGSRHAARPQGLAAE  
ASARTEAVGEREGWRSRLSRDVYASPLLDWSRSEWEAFREGPGQGEKPEAD  
HLWEQVLEALTRLRSEPEAGPQLYQSILSQGSLVEAIVGIIASEWRRGALH  
FIAVPCTALATKEYPCVCPAFVPSVLALAS HFAIPLFLPIDXPTFRE  
SRAKRHNTQYIHTTQHNTTQYNTHTHPPPKDEVETELIRATEIKKVFLL  
DVLTDDEAEAIHCDAIAAATRSPSVELAVLAVLFHTGLHALVCYRAGHRL  
WTVQGRGLAKYLQSTVSGRYSADIHPACEMGRGIYLC TASGVVIGETAT  
VGDDVSIHGVTLGG

TGKELGDRHPKVGNGVVLKDCSTVLGNIIVGTGAVVSAKAIVNKVPPLAIVGGVPARVI  
DHRVLEVGSRDDLEEHLASKYLDXVEGAGGEQMTKRHGPKQKAERLPVCDASLRGIP  
>comp13894\_c0\_seq4; 277 1 1596 LEN=2068; translated  
XISSIADNYEFVVRTHRRKPTTTSATALDADNQRVPVVESTLCKGTDRGAMKTNSTATTTT  
TAASRCGQRVLPPLLLLLVALHVPASGLPVRGSRHAARPQGLAAEASASRTEGWSRSLPRD  
VYASPLWDSRSEWEAFREGPGQGEKPPEADHLWEQVKLEALTRLRSEPEAGPQLYQSIL  
SQGSLVEAIVGIIASEWRRGALHFIAVPCTALATKEYPCVPCAFVPSVLALASHFAIPH  
LFPIDXPFTFRESRAKRHNTQYIHTTQHNTTQYNTHTHPPPKDEVETELIRATEIKKVFLD  
VLTDEDAEAIHCDAAIAATRSPSVELAVLAVLFHTGLHALVCYRAGHRLWTVQGRGLAK  
YLQSTVSGRYSADIHPACEMGRGIYLC TASGVVIGETATVGDDVSILHGVTLGGTGKELG  
DRHPKVGNGVVLKDCSTVLGNIIVGTGAVVSAKAIVNKVPPLAIVGGVPARVIDHRVLE  
VGSFRDDLEEHLASKYLDXVEGAGGEQMTKRHGPKQKAERLPVCDASLRGIP  
>comp13894\_c0\_seq5; 163 475 1181 LEN=1181; minus strand; translated  
MGFHEAMRRTPAIVRPFVLRVAVWSFVLLQLPPLVEVLGGQVLLQVVAEGPHLQDPVDD  
PGRDPHDGQGRDGLVDDGLGRDDRPRPHHDVAQDRGAVLEDDAVPDLGVPVPPQLLAGAA  
EGHPVQDADVVAHRGRFPDDWQSQGEAPIKQKPKQATNPAKTKANSSSSSKRRREMLHAN  
RAVRSIASALTPLHSAPAXSASAGLLTDPRRRAQVDAPPHLAGRVDVGAVPPADGR  
>comp13895\_c0\_seq2; 647 248 1729 LEN=1873; translated  
MTAPATSSSSSMRVSYDLDTGIDLTTPPPTRSKSNTERKSKMKTSEPKAIEPFPKESRA  
RRGGKKADIEKEDTNRVVETLQRRKRSRGAVKQVDPVPVFENTPTKRQRRKSATEEPPFI  
GNSTSKKQIVRKDSQKQPLPSATDKTPKGSNTKKGKQTSEVTPSAENISSNTKNTEVTSY  
LPILLSATGAAGFAAFRSQLEANKSEREGRQDKGAKTRSSVIGTRAVSAPKKKAFPRRGI  
SNPTTKGARPVVENGRNIKASPSKKKIFGAKKQSGSASVATVALTSKPSSADVAINPITF  
GGVAVLALA AVVTL SAPPSPPTSPASRENTPVII EKA AAKEKVKFEANANDKSLVISEKQ  
KSAKSTPELTKEENPLDLQNDQTPVLESETQNTATSPATSPASSIATSEKVTMASFAP  
KLTAPVVTGGVLAVFAYGQAIQEYNDIQKKKEDDEGIDASVGDGKDVVAAKDTDTDTIVA  
NRTIEADTADEDE  
>comp13896\_c0\_seq1; 410 198 1505 LEN=1563; translated  
MSNSDYNLEDEELYLESYLERATAFGTKRDDGNDNDSNALAGDAGQNKRRDDNDDFIEKRV  
YCCNTRSRLYCECCSVLIPKNFWPKRFISQQHSHGRRRQLQSSVFPFRSMDIVLGVKER  
RTSSTGIQMICISKMISESTGSTAPPEMEDQRLPQQLKEFEATESKIETTTSSSSHGFKN  
NGFADTDNNGNEWWRNVTLYDLNRGDKLPQYPHAKVSKKQTDGCDEASRSEAVENEGTYV  
LFPQEGKSVPISSVADKVKRLVVLDIKWTRSYNVQLFSADHHKITVSRPGESGGKTYNP  
LSPLKLNLPFVHLEFPQKSNFWRWHNRGDGMLSTIEAIYFAAREVSTALEYRRRHKDKNE  
MDHEIIGSKNPEQSCLTEKSEDEKDERFVDMLWLFALQRSIIQERSMQEGRPVAFSEEAK  
ALARALRQQNPRTDQ  
>comp13897\_c0\_seq1; 1409 125 4075 LEN=4257; translated  
MAAQKGAKLDALAIKALVA AVENSAPSAGDIFNCQSLCRLFQPLKRC DALVAGHTVKQQQ  
TLLWNALKNSTNKSSKNLLKRFFSGLHSIVERIIIEEGFVPE SVKDKGDSNEDGGDIND  
KDVKPDKKSDDCLLVLKCAALAVRAFLDGRIRQKEKEDEQKRRVALKVPPHIFQIASAL  
HESLFP LHS CGSPAGPAKT TILSLCETWWLSEAENREYLIAQCLPLIVLNASDERIDAF T  
TKSHIQRLYLKRAFGCIDFAEPSSDSL RQLLRVASNPVCLQLPEGRKFLAGLLQQDVH  
LVQDLHRAFRVQIPEAKPSILKSYGEIYHRAWKEVRENQDDEILDDDDDEEQEEMSISQ  
AIEHEVLQDLMYSVVNMDSPVTFKSVLTVLAPLHEDKKNKEVASLLHRLYSPILWRS LAA  
TNPRIRKNAVVLKVFPLHDP SNSLSMKDAVKKATEALQIALQDVP AVRVAASGATAQ  
TCAMFWEVLP PREIRPLLNHIVINHSSDSTSAAVRAAALDAATLLGTTKSHGVLRALLP  
SLGNLIHDKTEKVRLSAVRMLLEVKKCPGIRFYHVVPVDHLMARFVAEEKLHTSRRNAMT  
KGLTELMLSSYFPHGQDMSANKLLQRTV S FLLTHPNAASVFYANLVDHIEVESLVK FVIM  
LLKCVESCVGSDQAKQVKKCSKMKRRRNTRGEE SDEENDTSNHDTSSGLSAANTSLMAS  
LSDTINCLWDSLTHLLDKPKNKACKRVLEDRFTKKDCLIDIVAHFEQKGLS LAESSNDE  
SRHNECFRTCSSFLDCAGRLDHASTKKVVS YVTSSLASISKEESRSVIPLVTSYLSFLCK  
SGFIENVAEALARSIDDNGMENVTLSPDFEASLGLQRSRRRSSASRKEKDGVL PNFPSF  
ISWGLEIYV LQGASSQGRSIRQAILSSDSATLTLERAF EKGIKLSERLLADDAIARNYGN  
KEVEYAIRASEAYGRFELHRESSVFEKNDSTSM DRQVGKLLLWTTNKIIPAFMRSDDGA  
AALRDLDLSSISNRLSMSVEHIPPGSPSLMSPPKQKANCGRTP EAMRGTSSLFVATPIDS  
PVIYSAKVG SALLLSSCILSSEMLAMGMTNADEI SKAAVGSQIFNQSRWPVEEQ LINA F  
VRLSIQLFRASGNCSLLEDLLVKCN SHFKESGAAEMMKELQLLLRLRNGISNLLPSFFV  
VSRRIIESGKVPVSFENVCSINDIWDEGGSIKIFFDAIQGNSEAVLAF AEAIVKRLIECE  
GEIDGVLNFD AKCLSFIMNEASGPAMTKIIMKLDTEQSTKEGEMRLLFENLLECRA  
>comp13897\_c0\_seq2; 593 125 1582 LEN=1675; translated

MAAQKGAKLDALAIKALVAAVENSAPSAGDIFNCQSLCRLFQPLKRCDALVAGHTVKQQQ  
TLLWNALKNGSTNKSSKNLLKRFFSGLHSIVERIIEEEGFVPEVSKDKGDSNEDGGDIND  
KDVKPKKSDDCLLVLKCAALAVRAFLDGRIRQKEKEDEQKRRVALKVPPHIFQIASAL  
HESLFP LHS CGSPAGPAKTTILSLCETWWLSEAENREYLIAQCLPLIVLNASDERIDAF  
TKSHIQRLYKLRKAFGCIDFAEPSDSLRLQLLLRVASNPVCLQLPEGRKFLAGLLQQDVH  
LVQDLHRAFRVQIPEAKPSILKSYGEIYHRAWKEVRENQDDEILDDDDDEEQEEIMSSSQ  
AIEHEVLQDLMSVNVNMDSPVTFKSVLTVLAPLHEDKKNKEVASLLHRLYSPILWRSLAA  
TNPRIRKNAVVVLEKVFPLHDPNSLSMKDAVKKATEALQIALQDVPVAVRVAASGATAQ  
TCAMFW

>comp13899\_c0\_seq1; 491 247 1305 LEN=1537; translated  
MVQSTMLFTALGACLLPGGVRAFGMESVLPVAHDLHHTLHPVAIHQASSAFPALGTSPLPSG  
IIDASAHAAAPSVGNAASSSMLASVESPTAIGDLASSLLSDYRKALDAEPLKVKIITGCLL  
AIVGDAIAQSNTPEEYNTLRAGAFVAFDGVWRTVQVQVYGP I IQTCNGQFSLGLLGSLPF  
LHDKLQTEDTTFLLGAIEQTLVSQLVLIPLLYPIFYSVTFGVQSLTIEQTIQRAKDTFI  
TLMKRNLFWIPVQFGAFYFVEENLQIPVLTACGLLWTVILSVSAGSVSTSSEEEGVVDG  
ATVEEKMISEGVAVDTGASSFFSRLNPAARGGTDAEPESTATTSKNSKTLS

>comp13899\_c0\_seq2; 491 247 1305 LEN=1560; translated  
MVQSTMLFTALGACLLPGGVRAFGMESVLPVAHDLHHTLHPVAIHQASSAFPALGTSPLPSG  
IIDASAHAAAPSVGNAASSSMLASVESPTAIGDLASSLLSDYRKALDAEPLKVKIITGCLL  
AIVGDAIAQSNTPEEYNTLRAGAFVAFDGVWRTVQVQVYGP I IQTCNGQFSLGLLGSLPF  
LHDKLQTEDTTFLLGAIEQTLVSQLVLIPLLYPIFYSVTFGVQSLTIEQTIQRAKDTFI  
TLMKRNLFWIPVQFGAFYFVEENLQIPVLTACGLLWTVILSVSAGSVSTSSEEEGVVDG  
ATVEEKMISEGVAVDTGASSFFSRLNPAARGGTDAEPESTATTSKNSKTLS

>comp13899\_c0\_seq3; 382 247 1050 LEN=1199; translated  
MVQSTMLFTALGACLLPGGVRAFGMESVLPVAHDLHHTLHPVAIHQASSAFPALGTSPLPSG  
IIDASAHAAAPSVGNAASSSMLASVESPTAIGDLASSLLSDYRKALDAEPLKVKIITGCLL  
AIVGDAIAQSNTPEEYNTLRAGAFVAFDGVWRTVQVQVYGP I IQTCNGQFSLGLLGSLPF  
LHDKLQTEDTTFLLGAIEQTLVSQLVLIPLLYPIFYSVTFGVQSLTIEQTIQRAKDTFI  
TLMKRNLFWIPVQFGAFYFVEENLRK

>comp13900\_c1\_seq1; 190 163 939 LEN=1254; translated  
MSTTATNNGTEKNNIRTACDGYVQEGLTGNKTIQFLIENLVRMGCTPPEGFIQCLDCEGK  
PVSGGFQMLQEEVLAEDGNSGSAALNKQLSEAAATKKPHCTKSTQEILDQFQRDKDGKTKL  
SLRPEIYICQEHVSGPKHANTILTHELIHAIDMCRAKMDPLRNCMQLACTEIRAENLSGE  
CDMSWEFLRGKLNSSKHSRPRKGVCETEGHRFGPSQSKLHRASRIVRRCGDTVLRRYVS  
VRTPSQAEMRQNKSSQLD

>comp13901\_c0\_seq1; 455 1 1338 LEN=1657; translated  
LSFDFARIPSDSLPPLPVLINSAMGSKKISSPLLSIFQQWIAQQQRSEVSEPSPLSS  
SSYRILLQTSYSLQTRISAAEPVENPHLYKNAGLATPSEASRDIYGGSETGWLLRLVEL  
AVQQQMQSELESETVAPGKDAVSIIFVTTKARSYDYSIIQELPKDVKEKVQVIDLAFRDP  
FGWDCDEKDDNDSRDNRTTTRANIVDLHQIYRKIQEEFKRSRASGAPVILIWQSLAPLI  
LVHGFHKILRLLCALPTCLQVWPVNLPIPTPTQHAQLENVSNALLCMREGEMNIVRQIR  
ERGNILRQKVPFRLIPFVSDQDQRRFRIVEETDCEKSSSEVINDNRNTIEITNRKNNK  
EDESNAEAAEIGRLISSHGSSGTSGRGTKLRLEENDGGRSESVESHASSDREVIAPNRP  
RIYLQDDDEPFDDEEDPDDDEI

>comp13902\_c0\_seq1; 665 122 1474 LEN=1646; translated  
MPPPRRGSNLAGRSRDIVSQVEDKLLGAKLPACLESTRSSLRVLKIRNPVGSFGRYDN  
DTKRACALLEYDVRDYNKNHGDGDEIEITMEKLAKAAFMKLDKDFRDFHQKIGNFRDNLRS  
QAATNPTGATGKRPVAAGAKLNAANKAGKSGNKGETRIIFRDSSISSLAIRLGAFVPNSS  
DVAVRAQKFFWDAVGHLLKQKSKKGGVHGLRDMQRNQALYEAACFYLVATSGTESQPKIRR  
RKNKPLGDSGDPEDNQQLLSTFLDVIKEAPSQFQTVLDYAKKLQLEIEPPSKERAGNR  
GKSAGASRPRSSPRSSSTSSRAAKPVAPGKRSRTDDAPGNAQGAATKHPRSVDERDAAGTI  
DVATFAQYENYEKNHAGFEGNKPRMHTPPGYRPNPVFKWKVKILDRACELARQNAAAVA  
GKCGKAASLEAEYVLDAAARDVLRHGLL

>comp13902\_c0\_seq2; 669 122 1486 LEN=1658; translated  
MPPPRRGSNLAGRSRDIVSQVEDKLLGAKLPACLESTRSSLRVLKIRNPVGSFGRYDN  
DTKRACALLEYDVRDYNKNHGDGDEIEITMEKLAKAAFMKLDKDFRDFHQKIGNFRDNLRS  
QAATNPTGATGKRPVAAGAKLNAANKAGKSGNKGETRIIFRDSSISSLAIRLGAFVPNSS  
DVAVRAQKFFWDAVGHLLKQKSKKGGVHGLRDMQRNQALYEAACFYLVATSGTESQPKIRR  
RKNKPLGDSGDPEDNQQLLSTFLDVIKEAPSQFQTVLDYAKKLQLEIEPPSKERAGNR  
GKSAGASRPRSSPRSSSTSSRAAKPVAPGKRSRTDDAPGNAQGAATKHPRSVDERDAAGTI



DVATFAQYENYEKHNHAGFEGNKPRMHTPPGYRPNPVFKWKVILDRACELARQNATAVA  
GKKGDECGGKAASLEAEYVLDAAARDVLARHGLL  
>comp13903\_c0\_seq1; 311 314 1132 LEN=1492; translated  
MVTATTFSRVLLAAPLLAGSHAFHTVGTSSLASRSPQNELQTLATTRSPSSPRTPKIVL  
HESSDGENEAASETKNDDENDTDKTAATAVATNTINERLMAELKAAEQTEKYGSKGKTMS  
LVDGYGRPRKTD AEIQQAIAEARDLNGVNP IVAIVGSFFAFGVAAALWVATNKLGGYFAL  
HPPETEYVYFVLRSAQVFRNVVMGMI SLASGFFGVTGLGIFGMGVRVAYGVMTGELDPTPI  
KTKTPTKETVDLGNMMDLMMNKKPGRRGGGKK  
>comp13904\_c0\_seq1; 209 191 1102 LEN=1834; translated  
MTNDSTTIAAMTLEESRDETRKCEEEIQSIKAAALRGLGSDDEQNSLEIEFTKVEGLPEAA  
KPTVKLQLSAPIEEYELSLEDGKTKATFSGVETSLAMLTVDARDAE IPLGAAANPIEVAP  
FCAMDDPKPKKEYVTEVPVPIVAAPSETEGEKSEGEDEAEGTSVPPVCTVTTLRVVYKPS  
KDQREELYELLNKTSQRKADALSVLRKRTIEKARAGIQGSPGAMTKPSVRPGFNLKGRAK  
AEEPEETGILAAAKKLYKRVPSPDSIVMKTAILAIVTKDFWIFFGAVGLMHTRGNLLALP  
PPA  
>comp13905\_c0\_seq1; 1543 141 4535 LEN=4661; translated  
MPREDQWVAVAPQFAQEGSSSGSNVIKPAQSAFTFWQKDNSENIKAEHIASNNGKFEVGL  
FSRAMRGKWNLSLASEREPYEDLAREDLFRFRSESHKADVAAMQRRERLQQERSVLLLLDD  
IGGTQRGTRGQRAQKERKEKRKEKRLKMKRIADAEDGVDDDSTGRGKSILDDGMEYQ  
DEDESSGEESYSGSSDSDSDSDSYRRKKKKAKPAPRKISQKQIENRRRAQEEKORKEAII  
AEQQEDIQKEKAVQAKKRLEFLLKQSSIFSHFGVKVQDQAKFGIKSGAKSNNDKQGMRS  
RDQANANQEDELEEADEHQATFLTAQPTTLGFGKMREYQLEGLNWMIRLQENGVNGILAD  
EMGLGKTLQSSISILVYMLEFQNVNGPHLIVPKSTLSNWMNELARWAPTLKAVKFGDKT  
TREELIETVLRPGRKDSERDWNVVVTTYEVCNIEKNTFTKFAWSYLIIDEAHLKNEASA  
FSKTVRFTFETRYRVLLTGTPQLNSLHELWALLNFLVPDVFANSEQFDEWFNLDIDDNDEK  
NRLISQLHKILRPFMLRRLKKEVETSLPPKHETILFTGMSAMQKKLYRDILIRDIDSIQG  
TSGSRTAILNIVMQLRKCAGHPYLPFGVEDRTLPLPGEHLVENCCKMVLLDKLLKRLQER  
GSRVLLFTQMTRILDIMEDYLVMRRFQYCRIDGNTTYEVRENYIDAYNAPNSEKFFVLLS  
TRAGGLGINLQTADVVI LYDSWNPQADLQAQDRAHRIGQKKQVQVFRVTEHTIEEKIV  
ERAQQKLLDAMVVQQRLKDKDKLSRNELLEAVRFGADKIFKSKDSSITDEDIDLIINA  
GKRKTQELNDKFQAADKGDLLDFTLDGNSNMQTFEGVDYSGNALAAAKAEVGMGLGILDG  
KRERKTVANYNENKLYADQVAAIQGSKPKERKRPKIRLPKSLRLLPRMEEWQMFNRTRLL  
AIQEEEEAAFRALPEEVQTAATAKKKDRFKDDSI VTDENVANAVNAEPSTAETEETNPEE  
KHVELPPLLSEEVQKEKDSLLEKGF LGWSRVNYTSFIKASAKYSRSDFAKIASEVGKTEA  
QVVEYSTAFWGEIGKERFSEHEYTRVSNLVAKGEKKLVDMKALRQSLKVFISLFDNPWEK  
LEFTHVNTKDKLFSADNDRYLLCWTHKYGIGQWDAIKMAIRRSPPQFRFDYFFRSLPVDVI  
GRCETLMKATLKEVELLEKKMREDMGLPGEVKEGTSLPPIKLPRFRDMQRTLRAKKIQK  
REKEKNDLEEKVENLEHQIEEIQNRLKQLSKDPDIQRENVSRNGDSTTEREPSHPVPVSP  
PSATTEDAVAVDESKGAIGPDGTFVEFPQYDGLIPPKEYKKAFAQFCQRTKRSVKNSLDP  
EERKNKEKVNIRLRRFTAMSDEERQVYRGWTAWDKLR YARDLEIYEKTNQSDAVGNEAN  
EQITIPKKRSAEDSIASVPKKKKF  
>comp13906\_c0\_seq1; 926 230 3097 LEN=3366; translated  
MSEQDFQTPDRSTTKALSSVPVTGHPEEKDDTISDANINTRNVQSSATMVTPLD AFSTA  
AARKEASAAAAHLDNKQVRFDSTNGSKNNSSAKAKAIEATTHSTAGSDEGDS SSSSSTSS  
PSSGKRGVLSRRGGRCASPGRSLLPSSNGVKE SPALEFQTF LTPARTSSSNRNKENKS  
EESSSGETIPSHFSANSTDRKESDRENKNYPAVTSTAKGSIQQHARHQQRQPKPKST  
SVSLPQKNTTASFKAASRKNKTSVVSFSPVPPSKTNGDRYMKTPIKSPTGGRFTSLPTL  
DDDTLGS PGAI FLSPTRTP IYFDKKT SATSTKEKSDLESVSGISVTASSGRAPLTPRTPK  
RDLDRLRLATPTDFADYGKTP TNGSLLSSNVLSWLHSP TVNGIFSPGGLGSM LNTPR  
GAVPKAPPTPLFSTSFSDVAGLPRGECASP KSGAANGASDNEKRGNGRGNNNIICI  
SPLSSYKVGKNQIGPNSPKINYKEMFASPAERSGMAMLGASQRARSGVQKGGNLDAVHLA  
ERDLMEDEDL SVLLQLASSTPRPAVADSVQSGVPTKTEGSKVFRKNGESDNLPSLQLPMI  
GGSVGDGKGARLARKTHSRDHNDISDDHGVRPMSQASGGPAMD MKQKNAHDPLKLLPATG  
SLHPSNRYPPMSSHFPHESSYPALHPGMTHGGSMRVVVGPPPNRGKSSGDSQRVRSY  
PIGPRGEYPPPPPPPHYSHHRGVPPPHIHPHYGRYPPPHPHGHGAHRHMPLYAAHPKT  
KATPTSTKKQPIKVVP SKQNLKRQATSAAPKSASTKKSKKSQNP SKKKNRSPQLVDKAER  
QKAAATI QAVNQASGGKNDKAAALAAAILRGVTMRPSGKWQAQLYFAGKSR YIGVFDTRE  
KAALAYE IAREKLSVKSSAEGGVLSPKKTESAVNAARKAAFEVNERD PRLAGK  
>comp13906\_c0\_seq2; 926 300 3167 LEN=3436; translated  
MSEQDFQTPDRSTTKALSSVPVTGHPEEKDDTISDANINTRNVQSSATMVTPLD AFSTA

AARKEASAAAAAHLDNKQVRFDSSTNGSKNNSSAKAKAIEATTHSTAGSDEGDSSSSSTSS  
PSSGKRLVSRGGRCASPGRRSLPSSSSNGVKESPALETFLTPARTSSSNRNKENKS  
EEESSSETIPSHFSANSTDRKESDRENKNYPAVTSTAKGSIQQQHARHQQRQPKPKST  
SVSLPQKNTTASFASKAAASRKNKTSVFSFVPPSKTNGDRYMKTPIKSPTGGRFTSLPTL  
DDDTLGSFGAIFLSPTRTPYFDKKT SATSTKEKSDLESVSGISVTASSGRAPLTPRTPK  
RDLDRLRLATPTDFADYDYGKTPTNGLSLESSNVLSWLHSPVNGIFSPGGLGSM LNTPR  
GAVPKAPPTPLFSTSFSSDVAAGLPRGGECASPKSGAANGASDNEKRGNGRGNNNIICI  
SPLSSYKVKGNQIGPNPKINYKEMFASPAERSGMAMLGASQRARSGVQKGGNLDVAHHLA  
ERDLMEDELDVLLQLASSTPRPAVADSVQSGVPTKTEGSKVFRKNGESDNLPSLQLPMI  
GGSVGDGKGARLARKTHSRDHNDISDDHGVRPMSQASGGPAMDMKQKNAHDPLKLLPATG  
SLHPSNRYPMSHFPHHESYYPALHPGMTHGGSMRVVVGPPPNRGKSSGDSQRVRSY  
PIGPRGEYPPPPPPHYSHHRGVPPPHIHPHYGRYPPPHPHGHGAHRHMPLYAAHPKT  
KATPTSTKKQPIKVVPKQNLKRQATSAPKSASTKKSKKSNPSSKKNRSPQLVDKAER  
QKAAATIQAQVNSGKNDKAAALAAAILRGVTMRPSGKWQAQLYFAGKSRYIGVFDTRE  
KAALAYEIAREKLSVKSSAEGGVLSPKKTESAVNAARKAAFEGVNERDPRLAGK  
>comp13907\_c0\_seq1; 987 173 2788 LEN=3000; translated  
MSYAFQQGAPGRGRGRMMPPGMGRGGRGAPNPYGGMMGPAGMMGRGGRMMHPGMMGRG  
GRGGRMVHPGGRMLHQGRGRGRAMMPGRGRGQGGMMGRGAFGTTKPICTLDKFNYSYIG  
YIITCYMEREQESLGIAFPQFTPSPLTPDQKQLMMKKKQKEMMEFREKNKELKNTTPK  
NEKEQEGEQEHGEPNSIDNGILGTDSDKSSEETPGVTTDTTNEKDFSGGKDCPENTKVDI  
DGVSSSEDATEAEKDTKKGDSSDPNKVEVSSSEEGSKEDEGIPPPDPSCPCEPCVRAIEK  
TKGKESCKCSDCRKEQIKAIKDCDCRCEVLAQKIPDANVLVDAPADAPKGGDCTKKNQP  
DKEKMEKMEKMEKRQQQIKMNLTDCTLLAKLNTKRLYRRIKYYKRKDPEYDVKAYPY  
NKKTTEIAMIEWEALIEDWKTRRKAIEIEQIKAKNKEDAERAKRAKMAKRAKFKKKGK  
KRSSPRKKTQASAVEEENIPTLEEEGNEVEDEDEDNDSSGEESEPEEECDNGDVEDDKFE  
YVAVKPSKYELLMFTPCPRAVAVLASYPVRSNLSMRNLYEKITLVRTGSDMMGGLQAHL  
VGEMATGTNKCQFVKTHYPERMGARPFVSRVAVLLVRNPYDAMDYFNLMTTSTHTTSLT  
EDDRKKFYQIFAEMAKREVLVWRDFHEYWLKQKIPLLVRYEDLIRDVTVKVISKVIKRVL  
EITRMTFFEERIMRAIGEEQVEKLGYPYKARSGGVGRSITKGHYSPLLLQQINHGIGTME  
KFGYKEMLVPNPKQWKLRLDQHGVIYIPGTSKEPMIINRDGLVRGAMRQTNWVQKFIQ  
QTRFKEAKEKMEKEKAKEKIAPVEEKLLDLF  
>comp13908\_c0\_seq1; 658 1 1850 LEN=1909; translated  
XRAPLGEAALRAEAASSRFLDAYFSVALVLLRSSSRIPNHRSNDDAKRSLHGRLIRMVL  
DGLAKANDGLSEARPSRTS CAASPASESAVREAWTSQCHFSIAKFCLHSLSEGLFGSSSD  
LALLRSLVFSLLGRLQRGNESVAAVLFSDDVLFQTCGDP SRDEDASSAKSSLSSPISSMF  
LGEICGSEASRKQLDHSFKLQHGFGITSDGFGPFALDSSLSCADGLTTAPSVRKDGSDVP  
ALPLGKMWLWQSLSGSIRMREDVLVAGTKEASDVIA SVLELILELDETEDVTGIAGYAGR  
LPMGSKLYLNMVCLQHEHVLRLDERILNTGEALLDRYLMDFGRNDNDVLDVDFCRECLEHSG  
HTEKAERSNEDDETESALEEKDKKVLDDFANAITNIQVEDADISSEQIRALVALLEDLTT  
AYRDYGAQYDFFTKCIRVFLLPMPFSLIRCRALKELHNMLHILTLPKAEAEDEIEMMELLS  
RSLTGGLPAADDSLDKGDITILNAFAKAVASASTRPLNGYMRHFCIGMLVRNLAISLSTGQ  
GIEISQKRLERLGTKTVEVCRATEVFMETGSGTKRSLVKAILETSSCDSGCGEQPMDNK  
NQSATGCLDSFIAKHS  
>comp13909\_c0\_seq1; 183 296 625 LEN=1403; translated  
MAPVDDDDLYGDLDTNLKKARPDNERKRRLLSSNAEGGSNGGGHAGGSNLGTTQLEFEYVS  
MRERIRILEEENSRLRRNIGTLFR TAKNEIQKDEHINRLQQQLQQQES  
>comp13910\_c0\_seq1; 114 1 162 LEN=471; translated  
FNGKYYEPDQITFEVDDYSTDGAIEEDRPDDEDDVETVRSATVHAASDAQIVL  
>comp13910\_c0\_seq2; 537 139 858 LEN=1167; translated  
MTRYVTAFLAALLAAAPTTEARLRSGSNNNNNNDNPRKLNPNYHKDAPQAEESPPSSGVA  
PELEEAPSGDAGNDPNGKEETLILIAAEQIDATMEANLSAE EVAQIH FYEDEMIQAQMLE  
DQARYEQELLDVEATLAEK SATQAQKDEVLRQEKLASTILKDALEQE QEART EY TSEIRR  
KLEIEADGMVFFNGKYYEPDQITFEVDDYSTDGAIEEDRPDDEDDVETVRSATVHAIVL  
>comp13910\_c0\_seq3; 537 150 869 LEN=1178; translated  
MTRYVTAFLAALLAAAPTTEARLRSGSNNNNNNDNPRKLNPNYHKDAPQAEESPPSSGVA  
PELEEAPSGDAGNDPNGKEETLILIAAEQIDATMEANLSAE EVAQIH FYEDEMIQAQMLE  
DQARYEQELLDVEATLAEK SATQAQKDEVLRQEKLASTILKDALEQE QEART EY TSEIRR  
KLEIEADGMVFFNGKYYEPDQITFEVDDYSTDGAIEEDRPDDEDDVETVRSATVHAIVL  
>comp13911\_c0\_seq1; 611 186 1532 LEN=1798; translated  
MVRVPSFAVSAFLCLAGISSEGVNAFAPTGGVTQQRVAGGHARIAKTAPSAGRKGSTSLF

MSSRQQTGRDFYRILGINRNADSKEIKSAFRKMAKQYHPDANPGKDTTEQFQEVNRAYEV  
LKNPELKKKYDMFGESGVGTSAASEGQGSFPGGGAGFGQEVDLNDIFDSFFGGGGGFGGG  
PRTRQQPRGPVVGNDLRFDFLEIDFKTAVFGGEEKVRIHLETCDTCSGSGVKPGSKISTC  
PNCGGNGVTVEVTRTPLGNFQTQQTCPVCRGTGQKVEEYCGTCGGQQLNQKTKQIKVTVP  
AGVEDGNKLRVRGEGDAGPNGGPAGDLYIFLRVKEDAKFRREGPEIYSEETISYIDAILG  
NSIKTPVVDGEVTIKVPPGTQPGQVMRLKGNAPRLGNPNQRGDHYVTVKVDIPKDLKSKE  
EEELMEKLRITIREEKAGAKSGGGFFNRN

>comp13911\_c0\_seq2; 433 1 1078 LEN=1344; translated  
XVVVVVALAADANPGKDTTEQFQEVNRAYEV LKNPELKKKYDMFGESGVGTSAASEGQGS  
PFGGGAGFGQEVDLNDIFDSFFGGGGGFGGGPRTRQQPRGPVVGNDLRFDFLEIDFKTAVF  
GGEEKVRIHLETCDTCSGSGVKPGSKISTCPNCGGNGVTVEVTRTPLGNFQTQQTCPVC  
RGTGQKVEEYCGTCGGQQLNQKTKQIKVTVPAGVEDGNKLRVRGEGDAGPNGGPAGDLYI  
FLRVKEDAKFRREGPEIYSEETISYIDAILGNSIKTPVVDGEVTIKVPPGTQPGQVMRLK  
GNAPRLGNPNQRGDHYVTVKVDIPKDLKSKEEEELMEKLRITIREEKAGAKSGGGFFNRN

>comp13912\_c0\_seq2; 325 388 1371 LEN=1506; translated  
MSVEGDFDPEAISKAKEAIDSGSIKAKFNALYKFTRPHTIRGSILASIAGTIRALVDTPG  
SIANANWGIMLPRAFIGMISLLGNVFI VGINQIYDKEIDEMNKPFLPVASGEMTKSTAW  
AAVLSSLVVGPILVKKFFPPLLFQLYSFGFLFIGGIYSVPPIRTCKNPVLAGLTIATVRGF  
LLNFGVYYAVKDAVGAPFGWSPKVAFIARFMTAFASIIAITKDLDPVEGDKAYQIDTLAT  
RLGVKRIAQGATLCLGANYIHAILTGVLA KSSAAFRMIPMIGGHLALAAMLVFRYKQLDP  
ESMPSIKKYYKHIWDLFYLEYGLYTLI

>comp13913\_c0\_seq1; 746 244 1827 LEN=2072; translated  
MKIRLPLPLVGKSDKD GIGIGTVHSSDDMSCSSGSSEKSSLSRRSFSLSPRTSRLRGRPK  
PRSFREESTKTTASPKITGANTDTKNIQSPGKKPAIKRLQKSCNAILNNSNNHQKSSM  
HQKENAFSSNSTHSSVDSMTVSLPDIAFPLPSSATRPSPSDRVMNTKKAGARFPKGNN  
GKQRTKAMKKSEGNKVTQDKQTTKKNSIDTESNCNEDQDDRYSPTSVATANSLLPPLYDS  
DEEEEMNQFTEVEDDIRYESRFVTDKKTASNNQRNVASSHTKVS VAGISSGDTQSKGTKS  
CSLTRSGGKSVSSCKSLEAVKYVADSDDDGTGTGVAAGKSKMVPPEVVAITSTLKKPK  
REQSNQGGIAVSPDKNGIADSGFGKDCRYDVAEIEDDEK KIAQDLAVKLVRLDLEEVREES  
ERYASKNRRLESKFQKLKAQQDENMIHRGRLVKA CLYTS PVFLLCGGLDAFLSTILLVWV  
LVEVDGYLDLSDEALDREEDEGNSDGEDGDDSDDDVDDLDDNSSMSL

>comp13914\_c0\_seq1; 549 205 1537 LEN=1660; translated  
MSIDLSSDSSGDSSVDFSTLLTKKDNNETRNETKSVSSDLGGAPIQRLDASEDFNFDS  
DANSEISSVVDVSVILVPRNTSKDNNSVEKKSNSIAGDIPSQSNVGEDRTSEKRNGDKT  
HGFSESKQVDGNSVNRISKNSSDSTDDCKQDKSVCSGRMTRIVMGESVKAWRKQRKSAQS  
RNKAVTENKDSNLSDDDPDRKPPAKYPRYAVVHKKDSSNSKISRNFVPAEIDFEKSHLN  
VESGGSGGNSDSIEVTVRSRAQRGSEYTNDENSGREARYTAKKVKRQLLDHEHHMSSSTQ  
ISSSTFVDCIAIWDPTRGVYVLEIPELIANEIVAVASSDDNNGDNRKTVATSSLNNDNR  
NNGIIDGRHKPALQRHDPLEQQRQAENKLTIGSDGDHEPNKGECDFRFSISIPFFKDR  
NITLQNLTFELDTRVDKIKHLL

>comp13915\_c0\_seq1; 213 101 1146 LEN=1612; translated  
MSSMASRIALVTGGASGLGRATAERFVREGARVLLDLPRSESPGRSLVARLCDEHGGDR  
ALFVAGDARVPEQVGAALDAAEEAFGSHVDTVIN CAGIARARKTVTPAGSDGEGAWSLHG  
LGEFREVLDANVAGTFNVVRLAVERMLLAPEPKDGAKGDS PCSTVPRERGVVNTSSIAA  
YEGQMGQVAYAASKAAVAGMTLPLARDLAPHGIRVNAIAPGLFRTPLLEGLPQRVRDELG  
EAVPFPPRLGEPDEFAALVQSI VXE PDDQRRGRADRRGLPAAPPVVLPPGARPCRGLSER  
ATDSGGFVSGVVPIMEQHHPAYLAWPVGPGGNSKEMTSPACSNYMEV

>comp13916\_c0\_seq1; 1331 237 3329 LEN=3450; translated  
MGNAESSRSYHGNDLLEGSGLPSFPGSTLVESALKCGNIDDAAGGGCEDYSSRDHPGRR  
KKKSLAAQLLSRAENCVMSPQNSELEGHNSDSDVDNGIRHPHSSSEKDPKHFFDEEYEE  
FGRGRGAPGAKSSSKKEKKHSSGTAQQENKASSLLAKSLMSEVEDPNSMAPDAMTDREK  
KLLKAQE KARQHKVQYGMGRFGNDLGN DKGMVRPIGSPSEGVGQPSVLGSI AHVLKGNFS  
DPNSDVGDKHEGNDSSVFPNLSVNHAAQVEQRRGKNMKSTSGKHTVTI GLSLSRSSS  
LGHPD TVTRQTA FDFNELQDREYKYVSST DSSGWRAGGERGDNCE DNGSF IGDDGKKKN  
GMSTPASTRSSSNVPSTPNGEQSHKVAAPD TVHIPIIQIDAESPQVIDAII SALARGEIF  
IPHMAI IPEALSVDGVSPDLVVRFGTERNEDLPPDEWPNWCLEFMHNQLYEYFHEMGAR  
WVKRPF SITLAKKVRWKT VVKHMNRYF SHAERVIDAWREKGPQYLDPQLAYIEGGATPEEV  
ARPHGIYLFNRNGVPTNYFAPNFHPPYTTK MTRSLLFNVLGKSWDKKRREWSSAPIPKLIT  
PSLLVSAMCGCADNQTS GFMATEVT LVDGSSDRSTAVPAGAAVRSFTSMNKTPEKNMFGP  
DPSPSKKKKQKDWTGNADQQAVPSQSDPPQSIANELDADIPTIKPQISSSSASFFDGIGS

GSNDMIPSPPEDGVASNKEQREPEQKQOMLPLENSRQTLGLQDQRQDPQNERRLSVDSDE  
ANDENSGDSKNHEPRSGKGMKKGKRFNLFKFKKSEESDSITKTAADKWLNDLGTTPVAN  
TEYTTIESLKASNKGKDPMDKFRDGVVPGSPTVRSNNSKSARNGLLNVKGSEPARALS  
MEYSQDESTMVGEKSVGEYTFDSTLLGQNFADSKSVLSVPAKATFVMKEQKKEVPEDTQ  
HTRASIGVSSYTTADDESVP SDEALFAAGWAKALDPSSGYHYFTLDRKQTVWENPLAV  
TDGESSVGEI

>comp13917\_c0\_seq1; 565 265 1503 LEN=1693; translated  
MAKLSRRAFSRLGCVGILSSLMASVVTAKVTRIALHKRSNEDMVA AHLKRERDGLYEAL  
LHLGKTDATTNSRNL RAGEGSVALKDSESVVIKDYANAQYFGVVEIGTPPQSFEVIFDTG  
SSNLWVPKVGCTHCGLPFISHKSKYDDSKSSTYEADGEDFEIMYGSGSVKGGFFSKDQVTL  
AQDITIDELEFAEITDAGGLGMAYSVGKFDGILGLGFTSISVGGVPTVFEEAIKQNKVDQ  
PIFAFYLGDNRDGELTFGGYDSSKFEGDLEYVKLESATYWEITLDAIAAGDYKTDESTTA  
IVDSGTS LITGPKAEVAKLAQSMGATANFMGEYTI DCAKVPDLPDVVWTIGGKEYTIPGP  
ATVIQAQSTCLFAFMPLDIPTGPKWILGDVFMRYTTFVNYLDQTVGFAKAK

>comp13917\_c0\_seq2; 572 116 1327 LEN=1517; translated  
MKFLGCVGILSSLMASVVTAKVTRIALHKRSNEDMVA AHLKRERDGLYEALHLGKTDAT  
TNSRNL RAGEGSVALKDSESVVIKDYANAQYFGVVEIGTPPQSFEVIFDTGSSNLWVPKV  
GCTHCGLPFISHKSKYDDSKSSTYEADGEDFEIMYGSGSVKGGFFSKDQVTLAQDITIDEL  
EFAEITDAGGLGMAYSVGKFDGILGLGFTSISVGGVPTVFEEAIKQNKVDQPIFAFYLG  
NRD GELTFGGYDSSKFEGDLEYVKLESATYWEITLDAIAAGDYKTDESTTAIVDSGTS LI  
TGPKAEVAKLAQSMGATANFMGEYTI DCAKVPDLPDVVWTIGGKEYTIPGPATVIQAQST  
CLFAFMPLDIPTGPKWILGDVFMRYTTFVNYLDQTVGFAKAK

>comp13918\_c0\_seq1; 521 3137 4767 LEN=5346; translated  
MSDEQSQCQSHSESKALTDNPV FSSAALCVVLNHLGQSFRPEYTHQLVEGECWRGYRPIA  
SVLRAANSSYEKSVTNGKEQQSSLSSTTATTPDQSI LHKSHGNHSSAASELEITVEIAP  
SCQTCCVEIKRAESKRDNQNCDEPATKRLKTALDSVSRSEGNTSSPENITSLSCQAPMT  
DSEIIGALSKALPRIISANADVXKSFLSKPIGDIVEEYSIPATTQSENSPSASAVEFVLT  
VADGKLEPVEYQDSVQKLSLFYIENADTVDVGKDG DGGFWKILYLFRKHTLPAFDNKS  
G CEDGDAKEKTKKYQFQYSLVGYVTLFHFNALFHKPEPGWILRICQALVLPFQGGHGR  
LMQAVYSMAHCTNNTENAKSSHNI VQVNVEDPAPAFIALRNSMDWNLVREHHQEWNPQK  
GSLREENSKMVAPELVLFFS AMTEKEAMEVSTKARITPKQIHLTNELKLQAVRNFLD  
EETVSSGDKEAIERYFRLMVKRRLNK DHRDELLELPSKDDQKARLAALFAEEVKGYERIL  
TKG

>comp13919\_c0\_seq1; 711 52 3147 LEN=3258; translated  
MNDSTNNVNLPIVRDFDKVCFEYGDRAIILHGSDPVSYFELQEHSKALSYQLYHRFGCP  
DYILIDCQEFVPAEAIATLACMRINRPFVPSVSSMDQHRPGRMDKVV ELLSKKGKTYSCRK  
YGKANSSPSIVAVVVCNDRDPRLSVFEQAGVHRILYLS PNGELRECLVSPETLPIEDE  
TSSPQDDMYVMFTSGTTS LAESGTISKAKAVVGS HRATHSRLSWFLATFSSSPRIGRRTK  
LTFVDGVT ELWGALLDPMNVLVSVPPLELRARGIVVLIDEMKCSQLLLLPSQASQLLLAS  
SNNNPFPHLQRIIVSGEVFSPTLFGFRFRIQYPKVQLINLYGQTETTGDCLCAVLTDLG  
EAVVDNIVAVGKPIMSGFQITFLDDEENEGDSLKSQNQKNGNKQLVIKGS HLSNGYLG  
DSSFFDHFIPGDIGFQRNGVYVVRGRVDDIRKINGVLTSPSEVEAAFCNTYHVSDCATVA  
AVMLGNEVYLLCTSQDVVHEFSRFEMHTIKGIPLNLI PKQVFFVHGI PRSSSGAKKID  
R NACLNLVKCYVEPSKERLEFYNSDASLKRKPKGTVLSIISAVLGVNESELDRDKSFL  
ELGGDSA SSITLLYRIQQETSLLSDLNATDILWSESLHELENLITGKA EKPKKTKME  
SEGHFRILSKSKKFVAGNAV VNTSHRSVSLRACVDSAPLHVDNSIVAACQGGTIVKFN  
SIDGVI EGSRY YPGWMFQADLLLLLEPSTLLVAGHSLNLRGIVLCLTQDLKEEKWKIE  
FDG SVKSRPILLGD KVVILAGKKLCSVDLTTGKVLGEEFDLPRTPCVSNPITITDKGQ  
TSIVFASSDWEGGII VLDVQKLESKIYVDCEIGPVHKDVSVTKNSREIFISDIYGS  
LHVLNIKTMKLAASIQLSH SPLSAATI IDESTVVVGSYNGQVYCVRYDEKQSQLVKQ  
WECSYSSIIYSKPLALQNGSIL VCTTAGYVVRISIQKGKILFFYMISAEI WSSPVQ  
TGPINLVAVGARDSKCHLISLEEALT EEYCDVSSRL

>comp13919\_c0\_seq2; 729 52 3123 LEN=3276; translated  
MNDSTNNVNLPIVRDFDKVCFEYGDRAIILHGSDPVSYFELQEHSKALSYQLYHRFGCP  
DYILIDCQEFVPAEAIATLACMRINRPFVPSVSSMDQHRPGRMDKVV ELLSKKGKTYSCRK  
YGKANSSPSIVAVVVCNDRDPRLSVFEQAGVHRILYLS PNGELRECLVSPETLPIEDE  
TSSPQDDMYVMFTSGTTS LAESGTISKAKAVVGS HRATHSRLSWFLATFSSSPRIGRRTK  
LTFVDGVT ELWGALLDPMNVLVSVPPLELRARGIVVLIDEMKCSQLLLLPSQASQLLLAS  
SNNNPFPHLQRIIVSGEVFSPTLFGFRFRIQYPKVQLINLYGQTETTGDCLCAVLTDLG  
EAVVDNIVAVGKPIMSGFQITFLDDEENEGDSLKSQNQKNGNKQLVIKGS HLSNGYLG  
DSS

FFDHFIPGDIGFQRNGVYYVVRGRVDDIRKINGVLTSPSEVEAAFCNTYHVSDCATVAAVM  
LGNEVYLLCTSQDVVHEFSRFEHMTIKGIPLNLI PKQVFFVHGI PRSSSGAKKIDRNACL  
NLVKCYVEPSKERLEFYNSDASLKRKPKGTVLSII SAVLGVNESELDRDKSFLELGGDSA  
SSITLLYRIQOQETSLLSLDL NADILWSESLHELENLITGKA EKPKKTKMESEGHFRILSK  
SKKFVAGNAV VVNTSHRSVSLRACVDSAPLHVDNSIVAACQGGTIVKFNSIDGVI EGSRY  
YPGWMFQADLLLLLEPSTLLVAGHSLN RGI V LCLTQDLK EEKWKIEFDG SVKSRPILLGD  
KVWILAGKKLCSVDLTTGKVLGEEFDLPRTPCVSNPITITDKDGQTSIVFASSDWE GGI I  
VLDVQKLESKIYVDCEIGPVHKDVSVTKNSREIFISDIYGSLHVLNIKTMKLAASIQLSH  
SPLSAATI IDESTVVVGSYNGQVYCVRYDEKQSQLVKQWECSCYSSIIYSKPLALQNGSIL  
VCTTAGYVVRISIQKGKILFFYMISAEIWSSPVQ TGPINLVAVGARD SKCHLISLEEAL T  
E EY

>comp13920\_c0\_seq1; 507 128 2080 LEN=2144; translated  
MLGHRRIINSTLARRLTELRRRSY SLLSKSLTCDHLTSSIGTTAKDCRYSTSNHFDSSASL  
DCGLPRCSKELGDPLPFDEHACSVSLPTWCSVVG YEEGDQETVMALKTGYP RVVYHPYVL  
QLMEVILDMFPNSDSHKEDCLVLP TKEAALRCQAF LRESLEQNNIGNSFSS THSATRV DN  
ALIERPECESTSMGKESGSLNSKIRVVSLE DAGVHAVLFP AETSAGTEAKAYWQHTGELV  
SSRRAEKGLNVLGKQFSKRVTCCPMEGTPTILHSCETSICSNEATSGSESALSHEQLK KR  
ISSWTNVESDNVFLVPSGMATIYKSLRSARRYQLAKNPSSLGGTSIVYGFPYLDTLKMCS  
RKEFSPAGVEFFGKGDENDLQLLTRILQEREESWSAVFTEVPSNPLLQCPDLEALRSLA  
DEHDFCVVDDTIGNFLNIDLLQSGLADAVCTSLTKLVSGRGDAIAGSVITNP NTEKGRW  
MKEDLEKDTDIFGGLHEADAMAMVHNSVDFPARNSRINETTELLADFMNDHPD VDVVWYP  
KFVAPLFTRYQQADGGFGGLFSIHLGPHICQRTFYDLLDVAKGPSLGTNFTLVCPY TLLA  
HYHELD FAMSHNVPPNLI RIAVGL EDFDELKEKFAFALDKSRLH PKLP CS

>comp13921\_c0\_seq1; 557 1 1622 LEN=1839; translated  
XDLSSLSPPPPQGGAPSAALPPMAVPSSAVQELWMLAGRLPDGYGLVASAISQYARTRGG  
ALMGSVSPQSGAGARAGKQKITD LLELQGR LQGLLAHLPHSGEHCALKNVWEDVINPSSD  
GHQHDETSVVAEALAKYVDA CLKDGKRQMLASASALSSSSSPAGRGDNWAEAVISGVFCY  
LQAKDTFEAFYKQDLAKRLLWNRVVSMDVERHFV SLLKAECGAGYTSKMEGMFQDMDSR  
ETMNR YKQAQYQHEKNQAFASASAPGGG ESKVEMDMQVLT TGFVWPVYPQYPKLILPKCLL  
DPQNKFT EYKTKYQGRRM TQYALGHV VVRFKPRGENAGPKYELLVSLCQALVLLQFNN  
DGTELRLPQLMAAVGLEDRKEMERILLSLSL GKEGTRVLH KRDRDAPDVSSSDNANPG  
K K K KTRMNVHDLDTFRVQSGFKSNTRRIRINN ILMKETKEERDKTVKAVSRDRLYL VDAV  
LVRIMKARKTILHQELIPQVLEQVKVPAQPSDIKKRIETLIEREYFERDANDRNRYNYLA

>comp13922\_c0\_seq1; 429 95 1939 LEN=1970; translated  
MAYIRGAI AIGRIDMKLLIFVALNLC LILAESSTSSKDRAPNFV VFFVDDLGYGDLGFTG  
HPTTKTPNLD SLAWNGKILTTWYSGCNVCTGSRAALMTGRQFARTGLPGVIGPDCPYGLN  
LEEITIAEQLKNGGYSTAI V GKWHLGQRKVYLPGNRGFD FYLGIPFSDDMGAGMESSCPA  
EY PFSATGDDGGYTHGEWSARS MYEKMGLMDANFFTTKNYNNHRDDDMGTKWLP LVYQKF  
NQTQILQQPVDF TSLAKKYSNFATSFIEDHQDSSKPF FLYV PFSHVHTTQTGSTKERQYA  
GCNFQNTTKRGTFGDALAETDWIAGNIVQKIRDLGLEENTLILFTSDNGPWMAQGLSGGS  
EGLFTGRFAEGYTNTAKGSTWEGGIREPAFAYWKGKISPFTRTSEVISSLDVFP TLSALA  
GIPLPDDRPF DGKDMSKILLNNDGKSEHDFLFFYGTCSG EK YWSIASVRHGKYKAHWCTA  
PGLGHYNETLAKRYDPLLFDVEKDPSESEPI SFNSMPT ESEDLLAMKRILAA YAMEKST  
FEFGNITQEPDADGEGPGHYALCCDRSSN CYCKEPV GIMNLGTKNHHD RYHKALGKGEPL  
PPQTPHQNLRLNLE

>comp13922\_c0\_seq2; 387 95 1567 LEN=1586; translated  
MAYIRGAI AIGRIDMKLLIFVALNLC LILAESSTSSKDRAPNFV VFFVDDLGYGDLGFTG  
HPTTKTPNLD SLAWNGKILTTWYSGCNVCTGSRAALMTGRQFARTGLPGVIGPDCPYGLN  
LEEITIAEQLKNGGYSTAI V GKWHLGQRKVYLPGNRGFD FYLGIPFSDDMGAGMESSCPA  
EY PFSATGDDGGYTHGEWSARS MYEKMGLMDANFFTTKNYNNHRDDDMGTKWLP LVYQKF  
NQTQILQQPVDF TSLAKKYSNFATSFIEDHQDSSKPF FLYV PFSHVHTTQTGSTKERQYA  
GCNFQNTTKRGTFGDALAETDWIAGNIVQKIRDLGLEENTLILFTSDNGPWMAQGLSGGS  
EGLFTGRFAEGYTNTAKGSTWEGGIREPAFAYWKGKISPFTRTSEVISSLDVFP TLSALA  
GIPLPDDRPF DGKDMSKILLNNDGKSEHDFLFFYGTCSG EK YWSIASVRHGKYKVRRI LE  
ATVWNCHSCL

>comp13922\_c0\_seq3; 195 1 1023 LEN=1484; translated  
NQTRVLMASISYICISYFLGHPTTKTPNLD SLAWNGKILTTWYSGCNVCTGSRAALMTGR  
QFARTGLPGVIGPDCPYGLNLEEITIAEQLKNGGYSTAI V GKWHLGQRKVYLPGNRGFD  
YLGIPFSDDMGAGMESSCPA EY PFSATGDDGGYTHGEWSARS MYEKMGLMDANFFTTKNY  
NNHRDDDMGTKWLP LVYQKF NQTQILQQPVDF TSLAKKYSNFATSFIEDHQDSSKPF FLY

VPF SHVHTTQTGSTKERQYAGCNFQNTTKRGTFGDALAETDWIAGNIVQKIRDLGLEENT  
LILFTSDNGPWMAQGLSGGSEGLFTGRFAEGYTNTAKGSTW  
>comp13922\_c0\_seq4; 244 1 1837 LEN=1868; translated  
NQTRVLMASISYICISYFLGHPPTKTPNLDSLAWNGKILTTWYSGCNVCTGSRAALMTGR  
QFARTGLPGVIGPDCPYGLNLEEITIAEQLKNGGYSTAIVGKWHLGQRKVYLPGNRGFDF  
YLGIPFSDDMGAGMESSCPAEYPPFSATGDDGGYTHGEWSARSMYEKMGLMDANFFTTKNY  
NNHRDDDMGTKWLPLVYQKFNQTQILQQPVDFDSLAKKYSNFATSFIEDHQDSSKPPFLY  
VPF SHVHTTQTGSTKERQYAGCNFQNTTKRGTFGDALAETDWIAGNIVQKIRDLGLEENT  
LILFTSDNGPWMAQGLSGGSEGLFTGRFAEGYTNTAKGSTWVRVMTFIKNRVDLPHVAST  
IDPTYTVICFSLQIYEKLEGGIREPAFAYWKGKISPFTRTSEVISSLDVFPPTLSALAGIP  
LPDDRPFDGKMSKILLNNDGKSEHDFLFFYGTCSGEEKYWSIASVRHGKYKAHWCTAPGL  
GHYNETLAKRYDPPLLFDVEKDPSESEPI SFNSMPTESEDL LAMKRILAAAYAMEKSTFEF  
GNITQEPDADGEGPGHYALCCDRSSNCYCKEPEVGMNLTGKNHHDYHKALGKGEPLPPQ  
TPHQNLLRNLE  
>comp13922\_c0\_seq5; 334 95 1237 LEN=1698; translated  
MAYIRGAIAIGRIDMKLLIFVALNLCILAEESSTSSKDRAPNFVVFVDDLGYGDLGFTG  
HPTTKTPNLDSLAWNGKILTTWYSGCNVCTGSRAALMTGRQFARTGLPGVIGPDCPYGLN  
LEEITIAEQLKNGGYSTAIVGKWHLGQRKVYLPGNRGFDFYLGIPFSDDMGAGMESSCPA  
EYPPFSATGDDGGYTHGEWSARSMYEKMGLMDANFFTTKNYNNHRDDDMGTKWLPLVYQKF  
NQTQILQQPVDFDSLAKKYSNFATSFIEDHQDSSKPPFLYVPF SHVHTTQTGSTKERQYA  
GCNFQNTTKRGTFGDALAETDWIAGNIVQKIRDLGLEENTLILFTSDNGPWMAQGLSGGS  
EGLFTGRFAEGYTNTAKGSTW  
>comp13922\_c0\_seq7; 383 95 2051 LEN=2082; translated  
MAYIRGAIAIGRIDMKLLIFVALNLCILAEESSTSSKDRAPNFVVFVDDLGYGDLGFTG  
HPTTKTPNLDSLAWNGKILTTWYSGCNVCTGSRAALMTGRQFARTGLPGVIGPDCPYGLN  
LEEITIAEQLKNGGYSTAIVGKWHLGQRKVYLPGNRGFDFYLGIPFSDDMGAGMESSCPA  
EYPPFSATGDDGGYTHGEWSARSMYEKMGLMDANFFTTKNYNNHRDDDMGTKWLPLVYQKF  
NQTQILQQPVDFDSLAKKYSNFATSFIEDHQDSSKPPFLYVPF SHVHTTQTGSTKERQYA  
GCNFQNTTKRGTFGDALAETDWIAGNIVQKIRDLGLEENTLILFTSDNGPWMAQGLSGGS  
EGLFTGRFAEGYTNTAKGSTWVRVMTFIKNRVDLPHVASTIDPTYTVICFSLQIYEKLEG  
GIREPAFAYWKGKISPFTRTSEVISSLDVFPPTLSALAGIPLDDRPFDGKMSKILLNND  
GKSEHDFLFFYGTCSGEEKYWSIASVRHGKYKAHWCTAPGLGHYNETLAKRYDPPLLFDVE  
KDPSESEPI SFNSMPTESEDL LAMKRILAAAYAMEKSTFEF GNITQEPDADGEGPGHYALC  
CDRSSNCYCKEPEVGMNLTGKNHHDYHKALGKGEPLPPQTPHQNLLRNLE  
>comp13922\_c0\_seq8; 290 1 1725 LEN=1756; translated  
NQTRVLMASISYICISYFLGHPPTKTPNLDSLAWNGKILTTWYSGCNVCTGSRAALMTGR  
QFARTGLPGVIGPDCPYGLNLEEITIAEQLKNGGYSTAIVGKWHLGQRKVYLPGNRGFDF  
YLGIPFSDDMGAGMESSCPAEYPPFSATGDDGGYTHGEWSARSMYEKMGLMDANFFTTKNY  
NNHRDDDMGTKWLPLVYQKFNQTQILQQPVDFDSLAKKYSNFATSFIEDHQDSSKPPFLY  
VPF SHVHTTQTGSTKERQYAGCNFQNTTKRGTFGDALAETDWIAGNIVQKIRDLGLEENT  
LILFTSDNGPWMAQGLSGGSEGLFTGRFAEGYTNTAKGSTWEGGIREPAFAYWKGKISPF  
TRTSEVISSLDVFPPTLSALAGIPLDDRPFDGKMSKILLNNDGKSEHDFLFFYGTCSGE  
KYWSIASVRHGKYKAHWCTAPGLGHYNETLAKRYDPPLLFDVEKDPSESEPI SFNSMPTE  
SEDL LAMKRILAAAYAMEKSTFEF GNITQEPDADGEGPGHYALCCDRSSNCYCKEPEVGMN  
LGTKNHHDYHKALGKGEPLPPQTPHQNLLRNLE  
>comp13922\_c0\_seq9; 248 1 1353 LEN=1372; translated  
NQTRVLMASISYICISYFLGHPPTKTPNLDSLAWNGKILTTWYSGCNVCTGSRAALMTGR  
QFARTGLPGVIGPDCPYGLNLEEITIAEQLKNGGYSTAIVGKWHLGQRKVYLPGNRGFDF  
YLGIPFSDDMGAGMESSCPAEYPPFSATGDDGGYTHGEWSARSMYEKMGLMDANFFTTKNY  
NNHRDDDMGTKWLPLVYQKFNQTQILQQPVDFDSLAKKYSNFATSFIEDHQDSSKPPFLY  
VPF SHVHTTQTGSTKERQYAGCNFQNTTKRGTFGDALAETDWIAGNIVQKIRDLGLEENT  
LILFTSDNGPWMAQGLSGGSEGLFTGRFAEGYTNTAKGSTWEGGIREPAFAYWKGKISPF  
TRTSEVISSLDVFPPTLSALAGIPLDDRPFDGKMSKILLNNDGKSEHDFLFFYGTCSGE  
KYWSIASVRHGKYKVRRIEATVWNCHSCL  
>comp13923\_c0\_seq1; 639 336 2409 LEN=2433; translated  
MDGMSCDSGEETNSEGPANDNTSTDGGAPDDPPPISPLSSPELVKAMLYFEITLKRTRFTR  
EYVKKKYKRLSLIHPDRNGNTEESI QEMQTI NHYYDLLEEELDRLEDEVEDQNEEDPPI  
VPRDTSNSTSDTFNDDKDKDSKKEREGRTRRPSWRPVSRRRSASRRRSTSTEPSSRRRSYS  
IDERRRRRRRTSVERRQRKEREQERQDMEREMKREWDGNAKKISEFRKCLRKSSRWNNQ  
RSIDLHLDSVWVRDQAFRNYTRQARDYRVRVASMRNAGAQEFTSNGSTAAPSKPNYVLM

CCNDEAVVAMRLGETGIAIDI IHQQIANTTDEWILLKMRASTSAKAGPGVYESSKRGFN  
VQLDWSYYKRILQRLIRPLDEEDGNSILHYAIYIEDDEVVQYLIQIARQNKIFAQLVVHTN  
NRNMNASDFAAGCTWNNNTTIPMTIATLTTEAVGILDKKERRRAKRQQQERKPWEHP IAES  
LFHVFLCLAVGKYITCSGWIVSWII IALAHVVELCNKSASSAFISKAFFFALHTGWFIAV  
GTVLKTSNIILTLAESIPXSMATAAGDGVVAHTIPRESSIHTLRIYAADYHEDRVGFDFLP  
GMDHVAERNVLDWIHETPGGLCDVVSPLSRGAPVLLRQRTLSVVRLVNFLGVSFSPSIDH  
LTLRSGGFFIGGRIQLGSDFPPTVAFEGDIT

>comp13924\_c0\_seq1; 187 56 538 LEN=713; translated  
MTTASKSVYEQPPTNRSKRKRITITKRENCCIYDAAIAINKNFDVLGLVAMLNPSPRRR  
RPRRPMRLKSSSMPSQSNSCPCLLPLSASTSTFSVSTSSTQEKRGS DGAARREKEQLNN  
SDWSELLAMTDSMHIRGLHQHRQGHRNRRGAI SIVSAPHA

>comp13924\_c1\_seq1; 469 480 1355 LEN=1847; translated  
MTSCFYIFVRPIPEEGMPELPEKEFGWISRQIKVKEPPAYGKQCTWYTADERDEYFDAMW  
NAGMAMSILSVVIGLVAMSLVMCTCCVAFKLPMPFDGLFWTCMICFVAQCLTFLSWGSEMC  
TEMECTWSSGTGLNLTALMMWVAANMIKSFPEALPPRKRDRDQGEDYDDEDAGDVYL  
SNQNSGEYEDGDYNDWDNADDNGDGYDEDGNWVENYADDDVEGEYDSYDDYDGGYDKD  
NGGYDYDNESSNWAGTSDSGGLSGESRGASGESDSYDTPSAQGRHLT

>comp13926\_c0\_seq1; 608 1 1372 LEN=1927; translated  
XWHLIGTLTNRIVHGKTCPI SPSLNASTSTSSLSSKMNP RSSCSNEKQLSDFLDGGIIT  
GDTYDWMKPFHEKEQADRRE ILLAAEARNDPFYFDRDEEDEDILFTTTTQTLRNIEGT  
PGSL SFAADDNSTGHGNKVWHSSIATCRYLKEEFLANSPKTNWWFGTNS SKPLATNTTPP  
NSGFRSLELGAGTALPSLFLASQLKQRQRQRQRQLEAETAESAAARSAPPATVCISDA  
KQYRN IHQILRSVGMQLDSDDENSDNSDGSNPHSDDNVRFEVHPHNWGDLC DKVFSSCSG  
EDIGVGYDLVIASDCLYNPQYQGVLL ESIVHALAIDGRAVVSFSLHGNVGD EAIWAFVEQ  
AVPAATKTM TANAKANAKASPDASGGKEAVEQSWRLRARC VSAAVPNGDDAAGRGNRGRE  
GWDMEETMRELDMPTEGLAKERWKS YVYELTWVPLRS

>comp13927\_c0\_seq1; 304 1 1655 LEN=1698; translated  
QRDCNRDHTNSNLLIVVADIEDGIKEQTLPEIVXESSASHGIFIASYLRRMMDTKSKREI  
SYPLCLSLRVHSSVLLPELEGETSNGRKISEDVIFVPNEIALGVAAEKGGNHVVEFDGK  
ESAVQDGCVCTREEHTSVSHVFQIGEGRMKEQTIQAKRPNDPFYVTAITSMQRIVVQPS  
ADAIKELGRRARARTEQERQNRKGIKVIDESTLILQQQKEGTSKGF SNIASLNVVNGKKR  
QHQQKQRNSYSQKRNAVKKPRRMTQLLWTPDLSQIS IPEKIDQSAYVLVHGLPYGCTLE  
VVRKFFTGLVPEQILLLLTNQTDIWELDASSYDTLALYNLQDDIYTNE DVRLVKFDSAS  
AAGLAVDRSGETIFSKHLLTSSRS SHSVLDLPDEF SIGVTQISKKNSSFLSRLSIDATPGV  
PFHDCLYRVESKLDPMVIGILWSSTRKACHFSVDCEIKRFRV LLEEDTYQEDRATNRLLS  
FSGYQKHAKHYNRLLRIQEDLMQNI PIDCSEEATTSTDPV VRLTAHACSVLEDEM DRVDI  
LLYQYRASRFL

>comp13929\_c0\_seq1; 314 1 770 LEN=1706; translated  
XSNPAEPPEKSRLAPNNSDSAPPSEALVLEQLIEQHPLGKIWHDFVATTLAAEFALQ TTP  
LGGFQASTLGT DPLHMHRPGL EDSGGFDYEDDDGGALS LPPQRGGLLV DGDLDMDNDL  
EVAASMMAGLNL TGS GGDGRAQPRTPQSGYLFDDPLGGGGFGNF GNDDED DGSNGGSSS  
SDEEGDNVMDLFTGNLGDQDHFAANFEANFDDAFADVSSDGGENG PDED RNTLDNLF GDV  
RGHDILLDDFEKPPGN

>comp13930\_c0\_seq1; 105 1 229 LEN=564; minus strand; translated  
XLELGI ELGISLGL ELALGIELG TKLGF KLVVGMELGIELGV ELKLGIELG STLGS KLKL  
GVELGIMLGQGLSLGV

>comp13930\_c0\_seq7; 105 1 229 LEN=597; minus strand; translated  
XLELGI ELGISLGL ELALGIELG TKLGF KLVVGMELGIELGV ELKLGIELG STLGS KLKL  
GVELGIMLGQGLSLGV

>comp13931\_c0\_seq1; 424 136 2378 LEN=2624; translated  
MTPLSKEGSEAPDLPLHADEKSASTPSPSAERLIRVLEPEKQVR FVETIAVHGHFSLTAI  
ANKNRFLQLQLGXGYESNEAASIANKILIDFRHILSHFVVT TYKKGST EYK RQLLHCSP  
TRLEK LKTQMSFRLDEGN ICHYQIGVEDNGCHSLTDYHACAETAKLLEHLARSLNAVVL  
ERKMIQNEVSPVDHISFERMKDAGIIEVLEDSLLGDGTEQLFEDQQMAEDHSREPQENQ  
PILNKAKGALTRCELTIQRVETHLLDPSVSKAQNKKNQANEKSTPEEENLSVNETLSSR  
NVR IAVGVNDAGKSTMI GTLTSSLLDDGRGSSRTS IMKHRHEIESGRTSTASTHLMGFR  
STGEAVAGRDSVRATRKRSEDEVARESYRVVTLMDLAGHEKYLKTTIHGVASGMADYALI  
LVNSRHPPTHMTHHHLNLCVSFGIHVIIVFTKVDGCEHAFKTSKAEVSKLLKRPDINKR  
PFDIRSEEDIATCMGKLGTLAPMISTSCVTGEGIDLLKMLFELPKRRRHEKKQNRPF EF  
LVEDIFNVPGVGSVVS GFVNAGQLTTGSNAHVYVGP TDDGSFMKTI AKSAQIARINTTHV

TSGQSACLALALSKDMRKKLRRGMVVLKEAPTSTREFEAEICVLKGEGETTIRRSYQAFVH  
ILNVRQSAYAKKIEIVNTNAMGLASTHTALYGEENEIVLRPGCRAKVRVFQFARRPEYVRP  
GMRMLFRDGRVRGVGLVTSIPTLQPAH

>comp13931\_c0\_seq2; 241 136 1140 LEN=1386; translated  
MADYALILVNSRHPPPTHMTHHHLNLCVSFGIHVIIVFTKVDGCPEHAFKTSKAEVSKLLK  
RPDINKRPFDIRSEEDIATCMGKLGTLAPMISTSCVTGEGIDLLKKMLFELPKRRRHEKK  
QNRPFEFVLEDIFNVPVGVSVVSGFVNAGQLTTGSNAHVYVGPTDDGSFMKTIAKSAQIA  
RINTTHVTSGQSACLALALSKDMRKKLRRGMVVLKEAPTSTREFEAEICVLKGEGETTIRR  
SYQAFVHILNVRQSAYAKKIEIVNTNAMGLASTHTALYGEENEIVLRPGCRAKVRVFQFAR  
RPEYVRPGMRMLFRDGRVRGVGLVTSIPTLQPAH

>comp13931\_c0\_seq3; 405 136 2303 LEN=2711; translated  
MTPLSKEGSEAPDLPLHADEKSASTPSPSAERLIRVLEPEKQVRVETIAVHGHFSLTAI  
ANKNRFLLQLQXGYESNEAASIANKILIDFRHILSHFVVTYKKGSTHEYKRQLLHCSPT  
TRLEKLTQMSFRLDEGNIGICHYQIGVEDNGCHSLTDYHACAETAKLLEHLARSLNAVVL  
ERKMIQNEVSPSVDHISFERMKDAGIIEVLEDSLLGDGTEQLFEDQQMAEDHSREPQENQ  
PILNKAKGALTRCELTIQRVETHLLDPSVSKAQNKKNQANEKSTPEEENLSVNETLSSR  
NVR IAVVGNVDAGKSTMIGTLTSSLLDDGRGSSRTSIMKHRHEIESGRTSTASTHLMGFR  
STGEAVAGRDSVRATRKRKSEDEVARESYRVVTLMDLAGHEKYLKTTIHGVASGMADYALI  
LVNSRHPPPTHMTHHHLNLCVSFGIHVIIVFTKVDGCPEHAFKTSKAEVSKLLKRPDINKR  
PFDIRSEEDIATCMGKLGTLAPMISTSCVTGEGIDLLKKMLFELPKRRRHEKKQNRPFEF  
LVLEDIFNVPVGVSVVSGFVNAGQLTTGSNAHVYVGPTDDGSFMKTIAKSAQIARINTTHV  
TSGQSACLALALSKDMRKKLRRGMVVLKEAPTSTREFEAEICVLKGEGETTIRRSYQAFVH  
ILNVRQSAYAKKIEIVNTNAMGLASTHTALYGEENEIVLRPGCRAKVRVFQFARRPVSLSF  
LN

>comp13931\_c0\_seq4; 222 136 1065 LEN=1473; translated  
MADYALILVNSRHPPPTHMTHHHLNLCVSFGIHVIIVFTKVDGCPEHAFKTSKAEVSKLLK  
RPDINKRPFDIRSEEDIATCMGKLGTLAPMISTSCVTGEGIDLLKKMLFELPKRRRHEKK  
QNRPFEFVLEDIFNVPVGVSVVSGFVNAGQLTTGSNAHVYVGPTDDGSFMKTIAKSAQIA  
RINTTHVTSGQSACLALALSKDMRKKLRRGMVVLKEAPTSTREFEAEICVLKGEGETTIRR  
SYQAFVHILNVRQSAYAKKIEIVNTNAMGLASTHTALYGEENEIVLRPGCRAKVRVFQFAR  
RPVSLSFLN

>comp13931\_c0\_seq5; 446 136 2190 LEN=2436; translated  
MTPLSKEGSEAPDLPLHADEKSASTPSPSAERLIRVLEPEKQDGSTHEYKRQLLHCSPT  
EKLKTQMSFRLDEGNIGICHYQIGVEDNGCHSLTDYHACAETAKLLEHLARSLNAVVLERK  
MIQNEVSPSVDHISFERMKDAGIIEVLEDSLLGDGTEQLFEDQQMAEDHSREPQENQPIL  
NKAKGALTRCELTIQRVETHLLDPSVSKAQNKKNQANEKSTPEEENLSVNETLSSRNVR  
IAVVGNVDAGKSTMIGTLTSSLLDDGRGSSRTSIMKHRHEIESGRTSTASTHLMGFRSTG  
EAVAGRDSVRATRKRKSEDEVARESYRVVTLMDLAGHEKYLKTTIHGVASGMADYALILVN  
SRHPPPTHMTHHHLNLCVSFGIHVIIVFTKVDGCPEHAFKTSKAEVSKLLKRPDINKRPF  
DIRSEEDIATCMGKLGTLAPMISTSCVTGEGIDLLKKMLFELPKRRRHEKKQNRPFEFV  
DIFNVPVGVSVVSGFVNAGQLTTGSNAHVYVGPTDDGSFMKTIAKSAQIARINTTHVTS  
QSACLALALSKDMRKKLRRGMVVLKEAPTSTREFEAEICVLKGEGETTIRRSYQAFVHILN  
VRQSAYAKKIEIVNTNAMGLASTHTALYGEENEIVLRPGCRAKVRVFQFARRPEYVRPGMR  
MLFRDGRVRGVGLVTSIPTLQPAH

>comp13931\_c0\_seq6; 427 136 2115 LEN=2523; translated  
MTPLSKEGSEAPDLPLHADEKSASTPSPSAERLIRVLEPEKQDGSTHEYKRQLLHCSPT  
EKLKTQMSFRLDEGNIGICHYQIGVEDNGCHSLTDYHACAETAKLLEHLARSLNAVVLERK  
MIQNEVSPSVDHISFERMKDAGIIEVLEDSLLGDGTEQLFEDQQMAEDHSREPQENQPIL  
NKAKGALTRCELTIQRVETHLLDPSVSKAQNKKNQANEKSTPEEENLSVNETLSSRNVR  
IAVVGNVDAGKSTMIGTLTSSLLDDGRGSSRTSIMKHRHEIESGRTSTASTHLMGFRSTG  
EAVAGRDSVRATRKRKSEDEVARESYRVVTLMDLAGHEKYLKTTIHGVASGMADYALILVN  
SRHPPPTHMTHHHLNLCVSFGIHVIIVFTKVDGCPEHAFKTSKAEVSKLLKRPDINKRPF  
DIRSEEDIATCMGKLGTLAPMISTSCVTGEGIDLLKKMLFELPKRRRHEKKQNRPFEFV  
DIFNVPVGVSVVSGFVNAGQLTTGSNAHVYVGPTDDGSFMKTIAKSAQIARINTTHVTS  
QSACLALALSKDMRKKLRRGMVVLKEAPTSTREFEAEICVLKGEGETTIRRSYQAFVHILN  
VRQSAYAKKIEIVNTNAMGLASTHTALYGEENEIVLRPGCRAKVRVFQFARRPVSLSFLN

>comp13932\_c0\_seq1; 481 233 1879 LEN=2031; translated  
MDVPDTMENSNRATSPSEPOLSSRSERQVSKYYPWRWGKPLYDGNSEAIGWTMVSVSMA  
MQYIGTGFAFFATALRVAEKAYVCRNLNMANETDADLVREQC GPGVGGGLNATSLLTYYAGV  
VGLIAAIMLPFIGAVIDYTRHRLLIGRIMSILYTMFIFPLIFLNEENYVYMLFFHALSVF



FGWFVTAIQSYLPDLTKCELQLAYWIKCITIWYAGMVVYLSAILGAFILLKIRSDLFL  
NRIGMATSFTINALCMSIAWWGLFQTREPLHEKPPDANLWTSQFTQLYQTSTHIARNYRG  
LKWFFIHLCFSDAGWQTFALCMLTYFTDFMKNLALQTSITIIITLAGSVPGAVVAKIFAT  
RLDP IRSARINMVSMMMLVIVL FVSVLSGSGVQTKRAYAIVALIGFCGGWKYSMDKLLGAAL  
IPEGQDTEMMGVFLFAGQCLSWLPLLVTLLSEAGISPRINVAILIVYLVL SFAALCLVG  
SYTNARREVRRTSVYSK PDDGESGEGRIDSEKANADTDGSLAIEGNGTERKATATIKVSD  
DNSMELEA

>comp13932\_c0\_seq2; 462 233 2007 LEN=2159; translated  
MDVPTMENSNRATSPSESEPQLSSRSERQVSKYYPRWRGKPLYDGNSEAIGWTMVSVSMA  
MQYIGTGFAFFATALLRVAEKAYVCRNLNMANETDADLVREQCQPGVGGNATSLLTITYAGV  
VGLIAAIMLPFIGAVIDYTRHRLIGRIMSILYTMFIFPLIFLNEENYVYMLFFHALSVF  
FGWFVTAIQSYLPDLTKCELQLAYWIKCITIWYAGMVVYLSAILGAFILLKIRSDLFL  
NRIGMATSFTINALCMSIAWWGLFQTREPLHEKPPDANLWTSQFTQLYQTSTHIARNYRG  
LKWFFIHLCFSDAXLADICALHVYVIIVYAVTFVSLGSKVWYLSDLLVSFHANFVSLPNL  
PLLHTVTYFTDFMKNLALQTSITIIITLAGSVPGAVVAKIFATRLDP IRSARINMVSMMML  
VIVL FVSVLSGSGVQTKRAYAIVALIGFCGGWKYSMDKLLGAALIPEGQDTEMMGVFLFAG  
QCLSWLPLLVTLLSEAGISPRINVAILIVYLVL SFAALCLVGSYTNARREVRRTSVYSK  
PDDGESGEGRIDSEKANADTDGSLAIEGNGTERKATATIKVSDDNSMELEA

>comp13933\_c0\_seq1; 641 338 2119 LEN=2578; translated  
MATGLVLAQVLLSTMLPAVDSFVPSSTTSFSDRIHVLDNDFSIRTNENKPINYNNSCFHSRI  
QKSSTTETTLKAINAEEETSSSSIPPQTEEEKERLEKICSGLNAAFEASRKDLTRTCNVKV  
GVSPNVDSYGEVPGSNMRLGWIATKDVNKGDI LMNMPYDEQWEITPKTARKTVFSGILDD  
AYEGWTGETGLVALQLLNEVARSASTGGVQKPVVGGPP IQAFLNEWINALPTPTELETQHP  
IFWSEEDQEILQSSNTKIYRILDDIEEDANWLVTNIFEKDRATFPETVEIQSGETVPCF  
SVEGYKWAMALTNRAFFVDGDIRLLPFMDMCNHDDEAKELQGGFMGTFTGTTKGAEVLST  
RRYRAGEEVFLSLGPKSAADYLLEHGFCPEDCLKTAVSEITLELDPEDRFYDDKIDILEF  
ETYDQAPMDPSQSFDVVSAPGRDGEPPALMQFARLKLNNMDAFLLESIFRKEVWGFMA  
YPVSEKNEFAVVEAIAQLCETAMEDMKSCPEPEQEGPNSEVCAKLRASETRALRRTLEYM  
LRDKREALDLKEYYQERRLKDGLDSEWSPEDDIGDPDLNWGQTRSPGGADFDW

>comp13934\_c0\_seq1; 1255 164 4864 LEN=5083; translated  
MSGGRRIRKNRDNRRDRFRKRKLEEIARQEKEQKLRNQRRTFTDTSTSA PPTPIINDVEK  
PSTQVENKGNPDIHETADRRTNPIKNSPIPPYWGASSPKPKCPAARSRTLYSSSFRKKK  
EEQNYNEKWDDSSDDNNDLFCGKGDPIRDGRRKRKSKILSKTGRNSNVVGRSDSRVSHS  
PSAPATMATLPPPESKNARTATKARNESESDSDSDGSFNMMALWKENKAQRLKADKTRQQ  
ENQTT SAGVINDAEIWNMKGKKEADLDDEVVHDGRRKKNNGKIPRRRKRVAISDVNFVE  
DGLGSSEDDGGVCDYDGVDRKKNRNLKSYGNTKVRREYSGSSNKGHESQNDSSDDLDT  
ERPQAKLRKKKPRNPLTLEREASDNFFLIARA AKATSPQKGASDFEDIDDGFMSDCEPI  
SEPVHAKAKTKAATTRYGMDNLSRGKNNSTSRKKIEESSQEDRFYASGDEICDSDENDD  
YSGAQKSEIMVQSLDDLHPQFKNPKFGPYAPIEPLLLSHDQSKMIVQVPASLNRYLAPYQ  
KEGVKFMYNCLSRRSVILGDEMCGCKTVQVISLLCAMFNKTGTGKDLEDIRERDSFVRR  
KKVKLQKQRDLALRRGEVVDENIKDWKATSLSLSPWNPVMIIVPPTIMDTWKIAFATFSH  
FSVSFFSREKKT DVIDSMLYGNADILVVPKSAFQRELHFDELNKIRWKL VVIDEFHNFKN  
HKAKISIHRLKELHQPILIGMTGTPMQNNHKLWNLVDLVE TNFFGTQEEFNINFRP  
ITLGRQKCANPRVKARSEAASAELRNQLSKIYIKREKNVVLKGELPEKNEQMILCDLSPL  
QKEVYKACVELPDFDLVKHGSRPCDCGINKMFFRDLFKLCKAERLEFMRTNKRQVNVQA  
KCCWKL PVPNKYGEEGEPYINPDAVIWRSMADHCTDYTAAREGCKNCPWCCTLPCLTKLN  
KLSHHLGLLQACKTKPEKGS PAYNRYIKEKEFAKVS LAGITSRLPGGDKPGGGYDRNDGI  
MDDHFLSGKLVLDRL LQKYAAEEGKVL LFSHSTQSLGLIQNWLSRGLY EYRRMDGST  
PLSKRQQLTDEFNKEEHI FLFLLSIKATGLGLNLT SANRVIMFDVSWNPSWEIQAQDRAH  
RIGQTRDVRVRLISRGTV EEMIYLRQIYKIHLKQD TLQDHDIDAVAPRVFRGVQGDY  
RKGEIFGTENLFRFKENG SFLDDIWAELSSKGNDDGSSGLDIRDSGELSKLLDLTDEDK  
VRIRENNVPAIGEVI RDGSDKLSKTRRVFTKRTTLGAEFFDSELDDKICAKDEPLEGT  
VRAVNHGDLFRSDKGGAAIASGEDGFEEEMGGQTQAAYE IYENVIGDFIHEDHVAGAENG  
SCEDKHNEENDGSQTEKNEDGRNQSNISPTIYLPKSTSEKSVDSLVLPLKSSPTARNPRIS  
KSRHSVKCDCRAALASIDVAKSDGP IVQYDDRRMPTNQQQFNNEGRLIIDASFIPQKIHN  
KEKHHDPQKICAKKLPSIQTKNKVLLMGYPDIDNVKTTFSITDLRRPYYGRKKT KKKTTL  
IQNLSI

>comp13935\_c0\_seq1; 847 239 5070 LEN=5393; translated  
MDPDRDRTSAEDTIVSGSTPHQANREQPLSSSSLSPECTRTAAASSPSPFFSLLPPRHPPP  
RAKPRQPVPVVTDQVEDEATTVASAGGGTDGSAANPDRTAIQDRERQDPKGSTRYGHIPV

AAVGSFGNKSTIHNEYLPAAQSKASNRTAIHGPNQDPNQSTYHAGTPVPAEERSISSN  
KKNTIQNEYHREAAQPKATNQNSYKDPSSQIPKEPPQHAQGDARSTDADVVGADHNNSHD  
EKQHGNSENVVACNNTDAKQQPQNDPPRHNRKVSWSGGKTIVIPQNYDDNFANSIPALLSE  
QVVGHYNSDETNDKSDSKKAVIAKAAIDLSTIEAKMAHEGMDGFGTITTPRISDSTSGS  
AIKVEDLAKLHPIESEATYEI IKAIESHEQEQQQEDHGEEERHIEAIASVFSDESKLLE  
HVPEGAEGFLTNKTRDSSHLSSVAGISTSTAMSESI I STANNTNAHIRHDGLSPPRHRSY  
SIGSAAESHADVEGANNPSSHGRTHTPANIDPTISSTMRSPARSHARRQPYEYRRKQHRR  
KETMEEKLFFLNQALDATNGSGHHE INKEKEDDKSFPTAHHRASTSLDLFNQNLARLFSG  
IDVSPATEQELLSEQETVPLTNNVVDTDAQVP IPPVDSGHFSSTSEDET LGKPVTKDASS  
RDMTLSQKEAVPFHHQAAASNEANTLQKDSL PNEPDAKISKEKHPYETFYDDIESGTFR  
SNRISSGNTDKRKRSQLARFLRKIGLVRDIEFFLKPRTS SFVLYLQNLAWLMLFSAITAV  
VLFYGVGNPPIEYQRDRGQNRTC SYFPDPKKEDEDEIGASF SWWWVLYLLVRMPITLTI AW  
SLEIFMIEFLILECRCVGSWMGSTITLLIVQAKGWPAILFFWSICNMLMLQGKSRFANHW  
GYWQPYIEVFNECNPSGTIVESSMNLKVQLLALALSIVVAVKRLLI GFQQGRKTF LNYAE  
ELARLMKKILLI SEVSNLAIQLELEKEDDDDLSDPDEDKIRDGNANLEGWAGRQAR IAGI  
ETA AEI IKQDIDKEEGVDDIDHDDLHVDSSIASRTNVT SNTD'TTKHKLFVSNREKEFVKG  
FLLGQSQRRIERLLGTWEEPERERILTESV SIGAILQFRQSLSKLDSKY PFSYSFGKAN  
MRDHCVQSSQSLYLRLLRQSPDPVLHFNTLGLVALQRDGI LDGEKLSLIKLF RPD RDXA  
TESDR LCEICGAYQPFHVIALAFASF TDSSSNRPSEKSFVCF FQDNVYKEMKLLRASVRS  
SQKIDKSFEQIFNVVYFVI ILLILNALGFNALVXVREPFFYHP I IQFYDFTGQFQVCGG  
SLVHHLQASIRHRGEHGA A VRACATCSPLLFNFSCPMLNGLV SFLPSCATPSARFPGLR  
DHPARRPGVELQRVDPLDRPRHRSADHRHVLVHGRGGHPVERLDRELPRDERGPVPPRV  
PVRHPPVRRRHELREARDFPRGGGAVCPQEAEGVQADGHQELRRLYRQGLHRVHGGPPA  
REQ LAAARFPVHEPEPRQDLLPRALEAARHPVQEPPEPVDLNLGSSGVEAVLGEPRAGG  
LTAAGGPSLGVGERGQPPPRPPNEGDRDRVSRLAAESEEIRALISDRRL

>comp13935\_c0\_seq2; 877 239 4938 LEN=5261; translated  
MDPSDRD TSAEDTIVSGSTPHQANREQPLSSSSLSPECTRTAAASSPSPFFSLLPPRHPPP  
RAKPRQPVVVDQVEDEATTVASAGGGTDGSAANPDRTAIQDRERQDPKGSTRYGHIPV  
AAVGSFGNKSTIHNEYLPAAQSKASNRTAIHGPNQDPNQSTYHAGTPVPAEERSISSN  
KKNTIQNEYHREAAQPKATNQNSYKDPSSQIPKEPPQHAQGDARSTDADVVGADHNNSHD  
EKQHGNSENVVACNNTDAKQQPQNDPPRHNRKVSWSGGKTIVIPQNYDDNFANSIPALLSE  
QVVGHYNSDETNDKSDSKKAVIAKAAIDLSTIEAKMAHEGMDGFGTITTPRISDSTSGS  
AIKVEDLAKLHPIESEATYEI IKAIESHEQEQQQEDHGEEERHIEAIASVFSDESKLLE  
HVPEGAEGFLTNKTRDSSHLSSVAGISTSTAMSESI I STANNTNAHIRHDGLSPPRHRSY  
SIGSAAESHADVEGANNPSSHGRTHTPANIDPTISSTMRSPARSHARRQPYEYRRKQHRR  
KETMEEKLFFLNQALDATNGSGHHE INKEKEDDKSFPTAHHRASTSLDLFNQNLARLFSG  
IDVSPATEQELLSEQETVPLTNNVVDTDAQVP IPPVDSGHFSSTSEDET LGKPVTKDASS  
RDMTLSQKEAVPFHHQAAASNEANTLQKDSL PNEPDAKISKEKHPYETFYDDIESGTFR  
SNRISSGNTDKRKRSQLARFLRKIGLVRDIEFFLKPRTS SFVLYLQNLAWLMLFSAITAV  
VLFYGVGNPPIEYQRDRGQNRTC SYFPDPKKEDEDEIGASF SWWWVLYLLVRMPITLTI AW  
SLEIFMIEFLILECRCVGSWMGSTITLLIVQAKGWPAILFFWSICNMLMLQGKSRFANHW  
GYWQPYIEVFNECNPSGTIVESSMNLKVQLLALALSIVVAVKRLLI GFQQGRKTF LNYAE  
ELARLMKKILLI SEVSNLAIQLELEKEDDDDLSDPDEDKIRDGNANLEGWAGRQAR IAGI  
ETA AEI IKQDIDKEEGVDDIDHDDLHVDSSIASRTNVT SNTD'TTKHKLFVSNREKEFVKG  
FLLGQSQRRIERLLGTWEEPERERILTESV SIGAILQFRQSLSKLDSKY PFSYSFGKAN  
MRDHCVQSSQSLYLRLLRQSPDPVLHFNTLGLVALQRDGI LDGEKLSLIKLF RPD RDXA  
TESDR LCEICGAYQPFHVIALAFASF TDSSSNRPSEKSFVCF FQDNVYKEMKLLRASVRS  
SQKIDKSFEQIFNVVYFVI ILLILNALGFNALVVFGLSSI ILSFSFMISQASSKFVEG  
LLFIICRRPYDIDGYVTIQPVDQESSFNGSTHWIVRIDL LTTVMYSFTGEVATLSNGS  
IANSRVMNGARSLPAYLYVTLRFVDT SF EKLEIFREAVARFVHKRPREWGKLM DIKNCD  
VSTDKGYIEYMVVLQHVNNWQQLGSLFTSRSHARTFCHELSKQLGIRYKSPSLPVDLNL  
GSSGVEAVLGEPRAGGLTAAGGPSLGVGERGQPPPRPPNEGDRDRVSRLAAESEEIRAL  
ISDRRL

>comp13935\_c0\_seq3; 902 239 4837 LEN=5160; translated  
MDPSDRD TSAEDTIVSGSTPHQANREQPLSSSSLSPECTRTAAASSPSPFFSLLPPRHPPP  
RAKPRQPVVVDQVEDEATTVASAGGGTDGSAANPDRTAIQDRERQDPKGSTRYGHIPV  
AAVGSFGNKSTIHNEYLPAAQSKASNRTAIHGPNQDPNQSTYHAGTPVPAEERSISSN  
KKNTIQNEYHREAAQPKATNQNSYKDPSSQIPKEPPQHAQGDARSTDADVVGADHNNSHD  
EKQHGNSENVVACNNTDAKQQPQNDPPRHNRKVSWSGGKTIVIPQNYDDNFANSIPALLSE  
QVVGHYNSDETNDKSDSKKAVIAKAAIDLSTIEAKMAHEGMDGFGTITTPRISDSTSGS

AIKVEDLAKLHPIESEATYEI IKAIESHEQEQQQEDHGEEERHIEAIASVFSDTESKLE  
HVPEGAEGLFTNKTRDSSHLSSVAGISTSTAMSESI I STANNTNAHIRHDGLSPPRHRSY  
SIGSAAESHADVEGANNPSSHGRTHTPANIDPTI SSTMRS PARSHARRQPYEYRRKQHRR  
KETMEEKLFFLNQALDATNGSGHHE INKEKEDDKSFPTAHHRASTSLDLFNQNLARLFSG  
IDVSPATEQELLSEQETVPLTNNVVDTDAQVP IPPVDSGHFSSTSEDET LGKPVTKDASS  
RDMTLSQKEAVPFHHQAAASNE DANTLQKDSL PNEPDAK ISKEKHPYETFYDDI ESGTFR  
SNRISSGNTDKRKRSQLARFLRKIGLVRDIEFFLKPRTSSFVLYLQNLAWLMLFSAITAV  
VLFYGVGNPPIEYQRDRGQNR TCSYFPDPKKEDEDEIGASF SWWWLYLLVRMPITLTI AW  
SLEIFMIEFLILECRCVGSWMGSTITLLIVQAKGWPAILFFWSICNMLMLQGKSRFANHW  
GYWQPYIEVFNECNPSGTIVESSMNLKVQLLALALSIVVAVKRLLI GFQQGRKTFNLN YAE  
ELARLMK KILLI SEVSNLAIQLELEKEDDDDLSDPDEDKIRDGNANLEGWAGRQARIAGI  
ETA AEI IKQDIDKEEGVDDIDHDDLHVDSSIASRTNVT SNTDTTKHKL FVSNREKEFVKG  
FLLGQS QKRRIERLLGTWEEPERERILTESV SIGAILQFRQSLSKLDSKY PFSYSFGKAN  
MRDHC VQSSQSLYLRLLRQSPDPVLFHNTLGLVALQRDGI LDGEKLSLIKLF RPD RDGR  
LSLIDFVKSV DNVYKEMKLLRASVRSSQKIDKSFEQIFNVVYFYFVI ILLILNALGFNALV  
VFGSLSSIILSFSFMISQASSKFVEGLLFIICRRPYDIGDYVTIQPVDQESSFNGSTHWI  
VRDIDL LTTVMYSFTGEVATLSNGSIANSRVMNGARSLPAYLYVTLRFVDT SF EKLEI  
FREAVARFVHKRPREWGKLM DIKNCDVSTDKGYIEYMVVLQHVNNWQQLGSLFTSRSHAR  
TFCHELSKQLGIRYKSPSLPVDLNLGSSGVEAVLGEPRAGGLTAAGGPSLGVGERGQGP  
PPRPPNEGDRDRVSRLAAESE EIRALISDRRL

>comp13935\_c0\_seq4; 407 239 2916 LEN=2916; translated  
MDPSDRD TSAEDTIVSGSTPHQANREQPLSSSSLS PCTR TAAASSPSPFFSLLPPRHPPP  
RAKPRQPVPVVDQVEDEATTVASAGGGTDGSAANPDRTAIQDRERQDPKGSTRYGHIPV  
AAVGSFGNKSTIHNEYLP EAAQSKASNR TAIHGPNQDPNQSTYHAGTPVPA AERSISSN  
KKNTIQNEYHREAAQPKATNQNSYKDPSSQIPKEPPQHAQGDARST DADV GADHNNSHD  
EKQHGENSENVVACNNTDAKQQPQNDPPRHNRKVSWGGKTIVIPQNYDDNFANSIPALLSE  
QVVGHYNSDET NKDS DSKKAVIAKAAIDL VSTIEAKMAHEGM DGFGTITTPRISDSTSGS  
AIKVEDLAKLHPIESEATYEI IKAIESHEQEQQQEDHGEEERHIEAIASVFSDTESKLE  
HVPEGAEGLFTNKTRDSSHLSSVAGISTSTAMSESI I STANNTNAHIRHDGLSPPRHRSY  
SIGSAAESHADVEGANNPSSHGRTHTPANIDPTI SSTMRS PARSHARRQPYEYRRKQHRR  
KETMEEKLFFLNQALDATNGSGHHE INKEKEDDKSFPTAHHRASTSLDLFNQNLARLFSG  
IDVSPATEQELLSEQETVPLTNNVVDTDAQVP IPPVDSGHFSSTSEDET LGKPVTKDASS  
RDMTLSQKEAVPFHHQAAASNE DANTLQKDSL PNEPDAK ISKEKHPYETFYDDI ESGTFR  
SNRISSGNTDKRKRSQLARFLRKIGLVRDIEFFLKPRTSSFVLYLQNLAWLMLFSAITAV  
VLFYGVGNPPIEYQRDRGQNR TCSYFPDPKKEDEDEIGASF SWWWLYLLVRMPITLTI AW  
SLEIFMIEFLILECRCVGSWMGSTITLLIVQAKVSLNIDVLFDDDS ELLRRGX

>comp13935\_c0\_seq5; 332 110 2182 LEN=2505; translated  
MLMLQGKSRFANHWGYWQPYIEVFNECNPSGTIVESSMNLKVQLLALALSIVVAVKRLLI  
GFQQGRKTFNLN YAEELARLMK KILLI SEVSNLAIQLELEKEDDDDLSDPDEDKIRDGNAN  
LEGWAGRQARIAGIETA AEI IKQDIDKEEGVDDIDHDDLHVDSSIASRTNVT SNTDTTKH  
KLFVSNREKEFVKGFLLGQS QKRRIERLLGTWEEPERERILTESV SIGAILQFRQSLSKL  
DSKY PFSYSFGKANMRDHC VQSSQSLYLRLLRQSPDPVLFHNTLGLVALQRDGI LDGEKL  
KSLIKLFRPDRDGR LSLIDFVKSV DNVYKEMKLLRASVRSSQKIDKSFEQIFNVVYFYFVI  
ILLILNALGFNALVXVREPFYHP I IQFYDFTGQFQVCGGSLVHHLQASIRHRGEHGAAV  
RACATCSPLFLFNFS CPMNLGLVSFLP SCATPSARFPGLRDHPARRPGVELQRVDP LDRP  
RHSADDHRV LVHGRGGHPVERLDRELPRD ERGPVPPRV PVRHPPVRRRHELREARDFP  
RGGGAVCPQEAEGVQADGHQELRRLYRQGLHRVHGGPPAREQLAAARFPVHEPEPRQDL  
LPRAL EAARHPVQEPEPPVDLNLGSSGVEAVLGEPRAGGLTAAGGPSLGVGERGQGPPP  
RPPNEGDRDRVSRLAAESE EIRALISDRRL

>comp13935\_c0\_seq6; 337 110 2151 LEN=2474; translated  
MLMLQGKSRFANHWGYWQPYIEVFNECNPSGTIVESSMNLKVQLLALALSIVVAVKRLLI  
GFQQGRKTFNLN YAEELARLMK KILLI SEVSNLAIQLELEKEDDDDLSDPDEDKIRDGNAN  
LEGWAGRQARIAGIETA AEI IKQDIDKEEGVDDIDHDDLHVDSSIASRTNVT SNTDTTKH  
KLFVSNREKEFVKGFLLGQS QKRRIERLLGTWEEPERERILTESV SIGAILQFRQSLSKL  
DSKY PFSYSFGKANMRDHC VQSSQSLYLRLLRQSPDPVLFHNTLGLVALQRDGI LDGEKL  
KSLIKLFRPDRDXATESDRLCEICGAYQPFHVI ALAFASF TDSSSNRPSEKSFVCFQDN  
VYKEMKLLRASVRSSQKIDKSFEQIFNVVYFYFVI ILLILNALGFNALV VFGSLSSIILS F  
SFMISQASSKFVEGLLFIICRRPYDIGDYVTIQPVDQESSFNGSTHWI VRDIDL LTTVM  
YSFTGEVATLSNGSIANSRVMNGARSLPAYLYVTLRFVDT SF EKLEIFREAVARFVHKR  
PREWGKLM DIKNCDVSTDKGYIEYMVVLQHVNNWQQLGSLFTSRSHARTFCHELSKQLGI

RYKSPSLPVDLNLGSSGVEAVLGEPRAGGLTAAGGPSLGVGERGQPPPPNEGDRDR  
VSRLAAESEEIRALISDRRL

>comp13935\_c0\_seq7; 307 110 2283 LEN=2606; translated  
MLMLQGKSRFANHWGYWQPYIEVFNECNPSGTIVESSMNLKVQLLALALSIVVAVKRLLI  
GFQQGRKTFNLNYAEELARLMKKILLISEVSNLAIQLELEKEDDDDLSDPDEDKIRDGNAN  
LEGWAGRQARIAGIETA AEI IKQDIDKEEGVDDIDHDDLHVDSSIASRTNVTSNTDTTKH  
KLFVSNREKEFVKGFLLGQSQRRIERLLGTWEEPERERILTESV SIGAILQFRQSLSKL  
DSKYPFYSFGKANMRDHCVQSSQSLYLRLLRQSPDPVLHFNTLGLVALQRDGI LDGEKL  
KSLIKLFRPDRDXATESDRLCEICGAYQPFHVI ALAFASF TDSSSNRPSEKSFVCFQDN  
VYKEMKLLRASVRSSQKIDKSFEQIFNVVYFVI ILLILNALGFNALVXVREPFYHPII  
QFYDFTGQFQVCGGSLVHHLQASIRHRGEHGA A VRACATCSPLLFLNFSCPMLNGLVSFL  
PSCATPSARFPGLRDHPARRPGVELQRVDPLDRPRHRSADDHRHVLVHGRGGHPVERLDR  
ELPRDERGPVPPRPVVRHPPVRRRHELREARDFPRGGGAVCPQEAEGVQADGHQELRRL  
YRQGLHRVHGGPPAREQLAAARFPVHEPEPRQDLLPRALEAARHPVQEPEPPVDLNLGSS  
SGVEAVLGEPRAGGLTAAGGPSLGVGERGQPPPPNEGDRDRVSRLAAESEEIRALIS  
DRRL

>comp13935\_c0\_seq8; 362 110 2050 LEN=2373; translated  
MLMLQGKSRFANHWGYWQPYIEVFNECNPSGTIVESSMNLKVQLLALALSIVVAVKRLLI  
GFQQGRKTFNLNYAEELARLMKKILLISEVSNLAIQLELEKEDDDDLSDPDEDKIRDGNAN  
LEGWAGRQARIAGIETA AEI IKQDIDKEEGVDDIDHDDLHVDSSIASRTNVTSNTDTTKH  
KLFVSNREKEFVKGFLLGQSQRRIERLLGTWEEPERERILTESV SIGAILQFRQSLSKL  
DSKYPFYSFGKANMRDHCVQSSQSLYLRLLRQSPDPVLHFNTLGLVALQRDGI LDGEKL  
KSLIKLFRPDRDGRSLIDFVKSDNVYKEMKLLRASVRSSQKIDKSFEQIFNVVYFVI  
ILLILNALGFNALVVFGLSSIILSFSFMISQASSKFVEGLLFIICRRPYDIGDYVTIQP  
VDQESSFNGSTHWIVRDI DLTTVMYSFTGEVATLSNGSIANSRVMNGARSLPAYLYVT  
LRFQVDTSEKLEIFREAVARFVHKRPREWGKLM DIKNCVSTDKGYIEYMVVLQHVNNW  
QQLGSLFTSRSHARTFCHELKQLGIRYKSPSLPVDLNLGSSGVEAVLGEPRAGGLTAA  
GGPSLGVGERGQPPPPNEGDRDRVSRLAAESEEIRALISDRRL

>comp13935\_c0\_seq9; 872 239 4969 LEN=5292; translated  
MDPSDRD TSAEDTIVSGSTPHQANREQPLSSSSLSPECTRTAAASSPSPFFSLPPRHPPP  
RAKPRQPVPVVTDQVEDEATTVASAGGGTDGSAANPDRTAIQDRERQDPKGSTRYGHIPV  
AAVGSFGNKSTIHNEYLP EAAQSKASNRTAIHGPNQDPNQSTYHAGTPVPA AERSISSN  
KKNTIQNEYHREAAQPKATNQNSYKDPSSQIPKEPPQHAQGDARSTDADVVGADHNNSHD  
EKQHGNSENVVACNNTDAKQQPQNDPPRHNRKVSWSGGKTIVIPQNYDDNFANSIPALLSE  
QVVGHYNSDET NKDSKKA VIAKAAIDL VSTIEAKMAHEGMDGFGTITTPRISDSTSGS  
AIKVEDLAKLHPIESEATY E I KAI ESHEQEQQQEDHGEERHIEAIASVFS DTESKLE  
HVPEGAEGFLTNKTRDSSHLSSVAGISTSTAMSESI I STANNTNAHIRHDGLSPRRHSY  
SIGSAAESHADVEGANNPSSHGRTHTPANIDPTISSTMRSPARSHARRQPYEYRRKQHR  
KETMEEKLFFLNQALDATNGSGHHE INKEKEDDKSFPTAHHRASTSLDLFNQNLARLFSG  
IDVSPATEQELLSEQETVPLTNNVVD TDAQVP IPPVDSGHFSSTSEDET LGKPVTKDASS  
RDMTLSQKEAVPFHHQAAASNE DANTLQKDSL PNEPDAK ISKEKHPYETFYDDIESGTFR  
SNRISSGNTDKRKRSQLARFLRKIGLVRDIEFFLKPR TSSFVLYLQNLAWMLFSAITAV  
VLFYGVGNPPIEYQRDRGQNR TCSYFPDPKKEDEDEIGASF SWWWLYLLVRMPITLTI AW  
SLEIFMIEFLILECRCVGSWMGSTITLLIVQAKGWPA I LFFWSICNMLMLQGKSRFANHW  
GYWQPYIEVFNECNPSGTIVESSMNLKVQLLALALSIVVAVKRLLI GFQQGRKTFNLNYAE  
ELARLMKKILLISEVSNLAIQLELEKEDDDDLSDPDEDKIRDGNANLEGWAGRQARIAGI  
ETA AEI IKQDIDKEEGVDDIDHDDLHVDSSIASRTNVTSNTDTTKH KLFVSNREKEFVKG  
FLLGQSQRRIERLLGTWEEPERERILTESV SIGAILQFRQSLSKLDSKYPFYSFGKAN  
MRDHCVQSSQSLYLRLLRQSPDPVLHFNTLGLVALQRDGI LDGEKLKSLIKLFRPDRDGR  
LSLIDFVKSDNVYKEMKLLRASVRSSQKIDKSFEQIFNVVYFVI ILLILNALGFNALV  
XVREPFYHPIIQFYDFTGQFQVCGGSLVHHLQASIRHRGEHGA A VRACATCSPLLFLNF  
SCPMLNGLVSFLPSCATPSARFPGLRDHPARRPGVELQRVDPLDRPRHRSADDHRHVLVH  
GRGGHPVERLDRELPDRDERGPVPPRPVVRHPPVRRRHELREARDFPRGGGAVCPQEAEGV  
QADGHQELRRLYRQGLHRVHGGPPAREQLAAARFPVHEPEPRQDLLPRALEAARHPVQE  
PEPPVDLNLGSSGVEAVLGEPRAGGLTAAGGPSLGVGERGQPPPPNEGDRDRVSRL  
AAESEEIRALISDRRL

>comp13936\_c0\_seq1; 614 593 2182 LEN=2394; translated  
MAVIEFSKLHSRVLQMSPEKNDEESYEHIVSITTAQSSTAKNIGSFASSIATFVFFAKN  
RNLGEAVANTLILGTAVIFVLAALVSVKYQFYVGNLSANLHMRESTSDDDDAIDNNQELE  
EDDSTPALATNNFSCISSSIQNEIELSRFGDEEGTLSSELQSRSDTAQSTIQRHQKMV

EVSTLVVFQIILAATALRKPIIAVSTQATFVLLVAILV GALIFTIYIGYRYERKQKATSF  
MPVSDDESNTIYSQSNKLSHGRNLNYFLLRYSPLIAGFLMYSYLYTVFETEPQFLQLLSV  
LKSAIGSLATFFYERFLSPYFHSWPLIGLIASLDIVMGLIALLDVWVIRAVKEKEVDGD  
YSIDTSLRFLVAVGLVKYFFAELDYMPALVLTSTNVHSDDD KLFDDRRNNPQGNDGCPD  
EPAEMTSLAHDFERVQRPRFSSLSVDSRHEDDADISQCQSTGQKFPMISAGMQYASFLS  
CIDFGAQIGDWITIPIVTSLDITRENHWNLDKLVII CSIFRMVRVVFVFLW  
>comp13936\_c0\_seq2; 197 1 648 LEN=648; translated  
XKNIGSFASSIATFVFFAKNRNLGEAVANTLILGTAVIFVLAALVSVKYQFYVGNLSANL  
HMRESTSDDDDAIDNNQELEEDDSTPALATNNFSCISSSIQNEIELSRFGDEEGTLSSE  
LQSRSRDTAQSTIQRHQKMVEVSTLVVFQIILAATALRKPIIAVSTQATFVLLVAILVGA  
LIFTIYIGYRYERKQKATSFMPVSDDESNTIYSQSKX  
>comp13937\_c0\_seq1; 385 280 1914 LEN=2104; translated  
MATRLEFSSLQNLDEQEMTRDAMEI IKDAIRA VDPYTAIRSNLVRERDTLNLKKERLRFNL  
AKDYDEIILVAFGKASSAMATSVLEQIFPQNEVESNVNIPCHGVVICKDGHVTQYEKKIL  
NNHGVDIYEASHVPDDRSSKAADELMKLVSSHASPRTLAICCSGGGSALFCKPAPPLT  
LEDLQLVNSVLLASGMGIEEMNVLRKRLEHGKGGRLASACFP SHILALILSDVIGDPLDL  
IASGPTVPDTSTWQDGLNIVHQYNLRDKLPKAVIEVLEQGRD GILEDSPSSDHPVFAGVK  
NILVGNNSLAVEAASDSA KNLGYNP VILGTEIQGEAKEIAKVYTAMASYIQKSLSRH SKH  
KEGIQENIADCTVAKSFPVALIAGGGRHDAPLDNALSSVFLRKCSYPNLRISLLTFRFD  
XLISETTVSLPPNSGKGRNQELALSAALELDSLNLNRNVLT SVGTDGGDGPTDAAGAVV  
DATTTSSSTRSQAREALATHNSYPYLSLEAASKEVENLPPPLIKTGPSGTNVADICVTLI  
RPPQ  
>comp13937\_c0\_seq2; 460 280 1797 LEN=1987; translated  
MATRLEFSSLQNLDEQEMTRDAMEI IKDAIRA VDPYTAIRSNLVRERDTLNLKKERLRFNL  
AKDYDEIILVAFGKASSAMATSVLEQIFPQNEVESNVNIPCHGVVICKDGHVTQYEKKIL  
NNHGVDIYEASHVPDDRSSKAADELMKLVSSHASPRTLAICCSGGGSALFCKPAPPLT  
LEDLQLVNSVLLASGMGIEEMNVLRKRLEHGKGGRLASACFP SHILALILSDVIGDPLDL  
IASGPTVPDTSTWQDGLNIVHQYNLRDKLPKAVIEVLEQGRD GILEDSPSSDHPVFAGVK  
NILVGNNSLAVEAASDSA KNLGYNP VILGTEIQGEAKEIAKVYTAMASYIQKSLSRH SKH  
KEGIQENIADCTVAKSFPVALIAGGETTVSLPPNSGKGRNQELALSAALELDSLNLNRNV  
VLT SVGTDGGDGPTDAAGAVVDATTTSSSTRSQAREALATHNSYPYLSLEAASKEVENL  
PPLIKTGPSGTNVADICVTLIRPPQ  
>comp13938\_c0\_seq3; 285 1 738 LEN=1363; translated  
SNNNSGYTTDDVILLNDSL FALRPFTGILDALKGRNRDPQIPYSDTNHSGFDAAAPKHMV  
SLSYSLTDPAGMWLESVFRAFDPVGLFAFVKHSCHAPNHKAFCPDVADSREKKKCLVRHH  
EVGIARLFDHARTERTNNNNSTGAWEDPTNHGSVLGLYP SDVPRDMWKPERPYGTWASHM  
EYWKSVLINVHRFPAAKVSKRNMIKTMKHPLLQECTARFDRSIFEKEADVDFAKGVRTI  
KRNSP  
>comp13938\_c1\_seq1; 159 1 523 LEN=554; translated  
XKRNETKQNKTNQNQNKIEKRRDKIPDGSKRGGGGQRPGTNKHCGLSQRPQQOTLQRTNP  
ATERLPTMLERTTLHRTGTVVPRQTC SFSPPGNDHAVLCKYKYTYKYTYTYGT PATSDTP  
GLLFLIAVVHAVRHGKALLSQPPLELEPLWKIAGGGTESCRALPDSALANLNYL  
>comp13939\_c0\_seq1; 419 169 1488 LEN=2179; translated  
MANLLKLPNLRVALIDSKETPPSKPNSERIPSPRSYALSPRSLDVLGESVLSQLPIGF  
YDSMQVWQNSSPAALTFTSNDLDPDHTEKQYLGCCEDQALVSALYEEIQGSTEIFLNTS  
LDSFDTGDSNNLATVKTQKQDEFK TALLVGADGGNSWVRRTAGVSRIGGDYDQHALTFTV  
ALENPTSMNGRAFQRYLSDGGPLALLPTY SANHAVIVWSTSPGNIARWKNASEEDLVQHL  
NDCLLEGPQRIPSLIEEVENS KFSNENSVLSN ILYGAERVLDTVHYGLAMASQQSQSSFR  
VPPTISTIASPKFTFPLSCYNATTFVKERVALVGDA AHTVHPMAGQGLNLGLGDVDVLVS  
CLKKANDSGMDLSSFLNEYNSNRHKNVSI SLGGIHALQRLFQONQNVPLNHAKTLGINAIQ  
NFGPLRRKLAIAAAHGVSF  
>comp13939\_c0\_seq2; 357 169 1215 LEN=1247; translated  
MANLLKLPNLRVALIDSKETPPSKPNSERIPSPRSYALSPRSLDVLGESVLSQLPIGF  
YDSMQVWQNSSPAALTFTSNDLDPDHTEKQYLGCCEDQALVSALYEEIQGSTEIFLNTS  
LDSFDTGDSNNLATVKTQKQDEFK TALLVGADGGNSWVRRTAGVSRIGGDYDQHALTFTV  
ALENPTSMNGRAFQRYLSDGGPLALLPTY SANHAVIVWSTSPGNIARWKNASEEDLVQHL  
NDCLLEGPQRIPSLIEEVENS KFSNENSVLSN ILYGAERVLDTVHYGLAMASQQSQSSFR  
VPPTISTIASPKFTFPLSCYNATTFVKERVALVGDA AHTVHPMAGKSF  
>comp13940\_c0\_seq1; 523 82 2133 LEN=2322; translated  
MSSTEILPSVVVGFKNYRNFGPAQQSKLRHIGTLENE SYDIDSPLPTTVSSYQFTQEK

KENEKEDNDEQPPPPWEQENDPLVDVQCTSASSYFLTQAGKIYNCGTVHGHVVRPSLTQM  
VIQLPLKCVQLATGRHFICIARMEGGLAVCAWGAGHFGQLGLGVGFDEQNGEDTTRSSRSS  
PPSFVSRPALVEALLPHMVGSPVSSVAAGYWHSMALTKDGSVFAWGCNRNAQCCKRPSK  
EQPTICQPQRVSFEDANTGSKKSKIRKIAAGRSHSVALDEGGHIYAWGANQYGCQMLTR  
RRVIGVSSPKQVDALTKVRIVDVSAGDMHTLALTGGGRVFGWGGGFEGQLGTGYIYQMN  
KPKLVHDLDFVAIDAGQEWKTLQKLRPIPQVIDASTRSLDLNTPRIISVTAKGNSSFAI  
SSTGHLYAWGCNDVGHLLGLPKPDPSELTYSDPGDVNVKLSITIQRFHTFSFDS SHNVALP  
QRDLRLHLHIKSVGASSTFMWCLGTRKDDKAVVGRTRYEIQEERKTPAREQDEQLLR  
TMDNGTFGIKPMRLSSLVETDANGKTDQTEDQAVTERTRPEKQAAPKPSTEIDETNGNAC  
DDKPTNSVRAKEEGSKTVPATVLEDSQVPSSSSVSEKKKRGLFSPKKIVKAFVRRASNS  
NSFRGDRSMSTTDPDASQKSHK

>comp13941\_c0\_seq1; 405 1 1703 LEN=2427; translated  
XMTRHEVLSMEENDTERVDEHEVSIRSQILQSVKASPNLTIRPADLSQQLGFSINDAAAE  
LCGLLQTVGQGSSFYFEEIEICDDANGNKRTIKSMVFKFSPDFERKVLRAEKKDSFQAWS  
KILIKALKVVTAFLVISIIIVSTAVLAALVAAFVTLRGGGESRAVRNNVSQKLSLIF  
TIRQLLFCFAMLGPSGNDQNDFFREAYNTWLVMVSCCGNPGNIFWWSRAGRLHQRLRSR  
PSRATFRSTCANSDGSSEGRSLLSRNYLQSENNASIPVRTNTNHRQQPQPKSLISSLVE  
FLFGPTTPSGTSSADKWRLRSAAVIVDKASGDGGYLRPISLQELAPFVNSPPTSLDDTFQV  
IAEGLSIVSYFNGIPSSRIIEKDETKKHDDGNEKALFEFPELISESHRTWYGESQMGDQ  
GDEKTKEGFQNFYCNDDAVPASLAGTTTALRQAGPKSLVILPKYLCEQRKTFSSLSRNQ  
FFCCLLLTSFNFFGVVWLSRALETGGTLQRNLGTIGDFLKLGLIPVLWFYARLFVAIPIS  
RVVYVLIYNMLCKQRNARRKCLASALI

>comp13942\_c0\_seq1; 390 118 1188 LEN=1398; translated  
MREQVGDYFAHLVGGTSPSQIDRELTSSSTALLSRTGKPTVIHFYDGGEGAAXCAAQMKK  
WSLAIPTVQFLCVCVESPQVATMFHMFQFADAAPDLINCYIPSRHYMPVGYGQLGCSGFI  
VSDAEGNFVSRKTKAYLQYGEDAFGHVEHMLEGLVPDLYGKTGTGTDDAPSSVVMEREVA  
NNGEKSQKKQKTDPNKTMQPPESVGVVEVMDEEHKICTDSFNRAMKDPTVDNLEELHDILK  
SHFDHEEELIEKYSSSNGGFSALKSXPDPGPPADPRDRHGGALAGGGVIRIRIGLRHLFSA  
GRQEGMTRTGGGTHWGAIAATNKIDAGVIYKLADAFHAHADQFDSLYQAQIPADAE

>comp13942\_c0\_seq2; 133 1 527 LEN=737; translated  
XFFWRWQKQKTDPNKTMQPPESVGVVEVMDEEHKICTDSFNRAMKDPTVDNLEELHDILKS  
HFDHEEELIEKYSSSNGGFSALKSXPDPGPPADPRDRHGGALAGGGVIRIRIGLRHLFSAAG  
RQEGMTRTGGGTHWGAIAATNKIDAGVIYKLADAFHAHADQFDSLYQAQIPADAE

>comp13944\_c0\_seq1; 901 1 3542 LEN=3542; translated  
SSNNSNNNDNKSCDLECPNAPCRFGHADFSGRLDAGTLGMETHRNGMHCDPCIIGWTGIF  
CDRKYEACSNQNGHECYNGGECILGLQDKYGNLQFLCDCSRADGYVGYKCYETPSEQQCGG  
GGGNNAFCVNGGECNPGFPEESSHPCLCGEGWEGYHCEYEKDTVPRCTLDCQNGGVCVFD  
GSSSSSSSAAAGAGAQTHRWSLEKDEDRHMSCVCPSPGFGGRLCEAKAEQCGNDP GHACL  
NGGKCVTTTTIRASDGTVPVRNQHHCDCTVATSEDSDFRAGKFCHEKATSLCSGDDWNLF  
TQGGTCKTNP IEGCSCRSGTAGYKCEFILDNFEANDGAVSPDDISNNSGKDEACAGGYCLN  
GGHCLTEQIFLSDGSTEMEESDCDCSRAFDATSNYAGPFCQYKSTSLCFVEGLSPQDPLEE  
TFCVHNGVCQEDGSDCPRGWTGQFCEVKSLEFHQTPHNDLGDGAGEEFVFEADCGDSIC  
YNGGQCVTTKRMQSDGDWILDHSCDCSAAFDEKYLAYAGESCEFPSTKICSSPTDGKGLG  
RAFCTNHGTCMDDARLGCDCPPGFYGFSCYEYSRDTSNEENDNTVWDGDNENDKVKETG  
LEICGYGVCHNGGKICITITYNEKTDASITDYTCDCSTAYNDDVAYLGASCEYPTSTVSV  
PAQSGEPLSSAHFCVNHGSCQDPKSGCDCRNGFTGRFCQFATEPSGVDGAGAGDDNSD  
SKEACGDNLVCLNGGKICILTLTAGDDGDMVETRHCDCCASASAGDDTFAGTSCEYKATSLC  
TTPTEFFFCVNGGKQENNTCECDTAWKGSHELCPVDPEDLFSYDDDDTDDLANDQNNTV  
ECNMDCNNGGICAQGAKDLGSLRDTIGDVAHLNQTHAEDQFAHCVCSDGWVGLTCEHKVE  
VCGEGRHTCLHGSKCIPDSSSKRGYSCDCSQADDTFEGSDEKPLFDGSDCQYANTDICTI  
GDEDLRQPLYFCVNGGRCRAWAAGEPDPGICCTEDYVGLHCEVNVVAKNRASKRFYGD  
IVIIVMLALLGIVCVVIGIGIVIRVMSKKNATNVKNAPENNNNGSPFRRRRRKGFGKT  
PKRTSPTSIALDPTYSDGGFPSPNIDPIALDYTEGQRDGMVTDNFEDEGGGLPHHDDASAK  
VSRPLHQMAKMNILTQASFNLLKFSKNAGLVYENSLASRVX

>comp13944\_c0\_seq2; 827 474 3865 LEN=3865; translated  
KYEACSNQNGHECYNGGECILGLQDKYGNLQFLCDCSRADGYVGYKCYETPSEQQCGGGG  
NNAFCVNGGECNPGFPEESSHPCLCGEGWEGYHCEYEKDTVPRCTLDCQNGGVCVFDGSS  
SSSSSSAAAGAGAQTHRWSLEKDEDRHMSCVCPSPGFGGRLCEAKAEQCGNDP GHACLNGG  
KCVTTTTIRASDGTVPVRNQHHCDCTVATSEDSDFRAGKFCHEKATSLCSGDDWNLFCTQ  
GTCKTNP IEGCSCRSGTAGYKCEFILDNFEANDGAVSPDDISNNSGKDEYHHHTSGNEKR

VECAGGYCLNGGHCLTEQIFLSDGSTEMEESDCDSRAFDATSNYAGPFCQYKSTSLCFVE  
GLSPQDPLEETFCVHNGVCQEDGSCDCPRGWTGQFCEVKSLEFHQTPHNDLGDGAGEEFV  
FEDACGDSICYNGGQCVTTKRMQSDGDWILDHSCDCSAAFDEKYL YAGESCEFPSTKICS  
SPTDGKGLEGRAFACTNHGTCMDDARLGDCDCPPGFYGFSCYEYSRD TVSNEENDNTVWDGD  
NENDKVKETGLEICGYGVCHNGGKCITTTITYNEKTDASITDYTCDCSTAYNDDVAYLGAS  
CEYPSTSVCPVAQSGEPLSSAHFCVNHGSCKQDPSKGCDCRNGFTGRFCQFATEPSGVDG  
AGAGDDDNDSKEACGDNLVCLNGGKCILTLTAGDDGDMVETRHCD CASASAGDDTFAGT  
SCEYKATSLCTTPTQEFFCVNGGKCQENNTCECDTAWKGS HCCELPVDPEDLFSYYDDTD  
DLANDQNNTVECNMDCCKNGGICAQGAKDLGSLRDTIGDVAHLNQTHAEDQFAHCVCSDGW  
VGLTCEHKVEVCGEGRHTCLHGSKCIPDSSSKRGYSCDCSQADDTFEGSDEKPLFDGDC  
QYANTDICTIGDEDLRQPLYFCVNGGRCRAWVAAGEPDPGCICTEDYVGLHCEVNKVVAK  
NRASKRFYGDIVIIVMLALLGIVCVVIGIVIRVMSKKN TATNVKNAPENNTGSPFRR  
RRRKGGFKGT PKRTSPTS IADLPTYSDGGFP SNIDPIALDYTEGQRDGVMTDNFEDEGG  
LPHHDDSASKVSRPLHQMAKMNILTQASFN NLKFSKNAGLVYENSLASRVX

>comp13944\_c0\_seq3; 911 1 3581 LEN=3581; translated  
SSNNSNNNDNKSCDLECPRNAPCRFGHADFSGRLDAGTLGMETHRNGMHCD CP IGWGTGIF  
CDRKYEACSNQNGHECYNGGECILGLQDKYGN DQLFCDCSRADGYVGKYCETPSEQQCGG  
GGGNNAFCVNGGECNPGFPEESSHPCLCGEGWEGYHCEYEKDTVPRCTLDCQNGGVCFVD  
GSSSSSSSSAAAGAGAQTHRWSLEKDEDRHMSCVCPSGFGGRLCEAKAEQCGNDPGHACL  
NGGKCVTTTIRASDGT PVRNQHHCDCTVATSE DGSDFAGKFCEHKATSLCSGDDWNLFCTQ  
TQGGTCKTNP IEGCSCRSGTAGYKCEFILDNFEANDGAVSPDDI SNNSGKDEYHHHTSGN  
EKRV ECAGGYCLNGGHCLTEQIFLSDGSTEMEESDCDSRAFDATSNYAGPFCQYKSTSLC  
FVEGLSPQDPLEETFCVHNGVCQEDGSCDCPRGWTGQFCEVKSLEFHQTPHNDLGDGAGE  
EFVVFEDACGDSICYNGGQCVTTKRMQSDGDWILDHSCDCSAAFDEKYL YAGESCEFPSTK  
ICSSPTDGKGLEGRAFACTNHGTCMDDARLGDCDCPPGFYGFSCYEYSRD TVSNEENDNTVW  
DGDNENDKVKETGLEICGYGVCHNGGKCITTTITYNEKTDASITDYTCDCSTAYNDDVAYL  
GASCEYPSTSVCPVAQSGEPLSSAHFCVNHGSCKQDPSKGCDCRNGFTGRFCQFATEPSG  
VDGAGAGDDDNDSKEACGDNLVCLNGGKCILTLTAGDDGDMVETRHCD CASASAGDDTF  
AGTSCEYKATSLCTTPTQEFFCVNGGKCQENNTCECDTAWKGS HCCELPVDPEDLFSYYDD  
DTDDLANDQNNTVECNMDCCKNGGICAQGAKDLGSLRDTIGDVAHLNQTHAEDQFAHCVCSD  
DGWVGLTCEHKVEVCGEGRHTCLHGSKCIPDSSSKRGYSCDCSQADDTFEGSDEKPLFDG  
DSCQYANTDICTIGDEDLRQPLYFCVNGGRCRAWVAAGEPDPGCICTEDYVGLHCEVNK  
VAKNRASKRFYGDIVIIVMLALLGIVCVVIGIVIRVMSKKN TATNVKNAPENNTGSPF  
PRRRRRKGGFKGT PKRTSPTS IADLPTYSDGGFP SNIDPIALDYTEGQRDGVMTDNFEDE  
EGGLPHHDDSASKVSRPLHQMAKMNILTQASFN NLKFSKNAGLVYENSLASRVX

>comp13944\_c0\_seq4; 817 474 3826 LEN=3826; translated  
KYEACSNQNGHECYNGGECILGLQDKYGN DQLFCDCSRADGYVGKYCETPSEQQCGGGG  
NNAFCVNGGECNPGFPEESSHPCLCGEGWEGYHCEYEKDTVPRCTLDCQNGGVCFVDGSS  
SSSSSSAAAGAGAQTHRWSLEKDEDRHMSCVCPSGFGGRLCEAKAEQCGNDPGHACLNGG  
KCVTTTIRASDGT PVRNQHHCDCTVATSE DGSDFAGKFCEHKATSLCSGDDWNLFCTQ  
GTCKTNP IEGCSCRSGTAGYKCEFILDNFEANDGAVSPDDI SNNSGKDE CAGGYCLNGGH  
CLTEQIFLSDGSTEMEESDCDSRAFDATSNYAGPFCQYKSTSLCFVEGLSPQDPLEETFC  
VHNGVCQEDGSCDCPRGWTGQFCEVKSLEFHQTPHNDLGDGAGEEFVVFEDACGDSICYNG  
GQCVTTKRMQSDGDWILDHSCDCSAAFDEKYL YAGESCEFPSTKICSSPTDGKGLEGRA  
FACTNHGTCMDDARLGDCDCPPGFYGFSCYEYSRD TVSNEENDNTVWDGDNENDKVKETGLEI  
CGYGVCHNGGKCITTTITYNEKTDASITDYTCDCSTAYNDDVAYLGASCEYPSTSVCPVAQ  
SGEPLSSAHFCVNHGSCKQDPSKGCDCRNGFTGRFCQFATEPSGVDGAGAGDDDNDSKE  
ACGDNLVCLNGGKCILTLTAGDDGDMVETRHCD CASASAGDDTFAGTSCEYKATSLCTTP  
TQEFFCVNGGKCQENNTCECDTAWKGS HCCELPVDPEDLFSYYDDTDDDLANDQNNTVECN  
MDCCKNGGICAQGAKDLGSLRDTIGDVAHLNQTHAEDQFAHCVCSDGWVGLTCEHKVEVC  
GEGRHTCLHGSKCIPDSSSKRGYSCDCSQADDTFEGSDEKPLFDGDCQYANTDICTIGDE  
DLRQPLYFCVNGGRCRAWVAAGEPDPGCICTEDYVGLHCEVNKVVAKNRASKRFYGDIVI  
IVMLALLGIVCVVIGIVIRVMSKKN TATNVKNAPENNTGSPFRRRRRRKGGFKGT PKR  
TSPTS IADLPTYSDGGFP SNIDPIALDYTEGQRDGVMTDNFEDEGG LPHHDDSASKVSR  
PLHQMAKMNILTQASFN NLKFSKNAGLVYENSLASRVX

>comp13945\_c0\_seq1; 477 183 2171 LEN=2191; translated  
MAVGIGRYPWFWTALIAVLAYS DLRALHGDWVYDDAGSVIKNVVNGSVDWKEAFTRDYW  
GTEMKEAQSHKFRPITTLTLKANYVLGHYLGNTPEEQQQQEAENG SQNLPPTWTFHAV  
NILLHGIVTGLVTKATSFVLP RKDIVSQLVVGSLFAVHPVHAEVVSNITSRGEMLSVFF  
FVAFLSYAGTRQKRRQLQLQQQQLSLREQIWIYLLPWL CMTLSLFSKEQGATTLISLV

AWDFLKHGHNLSVFRKLFKSKVDEEKDANGAGTIAFRRTARAERAERARQFVVVTALVLAQAQT  
LIVVGWRYILNGETSPDFIEQQNPAGFAKDRFTRAFSVTWVYCLYIRDVYPPYLSPWDWS  
GLSIDLITNLRDPRAMAVVALWYFSAQSFWSMIVGAELPRGSFWNETTLRQVNTAVWAF  
FSPFLLSSNILVVVGLMKADRVIYLPFGFCLLEAILMSKFLKGATRMRPAFERRKEQLF  
WGTHFFFMFQVIVFSGRTHERNLAWNSLQLWGTAAYINPRSHHTMYNYGYELSLKCRYA  
ESEAVMRPIGSARVDGPSNTFVYTMVLFNLNQCKRANVLLDEAFEVIEEMRAEGGTRNTD  
SSLARSESLLVAKAHCTEDPKERGAVLYESVEKDPSTYAVQIATNYMKQLEQVGLINN  
NR

>comp13946\_c0\_seq1; 499 444 1799 LEN=1894; translated  
MKRHLSELLYLACPTSVLALVPHRFWNRPSTKATASSKKNRRISEQRRSPIDASFLMYFDD  
CERSKEVEERLKNPLLASNIFSRCSNLNNDENDFWIISQSDEKQRALDRFLGYNPKSAG  
MLTDEQVEEETLRWVVDTDIVWSEDEDASPSDSNTDDIPRRMERQRTNVQYDGINDLFV  
ASSCHSTAETLAFWNRIVEALEEETSTSPKSSSRNSAKLIVFPKSESIWNYDTMVTIL  
EAIQMTRPLLPSNIEFRLDLFHPNFKHSPRMWSPQWHSPFPTVGITIKTKKQVSIDEL  
DSVRGKLDVIFQSVDATREHIQNSHEDHQILKDSRSWFDAENEQPESAKNNEIDWVLP  
FGSPFQLYRTLWNLVLDLSTGDKNEYVVIDPFLDSHTFHRVAVTVNAALIRLDIPVRI  
TEVYHPFARSPCSNSSCKTRPPYGMISPLRQ

>comp13946\_c0\_seq2; 466 611 1942 LEN=2037; translated  
MFNTNTPLFDGYLRQFWRNPSTKATASSKKNRRISEQRRSPIDASFLMYFDDCERSKEVE  
ERLKNPLLASNIFSRCSNLNNDENDFWIISQSDEKQRALDRFLGYNPKSAGMLTDEQVE  
EETLRWVVDTDIVWSEDEDASPSDSNTDDIPRRMERQRTNVQYDGINDLFVASSCHSTA  
ETLAFWNRIVEALEEETSTSPKSSSRNSAKLIVFPKSESIWNYDTMVTILEAIQMTRP  
LLPSNIEFRLDLFHPNFKHSPRMWSPQWHSPFPTVGITIKTKKQVSIDEL  
DSVRGKLDVIFQSVDATREHIQNSHEDHQILKDSRSWFDAENEQPESAKNNEIDWVLP  
FGSPFQLYRTLWNLVLDLSTGDKNEYVVIDPFLDSHTFHRVAVTVNAALIRLDIPVRI  
TEVYHPFARSPCSNSSCKTRPPYGMISPLRQ

>comp13947\_c0\_seq1; 1104 777 3107 LEN=3136; translated  
MSSWFGSNKKGNDDDKAVAANGEDNEDSIWYKFASKFEGIKEEVSQKIVSFLPAPLVEF  
LAMVFAKLSALPNLKI AFLSFSAGAVLTLGAILVPVYSSVESLSQPVTTLFETILADLDA  
GYVDPVDTNKL FETGVSAMLKSLDPYTEFEAKEEAQQMTEGIMGRYGGVGLVISGATPRD  
MSEIEKMAGGGGAGEGSSSSTLQKESMPSGSKLLPNDAIQDSMDSNSQSSNNDKSDNSNKF  
VDNRNNDVDDDEEEDPFVKQKRKEQMKALAKAQEKGITVVSFAFEGYAFDYGMRTGDRITK  
VDDLVEKGGKTTVEDVRNVLRGVPGTMVNI EFERDGVKGTQEVTMPRTVVRLRDVKLATL  
VGKPSDGIGYISLSGFAQSAGNEVRGAMLALAQAAEDASNGEHSNLGLILDRLGNPGGLL  
TSAVDVASLLVPNGSDIVSAKGRGFPVGYTYSRTEPLLDKNTKLAVLVNRGTASAAEIVS  
GAVQDLVGIIVGTDRTFGKGLVQNVEDLPFNTALKFTVAKYYTPSGRCIQSINYKEGGV  
GDENDGKYTASRVSNKDRQVFYTKSGRTVRDGGGVEADYKIPAPKASALEITLLRSDVMN  
EYASQWSKKYELTNNFEVTDIYRDFQDFVDAKSKAGDLKLEAIYSSSLDDLKRTLSQSG  
YKIAENEVDQLKTQIVKEIKKDFDKYKDKEDIATSILARYIPESMIMERNLKTDDQVQ  
AAIKLLGNDKSF SKILAKGSSSERSLQENVRENSLVASSALESDSRDGGSFRIEF

>comp13947\_c0\_seq2; 1104 902 3232 LEN=3261; translated  
MSSWFGSNKKGNDDDKAVAANGEDNEDSIWYKFASKFEGIKEEVSQKIVSFLPAPLVEF  
LAMVFAKLSALPNLKI AFLSFSAGAVLTLGAILVPVYSSVESLSQPVTTLFETILADLDA  
GYVDPVDTNKL FETGVSAMLKSLDPYTEFEAKEEAQQMTEGIMGRYGGVGLVISGATPRD  
MSEIEKMAGGGGAGEGSSSSTLQKESMPSGSKLLPNDAIQDSMDSNSQSSNNDKSDNSNKF  
VDNRNNDVDDDEEEDPFVKQKRKEQMKALAKAQEKGITVVSFAFEGYAFDYGMRTGDRITK  
VDDLVEKGGKTTVEDVRNVLRGVPGTMVNI EFERDGVKGTQEVTMPRTVVRLRDVKLATL  
VGKPSDGIGYISLSGFAQSAGNEVRGAMLALAQAAEDASNGEHSNLGLILDRLGNPGGLL  
TSAVDVASLLVPNGSDIVSAKGRGFPVGYTYSRTEPLLDKNTKLAVLVNRGTASAAEIVS  
GAVQDLVGIIVGTDRTFGKGLVQNVEDLPFNTALKFTVAKYYTPSGRCIQSINYKEGGV  
GDENDGKYTASRVSNKDRQVFYTKSGRTVRDGGGVEADYKIPAPKASALEITLLRSDVMN  
EYASQWSKKYELTNNFEVTDIYRDFQDFVDAKSKAGDLKLEAIYSSSLDDLKRTLSQSG  
YKIAENEVDQLKTQIVKEIKKDFDKYKDKEDIATSILARYIPESMIMERNLKTDDQVQ  
AAIKLLGNDKSF SKILAKGSSSERSLQENVRENSLVASSALESDSRDGGSFRIEF

>comp13948\_c0\_seq1; 1541 113 3313 LEN=3491; translated  
MATGGINLSKEFFELLKAVGESKSKQEEDRIMAKEVMCLKCKLSPVPAGASNPLQSKKKS  
REFLVRLLYVEMLGHDASFGYIKAVEMAASASLYHKRTGYLVCSACLSPDHEFRFMLVNQ  
MQRDMQSANVLEICGGLLAATSLITSDMVPAMSGEVTKLISHDSETVRKKAIITLHRLFQ  
LAPDVVSSEELLEKAKKVLCDRDPAVMGSCLNVI EDMAKRNPVDIKPLIPSLVSIKQIS  
ERRLPDEFNYHRVPAPWMQIRVVRILCLLQADAEASSGMYEVLNETMKHADIGINAGYA



IVYECIKCITKIYPNPKLLDAAGDAIARFIESRSNNLRYLGVTGLAMIVETHPQYAAQHQ  
MSVMDCLEDPDETLQRKTLDLLYRMTNPNVNEFITDKLLVFLDGTDDLFLKQQLTTRICS  
VAERYAPSNAYWYITTTITHLFEVSGDMVDQQAQNLMSLIAEGTGESEEDMMLRQTALIEL  
YVNLQDKPPAKLPRILLETMAWCLGEYAYLSAAVSLLEEILTKLQCWNKSILHPSTRRFL  
TSAIFKLVAQLGTCPQAQAVVVDEYTRSKDLDLQQRCLFQSLLMNAPQYLGEILPVDAS  
AEDMEVDPNLSFLDGYCQQALANGARPYEKPEDDDDDDYDYGTSGSGSGASAFNMTPYAK  
PETNVSRSSTMMARGVGGGPQGAIASPAGVALPPGSSSGSQAQVSTNLDVVGDGLSLNTRG  
AANVWGKPAAPPAPAPAPAPAPAAVADPTPSQPANTFGSGHTAYGGMGGFGQTSAPAPV  
VPEKTPEQLEKERQAAALFGGMI PGQPPPPRAAAPP PRAVPASAPPVAATPVAAAPPV  
AAAPPAEAPIFDLLDFGAPAPAPAPAPAGDLVDIFGHATLEPTPMAPPPAAPPAPAP  
IVETVSEEEPEPAAPPAPAPVDPFAAEGLLDGLQTPTLQFGFASTSKFEFNGAPMAPLK  
ITTFQFGQNWGSCPATSPIALTSRKVVSLDQFMKECESSGLHP IEAIGATNEGICGGMFD  
GGSKIVLVHGKVSPLPSGESSLAITVKS DATLSGSLALYLQNMK  
>comp13949\_c0\_seq1; 2634 296 9974 LEN=10771; translated  
MSPRTLAVLTTALISSTTLRAVSAYNVDASKTSIIVEEEREELGQSNGRVTELENSSLNA  
KLTIRNLSAPKIRDDPKYHTLFAPCATSVEAYCSKSNFEFPVHLQSSNGTFTILQDALLP  
YSNHSDDDDGSSFCALVVKENLDDTRSRLNKVLPCTCRQLHPIDPSLCVAVDSKFPLLP  
LRNQAGRQVIYEMHVATFSPDGTDFGCI S RLSYLVELGITTVQLMPVNVVDYDSSWGYST  
AHIFAIRSELGGYDGLRRFIEAAHGEGLEVYMDVVYNHASARTLLYDRQNQCEANGKSI  
DRSLPSTYCPSSNFKEKVP CMFGDYFYNNGDQTPWGPFRFNYSSKQVVSYLMSNVKYWVE  
ELGVDGLRFDATVCIRKSRGNSSECWQPD AIPNEYGANFLRESTEYLSKMNRF SIAEDLQ  
NDPLITSKSSGDGLGFDAQWGNGLFYSFRETMRSKDRKSVMEVVKTIENRCDPNNGEWIS  
YTETHDIASSQADGHARTARVLEDLVVNESLLQRALILP IALSLSICGTPMIFQGGELGE  
KLPFDYAKPPPHDWEFGKDWPGLNVEVALET PVCDPKSEMSEKKKVYESTKALLKIFSR  
EYFFVKAGQDKFPTS AALDFELED SLGGKLTGVLNFE EATLNATIFSVPTPGFWKVVFD S  
TSADSGHGKTYETKTI SDLHYIESLVIPLATILLQPVGD LKPDSSPQCRPSFLQSIK  
LSNLKFFNQTYWENHVSLDLYPFWNSSDALGGDEYGNFP TYRCDDGGAYDKKMNQCKEIE  
TAPMWITDYTDYDIAVQHSRQIFFY SVGYHLTGNSKMLRHAKAGVDVFFRKFVDGDRGAI  
CTYVSKVERLCLPNENERTSMEHANALIGLAMFYVTRDEAVGNFIFKSVDYTF S QWYRE  
DWYMMGMANKTS AKPSVPVLEGEPELEVRKDMLAQLDQLNAYLMILRGLSMDSAQWNKRML  
DLALALKDSFWDEHFNIMWGNANYKVLNSVHSDFGHSQKSLWFIMMTAEHLNDKELFKWA  
YTRAMRMIPLAWLPRRLFHNVTG DVG TWAFDRTESGVSNSGHVWWVYAELSQTAAAFMSV  
SNPSIASAVTSKAYSAYMDLFLDPD SPDKGVFWHIDYLT HEPQFAKHVWKNGFHEAEHA  
LIASISSAALQNLRLYAPRKASLIKNDVDYNEFYPGFFKGTISRNVTS DNDSEMLAN  
HTKVAIDWADIRSTD SHADP SCLGVSCSNGICFEGECLCLHGWTGKKCNVNP CEDHLTI  
TTSDKNCDTCTVTFLNPS TIAPHPISKVMLAGSFSNWSAIE MELEQHDDSSDTLYSKLY  
PEDSFYHGFNSRSLYSVDIDIPNGQNHTYKFVLD DSTWTYDKCNPDAVLDGLTTADGIDS  
MDLNSMLHVSCPPSGRTCELAKQLRDEFNSNPTQEGGEGDAEADSDSEADEQKGGDAELN  
SGAIVQLFEWNFESVARECKRLGEEGWTAVQLSP INAHMNLGPKVVENYDSGDSLMPPLY  
PWWERYQQASFNVMSRSGSEAE LKAATEVCTHYGVQVWVEVTLNSVNAAPCCDL PQSSGL  
PTCDNFFIDDSKSCAAERVFPTAGFDAGDLHSPPCGIGNIGTWGSPDVTHNCDMTGLPDL  
NTSSDHVQRTLAKYLDHLELGVSGFRLLAVGHIDSKEVEQILARSQNQIRRHVFEKTGA  
RSMLPTLIVDLWPSWLVRFPHLQPAFY PDSMTPFTYNQLSSNTYNTDLAWSFAVGDTFY N  
KDESPTLTNLTELSITTRFSSHMYKQRTDR IPLDALILQLTNHFLT FYGVENCTSSKGTA  
DINGKFDHNVCPNLTSTWDEHLLALGSIWMMTL PVGYTRI YSGYDWQRSYITNEHGRPF  
DTLFSGPPRTYDGGTQSVL CDAANKPRHDLSPAFVEDGSRWMCEHRNVGIAAMPKWRKE  
VARAGAYQLKLN EWI GSGTANDL FVSI SRSVRQGNRPLKGGWAAINAHDKDTVKKQFAT  
RLPAGTYRNGARGNGGETLVVDSRGILEATLSPLESI IHTGDMTAPKGGNIPATVIVFI  
IFLWMLLPVVASVWILTKFSKESDIVLKDDASCAIPENGEKISLLNANFDCKDEETMIVN  
DMNKTRAMICTLEHIVPETALSRKINQKVGGLGKVMVVAKFHPGELIMVTPMMGGVSY P  
VMREADPVYCEVEGNI EEVRI FHFWRPGKDHKVESIFCKHDGLFGKRM D KDELYPDDSA  
DVDYFLHFFTLWNLTV AQLAMRHRNSIDVLHLCDYHTSFAPTYIKRDGVKIPTLCTLHNA  
SYQGNIMNHLSPSL LGRISKISGIPEEVI FRDFTHDSQFNMLSGLISHFQKEQNGRGFCA  
VSKRYAKEVPIQLDNFRAGMLKVRSLPNPELMVNRPS SLEGKTSFEEIRVIKKYKQELQ  
KVLNLEVNPN AIVGAFVGRMVYQKGVDAIADAATELLLRHGNLQLVVVGGPPGDFGEYAA  
TRLINLARNPLFKRRI FVVPKFYKFTADHRLGCD FALMP SRSEPF GFVDIEFAHCGCPVI  
GSLVGG LGKTPGWYFKLWEGDFNH IKMLSR TVSKAVEEGQEKMLEIGIEGICTSFPLM  
NWQFKLYELYKEVEESTKCNPRADGGNDTTLWTFPF EEDNLYLVNGVDDKKTNDMGDCK  
DAESLEQDTRIRNSDSSGVHGV PNGDEDEPQHEVKSNFKIEQNLN HKLLTGKTASVKS  
VFKSTVWKPGDSVKNAEQSKTYFQQLL KAKVIGRTIETWIVCLLSILMP SHSTLIYAKAI

VWASAYGWGNFIGGLYAIHTVVSFAIGCLIWIQIMQRLPIGKCVCFSAFAHVVYLFYFAP  
ISSYGTALTISFVTGLISSASGPVFTAAMFFDEWDGSLRSKVRNYGWLEGSRTCFSGIVQ  
GFI IYNFLFMGPNDDDDYDDDAGFAFSATLLIIYGCCFVDGSGCQHTLLGYEKGNEYND  
FAKGPFDGIQSFQAFPLLSLSHIIDGLISYPTLFFVSWLWLLDGYSAEETGLWIQVSSVVQ  
GTAIYCFAAVFNRYMEGRKCIGVIATFLINPVVLQALIMLSAPNFSANSVLVLLGLTSFL  
IKLKAGLLSILKLVLP SRWKVVTFSAYELFFSNIGAALSPFLIRSMSNAMSLSLNTVGP  
GASAEAAALAIIFYSVLPFVAVSTALQLFANRYTFKDMPEVYTKPFNYKKNNGGEIDLGSSR  
HLSSSIHSQCQSSEMHMQSSTMNKMRKAPDRSHHNTRSLHLTG  
>comp13949\_c0\_seq2; 2572 296 9921 LEN=10718; translated  
MSPRTLAVLTTALISSTTLRAVSAYNVDASKTSIIVEEEREELLGQSNGRVVELIRDDPKY  
HTLFAPCATSVEAYCSKSNFEEPVHLQSSNGTFTILQDALLPYSNHSDDDDDGSSFCALV  
VKNENLDDTRSRNLKVLPTCRQLHPIDPSLCVAVDSKFFLLPLRNQAGRQRVIYEMHVAT  
FSPDGTDFGDCISRLSYLVELGITTVQLMPVNVVDYDSSWGYSTAHIFAIRSELGGYDGLRR  
FIEAAHGEGLLEVYMDVVYNHASARTLLYDRQNQCEANGNKSIDRSLPSTYCPSPNNFKEKV  
PCMF GDYFYNNGDQTPWGPFRFNYSSKQVVSYLMSNVKYWVEELGVDGLRFDATVCIRKS  
RGSNSECWQPD AIPNEYGANFLRESTEYLSKMNRF SIAEDLQNDPLITSKSSGDGLGFDA  
QWGNGLFYSFRETMRSKDRKSVMEVVKTIENRCDPNNGEWISYTETHDIASSQADGHART  
ARVLEDLVVNESLLQRALILPIALSLSICGTPMIFQGGQELGEKLPFDYAKPPPHDWEGFG  
KDWPGLNYEVALETVPVCDPKSEMSEKKKVYESTKALLKIFSREYFFVKAGQDKFPTSAAAL  
DFELED SLGGKLTGVLNFEEATLNATIFSVP TPGFWKVVFDST SADS GHGKTY YETKTIS  
DLHYIESLVIPLATILLQPVDGDLKPDSSPQCRPSFLQSIKLSNLKFFNQTYWENHVSL  
DLYPFWNSSDALGGDEYGNFPTYRCDDGGAYDKKMNQCKEIE TAPMWITDYTDYDIAVQH  
SRQIFFYSVGYHLTGNSKMLRHAKAGVDVFFRKFVDGDRGAICTYVSKVERLCLPNENER  
TSMEHANALIGLAMFYVTRDEAVGNFIFKSVDYTF SQWYREDWYMMGMANKTSAKPSVP  
VLEGEPELEVRKDMLAQLDQLNAYLMILRGLSMDSAQWNKRMLDLALALKDSFWDEHFNIM  
WGNANYKVLNSVHSDFGHSQKSLWFIMMTAEHLNDKELFKWAYTRAMRMIPLAWLPRRLF  
HNVTTGDVGTWAFDRTESGVSN SGHVWVYAELSQTAAFMSVSNPSIASAVTSKAYSAYM  
DLFLDPDSDPKGVFHWIDYLTHEPQFAKHVWKNGFHEAEHALIASISSAALQNQELRLY  
YAPRKASLIKNDVDYNEFYFPGFFKGTISRNVTSNDSEMLANHTKVAIDWADIRSTD SHA  
DPSC LGVSCSNGNICFEFECECLHGWTGKKCNVNP CEDHLTITTS DKNC DTCTVTFKLN P  
STIAPHPISKVMLAGSFSNWSAIEMELEQHDDSSDTLYSKLYPEDSFYHGFSNSRLYSVD  
IDIPNGQNHTYKFVLLDDSTWTYDKCNPDAVL DGLTTADGIDSMDLNSMLHVSCPPSGRTC  
ELAKQLRDEFNSNPTQEGGEDAEADSDSEADEQKGGDAELNSGAI VQLFEWNFESVARE  
CKRLGEEGWTAVQLSPINAHMNLGPKVVENYDSGDSLMPPLYPWVERYQQASFNVMRSRG  
SEAE LKAATEVCTHYGVQVWVEVTLSNVNAAPCCDLPQSSGLPTCDNFFIDDSKSCAAER  
VFPTAGFDAGDLHSPPCGIGNIGTWGSPDVTHNCDMTGLPDLNTSSDHVQRTLAKYLDHL  
LELGVSGFRLLAVGHIDSKEVEQILARSQNI RRVHVF EKTGAR SMLPTLIVDLWPSWLVR  
FPHLQPAFY PDSMT PFTYNQLSSNTYNTDLAWSFAVGDTFY NKDESPTLTLNLT ELSITTR  
FSHSMYKQRTDRIPLDALILQLTNHFLT FYGVENCTSSKGTADINGKFHDNVCPNVLST  
WDEHLLALGSIWMMTLPVGYTRI YSGYDWQRSYITNEHGRPFDTLFSSGPPRTYDGGTQS  
VLCDAANKPRHDLSPA FVEDGSRWMC EHRNVGIAAMPKWRKEVARAGAYQLKLN EWIGSG  
TANDL FVSISR SVRQGNRPLKGGWAAINAHDKDTVKKQFATRLPAGTYRNGARGNGGET  
LVVDSRGILEATLSPLESII IHTGDMTAPKGGNIPATVIVFIIIFLWMLLPVVASVWILTK  
FSKESD IVLKDDASCAIPENGEKISLLNANFDC KDEETMI VNDMNKTRAMI CTLEHIVPE  
TALS RKINQKVGGLGKVM EVVAKFHPGELIMVTPMMGGVSY PVMREADPVYCEVEGNI EE  
VRI FHRWPGDKHKVESIFCKHDGLFGKRM DDKELYPDDSADVDYFLHFFTLWNLTV AQ  
LAMRHRNSIDVLHLC DYHTSFAPTYIKRDGVKIPTLCTLHNASYQGNIMNHLSPSLLGRI  
SKI SGIP EEVIFRDFTHDSQFNMLSGLISHFQKEQNGRGFCAVSKRYAKEVPIQLDNFRA  
GMLKVRSLPNPELMVNRPSSLEGKTSFEEIRVIK KYKQELQKVLNLEVNPN AIVGAFVG  
RMVYQKGVDAIADAATELLLRHGNLQLVVGPPGDI FGEYAATRLINLARNPLFKRRIFV  
VPKFYKFTADHRLGCFALMPSRSEPF GFVDIEFAHC GCPVIGSLVGG LGKTPGWYFKLW  
EGGDFNH IKMQLSRTVSKAVEEGQEKMLEIGIEGICTSFPLMNWQFKLYELYKEVEESTK  
CNPRADGGNDDTLWTFPFEE DNLYLVNGVDDKKTNDMGDC KDAESLEQDTTRIRNSDSS  
GVHVGVPNGDEDEPQHEVKSNFKIEQNLN HKLLTGKTASVKS VFKSTVWKPGDSVKNAEQ  
SKTYFQQLLAKVIGRTIETWIVCLLSILMP SHSTLIYAKAIVWASAYGWGNFIGGLYA  
IHTVVSFAIGCLIWIQIMQRLPIGKCVCFSAFAHVVYLFYFAPISSYGTALTISFVTGLIS  
SASGPVFTAAMFFDEWDGSLRSKVRNYGWLEGSRTCFSGIVQGFIIYNFLFMGPNDDDD  
YDDAGFAFSATLLIIYGCCFVDGSGCQHTLLGYEKGNEYNDFAKGPFDGIQSFQAFPLL  
SLSHIIDGLISYPTLFFVSWLWLLDGYSAEETGLWIQVSSVVQGTAIYCFAAVFNRYMEGR  
KCIGVIATFLINPVVLQALIMLSAPNFSANSVLVLLGLTSFLIKLKAGLLSILKLVLP

RWKVVTFSAYELFFSNIGAALSPFLIRSMSNAMSLSLNTVGPASAEAAALAIIFYSVLPF  
VAVSTALQLFANRYTFKDMPEVYTKPFNYKKNNGGEIDLGSSRHSLSSSSIHSLCQSSSEMHM  
QSSSTMNKMRRKAPDRSHHNTRSLHLTG

>comp13950\_c0\_seq1; 875 550 3765 LEN=3918; translated  
MALLGKRGRPSKRSKSPSTMSCHYSMATTKAVKPKNHVHRSDNQPTSSTTTINTETNSG  
TIHPPHNLQOREQQQQAQEKARLTKTLQEKIRAIERKRTVAFKANANVNRVSTDTRTTD  
EQNPVSKLPSLVHPKRSPTHPTPNPTRRVTSLDILSLNAASSPPSLSLTVVTPREVKLACV  
PNTRPEMI PNVAANTSDPLKTQTELPAMVAAFPPTTEPEQQPTAHQASVRDRVKYDMECVP  
PIRIEKLQKDGDKIQTNLKGIAATPNRIPIDSEESSRSPQTQIRPSNTSPINDNDSRNILQ  
GSQPQSFVQTTMQDSVLWIPSCRQWEDCISEMKAVCTSAAFRRWSRKLLEDFQSRSTSS  
SASSWNFHPPLAQAFIKDRVRIDDPDRGYQIRHAQGGWLQGFLLWTFVWTQDFHWDLSL  
HTASGLPAEAAALHRKTKATNEIMDDDYATSIMLASELESLPRGDPDPMDGGRVVFHQVAEI  
SLLGGLGCGRILLQKAI AEIANATTEDESRYKYVVLQATEGSRSFYQKMGFVRVAVCR  
YRWAGTATVAPGKTPPTPRSSLPFNGYRHWTYTNESVSLDAHGGPSVMMCLKLPTSIDD  
LDDAISIPISTRKPNIHPIVKSEPTNRNPNNNNSNDRVIPVELAIAPTRKSKRKRKPKR  
FGDDDTGEPSPKPEHQERQEQYEAPDNCENVQKEKESFYASASPASGAERGFSAANHNVNANA  
KDLLEHGSNSSSSTRAEDKVDHLPDHTLLRTAPEMCGVQTVLDNDSTFRQTEENNSNNAV  
REDSGVAVCVHEHTPIHPPPLACVVNTTHPQQKSRRRDQNTTLNITPNTIPSATAADTSN  
SNKF INVASNAAMRQKRKRPRVASTNPNAPIGVPEVGLRKTPTCTRRRQSVLRIDKSKLL  
KCNADADSTQTSFNEDKDYTNRVVLRKILTKLISDHNDKLDHHRGKPLLLHYNGGLMI  
DHGYEYCYFVLEHNRSHQSLTIVPMVKDGVFEPEDIVIGTNGTMTKRKNTNSNIESCLG  
RPLYRCNILETDKNWIRGASIKDYQIMTGATSIVGTPFIADETWDIALPTK

>comp13951\_c0\_seq1; 762 358 1752 LEN=2473; translated  
MAGPIQATQSLGAQTSIGSNLDLQIIDETYGKNADLYQDVLGVPTTATQDEIQVAYFDRR  
SELTMLAKIDAAARGPKSGTTASLATIDKRRYKAERKMESVVFVVRILTDPALRIAYDK  
IRGERLGLSASGGSAPVTRYSGSRSGSSTRSSNHGSKKNQYSPEVNDFRASNPRAVTPSM  
TDASSGSESKNWMQSTFSSQLFSNIGGGKGGDEDVIRGDEQRNPRKSKRRQKQQQPPSSPV  
QERDSEPVERETRVERAAESEKKS IWGRKKKKKVLKDSKEIPPVEITDSSATEESKAEN  
EEIVTRKASRSTRKIVETNNARPTQITKTPSPQNNGTGSEGGTPREGLKGAERNRNRNG  
DFAEDETVTVYDDDTTRRDDTRTYLGGDDGETFATGSVFSSTVQDKATCSISKTI RNT  
DELSGACEDTLVSVQVFAFTLTKEDIKAVTKKITKAKRQLES

>comp13952\_c1\_seq1; 237 502 1530 LEN=1724; translated  
MTLYNAPFSKGTIAIPIPSPKNTASTGDCNCKSKPSRSLLSVQLDEELSVTRHNGHCSRY  
DRYSCDHTQEPNESKTI SASANGSDGASTASATCSMTSSGSCGSVSSSLSSSLSSSSCEDL  
SSFRRKIFPKYWRNHTPQLPAAP IAALVRDPRSPLLNHAYAVAKTGSDDGATSSSTTQATT  
NDSRGP HSSPDRPAASAARSSFSRPDQHPALSVSPARRSIFGASCRSKADPMESEVKGFL  
SSHKHMTLLPASFDGAAAAAAVLP TLEGRRRSRLRSYSCSEVASQEASSKKVLTSLR  
RHSNRSLRHSVTFDSQVSI VSFEPITSMECYTDGSWTDVFDH

>comp13952\_c1\_seq2; 159 482 883 LEN=883; minus strand; translated  
MVCPHGGVPRLLGLGWASSVVKDVRPGSVGVAFHGSGGFEGNDRDLAVKGDRAQAFVGVV  
AGAAVAASIAVAEFAVPPPQAGSEDLFGACLLGSHLGAAVAPQTRPATAFEGGKDC TLVE  
RGRQQGHVLVAGQK

>comp13952\_c1\_seq3; 237 320 1348 LEN=1542; translated  
MTLYNAPFSKGTIAIPIPSPKNTASTGDCNCKSKPSRSLLSVQLDEELSVTRHNGHCSRY  
DRYSCDHTQEPNESKTI SASANGSDGASTASATCSMTSSGSCGSVSSSLSSSLSSSSCEDL  
SSFRRKIFPKYWRNHTPQLPAAP IAALVRDPRSPLLNHAYAVAKTGSDDGATSSSTTQATT  
NDSRGP HSSPDRPAASAARSSFSRPDQHPALSVSPARRSIFGASCRSKADPMESEVKGFL  
SSHKHMTLLPASFDGAAAAAAVLP TLEGRRRSRLRSYSCSEVASQEASSKKVLTSLR  
RHSNRSLRHSVTFDSQVSI VSFEPITSMECYTDGSWTDVFDH

>comp13953\_c0\_seq1; 386 741 2105 LEN=2156; translated  
MHEVGNAMAESLLKEIRMQEKGNDFQPTVRKVLPLMKCATVDVDFGLAILDGFDFKCSKR  
LKLNPLAHSFEYLLAELVRRFRFPWDPTSFYLYNIPTTSNREYKRHKEQVLTFFIREQVAQA  
RARIAEEEEHLCSRSTINYNHANSKSEVQKETTQKRSELMTNLINAATNMKASHKNND  
SGYDAIVEETLEDVYMSLLFGAYDTSSITMTYALYLLATHPHIQENCVEEILT VLNRRNE  
PHMNNSESEENCGVSAKDLPYTKAVIMESLRLFPAYTTRNLEKPLKLP SNGKLLPKGQ  
MVNISIWSIHRSEINFPRPTDMPERWVRRRKNKTNLASKVDADDAADDDADDNDASSK  
CVSAWEERGPNDDEEANMI IAPANQDAFCAFAAGARNCVGKVFAMEESVILACLKLLK  
FDLVSSDYMRPVICGFVQRPDDMPMRIQERHQ

>comp13953\_c0\_seq3; 406 741 2120 LEN=2171; translated  
MHEVGNAMAESLLKEIRMQEKGNDFQPTVRKVLPLMKCATVDVDFGLAILDGFDFKCSKR

LKLNPLAHSFEYLLAELVRRFRPWPDPSTFLYNIPTTSNREYKRHKEQVLTFFIREQVAQA  
RARIAEEHLCRSSTINYNHANSKSKEVQKETTQKRSELMTNLINAATNMKASHKNND  
SGYDAIVEETLEDVYMSLLFGAYDTSSITMTYALYLLATHPHIQENCVEEILTVLNRNE  
PHMNNSESEENCGVSAKDLPTYKAVIMESLRLFPAYTTRNLEKPLKLPKNGKLLPKGQ  
MVNISIWSIHRSEINFPRPTDMPERWVRRRKNKTNLASKVDADDAADDDADDNDADDN  
DASSKCVSAWEERGPNDDEEANMI IAPANQDAFCAFAAGARNCVGKVFAMEESVILACL  
LKKLKFDFLVSSDYMVRPVICGFVQRPDMPMRIQERHQ  
>comp13954\_c0\_seq1; 377 55 867 LEN=1468; translated  
MKGLNIVMWTASFAVLVGISDAFTPLRLSSRAATYNPSSPSSFHKTTSQSLIVMHST  
QYNGAAPNEQTILEEYANWRSKFYKGFDFPVRYENFKANFMAVTVRNNMERTRALQNGET  
APSPIALNEYGDCSADEYRMAMGQQQSNSSGPRRARTANTPNSTPTNQGLQPSNTVIN  
TNKNSGRNAGLSNATGQLREAIKQRTSLESELTQMKKLLEKKKLLAKATKDEQIYNER  
LALREEQKRMLNDRLNNGWEDEQGMNNYY  
>comp13955\_c0\_seq1; 586 274 2451 LEN=2597; translated  
MSAEAKCPYLHPGNGTTKNDWPEMISLNILNQNNERTNPMPLNFNYAAEFKKLDIESLK  
ADLTVLMTDSQDFWPADYGHYGPFFIRMAHWSAGTYRVSDGRGGAGAGQLRFAPLNSWPD  
NGNLDKARLLWPIKQKYGRKISWADLMVLTGNVALESMGFETLGFAGGREDDVWEPEDDV  
NWGQETTTLNDDKRYKGRQLDKPLGAVQMGLIYVNPPEGPGNSDPLSAAADIRTTFRM  
SMNDEETVALIAGGHTFGKGGAGDPSNVGVEPEGAPLEDQGLGWKNKFRGTGKGGDTITS  
GLEGAWTKNPIKWDGYSVLFGEWELTKTPAGAKLWIPKDGEGAGTVPDAHDSKSHA  
PVMFTTDLSLRMDPKYAVISKKFHENPNLFREAFAKAWYKLTHRDMGPYIRCLGPEVPAP  
QIWQDPLPPAKSLAIDAADAELKEKILASGLSPSRLVATAWASAATYRNSDKRGGANGA  
RIRLEPMKSWEVNEPEELQKVLTVLEGIKKFSKEVSIADLIVLGGCAGVEAAAAGGYD  
VSVPTPGRTDATQEMTSIESQQHLNPGADGFRNYVQPGISARPEEMLVDKAYLLALTAP  
EMTVLLGGLRVLGIGTEHSSAFTENVGQLSNDFVNLDMNTVWSPSSAAPNVYEGRDRG  
TGNAKWTGTSVDLVFGSHSILRALSEVYASNDYKEDFVRDFCAFAKVMMDLDRFDVNTDL  
NRSRL  
>comp13956\_c0\_seq2; 91 1 270 LEN=348; translated  
ARYFWGKSPKRRNFNPFCTCKLLLPVGGRAIVEVVDLAPCLRNHGASIQASHRSKTPEG  
SIEVGALHGELSWFFSPSSAPMGAMEQRL  
>comp13956\_c0\_seq4; 512 96 1819 LEN=1819; translated  
MEIMRSPHLIISAMTKKKPADSRYQQQRQRQWRPRTSSDYEEKREDSRSHTADRQSTES  
CSNDGDNTHVNRKTKNAKNECHGSVSHRDHPDSNERERFESKGPKRKNEKNTNRPASPSS  
FLASVGACMSVGKFRDEQNEEIRVEYRRCNLPNSCYRRQRARGQEDQKTEVGEVMVDFLN  
PSLSMPLSKSRTLETADTSKDSVLI LNTSSNTNAKEKIHSTLSRTDMDRGSRRKQNSITE  
KAQSAFSSSTRNLLFGTGKNTRTDGKNFDHNPNGNHVCNKDDLGENHSTYKSSGKKGAS  
KTLYDPAYYDNGNTFDDKKQNDTITGGDVHNI SNVTVPLPSILRNENNKGFANTEIGYT  
TIASENDMGGHREIQYWRQLNHSSQYNGKKHSSTADAFNLGLAQLKLGSSSNNNINN  
ITDPSHLYQNSNHQNDAKKRHQYDLAVENLTI AHEIFEGLYGPHHLAVGRALDALGLAIV  
RRANHEKASNRTEKGNQSGHQPTSPRNHSNTTTAIEKELSYAQRLLLEDALALRAHHLGVW  
HVDTVETYNKLAGVHLHLGQVQAAATAYHEVFLVR  
>comp13957\_c0\_seq1; 808 361 2619 LEN=3085; translated  
MTAPSIACALPPSPTFGTKTVAFSPSCSSHRNTERYKIPNYADAFVSEAGSSLLADPIPR  
ETQHEDVLERRPGE MRIA GSAVFASSSEDADGVGFLACPPSPGLPKECHKVRLERQGCLO  
LSKNCKEDGTKQNGILFVPALCPSPRCIAGGDGDGDGDPAAASVPAAPAAHLPPSSNKN  
TTKPLTRSKDDAMGRLKALSRDEI IMLVDIFGETGASTSTEE SRASASSAGR FNADATG  
CACGRRVTGHSHTGFTDVQTKLAKSKAQLSIEIGSGKPEATRVTPLPRSLFHLDGGMTAT  
TSTTTSTTTSTSSLECKSNSVLPYNAQGIISQYNSVAIETSTVATNNQOPDNVSLHPLP  
SFFFRALGSDCGSSLPLPSTVKE TVHEETETTKKNGAPNNSNDRPLCFILPSGDLPPRPL  
PSAGRKR SVARKKRKRKADADADT GATQLPYKKNVTTRLVPAAEVVETTSLTGN  
SRKEGQSPPNRGRTKNEKECQRTYIYISKPTIKDEERWHSRLEQARDFIQRNGHCIPIT  
YPPNPELANWAKRQRYHYKMMKRLSSHDSMHKPCAVSSSASPGQVLAASAVQESDDPL  
LTVSAAELRHKFPNAQIEKCLMTARRLRALMDIGFVLDNPNGRWEHNYQLLKEFARTNQG  
RTTPSRHHTHEVWRWASMQRYQMTLHKRDRAIRD RDDGEDEDQEKGHNNKNSKHKHQNG  
ATTRKKKVYLTEERIAKLNQAIGFEWEYAGQS  
>comp13957\_c0\_seq2; 715 507 2765 LEN=3231; translated  
MTAPSIACALPPSPTFGTKTVAFSPSCSSHRNTERYKIPNYADAFVSEAGSSLLADPIPR  
ETQHEDVLERRPGE MRIA GSAVFASSSEDADGVGFLACPPSPGLPKECHKVRLERQGCLO  
LSKNCKEDGTKQNGILFVPALCPSPRCIAGGDGDGDGDPAAASVPAAPAAHLPPSSNKN  
TTKPLTRSKDDAMGRLKALSRDEI IMLVDIFGETGASTSTEE SRASASSAGR FNADATG

CACGRRVTGHSHTGFTDVQTKLAKSKAQLSIEIGSGKPEATRVTPLPRSLFHLDDGGMTAT  
TSTTTSTTTSTTTSSLECKSNSVLPYNAQGIISQYNSVAIETSTVATNNQOPDNVSLHPLP  
SFFFRALGSDCGSSLPLPSTVKETVHEETETTTKNGAPNNSNDRPLCFILPSGDLPPRPL  
PSAGRKRSVARKKKRARKKVADADADADTGTATQLPYKKRNVTTRLVPAAEVVETTSLTGN  
SRKEGQSPNRRGRTKNEKECQRTYIYISKPTIKDEERWHSRLEQARDFIQRNHGHCIPIT  
YPPNPELANWAKRQRYHYKMMKKRLSSHDSMHKPCAVSSASPGQVLAASAVQESDDPL  
LTVSAAELRHKFPNAQIEKCLMTARRLRALMDIGFVLDNPNRWEHNYQLLKEFARTNQ  
RTTPSRHHTHEVWRWASMQRYQMTLHKRDRAIRDREDDGEDEDQEKGHNNKNSKHKQNG  
ATTRKKKVYLTEERIAKLNAIGFEWEYYAGQS

>comp13957\_c0\_seq3; 547 1 1781 LEN=2247; translated  
XDGDGPAAPAAHLPPSSNKNTTKPLTRSKDDAMGRLKALSRDEIIMLVDFGETGAST  
STEEASRASASSAGRFNADATGCACGRRVTGHSHTGFTDVQTKLAKSKAQLSIEIGSGKPE  
ATRVTPLPRSLFHLDDGGMTATTSTTTSTTTSTTTSSLECKSNSVLPYNAQGIISQYNSVAI  
ETSTVATNNQOPDNVSLHPLPSFFFRALGSDCGSSLPLPSTVKETVHEETETTTKNGAPN  
NSNDRPLCFILPSGDLPPRPLPSAGRKRSVARKKKRARKKVADADADADTGTATQLPYKKR  
NVTTRLVPAAEVVETTSLTGNSRKEGQSPNRRGRTKNEKECQRTYIYISKPTIKDEERWH  
SRLEQARDFIQRNHGHCIPITYPPNPELANWAKRQRYHYKMMKKRLSSHDSMHKPCAVSS  
SASPGQVLAASAVQESDDPLLTVSAAELRHKFPNAQIEKCLMTARRLRALMDIGFVLDN  
PNRWEHNYQLLKEFARTNQGRTPSRHHTHEVWRWASMQRYQMTLHKRDRAIRDREDDGE  
DEDQEKGHNNKNSKHKQNGATTRKKKVYLTEERIAKLNAIGFEWEYYAGQS

>comp13958\_c0\_seq1; 221 1 983 LEN=1722; translated  
XYIQPKTLLVRFVTSLSHLVCEPANTNRREEDDSSIMQFHGFCSPHGGWAIAGLIVSSI  
CALAATMWGMASCRMVYIDYTTDRGDFSDFFKDPTADGDPVLQRVGAGLFTWLVPYADDK  
SGNRNTDWTYGCAGFSESQRAFFTDDVFEVARIFAVLSVLGGMGSVLAVFFLSCMSLR  
FQIWMSTILGLPIFVGLTFIVLQSQLCNGLTTYQDDSYETTCTVDQGLVIVAAAFW  
TVAF LISVVIKDPKWDVGI RDGEITNAFEMRQEERYRREKERKEKAQRKREERQRRVN  
RRLKGDGDVNDLHLDQDISDLDDDDGEV

>comp13958\_c0\_seq2; 208 313 1098 LEN=1837; translated  
MWGMASCRMVYIDYTTDRGDFSDFFKDPTADGDPVLQRVGAGLFTWLVPYADDKSGNRNT  
DWTYGCAGFSESQRAFFTDDVFEVARIFAVLSVLGGMGSVLAVFFLSCMSLRRFQIWM  
STILGLPIFVGLTFIVLQSQLCNGLTTYQDDSYETTCTVDQGLVIVAAAFWTVAF LI  
SVVIKDPKWDVGI RDGEITNAFEMRQEERYRREKERKEKAQRKREERQRRVNRRLKGD  
GDVNDLHLDQDISDLDDDDGEV

>comp13959\_c0\_seq1; 559 32 1702 LEN=1756; translated  
MTTVLNIKIRKIPRNKDYVRRKEVDDHGSVEASLDVTLSMSQTSNREEISWSSSDGSTYYSD  
DDEMSLKHRRYARQASRPKEHDIIMASSKSKKDDVKI IHDDKKQSQIMNCVETRSPNK  
RKSMLENVDRFPAIDMATSSSEMSAVGFLTTEDTANVFCTSNVPFEVSTAEEKFSFEISAI  
SSASTDDSSVLTSCSRSDVAVRHYQHRTASKSGRATVNSQFTGLSSGTL SIPPINEHSV  
DLVSI TNQEPVSSLEYETTWDLSDSDSSSDSGSDGDRNREMDILTPQKTRDPPVKTP  
QIPSLPLNITPKVTKIKOMEREKSETDERIQQLKAKIKSIQEQHCS DSTVNHSDDVSS  
TQIESFISMSSSSQRRVHEETIMQKSHNDTDTSTPLIRKCLSGESQERKESNSTEEKDQ  
SIAQEHQVIDESLLSTSIPLMIPVVEREEISIMEFDGMTRNDVVLVDVEAGRLTHEP  
SMRNTKDLSPSKKGNKGEKIKSIAEKSKAKVLAAYDYVLP I IARKKIEFEQKPRSE  
QIIMTAIAVLSFIFIILLVMMVQ

>comp13960\_c0\_seq1; 230 357 1506 LEN=1506; translated  
MERSLNRDSDIDYDINGASLCNSIHNTKSYNGDGSEREIKHEKSRIVPKLAVSQREIRGG  
EPSSQQPKAKIEIKNAMEDGEYDTKNNPERIEAIKMK EIDTRPLSARERLQRRQLNHSR  
SFRVKNRRNLSSRQLFQHEDGRSRDLPKSRNRDHIGTDEDEDKTRNEDTSISESFLVED  
TDTPFAFRSMASSEQRMYSSRTNSIPRDI VVNSPSDADSDDMTGSAIKYSGSERCTR  
QS SRRRLTMTPKKCASTEQEEGSEERTNSHRSSKSKRSSLHGSNRKSGQSRRLRKN  
GASSPMELEALINSTVPRVDGISRRRERRATLSCATNHTRSTSRRTSVLSGRNTNHTK  
SERPRRSSTMSGHTNHTKSEQTGRRASMSGX

>comp13961\_c0\_seq2; 1062 109 2772 LEN=3175; translated  
MFHKEGSCVDIVSTGGSSQGGKAGNNKRGNTKKGSGKGGKAQHPTTEQTTNTSKAVD  
VPLRKSDRRRLRDRAAYFLGGIHVDDNENDDNDNHNHQSN TVAVDNGTDEAQNTPGK  
TNSAKKIEALLEEIFTKGGTISRSLPAPTSTTTTGDGSNTKGNHESMILYVKSPNQSG  
DDDKSSSGFRWPYQNKPFVWMAVEDKSGRVIRESP TISLIAVLWHSIEFSTTVSEHL  
HTSRIVRVPSAVSRYLCRGADLMRAGIFGAPDGSSNLAAGGADEARPRKPKKNKGK  
KEDPLESSKDMVLVCVHGNPQPFVAVGRSVLYCEQTKGEQDAATPPFGPGTKGIGVE  
IWSYGDLLWRTTTASASYIRATYNGGDAAVNLEDGSYGNP GFVVRTRDGELRVLPV  
VEVSSDEEDDQEEEEEG

ADQKDESGADRPEKQQEGGLSMPPPSTNAEGENSKGNDANSSEKRPASDNEEENSEINN  
DDKETSSAKQKETEETDSTPDDLHETVCRALVHLGKNDLPISVGTFFYTKFVVPHRPKG  
IESMTDLMKETTYKFKGNYLKRWQQKGDENDDDGFLKLTGPDPSNRNNKDPNALLISYN  
KRHSDLRGIKKTTRSTGDSGNGKTTKVVVVTLHVVP SNWTKLMRLDSDAVEAANATSAER  
RGTGMLTLPVVRKILDNYLERELLRMKSSMKRVALDGPLTVALYKGGSSNETTTPAELS  
PKDLYTKFAARMSPAFCLVEMPGSNVLKLAHGKPPVQIEVVRQSRKFVTRRLRGLLEYY  
FNGIEPAVFCCKDVKRLAISGSIDADPSSNGRAALPKKGHVEYVFGANIVDELEALLTGD  
ETLSEHGGVKGDDWPYPRIPSAVIEVVLKRGVPARKKRRQHGGSSNR

>comp13962\_c0\_seq1; 466 137 2378 LEN=2560; translated  
MTDEKETISATEEFRKDLNDIALQFKQNIKLEDRTFRLKTYKQVFGSEAVDFLLKSEAV  
SSREDAVELGKALQOMKLFHEHFRDHFDDYLFYRMVGENERGSFKIDEKTRQAVKWA  
FLGGENLGLAENDQPLQPMLOQDFDLSLNPDKDVHTASHVWPMDSHNTTLLDHHVPPDWL  
PKANGKDGSSSTYDMVICIGAGVGLVTAASAAGVGAKVAMIEENLLGGDCLNVGCVPSKGR  
NTVCRTYLLTVGNTNIPLIDGVDXGMIDTCVXSLELSFLSLANIFDLINAKKAI IHSANM  
AHSVKGDIKRLLEEAGVFVDPNAVRIDFEKVMERVRKVRAEISHHDSAERFTSLGVEVYIG  
RAVFTSERSVIVNGRTLNFKKAVIATGGYPTLIPMNGLQELYKKSFTTDPKEPKPIVMTN  
ETFFNMTKQPKRLGVIAGVIGMELAQAMQRLGSQVTVFGRSGKVLPEKEDDMAEVVKQQ  
MIKDGVSFSLVAEYKGIENLGNVNLKNGYPEMKMTVVEKGMKEKETTIEFDALLVAAGRRP  
NVTGMDLELAKVEYDTKKGLIVNDKLQTTNPRYIGVGDCCSQFKFTHAADFMARTVIRNA  
LFFGKGKMSDLLIPYATFTSPEIASVGLYQDLDELGIQYRVFEKHFKNDRACDDNRE  
GFIRFRVDAKTDAILGCSIVGEGAGNMIGEVTLAMDSGTGLGAVANVIHPYPTTSEVVRQ  
SGDLYNKTKLTTTVKSLLRGIVNIQS

>comp13962\_c0\_seq2; 635 137 2215 LEN=2397; translated  
MTDEKETISATEEFRKDLNDIALQFKQNIKLEDRTFRLKTYKQVFGSEAVDFLLKSEAV  
SSREDAVELGKALQOMKLFHEHFRDHFDDYLFYRMVGENERGSFKIDEKTRQAVKWA  
FLGGENLGLAENDQPLQPMLOQDFDLSLNPDKDVHTASHVWPMDSHNTTLLDHHVPPDWL  
PKANGKDGSSSTYDMVICIGAGVGLVTAASAAGVGAKVAMIEENLLGGDCLNVGCVPSKAI  
IHSANMAHSVKGDIKRLLEEAGVFVDPNAVRIDFEKVMERVRKVRAEISHHDSAERFTSLG  
VEVYIGRAVFTSERSVIVNGRTLNFKKAVIATGGYPTLIPMNGLQELYKKSFTTDPKEPK  
PIVMTNETFFNMTKQPKRLGVIAGVIGMELAQAMQRLGSQVTVFGRSGKVLPEKEDDMA  
EVVKQQMIKDGVSFSLVAEYKGIENLGNVNLKNGYPEMKMTVVEKGMKEKETTIEFDALLV  
AAGRRPNVTGMDLELAKVEYDTKKGLIVNDKLQTTNPRYIGVGDCCSQFKFTHAADFMAR  
TVIRNALFFGKGKMSDLLIPYATFTSPEIASVGLYQDLDELGIQYRVFEKHFKNDRACDDNRE  
GFIRFRVDAKTDAILGCSIVGEGAGNMIGEVTLAMDSGTGLGAVANVIHPYPTTSEVVRQ  
SGDLYNKTKLTTTVKSLLRGIVNIQS

>comp13963\_c1\_seq1; 511 294 1829 LEN=2014; translated  
MVSVKYHFTIESGKTSKEDIHTGKSNDNITSSYDNHSESRSNINININTNSSKSOAAPT  
KPSMNKTTNSPTATTASKTASSPFTPPSSASRLPYASFFEAQQKAVFDYFGCNGGSDVSL  
TASESSSDSNGSVRKINKNHAKKKRSTKISVSKQKQRSYGCFFHYQIETEQRDSDNSVSLGE  
DDVVLSPLYSPSTCSRHQFEDKNSKNNKPKDKGCPDQETEDRQSKTSKRDGKMIERQS  
QNLQRQSHNRGRQKQRRNGGSRHRSRNAADRKEQSKSESQTRSKRISKRCDSLIVVIEDR  
NQECDNISSVSSPSCGSSYSDPSLSPKSRKETRRERLLKIVNKATFLKKQRP IELGSTT  
ESGSSNSGSSTMPADYEDDET IWPHRKLPPPTSILRQPKYCRSSRKKKFARRSSSSAKP  
NSSNSVGVKFAEGTIFPNPDSPPRRRRKVRRTNRKQKQKERATKNRHHHTIILPLDVSSE  
DLRPENEEANTVAAYCSPTGSDSDAHFYVFR

>comp13964\_c0\_seq1; 214 1 908 LEN=2672; minus strand; translated  
XSFIDIEYDETKYSDFTLDVKNKWWGGIVGDDNAIYGVPIYRASGVLRIDSKSDTAKIIGP  
NYGVGNFYFHHGGIKVNGKIYKGYFDHHLNPRIECSLHRSRTAILFIHIFSDHNCITAH  
SHAETVLVIDTTKDAEEDIISELTIHRAEYDSDDRKKYKWLGGCVGADGNIYCPACDTSS  
ILKITVATDHCETLGFAGKDKNKWQGGILGRDDCIYCPADGLNICRIATNVDIENGKNP  
VQLIGNLSTHKDKWQGAAGKGDGSLYFIPENSYRVMRVTPPVNPPKILNGKLPEDVKVE  
LM

>comp13965\_c0\_seq1; 415 109 2035 LEN=2162; translated  
MSTEKLSPNESAVGNNGDAARLGESTRLLHDSVESRPLDRSETNDNSPDEDFALWNEMDA  
PWPATFERAISLLASPVKADKANDMTKSPKPGNTPIAIRRRMLKRSNSANTPEFSGLVP  
PRSRLSFRGKMSGGMDFOKTKAHLKAQAKFVPLAKTQKNMEIKSKEAAEYRKRILATQK  
GTKRKNPSSEKTTFLQCVFNLANILMGVGLLGLPYAFSKAGYLGGTFAIVSFVAVCWKT  
SILIGRELNGDPRPLAIFAAGISPGSDPVVRMRKQIRSFPIAREAFGDAGAIILGVVLY  
FELFSCLSIFIVSIGDHMNELFPTVPVTTTMLGFTVFSALPVKVS HVKVDVVGKTVKYFLL  
IPDHIIXPAIYLTQVFRTAGLLSYLSLVGTIATIFVVLTVVLSFIQEGDITEQLALSFD

ESVQSAETYHSSWNTSGLAVAFGLVAFCSGHAIIVPSIYASMEHPHQFERVVVDSFMIVV  
AACMAIGLSGYTMFGDFVLDQITLSLTQNSSAVLLMKILTWMILTAFSKLTLTMFPLAM  
GFEEIIAPYISSDSSMLVVGALIKVVLLFGALAVAIYVPSFSALCSMVMVCTMGVSVIF  
PAGAYLKLFWPKLSMMERYLYSFFVMIGIVMAVVGTAIEMS  
>comp13965\_c0\_seq2; 548 109 1941 LEN=2068; translated  
MSTEKLSPNESAVGNNDAARLGESTRLLHDSVESRPLDRSETNDNSPDEDFALWNEMDA  
PWPATFERAISLLASPVIKADKANDMTKSPKPGNTPIAIRRRMLKRSNSANTPEFSGLVP  
PRSRLSFRGEKMSGGMDQKTKAHLKAQAKFVPLAKTQKNMEIKSKEAAEYRKRILATQK  
GTKRNKPSSEKTTFLQCVFNLANILMGVGLLGLPYAFSKAGYLGGTFAIVSFAVVCWKT  
SILIGRELNGDPRPLAIFAAGISPGSDPVVRMRKQIRSFPIAREAFGDAGAILGVVLY  
FELFSCLSI FIVSIGDHMNELFPTVPVTTTMLGFTVFSALPVIVFRTAGLLSYLSLVGTI  
ATIFVVLTVVLSFIQEGDITEQLALSFDSESVQSAETYHSSWNTSGLAVAFGLVAFCSG  
HAIIVPSIYASMEHPHQFERVVVDSFMIVVAACMAIGLSGYTMFGDFVLDQITLSLTQNSS  
AVLLMKILTWMILTAFSKLTLTMFPLAMGFEEIIAPYISSDSSMLVVGALIKVVLLFGA  
LAVAIYVPSFSALCSMVMVCTMGVSVIFPAGAYLKLFWPKLSMMERYLYSFFVMIGIVM  
AVVGTAIEMS  
>comp13966\_c0\_seq1; 239 199 852 LEN=1244; translated  
MVRRDIIVHYIPVAIAIYACISLPGSAAFVGLGKAHVELSGCRQLRTFFCPSGGPSSSL  
SSSLGNNHEANSMVNDGGSGLDHSQHVKTKNEKQQPVTIISDRRNALLRVGRIALMTTAA  
SAATPSPALALKKKNEALCGTGFFEHIYEYKCTEIGDIQDEGTSKAMSEAETGMTNSLMG  
KLGFDTVEIIDNYDENKADKKTSGKDSMARLRDGNNS  
>comp13966\_c0\_seq2; 239 199 852 LEN=1074; translated  
MVRRDIIVHYIPVAIAIYACISLPGSAAFVGLGKAHVELSGCRQLRTFFCPSGGPSSSL  
SSSLGNNHEANSMVNDGGSGLDHSQHVKTKNEKQQPVTIISDRRNALLRVGRIALMTTAA  
SAATPSPALALKKKNEALCGTGFFEHIYEYKCTEIGDIQDEGTSKAMSEAETGMTNSLMG  
KLGFDTVEIIDNYDENKADKKTSGKDSMARLRDGNNS  
>comp13966\_c0\_seq3; 239 199 852 LEN=1132; translated  
MVRRDIIVHYIPVAIAIYACISLPGSAAFVGLGKAHVELSGCRQLRTFFCPSGGPSSSL  
SSSLGNNHEANSMVNDGGSGLDHSQHVKTKNEKQQPVTIISDRRNALLRVGRIALMTTAA  
SAATPSPALALKKKNEALCGTGFFEHIYEYKCTEIGDIQDEGTSKAMSEAETGMTNSLMG  
KLGFDTVEIIDNYDENKADKKTSGKDSMARLRDGNNS  
>comp13967\_c0\_seq1; 574 318 2047 LEN=2047; translated  
MPSVKEIDHIKFMVTALASDTNDSSKAEQEQSGEASASTGADIEAKCVSTNHTGEASG  
MQLGHTIDVGRREILHKIMPFFPAIEKEDLKKIIDFHFSAPAGQSNCGDGDGNSKNI  
DGDGANNKTENNECNSNVDDVDVDRERNTFVSPKGEMIGSNLAHSSSNSTSNAAISHP  
CDADVLLGSKGKTKTKRNRHHPGNKYEDLVSRQTLADHNDQTDPSNFR LTCNHVVAN  
IRKVGGRFLKPYHKHNGDDGNFLWIEIGDEQAVETTARAIHRDKHRCLRREEKKRKKKRH  
NKKPSPSPPPSSSPLPPPPPSXGLPFPEFEHQGRATEAAKSVPKEHHAREQQRHIEQE  
QQSKPATVAPPPTSIAVVPKTKTETQKHHAGGQENEQMLQSKPGKVPKSVATMLS  
EAVGGLKNPVHVSTTISTDKPADRIASMNDQANSKTASTVRLKIVAKDPTLNGFDPVLA  
DDMKFFGTSMLSLNKDKVGNEDDNI PNLSYGGHDSEPRLTQKQLLCKDKQKFVDSNKGCS  
PPPPAKILKSRNSKLATAINTDGDSSQGSQSPSSPSS  
>comp13968\_c0\_seq1; 685 69 1586 LEN=1828; translated  
MQSYSPELPGGNIDVDMILKMPVDNRATKIFCTLGPACWEVDQLVTLINAGLNVARFNF  
SHGDHAGHKACLDRLREAAKCGKPVGVLLDTKGPEIRTGFFAEGKKIELVRGETLVLTS  
DYSFKGDNTKLACSYSELATSVVGVQSILVADGSLVVKSCDAEKGEVACEIMNNASIG  
ERKNMNLPGVVNLPTLTKEDISDIQEWGIPNGIDYIAASFVRKASDVTKIREILGPENQ  
GIKICKIENQEGLENYDEILEVTDGIMVARGDLGMEIPPEKVFLAQKMMIRKANIVGKP  
VVTATQMLESMIGNRPRTRAECSDVANAVLDGTDVAVMLSGETANGDYPEAAVSI MAETCV  
EAEAAINNTLYAAIRNSTLEKFGKLTSESIASSAVKTAIDIDAKAIIVCSESGATAQQ  
IAKFRAGRPTVTLTTESEQVARQTFGYMKGCKAIVIPSVVEETDASVNSCIAGFKSAGICKE  
GDAVVIVHGKTKIVGSTNTMRIYA  
>comp13969\_c0\_seq3; 132 1 287 LEN=287; translated  
XSVADFSYEESVVKDLQCYDGTVDVGVFVYLDSDLTLEECCECKAPEADEEGVIAYYFEV  
PCTPICEISEDCVEVYGVAEKDIIDQIGSDATLPEDX  
>comp13969\_c0\_seq4; 234 1 478 LEN=478; translated  
XSVADFSYEESVVKDLQCYDGTVDVGVFVYLDSDLTLEECCECKAPEADEEGVIAYYFEL  
PCGSICEAHTAPYSAAPTGVPTVGYESMSPTDCLNVHGISEDDIIDQIGSDAPLPEDAI  
KIVHGESSISIELSQLWTDNSTANIFIHYHSGTHESVCE  
>comp13969\_c0\_seq5; 212 1 411 LEN=411; translated

XSVADFSYEEESVVKDLQCYDGTVDVGVFVYLDSDLTLEECCECKAPEADEEGVIAYYFEV  
PCTPICEISEDCVEVYVGAEKDIIDQIGSDAPLPEDAIVHGEDESSISIEISQLWTDNS  
TANIFIHYHSGTHESVCX

>comp13970\_c0\_seq1; 342 452 1553 LEN=1992; translated  
MSMDMVLDLIGGNDPNHSGKTTSSPAVSSPMLLEEVTTNSEEQRSAACPGLPFLTITTTTL  
EVALEHFVEQFHTNVAQALRQALSQHYSICIPQTNAENRVDHDDAIKLAYDKNYEVQLGV  
ISVEGTERECPFPASANSQCQIADVKIHLFGEEINEGFLPLLISIIITTSRFSHESLLSTG  
VVDVRIQDNGIITEVNEELNHLPHSTIFDGGSHSSDELTLNSVVDARIHDNMAANTKELM  
NPPQPGSVSIEFSSGKILAIVMILTTLIVTALIAIGMSVLQGDVVAIPADTRGFRLKAMEF  
LPSLNIPASITISTKEATKTIIIVARMVLLIHPMPTVCQKKIVELLCDAVRSQKTIVIVR  
HTQDIE

>comp13970\_c0\_seq2; 410 67 1396 LEN=1835; translated  
MPTIPLVVLVVLVNVLIIFGNNTCSADDINDLYLPHYRVEFEFGREPTRLLENNIEYNREN  
LAILQFEDFVMSMSMSMDMVLDLIGGNDPNHSGKTTSSPAVSSPMLLEEVTTNSEEQR  
SAACPGLPFLTITTTTLEVALEHFVEQFHTNVAQALRQALSQHYSICIPQTNAENRVDHDD  
AIKLAYDKNYEVQLGVISVEGTERECPFPASANSQCQIADVKIHLFGEEINEGFLPLLIS  
IIITTSRFSHESLLSTGVVDVRIQDNGIITEVNEELNHLPHSTIFDGGSHSSDELTLNSV  
DARIHDNMAANTKELMNPPQPGSVSIEFSSGKILAIVMILTTLIVTALIAIGMSVLQGDV  
AIPADTRGFRLKAMEFLPSLNIPASITISTKEATKTIIIVARMVLLIHPMPTVCQKKIVE  
LLCDAVRSQKTIVIVRHTQDIE

>comp13971\_c0\_seq1; 205 83 688 LEN=1078; translated  
MAEQTTKPARRASVAEKVSGNILGRSKGFKLVDKIFRACD'TTKSGDISKSELYVGTLSV  
HITLARYAGPAACFPPTREVSDELFEAADSCKSGTINKEEFKILLILGAQIVSRMVVYY  
TVLILFVWFQAQKTTDHFDSIPKGGFVESVAHQVISIAIFVLAIPSIWDAIDSTTKGTIH  
WVNSENKTDSDNPKQEADKDD

>comp13973\_c0\_seq1; 573 1 1508 LEN=1508; translated  
XGSSGSAASSARPSIEGNEDGNARGSNAPTGAATKSPIVHGFLT'TENVGLSSWNWVVL  
LDFSASYKGRALPDDDPSEYLYYFQLRQTGSAQTNASAGNAGDNNGGFQGSIQGGGSQ  
QTQPPGTSSSSPTDSGTSATHSPTDTSATTREKRCYLAPERFYTPGTNASKKGDGTESPG  
AVPIGNATTQKLTAMPDIFSAGCVIMETFLNGERAFDLGDLMEYRQRKTYTPTLQQKLN  
KIEFSALRAACKNMLSLDPSQRLSAGEYLKRLEASGLLPTSFETLARLMREVTATTRSQT  
NPELDAEAAVTPDARLAKAAACYSEILHETMGVSDREGQEYFDRVLGRTAVAMRNKTK  
ESPETD'TTANESGPNEAPGQINASSVAMTEEKKESEHDALFAETEALLEKLGALAIDEDE  
VLSMASEDAARKHQSGTTAGKEGEGKHPNRSKINRSQLSSESLLIYLQLVLSTIRHVQR  
ASKLVALQLMKRIGGYSTDEARLX

>comp13973\_c1\_seq1; 722 106 3054 LEN=3401; translated  
MSIVESFPPSDSKVFPQYVFKRVAHLVTDPSLVVRLAFARSAVLAETAHRFLDISHAVR  
LYEAVGGEAGGTSAGIPSONDGPSSNVFGDDVAKLLGESASSNKKENSKSLRKAESSET  
VGSMDKGATRTLIRSTYNSDLAALHETVSRWVIHIT'TDMSEHSSPAKRALLADMARLCNF  
FGLDGVMAFILPQILSFLNDRKDWQLRAALFDHLPVCHFIGRAATEHFVLP ILETALVD  
SEEVVIGRALLCLSELLVMGLLSRGVFLGRPAAHGTEASPGLLQKYGTL'LLHPSSYIRFN  
IIVTINALCKLVGSLDAEVFVLP LIRPYLRFQ'PSTEHL'LTPIGLERCLSVAWTRARFENE  
LNRLIAAMESSPMAGQWTTIALQINDGVAEDT'PREKTAVKTADKAGKGT'PAQQEELSDDD  
ALRSSAYMQMLARSRNAAKMGSDSDNPTQDMKNAIEGSLKLAQQLHFPRQDILGSPPAT  
LPQWYGILLECRHHRSDVRETAAIRSVSALGQVYGLS'IMDQAAAASLKYDGMTGDRAVE  
LLNSDRSKSIEAACRGEWGS'ETCLDPVLTDTSL'LLTKLNALDVP'PLPRLGEERPPVQKL  
VQPPRHYAREAGDPRDSQAWKPKIDNVVATSRKAAGFGHTAPV'ISLAVSNDQRFFISGSH  
DGT'CRIWESEKAEASNGVLESSTYTLGDHDCGRG'PSRVNDLIILEGSHSAASAGSDGSI  
RVWRVLDLVSSSTNLIDAKRDARRVAGSTDIKQIHPLEGEV'LT'VNQFNSQGSLLTYATQ  
KGHIHSWDLR'SAKEPFCLKNFQDTGYITNMAVGS'DRNWV'VGTNRGYISLWDLRFQQVMK  
LWHHSRSAPINRLATS'YVPPPPQSWVSKRSVNVDSKPYIFV'ASGPNECAMFDATTGHCSEC  
FR'TIEYKSRSPSLRIDDIP'LT'DVPLSTSVRRK'FVQAQGLGLGRLSNAIKTSFESVNCMV  
GSTGNSDRSFLITGGNDRRIRFW

>comp13973\_c1\_seq2; 664 106 3190 LEN=3537; translated  
MSIVESFPPSDSKVFPQYVFKRVAHLVTDPSLVVRLAFARSAVLAETAHRFLDISHAVR  
LYEAVGGEAGGTSAGIPSONDGPSSNVFGDDVAKLLGESASSNKKENSKSLRKAESSET  
VGSMDKGATRTLIRSTYNSDLAALHETVSRWVIHIT'TDMSEHSSPAKRALLADMARLCNF  
FGLDGVMAFILPQILSFLNDRKDWQLRAALFDHLPVCHFIGRAATEHFVLP ILETALVD  
SEEVVIGRALLCLSELLVMGLLSRGVFLGRPAAHGTEASPGKFLTRACFDPCVRSFRGTG  
IVPLVWLPYRCSGFEL'LLTCVSSTSL'LLQKYGTL'LLHPSSYIRFNIIVTINALCKLVGSL



DAEVFVLPLIRPYLRFQ PSTEHL LTP IGLERCLSVAWTRARFENELNRLIAAMESSPMAG  
QWTTIALQINDGVAEDTPREKTAVKTADKAGKGT PAQQEELSDDDALRSSAYMQMLARSR  
NYAAKMGSDSDNPTQDMKNAIEGSLKLAQQLHFPRQDILGSPATLPQWYGILLECRHDH  
RDSVRETAAIRSVSALGQVYGLS IMDQAAAASLKYDGMTGDRAVELLNSDRSKSIEAACR  
GEWGSETCLDPVLTDTSLLLTKLNALDVPPLPRLGEERPPVQKLVQPPRHYAREAGDPR  
DSQAWKPKIDNVVATSRAAGFGHTAPV ISLAVSNDQRFFISGSHDGT CRIWESEKAEAS  
NGVLESSTYTLGDHDCGRGPSRVNDLIILEGSHSAASAGSDGSIRVVRVDLVSSSSTNL  
IDAKRDARRVAGSTDIKQIHPLGEVLT VTNQFNSQGSLLTYATQKGHIHSDWDLRSAKEP  
FCLKNFQDTGYITNMAVGS DRNWWVVG TNRGYISLWDLRFQQVMKLWHHSRSAPINRLAT  
SYVPPPQSWVSKRSVNVD SKPYIFVASGPNECAMFDATTGHCSECFRTIEYKSRSPSLRI  
DDIPTLTDVPLSTSVRRKFVQAQQLGLGRLSNAIKTSFEVNCMVGSTGNSDRSFLITGG  
NDRRIRFW

>comp13974\_c0\_seq1; 217 367 1086 LEN=1283; translated  
MKCGLQQYLNHRDLSL PKRIESYCWKLKDGCGFWGGDPPKPIADTVEAVLGAIHVSSDFK  
SGQTATLKLMSPIF SVIKKASDDGIERFGEVLRAIKHPKKS LQEISGQIFQVIVCSEHEF  
ASFFEYEDEIVPTSTAAPLVPQILHKNEW RNPARGNGEHEGCVS FISM LGYPLVAVADE  
SITDARNRASSLMREAIQCNP TLQNR IKKYRSIVERNLTLAGKRQ NEMTVARANGFHNE

>comp13974\_c0\_seq3; 1437 93 5582 LEN=5838; translated  
MGDKDSNGTEVAIPVALNANADGDEDEDES VSRSGSTSIEDDGI FDDAEQDDSDDGNSIN  
HTTATIIQFGADNEIRNGSCDRNGKDTAREQRKRRRRGAQRKWFYDRLCEFRALKRRRR  
REQEIERQRDPQ QFDDTEFISATGSFP SGTHGSHRLLHSHQSSRRDRPNERDENEQRQKQ  
QQRQRQIVMTNKDEAVRSRPTENESE TMNDVATNLDNLYGQFSDATNKALDTRKQKDRST  
STREDENQTKTGIQDDSN DLSSSFFKFDEQKLFQVPIFAPGIKESAFQKIYAAMEEPMKL  
LEDRGYDAYKEFIEDCDNSVEKND SGGKRRTYRGRIFRNRKSARTNHVQIAKQKEESIRK  
SMEDALVNGDPREYQRLIFEVAKRNTIVYLTGAGKTLIALLLIREYWSGSLSSSSSRG  
KDETNQNAIQGEE SPSKETNDSIENG TATVAHENKSESPKNGEVTHSKKEKQQTFLVPS  
VALAIQQSLTLRANLPQLCIETACYATASSKRARASLERCEVIVATHGAIQDLFMHYGDS  
FSMDRLNLLVIDECHYAASGNHAYRHLMEKFYRPIQADRRPRVLG LGLTASPLLNKVENHSD  
GQLTAMLD SLESVLD SKMLSAAGLIAPHRKKQKEGSETTSLTPI LHSTNNILHRVIDERS  
MDYYGTNQNRTIPSTDNLDLLPSRHREFKQLEHL YRDLGPLVVSIIYSSVLKRELSRNIFE  
NESTRRFDLAVGHLQRIEDFCNREIKVLPNMGRNDKLLALEELVETLIEEKGTKTIGLVF  
VERRATAIALQCYFVWRNEQIHDWSTORGAKTWVFAKEARRNRCKSDDYFEMNSCRKRAD  
QVVKDDDCDDNQFDDSSDDPFHQFQKRKEARKKTKIVDMCKGELEDSATDHFNATNQFM  
DADSCSSDAWKDSPKQSLKNDFFETHGRVALKPVALVRNPIHIFNSLSIHQKKLKEAELA  
DLNKIWHRESNRVDVLSRLRSGHV NIMFATSVVEEGVDVQSCSLVVAFDGISSIKGYIQ  
MKGRARKQDAKFYVFGDPYK KIRSTLELRVAQRMECRIEKVI EKRMGLYAPT MQALSSH  
KNSDCAALLHKEFAAIQAGVYKVEDATVDLQSAKSLVYRYFLSVPLDPFVRYK KESLLQY  
MPFFESDSLVLPLVHL PSEIRTVTLPSKYSNSTWREKQKLLCLMACVRLHHHGLLNERLLP  
LTRKDMQQRVLR IATQDLQKDTVPLDL DGVYNNEKRQLVIYPVNEESSLLSNYRRKLN  
KGHSLGLITMEPIREMLPFRTYHKEFGKVSISFGEP ILEYCSSSEFEILQETFALLMNSR  
WSRKS RNVS YETRSQDEYEATILPYLVGISSNGNLDWDFMTLLDESKRSIENRTLAAR  
SFSSTLMSQPRIWSPTYSNGITYVVF GPTGKLCGAPVPYKMDGVKTYCDYFQKKYSIDF  
EKNSPLFRGHRLWSLPSGYIKKHEAHGGVSDSENVYDMIDI PQQAFVEEPLANAHIVSL  
CLFLPQVLFNFEQE QKTEAFIKHCEVC IPTLGACFKQLEFSMVKLVMTSKSCNASENYDI  
YEWVGDAVLKLLQTD SILSSPKLKH FVKFLHEGDL SMLRSGMGTNNRLKQICTHLRLDEF  
IMMTPLSRGVWVPSPLQIYQT TNKRIAEPLGGRMKLLADVVEAILGIVYIEFGYHRSIKV  
GNELHVTLPWDENDRSVACGEIGD VDNLLVDVIKKCTGHAKVDRPKVVSEAFTHPSAI  
DASVPSYQRLEWIGDAVLC LCTREWLFRNFGDRLEVGDLVMLEGAIVSNETLGFISMKCG  
LQQYLNHRDLSL PKRIESYCWKLKDGCGFW

>comp13974\_c0\_seq4; 1550 93 6200 LEN=6397; translated  
MGDKDSNGTEVAIPVALNANADGDEDEDES VSRSGSTSIEDDGI FDDAEQDDSDDGNSIN  
HTTATIIQFGADNEIRNGSCDRNGKDTAREQRKRRRRGAQRKWFYDRLCEFRALKRRRR  
REQEIERQRDPQ QFDDTEFISATGSFP SGTHGSHRLLHSHQSSRRDRPNERDENEQRQKQ  
QQRQRQIVMTNKDEAVRSRPTENESE TMNDVATNLDNLYGQFSDATNKALDTRKQKDRST  
STREDENQTKTGIQDDSN DLSSSFFKFDEQKLFQVPIFAPGIKESAFQKIYAAMEEPMKL  
LEDRGYDAYKEFIEDCDNSVEKND SGGKRRTYRGRIFRNRKSARTNHVQIAKQKEESIRK  
SMEDALVNGDPREYQRLIFEVAKRNTIVYLTGAGKTLIALLLIREYWSGSLSSSSSRG  
KDETNQNAIQGEE SPSKETNDSIENG TATVAHENKSESPKNGEVTHSKKEKQQTFLVPS  
VALAIQQSLTLRANLPQLCIETACYATASSKRARASLERCEVIVATHGAIQDLFMHYGDS  
FSMDRLNLLVIDECHYAASGNHAYRHLMEKFYRPIQADRRPRVLG LGLTASPLLNKVENHSD

GQLTAMLDSLESVLDKMLSAAGLIAPHRKKQKEGSETTSLTPILHSTNNILHRVIDERS  
MDYYGTNQRTIPSTDNLDLLPSRHREFKQLEHLYRDLGPLVVSIIYSSVLKRELSRNI FE  
NESTRRFDLAVGHLQRIEDFCNREIKVLPNMGRNDKLLALEELVETLIEEKGTKTIGLVF  
VERRATAIALQCYFVWRNEQIHDWSTQRGAKTWVFAKEARRNRCKSDDYFEMNSCRKRAD  
QVVKDDDCDDNQFDDSSDDPFHQFQKRKEARKKTKIVDMCKGELEDSATDHFNATNQFM  
DADSCSSDAWKDSPKQSLKNDFFETHGRVALKPVALVRNPIHIFNSLSIHQKKLKEAELA  
DLNKIWWHRESNVRDVL SRLRSGHVNIMFATSVVEEGVDVQSCSLVVAFDGISSIKGYIQ  
MKGRARKQDAKFYVFGDPYKKIRSTLELRVAQRMECRIEKVI EKRMGLYAPTMQALSSH  
KNSDCAALLHKEFAAIQAGVYKVEDATVDLQSAKSLVYRYFLSVPLDPFVRYKKESSLQY  
MPFFESDSLVLVPVHLPSEIRTVTLPSKYSNSTWREKQKLLCLMACVRLHHHGLLNERLLP  
LTRKDMQQRVLR IATQDLQKDTVPLDLG VYNNEKRQLVIYPVNEESSLLSNYRRKLN  
KGHSLGLITMEPIREMLPFRTYHKEFGKVISIFGEPILEYCSSEFEILQETFALLMNSR  
WSRKS RNVS YETRSQDEYEATILPYLVGISSNGNLDWDFMTLLDESKRSIENRTLAAR  
SFSSTTLMSQPRIWSPTYNGITYVVF GPTGKLCGAPVPYKMDGVKTYCDYFQKKYSIDF  
EKNSPLFRGHRLWSLPSGYIKKHEAHGGVSDSENVYDMIDIPQAFVEEPLANAHIVSL  
CLFLPQVLFNFQEQEQT EAFIKHCEVC IPTLGACFKQLEFSMVKLVMTSKSCNASENYDI  
YEWVGDAVLKLLQTD SILSSPKLKH FVKFLHEGDL SMLRSGMGTNNRLKQICTHLRLDEF  
IMMTPLSRGVWVPSPLQIYQTTNKRIA EPLGGRMKLLADVVEAILGIVYIEFGYHRSIKV  
GNELHVTLPW DENDRSVACGEIGD VDNLLVDVIK KCTGHAKVDRPKVVSEAFTHPSAI  
DASVPSYQRLEWIGDAVLCCLCTREWLFRNFGDRLEVGDLVMLEGAIVSNETLGFISMKCG  
LQQYLNHRDLSLPKRIESYCWKLKDGCGFWGGDPPKPIADTVEAVLGAIHVSSDFKSGQT  
ATLKLMSPIFSVIKKASDDGIERFGEVLRAIKHPKKS LQEISGQIFQVIVCSEHEFASFF  
EYED EIVPTSTAAPLVPQILHKNEWRNPARGNGEHEGCVS FISM LGYPLVAVADESITD  
ARNRASSLMREAIQCNPTLQNR IKKYRSIVERNLTLAGKRQNEMTVARANGFHNE

>comp13974\_c0\_seq5; 1414 93 5553 LEN=5809; translated  
MGDKDSNGTEVAIPVALNANADGDEDEDES VSRSGSTSIEDDGIFDDAEQDDSDDGNSIN  
HTTATIIQFGADNEIRNGSCDRNGKDTAREQRKRRRGAQRKWFYDRLCEFRALKRRRR  
REQEIERQRDPQQFDDTEFISATGSFP SGTGSHRLLHSHQSSRRDRPNERDENEQRQKQ  
QQRQRQIVMTNKDEAVRSRPTENESETMNDVATNL DNLYGQFSDATNKALDTRKQKDRST  
STREDENQTKTGIQDDSNLSSSFFKFDEQKLFQVPIFAPGIKESAFQKIYAAMEEPMKL  
LEDRGYDAYKEFIEDCDNSVEKND SGGKRRTYRGRIFRNRKSARTNHVQIAKQKEESIRK  
SMEDALVNGDPREYQRLIFEVAKKRNTIVYLG TGAGKTLIALLLIREYWSGSLSSSSSRG  
KDETNQNAIQGEESPKETNDSIENG TATVAHENKSESPKNGEVTHSKKEKQOTLFLVPS  
VALAIQQSLTLRANLPQLCIETACYATASSKRARASLERCEVIVATHGAIQDLFMHYGDS  
FSMDRLNLLVIDECHYAAAGNHAYRHLMEKFYRPIQADRRPRVLGLTASPLLNKVENHSD  
GQLTAMLDSLESVLDKMLSAAGLIAPHRKKQKEGSETTSLTPILHSTNNILHRVIDERS  
MDYYGTNQRTIPSTDNLDLLPSRHREFKQLEHLYRDLGPLVVSIIYSSVLKRELSRNI FE  
NESTRRFDLAVGHLQRIEDFCNREIKVLPNMGRNDKLLALEELVETLIEEKGTKTIGLVF  
VERRATAIALQCYFVWRNEQIHDWSTQRGAKTWVFAKEARRNRCKSDDYFEMNSCRKRAD  
QVVKDDDCDDNQFDDSSDDPFHQFQKRKEARKKTKIVDMCKGELEDSATDHFNATNQFM  
DADSCSSDAWKDSPKQSLKNDFFETHGRVALKPVALVRNPIHIFNSLSIHQKKLKEAELA  
DLNKIWWHRESNVRDVL SRLRSGHVNIMFATSVVEEGVDVQSCSLVVAFDGISSIKGYIQ  
MKGRARKQDAKFYVFGDPYKKIRSTLELRVAQRMECRIEKVI EKRMGLYAPTMQALSSH  
KNSDCAALLHKEFAAIQAGVYKVEDATVDLQSAKSLVYRYFLSVPLDPFVRYKKESSLQY  
MPFFESDSLVLVPVHLPSEIRTVTLPSKYSNSTWREKQKLLCLMACVRLHHHGLLNERLLP  
LTRKDMQQRVLR IATQDLQKDTVPLDLG VYNNEKRQLVIYPVNEESSLLSNYRRKLN  
KGHSLGLITMEPIREMLPFRTYHKEFGKVISIFGEPILEYCSSEFEILQETFALLMNSR  
WSRKS RNVS YETRSQDEYEATILPYLVGISSNGNLDWDFMTLLDESKRSIENRTLAAR  
SFSSTTLMSQPRIWSPTYNGITYVVF GPTGKLCGAPVPYKMDGVKTYCDYFQKKYSIDF  
EKNSPLFRGHRLWSLPSGYIKKHEAHGGVSDSENVYDMIDIPQAFVEEPLANAHIVSL  
CLFLPQVLFNFQEQEQT EAFIKHCEVC IPTLGACFKQLEFSMVKLVMTSKSCNASENYDI  
YEWVGDAVLKLLQTD SILSSPKLKH FVKFLHEGDL SMLRSDLHTSAAGRVHDDAI IAGS  
VGAI PVANLP TTNKRIA EPLGGRMKLLADVVEAILGIVYIEFGYHRSIKVGNELHVTLPW  
DENDRSVACGEIGD VDNLLVDVIK KCTGHAKVDRPKVVSEAFTHPSAIDASVPSYQRL  
EWIGDAVLCCLCTREWLFRNFGDRLEVGDLVMLEGAIVSNETLGFISMKCGLQQYLNHRDL  
SLPKRIESYCWKLKDGCGFW

>comp13974\_c0\_seq6; 1527 93 6171 LEN=6368; translated  
MGDKDSNGTEVAIPVALNANADGDEDEDES VSRSGSTSIEDDGIFDDAEQDDSDDGNSIN  
HTTATIIQFGADNEIRNGSCDRNGKDTAREQRKRRRGAQRKWFYDRLCEFRALKRRRR  
REQEIERQRDPQQFDDTEFISATGSFP SGTGSHRLLHSHQSSRRDRPNERDENEQRQKQ

QQRQRQIVMTNKDEAVRSRPTENESETMNDVATNLDNLYGQFSDATNKALDTRKQKDRST  
STREDENQTKTGIQDDSNLSSSFKFDEQKLFQVPIFAPGIKESAFQKIYAAMEEPMKL  
LEDRGYDAYKEFIEDCDNSVEKNDSSGGKRRTYRGRIFRNRKSARTNHVQIAKQKEESIRK  
SMEDALVNGDPREYQRLIFEVAKRNTIVYLGTGAGKTLIALLLIREYWSGSLSSSSSRG  
KDETNQNAIQGEEPSKETNDSIENGTATVAHENKSESPKNGEVTHSKKEKQQTFLVPS  
VALAIQQSLTLRANLPQLCIETACYATASSKRARASLERCEVIVATHGAIQDLFMHYGDS  
FSMDRLNLLVIDECHYAASGNHAYRHLMEKFYRPIQADRRPRVLGLTASPLLNKVENHSD  
GQLTAMLDLSLESVLDKMLSAAGLIAPHRKKQKEGSETTSLTPILHSTNNILHRVIDERS  
MDYYGTNQNRITPSTDNLDLLPSRHFQKLEHLYRDLGPLVVSIIYSSVLKRELSRNIFE  
NESTRFDLAVGHLQRIEDFCNREIKVLPNMGRNDKLLALEELVETLIEEKGTKTIGLVF  
VERRATAIALQCYFVWRNEQIHDWSTQRGAKTWVFAKEARNRCKSDDYFEMNSCRKRAD  
QVVKDDDCDDNQFDDSSDDPFHQFQKRKEARKKTKIVDMDCCKGELEDSATDHFNATNQFM  
DADSCSSDAWKDSPKQSLKNDFETHGRVALKPVALVRNPIHIFNSLSIHQKLLKEAELA  
DLNKIWWHRESNRDVLRSRLRSGHVNIMFATSVVEEGVDVQSCSLVVAFDGISSIKGYIQ  
MKGRARKQDAKFYVFGDPYKIRSTLELRVAQRMECRIEKVIEKRMGLYAPTMOALSSHH  
KNSDCAALLHKEFAAIQAGVYKVEDATVDLQSAKSLVYRYFLSVPLDPFVRYKKESSLQY  
MPFFESDSLVLPLVHLVLPSEIRTVTLPSKYSNSTWREKQKLLCLMACVRLHHHGLLNERLLP  
LTRKDMQQRVLRATQDLQKQDTPVPLDLGVDYNNNEKRQLVIYPVNEESSLLSNYRRKLNQ  
KGHSLGLITMEPIREMLPFRTYHKEFGKVSISFGEPILEYCSSSEFEILQETFALLMNSR  
WSRKSARNVSYETRSQDEYEATILPYLVGIISSNGNLDWDFMTLLDESKRSIENRTLAAR  
SFSSTLMSQPRIWSPTYSNGITYVVFQPTGKLCGAPVPYKMDGVKTYCDYFQKKYSIDF  
EKNSPLFRGHRLWSLPSGYIKKHEAHGGVSDSENVYDMIDIPQAFVEEPLANAHIVSL  
CLFLPQVLFNFEEQEQKTEAFIKHCEVCIPTLGACFKQLEFSMVKLVMTSKSCNASENYDI  
YEWVGDAVLKLLQTDLSILSSPKLKHFKVFLHEGDLMLRSDLHTSAAGRVHDDAI IAGS  
VGAI PVANLP TTNKRIAEP LGGRMKLLADVVEAILGIVYIEFGYHRSIKVGNELHVTLPW  
DENDRSVACGEIGDVDNLLVDVIKKTGHAKVFDPRKVVSEAFTHPSAIDASVPSYQRL  
EWIGDAVLCCTREWLFRNFGDRLEVGDLVMLEGAI VSNETLGFISMKCGLQQYLNHRDL  
SLPKRIESYCWKLKDGCGFWGGDPPKIADTVEAVLGAIHVSSDFKSGQTATLKLMSPIF  
SVIKKASDDGIERFGEVLRAIKHPKKSLOEISGQIFQVIVCSEHEFASFEEYEDEIVPTS  
TAAPLVPQILHKNEWRNPARGNGEHEGCVVSFISMLGYPLVAVADESITDARNRASSLMR  
EAIQCNP TLQNR I KKYRS IVERNLTLAGKRQNEMTVARANGFHNE  
>comp13975\_c0\_seq1; 252 71 721 LEN=721; translated  
MNTGVSSFQHGILNAKRLELQISSTLSLSDIFLNGGKIDGSRNDSERTQPLDYDESY  
NDSADAGDEHDYLP EEEPLECQSYREKNEEISEASDSKVEFPPEGRSQLQNHGGGLVRL  
CELDIKSQWRTSDTTTTNNKLLQOSPAPKKKPLKTLFHRVKKTLDP IRYKKHLGPHSSV  
PARRTPARRSSKRKRTLVSFATPGPGESIETDPFPTV  
>comp13975\_c0\_seq2; 158 1 480 LEN=622; translated  
XPRAALLGAGATHSGQEEQEKENPGAFATPGPGESIETDPFPTVIMSESEIESTWYSDE  
EYEAIKRDAALGEEAACGDATAREAIARRKEFKMASRDVAVYDEQEDQRLSGRKDPEAI  
RRVYEAATALAGATALETGRRDEAEVSVLHGGRDWLVS  
>comp13976\_c0\_seq1; 367 183 1640 LEN=2047; minus strand; translated  
MTKFDSSPFCSDMSRCLLYLDDIHTRGSDFLPLNTRAVLTLGKGMQKDKFIQACMRMRQ  
LGHGQSITFVASREVNRLVLETFDILLKRRNGKLAYVSVILEWTIAN SVKRI CHLMPYFAS  
QMRSTLLKADAYNTFKKENDSCLKSLTKACVEAEILELSQLYGHGERGDDFLPYI IDRHLS  
DCSFIESSKRNNENHVKGLVEVREKVKETIRTLAPSVVLP CSMLDEEQERELEQELEEEID  
IERPPPAPVPLVPKFSKGLLDVLTGKSRPTHFSDLCSKHLEPLSAIFGETSYGESPIGRQ  
LKETDNVFTTDFIDTVKGTGKEFYVKNIRWFLRWGSPKRESFVVISNYEAENLSNLLS  
PMTRKWFQKQNFPSLYAFTPI TRHNQPREIHDVSSVSCEPPVAVHVFGGSVHACGKLE  
KIRNFLSVFPRPKTDSGRETWDSLFEGGFMIAMALCFPVTAAMSTEIPASRISMDLLQVS  
FTKAP  
>comp13977\_c0\_seq2; 252 211 993 LEN=1145; translated  
MVRGVERMLRVAITFAVAIIPALAGSSYLPSQHYTWSPPFVGRSHSNRSRRSKMYSSPHD  
ISTTFLVSRNKNESSQNLSRREEPTKITENPAGDIASVSYDDLGP I GKT IAGCTEIVVST  
VLEYFTGYVQGGFFGTLVGSFGFVFRPMEKGV RQPFVAVEMSQRF SRMNTRSTSWGKNFAV  
ISAAGFGFVAVRVLNNGEEDVWTDIFSSAAAGAFFGRGSGPQGMRLRGALLYGLIYATS  
GGLGKKQDLQEYTDKPAVDF  
>comp13977\_c0\_seq3; 209 211 1112 LEN=1264; translated  
MVRGVERMLRVAITFAVAIIPALAGSSYLPSQHYTWSPPFVGRSHSNRSRRSKMYSSPHD  
ISTTFLVSRNKNESSQNLSRREEPTKITENPAGDIASVSYDDLGP I GKT IAGCTEIVVST  
VLEYFTGYVQGGFFGTLVGSFGFVFRPMEKGV RQPFVAVEMSQRF SRMNTRSTSWGKNFAV

ISAAFGGFVAVRVLNRNGEEDVWTDIFSSAAAGAFFGRGSKIRNRQLLYFLHPKWRKEYL  
KTAIVPIIDLILSSFFPLKXGPQGMLRGALLYGGLIYATSGGLGKKQDLQEYTDKPAVDF  
>comp13978\_c0\_seq1; 478 138 1193 LEN=1364; translated  
MSAAVVVIPPSTKFSDSAARKRRREILTSQRQALEAVTTTSSMMIADREEGHVKKVRR  
VSDITDDRSQSSALHQIASSTVKARNTATAKKTSTKPKQMKYDPDVPMSKEEAAWR  
REQRRKRNRESAALSQRQRDRIGDLEVEVGQWKNKVESIMERIKKLEEASGIDSRTLVP  
EPIEAQGLEQSLEFDVTDNNDKSFVSPPPSPVHPPLHEEPIVSPVASSSAKTVVDAVVDQ  
VLMGIESYEQEFSDNMISRHAVKITTVAPALPFLPKSEDSVTAIPTPEACLSDGDDVVSPT  
SNTVVPSNTALDPIDSSLFPVKEEPKMPNLLSDEENEDEFGEFLLDAVQWL  
>comp13978\_c0\_seq2; 365 138 929 LEN=1714; translated  
MSAAVVVIPPSTKFSDSAARKRRREILTSQRQALEAVTTTSSMMIADREEGHVKKVRR  
VSDITDDRSQSSALHQIASSTVKARNTATAKKTSTKPKQMKYDPDVPMSKEEAAWR  
REQRRKRNRESAALSQRQRDRIGDLEVEVGQWKNKVESIMERIKKLEEASGIDSRTLVP  
EPIEAQGLEQSLEFDVTDNNDKSFVSPPPSPVHPPLHEEPIVSPVASSSAKTVVDAVVDQ  
VLMGIESYEQEFSDNMISRHATS  
>comp13979\_c0\_seq1; 497 218 2413 LEN=2533; translated  
MEDVMRITPLGSGQEVGRSCHLLQFRDMTIMLDIGIHPGYDGINGLPFLDQVEPDQIDVL  
LVTHFHLDHVASLPYLTERTSFKGRIFMTHPTKAVTRLLLGDYIRLLQMRNAKEEDVLWT  
EAELMSCMDKIELIDYHTTVTVGGLSFHALNAGHVLGACMYFMEIGGRTLLYTGDYSMED  
DRHLMMAEIKEPKPDVLIESTFGVQVHASRAEREARFTGTVERIVSRGGRCCLIPVFALG  
RAQELLLLILDEFWQANPHLQNIPIVWYASKLASRALRVFQTYANMMNGRIRSQMDVSNPFS  
FQHIQNLKSIDVNNFNDSGSPSVVFASPGMLQSGVSRQLFDRWAADPKNGVLIAGYAVEHT  
LAKEILNQPPQEVVTLGRRQPLNCLVDYVSFAAHVDFVQNRSFITQVDPKHIIILVHGQKD  
EMGRLKSALLLQYRKVAENKRPTITMPPNLQTVSLKFARRRSKVMGSLATRGGPEEAGE  
EVQGVLVTHNFSSKIVKPDDLATYTPLRVGSISSKLHVPFSGSIETLRLFLSEMFAGVVE  
QTIVEEDKDGEKTCHKFSFYQDKVTVCVGRTERVAIVEWDASPAGDVVADALIALIMQAQ  
TSAASIRLSSKPCRHGKPEETDGSSSKKARYDDLSSTENRLRLINETLKNQFGKQVETVFE  
GDSASYEITTDGTGLASGLVDENEPLTCTANVSFSDASGGIAEIRVECMDSKIASNVQECL  
RNLTKATAPLN  
>comp13979\_c0\_seq2; 444 218 2520 LEN=2640; translated  
MEDVMRITPLGSGQEVGRSCHLLQFRDMTIMLDIGIHPGYDGINGLPFLDQVEPDQIDVL  
LVTHFHLDHVASLPYLTERTSFKGRIFMTHPTKAVTRLLLGDYIRLLQMRNAKEEDVLWT  
EAELMSCMDKIELIDYHTTVTVGGLSFHALNAGHVLGACMYFMEIGGRTLLYTGDYSMED  
DRHLMMAEIKEPKPDVLIESTFGVQVHASRAEREARFTGTVERIVSRGGRCCLIPVFALG  
RAQELLLLILDEFWQANPHLQNIPIVWYASKLASRALRVFQTYANMMNGRIRSQMDVSNPFS  
FQHIQNLKSIDVNNFNDSGSPSVVFASPGMLQSGVSRQLFDRWAADPKNGVLIAGYAVEHT  
LAKEILNQPPQEVVTLGRRQPLNCLVDYVSFAAHVDFVQNRSFITQVDPKHIIILVHGQKD  
EMGRLKSALLLQYRKVAENKRPTITMPPNLQTVSLKFARRRSKVMGSLATRGGPEEAGE  
EVQGVLVTHNFSSKIVKPDDLATYTPLRVGSISSKLHVPFSGSIETLRLFLSEMFAGVVE  
QTIVEEDKDGEKTCHKFSFYQDKVRRKVIACCYLNFLFQPNPQLFNTFGINADTSPMVT  
VCVGRTERVAIVEWDASPAGDVVADALIALIMQAQTSAAASIRLSSKPCRHGKPEETDGSS  
SKKARYDDLSSTENRLRLINETLKNQFGKQVETVFEEDGDSASYEITTDGTGLASGLVDENEPL  
TCTANVSFSDASGGIAEIRVECMDSKIASNVQECLRNLTKATAPLN  
>comp13980\_c0\_seq1; 335 204 680 LEN=1484; translated  
MLKAEHPTWKLTDRRVKNFLKQHNTKNPAEADDDEATAEDGADDVPAKTSPPKYLSPRKS  
LKRFFSSKNKKKDTVDDLDTASVPSEPEKEPFVAEEIPPIEKEEDLDSAEETAEEEEEPSP  
EPVVSIEEEGTVDKEIAYEVDNEKVDSSYDCFNPCSIM  
>comp13980\_c0\_seq2; 365 175 771 LEN=1575; translated  
MGESKSKTVPTEGADLSEASISFVLKDYNNPVDAAAVTKMLKAEHPTWKLTDRRVKNFL  
KQHNTKNPAEADDDEATAEDGADDVPAKTSPPKYLSPRKS LKRFFSSKNKKKDTVDDLDT  
ASVPSEPEKEPFVAEEIPPIEKEEDLDSAEETAEEEEEPSPPEPVVSIEEEGTVDKEIAYEV  
DNEKVDSSYDCFNPCSIM  
>comp13981\_c0\_seq1; 163 655 810 LEN=2899; minus strand; translated  
MPSMTDGDVSKNHFSIVVKQSANPLKRHIDHHILEQFIALICYDNRRFDLK  
>comp13981\_c0\_seq2; 163 655 810 LEN=2922; minus strand; translated  
MPSMTDGDVSKNHFSIVVKQSANPLKRHIDHHILEQFIALICYDNRRFDLK  
>comp13981\_c0\_seq3; 270 477 1334 LEN=3576; translated  
MSFQDVGKRSSNRKVVNARMGAASSAYNNSNSNSSTSNSSSVFGSMSALSASTATSQI  
SDSLTQYHRNVGILEKIARSLLSQTNQTSTLQRDELELQYKAQTDVLRQLESRLKEQIL  
AQRQRLSSQSQTSSQKQALAKLERDFERVQSSVVALRARVTKQQKQYQQRGYNGGGAGSN

AAPGSEYSNNAAKTALEQQQLLVQQDRLQEEIMREREEEEIRKINKGMHQVNQIYKDLAHI  
VGEQQEHVDQIEDKMEEKTAAQSGLDQIHKANESYGSNANCSIM  
>comp13981\_c0\_seq4; 270 477 1334 LEN=3553; translated  
MSFQDVGRKSSNRKVVNARMGAASSAYNNSNSNSSTSNSSSVFGSMSALSASTATSQI  
SDSLTQYHRNVGILEKIARSLLSQTNQTSTLQRDELELQYKAQTDVLRQLESRLKEQIL  
AQRQRLSSQSQTSSQKQALAKLERDFERVQSSVVALRARVTKQKQYQQRGYNGGGAGSN  
AAPGSEYSNNAAKTALEQQQLLVQQDRLQEEIMREREEEEIRKINKGMHQVNQIYKDLAHI  
VGEQQEHVDQIEDKMEEKTAAQSGLDQIHKANESYGSNANCSIM  
>comp13981\_c0\_seq5; 198 477 810 LEN=810; translated  
MSFQDVGRKSSNRKVVNARMGAASSAYNNSNSNSSTSNSSSVFGSMSALSASTATSQI  
SDSLTQYHVRTARGNACVSNPVVAVSRRAVTAQYSLSRPVRREQNGTERIEX  
>comp13981\_c1\_seq1; 320 636 1274 LEN=2028; translated  
MYKSIALLLTAFVGSTSAFVARSSPAATTAMHETKADLEVLAQELNPILGFYDPMNLAEGE  
FWDTSNEATIGFLRQAEIKHGRVAMAAAFVGYCIQSNYVFTWPQSLAGTLPPSFDLQPEEQ  
WDAIDINAKWQLFGLIGFLEIWDEMGYGDGTAMPHYTKGRQPGKYPTFDEFKRGVHWVPD  
LYDPFKWNGKMKESERERRLLVEIVSTTSSRR  
>comp13981\_c1\_seq2; 523 249 977 LEN=1287; translated  
MKSVIALSMVASAAAFAPASQSSKATSTQLAETQADLKALGPKLNPIVGFWDPLDLANAG  
FWGFSQEQTVGWLRQAEIKHGRVAMAAAFVGYCVQSNFAFPWSLTFGGLPFPSTDLSPPEQ  
WDALPMASKIQIIGFVGFLEWYSELSDNNGNGPHYTKGGKPGQFPFENVPHGATLDLYDP  
FKLSKNRTDEQKAKGLLVEINNGRLAMLGIFGFLCEQTIPGSVPALTGVVKPYAGEVMAP  
FV  
>comp13981\_c1\_seq3; 439 636 1499 LEN=1809; translated  
MYKSIALLLTAFVGSTSAFVARSSPAATTAMHETKADLEVLAQELNPILGFYDPMNLAEGE  
FWDTSNEATIGFLRQAEIKHGRVAMAAAFVGYCIQSNYVFTWPQSLAGTLPPSFDLQPEEQ  
WDAIDINAKWQLFGLIGFLEIWDEMGYGDGTAMPHYTKGRQPGKYPTFDEFKRGVHWVPD  
LYDPFKWNGKMKESERERRLLVEINNGRLAMLGIFGFLVADKIPGALPTIASIAKPYSGE  
VMNPFQVEWGSPPFVMVSASPAAAGTSDAIAAKAAAVVDTALQMAETL  
>comp13982\_c0\_seq1; 145 87 713 LEN=1754; translated  
MESLGGNARWSRDLFGYHVAFAYYWFLIVVYLGSPRIAYQFMELLEHAHAVDTYSTFVEEN  
RERLAMLPAPTVAVSYYKFEDLYLFDFFMTSRAPGSRRPPCDTLLDVFENIATDEGEHVK  
TMQACQDYARFGTRVVSPLRFGVAPDGTPLYHGSESSEPQEGGGEPAAEVDAEAQAYKRK  
MWKEWSESINHQIESELQGMDRGDELRM  
>comp13982\_c0\_seq2; 470 214 1903 LEN=2937; translated  
MKKRVARLPLLPPTGAAAALFLSAVCCSLAPVSGFASLTPFAPKVPSPAAAVVAPTQMCI  
PTPAASARERASRLFSSEPETEAEATEGNKGERGRRMDPYIEIQYESYFDGTRPDSSWNL  
AWNPFRLRQSSSLVGQGLERLGLGVDAEEVSLRPPNCLGLVLSNAAVAEAEALREASGGGS  
RPTRSAGPSTTSGASCWTVSSTAGRSRGSWSKPLPGSPTFPTRCCTCTRALGECVVYG  
MVSCGVVWCGSSGRDSSGKQSKPGGLDCAIVVVVVVVVAAFGCAFALSGWNGCSSIKPK  
VFLVASTNTVHSEHRSLRVVLQWLPMASSAAGSVPWNCEKSXAAEDWNLHLLHLLIMESLG  
GNARWSRDLFGYHVAFAYYWFLIVVYLGSPRIAYQFMELLEHAHAVDTYSTFVEENRERLA  
MLPAPTVAVSYYKFEDLYLFDFFMTSRAPGSRRPPCDTLLDVFENIATDEGEHVKTMQAC  
QDYARFGTRVVSPLRFGVAPDGTPLYHGSESSEPQEGGGEPAAEVDAEAQAYKRKMWKEW  
SESINHQIESELQGMDRGDELRM  
>comp13982\_c0\_seq3; 470 214 1903 LEN=2944; translated  
MKKRVARLPLLPPTGAAAALFLSAVCCSLAPVSGFASLTPFAPKVPSPAAAVVAPTQMCI  
PTPAASARERASRLFSSEPETEAEATEGNKGERGRRMDPYIEIQYESYFDGTRPDSSWNL  
AWNPFRLRQSSSLVGQGLERLGLGVDAEEVSLRPPNCLGLVLSNAAVAEAEALREASGGGS  
RPTRSAGPSTTSGASCWTVSSTAGRSRGSWSKPLPGSPTFPTRCCTCTRALGECVVYG  
MVSCGVVWCGSSGRDSSGKQSKPGGLDCAIVVVVVVVVAAFGCAFALSGWNGCSSIKPK  
VFLVASTNTVHSEHRSLRVVLQWLPMASSAAGSVPWNCEKSXAAEDWNLHLLHLLIMESLG  
GNARWSRDLFGYHVAFAYYWFLIVVYLGSPRIAYQFMELLEHAHAVDTYSTFVEENRERLA  
MLPAPTVAVSYYKFEDLYLFDFFMTSRAPGSRRPPCDTLLDVFENIATDEGEHVKTMQAC  
QDYARFGTRVVSPLRFGVAPDGTPLYHGSESSEPQEGGGEPAAEVDAEAQAYKRKMWKEW  
SESINHQIESELQGMDRGDELRM  
>comp13982\_c0\_seq4; 470 214 1613 LEN=2654; translated  
MKKRVARLPLLPPTGAAAALFLSAVCCSLAPVSGFASLTPFAPKVPSPAAAVVAPTQMCI  
PTPAASARERASRLFSSEPETEAEATEGNKGERGRRMDPYIEIQYESYFDGTRPDSSWNL  
AWNPFRLRQSSSLVGQGLERLGLGVDAEEVSLRPPNCLGLVLSNAAVAEAEALREASGGGI  
EAHPVSRALYDLGCLLLDRLFDGRPIQRWFLETIARIPIYFYSYVSMHLHYESFGWFRAVE

LRKVHAAEDWNEHLHLLIMESLGGNARWSDRFLGYHVAFAYYWFLIVVYLGSPRIAYQFM  
ELLEAHAVDTYSTFVEENRERLAMLPAPTVAVSYYKFEDLYLFDDFMTSRAPGSRRPPCD  
TLLDVFNFIATDEGEHVKTMQACQDYARFGTRVVSPHLRFGVAPDGTPLYHGESSPEQEG  
GGEPAAEVDAAEQAYKRKMWKEWSESINHQIESELQGMDRGDELRLM  
>comp13982\_c0\_seq5; 145 87 713 LEN=1747; translated  
MESLGGNARWSDRFLGYHVAFAYYWFLIVVYLGSPRIAYQFMELLEAHAVDTYSTFVEEN  
RERLAMLPAPTVAVSYYKFEDLYLFDDFMTSRAPGSRRPPCDTLLDVFNFIATDEGEHVK  
TMQACQDYARFGTRVVSPHLRFGVAPDGTPLYHGESSPEQEGGGEPAAEVDAAEQAYKRK  
MWKEWSESINHQIESELQGMDRGDELRLM  
>comp13982\_c0\_seq6; 470 214 1613 LEN=2647; translated  
MKKRVARLPLPPGTAAAALFLSAVCCSLAPVSGFASLTPFAPKVPSPAAAVVAPTQM  
PTPAASARERASRLFSSEPETEAEATEGNKGERRRMDPYEIQYESYFDGTRPDSWNL  
AWNPFRLRQSSLVGQGLERLGLGVDAEEVSLRPPNCLGLVLSNAVAEAEALREASXGGI  
EAHPVSRALYDLGCLLLDRLFDGRPIQRFWFLETIARIPIYFSYVSMHLHYESFGWFRAVE  
LRKVHAAEDWNEHLHLLIMESLGGNARWSDRFLGYHVAFAYYWFLIVVYLGSPRIAYQFM  
ELLEAHAVDTYSTFVEENRERLAMLPAPTVAVSYYKFEDLYLFDDFMTSRAPGSRRPPCD  
TLLDVFNFIATDEGEHVKTMQACQDYARFGTRVVSPHLRFGVAPDGTPLYHGESSPEQEG  
GGEPAAEVDAAEQAYKRKMWKEWSESINHQIESELQGMDRGDELRLM  
>comp13983\_c0\_seq1; 137 91 545 LEN=545; translated  
MVVSDWISSYKVCKVLSLEESGGKGTTLKICEVDAGGGPGATIRVATVAPNVREGSRLA  
VAPVGSSTVLDGSGEPLVVQKTNVGGHPSEGI FCD SKMLGWEGGSVGI AARMDEALELGA  
PPARKPRPAGSGGPSREALQESTAEGLFKKKP  
>comp13983\_c0\_seq2; 314 91 651 LEN=1060; translated  
MVVSDWISSYKVCKVLSLEESGGKGTTLKICEVDAGGGPGATIRVATVAPNVREGSRLA  
VAPVGSSTVLDGSGEPLVVQKTNVGGHPSEGI FCD SKMLGWEGGSVGI AARMDEALELGA  
PPARKPRPAGSGGPSREALQESTVEGLFKKKLTKEEKKKLAERKAARKAKKAAKEEAAA  
GGEKQE  
>comp13984\_c0\_seq1; 793 1 2204 LEN=2858; translated  
XPLEFVGRFVLLCFVFGRLNCCVVVLQQLAGVEYLVD SAI EK TAGFVMG PLVEYCTTVMG  
YERHVSIDAMPYDWRLAPSINEKRDGYLTKMIERIEKMYRDNDLDPVVLICHSMGAKMGH  
YFLN FVLHAKGKEDGRAWLDKHIHTFMPV GAPHGGVGC AVRCGLTGAGLNETVDTLVGNV  
SDGLIMYRSWSCGNWLMRMLPAGVFPTCIVRREGELGLTVASEIEVTSLFAMREKKPK  
LRLTVIFRGRIRAHSDYYPVLVDDDERMVVAFHESFYMAVPYLGSDDETSNSIGELVFY  
LEEPAGRNVNQNKSDLHKKF SHATRWARGIKK KASKFALNFAKRFGTVLRVAACENPLVLS  
VSDFEVETDRGSALANS GSSSNTLLAGDFQLESTIPMVG CIRQKESDVI EYSDSEDE  
EDHGGHHQH HHHHDPSGHCKE AIGSISVRVSYSPPPVPTGLEPSAAPIAMVNEATPDP  
CKKHKHNTISHEKVVDVWNGTDVFRADGFVEPMFDLVENVYEADPVGPTKESMDAAPP  
VNCLRSIYGINTDTEAGAIYRKVPIVTVGDNEADCRYTLDTSATFPTMNELFYDKDTRPD  
PWSKKHLHGKLEGGIVYETPKTLQTVPGQEKPRRVCGDGTVPYWNMVHALTWKDRV  
GELTVDEL DGATHRGIVADERFFGLVKRYCRVIDPRANAMMLM KKQVDSAGKIGSLGKSIAD  
RLCLSGKSCEAIEE  
>comp13984\_c0\_seq2; 1035 1 2951 LEN=3605; translated  
XNTNTNTKTNTTALVGMVNPDDL IQASKRENTLE EYDASCTVLQEEARDGRNRRLFRKD  
TYNERAAEEVYLPILIVPGVASSGLYVKESCLDKKFEGERLWMNA AFLAKARLNKVIN  
DAVERSRGSSSKSPQRNPKPRAEAE TETKTNSPRPRDSVFNPFSSSEKTEAKNKL  
RAMNP FAGNGTLD AVTEKIDVVS GALFEIKDMVKEAVQDEGDGAGNDQNGEFQ  
TNGDDEEHKSAFRKAE E EIAIKNTW IQHIALAKNMVDEKPGYEVRA YDGLAGVEYL  
VDSAI EK TAGFVMG PLVEYCTTVMG YERHVSIDAMPYDWRLAPSINEKRDGYLTK  
MIERIEKMYRDNDLDPVVLICHSMGAKMGHYFLN FVLHAKGKEDGRAWLDKHIHT  
FMPV GAPHGGVGC AVRCGLTGAGLNETVDTLVGNVSDGLIMYRSWSCGNWLMRML  
PAGVFPTCIVRREGELGLTVASEIEVTSLFAMREKKPKELRLTVIFRGRIRAHSDY  
YPVLVDDDERMVVAFHESFYMAVPYLGSDDETSNSIGELVFYLEEPAGRNVNQNK  
SDLHKKF SHATRWARGIKK KASKFALNFAKRFGTVLRVAACENPLVLSVSDFEVET  
DRGSALANS GSSSNTLLAGDFQLESTIPMVG CIRQKESDVI EYSDSEDEEDHGG  
HHQH HHHHDPSGHCKE AIGSISVRVSYSPPPVPTGLEPSAAPIAMVNEATPDP  
PKCKKHKHNTISHEKVVDVWNGTDVFRADGFVEPMFDLVENVYEADPVGPTKES  
MDAAPPVNCLRSIYGINTDTEAGAIYRKVPIVTVGDNEADCRYTLDTSATFPTMNE  
LFYDKDTRPDPWSKKHLHGKLEGGIVYETPKTLQTVPGQEKPRRVCGDGTVPYWN  
MVHALTWKDRV GELTVDEL DGATHRGIVADERFFGLVKRYCRVIDPRANAMMLM  
KKQVDSAGKIGSLGKSIADRLCLSGKSCEAIEE  
>comp13984\_c0\_seq3; 721 1 2033 LEN=2687; translated

XNPVFFHWRCALPFDSWRLAPSINEKRDGYLTKMIERIEKMYRDNDLPPVLI CHSMGAK  
MGHYFLNFVLHAKGKEDGRAWLDKHIHTFMPV GAPHGGV GCAVRCGLTGAGLNETVDTLV  
GNVSDGLIMYRSWSCGNWLMRMLPAGVFPTCIVRREGELGLTVASEIEVTSLFAMREKK  
PKELRLTVIFRGRIRAHSDYYPVLVDDDERMVVAFHESFYMAVPYLGSDDETSNSIGEL  
VFYLEEPAGRNVQNKSDLHKKF SHATRWARGIKKKASKFALNFAKRFGTVLRVAACENPL  
VLSVSDFEFVETDRGSALANS GSSSNTLLAGDFQLESTIPMVG CIRQKESSDVIEYSDS  
EDEEDHGGHHQH HHHDP SGHC KEAIGSISVRVSYSPPPVPTGLEPSAAPIAMVNEATPDP  
PMKCKKHKHNTISHEKVVDVWNGTDVFRADGFVEPMFDLVENVY EADPVGPTKESMDA  
APPVNCLRSIYGINTDTEAGAIYRKVIPVTVGDNEADCRYTLDT SATFPTMNELFYDKDT  
RPDPWSKKHLHG YKLEGGIVYETPKTLQTVPGQEKPRRVCGDGTVPYWNMVHALTWKDRV  
GELTVDEL DGATHRGIVADERFFGLVKRYCRVIDPRANAMMLMKQVDSAGKGIGSLGKS  
IADRLCLSGKSCEAIEE

>comp13984\_c0\_seq4; 1035 1 2951 LEN=3578; translated  
XNTNTNTKTNTTALVGMVNPDDLIQPASKRENTLEEYDASCTVLQEEARDGRNRRRLFRKD  
TYNERAAEEVYLPILIVPGVASSGLYVKESCLDKKFEGERLWMNA AFLAKARLNNKVINK  
DAVERSRGGSSKSPQRNPKPRAEAETETKTNSPRPRDSVFNPFSSSEGKTEAKNKL RAMNP  
FAGNGTLD AVTEKIDVVSGALFEIKDMVKEAVQDEGDGAGNDQNGEFQTN GDDEEHKSAF  
RKAEEEEIAIKNTWIQHIALAKNMVDEKPGYEVRA YDGLAGVEYLVD SAI EKTAGFVMG PL  
VEYCTTVMGYERHVSIDAMPYDWRLAPSINEKRDGYLTKMIERIEKMYRDNDLPPVLI C  
HSMGAKMGHYFLNFVLHAKGKEDGRAWLDKHIHTFMPV GAPHGGV GCAVRCGLTGAGLNE  
TVDTLVGNVSDGLIMYRSWSCGNWLMRMLPAGVFPTCIVRREGELGLTVASEIEVTSLF  
AMREKKPKELRLTVIFRGRIRAHSDYYPVLVDDDERMVVAFHESFYMAVPYLGSDDETS  
NSIGELVFYLEEPAGRNVQNKSDLHKKF SHATRWARGIKKKASKFALNFAKRFGTVLRVA  
ACENPLVLSVSDFEFVETDRGSALANS GSSSNTLLAGDFQLESTIPMVG CIRQKESSDV  
IEYSDSEDEEDHGGHHQH HHHDP SGHC KEAIGSISVRVSYSPPPVPTGLEPSAAPIAMV N  
EATPDP PMKCKKHKHNTISHEKVVDVWNGTDVFRADGFVEPMFDLVENVY EADPVGPTK  
ESSMDA APPVNCLRSIYGINTDTEAGAIYRKVIPVTVGDNEADCRYTLDT SATFPTMNEL  
FYDKDTRPDPWSKKHLHG YKLEGGIVYETPKTLQTVPGQEKPRRVCGDGTVPYWNMVHAL  
TWKDRV GELTVDEL DGATHRGIVADERFFGLVKRYCRVIDPRANAMMLMKQVDSAGKGI  
GSLGKSIADRLCLSGKSCEAIEE

>comp13984\_c0\_seq5; 721 1 2033 LEN=2660; translated  
XNPVFFHWRCALPFDSWRLAPSINEKRDGYLTKMIERIEKMYRDNDLPPVLI CHSMGAK  
MGHYFLNFVLHAKGKEDGRAWLDKHIHTFMPV GAPHGGV GCAVRCGLTGAGLNETVDTLV  
GNVSDGLIMYRSWSCGNWLMRMLPAGVFPTCIVRREGELGLTVASEIEVTSLFAMREKK  
PKELRLTVIFRGRIRAHSDYYPVLVDDDERMVVAFHESFYMAVPYLGSDDETSNSIGEL  
VFYLEEPAGRNVQNKSDLHKKF SHATRWARGIKKKASKFALNFAKRFGTVLRVAACENPL  
VLSVSDFEFVETDRGSALANS GSSSNTLLAGDFQLESTIPMVG CIRQKESSDVIEYSDS  
EDEEDHGGHHQH HHHDP SGHC KEAIGSISVRVSYSPPPVPTGLEPSAAPIAMVNEATPDP  
PMKCKKHKHNTISHEKVVDVWNGTDVFRADGFVEPMFDLVENVY EADPVGPTKESMDA  
APPVNCLRSIYGINTDTEAGAIYRKVIPVTVGDNEADCRYTLDT SATFPTMNELFYDKDT  
RPDPWSKKHLHG YKLEGGIVYETPKTLQTVPGQEKPRRVCGDGTVPYWNMVHALTWKDRV  
GELTVDEL DGATHRGIVADERFFGLVKRYCRVIDPRANAMMLMKQVDSAGKGIGSLGKS  
IADRLCLSGKSCEAIEE

>comp13984\_c0\_seq6; 793 1 2204 LEN=2831; translated  
XPLEFVGRFVLLCFVFGRLNCCVVVLQQLAGVEYLVD SAI EKTAGFVMG PLVEYCTTVMG  
YERHVSIDAMPYDWRLAPSINEKRDGYLTKMIERIEKMYRDNDLPPVLI CHSMGAKMGH  
YFLNFVLHAKGKEDGRAWLDKHIHTFMPV GAPHGGV GCAVRCGLTGAGLNETVDTLVGNV  
SDGLIMYRSWSCGNWLMRMLPAGVFPTCIVRREGELGLTVASEIEVTSLFAMREKKPKE  
LRLTVIFRGRIRAHSDYYPVLVDDDERMVVAFHESFYMAVPYLGSDDETSNSIGELVFY  
LEEPAGRNVQNKSDLHKKF SHATRWARGIKKKASKFALNFAKRFGTVLRVAACENPLVLS  
VSDFEFVETDRGSALANS GSSSNTLLAGDFQLESTIPMVG CIRQKESSDVIEYSDSEDE  
EDHGGHHQH HHHDP SGHC KEAIGSISVRVSYSPPPVPTGLEPSAAPIAMVNEATPDP PMK  
CKKHKHNTISHEKVVDVWNGTDVFRADGFVEPMFDLVENVY EADPVGPTKESMDA APP  
VNCLRSIYGINTDTEAGAIYRKVIPVTVGDNEADCRYTLDT SATFPTMNELFYDKDTRPDP  
PWSKKHLHG YKLEGGIVYETPKTLQTVPGQEKPRRVCGDGTVPYWNMVHALTWKDRV GEL  
TVDEL DGATHRGIVADERFFGLVKRYCRVIDPRANAMMLMKQVDSAGKGIGSLGKSIAD  
RLCLSGKSCEAIEE

>comp13985\_c0\_seq1; 560 139 3261 LEN=3417; translated  
MKIFETMNLVVTATMGAAIAMSSSSSSSYSSPSFAKADVGTALTRNLQTADVCCRTRCY  
EEDLIQATLSTAKSIDVDVVTNDVSSQNGISNDNTANATQPR TIRILTWDQPKGLQAYA

DLYRESHPEAPKVRIYGV PDLKDLHYEVTNELRSPSAIYDGYVPPVFLGSMYLQ RGGQA  
LVVWTNEDGTETQTDQNGNQYNRSVIDDLLPYRYNVATFDGKIRGLPILSGSQAMILFR  
KDYMDALKLPTPKTWDHWITLASLVSNADPPLLDGNGD TTQPVYGACLGLLNEAGCQKRK  
SIDGRPCDSQTMTYLGMMLASMTQYNGNSTGFMMGIDNTTETGLDPLFQPTLTRVLK WME  
DQIKSSRPTSLMEDAHD SMAHFREGRCAWTISINHDS ELLKDDNIGFVPLPGSHRVLDRR  
LADSGNPDDASGTMVNCTNTCDQNC ELIGTETLCPFGKDVDKWGRVNLVPPFGAVTATIGT  
VSGIISP SRQKFVKKFFEFV LASDAGDKVGRMEQPLTKSKLEMSDVQSYKSTLRSMTRSP  
NAAIPFRIPNAYNLLVDLDDR VYEYLLES DYSKIRREEVASSAEESWQTMISMYDARGQM  
KENLPTSFFYEQSLGVYEPMPASDLYIGSTARSIMWTFAGLGC FASVCFGILVWRYQDER  
VIRASQPVFLYLICGGAFV MYLSIFTLGIEDDLASYELVALSCVANYWLYSLGFNAVISA  
MFTKILMLAKALRMPRNEQRIQISKWDIIVPFLVIFGIDFVLLVWTIIDRQEWVRVPVH  
NMNLYALNIVEESTYGMCTSLETDWDIIFLLAFNFIILILALVQSYECRRITTEYAESGY  
ISVAIFVFAQIWLIALPLVVLAEYHPRTYFLLR SCTVLLTASAVLLLIFVPKSVYLYKSL  
RESESDGESSIESSSSSDTTRSSSEGTGGQRRDPRGTIGIRIVGTHFLNGEEIDELQDDV  
DKAAQRNTLLKDTREKLNENLEERQFARKTRFSM ASYKSSDSLNNKAIGSRKFSSEFC  
ILKVKPERPRKNRGREQYHK

>comp13985\_c0\_seq2; 547 139 3434 LEN=3590; translated  
MKIFETMNL LVTATMGAAIAMSSSSSSSYSSPSFAKADVGTALTRNLQTADVCCRTCRY  
EEDLIQATLSTAKSIDVDVVTNDVSSQNGISNDNTANATQPR TIRILTWDQPKGKLQAYA  
DLYRESHPEAPKVRIYGV PDLKDLHYEVTNELRSPSAIYDGYVPPVFLGSMYLQ RGGQA  
LVVWTNEDGTETQTDQNGNQYNRSVIDDLLPYRYNVATFDGKIRGLPILSGSQAMILFR  
KDYMDALKLPTPKTWDHWITLASLVSNADPPLLDGNGD TTQPVYGACLGLLNEAGCQKRK  
SIDGRPCDSQTMTYLGMMLASMTQYNGNSTGFMMGIDNTTETGLDPLFQPTLTRVLK WME  
DQIKSSRPTSLMEDAHD SMAHFREGRCAWTISINHDS ELLKDDNIGFVPLPGSHRVLDRR  
LADSGNPDDASGTMVNCTNTCDQNC ELIGTETLCPFGKDVDKWGRVNLVPPFGAVTATIGT  
VSGIISP SRQKFVKKFFEFV LASDAGDKVGRMEQPLTKSKLEMSDVQSYKSTLRSMTRSP  
NAAIPFRIPNAYNLLVDLDDR VYEYLLES DYSKIRREEVASSAEESWQTMISMYDARGQM  
KENLPTSFFYEQSLGVYEPMPASDLYIGSTARSIMWTFAGLGC FASVCFGILVWRYQDER  
VIRGTFTPAQFCEVFASRITYSEGGLQRCNFAAYDGF FREHFLSRFNSTFSLYDDFFCIG  
XASQPVFLYLICGGAFV MYLSIFTLGIEDDLASYELVALSCVANYWLYSLGFNAVISAMF  
TKILMLAKALRMPRNEQRIQISKWDIIVPFLVIFGIDFVLLVWTIIDRQEWVRVPVHNM  
NLYALNIVEESTYGMCTSLETDWDIIFLLAFNFIILILALVQSYECRRITTEYAESGYIS  
VAIFVFAQIWLIALPLVVLAEYHPRTYFLLR SCTVLLTASAVLLLIFVPKSVYLYKSLRE  
SESDGESSIESSSSSDTTRSSSEGTGGQRRDPRGTIGIRIVGTHFLNGEEIDELQDDVDK  
AAQRNTLLKDTREKLNENLEERQFARKTRFSM ASYKSSDSLNNKAIGSRKFSSEFC  
ILKVKPERPRKNRGREQYHK

>comp13985\_c0\_seq3; 581 139 2367 LEN=3685; translated  
MKIFETMNL LVTATMGAAIAMSSSSSSSYSSPSFAKADVGTALTRNLQTADVCCRTCRY  
EEDLIQATLSTAKSIDVDVVTNDVSSQNGISNDNTANATQPR TIRILTWDQPKGKLQAYA  
DLYRESHPEAPKVRIYGV PDLKDLHYEVTNELRSPSAIYDGYVPPVFLGSMYLQ RGGQA  
LVVWTNEDGTETQTDQNGNQYNRSVIDDLLPYRYNVATFDGKIRGLPILSGSQAMILFR  
KDYMDALKLPTPKTWDHWITLASLVSNADPPLLDGNGD TTQPVYGACLGLLNEAGCQKRK  
SIDGRPCDSQTMTYLGMMLASMTQYNGNSTGFMMGIDNTTETGLDPLFQPTLTRVLK WME  
DQIKSSRPTSLMEDAHD SMAHFREGRCAWTISINHDS ELLKDDNIGFVPLPGSHRVLDRR  
LADSGNPDDASGTMVNCTNTCDQNC ELIGTETLCPFGKDVDKWGRVNLVPPFGAVTATIGT  
VSGIISP SRQKFVKKFFEFV LASDAGDKVGRMEQPLTKSKLEMSDVQSYKSTLRSMTRSP  
NAAIPFRIPNAYNLLVDLDDR VYEYLLES DYSKIRREEVASSAEESWQTMISMYDARGQM  
KENLPTSFFYEQSLGVYEPMPASDLYIGSTARSIMWTFAGLGC FASVCFGILVWRYQDER  
VIRASQPVFLYLICGGAFV MYLSIFTLGIEDDLASYELVALSCVANYWLYSLGFNAVISA  
MFTKILMLAKALRMPRNEQRIQISKWDIIVPFLVIFGIDFVLLVWTIIDRQEWVRVPVHNM  
NLYALNIVEESTYGMCTSLETDWDIIFLLAFNFIILILALVQSYECRRITTEYAESGYIS  
VAIFVFAQIWLIALPLVVLAEYHPRTYFLLR SCTVLLTASAVLLLIFVPKSVYLYKSLRE  
SESDGESSIESSSSSDTTRSSSEGTGGQRRDPRGTIGIRIVGTHFLNGEEIDELQDDVDK  
AAQRNTLLKDTREKLNENLEERQFARKTRFSM ASYKSSDSLNNKAIGSRKFSSEFC  
ILKVKPERPRKNRGREQYHK

>comp13985\_c0\_seq4; 582 139 2633 LEN=3741; translated  
MKIFETMNL LVTATMGAAIAMSSSSSSSYSSPSFAKADVGTALTRNLQTADVCCRTCRY  
EEDLIQATLSTAKSIDVDVVTNDVSSQNGISNDNTANATQPR TIRILTWDQPKGKLQAYA  
DLYRESHPEAPKVRIYGV PDLKDLHYEVTNELRSPSAIYDGYVPPVFLGSMYLQ RGGQA  
LVVWTNEDGTETQTDQNGNQYNRSVIDDLLPYRYNVATFDGKIRGLPILSGSQAMILFR  
KDYMDALKLPTPKTWDHWITLASLVSNADPPLLDGNGD TTQPVYGACLGLLNEAGCQKRK  
SIDGRPCDSQTMTYLGMMLASMTQYNGNSTGFMMGIDNTTETGLDPLFQPTLTRVLK WME  
DQIKSSRPTSLMEDAHD SMAHFREGRCAWTISINHDS ELLKDDNIGFVPLPGSHRVLDRR  
LADSGNPDDASGTMVNCTNTCDQNC ELIGTETLCPFGKDVDKWGRVNLVPPFGAVTATIGT  
VSGIISP SRQKFVKKFFEFV LASDAGDKVGRMEQPLTKSKLEMSDVQSYKSTLRSMTRSP



NAAIPFRIPNAYNLLVDLDDRVYEYLLESDYSKIRREEVASSAEESWQTMISMYDARGQM  
KENLPTSFFYEQSLGVYEPMPASDLYIGSTARSIMWTFAGLGCFAVCFGILVWRYQDER  
VIRGTFTPAQCFEVFASRITYSEGGLQRCNFAAYDGGFFREHFLSRFNSTFSLYDDFFCIG  
XASQPVFLYLICGGAFVMYLSIFTLGIEDDLASYELVALSCVANYWLYSLGFNAVISAMF  
TKILMLAKALRMPRNEQRIQISKWDIIVPFLVIFGIDFVLLVWTIIDRQEW  
>comp13985\_c0\_seq5; 615 139 2460 LEN=3568; translated  
MKIFETMNLVVTATMGAAIAMSSSSSSSYSSPSFAKADVGTALTRNLQTADVCCRTCRY  
EEDLIQATLSTAKSIDVDVVTNDVSSQNGISNDNTANATQPRITIRILTWDQPKGKLQAYA  
DLYRESHPEAPKVRIYGV PDLKDLHYEVTNELRSPSAIYDGYVPPVFLGSMYLQRRGQA  
LVVWTNEDGTETQTDQNGNQYNRSVIDDLLPYRYNVATFDGKIRGLPILSGSQAMILFR  
KDYMDALKLPTPKTWDHWITLASLVSNADPPLLDGNGDTPVYGAACGLLLNEAGCQKRK  
SIDGRPCDSQTMTYLGMMLASMTQYNGNSTGFMMGIDNTTETGLDPLFQPTLTRVLKWE  
DQIKSSRPTSLMEDAHD SMAHFREGRCAWTISINHSELKDDNIGFVPLPGSHRVLDRR  
LADSGNPDDASGTMVNCTNTCDQNCELIGTETLCPFGKDVKWGRVNLVPPGAVTATIGT  
VSGIISPSRQKFVKKFFEFVFLASDAGDKVGRMEQPLTKSKLEMSDVQSYKSTLRSMTRSP  
NAAIPFRIPNAYNLLVDLDDRVYEYLLESDYSKIRREEVASSAEESWQTMISMYDARGQM  
KENLPTSFFYEQSLGVYEPMPASDLYIGSTARSIMWTFAGLGCFAVCFGILVWRYQDER  
VIRASQPVFLYLICGGAFVMYLSIFTLGIEDDLASYELVALSCVANYWLYSLGFNAVISA  
MFTKILMLAKALRMPRNEQRIQISKWDIIVPFLVIFGIDFVLLVWTIIDRQEW  
>comp13985\_c0\_seq6; 480 139 2100 LEN=3858; translated  
MKIFETMNLVVTATMGAAIAMSSSSSSSYSSPSFAKADVGTALTRNLQTADVCCRTCRY  
EEDLIQATLSTAKSIDVDVVTNDVSSQNGISNDNTANATQPRITIRILTWDQPKGKLQAYA  
DLYRESHPEAPKVRIYGV PDLKDLHYEVTNELRSPSAIYDGYVPPVFLGSMYLQRRGQA  
LVVWTNEDGTETQTDQNGNQYNRSVIDDLLPYRYNVATFDGKIRGLPILSGSQAMILFR  
KDYMDALKLPTPKTWDHWITLASLVSNADPPLLDGNGDTPVYGAACGLLLNEAGCQKRK  
SIDGRPCDSQTMTYLGMMLASMTQYNGNSTGFMMGIDNTTETGLDPLFQPTLTRVLKWE  
DQIKSSRPTSLMEDAHD SMAHFREGRCAWTISINHSELKDDNIGFVPLPGSHRVLDRR  
LADSGNPDDASGTMVNCTNTCDQNCELIGTETLCPFGKDVKWGRVNLVPPGAVTATIGT  
VSGIISPSRQKFVKKFFEFVFLASDAGDKVGRMEQPLTKSKLEMSDVQSYKSTLRSMTRSP  
NAAIPFRIPNAYNLLVDLDDRVYEYLLESDYSKIRREEVASSAEESWQTMISMYDARGQM  
KENLPTSFFYEQSLGVYEPMPASDLYIGSTARSIMWTFAGLGCFAVCFGILVW  
>comp13985\_c0\_seq7; 613 139 3534 LEN=3534; translated  
MKIFETMNLVVTATMGAAIAMSSSSSSSYSSPSFAKADVGTALTRNLQTADVCCRTCRY  
EEDLIQATLSTAKSIDVDVVTNDVSSQNGISNDNTANATQPRITIRILTWDQPKGKLQAYA  
DLYRESHPEAPKVRIYGV PDLKDLHYEVTNELRSPSAIYDGYVPPVFLGSMYLQRRGQA  
LVVWTNEDGTETQTDQNGNQYNRSVIDDLLPYRYNVATFDGKIRGLPILSGSQAMILFR  
KDYMDALKLPTPKTWDHWITLASLVSNADPPLLDGNGDTPVYGAACGLLLNEAGCQKRK  
SIDGRPCDSQTMTYLGMMLASMTQYNGNSTGFMMGIDNTTETGLDPLFQPTLTRVLKWE  
DQIKSSRPTSLMEDAHD SMAHFREGRCAWTISINHSELKDDNIGFVPLPGSHRVLDRR  
LADSGNPDDASGTMVNCTNTCDQNCELIGTETLCPFGKDVKWGRVNLVPPGAVTATIGT  
VSGIISPSRQKFVKKFFEFVFLASDAGDKVGRMEQPLTKSKLEMSDVQSYKSTLRSMTRSP  
NAAIPFRIPNAYNLLVDLDDRVYEYLLESDYSKIRREEVASSAEESWQTMISMYDARGQM  
KENLPTSFFYEQSLGVYEPMPASDLYIGSTARSIMWTFAGLGCFAVCFGILVWRYQDER  
VIRASQPVFLYLICGGAFVMYLSIFTLGIEDDLASYELVALSCVANYWLYSLGFNAVISA  
MFTKILMLAKVRCGKSDGTXL LGAASDADEARCLAFSHIFVPVFAFLAGLAMPRNEQRI  
QISKWDIIVPFLVIFGIDFVLLVWTIIDRQEWVVRVPHNMNLYALNIVEESTYGMCTSL  
ETDWDIIFLLAFNFIILILALVQSYECRITTEYAESGYISVAIFVFAQIWLIALPLVVL  
AEYHPRTYFLLRSCVLLTASAVLLLI FVPKSVLYKSLRESESDGESSIESSSSDTTR  
SSSEGTGXPEKGPTGDDRHPDRRDLPERRRDRRAPGRRGQGSAAQHAHQHEGETERKS  
RSATVREEDPVQHGLLQELGQPEQQGHRQPKILELRVLLDPQGETGAAQEEP GARAIPQV  
RSKRSVNFHPVFPVVRVGVQKGRGSHSGFCIGALFYILLYNTSSFEFTYAX  
>comp13985\_c0\_seq8; 480 139 2100 LEN=3707; translated  
MKIFETMNLVVTATMGAAIAMSSSSSSSYSSPSFAKADVGTALTRNLQTADVCCRTCRY  
EEDLIQATLSTAKSIDVDVVTNDVSSQNGISNDNTANATQPRITIRILTWDQPKGKLQAYA  
DLYRESHPEAPKVRIYGV PDLKDLHYEVTNELRSPSAIYDGYVPPVFLGSMYLQRRGQA  
LVVWTNEDGTETQTDQNGNQYNRSVIDDLLPYRYNVATFDGKIRGLPILSGSQAMILFR  
KDYMDALKLPTPKTWDHWITLASLVSNADPPLLDGNGDTPVYGAACGLLLNEAGCQKRK  
SIDGRPCDSQTMTYLGMMLASMTQYNGNSTGFMMGIDNTTETGLDPLFQPTLTRVLKWE  
DQIKSSRPTSLMEDAHD SMAHFREGRCAWTISINHSELKDDNIGFVPLPGSHRVLDRR  
LADSGNPDDASGTMVNCTNTCDQNCELIGTETLCPFGKDVKWGRVNLVPPGAVTATIGT

VSGIISPSRQKFVKKFFEFVLASDAGDKVGRMEQPLTKSKLEMSDVQSYKSTLRSMTRSP  
NAAIPFRIPNAYNLLVDLDRVYEYLLESDYSKIRREEVASSAEESWQTMISMYDARGQM  
KENLPTSFFYEQSLGVYEPMPASDLYIGSTARSIMWTFAGLGCASFVCFGILVW  
>comp13986\_c0\_seq1; 355 129 2008 LEN=2456; translated  
MRARWSRSHGKKNNTENCNHVAPAHEEENDNALVILESEIVYSIESFGALAMPVAVNMI  
LSAFVVVFVNTDETIAAGEEIEYIYQVFDVGDDEELSSFSKLXTFLDQYTHHSIGLSMT  
FVVVLCYKYRFMKCLYAYMVMVTAALLGYFTSNLLMVAISIYPWMNTDLVTFVFLMYNYA  
AVGTIAIFLPRGIPQWVTQAYLIATSVCLAWQLSYFGSWMTWSSLVMLALYDLFAVLT  
GPLKALANMISEKEAPALPGLLYEATLPSGVTKNSAKSTRRMGSKTKSEEENRSEKNDTV  
SDEDISGINYGIGDGNPNDSGEVYSTSKALDPQEEENVQSVPSRIVEKSAAPCHQQVIEER  
EGAYIQPSRDEGDEKLQSRKATQPSVINYPADFSNVGQVPLALAKLYQLSVLDTDGILK  
GRSIEPQQNRNILVKGGPNSIGSGASTYYTGTEVRSMEFTPPQQLSTELTCVFP  
PRGGRIS  
KARAQDQTYDGGTAYLVYGRGTNLQRKFIVTRQGSVMEVVRDVSPEDDDKTKGEDDKST  
IKLGLGDFIFYSVLVSEAAQYSFTAACFLVVLWGLAVTLVILAIKGGKALPALPISVFL  
GVIIIFLWTKAFLQPWAFDFLSLSIYV  
>comp13987\_c0\_seq3; 138 481 1395 LEN=1496; translated  
MDLDDLPAATETHHRPFHRTVLTHEILYAVQRCPPHPSGSGQAPSFPPVDMLRFRSQREA  
EEVAYHSALAEEDRLHGSDDHSGTKTLLLPSPALNPNGSSYGFCTQSGALFWVRALKATM  
VAANGGGRASCRSEVCAVLTGGVIGGQQQACTRRGAEVPEGRVFGGDAALAMAGGVAG  
AVAGEAMDPCGVVVKTLVGRPPRSRFAESWYSSGAFLGDWPQEVHAKGSWCGAPGVPPC  
HADAPKRHSCGGAGTVKGTQTPDGKENECPCLWTPVAKRRRLVSVSTEDETEAGEGGSDAW  
MVVP  
>comp13988\_c0\_seq1; 364 1 878 LEN=1589; translated  
XVKASPNLAKNLRLEAPVVGISYGASSSTTTTTTRKRITLVLAKDGTTVDKVVASRVIC  
TIPLAVLKTCAAAGAGTPQSGEGANERAFDPPPLSPSKTMAIERVPMPPGYRILFEMGAR  
FYPDLTSCEALGSSLWSGRLLVGDLLALYDAMYGKDKRDEHHVLAFAVAVGEHHAALSVPE  
AGDGNNGNNSHHALEDLLVRDALARIDELFDGNGTRHYKSHTIQNWTTPEYIGGAYTF  
PNHSRSDSEALAASEWDGSLLFAGEHTSVKYYSLVHGAAIEGVRAAVEAVVV  
>comp13988\_c0\_seq2; 566 1 1197 LEN=1908; translated  
STGGNGNGNGKPFNLGAVPLDLGAEWIHTPNGREAVTHMLDVFSDSSLPAAATPSPLLE  
DSNFVAYNPSFWFQKRELGIFFKKVYQETKWNRESTWNQYLDECLVKASPNLAKNLRLEAPV  
VGISYGASTSSSSSTTTTTTRKRITLVLAKDGTTVDKVVASRVICTIPLAVLKTCAAAG  
AGTPQSGEGANERAFDPPPLSPSKTMAIERVPMPPGYRILFEMGARFYPDLTSCEALGSS  
LWSGRLLVGDLLALYDAMYGKDKRDEHHVLAFAVAVGEHHAALSVPEAGDGNNGNNSHHA  
ALEDLLVRDALARIDELFDGNGTRHYKSHTIQNWTTPEYIGGAYTFPNHSRSDSEALAA  
SEWDGSLLFAGEHTSVKYYSLVHGAAIEGVRAAVEAVVV  
>comp13989\_c0\_seq1; 682 195 1343 LEN=1606; translated  
MMNGLSLIILGLLLPLSNGFQNAQVQRKAFSLQNPSSCASSVLPSSPSALFQSRQQSSD  
SVRTSLFQRPRFDTIATSGLNKVNHTAGSGGIPMFGLKSFLADIVRLMKWIFSI  
RDKDIQN  
FSKDDIKPKERLAKLHGPKTYILLVSLAKKFAPRAFRNRLFILWLAFCFKWYR  
RARYVFK  
VPVWDRQPNWNNIITSKDQEKDLKAYTCKKCGSTIFIAKSREFFEFEGDTGIGGLGCFSCG  
AKGKDNFVMDRDRIVDDVEDIDYFDYERPLDFVSAAEERREILKNAEGNEDVANAM  
LLEK  
ETGKASEQSESAEDGVVNGATGSMECDDEETEVTAGENDEMEDETPVTEPTSNAEK  
KVT  
KPTPSSDDDDLEDEDMDLLDMD  
>comp13990\_c0\_seq2; 57 1 132 LEN=316; translated  
GNAMNGTPFLDVIPLRFGIDNPDDHYHVPLLVSPWGYSTYRGS  
>comp13990\_c0\_seq3; 335 81 1070 LEN=1100; translated  
MKSSRTTVAILLALFFNLMSVATGNSQTAVCPGGGCTDDSSKPTVTELVAKPSEK  
LVEIL  
GGIYEHSWPVAEELVKEDAVTLKEISTVTELASRLKSIVNEASDDQKLALLRAHP  
DLCEK  
VEAMKSLTKESQEEQSRSGLQSMEGKELERFRSMNEAYKKKFGFPFILAVRNASK  
STVLS  
ALEGRLEGSSSQREFNVALEQVHNIAMRLLTKVNSDKAAGFLTCHVLDTANGIPAR  
KMK  
IVLKRRLAPEESAGVIGEFVTNDDGRLEGGPALKGNDFLVGTYEWEFHAGDYFAS  
NGNAMN  
GTPFLDVIPLRFGIDNPDDHYHVPLLVSPW  
>comp13990\_c0\_seq4; 247 81 782 LEN=948; translated  
MKSSRTTVAILLALFFNLMSVATGNSQTAVCPGGGCTDDSSKPTVTELVAKPSEK  
LVEIL  
GGIYEHSWPVAEELVKEDAVTLKEISTVTELASRLKSIVNEASDDQKLALLRAHP  
DLCEK  
VEAMKSLTKESQEEQSRSGLQSMEGKELERFRSMNEAYKKKFGFPFILAVRNASK  
STVLS  
ALEGRLEGSSSQREFNVALEQVHNIAMRLLTKVNSDKAAGFLTCHGKFFYFF  
>comp13991\_c0\_seq1; 669 157 1260 LEN=1378; translated  
MKFLCLSLLTATVSAFAPASLSPRAATQLYGEYGASSTSFYTTTEKQDSYASLD  
DVLSEK

CKDEKVKQCIVDMLDVCADITEALRTALVTVEDTSNEFGDTQLSVDMVADALIWEAVKKS  
SVVREGASEEDPIVRDVEGEGEFTVCWDPLDGGSSIVDNNWAVGTIMGIWPKSTGLLGA  
KGSQVTSLVALYGPRTTVLVALDDGTYEFSYGCTPEGCQLPDGSWEPWICSKSRVSISE  
DAKIFSPANLRAAQEVPGYKKYVDRFMDERYTLRYSGLLVPDVYQQFTKGQGVFSNPTSE  
KSPAKLRLAFAEAPFGLLVEKAGGLTSDGITGGSILDVEITGVDQRTPLCIGSAEEVKRF  
NEYLELN

>comp13992\_c0\_seq1; 491 486 1646 LEN=1754; translated  
MAENRTNEFMALARGLPTNGGLPPQILSPPTAGRNTPGDRNAGSASQLREFHNTAGGISR  
DIAATSGLLAELTQLVLRQKSLFQDDSQKVNELVVRIKMAIENLNGRLDAAERQSTQQRKRS  
LGKNSQTAQQASNVVQQLQEFGQAAAGFKTILQHRTDVLKETTRKRDIYGTSGADVED  
VPVLNLENRPPVYYGDNHAGGGAGPAGFPALDLTSGMMAAGESTGSQLP RP HGVTPS QNN  
SRTPSYAQS AVPSY YGNSQQNNNQN PAGMLS PF EIQQMEQASGQDQMMQLIPDQDYLRDR  
ADAMEQVESNIVELGAVYNRLATMVHEHKDMVQRVEDNVDEANSMINLSLNTLTDTLTNL  
RSNRGLALKVFSILVVFIIISFIIFFA

>comp13992\_c0\_seq2; 465 486 1968 LEN=2076; translated  
MAENRTNEFMALARGLPTNGGLPPQILSPPTAGRNTPGDRNAGSASQLREFHNTAGGISR  
DIAATSGLLAELTQLVLRQKSLFQDDSQKVNELVVRIKMAIENLNGRLDAAERQSTQQRKRS  
LGKNSQTAQQASNVVQQLQEFGQAAAGFKTILQHRTDVLKETTRKRDIYGTSGADVED  
VPVLNLENRPPVYYGDNHAGGGAGPAGFPALDLTSGMMAAGESTGSQLP RP RKF WCF FCG  
LFGCFLLQKMSLLQSGWKLLEPVCVRAEPSVATIRYTGTDVELWTDPMIMECMPAXVLEL  
EMQSFPLDSLIFASLFLVLCFATLS DVPADVVCF TDGVT PSQNN SRTPSYAQS AVPS  
Y YGNSQQNNNQN PAGMLS PF EIQQMEQASGQDQMMQLIPDQDYLRDRADAMEQVESNIVE  
LGAVYNRLATMVHEHKDMVQRVEDNVDEANSMINLSLNTLTDTLTNLRSNRGLALKVFSI  
LVVFIIISFIIFFA

>comp13993\_c0\_seq1; 326 190 1230 LEN=1350; translated  
MAGPAKPRDPRPPLWKVWFVAARPHTLTASLAPNIVAYHSGIGLLGIGSNANENANANDL  
SGWRSLVARWTLFCVLMQLGTNLHNDYADFVKGADNDKRVGQARATQKGWLTPFQTAAAS  
GGTLLSGLLVGAGLVGGLEPTSP LGEKAF AFV VVSSVFNAFAYTGGPWPLGCLGLPNFS  
LGYSGLDLFLVFLYFGLVATLFP AWLQ MATGTGTALGSGLWASWPPALQVAVLATNIIV  
NNLRDRHTDVLGKKT LA VRFGARFCLVEYGANLAVAYGLALVRGLALGGPCLSGLLPLL  
SLPLAWKEWKAVCAKEGSALNQHVGGAAKVQLLFCVLLAVSLRKN

>comp13994\_c0\_seq1; 284 1017 2979 LEN=2979; translated  
MLFAASLDFVCDAPVAVGESPIPTDARLAFFNETRHSYGR TALLLSGGAALGFYHVG VVK  
TLMENRMLMPRVLGGSSAGSIVCAMVGTRSVEFDQFAKQXLCHKLTY SFFLVSR TDEECIN  
DLFNVKGT TAPGHSGRIMINFRPLHMPRMANDEQKSQSTNRIDTEIGEYKNTAGFFHD  
AKRTWQIFVPIQLRNFTSILYDLLTLKTRPQELMSDTEHFRECLRVNVGDFTFQEA FDR  
TGRILNITVTPNNSDPPRLNLYLTAPHVLVWSAAVASSSLPGIFESNRLLVKDADGTVR  
YESAEGACFSDGSMEQDLPMQQLSEMFNVNHFIIISQANPHAVMLASYSHSKSIWSTPLIG  
LVNSILIFLKDQCRSWLTHVVMVGGRRYAPQHATSRTIGAQIFVQDYEGRD CDVSLIPW  
IGHRHLFSALLHALYNPSKA EFQEWIEAAQRQTWKHLPAIKSHVAEEITLDRCVQRLRKR  
ILAEKWEKHRKIGSMSDKISAKVPSFFTSPSLVNFGLGIGDQTI VDDLDQAQYKDVTHS  
SLTPLTL PADIKPGWAGLGLKGNHRSAA SLESSASHASGLFIEGDDHSKEQAAGEQTNHM  
PVFHGNTISISSSHNDSKRYLKT TNMAQFYRNNPNLSNNSIDKIQRSHSHGGK

>comp13994\_c0\_seq2; 439 1 2842 LEN=2842; translated  
QLPLENIVPTRKGPINDALPVP SRLHALTNVFNHYNKYKYFIV IARHNFNLSLNMTKISTK  
DDIDPTIEMLHRLVDEAAIFVVGNFPI LRKATIEALELIFGTRQLTRQFALAI ALETGMV  
TLSQLLKI VNRFLANFSSRSRLIRTLQHKKQDEVSSQDEWFDLAEKIDHIQGN DVWRSNNS  
QLYEGRHISARIDEFVHLMRRQDIFELMFVLRGGIGRNR YGLLHEGLFSKAIAGTKVLV  
ETYHNVCASLDFVCDAPVAVGESPIPTDARLAFFNETRHSYGR TALLLSGGAALGFYH V  
GVVKTLMENRMLMPRVLGGSSAGSIVCAMVGTRSVEFDQFAKQXLCHKLTY SFFLVSR TDE  
ECINDL FNVKGT TAPGHSGRIMINFRPLHMPRMANDEQKSQSTNRIDTEIGEYKNTAG  
FFHDAKRTWQIFVPIQLRNFTSILYDLLTLKTRPQELMSDTEHFRECLRVNVGDFTFQEA  
AFDR TGRILNITGKLQSSVDLLREHALFIRMGDDEALT IATKMNLVLT AQAYFLFLKFX  
TVTPNNSDPPRLNLYLTAPHVLVWSAAVASSSLPGIFESNRLLVKDADGTVRYESAEGA  
CFSDGSMEQDLPMQQLSEMFNVNHFIIISQANPHAVMLASYSHSKSIWSTPLIGLVNSILI  
FLKDQCRSWLTHVVMVGGRRYAPQHATSRTIGAQIFVQDYEGRD CDVSLIPWIGHRHLF  
SALLHALYNPSKA EFQEWIEAAQRQTWKHLPAIKSHVAEEITLDRCVQRLRKRILAEKWE  
KHRKIGSMSDKISAKVPSFFTSPSLVNFGLGIGDQTI VDDLDQAQYKDVTHS SLTPLTL  
PADIKPGWAGLGLKGNHRSAA SLESSASHASGLFIEGDDHSKEQAAGEQTNHMPV FHGNT  
TISISSSHNDSKRYLKT TNMAQFYRNNPNLSNNSIDKIQRSHSHGGK

>comp13994\_c0\_seq3; 277 249 941 LEN=1270; translated  
MVTLSQLLKIVNRFLANFSSRSRLIRTLQHKQDEVSSQDEWFDLAEKIDHIQGNDVWRSN  
NSSQLYEGHRISARIDEFVHLMRRQDIFELMFVLRGGIGRNRGLLHEGLFSKAIAGTKV  
LVETYNVVCASLDFVCDAPVAVGESPIPTDARLAFFNETRHSYGRTALLLSGGAALGFY  
HVGVVKTLMENRLMPRVLGGSSAGSKLTKNASMTYLMASKGRPRQVTQGGG  
>comp13994\_c0\_seq4; 394 1017 2989 LEN=3075; translated  
MLFAASLDFVCDAPVAVGESPIPTDARLAFFNETRHSYGRTALLLSGGAALGFYHVGVVK  
TLMENRLMPRVLGGSSAGSIVCAMVGTTRTDEECINDLNFVKGTTAPGHSGRIMINFRPL  
HMPRMANDEQKSQSTNRIDTEIGEYKNTAGFFHDAKRTWQIFVPIQLRNFTSILYDLLT  
LKTRPQELLMSDTEHFRECLRVNVGDFTFQEAFTDRGTGRILNITVTPNNSDDPPRLNLYLT  
APHVLVWSAAVASSSLPGIFESNRLLVKDADGTVRYESAEGACFSDGSMEQDLPMQQLSE  
MFNVNHFIIISQANPHAVMLASYSHSKSIWSTPLIGLVNSILIFLKDQCRSWLTHVEMVG  
GRRYAPQHATSRTIGAQIFVQDYEGRDCDVSLIPWIGHRHLSALLHALYNPSKAEFQEW  
IEAAQRQTWKHLPAIKSHVAEEITLDRCVQRLRKRILA EKWEKHRKIGSMSDKISAKVPS  
FFTSPSLVNFGLGIGDQTI VDDLDQAQYKDVTHSSLTPLTLPADIKPGWAGLGLKGNHR  
SAASLESSASHASGLFIEGDDHSKEQAAGEQTNHMPVFHGNKTISSSSHNDKRYLKTT  
NMAQFYRNNPNLSNNSIDKIQRSRSHSHGGKMEENENEKRTSTFQRQKWSHTSFGNT  
>comp13994\_c0\_seq5; 471 1 2768 LEN=2768; translated  
QLPLENIVPTRKGPINDALPVP SRLHALTNV FHYNNKYK YFIV IARHNFNLSLNMTKISTK  
DDIDPTIEMHLRLVDEAAIFVVGNFPI LRKATIEALELIFGTRQLTRQFALAI ALETGMV  
TLSQLLKIVNRFLANFSSRSRLIRTLQHKQDEVSSQDEWFDLAEKIDHIQGNDVWRSNNS  
SQLYEGHRISARIDEFVHLMRRQDIFELMFVLRGGIGRNRGLLHEGLFSKAIAGTKVLV  
ETYHNVVCASLDFVCDAPVAVGESPIPTDARLAFFNETRHSYGRTALLLSGGAALGFYH  
GVVKTLMENRLMPRVLGGSSAGSIVCAMVGTTRTDEECINDLNFVKGTTAPGHSGRIMIN  
FRPLHMPRMANDEQKSQSTNRIDTEIGEYKNTAGFFHDAKRTWQIFVPIQLRNFTSILY  
DLLTLKTRPQELLMSDTEHFRECLRVNVGDFTFQEAFTDRGTGRILNITGKLQSSVDLLLRE  
HALFIRMGDDEALT IATKMNLVLT AQAYFLFKFXTVTPNNSDDPPRLNLYLTAPHVLVW  
SAAVASSSLPGIFESNRLLVKDADGTVRYESAEGACFSDGSMEQDLPMQQLSEM FNVNHF  
IISQANPHAVMLASYSHSKSIWSTPLIGLVNSILIFLKDQCRSWLTHVEMVGGRRYAPQ  
HATSRTIGAQIFVQDYEGRDCDVSLIPWIGHRHLSALLHALYNPSKAEFQEWIEAAQRQ  
TWKHLPAIKSHVAEEITLDRCVQRLRKRILA EKWEKHRKIGSMSDKISAKVPSFFTSPSL  
VNFGLGIGDQTI VDDLDQAQYKDVTHSSLTPLTLPADIKPGWAGLGLKGNHRSAASLES  
SASHASGLFIEGDDHSKEQAAGEQTNHMPVFHGNKTISSSSHNDKRYLKTTNMAQFYR  
RNNPNLSNNSIDKIQRSRSHSHGGK  
>comp13994\_c0\_seq6; 492 461 2814 LEN=2900; translated  
MQAIALETGMVTLSQLLKIVNRFLANFSSRSRLIRTLQHKQDEVSSQDEWFDLAEKIDHI  
QGNDVWRSNNSQLYEGHRISARIDEFVHLMRRQDIFELMFVLRGGIGRNRGLLHEGLF  
SKAIAGTKVLVETYNVVCASLDFVCDAPVAVGESPIPTDARLAFFNETRHSYGRTALLL  
SGGAALGFYHVGVVKTLMENRLMPRVLGGSSAGSKLTKNASMTYLMASKGRPRQVTQGGXM  
INFRPLHMPRMANDEQKSQSTNRIDTEIGEYKNTAGFFHDAKRTWQIFVPIQLRNFTS  
ILYDLLTLKTRPQELLMSDTEHFRECLRVNVGDFTFQEAFTDRGTGRILNITVTPNNSDPP  
RLNLYLTAPHVLVWSAAVASSSLPGIFESNRLLVKDADGTVRYESAEGACFSDGSMEQDL  
PMQQLSEM FNVNHFIIISQANPHAVMLASYSHSKSIWSTPLIGLVNSILIFLKDQCRSWLT  
HVEMVGGRRYAPQHATSRTIGAQIFVQDYEGRDCDVSLIPWIGHRHLSALLHALYNPS  
KAEFQEWIEAAQRQTWKHLPAIKSHVAEEITLDRCVQRLRKRILA EKWEKHRKIGSMSDK  
ISAKVPSFFTSPSLVNFGLGIGDQTI VDDLDQAQYKDVTHSSLTPLTLPADIKPGWAGL  
GLKGNHRSAASLESSASHASGLFIEGDDHSKEQAAGEQTNHMPVFHGNKTISSSSHNDK  
RYLKTTNMAQFYRNNPNLSNNSIDKIQRSRSHSHGGKMEENENEKRTSTFQRQKWSHTS  
FGNT  
>comp13994\_c0\_seq7; 339 884 2831 LEN=2917; translated  
MLFAASLDFVCDAPVAVGESPIPTDARLAFFNETRHSYGRTALLLSGGAALGFYHVGVVK  
TLMENRLMPRVLGGSSAGSKLTKNASMTYLMASKGRPRQVTQGGXMINFRPLHMPRMAN  
EQKSQSTNRIDTEIGEYKNTAGFFHDAKRTWQIFVPIQLRNFTSILYDLLTLKTRPQEL  
LMSDTEHFRECLRVNVGDFTFQEAFTDRGTGRILNITVTPNNSDDPPRLNLYLTAPHVLVWS  
AAVASSSLPGIFESNRLLVKDADGTVRYESAEGACFSDGSMEQDLPMQQLSEM FNVNHF  
IISQANPHAVMLASYSHSKSIWSTPLIGLVNSILIFLKDQCRSWLTHVEMVGGRRYAPQ  
ATSRTIGAQIFVQDYEGRDCDVSLIPWIGHRHLSALLHALYNPSKAEFQEWIEAAQRQT  
WKHLPAIKSHVAEEITLDRCVQRLRKRILA EKWEKHRKIGSMSDKISAKVPSFFTSPSLV  
NFGLGIGDQTI VDDLDQAQYKDVTHSSLTPLTLPADIKPGWAGLGLKGNHRSAASLESS  
ASHASGLFIEGDDHSKEQAAGEQTNHMPVFHGNKTISSSSHNDKRYLKTTNMAQFYR

NNPNLSNNSIDKIQRSHSHGGKMEENENEKRTSTFQRQKWSHTSFGNT  
>comp13994\_c0\_seq8; 362 884 2930 LEN=3016; translated  
MLFAASLDFVCDAPVAVGESPIPTDARLAFFNETRHSYGRTALLLSGGAALGFYHVGVVK  
TLMENRLMPRVLGGSSAGSIVCAMVGTRSVEFDQFAKQXLCHKLTYSFLLVSRTEECIN  
DLFNVKGTTPAGHSGRIMINFFRPLHMPRMANDEQKSQSTNRIDTEIGEVEYKNTAGFFHD  
AKRTWQIFVPIQLRNFTSILYDLLTLKTRPQELLMSDTEHFRECLRVNVGDFTFQEAQFDR  
TGRILNITVTPNNSDPPRLLNLYLTAPHVVLVWSAAVASSSLPGIFESNRLLVKDADGTVR  
YESAEGACFSDGSMEQDLPMQQLSEMFVNVNHFIIISQANPHAVMLASYSHSKSIWSTPLIG  
LVNSILIFLKDQCRSWLTHVEMVGGRRYAPQHATSRTIGAQIFVQDYEGRDCDVSLIPW  
IGHRHLFSALLHALYNPSKAQEFQEWIEAAQRQTWKHLPAIKSHVAEEITLDRCVQRLRKR  
ILAEKWEKHRKIGSMSDKISAKVPSFFTSPSLVNFGLGIGDQTIIVDDLDQAQYKDVTHS  
SLTPLTLPADIKPGWAGLGLKGNHRSAASLESSASHASGLFIEGDDHSKEQAAGEQTNHM  
PVFHGKNTISISSSHNDSKRYLKTNNMAQFYRNNPNLSNNSIDKIQRSHSHGGKMEENE  
NEKRTSTFQRQKWSHTSFGNT  
>comp13994\_c0\_seq9; 409 1017 3135 LEN=3221; translated  
MLFAASLDFVCDAPVAVGESPIPTDARLAFFNETRHSYGRTALLLSGGAALGFYHVGVVK  
TLMENRLMPRVLGGSSAGSIVCAMVGTRTDEECINDLFNVKGTTPAGHSGRIMINFFRPL  
HMPRMANDEQKSQSTNRIDTEIGEVEYKNTAGFFHDAKRTWQIFVPIQLRNFTSILYDLLT  
LKTRPQELLMSDTEHFRECLRVNVGDFTFQEAQFDRGTGRILNITGKLGSSVDLLLREHALF  
IRMGDDEALTATKMNVLTAQAYFLFLKFXTVTPNNSDPPRLLNLYLTAPHVVLVWSAAV  
ASSSLPGIFESNRLLVKDADGTVRYESAEGACFSDGSMEQDLPMQQLSEMFVNVNHFIIISQ  
ANPHAVMLASYSHSKSIWSTPLIGLVNSILIFLKDQCRSWLTHVEMVGGRRYAPQHATS  
RTIGAQIFVQDYEGRDCDVSLIPWIGHRHLFSALLHALYNPSKAQEFQEWIEAAQRQTWKH  
LPAIKSHVAEEITLDRCVQRLRKRILAEKWEKHRKIGSMSDKISAKVPSFFTSPSLVNF  
GLGIGDQTIIVDDLDQAQYKDVTHSSLTPLTLPADIKPGWAGLGLKGNHRSAASLESSASH  
ASGLFIEGDDHSKEQAAGEQTNHMPVVFHGNKNTISISSSHNDSKRYLKTNNMAQFYRNNP  
NLSNNSIDKIQRSHSHGGKMEENENEKRTSTFQRQKWSHTSFGNT  
>comp13994\_c0\_seq10; 409 884 3002 LEN=3088; translated  
MLFAASLDFVCDAPVAVGESPIPTDARLAFFNETRHSYGRTALLLSGGAALGFYHVGVVK  
TLMENRLMPRVLGGSSAGSIVCAMVGTRTDEECINDLFNVKGTTPAGHSGRIMINFFRPL  
HMPRMANDEQKSQSTNRIDTEIGEVEYKNTAGFFHDAKRTWQIFVPIQLRNFTSILYDLLT  
LKTRPQELLMSDTEHFRECLRVNVGDFTFQEAQFDRGTGRILNITGKLGSSVDLLLREHALF  
IRMGDDEALTATKMNVLTAQAYFLFLKFXTVTPNNSDPPRLLNLYLTAPHVVLVWSAAV  
ASSSLPGIFESNRLLVKDADGTVRYESAEGACFSDGSMEQDLPMQQLSEMFVNVNHFIIISQ  
ANPHAVMLASYSHSKSIWSTPLIGLVNSILIFLKDQCRSWLTHVEMVGGRRYAPQHATS  
RTIGAQIFVQDYEGRDCDVSLIPWIGHRHLFSALLHALYNPSKAQEFQEWIEAAQRQTWKH  
LPAIKSHVAEEITLDRCVQRLRKRILAEKWEKHRKIGSMSDKISAKVPSFFTSPSLVNF  
GLGIGDQTIIVDDLDQAQYKDVTHSSLTPLTLPADIKPGWAGLGLKGNHRSAASLESSASH  
ASGLFIEGDDHSKEQAAGEQTNHMPVVFHGNKNTISISSSHNDSKRYLKTNNMAQFYRNNP  
NLSNNSIDKIQRSHSHGGKMEENENEKRTSTFQRQKWSHTSFGNT  
>comp13994\_c0\_seq11; 303 461 1279 LEN=1608; translated  
MQAIALETGMVTLSQLLKIVNRFLANFSSRSRLIRTLQHKQDEVSSQDEWFDLAEKIDHI  
QGNDVWRSNNSQLYEGHRISARIDFVHLMRRQDIFELMFVLRGGIGRNRYGLLHEGLF  
SKAIAGTKVLVETYNVVCASLDFVCDAPVAVGESPIPTDARLAFFNETRHSYGRTALLL  
SGGAALGFYHVGVVKTLMENRLMPRVLGGSSAGSIVCAMVGTRSVEFDQFAKQNCVTSSH  
IPSFWFLELTKNASMTYLMASKGRPRQVTQGGG  
>comp13994\_c0\_seq12; 263 355 1096 LEN=1096; translated  
MQAIALETGMVTLSQLLKIVNRFLANFSSRSRLIRTLQHKQDEVSSQDEWFDLAEKIDHI  
QGNDVWRSNNSQLYEGHRISARIDFVHLMRRQDIFELMFVLRGGIGRNRYGLLHEGLF  
SKAIAGTKVLVETYNVVCASLDFVCDAPVAVGESPIPTDARLAFFNETRHSYGRTALLL  
SGGAALGFYHVGVVKTLMENRLMPRVLGGSSAGSIVCAMVGTRSVEFDQFAKQNCVTSSH  
IPSFWFLX  
>comp13994\_c0\_seq13; 260 249 963 LEN=963; translated  
MVTLSQLLKIVNRFLANFSSRSRLIRTLQHKQDEVSSQDEWFDLAEKIDHIQGNDVWRSN  
NNSQLYEGHRISARIDFVHLMRRQDIFELMFVLRGGIGRNRYGLLHEGLFSKAIAGTKV  
LVETYNVVCASLDFVCDAPVAVGESPIPTDARLAFFNETRHSYGRTALLLSGGAALGFY  
HVGVVKTLMENRLMPRVLGGSSAGSIVCAMVGTRSVEFDQFAKQNCVTSSHIPSFWFLX  
>comp13994\_c0\_seq14; 127 778 1091 LEN=1420; translated  
MLFAASLDFVCDAPVAVGESPIPTDARLAFFNETRHSYGRTALLLSGGAALGFYHVGVVK  
TLMENRLMPRVLGGSSAGSKLTKNASMTYLMASKGRPRQVTQGGG

>comp13994\_c0\_seq15; 416 1 2743 LEN=2743; translated  
QLPLENIVPTRKGPINDALPVPSRLHALTNVFNHNNKYKYFIVVIARHNFNSLNMTKISTK  
DDIDPTIEMHLRLVDEAAIFVVGNFPILRKATIEALELIFGTRQLTRQFALAI ALETGMV  
TSLQLLKIVNRFLANFSSRSRLIRTLQHKQDEVSSQDEWFDLAEKIDHIQGNVWRSNNS  
SPLYEGHRISARIDEFVHLMRRQDIFELMFVLRGGIGRNRVYGLLHEGLFSKAIAGTKVLV  
ETYHNVCASLDFVCDAPVAVGESPIPTDARLAFFNETRHSYGR TALLLSGGAALGFYHV  
GVVKTLMENRLMPRVLGGSSAGSKLTKNASMTYLMASKGRPRQVTQGGXMINFFRPLHMPR  
MANDEQKSQSTNRIDTEIGEVIKNTAGFFHDAKRTWQIFVPIQLRNFTSILYDLLTLKTR  
PQELLMSDTEHFRECLRVNVGDFTFQEAFDRTGRILNITGKLQSSVDLLLREHALFIRMG  
DDEALTIATKMNLVLT AQAYFLFLKFXTVTPNNSSDPPRLLNYLTAPHVLVWSAAVASS  
LPGIFESNRLLVKDADGTVRYESAEGACFSDGSMEQDLPMQQLSEMFNVNHFIIISQANPH  
AVMLASYSHSKSIWSTPLIGLVNSILIFLKDQCRSWLTHVEMVGGRRYAPQHATSRTIG  
AQIFVQDYEGRDCDVSLIPWIGHRHLFSALLHALYNP SKAEFQEWIEAAQRQTWKHLPAI  
KSHVAEEITLDRCVQRLRKRILA EKWEKHRKIGMSMDKISAKVPSFFFTSPSLVNFGLGI  
GDQTI VDDLDQAQYKDVTHSSLTPLTLPADIKPGWAGLGLKGNHRSAA SLESSASHASGL  
FIEGDDHSKEQAAGEQTNHMPV FHGKNTISISSSHNDSKRYLKT TNMAQFYRNNPNLSN  
NSIDKIQRSHSHGGK

>comp13994\_c0\_seq16; 534 1 2706 LEN=2792; translated  
QLPLENIVPTRKGPINDALPVPSRLHALTNVFNHNNKYKYFIVVIARHNFNSLNMTKISTK  
DDIDPTIEMHLRLVDEAAIFVVGNFPILRKATIEALELIFGTRQLTRQFALAI ALETGMV  
TSLQLLKIVNRFLANFSSRSRLIRTLQHKQDEVSSQDEWFDLAEKIDHIQGNVWRSNNS  
SPLYEGHRISARIDEFVHLMRRQDIFELMFVLRGGIGRNRVYGLLHEGLFSKAIAGTKVLV  
ETYHNVCASLDFVCDAPVAVGESPIPTDARLAFFNETRHSYGR TALLLSGGAALGFYHV  
GVVKTLMENRLMPRVLGGSSAGSIVCAMVGTRTDEECINDLFNVKGT TAPGHSGRIMINF  
FRPLHMPRMANDEQKSQSTNRIDTEIGEVIKNTAGFFHDAKRTWQIFVPIQLRNFTSILY  
DLLTLKTRPQELLMSDTEHFRECLRVNVGDFTFQEAFDRTGRILNITVTPNNSSDPPRLL  
NYLTAPHVLVWSAAVASSSLPGIFESNRLLVKDADGTVRYESAEGACFSDGSMEQDLPMQ  
QLSEMFNVNHFIIISQANPHAVMLASYSHSKSIWSTPLIGLVNSILIFLKDQCRSWLTHV  
EMVGGRRYAPQHATSRTIGA QIFVQDYEGRDCDVSLIPWIGHRHLFSALLHALYNP SKAE  
FQEWIEAAQRQTWKHLPAIKSHVAEEITLDRCVQRLRKRILA EKWEKHRKIGMSMDKISA  
KVPSFFFTSPSLVNFGLGIGDQTI VDDLDQAQYKDVTHSSLTPLTLPADIKPGWAGLGLK  
GNHRSAA SLESSASHASGLFIEGDDHSKEQAAGEQTNHMPV FHGKNTISISSSHNDSKRY  
LKT TNMAQFYRNNPNLSNNSIDKIQRSHSHGGKMEENENEKRTSTFQRQKWSHTSFGN  
T

>comp13994\_c0\_seq17; 547 461 2839 LEN=2925; translated  
MQAIALETGMV TSLQLLKIVNRFLANFSSRSRLIRTLQHKQDEVSSQDEWFDLAEKIDHI  
QGNVWRSNNSQLYEGHRISARIDEFVHLMRRQDIFELMFVLRGGIGRNRVYGLLHEGLF  
SKAIAGTKVLVETIYHNVCASLDFVCDAPVAVGESPIPTDARLAFFNETRHSYGR TALLLS  
SGGAALGFYHVG VVKTLMENRLMPRVLGGSSAGSIVCAMVGTRTDEECINDLFNVKGT T  
PGHSGRIMINFFRPLHMPRMANDEQKSQSTNRIDTEIGEVIKNTAGFFHDAKRTWQIFV  
PIQLRNFTSILYDLLTLKTRPQELLMSDTEHFRECLRVNVGDFTFQEAFDRTGRILNITV  
TPNNSSDPPRLLNYLTAPHVLVWSAAVASSSLPGIFESNRLLVKDADGTVRYESAEGACF  
SDGSMEQDLPMQQLSEMFNVNHFIIISQANPHAVMLASYSHSKSIWSTPLIGLVNSILIFL  
KDQCRSWLTHVEMVGGRRYAPQHATSRTIGA QIFVQDYEGRDCDVSLIPWIGHRHLFSAL  
LHALYNP SKAEFQEWIEAAQRQTWKHLPAIKSHVAEEITLDRCVQRLRKRILA EKWEKHR  
KIGMSMDKISAKVPSFFFTSPSLVNFGLGIGDQTI VDDLDQAQYKDVTHSSLTPLTLPAD  
IKPGWAGLGLKGNHRSAA SLESSASHASGLFIEGDDHSKEQAAGEQTNHMPV FHGKNTIS  
ISSSHNDSKRYLKT TNMAQFYRNNPNLSNNSIDKIQRSHSHGGKMEENENEKRTSTFQR  
QKWSHTSFGNT

>comp13994\_c0\_seq18; 276 1017 3026 LEN=3026; translated  
MLFAASLDFVCDAPVAVGESPIPTDARLAFFNETRHSYGR TALLLSGGAALGFYHVG VV  
KTLMENRLMPRVLGGSSAGSKLTKNASMTYLMASKGRPRQVTQGGXMINFFRPLHMPRMAN  
DEQKSQSTNRIDTEIGEVIKNTAGFFHDAKRTWQIFVPIQLRNFTSILYDLLTLKTRPQEL  
LMSDTEHFRECLRVNVGDFTFQEAFDRTGRILNITGKLQSSVDLLLREHALFIRMGDDEA  
LTIATKMNLVLT AQAYFLFLKFXTVTPNNSSDPPRLLNYLTAPHVLVWSAAVASSSLPGI  
FESNRLLVKDADGTVRYESAEGACFSDGSMEQDLPMQQLSEMFNVNHFIIISQANPHAVML  
ASYSHSKSIWSTPLIGLVNSILIFLKDQCRSWLTHVEMVGGRRYAPQHATSRTIGA QIF  
VQDYEGRDCDVSLIPWIGHRHLFSALLHALYNP SKAEFQEWIEAAQRQTWKHLPAIKSHV  
AEEITLDRCVQRLRKRILA EKWEKHRKIGMSMDKISAKVPSFFFTSPSLVNFGLGIGDQ  
TI VDDLDQAQYKDVTHSSLTPLTLPADIKPGWAGLGLKGNHRSAA SLESSASHASGLFIEG

DDHSKEQAAGEQTNHMPVFHGNKTISISSSHNDSKRYLKTTNMAQFYRNNPNLSNNSID  
KIQRSHSHGGK

>comp13994\_c0\_seq19; 339 1017 2964 LEN=3050; translated  
MLFAASLDFVCDAPVAVGESPIPTDARLAFFNETRHSYGRTALLLSGGAALGFYHGVVVK  
TLMENRLMPRVLGGSSAGSKLTKNASMTYLMASKGRPRQVTQGGXMINFFRPLHMPRMAND  
EQKSQSTNRIDTEIGEVEYKNTAGFFHDAKRTWQIFVPIQLRNFTSILYDLLTLKTRPQEL  
LMSDTEHFRECLRVNVGDFTFQEAFFDRTGRILNITVTPNNSSDPPRLLNYLTAPHVLVWS  
AAVASSSLPGIFESNRLLVKDADGTVRYESAEGACFSDGSMEQDLPMQQLSEMFNVNHF I  
ISQANPHAVMLASYSKSIWSTPLIGLVNSILIFLKDQCRSWLTHVVEMVGGRRYAPQH  
ATSRTIGAQIFVQDYEGRDVSLIPWIGHRHLSALLHALYNPSKAQEFQEWIEAAQRQT  
WKHLPAIKSHVAEEITLDRVCVQLRKRILAEKWEKHRKIGSMSDKISAKVPSFFTS  
NFGGLGIGDQTIIVDDLDQAQYKDVTHSSSLTPLTLPADIKPGWAGLGLKGNHRS  
AASLESSASHASGLFIEGDDHSKEQAAGEQTNHMPVFHGNKTISISSSHNDSKRYLKTTNMAQFYR  
NNPNLSNNSIDKIQRSHSHGGKMEENENEKRTSTFQRQKWSHTSFGNT

>comp13994\_c0\_seq20; 117 778 1445 LEN=1445; translated  
MLFAASLDFVCDAPVAVGESPIPTDARLAFFNETRHSYGRTALLLSGGAALGFYHGVVVK  
TLMENRLMPRVLGGSSAGSIVCAMVGTRTDEECINDLFNVKGTAPGHSGRIMINFFRPL  
HMPRMANDEQKSQSTNRIDTEIGEVEYKNTAGFFHDAKRTWQIFVPIQLRNFTSILYDLLT  
LKTRPQELLMSDTEHFRECLRVNVGDFTFQEAFFDRTGRILNIT

>comp13994\_c0\_seq21; 479 1 2681 LEN=2767; translated  
QLPLENIVPTRKGPINDALPVP SRLHALTNVFHYNKYKYFIVIARHNFNLSNMTKISTK  
DDIDPTIEMHLRLVDEAAIFVVGNFPI LRKATIEALELIFGTRQLTRQFALAI ALETGMV  
TSLQLLKIVNRFLANFSSRSRLIRTLQHKQDEVSSQDEWFDLAEKIDHIQGNVWRSNNS  
SQLYEGHRISARIDEFVHLMRRQDIFELMFVLRGGIGRNRGGLHEGLFSKAIAGTKVLV  
ETYHNVCASLDFVCDAPVAVGESPIPTDARLAFFNETRHSYGRTALLLSGGAALGFYH  
GVVKTLMENRLMPRVLGGSSAGSKLTKNASMTYLMASKGRPRQVTQGGXMINFFRPLHM  
PRMANDEQKSQSTNRIDTEIGEVEYKNTAGFFHDAKRTWQIFVPIQLRNFTSILYDLLTLKTR  
PQELLMSDTEHFRECLRVNVGDFTFQEAFFDRTGRILNITVTPNNSSDPPRLLNYLTAPHV  
LVWSAAVASSSLPGIFESNRLLVKDADGTVRYESAEGACFSDGSMEQDLPMQQLSEMFNV  
NHF IISQANPHAVMLASYSKSIWSTPLIGLVNSILIFLKDQCRSWLTHVVEMVGGRRY  
APQHATSRTIGAQIFVQDYEGRDVSLIPWIGHRHLSALLHALYNPSKAQEFQEWIEAA  
QRQTWKHLPAIKSHVAEEITLDRVCVQLRKRILAEKWEKHRKIGSMSDKISAKVPSFFTS  
PSLVNFGGLGIGDQTIIVDDLDQAQYKDVTHSSSLTPLTLPADIKPGWAGLGLKGNHRS  
AASLESSASHASGLFIEGDDHSKEQAAGEQTNHMPVFHGNKTISISSSHNDSKRYLKTTNMAQ  
FYRNNPNLSNNSIDKIQRSHSHGGKMEENENEKRTSTFQRQKWSHTSFGNT

>comp13994\_c0\_seq23; 429 461 2876 LEN=2876; translated  
MQAIALETGMVTLSQLLKIVNRFLANFSSRSRLIRTLQHKQDEVSSQDEWFDLAEKIDHI  
QGNVWRSNNSSQLYEGHRISARIDEFVHLMRRQDIFELMFVLRGGIGRNRGGLHEGLF  
SKAIAGTKVLVETYHNVCASLDFVCDAPVAVGESPIPTDARLAFFNETRHSYGRTALLL  
SGGAALGFYHGVVKTLMENRLMPRVLGGSSAGSKLTKNASMTYLMASKGRPRQVTQGGX  
MINFFRPLHMPRMANDEQKSQSTNRIDTEIGEVEYKNTAGFFHDAKRTWQIFVPIQLRNFTS  
ILYDLLTLKTRPQELLMSDTEHFRECLRVNVGDFTFQEAFFDRTGRILNITGKLQSSVDLL  
LREHALFIRMGDDEALTIATKMNLVLTQAAYFLFLKFXTVTPNNSSDPPRLLNYLTAPHV  
LVWSAAVASSSLPGIFESNRLLVKDADGTVRYESAEGACFSDGSMEQDLPMQQLSEMFNV  
NHF IISQANPHAVMLASYSKSIWSTPLIGLVNSILIFLKDQCRSWLTHVVEMVGGRRY  
APQHATSRTIGAQIFVQDYEGRDVSLIPWIGHRHLSALLHALYNPSKAQEFQEWIEAA  
QRQTWKHLPAIKSHVAEEITLDRVCVQLRKRILAEKWEKHRKIGSMSDKISAKVPSFFTS  
PSLVNFGGLGIGDQTIIVDDLDQAQYKDVTHSSSLTPLTLPADIKPGWAGLGLKGNHRS  
AASLESSASHASGLFIEGDDHSKEQAAGEQTNHMPVFHGNKTISISSSHNDSKRYLKTTNMAQ  
FYRNNPNLSNNSIDKIQRSHSHGGK

>comp13994\_c0\_seq25; 394 884 2856 LEN=2942; translated  
MLFAASLDFVCDAPVAVGESPIPTDARLAFFNETRHSYGRTALLLSGGAALGFYHGVVVK  
TLMENRLMPRVLGGSSAGSIVCAMVGTRTDEECINDLFNVKGTAPGHSGRIMINFFRPL  
HMPRMANDEQKSQSTNRIDTEIGEVEYKNTAGFFHDAKRTWQIFVPIQLRNFTSILYDLLT  
LKTRPQELLMSDTEHFRECLRVNVGDFTFQEAFFDRTGRILNITVTPNNSSDPPRLLNYLT  
APHVLVWSAAVASSSLPGIFESNRLLVKDADGTVRYESAEGACFSDGSMEQDLPMQQLSE  
MFNVNHF IISQANPHAVMLASYSKSIWSTPLIGLVNSILIFLKDQCRSWLTHVVEMV  
GGRRYAPQHATSRTIGAQIFVQDYEGRDVSLIPWIGHRHLSALLHALYNPSKAQEFQEW  
IEAAQRQTWKHLPAIKSHVAEEITLDRVCVQLRKRILAEKWEKHRKIGSMSDKISAKVPS  
FFTS  
PSLVNFGGLGIGDQTIIVDDLDQAQYKDVTHSSSLTPLTLPADIKPGWAGLGLKGNHRS

SAASLESSASHASGLFIEGDDHSKEQAAGEQTNHMPVFGNKTISISSSHNDSKRYLKTT  
NMAQFYRNNPNLSNNSIDKIQRSHSHGGKMEENENEKRTSTFQRQKWSHTSFGNT  
>comp13994\_c0\_seq26; 267 249 1295 LEN=1295; translated  
MVTLSQLLKIVNRFLANFSSRSRLIRTLQHKQDEVSSQDEWFDLAEKIDHIQGNVWRSN  
NSSQLYEGHRISARIDEFVHLMRRQDIFELMFVLRGGIGRNRGGLLHEGLFSKAIAGTKV  
LVETYNVVCASLDFVCDAPVAVGESPIPTDARLAFFNETRHSYGRTALLLSGGAALGFY  
HVGVVKTLMENRLMPRVLGGSSAGSIVCAMVGTRTDEECINDLFNVKGTTPAGHSGRIMI  
NFFRPLHMPRMANDEQKSQSTNRIDTEIGEYKNTAGFFHDAKRTWQIFVPIQLRNFTSI  
LYDLLTLKTRPQELLMSDTEHFRECLRVNVGDFTFQEAFFDRTGRILNIT  
>comp13994\_c0\_seq27; 280 355 1074 LEN=1403; translated  
MQAIALETGMVTLSQLLKIVNRFLANFSSRSRLIRTLQHKQDEVSSQDEWFDLAEKIDHI  
QGNVWRSNNSQLYEGHRISARIDEFVHLMRRQDIFELMFVLRGGIGRNRGGLLHEGLF  
SKAIAGTKVLVETYNVVCASLDFVCDAPVAVGESPIPTDARLAFFNETRHSYGRTALLL  
SGGAALGFYHVGVVKTLMENRLMPRVLGGSSAGSKLTKNASMTYLMSKGRPRQVTQGGG  
>comp13994\_c0\_seq28; 276 884 2893 LEN=2893; translated  
MLFAASLDFVCDAPVAVGESPIPTDARLAFFNETRHSYGRTALLLSGGAALGFYHVGVVK  
TLMENRLMPRVLGGSSAGSKLTKNASMTYLMSKGRPRQVTQGGXMINFFRPLHMPRMAN  
EQKSQSTNRIDTEIGEYKNTAGFFHDAKRTWQIFVPIQLRNFTSILYDLLTLKTRPQEL  
LMSDTEHFRECLRVNVGDFTFQEAFFDRTGRILNITGKLQSSVDLLLREHALFIRMGDDEA  
LTIATKMNLVLTQAAYFLFLKFXTVTPNNSDPPRLLNYLTAPHVLVWSAAVASSSLPGI  
FESNRLLVKDADGTVRYESAEGACFSDGSMEQDLPMQQLSEMFNVNHFIIISQANPHAVML  
ASYSHSKSIWSTPLIGLVNSILIFLKDQCRSWLTHVEMVGGRRYAPQHATSRTIGAQIF  
VQDYEGRDCDVSLIPWIGHRHLFSALLHALYNPSKAEFQEWIEAAQRQTWKHLPAIKSHV  
AEEITLDRCVQRLRKRILA EKWEKHRKIGSMSDKISAKVPSFFTSPSLVNFGGLGIGDQT  
IVDDLQQAQYKDVTHSSLTPLTLPADIKPGWAGLGLKGNHRSAASLESSASHASGLFIEG  
DDHSKEQAAGEQTNHMPVFGNKTISISSSHNDSKRYLKTTNMAQFYRNNPNLSNNSID  
KIQRSHSHGGK  
>comp13994\_c0\_seq29; 484 461 2901 LEN=2901; translated  
MQAIALETGMVTLSQLLKIVNRFLANFSSRSRLIRTLQHKQDEVSSQDEWFDLAEKIDHI  
QGNVWRSNNSQLYEGHRISARIDEFVHLMRRQDIFELMFVLRGGIGRNRGGLLHEGLF  
SKAIAGTKVLVETYNVVCASLDFVCDAPVAVGESPIPTDARLAFFNETRHSYGRTALLL  
SGGAALGFYHVGVVKTLMENRLMPRVLGGSSAGSIVCAMVGTRTDEECINDLFNVKGTTP  
PAGHSGRIMINFFRPLHMPRMANDEQKSQSTNRIDTEIGEYKNTAGFFHDAKRTWQIFV  
PIQLRNFTSILYDLLTLKTRPQELLMSDTEHFRECLRVNVGDFTFQEAFFDRTGRILNITG  
KLQSSVDLLLREHALFIRMGDDEALTIATKMNLVLTQAAYFLFLKFXTVTPNNSDPPRLL  
NYLTAPHVLVWSAAVASSSLPGIFESNRLLVKDADGTVRYESAEGACFSDGSMEQDLPMQ  
QLSEMFNVNHFIIISQANPHAVMLASYSHSKSIWSTPLIGLVNSILIFLKDQCRSWLTHV  
EMVGGRRYAPQHATSRTIGAQIFVQDYEGRDCDVSLIPWIGHRHLFSALLHALYNPSKAE  
FQEWIEAAQRQTWKHLPAIKSHVAEEITLDRCVQRLRKRILA EKWEKHRKIGSMSDKISA  
KVPSFFTSPSLVNFGGLGIGDQTI VDDLQQAQYKDVTHSSLTPLTLPADIKPGWAGLGLK  
GNHRSAASLESSASHASGLFIEGDDHSKEQAAGEQTNHMPVFGNKTISISSSHNDSKRY  
LKTTNMAQFYRNNPNLSNNSIDKIQRSHSHGGK  
>comp13994\_c0\_seq31; 299 1017 3125 LEN=3125; translated  
MLFAASLDFVCDAPVAVGESPIPTDARLAFFNETRHSYGRTALLLSGGAALGFYHVGVVK  
TLMENRLMPRVLGGSSAGSIVCAMVGTRSVDFDQFAKQXLCHKLTYSFFLVSRTEECIN  
DLFNVKGTTPAGHSGRIMINFFRPLHMPRMANDEQKSQSTNRIDTEIGEYKNTAGFFHD  
AKRTWQIFVPIQLRNFTSILYDLLTLKTRPQELLMSDTEHFRECLRVNVGDFTFQEAFFD  
RGRILNITGKLQSSVDLLLREHALFIRMGDDEALTIATKMNLVLTQAAYFLFLKFXTVTP  
NNSDPPRLLNYLTAPHVLVWSAAVASSSLPGIFESNRLLVKDADGTVRYESAEGACFSD  
GSMEQDLPMQQLSEMFNVNHFIIISQANPHAVMLASYSHSKSIWSTPLIGLVNSILIFLKD  
QCRSWLTHVEMVGGRRYAPQHATSRTIGAQIFVQDYEGRDCDVSLIPWIGHRHLFSALL  
HALYNPSKAEFQEWIEAAQRQTWKHLPAIKSHVAEEITLDRCVQRLRKRILA EKWEKHRK  
IGSMSDKISAKVPSFFTSPSLVNFGGLGIGDQTI VDDLQQAQYKDVTHSSLTPLTLPADI  
KPGWAGLGLKGNHRSAASLESSASHASGLFIEGDDHSKEQAAGEQTNHMPVFGNKTISISS  
SHNDSKRYLKTTNMAQFYRNNPNLSNNSIDKIQRSHSHGGK  
>comp13994\_c0\_seq32; 299 884 2992 LEN=2992; translated  
MLFAASLDFVCDAPVAVGESPIPTDARLAFFNETRHSYGRTALLLSGGAALGFYHVGVVK  
TLMENRLMPRVLGGSSAGSIVCAMVGTRSVDFDQFAKQXLCHKLTYSFFLVSRTEECIN  
DLFNVKGTTPAGHSGRIMINFFRPLHMPRMANDEQKSQSTNRIDTEIGEYKNTAGFFHD  
AKRTWQIFVPIQLRNFTSILYDLLTLKTRPQELLMSDTEHFRECLRVNVGDFTFQEAFFD



TGRILNITGKQLQSSVDLLREHALFIRMGDDEALTIATKMNVLVTAQAYFLFLKFXTVTP  
NNSDDPRLNLTAPHVLVWSAAVASSSLPGIFESNRLLVKDADGTVRYESAEGACFSD  
GSMEQDLPMQQLSEMFNVNHFIIISQANPHAVMLASYSHSKSIWSTPLIGLVNSILIFLKD  
QCRSWLTHVEMVGGRRYAPQHATSRTIGAQIFVQDYEGRDCDVSLIPWIGHRHLSALL  
HALYNPSKAEFQEWIEAAQRQTWKHLPAIKSHVAEEITLDRCVQRLRKRILAEKWEKHRK  
IGSMSDKISAKVPSFFTSPSLVNFVGGGLGIGDQTI VDDLDQAQYKDVTHSSLTPLTLPADI  
KPGWAGLGLKGNHRSAAASLESSASHASGLFIEGDDHSKEQAAGEQTNHMPVVFHGNKTISI  
SSSHNDSKRYLKTNNMAQFYRNNPNLSNNSIDKIQRSHSHGGK  
>comp13994\_c0\_seq33; 117 911 1578 LEN=1578; translated  
MLFAASLDVCDAPVAVGESPIPTDARLAFFNETRHSYGR TALLLSGGAALGFYHGVVK  
TLMENRLMPRVLGGSSAGSIVCAMVGTTRTDEECINDLFNVKGT TAPGHSGRIMINFFRPL  
HMFRMANDEQKSQSTNRIDTEIGEYKNTAGFFHDAKRTWQIFVPIQLRNFTSILYDLLT  
LKTRPQELLMSDTEHFRECLRVNVGDFTFQEA FDR TGRILNIT  
>comp13994\_c0\_seq34; 424 1 2696 LEN=2696; translated  
QLPLENIVPTRKGPINDALPVP SRLHALTNV FHYNNKYKYFIV IARHNFNSLNMTKISTK  
DDIDPTIEMHLRLVDEAAIFVGNFPILRKATIEALELIFGTRQLTRQFALAI ALETGMV  
TSLQLLKIVNRFANFSSRSLIRTLQHKQDEVSSQDEWFDLAEKIDHIQGN DVWRSNNS  
SQLYEGHRISARIDEFVHLMRRQDIFELMFVLRGGIGRNR YGLLHEGLFSKAIAGTKVLV  
ETYHNVV CASLDVCDAPVAVGESPIPTDARLAFFNETRHSYGR TALLLSGGAALGFYH  
GVVKTLMENRLMPRVLGGSSAGSIVCAMVGT RSV EFDQFAKQXLCHKL TYSFFLVSR TDE  
ECINDLFNVKGT TAPGHSGRIMINFFRPLHMFRMANDEQKSQSTNRIDTEIGEYKNTAG  
FFHDAKRTWQIFVPIQLRNFTSILYDLLTLKTRPQELLMSDTEHFRECLRVNVGDFTFQEA  
AFDR TGRILNITVTPNNSDDPRLNLTAPHVLVWSAAVASSSLPGIFESNRLLVKDAD  
GTVRYESAEGACFSDGSMEQDLPMQQLSEMFNVNHFIIISQANPHAVMLASYSHSKSIWST  
PLIGLVNSILIFLKDQCRSWLTHVEMVGGRRYAPQHATSRTIGAQIFVQDYEGRDCDVSL  
LIPWIGHRHLSALLHALYNPSKAEFQEWIEAAQRQTWKHLPAIKSHVAEEITLDRCVQR  
LRKRILAEKWEKHRKIGSMSDKISAKVPSFFTSPSLVNFVGGGLGIGDQTI VDDLDQAQYK  
DVTHSSLTPLTLPADIKPGWAGLGLKGNHRSAAASLESSASHASGLFIEGDDHSKEQAAGEQ  
TNHMPVVFHGNKTISISSSHNDSKRYLKTNNMAQFYRNNPNLSNNSIDKIQRSHSHGGK  
>comp13994\_c0\_seq35; 127 911 1224 LEN=1553; translated  
MLFAASLDVCDAPVAVGESPIPTDARLAFFNETRHSYGR TALLLSGGAALGFYHGVVK  
TLMENRLMPRVLGGSSAGSKLTKNASMTYLM SKGRPRQVTQGGSS  
>comp13995\_c0\_seq2; 434 136 1206 LEN=1446; translated  
MSSKGYSEWESEEDDDEEDFVPDAYEEEGDDC VEFSDDEDDPEDFPPILOGEMFIDENKG  
LCYEQDGIFCLVCKSSIPTESFSFATPVMNIPLV FSGWIKNPGSWMEFEVHFSKEPMSKD  
PLEIKLLEEQEEQNLRSRSEIAKKNYIDDAKNK TSPGKCDLKAPPSYSL ENNSGNIKYAA  
EDRNGKQTSSTLKS GDSAEANEQKMMHV KDPQDNMVF LVS GSRITGNANDDRNISFRGSY  
RFPLQTS LKNIHLICSIQTIDSGMVVSGATASTAAAGKKNRNRPTRDDDSVEESTGEVYQE  
LIDLHDDTRLSTEELRKKYYGTGDMKGN SGGPRVSTAKRFKETDYEGEDDDAYGF  
>comp13996\_c0\_seq1; 407 212 1291 LEN=1662; translated  
MVSQAWKALPEDEREKWEEMARQDKARYEMEKSMYTG PWKVPATKRISKDPKAPKR PMSA  
FLSFSNSKRSEVKSKYKDAKNAEISRILAQM WKGADAEKKSFI DEEFALRQKYKKAMTE  
WKRQSEEEIKSKREERENEALKAVREGKLPVRNEEQQSRN NNVGSAADSTDTMGINYSTK  
MASDTFGPSAANSYTMSSHSHNITRSTQPLSNYSFSNNEY P QNNQPQPYTQGAASSSY  
YPEHQ TSTDSYGNAPGNHRNSYGATYQTHGNNLV TYDNYDRRYDGGSSIGYDNYGQTHPY  
GYAPQSYQQAFVADYSQGADLSTEHS PHQNFAYGSTPPFYHYDPNRPPSDQQDNLQSR  
>comp13996\_c0\_seq3; 340 628 1585 LEN=2220; translated  
MVSQAWKALPEDEREKWEEMARQDKARYEMEKSMYTG PWKVPATKRISKDPKAPKR PMSA  
FLSFSNSKRSEVKSKYKDAKNAEISRILAQM WKGADAEKKSFI DEEFALRQKYKKAMTE  
WKRQSEEEIKSKREERENEALKAVREGKLPVRNEEQQSRN NNVGSAADSTDTMGINYSTK  
MASDTFGPSAANSYTMSSHSHNITRSTQPLSNYSFSNNEY P QNNQPQPYTQGAASSSY  
YPEHQ TSTDSYGNAPGNHRNSYGATYQTHGNNLV TYDNYDDDMMEGHLLATTTMDKPIHT  
VTHHNL TINKVCALYQSI  
>comp13996\_c0\_seq4; 407 628 1707 LEN=2078; translated  
MVSQAWKALPEDEREKWEEMARQDKARYEMEKSMYTG PWKVPATKRISKDPKAPKR PMSA  
FLSFSNSKRSEVKSKYKDAKNAEISRILAQM WKGADAEKKSFI DEEFALRQKYKKAMTE  
WKRQSEEEIKSKREERENEALKAVREGKLPVRNEEQQSRN NNVGSAADSTDTMGINYSTK  
MASDTFGPSAANSYTMSSHSHNITRSTQPLSNYSFSNNEY P QNNQPQPYTQGAASSSY  
YPEHQ TSTDSYGNAPGNHRNSYGATYQTHGNNLV TYDNYDRRYDGGSSIGYDNYGQTHPY  
GYAPQSYQQAFVADYSQGADLSTEHS PHQNFAYGSTPPFYHYDPNRPPSDQQDNLQSR

>comp13996\_c0\_seq5; 340 212 1169 LEN=1804; translated  
MVSQAWKALPEDEREKWEEMARQDKARYEMEKSMYTGPKVPATKRISKDPKAPKRPM  
FLSFSNSKRSEVSKYKDAKNAEISRILAQMWKGADEEKKSFIDEEFALRQKYKKAMTE  
WKRQSEEEIKSKREERENEALKAVREGKLPVRNEEQQSRNNNVGSAADSTDTMGINYSTK  
MASDTFGPSAANSYTMSSSHSHNITRSTQPLSNYSFSNNEYQNNQPQPYTQGAASSSY  
YPEHQTSSTDSYGNAPGNHRNSYGATYQTHGNLVTYDNYDDMMEGHLLATTTMDKPIHT  
VTHHNLTKINKVCALYQSI

>comp13997\_c0\_seq1; 577 576 1787 LEN=2484; minus strand; translated  
MPSEKEKFPEQDPYDLLGVSFDAENAEISKAYRKLALKLHPDKQPQGNPALAEVAKK  
DIKEARTFLLEDFAQARRKYDAKRESDRLRKQTEALREKNMSERRKRLREELREKEAAA  
ARRSRGKKEEQRRKKDEDIVNQLRKEGKRKRQEAERDVQRKEDEEMEKMVRENARAKK  
QQRDLLEDQRVRLKWRDKMRPSPSEDSLATLLSDQFGLVEGIELLGRKGNQALATFADR  
ASCKPCVEFYATSPVMRAKYVGRRRDEEEDRAERERLAEQQREGGNLDKGPRNESLEDRR  
VRQAAERERLLRQLEDENENDSAAKPGARASDGDRRDGKTTRGRGHTPTRASKFPLPLPN  
TDGYDGLSPFEVLEKFEKSVLGSIFGGDNDGTEAMDAEGATQ

>comp13997\_c0\_seq2; 577 576 1787 LEN=2748; minus strand; translated  
MPSEKEKFPEQDPYDLLGVSFDAENAEISKAYRKLALKLHPDKQPQGNPALAEVAKK  
DIKEARTFLLEDFAQARRKYDAKRESDRLRKQTEALREKNMSERRKRLREELREKEAAA  
ARRSRGKKEEQRRKKDEDIVNQLRKEGKRKRQEAERDVQRKEDEEMEKMVRENARAKK  
QQRDLLEDQRVRLKWRDKMRPSPSEDSLATLLSDQFGLVEGIELLGRKGNQALATFADR  
ASCKPCVEFYATSPVMRAKYVGRRRDEEEDRAERERLAEQQREGGNLDKGPRNESLEDRR  
VRQAAERERLLRQLEDENENDSAAKPGARASDGDRRDGKTTRGRGHTPTRASKFPLPLPN  
TDGYDGLSPFEVLEKFEKSVLGSIFGGDNDGTEAMDAEGATQ

>comp13997\_c0\_seq3; 445 576 1787 LEN=2129; minus strand; translated  
MPSEKEKFPEQDPYDLLGVSFDAENAEISKAYRKLALKLHPDKQPQGNPALAEVAKK  
DIKEARTFLLEDFAQARRKYDAKRESDRLRKQTEALREKNMSERRKRLREELREKEAAA  
ARRSRGKKEEQRRKKDEDIVNQLRKEGKRKRQEAERDVQRKEDEEMEKMVRENARAKK  
QQRDLLEDQRVRLKWRDKMRPSPSEDSLATLLSDQFGLVEGIELLGRKGNQALATFADR  
ASCKPCVEFYATSPVMRAKYVGRRRDEEEDRAERERLAEQQREGGNLDKGPRNESLEDRR  
VRQAAERERLLRQLEDENENDSAAKPGARASDGDRRDGKTTRGRGHTPTRASKFPLPLPN  
TDGYDGLSPFEVLEKFEKSVLGSIFGGDNDGTEAMDAEGATQ

>comp13998\_c0\_seq1; 232 192 749 LEN=1190; translated  
MDSRMPYLLDNEGDFDSQISRLIEAQRHRNNRHNSHSTRTSCGRSSASNNNIMNRS  
AWFPTSLLECPGEQAPEEEEEYLSSPNRAQVIETACRILKNARVNNNFTEFHAGVDS  
NIETGDA SDLAPDFISHWTGRARSVYVPPVAIQCESSPFLVPVDHRNGKEAMGLT  
CVVSSSDSNESTGRESVW

>comp13999\_c0\_seq1; 403 81 1412 LEN=1514; translated  
MNFQAASRLLARTNPSGRLFFQRMKSIVGPTARRGFAGYAENVCDLIGKTPMVKINR  
VLPENMVADKILLKLEMQNPGGSIKDRIALSMIEEAEARGEITPGKTTIVEATSGNT  
GIGLAMVAAAGYKCVIVMPQVPAMYERYVIDRKFGAEVHLTSVKNDDMEKTFDNLL  
AYAEDLVAA NPDTHWMP SQFVNQDNPKVHYETTGP EIW EQAGGDIDIFVAGAGT  
GGTLAGGAKYLTEQN PDMKVVCVEPTEAKCDSAKSDYCSVHRQEQEYGPFLLVFLV  
STNAIIRLLECTIAHPPEMX LSGGSPALHGVVIGIGANIKLPFIEALAPGQEWQ  
PGPRGYISEFCSALTPESVAVANRLAAEEGLLVGPTSGAVVKVCADIACRPESE  
GKTIVGVVASSGIRYVKHPMWEQPORTEADAALPVPPDLENEIPILRWKSE  
DYVPPE

>comp13999\_c0\_seq2; 476 81 1277 LEN=1379; translated  
MNFQAASRLLARTNPSGRLFFQRMKSIVGPTARRGFAGYAENVCDLIGKTPMVKINR  
VLPENMVADKILLKLEMQNPGGSIKDRIALSMIEEAEARGEITPGKTTIVEATSGNT  
GIGLAMVAAAGYKCVIVMPQVPAMYERYVIDRKFGAEVHLTSVKNDDMEKTFDNLL  
AYAEDLVAA NPDTHWMP SQFVNQDNPKVHYETTGP EIW EQAGGDIDIFVAGAGT  
GGTLAGGAKYLTEQN PDMKVVCVEPTEANVLSGGSPALHGVVIGIGANIKLPFIE  
ALAPGQEWQPGPRGYISEFCSALTPESVAVANRLAAEEGLLVGPTSGAVVKVCADI  
ACRPESEGKTIVGVVASSGIRYVKHPMWEQPORTEADAALPVPPDLENEIPILRWK  
SEDYVPPE

>comp14000\_c0\_seq1; 685 129 1112 LEN=1355; translated  
MKFSLALFLLSAATSSAFLAAPSNSARISSTNLFMGGEITPKTIKALRDLTGAGM  
MDCKKALTEADGDQDAAAFLRKKGLAQADKKASRVAAEGKIAISSSDGKAVMVEV  
NCETDFVGGKDATFLAYCDRVAGAAAGAESGIDDLMNQEVGDGSEATRQALVSKIG  
ENIQVRRLESREGGSTVGGYVHMGTIGVLVELEGGSEELCTDIAMHVTAMNPPYAT  
SDDVPSDVLVDNEKRIILTEQALESGKPEAIVEKMEVEGRIRKFLEEKCLVVSQSF  
VKDSDMTVQQLLDKNDKVMVGF SRLVVGEGIEKKVDDFAAEVASMAAGK

>comp14001\_c0\_seq1; 485 203 1054 LEN=1114; translated  
MPASFRRRLRLLSGFVPRDGRILSLQRGRVSNAAVIRDNCHNNSTTTAFTRASVTTGGSSR  
QISQLSGRGRGQRRSESTTSIANNLRVTPAVAATAGFHSSPLSWFAAEAEEGDKPVDPA  
GEAGGEEEPAAATDIDYDMAPPLPLSKASQEKVQAI FDKVLWLDMIEVHLLTQIVNEQMI  
SWKETEMRQKGGGLVKVAGPGAAAAEAEPEAEKTFIDLKLTGFDAKAKIKVIKEVRTIAG  
LGLKEAKEMVEGAPKIVQKELKLEKAEELKAQLEAVGATVELV  
>comp14002\_c0\_seq1; 755 407 2164 LEN=2249; translated  
MSYTTNSALLNLLVLLSPWSFASFVAEASSAAAANGVKSPFKIIFDGGSTGSRLHIFEFL  
EADANGAQGSDRSNDDATTRL PASDTERDVQCVRRGSTRANIPLSAFGRLPADQNNNNPL  
NSSKVAHLLPLFDFAADIIPSQYHETTGVVYQATAGMRLLAESEQEAVYDAVYEGMAE  
ESFVFRGMQRKDIATLSGEMEAYYGALANFLKGIIDTELHLVYAQNNGRETNELPHHP  
GALDMGGSSTQIVYIANQDDEDETERDPSNTCPKQPKLNDSENKNVCKLSDEHFFST  
SYLSYGVQDIRKRLWDTLVLEYVASDDAYMVPNPKANGFEVEHKGHTLLGTGNTDECIR  
QMKRLIPHPDVLHDWSDYSGWAVGGVEHPPIRGKFLAMSLYFFSLDSLRFVSEPDEEAH  
HALDEAWPTPSIDELQNALDGLCSRNWQGDMELOEGTHSFTRKEVLP HRCLLETVYMTLL  
KDGFGFHPSSRDITFTFLVDGDEVETLGLALAMNANEKSSPTPTVTTTTTAYDYSIDD  
SNEDVKDDGCNETGNDVFEEEQYHMQGMPNSQYFAVAMPPTHCC  
>comp14003\_c0\_seq1; 156 100 999 LEN=1237; translated  
MSATTDPCVAVNGAGLAYREFSCDYPMLEPFYFEFEKKYDPVPMLEWMRDHPVPIVVVT  
AYAVLIFGGQHAMRNKPAWNWRKAMALWNLTL SVFSWVGMFRTL PQLVHNLYYTSLRDNL  
CLDPRVTYGSGSSGLWVQLFVLSKFPPELVDTFFIVIHKKPLIFLHWYHHITVLLCYHSY  
VTTSPPGIFFVVMNYSVHATMYGYYFLMAVKMRPKWFNP IWITIFQISQMIVGVAVTLAG  
FYFYKTDPTCKIEKENNTAAFVVMYGSYLF LFLQFFFGRYFNKKKGKNSVSATKTKQKSL  
>comp14003\_c0\_seq3; 213 198 811 LEN=1049; translated  
MDDWTLNARSMIPNKMNATIYPAMSNFAITLWCAAMTKSHTLANNENQYXSELVDTFFIV  
IHKKPLIFLHWYHHITVLLCYHSYVTTSPPGIFFVVMNYSVHATMYGYYFLMAVKMRPK  
WFNP IWITIFQISQMIVGVAVTLAGFYFYKTDPTCKIEKENNTAAFVVMYGSYLF LFLQFF  
FGRYFNKKKGKNSVSATKTKQKSL  
>comp14004\_c0\_seq1; 1458 71 2359 LEN=2447; translated  
MRITSLSAWLAACFASSTCAFSAFSAKQQRISGSTLSRSIQTTGGYIEKSKQRPAFALN  
VASSETIAVADMERGMGRLEEAFAAKAKGEEAFVSFITAGYPAKEDTPSILLAMQEGG  
ASVIELGVPYTDQADGATITAAHQVAIANGTSDIDTCLMVKKAREMGLTVPVVMGYV  
NPFLOYGEDRLCENAKEAGADGFIVVDLPPEEGIELNKACVKYGLSNVPLVAPTSSDKRI  
AALAEMATTFLYCVSVTGVGTGARSELPPDLEEF LGRVRKATDLPLAVGFGISSPEMNGV  
ANMADGVVVGSSILNAMKELGDDATTEQKADAVR KVISHLATGVKQSEDAKLQATKLGQV  
PKVWAETNDKARFGDFGGQYIPETLSVAFEIEESSYDEIKNDPEFLAELDRYRREFVGGP  
TPLHKAERLTEIAGGANIWLKREDLAHTGAHKINNAIGQALLAKRIGKPRIAETGAGQH  
GVATATVCAMLGLDCTVYMGAVDCERQKLN VFRMNTL GAKVVPVEAGQRTLKDAINEAMA  
DWVTNVRDTHYLIGSAVGPFPPTIVRDFQSVIGNEIKEQFAAKNDGRLPDALVACVGGG  
SNAIGTFAPFEKDESVAFYGAEEAAGKIEFDEEHCATLTVGTPGV LQGAQTYIIQKESGQ  
TLNTQISISAGLDYPGVGPEHAFYKASGRATYVGVTDQALEGFKMMCEYEGII PALETSH  
AIYQAIQLAKELGPGKDIVINMSGRGDKDMPQIARIMGVEVN  
>comp14005\_c0\_seq2; 312 1 513 LEN=1658; translated  
XQQQQQQQQAQQQQQLPLRFPPRYGSPFCGAXEDSNATGERPARRPRSSPFLRPSTGSK  
HCHPKAGGNSSSSSHHTATGAF LSPIFRSKGLEEEAAAAATVAATPIEDDNDKGHALDLF  
AIRRCNAFDEDDASDDASDES GDFGV LGLGHNFVNFVGFSGENHNGYY  
>comp14005\_c0\_seq3; 158 244 537 LEN=671; minus strand; translated  
MLEAGDGE GDAVRDVGAMLLCLPLLSRFEGESNEEGSDVCLLCNPEDMKNDSVGLAWIP  
VALGWVDQNPACLLVRNSMCWRRPVFLAEAEI WVRR  
>comp14005\_c0\_seq6; 312 1 513 LEN=1188; translated  
XQQQQQQQQAQQQQQLPLRFPPRYGSPFCGAXEDSNATGERPARRPRSSPFLRPSTGSK  
HCHPKAGGNSSSSSHHTATGAF LSPIFRSKGLEEEAAAAATVAATPIEDDNDKGHALDLF  
AIRRCNAFDEDDASDDASDES GDFGV LGLGHNFVNFVGFSGENHNGYY  
>comp14005\_c0\_seq7; 378 1219 2004 LEN=2179; minus strand; translated  
MALKNGNNNNNNNNNNNNNDNRIGDNKNLPSGQTDXEPALDLSHG VVRRAFHRDGEA  
VLVRKQKAEGHLLRVVLEGGVRLETTG PSLGSLLCGFGLAGSASF SAGLPVSEEASG  
LALASSGALSPASLAGFCFFFSAGSFSFLASATLSLSLEEPLADADADGDAGEDDDAVL  
PSFFFFFFFAGSVAVAAESALASAFSFFSSGGFSSMVSFASLIEGTMVAVSI AVL SVNN  
GFALLISSVSFRWDKRLQQT VW  
>comp14005\_c0\_seq8; 640 337 2285 LEN=3173; translated

MPWSLSSSFVARTILSQWIVFWCTSLLYLDPTKCGCSLAYSPSFYSPIRCSRRGAFGGDQ  
IVPSQQRFNRNPTGRXSALLLAANKKTPRDDNESDDQGSSSKRDSSNPKKKNRKNKNSGK  
KWMFRKRKGNEDDEDDKDCSDSDWNSNLEGSQDQLLNTNPNKPD RADASSLSDEISSTN  
ASHKDVDHQTRELSEEQTTHGQDNSSITPNDQEDDSITIAEDNKVEEQNTRDVT SERG  
KVDEDPELVNNAETKKKAEIDETERKTSRFGFFGFRERKKKATDVDDKNTTVASIA DLDS  
KNLEKASELIVGFNPPGPPRNATTNADGREDDSVAKKNKKNSSGGALGKITRRTL TLLLAVM  
LYPIVADEVGDHIIVSSSSPAVPRTRSLGREQDGEETPESGNDDIGEGKKFAAAEKGS GH  
DPDAGSTSREGGVGDEAWKDKMPPPPRQRTYASSNSNNKNNNGPGYSLNDRRKMALSFIS  
EVVEQVGPVVRIDTESQVNNRGGYSNYDSNFVQQQGSGLIFSSSEGFILTNHVVESAT  
KVKVTLTDRVYRCTVTGTDDIVDIAVLKILSEDGPPVANLPVAEFGNSDEL RVGKIVVA  
VGSPGGLDNTVTMGIVSGRERSMMVGI PHKLVNYIQTDAAINPGNSGR

>comp14005\_c0\_seq9; 560 80 1162 LEN=1372; translated  
MVDDNESTRNIPGGDGGGSGNVATAFSSGDNDFSTQAMKLAFCFAGLQASYLTWGYMQE  
LIMTTVFEP TPGAPNGIFPSAAF CVFSNRFLAVIVGAIACKIKHGALYSNNVAPLYSFAP  
CALSNLSSWSQYASLKYVAFPVQTVFKSSKIIPVMMGRFLKGN SYPLGQYVEALLITI  
GVAIFSLTTKTAKVNNDETEIIGLIFMLVYICCD SFTSQWQDKIYQQYGRSNVDQYQMLC  
VNTCAIVITTTGLIVSGDVPVVEFLSKNPVALNYNIITAIT SASQLFIFYTIKEFGPI  
VFTVIMTTRQLFSITLSCILFGHKIGLTSLFGASMVFLVIFYQIRRKYLARVARQ NAGGS

>comp14005\_c0\_seq10; 636 337 2127 LEN=2127; translated  
MPWSLSSSFVARTILSQWIVFWCTSLLYLDPTKCGCSLAYSPSFYSPIRCSRRGAFGGDQ  
IVPSQQRFNRNPTGRXSALLLAANKKTPRDDNESDDQGSSSKRDSSNPKKKNRKNKNSGK  
KWMFRKRKGNEDDEDDKDCSDSDWNSNLEGSQDQLLNTNPNKPD RADASSLSDEISSTN  
ASHKDVDHQTRELSEEQTTHGQDNSSITPNDQEDDSITIAEDNKVEEQNTRDVT SERG  
KVDEDPELVNNAETKKKAEIDETERKTSRFGFFGFRERKKKATDVDDKNTTVASIA DLDS  
KNLEKASELIVGFNPPGPPRNATTNADGREDDSVAKKNKKNSSGGALGKITRRTL TLLLAVM  
LYPIVADEVGDHIIVSSSSPAVPRTRSLGREQDGEETPESGNDDIGEGKKFAAAEKGS GH  
DPDAGSTSREGGVGDEAWKDKMPPPPRQRTYASSNSNNKNNNGPGYSLNDRRKMALSFIS  
EVVEQVGPVVRIDTESQVNNRGGYSNYDSNFVQQQGSGLIFSSSEGFILTNHVVESAT  
KVKGKMRIGKNHSXNATGLFPLGTERKNSFAVEGLPFSFAVSLRSKPPVPSREQSP

>comp14005\_c0\_seq11; 831 337 2876 LEN=3069; translated  
MPWSLSSSFVARTILSQWIVFWCTSLLYLDPTKCGCSLAYSPSFYSPIRCSRRGAFGGDQ  
IVPSQQRXSKQAHRSR SALLLAANKKTPRDDNESDDQGSSSKRDSSNPKKKNRKNKNSGK  
KWMFRKRKGNEDDEDDKDCSDSDWNSNLEGSQDQLLNTNPNKPD RADASSLSDEISSTN  
ASHKDVDHQTRELSEEQTTHGQDNSSITPNDQEDDSITIAEDNKVEEQNTRDVT SERG  
KVDEDPELVNNAETKKKAEIDETERKTSRFGFFGFRERKKKATDVDDKNTTVASIA DLDS  
KNLEKASELIVGFNPPGPPRNATTNADGREDDSVAKKNKKNSSGGALGKITRRTL TLLLAVM  
LYPIVADEVGDHIIVSSSSPAVPRTRSLGREQDGEETPESGNDDIGEGKKFAAAEKGS GH  
DPDAGSTSREGGVGDEAWKDKMPPPPRQRTYASSNSNNKNNNGPGYSLNDRRKMALSFIS  
EVVEQVGPVVRIDTESQVNNRGGYSNYDSNFVQQQGSGLIFSSSEGFILTNHVVESAT  
KVKVTLTDRVYRCTVTGTDDIVDIAVLKILSEDGPPVANLPVAEFGNSDEL RVGKIVVA  
VGSPGGLDNTVTMGIVSGRERSMMVGI PHKLVNYIQTDAAINPGNSGGPLIDVESGTVI  
GINAAIRAHMEGTSFAIPINRVRDILGDLSDGKEIKHGYIGCQLTCTPDWARENNAKAG  
GADQGGAGSGKGRPASIP EYVYGALVHKIYGKSPVHLGGLREQDVIQRI GSEPVLSAGDAS  
RLIDLAVPGESVPFTVLRNGRVRVISVRPKDMSSTQREMQRREKQRR LQDEKRRFQELGPF  
RSLLRD

>comp14005\_c0\_seq12; 584 376 1551 LEN=1761; translated  
MAPTSRTASPSPASSMVQEDNDKMLMRPLMVDDNESTRNIPGGDGGGSGNVATAFSS  
GDNDFSTQAMKLAFCFAGLQASYLTWGYMQELIMTTVFEP TPGAPNGIFPSAAF CVFSNR  
FLAVIVGAIACKIKHGALYSNNVAPLYSFAPCALSNLSSWSQYASLKYVAFPVQTVFKS  
SKIIPVMMGRFLKGN SYPLGQYVEALLITIGVAIFSLTTKTAKVNNDETEIIGLIFMLVY  
ICCD SFTSQWQDKIYQQYGRSNVDQYQMLCVNTCAIVITTTGLIVSGDVPVVEFLSKN  
PVALNYNIITAIT SASQLFIFYTIKEFGPIVFTVIMTTRQLFSITLSCILFGHKIGLTS  
LFGASMVFLVIFYQIRRKYLARVARQ NAGGS

>comp14005\_c0\_seq13; 312 1 513 LEN=1317; translated  
XQQQQQQQAQQQQQLPLRFPPRYGSPFCGAXEDSNATGERPARRPRSSPFLRPSTGSK  
HCHPKAGGNSSSSSHHTATGAF LSPIFRSKGLEEEAAAATVAATPIEDDNDKGHALDLF  
AIRRCNAFDEDDASDDASDESGDPFGVELGLGHNFVNF GFSGENHNGYY

>comp14005\_c0\_seq14; 536 279 1142 LEN=1942; translated  
MVPSISEAKDTIEEKPEEKKEKADAKADSAATATEPAK KKKKKKKEGNTASSSSPASPS  
ASASANGSSKD KESVADAKKEKEPAEKKKQKPAKDAGDKAPEEDAKAKPEASSETGKPAE

KEAEPAKPKPQSNDPSEGPVSVSKRTRPPYKYDPEKVTLRFLFANKDGLTVTVECTPND  
TVGKGRLLSVWPEDLPSCSGDQLRLICMGKGVLPDSRTLRLRACEVPVFKTHPTPVNV  
AVRPKTAIPVHKPSRKGDDGSRGVASQGSVNVVAEQSQGCGCVIS  
>comp14005\_c1\_seq1; 152 953 1644 LEN=1753; minus strand; translated  
MGLSCPQQAYPPASVPCAIAKQSTPAXKSIDPVIHRTDLGDNLASERLTHLDVGGEQRWVL  
SGRSGNCGGKNLDGLGPVGFQONAPYEPPALGAFSEGRVADES DAERERVVRRRLRLCLRC  
KIAKDFYFSLQFGKRSLAGQVPGSDETQATRATRFVVRQGS PRNTRHRC PHQGQAAPKPLG  
EKSLPGSAFAAAAAAAHGFGRSGVGSFSEFLETFSLCGTVRSLSETLSHD  
>comp14005\_c1\_seq2; 371 212 1363 LEN=1593; translated  
MSSSSSSSKSRSWKTLFTQRFGCRLPLMGAPMAGVSGSLAYETCRAGGLGFIAAGHLTS  
EASLAKLEREIKVFRDLASQTQPQSSDHSFPLGIGFIGHSTFGKGSEGWGLVRRILESHR  
PESVQIFAPAIRAPTGEDPSLFTTNVEMCQSFQCKVIAQVGSVNDGVDALAAGVDCLIA  
QGTEAGGHGIRRDVGNSTLSLASRLVRIASEGQRNVPVLAAGGIVDGRGLMAALSLGADG  
AVLGTRLWASEEALGDGAYKNALVAAGSCDDVVRTRVFDTIWNSQRSTKWPYPFDSGVL  
RNHTTDAWDASIPALEKELSSDNKALVEELNDAETTHLPSKGCVYSGQGVGEIDSIEPAY  
DIIMQIEKDAMSSLSRLSEVAGA  
>comp14006\_c0\_seq1; 758 201 2324 LEN=3467; translated  
MASKQRERIKAFLLVFNLLAANTFYLCYVCMYILSEDMDVSEHHPEQVHVPHPEAHLLE  
NQKLHHRLLHNPNIHIEWNGFRKKGANGTVERNENKNKNENNSNINTNTNRRNEHQDTGNK  
QKHTGEGHPQSTRNEKPHGNETNNTQQHPLLDCTRYGGPHDFDSLDEM VYWKHIPEDATY  
QSRFKNGDKGEQFLTFDMDSGFNNQRMVFEINVATAIATGRTLVMPRDRVMDHIHKTH  
KFAMDDFFDLQKIAGELPDILKMTIDDIYISQEGGPEKLNIPRDFTFGFGKKV GEMIREIQ  
EDKTRLTSNYNHDKFLINHVNDLHCNVTEHGEEYCSNYTDWINQRHVSKTHGIWQFYL  
DEFFHDHPKVVC PKWGSSICLLTIPVFDAPNHNNTIINTDNTSSSDRFKAWMKDL DGNV  
WERQNSFIGNPPLVNDPPKRVSELYQARNGLCVYDQNMQQSKYYHMRDTADRESRLIGH  
WYDYIFFEDWKEDLWMKRFMRDKLKYNDLLQCTAAKIVADIRKTSKTLYNHSDGQFHSMH  
VVRTDLTKFYKDYDIDRNASEIYNELKRHIVPKDSVVFVATDEADKHWFDVFRENYQRVY  
FLDDFVEGYLKDIPKEYYGMIDQLVASRGEHFVGTYYSTFTGYINRLRGYHSQKHYNPNL  
VNSLKKPPREAKGIIPSWFYSPKKVIDWYQQYAPVGSSTFFEMEYPLAW  
>comp14006\_c0\_seq3; 662 311 2281 LEN=3424; translated  
MASKRRERINAFLLVIFLFAANTSFLCYVTKKDVSEWEGHLHENMRLHYQLRDEPEQK  
SVHQKPSQPLTNDTGTTSQHHQEQQPRPQHPLLNCTRYGGPYDFNSLDDMVYWEIPEDA  
TYQSKFHKDGDEERFLTIDTDLGGFNNQRMVFEINIAMAIVTGRTLVLPDRDRV VSHIHTG  
DKFAMNYFFDLQKIASSYPKALKLMSTDDYIAQEGRPEKLDIPRDFYGFSLKADKI INDI  
KENRTNLTSNYSSHDI FVMVNAEELQCNVSKHGKEYCSNYTDWIDLHRHAKPRRFHQYY  
LDEFFHDHPKVVC PKWGAKTCVATIPAFNNNDNNHINNATANKRNNNINNSPDRFKAWTK  
DLKSEYWKRNHKNYVRNPPLVNDPPEKRLPELYQKRTSLCVYDQKMQQSKYYHMRDTADQ  
ESRSRLLGHWYDYIFFEDWKEDLWMKRFMRDKLKYNDLLQCTAAKIVADIRKTSKTLYNH  
SDGQFHSMHVVRTDLTKFYKDYDIDRNASEIYNELKRHIVPKDSVVFVATDEADKHWFDV  
FRENYQRVYFLDDFVEGYLKDIPKEYYGMIDQLVASRGEHFVGTYYSTFTGYINRLRGYH  
SQKHYNPNLVNSLKKPPREAKGIIPSWFYSPKKVIDWYQQYAPVGSSTFFEMEYPLAW  
>comp14007\_c0\_seq1; 290 420 1187 LEN=1327; translated  
MASQQQHLGGRILKAKPAGPMGLKQLFEEDSCTYTYLLWDLSTKDAILVDPVDVKVDRD  
LSEAEALGLNLVWAANTHAHADHVTGTGLLKQVRVGLKSVISEASGALADAKISHGDRIS  
FGNRWVGLATPGHTEGCVSLVADDGSFVLTGDALLVQCGRTRDFQGGCSDTLYGSVHDQ  
LFSLGDETVVYPAHDYKGRTHSTIGAEREKNPRLGREKSREEFVEIMKNLNLSPKKIDV  
AVPANMRCGVPDAAE  
>comp14007\_c0\_seq2; 290 396 1163 LEN=1303; translated  
MASQQQHLGGRILKAKPAGPMGLKQLFEEDSCTYTYLLWDLSTKDAILVDPVDVKVDRD  
LSEAEALGLNLVWAANTHAHADHVTGTGLLKQVRVGLKSVISEASGALADAKISHGDRIS  
FGNRWVGLATPGHTEGCVSLVADDGSFVLTGDALLVQCGRTRDFQGGCSDTLYGSVHDQ  
LFSLGDETVVYPAHDYKGRTHSTIGAEREKNPRLGREKSREEFVEIMKNLNLSPKKIDV  
AVPANMRCGVPDAAE  
>comp14008\_c0\_seq1; 210 87 1220 LEN=1552; translated  
MSFSSYLPCGFEPASLFGDDGDDKDCSSIVEYMTNLPLCCPSVARRTEDHPSHRETQAQ  
GAMAQPWRPPLYRDKSLIADACSPSVEEEKGSSPTS KTRSLSIGVLACGNSVPPREDQSA  
PSTNTDRNSLPPDFIPRHLFSRHVNTKRHVESTIVPKDSLSQGLRLQPKDVVCGRGAPT  
STHPGNQQFKKI IKRHEMEYVCSKRNEKPMIATKLLSMLQCDGVRVFKRERNEEGSLVWA  
EIGEQRAL EKVCQSLREDAPHIRKMMVASSALRSTRSEERREHRNRFQQSRQDTSNQVSS  
ETGDIYDVRHRSSLATNSNARKNISHQIQNNGAFHHEECVSKECSYNLGAHYDDPYVPHI

PPHLGGERMFGDKFSRE

>comp14009\_c0\_seq1; 314 90 1022 LEN=1110; translated  
MKMRFAVVASLATVLSFLCEESIASDDGSDISNGIVYSAFDSASWAVTSRFLSPVLGADK  
QSLYDDFMADCDEAMKEDAGYCSRNDEYRTRMNRSQPSSVYNYTKTGFAKTRVPPDLYKL  
IKEFFDENRRHAEVEWVKHYNTYHNAWESPPTIVHLAQEHMGGISLITEIEKKVTPILEE  
WTGQRLSPVSTYGVRLYHNNSILTPHVDRMPLVTSVLIQVDQDVDEPWPLEVYGHDIAT  
NVTMEPGDMVLYESHSHVIHGRPFPMVGNFYFANCFIHFEPYEPYIESEGYSYEPETDIPPYL  
IPGSAWEAEWW

>comp14009\_c0\_seq2; 247 90 632 LEN=798; translated  
MKMRFAVVASLATVLSFLCEESIASDDGSDISNGIVYSAFDSASWAVTSRFLSPVLGADK  
QSLYDDFMADCDEAMKEDAGYCSRNDEYRTRMNRSQPSSVYNYTKTGFAKTRVPPDLYKL  
IKEFFDENRRHAEVEWVKHYNTYHNAWESPPTIVHLAQEHMGGISLITEIEKKVTPILEE  
W

>comp14009\_c0\_seq3; 364 90 1373 LEN=1541; translated  
MKMRFAVVASLATVLSFLCEESIASDDGSDISNGIVYSAFDSASWAVTSRFLSPVLGADK  
QSLYDDFMADCDEAMKEDAGYCSRNDEYRTRMNRSQPSSVYNYTKTGFAKTRVPPDLYKL  
IKEFFDENRRHAEVEWVKHYNTYHNAWESPPTIVHLAQEHMGGISLITEIEKKVTPILEE  
WTGQRLSPVSTYGVRLYHNNSILTPHVDRMPLVTSVLIQVDQDVDEPWPLEVYGHDIAT  
NVTMEPGDMVLYESHSHVIHGRPFPMVGNFYFANCFIHFEPYEPYIESEGYSYEPETDIPPYL  
IPGSAWEAEWWKLNPEGWTKTKTASTLELRKVAIKGDIRFRSIVNANPDLLHAQDKNG  
WTVIHEAARSGDVEIIELELILELGVDMNLLTDHGFSPLRVAREFGENAEVIKYFESIGAKD  
IKFDEEL

>comp14010\_c0\_seq1; 362 1 1694 LEN=1694; translated  
XPNVNGLIETKSPGKHQVCVKRYRHKPDVFQAFSFNQPIDIWDDSSVTDMSQMFLAETGF  
NQCLSTWAGKTPMVVDMKMLKSGGCPQQSNPDPSVGPWCQTESDSCSVDLSTACTEIC  
STGRPVVNVSGKEFRDLIKNCVVNNSNCPYNSSVNCWDTSGVTDMAAFRDLVYTEFSEP  
LLCWDVSGVTNMEYMFGGSYFFNGDIGNWNVSRVTSIDSMFSSTSYFNQPLGDWDLSSVT  
SMNRVFRHSFPFNQPIGDWNVSRVTSMSSELFSSSSFNQPIGTWDVSSVRDFGGFFGPTFNQ  
PIGEWDLSSATVLDRMFAFASRFNQPIGDWNLSNAESMVLKNAKAFNQPIGDWNVSRA  
TNMSKMFDDAFGFNQPIGDWVSSVRDMSEMFPGDRQKFNQPIGDWVSRVTDMSFMFI  
SNKAFNQPIDVWDVSSATKMEGVFLRAENFNQCLATWASKTPGNVKVDYMFEDSGCPNTSD  
PNPSVGPWCQVDSEFCVADPGPEEIPAPTGGPGPDILSTCADSCPNRGPVINVSGSDFR  
ALISECGPNAWLCPPFLNCWDTSRV

>comp14010\_c0\_seq2; 316 1 1421 LEN=1421; translated  
XPNVNGLIETKSPGKHQVCVKRYRHKPDVFQAFSFNQPIDIWDDSSVTDMSQMFLAETGF  
NQCLSTWAGKTPMVVDMKMLKSGGCPQQSNPDPSVGPWCQTESDSCSVDLSTACTEIC  
STGRPVVNVSGKEFRDLIKNCVVNNSNCPYNSSVNCWDTSGVTDMAAFRDLVYTEFSEP  
LLCWDVSGVTNMEYMFGGSYFFNGDIGNWNVSRVTSIDSMFSSTSYFNQPLGDWDLSSVT  
SMNRVFRHSFPFNQPIGDWNVSRVTSMSSELFSSSSFNQPIGTWDVSSVRDFGGFFGPTFNQ  
PIGEWDLSSATVLDRMFAFASRFNQPIGDWNLSNAESMVLKNAKAFNQPIGDWNVSRA  
TNMSKMFDDAFGFNQPIGDWDLSSMEYLSVVFHKAASSFNQPLRWDVSKVKGMGMSGMSDA  
ISFNQPLDKWVSRVGLMAGMFDTATSFNQPIDIWVSRVYRMDRMFANAANFD

>comp14010\_c0\_seq3; 116 1 1481 LEN=1503; translated  
XPNVNGLIETKSPGKHQVCVKRYRHKPDVFQAFSFNQPIDIWDDSSVTDMSQMFLAETGF  
NQCLSTWAGKTPVDVNVEDMVFSSGCPQRQLDVLDERGFWCQTQSEFCYVPCSDLCPNER  
PVIQSGDFQELIGLCHNLPDECPYDLPINCWDTSLITNMDFAFLDEFERVIKPFDEPPI  
LLGCIKCDKHDGDSRPIFFQPFHWWLGCVKRDGHACDVFERGNLQHPLGNWDVSRVKDM  
RVMFAQSAFNQPIDIWVSSVTDMSNMFNMTSFHQCLTTWASKTPDFVSVSGMFRNSGC  
PRGAWYPI SFVGPWCQGDSEFCGASCTDYCVGRGPRCLDECRETLPPTPAPSPEEIPPPA  
PGPDI FVCTTKESFEMKGTFTCAELEDFSSKKKKKMSRRKNVKEACPGVCNRRCVCE  
NKKTSFRIKAGHINFGKFRCKNVGKQQPTCDTKVKKGKLVLDLCPKKCDFCLEEAGSV  
ELRVHLNNSLKV

>comp14010\_c0\_seq4; 438 3134 4681 LEN=4681; translated  
MSQMFLAETGFNQCLSTWAGKTPMVVDMKMLKSGGCPQQSNPDPSVGPWCQTESDSCSV  
DLSTACTEICSTGRPVVNVSGKEFRDLIKNCVVNNSNCPYNSSVNCWDTSGVTDMAAF  
RDLVYTEFSEPLLCWDVSGVTNMEYMFGGSYFFNGDIGNWNVSRVTSIDSMFSSTSYFNQ  
PLGDWDLSSVTSMNRFVFRHSFPFNQPIGDWNVSRVTSMSSELFSSSSFNQPIGTWDVSSVRD  
FGGFFGPTFNQPIGEWDLSSATVLDRMFAFASRFNQPIGDWNLSNAESMVLKNAKAFN  
QPIGDWNVSRA TNMSKMFDDAFGFNQPIGDWVSSVRDMSEMFPGDRQKFNQPIGDWVSR  
VTDMSFMFISNKAFNQPIDVWDVSSATKMEGVFLRAENFNQCLATWASKTPGNVKVDY

FEDSGCPNTSDPNPSVGPWCQVDSEFCVAPDPGPEEIPAPTPGPGPDILSTCADSCPNGR  
PVINVSGSDFRALISECGPNAWLCPFPLNCWDTSRV  
>comp14010\_c0\_seq5; 192 3134 4468 LEN=4490; translated  
MSQMFLEATGFNQCLSTWAGKTPVDVNVEDMVFSSGCPQRQLDVLDERGPWCQTQSEFCY  
VPCSDLCPNERPVIQSGDFQELIGLCHNLDPDECYPDLPINCWDTSLITNMDFAFLDEFER  
VIFKPFDEPILLGCIKCDKHDGDSRPIFFQPFHWWLGCVKRDGHACDVFERGNLQHPL  
GNWDVSRVKDMRVMFAQSAFNQPIDIWDVSSVTDMSNMFMATSFHQCLTTWASKTPDFV  
SVSGMFRNSGCPRGAWYPI SFVGPWCQGDSEFCGASCTDYCVGRGPRCLDECRETLPPTP  
APSPEEIPPPAPGPDIFPVCTTKESFEMKGTFTCAELEDFSSKKKKKMSRRKNVKEAC  
PGVCNRRVCENKKTFRIKAGHINFGVGFRCCKNVGKDQQPTCDTKVKKGKLVLDLCPKK  
CDFCLEEAGSVELRVHLNNSLKVK  
>comp14010\_c0\_seq6; 392 3134 4408 LEN=4408; translated  
MSQMFLEATGFNQCLSTWAGKTPMVVMDKMLKSGGCPQQSNPDPSVGPWCQTESDSCSV  
DLSFTACTEICSTGRPVVNVSGKEFRDLIKNCVVNNSNCPYNSSVNCWDTSGVTDMAYAF  
RDLVYTEFSEPLLCWDVSGVTNMEYMFGGSYFFNGDIGNWNVSRVTSIDSMFSSTSYFNQ  
PLGDWDLSSVTSMNRVFRHSPFNQPIGDWNVSRVTSMSSELFSSSSFNQPIGTWVSSVRD  
FGGFFGPTFNQPIGEWDLSSATVLDRMFAFASRFNQPIGDWNLSNAESMVL MFKNAKAFN  
QPIGDWNVSRATNMSKMFDDAFGFNQPIGDWDLSSMEYLSVVFHKASSFNQPLRKWDVSK  
VKGMSGMFSDAISFNQPLDKWDVSRVGLMAGMFDTATSFNQPIDIWDVSRVYRMDRMFAN  
AANFD  
>comp14010\_c0\_seq8; 83 1 594 LEN=649; translated  
VGSLRSMFDGATSFNQPLDKWDVSRVQSMYMFDRDATSFNQCLSTWASKTPTDVYTEDML  
KESGCPQQSDPDPSVGPWCQTEETESCVLDLGPCTNKGTFRFKRETYTCTDLENFSNKMRN  
KACNKRPAAKACPGVCNLRVCEDKFFRIKPNSDNDFRGKFRCKNVNKDQQPSCNTKVK  
KGKLVKDVCPKCKGFL  
>comp14010\_c0\_seq9; 291 1 952 LEN=1328; translated  
XFNQPIGDWVSSVTNMRMMFDDTFAFNQPIGNWNVSSVQDMAQIFKGGDHQFNQPIGDW  
DVSSVRDMSWMFVGNPFGFNQPIGDWVSKVKSTTGMAQTSSFNQPLDKWDVSSVRIMAL  
MFDRTSSFNQPIDLWDVSSVTHMMHMFRTGATSFQCLSTWASKTPTDVVFCRVMF IGSGCP  
QQTDPDPSLGPWCQVDSEFCIAPDFLENEISVCDNMEGFQMKGTITCRELEDFGSKKRK  
RVCRKEKAKEACPGICDRRCFKDKTAFKIKPNIDNFRGKFWCKNVNKDQQPSCTNMA  
MEMLVGDLCPVTCNFCF  
>comp14011\_c0\_seq2; 212 246 1633 LEN=1804; translated  
MKRFASLSVLAFLGLVTSFPFANGFSLATPHRAVGAPFQLFQPRASSTSLTTPLSASSGD  
ATASDKSPAASKEKKTWKELREEGGFPAINTPIGALNPFALYYFFVSIALGIPWFILAST  
CQLLYKITGNRFDPGVRVRGNEVFDTQCGAVRSEVRHIVGNNASPLRESHGLSMXVNF  
SNAISGNPLVPIAVVPSSLPFSLCNACAPHDVCVLCFLVREISHLMNPSIFYSCHQFFTY  
APQRRVPIFVGHCWGMALMRLTRCYPKIHNREYITEFFKKNKNAEGKEPNAMFVANHC  
SWMDIPFLGAVMGWRNYKIVSKKELGIVPILGTALRAGGHIMVDRDTRRSQIKTLKQGIN  
YLNKDGFNLATFPEGTRSRSGRMMKFKAGAFKMAHKAGAPVPIPIVHSDKVMPTGWM  
MAMRPAWGLAEVVVHRPIASDDKTEEELVEAVRKS MIDGLPDDQKPV  
>comp14011\_c0\_seq4; 225 246 1310 LEN=1481; translated  
MKRFASLSVLAFLGLVTSFPFANGFSLATPHRAVGAPFQLFQPRASSTSLTTPLSASSGD  
ATASDKSPAASKEKKTWKELREEGGFPAINTPIGALNPFALYYFFVSIALGIPWFILAST  
CQLLYKITGNRFDPGRRVPIFVGHCWGMALMRLTRCYPKIHNREYITEFFKKNKNAEGKE  
PNAMFVANHC SWMDIPFLGAVMGWRNYKIVSKKELGIVPILGTALRAGGHIMVDRDTRRSQ  
IKTLKQGINYLKKGDFNLATFPEGTRSRSGRMMKFKAGAFKMAHKAGAPVPIPIVHSDK  
VMPTGWMAMRPAWGLAEVVVHRPIASDDKTEEELVEAVRKS MIDGLPDDQKPV  
>comp14012\_c0\_seq1; 395 200 1453 LEN=1611; translated  
MSESDADNRDAPSKAMMIMLAPDGYTYLNI PKVPVQNSSGVS GSKESGEDPLLQIDL  
DLVKKNFRKLSIRHHPDKPGGSDTFRTLKRAQTVLSNPCLRQQYDILGLDLDDDDVEQ  
NSSAGINDEAGAEPQTT SQI IQDIASAALXDGIAIGCQDGYVCYHLSFVCRAIVVAN  
NRRTTAMIVTDTTIPDPADIYAPFCVLLINMNYFSFSFNSSYGSTRITMDFTRPALLGT  
ISLIARYRLTLFPTLAFLAFVAYKVRSGPTVDHSLLELMSPFVIGIGMIIMYQASSG  
SWSSISEDGTCKIHWLLYWLGESITIFMFTFNSMEVKPSMSSPIYLGAI GLFGILAAL  
WFRGKFWNYAIVIGLEIFLAIFIALAFPVFEMILEAILNDKLVGDKIRAQHKCMERY  
YKQSSND  
>comp14012\_c0\_seq2; 323 200 1396 LEN=1554; translated  
MSESDADNRDAPSKAMMIMLAPDGYTYLNI PKVPVQNSSGVS GSKESGEDPLLQIDL  
DLVKKNFRKLSIRV SITVPMFCDDAQLYAKXLNFDARLEVVLSLFLFVCN  
LWNSYNFRPLLSPKHHPDKPGGSDTFRTLKRAQTVLSNPCLRQQYDILGLDLDDDD  
VEQNSSAGINDE

DAGAEPQTTSQGI IQDIASAALTTVLQLGVRTALLGTISLI IARYRLTLFPTLAFLAFVA  
YKVRSGPTVDHSLELMSPFVIGIGMI IMYQASSGSWSSISEDGTKKIHWLLYWLGESITI  
FMFTFNSMEVKPSMSSPIYLGAIGLFGILAALWFRGKFWNYAIVIGLEIFLAIFIALAFP  
VFEMILEAILNDKLLKVGDKIRAQHKCMERYKQQSND  
>comp14012\_c0\_seq3; 324 200 1615 LEN=1773; translated  
MSESDADNRDAPSKAMMIMLAPDGYTYLNI PKVPVQNSSGSVGSKESGEDPLLQIDL DL  
VKKNFRKLSIRVSITVPMFCDDAQLYAKXLNFDARLEVVSLSLFLFVCNLWND SYNFRP  
LLSPKHHPDKPGGSDTFRTLKRAQTVLSNPCLRQQYDILGLDLDDDDVEQNSSAGINDE  
DAGAEPQTTSQGI IQDIASAALXDGIAIGCQDGYVCYHLSFVCRAIVVANNRRTTAMIVT  
DTTIPDPADIYAPFCVLLINMNYFSFSFNSSYGSTRITMDFTRPALLGTISLI IARYRL  
TLFPTLAFLAFVAYKVRSGPTVDHSLELMSPFVIGIGMI IMYQASSGSWSSISEDGTKKI  
HWLLYWLGESITIFMFTFNSMEVKPSMSSPIYLGAIGLFGILAALWFRGKFWNYAIVIGL  
EIFLAIFIALAFPVFEMILEAILNDKLLKVGDKIRAQHKCMERYKQQSND  
>comp14012\_c0\_seq4; 394 200 1234 LEN=1392; translated  
MSESDADNRDAPSKAMMIMLAPDGYTYLNI PKVPVQNSSGSVGSKESGEDPLLQIDL DL  
VKKNFRKLSIRHHPDKPGGSDTFRTLKRAQTVLSNPCLRQQYDILGLDLDDDDVEQNSS  
AGINDEDAGAEPQTTSQGI IQDIASAALTTVLQLGVRTALLGTISLI IARYRLTLFPTLA  
FLAFVAYKVRSGPTVDHSLELMSPFVIGIGMI IMYQASSGSWSSISEDGTKKIHWLLYWL  
GESITIFMFTFNSMEVKPSMSSPIYLGAIGLFGILAALWFRGKFWNYAIVIGLEIFLAIF  
IALAFPVFEMILEAILNDKLLKVGDKIRAQHKCMERYKQQSND  
>comp14013\_c0\_seq1; 443 1 1372 LEN=1391; translated  
HQRVRFEEAIIASIGSDSAAVYDTFGKHGEYIVDGSHTGTPLAPPLPIWAPVLCRHTGP  
ASIGMGSGQPALEPSVAGRKRKQSLGMWAACPVHNNTDRDKRKEKNKPSIETDLFGSSDG  
GGDEAVGFRNPSKHKDKGDPAKRRGGADPHSGVPAEARRRKLVLSSAAALLTTLASSWSGG  
GKPPSAGASSLAVLEESENRRIEVFERNAPSVVFIDTF SVKQDAFSPNIMEVPLGTGSGF  
VWDKDGHI VTNVVRNAKFAQVALITPRGRKDKKLPGSAISSP SLASSSTGDSSEIDVF  
GTTNGGLSRTSNTNKVSSDEYKRTVFKAKVVGVDPGKDIAVLKIDAPEDILYPIQQGKSS  
TLKVGQLGMAIGNPFGLDHTLTAGVISGLGREVKSPIGRPITNVIQTDAAINPGNSGGVL  
LDSRMLIGMNTAIYSPSGASAGIGFAIPIDTIKYM  
>comp14013\_c0\_seq2; 521 1 1786 LEN=1914; translated  
HQRVRFEEAIIASIGSDSAAVYDTFGKHGEYIVDGSHTGTPLAPPLPIWAPVLCRHTGP  
ASIGMGSGQPALEPSVAGRKRKQSLGMWAACPVHNNTDRDKRKEKNKPSIETDLFGSSDG  
GGDEAVGFRNPSKHKDKGDPAKRRGGADPHSGVPAEARRRKLVLSSAAALLTTLASSWSGG  
GKPPSAGASSLAVLEESENRRIEVFERNAPSVVFIDTF SVKQDAFSPNIMEVPLGTGSGF  
VWDKDGHI VTNVVRNAKFAQVALITPRGRKDKKLPGSAISSP SLASSSTGDSSEIDVF  
GTTNGGLSRTSNTNKVSSDEYKRTVFKAKVVGVDPGKDIAVLKIDAPEDILYPIQQGKSS  
TLKVGQLGMAIGNPFGLDHTLTAGVISGLGREVKSPIGRPITNVIQTDAAINPGNSGGVL  
LDSRMLIGMNTAIYSPSGASAGIGFAIPIDTIKYIVTTLIRDGKVVPRPILGIGFLESKQ  
ARALGIGRGLVLDVDPAGSPPARAGLKGTKRTETGLVEIGDIIVKVGDVTIETEANLFQS  
LENYKPGD TVDVKVLRIDAVDDQLKQRELTLOIELQSSEVLERTRFEMRPADHP  
>comp14014\_c0\_seq1; 339 388 1704 LEN=2025; translated  
MTTVPSQRESPNSIKNANPTTKEPDTKHKRPFSSVAVYHHYDDVDNQHVDNTDLNFDN  
VNRNYDSTTANATQTRYQHRYSHVSAQNLNKLNI GNANSAANGSCCYSLNNTNNI PRFPC  
GNNHHEDEVNDLPPALEEPKYSVHKRVLPAQLTAFSSQKGKRYLMEAFAGTAESYWKLT  
EHFVNQSDPAFCGVTTLLMCLNAMCIDPNIRWRGGWRFYGSEDVLLNRCCFSAERIRRQ  
IVLEDFARLGRCHGLTIDLKRPVVKDQELDRSKNNDSSFLESDCKRNEGDESFSLEDFRN  
DIRLILSNTKARHQPI LVVFSRLALGQTGDGHFSPIAAYHEKTDQVLVLDVARFKYAPY  
WVGVEDLYKSMREADSVTKPRGWFLAPPKNHDCIDDENGTEDRRPIEVVPKLGDPEIC  
PVSDIKVHFCKGNLQPVVA  
>comp14015\_c0\_seq1; 763 66 1733 LEN=1821; translated  
MAGRMSAPRAILVSLGVAAALLALVA AVSVAQRSEAI VDAASGAVHVGGEPTPTPTPE  
TNYGVDVSWPMQHGGNVANGQSERYNYMSGCYEQGSNFEKRADGLYQKKENPDEKGDNA  
DYVRVCNNAENDRLQMNLNQPREMQNYTHAGYAKVHTPRKAMELLQSFFEKNERYVWPEF  
WNEGNTYVNHWEVPTGLLDIGRESLPHFAREERETI IRSIQDVLESWTGQRLVLT SAYG  
IRVYQEGAILAPHVDRLPLVSSAI INVQKNVAEPWVLEVI GHDKAHNLTAEPGEMILY  
ESASVIHGRPYPLRGEGAKYGSVVFVHFEPYHTLRHAHGATGGDHYAAEAATKASKNAF  
EKALGEQLKKPPLGDVAREDPDVATDESSTAGSSSNHHPKPGVFRKHPGYVWPEYKGL  
YDQHFFHYEYEDRVT PKSPKAVFGDLTIHQ AASL GELAVL KELAKA QGRHKL FKADSN GWK  
PLHEAARS GHADVIEYLL EEGANVNERTNFDKGGNAMYWAKKKPVKNAKAI AVLELHGGV  
TVAPFEKKKQDAQSS



>comp14016\_c0\_seq1; 343 1 1631 LEN=1811; translated  
SCLAFVPTVFQILSLCISDFLVXVATTFFEGGPDADFVGMVGLGCTKPGQLCLITGSSHLHC  
VVSSTSSTAPGTWGAYKGAPLPGTCFAEGGQSSTGSIIRWARNILGESDREYKELDQDAA  
EIPPGCEGLVALETFQGSRTPVTDPLQRGALLGLTSLHTRAHIWRALMESVCFGTRACLE  
GIEKAGHGCNEIVIAGGATRSDLWLQMHADVTGKPVVVCEFADAPLLGCAILASVNAGVH  
ANVDEAIDCMVRKAKRVVPSEAASKAYDKLYKSVYSKVGSA TRPVAHSIAAFSRGGHVS  
PSEGTDARIPKVPTI SPSSLASDWS DIRGEIQRCLNAGANRLHVDIFDGVFIDSPHALTF  
GPQMVEAMRRC SNNDTVLDLHICVDRPARYISAKEAGNTFIFMWEAAKDAEAALEIARQ  
VAESGMDCGISINPSTPVEDIFP LLESGLIDVVDVLAVEPGF GGQRFQDSAIKKIEILRR  
FRDNRGETNDQRCFQIMVDGGINQDTAKLT TDADILVAGSFLFNKQYIQDGMSEIEASFA  
TIP

>comp14016\_c0\_seq2; 345 1 1391 LEN=1414; translated  
SCLAFVPTVFQILSLCISXFSRSVATTFFEGGPDADFVGMVGLGCTKPGQLCLITGSSHLHC  
VVSSTSSTAPGTWGAYKGAPLPGTCFAEGGQSSTGSIIRWARNILGESDREYKELDQDAA  
EIPPGCEGLVALETFQGSRTPVTDPLQRGALLGLTSLHTRAHIWRALMESVCFGTRACLE  
GIEKAGHGCNEIVIAGGATRSDLWLQMHADVTGKPVVVCEFADAPLLGCAILASVNAGVH  
ANVDEAIDCMVRKAKRVVPSEAASKAYDKLYKSVYSKVGSA TRPVAHSIAAFSRGGHVS  
PSEGTDARIPKVPTI SPSSLASDWS DIRGEIQRCLNAGANRLHVDIFDGVFIDSPHALTF  
GPQMVEAMRRC SNNDTVLDLHICVDRPARYISAKEAGNTFIFMWEAAKDAEAALEIARQ  
VAESGMDCGISINPSTPVEDIFP LLESGLIDVVDVLAVEV SLL

>comp14016\_c0\_seq3; 654 17 2248 LEN=2271; translated  
MGAISFKKTLQTSRSTASILTCIWFLVITATRRTVAISDTSSSPSAKARRRLVVGVDGGT  
ESIRACCFDAETGRVVGKSCASPYQTFHPNPGWAEQDPNDWYECLGKSVRSAITSLKEDD  
SNADEYEISICVDTTCCSVVALDKNDEPLRKCLLWMDARSASQTEQIMAE CRGDPALLV  
NCGGEGPISAEWMPKALWIRQNEPSVWENAKTICEYQDFINFKLTGEMCASSCNAATRW  
HWDGEECLKAATQENKYPGKPI SLYEKLGIPELANKLPLKCI PMGGSVGRLTKEAAQHLN  
LPEGTPVAQGGPDADFVGMVGLGCTKPGQLCLITGSSHLHC VVSSTSSTAPGTWGAYKGAP  
LPGTCFAEGGQSSTGSIIRWARNILGESDREYKELDQDAAEIPPGCEGLVALETFQGSRT  
PVT DPLQRGALLGLTSLHTRAHIWRALMESVCFGTRACLEGIEKAGHGCNEIVIAGGATR  
SDLWLQMHADVTGKPVVVCEFADAPLLGCAILASVNAGVHANVDEAIDCMVRKAKRVVPS  
EAASKAYDKLYKSVYSKVGSA TRPVAHSIAAFSRGGHVSVPSEGTDARIPKVPTI SPSSL  
ASDWS DIRGEIQRCLNAGANRLHVDIFDGVFIDSPHALTFGPQMVEAMRRC SNNDTVLDL  
HICVDRPARYISAKEAGNTFIFMWEAAKDAEAALEIARQVAESGMDCGISINPSTPVED  
IFP LLESGLIDVVDVLAVEV SLL

>comp14016\_c0\_seq4; 602 17 2488 LEN=2668; translated  
MGAISFKKTLQTSRSTASILTCIWFLVITATRRTVAISDTSSSPSAKARRRLVVGVDGGT  
ESIRACCFDAETGRVVGKSCASPYQTFHPNPGWAEQDPNDWYECLGKSVRSAITSLKEDD  
SNADEYEISICVDTTCCSVVALDKNDEPLRKCLLWMDARSASQTEQIMAE CRGDPALLV  
NCGGEGPISAEWMPKALWIRQNEPSVWENAKTICEYQDFINFKLTGEMCASSCNAATRW  
HWDGEECLKAATQENKYPGKPI SLYEKLGIPELANKLPLKCI PMGGSVGRLTKEAAQHLN  
LPEGTPVAQGGPDADFVGMVGLGCTKPGQLCLITGSSHLHC VVSSTSSTAPGTWGAYKGAP  
LPGTCFAEGGQSSTGSIIRWARNILGESDREYKELDQDAAEIPPGCEGLVALETFQGSRT  
PVT DPLQRGALLGLTSLHTRAHIWRALMESVCFGTRACLEGIEKAGHGCNEIVIAGGATR  
SDLWLQMHADVTGKPVVVCEFADAPLLGCAILASVNAGVHANVDEAIDCMVRKAKRVVPS  
EAASKAYDKLYKSVYSKVGSA TRPVAHSIAAFSRGGHVSVPSEGTDARIPKVPTI SPSSL  
ASDWS DIRGEIQRCLNAGANRLHVDIFDGVFIDSPHALTFGPQMVEAMRRC SNNDTVLDL  
HICVDRPARYISAKEAGNTFIFMWEAAKDAEAALEIARQVAESGMDCGISINPSTPVED  
IFP LLESGLIDVVDVLAVEPGF GGQRFQDSAIKKIEILRRFRDNRGETNDQRCFQIMVDG  
GINQDTAKLT TDADILVAGSFLFNKQYIQDGMSEIEASFATIP

>comp14017\_c0\_seq1; 350 175 1020 LEN=1750; translated  
MPHVELPSAVFKVVMLGETFTGKTSVLVRF AEGRYRDS SSSDPTVGASFITKRLTVQGVTA  
KVQIWDTAGQE QFKRLAPMYKNA AA AVICYDVTSPKSFETLEYWMNELQKNSQAHGMVI  
AMCATKCDLDRDPDTSQAELAAQTGSIFMKTSSKTNSNVQLLFQKVMERVL DCHNGVGS  
TSSPPAPPTTELNDGTNNTSIDKGTGAGSQNEATAQKSSGRFSDEKKMELEDNDDVV  
DVKRK VSEDGSLKHANVSRCDTSLMCGEVVGEDGSIRCVIQ

>comp14018\_c0\_seq1; 720 1 1833 LEN=2019; translated  
CSSKVRPQALIRRSYIDSLPKSTLRRHAKFKKTYEKAKEAMAGKIDMEDEKESTRENGAR  
ESSQKRKAGTIEDVSPPVDNTS VDRDEEIVKAPTKRQKREGNPGGDGDAGDKDSSEGE  
NNGGDKQLHTGGDEEKVDDKTDLSPLKRGDADHKDTASREERDDEDGTNDMKTETGGENS  
KVKDGINGIEHNNDGTNNDLETSSENDGRESSVKMKQGDGNESSQGAPSSSSPSTNEPMGD

TPSDKKNNTTTTNIYDSLKYIMVRNDGKPESLIKLVALKSLFSRQLPKMPRTYIARLVFD  
RRHTSLVILNDDPATKDTDEEVIGSICYRAFPEMRF AEIAFCAVNASHQVKGYGTKLMNL  
VKKEGARTGIEYFITYADNYAIGYFKKQGFTKSI SMPKGRYQGLIKEYDGGTMMECYVHP  
SIDFTRIP EMLAAQREFILSRIRLKAQSHKVVYDPLPKNWKPKLEGASRGNEAAARALAV  
PGMIEAGWTMADLMAATGQGKDLDRAKNQLKSELLAIVRKVEEQQFSWPFREPVD TNEVK  
DYLDI IKQPIDLQ TIDKRIRKGDHYKSKMLYADLMLMVNNCKLYNLEASTYVHCAVNLE  
RFLKNLFASK

>comp14019\_c0\_seq1; 326 203 1144 LEN=1262; translated  
MNTIETTPDIEFNMYEGIKPSENWELDCYSRPVLTAGGKKLWEVLITDSTGSFRFCKTLP  
SNKVN SKEVRQTVEDLMEDPNIDLK PSTIRFFRGAMFNMINIALNELDVVGRPSRCTNSI  
AQWLEERHRDVYPNMEGYRAQMVGSGLASGGPSFLNVRTPVKMPDSL RGEKYAFVALPL  
AELLPGGSITSENIGVGR LCP IPENLSGDMPPADTFVQGI VILTQRPDALAAWLAGTELA  
SMSCDLRKRNVIMETDIDTRYLMARLNDQQREEGVAFEEGKDALDGLHFVCVQRDEDDDD  
AGFWLMRDLPSGI

>comp14019\_c0\_seq2; 220 203 616 LEN=1562; translated  
MNTIETTPDIEFNMYEGIKPSENWELDCYSRPVLTAGGKKLWEVLITDSTGSFRFCKTLP  
SNKVN SKEVRQTVEDLMEDPNIDLK PSTIRFFRGAMFNMINIALNELDVVGRPSRCTNSI  
AQWLEERHRDVYPNMEG

>comp14020\_c0\_seq1; 788 105 2177 LEN=2454; translated  
MTDNVAELAEATKKMSPDRSGSASENGDETTSTKDTTDTDSYV VETATSSDET KSGDND  
DGDDVKSEAEDDTRTQEEKDEEAKEKEKEKEKQRIKELEIKYKDWPLHDIKEPHDHDV MYG  
RGGGTNHHPGNKRYRKMVEDRKVKYVNSKRLDKPLVALEI KEWRAQWPPGRFLKQDEAT  
GLWNDVGEKKAREKTSQALREKAPQIRKQEEEEKNEESASNGDANAEGTAAKGNKKGKVK  
RPDIVRRDHTFGREYLGKGESLDIEGFTWVKDSGGREMSIGSLGSLPGI VLPGRSSSRG  
SIGPPFAQQPPPDYHGRVASGEPREFSTSSIQSWGSSSFQQFP GAPP P P P P P P P P P P  
GSFTFPVPPSPRGARHQ RSGSWNAGGSGREHSFSLNPLPGAIVNRPAPSATFDSRGS GF  
NQPPPPPPPLVTHPGFGYQQSGDSMGTMGGHYRQVP SPANSNTSSPPFNTMNINRSWSDGG  
GPPPPRDFGHPNYPYPPQYDPQAYTGADTSPSRGQQSNHNDALPRPGMVKRDTSNQNET  
FESKPHKLRATLSRDQSATS NRLKQQYAPEVFNRDMQAIQKT TEDIRLGSPVPEAANLE  
PLSMDGRTT SIDFLEPGDLKPQHLTRGARETSLGVFGFNDLIGDSSNPLNNSNDVD TDKK  
PPSKPAPLQEASRANSLYELGFDDLIDDR

>comp14020\_c0\_seq2; 623 105 2274 LEN=2551; translated  
MTDNVAELAEATKKMSPDRSGSASENGDETTSTKDTTDTDSYV VETATSSDET KSGDND  
DGDDVKSEAEDDTRTQEEKDEEAKEKEKEKEKQRIKELEIKYKDWPLHDIKEPHDHDV MYG  
RGGGTNHHPGNKRYRKMVEDRKVKYVNSKRLDKPLVALEI KEWRAQWPPGRFLKQDEAT  
GLWNDVGEKKAREKTSQALREKAPQIRKQEEEEKNEVXQKQNM IYLFEDSAHXAMNNTFI  
AVFVSAXFMESASNGDANAEGTAAKGNKKGKVKRPDIVRRDHTFGREYLGKGESLDIEG  
FTWVKDSGGREMSIGSLGSLPGI VLPGRSSSRG SIGPPFAQQPPPDYHGRVASGEPREF  
STSSIQSWGSSSFQQFP GAPP P P P P P P P P P P P P P P P P P P P P P P P P P P  
GREHSFSLNPLPGAIVNRPAPSATFDSRGS GFVWNP P P P P P P P P P P P P P P P P  
GGHYRQVP SPANSNTSSPPFNTMNINRSWSDGGGPPPPRDFGHPNYPYPPQYDPQAYTG  
ADTSPSRGQQSNHNDALPRPGMVKRDTSNQNETFESKPHKLRATLSRDQSATS NRLKQQ  
YAPEVFNRDMQAIQKT TEDIRLGSPVPEAANLEPLSMDGRTT SIDFLEPGDLKPQHLTRG  
ARETSLGVFGFNDLIGDSSNPLNNSNDVD TDKKPPSKPAPLQEASRANSLYELGFDDLID  
DR

>comp14021\_c0\_seq1; 1171 93 1727 LEN=1896; translated  
MTSNA AETATAMETEEAANSESKNENECGDESQPPPLVDGTEEELKSGSDDDDNDDDDDK  
STSSTASDDSKEDPEIALAKAMAFKEEGN NYFVKEKDFEKASRSYRKGVNRIKHLNKAN  
SGDDQVKALLLTLQTNLSMCMCFKLGKHRQSRDVAGKCLEIDPHHV KARYRRAVAHRKLG  
SEEAVADLRAALATDPANASVRKELAAIQKELQRAKKAQKDSLRRAFSKGGLLND DRVED  
EAAKAERLAKEAREEAALKKRKQK WEDDCVARMARGEDAIGYEDWDKEQTEKEKAE EEE  
ATRKRKEDEKRRKEERRKAKAARKAAQADSDDDEDDTTFTEKELAE MRGYKKTADGRITSY  
FSREQSEEEKAMLDIAPKPI SDCTPQPI TPSSSAGEGGAARGSSWNHAGT WEEKDTTEW  
CKTRLETRLSETKVEASGSDGHLCCSVTKVKDITGDASVAVVSGKKRYIFDFHCKV VFE  
IKEESTGDVIAKATLNLDPICSTHHELEVENAGWKKAPSENQEVANDCRSRIVSEIRE  
SVKLLW

>comp14021\_c0\_seq2; 1149 93 2009 LEN=2178; translated  
MTSNA AETATAMETEEAANSESKNENECGDESQPPPLVDGTEEELKSGSDDDDNDDDDDK  
STSSTASDDSKEDPEIALAKAMAFKEEGN NYFVKEKDFEKASRSYRKGVNRIKHLNKAN  
SGDDQVKALLLTLQTNLSMCMCFKLGKHRQSRDVAGKCLEIDPHHV KARYRRAVAHRKLG

SEEAVADLRAALATDPANASVRKELAAIQKELQRAKKAQKDSLRRAFSKGGLLNDDRVED  
EAAKAERLAKEAREKEAALKKRKQKWEDDCVARMARGEDAIGYEDWDKEQTEKEKAAEEE  
ATRKRKEDEKRRKEERRKAKAARKAAQADSDDDEDDTFTEKELAEMRGYKKTADGRITSY  
FSREQSEEEKAMLDIAPKPI SDCTPQPITPSSSAGEGGGAARGSSWNHAGTWCVVVSEAC  
VCVCACVFVFCVFNPNVLFEARAWDSKRSKCEDPVRSLVVLVLSRHRIDXAAGVIHFAM  
WSFLTTAFFALGLHPKRYNGPHPSVWEEKDTTEWCKTRLETRLSETKVEASGSDGDHLCC  
SVTKVKDITGDASVAVVSGKKRYIFDFHCKVVFEIKEESTGDVIAKATLNLDPICSTHHD  
ELEVENAGWKKAPSENQEVANDCRSRIVSEIRESVKLW

>comp14022\_c0\_seq1; 753 1 2715 LEN=3271; translated  
QQQGLIGSHVGDGNNQAEGDDGIASKAAMEKVVDSNGNERSLAELTLHANLQPQELWANV  
AADTAQNQQNGSSNSNGGGGNDENDARHQQFEDAMGGIVAAYHDAASPAGGGSLNAAPQ  
LPNPPTLERLEEISDIIARIQNMHQRESLAVHISQDDCYLKSILSLFPPAEAKQDLCSL  
TRLAACVKNILLNNDPSILESVNDELVFEDICTTLEYDPDLRDKANHRWFLRERAKFRT  
VALMEDEELIGAIHRSFRVNYLKDITLLRPTMDESSLSTLSSLQTFTHADVVKGVTMSPFE  
SDDRGLDRLRDSYLAKVIRILGHEMDNICDLEWRELENLEAGKDVHFI IAKREQEESSSDQ  
STIIASGKYPESQKMSTIWKQHLAPQDNSTISRRIRRRGSLSLFLRELFNMVRI SLHQTDK  
DDFFAVLVSMEVDLSYPENELAAGLKDGTASQGTARPINFLLLLATVLSDPETDVTDKGL  
VLEIIAGIAMHDP SLIRKCLEFYASCKNNQGGVGLSRPRPNGKRQVIFQCPPNDLLASL  
LFLLLAIE TDAGLLLQVSEIMRI ILDTDVVGENRPMNAGFADEAEGIPPSGGHNPPHDQHP  
NPNNGSNTTSTEQNQFLSAFYDHYVQWLAAPFYAILFPLLRFP TAVFTGQTKSRIADKM  
FERFERGDYQDEPMLHKVPFSALRSSF AVELLSFCVRAHQYRMKMYLLRSRVLGNVLI  
RPSLPRNTSGDRCLKLAALRFLRAVLSVEEDLYHRHI IQDDLFGPVFEAFRANPVGDNL  
VSSSIVEMCDFINSKNTNSLIEYIVTKHIFATGAEAPVPSLEDVSSPYVSTLTCLRQSYE  
NLVREERNHQKQKNNHHHPAGGEHRAVVSNAIGRPLVMNERAIEDQRRRFREADQEE SYFDR  
DDDE

>comp14023\_c0\_seq1; 292 102 857 LEN=2366; translated  
MKVFENHHRRLSSILLLLWILRSFALSTASDNEDIAPSLSPIFLTKINYDRLTAGKTVFI  
KWAAPWCGHSQELAPAWDRIVERANDSRNSFHPVLIAEVDCSQEQEWCIEMGYTAYPTLT  
YGDGSVGIFLKRYSVNKEFEDLYQFYEDKLLGKSFCTPGNLAACGDSQDRIRQYSK  
LSIDELEDLVASEERRIHEAEKDFELRKKELQAEYDNISKDHELETANIKRQLRVLTNLL  
KKAQKKPTSDA

>comp14024\_c0\_seq1; 1094 332 2923 LEN=3154; translated  
MSWHNR IALKRHGF RKMGYQPPDDMPLVKASSSLTASTASSRSISPRSGNTSPSQIMCG  
SGLGFKVKGLNKNKNYHNHSTKNIAAVPDEIEALSFPDLRASDNNSPVSILEENSHSFT  
VQFDPDNGVIPVVEEKSDSATVFFDEASNDGSI FTDSKQDKCDEEDNRSLKPPSLADMN  
SYNGEEKERDASDSSSRNYLNEDADAATWKADEVDTFLDAEDFGDSSGRSPMLEISGINL  
VTERDRYVNELQETNHLMFVFNALVLIQKQRDWIAGSLVTAKGASKGASNLIMMELSNLER  
KIKLLMDHKWPNELEKQKIDPLTPSKAFFKSMALIDRSIEQFHKGYLECMSNTGEEN  
HELRARVEELLALNDTLQKEASRSKQKTETIRNLQKERDELTRMDRTDEKLASLLPNDE  
SESSTPKSKFLSVKSYIERLEAERERHFAEIRQLKDTMESTPVDSFTKGGDTQEENARAS  
ERSTLSALDKLADETI SIDEVLSVSDISDSENRLNDETDVLRDDLGSKWHTLQENEDAM  
ALVASKENEVNLKSKAVSDQGC SIESLRSECKLMRVQLELEETNRNEYKYQCEVKDAALA  
ISQDRISTLEEQVLGAHAQCAMYE EEELEAMKESFSPENAA TKQEFFHSGDEVKSQLERIQ  
TQFEEELSKKELKEVEEDRERLVRDLKSSMKEVEVERDNLRAELIRKNNASPRLPPLP  
PPIADTFKDEKKEADEDVLLPGHIDFERMQSRFAEKASKQANTIALLTEQNEIKDEQVKA  
LQEMI ESMLGNNKSEFRPEDKNRWGQRFSNLRAKSQRASDLLNRSRHHGGSTHGSRHGGS  
FHGSRHHGSIHSDADEMEDYSNR

>comp14025\_c0\_seq1; 461 68 1511 LEN=2104; translated  
MLAAANPKGPDSSATNDTKNDEIADGETSGGNDSTRQKEKKLYKSPRFTGYLIMFLSSV  
INYHGVFVSQSIDDVHVIASSSVQRQFGFVAVVSCITSGFCVACHLDTYSCLANIWKNK  
LFAPKSKFEMILDYSLLLWWMFMAVI IQTRAKGIAGDGKGQYNIYFSSWCCFCICATSIVES  
KMMERDWP SIKEFIKSWPHRAPGWIAILLSDFFALWVYVDIYTAYDMNPNSRSEEDANPK  
LEAYYGSIDDRQYELLVFLAAATLLPSAVFVMEIFRVSSDDKKNVEKYIEAFCLLVLA  
FVWIPAVCFATTPGGFAAVSPIENSLQASFN TAILLISCVFQTPNTANRKQLVLYMGYVF  
FGDGNATLVVSDSRESLHETILEKEQEYQKHQTKVLETAHEIMGESSDDGDESDDENGQ  
DSL RVTLLEDPPKAPKRQTVTFEMKDVSDDDQSLDSSIKQEIREKETNRNAYFDLDDILE

>comp14025\_c0\_seq2; 482 68 1426 LEN=2019; translated  
MLAAANPKGPDSSATNDTKNDEIADGETSGGNDSTRQKEKKLYKSPRFTGYLIMFLSSV  
INYHGVFVSQSIDDVHVIASSSVQRQFGFVAVVSCITSGFCVACHLDTYSCLANIWKNK  
LFAPKSKFEMILDYSLLLWWMFMAVI IQTRAKGIAGDGKGQYNIYFSSWCCFCICATSIVES

KMMERDWPSIKEFIKSWPHRAPGWIAILLSDFFALWWYVDIYTAYDMNPNSRSEEDANPK  
LEAYYGSIDDRQYELLVFLAAATLLPSAVFVMEIFRVSSDDKKNVEKYIEAFCLLVLA  
FVWIPAVCFATTPGGFAAQIGNSWFFTWTGTCFLVMETLLWFVSDSRESLHETILEKEQEY  
QKHQTKVLETAHEIMGESSDDGDESDEENGQDSLRTLEDPKAPKRQTVTFEMKDVSD  
DDQSLDDSIKQEIREKETNRNAYFDTLDDILE  
>comp14026\_c0\_seq1; 468 50 1411 LEN=1623; translated  
MITFKARFTFCLVFI SLATSLSQSWFLHVESFVEPGTRRHYSRSAWIAAPSIRGNPCLY  
SKYGNITIVKTNEFDPHWDPLWVTGRRESIAQMSMAAMLVGFPWDARASSTTQSQAGTQS  
SNSASNKSTPKDRLLDPELSAAVQQLFDLDASNRLVPGKDYVIDVQGAFRKSSGGNGTEG  
ANDAAPGLFRYVDPVAFVDRPTYQLFLALLDNYQSNVCSPEDDTKAEQEEAQAFLRACM  
ATPAMQFCYRCSRSLAAEAAAAEVAGGDGTANTPAAKKVSFDTEEDFLRLLYKIWFRMY  
SRSKCEDEDHNKINGSSGFEHVFGVETRNGKVI GFHNWIIQIYSQEKLGNVDYRGSIAK GK  
TTSNTNSSRILTYNLRWNGAEKYVGTSTF IGVSPEFELALYTMVFLVGKKNIVRLNLSQ  
SSAERSEIADLDVKCFKTKGKVGSSYVESIATL  
>comp14027\_c0\_seq1; 626 196 1746 LEN=1988; translated  
MPAPTSSTTASRSDPSISSTPTASFHIVATTFVLGTICLALLVLPRASSFSLSPSQSHGL  
SSRSTESNDRTPTISSLSFQSSTAVGTETDNSSTLLMKEQAGGNSMNRRRRQRIRNSNAG  
TDNAGTNGDENSSSAIFENVPKEEDLPDPVVPFVSVSSIKLVDPDDSGDDSDVRVELRLC  
PDDSSPGDVVVIDPRDLHQTSDFELWMMARKNLVDVSASQLSVVLGTNYFTSREKLLQDK  
TKARVADLEKDDSIDGAIALDKEDPTGTAENNSKSNKACAWGIRMEPLAFAQYSDVMT  
RDNNDGDGDDVEGGYQNNRVVETGMHLLRHTDPATKKTIFGASPDGMVTEESRDS DATE  
SQTSVGLLEIKSLWGRRHKGSLEFHFHGCPKRFYDQIQGQMAICKEWCDLMLFIPPSGGT  
GGGGGKKNKRKGS AKKRKKQAAAAAARNTNARKNRGRNYFIIRVKRNEKYWNETVLP A  
LVTFCDEVEARTAAVLAGEPIAEVAAEEDTSEAVAA  
>comp14028\_c1\_seq1; 214 323 1106 LEN=1106; minus strand; translated  
MWCSLFRFVLPCLALPCLAFQLAVATVLPDVP HGGDQVVDLQCRSRDLRVGVPGLAVAT  
KDNDSTRLEALS DQVALEALGLHPLVHPLHALVDLVGVQEGPPAQVVS DLAVAKGAVEIE  
VLVPVEWKLKVVVKDAESLVVLXHGTHGHTVQAMDDVQSKRKNPGARRKPTTAGATEKQ  
MAKQPQLFGIAKHAIRSNKGTAKTQRNKTRGKTRSCDTHHSSLLDDPEQIKSLQGGGL  
SSLASCRQLGQLLPVFAAQDSP  
>comp14028\_c1\_seq2; 305 1 907 LEN=1289; translated  
FGVDGKGLEQTHSLTHVHNXSVVEESPATTLAGSEIAIPVQVSFQKSSTSSLPHIARRRSM  
PFLLANGLRGAASATRAFRPSSPTTLAFAAAVLSLSTGSSTATMADAMPVGVPKRMHL  
TPLMKDSASWLSTASLVPIDFSPGIGDLVTEADQTVTGKEAVAANSKGAXEHLRGPQA  
RDDEGLRVFHGDHFKFPLYR DENLDFYRAF GDGKITDHLSSW SLLNPKIYKGMKGMNKR  
MKS KGLEGNLVGEGLKTGGIIVFGSDGEPYAYPEVTGSALEVDDLVAAVRDVRENGGDG  
EL  
>comp14028\_c1\_seq3; 313 1 1028 LEN=1410; translated  
FGVDGKGLEQTHSLTHVHNXSVVEESPATTLAGSEIAIPVQVSFQKSSTSSLPHIARRRSM  
PFLLANGLRGAASATRAFRPSSPTTLAFAAAVLSLSTGSSTATMADAMPVGVPKRMHL  
TPLMKDSASWLSTASLVPIDFSPGIGDLVTEADQTVTGKEAVAANSKGAXEHLRGPQA  
RGVLCREHGQQLSELAATGEGGEASPLEGFDFLFGVVKETGVDDGLRVFHGDHFKFPLYR  
DENLDFYRAF GDGKITDHLSSW SLLNPKIYKGMKGMNKR M KSKGLEGNLVGEGLKTGGI  
IVFGSDGEPYAYPEVTGSALEVDDLVAAVRDVRENGGDGEL  
>comp14029\_c0\_seq1; 443 200 1366 LEN=1508; translated  
MSHDSVRNSGYSASSVNAIGVADALSSGATTSHPKSKSWIVDFDGTCTERDTTPLLRL  
ACIVQSQQQQHATEEVPSTPEKHGLSLWNQRATADWKQREPVFAELEGEYFRRYVDVMK  
SIQSESFERGPDQTEQQQSELLQLLETSLDRLDGVSTEITGLVTESEVLRGLGGVTHLEL  
LRSIQAHGDEMAGSSSEGTEESLSEILRLREGCLPVLRRCAQRHGIGVLSINWCPALIR  
AVLVHPLCSGNDQGAGPPALEDVPPVWSNSVDHRGAVSLSVPGAI AKKEQILRLQTPTEPE  
SKATTTTEPATVVYVGDSSSTDLLALI QADVGILIGRSESTMGLASRFGVVLRLPLREFCKD  
GDEIDSNDAVVWTTSDWDEIGSFLDRFL  
>comp14030\_c0\_seq1; 913 90 3422 LEN=3482; translated  
MTGTENSSQOEWIFSLALPSTIDSNRVTGEFDTGQPQRCVELISIQNDSGPVGANFQSV  
ETKNERDDQSSSTEAAAGETA KDCEIKSLLDDEFEDSHDRKLPRAKGNEDDNIYFDGAR  
SSSCWKFYSSVHGLALQSSTLLRLSYRPAWQSIPEFTNNKRKRAIYNALMSCCQCEGLE  
EEQIWEVYSTEDIHKTEKLT TIRGIGSCAIRIYLKPLGDTDL DAMVTPRK FQTSLDLH  
RQRMNGQQEGSWSRFT EPVDNLPDGNFIVLTF AVPLDSNVCGHNHDPPLLWKVDVPPHW  
SGNSMTLDTITVLDGSVDLSE PATAVYVEGYQSWFSGSIWKGD PQPTSAMPNVFSRAFN  
LGGCLPMPPTLLPASGWQTNVCNPELFESSSPKPKKHRYKSDFFACVTTARDGIMD

EHGGPALVCGWLSQHKQFGVVSIDDR LKNVTMHAHADAMVNSRVSTDWAYAQLITPHRYD  
EPMVHYLHAAAHNQAKPLQNGPLLTGWCSWYHYENITEENLRSNFNRLSTMKHQVPT  
NMAMVDDGYMTAWGDWDSLKPGKFTTMDVVAGDIASSGMKPLWMAFPTADKHSKIAKDH  
PEWIKNDKGYPANSNCGKFFYGLDATNPQVRAHVSRIRRAVEDWGFRVLKIDFLYAA  
CLEGNGKYDMSMTRAEAMHLALQTI REAAGPDVFLIGCGCPMASGIGYIDGMRVSADTGP  
TWYPELPLPWWDNGLTSLRGMIRNSLSRAPMGHRWWQNDPDCLLLGDSTKLTNAEVASA  
ASIAMTCGMLLVSDDLTKVSPDRMKILSRIFPMTGVSGVLDLHTTKDKGMPSLIRLWC  
TDRYRNLERYSSESFRLSMREGDFSAEATYFGQOSAFVQNKSF DARERSRSCIHVAKGM  
GTWTVISLSNWSQPRYMHIRLAICSPSETGWGARDADTLKCTENTGGYHVFSAWGR  
YKYLKSKSGNDPHPI TRHLLAHETEIFHIRKVTPSKPQYVGSDIHFSCGHEVLSFET  
SSSSSEENRVTI RLKTELKRAGHVYLFVVDTS HVKVS MAGKATRWNVICNVPDDQEGL  
VSHCCGRVVRVMVVVDADQSENDGKIVIDY

>comp14031\_c0\_seq1; 496 120 1784 LEN=1961; translated  
MGKTRTATRIKQKVKGKSHNKSEDLTRLTEQYNVFTKRLQGLVSALVNQHVAMQQLAKA  
KFQVAQHLAILSKETVLFETTGTSGADRPSDSVNSYFSVQEGVANKTKMYADKYKQYV  
DYAQEWYKTIITDRVGEDLKAKEIRLELDHYQSKVESLRQSANATMAKKGQVDGKASEKL  
TRNEDKLIKIKETSSKFINDLCLLMEEITERSWRDLHPLLIKCSQFETQVSGDLAKAMAS  
LNQVVSALKKIASDNGIKEQHRLKDLGLDHPVLSSTRSKDDGRNSAIENGFSGLALGSSA  
SLSIISTGTGDNDSQYFPPGSTSGQGLGGFPVRIQPEASNGPDQSTASAATNAAPSTMSM  
MNINAAPAPMTMDTMAQAFGNAGALNGGIFGTAPNSGNSFGAPAPPPSSAPPPPPPTPP  
STSFGGGYNGFGTASPAPTPNSYGAAPQYGAAPSPMGGAYGSGYTQQPPTPQSTA  
GSFSQQPSPMATGANYAQEHSQMGGVNYAQQHSSMAAGGANFSQQPSMYSNQYGRSA  
PSYGRGTNPANPFG

>comp14032\_c0\_seq1; 266 336 1540 LEN=1842; translated  
MTAVAGDTNLFGRGIPNGNGNDDRNEGEKSIGISGYQSDYSDDNREQPQLRYGHGESFFF  
TRFQSPARIRRAFDAVRSRSSHFHFEKDGKGRKGVSTTKLGGDYVLAESEQVAVDCSTED  
VLRAYLSGDLQVKWSDGDLETSFTKCRKQPSDRCGPDRGSGEFDAHLPRGTPKPKRRNFR  
TRVMSSFDRTSNIDADS DGKKTTSYVLEKTQSNTSSDTNVNYSAA SENNGSDDKDKRSNG  
DEKRDWHFYRQDLLLKSQRVLFGHTGTMRYQQIVEIDKIGKDNYSALVRLKPNAKEKNG  
GTQIPTTTAKKPFESLHVYVGLAQAGSDVKIYAAGVFEVNRKVVPKIIVFDTS GFAGSLA  
GKGXTMALVLLRTFCPQTKLEQRKTKATMAHGAYASTAAAP

>comp14033\_c0\_seq1; 666 97 1515 LEN=1604; translated  
MTLLS IASRTYSRRALTSVAAAASSSPSFGSRFYSGSSDQVDHFVSGWDTDEV D KYKDTKK  
YCTQTFNKISEVGLSVF SKDLYDVL PNE SADGRPAHALMLRSHKLKEEEVTASVRAIARC  
GAGTNNIPVPRMTELGI PVFNTPGANANAVKELVLCGLLMGSRRVIDGINHMKDLGTQGL  
QRERVEKDKAMFGGREIKGKTLAVIGLGHIGASTAADAHALGMNLVGYDPGLSVESAMKL  
PGNLKLADSITS AVANADYISLNI PYTKGTHGII GQTI LRHCKPDAVILNFARGELVDSE  
AMKEFLDQSEGAKYISDFPDDLWDHSNAI VIPHLGASTGEAEDSAAAMAAETLRRLYLED  
GTVRHSVNF PDASL PARS PDHIRMTVVNQNPQGV LSSITEVF AKHNLNIVQQINHSRDDI  
AYTVIDIEADENADFKAMQQELTMSDGV LSSRVLFGLPGAGYSRNIDGEYHA

>comp14033\_c0\_seq3; 403 97 882 LEN=905; translated  
MTLLS IASRTYSRRALTSVAAAASSSPSFGSRFYSGSSDQVDHFVSGWDTDEV D KYKDTKK  
YCTQTFNKISEVGLSVF SKDLYDVL PNE SADGRPAHALMLRSHKLKEEEVTASVRAIARC  
GAGTNNIPVPRMTELGI PVFNTPGANANAVKELVLCGLLMGSRRVIDGINHMKDLGTQGL  
QRERVEKDKAMFGGREIKGKTLAVIGLGHIGASTAADAHALGMNLVGYDPGLSVESAMKL  
PGNLKLADSITS AVANADYIR

>comp14034\_c0\_seq1; 517 1 1617 LEN=1723; translated  
GNGNGNDPDSQQESSVFCTAHGTCVDHFETKAHPCDCPEGHRGIHCEFLRDSVPECTLSC  
GGTTLHEDGTVENPMLGGIGTCTLG IKDFESARYADFWEAHDGNFYCKCPPKWF GDNCE  
TPGVQCNAHCFNGGTCVESLDQNGETSYACDCRNAGHNWVSWAGQYCENAETASCTGHS  
FRDEGSLQQSANGHLFCTNGGTCKDPQNPHLGCDCPSDRFGPSCEF HQEEDDDCSLKCQ  
NGMCRAGMKDNKLI AKLKGKMKDFDATHHAELFEHCVC PDDYFGVQCEHKLEICPGGDH  
VCLHGSQCIAHGESEDNTLHYTCD CDSAFDALDKYAGKFCQYQSTDICTYNGQPMGRAN  
FAFCVNNGLCRGRVYDGEDPPGCDCPEGFTGDHCEYLVDQDIGSFSGNHGDFNGGSSLA  
PDPASSNEMQNAFLKKNL LVVGLSAVVILLVAVFIGIILKTL LCPGYQDECTNDVQAAL  
DEEESSPTAASSKSKHSTSRFPQSFGSGLSDVDIVDYVNNNRSVL TEKEMSNVQV

>comp14034\_c0\_seq2; 357 1 1444 LEN=1550; translated  
XPFSVLHFHSTFWPLPTPGFGTFVIPPNIYGDARIHQTKL NESHHTRASQKCPPKWF GD  
NCETPGVQCGNAHCFNGGTCVESLDQNGETSYACDCRNAGHNWVSWAGQYCENAETASCT  
GHSFRDEGSLQQSANGHLFCTNGGTCKDPQNPHLGCDCPSDRFGPSCEF HQEEDDDCSL

KCQNGGMCragmKDNKLIakLgKGMKDFDATHHAELFEHCVCpDDYFGVQCEHKLEICPG  
GDHVCLHGsqCIAHGESEDNTLHYTCDCDSAFDALDKYAGKFCQYQSTDICTYNGQPgmG  
RANFAFCVnnglCRGRVYDGEDPPGCDCEGFTGDHCEYLVDQDIGSfSGNHGDFNGGS  
SLAPDPASSNEMQNAFLKkHNLVGLSAVvILLVAVFIGIILKTLlCPGYQDECTNDVQ  
AALDEEESSPTAASSKSKHSTSRFPQSFSGDLEDVDIVDYVNNNRsvLteKEMSNVQV  
V

>comp14035\_c0\_seq1; 442 112 1113 LEN=1261; translated  
MANYGPNDGplGTAPDISIGASDALLLGVsfAGFLALAVSVYSIVLTKLkTSREllEEEE  
EREISYDERLAKADVSTLNRAQRARARHIMKQQRrvAPhPHhGPPAEEDeGRGgREll  
LEQEGEAPFAEPVPAFRDETHHSTAQNLLSRKERQKAQVELQERRllEEDRRREQKLA  
QEAAMQRKKERERKRVLEAEQGRKEREERRAEELegYRAWKVFLEDGETILTvgEWIRE  
LREHRVvGLKDLAERFRIGEAAVRNRIREllEESRVSGVLEESPAQEGGGSdSVFVYlSP  
QEMATLASyVKGRDTTtakELAArIEELVAPTQ

>comp14036\_c0\_seq1; 429 132 1400 LEN=1882; translated  
MVPLCLLFCLVVESTTSLPQFDKDSLLWSQSPMFPslPTTIVEYSQNIHRAVtNDDCSAS  
TIHRRDSVESfLSDLSLDNMYGTHPILTKSHSKRDSSYTKSWTDADWKLhQVksYERYS  
RHIRSWfSSPTFFSVLPTLISSfLWTLSCIFAVRVNLINNFVKQAPfSHSISsFTSPISI  
LLALKTNrSLNRLFearsVWGKMIRVCTSLAGMTVNYISPIDQELGILMGRYLAafGwCM  
KGKLRGEDDSLVLRLTLPSSEMqWIEtCSNAVGGISDNPSAIIFRLRSIVAKITngSEGR  
LSIAASQVMEQRLGELESSVgICKKIVASPIPTFTRMTSRVLCLFLGFLPLALVSSGMQ  
SPVAILVIVTFLSYIFVgIDEIGVEVEYpFPLlPMYSLASNLKSGVGNQfRLMEEMRTGg  
VL

>comp14037\_c0\_seq1; 540 1 1981 LEN=1981; translated  
XGTSKQHVAYDYAKRLQAGIDGLLPCTIRQLERlllllPIPNWETTRRRFPENLSfCQllN  
ETRCdVSVEATRPGNPRngLVLYAVIYNslAWERSEVIHLpVgSGGkYLVEGLADGTtET  
LEARPLPWRKSNESSGSDAEQEPKPFVLSFLAANLPAIGAKVFRIRKQQRtlQHQRllNY  
HTTKQSSemiPlGNrSEQTESQEQHQKDGLEeISNGQfSVLLDSKSGTIRrIGTQDIETL  
STWGYyTSYDKARDGNLRDDKGSQNSGAYVFRPSTPNQELKVVSPVNATVVrTALGMEVH  
TEYETPWIQTITRIFTGIPWVEIEYQVGPiPIADGRGKEVVTRYNTMVRNNATfYTDsNG  
REFMERRRNRrPTWDLTVFEPiAGNYYPVNTAIYVDEVRNDKENSGRHRKSNDRAKSVPA  
FAVVTDrsQGGGSIRDGTLELMVHRRTLADdGRGVGEPINETSSGITPCPPYGNATrLGG  
GLVIRGKHrIVVENNLGGCRQVSCGGVGGARLARSVMDSsFADPLVfVGSAPSSlVDDTG  
VLFGTTSfSGLETSLPKNVMLITRQIVYNEDSEATQGQPTTfLVRLGHQYGRGEDPDLsr  
PVDVDLAVLFPGRKLTmVQETTLsgNRNIEKWRKDRFDWQGSSTRMAHPSTRMANESTAG  
G

>comp14038\_c1\_seq1; 255 1 1175 LEN=1401; translated  
XKKQLFVNVRSLRTLSTSGEQDATMVLVPARNTAILFLAVALALCNTfSFDGPRFIVSAD  
QDESGSSfEEAQGFIRTKKTnASSAVETAeVLDCTRSSfEPGPLEKPCelDETGGPAPAE  
FSLIFPTQYGDFTAYCVRERAPVWADRvYKLAKHGYYNGNYFFRVIpGryIQFGTSGDPA  
VSNVYNYTSTTDPECSVLrPQPpDMPYCLASSSSSHPHDCTGVPALSNDfGTLAMSTSYK  
QGVPgYpDgVTWnATAELFINIGQNHFLDSNLfIPiCTIDPVAMEEVlRfPsfGEVSEL  
GGNGPSlGLLYQDGNPYIEsNPEWNASMAVTSIVSVCTAPGIPTKDEMEAKSDRASARSI  
GTKHGRSRLSWIASIAWKGVAVWLISLIVLN

>comp14039\_c0\_seq1; 318 57 878 LEN=1326; translated  
MALSTMRyKNHIKsFFWTSITRIAVPGGYNHCLsQPKSRlPVTsALGMYHTTTGCYSNSD  
KRLPTSWSELIASQSGNGEVGGDNKSYERPFWSDEWKRLGLGAALIESDGNFPQNLFFV  
QLGfGVDQHGDRLRDGFATKAaVRAVRNAIEFNsIPGVIDHVPgGRKGMiIHVKLGVPpP  
VDRPNNVAASIDALEVAKVFPYgKLLPIEIVTGGLEfHSGRVVEELGDDDDVGVCCVACV  
SIGYNDdNSSCRYESGNENETVHKTYNTKdGY

>comp14040\_c0\_seq1; 577 136 1419 LEN=1578; translated  
MEATRtAFsNKNKERTrSLTAAGRMPsVALLASVVLQLLSIHNRVSCVLSfATSPTPrT  
ATQHRNLAVNGASASTVDATAKdTEATTEALFDEFASFLQTKQSEIIDQIEQLEKdVAAS  
EGGNEAQQfSRDCWgIFENEDSNGNVSGSGGITRVIQRGSIIeKGACsFTLLKNGKLTAE  
RAASVRGRQGPENNDGINIQEGDNYCAAALSMVLHTRSPMVPTFRSDVRIflVesssSES  
DEKKAVAWfGGGSDlTPYYLFDedISFFHQRLKELCETHSDGDAMIDYPTMKQACDDYfF  
LpARSEHRGVGGMfYDDLPAAPSTLSfSKDVASNwMSWfPIVQKRQSLPYTEQQREWQL  
LRRGRYLEFNLLYDRGVKfGLANANPRVEGVMVSAPPLIAWEYNHSIEPGSEEDRLMGIL  
KSPKEWV

>comp14041\_c0\_seq1; 439 227 2719 LEN=2876; translated  
MTGIGIRNRKRGPafTAAGLVPNGRRVSQATLQRVfITMMGVVfLLWSTITVMVFRWgQN

TFFQKEVQGNWGPVFNMNKNKQLKEHIRNLRKDHDRQNEAARQPEKKKHKAPNHHFPKS  
NTGAQLNP IKPLSSKFDLEDADIHEMKHPPEEIKMKKAIQSKSSSSSQRTLKAHLEPIYLT  
DWERKPLPVRNVTEKQLTTIDYPRVNSCRKLPPELWVDDFPDADPFLPWIHDVFPDADDGK  
FIQFVAQNKRRCQSGTTPDQLEILEKMQPQVSLFQHVVPKRVNVRNSKGAAEIRYKLTSH  
EEADSDGVETRFICRFSNGQETLSQFNFNFDYVGARKHSHKLSKEGHKDHKTLHTSOLI  
FMCVPVEKLVETVREGTSVIDDWATLFTLVLPVRTPPRYGAPNRFLPPKYQFGEPYDFSA  
ATEWGDShVLPRVEDSGRWENIPICLPTYKAYPSVTSPPPEAAPTEEAAGVSLFHSTKNTK  
KHRVVACAWASLSYATRGRDFKIDGARRADEWIRFHLLTGIDHIFIYDNSREGAGLKDV  
ADQFPGRVTRVPWPATVCNNNRNFHDS PGERSSQYAAESSCRLRFGPHTDWMAMDIDEY  
ITPVGNYSIKDFLTTLDNGTKIINFSGSWRAWPRKDFIAPPVPIVDKAVCDEPYPCFHL  
KIRNDTSVLQTYNCDRQQVKTEKMPAEKQIYRTDYVLQHFVHFSTVTKFTMMGRQETVAA  
GMNFYRVAPDPLSRFSDEQTEVTMLHSAIATQDTAGWQKRCTGEMKRGTCTRIGVPTYTL  
DTSSNVTKDSEGWLYNCYVNP I IENHWVPLLNKELKSK I IDFQAPDKLQ

>comp14042\_c0\_seq1; 767 209 2230 LEN=2485; translated  
MSLESIDIENDWSEYVSLREDSFDVDPKLAPPSPVRPREEHQQHKIPLSPSNKSLCIE  
MPQQQLHPACSIGLKKVSSCYFSLASANDHESVSDLLSQLGDDVNDAGGRSNENESNPIDE  
SVNVFYHDLVMEVFTFLDAKSLMNFSETARVPNFVYFLQLRLQQLALLLNSNGNDRLA  
MSIVGKPDFSTIEGSASLLSRVATLDMKKARNLVEEYQDSNSTLRMTPLSYSLAYVRHYL  
LRNGFHNFFNNNESNEPNNEIGSTMAPTPQTLASAAVFMVVGAAASIVSSSDASAITMM  
TDRLGSDLPNVLFVRVGFVGLMRAISDTDHGTAMREKAEQMARSVQAVPAALMPGRRNGQ  
QQQHEHESQVSEDTANPELQSQTHPTPQRTKFLPLSLFEMKHMQLDMVSNAAAEKQREQ  
QTTIFGPYDHLPPETGTAEQERGEKKEQDACDAYDADENDEQPSTTQWNDPMHVGSNSTA  
NRKMPSGCVGAYSRAIHRAADFVTERVRRKERKSAFQALSPEQRFQSLRFLNACASNDTL  
DDVKEMIASVDVDQFYVGNQVETCALHSAAFNGADRVEFLCAGIDHRDPCLDGGGLCDV  
NARDENGWTALHFAAGSNSIAAVRVLARHGAVLDVEAHNGYTPLSWANRLSNDGVAEVLK  
ERMEVAAMDQSNW

>comp14043\_c0\_seq1; 157 114 479 LEN=479; translated  
MVNSTKSMMLDLTAKKVRRIRRSALAARKKAENDQGEPSLSAMLSKNEASTKSSSAATVAG  
DDITGKSSLQRLPEMSLSKEAPSTFSGSNQPFQPERKVSGLSIEDEEVATTYRKMLKMGMP  
PD

>comp14043\_c0\_seq2; 641 1 3027 LEN=3027; translated  
RLLIITISDYLTGTPKRNEEVVSTMSLLDVCHQGAWLTEDDAIQFLGLSSKAALRDAFRE  
GSLPHVYVEHGKQFEVSHPFNKHRFFVQKEGSSALKPSTEFVWVGICESLEGGEVDSL  
NSATQARIRDYNTYTDLEDAFRDLKEVRGIISSSELSGEDVDDGGDGYQYSSGGTTPPP  
SKAVEGEIYTRADGKVRVRRSSSTHGSLGKKDQLSGFIEKDKGSSRSRMSGSRVSGPG  
DGVKRNHRRNSNLHGELSRAASLSGFLSSNGEGESSKSRMSGSRVGGVEGTAERRKRS  
SSLHSRPLNQDGNFLSKTENNDSSGKMSGYSEGEIYIRADGKKVRRVKKSSVSSVASPST  
SKNSSLSGVLTDTPKQKQSGASVAGDQLAVSRESSLTAEIYVRADGKKVRRVKKSSLVS  
DETVEIITRADGKKVRRIRKTKPRPPVESTTQSMAAERSEAEGSESSTNPPKKEMTRSL  
GFFNSDKTSAPRKKPFSGSHSVAGYADSEIYIRADGKKVRRVRRVKKPSDDDPNSLAGFLD  
TEVASKPTASGAATVVGDTHPNPGRHPGVSDKSDTEIYVRPDGKKVRRIRKTKASKPPE  
EKKNSNLGGFLQKDQSSIKKKFGGSNSVAGDQIAISKEKSLTGEVYVRADGKKVRRVKK  
RDSAPSGASTDENVEIITRPDGKVRVRRIRKTKPSPSDGSDELAFLESQTKTPQKSAAT  
VAGGRINPVTPLRQKSLNDFAGDRVSDLTSTPVAANQVATRKKDDSMKGEIYIREDG  
KKVRRVKKITQAQPGDQVEIITRPDGKVRVRRIRRVKKPQDSNQGASGNDSSSLDAHLQSKV  
PQNKGSASVAGRVEGEIYIRADGKKVRRVRRVKKVSSAATSKSLATSAHGEQYEIYVRPDG  
KKVRRIRRSALAARKKAENDQGEPSLSAMLSKNEASTKSSSAATVAGDDITGKSSLQRLP  
ESMSLSKEAPSTFSGSNQPFQPERKVSGLSIEDEEVATTYRKMLKMGMPD

>comp14044\_c0\_seq1; 307 263 1045 LEN=1325; translated  
MREIVPGVKGFRRSLCSVFSVTLLGAVGAESNYNNHNSYQNSPYLYSEIQSVDFETIYD  
DGDSSGAADARRNCLNNGEGRDQQAHPGNMPPSDFSVSDVDTEYHEDPVSIVASSV  
LYDGDGCDVSMEAMMCHGGGLDNMMDRFMDYDELFEYDDEDISEDDDEDNDGHSSMLSN  
ASLRRSRSTRTERTRSHSSSGNTKSKTEPTAHMNKVVRLENKVQTKLSRIENQVKKEERN  
QLHRSFVVQERRTPVPFLRD

>comp14045\_c0\_seq1; 236 163 918 LEN=958; translated  
MDLDRDSSMSSFNNGFATFSASAGGHQQRVQPPQGLFGLVAATAPVRTDFLPVEGSNNT  
KFTLALDSPGCLPSPLSSINELVFFLLPGAASAIPANTGILLYWQVEVSPTVQSGFELLG  
SLTPLEKQSDIFRTGWSEREFIGLLPNQPVKNIGISIEPLETVRNLADGIGASVMPT  
ATNPGTAAPDKRPMVAQKIAQDLYNFMLSFDTTGGARGSQQMTVPANIFDRWRRRFENKLG  
RDPNFFLKNSD

>comp14045\_c0\_seq2; 251 350 1126 LEN=1625; translated  
MKLRILLLSVCAGTGLAFAPMHTISHTATTALDAVSMPPPGDSWSDKPLHVHETTTTPVVD  
PKFSRLNRMMMMDVVVPPSFFLTWAVGLLGPLIMWYHPSYMPDGSPSLIGIFGGGFHILF  
ATLLWVQTSRVRCVFEKDAFEFYNVVRGPRLDYENGKAEVLRKPDNYVSGTPNRWKYDTII  
NYGFFPSEDFPVICYFKETETPEYKWNRRWFAAFDSYNGGQPHFFPGICNVKKFKEQMELR  
GAARKPIPTLKSTREKKN  
>comp14045\_c0\_seq3; 251 350 1126 LEN=1596; translated  
MKLRILLLSVCAGTGLAFAPMHTISHTATTALDAVSMPPPGDSWSDKPLHVHETTTTPVVD  
PKFSRLNRMMMMDVVVPPSFFLTWAVGLLGPLIMWYHPSYMPDGSPSLIGIFGGGFHILF  
ATLLWVQTSRVRCVFEKDAFEFYNVVRGPRLDYENGKAEVLRKPDNYVSGTPNRWKYDTII  
NYGFFPSEDFPVICYFKETETPEYKWNRRWFAAFDSYNGGQPHFFPGICNVKKFKEQMELR  
GAARKPIPTLKSTREKKN  
>comp14045\_c0\_seq4; 207 905 1381 LEN=1851; translated  
MPDGSPSLIGIFGGGFHILFATLLWVQTSRVRCVFEKDAFEFYNVVRGPRLDYENGKAEVLR  
RKPDNYVSGTPNRWKYDTIIINYGFFPSEDFPVICYFKETETPEYKWNRRWFAAFDSYNGGQ  
PHFFPGICNVKKFKEQMELRGAARKPIPTLKSTREKKN  
>comp14045\_c0\_seq5; 207 905 1381 LEN=1880; translated  
MPDGSPSLIGIFGGGFHILFATLLWVQTSRVRCVFEKDAFEFYNVVRGPRLDYENGKAEVLR  
RKPDNYVSGTPNRWKYDTIIINYGFFPSEDFPVICYFKETETPEYKWNRRWFAAFDSYNGGQ  
PHFFPGICNVKKFKEQMELRGAARKPIPTLKSTREKKN  
>comp14046\_c0\_seq2; 1700 419 7168 LEN=7265; translated  
MGCGASNAAHAGMNSMDKSSGVTNNQNSSPAKASNAQNMQEAKQPLLPTNPVTSNARY  
EDERGRVNDANTAALFDKSPMELYSNGIRPSYANIDRQSASLHKINFPGPPEKVVQTQVGV  
DDPKWRELWFHAKDNLDPADVHATMQDLMANVTNRFSDTELLFLQRRVRSTVRRSQLYT  
EQQSI SNGGKNRGAVKSKRNRDASSNNTPSLMQELQETIILAKEHLLSSHVLRKVLPH  
PPVPIVKCNIQFLAANFIQAMGSQSDLQNTTVELSSSGNNILIGDIGGGPASTFEVNDTI  
SGIDIVETIYLLALYCNDVLDVDAEIAVDSAKANNLEMDVNKNIQNGSERSYNKNSLPQ  
PSEPKCEPPMAPLGMGMHSLTFILGLALRGSRQQQLNLLFYMLLEPDSLRTFLENHPAG  
GVPTWLLVEDQDIVISLASLSHYWYGGGSSNCPFSPSSNSKSGARKTGAEQWNRTQHNL  
ALKLSGYEVIHFLMAILIPESFMMIDNPSILAFGTSQESSNENEQNSTSRSPVSSNRKG  
GLVGFKLKRGSGNSKRDISNKNDSKINGNGSFTIDDSETHQTDVSNRLKRQRQQCCSDKFT  
SATMSDNIDFLNDYCAEESRMNFAEQAAIWLDRHPAGSMMTILDFDRFCRKALDDGCISA  
IMHRLVAHGWIPTPSMELDMVRSRWRLWQESSSSLSAWSKHVYQSADVAMELLSQNVRLV  
LSMGTDNSSDENKNASLVPECDRNQSCSSQVVFGLGGLGDFGKGLGFGVMYCIDKWWQD  
WEAYVGSWAGDSKSPSSRTC/VGNLKLPRKRPGELESTESLLDRHNDVVVAGTLGSYELMK  
NGLEKDVYVLPVPAVWDVLF EIYAGGPPLPRMVSSPEPKNENIKREGANEKSVELCSPT  
SSEGGVMHGDLIDILSIPTESDLAMATAPIDNKDRVLRIPRMEVITHPWVLOFQLCDPL  
QPYRKQDFNDAGPMTIRVMASPDQPLWRLYSEVIMRPLPFHIYRAYGPDGRGKVRWWKRVE  
ASEPKDPYGPWPCSLCKNRFAALPRKNDEKELNENFDELRSNWEEYSDNATVEGSGLS  
ESQVLVEFAIMNRNKNFIWPREAAAKVGRDRRLADKHKKFRMMLLGLNDNGSPMSTPPDL  
VGLYVDAREERTGRWYEVRI THVKVIDPETDEENDDSDIDDYPAQGYKEVRVDFTKHGR  
AEWIRIPGESGRLAAGRFTMGEGGVSPSPSKQTQGTSGAVTESKGIQAQVKKAPQDA  
NDISKVCTIPGYGACGLVNLGNTCYINSALQCIYFPLVRSYLLSGDFRDDLKNDNPLGT  
KGVLLLEFVELLRFMWSAKAGEKSPFQLRKLIAKLRPDFAGADQQAQELLSYVLDALME  
DSNRVIKKPYVEGLEDDWVKVTSLSRVGEEAWRRRERRRSRSIITDVHTGQTI STTTCPVC  
NFASQKFDPNLLSLPIPTVTDVIFKCKVIRRANSFNTPWILNRPKHRLGKAKIRFSPNK  
SMNSTSPSDNLIVEQYI IAMSRLADSSDLRLKIQSMCGISATNLIICSAEEKLATKEKDD  
GSPVRRITELTI INKKGPCSQFARQRNTNDESNTSATSPALLVAFESTLQSRPLDGRVDD  
GSETNYDDYDEEDDIDNFSKGRKEKEKELEKIMIMQYGNEEECRLYDTETLPIAQAVSR  
SLWPTRHQELKLRVDAIDHKKHWYPGSVVEILENDPANGEVGQDETQVKIHFDFSSK  
WDEIYSIEHFNNGQVPLYSHATPRAKPTFIVFHRYMDRSTRIPNLFGQSFYVQCRSEW  
STARAGAQILAQAQSRFLRQGSIQTGVPDVGQAQEREMKIDRLYDRTQSI ISELIDLLEA  
DKEYLMGALGLTDDTPMARRFRNPGFDASTISSTLVRRVNEKHLRPLFEVVRVCTAESPLA  
GNASEECAYPFLMRTIGNYLSARHAVVLQWREPPSDKKAINSPLSNTKYSNYLNAVPMY  
VPPKEFMDEASAEILTKANQKAKKSLSARGSAGMPLGKCLTEFCKTQKLENDGTHWRC  
PRCKDFRPGAKQNLVWLQLPDILTIHMKFRSSQKWREKITTKVNFPLTGLDMRKWCHQE  
SPVLETTVTDSDSYVDLIGVLNHYGGMTGGHYVATCKATPCSKDGREEVAFDFNGVGASM  
PIATEDEAGTPSGWKPFGRSKVEVNENKVSALATAKFQRESVEPLWLQFDDEVVEPIAPK  
NVVSESAYVLFYRRRLTPANVARYSSLE  
>comp14047\_c0\_seq1; 186 388 1174 LEN=1693; translated



MGVNNRRQLLVKVGSMKLSWRASRENLI EKDYSENDDHSAGNQRRRGDRK GKRRRNLF  
VTFDDEVSEIRSTYNEPLSKEGIEARWYQSDDFSRFKKDTVLCSLNYMNARRARKPIDET  
YNCIRGIEDMCIQDNAVRQRHIAEKKYSFKVIRDEQGRQKELQLKQEQKYDRTTIDKTK  
IFSAIFNMDDKLRASLVYTRGARDRALGRGIAYARAEQSFASAKSASMKNLFKAAAEL  
NLLRWYHSSLGRVPNESCEEK

>comp14048\_c0\_seq1; 443 1 1297 LEN=1652; translated  
XFQSNKGAARAGGVFFFTSDGAYLIKTI PNREKNTFLEMLPRYHRHMARYGKSSLLTRF  
CGMYGITIREETEVEEEAGGATILRSGSPGGEASDDGSPSPFAPTEKEYTFVVMNAVFPA  
ESNKFISERFDLKGSTVGREVSQEELRTKGSMAVLKDLDLKREVD AVEKENQRLLMVEAN  
RRVLVGGVGPLRRLWQRTNAGRQKSHDKADHAGFTIGATAKAALLSQLRKDVDFLKECR  
VMDYSLLVGVVHRDDASATTGSGRAAAVELSPDVVQTI RQRDRILERLEGPASSSSSFP  
GARTAPKLD SWVFHTLTTPVRL LASPPVYVAR KSWKILRRTLDSIATAPMPY YGSGHCGV  
YGGKLSVLHGERKRQRAIYYLGLIDFLQPWSTRKVLERRLKGLAGQD TDAVSAVTPEEY A  
ARFLRFLDEHIIH

>comp14049\_c0\_seq1; 444 83 2531 LEN=3379; translated  
MNGATKNRSERVSGLLPSRRNTFSSFASLLVMVLLMMLLVSLPVAEGSVIRSGLTAFG  
KKSLSGDGVNGDNEAHATKNLKPDSRKKRKHKKYTTLEHKKRSDIFAATKSPDPKRRNKGW  
NQQQHLRQHVMNVDVHMDVNGKENFPLSSPVWSQSHSHNPQQESSNNNNKQQQQGFPA  
MGFLLTAGGMGGKRFFLRQQLQRLQQAIAIPSSLALPSGVI TARNKLLAAATVLVGTTR  
TLLHDRETI ERAATFWYRCGPMVAHYKFTKWWLKASGAPLEHRDAVYKTLHDKYAPTAYS  
VALDLKGLYVKKLQVASSRPFVPGQYLELFVKAQDSL PWP IEDVTAI INKTLSQLNDK  
HNTNNAADNNMHYSYESVFEDIDEIGSDPSIGQCHRARIRKEYAQELLQRTNAPVGSSTA  
GTVDVAVKVMHPGSEERFRHDFKVFWRWLCRVALKGWEPILDECYRQIMSEFDYQREAGSL  
DAIRTNMSKSPFHESIKVPKPVGLCGKELLVMELLDGPKLSDSLEGELAEILGEEKSKQ  
LLERKRLELILGPDKLKALESLPSSSNGSEAPTREAIT EASLLKDCGLKTKLRLFSLYKR  
AQSTIDLLVDVQGYQMLRDGIFQGDHPGNILALRARAQYPNHIGSKILGRTKNRPLGL  
IDYGGTKAITDEERLGVARVILALAEASDDEDIAGSSIASVGRVETIAKAMRDLGFETKR  
NDPGVLAQYAGLFFDSDEAGKRLYDCPTPQTYFKLLTEM DPLLNVDPVAVFVARCGFLLR  
GAGTMLGKQIRTSKRWSIYAKQALEEHEEQQTNGE

>comp14050\_c0\_seq1; 473 1 1886 LEN=2071; translated  
XHLKGRNADDRFGSALS IADGLEYDFQLAIGCPGYNRNQGLVLVYGVSLATSTGWKQIG  
NDLTGSNEGERFGSSLDMSANTQPYLLIGSPGWKVT KDVEGTSADDDVISEQESFESLGC  
GIVRLFHWKSGSSIRSTRRWLVGDPM TGRNKADRFGTHVAISRTERIAIATS RMKTT  
SNDEC GGVPQAGYIGVYERQSWNSWGQPVNSTIPIREVHSDMLPIFALNDHGSMVATVI  
SKNSIKVFLDGSFPCGFPVSETLGSADSGAIDPEVSDLN IWLGRQICRENDSL VVNESAC  
SEQQVFRGNYKSCSWRDIPIFHFPAQVQLSKSPSPLSAIAPSLSPSFNPDVISSEAPSLQ  
QNRSISVSPSTASTFASAKPSSRISIKSSSHPSRLNIRNDGDGSSVLP SALPTGKTQ GK  
PHEIPTGLPF SYHPTREISESPTDISTNERHDESPVVVCHCNIFNTCFDR TISEDSPKL  
RICVSVASIMDAKVVSLNSAKLRQEDFSISVVDGAEAIN EDGATKMNC SAMSKCYMETPV  
SSVFFGTNRPSVVVEGNVSVVEESHVP SRNALINRVSF SITI ALNQINKTPTSSPKETDE  
KDNGMEHTLIGGATASFVLLLI VLVFCGW

>comp14051\_c0\_seq1; 559 377 2161 LEN=2839; translated  
MPSLFKLAVKNRRKKNRNKTRGVRENEGMSVAALSGIESNEFQQQHEPCPVGTAQHQLDD  
ATKNENNDLRQQGLLRVWSYQGGDCERTNSTISLIEQC SLSDTARAKERSG SV DSTNSNL  
NTSHSRSKRQLFRRRRKP SKTNAVSSPTD TVASDASSSPSRSDPRTQRRRPTPQK LDFD  
LVDGAPNARRANHPPELDLQQDQDVPVVEQPKNGKNSTNNAAMKNHGTKTVMIMNGDIVC  
NSLNGKTSSETVTIASAVSSISKAKAIRRETERNARAAAALDEKANELFERGYFDRAMAC  
YTKALKLKRRTFAHLIEDSDDIEEQLMFRNKEGDTISDPQALVSMATSINNIGYLRQRSG  
DATPEETMAAYKSLKIKRRILGNDSL SVGKTLN NIGSVHYLKRDFDKALPAYEEALEIM  
KANLGDNHPDVATVMSNIGDVYLAQDDRETSLDFYRKALAIRWEAFGGKSPRVVRLLEKI  
SNLEIGDRMSSRMNKSNQTTLLGLGDDVNSELMVSGSFQPLGKEFKDLQE QVQNDIDEMD  
QMERNAKVELFKDRIIIVRGMRDVWNGGSDLLDNDSVSVLTALS RASNITGSSG

>comp14052\_c0\_seq1; 257 394 1095 LEN=2643; translated  
MELQAATRVMKPKKPKRNMLLTAHIPGSPRTEEHQCLGECEATQNAL KADTECSARTMGE  
DWKAITVTNLDEF EKQFQMQL EQQPQQAHPF SHYVKIHILERLLFGENANGVAQNDTVN  
GSDNAGYDDDNDYDIDWMVVDADVRIVNASYPVSRLLNEDARFQRVSYYGIDDESKRY  
RENTGNEITGVRGATKSDVSIVVMSQYADNISKFRCEQYRLNVI PLEQSKFYV

>comp14052\_c0\_seq2; 454 394 1785 LEN=2504; translated  
MELQAATRVMKPKKPKRNMLLTAHIPGSPRTEEHQCLGECEATQNAL KADTECSARTMGE  
DWKAITVTNLDEF EKQFQMQL EQQPQQAHPF SHYVKIHILERLLFGENANGVAQNDTVN

GSDNAGYDDDDNNDYDIDWMVWVDADVRIVNASYPVSRLLEDARFQRVSYYGIDDESKRY  
RENTGNEITGVRGATKSDVSIIVMSQYADNIINNLFKKNPWGKRFLLAWKHYTLNAEN  
IHRKKKWKTCGFYDQCPFGVALLQIAHDYYWLQRQRTNDQFLDDEQEVQSASNPLESRLF  
NSTLEDMAFRSGANIQNTLKFDELNRLMSLQSNWTNTNVPLQIGPILFLPTWEGGLRPL  
SPGSI SPSNSNGTIGKNDSDSISENTNYDFIPSSLTIEPTSSFESSYNNTAWPFAIHAK  
YSKLF RDYDEKFADEFERKYTALHRDQCTPSELSSMWNDTASRW  
>comp14053\_c0\_seq1; 414 90 1388 LEN=1969; translated  
MGSTHIDPRNTKIMIDDYRATEDDDQTTQTEAALPVAMNLHNP I ESENSRGKTIVGN GDS  
VDSGGSVKNRSAFSEHPRTFLGCPLFALAAAAAAKEESCKPDAGETSHSEELSSASSQ  
PESEILQDHPLPSKTSVKEKNKIAVQSKKKSFPFKKRN VFKTKLGDSKDEAQPVLNVRM  
VEATWRWNYQTLVKYHSIHGNSNVLRS DPNKQLSGWVKRQRNNLKD GKLSPCKILLNKL  
DFVWNRIDGKWEKYLRLVEYQKKFGHCDVITKFDRLAEWTQRQRREYKNGLTMTDER  
IKKLEALQGWSWGLRFRKDG VGGADARDGVDAADTRADNLQWYEKYYQLVEYQKKFGNC  
DVTQGSEASLATWVQNQRREYKSANGTMEGERIKKLEALQGSWELTKEDTKMVYSTATP  
RVDREINHGGAF  
>comp14055\_c0\_seq1; 244 276 1668 LEN=2177; translated  
MASKTGSYLKSDRQRILRDLHQGELEEADVPESVRKEVESVTMVDVECKLNPEPESFG  
TGCLACGRDDDHANIILCEACDAEYHTHCLEPPQAAYLRETGIAPSAKDQRAMRTETAWA  
HSSVLCRRNLRRVLEKYAGRM EGWDLGGFTSGKVREEAKKSLGKRQLVYFFACKDTPFS  
VLTMSKITKWDGMSDDFHLGKTARSSGQKRTTNFREALQAATIEMAKPIEMRMDWNHSD  
QPQILPSPQPKVPPPRKRKRRLSPQRSASNKVSRPKPRSRSRGFPLIPDETQVQLTRR  
NLDFALEGLRMTNQNTSLVYPIIEPSEDGELFVKILQKESLPVEGLDGETLPNSFKNVG  
FIKLASRKTNTFSDARLVIQEELVPDTISSDAEWRFFV PGLGPVSSKQETIMGPVYSFLR  
QTTRHSNLGDGTLHLPLKVFIVELKTSAGTSSGTEPPTTASEN  
>comp14055\_c0\_seq3; 208 1237 2079 LEN=2588; translated  
MSKITKWDGMSDDFHLGKTARSSGQKRTTNFREALQAATIEMAKPIEMRMDWNHSDQPQ  
ILPSPQPKVPPPRKRKRRLSPQRSASNKVSRPKPRSRSRGFPLIPDETQVQLTRRNL  
FALEGLRMTNQNTSLVYPIIEPSEDGELFVKILQKESLPVEGLDGETLPNSFKNVGFIK  
LASRKTNTFSDARLVIQEELVPDTISSDAEWRFFV PGLGPVSSKQETIMGPVYSFLRQT  
RHSNLGDGTLHLPLKVFIVELKTSAGTSSGTEPPTTASEN  
>comp14055\_c0\_seq4; 99 276 848 LEN=2746; translated  
MASKTGSYLKSDRQRILRDLHQGELEEADVPESVRKEVESVTMVDVECKLNPEPESFG  
TGCLACGRDDDHANIILCEACDAEYHTHCLEPPLSCVPAGDWYCPECKGPAGHEDRDGLG  
ALVCALPPKFTSRFGEVCWAHGGTYWILSVARHCRDGRIFLSIDAIDKGGRILITFPSVG  
MFVLVPEKWD  
>comp14055\_c0\_seq5; 208 997 1839 LEN=2348; translated  
MSKITKWDGMSDDFHLGKTARSSGQKRTTNFREALQAATIEMAKPIEMRMDWNHSDQPQ  
ILPSPQPKVPPPRKRKRRLSPQRSASNKVSRPKPRSRSRGFPLIPDETQVQLTRRNL  
FALEGLRMTNQNTSLVYPIIEPSEDGELFVKILQKESLPVEGLDGETLPNSFKNVGFIK  
LASRKTNTFSDARLVIQEELVPDTISSDAEWRFFV PGLGPVSSKQETIMGPVYSFLRQT  
RHSNLGDGTLHLPLKVFIVELKTSAGTSSGTEPPTTASEN  
>comp14055\_c0\_seq6; 172 276 1007 LEN=2358; translated  
MASKTGSYLKSDRQRILRDLHQGELEEADVPESVRKEVESVTMVDVECKLNPEPESFG  
TGCLACGRDDDHANIILCEACDAEYHTHCLEPPLSCVPAGDWYCPECKGPAGHEDRDGLG  
ALVCALPPKFTSRFGEVCWAHGGVGFGWPAIIYDPRFTSGKVREEAKKSLGKRQLVYFF  
ACKDTPFSVLTMSKITKWDGMSDDFHLGKTARSSGQKRTTNFREALQAATIEMAKPIEM  
RMDW  
>comp14055\_c0\_seq8; 177 276 984 LEN=2335; translated  
MASKTGSYLKSDRQRILRDLHQGELEEADVPESVRKEVESVTMVDVECKLNPEPESFG  
TGCLACGRDDDHANIILCEACDAEYHTHCLEPPQAAYLRETGIAPSAKDQRAMRTETAWA  
HSSVLCRRNLRRVLEKYAGRM EGWDLGGFTSGKVREEAKKSLGKRQLVYFFACKDTPFS  
VLTMSKITKWDGMSDDFHLGKTARSSGQKRTTNFREALQAATIEMAKPIEMRMDW  
>comp14055\_c0\_seq10; 201 761 1132 LEN=2483; translated  
MRTETAWAHSSVLCRRNLRRVLEKYAGRM EGWDLGGFTSGKVREEAKKSLGKRQLVYFF  
ACKDTPFSVLTMSKITKWDGMSDDFHLGKTARSSGQKRTTNFREALQAATIEMAKPIEM  
RMDW  
>comp14055\_c0\_seq13; 239 276 1691 LEN=2200; translated  
MASKTGSYLKSDRQRILRDLHQGELEEADVPESVRKEVESVTMVDVECKLNPEPESFG  
TGCLACGRDDDHANIILCEACDAEYHTHCLEPPLSCVPAGDWYCPECKGPAGHEDRDGLG  
ALVCALPPKFTSRFGEVCWAHGGVGFGWPAIIYDPRFTSGKVREEAKKSLGKRQLVYFF

ACKDTPFSVLTMSKITKWYDGMSSDFHLGKTARSSGQKRTTNFREALQAATIEMAKPIEM  
RMDWNHSDQPQILPSPQPKKVP PPRKRKRRLSPQRSASNKVS RPKPRSRSRGFPLIPDE  
TVQVLTRRNLDFALEGLRMTNQNT RSLVYPIIEPSEDGELFVKILQKESLPVEGLDGETL  
PNSFKNVGFIK LASRKTNTFSDARLVIQEELVPDTISSDAEWRFFV PGLGPVSSKQETIM  
GPVYSFLRQTTRHSNLGDGTL LHPLKVFIVELKTSAGTSSGTEPPTTASEN  
>comp14055\_c0\_seq14; 208 1385 2227 LEN=2736; translated  
MSKITKWYDGMSSDFHLGKTARSSGQKRTTNFREALQAATIEMAKPIEMRMDWNHSDQPQ  
ILPSPQPKKVP PPRKRKRRLSPQRSASNKVS RPKPRSRSRGFPLIPDET VQVLTRRNLD  
FALEGLRMTNQNT RSLVYPIIEPSEDGELFVKILQKESLPVEGLDGETLPNSFKNVGFIK  
LASRKTNTFSDARLVIQEELVPDTISSDAEWRFFV PGLGPVSSKQETIMGPVYSFLRQT  
RHSNLGDGTL LHPLKVFIVELKTSAGTSSGTEPPTTASEN  
>comp14055\_c0\_seq15; 121 538 738 LEN=738; translated  
MSKITKWYDGMSSDFHLGKTARSSGQKRTTNFREALQAATIEMAKPIEMRMDWNHSDQPQ  
ILPSPQP  
>comp14055\_c0\_seq16; 268 761 1816 LEN=2325; translated  
MRTETA WAHSSVLCRRNLRRVLEKYAGRM EGWDL DGGFTSGKVREEAKKSLGKRQLVYFF  
ACKDTPFSVLTMSKITKWYDGMSSDFHLGKTARSSGQKRTTNFREALQAATIEMAKPIEM  
RMDWNHSDQPQILPSPQPKKVP PPRKRKRRLSPQRSASNKVS RPKPRSRSRGFPLIPDE  
TVQVLTRRNLDFALEGLRMTNQNT RSLVYPIIEPSEDGELFVKILQKESLPVEGLDGETL  
PNSFKNVGFIK LASRKTNTFSDARLVIQEELVPDTISSDAEWRFFV PGLGPVSSKQETIM  
GPVYSFLRQTTRHSNLGDGTL LHPLKVFIVELKTSAGTSSGTEPPTTASEN  
>comp14056\_c0\_seq1; 441 84 1334 LEN=1486; translated  
MISPHMRSASRWMIPNTFR RCTTSARSLSSLPSSRDADGSGPSKDRDTNVTEDHTPHPS  
SVLFPWRYESS PVARLIPGTPEH SKVGLLLTSQS QNVYGS SSSLNAIVTAYMFLNVPWYEL  
FWISHFKDELSSNMSWSFTQGVASLLSNLPSYGGGNP IPANRIISEEADGT CRIDFRET I  
EISSVGN GAYRISVLD EDE NVDGMENNGSSCS DPIDRNAVQLRQMFHEKVLELYQSSMDK  
TAAMPENDSSGTLVKNTQRLEVRLKMN PYDTKFIGLYAIPYLSRRNAKSDASLLNLYRKM  
LNTTSSGRATYLSQLRQEHELETNGYMESTIIAQCLVWCEELFYVKDLATGQILQKKEVDE  
DSSLSGATETQKTPHLVRMERTVITK RDPSTGKFDNERENWII TDIDDLVDGNLLV  
>comp14056\_c0\_seq2; 441 84 1334 LEN=1572; translated  
MISPHMRSASRWMIPNTFR RCTTSARSLSSLPSSRDADGSGPSKDRDTNVTEDHTPHPS  
SVLFPWRYESS PVARLIPGTPEH SKVGLLLTSQS QNVYGS SSSLNAIVTAYMFLNVPWYEL  
FWISHFKDELSSNMSWSFTQGVASLLSNLPSYGGGNP IPANRIISEEADGT CRIDFRET I  
EISSVGN GAYRISVLD EDE NVDGMENNGSSCS DPIDRNAVQLRQMFHEKVLELYQSSMDK  
TAAMPENDSSGTLVKNTQRLEVRLKMN PYDTKFIGLYAIPYLSRRNAKSDASLLNLYRKM  
LNTTSSGRATYLSQLRQEHELETNGYMESTIIAQCLVWCEELFYVKDLATGQILQKKEVDE  
DSSLSGATETQKTPHLVRMERTVITK RDPSTGKFDNERENWII TDIDDLVDGNLLV  
>comp14057\_c0\_seq1; 652 109 1881 LEN=2113; translated  
MYCGDETGSFIGEIGSHNCRFGYGGEDNP KLTVP SYVVSGKDDGSNNGNTKRMRSRFSSL  
HAPKEEELMESILRMPSSGNGNDY SHPITDPNSFLSQGEIVENW DNVETAWQTSMDVLR A  
TDMLKHTQGGTPYERTKKQKREHRASGLSSSTVTGSK EQDDTSGGRCVHPILAVTPGFTE  
CTGGFSEEDNSVGSNFQAAIKRQYTKYTELLMESLDATSAFLAPAPMLAAFSLGRQTAL  
VVDIGAGGCRVTPVVDGLILKQSQRRSRGGDWLG DVTWRALLEEKQREREVDDEQNKRM  
EEFSDEKETISR VEMIKPRY MVGKAKNKYL GKLENSV FHRAMNDLLYEIRTEPFI TLHG  
TDNREKIRIPFSIKPSNKEVGDG NEDA VDMVSTP GTPGQAAVNKIVPGTPESTMTD GESS  
LYELPDGTTVDLSSSF GKDL SQVPELIFCEESALPFQQLRHGKNGSGSSSSHNQTTFS  
KAPLHRLIHESLLAVGDVDVRKELAGCICLVGATSLLPNIETRLSQELSALLPSFVKPKV  
IAPRVSSVERSCAAWIGASVLTSLGSFQQLWLSRVEYEEYGAGMSIQRFP  
>comp14058\_c0\_seq1; 956 233 2599 LEN=2672; translated  
MRPLTEDATRS AFVTVPPPSHQQPPTSATGITASHLAAMAAGSNGFTPMDHSAAFMMSNA  
AATI AAVAASAVQOITQAKTPSAATGTPAPGGPTAALPSSLYHAALQGNRNALIPGTSQA  
QAVPPVTHAALLTALANAGQTGAVQGI PPSVPGHTDAASAASSLLRPNAPVLSQPTSS  
LASPALLSDMQSWTLEQLDNHINLLQOMNQPVPHSVA ILRAEAERKMKKKNDKRVANRKS  
ASNSRARKALVEEMTKTNARLKKQAMILALLPDLVMTTTT DGEITFCSAQAERILRYKT  
DDLVGAKLYNLLVPS SRHALKTLIEELVHPGKAKAARASAAAQARRSTKRTISNQKNSAD  
RNDANKNREENTNENSNGSARDSSRNGNSTDDTSGAAVVSEQSFPLSVVEVESKQQAQQ  
QNKRAGAGTNENLDSSTGGSGEDDGGAPSEPQKKE SNTMARADDYSSLSSETKNQCANS  
NLDRNVRWHNQRMLEESNKTDNGPKDDVTGASVTANNASARLSSLEHCPDASRTKKREQC  
PPYESAGDQSSDSSLLAGVEEKKSEDASDDSGYRESNDSREESSSSSLSDTSRSNDHRK  
KPLAPTCRMCLIRDDLTTVWCEVTSSIRNKSSDEDGGDGKATNSKSTESSETSGPKADQE

ILLCLRP I RNSSKKVDASCRFVPPNKQLTSGAFKDTLDPWISTSSSSGEINKVTSNSDKST  
NRFNSKQDPNKKRPPKRLLATGADAYKNNSEKRAKTESNNTQGPNASETEKSVVESL  
MLMKNSSQ

>comp14058\_c0\_seq2; 789 233 2086 LEN=2086; translated  
MRPLTEDATRSFVTVPPPSHQQPPTSATGITASHLAAMAAGSNGFTPMDSAAFMMSNA  
AATIAAVAASAVQOITQAKTPSAATGTPAPGGPTAALPSSLYHAALQGNNALIPGTSQA  
QAVPPVTHAALLTALANAGQTGAVQGI P S P P S V P G H T D A A S A A S S L L R P N A P V L S Q P T S S  
L A S P A L L S D M Q S W T L E Q L D N H I N L L Q Q M N Q P V P H S V A I L R A E A E R K M K K K N D K R V A N R K S  
A S N S R A R K K A L V E E M T K T N A R L K K Q A M I L A L L P D L V M T T T T D G E I T F C S A Q A E R I L R Y K T  
D D L V G A K L Y N L L V P S S R H A L K T L I E E L V H P G K A K A A R A S A A A Q A R R S T K R T I S N Q N K S A D  
R N D A N K N R E E N T N E N S N G S A R D S S R N G G N S T D D T S G A A V V S E Q S F P L S V V E V E S K Q Q A Q Q  
Q N K R A G A G T N E N L D S S T G G S G E D D G G A P S E P Q K K E S N K T M A R A D D Y S S L S S E T K N Q C A N S  
N L D R N V R W H N Q R M L E E S N K T D N G P K D D V T G A S V T A N N A S A R L S S L E H C P D A S R T K K R E Q C  
P P Y E S A G D Q S S S D S L L A G V E E K K K S E D A S D D S G Y R E S N D S R E E S S S S L S D T S R S N G K S P  
N M I V H F D E Y T L S Y V H S D A

>comp14059\_c0\_seq1; 495 236 2040 LEN=2040; translated  
MSGYEVLPMRAELYTPANKISAWVSKKEDNVARQDSKEYQGMWVVEDYALEKKIFSEIWI  
FHDDDEEGIDRRVLKNNPLQGKWGYRPGVNPSKAEPKDMWFFPPNSARCKIPQEMQEYNH  
KGTWVKPTYKRDFSQ LGSNSSGF INVSGAMKIAKGGKYSVPGRWNVLGYNDVVRGRPKK  
QDDDDRTKGLWKIFVTRTPSGECFPIFAIPGTKIAQCKTKIYDEKEIPVEEQRLSFYDVPL  
KDEKTLVGSVGRNGDTIDLGP I V H V R T R Q G K K Y S F E V D P D E L V E N L K K M V E K R E G T P V N  
EQRLYFKLKELV DGKPLLHFNIRHKSSIVLGSMMIYVQPLSNTPKIPLDVEPTDILKSVK  
VKVKNRIQVPVGSQRLKFKKEKEMLNDSKNLLQYKLRHLDVIFMINSESCRVSNDQQNPAM  
TIYIVKEWNNHKVKLKVPEPKNTVLDVKKMIKALENIPINEQRLSFNNKSIYNSRTLHQSK  
IRNKSILHLRKPNNIEEPEMNYPATVEIELPDRTKMNIPTVTSIAFSDIKDHIEIMNG  
IPKSKQRIFFFDNVEDEVKDNASVFP RGINNEHGP I V L K L Q K D P D C L Q V K T T D G K R I F F F  
D X

>comp14059\_c0\_seq2; 1967 236 6556 LEN=6737; translated  
MSGYEVLPMRAELYTPANKISAWVSKKEDNVARQDSKEYQGMWVVEDYALEKKIFSEIWI  
FHDDDEEGIDRRVLKNNPLQGKWGYRPGVNPSKAEPKDMWFFPPNSARCKIPQEMQEYNH  
KGTWVKPTYKRDFSQ LGSNSSGF INVSGAMKIAKGGKYSVPGRWNVLGYNDVVRGRPKK  
QDDDDRTKGLWKIFVTRTPSGECFPIFAIPGTKIAQCKTKIYDEKEIPVEEQRLSFYDVPL  
KDEKTLVGSVGRNGDTIDLGP I V H V R T R Q G K K Y S F E V D P D E L V E N L K K M V E K R E G T P V N  
EQRLYFKLKELV DGKPLLHFNIRHKSSIVLGSMMIYVQPLSNTPKIPLDVEPTDILKSVK  
VKVKNRIQVPVGSQRLKFKKEKEMLNDSKNLLQYKLRHLDVIFMINSESCRVSNDQQNPAM  
TIYIVKEWNNHKVKLKVPEPKNTVLDVKKMIKALENIPINEQRLSFNNKSIYNSRTLHQSK  
IRNKSILHLRKPNNIEEPEMNYPATVEIELPDRTKMNIPTVTSIAFSDIKDHIEIMNG  
IPKSKQRIFFFDNVEDEVKDNASVFP RGINNEHGP I V L K L Q K D P D C L Q V K T T D G R S F Y F D  
Y D P A A D T V K D L K R K A A K A L G F P L K D F H L I G D D D E R I G D D D M P P D G T I L N V A S L V I V E L P  
N K T K L K V P L L P K M S F D D V K D I E E K T G E P K A S Q R I F F L D T E G N E R D D Y T P M K K A K I K P G S  
T L Q M R L V P S E P N S M V T V R S P D G R S F Y F E F D P A N D T V K D L K T K M A R Q S D V P V N K L P S F L L D  
D V E V D D N Y P I S K D T V F H F K R N R L R I E L S T G E R L M I P T F P M Q T I G E I K D V V E E K T G V N K A D  
Q R I F H S E S D E E I D D D V P L A S A K V K I G I P L K I V C Q R N I K E P K E I E V K D P S G R T F Q C V I A P D  
E S G R E I K E R I A R K I E F P I G G F K L D N K E W K D V D D E T S L E E A G F P V R F G G I M E V D P A E V E I E  
L P N S K S M K L K L L P T M T I R N I R E L I E L E A P A L S T N D I K K R M F F D G I D E L D D D T P F E K L K F  
E N G Y K I E T Q S I L M N I H H W N G E K F K L K V H N D W Y M D D I R D R I C A L T G I P P E K Q N I S F K G E P V  
K E D L Q L T K Q G V V Q G S T L F L E P M S L R V N V P H R E K P M R F V V K P T D T V H D M K R R A L E K L E K E R  
I G P M R N Y Y V M A G G Q E L N D R E T I E K C G I Q H D D L L I V E E F K L Y I M H W F G K I I H V D G I Q R D D T  
V A S L K K Q I M R T E D M H V R D Q I L S L N G K K L K D M N T L E K E G V K H R A T L I L E P L M C N A K D P E V E  
K K T V T K M K I K Q F K T I R A D E I M P V M P D W R K R I F F F D Y D D T F D A H I E L V I M H W T G E S F T L N D  
I L L K M Q V S T I K N K I F R A K G I E K K K Q K I K F S G R I L D D K K T L L Q E S V S H R S I L V L E S P I K N R  
I A N P R V T R V S G I D L F G T V P T K V L A N I N I K V K H W N G E T L S L S P A P N Y I D D V K D L I S N M K G  
I P V E S I R L W F H G K L A D D C M N L K E Q N I V E G S I L L M E P M R V F L E L P K P K K E L K S M N V E E D Q Q  
V S A V R M E I S K L S K I P F E W I C I M F G G E E L D Y S K T I S E N D I K H E D T L K V E T Y E V R I M D W S G K  
T F S V K K I G P N S T P R D V K E R F S R M S S F S R E E Q I L L F K H Q I L N D T L T L K N Q G I Q H K S I L I L Q  
L L E E K N E V P A S V R Q K L A F S L Y D T S Q N V C K N K I G I S S S L T I S I Q H W S G D T F N V V S N P M E Y I  
D D L R D E I L S S K K I P I D Q Q R F E F N G Q L V S E D K S L G E Q G I G N K A T L V M K K M K I Y I S I S G T N S  
M V G I E I D P D E F I L D L K K R F R R Q S R L S A K F E C L L M A G E E L S D A K K V S D Y R I E D G E T L Y L D V  
F R I K I L D W N G E L S D I D G I H S K S T V D E L K A R I Y L L R A I P S A D Q L L R V E G G P V I D T L R L E D Q  
G I K H S S I V I I D L A P K S A K D S Q L Q N S A K A K E K I E D R G I S P T R K K D K L D K K K S L R S S K A H S T

RSKLSKDSKRNESKPPKRRETSDDPAMDGVVSKTSKLSKVPERTKSKSPKRGEKSGKLR  
QPLLKTRSLVSKSSKAAIKSKGKKSEFSRRAKENSDDKPAVESTDSMTPELSTDLKRKKLK  
RLKVTQKQSRESILSMSSAVESLESNLSEKRKLLKGGKSVKRKKEKPLNSRIASSDKS  
TLRVVQ

>comp14060\_c0\_seq1; 704 1 1770 LEN=2431; translated  
AAGGSVSDTEGLDELTLDSALLDNQSLTTLTTGTLQERVLSKKLSDMLVDVLSLTQSP  
PDIRLEDPSENRIVCLEADGTRLVFGKTVEETRLLYCGLKILLEKETARVGIIRGGQQ  
SRSSKKNRVIASALRNGKTPPSAASKFQSRPKHTGSNNSGNNGSGYASSDIDDTEGMN  
DPSDYNASVTAAFRDSLPGWKSWSGRVPGRSYMQRAQSTSPDDGYPTYAHGQLLIRDICK  
KVILPLPLPLCRVLLLDSSSPVSKWETERGDSDFERTPWTFPPATPREMEQFQSEHQLI  
ASGSMCGAHTISYERFRNGRPVRLSETHIVSDSDKLAQVNERLPRRGFSIKVNILL  
RAIENGSAACEATVLGEIRPVGKNMSDPEAVHKALLKVLEELRNRYGTDYVGLMAGFMSV  
ENMPKDETKQSRSGFSSSSWRSWEEKKEDGGGAKKILGKTSVVKFEDVMNADVGIADL  
PDPQFAQETRPSNRSADYKRNKPKPRSTPGDDNTFASTSDPVTIEVKPLPKIRLSLMP  
PREEDEENLDDEGEPKSKPKTSSSSSRKSRSSASKKRSLLKGGKTKREI

>comp14061\_c0\_seq1; 312 411 1192 LEN=1192; translated  
MKTASAILSLALAGTTSAFAPTATSPRSSVKVYESVAEPAPVATSDGYETKADLEELAK  
KLNPIVGFYDPLNLAAEFWGTNEQTIGFLRHAIEIKKYFFKFPSTDISSRMKRNKTN  
LKSDSCQRCDSLYRHGRVAMFAFVGYLVHANGIRWPWPMMLDGTFFPEGNNPPALWDQI  
PDNSKWQIFGLVLFLELYSEISTDDHKHYMRGGRPGDFPDFDTVALPHVPFNLDFPFL  
TKRASEEKKARGLEIEINNGX

>comp14062\_c0\_seq1; 1182 141 2228 LEN=2248; translated  
MKNFETSRIILVAALALASVDSLSLAFVAPTPSACLGVNSNNGALSIPVSPDVSGET  
FSNGFQIAAVSIDSVTSSALFTYFAEKVIDASIPAVFAAAVIFFFFSQFKKAKGNFGMDD  
EAAESATAISELYNDLYSSTRGSGKTKRGGPMNPFGGPGPPALPKNLGLPKKEYLRITN  
INERFDSYDFSLTQATDSKAKAAADFRRKSFDRALGLAMNAEPSVEGSTVAEFLAPRVKA  
KLIRIEKKFLKEGKDLLEDLQKVESTLAAVAMDAELAKLGEAAEKMNEDDLKVIDAEIEA  
KKEEEKANDAKSDSKKDNKMGAKKEELVKEATKLQTVKELELSFIAQVLAAVGPKRAI  
GLRNALMGDIAVRGTGGLLQMDQRPLSQILKAGTDSQQKSVFVMDFFPGDVQASQLNELR  
EEVTGVIIRSANPGDEVLVILQSGGGTGTGYGLAAGQLQRLKEKGLKLTIAVEQVAASGGY  
MMSCVADRIIASPFAVIGSIGVISEIPNVYERLTEEGIKFQTVTAGKFKRTLTPTKKITK  
EDLAKSEEDIAEIFELFKGWVAQNRPQLNIDEVATGETWFGPAALEKGLCDEIRTVDDVL  
LDYIDNDYNVYQVKYDPPPIPTPLAFLASEDGSPRADSDNSMGRRAIRWLVTLAEV  
KAVASVETNAPLEKKYMAKDDTMDRVKASSDDTYF

>comp14063\_c0\_seq1; 919 186 3544 LEN=3544; translated  
MSRRNHDHNSGRSSYGDNRSGSVDMSYSDSYNDVNVNNSDNDNNNYHLRNPYSQRTQAEQ  
QLEQQQQQAFRHNQNNQNHPRNPYTQKTQQQRYAVTTSSLFAINPVRPKQEQLEYHQE  
QAPMNDKDRATAQSPSSRASVLPDVQQQEAHDCSNSVLQHAQDGNGLSKNNNQHQQQ  
LLERLQAQLDESNESENFELEASVVALEAELQHTRRTIQEQALEKSKMEHELRLAQREAK  
RWKLLQQNQSEKPSNQGRSIVSDSSPSSAIATGASTHDAFSSRLLGNQANLQPSRSSKT  
TPSAEFPANDVEAATSFSSSKPKRVDNYALGFNAEDLAPSGANSRRRATQNAPLVRLAL  
NLLAQLEPSQSFVSPKPKSNPNASTTLAREDSKNDAMVTDKEDDVIYSGRDDSINVRQVL  
LSIATSKPCAAPILDVHERNPLPSPLVWTEGLTIEWLVKKSSSESADRYWSAFLQSP  
RKHVVEQVGAFEERPSGADSQIDHHQQQQQKQYSSTTSRRRNRRKDRIRPLLSNGDHD  
TKNENGLSGQELRQVQVRKSLRNPWWNPNDNQAADPTYSIASSSCLFREWIQWLSASQ  
NPMHLQTLRILLAEATGRNGLAATVNRTSEAWWNLCPYSIATTIQRITYRKLIRSRK  
NYSNDPF PASNSRRRQAGNKRNDSDRGRSRNCIGRYEDFLARLPVAGTVVLPASKEED  
RATTAMD IDIDESAKPGTTNMETKRISSKNEGGNSTNGIDIRPHNDASVVSEEAEQV  
FELALALVW GILQAASPRQLGAWYKNRKLGLTDQSWHKKRRDSTPPSPSSNGLFMI  
SLLLDLFEELQ FGQWMDKNGKNGRSMSSAQILSNGLLSSTTRNSAGKNSKIDEANR  
SGSSFKRIDRDSCK GNYDSCNSMVLVAIPQWYIAAIAVLAQVGRTEGMEILRTRLP  
DDRQSDWGMNALDVSIRQMHTLALHLDDVHTRHGSIVRLGESSCAGDSEYNDDCI  
IEDDPHAARLRRSVEAWVRVW HQVLIYVQSKETVFRSLVLDLQDWFTSSCATLLT  
SEEIRPEIRSMIRWQLDELKMD EEDLRNRDITLDNQHPSLYRDGADEVAKEV  
VINYSEQKSSMAX

>comp14065\_c0\_seq1; 2743 268 6327 LEN=6352; translated  
MSSVPNNVGGNSNMGPPPNQPPPPGANTHRKSSSLNRGWFEGETKELISGMAPRPVTP  
SQHQILKSASAPNSPARGLGLMGFGSRNSPHHHFPPQIDRTNSGGSVGGGSGINLPSFS  
NTINRLPSQDSLDRSIHNESGHGKSTAQIKDLKHSNSALTARMASQDKHHMNEMAQVQK  
AATSRINKLDLTSKQKMKLMQYENYKAAAESKMKQDAELTKVKEESAFQRHTISGLKN  
ELYQLQQRLEQEEYGRSSNDVVVVDDHELRRPHSGDGRNPLPHPSHSRSNSGGSLG

LVPTSSSVSTEELQOMSLDNEELVKEIQELQDQLMEYQGYDKKLDLQOKLESAQRNANG  
NDAGIPPRPTTPHALQKNQPERERPPPLAPSKSRDQEELQQLQDARGEIEVQKQKLLQRE  
SAVRDLEAEKEALI I ANEQRVQLEEDRYLDLEEEFKEREMELKKELASSSQESADEIAVR  
VREEQQVQIVELEEQLEQYAEKLAEVAATLAESRQQAKNQEQYRKDEAEDLRMIQDAHEA  
E IARLEKELDEARRELEVRDDELEETKQKHMALLQQQEKEDKKEETEAKVSTTKADTE  
QPCDGTNNLISSLEEELYSSANTVNALEQQLEDLRKERDETVAILQAENDKLLGNATGTD  
KSHSDGSDLHQLWEAKTSKTKEVESLKNEIEDLRHRVQENAETARVAEMKAQDMKELK  
ENQSGRAANESDSNELEEKLLAQSQVFDSEEEIAILKEKLEESRSLSFENDKKQDALRE  
AQVALLSLDDEKQALCDELHALKYSMEQEKAVLQNETKAQLEMKDRELAELKSVNARIGP  
LEDEKLRLEEEVKQLKERNFSFEDNSASVSSRSVRNKDEGSQKDLELQIEELKEERNLIN  
SKLKDRDTTIATLLRSSIVLEKKIEALDTELRESRKIQGKALDDVKELRSIASTHQEDYS  
KVCEEVKYMKGQLKIAKADAKRWKRSLODDGRPSSEYRYQISMLQKANEKFAETVQERDQ  
AIQNLVNQSMGHDKHVRDLKIRISSLMKEVESVRMKNKGRGDESALRAELDRLQEESEIFA  
GQIIEQDEEFKRMQRVMKNRDEQISSMKSIEQMMENTIPDRSAIQERDRVISELQKKIQ  
ILEKQQTESTNDIDPIAMKNLQAELEDEMQEAAESNRVELRDLRQQLWDAKDAAGSAHDLR  
IELKQARWEFDEYKRNISSEQLSGNQNGLQADLDKAI SRIEELEVII SDNQGMETKLNEL  
ENELQARDII IKELREQLSNAFSSGFEVSSSGLDKKSDGLEAELQLKVEEVERLNQKLSAS  
LIEVGEVRDLLQSKTDMVTDLNEQVKGLNVEISETQGGQLRASASKAENQSKAQQEAESR  
EVIEAKIESVNSLTKEVGALQRDAEDLRVLVKEKTVRIEQLEYDVTVLTRDINDSEKQLQ  
MKTNAICDLQERLRTNEAQLKEASDLKLLKGLSGLDADSQARLGALEKELSNAITETSSNEE  
LARKNQSLVQENASLAQKNKSLVEENASIEITNGSLMEESETLTNDNQVLCLELQALGK  
NHSLSQAKDSLQHDVGLKIEKQSLEKQNESISRENEELGERVTSLSENVVELNRCNDSL  
REEVRSISTIKEELATLSKANNLLTEEKRSLEVENNALTETVGSLEKKNISLSENGVKME  
KEIEALKADMEMPLSEGSSKLEGMKTQLQEEQRQREEVEKAI IANYEKQLSLLSSSKDLEM  
DSLRSNLTESREKHSEAIEDMIEQLKSMEHENGDMREQFEFEMEAKNQQIFALEHTLHAQ  
EQIVDTMRSEMDQIQSGMEHATKARRGEVEEIQQEVQMEEKAMQEREIVALKMQLEER  
KLEHKADVVKLDALAKAMEQDFPLKQTIHDLQNNDRMLEVRERLEQLKKRNTDLQFENL  
NLGGRLEAAIQINAFDLEKQQTEEIEEENMKLRKQLKEYEQLLSLSAKSSRSTSPAPSS  
TSQKEMTMKTEKFKKFKGLFKRRGVDGPISEVIEEDEC

>comp14066\_c0\_seq1; 254 1 900 LEN=1204; translated  
XRQAADTPTISHSTGEVXKEQREESFPRTNLDVMSFLGEWHMRQKALKHAEREGKMNAST  
NLRSYRGGHRSIRDAEEQKALKEAERHMRKNASNILRNYRGGEHDIKDHERVA INERKKN  
NARLDIEHREPDISAEIKRGKGFHAGKSRQLFIFDFSFGLIYDDSQPEPGVDLCAQAAE  
VIIPYILNQWSNETNVFFHPKSPPEVVDISIDDWYSESDSTRYVVRGKVP IQVFVDGSAK  
DIVAPLQKVLKRYVSFQPI SAKEVEDTTEEKRRQLIIGHEGRSRWVRVRCRLSGLGITF

>comp14067\_c0\_seq1; 1766 138 5975 LEN=5992; translated  
MANSNGVARPKSADARTSTGFAVERNVEGVPRDVGTTAMQNTTMLASTKTVDATKGTSLP  
QRGIGEKKEEDAVPMKQNSKSTSTNCGRVEKIESSSSTTSKVKGAPSNRAQSQTIGSR  
VEGNTKSSSPNSPMPISSPKGGNDGGNDRVTFDKKPNKPLAPESRSSISIVRNPRNPAP  
NRDMTPQNLMMMAAKNKSRAASLSPASVTQKPKSKAMQSSSKPGVMKKNFLTNPSSAAMAA  
RGQVTNIPNIDMDESMVSLGDEELQIQRAPLTTKYNPYITHSDTSLADARRRLEIALDQT  
RQLRAAFTERVYGYKRVCLQPPPQTRDI IKVLKDDPIGMHKKIELELKRIADEKSAEKKY  
SQMAVTDNDNVAAAAASVPSAAATIPAGPNAV GASKATNGNTTSSAAPTDTTEQFLYVTS  
LSLIVLPEDTSLNIDLFFVYRERAPLNAKTGQVRVGISPAAASSGNMLLERARQKVARAE  
RIKRLQQKVDKLAHNFFDSHYKSSISAFNAAAIELPSSISSAKPTATAGKNSTSVPQET  
KSKISASRSRSSSKSAEGKKVAGVKRPPAPKTTTKVPAGQTAAGAKVIRARVQTPMTLQT  
LLNLNPIHEELRTDTKYSAATLAMMECGVGTQGPPTQYHKNTPHRFKHPFPDSFGGRRR  
PVTSAAGVLDPSSTANLQLTLPSIPSVKERRRYKKT SVLSRKEAGTTRAAASIRKILDQF  
TPSTNKAVVAIESNETQENHLLCRPNKQRKISEIGFVRGLHLDSDVDEGRARVGGNTTESG  
KGDSDFIDSTLTLNLKAVGLIKSSVSTDSKSERSSFPQSLTSSLFKEIPSTGTGPYS  
LATLKDLEKLLTKQKSAFTAACSETDSFDEHNLEDRSLDGCNIVQEI EPKTSAPLTLR  
GGSGNNNDMKESVKSPDRKQNSGGASAKNSKAGKSSIRKSNASNK PAMNATATQTNLMR  
QNLIREQQLQQLRSLASLQAQQAQVQQRSAQFQAQLHSADHFRQTNALQLAHQLRMSRLQAH  
GHSGATDLADYIGGLHHSTQAQAAYGWPPASAAAVAVANSNNLAALGLNPTGVMP LTVED  
RTRVLLAREQQNLAVQAVRVAAAQRQQQALLMRGMAAVENPFAQQGYPHIPGQLLNPTA  
AALIARQGIQNRASASHKMTSESNNTSKNGKFE SKDLKDKQGDIDLKMETSNKIEA  
NVKKHDNTYTQIKGNDEKVDIGDSNGNIKKRRIIPPNKCTSVNKPEKRRTFSIGKSDDS  
SKI PSAGTIELKSAGASIKAKSSETKIERDVAKEITPAKRVDPNQVKAAPIVKKKEEQRP  
IPSVADKKGESQKNSVLKTPGLQYYVPDTPPGISTDFATTVLAGRCHEAIGVSVYRDL  
GEGLRVVNYIISVGMVPIPKTVVMNPLKDRMNSLVFKNSNVSSMPASSRDI IAAVILLW

LWRNQEGCFQRAFAKSGRIDVDPECKWVNAAVNKAVTALSNEVIGSTSRANGLTTALLT  
HKTKSSTNLKGTGKAEQDSLKTTTTKIDLLAASVVSKSLNMTLVLNEEMNSAIPQFNNL  
VDYLDECRKLALFAKSQERALLATVVSRSKSTMSLSFSHAYVSAIVRAGEALGHGALFEVI  
QNEKCGVSTMIPIYDVFTDEYGAWEDPCRPPIGFNKGLTGDDLMRRAHTRAI IQKSLKKLQ  
ARQNVKGGTHTIGPYVDHSNSAATSSGAKSTSGASRNTSHRRRSSSSEPLVQPGSGSAAA  
TSWTLYTPNHQSPPLDWDENATDNAPYGRYDESTRPRSLSLAQGAAILRNSGRGQRRRRS  
QAGGSSSVKREETIHHASSEKQDTKEGPDEDRRSTREIPWKDVAGIFQKVELPDSIKEQ  
KEKEAKMSSQRTIFAPIVRRPDSVPIVNEIESDADEDLSDAILENHRVVLDEMKAARLS  
SYMESKKRNNQDRRKSTGRDKSNTK

>comp14067\_c0\_seq2; 348 262 1212 LEN=1229; translated  
MIPYDVFTDEYGAWEDPCRPPIGFNKGLTGDDLMRRAHTRAI IQKSLKKLQARQNVKGGT  
HTIGPYVDHSNSAATSSGAKSTSGASRNTSHRRRSSSSEPLVQPGSGSAAATSWTLYTPN  
HQSPPLDWDENATDNAPYGRYDESTRPRSLSLAQGAAILRNSGRGQRRRRS QAGGSSSVK  
REETIHHASSEKQDTKEGPDEDRRSTREIPWKDVAGIFQKVELPDSIKEQKEKEAKMSS  
QRTIFAPIVRRPDSVPIVNEIESDADEDLSDAILENHRVVLDEMKAARLS SYMESKKRN  
NQDRRKSTGRDKSNTK

>comp14068\_c0\_seq1; 169 1032 1699 LEN=1872; minus strand; translated  
MGCPVGLRFFVLGTLFFFEACFDEVWNVVRLTNSRFFRVAKSGHAKAFHQSGGTRLDAFG  
EGDRTVANDRNNFLGSVCGFDGVLHPGIADEIIAATVASGDVETIIVARIHVGNHFAVTN  
ISMASASCKNVFATSVKKSPLKELASIGIGPPVGLKVMSPASLKILYGAASSSNHTPV  
GNFVDFPKEGADVMETKPTKGSKGGSNKQELWFESNEAMV

>comp14068\_c0\_seq2; 313 34 726 LEN=1670; translated  
MTKKVLF LITSAPSGKSTKFTGVWLEELAAPYKIFKDAGYDITFSSPTGGPIPIDANS  
LRGDFFTDVAKTFLHDADAMDMFGHSMITDVTGDYDCLYIPGGHGCCDDFVGNAGVKD  
AIESAYGAKKIVAVVCHGPIALAECVKPGTTTTPLVEGLCVTGFSDAEEAAVQTDNVPYL  
IETRFKEQGAKYEKAESDASHVCVDGNLVTGQNPASSTAAAQKVVELMS

>comp14068\_c0\_seq3; 169 952 1619 LEN=1792; minus strand; translated  
MGCPVGLRFFVLGTLFFFEACFDEVWNVVRLTNSRFFRVAKSGHAKAFHQSGGTRLDAFG  
EGDRTVANDRNNFLGSVCGFDGVLHPGIADEIIAATVASGDVETIIVARIHVGNHFAVTN  
ISMASASCKNVFATSVKKSPLKELASIGIGPPVGLKVMSPASLKILYGAASSSNHTPV  
GNFVDFPKEGADVMETKPTKGSKGGSNKQELWFESNEAMV

>comp14068\_c0\_seq4; 313 34 726 LEN=1590; translated  
MTKKVLF LITSAPSGKSTKFTGVWLEELAAPYKIFKDAGYDITFSSPTGGPIPIDANS  
LRGDFFTDVAKTFLHDADAMDMFGHSMITDVTGDYDCLYIPGGHGCCDDFVGNAGVKD  
AIESAYGAKKIVAVVCHGPIALAECVKPGTTTTPLVEGLCVTGFSDAEEAAVQTDNVPYL  
IETRFKEQGAKYEKAESDASHVCVDGNLVTGQNPASSTAAAQKVVELMS

>comp14069\_c0\_seq1; 324 1 673 LEN=713; translated  
XKFVLP PPF TAI AEEVCGGLVIPYGEHTVSLEK PWRVMTMHDIVKEEIPDFDFAALDLD  
PESLVKAKAAAASANVP GVEDLNSVGDVLTNCFEELCEPKLIQPTFVIDYPVEVSP LSKP  
HRSKPGLVERFELFAVGREHANSF SELTDPVDQRRERFEAQAAKKAAGDDEACDVDEEFLT  
ALEQGM PPTGGLGIGIDRLVMLLTNSP SIRDVIAFP LLRKEDGN

>comp14069\_c0\_seq2; 997 484 2610 LEN=2650; translated  
MTTTTFLARMLLFC AATSWNGSRHRFVNAFVGSLLRHHTAKSTRPLPSMLPSGHQSSQF  
QRSALQRTVPVGNWRLLSTVSGEIEEKIKIKGDEIRQLKADGIDKETLAPHIKELLALK  
AQLEDDNKSSLEELNKKIAEKGDQIRQLKADGVDKETLAPHIEELVSLKAKLPTDESAEK  
KPAQKKKGGKQKQKQNNNNKKKADEPLSESEIKLNRLAKVDAMREANVEPF EYTYDVTT  
SASRLAADYSKLEPGEED ESDVGVAGRIMTRRVFGKLAFFSLQDETGI IQLQFDKKRL  
GDTFKG IKNWTDGGDIIGV RGSVRRTDKGELTVYATEWKMLTKSVLPLPDKWAGLKDVT  
RYRQRHVDLIVNPDVDRD TFRKRAKITSMMRRLDDEDGFLEIETPVMHSQSGGAEAKPFET  
YHNSLMDLTLRIATELHLKRLIIGGFDRVYELGRIFRNEGLSTRHNPEFTSIELYQAYA  
DYDDMMELTENLVCTIAEEVCGGLVIPYGEHTVSLEK PWRVMTMHDIVKEEIPDFDFAAL  
DLDDPESLVKAKAAAASANVP GVEDLNSVGDVLTNCFEELCEPKLIQPTFVIDYPVEVSP  
LSKPHRSK PGLVERFELFAVGREHANSF SELTDPVDQRRERFEAQAAKKAAGDDEACDVDE  
EFLTALEQGM PPTGGLGIGIDRLVMLLTNSP SIRDVIAFP LLRKEDGN

>comp14070\_c0\_seq1; 1168 344 5227 LEN=5575; translated  
MTSNYRSQRDASTPQRSSNSQSSIKSTCSSVESTESDLGHLKEKAIIEEALTASYLDVRN  
VESRHGRSESSPTEQSLNTSMH SKRMILKRDSERGF DKKH FYE SLVASTEDVLEKIN  
EGWIKGSFTMEPAMYGAPLSKVPLEQKHAVLISQSWNKVLAFRSMFAEALISRWRLLA  
SVEYIEEQALREKNPXGSKLASPFSFVSPATLAGRISPDVQALNLI ESNNDP IAKCFETR  
TADLQVLVSMIDTAVRGLCPHSQTIQRESYRPIDGSADSDPDISQVFFHRKDCTTFEDF

CFLFARYWVKPHHWLTL CRAFLWAMKSONPYCIDDEKDDLDRDPADSVHARFFFTGMIILP  
ILEANLRRANYMRKGVFEELKVCISNDRLGNKFDITIGVEMFKKLFETFPEIKDHFCE  
EDMSYGLFEMIYVLVQSGRDLANPQSNLRKILREQSMKWVLEGLSTHVVYLI  
GREILEG  
METIFGDSVNHSKEKLRNAFAFLWKHSIQFVLHPILLQONLQAEALKFYNDVAAELK  
WST  
STKQNRLEFVNMEILATGEYTHTQEEELKSALGSRGETVQNASEGKHKSKFCRYFI  
ANENS  
SHPGISIHIQKGLHGTPLVVRDRRHCTQPSEIFNEVCEHMKLATGGASIQSVMTV  
FRPQR  
HNELEFGTRFWSSQFIRYCGYKDRDSEEMGDPACVDLTSYLI EKKLWTPPERRTA  
FDILP  
LVLKIPGNDIPFIYQLPKSVTHEVHLEHPEFPEVKDLGYKWAAPPAISNFMMNLG  
GIKYS  
AAPFNGWVFSIEVARNLLERYHVTEPLAIAMNMNLSDKFLAQKVSAAELES  
SAIIHSFEKSD  
FTIVDPDVTGHSFITHCKRERSAGRECPAQWSWIGGLVGP  
TNPVWHLEMRDFRVVPQFEY  
CCDPWRVLDIDGVS  
GTKAIDTTGHILSEDDFSQKVS  
MPEVLIAYGSETGKAEAVANSLAR  
TLKFCRPTVLTNLGALEYNQELGKFSHILICSTFGAGEPPLNAK  
KFANAELAGKVTGVK  
YAVLALGSSLYPDFCKAGKIDSQMEAAAGANSIMNIVCADAAGN  
QSDIYNWSIFLKKLL  
LPNSLLVELESSGIPVEDTKAAEYRIRWLAKDEYDEEY  
SKHRLRTGTMKCRKNQDLFEGS  
DPLRSTRHIELEQIDKTDIAYETGDHLSVVPINSMDMVS  
RFCNCFAPELEKAAESSGFHR  
LKLKASRKKFLQKTSARMNCTPSVLWQTHQPFYIESVEDQ  
GTTPCNAKHLTNNNLADVLQ  
FSLDLSLSSSESYLVEFLQMLNSKLEEASLTCCASDFQ  
TMAKDAVQQCNEEGDSGMINNI  
KATYPTIVHFLEKFNDFCKPLETRKNPLLGLADVLVIM  
PRLGPRQYSISSALTSPNKV  
SITVGVVKFETS  
RDVLEGEVCSHDLAGLEPGQMINASVVKSPFRAPRSIKS  
PLIMIGAGT  
GLAPFMGFLRDRSLAMKKAGASRRGMFGKCHLFFGCRSE  
GEMLYKDQLLEWESSGVAKLH  
IAYSREPGIHCPNRYVHDAMEDRGAELFALMTSEPKTHLY  
ICGDVNM  
AKACSEKICISLLQ  
EHGSMKINATRFMSNM  
RVS  
NRFQLDVWGTREVEIVDIDFSYHG  
NANTRLIKEASRRTIM  
REFNEKY

>comp14070\_c0\_seq2; 831 145 3660 LEN=4008; translated  
MKWVLEGLSTHVVYLI  
GREILEG  
METIFGDSVNHSKEKLRNAFAFLWKHSIQFVLHPILL  
QONLQAEALKFYNDVAAELK  
WSTSTKQNRLEFVNMEILATGEYTHTQEELEIGARLAWRN  
SAKICIGRIAWNTLVVRDRRHCTQPSEIFNEVCEHMKLATGGASIQSVMTVFRPQRHNELE  
FGTRFWSSQFIRYCGYKDRDSEEMGDPACVDLTSYLI EKKLWTPPERRTAFDILPLVLKIP  
GNDIPFIYQLPKSVTHEVHLEHPEFPEVKDLGYKWAAPPAISNFMMNLGGIKYSAAPFN  
GWVFSIEVARNLLERYHVTEPLAIAMNMNLSDKFLAQKVSAAELES  
SAIIHSFEKSDFTIVDPDVTGHSFITHCKRERSAGRECPAQWSWIGGLV  
GKTGTNLDHFLFDILLEVKA  
FDSPVAF  
FQXPTNPVWHLEMRDFRVVPQFEYCCDPWRVLDIDGVS  
GTKAIDTTGHILSEDDFSQKVS  
MPEVLIAYGSETGKAEAVANSLARTLKFCRPTVLTNLGALEYNQELGKFSHILICSTFG  
AGEPPLNAK  
KFANAELAGKVTGVK  
YAVLALGSSLYPDFCKAGKIDSQMEAAAGANSIMNIVCADAAGN  
QSDIYNWSIFLKKLLLPNSLLVELESSGIPVEDTKAAEYRIRWLAKDEYDEEY  
SKHRLRTGTMKCRKNQDLFEGSDPLRSTRHIELEQIDKTDIAYETGDHLSVVPINSMD  
MVS  
RFCNCFAPELEKAAESSGFHR  
LKLKASRKKFLQKTSARMNCTPSVLWQTHQPFYIES  
VEDQGTTPCNAKHLTNNNLADVLQFSLDLSLSSSESYLVEFLQMLNSKLEEASLTCCASD  
FQ  
TMAKDAVQQCNEEGDSGMINNIKATYPTIVHFLEKFNDFCKPLETRKNPLLGLADVLVIM  
PRLGPRQYSISSALTSPNKVSITVGVVKFETS  
RDVLEGEVCSHDLAGLEPGQMINA  
SVVKSPFRAPRSIKSPLIMIGAGTGLAPFMGFLRDRSLAMKKAGASRRGMFGKCHLFFGC  
RSE  
GEMLYKDQLLEWESSGVAKLHIAYSREPGIHCPNRYVHDAMEDRGAELFALMTSEPK  
THLYICGDVNM  
AKACSEKICISLLQEHGSMKINATRFMSNM  
RVS  
NRFQLDVWGTREVEIVDIDFSYHG  
NANTRLIKEASRRTIMREFNEKY

>comp14070\_c0\_seq3; 1246 344 5229 LEN=5577; translated  
MTSNYRSQRDASTPQRSSNSQSSIKSTCSSVESTESDLGHLKEKAIEEAL  
TASYLDVRN  
VESRHRSESSPPTQSLNTSMH  
SKRMILKRDSE  
RGDFGDKKH  
FYESL  
VASTEDVLEKIN  
EGWIKGSFTMEPAMYGAPLSKVPLEQKH  
HAVLISQSWNKVLAFRSMFAEALISRW  
LLASVEYIEEQALREKNPXGSKLASPF  
SFVSPATLAGRISPDVQALN  
LIESNNDPIAKCFETR  
TADLQVLVSMIDTAVRGLCPHSQTIQ  
RESYRPIDGSADSDPDISQVFFHRKDC  
TTFEDFCFLFARYWVKPHHWLTL  
CRAFLWAMKSONPYCIDDEKDDLDRDPADSVHARFFFTGMIILP  
ILEANLRRANYMRKGVFEELKVCISNDRLGNKFDITIGVEMFKKLFETFPEIKDHFCE  
EDMSYGLFEMIYVLVQSGRDLANPQSNLRKILREQSMKWVLEGLSTHVVYLI  
GREILEG  
METIFGDSVNHSKEKLRNAFAFLWKHSIQFVLHPILLQONLQAEALKFYNDVAAELK  
WST  
STKQNRLEFVNMEILATGEYTHTQEELEIGARLAWNSAKCIGRIAWNTLVVRDRRHCTQ  
PSEIFNEVCEHMKLATGGASIQSVMTVFRPQRHNELEFGTRFWSSQFIRYCGYKDRDSEEM  
GDPACVDLTSYLI EKKLWTPPERRTAFDILPLVLKIPGNDIPFIYQLPKSVTHEVHLEH  
PEFPEVKDLGYKWAAPPAISNFMMNLGGIKYSAAPFNGWVFSIEVARNLLERYHVTEPLA  
IAMNMNLSDKFLAQKVSAAELES  
SAIIHSFEKSDFTIVDPDVTGHSFITHCKRERSAGRECP  
AQWSWIGGLV  
GKTGTNLDHFLFDILLEVKA  
FDSPVAFFQXPTNPVWHLEMRDFRVVPQFE



YCCDPWRVLDIDGVSGTKAIDTTGHILSEDDFSQKVSMPVLIAYGSETGKAEAVANSLA  
RTLKFCRPTVLTNLNGALEYNQELGKFSHILIIICSTFGAGEPPLNAKKFANAELAGKVTGV  
KYAVLALGSSLYPDFCKAGKGIDSQMEAAGANSIMNIVCADAAGNQSIDIYNWSIFLKKL  
LLPNSLLVELESSGIPVEDTKAAEYRIRWLAKDEYDEEYSKHRLRTGTMKCRKNQDLFEG  
SDPLRSTRHIELEQIDKTDIAYETGDHLSVVPINSMDMVSRCNCFAPELEKAAESSGFH  
RLKLLKASRKKFLQKTSARMNCTPSVLWQTHQPFYIESVEDQGTTPCNAKHLTNNNLADVL  
QFSLDLSLSESYLEFLQMLNSKLEEASLTLCASDFQTMAKDAVQQCNEEGDSGMINN  
IKATYPTIVHFLEKFNDFLCKPLETRKNPLLGLADVLVIMPRLGPRQYSISSALTSPNK  
VSIITVGVVKFETS RDVLEGVCSHDLAGLEPGQMINASVVKSPFRAPRSIKSPLIMIGAG  
TGLAPFMGFLRDRSLAMKKAGASRRGMFGKCHLFFGCRSEGEMLYKDQLLEWESSGVAKL  
HIAYSREPGIHCPNRYVHDAMEDRGAELFALMTSEPKTHLYICGDVNMAKACSEKCSILL  
QEHGSMSKINATRFMSNMVRVSNRFQLDVGWGTREVEIVDIDFSYHGNNANTRLIKEASRRTI  
MREFNEKY

>comp14070\_c0\_seq4; 1301 344 5142 LEN=5490; translated  
MTSNYRSQRDASTPQRSSNSQSSIKSTCSSVESTESDLGHLKEKAIIEEALTASYLDVRN  
VESRHGRSESSPPTQSLNNTSMHSKRMILKRDSERGFQDKKHFFYESLVAIVEDVLEKIN  
EGWGIKGSFTMEPAMYGAPLSKVPLEQKHHAVLISQSWNKVLAFRSMFAEALISRWLLA  
SVEYIEEQALREKNPXGSKLASPFSFVSPATLAGRISPDVQALNLIENNDPIAKCFETR  
TADLQVLVSMIDTAVRGLCPHSQTIQRESYRPIDGSADSDPDISQVFFHRKDCTTFEDF  
CFLFARYWVKPHHWLTL CRAFLWAMKSNPYCIDDEKDDLDRDPADSVHARFFTGMII LP  
ILEANLRRANYMRKGVFEELKVCISNDR LGNKFDTIGVEMFKLFFETTFPEIKDHFCE  
EDMSYGLFEMIYVLVQSGRDLANPQSNLRKILREQSMKWVLEGLSTHVVYLI GREILEG  
METIFGDSVNHSKEKLRNAFAFLWKHSIQFVLHPILLQQLQAEALKFYNDVAAELKWST  
STKQNRLEFEVMEILATGEYTHTQEELEIGARLAWRNSAKCIGRIAWNTLVVRDRRHCTQ  
PSEIFNEVCEHMKLATGGASIQSVMTVFRPQRHNELEFGTRFWSSQFIRYCGYKDRDSEEI  
MGDPACVDLTSYLI EKKLWTPPERRTAFDILPLVLKIPGNDIPFIYQLPKSVTHEVHLEH  
PEFPEVKDLGYKWAAPPAISNFMMNLGGIKYSAAPFNWVFSIEVARNLLERYHVTEPLA  
IAMNMNLSDKFLAQKVSAAELESIIHSFEKSDFITVDPDTVGHFSFITHCKRERSAGRECP  
AQWSWIGGLVGPTNPVWHLEMRDFRVVPQFEYCCDPWRVLDIDGVSGTKAIDTTGHILSE  
DDFSQKVSMPVLIAYGSETGKAEAVANSLARTLKFCRPTVLTNLNGALEYNQELGKFSHI  
LIIICSTFGAGEPPLNAKKFANAELAGKVTGVKYAVLALGSSLYPDFCKAGKGIDSQMEA  
GANSIMNIVCADAAGNQSIDIYNWSIFLKKLLLPNSLLVELESSGIPVEDTKAAEYRIRW  
LAKDEYDEEYSKHRLRTGTMKCRKNQDLFEGSDPLRSTRHIELEQIDKTDIAYETGDHLS  
VVPINSMDMVSRCNCFAPELEKAAESSGFHRLKLLKASRKKFLQKTSARMNCTPSVLWQT  
HQPFYIESVEDQGTTPCNAKHLTNNNLADVLQFSLDLSLSESYLEFLQMLNSKLEEAS  
LTLCASDFQTMAKDAVQQCNEEGDSGMINNIAKATYPTIVHFLEKFNDFLCKPLETRKNP  
LLGLADVLVIMPRLGPRQYSISSALTSPNKVSIITVGVVKFETS RDVLEGVCSHDLAGL  
EPGQMINASVVKSPFRAPRSIKSPLIMIGAGTGLAPFMGFLRDRSLAMKKAGASRRGMFG  
KCHLFFGCRSEGEMLYKDQLLEWESSGVAKLHIAYSREPGIHCPNRYVHDAMEDRGAELF  
ALMTSEPKTHLYICGDVNMAKACSEKCSILLQEHGSMSKINATRFMSNMVRVSNRFQLDVG  
WGTREVEIVDIDFSYHGNNANTRLIKEASRRTIMREFNEKY

>comp14070\_c0\_seq5; 451 94 1607 LEN=2321; translated  
MVPRGKVGNSQHFPNTLHILLDEAEKAGHADIVSWCSQGSFRIHDSEALVPLLAKYFRQ  
TKFKSFLRQLQSYDFNRTTRGCDKGI VSHPLFVRGRRSLCFQMRKRAVTSTVVSQGLGS  
SSDLLFSRSAPVPSNGIAPIRKAFSSAIRNQRMELQRLAKYAGMSEMKNATFDLQGNSTV  
LKQPVMPDPKLLALNSHVLKATSDPDI AKRPSHALNYKTQQKRGYPAPTIMKNPQRGNVL  
ECTGIDHSLKANVCLSDVRTSQEACRDSII ESSSTMCGNPQQVPSQHEFAHSHRGQNYG  
EGYRVQYVQDQVPCGGQDKECQGRQSNLSQSKVQPQTTPRQPKSDESQNVQHQTI PHDQR  
HARQGHYQQAQVRAQNIHQQNTQPQAELVYSQNNTLIQIKELRENMTKQLACGDQGDQH  
PPLKVQSHGQIHNTNXDPSSTRNALPATDGTACTTSASSTYAFTASSSTATAAAATAA  
AAAATLTPQTAAAATEPKTTTETV

>comp14070\_c0\_seq6; 886 145 3573 LEN=3921; translated  
MKWVLEGLSTHVYLI GREILEGME TIFGDSVNHSKEKLRNAFAFLWKHSIQFVLHPILL  
QQLQAEALKFYNDVAAELKWSTSTKQNRLEFEVMEILATGEYTHTQEELEIGARLAWRN  
SAKCI GRIAWNTLVVRDRRHCTQ PSEIFNEVCEHMKLATGGASIQSVMTVFRPQRHNELE  
GTRFWSSQFIRYCGYKDRDSEEIMGDPACVDLTSYLI EKKLWTPPERRTAFDILPLVLKIP  
GNDIPFIYQLPKSVTHEVHLEHPEFPEVKDLGYKWAAPPAISNFMMNLGGIKYSAAPFN  
GWVFSIEVARNLLERYHVTEPLAIAMNMNLSDKFLAQKVSAAELESIIHSFEKSDFITVDP  
PDTVGHFSFITHCKRERSAGRECPAQWSWIGGLVGPTNPVWHLEMRDFRVVPQFEYCCDPW  
RVLDIDGVSGTKAIDTTGHILSEDDFSQKVSMPVLIAYGSETGKAEAVANSLARTLKFC

RPTVLTNLNGALEYNQELGKFSHILICSTFGAGEPPLNAKKFANAELAGKVTGVKYAVLALGSSLYPDFCKAGKIDSQMEAAGANSIMNIVCADAAGNQSIDIYNWSIFLKKLLLPNSLLVELESSGIPVEDTKAAEYRIRWLAKDEYDEEYSKHLRLRTGTMKCRKNQDLFEGSDPLRSTRHIELEQIDKTDIAYETGDHLSVVPINSMDMVSRFCNCFAPELEKAAESSGFHRLKPKASRKKFLQKTSARMNCTPSVLWQTHQPFYIESVEDQGTTPCNAKHLTNNNLADVLQFSLDLSLSSESYLVEFLQMLNSKLEEASLTLCASDFQTMADAVQQCNEEGDSGMINNİKATYPTIVHFLEKFNDLFCKPLETRKNPLLGLADVLVIMPRLGPRQYSISSSALTSFNKVSITVGVVKFETS RDVLVEGVCSHDLAGLEPGQMINASVVKSPFRAPRSIKSPLIMIGAGTGLAPFMGFLRDRSLAMKKAGASRRGMFGKCHLFFGCRSEGEMLYKDQLEWESSGVAKLHIAYSREPFIHCPNRYVHDAMEDRGAELFALMTSEPKTHLYICGDVNMAKACSEKCSLLQEHGSMKINATRFMSNMVSNRFQLDVWGTREREIVDIDFSYHGNNANTRLIKEASRRTIMREFNEKY

>comp14070\_c0\_seq7; 1113 344 5314 LEN=5662; translated  
MTSNYRSQRDASTPQRSSNSQSSIKSTCSSVESTESDLGHLKEKAIIEEALTASYLDVRN  
VESRHGRSESSPTEQSLNTSMHSKRMILKRDSERGFQDKKHFYESLVAIVEDVLEKIN  
EGWGIKGSFTMEPAMYGAPLSKVPLEQKHHAVLISQSWNKVLAFRSMFAEALISRWLLA  
SVEYIEEQALREKNPXGSKLASPFSFVSPATLAGRISPDVQALNLIENNDPIAKCFETR  
TADLQVLVSMIDTAVRGLCPHSQTIQRESYRPIDGSADSDPDISQVFFHRKDCTTFEDF  
CFLFARYWVKPHHWLTLCR AFLWAMKSNPYCIDDEKDDLDRDPADSVHARFFFTGMIILP  
ILEANLRRANYMRKGVFEELKVCISNDR LGNKFDITIGVEMFKKLFETFPEIKDHFCE  
ENDVEDMSYGLFEMIYVLVQSGRDLANPQSNLRKILREQSMKWVLEGLSTHVYVLI  
GREILEG METIFGDSVNHSKEKLRNAFAFLWKHSIQFVLHPILLQQLQAEALKFYNDV  
AAELKWSTSTKQNRLEFVNMEILATGEYTHTQEELKSALGSRGETVQNASSEGGKHSK  
FCRYFIANENS SHPGISIHQKGLHGTPLVVRRRHCTQPSEIFNEVCEHMKLATGGAS  
IQSVMTVFRPQRHNELFGTRFWSSQFIRYCYKDRDSEEIMGDPACVDLTSYLI  
EKKLWTPPERRTAFDILPLVLKIPGNDIPFIYQLPKSVTHEVHLEHPEFPEVKDLG  
YKWA AVPAISNFMNMLGGIKYSAAPFNGWFVSI EVARNLLERYHVTEPLAIAMN  
NLSDKFLAQKVS AELES AIH SF EKSDFTI VDPD TVGH SFITHCKRERSAGRE  
CPAQWSWIGGLVGKTGTNLDHFLFDILLEVKA FDS PVAFFQXPTNPVWHLEMR  
DFRVVPQFEYCCDPWRVLDIDGVS GTKAIDTTGHILS EDDFSQKVSMEPEVLI  
IAYGSETGKAEAVANSLARTLKF CRPTVLTNLNGALEYNQELGKFSHILICSTFG  
AGEPPLNAKKFANAELAGKVTGVKYAVLALGSSLYPDFCKAGKIDSQMEAAGAN  
SIMNIVCADAAGNQSIDIYNWSIFLKKLLLPNSLLVELESSGIPVEDTKAAEYRIR  
WLAKDEYDEEYSKHLRLRTGTMKCRKNQDLFEGSDPLRSTRHIELEQIDKTDIAY  
ETGDHLSVVPINSMDMVS RFCNCFAPELEKAAESSGFHRLKPKASRKKFLQKTS  
ARMNCTPSVLWQTHQPFYIESVEDQGTTPCNAKHLTNNNLADVLQFSLDLSLSSE  
SYLVEFLQMLNSKLEEASLTLCASDFQTMADAVQQCNEEGDSGMINNİKATYPTI  
VHFLEKFNDLFCKPLETRKNPLLGLADVLVIMPRLGPRQYSISSSALTSFNKVSIT  
VGVVKFETS RDVLVEGVCSHDLAGLEPGQMINASVVKSPFRAPRSIKSPLIMIG  
AGTGLAPFMGFLRDRSLAMKKAGASRRGMFGKCHLFFGCRSEGEMLYKDQLEWESS  
GVAKLHIAYSREPFIHCPNRYVHDAMEDRGAELFALMTSEPKTHLYICGDVNMAK  
ACSEKCSLLQEHGSMKINATRFMSNMVSNRFQLDVWGTREREIVDIDFSYHGNNAN  
TRLIKEASRRTIMREFNEKY

>comp14070\_c0\_seq8; 369 68 1038 LEN=1038; translated  
MDKESLLASLTS DKLVSNAKPDAAEQDLFGDIAIDDTPPPAISALLGTPSRATLSVEI  
KEAQTDVNIQAPT VHT EAPSIATET YPTAPSAYEPPAVESLLSQSGLLG VAGI  
ANTAQGLFD EVDNDDRKTAEKRMKNEQRM RQEEMGV SQRQETETHREFGEEQSRM  
QQQQHQQSLANS DIKPAPVQVNVGYSAPTYDQQS AMMQSAV I PQRQLHNQMDAM  
SLNNQNSSGFYSDHNSPIPKTSLGHR IESPNGHVGP THQNTSSYFYGTREP  
KIQHQSHLQQKGYSKNLSRPSSTVGMHNSTEDTNLGRIRKFKLMKPDEVAPX

>comp14070\_c0\_seq9; 765 68 2224 LEN=2597; translated  
MDKESLLASLTS DKLVSNAKPDAAEQDLFGDIAIDDTPPPAISALLGTPSRATLSVEI  
KEAQTDVNIQAPT VHT EAPSIATET YPTAPSAYEPPAVESLLSQSGLLG VAGI  
ANTAQGLFD EVDNDDRKTAEKRMKNEQRM RQEEMGV SQRQETETHREFGEEQSRM  
QQQQHQQSLANS DIKPAPVQVNVGYSAPTYDQQS AMMQSAV I PQRQLHNQMDAM  
SLNNQNSSGFYSDHNSPIPKTSLGHR IESPNGHVGP THQNTSSYFYGTREP  
KIQHQSHLQQKGYSKNLSRPSSTVGMHNSTEDTNLGRIRKFKLMKPEEVAPLY  
TNIRVTEPMLIQSQSFLISSPPYWSYQITSQLVDNQGTWL VRRRFRHVVALE  
DRLRQACPGSII PPRPEKHATRALEEASTQQSAEF AVQRSKEL EQYLNEVAR  
HPVAGHSEVFR LFLGLQDDIGTAWPEVSTNALTRLQAVGAGVTMRVAESTN  
LTAASAPAQEWEE DAELGLCSSESRLGAVSQAVPKLEGT VIVLREQGDAAGIL  
GMELSKSSKVVDIDYKFFEVLS SGLLRNRRTRKRLALETSAAMESFLEQYKLV  
RYEKMAMQDRRQALQRKAKERGRADARAVHLSQQQRHLQANGQIYHLNQL  
EQNAISMDTQALDAVSEANEIG

ARLRLEINRVAIDRRISWNNSIKIIASSMREACSERMAIWESTLEAFENLTKNVGQIE  
>comp14070\_c0\_seq10; 725 731 3745 LEN=4093; translated  
MTVFRPQRHNELFGTRFWSSQFIRYCGYKDRDSEEIMGDPACVDLTSYLIEKKLWTPPER  
RTAFDILPLVLKIPGNDIPFIYQLPKSVTHEVHLEHPEFPEVKDLGYKWAAPPAISNFMM  
NLGGIKYSAAPFNGWVFSIEVARNLLERYHVTEPLAIAMNMNLSKFLAQKVSAAELES  
IHSFEKSDFTIVDPDPTVGHSFITHCKRERSAGRECPAQWSWIGGLVGKTGTNLDFLFDI  
LLEVKAFDSPVAFFQXPTNPVWHLEMRDFRVVPQFEYCCDPWRVLDIDGVSGETKAIDTTG  
HILSEDDFSQKVSMPPEVLIAYGSETGKAEAVANSLARTLKFRCRPTVLTNLNGALEYNQELG  
KFSHILIIICSTFGAGEPPLNAKKFANAELAGKVTGVKYAVLALGSSLYPDFCKAGKGIDS  
QMEAAAGANSIMNIVCADAAGNQSIDIYNWSIFLKKLLLPNSLLVELESSGIPVEDTKAAE  
YRIRWLAKDEYDEEYSKHRLRTGTMKCRKNQDLFEGSDPLRSTRHIELEQIDKTDIAYET  
GDHLSVVPINSMDMVSRCNCFAPELEKAAESSGFHRLKCLKASRKKFLQKTSARMNCTPS  
VLWQTHQPFYIESVEDQGTTPCNAKHLTNNNLADVLQFSLDLSLSSSESYLVEFLQMLNSK  
LEEASLTLCCASDFQTMAKDAVQQCNEEGDSGMINNIKATYPTIVHFLEKFNDLFCCKPLE  
TRKNPLLGLADVLVIMPRLGPRQYSISSSALTSPNKVSIITVGVVKFETS RDVLEGVCSH  
DLAGLEPGQMINASVVKSPFRAPRSIKSPLIMIGAGTGLAPFMGFLRDRSLAMKKAGASR  
RGMFGKCHLFFGCRSEGEMLYKDQLEWEWESSGVAKLHIAYSREPGIHCNRYVHDAMEDR  
GAELFALMTSEPKTHLYICGDVNMAKACSEKISLLQEHGSMKINATRFMSNMVSNRF  
QLDVWGTREVEIVDIDFSYHGNNANTRLIKEASRRTIMREFNEKY  
>comp14070\_c0\_seq11; 358 168 1676 LEN=2632; translated  
MTILYVATNANRLKAEVNSDTGEFVRTVQDIDPIVRSRKHQTPLTPGDIENNDHHNSP  
PSRIDTNNDEKESFLFEWLTSHLNFGMTTEWIERHPTFDSLLYVFTSFGSKRSVVTTY  
RILGIGNNGNEDDSEKNKHIRGQLKKGVSQVETQGLHVAHVAFSPDYSTLSIKAKPPST  
LCVGHYLDGSLFFDCSQDCALGEPQKIVVLPEIRPETRRKTLPNPLPSIHHVTYNPRGR  
IPSSCNDSDDEGDSCNYLLVSETSKQGRVWYTNVDSIGLPISSQPASFLKVTFITPPSGW  
FARLVGTSWVAGLADYRIRRCVAVHPNGLYAYLLEFNCVIVYEQPETGRISGDCLQEI  
PTIDPNKVI GLAVHGS AELHATDTEIFVLNRGLNPFPTG SWAESDVRVFSIENNGAKLVP  
KTTIACAGRACHFLALPRDQSYPTQLFVGSMDMGRQFENVEEQTSASIIETVRSNAEEAGG  
TFERVGIANVGMDRITCIAALS  
>comp14070\_c0\_seq12; 780 731 3658 LEN=4006; translated  
MTVFRPQRHNELFGTRFWSSQFIRYCGYKDRDSEEIMGDPACVDLTSYLIEKKLWTPPER  
RTAFDILPLVLKIPGNDIPFIYQLPKSVTHEVHLEHPEFPEVKDLGYKWAAPPAISNFMM  
NLGGIKYSAAPFNGWVFSIEVARNLLERYHVTEPLAIAMNMNLSKFLAQKVSAAELES  
IHSFEKSDFTIVDPDPTVGHSFITHCKRERSAGRECPAQWSWIGGLVGPTNPVWHLEMRDF  
RVVPQFEYCCDPWRVLDIDGVSGETKAIDTTGHILSEDDFSQKVSMPPEVLIAYGSETGKAE  
AVANSLARTLKFRCRPTVLTNLNGALEYNQELGKFSHILIIICSTFGAGEPPLNAKKFANAEL  
AGKVTGVKYAVLALGSSLYPDFCKAGKGIDSQMEAAAGANSIMNIVCADAAGNQSIDIYNW  
SIFLKKLLLPNSLLVELESSGIPVEDTKAAEYRIRWLAKDEYDEEYSKHRLRTGTMKCRK  
NQDLFEGSDPLRSTRHIELEQIDKTDIAYETGDHLSVVPINSMDMVSRCNCFAPELEKA  
AESSGFHRLKCLKASRKKFLQKTSARMNCTPSVLWQTHQPFYIESVEDQGTTPCNAKHLTN  
NNLADVLQFSLDLSLSSSESYLVEFLQMLNSKLEEASLTLCCASDFQTMAKDAVQQCNEEG  
DSGMINNIKATYPTIVHFLEKFNDLFCCKPLETRKNPLLGLADVLVIMPRLGPRQYSISS  
ALTSPNKVSIITVGVVKFETS RDVLEGVCSHDLAGLEPGQMINASVVKSPFRAPRSIKSP  
LIMIGAGTGLAPFMGFLRDRSLAMKKAGASRRGMFGKCHLFFGCRSEGEMLYKDQLEWE  
SSGVAKLHIAYSREPGIHCNRYVHDAMEDRGAELFALMTSEPKTHLYICGDVNMAKACS  
EKISLLQEHGSMKINATRFMSNMVSNRFQLDVWGTREVEIVDIDFSYHGNNANTRLIK  
EASRRTIMREFNEKY  
>comp14071\_c0\_seq3; 317 423 755 LEN=1447; translated  
MPLYDEIEIEDMTYDPELTMYSYPCPCGDRFKIYLQDLWDGDDEAGCESCTLYIEVVYDE  
EDLPPLPEDDSDEDEDKDENENTEKASSGKASSLDEGDVCKSLGKLSVTTQ  
>comp14071\_c0\_seq4; 317 423 755 LEN=1593; translated  
MPLYDEIEIEDMTYDPELTMYSYPCPCGDRFKIYLQDLWDGDDEAGCESCTLYIEVVYDE  
EDLPPLPEDDSDEDEDKDENENTEKASSGKASSLDEGDVCKSLGKLSVTTQ  
>comp14072\_c0\_seq1; 537 159 1418 LEN=2235; translated  
MNHCSIIIDSSHNSSSSCRIGQSMYSVGVNNTSSTPSYHYDDTDGVDERTTVLRTMKSLE  
NSVYKRPNAQCLPEIFRGMWRKQIVEWMIYLVKYCKLKHEATAAAVYYLDVAVWASSSSS  
SSLVKSPRDYQLCAMTSLHLALKVYDSPTVRVVKLSCLVKLGNGEFTEDDIIQKEQELLR  
ALSWRINPPTANCFQRYLELLQFSDDEGGTGDGSGSERDMDNDVSTKHGCQNKFPDIEQ  
YRREQLETVEEVALDFIEVAMAHDRFLSVPSAVIAYAALLSAIELTMEANGQKQQQNGC  
GSYDWVTFHLKMNHVAEMGDIMNGDDHRGNGKDL SLLVLR TKLVLERIVKGLPAPAEED

DSSCDAFAKTKMLYWTSGIGKNNKHGKINDDNNTYRRFTRPSKEISSSSPSSLPTSTI  
>comp14073\_c0\_seq1; 682 671 2170 LEN=2561; translated  
MAQVLSTFSRLEQSRFEAFRKASFPGDAIAKFVAHCLIEQHRPLSGSIDFGANGISGNE  
TETDGLKTANGGLSNGADPNADPDSNNLNSKDNPNRNSKAIGNKNGNVDSNAISIQLHSQ  
GRPTITTSVRNKSFRHLRPVGCATRKS SVLSEVVAPGQAGDITVVVSTLAKEYAQRLVME  
ARRHASERKQRRRRKLEQVAQRRSDAPGEAGESESDGSLSEEDDPSTSPRDILEAYAH  
RQARGLDPGFFLNETGGGPNVSGVSGVLADPDVHRRQDLTRKVTLAAQRAYDEEARKKT  
SEGEGEEQEQQDEEDEAVRTGDNEGGAKVMEIQDREGNGDGNNDKQDTKEAVETW  
DYLQPEERGEMQEDPSEKAVWLYARHVHRMVARQHGISIVTSDSETEPENEGMIKRKGT  
NAKPNEGSSSSKSNAEEDPVP SAEAIHKPNDDDDNNKDQTKSRNNSHTEESAEDHEVPA  
TPVASGAEE DATLMDLSTS

>comp14073\_c0\_seq2; 757 168 1907 LEN=2298; translated  
MGGTARKRSADQLSSANAGTDPGAMEGVGGGSATGTVKTRSSRKKKDKRSKKSKETDNA  
SGNIGGSKTKDGSPLEITATAEGKQMAQVLSTFSRLEQSRFEAFRKASFPGDAIAKFVAH  
CLIEQHRPLSGSIDFGANGISGNETETDGLKTANGGLSNGADPNADPDSNNLNSKDNPN  
RNSKAIGNKNGNVDSNAISIQLHSQGRPTITTSVRNKSFRHLRPVGCATRKS SVLSEVVA  
PGQAGDITVVVSTLAKEYAQRLVMEARRHASERKQRRRRKLEQVAQRRSDAPGEAGESE  
SDGSLSEEDDPSTSPRDILEAYAH RQARGLDPGFFLNETGGGPNVSGVSGVLADPDVH  
RRQDLTRKVTLAAQRAYDEEARKKTSEGEGEEQEQQDEEDEAVRTGDNEGGAKVMEIQDRE  
GNGDGNNDKQDTKEAVETW DYLQPEERGEMQEDPSEKAVWLYARHVHRMVARQHGISIV  
TSDSETEPENEGMIKRKGT PNAKPNEGSSSSKSNAEEDPVP SAEAIHKPNDDDDNNKDQ  
TKSRNNSHTEESAEDHEVPAKATPVASGAEE DATLMDLSTS

>comp14073\_c0\_seq3; 778 168 1922 LEN=2313; translated  
MGGTARKRSADQLSSANAGTDPGAMEGVGGGSATGTVKTRSSRKKKDKRSKKSKETDNA  
SGNIGGSKTKDGSPLEITATAEGKQMAQVLSTFSRLEQSRFEAFRKASFPGDAIAKFVAH  
CLIEQHRPLSGSIDFGANGISGNETETDGLKTANGGLSNGADPNADPDSNNLNSKDNPN  
RNSKAIGNKNGNVDSNAISIQLHSQGRPTITTSVRNKSFRHLRPVGCATRKS SVLSEVVA  
PGQAGDITVVVSTLAKEYAQRLVMEARRHASERKQRRRRKLEQVAQRRSDAPGEAGESE  
SDGSLSEEDDPSTSPRDILEAYAH RQARGLDPGFFLNETGGGPNVSGVSGVLADPDVH  
RRQDLTRKVTLAAQRAYDEEARKKTSEGEGEEQEQQDEEDEAVRTGDNEGGAKVME  
IQDREGNGDGNNDKQDTKEAVETW DYLQPEERGEMQEDPSEKAVWLYARHVHRMVARQH  
GISIVTSDSETEPENEGMIKRKGT PNAKPNEGSSSSKSNAEEDPVP SAEAIHKPNDDDDN  
NKDQTKSRNNSHTEESAEDHEVPAKATPVASGAEE DATLMDLSTS

>comp14073\_c0\_seq4; 661 671 2155 LEN=2546; translated  
MAQVLSTFSRLEQSRFEAFRKASFPGDAIAKFVAHCLIEQHRPLSGSIDFGANGISGNE  
TETDGLKTANGGLSNGADPNADPDSNNLNSKDNPNRNSKAIGNKNGNVDSNAISIQLHSQ  
GRPTITTSVRNKSFRHLRPVGCATRKS SVLSEVVAPGQAGDITVVVSTLAKEYAQRLVME  
ARRHASERKQRRRRKLEQVAQRRSDAPGEAGESESDGSLSEEDDPSTSPRDILEAYAH  
RQARGLDPGFFLNETGGGPNVSGVSGVLADPDVHRRQDLTRKVTLAAQRAYDEEARKKT  
SEGEGEEQEQQDEEDEAVRTGDNEGGAKVMEIQDREGNGDGNNDKQDTKEAVETW DYLQ  
PEERGEMQEDPSEKAVWLYARHVHRMVARQHGISIVTSDSETEPENEGMIKRKGT PNAKPN  
EGSSSSKSNAEEDPVP SAEAIHKPNDDDDNNKDQTKSRNNSHTEESAEDHEVPAKATPVAS  
GAEE DATLMDLSTS

>comp14074\_c0\_seq1; 593 444 2189 LEN=2568; translated  
MRGFLLPNDFLFPFEAICRKARSKQKAATKKEYRQRANLTLMIRKPIIMDFRKKRGKASSH  
ESSISCSIDFKTILQSANPTEQEVEIEAIEKVRSLCSTPPTPYIDNMINAGIVPLLVDILD  
CGIRRNGLIKSKEECSRLVDKGGNKCKAASNTCTKGFTVQEDKLRKLIYVTAWALTNIA  
LTSANHVANSGAIKPLIQLLSHNDVKIKEQSAWCLGNIAGEGSILRDQVLDGSAIEPLLT  
NLADPKNTSHLGIIVFAISNLCKGNPTSLAPFRTKIFHNLVFLLDKSTMEELATDVVWA  
LSYLSNEDEQHTLPI SPCFLRKLMSKLIELLEINFKCKPIIQIIGNAVSGSDSQTI  
LDSGFLNHLADLLGNSPTEVRKNSCGI IAMIACGNHDQIQQLMKRKKILHQLVVKATHDQ  
WSVRKEALWAIIVYILTNGSYTDISWMIGANGFDPLITFLALENSDVKLLVAVLDAVENAF  
KAHQKYLDFLAENRGIDYIEELQKHRSDVYKVVYLIDNFFGVEEDENSIPATNDSGHF  
TLGMTSVPTPKNLFPIKQNGSPKESSPFRHLFTNNRSSH

>comp14074\_c0\_seq2; 571 326 2050 LEN=2429; translated  
MAIKVNHTICRKARSKQKAATKKEYRQRANLTLMIRKPIIMDFRKKRGKASSHESSISCI  
SDFKTILQSANPTEQEVEIEAIEKVRSLCSTPPTPYIDNMINAGIVPLLVDILDGCGIRRN  
GLIKSKEECSRLVDKGGNKCKAASNTCTKGFTVQEDKLRKLIYVTAWALTNIALTSANHV  
ANSGAIKPLIQLLSHNDVKIKEQSAWCLGNIAGEGSILRDQVLDGSAIEPLLTNLADPKN  
TSHLGIIVFAISNLCKGNPTSLAPFRTKIFHNLVFLLDKSTMEELATDVVWALS YLSNE

DEQHTELPISPCFLRKLMSKLIELLEINFKCKKPIIQIIGNAVSGSDSQTQIVLDSGFLN  
HLADLLGNSSTEVRKNSCGIAMIACGNHDQIQQLMKRKKILHQLVVKATHDQWSVRKEA  
LWAIIVYILTNGSYTDISWMI GANFDP LITFLALENSDVKLLVAVLDAVENAFKAHQKYL  
DLFAENRGIDYIEELQKHRSDVVYKVVYLIDNFFGVEEDENSIPATNDSGHFTLGMTSV  
PTPKNLFPKQNGSPKES SSPFRHLFTNNRSSH

>comp14075\_c0\_seq1; 1452 250 4053 LEN=5837; translated  
MKS KVRFDGLDVAAMVSHWNRVALGRRVINIYNGPNADTYIFKMDKLTSSSTDGTGTKEGI  
DDDQKTASSNMLLLLLESGVRFHTSRQPYENPGMPSQFCAKLRKHLRGLRLEQVTQLGTMD  
RVVHLVFGSGDTQRHSLMLELYARGNLVLTNSEYTI LSLRSHEYNKKNDDSDANTTND E  
KKEDSAVVASNDTIQVKVGHAYPVTYATTLTASDGDNHGSDSNPETKDQDDENDEILLTT  
SDPLLWFQNYHDEEQKRTASAAEADASNTKKKNKGGGNKKKNNTSHFAWKMLLTRPSSG  
VSHYGPSLLEHCLRCANLWGTSAVDTDQADGKDKSKFPHDLTTIEEWKALQSVLQSEGS R  
ILNGIQHGVS KGYILYQDKKNKNGESSSSPTSSFDDKVLLEFQPHLLKQHETMPRLEYPN  
FDLATDNFFSHLDLQKRILRAEQQQSQAESRLEKIRLDQEKRVASLIEQQESLLEEAQLV  
EIHADMVEKALQVVNSALDSGMDEQLEDLVELEARQNNNPVAKLIYKLDLENERMVLRL  
LREDAMYDIDGDENDNTRFQNVTVSLLDTAHGNAKTLFAKYRASKEKSKKTTEANAKALE  
AAEETAKRQMLEAQSRATHINLQAKRKPWFEFKNWFITTDNYLVLGGRDAQQNEQIVKR  
YLRPGDAYLHADVHGAASCVLRAKRRDPKTGKTSPIPLSSQALREAGNFTICRSSAWSS  
RMVTSAWWVESHQVSKTAPTGEYLTVGFSFMIRGKKNFLPPSQLEMGLAVLFLKLGDDDSIL  
RHKDERRDFALMQQDEADDVDDDDDLFRDDVGTSESMVVKTSKTKDSGLIEEEGPTRNG  
NLTLIEDSSREIETSEVAPNVSPDAEIFDDKIDVQNDGILANEEKEIKPKKKGLSVKERR  
LIKKYGSLEAAAYDAEKERKRAEEERKIASQGSKEKPSNEPKPTNHKRGKRAKLRMAKKY  
ADQDDEDRELALIALHAGEKLLKKDMKKEPQVSEKGEAAAETIAILRKDSAAIAAKLPQ  
EVQNSLAKCVTVVDAEDNQIIRWDKLDGDVLEQLNSFESEDQKIAASNRLLSLKETCRID  
NFSASLAGIIRTIRIHGHEGLGKGSERNNSNEARRKNKSDRIAEEESWKNTLAEEGILDG  
NIEVDDTIDDTAELSKLSGKPEKDDLLLYAVPVCAPYQSLSKFTYRVKLT PGNLKR GKAS  
KQCI AVFLKDEKSKTGLEQSRDLIKKVADNEWVQAICGDVKISAAGASKAIQRSKAKSKA  
SKKNKKK

>comp14075\_c0\_seq2; 1452 250 4053 LEN=5406; translated  
MKS KVRFDGLDVAAMVSHWNRVALGRRVINIYNGPNADTYIFKMDKLTSSSTDGTGTKEGI  
DDDQKTASSNMLLLLLESGVRFHTSRQPYENPGMPSQFCAKLRKHLRGLRLEQVTQLGTMD  
RVVHLVFGSGDTQRHSLMLELYARGNLVLTNSEYTI LSLRSHEYNKKNDDSDANTTND E  
KKEDSAVVASNDTIQVKVGHAYPVTYATTLTASDGDNHGSDSNPETKDQDDENDEILLTT  
SDPLLWFQNYHDEEQKRTASAAEADASNTKKKNKGGGNKKKNNTSHFAWKMLLTRPSSG  
VSHYGPSLLEHCLRCANLWGTSAVDTDQADGKDKSKFPHDLTTIEEWKALQSVLQSEGS R  
ILNGIQHGVS KGYILYQDKKNKNGESSSSPTSSFDDKVLLEFQPHLLKQHETMPRLEYPN  
FDLATDNFFSHLDLQKRILRAEQQQSQAESRLEKIRLDQEKRVASLIEQQESLLEEAQLV  
EIHADMVEKALQVVNSALDSGMDEQLEDLVELEARQNNNPVAKLIYKLDLENERMVLRL  
LREDAMYDIDGDENDNTRFQNVTVSLLDTAHGNAKTLFAKYRASKEKSKKTTEANAKALE  
AAEETAKRQMLEAQSRATHINLQAKRKPWFEFKNWFITTDNYLVLGGRDAQQNEQIVKR  
YLRPGDAYLHADVHGAASCVLRAKRRDPKTGKTSPIPLSSQALREAGNFTICRSSAWSS  
RMVTSAWWVESHQVSKTAPTGEYLTVGFSFMIRGKKNFLPPSQLEMGLAVLFLKLGDDDSIL  
RHKDERRDFALMQQDEADDVDDDDDLFRDDVGTSESMVVKTSKTKDSGLIEEEGPTRNG  
NLTLIEDSSREIETSEVAPNVSPDAEIFDDKIDVQNDGILANEEKEIKPKKKGLSVKERR  
LIKKYGSLEAAAYDAEKERKRAEEERKIASQGSKEKPSNEPKPTNHKRGKRAKLRMAKKY  
ADQDDEDRELALIALHAGEKLLKKDMKKEPQVSEKGEAAAETIAILRKDSAAIAAKLPQ  
EVQNSLAKCVTVVDAEDNQIIRWDKLDGDVLEQLNSFESEDQKIAASNRLLSLKETCRID  
NFSASLAGIIRTIRIHGHEGLGKGSERNNSNEARRKNKSDRIAEEESWKNTLAEEGILDG  
NIEVDDTIDDTAELSKLSGKPEKDDLLLYAVPVCAPYQSLSKFTYRVKLT PGNLKR GKAS  
KQCI AVFLKDEKSKTGLEQSRDLIKKVADNEWVQAICGDVKISAAGASKAIQRSKAKSKA  
SKKNKKK

>comp14075\_c0\_seq3; 1452 250 4053 LEN=5411; translated  
MKS KVRFDGLDVAAMVSHWNRVALGRRVINIYNGPNADTYIFKMDKLTSSSTDGTGTKEGI  
DDDQKTASSNMLLLLLESGVRFHTSRQPYENPGMPSQFCAKLRKHLRGLRLEQVTQLGTMD  
RVVHLVFGSGDTQRHSLMLELYARGNLVLTNSEYTI LSLRSHEYNKKNDDSDANTTND E  
KKEDSAVVASNDTIQVKVGHAYPVTYATTLTASDGDNHGSDSNPETKDQDDENDEILLTT  
SDPLLWFQNYHDEEQKRTASAAEADASNTKKKNKGGGNKKKNNTSHFAWKMLLTRPSSG  
VSHYGPSLLEHCLRCANLWGTSAVDTDQADGKDKSKFPHDLTTIEEWKALQSVLQSEGS R  
ILNGIQHGVS KGYILYQDKKNKNGESSSSPTSSFDDKVLLEFQPHLLKQHETMPRLEYPN  
FDLATDNFFSHLDLQKRILRAEQQQSQAESRLEKIRLDQEKRVASLIEQQESLLEEAQLV

EIHADMVEKALQVVNSALDSGMDWEQLEDLVELEARQNNNPVAKLIYKLDLENERMVLRL  
LREDAMYDIDGDENDNTRFQNVTVSLLDTAHGNAKTLFAKYRASKEKSKKTTEANAKALE  
AAEETAKRQMLEAQSRATHINLQAKRKPWFEEKFNWFITTDNYLVLGGRDAQQNEQIVKR  
YLRPGDAYLHADVHGAASCVLRAKRKRDPKTGKTSPIPLSSQALREAGNFTICRSSAWSS  
RMVTSAWWVESHQVSKTAPTGEYLTVGFSFMIRGKKNFLPPSQLEMGLAVLFLKLGDDDSIL  
RHKDERRDFALMQQDEADDVDDDDDLFRDDVGTSESMVVKTSKTKDSGLIEEEGPTRNG  
NLTLEDSSREIETSEVAPNVSPDAEIFDDKIDVQNDGILANEEKEIKPKKKGLSVKERR  
LIKKYGSLEAAYDAEKERKRAEEERKIASQGSKEKPSNEPKPTNHKRGKRAKLRMAKKY  
ADQDDEDRELALIALHAGEKLLKKDMKKEPQVSEKGEAAAETIAILRKDSAAIAAKLPQ  
EVQNSLAKCVTVVDAEDNQIRWDKLDGDVLEQLNSFESEDQKIAASNRLLSLKETCRID  
NFSASLAGIIRTIRIHGHEGLGKGSERNNSNEARRKNKSDRIAEEESWKNTLAEEGILDG  
NIEVDDTIDDTAELSKLSGKPEKDDLLLYAVPVCAPYQSLSKFTYRVKLTTPGNLKRKAS  
KQCIAVFLKDEKSKTGLEQSRDLIKKVADNEWVQAICGDVKISAAGASKAIQRSKAKSKA  
SKKNKKK

>comp14075\_c0\_seq4; 1452 250 4053 LEN=5398; translated  
MKSKVRFGLDVAAMVSHWNRVALGRRVINIYNGPNADTYIFKMDKLTSSSTDGTGTKEGI  
DDDQKTASSNMLLLESGVRFHTSRQPYENPGMPSQFCAKLRKHLRGLRLEQVTQLGTMD  
RVVHLVFGSGDQQRHSLMLELYARGNLVLTNSEYTIILSLLRSHEYNNKNDSDANTTDE  
KKEDSAVVASNDTIQVKVGHAYPVTYATTLTASDGDNHGSDSNPETKDQDDENDEILLTT  
SDPLLWFQNYHDEEQKRTASAAEADASNTKKKNKGGGNKKKNNTSHFAWKMLLTRPSSG  
VSHYGPSLLEHCLRCANLWGTSAVDTDQADGKDKSKFPHDLTTIEEWKALQSVLQSEGSR  
ILNGIQHGVSKEYILYQDKKNKNGESSSSPTSSFDDKVLEFQPHLLKQHETMPRLEYPN  
FDLATDNFFSHLDLQKRILRAEQQSQAESRLEKIRLDQEKRVASLIEQQESLLEEAQLV  
EIHADMVEKALQVVNSALDSGMDWEQLEDLVELEARQNNNPVAKLIYKLDLENERMVLRL  
LREDAMYDIDGDENDNTRFQNVTVSLLDTAHGNAKTLFAKYRASKEKSKKTTEANAKALE  
AAEETAKRQMLEAQSRATHINLQAKRKPWFEEKFNWFITTDNYLVLGGRDAQQNEQIVKR  
YLRPGDAYLHADVHGAASCVLRAKRKRDPKTGKTSPIPLSSQALREAGNFTICRSSAWSS  
RMVTSAWWVESHQVSKTAPTGEYLTVGFSFMIRGKKNFLPPSQLEMGLAVLFLKLGDDDSIL  
RHKDERRDFALMQQDEADDVDDDDDLFRDDVGTSESMVVKTSKTKDSGLIEEEGPTRNG  
NLTLEDSSREIETSEVAPNVSPDAEIFDDKIDVQNDGILANEEKEIKPKKKGLSVKERR  
LIKKYGSLEAAYDAEKERKRAEEERKIASQGSKEKPSNEPKPTNHKRGKRAKLRMAKKY  
ADQDDEDRELALIALHAGEKLLKKDMKKEPQVSEKGEAAAETIAILRKDSAAIAAKLPQ  
EVQNSLAKCVTVVDAEDNQIRWDKLDGDVLEQLNSFESEDQKIAASNRLLSLKETCRID  
NFSASLAGIIRTIRIHGHEGLGKGSERNNSNEARRKNKSDRIAEEESWKNTLAEEGILDG  
NIEVDDTIDDTAELSKLSGKPEKDDLLLYAVPVCAPYQSLSKFTYRVKLTTPGNLKRKAS  
KQCIAVFLKDEKSKTGLEQSRDLIKKVADNEWVQAICGDVKISAAGASKAIQRSKAKSKA  
SKKNKKK

>comp14075\_c0\_seq5; 1452 250 4053 LEN=6690; translated  
MKSKVRFGLDVAAMVSHWNRVALGRRVINIYNGPNADTYIFKMDKLTSSSTDGTGTKEGI  
DDDQKTASSNMLLLESGVRFHTSRQPYENPGMPSQFCAKLRKHLRGLRLEQVTQLGTMD  
RVVHLVFGSGDQQRHSLMLELYARGNLVLTNSEYTIILSLLRSHEYNNKNDSDANTTDE  
KKEDSAVVASNDTIQVKVGHAYPVTYATTLTASDGDNHGSDSNPETKDQDDENDEILLTT  
SDPLLWFQNYHDEEQKRTASAAEADASNTKKKNKGGGNKKKNNTSHFAWKMLLTRPSSG  
VSHYGPSLLEHCLRCANLWGTSAVDTDQADGKDKSKFPHDLTTIEEWKALQSVLQSEGSR  
ILNGIQHGVSKEYILYQDKKNKNGESSSSPTSSFDDKVLEFQPHLLKQHETMPRLEYPN  
FDLATDNFFSHLDLQKRILRAEQQSQAESRLEKIRLDQEKRVASLIEQQESLLEEAQLV  
EIHADMVEKALQVVNSALDSGMDWEQLEDLVELEARQNNNPVAKLIYKLDLENERMVLRL  
LREDAMYDIDGDENDNTRFQNVTVSLLDTAHGNAKTLFAKYRASKEKSKKTTEANAKALE  
AAEETAKRQMLEAQSRATHINLQAKRKPWFEEKFNWFITTDNYLVLGGRDAQQNEQIVKR  
YLRPGDAYLHADVHGAASCVLRAKRKRDPKTGKTSPIPLSSQALREAGNFTICRSSAWSS  
RMVTSAWWVESHQVSKTAPTGEYLTVGFSFMIRGKKNFLPPSQLEMGLAVLFLKLGDDDSIL  
RHKDERRDFALMQQDEADDVDDDDDLFRDDVGTSESMVVKTSKTKDSGLIEEEGPTRNG  
NLTLEDSSREIETSEVAPNVSPDAEIFDDKIDVQNDGILANEEKEIKPKKKGLSVKERR  
LIKKYGSLEAAYDAEKERKRAEEERKIASQGSKEKPSNEPKPTNHKRGKRAKLRMAKKY  
ADQDDEDRELALIALHAGEKLLKKDMKKEPQVSEKGEAAAETIAILRKDSAAIAAKLPQ  
EVQNSLAKCVTVVDAEDNQIRWDKLDGDVLEQLNSFESEDQKIAASNRLLSLKETCRID  
NFSASLAGIIRTIRIHGHEGLGKGSERNNSNEARRKNKSDRIAEEESWKNTLAEEGILDG  
NIEVDDTIDDTAELSKLSGKPEKDDLLLYAVPVCAPYQSLSKFTYRVKLTTPGNLKRKAS  
KQCIAVFLKDEKSKTGLEQSRDLIKKVADNEWVQAICGDVKISAAGASKAIQRSKAKSKA  
SKKNKKK

>comp14075\_c0\_seq6; 407 762 1487 LEN=1487; minus strand; translated  
MSGVPEYSKLKHDDSPDLVSPSTTALSYSSEPELEEEGEEEEVSKRDSVRRRTLFDMSK  
DVDSFPMTSIVKAAMFASSPNITSPTRKAARSPDGNLNGVADTGSTTSSQTTAIPAWNLSM  
KDAAEKNVEVPLNHFMSQPISLLTSPISFASDETQTPSSPSSSSSSSSSSSSAPVRSPLD  
GKESQWNTNRKNGNFKKNNDVEAEQRKQPAIIMEDPPEEPTSCNAALNLTPVQLAEIGRA  
HV  
>comp14076\_c0\_seq1; 614 80 1780 LEN=1926; translated  
MPPRDMDNDRNDATVSEFTRLNVEATTKNESSVKGDAEIEENLPRVVFALSFTLLVQS  
YLLVSVFPYSGFMAMHLMPELNEETAGSYAGFIASSFMIGRAFSSFWEWGKAADRYGRVVF  
IEMSLLLSAVFSILFGLAPTFTALILRCLLGCNGLIGPVKTLVSEYARGDNNKETQMM  
AIIILGMWGYGMLMNPASGYLSDPVKQYPGADFGSILLPFLEEFPFPLPNLVGCFFFCLFG  
YVLVHNFVDETLPEERRKEFHSLASILPCIKSDHKMMRRLSSWGLFKHLHNSDGEISEDSN  
VLLSCSQGCDEYGEKEEDEDVPTILCLMRRREGTRQHLWVYVWYSFLMITLSEVFFLYCM  
STVSGLGITEKIIIGNILSGCGLIYVGMQYFIVTGLVDRYGFYKSLRIGAYLSIPLAVFFP  
ISLITNRAAPDGTLASLAVFLSTLFAIIRSFSSLVFSTITMATNRTVQEHHRATLNGLA  
MLGGSFAKGLGPLFGGILFSTSVNNVTPPFGSVVYTTIGILGLFLCVQAYFLREPCEND  
KQARKATNDDMVDPLDLEEEQHPSF  
>comp14077\_c0\_seq1; 456 378 2285 LEN=2408; translated  
MPMAIALFAVLSLNNIMIALRDNTRRDDPLSFSLAAFLNSPTAQSIREGARVVTIDEIIN  
LQENANKGVKLRKKESNGWYNAKTLATIKNEFEHDSNDSNDSNDSKETSDDSRQHKNK  
NKFMLLHVGPATGAQRIQKDSALDRGLREALRKDGVLYVGNVYAEQQTKNDFVNSKICSQ  
KFVQTKLELAFMENSFEFREMPITNDLSAPDKVCTSSKCLMDCWVGREHQKYEKRRKGRE  
ITTTTTTTNVLEFDGIIQSNEKESWNDKTPFHQRFNKYKEFGFWKDYLGHNEIIAIAAYRR  
YYSWILEVYNEMTLEHCLPEPKPNHLQRVLVDEHGTDRGEIDEMTILWRYQNDIRKKS  
PDDGGFHCPNLWDFVKSHLERTEKDNKYGARVFDNIDVTVPMKNALKITGDNPYGRVEI  
LNYYQDPTAYNSITTELYCGVLGMRRTPHACAYAMANLDRGPPSMVNRKVHYDMIVVAAH  
QKQWIGTSPEADDLAIIIDFPDDIPQYNDPNQSRYNPEIVPKQTRIRLRNELIEYHTRQ  
LRKTIIDLPLICPPKEELKNLLDRSIEFEELVMPPELAKDKKNHVNEFWRSHESEKTF  
CWV DTERLFEGANSWSDVRKKALKKSWAADNSAAGQKR  
>comp14077\_c0\_seq2; 674 104 2420 LEN=2543; translated  
MNRFIHRFVSHPSKGIIVSRKQLFSELEKSLVWFGEFHSRITALQTELLRKLCSANTA  
AVGNSKLVHVFLEHFSFEMQGLLHAFQTDENFSFDDLKKSYSYSEIGTEGHNLDPYKEFLMS  
CKGKIQGDHLVANAGGAALPAIRLHGGFIIPRPLASRWYKAGSDTDEKRVLEECYKDY  
PPPDPRHGSLALNCDNMLDGGSTCHFRLIRSMMSGEDLYDPVDENLREVRSDDDYL  
SDEIASKPIGNLYQAQLKDHAMGYLSKLVAGAQNDRFMI IAGMGHLKHHLGVPERLE  
KYLQALVATKANAEGTSPSPIFQHPCALDVCEDSTVLIQSOMLYETCIEDRYEPLKDEC  
DKDEEEDQSVKDKILEVHDDDDDEVLEFDGIIQSNEKESWNDKTPFHQRFNKYKEFGFWK  
DYLGHNEIIAIAAYRRYYSWILEVYNEMTLEHCLPEPKPNHLQRVLVDEHGTDRGEIDEM  
TILWRYQNDIRKKS  
LWPDGGGFHCPNLWDFVKSHLERTEKDNKYGARVFDNIDVTVPMK  
NALKITGDNPYGRVEILNYYQDPTAYNSITTELYCGVLGMRRTPHACAYAMANLDRGPPS  
MVNRKVHYDMIVVAAHQKQWIGTSPEADDLAIIIDFPDDIPQYNDPNQSRYNPEIVPKQ  
TRIRLRNELIEYHTRQLRKTIDLPLICPPKEELKNLLDRSIEFEELVMPPELAKDKKNHV  
NEFWRSHESEKTFCWV DTERLFEGANSWSDVRKKALKKSWAADNSAAGQKR  
>comp14078\_c0\_seq1; 644 124 2115 LEN=2370; translated  
MASQPVLKSSSTAPLGAVAAAASITLSFDGVDFKLCPPDDDDSEMSYKAKADRVLVSLTS  
FSGLTVSKSMLSSLSRSIQSVSTAGPTLLSTSVTAVAPTVEDDPDQHHKSRKKVS  
PSQKTLFPKSGNKKNKTTKGSNDKDETARKRRTDSKTSQTPQATHSKRSRNAMEISLPL  
ISLGQASQPTQLTQMDTDVDFNDASIPPSAANSHVETKTTVTKNTSVQDILDRDGIQGS  
GDSVATMKDGDCCGIDVGM EIVDGDISATNADEKNVSEEAITNTIDPEKADPGTGAFSYP  
APPARWGTMTQVEKQGIILVYGGQSFDLNNGNPVILSDVHVYDPKNGGSHWKP INCRGEAR  
QWHTATYIIPGRQQIIAFGGETIDPIKKGAKKDKVITSDTLRVLDTEIMLWYPPAASGDV  
PTGRSGHTATFFPSTNELILFGGVRGSKWLNTVSVLDVTRWIWTTPHIVGTAPKPRSYHS  
ATAVGPQKLVVFGGNNKTSFCNTVHVLEAINDNDGNSMNPDEGGSIGWKWSNPTIRGNA  
PFPRTGHTATLLEDGKTIMVYGGWDPNEEDELGTEDNIFKGSYLLDTHDWTWKRGPDPDLS  
GGSGSANHIVEDCGAKRCGHATAALNAENGEVVFVGGRIIPGEVLAGDVQRLTPPQEKTLQ  
LEGS  
>comp14079\_c0\_seq1; 482 1 1221 LEN=1410; translated  
QQQQQHQQQQQSQHMFLQHQIYYQQVPPQQQQPIPLQQQQQLQQNHIQRQYQTGMGIDL  
IDDETTSLGGENTNSYSVLFNDYGNLNLQRQTNGMQSPQIVLSPQNQPYSNRSAQNETQK  
SGVTNANANADAATSAKTAAMTKAEIRSQRKRTREKQRRDGVNRQFAELTKVLKRLELE

EREEAERNARIAAGDNDALASSSSSSLYGARLSFLSPNNSVDLISCAIVHLQHLHRVMKR  
QQREVDLDELKVVRAAGESTAACKLDVLFNYRPPRPALGSTNPSFNLSGAGTSNSTQT  
GMDSNKTTNTENVNVGGTSGIGITNFANQAINQALQQKGQQQYSQYQQPVVRRKEKLSRDSF  
CYSMDPSNELGVISSGGCLLMPVLCHTMYCTIPYITVSKDCANLKH  
>comp14079\_c0\_seq2; 506 1 1209 LEN=1209; translated  
QQQQQHQQQQQSQHMFLQHQIYYQQVPPQQQQPIPLQQQQQLQQNHIQRQYQTMGIDL  
IDDETTSLGGENTNSYSVLF'DNYGNNLQRQTNGMQSPQIVLSPQNQPYSNRSAQNETQK  
SGVTNANANADAATSAKTAAMTKAEIRSQRKRTREKQRRDGVNRQFAELTKVLKRLELE  
EREEAERNARIAAGDNDALASSSSSSLYGARLSFLSPNNSVDLISCAIVHLQHLHRVMKR  
QQREVDLDELKVVRAAGESTAACKLDVLFNYRPPRPALGSTNPSFNLSGAGTSNSTQT  
GMDSNKTTNTENVNVGGTSGIGITNFANQAINQALQQKGQQQYSQYQQPVMMMPIMMGV  
NGNTVLGHNAANVAQNTTMYPSISMGSQFSPVPPVNNNNNNNRN  
>comp14079\_c1\_seq1; 77 1 227 LEN=640; minus strand; translated  
XAVNVRAAVVLDLSVAGRFVGLVARSTGSAGRGQPHSIPREGFGWAGSVPWGGAFKPAALS  
LPSMPQESAREFASE  
>comp14080\_c0\_seq1; 996 53 2410 LEN=4141; translated  
MDTIMEKRIRRRMVLLKSEKDRAIRRAQGFESTAKSFDEIKEERAAIGQGVNRDFSNE  
ERDIDCDASLMSDCVSEMRRRRVYEMTHGRPYPTKSTKKKHTFWQPEDSSHVAVLSPPFA  
KRSNEPTISKPPVSLQSHALPKKATPRVLWKVETANLNHSVEAVVLKEDNEDERQRLKDS  
FIKDEIIDGFYEDDEIMTPVRIKKFINAYDDAKNNKEEREGISASDCVFQEMDRAETA  
AVSEISSATQALAAVTSAVGVMREAKTPEKDRDGKYLMLHEEIEPKVLSSTTPYKSKLF  
HEKAVSFAAVTPSNKLITKVPTPKTMDSSMDEADIMVTNLGLGESEDNEDDSAVGKLDYG  
VLWPSLQFQNEDESGVSVIDTHNKKMLEALVEGGALQREVDGTNVLKLKLVDMYHKHTFERIV  
HAIQELKGLQALVICRAINKDRPTYRTTQEIKSLFDSTKRIQTLHSLMLLNFTSDSSTDL  
GMLIHSQPSLYRLQIQMVDGTLNGELLGVMATAPCLTHVLELNLNESCSSLGTLNLSRSLQT  
LRVNSENLFEKSSHIRTLYSLQSNIALTSLDLAPPISAEQFRSLCLTLKHNYRLESRLV  
NLELTGDES RDVAMELANLFRENNFLINWVNYSHKLCAINDEVKRDFAALRNSKGMKD  
FKFFNEDIGDWKNAKGGNPAWLEENLNSTIGDCSTVNTVDVSRNVGSIDNGEGNDSLSF  
DDSPNIQSNRKGDFLRMCGFESPDCERAFCGIDVSDMSKACDYSNLKKGTEIHKWATGT  
ATAKQ  
>comp14081\_c0\_seq1; 1137 149 2203 LEN=2251; translated  
MKFASTAVLSLLLAEKVNAFSPFTPVTSTKNSYRSSSTLSMALDVDVDAVSAPPSVSTPA  
PAVEMVVKPNPNGGPTDVRYSFELRLVDADKIEKVTFSADGTQLLQVVDVGTSLKLP  
DPDLLQQLTAHKVDVTVLPQQEASGLGDLAQSLIFPAALFAGLFFLSRGSQQGGMPGGP  
AGMGGMGFGKSKAEIQMVPDGTGVTFFDDVAGCDGAKLELAEVDFLQKPEAYTKNGCRIP  
RGVILDGPPGTGKTLAKAVAGEAGVPFISISGSEFVEMFVGVGASRVRFIFGQAKKNAP  
CIIFIDEIDAVGRQRGGGQGGGNDEREQTINQILVEMDGF DGNPGIITIAATNRIDILDQ  
ALLRPGRFRKVTVDLPDFKGRTRILGVHSRGKPLEPDVDLEAISRRTPGYSGAQLENLM  
NEAAISAAQEKSSIGWDEIDRAVDRMLVGLKKGKGNPETKSKEMVAYHEAGHAVVVALV  
PDYDQVQKISIIIPRSNGAGGLTFFAPQEGRLESGMYSIQYFESQLAVALGGRLAEIIEYG  
EDRVTTGASNDIQQVANIAKQMTQWGMSDKVGSVVIDEGGMSAMQMMMGGSGSLWGDV  
KLKEVEEVERLVNNSYLLAKKILLENRDLFEELTAALMEREVVSAAEFQMMLYENNSKV  
VDYKLIQERNRESLPPQTLPNAY  
>comp14082\_c0\_seq1; 364 295 1779 LEN=2066; translated  
MFVLPKLDLFPQKIALGLLVGLMVWTLNLMVMEQQLLVLRYPGHIAGHRPDGYQSSTTATL  
ADLLLANDAKGAKINTNVTITKTSGGVAVRSMPPGGRENNHLNKENNNDDDHQRLYTCSYGP  
DGSEKNQANRTNVTIPIHTPSFVLIQVQKSGSTAMLTIFRDHPQILQTKRRFRREGHF  
TSWQSRVLLKASELGLKQANDKHCLALELYMELFDTGTILANSQTHSHGLEHQHIFTFEK  
TMTYVLNPKIPARIKHTVPWSKLVLRNPVDRLYSHYKMTILNNHAMRKYSLLEDMMVHE  
LEAMRDKFHMTKAPLPIARRGNATNTTTLANESYEMPGSVPDHAIPDPKWTPREMAILK  
KTRGPNLKGKENVRRGLYSTQLEWVWLKHYTVGEDLLVINYADLLEDTKAVYERILMFVGI  
PLPNNYQRNDGNNTNSTATVINFDQKVRADRRKDDRPLREDTRRYLADFYRPNYAQLEQ  
LLGPDWSLCLKGWG  
>comp14083\_c0\_seq2; 504 223 1416 LEN=1828; translated  
MKSSLAFIISVLSLLSTSYSTSHVCAFNPVVFHLASKHQSTSFGITSTSTSFATRLNSLN  
QDINESDNSNEDKEELRKARVEKDPSSSKRFASGDELTMLEDIKSLKQNLWAKALKDD  
ARIESLEKAIGKQKRDPYFMYDKAQKIIAEAKMDDVSDEEKDILIEKWSNVE SDAREF  
MPHLNMEGLWVGDYGDSKGLQLINITYTGDEIIAEKVTGDINVPRGERSFTVNIKPSNSS  
ALPPVKLVNEQRSGEFYRFPKGQVSRKGFKNRFVEGQMILFENRFSFVWIPTKHHVLF  
RRPSPEMTIKLLRNTLSKEDEIENMREHVSRCFMDLSTAIAREQDPFIVHEPLRRISTQ



EELLEEVEQRFKQGERGNLFLQIGKWRNYIDQVLDKKN  
>comp14083\_c0\_seq4; 504 223 1416 LEN=1844; translated  
MKSSSLAFIISVLSLLSTSYSTSHVCAFNPVVFHLASKHQSTSFGITSTSTSFATRLNSLN  
QDINESDNSNEDKEELRKARVEKDPSSSKRFASGDELTMLREDIKSLKQNLWEAKALKDD  
ARIESLEKAIGKGQKRDPYFMYDKAQKIIAEAKKMDDVSDEEKDILIEKWSNVESDAREF  
MPHLNMEGLWVGDYGDSKGLQLINITYTGDEIIAEKVTGDINVPRGERSFTVNIKPSNSS  
ALPPVKLVNEQRSGEFYRFPKGQVSRKGFKNRFFVEGQMILFENRFSFVWIPTKHHVLF  
RRPSPEMTIKLLRNTLSKEDEIENMREHVSRCFMDLSTAIAREQDPFIVHEPLRRISTQ  
EELLEEVEQRFKQGERGNLFLQIGKWRNYIDQVLDKKN  
>comp14084\_c0\_seq1; 787 256 2592 LEN=3020; translated  
MEEAMSISTQVLIQEPDNLRRSDNIKQEQPFSDANNAIPQATTISHGFADGEETFERTSD  
SSRTMDCEDDKLENVVGSYWDIVATLYMPLILLWSRRSMFGPANLIRSVIVGQLMRIIVL  
DDVSKWICEKLPWSLEIYLIQPSMEARCMNSHVSTVLGAVSGKPDPAWPPAFTGLAML  
TVFALVVHPDGLTWIMLGKLRDAIYAIFALSALGRSLEFVINDYGVFPTIIASATLAGLFFV  
VFVVLRTLSPPKGNHNSNNQNNKQTNERKKKKKGGNGRHRREHQHHHNNHRLNRIKYS  
SQLPSPSLPEVVEDSSTREVLKDSSTPELLNDSSTQEVLEDSKTTAASMPSLMPSTPPSV  
IHNDSTESPSPLNDAKGTLELRPALPSPSTTNATNVSSDENNMKPTSVTENFSSPAATN  
KSKDKRSRRRMMMSGSTEDTIPMSDDQSCGSTSVRSYPSVSVNSNRPGGRAGHNNKGSST  
SRRGKRGETERPKHAERGNRRKNGKPSAESSVSSRDALKPKHGNNNSVGNKTSYNHN  
HSSNGGAGNKKQSRYPKGNRRGPGGSGNGSKNRKSRPTPKTFANNERPSAAASSANNPG  
ARVHEAPPLASARQNTGFQSPPTMTAFSSNPVLNSYTASPQSNKAPTPPPQFQVLSG  
LEDNKYEARHRYNDDLSVPTLFDTPPLVLKPPKAAIGPPPRPQYNEVVGAECYFPLVPS  
HGGSANGGTTRSRIKENPFSNDSNNNLSFSRYEENLDSQIEADLQKLGGMAGSILDF  
>comp14084\_c0\_seq2; 240 256 1174 LEN=1174; translated  
MEEAMSISTQVLIQEPDNLRRSDNIKQEQPFSDANNAIPQATTISHGFADGEETFERTSD  
SSRTMDCEDDKLENVVGSYWDIVATLYMPLILLWSRRSMFGPANLIRSVIVGQLMRIIVL  
DDVSKWICEKLPWSLEIYLIQPSMEARCMNSHVSTVLGAVSGKPDPAWPPAFTGLAML  
TVFALVVHPDGLTWIMLGKLRDAIYAIFALSALGRSLEFVINDYGVFPTIIASATLAGLFFV  
VFVVLRTLSPPKGNHNSNNQNNKQTNERKKKKKGGNGRHRREHQHHHNNHRLNRIKYS  
SQPPIEX  
>comp14084\_c0\_seq3; 707 168 1982 LEN=2410; translated  
MIQYAYSRSKLNQTRTIIFALHLTWYRDAIYAIFALSALGRSLEFVINDYGVFPTIIASATL  
AGLFFVVFVVLRTLSPPKGNHNSNNQNNKQTNERKKKKKGGNGRHRREHQHHHNNHRL  
NRIKYSSQLPSPSLPEVVEDSSTREVLKDSSTPELLNDSSTQEVLEDSKTTAASMPSLMP  
STPPSVIHNDSTESPSPLNDAKGTLELRPALPSPSTTNATNVSSDENNMKPTSVTENFS  
SPAATNKSADKRSRRRMMMSGSTEDTIPMSDDQSCGSTSVRSYPSVSVNSNRPGGRAGHNN  
KGSSTSRGKRGETERPKHAERGNRRKNGKPSAESSVSSRDALKPKHGNNNSVGNK  
TSYNHNHSSNGGAGNKKQSRYPKGNRRGPGGSGNGSKNRKSRPTPKTFANNERPSAAAS  
SANNPGARVHEAPPLASARQNTGFQSPPTMTAFSSNPVLNSYTASPQSNKAPTPPPQFQV  
GQVLSGLEDNKYEARHRYNDDLSVPTLFDTPPLVLKPPKAAIGPPPRPQYNEVVGAECYF  
PGLVPSHGGSANGGTTRSRIKENPFSNDSNNNLSFSRYEENLDSQIEADLQKLGGMAGS  
ILDF  
>comp14085\_c0\_seq1; 402 1 1069 LEN=1604; translated  
XISPIAALAVTTSTLLSFEKLPKPLSIDCHIESKVSRRNRMGGNEDENPIWSAIAEPLSSL  
VGLHQNDDEASRKAANKNEEAYKKRFRKRLQGLQTEVEEVNEEATRTRQQLWEAQDKLR  
SSEDQIRKLENLHLEIILELREKDLESLSLRAANSECVEMESRAREAMEVFKKCYKRAQL  
KLKENEEEIAMLREQRNCVERAHDMDTDVTDAMIDGSALEYIKTVSNEKEERLKQMLFHT  
ENEVDLWKSAYKVASRRCVNFQEQITAIIEHPSEASVYMEKQRIKIEQLEDQLEETRQLAQ  
EKVEERDDALFYPGYTVDSIVHRGLCDEDLNGSVTKDLMKTIKLNCAGLPTMPNA  
>comp14086\_c0\_seq1; 771 1 2071 LEN=2659; translated  
XQQQRQQHYLQRDQQDQQDQHQGSGGIRHPYNPPQQGDITLNMSAAGPIIDPHRRND  
YLSASMVAAAQQQQYIQQQQQQQYEAAIATSGGDPRLASSTQQHQQQYAQHLQYQQQLLM  
QRMTVSHGGTNHPPQHGTTTQQSQPNIHNQMGRLSQQQQHAPGMPPHSIVGGTIGMPPHH  
VPMHQVQHHLQHAAPYIQRVGRVLRQADRPLIKLTVSLIDTYKINNLYYQEREA  
KRALRASNNAAASSTTNVAQQQQAQLVRDVAMQSQSQQRAKDQKKSRASPQNQGTG  
TNNNGWDDNDYDIIRPGELFYNDRYKIMERIGKGSFGQVVRVLDLDRDVAIKIKSK  
KPFMLQARTEIELLNHLNEKDPNDQHNIVRLLTSFMYRNHQCLVFEMLSLNLKNTQ  
FGGVSLLNLRKFSKQVLKALLFLARQDQVDVIHCDLKPENILLRHPKSGVKVIDFGSSCR  
SDRRMYSYIQSRFYRSPEVILGLPYAVSIDMWSLGCILAEMHTGEPLFSGSDQFDQMOKI  
VKLLGMVPDHMLEQSSDQHRQLQFFEQVIGPSGRVSWSIKQNTGGSSRAGSSSRVDAVGQ

KQDKEMQDFPSSSRSAALVVP SKNPARSLMEIISAETHRKKKYPPSETGNSPRNYELFVD  
LIHRMLTFDPRKRIKAEALNHPFVTGIAS  
>comp14086\_c0\_seq3; 751 1 2162 LEN=2750; translated  
XQQQRQQHYLQRDQQDQQDQHGGSGGIRHPYNPPQQGDITLNMSAAGPIIDPHRRND  
YLSASMVAQAQQQYIQQQQQQYEAAIATSGGDPRLASSTQQHQQQYAQHL SYQQQLLM  
QRMTVSHGGTNHPPQHGT TTTQQSQPNIHNMGRLSQQQQHAPGMPHPSIVGGTIGMPPHH  
VPMHQ TQHHL PQHAAQLPQAPYIQPRVGR LQADRPLIKLTVSLIDTYKCINNLYYQEREA  
KRALRASNNAASSSTTNVAQQQKQAQLVRDVAMQSQSQNQRAKDQKKKSRASPQNQGTG  
TNNNGWDDNDYDIIRPGELFYNDRYKIMERIGKGSFGQVVRVAVDLDRD VDVAIKI I KSK  
KPFMLQARTEIELLNHLNEKDPNDQHNIGKKSYLRRYLRSIHRSEHSSILTISLHLNST  
AADIFHVSKSSMFVFEMLSLNLYELLKNTQFGGVSLNLRKFSKQVLKALLFLARQDQDV  
IHCDLKPENILLRHPKSGVKVIDFGSSCRSDRRMYSYIQSRFYRSPEVILGLPYAVSID  
MWSLGCILAEMHTGEPLFSGSDQFDQM QIVKLLGMVDPHMLEQSSDQHRLQFFEQVIGP  
SGRVSWSIKQNTGGSSRAGSSSRVDAVGQKQDKEMQDFPSSSRSAALVVP SKNPARSLM  
EII SAETHRKKKYPPSETGNSPRNYELFVDLIHRMLTFDPRKRIKAEALNHPFVTGIAS  
>comp14087\_c0\_seq2; 205 1 2041 LEN=2896; translated  
EY EY EY EY T P P G F F S R P R L L Y V A V Y C W I A A T G G R F T A T F L E S E S S H G G Q D D E S I A T N R L D  
S S Q I G L A L A I Q R F V G V F A G S L T G I W A D R L E K M Y P N R G R L L V L V I G C C L G S L V F L L H G T H R  
C L F Q D M E P S L T L P S N N T S G S G D L N A W A A R E A G E R E T T V E V P R H F F Q S F P W F V S L E S P L P S  
A H L V F P I L D G I C L D F L K K Q Q Q R N V E I N C D K N Q G A A T D D Y G K E R L F G A I S W A L T N L L I G P  
M L D Y C S K K E S S G D K S R D K R N E F W I F Y P L T I A S T G L L V V A V W I Y S Y S V Q R H S R L G R T P D N A  
R G R L Q S A K Q N D S T I F F L S D I P C E E D F L F E E N D Q S D S E G E M E D N E S R D L F Y N E P Y F V N P A A  
G T D E S E K E S T I R H Y W S I F S K T F G E S A Y T V A F L I C L V G L S S G Q A I V N D L V F L F F E S A L S S S  
Y T F M S M T V L L T V F F E I P I F R V A P T L L R T L G T N A L L V V A S L S Y V V R V I G Y S L V P A E M A W V A  
L L L E P L H G V T Y A S S Q T A A V D F V S T K L D F S S S D M D C P S K N T P D N G N N R F G S H K T I E N V D S N  
R S R G T K S Y P K R S C G N D G K E A T G Q G F L Q F F V G I G S V L G L V L G G Y A E D Y Y G P R V M Y R I S A G V  
V S I A C L C F V A V L L C P V G I A A A I N I G T T V P A R T R T H R W G R I R D K T I Q Q T D H D K K R S T Q N G M  
N I H N V G K E P V G M T Y L S E S I  
>comp14088\_c0\_seq1; 339 1 1397 LEN=1654; translated  
X N D I A Q L V K L D F C V E T T T S K S Y L T A A K H F D K N E S Y Q R R M W T S E Q T Q Q Q L R R A V K E S Q E A D  
Q G S L A L S S S N P Y D E E K G P S S L N R D E R G Y V D A L G N P N S M Y N F N N G T V D P N S I E A E E L R N I E  
H A L A H Q Q R V R N N K R L E L S T D F L A D L S F F F G S T M Y L W L A V S Q S K D V L F S E D T I G D D S G S G D  
K G L F L D D Q V L F S F R G G E S K V T L Y I L Y G F S S G L L M F A S G F L R L F T T A F S P T D K I P C V M M L L  
A A F F A M V S S A L M V S Q P V W S N R C Y S I A I H L F A L Q A A T L L L W R T T S P G G L A G V P W T R L V G D C  
L F F I A T L G G I A L S Y L V F E A T D R L P F A S E Y L V V F S Y S V W W V S S V V Y L S Q T T C L L I R R E K Q  
Q K A S R G T Q I R C G C C H R R R D A E E G G D E G N L Q K S L P Q E D T Q S T N E D G N E V E E H Y Q R H S N G H Q  
R I G N E N I G A P D D E Q S V M S L W T A G P G P E N K E Q I A S S S L D N I F G R S T  
>comp14089\_c0\_seq1; 714 329 2251 LEN=2581; translated  
M V A S Q K L R R S N A N T S H S G D A G G N K Q G Y L S K H Q Q Q Q R E K A V Q S Y S D T M R R D T K A I G N G V F W  
R L F F P P M A C A L I G I V Y V V M G V V E M K A P E A Q L D P P D F R S L R T H S P A Q H A L P K M N P S G A S N T  
T A T T N A A S A T T T Q Q Q L D L P K W I T D Y V K W H T E M R A K Y P G K T L F T S K G K D T P K L L V R T C L G I  
C G G L H D R L G Q L P W D L Y L A M R T K R V L L I A W Q R P R E L E H F L V P P I N D D G D D I E N S H Q A A A L D  
W R V P D C D M F E D Q N C V N F G F K D I R I V R S K V K E L F D D Q L E A N P G E K N F W N V G F E R A M V R A G A  
P P S P G A I T S Y F S D S T N T T E V F R K D H R Y T M A K I L R H R L L G H L D E H V L E E R L E R E G Y Y K D E P  
H W K P S D L H S A P S F G A I W D L F F R P S Q E V R T E I V G A L S E M N L L A S S S S S S S G L H P V S K L P P T  
V D F S A V H C R V R H P K A H Q F G E V V K G N D R Y A P A D K T G L P W I E G G P Q R R F A L E T A H K A L E C A R  
E I V G T E V A T S P K P P I Y F L S D S N D L V R H V A E E L V D T S P G G Y V E R H R T N E S W I Y P P L L E V V R  
G N G V D G D G P V V A R N T T L E N A H I D K Q K G R K P P D Y Y G T F V D L Y I A M K A R C V V Y G I G F Y A A F A  
A K L S G T D C T Y L Y A E E T W G L E K K K S A R V C P N H G Q E Q N G I E A  
>comp14090\_c0\_seq1; 867 87 2459 LEN=2722; translated  
M M P S I S L F V L L L L T A Q V L V P V F G F S S I A D S R H Q K N L S S R K P H V G W T T A T T A A N A V G S K S V  
A E T V D R N V F K D Y D G P I V L M G C S S D E G K E I H R L A E S F L S Q Y P D V N K D E G I I S A S P S S D F N  
D E K F L S L T S S G K A G K Q P N I V M D F S G L Q A E R T R F V E M A E S V Y A E K G L L S V Y V N V D A S S T  
S T M A D D S K D I K S R L E E D V F V K Y S D Y E L C I K N E G T T A Q Q N W E H I E W E L A R L I A R A R L A P A I  
P G A S T P S T N T A H L S M G E N T F F L S L S F P E I N Q V E P Y V E E M C V D V D A M E Y R T D L L S C R D S R F  
D L I Y G M Q L L R R Y C R P H V V R S P A L P V F G Q V L E D V M P I V Y T V R T E H Q A G T Y P D D E D G I S K M F  
D I L E W G L R G G V E C L D V E S A W D K D K T D A L L N R A E E K Y S S Q I L G S H H V V G T E I S T E E A V G L F  
Q Q C A L D G R A H G A K V V L S I E S Q D K D K M A H Q A A L L S A S L S A R D G K P V I P N V S L I L G D V G Q F S  
R I I N L P F T P V T H E S L P F K A A P G Q L S A S E I M A T R V I T K I V T T K R Y A I L G H N I A Y S V S P Q M Q  
G A A F A A A R L P H Q Y G R A D V E T V E E F V E S D F F K D D A F G G C S V T I P H K Q S I I P Y V D V M S D A A S

TIGSVNTLVVQEQLDDAGDSMKRVI FGDNTDWKGI FNPLERKIGVRTTEDEGSGDYALI IG  
GGGTARAAAYAASKLGLKRIYFNRTPSKAQDLSDSFGGIVVTSLESSSDEASEGKSLEDV  
LPDGASIKVVISLTPAAAFAFVLPKWLLLEKKPVAFVNVYKPYHTKLLTQCEEAGLQVVRGS  
EMLWEQGGSV

>comp14091\_c0\_seq1; 415 175 1542 LEN=1755; translated  
MGPKLKPPSRHDAIGIPIFGMHWYGDPGDGTSLAYCGGGSAATGVKNKLYIEIADDDQ  
SQEQQQPQGGTNDDEEPIIVETGDQLGVAINIAKNPITKKISLFLALGTKINVYSLPEAKL  
EQELSVGATVHAIGVNAMANAIALGCENGSIIVHEIVEDYRVKELPSYTCDEGPDVGHTK  
PICSVAFAFAPRSNDLIASSSKDGTARVWKGKNCISVLKCSIVDPKAPPPPKNRQKRIQTVM  
VRGCAFGLDEGLVYTVASGKRKGAFLSKWGLDEKENQYQCFERTACSDHPVSAMSMSAD  
ATTIALGNADGTIYLWDLKWKVAKQFPNVHEFPVTCIAARPYDLPLKGEDKIGIRFNAM  
SASADAQLARLTTRQKVPKSAADRNPAGFPLDEWLNWLIKWLVIWLVVSPPLARDAWDQCG  
SGSDVVGVAKLKCVKDKVIIAPHSSPGISVPPH

>comp14092\_c0\_seq1; 797 309 1610 LEN=2021; translated  
MTLCLVLTVVVALGVAFGVYEQKDSGRFGGLRSSNNKVSRRPDHNGYEDYKWEALPLEVQ  
QAAHVLGYNRGTWNHDGHAHEHFDKEWDDLTKAQRDAARTMGYDSETWCIDYDEYENEMEE  
RREFYPEYDWEDELPAQAARLFGFSQWEWDNDEPVLAMDTDWPDLSPELQEAAKELGY  
DEESWCEEFDEYEDEVQNNWLDEEDWADMPSSVRDAATELGFQATWDRGGRTPHFDKDW  
DLTKAQQDAAETLGYNQRTWCDDFFEWEEEEQEVENWTNEDWEDMPADVQEAATVLGFTQR  
AWDNDEKIPRFDRDWPDLSEEEKSAALKLGYDEDLWDDYNDYHAANNNGNDFGGEDSYPT  
LVGDEWEDLDWEELPPAISSAALVLGFDRESWDNDREPEHFGKTWFELTDEQQKAAITLG  
YDEDSWCDDFGDR

>comp14092\_c0\_seq2; 789 229 1584 LEN=1995; translated  
MAILCNTCRSRADGTFMRMTLCLVLTVVVALGVAFGVYEQKDSGRFGGLRSSNNKVSRRP  
DHNGYEDYKWEALPLEVQQAHHVLGYNRGTWNHDGHAHEHFDKEWDDLTKAQRDAARTMGY  
DSETWCIDYDEYENEMEERREFYPEYDWEDELPAQAARLFGFSQWEWDNDEPVLAMDT  
DWPDLSPELQEAAKELGYDEESWCEEFDEYEDEVQNNWLDEEDWADMPSSVRDAATELGFQ  
QATWDRGGRTPHFDKDWDLTKAQQDAAETLGYNQRTWCDDFFEWEEEEQEVENWTNEDWE  
DMPADVQEAATVLGFTQRAWNDDEKIPRFDRDWPDLSEEEKSAALKLGYDEDLWDDYND  
YHAANNNGNDFGGEDSYPTLVGDEWEDLDWEELPPAISSAALVLGFDRESWDNDREPEHF  
GKTWFELTDEQQKAAITLGDEDSWCDDFGDR

>comp14093\_c0\_seq1; 600 615 3005 LEN=3068; translated  
MEEFSRALVKVTDGIPEDLELGGSEKLAGILTCLIRKYPYVMVEFKPALGHVFEFLE  
GYSHWGYSDLDFGLDLERWITPDELNDFDIVTYGFGDQDKVYLRGQFTFHRNDPERINQ  
LWRKCDYLSHMDTRFANFLSGKEKLSLESAEGCYSEAILNTDDIKVKYAVKAFTDVQTKD  
TAYTHGVYVTTGTTKDKTVIYKAGSDHPEELLTLPRNWFEEKGSLYANSNEMLYRPVGR  
IPLSPTVQKEDVKCMHWVKSQYQSKLCIDNIDSNDTLYWIHGQLYKEKFEIAKMPGNIMT  
APFFHFQEWKRYRKAQLGGFQRNGPFTGFVLTKEGIVPIYSTKTDNKNRQNLNKA  
VANT SPLGHSFLFQWQDARRKDLPRRLYCLQSAPRKNPSTTKCKFMTSWWSDNVEILSWAPAWS  
TVDIDSEVTMAITLQLHADQVHDASAMQGFYRILELYLNHWQGGQPTVIVVHVAGATPDFI  
ATMKTCLGPESDLTNFGMDTVLVGAIFSENLDTF SRKALMNMAIDASPTRFVTSGYELER  
GIVPSRETIVLVHRTAQVHKDSQGAUYAIPQFGLVKGDHDF TAKSLEEARSDGNLDSVSK  
LEDSECVNDIPTRETEGEGEPFEMIEQLWWQLMQHDEDEERSQNEITIEDHALALEKIQSR  
LTGLLTKHEHYNLYTQDTSPIILLFDNLGPRAGMITSDMVREIDFEGGKMCYNTMRF SQMA  
TLGYQVNVLTGAFASIPALRNAIGDPSRGPNGVSRDCGCFFFTKEREHEDILENISLEE  
RQRPAKISILWEESIQ

>comp14094\_c0\_seq1; 203 790 2109 LEN=2629; translated  
MEARDQALDRIRHCNYTTQRKTEVQTALPPAPEPLERNKEWRKSAEQTSGTEKRTRTRTA  
GWRRRNADEKLPKRNKIRVRNQSSMDDQSYAARSQLESAGAFRSSSFRPASSITTAL  
LPSRVLKLSLIAIALTEALDRMGILCVCLELPSVIGAEIRAVWRRSILPLAALIRRKLSS  
ISLDWVKPRWKTIIYHGWLEPSTQSLFEAVQTTNAKRFGVSLAETLSTTKAVFAFGTAAGM  
IAIPLVWTTITLRFKAVLVVVVLESEANRSFKYRRGRSLVWVLGDTPTTLGMALDGALEEC  
AWLMRFCAAYASTLPERWAVARVEAVDTPVGDGLPRMQIIRPLRPPCVDYRDDCDLSDSD  
VPYSLGIASSVAKQQPRGPLSSIQRFRARMAFHVWVKFRWLANRLEDHYASYYSYYSEYDY  
SSNSRRIVPTGNNDHYYYK

>comp14095\_c0\_seq1; 318 1 2024 LEN=2311; translated  
QQKATFN SGRLIRPNSELADPGRIMIDERQEPYQKHRKSLQLLSASPQSDRKAQAV  
FEVPQGVVPQFRVSAEPPFSSSKEDCRRWSAARKEKSNDIGTGRRERTLTNTTTTTTPRP  
VNKKFVQYREGRGKCLVALSSSSSGSEKGIKGERIGDPDKKQDFWDPLIPPVLLGEYR  
TSRCALCFGRLLQPYSFDRSPNHPLYRLLFCSDACRRIASRIGLEREERDAGMLQSPSG

RGPPRILPTAILLYRIMITEQRTEQQQKSQNSNKDAFVWDQVCELQSKPKRGP SDNLEDN  
EMNLSDDKLMASKYHTQGVIATAMGMLQCSESSFSQYRPSMEHLIGMVHRIKVN GFSIT  
YEEDFERIGIGLYGIP SFMNHSCRPNALQTFLLRPGRLPSLYVTA FQDIPSQQE ICISYT  
DTSCPSHVRQKRLEEDYCFVCNCEACNNTSNAQDDCNTMAIRCMDCCNQLSPPPCSFVTR  
SDRAVGPSIQPAYRCTR CNKTD FSTLRQLRESEEEEMGNDKISIESNPTKLKKT FQNLKK  
LCYTESWYVQEAGDQLLQHYIEKLPMLRNDPEREQQTAWAALNIAEELLGAESSSGPRPT  
SPLTTSIDFGSTSTFLRYQH LRYKMAKLRLFLVDPDRSVQELQQVLRSL EPHYFSDEHPV  
ISGLKACLANAML

>comp14095\_c0\_seq2; 271 1 1826 LEN=2113; translated  
QQKKATFNSGRLIRPN GSELADPGRIMIDERQEPYQKHRKSL LQLLSASPQSDR KKAQAV  
FEVPOGVVPQFRVSAEPFSSSKEDCRRWSAARKEKSN D IGTGRRERTL TTTTTTTTTPRP  
VNKKFVVQYREGRGKCLVALSSSSSGSEK GIRKGERIGDPDKKQDFWDPLIPPVLLGEYR  
TSRCALCFGRLLQPYSFDRSPNHPLYRLLFCSDACRR IASRIGLEREERD ACGMLQSPSG  
RGPPRILPTAILLYRIMITEQRTEQQQKSQNSNKDAFVWDQVCELQSKPKRGP SDNLEDN  
EMNLSDDKLMASKYHTQGVIATAMGMLQCSESSFSQYRPSMEHLIGMVHRIKVN GFSIT  
YEEDFERIGIGLYGIP SFMNHSCRPNALQTFLLRPGRLPSLYVTA FQDIPSQQE ICISYT  
DTSCPSHVRQKRLEEDYCFVCNCEACNNTSNAQDDCNTMAIRCMDCCNQLSPPPCSFVTR  
SDRAVGPSIQPAYRCTR CNKTD FSTLRQLRESEEEEMGNDKISIESNPTKLKKT FQNLKK  
LCYTESCTFLRYQH LRYKMAKLRLFLVDPDRSVQELQQVLRSL EPHYFSDEHPV ISGLKA  
CLANAML

>comp14096\_c0\_seq2; 356 94 1342 LEN=1718; translated  
MSIRNDNNSHNYCFDL DLDLDDARKKLATCAAFVDSTDLTYGFSSKNLLALGGSEISR LKE  
LVSMDEHWASKDAACGGIITQPPEGNRIVVKLYWDIAPLACENFATLCSNGSSV TAGPG  
QKSSKPKPVP IGECEGKPLTYRGCKIHRVVPGFVLQGGDFVLENGSGGECVFGNKKTFKDE  
RAGLNLKHNRFGLLSMGN SGNSSQFFFTLDKAPQCDGKHVIFGEVVS GGQVLEKAES  
FGSSDGTPTAPIRIADCGVFTPLQTPGAGYWYDKPDSESWNGISPTFVVRPRIAIAAPEA  
ARKKFEQAMSGLCSVVL SICV GAGGEAPEAASKL LLESLSFSVDIVVIAPVCKDVKSKM  
GQRLPVSWVNSNFSFEVVIVSKPLDEYLRYILNLG YRATENIGSLMVDDDIESI

>comp14096\_c0\_seq3; 201 1 1132 LEN=1508; translated  
LATLHRIALRYLFHTLFYINKAIVFLRGYRNADLNCNYVCIRNSIPGNRIVVKLYWDIAP  
LACENFATLCSNGSSV TAGPGQKSSKPKPVP IGECEGKPLTYRGCKIHRVVPGFVLQGGDF  
VLENGSGGECVFGNKKTFKDERAGLNLKHNRFGLLSMGN SGNSSQFFFTLDKAPQCD  
GKHVIFGEVVS GGQVLEKAESFGSSDGTPTAPIRIADCGVFTPLQTPGAGYWYDKPDSE  
WNGISPTFVVRPRIAIAAPEAARKKFEQAMSGLCSVVL SICV GAGGEAPEAASKL LLESLS  
SFSVDIVVIAPVCKDVKSKMGQRLPVSWVNSNFSFEVVIVSKPLDEYLRYILNLG YRA  
TENIGSLMVDDDIESI

>comp14097\_c0\_seq1; 683 242 2142 LEN=2225; translated  
MRMLSPNELSTGTVRSESDLSSSSSGPTTIRNKGEM EIDFFGLFLVLLPPMLGGFLYGF D  
LGATSFVLVMLLNPPDVDDFGAAVWWTDLSSSTRQGLVVS SLSL GALVGS H I VLMYLSQRI  
GRRMELRLCAIFYIAGSFLNVMSGTVLKEAAIFGYLSLCVGRVLYGIGVGFVMHGAPAYL  
AEMSPTKIRGAI VSAKETVIVGGIVVGYMIGNCMST DPLGWTHLYGICGIIALPMLALTY  
CIPRSKRWLLMQGLDQEAYESMKFIYNGDIREEYESLAKSVLAGGLSPSQT KTRKDP SLV  
DPRYRKAVKASMG LIIFQQFSGQPRCVRYGRTKSKLPFCPLRLAIVNDAL TNRTASILL S  
SSF IQHLTSFILSIFHSIISVLSYATVLFQAAGWTGIASVASSVLM MITSAITVLLVERV  
GRKFLLSLGCLVMMTALSALSTSFWGWDHIDTETGDLRSSQNYVILFAMFFYIAGYQIG  
FGPITWCIVSETFPLEIRGKAIALGVELNYALNFGVQFIFPTLKENL GWGRTFGLFAVIL  
FAFFFYIRSYVPETTGLTLEEIEVELGGEHNSDYPKNNAKKHQFIEFECPTENS SLLGR  
ASSFLGAHPSLEEMESQLIRTSSDAALRNAIV

>comp14097\_c0\_seq2; 732 242 1975 LEN=2058; translated  
MRMLSPNELSTGTVRSESDLSSSSSGPTTIRNKGEM EIDFFGLFLVLLPPMLGGFLYGF D  
LGATSFVLVMLLNPPDVDDFGAAVWWTDLSSSTRQGLVVS SLSL GALVGS H I VLMYLSQRI  
GRRMELRLCAIFYIAGSFLNVMSGTVLKEAAIFGYLSLCVGRVLYGIGVGFVMHGAPAYL  
AEMSPTKIRGAI VSAKETVIVGGIVVGYMIGNCMST DPLGWTHLYGICGIIALPMLALTY  
CIPRSKRWLLMQGLDQEAYESMKFIYNGDIREEYESLAKSVLAGGLSPSQT KTRKDP SLV  
DPRYRKAVKASMG LIIFQQFSGQPSVLSYATVLFQAAGWTGIASVASSVLM MITSAITV L  
LVERVGRKFLLSLGCLVMMTALSALSTSFWGWDHIDTETGDLRSSQNYVILFAMFFYI A  
GYQIGFGPITWCIVSETFPLEIRGKAIALGVELNYALNFGVQFIFPTLKENL GWGRTFGL  
FAVILFAFFFYIRSYVPETTGLTLEEIEVELGGEHNSDYPKNNAKKHQFIEFECPTENS  
SLLGRASSFLGAHPSLEEMESQLIRTSSDAALRNAIV

>comp14098\_c0\_seq1; 418 384 1960 LEN=1990; minus strand; translated

MARTASARGATRQSSTEPLQNESNGEDTSSGFPLSNKVLGTLDPCCVVKTKQWMEDHAHRW  
EDKEGIFSLAQGVVYWSPPPACRKALVDAVMPMAMASGGESNAESNADDPLALHSYSPAG  
GLPELVEALKAKIGAEHGMDHDVTVTVGANQAYTNIVLTLGDNNGGRAVVFVCPYYFNHV  
MAIQMCAGPEAVVTGPTDMSTGRPDLEWLGEALRSERGI RLVTLVNPNGNPTGVALPEEDL  
REIVDLCDRHGVWLVLDCYEHFFYAPDGGKRKASRSIHPKYETNPLPTFPNDPHVIHVS  
FSKGYALAGYRCGYVVTHRGDASEGSGFLEQMLKVQDTIPIGPPRLSQHVALGALRQGA  
QDSGENAGQSLYSPGSKEWVYKDYDTLEPSRQCILEALSSLPQTIGGSGSMYVMGRLPDH  
LSRSSLPGGDDDDDEPIDVLVXQTACEGLRDRGHPREFLRDPRMDPGLLRQPAAGPDQAR  
RRAAAERDRGAHGGDGGGVAIARPKTTVAWAHRSGNGCGLRCTLVW

>comp14099\_c0\_seq1; 357 319 3018 LEN=3137; translated  
MNHGHSKPGHENKIGTGGFHLSSSLQSNDSVAIAGSNYAHGDLAGMMPRRDSLGLMQGVF  
GRSPSLGLGSELFADLGATGLGGVAARRGSME SVVDAAIQNLAHRRLSLVGGSATPPLSA  
MTQGSATGMPGLGGMNMGMPSSMLQGMQSQGMGNQMGGLTPGRTGMSMNPFLMKGL  
GLTQAMMSTKSNATFNNTDGS GDTEGFMGPSYNSDRDGSNRRGNVNKLRQKQLQDQRMEL  
QRRQKELEYQRQQLLSAMEERKQVMQRMQSSLQSQGMIDPQQPQQPQQPPHVPFERRHS  
LFGGKVGALEGPDLEATGMVDGHRFSSRFETEYGGRRDRRGSLLDLGVVAGATQEAVS  
NPDVTSRNKSATGDLSPGSGGKLSPGPLLDKDTSKFTSIGKSIALGLPEDKDWLTPH  
CFVRLHCVEVFTATKNDVAVPTKGRKPIQVGVGIRCPHCHKSDMAPLSRERGSVYPT  
SVSSIYNATMNLQRHLHSCKAVDPEIMRRYETLKLDDARSGTSKSYWAKSALSGLVDT  
REGIRFSSAKPPPLRLTMEQKASDNYHTVRGNDAFFNSASNTIMGLSNINNESSYASKY  
PVNFEPVCDGGPSKGSSEKAEIQHPLGLRDITSSKEKAVPDVNTIKSSGSSAPLVTGKDEK  
VATQFSFFLLSQMQTCVFTEADRLGKRKGLPPGFPLACRHCFFGGYSGRFFPSSIKTLS  
DTSKTLNVLYNHMMRCRCKPADVRGTLQKFRTHDEERAKMKFGSQKAFFARIWDRLHDN  
NPTVDVRKRKFNHPKKEPKSISKDIVLNARSTAQQALNMQIGGGHLGQVPYLDAAANLS  
GGLGGLSTAELLNGLAAGNMLPGNNMLNPSVVSQQYLATDPESENKRLKLQHF INPNPNMR

>comp14100\_c0\_seq1; 563 319 2205 LEN=2225; translated  
MAKLEILSLGSEDVTSIGILTQILPVNSMVRAGDVVATVILSPRIETIGSDTIKEDETRSD  
NYDVEELSIYAPKTGRIMEVFHQIRDPIILIGDYLMIDDADFQADMKVLEEQLQKILGSQ  
EGQPKLPKDYMDTLLKIEDPFRLOTIVQHIPGPLQSQTLPYERLLVLQKDDLAELSKVH  
TQIGVVLYKLGDLLETLQHLHKALECRQEALGSDHPQVAATCIHLGALYRTAGDFENSLK  
HMLQAVEIQEKALGDDHPVVASSYNNIGALHYQTNDFAFAIREYEKALNIHLKKNKGELDP  
DTAGTYHNLGVAVKHLGDYNTAQEKLLKALNIRQEQHKQQQIQTSHDDNEQNANTSGPPI  
ASDVAVSHTTLGQLYAEMANFEAAMEQYEAALAIQQQIHGPDSMTATSHNNIGAVHYET  
GKYSDALEIYQKALDILRGKEPNHPDAAASWNNVGLTYLKMGEAEKALEHHQEGQLILSN  
LYGPRHPNLATTIGSIGNVYKAQEQWEKALGEYQIAHELLETALGTSHHPDVASSFNMG  
LVLSHLPGREAEALEKYRSACEAFKSLGSEHPHVGSCKFNIALMLQSQGSIEEAKTEFQ  
AARDIWKTHFGPEHVHVEAAQKGVDECS

>comp14101\_c0\_seq1; 344 667 1929 LEN=2907; translated  
MQRVTCLFSKPTPEDRPADSASRRRSSGFRDNVKRLFTSRSIIGGSTSTSTSNVSPSP  
ATDGKKAQEKPFNPHQSKVDLAFAPVEASLNELEESLRSARLALNKVKQESVAALAMEM  
IAAVGGKESISAAAAEGENEGLVDLSELTFFDDIDYGSSAMAPPFLDPDSCLLPDAEPV  
RIEKAPENSRRIFAGIDILASADDVWVNLTYNGELQNVIPNLVNDVLELYDGSDETKSI  
DAIAGDEAVPEEVRCEKLANTKKGSLLRQVGGAKVAGIQFSARTTLEVREWPTGMPDFAH  
FLDDVWEGESREARAGVLKDTKLKRYRFPFPFCVGDKKLPKTDISMQSI VGDGGEFRLYQ  
GVWRMQPLVGCSPPGKEAMRLTYAVEISPRPYLPVRLVEGRIVADLCSNLEAIRAAVTSP

>comp14101\_c0\_seq2; 311 667 2155 LEN=3192; translated  
MQRVTCLFSKPTPEDRPADSASRRRSSGFRDNVKRLFTSRSIIGGSTSTSTSNVSPSP  
ATDGKKAQEKPFNPHQSKVDLAFAPVEASLNELEESLRSARLALNKVKQESVAALAMEM  
IAAVGGKESISAAAAEGENEGLVDLSELTFFDDIDYGSSAMAPPFLDPDSCLLPDAEPV  
RIEKAPENSRRIFAGIDILASADDXLERELGLLYGITSRLNLSMMVQIKNDVVYRSSSGI  
ACYATASSAPIPALVSLSSINILFLVSGPFCQCIAWHYIQVLTNYGELQNVIPNLVND  
DVLELYDGSDETKSIDAIAGDEAVPEEVRCEKLANTKKGSLLRQVGGAKVAGIQFSARTT  
LEVREWPTGMPDFAHFLDDVWEGESREARAGVLKDTKLKRYRFPFPFCVGDKKLPKTDIS  
MQSIVGDGGEFRLYQGVWRMQPLVGCSPPGKEAMRLTYAVEISPRPYLPVRLVEGRIVAD  
LCSNLEAIRAAVTSP

>comp14102\_c0\_seq1; 368 101 1117 LEN=1340; translated  
MNRFSVASTIHRVFNVRGTRKLRIRQRYDDAVKSFTIVLNILRPLAVFVEDGNSKNNDT  
VTESDDDAYQDCMDQRNELDTRRSGPQTPASEASMRHSSHPSSSEACWIGGRSTRRYSFS  
SSSSAPSQPNAQRPHSATAPTKHLSSPASSSPVAPRKPLFVFRDPVEIPPESVPSEVSE  
TDAEETSSELLSKFLMIVMYNLALALHLHALSIDRCDGSI RGDENARGARSERNRQRGL

FGRARKLYELAFEMNLDESCDVSLLFTLALINNLGVSVEILGETQRSETCFQNMFSSTMMY  
LTDSNESQRNSIKEDWGLLSNALNVLFKKECEIAAPAA

>comp14103\_c0\_seq1; 1003 143 3149 LEN=3561; translated  
MAAGAAFAGGGVGSNNGNANTNADNSLSVNNRIVVVGLNGALQKRFLVLPDRQVLVPGNV  
HRAAGVDFGVGGKQDVAIALHCLLTEGDRIVGEEHGSSNSDAIRLVQFLGTGFAGDTV  
YGMLEDRLGGNAMGLTVRSATELRTCTSIVAADETTELVEPSGRIAAGELGDLARLPPP  
GASAGGRRARALCVMGSMPPGCPGGTYAEIYERVAGPETVCVVDLAGIDPVLRTAGGLG  
PLVLKLNASELCKLGGTPKAGSETGGVTPRELVGAAEGFCSLHREALRRRTGNASACGVV  
GLAITDGKHDAYFVGMAENTSDGGGDDGCDHHTIGDTTIGDTARSILCDARSQLGHSRS  
HSSSDGGIVRKVFVGAAYVREADSFLEPGRANADDVVVADEDTTVALSAFVSSDYAFRESR  
RTADRFGGETPVAAEASGRPRSNRSCDSEETGSLVSYRTEWTNATAATATPNGTQGEFF  
RWQSSSTTPNEQEHQLRLEHEEFQQHKKSYQQQLQQRQQYEQQQYDTNTHSQNDNRTSTSTS  
NTRTGDKSNASSSSSSNTRNSTIQATNTTTTTSSSSSDNHLAPPEISEKSLRRLLELLSS  
AVPRNGWRRVDDQSCWRDFNISNLLLSDVVRDQTVQLNAAIFDADVVCVIDWTGAVAYRS  
IVDHGKYHQGDDNVNCYTDITKHLHLYLNFRVFSGGVDDDKRRDWYDQMEYQAMKNANVV  
VLSLSSKDTQQLSAILLESKDKRILDIPMEIAFPPLRQDMEDFAKFRCTSNGLYRYPFEFI  
QSGILRTVSKNYSHYATSATNTLLSKRPLIVCVARQSPEKCVHRFVEFAEMAANILQELN  
LMVVLGAPSDVEYAKQSRKRLLRVPQAIIDRFLSPTTEL GALFAHTLINHPASYDAY  
GMTIVEAAAFGAPSVLAGPSIGAFRLGKDGCLQVDMNGD TDDNTFPQQSLITVVDFLRD  
CKIDGKAWKILSQVAREKALGWD AESYGKMLHIIDKYSIS

>comp14103\_c0\_seq2; 543 241 2458 LEN=2870; translated  
MNCAFP TLEGCDYNTASDLASACFVDHDEEAIRKSRNGFFWRQDGM LQKVERRPSYRDG  
GGDDDGCDHHTIGDTTIGDTARSILCDARSQLGHSRSHSSSDGGIVRKVFVGAAYVREADS  
FLEPGRANADDVVVADEDTTVALSAFVSSDYAFRESRRTADRFGGETPVAAEASDALGAT  
AAATARKRAPSCPTERNGPMRRRQPQHTEPNKGSSSAGSPRPPPTNRNTSSGSTRNSSS  
TRNPTSSNSSNASNTSSSNTSTNTHSQNDNRTSTSTSNTRTGDKSNASSSSSSNTRNST  
IQATNTTTTTSSSSSDNHLAPPEISEKSLRRLLELLSSAVPRNGWRRVDDQSCWRDFNISN  
LLLSDVVRDQTVQLNAAIFDADVVCVIDWTGAVAYRSIVDHGKYHQGDDNVNCYTDITK  
LHLYLNFRVFSGGVDDDKRRDWYDQMEYQAMKNANVVVLSLSSKDTQQLSAILLESKDKRI  
LDIPMEIAFPPLRQDMEDFAKFRCTSNGLYRYPFEFIQSGILRTVSKNYSHYATSATNTL  
LSKRPLIVCVARQSPEKCVHRFVEFAEMAANILQELNLMVVLGAPSDVEYAKQSRKRLR  
RAVPQAIIDRFLSPTTEL GALFAHTLINHPASYDAYGMTIVEAAAFGAPSVLAGPSIGA  
FRLGKDGCLQVDMNGD TDDNTFPQQSLITVVDFLRDCKIDGKAWKILSQVAREKALGWD  
AESYGKMLHIIDKYSIS

>comp14103\_c0\_seq3; 1044 141 3171 LEN=3583; translated  
MAAGAAFAGGGVGSNTNGNNGNANGNANTNANNPLSVNNRIVVVGLNGALQKRFLVLPDR  
QVLVPGNVHRAAGVDFGVGGKQDVAIALHCLLTEGDRIVGEEHGSSNSDAIRLVQFLG  
TGFAGDTVYGMLEDRLGGNAMGLTVRSATELRTCTSIVAADETTELVEPSGRIAAGELG  
LLARLPPPGASAGGRRARALCVMGSMPPGCPGGTYAEIYERVAGPETVCVVDLAGIDPV  
LRTAGGLGPLVLKLNASELCKLGGTPKAGSETGGVTPRELVGAAEGFCSLHREALRRRTG  
NASACGVVGLAITDGKHDAYFVGMAENTSDGGGDDGCDHHTIGDTTIGDTARSILCDAR  
SQLGHSRSHSSSDGGIVRKVFVGAAYVREADSFLEPGRANADDVVVADEDTTVALSAFVSS  
DYAFRESRRTADRFGGETPVAAEASGRPRSNRSCDSEETGSLVSYRTEWTNATAATATPN  
GTKQGEFFRWQSSSTTPNEQEHQLRLEHEEFQQHKKSYQQQLQQRQQYEQQQYDTNTHSQND  
NRTSTSTSNTRTGDKSNASSSSSSNTRNSTIQATNTTTTTSSSSSDNHLAPPEISEKSL  
RRLLELLSSAVPRNGWRRVDDQSCWRDFNISNLLLSDVVRDQTVQLNAAIFDADVVCVIDW  
TGAVAYRSIVDHGKYHQGDDNVNCYTDITKHLHLYLNFRVFSGGVDDDKRRDWYDQMEYQ  
AMKNANVVVLSLSSKDTQQLSAILLESKDKRILDIPMEIAFPPLRQDMEDFAKFRCTSNGLY  
RYPFEFIQSGILRTVSKNYSHYATSATNTLLSKRPLIVCVARQSPEKCVHRFVEFAEMA  
ANILQELNLMVVLGAPSDVEYAKQSRKRLLRVPQAIIDRFLSPTTEL GALFAHTLINHP  
ASYDAYGMTIVEAAAFGAPSVLAGPSIGAFRLGKDGCLQVDMNGD TDDNTFPQQSLI  
TVVDFLRDCKIDGKAWKILSQVAREKALGWD AESYGKMLHIIDKYSIS

>comp14103\_c0\_seq4; 1003 141 3147 LEN=3559; translated  
MAAGAAFAGGGVGSNNGNANTNADNSLSVNNRIVVVGLNGALQKRFLVLPDRQVLVPGNV  
HRAAGVDFGVGGKQDVAIALHCLLTEGDRIVGEEHGSSNSDAIRLVQFLGTGFAGDTV  
YGMLEDRLGGNAMGLTVRSATELRTCTSIVAADETTELVEPSGRIAAGELGDLARLPPP  
GASAGGRRARALCVMGSMPPGCPGGTYAEIYERVAGPETVCVVDLAGIDPVLRTAGGLG  
PLVLKLNASELCKLGGTPKAGSETGGVTPRELVGAAEGFCSLHREALRRRTGNASACGVV  
GLAITDGKHDAYFVGMAENTSDGGGDDGCDHHTIGDTTIGDTARSILCDARSQLGHSRS  
HSSSDGGIVRKVFVGAAYVREADSFLEPGRANADDVVVADEDTTVALSAFVSSDYAFRESR

RTADRFGGETPVAAEASGRPRSNRSCDSEETGSLVSYRTEWTNATAATATPNGTKQGEFF  
RWQSSSTTPNEQEHLQRLHEEFQQHKKSYQQQLQQRQQYEQQQYDTNTHSQNDNRTSTSTS  
NTRTGDGKSNASSSSSSNTRNSTIQATNTTTTTSSSSSDNHLAPPEISEKSLRRLLELLSS  
AVPRNGWRRVDDQSCWRDFNISNLLLSDVVRDQTVQLNAAIFDADVVCVIDWTGAVAYRS  
IVDHGKYHQGDDNVNICYTDITKKLHLYLNFRVFSGGVDDDKRRDWDYDQMEYQAMKNANVV  
VSLSSKDTQQLSAILLESKDKRILDIPMEIAFPPLRQDMEDFAKFRCTSNGLRYLPEFI  
QSGILRTVSKNYSHYATSATNTLLSKRPLIVCVARQSPEKCVHRFVEFAEMAANILQELN  
LMVVLGAPSDVEYAKQSRKRLRAVPQAIIDRFLSPTTELGAHFAHTLINHPASYDAY  
GMTIVEAAAFGAPSVLAGPSIGAFRLGKDGCLQVDMNGDIDDNTFPQQSLITVVDFLRD  
CKIDGKAWKILSQVAREKALGWDAESYGKMLHIIDKYSIS

>comp14103\_c0\_seq5; 1044 143 3173 LEN=3585; translated  
MAAGAAFAGGGVGSNTNGNGNANGNANTNANNPLSVNRIVVVGLNGALQKRFVLPDR  
QVLVPGNVHRAAGVDFGVGGKQDVAIALHCLLTEGDRIVGEEHGSSNNSDAIRLVQFLG  
TGFAGDTVYGMLEDRLGGNAMGLTVRSATELRTCTSIVAADETTELVESGRIAAAGELGD  
LLARLPFGASAGGGRARALCVMGSMPPGCPGGTYAEIYERVAGPETVCVVDSLALGIDPV  
LRTAGGLGPLVLKLNASELCKLGGTPKAGSETGGVTPRELVGAAEGFCSLHREALRRRTG  
NASACGVVGLAITDGKHDAYFVGMMAENTSDGGGDDDGCDHHTIGDTTIGDTARSILCDAR  
SQLGHSRSHSSSDGGIVRKVFVGAAYVREADSFLEPGRANADDDVVADEDTTVALSAFVSS  
DYAFRESRRTADRFGGETPVAAEASGRPRSNRSCDSEETGSLVSYRTEWTNATAATATPN  
GTKQGEFFRWQSSSTTPNEQEHLQRLHEEFQQHKKSYQQQLQQRQQYEQQQYDTNTHSQND  
NRTSTSTSNTRTGDGKSNASSSSSSNTRNSTIQATNTTTTTSSSSSDNHLAPPEISEKSL  
RRLLELLSSAVPRNGWRRVDDQSCWRDFNISNLLLSDVVRDQTVQLNAAIFDADVVCVIDW  
TGAVAYRSIVDHGKYHQGDDNVNICYTDITKKLHLYLNFRVFSGGVDDDKRRDWDYDQMEYQ  
AMKNANVVVSLSSKDTQQLSAILLESKDKRILDIPMEIAFPPLRQDMEDFAKFRCTSNGL  
RYLPEFIQSGILRTVSKNYSHYATSATNTLLSKRPLIVCVARQSPEKCVHRFVEFAEMA  
ANILQELNLMVVLGAPSDVEYAKQSRKRLRAVPQAIIDRFLSPTTELGAHFAHTLINHP  
ASYDAYGMTIVEAAAFGAPSVLAGPSIGAFRLGKDGCLQVDMNGDIDDNTFPQQSLI  
TVVDFLRDCKIDGKAWKILSQVAREKALGWDAESYGKMLHIIDKYSIS

>comp14104\_c0\_seq1; 667 96 1901 LEN=2205; translated  
MGNRKQSGARWRGFFATAVVCVSWLSPCSAFGVSRQIGARQQCQYHQRYQHRQNSAL  
GMSLSGTEEDPAILAIRSLATYHEGEWTGRARSFTVTPDVAAGVVKRKLSEEYTVAVRLA  
TSEINIDPSTASEPDLGTISLSETVSWGDKISHRSIPLFTAPGASRSGAEKGSRTGHVDV  
DDVDASYSLDTTNPKDFPSILAGLSGKSARDRLQFVVEHCVAAGEDRRSRFCFAIYGEDNS  
LLRVVVEEERVASGKPGAGASGNPVAGGSGKNGSESGVTMSDLIEMQNDVDRDLVDKIAA  
NVYDGTSGDPPSSQGSPPARDGGDEDTPASRLEKLGAMGPPKEDGTRDLSPYDMSLLEM  
TGGVWLGDMMIRETADVAASPSDKGPGKGFVKPPAASSAPPPEPSSAFGTWKPGVQKIA  
YRWMWNFEEIIRQTVDAGKSLGSSMDFHLKSLAGSVCLDESFRRKAKNERMVYVDWGE  
DSVGFLLGPYSVQVPRYVNFDPAPTARAPAVTKPFYTEFGVFQSAPPALARGSDGVIDV  
TETPGPELWCWSKIGRLYNFEGRLKQGCTSFSTFKRFELEDDSIDDDQLDDEIDDDLAEL  
L

>comp14105\_c0\_seq1; 285 126 953 LEN=1356; translated  
MGDSTPASESVPAENKPLNAMSTGTEQPPSSPTPGDDGDLETNKRSEKRRREKQRRSD  
LSNAFDELAFAFIVQVEPGSGEDSDKKGKRRKSSDGGEDSAGITRLDLIGRALRIMERLY  
RENEERKRVIASFEGRGQGGPNDNVIMVPTLAPSGDEPQPIARAGYPGPYHHSPPPPY  
ASAASALPSSAALGNHDPREYSMPPPHPYTSHWGAAAAASGYGGRQPPPTAGLPHHLAP  
PGTAMRLPHQHVAAARAPGIGADGLPMPHVPSGRQH

>comp14105\_c0\_seq2; 123 186 1180 LEN=1583; translated  
MSTGTEQPPSSPTPGDDGDLETNKRSEKRRREKQRRSDLSNAFDELAFAFIVQVEPGSG  
EDSDKKGKRRKSSDGGEDSAGITRLDLIGRALRIMERLYRENEERKRVIASFEGRGQGG  
PNDNVSEQIPTRRIGFYSVKLFASCWMTVPVFGWVFRNMNAPCSVGGGLSSVAPWFLVSQPV  
LPILICCYPNVYVLPVCMCXVIMVPTLAPSGDEPQPIARAGYPSPYHHSAPPYASAA  
SALPSSAALGNHDPREYSMPPPHPYTSHWGAAAAASGYGGRQPPPTAGLPHHLAPPGTA  
MRLPHQHVAAARAPGIGADGLPMPHVPSGRQH

>comp14106\_c0\_seq1; 873 153 3215 LEN=3405; translated  
MTGLKNNAVVFTVSMRSLANTASPRLLFVVFLFLLWLSRESNFNAATNINPSETFGGSER  
TGREDDKPTLSSSPLPDGFDCAVRKYAYEYAIRKLPWSSHAEQQSVRDALRLQCEAADPS  
LDPTTIEHRQDEAENPEKDDSTDSLEALPLSLRSTLLSTEGFQILRHRTRRLNEEQTKI  
RTKTTAAETTTKPLFEDLEATVQSMQRQGMSPNKKDIVFFVVDPEHGDDGASGSFPRPF  
RTIETALATRRSRKFSHSGNDNDKDTVNNTGSFYAIVLRGGRYLEDTIALDSRDNDL  
TILPYPNETPILSGGYPLSLTMHPTAEDQNIYAKLPSGRKRTSKSDKRNEYKNSRPSQ

LPLHCNFTTLFLARSEGDDLRLVWAREPNGHPERDLQPDGYTRANGTTSSTWPDPSRAIH  
FMIGKEGGMSRNSTVYPWYGEDLDPRGGGNWFHLGGTGDRFFDQAGFWNGTVPMLWYNA  
STSAMNTSRWTPEGYAPAI AHVFHEAFWGNWQFEVEEVQNSGREMGQISFSRGGWQEGRG  
GSIRDQPFVVEGVKEALDEPGEWWLDVPNQVLFYYPFGNETMNGNHHSESTPASELRVDF  
VAPRLQQIVTVMGENSKDRNTANRIAMNGITFSHSATTFLEPYEVPSPGDWSIHRGGAVFL  
ENVQEI ALIGCRFLRTGGNALFLSGHAKRCRVS RNEFAWIGDSAVVTVGR LAMADGFTVD  
TFPEDTFIAGNHFEIGIHGKQTSALFSALS CRTTFVSNVAYNGPRAGINLNDQFCHGHT  
IRDNL LFNWVRETQDHGPINTWDRAMYVQRDRHGAPDEL PKPTL IPEWAHIERNFIMNGP  
SGNRNLGNLFP TIDNDDGSSYFYIANNFLVYGGAKNYLGHDKRWISNLLVFPGRWSGDPC  
AQIWGGENH L FENNTCIVASGD PPIGLDGS MKGF ECKIDWNDTRNNLRFVGV T AGNVYYM  
NSSDQWGF GCGNGTSPNHFFTFLEMQKHEREIGSVIKDQSELTPDI ILGMAKSMLEKVL  
>comp14107\_c0\_seq1; 415 1 1335 LEN=1462; translated  
TASAA TNSYDSKDTAPPVLTTPKGEMTQELLDSSKVHSTAQIGNPRLQPARVPLSHFPTL  
LHRILADSDEEGSAMRWLPDGEAWKVNNWNAMRREILPRYFSDLPDEDGRSCGTIDAF LH  
HVDAWGFEETTAGAYRHNL FIRGAQKLCVKMRFTADARS DGATNGQRPNTVSPGRHGADV  
TERRMLQV PMLASAGTTDPKKQPVLHPGKRPRYESDAAGQPGHAPLHWPFSGDAKTGAMW  
GANGQFGE GPHARAYGMRAAAALSAGTTSFATLNGTYNIDPRMQLSRIPTSDSGTVSRPQ  
PHLSFQYIPPVRSRGRALRGIAPSAQPNQGSPPAAAASPTFRHGFPVSNRGKGRRKTAFC  
CRTPLAGPATENPTASTSEAPKATTASAGMNIVGEAQRVGT SVQGVAVAI SRKGRKRLPM  
AGARKAETGSNSALASAEQTGTAQ  
>comp14108\_c0\_seq1; 329 1 1261 LEN=1489; translated  
XKQRSTSS TINDSSTKCRVGR TKIHSSGIYRSISSKMATASQQDEDITETFYDASQDPYE  
DSEVTTDVI PNKNSNENNNWHKNGFGQGLKTRTGKYTKETE I IKNVKEYCAMKQISVSR  
LCSECDHKADLKG SWMEIAKCLPYRSVQSVYRHGLRQLHPFKRGAWSDREVEQLIGFVAT  
LGKKWAHIQAKLNRSADSCRDKYRELDSSYVRGRWQEEETEQLKRLIRESLNVDPKMDML  
ALGKMVEAEQITIAWSAISKRMGKRSRLSCFKKWQKMTGLFSPCDVGRFKLRSDDGRAKE  
VASGRSKQNSAQAKSEVDESSVSIVDETVD VDVYLLTELISMDYSKASDVSWDEFRIDDA  
ENRWYELVEEWQSNMTDDSL LALPLSEIAQLIMDRKTS AQRAAETVEAVDLP GFSSTVQL  
>comp14108\_c0\_seq2; 299 612 1538 LEN=1766; translated  
MKQISVSR L CSECDHKADLKG SWMEIAKCLPYRSVQSVYRHGLRQLHPFKRGAWSDREVE  
QLIGFVATLGKKWAHIQAKLNRSADSCRDKYRELDSSYVRGRWQEEETEQLKRLIRESLN  
VDPKMDMLALGKMVEAEQITIAWSAISKRMGKRSRLSCFKKWQKMTGLFSPCDVGRFKL  
SDDGRAKEVASGRSKQNSAQAKSEVDESSVSIVDETVD VDVYLLTELISMDYSKASDVSW  
DEFRIDDAENRWYELVEEWQSNMTDDSL LALPLSEIAQLIMDRKTS AQRAAETVEAVDLP  
GFSSTVQL  
>comp14109\_c0\_seq1; 73 1 231 LEN=438; translated  
LSSIALFVSLFAFQNVSLSLADRQAIQRAHQ LKFLKEQGLINKESDVRGGAGGDAHSVNS  
GKSSRQRRSSPRITSV  
>comp14109\_c0\_seq2; 350 75 443 LEN=779; translated  
MKFLATLSV FVALQAVYGFQPISTSSVSRTQLMAANTEEPASPLSNKVLPSIAATTGFL  
LSMGIDPAFAAKELPPDTSYIGKDFTAAYLPAIMVPLVGI VFPAFSMALFFLYSQDDVE  
SA  
>comp14109\_c0\_seq3; 570 1 1676 LEN=1883; translated  
XKQDVDTTKVKEL EARI EALKKEHNQKLASVRSQMETLSQKLVQSQKECQDVQKDLASQR  
MEMTMHQSSSTRTKLGLSLQSHKILKKEVIELRKKLEESNSELDMYRHRESSNKLKVEQER  
QKSKLLERYVDKIESQVKVQQNMEMMSQAGSVYGGGSVYGGSSQFGSLNPSSPPIVVRTG  
GSVSGSIAKQQQVQSPGNYNDRSLLGDGEDEDDDDDEENIPGNHLMGNRRRGRSSRRATEDD  
AKSHMSELTEERTQKQF DAAMLLYSSNPQLRAAMAGSPRMAGPPAII GIAEESDQSNSAG  
PANSSSKLDTIASGSRGSSHRPPSSSGKGARRGRDVS RERFALDQGAPSGNEVPRSNRK  
SGSERSRQEGENKLSVAQRARLEADRQSTPVRVRPNQTPLRNNKHKPRDSPSVNSQNSSG  
FFSRFGRRLEEAVDNSVLGIPSDDDSSGSEGSYDDDGRYASSAAGTDVTPRERYDPS  
HSDEKKMPDQASVGSANVSLSLADRQAIQRAHQ LKFLKEQGLINKESDVRGGAGGDAHSV  
NSGKSSRQRRSSPRITSV  
>comp14111\_c1\_seq1; 436 102 1875 LEN=2436; translated  
MKGEPQ TALQC NKDSQSWQLLSSYGIWTFIVLPIHIGYRVYLANRMPIMDCDETFNYWEV  
VHFLLFRDNSFQTWEYANEFSLRTYAYLTPIAGIARVYLEGLRSGIFPSWLWPLLTEQMF  
DPSQSLNIALFVLLRCTLGGLMAYAEVDFCWSIVEQGFGRKDGDQEDKVKGGCEGEIKT  
VVATKKRWYVLVGVWVTECLLISSAGMAHSA AALLPSSLTAMWLLAASAYMKKHVRFCL  
FAILATLAIGWPFVGLVLI PP GIGILVEERERLLTFVLLRIIPMTMVIQGLVMFVDFQHY  
GRIVSPLWNILLYNTQVGGDELYGVEPLSYAKNLLLNLNYVAPVGLAGIFPLIWSLFRS



RSLSLTWIAGLNLMPVLYLWLAVVAPRPHKEERFLYPVYPSFCLGAAIVSVSLIEGIVNI  
PLWPKSQQQEHNQKRQSTRKIQISAIALAIIWIPACAISSLRTAALSKYYSAPLHVYAQI  
SSAIAEKKKTSTLEETDHTKTSIDVVCTCGEYRFPSSFFIKSELSEIQFGFAPSTFAGQ  
LPQLFTAEGSGIPKATTNRFNNDKNAPEAGSYTPLESCDFLEVELSTSFTPV  
>comp14111\_c1\_seq3; 436 102 1875 LEN=2393; translated  
MKGEPQATALQCNKDSQSWQLLSSYGIWTFIVLPIHIGYRVYLANRMPIMDCDETFNYWEV  
VHFLLFRDNSFQTWEYANEFSLRTYAYLTPIAGIARVYLEGLRSGIFPSWLWPLLTEQMF  
DPSQSLNIALFVLLRCTLGGLMAYAEVDFCWSIVEQGFGRKDGDKQEDKVKGGCEGEIKT  
VVATKKRWYVLVGVWTECLLISSAGMAHSAALLPSSTLTAMWLLAASAYMKKQHVRFC  
FAILATLAIGWPFVGLVLIIPPGIGILVEERERLLTFVLLRIIPMTMVIQGLVMFVDFQHY  
GRIVSPLWNILLYNTQVGGDELYGVEPLSYAKNLLNLYVAPVGLAGIFPLIWSLFRS  
RSLSLTWIAGLNLMPVLYLWLAVVAPRPHKEERFLYPVYPSFCLGAAIVSVSLIEGIVNI  
PLWPKSQQQEHNQKRQSTRKIQISAIALAIIWIPACAISSLRTAALSKYYSAPLHVYAQI  
SSAIAEKKKTSTLEETDHTKTSIDVVCTCGEYRFPSSFFIKSELSEIQFGFAPSTFAGQ  
LPQLFTAEGSGIPKATTNRFNNDKNAPEAGSYTPLESCDFLEVELSTSFTPV  
>comp14112\_c0\_seq1; 1200 95 2962 LEN=3096; translated  
MRFVCGVVALAALSPLFADAFSPGRYAALSARKTSSQTAVATTQLSVAADLTDVDFDAIDAS  
AENIVSPKGSQNAWEVHKFGGASLATAELYKTVGDLLIAEASGTRKENNEGKGAVPTMAV  
VSARGMTDLLVKVVDLALIDLAAAKTVLMEAIQGISILTELAPPSVTDPIEANIRNDA  
NDILLLVQSLRMINTVPSVTMEVVTGYGEIWSAQTLNAYLQTKQEIPAEWIDARPIILRVK  
SDSSGLGEKGEASTGGVVPLWEETTSQLSDWNTVAKDRGMHDCDYQSGISPIIVVTGFV  
ASTIDGVPTTLKRSQSDYSATIFAKLTGASRVTMWKNTDGVYTADPRRVPEAFSIGSLKY  
DEALELAYFQAQVLHPSAMVPCIDDSIPVYVRNIFNPSFSGTVVQGRSPSLAEKSQEGSV  
KNWRACKGEIPIKIGITSVDSVALVTLEGASTIGGSNVAEKFMGAMADNDINVLIITQASS  
ESSICIAVPENEGQKAINALQSSFELELARSTVGSISLCKGVSVIVAIVGEGMAYSSGISS  
TLMGSLKANVNIRLIAQGSSEQRQIAVVVDKDDTTRALRAAHQAFTLSDTTASITLLGTT  
GAIGSTFINALEKQRRTLIDRLGVCPRVMISANSKKMSIAKNAKGLSMDSLISKLSSD  
EDTVDLNLEKLTTEEIEADVNPHRVIDMTNSQEVAYQYERWMSLGLIDLISPSRNVAAGPL  
ETYKKVIDVQKGNFVNWQYESSVGSALPVLTTLRDLIETGDSVKNIRGCVSGTFAYALSL  
LDEETSFSEAFGRAMEMGFTEKDLREDLMGIDVARKIVILARQLGMDIEIDDVERESMLP  
EDLASKADLTVDLKVLDDEGMLEKYKAAEADGRKRLRYKFEIEKDSGKCRCFLEAVDSLDP  
LYRLKNTENLVAFETDLYTDSPLIVKGAAGPGLAAAGIFSDLLRCTRAYSERS  
>comp14113\_c0\_seq1; 448 208 1716 LEN=1793; translated  
MNAHSLPLFRLLLILPLLFGRCLFSSAFSVQSQSLKLAPKASRRSHLLARPEDEEFLKKK  
REIEEQREWERKIKAKNERKASGKGADDAATTSEKITPNGQEKDENDDASSCTHFVSN  
AITFAQAHSAELIALAGPKFDGDLGVLGGLDDVIAEIKRRVWTPLAAPPVMDDELGITPV  
RGVLLYGSSGCGKTLAKTIGKLLSPCRPITVVSGPQLMDKFGVSSSEKNLRELFDPNPSPV  
YDPYRISGGKGMDNAALHVIIVLDEFDAMARTRGGDDSSSTAAGVARDSVVNQILSKMDGV  
DPLPVPTLVIAMTNRPNLIDPALLRGRFEVQVEVPPPQTTKQRMGVLNVHMKRMHEAGR  
LEVKDAPKDGYSVSPQCAKQASMTYQELLAYLSDQCQFGSGASLAAIPRAAASRALERAVS  
QYSTDLNMNMKENKQDAIAMFNIVSLEDLKVAVDDVRRSATRKLRLHSLNGSINEQPP  
NGTRNGVNGNTEIETLSNTPAI  
>comp14114\_c0\_seq1; 694 1 2704 LEN=3066; translated  
VDDPLRAAASPPPAKSPSMAQKVFRELEQDHPLSALS LGNTTKIPLTEPGSTKAAVPPAT  
PSPSMGSTMSNLFQQGSHGMGVLHNKMRMGSAAGEAAASGMDTFSKTSMFASNLASMA  
QRGMAHVAAAAAPVQAVSVMGATGTMAGQGGQPPMVSPAMGTGHGVVSGPGGPQAGAGPG  
SNPQGHPLDKEQKIGLLKKHVGPLLKGEQLIMFLTNLHVS DTSGLSYVATQQQASQG  
GPVPMWCGVMTYRILFSTADRDSPSVRPMEAPRGWDPNCWKAATPRIASVNIEMPLA  
SMDRVEKTVYQASGSSYMGILVHGKDCGRKIQFSTSSYVDTSRAFESLNTYAFPRRNLG  
YLFAFESKRQAVQDSIEVDEASGHQGVTLPTPKRFDPMTEFPRLLKKTAITQPPWALWA  
AANANYQLSQSYPSVLVGPASLDETKPEALRVIRQCAAFRKAQRLPSMSWCGVGGASWR  
SSQPKVGLQGNRSPADELYVRHIIESARGANAMAEPPIYPRGVLEQLTGDTYASSGGKG  
DDWLPEPGCGLKILDLRPRAAAMGNRTAGKKDRQEPSPGQPTVPFLSVLIAVVFSTPKF  
SFDASSRMNLSNWISSVCAVPPFPLRRVLFVGYGYENTSNYSNTTLKFTNIQNIHAVRDS  
YEKLCCTVCNSISTADVHWNLSIEDTKWLSHIRTILAASWETAYWVHVWRLPILVHC SHG  
DRTSQTVCLSQLLLLDSYRTRHGFVSVLVEKDFMSFGHPFHLRSAHGGRSDTKNAQSNV  
SQISPVFLQFLDCVYQLVELYPSAFEFNTQYLLDLSFHIYSCRFGNMLCDTERERESMAA  
IRQRTYSVWDYLETKPENLNQNYAKADDAIIMPLPTLLRNKVKWKERHLAYCPKASTIAF  
>comp14114\_c0\_seq2; 668 1 2514 LEN=2876; translated  
VDDPLRAAASPPPAKSPSMAQKVFRELEQDHPLSALS LGNTTKIPLTEPGSTKAAVPPAT

PSPSMGSTMSNLFQQGSHEMGGVHLNKMHRMGSAGEAAAASGMDTFSKTTSMFASNLA  
SMARQGMHVAAAAAPVQAVSVMGATGTMAGQGGQPPMVSPAMGTGHGVVSGPGGPQAGAGPG  
SNPQGHPLDKEQKIGLLKHKHVGPLKGEQLIMFLTNLLHVSDTSGLSYVATQQQQASQG  
GPVPMWCGVMTYYRLILFSTADRDSPSVRPMAPRGWDPNCWKAATPRIASVNILEMPLA  
SMDRVEKTVYQASGSSYMGLIVHGKDCGRKIQFSTSSYVDTSRAFESLNTYAFPGRRLNG  
YLFAPFESKRQAVQDSIEVDEASGHQGVTLPTPKRFDPMTEFPRLKKTAITQPPWALWA  
AANANYQLSQSYPSVLVGPASLDETKPEALRVIRQCAAFRKAQRLPSMSWCGVGGASIWR  
SSQPKVGLQGNRSPADELYVRHIIESARGANAMAEPPIYPRGVLEQLTGDTASSGGKG  
DDWLPPEPGCGLKILDLRPRAAAMGNRTAGYGYENTSNYSNTTLKFTNIQNIHAVRDSYEK  
LCTVCNSISTADVHWNLSIEDTKWLSHIRTILAAASWETAYVHVWRLPILVHC SHGWDR  
SQTVCLSQLLLDSYRTRHGF SVLVEKDFMSFGHPFHLRSAHGEGRS DTKNAQSNVDSQI  
SPVFLQFLDCVYQLVELYPSAFEFNTQYLLDLSFHIIYSCRFGNMLCDTERERESMAAIRQ  
RTYSVWDYLETKPENLNQNYAKADDAIIMPLPTLLRNKVKERHLAYCPKASTIAF  
>comp14114\_c0\_seq3; 406 1 1626 LEN=1707; translated  
VDDPLRAAASPPPAKSPSMAQKVFRELEQDHPLSALS LGNTTKIPLTEPGSTKAAVPPAT  
PSPSMGSTMSNLFQQGSHEMGGVHLNKMHRMGSAGEAAAASGMDTFSKTTSMFASNLA  
SMARQGMHVAAAAAPVQAVSVMGATGTMAGQGGQPPMVSPAMGTGHGVVSGPGGPQAGAGPG  
SNPQGHPLDKEQKIGLLKHKHVGPLKGEQLIMFLTNLLHVSDTSGLSYVATQQQQASQG  
GPVPMWCGVMTYYRLILFSTADRDSPSVRPMAPRGWDPNCWKAATPRIASVNILEMPLA  
SMDRVEKTVYQASGSSYMGLIVHGKDCGRKIQFSTSSYVDTSRAFESLNTYAFPGRRLNG  
YLFAPFESKRQAVQDSIEVDEASGHQGVTLPTPKRFDPMTEFPRLKKTAITQPPWALWA  
AANANYQLSQSYPSVLVGPASLDETKPEALRVIRQCAAFRKAQRLPSMSWCGVGGASIWR  
SSQPKVGLQGNRSPADELYVRHIIESARGASKFSSTRLPARWLARSLGRTCLAAQAIACA  
>comp14115\_c0\_seq1; 497 370 2160 LEN=2365; translated  
MAEASMPGSSSCSSPLPPPLPPPTNLRQQLHRLLLAAWHLFFSFCCIRTSTARTRTVVA  
PGHRERRSAAAKASSMPRLVLALCFLSMYFAAHHQLEGMEEHEMQLHYIKQQQQEQRR  
KYDIIIGSKTGLLSSMEKNVTAQSPSSRSLSHYLTRRTLEKGS DANSSLTLEEARKGEP  
ILAILLEDAGIQTYDASDVVQLPLWSSVVELYYSRHGGRKRDNSISDRTVLEARESTEPEA  
GGPVILGLEGCAAFRERVPAKDRFLGVAGSFNSGTTAFGVSLQKNCRLAEHGAGRNWQES  
LGRGKRRMVVSNANGMLSQVPWAKHKMASYRFNHTLLPPSSTNRRPPIDHNVLPVIVLVR  
DPFYWMQSMCKEYGVWRWDHDSNHHCNLPVNDPDRARFSAGRPPQHGANATTSSVPVWM  
GPNPTVGPSPVSLVHYWNAWYESYYYNDTNNGYTGGLSKNSYKKGEP AIVSPQPNQKW  
PRLIIRFEDTLFYPREVMKVCHCSGGILNSETAIGMEDSSIGAPLQRNKNYEYSLSEAK  
PHHHETPDKNTNFVQAMVQYGTNATFRNMTDDDLRFAIESLNPTLMEAFGYSYGA  
>comp14116\_c0\_seq1; 656 291 3176 LEN=3293; translated  
MRVSSINNRVPGSVSCLTTPCGLEMETVMRIRPLKKERDDVLLLEAQEGDRIVVFNPLD  
PFPLQQQVGS SMCRAFSDSTAECAPKEYRFNHVNLNESTTQDKMFNTLGLSIVHTAMKSL  
KNTVSTQIPKSHLLISMGVENS GKS YTCFGGMTISKRRSSEDGLVPRLLDLSLFSQSAHAG  
GNSNRFTVQVSI MQITQPNGRS GHSNSCQVYDLLANKSSPVKTKMFGKSPMKKKNLNVK  
NIAARFERAIPSPVGRKPKQLCEDTAVLDAENLKPTVQNCRDITHAREVLQ TGLNASQKL  
TTGNKKCHLYITMQPVVDDSKFGDRISILDMA SLEKEDSMQNTRGNGS IASNMNQIASAN  
NAVLNCLRVLTRNAKISNRKVNGGHGIVDHDYSEISSVSRANLSTNDQMKVPVFRHHK  
VTMLMNSIIEQSSFVNVTLLVTAYPGHVDFQOKRNL LNEVEKLGSTLVVHEDAEMARET  
MNLNIGTKVDNRVKQRMNFENKGVTIASAPFEEESSDPHPSSKSNRRKFQSRDSTRKSM  
NVVPGAPRMAKVSVHNPRSTCSSKPIASAIVRTEPVKMSRGINSRVEVISQVPRHEIE  
HLPSSENHMSAETSIQPSASAMA EVQQPRLKSTKMREKVTDFPGVHFSQSAETESRGERY  
PIATRSPRNSRNRKALSVGTEQENSLERRGCKAMLDPPEAKQNF EKL RQEELISPLGR  
SRLENSEYSTTGNQDKIQDHSHEITEKQLNAKELPPNWFETGFTNFDSKPEDKKNPTK  
NLEAKLKKALQEKQALEQICTQLEKENAELKNAVREAGRKALQSKWTQDEEDFQASRRL  
RQEAQSKIKHPIHEHLERVNYIYDIKNQYLMTNKQHFSLSPDFHQRAPILDMRDKNND  
TEFSKFETSEKQRKEETVVKNPAVANRRASLTQARLSPPKRLPPPGLTALRRLTGKTS  
Q  
>comp14117\_c0\_seq1; 715 37 2069 LEN=2147; translated  
MASSILDPNETFSSLAESVGLDNRIRKAVQRLGHIRPTLVQSKCLPLAISSGRDLLVRAK  
TGSGKTLAYCLPLLQKILRSSESNHTPGVRAIVLVPTR ELC SQVFKTLQSLVYYCDEVV  
SLAVLSATRGTGGRGDKAHQELARQKAMLRDPDVI VATPAGLLTHIRNGDVNLKDSMETL  
VVDEADLVLSYGYKDDISEIIRSLPRICQGF LMSATLSPELNSXKKVVLHSPVVLKLEND  
EANKNDGSGHLTQFYQLPRKDKNLVLYVFLKLG LKGGIFFVNSTDMGYRLKLFLEQF  
HIRSSVLNAELPFRSRLNII EQFNVGNFDYLIATDESTDAVDTDDEEDESNDDRDSDSD  
DSDAPQKAKGKKKDD EYGVSRGLDFRNVSVFVNVDFFPSARSYAHRVGRTARGGAKGVAL

SLVEKDSYDQYEVLQAVQDDQPKISNAGAATDTLQSSTAESADASNDTHLNEQSQPSPLD  
FDLREIEGFRYRVEDVSRVATKHSIKEARAAELRAEILNSERLQAHFEDNPNDLQLLRHD  
RLATHASKVQEHLKHIPKYLLPRGMHVADLNRKRKRKRNRGGKQRRSAKDPLQSFSDGDV  
NLDGLEGDDFELPDLGEEGRSEKKQKREEEKKTFMNTHDGTGKSTSGRNAWKEKHRKGF  
SKKTRLADRKNKDPLGI

>comp14117\_c0\_seq3; 770 142 2175 LEN=2253; translated  
MASSILDPNETFSSLAESVGLDNRIRKAVQRLGHIRPTLVQSKCLPLAISSGRDLLVRAK  
TGSGKTLAYCLPLLQKILRSSESNHTPGVRAIVLVPTRRELCSQVFKTLQSLVYYCDEVV  
SLAVLSATRTGGRGDKAHQELARQKAMLRDRPDVIVATPAGLLTHIRNGDVNLKDSMETL  
VVDEADLVLSYGYKDDISEIIRSLPRICQGFMSATLSPELNSLKKVVLHSPVVLKLEND  
EANKNDGSGHLTQFYLLQPRKDKNLVLYVFLKLGLLKGGKGIFFVNSTDMGYRLKLFLEQF  
HIRSSVLNAELPFRSRLNII EQFNVGNFDYLIATDESTDAVDTTDEEDESNDDRDSDSD  
DSDAPQKAKGKKKDDDEYGVSRGLDFRNVSVFVVNVDFPPSARSYAHRVGRRTARGGAKGVAL  
SLVEKDSYDQYEVLQAVQDDQPKISNAGAATDTLQSSTAESADASNDTHLNEQSQPSPLD  
FDLREIEGFRYRVEDVSRVATKHSIKEARAAELRAEILNSERLQAHFEDNPNDLQLLRHD  
RLATHASKVQEHLKHIPKYLLPRGMHVADLNRKRKRKRNRGGKQRRSAKDPLQSFSDGDV  
NLDGLEGDDFELPDLGEEGRSEKKQKREEEKKTFMNTHDGTGKSTSGRNAWKEKHRKGF  
SKKTRLADRKNKDPLGI

>comp14118\_c0\_seq1; 435 204 1349 LEN=1476; translated  
MNPQRTRNVPARRQATPMAVPGTNRCLAPSLSRWLLFVPLVCLCFSRSDAFAPVPPCAPG  
HAVGPGSRSSASRHNNAILVLRASKHKDVPVGHDDYNNNDNDEEEFFTPNRTSSSPGTA  
GDPKTSLSASPGGSNSYNDNYNDSYLDLTPPPVNFARNISILFSEQPSTRVRNNSSLDAW  
RFARNHLPAAVTGAWPWRDQEALEQRPLAALYNAAFVRLPVLGVAASYLYQKTVEGHDLV  
MDFGFDATGATGDPAGGGPGGAGADPAVEFRNGTEWIAMEARADRGEGCDFNPKPGSQTM  
EQRNATQLNGTTIEQRPRPQAVPNERIGNAMQPGGAPVFDIRLEHAFLSQASLATAIPPS  
VLLGFGSKLQGTKRVAATFATT

>comp14118\_c0\_seq2; 395 204 1350 LEN=1692; translated  
MNPQRTRNVPARRQATPMAVPGTNRCLAPSLSRWLLFVPLVCLCFSRSDAFAPVPPCAPG  
HAVGPGSRSSASRHNNAILVLRASKHKDVPVGHDDYNNNDNDEEEFFTPNRTSSSPGTA  
GDPKTSLSASPGGSNSYNDNYNDSYLDLTPPPVNFARNISILFSEQPSTRVRNNSSLDAW  
RFARNHLPAAVTGAWPWRDQEALEQRPLAALYNAAFVRLPVLGVAASYLYQKTVEGHDLV  
MDFGFDATGATGDPAGGGPGGAGADPAVEFRNGTEWIAMEARADRGEGCDFNPKPGSQTM  
EQRNXNATEWNNNRRTTAPTTSKSRKDRQRNATGGSSRFHSSTARHGTSLAVLFDHQV  
IGALRNRDPNVRVESSIERNDW

>comp14119\_c0\_seq1; 387 326 946 LEN=1494; translated  
MAEAAKAKFEKEKSDVLKALPDEIKDVFGTIGFCPEGEDDDDEDSGEKNEATARS DPAEP  
YMQPVLIVSPYDVPPKPIRDIYWDAFTKAKRSKAKLKKLDYLVYVYGSDDPDDCYNFVS  
HEDFVTLEGRASGFDVLPVAVAAKSEERTASEKKLVRAVEALNNDLAKTPEERRKHGA  
SFLEGYEKLKAKEDAKDQPPAKKQKT

>comp14119\_c0\_seq2; 442 111 959 LEN=1157; translated  
MATSEVSKQMKSLVGGVVKRIVGKMAKEKRSRKVIDVSNSLSTTLSKRIVDCGQDLDLT  
LVNTEPEVLRVSPMDTSCVTLISFSDDEPETCYKISVNHAIDQKHEESYHIVVNHSRTA  
KNFDDHHSVGETNDVAQELTNKSATQDMNEALPSSHLEHEMRKNICTENRDSEKNCVIP  
ECVDSSEYECRRPRQDFVFKKDSIFYESL FVASDSEDDDDDEENLLFRRNNNQWFIDGME  
NNFPPKQNTSKPDASDKPCRLLNITLDTAVDDL SFIDDEYSM

>comp14119\_c0\_seq3; 387 326 946 LEN=1520; translated  
MAEAAKAKFEKEKSDVLKALPDEIKDVFGTIGFCPEGEDDDDEDSGEKNEATARS DPAEP  
YMQPVLIVSPYDVPPKPIRDIYWDAFTKAKRSKAKLKKLDYLVYVYGSDDPDDCYNFVS  
HEDFVTLEGRASGFDVLPVAVAAKSEERTASEKKLVRAVEALNNDLAKTPEERRKHGA  
SFLEGYEKLKAKEDAKDQPPAKKQKT

>comp14120\_c0\_seq1; 362 1 1337 LEN=1497; translated  
DNDNDNDNSDASSEASSLPLSTENPNYQQDPPRKP KPKPSLSFIQIDRIDPHGWFHSA  
ILNQGDIVLAINGHPIVEETTIEEANELLLASYGIGAFGTIDVMALNPRKXSGGARRKQQ  
EQEESHLSFFSRGRGRDRFSGRRRDRGAWMRKQAKRASVAIGGAMIGVGLVFHPLGGV  
LLCSGVSVLGTEFEAPNKLKVGARNSLEQWANAPTGGDKGAGAARGGNE SAGEDECADAG  
SFHSHDSGRSGTGASAPLPRCPLSPTARKVEASRLSQTIAFSGESRSDAYRRGKVRSID  
YDTPDLSPLSPHQNRLPATGKNFNHNVTDRMKGFGRRYVLPFLDRMAGDRREVTIDRC  
SMHGGSSRSLMSTSSNSASSLQLQQQQQQRGPDDNNYKNNVNLQHNGDDQERDAPLSL  
SAPIHGTDKPPSRLPMMGWKDGQQV

>comp14120\_c1\_seq1; 368 315 896 LEN=896; translated

MGGGEDDGKPREEDNQSVSIDMIATNHSNGLLRNTPLVEGDVLKTINNKAAGDFLLPGS  
PTGYLRGGCFGEGDRVTFVAERGSNKHREGTSEEEEGNCDSAVLRAFCRATETSSDPAME  
DDEKRLERIGLGFHRVVVEDDADIDENSNDSDHGEEATESTESDEETSSIASENTLIR  
ESERTRTESDSDSD

>comp14120\_c1\_seq2; 368 470 1051 LEN=1051; translated  
MGGGEDDGKPREEDNQSVSIDMIATNHSNGLLRNTPLVEGDVLKTINNKAAGDFLLPGS  
PTGYLRGGCFGEGDRVTFVAERGSNKHREGTSEEEEGNCDSAVLRAFCRATETSSDPAME  
DDEKRLERIGLGFHRVVVEDDADIDENSNDSDHGEEATESTESDEETSSIASENTLIR  
ESERTRTESDSDSD

>comp14120\_c1\_seq3; 237 179 412 LEN=559; minus strand; translated  
MTLSPTSNPSKQIWIQTYSSSSSSSYQFSDSSGYVSEVSVLLLLRIAIAIAIASDVGVG  
VGDWRQRPVLLWDVRGR

>comp14121\_c0\_seq1; 136 64 423 LEN=2308; translated  
MLSCSNHQNFVEIATENELTDFLNKYETDGCVVTF SATWCGPCKACKPQLKGEISRKSPI  
PIGYVYEEEDLPSFLDVFVEIKAFPTFVFRNGREVARVEGTNLGAVEAMIHSQGHRKH

>comp14122\_c0\_seq1; 655 169 2157 LEN=4303; translated  
MSTITSANASLVVALSPVFPTALIVSCAILLDHSFRRESTLNRCQIQIWMWVALALSSST  
LILSSQAAQGANSNANENTGEENDDIETDTQLRVLFLAWGHFTVFFNLLAILAKELQIR  
LILPARSKQLVGNVIRILPVC SWLAMLIVGFRIITNTRNSQQSSQAFFVRLSFQVFFSSFF  
SLWFLQWYHRKRKASVEMQGMPTTGATAAPSDSGECCGLVARFCGMAPAASLSYHYDN  
SDDASRINAHSCWLDERRWYTWTRIQTMQWISQQLSSSSSKRGDHNGLSGTRDDDEELHD  
SILECLAPHYITGDVLDGLSDASQLVTLRVFPFGPARRLADSVARLIERYPKPGSTGDWNT  
IRAEPMGPRHRRCCNSGPEGDGSGSRVPNDHSLDLHDQYNDPEVDRPIKDVRELIADGGS  
QHLQRDQWPSIQRGEYRQHSHPHSYRFPHDAGARRDTTAEQREQLNNTMKQRFGLLEPKL  
RGADFVDVQKGLWRDAEHRGKAPASSASDGILPLHPPASGPTRGALHGGTGGDHAASAAA  
GSPGNAPYRDTPRGPLPIPPDGAAPD TLLDAMPPIQIREIAERRPDLMQTLWKRKQKQAQ  
VPPPRDEARQRGGAGETD GSEGA FDSDEEDEM TSLIERDGNHEHPLRYSIGKSPSTIGG  
IV

>comp14123\_c0\_seq1; 407 214 2163 LEN=3700; translated  
MFGYKYFSTDDDDTTSSNFWGNLTNVYSTQDDFTSSYEKVEDITVDTVLTISIYLNGLVFI  
AIMLLYECLRRLLP SVYSSQIKRQFKMTGGGWKTSETLKSTESFFKTDVCNATHDDSDS  
YLKLN SDGTGSSDL SGLSRDSRFDESSSLRIPKRSRYS LDPVISLNWVFNVL DVPWDVVR  
KHAGLDGYFFLRYVRMNLRI CSVTCIWAFLFLIECYAGGYNNDQQGWYHISVANLRDKSW  
RLWIPTIFAYLFSGFVCFVMKQEYRHFLELRMDFLARGTTFINPQHYSMLMVENIPHEL  
SEKALSDYFESLFPKGVHSTSMVLNLPDLESVATRCMRACRRLEKSIAYYYATGKKATHN  
VGS PRMTILGIDMAPCDKFCCGSGPNVVFYFNRRMAEKPQRGIHVDSISYYTYDLAEMNR  
QMCSMQIKEEIAFEGTDHPEANNWF TKLVVSAYEMADEIMLDSAEDNALRTAYISIGET  
GTPIPQAE LMG EKTIYGT LQGVGISKHSQGS SYVDRPLAKSESDTNLLYGVDDATSCSND  
SVRSKKQEEALGKARSRRQRKLVTPGEEKGILRRWAGRLGLDFVVS GIKFANRQIDNAVD  
GVLIRSNVSSTGFVTFDLT SVTTAASTPLTSKPEILDVCVAPEPKDIIW

>comp14123\_c0\_seq2; 407 214 2163 LEN=3619; translated  
MFGYKYFSTDDDDTTSSNFWGNLTNVYSTQDDFTSSYEKVEDITVDTVLTISIYLNGLVFI  
AIMLLYECLRRLLP SVYSSQIKRQFKMTGGGWKTSETLKSTESFFKTDVCNATHDDSDS  
YLKLN SDGTGSSDL SGLSRDSRFDESSSLRIPKRSRYS LDPVISLNWVFNVL DVPWDVVR  
KHAGLDGYFFLRYVRMNLRI CSVTCIWAFLFLIECYAGGYNNDQQGWYHISVANLRDKSW  
RLWIPTIFAYLFSGFVCFVMKQEYRHFLELRMDFLARGTTFINPQHYSMLMVENIPHEL  
SEKALSDYFESLFPKGVHSTSMVLNLPDLESVATRCMRACRRLEKSIAYYYATGKKATHN  
VGS PRMTILGIDMAPCDKFCCGSGPNVVFYFNRRMAEKPQRGIHVDSISYYTYDLAEMNR  
QMCSMQIKEEIAFEGTDHPEANNWF TKLVVSAYEMADEIMLDSAEDNALRTAYISIGET  
GTPIPQAE LMG EKTIYGT LQGVGISKHSQGS SYVDRPLAKSESDTNLLYGVDDATSCSND  
SVRSKKQEEALGKARSRRQRKLVTPGEEKGILRRWAGRLGLDFVVS GIKFANRQIDNAVD  
GVLIRSNVSSTGFVTFDLT SVTTAASTPLTSKPEILDVCVAPEPKDIIW

>comp14123\_c0\_seq3; 494 214 3132 LEN=3590; translated  
MFGYKYFSTDDDDTTSSNFWGNLTNVYSTQDDFTSSYEKVEDITVDTVLTISIYLNGLVFI  
AIMLLYECLRRLLP SVYSSQIKRQFKMTGGGWKTSETLKSTESFFKTDVCNATHDDSDS  
YLKLN SDGTGSSDL SGLSRDSRFDESSSLRIPKRSRYS LDPVISLNWVFNVL DVPWDVVR  
KHAGLDGYFFLRYVRMNLRI CSVTCIWAFLFLIECYAGGYNNDQQGWYHISVANLRDKSW  
RLWIPTIFAYLFSGFVCFVMKQEYRHFLELRMDFLARGTTFINPQHYSMLMVENIPHEL  
SEKALSDYFESLFPKGVHSTSMVLNLPDLESVATRCMRACRRLEKSIAYYYATGKKATHN  
VGS PRMTILGIDMAPCDKFCCGSGPNVVFYFNRRMAEKPQRGIHVDSISYYTYDLAEMNR

QMCSMQKIKEEIAFEGTDHPEANNWF'TKLVVSAYEMADEIMLDSAEDNALRTAYISIGET  
GTPIPQAELMGEKTIYGTLOQGVGISKHSQSSYVDRPLAKSESDTNLLYGVDATSCSND  
SVRSKKQEEALGKARSRRQRKLVTPGEEKKILRRWAGRLGLDFVVSIGKIFANRQIDNAVD  
GVLIRSNVSSTGFVTFDLTSTVTTAASTPLTSKPEILDVCAPEPKDI IWKNAHISLKSQ  
SRRENNTNLLLVI IGLLWIFPLATI QALAKADYIAKIPGMHWILTAGGGSVVSQFVNGYLP  
VAALLLTMILPLIFEFLLARNYERRKRLSDVQNSMLGRYFYFQVLNLYVSVTAGSVWKS  
L ADI IDHPTSILGLLGESMPFMVGYFVSLLVTKILVGLPMVFLRFGALSKMCLRRMLSPLS  
KLTQRELDEIYSPENILYGWEFPAQIFVIMII FMYVVICPMILPFGTLYFGFSLIVYKKQ  
ILYVYQPVYESGGAMFPGVLQKTVFSLVLGQLTLIGYLFTRKAVFQGLFLFPLPFGTTWI  
MRYFDRHYASKF

>comp14123\_c0\_seq4; 493 214 3509 LEN=3509; translated  
MFGYKYFSTDDTTDSSNFWGNLTNVYSTQDDFTSSYEKVEDITVDTVLTISIYLNGLVFI  
AIMLLYECLRRLPSVYSSQIKRQFKMTGGGWKTSETLTKSTESFFKTDVCNATHDDSDS  
YLKLNSDGTGSSDLSGLSRDSRFDSESSLRIPKRSRYSLPDVISLNWVFNVLDPWDVVR  
KHAGLDGYFFLRYVRMNLRI CSVTCIWAFLFLIECYAGGYNNDQQGWYHISVANLRDKSW  
RLWIPTIFAYLFSGFVCFVMKQFYRHFLELRMDFLARGTTFINPQHHSYLMVENIPHEL  
SEKALSDYFESLFPKGVHSTSMVLNLPDLESVATRCMRACRRLEKSIAYYYATGKKATHN  
VGSPRMTILGIDMAPCDKFCGSGPNVYFDNRRMAEKPQRGIHVDSISYYTYDLAEMNR  
QMCSMQKIKEEIAFEGTDHPEANNWF'TKLVVSAYEMADEIMLDSAEDNALRTAYISIGET  
GTPIPQAELMGEKTIYGTLOQGVGISKHSQSSYVDRPLAKSESDTNLLYGVDATSCSND  
SVRSKKQEEALGKARSRRQRKLVTPGEEKKILRRWAGRLGLDFVVSIGKIFANRQIDNAVD  
GVLIRSNVSSTGFVTFDLTSTVTTAASTPLTSKPEILDVCAPEPKDI IWKNAHISLKSQ  
SRRENNTNLLLVI IGLLWIFPLATI QALAKADYIAKIPGMHWILTAGGGSVVSQFVNGYLP  
VAALLLTMILPLIFEFLLARNYERRKRLSDVQNSMLGRYFYFQVLNLYVSVTAGSVWKS  
L ADI IDHPTSILGLLGESMPFMVGYFVSLLVTKILVGLPMVFLRFGALSKMCLRRMLSPLS  
KLTQRELDEIYSPENILYGWEFPAQIFVIMII FMYVVICPMILPFGTLYFGFSLIVYKKQ  
ILYVYQPVYESGGAMFPGVLQKTVFSLVLGQLTLIGYLFTRKAVFQGLFLFPLPFGTTWI  
MRYFDRHYAKSSTKLSLERAREYDRVSEWLAANKIQRNSEKNYQGTSTFGESHAKAEYRYG  
IEGRRVQFQKDSYRQPVLRQPMPNPKSYRRDQDPETELCIKRLQELTVRHSSMSETHES  
MSIVAGSDDSGHNSHSHVV

>comp14124\_c0\_seq2; 1080 250 2688 LEN=3024; translated  
MKFSTAALTLGLATAATAFVGP SKLYAPHKIGNVRTSTTFKAATLDAETA AVNGADTGNP  
MRPPINMKWNQVATQLEDAGYSTAEVQAYADDMEGDKDKLLNLYKAMQMARGFENACNQ  
QYMQGKIRGFMHLNDNGQESVPGLLDYAIKQTDKKSYYREHTHAIASGVDAGAVMAELFM  
KDTGTCRGAGGSMHIFDREQYFQGGWALVCEQLPYAAGAAKSILLDRTLGVSDSDSYQKQ  
NVAPPADDDRIAVVVFVGGGAQNGRTAELLNSAAKDNLPILLVLDNGRAINTFTGDI AQ  
NPNVYEQGKHYGIPGLLV DGNP ADVAKGGKAVIDYIRSGKGPAILQVHTYRFNGHSPAD  
PEHERGRKDEKAWARQEQDPLKSFEAKYTGVSFTTEDELKDAKKE IMAQVKEAVKFADDS  
P MPPVELAKELEFPDAPD TDY NLREGPAFADEVNARTISPEKMQNVQDHIASLVAKAEAGD  
ISIGDAINLAIHEEMLRDPSTTIHAEDLQAGSSYDIPKLTQQT YGQMRAADEI IDEGHFI  
GKALGEGLN GYRPIVELMNTNFGIYGMAELSSAGNTYATTGGKFDMPMTIIGAGGTAPNQ  
SLGAEHSQPFHAYVMGIPGLKIATAASPAAAYGITKSMIRDNGPCFLFAPVKMMKEAKGP  
VDL GKCMPLNKSAVLHKASDEVCAAGNAVTVLTYLHG VKESLASIEAIQEEGFDIDLIEL  
RSLKPLDMDTIRESLERTNKLCILDESTKSGGVGATISAQVSEELFDLLDSPVKRLC MDD  
APVPYASSMEVAVVKRGS DLIEGVFDLCTGKW

>comp14125\_c0\_seq1; 385 108 1502 LEN=1593; translated  
MAYFALKLLLLLTSTTITVQGLSSAPQRHEIIRSGHVRSRRSPSELNLFGRSMGGEGGD  
SDGDRNENDGSSNTGRYGNRRGMLRKDVKKLESGFD TNPSKTEARHAWKKKKYQAGRD  
YPSFLKSAIYRYRGLKQKIRYLFYRNTVYVLECEKDYVVGSTNNRKRRYREHFEFSRGG  
SKWTRMHRPIRVVAEYKRI PSRYLMGMESQKTAETMIEHG VNNVRGGPYCYGRNFTTSDL  
SSLTAF LGHYNQLDYKELRSQELRKVLPRDPTEFSFPPPARNNYGAKSSYRSKSYTTQPK  
GNAMGSDDNNTESPRPKRSRQKLRRLK KQRASRKANSKCYKCGQTGHWAYECPNDPAT  
SPENRKTSPAKVSPGSSAGNDETSFEDSIDQVVSAS YRDVPLSKPSIEDPNTTVPEGSP  
QSD EDKLFNETVDQFFRSAS IPTTSNGDNNTNGVDDSKNRHSE

>comp14126\_c0\_seq1; 863 119 2155 LEN=2305; translated  
MPLTPRFSLRQTQKHVFKISVPSFRLTTRSAGGDADDDYGCPSNGGMEVALTGENNSEF  
HFYAKPYLLKLDFFPRGFLDEDEGGPRTNDNDGDGDGDDNDNDTRATKEEPTTARYDPS  
EQTIVVPLRKKPPSTK GIDGDDQNHWPDL ELTARLLEAREVPKQWLHSVVDSTVPTD  
TTASDEDLEDDAEDVNDNTGDDNNAIASCYDGYGFNMFRNVLAEYCRSGLAEEMLPQLM  
MGKESIDPERSTIQORRIARIEHELSCFD FERYLGDLELGNENDDYLYTMVKDYVPWWR

TKIGTPNRVGSAMTLKATSTTTTTTESSSPSSLI EEMDNMAIHDADNKRQSSPTTTTDTKS  
SSIFTESEKLLLSTIPYPLLAKHLAHYRLWCGALELVLAYVYDHLTTMGDPSVESPWTVS  
VLSCQLSWLDDHSAAGDDGGSSSGIAGTVRSTVATFLRRVLFVFPYWRNADDVGFVRET  
HTLLTTHRTRGCVKALLGIRTALDQSEVHYLGNKLFVDPYLYWVQVQAGKDDGLDAILSEL  
RELVDDEDFAKLLTGVEESLIGIDAMMI EYFGEESSDDGSEDAYTSCGSSEEDDGSDNESD  
SDDNGDDTEHQRYHSAEQISVASVRQLLDDQVGDEVSASPAASFSSLLVTAPTDDGNQEQ  
QARQQQDNTRNRPLIQEL

>comp14127\_c0\_seq1; 451 356 1699 LEN=1825; translated  
MKWKVGQTVMVQSRTWANINKPGGCARITKIHTAE EESSYVEGLDVKYVVDGRKEKSLDP  
AIVTPYEHLERGGRRGRDFLMKREEDALLEEQKAPQRNKAPAKQAAPPANAQGMARAG  
KENRSSPQSSPTCSTPERPPKPAKKPKQVTPIPKMITGRKIDDV SPLIEDLPSLRRPHT  
KAKSDKKA EKKPVARGLVFDASEPRNPGAKESLPPKNAHAASASVSHANKPRLPGTKEC  
GKIDTVLSRPGSALMDKKAAGFVLKPPRKVPPSSTHSTDNPNRCRSNHKTTTTKAVPPKS  
HPLGTIGTKPRPHYKPATASF SRVTSAYDTKNKAETNRKPLLDVYRAEVQKAREFMDVM  
GHRSDRDNQKGGFFSTTKSRYDEF LSHLYKVIKIDEEEVSEEEFREVYNTIAPNSFTSE  
ELDRHVQRMCDGKEVMKSDGMLYRIH

>comp14127\_c0\_seq2; 202 634 1935 LEN=2061; translated  
AVPSINKPGGCARITKIHTAE EESSYVEGLDVKYVVDGRKEKSLDPAIVTPYEHLERGGRR  
KRRGRDFLMKREEDALLEEQKAPQRNKAPAKQAAPPANAQGMARAGKENRSSPQSSPTCS  
TPERPPKPAKKPKQVTPIPKMITGRKIDDV SPLIEDLPSLRRPHTKAKSDKKA EKKPVA  
RGLVFDASEPRNPGAKESLPPKNAHAASASVSHANKPRLPGTKECGKIDTVLSRPGSAL  
MDKKAAGFVLKPPRKVPPSSTHSTDNPNRCRSNHKTTTTKAVPPKSHPLGTIGTKPRPHY  
KPATASF SRVTSAYDTKNKAETNRKPLLDVYRAEVQKAREFMDVMGHRSDRDNQKGGFF  
STTKSRYDEF LSHLYKVIKIDEEEVSEEEFREVYNTIAPNSFTSEELDRHVQRMCDGK  
EVMKSDGMLYRIH

>comp14128\_c0\_seq1; 731 179 2714 LEN=3135; translated  
MASTSLLLSATLTD AWPGLSLLRFGRGPRLRPVPTNLCVLAGRPRKSSSPQMPEDFDNDF  
DNDGKVTRQKQELRSMLEQH HFEESTSSTMASTTFTEDIYHKKLDADSPTPQH FSPDPLE  
NNNNKESYNNENNNSSNKNFLQVPQLSIPTRIAKPGLGLEH HNRAMKSLVHERFGRNPGQ  
QQPRKPENKDIDNADSKSRLVSKKPEWKRL EEHKADIDKIHRLDLLMEEERSEAMYAEHD  
GVYLD FSRQRATSETMKLLQDLAKTQRLEERI QDMVTGKKINFTEKRAVLHTALRADRSE  
EIMVDGVNVVDEVHQVLDQIKHFTQGV RNGEILGYTGKIRNII SVGIGGSYLGPEFLHE  
VLKTEPEGINSALGYNLRF LANVDPIDVERTCADLDPEETLIVVSKTFTTTAETMLNARA  
MRQWLWDFMGNDKEVVKKHIVACASVSSIDKVK EFGIDTENYFFRFWDVWGGGRYSVCSAV  
GAVPISL MYGFDLFEQFLKVRKLVMSGNEMASSVXPSFCTQMKITLICRLLLF CXEQGAQ  
SVDEHFKTTPMEKNIPVIMG LLG VWNH SFLGYKTRTTL PYAEALLR LPSHIQQLDMESNG  
KVMTKHGVEVDY NVGEIDFGEPGTNGQHSFFQLLHMGQTAPCDFIGFCQSQHDLCLDNES  
LSSHDEL MANFFAQP DALANGKTEDEARAEGIEEELIPHRVFKGNRPSMSLLMPKLTAYA  
AGQLLAIYEHRTAVQGF IWDINSFDQWGV ELGKKLANDVKDQLIKARKNTGNENHVVKSS  
NPASSRMLNYYVKNSPANTCFAGDVHGIDETPITYITR KTHQDHARATSVAPPTGHDLGG  
NQGLL

>comp14128\_c0\_seq3; 818 179 2602 LEN=3023; translated  
MASTSLLLSATLTD AWPGLSLLRFGRGPRLRPVPTNLCVLAGRPRKSSSPQMPEDFDNDF  
DNDGKVTRQKQELRSMLEQH HFEESTSSTMASTTFTEDIYHKKLDADSPTPQH FSPDPLE  
NNNNKESYNNENNNSSNKNFLQVPQLSIPTRIAKPGLGLEH HNRAMKSLVHERFGRNPGQ  
QQPRKPENKDIDNADSKSRLVSKKPEWKRL EEHKADIDKIHRLDLLMEEERSEAMYAEHD  
GVYLD FSRQRATSETMKLLQDLAKTQRLEERI QDMVTGKKINFTEKRAVLHTALRADRSE  
EIMVDGVNVVDEVHQVLDQIKHFTQGV RNGEILGYTGKIRNII SVGIGGSYLGPEFLHE  
VLKTEPEGINSALGYNLRF LANVDPIDVERTCADLDPEETLIVVSKTFTTTAETMLNARA  
MRQWLWDFMGNDKEVVKKHIVACASVSSIDKVK EFGIDTENYFFRFWDVWGGGRYSVCSAV  
GAVPISL MYGFDLFEQFLKGAQSVDEHFKTTPMEKNIPVIMG LLG VWNH SFLGYKTRTTL  
PYAEALLR LPSHIQQLDMESNGKVMTKHGVEVDY NVGEIDFGEPGTNGQHSFFQLLHMGQ  
TAPCDFIGFCQSQHDLCLDNESLSSHDEL MANFFAQP DALANGKTEDEARAEGIEEELIP  
HRVFKGNRPSMSLLMPKLTAYAAGQLLAIYEHRTAVQGF IWDINSFDQWGV ELGKKLAND  
VKDQLIKARKNTGNENHVVKSSNPASSRMLNYYVKNSPANTCFAGDVHGIDETPITYITR  
KTHQDHARATSVAPPTGHDLGGNQGLL

>comp14128\_c0\_seq4; 812 668 3130 LEN=3551; translated  
MTRKITHLDLFLVCLLNSLLLSATLTD AWPGLSLLRFGRGPRLRPVPTNLCVLAGRPRKS  
SSPQMPEDFDNDFDNDGKVTRQKQELRSMLEQH HFEESTSSTMASTTFTEDIYHKKLDAD  
SPTPQH FSPDPLENNNNKESYNNENNNSSNKNFLQVPQLSIPTRIAKPGLGLEH HNRAMK

SLVHERFGRNPGQQQPRKPENKIDIDNADSKSRLVSKKPEWKRLEEKKADIDKIHLRDLML  
EERSEAMYAEHDGVYLDLDFSRQRATSETMKLLQDLAKTQRLEERIQDMVTGKKINFTEKR  
AVLHTALRADRSEEIMVDGVNVVDEHVVLDQIKHFTQGVNNGEILGYTGKRIRNIISVG  
IGGSYLGPEFLHEVLKTEPEGINLSALGYNLRFLANVDPIDVERTCADLDPEETLIVVSK  
TFTTAETMLNARAMRQWLWDFMGNDKEVVKKHIVACASVSSIDKVKEFGIDTENYFFRFW  
DWVGGRYSVCSAVGAVPISLMYGFDFEQFLKGAQSVDEHFKTTPMEKNIPVIMGLLGVW  
NHSFLGYKTRTTLPYAEALLRRLPSHIQQLDMESNGKVMTKHGVEVDYVGEIDFGEPTN  
GQHSFFQLLHMGTAPCDFIGFCQSQHDLCLDNESLSSHDELMAFFAQPDALANGKTED  
EARAEGIEEELIPHRVFKGNRPSMSLLMPKLTAYAAGQLLAIYEHRTAVQGFIDWINSFD  
QWGVLELGGKLANDVKDQLIKARKNTGNENHVVKSSNPASSRMLNYYVKNSPANCFAGDV  
HGIDETPITYITRKTTHQDHARATSVAPPTGHDLGGNQGGLL

>comp14128\_c0\_seq5; 725 668 3242 LEN=3663; translated  
MTRKITHLDFLVLCLLNSLLSATLTDASPGSLLRFGRGPRLRPVPTNLCVLAGRPRKS  
SSPQMPEDFDNDFDNDGKVTQRKQELRSMLEQHHFEESTSSTMASTTFTEDIYHKKLDAD  
SPTPQHFSPLDLENNNNKNESYNNENNNSSNKNFLQVPQLSIPTRIAKPGLGLEHHNRAMK  
SLVHERFGRNPGQQQPRKPENKIDIDNADSKSRLVSKKPEWKRLEEKKADIDKIHLRDLML  
EERSEAMYAEHDGVYLDLDFSRQRATSETMKLLQDLAKTQRLEERIQDMVTGKKINFTEKR  
AVLHTALRADRSEEIMVDGVNVVDEHVVLDQIKHFTQGVNNGEILGYTGKRIRNIISVG  
IGGSYLGPEFLHEVLKTEPEGINLSALGYNLRFLANVDPIDVERTCADLDPEETLIVVSK  
TFTTAETMLNARAMRQWLWDFMGNDKEVVKKHIVACASVSSIDKVKEFGIDTENYFFRFW  
DWVGGRYSVCSAVGAVPISLMYGFDFEQFLKVRKLVMSGNEMASSVXPSFCTQMKITLI  
CRLLLFCXEQGAQSVDEHFKTTPMEKNIPVIMGLLGVWNHSFLGYKTRTTLPYAEALLRRL  
PSHIQQLDMESNGKVMTKHGVEVDYVGEIDFGEPTNGQHSFFQLLHMGTAPCDFIGFC  
CQSQHDLCLDNESLSSHDELMAFFAQPDALANGKTEDEARAEGIEEELIPHRVFKGNR  
SMSLLMPKLTAYAAGQLLAIYEHRTAVQGFIDWINSFDQWGVLELGGKLANDVKDQLIKAR  
KNTGNENHVVKSSNPASSRMLNYYVKNSPANCFAGDVHGDIDETPITYITRKTTHQDHARA  
TSVAPPTGHDLGGNQGGLL

>comp14129\_c0\_seq1; 205 1 1325 LEN=1522; translated  
XNQNAQKTNLIVETSANSEARTEMHFPLRLLISVLLPTASSFATGSKHLLKCRSEQDC  
RDTKLALSVQDVAHDIGVSVPALQAGIPGYLLYPSVFAACFRIGAAIAVIGQPRLPSSDN  
DGYRVGSRVRLPRLKSRVRLFYPCSDQGTGTAATEGRYCTDGRETSDGMAGLVGFRQI  
GLSFLLAHLADAPSGCCEDPSGTGGPSIRDGAGYPLLVSYSHGYGGNMDMSTYFLRGLARK  
GFVVAAVEHTDGTASSTRLSGTRLGFDPRRSSLRDGLRLRSEELLEAVDYLPVLFPSI  
GRVFLGGHSYGAPSALLASQKRPGGISGLVLHDPALGMGSGSLSPPAVPAVSYSVDEYH  
RAGIACGDATYHVRGAFHGNFVDAPLWAPLWIMRTLSLVIPACGPADPEKVHEQLAESAI  
AFAADPSGREGVDRGLFERVV

>comp14130\_c0\_seq1; 506 1 1657 LEN=1871; translated  
XTGSRHKLVPVQQTDEVEYQSHSSIVNFNFKIPPAKVITNNELEDMALIPLSSRPCRAV  
VNKTAVFAKKRLPPIISWCGISRCNTSFRNRYFSYSGKSPSDGEEKHAKKYSYNHQPIQK  
STSLKRAEWEKNRQRKHHQYLQRKKHADAGPSLIQSSQYTYKIRCGKDAASTPDSSCASQN  
TEGNNAASTVMKSMNASALLDPLKYCKGSGKLIANVNNGGRTINGADAARRLSRGKKDFL  
SAARELDGPVVLDDHGVVPPALFQHCADMAALLRYYGPDVVECSFHNYHSTENNTSSSGK  
TPLHVRVRRRDGTNSCLPPPSISERNRDGKNHGI EGREMNRIDWDYNLTLYLTVMERLAK  
NLGQVLELSTTRNDGGQTPVQKESLSLGGNTCVDADSSDENDGEDGDDDFVDSPVFGAL  
PKPRWNVDILRGAYFDFQPNENGASSTITNDMERWEQKRKATKNPNDDKGEKGHNHTI  
DGIRPFVVEFVQQSSRSNGNVLIRLQGCPLPNEEFGDARLQRLGEHLQQPVTLVFDAC  
FQAPLREKAQVH

>comp14131\_c0\_seq1; 546 249 1667 LEN=1804; translated  
MLSIQTLRRNAENHRRLLLLLDRSNRGDATREMNRCDRAIGGVHRGGRRWRSASASTATG  
TNLHAATGDPSSQRTRRRPLSSATGASAKNDDNNATATVKTEKTAPSKASSYLQLGKAKL  
SGLVVTTSLAGFVAAGGPLYEQAPLAASCVAGTALCSFSAAALNQIYERDKDARMKRTRQ  
RPLVTGALTVDEAKRAAVWGIIGTTLAVGTDPVTTLLGLTNIIGLYAGIYTYMKPRSVY  
NTWVGAVVGAIPVVMGWAATSGNLLDLDAIILGSTLYYQQLPHFFALNYMYRVVYERGG  
FCMLSSHEVDGERTSAVILRNAAYLSAIPFLSTAAGVTSMFALEGIALNSYALWVAYRF  
RQERTNTNARKVFLTSLWYLPVWLVFLHLSKVWDEDHDQDVLRAVSDVVHRVRDEGRK  
ICLHEQVLLDHSTTDAVANENACPVTLTKKAPAMIQSTASSAMKECETKEVL

>comp14131\_c0\_seq2; 434 249 1760 LEN=1897; translated  
MLSIQTLRRNAENHRRLLLLLDRSNRGDATREMNRCDRAIGGVHRGGRRWRSASASTATG  
TNLHAATGDPSSQRTRRRPLSSATGASAKNDDNNATATVKTEKTAPSKASSYLQLGKAKL  
SGLVVTTSLAGFVAAGGPLYEQAPLAASCVAGTALCSFSAAALNQIYERDKDARMKRTRQ

RPLVTGALTVDEAKRAAAVWGIGGTTLLAVGTDVPTLLGLTNIIGLYAGIYTYXEAAVGI  
QHLVGSIQFYRNKVYATTSSSPDHIALFSSQLQRVGAVVGAIPPVMGWTAATSGNLLDLD  
AIIILGSTLYYWQLPHFFALNYMYRVVDYERGGFCMLSSHEVDGERTSAVILRNAAYLSAIP  
FLSTAAGVTSSMFALEGIALNSYALWVAYRFRQERTNTNARKVFLTSLWYLP SWLVLFLL  
HSKVWDEDHDQDVL RDAVSDV VHRVRDEGRKICLHEQVLLDHSTTDAVANENACPVTLTK  
KAPAMIQSTASSAMKECETKEVL

>comp14132\_c0\_seq1; 329 282 1544 LEN=1708; translated  
MARAVTSAKMERMFAKPLVGNFNGHQDAVYHTAISRKSLPLLSGCADGTIKLWDMPTR  
TCVSQNLNAHKQAVKGI AFGLDQDFYSCSQDGSVRRFSIPEVLSKNSSNEVSNLNGGFVDT  
WRTNGSFQSIDHQWNTERQFVTASDSAVQLWTPERSAPIQSHDDLWGSADTVNVVRFHPS  
EQQIIANCSMDRGVGLHDLRTASAMKKTVLRMRSNLQWNPM EPLNFV VV ANEDFNCYTFD  
MRNLSQPTHYKGHNTAVISVNWAPTGREFVTGSDYRTIRIFNLRRNGYARDVYHTKRM  
QRVFTVNYTMDNTYIISGSDDTNVLWKARSNEKLGQLTPREESAMQYRQALVKKYQHLP  
TVKKIHRSRKIPKTIRKQTNQAI IQKESAERKQANRIKHSKPGTYSFKSERKKIVQKEID

>comp14134\_c0\_seq1; 391 162 1061 LEN=1662; translated  
MDGINDEDEDNGNYDDTIVAIAIGTHSDMDMDDDGSDIDAALDDMLANPDEVDREETWLRR  
CVGDLPEDEMGVDS PRFASLPAGVQIKLVLELRDREKATLLENLRECGSRVEKLLKQQLYAS  
EDRRMELEHDLDTENQEI AEMKREFQGMKVTFN AHVSETQRIRKELLVQRDRLSRTIEVQ  
KQQEQPTQAVEEQHLSSADSTGGPDSISAIGLPQLIDNQGASRTKSKIAIEFERKLETN  
PRYREEFERFKEFQDYQEMKQNLDPKDVNTKNLNEDYRKMLEFQLGYERLLFTNNQTT

>comp14134\_c0\_seq2; 391 162 1061 LEN=1684; translated  
MDGINDEDEDNGNYDDTIVAIAIGTHSDMDMDDDGSDIDAALDDMLANPDEVDREETWLRR  
CVGDLPEDEMGVDS PRFASLPAGVQIKLVLELRDREKATLLENLRECGSRVEKLLKQQLYAS  
EDRRMELEHDLDTENQEI AEMKREFQGMKVTFN AHVSETQRIRKELLVQRDRLSRTIEVQ  
KQQEQPTQAVEEQHLSSADSTGGPDSISAIGLPQLIDNQGASRTKSKIAIEFERKLETN  
PRYREEFERFKEFQDYQEMKQNLDPKDVNTKNLNEDYRKMLEFQLGYERLLFTNNQTT

>comp14135\_c0\_seq1; 948 289 2304 LEN=2346; translated  
MEYFRKVSVLAALFIAVASTASAFVPRANKLSNACGASSGMFMSAVAESSDTASVAKTID  
NIRNIAVIAHVDHGKTTLV DALIRQSGVFRDENQADEAGERVM DSEDQERERGITILSKN  
LAVQRDGVKINIMDTPGHADFGGEVERVLNMCDGVILLVDSVEGPKPQTRFVLDKALSKG  
MKALVVVNKVD RPAARVDYVVDN VFDL FVDLGATDEQ TDFRVVYASGLQ GKAGDDPEELA  
DDMGPLFD AILESIDAPTVEKSEPEALQALISNIDFDPFKGKMG IARITNGSVKAGQPIA  
LVHPDKDKRTGKINELYVFDNLGKTAVEEAAAGEIIMFTGVDGVEIGDTLVTNENAGLNA  
AEPLPEIAVEQPTVRMTIGVNKSPLAGREGKFLTSRMIRDRLFKELDNRNALNVAETNSA  
DRYEVSGRQGLHLTVLIETMRREGFELEVGPPTVIFKTNEDTGKEEPPWESVEVRVPEEY  
NGAVIDLLNTRK GELQDMGLEESSGMSVVKYLVPTRGMLGLRSALLSSTRGTALIDSVFD  
SYRPKISGDIQARDQGSLLAFADGATTFGIEGAQSRGKMFVSVGDDVYKGMIIGINQRP  
GDLEVNICKTKALNNMRAASKDKNAGIVTPIEMSLDSCVEYLA VDEILEVTPSLFRMSKN  
PEMAKKGKGGK

>comp14136\_c0\_seq1; 164 880 1260 LEN=2187; minus strand; translated  
MPVPQSQNAPLWHGHTVKHEGWEEYIYFYAAAGLALQAAVLLGAPETSIESWARSEAKAR  
LYLASEEGGAQTEFAFGTHYQDLVKKQHEDLWTKFNEKSIIPHLYIYLTRLGSRCILVFD  
EKDEEE

>comp14136\_c0\_seq3; 248 880 1254 LEN=2368; minus strand; translated  
MPVPQSQNAPLWHGHTVKHEGWEEYIYFYAAAGLALQAAVLLGAPETSIESWARSEAKAR  
LYLASEEGGAQTEFAFGTHYQDLVKKQHEDLWTKFNEKSIIPGEDDDDDDDDEDDDEDDDD  
EVRFW

>comp14137\_c0\_seq1; 1066 29 1561 LEN=1768; translated  
MVSFNAAAALVLLASTSMSSAADSRRLSFERIANYPDSQVTDHNAIDLQAAAMEEQLA  
LGTPESEYENALKIYSEGGNSKVAEVTLAAPLTA AVPKGTPIMGTNSNGNQVAGKAYEDN  
AAGATTFAVQYQTSDSQKNYVGCQV GALVSTNTDGCFAASGTL SIDGTDAAAYTYDIATDN  
VAKRSIAGFSTSAQKKMAECANCPYKFYEQFYNYGAYDIANQIVLAAFAGNKANLNNFD  
NDYSLYGNAGNEQIIKKGTA YMVIWYVIREMEDALDDCKEECTIENCNDPVHAWDEAV  
AFYTG TLEGEDGSGSGLAYALADKRCANFKTCGEFGDETTGTSSVNTMMFDL FNKGQAL  
IKNGKCSEARPIKEIEELMLIPLIQGTLRYAWKQDNEDYSEKSEAEGAI FAASVLP LVA  
GCNSSAAATIADNMKVGNQGTDFAAVKKAFESTYECMGVPGHMVGGLYDSATGDYYAGA  
EPVGGASSSSSVSTMVAAGVAAATSMFLFL

>comp14138\_c0\_seq2; 151 1 468 LEN=1172; translated  
NSSSNGKPHHSKLRSRNASRSSSQASGVGDLEAGGSFGSDGDDNDSDEEIRAKIEEAS  
KSLRRFVTVCMGTLDDMIVFSAFVAGGAGSAGGKHHHKHSNLALFIGTTLAALLIVTIS



WFFSEIDCFKRAVKKIPMWALLSGIAVYILAMGLL  
>comp14138\_c0\_seq3; 151 1 468 LEN=1191; translated  
NSSSNGKPHHSLKRSRNASRSSSQASGVGDLEAGGSFGSDGDDNDSDEEIRAKIEEAS  
KSLRRFVTVCMGTLDDMIVFSAFVAGGAGSAGGKHHKHSNLALFIGTTLAALLIVTIS  
WFFSEIDCFKRAVKKIPMWALLSGIAVYILAMGLL  
>comp14139\_c0\_seq1; 594 63 3092 LEN=3358; translated  
MVIGFLTLEKRVIVMSKRPSLVLDVCECARALLFPFELVAPYVPRLTEPFMSCLEFPGAI  
FAGIHDDGTPDGLAAIVRGQMPEDSTIIDLDSENVDCSGDRMAILNNSWGVLPFGPRSVL  
VTEIETLCRDASIVPGQEPLDGVLDPSFAASAPTSMVQDDLILSNEDKEPLDDRAVRDAF  
LRFFCSILVGYERFLVVPDVFLLISGNEWFDAGKFLDAASEDKAVFLGSLVSTQLFQSF  
QRRTEASDVHLLLFDECLQEYHSSPVPYGRLLGGDVETVVSKEGKSHMLYSLLDVQAAEE  
ARSAVSVVRSFDGDSGVQGSADNSSGYNVKNKSVATEVAESLVKYSEFGINPIGDWVTL  
SRQDIPKDACFTYCVDGNPTFPDKLNQCFYVPRQPESWLVEMSTSSTPMLTRSGPEKDEA  
ERRRRFSTSYRGLHSQRRCLWQLPKLMGSHFLGSWLLCIPTLVSQPNISNERQSRHLLRA  
FGALRLLRSRQKIIPDEAAAYRALIVACGRTKNDRRAELVKLFGHLRSDFGIFPSAVTLGQY  
TRALAEGYSKRAVGIADDDTHVGGFEMTESTCGDLPLGPRKNCEAILNSLDESATLEES  
GRRWRQKTNNSKNNDTI IENPSSLDLKASDRPRSRNNSKYWLPVLLSSSFI EAKVDES  
KGISNNVGDVQLTAIWSRTVACKECGYIPFEEEVQGGWDTIQGGEHDFPGAVSCARCGFL  
LTPKLAYKNISLHEAIQHPQNTTEGLPPQIRPTIDENDDVSLVPYICPSSLREKLEQVVD  
EHGEQILDREKLRKNYPDIFYNFWWYCARFQLPLPLAVSANDGGDSRHCCAIVSWDRQVA  
MRGCYSAAKILLDALPSEDGQAPGSGESIESIDDFPLLSKFNLSGYYSNVWDHPELSEIL  
VALVQACDKRDFRPVSVLRRRGDIDCYRTILYLAKYQCTSAFHAFPPATLKPCKGYHF  
WCPMVPLPIFDRLFREAVKVRANNTGIPPIHEVQEVPLAFRSVFGHLM  
>comp14140\_c0\_seq3; 522 213 2498 LEN=2624; translated  
MNIISRPLRLLASQMDGITRCCPMSSRVRNGPKRAMAYSLSVSCASSQTIRRGFAVDS  
QSNERQPQTRHGGNGAIGLFSIPGLIHPCDFQRLTKEAIQESDRLRDNI PNISIESTS  
QARATLYELDQISRTVCNVIDAAELCRSAHADPEWRDAANRSFLELQNYIATLNADQGLY  
HALVLVEDGYFDAMSEEEERFCFLKREFELSGIHLPPDDQREHVKQLHNTVTTLET  
LTFANNITNAHKEFSIDADLVEAVIPRHVLEANGAVYGEARGEKQQVRLAAVSSISHS  
ITNYAASGSLRKEVYMETKTSCPENIDVLDAMIDARHQLARTLDFESYSHRFLQDKMAQ  
SPDAVSGFLHDLQKRIEPAYQQEMEILSRAKQQFEGNPEIEPWDVNFYTKALKAQGGV  
DPGALAPFLSLSNCLRAMKLLTKTLFGIRMEEMELED AERWDAITDGNNGNTSAAPAH  
REEEIRKFI VSEETGRELGTMYLDLHPRPGKYTHAAHFTVRCGCLENGPDSSYQKP  
IVALVCNMNTGEASFSSHQEVETFFHEFGHAMHSLLSRTNFQHMSGTRAAMDFVET  
PSHWMEHYAWCEQFLPLLATNTDGEPLPESLVKALNQSRNQFRFIEMQKQIVLSNF  
DQTI FGPQESSNSQRLPTKDVWAAMHRQSGVPFAEGTHWYTNIGHFVTYGAGY  
GYLYSQVFADAIWNE LFRKQSLNRSSGERIWKMLIHGGARDANIMLEDLLGHKPT  
VDHYWKS LVSIREKEG >comp14141\_c0\_seq1; 668 54 1976 LEN=2438; translated  
MPKKEKQRSFRFRFEIVPMPSPCYTVERHGREENDWDNSNREQNEEGSWDGVSTAALL  
GEPVGTVARDKGREQAGEEEKDHGEDNKQGGDNGNGNEDKDENS DARDVVERRDKIQAP  
VGEAVRNDNEIDNEIDNDPRVPMASVLEEVRRTDNII LVS EIGKNELVLYLNHILVA  
EASTSELGVGGIVEWK FESDKVFFYAMEIFQANVIHFLRSRYFDLERGRYRPRETRD  
GAGGNRHGGV GKAANGP GNGSATPAYPQHPHSTSEHNSKPE SCYWGEEQICEDFRK  
VFRASASRYFPNKRAVVEYCFKDERMGNAPQANQNECGNSNCYSK PQSQAHRRQQAQ  
QEHPRRLPPSFSMSVRRALVRLHRRAGIYLPNPKPSTTAAALGKNDS DSDCEYWLAL  
WVVCSSLWVWILGPCL EILHHCHEKPLRQKEFRKRQGEDRLCHARDTESDSGELLG  
GSRKRRKRTALSSGFAKQSR TLARIHLYLLQRELKRLGLPFDTVLMHGGPYDGGEG  
SDYGDSENEDEGDNADYGGDCDGRCSGPTTREASAPCTEITDDDDSSERRDRQRE  
AARGNDTDRGRREIPEHKEERDEGQGPPEQDQEERNEPFGTDRGGGNTDGASRV  
WLSEQLIGETVPV >comp14142\_c0\_seq1; 540 232 1671 LEN=2166; translated  
MSVQSSSSTSIDGCSMEERLARERERLRVAQKRLNLQKERLVL DREM LEADKKNFRKTA  
KLASKRNSMWSQGLANAAAGNAERDTTRQVELGRDVETLRSQIQSYREKEEQWEQRD  
KEQTKNLAAAEVAVIESSRQLNLKILNLERDLKATKDELVVSTETHAKEKERWENG  
ILEFVKSDSSADEEIQRLNLLVDKFELENKLLKDANRSNQDVSETLSISFSALE  
GNAEMSEALQKEWRKEKENLESRI RDQNEIENWKLLVPRNKILLEQTQSKNQQLV  
KELEESQSRTKEQAEYILELEYKKAQQEQEMQQONT EETQEEMDTISLDHEPIDT  
SESATTNTLLSSHGVI MIPSDFTSEQRKRLKKEK FVIEWETNHETSLGGLYTG  
WLDLEGNPCGNGTLRIDGGIYIGEWKRLRTGIGVYTSIDGALYSGPWLNDK  
FQGRGVFVSEDNKVYTG DWTNGLRHGTGIETW >comp14142\_c0\_seq2; 522 232 1872 LEN=2031; translated  
MSVQSSSSTSIDGCSMEERLARERERLRVAQKRLNLQKERLVL DREM LEADKKNFRKTA

KLASKRNSMWSQGLANAAAGNAERDTTRQVELGRDVETLRSQIQSYREKEEQWEQRDKEQ  
TKNLAAAEEVAVIESSRQLNLKILNLERDLKATKDELVVSTETHAKEKERWENGILEFVK  
DSSADEEIQRLNLLVDFKFELENKLLKDNANRSNQDVSETLSISFSALEGNAEMSEALQKEW  
RKEKENLESIRIQDQNEIENWKLVPKILLEQTQSKNQQLVKELEESQSRTKEQAEYI  
LELEYKKAQQQEQEMQQQNTTEETQEEMDTISLDHEPIDTSESATTNTLLSSHGVI  
PSDFTSEQRKRLEKKFVIEWETNHETSLGGLYTGWLDLEGNPCGNGTLRIDGGIYIGE  
WKRGLRTGIGVYTSIDGALYSGPWLNDKFQGRGVFVSEDNKVYTGDTNGLRHGTG  
EHGDRYIGQYLDKENGRTYTYPPEDGKSLGIQEQRDPADRRQVFSGSDVLRDSEWSI  
GAFVGS

>comp14143\_c0\_seq1; 175 139 564 LEN=2138; minus strand; translated  
MQGSDLPISKRRKKEEGNVTGKAAQAFNIPNDDSDYVGYIMGNLTLPPGGIKDSESVGP  
CAQFTTVVRCQLKAFAVEAYGDPDLPDGELDAESAQRFLGPGDMFRVPPGNSYRLENHSE  
HTDCLLTWTIIRPRAVNGTT

>comp14144\_c0\_seq3; 690 1 1836 LEN=2451; translated  
RRPSLELSILSIRTRTRTDHRSAAHRPKQDKSQRSIGLLIRKGEEMVRVAKAETVAGGSDD  
GDIDIDFGDLLLLSLGNPTAEREAAALERKRKRAERLERHAASVTNERQAGETDTAAKIDG  
SGTGGGAGNQEKPENNKANGDGGEEESTGGEETDGSDFMFGTSSSESDSGSGTKPRKKKAK  
PAKAADEAASASTANRLDGFDDSEGYYKASIGETMEVDVDVDVSGDENENDGAASSKTQ  
FRVLGVIGKGVFSSVLKCSNASASAPSLPTEVAIKCIRSNETMAKAALDETKFLVRLRG  
SPGIVPLLLPAAGNHNHPDRHQLPGAALRPIEFKGTLLVFPYLPYNLRDVLQKFGKGVG  
LALGAVKNYFRQLEALGHLEDRILHADLKPNDILVEGGF SRVLLADFGSALETPVHA  
AEDAAAGTGAGVAGTYEVLAPYLVSRFYRAPEIMLGLQPLTHAVDLWSLAVTMGELFLGV  
VLLKGANNNDMLHSMKLLGPFSGRMIKSHLLQTKKHPLPAHFSQVQSNYVFRQETVDPV  
LGQAVHKELSLVHTFKPTLQSKLLKAKSSKDSRTEVVRFAADLLSKCLVLDPHKRVSIQEA  
LSHDFFCSTQ

>comp14144\_c0\_seq4; 524 1 1522 LEN=1522; translated  
RRPSLELSILSIRTRTRTDHRSAAHRPKQDKSQRSIGLLIRKGEEMVRVAKAETVAGGSDD  
GDIDIDFGDLLLLSLGNPTAEREAAALERKRKRAERLERHAASVTNERQAGETDTAAKIDG  
SGTGGGAGNQEKPENNKANGDGGEEESTGGEETDGSDFMFGTSSSESDSGSGTKPRKKKAK  
PAKAADEAASASTANRLDGFDDSEGYYKASIGETMEVDVDVDVSGDENENDGAASSKTQ  
FRVLGVIGKGVFSSVLKCSNASASAPSLPTEVAIKCIRSNETMAKAALDETKFLVRLRG  
SPGIVPLLLPAAGNHNHPDRHQLPGAALRPIEFKGTLLVFPYLPYNLRDVLQKFGKGVG  
LALGAVKNYFRQLEALGHLEDRILHADLKPNDILVEGGF SRVLLADFGSALETPVHA  
AEDAAAGTGAGVAGTYEVLAPYLVSRFYRAPEIMLGLQPLTHAVDLWSLAVTMGELFLGV  
VLLKGANNNDXAPFDETAGERDILVVX

>comp14144\_c0\_seq7; 718 1 2267 LEN=2438; translated  
RRPSLELSILSIRTRTRTDHRSAAHRPKQDKSQRSIGLLIRKGEEMVRVAKAETVAGGSDD  
GDIDIDFGDLLLLSLGNPTAEREAAALERKRKRAERLERHAASVTNERQAGETDTAAKIDG  
SGTGGGAGNQEKPENNKANGDGGEEESTGGEETDGSDFMFGTSSSESDSGSGTKPRKKKAK  
PAKAADEAASASTANRLDGFDDSEGYYKASIGETMEVDVDVDVSGDENENDGAASSKTQ  
FRVLGVIGKGVFSSVLKCSNASASAPSLPTEVAIKCIRSNETMAKAALDETKFLVRLRG  
SPGIVPLLLPAAGNHNHPDRHQLPGAALRPIEFKGTLLVFPYLPYNLRDVLQKFGKGVG  
LALGAVKNYFRQLEALGHLEDRILHADLKPNDILVEGGF SRVLLADFGSALETPVHA  
AEDAAAGTGAGVAGTYEVLAPYLVSRFYRAPEIMLGLQPLTHAVDLWSLAVTMGELFLGV  
VLLKGANNNDMLHSMKLLGPFSGRMIKSHLLQTKKHPLPAHFSQVQSNYVFRQETVDPV  
LGQAVHKELSLVHTFKPTLQSKLLKAKSSKDSRTEVVRFAADLLSKCLVLDPHKRVSIQEA  
LSHDF FARKHNEQDSSMPVPRMRRVRLPCILRSSSMEIMKQGSVETTSTSKNTSSINYSS  
NSECHNNLGTGRPRREAKNETCSVEQIAISLFLNIPSCSVEQNNFITDNMSLRNCMIDPM  
CENFDSTMQSGGTWFMA SVTTRKIPPLLVLEY

>comp14144\_c0\_seq8; 190 1 1189 LEN=1783; translated  
SSNSSSNKNNPTGGHAATADRTNARETRNFGTTKRLSPVSPRMLLSLSTPTQWTA  
TFSDVELVDLLVGDENENDGREDLSSLCEIRSTALRIREFRSLEREVL SRDGRDPIAPG  
ICFYKPSSGSRHRAQARNEQLEPGPDQDQPHGAELVGLCERILEASSRSPTGSSGGST  
NETTGSARAPLATLSGVRMMVPGRLKEHVFWALWVLLYERHRARRRGEFWRNLEALAN  
DAATARDTEERGGPWTQIGHERERRRLVARLGAAWDCVSFLTVEHAAMRDERDTAEALAR  
ALWAGGRDGGDRPEPKGLAAPARGHTGTWERSRDSLEFLAFPADAKEALRKEKQKRLSR  
VRDEMRFILSDAPEDSHGEWTCCRQTDYHGECTA

>comp14144\_c0\_seq9; 190 1 1189 LEN=1971; translated  
SSNSSSNKNNPTGGHAATADRTNARETRNFGTTKRLSPVSPRMLLSLSTPTQWTA  
TFSDVELVDLLVGDENENDGREDLSSLCEIRSTALRIREFRSLEREVL SRDGRDPIAPG

ICFYKPSSGSRHRAQARNEQELEPGPDQDQPHGAELVGLCERILEASSRSPTGSSGGST  
NETTGSARAPLATLSGVRRRMVPGRLEKHEVFWREALWVLLYERHRARRRGEFWRNLEALAN  
DAATARDTEERGGPWTQIGHERRRRLVARLGAAWDCVSFLTVEHAAMRDERDTAEALAR  
ALWAGGRDGGGDRPEPKGLAAPARGHTGTWERSRDSLEFLAFPADAKEALRKEKQKRLSR  
VRDEMRFILDSAPEDSHGEWTCCRQTDYHGECTA

>comp14145\_c0\_seq1; 669 145 1386 LEN=1419; translated  
MNVFKCLPVVLAVSCIGLFATDVEGWSCFPPSPAKKIVKEISRKSFIAGAVGGLVVGTTA  
TAAGAAVAIERNAAASKGPYEPAGSLTDKVVLLITGGSTGLGLESARKLAAAGATIVLTA  
RSVAKGEKSVEAVQSYLTKSVTGSKVFSVLVLDLDDLASVKAFPPDSYKKLGLGDIDVLMN  
NAGVMAIPDRQLTKDGFERTFQSNHLGHFVLTAGLFPFLSRKATVINVSSEAYQFTGGK  
FDLDNLNGEKKYGAWSSYGLSKLANILFTQELQRRADASGDSSWLTAVTLHPGAVQTDLG  
RNIAGEEKWEKLTNEITLSPVESFLLNTASKFTLTVPQGASTQVYLAAGADGALKKGAF  
YEDLKAKNLPAFANDEAKAKQLWEISEQLGGVEFKIEKPVETQAPPSPEESSA

>comp14146\_c0\_seq1; 409 1 1313 LEN=1650; translated  
XKSLLPVCCIQNTFCDKCQVLLRIRHRLKEFLDRESKVTLEEGRRMKSGVLTITIAVLLY  
SAQVNAIRSTTVASSLLGNNSDRPRSLLKIRGGDGGSSDNIIGNASSVTVVPEETLPQA  
ISGGDVETATDVATEEDLAMKSAKWNGLNRNRLSAGMIASLGGLAYYKEDGLSVFVVF  
LQAMMFREMSATIGGEDWGAIGATLRKYWWFATAAVVWNGPKVYPWMQKLEAVAFGMTV  
TAGVVTSVLGFQHKKSGVADFREYIRQAAVSLLSAALVILPSSFWIGTLEDHGMKWVFP  
AALVAINDIMAYVFGKLLGKHPLLPSISPNTWEGFLGAAFSTVGTAWVGLADSKGADPL  
LGPGLGVTRMDGMVLATFASLVAPFAGFFASVIKRAYGRKDFGNTLPGHGGFVDRLLDCQ  
LILAPFVYFYALYKFA

>comp14147\_c0\_seq1; 450 186 1868 LEN=1868; translated  
MVNNTMQERLARSRRQRSIAYAQQKSSSTSCETSSVGGGKDNASVASAGSLSTTVTGNS  
ASKLEERIRQQLRNKVDRSRFSVNATSAKPTKNEVVASPSPTRIANRRQRMIAISTKA  
SMTNKMNRSNPSTPQTPKTPPEASAFPASSPCESLLYQSNEMEDYDGRHEPNSTGKITQK  
LKSFRDLGTGPYANGRASPPPPPPPLPEPTHVKHANKFKTWNDKNNQKHRGHDPDSFT  
SERQTSLDSASNRVGEHQYPSTAIQPQGGRVVSRSPSAATRPNMQASFPSQQQLRSNRV  
VVPVESPYPSHQQFKGNHAVDSSPSHKKQFSGNNVGFPMDSPPSRQQFRSNRVVPAES  
PSSSQKQFVGGRRVVSRPSTSSGSADSSYSSQQQKWNTHSTNGAAYSRNWSGNARTK  
VNESPKMQRSFSAAKFGSPQAKQATIGGRKSLESQVSMYKHMLKPVQKETETKKSHEKEA  
YGAI IETPEKSSVSSLHAMFN SQNATPLMPMNSTDARVRQSFGLPSPGSGKSPSSIKSG  
SVVSSRFRPATETVAPQQQQQ

>comp14148\_c0\_seq1; 536 531 2345 LEN=2564; translated  
MTLLLFNGFENNEDPFDELAQKRIDTAASPPVTQFSLCSDKEKSSPDWNDKILQLSFHEE  
TSILYALSMESCIIYQLKILVDASIDGTDSDIDTTNSDSQLKRNSQCSCGDNSQSTVASNRK  
PEFTLIHNWVTQNL SATCMTTLHGGGGTGIDTICVGYKTGYIEAWNIHQILSSPPPPKQS  
GHWATQRKLETKKEVHCYLHWEGYMND SIRTLSFLFRGSDPQKETLVGGLDNTVDDTKAI  
QNDGKEGFGTAKEYNLI AVVAISIRTADKGGKQNQPTSSMLKVLDLKRIMNDILKPSDLPK  
VTKEMSLQKYVMADAHSMESIDGTSKLP LSNDRSPSRAPILESNGSDAACILGSI GTGS  
QVNRRCVGITL PNGIVAMLSSSRNDFTVVTCEKQVLLSYPAIGSGQIDVVEANGKASK  
YLVA CLRGGTCYLIPTPEASDSTNSIATVPFAHDIESDSSAVYIQAFTAGNLVVDRLILP  
VLIYAWPGGIIDIYSSTLVP SKPNQTNEIPKIGNANEYILVRAEQRALQDLIDNDSLLLL  
SKI IDEARIDSKHPLLQKEEWKELLEETKRGKATS IENIALDALCSIRHRSLHRILLSLA  
LVDE

>comp14149\_c0\_seq1; 617 107 1609 LEN=1947; translated  
MTQTITEKQRKEEGKRIKRQRIEEAGGVRPRDNIDGKKKKKSSSAEAIESKPRQTQNGSD  
YIPSFKKNSNND SYGRTYDRNFGTNRVQPAKHRFGRVMEKVPCRNKPRFSTLSIALPGS  
VLSNCQTR ELRTLLVGNIARAATIYHVDEIIVFDDKLGKMNKNYQNNRNGGWRDFKRRKH  
DHDAHGREGDKKEDKQDESTEKTEGDDSERGERFEHRPRSTHEEFMARLLQYCECPQY  
LRRCFPMHPDLQFAGLLAP IDAPHVRAEDRSKYREGIVMKKCSPSGNSFVNCGIRNRP  
VEIDRKITPGIRCTVQIDPAAYGKASQIRGTVVAPSAPREDDGTYWGFTRMADSI NGVF  
ENCPSDAGYDLKIGT SERGSKSVEDKSFGLPKFRHSLLVFGGVAGIEECVDADES IKIP  
GSSSSKLFDLWLNTCPFGSRTIRTEEAVMISLAKINPFLMKSSSDKAMPDESQEEDDEF  
SDESPSDESSDEEAVSSEEE

>comp14150\_c0\_seq1; 490 63 1676 LEN=1730; translated  
MLSSKSSNCP SPLRTFKKKNGLGLYGAIIYQSAATS DLESHDDGSDDNSLEGIGSEDDPLL  
ESLRRNLSLETNSNLAVPVLEKDDDDDEEEDDKHADRKSVHSALVGGASRSATTS LADAM  
ADPDQVGTASVASEVMSITKNILGAGVLSLSEGIATYSNDPNAMISAVGWVLLGGMFGY  
FCVLI AKICKMTRSATYRECWESTMGRGGLAVSIVSALLPAQGNLSATTVLSQTLQSL

ETFHIYWSRVTCLLLLLVFILLPMCLVKDLDSISTYSTIGVVSIGVAAISMVIRYYDESY  
QLGGMYYDETKIEFRPSFGHETLWNATVLPFVCMVFNYSYIMHYNsprfymelkERSIPRY  
ALSVGLSFGGLASIIILILIAGSGYLTFGKNSSSYILNNYSPNDPLATASRIGVFLSTLMMY  
PIAFFGVRDGLDGFVPHYQTSRFLDFVSVLVLSLLTIGAIYFHDLVINTVGGGTLA  
TLLCVIFPALMYRQLVVSLEKDVGQIAESWMLFLMLIGIVLGGGLGVYQSVVVESS  
>comp14152\_c0\_seq1; 428 61 1152 LEN=1224; translated  
MKGLNKFNGDDKANASTFVLIIVIALNLIGGVEGMLQPLKYAEPETLFPVLFESKRVLVV  
RKPHGIGHDESSSFAAFDNKQRHEALSTPGVLRLLRSERQRQRDEEGERLYGVHRLDK  
VTSGILVLAKDTLTASTLSEYFTKGIQKVYFGMSAKKPQKKKQGLVQGGMTRSRNKSWK  
LLRKPKEGKQPNFAKTRFFFTGIQANQIIDQGGDVINAMSKVKTVMFRPYTGRTHQL  
RVAAMGIPLLGDPYKDGDDKNNTGEDIELAAATRMLHASGIHIPKFLDQAEINWVC  
SPTFFHDVQSMQDALDCSNISSKMASLADSLDVAVSKLMTKNCDVPGILEAMMTQOSKK  
KQH  
>comp14153\_c0\_seq1; 273 438 1568 LEN=1610; translated  
MIGPRSDTNQTELREHMDIDADMTSWETPSTVLEVMHLKERTTYAQHDYFARSHPVAPCP  
DSNPAVSDHSGRIPVDPACRSIMAKWCVSLCNFCNYDRYTMASVMSCVDRFVATPQGSRI  
LFDRNDYQLVVMASLYLMTKVLESQALEPSSMAKLSRGKYCKADIERMELEILMALDWCV  
TPPTPMAFAHEFVKHLGLCPDHENDQSCGSGMGEAESNDDSSCSAYSCEAASCCTTEER  
IIELIHCQIKDTASDYELSCLHRPSHVFAALRNALESLDIDSSGMESMNVLKEKLDINA  
DGLVDVAICYISEALLRIVSSCEEGLNNWSSALLMQRCCGLSSSSVSHDLKQRSGDPSLT  
KTASSCIYSSPRAVAC  
>comp14155\_c0\_seq1; 321 141 704 LEN=1298; translated  
MSHRIASLWCGVESHGCQPTPFSHPLRLLFFDLLGSRSSRAHLPTRHFCHLPTGQFLTVF  
VSEAGTVPPTDPGTTTDTATGTSIATPDATNGIINVSTDAPVVVNSNATNATLPLEATN  
ATEASNATEAPTADAPVAPPTAAPVPAATEAPGASTTASSAESSPAAARTHGFSLALAVAC  
LALFSVV  
>comp14155\_c0\_seq2; 438 115 891 LEN=1485; translated  
MTPSPLRTASVLALLVLAQLAAIATAQPGAQPGVATPDGIINVFRWVVPYNGPRQIEAEV  
GNTIIFRWAQGIHNVYIHPTMNCDLTGAIEVGLPEPGSEYTFTEADAGTEMFFS CDVGN  
HCMAGQFLTVFVSEAGTVPPTDPVSTPDTATGTSIATPDATNGIINVSTDAPVVVNSNA  
TNATLPLEATNATEASNATEAPTADAPVAPPTAAPVPAATEAPGASTTASSAESSPAAART  
HGFSLALAVACLALFSVV  
>comp14155\_c0\_seq3; 438 115 891 LEN=1474; translated  
MTPSPLRTASVLALLVLAQLAAIATAQPGAQPGVATPDGIINVFRWVVPYNGPRQIEAEV  
GNTIIFRWAQGIHNVYIHPTMNCDLTGAIEVGLPEPGSEYTFTEADAGTEMFFS CDVGN  
HCMAGQFLTVFVSEAGTVPPTDPVSTPDTATGTSIATPDATNGIINVSTDAPVVVNSNA  
TNATLPLEATNATEASNATEAPTADAPVAPPTAAPVPAATEAPGASTTASSAESSPAAART  
HGFSLALAVACLALFSVV  
>comp14155\_c0\_seq4; 438 300 1076 LEN=1659; translated  
MTPSPLRTASVLALLVLAQLAAIATAQPGAQPGVATPDGIINVFRWVVPYNGPRQIEAEV  
GNTIIFRWAQGIHNVYIHPTMNCDLTGAIEVGLPEPGSEYTFTEADAGTEMFFS CDVGN  
HCMAGQFLTVFVSEAGTVPPTDPVSTPDTATGTSIATPDATNGIINVSTDAPVVVNSNA  
TNATLPLEATNATEASNATEAPTADAPVAPPTAAPVPAATEAPGASTTASSAESSPAAART  
HGFSLALAVACLALFSVV  
>comp14155\_c0\_seq5; 321 141 704 LEN=1287; translated  
MSHRIASLWCGVESHGCQPTPFSHPLRLLFFDLLGSRSSRAHLPTRHFCHLPTGQFLTVF  
VSEAGTVPPTDPGTTTDTATGTSIATPDATNGIINVSTDAPVVVNSNATNATLPLEATN  
ATEASNATEAPTADAPVAPPTAAPVPAATEAPGASTTASSAESSPAAARTHGFSLALAVAC  
LALFSVV  
>comp14155\_c0\_seq6; 438 300 1076 LEN=1670; translated  
MTPSPLRTASVLALLVLAQLAAIATAQPGAQPGVATPDGIINVFRWVVPYNGPRQIEAEV  
GNTIIFRWAQGIHNVYIHPTMNCDLTGAIEVGLPEPGSEYTFTEADAGTEMFFS CDVGN  
HCMAGQFLTVFVSEAGTVPPTDPVSTPDTATGTSIATPDATNGIINVSTDAPVVVNSNA  
TNATLPLEATNATEASNATEAPTADAPVAPPTAAPVPAATEAPGASTTASSAESSPAAART  
HGFSLALAVACLALFSVV  
>comp14156\_c0\_seq1; 440 285 1241 LEN=1367; translated  
MKPFAKTSAGRYITKKRGLSNLPSAVFVCALLLIAISCVGAEESDCSGLKRNKCRKSREC  
SWVRRKNTRNTSIGLCVTKLTDDACKKIEKKFNCKRHRCKWNKENESCGAKNQKESDDD  
NDDPFEDKEEVEGEDEDSTSEDSSESDDKDKDEATVDDEYGREITDDDVDDDRKTPENSS  
EVFHKRFVDKLMGMDATHAKRLIDSKRVIICSYDIIITMGCVSREYDPSRIKLMVEGETN

EVLQVVDNSFLHEEYSENLRGMDGEAARRQINGL FVAICPNNEFNLDSDDQCMMKNL NES  
RIKLMVDTDNIVEDIVFG  
>comp14157\_c0\_seq1; 298 665 1186 LEN=1186; minus strand; translated  
MHLPHRCVPHIASGRIVASPLFLFPGQRRGFVSLASAPAALLRRSAVSISVAASGSVPAS  
DAGVLFSAATAAAAVLVVVVSAFQLAAVFAGWFVAVVRLLRKPFPPVSMPPAAAALLR  
GIAVAVGTARGIAATPVSPVPAAPVALV LARAAI AVVSLAVATTTTTTAVAVFV  
>comp14158\_c0\_seq2; 560 628 2790 LEN=3458; translated  
MQSTNYDLVDDSSDESSGPCDKVKNPSRQGFGRNRRWGFVAKWGKTLYLATFLLGACLQL  
PLRFQORRCQLDQSKMCFWGIT TATN WITQDVDHGRSDNTKSIALTIRNDENTNHGTSDWT  
PNVIFGNYSMPITFGFASSSCNAINRDSRARIQQMFDVALLECYGFAFFEARNTISKLLA  
ESISLSSANCLDFYCPMCHWILSMGYSPYINHP IIAEQSQYENAAEAARIAIYEQAHKK  
LRNRYQYQTL SKELGLIDAMYLRFRPSFTNQTIGFESYSKRLKVLHETMVLKEGKGDSDA  
MGFLADSIMILHSDNDGYHYFYQDDDQQTPEPGIAYAISLLEDCLLEESPDHPLCQHLYIHI  
TEPSKNIPVRKAGVVADRLAIGSHATEAHLQHMPSTYLRIGRYHDAVASNVVAHESEDE  
AYIRHGLVPYGPANHTAFLVHSAQLSGERKTAYRYADLLRDHYRNDLTKPDGPGTEEGWH  
IWR TIRLRF GDYASILDDSDDIANVSGSQEHLLRAGETEKPVWPYAIVLGHYSKGVASL  
WNNASGGNSIDSDSERLSQAMHHLRSLRDVIPKVDPSFRGMVAVANLTL SAGIEYYRQS  
RTTIEPDTQSILQLFREVR IEQEGWAYTEPPSWYTSVALCEGTL LRIMGRYTESIAAFRN  
HLKLV PENRFGLYGLRISLTVAGANVIDIQDATSRFNTASYWADADIQSSPPIVCP EIGE  
>comp14159\_c0\_seq1; 275 1 1837 LEN=1936; translated  
XVCPDLRIVDGSDLRRYRTHSR TIYKAFRGA IHEEIGASVHGKVADGCVEQLLPCKR NAM  
DEM VADLSTAVDKLVAVESEEGNAAMLATIAIPQEKKS RKR SYHDSELPRQLPPVFKTYV  
FGDDSGSSAARIVEDQTGASTDIVFGGRDSQNNQGSASRSLAPSR RNVEDC NNGQMNSE  
RKLLGRHRRKALCRKRL EIAIRLAQRICQKIFHRTGFHVSAGISVSPMLAKLSVIEKPKT  
VNLLL PWRSPDLLYFMPLRKMHEMGSRTHRALSEVAFSAVPSKKSNGTANILVRN LLEIP  
REKIVESLLMMTQRGEDGNAKGSIT AANNRSSCEQKCDLILQRCRGLDCTMVEDDGGGAP  
RTVSVENSFRRGTMTEVDVQ EALNELCRRLPPLVQDRAGWSRNPPLAYPTTLRLTVR TM  
LSIDVSERQPGPARRKPRHITRSKQASIGAQRGKTL LVSTLRSTPEAEIERSAAFR TLRD  
SVDPLVQDLLLRLDARIDVTRMNLAVTSFRD VATADLTSQSPYYETKKF SVNNNNTILDK  
QLNSKSCIETNGSPYEKRKNQNPTVASSMKPSKSLTPCRNPPSF AVPRTSAEQSKNSRKF  
ARTRIDQFFTRK  
>comp14160\_c0\_seq1; 401 129 1601 LEN=2074; translated  
MVSNETKSTCCGGNGR VVRGVDLNRDSQPNPTTKTNELVSEPTVYLT LGDGDFTYSLDL  
TRYMASSTKEQPVKLILT GIDTLET LISKYK DSPSILEEIKVQGEQVPSLELSIRHGVNA  
IVTNPKGKEEAKMRTQDAADHVVFHHPHLGTENCAMHQRF LAHMFHSGTNYWMKENGGLF  
HLTLVEGQYLRWK CQEQAERHGLELLHQTT FAPPVSDYTI AKAANKGTAFN NNR YHYR  
RHQTGKSFKTRRPNSKSITYTFGRIVDKGTYVTTHLPWQPLN SSSQDTVKKKSETKELNP  
QLSMLSCPFCDKTFMEKRSLKCHLRDKHADMEHERSHLEPP I KKKLGTGDTCTLATTEK  
RDIPIISCTHCSR TFQSTKALEDHVRAKHSAIN TYIAPDWAIAKQKEIDTLD SGLLKGA  
DSSNEEGIDNKYDECHICGLKLVGKNLSQH FEDFVPKEG IETFSCDFCSKPFREERAKLQ  
HMNFCKKRPQ  
>comp14160\_c0\_seq2; 401 129 1601 LEN=2086; translated  
MVSNETKSTCCGGNGR VVRGVDLNRDSQPNPTTKTNELVSEPTVYLT LGDGDFTYSLDL  
TRYMASSTKEQPVKLILT GIDTLET LISKYK DSPSILEEIKVQGEQVPSLELSIRHGVNA  
IVTNPKGKEEAKMRTQDAADHVVFHHPHLGTENCAMHQRF LAHMFHSGTNYWMKENGGLF  
HLTLVEGQYLRWK CQEQAERHGLELLHQTT FAPPVSDYTI AKAANKGTAFN NNR YHYR  
RHQTGKSFKTRRPNSKSITYTFGRIVDKGTYVTTHLPWQPLN SSSQDTVKKKSETKELNP  
QLSMLSCPFCDKTFMEKRSLKCHLRDKHADMEHERSHLEPP I KKKLGTGDTCTLATTEK  
RDIPIISCTHCSR TFQSTKALEDHVRAKHSAIN TYIAPDWAIAKQKEIDTLD SGLLKGA  
DSSNEEGIDNKYDECHICGLKLVGKNLSQH FEDFVPKEG IETFSCDFCSKPFREERAKLQ  
HMNFCKKRPQ  
>comp14162\_c0\_seq1; 312 221 1497 LEN=1867; translated  
MVPQNTKGDGAVDEDVAIEI SLKERGLLDASHNEIAGSESSIDETVVVPVIDMSKGTREE  
VIAQLWDAATGVGFFSLVGHGIPGELIDEAFSNSEEFFGLPLNEKRKQSPLDMSINC GFE  
HCAQVRPSTGLADQKESI QITARRGAMDRWPRLGGSERRFEDTARRLLEANRLAGELL  
DMLQPMAC PQIDASDPHALSGSHTLWGPEGQCTLRF LHYPPQSPETTKALARDGYWRAGP  
HTGKXLLIARHRRR VMSVSFLHPD SHCFGAPRWIAVSLRSLSTRIDSSFSLLSSILAAD  
WCNLTLLFQRPGPGQSGLECCANPRATTGGASSCTKRLRWTRVDPVEGAI AVNIGDMLAR  
WSDGRLYSNLHRVRLPEDASRARYSIAFFAQSDKSVVME TRSSEPITAGEYILGRIRSNF  
ASTEK

>comp14162\_c0\_seq2; 355 221 1327 LEN=1697; translated  
MVPQNTKGDGAVDEDVAIEIISLKERGLLDASHNEIAGSESSIDETVVVPVIDMSKGTREE  
VIAQLWDAATGVGFFSLVGHGIPGELIDEAFNSNEEFFGLPLNEKRKQSPLDMSINCGFE  
HCAQVRPSTGLADQKESIQITARRGAMDGRWPRLGGSERRFEDTARRLLEEANRLAGELL  
DMLQPMACQIDASDPHALSGSHTLWGPEGQCTLRFLHYPPQSPETTKALARDGYWRAGP  
HTDWCNLTLLFQRPQPGQSGLECCANPRATTGGASSCTKRLRWTRVDPVEGAI AVNIGDM  
LARWSDGRLYSNLHRVRLPEDASRARSIAFFAQSDKSVVMETRSSEPITAGEYILGRIR  
SNFASTEK

>comp14162\_c0\_seq3; 315 1 1402 LEN=1772; translated  
XTIVLVLSILLVEQPLVSIHHPVYIHVDRGVNADVDIDQVIRAFRLYETNTIICCTSL  
VLHLRPGIQYRQTEAIRIIRTEGQTPHIACPKRERISAAMVPQNTKGDGAVDEDVAIEIS  
LKERGLLDASHNEIAGSESSIDETVVVPVIDMSKGTREEVIAQLWDAATGVGFFSLVGHG  
IPGELIDEAFNSNEEFFGLPLNEKRKQSPLDMSINCGFEHCAQVRPSTGLADQKESIQIT  
ARRGAMDGRWPRLGGSERRFEDTARRLLEEANRLAGELLDMLQPMACQIDASDPHALSG  
SHTLWGPEGQCTLRFLHYPPQSPETTKALARDGYWRAGPHTDWCNLTLLFQRPQPGQSGLE  
ECCANPRATTGGASSCTKRLRWTRVDPVEGAI AVNIGDMLARWSDGRLYSNLHRVRLPED  
ASRARSIAFFAQSDKSVVMETRSSEPITAGEYILGRIRSNFASTEK

>comp14162\_c0\_seq4; 272 1 1572 LEN=1942; translated  
XTIVLVLSILLVEQPLVSIHHPVYIHVDRGVNADVDIDQVIRAFRLYETNTIICCTSL  
VLHLRPGIQYRQTEAIRIIRTEGQTPHIACPKRERISAAMVPQNTKGDGAVDEDVAIEIS  
LKERGLLDASHNEIAGSESSIDETVVVPVIDMSKGTREEVIAQLWDAATGVGFFSLVGHG  
IPGELIDEAFNSNEEFFGLPLNEKRKQSPLDMSINCGFEHCAQVRPSTGLADQKESIQIT  
ARRGAMDGRWPRLGGSERRFEDTARRLLEEANRLAGELLDMLQPMACQIDASDPHALSG  
SHTLWGPEGQCTLRFLHYPPQSPETTKALARDGYWRAGPHTGKXLLIARHRRRVMSVSFL  
HPDSHCFGAPRWIAVLSRLSSSTRIDSSSFLSILAADWCNLTLLFQRPQPGQSGLECC  
ANPRATTGGASSCTKRLRWTRVDPVEGAI AVNIGDMLARWSDGRLYSNLHRVRLPEDASR  
ARARSIAFFAQSDKSVVMETRSSEPITAGEYILGRIRSNFASTEK

>comp14163\_c0\_seq1; 644 101 1372 LEN=1737; translated  
MAIRSLLTAAFIAPLVAGFAPAPVAHQTAVSSANAIAPAPFATTSNSALAAVSDVGTD  
SDKIYDAKETPKVLGGVKIGLKKLVVITGASSGLGLATTIALTKKGNHYHVMMACRDIEKA  
KRVAKEVGLPKNSYTCMKLELASLQSVRDFVANLKAFKSARPLTHLICNAAVYRPTDPEP  
AFTDDGFEMSMGVNHLGHFLLVNLLLEDMSRAKGARVCIVGSITGNSNTVGGGLVYPRAD  
LGDLEGF EAGGVAPISMVDGKPFPGAKAYKDSKVCNMMTVSELNRRYHEDTGIVFSSMYP  
GCIAETALFREKRDWFRKIFPAFMKYVTGGYVGEEEAGERLAQVIDDPQCSKSGVYWSWN  
GGAKTVGRWSEDKPRGAGGSGGEIFENDQSDAVTDAVMSKRWELSKELVGLSDKEMYN  
GGK

>comp14164\_c0\_seq1; 575 1 1907 LEN=2657; translated  
XLAGKDAGHQPNNTKATRLDPPQGQDELPVFAICLLTRDDVPILPEWIAYHYHSVRLRHL  
VVAVDPESDTPDKPVLDSFRTLGGNYQKKSRRLLVEQWADKDFMPDYFVRGEYKAPNF  
VGGFGEPPDSKTWEGWYSKQKHMVKVRIKDQTYVNNHRFRQTRFLSRCTEHLREKYSNGQ  
KGDSNRKKNVWMATLDTDEYLA INPWMLLENGADASGALPADRETVD SVMKLEPASVLRW  
WVGKQNELQTKESLPSQHANRNHPVCRQIPRLLFGSVEAANLTVAADKVEPDTTYGFFP  
KDGTKEFRFASGLPRSKSPMETLRWKYHAAPDDNRNFQPKVVLDVHSIPD TDQDIWGNHV  
FTVHRPSRALCAPXDPQQLERDPAGGSKGKERSGPEECGRRSLPRGGLPLHRVSPAVLR  
TAERP AEPPQAVPGAQHHHPRAQERPVDRSVAPGLCRGGGGHRRGETAGPEGAGPKIPQK  
GQGAEGPEEHRCPAKVNPTQREGKMLVVPSEPRACIAERHATPCSMGRFPGPSRFGWV  
WQKNYATIGKALRSFLRWKSRRVLSVDGFGIAHGFBVSSSELRFVQKEVRGVFNHPFETKA  
VSESKKLSWVLCGWLGEVDSFLQVSSTTRDNL DAG

>comp14165\_c0\_seq1; 827 114 2651 LEN=2798; translated  
MIATRVP AIFGFGSVLILMLCGLPSCAATGYTIPHRNSSNSNKRVD SHRVLEDTASETSN  
YYDYSTKKSKEKKSYTYSTSYSPKKGKCKGSKGSKKSYGYNCEEIETPTEPPV  
TETEVGDDTADQEEVEVSEITNKSEKSKKDKKKSNKDKKDKSYKSKSEKSDKKE  
KGSKSGKIKKDKSIKQSKKTLSPKSSKSPSPSPDDEGFTPSESWKISFNGAVDTGFLF  
YDSTTKYAWAYANADFGVDEVLVSKSSASAVDGTVLESHTVIEGKDSVTMGRICPIDTTK  
KGEVIEETMCI DIKPPKEWQTATSTTIQSAEACYASVTGAVFKLAVVVKDTSKFMQFYDEL  
VGGRLIVYDISLAGKAQDPIIAEVAYEGWESLYGDPTINGRPSFSPDCRTVYSTWLTSGT  
VITETEGSTVIINLEPTATTTVA INVDSVANNETPELWRLGTNSRLAGLTASKDGKTLY  
SAINVAEGDSLRSRGMVALEAATGKIVQQYAFNPNTGGVPHSAYTNVVDLNSGHTYHVDLSL  
YGLVKFEGDDLNDGPIIWSVIGSDTEMTDQII EENTMKTRHLNPLRPDKKEKNIVTGEE  
RTQT VETKSSVVADEIFTAFK PALDASKYSTVYSCGSAVDNEVDLSIALD TVEGESVWF

TALGSSGVSKAETKSVSGDETDVVDVVGSCSGITDDVWRWAPSSAAGPESEGIYISRGNKVQ  
CLDGKNGTILWTYDAMGDHDISKFAVVSGEAVLVANGGSVVFLETREPTPSPTIAPSPLL  
STPVEVPVVKPTRKPTSPTSPVTVKPIGNPASPPSSPPSSAVRTSYSIGFLSGLPLL  
LFLWQ

>comp14166\_c0\_seq1; 371 182 1327 LEN=1819; translated  
MKWPNGTGLLAAAANGGASLILTLVTARSASAAFAANGLAGSRPQPWIGARQHGPVPP  
GFLRGAPFLECPSSRSFSVTKRSGSKSSVGVNSNGTDGDCGCGEGTGDSGERFGIETEPS  
EIGKLLKSTELTNIDGSRVPLGDYFGDGDATIVVFRGTLRESTAGVXANQWIDYEEQLQ  
HNQQQQQSSASLPTNGATTTSATSTTNRFSIGGPIFVVSIGSVEQLRTFLEENPRI PRDRI  
LVDDYRHRYSKETMRFRRFDDAESLESVFS DGSIPQILD LARKLVVPLFTVVGVQRLRS  
YLKRI PDLAPVKPGNRLDWTDLPEGGLRNGGTIVVGTTLN N N N N E E E E D G A L L Y R W N D K V P  
GDVPAPADVYNEALSVLQRKA

>comp14167\_c0\_seq1; 304 209 1768 LEN=1768; translated  
MSMDRLTPAFMPSLKRQRSRRNSFVHGIRSQFDLNLRIHDKRGGDEKITAPRGWKRMQAR  
FRRRSRKQAKPNGIGVPTSDRDTTRVPKEHTQVPLPDLPHTTLVEILSFCDYSTLLAVRG  
VSRVFRVEDVPKELHRRVLNQWTSTAPRHLRPKVQMKQQMRHHC SRGEEEDRVCEHGNN  
NYTEGECDYSGQQVQRRRQQQHMQTEFIPENTPTVRQQPASGTAGDPHRGLPNNNDNNDNI  
KNEYDDD GKTHRLLRRPRLCREARPKVRSYQKKVVNLDHRKVWIFLRDNPSDTARNNLHP  
PQNNCDRQRPKQKHWSMQVVVSEVLKLRDIEFYNGAVFGYDEAKAEALLLRNGFIDER  
DFHRPPAITSNPSVYKWRAEASLRTLSTAEACRVLISGRGKGMASVTTAAEPPSSQGH  
SDTTTGTALPDRAASDACPTSCWPATAASASQNIPPFLTKRRCRARFSSSGPYAGSKQK  
SASSRPRFLRDADRWEKPFLLSWVGKQLTIVLSNKKQLDCP

>comp14168\_c0\_seq1; 137 543 1364 LEN=1425; translated  
MNTRGLLLPSRRRLSGIGALGDHTVIRNTIFNENQRLWGPFIGQLQLVPSHRMASTVSSS  
NQSEFKKRESSETIRSGSNTTGKSPNDKKNQNTPEPSKLVASDIETPDEF SFKAMMKKYG  
VVFFGTYFAIYCSTVLGLFMSVQSGHLDVIYIISLITGTSSPTDPPGGVADPETIQEAKST  
VKHLVEFLESYTLTKPVAMPVEEYPSIGNLAI AWIATKFT EPIRFGATVALTPPIARFLG  
YKRVSPVIENAGPIDIVSADQKGGTSSSEKTSP

>comp14169\_c0\_seq1; 87 32 776 LEN=776; translated  
MARVILTRNEKNRSLEQHKALTRCIEGTIQREHDCCCSPDHDNSCQGNIPLEIIVDHVTP  
FLDRTTYNSFLLSRRRAHSILTTPRWQSDPLLSQQEQQQQFPWPVKVVAR DHSCRVRCL  
TFSDDHSL LACGCFDGKIRSWDVRTGELPLPYEGHWPDEAVVAVAYSSSNRNLTKWNRK  
ANNRRMLASSSTDGTIRIWRVQPNPETRRAGTCGDSWSKAETYSKTAERVQPLANGTASV  
FASTYMHCX

>comp14169\_c0\_seq2; 329 32 1867 LEN=2129; translated  
MARVILTRNEKNRSLEQHKALTRCIEGTIQREHDCCCSPDHDNSCQGNIPLEIIVDHVTP  
FLDRTTYNSFLLSRRRAHSILTTPRWQSDPLLSQQEQQQQFPWPVKVVAR DHSCRVRCL  
TFSDDHSL LACGCFDGKIRSWDVRTGELPLPYEGHWPDEAVVAVAYSSSNRNLTKWNRK  
ANNRRMLASSSTDGTIRIWRVQPNPETRRAGTCGDSWSKAETYSKTAERVQPLANGTASV  
FASTKRQRTATVGDGNECEGVTKNSPTCLICIAADHAYSLHFS PDNSYLVSGHLPVSRT  
QATLQLGETIQIWDVWTGIRLRLRLEGGGVPVAF LPSQTLPRDPSQLNSQKSYDYCATNDD  
QENENKNGTSSASRTEHRLISSCGPSKCFKLWSWSDGTRCDNTSNIAATEGDTVLENDRCV  
QRWFLDPFNTVVPVPTGAMATGGGNDRSTKVRCELLVASIDGPDSFAIWNTSEPGKRRTF  
RNTSPYEIQFSPDGRKVASVDDFNKVKVWRVSDGTL LQSFSGETYCEASDGGYGGSSGCS  
RCCRRPCGRCSSSNTVTKENDGFEESSPTSSSGGGSGGLFPIHELAFSKNSSTVAVIS  
RYYNEVHLFSA

>comp14169\_c0\_seq3; 154 1 510 LEN=772; translated  
RSTCTENVRCELLVASIDGPDSFAIWNTSEPGKRRTFRNTSPYEIQFSPDGRKVASVDD  
FNKVKVWRVSDGTL LQSFSGETYCEASDGGYGGSSGCSRCCRRPCGRCSSSNTVTKEND  
GFEESSPTSSSGGGSGGLFPIHELAFSKNSSTVAVISRYYNEVHLFSA

>comp14170\_c0\_seq1; 272 216 952 LEN=952; translated  
MFRWASTRANEDGQNMEPTFRVQSKHPAQSKKTAPSPLGVNINHTNQNGLRPPQTITYV  
SPTSAEDRNGNYFETRDVQPQM QESSARYVSMDDEREAPATSYQDISNQSLARLEKLDPS  
HPMVSGRSRTSQRAPALDLKHNDSSFQIVASLIVDRFEDHLSNRETKSIRITAGDTYHME  
RVVPDKKQFIDAVKYRIQNCPENSSKQIHKVTRQCHVLGLDRKGESNLLFAPIGSHFELT  
VSLVTV

>comp14170\_c0\_seq2; 649 216 2219 LEN=2383; translated  
MFRWASTRANEDGQNMEPTFRVQSKHPAQSKKTAPSPLGVNINHTNQNGLRPPQTITYV  
SPTSAEDRNGNYFETRDVQPQM QESSARYVSMDDEREAPATSYQDISNQSLARLEKLDPS  
HPMVSGRSRTSQRAPALDLKHNDSSFQIVASLIVDRFEDHLSNRETKSIRITAGDTYHME

RVVPDKKQFIDAVKYRIQNCPENSSKQIHKVTRQCHVLGLDRKGESNLLFAPIGSHFELT  
KINEEEMQDRTLDRREAVDKAKPLTPEDLAREQITTELKEARNLLAESVTPEAAEFWTNQV  
VDLQKKLRALDNGAESSFPTNKNDYGSYFKSQEGILSNLWQTLGYAPSKQEKDIELTTS  
PVSSPVPSPVSESDVSAEEKPEENEKPIVDVVPADLPGGYQFEAELNGRRFIATVPVGG  
VQKGKTFYCYMEETNGTDALYGRWRDELTDIYKYGPKHPMTLVSIVCPLLALSVMKVG  
LDITGQKAPRTVSQTGLWSPRGMALSMLSLWAGLNVITILFGFELKLHAYLALSAADFCSI  
ILVNLMLAFTIFATVNRNYIVQKFEIPAGKYGSLAETILSAVFFPLSIAQMGRHTVCY  
DSNEGVWCDPTRIFRQDSNEGPWCPSGYLRHDIMEGASCDPTSILRQESTEGATCDPSR  
ILKHEEP

>comp14170\_c0\_seq3; 198 216 666 LEN=666; translated  
MFRWASTRANEDGQNMEPTFRVQSKHPAQSKKTAPSPLGVNINHTNQNGMLRPPQTITYV  
SPTSAEDRNGNYFETRQVQPMQESSARYVSMDDEREAPATSYQDISNQSLARLEKLDPS  
HPMVSGRSRSTSQRAPALDLKHNDSSFQIVAX

>comp14171\_c0\_seq1; 326 1 1982 LEN=2144; translated  
LAKPHLHEECPRLLSEGDVATDDADDLEAFLQATKRIVDISKLPCKRHCYDALCGTTAA  
ELSGTFFGRAANAGGMFSSNASFSSAATPRTIASEHEHLGGFESTRTATAATTAGDVDD  
DQDLRQNIAGLPSVIKNLDRACRFNQGKGGGPNPNASKKKWNSEFVRETVDQYEQYL  
KYFYNEEDLDGSSGSSPVSKEMKELFFAPETTQAFVAVLRCRLPTHVLSRKIREWERYIG  
SMGATKMTDDLSSMLEANGKAGNIGRAIQLLSLRKARDYPPREQEFVHTITAITAAGLY  
LRKNRNIFLPEQKQPKIDDPTRWLDAILINMNQRDVALTTKMANRMLNAFARTGRTGKTT  
HFFYRVVRKPIDGESNTDGESESAENPTANHVDMATFRDRPVEVRLKMRPPPPYHKIPS  
QVRGKLVKPKGSNLRQLKLERESDPDWSPVLTSAISFADSLKQGACGHDPVELDLVSYSI  
LMRVCVNRGSLWRAMHILDEVMPANKIKPDIWAYNTLLIGLSRVGDVPTMKEYSRKLLSE  
GLSPTKETIGASIDGLNLGADVGAAILSLCQDCFNQYSVLPPTYTHLKILEMTLGRGLVYE  
AKRHVSFLQQLWKWEPNKYHSKEVSRVLYATQNNPSSLSREALQKMFAYFGYTLDESDF

>comp14172\_c0\_seq1; 437 236 1508 LEN=1508; translated  
MKATINPNNGLNPFADPMQVHSPVFGMQLASVTKLSPFMPADFHGFSRSGLVLALVFG  
LSLVIFLAFSKTQKMEHLQKQEQKQCSESPGPLWVVPGARPFVGNITIPGGFKNSTICF  
EDWAARYGENGIFECNIFGKKLIVLYSDETISALDKHRPYDIIRRSRTSEVLDSLGLATGI  
LTAEGAQWKRERRLVGALNRKNVVDYVSVAKLVASRLVQKWEDAMEEDGSVLANDDLLC  
YSVDIISLVVFATDVNSVQTGDKGICSEVQNVLSRAALRIFAPFPYWNIPVVGQYLDGAG  
FCADRAKTTMRGILRDHESPPPQGDHPRGEDGTTPRVRKTFLLAKLLALTEEKGVGLSED  
RVIGNLITMFAAGSETTSVTILDICIYELALDKTLGGSLQDEIAGEVLEMFRGASGGSGNG  
NGNGX

>comp14173\_c0\_seq1; 568 364 1841 LEN=1960; translated  
MEPPAEWPPQVRESYEPLRVLGVGFGSVVLARETKPPPEAPADGRTRPKKVAVKMGAV  
GNNKDDYDDEEQQDMAVLYARREIEILQHVSHPGIVRLFHFWIVEKETASDQAAAAVLVL  
EYAKGPTVESLLKHGGALSTTFGQVVIQVVDALAYLHYRAVLHRDIKPDNIVLVTGALSS  
DASIWNDNDEHDPSEKPDWAALRKKYKVTLIDFGFARALTPGDVAKPNQETMKKDARRAS  
YHELLLNENAKAGASGEEKDLSERSRKSLGSSMGRSIRKRLSGLAGGDSIDKSNRSAMS  
NDSLGSRRSVSHGLTRTMTSLGNRNFAAPEIINNVRKSPKDKASTGGSKATPGSSETDG  
KAEASEAPITETILEFVADYGLLVDSYSLGQAIKYMMTGXPPGQGGSDPEPGTEGPPG  
VALPVPFKPGGFFPEKAVRPVPGPERPARQDLRADRPPAGGLDAEAGLGPKGPADRVDRR  
DPGGGAQTTGA

>comp14173\_c0\_seq3; 517 364 2129 LEN=2312; translated  
MEPPAEWPPQVRESYEPLRVLGVGFGSVVLARETKPPPEAPADGRTRPKKVAVKMGAV  
GNNKDDYDDEEQQDMAVLYARREIEILQHVSHPGIVRLFHFWIVEKETASDQAAAAVLVL  
EYAKGPTVESLLKHGGALSTTFGQVVIQVVDALAYLHYRAVLHRDIKPDNIVLVTGALSS  
DASIWNDNDEHDPSEKPDWAALRKKYKVTLIDFGFARALTPGDVAKPNQETMKKDARRAS  
YHELLLNENAKAGASGEEKDLSERSRKSLGSSMGRSIRKRLSGLAGGDSIDKSNRSAMS  
NEASGGPEGACPTGSRGPCRRWETGKRMVCVCVCLVCLCFLFRRWFFFLGWMDGWNDSW  
TIGVTLIQVLSLQPVSYGMFSLFRSPKNRNFAAPEIINNVRKSPKDKASTGGSKATPGS  
SETDGKAEASEAPITETILEFVADYGLLVDSYSLGQAIKYMMTGXPPGQGGSDPEPGT  
EGPPGVALPVPFKPGGFFPEKAVRPVPGPERPARQDLRADRPPAGGLDAEAGLGPKGPAD  
RVDDELLAAGEPKPPEDGTRLYALDKLSYLPFAEGSANATPGVQAGH

>comp14173\_c0\_seq4; 552 364 1932 LEN=2115; translated  
MEPPAEWPPQVRESYEPLRVLGVGFGSVVLARETKPPPEAPADGRTRPKKVAVKMGAV  
GNNKDDYDDEEQQDMAVLYARREIEILQHVSHPGIVRLFHFWIVEKETASDQAAAAVLVL  
EYAKGPTVESLLKHGGALSTTFGQVVIQVVDALAYLHYRAVLHRDIKPDNIVLVTGALSS  
DASIWNDNDEHDPSEKPDWAALRKKYKVTLIDFGFARALTPGDVAKPNQETMKKDARRAS



YHELLLNENAKAGASGEEKDLSESRRKSLGSSMGRSIRKRLSGLAGGDSIDKSNRSAMS  
NDSLGSRRSVSHGLTRTMTSLGNRNFAAPEIINNVRKSPKDKASTGGSKATPGSSETDG  
KAEASEAPITETILEFVADYGLLVDSYSLGQAIKYMMTGXPPGQGGSDPEPGTEGPPG  
VALPVPFKPGGFFPEKAVRPVGPGERPARQDLRADRPPAGGLDAEAGLGPKGPADRVDDE  
ILAAGEPKPPEDGTRLYALDKLSYLPFAEGSANATPGVQAGH  
>comp14173\_c0\_seq5; 533 364 2038 LEN=2157; translated  
MEPPAEWPPQVRESYEPLRVLVGGFGSVVLARETKPPPEAPADGRTRPKKVAVKMGAV  
GNNKDDYDDEEQQDMAVLYARREIEILQHVSHPGIVRLFHHWIVEKETASDQAAAAVLVL  
EYAKGPTVESLLKHGGALSTTFGQVVIAQVVDALAYLHYRAVLHRDIKPDNILVTGALSS  
DASIWDNDDEHDPSEKPDWAALRKKYKVTLLIDFGFARALTPGDVAKPNQETMKKDARRAS  
YHELLLNENAKAGASGEEKDLSESRRKSLGSSMGRSIRKRLSGLAGGDSIDKSNRSAMS  
NEASGGPEGACPTGSRGPCRRWETGKRMCVVCVVLVCLCFLFSRRWFFFLGWMDGWSNDW  
TIGVTLIQVLSLQPVSYGMFSLFRSPKRNFAAPEIINNVRKSPKDKASTGGSKATPGS  
SETDGKAEASEAPITETILEFVADYGLLVDSYSLGQAIKYMMTGXPPGQGGSDPEPGT  
EGPPGVALPVPFKPGGFFPEKAVRPVGPGERPARQDLRADRPPAGGLDAEAGLGPKGPAD  
RVDRRDPGGGGAQTTGA  
>comp14173\_c0\_seq6; 323 364 891 LEN=902; translated  
MEPPAEWPPQVRESYEPLRVLVGGFGSVVLARETKPPPEAPADGRTRPKKVAVKMGAV  
GNNKDDYDDEEQQDMAVLYARREIEILQHVSHPGIVRLFHHWIVEKETASDQAAAAVLVL  
EYAKGPTVESLLKHGGALSTTFGQVVIAQVVDALAYLHYRAVLHRDIKPDNILGT  
>comp14174\_c0\_seq1; 403 1 1489 LEN=1710; translated  
QRPDETEKITAEEAKPLDARQALDEILPGAGRVHGGPGRSQGSDPLPEIPQLFGGFSV  
EPPTSGETENKEDDESPAPIETSSLDPLDPKEPPSSSEHAPRMNGAKKLVGNAAPVHGPS  
YLEQDWILAECIGYGKYSLVHIPTETKECGSSSYNVFEANQGKTSPTGKKSSKRTSGS  
SSSDHKTATGMTGHGCAFRVSPRDKQVMAALVQAEREERDRVKRWKLPNRNAWHPKALV  
SRDEFALGALDFRSDCGNEGNNGMGDTTMVEENDGGESREEKGHNAAANTSKRSIVIH  
PSPLIIRTGLDRMYIMDQFVTQDFVHGAGNRGRIDETSPNTILTKTRDLAMSLSCDLVCN  
DSITSHIQQNRMVRSFQKDPHQGRRGTTESNLWVEEPSKLLAVGEEELAITAPPIKEEAP  
NLGLDNAENGCAPSQNQTATVSNPEKKENACSTKAEGDTGRSPETIDNPLHKNRSTAN  
GIERYEIEIDTRCS  
>comp14175\_c0\_seq1; 222 1 753 LEN=1265; translated  
RTNRVALIMVFLGTSAAVAEFAAKPFIKHALANPRSEIAVRSFFFIDCSASDVSDLLGD  
GKVEKEMVFWYFGHEEYDKLCHSFKDLIRDAGRNELFTDGEWGTIDGRFARILLCDQLS  
RNCFRGTKEAFQYDDVALSLAKEMSLAALSNTSRSEIHGMYASILTPLMHSESI  
LGRDLIEWGKLRNPNLSWGTLTAFLEHTKVLEKFGHYPHRNRAQGRPTTAEENWLASP  
ECPGWAKSQY  
>comp14176\_c0\_seq1; 498 162 1785 LEN=2631; translated  
MGNEERKDEAAPEAAPGDCKRNVSREKKDEDTSGTKRVLAANTNHYCTSTGGIDGDHDES  
GVKSIRMLEFFSGIGMRLSLERLWLLNDGDNQTKPQTNNLSARFLSAYDISLHANNVY  
RHNFEAGKNGEKCNETNKNFAVATKLVQQLRVGTIAKLRTNLWTMSPPCQPFITTNGRDK  
KGSDRRLDAEDKRCNGLKGIISLLDALRRISITGNSHAADETEGANAIEDPLPRWILLEN  
VKGFANSEMCRQWYECLNRNGYSYKPYLLSPIDLGI PNHRMRFYVLAERTTRSPRWVVP  
QRQQPQHNHADVNDPDHGDQSTTVVPIHDAASLPNRSSSWGGQAGTTPPTIQTIGTYV  
FDDDFYAASCDEPGREQHAARDGSAEASRPVVPMSVLSKPWAKNLGIVTKKDTITHCFT  
AGYGR IYHRSTGSLWGMGDDTERDDRPLSEVPLDRSDMTAYEGKLRFRFTPEELLRLFGF  
VEVDIDGGCGGDEGKSNPFEIPSGVVP SLEQRYKLIGNSISVRVTELLCELLMDSQNE  
>comp14176\_c0\_seq2; 530 1 2213 LEN=2511; translated  
XSPSTALATHDFTKTHSNRNSNSNSNNVSNNI SNNVSNKNSNRKSNNGTHVHASSKRK  
RPTTSRNAYAYASPSVHSEMEMETEIALVSDDDDEKRTETATETETEADSDAGFHGFLHR  
LVFDESITTASVEDQYNIIDVSYGGSENESENESSSSSSASTSSSASSASSSSSS  
LNHMLGDLD AIPSDQDSYRNNDTSYASSNYTSSSGEIEAATEVTYNHYDDNEQRGR  
YSNRGFESSRAGREVALLLSSDRSGVATLDAQALATVPMTIEQARTVVQPIAEAIARS  
TSLHTLVFTGPNFNDNNTGNNAGSKRPPQPQPQIHTHTHARTLESRAEMLGTILSD  
GLLPNTSVRTLVLVLEGNYSFDRYAGSIFGNLLRLHPRIRRELELRNCWWQCQSPSHTNSNS  
SNSNSNSKATSNHQHSNGSSSSGWNALLLGLQHSKSVKELSLLENLPPNGLSDSDLDGISL  
TMGYLQLESRLVGVGLQTIHPESLVVFFRAIQETPSIKDLDL SKNVLEGRSSHSLFLLS  
RCLSGATVDL FQCHRHGHDRHQTYATRSFAFYHRDDCFEVHHIERLTLVDCGITR TSDLK  
TLTSALSSTSGNTSSKSKSKHPTQAEKNPNRLNDATITSSLDVSGNRFNAGAKVLHEWI  
SAHPNVKALGMLSCNVS AKHLKIVSDRLRYNNSFLQAIGLGSEMSLAILDSVSTMENVLG  
GVVGGSGTSTVGGATPT



LGALRFGNPLPTASLGAEVRSAAIARFPGLEFLNASRISHEERLEAERRVTVLVSYSLQ  
KLNREVPVPGSTGTSGTGDGRGGEDSPERTAILDDHPRYPELMEKHNLKLAALLTKGTSGGG  
SLAASVYNLTIRSMAAASCTMDPVVRRLLPGSMTVERTRALCSRAFGVDYDLVRLRFRFTGG  
DDNGCLPVEMDEHDHRTLDDYGLCDGAEVLVDEADPRAVALESERTERDLERRMADHGRTI  
AAMQKAKTGGEGAAADADAPSIIPAPNPRARRNATAGPQGLFWPGDGSRWQPCCLLWVWPS  
NPSACSESNKTVGATERRPMRCGKNTSETQAVGTNMMEGGGVARSATKSRVESASRPNET  
TSSTSSNYSVWIRCTGALA

>comp14180\_c0\_seq1; 570 220 2223 LEN=3048; translated  
MYALAYLCQNLSNQCPOHLVKALLPEYPTFERIRRDVHTRTLSKEGINHSNFNQNFNN  
NNNKNKNKNKNDPNFIPAHEQLLSSTSRREPGNIFSGFSPSQSDVSPLPSPATTNITPLK  
VMIFIDGTWLYYSIYERSYERDVIAQKLGKYWRAELTPDWSRLPTVACQALLEDPKSKWS  
AIMPIGADASNESPSPSTTTVPARPIEVSRSVSYSSMHRDTPKDSFRYKMFADMMKAGFD  
VNMMEVVGKGEKCVDIQLAVDMLYYATVPDAYDVALLLTGDRDFLPAVIRCRQKGRRIGL  
VSMRTGSLAFEDTPNLKDYDTIWMEDYLSKWIREKTPQEMVSMNGLRGGKRPFSSSTNGT  
QQLSQISAHTLNKVITNFIKESGAPRVSSRDMGRHLKALTVGERSMLDEIKAVYGGGLYQF  
LVLAEIYRVEADSRRAFKAFVWSMQIDSKMTKKEERVREDEDLSDNEKKFLTMYEQWVPTD  
KNKEYHFTMTPEDLKKSPLSDISSSRVMPESLEDESPSVDYALTVPPELKEICRKRGLK  
VSAKKKIELIERIEASVSSEMQEPEIKVAESSPEKYLQSLVLEYLHASGGQASSRDVGRY  
LAANKVSYERRRIEGSMAQRMSALLELKEIYGLNAFVKNVHYLYTTSSEGHEFNICIDK  
DSRQKLS

>comp14180\_c0\_seq2; 570 220 2223 LEN=2338; translated  
MYALAYLCQNLSNQCPOHLVKALLPEYPTFERIRRDVHTRTLSKEGINHSNFNQNFNN  
NNNKNKNKNKNDPNFIPAHEQLLSSTSRREPGNIFSGFSPSQSDVSPLPSPATTNITPLK  
VMIFIDGTWLYYSIYERSYERDVIAQKLGKYWRAELTPDWSRLPTVACQALLEDPKSKWS  
AIMPIGADASNESPSPSTTTVPARPIEVSRSVSYSSMHRDTPKDSFRYKMFADMMKAGFD  
VNMMEVVGKGEKCVDIQLAVDMLYYATVPDAYDVALLLTGDRDFLPAVIRCRQKGRRIGL  
VSMRTGSLAFEDTPNLKDYDTIWMEDYLSKWIREKTPQEMVSMNGLRGGKRPFSSSTNGT  
QQLSQISAHTLNKVITNFIKESGAPRVSSRDMGRHLKALTVGERSMLDEIKAVYGGGLYQF  
LVLAEIYRVEADSRRAFKAFVWSMQIDSKMTKKEERVREDEDLSDNEKKFLTMYEQWVPTD  
KNKEYHFTMTPEDLKKSPLSDISSSRVMPESLEDESPSVDYALTVPPELKEICRKRGLK  
VSAKKKIELIERIEASVSSEMQEPEIKVAESSPEKYLQSLVLEYLHASGGQASSRDVGRY  
LAANKVSYERRRIEGSMAQRMSALLELKEIYGLNAFVKNVHYLYTTSSEGHEFNICIDK  
DSRQKLS

>comp14181\_c0\_seq1; 589 229 1328 LEN=1684; translated  
MKIPSACSVVIVLAGVAVVVRGFSVNTIARPAASTSPSGIVGPPRTELFGAGETSGEDAS  
APYREELVRREMLAARLQKNHIEPIPTAETEEEPDEEEDSQAVAVAEETDDEKEPET  
ISEKEEKDTQEGEPEGEVSSAEVDESEGATSEEPDNEDETESILSEADPTEKDAAVEVE  
ENKDEGKGIDALEPYANTFSTINPPFDKADPRAGSKASGKGNDDGGVKLEVVAASIA  
AKEVAADLLSFIRFGAANLLTSSLPETQREELLRRMGAQMLPPGTTATTIETTAEPEDAR  
ASINEEIALARAEEEAQASXEKVGEAKTMQVCVVRQGGVKEMLEESAIQAHVDEIEASMEE  
EKRPAE

>comp14181\_c0\_seq2; 467 1 1164 LEN=1466; translated  
AEEQNKEVEELLEKRKKQKAVLDTIEEELRVSVANAEERERLNSLLEKRKEQQSELSIV  
EENLRVQVVEIEAEKVQYKELVAELEVLEKEQEIMKQESPTAQESSEATPGEDTDSSE  
DSEEDIVHPVLGPVVADLGYKRIHFVSAGRLSNIPVWNRNRIYRNNRAKSMATEKIKSME  
LGFFPGAICLHETASGKLSIVDQHRVGMMAALKTTINKKVQKGEDLGDLGDEVFERVL  
VEVYPEQEGEGDRFAEKVFLINKAEPVKLIDMPGVASAADRKIITEAVETLNENFPSM  
FSPSQRCRIPNVNVDNLRGAVYGANILKRHKLTTGKQLVEWFVEKNAELGEEYENSKEKQ  
GLVSAKQWSKASSNNFYLGIDSSWLYK

>comp14181\_c0\_seq3; 462 1 1291 LEN=1593; translated  
AEEQNKEVEELLEKRKKQKAVLDTIEEELRVSVANAEERERLNSLLEKRKEQQSELSIV  
EENLRVQVVEIEAEKVQYKELVAELEVLEKEQEIMKQESPTAQESSEATPGEDTDSSE  
DSEEDIVHPVLGPVVADLGYKAFILFPLAGFQIFRYGTEIGKLVVVRTEANRVGTSQGRS  
SEMCRFRFVAFRLFARCSLKRTRRIYRNNRAKSMATEKIKSMELGFFPGAICLHETASGKLS  
IVDQHRVGMMAALKTTINKKVQKGEDLGDLGDEVFERVLVEVYPEQEGEGDRFAEK  
VFLINKAEPVKLIDMPGVASAADRKIITEAVETLNENFPSMFSQRCRIPNVNVDNLR  
GAVYGANILKRHKLTTGKQLVEWFVEKNAELGEEYENSKEKQGLVSAKQWSKASSNNFYLG  
IDSSWLYK

>comp14181\_c0\_seq4; 248 150 902 LEN=1258; translated  
MSYDRAITVFPDGHLLQVEYSMEAVRRGSTVVGIIQGNDCVVLAVEKRALAKLQDSRTIR

KIANIDDRTVLAFAGLTADARVLINKVRLEAQSYRLTMEDAPSADYLARYLAR IQQKYTO  
QGGVRRPFGIATLVAGVNDKGLKPYLYQTD PAGTHSRWKAQVIGGRNSKSLREFLEKQY  
QEIEQEELTEEKSVRLAVQALLEVVDSGAKTMQVCVVRQGGVKEMLEESAIQAHVDEIEA  
SMEEEKRPAE

>comp14181\_c0\_seq5; 862 229 1455 LEN=1455; translated  
MKIPSACSVVIVLAGVAVVVRGFSVNTIARPAASTSPSGIVGPPRTELFAGAGETSGEDAS  
APYREELVRREMLAARLQKNNHIEPIPTAETEEEPDEEEDSQAVAVAEEEGTDDKEPET  
ISEKEEKDTQEGEPEGEVSSAEVDSGATSEEPDNEDETESILSEADPTEKDAAVEVE  
ENKDEGKIDALEPYANTFSITNPPFDKAPRAGSKASGKGNDDGGVKLEVVANVAASI  
AKEVAADLLSFIRFGAANLLTSSLPETQREELLRRMGAQMLPPGTTATTIETTAEPEDAR  
ASINEEIALARAEAAQASEKKWEREKEDIVRQMEDAANARVEDELKIQMKLEKEQREAL  
KAKETELEEERKRFLLLLEERKKEKEFLANEVDPDGGAEVSDLFVAKKKE

>comp14182\_c0\_seq1; 1306 196 5837 LEN=5944; translated  
MAQLPPLVSYTLPSADASEESEKYKYEGSGQRLVVEEQKLGSGTDSSTSGTILTGESNLDE  
EQYTVAKSSCTENSTVNADSEIITIVKGENNSHNNQIQENHIDNLNSVDAVKIFESGHRH  
NNNDNNTKKRFLGKCTHCCKGHEAVQCWEKEENADQRPKNWVSNKEKREVMGVAISAQS  
ATEGRSPISVSGQKRRCPSTTSII EGEMSSHDDIVKRKHQDFYSKLYPCIPNTTITNLS  
YDASIGAVEGAMDEGSLTSSISSGGSWKIASLPRQSLQLRPWESDSKVHTAYHHTKWIIP  
KWIPNDSGEYLDEDVTSLLFTPPQFSKHVLRVRAEDAIAKKLDNMHHLWKATLSSNDHTSPQ  
SYVVEATGTAKVLEILRQLIQVFVRLEIERSNLNRLVNDNSLIVEIPWVIDLQANPSHQ  
TLGARISGVHYANTVGAYIKTVHPDSVLIKALGNDACSRGCALLAVNGKKAIAKASQIGKL  
VTEAKSEISEISKGSPTVTIQLTLCLSKYCDLSAATNLFRMNLKNDGSPYNKEEHLNFM  
LQRCIAIEQRQDLNFIQCHDSTTQQKTVDQIQMQEEQDTNCSKSDQKLLNSSQISKKRA  
SGSSHKTCTKRRKVVGIEDESDRESSEEEESLSTEDTFVKVKKRAANDGIKKFWHFEEK  
MRPLISLDFRDTKINSKLITSSMWKHKELFGEDQVCGENCRCIMLLPDITKNVIQDYIV  
RQRKKKQVVEETEEILTKNTNGLCKYFAPKRVPLLEMEYPNETKSKLLKRLVSMWELHQEN  
RMYGIRCKKNACAGEWDQFLGKGDREKANAFLKQTRHFQKRNVSQVIKAKPEGLVPR  
KKKTPAPILTHKKHDSNEVISMMKIGESSLISSMASRNEPYEIAFDSSIALGGYFKTEG  
NPQRCIIYSKYKDGQMAKHQKLGNGTTVVSVVTGETKNPIHSHNDLKHFYENAQRTRSIL  
CILFVNQSAKSDYAQSESGWDDLGQWISTNYLDDDHGWAGGATVVKTPQVRKVSIASSKP  
IEAILPGQELFEPNADGKTRQTTVQEWTSIINTTKPGHNERVPPKPLIGKQSTFLPDEPI  
GSLQKSNQGIGLLSQGKRITSRRKRTHSKVKFSEPKNEEFYCKNEANVRRVLTSG  
KIETNKTSQKLPQQTLDALTNNGSCKDMLQVLQMQPCEDPNLESLLQKQYSVTGIEMRN  
HPQRTGHGSKNNDFYAKYRALSIIYHCIIHLIERAMCLKKWAYALEIELNYIDLVRDNQTQN  
DVI EGGVSLKSKNGNALTDLVSFLSGLQFMIYIPLPFRSIIASILSLEIGSSAISAVFSAL  
SYSDSESPLLFNHNNKAFSFDQRNLI IALTKRSSEGSEATATNVGCFKLNLDIEEEKCP  
SDGSHVKSQLLVRNGTGEISSGFASFVTKKRKADSSYIREKKREVSKLROQFAQIERF  
NQDPKIDPDVHMNGNIFGLDGKSI LHAAVNLMDDDDLIRKLLKLGANPRSCDYLSIGSPL  
SLAQRNYHSAEKEKSMRCENSADLELHEKRSNQARLIVEMLNHSTEPNAPVANSSLAS  
GVSKQSSYVLQNRQSNALSSKSDIQSTSTPKQRMSATEYNQLASRTTVSHASSTRETSAM  
ISDSKESISYSQQSNPQPTSAKGGIHLPLMKDPNWFEPREWTGHYKCVHGDDCRFFKQ  
RKCRFWHDLRNLPHGQISPPPVSLLPSLADLPVLSAHQVVYKEVGCWHTAAYADRDSNL  
IIYVTKILSYSGSVGTDTGTCWFRTRADALVGLRFTVYFEMKNEDATRTAPSGHRGRNSDH  
GDRSSSSHYTNQSKNTSHRKHQHQQHQHQHQHQHSGDRSHYYKSYDFRDNHRHSRHGNKQN  
HHNDYYDSRRDSRAHHR

>comp14182\_c0\_seq2; 1365 196 5751 LEN=5858; translated  
MAQLPPLVSYTLPSADASEESEKYKYEGSGQRLVVEEQKLGSGTDSSTSGTILTGESNLDE  
EQYTVAKSSCTENSTVNADSEIITIVKGENNSHNNQIQENHIDNLNSVDAVKIFESGHRH  
NNNDNNTKKRFLGKCTHCCKGHEAVQCWEKEENADQRPKNWVSNKEKREVMGVAISAQS  
ATEGRSPISVSGQKRRCPSTTSII EGEMSSHDDIVKRKHQDFYSKLYPCIPNTTITNLS  
YDASIGAVEGAMDEGSLTSSISSGGSWKIASLPRQSLQLRPWESDSKVHTAYHHTKWIIP  
KWIPNDSGEYLDEDVTSLLFTPPQFSKHVLRVRAEDAIAKKLDNMHHLWKATLSSNDHTSPQ  
SYVVEATGTAKVLEILRQLIQVFVRLEIERSNLNRLVNDNSLIVEIPWVIDLQANPSHQ  
TLGARISGVHYANTVGAYIKTVHPDSVLIKALGNDACSRGCALLAVNGKKAIAKASQIGKL  
VTEAKSEISEISKGSPTVTIQLTLCLSKYCDLSAATNLFRMNLKNDGSPYNKEEHLNFM  
LQRCIAIEQRQDLNFIQCHDSTTQQKTVDQIQMQEEQDTNCSKSDQKLLNSSQISKKRA  
SGSSHKTCTKRRKVVGIEDESDRESSEEEESLSTEDTFVKVKKRAANDGIKKFWHFEEK  
MRPLISLDFRDTKINSKLITSSMWKHKELFGEDQVCGENCRCIMLLPDITKNVIQDYIV  
RQRKKKQVVEETEEILTKNTNGLCKYFAPKRVPLLEMEYPNETKSKLLKRLVSMWELHQEN  
RMYGIRCKKNACAGEWDQFLGKGDREKANAFLKQTRHFQKRNVSQVIKAKPEGLVPR

KKKTPAPILTHKKHDDSNEVISMMKIGESSLISSMASRNEPYEIAFDSSIALGGYFKTEG  
NPQRCCIYSKYKDGQMAKHQKLGNGTTVVSVVTGETKNPIHSHNDLKHFYENAQRTRSIL  
CILFVNQSAKSDYAQSESGWDDLQOWI STNYLDDDHWAGGATVVKTPQVRKVSIASSKP  
IEAILPGQELFEPNADGKTRQTTVQEWTSIINTTKPGHNERVPPKPLIGKQSTFLPDEPI  
GSLQKSNQIGIGLLSQGKGRITSRKRTHSKVKFSEPKNEEFYFKNEAANVRRVLSTG  
KIETNKTSQKLPQQTLDALTNNGSCKDMLQVLQMQPCEDPNLESLLQKQYSVTGIEMRN  
HPQRTGHGSKNDFYAKYRALSIIYIHCIIHLIERAMCLKKWAYALEIELNYIDLVRDNQTQN  
DVI EGGVSLKSKNGNALTDLGRLPSRQCSQHMSYSDSESPLLFNVHNNKAFSFDQRNLII  
ALTKRSSEGEATATNVGCFKLNLEIEEKCPSDGSHVKHSQLLVRNGTGEISSGFASFT  
VKKRKADSSYIREKKREVSKKLRQQAQIERFNQDPKIDPDVHMNGNIFGLDGKSI LHA  
VNLMDDDLIRKLLKLGANPRSCDYLSIGSPLSLAQORNYHSAEKEKSMRCENSADLELH  
EKRSNQARLIVEMLKNHSTEPNAPVANSSLASGVSKQSSYVLQNRQSNALS SKSDIQSTS  
TPKQRMSATEYNQLASRTTVSHASSTRETSAMISDSKESISYSQQSNPQPTS AKGGIHL  
MLKDPNWFEPREWTFHYKCKVHGDDCRFFKQRKCRFWHDLRNLPHGQISPPPVS SLP  
LADLPVLSAHQVYKEVGCWHTAAYADRDSNLIIYVTKILSYSGSVGTDGTCWFRTRADA  
LVGLRFTVYFEMKNEDATRTAPSGHRGRNSDHGDRSSSSHYTNQSKNTSHRKHQH QHQ  
HQHQHQRQHS GDRSHYKSYDFRDENRHSRHGNKQNHNDYD SRRDS DRAHGR  
>comp14183\_c0\_seq1; 331 1418 2386 LEN=2760; translated  
MAEGAPPHANLHPLRAIFVIPTKPAPTLDADPNWSPDMLDFVRACCQK DASQRRDSASLA  
TQAFIRKDV MALRAMHAGEVPTVDADAKAKYRKLAE SQNSKPGLPALRRVMERM RKKLD  
VKKRGEETAKNTE SRNDTGSAISRNSSAPQTNGQLG PLDMSNQATLAISSRN VSEYNTG  
DSPLPNGSGPSPAGIFTPD TLNYGLSSAMDFDPK LLEDNKFRKDI EKLSRVFETKLAAL  
TAHEFAQHKLVAEAQIRNNIPIDVMALMEQAHRGNAK DDES RKALDDAKDIGMIKEV VQ  
KNQMKSNRNTSSERVLLMDQSI  
>comp14183\_c0\_seq2; 359 992 2311 LEN=2685; translated  
MEYCEGGSMTDILEANAGYSLPEDCIREVCASIVLGL EYLHG VANVCHRDIKCGNVLLTS  
DGHVKLADFGVSAELSNTLNKRKTVVGS PYWMAPEVIRESHYDGRADVWSL GITCIEMAE  
GAPPHANLHPLRAIFVIPTKPAPTLDADPNWSPDMLDFVRACCQK DASQRRDSASLATQA  
FIRKDV MALRAMHAGEVPTVDADAKAKYRKLAE SQNSKPGLPALRRVMERM RKKLD  
KRGEETAKNTE SRNDTGSAISRNSSAPQTNGQLG PLDMSNQATLAISSRN VSEYNTGDS  
PLPNGSGPSPAGIFTPD TLNYGLSSAMDFDPK LLEDNKFRKDI EKLSRVFETKLAALRTA  
HEFAQHKLVAEAQIRNNIPIDVMALMEQAHRGNAK DDES RKALDDAKDIGMIKEV VQ  
MKS NRNTSSERVLLMDQSI  
>comp14183\_c0\_seq3; 409 150 1745 LEN=2119; translated  
MALSQNDRSNELEILNLIGEGSFGAVYRATHRSTGAVVAVKVI VNASSSKSEEEKIKGEI  
EILSRCDSPYIVGYFECFIK PATSKPGEMWIVMEYCEGGSMTDILEANAGYSLPEDCIRE  
VCASIVLGL EYLHG VANVCHRDIKCGNVLLTS DGHVKLADFGVSAELSNTLNKRKTVVGS  
PYWMAPEVIRESHYDGRADVWSL GITCIEMAE GAPPHANLHPLRAIFVIPTKPAPTLD  
ADPNWSPDMLDFVRACCQK DASQRRDSASLATQAFIRKDV MALRAMHAGEVPTVDADAKA  
KYRKLAE SQNSKPGLPALRRVMERM RKKLD R VKKRGEETAKNTE SRNDTGSAISRNSSA  
PQTNGQLG PLDMSNQATLAISSRN VSEYNTGDSPLPNGSGPSPAGIFTPD TLNYGLSSA  
MDFDPK LLEDNKFRKDI EKLSRVFETKLAALRTAHEFAQHKLVAEAQIRNNIPIDVMA  
LMEQAHRGNAK DDES RKALDDAKDIGMIKEV VQ MKNQMKSNRNTSSERVLLMDQSI  
>comp14183\_c0\_seq4; 332 150 1820 LEN=2194; translated  
MALSQNDRSNELEILNLIGEGSFGAVYRATHRSTGAVVAVKVI VNASSSKSEEEKIKGEI  
EILSRCDSPYIVGYFECFIK PATSKPGEMWIVMEYCEGGSMTDILEANAGYSLPEDCIRE  
VCASIVLGL EYLHG VANVCHRDIKCGNVLXNQVSP I P S P IGETPRSEPI LTIADAYSD  
GHVKLADFGVSAELSNTLNKRKTVVGS PYWMAPEVIRESHYDGRADVWSL GITCIEMAE  
GAPPHANLHPLRAIFVIPTKPAPTLDADPNWSPDMLDFVRACCQK DASQRRDSASLATQAF  
IRKDV MALRAMHAGEVPTVDADAKAKYRKLAE SQNSKPGLPALRRVMERM RKKLD R V  
KKRGEETAKNTE SRNDTGSAISRNSSAPQTNGQLG PLDMSNQATLAISSRN VSEYNTGDS  
PLPNGSGPSPAGIFTPD TLNYGLSSAMDFDPK LLEDNKFRKDI EKLSRVFETKLAALRTA  
HEFAQHKLVAEAQIRNNIPIDVMALMEQAHRGNAK DDES RKALDDAKDIGMIKEV VQ  
MKNQMKSNRNTSSERVLLMDQSI  
>comp14184\_c0\_seq1; 762 1 2978 LEN=2978; translated  
XDTFGSIDCILNENIADTTEIIQSHCSSSGISLVKLYVQDSTFVVGSKTAKLPKCCHDP  
SPIESKEGSLFEYTVVINCTPTCPENELTKYDSETGSSSESINDVDYNNSPKLIKHALPS  
PEDGPVIIAYNDGDTLELENTSGQNSLTILLKMDIGEDGSVAGNFVPVGRSYNGNPWENY  
ANKFSQLVFSHCDGSSSRMTLPPPETGRAYVLKSKRYPRDPTQDELRARFLERTTYGPT  
KADISAFSSPGEWMEEQFNMDLTSHRQFYRERATHWHPETNQIGLLKTGPCEDESARYRY

AFLTKDRGRYVEIAVSPYDPDKLILSIDGLVRTIVDGGPFQYKVKNDVWENVKSESYGMYE  
ICSSPFEGVGGFRFMLRGEEMDGCKEYVFNVDVYGHPAVNFDDLHRHLPEQPVVKLDSENVK  
DVMTEFFQGETEMLKVTSTLTKDACRISDEIVIGLPERIIIGETQDETNGTRYWIHSP  
FQIQNNQLDSPLNDGGKRAVTLTETNHVSDDRFIAKCSNAPRTFLNEDTCQFSEDACYAA  
EGKDVDFELSVENLELIHQKTGGKDGSDTKYVYAVTGLRNDPEWTDPPCTPGARSRWIVV  
DDCNPSSWDSTTRSSFETLLRMSDDTNSFMKDVFFPTSDGGTVTCSPEDSDKFDKFIQ  
IDGICYENTHPDNLQVYDMTHWTSDAHPGNFRENKIKAFETNTTWYLTYPDWHEMDRWH  
RKKGLFSYVGRGLDTTTTLKSPLSLQREDIAQAFGSARAI FSGGVVCGSPFEVANVDND  
HAGPFGKGGFDMRTHKNATTGGDFRTQRATVWNSIALWSKDQLRQRMALFALSQIFSVSPD  
AVGSQDFTESYLSYYDIFVRHAFGNFYDIMKEVYHPIMSRMLTYRDGLSTGYSIVRKS  
MFLTPDENYAREIMQLFSIGLKMNNNGTIQVNDGTEPLPYTNEDIAEYAKIYLGVAQK  
SRGNIDGNHNQVDPLLIMSEHKDHF PKVRS LFN

>comp14184\_c0\_seq3; 545 674 2491 LEN=2681; translated  
MNLFLSHLKYGPSNCYSGMGISGRIATGWTNKCEIGNNIYNQGNKYLP  
SAYGLNEASAS EVIDDLAMLLTSGRLSPENR  
GIMKEVFDHTLASGKGEFEAMINVQQLMVLSP  
EFHTTGLVQKTGKKRPLPTKPDATNIPYKAVIY  
LMLGGGMSDFNVLVPDSCSGKNAAGQTVDEQY  
LEQRDVLA  
FDRSQGEFDFKINPKTEQPCE  
SFAINKDLKYMQLYDEGDLLFMANTGIVN  
QNGMTIKNYNTKTRSRFLDHAGMQKEAKR  
VDPYDTFVGTGVLGRAKDVLTQKGHV  
VNAMSVNGASVTLTGT  
PGLSTSM TVVSSGGVSPFGKRP  
NHEKYFELERYAEELNAEVDL  
FSSVFGETWSDHFVNGVEEAFNFDKLLAD  
VEVDPNIWNRDSSSLHGK  
LKIARLIKIREERNADR  
DVFYTDHNI  
FDHHSMDKNRLGKGLSEVDN  
NLKMLVEELKSENLDNVTIVVASE  
FARTITPNSNKGS  
DHA  
WGGNYWMLGGNVRGGRVVGKYPDDIT  
KESPLNAGSNARVRFIPTTSWDSV  
WHGIIQWFGVDEKDL  
DYCLPNRNTASPVV  
GAGDFPLLNRIDLFESQDTPTDEL  
PKQRKLRQASIQSKSV

>comp14184\_c0\_seq4; 1676 1 6542 LEN=6732; translated  
XDTFGSIDCILNENIADTTEIIQSHCSSSGISLVKLYVQDSTFVVG  
SKTAKLPKCCHDPSP  
IESKEGSLFEYTVVINCTPTCPENELTKYD  
SETGSSSESINDVDYNN  
SPKLIKHALPSPEDG  
PVIIAYNDGDTLELENTSGQNSLTILLKMDI  
GEDG  
SVAGNFVPVGRSYNGNPWENYANKFS  
QLV  
SFHCDGSSSRMTLPPPETGRAYVLKSKRY  
PRDPTQDEL  
RARFLERTTYGPTKADISAFSSPGEW  
MEEQFNMDLTS  
HRQFYRERATHWHPETNQIGLLKTG  
PCDESARYRRYAF  
LTKDRGRYVEIAVSPYDPDKLILSIDGL  
VRTIVDGGPFQYKVKNDVWENVKSESYG  
MYEICSSPFEGVGGFRFMLRGEEMDGCKEY  
VFNVDVYGHPAVNFDDLHRHLPEQP  
VVKLDSENVKDVMTEFFQGETEMLKVT  
STLTKDACRISDEIVIGLPERIIIGET  
QDETNGTRYWIHSPFQIQNNQLDSPL  
NDGGKRAVTLTETNHVSDDRFIAKCS  
NAPRTFLNEDTCQFSEDACYAAEGK  
DVDFELSVENLELIHQKTGGKDGSDTK  
YVYAVTGLRNDPEWTDPPCTPGAR  
SRWIVVDDCNPSSWDSTTRSSFETLL  
RMSDDTNSFMKDVFFPTSDGGTVTC  
SPEDSDKFDKFIQIDGICYENTHPD  
NLQVYDMTHWTSDAHPGNFRENKIK  
AFETNTTWYLTYPDWHEMDRWH  
RKKGLFSYVGRGLDTTTTLKSPLSL  
QREDIAQAFGSARAI FSGGVVCG  
SPFEVANVDNDHAGPFGKGGFDMR  
THKNATTGGDFRTQRATVWNSIAL  
WSKDQLRQRMALFALSQIFSVSPD  
AVGSQDFTESYLSYYDIFVRHAF  
GNFYDIMKEVYHPIMSRMLTYRD  
GLSTGYSIVRKS MFLTPDENYARE  
IMQLFSIGLKMNNNGTIQVNDGTE  
PLPYTNEDIAEYAKIYLGVAQK  
SRGNIDGNHNQVDPLLIMSEHKDHF  
PKMGMSKYVGDGYPLCS  
DLPRQHFLKEGAVYRLLGADPN  
PELLVDP  
SDWYGAPAKRISLDF  
TSSPLALALCNGNGIDCNPQS  
QVILKSDIRCTGIECEI  
HQPTIEVAKNLWFEYVRPPCVNQA  
FFNNGQSIRKNGHCGWQKNM  
CGNPLNLEASTLCCDNTK  
SWDIPWRRELF  
GGERVSFDISLERCSENEGLR  
LCKNAQSSWQDCFNES  
PDG GYRSTKNGGCDRCN  
QFYWLSEPCSIHAKIGVEG  
SIAIVHDFVETSSFQET  
YRMVRNDTKMFFRVDW  
KTSYARDFLLDYSTNCNSL  
GCFVDDL  
DGTCCQCTLVEDAMAFVNE  
SELISVDHL  
LATADIGAFPPSDSFVPTVVDGI  
HKYPPGILS  
QETVFKVTD  
FNGQIT  
YRKNLVSIVK  
LGN GKL  
SFRNPV  
SFWSLSEHTV  
RDAR  
YELDAALEHYFYH  
QNVAPFVAYRLAQR  
FGT  
SNPSRYIDVIA  
TAFRTGTY  
SNGSRFFGSKY  
GCLQATIAAVVLD  
REAQDHILDADPT  
SGHLREILL  
KLIQIYRSLE  
FAPDADNPL  
PVFKFN  
LQDRIKQAPHS  
IPSVF  
SFFKPOYSPPG  
IVSAAEMV  
SPESQILNGP  
NAVTTMNLFL  
SHLKYGPSNCY  
SGMGISGRIAT  
GWTNKCEIGN  
NIYNQGN  
KYLPSAYGL  
NEASASEVID  
DLAMLLTSG  
RLSPENR  
GIMKEVFDHT  
LASGKGEFE  
AMINVQQLM  
VLSPEFHTT  
GLVQKTGK  
KRPLPTKPD  
ATNIPYKAV  
IYLMG  
GGMSDFNVL  
VPDSCSG  
KNAAGQTV  
DEQYLEQR  
DVLA  
FDRSQGEF  
DFKINPKTE  
QPCE  
SFAINKDL  
KYMQLYDE  
GDLLFMANT  
GIVN  
QNGMTIK  
NYNTKTR  
SRFLDHAG  
MQKEAKR  
VDPYDTFV  
GTGVLGRA  
KDVLTQK  
GHV  
VNAMSV  
NGASVTL  
TGT  
PGLSTSM  
TVVSSGG  
VSPFGKRP  
NHEKYFEL  
ERYAEEL  
NAEVDL  
FSSVFGET  
WSDHFV  
NGVEEAF  
NFDKLLAD  
VEVDPNI  
WNRDSS  
SLHGK  
LKIARLI  
KIREERN  
ADR  
DVFYTDH  
NI  
FDHHSMD  
KNRLGKGL  
SEVDN  
NLKMLVE  
ELKSENLD  
NVTIVV  
ASE  
FARTITP  
NSNKGS  
DHA  
WGGNYW  
MLGGNVR  
GGRVVGK  
YPDDIT  
KESPLN  
AGSNAR  
VR

FIPTTSWDSVWHGIIQWFGVDEKDLDYCLPNRNTASPVVGAGDFPLLNRIDLFESEQDTP  
TDELPKQRKLRQASIQSKSV

>comp14185\_c0\_seq1; 254 463 2403 LEN=2493; translated  
MDNYLSSEFEGNLGLSSTAREWRPPGAQQQQPTTNQQQYPPPLAPGSDQQKSPQVSRIVSN  
DWQYQNQGETELNHSVKEFVPGRGWSTQGSAAASNAVMEAKKDPSTYDIFGSNMSSHNEPHD  
GSASMEQILSGPGTSTVPSGPTPPPFRSLHSLGLSDDNWRYYRDLAAEETRQMNPSDRPH  
KAIPLPYCNAFCLDPPKHQNSRSSFGYPASTYQVVNRDDGHLYCLRRFDNVKSVNPKIAA  
AVMEQWAGLEHPGIATLHQCFVAQRAVFFVHQYIIPGTQSFLQIANPPSLSEPVIWSAICQ  
MVTVIRR VHGAGLALRTLDRHTLLQMDALRLKVFLNCLGIVDALEFEARKPIPELQAKD  
MRKFGRWILSIVTGTNITASTDAQTLQNCERYCMQNYSRDLRHFILTLIRSNPPSILDV  
SRALPGRMLDELSTQLSLLRTEKALSGEYESGRALRLLLKLGFNERPENGANRRWSQS  
GDCYVLTFRDYGKCGTCADAVYSXLFDTQRNSLLHCALTL DANVFFIPLVFHQADGAGN  
PVMDLGHVVTALNKLDAADEEKIVLSSRDGKSVMVVSYADVARCLNSAYHELCSGSTPLQ  
ALQAEDKGNPIDNEEERIHFYDTQTKIRNNILAILFLLISGSCIGR

>comp14185\_c0\_seq2; 307 463 2290 LEN=2380; translated  
MDNYLSSEFEGNLGLSSTAREWRPPGAQQQQPTTNQQQYPPPLAPGSDQQKSPQVSRIVSN  
DWQYQNQGETELNHSVKEFVPGRGWSTQGSAAASNAVMEAKKDPSTYDIFGSNMSSHNEPHD  
GSASMEQILSGPGTSTVPSGPTPPPFRSLHSLGLSDDNWRYYRDLAAEETRQMNPSDRPH  
KAIPLPYCNAFCLDPPKHQNSRSSFGYPASTYQVVNRDDGHLYCLRRFDNVKSVNPKIAA  
AVMEQWAGLEHPGIATLHQCFVAQRAVFFVHQYIIPGTQSFLQIANPPSLSEPVIWSAICQ  
MVTVIRR VHGAGLALRTLDRHTLLQMDALRLKVFLNCLGIVDALEFEARKPIPELQAKD  
MRKFGRWILSIVTGTNITASTDAQTLQNCERYCMQNYSRDLRHFILTLIRSNPPSILDV  
SRALPGRMLDELSTQLSLLRTEKALSGEYESGRALRLLLKLGFNERPENGANRRWSQS  
GDCYVLTFRDYVVFHQADGAGNPVMDLGHVVTALNKLDAADEEKIVLSSRDGKSVMVVSY  
ADVARCLNSAYHELCSGSTPLQALQAEDKGNPIDNEEERIHFYDTQTKIRNNILAILFLL  
ISGSCIGR

>comp14186\_c0\_seq1; 162 133 510 LEN=988; translated  
MRNPVTNIASMITSTDIPDWC FGEVMGEYDQSLFRGPTSEQIVKMYEKSPMSLVHRVKTP  
TLLALGSVDLRVPPSQGLEWYHSLRSLGVPTKLLKYPQDCHSLNLVTTEVDHWMHIRHWF  
DEYFR

>comp14186\_c0\_seq2; 162 133 510 LEN=818; translated  
MRNPVTNIASMITSTDIPDWC FGEVMGEYDQSLFRGPTSEQIVKMYEKSPMSLVHRVKTP  
TLLALGSVDLRVPPSQGLEWYHSLRSLGVPTKLLKYPQDCHSLNLVTTEVDHWMHIRHWF  
DEYFR

>comp14186\_c0\_seq3; 590 258 2654 LEN=2962; translated  
MTKLSAVETLSTIPDLDEDTRQFHQYAAA AVDL SLAHVSAQSVLSVVR SVRNWETNTRRN  
YLYRINLAPALTESGSTETLSESMMLPPIPLDPSVQMFLPSPSGQKTIVVRKEHQNDNDC  
QIVEVWEGSLLKRRVEVGKTSHGNI INDPAGFGMPSPDEKHLLYSAERRPPSTSPFW  
SKI KDDR GKHKIGGQNVGEGQTESWGETYHNQEA ILDLYI LNLSTGQLGRVWNVPKTFD  
QETPQSSVSEKEKASSVTFGQGVWHPTASRIAVTGWSAGQPKRLGMVYCKNRASQIYEID  
VGSLIEELGETSIDEKEEQKKNKSEASCKSDVNYTRISSDLFFARSPRYIGESLVFLSS  
HAFVSHDACMALYRWDKEEESFVVVPTIENPSPNGAKVSGLGFPGLYLSQLP INCDIDG  
NYLVT'TTLWGSFQRVIRVNVENG DVHLIHIPQMNELGSQSLCTVSANGDLVISEASCDQP  
ASLWTVKKQDVLQANKADSGRIEVDAYRITSFFPIAASTFSDVQPTTDLPYDMQVMSLES  
NSIDGAPSTSIQALLLLPKNKDQKVP MIVVPHGGPHGCSTSAFAPGIAYLASKYAVLLPN  
YRGSTGFGQAPLKSLLTRIGRVDVDDVMLCTRHTIENFSVVD SKRIGICGGSHGGFLTAH  
CTSQYPEFFKAAAMRNPVTNIASMITSTDIPDWC FGEVMGEYDQSLFRGPTSEQIVKMYE  
KSPMSLVHRVKTP TLLALGSVDLRVPPSQGLEWYHSLRSLGVPTKLLKYPQDCHSLNLVT  
TEVDHWMHIRHWFDEYFR

>comp14186\_c0\_seq4; 590 258 2654 LEN=3132; translated  
MTKLSAVETLSTIPDLDEDTRQFHQYAAA AVDL SLAHVSAQSVLSVVR SVRNWETNTRRN  
YLYRINLAPALTESGSTETLSESMMLPPIPLDPSVQMFLPSPSGQKTIVVRKEHQNDNDC  
QIVEVWEGSLLKRRVEVGKTSHGNI INDPAGFGMPSPDEKHLLYSAERRPPSTSPFW  
SKI KDDR GKHKIGGQNVGEGQTESWGETYHNQEA ILDLYI LNLSTGQLGRVWNVPKTFD  
QETPQSSVSEKEKASSVTFGQGVWHPTASRIAVTGWSAGQPKRLGMVYCKNRASQIYEID  
VGSLIEELGETSIDEKEEQKKNKSEASCKSDVNYTRISSDLFFARSPRYIGESLVFLSS  
HAFVSHDACMALYRWDKEEESFVVVPTIENPSPNGAKVSGLGFPGLYLSQLP INCDIDG  
NYLVT'TTLWGSFQRVIRVNVENG DVHLIHIPQMNELGSQSLCTVSANGDLVISEASCDQP  
ASLWTVKKQDVLQANKADSGRIEVDAYRITSFFPIAASTFSDVQPTTDLPYDMQVMSLES  
NSIDGAPSTSIQALLLLPKNKDQKVP MIVVPHGGPHGCSTSAFAPGIAYLASKYAVLLPN

YRGSTGFGQAPLKSLLTRIGRVDVDDVMLCTRHTIENFSVVDKIRIGICGGSHGGFLTAH  
CTSQYPEFFKAAAMRNPVTNIASMITSTDI PDWCFGEVMGEYDQSLFRGPTSEQIVKMYE  
KSPMSLVHRVKTPTLLALGSVDLRVPPSQGLEWYHSLRSLGVP TKLLKYPQDCHSLNLVT  
TEVDHWMHIRHWFDEYFR

>comp14187\_c0\_seq1; 613 1 2122 LEN=2176; translated  
XENQNKKPLTKTTQDAKLKRDKSTPTKVASKSENRIKKPSAKTTRDDKNELQYDNPRNH  
NFSIPPRSNETNTSHENHQFAHSDDNSRIAKAVEDKTKKTKKKAPEEYVRITPPPSHSI  
TPEKENTDLNLAVGTGIITPVSDTAISRPTTFNQHTNGIARNTTVPRKDSEIDTQSSD  
SKKRSRSSSSSGRRRAKRRKAAQKIRPPTRRERHKVLV NKARRNHDSIEESTNVVPEEY  
GRSTSSCPRRSDARGVKEGSKDEKNVPSATRRRLRSSSNKVAVLXEMNLP RSPTLHVGLQ  
RETLNGESLKKDMNSCSTQTPIVHHQRNDSMHITPYGPSKFATSICLEAQFRRVGLSMPA  
LGHLLSFFSSRFGTARAEALEHIITFRAGIRAKFQPELTF LAKLLPFVRDPSCATANALK  
GLHHFILDCLLLET CNSQLAKKYGEEWHERIIISLIQNRSLSDMVCTKLLTICRDSTRGLI  
MVVFEIVDHLIKHESREIGNRAWNDHKRNQIEEATFRVEDERILFPQKEENRKAWGCVSQ  
VNHDVNNPSSCSFHSMTDTCNEIAERGFRATERDWRSTDGRSLGSSVGEDQRLMWTKEG  
MNENALQQQEATYTSQDEKYWLQRNEHNRNGTEPGLVHFNHGNSNGLWYSGDHSYYNDG  
RSNHNNAAINSMITNERPQSCAQHPPTNYLNQLLENLLTNP DNYFRK

>comp14187\_c0\_seq2; 709 1 2318 LEN=2372; translated  
XENQNKKPLTKTTQDAKLKRDKSTPTKVASKSENRIKKPSAKTTRDDKNELQYDNPRNH  
NFSIPPRSNETNTSHENHQFAHSDDNSRIAKAVEDKTKKTKKKAPEEYVRITPPPSHSI  
TPEKENTDLNLAVGTGIITPVSDTAISRPTTFNQHTNGIARNTTVPRKDSEIDTQSSD  
SKKRSRSSSSSGRRRAKRRKAAQKIRPPTRRERHKVLV NKARRNHDSIEESTNVVPEEY  
GRSTSSCPRRSDARGVKEGSKDEKNVPSATRRRLRSSSNKVCHDTSSDMIKNRSIEPLHL  
VRNFEITMFQHERLNAMNHMMFE GAHEQS AKTNRMELSLPHNLFD SGRRIGEMNLP RSPTL  
HVGLQRETLNGESLKKDMNSCSTQTPIVHHQRNDSMHITPYGPSKFATSICLEAQFRRVG  
LSMPALGHLLSFFSSRFGTARAEALEHIITFRAGIRAKFQPELTF LAKLLPFVRDPSCAT  
ANALKGLHHFILDCLLLET CNSQLAKKYGEEWHERIIISLIQNRSLSDMVCTKLLTICRDS  
TRGLIMVVFEIVDHLIKHESREIGNRAWNDHKRNQIEEATFRVEDERILFPQKEENRKAW  
GCVSQVNHDVNNPSSCSFHSMTDTCNEIAERGFRATERDWRSTDGRSLGSSVGEDQRLM  
WTKEGMNENALQQQEATYTSQDEKYWLQRNEHNRNGTEPGLVHFNHGNSNGLWYSGDHS  
YYNDGRSNHNNAAINSMITNERPQSCAQHPPTNYLNQLLENLLTNP DNYFRK

>comp14188\_c0\_seq1; 226 1 1161 LEN=1513; translated  
IRNIQTTRSNTPNVPPHKGKSDRQRHTLREDQIHGMPAEPDRNTHANESSEKTNHGND  
NGNGNGKDPVLLRDLPEVPTGDQGCERAVCVRLYLIRHGQTDWNRAGR VQGGGYDV  
PLNATGRLOAKRAGKALGGIPLDLVSSGLSRASETADLVALEVQALAKKSGSGNHNGC  
SPARVVDKGFNEMRFGALEGIKGTGRGRACSRGGEDRLWERARAAKEKVR LDPDCCFPATL  
FGEDDACGDDDEAAEKDKWRVLEGTREGESTRMVQERSLRALSRVLSAVPGGERLGGTD  
TTKNTKRVYHVAVVGHGRNTNKVLLAAMLHG EAQGRYSEIQQGNACIYVLDLREDALHNQ  
GNGNDRGLWKPLLNVNHTQH VLEPQL

>comp14189\_c1\_seq1; 164 59 1060 LEN=1060; translated  
MSPAAAPSREPRAPAVEVLGPGEQPPHPVIQTIPFAIPPLPVASLPSTGRNGIVGSIVR  
MGKKSAMVWVGWGLLEEDGAPASASRAETAKEAHGGDPSWSGFGTATPAMGQLVLAMPRT  
RYAGAFSPPGGEAPCSQLVGSASSEDQMLANQMAARLSSRS GMAIYVSCRLSSLEGLGGS  
PGPEADTLCQRAAALAEREAWKILREQQQXVETAATGGTKK GKACRAGLARGRRAQPTRG  
EAGNAASVAGTGGRAPPLYET TNGNQ RNDETRPTLLLANTTDGDAYETHYGSFLVQPTAK  
PLALLRSNQKRKKSHVNHNP RKPACFIVVKYPLW

>comp14189\_c1\_seq2; 160 59 1078 LEN=1078; translated  
MSPAAAPSREPRAPAVEVLGPGEQPPHPVIQTIPFAIPPLPVASLPSTGRNGIVGSIVR  
MGKKSAMVWVGWGLLEEDGAPASASRAETAKEAHGGDPSWSGFGTATPAMGQLVLAMPRT  
RYAGAFSPPGGEAPCSQLVGSASSEDQMLANQMAARLSSRS GMAIYVSCRLSSLEGLGGS  
PGPEADTLCQRAAALAEREAWKILREQQQXVETAGGTETAATGGTKK GKACRAGLARGRR  
AQPTRGEAGNAASVAGTGGRAPPLYET TNGNQ RNDETRPTLLLANTTDGDAYETHYGSFL  
VQPTAKPLALLRSNQKRKKSHVNHNP RKPACFIVVKYPLW

>comp14190\_c1\_seq1; 235 16 1640 LEN=1764; translated  
MRFRHDNVMLIGVILFMISSTVQVHIVEGLVVNRNRQHQQAQ TQTRLSNHRGDHQPQANS  
DRGKTCRNKTSKPNANDKTLVSM LAKAFRIMHDQGGTTAVLKGCDTLLQYKAPVLVNA  
ALMAGSGEFSNGRRNNYNI RKNKGVSSGILNALLGCCCVDDGGKNTSKYRQMAVDLMT  
AYDSIDSFEPDLVSLCLAYVATATPDKARERKSKDESVAETFLRRAEQFYSSTPDHDKVN  
PSNQNAKTNAGTAIELSSISHELEELYGIKILQDSKEFVVL SKPSGMVCYHGENSPALA  
ADKGRKGNQQTQKYHRKRKKQRVLGGTDDDKSLEDCLLE YGIPLSSLNKEGRGLVHRIDR



GTSGCLVLAKTNRMHAILLAQFFLRRS KKS YQALVCCSSDSQQRALLKKKPKGSGDSVPS  
SIVSLDVDGRPATSRYALERRV GSHLAATPGRNRTGPAAPGANPLFERLGGTDLAGSAVR  
GAVDPVHAAQEPTSEIASATGPGRSTILPARQFPGDRKGRHRC LGSAARLVARARRGTQQ  
S

>comp14191\_c0\_seq1; 788 262 2904 LEN=3220; translated  
MSSYRPVYIPKRRKLAAHNNEGKHANATERNKIPFQKRHTKNQQSRFHGAFTGGFSAGHF  
NTVGTKEGWAPSQVKKRDQKLEDFMDEEDHSEWGGPTRLREFFGSKAGAPAAA EFGQSRI  
AGMNAPGEADLTNLGTSMSGSKYQMP LLLPLKSILEVSHETIGPRLRLRLGWREGRSAIIP  
ENETTIVNSEGKEDKNENENENDLEKASLSKRRLRKLQLQSSRIVKLPSPKLDQCGLGFEP  
YKDAPEFEREYRQRKRAQDRASYNRNAKDRNVYRLSDIAADPFGGGDSALS YERNTRKA  
SGSSDYLGFETTEDFVGRSAAGFALRDEDDAYDDEGFRKGLLKKGG LLEAGDEYNTTEA  
YEHEYSSDDECDVGS SLPKI QGPFSVKMGNAHSPSNGKSRNPVDAGNVFAAWAGTNPSTE  
GKLATPPPSSNHKGAITRARVTS DKRAPITGFVVGG SMDT SKKRYPGPDILRNYTVQKHV  
FGEHENPLFLEAISNAVKLEQKDERTARIEQQETQHQT PQGITEPSNRPLTENFSSSLADA  
MRNRFTSGESSFIDKGDSSHEKQKAFP GGLHMPSPVQHNNDAPEGTDPSNHGNHNQNI AI  
QRTVQ SFFPNPLVCKRFRVPIPSKARKNNAWDAIDS SKTKESLYFEKEILQKAIQQTRI Q  
PGNTVPGTHGNRSANTSESRTS QSSQKEGQGRSEIERPSIEKLSVFEASSDES SLSSED  
GNEGSDTEERE PHADPTIKATTRDPSRSIEAKLPLREGGKDS PNDTIETNAESIRAI VEY  
QFSSPLRGEEDVSI PSGSNSDGYGDDGSSMGRKRKKEKRPRNHDRRRKRHRKRKRSRSTDR  
DRDSRYSDNTEEDGRARDRRRRKDKKRKKEKSSSSSKYR

>comp14192\_c0\_seq1; 2485 1 8940 LEN=9133; translated  
EKQVDRSGKWHVLS DSKDNHDNKRDDSVSNGSKQDSDDEF SFDSDGEGGEEEEKSNIQKAS  
PSIVKAFDMDLLRYCISKGEESVLNIDGRDVIVIVGKTGTGKSTLIQGIAGKHFKKLSFS  
SGGAVSKSIFEAE DPVSGFEIGHAKVSMTKYIKCFFRKGGTEDEAVYLDTPGFEDTDGEE  
VDIATSVMLAQVAKKSRSMRFVMMIN YVSLLEDRGGAIRSVLKL MRNFVTDFKKERTSFM  
FLF SHADEIKDVPDSII GAKKSLLEE IIRTISGTKDDGVRDLLTFIRKSLEKGYPFVDVL  
HPLKTDY SLLVNFMECKLKP TKRMIVGNGGFG LTLSSQMKL TGA AQKLLRALRILLNRGD  
VDIKEVQEIRSSFEYFKKYIDFEDMRAAVKDCDEILCDHVAYLRSVVDREVEAGTSSEVS  
FTEVNIAYLQDALSQLVAIDSSFNMDIQSNIIVSEVTKFQKGLFTNLARRNFDGFHQDLT  
KLKEWCGFSSDFRVLVDPLIDHATMI AKKAKDEVSNFAVTNIFSSSEATLSNLFSELKVL  
ESIHRNERGLSVHLGIVSQALDSLKSFSIVLQSHLRDWNAE LAQAGGKQIDFRNERSMEV  
IATQIANLERNVANLSKVSQLENEIFHSIEFVRKTIHSQIMGK CSTIC SGLKNTDYGRNEE  
WLDGLSMFRNAVTSFSTLES PSVRQMESSYAAIRDEM KSHLKT KYGELDEMSQNAATHGL  
IDGAREGD AVCNFKRYLWFDDFLPIEECFVQNCFTK LMSDYFRVVT TDFETLEALLYWLA  
NCHGDSVDATHEL RQVFSTILEWGI FGRKVENEELTTGVAGLVEKMNYVSKRIYSWEEV  
LTKWTVISFESIVWEQVTVATESLNAV LGEISEIEIEIECREDIKEDVKSMKEQIITAMD  
IFKENTE LTLDDSLISYDEIATSLARVQALGDFPLTSPHLPRFDTIQEY AQKRVANEARK  
IADMVEQTSEFDKID LLLLQFEKAQILDNFVHQEVS NHLRPLKRLRTEREIDVNDL IMAQ  
IEREDFAGLNSLLRPLSKTKDLIQKEKFKNYVSKIDERILETHK LSSIFCGTLTDDKAQ  
KIIACVKVLEQANEEVGEYLPKGTR INKKTTSWKRKVNGKVENMIRMRFAIKRVDFMEL  
ARTREKITIASNHFSPLYIHEVETGMKEVDMKYSEL TSVPLHINKFIEGWFSESKEIQK  
ILDGLKSTTNEASTEQVNELVQTTKDSVTEAQCYDD SXRNLRSLDSGLERHLPQEIGDD  
CDQTIARYEKARKREL RVDFEVVSAEAKFKKLAMQMDKLDPESTGFFTILHKFSGRKTYD  
NLKREISGKVQHHRKGI EALQRRDYNTLND SLNQMAIMNKTI VKHVPLVSSKLQELNEK  
TLTAFQSICKNSQEALQSDNCRAFEP LFADYSGFVIVSVTTLMKDDRATKTFSLTNQLVYE  
RMVKEVSSVEDELSTFEFNV MKQKIEEVRAFGGFIADRF SIFHEQLKGVFHVKSDRWLGL  
LRGMITTHFQNGRDLRRLK FYAILGLPPSASKKEIRQAHEEQVKILVDS PKNTDSISKLD  
QMKEAISMLENEGVEYNSSSKPFDEQVRGIGNRLRETTREALKEQH YDLIEKLLFKLQG  
IDAIGDLVSPKLDTCRVKESVVELVKNHVDRI RVEVMSNWSQRMYQDLNHNISDLKLMEE  
RFKSHKHI FSSSWNTGIVDSVEKEIEKLGKHATSL LKTRSTANESRDEFRRCFMRMGAVL  
VELPQFKDHTKDVMSDVLG SCLNSDWGYGFVFDLGLSLQKGEDTNDDEVR IAQNLVTEF  
GHFKEVLT MVWNEETIQKPPEATVKDIRGENLEKEKMTAIPLDIKSDQLLQQFFDFETKY  
TSLLG EFLVP GADLNALVRTIVDAAEEMKPLSCDDGFGPETKRVLPELIAGVFSLFTILK  
SGDSYNRLQDAPNGQSVDS SKLLMKPHNIQIL TLLCMFGCGTSDSSSLRSQLMQIRTGEG  
KSMILGAAATIFGLLGFQVRCICYSEYLS SRDFELFRDVFRHFDLLESIKYSKITTLSEE  
TTAAKGNIREMTLSL INGNQCVDQK PMSKTTKISNSREADGKDSNTSSKTMKKS FVEEIM  
LVDEVDVFFGSEFYGR TYNQVAELREPEVATILRTI WEGHKRGRKRLRLADIKALVEYTH  
LRHKLAGEYFLIDNEISLMLDQVRRVDDEPMYHLDRVSDRIGYKIQDTISYNV TYGYRTI  
FAYLKEADNGNLN NPAGTLARVLTMPISCGQFSYANIKPTRILGVSGTLEVMSNHQKIVL  
QKYGVSQYLYVPSVYGQSNFSFDKGGEGV SIEKSTSDFFQKITDETARVATKQRRAVIVF

FND SKRLNEYVKS AFYRKLGRKKEILTESKNANEKAFI I SKAATAGQITICTAVFGRGTD  
FFSKDDALDNNGGVHVIQAFLSCDMSEEVQIQGR TARQGGKGSYKLILLDKDLEDKFGIK  
CGSFGTWPRGQFYDRLCEARNKALES DYLTIEMSLSKAKTKDDATHQYFDALLNSNVCKA  
KSLLKEIYLSMKKKHTGPM SIDLAIAIDITGSMAPYAI AIASTIQNLLAGQNPILAKLTS  
KFPDSKFKLRVAVLGFRDIDDGSRQFEEKLWDGVTHFGENVEDTIRYVKSLTSSTSGGSD  
LAEDHLGAIDRCVKWNSSDDWKGM IKA ILLLT DAPAHGYAPNGDATQNI DNYSVRHPLGL  
TMDSVVENVLDKIDILFVCSFDPIATQKFE EK MSEAFNRHPSNVDGREVTMVQLV PKTAV  
HNKASRMMGDSRKHNI FVLDES GMSNDW SGVVQVYNKYLENRRQRQHSDLI SVVQFSG  
TARVTC SLAKVASAPRNLGYNGGGTCFSPA AICACDLARKTPQSHQP VVIFMSDGM AEDS  
HIASSHFLSLNEELKTRSGLDLELHVIGFGGGTDTSQLQE IARASANGRVHTTSDIDSLS  
RVFVQISGGGDNVSSVLEAEISKRISDAVTNRLSVEYFG  
>comp14192\_c0\_seq2; 2978 675 10193 LEN=10386; translated  
MQDSSDKNRQSWHRHREPYSGLTGLSGMDEDYVSI AKAGEDKKDDHVSAMKDTKEKGLE Y  
AWMAGDGGKKEEVDSVA INISDIATSFL ED PGEKQMITNLFVSQGFEGKDIIGKEKKDSV V  
SGMEDKKEREVDDISRRLVLTREVEAVEEKQEYLG VNDGNLFSKIGKGMQ MENEKQVDRSG  
KWHVLSDSKDNHDNKRDDSVSNGSKQDS DDEF SFDSDGEGGEEKSNIQKASPSIVKAFD  
MDLLRYCISKGEESVLNIDGRDVIVIVGKTGTGKSTLIQGIAGKHFKKLSFSSGGAVSKS  
IFEAEDPVSGFEIGHAKVSMTKYIKCFFRKGGTEDEAVYLDTPGFEDTDGEEVDIATSV M  
LAQVAKSRSMRFVMMINYSV LLED RGGAIRSVLKL MRNFVTD FKKERTSFMFLFSHADE  
IKDVPDSIIGAKKSLLEE IIRTI SGT KDDGVRDLLTFIRKSLEKGYPFVDVLHPLKTDYS  
LLVNFMECKLKPTRMIVGNNGFGLT LSSQM KLTGAAQKLLRALRILLNRGDVDIKEVQE  
IRSSFEYFKKYIDFEDMRAAVKDCDEILCDHVAYLRSVVDREVEAGTSSEVSFTEVNIAY  
LQDALSQ LVAIDSSFNMDIQSNIIVSEVTKFQKGLFTNLARRNF DGFHQDLTKLKEWCGF  
SSDFRVLVDPLIDHATMIAKKAKDEVSNFAVTNIFSSSEATLSNLFSELKVLES IHRNER  
GLSVHLGIVSQALDSLKSFSIVLQSHLRDWN AELAQAGGKQIDFRNERSMEVIATQIANL  
ERVANLSKVSQLENEIFHSIEFVRKTIHSQIMGKCSTICSGLKN TDYGRNEEWLDGLSMF  
RNAVTSFSTLES PSVRQMESSYAAIRDEM KSHLKT KYGELDEMSQNAATHGLIDGAREGD  
AVCNFKRYLWFDDFLPIEECFVQNCFTK LMSDYFRVVTDFETLEALLYWLANCHGDSVD  
ATHEL RQVFSTILEWGI FGRKVENEELTTGVAGLVEKMNYVSKRIYSWEEVLT KWTVI  
SFESIVWEQVTVATESLNAV LGEISEIIEIECREDIKEDVKSMEQIITAMDI FKENTEL  
TLDDSLISYDEIATSLARVQALGDFPLTSPHLPRFDTIQEY AQKRVANEARKIADMVEQT  
SEFDKIDLLLLQFEKAQILDNFVHQEVS NHLRPLKRLRTEREIDVNDLIMAQIEREDFAG  
LNSLLRPLSKTKDLIQEKFKNYVSKIDERILETHKKLSSIFCGTLTDDKAQKI IACVKV  
LEQANEEVGEYLPKGTRINKKTSWKRKVNGKVENMIRRMRF AIKRVD FMELARTREKIT  
IASNHFSPLYIHEVETGMKEVDMKYSEL TSVPLHINKFIEGWFSESKIEQKILDGLKST  
TNLKDDPIFTDLSQLYNDNAKLLLEQVNELVQTTKDSVTEAQCYDSDIAVLQNLKRS LDS  
GLERHLPQEI GDDCQTIARYEKARKREL RVD FEVVSAEAKFKKLAMQMDKLDPESTGFF  
TILHKFSGRKYDNLKREISGKVQH HYRKGIEALQRRDYNTLND SLNQMAIMNKTIVKHV  
PLVSSKLQELNEKTLTAFQSICKNSQEALQSDNCRAFEPLFADYSGFVIVSVTTLMKDDRA  
TKTFSLTNQLVYERMVKEVSSVEDELSTFEFNV MKQKIEEVRAFGGFIADRFSIFHEQLK  
GVFHVKSDRWLGLLRGMITTHFQNGRDLRRLKFYAILGLPPSASKKEIRQAHEEQVKILV  
DSPKNTDSISKLDQMEKAI SMLNEGVEYNSSSKPFDEQVRGIGNRLRETTREALKEQH  
YDLIEKLLFKLQGIDAIGDLVSPKLDTCRVKESVVELVKNHVDRIRVEVMSNWSQRM YQD  
LNHNISDLKLMEEERFKSHKHIFSSWNTGIVDSVEKEIEKLGKHATSL LKTRSTANESRD  
EFRRCFMRMGAVLVELPQFKDHTKDVMSDVLG SCLNSDWGYGFVFDLGLSLQKGEDTND  
DEVRIAQNLVTEFGHFKEVLT MVWNEETIQKPPEATVKDIRGENLEKEKMTAIPLDIKSD  
QLLQQFFDFETKYTSL LGEFLVPGADLNALVRTIVDAAEEMKPLSCDDGFGPETKRVLPE  
LIAGVFSLFTILKSGDSYNRLQDAPNGQSVDS SKLLMKPHNIQILTL LCMFGCGTSDSSS  
LRSQMLQIRTGEGKSMILGAAATIFGLLGFQVRCICYSEYLSRDFELFRDVFRHFDLLE  
SIKYSKITTLSEETTAAKGNIREMTLSLINGNQCV DQKPM SKTTKISNSREADGKDSNTS  
SKTMKKS FVEEIMLVDEVDVFFGSEFYGR TYNQVAELREPEVATILRTI WEGHKRGRKRL  
RLADIKALVEYTHLRHKLAGYEF LIDNEISLMLDQVRRVDDEPMYHLDRVSDRIGYKIQD  
TISYNV TYGYRTIFAYLKEADNGNLN NPAGTLARVLTMPISCGQFSYANIKPTRILGVSG  
TLEVMSNHQKIVLQKYGVSQYLYVPSVYGQSNFSFDKGGEGV SIEKSTSDFFQKITDETA  
RVATKQRRAVIVFFND SKRLNEYVKS AFYRKLGRKKEILTESKNANEKAFI I SKAATAGQ  
ITICTAVFGRGTDFFSKDDALDNNGGVHVIQAFLSCDMSEEVQIQGR TARQGGKGSYKLI  
LLDKDLEDKFGIKCGSFGTWPRGQFYDRLCEARNKALES DYLTIEMSLSKAKTKDDATHQ  
YFDALLNSNVCKAKSLLKEIYLSMKKKHTGPM SIDLAIAIDITGSMAPYAI AIASTIQNLL  
LAGQNPILAKLTSKFPDSKFKLRVAVLGFRDIDDGSRQFEEKLWDGVTHFGENVEDTIRY  
VKSLTSSTSGGSDLAEDHLGAIDRCVKWNSSDDWKGM IKA ILLLT DAPAHGYAPNGDATQ

NIDNYSVRHPLGLTMDSVVENVLDKDIDLFCVCSFDPIATQKFEEKMSEAFNRHPSNVDGR  
EVTMVQLVPKTAVHNKASRMMGDSRKHNI FVLDESGSMSNDWSGVVQVYNKYLENRRQRQ  
HSDSLISVVQFSGTARVTC SLAKVASAPRNLGYNGGGTCFSPAACACDLARKTPQSHQP  
VVI FMSDGM AEDSHIASSHFLSLNEELKTRSGLDLELHVIGFGGGTDTSQLQEIARASAN  
GRVHTTSDIDSLSRVVFQISGGGDNVSSVLEAEISKRISDAVTNRLSVEYFG

>comp14193\_c0\_seq4; 914 149 2959 LEN=3379; translated  
MPSVKDKSAENNNDRLESPEDTNAMREGHSSFSKGFDRDSTNLNNSNGNTSMISSHVQE  
DRTEGIEGETSIELQFLPPDQSRGQTGDFLLAAVVEPEIEDDTEAAEALRANSKVKVGMF  
SKAARGINAQTVRKFKVIASLRGSGMRRGKPPRVPPGLGAGPQHKLHNSDYTIREEDEKQ  
IYCVEEEGGSDHQEVSEISKRNDDGIPTVVSTSNESIKNSASKSHEGLVNAGVEQTSTN  
VKSHPRQSVQKVHFDEGDQSSKQRKLDPYSTIGLEENQRDIPTEVVAETMDVGRKVMGAM  
DPHNMLQVQRWRRKKKDGKKERKSYVKGKVIDGRHELYTSLIAVMLGVRTSIARTNTIIS  
SDGKKILSPQDFMAEEKYEFAPKGSATTPPHKLSHTFKFKDYAPVAFAYIRRMFGVNEFD  
FLLSVCGNANFIEFISNAKSGQFFFYSSDGKYMIMTMTNSESKFLRRILPHYFRHCTENP  
NTLLAKFYGMRYVKLYHLRRNVKFIIMNSVYYTDKSIQSFYDLKGSEIGRSKAGQDVLK  
DNDLRKNLRENAF SFNPEQIRFRDQIESDCNFLRKMQIMDY SMLIGIHHI PPKMASQRS  
NIADTGFKIQEHRAPRKS NMLGVVADTDNGCDSTSKSNRSLGSDTANSRNQDVVLDGND  
TKHLIRDIRENAYSNSNF EFAGLLEDEDDCSYLEGSENYNKQFARKIRAYQQHPKYNDIE  
KKKEHTIEQIYWPFFHRFFDINGHRRMKPKTDSCISDGVS DLIKAWKIPEFVPPLSDRKDG  
GVMMDTSHLKMPMVF DGKQKMTYEGKIYYMGIIDILQQYNARKRAETRYRKIEVRGRAE  
PSCVSPDDYAERFLSFFDEYSQKAHPKTFGEQESTEIEVSRNESSLIRVTSNNKLVPLLT  
KDNTTISNGSIGPAKVTPEDSKTGSSVRKSGKHVAT

>comp14193\_c0\_seq5; 717 149 2404 LEN=2404; translated  
MPSVKDKSAENNNDRLESPEDTNAMREGHSSFSKGFDRDSTNLNNSNGNTSMISSHVQE  
DRTEGIEGETSIELQFLPPDQSRGQTGDFLLAAVVEPEIEDDTEAAEALRANSKVKVGMF  
SKAARGINAQTVRKFKVIASLRGSGMRRGKPPRVPPGLGAGPQHKLHNSDYTIREEDEKQ  
IYCVEEEGGSDHQEVSEISKRNDDGIPTVVSTSNESIKNSASKSHEGLVNAGVEQTSTN  
VKSHPRQSVQKVHFDEGDQSSKQRKLDPYSTIGLEENQRDIPTEVVAETMDVGRKVMGAM  
DPHNMLQVQRWRRKKKDGKKERKSYVKGKVIDGRHELYTSLIAVMLGVRTSIARTNTIIS  
SDGKKILSPQDFMAEEKYEFAPKGSATTPPHKLSHTFKFKDYAPVAFAYIRRMFGVNEFD  
FLLSVCGNANFIEFISNAKSGQFFFYSSDGKYMIMTMTNSESKFLRRILPHYFRHCTENP  
NTLLAKFYGMRYVKLYHLRRNVKFIIMNSVYYTDKSIQSFYDLKGSEIGRSKAGQDVLK  
DNDLRKNLRENAF SFNPEQIRFRDQIESDCNFLRKMQIMDY SMLIGIHHI PPKMASQRS  
NIADTGFKIQEHRAPRKS NMLGVVADTDNGCDSTSKSNRSLGSDTANSRNQDVVLDGND  
TKHLIRDIRENAYSNSNF EFAGLLEDEDDCSYLEGSENYNKQFARKIRAYQQHPKYNDIE  
KKKEHTIEQIYWPFFHRFFDINGTDEMPMVF DG

>comp14193\_c0\_seq7; 892 149 3066 LEN=3486; translated  
MPSVKDKSAENNNDRLESPEDTNAMREGHSSFSKGFDRDSTNLNNSNGNTSMISSHVQE  
DRTEGIEGETSIELQFLPPDQSRGQTGDFLLAAVVEPEIEDDTEAAEALRANSKVKVGMF  
SKAARGINAQTVRKFKVIASLRGSGMRRGKPPRVPPGLGAGPQHKLHNSDYTIREEDEKQ  
IYCVEEEGGSDHQEVSEISKRNDDGIPTVVSTSNESIKNSASKSHEGLVNAGVEQTSTN  
VKSHPRQSVQKVHFDEGDQSSKQRKLDPYSTIGLEENQRDIPTEVVAETMDVGRKVMGAM  
DPHNMLQVQRWRRKKKDGKKERKSYVKGKVIDGRHELYTSLIAVMLGVRTSIARTNTIIS  
SDGKKILSPQDFMAEEKYEFAPKGSATTPPHKLSHTFKFKDYAPVAFAYIRRMFGVNEFD  
FLLSVCGNANFIEFISNAKSGQFFFYSSDGKYMIMTMTNSESKFLRRSECKIVTFLRFQM  
QLSFFAWWLSLVFLQRPLSCELQYCRITTFVTAXENPNTLLAKFYGMRYVKLYHLRRNVKFI  
IMNSVYYTDKSIQSFYDLKGSEIGRSKAGQDVLKDNDLRKNLRENAF SFNPEQIRFR  
DQIESDCNFLRKMQIMDY SMLIGIHHI PPKMASQRSNIADTGFKIQEHRAPRKS NMLGVV  
ADTDNGCDSTSKSNRSLGSDTANSRNQDVVLDGNDSTKHLIRDIRENAYSNSNF EFAGLL  
EDEDDCSYLEGSENYNKQFARKIRAYQQHPKYNDIEKKKEHTIEQIYWPFFHRFFDINGHR  
RMKPKTDSCISDGVS DLIKAWKIPEFVPPLSDRKDGVMMDTSHLKMPMVF DGKQKMTY  
EGKIYYMGIIDILQQYNARKRAETRYRKIEVRGRAEPSCVSPDDYAERFLSFFDEYSQKA  
HPKTFGEQESTEIEVSRNESSLIRVTSNNKLVPLLT KDNTTISNGSIGPAKVTPEDSKTG  
SSVRKSGKHVAT

>comp14193\_c0\_seq8; 695 149 2511 LEN=2511; translated  
MPSVKDKSAENNNDRLESPEDTNAMREGHSSFSKGFDRDSTNLNNSNGNTSMISSHVQE  
DRTEGIEGETSIELQFLPPDQSRGQTGDFLLAAVVEPEIEDDTEAAEALRANSKVKVGMF  
SKAARGINAQTVRKFKVIASLRGSGMRRGKPPRVPPGLGAGPQHKLHNSDYTIREEDEKQ  
IYCVEEEGGSDHQEVSEISKRNDDGIPTVVSTSNESIKNSASKSHEGLVNAGVEQTSTN  
VKSHPRQSVQKVHFDEGDQSSKQRKLDPYSTIGLEENQRDIPTEVVAETMDVGRKVMGAM

DPHNMLQVQRWRRKKKDGKKERKSYVKGKVIDGRHELYTSLIAVMLGVRTSIARTNTIIS  
SDGKKILSPQDFMAEEKYEFAPKGSATTPPHKLSHTFKFKDYAPVAFAYIRRMFVNEFD  
FLLSVCNANFIEFI SNAKSGQFFYSSDGKYMIKTMTNSESKFLRRSECKIVTFLRFQM  
QLSFFAWWLSLVFLQRPLSCELQYCRRTTFVTAXENPNTLLAKFYGMRYVKLYHLRRNVKF  
IIMNSVYYTDKSIQSFYDLKGSEIGRSKAGQDVLKDNDLRKNLRENAFSFNPEQIRFR  
DQIESDCNFLRKMQIMDYSMLIGIHHIPPKMASQRSNIADTGFKIQEHRAPRKSNNMLGVV  
ADTDNGCDSTSKSNRSLGSDTANSRNQDVVLDGNDSTKHLIRDIRENAYSNSNFEFAGLL  
EDEDDCSYLEGESENYNKQFARKIRAYQQHPKYNDIEKKKEHTIEQIYWPFHRFFDINGTD  
EMPMVFDG

>comp14194\_c0\_seq1; 801 66 2306 LEN=2331; translated  
MRLSIAALLLAAYTSTNTGVHGFAPTSRYHARAPNTVNLNAEGSDKVKVSGPPYSGPTVKP  
ILDSIKYPHDMNGLDMRQLKQLANEVRWEVLEQVSKTGGHLSSSLGVTELTVALHYVFD  
PTDDI IWDVAHQCYPHKMLTGRDRFPPTLRQMNGLSGFCKRKESEYDSFGAGHSSTSISA  
AQGMSIAKSI LNKRKNNCVAVIGDGAITGGMAYEAMNSAGYLQSRMIVVLNDNGQVSLPT  
GTPSAGGTVPASQLSTYTSNLLVSKPFQDFRDFAKSFNKLLEPQVSVNKRIDEYTRGLV  
SGGTLFEELGFYVGPIDGHDLDNLIPILEKLRDPSNKPVLLHIKTTTKGYGYPPAEAAAS  
DRMHGKFNLTGAQFKIKGGEPSTSFIFANALIDAAIEDRSIVGITAAMPGGTGMDIF  
GRRFPKRTFDVIGAEQHAVTMGAGMACEGLKPFVCIYSTFMQRGYDQVVHDVAVQNLVPR  
MMLDRGGFVGNLDPHHCYDLSYMGCI PNLTIMAPSDEIELRNMVMTCADYDEGPTVLR  
YPRGVGYGAEKQLNLFQYKLEKGEIPTKGEKIPIGKGRIRGEGGLIDNKSSTRGKERKD  
RVAVLSIGTRLHEALVAAQVEVEDEHEDLSVTADARYMKPLDVLVRLADDHSLVITIE  
EGSIGGFGDHVLHFLSLDGLLDEGNLKFRRPMVIPDAYFEAATQFQQYEQAGLNARHIKGT  
ILRLAKKIEIPILDEIPVDNSESTIA

>comp14195\_c0\_seq1; 476 1 1917 LEN=2105; translated  
PEENHDKVPCGTRTSEQNITLAFANHFNMEIASHGKAKVRPATPKRGAERRCHRNYFSTRY  
AASAILIVSLFVQSQLVLLDQKASDGNLGGFFVSAFLGSPVPASKTFPRTGRPNLAID  
EKWNSLASPALFLRPDKDTGTDANEHENQTPGDLSEPLAEAAVKSATMSPIMPTRPRIR  
VERMPRLPVVWVWAGVIDFFVWIFGAEAGSRLEQYWLGGRVCPMQLDGRSTSPFLLLVH  
HHHNFWKWDALFRKLSALVLPFEGFPAHPRHGFTTLTYFLPDTKGSNDGSGGGGFVHRDS  
IGVKQTYGKTYKHQAQWLFTGSGMLHEEMFDFLQDNFTGNQYNSRYELYQLWVNVPR  
HKLDPPKVQLLRTVDGNDEDATEGGAESESEGTMPTNISTHTVEKLTTCVTVVIAGNYK  
PNETDNKDNNGIGNSVYQSEAAPLHSDLSVLHVTVTVTEAETTEESLETLSKQEI GWTY  
DIPSDHHTLIVYVRKGCIMETITTPKNSRDVSSRSSSGATEVPIHSTVFMEKNNGSPA  
SHVVHEQLIVRPSKPPDDPVDILVLSGRPLYGEATSNSGSSAVVEPIAMQGSMMNDFQ  
IQEAYRDYQMGQMGVPPWDHELNDEQWTDHVRQTTSRTR

>comp14196\_c0\_seq1; 496 1 2236 LEN=2332; translated  
XILRIVDEPKRQWISVTRRPSYLLHSLLDTERMRNFHSRLALCLQILLVAVITLKKISV  
SFTALPQNLRLVGRQCQSKLRSSVIVAAGQSGNKSNNKRRKKWKKKSVEKNAYDTIDFVQG  
GIEIWRVYGISVHPDLEESEVSSTTSQVTISDNQIPQALQNALLLKLRLESIPVGRIV  
RRSLDARKKLDHPEYSYVVDIPIEGSLRHALRWQVKSQKMDKLTIDTTDAGEKNDLNS  
EHEDIQTKDVVVVGMGPAGLFCALQALSSKGRVRLILLDRGQPVDRKQDIGRLIHR  
HLNEESNFSFGEGGAGTWSGDKLTTRIGRNSGTVRLVLETLVEFGAPSDILWKGAPHLGT  
DNLVLLRNMRFKLTELGGIEHFGTKMTNLRMDGTVKCGVEAEDNDGNQRYFEGESVLS  
TGHSARDVYENLHQAGVKLEPKGFVGFRIEHPQKLINKIQYGDWGPVSVRTGKGLTDA  
NKEYYFGESEPKHAAKMPVPSYRLATDKAMDGVNLRGVYSFCMCPGGQIVPASTEPEEVC  
VNGMSFSRRDSKWANSALVVTVDEDEILDEYRANHGVLGLEGFQREMERRAYKLGGNL  
TVPVQRMTDFCDKKSISTIPSSSYRLGVKSAACHEIYPEAITNALRDALTNHFQKQMPGY  
YHPDGLLHAVETRTSSPIRIPRDRKTLAIGTENLYPSGEGAGYAGGIVSAAVDGINVAE  
TILDSICGESRPNRIDKGSVGFY

>comp14197\_c0\_seq1; 394 1 1513 LEN=1656; translated  
XPPTTPTTPVSPPTPAPVPTKAPSPAPFSGELLTTNQLNAWEVFEGLDFITHKNSESP  
LNYAVVASXSWMSTSAVLF SNEELFEAEALGSHSNFLLCFFIFLSGGAAGGGNDVSESQ  
AYGLLITGTVLASWDTHAGKVS GSDRAKVLKYFEGYYYFWKDMCKNSSNNNSNCQPNGKY  
CKSGSNSYVCLPDWKHSKYGGSTATGPAPDGEDAIVGIMLAVKAVENDPNKPSWYEEAR  
RWADASASAFFTYSDKSKGDYRLLKLGSCWGGWDNNGNPNPSYHSPGSYRVMKDYQESFP  
DNLRQGYNAVTPAEWTKLIDTSHEVLRVAVQCSNGGALVNPWATVGVNRNGHIVHTGGSFSG  
SGTAQY EYGAEAAARTTFRVALDAAFYPDSSSEWSGYLNHYNERMSENFQNGSFPNTFPS  
CRGPGTNQINMFGNWQSNAFIYGPTYSALIAASSGGNSQAMIDAAGAILGRALPNSYYP  
RSWAMISNLMLNGAMESAGNTLKQ

>comp14197\_c0\_seq2; 448 1 1402 LEN=1545; translated

XPPTTPTTPVSPPTPAPVPTKAPSPTAPFSGELLTTNQGLNAWEVFEGLDFITHKNSESP  
LNYAVVASGGAAGGGNDVVSESQAYGLLITGTVLASWDTHAGKVS GSDRAKVLKYFEGYY  
YFWKDMCKNSSNNNSNCQPNGKYCKSGSNSYVCLPDWKHSKYGGSTATGPAPDGEDAIV  
GIMLAVKAVENDPNKPSWYEEARRWADASASAFFTYSVDKSKGDYRLLKLGSCWGGWDDN  
GNNPSYHSPGSYRVMKDYQESFPDNLRQGYNAVTPAEWTKLIDTSHEVLRVQCSNGGAL  
VPNWATVGVNRHIVHTGGFSGSGTAQYEGAEAAARTTFRVALDAAFYPDSSSEWSGYL  
NHYNERMSENFQNGSFPSNTFPSCRGPGTNQNINMFGNWQSNAFIYGPTYALIAASSGG  
NSQAMIDAAGAILGRALPNSYPRSWAMISNLMLNGAMESAGNTLKQ

>comp14198\_c0\_seq1; 1295 266 4850 LEN=4975; translated  
MADAFPATGSGPLNAGADASNDPNSDGCVQVAVRVRPMLPSEAGNTECVGVFRSAPQDKG  
DGTGVLNVLQGGSSGPKFTFDQVFGTQTLOSEVYRDRVAPLVANCLEGYNATVLAYGQT  
GSGKTHTIMGGGMSNAMMQEETHQGVLPRAIRNIFDELQTTQQQVSDTRSKPRNNVRNDT  
GASCTSYEF SVRVQFLEIYEGEIRDLLNPRPVGTSTTESKLSIRDVGNEEPEVVGATMHK  
VDSAEELCLTSGMYRRVTASTAMNAGSSRSHAILSLIVEQSTSMDEIEQNTQSKTSRF  
NFVDLAGSERQKRTQATGQRLKEGIDINKGLLVLGNVISALGDPQKRGKTFVPYRDSKLT  
RLKLGSLGGNHKTLMIACVSPSSSNMDETNLCLRYANRAXNIQNHAVVNLDAASLLVAEL  
RGKIQGLARDLIKAKTGLKLEDCSIPMNIVESLASGGDGAGGGKIFTKNIQPAFSASATDN  
ESKAETQRLRAENESIRLQLHSFSEGNDPSEVLQEAAYVTKVTEYEKEISRLKHEIQAKND  
TKSTLPIQPESPELNRRLRSQMFGLAKSITLDAEVEAEEMKNLSEKFLNHPMTDGEFP  
EYDRSHMEDETASTPAEVPAAALDADLFALSNSISAKESLIHQLASQEKFEFESMREFYEE  
KLREMGDIVAEKEADTEKLVDELKKGDLGHSRGKELSQKLKEKQAQVVELKRKQAELSRL  
TNVASRNESQIARLKNVDVQEMKHKKIDLQKQMVAAERKNHMSEVKKMKKESLQKDRELNKA  
KREVNKKSQEASKAQKIAKVRLGQMNQLKAKYKDTTEKRLRMKTVKQGVLLKAGLEPVLF  
RSQARDDGGKKHRTAASKWGKADV DKLDRDFDKKADVSRRENLAEKLAQEWEEHLELT  
IQKEESFKTDPDDQHESI QALDSA I KYREERIRQLASKLGRDKNKHDPANDETFVFKK  
EFTTIVGSETLTGGAETVAKVLFGMVVRERRRIASLARTASSLDEKVOIEAALAEKDA  
FNAYVGEQRLDAAALAQNQOEHILSLMEMVKEGQTEESQKPLSPRTDTTNRRLSLSAKDG  
NSRLLVLANGRIEVLERQLSETLLARDAVRKHQEREQSALFELDAKTKECEELLELEXIDEL  
RSALRRIREQVVDDESRSVAVGLEKERQTPSKAVEDIVTLALHPASLSSSNTRRRRSVAQS  
MKRQSLVVSTREKENELSSDSDEVPDWAEDIMADLAIADGKMPASLMQSQEVIEAEAN  
NVFDRLTNPKGFTGVQKQRSVTRSRTRMKNQTS DGLKSSTFVDEKERKKEGAPLRRQKEK  
ISSESAGNGRTVFDRLSPSNLTGTQKQKFHRIHDKKGRLEKAIENQHVSVRGRSRAIH  
YSDHTEDEKDFVLHDQFSPKSKGSDAGEKRNHNSKVDHDSQLSVFERLNKTTTQAYK  
EKVHGNI AEKMLDDILLDEEEHENDDDNDDESHKFEPRTKRIKEYASQDVFERLQRTTT  
EAYASKQNHPTESSVPRSPSPMRRGA

>comp14199\_c0\_seq1; 394 351 1596 LEN=2777; translated  
MNFSTAARRLLLSSPVLAATTNVAAFTRSRIPLPSAARALSSSSTSLNMANVLKLSDPQSQ  
LLDNVDVFI FDCDGV IWRGDSLIDGIPETLAKLRAAGKMMFFVTNNSTKSRAGYKKKFDG  
LGLTEIPAEEIFSSSFAAAAYLEQSKFPTDGSKKVIYIIGEVGIGEELDLIGIPHLGGPAD  
SEKAPDMGPGGRLEVPDVGAIYVGFDRNVNYYKIQAQLCINEGGAEF IATNLDAVTHL  
VTFHTPVLVCLKNAVNIEXISGAIIVGFDRNVNYYKIQAQLCINEGGAEF IATNLDAVTHL  
HLTDAQEWAGNGSMVGAIKGCTGQEPTLVGKPSPLMIDYLESKYGVERNRI CMVGDRLD  
DVLFGTENGLQSLLVLSGVTSEEKLLGPDNTITPDYYADDINAFFQTESEPSVTK

>comp14199\_c0\_seq2; 505 351 1412 LEN=2593; translated  
MNFSTAARRLLLSSPVLAATTNVAAFTRSRIPLPSAARALSSSSTSLNMANVLKLSDPQSQ  
LLDNVDVFI FDCDGV IWRGDSLIDGIPETLAKLRAAGKMMFFVTNNSTKSRAGYKKKFDG  
LGLTEIPAEEIFSSSFAAAAYLEQSKFPTDGSKKVIYIIGEVGIGEELDLIGIPHLGGPAD  
SEKAPDMGPGGRLEVPDVGAIYVGFDRNVNYYKIQAQLCINEGGAEF IATNLDAVTHL  
TDAQEWAGNGSMVGAIKGCTGQEPTLVGKPSPLMIDYLESKYGVERNRI CMVGDRLD  
LFGTENGLQSLLVLSGVTSEEKLLGPDNTITPDYYADDINAFFQTESEPSVTK

>comp14199\_c0\_seq3; 505 351 1412 LEN=2325; translated  
MNFSTAARRLLLSSPVLAATTNVAAFTRSRIPLPSAARALSSSSTSLNMANVLKLSDPQSQ  
LLDNVDVFI FDCDGV IWRGDSLIDGIPETLAKLRAAGKMMFFVTNNSTKSRAGYKKKFDG  
LGLTEIPAEEIFSSSFAAAAYLEQSKFPTDGSKKVIYIIGEVGIGEELDLIGIPHLGGPAD  
SEKAPDMGPGGRLEVPDVGAIYVGFDRNVNYYKIQAQLCINEGGAEF IATNLDAVTHL  
TDAQEWAGNGSMVGAIKGCTGQEPTLVGKPSPLMIDYLESKYGVERNRI CMVGDRLD  
LFGTENGLQSLLVLSGVTSEEKLLGPDNTITPDYYADDINAFFQTESEPSVTK

>comp14199\_c0\_seq4; 394 351 1596 LEN=2509; translated  
MNFSTAARRLLLSSPVLAATTNVAAFTRSRIPLPSAARALSSSSTSLNMANVLKLSDPQSQ  
LLDNVDVFI FDCDGV IWRGDSLIDGIPETLAKLRAAGKMMFFVTNNSTKSRAGYKKKFDG

LGLTEIPAEEIFSSSFAAAAYLEQSKFPTDGSKKVYIIGEIVGIGEELDLIGIPHLGGPAD  
SEKAPDMGPGGRLEVPDPVKGYYVCIPHCSEENMRVGGVAAPERRQCRSXVFTLDFTTFL  
VSFHTPVLVCLKNAVNIEXISGAIIVGFDRNVNYYKIQYAQLCINEGGAEFIATNLDAVT  
HLTDAQEWAGNGSMVGAIKGCTGQEP TLV GKPSPLMIDYLESKYGVERNRICMVGDRDLD  
DVLFGTENGLQSLLVLSGVTSEEKLLGPDNTITPDYYADDINAFFQTESEPSVTK  
>comp14200\_c0\_seq1; 572 86 1609 LEN=1990; translated  
MKSIDRLNSCASESESDNCTCSTSDLKHVSDCSPRDPQRSSEKRRHQHSSSTSSRPLLLA  
AAVVILCLSSSPSQHVVFSSKHVPSARRFLGIPSSYRRPLGDKANNNDNRGSISSQKKH  
QHRNQNRPRALASVAHSRSLSTLLRFSSASPEDESSGHDKENKPPASSFNGTSLSSPS  
SSATAYDEVDDETSVTSTTSFFRFPSTPPEEQQPPLDLVEAGSQSNAQSSILGRRYFGSA  
RSPKGLVQRKHALQTTFVCSLMGLAGFVEGFCIRRHGCFPNLMTGTVLKLAELSTLNL  
AAAMHAMVVAYASGGSIFALWKASGNASSIDNESETVAKHRQKRSSIEGVSVLSTLCF  
LLSDIWGGRLRPLLAAAFGILNAGTMDAGAGVTNAITGHVTKIGQGFATHRPSEQQA  
NAAPPAHVTSARGLAVFFVAAVASNGLCALLDATSRMEGGSALGLVGAVVNRPLGTTLA  
VYGVFFRWYLRASGALVDAEVATKEA  
>comp14201\_c0\_seq1; 1011 133 1998 LEN=2483; translated  
MAQTMGTVP TIGMRLDAMVAQIDQLPSTQLYGLIVAATVGLCTVLLGTGNSNLEKQLQON  
DDLKPKKASAAPVGVDRGKQPKWHLFKWINFVAVATFLYVFLFCSNATQYLHHESQGV  
VQFLVGSVFLMYFFGFFGVSF IHDDIPREAEVIPSQKQSPASGASKKTVHPPAACAP  
VCSDPSSFKSKASPPDNLKELPDEE IADLVLSNKVKDHMLEKLLDPFRAVTVRRIACNRK  
LASVLGRDQANSNVLEKLPSEHSLDYSRVYGANCEIVVGYVPLPVGLVGLPLTLNGESVYV  
PMATTEGCLVASSNRGAKAITQGS GAKARIVRDGITRAPCLRMGSAMEAADLKIWCEQPE  
NFAVLKKAFFESTTSFGKLECNPTVAGKNVYLRVCFSGDAMGMNMI SKGSLAVIETLQS  
YFPSCQLIALSGNMCTDKKAAATNWLHGRGKSVIVECFIPKEVVRTTLKTTVAALVHTNL  
NKNLIGSAMAGAIGGFNAHASNIVTAVFLATGQDPAQNVESNCITLMEENENGLWMCC  
TMPSIEVGTVGGTSLPAQAACLEAIGCKGGGSTPGANAKKLATVVAATMAGELSLLLAA  
LAANTLVQAHMVHNRKPAPKK  
>comp14202\_c0\_seq1; 393 204 2240 LEN=2255; translated  
MPLSRNHSQNAGPTIAIAAIGFALLFFNTQMPRRTFRNVVSQTAFEYAYADINSHGESNG  
YDNERSNGLPYRHDNQHDYDSGGNITSNSFSTNTSSANRVVSISSSRPDNDDAIVDTTTS  
NSTNRRSSPVKNDNATSTTTKNRRGEFLSTIVNTSSLEI HDSIGNSTYLSEPPSRNDANG  
SSTDLKFTVDNEDSKRIPKNGYAATEHTSASKTKNELASQLKNTTIESNFATTSSSTTT  
TTSAIINWTTWRNATEMEDGNIQIEFFRPRSNTSTETNASIASRQMAACLINLED TIRLA  
EWIPYHFATPLTGLVIALDPKTSQRGARRTLELINLWRDKIEITLWPDYKFAESKRFR  
GQSYVRERQVYFANRCLSYHKIQNRSWTLLTDNDEYLVFNFIHDEI IKYDHPGSKKGV  
KKVIDKNRKRYPMLRSSLPPQNSTVHAFLEQLQRDYDYN TLLNDTKKKKKGKDFLPRCV  
RFPGIHYGGRNRLRDHQSPAAFNSKNVGDATI IDPALLSTYRDVHDKRKSFKSKVMID  
VSRVLETFEWTPKNARNAKTIHNP SRVCGYNGSHDSGADYSSFLRNLNHYLGSLESFME  
RSADYRKKRTNEGYAKKAAKVNTTEHGDWDRDVLWVDLLVQRLGGGAVEAKRLLAPIA  
KYTNATMALGTNHSYHTV  
>comp14203\_c0\_seq1; 569 293 2494 LEN=2604; translated  
MCGIHLRAWRDESCLELQSLFGHHQFENNAEIDGVSPASCDQNLIRRGPD AQGKISITHP  
NYHRIECAASVLKMRAELLEQPVPLPGWINFKENTTDQTEHSDEHHQONEDEKKAYLCW  
NGE IYQQLSPSSALSSDQSTDV VETDEAFMYDVADTTI I KEHLES P S I S I EKN CVDNAS  
DSDPERCSCSSSSSASPLQHHIANAMARLYNAEFAFCVLTQNGIYYGRDFWGRRLSLLR  
CPRNCGSFQLVSAENLTFSLSSSGSFSTTPTTASTSGVPPAKVTPTFAQEWIEVPPGAV  
HSILFSESNDQIAEVFYPKASFSLPRLPKDFPIPPKPNQNVIRSQIQSPLTMI SDRLWTA  
SLELEFYLRRAVTRMVDLTSPPRSTGVLFSGGVDSVVLAAALADVLSSQFREEKLAACLE  
LRSQSDSESANLLPTKKTLPVILYLYNVVSGPNPEKSNDRKAALKSYGTLREKYQTISSE  
HDNQAKIHDTCKSLNDINHRDEFDDESHDIKIVFRDIVVEWEDICRTESHIRTLTLLSPKH  
TVMDINIATALWFASRGATENTNANG EEDFSGNSTNHNGDDRSRVL LLLGMDGADLMG  
GYGRHRKAYERGGWNELOKELTMDQNRLWERNCGRDDRLCSDHGREARFPFLDAHVVRF  
QEGMASKDGLVCFNLPPGVGDKRIILRLVAERLGLLEHACGLVKRAIQFGSRISHLSDTKR  
FGSRRKAKGATNI  
>comp14204\_c0\_seq2; 886 1 2278 LEN=2696; translated  
XAQEILALVFETTPSPSMVSEKENGKQRRGHRHRRRQQSIFACSPSLSMAILVVSCSLP  
DLDGVS GWTS GSIVVGRRTLLHRLTPVARTRLYANKGGEDEDLISEMDARILQSMRLDNK  
LDLEQTSNMKLLERGVKDKDFESIKELQERQKQEQKEEEDDYSSEVIKTLANTKFWK  
ALKRNAGEALES LAISVTNEIEKTAKVLVGLGFFAWDRAKQDVARALPTAASVPK KVFQ  
LEESSYVEPPVESEEEKEIRTRAERAKSLRQEF TTPADEFSAVTAEISSIFKRANRQVE

MKEDKSKDMGNPFFAAAFVVEEQSSREGGSGEDSSPFYASSTLSTTASRGNARLQSAFKKSQ  
KTKLAQQKENPASKANRLASAAIDSAYQVRKEIQSEENVPGYKTKELRESTVDVSRRIAG  
AAKKTAGFLGGASAFLLGSEEPSKQAQLPSSDGAKVKAEPAEFLDDSDAYFAFKREAPQQT  
EDLSGGTVIEGGGLPTPKKEESGGAFGFLSAISKRGRSGEAQQETDSNPVEDLSTGVVIE  
DGNVATPEKEKGGGAFGFFSAITNRGRQDQDRETEKESAEVFAPPPIAQETESITAELVD  
IDSDGSFEYFDAETEGAKSEPFTTTSYLENMEAGTATEVASDEDLRQVTVEVVSDDDFDD  
SVFEQATAVDNISIEELLEQQAAEEAAENREPNFVTKATLRTLDAFLVVEKGVSVAPEA  
LEVAKRAVTRATEAKLKDSAGSKVGWEAHNGNVRGEKRY

>comp14205\_c0\_seq1; 995 218 3901 LEN=3935; translated  
MSSTGPGEQRPQSERAPTQLPTSNVLPQNYNACDPTDPRIATTSTPHQVNNRDVGQN  
DTCTTEFNDESPLGTTKSVVALMERYHKNAQSKDDDEDSLLQRDPGALHIPSGIHVEHSS  
KEYTLDDVINSNNEGVDVSEHIRSLEKCPPNQTLSTSSLLPRIHDSFLDNMELNKDQSQD  
GLEENVGQLFLTDSECRPEEENSSSNI SELTMKLAQLPTVGMNHHHHTNAFRPSSSEDS  
MTLPTTKKTGADMYENAAKIFPTRRYSTSSSKSGYNADGSRKNDIEIGTGVGTMNDEGD  
NEGDP SKKKKLGAKIKMRLQRGLANMGNTNKADIEIFKKIVKPHRKKLLRSFRKIAATHIV  
LPSLFMAVLLFYGFENPPNGVALAPCKDSTDNTNALNKKVKETPSPPTPPPTVAPSNIIPS  
EFPTKTPTPSQFPTKLSEASNLP TSSPTTSPTRKPTYTFVDKKNETLCTSEEISLKQAS  
VSWWFLFVGVRQVITLCLAVVMQVIVIDFVAFRTRYLPQLMGTELT LAIAQSKGWPCILF  
FWAIFDMI FLFGKSRFARNWLYYQDYIDLFNANNPSGDI PNNKHYKKI IFFSIPLSAAVT  
LKRTVMANFVGVQRVVAYYKNDLSKLMKKLITVGEVAELSNDIAFHSRTVHRKSVFQRLSS  
VGRMVVGELEGSEINDDDDTDINYEYLYKTEGSE SIGNAKFMTSTPVEDNGTVKHSSTFI  
TNI FENLDEWEEPGLQEK NQIVSTTDVLFHFRRAVNF INSKYPFSPAFGKMTREECAQAS  
QNTFEKLLKSKRSNVIHFDDLCKIAENPDGTS DRKQVLELVRLFRPNRKG EITKLEFVK  
SIDSVYKQLRLLLLANINSASQIDRAYGKIANFVYFAVLVGLFIFGVDIQHVILAI SGI  
AVSFAFIIGSASSKYLEGILLILVRKPYDIGDKVCFLEPNAPVDDVGGPPSGGWMVESVDL  
YTTTVRLGTTREYATFSNGSLANLRI LNLRRSEKPNVYMF LKFTMDFTTEQLNEFRRRIT  
EFIKDRPREWIKVVSRLCTHVETEQQYMKFVLIVQHREPWQSFATI QISKGEVYVHSIHL  
MQELGMNYTAPKLPVQLSAVSPNELAKTLGDDYDGDGDEDFVGHYPYSSSRFEDKKVVT  
TETPLAQVKKSTLHESTTDG SVATRNLNQSSSSASSGKSRVMFDDEVTTTRAVNAVDGTLV  
RRKGKRGSTRSVERVSSKNDEVKNKII

>comp14205\_c0\_seq2; 719 218 2479 LEN=2687; translated  
MSSTGPGEQRPQSERAPTQLPTSNVLPQNYNACDPTDPRIATTSTPHQVNNRDVGQN  
DTCTTEFNDESPLGTTKSVVALMERYHKNAQSKDDDEDSLLQRDPGALHIPSGIHVEHSS  
KEYTLDDVINSNNEGVDVSEHIRSLEKCPPNQTLSTSSLLPRIHDSFLDNMELNKDQSQD  
GLEENVGQLFLTDSECRPEEENSSSNI SELTMKLAQLPTVGMNHHHHTNAFRPSSSEDS  
MTLPTTKKTGADMYENAAKIFPTRRYSTSSSKSGYNADGSRKNDIEIGTGVGTMNDEGD  
NEGDP SKKKKLGAKIKMRLQRGLANMGNTNKADIEIFKKIVKPHRKKLLRSFRKIAATHIV  
LPSLFMAVLLFYGFENPPNGVALAPCKDSTDNTNALNKKVKETPSPPTPPPTVAPSNIIPS  
EFPTKTPTPSQFPTKLSEASNLP TSSPTTSPTRKPTYTFVDKKNETLCTSEEISLKQAS  
VSWWFLFVGVRQVITLCLAVVMQVIVIDFVAFRTRYLPQLMGTELT LAIAQSKGWPCILF  
FWAIFDMI FLFGKSRFARNWLYYQDYIDLFNANNPSGDI PNNKHYKKI IFFSIPLSAAVT  
LKRTVMANFVGVQRVVAYYKNDLSKLMKKLITVGEVAELSNDIAFHSRTVHRKSVFQRLSS  
VGRMVVGELEGSEINDDDDTDINYEYLYKTEGSE SIGNAKFMTSTPVEDNGTVKHSSTFI  
TNI FENLDEWEEPGLQEK NQIVRNIIITLCCRLVW

>comp14205\_c0\_seq3; 1004 218 4028 LEN=4062; translated  
MSSTGPGEQRPQSERAPTQLPTSNVLPQNYNACDPTDPRIATTSTPHQVNNRDVGQN  
DTCTTEFNDESPLGTTKSVVALMERYHKNAQSKDDDEDSLLQRDPGALHIPSGIHVEHSS  
KEYTLDDVINSNNEGVDVSEHIRSLEKCPPNQTLSTSSLLPRIHDSFLDNMELNKDQSQD  
GLEENVGQLFLTDSECRPEEENSSSNI SELTMKLAQLPTVGMNHHHHTNAFRPSSSEDS  
MTLPTTKKTGADMYENAAKIFPTRRYSTSSSKSGYNADGSRKNDIEIGTGVGTMNDEGD  
NEGDP SKKKKLGAKIKMRLQRGLANMGNTNKADIEIFKKIVKPHRKKLLRSFRKIAATHIV  
LPSLFMAVLLFYGFENPPNGVALAPCKDSTDNTNALNKKVKETPSPPTPPPTVAPSNIIPS  
EFPTKTPTPSQFPTKLSEASNLP TSSPTTSPTRKPTYTFVDKKNETLCTSEEISLKQAS  
VSWWFLFVGVRQVITLCLAVVMQVIVIDFVAFRTRYLPQLMGTELT LAIAQSKGWPCILF  
FWAIFDMI FLFGKSRFARNWLYYQDYIDLFNANNPSGDI PNNKHYKKI IFFSIPLSAAVT  
LKRTVMANFVGVQPSVSLFMYSDNGSDCTTEQSINAI FNNHFRSLSL SFLILLNLV LAYY  
KNDLSKLMKKLITVGEVAELSNDIAFHSRTVHRKSVFQRLSSVGRMVVGELEGSEINDD  
DTDINYEYLYKTEGSE SIGNAKFMTSTPVEDNGTVKHSSTFI TNI FENLDEWEEPGLQEK  
NQIVSTTDVLFHFRRAVNF INSKYPFSPAFGKMTREECAQASQNTFEKLLKSKRSNVIH  
FDDLCKIAENPDGTS DRKQVLELVRLFRPNRKG EITKLEFVKSIDSVYKQLRLLLLANINS

ASQIDRAYGKIANFVVFYFAVLVVGLFIFGVDIQHVILAIISGIAVSFAFIIGSASSKYLEG  
ILLILVRKPYDIGDKVCFLEPNAPVDDVGGPPSGGWMVESVDLYTTTTVRLGTTREYATFSN  
GSLANLRIINLRRSEKPNVYMF LKF TMDFTTEQLNEFRRRITEFIKDRPREWIKVVS LRC  
THVETEQQYMKFVLIVQHREPWQSFATIQISKGEVYVHSIHLMQELGMNYTAPKLPVQLS  
AVSPNELAKTLGDDYDGGDDGGDEDVFGHPYSSSRFEDKKVVTETETPLAQVKKSTLHES TT  
DGSVATRNLNQSSSSASSGKSRVMFDEVTTRAVNAVDGTLVRRKGRGSTRSVERVSSK  
NDEVKNKII

>comp14205\_c0\_seq4; 728 218 2606 LEN=2814; translated  
MSSTGPGEQRPQSERAPTQLPTSNVLP CPQNYNACDPTPDRIATTSTPHQVNNRDVGQN  
DTCTTEFNDESPLGTTKSVVALMERYHKNAQSKDDDEDSLLQRDPGALHIPSGIHVEHSS  
KEYTLDDVINSNNEGVDVSEHIRSLEKCPNQTLSSTSSLLPRIHDSFLDNMELNKDQSOD  
GLEENVGQLFLT DSECRRPEEENSSSNI SELTMKLAQLPTVGKMNHHHTNAFRPSS EDS  
MTLPTTKKTGADMYEYENAAKIFPTRRYSTSSSKSGYNADGSRKNDIEIGTGVTMND EGD  
NEGDP SKKKKLGAKIKMRLQRGLANMG TNTKADIEIFKKIVKPHRKKLLRSFRK IATHIV  
LPSLFMAVLLFYGFENPPNGVALAPCKDST DNTNALNKKVKETPSP TPPPPTVAPSNI PS  
EFPTKTPTPSQFPTKLSEASNLP TSSPTTSPTRKPTYTFVDKKNETLCTSEEISL KQAS  
VSWWFLFVGVRQVITLCLAVVMQVIVIDFVAFRTRYLPQLMGTELT LAIAQSKGWPCILF  
FWAIFDMI FLFGKSRFARNWLYYQDYIDL FNANNPSGDIPNNKHYKKI IFFSIPLSAAVT  
LKRTVMANFVGVQPSVSLFMYWSDNGSDCTTEQSINAI FNNHFRSLSL SFLILLNLV LAY  
KNDLSKLMKKLITVGEVAELSNDIAFH SRTVHRKSVFQRLSSVGRMVVGELEGSE INNDD  
DTDINYEYELKTEGSE SIGNAKFM TSTPVEDNGTVKHSSTFITNIFENLDEWEE PGLQEK  
NQIVRNII TLCCRLVW

>comp14205\_c0\_seq5; 274 488 1159 LEN=1193; translated  
MDFTEQLNEFRRRITEFIKDRPREWIKVVS LRC THVETEQQYMKFVLIVQHREPWQSF A  
TIQISKGEVYVHSIHLMQELGMNYTAPKLPVQLSAVSPNELAKTLGDDYDGGDDGGDEDV F  
GHPYSSSRFEDKKVVTETETPLAQVKKSTLHES TT DGSVATRNLNQSSSSASSGKSRVMF D  
DEV TTRAVNAVDGTLVRRKGRGSTRSVERVSSKNDEVKNKII

>comp14205\_c0\_seq6; 679 218 2957 LEN=2957; translated  
MSSTGPGEQRPQSERAPTQLPTSNVLP CPQNYNACDPTPDRIATTSTPHQVNNRDVGQN  
DTCTTEFNDESPLGTTKSVVALMERYHKNAQSKDDDEDSLLQRDPGALHIPSGIHVEHSS  
KEYTLDDVINSNNEGVDVSEHIRSLEKCPNQTLSSTSSLLPRIHDSFLDNMELNKDQSOD  
GLEENVGQLFLT DSECRRPEEENSSSNI SELTMKLAQLPTVGKMNHHHTNAFRPSS EDS  
MTLPTTKKTGADMYEYENAAKIFPTRRYSTSSSKSGYNADGSRKNDIEIGTGVTMND EGD  
NEGDP SKKKKLGAKIKMRLQRGLANMG TNTKADIEIFKKIVKPHRKKLLRSFRK IATHIV  
LPSLFMAVLLFYGFENPPNGVALAPCKDST DNTNALNKKVKETPSP TPPPPTVAPSNI PS  
EFPTKTPTPSQFPTKLSEASNLP TSSPTTSPTRKPTYTFVDKKNETLCTSEEISL KQAS  
VSWWFLFVGVRQVITLCLAVVMQVIVIDFVAFRTRYLPQLMGTELT LAIAQSKGWPCILF  
FWAIFDMI FLFGKSRFARNWLYYQDYIDL FNANNPSGDIPNNKHYKKI IFFSIPLSAAVT  
LKRTVMANFVGVQPSVSLFMYWSDNGSDCTTEQSINAI FNNHFRSLSL SFLILLNLV LAY  
KNDLSKLMKKLITVGEVAELSNDIAFH SRTVHRKSVFQRLSSVGRMVVGELEGSE INNDD  
DTDINYEYELKTEGSE SIGNAKFM TSTPVEDNGTVKHSSTFITNIFENLDEWEE PGLQEK  
NQIVSTTDVLHFRAVNF INSKYPFSPAFGKTM TREECAQASQNTFEKLLKSKRSNVIH  
FDDLCKIAENPDGTS DRKQVLELVRLFRPNRKG EITKLEFVKSIDSVYKQLRLL LANINS  
ASQIDRDVSLTCX

>comp14205\_c0\_seq7; 670 218 2830 LEN=2830; translated  
MSSTGPGEQRPQSERAPTQLPTSNVLP CPQNYNACDPTPDRIATTSTPHQVNNRDVGQN  
DTCTTEFNDESPLGTTKSVVALMERYHKNAQSKDDDEDSLLQRDPGALHIPSGIHVEHSS  
KEYTLDDVINSNNEGVDVSEHIRSLEKCPNQTLSSTSSLLPRIHDSFLDNMELNKDQSOD  
GLEENVGQLFLT DSECRRPEEENSSSNI SELTMKLAQLPTVGKMNHHHTNAFRPSS EDS  
MTLPTTKKTGADMYEYENAAKIFPTRRYSTSSSKSGYNADGSRKNDIEIGTGVTMND EGD  
NEGDP SKKKKLGAKIKMRLQRGLANMG TNTKADIEIFKKIVKPHRKKLLRSFRK IATHIV  
LPSLFMAVLLFYGFENPPNGVALAPCKDST DNTNALNKKVKETPSP TPPPPTVAPSNI PS  
EFPTKTPTPSQFPTKLSEASNLP TSSPTTSPTRKPTYTFVDKKNETLCTSEEISL KQAS  
VSWWFLFVGVRQVITLCLAVVMQVIVIDFVAFRTRYLPQLMGTELT LAIAQSKGWPCILF  
FWAIFDMI FLFGKSRFARNWLYYQDYIDL FNANNPSGDIPNNKHYKKI IFFSIPLSAAVT  
LKRTVMANFVGVQRVVAYYKNDLSKLMKKLITVGEVAELSNDIAFH SRTVHRKSVFQRLSS  
VGRMVVGELEGSE INNDD DTDINYEYELKTEGSE SIGNAKFM TSTPVEDNGTVKHSSTFI  
TNI FENLDEWEE PGLQEK NQIVSTTDVLHFRAVNF INSKYPFSPAFGKTM TREECAQAS  
QNTFEKLLKSKRSNVIHFDDLCKIAENPDGTS DRKQVLELVRLFRPNRKG EITKLEFVK  
SIDSVYKQLRLL LANINSASQIDRDVSLTCX



>comp14206\_c0\_seq1; 612 118 2044 LEN=2044; translated  
MQMEIGLGYITILKHFSPYATELWNAHNNLQKICTVLANPKYARHRKEMQELRKKHAQGK  
IWE PQMPAELGNALSPMISIRSSFEELMSDTQKQYQQHLKLYHPSIKSHQPLSFQFPA  
LTAEIKLDGERMVIHIDNGQVTMNRNSKWFSELYAPVLPGLRRSLSKYDPINVILDGE  
VESWDDINGTLIPFGENRAVAGYRRAYLHSHGMIDPIDTEKLHDTNDDTVMRPAADFSTY  
VPSRRKKMVELGKNFWLKFRAFDILYVDGSDKHRLFHDCGMDTEESDDNGSIVHLPLMKR  
KQLLYQILTEQKNEVEICPTIVIRCNGNAVLGEEYFTTKNPISEFGYPATLLDSSQTLFQ  
HEIKDLENLDTMRKLGRTNNQISKMRAEAMERFYGKVVEDYKYEGLVVKDLASPYFFGTR  
KCWWKFKPDYEAEAVDIDVSI FICEIRNIPILNLVDTDDPLLQVVIIGAKFATGLRNS  
GTPSAYLVGVVDFDENC FMPFNSINAASTTREKMEELNYTGFKKGGDEPLELGKWFRE  
ESFGLPSFISKRS LQRNSTEDFEGWSFNKTKHYDPDIWIDPKDSVVLTIKGAELVVSDEFS  
VGLALRFPRIKKVRLESVDGDEKKASETSTDEEIWRI FDEARS

>comp14206\_c0\_seq2; 955 893 4303 LEN=4407; translated  
MNGEDHRRIKEVPEXNNEDSGEKQTDANLRADWLRRVMNHGLSPLEHKWLVRILQKKMEI  
GLGYITILKHFSPYATELWNAHNNLQKICTVLANPKYARHRKEMQELRKKHAQGKIWE PQ  
MQPAELGNALSPMISIRSSFEELMSDTQKQYQQHLKLYHPSIKSHQPLSFQFPALTAEI  
KLDGERMVIHIDNGQVTMNRNSKWFSELYAPVLPGLRRSLSKYDPINVILDGEVESWD  
DINGTLIPFGENRAVAGYRRAYLHSHGMIDPIDTEKLHDTNDDTVMRPAADFSTYVPSRR  
KKMVELGKNFWLKFRAFDILYVDGSDKHRLFHDCGMDTEESDDNGSIVHLPLMKRQQLLY  
QILTEQKNEVEICPTIVIRCNGNAVLGEEYFTTKNPISEFGYPATLLDSSQTLFQHEIKD  
LENLDTMRKLGRTNNQISKMRAEAMERFYGKVVEDYKYEGLVVKDLASPYFFGTRKCWWK  
FKPDYEAEAVDIDVSI FICEIRNIPILNLVDTDDPLLQVVIIGAKFATGLRNSGTPSA  
YLVGVVDFDENC FMPFNSINAASTTREKMEELNYTGFKKGGDEPLELGKWFREESFGL  
PSFISKRS LQRNSTEDFEGWSFNKTKHYDPDIWIDPKDSVVLTIKGAELVVSSTLLDFQF  
XKLIFIQSKIVSPFLHHGQDEF SVGLALRFPRIKKVRLESVDGDEKKASETSTDEE IWRI  
FDEARSKKLNAESMIGSQCSGRARKVSRQGRFLTPEEFRHKTRKRKMKMVSSPSRKVP  
KVDVCESSLLKDLTFCVLEGT YFFDANSLEGQVAEKEGWVCEVEKVKSEEDVIEFIMKHG  
GNYRTEVKGTINEYIVGGTKDDARVQNMIGLKD KDAKSLDSSKKKGDKALFQMAQHHDGIL  
KWTFFVYLLHRLQKNNNSNRNSNYLKPEPHQYLGSTAEVLF SYNRI SIDELRESLSVPNN  
NDKQVPPWQLKGLIDLPEERWILSSRHTHFWPYNDEKLGESCNDRNGIIMYPDVFSYG  
FGFSAEKDANGEALSCTTSPRWNVLPDFEEIMSVLPLVSVMGGFVTPHLHCGVTHIICL  
LKIDDELQYKDEVSLTRFLCKE HGRLLLEYLR CNFPHRNNIKLISPNIWIRKMMELNI

>comp14206\_c0\_seq3; 1133 79 4040 LEN=4144; translated  
MDDQSEERDTALSDDDEQLADRQPEGPPRQDPSGEAVGNLPHYKFFCLRVQKLWRNKREK  
VASKRWKEKDRLEYILPRRMIKDLNGQTFPYLRLLLLPEQDSRRQFNVKEKKIAEAYCKV  
LAFRKGTKSYEMLMNF TDPQAVPSNIAGDLSLVIEYVLKQRLPVPDPDQDPYLSNVKL  
KTINHYLEIANL RAYASKDNSRTTAHNNHEWRRSPENQRSSRGNNEDSGEKQTDANLRA  
DWLRRVMNHGLSPLEHKWLVRILQKKMEIGLGYITILKHFSPYATELWNAHNNLQKICTV  
LANPKYARHRKEMQELRKKHAQGKIWE PQMPAELGNALSPMISIRSSFEELMSDTQKQY  
QQHLKLYHPSIKSHQPLSFQFPALTAEI KLDGERMVIHIDNGQVTMNRNSKWFSELYA  
PVLGSLRRSLSKYDPINVILDGEVESWDDINGTLIPFGENRAVAGYRRAYLHSHGMIDP  
IDTEKLHDTNDDTVMRPAADFSTYVPSRRKKMVELGKNFWLKFRAFDILYVDGSDKHRLF  
HDCGMDTEESDDNGSIVHLPLMKRQQLLYQILTEQKNEVEICPTIVIRCNGNAVLGEEYF  
TTKNPISEFGYPATLLDSSQTLFQHEIKDLENLDTMRKLGRTNNQISKMRAEAMERFYGK  
VVEDYKYEGLVVKDLASPYFFGTRKCWWKFKPDYEAEAVDIDVVIIGAKFATGLRNSGT  
PSAYLVGVVDFDENC FMPFNSINAASTTREKMEELNYTGFKKGGDEPLELGKWFREES  
FGLPSFISKRS LQRNSTEDFEGWSFNKTKHYDPDIWIDPKDSVVLTIKGAELVVSSTLLD  
FQFXKLIFIQSKIVSPFLHHGQDEF SVGLALRFPRIKKVRLESVDGDEKKASETSTDEE I  
WRI FDEARSKKLNAESMIGSQCSGRARKVSRQGRFLTPEEFRHKTRKRKMKMVSSPSR  
KVPKVDVCESSLLKDLTFCVLEGT YFFDANSLEGQVAEKEGWVCEVEKVKSEEDVIEFIM  
KHGNYRTEVKGTINEYIVGGTKDDARVQNMIGLKD KDAKSLDSSKKKGDKALFQMAQHHD  
GILKWTFFVYLLHRLQKNNNSNRNSNYLKPEPHQYLGSTAEVLF SYNRI SIDELRESLSV  
PNNNDKQVPPWQLKGLIDLPEERWILSSRHTHFWPYNDEKLGESCNDRNGIIMYPDV  
SYGFGFSAEKDANGEALSCTTSPRWNVLPDFEEIMSVLPLVSVMGGFVTPHLHCGVTHI  
ICLLKIDDELQYKDEVSLTRFLCKE HGRLLLEYLR CNFPHRNNIKLISPNIWIRKMMELNI

>comp14206\_c0\_seq4; 1075 79 4130 LEN=4234; translated  
MDDQSEERDTALSDDDEQLADRQPEGPPRQDPSGEAVGNLPHYKFFCLRVQKLWRNKREK  
VASKRWKEKDRLEYILPRRMIKDLNGQTFPYLRLLLLPEQDSRRQFNVKEKKIAEAYCKV  
LAFRKGTXKL RDAYGMYGRRVVVEEASLFNFIPHVVFYLNGLTKNFTDPQAVPSNIAGD  
LSLVIEYVLKQRLPVPDPDQDPYLSNVKLKTINHYLEIANL RAYASKDNSRTTAHNNH

EWRRSPENQRSSRGNNEDSGEKQTDANLRADWLRRVMNHGLSPLEHKWLVRIILQKKMEIG  
LGYITILKHFSPYATELWNAHNNLQKICTVLANPKYARHRKEMQELRKKHAQGKIWEPQM  
QPAELGNALSPMISIRSSFEELMSDTQKQYQQHLKLYHPSIKSHQPLSFQFPALTAIEIK  
LDGERMVIHIDNGQVTMNRNSKWFSELYAPVGLPSLRRSLSKYDPDINVILDGEVESWDD  
INGTLIPFGENRAVAGYRRAYLHSHGMIDPIDTEKLDHTNDDTVMRPAADFSTYVPSRRK  
KMVELGKNFWLKFRAFDILYVDGSDKHLRFHDCGMDTEESDDNGSIVHLPLMKRKQLLYQ  
ILTEQKNEVEICPTIVIRCNGNAVLGEEYFTTKNPISEFGYPATLLDSSQTLFQHEIKDL  
ENLDTMRKLGRTNNQISKMRAEAMERFYGKVVEDYKYEGLVVKDLASPYFFGTRKCCWKF  
KPDYEAEAVDIDVVIIGAKFATGLRNSGTPSAYLVGVVDKFDENCMPFNSINAASTTR  
EKMEEILNYTGFKKGGDEPLELKGWFFREESFGLPSFISKRSLQRNSTEDFEGWSFNKTKH  
YDPDIWIDPKDSVLTIKGAELVVSSTLLDFQFXKLIFIQSKIVSPFLHHGQDEFVGLA  
LRFPRIKKVRLESVDGDEKKASETSTDEE IWRIFDEARSKKLNAESMIGSQCSGRARKV  
SRQGRFLTPEEFRHKTRKRKMKMVSSPSRKVPKVDVCESSLLKDLTFCVLEGTYYFFDAN  
SLEGQVAEKEGWVCEVEKVKSEEDVIEFIMKHGGNYRTEVKGTINEYIVGGTKDDARVQN  
MIKGLKDAKSLDSSKKKGDKALFQMAQHHDGILKWTFFVYWLLHRLQKNNNSNRNSNYLKPE  
PHQYLGSTAEVLFVSYNRQISIDELRESLSPNNNDKQVPPWQLKGLIDLKPEERWILSSR  
HTHFWPYNDEKLHGESCNDNRNGIIMYPDVFSYGFSGSAEKDANGEALSCTTSPRWNVLP  
DFEEMSPLVSVMGGFVTPHLHCGVTHIICLLKIDDELQYKDEVSLTRFLCKEHGHRL  
LEYLR CNFPHRNNIKLISPWNIRKNMELNI

>comp14206\_c0\_seq5; 1099 79 4117 LEN=4324; translated  
MDDQSEERDTALSDDDEQLADRQPEGPPRQDPSGEAVGNLPHYKFFCLRVQKLWRNKREK  
VASKRWKEKDRLEYILPRRMIKDLNGQTFPYLRLLLLPEQDSRRQFNVKEKKIAEAYCKV  
LAFRKGTKSYEMLMNF TDPQAVPSNIAGDLSLVIEYVLKQRLPVDPDQDPQPYLHSNVKL  
KTINHYLEIANLRAYASKDNSRTTAHNNHEWRRSPENQRSSRGNNEDSGEKQTDANLRA  
DWLRRVMNHGLSPLEHKWLVRIILQKKMEIGLYITILKHFSPYATELWNAHNNLQKICTV  
LANPKYARHRKEMQELRKKHAQGKIWEPQMOPAEELGNALSPMISIRSSFEELMSDTQKQY  
QQHLKLYHPSIKSHQPLSFQFPALTAIEIKLDGERMVIHIDNGQVTMNRNSKWFSELYA  
PVLGPSLRRSLSKYDPDINVILDGEVESWDDINGTLIPFGENRAVAGYRRAYLHSHGMIDP  
IDTEKLDHTNDDTVMRPAADFSTYVPSRRKMMVELGKNFWLKFRAFDILYVDGSDKHLRF  
HDCGMDTEESDDNGSIVHLPLMKRKQLLYQILTEQKNEVEICPTIVIRCNGNAVLGEEYF  
TTKNPISEFGYPATLLDSSQTLFQHEIKDLLENLDTMRKLGRTNNQISKMRAEAMERFYGK  
VVEDYKYEGLVVKDLASPYFFGTRKCCWKF KPDYEAEAVDIDVSIFICEIRNIPILNLV  
DTDDPLLQVVIIGAKFATGLRNSGTPSAYLVGVVDKFDENCMPFNSINAASTTREKME  
EILNYTGFKKGGDEPLELKGWFFREESFGLPSFISKRSLQRNSTEDFEGWSFNKTKHYDPI  
WIDPKDSVLTIKGAELVVSSTLLDFQFXKLIFIQSKIVSPFLHHGQDEFVGLALRFP  
RIKKVRLESVDGDEKKASETSTDEE IWRIFDEARSKKLNAESMIGSQCSGRARKVSRQG  
RRFLTPEEFRHKTRKRKMKMVSSPSRKVPKVDVCESSLLKDLTFCVLEGTYYFFDANSLEG  
QVAEKEGWVCEVEKVKSEEDVIEFIMKHGGNYRTEVKGTINEYIVGGTKDDARVQNMIGK  
LKDAKSLDSSKKKGDKALFQMAQHHDGILKWTFFVYWLLHRLQKNNNSNRNSNYLKPEPHQY  
LGSTAEVLFVSYNRQISIDELRESLSPNNNDKQVPPWQLKGLIDLKPEERWILSSRHTHF  
WPYNDEKLHGESCNDNRNGIIMYPDVFSYGFSGSAEKDANGEALSCTTSPRWNVLPDFEE  
IMSVLPLVSVMGGFVTPHLHCGVTHIICLLKIDDELQYKDEVSLTRFLCKEHGHRLLEYL  
RCNFPHRNNIKLISPWNIRKNMELNI

>comp14206\_c0\_seq6; 763 79 2797 LEN=2797; translated  
MDDQSEERDTALSDDDEQLADRQPEGPPRQDPSGEAVGNLPHYKFFCLRVQKLWRNKREK  
VASKRWKEKDRLEYILPRRMIKDLNGQTFPYLRLLLLPEQDSRRQFNVKEKKIAEAYCKV  
LAFRKGTKSYEMLMNF TDPQAVPSNIAGDLSLVIEYVLKQRLPVDPDQDPQPYLHSNVKL  
KTINHYLEIANLRAYASKDNSRTTAHNNHEWRRSPENQRSSRGNNEDSGEKQTDANLRA  
DWLRRVMNHGLSPLEHKWLVRIILQKKMEIGLYITILKHFSPYATELWNAHNNLQKICTV  
LANPKYARHRKEMQELRKKHAQGKIWEPQMOPAEELGNALSPMISIRSSFEELMSDTQKQY  
QQHLKLYHPSIKSHQPLSFQFPALTAIEIKLDGERMVIHIDNGQVTMNRNSKWFSELYA  
PVLGPSLRRSLSKYDPDINVILDGEVESWDDINGTLIPFGENRAVAGYRRAYLHSHGMIDP  
IDTEKLDHTNDDTVMRPAADFSTYVPSRRKMMVELGKNFWLKFRAFDILYVDGSDKHLRF  
HDCGMDTEESDDNGSIVHLPLMKRKQLLYQILTEQKNEVEICPTIVIRCNGNAVLGEEYF  
TTKNPISEFGYPATLLDSSQTLFQHEIKDLLENLDTMRKLGRTNNQISKMRAEAMERFYGK  
VVEDYKYEGLVVKDLASPYFFGTRKCCWKF KPDYEAEAVDIDVSIFICEIRNIPILNLV  
DTDDPLLQVVIIGAKFATGLRNSGTPSAYLVGVVDKFDENCMPFNSINAASTTREKME  
EILNYTGFKKGGDEPLELKGWFFREESFGLPSFISKRSLQRNSTEDFEGWSFNKTKHYDPI  
WIDPKDSVLTIKGAELVVSDEFVGLALRFPRIKKVRLESVDGDEKKASETSTDEE IWR  
IFDEARS

>comp14206\_c0\_seq7; 989 893 4226 LEN=4433; translated  
MNGEDHRRRIKEVPEXNNEDSGEKQTDANLRADWLRRVMNHGLSPLEHKWLVRILQKKMEI  
GLGYITILKHFSPYATELWNAHNNLQKICTVLANPKYARHRKEMQELRKKHAQGKIWEPQ  
MQPAELGNALSPMISIRSSFEELMSDTQKQYQQHLKKLYHPSIKSHQPLSFQFPALTAEI  
KLDGERMVIHIDNGQVTMNRNSKWFSELYAPVLGPSLRRSLSKYPDINVILDGEVESWD  
DINGTLIPFGENRAVAGYRRAYLHSHGMIDPIDTEKLHDTNDDTVMRPAADFSTYVPSRR  
KKMVELGKNFWLKFRAFDILYVDGSDKHRLFHDCGMDTEESDDNGSIVHPLMKRKQLLY  
QILTEQKNEVEICPTIVIRCNGNAVLGEEYFTTKNPISEFGYPATLLDSSQTLFQHEIKD  
LENLDTMRKLGRTNNQISKMRAEAMERFYGKVVEDYKYEGLVVKDLASPYFFGTRKCWWK  
FKPDYEAEAVDIDVVIIGAKFATGLRNSGTPSAYLVGVVDKFDENCFMPFNSINAASTT  
REKMEEILNYTGFKKGGDEPLELGKWFREESFGLPSFISKRSLQRNSTEDFEGWSFNKTK  
HYPDIWIDPKDSVVLTIKGAELVVSVSTLLDFQFXKLIFIQSKIVSPFLHHGQDEFVGL  
ALRFPRIKKVRLESVDGDEKKASETSTDEEIIWRI FDEARSKKLNAAESMIGSQCSGRARK  
VSRQGRRFLTPEEFRHKTRKRKMKMVSSPSRKVPKVDVCESSLLKDLTFCVLEGTYYFFDA  
NSLEGQVAEKEGWVCEVEKVKSEEDVIEFIMKHGGNYRTEVKGTINEYIVGGTKDDARVQ  
NMIKGLKDAKSLDSSKKKGDKALFQMAQHHDGILKWTFFVYLLHRLQKNNSNRNSNYLKP  
EPHQYLGSTAEVLFVSYNRQISIDELRESLSVNNNDKQVPPWQLKGLIDLPEERWILSS  
RHTHFWPYNDEKLHGESCNDRNGIIMYPDVFVSYGFGFSAEKDANGEALSCTTSPRWNVHL  
PDFEEMSIVLPLVSVMGGFVTPHLHCGVTHIICLLKIDDELQYKDEVSLTRFLCKEHGHR  
LLEYLR CNFPHRNNIKLISPNIWIRKNMELNI

>comp14206\_c0\_seq8; 1041 79 4207 LEN=4311; translated  
MDDQSEERDTALSDDDEQLADRQPEGPPRQDPSGEAVGNLPHYKFFCLRVQKLWRNKREK  
VASKRWKEKDRLEYILPRRMIKDLNGQTFPYLRLLLLPEQDSRRQFNVKEKKIAEAYCKV  
LAFRKGTXKLRDAYGMYGRRVVVEASLFNFIPHVVVYLNGLTKNFTDPQAVPSNIAGDL  
SLVIEYVLKQRLPVDPDQPDQPYLHSNVKLTINHYLDEIANLRAYASKDNSRTTAHNNH  
EWRRSPENQRSSRGNNEDSGEKQTDANLRADWLRRVMNHGLSPLEHKWLVRILQKKMEIG  
LGYITILKHFSPYATELWNAHNNLQKICTVLANPKYARHRKEMQELRKKHAQGKIWEPQM  
QPAELGNALSPMISIRSSFEELMSDTQKQYQQHLKKLYHPSIKSHQPLSFQFPALTAEI  
LDGERMVIHIDNGQVTMNRNSKWFSELYAPVLGPSLRRSLSKYPDINVILDGEVESWDD  
INGTLIPFGENRAVAGYRRAYLHSHGMIDPIDTEKLHDTNDDTVMRPAADFSTYVPSRRK  
KMVELGKNFWLKFRAFDILYVDGSDKHRLFHDCGMDTEESDDNGSIVHPLMKRKQLLYQ  
ILTEQKNEVEICPTIVIRCNGNAVLGEEYFTTKNPISEFGYPATLLDSSQTLFQHEIKDL  
ENLDTMRKLGRTNNQISKMRAEAMERFYGKVVEDYKYEGLVVKDLASPYFFGTRKCWWKF  
KPDYEAEAVDIDVSI FICEIRNIPILNLVDTDDPLLLQVVIIGAKFATGLRNSGTPSAY  
LVGVVDKFDENCFMPFNSINAASTTREKMEEILNYTGFKKGGDEPLELGKWFREESFGLP  
SFISKRSLQRNSTEDFEGWSFNKTKHYPDIWIDPKDSVVLTIKGAELVVSVSTLLDFQFX  
KLIFIQSKIVSPFLHHGQDEFVGLALRFPRIKKVRLESVDGDEKKASETSTDEEIIWRI F  
DEARSKKLNAAESMIGSQCSGRARKVSRQGRRFLTPEEFRHKTRKRKMKMVSSPSRKVPK  
VDVCESSLLKDLTFCVLEGTYYFFDANSLEGQVAEKEGWVCEVEKVKSEEDVIEFIMKHGG  
NYRTEVKGTINEYIVGGTKDDARVQNMKGLKDAKSLDSSKKKGDKALFQMAQHHDGILK  
WTFVYLLHRLQKNNSNRNSNYLKP EPHQYLGSTAEVLFVSYNRQISIDELRESLSVNNN  
DKQVPPWQLKGLIDLPEERWILSSRHTHFWPYNDEKLHGESCNDRNGIIMYPDVFVSYG  
GFSAEKDANGEALSCTTSPRWNVHLPDFEEMSIVLPLVSVMGGFVTPHLHCGVTHIICLL  
KIDDELQYKDEVSLTRFLCKEHGHR LLEYLR CNFPHRNNIKLISPNIWIRKNMELNI

>comp14206\_c0\_seq9; 948 118 3364 LEN=3468; translated  
MQMEIGLGYITILKHFSPYATELWNAHNNLQKICTVLANPKYARHRKEMQELRKKHAQGK  
IWEPQMMPAELGNALSPMISIRSSFEELMSDTQKQYQQHLKKLYHPSIKSHQPLSFQFPAL  
LTAEIKLDGERMVIHIDNGQVTMNRNSKWFSELYAPVLGPSLRRSLSKYPDINVILDGE  
VESWDDINGTLIPFGENRAVAGYRRAYLHSHGMIDPIDTEKLHDTNDDTVMRPAADFSTY  
VPSRRKMMVELGKNFWLKFRAFDILYVDGSDKHRLFHDCGMDTEESDDNGSIVHPLMKR  
KQLLYQILTEQKNEVEICPTIVIRCNGNAVLGEEYFTTKNPISEFGYPATLLDSSQTLFQ  
HEIKDLENLDTMRKLGRTNNQISKMRAEAMERFYGKVVEDYKYEGLVVKDLASPYFFGTR  
KCWWKFKPDYEAEAVDIDVSI FICEIRNIPILNLVDTDDPLLLQVVIIGAKFATGLRNS  
GTPSAYLVGVVDKFDENCFMPFNSINAASTTREKMEEILNYTGFKKGGDEPLELGKWFRE  
ESFGLPSFISKRSLQRNSTEDFEGWSFNKTKHYPDIWIDPKDSVVLTIKGAELVVSVSTL  
LDFQFXKLIFIQSKIVSPFLHHGQDEFVGLALRFPRIKKVRLESVDGDEKKASETSTDE  
EIWRI FDEARSKKLNAAESMIGSQCSGRARKVSRQGRRFLTPEEFRHKTRKRKMKMVSSP  
SRKVPKVDVCESSLLKDLTFCVLEGTYYFFDANSLEGQVAEKEGWVCEVEKVKSEEDVIEF  
IMKHGGNYRTEVKGTINEYIVGGTKDDARVQNMKGLKDAKSLDSSKKKGDKALFQMAQH  
HDGILKWTFFVYLLHRLQKNNSNRNSNYLKP EPHQYLGSTAEVLFVSYNRQISIDELRESL

SVPNNNDKQVPPWQLKGLIDLDPKEERWILSSRHTHFWPYNDEKLGESCNDRNGIIMYPD  
VFSYGFSAEKDANGEALSCTTSPRWNHVLPDFEEMSVLPLVSVMGGFVTPHLHCGVTH  
IICLLKIDDELQYKDEVSLTRFLCKEHGHRLLLEYLRCNFPHRNNIKLISPWIRKNMEL  
NI

>comp14206\_c0\_seq10; 1041 79 4207 LEN=4414; translated  
MDDQSEERDTALSDDDEQLADRQPEGPPRQDPSGEAVGNLPFYKFFCLRVQKLWRNKREK  
VASKRWKEKDRLEYILPRRMKDLNGQTFPYLRLLPEQDSRRQFNVKEKKIAEAYCKV  
LAFRKGTXKLRLDAYGMYGRRVVVEEASLFNFIPHVVFYLNGLTKNFTDPQAVPSNIAGDL  
SLVIEYVLKQRLPVDPDQPDQPYLHSNVKLTINHYLDEIANLRAYASKDNSRTTAHHNH  
EWRSPENQRSSRGNNEDSGEKQTDANLRADWLRRVMNHGLSPLHKKWLVRILOKQKMEIG  
LGYITILKHFSPYATELWNAHNNLQKICTVLANPKYARHRKEMQELRKKHAQGKIWE PQM  
QPAELGNALSPMISIRSSFEELMSDTQKQYQOHLKLYHPSIKSHQPLSFQFPALTAETIK  
LDGERMVIHIDNGQVTMNRNSKWFSELYAPVLGPSLRRSLSKYPDINVILDGEVESWDD  
INGTLIPFGENRAVAGYRRAYLHSHGMIDPIDTEKLDHTNDDTVMRPAADFSTYVPSRRK  
KMVELGKNFWLKFRAFDILYVDGSDKHRLFHDCGMDTEESDDNGSIVHPLMKRKQQLLYQ  
ILTEQKNEVEICPTIVIRCNGNAVLGEEYFTTKNPISEFGYPATLLDSSQTLFQHEIKDL  
ENLDTMRKLGRTNNQISKMRAEAMERFYGKVVEDYKYEGLVVKDLASPYFFGTRKCVWK  
KPDYEAEADVIDVSI FICEIRNIPILNLVDTDDPLLQVVIIGAKFATGLRNSGTPSAY  
LVGVVDKFDENCMPFNSINAASTTREKMEEILNYTGFKKGGDEPLELGKWFREESFGLP  
SFISKRSQRNSTEDFEGWSFNKTKHYPIWIDPKDSVVLTIKGAELVVSSTLLDFQFX  
KLIFIQSKIVSPFLHGGQDEFVGLALRFPRIKKVRLSVGDGDEKKASETSTDEEIIWRIF  
DEARSKKLNAAESMIGSQCSGRARKVSRQGRFLTPPEEFRHKTRKRMKMVSSPSRKVVK  
VDVCESSLLKDLTFCVLEGTYYFFDANSLEGQVAEKEGWCEVEKVKSEEDVIEFIMKHGG  
NYRTEVKGTINEYIVGGTKDDARVQNMIGLKDASLDSSKKGDKALFQMAQHHDGILK  
WTFVYWLLHRLQKNNSNRNSNYLKPEPHQYLGSTAEVLFVSYNRQISIDELRESLSVNNN  
DKQVPPWQLKGLIDLDPKEERWILSSRHTHFWPYNDEKLGESCNDRNGIIMYPDVFSYGF  
GFSAEKDANGEALSCTTSPRWNHVLPDFEEMSVLPLVSVMGGFVTPHLHCGVTHIICLL  
KIDDELQYKDEVSLTRFLCKEHGHRLLLEYLRCNFPHRNNIKLISPWIRKNMELNI

>comp14206\_c0\_seq11; 619 893 2983 LEN=2983; translated  
MNGEDHRRIKEVPEXNNEDSGEKQTDANLRADWLRRVMNHGLSPLHKKWLVRILOKQKMEI  
GLGYITILKHFSPYATELWNAHNNLQKICTVLANPKYARHRKEMQELRKKHAQGKIWE PQ  
MQPAELGNALSPMISIRSSFEELMSDTQKQYQOHLKLYHPSIKSHQPLSFQFPALTAETIK  
KLDGERMVIHIDNGQVTMNRNSKWFSELYAPVLGPSLRRSLSKYPDINVILDGEVESWD  
DINGTLIPFGENRAVAGYRRAYLHSHGMIDPIDTEKLDHTNDDTVMRPAADFSTYVPSRR  
KKMVELGKNFWLKFRAFDILYVDGSDKHRLFHDCGMDTEESDDNGSIVHPLMKRKQQLLY  
QILTEQKNEVEICPTIVIRCNGNAVLGEEYFTTKNPISEFGYPATLLDSSQTLFQHEIKD  
LENLDTMRKLGRTNNQISKMRAEAMERFYGKVVEDYKYEGLVVKDLASPYFFGTRKCVWK  
FKPDYEAEADVIDVSI FICEIRNIPILNLVDTDDPLLQVVIIGAKFATGLRNSGTPSA  
YLVGVVDKFDENCMPFNSINAASTTREKMEEILNYTGFKKGGDEPLELGKWFREESFGLP  
PSFISKRSQRNSTEDFEGWSFNKTKHYPIWIDPKDSVVLTIKGAELVVSDEFVGLAL  
RFPRIKKVRLSVGDGDEKKASETSTDEEIIWRIFDEARS

>comp14206\_c0\_seq12; 982 118 3287 LEN=3494; translated  
MQMEIGLGYITILKHFSPYATELWNAHNNLQKICTVLANPKYARHRKEMQELRKKHAQGK  
IWE PQMQPAELGNALSPMISIRSSFEELMSDTQKQYQOHLKLYHPSIKSHQPLSFQFPAL  
LTAEIKLDGERMVIHIDNGQVTMNRNSKWFSELYAPVLGPSLRRSLSKYPDINVILDGE  
VESWDDINGTLIPFGENRAVAGYRRAYLHSHGMIDPIDTEKLDHTNDDTVMRPAADFSTY  
VPSRRKMMVELGKNFWLKFRAFDILYVDGSDKHRLFHDCGMDTEESDDNGSIVHPLMKR  
KQLLYQILTEQKNEVEICPTIVIRCNGNAVLGEEYFTTKNPISEFGYPATLLDSSQTLFQ  
HEIKDLNLDTRKLGRTNNQISKMRAEAMERFYGKVVEDYKYEGLVVKDLASPYFFGTR  
KCWWKFKPDYEAEADVIDVVIIGAKFATGLRNSGTPSAYLVGVVDKFDENCMPFNSIN  
AASTTREKMEEILNYTGFKKGGDEPLELGKWFREESFGLPSFISKRSQRNSTEDFEGWS  
FNKTKHYPIWIDPKDSVVLTIKGAELVVSSTLLDFQFXKLIFIQSKIVSPFLHGGQDE  
FSVGLALRFPRIKKVRLSVGDGDEKKASETSTDEEIIWRIFDEARSKKLNAAESMIGSQCS  
GRARKVSRQGRFLTPPEEFRHKTRKRMKMVSSPSRKVVKVDVCESSLLKDLTFCVLEGT  
YFFDANSLEGQVAEKEGWCEVEKVKSEEDVIEFIMKHGGNYRTEVKGTINEYIVGGTKD  
DARVQNMIGLKDASLDSSKKGDKALFQMAQHHDGILKWTFFVYWLLHRLQKNNSNRNS  
NYLKPEPHQYLGSTAEVLFVSYNRQISIDELRESLSVNNNDKQVPPWQLKGLIDLDPKEER  
WILSSRHTHFWPYNDEKLGESCNDRNGIIMYPDVFSYGFSAEKDANGEALSCTTSPR  
WNHVLPDFEEMSVLPLVSVMGGFVTPHLHCGVTHIICLLKIDDELQYKDEVSLTRFLCK  
EHGHRLLLEYLRCNFPHRNNIKLISPWIRKNMELNI

>comp14206\_c0\_seq13; 982 118 3287 LEN=3391; translated  
MQMEIGLGYITILKHFSPYATELWNAHNNLQKICTVLANPKYARHRKEMQELRKKHAQGK  
IWE PQMQPAELGNALSPMISIRSSFEEELMSDTQKQYQQHLKLYHPSIKSHQPLSFQFPA  
LTAEIKLDGERMVIHIDNGQVTMNRNSKWFSELYAPVLPGLRRSLSKYDPINVIDLGE  
VESWDDINGTLIPFGENRAVAGYRRAYLHSHGMIDPIDTEKLHDTNDDTVMRPAADFSTY  
VPSRRKKMVELGKNFWLKFRAFDILYVDGSDKHRLFHDCGMDTEESDDNGSIVHLPLMKR  
KQLLYQILTEQKNEVEICPTIVIRCNGNAVLGEEYFTTKNP ISEFGYPATLLDSSQTLFQ  
HEIKDLENLDTMRKLGRTNNQISKMRAEAMERFYGKVVEDYKYEGLVVKDLASPYFFGTR  
KCWWKFKPDYEAEAVDIDVVIIGAKFATGLRNSGTPSAYLVGVVDKFDENCMPFNSIN  
AASTTREKMEEILNYTGFKKGGDEPLELGKWFREESFGLPSFISKRSLQRNSTEDFEGWS  
FNKTKHYDPIWIDPKDSVVLTIKGAELVVSSTLLDFQFXKLIFIQSKIVSPFLHHGQDE  
FSVGLALRFPRIKKVRLESVDGDEKKASETSTDEEIWRIFDEARSKKLNAAESMIGSQCS  
GRARKVSRQRRFLTPEEFRHKTRKRKMKMVSSPSRKVPKVDVCESSLLKDLTFCVLEGT  
YFFDANSLEGQVAEKEGWVCEVEKVKSEEDVIEFIMKHGGNYRTEVKGTINEYIVGGTKD  
DARVQNMIGLKDAKSLDSSKKKGDKALFQMAQHHDGILKWTFFVYWLLHRLQKNNSNRNS  
NYLKPEPHQYLGSTAEVLFVSYNRQISIDELRESLSVPPNNNDKQVPPWQLKGLIDLPEER  
WILSSRHTHFWPYNDEKLHGESCNDRNGIIMYPDVFSYGFSAEKDANGEALSCTTSPR  
WNHVLPDFEEMSIVLPLVSVMMGGFVTPHLHCGVTHIICLLKIDDELQYKDEVSLTRFLCK  
EHGHRLLLEYLRNCFPHRNNIKLISPWIRKMMELNI

>comp14206\_c0\_seq14; 797 79 2720 LEN=2720; translated  
MDDQSEERDTALSDDDEQLADRQPEGPPRQDPSGEAVGNLPHYKFFCLRVQKLWRNKREK  
VASKRWKEKDRLEYILPRRMKDLNGQTFPYLRLLLLPEQDSRRQFNVKEKKIAEAYCKV  
LAFRKGTKSYEMLMNFQAVPSNIAGDLSLVIEYVLKQRLPVDPDQDPQPYLHNSVKL  
KTINHYLEIANLRAYASKDNSRTTAHNNHEWRRSPENQRSSRGNNEDSGEKQTDANLRA  
DWLRRVMNHGLSPLLEHKWLVRI LQKKMEIGLGYITILKHFSPYATELWNAHNNLQKICTV  
LANPKYARHRKEMQELRKKHAQGKIWE PQMQPAELGNALSPMISIRSSFEEELMSDTQKQY  
QQHLKLYHPSIKSHQPLSFQFPALTAIEIKLDGERMVIHIDNGQVTMNRNSKWFSELYA  
PVLGSLRRSLSKYDPINVIDLGEVESWDDINGTLIPFGENRAVAGYRRAYLHSHGMIDP  
IDTEKLHDTNDDTVMRPAADFSTYVPSRRKKMVELGKNFWLKFRAFDILYVDGSDKHRLF  
HDCGMDTEESDDNGSIVHLPLMKRKQLLYQILTEQKNEVEICPTIVIRCNGNAVLGEEYF  
TTKNP ISEFGYPATLLDSSQTLFQHEIKDLENLDTMRKLGRTNNQISKMRAEAMERFYGK  
VVEDYKYEGLVVKDLASPYFFGTRKCWWKFKPDYEAEAVDIDVVIIGAKFATGLRNSGT  
PSAYLVGVVDKFDENCMPFNSINAASTTREKMEEILNYTGFKKGGDEPLELGKWFREES  
FGLPSFISKRSLQRNSTEDFEGWSFNKTKHYDPIWIDPKDSVVLTIKGAELVVSDEFVSG  
LALRFPRIKKVRLESVDGDEKKASETSTDEEIWRIFDEARS

>comp14206\_c0\_seq15; 1099 79 4117 LEN=4221; translated  
MDDQSEERDTALSDDDEQLADRQPEGPPRQDPSGEAVGNLPHYKFFCLRVQKLWRNKREK  
VASKRWKEKDRLEYILPRRMKDLNGQTFPYLRLLLLPEQDSRRQFNVKEKKIAEAYCKV  
LAFRKGTKSYEMLMNFQAVPSNIAGDLSLVIEYVLKQRLPVDPDQDPQPYLHNSVKL  
KTINHYLEIANLRAYASKDNSRTTAHNNHEWRRSPENQRSSRGNNEDSGEKQTDANLRA  
DWLRRVMNHGLSPLLEHKWLVRI LQKKMEIGLGYITILKHFSPYATELWNAHNNLQKICTV  
LANPKYARHRKEMQELRKKHAQGKIWE PQMQPAELGNALSPMISIRSSFEEELMSDTQKQY  
QQHLKLYHPSIKSHQPLSFQFPALTAIEIKLDGERMVIHIDNGQVTMNRNSKWFSELYA  
PVLGSLRRSLSKYDPINVIDLGEVESWDDINGTLIPFGENRAVAGYRRAYLHSHGMIDP  
IDTEKLHDTNDDTVMRPAADFSTYVPSRRKKMVELGKNFWLKFRAFDILYVDGSDKHRLF  
HDCGMDTEESDDNGSIVHLPLMKRKQLLYQILTEQKNEVEICPTIVIRCNGNAVLGEEYF  
TTKNP ISEFGYPATLLDSSQTLFQHEIKDLENLDTMRKLGRTNNQISKMRAEAMERFYGK  
VVEDYKYEGLVVKDLASPYFFGTRKCWWKFKPDYEAEAVDIDVSI FICEIRNIPILNLV  
DTDDPLLLQVVIIGAKFATGLRNSGTPSAYLVGVVDKFDENCMPFNSINAASTTREKME  
EILNYTGFKKGGDEPLELGKWFREESFGLPSFISKRSLQRNSTEDFEGWSFNKTKHYDPI  
WIDPKDSVVLTIKGAELVVSSTLLDFQFXKLIFIQSKIVSPFLHHGQDEFVGLALRFP  
RIKKVRLESVDGDEKKASETSTDEEIWRIFDEARSKKLNAAESMIGSQCSGRARKVSRQG  
RRFLTPEEFRHKTRKRKMKMVSSPSRKVPKVDVCESSLLKDLTFCVLEGTFFDANSLEG  
QVAEKEGWVCEVEKVKSEEDVIEFIMKHGGNYRTEVKGTINEYIVGGTKDDARVQNMIG  
LKDAKSLDSSKKKGDKALFQMAQHHDGILKWTFFVYWLLHRLQKNNSNRNSNYLKPEPHQY  
LGSTAEVLFVSYNRQISIDELRESLSVPPNNNDKQVPPWQLKGLIDLPEERWILSSRHTHF  
WPYNDEKLHGESCNDRNGIIMYPDVFSYGFSAEKDANGEALSCTTSPRWNHVLPDFEEM  
IMSVLPLVSVMMGGFVTPHLHCGVTHIICLLKIDDELQYKDEVSLTRFLCKEHGHRLLLEYL  
RCNCFPHRNNIKLISPWIRKMMELNI

>comp14206\_c0\_seq16; 1075 79 4130 LEN=4337; translated

MDDQSEERDTALSDDDEQLADRQPEGPPRQDPSGEAVGNLFPYKFFCLRVQKLWRNKREK  
VASKRWKEKDRLEYILPRRMIKDLNGQTIFFYLRLLLPEQDSRRQFNVKEKKIAEAYCKV  
LAFRKGTXKLRDAYGMYGRRVVVEEASLFNFIPHVVFYLNGLTKNFTDPQAVPSNIAGDL  
SLVIEYVLKQRLPVDPDQPDQPYLHSNVKLKTINHLYDEIANLRAYASKDNSRRTTAHHNH  
EWRRESPENQRSSRGNNEDSGEKQTDANLRADWLRRVMNHGLSPLEHKWLVRILOKKMEIG  
LGYITILKHFSPYATELWNAHNNLQKICTVLANPKYARHRKEMQELRKKHAQGKIWEPQM  
QPAELGNALSPMISIRSSFEELMSDTQKQYQOHLKLYHPSIKSHQPLSFQFPALTAIEIK  
LDGERMVIHIDNGQVTMNRNSKWFSELYAPVLGPSLRRSLSKYPDINVILDGEVESWDD  
INGTLIPFGENRAVAGYRRAYLHSHGMIDPIDTEKLHDTNDDTVMRPAADFSTYVPSRRK  
KMVELGKNFWLKFRAFDILYVDGSDKHRLFHDCGMDTEESDDNGSIVHLPLMKRKQLLYQ  
ILTEQKNEVEICPTIVIRCNGNAVLGEEYFTTKNPISEFGYPATLLDSSQTLFQHEIKDL  
ENLDTMRKLGRTNNQISKMRAEAMERFYGKVVEDYKYEGLVVKDLASPYFFGTRKCWWKF  
KPDYEADEAVDIDVVIIGAKFATGLRNSGTPSAYLVGVVDKFDENCMPFNSINAASTTR  
EKMEEILNYTGFKKGGDEPLELKGWFREESFGLPSFISKRSLQRNSTEDFEGWSFNKTKH  
YPDIIWIDPKDSVVLTIKGAELVVSSTLLDFQFXKLIFIQSKIIVSPFLHHGQDEFVGLA  
LRFPRIKKVRLESVDGDEKKASETSTDEEIIWRIFDEARSKKNLNAESMIGSQCSGRARKV  
SRQGRFLTPPEFRHKTRKRKMKMVSSPSRKVPKVDVCESSLLKDLTFCVLEGTYYFFDAN  
SLEGQVAEKEGWVCEVEKVKSEEDVIEFIMKHGGNYRTEVKGTINEYIVGGTKDDARVQN  
MIKGLKDAKSLDSSKKKGDKALFQMAQHHDGILKWTFFVYLLHRLQKNNNSNRNSNYLKPE  
PHQYLGSTAIEVLFVSYNRQISIDELRESLSPNNNDKQVPPWQLKGLIDLKPEERWILSSR  
HHTFWPYNDEKLHGESCNDNRNGIIMYPDVFSYGFSAEKDANGEALSCTTSPRWNVLP  
DFEEMSPLVSVVMGGFVTPHLHCGVTHIICLLKIDDELQYKDEVSLTRFLCKEHGHRLL  
LEYLRCNFPHRNNIKLISPNWIRKNMELNI

>comp14206\_c0\_seq17; 653 893 2906 LEN=2906; translated  
MNGEDHRRIKEVPEXNNEDSGEKQTDANLRADWLRRVMNHGLSPLEHKWLVRILOKKMEI  
GLGYITILKHFSPYATELWNAHNNLQKICTVLANPKYARHRKEMQELRKKHAQGKIWEPQ  
MQPAELGNALSPMISIRSSFEELMSDTQKQYQOHLKLYHPSIKSHQPLSFQFPALTAIEI  
KLDGERMVIHIDNGQVTMNRNSKWFSELYAPVLGPSLRRSLSKYPDINVILDGEVESWD  
DINGTLIPFGENRAVAGYRRAYLHSHGMIDPIDTEKLHDTNDDTVMRPAADFSTYVPSRR  
KKMVELGKNFWLKFRAFDILYVDGSDKHRLFHDCGMDTEESDDNGSIVHLPLMKRKQLLY  
QILTEQKNEVEICPTIVIRCNGNAVLGEEYFTTKNPISEFGYPATLLDSSQTLFQHEIKD  
LENLDTMRKLGRTNNQISKMRAEAMERFYGKVVEDYKYEGLVVKDLASPYFFGTRKCWWK  
FKPDYEADEAVDIDVVIIGAKFATGLRNSGTPSAYLVGVVDKFDENCMPFNSINAASTT  
REKMEEILNYTGFKKGGDEPLELKGWFREESFGLPSFISKRSLQRNSTEDFEGWSFNKTK  
HYPDIWIDPKDSVVLTIKGAELVVSDEFVGLALRFPRIKKVRLESVDGDEKKASETSTDE  
EIIWRIFDEARS

>comp14206\_c0\_seq18; 955 893 4303 LEN=4510; translated  
MNGEDHRRIKEVPEXNNEDSGEKQTDANLRADWLRRVMNHGLSPLEHKWLVRILOKKMEI  
GLGYITILKHFSPYATELWNAHNNLQKICTVLANPKYARHRKEMQELRKKHAQGKIWEPQ  
MQPAELGNALSPMISIRSSFEELMSDTQKQYQOHLKLYHPSIKSHQPLSFQFPALTAIEI  
KLDGERMVIHIDNGQVTMNRNSKWFSELYAPVLGPSLRRSLSKYPDINVILDGEVESWD  
DINGTLIPFGENRAVAGYRRAYLHSHGMIDPIDTEKLHDTNDDTVMRPAADFSTYVPSRR  
KKMVELGKNFWLKFRAFDILYVDGSDKHRLFHDCGMDTEESDDNGSIVHLPLMKRKQLLY  
QILTEQKNEVEICPTIVIRCNGNAVLGEEYFTTKNPISEFGYPATLLDSSQTLFQHEIKD  
LENLDTMRKLGRTNNQISKMRAEAMERFYGKVVEDYKYEGLVVKDLASPYFFGTRKCWWK  
FLVGVVDKFDENCMPFNSINAASTTREKMEEILNYTGFKKGGDEPLELKGWFREESFGL  
PSFISKRSLQRNSTEDFEGWSFNKTKHYPDIWIDPKDSVVLTIKGAELVVSSTLLDFQF  
XKLIFIQSKIIVSPFLHHGQDEFVGLALRFPRIKKVRLESVDGDEKKASETSTDEEIIWRIF  
DEARSKKNLNAESMIGSQCSGRARKVSRQGRFLTPPEFRHKTRKRKMKMVSSPSRKVP  
KVDVCESSLLKDLTFCVLEGTYYFFDANSLEGQVAEKEGWVCEVEKVKSEEDVIEFIMKHG  
GNYRTEVKGTINEYIVGGTKDDARVQNMIKGLKDAKSLDSSKKKGDKALFQMAQHHDGIL  
KWTFFVYLLHRLQKNNNSNRNSNYLKPEPHQYLGSTAIEVLFVSYNRQISIDELRESLSPNN  
NDKQVPPWQLKGLIDLKPEERWILSSRHTFWPYNDEKLHGESCNDNRNGIIMYPDVFSYGF  
FGFSAEKDANGEALSCTTSPRWNVLPDFEEMSPLVSVVMGGFVTPHLHCGVTHIICLL  
LKIDDELQYKDEVSLTRFLCKEHGHRLLLEYLRCNFPHRNNIKLISPNWIRKNMELNI

>comp14206\_c0\_seq19; 739 79 2810 LEN=2810; translated  
MDDQSEERDTALSDDDEQLADRQPEGPPRQDPSGEAVGNLFPYKFFCLRVQKLWRNKREK  
VASKRWKEKDRLEYILPRRMIKDLNGQTIFFYLRLLLPEQDSRRQFNVKEKKIAEAYCKV  
LAFRKGTXKLRDAYGMYGRRVVVEEASLFNFIPHVVFYLNGLTKNFTDPQAVPSNIAGDL

SLVIEYVLKQRLPVDPDQPDQPYLHNSVKLKTINHYLDEIANLRAYASKDNSRRTTAHHNH  
EWRRESPENQRSSRGNNEDSGEKQTDANLRADWLRRVMNHGLSPLEHKWLVRILOKKMEIG  
LGYITILKHFSPYATELWNAHNNLQKICTVLANPKYARHRKEMQELRKKHAQGKIWEPQM  
QPAELGNALSPMISIRSSFEELMSDTQKQYQQHLKLYHPSIKSHQPLSFQFPALTAIEIK  
LDGERMVIHIDNGQVTMNRNSKWFSELYAPVLPGLRRSLSKYDPDINVILDGEVESWDD  
INGTLIPFGENRAVAGYRRAYLHSHGMIDPIDTEKLHDTNDDTVMRPAADFSTYVPSRRK  
KMVELGKNFWLKFRAFDILYVDGSDKHRLFHDCGMDTEESDDNGSIVHLPLMKRQQLLYQ  
ILTEQKNEVEICPTIVIRCNGNAVLGEEYFTTKNPISEFGYPATLLDSSQTLFQHEIKDL  
ENLDTMRKLGRTNNQISKMRAEAMERFYGKVVEDYKYEGLVVKDLASPYFFGTRKCCWKF  
KPDYEAEAVDIDVVIIGAKFATGLRNSGTPSAYLVGVVDKFDENCMPFNSINAASTTR  
EKMEEILNYTGFKKGGDEPLELKGWFFREESFGLPSFISKRSQJRNSTEDFEGWSFNKTKH  
YPDIIWIDPKDSVVLTIKGAELVVSDEFVGLALRFPRIKKVRLESVDGDEKKASETSTDE  
EIWRIFDEARS

>comp14206\_c0\_seq20; 948 118 3364 LEN=3571; translated  
MQMEIGLGYITILKHFSPYATELWNAHNNLQKICTVLANPKYARHRKEMQELRKKHAQGK  
IWEFQMOPAELGNALSPMISIRSSFEELMSDTQKQYQQHLKLYHPSIKSHQPLSFQFPA  
LTAIEIKLDGERMVIHIDNGQVTMNRNSKWFSELYAPVLPGLRRSLSKYDPDINVILDGE  
VESWDDINGTLIPFGENRAVAGYRRAYLHSHGMIDPIDTEKLHDTNDDTVMRPAADFSTY  
VPSRRKMMVELGKNFWLKFRAFDILYVDGSDKHRLFHDCGMDTEESDDNGSIVHLPLMKR  
KQLLYQILTEQKNEVEICPTIVIRCNGNAVLGEEYFTTKNPISEFGYPATLLDSSQTLFQ  
HEIKDLENLDTMRKLGRTNNQISKMRAEAMERFYGKVVEDYKYEGLVVKDLASPYFFGTR  
KCCWKFKPDYEAEAVDIDVSI FICEIRNIPILNLVDTDDPLLQVVIIGAKFATGLRNS  
GTPSAYLVGVVDKFDENCMPFNSINAASTTREKMEEILNYTGFKKGGDEPLELKGWFFRE  
ESFGLPSFISKRSQJRNSTEDFEGWSFNKTKHYDPDIWIDPKDSVVLTIKGAELVVSSTL  
LDFQFXKLIFIQSKI VSPFLHGGQDEFVGLALRFPRIKKVRLESVDGDEKKASETSTDE  
EIWRIFDEARSKKLNAAESMIGSQCSGRARKVSRQGRRLTPEEFRHKTRKRKMKMVSSP  
SRKVPKVDVCESSLLKDLTFCVLEGTFFDANSLEGQVAEKEGWVCEVEKVKSEEDVIEF  
IMKHGNYRTEVKGITINEYIVGGTKDDARVQNMIGLKDASLDSSKKKGDALFQMAQH  
HDGILKWTFFVYLLHRLQKNNSNRNSNYLKPEPHQYLGSTAEVLF SYNRQISIDELRESL  
SVPNNNDKQVPPWQLKGLIDLPEERWILSSRHTHFWPYNDEKLHGESCNDNRNGIIMYPD  
VFSYGFSAEKDANGEALSCTTSPRWNVLPDFEEIMSVLPLVSVMMGGFVTPHLHCGVT  
HIICLLKIDDELQYKDEVSLTRFLCKEHGHRLLLEYLR CNFPHRNNIKLISPWIRKNNMEL  
NI

>comp14206\_c0\_seq21; 1133 79 4040 LEN=4247; translated  
MDDQSEERDTALSDDDEQLADRQEGPPRQDPSGEAVGNLPFYKFFCLRVQKLWRNKREK  
VASKRWKEKDRLEYILPRMIKDLNGQTIFFYLRLLLPEQDSRRQFNVKEKKIAEAYCKV  
LAFRKGTKSYEMLMNF TDPQAVPSNIAGDLSLVIEYVLKQRLPVDPDQPDQPYLHNSVKL  
KTINHYLDEIANLRAYASKDNSRRTTAHHNHEWRRESPENQRSSRGNNEDSGEKQTDANLRA  
DWLRRVMNHGLSPLEHKWLVRILOKKMEIGLGYITILKHFSPYATELWNAHNNLQKICTV  
LANPKYARHRKEMQELRKKHAQGKIWEPQMOPAELGNALSPMISIRSSFEELMSDTQKQY  
QQHLKLYHPSIKSHQPLSFQFPALTAIEIKLDGERMVIHIDNGQVTMNRNSKWFSELYA  
PVLGSLRRSLSKYDPDINVILDGEVESWDDINGTLIPFGENRAVAGYRRAYLHSHGMIDP  
IDTEKLHDTNDDTVMRPAADFSTYVPSRRKMMVELGKNFWLKFRAFDILYVDGSDKHRLF  
HDCGMDTEESDDNGSIVHLPLMKRQQLLYQILTEQKNEVEICPTIVIRCNGNAVLGEEYF  
TTKNPISEFGYPATLLDSSQTLFQHEIKDLENLDTMRKLGRTNNQISKMRAEAMERFYGK  
VVEDYKYEGLVVKDLASPYFFGTRKCCWKFKPDYEAEAVDIDVVIIGAKFATGLRNSGT  
PSAYLVGVVDKFDENCMPFNSINAASTTREKMEEILNYTGFKKGGDEPLELKGWFFREES  
FGLPSFISKRSQJRNSTEDFEGWSFNKTKHYDPDIWIDPKDSVVLTIKGAELVVSSTLLD  
FQFXKLIFIQSKI VSPFLHGGQDEFVGLALRFPRIKKVRLESVDGDEKKASETSTDEE  
IWRIFDEARSKKLNAAESMIGSQCSGRARKVSRQGRRLTPEEFRHKTRKRKMKMVSSP  
SRKVPKVDVCESSLLKDLTFCVLEGTFFDANSLEGQVAEKEGWVCEVEKVKSEEDVIEF  
IMKHGNYRTEVKGITINEYIVGGTKDDARVQNMIGLKDASLDSSKKKGDALFQMAQH  
HDGILKWTFFVYLLHRLQKNNSNRNSNYLKPEPHQYLGSTAEVLF SYNRQISIDELRESL  
SVPNNNDKQVPPWQLKGLIDLPEERWILSSRHTHFWPYNDEKLHGESCNDNRNGIIMYPD  
VFSYGFSAEKDANGEALSCTTSPRWNVLPDFEEIMSVLPLVSVMMGGFVTPHLHCGVT  
HIICLLKIDDELQYKDEVSLTRFLCKEHGHRLLLEYLR CNFPHRNNIKLISPWIRKNNMEL  
NI

>comp14206\_c0\_seq22; 646 118 1967 LEN=1967; translated  
MQMEIGLGYITILKHFSPYATELWNAHNNLQKICTVLANPKYARHRKEMQELRKKHAQGK  
IWEFQMOPAELGNALSPMISIRSSFEELMSDTQKQYQQHLKLYHPSIKSHQPLSFQFPA  
LTAIEIKLDGERMVIHIDNGQVTMNRNSKWFSELYAPVLPGLRRSLSKYDPDINVILDGE

VESWDDINGTLIPFGENRAVAGYRRAYLHSHGMIDPIDTEKLHDTNDDTVMRPAADFSTY  
VPSRRKMMVELGKNFWLKFRAFDILYVDGSDKHRLFHDCGMDTEESDDNGSIVHLPMLKR  
KQLLYQILTEQKNEVEICPTIVIRCNGNAVLGEEYFTTKNPISSEFGYPATLLDSSQTLFQ  
HEIKDLLENLDTMRKLGRTNNQISKMRAEAMERFYGKVVEDYKYEGLVVKDLASPYFFGTR  
KCWWKFKPDYEAEAVDIDVVIIGAKFATGLRNSGTPSAYLVGVVDKFDENCMPFNSIN  
AASTTREKMEEILNYTGFKKGGDEPLELGKWFREESFGLPSFISKRSLQRNSTEDFEGWS  
FNKTKHYDPIWIDPKDSVVLTIKGAELVVSDEFVSVGLALRFPRIKKVRLESVDGDEKKAS  
ETSTDEEIWRIFDEARS

>comp14206\_c0\_seq23; 705 79 2887 LEN=2887; translated  
MDDQSEERDTALSDDDEQLADRQPEGPPRQDPSGEAVGNLPFYKFFCLRVQKLWRNKREK  
VASKRWKEKDRLEYILPRRMIKDLNGQTFPYLRLLLLPEQDSRRQFNVKEKKIAEAYCKV  
LAFRKGTXKLRDAYGMYGRRVVVEEASLFNFIPHVVFYLNGLTKNFTDPQAVPSNIAGDL  
SLVIEYVLKQRLPVPDPQDPQPYLHSNVKLTINHYLDEIANLRAYASKDNSRTTAHNNH  
EWRSPENQRSSRGNNEDSGEKQTDANLRADWLRRVMNHGLSPLEHKWLVRILQKKMEIG  
LGYITILKHFSPYATELWNAHNNLQKICTVLANPKYARHRKEMQELRKKHAQGKIWEPQM  
QPAELGNALSPMISIRSSFEELMSDTQKQYQOHLKLYHPSIKSHQPLSFQFPALTAIEK  
LDGERMVIHIDNGQVTMNRNSKWFSELYAPVLGPSLRRLSKYDPDINVILDGEVESWDD  
INGTLIPFGENRAVAGYRRAYLHSHGMIDPIDTEKLHDTNDDTVMRPAADFSTYVPSRRK  
KMVELGKNFWLKFRAFDILYVDGSDKHRLFHDCGMDTEESDDNGSIVHLPMLKRKQLLYQ  
ILTEQKNEVEICPTIVIRCNGNAVLGEEYFTTKNPISSEFGYPATLLDSSQTLFQHEIKDL  
ENLDTMRKLGRTNNQISKMRAEAMERFYGKVVEDYKYEGLVVKDLASPYFFGTRKCWWK  
KPDYEAEAVDIDVSIFFICEIRNIPILNLVDTDDPLLLQVVIIGAKFATGLRNSGTPSAY  
LVGVVDKFDENCMPFNSINAASTTREKMEEILNYTGFKKGGDEPLELGKWFREESFGLP  
SFISKRSLQRNSTEDFEGWSFNKTKHYDPIWIDPKDSVVLTIKGAELVVSDEFVSVGLALR  
FPRIKKVRLESVDGDEKKASETSTDEEIWRIFDEARS

>comp14206\_c0\_seq24; 989 893 4226 LEN=4330; translated  
MNGEDHRRIKEVPEXNNEDSGEKQTDANLRADWLRRVMNHGLSPLEHKWLVRILQKKMEI  
GLGYITILKHFSPYATELWNAHNNLQKICTVLANPKYARHRKEMQELRKKHAQGKIWEPQ  
MQPAELGNALSPMISIRSSFEELMSDTQKQYQOHLKLYHPSIKSHQPLSFQFPALTAIEK  
KLDGERMVIHIDNGQVTMNRNSKWFSELYAPVLGPSLRRLSKYDPDINVILDGEVESWD  
DINGTLIPFGENRAVAGYRRAYLHSHGMIDPIDTEKLHDTNDDTVMRPAADFSTYVPSRR  
KKMVELGKNFWLKFRAFDILYVDGSDKHRLFHDCGMDTEESDDNGSIVHLPMLKRKQLLY  
QILTEQKNEVEICPTIVIRCNGNAVLGEEYFTTKNPISSEFGYPATLLDSSQTLFQHEIKD  
LENLDTMRKLGRTNNQISKMRAEAMERFYGKVVEDYKYEGLVVKDLASPYFFGTRKCWWK  
FKPDYEAEAVDIDVVIIGAKFATGLRNSGTPSAYLVGVVDKFDENCMPFNSINAASTT  
REKMEEILNYTGFKKGGDEPLELGKWFREESFGLPSFISKRSLQRNSTEDFEGWSFNKTK  
HYDPIWIDPKDSVVLTIKGAELVVSSTLLDFQFXKLIFIQSKIVSPFLHHGQDEFVSVGL  
ALRFPRIKKVRLESVDGDEKKASETSTDEEIWRIFDEARSKKLNAESMIGSQCSGRARK  
VSRQRRFLTPEEFHRKTRKRKMKMVSSPSRQVVKVDVCESSLLKDLTFCVLEGTFFDA  
NSLEGQVAEKEGWVCEVEKVKSEEDVIEFIMKHGGNYRTEVKGTINEYIVGGTKDDARVQ  
NMIKGLKDAKSLDSSKGGKALFQMAQHHDGILKWTFFVYLLHRLQKNNNSNRNSNYLKP  
EPHQYLGSTAEVLFVSYNRQISIDELRESLVPNNNDKQVPPWQLKGLIDLKPEERWILSS  
RHTHFVYNDEKHLHGESCNDRNGIIMYPDVFSYGFSAEKDANGEALSCTTSPRWNVHL  
PDFEEMSVLPLVSVMGGFVTPHLHCGVTHIICLLKIDDELQYKDEVSLTRFLCKEHGHR  
LLEYLRNCFPHRNNIKLISPNIWIRKNMELNI

>comp14207\_c0\_seq1; 671 76 2166 LEN=2405; translated  
MLRIFVYSIFLIGLGAIGGFSIFHYNLHRSIERAERSHNETLAIVEGKFVESEAERARCV  
SQDNRLREEMSELGRGLDAQYKNWYDLTAAQRTLVSKHRESAQEAQKLRETSERDQAALK  
ELAGKMGQRDRDFDLREDAEKKQQQLKDFETQLSKRVGELVDVRRALEINERKGRELES  
EVAKMKSLEMEQNTQLERETIELRKLQRTNHLELVGVKNDSEKAILQEELANLNEV  
VGGMQSQIEEKDKELLEYYRREEGNLEAKLVNLRGMIGLLKEKIEHAQDLESHIDQLNKE  
KAALVVKLDNWRDGMALVLRDKMEEIQRLKTELTESQESTMRIMDEVESARSQDRFAVL  
VNEKQGTLEDSNPDEDAETIIELNKIEKMNQELQESKDWVNRAMQEIIVSRKAAWAESEQ  
LIADKTNEIEELQSRMETDQSSAREMISKLESLEEARQVDEKNAQIEDLNSEVTELV  
EFNDLKSFGVSDAAKSTSETIIDHIQQRDSVMCRQLFGKGPYVVKFVVRPLVIDESDE  
EESTIFFVVELSSRQLPHSTYTFLLALVESNLYNDGAAFLFAQDGGGLKIGSSSPDVP  
SLQKLRPLGLTGGASLSPETSTSGNPLRCGINSFGFDLRGPNLNLFLSEEDNDRSETSDC  
FARVIRGEDHLPRIRSLVLRGVPLEIVSAEHLRVD

>comp14207\_c0\_seq2; 491 76 1668 LEN=2539; translated  
MLRIFVYSIFLIGLGAIGGFSIFHYNLHRSIERAERSHNETLAIVEGKFVESEAERARCV



SQDNGRLEEMSELRGRLLDAQYKNWYDLTAAQRTLVSXKHRSAQEAQKLRERSERDQAALK  
ELAGKMGQRDRDFDLREDAEKKQQQLKDFETQLSKRVGELVDVRRALEINERKGRELES  
EVAKMKSLEMQNTQLERETIELRKLQRTNHVGVKNDSEKAILQEELANLNEV  
VGGMQSQIEEKDKELLEYYRREEGNLEAKLVNLRGMI GLLKEKIHEAQDLESHIDQLNKE  
KAALVVKLDNWRDGLALVRDKMEEIQRLKTELTESQESTMRIMDEVESARSQDRFAVL  
VNEKQGTLDENPDEDAETIEELKNIIEKMNQELQESKDWVNRAMQEI VSRKAAWAASEQ  
LIADKTNEIEELQSRMETDQSSAREMISKLESLEEARKQVDEKNAQIEDLNSEVTELVA  
EFNDLKSQFVGDSDAAKSTSETIIDHIQQRDSVMCRQLYVKYCRTNHSPE  
>comp14208\_c0\_seq1; 571 281 2171 LEN=2171; translated  
MLNFTKYGILAVAI AASSKFQNASAHRRIGARKNANSGLPMEPYCVLLKRTIESADG  
DESIWCCEIDFETAQSFVNSVVCNLNEEIEELIEAADPVPVSGDTFMRAENASIVQSLS  
SSEVHIDFPNTNVTFGKISQSESDSAQYRRRRKLPAGDPQIGVRNTLVVMAIDAAGVSST  
DSVSQVRNDVFEDPVCLKTQYEACSKNQLTIQPASVGDGGVVVVNIGVVTASSTKQEVEN  
AMVTAAQTAYGGSNGLGSLDFVLFCLPPGTGDWVAYQLNNWQSFYNDRWCQRVSAQMH  
EVGHNLNLDHSNEDEQEYGDTSMMGF SHNQDDTPQQCFNAAKNYQLGWFNNQRASIDPL  
NLPDGRQTFLLIGIDDYQATGISNKIVTLRIEMDGDQPIPGKDYVGFNLATGPNAGTLE  
AANKVAIMEKPTGGPNVQSWRLAELDVGETYAIENFKNL DDEVYINYISRSGNDALIE  
IVTSATAAPTGTPTMSCGGFGRFKLEIQLD SWPEDNPWFREKDGAVISSATYKMHDDSN  
SLYFYPAENQYCLTPGACYEFEIQELWGNMCCDDG VGYKGFLEVEIFSGGSNMEATN  
LHEFCVEDALLPEPVPPPVPVAPPVPPX  
>comp14208\_c0\_seq2; 571 249 2139 LEN=2139; translated  
MLNFTKYGILAVAI AASSKFQNASAHRRIGARKNANSGLPMEPYCVLLKRTIESADG  
DESIWCCEIDFETAQSFVNSVVCNLNEEIEELIEAADPVPVSGDTFMRAENASIVQSLS  
SSEVHIDFPNTNVTFGKISQSESDSAQYRRRRKLPAGDPQIGVRNTLVVMAIDAAGVSST  
DSVSQVRNDVFEDPVCLKTQYEACSKNQLTIQPASVGDGGVVVVNIGVVTASSTKQEVEN  
AMVTAAQTAYGGSNGLGSLDFVLFCLPPGTGDWVAYQLNNWQSFYNDRWCQRVSAQMH  
EVGHNLNLDHSNEDEQEYGDTSMMGF SHNQDDTPQQCFNAAKNYQLGWFNNQRASIDPL  
NLPDGRQTFLLIGIDDYQATGISNKIVTLRIEMDGDQPIPGKDYVGFNLATGPNAGTLE  
AANKVAIMEKPTGGPNVQSWRLAELDVGETYAIENFKNL DDEVYINYISRSGNDALIE  
IVTSATAAPTGTPTMSCGGFGRFKLEIQLD SWPEDNPWFREKDGAVISSATYKMHDDSN  
SLYFYPAENQYCLTPGACYEFEIQELWGNMCCDDG VGYKGFLEVEIFSGGSNMEATN  
LHEFCVEDALLPEPVPPPVPVAPPVPPX  
>comp14209\_c0\_seq1; 351 157 1950 LEN=2703; translated  
MVGLNSSIRLALIFVCALSSMAVWKIHHGFVYKDEIIGTRSMKDAKVYRGHVDDDQVVP  
TKNAAPAVGSTKAVDTKKQONEPQVPPKSETKVEASTNTSRTTTAAEEISTASVDSNFDVL  
PKALRLDPSLIPPSTMGILEGNAQCCSHWIQNKRRDRKRPLSGKARTCSGICYTPQACGK  
YGLDGGEGNGFYFRDRHEKKKFLRQKETDTTKTLNHLRPSYFPPIEWNTSSQFPFQ  
SLPELGC SRFTGGGSGSFQONLYIIPSAKLAFCGIPKVGITAWKQFIRYVMGAHDYLSLP  
YGKPDLMWNFDLLAPEVQQE IWNDEEWTFAAILRDP AERLLSAYLDKLOIKRRGGSVAK  
DLKLTSDFTFKDFLVGLDQDPPDALYCRDSKNGKNATGLTGIHWCSDPHWRPQVWGCMS  
EKIDRFDFLGTLDLVSEHAKALLEKVDLWESHGKFYRNRKSNRTQRADSCNALFQLQDEV  
DSTPLHLREFGFQHRKKDPNKSHDDSIGRKKTRKSAKARGKPD PWDVVGHAQGADGKIK  
EYYTPEMLQKVRELYRADYEVWDLVTKREGGWASGKD IVPDLLKGSTKIEKYPDSNQ  
>comp14209\_c0\_seq2; 191 157 519 LEN=519; translated  
MVGLNSSIRLALIFVCALSSMAVWKIHHGFVYKDEIIGTRSMKDAKVYRGHVDDDQVVP  
TKNAAPAVGSTKAVDTKKQONEPQVPPKSETKVEASTNTSRTTTAAEEISTASVDSAPAVG  
S  
>comp14210\_c0\_seq1; 547 259 2235 LEN=2609; translated  
MKE SLVFGSNIVVILDSL RHSTEELDRRVLRLTELVCDESICDEDVQAIQQLLSEHHCV  
IHL SKLELPRNGLTSKSGRSLGSIVLLQHETL KCLSLAHNPFASIGLDEMLKPLVAHPAT  
ATNL IHLDTNTQLGSKCGPLIKQLLRRCNSIQELNLTNNSLGPKGIKSLSVELKENSAL  
KILNLSRNKIKAKGAALLAQAI GDPEASALKSLDLTCNAIGHLGMNALSRI LAVNRTIE  
SLYVGMNIGPEGAANLAI AIKRNHTLQVLHIENNNIKSDAACLLFDQLRGDHNRTVENL  
NLAWNIGTKGANHLAETLKSNGTLTSIDLTHNQIGSDDL LLLIDALSYNFSLTHLNVSS  
NQIDDRGAQAI FNVLC DPRPRALQSITCEDNPDISLEVLVSLSRVPQIRRNREHWLDKLI  
TNLIGRKVHSINLKNRIVGNEELLLNEALNDIEFRLKPPLIQSIRIRSSLLTHISLVPF  
FEPCKAPLLRIYLS DCCDAGEEGMKALATHLASSKNLQVLSLTNCCITP THAAWIAEGLR  
QNTTLRRLNLDN QIGDNGLAEIALALPHKTLTSLSANGNNITDSAMDSKGLISIDELHL  
KNNHVTD RGALSLARNLLDSKCSLTWLN LKGNHVTEKGGATIEMFLPHTIPGTMIVEY  
>comp14211\_c0\_seq1; 521 52 1749 LEN=1820; translated

MRASSHRPVTAPPSTRDRGGFLCQWCFVVCFLTFATTISLVALEGTAGASAAPCPPPPA  
FVSFPNPAPRWRNSVQDRLLRVQEELPRGARKTRSGTNGTTTKRSTTAIASSHPGNQPRD  
GDVGSNGSSSSNGSDGGEDGNKNNDLDFKRRNQQWVVLVDDEESIRFAVGDFLYDRGYEV  
TACADAGSLDLIALRNKQGRKSESSRGSEAGTPRLPDVIVSDVRMPESDKNGYELVEFL  
RSAGESPSSGTDLGTNAFLAPLKTVPVIVLLTAKAMTDDRIRGYQAGADVVPKPFAPPEE  
LVSILDNLIRRRQQLKPTTTALPGGHASGGSNAHPDDLRALQREVETIKALVAQNAAT  
VRMTDVVLTERERTAIRLLSEGSTPREMARAIWPGRGEEAGGSESGGEGTTAAVHRLIKS  
LCERTETESKTELVRWARAVDTFRDAARANGRPVPCRAATCSVRGGALGDAFPQPHHPS  
PSARNSNTQLCYGCQRGPKSSKEQSVRAVQKLVTNASVXSILTTVTIAKTMLRDGTNQCI  
AARSGNALFGSFESVWKQGVQDSF

>comp14212\_c0\_seq1; 636 234 1730 LEN=1730; translated  
MQISVPVSWILLVSKVDYTDAFIPNQLNVLPDHYNNHNSNKKHIKNDATLDDLDPK  
TKRTYFFQRLWAAPGDTNLDADAARRIRSAYLQWCERYKKQPNESRYPQFVSNFKVMAS  
IAKKGKPMHLNEFADFTGEEYQAMMAKNTQAGTSSVPASTSVSASASTSTSTPTKPPQA  
VRKKMERIEAIDREENYVAKRLVVAKSMTSTPPPPKAPPQDQPIQKLTTPPKQQQADAS  
NPVPSPPRSTVQKSSVAEAAASSVEKPPASTKNNQPSQTIATPKPSVTKAPSDKTI TATA  
GLSEQKNRDTQPKPEVRTETDKQESI IASGIRSTPRKNLTFDLMKAKLNKNQDTKTIDD  
RQTDGDKAKKASDRELKPKKERTEYDEKQRIKQAMEEAKLKQEAEPKAKADKIVDDKKR  
LEAETKRKIEDEKKMKEAEAQADAAARRKAAEERKRLEAEAKRKEEEEERTRLEAEAKAKI  
EEEAKKKAEEERKRLEAEA

>comp14213\_c1\_seq1; 184 1 1169 LEN=1495; translated  
XQSNHGQSDPIQSIPIRSARQKCKPVVRRWQRDLAGGGSGAPETGWNSPALSHMAAASIG  
ESAACLVRVPTEVIKARMQTSTSSASSLTKTVRSVLGETHKGKGGLLANWTGGLYRGYGI  
TLLREIPFAMIQFPIYEFLKTFWTEFLRDGVPVNPVQAAACGSFSGGAVAAAATTPLDVVK  
TRLMLGADADGRPYDKGVLDLVRRTAEERPSRPWAVFFSGLQPRVVWISIGGFVFFGAYE  
GFKTSLSPPSSAEALSVGPENQTKDLSVPLDGMIOCCRTIETAAAGASLSLTTIAGVAQDE  
AHHARHNTTRNNTTQASTRAPGPQTANLVVRECSI IIVSRNGAMPAVLFDKDKGATRALAC  
GLWGRWLFGRVWFRERLVCARHAPCRV

>comp14213\_c1\_seq2; 320 38 1427 LEN=1753; translated  
MGDNSNSNTNSNRKSNTPGAAGTAATGFATALVAGGLAGTSVDVALFPIDTLKTRMQSPQ  
GFARAGGFRGIYNGLGAAAAGSAPGAALFFCSYEKCKPVVRRWQRDLAGGGSGAPETGWN  
SPALSHMAAASIGESAACLVRVPTEVIKARMQTSTSSASSLTKTVRSVLGETHKGKGGLL  
ANWTGGLYRGYGITLLREIPFAMIQFPIYEFLKTFWTEFLRDGVPVNPVQAAACGSFSGGA  
VAAAATTPLDVVKTRLMLGADADGRPYDKGVLDLVRRTAEERPSRPWAVFFSGLQPRVVW  
ISIGGFVFFGAYEGFKTSLSPPSSAEALSVGPENQTKDLSVPLDGMIOCCRTIETAAAGAS  
LSLTTIAGVAQDEAHHARHNTTRNNTTQASTRAPGPQTANLVVRECSI IIVSRNGAMPAVL  
FDKDKGATRALACGLWGRWLFGRVWFRERLVCARHAPCRV

>comp14213\_c1\_seq3; 291 38 1012 LEN=1790; translated  
MGDNSNSNTNSNRKSNTPGAAGTAATGFATALVAGGLAGTSVDVALFPIDTLKTRMQSPQ  
GFARAGGFRGIYNGLGAAAAGSAPGAALFFCSYEKCKPVVRRWQRDLAGGGSGAPETGWN  
SPALSHMAAASIGESAACLVRVPTEVIKARMQTSTSSASSLTKTVRSVLGETHKGKGGLL  
ANWTGGLYRGYGITLLREIPFAMIQFPIYEFLKTFWTEFLRDGVPVNPVQAAACGSFSGGA  
VAAAATTPLDVVKTRLMLGADADGRPYDKGVLDLVRRTAEERPSRPWAVFFSGLQPRVVW  
ISIGGFVFFGAYEGFKTSLSPLVG

>comp14213\_c1\_seq4; 155 1 754 LEN=1532; translated  
XQSNHGQSDPIQSIPIRSARQKCKPVVRRWQRDLAGGGSGAPETGWNSPALSHMAAASIG  
ESAACLVRVPTEVIKARMQTSTSSASSLTKTVRSVLGETHKGKGGLLANWTGGLYRGYGI  
TLLREIPFAMIQFPIYEFLKTFWTEFLRDGVPVNPVQAAACGSFSGGAVAAAATTPLDVVK  
TRLMLGADADGRPYDKGVLDLVRRTAEERPSRPWAVFFSGLQPRVVWISIGGFVFFGAYE  
GFKTSLSPLVG

>comp14214\_c0\_seq1; 465 209 2112 LEN=2252; translated  
MPLFRFRKMKGLDESSGEECEDASAGDLSYVGTAAYNVLRQKHNRHHELWNVTGKVI  
RLDNTPRDAFSRDDRVDPVEGHDDWLPKRLEELISKTEEWCIDILTLGPPDGMFLDAFKNG  
IKALCEKEFILNRIVRIMFGNIVGQPVNCTKIIADLVKDLPPNAGDKIKLWVGSWRKGV  
TWNHSKI IAVDGKYLWTGGHNFWRHYLRKNPVNDISVEMKGNVARDGHRYANAQWAYIV  
KKQSTAWGRFVDRHVADCVDVPR TARVTVSEFPEGSAAEFPPLYNPKNSLLQETRLFRGP  
SSKSNISDPGAPVITMGRYGTILKNARPSDDAFIAMFKSAKTTIRCALQDIPICVPKTK  
MTVPGAVHCFLLILSICSHIFXKAASRVIANFFSSFHHSNSTINLCYLFLHMNGMVWPKA  
YMNAMAEALWTKDVDVEIVLSNPGSIPDNLSLTEAQYNGWSCVDVAAEIIKCIIVEQFPD  
ANDNHTKLRRTVKENLRVCFKCRGGSSRYSYDGSLSGLHSHKHFIIIDDICCYIGSQNLYIC

DLAEWGVLIDSPDAVADIKQQYWDQMWEVSYTRDDCNVNEVMDGLGINRNAVSRMSLTAY  
ELQQTAVMKANFKDYLDGSESDQSDAEDEKEDE  
>comp14214\_c0\_seq2; 552 209 1966 LEN=2106; translated  
MPLFRRFRKKMGLDESSGEECEDASAGDLSYVGTAAYNVLRQKHNHRHHELWNVTKGKVI  
RLDNTPRDAFSRDDRVPVEGHDDWLPKRLEELISKTEEWCDILTLGPPDGMFLDAFKNG  
IKALCEKEFILNRIVVRIMFGNIVGQPVNCTKIIADLVKDLPPNAGDKIKLWVGSWRKGV  
TWNHSKIIVAVDGKYLWTGGHNFWRHYLRKNPVNDISVEMKGNVARDGHRYANAQWAYIV  
KKQSTAWGRFVDRHVADCVDVPRRTARVTVSEFPEGSAAEFPLYNPKNSLLQETRLFRGP  
SSKSNISDPGAPVITMGRYGTILKNARPSDDAFIAMFKSAKTTIRCALQDIGPICVPKTK  
MTVPGMVWPKAYMNAMAEALWTKDVDVEIVLSNPGSIPDNLSLTEAQYGNWSCVDVAE  
IIKCIVEQFPDANDNHTKLRRTVKENLRVCFKCRGGSRYS DGSSLGLHSHKHFIIIDDIC  
CYIGSQONLYICDLAEWGVLIDSPDAVADIKQQYWDQMWEVSYTRDDCNVNEVMDGLGINR  
NAVSRMSLTAYELQQTAVMKANFKDYLDGSESDQSDAEDEKEDE  
>comp14214\_c0\_seq3; 418 209 2239 LEN=2379; translated  
MPLFRRFRKKMGLDESSGEECEDASAGDLSYVGTAAYNVLRQKHNHRHHELWNVTKGKVI  
RLDNTPRDAFSRDDRVPVEGHDDWLPKRLEELISKTEEWCDILTLGPPDGMFLDAFKNG  
IKALCEKEFILNRIVVRIMFGNIVGQPVNCTKIIADLVKDLPPNAGDKIKLWEAVGAKVS  
PGITPRSLSTANISGQVDIFGIDIISARSKRNEYEKVEFIEGGSMSXLFGDRFDAVLS  
LLLTRIVVDLALNPVNDISVEMKGNVARDGHRYANAQWAYIVKKQSTAWGRFVDRHVADC  
VDVPRRTARVTVSEFPEGSAAEFPLYNPKNSLLQETRLFRGPPSSKSNISDPGAPVITMGR  
YGTILKNARPSDDAFIAMFKSAKTTIRCALQDIGPICVPKTKMTVPGAVHCFLLILSICS  
HIFXKAASRVIANFFSSFHHSNSTINLCYFLHMNGMVWPKAYMNAMAEALWTKDVDVEI  
VLSNPGSIPDNLSLTEAQYGNWSCVDVAEIIKCIVEQFPDANDNHTKLRRTVKENLRV  
CFKCRGGSRYS DGSSLGLHSHKHFIIIDDICCYIGSQONLYICDLAEWGVLIDSPDAVADI  
KQQYWDQMWEVSYTRDDCNVNEVMDGLGINRNAVSRMSLTAYELQQTAVMKANFKDYLD  
GSESDQSDAEDEKEDE  
>comp14214\_c0\_seq4; 505 209 2093 LEN=2233; translated  
MPLFRRFRKKMGLDESSGEECEDASAGDLSYVGTAAYNVLRQKHNHRHHELWNVTKGKVI  
RLDNTPRDAFSRDDRVPVEGHDDWLPKRLEELISKTEEWCDILTLGPPDGMFLDAFKNG  
IKALCEKEFILNRIVVRIMFGNIVGQPVNCTKIIADLVKDLPPNAGDKIKLWEAVGAKVS  
PGITPRSLSTANISGQVDIFGIDIISARSKRNEYEKVEFIEGGSMSXLFGDRFDAVLS  
LLLTRIVVDLALNPVNDISVEMKGNVARDGHRYANAQWAYIVKKQSTAWGRFVDRHVADC  
VDVPRRTARVTVSEFPEGSAAEFPLYNPKNSLLQETRLFRGPPSSKSNISDPGAPVITMGR  
YGTILKNARPSDDAFIAMFKSAKTTIRCALQDIGPICVPKTKMTVPGMVWPKAYMNAMAE  
ALWTKDVDVEIVLSNPGSIPDNLSLTEAQYGNWSCVDVAEIIKCIVEQFPDANDNHTK  
LRRTVKENLRVCFKCRGGSRYS DGSSLGLHSHKHFIIIDDICCYIGSQONLYICDLAEWGV  
LIDSPDAVADIKQQYWDQMWEVSYTRDDCNVNEVMDGLGINRNAVSRMSLTAYELQQTAV  
MKANFKDYLDGSESDQSDAEDEKEDE  
>comp14215\_c0\_seq1; 1624 163 6956 LEN=6956; translated  
MEQLVLGLFQEQLSKVIIGFRKEQVNANLLNGKGEIRDVNLNCSLLNESFARLFPPYVRLE  
EIHVSRIGFHVTSWTNLRRAPIIVDIGHXDRQGGGAPGPPSPQRAESHDPHYGKRANKAV  
VRGFRAVQCRKFVWLGGSDSRQHGGRSIGVPTGISNLWKIQNQATGTMDAAPAPIEMKHI  
KACMVDPEGCEGTPDRVWAHNQGRDNFLIYRKVQGECKIRLSPQDPSLNEQENGESYRD  
IASLKLEIQIATERRLRDGAVMACQFDVTIPEVDVDVDSRDVRLAHFASGLQYCLAKDR  
SFEDPLKPFVKKDDLSSSSSSSSPELSDSDDSREIKDDFSDSLDSSYSSTGTDASSAE  
EDGSVSSRDSADGAGAEDSSVAKEGSSSTHRSSTPSAKDRRRFERSVIVLPNNQIIYNS  
VTMTCSIHDIVLRGSYQNGENAYLECVAKGFVAEAIWPKSNTERGMVYQLSTSFVSIQE  
RIGHHKRTLLLGGMQRDDHLSRHLPSPKPREVCVDDFFPLFERRSLRDDPLDVRHLFPTQ  
AFGLKTTIDFLEDKDDVTLGSFIVYHEVGVNEMDIVLDTAVFLRITRFIMGMDGQGFDR  
WDTGDWIDLTPDMLCNPSETLHLDECIQECTQIFLDENLMISSDLLNITARFANMEMRI  
PSAVQESLRSCDITLKWKETTFVSSALPRTFLTGRIGNSIGDDRPDGATELIDFPNDP  
SDICYKYKDLGAGQISTFRLLQTLTLGFEVNIVPVVPFCTAPEPQKFAIGESTSIFCFE  
GKAPTTGKNKTKITVFLSVLIQELILNIDFDLLAGATCTLLFHKKNIVDIIIEIFGDSIR  
SRDAPPDNTKIKKGMGRRRVLARRHMAQSRETGGLVVIIFCLQQRHFRLKVWRQNVVRS  
LRDNLRSANGSTNQHKEEFIDLLAIVDYGMRDLEIGIEFDFHSSKSGHRTVMKSYITSANL  
KVVDLAREIENNVCRSREGTAKEDESAQPDLKDLCSFGSEQLPCGLEPSGRAQHFAFRLE  
AHHKNSQSWSMAADVSA PSTVNLDAEAFRNATLLIIEALLLPSWSKDPIMENKTSVFP  
NTVGALFDSVVAELVGDQSVAFDLDSIEIDTNSCEPIVERVLR SICMFFPSNLQVILL  
RAEIANLMISIPSENGEKKKSKLSFLNMTDLITRFYPIHGSPSEIEQVLACKGTDW  
STLINTDKAGFYQSIFSRQSLFSMTEEDGDILERVVHPFEIRLTYS GASVDLSMNK GIM

IDDIRLIENIQSRLKSAVEISSERFAEIWTVLRAILDRDATKRSASELPITSSGVNKLNG  
GTKGQRKSSVVEIRKLLLEKANDEFSTRYECVDRNSMKKKDDLEESMKIKLFNKERERFGA  
LSLISSRVAGWVRMGQHRSGQRAVKKSMWPFWAILRKELLILYSRPGEPKPSDIISLV  
NAKIHALLSGGNSKQDTKRAFIVESSGMIRYFVTGNAQYELWTRINFAILSFSDATIO  
SSENAIDDNASQSVGIGDQNDNPVRASIRNSGIGNRLSSAFQSARFRRGEMTDQTSAS  
SMDQSNHDDSSVLPNAVVEDSEADDGRSTTPTLDSSTTSRRAEFGKLSGVGQVTKNR  
LGSALMNVQRKGAEISRRNLEYNPLSFSEADESVEEELGSAADASTDTRNSSRGVEPSR  
DSTYSLSSFRNRDTRARQDVTNRGRSFRFRQQDDSLDDSLFGGELLTLKNIYIDERN  
PPVNALDQQVKPLKVFKEKWIVVSEIENSAASTLMETSTESPVTSMGQAEETSQNKHPE  
SSNEEVDIERTSDDDHPKSKRYFPRFVVKVSQIKSVKAEGLIVKQWSFGDVLKLYSNVS  
EAI EADLPRLVGKYSYGTDAQCTPSAGRPPSAVQAQEKVSWGRVLGGLLAAADHEDCTQG  
LRQYQCECIENFLNSLLECLPIDAIMLLSESLGIDCATKSIESTIETDESNICASESVD  
DCEDSDTPKQDVFEKVETPKIPARNLGGSVLSLLSSCDAELQQFETKNGTVGEIQDPQAA  
TNTAAAIFRPIVYDPLIPPSLTDQVHESLHQALSNI IERDEIHAQLIGTNVMHTHILE  
RMRKKIERLELSATFSQEIARVQRLQDLQTPNLANMFGKADYRVEMLRNEIDRKIEKVHH  
VIRNDGDGAEMQLCSQLAGEIATRSTNELEIQRLQTVRETERKTEAAEQEALRAELLAA  
RALLERXANGNGPLEIAVRAMPGQQRRIVALALALAIAMAMAMAX

>comp14216\_c0\_seq1; 640 369 1901 LEN=1973; translated  
MTKHPYDADGGVLGVTFSGDGTVTTRYRYVRTIAFTSERRKGQRVYKGMDSRELGF  
DIAQGLGNDLHTPMFRHHLQPLNKKRKNLSNNRSIYWGRLLSTFEGCQPYKMSLALSTEG  
KSQLGGLVLEEKDPFGSKMVIDPVKNRRLMYRLREDAKSSQLTVFEFEDNFRLVPEGKQDE  
EGKSSVDLPGLAILSDMAVTDNYSLVQPIVSTGMQFLFNKDPGTAVSTESKPAMLHLVP  
RVGTNKEPISMEIPFDGTFEANLQFCNAYEEGNKIVLDAIRSDGSKKPSTSSMQWPYVSS  
RKDYEAKAANKSLWRYEVDLSSRSVTKTNLSDVQCYFGTTKPSQSTQKHDEIFMAIGGLG  
DETAPPQGIASFKCDRSMSWMPAYQFCGEPMFAPKEGASSEDGGLLTVLFDGKSEQ  
SELLIFESSAISAGPICRMLPGIGIPHGLHGCFATAEEATWSFEEIKRRSKLADKIESQG  
DLWNEVKSDFSGLGLRFDDMEEYFGDSFLS

>comp14216\_c0\_seq2; 640 822 2354 LEN=2428; translated  
MTKHPYDADGGVLGVTFSGDGTVTTRYRYVRTIAFTSERRKGQRVYKGMDSRELGF  
DIAQGLGNDLHTPMFRHHLQPLNKKRKNLSNNRSIYWGRLLSTFEGCQPYKMSLALSTEG  
KSQLGGLVLEEKDPFGSKMVIDPVKNRRLMYRLREDAKSSQLTVFEFEDNFRLVPEGKQDE  
EGKSSVDLPGLAILSDMAVTDNYSLVQPIVSTGMQFLFNKDPGTAVSTESKPAMLHLVP  
RVGTNKEPISMEIPFDGTFEANLQFCNAYEEGNKIVLDAIRSDGSKKPSTSSMQWPYVSS  
RKDYEAKAANKSLWRYEVDLSSRSVTKTNLSDVQCYFGTTKPSQSTQKHDEIFMAIGGLG  
DETAPPQGIASFKCDRSMSWMPAYQFCGEPMFAPKEGASSEDGGLLTVLFDGKSEQ  
SELLIFESSAISAGPICRMLPGIGIPHGLHGCFATAEEATWSFEEIKRRSKLADKIESQG  
DLWNEVKSDFSGLGLRFDDMEEYFGDSFLS

>comp14216\_c0\_seq3; 742 281 2218 LEN=2292; translated  
MAHLLSFNLVFGLLGASGFQSSLKPTFSVVRPSRFMVATASDASSTDSKEDRPLTI  
EPDFKAYNGYKTVFKEVPYAECEASFGTVPTDLKGTYFRTGPAMFSAGSIPPPKTSIIQ  
PRDGPPIPDGQNPNRMTKHPYDADGGVLGVTFSGDGTVTTRYRYVRTIAFTSERRKGQRV  
YKGMDSRELGF DIAQGLGNDLHTPMFRHHLQPLNKKRKNLSNNRSIYWGRLLSTFEG  
CQPYKMSLALSTEGKSQLGGLVLEEKDPFGSKMVIDPVKNRRLMYRLREDAKSSQLTVFE  
FEDNFRLVPEGKQDEEGKSSVDLPGLAILSDMAVTDNYSLVQPIVSTGMQFLFNKDPGT  
AVSTESKPAMLHLVPRVGTNKEPISMEIPFDGTFEANLQFCNAYEEGNKIVLDAIRSDGS  
KKPSTSSMQWPYVSSRKDYEAKAANKSLWRYEVDLSSRSVTKTNLSDVQCYFGTTKPSQS  
TQKHDEIFMAIGGLGDETAPPQGIASFKCDRSMSWMPAYQFCGEPMFAPKEGASSED  
DGLLTVLFDGKSEQSELLIFESSAISAGPICRMLPGIGIPHGLHGCFATAEEATWSFEE  
IKRRSKLADKIESQGLWNEVKSDFSGLGLRFDDMEEYFGDSFLS

>comp14217\_c0\_seq1; 723 1 1352 LEN=1620; translated  
XLLEECSTVSGEKEPTEKSLLPPEGDEEDAVEEADGRGGDEPCAAPIDWSSTAFAQALEK  
RASAIREQDRGEAPEAASPEPSPDAEDGSTAVDRAGETTSTTASPETDPEPLALPQEATT  
EAPAATEAPAPAEETTGAATVKTVNKAQSTPKKAQHKPVEKKKPKKFKLIRNPFKREK  
SKKGVSTTPQAPKVTVRPTPSSSPQDSPAVTKATREAPVEKEAETETVGSLLVESFESEA  
PMDFANFEEMDFAPAEQQQQEALPGMAFGSTDAASGSGPEEPEGSPSSDEPIPTQGAAP  
GSPVRHSAVGPEAVTATPKSSNLESEMRRPSSYVLSSELGGIEETKSNSEASFDNSGFR  
TPTKASKPPLRPRSSVSTSNVAVGFDSFDNHNKELSFDDFEGQGFDSLPTAGSWEPPFAE  
DVGAAAYRQKAASYGASGTSPOKVSDFPRC

>comp14217\_c0\_seq2; 735 1 1485 LEN=1604; translated  
XLLEECSTVSGEKEPTEKSLLPPEGDEEDAVEEADGRGGDEPCAAPIDWSSTAFAQALEK

RASAIREQDRGEAPEAASPPPEPSDAEDGSTAVDRAGETTSTTASPETDPEPLALPQEATT  
EAPAAATEAPAPAEETTGAATVKTVNKSQAQSTPKKAQHKKPVEKKKPKKFKGLKIRNPFKREK  
SKKGVSSSTPQAPKVTVRPTPSSSPQDSPAVTKATREAPVEKEAETETVGSLLVESFESEA  
PMDFANFEEMDFAPAEQQQQEALPGMAFGSTDAASGSGPEEPEGSPSSDEPIPTQGPAAP  
GSPVRHSAVGPEAVTATPKSSNLESEMRRPSSYVLSSELGGIETKSNSFEASFDNSGFR  
TPTKASKPPLRPRPSSVSTSNATAVGFDSFDNHNKELSFDDFEGQGFDSLPTAGSWEFPAE  
DVGAAAYRQKAASYGASGTSPOKVSDFPAAELGVRVRDWLLFSAGRGSIGGGAPTGVGFDL  
IRFFRIRIGTSTFL

>comp14219\_c0\_seq1; 338 1 1064 LEN=2325; translated  
XYNTIKVSELPNRRRNGQQRSIQRSTDDDAVDNNVADNVVDNVSDIVFVGGHHDDIYG  
ISQQFPNRISKFSLAVLGRNAIELFFGFVFLMLLRTWIDKKRGEESGGGGNGTNSGES  
SENEGIATQIKKLTTEWDWIQLYNKTFDSNGNTTTTLTSENIVGHSKDFVDIELGGQNAAD  
GDGDGEKKYTGADGNDSSSLYLSDTNLNTSSRKSIVRLSPAEDTKISGTCIICFDEF  
VAGDEVVWAEGRKAPKHDGDDAEQNRNHHDKHVFHKDCMVRYLASNSHRRFKKSAAFEG  
AEGIENPCPTCRQPCTLSDEDLEMAIQTKLSLLMAEETENNAGGATLPVEQRA

>comp14220\_c0\_seq1; 362 236 1234 LEN=1677; minus strand; translated  
MTSPRIFRGRRLVLRVLRRLREVEPGHSSVFRSSPLSDSSTNKTLYRTPCGTKPRAFRFP  
SQADSYHRQRRFGTLNDGERKFSEGQSLVLSITETPLDSTVIEKPYTIVLMEDQVAVSP  
LLSTEGDENHSYDCAEHPVGNQATTSWIDTFRSKVPSYHGMSFASISLSWQRNPSVADGV  
LALKSCQLSSINDAILVTRGPVSLCAQYYLESFSLQGLVMIDPILIDDEDACGDGEAV  
SSLVSRMYRCQDDDADKDRFRSGRLLVEPNSVPMVVVTAQDEKAWNESSRFVVAARHGDD  
NGPYGRVPIVDLANIDGTEKNSAVTVLDVIGEW

>comp14220\_c0\_seq2; 362 408 1406 LEN=1759; minus strand; translated  
MTSPRIFRGRRLVLRVLRRLREVEPGHSSVFRSSPLSDSSTNKTLYRTPCGTKPRAFRFP  
SQADSYHRQRRFGTLNDGERKFSEGQSLVLSITETPLDSTVIEKPYTIVLMEDQVAVSP  
LLSTEGDENHSYDCAEHPVGNQATTSWIDTFRSKVPSYHGMSFASISLSWQRNPSVADGV  
LALKSCQLSSINDAILVTRGPVSLCAQYYLESFSLQGLVMIDPILIDDEDACGDGEAV  
SSLVSRMYRCQDDDADKDRFRSGRLLVEPNSVPMVVVTAQDEKAWNESSRFVVAARHGDD  
NGPYGRVPIVDLANIDGTEKNSAVTVLDVIGEW

>comp14220\_c0\_seq3; 362 408 1406 LEN=1849; minus strand; translated  
MTSPRIFRGRRLVLRVLRRLREVEPGHSSVFRSSPLSDSSTNKTLYRTPCGTKPRAFRFP  
SQADSYHRQRRFGTLNDGERKFSEGQSLVLSITETPLDSTVIEKPYTIVLMEDQVAVSP  
LLSTEGDENHSYDCAEHPVGNQATTSWIDTFRSKVPSYHGMSFASISLSWQRNPSVADGV  
LALKSCQLSSINDAILVTRGPVSLCAQYYLESFSLQGLVMIDPILIDDEDACGDGEAV  
SSLVSRMYRCQDDDADKDRFRSGRLLVEPNSVPMVVVTAQDEKAWNESSRFVVAARHGDD  
NGPYGRVPIVDLANIDGTEKNSAVTVLDVIGEW

>comp14220\_c0\_seq4; 362 236 1234 LEN=1587; minus strand; translated  
MTSPRIFRGRRLVLRVLRRLREVEPGHSSVFRSSPLSDSSTNKTLYRTPCGTKPRAFRFP  
SQADSYHRQRRFGTLNDGERKFSEGQSLVLSITETPLDSTVIEKPYTIVLMEDQVAVSP  
LLSTEGDENHSYDCAEHPVGNQATTSWIDTFRSKVPSYHGMSFASISLSWQRNPSVADGV  
LALKSCQLSSINDAILVTRGPVSLCAQYYLESFSLQGLVMIDPILIDDEDACGDGEAV  
SSLVSRMYRCQDDDADKDRFRSGRLLVEPNSVPMVVVTAQDEKAWNESSRFVVAARHGDD  
NGPYGRVPIVDLANIDGTEKNSAVTVLDVIGEW

>comp14221\_c0\_seq1; 459 333 1649 LEN=2233; translated  
MEKRDGSLHRTLDLNASVENILKNLASALELSGAAKLPPPPAPLPLSSRTKHSNDNDQI  
HWTKYDPHDSIKGESKGGSTIDHRYDVNSNRGRDLERFLSSVTPSQIEERKAYRMDATAA  
ALVARRLFSFQSIDGIRLGWSSKSFAGLLSSLIRLHEEYQHRFNVQSFYPLGLVFTNNEK  
KPALDVYGGNIYLTPTSGTQLEWLESIREVTEERLDEFLEYRIMTERVALLQEGLVGDRR  
NIANGKHDNTTKVKKGFTCPSEFYMFQQRATEPYRNMQISMEIPIAERNGFVPAISQS  
SLSTTGHLRLVVEPESCRRPKVTREGFIQVPSTITSEDLTLSVSKLSGLAKERWDAEQE  
KKHKCREAIEQVQWKFGLOKVSRSNERVRWEDFLSALSRLIDHETQLEEGELAGSNLQIS  
TNGHCHLSDDGSLVIPHNV

>comp14221\_c0\_seq2; 459 431 1747 LEN=2331; translated  
MEKRDGSLHRTLDLNASVENILKNLASALELSGAAKLPPPPAPLPLSSRTKHSNDNDQI  
HWTKYDPHDSIKGESKGGSTIDHRYDVNSNRGRDLERFLSSVTPSQIEERKAYRMDATAA  
ALVARRLFSFQSIDGIRLGWSSKSFAGLLSSLIRLHEEYQHRFNVQSFYPLGLVFTNNEK  
KPALDVYGGNIYLTPTSGTQLEWLESIREVTEERLDEFLEYRIMTERVALLQEGLVGDRR  
NIANGKHDNTTKVKKGFTCPSEFYMFQQRATEPYRNMQISMEIPIAERNGFVPAISQS  
SLSTTGHLRLVVEPESCRRPKVTREGFIQVPSTITSEDLTLSVSKLSGLAKERWDAEQE  
KKHKCREAIEQVQWKFGLOKVSRSNERVRWEDFLSALSRLIDHETQLEEGELAGSNLQIS

TNGHCHLSDDGSLVIPHNW

>comp14222\_c0\_seq1; 414 262 990 LEN=1550; translated  
MSSSSGGGKPPAAMSSSQMQAVMRVMTGQAERTIAEKLADSNRPTWEQYKKNHDKLHLEGV  
DQKEMEEYRKQLDRDRESKLLKGTNHRGDRERERKKAEKKKKKKEKKRKRSSRKKKSSRY  
YSSSSSYSSSDGEDSSRTSGNEEGESHRRDRDRDRDRNGDGEEDGRDRDRKRRHKRSRRR  
HRRDSDDSDGSDGGRRKRKAKKKKARRKKDRSSDDNDGNDSEGSYRLSKFFDDDD  
DE

>comp14223\_c0\_seq1; 230 810 1502 LEN=1970; translated  
MVVASIVHKRTFSVLEYGCAFCICAGLVLFAAADWSLAPSFHPIGLAFVILSVCADAVLP  
NAQERLFGMGSSRLEVTFTYTNIFTLIAMTATLLSGDLLGSMRFVMGSPDRTTLCHYIFV  
YTFIAYIAISCHMNVRRFVGGVSSVLLATGRKGMTLILSFLFPKAFSWYYVLGALMVLG  
GLLLSSLIKIRNKNKEKEEKRRNSGDEEQGMLMAPLTAASGSAARRHKH

>comp14223\_c0\_seq2; 230 1001 1693 LEN=2161; translated  
MVVASIVHKRTFSVLEYGCAFCICAGLVLFAAADWSLAPSFHPIGLAFVILSVCADAVLP  
NAQERLFGMGSSRLEVTFTYTNIFTLIAMTATLLSGDLLGSMRFVMGSPDRTTLCHYIFV  
YTFIAYIAISCHMNVRRFVGGVSSVLLATGRKGMTLILSFLFPKAFSWYYVLGALMVLG  
GLLLSSLIKIRNKNKEKEEKRRNSGDEEQGMLMAPLTAASGSAARRHKH

>comp14224\_c0\_seq1; 503 61 1746 LEN=1853; translated  
MSASALYRIATRATGTLLAGGVGTGAYLYEFDEGAKRSIQAYSSFAPVILHYRWVELKDK  
YVKSVEEDWEELDEKYAKPTVAKLGELQGMYSKYQTAAGLTNTLGDWIRELRTLENE  
IPPSAETVRETIIEETKLEETFEFDPKPLGSASIGQVHRAVLKKNQEVAVKVQYP  
EAQELFTDDIHAIRKLCWFAPQVCTLDALENQKAELDYNNANLLEISRNMTLHGF  
QPRDALVPQPIADLTTRKMLVMELLPKPLIDGMRAYAKWAKENGTTLKRMETQARKKI  
EEEGIPDKYDGPSASQIAMYQKWVRVKTSTCTNVLIALLYNCVPSMKKRDSKDGKLSYIQSS  
IPPNTPRIVDTLMRIHGHQLMIDGCFNADPHGGNLLLLPDGRIGLIDYGATKRLSENERL  
CVCVMYAALARGDKDTIWTMAKTGGYKSKYMPNDIHYKLAQFGFDSWGNEVTGGKNVQQF  
MDDLKAQDPWYETPDNFVLASFMSVVRMRALTLGMNHPVKCSDDWWGEIAEKELQRMGLPYE  
TWDAEQFEKYKPELNIQKFEM

>comp14225\_c0\_seq1; 284 172 1179 LEN=1566; translated  
MQSAHTRMRAVEKENRDIDEEAGRAAGGKQKRRVRLKKKSRKPINLCLLLIVLSPVLV  
IGILLYATNQYASLSGLLRKETQVDGSGGKDVSGKSSNEASRSTRLGNNQAEEQTDQE  
ANSIEQGDNQEVGNIVEGIEATKPEQKQQNDKITTHDKKFLVLTQTQGNIKITLRPD  
LSKGSVDYIYKLVESYGGKRLHCNFYRAEKPGILOQIMENKDVVPINTVRGTCPEGAEG  
VPNNCPPWDKNCGCHGPIMTRGAVAWAAGDAGGPDFFIDAYKNPADWWGTQHTNFGFIDD  
EASLDVVDAMFELPIESTPDMDFIKDPIHFDDLLLE

>comp14226\_c0\_seq1; 314 1 2286 LEN=2444; translated  
XKENINSTVHVRHQPHCHQQYPFDEMCKERAKSISESISEKPPLGAIGTQQSRFRCPGGV  
KSSNTKNKCSSRKGTVKKEEFAITGRTHTTTKLNDITXFIRNYDGKNCDELRRGQQIKNS  
RTKMTSPWKSALDPRTGRTYFHEHTRETQWRKPICLANDEMLAIKEKEQKVKDFFGVM  
EANILSTLSRGLIPGNHTNDQQSSSPIKEGESEGVPGDEHIEDQRNLWKARLNNVNPVELV  
RTIISTMDEGILTSVIRRQPSVRNIKLGAFNSELSLDLDDLRLSGHGPSSSPVGDGFDTC  
NRGGSRQFEFQTDLSLETLEEKAGEANSTNAPRATSELLSYLREPPTDDSTKETQALTKLV  
SLTKEMINAGKEHIEKTKELVSTGKEKLEIITPISSTKMIHTGKEQLDEFKSVAMGENT  
KCNGQNQVRNSKSPTRTLRRATCGDIGRMLPRELNFDDSDTEEEKPATPRNEKVARMVKN  
SSRSAADILHPTVQRRNTCGTMYIKTTMSAPDIDATIKVCVGVYRSHILSSEQENLCVEG  
MDAFKVFNDYPDNVLETKYIPSLDEVTTTFYRGVFFKSQMEADCIIMSLIYVERLIKKTIV  
GRLRPRASNWRSLIFSCMILSSKVVWDDLMSWNGDFSQSCPPGGVNFVSVQRVNQLELAVLN  
SLKFNKVPASEYAKYYFLRSMLIKSGLGGEDEFRASDPLDVEGARRLQKVSHDFESRSF  
IMKPNLSDALHRKSHAVQSEGNTRVLQQPKTKVGLVQLVRM

>comp14226\_c0\_seq2; 318 1 1884 LEN=2559; translated  
XKENINSTVHVRHQPHCHQQYPFDEMCKERAKSISESISEKPPLGAIGTQQSRFRCPGGV  
KSSNTKNKCSSRKGTVKKEEFAITGRTHTTTKLNDITXFIRNYDGKNCDELRRGQQIKNS  
RTKMTSPWKSALDPRTGRTYFHEHTRETQWRKPICLANDEMLAIKEKEQKVKDFFGVM  
EANILSTLSRGLIPGNHTNDQQSSSPIKEGESEGVPGDEHIEDQRNLWKARLNNVNPVELV  
RTIISTMDEGILTSVIRRQPSVRNIKLGAFNSELSLDLDDLRLSGHGPSSSPVGDGFDTC  
NRGGSRQFEFQTDLSLETLEEKAGEANSTNAPRATSELLSYLREPPTDDSTKETQALTKLV  
SLTKEMINAGKEHIEKTKELVSTGKEKLEIITPISSTKMIHTGKEQLDEFKSVAMGENT  
KCNGQNQVRNSKSPTRTLRRATCGDIGRMLPRELNFDDSDTEEEKPATPRNEKVARMVKN  
SSRSAADILHPTVQRRNTCGTMYIKTTMSAPDIDATIKVCVGVYRSHILSSEQENLCVEG  
MDAFKVFNDYPDNVLETKYIPSLDEVTTTFYRGVFFKSQMEADCIIMSLIYVERLIKKTIV

GRLRPRASNWRSLIFSCMILSSKVVWDGK

>comp14227\_c0\_seq1; 757 211 2001 LEN=2349; translated  
MPASPRPHPPPPRARPPPPMSPRREGDAPLTPRRYQSHDESILSGSPVSTNSTGAPSSPMR  
EAASLIQSLDIARTKMGISAADAATEAETARRNARTAQEIARRYQSGSYSTFKMNALDTS  
ASSAASIVTTATMASSSILITSRPKHPDITGLFKNQNALDGGEEDEEKTFEFEGGDSPNGNV  
GGDDNNGGDNHRVPYTPSPRHSSPTHEHAENQIKSSDKKSGDAAQNRGDFHSPTSFERIA  
QHHADDLLQLTMELEKTKQELESEQRRLKQFHFSMLSMETKATKLESINEKLKEDIKER  
KQSAAEISNLKMELEKSSQMKLQAAEEDAQLALDLAKDSAEEREKTEELLQKAKNEVEMLR  
QQGNNQLAVIGTPERRVHFADSDANA AVENEATNTVEPEKEVKSPALLDASREGGPSRA  
MIAAGRQLLLRRSMSPQDAVIRLELTPSKSAERRQQLSARLNKSLNESTDDANITLLSSS  
PSRTPSPTPGPPAITSGESHTTSNSITNLDKMTTLEEYVAAIKTLETSGKRLDLGDFY  
WREHSKNRPSHTPIRIDQMTRQYQCQNVFVKIGRQQKDINQLESLLGYLEKKLVLDE

>comp14228\_c0\_seq1; 696 1 1461 LEN=1916; translated  
VDTKIKSSSIKPRTIATSKQYKMPFSDSVRAKMEAEKIASSAISAFESTFDSLVSNGTGM  
IPESTISPAPDLVDAESFNSEKNTSVLAETVVLKLNGLGTGMGLDKAKSLLKVKGDDTF  
LDLTAQIVDMRKEFGMKVKFMLMNSFSTSEDTLNFKEKYPDIAAEEGLEMMQNKVPKL  
CQETLEPATCASDPSNEWCPFGHDLYAALEGSRLDALLKDGKYMVFSNSDNLGASLD  
LDILTIFAETDAPFMMECCKRTANDKKGGHLAKRNADGQLILRESAMCADEDEDADFQDIN  
KHRYFNTNNLWIRLDKLEIINENGGFIPLPMIKNKKTVDPKDDSSQAVFQLETAMGAAI  
ECFKGATAIVVPRTRFAPVKKCNLLLLRSDAYI IENKPVLPACNGVAPTMAALDSSKY  
KLVGALEKATEGGIPSLVECTKLIKISGLVTMTKDTKFGDVEIVNTDSEAKAVPTGVVTG  
KLDLSA

>comp14229\_c0\_seq1; 995 1 3425 LEN=3560; translated  
LACAEASARPGGENRIDQAI SGKFYRVGANLWVSAYSTKAHRHPGDNTGRGKGS DRNTKN  
DMVPSAAAVLASNARLAIWAGVLLQHCPEDAMVVLEGARHVFVGFKERDATE SLKGGILG  
ALTRGRDANDGYGYYYGQRLP RHRHTDWRIGAYDDEGDLGHHYEFDDNTHFLFYKKQCQ  
EHVQDVYEEAWGCKDRRTPLWGSIDDPVKS VYATTTWNGKSSPKASGSEEPQNSQRSVSE  
PLLTFFPLRIRSRRELSKRDAEMEESEVEKTI LDPGNPSRFCVQAYYDRETSVSTLAANQR  
CVLAGLVRATTL PNETVLHHLTDANLVS RWDAAGRKVAAKIAELARVGNNGTKKI IDAMD  
WSNAVDEIISVREAEYVHVAVMNGSLTAGIPSSPEGFNSENDFLAPFRKSAPWGRLLSVL  
FAHMARLRSLPSIALVWRVFCQELRRRWDERESLPNMQYVAGLDPHPLELKKQRCFSTIE  
PKAAF SAYLNCSEPPDDYHCLIGQKLQVFN LGIECIVADELLENEAMEQFLGAGQLPSS  
LNVADATGSPNPPEEIQNH SADSSSWKSTPKMKANPTVGVXNNTSTEKN DYGPPAIDRD  
MDFVWMEPTNYQVQDRNLPMNATDERDFDYVGP PSTSPGDPDADSVKHPYEDGKQKEPK  
KKRLILEGIPMPWHSSSSNDGTSSSEGS AKSMGSTGTL SQMYFDAEAGSIFSAKRGFIT  
LDTVLDIKDAQRRPGARCPVAALC I LSTGDQLYAPYLQRP HPLTDDVALQRRIMLTKSDE  
GREKKGALKGRDLAYRLQKPKLISDMNS FKAANPKCSLDDFAKWYGNPGSPFENYNI ED  
PISDEISVQSAFQESA AKKLDKASEAMRVLVATRDFWSECWEQSSPIPAAEQQPLFDHVS  
TVEMVIDYLEQLHPANLMNQVMAVNLSSAYFALASSAKATMKIGIVQLSMKMLRQKTEKA  
LKLSSHNSLGKLSQISDSRRSGTGSTVGTTS GVTSSQFASEQAICACEDVCNALSVTETM  
MARATSL LHKFPDQYKLVSDLLRFADGSTLAL TDRGGRSNFLKLVFDQQQKENKLLDP SK  
DKLPNPMLERYVFRNLDDDNPCQLAVRFGDEITNLDRGENEGGVLLALNKSYYHKNNEDG  
N

>comp14230\_c0\_seq1; 391 287 3193 LEN=3858; translated  
MDKSLPYSSPPTASMSQARQQ LQQQQQPAHIYSSMNQAQMKN SRQQQHNNQHLQLAEK  
LASFYLQQNHLLQWQNVQHHSS IHQKSVSSHSLTPTNFNQSNHNYFSSYPFQSQPPIQI  
QRGLRQNTCVVPVQSMGKSVGATE TKTCQNRTLLSARGLKLITAKLERRSLDKPWGLGFV  
STKGTQKFGLS SSPDVRVLVVKSPSSNKHKNETYANVKT SWARSIVAGKLSFLRNHSSKI  
NKNDCAIDPNNYLAEIMRAMADPSLSSLETGSGKGFPGDMIL AIDGRPLSSPVLGSNVQ  
NKNAFNGPNITSEIASYL RQVFSCLMVL RHTDVVYASACVEKQKSQHDPLWVSSVANMA  
WDKLLLPFGSTMLRGAPLTKNTV KRKPWIASEVVHRNPWFRDENKTGTTT SNI PYSDN TS  
SLDYWLYLQEDGSRAGMFLPPLFASPSADCEQHSGIPATFHDWLSRRKLSWRNRYNVYQH  
APSCEKKERKQPGRKQHLKPQGT DDEDHASSADHHASGVAVDFWTQQGLSSSFQEWLRKR  
STQWHRYSWNRRRKRQKIEQECFEKV VHLPFYRPQSTNASNCKSKCNPNSDCGSDVNSNN  
STASGTCSAKEFEWLKVRRYQWRMSRRRRRRERSQREGQQHNETTIDASVEGLRAQSE  
SFPVDNAGSPKATPSSI IDEETS NKGIVKSI PAKRKLQFLSKENQEI AFIDDI LEEEREKE  
KEEIKRQRDKRPPIDIARFFDASQGI PDDIVVHCLEYLDSKEHRKLF AITKGISKSLDR  
PEIWRQLCPNHVLP RRRPRKPWHEL YFTRLRKEREQHQRWDDLLVKCSAALFKRDDLQK  
IEKIVEKA EKDFGFDLNYASGVVCERN SILNLAVIHGRHKVVRWLVDVKGADIETS DRGN  
FTPLLNAAWSGDRWLVRFLLRQSDRNVLGTQHYTQGIAPIGFRGRTADEWADKRGHPEV

AKLIRLGL

>comp14231\_c0\_seq1; 1400 121 3405 LEN=3786; translated  
MKFTITKAVLVALTLGESSLAEKIIGDSNDSSEDDPFWRSFIGQGVDSMAVPTTKPSVKPI  
EITSEPTNLPIDPSTATPTQLDTFNSTAPSLSLTAGTSSPSSNSSSSCESIETLICSVPEF  
GTLCELVDLADLGDSEFNEDIFTIFAPTNDADFSLPEIPALTDFEVLRDVLVLYHTVPEVTL  
LSGNLVCDDIMMGSKDFNETTTTTTTCVGEDIFQVGTGNSPDGLPLIIGFDAEACNGIIH  
AINQVILPPTLTPPVAPTVPVDQIPAPTDSTTAPVDPPTVPVSDPTNTTIVPTTTPVD  
PVPPTFTPIESTATPTDVVPCQSI AELVCSLPQFELLCALVGDAGLASVLDGEEKFTVFA  
PINDAFTGLSEELASAIISDAELLTSVLLSHVVDDEVFSTDLECSGEVEMVSGEATTTIC  
VSDRVFQSGDGNASDSLPEIIAADKIACNGVIHEIDRVILPRGEEAPVEQTPATTPGPSQ  
VPVESTTSPTLVPTQAPSQIPIEATSAPVDIASLAPTEAPSIVGVPQTSAPTTTTSDSCQT  
IAEVVCSLPEFELLCSLIGLIDLPEAVDGEETFTLFAPIINDAFTGLPADLSDEIISDIDL  
LASVLLSHAVAGKVFSTDLSCSGQVTMISGEETTTTECVDDLIFQSGAGNTPGSFPEIVAP  
DGVACNGVIHIGIDRVILPAAVGVDPVLDLDPDSDALSFRDEL SKYLLNGGAELDDSDSY  
QSRALQETASITGAESLSEELVQYYVLYSILFATNGVNAVTEAIPNFEIPTWINDEGW  
FGGDIPPCDGFWFGISCSDEEGKIKTIDLFDNGLTGVPPEVLLLLTSDSQYAMGAGTLERLD  
LTGNRFLSNNDSSWMTDLGTSMQTI SVENTSFSGGSLPRLPDGLVNLDISGAFYTDGLDD  
ATFEGLELMNFIDLNNLFEFSVPAVFNRLPTLEFLYLSGNSFTGDLSFMEGMPAMRELW  
IDNNPELTGQLYDFIGDISTLESFVSYSMLTGPPIPEFSGELEQMKQMWLTSNNLTGAVP  
ASLGNLNFMETLQLEGNDLTGSMPEICAQKFFDDFLTILGGDCTDEQFECSCCTCCGVED  
CNDTVESRLQKRRL

>comp14232\_c0\_seq1; 577 125 1873 LEN=2163; translated  
MAPCYLGIDVGTQGLTALLVESSETSATNGGDPKTSKVLAMGEGSYDFVPGLPDGCYEQ  
DPSAWETALVQALKQIQESDDINESEISIASLCVTGQMHGCV MIDADGNLGTARLWCDA  
RNQEEADELSELFGERMPKRLTAARYLWSMKHEPKKAQACHAITTPAGYIAHRLTTRVSG  
SPSLPPLLLGAGEASGMFPIHTIDGGCCEYQADWIEAFDNHVRNTIYEPETKFSLEKLLP  
KIRTAGDTRNHCDNTENS VVLNPSILEPGGWLSDVRELLTSDGEISVAPAEGDQPTALAA  
SLIGEPGMISCSFGTSSVANMVGRSSGNGGKKNISLAAVDRFNAVNGQPI SMVWLRNGT  
TYLNRMVESYGGDFELLLKQAVDAPPDCGGLLALPFLDDEPGLGVKRGGTAMIVGFNNSG  
SDNGNDGNHRAGNVIKAAMISVMFNLLLTGQQVEEQAEADENNDGSSTRKEIVLTGGLTK  
TPQTGKILANIFDRPVRLMEAADEGGAWGAALLAKYYDDCGANTVVPSSSDSWLTFLNTI  
EAKEQQTTFHPETEHVAIYRKMLRKYKRLLLLQPLNEVMNEP

>comp14232\_c0\_seq2; 453 256 1674 LEN=1964; translated  
MLHTTLRLTLFTTSQADELSELFGERMPKRLTAARYLWSMKHEPKKAQACHAITTPAGYI  
AHRLTTRVSGSPSLPPLLLGAGEASGMFPIHTIDGGCCEYQADWIEAFDNHVRNTIYEPE  
TKFSLEKLLPKIRTAGDTRNHCDNTENS VVLNPSILEPGGWLSDVRELLTSDGEISVAPA  
EGDQPTALAA SLIGEPGMISCSFGTSSVANMVGRSSGNGGKKNISLAAVDRFNAVNGQP  
ISMVWLRNGTTYLNRMVESYGGDFELLLKQAVDAPPDCGGLLALPFLDDEPGLGVKRGGT  
AMIVGFNNSGSDNGNDGNHRAGNVIKAAMISVMFNLLLTGQQVEEQAEADENNDGSSTRK  
EIVLTGGLTKTPQTGKILANIFDRPVRLMEAADEGGAWGAALLAKYYDDCGANTVVPSS  
DSWLTFLNTIEAKEQQTTFHPETEHVAIYRKMLRKYKRLLLLQPLNEVMNEP

>comp14233\_c0\_seq1; 520 403 2136 LEN=2326; translated  
MAMGSLRHRAENKGTSWIFPWARRDTSFFFLVVIFFVFGIEIVMFNQLEMTQKMEQPS  
RETAMSTKFFHAGEDNDRSLPEHLLPMVPIPLPFESVKNADDYIASLMGRPSMAGIIAL  
LQKFLAELHEKNRERAKKDEDNKAFDNFYETVAKYLKPFDDLYRGQNI FVRSDDSI FI  
SLAAAFREHLLAETLVSAFRHAKDPDKL FVGAVVQNCFGKQMDGTIDTSGTPCLTGPKKV  
GENDKGKPI TKRLEVGPDMNGIAVFCAMPDYEKYCKQGQIRVLYMYD TDSLGP SMARYYA  
SKLWGGETFVMQIDSHLRFAFDWDAKYIEDIKLTKNYPKSLMSTYPPGFDQRTFIPKKWK  
IDL SKIDNKTVIETPGCR LCGC GIPHDKGDI IHINQGRSYKGGEKRPTQQPFLGAGFVF  
FPGQFLKEIPFDPYLPWTFMGEEILLSMRAWTHGWNLYAPRKNLI IHQYRPGSLGIPKFV  
GAVNSQAKKGFQNGWLQKRTIRRIKNL CGYPLHTTELI EGDEQGFVLVEKDHYGLGTERS  
WDEFMEMAGLSVNKTSGALDCPPGKIGPAWCNDGSVE

>comp14233\_c0\_seq2; 507 403 1863 LEN=2462; translated  
MAMGSLRHRAENKGTSWIFPWARRDTSFFFLVVIFFVFGIEIVMFNQLEMTQKMEQPS  
RETAMSTKFFHAGEDNDRSLPEHLLPMVPIPLPFESVKNADDYIASLMGRPSMAGIIAL  
LQKFLAELHEKNRERAKKDEDNKAFDNFYETVAKYLKPFDDLYRGQNI FVRSDDSI FI  
SLAAAFREHLLAETLVSAFRHAKDPDKL FVGAVVQNCFGKQMDGTIDTSGTPCLTGPKKV  
GENDKGKPI TKRLEVGPDMNGIAVFCAMPDYEKYCKQGQIRVLYMYD TDSLGP SMARYYA  
SKLWGGETFVMQIDSHLRFAFDWDAKYIEDIKLTKNYPKSLMSTYPPGFDQRTFIPKKWK  
IDL SKIDNKTVIETPGCR LCGC GIPHDKGDI IHINQGRSYKGGEKRPTQQPFLGAGFVF



FPGQFLKEIPFDPYLPWTFMGEEILLSMRAWTHGWNLYAPRKNLI IHQYRPGSLGIPKFV  
GAVNSQ

>comp14234\_c0\_seq1; 441 94 1449 LEN=1538; translated  
MSECSDSLSAFDAGSSTLASRLDRPIKATADDAMA AKLATTHAGYYVDPFVDAVCRAPGE  
EPTKQGRSLGASPR LGQANGNRRGGRRRTVQPLIKRGTHARVCVMDRAISTFLDTAQT  
GEGVASACQIVVLGAGKDTSYFRYRNGNLMGAEDREESGPQRRPGSNRATQSPPRVKVPV  
HWYEVHDHDSVIKEKASLIRKSNLLKSF CPLMVKTPTGYECTGSGVGLLGSFNEAPQPSYH  
LIGHDLRESPAKLFEKLG LDPALPTLFTIECVSMYVPI TACKNLLQALSVSADTVYIACY  
EPI LGSDNGSARGDPFGRVMEQNIVQMGV ASPDSCLLQTRTLADQLEKLVRC EGFDRAVG  
CDMWSAYETIVTDAQRKRASKSEFMDEYEELV LIMRHYCFVVARGGRRSPGNSRQQPIDLT  
TIRGPDSTTEERSSSLGWVPGKCLELEKDET

>comp14234\_c0\_seq2; 469 94 1470 LEN=1559; translated  
MSECSDSLSAFDAGSSTLASRLDRPIKATADDAMA AKLATTHAGYYVDPFVDAVCRAPGE  
EPTKQGRSLGASPR LGQANGNRRGGRRRTVQPLIKRGTHARVCVMDRAISTFLDTAQT  
AAAAATAGEGVASACQIVVLGAGKDTSYFRYRNGNLMGAEDREESGPQRRPGSNRATQSP  
PRVKVPVHWYEVHDHDSVIKEKASLIRKSNLLKSF CPLMVKTPTGYECTGSGVGLLGSFNE  
APQPSYHLIGHDLRESPAKLFEKLG LDPALPTLFTIECVSMYVPI TACKNLLQALSVSAD  
TVYIACYEPI LGSDNGSARGDPFGRVMEQNIVQMGV ASPDSCLLQTRTLADQLEKLVRC E  
GFDRAVGCDMWSAYETIVTDAQRKRASKSEFMDEYEELV LIMRHYCFVVARGGRRSPGNSR  
QQPIDLTTIRGPDSTTEERSSSLGWVPGKCLELEKDET

>comp14235\_c0\_seq1; 1152 149 3733 LEN=4097; translated  
MMGSKSSKPVVKKPPADWERQEVRRPF EVISPCSDISNPSDFNVRVYHRKSHEYKLEPPPP  
PHQRQQSRKNGAGAKQGT PFDQNKPIPRRVS NKSSGSNPHNIPVAVKVRRSNSTRGTGSE  
KVRNRSSTTGTNSGGDKAIAPGAFYFPTKESERRADRLAKREL RADHQEIAIKAITSNK  
KKDRNKSRMITTNMNR IITTSIKENIKNIDIKQKTKSIRRGARKAARKM KKKKDTFTRIA  
IAVANACLEETKNMRLEEAMAANTKTDSQLIASQTSETYPLERKNSALMRRTRRRSEIIA  
PGDLGVTTRKQIDSR TIVKKEDEQVDSFTKEQERHQ NQMDRVTSVALHQEDVYFARLS  
LSPSAQH GASPCAQNGGNRVTSILGSIKPGLESRTDVE TTPVDHRQKSV DSTMDTPVSD  
LFSANGSLPDKRDDDCLNAS IKNKQNNSSPVSSLMRFYTKTGPME LSPKSYFSNEEDKTF  
QVFADEHSDSSSDRKGKDATIGSRQSLESNSSLYTVE SMTYKKVDGKDLKLLVHDNEVDS  
DRETDTFSSYSR SVMKTVESKKSSTKKKSSKPKVSKLES LFRPILPALSTDDAQSQSSYD  
PYEIKVTESAPGIIQAANYMSLGARRSSSSSRISVQSRKNNFTSGSPSMSVLSIDTQREP  
SPTLSKKT VSNQANLNSDFLFTDD SAPVVVAQDPNERNNSATISISTAGARSRLANKSTQ  
KGVAILRRNEETEFDGISVDNSSLKSERVRVFSKDSVRLVPTQEPEKSEFENVQFVSNFV  
GRSHEETPEDEPES SKNFGERVNEQELKSIGEEP YLSLQDAKHDIQTEIERVDSVAESID  
LPEVKS NMAIRRSSES VRSIRSNDSPESILEEEEEEEERE EASPD SVHWYTSKNGVTFV  
PGRSAANPAKSPFYRYQNAKTKFNTQDLIVKSKSPKKSPAKILRKGSGGLVSLRVQELNT  
RVTEVRKLRMRKMTN PRLHTHNFDNTQPVRSRALMNYKTNF SAADLEKSNMMAAKFN  
VIPDVDDDDSTFSAELIPNIALEKGE DDDVSRMSETTGVT SIATIRQHRDSSGLSMSS  
RSTASSGLSNLKKQVFRVSEGTKSRTSTSDSTTISSMIQEENENYLPFRSTSKVVKPNEQ  
YPAVLHLSPSKGT PAMKWRSLAAKAAEMDALKASSCKPRKGLAIRNMNHGEALP

>comp14235\_c0\_seq2; 1168 149 3748 LEN=4112; translated  
MMGSKSSKPVVKKPPADWERQEVRRPF EVISPCSDISNPSDFNVRVYHRKSHEYKLEPPPP  
PHQRQQSRKNGAGAKQGT PFDQNKPIPRRVS NKSSGSNPHNIPVAVKVRRSNSTRGTGSE  
KVRNRSSTTGTNSGGDKAIAPGAFYFPTKESERRADRLAKREL RADHQEIAIKAITSNK  
KKDRNKSRMITTNMNR IITTSIKENIKNIDIKQKTKSIRRGARKAARKM KKKKDTFTRIA  
IAVANACLEETKNMRLEEAMAANTKTDSQLIASQTSETYPLERKNSALMRRTRRRSEIIA  
PGDLGVTTRKQIDSR TIVKKEDEQVDSFTKEQERHQ NQMDRVTSVALHQEDVYFARLS  
LSPSAQH GASPCAQNGGNRVTSILGSIKPGLESRTDVE TTPVDHRQKSV DSTMDTPVSD  
LFSANGSLPDKRDDDCLNAS IKNKQNNSSPVSSLMRFYTKTGPME LSPKSYFSNEEDKTF  
QVFADEHSDSSSDRKGKDATIGSRQSLESNSSLYTVE SMTYKKVDGKDLKLLVHDNEVDS  
DRETDTFSSYSR SVMKTVESKKSSTKKKSSKPKVSKLES LFRPILPALSTDDAQSQSSYD  
PYEIKVTESAPGIIQAANYMSLGARRSSSSSRISVQSRKNNFTSGSPSMSVLSIDTQREP  
SPTLSKKT VSNQANLNSDFLFTDD SAPVVVAQDPNERNNSATISISTAGARSRLANKSTQ  
KGVAILRRNEETEFDGISVDNSSLKSERVRVFSKDSVRLVPTQEPEKSEFENVQFVSNFV  
GRSNDASHEETPEDEPES SKNFGERVNEQELKSIGEEP YLSLQDAKHDIQTEIERVDSV  
AESIDLPEVKS NMAIRRSSES VRSIRSNDSPESILEEEEEEEERE EASPD SVHWYTSKNG  
VTFVFPGRSAANPAKSPFYRYQNAKTKFNTQDLIVKSKSPKKSPAKILRKGSGGLVSLRV  
QELNTRVTEVRKLRMRKMTN PRLHTHNFDNTQPVRSRALMNYKTNF SAADLEKSNMMA  
AAKFNVIPDVDDDDSTFSAELIPNIALEKGE DDDVSRMSETTGVT SIATIRQHRDSSG

LSMSSRSTASSGLSNLKKQVFRVSEGTKSRTSTSDSTTISSMIQEENENYLPPFRSTSKVV  
KPNEQYPAVLHLSPSKGTPAMKWRSLAAKAAEMDALKASSCKPRKGLAIRNMNHGEALP  
>comp14236\_c0\_seq1; 494 1 1425 LEN=1596; translated  
SSCGKCVKVLKELISGLHDDDEDDGSGLSDSNSNSNTSSAKQSSPPLTLRLAIARSSQQHP  
HHDQWGQELVRRRRPPREMLYPPHLEPPPPHTDAVLHSRPTCEGDEEKRGARRRPPLLSI  
EETKEGVKLTIPVETTAPSLMKRWTQLEQQPPMPRGDRKEADRNEKGNKEKNGQPGVKSS  
YAEWLDDLVLPLATSVRSQKADGLNDGDNEGSYAVTNPLTIELKCRRCQTTGPEAGARA  
FLMGPEPLSIVLCHNRINSTLEEVVEILTHELIHLYDVQTLKLNLDACETVAYSEVRAAR  
EAECATTSSAVAEALEMAERRKASGSDDEPDARASGHGTTNHERHDSGWPSLSTGMQAVA  
TNLRDSFSQKVLRPYCVKSIALGATQNMFPKAGKACLHTVWETAYADHRPFGTANSRGRG  
DKENQNTTRPEAEAAAAAASQTETQTTTIPSEIRSSNRVRGSNSSGTSHGTSCK  
>comp14236\_c0\_seq2; 568 193 1665 LEN=1836; translated  
MASGSFTSTLPRSSCGKCVKVLKELISGLHDDDEDDGSGLSDGNSISNSNSNTSSAKQSSP  
PLTLRLAIARSSQQHPHHDQWGQELVRRRRPPREMLYPPHLEPPPPHTDAVLHSRPTCEG  
DEEKRGARRRPPLLSIEETKEGVKLTIPVETTAPSLMKRWTQLEQQPPMPRGDRKEADR  
EKGNKEKNGQPGVKSSYAEWLDDLVLPLATSVRSQKADGLNDGDNEGSYAVTNPLTIEL  
KCRRCQTTGPEAGARAFMLMGPEPLSIVLCHNRINSTLEEVVEILTHELIHLYDVQTLKLN  
LDACETVAYSEVRAAREAECAATTSSAVAEALEMAERRKASGSDDEPDARASGHGTTNHER  
HDSGWPSLSTGMQAVATNLRDSFSQKVLRPYCVKSIALGATQNMFPKAGKACLHTVWETA  
YADHRPFGTANSRGRGDKENQNTTRPEAEAAAAAASQTETQTTTIPSEIRSSNRVRGSNS  
SGTSHGTSCK  
>comp14237\_c0\_seq1; 537 289 2008 LEN=2022; translated  
MRISRKILRSNASSPKKSGLSLLMIIRIFFFLVIFGYFLLMFVYFQVHFQLVFLQNDRV  
QIEISKNTHTPLASKDSTTQKLQKQVQEKIKNTHPLASKDSTAQKLQKDRVQEKISDST  
AQKIDRKLRSCEQKDNFDKDMSSKKYPIFYPPPLPTELREEASTSSAKYCVAPVPRYGQ  
HRSNKDAVMTFAHGYPQLINFMVSLWETDYNGLVIGVGTNLTEETRTFLEESAQNR  
GLVVYEISLPCQRKNSCKSANIEQEDSNGSDGWVPLSDTRPYRRVSVVRYEYYAWAKR  
YNSKSLIFLTDARDVFFQRNPFQVYRHQTKRSGKAGTLVFFQEAIKISESKANSRWIEKM  
YSSELKDELAEKMVVCSGTTFFGSQAAVEVYARAMVYEFDKTKCKHCANKNDQGFHNFLIH  
KNRLDGANRGGISKVLVHAQGGGIVNVVGMVSKANDGKSLHDLGLVNADTQEILENDHK  
TVSAVVQMNDRDKRLKDWVDSQVEKRLSLYRSCGSDYLIQTDDFKHEEAMTIGIADMKSE  
VAAAMTVTYCFVSKTVLVQQLFNRSEIDNLYI  
>comp14237\_c0\_seq2; 504 289 1954 LEN=1968; translated  
MRISRKILRSNASSPKKSGLSLLMIIRIFFFLVIFGYFLLMFVYFQVHFQLVFLQNDRV  
QIEISKNTHTPLASKDSTTQKLQKQVQELQKDRVQEKISDSTAQKIDRKLRSCEQKDNFD  
AKDMSSKKYPIFYPPPLPTELREEASTSSAKYCVAPVPRYGQHRSNKDAVMTFAHGYPQL  
QLINFMVSLWETDYNGLVIGVGTNLTEETRTFLEESAQNRPLVVYEISLPCQRKNSCK  
SANIEQEDSNGSDGWVPLSDTRPYRRVSVVRYEYYAWAKRYNSKSLIFLTDARDVFFQ  
RNPFFQVYRHQTKRSGKAGTLVFFQEAIKISESKANSRWIEKMYSELKDELAEKMVVCSG  
TTFFGSQAAVEVYARAMVYEFDKTKCKHCANKNDQGFHNFLIHKNRLDGANRGGISKVLVH  
AQGGGIVNVVGMVSKANDGKSLHDLGLVNADTQEILENDHKTVSAVVQMNDRDKRLKDW  
VDSQVEKRLSLYRSCGSDYLIQTDDFKHEEAMTIGIADMKSEVAAAMTVTYCFVSKTVLV  
QQLFNRSEIDNLYI  
>comp14238\_c0\_seq1; 566 493 2566 LEN=2566; translated  
MDDDDSDNDDGNNKPAAGNSAPKPSPIRDGEVVVLEGGPIRTSQDRRKPPPRANTPPQ  
NPPSPLVRIMEIFPDADIDYVEKKLREQSNKIEVVAVMSEGEYPKQKNGSLSDTTSQPN  
VNNTIIRAQKITEPKHDYSSPAASFDLTPTYNGECMNLFLDFCFQKKAIKILLSENQ  
RYTLTRNFQDITLVGKSPNPPAAAGAGSAAAMRIEKEEDNNYRLLRSALKRGVIPENVRD  
RFGGRMQLMKPRKIGVSCPAITDPVLMDEHFHYEKRLNEWLDKVQDRMRGQANNELAL  
KDGSVQKCCFFDDVAISECVSCKENGLICKECMVQYIXKSSLQLRNLGVQDKVTKKPAL  
EIKCCDGSNGSFRDEVLKILSSKTWEKYSEMQTKAQIEQAGLGDLSLAMCPKCGYQAE  
VPDTQNNFECPEVEGCRFVSCRKCGKASHIPLRCEEVKEKDRQDAGRLKVEEALSEAKMRT  
CPKCKKFKIKIDGCNKMTCPGKMCYVCRTPLNKLSNPYTHFCNTPHCDHSSCGKCKMY  
SNDEEDDAQAMREAGIAAKEEYEAQLLNDGQVQASANLNLDVDQMIHDPYSSNSRKRKE  
REQRAPRRVRHEGDGSKKDRTOQFDLVDSESRKVRHSWEEQINSEMKGANGDKVCSNGI  
INTALIQVKESLCVEANRYVTAIEIFHGLLLX  
>comp14239\_c0\_seq1; 532 792 2606 LEN=2741; translated  
MLGYHKAHGRHRGSRPSSRPSLKKLTGCRSFCVVSFSLALLSSSSLVNCFSMDAIDGVSS  
SFISSLKTPTGTTNIALVPASPCWLEAMQVLKSRHESLFLSEHLTATNPDKNDSYKIDID  
TMTCRWMTSDDQKVLALALELSKCHMEDIGRPLFQFQDRDQRIACSRVIYIYDVASSRETVR

TNDDGASHREEKKEYPRSVASNCLVHLTDSGVATYTHFFSYVNELCTRLSETMLSMYRQ  
TSYQLAKSSKIAESKVQALIEQQDFLIHRWNKREEHVLRVYDELESRVQEQSYSIQSEIE  
SLHSMLENERRLRNDEYKDYRETLAQELEKYREEFTVFSFIKRRGRGFMQLWYIGKNLVT  
SGLRTIHFLFQGIICNICGFFLAYFLTLPAIFRWMRLYMFSVILLSSSIKICGSWFSNNE  
DQEKFWFFTTSSGSPDSLYTNCLYAICNIYLFGILLSVFSCHGHTEGQISDGEHPGTCKE  
STAEGII EQSALSSNQFGQARGSIIPVGTTLHQNNAFVFPSSQGPSGAAAYSNLFFGAHDG  
LRSHSIEDQYASHQRHYWLMHYVVTPPPIGSRASPIII ESNDESKRNETGSKSYNEDHE  
AGGN

>comp14239\_c0\_seq2; 532 582 2396 LEN=2531; translated  
MLGYHKAHGRHRGSRPSSRPSLKKLTGCRSFCVVSFSLALLSSSSLVNCSEFMDAIDGVSS  
SFISSLKTPTGTTNIALVPASPCWLEAMQVLKSRHESLFLSEHLTATNPKNDSDYKID  
TMTCRWMTSDDQKVLALALELSKCHMEDIGRPLFQFQDRDQRIACSRVIYDYVASSRETVR  
TNDDGASHREEKKEYPRSVASNCLVHLTDSGVATYTHFFSYVNELCTRLSETMLSMYRQ  
TSYQLAKSSKIAESKVQALIEQQDFLIHRWNKREEHVLRVYDELESRVQEQSYSIQSEIE  
SLHSMLENERRLRNDEYKDYRETLAQELEKYREEFTVFSFIKRRGRGFMQLWYIGKNLVT  
SGLRTIHFLFQGIICNICGFFLAYFLTLPAIFRWMRLYMFSVILLSSSIKICGSWFSNNE  
DQEKFWFFTTSSGSPDSLYTNCLYAICNIYLFGILLSVFSCHGHTEGQISDGEHPGTCKE  
STAEGII EQSALSSNQFGQARGSIIPVGTTLHQNNAFVFPSSQGPSGAAAYSNLFFGAHDG  
LRSHSIEDQYASHQRHYWLMHYVVTPPPIGSRASPIII ESNDESKRNETGSKSYNEDHE  
AGGN

>comp14240\_c0\_seq1; 568 274 1584 LEN=1869; translated  
MPPATGFQYTPPSYLLRASDTTNRPNWKTEEGEARSDDAGFQGENEYDLPQEQRQPQTRRE  
SHLDAHFQQRVRNKQSRDYRDLKGERDAEGSLSYGQGYGNSYSNSNQRSSASDDEDDSVL  
LAAANADSYADVHSARVHALQSRSNELARKNRKERITGVPDSSASSRRSEASEAETARS  
LRAQRLRSSLLKPTAEEDYDVQTKLEMRRFARKEEEAARKLEREEALALEKQKQRELEE  
KQRKQHQKQKQKRAMKERTLEAEREALAIKEEAAALMRAAELNEERLRQRELDARE  
EDRKPHRDRLSAGSAEGRKHRKMRKTYFSGSSTSDGETFMTEFDPQNDFAFLNDLSGI  
VRDTGLLKTCGACFGDTEDEVLETSPMKPDGTSKASSKISSVFPDLVASSDNSASDDDR  
TGDSVHKSRYARYRA

>comp14240\_c0\_seq2; 568 274 1602 LEN=1887; translated  
MPPATGFQYTPPSYLLRASDTTNRPNWKTEEGEARSDDAGFQGENEYDLPQEQRQPQTRRE  
SHLDAHFQQRVRNKQSRDYRDLKGERDAEGSLSYGQGYGNSYSNSNPNNSNQRSSASDD  
EDDSVLLAAANADSYADVHSARVHALQSRSNELARKNRKERITGVPDSSASSRRSEASE  
AETARSLRAQRLRSSLLKPTAEEDYDVQTKLEMRRFARKEEEAARKLEREEALALEKQKQ  
QRELEEKQRKQHQKQKRAMKERTLEAEREALAIKEEAAALMRAAELNEERLRQR  
ELDAREEDRKPHRDRLSAGSAEGRKHRKMRKTYFSGSSTSDGETFMTEFDPQNDFAFL  
NDLSGIVRDTGLLKTCGACFGDTEDEVLETSPMKPDGTSKASSKISSVFPDLVASSDNS  
ASDDDRTGDSVHKSRYARYRA

>comp14241\_c0\_seq1; 349 56 1365 LEN=1542; translated  
MSCSMNHAVFLPPLVWVGLQTPAHFAHTLPNSETESQRCLARYWINRVDDPLAKAVVGY  
GCLSVGCSPDCHAAGDTENPTTSFDPDQPSMEERLDPGRVELFFKSPSELEDRVRF LRSC  
GVSSFNLVNKNKKDDVEGWVGLVRATFPGASVCAHYSVKHNRLPRKAPAEQREPWLRLSLR  
DSDADEVLVSGSGEKKAWNTVEALAAVGKSLPGNRPKIAYAYNPYFSPSRSDQDLEDRRL  
AEKLATGCVSKVYLQFGTDPRLTEGLETIRSVARRTPGQTDVEVAGSVFLPTKLLIAQQ  
KFRPWNGVFLSEAFSLSGPGEASAIVSETIEIYRANNVEMLWEAPGIRTEADMVAVRELLG  
AQSGAKPLEGSSTHNKTPKGTSTAAAVGVSRRNKATATIGSSGKADELVGNPKGQEH  
PANRFMGWFLQERSR

>comp14242\_c0\_seq1; 190 211 1248 LEN=1371; translated  
MGQEDYEMYKEFSANIQNEVSRLKNILANIESRGSERGWLKRQSYGDIDDAKLVDGITGD  
KYIYKRRGSIEDSPIPKRKQIRFVMDVSGSMYRFNGCKCDWFPPIVTARKCDTXGMKTRGT  
KRLTRVNTFERKTLVQKCRIFLTFVADCYHALILDTDQRLVRCLEAALLVMEGFHSDV  
VETKKFDYSIVGHSGDSPCIQPPFVDWLSPPKNKQQLQILQTMLAHSQYCMGDF'TLEA  
MRKAIDEVSSRTDDYGGSELGNQGTVICLSANLARYGIDPGRIRSIIESGVQKGVKVIYI  
VFIASFGKEADAMMRALPIGSAYTCMETTELPRAVREILTSGVLT

>comp14242\_c0\_seq2; 294 211 1065 LEN=1188; translated  
MGQEDYEMYKEFSANIQNEVSRLKNILANIESRGSERGWLKRQSYGDIDDAKLVDGITGD  
KYIYKRRGSIEDSPIPKRKQIRFVMDVSGSMYRFNGYDQRLVRCLEAALLVMEGFHSDV  
ETKKFDYSIVGHSGDSPCIQPPFVDWLSPPKNKQQLQILQTMLAHSQYCMGDF'TLEAM  
RKAIDEVSSRTDDYGGSELGNQGTVICLSANLARYGIDPGRIRSIIESGVQKGVKVIYI  
VFIASFGKEADAMMRALPIGSAYTCMETTELPRAVREILTSGVLT

>comp14242\_c0\_seq3; 1231 471 4922 LEN=5045; translated  
MGCQDNAAGVCQDWLVPSGYLSSNDSPDQLPEHISSAVLPSYSPAILKHLQWMMAKDSMV  
QDMFLVGPAGEVFRRLAFAYAQLTKKPIEILTISGDLTESDLKQRREITQNNASGSA  
DTSPTNIEFIDQAPVRAAKHGRLLILDGIEKSERNVLPPTLNLLLENREMHLEDGTMLLPS  
HRIEQLSLSSQHETHDSSSSFLIPVHPDFRVIALGIPSPFPGRSLDPPIRSRFQIRRIE  
NPSSEELYEQTLVGQKCRNSKENKDNYSKSLAKSCAILASAMEKNGNLFPSNKLHSIWKLM  
KEFPLEDRKNILRRAYPVKGDIEFDTDDTFDELALGPLVQNLRESESVKEDRSLSHYMIKS  
VNPCDEDGGFPRVKITFMLDPELTSQELPQEHYPYLFAPTAGRRTNLNPPHYIAQTATFRK  
ALTAMIQEHAVGNDFLLVSSKGEKTTLAQGFAATLGYDTHLTFAMNTEMTSHDLLARRS  
TDPSTGETQWEDSPLMRAARQGEICVLDGVEKLRPDVLSIQSLIVDRDISLPDGRRLR  
HDIRIKHNSATDDNIVTVNPSFRVIALASLPKGDGLRWITPSLMAMFTTIRLPSLTEEC  
LRQILSTHASSHASKTAIDTILALRDELTDVAEECGISPLSTRNMVQVVRMGLQNSLY  
HVLSSIFLFDLLPQRQRALETVFNRIGVSDCKSKLSTEDSNLESIVVINGNEAKIGSMT  
FERGDTRRPEMVPSPNAFDIPAHTQIIQDLLLLDWKSGERAFLLGNQGVGKNKIVDRICE  
IANWEREYIQLHRDSTIGQLTLPQLKDGKIVWNSPLIRALRDGCVLLVDEADKAPVEV  
VSILKGLVEDGELLADGRRISRQGGSSDYDVIKMNPNSLWVLANRPGYPFLGNDFFRE  
IGDCFNTRVNNPDLSEIRLLSSYAPSLETSVIHAVASSFSDLRHLSDIGDIAYPYSTR  
EAI AVVKHLEKYPDDGLAASLYNILD FDSFDELTYSM LGQTFQKYGIAISDYTSRKEELL  
GYHYHSGDLGQGLQIEYLTFRGDEDRKSHNPKLSDPKFGKWDDKNEAHVGGNQWAGGT  
GGSDTAGLGGGGPYRLDRGHRVHQVSNEAKEEVSEQAKLVAKQIAKKALDDHLQRIKMG  
QEDYEMYKEFSANIQNEVSRLKNILANIESRGSERGWLKRQSYGDIDDAKLVDGITGDKY  
IYKRRGSIEDSPIPKRKQIRFVMDVSGSMYRFNGCKCDWFPVITARKCDTXGMKTRGTRK  
LTRVNTFERKTLVQKCRIFLTFVADCYHALILD TD DQRLVRCLEAALLVMEGFHSDVVE  
TKKFDYSIVGHSGDSPCIQPPFVDWLSLPPKNKQORLQILQTMLAHSQYCMGDFTEAMR  
KAIDEVSSRTDDYGGSELGNQGTVICLS DANLARYGIDPGRIRSIIESGVQKGVKVI VFI  
IASFGKEADAMMRALPIGSAYTCMETTELPRAVREILTSGVLT

>comp14242\_c0\_seq4; 1335 471 4739 LEN=4862; translated  
MGCQDNAAGVCQDWLVPSGYLSSNDSPDQLPEHISSAVLPSYSPAILKHLQWMMAKDSMV  
QDMFLVGPAGEVFRRLAFAYAQLTKKPIEILTISGDLTESDLKQRREITQNNASGSA  
DTSPTNIEFIDQAPVRAAKHGRLLILDGIEKSERNVLPPTLNLLLENREMHLEDGTMLLPS  
HRIEQLSLSSQHETHDSSSSFLIPVHPDFRVIALGIPSPFPGRSLDPPIRSRFQIRRIE  
NPSSEELYEQTLVGQKCRNSKENKDNYSKSLAKSCAILASAMEKNGNLFPSNKLHSIWKLM  
KEFPLEDRKNILRRAYPVKGDIEFDTDDTFDELALGPLVQNLRESESVKEDRSLSHYMIKS  
VNPCDEDGGFPRVKITFMLDPELTSQELPQEHYPYLFAPTAGRRTNLNPPHYIAQTATFRK  
ALTAMIQEHAVGNDFLLVSSKGEKTTLAQGFAATLGYDTHLTFAMNTEMTSHDLLARRS  
TDPSTGETQWEDSPLMRAARQGEICVLDGVEKLRPDVLSIQSLIVDRDISLPDGRRLR  
HDIRIKHNSATDDNIVTVNPSFRVIALASLPKGDGLRWITPSLMAMFTTIRLPSLTEEC  
LRQILSTHASSHASKTAIDTILALRDELTDVAEECGISPLSTRNMVQVVRMGLQNSLY  
HVLSSIFLFDLLPQRQRALETVFNRIGVSDCKSKLSTEDSNLESIVVINGNEAKIGSMT  
FERGDTRRPEMVPSPNAFDIPAHTQIIQDLLLLDWKSGERAFLLGNQGVGKNKIVDRICE  
IANWEREYIQLHRDSTIGQLTLPQLKDGKIVWNSPLIRALRDGCVLLVDEADKAPVEV  
VSILKGLVEDGELLADGRRISRQGGSSDYDVIKMNPNSLWVLANRPGYPFLGNDFFRE  
IGDCFNTRVNNPDLSEIRLLSSYAPSLETSVIHAVASSFSDLRHLSDIGDIAYPYSTR  
EAI AVVKHLEKYPDDGLAASLYNILD FDSFDELTYSM LGQTFQKYGIAISDYTSRKEELL  
GYHYHSGDLGQGLQIEYLTFRGDEDRKSHNPKLSDPKFGKWDDKNEAHVGGNQWAGGT  
GGSDTAGLGGGGPYRLDRGHRVHQVSNEAKEEVSEQAKLVAKQIAKKALDDHLQRIKMG  
QEDYEMYKEFSANIQNEVSRLKNILANIESRGSERGWLKRQSYGDIDDAKLVDGITGDKY  
IYKRRGSIEDSPIPKRKQIRFVMDVSGSMYRFNGYDQRLVRCLEAALLVMEGFHSDVVE  
KKKFDYSIVGHSGDSPCIQPPFVDWLSLPPKNKQORLQILQTMLAHSQYCMGDFTEAMR  
KAIDEVSSRTDDYGGSELGNQGTVICLS DANLARYGIDPGRIRSIIESGVQKGVKVI VFI  
IASFGKEADAMMRALPIGSAYTCMETTELPRAVREILTSGVLT

>comp14243\_c0\_seq1; 774 120 1829 LEN=1994; translated  
MARLLFTTFLVLTLMVQTSAFGSMATRPTSKFVGTQHQQPNQMPFALRNGIRPGSAI  
YQSQRSSSTATNLKMYAGISAPSLSLVSSVGRFRGGASAVATATPTKLFNTCLLAVAML  
TTTTFKVLQAVDSRTKGGSDATESKTKPKDVKDLQRKFLSVFWLLRCADWLQGPYFYE  
VYASKMFGGAPASMI SRLFLTGFALSTALFGPSVGRAIDSYGRKKGTLAFSILYAIGAL  
STKSPLLMVLVLFGRVMSGIGTSLFLSAPESWLVGESQSRSGDDPDGEYLGTFGLAYAGDS  
IVAI IAGQLASLAATRRTGPFEMSTGFLAVGGLLAALLWKENVAAKSSDDSGGNKPSI  
RDAIDVVRADPKIMMVGGVQSLFEAAMYIFVLQWPPAIAAAVAKSFGGAVTPYGTVFSC  
FMACCLFGSTLFGQFAKMKGPTTEGVTTGMLAIATIAMSTATYTVSTASAASSLPALIAS

FFAFEACVGMYPFSIGTLRSKYIPDSHRSVIMNLFGIPLNVLVSVFMFVKYLGVNGALG  
ISSGALGLATLCLMLKLNAAISKNTAPAVA

>comp14244\_c0\_seq1; 920 361 2775 LEN=3278; translated  
MQATNQNTGRVEHCPSPRSSEIQGTANADRCRDDDAVAEMRISSSDDEASFGKSEEKM  
DLSSRATLNKGSERKTFPKDCYSFSLSHSFVDSPLFFSFGFTVFLFQVSFFVLMVLSVLD  
PVWSSNGDKDNPSDSILATFVDANSTPLVRATQVISILTYVVFADSSMMDVAIGVETFP  
DLKEATNSMVFSVLRISQGFMAAMTAFVLIITAENVIDIVLNFTAVNFI SHLDDVAFQL  
AVLGKYGERLEQEANRIKQIPLPPCMSQKTHTRFRSTLATCGVFLFGTMIAIMCAQDND  
DVWLTkVLRIEFQDPELHPYSGCYEIDATSIHDTFKRKVYRSDDSLDDVNFYGCIDSRQ  
WKLFEVNGDPCDANENTLAVSAKTDSFDISTVFGEAWFSLYGKPLDVYFYELDEKLEGNC  
SSFDDGKCDSLFNKFEYQFDGGDCCSATCSHFDCGIGAIKKGFGMENAI GDGFPQCSDPN  
MVPLTIRIGNFSSSGLAQVPEEWDIDNSENPLDGHNNPVSPHLSLECDQKNVFAIDLDP  
MTDRTEIVSVTDGAKCTMKVSNRTVHNDTDNVLNREP IWFVDYAMFQGETVENGTKILEH  
NSGVQEESSFFVIPKCMFKKLSLYTDETELYNDGASIEAFEWIREGFFGTQACDDDNDLI  
CLFALSSSLYFAAPLVGIDDEAWIKETPHCNWGAVECTRGDISKLEKSSLAGTISSAIG  
LLTSLREFNMKSNIIGKIPIEIGLLTFLQKLDLKSNEIEGEIPSEIGLLMSLQALDLSY  
NRLTGRIPTEILSLPSLEVLHLGK

>comp14244\_c0\_seq3; 1018 361 2994 LEN=5604; translated  
MQATNQNTGRVEHCPSPRSSEIQGTANADRCRDDDAVAEMRISSSDDEASFGKSEEKM  
DLSSRATLNKGSERKTFPKDCYSFSLSHSFVDSPLFFSFGFTVFLFQVSFFVLMVLSVLD  
PVWSSNGDKDNPSDSILATFVDANSTPLVRATQVISILTYVVFADSSMMDVAIGVETFP  
DLKEATNSMVFSVLRISQGFMAAMTAFVLIITAENVIDIVLNFTAVNFI SHLDDVAFQL  
AVLGKYGERLEQEANRIKQIPLPPCMSQKTHTRFRSTLATCGVFLFGTMIAIMCAQDND  
DVWLTkVLRIEFQDPELHPYSGCYEIDATSIHDTFKRKVYRSDDSLDDVNFYGCIDSRQ  
WKLFEVNGDPCDANENTLAVSAKTDSFDISTVFGEAWFSLYGKPLDVYFYELDEKLEGNC  
SSFDDGKCDSLFNKFEYQFDGGDCCSATCSHFDCGIGAIKKGFGMENAI GDGFPQCSDPN  
MVPLTIRIGNFSSSGLAQVPEEWDIDNSENPLDGHNNPVSPHLSLECDQKNVFAIDLDP  
MTDRTEIVSVTDGAKCTMKVSNRTVHNDTDNVLNREP IWFVDYAMFQGETVENGTKILEH  
NSGVQEESSFFVIPKCMFKKLSLYTDETELYNDGASIEAFEWIREGFFGTQACDDDNDLI  
CLFALSSSLYFAAPLVGIDDEAWIKETPHCNWGAVECTRGDISKLEKSSLAGTISSAIG  
LLTSLREFNMKSNIIGKIPIEIGLLTFLQKLDLKSNEIEGEIPSEIGLLMSLQALDLSY  
NRLTGRIPTEILSLPSLEVLHLDNALSNGEIPSEIGLLTSLESWLGHNGFTGEIPTEIG  
SLTSLQGLWFELDNGFTGDIPSEIGLLSSLQQLWLGE

>comp14244\_c0\_seq4; 1018 361 2994 LEN=5383; translated  
MQATNQNTGRVEHCPSPRSSEIQGTANADRCRDDDAVAEMRISSSDDEASFGKSEEKM  
DLSSRATLNKGSERKTFPKDCYSFSLSHSFVDSPLFFSFGFTVFLFQVSFFVLMVLSVLD  
PVWSSNGDKDNPSDSILATFVDANSTPLVRATQVISILTYVVFADSSMMDVAIGVETFP  
DLKEATNSMVFSVLRISQGFMAAMTAFVLIITAENVIDIVLNFTAVNFI SHLDDVAFQL  
AVLGKYGERLEQEANRIKQIPLPPCMSQKTHTRFRSTLATCGVFLFGTMIAIMCAQDND  
DVWLTkVLRIEFQDPELHPYSGCYEIDATSIHDTFKRKVYRSDDSLDDVNFYGCIDSRQ  
WKLFEVNGDPCDANENTLAVSAKTDSFDISTVFGEAWFSLYGKPLDVYFYELDEKLEGNC  
SSFDDGKCDSLFNKFEYQFDGGDCCSATCSHFDCGIGAIKKGFGMENAI GDGFPQCSDPN  
MVPLTIRIGNFSSSGLAQVPEEWDIDNSENPLDGHNNPVSPHLSLECDQKNVFAIDLDP  
MTDRTEIVSVTDGAKCTMKVSNRTVHNDTDNVLNREP IWFVDYAMFQGETVENGTKILEH  
NSGVQEESSFFVIPKCMFKKLSLYTDETELYNDGASIEAFEWIREGFFGTQACDDDNDLI  
CLFALSSSLYFAAPLVGIDDEAWIKETPHCNWGAVECTRGDISKLEKSSLAGTISSAIG  
LLTSLREFNMKSNIIGKIPIEIGLLTFLQKLDLKSNEIEGEIPSEIGLLMSLQALDLSY  
NRLTGRIPTEILSLPSLEVLHLDNALSNGEIPSEIGLLTSLESWLGHNGFTGEIPTEIG  
SLTSLQGLWFELDNGFTGDIPSEIGLLSSLQQLWLGE

>comp14244\_c0\_seq5; 1018 361 2994 LEN=3191; translated  
MQATNQNTGRVEHCPSPRSSEIQGTANADRCRDDDAVAEMRISSSDDEASFGKSEEKM  
DLSSRATLNKGSERKTFPKDCYSFSLSHSFVDSPLFFSFGFTVFLFQVSFFVLMVLSVLD  
PVWSSNGDKDNPSDSILATFVDANSTPLVRATQVISILTYVVFADSSMMDVAIGVETFP  
DLKEATNSMVFSVLRISQGFMAAMTAFVLIITAENVIDIVLNFTAVNFI SHLDDVAFQL  
AVLGKYGERLEQEANRIKQIPLPPCMSQKTHTRFRSTLATCGVFLFGTMIAIMCAQDND  
DVWLTkVLRIEFQDPELHPYSGCYEIDATSIHDTFKRKVYRSDDSLDDVNFYGCIDSRQ  
WKLFEVNGDPCDANENTLAVSAKTDSFDISTVFGEAWFSLYGKPLDVYFYELDEKLEGNC  
SSFDDGKCDSLFNKFEYQFDGGDCCSATCSHFDCGIGAIKKGFGMENAI GDGFPQCSDPN  
MVPLTIRIGNFSSSGLAQVPEEWDIDNSENPLDGHNNPVSPHLSLECDQKNVFAIDLDP  
MTDRTEIVSVTDGAKCTMKVSNRTVHNDTDNVLNREP IWFVDYAMFQGETVENGTKILEH

NSGVQEESFFVIPKCMFKKLSLYTDETELYNDGASIEAFEWIREGFFGTQACDDDNDLI  
CLFALSSLYFAAPLVGIDDEAWIKETPHCNWGAVECTRGDISKLEKSSLAGTISSAIG  
LLTSLREFNMKSNKIIGKIPIEIGLLTFLQKLDLKSNEIEGEIPSEIGLLMSLQALDLSY  
NRLTGRIPTTEILSLPSLEVLHLDSNALSGEIPSEIGLLTSLESWLGHNGFTGEIPTEIG  
SLTSLQGLWFELDNGFTGDIPSEIGLLSSLQQLWLGE

>comp14244\_c0\_seq6; 920 361 2775 LEN=5603; translated  
MQATNQNTGRVEHCPSPRSSEIQGTANADRHDDDAVAEMRISSSDDEASFGEKSEEKM  
DLSSRATLNKGSEKTFPKDCYSFSLHSFVDSPLFFSFGFTVFLFQVSFFVLMVLSVLD  
PVWSSNGDKDNPSDSILATFVDANSTPLVRATQVISILTYVVFADSSMMDVAIGVETFPR  
DLKEATNSMVFSVLRISQGFMAAMTAFVLIITAENVIDIVLNFTAVNFI SHLDDVAFQL  
AVLGKYGERLEQEANRIKQIPLPPCMSQKTHTRFRSTLATCGVFLGTMIAIMCAQDND  
DVWLTkVLRIEFQDPELHPYSGCYEIDATSIHDTFKRKVYRSDSDSLDDVNFYCYCIDSRO  
WKLFEVNGDPCDANENTLAVSAKTDSFDISTVFGEAWFSLYGKPLDVYFYELDEKLEGNC  
SSFDDGKCDLNFNKFYQFDGGDCCSATCSHFDCGIGAIKKGFGMENAI GDGFPQCSDPN  
MVPLTIRIGNFSSSGLAQVPEEWDIDNSENPLDGHNNPVSPHLSLECDQKNVFAIDLDP  
MTDRTEIVSVTDGAKCTMKVSNRNVHNDTDNVLNREPWFVDYAMFQGETVENGTKILEH  
NSGVQEESFFVIPKCMFKKLSLYTDETELYNDGASIEAFEWIREGFFGTQACDDDNDLI  
CLFALSSLYFAAPLVGIDDEAWIKETPHCNWGAVECTRGDISKLEKSSLAGTISSAIG  
LLTSLREFNMKSNKIIGKIPIEIGLLTFLQKLDLKSNEIEGEIPSEIGLLMSLQALDLSY  
NRLTGRIPTTEILSLPSLEVLHLGK

>comp14244\_c0\_seq7; 1065 361 4496 LEN=5295; translated  
MQATNQNTGRVEHCPSPRSSEIQGTANADRHDDDAVAEMRISSSDDEASFGEKSEEKM  
DLSSRATLNKGSEKTFPKDCYSFSLHSFVDSPLFFSFGFTVFLFQVSFFVLMVLSVLD  
PVWSSNGDKDNPSDSILATFVDANSTPLVRATQVISILTYVVFADSSMMDVAIGVETFPR  
DLKEATNSMVFSVLRISQGFMAAMTAFVLIITAENVIDIVLNFTAVNFI SHLDDVAFQL  
AVLGKYGERLEQEANRIKQIPLPPCMSQKTHTRFRSTLATCGVFLGTMIAIMCAQDND  
DVWLTkVLRIEFQDPELHPYSGCYEIDATSIHDTFKRKVYRSDSDSLDDVNFYCYCIDSRO  
WKLFEVNGDPCDANENTLAVSAKTDSFDISTVFGEAWFSLYGKPLDVYFYELDEKLEGNC  
SSFDDGKCDLNFNKFYQFDGGDCCSATCSHFDCGIGAIKKGFGMENAI GDGFPQCSDPN  
MVPLTIRIGNFSSSGLAQVPEEWDIDNSENPLDGHNNPVSPHLSLECDQKNVFAIDLDP  
MTDRTEIVSVTDGAKCTMKVSNRNVHNDTDNVLNREPWFVDYAMFQGETVENGTKILEH  
NSGVQEESFFVIPKCMFKKLSLYTDETELYNDGASIEAFEWIREGFFGTQACDDDNDLI  
CLFALSSLYFAAPLVGIDDEAWIKETPHCNWGAVECTRGDISKLEKSSLAGTISSAIG  
LLTSLREFNMKSNKIIGKIPIEIGLLTFLQKLDLKSNEIEGEIPSEIGLLMSLQALDLSY  
NRLTGRIPTTEILSLPSLEVLHLDSNALSGEIPSEIGLLTSLESWLGHNGFTGEIPTEIG  
SLTSLQGLWFELDNGFTGDIPSEIGLLSSLQQLWLELINGFGGEIPSEIGLLTSLQTLWL  
ELDKDVTGAIPTIEIGLLTSLRVLHMELENDFTGEIPSEIGLLTSLEEINLTSNNSTAAIPC  
EIASLLDNNTTGGDSERVTFVSVIGRGLGXIAFVAFHFKAIKNYSSSTVPCRGLWHLK  
CLWWASIALRSIPLRFVVRGGSXGHAHNRTTRRPENIRRRVGESTVPGDGDWQGM  
DTSAPGRGRLPFVSRARASGEGGILGTSTSTAAEADASDQRVNGRIPPASFMYH  
MYRMYHTYGTSKIQTNEKMAHNRNSALHLLHCICYAAFLNKHVPKAKASMTKEGIPRD  
GDGDDDDNQAAGVLGVLGDLSDDDDEASDDGFEPAPTLFVLKGVDTSLDEIVLEDCLTRV  
LSGGYDMGSDETGADEDAENFLPSFVVTLETDHGGIAGAVLFCVDRALVLHGERHND  
DDAEGVLARIREYAASGEAGKTDLWLVGESPSIEVLGEEETARRMAGEEAGAEPAE

>comp14244\_c0\_seq9; 1027 361 3140 LEN=5516; translated  
MQATNQNTGRVEHCPSPRSSEIQGTANADRHDDDAVAEMRISSSDDEASFGEKSEEKM  
DLSSRATLNKGSEKTFPKDCYSFSLHSFVDSPLFFSFGFTVFLFQVSFFVLMVLSVLD  
PVWSSNGDKDNPSDSILATFVDANSTPLVRATQVISILTYVVFADSSMMDVAIGVETFPR  
DLKEATNSMVFSVLRISQGFMAAMTAFVLIITAENVIDIVLNFTAVNFI SHLDDVAFQL  
AVLGKYGERLEQEANRIKQIPLPPCMSQKTHTRFRSTLATCGVFLGTMIAIMCAQDND  
DVWLTkVLRIEFQDPELHPYSGCYEIDATSIHDTFKRKVYRSDSDSLDDVNFYCYCIDSRO  
WKLFEVNGDPCDANENTLAVSAKTDSFDISTVFGEAWFSLYGKPLDVYFYELDEKLEGNC  
SSFDDGKCDLNFNKFYQFDGGDCCSATCSHFDCGIGAIKKGFGMENAI GDGFPQCSDPN  
MVPLTIRIGNFSSSGLAQVPEEWDIDNSENPLDGHNNPVSPHLSLECDQKNVFAIDLDP  
MTDRTEIVSVTDGAKCTMKVSNRNVHNDTDNVLNREPWFVDYAMFQGETVENGTKILEH  
NSGVQEESFFVIPKCMFKKLSLYTDETELYNDGASIEAFEWIREGFFGTQACDDDNDLI  
CLFALSSLYFAAPLVGIDDEAWIKETPHCNWGAVECTRGDISKLEKSSLAGTISSAIG  
LLTSLREFNMKSNKIIGKIPIEIGLLTFLQKLDLKSNEIEGEIPSEIGLLMSLQALDLSY  
NRLTGRIPTTEILSLPSLEVLHLDSNALSGEIPSEIGLLTSLESWLGHNGFTGEIPTEIG  
SLTSLQGLWFELDNGFTGDIPSEIGLLSSLQQLWLELINGFGGEIPSEIGLLTSLQTLWL

ELDKDVTGAIPTTEIGXVDFSSSFAYG

>comp14244\_c0\_seq10; 920 361 2775 LEN=5691; translated  
MQATNQNTGRVEHCPSPRSSEIQGTANADRCRDDDAVAEMRISSSDDEASFGKSEEEKM  
DLSSRATLNKGSERKTFPKDCYSFLSLHSFVDSPLFFSFGFTVFLFQVSFFVLMVLSVLD  
PVWSSNGDKDNPSDSILATFVDANSTPLVRATQVISILTYVVFADSSMMDVAIGVETFP  
DLKEATNSMVFSCVLRISQGFMAAMTAFVLIITAENVIDIVLNFTAVNFI SHLDDVAFQL  
AVLGKYGERLEQEANRIKQIPLPPCMSQKTHTRFRSTLATCGVFLFLGTMIAIMCAQDND  
DVWLTkVLRIEFQDPELHPYSGCYEIDATSIHDTFKRKVYRSDSLDDVNFYGCIDSRQ  
WKLFEVNGDPCDANENTLAVSAKTDSFDISTVFGEAWFSLYGKPLDVYFYELDEKLEGNC  
SSFDDGKCDSLFNKFEYQFDGGDCCSATCSHFDCGIGAIKKGFGMENAI GDGFPQCSDPN  
MVPLTIRIGNFSSSGLAQVPEEWDIDNSENPLDGHNNPVSPHLSLECDQKNVFAIDLDP  
MTDRTEIVSVTDGAKCTMKVSNRTVHNDTDNVLNREP IWFVDYAMFQGETVENGTKILEH  
NSGVQEESFFVIPKCMFKKLSLYTDETELYNDGASIEAFEWIREGFFGTQACDDNDLI  
CLFALSSSLYFAAPLVGIDDEAWIKETPHCNWGAVECTRGDISKLEKSSLAGTISSAIG  
LLTSLREFNMKSNKIIGKIPIEIGLLTFLQKLDLKSNEIEGEIPSEIGLLMSLQALDLSY  
NRLTGRIPTTEILSLPSLEVLHLGK

>comp14244\_c0\_seq11; 822 361 2586 LEN=2691; translated  
MQATNQNTGRVEHCPSPRSSEIQGTANADRCRDDDAVAEMRISSSDDEASFGKSEEEKM  
DLSSRATLNKGSERKTFPKDCYSFLSLHSFVDSPLFFSFGFTVFLFQVSFFVLMVLSVLD  
PVWSSNGDKDNPSDSILATFVDANSTPLVRATQVISILTYVVFADSSMMDVAIGVETFP  
DLKEATNSMVFSCVLRISQGFMAAMTAFVLIITAENVIDIVLNFTAVNFI SHLDDVAFQL  
AVLGKYGERLEQEANRIKQIPLPPCMSQKTHTRFRSTLATCGVFLFLGTMIAIMCAQDND  
DVWLTkVLRIEFQDPELHPYSGCYEIDATSIHDTFKRKVYRSDSLDDVNFYGCIDSRQ  
WKLFEVNGDPCDANENTLAVSAKTDSFDISTVFGEAWFSLYGKPLDVYFYELDEKLEGNC  
SSFDDGKCDSLFNKFEYQFDGGDCCSATCSHFDCGIGAIKKGFGMENAI GDGFPQCSDPN  
MVPLTIRIGNFSSSGLAQVPEEWDIDNSENPLDGHNNPVSPHLSLECDQKNVFAIDLDP  
MTDRTEIVSVTDGAKCTMKVSNRTVHNDTDNVLNREP IWFVDYAMFQGETVENGTKILEH  
NSGVQEESFFVIPKCMFKKLSLYTDETELYNDGASIEAFEWIREGFFGTQACDDNDLI  
CLFALSSSLYFAAPLVGIDDEAWIKETPHCNWGAVECTRGDISKLEKSSLAGTISSAIG  
LLTSLREFNMSEFFRRGEGFKW

>comp14244\_c0\_seq12; 309 1401 1964 LEN=2763; translated  
MTKEGIPRDGDGDDDDNQAAGVLGVLGSLDDDDDEASDDGFEPAPTLFVLKGVDTSLDEI  
VLEDCLTRVLSGGYDMGSDETGDADEDAENFLPSFVVTLLETDHGGIAGAVLFCVDRALV  
LHGERHNDDDDAEGVLARIREYAASGEAGKTDPWLVLVGEPSIEVLGEEETARRMAGEEA  
GAEEPAE

>comp14244\_c0\_seq13; 223 1 608 LEN=1358; translated  
FFFCSTESNKIIGKIPIEIGLLTFLQKLDLKSNEIEGEIPSEIGLLMSLQALDLSYNRLT  
GRIPTTEILSLPSLEVLHLDNSNALSGEIPSEIGLLTSLLESLWLGHNGFTGEIPTTEIGSLTS  
LQGLWFELDNGFTGDIPSEIGLLSSLQQLWLELINGFGGEIPSEIGLLTSLQTLWLELDK  
DVTGAIPTTEIGXVDFSSSFAYG

>comp14244\_c0\_seq14; 920 361 2775 LEN=5470; translated  
MQATNQNTGRVEHCPSPRSSEIQGTANADRCRDDDAVAEMRISSSDDEASFGKSEEEKM  
DLSSRATLNKGSERKTFPKDCYSFLSLHSFVDSPLFFSFGFTVFLFQVSFFVLMVLSVLD  
PVWSSNGDKDNPSDSILATFVDANSTPLVRATQVISILTYVVFADSSMMDVAIGVETFP  
DLKEATNSMVFSCVLRISQGFMAAMTAFVLIITAENVIDIVLNFTAVNFI SHLDDVAFQL  
AVLGKYGERLEQEANRIKQIPLPPCMSQKTHTRFRSTLATCGVFLFLGTMIAIMCAQDND  
DVWLTkVLRIEFQDPELHPYSGCYEIDATSIHDTFKRKVYRSDSLDDVNFYGCIDSRQ  
WKLFEVNGDPCDANENTLAVSAKTDSFDISTVFGEAWFSLYGKPLDVYFYELDEKLEGNC  
SSFDDGKCDSLFNKFEYQFDGGDCCSATCSHFDCGIGAIKKGFGMENAI GDGFPQCSDPN  
MVPLTIRIGNFSSSGLAQVPEEWDIDNSENPLDGHNNPVSPHLSLECDQKNVFAIDLDP  
MTDRTEIVSVTDGAKCTMKVSNRTVHNDTDNVLNREP IWFVDYAMFQGETVENGTKILEH  
NSGVQEESFFVIPKCMFKKLSLYTDETELYNDGASIEAFEWIREGFFGTQACDDNDLI  
CLFALSSSLYFAAPLVGIDDEAWIKETPHCNWGAVECTRGDISKLEKSSLAGTISSAIG  
LLTSLREFNMKSNKIIGKIPIEIGLLTFLQKLDLKSNEIEGEIPSEIGLLMSLQALDLSY  
NRLTGRIPTTEILSLPSLEVLHLGK

>comp14244\_c0\_seq16; 920 361 2775 LEN=5382; translated  
MQATNQNTGRVEHCPSPRSSEIQGTANADRCRDDDAVAEMRISSSDDEASFGKSEEEKM  
DLSSRATLNKGSERKTFPKDCYSFLSLHSFVDSPLFFSFGFTVFLFQVSFFVLMVLSVLD  
PVWSSNGDKDNPSDSILATFVDANSTPLVRATQVISILTYVVFADSSMMDVAIGVETFP  
DLKEATNSMVFSCVLRISQGFMAAMTAFVLIITAENVIDIVLNFTAVNFI SHLDDVAFQL

AVLGKYGERLEQEANRIKQIPLPPCMSQKTHTRFRSTLATCGVFLFGTMIAIMCAQDND  
DVWLTkVLRlEiFQDPELHPYSGCYEIDATSIHDTfKRkVYRSDDSLDDVNFgYCIDSRQ  
WkLFENVgDPCDANENTLAVSAKtDSFDIStVfGEAWfSLYgKPLDVYfYELDEKLEgNC  
SSfDDGkCDSLfNKfEYQfDGGDCCSATCSHFDCGIGAIKkGfGMENAIgDGfPQCSDPN  
MvPLtIRIGNfSSSGLAQVPEEWDIDNSENPLDGHNNPvSPHLSLECDQKNVFAIDLDPs  
MTDRTEIvSVTDGAKCTMKVSNRtVHNDtDNVlnREPIWfVDYAMfQGETVENGtKILeH  
NSGvQEESfFvIPKCMfKkLSLYtDEtELYNDGASIEAFEWIREGfFgTQACDDNDLI  
CLFALSSLYFAAPLVGIDDEAWIKETPHCNWGAveCTRGDISKkLEKSSLAGtISSAIG  
LLtSLREFNMKSNKIIGKIPIEIGLLtFtLQkLDLKSNEIEGEIPSEIGLLMSLQALDLSY  
NRLtGRIPTEILSLPSLEVLHLGk

>comp14244\_c0\_seq17; 214 1 462 LEN=1446; translated  
FFFcSTESNKIIGKIPIEIGLLtFtLQkLDLKSNEIEGEIPSEIGLLMSLQALDLSYNRLT  
GRIPTEILSLPSLEVLHLDSNALSGEIPSEIGLLtSLESWLGHNGfTGEIPTEIGSLtS  
LQGLWFELDNGfTGDIPSEIGLLSSLQQLWLGE

>comp14245\_c0\_seq1; 575 84 1742 LEN=1950; translated  
MGRSTDERNVAQTSENVATSGENDIATtNNLNHTMARQPQLtSTtKKVSLHLSKELREF  
YKNHDVdLTKLADGADfPYRYVRLNPRYDRtQTLEMLRKEVRKLRDNNSHGCGDGSdCNk  
DKVtTStQNSSGvKGPWLESWGFfAIPASfRLSASHCFRTGRIYGMdVSSGAGVAVLL  
TDHHDkITtVDPDPSCSDLSGkLRTTEERANNWNANKNDtNGDKNREVRILdLCCSPGLk  
LLQMADFfFHGkDFINSRVdGDAEDGICVDGvGQQRsvKvVGVdISKHRLdICKtIVNKY  
FIDPETSGSGERSKkSLPANVKIQLYNEDGtLFGTKGSRDGRNLIFdSTVATEEMMQRGg  
KRKRmNKSARAREKkRLREIAfLECVSAtSDGNdSHNPPDADHTNSntDAQDVCIDCFdY  
VLVDAECStDGSfKHVKERIKGSSGghYREEntMLtDPAKLAEVLdLQRkLVASGFRLlK  
DGGtLVYStCSLSEdQNEKvVkwLLEtNEdAFliPvHFPSIKtTKfVtDGTlTGTvRFYp  
NLLHNPGSSeALW

>comp14246\_c0\_seq1; 661 760 1935 LEN=2121; translated  
MSFEVDFHENITdLYNAITESNWEeAMRAVKKNPDEAKtWvVRKHEDDPTKNMWRfLPIH  
SACARQPPAGLIKALLAAyPTGARSvDDQGMALHYAAAGNqASREvIRALLMAfPDAAKL  
TDPRGMLPIHYIACWGpSSISvVDMILVANRNISdCKDEDGntPSDLAKEGdYRERNAVv  
AALKRWStSSSSEHQrStSSQSSItPSYKvIGSNfRSLHISEERKtDDSLdSLTRCSPG  
TTGkLREMDdHISVMEIEKKEDKLEISMLQYEVKQRNDMIEKkETLSQMTDECNGlRkT  
LADvTEQHDGLASMNSSLLSMVEQqEIVLkATRAREEQWEElAKVRREKLKEIVQMEDQD  
TFHEVdLRNVLAQQDRKMAAIKATISATLEA

>comp14246\_c0\_seq2; 661 936 2111 LEN=2297; translated  
MSFEVDFHENITdLYNAITESNWEeAMRAVKKNPDEAKtWvVRKHEDDPTKNMWRfLPIH  
SACARQPPAGLIKALLAAyPTGARSvDDQGMALHYAAAGNqASREvIRALLMAfPDAAKL  
TDPRGMLPIHYIACWGpSSISvVDMILVANRNISdCKDEDGntPSDLAKEGdYRERNAVv  
AALKRWStSSSSEHQrStSSQSSItPSYKvIGSNfRSLHISEERKtDDSLdSLTRCSPG  
TTGkLREMDdHISVMEIEKKEDKLEISMLQYEVKQRNDMIEKkETLSQMTDECNGlRkT  
LADvTEQHDGLASMNSSLLSMVEQqEIVLkATRAREEQWEElAKVRREKLKEIVQMEDQD  
TFHEVdLRNVLAQQDRKMAAIKATISATLEA

>comp14247\_c0\_seq1; 941 163 1959 LEN=2063; translated  
MFSSkSIAYLAAAAALAAspSSAFvPRStAGRSvPvLYDAATfTSDGAKtQIGNdSfLNE  
NLMARAQNGPGKkNEESLkIGIVGAGLAGMIAAMdLADAGHQVEMfELRPfVGGKvSSWQ  
DKDGNHIEMGLHVfFGCYNlFGIMKRTGAFdKNLRIKEHTtFVNKGgELGSLDFRfPI  
GAPVSGLQAFAKTEQLGIEDKfHNAVRLGTSPiVRALVDFdGGMDMvRELDDItfTEWfT  
QLGGKRGSLDRMWDAlAYALGFldCDtISARAMlTIFMLFAIRTEASvLRMLdGSPQTL  
HDPIINYLEERGvKINLRSPCREIVHDIDPDTGLPTRVKGLIGStATYHEfDAVIAACD  
VPGIKkVLPESFRKYDEfDKIYNLDtVPIATvQVRfDGWVTELNdEKRMdVSGDQSDGR  
GGGIDNLLYSVDTEfSCFADLAVtSPGEYyKEGEGSLIQAVfDERAFtRSNNELVADCIa  
QLNEVfPSSRkLNCTWSSvVklGQSLYREKtGQDKFRPKQATPIPNfFLAGSYTYQDYLD  
SMEGATRSGLMVADEVIARADGPKGLKAMSIEAQKNAAPAEKKAPEKEKtLFFATESA

>comp14248\_c0\_seq1; 410 302 1342 LEN=2143; translated  
MSSGQkPvSVSSMMGAKALFRQGSsPvVvTSDDEVIGGDINEKkRlyGRkSLQqDKGIPL  
SPpQVDKANKKSADNSessfYDPVQHRShLFAIEGLNRYPNYLSRWNEKdVETLERALE  
DTLARVRDQAKKNDQHHTIQQILGDFfREHPEWNEfSALPESWEDLRQkILHPKATKAI  
FQSKVFRkNRDGDGISLQDVLSGREPIALDTCYLQEWMDDEEMfDVYSfPLLSKAfCNKLC  
LYASTIMSFIESSPRSLDCPVStSYfLkMDNlGLGWLNDLIFHLVLKPIsAQLYNDTDL  
NGSDLDWRQGFIAAYSSIPSSlKPRQRLVAHTDDSEvSLERNQGIpW

>comp14248\_c0\_seq2; 406 302 1366 LEN=2032; translated



MSSGQKPVSVSSMMGAKALFRQGSSPVVVTSDDEVIGGGDINEKKRLYGRKSLQQDKGIPL  
SPPQVDKANKKSADNNESSFYDPVQHRSHLFHAIIEGLNRYPNYLSRWNEKDVETLERALE  
DTLARVRDQKAKKNDQHHTIQQILGDFFREHPEWNEFSALPESWEDLRQKILHPKATKAI  
FQSKVFRKNRDGDGIGSLQDVLSGREPIALDTCYLQEWMDDEEMFDVYSFPLLSKAFCKNCLC  
LYASTIMSFIESSPRSLDCPVSTSYFLKMDMDNLGLGWLNDLIFHLVLKPI SAQLYNDTDL  
NGSDLDWRQGFIAAYSSIPSSLKPRQLVAHTDDSEVTLNLCFGDQFTGGDLRFW  
>comp14249\_c0\_seq1; 543 1596 3425 LEN=3831; translated  
MKSTKSEQEVSVDATSEGYRVVVEKPTSTKHLHDNDNASCIVRRVVGTYVTKADAIQA  
AKRERSLHQVFDGWAEYYGKAPPYSTEQCEDSKRMAKKEEDYCIFIEDAVSINKSKKD  
IPKRKMQPSPTAPRSNKKFKTEATASKTNKRKTTMPLTYPIGTKLSKSFQVGFYNGEVVS  
YDPESEFYKIEYEDGDEEEMDHEDVKRCVENKMTYPIGTKISKKFQGVFYSQKVTSYNAA  
TTYKITYEDGDQEDMEDKQIKRYLVSSQPPKPKIRNFGAVKLSMKAMKDNIDKNRFAR  
NPCRIIGGEQNPADYANTGRGEPLKSYYYLIQRLSDRNYAMRGLCIDGDGVRYSSYRRA  
DLTFPAVVFLPETNLNNHANDPTIVDACHLDMIHPKTGGSLITGPNLLEAVTPETECIFL  
NGFQNGGPKSRDKQSVDPNFIVKSI EVCKDSLKCFSLTECIVSNEILNALASCKNLRGLT  
LYSTQSCDASPTTTVANDRGFHAI I KACTDLRWLLVDCNFFQGASWKALDSPTACPKLE  
VLWVSQPKDAKAFLNESDAQDIIPKALAGRASILKICMIYFDTDLKSRYPSTDAKTTD  
QSEGDTESS  
>comp14250\_c0\_seq1; 364 90 1484 LEN=2251; translated  
MGSCMSKIGGSLILDNTDGGEYYHKRFIEDRILGEGEFGVVTLVHDLTKKREKRELEM  
SRSGRHNDLNGTMHSEKSGKII IEDDNIGCDFDESSMACKTLRKGVMFKYNTVYAPLKPE  
VLRREVDILRKLDGKCFCLKVHAVYETPRVINLITELCAGGDMFQYVSRREEDLRTDEVS  
RIAYQLLSAVDHCAKNGVINRDIKPENIMFVSPAADSELRLIDFGSGTDRVVDGMHTTFA  
GTAFYISP EMFQNTYTQKTDVWSCGVCLYVLIAGYPSDKLQTAFNLMHKITPGERNLRLN  
PNMPENLPDSYHKMLKDLLEYKHKRKTAGQLLEKSDFVRFHKFASSVEKSNIIGSVGRH  
SLFLDYQKFERCLTTLATMLSKSELLIFVETVQEEVREKLLKKEEEEERMKAAADKEKAE  
DPADTDVELPKMEDKNKSLDVISVKRVIIEILRESNDQVYVTR  
>comp14250\_c0\_seq2; 527 108 1357 LEN=1357; translated  
MTAVTKSAMRKTDRYRGYRSKNNKNHTLGIINVLFLICFTIYQFILSKSNGGRDAVSST  
YRSFLKGGQFPKGSNGSEYDGEAIRGDNPGPALMNINEEYQESLHNNESEFDDQDRAP  
QIEQEHQFLRQNKAEFQEDLAEVPQITEVHDQMSQEKKIHPEDDRLEVPEFLNGRDSFS  
KENEVNSEDDPADVPEVNVGHDPFLEESEVKS VNDQADIPEIVSDHDPFSKENEVD FEEN  
IAGAGEFVREHSPISKENEVELKDVIEHNPFKENEVVVEDNSADVIEILEEHEPLSTQN  
KVEFEDNIAAGAEFVREHNPFKENEVVADNSAEVPEFLKEHDPFSKKNVVFEDNNAE  
MPKILEDHDPFSKENEVFEDESAEVPDILKEHNPFKENEVIFSGNNADVPNIFRX  
>comp14250\_c0\_seq3; 364 559 1953 LEN=2720; translated  
MGSCMSKIGGSLILDNTDGGEYYHKRFIEDRILGEGEFGVVTLVHDLTKKREKRELEM  
SRSGRHNDLNGTMHSEKSGKII IEDDNIGCDFDESSMACKTLRKGVMFKYNTVYAPLKPE  
VLRREVDILRKLDGKCFCLKVHAVYETPRVINLITELCAGGDMFQYVSRREEDLRTDEVS  
RIAYQLLSAVDHCAKNGVINRDIKPENIMFVSPAADSELRLIDFGSGTDRVVDGMHTTFA  
GTAFYISP EMFQNTYTQKTDVWSCGVCLYVLIAGYPSDKLQTAFNLMHKITPGERNLRLN  
PNMPENLPDSYHKMLKDLLEYKHKRKTAGQLLEKSDFVRFHKFASSVEKSNIIGSVGRH  
SLFLDYQKFERCLTTLATMLSKSELLIFVETVQEEVREKLLKKEEEEERMKAAADKEKAE  
DPADTDVELPKMEDKNKSLDVISVKRVIIEILRESNDQVYVTR  
>comp14250\_c0\_seq4; 483 559 2292 LEN=2570; translated  
MGSCMSKIGGSLILDNTDGGEYYHKRFIEDRILGEGEFGVVTLVHDLTKKREKRELEM  
SRSGRHNDLNGTMHSEKSGKII IEDDNIGCDFDESSMACKTLRKGVMFKYNTVYAPLKPE  
VLRREVDILRKLDGKCFCLKVHAVYETPRVINLITELCAGGDMFQYVSRREEDLRTDEVS  
RIAYQLLSAVDHCAKNGVINRDIKPENIMFVSPAADSELRLIDFGSGTDRVVDGMHTTFA  
GTAFYISP EMFQNTYTQKTDVWSCGVCLYVLIAGYPSDKLQTAFNLMHKITPGERNLRLN  
PNMPENLPDSYHKMLKDLLEYKHKRKTAGQLLEKSDFVRFHKFASSVEKSNIIGSVGRH  
SLFLDYQKFERCLTTLATMLSKSELLIFVETVQEEVREKLLKKEEEEERMKAAADKEKAE  
DPADTDVELPKMEDKNKSLDVISVKRVIIEILRESNDQVIAMIDKLPGSDSYDDFAYNIA  
VLKYFVGKSHGGGRERQRPMSRRSSRVFGKIKQSLDSSLHSISGRIRSSLDWSGHSS  
NSGRMRPASMDGSNHSYTARKASQQFP MNGNRPAPLI  
>comp14250\_c0\_seq5; 69 1 909 LEN=2023; translated  
EVVFEVFEENSAGAHDPFSKENEVDASQVVSAAVPSYVFPDPDHQMFHNYFKGKSGKVVR  
DMLMAHAYIFHKNATYGGCCGTASAKISAHEDLLSSLGLNGPLRFRCPRDFVHDTRTRRS  
VIPKDKYTAEDTRIWTPEYVDYLRSLVTYPEKRHQGYTIVVHMLRGNTSPCKEKTNGYNS  
YLPNLHYLKVIEKYMOPGARVIIYTSSKSFEDLNEFRNRGYEVNTGTSLKDTWKDYVTAD



FDQESFLIRYERMMKGQVEVEQTTTISYVQSLLDLLESIQPEEIQAGKNYEDAEQSNPLLR  
EISLEQLKRMYSKLENLGEYDTIKIDKQFLMVLEIFCEEKEAASTIDNIEKNEEKVSWAE  
IIQCYRSCVLGMQTLLEIIGPHTMIRKRAKERILAMLSLYRKSSFEGNDSLATASSMTPDV  
ASSKITWNDKSNISSKVNQRRYQKTKQGWLLNFIAFVTGVMIATLSFHDRSSSAHRDAIS  
ENTNKHTECPIAGKESFSSVEQQFEDQFLENMTYAPLPDQSKTNETRTRTFKKRNQPLSASR  
TADAITSAQKPHDLAIFPSPDFSELVTAFDPKFGILSTDKEGQSDKATKIPLNDIKVASMI  
GGFATGLYVLTSTGGVVAGLLSWLPMGMTVMIATLTAHGIRDGISGIWKKFRRNKKKRQD  
IFT

>comp14255\_c0\_seq1; 424 184 1185 LEN=1596; translated  
MHSSYIPVQNNTSHLPPSLEEYAAFHGMLCGPNTAHRCIDSFEEQGAIMFVDQRDCDTKTP  
SAEESSTDYNFILIPFNELPIPLNVWTYLMMVATFTGFCSLMGWTRLIKAVDYTNQGNS  
VGEKSNCDRISVSPSPRAHEAKKKIAPSSSFDTDFLWQFKSGDDKWFESSYSLSCSSAS  
TIQNKANRPLRPPEAMEYVINRSVALGPLRQTQIERTDATKRTFNNTDYDNGSPKSVR  
KHDNKGTKRIRTPSKSLQAISEDNSTRIKSKADATNPEITLMRHFYDFGGYISVMMLHF  
ACTNGMTHLVEVFHLHEGTIPGILVHRFYKFAR

>comp14256\_c0\_seq1; 211 224 1324 LEN=2241; translated  
MPPRDTSTEVAVVPEIDRSATAASNYSPPMSPLEANDHGETDDSGEYSIDIEIAPLVSAAE  
GKRRAGGGSSGSPAAMSTPEWFRFHLKKNKGVLSACFSYSFCSVSMVLVNKSLASSYNHL  
IKGDLNILLVVFQAIIVAVFAVEGCRKMNWVEYPSFNMDTAKQWAPVNIFFCAMLFSGMAS  
LQYNSVPMVITIFKNVSNITTAAGDYFFGNKPENLVVVAFGIMLSGAVAAWNDISVSGT  
GLLWMCNCLSSSGYVLYMKHATAKVKLSKFGMVFNVLCAVFLLPVAGLMGQTTVFAT  
TSAIHTPDYALKNFLFAGLVGFFLNFASLNCVSVSGPTTYVTIGSLNKVPVAIIGYWIFDS  
VISKETW

>comp14257\_c0\_seq1; 1009 607 3798 LEN=4550; translated  
MSEYRWIKLENNLQVLLVSTASDKANGGGNNSGAKVEAASVHVQAGHFDDTIAGLAHFHE  
HMLFLGTTKYPGEDEYEGFLSKHGGFCNAYTDMEDTNYFYSVTSQQVDTNETSEGLKGG  
DRLAQFFIHPTFDPDMVERELRAIDSEYRNGKTSDSWRNYQLLKSLSNQKHPFSNFGCGN  
YETLSSLGSPVQELKNFWKKYYTTSNMRLSVVGCSSLDALQKTVEETFGEALASDEPPR  
EKVNPLSIFPRENAVHDPENPAFGPEQIGKFRQVIPLLESRTLKVQFVTPIYDVPVLRK  
TRPHRVLSHLIGHESPGSLHLLNNGYITGLSSGAALDASDFSLFSVSLALTPKGMRAK  
DEVLNLIFQWLSLIKNVATEQPELLERYHDELQQISMTNFKFREQGDPTDFCSSASDLMF  
ETVRPEEILVAGSKSEKYDPAIAAAFDRLRPQNCMINIVDSDLKQENPDEWSVEPLYGA  
VYRESNFDEDQIKLWENPAEIHPELVHPALNEYIPTDFSLRCKDSGDSMTEAERKRTKSE  
PPTMFHQSENFRMWHKMDQFWRVPKTFIRLSLVTPRVYESPKSMTLSRIYQKVLNDDLNS  
FVYDASLAGCNYRINCTPTGYKIAVRGYSEKLPILLETLTSRMLSLIKELKEGKDMHPAL  
YDRFEKAKESLLRETKNYRLDNPYEVANYSRLLMEENVWYIDNYVDLLEGGQADKDLPT  
MEQCAVAEESLTSRLNAEAMCIGNIDEKGTREVVDVINRVFINRSRPLNFAESPGRFSM  
KLPTRAEAEYIFGSEVKKELVPVKYQELASSPSEENNAVEMTLQFGSDASLGYEIGIL  
LIGHLAYSSAYNQLRTKEQLGYIVSVYTRKTAGSTWGLTMVQSSSKPKHLEERIEQWL  
KTFREELEGGKSPFLFATEARGVVVQLMEEDRKLSSSEVGSWNEIAATEANHDRLKTPSFD  
RLEKLADENLPTSEGLSDTTLIGSKRKSPEELKERVLRMFDQFCASDSPDRRAISSRVFS  
HASKEEYEESLAEPGVLSYSDMQYLKEFLPTWVVPVYWRITK

>comp14258\_c0\_seq1; 200 153 545 LEN=1470; translated  
MSGNNSQRRRSKSSSTKKGAANKNDSERTVAKRGRGKRRGSDAKHETPSKRDSNKKINQR  
RLSGNSKKGKSGNRKSKQDAKANKREKKEPMTAEQLDASMDDYWSKSKDKTIIISKKLDDD  
MEEYWAKKEE

>comp14258\_c0\_seq2; 232 153 608 LEN=1533; translated  
MSGNNSQRRRSKSSSTKKGAANKNDSERTVAKRGRGKRRGSDAKHETPSKRDSNKKINQR  
RLSGNSKKGKSGNRKSKQDAKANKREKKEPMTAEQLDASMDDYWSKSKDKTIIISKKLDDD  
MEEYWAKKEENLPEETDADKAEPKEEGKQEE

>comp14258\_c0\_seq3; 165 153 546 LEN=546; translated  
MSGNNSQRRRSKSSSTKKGAANKNDSERTVAKRGRGKRRGSDAKHETPSKRDSNKKINQR  
RLSGNSKKGKSGNRKSKQDAKANKREKKEPMTAEQLDASMDDYWSKSKDKTIIISKKLDDD  
MEEYWAKKEENX

>comp14259\_c0\_seq1; 677 1499 2719 LEN=3309; minus strand; translated  
MSILSFVGSCLLATIAPTYYTGFLLSQQQHAMKNSKPMFQFETGKLSTTNLHQSSRPE  
DLYAAVHRKEYEMRGVKQQHKSSADPVRMAMSYAQETQSSMKLAKALRRVHDDPFRNNEE  
ELSEEEMARKQKLMNGLGEMTMRRACFCVDVCRKSLSRPGEKPFRCFDNAAMVCEAMVR  
LGADVVFVNVDYPAYGGDISSELKSAVNAVRKASDTAAVMKDIVVDEIQLGLAKEAGCDG  
ILLIASVLGPALDNFLDLATTIGLETIVECHTNNEVQRALDAMATNILVSNYDRVAQQMY

PEQAIKLAGLFPGSGGPIICLAGGGIETPEQMKRHLAVGYDGVIVGKAVMGSAKAPEFIR  
VVRDRSLLPAELSQWGLEDFDLNGQPMPGPKQDIPNPYDDVYQ  
>comp14259\_c0\_seq2; 677 1728 2948 LEN=4563; minus strand; translated  
MSILSFVGSCLLATIAPTYTTGFLLSQQQHAMKNSKPMFQFETGKLSTTNLHQSSRPE  
DLYAAVHRKEYEMRGVKKQHKSSADPVRMAMSYAQETQSSMKLAKALRRVHDDPFRNNEE  
ELSEEEMARKQKLMNGLGEMTMRRACFCVDVKKRSLSRPGEKPFRCFDNAAMVCEAMVR  
LGADVVFVNVDYPAYGGDISELKSAVNAVRKASDTAAVVMKDIVVDEIQLGLAKEAGCDG  
ILLIASVLGPALDNFLDLATTIGLETIVECHTNNEVQRALDAMATNILVSNYDRVAQQMY  
PEQAIKLAGLFPGSGGPIICLAGGGIETPEQMKRHLAVGYDGVIVGKAVMGSAKAPEFIR  
VVRDRSLLPAELSQWGLEDFDLNGQPMPGPKQDIPNPYDDVYQ  
>comp14260\_c0\_seq1; 832 160 2202 LEN=2523; translated  
MNSHNPGSAGMVTSPSLDQAIENKTEGRPEANESSTNDGDDAGAVAKKDGSSSSGSS  
DSTGGLKVLFLSSDTGGGHRASAESLAAQFELLFEGSSYDLLDLATEAYLPPYNSIVPYY  
KHLSAHPNQWKILYRVSNSKAMERVVETNIKVMSVVCERTIRKKIKSYKPDVVVSVHPLQ  
TSVPVLSCAKISHETGKHLPMFTVVTDLGSASTWFSGGVEKLFVGSQPQIHELARQKGI  
EDKLVLVGLPIRHDFAIQSEKLGDRMSESGKAYQRQIREKLELPAMDRKTLVMMGGGEGV  
GSLSNIVDALYTELVKQGVNAVIMVVCGRNETLKKGLENRDWGEVVFQKRRTTSKIEKKKLG  
LFSASTLFPDLTGGCGDAAEVTLNAGCIEAGGSFNTRKILSSGSMRKNDDSAVFIPSPT  
NRMQAIENGTNEEKTDDVRSENNKINALETIPSDRTVSESKGTYVSESEVDDSALEENG  
NLSIKQTESLEANGTGMVSVVPLGFVTNMAEYMVAADVLIISKAGPGTISEAAALSLPVML  
TSFLPGQEEGNVDYVVDGGFGSFCQDQDTGAVAEVALWLNDELKLEKEMSDAAKKGAPF  
AARDIVQQIGDSTLKWKLNDGQFTEIISGEDLSDDKEKEKEEIAKIMAEEEKINADIIAS  
AELTPAEAEETIESEALNETI  
>comp14260\_c0\_seq2; 618 1 1915 LEN=2236; translated  
XNLRMQRVLTETFLCSVFIIDSXLTFPHFFLFRPLGGHRASAESLAAQFELLFEGSSYDLL  
DLATEAYLPPYNSIVPYYKHLSAHPNQWKILYRVSNSKAMERVVETNIKVMSVVCERTIR  
KKIKSYKPDVVVSVHPLQTSVPVLSCAKISHETGKHLPMFTVVTDLGSASTWFSGGVEK  
LFVGSQPQIHELARQKGIPEDKLVLVGLPIRHDFAIQSEKLGDRMSESGKAYQRQIREKLE  
LPAMDRKTLVMMGGGEGVGSLSNIVDALYTELVKQGVNAVIMVVCGRNETLKKGLENRDW  
GEVVFQKRRTTSKIEKKKLGFSASTLFPDLTGGCGDAAEVTLNAGCIEAGGSFNTRKILS  
SGSMRKNDDSAVFIPSPTNRMQAIENGTNEEKTDDVRSENNKINALETIPSDRTVSESKG  
KTYVSESEVDDSALEENGLNSIKQTESLEANGTGMVSVVPLGFVTNMAEYMVAADVLIISK  
AGPGTISEAAALSLPVMLTSFLPGQEEGNVDYVVDGGFGSFCQDQDTGAVAEVALWLN  
DELKLEKEMSDAAKKGAPFAARDIVQQIGDSTLKWKLNDGQFTEIISGEDLSDDKEKEKEE  
IAKIMAEEEKINADIIASAELTPAEAEETIESEALNETI  
>comp14261\_c0\_seq1; 321 245 1798 LEN=2359; translated  
MSNVVTGAGSPNPVYTGTCNDQKENNASMQQTALHISNAADQTSLSLSNRGLETIDLERC  
IVGSTLQSYQQLSTLQTSLLPMFPPSMRSIVRLDLSRNNLNSLPKEIFGGSLEFLNVGRN  
KLKELPPEIGNCKCLKEIIALSNNLRWGSFVPVDSISSLPFLEVLDLRWNKKMNSQSTRKR  
LLELFQRADHKDQKLVNVLSSKNDDSSGLDTTTTLPKPKLSACDRDANELRSQLEPLSTP  
QLRKRFRFTFVKFDDHDESSYDREVLQMORLLSCYRSISGCEKNVHPLWMSVRHESGVA  
LDPALVKELVQEMEAIWPRTRERPKISAEGYVILQRPLPSASTTNRRTTAGAEIDPLSQ  
KASNKAKREAELKRFMGIWTKALEAIETVDKIFAQQFTALAVTMNFRGSPHIDTLNIAP  
FYGLALGDFTTGGGKLCVECSATEVAEIDTRGRLAKVDGRFCHWVSDYEGTRYSLIYYVTH  
GDVVPQTTAIFRPPRAGDGGEDGDDAIPWVPPPSHVA  
>comp14261\_c0\_seq2; 321 245 1798 LEN=2348; translated  
MSNVVTGAGSPNPVYTGTCNDQKENNASMQQTALHISNAADQTSLSLSNRGLETIDLERC  
IVGSTLQSYQQLSTLQTSLLPMFPPSMRSIVRLDLSRNNLNSLPKEIFGGSLEFLNVGRN  
KLKELPPEIGNCKCLKEIIALSNNLRWGSFVPVDSISSLPFLEVLDLRWNKKMNSQSTRKR  
LLELFQRADHKDQKLVNVLSSKNDDSSGLDTTTTLPKPKLSACDRDANELRSQLEPLSTP  
QLRKRFRFTFVKFDDHDESSYDREVLQMORLLSCYRSISGCEKNVHPLWMSVRHESGVA  
LDPALVKELVQEMEAIWPRTRERPKISAEGYVILQRPLPSASTTNRRTTAGAEIDPLSQ  
KASNKAKREAELKRFMGIWTKALEAIETVDKIFAQQFTALAVTMNFRGSPHIDTLNIAP  
FYGLALGDFTTGGGKLCVECSATEVAEIDTRGRLAKVDGRFCHWVSDYEGTRYSLIYYVTH  
GDVVPQTTAIFRPPRAGDGGEDGDDAIPWVPPPSHVA  
>comp14262\_c0\_seq1; 873 1 3301 LEN=3335; translated  
ESLASLEKAFGLACNNERVGRTRREGIKKYQNTYKEWGERKWLGKATIVVTGSRVTMTNY  
FLSLLPRTPGTDRSIDRLRAVYTDLLWHIDLDNSSLGDRRGIDDKDVECHKKSTRFSFRN  
NLTPSKDKTRKSSRNPIPDNRNGSSEKNQEETRDAPNSQHLLGNPTSNSFSVKNESFNS  
NNNSHVDLATAFRILAATKSPDKEGDNYGAVAIREDSSVCGIQRALERRVCELIQQIG

EIVVAAGGKDGESRNFVGHGPGGRRSNREGTLSVRTDPVFEYFCEKCILSLFVDIAREVR  
QGKTNSDSFGSSEPAKALSSVSVHGVVWSGVVKAQVYETVSLLVSDVRNQSIVYYLLSNN  
YINELIKCIMPLQWTEPAISKMLPAYVDLLKNLTLQLADDPHLPFLTIENTSGVDDDD  
DEGDSQSIEFPLFSAALLETATSVYAQNSQIYATCLAIIVNLMHVPHLP IQTWICQSSV  
SQRILADHLCQRLLDYRHRMTNLTTRGPVVDGPRHNAIVNQLVNLKDEMGMVHEIFWSGVR  
GMDVRLCESLLQRLVSVLLKSLSQSPPARPFLT VGLIDL DVIPEQEASAQVATLFFSYMF  
SNLVYIPFQRMLAVALFHPNSTPIWSTAASIPTSKTIDFEPDAYVFMALSDIVNEE  
KSRKTCPNPFRHEMLKTLEGDYGEWRTAAVACLQLQSVLDTDETDTDTMIMSGVITGDNST  
SLEHSIAKFFVRSHKPSAITVRALECMGRLGLLILHRNAMNLI RDGKNTKEQIKNSLSN  
SPIWIALTNTRDDFCQALAFRDVTGVSDIFLDL TEAVIKNRYTGRYDENG TATFTCHLS  
RRGSFQNMMDADFLVRRSRCV SANDVETTRFYINMGIHFRLCNVMDRLCLDIEVDDSS  
SVSKEANEDLHLDFTDTADPLTRTIGGLSDKLVGSDLDLTGRMFFKFQSAVNPDLTQSF  
ADIILNDGSPEDSINATHPTAQLMLVLDPTEILIVKPLVKKMEENRGTVLCGISLRNIIA  
AAVDGTWLHIAIRNPENIKSPTLIKNGNMAMQFDSSGTCLIVKQYFDRSREVL RQDLLSK  
VPDLLHSGPNKTSEDECRC

>comp14263\_c0\_seq1; 386 87 1377 LEN=1415; translated  
MFRFLLQGSPDCANENQVSFDLRKLAVLARHADRAASERDGEAHALPRALNLTAVAFHES  
RCGSTLVANSMIAMDPDKHRAYSSESSPPVAALHICGDYFHRCTREQAASVLRDTIYLMSR  
TDDPLEERVFFKFQ SITSKA IPTFQMAFPEVPWMYVYRDPVQVMMSHVKDDPSLKRAICT  
KTRGKPPRELVAIARRHGRRGADDLEPSEYCAAHLAQLTEAAVENLNDMAIPVPYDRLPD  
MMWETIMPKIFGRPLEQFEIDNLKEISKSYSKQKGKNDKQGEFKGDSEQKEKKASDAI  
RNAAKEFLKESFDQLGAXPVQGLGVGQAIDRSMGAAHHESTTARETAFGRHG NRVCGRV  
FALHGGACMPFRFAAAGAAVGFWMLCFAAPGLEPHGAASSGTDVPPISVNAXASMDETE  
TRFLTGLEIA

>comp14263\_c0\_seq2; 320 1 1918 LEN=1956; translated  
XNNNGERRHKKHKKGEKITASDYHRAEIGRRNAEGATDRRHQGRHGFGGIDDDLHARMAKR  
FRPRGEREPGNLDDGSESGS GDAARAITPGSDDHGLAGFRAWKADRPGESESESESQSGDD  
RPYPPALLARIRRELIEESGEGATRGGDVLDAVLAGSTHLV SIGANSRLGTSRDGSYQG  
VTGRFCRLDFGLHKKDPSKYPMFRFLLQGSPDCANENQVSFDLRKLAVLARHADRAASER  
DGEAHALPRALNLTAVAFHESRCGSTLVANSMIAMDPDKHRAYSSESSPPVAALHICGDYF  
HRCTREQAASVLRDTIYLMSRTDDPLEERVFFKFQ SITSKA IPTFQMAFPEVPWMYVYR  
PVQVMMSHVKDDPSLKRAICTKTRGKPPRELVAIARRHGRRGADDLEPSEYCAAHLAQLT  
EAAVENLNDMAIPVPYDRLPMMWETIMPKIFGRPLEQFEIDNLKEISKSYSKQKGKNDK  
DKQGEFKGDSEQKEKKASDAIRNAAKEFLKESFDQLGAFRSVLERASHRSTDGSI GHRH  
RSGAAHHESTTARETAFGRHG NRVCGRV FALHGGACMPFRFAAAGAAVGFWMLCFAAPG  
LEPHGAASSGTDVPPISVNAXASMDETEETRFLTGLEIA

>comp14263\_c0\_seq3; 346 1 1892 LEN=1930; translated  
XNNNGERRHKKHKKGEKITASDYHRAEIGRRNAEGATDRRHQGRHGFGGIDDDLHARMAKR  
FRPRGEREPGNLDDGSESGS GDAARAITPGSDDHGLAGFRAWKADRPGESESESESQSGDD  
RPYPPALLARIRRELIEESGEGATRGGDVLDAVLAGSTHLV SIGANSRLGTSRDGSYQG  
VTGRFCRLDFGLHKKDPSKYPMFRFLLQGSPDCANENQVSFDLRKLAVLARHADRAASER  
DGEAHALPRALNLTAVAFHESRCGSTLVANSMIAMDPDKHRAYSSESSPPVAALHICGDYF  
HRCTREQAASVLRDTIYLMSRTDDPLEERVFFKFQ SITSKA IPTFQMAFPEVPWMYVYR  
PVQVMMSHVKDDPSLKRAICTKTRGKPPRELVAIARRHGRRGADDLEPSEYCAAHLAQLT  
EAAVENLNDMAIPVPYDRLPMMWETIMPKIFGRPLEQFEIDNLKEISKSYSKQKGKNDK  
DKQGEFKGDSEQKEKKASDAIRNAAKEFLKESFDQLGAXPVQGLGVGQAIDRSMGAAHHE  
STTARETAFGRHG NRVCGRV FALHGGACMPFRFAAAGAAVGFWMLCFAAPGLEPHGAAS  
SGTDVPPISVNAXASMDETEETRFLTGLEIA

>comp14263\_c0\_seq4; 225 1 825 LEN=863; translated  
XSALVCVRSSRAIPCRAAQKRAICTKTRGKPPRELVAIARRHGRRGADDLEPSEYCAAHL  
AQLTEAAVENLNDMAIPVPYDRLPMMWETIMPKIFGRPLEQFEIDNLKEISKSYSKQKG  
GKNKDKQGEFKGDSEQKEKKASDAIRNAAKEFLKESFDQLGAXPVQGLGVGQAIDRSMGA  
AHHESTTARETAFGRHG NRVCGRV FALHGGACMPFRFAAAGAAVGFWMLCFAAPGLEPH  
GAASSGTDVPPISVNAXASMDETEETRFLTGLEIA

>comp14263\_c0\_seq5; 199 1 851 LEN=889; translated  
XSALVCVRSSRAIPCRAAQKRAICTKTRGKPPRELVAIARRHGRRGADDLEPSEYCAAHL  
AQLTEAAVENLNDMAIPVPYDRLPMMWETIMPKIFGRPLEQFEIDNLKEISKSYSKQKG  
GKNKDKQGEFKGDSEQKEKKASDAIRNAAKEFLKESFDQLGAFRSVLERASHRSTDGSI  
GHRHRS GAAHHESTTARETAFGRHG NRVCGRV FALHGGACMPFRFAAAGAAVGFWMLC  
FAAPGLEPHGAASSGTDVPPISVNAXASMDETEETRFLTGLEIA

>comp14263\_c0\_seq6; 360 87 1403 LEN=1441; translated  
MFRFLLQGSPDCANENQVSFDLRKLAVALRHADRAASERDGEAHALPRALNLTAVAFHES  
RCGSTLVANSMIAMDPDKHRAYSSESSPPVAALHICGDYFHRCTREQAASVLRDTIYLSMR  
TDDPLEERVFFKFQSSITSKAIPTFQMAFPEVPWVYRDPVQVMMSHVKDDPSLKRAICT  
KTRGKPPRELVAIARRHGRRGADDLEPSEYCAAHLAQLTEAAVENLNDMAIPVPYDRLPD  
MMWETIMPKIFGRPLEQFEIDNLKEISKSYKQKQKGNKDKQGEFKGDSEQKEKKASDAI  
RNAAKEFLKESFDQLGAFRSRVLERASHRSTDGSIGHRHRSGAHHSTTARETAFGRHG  
NRVCGPRVFALHGGACMPFRFAAAGAAVGFWMLCFAAPGLEPHGAASSGTDVPPISVNAX  
ASMDETEETRFLTGLEIA

>comp14264\_c0\_seq1; 515 81 1433 LEN=1830; translated  
MRAARRLWAESVKEKFNPKNPKSLLLRTHCQTSYTLTETQPMNNIVRTTIGAMAAIQGG  
TQSLHTNSYDEAIGLPTEQSARTARNTQLILQEETGITDVADPWGGSFMMESLTDELYNK  
AKCIMDDVESKGGMTAFVNDGHAKLLMEESAACKQGRIDSGVDVVVGVNKYRLSDEEEQE  
EKVDVLDVNDNSAVRNKQIARINEVKASRNDSEVKDALANLEKSARRSDSTSSADDPNLL  
HLCIACAKARCTVGEMSALENAGRHVPSTSMIQGVYAASFNSRPGGGDSEAHGKCSAE  
YQSMDDLVEEFEEAAEGRRPRILVAKMGQDGHDRGAKVIATGFADLGFVDVIGPLFQTPRE  
VALQAIDSDVHIIGVSSQAAGHKTLPLALQOELKELGADHMVVVAGGIIPSQDYDYLLKE  
TKSCAAIFGPGTRIVDAAREVLNVIPLSHQ

>comp14264\_c0\_seq2; 407 355 1690 LEN=2087; translated  
MAAIQGGTQSLHTNSYDEAIGLPTEQSARTARNTQLILQEETGITDVADPWGGSFMMESL  
TDELYNKAKCIMDDVESKGGMTAFVNDGHAKLLMEESAACKQGRIDSGVDVVVGVNKYRL  
SDEEEQEEKVDVLDVNDNSAVRNKQIARINEVKASRNDSEVKDALANLEKSARRSDSTSSA  
DDPNLLHLCIACAKARYVFIXKLYFSCLMI IAPSTRLYTLIYLSLCLAFSLYVVCGLT  
FETEGAPLXEMSALENAGRHVPSTSMIQGVYAASFNSRPGGGDSEAHGKCSAEYQSM  
DLVEEFEEAAEGRRPRILVAKMGQDGHDRGAKVIATGFADLGFVDVIGPLFQTPREVALQA  
IDSDVHIIGVSSQAAGHKTLPLALQOELKELGADHMVVVAGGIIPSQDYDYLLKTKSCA  
AIFGPGTRIVDAAREVLNVIPLSHQ

>comp14264\_c0\_seq3; 445 81 1575 LEN=1972; translated  
MRAARRLWAESVKEKFNPKNPKSLLLRTHCQTSYTLTETQPMNNIVRTTIGAMAAIQGG  
TQSLHTNSYDEAIGLPTEQSARTARNTQLILQEETGITDVADPWGGSFMMESLTDELYNK  
AKCIMDDVESKGGMTAFVNDGHAKLLMEESAACKQGRIDSGVDVVVGVNKYRLSDEEEQE  
EKVDVLDVNDNSAVRNKQIARINEVKASRNDSEVKDALANLEKSARRSDSTSSADDPNLL  
HLCIACAKARYVFIXKLYFSCLMI IAPSTRLYTLIYLSLCLAFSLYVVCGLTFETEGAP  
LXEMSALENAGRHVPSTSMIQGVYAASFNSRPGGGDSEAHGKCSAEYQSMDDLVEEFE  
AAEGRRPRILVAKMGQDGHDRGAKVIATGFADLGFVDVIGPLFQTPREVALQAIDSDVHI  
IGVSSQAAGHKTLPLALQOELKELGADHMVVVAGGIIPSQDYDYLLKTKSCAAIFGPGT  
RIVDAAREVLNVIPLSHQ

>comp14264\_c0\_seq4; 670 170 2681 LEN=3078; translated  
MIHCFKLPFSSLRRTFPNRRSVNRYSGSGTQFSPLSTFTIPKSVQQWEKLANDELAKSKS  
KKVTVDLSLRTERTITPEGIEIQPVYWNVSHNDNDGDGNGPEMPGIFPYTRGPYATMHTHRP  
WTIRQYAGFSTAEESNAFYKKNLAAGQQGLSVAFDLP THRGYDSNHERVVGDVGMAGVPI  
DTLDDMEILFDGIDLTKVSVSMTMNGAVLPILAFYIQAAIEQHMDDDDDMTQSEVMANLR  
GTIQNDILKEFMVRNTYIYPPEPSMRIIGDIMGYTAKHMPNYNSISISGYHLQEAGADAA  
LELGFTIADGLEYLRTAVDVAKLDVDKVTXKALIFLGYWSKFLHRDRENEGSKEDNFAEF  
CLVSAESTNVNVIHSLLFVVESYHDL CVRRRLWAESVKEKFNPKNPKSLLLRTHCQTS  
YTLTETQPMNNIVRTTIGAMAAIQGGTQSLHTNSYDEAIGLPTEQSARTARNTQLILQEE  
TGITDVADPWGGSFMMESLTDELYNKAKCIMDDVESKGGMTAFVNDGHAKLLMEESAACK  
QGRIDSGVDVVVGVNKYRLSDEEEQEEKVDVLDVNDNSAVRNKQIARINEVKASRNDSEVK  
DALANLEKSARRSDSTSSADDPNLLHLCIACAKARCTVGEMSALENAGRHVPSTSMI  
QGVYAASFNSRPGGGDSEAHGKCSAEYQSMDDLVEEFEEAAEGRRPRILVAKMGQDGHDRG  
AKVIATGFADLGFVDVIGPLFQTPREVALQAIDSDVHIIGVSSQAAGHKTLPLALQOELK  
ELGADHMVVVAGGIIPSQDYDYLLKTKSCAAIFGPGTRIVDAAREVLNVIPLSHQ

>comp14264\_c0\_seq5; 600 170 2823 LEN=3220; translated  
MIHCFKLPFSSLRRTFPNRRSVNRYSGSGTQFSPLSTFTIPKSVQQWEKLANDELAKSKS  
KKVTVDLSLRTERTITPEGIEIQPVYWNVSHNDNDGDGNGPEMPGIFPYTRGPYATMHTHRP  
WTIRQYAGFSTAEESNAFYKKNLAAGQQGLSVAFDLP THRGYDSNHERVVGDVGMAGVPI  
DTLDDMEILFDGIDLTKVSVSMTMNGAVLPILAFYIQAAIEQHMDDDDDMTQSEVMANLR  
GTIQNDILKEFMVRNTYIYPPEPSMRIIGDIMGYTAKHMPNYNSISISGYHLQEAGADAA  
LELGFTIADGLEYLRTAVDVAKLDVDKVTXKALIFLGYWSKFLHRDRENEGSKEDNFAEF  
CLVSAESTNVNVIHSLLFVVESYHDL CVRRRLWAESVKEKFNPKNPKSLLLRTHCQTS

YTLTETQPMNNIVRTTIGAMAAIQGGTQSLHTNSYDEAIGLPTEQSARTARNTQLILQEE  
TGITDVADPWGGSFMME SLTDELYNKAKCIMDDVESKGGMTAFVNDGHAKLLMEESA  
KQGRIDSGVDVVVGVNKYRLSDEEEQEEKVDVLNVDNSAVRNKQIARINEVKASRNDSEVK  
DALANLEKSARRSDSTSSADDPNNLLHLCIACAKARYVFIXKLYFSCLMIIAPSTRLYTL  
IYLSLCLAFSLYVVCGLTFETEGAPLXEMSQALENAWGRHVPSTSMIQGVYAASFNSRP  
GGGDSEAHGKCSAEYQSMLDLVEEFEEAAEGRRPRILVAKMGQDGHDRGAKVIATGFADLG  
FDVDIGPLFQTPREVALQAIDSDVHIIGVSSQAAGHKTL L PALQQELKELGADHMVVVAG  
GIIPSQDYDYLLKETKSCAAIFGPGTRIVDAAREVLNVIPLSHQ

>comp14264\_c0\_seq6; 681 170 2708 LEN=3105; translated  
MIHCFKLPFSSLRRTFPNRRSVNRYSGSGTQFSPLSTFTIPKSVQQWEKLANDELAKSKS  
KKVTVDLSLRTERITPEGIEIQPVYWNVSHNDNDGDGNGPEMPGIFPYTRGPYATMHTHRP  
WTIRQYAGFSTAEESNAFYKKNLAAGQQGLSVAFDLP THRGYDSNHERVVGDVGMAGVPI  
DTLDDMEILFDGIDLTKVSVSMTMNGAVLPILAFYIQAAIEQHMDDDDDMTQSEVMANLR  
GTIQNDILKEFMVRNTYIYPPEPSMRIIGDIMGYTAKHMPNYNSISISGYHLQEAGADAA  
LELGF TIADGLEYLRTAVDVAKLDVVKVAPRLSFFWIGLNFYTEIAKMRAARRLWAESV  
KEKFNPKNPKSLLLRTHCQTSGYTLTETQPMNNIVRTTIGAMAAIQGGTQSLHTNSYDEA  
IGLPTEQSARTARNTQLILQEE TGITDVADPWGGSFMME SLTDELYNKAKCIMDDVESK  
GMTAFVNDGHAKLLMEESA KQGRIDSGVDVVVGVNKYRLSDEEEQEEKVDVLNVDNSA  
VRNKQIARINEVKASRNDSEVKDALANLEKSARRSDSTSSADDPNNLLHLCIACAKARYV  
FIXKLYFSCLMIIAPSTRLYTLIYLSLCLAFSLYVVCGLTFETEGAPLXEMSQALENAW  
GRHVPSTSMIQGVYAASFNSRPGGDSEAHGKCSAEYQSMLDLVEEFEEAAEGRRPRILVA  
KMGQDGHDRGAKVIATGFADLGF D VD I G P L F Q T P R E V A L Q A I D S D V H I I G V S S Q A A G H K T  
L L P A L Q Q E L K E L G A D H M V V V A G G I I P S Q D Y D Y L L K E T K S C A A I F G P G T R I V D A A R E V L N V  
I P L S H Q

>comp14264\_c0\_seq7; 751 170 2566 LEN=2963; translated  
MIHCFKLPFSSLRRTFPNRRSVNRYSGSGTQFSPLSTFTIPKSVQQWEKLANDELAKSKS  
KKVTVDLSLRTERITPEGIEIQPVYWNVSHNDNDGDGNGPEMPGIFPYTRGPYATMHTHRP  
WTIRQYAGFSTAEESNAFYKKNLAAGQQGLSVAFDLP THRGYDSNHERVVGDVGMAGVPI  
DTLDDMEILFDGIDLTKVSVSMTMNGAVLPILAFYIQAAIEQHMDDDDDMTQSEVMANLR  
GTIQNDILKEFMVRNTYIYPPEPSMRIIGDIMGYTAKHMPNYNSISISGYHLQEAGADAA  
LELGF TIADGLEYLRTAVDVAKLDVVKVAPRLSFFWIGLNFYTEIAKMRAARRLWAESV  
KEKFNPKNPKSLLLRTHCQTSGYTLTETQPMNNIVRTTIGAMAAIQGGTQSLHTNSYDEA  
IGLPTEQSARTARNTQLILQEE TGITDVADPWGGSFMME SLTDELYNKAKCIMDDVESK  
GMTAFVNDGHAKLLMEESA KQGRIDSGVDVVVGVNKYRLSDEEEQEEKVDVLNVDNSA  
VRNKQIARINEVKASRNDSEVKDALANLEKSARRSDSTSSADDPNNLLHLCIACAKARCT  
VGEMSQALENAWGRHVPSTSMIQGVYAASFNSRPGGDSEAHGKCSAEYQSMLDLVEEFE  
AAEGRRPRILVAKMGQDGHDRGAKVIATGFADLGF D VD I G P L F Q T P R E V A L Q A I D S D V H I I G V S S Q A A G H K T  
L L P A L Q Q E L K E L G A D H M V V V A G G I I P S Q D Y D Y L L K E T K S C A A I F G P G T R I V D A A R E V L N V  
I P L S H Q

>comp14264\_c0\_seq8; 477 355 1548 LEN=1945; translated  
MAAIQGGTQSLHTNSYDEAIGLPTEQSARTARNTQLILQEE TGITDVADPWGGSFMME SL  
TDELYNKAKCIMDDVESKGGMTAFVNDGHAKLLMEESA KQGRIDSGVDVVVGVNKYRL  
SDEEEQEEKVDVLNVDNSAVRNKQIARINEVKASRNDSEVKDALANLEKSARRSDSTSSA  
DDPNNLLHLCIACAKARCTVGEMSQALENAWGRHVPSTSMIQGVYAASFNSRPGGDSEA  
HGKCSAEYQSMLDLVEEFEEAAEGRRPRILVAKMGQDGHDRGAKVIATGFADLGF D VD I G P L F Q T P R E V A L Q A I D S D V H I I G V S S Q A A G H K T  
L L P A L Q Q E L K E L G A D H M V V V A G G I I P S Q D Y D Y L L K E T K S C A A I F G P G T R I V D A A R E V L N V  
I P L S H Q

>comp14265\_c0\_seq1; 244 1 1078 LEN=1658; minus strand; translated  
XTSSFVDPVFLARFGLSRVNLIDYFLHPLNPFRTPNNTSNEVLTMQGISIELLMQPSFGH  
IPLSPMAEEAYAKNLSKLTGDQYELLPPDPNDLEQYTLPSPLYTIRHVIRTNVNSVKV  
LGIYYVVEGVIYKPAIRSLMKSNSVRTLDGLAGMASIVFERATQLTVARVARYCSIMAR  
HLVVFVFEWYSVRLDITLGAVTDXITGFISFFGCFDVTTGACALSVCARYLPSTGYTWLF  
NENEDVNKSKNDVDAVDPVVSMLKLNKRMKRKILDNRKAGERNEAEEEEGLRASAAIDQI  
LVRLSKNSHFTAATSIDDRSTNI PQYQGGTIAVAEPTSSNDRTTTTGVLASSLNK

>comp14265\_c0\_seq2; 500 587 2026 LEN=3436; translated  
MSQGIQQPLFASASAQGGDDFDLNEIFA EYFISEFENPHNAYTNAMGNYVAGPGTVAPS  
PAITAPAPASTTYAPAPVQMQQPGLSTGIRTPYHSAAVAPAPAPTVSAAQPQTLGLPVA  
KRAKLLPGITTKSTMTATVAATGGVTSRLGFNTGHLQGGTQVQMGSGALLPGGVPGSMM  
AQQQQQGSYAQHQQGTGVALPVGRGIRLGGAGVAPATARKGPGVGGIVWGGPQMMGMN  
DQAVAERRQRNREHAKRSRVRKFKFMLES LQEQVASLQRENQRLRMLVQDNIPHAQVIIS

ECCTSSPLFGDGNAQSGEEETQDRGTALVRSDFQLIDSLSAGQQNFVLSDPRLPDNPI  
VFATPGFYRLTGYTPEQVLRNCRFLQSGTDPKAVDIVRKAIQSGSDCTVCILNYKADG  
TPFWNQFFVAALRSDNCIVNYVGVQTEIEPDAGANALEDRVNAV MPLANKDEEDDEGK  
>comp14266\_c0\_seq1; 761 90 1217 LEN=2200; translated  
MAMPKDIEAILSSLGETESQRLKEYIESLHAEIEKLGGSAGTAMDADDDDDNEADGGTAGG  
VEDDGFVTPQYVSGEDYDKQADFKAKAADAKNNGNYEEALQSYNEAVLAAPPSALLYANR  
AIALEKLGHYKAAELDCKLALQNPDSAKALKTRGKLRFMHLDDWEGALRDL SQAQSIDF  
DPDVADMLKELTKKRIEKEKEEAHERIQKEEAMRKAEDIKKAREEAKREAEAAAASSAG  
MGGMPGGMPGMGGMPGMGGMPGMGNPDMMQGMMNDPEIKEAMQNPKVVAAFSEIMNG  
PGGPMGLLSNPAKLQELMADPDVGPALNLMKKMMGGGGMPGMGGMPGMGGMPGMGGMGGAPS  
DDDGIPNMDEMPDLLD  
>comp14266\_c0\_seq2; 695 90 1396 LEN=2379; translated  
MAMPKDIEAILSSLGETESQRLKEYIESLHAEIEKLGGSAGTAMDADDDDDNEADGGTAGG  
VEDDGFVTPQYVSGEDYDKQADFKAKAADAKNNGNYEEALQSYNEAVLAAPPSALLYANR  
AIALEKLGHYKAAELDCKLALQNPDSAKALKTRGKLRFMHLDDWEGALRYFPEWDRDAI  
FLLGAYLAEQYDAVLR SIGTYGSFLSRSMFTNVCFNVRIVILPRKLFRLDLSQAQSIDFD  
PDVADMLKELTKKRIEKEKEEAHERIQKEEAMRKAEDIKKAREEAKREAEAAAASSAGM  
GGMPGGMPGMGGMPGMGGMPGMGNPDMMQGMMNDPEIKEAMQNPKVVAAFSEIMNGP  
GGPMGLLSNPAKLQELMADPDVGPALNLMKKMMGGGGMPGMGGMPGMGGMPGMGGMGGAPSD  
DDGIPNMDEMPDLLD  
>comp14267\_c0\_seq1; 621 362 2810 LEN=3282; translated  
MTVSKVSV AHRGRQVTSAAAVLLILSSTIVESLVSPFSPSQYQRIQFLSPIDSSKPMAGR  
SVGFSSKSVTTAQLLLSSRTSSAARTSLFVSSVGDPRVSSSDVDEDLGGKEMGKTEKDSL  
TSSVSKFRQLKDV MWIRETLEDWTAAEFALSVERQSEGATSIDGKSDGNLSSQAAPSNN  
SRKTKKRAVDY EKLLSQVTKRIEDMTCQAFVDDMDFMDEKGV LKIDEGVGMGRYAYSNEE  
XDDAHGVRTLKYSTLLRSFVFLGFWRVFCNSIGDRKDLTSSFVIYRRLKTRDNL SRVL  
DSVDLENGDSNSEESASSFLKQVKVPELSSLVSKSEDAGAGGEVNATTTAIGPLLYVRDD  
GTVDWEGALQDRAALRKFFGAVWARINGQTPDNLGEDDDNEVESKDEGGAIGGGSGH SKP  
AVTAKIEDTPAIQEARRKLVLLQEQLNEKEKAHTALVESGLKAGQAVANVKLASLNPTLR  
NKIRQSAEALLILEQKVSQNLVYELERIYTYLVTELENPTTKGYIPLQDRLNVAEYGLL  
ESQVESCSKDLNSKGVLDADILAVIAEQMTDFKRR LGIDYYVTGLTYDREAI VRWLN DLV  
ISSKTGIMFYVKGTRFLFWSVDVLYSVSLIGRAAQGVTLKPREVRTIRYVALVSKIFGT SCL  
ARIDSTIPLVLLSDTTALYVISNKIRFLFHENEMCRRTFKDVITFIPVVIIL I IPLSPV  
GHVLVFGAIQRFFPGFFPSCFTEQRQNL LQLYETTEFSEVVIKETLQERLNRFL EALAFS  
IVNRTRNTYKRVTNTYSEETDNDNNTNGTNGDVEKK  
>comp14267\_c0\_seq2; 728 362 2689 LEN=3161; translated  
MTVSKVSV AHRGRQVTSAAAVLLILSSTIVESLVSPFSPSQYQRIQFLSPIDSSKPMAGR  
SVGFSSKSVTTAQLLLSSRTSSAARTSLFVSSVGDPRVSSSDVDEDLGGKEMGKTEKDSL  
TSSVSKFRQLKDV MWIRETLEDWTAAEFALSVERQSEGATSIDGKSDGNLSSQAAPSNN  
SRKTKKRAVDY EKLLSQVTKRIEDMTCQAFVDDMDFMDEKGV LKIDEGVGMGRYAYSNEE  
RMMLMERLLKTRDNL SRVLDSVDLENGDSNSEESASSFLKQVKVPELSSLVSKSEDAGAG  
GEVNATTTAIGPLLYVRDDGTVDWEGALQDRAALRKFFGAVWARINGQTPDNLGEDDDNE  
VESKDEGGAIGGGSGH SKPAVTAKIEDTPAIQEARRKLVLLQEQLNEKEKAHTALVESGL  
KAGQAVANVKLASLNPTLRNKIRQSAEALLILEQKVSQNLVYELERIYTYLVTELENPT  
TKGYIPLQDRLNVAEYGLLESQVESCSKDLNSKGVLDADILAVIAEQMTDFKRR LGIDYY  
VTGLTYDREAI VRWLN DLV I SSKTGIMFYVKGTRFLFWSVDVLYSVSLIGRAAQGVTLKPRE  
VRTIRYVALVSKIFGT SCLARIDSTIPLVLLSDTTALYVISNKIRFLFHENEMCRRTFK  
DVITFIPVVIIL I IPLSPVGHVLVFGAIQRFFPGFFPSCFTEQRQNL LQLYETTEFSEV  
IKETLQERLNRFL EALAFSIVNRTRNTYKRVTNTYSEETDNDNNTNGTNGDVEKK  
>comp14267\_c0\_seq3; 798 362 2536 LEN=3008; translated  
MTVSKVSV AHRGRQVTSAAAVLLILSSTIVESLVSPFSPSQYQRIQFLSPIDSSKPMAGR  
SVGFSSKSVTTAQLLLSSRTSSAARTSLFVSSVGDPRVSSSDVDEDLGGKEMGKTEKDSL  
TSSVSKFRQLKDV MWIRETLEDWTAAEFALSVERQSEGATSIDGKSDGNLSSQAAPSNN  
SRKTKKRAVDY EKLLSQVTKRIEDMTCQAFVDDMDFMDEKGV LKIDEGVGMGRYAYSNEE  
RMMLMERLLKTRDNL SRVLDSVDLENGDSNSEESASSFLKQVKVPELSSLVSKSEDAGAG  
GEVNATTTAIGPLLYVRDDGTVDWEGALQDRAALRKFFGAVWARINGQTPDNLGEDDDNE  
VESKDEGGAIGGGSGH SKPAVTAKIEDTPAIQEARRKLVLLQEQLNEKEKAHTALVESGL  
KAGQAVANVKLASLNPTLRNKIRQSAEALLILEQKVSQNLVYELERIYTYLVTELENPT  
TKGYIPLQDRLNVAEYGLLESQVESCSKDLNSKGVLDADILAVIAEQMTDFKRR LGIDYY  
VTGLTYDREAI VRWLN DLV I SSKTGIMFYVKGTRFLFWSVDVLYSVSLIGRAAQGVTLKPRE



VRTIRRTFKDVITFIPVVIILIIPLSPVGHVLFVFGAIQRFFPGFFPSCFTEQRQNLQLY  
ETTEFSEVVIKETLQERLNRFLAALAFSIVNRTRNTYKRVNTYSEETDNDNNTNGTNGD  
VEKK

>comp14267\_c0\_seq4; 752 362 2649 LEN=3121; translated  
MTVSKVSVAHRRQVTSAAAVLLILSSTIVESLVSPFSPSQYQRIQFLSPIDSSKPMAGR  
SVGFSSKSVTTAQLLLSSRTSSAARTSLFVSSVGDPRVSSSDVDEDLGGKEMGKTEKDSL  
TSSVSKFRQLKDVMMWIRETLEDWTAAEFALSVERQSEGATSIDGKGS DGNLSSQAAPSNN  
SRKTKKRAVDYKLLSQVTKRIEDMTCQAFVDDMDFMDEKGVKIDEGVGMGRYAYSNEE  
RMMLMERLLKTRDNL SRVLDSDVLENGDSNSEESASSFLKQVKVPELSSLVSKSEDAGAG  
GEVNATTTAIGPLLYVRDDGTVDWEGALQDRAALRKF GGAVWARINGQTPDNLGEDDDNE  
VESKDEGGAIGGGSGHSPAVTAKIEDTPAIQEARRKLVLLQEQLNEKEKAHTALVESGT  
YGDCEARASXTALCPLLISYFDRYRIFHMIWIYSVTGLKAGQAVANVKLASLNPTLRNKI  
RQSAEALLILEQKVSQNLVYELERIYTYLVTELENPTTKGYIPLQDRNLVAEYGLLESQ  
VESCSKDLNSKGVLDADILAVIAEQMTDFKRRLGIDYVVTGLTYDREAIVRWLNDLVISS  
KTGIMFYVKGTRLFWSVDVLYSVSLIGRAAQGVTLKPREVRTIRRTFKDVITFIPVVIILII  
PLSPVGHVLFVFGAIQRFFPGFFPSCFTEQRQNLQLYETTEFSEVVIKETLQERLNRFL  
EALAFSIVNRTRNTYKRVNTYSEETDNDNNTNGTNGDVEKK

>comp14267\_c0\_seq5; 575 362 2923 LEN=3395; translated  
MTVSKVSVAHRRQVTSAAAVLLILSSTIVESLVSPFSPSQYQRIQFLSPIDSSKPMAGR  
SVGFSSKSVTTAQLLLSSRTSSAARTSLFVSSVGDPRVSSSDVDEDLGGKEMGKTEKDSL  
TSSVSKFRQLKDVMMWIRETLEDWTAAEFALSVERQSEGATSIDGKGS DGNLSSQAAPSNN  
SRKTKKRAVDYKLLSQVTKRIEDMTCQAFVDDMDFMDEKGVKIDEGVGMGRYAYSNEE  
XDDAHGVRTLKYSTLLRSFVFLGFWRVFCNSIGDRKDLTSSFVIYRRLKTRDNL SRVL  
DSVDLENGDSNSEESASSFLKQVKVPELSSLVSKSEDAGAGGEVNATTTAIGPLLYVRDD  
GTVDWEGALQDRAALRKF GGAVWARINGQTPDNLGEDDDNEVESKDEGGAIGGGSGHSP  
AVTAKIEDTPAIQEARRKLVLLQEQLNEKEKAHTALVESGT YGDCEARASXTALCPLLIS  
YFDRYRIFHMIWIYSVTGLKAGQAVANVKLASLNPTLRNKIRQSAEALLILEQKVSQNL  
VYELERIYTYLVTELENPTTKGYIPLQDRNLVAEYGLLESQVESCSKDLNSKGVLDADIL  
AVIAEQMTDFKRRLGIDYVVTGLTYDREAIVRWLNDLVISSKTGIMFYVKGTRLFWSVDL  
YSVSLIGRAAQGVTLKPREVRTIRYVALVSKIFGTSCCLARIDSTIPLVLLSDTTALYVI  
SNKIRFLFHENEMCRRTFKDVITFIPVVIILIIPLSPVGHVLFVFGAIQRFFPGFFPSCFT  
EQRQNLQLYETTEFSEVVIKETLQERLNRFLAALAFSIVNRTRNTYKRVNTYSEETDN  
DNNTNGTNGDVEKK

>comp14267\_c0\_seq6; 645 362 2770 LEN=3242; translated  
MTVSKVSVAHRRQVTSAAAVLLILSSTIVESLVSPFSPSQYQRIQFLSPIDSSKPMAGR  
SVGFSSKSVTTAQLLLSSRTSSAARTSLFVSSVGDPRVSSSDVDEDLGGKEMGKTEKDSL  
TSSVSKFRQLKDVMMWIRETLEDWTAAEFALSVERQSEGATSIDGKGS DGNLSSQAAPSNN  
SRKTKKRAVDYKLLSQVTKRIEDMTCQAFVDDMDFMDEKGVKIDEGVGMGRYAYSNEE  
XDDAHGVRTLKYSTLLRSFVFLGFWRVFCNSIGDRKDLTSSFVIYRRLKTRDNL SRVL  
DSVDLENGDSNSEESASSFLKQVKVPELSSLVSKSEDAGAGGEVNATTTAIGPLLYVRDD  
GTVDWEGALQDRAALRKF GGAVWARINGQTPDNLGEDDDNEVESKDEGGAIGGGSGHSP  
AVTAKIEDTPAIQEARRKLVLLQEQLNEKEKAHTALVESGT YGDCEARASXTALCPLLIS  
YFDRYRIFHMIWIYSVTGLKAGQAVANVKLASLNPTLRNKIRQSAEALLILEQKVSQNL  
VYELERIYTYLVTELENPTTKGYIPLQDRNLVAEYGLLESQVESCSKDLNSKGVLDADIL  
AVIAEQMTDFKRRLGIDYVVTGLTYDREAIVRWLNDLVISSKTGIMFYVKGTRLFWSVDL  
YSVSLIGRAAQGVTLKPREVRTIRRTFKDVITFIPVVIILIIPLSPVGHVLFVFGAIQRFF  
PGFFPSCFTEQRQNLQLYETTEFSEVVIKETLQERLNRFLAALAFSIVNRTRNTYKRVNT  
YSEETDNDNNTNGTNGDVEKK

>comp14267\_c0\_seq7; 682 362 2802 LEN=3274; translated  
MTVSKVSVAHRRQVTSAAAVLLILSSTIVESLVSPFSPSQYQRIQFLSPIDSSKPMAGR  
SVGFSSKSVTTAQLLLSSRTSSAARTSLFVSSVGDPRVSSSDVDEDLGGKEMGKTEKDSL  
TSSVSKFRQLKDVMMWIRETLEDWTAAEFALSVERQSEGATSIDGKGS DGNLSSQAAPSNN  
SRKTKKRAVDYKLLSQVTKRIEDMTCQAFVDDMDFMDEKGVKIDEGVGMGRYAYSNEE  
RMMLMERLLKTRDNL SRVLDSDVLENGDSNSEESASSFLKQVKVPELSSLVSKSEDAGAG  
GEVNATTTAIGPLLYVRDDGTVDWEGALQDRAALRKF GGAVWARINGQTPDNLGEDDDNE  
VESKDEGGAIGGGSGHSPAVTAKIEDTPAIQEARRKLVLLQEQLNEKEKAHTALVESGT  
YGDCEARASXTALCPLLISYFDRYRIFHMIWIYSVTGLKAGQAVANVKLASLNPTLRNKI  
RQSAEALLILEQKVSQNLVYELERIYTYLVTELENPTTKGYIPLQDRNLVAEYGLLESQ  
VESCSKDLNSKGVLDADILAVIAEQMTDFKRRLGIDYVVTGLTYDREAIVRWLNDLVISS  
KTGIMFYVKGTRLFWSVDVLYSVSLIGRAAQGVTLKPREVRTIRYVALVSKIFGTSCCLARI

DSTIPLVLLSDDTTALYVISNKIRFLFHENEMCRRTFKDVITFIPVVIILIIPLSPVGHV  
LVFGAIQRFFPGFFPSCFTEQRQNLQLYETTEFSEVVIKETLQERLNRFLAALAFSIVN  
RTRNTYKRVNTNTYSEETDNDNNTNGTNGDVEKK

>comp14267\_c0\_seq8; 691 362 2657 LEN=3129; translated  
MTVSKVSAHRGRQVTSAAAVLLILSSTIVESLVSPFSPSQYQRIQFLSPIDSSKPMAGR  
SVGFSSKSVTTAQLLLSSRTSSAARTSLFVSSVGDPRVSSSDVDEDLGGKEMGKTEKDSL  
TSSVSKFRQLKDVMMWIRETLEDWTAAEFALSVERQSEGATSIDGKGSNGNLSSQAAPSNN  
SRKTKKRAVDYKLLSQVTKRIEDMTCQAFVDDMDFMDEKGVKIDEGVGMGRYAYSNEE  
XDDAHGVRTLKYSTLLRSFVFLGFWRVFCNSIGDRKDLTSSFVIYRLLKTRDNLNRVL  
DSVDLENGSDNSEESASSFLKQVKVPELSSLVSKSEDAGAGGEVNATTTAIGPLLYVRDD  
GTVDWEGALQDRAALRKFVGGAVWARINGQTPDNLGEDDNEVESKDEGGAIAGGSGHSP  
AVTAKIEDTPAIQEARRKLVLLQEQLNEKEKAHTALVESGLKAGQAVANVKLASLNPTLR  
NKIRQSAEALLILEQKVSQNLVYELERIYTYLVTELENPTTKGYIPLQDRLNVAEYGLL  
ESQVESCCKDLNSKGVLDADILAVIAEQMTDFKRRLGIDYYVTGLTYDREAIVRWLNDLV  
ISSKTGIMFYVKGTRLFWSDVLYSVSLIGRAAQGVTLKPREVRTIRRTFKDVITFIPVVI  
ILIIPLSPVGHVLFVFGAIQRFFPGFFPSCFTEQRQNLQLYETTEFSEVVIKETLQERLN  
RFLEALAFSIVNRTRNTYKRVNTNTYSEETDNDNNTNGTNGDVEKK

>comp14268\_c0\_seq1; 494 45 1667 LEN=1760; translated  
MKNSHALRRKTAPSVWYRMLVSMAMLI VLASFTGNNGLLVSAEMEASWTPNEEGPAMP  
LSMHQRQQLVQLQQAQI QNSPDPNGTLQQAQSNMSPNELYQMIKNAKDLQQDPALLSE  
LQQAQSGGRMGNSLPKMVVKF IAGLGAMRQTAQQNPRAFTTSLMAALLIFYTLLAIPR  
TGLQISSGRSILTLSSGPTTVFSPDRYLHKMIGKVDSMVASPKLSIKTMKKDWDLLKP  
LTRELVS DYGAKDNEEDTDDLNDPYGRVETHSLGRKNEKQAVTAQFMLGPDQFLTDFPL  
GDTLEEIAAERENIIDMLYANAAGLLTERNLVEFSDATSKARDRLRAVCGDGKKDRDSSL  
SSKDFGVIVVPLGLKGRYGLMYWVVTSETS QKSSAVSSQTLTLTLTKGKGFDFGQIHF  
DVRKIPHLDGMLLVQVSLAVPRGGRKLQKRAEALVENMARSLSVRSRTRQRLARQSQ  
GKRFKDTGSRRADRRKERFERERLLEEMATDRRRRWQKTNPDAGRYRPSGHRMRSPNNC

>comp14269\_c0\_seq1; 107 85 792 LEN=1510; translated  
MPIRRFIQTGRGFRGDERTRATRVETIAEHLPLAPSEFGGSRSDHIDNSGSPANTNANR  
SSLICMGNRKKQSGNPTKKSVRWSTKLTKRRIHQIKDMKEEERESAWYTPEDTKIILAMA  
KVTVKMMNGDYCDNIDYCSRGLEGKTSRGARQRIHKNQRVRTAVLEEQLQRTEGLLDA  
DALARVSLKYSEDLAAQARDKALGDERDAREFLLGVRTIGMHLEQQDILVSAMAA

>comp14269\_c0\_seq2; 107 85 792 LEN=1543; translated  
MPIRRFIQTGRGFRGDERTRATRVETIAEHLPLAPSEFGGSRSDHIDNSGSPANTNANR  
SSLICMGNRKKQSGNPTKKSVRWSTKLTKRRIHQIKDMKEEERESAWYTPEDTKIILAMA  
KVTVKMMNGDYCDNIDYCSRGLEGKTSRGARQRIHKNQRVRTAVLEEQLQRTEGLLDA  
DALARVSLKYSEDLAAQARDKALGDERDAREFLLGVRTIGMHLEQQDILVSAMAA

>comp14269\_c1\_seq1; 186 517 981 LEN=2581; translated  
MDLVEADLTPGQDWRESLNATCNRLSTQYINLLRAASSVSALEKGGGSGSNNAHDPRACT  
GKMMSLQDPPPPSLAAEIASSSLQCQLAAENICVASSQLLSLIRTLRLSILMMDEEAIAA  
EEELQVLEVEKITTEAQHQANQLEKEWMQLRNS

>comp14270\_c0\_seq1; 106 1 366 LEN=1151; translated  
CKRYEKAekliHQKetrILSRyRRMPTRNRRGRSPTRYTDATNSYLrNHDDDDSFSDYEP  
LDEDDQRELLESLEQEAQAQSRlFQIAFGYgIGGTAVVfSLVfPllCPEECGADTETA  
VA  
CW

>comp14271\_c0\_seq1; 757 246 2222 LEN=2306; translated  
MRFTLSAVLALASIAQESDAFLSPALRTKTTAIHMNPEDEENEPASGSSRFKEMMAAAK  
AQQGQGAVPRGRPIENPFLNPSAPPVNPGLSVVEEQARMFREMMAGTAVPTPPPVRVAR  
EDRAGRPVGRNPADAKISNTSDLYFAQLKRDSTVRTLARQRDSSVSEAVFQDDGIKQLD  
DLLQNNPHLQSQKDEEREMLENLPDEIVAPYFNTKPMEEDELTKTGINYKKILAARTGKK  
GEEGTAPAPAPLEQPAPPAPQPEPVVAQVSTPPPPPPKPEPVPEPEPEVPRPVTVTSSK  
DGRVQNIrTLmGLTLKhrGGPGFGGRLKGPDIIDLfEGLVDEISNMLGEEAKLALPPIDT  
PAIPTMEATPTTVAPPVTVQAPATVPAPA AVSEPVASSTEANIDSTIACIEGAIMYNN  
SPPAIRESVLVTLRAALMSAVDTCNIALAQPATPVAASPDGSI EGMVACIEGAVTMYKNS  
PPALKDSVMVTLRMALMSAVETCNVIIGDQVAPPPPPATPAPVAPQTT PATSVAPPEV  
PQAQAPPATS VVPEPPAPQAPPATSEASPPTEENSKALESVLEKVIAASGDGKLGRLSD  
L  
TATEADELADQLVNMRGILMDELNSDKPAPDSSQASQGTASKYEQMLAKARA EKAQA

>comp14272\_c0\_seq1; 973 97 3120 LEN=3244; translated  
MELGDPNTSSSEIKAMENTKSAKVAPLKDRTIKREDRDDDVPsRRDLREGRDEPHLSKS  
STQSPKARKGKTSQHPYSMHEGFHPSYHHQPAGRGGHYPahpAMHGGSrGPPPGPYLPP

HAPHQYLNYNRNPAGPHDHHFRAPHPHHYHQMPPLPHPGQPHYGGRNGHYGHPNMPGRP  
GPPPPGYHHNGYGGYPYPPPPMSYHPAPPPQSYHGSQQASDSMSISSSRSKRSTKSHSS  
EGSRKKRTIEGVHDGSKEVKSVPLSYSFRRTNSSCSNSTATASKTTDQSMTESPSKRERS  
SSRDSNFLPPMPRSANIFDERERPAHRRRTNSGNSTTSSLSGGGFLSSYEGPKVEDVPM  
KASPKRRKGSSEPVSIERDTPSSIFKRKGGSRMANASDHSIDDAETSRFRQLSMKDSE  
QEDSNENRNIFLSLSTSPINHRDDETPLKTNINRKKNLTPKMTVKTDMDEINEKPRLGS  
FTDTPTPPNMLQNDSTDEHTLNKHLRGQSFTPLPHAGETGISPSAAAFSAIAPSLWSI  
AGDTPSLEDLAGCSWEESEKGDRRRPDSTTSHLSSATGNMVISPHHFSLWKEDHESKKK  
NEEDENDKDDGESIRLSMLSPNSDTAMSLDRVGGTTTPLPIFFRDSGTDERENHHSDRPD  
KKSQVSKELGSKASQPEQLYHSNSVFMRRQKQATPQFFSHGPPREGLPPTPVYAGSKTQ  
PPQYPI SNMSGAYSRSPLHGERRDYGHMYGGHHPPPGPHNDRIRNLRGRMPPGAHMAMP  
PIHIPPPMSTHHPLTSPMGLPGPKQMWSPHQRGMAPPMASPHHMSPMDITQSKRKCIPLK  
PPIPSKQFQDIEKFKGATVPEFTSLVNFVHMSQKQAVNLPEGMRCVCMCGSACPCSSGN  
KKKNGSHGSKKDGKSSGDKGGYAIIPQNKGLCTLCDVNVVVVANSGLLEIKWCKGCKN  
FRPWAAGDKGLATKCLREREREKQYALQKEEKEKARLLKTAKAKA

>comp14273\_c0\_seq1; 570 1 3807 LEN=3807; minus strand; translated

LSLSLMGSTSDSDENPQSPRKRRTDSSGSGSGASAIQSTPNKVGLAFLKGGNAMKKLTENAM  
VQIAQISMAEKDQKEANDKLALAEARVKKKSAVLAYTTYTKERIRKIESEDDIGWTEMKN  
TVEELIESANALNTVRSNAFENRVSKELDTSFQSLMATKEDWSKRFRKILNAEQSSLSS  
TDAVTEYTLVINPIKSGNVGRILGVTETVTTLAALDLEIEPLDQEIKEGDVASCNDIPSD  
QSI SPSDSTPAETSTDGTNSVRSEIGEKEVSTTEESSKKGDLLTSNLYGRLYTTKDAI  
YFLASDKHFTLQWDTITGIEKEKGFMGSNNDTDLVVSYSRSDNEILSFLLCRLKDRDEVVA  
HLKRLKKESEDERRASETPKDNTAADAKSSLVPPDSTLKKMNIVLSKTIKNMSIESLFESA  
WADRSEGESFYGSWLKEEECFDVATEEWKIAEDTRFRNEWCNEEYDQYRLVTFKFNRTTH  
LYIGPPVAIVKQRHFIRVEGKDRCVLAISAEFDGIPYADTFAVEMRWVATRKGAKDVQVE  
VGLFVNFKKRTMLRSQIESGTIEETRNVHLRFLDAVKNAARKSLGGQPGDGEDEDEAED  
DAVPVGTAEPLGLLALFGSLVGLDRSTVLSSIAAVCLLLAGSYAGRSFLGSPSSPDTQRL  
EHQMTELQNEVRALRXVAGPGHGSPEGGREPAVPPIGIDAPCGVRDAAPYGQLWLEITTN  
RVRWIRFEFESNSDSISIRFFETRTSVKMPIARNERNVNAVAKYLRSSELLTRFERASLVD  
VPRRGSPLGITGVVVWVQPEGSLDVQERRGVPALAAARASGLLRAHAGGLLQGIAAAATVP  
PRCLQVPDPHAEGVRPHVQGRVVPQNGQEVPPQAAAPVDGPPEEVGPRCPFPFEQPPHGGRED  
GNVLRVAVGAVAGQDRVVAPGVGVRELLKGGPKGNPVPVQGGHAEGNRNRNRRCSSPRHV  
FGAAPEDLLL VVRQGRQRAKGGETGRNQLRWPQEGGQDAAQADAPELDGPPGQELGPGPE  
VQGHGDRAVPGPAARPHPRHRWCPPGDLPEPQGGNVLDRIAEGQIGGFVGLGAGAGLGI  
GLGAGLALGAVGGSEMAVASHQKGLAGSPNVVEFLDRHGRGGPRAPLPVRQLVEGAGDPP  
VRAPVGIPLLEEQQGFWKRLGLRLRRGGAGGTGPRDRLPAPAAAGSDAATATGAPAAAAR  
FRVAASGDQGSVVPQAFHLGGGTAAPIEDASNADRVGGRAMQSLRLGLVSATTAMP RVC  
VFVCVFGCV

>comp14273\_c0\_seq2; 13 1 314 LEN=314; minus strand; translated

TGDPREASPGITGVVVWVQPEGSLDVQERRGVPALAAARASGLLRAHAGGLLQGIAAAATV  
PPRCLQVPDPHAEGVRPHVQGRVVPQNGQEVPPQAAAPVDGPPEEVG

>comp14273\_c0\_seq3; 625 1 3899 LEN=3899; minus strand; translated

LSLSLMGSTSDSDENPQSPRKRRTDSSGSGSGASAIQSTPNKVGLAFLKGGNAMKKLTENAM  
VQIAQISMAEKDQKEANDKLALAEARVKKKSAVLAYTTYTKERIRKIESEDDIGWTEMKN  
TVEELIESANALNTVRSNAFENRVSKELDTSFQSLMATKEDWSKRFRKILNAEQSSLSS  
TDAVTEYTLVINPIKSGNVGRILGVTETVTTLAALDLEIEPLDQEIKEGDVASCNDIPSD  
QSI SPSDSTPAETSTDGTNSVRSEIGEKEVSTTEESSEMKAFFIKRFRWKKPKDEKIPDIL  
ETHLCAYRPKERVTLTNSNLYGRLYTTKDAIYFLASDKHFTLQWDTITGIEKEKGFMGSN  
NDTDLVVSYSRSDNEILSFLLCRLKDRDEVVAHLKRLKKESEDERRASETPKDNTAADAKSS  
LVPPDSTLKKMNIVLSKTIKNMSIESLFESAWADRSEGESFYGSWLKEEECFDVATEEWK  
IAEDTRFRNEWCNEEYDQYRLVTFKFNRTTHLYIGPPVAIVKQRHFIRVEGKDRCVLAIS  
AEFDGIPYADTFAVEMRWVATRKGAKDVQVEVGLFVNFKKRTMLRSQIESGTIEETRNH  
LRLFLDAVKNAARKSLGGQPGDGEDEDEAEDDAVPVGTAEPLGLLALFGSLVGLDRSTVL  
SSIAAVCLLLAGSYAGRSFLGSPSSPDTQRLQEHQMTELQNEVRALRXVAGPGHGSPEGGR  
EPAVPPIGIDAPCGVRDAAPYGQLWLEITTNRVRWIRFEFESNSDSISIRFFETRTSVKM  
PIARNERNVNAVAKYLRSSELLTRFERASLVDVPRRGSPLGITGVVVWVQPEGSLDVQERR  
GVPALAAARASGLLRAHAGGLLQGIAAAATVPPRCLQVPDPHAEGVRPHVQGRVVPQNGQ  
EVPPQAAAPVDGPPEEVGPRCPFPFEQPPHGGREDGNVLRVAVGAVAGQDRVVAPGVGVRELLK  
GPKGNPVPVQGGHAEGNRNRNRRCSSPRHVFGAAPEDLLL VVRQGRQRAKGGETGRNQLR  
WPQEGGQDAAQADAPELDGPPGQELGPGPEVQGHGDRAVPGPAARPHPRHRWCPPGDL

EPQGGNVLDRIAEQIGGFVGLGAGAGLIGLGLGAGLALGAVGGSEMAVASHQKGLAGSP  
NVVEFLDRHGRGGPRAPLPVRQLVEGAGDPPVRAPVGIPLLEEQGFWKRLGLRLRRGGAG  
GTGPRDRLPAPAAAGSDAATATGAPAAAARFRVAASGDQGSVVPQAFHLGGGTAAPIED  
ASNADRVGGRAMQSLRLGLVSAATTAMPRGVCVFVFCVFCV

>comp14274\_c0\_seq1; 191 1 1352 LEN=1480; translated  
XSAYGSVSLGPLVYTWMRSRSTYQDISSKCSQLSSQSESMRNVCKTCVKILREDAFLHFR  
ACPIFQKELDAGISNQKFTSEKSTSIRRKDKKSVCVEQVGQWAEAHLLRHLCPNQCYLRA  
FAPSREWMLLRKLLKLVPIGEVLNDWTCRLVHEMEPNQDSSSSRTRKEENAIKSAKLL  
PVQLPRIEFVSLKSRKVSIVYVHVYIHTASIGMLRSIPIEMCSIIISANIEKQSFLSFEK  
ARSSILGERDILNKNYGQIFTLSTCEQFTTDEKKHEVTSKSVESPFGLLEELFPEDPWRV  
LICTMLLNKTQRKQNLDTLFLHIFQKWPTAESVVDAAANNEAVRLFVFALVRPAGLGRS  
KAKAFVQLSRDYVALLARKNYLIDTLQDLETIAAKNRGDRKGVFELTRTEVKQLFNCGN  
YAADAYQIFIRKDFESPLYSNDQMLLSYVGW

>comp14274\_c0\_seq2; 84 1 702 LEN=702; translated  
XSAYGSVSLGPLVYTWMRSRSTYQDISSKCSQLSSQSESMRNVCKTCVKILREDAFLHFR  
ACPIFQKELDAGISNQKFTSEKSTSIRRKDKKSVCVEQVGQWAEAHLLRHLCPNQCYLRA  
FAPSREWMLLRKLLKLVPIGEVLNDWTCRLVHEMEPNQDSSSSRTRKEENAIKSAKLL  
PVQLPRIEFVSLKSRKVSFLSFEKARSSILGERDILNKNYGQIFTLSTCEQFTTDX

>comp14275\_c0\_seq1; 615 654 2992 LEN=3105; translated  
MCARVASETLALENIDWTGVTGPGITCDEVVFKFLTGGGHCTSLNSDVIAKTVFCAAFSSCV  
VWDDDDATSAEDDENDDENTVDCASLTECKWEGMRMNWIGDGVCHDNIDGCYNTAICGYD  
GGDCCEDTCEITDTSSYMECGHDGYACKDPSSDNCDSNLTKCAGDPSSNGEGADPSKTV  
CNKDETKYRLTMYDSFGDGDWSTTVTIQPEGSSDIVFKGGLVDGFRGDEYLCLSKAPQCY  
NVKAQGGTGWGEVSWEIRPMSDGAPSIAGGGAPGDCDFSVSGEVC PKTCDGKKPENHAAD  
DPDYRSFKDLYSKIEKCVIQLGACNEDPLCKDCFTQDAPDYCYAIEFVSVVIDCTVCS  
TDKAESEFCSTKSGPGQVIPSTPTDNEKVKI ECTPKETRMGTAAIMDYSSCANLDSVS  
LLVTEFDQNNFGQLDAFETCAHSFKDEENHGGRALSCMQILKNAMTNPTVDGNSKNAPK  
EAI AALATNLYEHAGTFDCDSKKASDACPLCP S FMNFKTILYESIDACQSLDAIDCDAWN  
EFYKPKDNVEEVFDDDPWTPEGQCKYIKDGCNAGPFPAPFRRLDCEAEISEEAWDFYKL  
FSKKCLKGSDGIPPSEAPSPTSAPKPQPKPAPKPAPKPAPKPAPKPAPK PAPS DPG  
NKPTPKPYIPQDDDYIDPSSDSGEGESKSHWFRNVVIFSLVSGVGYIYKQRFDFGFSFVQ  
YRRRVFGGRGGFAYGQVNSSGYGESEMYGNLNSSTTFEPPSLPPTPQMMSQNNYPATYP

>comp14275\_c0\_seq2; 527 654 3197 LEN=3310; translated  
MCARVASETLALENIDWTGVTGPGITCDEVVFKFLTGGGHCTSLNSDVIAKTVFCAAFSSCV  
VWDDDDATSAEDDENDDENTVDCASLTECKWEGMRMNWIGDGVCHDNIDGCYNTAICGYD  
GGDCCEDTCEITDTSSYMECGHDGYACKDPSSDNCDSNLTKCAGDPSSNGEGADPSKTV  
CNKDETKYRLTMYDSFGDGDWSTTVTIQPEGSSDIVFKGGLVDGFRGDEYLCLSKAPQCY  
NVKAQGGTGWGEVSWEIRPMSDGAPSEYIITDNWKETEESTPTELGCSTAYNAHRLKAKL  
DGNNXMFSTRFSNLLFCSLVCWVCLLIRDMLHFNHVIAGGGAPGDCDFSVSGEVC PKT  
CDGKKPENHAADDPDYRSFKDLYSKIEKCVIQLGACNEDPLCKDCFTQDAPDYCYAIEF  
FVSVVIDCTVCSCTDKAESEFCSTKSGPGQVIPSTPTDNEKVKI ECTPKETRMGTAAIM  
DYSSCANLDSVSLLVTEFDQNNFGQLDAFETCAHSFKDEENHGGRALSCMQILKNAMTN  
PTVDGNSKNAPKEAIAALATNLYEHAGTFDCDSKKASDACPLCP S FMNFKTILYESIDAC  
QSLDAIDCDAWNEFYKPKDNVEEVFDDDPWTPEGQCKYIKDGCNAGPFPAPFRRLDCEA  
EISEEAWDFYKLFSSKCLKGSDGIPPSEAPSPTSAPKPQPKPAPKPAPKPAPKPAPK P  
KPAPSDPGNKPTPKPYIPQDDDYIDPSSDSGEGESKSHWFRNVVIFSLVSGVGYIYKQ  
FDGFSFVQYRRRVFGGRGGFAYGQVNSSGYGESEMYGNLNSSTTFEPPSLPPTPQMMSQ  
NYPATYP

>comp14275\_c0\_seq3; 727 194 2794 LEN=2907; translated  
MKIRFRQDMLLLVMSASASASAAATLSGTEATRSASNIDISKTLASNPDRFLDNRFATRE  
NIHRLLAGDGDGSAESCDSAFIKCLPNDVCTSCFETLALLENIDWTGVTGPGITCDEVVFKL  
TGGGHCTSLNSDVIAKTVFCAAFSSCVWDDDDATSAEDDENDDENTVDCASLTECKWEG  
MRMNWIGDGVCHDNIDGCYNTAICGYDGGDCCEDTCEITDTSSYMECGHDGYACKDPSSD  
NCDNLTKCAGDPSSNGEGADPSKTVCNKDETKYRLTMYDSFGDGDWSTTVTIQPEGSS  
DIVFKGGLVDGFRGDEYLCLSKAPQCYNVKAQGGTGWGEVSWEIRPMSDGAPSIAGGGAP  
GDCDFSVSGEVC PKTCDGKKPENHAADDPDYRSFKDLYSKIEKCVIQLGACNEDPLCKD  
CFTQDAPDYCYAIEFVSVVIDCTVCSCTDKAESEFCSTKSGPGQVIPSTPTDNEKVKI  
ECTPKETRMGTAAIMDYSSCANLDSVSLLVTEFDQNNFGQLDAFETCAHSFKDEENHGGR  
TALSCMQILKNAMTNPTVDGNSKNAPKEAIAALATNLYEHAGTFDCDSKKASDACPLCP S  
FMNFKTILYESIDACQSLDAIDCDAWNEFYKPKDNVEEVFDDDPWTPEGQCKYIKDGC

NAGPFPAPFRRLDCEAEISEEAWDFYKLFSSKCLKGS DGI PPSEAPSPTSAPKPQPKPAPK  
PAPKPAPKPAPKPAPKPAPK PAPS DPGNKPTPKPYIPQDDDYIDPSSDSGEGESKSHWFR  
NVVIFSLVSGVGYIYKQRFDFGFSFVQYRRRVF GGRGGFAYGQVNSSGYGESEMYGNLNS  
STTFEPPSLPPTPQMMSQNNYPATYP

>comp14275\_c0\_seq4; 425 654 3402 LEN=3515; translated  
MCARVASETLALENIDWTGVTPGITCDEVVKFLTGGGHCTSLNSDVI AKTVFCAAFSSCV  
VWDDDDATSAEDDENDDENTVDCASLTECKWEGMRMNWIGDGVCHDNIDGCYNT EICGYD  
GGDCCEDTCEITDTSSYMECGHDGYACKDPSSDNCD SNLTTKAGDPSSNGEGADPSKTV  
CNKDETKYRLTMYDSFGDGW DSTTVTIQPEGSSDIVFKGGLVDGFRGDEYLC LSKAPQCY  
NVKAQGGTGWGVEVSWEIRPMSDGAP SSEYIITDNWKETEESTPTELGCSTAYNAHRLKAKL  
DGNNXMFLSTRFSNLLFC SLVCWVCLLIRDMLHFNHVIAGGGAPGDCDFSVS GEVCPKT  
CDGKKPENHAADDPDYRSFKDLYSCIEDKCVIQLGACNEDPLCKIAVSDAPLR TSARDDV  
HVYMLAREITDRNGDSMIVALCSRLFFSCVRQYEKKN TDTLYTPCSSRIQSLKMPQITVT  
PSKHLCPSLTAPCVLXTDKAESEFCSTKSGPGQVIPSTPTD NENKVIKECTPKETRMGT  
AAIMDYSSCANLDSVSLLVTEFDQNNFGQLDAFETCAHSFKDEENHGGRTALSCMQILKN  
AMTNP TVDGNSKNAPKEAIAALATNLYEHAGTFCD CSKASDACPLCPSFMNFKTILYES  
IDACQSLDAIDCD AWNEFYKPKCDNVEEVFDDDPWTP EGQCKYIKDGCNAGPFPAPFRRL  
DCEAEISEEAWDFYKLFSSKCLKGS DGI PPSEAPSPTSAPKPQPKPAPKPAPKPAPK P  
KPAPKPAPK PAPS DPGNKPTPKPYIPQDDDYIDPSSDSGEGESKSHWFRNVVIFSLVSGV  
GYIYKQRFDFGFSFVQYRRRVF GGRGGFAYGQVNSSGYGESEMYGNLNSSTTFEPPSLP  
TPQMMSQNNYPATYP

>comp14275\_c0\_seq5; 423 654 3390 LEN=3503; translated  
MCARVASETLALENIDWTGVTPGITCDEVVKFLTGGGHCTSLNSDVI AKTVFCAAFSSCV  
VWDDDDATSAEDDENDDENTVDCASLTECKWEGMRMNWIGDGVCHDNIDGCYNT EICGYD  
GGDCCEDTCEITDTSSYMECGHDGYACKDPSSDNCD SNLTTKAGDPSSNGEGADPSKTV  
CNKDETKYRLTMYDSFGDGW DSTTVTIQPEGSSDIVFKGGLVDGFRGDEYLC LSKAPQCY  
NVKAQGGTGWGVEVSWEIRPMSDGAP SSEYIITDNWKETEESTPTELGCSTAYNAHRLKAKL  
DGNNXMFLSTRFSNLLFC SLVCWVCLLIRDMLHFNHVIAGGGAPGDCDFSVS GEVCPKT  
CDGKKPENHAADDPDYRSFKDLYSCIEDKCVIQLGACNEDPLCKIAVSDAPLR TSARDDV  
HVYMLAREITDRNGDSMIVALCSRLFFSCVRQYEKKN TDTLYTPCSSRIQSLKMPQITVT  
PSKHLCPSLTAPCVLXTDKAESEFCSTKSGPGQVIPSTPTD NENKVIKECTPKETRMGT  
AAIMDYSSCANLDSVSLLVTEFDQNNFGQLDAFETCAHSFKDEENHGGRTALSCMQILKN  
AMTNP TVDGNSKNAPKEAIAALATNLYEHAGTFCD CSKASDACPLCPSFMNFKTILYES  
IDACQSLDAIDCD AWNEFYKPKCDNVEEVFDDDPWTP EGQCKYIKDGCNAGPFPAPFRRL  
DCEAEISEEAWDFYKLFSSKCLKGS DGI PPSEAPSPTSAPKPQPKPAPKPAPKPAPK P  
KPAPKPAPK PAPS DPGNKPTPKPYIPQDDDYIDPSSDSGEGESKSHWFRNVVIFSLVSGVGYI  
YKQRFDFGFSFVQYRRRVF GGRGGFAYGQVNSSGYGESEMYGNLNSSTTFEPPSLPPTPQM  
MSQNNYPATYP

>comp14275\_c0\_seq6; 623 194 2987 LEN=3100; translated  
MKIRFRQDMLLLVMSASASASAAATLSGTEATRSASNIDISKTLASNPDRFLDN RFFATRE  
NIHRLLAGDGDSGAESCDSAFIKCLPNDVCTSCFETLAL ENIDWTGVTPGITCDEVVKFL  
TGGGHCTSLNSDVI AKTVFCAAFSSCVWDDDDATSAEDDENDDENTVDCASLTECKWEG  
MRMNWIGDGVCHDNIDGCYNT EICGYDGGDCCEDTCEITDTSSYMECGHDGYACKDPSS  
NCD SNLTTKAGDPSSNGEGADPSKTV CNKDETKYRLTMYDSFGDGW DSTTVTIQPEGSS  
DIVFKGGLVDGFRGDEYLC LSKAPQCYNVKAQGGTGWGVEVSWEIRPMSDGAP SIAGGGAP  
GDCDFSVS GEVCPKTC DGKKPENHAADDPDYRSFKDLYSCIEDKCVIQLGACNEDPLCKI  
AVSDAPLR TSARDDVHVYMLAREITDRNGDSMIVALCSRLFFSCVRQYEKKN TDTLYTPC  
SSRIQSLKMPQITVTPSKHLCPSLTAPCVLXTDKAESEFCSTKSGPGQVIPSTPTD NENK  
KVIKECTPKETRMGTAAIMDYSSCANLDSVSLLVTEFDQNNFGQLDAFETCAHSFKDEEN  
HGGRTALSCMQILKNAMTNP TVDGNSKNAPKEAIAALATNLYEHAGTFCD CSKASDACP  
LCP SFMNFKTILYES IDACQSLDAIDCD AWNEFYKPKCDNVEEVFDDDPWTP EGQCKYIK  
DGCNAGPFPAPFRRLDCEAEISEEAWDFYKLFSSKCLKGS DGI PPSEAPSPTSAPKPQPK  
PAPKPAPK PAPS DPGNKPTPKPYIPQDDDYIDPSSDSGEGESKSHWFRNVVIFSLVSGVGYI  
YKQRFDFGFSFVQYRRRVF GGRGGFAYGQVNSSGYGESEMYGNLNSSTTFEPPSLPPTPQM  
NLSSTTFEPPSLPPTPQMMSQNNYPATYP

>comp14275\_c0\_seq7; 529 654 3209 LEN=3322; translated  
MCARVASETLALENIDWTGVTPGITCDEVVKFLTGGGHCTSLNSDVI AKTVFCAAFSSCV  
VWDDDDATSAEDDENDDENTVDCASLTECKWEGMRMNWIGDGVCHDNIDGCYNT EICGYD  
GGDCCEDTCEITDTSSYMECGHDGYACKDPSSDNCD SNLTTKAGDPSSNGEGADPSKTV  
CNKDETKYRLTMYDSFGDGW DSTTVTIQPEGSSDIVFKGGLVDGFRGDEYLC LSKAPQCY

NVKAQGGTGWGEVSWAIRPMSDGAPSEYIITDNWKETESTPTELGCSTAYNAHRLKAKL  
DGNNXMFLSTRFSNLLFCSLVCWVCLLIRDMLHFNHVIAGGGAPGDCDFSVSGEVC PKT  
CDGKKPENHAADDPDYRSFKDLYSCIEDKCVIQLGACNEDPLCKDCFTQDAPDYCYAIET  
FVSVIDCTVCSCDCAESEFCSTKSGPGQVIPSTPTDNENKVKIJECTPKETRMGTAAIM  
DYSSCANLDSVLLVTEFDQNNFGQLDAFETCAHSFKDEENHGGRTALSCMQILKNAMTN  
PTVDGNSKNAPKEAIAALATNLYEHAGTFCDCKKASDACPLCPSFMNFKTILYESIDAC  
QSLDAIDCDAWNEFYKPKCKDNVEEVFDDDPWTPEGQCKYIKDGCNAGPFPAPFRRLDCEA  
EISEEAWDFYKLFSSKCKLKGSDGIPPSEAPSPTSAPKPQPKPAPKPAPKPAPKPAPKPAP  
KPAPKPAPSDPGNKPTPKPYIPQDDDYIDPSSDSGEGESKSHWFRNVVIFSLVSGVGYI  
YKQRFDFGFSFVQYRRRVFGGRGGFAYGQVNSSGYGESEMYGNLNSSTTFEPPSLPPTPQM  
MSQNNYPATYP

>comp14275\_c0\_seq8; 621 194 2975 LEN=3088; translated  
MKIRFRQDMLLLVMSASASASAATLSGTEATRSASNIDISKTLASNPDRFLDNRRFFATRE  
NIHRLLAGDGDGSAESCDSAFIKCLPNDVCTSCFETLALLENIDWTGVTPGITCDEVVKFL  
TGGGHCTSLNSDVIAKTVFCAAFSSCVVWDDDDATSAEDDENDENTVDCASLTECKWEG  
MRMNWIGDGVCHDNIDGCYNTAICGYDGGDCCEDTCEITDTSSYMECGHDGYACKDPSSD  
NCDSNLTTKAGDPSSNNEGADPSKTVCNKDETKYRLTMYDSFGDGDWSTTVTIQPEGSS  
DIVFKGGLVDGFRGDEYLCLSKAPQCYNVKAQGGTGWGEVSWAIRPMSDGAPSIAGGGAP  
GDCDFSVSGEVC PKTCDGKKPENHAADDPDYRSFKDLYSCIEDKCVIQLGACNEDPLCKI  
AVSDAPLRTSARDDVHVYMLAREITDRNGDSMIVALCSRLFFSCVRQYEKKNNTDLYTPC  
SSRIQSLKMPQITVTPSKHLCPSLTAPCVLXTDKAESEFCSTKSGPGQVIPSTPTDNENK  
VKIJECTPKETRMGTAAIMDYSSCANLDSVLLVTEFDQNNFGQLDAFETCAHSFKDEEN  
HGGRTALSCMQILKNAMTNPTVDGNSKNAPKEAIAALATNLYEHAGTFCDCKKASDACP  
LCPSFMNFKTILYESIDACQSLDAIDCDAWNEFYKPKCKDNVEEVFDDDPWTPEGQCKYIK  
DGCNAGPFPAPFRRLDCEAEISEEAWDFYKLFSSKCKLKGSDGIPPSEAPSPTSAPKPQPK  
PAPKPAPKPAPKPAPKPAPKPAPSDPGNKPTPKPYIPQDDDYIDPSSDSGEGESKSHWFR  
NVVIFSLVSGVGYIYKQRFDFGFSFVQYRRRVFGGRGGFAYGQVNSSGYGESEMYGNLNS  
STTFEPPSLPPTPQMMSQNNYPATYP

>comp14275\_c0\_seq9; 511 654 3185 LEN=3298; translated  
MCARVASETLALLENIDWTGVTPGITCDEVVKFLTGGGHCTSLNSDVIAKTVFCAAFSSCV  
VWDDDDATSAEDDENDENTVDCASLTECKWEGMRMNWIGDGVCHDNIDGCYNTAICGYD  
GGDCCEDTCEITDTSSYMECGHDGYACKDPSSDNCDSNLTTKAGDPSSNNEGADPSKTV  
CNKDETKYRLTMYDSFGDGDWSTTVTIQPEGSSDIVFKGGLVDGFRGDEYLCLSKAPQCY  
NVKAQGGTGWGEVSWAIRPMSDGAPSIAGGGAPGDCDFSVSGEVC PKTCDGKKPENHAAD  
DPDYRSFKDLYSCIEDKCVIQLGACNEDPLCKIAVSDAPLRTSARDDVHVYMLAREITDR  
NGDSMIVALCSRLFFSCVRQYEKKNNTDLYTPCSSRIQSLKMPQITVTPSKHLCPSLTAP  
CVLXTDKAESEFCSTKSGPGQVIPSTPTDNENKVKIJECTPKETRMGTAAIMDYSSCANL  
DSVLLVTEFDQNNFGQLDAFETCAHSFKDEENHGGRTALSCMQILKNAMTNPTVDGNSK  
NAPKEAIAALATNLYEHAGTFCDCKKASDACPLCPSFMNFKTILYESIDACQSLDAIDC  
DAWNEFYKPKCKDNVEEVFDDDPWTPEGQCKYIKDGCNAGPFPAPFRRLDCEAEISEEAWD  
FYKLFSSKCKLKGSDGIPPSEAPSPTSAPKPQPKPAPKPAPKPAPKPAPKPAPKPAP  
SDPGNKPTPKPYIPQDDDYIDPSSDSGEGESKSHWFRNVVIFSLVSGVGYIYKQRFDFG  
SFVQYRRRVFGGRGGFAYGQVNSSGYGESEMYGNLNSSTTFEPPSLPPTPQMMSQNNYP  
ATYP

>comp14275\_c0\_seq10; 639 194 2999 LEN=3112; translated  
MKIRFRQDMLLLVMSASASASAATLSGTEATRSASNIDISKTLASNPDRFLDNRRFFATRE  
NIHRLLAGDGDGSAESCDSAFIKCLPNDVCTSCFETLALLENIDWTGVTPGITCDEVVKFL  
TGGGHCTSLNSDVIAKTVFCAAFSSCVVWDDDDATSAEDDENDENTVDCASLTECKWEG  
MRMNWIGDGVCHDNIDGCYNTAICGYDGGDCCEDTCEITDTSSYMECGHDGYACKDPSSD  
NCDSNLTTKAGDPSSNNEGADPSKTVCNKDETKYRLTMYDSFGDGDWSTTVTIQPEGSS  
DIVFKGGLVDGFRGDEYLCLSKAPQCYNVKAQGGTGWGEVSWAIRPMSDGAPSEYIITD  
NWKETESTPTELGCSTAYNAHRLKAKLDGNNXMFLSTRFSNLLFCSLVCWVCLLIRDML  
HFNHVIAGGGAPGDCDFSVSGEVC PKTCDGKKPENHAADDPDYRSFKDLYSCIEDKCVI  
QLGACNEDPLCKDCFTQDAPDYCYAIETFVSVIDCTVCSCDCAESEFCSTKSGPGQVIP  
STPTDNENKVKIJECTPKETRMGTAAIMDYSSCANLDSVLLVTEFDQNNFGQLDAFETCA  
HSFKDEENHGGRTALSCMQILKNAMTNPTVDGNSKNAPKEAIAALATNLYEHAGTFCDCK  
KASDACPLCPSFMNFKTILYESIDACQSLDAIDCDAWNEFYKPKCKDNVEEVFDDDPWT  
PEGQCKYIKDGCNAGPFPAPFRRLDCEAEISEEAWDFYKLFSSKCKLKGSDGIPPSEAPS  
PTSAPKPQPKPAPKPAPKPAPKPAPKPAPSDPGNKPTPKPYIPQDDDYIDPSSDSGEG  
ESKSHWFRNVVIFSLVSGVGYIYKQRFDFGFSFVQYRRRVFGGRGGFAYGQVNSSGYG  
ES

EMYGNLNSSTTFEPPSLPPTPQMMSQNNYPATYP

>comp14275\_c0\_seq11; 535 194 3192 LEN=3305; translated  
MKIRFRQDMLLLVMSASASASAATLSGTEATRSASNIDISKTLASNPDRFLDNRFFATRE  
NIHRLLAGDGDGSAESCDSAFIKCLPNDVCTSCFETLALENIDWTGVTPGITCDEVVKFL  
TGGGHCTSLNSDVIAKTVFCAAFSSCVVWDDDDATSAEDDENDDENTVDCASLTECKWEG  
MRMNWIGDGVCHDNIDGCYNTAICGYDGGDCCEDTCEITDTSSYMECGHDGYACKDPSSD  
NCDSNLTTKAGDPSSNGEGADPSKTVCNKDETKYRLTMYDSFGDGDWSTTVTIQPEGSS  
DIVFKGGLVDGFRGDEYLCLSKAPQCYNVKAQGGTGWVEVSWEIRPMSDGAPSSEYIITD  
NWKETESTPTELGCSTAYNAHRLKAKLDGNNXMFLSTRFSNLLFCSLVCWVVCLLIRDML  
HFNHVIAGGGAPGDCDFSVSGEVCPKTCGDKKPENHAADDPDYRSFKDLYSCIEDKCVIQ  
LGACNEDPLCKIAVSDAPLRTSARDDVHVYMLAREITDRNGDSMIVALCSRLFFSCVRQY  
EKKNTDTLYTPCSSRIQSLKMPQITVTPSKHLCPSLTAPCVLXTDKAESEFCSTKSGPGQ  
VIPSTPTDNNKVIKECTPKETRMGTAAIMDYSSCANLDSVSLLVTEFDQNNFGQLDAF  
ETCAHSFKDEENHGRTALSCMQILKNAMTNPTVDGNSKNAPKEAIAALATNLYEHAGTF  
CDCSKKASDACPLCPSFMNFKTILYESIDACQSLDAIDCDAWNEFYKPKCKDNVEEVFDDD  
PWTPEGQCKYIKDGCNAGPFPAPFRRLDCEAEISEEAWDFYKLFSSKCLKGSDGIPPSEA  
PSPTSAPKPQPKPAPKPAPKPAPKPAPKAPKAPSDPGNKPTPKPYIPQDDDYIDPSSD  
SGEGESKSHWFRNVVIFSLVSGVGYIYKQRFDDGFSFVQYRRRVFGGRGGFAYGQVNSSG  
YGESEMYGNLNSSTTFEPPSLPPTPQMMSQNNYPATYP

>comp14275\_c0\_seq12; 509 654 3173 LEN=3286; translated  
MCARVASETLALENIDWTGVTPGITCDEVVKFLTGGGHCTSLNSDVIAKTVFCAAFSSCV  
VWDDDDATSAEDDENDDENTVDCASLTECKWEGMRMNWIGDGVCHDNIDGCYNTAICGYD  
GGDCCEDTCEITDTSSYMECGHDGYACKDPSSDNCDSNLTTKAGDPSSNGEGADPSKTV  
CNKDETKYRLTMYDSFGDGDWSTTVTIQPEGSSDIVFKGGLVDGFRGDEYLCLSKAPQCY  
NVKAQGGTGWVEVSWEIRPMSDGAPSIAGGGAPGDCDFSVSGEVCPKTCGDKKPENHAAD  
DPDYRSFKDLYSCIEDKCVIQLGACNEDPLCKIAVSDAPLRTSARDDVHVYMLAREITDR  
NGDSMIVALCSRLFFSCVRQYKKNNTDTLYTPCSSRIQSLKMPQITVTPSKHLCPSLTAP  
CVLXTDKAESEFCSTKSGPGQVIPSTPTDNNKVIKECTPKETRMGTAAIMDYSSCANL  
DSVSLLVTEFDQNNFGQLDAFETCAHSFKDEENHGRTALSCMQILKNAMTNPTVDGNSK  
NAPKEAIAALATNLYEHAGTFCDCSKKASDACPLCPSFMNFKTILYESIDACQSLDAIDC  
DAWNEFYKPKCKDNVEEVFDDDPWTPEGQCKYIKDGCNAGPFPAPFRRLDCEAEISEEAWD  
FYKLFSSKCLKGSDGIPPSEAPSPPTSAPKPQPKPAPKPAPKPAPKPAPKAPKAPSDPG  
NKPTPKPYIPQDDDYIDPSSDSGEGESKSHWFRNVVIFSLVSGVGYIYKQRFDDGFSFVQ  
YRRRVFGGRGGFAYGQVNSSGYGESEMYGNLNSSTTFEPPSLPPTPQMMSQNNYPATYP

>comp14275\_c0\_seq13; 613 654 2980 LEN=3093; translated  
MCARVASETLALENIDWTGVTPGITCDEVVKFLTGGGHCTSLNSDVIAKTVFCAAFSSCV  
VWDDDDATSAEDDENDDENTVDCASLTECKWEGMRMNWIGDGVCHDNIDGCYNTAICGYD  
GGDCCEDTCEITDTSSYMECGHDGYACKDPSSDNCDSNLTTKAGDPSSNGEGADPSKTV  
CNKDETKYRLTMYDSFGDGDWSTTVTIQPEGSSDIVFKGGLVDGFRGDEYLCLSKAPQCY  
NVKAQGGTGWVEVSWEIRPMSDGAPSIAGGGAPGDCDFSVSGEVCPKTCGDKKPENHAAD  
DPDYRSFKDLYSCIEDKCVIQLGACNEDPLCKDCFTQDAPDYCYAIEFVSVIDCTVCSC  
TDKAESEFCSTKSGPGQVIPSTPTDNNKVIKECTPKETRMGTAAIMDYSSCANLDSV  
LLVTEFDQNNFGQLDAFETCAHSFKDEENHGRTALSCMQILKNAMTNPTVDGNSKNAPK  
EAIAALATNLYEHAGTFCDCSKKASDACPLCPSFMNFKTILYESIDACQSLDAIDCDAWN  
EFYKPKCKDNVEEVFDDDPWTPEGQCKYIKDGCNAGPFPAPFRRLDCEAEISEEAWDFYKL  
FSKCLKGSDGIPPSEAPSPPTSAPKPQPKPAPKPAPKPAPKPAPKAPKAPSDPGNKPT  
PKPYIPQDDDYIDPSSDSGEGESKSHWFRNVVIFSLVSGVGYIYKQRFDDGFSFVQYRRR  
VFGGRGGFAYGQVNSSGYGESEMYGNLNSSTTFEPPSLPPTPQMMSQNNYPATYP

>comp14275\_c0\_seq14; 641 194 3011 LEN=3124; translated  
MKIRFRQDMLLLVMSASASASAATLSGTEATRSASNIDISKTLASNPDRFLDNRFFATRE  
NIHRLLAGDGDGSAESCDSAFIKCLPNDVCTSCFETLALENIDWTGVTPGITCDEVVKFL  
TGGGHCTSLNSDVIAKTVFCAAFSSCVVWDDDDATSAEDDENDDENTVDCASLTECKWEG  
MRMNWIGDGVCHDNIDGCYNTAICGYDGGDCCEDTCEITDTSSYMECGHDGYACKDPSSD  
NCDSNLTTKAGDPSSNGEGADPSKTVCNKDETKYRLTMYDSFGDGDWSTTVTIQPEGSS  
DIVFKGGLVDGFRGDEYLCLSKAPQCYNVKAQGGTGWVEVSWEIRPMSDGAPSSEYIITD  
NWKETESTPTELGCSTAYNAHRLKAKLDGNNXMFLSTRFSNLLFCSLVCWVVCLLIRDML  
HFNHVIAGGGAPGDCDFSVSGEVCPKTCGDKKPENHAADDPDYRSFKDLYSCIEDKCVIQ  
LGACNEDPLCKDCFTQDAPDYCYAIEFVSVIDCTVCSCDCAESEFCSTKSGPGQVIPPS  
TPTDNNKVIKECTPKETRMGTAAIMDYSSCANLDSVSLLVTEFDQNNFGQLDAFETCA  
HSFKDEENHGRTALSCMQILKNAMTNPTVDGNSKNAPKEAIAALATNLYEHAGTFCDCS

KKASDACPLCPSFMNFKTILYESIDACQSLDAIDCDAWNEFYKPKCKDNVEEVFDDDPWTP  
EGQCKYIKDGCNAGPFPAPFRRLDCEAEISEEAWDFYKLFSSKCLKGSBGIPSEAPSPT  
SAPKPQPKPAPKPAPKPAPKPAPKPAPKPAPKPSDPGNKPTPKPYIPQDDDYIDPSSD  
SGEGESKSHWFRNVVIFSLVSGVGYIYKQRFDFGFSFVQYRRRVFVGGGGFAYGQVNSSG  
YGESEMYGNLNSSTTFEPPSLPPTPQMMSQNNYPATYP

>comp14275\_c0\_seq15; 725 194 2782 LEN=2895; translated  
MKIRFRQDMLLLVMSASASASASAATLSGTEATRSASNIDISKTLASNPDRFLDNRFFATRE  
NIHRLLAGDGDGSGAESCDSAFIKCLPNDVCTSCFETLALLENIDWTGVTPGITCDEVVKFL  
TGGGHCTSLNSDVIKTVFCAAFSSCVVWDDDDATSAEDDENDDENTVDCASLTECKWEG  
MRMNWIGDGVCHDNIDGCYNTICGYDGGDCCEDTCEITDTSSYMECGHDGYACKDPSSD  
NCDSNLTTKAGDPSSNGEGADPSKTVCNKDETKYRLTMYDSFGDGDWSTTVTIQPEGSS  
DIVFKGGLVDGFRGDEYLCLSKAPQCYNVKAQGGTGWVEVSWEIRPMSDGAPSIAGGGAP  
GDCDFSVSGEVCCKTCDGKKPENHAADDPDYRSFKDLYSIEDKCVIQLGACNEDPLCKD  
CFTQDADPYCYAIETVSVVIDCTVCSCTDKAESEFCSTKSGPGQVIPSTPTDNENKVKIK  
ECTPKETRMGTAAIMDYSSCANLDSVLLVTEFDQNNFGQLDAFETCAHSFKDEENHGGR  
TALSCMQILKNAMTNPTVDGNSKNAPKEAIAALATNLYEHAGTFCDCKASDACPLCPS  
FMNFKTILYESIDACQSLDAIDCDAWNEFYKPKCKDNVEEVFDDDPWTPPEGQCKYIKDGCN  
NAGPFPAPFRRLDCEAEISEEAWDFYKLFSSKCLKGSBGIPSEAPSPTSAPKPQPKPAPK  
PAPKPAPKPAPKPAPKPSDPGNKPTPKPYIPQDDDYIDPSSDSGEGESKSHWFRNVVIF  
FSLVSGVGYIYKQRFDFGFSFVQYRRRVFVGGGGFAYGQVNSSGYGESEMYGNLNSSTTF  
EPPSLPPTPQMMSQNNYPATYP

>comp14275\_c0\_seq16; 537 194 3204 LEN=3317; translated  
MKIRFRQDMLLLVMSASASASASAATLSGTEATRSASNIDISKTLASNPDRFLDNRFFATRE  
NIHRLLAGDGDGSGAESCDSAFIKCLPNDVCTSCFETLALLENIDWTGVTPGITCDEVVKFL  
TGGGHCTSLNSDVIKTVFCAAFSSCVVWDDDDATSAEDDENDDENTVDCASLTECKWEG  
MRMNWIGDGVCHDNIDGCYNTICGYDGGDCCEDTCEITDTSSYMECGHDGYACKDPSSD  
NCDSNLTTKAGDPSSNGEGADPSKTVCNKDETKYRLTMYDSFGDGDWSTTVTIQPEGSS  
DIVFKGGLVDGFRGDEYLCLSKAPQCYNVKAQGGTGWVEVSWEIRPMSDGAPSSSEYIITD  
NWKETESTPTELGCSTAYNAHRLKAKLDGNNXMFLLSTRFSNLLFCSLVCWVCLLIRDML  
HFNHVIAGGGAPGDCDFSVSGEVCCKTCDGKKPENHAADDPDYRSFKDLYSIEDKCVIQ  
LGACNEDPLCKIAVSDAPLRTSARDDVHVYMLAREITDRNGDSMIVALCSRLFFSCVRQY  
EKKNTDTLYTPCSSRIQSLKMPQITVTPSKHLCPSLTAPCVLXTDKAESEFCSTKSGPGQ  
VIPSTPTDNENKVIKECTPKETRMGTAAIMDYSSCANLDSVLLVTEFDQNNFGQLDAF  
ETCAHSFKDEENHGGRALSCMQILKNAMTNPTVDGNSKNAPKEAIAALATNLYEHAGTF  
CDCKASDACPLCPSFMNFKTILYESIDACQSLDAIDCDAWNEFYKPKCKDNVEEVFDDDD  
PWTPEGQCKYIKDGCNAGPFPAPFRRLDCEAEISEEAWDFYKLFSSKCLKGSBGIPSEAP  
PSPTSAPKPQPKPAPKPAPKPAPKPAPKPAPKPAPKPSDPGNKPTPKPYIPQDDDYID  
PSSDSGEGESKSHWFRNVVIFSLVSGVGYIYKQRFDFGFSFVQYRRRVFVGGGGFAYGQV  
NSSGYGESEMYGNLNSSTTFEPPSLPPTPQMMSQNNYPATYP

>comp14276\_c0\_seq1; 177 185 736 LEN=1576; translated  
MGVFNDIASVDAFAINAYCIVSALFFSACAYAQLNDPNPQWFCAVYVGGCVPNLYWMTT  
STDSNSATTQKLVLALHGFVGGGLLAIYKLATVAPKLLDEMAEHHHGLLWAFMEHEEGR  
DSCGLLLLIFHASYLASVIKKKGPDHRRQQMNGNNGRGAPSVMLSPAVLSLGLLGLVAVC  
VYVW

>comp14277\_c0\_seq1; 416 169 1260 LEN=1687; translated  
MRCSPAVAAFAFVAALCTTSCYARSSNTVIDNREQTPSRSRIRGISNQNPRTRRLDEPD  
RRPADKELPVPDEEPIACADHGEAPFSYTTLTRVSYTGEIDFSDLDFVGAIEANFESA  
YNNVAGSCEQPNAFRQIVFAFVLTDPGCSVPGIELPDPQTIDAEISSRLRHNATDELGAG  
PPDAAPPVTEQASGAFLIATQLRCNACSTLCEPFVAPALFSGEGVENFSKQPEEGECN  
CDGPSRGDMTAE LNIGFGKILADQGVNGTDIVFNVDQLCIDGGCRPPDGTEICFTNDVAV  
CLDARSTELFLNPTSPPTNEPSAYPTKAPTVPKPKQNHKTKPTPPPTASPTAQPTKAKKN  
PKL

>comp14278\_c0\_seq1; 426 224 1204 LEN=1391; translated  
MNPANESDQTCLPCCSSSSEDDENGFDALNPEFLAVCVGFLTVMGSLVGYIYQKRER  
KEEKEADRKAANDLDRQQAALERVRKQLSVFVGPLHRHWKTHNTIFAQFQVMKNFKSHSW  
RKAQKGGRAYWFKMFPQEAMEAFSSNPMSEAKLFRHVVKRRSQPIYTRIRELVLCHSS  
DLADMPTQEEWLEKYSRESVTSYVGSVNVNVIDLTFVWTFEFDDIIQSWEENDFSRMQ  
PSTEVAWMI CNLDLVDALYDTAKSKEAKYNKHVKIHQNKVQRSLIDQMKNGEFIGEGSDAE  
EPDEADEPDEILLAVATGSSFIGSR

>comp14278\_c0\_seq2; 416 122 1102 LEN=1289; translated



MNPANESDQTCLPCCSSSSSEDDENGFDALNPEFLAVCVGFLTVMGSLVGYIYIQRKRER  
KEEKEADRKAANDLDRQQALERVRKQLSVFVGPLHRHWKTHNTIFAQFQTMKNFKSHSW  
RKAQKGGRAYWFKMFPQEAAMEAFSSNPMSKEAKLFRHVVKRRSQPIYTRI RELVLCHSS  
DLADMPTQEEWLEKYSRESVTSYVGSVNVNVIDTFTVWTFLEFDDIIQSWEENDFSRMQ  
PSTEVAWMICNDLVDALYDTAKSKEAKYNKHVKIHQNKVQRSLIDQMKNGEFIGEGSDAE  
EPDEADEPDEILLAVATGGSSFIGSR

>comp14279\_c0\_seq1; 721 92 1939 LEN=2155; translated  
MSEELRSCEAPLLSSPASHSAYGSSGRQVQSRNEERGQQHDDSNIGPLRGIFLDHTFSAA  
MMHSVGLGRDEYVDDRGIHLVSIKRRRRTVAVASGAPALSNETTTSSYGNLKNLFHRET  
PKQQDIDDKRTLIAKCGQDEDEELEVQDQVEGGSITAAIFGIVKGTVPAILYLPKGFQ  
QAGWACALPALVSTFAYVYSAHRLQCWKVEEVRQQFLAQRMGIEIQKILERHDSIDYKD  
PNDHKMRGERARSKHSVSHLQASPEDDRRAEALTAFKPKLLTYPELARRAFGPFPAFLIE  
FGIAAMQFGVCLTYLIFVPANLYASCQALFGVAIPKSYFLVGMCLCIEIPCTFIRDIRRLT  
PFNVFATILIVYGLGSCLLISFIYSFTQKEEPLFESVISLPAIQPAWFIFIGTAFVFEFEG  
SITLVVPLQEAVYKDDRERFPMVNQNTISIVLFYMFALVWVATFEDQVQTALTASLP  
PGHFSTSVQFAYSIAVVLTYPLQAFPALVLRKHGDAASTGIWNRNFYAGLLNVGLGI  
IAI IAIDYLGNNVSLGLSLVGMPIALVYPPMMHNFVVKDSSATERCLNHLVSIIGLIATV  
AASYATISNWNNEGGD

>comp14280\_c0\_seq1; 459 166 1487 LEN=1641; translated  
MISRAASGCASRALRRTASTAHRASMASTLVI SEPLEADGSTPAGTQSTVTAAARLGGG  
NDIHLLVVGGTAPSKIPAGVSKVFHAAIDDKLSETVASAVLEVAGADKECSVVVGTQSKF  
GSTVVPRAAALLDVSPVTDILEIEDEKTFVRPMYAGNVLGKVVVKPGPNGNDRKVL SIRP  
TCFDKADLVDASSVEVESLEVEAFGKAEWVGESVSQSDRDLSSATTVVSGGRGIKSGEN  
FP ILEALADKLGVSVAALLSGMDPTGVFVDSRYEYDHDAAEFWRNWQQDCAVASGFFSRL  
TFFVVS CASFLFCLVSR LIRNPMNEHESRGXNTQQAAVGASRAAVDAGFCPNWQVQGTG  
KVVAPDLYIAAGISGAIQHLSGMKDSKVIVAINTD AEAP IFQVADYGLQDDLFEAVPELT  
EKLLAFAGILSKEGHNTVLI

>comp14280\_c0\_seq2; 258 359 1174 LEN=1378; translated  
MYAGNVLGKVVVKPGPNGNDRKVL SIRP TCFDKADLVDASSVEVESLEVEAFGKAEWVGE  
SVS QSDRDLSSATTVVSGGRGIKSGENFP ILEALADKLGVSVAALLSGMDPTGVFVDSR  
YEYDHDAAEFWRNWQQDCAVASGFFSRLTFFVVS CASFLFCLVSR LIRNPMNEHESRGAT  
XQQAAVGASRAAVDAGFCPNWQVQGTGKVVAPDLYIAAGISGAIQHLSGMKDSKVIVAI  
NTDAEAP IFQVADYGLQDDLFEAVPEL TEKL

>comp14280\_c0\_seq3; 453 166 1238 LEN=1392; translated  
MISRAASGCASRALRRTASTAHRASMASTLVI SEPLEADGSTPAGTQSTVTAAARLGGG  
NDIHLLVVGGTAPSKIPAGVSKVFHAAIDDKLSETVASAVLEVAGADKECSVVVGTQSKF  
GSTVVPRAAALLDVSPVTDILEIEDEKTFVRPMYAGNVLGKVVVKPGPNGNDRKVL SIRP  
TCFDKADLVDASSVEVESLEVEAFGKAEWVGESVSQSDRDLSSATTVVSGGRGIKSGEN  
FP ILEALADKLGAAVGASRAAVDAGFCPNWQVQGTGKVVAPDLYIAAGISGAIQHLSGM  
KDSKVIVAINTD AEAP IFQVADYGLQDDLFEAVPEL TEKLLAFAGILSKEGHNTVLI

>comp14280\_c0\_seq4; 253 359 925 LEN=1129; translated  
MYAGNVLGKVVVKPGPNGNDRKVL SIRP TCFDKADLVDASSVEVESLEVEAFGKAEWVGE  
SVS QSDRDLSSATTVVSGGRGIKSGENFP ILEALADKLGAAVGASRAAVDAGFCPNWQ  
VQGTGKVVAPDLYIAAGISGAIQHLSGMKDSKVIVAINTD AEAP IFQVADYGLQDDLFEA  
VPEL TEKL

>comp14281\_c0\_seq1; 1000 1 2794 LEN=2871; translated  
XEQKPSVLPVDDCKQAATKGEERTPEFPDPLTERNNTRTGTHAGFTSRWICFGSIGENQ  
TIQAATTTK MADNTLSVKIGGRIVS PHLPIVDGSPSSGHELTFDSSLQKFVGDNI PLEST  
EGIQTRERVLSRMGVL CRAWIKSVCEKRGLPREVVNSAGGQLFTAGSYRLGIHEPGADID  
ALLVMP SMC TRQDIFGTSTTEDGESLPIDPDSLAEVRVRAHPDVTNFPVVEGAAVPILTFD  
WEGVNI D L L FARLNTACVPPDFDIDNDANLDGVDAGTSRTMNATRVTNLIAALASGTRER  
YQTF LTVVRCVRK WAKARGLYSNKMGYWG VNI NIAVALCVQLYPNSSPASLLRRFFLVF  
KTWRWPKPLMLTKPHDAGYGLPVWAQGPQTARQVAPMLTPAYPSMNSMANVSRQTLQIFH  
EEFCRGFEI IDRLWKQHEASEKRKAKSGNDAEDDADPLDWAELFRPSDFFIAYPYL SLC  
IVGPTQADEQAWVGFVESRLRILVSGLLGKSLPLSKIQLWPKKIEACVADR SALLTMDQR  
RNSITYFVGFVLDKLRMRGSQLNVELQMQHFRDWELSKFSPLVPGMDVMAKFTFTCKHLPL  
ICFEMYDGGKQNAMKRRRMLRNIDPKRQERRAKKLADLKAKMAAIQKRKAAAAAESAMK  
SETDNDDEEGKKRKRSDSETGDELDETTAVKEEAAPVSQDENDTNDGNGEEDLLEN  
ALDTLQEAEGGERKTREDAEADRKLLSGELLVEGAELDGDHDEDLDFIGDGE EGRRSFV  
VQRSKSRMQPTEENEKLYRDIRALPMKEEEAQLLRSAGYTVVSDAETETKI IGGNMPTPY

RSRTDDDENGDGEAPNGTKKKKPKASILFRTKFDIVDLDAAGHIIDKGDFFTPSKSWKG  
RKAGFEFKLGERGLGYRTGKKVVVPSNTAY  
>comp14282\_c0\_seq1; 701 171 1931 LEN=2066; translated  
MTTTPQLLRRCRPFQRRQPLSSLHFRRDATIISKDRFQSDKIQKQHYHHQFIQKNSRSIL  
SPFSCSYGPLESETDASLSSSISLQGSPLQRRHFWNPFSSSKSGSVRDSNAVVGSSRTKSE  
DETEQPRKIQERKDLTLLVLALEFHKIAAEEDRRRLEKAESEDETKSSSSGNEYLENREK  
MIDLAFEKLEEMEIDNKTMMQLRYVLQEGLEEQVKDLFDAFLSIDEELLLLRLDDEENTH  
DADRADVDESYLEEILRLELERTIDELANTEQSRAPKGADPKEFLTLKRGAIETLLRER  
EGEQRLSSQEI SNSDENESNNSTENQDANENTNDEKQNTVTWTPPDEFYHVSVD EERNR  
LIRYYQSINLCRSKMRDQVGYSVIALRSSIPAAGRGVYVDGYARAGSILAFQPGPVWAK  
ESLVNLSVDEERDLERNDAYQMSLRPDDYMIDSRSPYTVLVDDNSNLMALGHIVNHPSP  
SNPPSCRSAMLNFTQGMEIGSSTKLRKYIPNTYARPRNVTLMDSLWDRDVIEMHSMVLI  
TRDICNEEIFYDYLASSHL PQWYHKVDDTAFESVDELDDSDGND  
>comp14283\_c0\_seq1; 525 324 1882 LEN=2124; translated  
MAKGRNYVIGLXLEQNRFVFGPDRTAPDRTGVDDAMEKAKFAFLGGQNAGKTSILRRYF  
QGTFFYGDCRMPTIGADVSTIVSANRPDPPAEDTATTHGGGGEAEETRGRAGGKRPDDSD  
GDDDDDDAANHNHAGSDHRDRRGTTTRRPEPQGRRRRQPI SIQVWDT PGRERFENTGGTTR  
YKASFSDDFLKDLDAVCLVYDVSSSTSFTHVLNWWYELIXAPPEDEGQPQALQEAPRSE  
SAHRHRRQQDRHHRAPGAKEHAAEAASAPPEGPAPPEPEAGVRRAAAGRPAGGEELEGP  
DYRYEYASSASSKPSGGTATTSNTNANSANANANANANNTGNNEEGNENRLELLTYLGT  
NTNYLEAILNNEVYRGSYLDSSLSEEDNSHPDKDMVQLWCTRNGLIHMDVSAKSGAGIHD  
LVQQLEIALKQIDESGEHPAGPNSGTGANANTNTNTSTAI AASET TA HGGTGDRGFRES  
SIPLLLQH NKELDLHQRYGPKSKTCFWPPLSFRWCYGR  
>comp14283\_c0\_seq2; 55 1 625 LEN=1712; translated  
AWLALVCRAKPKSAKRGYQNNWLQRRPIRRIRHL CGYPHETEEAIASDGEAFVLTEAEFY  
GRGSVRSLEDYMEFAGMTPNHTTGLLDCGPVWRWCNKGLKDDTSRKQQQQQQRKGDGHPGS  
LPLREQGGVWQERNPHSAFVVVPLRALVSRNRCWHRAGDGARIVLILGT ELATELGSKGS  
TFIGTTGGTAQGI PDKT PPGEPGGNRV  
>comp14283\_c0\_seq3; 365 324 1383 LEN=1383; translated  
MAKGRNYVIGLXLEQNRFVFGPDRTAPDRTGVDDAMEKAKFAFLGGQNAGKTSILRRYF  
QGTFFYGDCRMPTIGADVSTIVSANRPDPPAEDTATTHGGGGEAEETRGRAGGKRPDDSD  
GDDDDDDAANHNHAGSDHRDRRGTTTRRPEPQGRRRRQPI SIQVWDT PGRERFENTGGTTR  
YKASFSDDFLKDLDAVCLVYDVSSSTSFTHVLNWWYELIXAPPEDEGQPQALQEAPRSE  
SAHRHRRQQDRHHRAPGAKEHAAEAASAPPEGPAPPEPEAGVRRAAAGRPAGGEELEGP  
DYRYEYASSASSKPSGGTATTSNTNANSANANANANANNTGNNEEGTATTSNT  
>comp14283\_c0\_seq4; 813 324 3321 LEN=4408; translated  
MAKGRNYVIGLXLEQNRFVFGPDRTAPDRTGVDDAMEKAKFAFLGGQNAGKTSILRRYF  
QGTFFYGDCRMPTIGADVSTIVSANRPDPPAEDTATTHGGGGEAEETRGRAGGKRPDDSD  
GDDDDDDAANHNHAGSDHRDRRGTTTRRPEPQGRRRRQPI SIQVWDT PGRERFENTGGTTR  
YKASFSDDFLKDLDAVCLVYDVSSSTSFTHVLNWWYELIXAPPEDEGQPQALQEAPRSE  
SAHRHRRQQDRHHRAPGAKEHAAEAASAPPEGPAPPEPEAGVRRAAAGRPAGGEELEGP  
DYRYEYASSASSKPSGGTATTSNTNANSANANANANANNTGNNEEGNENRLELLTYLGT  
NTNYLEAILNNEVYRGSYLDSSLSEEDNSHPDKDMVQLWCTRNGLIHMDVSAKSGAGIHD  
LVQQLEIALKQIDESGEHPAGPNSGTGANANTNTNTSTSNTHGTIFPVRSDDSIFLSVA  
AFREHLLTDTLVSAFGHAKNPNKLFVGVVVQNASGPSRTATATKPTAATATANNTVDTEI  
DIDIDPSGTPCLTGPKVGTSTGKPKMQRLSAPPDANGVADFCGLPAYEAYCKNGQVRV  
LYVHESDSLGPMSMARYASKLYGGETFFVQIDSHLRFASDWDQKYLDELRLTKNYPKSIL  
STYPPGFGQIRFIPKRMKLDRESVNGTVVESPGCRLCNCATPLGEPNPILHVHQKAYF  
GNETRPTQT PFLGAGLLVAHSSLLGEVFPDPYLPWTFMGEEILLAVRAWTHGWNIIYAPRK  
NLV IHYRTRSMGIPKFFSSV NAKRGYQNNWLQRRPIRRIRHL CGYPHETEEAIASDG  
EAFVLTEAEFYGRGSVRSLEDYMEFAGMTPNHTTGLLDCGPVWRWCNKGLKDDTSRKQQQQ  
QQRKGDGHPGSLPLREQGGVWQERNPHSAFVVVPLRALVSRNRCWHRAGDGARIVLILGT  
ELATELGSKGSTFIGTTGGTAQGI PDKT PPGEPGGNRV  
>comp14284\_c0\_seq1; 566 121 1473 LEN=1893; translated  
MDWNDFNTIRNKLGRGEELSTSDLISLDPLHDAIYDHEGCI VGNHKPCSSTKCRMEENAP  
FHLEYLDRSLLDGQCQKSQQHGQQGLPRVVRYVGMVQDMLEPEYYE SYDSQGRSTHFVDH  
NEPGDDINNANANNHRKSDAYQSKPSLIERTPLVVVPIPFASDWLHRGIVRDQRKSSAS  
KSAVVS PVSANRGDRKRDRREVGGVGADEDCMKGDLDERVSCPM DINSNATDPLPKTT  
TTEGKKNRSTIGSAGSSTPNADATTTDWWPAGTCGT SKDQCPILAKMICYDQLLSGEPL  
DNEDDQESASGTRKQRERPLLLNDLVSMVGVLSIDPF EADFSGQETKNNELGYCLTEDP

LTMLMAEIPPPSRLPRLHVL SYRRLRLDDLARRAINV GKMDNDENNRDDIAL LSEQEEVR  
ATEFRADGNSDDDDGDDDDHDGGGGGDDAE  
>comp14284\_c0\_seq2; 566 136 1488 LEN=1908; translated  
MDWDFNTIRNKLGRGEELSTSDLI SLDP LHD AIYDHEGCI VGNHKPCSSTKCRMEENAP  
FHLEYLDRSLLDGQCQKSQQHQGLPRVVRYVGMVQDMLEPEYYESYDSQGRSTHFVDH  
NEPGDDINNANANNHRKSDAYQSKPSLIERTPLVVVPIPFASDWLHRGIVRDQRKSSAS  
KSAVVS PVSANRGRDRKRDREVG GVGGADEDC HMKGDLDERVSC PMDINSNATDPLPKTT  
TTEGKGNRSTIGSAGSSTNPNADATTTDWWPAGTCGTSKDQCPILAKMICYDQLLSGEPL  
DNEDDQESASGTRKRQRERPLLLNDLVSMVGVLSIDPF EADFSGQETKNNELGYCLTEDP  
LTMLMAEIPPPSRLPRLHVL SYRRLRLDDLARRAINV GKMDNDENNRDDIAL LSEQEEVR  
ATEFRADGNSDDDDGDDDDHDGGGGGDDAE  
>comp14285\_c0\_seq1; 710 276 1931 LEN=2104; translated  
MKAVMSMPGDGMQNETVTNITSYDVLVDP SVEGVVGEYQLDNYSKNVGNRLKVFL TLYK  
QDYDRARRHNDVARCESIADEILHTLNTKCVPTGRFLINSASNPNDAIWNLMGEYQSKQL  
IHGMLFGVLP PASYL RQQHQIQEHQAVEQCNSNSNGNNEAE EHKRRRRSSLLRRSTSDSF  
LNDSKKV LRYDHQLQNQRQEKFGQDRRMSKEEPIWSSSRQLTANGVVSLNRMDVILTSNR  
KALDPNCQSIGNNRLHILVAMQSGKYQLANDRQKEAILDEVIQTVNSFWKGRFLTESIGG  
SYELLDNADAKRSLRNIFDMRSGQNLFSQSSSPAINIPSN TVSSRLSGS QLMGRNSGIHA  
LGKMNISSESLSGSFTNAMNDMNDANRFRQDTMNAMRHASASSLPVGNTSMISNDTKKI  
LRRQLSSSVV PNLTQSKTLPNIEPPIGLSGIDDLRSAAIKSLQKQKARQQVANRLEK VAM  
RNSQQQLHQQFQQPNANNTNGVNYNSNGNMNFS SFSMGGGAKRRQSSIFGALDPSMMDE  
IVSGCFDDEDD  
>comp14285\_c0\_seq2; 710 276 1931 LEN=2084; translated  
MKAVMSMPGDGMQNETVTNITSYDVLVDP SVEGVVGEYQLDNYSKNVGNRLKVFL TLYK  
QDYDRARRHNDVARCESIADEILHTLNTKCVPTGRFLINSASNPNDAIWNLMGEYQSKQL  
IHGMLFGVLP PASYL RQQHQIQEHQAVEQCNSNSNGNNEAE EHKRRRRSSLLRRSTSDSF  
LNDSKKV LRYDHQLQNQRQEKFGQDRRMSKEEPIWSSSRQLTANGVVSLNRMDVILTSNR  
KALDPNCQSIGNNRLHILVAMQSGKYQLANDRQKEAILDEVIQTVNSFWKGRFLTESIGG  
SYELLDNADAKRSLRNIFDMRSGQNLFSQSSSPAINIPSN TVSSRLSGS QLMGRNSGIHA  
LGKMNISSESLSGSFTNAMNDMNDANRFRQDTMNAMRHASASSLPVGNTSMISNDTKKI  
LRRQLSSSVV PNLTQSKTLPNIEPPIGLSGIDDLRSAAIKSLQKQKARQQVANRLEK VAM  
RNSQQQLHQQFQQPNANNTNGVNYNSNGNMNFS SFSMGGGAKRRQSSIFGALDPSMMDE  
IVSGCFDDEDD  
>comp14285\_c0\_seq3; 645 1 1815 LEN=1968; translated  
XTTKRQHKIQ LIPSI SNTLVEVREIPNTSN SLMEDIA YFKGDLWTATSLANLPMKAVMSM  
PGDGMQNETVTNITSYDVLVDP SVEGVVGEYQLDNYSKNVGNRLKVFL TLYKQDYDRAR  
RHNDVARCESIADEILHTLNTKCVPTGRFLINSASNPNDAIWNLMGEYQSKQLIHGMLFG  
VLPPASYL RQQHQIQEHQAVEQCNSNSNGNNEAE EHKRRRRSSLLRRSTSDSFLNDSKKV  
LRYDHQLQNQRQEKFGQDRRMSKEEPIWSSSRQLTANGVVSLNRMDVILTSNRKALDPNC  
QSIGNNRLHILVAMQSGKYQLANDRQKEAILDEVIQTVNSFWKGRFLTESIGGSYELLDN  
ADAKRSLRNIFDMRSGQNLFSQSSSPAINIPSN TVSSRLSGS QLMGRNSGIHALGKMNIS  
SSESLSGSFTNAMNDMNDANRFRQDTMNAMRHASASSLPVGNTSMISNDTKKILRRQLSS  
SVV PNLTQSKTLPNIEPPIGLSGIDDLRSAAIKSLQKQKARQQVANRLEK VAMRNSQQQL  
HQQFQQPNANNTNGVNYNSNGNMNFS SFSMGGGAKRRQSSIFGALDPSMMDEIVSGCFD  
DEDD  
>comp14285\_c0\_seq4; 645 1 1815 LEN=1988; translated  
XTTKRQHKIQ LIPSI SNTLVEVREIPNTSN SLMEDIA YFKGDLWTATSLANLPMKAVMSM  
PGDGMQNETVTNITSYDVLVDP SVEGVVGEYQLDNYSKNVGNRLKVFL TLYKQDYDRAR  
RHNDVARCESIADEILHTLNTKCVPTGRFLINSASNPNDAIWNLMGEYQSKQLIHGMLFG  
VLPPASYL RQQHQIQEHQAVEQCNSNSNGNNEAE EHKRRRRSSLLRRSTSDSFLNDSKKV  
LRYDHQLQNQRQEKFGQDRRMSKEEPIWSSSRQLTANGVVSLNRMDVILTSNRKALDPNC  
QSIGNNRLHILVAMQSGKYQLANDRQKEAILDEVIQTVNSFWKGRFLTESIGGSYELLDN  
ADAKRSLRNIFDMRSGQNLFSQSSSPAINIPSN TVSSRLSGS QLMGRNSGIHALGKMNIS  
SSESLSGSFTNAMNDMNDANRFRQDTMNAMRHASASSLPVGNTSMISNDTKKILRRQLSS  
SVV PNLTQSKTLPNIEPPIGLSGIDDLRSAAIKSLQKQKARQQVANRLEK VAMRNSQQQL  
HQQFQQPNANNTNGVNYNSNGNMNFS SFSMGGGAKRRQSSIFGALDPSMMDEIVSGCFD  
DEDD  
>comp14286\_c0\_seq1; 358 85 1392 LEN=1392; translated  
MSSRRDRSDDRHSSEKRSEKRDRDRDRDRDRYDERHERGHRDRDRDRGSSKASRK  
RDREDHNDERRSRRRDRDRDDHGSEEGSDKKHRKKSRSRSHRGRNRSRSDKYSDDDSRDSS

YDRDDRKKKKKSSKSHKEKREKSSRSAAGSPPKKKPKDKSTLCPMGGPVGRVPDSAID  
PDKDYFSYHQEFVWYLFREEGTCFNIDITKEARAAFCRFAKAYNAGHLEEPYYTRNFPAA  
VIEESKTTKHAWGFKTTHSERKGLNDLQKGVRRQTEYSSNTRKDQNVQVITGLEAKKSL  
PVPNRAPPRQQRPTPGERLAQRRADKRLREEVQVAREELTGGPSSDPRERRLEKKREHS  
ARIHGAHLQNEAAAAGMELSDADLFGGGAAGGRDGD SFAAAVARRKQHRERRDERRAIRI  
EELRAKEAAPGAEGRA

>comp14286\_c0\_seq3; 449 85 1464 LEN=1601; translated  
MSSRRDHRSDDRHRSSEKRSEKRRDRDDDRDRDRDRYDERHERRGHRDRDRDRGSSKASRK  
RDREDHNDERRSRSDRDRDDHGSEEGSDKKHRKKSRSRHRGRNRSRSDKYSDDDSRDSS  
YDRDDRKKKKKSSKSHKEKREKSSRSAAGSPPKKKPKDKSTLCPMGGPVGRVPDSAID  
PDKDYFSYHQEFVWYLFREEGTCFNIDITKEARAAFCRFAKAYNAGHLEEPYYTRNFPAA  
VIEESKTTKHAWGFKTTHSERKGLNDLQKGVRRQTEYSSNTRKDQNVQVITGLEAKKSL  
PVPNRAPPRQQRPTPGERLAQRRADKRLREEVQVAREELTGGPSSDPRERRLEKKREHS  
ARIHGAHLQNEAAAAGMELSDADLFGGGAAGGRDGD SFAAAVARRKQHRERRDERRAIRI  
EELRAKEDERQKNMLRMLGLENLQGQAKLKIAPRNDPPE

>comp14286\_c0\_seq4; 379 85 1816 LEN=1816; translated  
MSSRRDHRSDDRHRSSEKRSEKRRDRDDDRDRDRDRYDERHERRGHRDRDRDRGSSKASRK  
RDREDHNDERRSRSDRDRDDHGSEEGSDKKHRKKSRSRHRGRNRSRSDKYSDDDSRDSS  
YDRDDRKKKKKSSKSHKEKREKSSRSAAGSPPKKKPKDKSTLCPMGGPVGRVPDSAID  
PDKDYFSYHQEFVWYLFREEGTCFNIDITKEARAAFCRFAKAYNAGHLEEPYYTRNFPAA  
VIEESKTTKHAWGFKTTHSERKGLNDLQKGVRRQTEYSSNTRKDQNVQVITGLEAKKSL  
PVPNRAPPRQQRPTPGERLAQRRADKRLREEVQVAREELTGGPSSDPRERRLEKKREHS  
ARIHGAHLQNEAAAAGMELSDADLFGGGAAGGRDGD SFAAAVARRKQHRERRDERRAIRI  
EELRAKEDERQKNMLRMLGLENLQGQAKLKIAPETTLPSEQAPARNETPKRRIPIFGFSAL  
GFRSSPAPAHPGGSFRGAI FSLAXSLQVFAEHPEHVLLAFVFLGPELLDADHPALVPPL  
PVLFPFRHRRRKGI PVPSTSGAAPEEVGVRELHPGRRX

>comp14287\_c0\_seq1; 328 316 1178 LEN=1756; translated  
MKVIYSQPKSFRGERTNRRTVDPESYHYRLGGGQQEEGGSNNESRQKLRWGKREGRSAT  
TYFSKKRDTSDRPVKKEMYISTKQSSGCLMRQGDCLDTTFESIESYTCRDTSVGMNSGGL  
RPPSPVIMYEQQGPFDLNVECCQIEVSNDQPFKNNAHDNGNGFEERRTP IKGEGGDK  
QFRGRSGTEQNDVKVGDSSSPDSRSFRKLPYESYESPEHRALYDSFRIVRNNSLLDTE  
ASVGLECDGITSSMLKDKPDRLEQLRQNKRDNRKNSQSNSKKFDEVR

>comp14288\_c0\_seq2; 733 213 2954 LEN=3214; translated  
MILSVATRRFIGKCSGRSAFATRGLSRACSTFASLNPSKTTTSSSTTTKLRRPGTCFNP  
AIPHPQLQSQRRSLHLTPREIDHLRLHECGRLAQYRLARGLKLNIPEVALITSVMME  
RIRDGETSVADLMSLGQSLGRRQVQAGVPDIVKDVQIEATFPDGTKLLTVHAPISKLDG  
DLNLALEGSFLPVPPELVFVGDLEEEKPGAVTLVETEETLNSDRLDLVELSVTNTGDR  
PIQVGSYAFLETNKALSFRDQVSIKRLNIPSGASVRFEPGETKTVTLVLDIGGSCNVVS  
GNRLHNGERSNENAIMDRVLSQGFLEHAAAEPKQPLVVERSSYADMYGPTTGDKIKLG  
DTSLEIQVERDLTTYGEECKFGGKTLREGMGQSTS IQSDVALDVVITNALIVDSVTGII  
KADIGIKGNKIVGIGKAGNPDMMMSGVVDENMIVGATTDVIAGEKLILTAGGIDTHVHYIC  
PQQFEDAVASGLTTMFGGGTGP SAGTSATTCTPAPSQFEMMLKATDGI PMNFGFSGKNT  
SDSSVLKECLMAGAAGFKLHEDWGTTPSAIDSLGFADEHDI AVTIHTDTLNE SGFVDDS  
IAAMKGRTHIHTYHTGAGGGHAPDI IKIVEEPYVLPSSSTNPTRPFTVNTMDEHLDMLMVC  
HHLDS SIPEDVAFAESRIRAETIAAEDILHDIGAISSISSDSQAMGRVGEVITRTWQTAC  
KMKTQRGALDESSKGNDRVTRVRYLAKYTI NPAITHGMSQHVGSVEVGKLDLVLWKPS  
MFGAKPEMIVKGGAI AWSQMGDPNAS IPTPQPVQMRPMPGAMATGRGQEDNRSIAFVSKA  
AAEIGNVRDKYGLTKSVEGVTNCRNVTKHDMVLNDALPRMEVDPETFEVKADGEILYCKP  
LEKVPLAQKYFIF

>comp14289\_c0\_seq1; 712 420 3296 LEN=3387; translated  
MDGDANALDDLPAWFDPODEERPIGYSHGVVGVHGTATPSQTTPAAFLSLDWGNYDG  
LMREESEFVSAGRKKSHIRNESNP INAVMHVQDNARIPNYNHAVDRSNSNSAVKRSSET  
SVPVARENENSLAEHFLNYESKYRKSLSQYKANLALEDSDFRREIEELAVVSVDPPTPWS  
EIAMQVEEKDQQRQRPQTHFQQVPPQATQRPVTTSSPTPESSVPVLAPAGVPELVSPSH  
PHTSSYPYGRHHQLPIPERASSPQGEITSPLDNNNTAGERVDGMAQAIATAAAIVAGS  
NVTAPTETNATEVERVIEPTPTKSAAPAVNNISGINSFSPTAGLPKRTNQPI TKSNGQLT  
TKGTPIQNRSTLKTGGDLRTLPLNGHLQRQRSNANPPPHAAAHTVRRASVLAATNRKSQYG  
FGGNHTVPSVPAPPTIRSASKP INGRKPKQIAAMKKAPSATASSITKAQNP IPRLPPPAV  
PNCRHPTMPIVNACSAYERKKQKAKDARVKLNE SIERLSIAVSLAGSQRSRRIEQLENE  
ITVTEFRQKSIQVNEEGIKLAENAKKWDRPSFVGTAA SVIQSLNAQCEALMAELGAMQSF

LDAAQNGNRCTSKNVDFKNPSEVSVSPNSSNIDSVPTNTANFEDSSPSTDGIQMPIPNQK  
HKRQDVHVGVEQNHQSPIKRPRIDFQETKNSAEKDKIYGHVAKMLDPVSLCNCVCVSKH  
WRGMQVFAQHDHWDLAVNRFGFSNVRQWSEDLDDDEHKMSKSLYMKMNASNVMPHFSQ  
EGLTFLGSGKIPGKISGWAFIVERSNGETLRSVKRDPKSGVSGGGTYQSRPVVELRIVVQ  
NIGMARQPIVLKSQSIGVDVSTRRRGGEFNEIGWDDRFKKILRNMDGTIRPRVQSPSNVF  
HDDLCSLRLFESIALEVHIDARGCSTTSKFQQRSNFTKILVSLDGTTPVMVIPFLKHV  
>comp14290\_c0\_seq1; 541 263 1870 LEN=2378; translated  
MKFSIFRRNRRRASVGNASILNEHEAMVDPSISSDSDTSTTRRNQSSRKKHRMSRQERKQ  
RQRHRHLHRQNYPYGALPESINDGIDGDLEGNIINKNDRQHYNEYRVAELGRPQKRLQR  
KERMTFKIHDFAECEPEKRGFEFKISPTLHAHGYSWKLQVYPRGDNRSKKNTEYVSCFLHYF  
FSPNDKEAPVAKIGYHCGSHRTQTQICTFAVQKGNSSTSWGLENFLRRDRVLDHHLDEDG  
ALVIHIDIRLAIDPKIVWYPPPMRREPTLMQLYHTSEETGDVMFRLNGSMTSFCYRAHKM  
ILALRAKILYEIVNEESSCSEVDLDSFVIVDLPGVDRDVFAMLEHIYTVKQPTIEDEV  
TAQKLLVAADRFLCLTDLKLYVESVMVDRFLTTEAASFLLLGDAHSCALLKETSMDLYVS  
DPDSVVRSSGWMLDQSERILAEELLAHTHTSCRNCFYEDKKKIIDNMQDANNRNDQEEI  
DAPSVCTNDVDDAMNRLDVFSLREQLCEKGLDVGSRQTLVARLKESQQEAEERE  
>comp14291\_c0\_seq1; 262 1026 1400 LEN=1665; translated  
MIKNKDPDESQQTGGVVHCAGSIIALPSACFLWKVRDPKELTVESLSPILLYRPKLEY  
LFLGSSEPQPQVTE SIRKELRKEAPGLVVEVLVSNAMGTFNVLNGEDRRVAAAFILPP  
DDDE  
>comp14292\_c0\_seq1; 314 1 1953 LEN=1981; translated  
EGCTTCNARTTTEGMEIIPSIINALSFNDTPENLESTVGATATERQQPRKPQHVAFATGR  
NLSTSSSRRRRRPQQENSRAAEQSSTTSTEEGSGYLDVFPISIANVFTTNDAGSNSSSAN  
QANGDCRQKIHIPAKSPNVRSRSYQTENVPETCAAQVFPISIRNVLSMNDSEIVEDSKAPG  
VSYPFVRNVFSMNDVESNKAIEETSNNGNRTMASSSLNLP SMIDELDEISMQREQKPAQR  
ILVTRAYEVKEHYLESVFVYSISAILGVSFRVYMARIFGLDCEYEGGFSDFLSPVATNIC  
VTNGGRTEQTGGALFTDFPSNVFGSFLMGLITPTVGDERRARLPWLHKDHPLQRDEVFHAS  
LGTGFCGCLTTFASWNTQMIVMLDGSYCELG SQVVTVLFGYIIGMMGAACGFHYGRQCGM  
WMYNFRHQNNDDRANSSRGRSEVDDVSSSESQISMDEGVELVDDDNVKLQPVPSHLHKI  
PLFLTAIALLIGFIIANIVSGLEFYRGMILLWVLSVPGSLLRWRLSNLNVQKTEGMFTLS  
PLWIPWGTLIANMLATVISACMEGLNDRYYSGSNQTSIKSKWIDAVIFAFKTVAGSLST  
VSTLVKESVLLSEKYPGTAKGHYAAATCTSGCLLGLTVYAMTIRINNKL  
>comp14293\_c0\_seq1; 646 1 1828 LEN=1877; translated  
XHRILHDTRRLLAEKRERRSWIDSDTSRVRPSVPHTQRRRKETKMPRSTRRSTRNRGSNE  
IVAPGFGTNSDINQLTRDLGGSEGRGLAGASDGDRAPGAAPFASPQTSSAWADFLQEEGG  
SAVAASSSSGTDAEGAGKEPPAKKLRLDGEDGSGSPRGGTGYDLSALSAGKEAASVSYGS  
LVQSGTMDSTLVGRKNLRASDVAVYHLSVPTVLMPRVAITRVCTSCNAAHAVAIDRSNRA  
YGWGRNEGLVLGSEFGEDAKTIPTPKIIASDIETAALGKSHTLFLKTDGTI WALGQNKVG  
QCAWRGNVKQSGILKQCVVSGSKKGDETRDFVRIACGEDFSVALSEKIMYTTGSGEFGQ  
LANGETGEHFVSANKLAFANSFGFSERTV FVENDPTDGSSGDLNRKTVTIQQAIKIQDIA  
AGKHHALALEATPAGGSGGTRIFSWGCGNYGVLGHNROKDEYFPRHCSFLSRGMTFTKLA  
AGANCSLALTAKGHVYYWGNHRSNADAVMKPQLVDALANNQHVVTHIGAGPGNVACTTDV  
GNTVVWGS GPY GELGLEGKKS SAKPAFVDSISGLVVSDMAVGQGT VLYVIK DDEKLPRAD  
LEAIDQALG  
>comp14293\_c0\_seq2; 661 1 1864 LEN=1913; translated  
XHRILHDTRRLLAEKRERRSWIDSDTSRVRPSVPHTQRRRKETKMPRSTRRSTRNRGSNE  
IVAPGFGTNSDINQLTRDLGGSLPRNAV LAMMQSEGRGLAGASDGDRAPGAAPFASPQTS  
SAWADFLQEEGSAVAASSSSGTDAEGAGKEPPAKKLRLDGEDGSGSPRGGTGYDLSALS  
AGKEAASVSYGSLVQSGTMDSTLVGRKNLRASDVAVYHLSVPTVLMPRVAITRVCTSCNA  
AHAVAIDRSNRAYGWGRNEGLVLGSEFGEDAKTIPTPKIIASDIETAALGKSHTLFLKTD  
GTI WALGQNKVGQCAWRGNVKQSGILKQCVVSGSKKGDETRDFVRIACGEDFSVALSEK  
IMYTTGSGEFGQLANGETGEHFVSANKLAFANSFGFSERTV FVENDPTDGSSGDLNRKTV  
TIQQAIKIQDIAAGKHHALALEATPAGGSGGTRIFSWGCGNYGVLGHNROKDEYFPRHCS  
FLSRGMTFTKLAAGANCSLALTAKGHVYYWGNHRSNADAVMKPQLVDALANNQHVVTHIG  
AGPGNVACTTDVGN TVVWGS GPY GELGLEGKKS SAKPAFVDSISGLVVSDMAVGQGT VLY  
VIK DDEKLPRADLEAIDQALG  
>comp14293\_c0\_seq3; 472 1 1338 LEN=1387; translated  
XHRILHDTRRLLAEKRERRSWIDSDTSXSTTIRT AHPTATKGNQDAPLYTPLDPQPRVQR  
DRSSRVRNEQRHQPADAGPRWKNEGLVLGSEFGEDAKTIPTPKIIASDIETAALGKSHTL  
FLKTDGTI WALGQNKVGQCAWRGNVKQSGILKQCVVSGSKKGDETRDFVRIACGEDFSVA

LSEKGI MYTTGSGEF GQLANGETGEHFVSANKLAFANSFGFSERTV FVENDPTDGSSGDL  
NRKTVTIQQAIKIQDIAAGKHHALALEATPAGGSGGTRIFSWGCGNYGVLGHNROKDEYF  
PRHCSFLSRGMTFTKLAAGANCSLALTAKGHVYYWGNHRSNADAVMKPQLVDALANNQH  
VTHIGAGPGNVACTTVDGNTVWVWGS GPY GELGLEGGKSSAKPAFVDSISGLVVSDMAVG  
GTVLYVIK DDEKLPRADLEAIDQALG

>comp14294\_c0\_seq1; 249 354 1317 LEN=1647; translated  
MKQIDDLMDPLEKAIKASQDAFTGSLEERDALDKAYNAQVKA AKLLTELEE QMVPKGYKT  
EVPEQYSDLPQLQQRATVEMVIKKGESGAQFDINGVNFPEARMKMVIDGYNVRYKELLD  
NIDFFF FEKMSLTRTCFLTQPFNIEQPPVTGGNFVDLVNKGFDNMPIQRSDGFVVQTGE  
PAGEAVGYTGGKPSK SIGQGPKGERLIPCEISIVGDKTPLYETTIEDEGRGGEATILPFS  
AYGAMGWARDEYDPNSGSSQFFWLLFDSDLTPAGKNVLDGRYPCFGYVVEGADFLQDVKE  
GDVIVSAKVTEGLKYLKDPN

>comp14294\_c0\_seq2; 493 388 1785 LEN=2115; translated  
MKFSSTLLCALSVAPVAAFTNPSTWSTTCPATTTKTSLEAERN SGIHNAFSTFCATAAM  
SAFLWGS PAMIADQATSHQLPFG LSETVQQHFVAGAKDKASATGSRVNKDAESLLRLGLP  
INSKEVRELQTSLEGIKQDIGSKRKGAAADGAKKVSSILASKKADKMAAVCRDGNFCKET  
MKQIDDLMDPLEKAIKASQDAFTGSLEERDALDKAYNAQVKA AKLLTELEE QMVPKGYKT  
EVPEQYSDLPQLQQRATVEMVIKKGESGAQFDINGVNFPEARMKMVIDGYTSPVTGGNFV  
DLVNKGFDNMPIQRSDGFVVQTGE PAGEAVGYTGGKPSK SIGQGPKGERLIPCEISIVG  
DKTPLYETTIEDEGRGGEATILPFSAYGAMGWARDEYDPNSGSSQFFWLLFDSDLTPAGK  
NVLDGRYPCFGYVVEGADFLQDVKEGDVIVSAKVTEGLKYLKDPN

>comp14294\_c0\_seq3; 396 388 1891 LEN=2221; translated  
MKFSSTLLCALSVAPVAAFTNPSTWSTTCPATTTKTSLEAERN SGIHNAFSTFCATAAM  
SAFLWGS PAMIADQATSHQLPFG LSETVQQHFVAGAKDKASATGSRVNKDAESLLRLGLP  
INSKEVRELQTSLEGIKQDIGSKRKGAAADGAKKVSSILASKKADKMAAVCRDGNFCKET  
MKQIDDLMDPLEKAIKASQDAFTGSLEERDALDKAYNAQVKA AKLLTELEE QMVPKGYKT  
EVPEQYSDLPQLQQRATVEMVIKKGESGAQFDINGVNFPEARMKMVIDGYNVRYKELLD  
NIDFFF FEKMSLTRTCFLTQPFNIEQPPVTGGNFVDLVNKGFDNMPIQRSDGFVVQTGE  
PAGEAVGYTGGKPSK SIGQGPKGERLIPCEISIVGDKTPLYETTIEDEGRGGEATILPFS  
AYGAMGWARDEYDPNSGSSQFFWLLFDSDLTPAGKNVLDGRYPCFGYVVEGADFLQDVKE  
GDVIVSAKVTEGLKYLKDPN

>comp14294\_c0\_seq4; 346 354 1211 LEN=1541; translated  
MKQIDDLMDPLEKAIKASQDAFTGSLEERDALDKAYNAQVKA AKLLTELEE QMVPKGYKT  
EVPEQYSDLPQLQQRATVEMVIKKGESGAQFDINGVNFPEARMKMVIDGYTSPVTGGNFV  
DLVNKGFDNMPIQRSDGFVVQTGE PAGEAVGYTGGKPSK SIGQGPKGERLIPCEISIVG  
DKTPLYETTIEDEGRGGEATILPFSAYGAMGWARDEYDPNSGSSQFFWLLFDSDLTPAGK  
NVLDGRYPCFGYVVEGADFLQDVKEGDVIVSAKVTEGLKYLKDPN

>comp14295\_c0\_seq1; 852 145 2391 LEN=2710; translated  
MASTASTSSSEMASAATPTVSSMTAASGASTPAAPDAVPLPPEASSFPLKRTVVTA KRK  
EELLLHARAERKRWRVTVP LPYDSKQLASIVGNNAEAGMGAANGT SKAINEFWSSYDGL  
DRFQNSLICSSQFLPVATAVLS ELYGIGGTLESD EDDDDVEVDNGNNNDALKEHREHPLSL  
NETAKRVEQLANSYVWNEEKESHGSDQKVETKSEKNIPDATAQKNGARANTGANDDDDKD  
DKYEDLRTAYSEFLNTMLLPESA VTVQGMKNFLRQFVASPQSTKQYSDHELQVRNMA SML  
NGHARSSYESLITEKNSNSNTSNTGEGVPDWSRRSLESFLYGQTKETVDSILDRVLGNSA  
IEPSSSPFSMTQRLFDVRL EELQFLQPSHLDIACLNDVDNKNR LSGSTAPT GKSELES  
LLEEP IKSLSQIEAFYSPYEKLSRVLEVFVRGVNVALSKTSEALPSADDVLP TVILVVVKA  
AAITANKKIKAPPLRNLLRDLYFIESFALPEYLRGEAGYAF TNLYGAVQFLQELELDRAN  
DGMTNAGPSNSLSISAEELRVKLEKSRADATKYNKKRQAMLGTSNDDERK LKGLISQGE  
ELLGGNNDGTEEAGTFVPALPRLSVMEVRAARLRGETLNLEWARRHQEGQPTYGDPMSRD  
GTKLASSPTKSPRSKAPQQRYSFLGLR PENVKLSDLPKLLDEYKRLAL TTEELLGEQQR  
LNSKIQSERKRQRDEKYLRLSLGERALLL

>comp14296\_c0\_seq1; 1398 136 2931 LEN=3020; translated  
MLFRPLATPVGVVLLAALMGRYEEGVEARSSPAFVPR TASSSFALTEITSSHKSISQSI  
IDNIPRGGAEAESDDSEDEEAETEVL YLPGLLEVQLIATDQPTAITDS AISLSAKKAKE  
LGVSNGEVVAVIGRRRTATYGRVLVQKKK VSSICTVSEN LAKNMLRKGDKVKIVPLD  
DESSSDEGNRSGDLVLVGTASAPIVESVTLSP IEDSLASLEAVEGGDSISDDDI ESRFIA  
PYLEESGGLLKQGQVLV LNDEDGRKLEFVVS NLMIEGASDEASEEGTEEE EVRAGELNGE  
TVT VVGG SAPRPLV GAGYDSVGGLEKAT TLMRELIEMPLRFPELWTTAGVPTPKGVLLHG  
PPGCGKTLLANALVEETGAHV VINGPEIMARKGGESEANLRQAFEEAAEKAPAI IFMDE  
LDSIAPKRDEAQGETEKRVVSQLLTLMDSLKTNSNMVIGATNRPNVIESALRRPGRFDR

ELEIAMPDEDGRHEILKIKTKDMQLDQDLDVDFQIARDTHGFGADLQQLTLEAALQCIRS  
NIQNLDIDSEPIPEEDLDILKVTNEHFTHALSQCDPSTLRDNKVEVPDTKWADIGGLEQ  
TKRELQEMVRYPIEHRHLFERFGMQASRGVLFYGPPEGKTLMAKAIANECGANFISVKG  
PELLNAWFGGSEANVRNLFDKARAASPCILFFDEMDSIARARGSGGSGSDTSDRVINQI  
LSEIDMGSGKTLFIIGATNRPDILDPGIMRPGRLDQLIYIPLPDFESRVSIFKANLRKS  
PIADDISLEQLAGATEGFSGADITEICQRAAKNAIRDCITADIERQKRVEAGEMTQEEAD  
ALPDPVGAITKAHFEASMSKARRSVGPEIIAQYDEFTAKQKASWGAGNENDSAYDIDQAA  
IDQSREDALLEGADEEEEEAGVPVAATGDEEEE

>comp14297\_c1\_seq1; 268 299 1569 LEN=1780; translated  
MLNPRSKQQQAVVFKFFISTVIVLDLVAFILSTDPDLTWINDQVFATWEAIDSWIFLLEY  
ILRLITVNESEKHRSMGPIKGRLSYMVSTPAMIDLVAATMPYFVEKCSGYDLPTLTYLRSF  
RLLRILKTQGFIEAIKSVCRVFRYNSEILYVAVWIGLGLVLTAVLMYYLRPRNEDNPQF  
KSLPATLFLAAMMLTGQGGPEGALPWTSSVLLTGAFSIGMFAIPASMLTWGFEGXVFQ  
RRRIGTKKVKKHKHIPAHRIAHVLHRDICFCTRARTHLCSGEAERLAKLRKMKCANPSN  
GNNQNDNEITDDWSFSSSDYSTDEEYLNTIAGFEDEDDSDDEDLRAKAFKSGDTDGDGNL  
SLREYMALSKRMESANDLRRSTKDFNNPLLARRLEVLEQKVEENSKKLDKICQILEGMKV  
SRS

>comp14297\_c1\_seq2; 195 82 461 LEN=672; translated  
MHIIVLFLIFILEPDTTIXIASDYSTDEEYLNTIAGFEDEDDSDDEDLRAKAFKSGDTDGD  
GNLSLREYMALSKRMESANDLRRSTKDFNNPLLARRLEVLEQKVEENSKKLDKICQILEG  
MKVSRS

>comp14297\_c1\_seq3; 329 299 1435 LEN=1646; translated  
MLNPRSKQQQAVVFKFFISTVIVLDLVAFILSTDPDLTWINDQVFATWEAIDSWIFLLEY  
ILRLITVNESEKHRSMGPIKGRLSYMVSTPAMIDLVAATMPYFVEKCSGYDLPTLTYLRSF  
RLLRILKTQGFIEAIKSVCRVFRYNSEILYVAVWIGLGLVLTAVLMYYLRPRNEDNPQF  
KSLPATLFLAAMMLTGQGGPEGALPWTSSVLLTGAFSIGMFAIPASMLTWGFEGEAER  
LAKLRKMKCANPSNGNNQNDNEITDDWSFSSSDYSTDEEYLNTIAGFEDEDDSDDEDLRA  
YKAFKSGDTDGDGNLSLREYMALSKRMESANDLRRSTKDFNNPLLARRLEVLEQKVEENS  
KKLDKICQILEGMKVSRS

>comp14298\_c0\_seq1; 402 115 1439 LEN=1822; translated  
MDRSAQSFADFMRSNDPENNKGIACKRGSIGDGDSEEDSFGNSGDLIGSSFPDPDTQRHQQ  
EQHLQQHRSRSGVAAVALAPPPAPRRRTGDSTSHSHSNHSHSDSNTNSSSSHLTGPH  
HSLDSFRQNAVAVAAVAFATNSTVGSNHPSYGSTSEFPLDHGGGNSNSRNRNGHNYAPR  
HNLRRHHQQQSERKQPPPYQYDARNLKDLSYSYQQQSFDEDETDNRNRPGLNARHQAKE  
RQHEEAQPEHPSPYQHYSLPASGGDRSDEIYGTYRGGGGPANTSRAGGADGVDALDRK  
LPGTSPSRDGSRRRASPGHESNRSGGSSGARSSGNVNGNPXTAPAGEAAGPDREARL  
AKVVCPAAGPPKPVAVVVVAAAAGVARPRTTSDGEHDTGGMRWVHVVPYQKHSKECHCTG  
MSAMPAILSYRDVPRGAIGNE

>comp14300\_c0\_seq1; 1065 258 4070 LEN=4384; translated  
MLFHRNTHSKNNQIRNQTHPLNPAFEDDDDLEKREKCCIRTNVLCRRRKLVRSFLLLS  
FIFAARNALYHSLSSMSTASSDNLKHDFTLQPORYQRQRQGTTHRRSPTDHACDGYEGYI  
HIEKGDIGGAAGTVFFQFVIGQILWAEKYKFKPWVHFNNVSYIVFDPVVHGNSSGVDVTM  
QKGMKISYVSRPMGHRRAVPGAPVGDPKNLTFFHFHFDGDGVWNNYFEPISDFAPGDKS  
CESKPLVTMDLYLVTGPVHGFSGAPRCWRYEYLPDYITKPHIPLNDWLAPQRQSAHDVFN  
RYIRFLPHIEELAEDANPYCSLHNSCLGLHIRHSDKAAGRVRLETDEFLLPYVQSFLAAGG  
KWVYLATDSENVVDHIKNRWPRNVLKVIRSLGDNVVRNDLQAVFDIGSHHRTNTEILVE  
ILALSCKQFMIHGLSAVTESSIWINIDLHYTSINLEDSEHSRAHEFEDLVRNVLNGENAS  
QIAKEKKIPDWMWPHSNYLQQLPTKDQSCDSVNGILHISHIDPHDGSAAFFTSVLNQLI  
YAERNNLKPWVHLSDSSNLLYDDEIHGTDVSI IENVENELMIPLTRNDQNASLVYPGPPM  
GSEQSNQTKRLRLQGNLIWSSYFHPVSDVFPVSGESCTGKPILSMDSMVSLSNSFDPLS  
SKAWQYDDIPNNLWNPDLTLKSWLEPMRSRASEIVKSYFKNSFIVERVQQVNPVNST  
PPCLAVHLRNADKEGSHRTKFPNPKFRDYLVAFARAGGKEVYVASDSHRSLEYIIQHFP  
DVQRMIRTQGSFVVRSSWKWPAHMLEKHHRVNSEALVDVLAMSKCQFLHGNLSAISEAAI  
YLNMNHLNQSUNWEDPHRLSPVEFYSMVEQVLTSSGKVSKNANANEVRAEKTSVKIDAK  
ISKGSQNHICKRNAIVYLQKQNHSSYDRNSFNLSLESLELMNTNYLSLNNHQNTDVIIVF  
HTADFDTDDMNLIEGRLGSKFREALLYFIDLNTSYWRRPSWHSQDNPHDWAYAYPLFSEGY  
RQMMHWYAIIDIWRFEDYRKTGCLYEYIMRFEDEDSFLRSPVKYDVFDFMKENDFNYGFR  
LCSYEMQVTRRIWKIWRNLKGSAPIRIDIDLMCGIYNNFFVAKLSFFQSNEVRRFLKVV  
DRQGMIRRRRLGDLMIHSMVYAFSPKEKIHRFLDFTYEHSTVDSKTCVTVGGIQAGYN  
DPNASSTLKKYLQQKVLGVEGCTANISLMTTNDLSPSYQHLEDTLMGRELNLKTIMAGKV

ELPDQGLLSG

>comp14301\_c0\_seq1; 648 322 1809 LEN=2127; translated  
MSSLVSGDSSVSGDESIEESGGELNPIEIDDSTSSNSESESDSPSGSFVLSGNTQNDKNDY  
ETKAAKGNHSGEDGDEEYVEGEDEEESNSNSESESVVDVDETEGNYNMDGEDDNDDEKDDD  
ETNSDPIRKASPKASAKTSGETSTMPEKVRKHIWGDIESMLEIKKSPYEGYECAEVGEDC  
FEELR TMLHYTGKRNDEINPKLAALVGDKLALDLYKAHYEIGKSGILYSANWREGKIRDG  
DFGLIPKGSLLLCLHEHRFARGSESLQAVARNLECTRIVLEAMDTWHLTEDFPNLLSTK  
DEDSFVFATQKSSCYKCEIFVARAFQTL LLLL NKTHEVTSVLTKKIKECLALMKNKHVRPNQ  
TALARMRDKPPRSTRRARAPARVDRARKSRTPEDEGEGPGHPSPAAAQEKKTKRPSRRRR  
AKAETGGGNPPKRRRKVQDSGERMESLLMLFDNMQSQIKRICQMMTFYGTQLRDHRDILR  
DEIMESLLEGEKSGG

>comp14301\_c0\_seq2; 648 311 1798 LEN=2116; translated  
MSSLVSGDSSVSGDESIEESGGELNPIEIDDSTSSNSESESDSPSGSFVLSGNTQNDKNDY  
ETKAAKGNHSGEDGDEEYVEGEDEEESNSNSESESVVDVDETEGNYNMDGEDDNDDEKDDD  
ETNSDPIRKASPKASAKTSGETSTMPEKVRKHIWGDIESMLEIKKSPYEGYECAEVGEDC  
FEELR TMLHYTGKRNDEINPKLAALVGDKLALDLYKAHYEIGKSGILYSANWREGKIRDG  
DFGLIPKGSLLLCLHEHRFARGSESLQAVARNLECTRIVLEAMDTWHLTEDFPNLLSTK  
DEDSFVFATQKSSCYKCEIFVARAFQTL LLLL NKTHEVTSVLTKKIKECLALMKNKHVRPNQ  
TALARMRDKPPRSTRRARAPARVDRARKSRTPEDEGEGPGHPSPAAAQEKKTKRPSRRRR  
AKAETGGGNPPKRRRKVQDSGERMESLLMLFDNMQSQIKRICQMMTFYGTQLRDHRDILR  
DEIMESLLEGEKSGG

>comp14302\_c0\_seq1; 729 191 2352 LEN=2386; translated  
MLPKTTTTLPFLVLAFLAAAVRGQEKS DSSGHNATSPVPSSFPDAPFYDDEDIDNDQSDSD  
AEEGCGAGANCTYSCGDYSLALPIGRLGNKSGSGSSGKGERPVRFISADITCAFDSDRKI  
FDNDYISRNDIKNMVWKTNEGDPVLLWKLGGGGNLTVSEPPNSAADVGAGADGTSQGA  
VDPRQWCGEPQQDGEICEDDDIAIPKKIHVRIYAIIDDLEPRYRSHPWEMILPFYDVLDP  
VEFDNHSYLNSELLRFVWNR TAGKKRRRKNHPTTWEKIVEDTRGQEKDENYAALEMWIPN  
WMLETSIIMGPKYDYSLGIEIGGTVNSGGNGSNDNNETIAAASETNETTFEIDDP TFLLT  
QGPPSRLTVLNRGIGTQVTLVISPDESSESGVDPGTELRFDESMSGEVRIKTHENVTGTI  
QMAGSNVRAAIVRS GADDTGENVGGGERLRVSVTGFRQVVTADGDDTHIALGGDSNTLF  
TTGGCLMRDGMVTVSSSSTCEEVNDLLRNITNGTTIANETS VSEIAAGPESSWQWTLGA  
NLNYTNGTFPDAWRLKPLLPVVKLPKDCLVETETMKYCNPLHSETRSEKFFSFVPLVIL  
FIFVFXGGSNDHDFVTAFRGTIGSGNSSVRALVVTESCHTARMLRRSRGDHFLMDAARH  
EKGNPATNAHFLAFFAWKIHEL VKDAWLRRCSSRSVSVARDSYSAMTAIKQKTPLVFF  
>comp14303\_c0\_seq1; 990 117 3686 LEN=4136; translated

MGGPKQVQLQKQEEVSSAQTMDEVNRHIGTVKTNPIESDKKSKHVAAGSNPKAIETEGN  
TTTKAESANSATQPAPEIGQWTMSTEYHGPHSKSPGRSFSIFYSPEHKYGFSGPAEAKK  
FLAALAMIEDGDERLAYKAYTALGQNTREKQKSTLDDDDPPPKRPPTTYVMYTAKLRKM  
MAENKDKHYVVD SKKLGEHWKRLSTKEKEKLVYDQKQLEVYKEMKQWQLRNPGLNKLA  
KPKKKRRSSVASDFKDNTAKKLS PSSGPKKVKTMKKTNEKDETEI WAVEGFRDRR INKK  
TGNVEYLIKWKDCPESSNTWEP SKNLNADDAE EWWRQEKERQSNEALRTKRIEESTQRLL  
KNINALSSSEDDESIGGDMESTQYGT SRKRRRAQHKS I IAGDYEAISEQQSVVNTDCC  
QGTVPVAGTNEIKMATGPNPVEDKTWNWDDASQVKFRPIQRISVHDKRARDLVTEARING  
TPVVLTDHVGWANFALRWLRRRKDLGSAPPATTTTQEKLSTEVESTGEPKGHVSLSDAVP  
VKNASMELENEHQAKSGNAIIVSSDAEVSDKGALNKPEGKETETDEMHNKTKSGQNER  
NDLNDEESKGGAEVSDGSNGTNIHNNVTQEMNGNGNAKISVVGKPLDLSETTWYLDVEA  
MSKDIGDEEVPVVRKNYNE SKPISGNILASKFFEVGWNNKKKGS PRKRRKSILYLHQWQF  
PLSVEAGKKLCHQSAPLPNHILGEDLLKYWLD RVKLDSP LQYLFMGKADTMSRIHRDNGG  
LAISITPIIGEKECILVHRDDGHACLYQNLAGLDPNEIDL NAYPLLPHARIWKSTIVPGE  
ILLMPHGTYHQCRNVTPCLSYSRFHLDGVNLR AFLHSMMDGDAPELNQDEVIWNATRELI  
DTVDKATDEKKSVDPELFAVDALRALRNIAKEVTRKLQIRRTVKGEDPSTPIVSSVTKI  
DGDAEVWQSLVDDVDVCLHEFRYRFNKKIPPFKRRRSIGKKILALPALPFRGKAKPSHEE  
LYQGQNEPVAFAFECPSDRSFLSLPEAPSNVTPADRKA IADGIGSIVPGDKIDVRIEGRKC  
PAIVTEVYPNAHAAYVSFEDLPSLYNDFCLFDHLRISVVGGSCLVPPLPEDVVVVKLFVC  
LIGKDEYRGVVQRLKKGPMVRVQLDFGKGHKTDKLVVDVDSILSLHKIKK

>comp14304\_c0\_seq2; 504 263 1684 LEN=1851; translated  
MFAATTAASRIRESSAGVVTVEAGEEVLRSVRISAGGRENILFDPSALKLRELLNAGYP  
RGKNEILSMLSKEFPPTKQKWFEDRGVTFVSEKDGRRMTIPDSGNDDMLPSSTVCDAL  
LDEATKAGVQICTRVKIIAISKEKDSFVISKMDIEGGNFEEEWDCVILATGNSHSGLSL  
AKSFNHTIQGPFRCFGFRSSNRDKNSSEKARSYKVPISVSDGIHKIHRARLTLKIKV



PGQKRPRIFKKEGPVEVLICGNSVKLTGMAAFNLASIAAPELKRENYSGTILIHFCPDIG  
KVERVEEILWDRRQDQRYASQRLGEOCLVHEEIDYDNYDFETDTFPRVNTCEVQDIWE  
NLCQNSGATSNYKWSQMSPKIRALADLTVGYEFKFEKHTSRDEFVNGGGVSLNEIDMP  
SMKSKIIDGLILCGQILDGDGAHGGFTFMRDFGSGFIAGKTAANYAVQNQSGL

>comp14305\_c0\_seq1; 309 382 1290 LEN=1434; translated  
MNPILRVNTSATQPSLDYLFHEDEDCSRMIHRTFAFDEWDEEETLTNEASEAIVGLQSEI  
HEATDEYIHYEPEEESRQRTIYRSFAFDEWDNEVSENFEEEFMNERSFIPINSDGENHGT  
ETTKFDIDNIHITSTTVTPSHTPDKFPHFEYFPVYPSRSVRRLDFSSVLPDQNTQTTP  
CRQQNLDPDFPRTLTMHPGDYSALKHMLRQKFVYSPMCESIPRRGSAFHTVTPVTEPSS  
PSSSANHWNDAPKNCDSPHLPDNQFLDQEDTGHVFNPSSSFEGNHEVSPPIPEFVVIYK  
SV

>comp14306\_c0\_seq1; 406 1465 2746 LEN=3014; translated  
MMIETIPKFNDNKNRVKQVYQSNVVKRDLQPVWNEATLDLEAICNGDVNRAMKII IWDHRR  
SGKHKLMGEFETSVRGLINASRSSNSNELINFPVQRQDNKPAGDCEVMKAYIIIGGRERDV  
GMSHSMPTAHVTQQMAAASISQSMPSRESVPAQRPEFTDYLIIGGCQISLAVAIDFTAS  
NGDPRVPGTPHYFHSAGSKQWNDYEKAIFAVGSILAKYDSDNKFPVWGFAGAKYSDKVRHC  
FQCGTDVEVEGVQGIMDAYRGVFRTPLRMSFPTKFTTEVIHTAAGYAQHEQEGAREEGHLS  
YTILLILTAGNVEDVQETKKHLIAASKEPLSVVILGIGDEDFTGMEFLDAFDADVEKGRD  
ITKFKVFNKYKSYNALTEAVLDEIPDQLVEYYYYDQGIMPGIVEDFNADMVEVQPADDDER  
TFTFLG

>comp14306\_c0\_seq2; 214 413 2647 LEN=2915; translated  
MATTRLQLSLSGKNLKNLSGFMGVSDPFAVVTSRGDNKDNAPEIIGRTEVVFNNLNPEWS  
TIVFLDGYKFGFRPFYIEVGVDFDACAAGSTEKKLQMNDAQTNLNIIVYDASSRALLRKGQ  
FPHRVMGTALFEVGEILGSRGNVGSKSLQTGGIIYAHVERCKEDGEQKFCFQLRAFKLR  
NTHSSLMGMTSCPFELLRQVDRPTGXSMVETQSINTAVRLYVTRCYAAQNNNGMKTIVYL  
GGMYNCECANCYGFRRFFVIEKMMIETIPKFNDNKNRVKQVYQSNVVKRDLQPVWNEAT  
LDLEAICNGDVNRAMKII IWDHRRSGKHKLMGEFETSVRGLINASRSSNSNELINFPVQR  
QDNKPAGDCEVMKAYIIIGGRERDVGMSHSMPTAHVTQQMAAASISQSMPSRESVPAQR  
PEFTDYLIIGGCQISLAVAIDFTASNGDPRVPGTPHYFHSAGSKQWNDYEKAIFAVGSILA  
KYDSDNKFPVWGFAGAKYSDKVRHCFQCGTDVEVEGVQGIMDAYRGVFRTPLRMSFPTKFT  
EVIHTAAGYAQHEQYVLAYYHFWMLFVLSNIDWEGVENVNNRSIFRMTXNKLTYYDSSCT  
TTIVPILEGAREEGHLSYTIILLILTAGNVEDVQETKKHLIAASKEPLSVVILGIGDEDF  
TGMEFLDAFDADVEKGRDITKFKVFNKYKSYNALTEAVLDEIPDQLVEYYYYDQGIMPGIVE  
DFNADMVEVQPADDDERTFTFLG

>comp14306\_c0\_seq3; 281 1465 2907 LEN=3175; translated  
MMIETIPKFNDNKNRVKQVYQSNVVKRDLQPVWNEATLDLEAICNGDVNRAMKII IWDHRR  
SGKHKLMGEFETSVRGLINASRSSNSNELINFPVQRQDNKPAGDCEVMKAYIIIGGRERDV  
GMSHSMPTAHVTQQMAAASISQSMPSRESVPAQRPEFTDYLIIGGCQISLAVAIDFTAS  
NGDPRVPGTPHYFHSAGSKQWNDYEKAIFAVGSILAKYDSDNKFPVWGFAGAKYSDKVRHC  
FQCGTDVEVEGVQGIMDAYRGVFRTPLRMSFPTKFTTEVIHTAAGYAQHEQYVLAYYHFWM  
VLFVLSNIDWEGVENVNNRSIFRMTXNKLTYYDSSCTTTIVPILEGAREEGHLSYTIILLILT  
TAGNVEDVQETKKHLIAASKEPLSVVILGIGDEDFTGMEFLDAFDADVEKGRDITKFKVFN  
NDYKSYNALTEAVLDEIPDQLVEYYYYDQGIMPGIVEDFNADMVEVQPADDDERTFTFLG

>comp14306\_c0\_seq4; 339 413 2486 LEN=2754; translated  
MATTRLQLSLSGKNLKNLSGFMGVSDPFAVVTSRGDNKDNAPEIIGRTEVVFNNLNPEWS  
TIVFLDGYKFGFRPFYIEVGVDFDACAAGSTEKKLQMNDAQTNLNIIVYDASSRALLRKGQ  
FPHRVMGTALFEVGEILGSRGNVGSKSLQTGGIIYAHVERCKEDGEQKFCFQLRAFKLR  
NTHSSLMGMTSCPFELLRQVDRPTGXSMVETQSINTAVRLYVTRCYAAQNNNGMKTIVYL  
GGMYNCECANCYGFRRFFVIEKMMIETIPKFNDNKNRVKQVYQSNVVKRDLQPVWNEAT  
LDLEAICNGDVNRAMKII IWDHRRSGKHKLMGEFETSVRGLINASRSSNSNELINFPVQR  
QDNKPAGDCEVMKAYIIIGGRERDVGMSHSMPTAHVTQQMAAASISQSMPSRESVPAQR  
PEFTDYLIIGGCQISLAVAIDFTASNGDPRVPGTPHYFHSAGSKQWNDYEKAIFAVGSILA  
KYDSDNKFPVWGFAGAKYSDKVRHCFQCGTDVEVEGVQGIMDAYRGVFRTPLRMSFPTKFT  
EVIHTAAGYAQHEQEGAREEGHLSYTIILLILTAGNVEDVQETKKHLIAASKEPLSVVILG  
IGDEDFTGMEFLDAFDADVEKGRDITKFKVFNKYKSYNALTEAVLDEIPDQLVEYYYYDQG  
IMPGIVEDFNADMVEVQPADDDERTFTFLG

>comp14306\_c0\_seq5; 470 413 2275 LEN=2543; translated  
MATTRLQLSLSGKNLKNLSGFMGVSDPFAVVTSRGDNKDNAPEIIGRTEVVFNNLNPEWS  
TIVFLDGYKFGFRPFYIEVGVDFDACAAGSTEKKLQMNDAQTNLNIIVYDASSRALLRKGQ  
FPHRVMGTALFEVGEILGSRGNVGSKSLQTGGIIYAHVERCKEDGEQKFCFQLRAFKLR

NTHSSLMGMTSCPFELLRKVDRPTGAAWVKVYQSNVVKRDLQPVVNEATLDLEAICNGD  
VNAMKII IWDHRRSGKHKLMGEFETSVRGLINASRSSNSNELINFPVQRQDNKPA GDCE  
VMKAYIIIGGRERDVGMSSHSMPTAHVTQQMAAASISQSMPSPRESVPAQRPEFTDYLI GG  
CQISLVAIDFTASNGDPRVPGTPHYFHSAGSKQWNDYEKAIFAVGSILAKYSDNKFV  
WGF GAKYSDKVRHCFQCGTDVEVEGVQGIMDAYRGVFRTPLRMSFPTKFTTEVIHTAAGYA  
QHEQEGAREEGHLSYTIILLILTAGNVEDVQETKKHLIAASKEPLSVVILGIGDEDFTGME  
FLDAFDADVEKGRDITKFKVFN DYKSYNALTEAVLDEIPDQLVEYYYDQGIMPGIVEDFN  
ADMVEVQPADDDERTFTFLG

>comp14306\_c0\_seq6; 426 808 2535 LEN=2803; translated  
MFLCRVFNNLNPEWSTIVFLDGYKGRPFYIEVGVVDFDAKAAGSTEKKLQMND AQTNLN  
IVYDASSRALLRKGQFPHRVMGTALFEVGEILGSRGNVGSLSLQTGGIIYAHVERCKEDG  
EQGKFCFQLRAFKLRNTHSSLMGMTSCPFELLRKVDRPTGAAWVKVYQSNVVKRDLQP  
VNEATLDLEAICNGDVNAMKII IWDHRRSGKHKLMGEFETSVRGLINASRSSNSNELIN  
FPVQRQDNKPA GDCEVMKAYIIIGGRERDVGMSSHSMPTAHVTQQMAAASISQSMPSPRESV  
VPAQRPEFTDYLI GG CQISLVAIDFTASNGDPRVPGTPHYFHSAGSKQWNDYEKAIFAV  
GSILAKYSDNKFVWGF GAKYSDKVRHCFQCGTDVEVEGVQGIMDAYRGVFRTPLRMSF  
PTKFTTEVIHTAAGYAQHEQEGAREEGHLSYTIILLILTAGNVEDVQETKKHLIAASKEPLS  
VVILGIGDEDFTGMEFLDAFDADVEKGRDITKFKVFN DYKSYNALTEAVLDEIPDQLVEY  
YYDQGIMPGIVEDFNADMVEVQPADDDERTFTFLG

>comp14306\_c0\_seq7; 301 808 2696 LEN=2964; translated  
MFLCRVFNNLNPEWSTIVFLDGYKGRPFYIEVGVVDFDAKAAGSTEKKLQMND AQTNLN  
IVYDASSRALLRKGQFPHRVMGTALFEVGEILGSRGNVGSLSLQTGGIIYAHVERCKEDG  
EQGKFCFQLRAFKLRNTHSSLMGMTSCPFELLRKVDRPTGAAWVKVYQSNVVKRDLQP  
VNEATLDLEAICNGDVNAMKII IWDHRRSGKHKLMGEFETSVRGLINASRSSNSNELIN  
FPVQRQDNKPA GDCEVMKAYIIIGGRERDVGMSSHSMPTAHVTQQMAAASISQSMPSPRESV  
VPAQRPEFTDYLI GG CQISLVAIDFTASNGDPRVPGTPHYFHSAGSKQWNDYEKAIFAV  
GSILAKYSDNKFVWGF GAKYSDKVRHCFQCGTDVEVEGVQGIMDAYRGVFRTPLRMSF  
PTKFTTEVIHTAAGYAQHEQYVLAHYFWMVFLVSNIDWEGVENVNNRSIFRMTXNKLT TY  
DSSCTTTIVPILEGAREEGHLSYTIILLILTAGNVEDVQETKKHLIAASKEPLSVVILGIG  
DEDFTGMEFLDAFDADVEKGRDITKFKVFN DYKSYNALTEAVLDEIPDQLVEYYYDQGIM  
PGIVEDFNADMVEVQPADDDERTFTFLG

>comp14306\_c0\_seq8; 345 413 2436 LEN=2704; translated  
MATTRLQLSLSGKNLKNLSGFMGVSDPFAVVT SRGDNKD NAPEIIGRTEVVFNNLNPEWS  
TIVFLDGYKGRPFYIEVGVVDFDAKAAGSTEKKLQMND AQTNLNIVYDASSRALLRKGQ  
FPHRVMGTALFEVGEILGSRGNVGSLSLQTGGIIYAHVERCKEDGEQGKFCFQLRAFKLR  
NTHSSLMGMTSCPFELLRKVDRPTGAAWVKVYQSNVVKRDLQPVVNEATLDLEAICNGD  
VNAMKII IWDHRRSGKHKLMGEFETSVRGLINASRSSNSNELINFPVQRQDNKPA GDCE  
VMKAYIIIGGRERDVGMSSHSMPTAHVTQQMAAASISQSMPSPRESVPAQRPEFTDYLI GG  
CQISLVAIDFTASNGDPRVPGTPHYFHSAGSKQWNDYEKAIFAVGSILAKYSDNKFV  
WGF GAKYSDKVRHCFQCGTDVEVEGVQGIMDAYRGVFRTPLRMSFPTKFTTEVIHTAAGYA  
QHEQYVLAHYFWMVFLVSNIDWEGVENVNNRSIFRMTXNKLT TYDSSCTTTIVPILEGA  
REEGHLSYTIILLILTAGNVEDVQETKKHLIAASKEPLSVVILGIGDEDFTGMEFLDAFD  
ADVEKGRDITKFKVFN DYKSYNALTEAVLDEIPDQLVEYYYDQGIMPGIVEDFNADMVEV  
QPADDDERTFTFLG

>comp14307\_c0\_seq1; 1784 90 3935 LEN=4175; translated  
MGMGWKKTVLC LATLLAVVGAEAEAKRAVPDDAVDLTGDGTETKADDD SAPIRLTKWLASV  
KGGFFSNKQEV RPIKAAGDGKAFHGIFAKESIRRGEILAEIPWEFIITDVEDDPSLSEND  
LDEAVLKCGTARNLAQEMKQVQTLGKYIKDPNSVSKYGPYIQYLLDQPLGLIPSEWSTKG  
IALLNDILGSSRQNI PPVYATTWLEEDWLQDCAGDPKDDL GAKAAMIVVSRADDDLLVPV  
YDMYNHRNGK WYNTHTMVTN HGVNYQVTARRDIEAGEQIYNSYNMCDNCGGRNDGYGTPEV  
FRDYGFVENFPQRWKFEELD IMIDLDESEGDELQVTWNQKPDEKEIEATRRLIMKELRR  
LIKRRQILRTEYEDGKSTIPDKELNDVWEFYDATVNALTA AFNDIVDDDSKKIPVSTES  
CAADEICGLNYFDDLDWEKDETKYNIQTCDNKEIMQFPNYWMLEGLKTHYQQLNFAYGEL  
NGDICMDLED TVQICSTYRPHYHEFSSHFAARFVDNVKNVVFVGGGDSMMLHEVLKYP SL  
EKVVGLELDQTVVRKSFKYFHTQPHFDNDKVEWFGDATKSLLLL PKDYWGSFDLVIDL  
SETVMAFSVTEKLDVFDALALLLNPDGVMVKN EHYMETMSETFDYTLQVYLDQNPKICSQ  
CMIFGSNKADFFHKPVVEHGVETLLEPVKELKDG YDYFHDVRKNNAMAQ GKCDLNTEEK  
DETEEKKRAGLLHILDAEGVEVDLNKETTERAILAAA EKVGFTRIE PNKDKSLAPASTKS  
DGN DSTSTMVNVVFKEGYASARIYPKSYAAVDVGVWGSFENGDEF RKQIAKELKAETTS  
FFRVVGGMYGSNTWEVDKDLIGPQIVQQRNCEVQDKNDTELTDDVSVNSVLNEAMNVLD

AQKSVAAVFCGVKDVDKCPSLDLLEKSTMVSKVIPVWACPELSNISDEDEAGKFRKMTEC  
ENKVVGTLMTGRGFDGDIKTIIVLDGSAPYEMGQIVNSILTVDDHRDHLINHHYIISLS  
NKPRSEQWRASMLERHRKLIILYDPVKTVKYDITADGISIELCMLVYDNDKTGFKTFRSLE  
DNITKALASNGVDATAEVTAVTGGFRFQHNFNPRTYVQEDYPEIPGKVQWDHQESFGRK  
TVVQYKKEFAQDFDAEGFVGLVDSIIGGDGKNLYDLQTYTVDVGDGLVIIADSTAGSVI  
LVWDGKEHVDLNFFLHDDTEFEIKEHLEEFEKLTKLQAMMTRLRDDFPRGTGRVMNFRADM  
IYHGVNSVVDPEPYVDMSSDDE

>comp14308\_c0\_seq1; 361 376 1896 LEN=2876; translated  
MTTTGGSSMRSLIRPRTSSPRSPSIRQARALSPRSVIFECQDEDVEHLKHLTQPDYGD  
SSCEDLFFDDNGNNNDGRNSTLPLMPLYPTTYPRSNIAMNIYSDRNNRSRNRKRLFSSEL  
PPRCSLNLRRHKISDETVEWLAASSRYNPNSDNNSSPSHVSPGTENEYEVLPNPSQEQ  
HLAIRATPRLQPVRVEELWLGPVFESSQTVLAAIETLPASVMHLDLDRNTLHLLPEAMP  
LLFAKGHLKHLSLRVFGDAGAEVAKWMNQPNLEHLDLRGNRIGSLGARTIVDAIISWS  
ERHTGTTIDCDDSYPLHRLSHLNLSCNCILHGDLIGQLLALNSTLTDLDLGYNWFGDQDV  
EEICRGLSKNKSRLKLNLFGCNRISSLGKMAILHCLKEHNTSLHTIGIQAFDEEGEELVR  
QIKYWLKLNKAGRCLVKSSLPASCPSPPPQQGSLSRHRCGTSGQKKVPMGLWPLALGKSE  
VDPDSMFFLVREGLSPWITNHNSEPT

>comp14309\_c1\_seq3; 887 1 4086 LEN=4264; translated  
XLGGDGPTSRADAERRFRSRWVNLMSLATRCCATVDTNKRGMMLDVRPYVVIKVIPGG  
SCDDCAYISGIAFRKTGTSTKQMPREIINPKIMLLSGGIEFTRTARIASLDTLLEQEDKYI  
EILVGKILKLEPDVLMVGKGVSRRAQDILLIENNVQLLQVKASLLNRISRQTGATIISS  
DHIMNQFGAHVLGKCHRFRFIVARDNESWVSGPSGAVSNGQHIIQTLLENEKLSNHERQA  
ALAAKILGEDILDGSEAIRSGLAKRGVTQTYALLEGFQNSSDAXVVLRGANKAALKQIKN  
VFRFLVGAAYNVKLEMSYLKERCARLPDYKVEKKNLFSFSCVDYGTTPNSRKVRPWNG  
GTNNEGIQRSISGQITAFDHQSILITSVWMTDKTQCCPAEVKGCYYSVQDVSLGQFLRD  
SCFNLSLKCQNPSCKKSVLDHLSLHVNDGLINITVDHMDEPLPPAPVDSTQTNDSSKHA  
DDDSEELDDSPIATWTYCNCEGKVVTPLTWLSENTWKYSFGKFLESFFYNRDLIMNSPQS  
DCACNLQESTTLFFGCGRLAAKFTYERIRPFVGFVRKSLPIDTTFHRARAQHLEKISIS  
SSSLFVKFDKHIEKVAREARSVQRI SDNQNLTQTVISELSRISNEVDHAAKTLQEKIASVS  
AKCLNEHGGIVNDAALFRFPWHARRFLMILTSAWNEKLSAAGQAIIVAMKKLSSVSQRIDS  
GMGSNPAIVAGDQNTTEELNEGMRRLRQLHEVYSRYNLTDIHTVLPTIPGNTDQKVVETE  
FDDDFEDPEGAI D FSAEVDADVLASRRRLYSANVLPQTTDSSRLGVKALARREQDRTPNS  
QIKQTPGATVKSAITRFFQGGREDPYVVDLGLFHDGRPRLEPGVNGI VVPVIDEQLST  
VIAYSLSSKEYDNQFQNYSKVENASPETSSDVGTLPNVPPKSVSDGNHRNPPSDSQENQP  
RGQTPSNTPSSSGKKDIERRMLVRNKSHIKHTFRDLDEKGQNLCKFVCTTYWATQFHAVR  
EAFLSQGSSSKSDSTNDSAFGIQSGLDIEKSYILSLSSAYSWAASGGKSGASFARTADDRF  
VIKISRTELQMFLDCAPAYFEYLSKAFFHGLPTVLCKIVGVYQIGYHNRVTGKRSMEQV  
AVMQNIFYNKKITKTFDLKGSRLGRFAAQMKNNYEEHSSPNI SNNVGGHSADSASGHRKH  
SSESGYEVGGRSAVEDYLNNDREDGIDSKNSRKDGPDPAPRTLLDGD FLETTHGRPMPMH  
DRAKEVFHMSILNDTLFLSIINVL DYSILVGI DEEKMELVVGIIIDFMRQYDILKQMERVG  
KSLPMVVGSEAPTI IQPPLYKARFTNAMERYFMTVP SKWTTI

>comp14309\_c1\_seq4; 676 1 3474 LEN=3474; translated  
XLGGDGPTSRADAERRFRSRWVNLMSLATRCCATVDTNKRGMMLDVRPYVVIKVIPGG  
SCDDCAYISGIAFRKTGTSTKQMPREIINPKIMLLSGGIEFTRTARIASLDTLLEQEDKYI  
EILVGKILKLEPDVLMVGKGVSRRAQDILLIENNVQLLQVKASLLNRISRQTGATIISS  
DHIMNQFGAHVLGKCHRFRFIVARDNESWVSGPSGAVSNGQHIIQTLLENEKLSNHERQA  
ALAAKILGEDILDGSEAIRSGLAKRGVTQTYALLEGFQNSSDAXVVLRGANKAALKQIKN  
VFRFLVGAAYNVKLEMSYLKERCARLPDYKVEKKNLFSFSCVDYGTTPNSRKVRPWNG  
GTNNEGIQRSISGQITAFDHQSILITSVWMTDKTQCCPAEVKGCYYSVQDVSLGQFLRD  
SCFNLSLKCQNPSCKKSVLDHLSLHVNDGLINITVDHMDEPLPPAPVDSTQTNDSSKHA  
DDDSEELDDSPIATWTYCNCEGKVVTPLTWLSENTWKYSFGKFLESFFYNRDLIMNSPQS  
DCACNLQESTTLFFGCGRLAAKFTYERIRPFVGFVRKSLPIDTTFHRARAQHLEKISIS  
SSSLFVKFDKHIEKVAREARSVQRI SDNQNLTQTVISELSRISNEVDHAAKTLQEKIASVS  
AKCLNEHGGIVNDAALFRFPWHARRFLMILTSAWNEKLSAAGQAIIVAMKKLSSVSQRIDS  
GMGSNPAIVAGDQNTTEELNEGMRRLRQLHEVYSRYNLTDIHTVLPTIPGNTDQKVVETE  
FDDDFEDPEGAI D FSAEVDADVLASRRRLYSANVLPQTTDSSRLGVKALARREQDRTPNS  
QIKQTPGATVKSAITRFFQGGREDPYVVDLGLFHDGRPRLEPGVNGI VVPVIDEQLST  
VIAYSLSSKEYDNQFQNYSKVENASPETSSDVGTLPNVPPKSVSDGNHRNPPSDSQENQP  
RGQTPSNTPSSSGKKDIERRMLVRNKSHIKHTFRDLDEKGQNLCKFVCTTYWATQFHAVR  
EAFLSQGSSSKSDSTNDSAFGIQSGLDIEKSYILSLSSAYSWAASGGKSGASFARTADDRF

VIKISRTELMFLDCAPAYFEYLSKAFFHGLPTVLCKIVGVYQIGYHNRVTGKRSMEQV  
AVMQVSFACHVCFACIQQ

>comp14309\_c1\_seq5; 196 1 724 LEN=902; translated

XTESTIAQTSCKRIHLSFCFSFAQNI FYNKKITKTFDLKGSRLRGRFAAQMKNNYEEHSSPN  
ISNNVGGHSADSASGHRKHSSESGYEVGGRSAVEDYLNNDREDGIDSKNSRKDGPDPAPR  
TLLDGDFLETTTHGRPMPMHDRAKEVFHMSILNDTLFLSI INVLDYSILVGI DEEKMELVV  
GIIDFMRQYDILKQMERVGSPLMVVGSEAPTI IQPPLYKARFTNAMERYFMTVP SKWTT  
I

>comp14310\_c1\_seq1; 3178 1 9470 LEN=9550; translated

XLWDTQVADVATSVGN DIEQWQRLLLES AEARS AVDMSATSSEFGPVV VNYNKVQSQITL  
KYDSWQKELQSSFAGILGQC IQASHAKMVD AKLRLEAATLESSSGTENIVLGVTFIQEMK  
KNVDSWTQELDQLEASERLIKRFHFHFGSDWMESTVVRGQFDLVKQILGRRITSMEQQFP  
LLQARVSAEEKSAAKRSVDLVADWGRDKPLRGNMSPADAMNLLAKFETDLKKAQTHQENL  
VKAKDALGLEHTAESNAVSECV EELTDLKEVWGAVSKPHDQLQTIKDMVWSSAVMRKVR  
ALDDLLAEMRSM PNRI RQYEPYIALHDEVKGYIGGHGLLSELKTEALKERHWKKILKTLG  
ITLVYSQLSIGVLWDKGILTRKKEVGEILTVAQGE MALEQFLGQVRDRWMKQELELVLFQ  
NRVRLIRGWDDLFDLDDHISGLALMKSSPYRAVREFQEEGKLWEGRLTQLRAAFD VWI  
DVQRRWVYLEGILFGSSDIKAQLPSEWSRFKSVDT EFLMRRIAARPFAMEVLSIENVQ  
RTLERLGNLMTVIQKALGEYLEKQRREFARFYFLGDDDLLEILGNSSEPGKVLGHVSKMF  
AGINSARISTTDLPEDTLAVLDAMVSKDGEVVPFHEPITIMHSTNVKEWLKEMESKMKN  
LALLLEQAISEDKAEATDKDAFVNWATKFP AQVMILATQINWSMGVDEALKSDDTQAALN  
ERLKSLEAKLSVMAETVLEL PADNRKKFEQMITELVHQRDVVRDLMKENVCSATDFRWL  
YHLRYTYNPDAPELTEKLIKISLSNADFYGF EYLGIGERLVQTPLTDKAYLTLTQALHYR  
MGGSPFGPAGTGKTETVKALGAQLGRFVLFVNCDEAFDF SAMGRIFAGLCQVGAWGCFDE  
FNRLEEGILSAVSQQILGIQQGLLNSPHIDLGRSVRLDQNMATFITMNPYAGRSNLP  
DNLKTLFRSVAMVVPDRKLI AQVMLYSQGI VTAEQ LAPNVVDLFLQCEARMTKQRHYDFG  
LRALKTLLVSAGGLKRKAI EGKEDFDLAL EKEALIMGACNNIVPKLVAEDVSTFSEILK  
DVFPGAEVSSMEDDALREQMVNICEERGLVADERFLQKMLQLNQVIASRHGIMVVGKSCV  
GKSTALSVLLESMEKVDGVKGEIYNIDPKAIEKEKLYGDL DGTLEWTDGIFTSLLRKIL  
DNQKGESERRHWIVFDGDVDP EWAENLNSVLDDNKMLTLP SGERLGI PKNIRIILEVDSL  
NFATPATVSRCGMVFFNENTISTEMNLEYMSS LKNADLGRGGGTSTQILFLQSIQSLVI  
SDRTSSLVMDALEFAMQETHIMDASSGRSLHTLKTLL LQGIGQAVEYDENHPDFPMTGEH  
MEKFARRWLLHSLMWSFVSGASWDVRKKFGDMLLR TSGIDLPSSEKSVVDYRVRVQDGEY  
ELWSDSVPRMEIESHRVNATDLVITTTDTVRHTDVLGAWMNSRTPILICGPPGSGKTMTL  
TSVLQSMQGVVFTSLNFS SHTTPDIILKSFQOYCKYVRRGRELFL EPAESLGSDVWL VVF  
CDEINLPQEDTYGTQRVIMFMRQLVEQGGFWREDNVWIKINRIQFVGACNPPSDAGR VEM  
SHRFLRHVPLLLVDFPETDSLMQIYHTFN GGMKLFPNLRGETDSMTEAMIEVYSENQKR  
FTAQQQPQYIYSPRELSRWVRGIYEA VVHMDAGLSKEELCR IWAHEGLR LFCDRLVEDED  
RKWCHDKIDEVARKWFAGVDFDIALKRPIFYTTWLSKETKKVEREELKEFLAARLRV FYE  
EMLDVKLVIFDEVLEHILRIDRVLRQPMGHLL LCGDAGAGKTVLTKFVSWMNGLSV FQIK  
AHSKYGLADFYEDLRDVMKRVALKGEKICFI FDEANCLNTSFI EAMNALLASGEVPG LFE  
GDEYNALMNSCRDSALKEGII LDSEELWNRFTNLVQRNLHV VFTMNPSSGGDWKNRSTTS  
PALFNRCVVDWFGTWGSKAMA EVGKEFTIKIDMGDLGGYSYGLGEGAALMERVSEVFDGN  
SGLRQAVVAALVDLHLIAKQTAEDASNQPS SVSRTFLSPRDYLT LIQN FV SCLNKRREEV  
EDEQLHVNAGLQKLVQTQENVAELKKS LGKETHVLR EKEKQANEK LQQMVADQNVAEKRK  
EEAEK MSEAVQKQARINERKDEAQRDLDEAEPALRAA QASVQGIKKRDLDEIKALARPP  
DNVRLTLECVAIMLGETKVEWGHVRKLLAKSEFI PSILNFNANSLSPRQTKLVREKYLDG  
NPDLSVEKVRKSSVACGPLYSWAESLVKYSTVYNR IQPLRDEVEQELEKDSSEVKEKLEEV  
TSEVESLENSIAQYKDDYATLIRDVEALKSEM QSVSTKVDR AESLLKSLGHESERWEKSA  
EGFQSILRSLVGDSLVAALFTYSGFFDFKNRLVMMEKWKHTLEILGIECHDDLGI VESL  
STGKQRVEWQSQGLLSDQSMENGVILDHAVRFPL LIDPSGDAINFLMKKLEAKKI QKTS  
FLDKAFVKTLGAVRFQTALLVENVEQIDPILNPLLNKELQRTGGRTLVRIGTEDIDYSP  
DFMIVLSTKNPAVHLTPDVC SRVTLANFTVTPASLQSQSLSKVLSY EKPELETKRAAVLK  
LQGEQNVKLRLEDQMLAKISACEGSI LEDEVVTGMEVLMKEGAQVEEQIAESDKVMAQ  
VHLAVGEFEPFAAICRKVFVLLGALRGISFLYEFSSNTFMTILTHVLEENKPGKDE TASS  
ETQRLAALKKSLFNELVARVARGLKSN DKVAFSVLLARLFTSDDSIGSAEGGSTDEYISA  
FTHVFGDKFQWQGRDELHAVVEIDAISPL LICAPGYDVSGRVESMAREMKKELKSVAM  
GSSEGFEIAESLVTA AAKRGTWVMLKNVHLCTDWLSETFVKKLQTFGQSTNNDFR LFTS  
EISPKLPTALLRLSDVIVAEASSGIRAS MTRFMSTFSKNRLDES LIRNRLYLLVAWTHAV  
LEERVRYGWTYELAEADSFNALKVIDNFIDTQMKNPDQIPFDALCTTLKLDVFGSRIAVT

EDQEILSTMIDSIFKKDAFDLQFPLVPAIGADSPVLPDSCSQEDMASWISGLPSHTLPTW  
VGLGEEAEAGLEKIKANYIHSIAIEKVSTAI AATSGK

>comp14310\_c1\_seq2; 1674 1 5549 LEN=5566; translated  
XLWDTQVADVATSVGN DIEQWQRLLESAEARS AVDMSATSSEFGPVV VNYNKVQSQITL  
KYDSWQKELQSSFAGILGQCIQASHAKMVD AKLRLEAATLESSSGTENIVLGVTFIQEMK  
KNVDSWTQELDQLEASERLIKRFHFHFGSDWMESTVVRGQFDLVKQILGRRITSMEQQFP  
LLQARVSAEEKSAAKRSVDLVADWGRDKPLRGNMSPADAMNLLAKFETDLKKAQTHQENL  
VKAKDALGLEHTAESNAVSECV EELTDLKEVWGA VSKPHDQLQTIKDMVWSSAVMRKVRR  
ALDDLLAEMRSM PNRI RQYEPYIALHDEVKGYIGGHGLLSELKTEALKERHWKKILKTLG  
ITLVYSQLSIGVLWDKGILTRKKEVGEILTVAQGEMALEQFLGQVRDRWMKQELELVLFQ  
NRVRLIRGWDDLFDLDDHISGLALMKSSPYRAVREFQEEGKLWEGRLTQLRAAFDVWI  
DVQRRWVYLEGILFGSSDIKAQLPSEWSRFSVDTEFIALMRRIAARPFAMEVLSIENVQ  
RTLERLGNLMTVIQKALGEYLEKQRREFARFYFLGDDDLLEILGNSSEPGKVLGHVSKMF  
AGINSARISTTDLPEDTLAVLDAMVSKDGEVVPFHEPITIMHSTNVKEWLKEMESKMKN  
LALLLEQAISEDKAEATDKDAFVNWATKFP AQVMILATQINWSMGVDEALKSDDTQAALN  
ERLKSLEAKLSVMAETVLEL PADNRKKFEQMITELVHQRDVVRDLMKENVC SATDFRWL  
YHLRYTYNPDAPELTEKLIKISL SNADFYGF EYLGIGERLVQTP LTKAYLTLTQALHYR  
MGGSPFGPAGTGKTETVKALGAQLGRFVLVFNCD EAFDFSAMGRIFAGLCQVGAWGCFDE  
FNRLEEGILSAVSQQILGIQQGLLNNSPHIDL LGRSVRLDQNMATFITMNPYAGRSNLP  
DNLKTLFRSVAMVVPDRKLI AQVMLYSQGI VTAEQ LAPNVVDLFLQCEARMTKQRHYDFG  
LRALKTLLVSAGGLKRKAIEGKEDFDL ALEEKEALIMGACNNIVPKLVAEDVSTFSEILK  
DVFPGAEVSSMEDDALREQMVNICEERGLV ADERFLQKMLQLNQVIASRHGIMVVGKSCV  
GKSTALSVLLESMEKVDGVKGEIYNIDPKAIEKEKLYGDL DGTTLLEWTDGIFTSLLRKIL  
DNQKGESERRHWIVFDGDVDPEWAENLNSVLD DDKMLTLP SGERLGIPKNIRIILEVDSL  
NFATPATVSRCGMVFFNENTISTEMNLEYMMS SLKNADLGRGGGTSTQILFLQSIQSLVI  
SDRTSSSLVMDALEFAMQETHIMDASSGRSLHTLKTLL LQGIGQAVEYDENHPDFPMTGEH  
MEKFARRWLLHSLMWSFVSGASWDVRKKFGDMLLR TSGIDLPSSEKSVVDYRVRVQDGEY  
ELWSDSVPRMEIESHRVNATDLVITTTDTVRHTDVLGAWMNSRTP LILCGPPGSGKTMTL  
TSVLQSMQGVVFTSLNFSSHTTPDIILKSFQOYCKYVRRGRELFL EPAESLGSVDVWL VVF  
CDEINLPQEDTYGTQRVIMFMRQLVEQGGFWREDNVWIKINRIQFVGACNPPSDAGR VEM  
SHRFLRHVPLLLVDFPETDSLMQIYHTFNGGMMKLF PNLRGETDSMTEAMIEVYSENQKR  
FTAQQQPQYIYSPRELSRWVRGIYEAVVHMDAGLSKEELCR IWAHEGLRFLFCDRLVEDED  
RKWCHDKIDEVARKWFAGVDFDIALKRPIFYTTWLSKETKKVEREELKEFLAARLRV FYE  
EMLDVKLVIFDEVLEHILRIDRVLRQPMGHLL LCGDAGAGKTVLTKFVR

>comp14311\_c0\_seq1; 494 196 1287 LEN=1445; translated  
MPNPLFVPKSNEKPQLLTISFEDDPQGS LGAQLINSDKGEP AEMFSPGFAQIGRLLEGDT  
VARKSGVEVGDIIVAVNGSGFRRFASDFDESEVVNLSKDCHI PNDNNVLHLGRGEAYDAL  
LTKIKTIKSAGSPPLVLSLERYTWD AKVNSWPRFLKARDGDVPAAMKMLQDHENWKTQNL  
PMDLTRDGLQEVLRLKAVAEVDVNQNRDVPPAVYVNF AKLQSIETISFDDVCKAFVIYTE  
MMLARSKDPRRPQINQFIDMTDVS VSSGFRAELIRKIYEIFEANYPECLGVMVMHPVSTV  
LATTIRHVLFKFNENTLQKVFVANTLSEVCDAMGWDEEEVE SCGGVKEFMHKHEEAGADL  
ILE

>comp14311\_c0\_seq2; 494 33 1124 LEN=1282; translated  
MPNPLFVPKSNEKPQLLTISFEDDPQGS LGAQLINSDKGEP AEMFSPGFAQIGRLLEGDT  
VARKSGVEVGDIIVAVNGSGFRRFASDFDESEVVNLSKDCHI PNDNNVLHLGRGEAYDAL  
LTKIKTIKSAGSPPLVLSLERYTWD AKVNSWPRFLKARDGDVPAAMKMLQDHENWKTQNL  
PMDLTRDGLQEVLRLKAVAEVDVNQNRDVPPAVYVNF AKLQSIETISFDDVCKAFVIYTE  
MMLARSKDPRRPQINQFIDMTDVS VSSGFRAELIRKIYEIFEANYPECLGVMVMHPVSTV  
LATTIRHVLFKFNENTLQKVFVANTLSEVCDAMGWDEEEVE SCGGVKEFMHKHEEAGADL  
ILE

>comp14311\_c0\_seq3; 457 33 1295 LEN=1453; translated  
MPNPLFVPKSNEKPQLLTISFEDDPQGS LGAQLINSDKGEP AEMFSPGFAQIGRLLEGDT  
VARKSGVEVGDIIVAVNGSGFRRFASDFDESEVVNLSKDCHI PNDNNVLHLGRGEAYDAL  
LTKIKTIKSAGSPPLVLSLERYVVA FAGEKYQKLVQLSENCFIVVINLVPVQHVNGNDX  
M FVPFILPTQPMICFIACRYTWD AKVNSWPRFLKARDGDVPAAMKMLQDHENWKTQNL  
PMDLTRDGLQEVLRLKAVAEVDVNQNRDVPPAVYVNF AKLQSIETISFDDVCKAFVIYTEMML  
ARSKDPRRPQINQFIDMTDVS VSSGFRAELIRKIYEIFEANYPECLGVMVMHPVSTV  
LATTIRHVLFKFNENTLQKVFVANTLSEVCDAMGWDEEEVE SCGGVKEFMHKHEEAGADL  
ILE

>comp14311\_c0\_seq4; 457 196 1458 LEN=1616; translated  
MPNPLFVPKSNEKPQLLTISFEDDPQGS LGAQLINSDKGEP AEMFSPGFAQIGRLLEGDT

VARKSGVEVGDIIIVAVNGSGFRRFASDFDESEVVNLSKDCHIPNDNNVLHLGRGEAYDAL  
LTKIKTIKSAGSPPLVLSLERYVVAFAGEKYQKLVQLENCFIVVINLVPVQHVNGNDX  
FVFPFILPTQPMICFIACRYTWDKVNNSWRFLKARDGDVPAAMKMLQDHENWKTQNLPM  
LTRDGLQEVRLKAVAEVDVNQNRDVPVAVYVNFQAKLQSIETISFDDVCKAFVIYTEMML  
ARSKDPRRPQINQFIDMTDVS SVSSGFRAELIRKIYEIFEANYPECLGVMVMHPVSTVLAT  
TIRHVLKFNENTLQKVFVANTLSEVCDAMGWDEEEVESCGGVKEFMHKHEEAGADLILE  
>comp14312\_c0\_seq1; 245 97 855 LEN=1672; translated  
MTRYSTTLTLLLLAPLSASAFTTVPQSSTRPTAVFMSEKVDSSVAQLVLTGNNDLTPAL  
EYEAQKRIGLLDKLGGGIVRECDVHLSVSKNPAVKNGHRVDCCTTALKGLTVHCKEETP  
DMYESIDAVAKALQSKLQKYRSRRNEGYHAGNSMGQDLMDALERLELEETADEDEALVED  
LMYAEQDFIDVNKNIMEVNSYDLDNAIPINEAVFALDYVDHDFFIKNEETGKASVVYK  
RNAGVGLINIP  
>comp14313\_c0\_seq3; 176 1 333 LEN=333; translated  
WSEAADPSTGKTYYYNSVTGETSWEKPAELEDEKAPVIPDTATAEETTANNAGANNPVEE  
ATEEKKTEEETSPEVDTPSDTVKEEADATPENKTEATEEEVSMAKEVATESP  
>comp14313\_c0\_seq4; 553 1 1104 LEN=1144; translated  
WSEAADPSTGKTYYYNSVTGETSWEKPAELSLAADTTTPEEAEANETATSSHPVDEVTEE  
KPNAEVEKSQEEPKSDGAGDLAQGWQEVQDPNTGKCYFQETQETTWEKPTVSSTEVSG  
TDDAPSSSDEQNDWVETLDPSSGKSYYYNTKTCETTWEKTEVLSGQKDSASATD DATGV  
ANASPVEDTSAPPAVENSADSVESGQANTSPFGKGHVRDQSAEDIFASPPVSDGPPAS  
FPVAAPGQEPVSESVATTAQDLFGAGPATTEASEPAKTTTEENLKPPLSSECAEDTS  
EMEDGEMTDIPLSPEPVMNLKAAKLPDIPDIPSKTEAPAATEPVAAPTNDLFAAIGMPP  
PPFQSRR  
>comp14314\_c0\_seq1; 620 603 2801 LEN=3140; translated  
MATRRPTAKRTTTRRRRSSELWRAAWIILATATTAFAFPVVPNRPASATAAFVAGTRP  
TSRSTGNGPPQLVPPRTRTPPRESHPGWQRPHSEPRKPPDRPPCLLSYRSDAHETTGSK  
ATERLPPNPPGLAEKRLGAAALLAATIGLSAAFPLPAHAGFGPSSGATTTPPPNLNSISA  
NARKVTSPEKAPTESFNVDLDGKCLKIRIDSALDSRRLEEFSGQLDAVIDSLKESISESL  
AAAIQASEEDGTGAGLPEGAARDSNASSAPSEEQRARNAERERELLQAQVLREEVLK  
QEQI IARLQRQPYWFNYFAAFVGVSTVSTLIMHPIDTIKTRLQVGLGEDEADDNDEHEHES  
CGPLPPDRHDNLSRQNSGAEPGLGAASQSLQASRSNGRASSDANAATDTNASNGEDHCSVT  
EKGRSAFSSDGTGLVAAPTVLVADADAANQTETFECDGTDPMHTNHGGRPYVTKPPLTSGN  
PLL FENLYEGLTGNLFKEVPPSAVYLG VYETVKYALTPMVTNPAYLLWVYLVAGSAGEVV  
GSIIRAPAEAVKSLVQSKAHNSTLDAARSVLLDPSGRQNVVRAWSASISRDVPFGGIQLA  
VFETIKAAI LNNPNIEIDSSTLLAEAIIGAVAGGIGALVTAPADVITTRIIITQDGTGDTV  
VTTADGATNANTNGTAPMGVLEMGTIYEEEGIGAFFVGVQARVGYWAPAIGIFLSCYCS  
VRQAGLTYDLFP  
>comp14315\_c1\_seq1; 468 1 1742 LEN=1980; translated  
XLNESARTAI AEARQE QEESDLPEVTDPHSNNSANQRSISTARKFLATASPTFLASEWS  
SDDDRLVKVGSRLEDLVAADKNDKEDILTHALRNVIDQSNILADMGEFKVPKVRFGK  
TGIDMPVLTGLCMRFQHTWDGTFETFDKVNKEGOENLTETIYHAIKNLGINHIETARGYG  
SSELQIGHALKTIFARGIKREDLLIQTKVNCMPKDFRATLEKSFKTLGVYIDLFSFHG  
VNMPYAYEQMFNYKDNENLMDIALEYKSKGKIRHIGFSTHGQPELTKRCIETDKFEYVNL  
HYHAFGSYTAGGGNCGGNDNVRMLKEKDMGVFIIISPYDKGGRLYAPSRKLRSLTLPDL  
EPIQYGPLWCMSHEHIDA EHAP IHTMTIGAARPSDLDEPFVTAYLFAKRRDEMVAKVENV  
AKRLRAAEVEALGEDWVQNWGHKGLRNCLTMDDAYEFGQIVWCYNLIKAFGMLDYAKDRYA  
MFDKNYKSWDFELSTKENIKKLWIPWGYCPGLATPGDGKVDYATLLPDVPEERKARVLA  
ISFVYSYCSKDSATAKELTVPEEWECAYDMRPWTAFFPERG  
>comp14316\_c0\_seq1; 550 226 2361 LEN=2554; translated  
MGNEEPNEESISEWIPKSGATNLVLQNOEYPIKAKHGTSTNKMIVDETKGANEGDDNDDA  
KFHIIAIGMQEATFELREATKSLKGFQKVTNAVEQVTKDQDHNSQGRPSSAKFKELISP  
LYDRDSSLREKEEELKSDL DGGKVQADTEFLHQMLGNHLPGYTRAVSYQRGMRLMIFYD  
DDEISLDVLSVKAQNTGRAGLANKGIVAECEIDSGTRISFLTAHLEAHEGLSKYNTRCS  
TIGDILKGTASSLLDSYCCDVSM TSHFMFAMGDLNFRTRLPNHAIGSDEHLKEAHKLAEM  
KDWDALNKYDELSFALREKECFVGFSTPRCDFPPTFKVDRKDGYSYVSKRSPSYTDRILY  
KANHRLAPMIDLLAYGPIDRFTTSDHKPVRGAYEIQLNQKLSRPILTKRYKKSMTLISS  
TSALVRKVKKLSTSKQKRATMAKQKSNQVHSEKFMFLSSISCEIAQDDSTSSHPPSPRV  
TLISTPTDAMTKENKMNRFKVVYQKSAGRFRQSVSKWPQTTTIGNTYCPRWKKEIAIAI  
QTHLDCGSPVDLTGAMLHILVHDARDFVTLIGSCTLNLA SLITSSDNEKPESNSSNSTFG  
GYNSPSFKERLKRMSSEVMKITEASLFTLSERSKEMRGRSSSVTFSPRSSEKASSAIRL

ADSYAGIVPLHHVFDEALLKNGKEVGRIKFKVDTWWLNDGDFAHLPARSMR  
>comp14317\_c0\_seq1; 513 201 1850 LEN=2377; translated  
MDSIGRRNPPTAPGPQLARKCYNVDDGSSDSDNSLVILSPSRDHTKSFDKIRENPI  
HLTRDFDLVLETSTADTPNNYCKDAKI PAKKKPPQTTATKIADVVSNKSKVTSEGRGTLN  
VLPLLDES DTGDDSDDDNFLRSKRIFGPSKKQHFKGNSKQKMKRVRENQKEKEKQDRIR  
RRKEVKEAKELKKQKDKITKKRQNEEYNQATGKYSHEEIAVLLDAELYTDNSHGLKSRLS  
EDFFVYRFP SRLPTPAKAIQFIRKDKLLGGAKDAVLCLEAERTGGRSNLDNPNPGYEHIEY  
LVVLFEPDEFIPLLRDAHDEEDDYPALESWLDLRTQWQRIWKQNCLEPKIIFLLYDMP  
DALDKKWLAYRRRTQNVSRNEAPLPTVKELQDAMQWVLVQFQVECILCPTVELLQSTIHK  
MARGLCEKPYVSQVTELECIKKIKQGFIGSDDPLEKAKDVWLRQLQQIPGLSITKAQHIT  
EHFPTSQSLWQAYQWEHYQQHEDNTYNADAVCSSLEDKFSADNKRYKLSDSVYRVLT  
SNDPNEMIL

>comp14318\_c0\_seq1; 681 158 2870 LEN=2870; translated  
MDFDETRLYYTHQQQLQRRPGGQTEGEDANQTNNGDDVGNDSADNVNMDAVRRHFKEFLRHY  
RLGNTRYVYREKLLRMHRRLSNHGKNKYPTAESENNYEENEDGTTNATSSSNSSRKNQMMN  
HKNMML EIDVAHLGEYDGSLLGYLRESPSAILPELEVAAGKALDSSLYDLRESSSTSHGN  
TQNEDDDLNDEGNRSEANENGNNNRTNNNDGRASSEWSIQILLKGNLTSTPLRQIQSQH  
INRLIKCPGIVISATPIQVRAVKLTVRCNRCMDTHSISATEGPYGNVPLPQRCQGVPEKE  
CGPYPYSIVADESLFSDRQKLLKQESPERVPTGEMPR SVMVAVEKGLVDKAPPGTRVSLF  
CIPTL FNGGGGAPGQRGGAGAVQKVYLRCVGM SKDQASGEAARFTPAEEEEAFQQFSKRAD  
AYEILTRSVAPSIQGSYTVDIKKALVCMLMGTRKRLPDGMRLRGDINVLLLGDPSTAKS  
QFLKFVGTSPIGIYTSKGKSSAAGLTASVVKNAAGEFYLEGGAMVLADGGIVCIDDEFDK  
MRPQDRVAIHEAMEQQTISI AKAGITTVLNSRS AVLAAAANPVFGRYDDFKSASENIDLMT  
TILSRFDMIFLVRDVREEERDLMICRHVMGVHIRGGAPDSNAPSGGPGSGTGGLGFLAGLS  
MGGAGGEGGGDRARSEAQSNTPEAIAENVMRLATTGQGELDVPSMKKYIQYCKSRCKPTL  
SEEAGQVLTSSYVKIRDDVRKSTLQSLGEDAQATIPITVRQLEALVRISESLAKIRLDSE  
VRIEDVNEALRLFRVSTMAANSADQANGAGGTGSGNPF LNGAGGNREEFDRAQGFLRCR  
LAIGSTVNKQKLIIEEGSGQGYDFMTMVRVLSAMAQRGELLERNQGXAPEENKIVTINQGT  
AKSIG

>comp14318\_c0\_seq2; 643 158 3025 LEN=3025; translated  
MDFDETRLYYTHQQQLQRRPGGQTEGEDANQTNNGDDVGNDSADNVNMDAVRRHFKEFLRHY  
RLGNTRYVYREKLLRMHRRLSNHGKNKYPTAESENNYEENEDGTTNATSSSNSSRKNQMMN  
HKNMML EIDVAHLGEYDGSLLGYLRESPSAILPELEVAAGKALDSSLYDLRESSSTSHGN  
TQNEDDDLNDEGNRSEANENGNNNRTNNNDGRASSEWSIQILLKGNLTSTPLRQIQSQH  
INRLIKCPGIVISATPIQVRAVKLTVRCNRCMDTHSISATEGPYGNVPLPQRCQGVPEKE  
CGPYPYSIVADESLFSDRQKLLKQESPERVPTGEMPR SVMVAVEKGLVDKAPPGTRVSLF  
CIPTL FNGGGGAPGQRGGAGAVQKVYLRCVGM SKDQASGEAARFTPAEEEEAFQQFSKRAD  
AYEILTRSVAPSIQGSYTVDIKKALVCMLMGTRKRLPDGMRLRGDINVLLLGDPSTAKS  
QFLKFVGTSPIGIYTSKGKSSAAGLTASVVKNAAGEFYLEGGAMVLADGGIVCIDDEFDK  
MRPQDRVAIHEAMEQQTISI AKAGITTVLNSRS AVLAAAANPVFGRYDDFKSASENIDLMT  
TILSRFDMIFLVRDVREEERDLMICRHVMGVHIRGGAPDSNAPSGGPGSGTGGLGFLAGLS  
MGGAGGEGGGDRAXVSLVARCRNIFSSRGELLRS DNCAHFVVLQIDCMLPNAVSASSFLR  
GFASLRSEAQSNTPEAIAENVMRLATTGQGELDVPSMKKYIQYCKSRCKPTLSEEAGQVL  
TSSYVKIRDDVRKSTLQSLGEDAQATIPITVRQLEALVRISESLAKIRLDSEVRIEDVNE  
ALRLFRVSTMAANSADQANGAGGTGSGNPF LNGAGGNREEFDRAQGFLRCRLAIGSTVN  
KQKLIIEGSGQGYDFMTMVRVLSAMAQRGELLERNQGXAPEENKIVTINQGTAKSIG

>comp14319\_c0\_seq1; 797 1 2472 LEN=2754; translated  
XHVEHETILARIHDGKVLNSDTIRDTKCARTFLTIECNDPTTSSKDRRNDPMPNKEDASC  
VNEKKGLLQDCLPGVTL PNGNVVNYQQQRHDDPSRSSSSSLQPPHELDQLQHHILVSKIS  
MNQHR TDQDSICTGDMNDAESPSSIQVLYIDNMDGQKAFQKGR TFRGYGDDDFDMMASF  
SVSIRQAAATSEARRRTEQRRCFSLKLI L VGMVLLMLWDRFQPTNTSNNI IKPMHRSDVP  
SQAGTHQQRFRLYTHWKNKMDVNSMHDKGGQQQLDERNNHHDDEKRRQILVVLKDLDEAIEG  
DIVLRSNKTKFQNAARAWRREDFVITENDASWSSDANENLLPLAVVEAATLRDVQITVPI  
LAGLQRDYQLGFRVRS GGAYMSGYSTIPGGVVL SLAKLNSIEFLDDNLLGAMHSDNNEE  
VSGGIGRIDGFLD TTKGVAEENHTKGTVPRSIANPKTVRIGPGVRTEQFMKDVLDTNG  
YSGIVASAARVAMGGYVAGGGYGLQSRMYGLAIDNVLSLQTVLASGEIKNVTVGDDLFWA  
LAGVGGNIGVVTSM EYRVYPSHDIKLAAIVKVS LAEMTQFLRRLGEKEADLSPEFTLSI  
QGLKSSNNRTFSDFSQVVRTNTDLAQNIETKDFNEEEDWLVKISMFWMGDSNPDDPVGAE  
YIKKEI IPLFSNSSALEDISYFFSWSGMSRERERQRPESKSVWSAQSWNGFLLPGNNTEE  
VWADIESSLSAMILYCKYVSLRVELWGGAISKIPFNATAFSYREAIYNI GIDLLVPTKSE

EDAASDEMHLVNAIWPSIARHLDGAFVNYPMASLSSESYASAYW  
>comp14319\_c0\_seq2; 774 1 2578 LEN=2860; translated  
XHVEHETILARIHDGKVLNSDTIRDTKCARTFLTIECNDPTTSSKDRRNDPMPNKEDASC  
VNEKKGLLQDCLPGVTLPNGNVVNYQQQRHDDPSRSSSSSLQPPHELDQLQHILVSKIS  
MNQHRDQDSICTGDMNDAESPSSIQVLYIDNMDGQKAFQKGRTRFRGYGDDDFDMMASF  
SVSIRQAAATSEARRRTEQRRCFSLKLILVGMVLLMLWDRFQPTNTSNNI IKPMHRSDVP  
SQAGTHQQRFRLYTHWKNKMDVNSMHDKGQQQLDERNNHDEKRRQILVVLKDLDEAIEG  
DIVLRSNKTKFQNAARAWRREDFVITENDASWSSDANENLLPLAVVEAATLRDVOITVPI  
LAGLQRDYQLGFRVRSGGYAYMSGYSTIPGGVVLSLAKLNSIEFLDDNLLGAMHSDNNEE  
VSGGIGRIDGFLDTTKGVVAEENHTKGTVPRSIANPKTVRIGPGVRTEQFMKDVLDTNG  
YSGIVASAARVAMGGYVAGGGYGLQSRMYGLAIDNVLSLQTVLASGEIKNVTVGDDLFWA  
LAGVGGNIGVVTSMEYRVYP SHDIKLAGKFFPSVGMHTLCLSNGAIVTKSNATTHYFSF  
SVNSNRKSVFGRNDPISPTIGEKEADLSPEFTLSIQGLKSSNNRTFSDFSQVVRTNTDLA  
QNIETKDFNEEDWLVKISMFWMGDSNPDDPVGAEYIKKEI IPLFSNSSALEDISYYYFS  
WSGMSREREQRPEKSVWSAQSWNGFLLPGNNTTEEVWADIESSLSAMILYCKYVSLRVEL  
WGGAI SKIPFNATAFSYREAIYNIGIDLLVPTKSEEDAASDEMHLVNAIWPSIARHLDGA  
FVNYPMASLSSESYASAYW  
>comp14320\_c0\_seq1; 377 214 1413 LEN=2257; translated  
MNEASSLSSVTNRRIPENKNHNLPSVVARLSGHDGPVQAITFTPDGKWCLTGGGLDRTVK  
LWNPFRVDPQHAVSASASTTKPSSTLFRGNVARAEGSFEEIEAFQDLPPALNIQTYSGGM  
THDVSALCVTTTSSSSSPQAVLAASNQALVVTDLVSNQVKRRLGQNHHTGRINAVAAP  
CGGEAYLTASYDATVAIWDGRSRDNKPMQVLNDAKDSVTSVCVRQNTCHGESGGVHNNNI  
AVIRTASVDGVLRTYDLRKLMECDDFGSPITSMHAHTSDGNCAIVSCLDGTIRLMEADTG  
ELLNTYDSHHTAGRYGLDVDILADDATIVTGSENGACALYDIVRANPVQILEGPARRPAC  
TVKAHPKQPSVVVASYDNSTVWVSHDASPWQE QFSSQR  
>comp14321\_c0\_seq1; 897 1 1943 LEN=2670; translated  
XVRPRWRFEEATQSARHGDKPTTLEPAAPALPIAQSQISASVCIPSNTAVDHVVPPEAD  
GIGCDNGIAGFGEPA SDRFLPASNDHEGEIVGGRISGIVEYGLGGQHWRFNPESYQELI  
HQALSKNVSYFEVAGQEGDIAMAGAIQSALERNPGFSSSPITITARLGYRSLSDGPAAG  
PGE GEGKVDAAAAPGDNQPM PGDVLLAPPEDGTGNAGVAAAYDTPQNVVHNLSSSEYVL  
QAVRSSLLELQETMENVRLVFLHNPVQVVELLQEDPNATAEARQEFIRQRWTPAMET  
LQEYSSNGTGV SFGVCSNGLGIPDVDNHPMHLGTNSIVQAANAYDRFSTVQLPANLLETY  
GWEMARKIKAETQQQRESFGAVDVVAMRPLTCYPDLGTGSGYPFRLVDYALPAFQENDSV  
AGDGGNPSLCYTNMDEGIPALYQMTLQAAMSHFDAEELLEKKQERDLSMEERETLDGCKL  
MQSMIHLDLNLADIRSFAAHEDELYGRI I PLIHDTFELMDDTTSVDLQAYFAAYAVAVR  
YAIATKTREVLKGGEETGNKASGGTGNITYPDIPQTMTLQEYALRHMLVERCFDR IAIGA  
STMQDFDHATQLMETIDS GEEHPLGKLLSVTDGQPENETNDGGKSNH  
>comp14322\_c0\_seq1; 384 1 1684 LEN=1714; translated  
XRCILDEWPMQRNGSPLSKRQKQRDL DGGSNIGLVPDAEDPPPSQLSLPLQPCTRQEK  
SLHIAPMIRVSNREFRQLLRILSKRCVLWTEMVVDETIYYCSRSKKPCSSSVATAGMTTP  
INKEKVDVHLDYDRSVEHP IVCQIGGINPVHTAFTSRIVAE EYGYDEVNLMGCP SNRVS  
GKGF GAVLMKEIERACELLKAMKNTCRSIPVSVKLRIGVDDDEDFGFICEIVRRLHEAGC  
DKFYVHARKVLLKGLNPAENRIIPPLNYP IVYRLCEEFPQCDFWINGGISGLKAAKAI VY  
GDDEQEKVHSNDTPAIHSVPCA VCNYPNGSCIAPPTKAKVPTNLRGCMLGRAAMDHP SLF  
WDCDRYFYGESENPCRTRRDVNLQYIEYLEEVYPRCCDDVDEITNRIPSPNVVHTKDFC  
SICSDWRKGRAKSKKSTHEPNGQLPIANRMLDKMGSIDGDSEPKNRKKKKKAKITTHV  
IRRALRPVLGIFNGLSTNKAFRRKCEDLTQDLSIRHCGPAF ILVTAMQIVPDGF IDAEFI  
RTEDIPASSIIEHVSPLEPCPC  
>comp14323\_c1\_seq2; 981 1 3481 LEN=3656; translated  
XCCESLPSHSDMQWSAPSEKSIAREDSNTNSSSSIGPSANENGASPTSKTAIRSNGHGL  
LSVVVLVEDEERTITNGLRFCKNGCDHKRDESESVVPSLSDAEHSRERV PASNRDIMGNN  
TLWIVSVEEVQGVSMKSKFGSLSYSQKISLDWKETQELQGFEMENEYDRDINSHPNGND  
ILNRKSIGSNLTSFRQRTKRVLHVGEANCTFMIPLESCNPPDTRRLSYGTTT VVVVSLMKT  
IQHP I PDTSTTNNSHDVERQFDNSYNDGNKTTNLLTRRLATLRCKIYSRPHSTIDQAKVV  
LRHRQERRFYAVSQEVDEQFSSRSKKELEEEEDNQFDNESPF IASDDARKFLCYFFHH  
GSLDFVWISLLLLVIYIGKSSVASFFGLILFRALFWCNRQERSINSIVTNDVYYQDDHEH  
ESYVDFLHGPRNEKEDEDEGEKTSIRNKQDKHQDCSQDAKNLEQENLVPQPI CYPHAAT  
SVYESANTAMLSAFITGSKSRDDPKSEKYQDDWEKIERYCGGINSHGDRRGEDLNNHKAH  
KQEDTNLSRNTSKDPPTTNNSHVFPLGNEKKYVLKTI DFDSDSDHILSSNSNNLNTDRSD  
LGLSFDTNASKNSRSASLPSNSSEKNPQTSSESCMMSSMKAGDDKGCENLESPTNPNPESKI





MIVSCAPNPNHCGGKGGCSGSTGELAYDYVSKHGIVSEWVDGYTSYGGETGSCTAAAANK  
SNRNDNDIDNDNDSSSRIGDTAKISYLEDRALASVDGFFSLPTNSYDALVSAVAIEGPVV  
VTVAANEWIHYGGGVFDDSNATNHYDMNHAVVVEG  
>comp14325\_c0\_seq9; 422 336 1091 LEN=1091; translated  
MNPRQKFGGNNSLHSSATRNASNLQRQRQTPTPTQQQQAQQAQRIDSMQTMPPRYMDS  
TPPRQASALGMDTAIVDSYNDGNGFTFPFGSTRGGALFQSTNGASSNANANANGYGSSGG  
GKHNKTPPRYSANGGDAAGRSCLVIPSFGSGRKKKKPAKKLSPNKTSPKRRGGGGGGGLF  
GRGPPSSAASTSAESSMGDPFVDGYHHNDKRSLLSFPAKKADGNHAKDWYLETMVEEDED  
EDTATNDNSNA  
>comp14325\_c0\_seq10; 411 336 1073 LEN=1073; translated  
MNPRQKFGGNNSLHSSATRNASNLQRQRQTQTQTQQQQRIDSMQTMPPRYMDSTPPRQA  
SALGMDTAIVDSYNDGNGFTFPFGSTRGGALFQSTNGASSNANANANGYGSSGGGKHNKT  
PPRYSANGGDAAGRSCLVIPSFGSGRKKKKPAKKLSPNKTSPKRRGGGGGGGLFGRGPPS  
SAASTSAESSMGDPFVDGYHHNDKRSLLSFPAKKADGNHAKDWYLETMVEEDEDTATN  
DNSNA  
>comp14325\_c0\_seq11; 440 1 1061 LEN=2148; translated  
KTAAAAAAAAATPMAGGGGGLGSSGNANANANGRPFGWIDWRERGVATPVKDQGMCGSC  
WAFAAVSALESHLAIATGRLVLSLSPQELVSCAPNPNHCGGKGGCSGSTGELAYDYVSKHG  
IVSEWVDGYTSYGGETGSCTAAAANKSNRNDNDIDNDNDSSSRIGDTAKISYLEDRALAS  
VDGFFSLPTNSYDALVSAVAIEGPVVVTVAANEWIHYGGGVFDDSNATNHYDMNHAVVVE  
GYGTDEKTGEDYWLVRNSWGALWGEDGYIRLKRTPSALAKGEGDGPDSLLSSGYCKTDV  
TPFHGVACAGPNDEGEDAATGAGGGPPPACGTSGILYASVVPVGARLVGRQA  
>comp14325\_c0\_seq12; 306 1 1291 LEN=3692; translated  
KTAAAAAAAAATPMAGGGGGLGSSGNANANANGRPFGWIDWRERGVATPVKDQGMCGSC  
WAFAAVSALESHLAIATGRLVLSLSPQELVSCAPNPNHCGGKGGCSGSTGELAYDYVSKHG  
IVSEWVDGYTSYGGETGSCTAAAANKSNRNDNDIDNDNDSSSRIGDTAKISYLEDRALAS  
VDGFFSLPTNSYDALVSAVAIEGPVVVTVAANEWIHYGGGVFDDSNATNHYDMNHAVVVE  
XVRESFTVRCALARKRRAGMGFVRRSPEDAPGFHSHCFPLVRQSVNRETNXLIIFLIEF  
NLSTIATRVCFLGDSIPKYGTDEKTGEDYWLVRNSWGALWGEDGYIRLKRTPSALAKGE  
GDGPDSLLSSGYCKTDVTPFHGVACAGPNDEGEDAATGAGGGPPPACGTSGILYASVVP  
VGARLVGRQA  
>comp14325\_c0\_seq13; 435 14 817 LEN=3218; translated  
MIVSCAPNPNHCGGKGGCSGSTGELAYDYVSKHGIVSEWVDGYTSYGGETGSCTAAAANK  
SNRNDNDIDNDNDSSSRIGDTAKISYLEDRALASVDGFFSLPTNSYDALVSAVAIEGPVV  
VTVAANEWIHYGGGVFDDSNATNHYDMNHAVVVEGYGTDEKTGEDYWLVRNSWGALWGED  
GYIRLKRTPSALAKGEGDGPDSLLSSGYCKTDVTPFHGVACAGPNDEGEDAATGAGGGP  
PPVACGTSGILYASVVPVGARLVGRQA  
>comp14325\_c0\_seq14; 188 2461 3413 LEN=3680; translated  
MMNRCVPTSNATSRMVLYLRARTLQTKDRGPFHTSLVAKQLKPLRPPTRNSSSSSSAR  
NRGTKSNQKHSNDGGFFHWYSKRLDERPWSTKIVSSALIAAAGDVVCQVLEYRFDASKAS  
DENRREPTAGAAAQPTVADAFRAMDWHRTGRFLLIGAFWVAPATHLWYGLGTRLVPGVA  
TPKRILQRLALDQFGAAPVFCPAFMGLLWLEGGKAPSDVAAGLVEAGPTLVTSNXEAVDS  
GNGNHVRNGPAQVPGRLLELRGAGLDRLELVRVHKAGGGTGATDRGPGVCRNETTRILCE  
VLLKLLKCYETKSNSTK  
>comp14325\_c0\_seq15; 375 1 1523 LEN=3924; translated  
KTAAAAAAAAATPMAGGGGGLGSSGNANANANGRPFGWIDWRERGVATPVKDQGMCGSC  
WAFAAVSALESHLAIATGRLVLSLSPQELVSCAPNPNHCGGKGGCSGSTGELAYDYVSKHG  
IVSEWVDGYTSYGGETGSCTAAAANKSNRNDNDIDNDNDSSSRIGDTAKISYLEDRALAS  
VDGFFSLPTNSYDALVSAVAIEGPVVVTVAANEWIHYGGGVFDDSNATNHYDMNHAVVVE  
XVRESFTVRCALARKRRAGMGFVRRSPEDAPGFHSHCFPLVRQSVNRETNXLIIFLIEF  
NLSTIATRVCFLGDSIPKIRNGREDXGKIIGWSETAGALCGTYSLFTENSSQQKRLQSFL  
YRSMPEKCVALLWTASPHASSFCVVP CRTSPNPIDPPTPFSAAPERNTTKKQSTFVRGE  
DGYIRLKRTPSALAKGEGDGPDSLLSSGYCKTDVTPFHGVACAGPNDEGEDAATGAGGG  
PPPVACGTSGILYASVVPVGARLVGRQA  
>comp14326\_c0\_seq1; 1000 360 2777 LEN=3107; translated  
MNNNNLNGGNHHRQHQQNNQQQSSQHAQQGRPSIPPQFQQHFQRHPQLQARNQDPQLA  
YLLANAAAGRTQQPPSLNAFQSMGAGNSGTAATSLFEEQILQRASALRAEALMHQNNQQH  
PYGGSSGNNNQQQHRQQLQLQAAMQAFQQQHSRTGGPLSTSSMRNSSSPPARTPQRDIL  
QQQQEAALLARAATLRDYGLASAGGSSPNSAQSDPSAFYGSAPTIGSGGPPGPGNLGRM  
QEHLDMNALMRHRQQQNNHQRAFALEQELGRVNQTQRYAATSAQSPLNGGGPSGVIASNS

GSSFIGNVPKTSQGNPAPTVASAQKTTALSKRDSEASEAPSSVFSAPQGDGPTAAAAA  
VSKNKTDVDRAPKGDEASTVSTSSKTSTAPSKTKPTINAPKKSSGQQRSTPESSDPELKT  
SEPMVAGDAAAATAASIKTKEHRNTPGTIVPCRARGMPMNHNFISAYFVISEDAPH  
GENLICSYFACRNGGVKFRYCAICMAPVAKRNFRRHDHGMSKNMGAGNLQDEEDDDDD  
TLGEQPEKMECIPCDKELSGSEAEIEINDPQPPEKEENEHLPTGDQDGKRKGMESDVVEA  
KVEASIIDADDNKTSSVSDSERQSMWNKLLTKRPRNTNDPKELSSWLSEVIAISDVDFPL  
ERVYAQNMNPLGQILFNQLPTLTEQKNVAANGVEETEGDSIRNSSSAKDSIASNGKKDS  
DVTLASAEGDEEASDSTKEEPPDLAGDSTSKGPEKKPNKSVATSSPSKRNARNDDEEGF  
SGTFADWRDRKKGRSLKKGPGSLRK

>comp14326\_c0\_seq2; 1000 462 2879 LEN=3209; translated  
MNNNNLNGGNHHRQHQQNNOQQRSQHAQQGRPSIPPQFQQHFQRHPQLQARNQDPQLA  
YLLANAAAGRTQQPPSLNAFQSMGAGNSGTAATSLFEEQILQRASALRAEALMHQNOQQH  
PYGGSSGGNNNQQRQLQLQAAMQAFQQQHSRTGGPLSTSSMRNSSSPPARTPQRDIL  
QQQQEAALLARAATLRDYGLASAGGSSPNSAQSDPSAFYGSAPTIGSGGPPGPGNLGRM  
QEHLDMNALMRHRQQQNNHQRAFALEQELGRVNQTQRYAATSAQSPLNNGGPPSGVIASNS  
GSSFIGNVPKTSQGNPAPTVASAQKTTALSKRDSEASEAPSSVFSAPQGDGPTAAAAA  
VSKNKTDVDRAPKGDEASTVSTSSKTSTAPSKTKPTINAPKKSSGQQRSTPESSDPELKT  
SEPMVAGDAAAATAASIKTKEHRNTPGTIVPCRARGMPMNHNFISAYFVISEDAPH  
GENLICSYFACRNGGVKFRYCAICMAPVAKRNFRRHDHGMSKNMGAGNLQDEEDDDDD  
TLGEQPEKMECIPCDKELSGSEAEIEINDPQPPEKEENEHLPTGDQDGKRKGMESDVVEA  
KVEASIIDADDNKTSSVSDSERQSMWNKLLTKRPRNTNDPKELSSWLSEVIAISDVDFPL  
ERVYAQNMNPLGQILFNQLPTLTEQKNVAANGVEETEGDSIRNSSSAKDSIASNGKKDS  
DVTLASAEGDEEASDSTKEEPPDLAGDSTSKGPEKKPNKSVATSSPSKRNARNDDEEGF  
SGTFADWRDRKKGRSLKKGPGSLRK

>comp14327\_c0\_seq1; 798 1 1416 LEN=1433; translated  
QRVKRLARLASNTVCANCGTAKKFGFSTVCIKYTFVCNNCKSSHQAISHRCKSLTMSSW  
TDKEADELECRGNDYARRTWLKNAPPIGQGRPKEGDPVDVFKRFVVDAYERRRYGEDD  
GARAGSSNNSNRNNNASSAGRPVVPKPNPAATIRAPAPRAARPPPAAPVADLLDFTSVS  
SAAPPASTSRQPATGNAAAAATNHASFEANFDAPAVAPVAAPVAATI QNDPFAPSA  
AAGSGFDFMNTTSTNTTTTTNSFSTPAPVAAAPVAPAIKKPIMNSANRSQQSSMISMT  
MPGQNNNHQGNRNNMMNGMGNGMMNGMNCMAMGWNNTNTNTNSNQGAFFGGMGNPQMMQ  
QQMMMQQQQAMMMMQQMKMANGMGMNGMNNNGIGVGMNGMINGMGMGMSKNNNNMMS  
MNNTMMTGNTMNAFGGMNTNGNNGSRKSSGGMDCLQMSSSSMNAWSSGVNK

>comp14328\_c1\_seq1; 544 96 1796 LEN=2108; translated  
MPNHSGGDEFGFCVPGSVDARTIVAGQDRRAFARRSLRAGEVVLNRNAPTAHALFCEQRR  
ERCAHCLSTTRGAGDEKISRSTKLLRCGGCKQIWCYCRDCQKEDFFFHKVECKQSSILLT  
PAEIGQQSDDAALLVRNFLALHVRNRNGNPKHGGSSDSNECCQPSKDGTVRCGSDHFESL  
QQYRKERPLDARERQDIRRAARALWNQRTTLHKQLKNTSSDALRSLSELEERLEGDLRRF  
RVNNGFVTNPMVRVVASGVYPLGALLNHSCAPNCLLRYDFASSGSAQRRVAPPMEIVAA  
RDI SEGEELTHSYVELVSSVDSRRSNLREIYGFDCHCARCQAPPAGGVFQTTLPGNYRSL  
SPIGLTQWVLQHCNPATPCQDNDSSLVRVNQDLLLQPPSFDTTSDSNGTAVVDAGKAKQ  
REAQCCMINGDMDGELACLKEAVRLFESSLKPTATPTHTLPLSLDLYKARCDRLGSLIVA  
GGEAFLEALVECEHVVSFLCLALNHVPHNSLLGLQLFTLGDLYEANGKRDKAQSTYIWA  
RRTLRI SQGARSDMVVMLNEKIIKS

>comp14329\_c0\_seq1; 661 189 1790 LEN=2097; translated  
MTVPTSIALLLLVAFFASGWLKMSFRGSTKITPLVSEKEKSLGRCFSSAVLSSSNLFAY  
TAEDDEDEIEIYLEDDEDDDESTFEYEPETARMKKGEWMDQLQRLAQTSSNDPSAVTVAQEI  
FDEMFTTYAETDDAIFFPVTVVYNLILETHAYSKSPDGGEEAEKILDRMEDKSNAFVAPP  
NEETYLCVMDAWAMRERPDKAQQILERQDTPTKSSYNKLIKAYGIAGDPDQAEVFRSL  
SDKMANHKSWSVQMLKARAASEGKSSYETIRSLFVEMEEEGFKPQTSAYNVLIRSVGRND  
GPKEAEAILFEMIERFRMGDDQVKPNSDTFRAVL MAYNGRGRKFTVASIASKVEQIMQIR  
EGILTRAESGEDERTYRLALGIVGRSKDSKKAERTNRI LHKYNKESLYLNYLVLKACAYT  
EGDSKEKFEAFQVALAVLKGVRSSAELMVDSSILGMFIKACNNLMPSGPKRDDIVQKIFQ  
ESCTRGLVNDVFLNEFRLASPELQLDVLGKPGIDGVSIPKWSENVPLQRNV

>comp14330\_c0\_seq1; 767 1 2574 LEN=2574; translated  
EPYRKARARLSSFFPKKLVQYDAGKLQALATLLRKRKEGGHKCLIFTQMKGVLVDVLEAF  
LSMNGHTYLRLDGSTGVDRQRLMDRFNNDPKVFCFILSTRSGGTGINLTGADTVIFYDS  
DWNPAMDAQADRHRIGQTRDVHIYRLITEHTIEENILKKAQKKKNDIMVMDQKFN  
STPSRPEDSNKSEVDKDVYTKAGLQAILGFEDDEPHSIMAEFEKAQDMSKDEMEEAMAAL  
EDEDDAKALRGAQKETEEDQKEFDENTAMPERSDDDEGDPEKAKGSKGRNSNKTTRKG

GKESQQEGDEQNL YEKDL EKEFAAWQSTEGF DAKDIGNFLSPMERYGLKFREEIDPFYSI  
FYINEQRRKMEATEGAE EIDMDAVEQQKALEEQQAIDNQDLLATGTRPEDLVRQRNLYRR  
EKIRLRSEKLRKITGELWSQKVDGLTKKLFWYNEETGEATWDTPSVVADLEAEVAIRE  
GWGKLPTELLTRVMGYLVFPFERQSCSAVCRQWKVAAKDIRFVIHVYPVEMGALANRDP  
KRHYNHYATIADALANAHPGDTIELGDGHYVWVNDPGILIDKPLRFVGDENNPANVVIEM  
GSVQWTASGGWIEGITFRRPKMSSGGKSLPSHPMLEVSGPGRVDMIHSVFDNDGSTGPVA  
RASGSGTKGLWRGVSFRNGGSSGMFIDGSERARAEFIDCTFKGNRADGLFVTNKARVRLS  
NCTVENNQSGMRLATTGCHAEVFD SRFKDN TGGVIKKETHCVVTSSSNTAFLKAKPKRQ  
IPGFKLMVLKHGPVAASVAPSNASAKEKRPSGGFTRKRNACVLGWSLDGAPGPSVARTND  
DPSKQCSTEVPIVISNPTX

>comp14331\_c0\_seq1; 723 74 2560 LEN=2657; translated  
MRRSFVITRRRRWQTDPMTTTGHAAVRGISTSSGCHNNIFQHLPSSSTAYHRNMRDPF  
PSRRHQNRSRTYGSKTHMSTSTVASVSCWVKDVVTRTKSLNPPNPILQSLPSAEAVLDSMP  
MDPRTDCKEPTKRDAPIPLLPRFVSVLQPHHLEKAAEEIRRQYDVELAQLEVRLLTSVQGED  
GSDGGKRTARNRSALSALLLDMRLTAPIAHL SAVSNLYATLAAPPDRIDDWSRASDVAD  
SSTTRRFLEQLYRSGIVYKALVSALDE TGTGTKSPSVLVFPFHKRG AHTGTGTHGPSGSDS  
SDSDNEPYLEDAERFQQIQDEL CVLNERLGN IASYERASKAMRLQCMSDMYNCIGLTRMQ  
AESLTQNASVWELARLQHNHMASPHDELTSKLFPEIALFLEPFLPTKTKLDLEGVGAFL  
ESKSEVANKYSSQISVEAQKASKARFDKQRMRLHGVM EGLIDFCDGILGISVVEDDTA  
FGAEAGWSKNVRLLLHIYQKNATGSTAEGEETANSDDNKGRYLGTIYFDPFADSYWRTE  
KELVTTKLFSEQLTGQTIAPVAIMALKITPIWDDTPVPMTWTDTRDFLYQFGTALQLILT  
QDCRRNHHHTHTNDVMIDPVPIDTSEFLGHF MEMWIQNDGFLNRLAQLSQDDLLLEDDTL  
KVLRKDIKKEKALEIMNTMFLSRLQFTVFDGFDPRGDETLVALQERLATQYLPKSNLDP  
SDLSPLLAIFQQSGLDQTM SAYGTLWSEVLAATVYEFQNTDLRDRKEVERLGTGIRDLF  
LCGSTEDSTQHLSKKDFEQ LCGMKELSGECLKRVFGFDTKDDQE QDVP

>comp14332\_c0\_seq1; 673 185 1603 LEN=1730; translated  
MGGKSTGTFVTVDTDQKVGIFHGSVEIVSFLDAPGFVKAETTRGESWPDVSTCNGLRFALK  
SSTPSYKGF RV SFGHKRPPGSFPYIYGFKTDLHLPESDGTDEDEFQQI ELPFDSFTDKWD  
AGSGDAIVTCKENNEFCPDAESLKDLYSIGVWEGEGVEGIVDLQIRSI SAYGCASDDANNS  
SDASDDGEDESSVVAIEDFSDPKHEWRTMNDPVMGGQSESSLELHDGMASFEGTCAIVP  
LHAPGFITMTTGAHYGPGNPFKSLFRRSTTNN SNKGESSFPDVSSCKALSITVRSRDADT  
YEGYYVSFGTDRVPGGHHAMGYKTHFTVDSNNEFVELTLPFSDFSAHWDDATGKTTVTCE  
EDPAVCPTIETLRDMKTI SFWAEGVEGTIALDIKYIGASGCDGEPAPGVSAAGMVVGGGA  
LSNTGIERPCSLGMLAMVSVLVLLVARSRGRRGSRVQSSEYVEVKQQAIVV

>comp14332\_c0\_seq2; 398 1 963 LEN=1090; translated  
LYSIGVWEGEGVEGIVDLQIRSI SAYGCASDASDDGEDESSVVAIEDFSDPKHEWRTMNDP  
VMGGQSESSLELHDGMASFEGTCAIVPFLHAPGFITMTTGAHYGPGNPFKSLFRRSTTNN  
SNKGESSFPDVSSCKALSITVRSRDADTYEGYYVSFGTDRVPGGHHAMGYKTHFTVDSNN  
EFVELTLPFSDFSAHWDDATGKTTVTCEEDPAVCPTIETLRDMKTI SFWAEGVEGTIALD  
IKYIGASGCDGEPAPGVSAAGMVVGGALSNTGIERPCSLGMLAMVSVLVLLVARSRGRR  
GSRVQSSEYVEVKQQAIVV

>comp14332\_c0\_seq3; 800 98 1744 LEN=1871; translated  
MISTLGIRTTAIAPLAI VALFVV LIVSSDPTSATATTSSTPVLGCETKDSLGC GDIIMLE  
DFTNPRHKWKEMNDPVMGGKSTGTFVTVDTDQKVGIFHGSVEIVSFLDAPGFVKAETTRGE  
SWPDVSTCNGLRFALKSSTPSYKGF RV SFGHKRPPGSFPYIYGFKTDLHLPESDGTDEDE  
FQQI ELPFDSFTDKWDAGSGDAIVTCKENNEFCPDAESLKDLYSIGVWEGEGVEGIVDLQI  
RSI SAYGCASDDANNSDASDDGEDESSVVAIEDFSDPKHEWRTMNDPVMGGQSESSLEL  
HDGMASFEGTCAIVPFLHAPGFITMTTGAHYGPGNPFKSLFRRSTTNN SNKGESSFPDV  
SCKALSITVRSRDADTYEGYYVSFGTDRVPGGHHAMGYKTHFTVDSNNEFVELTLPFSDF  
SAHWDDATGKTTVTCEEDPAVCPTIETLRDMKTI SFWAEGVEGTIALDIKYIGASGCDGE  
PAPGVSAAGMVVGGALSNTGIERPCSLGMLAMVSVLVLLVARSRGRRGSRVQSSEYVE  
VKQQAIVV

>comp14332\_c0\_seq4; 472 537 1955 LEN=2082; translated  
MGGKSTGTFVTVDTDQKVGIFHGSVEIVSFLDAPGFVKAETTRGESWPDVSTCNGLRFALK  
SSTPSYKGF RV SFGHKRPPGSFPYIYGFKTDLHLPESDGTDEDEFQQI ELPFDSFTDKWD  
AGSGDAIVTCKENNEFCPDAESLKDLYSIGVWEGEGVEGIVDLQIRSI SAYGCASDDANNS  
SDASDDGEDESSVVAIEDFSDPKHEWRTMNDPVMGGQSESSLELHDGMASFEGTCAIVP  
LHAPGFITMTTGAHYGPGNPFKSLFRRSTTNN SNKGESSFPDVSSCKALSITVRSRDADT  
YEGYYVSFGTDRVPGGHHAMGYKTHFTVDSNNEFVELTLPFSDFSAHWDDATGKTTVTCE  
EDPAVCPTIETLRDMKTI SFWAEGVEGTIALDIKYIGASGCDGEPAPGVSAAGMVVGGGA

LSNTGIERPCSLGMLAMVSVLVLLVARSRGRRGSRVVSQSSEYVEVKQQAIVV  
>comp14333\_c0\_seq1; 371 1 1096 LEN=1811; translated  
XLAQCSRAVDAELVRLRSEKTSKAKLSRRDAAAKVRTVEAAFQDAFVALCYLIQAQAKFL  
AFAENCAEGVFDEASMERLRDEFRLRGPCADLTSRITQHCLFQEEAGEDCLFTTFSDPSEKR  
QGDTTDDENDNDDEEPPVSNALPQYCAEVDIAARRYPRSYLSSPPPPEPLPVLRESFSG  
NTGTVLAKTWVLCGGHCYRGGVVRPVDRRDRSRGTYVRPGSVDFGLSYVEENCLVLCGLPF  
RKLDKKAEKALLFSRKRTLTDKLANADADADPAGVLEGTVAIFLQQARNLVASGSLLRGP  
ILEALCGERKIPSPVAFALRRLKGAIDDPGAQIDDELVAFVKEFGLTRDIHKYDTAPLEA  
FLAKQ  
>comp14334\_c0\_seq1; 484 1396 2826 LEN=3184; translated  
MIPNQPYMCPDELKNIQPQPPPPQFFNNEQNLIIDNNMMISSNQDNANSTDAASRYFDPIET  
LPDPDDGLPIALLVERGMCTFWWEKAELASKYGPSVRYVVIYDDVVSPDLVPMSSSEYPTDM  
TLLFVSSASGHEMRDLIRSNQPTPHQDSGPGNAGVPPPPITGFDTTQGSGEENQDGTAAH  
SSNDYGDHKDGLLVLDGDRPYMDPAFPALNMAAYFLAAMSGFLAFLIFFGCLLVCAQC  
GCITAAPDEHGRIVLVFAAGPGIRHTEGLARMIRVHKLTAEQVQILDEEEFLGDADACNSE  
EGGDSGCCCAICLDDFDDGEEKVRVLPCHGKHFHEPCLIPWALTERDASCPLCKMDVLKHVLE  
IERKKKLNNKDGGSNSETGKEGRASDMEASGDETAQGIAGNHNDNRNTNNPRGTSPVRSVWY  
RLWGWSLIADTVPSEDHNPAGSGATQSSLEVI SEIEMENRTPASSVSGGVENTI  
>comp14334\_c0\_seq2; 484 1278 2708 LEN=3066; translated  
MIPNQPYMCPDELKNIQPQPPPPQFFNNEQNLIIDNNMMISSNQDNANSTDAASRYFDPIET  
LPDPDDGLPIALLVERGMCTFWWEKAELASKYGPSVRYVVIYDDVVSPDLVPMSSSEYPTDM  
TLLFVSSASGHEMRDLIRSNQPTPHQDSGPGNAGVPPPPITGFDTTQGSGEENQDGTAAH  
SSNDYGDHKDGLLVLDGDRPYMDPAFPALNMAAYFLAAMSGFLAFLIFFGCLLVCAQC  
GCITAAPDEHGRIVLVFAAGPGIRHTEGLARMIRVHKLTAEQVQILDEEEFLGDADACNSE  
EGGDSGCCCAICLDDFDDGEEKVRVLPCHGKHFHEPCLIPWALTERDASCPLCKMDVLKHVLE  
IERKKKLNNKDGGSNSETGKEGRASDMEASGDETAQGIAGNHNDNRNTNNPRGTSPVRSVWY  
RLWGWSLIADTVPSEDHNPAGSGATQSSLEVI SEIEMENRTPASSVSGGVENTI  
>comp14334\_c0\_seq3; 301 243 1013 LEN=1371; translated  
MSGFLAFLIFFGCLLVCAQCGCITAAPDEHGRIVLVFAAGPGIRHTEGLARMIRVHKLTAEQVQILDEEEFLGDADACNSE  
EGGDSGCCCAICLDDFDDGEEKVRVLPCHGKHFHEPCLIPWALTERDASCPLCKMDVLKHVLE  
IERKKKLNNKDGGSNSETGKEGRASDMEASGDETAQGIAGNHNDNRNTNNPRGTSPVRSVWY  
RLWGWSLIADTVPSEDHNPAGSGATQSSLEVI SEIEMENRTPASSVSGGVENTI  
>comp14335\_c0\_seq1; 131 1 303 LEN=787; translated  
DSTFQTIMKCDVDIRKDLIANIVLSGGTTFMFPGISERMSKEVTALAPASIKVKIVAPPER  
KYSVWIGGSILSSLSTFQSMWISKEEYDESGPSIVHRKCF  
>comp14335\_c0\_seq2; 556 90 1039 LEN=1039; translated  
MADDEDVPALVVDNNGSGMCKAGFAGDDAPRSVFP SLIGRARQPGIMVGMEQRDAYVGD  
AQAKRGVLTLYPIEHGIVTNWDDMEKIWHHTFYNELRVAPAEHPVLLTEAPMNPKANRE  
RMTQIMFETFNVPAMYVNIQAVLSLYASGRRTTGCVLDSGDGVSHTVPIYEGYALPHAVR  
MDLAGRDLTDYLVKILTERGYSLT'TTAEREIVRDIKESLCFIAVD FEEEMKKAESSALE  
KSFELPDGNIIVIGNERFRCPEVLFQPNLTGLEMDGIADSTFQTIMKCDVDIRKDLIANI  
VLSGGTTFMFPGISERMS  
>comp14335\_c0\_seq3; 131 1 303 LEN=452; translated  
DSTFQTIMKCDVDIRKDLIANIVLSGGTTFMFPGISERMSKEVTALAPASIKVKIVAPPER  
KYSVWIGGSILSSLSTFQSMWISKEEYDEAGPSIVHRKCF  
>comp14335\_c0\_seq4; 479 90 1039 LEN=1039; translated  
MADDEDVPALVVDNNGSGMCKAGFAGDDAPRSVFP SLIGRARQPGIMVGMEQRDAYVGD  
AQAKRGVLTLYPIEHGIVTNWDDMEKIWHHTFYNELRVAPAEHPVLLTEAPMNPKANRE  
RMTQIMFETFNVPAMYVNIQAVLSLYASGRRTTGCVLDSGDGVSHTVPIYEGYALPHAVR  
MDLAGRDLTDYLVKILTERGYSLT'TTAEREIVRDIKESLCFIAVD FEEEMKKAESSALE  
KSFELPDGNIIVIGNERFRCPEVLFQPNLTGLEMDGIADSTFQTIMKCDVDIRKDLIANI  
VLSGGTTFMFPGISERMS  
>comp14335\_c0\_seq5; 179 1 336 LEN=484; translated  
NLTGLEMDGIADSTFQTIMKCDVDIRKDLIANIVLSGGTTFMFPGISERMSKEVTALAPAS  
IKVKIVAPPERKYSVWIGGSILSSLSTFQSMWISKEEYDEAGPSIVHRKCF  
>comp14336\_c0\_seq2; 126 1 379 LEN=1536; translated  
XPTAKMNCKEHYLPELELATGQVREALQAILYTILFIRSPGPVSPRDVECEGFDFLTYP  
IASTPSSPSSLNYDVKKVDESIQNFLMKLSQIGPELLIGGLTLSFFERRKTQQLFGLVS  
NEERVV

>comp14336\_c0\_seq4; 126 1 379 LEN=1684; translated  
XPTAKMNCKEHYLPELELATGQVREALQAILYTILFIRSPGPVSPRDVECEGFDFLTYPR  
IASTPSSPSSLNYDVKVDESIQNFLMKLSQIGPELLIGGLTSLFFERRKTQQLFGLVS  
NEERVV

>comp14336\_c0\_seq6; 141 1 655 LEN=1441; translated  
XPTAKMNCKEHYLPELELATGQVREALQAILYTILFIRSPGPVSPRDVECEGFDFLTYPR  
IASTPSSPSSLNYDVKVDESIQNFLMKLSQIGPELLIGGLTSLFFERRKTQQLFGLVS  
NEERVVWEQWHLRVVNNTPRPVSSDNAAMERQRMQDTAEGMLRSVLVQIYEIARASID  
HVPPVMYEFEEKSKTVDDRENVYSRVTNMPLINLSS

>comp14337\_c0\_seq1; 392 130 1125 LEN=1370; translated  
MGKCSGLKGGGHRKALDVAERKRKEKEDRKKEQEYAGQRSIILQEILTKLDPNCDIYLD  
ANDNKTNMSIPELCRSHFRYEDCSNRRCKFSHEHSIAEALGNVVS GSNVMNDDGGCPTI  
PGLRLVAGILGDRGVASRRRRDQENRSRRKRTSLPDVDDGAIYSQSHGDS PFENALLEGS  
SFTNTIVTYLESDDLVLHLALSCRHFHNMVLI GDGN GEGCKDVQRRKHRAKERLLERNR  
ALLQSKAVAGRLRYAVSYVETNINANSHPKVKNKRNKRNNSSSSSVGSLRPILVYDYEN  
PHVFRAPRESGIKPNAESLPSTFSSNCKIVR

>comp14337\_c0\_seq2; 392 130 1125 LEN=1420; translated  
MGKCSGLKGGGHRKALDVAERKRKEKEDRKKEQEYAGQRSIILQEILTKLDPNCDIYLD  
ANDNKTNMSIPELCRSHFRYEDCSNRRCKFSHEHSIAEALGNVVS GSNVMNDDGGCPTI  
PGLRLVAGILGDRGVASRRRRDQENRSRRKRTSLPDVDDGAIYSQSHGDS PFENALLEGS  
SFTNTIVTYLESDDLVLHLALSCRHFHNMVLI GDGN GEGCKDVQRRKHRAKERLLERNR  
ALLQSKAVAGRLRYAVSYVETNINANSHPKVKNKRNKRNNSSSSSVGSLRPILVYDYEN  
PHVFRAPRESGIKPNAESLPSTFSSNCKIVR

>comp14337\_c0\_seq3; 423 130 1258 LEN=1485; translated  
MGKCSGLKGGGHRKALDVAERKRKEKEDRKKEQEYAGQRSIILQEILTKLDPNCDIYLD  
ANDNKTNMSIPELCRSHFRYEDCSNRRCKFSHEHSIAEALGNVVS GSNVMNDDGGCPTI  
PGLRLVAGILGDRGVASRRRRDQENRSRRKRTSLPDVDDGAIYSQSHGDS PFENALLEGS  
SFTNTIVTYLESDDLVLHLALSCRHFHNMVLI GDGN GEGCKDVQRRKHRAKERLLERNR  
ALLQSKAVAGRLRYAVSYVETNINANSHPKVKNKRNKRNNSSSSSVGSLRPILVYDYEN  
PHVFRAPRESGIKPNAESLPSTFSSNCKIGDKFRDYNKILKDETLEMKGEDINGKYNIQI  
CTLFEIQIHHHHYHK

>comp14338\_c0\_seq1; 337 103 1455 LEN=1658; translated  
MKRQRAASESSSKDHLRCQTGNWDYDEILRQENDGDSIRNSWLKDRSFLHVHKRDSFVGK  
TVHSHPQSDLELRLSLGQQLIQVKRRLWPAAEKALACGSTPSEEFWRARAYANPMEALGEC  
RHRGLNQMFINRSAIKLANIDAILDFVLTRIHSSGTLSDGFGRNAFLFADLCGAPGGFS  
EYIMKRIRANGIGCTCRGYGMSLVGNNEHGKGATWRLEDFSQDDNIVSINYKIHYGNDGT  
GDIYKVENVKAFKRDIGVDLHAAGISQQRMNLVVADGGFDAQRDSECQEGLAQKIVLCEF  
ATALELLDVGGSLIVKLFQGFQTD SIRMAMRSLSDDFNSLEITKPISSRPASSERYVIFS  
GFKGLPESWEGGESWISNVLIGRCLRQDISFYSNVTDALLDRFDRDMLMLNLKACFAILS  
RLERKTSAVEMNRRYENGRKDVNIKMYKHTW

>comp14339\_c0\_seq1; 575 336 1553 LEN=1903; translated  
MPSDYPLSDSKATRLIAARETLADSTVSLDDDFEVDDDILGIVKDDALQNNKL VYPGDDG  
YWDELEQVDMQIARLEGGKPPSDYQTPWELWQGWDLTRISAEVRGEYPGFHQQILLGALF  
SQGIKPHGPGSPFRSKRDFVGLQVRMAEINTWAFHAVAPINFGLKWSVGMPRPEEMAYL  
IARNAVKDENNKDFKRIARKIKKIEDMKEKDLADTDDTFRYKATDFTAYTDGKNKGSPTH  
PSWPAMHSAGSTISTWLPAIVELTGEQYCEALRTDFAVSYGRTVAGVHYQQDNLAGLNIG  
MKIIQLKLPKYLEEKFGYDASVIERRLNALSFDWNTFDSKACTINGKDAAEHLKNAMVPE  
MPPGYKNSEKTKSNVKNKNGKIIRNSIKSIGSHLRTVTSVGVVE

>comp14339\_c0\_seq2; 634 458 1864 LEN=2214; translated  
MVP CGCSTMVETQTCEAPERVPDRSISEIRFNKLPPTDDLKDFVGD SKDYENG VHKKI  
FPLMPDYPLSDSKATRLIAARETLADSTVSLDDDFEVDDDILGIVKDDALQNNKL VYPG  
DDGYWDELEQVDMQIARLEGGKPPSDYQTPWELWQGWDLTRISAEVRGEYPGFHQQILLG  
ALFSQGIKPHGPGSPFRSKRDFVGLQVRMAEINTWAFHAVAPINFGLKWSVGMPRPEEM  
AYLIARNAVKDENNKDFKRIARKIKKIEDMKEKDLADTDDTFRYKATDFTAYTDGKNKGS  
PTHPSWPAMHSAGSTISTWLPAIVELTGEQYCEALRTDFAVSYGRTVAGVHYQQDNLAGL  
NIGMKIIQLKLPKYLEEKFGYDASVIERRLNALSFDWNTFDSKACTINGKDAAEHLKNAM  
VPEMPPGYKNSEKTKSNVKNKNGKIIRNSIKSIGSHLRTVTSVGVVE

>comp14340\_c0\_seq1; 538 1 2000 LEN=2212; translated  
XEKRAITLRSNCVLLFVDILRLILLVIERTDQSLELRIDLVEEGESLESSFRSCIFSAA  
PVTKRTNAAETNNESCDLSRGSQRVTSFFVDSSGRSSFTLPLQMTFANKNDLEELLARK

CFDPPPRNLASSNPVAGNSSDKDDDGIKRDQPIDSNKNSKVEASIAFEVKSFPIDEDDPT  
NVVVEGVSILSCSVANLVATFKVEITVRATPVEPSHTPDRSTADSRLPVSPSFSSSSPRPT  
NNMDTTEPELGLKEQEQQQSVSTRLEITPVLAIENSPTSDDKENDKSKSDLGTDLMLEL  
AAIPDQMHNKSNENGRPSILSSTNDRVHETRLSPVLTDTVLTSAFVIVSVNNLSGNSRSTG  
NNFVLLAIRHSKTHNLPVTITNIAFHGHSRHTIVAQKSKKNSKDKISPSVIQQTVSNM  
TASVEWGYMPKTELKPLTILPHEAYSSILFINAGEERISRQFVSPLSVTGVINMNTCVE  
GDYLGKDINDYIDNGVQEECTVVVAGDAHWTTRLIAVEPADAFRDMCTLESTVRRGEP  
VVKLRIFNLSLEPRNMLFMMAKKDPDGVKEVSVNSAIVTESDGYRFGVWGISGDDDGTVR  
LNRDHDLLAVDTALILGDLQGGHVAEDAELRFVPLHLGRLKIPNWRLYDKIANRWYTCKHD  
LTVVAI

>comp14340\_c0\_seq2; 207 159 902 LEN=1114; translated  
MTASVEWGYMPKTELKPLTILPHEAYSSILFINAGEERISRQFVSPLSVTGVINMNTCV  
EGDYLGKDINDYIDNGVQEECTVVVAGDAHWTTRLIAVEPADAFRDMCTLESTVRRGEP  
MVVKLRIFNLSLEPRNMLFMMAKKDPDGVKEVSVNSAIVTESDGYRFGVWGISGDDDGTV  
RLNRDHDLLAVDTALILGDLQGGHVAEDAELRFVPLHLGRLKIPNWRLYDKIANRWYTCKH  
DLTVVAI

>comp14341\_c0\_seq1; 787 1 1976 LEN=2122; translated  
PTESGPKSIAKGTAPRAPRLATKKSRRSTKVNNKTVARMPFRFRPFATKRMFLSLSSA  
FIVFSAILIETATSLALPKAPAPTNPTKFVVLGGTGKIGTAVAAHLSHRLSSSSPAPSDC  
EIVLVGRRLLSSAEDDITYFRAALQEIEELLALSSDHKKTFPDSQRPKISYRCVPDVWQAG  
ALDEILLGGGQTPDSSSDNSGPVSCVIHVAGPYADRSPVLDACIDFKIPVYVDVSDPV  
DFLEASLERNDRAIASGTTALLAAGAFPGMSNVLAMEAAEAALSTDHDESSASSVVKDVR  
FNYFTKGLGGSGTINLYITNLGFGDPMVMHEKXKAEPVRGLVRTPTGEGRLFIDDDNTRT  
TIDAPWRKDNARAKARVGSQKVFAPPFPEAATVASELSISGSSSSAMGTAPEIWNMMLGL  
LVLDLVPNRWRSDFRSKFLADFSEPLVLATDLAMRKLSPASEETGKGDCEGTHAMRVV  
TERSDNGASAQAMTSIVQCHDSFRRCVQSCAEFALDAVLEHERGTAVQTGVFLPEQRYR  
GSADRARIVERLTATPGTFCYTGPEIRPTDAGAAEAGPENAPADRILLKNTPTPGLICN  
GAPIEVRLERIEEDDDSDSDGTTSRQKSETQRRPKQLPVYPNDVREVVQAMENQLR

>comp14342\_c0\_seq1; 707 247 1866 LEN=2357; translated  
MTLPTLSIVAVLAVAVAVYQFLKSWAETAYDFYKNDPPSQCDIDSFVSTSEYNSNPPN  
KLKVSMLMKIQCRGLKGRARTTPVELVCTKSPHVEGLYVSRQAESEGGEPAKEPTVPIG  
DVLATKQPGHEDKPPVVVVVTIRMFGFHRIAYSACSWAMERGHHTTIFHDFLNIESAESDL  
IKTVQDFYSKGSRLASELGSHEKVVWQQLMKGGDADALRAAALTGAQLMPLKTFPKDTP  
IVCTHQICALVAAAAGFTNVVNLVVDNYPQWFLVVPKTLNITQGPVNYQSYLRMGVPASE  
LRLAGHWCPADLVKNIGTDCNRRIRAKDSGNKPRLLIPVGGAGAQSFIINFIEAVEP  
WIRRGKLQFLNAGDHKHMKTAFVEVLDKVGLEYDVTVTKTKGVYDFQSRLLEPGAEPDKA  
VTLFAFDDYFPAVATDILLCRVADILTCKPSELAFYIPKLIHRRVGDHEAYSAIRAAEV  
NDGSLEAREISDALRYLELLCDSTCDLLPSWNQAVIDNQTCLGMYDGCKNAVKWACGEQ

>comp14342\_c0\_seq2; 139 565 1067 LEN=1420; minus strand; translated  
MTAXVPARQQITGAVAQEFKVPPEGVADFAGLETVPVVDLRGTNGGIGLVVPDSANVQLGDG  
IKGELAGLAGQDIGNAAEQIGGGDGWEIIVKSKEGNLGVFGTGFQKQSGLEIVDALGLGY  
GVVFEEDLVQDFYKCCFHVFVIAGVQEQLKFSATDPGFYRFDEVVDE

>comp14343\_c0\_seq1; 416 1 1298 LEN=1543; translated  
XQFQRIGTPKSMIISKLILLPPTKYKDRLLISNHYICINSSHTTERMNEIGIKRRPMATA  
FPRSNSNVLSIVALFAVLVSFSIIYPHSHYIIPRHSLSCKINEAAIDTAYTVRRIHHSK  
STVRIDPSTRHLHSYQPQSPEDGKEANTGSKANGTTADSNTKDDREPTLYEILGASRTAT  
RSELKQQYVKLARVSHPDQAIGGTGSTENDVDFQKVAEAWRTLGNKFRKRYDRELKAKE  
WGEKAQRFTEGLEQVAPVASKIMDNVAVPFLRRTSATIAFGKNIASNLSISQTEFDLP  
TPTTPPQQPSATIETEENDAMANEQEVKQAIANTNSGIDVDKTDKRLTKLNVNQDITEDV  
VNGNQEITEDVVKNSVSEQKNDVDTITQDVDNAEFDVDSFIATTIEAGKRAGKSPIDTSN  
DLNDKSLELEYR

>comp14343\_c0\_seq2; 448 1 1423 LEN=1423; translated  
XQFQRIGTPKSMIISKLILLPPTKYKDRLLISNHYICINSSHTTERMNEIGIKRRPMATA  
FPRSNSNVLSIVALFAVLVSFSIIYPHSHYIIPRHSLSCKINEAAIDTAYTVRRIHHSK  
STVRIDPSTRHLHSYQPQSPEDGKEANTGSKANGTTADSNTKDDREPTLYEILGASRTAT  
RSELKQQYVKLARVSHPDQAIGGTGSTENDVDFQKVAEAWRTLGNKFRKRYDRELKAKE  
WGEKAQRFTEGLEQVAPVASKIMDNVAVPFLRRTSATIAFGKNIASNLSISQTEFDLP  
TPTTPPQQPSATIETEENDAMANEQEVKQAIANTNSGIDVDKTDKRLTKLNVNQDITEDV  
VNGNQEITEDVVKNSVSEQKNDVDTITQDVDNAEFDVDSFIATTIEAGKRAGKSPIDTSN  
DLNDKSLELEYRAKEEEEKAKYIFEELDSVKKQRIFGTLQSSSELTLSKEAEEVX

>comp14343\_c0\_seq3; 165 1 586 LEN=697; translated  
XEELSSSEDAVSFVSRDMKKAIEKEIQSLRNTENQFTENLETYNKIDREWSVWLTKQEEA  
KKNLSEKRKEEIEARKAFDNAQQMVVKAKDDMVSASNTLRGVEQEVKSAEEMDRVSTTL  
SKKQERVRNALRRKTELMKGGIHVEYITEQEVMSLRKKEIQLMGESQIATMVARLQSR  
DKLKKRSELLEQSKK

>comp14344\_c0\_seq1; 519 450 1919 LEN=2136; translated  
MNDDLAEFTSIAGGGYDRPVVQWYPGHIAKAERQLSETLKAVDVVVEVRDARACKATAHP  
RVGEWCAGRPRIVVLTHLDMVPKAASGSWKKAYETLGAERWDDAPINRQVANQAKQARDL  
RSKFLDNDAGKGTGKKKKKKQKLSNENI IETKNDGNENNITPVEQVLFVNAKQGGIHAL  
HRSIFKAGAHVQERRERRGLNPRALRVGIIGYPNVGKSALINKILGRKRAKTENKPGVTR  
SLQWIRVRTEDSRKAYASGKTSASPTSSTHSNAMKREFELLDSPGIIPAKMVDQSDALIL  
AACNCIGEAAYDNQAVAAYLCEWLKAIHIMGMQGRAAPDWQKKCKERYGFDPLKKVKRDE  
FDVIQEEYMTGEDMLFKVADDLCRGDAEDASRKILQDFRTGRMGPIISLQLAPESEEDDGQ  
LSVPVGDGTILGRQSNRDFDEEFKQQQEERARIAVETAKERGLELPPIVDENDNAAAN  
VGKGMFDGW

>comp14345\_c0\_seq1; 212 182 1414 LEN=1519; translated  
MRVALHLLALLAASRAPATAREILYEGDEDRSHIVSPLPHTYLDESLLPKRFDWGRVADA  
SDGDADRGDAPADAPLADPPRFPRTRSMLTRVLNQHVPPQYCGSCWAHSSLSALADRIKI  
DRGGAGTEINLSVQFLLSCGASAGSCHGGSAIRAYAF LAGEKRGT AHPVPYDTCSPYLAC  
SSDSEHGFCPHADTSCGASARCKTCANPSHEPGGGACDPIGSYPNATVAEYGSYSLDDGI  
VPIMAEILMRGPVKASVNAGPLLAYEGGILVDSPANRNTTHNHGVSIVGWGYDDFAELPY  
WIVRNSWGEYWGELGFFRVELGKNLLGIEAHVCWATPGSYTETNLPCLKDGSNCRPGGGL  
PQQQRQARGWVSRRYEDPSNRPAYVRRRLFQAGVGGTVGPAEDASDTAR

>comp14346\_c0\_seq1; 734 206 3025 LEN=3208; translated  
MRWRSHAGNRKRVRYDRSIGLVGFCCILRICLWHWGNILVECFSLAVGRRGPPKSLDTK  
LLFKTTSAPTYPYFGDFITEELAPYFGDDMLKKESSDDEDFPIFEEANPKRSDQRNRE  
EYTDIDHGRKFNPFAPFPDAKKYNDGSPAQPEDGILDDEILSAEQTLALKLITEGRNV  
FVTGVAGTGKSLVLRKTLEYVQEVYEPNEYVAMAPTGSTAIALEGQTVHSFAGIGIPKIY  
KDFKRMKTNKNIRKWEELQVLILDEVSMISGEFFDSLSKVVS DIRNDPRPFGGIQLIVC  
GDFLQLPPI SPRQWEVDQTVKALQEREGLETPEEARDWFLFNRGFCFQSVAWKEANFELV  
ELNHVFRQRNEDFVRALQDIRVGNVTPETIRYLRENCERPLPENDLGIQPTILHSKNIDV  
ARENLVDLNKLSGD TVSYEASDAVEPEKGVGPWVKKDLNNSFFRSCLAERKLQKIGAQ  
VMLIRNLSQNSGLVNGSRGTIVGFREVKSSSSSTGLNLLPGVTKYPPVVQFKNGLQQVITP  
QKFQSRILGKGKCI RTAIP LKLAWAITAHKAQGLTMDYVIADVGVFAEAQLYVALSRAS  
DATGLEIRNF SRNRVRANALALRFHGDPEQKYPFWWDSDGSRP MILMES PSESLPEKSKK  
ERPSETAGFGMKAQVRGVKKTGSNAPRKTPERAEFI PRSHRTGV DKT VRSATSSKTPEI  
PSLVPTPQSQVVDKIRSSNLRKEPKKTSESLGMKR ISSQTEMPIRSKPIESCEAQDTS  
EQLHEPTLKS RKVVELKQMLRERGLKVSGRKAELIERLVKANGIGETHGHAEKRRVFEL  
QCMLRAQGLK VVGTKAELIERLVTSKCI EDTNSGSNMNGKMASYWGSSRKTNTQPSEPLH  
EHALAGRKFV FELKGM LRELDLKV TGRKSELIDRLIAENQ

>comp14347\_c0\_seq1; 525 85 1950 LEN=2184; translated  
MNALTLSSVLFSSSLLLVANALVASGRPTISKNALLTQHAGFGGGIVSNFWTRIPRGG  
VRNRKQKLLHEGTPLIFTAVAATDV DENYKPNVFPKEDDENTFLGEILKANFLFDDFTTY  
KNAENDDMSEVIASFEKCTYDEGYLLCEQGDTE TDYMYVIAEGSCKISIDGKKLPKPYG  
TMGSGSLIGDLAMLHGTPRAATV RTMTPVTLFRLHRNDFYHFLEKFSGKVKDKNTKSLAV  
SRKEEMQKQVKEIDHII DQISGVKSKFQGDII RQFQPNRRWLWTRWRGTIMQHAWKSALG  
NMALSIFFMVAIRFASDQSLTWP IGAIPDPEHPLIVRLKGLHKLWGYTMSITTMILSFYL  
NKAYGLWRDIYVKGRIIQGR LNDISMV LACAAERDPR TGRFTDRASSMLEDVAMSCRLSH  
AFSWAGFIKRFSVLLTPPGLSRMLSRGVMTRS QYDTLVHIRPSECAPQHVTLMWIMSRIF  
QGMRDGVIPDDNATKSVLMNKICDIRGTLGGLGDSLDAK IPLAYAHLVQVMVDVFLTMAP  
FALYSELGIVSVFVAVGLNIFYSGMNDLSKILLDPLDNC DGSFYQDSSMNMDVGVLIRES  
NDGSNRWKAGLQELPF EYGSK

>comp14347\_c0\_seq2; 434 85 969 LEN=1347; translated  
MNALTLSSVLFSSSLLLVANALVASGRPTISKNALLTQHAGFGGGIVSNFWTRIPRGG  
VRNRKQKLLHEGTPLIFTAVAATDV DENYKPNVFPKEDDENTFLGEILKANFLFDDFTTY  
KNAENDDMSEVIASFEKCTYDEGYLLCEQGDTE TDYMYVIAEGSCKISIDGKKLPKPYG  
TMGSGSLIGDLAMLHGTPRAATV RTMTPVTLFRLHRNDFYHFLEKFSGKVKDKNTKSLAV  
SRKEEMQKQVKEIDHII DQISGVKSKFQGDII RQFQPNRRWLWTRWRGTIMQHAW

>comp14348\_c0\_seq1; 846 263 2101 LEN=2258; translated  
MKQNQNMFVNFVVLVADVPTSSSFVEHFRNCRIRGSGFPKFRFDRHKSTILMTQRGA



YDQRDQNEGNGDEIYQERTNGRYSNGNDANALGQNNTNSRFNQEADVRTGSFSNVRQAES  
DGNQKPFIPRRLSQSPDRAISIVSELKSNAALFAAFAYGSLNLPGLTLTVSESKVTSVTT  
LSVSRPLPDSLIRTFVVLDI STLCLMISCVAAASQLLIYRLTDGSYEDVDFSLQDDGRD  
VESASYRKKKNSRESALGRLVTTYRNEFTVARITFDLGLVTL LLA VGVRSLAIFDEDIVV  
PVAFVLGLTSIFLAVAYLTTYVEVFRTAENLPERPLFSIAFPFLT KGSEKRTDEIKIDAV  
DKSLSQMI PQIVLPVSLTSIGLGLFLGLNDGSGSSESNLSRLGPYDVTSGATKLRVVTEK  
IDSEKAKLDAKAKNQRIEEQEQLRKKRAERRAADTRKKEKAKRASVRAEAEAAKKKTAE  
DATKKAEEAKKKLEQEAKQKADEEAKRKAQEAKQKVEEAKRKAQEAKQKAEEAKR  
KAEDEAKLKAEEEEAKTKAMEEAKSRAEEEMKRRTEEEAKKKAMEGANAAEEAKMKTDEA  
PPSVSATAKTTL

>comp14349\_c0\_seq1; 494 206 2140 LEN=2505; translated  
MGEWSVERIDRVPTDWIKNVEKRNLFGAEKKENANPIEERNYLYPPTVPENEYKFCLDVA  
LNQNKSTIEQLDVLFSNSPIIVREPDTNMIIFTISDYSYIQDMLHEVFQMMDET VGFSP  
KHFFLVAIDQVSVELACRYGYPVVWKADEGNLKD AVANTKVTL SHELVKRGYDYLFTEM  
DVWWIRSPKPHLVDFQNKHKEKQK DAPHIYFSGHQNNPTAPNIGVYAVKADKYSEEYFRV  
CLDALKAKPETHDQVWLAEVFRLFHHIYEGRPYKFGGRFQPDGPPETPEIENPFKAM LFS  
PHEVVADERPMPGQKTLAIHTLNSLPLQMPHGKMMVAKELGVFYGFRSHPRSDSYGYMPN  
TTNNDTVAAGYYDREGKYRRFMWLDTDVRSNFYSIVENKRYHDHFTMEWTMAILIAIAR  
KTDIRILVLPQIFNSDMAGTYFAWSIMDYSKVSGMVDFRETNFLSNPKAWRKDRGSDWP  
FESVFNTGLFLANDPPNSVMIFTQFSNRSSTVSIKAWRATLHEWDWLD AWVGSVLA APEA  
ESAEVLLVNPDLVMDTGKMSIVNRLKAYKKFEEEQEILDADDANDQNNKGRKQHPPPLL  
GHMEWEILKIYDLLGWCWDRGMQHTVSKVSGSDSCY GIGNPRNY

>comp14350\_c0\_seq1; 1112 177 2963 LEN=3511; translated  
MDNPDSSSTSMGNPQQSANEEKQEEAIPPKTSKETADESGEQTSPEEGSAAGAPNAAKSTDD  
ADDVKTNVDENAGSKSEGPGEGETENSPEETISGPVPEEKDGAPESSEDPDVPASKDGEAA  
ASSTESGTPNKQTVTHAKSGSDPPAAETAPETEAKNEKTE TELSQPTVKEEGKEGGEESA  
AMEVEESTEAKEPEAQPAPE SPKLKAENS AKSNDNNSNTNYSNTTTTYSTRGRSTEAEE  
EKQDR IHERDSFEESPRPKDPSAAF SFLVEGTEEERRTRTRFIPEVDGMHMLRKHVEKSD  
LALARSLPSIVSPSGV FQSR TGRLAASAGRSNDSDMDVDGEMNLAVNDENTTTIELPSSN  
LTIPSDV FVAPKGVVVGESGSSIAVKEFEPRVPSVSVESVTKFNP RPPPE SVGGKKKHR  
MIRWERRPEDI EVD MKNYRKTVQRTRQELQKSEGEYERLEMVDAHLRRHFLNQSDLLDEE  
YEKLNDEM DREVEKLIKESELIGSRTRSRNLTKVDVVMRDVLTMLTRNEQKDVMPGEAAS  
VDSFSSGRFAGFGGLNAAAFNDWRSTK LKSMKLSSSWLEPGQKVK TLYGEGTVIEVIPP  
VCPPSNDKAVIPIHGSKKSVLSEEKLNRIKAKKKYDSVLP LRVKIQLDYGIGVFSASSIL  
DIESPGHFTDAKLAKRWKGMIDSALKVGHCIDVEGMLLNEDTKSDAPDGVSSDEF LPGA  
TLIPTKGGRGNF LQNM DILDIEEPLKTALYDGHGVMGRKSNPGVTKDIRKWEEEEQEYLN  
LRASILQLKNTLTRQRRIRILNEKTANSMDRYVRAEELVSEMRSDLKSLKRRLRDELSE  
LGITDTIAKQIMFQFYQGHHEEDHGDASTPKRLRRASSMIGEMLPDIDMGNSSGEGDTRD  
SMDEQGTDDL SGGDLETHRPTKKIRSGE

>comp14351\_c0\_seq1; 970 80 2200 LEN=2423; translated  
MAKALSPLSLSLLAVVAAAF LGDAVHAIEYFAPDWIIPQNI GQAYPPMTVSAGDTLTF AW  
SQGTHDVWIYPSGSCDP SGGIQIGGTQDNPTTYSFSEADAGQVLN FVCAVGS HCALGMQM  
AVTVLAAEDVVEDDAVEDDAFYAVEDVVEDVVEENEVADATDP PGEEDDAEPEITAGMF  
GVCNVCGDPEAQITNPGFV VSLPNPNPNAPTDFVTC AELYQDGLDGIIPDD SCTFISQFA  
NIPCGCTPTDFTCNICGSDENLAVFSPDTEITLPSNPTDGI VVTTTCGEFFESGQSGELSP  
AQCQAAPSF AFIQCECAPANFTCGVCADGFKNVSPDEEILTPTGEIGTCGGLEAQGLAGE  
LGPNACLA IQDFTIATNACNCVPEEGY EPCYICGDNTTQPLTPEVNL TFTQFQVDS CGAL  
YEDGLNSNL SPLQCGAIQAQAGACNCAPVDFTCNVCGGNGTDVFM RAPDVNFTVPGIGLL  
VNCGELDMAGIDG SITPNDCAAISP AVQANCCTPV DYT CNICGDDSGMSVTDGATFVP  
QNPDITCASAEAAAGLAGELDPNTCTFYQILAEQSCGCLVGGTVAPT TAGPTPSASTV PQE  
ATTVDPMVEATTVPVAVVSPVAAMDDGDSSVNTTVPAPVAAPVAAPVAAPVAAPVAAPVA  
VPVESFTPGSVDGVTGASQVASDAAVL GAGAAIHALLVATVVALVA

>comp14351\_c0\_seq2; 963 80 2188 LEN=2411; translated  
MAKALSPLSLSLLAVVAAAF LGDAVHAIEYFAPDWIIPQNI GQAYPPMTVSAGDTLTF AW  
SQGTHDVWIYPSGSCDP SGGIQIGGTQDNPTTYSFSEADAGQVLN FVCAVGS HCALGMQM  
AVTVLAAEDVVEDDAVEDDAFYAVEDVVEDVVEENEVADATDP PGEEDDAEPEITAGMF  
GVCNVCGDPEAQITNPGFV VSLPNPNPNAPTDFVTC AELYQDGLDGIIPDD SCTFISQFA  
NIPCGCTPTDFTCNICGSDENLAVFSPDTEITLPSNPTDGI VVTTTCGEFFESGQSGELSP  
AQCQAAPSF AFIQCECAPANFTCGVCADGFKNVSPDEEILTPTGEIGTCGGLEAQGLAGE  
LGPNACLA IQDFTIATNACNCVPEEGY EPCYICGDNTTQPLTPEVNL TFTQFQVDS CGAL

YEDGLNSNLSPLQCGAIQAQAGACNCAPVDFTCNVCGNGTDFVFMRAPDVNFTVPGIGLL  
VNCGELDMAGIDGSITPNDCAAISPAVQANCGCTPVDYTCNICGDDSGMSVTDGTATFVP  
QNPDITCASAEAAAGLAGELDPNTCTFYQILAEQSCGLVGGTVAPT TAGPTPSASTVPQE  
ATTVPDMVEATTVPVVPVAAMDDGDSSVDTTLAPVAAPVAAPVAAPVAVPADDPVAVPVE  
SFTPGSVDGVTGASQVASDAAVLGAGAAIHALLVATVVALVA

>comp14352\_c0\_seq1; 454 118 2107 LEN=2361; translated  
MNKSDFPGERHSSYPFNEDEILNRFKVISHDIGDKVISLSEVLLTCDSWSDPNHNKKL  
EEAINDPRKKHLVFYDMWHDVVEGILSLFSEHRSRCWSSIEFRGCQERHINAVLECALQ  
IDIVQTIASFSLTNDRFNPSKICDDSTFHIISRSMNGNERLECLIFHSRPLHFIQYEALKN  
LKVKRLHFLDGCICLHPNEITELAAGIKANHSLVSFSFLGGTRVSNNGNDISSIVNALKAH  
SLKRLVLCCLKSASENGVRGLSDLLKCQNSVLESLLTGGFTLSSFFAKGTFSSNGLAMSKL  
KHYLREIFLFPEDVEDMAVGLRKNRSIESLSMKLEASGIRVNLAPIAFALEGNYHIQRL  
ALSGKCSLGGQICGISKLLSSDRCKVKDLHLSGAFLDKPSRIPNFLEIFLNGLKGNQRLE  
SLDLSVNDLSDQEVATIYNEIPTCRSLTNLDLGMNDITAQVVGLFAKVKTPSQCVCVLRIS  
SQKFSFFEINDRVCRRLVKLLTTNPRLDGVNFMNMPVEWHHSYQDNGNMKWHRKCNNQSL  
TTLYESEKQCQTMISQTRVLISFYRFPLLKFLSNYERYNILRIRSLRFFDFFPYSYITYA  
LHFNNKRVNYIKTKELSRAGRLDLERIQYLLDYNWTGRSLVSHGYADKKVPISLWPKVLE  
RVW

>comp14352\_c0\_seq2; 464 118 1932 LEN=2186; translated  
MNKSDFPGERHSSYPFNEDEILNRFKVISHDIGDKVISLSEVLLTCDSWSDPNHNKKL  
EEAINDPRKKHLVFYDMWHDVVEGILSLFSEHRSRCWSSIEFRGCQERHINAVLECALQ  
IDIVQTIASFSLTNDRFNPSKICDDSTFHIISRSMNGNERLECLIFHSRPLHFIQYEALKN  
LKVKRLHFLDGCICLHPNEITELAAGIKANHSLVSFSFLGGTRVSNNGNDISSIVNALKAH  
SLKRLVLCCLKSASENGVRGLSDLLKCQNSVLESLLTGGFTLSSFFAKGTFSSNGLAMSKL  
KHYLREIFLFPEDVEDMAVGLRKNRSIESLSMKLEASGIRVNLAPIAFALEGNYHIQRL  
ALSGKCSLGGQICGISKLLSSDRCKVKDLHLSGAFLDKPSRIPNFLEIFLNGLKGNQRLE  
SLDLSVNDLSDQEVATIYNEIPTCRSLTNLDLGMNDITAQVVGLFAKVKTPSQCVCVLRIS  
SQKFSFFEINDRVCRRLVKLLTTNPRLDGVNFMNMPVEWHHSYQDNGNMKWHHFFPSYIT  
YALHFNNKRVNYIKTKELSRAGRLDLERIQYLLDYNWTGRSLVSHGYADKKVPISLWPKV  
LERVW

>comp14353\_c0\_seq1; 1244 107 2899 LEN=3382; translated  
MKFSFLVHGTVFWGAYASLLLASTTYVSAKAILGVDLGSVYMKVGLVQRGAPLEIVTNMH  
SKRKTEQIILFDQGTRLYGSDANSLARKPTKTAVGMSTMLGRDENHPAVKVLTDHRHYPL  
TPEYNETRKGLYLSIDGGKQVHTPEELTAMLLHYAEFFTHHYGKEKGHVYGDITDCVLT  
PSFATQAERQALLDSAKLGGFKVLGLIDENTASALNFMDKTFDEPKIYLFYNLGASSLQ  
VSVVKFHHYEVPEESKYSKMKKVKGSIEVLGKGWDATLGGLAYDNRLVEYMADSFNHKWRH  
ARGHEKDIRDVPAMTKIRLQANKVKHVL SANQEIP IHMDSLYDDMTLSMHITRSQFEEM  
CEDLAKRATEPINNALASANVTLEEIDEIEMLGGMVRPKVQSSLTSLGGKEIGMHINS  
DESMALGAIFYGANI STAFVRVQVGLVDINFPPIGISLENLESDDDSEEAWGKKATIFKT  
NGKVGKKTIAFTHDKDILCSLDYAEPENIPDGAKTELEKYISGVSDFAKEMEKEKGLGK  
PKISLQFELSSSGVTSLRKAEAAVEEKYTVVEVEVEIEDEEQTSEASETNSTDDDKKSEET  
NSQDESAEKAPDGKESGEGSEADETSEEEKPKKTKIVEQEKKRVHRKSLDVESYQVGK  
IQSLSEDLIQEYKDNIATLAELDKQRVLLEEAKNKLESYFYVKNKLVDEEDNIGKISTE  
EQREELLKLSMDAEWLFDEGDSADLATIOQSKYDELAPAEKVVFRKEMTERPAAVKAL  
NEKLVEIEEKFTKVVNTLNTHITEDEKSDVFGKIEGARKWLSDMVDAQSEKAGHEDPVFSS  
EEVPLQTKSIQKLI AKLTKKPKPKPKPKVEKKGTEMNSTEKETSDETDSESVADTEGTEE  
KENAADSSDKD TDAKSDGTGKDGEDSDEL

>comp14353\_c0\_seq2; 358 168 1007 LEN=1490; translated  
DVESYQVGKIQSLSEDLIQEYKDNIATLAELDKQRVLLEEAKNKLESYFYVKNKLVDE  
DNIGKISTEEQREELLKLSMDAEWLFDEGDSADLATIOQSKYDELAPAEKVVFRKEMT  
ERPAAVKALNEKLVEIEEKFTKVVNTLNTHITEDEKSDVFGKIEGARKWLSDMVDAQSEK  
GHEDPVFSS EEVPLQTKSIQKLI AKLTKKPKPKPKPKVEKKGTEMNSTEKETSDETDSESV  
DADTEGTEEKENAADSSDKD TDAKSDGTGKDGEDSDEL

>comp14354\_c0\_seq1; 735 161 1532 LEN=1658; translated  
MSDNNSQKEDNATWSDDDDFFADDDFAVE SKMDPGNDDGWQDSYDANEDDDLVSRIQY  
EPVDESKEDEDDANEDDIDEDEDTPRNPIAEGGGSEPEQHAEEPEDSRGAGAGKPAETGH  
ATGEQGETNGGDSAPADAAPPAPLPPRGAGSGNKPPLPAERTVPATPNFLSTVSGAPDG  
VGSTPTALPGTPVTPFGELTNEDEKFEIVRQRNRSRKEKEDYHIANIKVQMGRLEDALA  
AETKRRVDATTALDELGRSQVHKMEERIKAQLRDENEQLQSRLGDLEERVRRLEESWTTE  
ANHQIEVVNSKASDLNKAISRQVEDQDMERRARLKREGILLRQVEDHAKQTEDTWKTERK

ERIERLKELETSILRNEARLALAEQKRYEDRIENELTLLKEELEVIEEERQNQDEQIVSAL  
NRYTQQQLQQSLAILAPIDADRSALLSKYGRGGLQAI  
>comp14355\_c0\_seq1; 373 92 1227 LEN=1393; translated  
MATTIKGPVHRFGRSILNGRNLGRNLMPRVASDQKYLSSSSSTPSQVLMENIFRGPNAESG  
DDASCMTKITLNRPKANAMGREMIQGLQNCLELDILEQSNDDYDNNNDNNETHNDGTDESR  
RRSSGGCRCLVLTFSFSDRVFSAGADLKERATMTQDEAAEYVTLRDRTERFACLPMPVIA  
AIEGVAVGGGLELALAAADIRVASSKAVLGFPEPETS LAIIPGAGGTQRLPRLVGASRAKELV  
WTGRRLSGREAGECGLVTDVVPEGGSATERALELAFIAAAHGPVAVRASKAAIDEGGRSA  
SMAEALDVXAPVLRQGPADGGPPGGPGGLSGGTGAELQGAVNRRPRTDSGGHAPADHQPP  
VRKDGRRGGSSRRDRGGSP  
>comp14356\_c0\_seq1; 358 1 1334 LEN=2818; translated  
XVAHVEDAVDDTAWAKKIAGNALSHYKTVSIRYSHHTKENAFPPFPVPCFHKVPGDPSFSA  
MNIEMSSAALAVGLPLRSRSLRVRPRNERAGPEHCDEPTATGGRDNNAGVGVPMQHORA  
TIELWCRVESWRIAAYAVFMVFLFAYLVSTLVVAGVLEKGDGPGCANNATADTNSTGCGPF  
NRNGGRFNLTGYKGFDFATENHLFENFGYSNICVYWDYSPAREYTAVLFPFFFEVAMITYL  
TLDFFNKLSFQAGRVSARYWRFCKIQYPVTVFLCLVFRLLIFVIRAYEDVKGHTFGLFCF  
QVGLLLIAASNTAYVETKQKYAGVGLGLDRPENVALVGKVYLSLLFLVSSVKKLVGTAHI  
VKTGEAIFFYTWSTSGDPGTGILVGLKIDKWLFLNLVPLVVAIVRASHEEPLRIEISL  
PATPAVYSSVPEHDPDRDYHRTLA  
>comp14356\_c0\_seq3; 307 1345 3025 LEN=3025; minus strand; translated  
MPLSSDDTTSTTDPLGEDDAGDARVVFRGYPYGYNYFFRKNKLPKIPSLRQCSMIVPIRIV  
LWYARIHSRRCRQGNLDAERLLVASTNYSNDQRNNKVEEQPALVDEFSENENARPGVAGGR  
PCIEKNRLARLHDVGGAYELDGRDQKEKRQVDLADEGHVFGPVEETETNPGIFLFCLDNVR  
RVRSRNQEESHLETEESKGVSLYVFGSDHKNQALVVGWIEKQHASRGKKTRASKKQHGI  
AIGCECERPWHRTPNGMATRDFRAKKQSDQQTHTHTLRFLLTKDEAKEYNGIILDLAKP  
PVPGAYPARLEGELGVEKVQREVGDRNLEERKQDRRIFTSGRVVPHADIGIPEILEEM  
VFGGKIESFSVGEIEATPVPVERPAPSRVGVGRGVVAARIPLFEDPRRHQGAHQVGKEDE  
HHEHGVRDPPRLDSAPQLDGGALVLHGNTNTRVVVPSARGGWFVAVFWSGPFVWPANPR  
SRSRPQRQANGQGRGGHLDIHGGKGIAGDFMEARHWKRKRIFFGVVRIPYRHC FVMTEC  
VSRNFLRPSRVVNSIFNVCNX  
>comp14357\_c0\_seq2; 289 1 1312 LEN=2865; translated  
LRLRFSEAASSKSPSASNKNPPQHCHHTAPFHRYDVPASETCTKTKFVLGCVCLPAGGDGG  
FRLVRGKRPGVAHRDSLNRHRRSSTVAHPHASASAGVETRGGACSRYLDPSSDDAKERES  
PSPSPASQRHLQKPNQSVMPETNDNGDDRGNKANRRRDDPELDQPPQPRKWNRLGLRGLG  
FSPASAAAAAAEPPDDGFLDDVDGIGXPDPGKRPAGEKTAGPAAALEPPVQRAPP  
PALLRVASLGAVALVAVALVLAARAVALSLGGVLGAGPSGKPRGPLEALSRRGGSTLLLMA  
GGRRVRAASGLAASFGIGTGP SLGTLAKCSAIAWYGWWSRVLDRSSDSLPPARGADET  
AGAGTTAAGVPPTDADSPPPDAASKDTRALHSPTTERKDQGRARTDDDDDDREVNRSF  
FPPPLETTGRSDMMSF  
>comp14358\_c0\_seq1; 202 1 225 LEN=282; translated  
IKDASEGKMGILGYTDEDIVSSDFISDRSSIVDAKAGIALTDDFVKLVSWYDNECGYS  
TRVLDLIEHMEASK  
>comp14358\_c0\_seq2; 725 81 1094 LEN=1440; translated  
MAPITVGINGFGRIGRLVMRAAQNNPNVKVAVNDPFI PVEYMEYMYKYDSTHGKAEGEI  
THDAAANTV SIDGSP IKVFGEMDPSKIAWGDAGVDYVVESTGAFTSTEAASAHMAGGAKK  
VVISAPSGDAPMFVMGVNQEKEYESSMDVVSNASCTTNCLAPLAKVINDEFGLKEGLMTTV  
HAVTATQQTVTDGPKSKDWRGGRAACYNIIPSSSTGAAKAVGKVIPELNGKLTGMSFRVPTV  
NVSVDLTARLDK GASYETVCAA IKDASEGKMGILGYQD TDIVSSDFMSSPYSSIFDQK  
AGIALTDDFVKVSWYDNECGYSNRVLDLIKHM DVTK  
>comp14358\_c0\_seq3; 1002 92 1933 LEN=2279; translated  
MQSSKTFLLSSASKAAARAYHSSSTKVEARKFFVGGNWKCNGTVSQTKELVSMLNQSTLST  
TEVVVCP SQVHIQGVKENLRGDVSVGAQDVWTKGNGAFTGETSAEMLSDMGVEWTLVGH  
ERREKGESNEEVAAKAYALDKGIKVLACCGEPLENREAGTTNDFVFPQIKAYADVFTKE  
DWENVVIAYEPIWAIGTGLTATPEQAQDTHAEIRQYLAEIAGADVAAACRILYGGSANAA  
TAPGLSAKEDIDGFLVGGASLKPEFADIVNCQSENKLPVNIINGFGRIGRLVMRAAQ  
DDPMNIVGINDPFI GTEYMEYMFKHDTAHTYSGSVNRIDDNHIEIDGKTIRVFEEMDP  
SKIAWGDAGVDYVVESTGAFTSTEAASAHMAGGAKKVVISAPSGDAPMFVMGVNQEKEYES  
SMDVVSNASCTTNCLAPLAKVINDEFGLKEGLMTTVHAVTATQQTVTDGPKSKDWRGGRAA  
CYNIIPSSSTGAAKAVGKVIPELNGKLTGMSFRVPTVNVSVVDLTARLDK GASYETVCAA  
IKDASEGKMGILGYQD TDIVSSDFMSSPYSSIFDQKAGIALTDDFVKVSWYDNECGYSN

RVLDLIKHMVTK

>comp14359\_c0\_seq1; 214 1 1192 LEN=1272; translated  
XGTTIRRPTQPTYRLLPGTKGLLFLIIPTTTTVIIIMLRSDAICSQKIPGESKKESQVFGS  
IELEKCTQRRHFDLKLPLGLRMISACATHIYLYRYRFSYGDESTPLHKAAGGRYLAVH  
MILEALRDRDAESPVETSQGPHASRATTWLQNGLSARDKNGRTPLDVAQQFYKFRDTEK  
DAVARWDAVAGGLPDWGKCAQLLRNASSDDHGDNDDEDARKNSSNGCNLRDRGSIMTQQ  
ETIVNNGGVHRYDPSIDNKRSRRLPRLPLHLTRGIMGCLDCDRSSSSGGNALCLTAKWQT  
DFQEALGASASMCIFASPDVTTTAAASSVTRGCNSKLEKTQRRNKTQTTADMNTDIEDKK  
VATVDSTCPRCQKSTVAFYPLPGVGTLVCKRCRRLRK

>comp14359\_c0\_seq2; 404 157 1482 LEN=1562; translated  
MATCPCKLLPRSLSSFTAAEYGDIIHLSKIKDVASRRDDAGYNPIHYAAQFNHVAATAFL  
LQLGCPVDGGGHCATPLHRASFSGATAAMKVLLEWNNNTQTNSTHLPVAARNEGSSLSLSD  
HTNYYKSDNNASERCNLLAKDTSYGDESTPLHKAAGGRYLAVHMILEALRDRDAESPV  
ETSQGPHASRATTWLQNGLSARDKNGRTPLDVAQQFYKFRDTEKDAVARWDAVAGGLPDW  
GKCAQLLRNASSDDHGDNDDEDARKNSSNGCNLRDRGSIMTQQETIVNNGGVHRYDPSI  
DNKRSRRLPRLPLHLTRGIMGCLDCDRSSSSGGNALCLTAKWQTDQEALGASASMCIFA  
SPDVTTTAAASSVTRGCNSKLEKTQRRNKTQTTADMNTDIEDKKVATVDSTCPRCQKSTV  
AFYPLPGVGTLVCKRCRRLRK

>comp14359\_c0\_seq3; 311 157 1633 LEN=1713; translated  
MATCPCKLLPRSLSSFTAAEYGDIIHLSKIKDVASRRDDAGYNPIHYAAQFNHVAATAFL  
LQLGCPVDGGGHCATPLHRASFSGATAAMKVLLEWNNNTQTNSTHLPVAARNEGSSLSLSD  
HTNYYKSDNNASERCNLLAKDTSYVSQKRSKSLGQLNSRNDARKEDXFDVLKPLGLRMIS  
ACATHIYLYRYRFSYGDESTPLHKAAGGRYLAVHMILEALRDRDAESPVETSQGPHAS  
RATTWLQNGLSARDKNGRTPLDVAQQFYKFRDTEKDAVARWDAVAGGLPDWGKCAQLLRN  
ASSDDHGDNDDEDARKNSSNGCNLRDRGSIMTQQETIVNNGGVHRYDPSIDNKRSRRLP  
RLPLHLTRGIMGCLDCDRSSSSGGNALCLTAKWQTDQEALGASASMCIFASPDVTTTAA  
ASSVTRGCNSKLEKTQRRNKTQTTADMNTDIEDKKVATVDSTCPRCQKSTVAFYPLPGV  
TLVCKRCRRLRK

>comp14359\_c0\_seq4; 242 1 1041 LEN=1121; translated  
WNNNTQTNSTHLPVAARNEGSSLSHTNYYKSDNNASERCNLLAKDTSYGDESTPLHKA  
AGGRYLAVHMILEALRDRDAESPVETSQGPHASRATTWLQNGLSARDKNGRTPLDVAQQ  
FYKFRDTEKDAVARWDAVAGGLPDWGKCAQLLRNASSDDHGDNDDEDARKNSSNGCNLR  
DRGSIMTQQETIVNNGGVHRYDPSIDNKRSRRLPRLPLHLTRGIMGCLDCDRSSSSGGNA  
LCLTAKWQTDQEALGASASMCIFASPDVTTTAAASSVTRGCNSKLEKTQRRNKTQTTAD  
MNTDIEDKKVATVDSTCPRCQKSTVAFYPLPGVGTLVCKRCRRLRK

>comp14360\_c0\_seq1; 261 72 1106 LEN=1529; translated  
MATETAAPMEQQQYDEGEMEQEESATTYQPIDLLAEHGIATNDIQKLQONAGYYTIESIAH  
ATTRRLSDVKGISEAKVLKLDIVKQMVSMEFKTAADALEDRTIAMLTGAVEIDKLE  
GGIETGSITEVFGEFRTGKTQLCHTLCVTCQMPVSDGGAEGKAIYIDTEGSFRPERLRAI  
AERFGLDPAVLENVACARAHNSEHQMELLKVAAA IMSQDRYALLVVDSATALFRDYG  
RGELSERQMGMQFLRQLTRLAEFEFGVAVFITNQVVANPDGMSFAKDATKPIGGNIIA  
HASTTRRLRKRGENRIMSVDSPSLPEADCQFALSNAVC DATD

>comp14360\_c0\_seq3; 209 72 1304 LEN=1727; translated  
MATETAAPMEQQQYDEGEMEQEESATTYQPIDLLAEHGIATNDIQKLQONAGYYTIESVES  
VAIDKGMTANCVPDSWVMTDENCKCALSLTDIPAICAYRTAHRSSRFVLLFFHLSSTLLP  
IQKIAHATTRRLSDVKGISEAKVLKLDIVKQMVSMEFKTAADALEDRTIAMLTGAVE  
IDKLEGGIETGSITEVFGEFRTGKTQLCHTLCVTCQMPVSDGGAEGKAIYIDTEGSFRP  
ERLRAIAERFGLDPAVLENVACARAHNSEHQMELLKVAAA IMSQDRYALLVVDSATALFR  
RTDYGELSERQMGMQFLRQLTRLAEFEFGVAVFITNQVVANPDGMSFAKDATKPIGG  
NIIA HASTTRRLRKRGENRIMSVDSPSLPEADCQFALSNAVC DATD

>comp14361\_c0\_seq1; 247 424 1404 LEN=2470; translated  
MGTSGLIGTLRGGAIAPVAVTSALASSLRSGSTIGAVLALTVVASC AVTPLTLYRQAYS  
FSVGYGLSVAAMGLALLAVFRDTLFAVSRGGNSSPLLLVSALIVYGLRLGFFLLAREVT  
PSKREQIKSFDKTSIPKRIIPFAAAVSLVYAFMSPALFLCRSANVSGHLHPVAAAGACMA  
WTGAVIEGIADQKQFHAKKGRDGA KDFSGPTTGWFGLSRHPNYFGEIVFWLGILVGGSPG  
LGTNAIAWITSLGFGAIYSIMTGATGRLETKQGDKYGGQTAYEDWKKAVPSLFPPTKLG  
IPTLIATAGLTAFLVKAQSLAVVAA

>comp14362\_c0\_seq1; 507 1 1424 LEN=2167; translated  
XTRTEQVTQSPNSTPRCGVDLHPMEASRHSQTHRLKMKVAIIATAAAFSTVWRTPPVT  
IGMQQQLDAELSLEAPDGDPLESKPGGGAPPNYRPLPDPVVLPLPTSGDGTNRPFVVRV

TTRRKKQTKMTTTTTTTTTTTTTIPITSPRSSNDTHSPRMSTTTDVVVVDSEAHSYDKEHRGY  
LVATNYPWSVVLNPNPGTENENESRRKQONTSFSPSQDFLERTSVQASDYRCDIVATNGGP  
FDEGGIWNISGPTVRNGVLVVRTPGANATNFVGFGTATEQRTSTDGDGDGDSGNGSEKRYW  
ILGTYGQLEALPAATPQATAVWDFVTGFGWL VYHGRPVFRDSDPTGAVRAPRTAIGLDG  
DSNLLVLVVDGCEHCLRRKGPTLEELADLMVDLGAVYAINMDGGGSSTMAMPFPLPARFG  
SNGSNNGTVASDPDQSNRKHGYAVINRPTCLDVFPFHCQRKVATVLCVSSDGA I  
>comp14362\_c0\_seq2; 644 32 2001 LEN=2146; translated  
MRQVPPQRLFLFLLLLLLVRAEASAGTVSGDSGWL REREPALLRGRATPGEDPTEEPS  
SPAPSAATSSNSTSVSPSPTVAPSTPFPTTVAPTTAAPTGLPTAAPSDSRPAHRRHGW  
KKLLVLLAKTACWLVLAGLFFFFAFGAAMSNRYRIYYYLRGSWYTFWHGIRRRAGRNGARN  
AALNDVIFSDGDMHEGLLMGETYGTDRKRNETKQIQRKQNKHTKRNNAFGNLEPIPFHS  
IPFQSGSFVTLQQGS SVSLVPTKVL S QGSNPSRVSVQARHPPTKMAIHGTKNRTTVILGL  
ALLLLGTSFALAKEQIEPDARAFEPSVQSSVATFHSLAGKTDGDSEIAGAALDPNDETTE  
TTTTTTTTTAAATDTTDTAIVTAAIEDGEHEVEAEELARLCTDDSTFRYKHLDRNVGLVDMK  
NCTWVATKPMVRCNFRLSRDDDTSPFLKEFCPLSCGLCPTAAQVIPCPEDIPTVPPSTGS  
SFGSSTSSSVAFVAGLGGSNNGAIVDNRESSVDNTNSKRSLAIALSVFVVL LLLLLLWIY  
CCCCGSPREGKNDTDEEMAMAEMDHNHANTAKSVSSVGSRLLGMVLSTFNGLRGDPKI  
DVHQCTSA YCDACEGERKAAALRNQSDVHRVRSVDTFERERQEKQRRMYRDEQEC  
>comp14362\_c0\_seq3; 547 405 1520 LEN=1665; translated  
MAIHGTKNRTTVILGLALLLLGTSFALAKEQIEPDARAFEPSVQSSVATFHSLAGKTDGD  
SEIAGAALDPNDETTETTTTTTTTTAAATDTTDTAIVTAAIEDGEHEVEAEELARLCTDDST  
FRYKHLDRNVGLVDMKNCTWVATKPMVRCNFRLSRDDDTSPFLKEFCPLSCGLCPTAAQV  
IPCPEDIPTVPPSTGSSFGSSTSSSVAFVAGLGGSNNGAIVDNRESSVDNTNSKRSLAIA  
LSVVFVVL LLLLLLWIYCCCCGSPREGKNDTDEEMAMAEMDHNHANTAKSVSSVGSRLL  
GMVLSTFNGLRGDPKIDVHQCTSA YCDACEGERKAAALRNQSDVHRVRSVDTFERERQEK  
QRRMYRDEQEC  
>comp14362\_c0\_seq6; 46 1 181 LEN=1407; translated  
XRDSPTGAVRAPRTAIGLDGDSNLLVLVVDGCEHWYVLRAPPWYAWFCYKPKQSCHY  
>comp14363\_c0\_seq1; 683 507 1880 LEN=1917; translated  
MSAGECQTSNRNDYDDEDEGDAPPPLDEGDIALLSYGLGPYSIQIKKLEDEIKKHQKEV  
KNLIGIKESDTGLSPPSMWDLVGDQMMSEEAPLQVARCTKIIADEGEAEAGGNANANSNS  
EGTSGNAQAPSKYVINVKQIAKFVVGLEKVAPTDIEEGMRVGVDRSKYSIQIPLPPKID  
PTVSLMTVEDKPDVTYDDVGGAKESMEKLREVLETPLHHPERFVTLGIEPPKGILLYGPP  
GTGKTLTARAVANRTDACFIRVIGSELVQKYVGE GARMVRELF TMARSKRACIVFFDEVD  
AIGGARGGGDDNGSDNEVQRTMLQIVTEL DGF DARGNIKVLMATNRPDTLDPALLRPGR  
LDRKVEFGLPDLEGRGHILRIH SKRMNCDRDIRFELIARLCPNTTGAELHSVCTEAGMFA  
IRARRKSVSEKDFLESVNKVIKGYKFSATPKYMVYN  
>comp14363\_c0\_seq2; 683 495 1868 LEN=1905; translated  
MSAGECQTSNRNDYDDEDEGDAPPPLDEGDIALLSYGLGPYSIQIKKLEDEIKKHQKEV  
KNLIGIKESDTGLSPPSMWDLVGDQMMSEEAPLQVARCTKIIADEGEAEAGGNANANSNS  
EGTSGNAQAPSKYVINVKQIAKFVVGLEKVAPTDIEEGMRVGVDRSKYSIQIPLPPKID  
PTVSLMTVEDKPDVTYDDVGGAKESMEKLREVLETPLHHPERFVTLGIEPPKGILLYGPP  
GTGKTLTARAVANRTDACFIRVIGSELVQKYVGE GARMVRELF TMARSKRACIVFFDEVD  
AIGGARGGGDDNGSDNEVQRTMLQIVTEL DGF DARGNIKVLMATNRPDTLDPALLRPGR  
LDRKVEFGLPDLEGRGHILRIH SKRMNCDRDIRFELIARLCPNTTGAELHSVCTEAGMFA  
IRARRKSVSEKDFLESVNKVIKGYKFSATPKYMVYN  
>comp14363\_c0\_seq4; 764 304 1961 LEN=1998; translated  
MVDDRNVFRSTPPEQKIDHEFLRCLLCDVRCVAYVATLPLRNAKLIADASSIPLCTQQQ  
QQNEMVNPYDTKSPLSASRCRFRCLSHNQIKLNQIKLIRMQSNPIHRCAQEDEGDAPP  
LDEGDIALLSYGLGPYSIQIKKLEDEIKKHQKEVKNLIGIKESDTGLSPPSMWDLVGDQ  
QMMSEEAPLQVARCTKIIADEGEAEAGGNANANSNSEGTSNAQAPSKYVINVKQIAKFV  
GLGEKVAPTDIEEGMRVGVDRSKYSIQIPLPPKIDPTVSLMTVEDKPDVTYDDVGGAKES  
MEKLREVLETPLHHPERFVTLGIEPPKGILLYGPPGTGKTLTARAVANRTDACFIRVIGS  
ELVQKYVGE GARMVRELF TMARSKRACIVFFDEVD AIGGARGGGDDNGSDNEVQRTMLQ  
IVTEL DGF DARGNIKVLMATNRPDTLDPALLRPGRLDRKVEFGLPDLEGRGHILRIH SKR  
MNCDRDIRFELIARLCPNTTGAELHSVCTEAGMFAIRARRKSVSEKDFLESVNKVIKGYK  
KFSATPKYMVYN  
>comp14364\_c0\_seq1; 635 1 1902 LEN=2400; translated  
KEPPTRNKFFRRTRSLHLGAPCFHIQTLPFYHPATVDMPKPKKILNDPKESVDEFISGL  
LLQYPNRLQKLQNHVVLT TTPPCGGS AVQLLSGGSGHEP SHAGWIGNMLSGAICGGI

FASPSVASILAAIRAAAASMTENAGILLVVKNYTGDRLNFGMACEKANQEGILSRMVVA  
DDCALERTKGITGARGVAGCVLVHKVAGAASVAGKSLDEVVALVEEVNGCIGTLGVALDS  
VTIPGAESVNDRLDDKTIEIGLGIHGEAGMKQSPLLTADEMAKEMVDTIREYGRTNKSGE  
IVPLFEKGDSLCVLVNNLGGTSNFEMSILANACVKYIEGDANGCKVTRLLVGSFMTSFD  
HGASVTIILNLSCASEEMISLLDAPTDAPAWSTCDIWKAE GDKIRLSSTERSEVVVDDSTE  
PKLTLPPVAIPNFGETAKTLVLKAVKSLGEAEATLTKYDTIVGDGDCGITMKRGATEIEE  
RLTKGTIPTDHPVSMFSAMADAVSDSMGGTSGILLELMFRKISSTLSRCETIGAAEMSQA  
FKAGVDAISLYGGATVGSRTMLDALVPAATSLVESGSI AEACEKAKLGS DGTADMKVASA  
GRSNYLSEETLTGTPDPGAVAVAI VFEAISSAP

>comp14365\_c0\_seq1; 302 993 1478 LEN=1486; translated  
MAENEATREDYARLPPVAADVGIETNSQSNRLGVAGVDTTAVAPATSAVDQTVAAFQSEP  
RATGEKNDSIADVDADADAKPTTITQRRASAGHRKTENDQSLDPTQSTSHKAKTEATNKR  
SSVGEVTETPTATK KKKVGDLSVSPDWHRKGDRTVIPLPSI

>comp14365\_c0\_seq2; 744 227 3154 LEN=3364; translated  
MAVREQQQLNAEGILSPRQKIHSPPRDGTEGILSPRKKSRDRYPSNGELTGSGDNDANG  
AARYGEYHLLSATNHKAGSSGLEHQPHGDQQYQEHSSPHSPPQRVVHVDGEDHGCEDISP  
IKFSPPTDSSPSNLSNHRGHYTQPSVDHRQRYRGGFPAGSDVRLSEDFEFPYETSSPPDG  
HDEQHAAEISFDTSAAAGNSGYHHQTIRNSGDEGRRQYSLPVSHSPSHRGTGESRAVQEV  
EEEVDHENGKNTSTHEASIGGQHYDSNRERYHDKRSFYSTAPPLPRGLPSPDLRDP  
RHY YHNHKS KFY PGEDVRPPLSGDGARYADKEVTKGRNDS SKNVLD RPSRMVQSSPIQSGRPR  
YPNWPQQELHYAPYGAPANTILPPP HPPFVGT PWTIRPPNSKQREP NPPRDHMAADTFYR  
NRHHQVDQY PPLPPYSQGETKRPSGAPFTQSTKLKADAAPP SDNHKIYQQHSPFP PPTY  
SPYHNHRHDLAYVGKDPFTILRCIRTI FQGCSYLLYPVHVGINWSGEEQQA IHTDPDDLKI  
ARRRIESAICALGGYIKDVREGQYSCNGTSSHDTNGYSSKSSRSPTISSHIFRRTDGNQH  
IGSITGTSSSSSSDHYRDRFHSRYFIGNHGVSWEVEENPPVCISIDDEDNVISRNGNND  
KTDNSSGT VGNPSRSGMGNRHVPPLFNPKSPSLDTKRQTSGLTPVDHSQKMKYRCKLCGQ  
PKQNHVCPYRKS LVRTIGVMVCPAVNAYTTSEPGVLT PALTEMNNVVPYARPHSRDDNSD  
IGTESSSRDHSSHG YRSTPGGQQKTSGRYHYSPTTSSLSSTSPHSNNQSSYLERHHHANL  
WQEEKRPIQQSATMPLVLRAEHYRVVTPRSPCQNTDPNRMDERDDKEEDSFDYPHVPLTY  
AGRKRLTDTL FYLSQRVPSVMTDVASLLRLARERDEWDLAVAEVLTQII VCIHCS DGFQ  
LSGLCKYLLKIGTAS

>comp14365\_c0\_seq3; 302 962 1447 LEN=1455; translated  
MAENEATREDYARLPPVAADVGIETNSQSNRLGVAGVDTTAVAPATSAVDQTVAAFQSEP  
RATGEKNDSIADVDADADAKPTTITQRRASAGHRKTENDQSLDPTQSTSHKAKTEATNKR  
SSVGEVTETPTATK KKKVGDLSVSPDWHRKGDRTVIPLPSI

>comp14365\_c0\_seq4; 744 228 3155 LEN=3365; translated  
MAVREQQQLNAEGILSPRQKIHSPPRDGTEGILSPRKKSRDRYPSNGELTGSGDNDANG  
AARYGEYHLLSATNHKAGSSGLEHQPHGDQQYQEHSSPHSPPQRVVHVDGEDHGCEDISP  
IKFSPPTDSSPSNLSNHRGHYTQPSVDHRQRYRGGFPAGSDVRLSEDFEFPYETSSPPDG  
HDEQHAAEISFDTSAAAGNSGYHHQTIRNSGDEGRRQYSLPVSHSPSHRGTGESRAVQEV  
EEEVDHENGKNTSTHEASIGGQHYDSNRERYHDKRSFYSTAPPLPRGLPSPDLRDP  
RHY YHNHKS KFY PGEDVRPPLSGDGARYADKEVTKGRNDS SKNVLD RPSRMVQSSPIQSGRPR  
YPNWPQQELHYAPYGAPANTILPPP HPPFVGT PWTIRPPNSKQREP NPPRDHMAADTFYR  
NRHHQVDQY PPLPPYSQGETKRPSGAPFTQSTKLKADAAPP SDNHKIYQQHSPFP PPTY  
SPYHNHRHDLAYVGKDPFTILRCIRTI FQGCSYLLYPVHVGINWSGEEQQA IHTDPDDLKI  
ARRRIESAICALGGYIKDVREGQYSCNGTSSHDTNGYSSKSSRSPTISSHIFRRTDGNQH  
IGSITGTSSSSSSDHYRDRFHSRYFIGNHGVSWEVEENPPVCISIDDEDNVISRNGNND  
KTDNSSGT VGNPSRSGMGNRHVPPLFNPKSPSLDTKRQTSGLTPVDHSQKMKYRCKLCGQ  
PKQNHVCPYRKS LVRTIGVMVCPAVNAYTTSEPGVLT PALTEMNNVVPYARPHSRDDNSD  
IGTESSSRDHSSHG YRSTPGGQQKTSGRYHYSPTTSSLSSTSPHSNNQSSYLERHHHANL  
WQEEKRPIQQSATMPLVLRAEHYRVVTPRSPCQNTDPNRMDERDDKEEDSFDYPHVPLTY  
AGRKRLTDTL FYLSQRVPSVMTDVASLLRLARERDEWDLAVAEVLTQII VCIHCS DGFQ  
LSGLCKYLLKIGTAS

>comp14365\_c0\_seq5; 735 227 3252 LEN=3462; translated  
MAVREQQQLNAEGILSPRQKIHSPPRDGTEGILSPRKKSRDRYPSNGELTGSGDNDANG  
AARYGEYHLLSATNHKAGSSGLEHQPHGDQQYQEHSSPHSPPQRVVHVDGEDHGCEDISP  
IKFSPPTDSSPSNLSNHRGHYTQPSVDHRQRYRGGFPAGSDVRLSEDFEFPYETSSPPDG  
HDEQHAAEISFDTSAAAGNSGYHHQTIRNSGDEGRRQYSLPVSHSPSHRGTGESRAVQEV  
EEEVDHENGKNTSTHEASIGGQHYDSNRERYHDKRSFYSTAPPLPRGLPSPDLRDP  
RHY YHNHKS KFY PGEDVRPPLSGDGARYADKEVTKGRNDS SKNVLD RPSRMVQSSPIQSGRPR

YPNWPQQELHYAPYGAPANTILPPPHPPFVGTPTIRPPNSKQREPNNPRDHMAADTFYR  
NRHHQVDQYPPLPPYSQGETKRPSGAPFTQSTKLKADAAPPSDNHKIYQQHSPFPPTY  
SPYHNHRHDLAYVGKDPFTILRCIRTIHQGCSYLLYPVHVGINWSGEGQVRDFLXLVTLH  
SVCVVFDPFAFFSTILLGSYIQAIHTDPDDLKIARRRIESAICALGGYIKDVREGQYSCN  
GTSSHDTNGYSSKSSRSPTISSHIFRRTDGNQHIGSITGTSSSSSSSDHYRDRFHSRYFIG  
NHGVSWEVEENPPVCISIDDDDEDNVI SRNGNNDKTDNSSGTVGNPNSRSGMGNRHVPPLFN  
PKSPSLDTRKQTSGLTPVDHSQKMKYRCKLCGQPKQNHVCPYRKS LVRTIGVMVCPAVNA  
YTTSEPGVLTALTEMNNVVPYARPHSRDDNSDIGTESSSRDHSSHGYSRSTPGGQKTS  
RYHYSPTTSSLSTSPHSNNQQSSYLERHHHANLWQEEKRPIQQSATMPLVLR AEHYRVVT  
PRSPCQNTDPNRM DERDDKEEDSFDYPHVPLTYAGRKRLTDTLFYLSQRVPSVMTDVASL  
LRLARERDEWDLAVA EVLTOIIVCIHCSGDGFQLSGLCKYLLKIGTAS

>comp14365\_c0\_seq6; 735 228 3253 LEN=3463; translated  
MAVREQQQLNAEGILSPRQKIHSPPRDGTEGILSPRKKSRDRYPSNGELTGSGDNDANG  
AARYGEYHLLSATN HKAGSSGLEHQPHGDQQYQEHSSPHSPPQRVVHVDGEDHGCEDISP  
IKFSPPTDSSPSNLSNHRGHYTQPSVDHRQRYRGGFPAGSDVRLSEDFREFFYETSSPPDG  
HDEQHAAEISFDTSAAAGNSGYHHQTIRNSGDEGRRQYSLPVSHSPSHRGTGESRAVQEV  
EEEVDHENGKNTSTHEASIGGQHYDSNRERYHDKRSFYSTAPPLPRGLPSPDLRDPHY  
YHNHKS KFPYGEDVRPPLSGDGARYADKEVTKGRNDS SKNVLD RPSRMVQSSPIQSGRPR  
YPNWPQQELHYAPYGAPANTILPPPHPPFVGTPTIRPPNSKQREPNNPRDHMAADTFYR  
NRHHQVDQYPPLPPYSQGETKRPSGAPFTQSTKLKADAAPPSDNHKIYQQHSPFPPTY  
SPYHNHRHDLAYVGKDPFTILRCIRTIHQGCSYLLYPVHVGINWSGEGQVRDFLXLVTLH  
SVCVVFDPFAFFSTILLGSYIQAIHTDPDDLKIARRRIESAICALGGYIKDVREGQYSCN  
GTSSHDTNGYSSKSSRSPTISSHIFRRTDGNQHIGSITGTSSSSSSSDHYRDRFHSRYFIG  
NHGVSWEVEENPPVCISIDDDDEDNVI SRNGNNDKTDNSSGTVGNPNSRSGMGNRHVPPLFN  
PKSPSLDTRKQTSGLTPVDHSQKMKYRCKLCGQPKQNHVCPYRKS LVRTIGVMVCPAVNA  
YTTSEPGVLTALTEMNNVVPYARPHSRDDNSDIGTESSSRDHSSHGYSRSTPGGQKTS  
RYHYSPTTSSLSTSPHSNNQQSSYLERHHHANLWQEEKRPIQQSATMPLVLR AEHYRVVT  
PRSPCQNTDPNRM DERDDKEEDSFDYPHVPLTYAGRKRLTDTLFYLSQRVPSVMTDVASL  
LRLARERDEWDLAVA EVLTOIIVCIHCSGDGFQLSGLCKYLLKIGTAS

>comp14366\_c0\_seq1; 409 1 1046 LEN=1273; translated  
XKTQQDSPLRRGENDKTQKASDNSYDKSPPIAQSEERQWQAIDTELTMLNENEEERRCDA  
EHN NVNPLAQDAI IHCTADQPIEMGLSNDERSRKISGKTEYDKIKS QYD TTLELEKSKI  
ENIRKDKQIIILNNSQVIEKRIESEKKEAKEDYERRLHEIQLKKKEQSLKIEEQQEIIQ  
NLKADA EKARNEIKGLYSK LQGLQGRYQEMTDALTCATKMCEEEREARRQLTVDVIGFKK  
AKKAAERKLKALKSLADSKGTVGAKGGDLELDSEEP TAKEFKSRALSVGDVVLANSTQLG  
YKDKLIITSVNPNGTYRSRDFVTLRKRK TLLKESDIEVVGKESEYVS

>comp14366\_c0\_seq2; 986 108 2963 LEN=3190; translated  
MSYASDEYQS QHPEHHGYNRWTHRHRGRHQYQHDHYYQYQYHHRRQYHAPHKDFRPELA  
VSFTA EIPNFWEDSRVLDCLNYQLAWDSRNRSTSKPVVICRRSSTVNEREVEYYVELYDEK  
IREIFLELNGVNIRSGSLVFRPRI EPWQNADQQQEQHQQQEQGSHSSQRDESVEKNSS  
SIASLNNNSGNMQQDSPEDEKQNDKNDAIKWNTDPEKSGDDMSMGSDSSSIIASIDNDK  
NRNSRHDCSQDEPKDINNEI IERKIDKEKSDSGSSERPSKRARTTSLSEQNTEDTSSTST  
SADIISTGQEVHANKINASSNAPDASSPRLKRKKS IENSCKLLLTMPNKYNAESFRKY  
LNSHLIDTKIVDDISSESPILECYCDRDNVLTTRTEEIRDIIMNSVSGTLTLTGTKVYF  
KRHP EYHFSREGTSNKRHRIPSSPSPSPTSSQSTGCRNREDMTQSLPLPSWSNVDCI IH  
ASNKSKDVSWEVASFIICYIRGYTTLANEDVIDTARFTPIEETQSFLCSSAVAAQTIV  
TKINGIDL RGSKLSLNRHPKFRQDVPPVDTDTNDPTRPIMDEFPGSRGSTKDDDLASVEE  
GEMKKTQQDSSLRRGENDKTQKASDNSYDKSPPIAQSEERQWQAIDTELTMLNENEEERR  
CDAEHN NVNPLAQDAI IHCTADQPIEMGLSNDERSRKISGKTEYDKIKS QYD TTLELEK  
SKIENIRKDKQIIILNNSQVIEKRIESEKKEAKEDYERRLHEIQLKKKEQSLKIEEQQE  
IIQNLKADA EKARNEIKGLYSK LQGLQGRYQEMTDALTCATKMCEEEREARRQLTVDVIG  
FKKAKKAAERKLKALKSLADSKGTVGAKGGDLELDSEEP TAKEFKSRALSVGDVVLANST  
QLGYKDKLIITSVNPNGTYRSRDFVTLRKRK TLLKESDIEVVGKESEYVS

>comp14367\_c0\_seq1; 532 55 1722 LEN=2209; translated  
MYKEDNPNSRTAIVNMTGEVSVNKTEDPGSDYGDVVRDAEANPSKDY GESSNLSNDDSLE  
KKNDANQDEY LKDSAI FSLGYVGIP IQGFVNQFMAFGLGLLFTYIFGPYGRDLPTAQLQA  
ATSLGTVFHSF SILFGI WVDAFPIMGLSWKPYLILGWLAYLSFLLPVTIIGDDIGDTL I  
ILIAMSQFGIQLSTTAVDGF LPWITSKEAPEKKGRFQVLRDLFGTLGIVCAIIFMFFAFS  
GPRYNC PGYETDPTEPCSTDETVLARNALSGDNPDDWCYMICPEAIFDFDFGVRAVYSVI  
IGIILLALPFCFFLHEEKVKKNLKKR LGMWRALTNRAVWQLALYSLCLGTLIHVENFA

YFIFSATLISQRTLLPLVSTMLGVLVIVTLGVVAKYALGFSWHKIMLIGTLLDVFIELL  
RFLFVFDVTRNPVLWIICTTPAGFLQVLTSLPLMWAVNIVADEGLEAATVALIGTTNVLV  
VFLSRIAISVPLQSFPLSDTARIIEDTHEVHMEFVKYDSIALLLKISTIFLLPMLPRQ  
REEAKALKDRNERSHW

>comp14368\_c0\_seq1; 164 153 683 LEN=877; translated  
MAFTLLELARNPDLQKSVRDEVAVMESSDHWRRSEALQMAIKESMRLYPVSASGSSRVCG  
RDFVTKEGWVIPAGTSVSSHIMLIHRNKNVFGENADEVVPSRWENPTQAQKDSFLIFAAG  
KQNCLGQSLAQAEHLHCIIIPRILSEVELEVEDEGNITWFLTLKPIGVKLRPKLVVAQ

>comp14368\_c0\_seq2; 253 228 1298 LEN=1492; translated  
MKFHSQQHARRKGVAPAFSNRHVKRMNLVALEHAEKWIQEVLIIPCAKAGKSFVSKGMIS  
ITLEAICKTAFEYDISQQEKDEYLRNSELVLKEFLTKSINNPFRKYFGRWIPGRRRALDA  
ALANASLARRIISKYKANTKPIKGTIIDYLCHNPNPCYANEDEIVADVLLYLTAGHDTTAYT  
MAFTLLELARNPDLQKSVRDEVAVMESSDHWRRSEALQMAIKESMRLYPVSASGSSRVCG  
RDFVTKEGWVIPAGTSVSSHIMLIHRNKNVFGENADEVVPSRWENPTQAQKDSFLIFAAG  
KQNCLGQSLAQAEHLHCIIIPRILSEVELEVEDEGNITWFLTLKPIGVKLRPKLVVAQ

>comp14368\_c0\_seq3; 281 301 1809 LEN=2003; translated  
MELLLSLSNYMGESGVALIAVPLATFALGLLFCFAVCLMMLFFNTDHTLRSWLKMNSAI  
GHNYRPPVAPFGMFECIRFMTSDQQPWFPLRARKALNDSDTFVLPLPRRPVMTGDYELAR  
EILTDP LSVKPKTYQEFEP LGGVGSIFTRNGSYWHARRKGVAPAFSNRHVKRMNLVALEHA  
EKWIQEVLIIPCAKAGKSFVSKGMISITLEAICKTAFEYDISQQEKDEYLRNSELVLKEF  
LTKSINNPFRKYFGRWIPGRRRALDAALANASLARRIISKYKANTKPIKGTIIDYLCHNP  
CYANEDEIVADVLLYLTAGHDTTAYTMAFTLLELARNPDLQKSVRDEVAVMESSDHWRRS  
EALQMAIKESMRLYPVSASGSSRVCGRDFVTKEGWVIPAGTSVSSHIMLIHRNKNVFGEN  
ADEYVPSRWENPTQAQKDSFLIFAAGKQNCLGQSLAQAEHLHCIIIPRILSEVELEVEDEGN  
ITWFLTLKPIGVKLRPKLVVAQ

>comp14369\_c0\_seq1; 700 105 2273 LEN=2498; translated  
MGGIIGTSKNVDDGYTDSKNENNKQRSATSTETAESTQATSPTPEPPSKKKRVEQPPSSIA  
AGGNHQQPQMAKPRGGKSTSKKKLKTGHMDPKILKVRKTIQEGCRTNDLASAMDAYEGAI  
RDNVRIEAQSYNLLNLC DGLDREDRKLHVGT PKVVESQKDSTGSGGSI PETLVASKEK  
KQIDSKRQEYVFAIKRMSKEINLPLNETAYSALVKILSKNKEFSKAEELVEAEGVQ  
QCKPKLRLYASLLHAYCQEE SRVVDALGCWKRLRKRASSTKAFKGS DKNSENADGMDLTE  
REYLSLIQC AVRAKK GEGNDLVMEDALTRLAEDI PVPKATAVAIADWFRQNNH MVATA  
TQEARQNSDSSKATATI QALLNEIRTYDTVSEPSRMPGPVTLAPGEQWTISPACSIDGT  
TGMLKDGCLEGSKLKPVPLSDGSFADMVAMNESIVTDGTIKGNANAKFQGGKGRRTDF  
SVSDRKQEWKCFQDFLDRGVRDTGRPYDVVDGANIGYFKNFASAPKHVDYEQIDWVLR  
HFLQTLGKKVLLVMHHRHFSRHMLPHKYRPLCDAWRNEGLLYATPPGMNDDWFMHAAALK  
YKTLVVTNDEM RDH HFQMLAPKFFLRWKDRHQVHFDGFSYVTDSSSLLSNPRIDRPKRPR  
EVLLTYPDAYSRRIRQVDDGLVVP LAKRGDENRFLDGCHVASDQEP EEEELYLCIRPSKQT  
KK

>comp14370\_c2\_seq1; 253 108 1304 LEN=1727; translated  
MSSSTLQMRARGQSPEAKESAKPSDAVVDPTPTSSEK LKKDHGLFRRCSPRTALLVFAIS  
QLLVLLVKS AVTKV VESH SNTSISTPDDDAYDPVTDHCLKLSTELQKCELNYCNPLASKD  
VSITKNRGFAIRFPDKYIRKFM EIPGSGGASCVM SKKYGF LYVHNLKSGGTTTKFFLKNA  
LCSNKGFP CDEGDDTLELVPCSKGIWVSR AKKYVFSFVRN PYARLYSGFAMAERMNET  
THPEPIDFRTFALASNNDRYK MSETHTSHYVPQSKLLADKRGCPVLDYVGR IEHYDDDLW  
RILREIEKRSGLDTLTQAYRERISANGTINVD TSTS YGTMRKSKIRGKQLAMGNSTATNV  
KSEMTAVYSDAKVTKKVYLEFKADFD MFGYASRDIPWE

>comp14370\_c2\_seq2; 253 108 1304 LEN=1823; translated  
MSSSTLQMRARGQSPEAKESAKPSDAVVDPTPTSSEK LKKDHGLFRRCSPRTALLVFAIS  
QLLVLLVKS AVTKV VESH SNTSISTPDDDAYDPVTDHCLKLSTELQKCELNYCNPLASKD  
VSITKNRGFAIRFPDKYIRKFM EIPGSGGASCVM SKKYGF LYVHNLKSGGTTTKFFLKNA  
LCSNKGFP CDEGDDTLELVPCSKGIWVSR AKKYVFSFVRN PYARLYSGFAMAERMNET  
THPEPIDFRTFALASNNDRYK MSETHTSHYVPQSKLLADKRGCPVLDYVGR IEHYDDDLW  
RILREIEKRSGLDTLTQAYRERISANGTINVD TSTS YGTMRKSKIRGKQLAMGNSTATNV  
KSEMTAVYSDAKVTKKVYLEFKADFD MFGYASRDIPWE

>comp14371\_c0\_seq1; 344 258 2324 LEN=2607; translated  
MSNDGTPGRVGNHQANYEGHQLSYFDQGI PRGQPHASISTLSEPGETEASHPLQSTEG  
SPPPN SATTGSSASASTPLGLPDPQ QASSKYSSSLADGMITKPFDDSDTSLKADLHTEKS  
VDVPI SHAKEPKSNSTSYQSAIKLMVSNNVAGSII GRQGQTISDLQSQS SARIKLSQTGD  
YYPGTQDRVCLVQGQLGTVKHAVKLLLERFHMLQEQQHTQHTQHLPWRKGSNAPSGDFV



IRLLVPSSSCGMIIGKGGANIKLMEESSGVTSVRLSPKEGQDQAAHPSIAGRSGLTERVV  
TITGPNLETCVNCLHIIVDCMFANHEICRYTNMTTSYSRHSVSPGAYAPAQPGRPLHTVLS  
SPGEWDNQPGPYGSFMIKRSTSQPDLSHLSIDQRRVQSQVAPEAFGGNVSSQQQIGRREPT  
VQQQQFSQSFIDLDPQTYNSEMPMLGAQDRGQRTNDPIAPMYLLGSSTPTQLDHQSMQSS  
SSAPDLLALQFQDSLRLSNSQSAQNDYSHFAPQLPQPTRPGGYAAQVLPDNLIGSILGR  
GGSTLNELQMHSNTRIRISQRGEYVPGTRNRIVTIRGQTAHSVNLAQYLMNQRMVLPPTA  
GFTGQSTHLTPYIHQTQLQAPHAQRIPLHQSTQTAPAGSSVSSTTPKQQQALHQTAFLP  
SESHQTTAGTPSISLGLNSPKELATHR

>comp14372\_c0\_seq1; 674 1 2549 LEN=3838; translated  
XSSNSSNINSSNVNSSSSSVNPRDSEILPVRSTTVRTERERVVKQKQKQKNSNWETPL  
LKWHRSNLELPSGASFYDLGTTWNEDEPYGFDGVHAAVEPSWNLVTDHLSEGLSILRCSP  
VTDVRIVLPNGTTPKLAEPTKPPALVGESQSRNGERTKNLSKPESSEATTLSTSKATEE  
EKNELPEQTKSKSQQKKHETRQRPPQKPQRQVHKRNPKRSTNFLDSTVPARRLSRRQRN  
VDANVRRSARATKGIITRLEFDHGWDESQARKKQKKRSSNNDAGDHGKVKRKAAILTEAE  
NDKQRIPNGEAKAAEEKVVKYDPSSTVQVTLRDGTVLEADAVVCTPLPLGVLKLPSPDPCH  
VRFVPPPLSPTKTKAIQNLGCGLLNKCAISFPSVFWQSDFLGQARSEYSYLVLNAANYTQ  
KPVLIIFMYGGDFARVVEDWTDQRIVEDCLEVLKMKCVGSRAERQIPPPVDYCVTRWGKEE  
YSRMAFTCVPPGVDGAASLAAISEPIPDVPLPQKPLVLFAGEHSTPYHPSTMHGAFLSGI  
REAYRFDLYMEPVLNNHLGFDEKIHVYKHTFATRRVYKKRSASGNRDKAAEATTSAES  
EPNHNGGHSRRRGFSGMTLRSRLSGPSVLGPTPEAAAARTTTSPPKTRRSTSVGLSS  
PTASGTRRSQRSLASTPALFRETETNHKNGTTNGKSNDKAASEQENRTLLRALESYGS  
FCESLLSSHILPVYSSKKNQRRRSSSSAKKIKAAWKRLAAVRGDSTGTDDAGNATNDQL  
LQSWKAQHIVRDNSYTDFAFIAMGAAAEAAVSSAGNALGPLSNAAASTNKAGGPRRSQRG  
SAKRREFSY

>comp14372\_c0\_seq2; 301 1 1169 LEN=2458; translated  
XPLCFPPPPVDYCVTRWGKEEYSRMAFTCVPPGVDGAASLAAISEPIPDVPLPQKPLVLF  
GEHSTPYHPSTMHGAFLSGIREAYRFDLYMEPVLNNHLGFDEKIHVYKHTFATRRVYKK  
RSASGNRDKAAEATTSAESAEPNHNGGHSRRRGFSGMTLRSRLSGPSVLGPTPEAAA  
RTTTSPPKTRRSTSVGLSSPTASGTRRSQRSLASTPALFRETETNHKNGTTNGKSNDK  
ASEQENRTLLRALESYGSFCESLLSSHILPVYSSKKNQRRRSSSSAKKIKAAWKRLA  
AVRGDSTGTDDAGNATNDQLLQSWKAQHIVRDNSYTDFAFIAMGAAAEAAVSSAGNALGP  
LSNAAASTNKAGGPRRSQRGSAKRREFSY

>comp14372\_c0\_seq3; 674 1 2549 LEN=3946; translated  
XSSNSSNINSSNVNSSSSSVNPRDSEILPVRSTTVRTERERVVKQKQKQKNSNWETPL  
LKWHRSNLELPSGASFYDLGTTWNEDEPYGFDGVHAAVEPSWNLVTDHLSEGLSILRCSP  
VTDVRIVLPNGTTPKLAEPTKPPALVGESQSRNGERTKNLSKPESSEATTLSTSKATEE  
EKNELPEQTKSKSQQKKHETRQRPPQKPQRQVHKRNPKRSTNFLDSTVPARRLSRRQRN  
VDANVRRSARATKGIITRLEFDHGWDESQARKKQKKRSSNNDAGDHGKVKRKAAILTEAE  
NDKQRIPNGEAKAAEEKVVKYDPSSTVQVTLRDGTVLEADAVVCTPLPLGVLKLPSPDPCH  
VRFVPPPLSPTKTKAIQNLGCGLLNKCAISFPSVFWQSDFLGQARSEYSYLVLNAANYTQ  
KPVLIIFMYGGDFARVVEDWTDQRIVEDCLEVLKMKCVGSRAERQIPPPVDYCVTRWGKEE  
YSRMAFTCVPPGVDGAASLAAISEPIPDVPLPQKPLVLFAGEHSTPYHPSTMHGAFLSGI  
REAYRFDLYMEPVLNNHLGFDEKIHVYKHTFATRRVYKKRSASGNRDKAAEATTSAES  
EPNHNGGHSRRRGFSGMTLRSRLSGPSVLGPTPEAAAARTTTSPPKTRRSTSVGLSS  
PTASGTRRSQRSLASTPALFRETETNHKNGTTNGKSNDKAASEQENRTLLRALESYGS  
FCESLLSSHILPVYSSKKNQRRRSSSSAKKIKAAWKRLAAVRGDSTGTDDAGNATNDQL  
LQSWKAQHIVRDNSYTDFAFIAMGAAAEAAVSSAGNALGPLSNAAASTNKAGGPRRSQRG  
SAKRREFSY

>comp14372\_c0\_seq4; 301 1 1169 LEN=2566; translated  
XPLCFPPPPVDYCVTRWGKEEYSRMAFTCVPPGVDGAASLAAISEPIPDVPLPQKPLVLF  
GEHSTPYHPSTMHGAFLSGIREAYRFDLYMEPVLNNHLGFDEKIHVYKHTFATRRVYKK  
RSASGNRDKAAEATTSAESAEPNHNGGHSRRRGFSGMTLRSRLSGPSVLGPTPEAAA  
RTTTSPPKTRRSTSVGLSSPTASGTRRSQRSLASTPALFRETETNHKNGTTNGKSNDK  
ASEQENRTLLRALESYGSFCESLLSSHILPVYSSKKNQRRRSSSSAKKIKAAWKRLA  
AVRGDSTGTDDAGNATNDQLLQSWKAQHIVRDNSYTDFAFIAMGAAAEAAVSSAGNALGP  
LSNAAASTNKAGGPRRSQRGSAKRREFSY

>comp14373\_c0\_seq2; 96 1 752 LEN=752; translated  
RCLKLKLVDLMKEASSSYFTFNISEPRLVKEKPLMTQAACAHQVIQIVQESILKRSVVQ  
SNIAHKKQFIMESSLLHQEEQKQSWEDHPYASLMAVVLASAVSISNYKTENPRVMNDP  
STVVSSRPGHGCRQKRLSSRPVAVDWSTSAATDDQPYHRPRDEDTSTRMPKPKKQRPMSM

DDGKDSWKKKARKQNIDSLNTPGDHAI I ISPLHKSNI TDTALPVIMNVPNGCSWRISDD  
EDNESVDTIEX

>comp14373\_c0\_seq3; 115 1 485 LEN=1317; translated  
XDEDNESVDTIEFVNAINQSVQRKKRQRHQCRQQNQONHPAHKSHMPVLNKPGELATLN  
SIPKRPVHRKSKRKDTALQVGTGRSGINQDKESIDALVNDNKQSIQEQQVDEGSFPYVTV  
GPYFLSRKSLTDGTGPSIKELLGVYRGLRHLESHVCDHESK

>comp14374\_c0\_seq1; 225 1 1162 LEN=1228; translated  
RFQKPVVEDPKVFLAQQASRPLSSSFVDRILHTIALFFRLNTGTRALKVPALLRSAMEIE  
DRKRSIWTIKRPDDEAPISSSSMTLKTSMQASSALSPKVI VLLVGGWGWAKPKDIGKYSAL  
YHGMMPCVTVAGVADSTDIMFKREEGLKRFALNGLETVDVHSEYDALELPVVVHLFSNG  
GGFVWQHMLKILDESDDSKSMELQDHVPQNTASDTNHVGSATSPFGTERIPLHRSTRLSE  
LRTNIKALIMDSCPAYPKLSSGMAALEGSLNGKATCLLPLVKAMFFLFHASGSLWNWLWC  
RPSPLKQFWNELLTSSLKVPQAFVYSTVDRMVDHCCELEDFIETRNSMAHDVSVLKFNDT  
PHVQHRYRYPNEYKAFVNNFLTQCLH

>comp14375\_c0\_seq1; 537 1 2558 LEN=2619; translated  
XSEASQFYEPNTTLRIPKPYNLHKFREIQFKIEFVLKEAMSKHQSIDGRFERKLDLDDTPNG  
SPPSSRQLLSRRVTDDYLCHDGDGMGASVVC SRKRSRDGQSI SVRETPVNNNDNEFPGL  
LDDDAFCQIDETPFKRKMTGQSSAESTTKVGKSSRTYYKAATLSVTPLPSKNSNMGIGR  
SSNAINVKKATDSTNQDPPSSQAALSRGTQDEF AAI PDEAFD LLLCPTTDTPSRIPKAIN  
HSSSGKAGTFTTGHKSSHSDNRDGYQSTGNLCSNVAEDVDGDNYDADLHEDLNIRLTV  
QLTQEVVDFDSMYEPRSADDTNELIVEELEADQQGGPVVKVANDNGFDESKALRQPTMSQ  
FYARETESTRSAPTIAKYVEYNGRHFFRSDIWRLDSSNLIVQIENFSKEKLSGSMRRRKM  
ANVKNKFHLAIKLNPLCLSIKGAQRLIEYWKAKGITGPEYVQCEWHQKLSIPRFPLSQFEE  
RITKPIVSDLIYRSFRDKQFTFKYKPSALHLSEKPAIPTTPEGKLRVLDLYAGAGGFSQG  
LKDAGFHVSHVSDTASCSTLQANFSDSKVFCQSVQDFLAGCRHNPSTRYPQNGFFA  
LIHGSSPCQGFSSANRNGGANDDATIXETFTFMEAVKYFQPPFVTFENVEGITHDKHKRY  
LHKMTEEFKMDYQIRELLL TASDYGDAQNRTRFFILASKKGLKLRVNPNSHGDDASVA  
PRRTTKDALQFLEDISPLAYEYEVKQVFNQVPLSLQGHKFKFKPNEDDVKLKPHVPAPT  
VIKKRVILHYKNNNRQLTRLERAQLQSFPPTYKFKYGTDSEIRDQIGNAVPVCLARAIGSC  
VMEAILRSGEIN

>comp14376\_c0\_seq2; 1378 412 4068 LEN=4229; translated  
MANTTTIEVDPDVAKTPSKSDPPSKNGVQSKGETPSKSKRKSISIPYTELIHTAIVALKD  
RTGSSAPAITKWIMNHNPTMDPAK LKQKMNFTLKLGVKSKRFVKIKSSFKINPVYVKNQ  
KKKAAANAKKRKATALANAKADKAAKAAAAAKPPTKAELAALKEKERKEKAEREKQKKE  
KDRQERIRKRKFPMDLKLIEEDRELKVVSPCRDNARPSLELAMPNYP SACRSDTMGSGI  
MNDVIHIYHFFRGDLGWGRFKKQKSIVAPFSLNQWMECVQLVSKGWCKKAKMLPPLMTHL  
FVVALQYLVEPKLSVALTPASWSEVLLLYMDAMEQKYTDRI PAEEGKTTIRSLGIDAEYL  
FFINDEPKDSSELDPPTSNSSYLGTGILKKAH SKFVNTDPWQLSAEELLSLLKALVDDIL  
GTCGDCAEELEIRNDETYELLKRKKAADAQRFRKQTAHNRQLAAEAAEEKEKQKAEAAI  
KGEANGEEKVEVKKPEKVTRSSSKASKISEAKLEKVRREQQKAQDAYDKSVRSKRIRTEP  
AGMDRNFQEVYHCSQDPEFVFFLQQGKPIQTDLPFKIPDSKPVRRISWQAIAKKKSTLNQF  
MESLDVRGIRESNLHEALQLARRHVYDDIKEANDKKALLREKSDVKRRLNARTNYQSGR  
KSGRLASQSEQELIDLQEEIERLEKSVEEGNVVEEYDLELETGLEMLRNFETQEEQTRKR  
RANRREVRKAPDDEDKRVKLPCKSKLWPTGHIDGTGIVGFTVSQLLELEERVENLSKWET  
GDRKAWISSLETAIHAWNEGSLPFLFCDETTLTNNGGSPSSVIASPEPKSKKQHNLGSS  
YNSNAASSQNSALSTYQIVCMIRQLLELENRIFEATGLAMVAKETDEADENMSTSPED  
EERI QDAWKQIHLRRIIPAKAYTKIHTVLVDAISAARKTQNTVVVAELKHALVEYHPEA  
ASYCKEEALQVLEKHGGYEDTDESVEDANETNLEKGI EDQTKTKIDYSDISNCLCAEA  
IILNSLDGHEDASRVDWIRAVKQTRTVSKQAAFISAFVQKANAKITKMEENSALIDAM  
GVWIKSRPKKKKTSHVPVELSEVWANVNFSEEFVFKVEEYPMWPARKCIPKDGELTSQ  
ELADRLLVSLVGERGALRVVKTENCIPFS DTPPEEDISNHPRDIRNQLEEAMNVARRVVR  
GQQKKKSKSKKIPINSIK

>comp14376\_c0\_seq3; 1250 412 4174 LEN=4335; translated  
MANTTTIEVDPDVAKTPSKSDPPSKNGVQSKGETPSKSKRKSISIPYTELIHTAIVALKD  
RTGSSAPAITKWIMNHNPTMDPAK LKQKMNFTLKLGVKSKRFVKIKSSFKINPVYVKNQ  
KKKAAANAKKRKATALANAKADKAAKAAAAAKPPTKAELAALKEKERKEKAEREKQKKE  
KDRQERIRKRKFPMDLKLIEEDRELKVVSPCRDNARPSLELAMPNYP SACRSDTMGSGI  
MNDVIHIYHFFRGDLGWGRFKKQKSIVAPFSLNQWMECVQLVSKGWCKKAKMLPPLMTHL  
FVVALQYLVEPKLSVALTPASWSEVLLLYMDAMEQKYTDRI PAEEGKTTIRSLGIDAEYL  
FFINDEPKDSSELDPPTSNSSYLGTGILKKAH SKFVNTDPWQLSAEELLSLLKALVDDIL

GTCGDCAEELEIRNDETYELLKRKKAADAQFRKFQTAHNRQLAAEAAEEKEKQKAI EAAI  
KGEANGEEKVEVKKPEKVTRSSSKASKISEAKLEKVRREQQKAQDAYDKSVRSKRIRTEP  
AGMDRNFQEVYHCSQDPEFVFFLQQGKPIQTDLPFKIPDSKPVRRISWQAIAKKKSTLNQF  
MESLDVRGIRESNLHEALQLARRHVYDDIKEANDKKALLREKSDVKRRLNARTNYQSGR  
KSGRLASQSEQELIDLQEEIERLEKSVEEGNVVEEYDLELETGLEMLRNFETQEEQTRKR  
RANRREVRKAPDDEDKRVKLLPCSKLWPTGHIDGTGIVGFTVSQLLELEERVENLSKWET  
GDRKAWISSLETAIHAWNEGSLPFLFCDETTLTNNGGSPSSVIASPEPKSKKQHNGLPSS  
YNSNAASSQNSALSTYQIVCMIRVIPFQLSIQMYSHAETXEVVFLILTPDXPPVTSFSN  
XLLELENRIFEATGLAMVAKETDEADENMSTSPEDDEERIQDAWKKQIHRLRRIPAKAYT  
KIHTVLVDAISAARKTQNTVVVAELKHALVEYHPEAASYCKEEALQVLEKHGGYEEDTDD  
ESVEDANETNLEKGIEDQTKTKIDYSDISNCLCAEAIILNSSLDGHEDASRVDWIRAVKQ  
TRTVSKQAAFISAFVQKANAKITKMEEENSALIDAMGVWIKSRPKKKKTSHPVPELSEVW  
ANVNFSEEFVVKVEEYPMWPARKCIPKDGELTSQLELADRLLVSLVGERGALRVVKTEN  
CIPFSDTPPEEDISNHPRDIRNQLEEAMNVARVVRGQQKKKSKSKKIPINSIK  
>comp14377\_c0\_seq4; 272 671 1837 LEN=2441; translated  
MEDLDFLENASASYTDIEQNGAPILPLPFDPQAGRAVRVDAPVYNPHTERAVKVSNIYY  
ENRMDGRPPERAYWVGRKLLKCCIFGVVKECTILRFRNNPDAPWEVTEHKAAAKIMAWHKI  
RDLQHIEDPQKEVAAMQFISRQGGHPHVMGALDVLQDDEYLLMFMPFCTSGDLFGFVHEA  
GRFPENMARYWFTQILDGVQHLQKLGICHRDMSLENILVDQYTRSVVIDLGMCLRVFPDN  
GEGQIGDVSRRGLRRLIKPLIPCGKPNYISPEILASTEFPDGFADLWATGVILFIMLVG  
LPPWEFAKPEDPRYVMVTRGKLSRMLSSWGRPISPLAADLLQKMLMEDPRQRSLSTEVL  
HPWVVDQPDNNITNANFRQGNDDDDDEGW  
>comp14377\_c0\_seq5; 162 671 1968 LEN=2483; translated  
MEDLDFLENASASYTDIEQNGAPILPLPFDPQAGRAVRVDAPVYNPHTERAVKVSNIYY  
ENRMDGRPPERAYWVGRKLLKCCIFGVVKECTILRFRNNPDAPWEVTEHKAAAKIMAWHKI  
RDLQHIEDPQKEVAAMQFISRQGGHPHVMGALDVLQDDEYLLMFMPFCTSGDLFGFVHEA  
GRFPENMARYWFTQILDVSVSIVIREMAGXTLVMTNAAVSAVYSVYNSGLAVLIKCISI  
TGSSASTETWNMSPGYVFENILVDQYTRSVVIDLGMCLRVFPDNGEGQIGDVSRRGLRRL  
IKPLIPCGKPNYISPEILASTEFPDGFADLWATGVILFIMLVGLPPWEFAKPEDPRYVM  
VTRGKLSRMLSSWGRPISPLAADLLQKMLMEDPRQRSLSTEVLDPWVVDQPDNNITNA  
NFRQGNDDDDDEGW  
>comp14377\_c0\_seq6; 272 671 1837 LEN=2352; translated  
MEDLDFLENASASYTDIEQNGAPILPLPFDPQAGRAVRVDAPVYNPHTERAVKVSNIYY  
ENRMDGRPPERAYWVGRKLLKCCIFGVVKECTILRFRNNPDAPWEVTEHKAAAKIMAWHKI  
RDLQHIEDPQKEVAAMQFISRQGGHPHVMGALDVLQDDEYLLMFMPFCTSGDLFGFVHEA  
GRFPENMARYWFTQILDGVQHLQKLGICHRDMSLENILVDQYTRSVVIDLGMCLRVFPDN  
GEGQIGDVSRRGLRRLIKPLIPCGKPNYISPEILASTEFPDGFADLWATGVILFIMLVG  
LPPWEFAKPEDPRYVMVTRGKLSRMLSSWGRPISPLAADLLQKMLMEDPRQRSLSTEVL  
HPWVVDQPDNNITNANFRQGNDDDDDEGW  
>comp14377\_c0\_seq7; 240 497 1030 LEN=1634; translated  
MSLENILVDQYTRSVVIDLGMCLRVFPDNGEGQIGDVSRRGLRRLIKPLIPCGKPNYISP  
EILASTEFPDGFADLWATGVILFIMLVGLPPWEFAKPEDPRYVMVTRGKLSRMLSSWGR  
PISPLAADLLQKMLMEDPRQRSLSTEVLDPWVVDQPDNNITNANFRQGNDDDDDEGW  
>comp14377\_c0\_seq9; 240 497 1030 LEN=1545; translated  
MSLENILVDQYTRSVVIDLGMCLRVFPDNGEGQIGDVSRRGLRRLIKPLIPCGKPNYISP  
EILASTEFPDGFADLWATGVILFIMLVGLPPWEFAKPEDPRYVMVTRGKLSRMLSSWGR  
PISPLAADLLQKMLMEDPRQRSLSTEVLDPWVVDQPDNNITNANFRQGNDDDDDEGW  
>comp14377\_c0\_seq10; 162 671 1968 LEN=2572; translated  
MEDLDFLENASASYTDIEQNGAPILPLPFDPQAGRAVRVDAPVYNPHTERAVKVSNIYY  
ENRMDGRPPERAYWVGRKLLKCCIFGVVKECTILRFRNNPDAPWEVTEHKAAAKIMAWHKI  
RDLQHIEDPQKEVAAMQFISRQGGHPHVMGALDVLQDDEYLLMFMPFCTSGDLFGFVHEA  
GRFPENMARYWFTQILDVSVSIVIREMAGXTLVMTNAAVSAVYSVYNSGLAVLIKCISI  
TGSSASTETWNMSPGYVFENILVDQYTRSVVIDLGMCLRVFPDNGEGQIGDVSRRGLRRL  
IKPLIPCGKPNYISPEILASTEFPDGFADLWATGVILFIMLVGLPPWEFAKPEDPRYVM  
VTRGKLSRMLSSWGRPISPLAADLLQKMLMEDPRQRSLSTEVLDPWVVDQPDNNITNA  
NFRQGNDDDDDEGW  
>comp14377\_c0\_seq11; 237 291 899 LEN=1414; translated  
MARYWFTQILDGVQHLQKLGICHRDMSLENILVDQYTRSVVIDLGMCLRVFPDNGEGQIG  
DVSRRGLRRLIKPLIPCGKPNYISPEILASTEFPDGFADLWATGVILFIMLVGLPPWEF  
AKPEDPRYVMVTRGKLSRMLSSWGRPISPLAADLLQKMLMEDPRQRSLSTEVLDPWVVD

EQPDNNITNANFRQGNDDDDDEGW

>comp14377\_c0\_seq12; 237 291 899 LEN=1503; translated  
MARYWFTQILDGVQHLQKLGICHRDMSLENILVDQYTRSVIDLGMCLRVFPDNGEGQIG  
DVSRRGLRLIKPLIPCGKPNYISPEILASTEFPDGFADLWATGVILFIMLVGLPPWEF  
AKPEDPRYVMVTRGKLSRMLSSWGRPISPLAADLLQKMLMEDPRQRLSLTEVLDPVWVD  
EQPDNNITNANFRQGNDDDDDEGW

>comp14378\_c0\_seq1; 368 362 1405 LEN=1666; translated  
MTAPTITVTCQYLQAGGRSCSRFKNCKCLRIRNGMNCWAVSNGSSSNCVDEAQCDSENEEA  
KCITNETPFGCGAACETIIDRDGCDNCVTMNGVACAWFVQGNVSLRCIGKERCSDRGFEA  
GSCII SKRKKKLTCEKINRCKQIKNCTECLTFRSSRRGTNCAWWHSQDGSVAQCVGLE  
QCSNKESGTCIQRKAFSTDESVSIEESCEIIPPPSLCLDFLNCEECSSKEEGCFWNQDAY  
GDKCGFGRGACRSEVGVVTPDIDVDPDVTETCPVLPKCDTQFPNLENMLATDAVEYL  
EKRYGKALCVQVLGENDPHIEDYRCDRLRLFVDNETRTIVVKIPQIG

>comp14378\_c0\_seq2; 335 1 1221 LEN=1482; translated  
ETATTSVCGCFPAIGRHYIREENSELTETVAIMGKRMMLFAIVLIGISLVSFLPVGANEE  
ASDEFHNHRYLQAGGRSCSRFKNCKCLRIRNGMNCWAVSNGSSSNCVDEAQCDSENEEA  
CITNETPFGCGAACETIIDRDGCDNCVTMNGVACAWFVQGNVSLRCIGKERCSDRGFEAG  
SCII SKRKKKLTCEKINRCKQIKNCTECLTFRSSRRGTNCAWWHSQDGSVAQCVGLEQ  
CSNKESGTCIQRKAFSTDESVSIEESCEIIPPPSLCLDFLNCEECSSKEEGCFWNQDAYG  
DKCGFGRGACRSEVGVVTPDIDVDPDVTETCPVLPKCDTQFPNLENMLATDAVEYLE  
KRYGKALCVQVLGENDPHIEDYRCDRLRLFVDNETRTIVVKIPQIG

>comp14379\_c0\_seq2; 1341 58 3201 LEN=3201; translated  
MSDLDDFLVLKPKGGLASGAAEDDEPCSIQPGLESPIRPTTVGLKLIDSPSGVSNGLVYR  
INGCNIERIVISEGNDGDSSIGAANIVCSCPLSFSAGGAVHLKASPDGRMVAVACIDGS  
LQCFDSTSDGISLRWSIPQAHSHVSPITIDSPVSGDRSRAATASGPILALDFSPHNYALLL  
ADATKGVAIYDARVEEPTNLIQQHKEQELVQNVSSASWQANVSVDDNGAMPIAIGRYDGS  
VAILRYSPPSPSSAIDLQAVSECGRPSEEDGFVCTHLNWNMETIIAGFCKVIPPEDNE  
EPDEDEDNADHEACLVTYVTSVDEALNRCAEWSEQGDVVPFFSVPKFGRHVFFTSVLRSL  
TKTRLIAVATNVGSDIGTSLLEDNDSNWNVPVEFQEGAGASTPTNEDDEFVPLGICIVQL  
ASLSSFRLVASTDNSISTFEFQHINDPSFFTETALGSIIDLPREPLKIVEPTGTGKSTN  
LPEGTEKNSWVVDDTNAISMSTA EKAPAPTANSFGSSGGVGTGSTVNAPAPSDSVATT  
TKEPFSFGLAGSSTFGSGSNAPTFGSGSSSVTFGSGTSSGLTFGSPSTDSTSPFSGFGKK  
PGETSKSSIFANSASFGGTAQSTNVATSLTTPAFGATSPLGGLPMTPKDSTNPTSGTIKP  
NTTFRITSGTTFGSNTQVSSGGFAALSSVSSKNSFGFGSSSDTRTSGNTSVFTSVANPF  
KTFPTTQPSSKEDIVSAEPLSETPTTKMPDNESDRKSI MESECEKAIRDDSFSDIEK  
TAAKVFDKFDTTKSGKVDVTA FEELSEALGEGFYGDEYNAQVSLVDPNNDGFI SRQNF IG  
WYKTLVEGDGDDDDC SLDTTEELAEREERVKASSAFGKLGKKSESGKSYIVPDQFGALFE  
SMGSVYCEEHRKTLKVKVSADGHIYEKDFLAWYIEWLFGDES DSDSDDEDSISEGNNAD  
NEGTEDSKEVKMLGDI FKVDESEWK CNVCSIRNKASLNQCSACESPRPGFEGKVSDGGST  
SIPTSNPTSSIGAGGFTFGGTEGEK DAG

>comp14379\_c0\_seq3; 628 1 1089 LEN=1089; translated  
GGFSFGGTSTKGEISSIGSKGVSSGVDTSNDSEAPKEATIGIGGFSFGDNACKGETAKVL  
PTNSEGFSIGLCGSKDTSPTESPKNHDQTPSDTEKTA AKVDFKFDTTKSGKVDVTA FEEL  
SEALGEGFYGDEYNAQVSLVDPNNDGFI SRQNF IGWYKTLVEGDGDDDDC SLDTTEELAER  
EEERVKASSAFGKLGKKSESGKSYIVPDQFGALFESMGSVYCEEHRKTLKVKVSADGHI  
YEKDFLAWYIEWLFGDES DSDSDDEDSISEGNNADNEGTEDSKEVKMLGDI FKVDESEWK  
CNVCSIRNKASLNQCSACESPRPGFEGKVSDGGSTSIPTSNPTSSIGAGGFTFGGTEGEK  
DAG

>comp14380\_c0\_seq1; 667 127 1408 LEN=1438; translated  
MFD SRKMP LLLALALLFLSLQALCSLAEVSPTCS DPTCEAEKDTPALPELPEMVDGGVVF  
HFHLYKTGGSSVTELFVELKQEFDEIAYEEAEAAAGKFDEEEDFPDDNNPNSEFLEGVKI  
IFVNNREDMTEEDI EWSITEAKEKKKPVFYNFHVEFPATMYPTLIEAAPILREWRARAEA  
EGIPFFATTVLRPLGHALSFFNFHVTVDEMEWSPFAGDMDATEENFLKTYVGNRLCHL  
MYNDAHGILEAPDEALREGLKENLFHFMDEHELNRNNEPSHCDADALRTILFEDNTFDYV  
GITERLSTHILPMFTKIVFGDARLAGDAEVKKAADM TDDTWVPLKKNLSESTKELVAR  
ESAKDQKLYEEARDFAHWPSYFDTRPPAAGAATRPGRRI LPRRRRRRPPRAKRKESCSG  
DAAREK

>comp14382\_c0\_seq1; 281 955 1956 LEN=2073; translated  
MTTLDHMEKMMNYLGSDDYKSLPSQIKMHCKNQLCSFWAGIGECENNKSFMKVQCAPA  
CQSCHLIDIANRCPNLPDAIPGLKEGDLNKMFERIVEEAPGNRTLTQDREKLALLEVPE

YYVTVLSRPSEVPATEANIISDRKLPWPVITLDNFLTDEECDLSLIQHGYEAGYKRSQDVG  
KQKFDGMLESKLESGRTSENAWCTTRNGCRHATVPKRVLDRLANVVGIPPENSEDLQILK  
YEKGQFYNTTHDYIPYQKMRQCGRILTFFLYLSQVEAGGGTDFPKLGITVMPKKGRALL  
WPSVYNAEPMNEDRRMKHQALPVVAGTKFGANAW

>comp14382\_c0\_seq2; 278 152 1853 LEN=2309; translated  
MKVVAVFRALVTLFFQKVDSDQECGANGDCDSHQRCPLWEIEGECYRSPAYMANICPVSC  
SGMKGAPARTECYDVHKNCSDWAEVDECETNNAVKNYCP LSCGRCTAKATINTVAENTGC  
GDDNENCSAWADLGECDKNPRYMLEKCRKSCGVCHGTVTSTTEKTQTKDFVDLIQRTANFG  
VTQTASGAQKMTTLDHMEKMMNYLGSDDYKSLPSXNQDALQKPGMTLFEITKQVPSKADF  
PNMFCLLLLFRMNYVRFGLLEENXENNKSFMKVQCAPACQSCHLIDIANRCPNLPDAIPG  
LKEGDLNKMFERIVEEAPGNRTLTQDREKLALLEVPEYYVTVLSRPSEVPATEANIISD  
RKLPPWVITLDNFLTDEECDLSLIQHGYEAGYKRSQDVGKQKFDGMLESKLESGRTSENAW  
CTTRNGCRHATVPKRVLDRLANVVGIPPENSEDLQILKYEKGQFYNTTHDYIPYQKMRQC  
GRILTFFLYLSQVEAGGGTDFPKLGITVMPKKGRALLWPSVYNAEPMNEDRRMKHQALP  
VVAGTKFGANAWIHMYDYQHPQENGCN

>comp14382\_c0\_seq3; 313 853 1902 LEN=2358; translated  
MTTLDHMEKMMNYLGSDDYKSLPSQIKMHCKNQNELCSFWAGIGECENNKSFMKVQCAPA  
CQSCHLIDIANRCPNLPDAIPGLKEGDLNKMFERIVEEAPGNRTLTQDREKLALLEVPE  
YYVTVLSRPSEVPATEANIISDRKLPWPVITLDNFLTDEECDLSLIQHGYEAGYKRSQDVG  
KQKFDGMLESKLESGRTSENAWCTTRNGCRHATVPKRVLDRLANVVGIPPENSEDLQILK  
YEKGQFYNTTHDYIPYQKMRQCGRILTFFLYLSQVEAGGGTDFPKLGITVMPKKGRALL  
WPSVYNAEPMNEDRRMKHQALPVVAGTKFGANAWIHMYDYQHPQENGCN

>comp14382\_c0\_seq4; 158 1205 1681 LEN=2104; translated  
MFERIVEEAPGNRTLTQDREKLALLEVPEYYVTVLSRPSEVPATEANIISDRKLPWVI  
TLDNFLTDEECDLSLIQHGYEAGYKRSQDVGKQKFDGMLESKLESGRTSENAWCTTRNGCR  
HATVPKRVLDRLANVVGIPPENSEDLQILKYEKGQCES

>comp14382\_c0\_seq5; 190 152 826 LEN=1973; translated  
MKVVAVFRALVTLFFQKVDSDQECGANGDCDSHQRCPLWEIEGECYRSPAYMANICPVSC  
SGMKGAPARTECYDVHKNCSDWAEVDECETNNAVKNYCP LSCGRCTAKATINTVAENTGC  
GDDNENCSAWADLGECDKNPRYMLEKCRKSCGVCHGTVTSTTEKTQTKDFVDLIQRTANFG  
VTQTASGAQKMTTLDHMEKMMNYLGSDDYKSLPSQIKMHCKNQV

>comp14382\_c0\_seq6; 313 853 1902 LEN=2336; translated  
MTTLDHMEKMMNYLGSDDYKSLPSQIKMHCKNQNELCSFWAGIGECENNKSFMKVQCAPA  
CQSCHLIDIANRCPNLPDAIPGLKEGDLNKMFERIVEEAPGNRTLTQDREKLALLEVPE  
YYVTVLSRPSEVPATEANIISDRKLPWPVITLDNFLTDEECDLSLIQHGYEAGYKRSQDVG  
KQKFDGMLESKLESGRTSENAWCTTRNGCRHATVPKRVLDRLANVVGIPPENSEDLQILK  
YEKGQFYNTTHDYIPYQKMRQCGRILTFFLYLSQVEAGGGTDFPKLGITVMPKKGRALL  
WPSVYNAEPMNEDRRMKHQALPVVAGTKFGANAWIHMYDYQHPQENGCN

>comp14382\_c0\_seq7; 321 152 1468 LEN=1947; translated  
MKVVAVFRALVTLFFQKVDSDQECGANGDCDSHQRCPLWEIEGECYRSPAYMANICPVSC  
SGMKGAPARTECYDVHKNCSDWAEVDECETNNAVKNYCP LSCGRCTAKATINTVAENTGC  
GDDNENCSAWADLGECDKNPRYMLEKCRKSCGVCHGTVTSTTEKTQTKDFVDLIQRTANFG  
VTQTASGAQKMTTLDHMEKMMNYLGSDDYKSLPSQIKMHCKNQNELCSFWAGIGECENNK  
SFMKVQCAPACQSCHLIDIANRCPNLPDAIPGLKEGDLNKMFERIVEEAPGNRTLTQDR  
EKLALLEVPEYYVTVLSRPSEVPATEANIISDRKLPWPVITLDNFLTDEECDLSLIQHGYE  
AGYKRSQDVGKQKFDGMLESKLESGRTSENAWCTTRNGCRHATVPKRVLDRLANVVGIPP  
ENSEDLQILKYEKGQCES

>comp14382\_c0\_seq9; 321 152 1468 LEN=2044; translated  
MKVVAVFRALVTLFFQKVDSDQECGANGDCDSHQRCPLWEIEGECYRSPAYMANICPVSC  
SGMKGAPARTECYDVHKNCSDWAEVDECETNNAVKNYCP LSCGRCTAKATINTVAENTGC  
GDDNENCSAWADLGECDKNPRYMLEKCRKSCGVCHGTVTSTTEKTQTKDFVDLIQRTANFG  
VTQTASGAQKMTTLDHMEKMMNYLGSDDYKSLPSQIKMHCKNQNELCSFWAGIGECENNK  
SFMKVQCAPACQSCHLIDIANRCPNLPDAIPGLKEGDLNKMFERIVEEAPGNRTLTQDR  
EKLALLEVPEYYVTVLSRPSEVPATEANIISDRKLPWPVITLDNFLTDEECDLSLIQHGYE  
AGYKRSQDVGKQKFDGMLESKLESGRTSENAWCTTRNGCRHATVPKRVLDRLANVVGIPP  
ENSEDLQILKYEKGQCES

>comp14382\_c0\_seq10; 341 407 1873 LEN=2329; translated  
MANICPVSCSGMKGAPARTECYDVHKNCSDWAEVDECETNNAVKNYCP LSCGRCTAKATI  
NTVAENTGCGDDNENCSAWADLGECDKNPRYMLEKCRKSCGVCHGTVTSTTEKTQTKDFVD  
LIQRTANFGVTQTASGAQKMTTLDHMEKMMNYLGSDDYKSLPSQIKMHCKNQNELCSFWA

GIGECENNKSFMKVQCAPACQSCHLIDIANRCPNLPDAIPGLKEGDLNKMFERIVEEAPG  
NRTLTDQDREKLALLEVPEYYVTVLSRPSEVPATEANIISDRKLPWVITLDNFLTDEEC  
DSL IQHGYEAGYKRSQDVGKQKFDGMLESKLSSEGR TSENAWCTTRNGCRHATVPKRVLDRLANVVGIPPENSEDLQILKYEKGQFYNTTHHDYIPYQKMRQCGPRILTFFLYLS DVEAGGG  
TDFPKLGITVMPKKGRALLWPSVYNAEPMNEDRRMKHQALPVVAGTKFGANAWIHMYDYQ  
HPQENGCN

>comp14382\_c0\_seq11; 175 407 928 LEN=2024; translated  
MANICPVSCSGMKGAPARTECYDVHKNCS DWA EVD ECE TNN AVKNY CPLSCGRCTAKATI  
NTVAENTGCGDDNENCSAWADLGECDKNPRYM LEKCRKSCGVCHGTVTST EKTQTKDFVD  
LIQRTANFGVTQTASGAQKMTTLDHMEKMMNYLGSDDYKSLPSQIKMHCKNQV

>comp14382\_c0\_seq12; 278 853 1599 LEN=2022; translated  
MTTLDHMEKMMNYLGSDDYKSLPSQIKMHCKNQNELCSFWAGIGECENNKSFMKVQCAPA  
CQSCHLIDIANRCPNLPDAIPGLKEGDLNKMFERIVEEAPGNRTLTDQDREKLALLEVPE  
YYVTVLSRPSEVPATEANIISDRKLPWVITLDNFLTDEECDSL IQHGYEAGYKRSQDVG  
KQKFDGMLESKLSSEGR TSENAWCTTRNGCRHATVPKRVLDRLANVVGIPPENSEDLQILK  
YEKGQCES

>comp14382\_c0\_seq13; 263 407 1955 LEN=2411; translated  
MANICPVSCSGMKGAPARTECYDVHKNCS DWA EVD ECE TNN AVKNY CPLSCGRCTAKATI  
NTVAENTGCGDDNENCSAWADLGECDKNPRYM LEKCRKSCGVCHGTVTST EKTQTKDFVD  
LIQRTANFGVTQTASGAQKMTTLDHMEKMMNYLGSDDYKSLPSXNQDALQKPGMTLFEIT  
KQVPSKADFPNMFCLLLLFRMNYVRFGLELENXENNKSFMKVQCAPACQSCHLIDIANRCP  
NLPDAIPGLKEGDLNKMFERIVEEAPGNRTLTDQDREKLALLEVPEYYVTVLSRPSEVP  
ATEANIISDRKLPWVITLDNFLTDEECDSL IQHGYEAGYKRSQDVGKQKFDGMLESKLS  
EGR TSENAWCTTRNGCRHATVPKRVLDRLANVVGIPPENSEDLQILKYEKGQFYNTTHHDY  
IPYQKMRQCGPRILTFFLYLS DVEAGGGTDFPKLGITVMPKKGRALLWPSVYNAEPMNED  
RRMKHQALPVVAGTKFGANAWIHMYDYQHPQENGCN

>comp14382\_c0\_seq14; 158 1307 1783 LEN=2206; translated  
MFERIVEEAPGNRTLTDQDREKLALLEVPEYYVTVLSRPSEVPATEANIISDRKLPWVI  
TLDNFLTDEECDSL IQHGYEAGYKRSQDVGKQKFDGMLESKLSSEGR TSENAWCTTRNGCR  
HATVPKRVLDRLANVVGIPPENSEDLQILKYEKGQCES

>comp14382\_c0\_seq15; 321 152 1468 LEN=2409; translated  
MKVVAVFRALVTLFFQKVD SQECGANGDCDSHQRCPLWEIEGECYRSPAYMANICPVSC  
SGMKGAPARTECYDVHKNCS DWA EVD ECE TNN AVKNY CPLSCGRCTAKATINTVAENTGC  
GDDNENCSAWADLGECDKNPRYM LEKCRKSCGVCHGTVTST EKTQTKDFVDLIQRTANFG  
VTQTASGAQKMTTLDHMEKMMNYLGSDDYKSLPSQIKMHCKNQNELCSFWAGIGECENNK  
SFMKVQCAPACQSCHLIDIANRCPNLPDAIPGLKEGDLNKMFERIVEEAPGNRTLTDQDR  
EKLALLEVPEYYVTVLSRPSEVPATEANIISDRKLPWVITLDNFLTDEECDSL IQHGYE  
AGYKRSQDVGKQKFDGMLESKLSSEGR TSENAWCTTRNGCRHATVPKRVLDRLANVVGIPP  
ENSEDLQILKYEKGQCES

>comp14382\_c0\_seq16; 281 853 1854 LEN=1971; translated  
MTTLDHMEKMMNYLGSDDYKSLPSQIKMHCKNQNELCSFWAGIGECENNKSFMKVQCAPA  
CQSCHLIDIANRCPNLPDAIPGLKEGDLNKMFERIVEEAPGNRTLTDQDREKLALLEVPE  
YYVTVLSRPSEVPATEANIISDRKLPWVITLDNFLTDEECDSL IQHGYEAGYKRSQDVG  
KQKFDGMLESKLSSEGR TSENAWCTTRNGCRHATVPKRVLDRLANVVGIPPENSEDLQILK  
YEKGQFYNTTHHDYIPYQKMRQCGPRILTFFLYLS DVEAGGGTDFPKLGITVMPKKGRALL  
WPSVYNAEPMNEDRRMKHQALPVVAGTKFGANAW

>comp14382\_c0\_seq17; 341 407 1873 LEN=2307; translated  
MANICPVSCSGMKGAPARTECYDVHKNCS DWA EVD ECE TNN AVKNY CPLSCGRCTAKATI  
NTVAENTGCGDDNENCSAWADLGECDKNPRYM LEKCRKSCGVCHGTVTST EKTQTKDFVD  
LIQRTANFGVTQTASGAQKMTTLDHMEKMMNYLGSDDYKSLPSQIKMHCKNQNELCSFWA  
GIGECENNKSFMKVQCAPACQSCHLIDIANRCPNLPDAIPGLKEGDLNKMFERIVEEAPG  
NRTLTDQDREKLALLEVPEYYVTVLSRPSEVPATEANIISDRKLPWVITLDNFLTDEEC  
DSL IQHGYEAGYKRSQDVGKQKFDGMLESKLSSEGR TSENAWCTTRNGCRHATVPKRVLDRLANVVGIPPENSEDLQILKYEKGQFYNTTHHDYIPYQKMRQCGPRILTFFLYLS DVEAGGG  
TDFPKLGITVMPKKGRALLWPSVYNAEPMNEDRRMKHQALPVVAGTKFGANAWIHMYDYQ  
HPQENGCN

>comp14382\_c0\_seq18; 193 1205 1984 LEN=2440; translated  
MFERIVEEAPGNRTLTDQDREKLALLEVPEYYVTVLSRPSEVPATEANIISDRKLPWVI  
TLDNFLTDEECDSL IQHGYEAGYKRSQDVGKQKFDGMLESKLSSEGR TSENAWCTTRNGCR  
HATVPKRVLDRLANVVGIPPENSEDLQILKYEKGQFYNTTHHDYIPYQKMRQCGPRILTF

LYLSDVEAGGGTDFPKLGITVMPKKGRALLWPSVYNAEPMNEDRRMKHQALPVVAGTKFG  
ANAWIHMYDYQHPQENGCN  
>comp14382\_c0\_seq19; 278 152 1853 LEN=2287; translated  
MKVVAVFRALVTLFFQKVDSDQECGANGDCDSHQRCPLWEIEGECYRSPAYMANICPVSC  
SGMKGAPARTECYDVHKNCSDWAEVDECETNNAVKNYCPLSCGRCTAKATINTVAENTGC  
GDDNENCSAWADLGECDKNPRYMLEKCRKSCGVCHGTVTSTTEKTQTKDFVDLIQRTANFG  
VTQTASGAQKMTTLDHMEKMMNYLGSDDYKSLPSXNQDALQKPGMTLFEITKQVPSKADF  
PNMFCLLLLFRMNYVRFGLLELENXENNKSFMKVQCAPACQSCHLIDIANRCPNLPDAIPG  
LKEGDLNKMFERIVEEAPGNRTLTDQDREKLALLEVPEYYVTVLSRPSEVPATEANIISD  
RKLPPWVITLDNFLTDEECDLSLIQHGYEAGYKRSQDVGKQKFDGMLESKLSSEGRITSENAW  
CTTRNGCRHATVPKRVLDRLANVVGIPPENSEDLQILKYEKGFYNTHHDYIPYQKMRQC  
GPRILTFFLYLSDVEAGGGTDFPKLGITVMPKKGRALLWPSVYNAEPMNEDRRMKHQALP  
VVAGTKFGANAWIHMYDYQHPQENGCN  
>comp14382\_c0\_seq20; 306 407 1570 LEN=1993; translated  
MANICPVSCSGMKGAPARTECYDVHKNCSDWAEVDECETNNAVKNYCPLSCGRCTAKATI  
NTVAENTGCGDDNENCSAWADLGECDKNPRYMLEKCRKSCGVCHGTVTSTTEKTQTKDFVD  
LIQRTANFGVTQTASGAQKMTTLDHMEKMMNYLGSDDYKSLPSQIKMHCKNQNELCSFWA  
GIGECENNKSFMKVQCAPACQSCHLIDIANRCPNLPDAIPGLKEGDLNKMFERIVEEAPG  
NRTLTDQDREKLALLEVPEYYVTVLSRPSEVPATEANIISDRKLPPWVITLDNFLTDEEC  
DSLIIQHGYEAGYKRSQDVGKQKFDGMLESKLSSEGRITSENAWCTTRNGCRHATVPKRVLD  
RLANVVGIPPENSEDLQILKYEKGCES  
>comp14382\_c0\_seq21; 278 853 1599 LEN=2443; translated  
MTTLDHMEKMMNYLGSDDYKSLPSQIKMHCKNQNELCSFWAGIGECENNKSFMKVQCAPA  
CQSCHLIDIANRCPNLPDAIPGLKEGDLNKMFERIVEEAPGNRTLTDQDREKLALLEVPE  
YYVTVLSRPSEVPATEANIISDRKLPPWVITLDNFLTDEECDLSLIQHGYEAGYKRSQDVG  
KQKFDGMLESKLSSEGRITSENAWCTTRNGCRHATVPKRVLDRLANVVGIPPENSEDLQILK  
YEKGCES  
>comp14382\_c0\_seq22; 175 407 928 LEN=1122; translated  
MANICPVSCSGMKGAPARTECYDVHKNCSDWAEVDECETNNAVKNYCPLSCGRCTAKATI  
NTVAENTGCGDDNENCSAWADLGECDKNPRYMLEKCRKSCGVCHGTVTSTTEKTQTKDFVD  
LIQRTANFGVTQTASGAQKMTTLDHMEKMMNYLGSDDYKSLPSQIKMHCKNQV  
>comp14382\_c0\_seq23; 120 1 580 LEN=580; translated  
XLSAKACQSCHLIDIANRCPNLPDAIPGLKEGDLNKMFERIVEEAPGNRTLTDQDREKLA  
LLEVPEYYVTVLSRPSEVPATEANIISDRKLPPWVITLDNFLTDEECDLSLIQHGYEAGYK  
RSQDVGKQKFDGMLESKLSSEGRITSENAWCTTRNGCRHATVPKRVLDRLANVVGIPPENSE  
DLQILKYEKGFYN  
>comp14382\_c0\_seq24; 321 152 1468 LEN=2431; translated  
MKVVAVFRALVTLFFQKVDSDQECGANGDCDSHQRCPLWEIEGECYRSPAYMANICPVSC  
SGMKGAPARTECYDVHKNCSDWAEVDECETNNAVKNYCPLSCGRCTAKATINTVAENTGC  
GDDNENCSAWADLGECDKNPRYMLEKCRKSCGVCHGTVTSTTEKTQTKDFVDLIQRTANFG  
VTQTASGAQKMTTLDHMEKMMNYLGSDDYKSLPSQIKMHCKNQNELCSFWAGIGECENNK  
SFMKVQCAPACQSCHLIDIANRCPNLPDAIPGLKEGDLNKMFERIVEEAPGNRTLTDQDR  
EKLALLEVPEYYVTVLSRPSEVPATEANIISDRKLPPWVITLDNFLTDEECDLSLIQHGYE  
AGYKRSQDVGKQKFDGMLESKLSSEGRITSENAWCTTRNGCRHATVPKRVLDRLANVVGIPP  
ENSEDLQILKYEKGCES  
>comp14382\_c0\_seq25; 157 1 583 LEN=1006; translated  
XLSAKACQSCHLIDIANRCPNLPDAIPGLKEGDLNKMFERIVEEAPGNRTLTDQDREKLA  
LLEVPEYYVTVLSRPSEVPATEANIISDRKLPPWVITLDNFLTDEECDLSLIQHGYEAGYK  
RSQDVGKQKFDGMLESKLSSEGRITSENAWCTTRNGCRHATVPKRVLDRLANVVGIPPENSE  
DLQILKYEKGCES  
>comp14382\_c0\_seq26; 321 152 1468 LEN=2312; translated  
MKVVAVFRALVTLFFQKVDSDQECGANGDCDSHQRCPLWEIEGECYRSPAYMANICPVSC  
SGMKGAPARTECYDVHKNCSDWAEVDECETNNAVKNYCPLSCGRCTAKATINTVAENTGC  
GDDNENCSAWADLGECDKNPRYMLEKCRKSCGVCHGTVTSTTEKTQTKDFVDLIQRTANFG  
VTQTASGAQKMTTLDHMEKMMNYLGSDDYKSLPSQIKMHCKNQNELCSFWAGIGECENNK  
SFMKVQCAPACQSCHLIDIANRCPNLPDAIPGLKEGDLNKMFERIVEEAPGNRTLTDQDR  
EKLALLEVPEYYVTVLSRPSEVPATEANIISDRKLPPWVITLDNFLTDEECDLSLIQHGYE  
AGYKRSQDVGKQKFDGMLESKLSSEGRITSENAWCTTRNGCRHATVPKRVLDRLANVVGIPP  
ENSEDLQILKYEKGCES  
>comp14382\_c0\_seq27; 190 152 826 LEN=1020; translated

MKVVAVFRALVTLFFQKVDSDQECGANGDCDSHQRCPLWEIEGECYRSPAYMANICPVSC  
SGMKGAPARTECYDVHKNCSDWAEVDECETNNAVKNYCPLSCGRCTAKATINTVAENTGC  
GDDNENCSAWADLGECDKNPRYMLEKCRKSCGVCHGTVTSTTEKTQTKDFVDLIQRTANFG  
VTQTASGAQKMTTLDHMEKMMNYLGSDDYKSLPSQIKMHCKNQV  
>comp14382\_c0\_seq28; 190 152 826 LEN=1922; translated  
MKVVAVFRALVTLFFQKVDSDQECGANGDCDSHQRCPLWEIEGECYRSPAYMANICPVSC  
SGMKGAPARTECYDVHKNCSDWAEVDECETNNAVKNYCPLSCGRCTAKATINTVAENTGC  
GDDNENCSAWADLGECDKNPRYMLEKCRKSCGVCHGTVTSTTEKTQTKDFVDLIQRTANFG  
VTQTASGAQKMTTLDHMEKMMNYLGSDDYKSLPSQIKMHCKNQV  
>comp14382\_c0\_seq29; 306 407 1570 LEN=2436; translated  
MANICPVSCSGMKGAPARTECYDVHKNCSDWAEVDECETNNAVKNYCPLSCGRCTAKATI  
NTVAENTGCGDDNENCSAWADLGECDKNPRYMLEKCRKSCGVCHGTVTSTTEKTQTKDFVD  
LIQRTANFGVTQTASGAQKMTTLDHMEKMMNYLGSDDYKSLPSQIKMHCKNQNELCSFWA  
GIGECENNKSFMKVQCAPACQSCHLIDIANRCPNLPDAIPGLKEGDLNKMFERIVEEAPG  
NRTLTDQDREKLALLEVPEYYVTVLSRPSEVPATEANIISDRKLPWVITLDNFLTDEEC  
DSLQHGQYEAQYKRSQDVGKQKFDGMLESKLSSEGRITSENAWCTTRNGCRHATVPKRVLD  
LANVVGIPPENSEDLQILKYEKGQCES  
>comp14382\_c0\_seq30; 313 955 2004 LEN=2460; translated  
MTTLDHMEKMMNYLGSDDYKSLPSQIKMHCKNQNELCSFWAGIGECENNKSFMKVQCAPA  
CQSCHLIDIANRCPNLPDAIPGLKEGDLNKMFERIVEEAPGNRTLTDQDREKLALLEVPE  
YYVTVLSRPSEVPATEANIISDRKLPWVITLDNFLTDEECDSLQHGQYEAQYKRSQDVG  
KQKFDGMLESKLSSEGRITSENAWCTTRNGCRHATVPKRVLDRLANVVGIPPENSEDLQILK  
YEKGQFYNTTHDYPYQKMRQCGPRILTFFLYLSVDEAGGGTDFPKLGITVMPKKGRALL  
WPSVYNAEPMNEDRRMKHQALPVVAGTKFGANAWIHMYDYQHPQENGCN  
>comp14382\_c0\_seq31; 321 152 1468 LEN=2334; translated  
MKVVAVFRALVTLFFQKVDSDQECGANGDCDSHQRCPLWEIEGECYRSPAYMANICPVSC  
SGMKGAPARTECYDVHKNCSDWAEVDECETNNAVKNYCPLSCGRCTAKATINTVAENTGC  
GDDNENCSAWADLGECDKNPRYMLEKCRKSCGVCHGTVTSTTEKTQTKDFVDLIQRTANFG  
VTQTASGAQKMTTLDHMEKMMNYLGSDDYKSLPSQIKMHCKNQNELCSFWAGIGECENNK  
SFMKVQCAPACQSCHLIDIANRCPNLPDAIPGLKEGDLNKMFERIVEEAPGNRTLTDQDR  
EKLALLEVPEYYVTVLSRPSEVPATEANIISDRKLPWVITLDNFLTDEECDSLQHGQY  
AGYKRSQDVGKQKFDGMLESKLSSEGRITSENAWCTTRNGCRHATVPKRVLDRLANVVGIP  
PENSEDLQILKYEKGQCES  
>comp14382\_c0\_seq32; 175 407 928 LEN=2075; translated  
MANICPVSCSGMKGAPARTECYDVHKNCSDWAEVDECETNNAVKNYCPLSCGRCTAKATI  
NTVAENTGCGDDNENCSAWADLGECDKNPRYMLEKCRKSCGVCHGTVTSTTEKTQTKDFVD  
LIQRTANFGVTQTASGAQKMTTLDHMEKMMNYLGSDDYKSLPSQIKMHCKNQV  
>comp14382\_c0\_seq33; 324 152 1723 LEN=1840; translated  
MKVVAVFRALVTLFFQKVDSDQECGANGDCDSHQRCPLWEIEGECYRSPAYMANICPVSC  
SGMKGAPARTECYDVHKNCSDWAEVDECETNNAVKNYCPLSCGRCTAKATINTVAENTGC  
GDDNENCSAWADLGECDKNPRYMLEKCRKSCGVCHGTVTSTTEKTQTKDFVDLIQRTANFG  
VTQTASGAQKMTTLDHMEKMMNYLGSDDYKSLPSQIKMHCKNQNELCSFWAGIGECENNK  
SFMKVQCAPACQSCHLIDIANRCPNLPDAIPGLKEGDLNKMFERIVEEAPGNRTLTDQDR  
EKLALLEVPEYYVTVLSRPSEVPATEANIISDRKLPWVITLDNFLTDEECDSLQHGQY  
AGYKRSQDVGKQKFDGMLESKLSSEGRITSENAWCTTRNGCRHATVPKRVLDRLANVVGIP  
PENSEDLQILKYEKGQFYNTTHDYPYQKMRQCGPRILTFFLYLSVDEAGGGTDFPKLGIT  
VMPKKGRALLWPSVYNAEPMNEDRRMKHQALPVVAGTKFGANAW  
>comp14382\_c0\_seq34; 136 152 541 LEN=2053; translated  
MKVVAVFRALVTLFFQKVDSDQECGANGDCDSHQRCPLWEIEGECYRSPAYMANICPVSC  
SGMKGAPARTECYDVHKNCSDWAEVDECETNNAVKNYCPLSCGRCTAKATINTVAENTGC  
GDDNENCSAW  
>comp14382\_c0\_seq35; 263 407 1955 LEN=2389; translated  
MANICPVSCSGMKGAPARTECYDVHKNCSDWAEVDECETNNAVKNYCPLSCGRCTAKATI  
NTVAENTGCGDDNENCSAWADLGECDKNPRYMLEKCRKSCGVCHGTVTSTTEKTQTKDFVD  
LIQRTANFGVTQTASGAQKMTTLDHMEKMMNYLGSDDYKSLPSXNQDALQKPGMTLFEIT  
KQVPSKADFPNMFCLLLLLFRMNYVRFGLELENXENNKSFMKVQCAPACQSCHLIDIANR  
PNLPDAIPGLKEGDLNKMFERIVEEAPGNRTLTDQDREKLALLEVPEYYVTVLSRPSEVP  
ATEANIISDRKLPWVITLDNFLTDEECDSLQHGQYEAQYKRSQDVGKQKFDGMLESKLS  
EGRTSENAWCTTRNGCRHATVPKRVLDRLANVVGIPPENSEDLQILKYEKGQFYNTTHDYP  
IPYQKMRQCGPRILTFFLYLSVDEAGGGTDFPKLGITVMPKKGRALLWPSVYNAEPMNED



RRMKHQALPVVAGTKFGANAWIHMYDYQHPQENGCN  
>comp14382\_c0\_seq36; 309 407 1825 LEN=1942; translated  
MANICPVSCSGMKGAPARTECYDVHKNCSWAEVDECETNNAVKNYCPLSCGRCTAKATI  
NTVAENTGCGDDNENCSAWADLGECDKNPRYMLEKCRKSCGVCHGTVTSTEKTQTKDFVD  
LIQRTANFGVTQTASGAQKMTTLDHMEKMMNYLGSDDYKSLPSQIKMHCKNQNELCSFWA  
GIGECENNKSFMKVQCAPACQSCHLIDIANRCPNLPDAIPGLKEGDLNKMFERIVEEAPG  
NRTLTDQDREKLALLEVPEYYVTVLSRPSEVPATEANIISDRKLPWPVITLDNFLTDEEC  
DSL IQHGYEAGYKRSQDVGKQKFDGMLESKLESGRTSENAWCTTRNGCRHATVPKRVLDR  
LANVVGIPPENSEDLQILKYEKGQFYNTTHDYPYQKMRQCGPRILTFFLYLSDVEAGGG  
TDFPKLGITVMPKKGRALLWPSVYNAEPMNEDRRMKHQALPVVAGTKFGANAW  
>comp14382\_c0\_seq37; 313 955 2004 LEN=2438; translated  
MTTLDHMEKMMNYLGSDDYKSLPSQIKMHCKNQNELCSFWAGIGECENNKSFMKVQCAPA  
CQSCHLIDIANRCPNLPDAIPGLKEGDLNKMFERIVEEAPGNRTLTDQDREKLALLEVPE  
YYVTVLSRPSEVPATEANIISDRKLPWPVITLDNFLTDEECDSL IQHGYEAGYKRSQDVG  
KQKFDGMLESKLESGRTSENAWCTTRNGCRHATVPKRVLDRLANVVGIPPENSEDLQILK  
YEKGQFYNTTHDYPYQKMRQCGPRILTFFLYLSDVEAGGGTDFPKLGITVMPKKGRALL  
WPSVYNAEPMNEDRRMKHQALPVVAGTKFGANAWIHMYDYQHPQENGCN  
>comp14382\_c0\_seq38; 356 152 1771 LEN=2227; translated  
MKVVAVFRALVTLFFQKVDSDQECGANGDCDSHQRCPLWEIEGECYRSPAYMANICPVSC  
SGMKGAPARTECYDVHKNCSWAEVDECETNNAVKNYCPLSCGRCTAKATINTVAENTGC  
GDDNENCSAWADLGECDKNPRYMLEKCRKSCGVCHGTVTSTEKTQTKDFVDLIQRTANFG  
VTQTASGAQKMTTLDHMEKMMNYLGSDDYKSLPSQIKMHCKNQNELCSFWAGIGECENNK  
SFMKVQCAPACQSCHLIDIANRCPNLPDAIPGLKEGDLNKMFERIVEEAPGNRTLTDQDR  
EKLALLEVPEYYVTVLSRPSEVPATEANIISDRKLPWPVITLDNFLTDEECDSL IQHGYE  
AGYKRSQDVGKQKFDGMLESKLESGRTSENAWCTTRNGCRHATVPKRVLDRLANVVGIPP  
ENSEDLQILKYEKGQFYNTTHDYPYQKMRQCGPRILTFFLYLSDVEAGGGTDFPKLGIT  
VMPKKGRALLWPSVYNAEPMNEDRRMKHQALPVVAGTKFGANAWIHMYDYQHPQENGCN  
>comp14382\_c0\_seq39; 356 152 1771 LEN=2205; translated  
MKVVAVFRALVTLFFQKVDSDQECGANGDCDSHQRCPLWEIEGECYRSPAYMANICPVSC  
SGMKGAPARTECYDVHKNCSWAEVDECETNNAVKNYCPLSCGRCTAKATINTVAENTGC  
GDDNENCSAWADLGECDKNPRYMLEKCRKSCGVCHGTVTSTEKTQTKDFVDLIQRTANFG  
VTQTASGAQKMTTLDHMEKMMNYLGSDDYKSLPSQIKMHCKNQNELCSFWAGIGECENNK  
SFMKVQCAPACQSCHLIDIANRCPNLPDAIPGLKEGDLNKMFERIVEEAPGNRTLTDQDR  
EKLALLEVPEYYVTVLSRPSEVPATEANIISDRKLPWPVITLDNFLTDEECDSL IQHGYE  
AGYKRSQDVGKQKFDGMLESKLESGRTSENAWCTTRNGCRHATVPKRVLDRLANVVGIPP  
ENSEDLQILKYEKGQFYNTTHDYPYQKMRQCGPRILTFFLYLSDVEAGGGTDFPKLGIT  
VMPKKGRALLWPSVYNAEPMNEDRRMKHQALPVVAGTKFGANAWIHMYDYQHPQENGCN  
>comp14382\_c0\_seq40; 306 407 1570 LEN=2414; translated  
MANICPVSCSGMKGAPARTECYDVHKNCSWAEVDECETNNAVKNYCPLSCGRCTAKATI  
NTVAENTGCGDDNENCSAWADLGECDKNPRYMLEKCRKSCGVCHGTVTSTEKTQTKDFVD  
LIQRTANFGVTQTASGAQKMTTLDHMEKMMNYLGSDDYKSLPSQIKMHCKNQNELCSFWA  
GIGECENNKSFMKVQCAPACQSCHLIDIANRCPNLPDAIPGLKEGDLNKMFERIVEEAPG  
NRTLTDQDREKLALLEVPEYYVTVLSRPSEVPATEANIISDRKLPWPVITLDNFLTDEEC  
DSL IQHGYEAGYKRSQDVGKQKFDGMLESKLESGRTSENAWCTTRNGCRHATVPKRVLDR  
LANVVGIPPENSEDLQILKYEKGQCES  
>comp14382\_c0\_seq41; 136 152 541 LEN=1151; translated  
MKVVAVFRALVTLFFQKVDSDQECGANGDCDSHQRCPLWEIEGECYRSPAYMANICPVSC  
SGMKGAPARTECYDVHKNCSWAEVDECETNNAVKNYCPLSCGRCTAKATINTVAENTGC  
GDDNENCSAW  
>comp14382\_c0\_seq42; 278 955 1701 LEN=2124; translated  
MTTLDHMEKMMNYLGSDDYKSLPSQIKMHCKNQNELCSFWAGIGECENNKSFMKVQCAPA  
CQSCHLIDIANRCPNLPDAIPGLKEGDLNKMFERIVEEAPGNRTLTDQDREKLALLEVPE  
YYVTVLSRPSEVPATEANIISDRKLPWPVITLDNFLTDEECDSL IQHGYEAGYKRSQDVG  
KQKFDGMLESKLESGRTSENAWCTTRNGCRHATVPKRVLDRLANVVGIPPENSEDLQILK  
YEKGQCES  
>comp14382\_c0\_seq43; 190 152 826 LEN=1876; translated  
MKVVAVFRALVTLFFQKVDSDQECGANGDCDSHQRCPLWEIEGECYRSPAYMANICPVSC  
SGMKGAPARTECYDVHKNCSWAEVDECETNNAVKNYCPLSCGRCTAKATINTVAENTGC  
GDDNENCSAWADLGECDKNPRYMLEKCRKSCGVCHGTVTSTEKTQTKDFVDLIQRTANFG  
VTQTASGAQKMTTLDHMEKMMNYLGSDDYKSLPSQIKMHCKNQV

>comp14382\_c0\_seq44; 121 1307 1780 LEN=1780; translated  
MFERIVEEAPGNRTLTDQDREKLALLEVPEYYVTVLSRPSEVPATEANIISDRKLPWVI  
TLDNFLTDEECDLSLIQHGYEAGYKRSQDVGKQKFDGMLESKLESGRTSENAWCTTRNGCR  
HATVPKRVLDRLANVVGIPPENSEDLQILKYEKGFYN  
>comp14382\_c0\_seq45; 306 407 1570 LEN=2049; translated  
MANICPVSCSGMKGAPARTECYDVHKNCSDWAEVDECETNNAVKNYCPLSCGRCTAKATI  
NTVAENTGCGDDNENCASAWADLGECDKNPRYMLEKCRKSCGVCHGTVTSTEKTQTKDFVD  
LIQRTANFGVTQTASGAQKMTTLDHMEKMMNYLGSDDYKSLPSQIKMHCKNQNELCSFWA  
GIGECENNKSFMKVQCAPACQSCHLIDIANRCPNLPDAIPGLKEGDLNKMFERIVEEAPG  
NRTLTDQDREKLALLEVPEYYVTVLSRPSEVPATEANIISDRKLPWVITLNDNFLTDEEC  
DSLQIHYEAGYKRSQDVGKQKFDGMLESKLESGRTSENAWCTTRNGCRHATVPKRVLDRL  
ANVVGIPPENSEDLQILKYEKQCES  
>comp14382\_c0\_seq46; 193 1205 1984 LEN=2418; translated  
MFERIVEEAPGNRTLTDQDREKLALLEVPEYYVTVLSRPSEVPATEANIISDRKLPWVI  
TLDNFLTDEECDLSLIQHGYEAGYKRSQDVGKQKFDGMLESKLESGRTSENAWCTTRNGCR  
HATVPKRVLDRLANVVGIPPENSEDLQILKYEKGFYNTHHDYIPYQKMRQCGPRILTF  
LYLSDVEAGGGTDFPKLGITVMPKKGRALLWPSVYNAEPMNEDRRMKHQALPVVAGTKFG  
ANAWIHMYDYQHPQENGCN  
>comp14382\_c0\_seq47; 278 853 1599 LEN=2078; translated  
MTTLDHMEKMMNYLGSDDYKSLPSQIKMHCKNQNELCSFWAGIGECENNKSFMKVQCAPA  
CQSCHLIDIANRCPNLPDAIPGLKEGDLNKMFERIVEEAPGNRTLTDQDREKLALLEVPE  
YYVTVLSRPSEVPATEANIISDRKLPWVITLNDNFLTDEECDLSLIQHGYEAGYKRSQDVG  
KQKFDGMLESKLESGRTSENAWCTTRNGCRHATVPKRVLDRLANVVGIPPENSEDLQILK  
YEKGQCES  
>comp14382\_c0\_seq48; 278 853 1599 LEN=2465; translated  
MTTLDHMEKMMNYLGSDDYKSLPSQIKMHCKNQNELCSFWAGIGECENNKSFMKVQCAPA  
CQSCHLIDIANRCPNLPDAIPGLKEGDLNKMFERIVEEAPGNRTLTDQDREKLALLEVPE  
YYVTVLSRPSEVPATEANIISDRKLPWVITLNDNFLTDEECDLSLIQHGYEAGYKRSQDVG  
KQKFDGMLESKLESGRTSENAWCTTRNGCRHATVPKRVLDRLANVVGIPPENSEDLQILK  
YEKGQCES  
>comp14383\_c0\_seq1; 412 242 1024 LEN=2165; minus strand; translated  
MSDLANLHSHLSTDRVGLVQASTLGALEALLQFLRVDTDPPIPVSAIGIGTIHKRDVTK  
ISIMNEKGHPYATILAFDCDIEKEAREHAAEMGVRIMTADIIYHLFDQFTRFMDELTA  
RREEAAAVAVFPSIIKILPQHVFVNQKDPDIVGVEVVEGILKIGTPLCVPAIGGLHVGVKVT  
SIEMNGKEQNTARKGQSVAIKIVNESNPNTITYGRQFDSSHSLSYTLTRASIDALKLNFKD  
ALEKEDWRLVVMMKKVFCII  
>comp14384\_c0\_seq1; 414 1 1723 LEN=1983; translated  
XQHEHVHGLPPLAHAASSNDSTCTVILPHRSRMPSPPTTKPVLLERLLGTSNYNVLLAVS  
GNIISWFVATLVP SRLPYLLPFIPEEQASDENDGAKASDLGGEKTDRRTRCVAIGRPGGM  
EQLRIIRLKEGHATRGYNVEIPGCSSGSPFVDSLILDRKETKEGDPSTEEGDQPSLVVLR  
ICAFSINYADCCIRWGLYESANRFVGYPIVPGFDVAGVVEKVISSDAATETSSSPPQLKV  
GDRVYGATFFGSYSTRCLIPANQLRKIPEGLSFAEAAALPAVSLTALYALHLGGRFPFAT  
NVRHETNLPTRPSSEITVIAPSNRSILIHSAAGGVGSMVMQAKLLGLSPVVGVVGRTA  
KVEEAKALGCDVVIDKQSLREAAAEGSAKAPGTMWESIRAAGPPDGYSIIADPNGVATLQ  
DSFDHLCPTGRLIVFGFHSNLP MGRDSLNPMEWVRMVFRASKMPAFDPMELVTSNKSVLG  
FNLSFFASETDMLNPMYDQIERWLSLPKQEPQOGKSTTDTAATGNEPKQGLRLRCPRVTE  
MPMERIGEAHQLIQSGTTVGKLVMIATNDDDDDDV  
>comp14386\_c0\_seq1; 453 283 1939 LEN=1964; translated  
MIRPIGSAVLWWCLASLSLSLYLSLSSTKHDWAVSAGSASANPLVRSRSPESPSSDRAVP  
GLGGERAGAHFHCADGGNAGGGEGLSPLMLCLRPTNPRGRLSLQTLGRRNHGSKEEKNHH  
AAHENPETPGKSESPRCCWNLRNATAVSPPLGGRNGRTLSPRSDAEPDTPGNATGTPG  
KDSSGLRLLSRRLDLLRAAERVRNNEIPLPQTIAGLFQPPQAQPRRHIRIVAFRFDGAVPD  
TPLPPPPPPRTADSRSPRAGPGVDLTGRWRPARTISSDLVDYEAFLAECSDAISYWTR  
RLASSSVVSRQELLAEQSDGGRFLELVDVHPLSSGGWNRTFVAGEGSADTVYRPRWNRL  
EDPQGNPILVQAYWQSNQTVHTTTSRPIDGGGDTDERKGSADDPGWVHTHMYLWEGGSE  
NESERENERRVMVETTFHSTPFPSAPEVDGSPGSRETAERAAEASRRAPQRECPGGGKK  
SASERRNKRNEPTNQGRMEGSESTARAQPDVAVGIGIALSIRFDSKSFVARSRGNQKLLFR  
RGKCLQQHYDF  
>comp14386\_c0\_seq2; 436 283 1900 LEN=1925; translated  
MIRPIGSAVLWWCLASLSLSLYLSLSSTKHDWAVSAGSASANPLVRSRSPESPSSDRAVP

GLGGERAGAHHFCADGGNAGGGGEGLSPLMLCLRPTNPRGRSLSLQTLGRRNHGSKEEKHH  
AAHENPETPGKSESPRCCWNGLRNATAVSPPLGGRNGRTLSPRSDAEPDTPGNATGTPG  
KDSSGLRLLSRRLDLLRAAERVRNNEIPLPQTIAGLFQPPQAQPRRHIRIVAFRFDGAVPD  
TPLPPPPPPRTADSRSPRAGPGVDLTGRWRPARTISSSDLVDYEAFLAECSSDAISYWTR  
RLASSSVVSRQELLAEQSDGGRFLELVDVHPLSSGGWNRTFVAGEGSADTVYRPRWNRL  
EDPQGNPILVQAYWQSNQTVHTTTSRPIDGGGGDTDDPGWVHMYLWEAGSENERVMV  
VETTFHSTPFPSAPEVDGSPGSRETVERAAEASRRAPQRECPGGGKKSASERRNKRNEPT  
NQGRMEGSESTARAQPDVAVGIGIALSIRFDSKSFVARSRGNQKLLFRRGKCLQQHYDF  
>comp14386\_c0\_seq3; 455 283 1951 LEN=1976; translated  
MIRPIGSGAVLWVCLASLSLSLYLSLSSTKHDWAVSAGSASANPLVRSRSPESPSSDRAVP  
GLGGERAGAHHFCADGGNAGGGGEGLSPLMLCLRPTNPRGRSLSLQTLGRRNHGSKEEKHH  
AAHENPETPGKSESPRCCWNGLRNATAVSPPLGGRNGRTLSPRSDAEPDTPGNATGTPG  
KDSSGLRLLSRRLDLLRAAERVRNNEIPLPQTIAGLFQPPQAQPRRHIRIVAFRFDGAVPD  
TPLPPPPPPRTADSRSPRAGPGVDLTGRWRPARTISSSDLVDYEAFLAECSSDAISYWTR  
RLASSSVVSRQELLAEQSDGGRFLELVDVHPLSSGGWNRTFVAGEGSADTVYRPRWNRL  
EDPQGNPILVQAYWQSNQTVHTTTSRPIDGGGGDTDERKGSADDPGWVHMYLWEAGSE  
NESERENERVMVETTFHSTPFPSAPEVDGSPGSRETAERAAEASRRAPQRECPGGGKKS  
SASERRNKRNETNQARKDGRKRVFSSRTARTQPDVAVGIGIALSIRFDSKSFVARSRGNQK  
LLFRRGKCLQQHYDF  
>comp14386\_c0\_seq4; 438 283 1912 LEN=1937; translated  
MIRPIGSGAVLWVCLASLSLSLYLSLSSTKHDWAVSAGSASANPLVRSRSPESPSSDRAVP  
GLGGERAGAHHFCADGGNAGGGGEGLSPLMLCLRPTNPRGRSLSLQTLGRRNHGSKEEKHH  
AAHENPETPGKSESPRCCWNGLRNATAVSPPLGGRNGRTLSPRSDAEPDTPGNATGTPG  
KDSSGLRLLSRRLDLLRAAERVRNNEIPLPQTIAGLFQPPQAQPRRHIRIVAFRFDGAVPD  
TPLPPPPPPRTADSRSPRAGPGVDLTGRWRPARTISSSDLVDYEAFLAECSSDAISYWTR  
RLASSSVVSRQELLAEQSDGGRFLELVDVHPLSSGGWNRTFVAGEGSADTVYRPRWNRL  
EDPQGNPILVQAYWQSNQTVHTTTSRPIDGGGGDTDDPGWVHMYLWEAGSENERVMV  
VETTFHSTPFPSAPEVDGSPGSRETVERAAEASRRAPQRECPGGGKKSASERRNKRNETN  
QARKDGRKRVFSSRTARTQPDVAVGIGIALSIRFDSKSFVARSRGNQKLLFRRGKCLQQHY  
DF  
>comp14387\_c0\_seq1; 396 123 2024 LEN=2090; translated  
MKRFALAISSLLWLRKASSLTIGSSPPTKQPTNSAVATPKVVWFRDHALSVRDNDAFYNA  
VKSTSGVSSKIGVGTNNNTNENGVVPIPVYIWNSSNSNSDDRSLDYPVNAMTGGTASDV  
FIANALNSLNQTLFGRLSVGLLSGKAQPELIADELATICNNSGSFEIHYMESPNQKFEDA  
LRDQLVIRNLVPCSVKSGYSLLDYTEVPPWKEIISNHPFRSPLIPFVDYLMKRLEQTPPP  
LPKAEPTALEDSIGNLSRNVVTKPISVEDLLNIVGYSQGRTDWGSIIAGAWPATEKDAMN  
ALSSFLDSLPISSKSAEDTEERQNESKRTHLASRLSPYLARGLLSPRQVYCAMVLSSSDY  
AKKDKASFVRRICWRDYTYAVSSFLPDAIRGRPIREGYSLDKCNGADEDQNSESDRSLGF  
ELWKNKATGFPLVDAGMRQLTKEGWMPQKVRLATSTCLVEGLGISWEEGMQHFAEYLVYD  
DGAINSNMWMNAGCVGFDPYVGTDYKRRPYWDKDGDYVRQWCPELKDLPDYEVAEAQR  
GIGTFKVDCLYEPWSAPEEALRTSGVVLGETYPNRCCDERIERKRFFEKIRKLRAQWPSS  
RTDERGRDIVRLGRDPKSESIGMFTPRALLISK  
>comp14387\_c0\_seq2; 139 1 729 LEN=795; translated  
PDAIRGRPIREGYSLDKCNGADEDRLSGLFELWKNKATGFPLVDAGMRQLTKEGWMPQKVR  
LATSTCLVEGLGISWEEGMQHFAEYLVYDYGAINSNMWMNAGCVGFDPYVGTDYKRRPY  
WDKDGDYVRQWCPELKDLPDYEVAEAQRGIGTFKVDCLYEPWSAPEEALRTSGVVLGET  
YPNRCCDERIERKRFFEKIRKLRAQWPSSRTDERGRDIVRLGRDPKSESIGMFTPRALLI  
SK  
>comp14388\_c0\_seq1; 580 550 2193 LEN=2500; translated  
MPTYNPNEDLIEQTFGDRKLVVVTGTSSGLGRKAALALLRSGEYHVVGAVRDLDKMEAVA  
EIDGFDMDHFTPMCEELNSFASVRKFCDSLDEFRMEKPIDRLICNAGVYQPTLDYAKWSV  
DNHEQTMQINFLSHFLMISKLIPIGMMDCSDPRVIMVGSVTGNDNTVGGGGVYPIADLHEL  
EGFERGFKNPIPMADGYGFIGAKAYKDSKLCMMMANFLHYKYNKLTGVTFCSMYPGCIA  
ESPLFREKREWFRTYFPIFMKFITGGFVGEHEAGQRLFQVAHDPRCSKSGVYWSWNGGPR  
EGRGAEALEKGGQISGGGGAGGWDISIFENDQSSKVLNIDTAAKLFDTSTKITGAEWPTL  
KQITSPCPTLKVIGAVTQGMVKREELKRMRELGRPGMSDDDLEVMDKAIELAEAEELAAT  
QAKTVTRVVEAKKPAKKFSKRQQVVMFADKAVGFVLKNTIGRVAGFIGRLLGQIPETA  
KNGSYHEEIEVVEEEYAEATATVAAVVDPEGVELLEEAISEQLKEDASSSSKIVTDTED  
KDILVSA  
>comp14389\_c0\_seq1; 384 1 1322 LEN=1459; translated

XYSLTRWYPTEEEETGSCNIPTTPEVKQNMKTFFMLLLLTAVTKGFRQHLGQHRRRIYNS  
KKGLFSSALEDDAHSSMTISSDKKYRFLTEDNAGGIGKIADDYDVFLLDMMWGMHGDGIRP  
YKGVPEVVQKLKEAGKLIILSNSSKRRENSVKMLKLLGFSFDYDFEEIITSGEVAHLL  
RSIASSSQDEDSKEFKSSWVPKNI PGAFQELRESKREQLSAFCFGSGDGEDYLNSCGWA  
LAENIETADLIVARGTFLVLSATECADKKVDEDAYWSAYRSTLERASKLKNPPPMVVCNP  
DKVRPDADKSPMPGTIGVAYQGLLQTAGMSAEDLILSLGKPFPSVYEIALSSIENSNDI  
QPRVAMVGDALET DVTGATATGIDS IWVVEDGIHNQEISVASSLAEGCEAALQDFNKHSE  
DTYAKGLSVSPTVVLPHFQW

>comp14390\_c0\_seq1; 474 296 1687 LEN=1907; translated  
MWQKQRRVTQISLPPSTKCTTSNCFLIAVSFFILALKIDGVVGEDSDSYNEDAEEKQRVH  
DVIVEEWFDLVRYLVGLGLCIFGLVGMVYFHQFASYHFVKQYSRPTNTEHRVGRVLTCKPL  
AVCASETRRKQYRKKNRKAPKVASVLPKSKTGKVAEGYASSITDYVREEDIERQRQQLGM  
ECASSEQQHTDYRMLVVYTVPKESPNSPMCCNPIENEMVINCA NSFSVNSCAPDVL EIEE  
VETYRSRSLPPNRKEGQNYRQFKHAMKGSTTSSYIPRNDDEYFRWFQTTNPKGIDSDID  
LILLKGEPKSACTPELIESHLEQIRIGGKTKSDKRKYKSVSMVGIALVVTIIVLALVCV  
VEVLSMPNPEIQRPIGFTVLGVYFVMSIASAYLFAKLRFQYKQDVFLSAFSVPLVDRPQ  
ATDRNV DANANLRGNASDGADDSIALNSIRHHFPSRTEERLLS

>comp14391\_c0\_seq1; 424 700 1653 LEN=2105; translated  
MNGGGRSKFGASSGPGSVQTIIGGVINHGKEDLWSPSQSNHYHATLQKGENTLEASLARV  
LMKSIVATNGKFDADHFRDAYVRFMTTPGSHNDTYASTCHRMFFANLVFRRLPPKDCPDN  
DQHNVDTIDGLVLPTIVALAGSFRGGSP E IERSASDCAA VTRRSTVLERIAASWSGVVVE  
AVRSPSDEGFREALDRFSMETIRRRPNDRVRDDTTMSACYLGSSLPGLIDMVAKYSPTSG  
STDPGDRVWEGLLANANVGGENVHRGSSMGAILGARAGAARLPSKLVAGLYPRSELEAEI  
DDFVRAVMPKPSQESHQ

>comp14391\_c0\_seq2; 498 181 1413 LEN=1865; translated  
MGIFSTFQKKTVAGSVVTGNAPGRHASSVASGSELEDRLRGALWGFLAGDALASPTHWFY  
GGRRQV VSEYGHAITDYTKPNQHLSGSILNKSDMNGGGRSKFGASSGPGSVQTIIGGVIN  
HGKEDLWSPSQSNHYHATLQKGENTLEASLARVLMKSIVATNGKFDADHFRDAYVRFMTT  
PGSHNDTYASTCHRMFFANLVFRRLPPKDCPDNDQHNVDTIDGLVLPTIVALAGSFRGG  
PEIERSASDCAA VTRRSTVLERIAASWSGVVVEAVRSPSDEGFREALDRFSMETIRRRPN  
DRVRDDTTMSACYLGSSLPGLIDMVAKYSPTSGSTDPGDRVWEGLLANANVGGENVHRGS  
SMGAILGARAGAARLPSKLVAGLYPRSELEAEIDDFVRAVMPKPSQESHQ

>comp14392\_c0\_seq1; 528 75 2344 LEN=2886; translated  
MIHRHRFSAVANKQIATKMDPPPEQKSFDDKSEIDAFDHCLCPTQSTLLGLPPLLRTSLA  
IYRXTAMKSRKPKQKEQSDRQGHYSGPNETKEKNGTNGERLLEPHGDSGVSKIETN  
TARDRTANLHTGRATLSNHPVTAREDEHSHKPHAPSPHNPPFIYFPLNYSFPPNNQF EAP  
NTN NYKYTGP SHYLPGHSYPPRHYFSSYHPSFCAPAFCAPAFYAPARMAPFDDKTYVAS  
NSNSNIHKNKEVIRPLAVKTTSDRTNPRRRDEEVLPRPSPPA CLAPPVPPPPPTSYNSGF  
FLDRLGKSTHRHRHFRFYDEDDSAERAQAHG YDHDYDHDGCTSSAATPQRSNQSATVASR  
ATRSHEQGRYSPVAVPPPRTHPCGSTAGDARADAPPDPHPCQHDRHYGYPPPAYSSGWY  
GPEYAPQYPPQAYDQRYFSPSPPPPLPDYRQGYASSNSFSLPSGSPSPPPAWCEGG  
NDEGSRRRSPCVRHSGHPVSTPGGFGRSGCPSPHTPAAQGSIERPETPCSDSSENAISRV  
TPVGKDGRRKVSPEAVRINFASSTKAI VTPGDKRKTSASTFLPSLFPVELRDTDIVCGR  
GAPTNYHAGNEEFRQLVSEYQTDYFIAKRSEKPNIAMNIMEVLQSRGARFVRRQKGRRTT  
PTPQGGNTKGASSPSQWVEVPSKIAYEKVCQALRERTSNIHKQMLSTPSLVNTMRTSRIQ  
NVLGCNSRTPGRHSGGRINKGGTAIDEGKENGDLAN

>comp14393\_c0\_seq1; 136 1 689 LEN=999; translated  
XIGDWDVSSVTEMYDMFRDSAFNQPIGNWNVSSVVTMNMKMFHNNVDFNQPIDGWDVSSVT  
SMNLMFDSAKTFNQCLGSWGSKTPSSVVVNDMFVLTGCPGEWEPNPNRGPWCQTSKESCG  
TLCTNKSSFKSEGKRMTCEELQDLGKNRKKMCRKKRVGKACPGVCNTRCVCKDRAKFRI  
KKNENHDFKGYECKNVGKDEKQPS CETELKKRRLVKDLCEKCGYCLA

>comp14393\_c0\_seq3; 164 1 527 LEN=527; translated  
DWDVSSVTDMYRMFEYNEYFDQPIGDWDVSKVTDMSYMFYQNKVFNQPIGDWDVSGVENM  
ADMFLYGNKFNQPIGDWDVSNVTNMYGMFLGGKIFDATR FNQPIGDWNVSKVSNMGLMFK  
GTSHFNQPIQNWVSSVTTMDGMFMYFFNQPIGDWNVSSVKEMVSMFHYNRVFNL

>comp14394\_c0\_seq1; 554 464 2500 LEN=2582; translated  
MIRVEAQARSAFAIRSGSIFLAFVGSQNHLSAFSGIRQSIHGAKRELRSGRIQTTTAS  
PCPLAFPPTKPLVCCQFRVYSSSLNALRKNGGDGS MRSETEESIPLVFLHGIKGSHLAF  
LGTKGDVKPQRSWLTGLGLLNFPDRDDHDPERDISLPLSYTFQKADGDGNTITSAPIQDK  
GRHFVDGTVDHVVELTGMLPGKGGALLSNTGNLDFPFYGHATKFLKVNDAYNANTDRN

GCGNRNEIGSDTDQEQDGSIAKIMEPRPRTTFSYDWRRLNSELSEEFHEFCETEFPGGR  
PVQVVAHSLGGLIAYTAMKKHPEKYKPGGVLVGVVFGTGIQYFQDMHKGYFTELGTCTCRQF  
LPPVQFTFSSHWMFFPQIQEDI GDSFVDVSEYFSSDGESDDDTIAFEADRSTIGKKISSP  
ADDEESKWRPASP GKPIEIDFYDPDEWEKNEIGIFDPAYRHKIDQDDKGI SEYKQHMKL  
QLEEARAWRNTVLAPWEDEKVARKKMPPLTICSTNSIPTVNQILRRRARRARATSDAAEK  
FSRSLLSLLEKATKQEGKVAEAKSFPRSFLSLLEKATEKDNLKKDKIPACQWEYDYASGR  
TVPDGRIDYDKSFPPLGTLFKTVDLGSLHAKQFCWEESGGDLGKVWKEVNEQLKEYQSR  
DSAERVKKKDSLHPTGRR

>comp14395\_c0\_seq1; 540 1 2318 LEN=2642; translated  
XTTTDIDPYLISLCRQLES PRDQINLGQSEGNCSISLGFLSLSIYTSFELKYLSSSLGK  
CRLFHLEIEGVDDLWDWPILNHNHCVLKELVVTVKSVTALEHLVNALCHNKTLTNELEDY  
YHLDDTII EERENNHYNDYCEDIGEIPNNEHLNENHASSTALDERFLKALLPLQHVVLRG  
ITPSRALDIAVFDEKNRAISCSWEYLTLNENCDLTGDNTTWLTQC IANLKKIEIENCQLSE  
STMKFLSEAYLTI STPRFATSRESHGHRGRELRRKNALEVL DLSNNDWLLPTCDVGLEV  
DNDCQISTPEYFDAYGVQPERRKALPSPSCMTLLASWLDLSNLIELDLSNPNQLFDRGM  
SGNCNRSMIDLCGTVNQSLKRLSLRNCCLIPNDLNHLVNTFCWLEGLDLSENPELSSDLQ  
PLSQLEYLTELVLNMFVNDSDNSFEFERLLCDEDFGICTLEQGLIDLLHDLLSGESSNF  
DNLGGNPKKSDFGQLRRKPLERLNLSGNILSKKTMNILSMFKSLKILILMGCQINGEGIL  
ELLSATHKDSLRELYIGSNTISDTGVLALAKSLKRQRLPRLKVLDMESNVISVEAFRVF  
VEDGLIHNKRLEFVEVSSDGAISHNQQKTWNELEEIMNHNLLL NQAGRFTLYIDSNDNGN  
KNTDCEIEILHEFNNGRDTVNPEKNCVPMMTVPTNLWPF ILEDADAIYGPDALFYFLH  
KRPDLIFSSKLPPQTL SKIDTMQSADSLTTPIKSAPQTSSPKGVADVAAYL

>comp14395\_c0\_seq2; 540 1 2318 LEN=2627; translated  
XTTTDIDPYLISLCRQLES PRDQINLGQSEGNCSISLGFLSLSIYTSFELKYLSSSLGK  
CRLFHLEIEGVDDLWDWPILNHNHCVLKELVVTVKSVTALEHLVNALCHNKTLTNELEDY  
YHLDDTII EERENNHYNDYCEDIGEIPNNEHLNENHASSTALDERFLKALLPLQHVVLRG  
ITPSRALDIAVFDEKNRAISCSWEYLTLNENCDLTGDNTTWLTQC IANLKKIEIENCQLSE  
STMKFLSEAYLTI STPRFATSRESHGHRGRELRRKNALEVL DLSNNDWLLPTCDVGLEV  
DNDCQISTPEYFDAYGVQPERRKALPSPSCMTLLASWLDLSNLIELDLSNPNQLFDRGM  
SGNCNRSMIDLCGTVNQSLKRLSLRNCCLIPNDLNHLVNTFCWLEGLDLSENPELSSDLQ  
PLSQLEYLTELVLNMFVNDSDNSFEFERLLCDEDFGICTLEQGLIDLLHDLLSGESSNF  
DNLGGNPKKSDFGQLRRKPLERLNLSGNILSKKTMNILSMFKSLKILILMGCQINGEGIL  
ELLSATHKDSLRELYIGSNTISDTGVLALAKSLKRQRLPRLKVLDMESNVISVEAFRVF  
VEDGLIHNKRLEFVEVSSDGAISHNQQKTWNELEEIMNHNLLL NQAGRFTLYIDSNDNGN  
KNTDCEIEILHEFNNGRDTVNPEKNCVPMMTVPTNLWPF ILEDADAIYGPDALFYFLH  
KRPDLIFSSKLPPQTL SKIDTMQSADSLTTPIKSAPQTSSPKGVADVAAYL

>comp14396\_c0\_seq1; 958 81 1829 LEN=2871; translated  
MVRFLPIFGGLWAAIAAYLRRRSLCFGLTNLGTIKVNFNPAFLSFDEFQSGGDALVITSF  
FTVKFGFEGGPPRPIPLAPDLVAKISVDENTSFDPEAVNAVEILTDQIPSSPPGPKTVW  
PNQALVAPGEVFPFEALVVAQGFLATPPFGRLSAIDLANGE EYIIDQSIGLGPQSRAYHN  
SVFYDMDGDGLLDIVTVRTGERVFP PPKPPTAGELVWFKNPGAGLQKDV EWE EGVLDGL  
GPDIEITNYDLGDGVPEFIATHFFTGDKITVYGVSDLMAADGGSSETPDWPSVVS GKAT  
IRSDVSTDQGKPFVKIVDLDD DGRVDILATNHQSDNCAFPTDIPGRVYAITPPSDAQD  
LYDASKWTRVLLDGIYPQSPPGSRASRLAPGKALS FYPSKKEELQKGRPWVVVGGDEA  
GKVWVFRPKKYSKWGYDINIIFDINDFYQGTTQANLPDKPLITVSTIGSVATRYDR TDE  
DGMTEIYIPVFEAQDIHVFSFRDFGRNGP GTGVKCLRDAQIACPPPGPPGGGGPPGGGG  
PPGGGGPLGGGGPPGVTS CP GK YDCDSWDI PLEEVGAEDLE

>comp14397\_c0\_seq1; 181 357 1409 LEN=1727; translated  
MKRVDGVLVQNPPAMPLLVVVVLYCSLMSMLRGYRPAFIIDWHNLGFTMLAKSSMIFATI  
ARFYEQLMAPLATSHLCVTDAMKTFIEKQFRINASKIYVVHDCPSSMFYPRSAKDNHALM  
TKIHGKVCAGCPRSRYQHLDPCYQTLFTEKNLKVGTNEFDEYGRSGRPALITSSTSWTP  
DEDFGVLLKALERLDGTLTELKSSLKVVVVVTGKGPLKGFYQKEISMLKFKHVAIVTLWL  
EPADYPRLLACADVGISLHTSTSGIDLPMKILDNFGCEVPVCAFNF PCLKELVEDDVNGK  
IFNSISDLHDQLLVLLSPLDKYPSWPPHSFGDLAKYSRKL MGRKKWDSNW

>comp14397\_c0\_seq2; 181 511 1563 LEN=1881; translated  
MKRVDGVLVQNPPAMPLLVVVVLYCSLMSMLRGYRPAFIIDWHNLGFTMLAKSSMIFATI  
ARFYEQLMAPLATSHLCVTDAMKTFIEKQFRINASKIYVVHDCPSSMFYPRSAKDNHALM  
TKIHGKVCAGCPRSRYQHLDPCYQTLFTEKNLKVGTNEFDEYGRSGRPALITSSTSWTP  
DEDFGVLLKALERLDGTLTELKSSLKVVVVVTGKGPLKGFYQKEISMLKFKHVAIVTLWL  
EPADYPRLLACADVGISLHTSTSGIDLPMKILDNFGCEVPVCAFNF PCLKELVEDDVNGK

IFNSISDLHDQLLVLLSPLDKYPGSWPPHSFGDLAKYSRKL MGRKKWDSNW  
>comp14397\_c0\_seq3; 181 511 1563 LEN=2049; translated  
MKRVDGVLVQNPPAMPLLVVVVLYCSLMSMLRGYRPAFIIDWHNLGFTMLAKSSMIFATI  
ARFYEQLMAPLATSHLCVTDAMKTFIEKQFRINASKIYVVHDCPSSMFYPRSAKDNHALM  
TKIHGKVCAGCPRS WYQHLDPCYQTLFTEKNLKVGTNEFDEYGPRSGRPALITSSTSWTP  
DEDFGVLLKALERLDGTLTELKSSLKVVVVVTGKGPLKGFYQKEISMLKFKHVAIVTLWL  
EPADYPRLLACADVGISLHTSTSGIDLPMKILDNFGCEVPVCAFNFPCPKELVEDDVNGK  
IFNSISDLHDQLLVLLSPLDKYPGSWPPHSFGDLAKYSRKL MGRKKWDSNW  
>comp14397\_c0\_seq4; 181 357 1409 LEN=1895; translated  
MKRVDGVLVQNPPAMPLLVVVVLYCSLMSMLRGYRPAFIIDWHNLGFTMLAKSSMIFATI  
ARFYEQLMAPLATSHLCVTDAMKTFIEKQFRINASKIYVVHDCPSSMFYPRSAKDNHALM  
TKIHGKVCAGCPRS WYQHLDPCYQTLFTEKNLKVGTNEFDEYGPRSGRPALITSSTSWTP  
DEDFGVLLKALERLDGTLTELKSSLKVVVVVTGKGPLKGFYQKEISMLKFKHVAIVTLWL  
EPADYPRLLACADVGISLHTSTSGIDLPMKILDNFGCEVPVCAFNFPCPKELVEDDVNGK  
IFNSISDLHDQLLVLLSPLDKYPGSWPPHSFGDLAKYSRKL MGRKKWDSNW  
>comp14397\_c0\_seq5; 170 357 1523 LEN=2009; translated  
MKRVDGVLVQNPPAMPLLVVVVLYCSLMSMLRGYRPAFIIDWHNLVSPKYSFPPFICAVYI  
LSSKDSSFVHLHAKNDLKN CIRKGF TMLAKSSMIFATIARFYEQLMAPLATSHLCVTDAM  
KTFIEKQFRINASKIYVVHDCPSSMFYPRSAKDNHALM TKIHGKVCAGCPRS WYQHLDPC  
YQTLFTEKNLKVGTNEFDEYGPRSGRPALITSSTSWTPDEDFGVLLKALERLDGTLTELK  
SSLKVVVVVTGKGPLKGFYQKEISMLKFKHVAIVTLWLEPADYPRLLACADVGISLHTST  
SGIDLPMKILDNFGCEVPVCAFNFPCPKELVEDDVNGKIFNSISDLHDQLLVLLSPLDKY  
PGSWPPHSFGDLAKYSRKL MGRKKWDSNW  
>comp14397\_c0\_seq6; 170 511 1677 LEN=2163; translated  
MKRVDGVLVQNPPAMPLLVVVVLYCSLMSMLRGYRPAFIIDWHNLVSPKYSFPPFICAVYI  
LSSKDSSFVHLHAKNDLKN CIRKGF TMLAKSSMIFATIARFYEQLMAPLATSHLCVTDAM  
KTFIEKQFRINASKIYVVHDCPSSMFYPRSAKDNHALM TKIHGKVCAGCPRS WYQHLDPC  
YQTLFTEKNLKVGTNEFDEYGPRSGRPALITSSTSWTPDEDFGVLLKALERLDGTLTELK  
SSLKVVVVVTGKGPLKGFYQKEISMLKFKHVAIVTLWLEPADYPRLLACADVGISLHTST  
SGIDLPMKILDNFGCEVPVCAFNFPCPKELVEDDVNGKIFNSISDLHDQLLVLLSPLDKY  
PGSWPPHSFGDLAKYSRKL MGRKKWDSNW  
>comp14397\_c0\_seq7; 170 357 1523 LEN=1841; translated  
MKRVDGVLVQNPPAMPLLVVVVLYCSLMSMLRGYRPAFIIDWHNLVSPKYSFPPFICAVYI  
LSSKDSSFVHLHAKNDLKN CIRKGF TMLAKSSMIFATIARFYEQLMAPLATSHLCVTDAM  
KTFIEKQFRINASKIYVVHDCPSSMFYPRSAKDNHALM TKIHGKVCAGCPRS WYQHLDPC  
YQTLFTEKNLKVGTNEFDEYGPRSGRPALITSSTSWTPDEDFGVLLKALERLDGTLTELK  
SSLKVVVVVTGKGPLKGFYQKEISMLKFKHVAIVTLWLEPADYPRLLACADVGISLHTST  
SGIDLPMKILDNFGCEVPVCAFNFPCPKELVEDDVNGKIFNSISDLHDQLLVLLSPLDKY  
PGSWPPHSFGDLAKYSRKL MGRKKWDSNW  
>comp14397\_c0\_seq8; 170 511 1677 LEN=1995; translated  
MKRVDGVLVQNPPAMPLLVVVVLYCSLMSMLRGYRPAFIIDWHNLVSPKYSFPPFICAVYI  
LSSKDSSFVHLHAKNDLKN CIRKGF TMLAKSSMIFATIARFYEQLMAPLATSHLCVTDAM  
KTFIEKQFRINASKIYVVHDCPSSMFYPRSAKDNHALM TKIHGKVCAGCPRS WYQHLDPC  
YQTLFTEKNLKVGTNEFDEYGPRSGRPALITSSTSWTPDEDFGVLLKALERLDGTLTELK  
SSLKVVVVVTGKGPLKGFYQKEISMLKFKHVAIVTLWLEPADYPRLLACADVGISLHTST  
SGIDLPMKILDNFGCEVPVCAFNFPCPKELVEDDVNGKIFNSISDLHDQLLVLLSPLDKY  
PGSWPPHSFGDLAKYSRKL MGRKKWDSNW  
>comp14398\_c0\_seq1; 189 616 1254 LEN=1686; translated  
MTATDSVNMGEDVLKGSLLTILGSAMHGLTYVICEAVMTVGEERLTAAQNNFVQGSVAGG  
VFLGWQVVYTLPHSAELIRIPMHNAGTTIWIYALILLAGFGMSNVVHSYTYFYTLHHPGG  
ATSAGVMKGVQAVLVFVLTNLLYCNRIGGPEMCF SNGK FISCVTVTGGVIGYGHATKQAL  
ATTAKDGKEDDAKKGSEIEPVDETSKLLSMSP  
>comp14398\_c0\_seq2; 189 467 1105 LEN=1537; translated  
MTATDSVNMGEDVLKGSLLTILGSAMHGLTYVICEAVMTVGEERLTAAQNNFVQGSVAGG  
VFLGWQVVYTLPHSAELIRIPMHNAGTTIWIYALILLAGFGMSNVVHSYTYFYTLHHPGG  
ATSAGVMKGVQAVLVFVLTNLLYCNRIGGPEMCF SNGK FISCVTVTGGVIGYGHATKQAL  
ATTAKDGKEDDAKKGSEIEPVDETSKLLSMSP  
>comp14398\_c0\_seq3; 189 791 1429 LEN=1861; translated  
MTATDSVNMGEDVLKGSLLTILGSAMHGLTYVICEAVMTVGEERLTAAQNNFVQGSVAGG  
VFLGWQVVYTLPHSAELIRIPMHNAGTTIWIYALILLAGFGMSNVVHSYTYFYTLHHPGG

ATSAGVMKGVQAVLVFVLTNLLYCNRIGGPEMCF SNGKFISCVTVTGGVIGYGHATKQAL  
ATTAKDGKEDDAKKGSEIEPVDETSKLLSMSP  
>comp14398\_c0\_seq4; 189 642 1280 LEN=1712; translated  
MTATDSVNMGEDVLKGSLLTILGSAMHGLTYVICEAVMTVGEERLTAAQNNFVQGSVAGG  
VFLGWQVVYTLPHSAELIRIPMHNAGTTIWIYALILLAGFGMSNVVHSYTYFYTLLHFPGG  
ATSAGVMKGVQAVLVFVLTNLLYCNRIGGPEMCF SNGKFISCVTVTGGVIGYGHATKQAL  
ATTAKDGKEDDAKKGSEIEPVDETSKLLSMSP  
>comp14399\_c0\_seq1; 591 124 2249 LEN=2798; translated  
MSLVSERSNPSASRLSGCSKRTVAIDEDFYNSIGRAYSSGEDDDSDGAYDDDGGISTENL  
GQWSSIKGGDTAGARAPEATLSKASSIAVAAATNPSRMGSTSERTTQNDAAHNGKHSLYT  
TGQSNLHEPYRKVPANPEAPPTAFVSDVEPQAALSCAGPLVGAIASCEARSAPDAMDDAE  
QGVGGSMDVLERRTCLQQQEQPMEIEESCPRKSFGLEDRIDKARISGSNDGDSYHGSIS  
TASSINKDRGVEVRLWICDRVDGTVCVSDEEQQRFPERDTRPPCFLCLPSPILTIFPWL  
LEENLFCVTVGKFGFFGRGYRGEAPSRHGKTIQSTTADESEAVDIDVGFRRTRFLMHNLR  
LNLGFLVTVLATVALTKSSAGLLELASFGRTNLPDSNYKKEEAGSVASSPVNLYMGLLA  
MGIDNPNGIENGSSRRTKVVPFQDFCTTQGIDQFLPEDDCHKCAQISVWIIIVGFVVILLS  
YIPTFTTGTLLRLYEHYDMNC SKVWAGFWSFLGLVGYAVVLYCYSGVCLES LYHGEM IYTG  
GREVYTS DQFESIAGDPDERIVRVTFEWMGIGQVLFVGFALKAVDFVANCCIATPAIT  
RSRSAQWDYEDLSLLTKKNAEVXMSLLPQDRTRSENPEPSRGGSKPRTAVGF LCPGGKS  
PSSGDPRRGYRCSGGQTAEPLGFIVVAIDGAAAAVAISNPVCVPPQ  
>comp14400\_c0\_seq1; 771 180 1706 LEN=1805; translated  
MLS YFSSSSNGAEDSNDSDCAAKTEEISSEVLSSEPDCSATQTKSSPTAASFGEAHDVYC  
TKHGTLRASIHQVLTEACGKNEEIPWALPKRNQPSVLVEANEVAEFLLSKRGNNNGVAGT  
KAAATTPQKQSFASSLLMSPLKVVS AVASMMRDPDDD VDEWIQEGDDALLDDGDTGNSSS  
GSSAALALNVPVANPGATEAAIRCLEDEIETH TLEAPCVMGFSEWNAWARSALS KHQGNK  
EYQLSADDNDFLLRVLVGLGKACIIRRQDQAPKGLDLVVLSTAAMSKIDGSDDCVPEKL  
RIPVCLWDIQKAEAKIEKNLHDWSDQAAACTKKALQYKKKHQTKLATIQLAKRRAIQQRI  
DSDSRLQLQLLQTKNAIESAQSNRSMVDIMASSRLLKQLREETPLEEIDDTMDDLQSEL  
DDL RDVNNTLTSVNGNTATMGKDEEEELLRELEGLTVTSDPAASTPETKATPEKESSCAV  
PNVGTGLTETLQTSAIRDAITEKIPDLA  
>comp14401\_c0\_seq1; 309 168 1199 LEN=1636; translated  
MATFY SATGNNGQNGSFGGNQAGGYSSGTSGGNGFQKLQQQPQQQPFGFSNNVQQWQAQ  
PQGQQPYGQASQQQQAQPTAQPFWSPNVQQAATQAAAGFMAQAATGNLTSEKVL SQGMNE  
IQKAFGGGIPGMNYVMTMLRSYFAVDNRYVVRKMGKVLFPFTNKQWRRDQVEGPEIVNYA  
LPHSDENAPDLYIPIMSLVTYCLLSAFLYGTAGKFNPEVIADVISKFLTQIAEVLVIRG  
CLYAMQATIPFLDIFS YTYGKYLG L TICMLCGILFKYLEWGT VGYLLAFLWTASAAAWFM  
LKT MANNIPTQTASTG PQRDVVVLAFAASQVATMWFVVSQTKYL  
>comp14401\_c0\_seq2; 140 767 889 LEN=1326; translated  
MANNIPTQTASTG PQRDVVVLAFAASQVATMWFVVSQTKYL  
>comp14402\_c0\_seq1; 757 156 1532 LEN=1773; translated  
MSCLPFPSPFVDQVPVDKSNRAGLCAAGTCRIHPLTCANAHKDEYLAI IAKNKEQASVDG  
SSADKDEK KKKKMYMKQGVAMASDYMTKSLQLDPTVVSVQMSIESSTIVETDGCITACF  
LDAGCTHIAIDGTNLEALDAARIPRERIVASFGSIESCGKDEITAALALAATISVPVTNL  
EQVDAMSSVPDAHDKVI FELSSPDDAPATLEFIAAIAKKCKDHKGKIALVDPDATILGK  
SYCACARTDRPDGLYTTVVCTRNNEALGLVYSAVESI IAAFECARGVYWSRSRGG LWRKG  
DTSGHFQTLHRLDVDCDGAFRFTVTQRGDDVVAFC HLHTLTCWGE PNGLRHLEMTMQDR  
LKNAP EGSYTKR LFD DPELLRDKLV EEAQELSEAETKEEVAGELADVLYFAMARAVKAGV  
SIDD AVAVLDGRTRKVTTRKGD SKAFRIEEGAKILAKK  
>comp14403\_c1\_seq1; 212 1613 2183 LEN=2183; translated  
MSVATPSRGGKESENI VLSLDR LCHGFKVGEDEESNAKEN EYKNESTTRILFENVSFKLY  
SGDSALVMGPGSAGKSTLLRI IAGLTDADAQR IKLFGIAQDSFASMPRWRKRVRVYPQTK  
VEIPGTPNDFIRKISSFGTWNKNKNSVDDSSSLYLEMESTVTELTTSWIGIGINLLNSEWKF  
LSGGESQRILX  
>comp14403\_c1\_seq2; 303 1 1132 LEN=1273; minus strand; translated  
SHSDYDILMMPICYDKKNMVM DLLS QASRRAHHCNMTEYRFCIARQLRLTFFEFGFSRT  
SAQAFASYGKLLQSDNDVKNALRMAGLAREIMAKTDEISSMKSETLFVVGYWIEAWSY  
PREHVMETLQEAHSAGMAKGNIEIGFQCIVFCNIIAQSSGYPLEPVEKTGAQLIQQLSLY  
NVE SVLTYLMASRVSVLCLMGKRKIDWNELEPPEDVGRGESDYTTVFSLISRLELGVLF  
GNIEFAVRMSESISSLVGFERSYIVVAKNSFILDLLIGAVMKALNEDDLADQYLNQACKL  
WKEYGAHV KVRQLSLQRNPSATEEHEPSVSFRSNFLNSKDISKSCAAVDLELLLVGIEMKK

DIKFDASKSDLSFQRS

>comp14403\_c1\_seq3; 78 1 397 LEN=397; minus strand; translated  
XTIITVRDVLILPSRDHRIHACAFVEIYASLIRSFWPGSWDIQIATERSLVQNSLTVFST  
CIFLVWSSADVDSSSRITLFSNEANEIAIRILCDSPPDRNFHSELRRLMPMPQLVVSSV  
TVDSISKYKEDES

>comp14403\_c1\_seq4; 212 1367 1937 LEN=1937; translated  
MSVATPSRGGKESENIIVLSLDRLCHGFKVGEDEESNAKENYKNESTTRILFENVSFKLY  
SGDSALVMGPGSAGKSTLLRI IAGLTDADAQRIKLFGLAQDSFASMPRWRKRVRYVPQTK  
VEIPGTPNDFIRKISSFGTWNKNKNSVDDSSSLYLEMESTVTELTTSWGIGINLLNSEWKF  
LSGGESQRILX

>comp14403\_c1\_seq5; 368 1 1380 LEN=1521; minus strand; translated  
SHSDYDILMMPICYDKKNMVMMDLLSQASRAHHCNMTEYRFCIARQLRLTFEFGFSRT  
SAQAFASYGKLLQSDNDVKNALRMAGLAREIMAKTDEISSMKSETLFVVGWYIEAWSY  
PREHVMETLQEAHSAGMAKGNIEIGFQCIVFCNIIAQSSGYPLEPVEKTGAQLIQQLSLY  
NVESVLTYLMASRVSVLCLMGRKIDWNELEPPEDVGRGESDYTTVFSLISRLELGVLF  
GNIEFAVRMSESISSLVGFERSYICGSKELFYSGLAYLELARKTGSKKYERKAMKFIKTL  
RYFCRTRGLNALHKCLLLEAEVLSLECHDVQKLTAKAYDEAIIAAVKIGYTQDAAHGSELT  
GAVMKALNEDDLADQYLNQACKLWKEYGAHVQVRLSLQRNPSATEEHEPSVSFRSNFLN  
SKDISKSCAAVDLELLVGIEMKKDIKFDASKSDLSFQRS

>comp14403\_c1\_seq6; 212 1464 2034 LEN=2034; translated  
MSVATPSRGGKESENIIVLSLDRLCHGFKVGEDEESNAKENYKNESTTRILFENVSFKLY  
SGDSALVMGPGSAGKSTLLRI IAGLTDADAQRIKLFGLAQDSFASMPRWRKRVRYVPQTK  
VEIPGTPNDFIRKISSFGTWNKNKNSVDDSSSLYLEMESTVTELTTSWGIGINLLNSEWKF  
LSGGESQRILX

>comp14403\_c1\_seq7; 212 1445 2015 LEN=2015; translated  
MSVATPSRGGKESENIIVLSLDRLCHGFKVGEDEESNAKENYKNESTTRILFENVSFKLY  
SGDSALVMGPGSAGKSTLLRI IAGLTDADAQRIKLFGLAQDSFASMPRWRKRVRYVPQTK  
VEIPGTPNDFIRKISSFGTWNKNKNSVDDSSSLYLEMESTVTELTTSWGIGINLLNSEWKF  
LSGGESQRILX

>comp14403\_c1\_seq8; 212 1296 1866 LEN=1866; translated  
MSVATPSRGGKESENIIVLSLDRLCHGFKVGEDEESNAKENYKNESTTRILFENVSFKLY  
SGDSALVMGPGSAGKSTLLRI IAGLTDADAQRIKLFGLAQDSFASMPRWRKRVRYVPQTK  
VEIPGTPNDFIRKISSFGTWNKNKNSVDDSSSLYLEMESTVTELTTSWGIGINLLNSEWKF  
LSGGESQRILX

>comp14403\_c1\_seq9; 212 1516 2086 LEN=2086; translated  
MSVATPSRGGKESENIIVLSLDRLCHGFKVGEDEESNAKENYKNESTTRILFENVSFKLY  
SGDSALVMGPGSAGKSTLLRI IAGLTDADAQRIKLFGLAQDSFASMPRWRKRVRYVPQTK  
VEIPGTPNDFIRKISSFGTWNKNKNSVDDSSSLYLEMESTVTELTTSWGIGINLLNSEWKF  
LSGGESQRILX

>comp14404\_c0\_seq1; 377 256 1620 LEN=2265; translated  
MCSETDRLLGGDGSKQASEQFLRRQARKKKRRNRLIAWIGALVCASVYGTVMVYQHASDP  
SRAASSLLGRARHNKAMVKIDPDTGVYSIDWDGDMGDNAYSVIDTDDSTTFAELAKIM  
LLPWYEASIMALTDDPAWESEDGIQPSNAAHIRKVLITRDMIDVFSVPVFPDTPVGKQK  
TKKHKTAKQTEHEKDRSLWKKLRKMYRQGYQKMGELKDLEDLTYSNKLLATRVDVAVT  
EWKKEFIAFQRKYRIRHFLYEP LSSGGIDPNGCYHDASHLFWADTEGSELP SGNSSGV  
GSLRNLGTVQLENSLGYLRLIRSYESVLSRDHEIHFNLRKELRIFLDEYGFVSVLVPS  
TNATLSTADGHDDDDGDDSP LGEAMGILNHAQSKLGHINDKWTALDIYKSDDSHKKHWGS  
MATKIDKLWEEFLDWEHRHDLEGEIEFVLEEMKQ

>comp14405\_c0\_seq1; 594 212 2365 LEN=2918; translated  
MREKCMKKVIAVQLALVFTLLTAVVVAYFVQSNKPEPTTLSEPTNASSGEDISSLFDDNS  
KQVDDLFISTVEIPEGTEDEDDDFIATVEQHEIDKLFERNAGN KINGIQKVS GEEAELP  
LSSEQTKPADSRIDGLLQRNGPPKRTNSSDSNGSGGDKDNNTTQRPSRNSINKISKQEP  
QRPVSMNRHPLKQTKGSRSPSFPVSSPPSESSYPSSGPSTSFSEMPSLSPSGMPSQSL  
NPPSLSMENPFLIAEGMVFAATQFSPSEPSIAIESDASSILAGASAGLDPGSNSGVDDNK  
SWSFQFGSDFSTAVFEKPS SPLPLVSPCPQTYEAGDGTPCVTSNSSPSQVCFYDFSVG  
CTWATLGCSPKVRCDGCVPMGGDTYEGLWSCTKITPVEESSCNLRRSAGLPELGETCDPD  
DMLPTPTTTTTTTGALPVAETAPHSKYPIGTCPHQPGLGSCDIYSDEYRCNYDFVYTG  
SWDAIACTPSITCDCNDGAWKCAGNFVSPCLYNDGRLPPEGLPWGKTCDPIDPLPTSLKK  
SECPESFELGKCDEYEENLECEFKHVYKGTWNALSCSPAVECKQDGNWQCSADFAEPC  
EQGLVTPPEGLPWGQECDPYGS LPFMEAPIVATSPTSAMTTQLRTTEPSSTPTSPPSAMP



TKLRTNEPSSSTPTVTPTHSFVDQLARECPDTFQFGECYQTYALNLQCAVDYVYNGCTW  
>comp14406\_c0\_seq1; 554 1 1199 LEN=1475; translated  
XLFRSGTQTLDIVDACPDNFDVVDALSAGTNSKLLTDQVLKYTPKIVSMATEKAAKELKSN  
LEDAGMKNMPTIMHGEEGILAAATIDTADTVVTGIVGSAGLLPTIEAIKLLKDDIALANKE  
TLISGGPVINPLVKEHGINMLPADSEHSAIFQCLQGVPEGLRRVILTASGGAFRDFSKE  
ELFNMCRDDPRAVQAKATTHPNWDMGAKITLDSATMMNKGLEVIEAHYLFGASYDDIDVV  
IHPQSIHVSMVETKDTSCIAQLGWADMRLPLVYSVSWPHRLEMPYKPLDLAEVSQMTFQK  
PDHDKYPCIALAYEAGRAGGTMTAVLNAANEANEIFRKDVGLGFLDIPKLIESAMEAHK  
DDHKVNDVTLDDILSCDEWAREFVMEKSETMKTELLLP  
>comp14406\_c0\_seq2; 741 106 1545 LEN=1844; translated  
MKLSIALSLLLSAAPATVAFAPVSSTAPSSTKLNVSFSGSAGTGDGWIEPSAPVNSEESLK  
LTLEKSLGSSSQKRLSLLGSTGSIGTQTLDIVDACPDNFDVVDALSAGTNSKLLTDQVLK  
YTPKIVSMATEKAAKELKSNLEADAGMKNMPTIMHGEEGILAAATIDTADTVVTGIVGSAG  
LLPTIEAIKLLKDDIALANKETLISGGPVINPLVKEHGINMLPADSEHSAIFQCLQGVPEG  
GLRRVILTASGGAFRDFSKEELFNMCRDDPRAVQAKATTHPNWDMGAKITLDSATMMNK  
LEVIEAHYLFGASYDDIDVVIHPQSIHVSMVETKDTSCIAQLGWADMRLPLVYSVSWPHR  
LEMPYKPLDLAEVSQMTFQKPDHDKYPCIALAYEAGRAGGTMTAVLNAANEANEIFEKDV  
VGLGFLDIPKLIESAMEAHKDDHKVNDVTLDDILSCDEWAREFVMEKSETMKTELLLP  
>comp14407\_c0\_seq1; 632 186 2222 LEN=2291; translated  
MPTFFIGSLLSGWLLVNGLRNREVHGLSLSPPVTQRYRWSTSLPAVTGADIEQDAEGKQT  
PQVVGDKIIYRGKVNEIDYCIAPGDVLSRSRSGKITKGDNDQSPQTVSLTQALNNASNR  
AVRRILLAKSWPSEEDFNLSLRLLLLAAAEKKADEAREKDGGVSTSKCPVPRPILNLLTRSS  
SSNNAADGPASPTKTRTNQEVVADQIVAFRERYGSLQDYNFAEAYLESILSLATTGEESE  
RVKEVFQSRTYLRSYKRVLSVLQSVGVVLEEIPDAKRFKIAKLLKQDNICLSMIDTLRIR  
EEIANPTKAIDEAAEVEVEEENDTDTVTDIDIDTTESKNEVESKNSTKGKNRFKFWKKDK  
KEGPKPEEEIASSDEESAKEPSTPVSENRFVSSDEPSMTRQLNAFVSNIVRRVLLFGGDQ  
ELLILSETLSGNDKTFVDRWYPTDGPTEKMEDELRPVQYLNALVSLREAYNEGIVTD  
LNPLTSVSQSYSNAYERLIASLVEDGSGYIRAEADVMAMPKPRATEELGRFAVWEAAFR  
SKDESTSFDDLEGTWEVKDEVGGETIGVSTVKLLPNGEVGVAAAPLQGLQWRLDPGPHL  
DTCTFQVLSGDGTVLQYRGFIDRGARLEARFSGRPIRIRGSMVFQMRYLGGGPDYWKETL  
PVNYLEGATKFEMKKTVA  
>comp14408\_c0\_seq1; 956 426 2285 LEN=2622; translated  
MFNNNNNPGGGNPPSNTGIGVDFGGSGVHSGHGRGNSPDDLMSMYHNVGGNDNMSA  
AARFGMGGSDMMGMNVMGNMNSNLGSMGGMGNMGMGGMGSMSGMGMGNMPTGMSSRM  
NMDNMDIALYRAKEKMMAMNARRAFLGGSEDKFGSSGMGMGLNGPSFSGDDPLTGIGM  
KRHSPSEDLKLSGSLKGRKRRKTKKPVDMPRRALSAYNIFSEQREKILQEIDERDAAK  
KKKDDCTEGDKQTEGDEDKTSKIKSSDSTDVENQDEQENTSPAKGNQDKDDGSSSENKEK  
GEKTTKQDPEEGDDKDDKGEVDVTKEEVGKSADDEAKKKKDSKSEPKVMNRTFFPTRA  
KRAHRKVHGKIGLVDLAREVSRWKALDQENRAHYESLAEEDRKRHKQVMAEYQERKAAE  
NMLSMGGPGEDEKDGKSKEKSSDNPNQAQSKSEQDIRETITHHHQQRILAEEMMARQAGDP  
LLGSGSNMGSNFGMNLNRFGGGMGNRSMGGMNDMQSILDLQTRAMMMQMRMMSGMGMG  
GMDTMEGMGGYGMGGSGMGMGNMGGSSMGGNMGGSGMGGSGMGGSGMGGSGMGGSGMGGH  
MGGMMSGMGGMGGMGPSL  
>comp14409\_c0\_seq1; 182 1 953 LEN=953; translated  
XKEQTRNATIGWLSPPFGIFCTLAIYTLCAFINFSGLDLSVEHEPLFASTKPRVVDSDFT  
SDGNSTPIAHRSWHEPSIIDSASKKSEIDWTDSEIFSRGWDNDPIVIESHKLLFFFTVP  
KNACSTFKRFRMMGHQNLQASPHNPSKNGLKYLGHYSKDKQREFMTSPEWTRAI FVR  
DPLERTLSAYMDKGMKTGPLDWQPTVVRGAHIKRACCSRTKRQIAACREFPLTPFKIDLTP  
QNFPPDFVVEFMRQCKDQSHWQPQHLRMREENWKWINFVVGKFNKQNDTRLLERIGAYD  
EFGASGWENSEEESGKNV  
>comp14410\_c0\_seq1; 749 91 2307 LEN=2335; translated  
MAPIGEIPDTSIESQASGTNEQSMFGLASSQQLRFDVKWSPINRGIVSTASLDRKVQVH  
SILNLAAGRPPKWMRPPSSVSCGFGGVIIVSCGATDKVVRIRTVAEEPELEKISRKFETA  
LNLENIIAVCNKAIKNDLDERQLWQFMQVIFDADARQQLNLTLYDPTIIATKVSAY  
QEESENGCSKTKSEMSLATQNIKESLMVGNFDAAVDCCFRGNFADALLLASC GGDLWA  
KTQERYFASQSQRPFVSVGAIIRHDLASLVQSDSLGNWKETLAILSTYSKSEFPPLC  
VALGEKLEAAGDHSNASLFCMCSLNKAVKYWRMQLTKQNASEGSKLNLKAIHDFVVKV  
AVFLQAAGSSESLDAEFEEIFSIYAEKLAEQGLLVTAAYCKGNSTSSKILRDRLYRSKA  
SQKCLAAMGGIAPEFPFSLADVKNQRAATSNSQAGQNRSYGRTEKSNMSRSRGGNTAY  
AQTKHTNSLQQTQAPAPTVPVSALPTGWIELVDPSSGRPYANQATGEVSWDKPQAAPVPA

PTPTPVVPQPTPQVRAKPTSAKTKNAKMASKYGDGFVTSASHPELASQYGNVGTSPNYHT  
TGRPGTATVGTSDQGKAPVSGNLDTMPALRDEYQPIPDTLALIEALKGGQLSSVDKRQL  
TEAQKAVAI FSKRLALGDISDDTANQMLTIKNQLSEYDWSSASATMSSLVTNEWKEHKEW  
LKGIKSLVQLATKMYSR

>comp14410\_c0\_seq2; 797 98 3202 LEN=3230; translated  
MSKITQIVDRSAATAWSPVSEYASVIALGVKDSGGVSFEETGGELELYDMNLLNQKEPTK  
LGSIKTQSRFASLTWSDANPEKYPLGLIAGGMENGSVHVWDPRAILQPESTRTAPTILSF  
SQHVSQVKSQVFSPLVPSQLATGGSDGKVLIVDLNEPKSPPFMPCANSSQQRSQITSLA  
WNTQVAHIVASAARDGTVSIWDIKSRKVVCDLQAGDQAI SDVEWNPTQGFHLLTASNDDR  
NPLIKLWDLRSSTTmplatLTGHSQGILSMSWCPHDEHLLSTGKDNRTILWDLYTMAPI  
GEIPTDSIESQQASGTNEQSMFGLASSQQLRFDVKWSPINRGIVSTASLDRKVQVHSILN  
LAAAGRPPKWMRPPSSVSCGFGGVI VSCGATDKVVRIRTVAEEPELEKISRKFETALNLE  
NIIAVCNKAI AAKNDLDERQLWQFMQVIFDADARQQLNLTLYDPTIIATKVSAYQEEES  
NGCSKTKSEMSLATQNI VKE SLMVGNF DAAVDCCFR TGNFADALLASC GGGDLWAKTQE  
RYFASQSQRPFSLVVGAI IRHDLASLVQSDSLGNWKETLAILSTYSKSEEFPLCVALG  
EKLEAAGDHSNASL CFMCALSLNKAVKYWRMQLTKQNASSESKLNLKAIHDFVVKVAVFL  
QAAGSSESLDAEFEEIFSIYAEKLAEQGLLVTA AKYCKGNSTSSKILRDRLYRSKASQKC  
LAAMGGIAPEFPFLADVKQNQRAATSNSQAGQNRSYGR TKESNSMSRSRGGNTAYAQT  
HTNSLQQTQAPAPT PV SALPTGWIELVDPSSGRPYANQATGEVSWDKPQAAPVPAPTPT  
PVVPQPTPQVRAKPTSAKTKNAKMASKYGDGFVTSASHPELASQYGNVGTSPNYHTTGRP  
GTATVGTSDQGKAPVSGNLDTMPALRDEYQPIPDTLALIEALKGGQLSSVDKRQLTEAQ  
KAVAI FSKRLALGDISDDTANQMLTIKNQLSEYDWSSASATMSSLVTNEWKEHKEWLGKI  
KSLVQLATKMYSR

>comp14411\_c0\_seq1; 206 494 1537 LEN=1877; translated  
MESPLRGSKIFTRYHQHVELYRDENRRRNDDEVENSNGSPTRKRADMIQKMLVTNKR  
QIGASGTRSDPTSNILDDLTMGYSASPSRLLTERDPEEYALSPSSARYFRIVSLDGCRE  
EQVSPLPDSSASSTSSLHHLNLP MIPGPIVSSLDGEDDVPCTVSKRTGDV FVPKTSRS  
SKLSARADRKISDASSEKEATPNSRQRRRSSHNSQFVFDGNLSFGSVNSPPMYASPTT  
RYLSPTS RAPSI PMYI SPKGMASLPDMSVVVNYPLSASLTMSPPPFDIGLCYEDGCHK  
DGRRTPPPTHEEQRRNRAMP SMQYEATILNRLRQQEHLELRHQNTW

>comp14412\_c0\_seq2; 481 62 1051 LEN=1137; translated  
MSYNRSGRKAPGAGMTKRQKHNAEQKRSARAVGLTEFSQKRGQVRALEEFKRRKTRKHLE  
TSIALRKYRRLMKKEGLEAGTGASRKRPPGPETGDEEGGEAEAE AIDAGENWNDEEVP  
VVGSDSDSSDDSDSDSDDENNNKNSDEKNDNTYDEGKEPSGLPSAAADDDATMQK  
PESNSNSNTNSKPSRKPKRSDPLARAREKAAENKRAAEARKQREASERERA EKLR YRKQ  
QTRLLQKRTRRGQPI MKHAINNLLHKLEKQQHQDQPHQPKERGETRKRPRTPRGNPQRQ  
QQKGGVDHTKQERPAGDPPK KKKKSRKFY

>comp14412\_c0\_seq3; 481 259 1248 LEN=1334; translated  
MSYNRSGRKAPGAGMTKRQKHNAEQKRSARAVGLTEFSQKRGQVRALEEFKRRKTRKHLE  
TSIALRKYRRLMKKEGLEAGTGASRKRPPGPETGDEEGGEAEAE AIDAGENWNDEEVP  
VVGSDSDSSDDSDSDSDDENNNKNSDEKNDNTYDEGKEPSGLPSAAADDDATMQK  
PESNSNSNTNSKPSRKPKRSDPLARAREKAAENKRAAEARKQREASERERA EKLR YRKQ  
QTRLLQKRTRRGQPI MKHAINNLLHKLEKQQHQDQPHQPKERGETRKRPRTPRGNPQRQ  
QQKGGVDHTKQERPAGDPPK KKKKSRKFY

>comp14413\_c0\_seq1; 238 144 602 LEN=858; translated  
MDAIVAGVGA AVSFAMLHTVHDSVLAPQGLSCLCPPLGAVAVLLFCLPGAPASQPKAVIG  
GHILAGLIGYAVVENSIPYGEAVALTITAMTFFKVHPPAGAYAFLYVNKGMGWKGIL  
APLAGAIVLVFVQHVINKAIKPIIVGKKKKD

>comp14414\_c0\_seq1; 450 316 2058 LEN=2163; translated  
MSLRRSRRSFRHSSPAASRLARWSSYYCFLMLIIH DSTNYHACSAFSP LFTTTSASSNHP  
SIRKIVGAAGMKSSISSNKRKRKKEKSKEEDH SKWMSWMSRGS LTRSRHADEV RMREAE  
ELGGVPRSGRYSSRDWCHNTLSL PNSAILRAIRGPVLFM SCWAGLLSILYRHL LV TNQTV  
ANIMCISSTPHSLMSSALSLLL VFKTNSAYQRFSEGRKVWENITNLSRDMYRMINLYENE  
MGRSKRRRLQRLIAAFPYLLRHRIRPNLIMYRVDDVDNVRDPENSIVLYQDKAAHDLDE  
LAAVATQEEKEGKSRRRPLYWVDKRTL PWRLPPDAMESCASSQNRPLWVCDRMAQEI  
RSIPDGP CFTSRERLTLIGKVEKLSNCIGSCERIHQTAVPLNYARHSLRALS IWLFTLPF  
CLVQSLELLTAPAI FLVSWLMFGVYEIGYSIEDPFQGT LRLSVL CDTIRRDVLADEVIRN  
TAFDRRSNTGSGRDKNAESSGSTEEQEDDELEYESSPIAKESRQVLTVDEIKKKPMSKKM  
RSANGSGAIVEELPILPSKTAIWEGSSSKSEKQDRDAKRP

>comp14414\_c0\_seq2; 353 966 2159 LEN=2264; translated



LAEAAVIAARREREENLEENSEMSIGAKIAEAAVVIARRREREENERRSEYSQVEEDFT  
EQYSQLRNEEDHNELHESNVEETVTEASLAKEVALMALAKKKSNSQLQSADYYDKIYNQK  
AEANTPNNSLEDQIAAANAANKMNIISTPKTEEYDYDKLYQPREDAKSSDILADQIAAAA  
MAVRMKNSSPKTEEDYDKLYQPKTKTMAYQKNPATSRDFYESSDNSTNYEWKEERHSS  
YSSYSNTLGKQLDYDLEASYSSRHSRSEPIEKPKIKRWSIGRTMLLLGAILVLIIGVL  
VYFLVFHGSRRNDRDDSTSNVTDYLSTPEPTRSPIKSPSFLPTVKPTIPVDKPIITSSGPIRT  
DRPTFQPSRVPSLPDPTIQPILPTFNPLPSEIFDSSPSQPVANNPPPLHITLPPQTSQAKP  
SNRPSFIASSTVPTDKMLSPTFSAAYLRQLLISQWPPLQESLRQQFSPQSRAFQWLIASN  
SKVSYSQERLIQRFAMATFFFSTNGQSWSNNDGWLSESECTWYQTKSYRDPNAASRIIL  
NLELDNGISGSLPELALLSNLARLDLAKDTNENGVNRFVFLQALPSEIGRLTMLQYM  
SLSNQQMTGKIPDEVSELSLLTVLDLENRFQGPLMPTIGELQQLHNIYLGSNKLSGTIP  
SEFGLMRFLVNLDSLGNHFSSTLPSELGKLSYLSLQSLGNNKITGTIPSFLGLLTLNLQGS  
LSLGDNLLTGTIPTDLGQLSMILTVDLSSNQLTGSVPTELDRLVKLGNLQLQNNLLTGT  
VPSSFFKLSHLQFLQLEHNNLTGDVPSKVCDTLVTDKIENRISPTYVLTDCASKVSCECC  
QYCCSESGCECQFSHTNQDYLCYGDGLSPGVRMIDLHKKLNY

>comp14417\_c0\_seq2; 199 1 577 LEN=577; translated  
XEDTGESAEHVSGCESVEDTRESAEDVSVFESVEDTGESTEDLICTERRVEIVRDSVEGA  
SESVEDTCEVEDTDVSTEGTPTPKDTEEMFSVLYGINPPGIGIESPPESSES DSGPSGE  
FSTEDFSSETEPKSKNWFAPLGSFLQWCRAEPASSSSSSSGEEHSDQEIIDEEEKGEMREM  
TISEQIAEAAAVX

>comp14417\_c0\_seq3; 673 278 1907 LEN=1907; translated  
MSSFSDNNFRPVAGRKRPMRMRVKKYNVDASNNYIAIDMAGRVENTEYHDQRPRSRPA  
ENDAARSSQTTSNVALPLMEGSESKSRNVIRNGIETGKHSDEYSMRVAPSLFESSVSDS  
AEASYPSESSESSVVSSEDYSDATSEDEVEDEAVTEAASVLAKYGTSETRSAHHRMLLTTL  
TSSTSTSSPMSSTIHKSCETPGKDGSESRDRQHHPISARSMGSLPSSEADSRRCGDTH  
AIEESGPADCVSDRDRDATTIGASDQKELLAKYQNIYNPPTPEHDDHTIESNYNSGEGEE  
DAKANSNGGEGEEDTKINWGNIDENDNNSDNENENYNNDYDNVNNNNDDDDNTDKYSRNH  
GDNHSENGISSKPKFGSSWGKVDYEKGECEESMTGEKENDKGTIGAQSVALDDGGDVFH  
DAVSSQPEAQHEGSKASTVKNLIKFYDSFENQENEDYEHV DSTRENEYKAIKDERFHSQ  
SPSSLICTERREEIVSESVGDTGQSLEDFSVCESIEDTGESAEHVSGCESVEDTRESAED  
VSVX

>comp14418\_c0\_seq1; 634 1 1647 LEN=2012; translated  
KDAAFEAMRNEFDAAFEALRTQKDATIEELTEESANAMETLRETAHNEYQSLKTEKDNEI  
AGLEAKLLMSSEELQATMRLELEKAKLDKENKVAAITADRDETVAELTGRMEHAIREAAQ  
VLQSTKEEAENTARLEEEERDENIAKMTAEMQDAEQHFTRVLEETRDEAQALLAKKMGEK  
TAELEQTKRENDERLSEKNQKILKLKEYTEQMLDKKAAIERSMEEATAEITHWRALHAER  
SYCNMTHVSTDLYDGGLAVYAMAVEQAGVVGDIA MVHVS KGLEKSKDFVHGQVEEYQAI  
EPHYQEHVASQYQTHLEPHLHKHVF PKLHQASVWFQTTVMPLVMEGIGIVKEIYHTKVVP  
IVEAKYQGLVDSYGYCKSYLRDFEKVSQESQVLKDNPPPAYLLESWQISCANPRESLGA  
LINGTLTLFALVFYRRLGVCWMRAFSLSLVLLPLRWTPLGWFLPRRSAAAGELACDAG  
DPVELAPAAEEVEVGSAGSEVESEGGNGGEVVAEEDSEDNDEDEDKSTSGKTD CGDET  
N GPVAATLY

>comp14418\_c0\_seq2; 540 1 1850 LEN=2215; translated  
KDAAFEAMRNEFDAAFEALRTQKDATIEELTEESANAMETLRETAHNEYQSLKTEKDNEI  
AGLEAKLLMSSEELQATMRLELEKAKLDKENKVAAITADRDETVAELTGRMEHAIREAAQ  
VLQSTKEEAENTARLEEEERDENIAKMTAEMQDAEQHFTRVLEETRDEAQALLAKKMGEK  
TAELEQTKRENDERLSEKNQKILKLKEYTEQMLDKKAAIERSMEEATAVRTASHCTELRA  
SCVGHGDSSTESRTGVGEHPISGCGSPDLVVVSSPSQLAPLFYSFSPVAWTSWTGNHAL  
EALHAERSYCNMTHVSTDLYDGGLAVYAMAVEQAGVVGDIA MVHVS KGLEKSKDFVHGQV  
EEYQAI EPHYQEHVASQYQTHLEPHLHKHVF PKLHQASVWFQTTVMPLVMEGIGIVKEI  
YHTKVVP IVEAKYQGLVDSYGYCKSYLRDFEKVSQESQVLKDNPPPAYLLESWQISCAN  
PRESLGLALINGTLTLFALVFYRRLGVCWMRAFSLSLVLLPLRWTPLGWFLPRRSAAAG  
ELACDAGDPVELAPAAEEVEVGSAGSEVESEGGNGGEVVAEEDSEDNDEDEDKSTSGKT  
DCGDETNGPVAATLY

>comp14418\_c0\_seq3; 291 160 708 LEN=708; translated  
MHRSLSTPASLCLVLLLLALGPVYGKNILSQLGELMSDMSGNKAI VDDAATGT VQDLESK  
QAASCDGQLAVALVQANDLAAVARKEKDEAQAKHGEALATIAGLERDLAHTKRSLEKDV  
ELTKIRDASEEVLREEKDRAANELEETKARAREEYEALRGEMDASLALREEKDAAFEAM  
RNE

>comp14419\_c0\_seq1; 383 360 1435 LEN=1748; minus strand; translated

MAGTQLSVASSLSRTEGSLVAAXYKDAPIDQRVDAVALPLRRHAGGVVWGWGGGAADAG  
SPKGRGRVVPVEELRPSGRSLPRRDLHLLDVGALEGSLVVLQKESLVANHRGASVAGTA  
AAATDATPRRAERNNGSRSNGLFQRRSNFVHGVAASLPPLDLENDLFPGGGRALCFGAGL  
GARAVRSADGDASPPELDHKRGTGVGAKDSRPLAVVNGTHGVEPQVKVQAVPNLGNLGPV  
DNQGRGEPRVDFRELRDVFLDSPLAREEXARKQHQNALAEI IAAGIARIATVADTAG  
VARNAVSDVDTVYEVLVGENAVHRVLNIKNI IVGNIGIPPELFLVVDVHCLLGEENTFA  
>comp14420\_c0\_seq1; 927 232 2809 LEN=2952; translated  
MVEVAGLMKDSLACSLVDATDIIDSSLSTLRIDENDESKNADFEDFNQSTTLTRETVEE  
AQAAAAEAVAAAI SHTAATSTLPHRSRSIGTDQSDFFSATPDGSKVSGAEQQSKTTTTDE  
GAVDTSKKYVTPKDFELLKVI GMGAFGKVLQVRNKQSSQILAMKII SKRQLKKKSGYIEN  
VQAERNILKRVNHPFVVKMCHSFQTREKFLILMDFLAGGELFLRLGREGIFLEKDAAFYL  
AELISGLDHLHNLGILHRDLKPENILLCNDGHI CLTDFGLAKDFGTDWSDGRDGSDDKNEP  
ERFAAPKSTCRLAFIXVTLIYSLNLDMIFFVLSVNNEFFLFSIFGAVRRAPEMVANKGY  
GKAADYWSLGCIA YEMLNGLPPFSSKQGSKELFRKIMSEKVKMPPGSTAAACKLLKGLLN  
RNPDKRLGSRSTMFVEVGGVAGLKQQPFFAKIDWIKLDQKELTPPYDLNVDHEHDLRNFH  
EEFTDMPLPRSVKEMASENHKPRRIASDTFRGFSFIQDDFMLPSRDAKEIESYWKTV EED  
GESDSMMASSKYGSDNEAPPPPQPEKKRPPRKRKKKNKNVNSAASETASVDTTTTPLPS  
DNEGETASASQAPQREASSDSPKQSVVTSVPQLTPSTATSKISSKTLATTMVEVPKTQP  
APKPVAKESWQSVNSTGTKNRNRVAGYSPTTSSKNFNFTKNRQQQFQSPGMAAVSQSGRI  
LTPPTTHKVPAPGSWAARLHQASSASPHHGATKNVNRSTISGNNVPI TPPTPPSPSSDWR  
THASPQIQRAIKRGCQQRSTPPNSVAGSLQSANFGSANAWPSLKDFPAAPSLNSSPASA  
STKLT KP VQGAWASRIHK  
>comp14420\_c0\_seq2; 1039 232 2688 LEN=2831; translated  
MVEVAGLMKDSLACSLVDATDIIDSSLSTLRIDENDESKNADFEDFNQSTTLTRETVEE  
AQAAAAEAVAAAI SHTAATSTLPHRSRSIGTDQSDFFSATPDGSKVSGAEQQSKTTTTDE  
GAVDTSKKYVTPKDFELLKVI GMGAFGKVLQVRNKQSSQILAMKII SKRQLKKKSGYIEN  
VQAERNILKRVNHPFVVKMCHSFQTREKFLILMDFLAGGELFLRLGREGIFLEKDAAFYL  
AELISGLDHLHNLGILHRDLKPENILLCNDGHI CLTDFGLAKDFGTDWSDGRDGSDDQERA  
RTICGTQEYMAPEMVANKGYGKAADYWSLGCIA YEMLNGLPPFSSKQGSKELFRKIMSEK  
VKMPPGSTAAACKLLKGLLN RNPDKRLGSRSTMFVEVGGVAGLKQQPFFAKIDWIKLDQK  
ELTPPYDLNVDHEHDLRNFHEEFTDMPLPRSVKEMASENHKPRRIASDTFRGFSFIQDDF  
MLPSRDAKEIESYWKTV EEDGESDSMMASSKYGSDNEAPPPPQPEKKRPPRKRKKKNKN  
VNSAASETASVDTTTTPLPSDNEGETASASQAPQREASSDSPKQSVVTSVPQLTPSTAT  
SKISSKTLATTMVEVPKTQPAPKPVAKESWQSVNSTGTKNRNRVAGYSPTTSSKNFNFTK  
NRQQQFQSPGMAAVSQSGRILTPPTTHKVPAPGSWAARLHQASSASPHHGATKNVNRSTI  
SGNNVPI TPPTPPSPSSDWRTHASPQIQRAIKRGCQQRSTPPNSVAGSLQSANFGSANA  
WPSLKDFPAAPSLNSSPASA STKLT KP VQGAWASRIHK  
>comp14421\_c0\_seq1; 773 236 1777 LEN=1787; translated  
MVKTRKIQNSKKGGRSGVVIERTDDSNVDEWFDSAHPKESARKNEQQEESSEIENKERSK  
TKESKKKTVKTPKQVRMSLTGAATEDGSEKGEDSKSAEKYATRLRKKSGSGV SFASP  
LSRVSTAPFSPGREDERKQESTKTNLEGE SDTDDAFLTQDNHDEADLAGE SDVIALQSAK  
ANGEKLG LASPEVDFPPHEDEVEDDLGPPALPNDL SNDEDEDQE QALEANDGKDDVIGGL  
DTDHVENS GEKSDSNNDYHDDHDDHDEGPGFNMVHDPETPLTVREDRAKKEME KIKEE  
RRKQRRENNLESESEKDEDEDEGEPEDEQSKSTPKAEKSKRPK KKKR SVVFS PKGIPIA  
NRDYESVP I GALVEASPDENGRSRARVKPLQFWRGEKLEYGAHNERGYIGKAFGDMP  
VVTGIKKALPTPYKKRKPVKTSNVS RKSGSKNDVTDTRG SVADEKFN SKKLRRKYKYHDG  
EEAYLWDDIADETADQSKKLSLKSFLTGLAMLN  
>comp14421\_c0\_seq2; 856 236 2173 LEN=2562; translated  
MVKTRKIQNSKKGGRSGVVIERTDDSNVDEWFDSAHPKESARKNEQQEESSEIENKERSK  
TKESKKKTVKTPKQVRMSLTGAATEDGSEKGEDSKSAEKYATRLRKKSGSGV SFASP  
LSRVSTAPFSPGREDERKQESTKTNLEGE SDTDDAFLTQDNHDEADLAGE SDVIALQSAK  
ANGEKLG LASPEVDFPPHEDEVEDDLGPPALPNDL SNDEDEDQE QALEANDGKDDVIGGL  
DTDHVENS GEKSDSNNDYHDDHDDHDEGPGFNMVHDPETPLTVREDRAKKEME KIKEE  
RRKQRRENNLESESEKDEDEDEGEPEDEQSKSTPKAEKSKRPK KKKR SVVFS PKGIPIA  
NRDYESVP I GALVEASPDENGRSRARVKPLQFWRGEKLEYGAHNERGYIGKAFGDMP  
VVTGIKKALPTPYKKRKPVKTSNVS RKSGSKNDVTDTRG SVADEKFN SKKLRRKYKYHDG  
EEAYLWDDIADETADQKVAYASNMQGSDLPISKRRKKEGNVTGKAAQAFNIPNDDSD  
YVGYIMGNLTLPPGGIKDSESVGPCAQTFTTVRCQLKAFEVAYGDPDLPDGELDAESAQR  
FLLGPGDMFRVPPGNSYRLENHSEHTDCLLTWTIIRPRAVNGTT  
>comp14422\_c0\_seq2; 271 105 302 LEN=334; minus strand; translated

MGLEQFEINSALALLVAPSSFVVAHWLELESAGVVDFALAAAASAFVEAAVHQVDLASEE  
DVDLA

>comp14422\_c0\_seq3; 959 340 2226 LEN=2923; translated  
MTDTISHQPQQQQQAKAQTSSSTSTAPSTASSGSASSDINARRDAASMMMSMSQLMDAA  
ALHAQAQQQSVGGMVNAANSHLNHTSRGPHKKRTASSASLENDLMNGRRPVAAHHGHHL  
INGGGILRMPVTGNATATTASSAVSAATSSTDVSISSVGK GKASASSSGNKTNGASANVP  
LTEEEKKAERRAANRRSAFQSRQRKILIEDLQRTVAALSKDNNDLRKTNDEIRSQLEAA  
LLENRQLRQITNSLSVQAHAQQQAQQVVAQQQVPPQSQQQVAQAPSNSGSPKLSAQQTPTS  
VPTLPPPPPSVAVAPAPPTIPQPPAFNPAALTNFLTTFSSQAAAAGTSPVDQQHIFNAKI  
ALMAAQSRVSELEHHQAVSQAQAANAAVAQQQQAQQQLQAQAQAASAALGLAHVAHQ  
PATGNLPGRSDNQHLARLQELLSRGIGGMNGPATSSASQQPAPATTAPSAPGNNAAGVDL  
THLRSLLAQQQQQQNMASQAPGSPSTSAKQEAHEQGKSHSENAAMIANVNEARSVT  
NPAIVTPPSPAGAATGASPLTGLSIAAGQDAPGIQLLIKSLRAGQGGTSGSAPLDDAVRN  
FLKQQQAQIAQQQQTNSSTTASIKAESK

>comp14422\_c0\_seq4; 1036 368 2346 LEN=2346; translated  
MSQTNNDKVNLVWLARFDPKNER SRLNQPPNGNQDQEHLRAWIRRYKDKRWYSSDGTVA  
AGSQTNSARRGSVSSNQPPQATVVQIPPANPPTDLFGGF DAPAPAPVAAPSPQNGGWD  
GGSSQQPPQQASNFNGFNNDNQGTAPDPFAQPTPPQQQQQQQNFANFGATDPFAKQPQQ  
QPPAQNQNFANFGGQQPPPPQQQFANFGGQQPPPPQQNQNFANFGGQNTQQQQQLQAGFAN  
FNQQQQRQPPQPVQQMGGFANFNQQQDMTHQQQPQMGNVPTGGGFANFNQQGQQQEQ  
QQEPPAQTGFTANFEQQQAAQTQPPVAQQGGGFAANFKQPSQQPEQFSQSQPPGFSNM  
PPPVS DALPPVQQLPQQKPPQTSQPMAMPTMAAPKEDPMDAFAHLSVGGEKNNTGSTN  
PLSMNQPATNPDVAEMKPDSSPVQYEAQDVVVCYKSNKRSKAQIVKKHLDELTPYYTI  
VLPFGKEKQTD DAHLDRLDPAYEKIESTLLSLSTTQLKQVEDFLSKITAGASSISGSIPA  
APVSSMQSPFVENAMTINQASANVPTNMGGMTNASASATMMNKPSSNISAI PVPVLEAK  
PPVPSMGSIPDPKTGSQANNSGQTVQQPNAQQYQQQPQMLPQMOMQQQPMQGGQPPQM  
>comp14422\_c0\_seq5; 959 550 2436 LEN=3133; translated

MTDTISHQPQQQQQAKAQTSSSTSTAPSTASSGSASSDINARRDAASMMMSMSQLMDAA  
ALHAQAQQQSVGGMVNAANSHLNHTSRGPHKKRTASSASLENDLMNGRRPVAAHHGHHL  
INGGGILRMPVTGNATATTASSAVSAATSSTDVSISSVGK GKASASSSGNKTNGASANVP  
LTEEEKKAERRAANRRSAFQSRQRKILIEDLQRTVAALSKDNNDLRKTNDEIRSQLEAA  
LLENRQLRQITNSLSVQAHAQQQAQQVVAQQQVPPQSQQQVAQAPSNSGSPKLSAQQTPTS  
VPTLPPPPPSVAVAPAPPTIPQPPAFNPAALTNFLTTFSSQAAAAGTSPVDQQHIFNAKI  
ALMAAQSRVSELEHHQAVSQAQAANAAVAQQQQAQQQLQAQAQAASAALGLAHVAHQ  
PATGNLPGRSDNQHLARLQELLSRGIGGMNGPATSSASQQPAPATTAPSAPGNNAAGVDL  
THLRSLLAQQQQQQNMASQAPGSPSTSAKQEAHEQGKSHSENAAMIANVNEARSVT  
NPAIVTPPSPAGAATGASPLTGLSIAAGQDAPGIQLLIKSLRAGQGGTSGSAPLDDAVRN  
FLKQQQAQIAQQQQTNSSTTASIKAESK

>comp14423\_c0\_seq1; 661 193 3186 LEN=3424; translated  
MSTASDIRPDVEISCEFSANLASRSNALLPDMIYEDEAE GAVLTSVEQRAKDTQVGEDGF  
RPAVRGERPLLRMQSLGVSNNFRSRPPSTNSLVSNRNSVQSQRSNRHSVAAILQDYMQGR  
GSSIGMQNSFRSRGSSRRSSEP VVKAFQNP LK GK SANGVFQGRNQKARTLLRDLGKQKSD  
YSFKAETLRDGD PFRFEVSRRHGNGKFDNASTISFP ESSDESIPNSEDEYEGYPDEGLP  
LLNNDKDLSEKWRARKLLKKNKAWKEFLNPVTVLQHL YDFWIRSTLLIAIPFFAISF  
VLFYFFGNPSTPNYIPGDVCF S W W F D F AGRQLVMLELSRFSQAILVDGLIRKKKGF SKLM  
GPWVTVYFHQSRGWPFVLSAWGFWDLIFLEGNSRFKQHWFYFTGLQIFSKQNSGAYILSS  
HYLRILFCMI IAGIARSLKETVLTLYFGRRMVATYKRKLQDIVDDVLVISEVADLSMVS  
DNIADIVGIDLGNSNAPESRDNSRKGREFSVIRWSDIQFDEEDLSD EDSL TNEMASQGET  
PSQDGRSKK IETEFYNQ GKPTQTLQGQK FYGSSTRFAMKSLLDKWE E PINKGLKSQDLFT  
ADILRFSDALHYMDLDYPFNESFGLASTRNEMISSAELVYKRLKMLSPDSVVLNFSAFEF  
LLIQEDGSEDEIKKKKL VNTFHPDPDGAIDL SFVQACD TVYRKL RFFRASVGNSSVIDS  
VLKSI INPVFYFLLV TILMILEFNPM SMLVPLSLLLAGSFAFGSTCAKAFEGIMLIVG  
RRPYAIGDRIVIQDSAGADAPEMTMSWIVEDISVLSTTLRF GATNEIAQVSNSSIASARI  
TNCNRSEKATV SILLHFHLSCHKDSKTMEKFREGVEQYVRDNRNTWDALFFRCENVDAN  
REEVVYRLSVRSIHPWQVSNRVYRDRGELHQFCNALS YKLDINYEVPNQRSIMYYGGHLE  
NGGVQDYRLKVLKNSNIKNNGDCNFLT PAKTTVHSNA

>comp14423\_c0\_seq2; 676 69 3132 LEN=3370; translated  
MSTASDIHPDVEISCEFSANFASRSNALLPDMIYEDEAE GAVLTSVEQRAKDTQVGEDGF  
RPAVRGERPLLRMQSLGVSNNFRSRPPSTNSLVSNRNSVQSQRSNRHSVAAILQDYMQGR  
GSSIGMQNSFRSRGSSRRSSEP VVKAFQNP LK GK SANGVFQGRNQKARTLLRDLGKQKSD

YSFKAETLRDGDPPFRFEVSRRHGNGKFDDNASTISFPESSSDESIPNSEDYEGYPDEGLP  
LLNNDKDLSEKWRARKLLKKNEWKAWKEFLNPVTVLQHLYDWFIRSTLLIAIPFFAISF  
VLFYFFGNPSTPNYIPGDVCFSSWWFDFAGRQLVMLELSRFSQAILVDGLIRRKKGF SKLM  
GPWVTVYFHQSRGWPFVLSAWGFWDLIFLEGNSRFKQHWFYFTGLQIFSKQNSGAYILSS  
HYYLRILFCMIIAGIARSLKETVLTLYFGRRMVATYKRKLQDIVDDVLVI SEVADLSMVS  
DNIADIVGIDLGN SNPESRDNSRKGREFSVIRWSDIQFDEEDLSDEDSL TNEMASQGET  
PSQDGRSKKIETEFYNQ GKPTQTLQGQK FYGSSTRFAMKSLLDKWE EEPINKGLKSQDLFT  
ADILRFSDALHYMDLDYPFNESFGLASTRNEMISSAELVYKRLKMLSPDSVVLNFSAFEF  
LLIQEDGSEDEIKKKKL VNTFHPDPDGAIDL LSFVQACDTVYRKL RFFRASVGNSSVIDS  
VLKSIINPVFYFLLVTILLMILEFNPM SMLVPLSLLLAGSFAFGSTCAKAFEGIMLIVG  
RRPYAIGDRIVI QDSAGADAPEMTMFGLLKASEVISPI SLFCFSVLIVLFLFVDISVLST  
TLRFGATNEIAQVSNSSIASARITNCNRSEKATVSILLHFHLSCHKD SKTMEKFREGVEQ  
YVRDNRNTWDALFFRCENVDANREEVVYRLSVRSIHPWQVSNRVYRDRGELHQFCNALS  
YKLDINYEVPNQRSIMYYGGHLENGGVQDYRLKVLKNSNIKNNGDCNFLT PAKTTVHSNA  
>comp14423\_c0\_seq3; 290 1 1031 LEN=1542; translated  
TNWVYPHIDFSPKKLXYKRKLQDIVDDVLVI SEVADLSMVS DNIADIVGIDLGN SNPES  
RDNSRKGREFSVIRWSDIQFDEEDLSDEDSL TNEMASQGETPSQDGRSKKIETEFYNQ GK  
PTQTLQGQK FYGSSTRFAMKSLLDKWE EEPINKGLKSQDLFTADILRFSDALHYMDLDYPF  
NESFGLASTRNEMISSAELVYKRLKMLSPDSVVLNFSAFEFLLIQEDGSEDEIKKKKL VNT  
TFHPDPDGAIDL LSFVQACDTVYRKL RFFRASVGNSSVIDSVLKSIINPVFYFLLVTILL  
MILEFNPM SMLVPLSLLLAGSFAFGSTCAKAFEGIMLIVGRR  
>comp14423\_c0\_seq4; 461 69 2939 LEN=2939; translated  
MSTASDIHPDVEISCEFSANFASRSNALLPDMIYEDEAE GAVLTSVEQRAKDTQVGEDGF  
RPAVRGERPLLRMQSLGVSNN SFRSRPPSTNSLVSNRNSVQSQR SNRHSVAILQDYMQGR  
GSSIGMQNSFRSRGSSRRSSEP VVKAFQNP LKGKSANGVFQGRNQKARTLLRDLGKQKSD  
YSFKAETLRDGDPPFRFEVSRRHGNGKFDDNASTISFPESSSDESIPNSEDYEGYPDEGLP  
LLNNDKDLSEKWRARKLLKKNEWKAWKEFLNPVTVLQHLYDWFIRSTLLIAIPFFAISF  
VLFYFFGNPSTPNYIPGDVCFSSWWFDFAGRQLVMLELSRFSQAILVDGLIRRKKGF SKLM  
GPWVTVYFHQSRGWPFVLSAWGFWDLIFLEGNSRFKQHWFYFTGLQIFSKQNSGAYILSS  
HYYLRILFCMIIAGIARSLKETVLTLYFGRRMVATYKRKLQDIVDDVLVI SEVADLSMVS  
DNIADIVGIDLGN SNPESRDNSRKGREFSVIRWSDIQFDEEDLSDEDSL TNEMASQGET  
PSQDGRSKKIETEFYNQ GKPTQTLQGQK FYGSSTRFAMKSLLDKWE EEPINKGLK VSTKFX  
IQFVGFQLISLSILVYFSRSQSQDLFTADILRFSDALHYMDLDYPFNESFGLASTRNEMI  
SSAELVYKRLKMLSPDSVVLNFSAFEFLLIQEDGSEDEIKKKKL VNTFHPDPDGAIDL LLS  
FVQACDTVYRKL RFFRASVGNSSVIDSVLKSIINPVFYFLLVTILLMILEFNPM SMLVPL  
SLLLAGSFAFGSTCAKAFEGIMLIVGRRKWTFL LILLQQAAFNFPMKVTDADMLLNGS  
FSSFRFHKTDAIGDRIVI QDSAGADAPEMTMSWIVEDISVLSTTLRFGATNEIAQVSNSS  
IASARITNCNRSEKATVSILLHFHLSCHKD SKTMEKFREGVEQYVRDNRNTWDALFX  
>comp14423\_c0\_seq5; 424 69 2498 LEN=2676; translated  
MSTASDIHPDVEISCEFSANFASRSNALLPDMIYEDEAE GAVLTSVEQRAKDTQVGEDGF  
RPAVRGERPLLRMQSLGVSNN SFRSRPPSTNSLVSNRNSVQSQR SNRHSVAILQDYMQGR  
GSSIGMQNSFRSRGSSRRSSEP VVKAFQNP LKGKSANGVFQGRNQKARTLLRDLGKQKSD  
YSFKAETLRDGDPPFRFEVSRRHGNGKFDDNASTISFPESSSDESIPNSEDYEGYPDEGLP  
LLNNDKDLSEKWRARKLLKKNEWKAWKEFLNPVTVLQHLYDWFIRSTLLIAIPFFAISF  
VLFYFFGNPSTPNYIPGDVCFSSWWFDFAGRQLVMLELSRFSQAILVDGLIRRKKGF SKLM  
GPWVTVYFHQSRGWPFVLSAWGFWDLIFLEGNSRFKQHWFYFTGLQIFSKQNSGAYILSS  
HYYLRILFCMIIAGIARSLKETVLTLYFGRRMVATYKRKLQDIVDDVLVI SEVADLSMVS  
DNIADIVGIDLGN SNPESRDNSRKGREFSVIRWSDIQFDEEDLSDEDSL TNEMASQGET  
PSQDGRSKKIETEFYNQ GKPTQTLQGQK FYGSSTRFAMKSLLDKWE EEPINKGLK VSTKFX  
IQFVGFQLISLSILVYFSRSQSQDLFTADILRFSDALHYMDLDYPFNESFGLASTRNEMI  
SSAELVYKRLKMLSPDSVVLNFSAFEFLLIQEDGSEDEIKKKKL VNTFHPDPDGAIDL LLS  
FVQACDTVYRKL RFFRASVGNSSVIDSVLKSIINPVFYFLLVTILLMILEFNPM SMLVPL  
SLLLAGSFAFGSTCAKAFEGIMLIVGRR  
>comp14423\_c0\_seq6; 424 69 2498 LEN=3009; translated  
MSTASDIHPDVEISCEFSANFASRSNALLPDMIYEDEAE GAVLTSVEQRAKDTQVGEDGF  
RPAVRGERPLLRMQSLGVSNN SFRSRPPSTNSLVSNRNSVQSQR SNRHSVAILQDYMQGR  
GSSIGMQNSFRSRGSSRRSSEP VVKAFQNP LKGKSANGVFQGRNQKARTLLRDLGKQKSD  
YSFKAETLRDGDPPFRFEVSRRHGNGKFDDNASTISFPESSSDESIPNSEDYEGYPDEGLP  
LLNNDKDLSEKWRARKLLKKNEWKAWKEFLNPVTVLQHLYDWFIRSTLLIAIPFFAISF  
VLFYFFGNPSTPNYIPGDVCFSSWWFDFAGRQLVMLELSRFSQAILVDGLIRRKKGF SKLM

GPWVTVYFHQSRGWPFVLSAWGFWDLI FLEGNSRFKQHWFYFTGLQIFSKQNSGAYILSS  
HYLRILFCMIIAGIARSLKETVLTLYFGRRMVATYKRKLQDIVDDVLVI SEVADLSMVS  
DNIADIVGIDLGN SNPESRDNSRKGREFSVIRWSDIQFDEEDLSDEDSL TNEMASQGET  
PSQDGRSKKIETEFYNQ GKPTQTLQGQK FYGSSTRFAMKSLLDKWE EPINKGLKVSTKFX  
IQFGVFQLISLSILVYFSRSQSQDLFTADILRFSDALHYMDLDY PFNESFGLASTRNEMI  
SSAELVYKRLKMLSPDSVVLNFSAFEFLLIQEDGSEDEIKKKKLVNTFHPDPDGAIDL  
LSS FVQACDTVYRKLRFRRASVGNSSVIDSVLKSI INPVFYFLLVTILLMILEFNPM  
SMLVPL SSSLLLAGSFAFGSTCAKAFEGIMLIVGRR

>comp14423\_c0\_seq7; 290 1 1031 LEN=1209; translated  
TNWVYPHIDFSPKKLXYKRKLQDIVDDVLVI SEVADLSMVS DNIADIVGIDLGN SNPES  
RDNSRKGREFSVIRWSDIQFDEEDLSDEDSL TNEMASQGETPSQDGRSKKIETEFYNQ GK  
PTQTLQGQK FYGSSTRFAMKSLLDKWE EPINKGLKSQDLFTADILRFSDALHYMDLDY PF  
NESFGLASTRNEMISSAELVYKRLKMLSPDSVVLNFSAFEFLLIQEDGSEDEIKKKKLVN  
TFHPDPDGAIDLSS FVQACDTVYRKLRFRRASVGNSSVIDSVLKSI INPVFYFLLVTILL  
MILEFNPM SMLVPLSSLLLAGSFAFGSTCAKAFEGIMLIVGRR

>comp14423\_c0\_seq8; 412 193 2622 LEN=2800; translated  
MSTASDIRPDVEISCEFSANLASRSNALLPDMIYEDEAE GAVLTSVEQRAKDTQVGEDGF  
RPAVRGERP LLRMQSLGVSNN SFRSRPPSTNSLVS NRNSVQSQR SNRHSVAILQDYMQGR  
GSSIGMQNSFRSRGSSRRSSEP VVKAFQNP LKGSANGVFQGRNQKARTLLRDLGKQKSD  
YSFKAETLRDGD PFRFEVSRRHGNGKFD DNASTISFP ESSSDESIPNSEDYEGYPDEGLP  
LLNNDKDLSEKWRARKLLKKN EWKAWKEFLNPVTVLQHLYDWFIRSTLLIAIPFFA ISF  
VLFYFFGNPSTPNYIPGDVCF SWWFDFAGRQLVMLELSRFSQAILVDGLIRRKKGFSKLM  
GPWVTVYFHQSRGWPFVLSAWGFWDLI FLEGNSRFKQHWFYFTGLQIFSKQNSGAYILSS  
HYLRILFCMIIAGIARSLKETVLTLYFGRRMVATYKRKLQDIVDDVLVI SEVADLSMVS  
DNIADIVGIDLGN SNPESRDNSRKGREFSVIRWSDIQFDEEDLSDEDSL TNEMASQGET  
PSQDGRSKKIETEFYNQ GKPTQTLQGQK FYGSSTRFAMKSLLDKWE EPINKGLKVSTKFX  
IQFGVFQLISLSILVYFSRSQSQDLFTADILRFSDALHYMDLDY PFNESFGLASTRNEMI  
SSAELVYKRLKMLSPDSVVLNFSAFEFLLIQEDGSEDEIKKKKLVNTFHPDPDGAIDL  
LSS FVQACDTVYRKLRFRRASVGNSSVIDSVLKSI INPVFYFLLVTILLMILEFNPM  
SMLVPL SSSLLLAGSFAFGSTCAKAFEGIMLIVGRR

>comp14423\_c0\_seq9; 673 69 3062 LEN=3300; translated  
MSTASDIHPDVEISCEFSANFASRSNALLPDMIYEDEAE GAVLTSVEQRAKDTQVGEDGF  
RPAVRGERP LLRMQSLGVSNN SFRSRPPSTNSLVS NRNSVQSQR SNRHSVAILQDYMQGR  
GSSIGMQNSFRSRGSSRRSSEP VVKAFQNP LKGSANGVFQGRNQKARTLLRDLGKQKSD  
YSFKAETLRDGD PFRFEVSRRHGNGKFD DNASTISFP ESSSDESIPNSEDYEGYPDEGLP  
LLNNDKDLSEKWRARKLLKKN EWKAWKEFLNPVTVLQHLYDWFIRSTLLIAIPFFA ISF  
VLFYFFGNPSTPNYIPGDVCF SWWFDFAGRQLVMLELSRFSQAILVDGLIRRKKGFSKLM  
GPWVTVYFHQSRGWPFVLSAWGFWDLI FLEGNSRFKQHWFYFTGLQIFSKQNSGAYILSS  
HYLRILFCMIIAGIARSLKETVLTLYFGRRMVATYKRKLQDIVDDVLVI SEVADLSMVS  
DNIADIVGIDLGN SNPESRDNSRKGREFSVIRWSDIQFDEEDLSDEDSL TNEMASQGET  
PSQDGRSKKIETEFYNQ GKPTQTLQGQK FYGSSTRFAMKSLLDKWE EPINKGLKSQDLFT  
ADILRFSDALHYMDLDY PFNESFGLASTRNEMISSAELVYKRLKMLSPDSVVLNFSAFEFL  
LLIQEDGSEDEIKKKKLVNTFHPDPDGAIDLSS FVQACDTVYRKLRFRRASVGNSSVIDS  
VLKSI INPVFYFLLVTILLMILEFNPM SMLVPLSSLLLAGSFAFGSTCAKAFEGIMLIVG  
RRPYAIGDRIVI QDSAGADAP EMTMSWIVEDISVLSTTLRFGATNEIAQVSNSSIASARI  
TNCNRSEKATVSILLHFHLSCHKDSKTMEKFREGVEQYVRDNRNTWDALFFFRCENVDAN  
REEVVYRLSVRSIHPWQVSNRVYDRGELHQFCNALS YKLDINYEVPNQRSIMYYGGHLE  
NGGVQDYRLKVLKNSNIKNNGDCNFLT PAKTTVHSNA

>comp14423\_c0\_seq10; 351 600 1202 LEN=1504; translated  
MDLDYPFNESFGLASTRNEMISSAELVYKRLKMLSPDSVVLNFSAFEFLLIQEDGSEDEI  
KKKKLVNTFHPDPDGAIDLSS FVQACDTVYRKLRFRRASVGNSSVIDSVLKSI INPVFYF  
LLVTILLMILEFNPM SMLVPLSSLLLAGSFAFGSTCAKAFEGIMLIVGRRPYAIGDRIVI  
QDSAGADAP EMTMSWIVEGK

>comp14423\_c0\_seq11; 515 69 2417 LEN=2595; translated  
MSTASDIHPDVEISCEFSANFASRSNALLPDMIYEDEAE GAVLTSVEQRAKDTQVGEDGF  
RPAVRGERP LLRMQSLGVSNN SFRSRPPSTNSLVS NRNSVQSQR SNRHSVAILQDYMQGR  
GSSIGMQNSFRSRGSSRRSSEP VVKAFQNP LKGSANGVFQGRNQKARTLLRDLGKQKSD  
YSFKAETLRDGD PFRFEVSRRHGNGKFD DNASTISFP ESSSDESIPNSEDYEGYPDEGLP  
LLNNDKDLSEKWRARKLLKKN EWKAWKEFLNPVTVLQHLYDWFIRSTLLIAIPFFA ISF  
VLFYFFGNPSTPNYIPGDVCF SWWFDFAGRQLVMLELSRFSQAILVDGLIRRKKGFSKLM



GPWVTVYFHQSRGWPFVLSAWGFWDLIFLEGNSRFKQHWFYFTGLQIFSKQNSGAYILSS  
HYYLRLILFCMIIAGIARSLKETVLTLYFGRRMVATYKRKLQDIVDDVLVI SEVADLSMVS  
DNIADIVGIDLGN SNPESRDNSRKGREFSVIRWSDIQFDEEDLSDEDSL TNEMASQGET  
PSQDGRSKKIETEFYNQGKPTQTLQGQKIFYGSSTRFAMKSLLDKWEEPINKGLKSQDLFT  
ADILRFSDALHYMDLDYPFNESFGLASTRNEMISSAELVYKRLKMLSPDSVVLNFSAFEF  
LLIQEDGSEDEIKKKKLVNTFHPDPDGAIDL LSFVQACDTVYRKL RFFRASVGNSSVIDS  
VLKSI INPVFYFLLVTILLMILEFNPM SMLVPLSLLLAGSF AFGSTCAKAFEGIMLIVG  
RR

>comp14423\_c0\_seq12; 305 600 1112 LEN=1182; translated  
MDLDYPFNESFGLASTRNEMISSAELVYKRLKMLSPDSVVLNFSAFEFLLIQEDGSEDEI  
KKKKLVNTFHPDPDGAIDL LSFVQACDTVYRKL RFFRASVGNSSVIDS VLKSI INPVFYF  
LLVTILLMILEFNPM SMLVPLSLLLAGSF AFGSTCAKAFEGIMLIVGRR

>comp14423\_c0\_seq13; 357 600 1434 LEN=1434; translated  
MDLDYPFNESFGLASTRNEMISSAELVYKRLKMLSPDSVVLNFSAFEFLLIQEDGSEDEI  
KKKKLVNTFHPDPDGAIDL LSFVQACDTVYRKL RFFRASVGNSSVIDS VLKSI INPVFYF  
LLVTILLMILEFNPM SMLVPLSLLLAGSF AFGSTCAKAFEGIMLIVGRRPYAIGDRIVI  
QDSAGADAPEMTMSWIVEDISVLSTTLRFGATNEIAQVSNSSIASARITNCNRSEKATVS  
ILLHFHLSCHKDSKTMEKFREGVEQYVRDNRNTWDALFX

>comp14423\_c0\_seq14; 327 1 1472 LEN=1472; translated  
TNWVYPHIDFSPKKLXYKRKLQDIVDDVLVI SEVADLSMVS DNIADIVGIDLGN SNPES  
RDNSRKGREFSVIRWSDIQFDEEDLSDEDSL TNEMASQGETPSQDGRSKKIETEFYNQGK  
PTQTLQGQKIFYGSSTRFAMKSLLDKWEEPINKGLKSQDLFTADILRFSDALHYMDLDYPF  
NESFGLASTRNEMISSAELVYKRLKMLSPDSVVLNFSAFEFLLIQEDGSEDEIKKKKLVN  
TFHPDPDGAIDL LSFVQACDTVYRKL RFFRASVGNSSVIDS VLKSI INPVFYFLLVTILL  
MILEFNPM SMLVPLSLLLAGSF AFGSTCAKAFEGIMLIVGRRKWTFL LILLLQQAANF  
PMKVTDADMLLNGSFSSFRFHKTDAIGDRIVI QDSAGADAPEMTMSWIVEDISVLSTTLR  
FGATNEIAQVSNSSIASARITNCNRSEKATVSILLHFHLSCHKDSKTMEKFREGVEQYVR  
DNRNTWDALFX

>comp14423\_c0\_seq15; 342 1 1353 LEN=1353; translated  
TNWVYPHIDFSPKKLXYKRKLQDIVDDVLVI SEVADLSMVS DNIADIVGIDLGN SNPES  
RDNSRKGREFSVIRWSDIQFDEEDLSDEDSL TNEMASQGETPSQDGRSKKIETEFYNQGK  
PTQTLQGQKIFYGSSTRFAMKSLLDKWEEPINKGLKSQDLFTADILRFSDALHYMDLDYPF  
NESFGLASTRNEMISSAELVYKRLKMLSPDSVVLNFSAFEFLLIQEDGSEDEIKKKKLVN  
TFHPDPDGAIDL LSFVQACDTVYRKL RFFRASVGNSSVIDS VLKSI INPVFYFLLVTILL  
MILEFNPM SMLVPLSLLLAGSF AFGSTCAKAFEGIMLIVGRRPYAIGDRIVI QDSAGAD  
APEMTMSWIVEDISVLSTTLRFGATNEIAQVSNSSIASARITNCNRSEKATVSILLHFHLS  
CHKDSKTMEKFREGVEQYVRDNRNTWDALFX

>comp14423\_c0\_seq16; 646 193 3305 LEN=3543; translated  
MSTASDIRPDVEISCEFSANLASRSNALLPDMIYEDEAE GAVLTSVEQRAKDTQVGEDGF  
RPAVRGERPLLRMQSLGVSNN SFRSRPPSTNSLVSNRNSVQSQR SNRHSVAILODYMQGR  
GSSIGMQNSFRSRGSSRRSSEP VVKAFQNP LK GK SANGVFQGRNQKARTLLRDLGKQKSD  
YSFKAETLRDGPFRFEVSRRHGNGKFDDNASTISFP ESSDESIPNSEDEYEGYPDEGLP  
LLNNDKDLSEKWRARKLLKKN EWKAWKEFLNPVTVLQHLYDWFIRSTLLIAIPFFAISF  
VLFYFFGNPSTPNYIPGDVCF SWWFDFAGRQLVMLELSRFSQAILVDGLIRRKKGF SKLM  
GPWVTVYFHQSRGWPFVLSAWGFWDLIFLEGNSRFKQHWFYFTGLQIFSKQNSGAYILSS  
HYYLRLILFCMIIAGIARSLKETVLTLYFGRRMVATYKRKLQDIVDDVLVI SEVADLSMVS  
DNIADIVGIDLGN SNPESRDNSRKGREFSVIRWSDIQFDEEDLSDEDSL TNEMASQGET  
PSQDGRSKKIETEFYNQGKPTQTLQGQKIFYGSSTRFAMKSLLDKWEEPINKGLKSQDLFT  
ADILRFSDALHYMDLDYPFNESFGLASTRNEMISSAELVYKRLKMLSPDSVVLNFSAFEF  
LLIQEDGSEDEIKKKKLVNTFHPDPDGAIDL LSFVQACDTVYRKL RFFRASVGNSSVIDS  
VLKSI INPVFYFLLVTILLMILEFNPM SMLVPLSLLLAGSF AFGSTCAKAFEGIMLIVG  
RRKWTFL LILLLQQAANFPMKVTDADMLLNGSFSSFRFHKTDAIGDRIVI QDSAGADAP  
EMTMSWIVEDISVLSTTLRFGATNEIAQVSNSSIASARITNCNRSEKATVSILLHFHLS  
CHKDSKTMEKFREGVEQYVRDNRNTWDALFFRCENVDANREEVYRLSVRSIHPWQVSNR  
VYRDRGELHQFCNALSYKLDINYEVPNQRSIMYYGGHLENGGVQDYRLKVLKNSNIKNNG  
DCNFLTPAKTTVHSNA

>comp14423\_c0\_seq17; 573 193 3337 LEN=3575; translated  
MSTASDIRPDVEISCEFSANLASRSNALLPDMIYEDEAE GAVLTSVEQRAKDTQVGEDGF  
RPAVRGERPLLRMQSLGVSNN SFRSRPPSTNSLVSNRNSVQSQR SNRHSVAILODYMQGR  
GSSIGMQNSFRSRGSSRRSSEP VVKAFQNP LK GK SANGVFQGRNQKARTLLRDLGKQKSD

YSFKAETLRDGDPPFRFEVSRRHGNGKFDDNASTISFPESSSDESIPNSEDYEGYPDEGLP  
LLNNDKDLSEKWRARKLLKKNEWKAWKEFLNPVTVLQHLYDWFIRSTLLIAIPFFAISF  
VLFYFFGNPSTPNYIPGDVCFSSWFFDFAGRQLVMLELSRFSQAILVDGLIRRKKGF SKLM  
GPWVTVYFHQSRGWPFVLSAWGFWDLI FLEGNSRFKQHWFYFTGLQIFSKQNSGAYILSS  
HYLRILFCMIIAGIARSLKETVLTLYFGRRMVATYKRKLQDIVDDVLVI SEVADLSMVS  
DNIADIVGIDLGNAPESRDNSRKGREFSVIRWSDIQFDEEDLSDEDSL TNEMASQGET  
PSQDGRSKKIEETEFYNQKPTQTLQGQKFGSSTRFAMKSLLDKWEEPINKGLKVSTKFX  
IQFGVFQLISLSILVYFSRSQSQDLFTADILRFSDALHYMDLDYPFNESFGLASTRNEMI  
SSAELVYKRLKMLSPDSVVLNFSAFEFLLIQEDGSEDEIKKKKLVNTFHPDPDGAIDL  
FVQACDTVYRKLRFRRASVGNSSVIDSVLKSIINPVFYFLLVTILLMILEFNPMSMLVPL  
SSLLLAGSFAFGSTCAKAFEGIMLIVGRRPYAIGDRIVI QDSAGADAPEMTMFGLLKASE  
VISPISLFCFSVLIVLFLFVDISVLSTTLRFGATNEIAQVSNSSIASARITNCNRSEKAT  
VSILLHFHLSCHKDSKTMEKFREGVEQYVRDNRNTWDALFFRCENVDANREEVVYRLSV  
RSIHPWQVSNRVYRDRGELHQFCNALS YKLDINYEVPNQRSIMYYGGHLENGGVQDYRLK  
VLKNSNIKNNGDCNFLTPAKTTVHSNA

>comp14423\_c0\_seq18; 664 193 3256 LEN=3494; translated  
MSTASDIRPDVEISCEFSANLASRSNALLPDMIYEDEAEAGAVLTSVEQRAKDTQVGEDGF  
RPAVRGERPLLRMQSLGVSNNFSRSPSTNSLVSNRNSVQSQRSNRHSVAILQDYMQGR  
GSSIGMQNSFRSRGSSRRSSEPVKAFQNP LKGSANGVFQGRNQKARTLLRDLGKQKSD  
YSFKAETLRDGDPPFRFEVSRRHGNGKFDDNASTISFPESSSDESIPNSEDYEGYPDEGLP  
LLNNDKDLSEKWRARKLLKKNEWKAWKEFLNPVTVLQHLYDWFIRSTLLIAIPFFAISF  
VLFYFFGNPSTPNYIPGDVCFSSWFFDFAGRQLVMLELSRFSQAILVDGLIRRKKGF SKLM  
GPWVTVYFHQSRGWPFVLSAWGFWDLI FLEGNSRFKQHWFYFTGLQIFSKQNSGAYILSS  
HYLRILFCMIIAGIARSLKETVLTLYFGRRMVATYKRKLQDIVDDVLVI SEVADLSMVS  
DNIADIVGIDLGNAPESRDNSRKGREFSVIRWSDIQFDEEDLSDEDSL TNEMASQGET  
PSQDGRSKKIEETEFYNQKPTQTLQGQKFGSSTRFAMKSLLDKWEEPINKGLKSQDLFT  
ADILRFSDALHYMDLDYPFNESFGLASTRNEMISSAELVYKRLKMLSPDSVVLNFSAFE  
LLIQEDGSEDEIKKKKLVNTFHPDPDGAIDL SFVQACDTVYRKLRFRRASVGNSSVIDS  
VLKSIINPVFYFLLVTILLMILEFNPMSMLVPLSSLLLAGSFAFGSTCAKAFEGIMLIVG  
RRPYAIGDRIVI QDSAGADAPEMTMFGLLKASEVISPISLFCFSVLIVLFLFVDISVLST  
TLRFGATNEIAQVSNSSIASARITNCNRSEKATVSILLHFHLSCHKDSKTMEKFREGVEQ  
YVRDNRNTWDALFFRCENVDANREEVVYRLSVRSIHPWQVSNRVYRDRGELHQFCNALS  
YKLDINYEVPNQRSIMYYGGHLENGGVQDYRLKVLKNSNIKNNGDCNFLTPAKTTVHSNA

>comp14423\_c0\_seq19; 570 193 3267 LEN=3505; translated  
MSTASDIRPDVEISCEFSANLASRSNALLPDMIYEDEAEAGAVLTSVEQRAKDTQVGEDGF  
RPAVRGERPLLRMQSLGVSNNFSRSPSTNSLVSNRNSVQSQRSNRHSVAILQDYMQGR  
GSSIGMQNSFRSRGSSRRSSEPVKAFQNP LKGSANGVFQGRNQKARTLLRDLGKQKSD  
YSFKAETLRDGDPPFRFEVSRRHGNGKFDDNASTISFPESSSDESIPNSEDYEGYPDEGLP  
LLNNDKDLSEKWRARKLLKKNEWKAWKEFLNPVTVLQHLYDWFIRSTLLIAIPFFAISF  
VLFYFFGNPSTPNYIPGDVCFSSWFFDFAGRQLVMLELSRFSQAILVDGLIRRKKGF SKLM  
GPWVTVYFHQSRGWPFVLSAWGFWDLI FLEGNSRFKQHWFYFTGLQIFSKQNSGAYILSS  
HYLRILFCMIIAGIARSLKETVLTLYFGRRMVATYKRKLQDIVDDVLVI SEVADLSMVS  
DNIADIVGIDLGNAPESRDNSRKGREFSVIRWSDIQFDEEDLSDEDSL TNEMASQGET  
PSQDGRSKKIEETEFYNQKPTQTLQGQKFGSSTRFAMKSLLDKWEEPINKGLKVSTKFX  
IQFGVFQLISLSILVYFSRSQSQDLFTADILRFSDALHYMDLDYPFNESFGLASTRNEMI  
SSAELVYKRLKMLSPDSVVLNFSAFEFLLIQEDGSEDEIKKKKLVNTFHPDPDGAIDL  
FVQACDTVYRKLRFRRASVGNSSVIDSVLKSIINPVFYFLLVTILLMILEFNPMSMLVPL  
SSLLLAGSFAFGSTCAKAFEGIMLIVGRRPYAIGDRIVI QDSAGADAPEMTMSWIVEDIS  
VLSTTLRFGATNEIAQVSNSSIASARITNCNRSEKATVSILLHFHLSCHKDSKTMEKFRE  
GVEQYVRDNRNTWDALFFRCENVDANREEVVYRLSVRSIHPWQVSNRVYRDRGELHQFC  
NALS YKLDINYEVPNQRSIMYYGGHLENGGVQDYRLKVLKNSNIKNNGDCNFLTPAKTTV  
HSNA

>comp14423\_c0\_seq20; 515 69 2417 LEN=3489; translated  
MSTASDIHPDVEISCEFSANFASRSNALLPDMIYEDEAEAGAVLTSVEQRAKDTQVGEDGF  
RPAVRGERPLLRMQSLGVSNNFSRSPSTNSLVSNRNSVQSQRSNRHSVAILQDYMQGR  
GSSIGMQNSFRSRGSSRRSSEPVKAFQNP LKGSANGVFQGRNQKARTLLRDLGKQKSD  
YSFKAETLRDGDPPFRFEVSRRHGNGKFDDNASTISFPESSSDESIPNSEDYEGYPDEGLP  
LLNNDKDLSEKWRARKLLKKNEWKAWKEFLNPVTVLQHLYDWFIRSTLLIAIPFFAISF  
VLFYFFGNPSTPNYIPGDVCFSSWFFDFAGRQLVMLELSRFSQAILVDGLIRRKKGF SKLM  
GPWVTVYFHQSRGWPFVLSAWGFWDLI FLEGNSRFKQHWFYFTGLQIFSKQNSGAYILSS

HYLLRILFCMIIAGIARSLKETVLTLYFGRRMVATYKRKLQDIVDDVLVI SEVADLSMVS  
DNIADIVGIDLGNSSNAPESRDNSRKGREFSVIRWSDIQFDEEDLSDEDSL TNEMASQGET  
PSQDGRSKKIETEFYNQGKPTQTLQGQKIFYGSSTRFAMKSLLDKWEEPINKGLKSQDLFT  
ADILRFSDALHYMDLDYPFNESFGLASTRNEMISSAELVYKRLKMLSPDSVVLNFSAFEF  
LLIQEDGSEDEIKKKKL VNTFHPDPDGAIDL LSFVQACDTVYRKL RFFRASVGNSSVIDS  
VLKSI INPVFYFLLVTILLMILEFNPM SMLVPLSSLLLAGSFAFGSTCAKAFEGIMLIVG  
RR

>comp14423\_c0\_seq21; 470 69 2588 LEN=2890; translated  
MSTASDIHPDVEISCEFSANFASRSNALLPDMIYEDEAE GAVLTSVEQRAKDTQVGEDGF  
RPAVRGERPLLRMQSLGVSNNFSRSPSTNSLVSNRNSVQSQR SNRHSVAILQDYMQGR  
GSSIGMQNSFRSRGSSRRSSEP VVKAFQNP LKGSANGVFQGRNQKARTLLRDLGKQKSD  
YSFKAETLRDGD PFRFEVSRRHGNGKFDDNASTISFP ESSSDESIPNSEDYEGYPDEGLP  
LLNNDKDLSEKWRARKLLKKN EWKAWKEFLNPVTVLQHLYDWFIRSTLLIAIPFFAIF  
VLFYFFGNPSTPNYIPGDVCF SWWFDFAGRQLVMLELSRFSQAILVDGLIRRKKGF SKLM  
GPWVTVYFHQSRGWPFVLSAWGFWDLI FLEGNSRFKQHWFYFTGLQIFSKQNSGAYILSS  
HYLLRILFCMIIAGIARSLKETVLTLYFGRRMVATYKRKLQDIVDDVLVI SEVADLSMVS  
DNIADIVGIDLGNSSNAPESRDNSRKGREFSVIRWSDIQFDEEDLSDEDSL TNEMASQGET  
PSQDGRSKKIETEFYNQGKPTQTLQGQKIFYGSSTRFAMKSLLDKWEEPINKGLK VSTKFX  
IQFGVFQLISLSILVYFSRSQSQDLFTADILRFSDALHYMDLDYPFNESFGLASTRNEMI  
SSAELVYKRLKMLSPDSVVLNFSAFEFLLIQEDGSEDEIKKKKL VNTFHPDPDGAIDL LLS  
FVQACDTVYRKL RFFRASVGNSSVIDSVLKSI INPVFYFLLVTILLMILEFNPM SMLVPL  
SSLLLAGSFAFGSTCAKAFEGIMLIVGRRPYAIGDRIVI QDSAGADAP EMTMSWIVEGK

>comp14423\_c0\_seq22; 658 69 3181 LEN=3419; translated  
MSTASDIHPDVEISCEFSANFASRSNALLPDMIYEDEAE GAVLTSVEQRAKDTQVGEDGF  
RPAVRGERPLLRMQSLGVSNNFSRSPSTNSLVSNRNSVQSQR SNRHSVAILQDYMQGR  
GSSIGMQNSFRSRGSSRRSSEP VVKAFQNP LKGSANGVFQGRNQKARTLLRDLGKQKSD  
YSFKAETLRDGD PFRFEVSRRHGNGKFDDNASTISFP ESSSDESIPNSEDYEGYPDEGLP  
LLNNDKDLSEKWRARKLLKKN EWKAWKEFLNPVTVLQHLYDWFIRSTLLIAIPFFAIF  
VLFYFFGNPSTPNYIPGDVCF SWWFDFAGRQLVMLELSRFSQAILVDGLIRRKKGF SKLM  
GPWVTVYFHQSRGWPFVLSAWGFWDLI FLEGNSRFKQHWFYFTGLQIFSKQNSGAYILSS  
HYLLRILFCMIIAGIARSLKETVLTLYFGRRMVATYKRKLQDIVDDVLVI SEVADLSMVS  
DNIADIVGIDLGNSSNAPESRDNSRKGREFSVIRWSDIQFDEEDLSDEDSL TNEMASQGET  
PSQDGRSKKIETEFYNQGKPTQTLQGQKIFYGSSTRFAMKSLLDKWEEPINKGLKSQDLFT  
ADILRFSDALHYMDLDYPFNESFGLASTRNEMISSAELVYKRLKMLSPDSVVLNFSAFEF  
LLIQEDGSEDEIKKKKL VNTFHPDPDGAIDL LSFVQACDTVYRKL RFFRASVGNSSVIDS  
VLKSI INPVFYFLLVTILLMILEFNPM SMLVPLSSLLLAGSFAFGSTCAKAFEGIMLIVG  
RRKWTFL LILLQQA AFNFPMKVTDADMLLNGSFSSFRFHK TDAIGDRIVI QDSAGADAP  
EMTMSWIVEDISVLSTTLRFGATNEIAQVSNSSIASARITNCNRSEKATVSILLHFHLS  
HKDSKTMEKFREGVEQYVRDNRNTWDALFFRCENVDANREEVYRLSVRSIHPWQVSNR  
VYRDRGELHQFCNALS YKLDINYEVPNQRSIMYYGGHLENGGVQDYRLKVLKNSNIKNNG  
DCNFLTPAKTTVHSNA

>comp14423\_c0\_seq23; 582 69 3143 LEN=3381; translated  
MSTASDIHPDVEISCEFSANFASRSNALLPDMIYEDEAE GAVLTSVEQRAKDTQVGEDGF  
RPAVRGERPLLRMQSLGVSNNFSRSPSTNSLVSNRNSVQSQR SNRHSVAILQDYMQGR  
GSSIGMQNSFRSRGSSRRSSEP VVKAFQNP LKGSANGVFQGRNQKARTLLRDLGKQKSD  
YSFKAETLRDGD PFRFEVSRRHGNGKFDDNASTISFP ESSSDESIPNSEDYEGYPDEGLP  
LLNNDKDLSEKWRARKLLKKN EWKAWKEFLNPVTVLQHLYDWFIRSTLLIAIPFFAIF  
VLFYFFGNPSTPNYIPGDVCF SWWFDFAGRQLVMLELSRFSQAILVDGLIRRKKGF SKLM  
GPWVTVYFHQSRGWPFVLSAWGFWDLI FLEGNSRFKQHWFYFTGLQIFSKQNSGAYILSS  
HYLLRILFCMIIAGIARSLKETVLTLYFGRRMVATYKRKLQDIVDDVLVI SEVADLSMVS  
DNIADIVGIDLGNSSNAPESRDNSRKGREFSVIRWSDIQFDEEDLSDEDSL TNEMASQGET  
PSQDGRSKKIETEFYNQGKPTQTLQGQKIFYGSSTRFAMKSLLDKWEEPINKGLK VSTKFX  
IQFGVFQLISLSILVYFSRSQSQDLFTADILRFSDALHYMDLDYPFNESFGLASTRNEMI  
SSAELVYKRLKMLSPDSVVLNFSAFEFLLIQEDGSEDEIKKKKL VNTFHPDPDGAIDL LLS  
FVQACDTVYRKL RFFRASVGNSSVIDSVLKSI INPVFYFLLVTILLMILEFNPM SMLVPL  
SSLLLAGSFAFGSTCAKAFEGIMLIVGRRPYAIGDRIVI QDSAGADAP EMTMSWIVEDIS  
VLSTTLRFGATNEIAQVSNSSIASARITNCNRSEKATVSILLHFHLSCHKDSKTMEKFR  
GVEQYVRDNRNTWDALFFRCENVDANREEVYRLSVRSIHPWQVSNRVYRDRGELHQFC  
NALS YKLDINYEVPNQRSIMYYGGHLENGGVQDYRLKVLKNSNIKNNGDCNFLTPAKTTV  
HSNA

>comp14423\_c0\_seq24; 412 193 2622 LEN=3133; translated  
MSTASDIRPDVEISCEFSANLASRSNALLPDMIYEDEAEAVLTSVEQRAKDTQVGEDGF  
RPAVRGERPLLRMQSLGVSNNFSRSPSTNSLVSNRNSVQSQRSNRHSVAILQDYMQGR  
GSSIGMQNSFRSRGSSRRSSEPVKAFQNP LKGSANGVFQGRNQKARTLLRDLGKQKSD  
YSFKAETLRDGDPPFRFEVSRRHGNGKFDDNASTISFPESSEDESIPNSEDYEGYPDEGLP  
LLNNDKDLSEKWRARKLLKKNEWKAWKEFLNPVTVLQHLYDWFIRSTLLIAIPFFAISF  
VLFYFFGNPSTPNYIPGDVCFSSWWFDFAGRQLVMLELSRFSQAILVDGLIRRKKGF SKLM  
GPWVTVYFHQSRGWPFVLSAWGFWDLI FLEGNSRFKQHWFYFTGLQIFSKQNSGAYILSS  
HYLRILFCMIIAGIARSLKETVLTLYFGRRMVATYKRKLQDIVDDVLVI SEVADLSMVS  
DNIADIVGIDLGN SNPESRDNSRKGREFSVIRWSDIQFDEEDLSDEDSL TNEMASQGET  
PSQDGRSKKIETEFYNQ GKPTQTLQGQK FYGSSTRFAMKSLLDKWE EPINKGLKVSTKFX  
IQFGVFQLISLSILVYFSRSQSQDLFTADILRFSDALHYMDLDY PFNESFGLASTRNEMI  
SSAELVYKRLKMLSPDSVVLNFSAFEFLLIQEDGSEDEIKKKKLVNTFHPDPDGAIDL LS  
FVQACDTVYRKLRFRRASVGNSSVIDSVLKSI INPVFYFLLVTILLMILEFNPM SMLVPL  
SSLLLAGSF AFGSTCAKAFEGIMLIVGRR

>comp14423\_c0\_seq26; 305 600 1112 LEN=1234; translated  
MDLDYPFNESFGLASTRNEMISSAELVYKRLKMLSPDSVVLNFSAFEFLLIQEDGSEDEI  
KKKKLVNTFHPDPDGAIDL LLSFVQACDTVYRKLRFRRASVGNSSVIDSVLKSI INPVFYF  
LLVTILLMILEFNPM SMLVPLSSLLLAGSF AFGSTCAKAFEGIMLIVGRR

>comp14423\_c0\_seq27; 336 1 1121 LEN=1423; translated  
TNWYPHIDFSPKKLXYKRKLQDIVDDVLVI SEVADLSMVS DNIADIVGIDLGN SNPES  
RDNSRKGREFSVIRWSDIQFDEEDLSDEDSL TNEMASQGETPSQDGRSKKIETEFYNQ GK  
PTQTLQGQK FYGSSTRFAMKSLLDKWE EPINKGLKSQDLFTADILRFSDALHYMDLDY PF  
NESFGLASTRNEMISSAELVYKRLKMLSPDSVVLNFSAFEFLLIQEDGSEDEIKKKKLVN  
TFHPDPDGAIDL LLSFVQACDTVYRKLRFRRASVGNSSVIDSVLKSI INPVFYFLLVTILL  
MILEFNPM SMLVPLSSLLLAGSF AFGSTCAKAFEGIMLIVGRRPYAIGDRIVI QDSAGAD  
APEMTMSWIVEGK

>comp14423\_c0\_seq28; 503 193 2541 LEN=2719; translated  
MSTASDIRPDVEISCEFSANLASRSNALLPDMIYEDEAEAVLTSVEQRAKDTQVGEDGF  
RPAVRGERPLLRMQSLGVSNNFSRSPSTNSLVSNRNSVQSQRSNRHSVAILQDYMQGR  
GSSIGMQNSFRSRGSSRRSSEPVKAFQNP LKGSANGVFQGRNQKARTLLRDLGKQKSD  
YSFKAETLRDGDPPFRFEVSRRHGNGKFDDNASTISFPESSEDESIPNSEDYEGYPDEGLP  
LLNNDKDLSEKWRARKLLKKNEWKAWKEFLNPVTVLQHLYDWFIRSTLLIAIPFFAISF  
VLFYFFGNPSTPNYIPGDVCFSSWWFDFAGRQLVMLELSRFSQAILVDGLIRRKKGF SKLM  
GPWVTVYFHQSRGWPFVLSAWGFWDLI FLEGNSRFKQHWFYFTGLQIFSKQNSGAYILSS  
HYLRILFCMIIAGIARSLKETVLTLYFGRRMVATYKRKLQDIVDDVLVI SEVADLSMVS  
DNIADIVGIDLGN SNPESRDNSRKGREFSVIRWSDIQFDEEDLSDEDSL TNEMASQGET  
PSQDGRSKKIETEFYNQ GKPTQTLQGQK FYGSSTRFAMKSLLDKWE EPINKGLKSQDLFT  
ADILRFSDALHYMDLDY PFNESFGLASTRNEMISSAELVYKRLKMLSPDSVVLNFSAFEFL  
LLIQEDGSEDEIKKKKLVNTFHPDPDGAIDL LLSFVQACDTVYRKLRFRRASVGNSSVIDS  
VLKSI INPVFYFLLVTILLMILEFNPM SMLVPLSSLLLAGSF AFGSTCAKAFEGIMLIVG  
RR

>comp14423\_c0\_seq29; 449 193 3063 LEN=3063; translated  
MSTASDIRPDVEISCEFSANLASRSNALLPDMIYEDEAEAVLTSVEQRAKDTQVGEDGF  
RPAVRGERPLLRMQSLGVSNNFSRSPSTNSLVSNRNSVQSQRSNRHSVAILQDYMQGR  
GSSIGMQNSFRSRGSSRRSSEPVKAFQNP LKGSANGVFQGRNQKARTLLRDLGKQKSD  
YSFKAETLRDGDPPFRFEVSRRHGNGKFDDNASTISFPESSEDESIPNSEDYEGYPDEGLP  
LLNNDKDLSEKWRARKLLKKNEWKAWKEFLNPVTVLQHLYDWFIRSTLLIAIPFFAISF  
VLFYFFGNPSTPNYIPGDVCFSSWWFDFAGRQLVMLELSRFSQAILVDGLIRRKKGF SKLM  
GPWVTVYFHQSRGWPFVLSAWGFWDLI FLEGNSRFKQHWFYFTGLQIFSKQNSGAYILSS  
HYLRILFCMIIAGIARSLKETVLTLYFGRRMVATYKRKLQDIVDDVLVI SEVADLSMVS  
DNIADIVGIDLGN SNPESRDNSRKGREFSVIRWSDIQFDEEDLSDEDSL TNEMASQGET  
PSQDGRSKKIETEFYNQ GKPTQTLQGQK FYGSSTRFAMKSLLDKWE EPINKGLKVSTKFX  
IQFGVFQLISLSILVYFSRSQSQDLFTADILRFSDALHYMDLDY PFNESFGLASTRNEMI  
SSAELVYKRLKMLSPDSVVLNFSAFEFLLIQEDGSEDEIKKKKLVNTFHPDPDGAIDL LS  
FVQACDTVYRKLRFRRASVGNSSVIDSVLKSI INPVFYFLLVTILLMILEFNPM SMLVPL  
SSLLLAGSF AFGSTCAKAFEGIMLIVGRRKWTFL LILLQQA AFNFPK VTDADMLLNGS  
FSSFRFHKTDAIGDRIVI QDSAGAD APEMTMSWIVEDISVLSTTLRF GATNEIAQVSNSS  
IASARITNCNRSEKATVSILLHFHLSCHKDKS KTMEKFR EGVEQYVRDNRNTWDALFX

>comp14423\_c0\_seq30; 503 193 2541 LEN=3613; translated

MSTASDIRPDVEISCEFSANLASRSNALLPDMIYEDEAEAGAVLTSVEQRAKDTQVGEDGF  
RPAVRGERPLLRMQSLGVSNNNSFRSRPSTNSLVSNRNSVQSQRSNRHSVAILQDYMQGR  
GSSIGMQNSFRSRGSSRRSSEPVVKAQFQNPGLKGSANGVFQGRNQKARTLLRDLGKQKSD  
YSFKAETLRDGDPPFRFEVSRRHGNGKFDNASTISFPESSSDESIPNSEDYEGYPDEGLP  
LLNNDKDLSEKWRARKLLKKNNEWKAWKEFLNPVTVLQHLVDWFIRSTLLIAIPFFAISF  
VLFYFFGNPSTPNYIPGDVCFSWWFDFAGRQLVMLELSRFSQAAILVDGLIRRKKGFSKLM  
GPWVTVYFHQSRGWPFVLSAWGFWDLI FLEGNRFRKQHWFYFTGLQIFSKQNSGAYILSS  
HYLRILFCMIIAGIARSLKETVLTLYFGRRMVATYKRKLQDIVDDVLVISEVADLSMVS  
DNIADIVGIDLGNSNAPESRDNSRKGREFSVIRWSDIQFDEEDLSDEDSL TNEMASQGET  
PSQDGRSKKIEFETFYNQGKPTQTLQGQKFYGSSTRFAMKSLLDKWEEPINKGLKSQDLFT  
ADILRFSDALHYMDLDYPFNESFGLASTRNEMISSAELVYKRLKMLSPDSVVLNFSAFEF  
LLIQEDGSEDEIKKKKLVNTFFHPDPDGAIDLFSVQACDTVYRKLRFRRASVGNSSVIDS  
VLKSIINPVFYFLLVITILLMILEFNPMMLVPLSLLLAGSFAFGSTCAKAFEGIMLIVG  
RR

>comp14424\_c0\_seq1; 688 109 1272 LEN=2053; translated  
MAEESILAEASSKKKAKKDKKKEDKKKSKKRKLLDDGDGSDHGDEPIVDQGSSEVSNDT  
NKLDEGEKVKDKPKKKKKMKEAKSRLKSKKEEKAELMKKVPPLTDDDGIAAYTKFQIRQMLK  
RVKKGGLPPVATAKEQEERQNEARLRREEQAELAGLASERNMQDSDEESASDNGDDGSG  
DDNDDNNDNTAGDGDNDVSNDAVCAPASAVNSSKEDGAPTKKAKRNKVVADYVCQACK  
NRHQPAHWIYDCPKITVRGTNKKRKKDRGINDPDSRKVFVSGLPFEAKVKAVEDFFSVT  
KNCGTVAAVRLIKFEDTGRGNGQAYISFDTDAGAQRALLSGTTIDAELLSSSDSKKKKK  
DDGAPTKRRELKLVSKVLNRRKTKRG

>comp14425\_c0\_seq2; 554 122 2413 LEN=3035; translated  
MPSSQHNGSQQFDNLKVVYHFDDNDRSEAIRAVQHVASLAMRDARNESARSVIDFGMM  
EPSFHGQRTLRSSDLYSEQSYSSYSRERPIFHGSGISRYGDNESESVRSDDLMVEDRL  
SAFAEIKKRNNKKAGEATAYVRKSLAQLGNPVKNNPREAWMCGVTGKRFSSYEAAASEHED  
YHIREIVAELGWAQNGLEHDNSFGRADRDSEVFQTARENFAFEGSQREHLQLDEDFKTY  
EQASKASVANS GASPAPARPDFLAVSSRNLNHQFALSSEIGPPPIGHRGILSNKNNPYQ  
SDDFVVLADEALTDVCKKAELVLSQLEQEAFFELESYSKDKYYYDMLEQREIERQRDGA  
YSRFRTEGKNLAEKIQNKFVDAYAIMKKGKSKKATSAVDHYKRKIESDSVVKQKIENTKQ  
TLYVNVIVKNSIQVVSHELDRLARQRWEEHKQKEGKLNDRNDESRAQFEKFKARAQQQL  
VQLAGLALASDFTPRRIAVQLSNDLYRLLTPRLKRRGVFIESEIEYRVGPFVFLAVNVLG  
VDWSRLVEKTYVDVNERRAKWIRKAELDNANGVTRRYGPLASLIRLSHMTSMEVLAGFVA  
TLYYTHWIVYTPICWFLYRFCIGETFRKYFLSSVTDEIFYIVEQKGMEMNIQIQDAESQT  
VCMLSALQEIRTDNRALKKKKQEKAGSGEGEAELLGPLLGPAILKDDNRAAPGIPDGFVFP  
NLEYVSLELNLQVGFQRLRWALLNSESSFMKDAVMKTELNYDK

>comp14425\_c0\_seq3; 601 122 2845 LEN=2915; translated  
MPSSQHNGSQQFDNLKVVYHFDDNDRSEAIRAVQHVASLAMRDARNESARSVIDFGMM  
EPSFHGQRTLRSSDLYSEQSYSSYSRERPIFHGSGISRYGDNESESVRSDDLMVEDRL  
SAFAEIKKRNNKKAGEATAYVRKSLAQLGNPVKNNPREAWMCGVTGKRFSSYEAAASEHED  
YHIREIVAELGWAQNGLEHDNSFGRADRDSEVFQTARENFAFEGSQREHLQLDEDFKTY  
EQASKASVANS GASPAPARPDFLAVSSRNLNHQFALSSEIGPPPIGHRGILSNKNNPYQ  
SDDFVVLADEALTDVCKKAELVLSQLEQEAFFELESYSKDKYYYDMLEQREIERQRDGA  
YSRFRTEGKNLAEKIQNKFVDAYAIMKKGKSKKATSAVDHYKRKIESDSVVKQKIENTKQ  
TLYVNVIVKNSIQVVSHELDRLARQRWEEHKQKEGKLNDRNDESRAQFEKFKARAQQQL  
VQLAGLALASDFTPRRIAVQLSNDLYRLLTPRLKRRGVFIESEIEYRVGPFVFLAVNVLG  
VDWSRLVEKTYVDVNERRAKWIRKAELDNANGVTRRYGPLASLIRLSHMTSMEVLAGFVA  
TLYYTHWIVYTPICWFLYRFCIGETFRKYFLSSVTDEIFYIVEQKGMEMNIQIQDAESQT  
VCMLSALQEIRTDNRALKKKKQEKAGSGEGEAELLGPLLGPAILKDDNRAAPGIPDGFVFP  
NLEYVSLELNLQVGFQRLRWALLNSESSFMKDAVMKTELNYDNIVSGEWNKFNDEIGLSK  
LPDSVKHEDYIGAERKTSYLMPKSAFVAANTAHETAYIECYNDYCFSLKLRALTPDVPY  
STFEAWTKYVVINTGNKSCKLICSL EAVFPNGPPMVSRIKSGMRDGVGEVVFVKTGEAFQ  
RYANAYP

>comp14426\_c0\_seq1; 389 147 2499 LEN=2929; translated  
MINELDQTAMKRCPCAAAETS GTGRSLQLILTVLFLAIKATLKYKSNTTASGYPHLEQK  
VDRFPQQVYFKGENKNNVLT LINNEERVSLPLASPLPTPSLVSEEKLYIPSSRSRSDDKI  
KRLNEQTQEHRQTSSFRKRSRKNANDSQREHFRKGHNIDDVHFPASMKKRHRILICSH  
DQTQDQCHSQFLSMYGNIP IERSGNRNLGNSYRNKVVVRNLESVRALSVEIDAQTLAK  
VHIDNEFVYLDLFLRRPLVAGSIREYIPSRKDNENRNLQENSQKVPWGLEAIIHAQDVWQ  
DYDVHGEVGVKICILDTGVQASHEDFRQSNLDGFYGNFVSPHWYEDNSGHGTHIGTVTA

SNNTIGVLKFKVDQLQCSGSFRSFLSNNRNI AVYFFLQRNAPAAETFVVRVFDDGKRLYD  
FADGTTFFSTDLIAAASICNEWGANIISASLGGSNYNEIEEKFFKELFYKSGIFTVAAAGN  
GGNTNNVYPAAAYDGVLSVGAVDESLSLANFSTFNPIITDVLAPGNHFTKVELIENLKFDR  
PANIFFDLTRMSFSPGIFGNNIGVNILSTFRGNKYATLSGTSMVPHVTGTLALMLS YVL  
KTGITPDVGDILNALKHSTALTANITVNHEYSIDEAEPSSIGVIDSYAAIQYLAGDRRVP  
ENRGSFLSRRKSDPNVVICNNLIHLDIFTDKSGNETYYCLKRLSDDQMIWSTGPNMLE  
NYSKYSESSCLEVDKYCYQFVVRDVGGDGI SEGGGIVVFFRGNEVYRGGDYGRGGILMFG  
NC

>comp14426\_c0\_seq2; 455 147 2380 LEN=2745; translated  
MINELDQTAMKRCPCAAAETSGTGKRSLQLILTVLFLAIKATLKYKSNTTASGYPHLEQK  
VDRFPQQVYFKGENKNNVLT LINNEERVSLPLASPLPTPSLVSEEKLYIPSSRSRSDDKI  
KRLNEQTQEHRTQSSFRKRS LRKNANDSQREHFRKGHNIDDVHFPASMKKRHRILICSH  
DQTQDQCHSQFLSMYGNIP IERSGNNRNGLSNSYRNVKVVRLNESVRALSVEIDAQTLAK  
VHIDNEFV FYLDFLRRLV VAGSIREYIPSRKDNENRNLQENSQKVPWGLEAIIHAQDVWQ  
DYDVHGEVVKICILDTGVQASHEDFRQSNLDGFYGFNEFVSPHWYEDNSGHGTHIIGTVTA  
SNNTIGVLKFKVDQLQCSGSFRSFLSNNRNI AVYFFLQRNAPAAETFVVRVFDDGKRLYD  
FADGTTFFSTDLIAAASICNEWGANIISASLGGSNYNEIEEKFFKELFYKSGIFTVAAAGN  
GGNTNNVYPAAAYDGVLSVGAVDESLSLANFSTFNPIITDVLAPGVN ILSTFRGNKYATLS  
GTSMVPHVTGTLALMLS YVLKTGITPDVGDILNALKHSTALTANITVNHEYSIDEAEPSS  
SIGVIDSYAAIQYLAGDRRVPENRGSFLSRRKSDPNVVICNNLIHLDIFTDKSGNETY  
YCLKRLSDDQMIWSTGPNMLENYSKYSESSCLEVDKYCYQFVVRDVGGDGI SEGGGIVV  
FRGNEVYRGGDYGRGGILMFGNC

>comp14426\_c0\_seq3; 535 147 2288 LEN=2718; translated  
MINELDQTAMKRCPCAAAETSGTGKRSLQLILTVLFLAIKATLKYKSNTTASGYPHLEQK  
VDRFPQQVYFKGENKNNVLT LINNEERVSLPLASPLPTPSLVSEEKLYIPSSRSRSDDKI  
KRLNEQTQEHRTQSSFRKRS LRKNANDSQREHFRKGHNIDDVHFPASMKKRHRILICSH  
DQTQDQCHSQFLSMYGNIP IERSGNNRNGLSNSYRNVKVVRLNESVRALSVEIDAQTLAK  
VHIDNEFV FYLDFLRRLV VAGSIREYIPSRKDNENRNLQENSQKVPWGLEAIIHAQDVWQ  
DYDVHGEVVKICILDTGVQASHEDFRQSNLDGFYGFNEFVSPHWYEDNSGHGTHIIGTVTA  
SNNTIGVLGIAPAAETFVVRVFDDGKRLYDFADGTTFFSTDLIAAASICNEWGANIISASL  
GGSNYNEIEEKFFKELFYKSGIFTVAAAGNGGNTNNVYPAAAYDGVLSVGAVDESLSLANF  
STFNPIITDVLAPGVN ILSTFRGNKYATLSGTSMVPHVTGTLALMLS YVLKTGITPDVG  
DILNALKHSTALTANITVNHEYSIDEAEPSSIGVIDSYAAIQYLAGDRRVPENRGSFLSR  
RKSDPNVVICNNLIHLDIFTDKSGNETYYCLKRLSDDQMIWSTGPNMLENYSKYSESS  
CLEVDKYCYQFVVRDVGGDGI SEGGGIVVFFRGNEVYRGGDYGRGGILMFGNC

>comp14426\_c0\_seq4; 469 147 2407 LEN=2837; translated  
MINELDQTAMKRCPCAAAETSGTGKRSLQLILTVLFLAIKATLKYKSNTTASGYPHLEQK  
VDRFPQQVYFKGENKNNVLT LINNEERVSLPLASPLPTPSLVSEEKLYIPSSRSRSDDKI  
KRLNEQTQEHRTQSSFRKRS LRKNANDSQREHFRKGHNIDDVHFPASMKKRHRILICSH  
DQTQDQCHSQFLSMYGNIP IERSGNNRNGLSNSYRNVKVVRLNESVRALSVEIDAQTLAK  
VHIDNEFV FYLDFLRRLV VAGSIREYIPSRKDNENRNLQENSQKVPWGLEAIIHAQDVWQ  
DYDVHGEVVKICILDTGVQASHEDFRQSNLDGFYGFNEFVSPHWYEDNSGHGTHIIGTVTA  
SNNTIGVLGIAPAAETFVVRVFDDGKRLYDFADGTTFFSTDLIAAASICNEWGANIISASL  
GGSNYNEIEEKFFKELFYKSGIFTVAAAGNGGNTNNVYPAAAYDGVLSVGAVDESLSLANF  
STFNPIITDVLAPGNHFTKVELIENLKFDRPANIFFDLTRMSFSPGIFGNNIGVNILSTF  
RGNKYATLSGTSMVPHVTGTLALMLS YVLKTGITPDVGDILNALKHSTALTANITVNHE  
YSIDEAEPSSIGVIDSYAAIQYLAGDRRVPENRGSFLSRRKSDPNVVICNNLIHLDIF  
TDSKNETYYCLKRLSDDQMIWSTGPNMLENYSKYSESSCLEVDKYCYQFVVRDVGGDGI  
SEGGGIVVFFRGNEVYRGGDYGRGGILMFGNC

>comp14427\_c0\_seq1; 134 1 168 LEN=336; minus strand; translated  
GGRDYR KSHNDGGSRGGNRNSGYGGGGYGGGGYGGGYGGGGYGGGGGNFGGAW

>comp14427\_c1\_seq1; 647 1 1888 LEN=2109; translated  
XFDLSCAEVY TALVMQNGTKYVPPHLRNSQSSGGGNEPRDNNRGGGYNNDRRGGSYGNDR  
RGSYGD RRGSYGGRRGGGEPRRNSRWSVDGSDGGDRRGSYGRSGGGYGRGSNARKNER  
GFHGDMPDPRLE RTLYTSDHQTTGINFNDYDKIPVEVSGENAPEPIDIYSEETIGADLF  
RCTQLCGYTRPTPVQKYS CPIGSAGRDLMACAQTGSGKTAGFLFPIIMSMCAKGGSESPA  
GGRRQVYPEALVMAPTRELAQQIFDEARRFTYCTGIATVCIYGGAEVRDQLRQIERGCDL  
LVATPGRVLVDLIERGRLGMENIKFLVLDEADRMLDMGFEPQIRRIVEESGMPQGD DRQTM  
MFSATFPQAQIQRLASDFLRDYIFLTVGRVGSASKDVTQKIEYVEERDKLDSL MKFLLTIE  
DGLILIFTETKRNC DYLEDVLCENGF PACSIHGDKSQRE REDSLRSFKRGNTPVMAATDV

ASRGLDIPNVTQVVNYDLPTNIDDYVHRIGRTGRAGNTGNALS FVNEKNSGIIREL RDML  
DENEQEV PQWLNQMASYSGRGGGRRSGGGRNNF GGRDYR KSHNDGGSRGGNRNSGYGGG  
GGYGGGGYGGGYGGGGYGGGGGNFGGAW

>comp14427\_c1\_seq2; 382 1178 2266 LEN=2319; translated  
MHL SIPSQRLITYYPSLLANA ISSKPPYLKPGEGPIV LVLAP TRELAVQIKEE CDKFGKS  
SDIRNTVVYGGV PKRRQVQDLQSGIEI VIATPGRLIDHLDQGN TNLKRVTYLV LDEADM  
LDMGFEPQLRKIVSQIRPDRQVLMWSATWPKEIQNLARDYLDEYYQVTVGSLDLTG NKDV  
TQII EVCQDPDKYRSLLKYLRENLTQKDRVLV FVETKKGCDMLTRSLRMDGFQARAMHGD  
KSQEERD WALREFKSCQSTLLVATDVAARGLDVDDIRMV VNFDMPSNMEDYVHRIGRTGR  
AGRKGTA VSFVAEKNGRMAKDLLDILKRTEQNIPPELNNMASFSYGRGGGRGRGRGRG  
RY

>comp14427\_c1\_seq3; 198 1 520 LEN=2626; translated  
XGYGGGGGGYGGGGYGGGGGGYGGGGYGN GGGRRGGSNLGSNLQNIDFSKEQLVAFE  
KNFYMEHPDVTKRSEEEAAQWRQSKGIVVVGKDV PKPCMTFEEASMP EYILTEVLKCGFN  
SPTPIQS QGWP MALKGQNTVGV SATGSGKTLAFLLPAMIHINAQVRNRNIPTQ

>comp14427\_c1\_seq4; 382 1156 2244 LEN=2297; translated  
MHL SIPSQRLITYYPSLLANA ISSKPPYLKPGEGPIV LVLAP TRELAVQIKEE CDKFGKS  
SDIRNTVVYGGV PKRRQVQDLQSGIEI VIATPGRLIDHLDQGN TNLKRVTYLV LDEADM  
LDMGFEPQLRKIVSQIRPDRQVLMWSATWPKEIQNLARDYLDEYYQVTVGSLDLTG NKDV  
TQII EVCQDPDKYRSLLKYLRENLTQKDRVLV FVETKKGCDMLTRSLRMDGFQARAMHGD  
KSQEERD WALREFKSCQSTLLVATDVAARGLDVDDIRMV VNFDMPSNMEDYVHRIGRTGR  
AGRKGTA VSFVAEKNGRMAKDLLDILKRTEQNIPPELNNMASFSYGRGGGRGRGRGRG  
RY

>comp14427\_c1\_seq5; 595 1 1501 LEN=1554; translated  
XGYGGGGGGYGGGGYGGGGGGYGGGGYGN GGGRRGGSNLGSNLQNIDFSKEQLVAFE  
KNFYMEHPDVTKRSEEEAAQWRQSKGIVVVGKDV PKPCMTFEEASMP EYILTEVLKCGFN  
SPTPIQS QGWP MALKGQNTVGV SATGSGKTLAFLLPAMIHINAQPYL KPGEGPIV LVLAP  
TRELAVQIKEE CDKFGKSSDIRNTVVYGGV PKRRQVQDLQSGIEI VIATPGRLIDHLDQG  
NTNLKRVTYLV LDEADRMLDMGFEPQLRKIVSQIRPDRQVLMWSATWPKEIQNLARDYLD  
EYYQVTVGSLDLTG NKDV TQII EVCQDPDKYRSLLKYLRENLTQKDRVLV FVETKKGCDM  
LTRSLRMDGFQARAMHGDKSQEERD WALREFKSCQSTLLVATDVAARGLDVDDIRMV VNF  
DMP SNMEDYVHRIGRTGRAGRKGTA VSFVAEKNGRMAKDLLDILKRTEQNIPPELNNMA  
SFSYGRGGGRGRGRGRGRY

>comp14427\_c1\_seq6; 198 1 520 LEN=2604; translated  
XGYGGGGGGYGGGGYGGGGGGYGGGGYGN GGGRRGGSNLGSNLQNIDFSKEQLVAFE  
KNFYMEHPDVTKRSEEEAAQWRQSKGIVVVGKDV PKPCMTFEEASMP EYILTEVLKCGFN  
SPTPIQS QGWP MALKGQNTVGV SATGSGKTLAFLLPAMIHINAQVRNRNIPTQ

>comp14427\_c1\_seq7; 759 669 2552 LEN=2773; translated  
MSSTTTTATTTTKIEGTKYVPPHLRNSQSSGGGNEPRDNNRGGGYNNDRRGGSYGNDRRG  
SYGDDRRGSYGGGRGGEP RRNSRWSVDGDSGGDRRGSYGGRSGGGYGRG SNARKNERGF  
HGDMQDPRLERTLYTSDHQTTGINF DNYDKIPVEVSGENAPEPIDIYSEETIGADLFR C  
TQLCGYTRPTPVQKYS CPIGSAGRDLMACAQ TGSKTAGFLFPIIMSMCAKGGSESPAGG  
RRQVYPEALVMAPTRELAQQIFDEARRFTYCTGIATVCIYGGAEVRDQLRQIERGCDLLV  
ATPGRLVDLIERGLGMENIKFLVLDEADRMLDMGFEPQIRRI VEESGMPQGGDRQTM MF  
SATFPAQIQRLASDFLRDYIFLTVGRVGSASKDVTQKIEYVEERDKLDSL MKFLLTIEDG  
LILIFTETKRNC DYLEDVLCENGF PACSIHGDKSQREREDSLRSFKRGNTPVMAATDVAS  
RGLDIPNVTQVVNYDLPTNIDDYVHRIGRTGRAGNTGNALS FVNEKNSGIIREL RDMLDE  
NEQEV PQWLNQMASYSGRGGGRRSGGGRNNF GGRDYR KSHNDGGSRGGNRNSGYGGGGG  
YGGGGYGGGGYGGGGYGGGGGNFGGAW

>comp14428\_c0\_seq1; 815 186 3449 LEN=4107; translated  
MKTNDRGINPGDARSKKKKGRRILRPDEKQKSKETIPVGLSAFDRFYAGLLRSEASEFLG  
QSKEVWKVICDR LALPTLSTPLASSYSSQKHFLSRAALVIEEARQSLADSI RLVNEDIQ  
NNTKRNTGNHNRYPNNLVRHGQNRHAINQQSICSMELSI RRVEHKGVSGHSLLTFFVKEST  
PFTKDEILHLRQGTIF SCLDGKATNSIENVLLGVILPQSRDEMVASNSFVIMMFRKIKKT  
IKGKWLTPII SLLSEQRKFEACMSQMVKVPVFLPLLG IKKPTDLRSLEYRPKRNHKS N  
VEDHF IETNADSESDCEMLEVVDLEATFQIPRLNNMQELAAKTFLKSKSDTICLVQGGPPG  
TGKTTLLTSVICRYIIDS RKL EHNKRCLMVCAPT NKA VTLCSRFLNTFLD VDS CP CNVV  
LIGDEDKLLENDGRKRGN AFTDNPRMRESLLYTFIDTVENDYLYIRKILDKGNFGLFNRI  
LMVARRLENLLKRKVTD AEVIMGATSIVKLI EKFTKSRQKQYPT EINKVDLVVGMV GAW  
NRDTIWQEILQGADVIFCTLGSSGSSLLKKVIGEVDDL VVDEAAAATEPEIYIPFYQLPR







MGDHADDDQGETRILCVLVDSPPTPRKVVIVKVFDKLTGGKRQKDRVHQDRDEIVELLLRP  
GDAYEMDGVRCVVHAFLIPFASSNCSVLFNRWFRTESEELNPPGVPKYSSESFDELKTLV  
DNIVLNVLFFXLVVMQEFYSHCVKDNLSKDDECKDHKSEHSRIRRMCVVLRGTGQKFEFE  
RDTGEACTDLAPRKAISYYHGP IANLKVGSSTYRRELQKMNHAQLLQRGISGTIRDGADA  
IIISGKRRGHDKLQHIKYVAEWRIGANALFKSFVRESMIRVFRSLAYISSNEALKTGTGL  
KQRKSTSKLYRYDGLYKIVRVNPPIDPKGAFEFFLTHSR IASNKNGGAVSFENVAKRVNR  
NLFGAKRQNAIHI PPPPPPTLLCATT TDSKRLEINQEHSMVSI PSGIPLNPLWARDYGP  
IDLSWNSPA

>comp14433\_c0\_seq3; 717 343 3643 LEN=3778; translated  
MSLFSVVPVGPVAVPDPVPFAGYHHDIEIQKSERIRYPLLLLEEF TSDGNAESFEQLPAAST  
ADANTANAALDQTQTTTNEFLRGFP PPSPPAHRHSHCAPRIRRLFYPLPCPLTPPEPPI  
DRTAGTQGDGIAHHHSDFQPPWPGRQHAAAVVSPLSATQQAHEEGDRCRHRIEPQRRRWE  
LQDGRGLDQAKIQAEIDAIVGGVSNVDPYGDRSFRGNSGPPGASGTFAGSGGASELVLGR  
AELDAAAKKLGLFAGSGPCLPPLGDADGGKDPEPIPRPRWHTGHTNFVVGKDVPGAAGCTA  
RCGRTQQQQQRLASDQSVVERPLFTYKSWDERANRWKPKRTFWVRKEAEAGGSGACAPPH  
FRISLSRGGTVHVFPNLLGAQSVGAVKTELLKCGFWRKYSIQGGDEPRLHFLAHENATDN  
FENGAQPGYRYTNITMKARPLSALPNLQRMKQLAKMRNIPSEKWTIGVHPVLYRDNRDS  
MGDHADDDQGETRILCVLVDSPPTPRKVVIVKVFDKLTGGKRQKDRVHQDRDEIVELLLRP  
GDAYEMDGVRCVVHAFLIPFASSNCSVLFNRWFRTESEELNPPGVPKYSSESFDELKTLV  
DNIVLNVLFFXLVVMQEFYSHCVKDNLSKDDECKDHKSEHSRIRRMCVVLRGTGQKFEFE  
RDTGEACTDLAPRKAISYYHGP IANLKVGSSTYRRELQKMNHAQLLQRGISGTIRDGADA  
IIISGKRRGHDKLQHIKYVAEWRIGANALFKSFVRESMIRVFRSLAYISSNEALKTGTGL  
KQRKSTSKLYRYDGLYKIVRVNPPIGKRSSSNHLPQHCLSAAYKLDHMLAHDLSNILELF  
QDPKGAFEFFLTHSR IASNKNGGAVSFENVAKRVNRNLFGAKRQNAIHI PPPPPPTLLC  
ATTTDSKRLEINQEHSMVSI PSGIPLNPLWARDYGP IDLSCCATLLLLLEKELSCMNALAF  
QLQKNNSISKKRTSASSDLIHVSDDRLQSEPFKHKGPS IENHNYHRRSHCHTVSATSA  
TFDRPLSVVAGSTNHPIQGD TSKPTIYKKTAKIXDDGLAGEHAVARRKKVPNPVNRADP  
IAKNETIAYEKNEKDEGGC

>comp14433\_c0\_seq4; 299 343 1767 LEN=4033; translated  
MSLFSVVPVGPVAVPDPVPFAGYHHDIEIQKSERIRYPLLLLEEF TSDGNAESFEQLPAAST  
ADANTANAALDQTQTTTNEFLRGFP PPSPPAHRHSHCAPRIRRLFYPLPCPLTPPEPPI  
DRTAGTQGDGIAHHHSDFQPPWPGRQHAAAVVSPLSATQQAHEEGDRCRHRIEPQRRRWE  
LQDGRGLDQAKIQAEIDAIVGGVSNVDPYGDRSFRGNSGPPGASGTFAGSGGASELVLGR  
AELDAAAKKLGLFAGSGPCLPPLGDADGGKDPEPIPRPRWHTGHTNFVVGKDVPGAAGCTA  
RCGRTQQQQQRLASDQSVVERPLFTYKSWDERANRWKPKRTFWVRKEAEAGGSGACAPPH  
FRISLSRGGTVHVFPNLLGAQSVGAVKTELLKCGFWRKYSIQGGDEPRLHFLAHENATDN  
FENGAQPGYRYTNITMKARPLSALPNLQRMKQLAKMRNIPSEKWTIGVHPVL

>comp14433\_c0\_seq5; 453 343 1840 LEN=2098; translated  
MSLFSVVPVGPVAVPDPVPFAGYHHDIEIQKSERIRYPLLLLEEF TSDGNAESFEQLPAAST  
ADANTANAALDQTQTTTNEFLRGFP PPSPPAHRHSHCAPRIRRLFYPLPCPLTPPEPPI  
DRTAGTQGDGIAHHHSDFQPPWPGRQHAAAVVSPLSATQQAHEEGDRCRHRIEPQRRRWE  
LQDGRGLDQAKIQAEIDAIVGGVSNVDPYGDRSFRGNSGPPGASGTFAGSGGASELVLGR  
AELDAAAKKLGLFAGSGPCLPPLGDADGGKDPEPIPRPRWHTGHTNFVVGKDVPGAAGCTA  
RCGRTQQQQQRLASDQSVVERPLFTYKSWDERANRWKPKRTFWVRKEAEAGGSGACAPPH  
FRISLSRGGTVHVFPNLLGAQSVGAVKTELLKCGFWRKYSIQGGDEPRLHFLAHENATDN  
FENGAQPGYRYTNITMKARPLSALPNLQRMKQLAKMRNIPSEKWTIGVHPVLYRDNRDS  
MGDHADDDQGETAYYAF

>comp14433\_c0\_seq6; 578 343 2148 LEN=3409; translated  
MSLFSVVPVGPVAVPDPVPFAGYHHDIEIQKSERIRYPLLLLEEF TSDGNAESFEQLPAAST  
ADANTANAALDQTQTTTNEFLRGFP PPSPPAHRHSHCAPRIRRLFYPLPCPLTPPEPPI  
DRTAGTQGDGIAHHHSDFQPPWPGRQHAAAVVSPLSATQQAHEEGDRCRHRIEPQRRRWE  
LQDGRGLDQAKIQAEIDAIVGGVSNVDPYGDRSFRGNSGPPGASGTFAGSGGASELVLGR  
AELDAAAKKLGLFAGSGPCLPPLGDADGGKDPEPIPRPRWHTGHTNFVVGKDVPGAAGCTA  
RCGRTQQQQQRLASDQSVVERPLFTYKSWDERANRWKPKRTFWVRKEAEAGGSGACAPPH  
FRISLSRGGTVHVFPNLLGAQSVGAVKTELLKCGFWRKYSIQGGDEPRLHFLAHENATDN  
FENGAQPGYRYTNITMKARPLSALPNLQRMKQLAKMRNIPSEKWTIGVHPVLYRDNRDS  
MGDHADDDQGETRILCVLVDSPPTPRKVVIVKVFDKLTGGKRQKDRVHQDRDEIVELLLRP  
GDAYEMDGVRCVVHAFLIPFASSNCSVLFNRWFRTESEELNPPGVPKYSSESFDELKTLV  
A

>comp14433\_c0\_seq7; 476 343 1767 LEN=3475; translated

MSLFSDVVPGPAVPDPVPPFAGYHHDIEIQKSERIRYPLLLLEEF TSDGNAESFEQLPAAST  
ADANTANAALDQTQTTTNEFLRGFP PPSPPAHRHSHCAPRIRRLFYPLPCPLTPEPPGI  
DRTAGTQGDGIAHHHSDFQPPWPGRQHAAAVVSPLSATQQAHEEGDRCHRRIEPQRRRWE  
LQDGRGLDQAKIQAEIDAI VGGVSNVDPYGDRSFRGSNGPPGASGTFAGSGGASELVLGR  
AELDAAAKKLGLFAGSGPCLPLLGDADGGKDPEIPRPRWHTGHTNFVVGKDVPGAAGCTA  
RCGRTQQQQQRLASDQSVVERPLFTYKSWDERANRWKPKRTFWVRKEAEAGGSGACAPPH  
FRISLSRGGTVHVFPNLLGAQSVGAVKTELLKCGFWRKYSIQGGDEPRLHFLAHENATDN  
FENGAQPGYRYTNITMKARPLSALPNLQRM SKQLAKMRNIPSEKWTIGVHPVL  
>comp14433\_c0\_seq8; 299 343 1767 LEN=4049; translated  
MSLFSDVVPGPAVPDPVPPFAGYHHDIEIQKSERIRYPLLLLEEF TSDGNAESFEQLPAAST  
ADANTANAALDQTQTTTNEFLRGFP PPSPPAHRHSHCAPRIRRLFYPLPCPLTPEPPGI  
DRTAGTQGDGIAHHHSDFQPPWPGRQHAAAVVSPLSATQQAHEEGDRCHRRIEPQRRRWE  
LQDGRGLDQAKIQAEIDAI VGGVSNVDPYGDRSFRGSNGPPGASGTFAGSGGASELVLGR  
AELDAAAKKLGLFAGSGPCLPLLGDADGGKDPEIPRPRWHTGHTNFVVGKDVPGAAGCTA  
RCGRTQQQQQRLASDQSVVERPLFTYKSWDERANRWKPKRTFWVRKEAEAGGSGACAPPH  
FRISLSRGGTVHVFPNLLGAQSVGAVKTELLKCGFWRKYSIQGGDEPRLHFLAHENATDN  
FENGAQPGYRYTNITMKARPLSALPNLQRM SKQLAKMRNIPSEKWTIGVHPVL  
>comp14433\_c0\_seq9; 569 343 3052 LEN=3052; translated  
MSLFSDVVPGPAVPDPVPPFAGYHHDIEIQKSERIRYPLLLLEEF TSDGNAESFEQLPAAST  
ADANTANAALDQTQTTTNEFLRGFP PPSPPAHRHSHCAPRIRRLFYPLPCPLTPEPPGI  
DRTAGTQGDGIAHHHSDFQPPWPGRQHAAAVVSPLSATQQAHEEGDRCHRRIEPQRRRWE  
LQDGRGLDQAKIQAEIDAI VGGVSNVDPYGDRSFRGSNGPPGASGTFAGSGGASELVLGR  
AELDAAAKKLGLFAGSGPCLPLLGDADGGKDPEIPRPRWHTGHTNFVVGKDVPGAAGCTA  
RCGRTQQQQQRLASDQSVVERPLFTYKSWDERANRWKPKRTFWVRKEAEAGGSGACAPPH  
FRISLSRGGTVHVFPNLLGAQSVGAVKTELLKCGFWRKYSIQGGDEPRLHFLAHENATDN  
FENGAQPGYRYTNITMKARPLSALPNLQRM SKQLAKMRNIPSEKWTIGVHPVLSEYKDWI  
EWIPLDLDVHAXAVGTVCVAVFVLDL KIAAVELRNVPDVLHATPPIGSLSRDNRDSMGDHA  
DDDQGETRILCVLVDSPPTPRKVV I KVFDKLTGGKRQKDRVHQDRDEIVELELLRPGDAYE  
MDGVMQEFYSHCVPKDNLSKDDECKDHKSEHSRIRRM CVVLR TGQQKEFERDTGEACTDL  
APRKAISYYHGPIANLKV GSSYTRRELQKMNAHQLLQRGISGTIRDGADAI I ISGKRRGH  
DKLQHIKYVAEWRIGANALFKSFVRESMIRVFRSLAYISSNEALKTGTGLKQRKSTSKLY  
RYDGLYKIVRVNPPIDPKGAF EFFLTHSR IASNKNGGAVSFENVAKRVNRNLF GAKRQNA  
IHIPPPPPPTLLCATT TDSKRLEINQEHSMVSI PSGIPLNPLWARDYGPIDLSCCATLL  
LLEX  
>comp14433\_c0\_seq10; 705 343 2877 LEN=3446; translated  
MSLFSDVVPGPAVPDPVPPFAGYHHDIEIQKSERIRYPLLLLEEF TSDGNAESFEQLPAAST  
ADANTANAALDQTQTTTNEFLRGFP PPSPPAHRHSHCAPRIRRLFYPLPCPLTPEPPGI  
DRTAGTQGDGIAHHHSDFQPPWPGRQHAAAVVSPLSATQQAHEEGDRCHRRIEPQRRRWE  
LQDGRGLDQAKIQAEIDAI VGGVSNVDPYGDRSFRGSNGPPGASGTFAGSGGASELVLGR  
AELDAAAKKLGLFAGSGPCLPLLGDADGGKDPEIPRPRWHTGHTNFVVGKDVPGAAGCTA  
RCGRTQQQQQRLASDQSVVERPLFTYKSWDERANRWKPKRTFWVRKEAEAGGSGACAPPH  
FRISLSRGGTVHVFPNLLGAQSVGAVKTELLKCGFWRKYSIQGGDEPRLHFLAHENATDN  
FENGAQPGYRYTNITMKARPLSALPNLQRM SKQLAKMRNIPSEKWTIGVHPVLYRDNRDS  
MGDHADDDQGETRILCVLVDSPPTPRKVV I KVFDKLTGGKRQKDRVHQDRDEIVELELLRP  
GDAYEMDGVMQEFYSHCVPKDNLSKDDECKDHKSEHSRIRRM CVVLR TGQQKEFERDTGE  
ACTDLAPRKAISYYHGPIANLKV GSSYTRRELQKMNAHQLLQRGISGTIRDGADAI I ISG  
KRRGHDKLQHIKYVAEWRIGANALFKSFVRESMIRVFRSLAYISSNEALKTGTGLKQRKS  
TSKLYRYDGLYKIVRVNPPIDPKGAF EFFLTHSR IASNKNGGAVSFENVAKRVNRNLF GAKRQNA  
IHIPPPPPPTLLCATT TDSKRLEINQEHSMVSI PSGIPLNPLWARDYGPIDL SW  
NSPA  
>comp14433\_c0\_seq11; 578 343 2148 LEN=3787; translated  
MSLFSDVVPGPAVPDPVPPFAGYHHDIEIQKSERIRYPLLLLEEF TSDGNAESFEQLPAAST  
ADANTANAALDQTQTTTNEFLRGFP PPSPPAHRHSHCAPRIRRLFYPLPCPLTPEPPGI  
DRTAGTQGDGIAHHHSDFQPPWPGRQHAAAVVSPLSATQQAHEEGDRCHRRIEPQRRRWE  
LQDGRGLDQAKIQAEIDAI VGGVSNVDPYGDRSFRGSNGPPGASGTFAGSGGASELVLGR  
AELDAAAKKLGLFAGSGPCLPLLGDADGGKDPEIPRPRWHTGHTNFVVGKDVPGAAGCTA  
RCGRTQQQQQRLASDQSVVERPLFTYKSWDERANRWKPKRTFWVRKEAEAGGSGACAPPH  
FRISLSRGGTVHVFPNLLGAQSVGAVKTELLKCGFWRKYSIQGGDEPRLHFLAHENATDN  
FENGAQPGYRYTNITMKARPLSALPNLQRM SKQLAKMRNIPSEKWTIGVHPVLYRDNRDS  
MGDHADDDQGETRILCVLVDSPPTPRKVV I KVFDKLTGGKRQKDRVHQDRDEIVELELLRP

GDAYEMDGVRCVVHAFLIPFASSNCSVLFNRWFRTESEELNPPGVPKYSSESFDELKTLV  
A

>comp14433\_c0\_seq12; 398 343 2148 LEN=3876; translated  
MSLFSVVPVGPVAVPDPVPPFAGYHHDIEIQKSERIRYPLLLLEEFSDGNAESFEQLPAAST  
ADANTANAALDQTQTTTNEFLRGFPPSSPPAHRHSHCAPRIRRLFYPLPCPLTPEPPGI  
DRTAGTQGDGIAHHHSDFQPPWPGRQHAAAVVSPLSATQQAHEEGDRCRHRIEPQRRRWE  
LQDGRGLDQAKIQAEIDAIVGGVSNVDPYGDRSFRGNSGPPGASGTFAGSGGASELVLGR  
AELDAAAKKLGLFAGSGPCLPLLGDADGGKDPEPIPRPRWHTGHTNFVVGKDVPGAAGCTA  
RCGRTQQQQQRLASDQSVVERPLFTYKSWDERANRWKPKRTFWVRKEAEAGGSGACAPPH  
FRISLSRGGTVHVFPNLLGAQSVGAVKTELLKCGFWRKYSIQGGDEPRLHFLAHENATDN  
FENGAQPGYRYTNITMKARPLSALPNLQRMKQLAKMRNIPSEKWTIGVHPVLYRDNRDS  
MGDHADDDQGETRILCVLVDSPPTPRKVVIVFVKLTGGKRQKDRVHQDRDEIVELLLRP  
GDAYEMDGVRCVVHAFLIPFASSNCSVLFNRWFRTESEELNPPGVPKYSSESFDELKTLV  
A

>comp14433\_c0\_seq13; 679 343 2691 LEN=3095; translated  
MSLFSVVPVGPVAVPDPVPPFAGYHHDIEIQKSERIRYPLLLLEEFSDGNAESFEQLPAAST  
ADANTANAALDQTQTTTNEFLRGFPPSSPPAHRHSHCAPRIRRLFYPLPCPLTPEPPGI  
DRTAGTQGDGIAHHHSDFQPPWPGRQHAAAVVSPLSATQQAHEEGDRCRHRIEPQRRRWE  
LQDGRGLDQAKIQAEIDAIVGGVSNVDPYGDRSFRGNSGPPGASGTFAGSGGASELVLGR  
AELDAAAKKLGLFAGSGPCLPLLGDADGGKDPEPIPRPRWHTGHTNFVVGKDVPGAAGCTA  
RCGRTQQQQQRLASDQSVVERPLFTYKSWDERANRWKPKRTFWVRKEAEAGGSGACAPPH  
FRISLSRGGTVHVFPNLLGAQSVGAVKTELLKCGFWRKYSIQGGDEPRLHFLAHENATDN  
FENGAQPGYRYTNITMKARPLSALPNLQRMKQLAKMRNIPSEKWTIGVHPVLYRDNRDS  
MGDHADDDQGETRILCVLVDSPPTPRKVVIVFVKLTGGKRQKDRVHQDRDEIVELLLRP  
GDAYEMDGMQEFYSHCVPKDNLKDDCKDHKSEHSRIRRMCVLVRTGQQKEFERDTGE  
ACTDLAPRKAISYYHGP IANLKVGSYTRRELQKMNHAHQLLQRGISGTIRDGADAI IISG  
KRRGHDKLQHIKYVAEWRIGANALFKSFVRESMIRVFRSLAYISSNEALKTGTGLKQRKS  
TSKLYRYDGLYKIVRVNPP I GKRSSSNHLPQHCLSAAYKLDHMLAHDLSLNILELQFQRKR  
GV

>comp14433\_c0\_seq14; 299 343 1767 LEN=3931; translated  
MSLFSVVPVGPVAVPDPVPPFAGYHHDIEIQKSERIRYPLLLLEEFSDGNAESFEQLPAAST  
ADANTANAALDQTQTTTNEFLRGFPPSSPPAHRHSHCAPRIRRLFYPLPCPLTPEPPGI  
DRTAGTQGDGIAHHHSDFQPPWPGRQHAAAVVSPLSATQQAHEEGDRCRHRIEPQRRRWE  
LQDGRGLDQAKIQAEIDAIVGGVSNVDPYGDRSFRGNSGPPGASGTFAGSGGASELVLGR  
AELDAAAKKLGLFAGSGPCLPLLGDADGGKDPEPIPRPRWHTGHTNFVVGKDVPGAAGCTA  
RCGRTQQQQQRLASDQSVVERPLFTYKSWDERANRWKPKRTFWVRKEAEAGGSGACAPPH  
FRISLSRGGTVHVFPNLLGAQSVGAVKTELLKCGFWRKYSIQGGDEPRLHFLAHENATDN  
FENGAQPGYRYTNITMKARPLSALPNLQRMKQLAKMRNIPSEKWTIGVHPVL

>comp14433\_c0\_seq15; 644 343 2947 LEN=3104; translated  
MSLFSVVPVGPVAVPDPVPPFAGYHHDIEIQKSERIRYPLLLLEEFSDGNAESFEQLPAAST  
ADANTANAALDQTQTTTNEFLRGFPPSSPPAHRHSHCAPRIRRLFYPLPCPLTPEPPGI  
DRTAGTQGDGIAHHHSDFQPPWPGRQHAAAVVSPLSATQQAHEEGDRCRHRIEPQRRRWE  
LQDGRGLDQAKIQAEIDAIVGGVSNVDPYGDRSFRGNSGPPGASGTFAGSGGASELVLGR  
AELDAAAKKLGLFAGSGPCLPLLGDADGGKDPEPIPRPRWHTGHTNFVVGKDVPGAAGCTA  
RCGRTQQQQQRLASDQSVVERPLFTYKSWDERANRWKPKRTFWVRKEAEAGGSGACAPPH  
FRISLSRGGTVHVFPNLLGAQSVGAVKTELLKCGFWRKYSIQGGDEPRLHFLAHENATDN  
FENGAQPGYRYTNITMKARPLSALPNLQRMKQLAKMRNIPSEKWTIGVHPVLYRDNRDS  
MGDHADDDQGETRILCVLVDSPPTPRKVVIVFVKLTGGKRQKDRVHQDRDEIVELLLRP  
GDAYEMDGMQEFYSHCVPKDNLKDDCKDHKSEHSRIRRMCVLVRTGQQKEFERDTGE  
ACTDLAPRKAISYYHGP IANLKVGSYTRRELQKMNHAHQVI IASNSFYRSLVEPNLXAV  
TLIGIAFAAFKNELLXKHKLQRGISGTIRDGADAI IISGKRRGHDKLQHIKYVAEWRIG  
ANALFKSFVRESMIRVFRSLAYISSNEALKTGTGLKQRKSTSKLYRYDGLYKIVRVNPP I  
DPKGAFEFFLTHSRIASNKNGAVSFENVAKRVNRNLF GAKRQNAIHIPPPPPPTLLCA  
TTTDSKRLEINQEHSMVSIPIPLNPLW

>comp14433\_c0\_seq16; 476 343 1767 LEN=3806; translated  
MSLFSVVPVGPVAVPDPVPPFAGYHHDIEIQKSERIRYPLLLLEEFSDGNAESFEQLPAAST  
ADANTANAALDQTQTTTNEFLRGFPPSSPPAHRHSHCAPRIRRLFYPLPCPLTPEPPGI  
DRTAGTQGDGIAHHHSDFQPPWPGRQHAAAVVSPLSATQQAHEEGDRCRHRIEPQRRRWE  
LQDGRGLDQAKIQAEIDAIVGGVSNVDPYGDRSFRGNSGPPGASGTFAGSGGASELVLGR  
AELDAAAKKLGLFAGSGPCLPLLGDADGGKDPEPIPRPRWHTGHTNFVVGKDVPGAAGCTA

RCGRTQQQQQRLASDQSVVERPLFTYKSWDERANRWKPKRTFWVRKEAEAGGSGACAPPH  
FRISLSRGGTVHVFPNLLGAQSVGAVKTELLKCGFWRKYSIQGGDEPRLHFLAHENATDN  
FENGAQPGYRYTNITMKARPLSALPNLQRMKQLAKMRNIPSEKWTIGVHPVL  
>comp14433\_c0\_seq17; 640 343 3025 LEN=3767; translated  
MSLFSVVPVGPVAVPDPVFPFAGYHHDIEIQKSERIRYPLLLLEEFSDGNAESFEQLPAAST  
ADANTANAALDQTQTTTNEFLRGFPPSSPPAHRHSHCAPRIRRLFYPLPCPLTPEPPGI  
DRTAGTQGDGIAHHHSDFQPPWPGRQHAAAVVSPLSATQQAHEEGDRCRHRIEPQRRRWE  
LQDGRGLDQAKIQAEIDAIVGGVSNVDPYGDERSFRGSNGPPGASGTFAGSGGASELVLGR  
AELDAAAKKLGLFAGSGPCLPLLGDADGGKDPEPIPRPRWHTGHTNFVVGKDVPGAAGCTA  
RCGRTQQQQQRLASDQSVVERPLFTYKSWDERANRWKPKRTFWVRKEAEAGGSGACAPPH  
FRISLSRGGTVHVFPNLLGAQSVGAVKTELLKCGFWRKYSIQGGDEPRLHFLAHENATDN  
FENGAQPGYRYTNITMKARPLSALPNLQRMKQLAKMRNIPSEKWTIGVHPVLYRDNRDS  
MGDHADDQGETRILCVLVDSPPTPRKVVIKVFDKLTGGKRQKDRVHQDRDEIVELLLRP  
GDAYEMDGVRCVVAFLIPFASSNCSVLFNRWFRTSEELNPPGVPKYSSSEFDELKTLV  
DNIVLNVLFFXLVVMQEFYSHCVPKDNLSKDDECKDHKSEHSRIRRMCVLVRTGQQKEFE  
RDTGEACTDLAPRKAISYYHGP IANLKVGSYTRRELQKMNAHQLLQRGISGTIRDGADA  
IIISGKRRGHDKLQHIKYVAEWRIGANALFKSFVRESMIRVFRSLAYISSNEALKTGTGL  
KQRKSTSKLYRYDGLYKIVRVNPPIDPKGAFEFFLTHSR IASNKNGGAVSFENVAKRVNR  
NLFGAKRQNAIHIPPPPPPTLLCATTTDSKRLEINQEHSMVSI PSGIPLNPLW  
>comp14433\_c0\_seq18; 398 343 2148 LEN=3885; translated  
MSLFSVVPVGPVAVPDPVFPFAGYHHDIEIQKSERIRYPLLLLEEFSDGNAESFEQLPAAST  
ADANTANAALDQTQTTTNEFLRGFPPSSPPAHRHSHCAPRIRRLFYPLPCPLTPEPPGI  
DRTAGTQGDGIAHHHSDFQPPWPGRQHAAAVVSPLSATQQAHEEGDRCRHRIEPQRRRWE  
LQDGRGLDQAKIQAEIDAIVGGVSNVDPYGDERSFRGSNGPPGASGTFAGSGGASELVLGR  
AELDAAAKKLGLFAGSGPCLPLLGDADGGKDPEPIPRPRWHTGHTNFVVGKDVPGAAGCTA  
RCGRTQQQQQRLASDQSVVERPLFTYKSWDERANRWKPKRTFWVRKEAEAGGSGACAPPH  
FRISLSRGGTVHVFPNLLGAQSVGAVKTELLKCGFWRKYSIQGGDEPRLHFLAHENATDN  
FENGAQPGYRYTNITMKARPLSALPNLQRMKQLAKMRNIPSEKWTIGVHPVLYRDNRDS  
MGDHADDQGETRILCVLVDSPPTPRKVVIKVFDKLTGGKRQKDRVHQDRDEIVELLLRP  
GDAYEMDGVRCVVAFLIPFASSNCSVLFNRWFRTSEELNPPGVPKYSSSEFDELKTLV  
A  
>comp14433\_c0\_seq19; 597 343 3087 LEN=3087; translated  
MSLFSVVPVGPVAVPDPVFPFAGYHHDIEIQKSERIRYPLLLLEEFSDGNAESFEQLPAAST  
ADANTANAALDQTQTTTNEFLRGFPPSSPPAHRHSHCAPRIRRLFYPLPCPLTPEPPGI  
DRTAGTQGDGIAHHHSDFQPPWPGRQHAAAVVSPLSATQQAHEEGDRCRHRIEPQRRRWE  
LQDGRGLDQAKIQAEIDAIVGGVSNVDPYGDERSFRGSNGPPGASGTFAGSGGASELVLGR  
AELDAAAKKLGLFAGSGPCLPLLGDADGGKDPEPIPRPRWHTGHTNFVVGKDVPGAAGCTA  
RCGRTQQQQQRLASDQSVVERPLFTYKSWDERANRWKPKRTFWVRKEAEAGGSGACAPPH  
FRISLSRGGTVHVFPNLLGAQSVGAVKTELLKCGFWRKYSIQGGDEPRLHFLAHENATDN  
FENGAQPGYRYTNITMKARPLSALPNLQRMKQLAKMRNIPSEKWTIGVHPVLYRDNRDS  
MGDHADDQGETRILCVLVDSPPTPRKVVIKVFDKLTGGKRQKDRVHQDRDEIVELLLRP  
GDAYEMDGMQEFYSHCVPKDNLSKDDECKDHKSEHSRIRRMCVLVRTGQQKEFERDTGE  
ACTDLAPRKAISYYHGP IANLKVGSYTRRELQKMNAHQVI IASNSFY SRLVEPNLXAV  
TLIGIAFAAFKNELLXKHKLLQRGISGTIRDGADAI IISGKRRGHDKLQHIKYVAEWRIG  
ANALFKSFVRESMIRVFRSLAYISSNEALKTGTGLKQRKSTSKLYRYDGLYKIVRVNPP I  
GKRSSSNHLPQHCLSAAYKLDHMLAHD SLNILELFDQDPKGAFEFFLTHSR IASNKNGGAV  
SFENVAKRVNRNLFGAKRQNAIHIPPPPPPTLLCATTTDSKRLEINQEHSMVSI PSGIPL  
LNPLWARDYGPIDLX  
>comp14433\_c0\_seq20; 476 343 1767 LEN=3833; translated  
MSLFSVVPVGPVAVPDPVFPFAGYHHDIEIQKSERIRYPLLLLEEFSDGNAESFEQLPAAST  
ADANTANAALDQTQTTTNEFLRGFPPSSPPAHRHSHCAPRIRRLFYPLPCPLTPEPPGI  
DRTAGTQGDGIAHHHSDFQPPWPGRQHAAAVVSPLSATQQAHEEGDRCRHRIEPQRRRWE  
LQDGRGLDQAKIQAEIDAIVGGVSNVDPYGDERSFRGSNGPPGASGTFAGSGGASELVLGR  
AELDAAAKKLGLFAGSGPCLPLLGDADGGKDPEPIPRPRWHTGHTNFVVGKDVPGAAGCTA  
RCGRTQQQQQRLASDQSVVERPLFTYKSWDERANRWKPKRTFWVRKEAEAGGSGACAPPH  
FRISLSRGGTVHVFPNLLGAQSVGAVKTELLKCGFWRKYSIQGGDEPRLHFLAHENATDN  
FENGAQPGYRYTNITMKARPLSALPNLQRMKQLAKMRNIPSEKWTIGVHPVL  
>comp14433\_c0\_seq21; 299 343 1767 LEN=4040; translated  
MSLFSVVPVGPVAVPDPVFPFAGYHHDIEIQKSERIRYPLLLLEEFSDGNAESFEQLPAAST  
ADANTANAALDQTQTTTNEFLRGFPPSSPPAHRHSHCAPRIRRLFYPLPCPLTPEPPGI

DRTAGTQGDGIAHHHSDFQPPWPGRQHAAAVVSPLSATQQAHEEGDRCRHRIEPQRRRWE  
LQDGRGLDQAKIQAEIDAIVGGVSNVDPYGDRSFRGSNGPPGASGTFAGSGGASELVLGR  
AELDAAAKKLGLFAGSGPCLPLLGDADGGKDPEIPRPRWHTGHTNFVVGKDVPGAAGCTA  
RCGRTQQQQQRLASDQSVVERPLFTYKSWDERANRWKPKRTFWVRKEAEAGGSGACAPPH  
FRISLSRGGTVHVFPNLLGAQSVGAVKTELLKCGFWRKYSIQGGDEPRLHFLAHENATDN  
FENGAQPGYRYTNITMKARPLSALPNLQRMKQLAKMRNIPSEKWTIGVHPVL  
>comp14433\_c0\_seq22; 476 343 1767 LEN=2262; translated  
MSLFSVVPVGPVAVPDPVPFAGYHHDIEIQKSERIRYPLLLLEEFSDGNAESFEQLPAAST  
ADANTANAALDQTQTTTNEFLRGFPPPSSPPAHRHSHCAPRIRRLFYPLPCPLTPPEPPI  
DRTAGTQGDGIAHHHSDFQPPWPGRQHAAAVVSPLSATQQAHEEGDRCRHRIEPQRRRWE  
LQDGRGLDQAKIQAEIDAIVGGVSNVDPYGDRSFRGSNGPPGASGTFAGSGGASELVLGR  
AELDAAAKKLGLFAGSGPCLPLLGDADGGKDPEIPRPRWHTGHTNFVVGKDVPGAAGCTA  
RCGRTQQQQQRLASDQSVVERPLFTYKSWDERANRWKPKRTFWVRKEAEAGGSGACAPPH  
FRISLSRGGTVHVFPNLLGAQSVGAVKTELLKCGFWRKYSIQGGDEPRLHFLAHENATDN  
FENGAQPGYRYTNITMKARPLSALPNLQRMKQLAKMRNIPSEKWTIGVHPVL  
>comp14433\_c0\_seq23; 727 343 3534 LEN=3669; translated  
MSLFSVVPVGPVAVPDPVPFAGYHHDIEIQKSERIRYPLLLLEEFSDGNAESFEQLPAAST  
ADANTANAALDQTQTTTNEFLRGFPPPSSPPAHRHSHCAPRIRRLFYPLPCPLTPPEPPI  
DRTAGTQGDGIAHHHSDFQPPWPGRQHAAAVVSPLSATQQAHEEGDRCRHRIEPQRRRWE  
LQDGRGLDQAKIQAEIDAIVGGVSNVDPYGDRSFRGSNGPPGASGTFAGSGGASELVLGR  
AELDAAAKKLGLFAGSGPCLPLLGDADGGKDPEIPRPRWHTGHTNFVVGKDVPGAAGCTA  
RCGRTQQQQQRLASDQSVVERPLFTYKSWDERANRWKPKRTFWVRKEAEAGGSGACAPPH  
FRISLSRGGTVHVFPNLLGAQSVGAVKTELLKCGFWRKYSIQGGDEPRLHFLAHENATDN  
FENGAQPGYRYTNITMKARPLSALPNLQRMKQLAKMRNIPSEKWTIGVHPVLYRDNRDS  
MGDHADDDQGETRILCVLVDSPPTPRKVVIVFVKLTGGKRQKDRVHQDRDEIVELLLRP  
GDAYEMDGVRCVVHAFIPIFASSNCSVLFNRWFRTSEELNPPGVPKYSSESFDELKTLV  
DNIIVLNVLFFXLVVMQEFYSHCVPKDNLSKDDECKDHKSEHSRIRRMCVVLRGTGQKQEF  
RDTGEACTDLAPRKAISYYHGP IANLKVGSYTRRELQKMNAHQLLQRGISGTIRDGADA  
IIISGKRRGHDKLQHIKYVAEWRIGANALFKSFVRESMIRVFRSLAYISSNEALKTGTGL  
KQRKSTSKLYRYDGLYKIVRVNPPIDPKGAFEFFLTHSR IASNKNGGAVSFENVAKRVNR  
NLFGAKRQNAIHIPIPPPPPTLLCATTTDSKRLEINQEHSMVSI PSGIPLNPLWARDYGP  
IDLSCCATLLLEKELSCMNALAFQLQKNNSISKKRTSASSDLIHVSDDRLOSEPFSKH  
GPSIENHNYHRRSHCHTVSATSAATFDRPLSVVAGSTNHPIQGDTKSKPTIYKKTAKIXD  
DGLAGEHAVARRKKVNPVNRADPIAKNETIAYEKNEKDEGGC  
>comp14433\_c0\_seq24; 398 343 2148 LEN=3869; translated  
MSLFSVVPVGPVAVPDPVPFAGYHHDIEIQKSERIRYPLLLLEEFSDGNAESFEQLPAAST  
ADANTANAALDQTQTTTNEFLRGFPPPSSPPAHRHSHCAPRIRRLFYPLPCPLTPPEPPI  
DRTAGTQGDGIAHHHSDFQPPWPGRQHAAAVVSPLSATQQAHEEGDRCRHRIEPQRRRWE  
LQDGRGLDQAKIQAEIDAIVGGVSNVDPYGDRSFRGSNGPPGASGTFAGSGGASELVLGR  
AELDAAAKKLGLFAGSGPCLPLLGDADGGKDPEIPRPRWHTGHTNFVVGKDVPGAAGCTA  
RCGRTQQQQQRLASDQSVVERPLFTYKSWDERANRWKPKRTFWVRKEAEAGGSGACAPPH  
FRISLSRGGTVHVFPNLLGAQSVGAVKTELLKCGFWRKYSIQGGDEPRLHFLAHENATDN  
FENGAQPGYRYTNITMKARPLSALPNLQRMKQLAKMRNIPSEKWTIGVHPVLYRDNRDS  
MGDHADDDQGETRILCVLVDSPPTPRKVVIVFVKLTGGKRQKDRVHQDRDEIVELLLRP  
GDAYEMDGVRCVVHAFIPIFASSNCSVLFNRWFRTSEELNPPGVPKYSSESFDELKTLV  
A  
>comp14433\_c0\_seq25; 662 343 2997 LEN=2997; translated  
MSLFSVVPVGPVAVPDPVPFAGYHHDIEIQKSERIRYPLLLLEEFSDGNAESFEQLPAAST  
ADANTANAALDQTQTTTNEFLRGFPPPSSPPAHRHSHCAPRIRRLFYPLPCPLTPPEPPI  
DRTAGTQGDGIAHHHSDFQPPWPGRQHAAAVVSPLSATQQAHEEGDRCRHRIEPQRRRWE  
LQDGRGLDQAKIQAEIDAIVGGVSNVDPYGDRSFRGSNGPPGASGTFAGSGGASELVLGR  
AELDAAAKKLGLFAGSGPCLPLLGDADGGKDPEIPRPRWHTGHTNFVVGKDVPGAAGCTA  
RCGRTQQQQQRLASDQSVVERPLFTYKSWDERANRWKPKRTFWVRKEAEAGGSGACAPPH  
FRISLSRGGTVHVFPNLLGAQSVGAVKTELLKCGFWRKYSIQGGDEPRLHFLAHENATDN  
FENGAQPGYRYTNITMKARPLSALPNLQRMKQLAKMRNIPSEKWTIGVHPVLYRDNRDS  
MGDHADDDQGETRILCVLVDSPPTPRKVVIVFVKLTGGKRQKDRVHQDRDEIVELLLRP  
GDAYEMDGVMEQEFYSHCVPKDNLSKDDECKDHKSEHSRIRRMCVVLRGTGQKQEFERDTE  
ACTDLAPRKAISYYHGP IANLKVGSYTRRELQKMNAHQLLQRGISGTIRDGADAIISG  
KRRGHDKLQHIKYVAEWRIGANALFKSFVRESMIRVFRSLAYISSNEALKTGTGLKQRKS  
TSKLYRYDGLYKIVRVNPPIGKRSSSNHLPQHCLSAAYKLDHMLAHDLSLNILELFDQDPKG

AFEFFLTHSRIASNKNGGAVSFENVAKRVNRNLFGAKRQNAIHIPPPPPPTLLCATTTD  
SKRLEINQEHSMVSIPIGIPLNPLWARDYGPIDLSCCATLLLLLEX  
>comp14433\_c0\_seq26; 630 343 3182 LEN=3751; translated  
MSLFSVVPVGPVDPVPPFAGYHHDIEIQKSERIRYPLLLLEEFSDGNAESFEQLPAAST  
ADANTANAALDQTQTTTNEFLRGFPPSSPPAHRHSHCAPRIRRLFYPLPCPLTPEPPGI  
DRTAGTQGDGIAHHHSDFQPPWPGRQHAAAVVSPLSATQQAHEEGDRCHRRIEPQRRRWE  
LQDGRGLDQAKIQAEIDAIVGGVSNVDPYGDRSFRGSNGPPGASGTFAGSGGASELVLGR  
AELDAAAKKLGLFAGSGPCLPLLGDADGGKDPEPIPRPRWHTGHTNFVVGKDVPGAAGCTA  
RCGRTQQQQQRLASDQSVVERPLFTYKSWDERANRWKPKRTFWVRKEAEAGGSGACAPPH  
FRISLSRGGTVHVFPNLLGAQSVGAVKTELLKCGFWRKYSIQGGDEPRLHFLAHENATDN  
FENGAQPGYRYTNITMKARPLSALPNLQRMKQLAKMRNIPSEKWTIGVHPVLYRDNRDS  
MGDHADDDQGETRILCVLVDSPPTPRKVVIKVFDKLTGGKRQKDRVHQDRDEIVELELLRP  
GDAYEMDGVRVHAFVLPFASNSVLFNRWFRTESEELNPPGVPKYSSSEFDELKTLV  
DNIVLNVLFFXLVVMQEFYSHCVPKDNLSKDDECKDHKSEHSRIRRMCVVLRGTGQQKEFE  
RDTGEACTDLAPRKAISYYHGP IANLKVGSSTYRRELQKMNAHQLLQRGISGTIRDGADA  
IIISGKRRGHDKLQHIKYVAEWRIGANALFKSFVRESMIRVFRSLAYISSNEALKTGTGL  
KQRKSTSKLYRYDGLYKIVRVNPPIGKRSSSNHLPQHCLSAAYKLDHMLAHDSLNIILELF  
QDPKGAFEFFLTHSRIASNKNGGAVSFENVAKRVNRNLFGAKRQNAIHIPPPPPPTLLC  
ATTTDSKRLEINQEHSMVSIPIGIPLNPLWARDYGPIDLSPWNSPA  
>comp14433\_c0\_seq28; 476 343 1767 LEN=3366; translated  
MSLFSVVPVGPVDPVPPFAGYHHDIEIQKSERIRYPLLLLEEFSDGNAESFEQLPAAST  
ADANTANAALDQTQTTTNEFLRGFPPSSPPAHRHSHCAPRIRRLFYPLPCPLTPEPPGI  
DRTAGTQGDGIAHHHSDFQPPWPGRQHAAAVVSPLSATQQAHEEGDRCHRRIEPQRRRWE  
LQDGRGLDQAKIQAEIDAIVGGVSNVDPYGDRSFRGSNGPPGASGTFAGSGGASELVLGR  
AELDAAAKKLGLFAGSGPCLPLLGDADGGKDPEPIPRPRWHTGHTNFVVGKDVPGAAGCTA  
RCGRTQQQQQRLASDQSVVERPLFTYKSWDERANRWKPKRTFWVRKEAEAGGSGACAPPH  
FRISLSRGGTVHVFPNLLGAQSVGAVKTELLKCGFWRKYSIQGGDEPRLHFLAHENATDN  
FENGAQPGYRYTNITMKARPLSALPNLQRMKQLAKMRNIPSEKWTIGVHPVL  
>comp14433\_c0\_seq29; 476 343 1767 LEN=3357; translated  
MSLFSVVPVGPVDPVPPFAGYHHDIEIQKSERIRYPLLLLEEFSDGNAESFEQLPAAST  
ADANTANAALDQTQTTTNEFLRGFPPSSPPAHRHSHCAPRIRRLFYPLPCPLTPEPPGI  
DRTAGTQGDGIAHHHSDFQPPWPGRQHAAAVVSPLSATQQAHEEGDRCHRRIEPQRRRWE  
LQDGRGLDQAKIQAEIDAIVGGVSNVDPYGDRSFRGSNGPPGASGTFAGSGGASELVLGR  
AELDAAAKKLGLFAGSGPCLPLLGDADGGKDPEPIPRPRWHTGHTNFVVGKDVPGAAGCTA  
RCGRTQQQQQRLASDQSVVERPLFTYKSWDERANRWKPKRTFWVRKEAEAGGSGACAPPH  
FRISLSRGGTVHVFPNLLGAQSVGAVKTELLKCGFWRKYSIQGGDEPRLHFLAHENATDN  
FENGAQPGYRYTNITMKARPLSALPNLQRMKQLAKMRNIPSEKWTIGVHPVL  
>comp14433\_c0\_seq30; 299 343 1767 LEN=3915; translated  
MSLFSVVPVGPVDPVPPFAGYHHDIEIQKSERIRYPLLLLEEFSDGNAESFEQLPAAST  
ADANTANAALDQTQTTTNEFLRGFPPSSPPAHRHSHCAPRIRRLFYPLPCPLTPEPPGI  
DRTAGTQGDGIAHHHSDFQPPWPGRQHAAAVVSPLSATQQAHEEGDRCHRRIEPQRRRWE  
LQDGRGLDQAKIQAEIDAIVGGVSNVDPYGDRSFRGSNGPPGASGTFAGSGGASELVLGR  
AELDAAAKKLGLFAGSGPCLPLLGDADGGKDPEPIPRPRWHTGHTNFVVGKDVPGAAGCTA  
RCGRTQQQQQRLASDQSVVERPLFTYKSWDERANRWKPKRTFWVRKEAEAGGSGACAPPH  
FRISLSRGGTVHVFPNLLGAQSVGAVKTELLKCGFWRKYSIQGGDEPRLHFLAHENATDN  
FENGAQPGYRYTNITMKARPLSALPNLQRMKQLAKMRNIPSEKWTIGVHPVL  
>comp14433\_c0\_seq31; 695 343 2986 LEN=3555; translated  
MSLFSVVPVGPVDPVPPFAGYHHDIEIQKSERIRYPLLLLEEFSDGNAESFEQLPAAST  
ADANTANAALDQTQTTTNEFLRGFPPSSPPAHRHSHCAPRIRRLFYPLPCPLTPEPPGI  
DRTAGTQGDGIAHHHSDFQPPWPGRQHAAAVVSPLSATQQAHEEGDRCHRRIEPQRRRWE  
LQDGRGLDQAKIQAEIDAIVGGVSNVDPYGDRSFRGSNGPPGASGTFAGSGGASELVLGR  
AELDAAAKKLGLFAGSGPCLPLLGDADGGKDPEPIPRPRWHTGHTNFVVGKDVPGAAGCTA  
RCGRTQQQQQRLASDQSVVERPLFTYKSWDERANRWKPKRTFWVRKEAEAGGSGACAPPH  
FRISLSRGGTVHVFPNLLGAQSVGAVKTELLKCGFWRKYSIQGGDEPRLHFLAHENATDN  
FENGAQPGYRYTNITMKARPLSALPNLQRMKQLAKMRNIPSEKWTIGVHPVLYRDNRDS  
MGDHADDDQGETRILCVLVDSPPTPRKVVIKVFDKLTGGKRQKDRVHQDRDEIVELELLRP  
GDAYEMDGVMQEFYSHCVPKDNLSKDDECKDHKSEHSRIRRMCVVLRGTGQQKEFERDTE  
ACTDLAPRKAISYYHGP IANLKVGSSTYRRELQKMNAHQLLQRGISGTIRDGADAIISG  
KRRGHDKLQHIKYVAEWRIGANALFKSFVRESMIRVFRSLAYISSNEALKTGTGLKQRKS  
TSKLYRYDGLYKIVRVNPPIGKRSSSNHLPQHCLSAAYKLDHMLAHDSLNIILELFQDPKG

AFEFFLTHSRIASNKNGGAVSFENVAKRVNRNLFGAKRQNAIHIPPPPPPTLLCATTTD  
SKRLEINQEHSMVSIIPSGIPLNPLWARDYGPIDLSWNSPA  
>comp14433\_c0\_seq32; 494 343 3251 LEN=3251; translated  
MSLFSVVPVGPVAVPDPVFPFAGYHHDIEIQKSERIRYPLLLLEEFSDGNAESFEQLPAAST  
ADANTANAALDQTQTTTNEFLRGFPPSSPPAHRHSHCAPRIRRLFYPLPCPLTPEPPGI  
DRTAGTQGDGIAHHHSDFQPPWPGRQHAAAVVSPLSATQQAHEEGDRCRHRIEPQRRRWE  
LQDGRGLDQAKIQAEIDAIVGGVSNVDPYGDRSFRGSNGPPGASGTFAGSGGASELVLGR  
AELDAAAKKLGLFAGSGPCLPLLDADGGKDPEPIPRPRWHTGHTNFVVGKDVPGAAGCTA  
RCGRTQQQQQRLASDQSVVERPLFTYKSWDERANRWKPKRTFWVRKEAEAGGSGACAPPH  
FRISLSRGGTVHVFPNLLGAQSVGAVKTELLKCGFWRKYSIQGGDEPRLHFLAHENATDN  
FENGAQPGYRYTNITMKARPLSALPNLQRMKQLAKMRNIPSEKWTIGVHPVLSEYKDWI  
EWIPLDVDVHAXAVGTVCVAVFVLDLKIAAVELRNVPDVLHATPPIGSLSRDNRDSMGDHA  
DDDQGETRILCVLVDSPPTPRKVVIKVFDKLTGGKRQKDRVHQDRDEIVELLLRPGDAYE  
MDGVMQEFYSHCVPKDNLKDDCKDHKSEHSRIRRMCVLRTGQQKEFERDTGEACTDL  
APRKAISYYHGPIANLKVGSSTYRRELQKMNAHQVVIASNSFYSLVEPNLXAVTLIGI  
AFAAFKNELLXKHKLLQRGISGTIRDGADAIISGKRRGHDKLQHIKYVAEWRIGANALF  
KSFVRESMIRVFRSLAYISSNEALKTGTGLKQRKSTSKLYRYDGLYKIVRVNPPIGKRSS  
SNHLPQHCLSAAYKLDHMLAHDNLNILELFDQPKGAFEFFLTHSRIASNKNGGAVSFENV  
AKRVNRNLFGAKRQNAIHIPPPPPPTLLCATTTDSKRLEINQEHSMVSIIPSGIPLNPLW  
ARDYGPIDLSX

>comp14433\_c0\_seq33; 602 343 3041 LEN=3610; translated  
MSLFSVVPVGPVAVPDPVFPFAGYHHDIEIQKSERIRYPLLLLEEFSDGNAESFEQLPAAST  
ADANTANAALDQTQTTTNEFLRGFPPSSPPAHRHSHCAPRIRRLFYPLPCPLTPEPPGI  
DRTAGTQGDGIAHHHSDFQPPWPGRQHAAAVVSPLSATQQAHEEGDRCRHRIEPQRRRWE  
LQDGRGLDQAKIQAEIDAIVGGVSNVDPYGDRSFRGSNGPPGASGTFAGSGGASELVLGR  
AELDAAAKKLGLFAGSGPCLPLLDADGGKDPEPIPRPRWHTGHTNFVVGKDVPGAAGCTA  
RCGRTQQQQQRLASDQSVVERPLFTYKSWDERANRWKPKRTFWVRKEAEAGGSGACAPPH  
FRISLSRGGTVHVFPNLLGAQSVGAVKTELLKCGFWRKYSIQGGDEPRLHFLAHENATDN  
FENGAQPGYRYTNITMKARPLSALPNLQRMKQLAKMRNIPSEKWTIGVHPVLSEYKDWI  
EWIPLDVDVHAXAVGTVCVAVFVLDLKIAAVELRNVPDVLHATPPIGSLSRDNRDSMGDHA  
DDDQGETRILCVLVDSPPTPRKVVIKVFDKLTGGKRQKDRVHQDRDEIVELLLRPGDAYE  
MDGVMQEFYSHCVPKDNLKDDCKDHKSEHSRIRRMCVLRTGQQKEFERDTGEACTDL  
APRKAISYYHGPIANLKVGSSTYRRELQKMNAHQLLQRGISGTIRDGADAIISGKRRGH  
DKLQHIKYVAEWRIGANALFKSFVRESMIRVFRSLAYISSNEALKTGTGLKQRKSTSKLY  
RYDGLYKIVRVNPPIDPKGAFEFFLTHSRIASNKNGGAVSFENVAKRVNRNLFGAKRQNA  
IHIPPPPPPTLLCATTTDSKRLEINQEHSMVSIIPSGIPLNPLWARDYGPIDLSWNSPA

>comp14433\_c0\_seq34; 705 343 2829 LEN=3571; translated  
MSLFSVVPVGPVAVPDPVFPFAGYHHDIEIQKSERIRYPLLLLEEFSDGNAESFEQLPAAST  
ADANTANAALDQTQTTTNEFLRGFPPSSPPAHRHSHCAPRIRRLFYPLPCPLTPEPPGI  
DRTAGTQGDGIAHHHSDFQPPWPGRQHAAAVVSPLSATQQAHEEGDRCRHRIEPQRRRWE  
LQDGRGLDQAKIQAEIDAIVGGVSNVDPYGDRSFRGSNGPPGASGTFAGSGGASELVLGR  
AELDAAAKKLGLFAGSGPCLPLLDADGGKDPEPIPRPRWHTGHTNFVVGKDVPGAAGCTA  
RCGRTQQQQQRLASDQSVVERPLFTYKSWDERANRWKPKRTFWVRKEAEAGGSGACAPPH  
FRISLSRGGTVHVFPNLLGAQSVGAVKTELLKCGFWRKYSIQGGDEPRLHFLAHENATDN  
FENGAQPGYRYTNITMKARPLSALPNLQRMKQLAKMRNIPSEKWTIGVHPVLYRDNRDS  
MGDHADDDQGETRILCVLVDSPPTPRKVVIKVFDKLTGGKRQKDRVHQDRDEIVELLLR  
GDAYEMDGVMQEFYSHCVPKDNLKDDCKDHKSEHSRIRRMCVLRTGQQKEFERDTGE  
ACTDLAPRKAISYYHGPIANLKVGSSTYRRELQKMNAHQLLQRGISGTIRDGADAIISG  
KRRGHDKLQHIKYVAEWRIGANALFKSFVRESMIRVFRSLAYISSNEALKTGTGLKQRK  
TSKLYRYDGLYKIVRVNPPIDPKGAFEFFLTHSRIASNKNGGAVSFENVAKRVNRNLFGA  
KRQNAIHIPPPPPPTLLCATTTDSKRLEINQEHSMVSIIPSGIPLNPLW

>comp14433\_c0\_seq35; 672 343 2888 LEN=2888; translated  
MSLFSVVPVGPVAVPDPVFPFAGYHHDIEIQKSERIRYPLLLLEEFSDGNAESFEQLPAAST  
ADANTANAALDQTQTTTNEFLRGFPPSSPPAHRHSHCAPRIRRLFYPLPCPLTPEPPGI  
DRTAGTQGDGIAHHHSDFQPPWPGRQHAAAVVSPLSATQQAHEEGDRCRHRIEPQRRRWE  
LQDGRGLDQAKIQAEIDAIVGGVSNVDPYGDRSFRGSNGPPGASGTFAGSGGASELVLGR  
AELDAAAKKLGLFAGSGPCLPLLDADGGKDPEPIPRPRWHTGHTNFVVGKDVPGAAGCTA  
RCGRTQQQQQRLASDQSVVERPLFTYKSWDERANRWKPKRTFWVRKEAEAGGSGACAPPH  
FRISLSRGGTVHVFPNLLGAQSVGAVKTELLKCGFWRKYSIQGGDEPRLHFLAHENATDN  
FENGAQPGYRYTNITMKARPLSALPNLQRMKQLAKMRNIPSEKWTIGVHPVLYRDNRDS



MGDHADDQGETRILCVLVDSPPTPRKVVIVFDKLTGGKRQKDRVHQDRDEIVELLLRP  
GDAYEMDGVMQEFYSHCVPKDNLKDECKDHKSEHSRIRRMCVVLRGTGQQKEFERDTGE  
ACTDLAPRKAISYYHGPIANLVGSSYTRRELQKMNAHQLLQRGISGTIRDGADAI IISG  
KRRGHDKLQHIKYVAEWRIGANALFKSFVRESMIRVFRSLAYISSNEALKTGTGLKQRKS  
TSKLYRYDGLYKIVRVNPPIDPKGAFEFFLTHSRIASNKNGGAVSFENVAKRVNRNLFGA  
KRQNAIHI PPPPPPTLLCATTTDSKRLEINQEHSMVSI PSGIPLNPLWARDYGPIDLSC  
CATLLLLLEX

>comp14433\_c0\_seq36; 578 343 2148 LEN=3760; translated  
MSLFSVVPVGPVAVPDPVPPFAGYHHDIEIQKSERIRYPLLLLEEFSDGNAESFEQLPAAST  
ADANTANAALDQTQTTTNEFLRGFPSSPPAHRHSHCAPRIRRLFYPLPCPLTPEPPGI  
DRTAGTQGDGIAHHHSDFQPPWPGRQHAAAVVSPLSATQQAHEEGDRCRHRIEPQRRRWE  
LQDGRGLDQAKIQAEIDAIVGGVSNVDPYGDRSFRGSNGPPGASGTFAGSGGASELVLGR  
AELDAAAKKLGLFAGSGPCLPLLDADGGKDPEIPRPRWHTGHTNFVKGKDVPGAAGCTA  
RCGRTQQQQQRLASDQSVVERPLFTYKSWDERANRWKPKRTFWVRKEAEAGGSGACAPPH  
FRISLSRGGTVHVFPNLLGAQSVGAVKTELLKCGFWRKYSIQGGDEPRLHFLAHENATDN  
FENGAQPGYRYTNITMKARPLSALPNLQRMKQLAKMRNIPSEKWTIGVHPVLYRDNRDS  
MGDHADDQGETRILCVLVDSPPTPRKVVIVFDKLTGGKRQKDRVHQDRDEIVELLLRP  
GDAYEMDGVRCVVHAFLIPFASSNCSVLFNRWFRTESEELNPPGVPKYSSSESFDELKTLV  
A

>comp14433\_c0\_seq37; 578 343 2148 LEN=3311; translated  
MSLFSVVPVGPVAVPDPVPPFAGYHHDIEIQKSERIRYPLLLLEEFSDGNAESFEQLPAAST  
ADANTANAALDQTQTTTNEFLRGFPSSPPAHRHSHCAPRIRRLFYPLPCPLTPEPPGI  
DRTAGTQGDGIAHHHSDFQPPWPGRQHAAAVVSPLSATQQAHEEGDRCRHRIEPQRRRWE  
LQDGRGLDQAKIQAEIDAIVGGVSNVDPYGDRSFRGSNGPPGASGTFAGSGGASELVLGR  
AELDAAAKKLGLFAGSGPCLPLLDADGGKDPEIPRPRWHTGHTNFVKGKDVPGAAGCTA  
RCGRTQQQQQRLASDQSVVERPLFTYKSWDERANRWKPKRTFWVRKEAEAGGSGACAPPH  
FRISLSRGGTVHVFPNLLGAQSVGAVKTELLKCGFWRKYSIQGGDEPRLHFLAHENATDN  
FENGAQPGYRYTNITMKARPLSALPNLQRMKQLAKMRNIPSEKWTIGVHPVLYRDNRDS  
MGDHADDQGETRILCVLVDSPPTPRKVVIVFDKLTGGKRQKDRVHQDRDEIVELLLRP  
GDAYEMDGVRCVVHAFLIPFASSNCSVLFNRWFRTESEELNPPGVPKYSSSESFDELKTLV  
A

>comp14433\_c0\_seq38; 504 343 3142 LEN=3142; translated  
MSLFSVVPVGPVAVPDPVPPFAGYHHDIEIQKSERIRYPLLLLEEFSDGNAESFEQLPAAST  
ADANTANAALDQTQTTTNEFLRGFPSSPPAHRHSHCAPRIRRLFYPLPCPLTPEPPGI  
DRTAGTQGDGIAHHHSDFQPPWPGRQHAAAVVSPLSATQQAHEEGDRCRHRIEPQRRRWE  
LQDGRGLDQAKIQAEIDAIVGGVSNVDPYGDRSFRGSNGPPGASGTFAGSGGASELVLGR  
AELDAAAKKLGLFAGSGPCLPLLDADGGKDPEIPRPRWHTGHTNFVKGKDVPGAAGCTA  
RCGRTQQQQQRLASDQSVVERPLFTYKSWDERANRWKPKRTFWVRKEAEAGGSGACAPPH  
FRISLSRGGTVHVFPNLLGAQSVGAVKTELLKCGFWRKYSIQGGDEPRLHFLAHENATDN  
FENGAQPGYRYTNITMKARPLSALPNLQRMKQLAKMRNIPSEKWTIGVHPVLYSEYKDWI  
EWIPLDVDVHAXAVGTVCVAVFVLDLKI AAVELRNVPDVLHATPPIGSLSRDNRDSMGDHA  
DDDQGETRILCVLVDSPPTPRKVVIVFDKLTGGKRQKDRVHQDRDEIVELLLRPGDAYE  
MDGVMQEFYSHCVPKDNLKDECKDHKSEHSRIRRMCVVLRGTGQQKEFERDTGEACTDL  
APRKAISYYHGPIANLVGSSYTRRELQKMNAHQV I IASNSFY SRLVEPNLXAVTFLIGI  
AFAAFKNELLXKHKLLQRGISGTIRDGADAI I IISGKRRGHDKLQHIKYVAEWRIGANALF  
KSFVRESMIRVFRSLAYISSNEALKTGTGLKQRKSTSKLYRYDGLYKIVRVNPPIDPKGA  
FEFFLTHSRIASNKNGGAVSFENVAKRVNRNLFGAKRQNAIHI PPPPPPTLLCATTTDS  
KRLEINQEHSMVSI PSGIPLNPLWARDYGPIDL SX

>comp14433\_c0\_seq39; 602 343 2993 LEN=3150; translated  
MSLFSVVPVGPVAVPDPVPPFAGYHHDIEIQKSERIRYPLLLLEEFSDGNAESFEQLPAAST  
ADANTANAALDQTQTTTNEFLRGFPSSPPAHRHSHCAPRIRRLFYPLPCPLTPEPPGI  
DRTAGTQGDGIAHHHSDFQPPWPGRQHAAAVVSPLSATQQAHEEGDRCRHRIEPQRRRWE  
LQDGRGLDQAKIQAEIDAIVGGVSNVDPYGDRSFRGSNGPPGASGTFAGSGGASELVLGR  
AELDAAAKKLGLFAGSGPCLPLLDADGGKDPEIPRPRWHTGHTNFVKGKDVPGAAGCTA  
RCGRTQQQQQRLASDQSVVERPLFTYKSWDERANRWKPKRTFWVRKEAEAGGSGACAPPH  
FRISLSRGGTVHVFPNLLGAQSVGAVKTELLKCGFWRKYSIQGGDEPRLHFLAHENATDN  
FENGAQPGYRYTNITMKARPLSALPNLQRMKQLAKMRNIPSEKWTIGVHPVLYSEYKDWI  
EWIPLDVDVHAXAVGTVCVAVFVLDLKI AAVELRNVPDVLHATPPIGSLSRDNRDSMGDHA  
DDDQGETRILCVLVDSPPTPRKVVIVFDKLTGGKRQKDRVHQDRDEIVELLLRPGDAYE  
MDGVMQEFYSHCVPKDNLKDECKDHKSEHSRIRRMCVVLRGTGQQKEFERDTGEACTDL

APRKAISYYHGPIANLKVGSSTYRRELQKMNAHQLLQRGISGTIRDGADAI I I SGKRRGH  
DKLQHIKYVAEWRIGANALFKSFVRESMIRVFRSLAYISSNEALKTGTGLKQRKSTSKLY  
RYDGLYKIVRVNPPIDPKGAFEFLLTHSRIASNKNGGAVSFENVAKRVNRNLFGAQRQNA  
IHIPPPPPPTLLCATTTDSKRLEINQEHSMVSIIPSGIPLNPLW  
>comp14433\_c0\_seq40; 299 343 1767 LEN=3924; translated  
MSLFSDVVPGPAVPDPVPFAGYHHDIEIQKSERIRYPLLLLEFFTSDGNAESFEQLPAAST  
ADANTANAALDQTQTTTNEFLRGFPSSPPAHRHSHCAPRIRRLFYPLPCPLTPPEPPI  
DRTAGTQGDGIAHHHSDFQPPWPGRQHAAAVVSPLSATQQAHEEGDRCRHRIEPQRRRWE  
LQDGRGLDQAKIQAEIDAIVGGSNDVPYGDERSFRGSNGPPGASGTFAGSGGASELVLGR  
AELDAAAKKLGFLFAGSGPCLPLLDGADGGKDPEPIPRPRWHTGHTNFVVGKDVPGAAGCTA  
RCGRTQQQQQLASDQSVVERPLFTYKSWDERANRWKPKRTFWVRKEAEAGGSGACAPPH  
FRISLSRGGTVHVFPNLLGAQSVGAVKTELLKCGFWRKYSIQGGDEPRLHFLAHENATDN  
FENGAQPGYRYTNITMKARPLSALPNLQRMSKQLAKMRNIPSEKWTIGVHPVL  
>comp14434\_c0\_seq1; 392 98 1753 LEN=2081; translated  
MSTNGGPFICSLQSLEIHLNDEIRQHLSQYSSHLTIDDGNHTEEKTQKESRDCSLGAIF  
SAMKRPPAFTTCRVNLISSREEVLSLQNLSSHIPQLEVVEDAGFSDIINIVPKAQDDC  
DSQSKNPDDKGYQKTTLSNSTGPDHENDEGGRTNAKGEAETSNSMFHHWQSRKEQGS  
MNYRSVVCDFRCGEAVLRGSDIFVKGILAADTNIQAGEKVAVYADIPQKIESQKVLGRMK  
LDQYRGRCVYLGLGRAECSRNEIFSKAQGVGIIIMSLDPKDRVGPPLPLYGVLPNKMMMLQ  
NLPSVLVGHALNPRPNDVILDMCSAPGGKASHLASLVRNQALIVACDKSKKKVMAAKELF  
ARMGASCIIPALDATNCCIGNVGNVGDKNVQIIAEGQVGKEGLKEIKKFYEKSFDKIL  
LDPPCSALGLRPKFLIAQETLQKHAQYQRKFVEQAVKLLKVGGMVMTYSTCTINGDEN  
EGMVSHILRAHPCMELMPELNPNAWRQKNIGRRGLNGFGLSTNELDCVRRFEPNGTADTM  
GFFVALFRKRF  
>comp14435\_c0\_seq1; 102 1 905 LEN=1812; translated  
XVASNARSENNSSSTHGKQENPAFRKSTGFRMRELESFYPRPLPLDGSLWTFNNYLGTA  
AKRYGACVMMPRILFGSREEGDGASTTATETLSARSTSNTTDTIIASWNHTKFESLRWKY  
HTDFESSNERPKSMVNAGLLTLPQPRAFLEKNRGEISFRGNKLVRSIHRPLKNCPEGPKI  
IYNTRHYNQPLAVFHYLGLSLERYMKRPDVRDPVVYHRYNSRANSAIGDLNHNASEPKND  
TDNDIHRPPRWMAGWLDEFVKTHGAEASFVSLGETYGSRLRRTTPTSLEAQKSAQLALFD  
A  
>comp14436\_c0\_seq1; 434 253 1689 LEN=2170; translated  
MINRLKRRAAKTAEASEQKR IKAKAEDEAQKSTRKAPSPTKASKTEQTIPKKAKKTLTIP  
KKSSVKDGEKAQTSSENGKTKKETPSLLSGMKKPLPIIVHSIKKDKQRPLPSSRGPPNTR  
PKSPQRMSPAPRVATPPPPSDAANLIQNPQPTNHPSSRVVTEVEKLRKLVWDGLRDLCKE  
TFPVPPEPENGVDLDFASFLRHKDLKPGNNLQYDFDTEETGNIIVLQPKIPIFPEDFPQGA  
KQWPLSWWGIIVDPSIEDQKTEVDGKVKGQTDTTAYTKSRDISDSQSDKISSGAKDESSD  
RDRRGGNHSTRKRSSRDRHDSGAYYDDNPSREANRDRFLGGERDGGSCPPSLRENGYDY  
DRNDFRIHNHRDGGPPFPHRMGDGPPPHSRDRSRDRPPHGFDFRGRSRPYPGQGDHSRDY  
NFRDQYGPPTGRGPHGPFHDDRRNMRNIDRSSRPSYSHSAREDGWSRRHPSGNPNRQR  
>comp14436\_c0\_seq2; 326 253 981 LEN=2469; translated  
MINRLKRRAAKTAEASEQKR IKAKAEDEAQKSTRKAPSPTKASKTEQTIPKKAKKTLTIP  
KKSSVKDGEKAQTSSENGKTKKETPSLLSGMKKPLPIIVHSIKKDKQRPLPSSRGPPNTR  
PKSPQRMSPAPRVATPPPPSDAANLIQNPQPTNHPSSRVVTEVEKLRKLVWDGLRDLCKE  
TFPVPPEPENGVDLDFASFLRHKDLKPGNNLQYDFDTEETGNIIVLQPKIPIFPEDFPQGA  
KQW  
>comp14437\_c0\_seq1; 446 160 1482 LEN=1958; translated  
MKTRAKRREEELSKKRTHYGNESNNGNIVRDDDDDDGDDGANNNDATVAASTRYRA  
YPHCPYVCVYCGTPCSALYRQLTSSLSSIKAMHCEKQRIVDPIEREWLLVVIDCILLR  
SEAWRHVLYNNKELSWHGAREKEGEGGGTGDARRGTVPVIVQGLIQGLTASGLFHAY  
LKRQTLVHDHPVLIQYQYQYANETGDSWIDEEFSFPALLYGIFLVTSILDIVVQWLAIYG  
CLKLLSAVTSTLDYNEEDNEQRRSTKATAKKQKLQSKLEGLLGPRTSHSLAYQIYLAL  
LLPTSAQLLSVLVLVWENSKMTRALGSLLVACWQSLAVSIIISIHYSNRNYYSCHNGDIKS  
SGSPANGNSSCTKLGRILASVIPVLVGVASLIAWRLGVVQLLAATGGTAALHPIPCVGFE  
MDSSEHFWRGAPSALRLCLT  
>comp14438\_c0\_seq1; 369 138 1168 LEN=1168; translated  
MPNAATATTAACRVWARRSSLSSDPPWFDPCRFGTSVYDTVASHRLGRVGNSTDASTP  
RGRRRHCDRMLVDLGEAERAGVFLSPSESGAAEAAKTAADTKTATDTNTETPAPRTHRGI  
PFGRARDCPPTLTPRARDDARLDRRRRPFVRLAVVGMVVGDETGKNSNCDNDGVLLLTRR  
PRYMRSFPGAFVFPGNIDEGESLAEAVSREIEEETGLAIASDSWELECLWESIYPTELP

EEDDESRRERGSSDGAIRAHHLVCFYSSKLAQREHEKQRLRLCREEVDGAVWLSRCDIERL  
LEAEHGAGANAHQSPGVLDELQKIDLALHTPSVATGENDERTTT  
>comp14438\_c0\_seq3; 369 123 1153 LEN=1153; translated  
MPNAATATTAACRVWARRSSLSLSSDPPWFDPFCRFGT SVYDTVASHRLGRVGNSTDASTP  
RGRRRHCDRMLVDLGEAERAGVFLSPSESGAAEAAKTAADTKTATDTNTETPAPRTHRGI  
PFGRARDCPPTLTPRRARDARLDRRRRPFVRLAVVGMVVGDETGKNSNCDNDGVLLLTRR  
PRYMRSFPGAFVFPGGNIDEGESLAEAVSREIEEETGLAIASDSWELECLWESIYPTELP  
EEDDESRRERGSSDGAIRAHHLVCFYSSKLAQREHEKQRLRLCREEVDGAVWLSRCDIERL  
LEAEHGAGANAHQSPGVLDELQKIDLALHTPSVATGENDERTTT  
>comp14439\_c0\_seq1; 1290 193 3130 LEN=3130; translated  
MEAGSGVNSRDLPVARKASPSTKKNHKSRDHYNDSNREIDKEHLAKLLRASADIVEKGE  
FASVLYEALQDFRVYKQNYPKNHKKKHSKKGQQSLVRENSGNSQLTAGSEKTNSESS  
EILKDLKHSEENAPKSAHAAHVDTKEDAESDTLHGKANKANASHDAESPEETGANPKDDG  
DTAGANHSASRHEQMKPEVSAPFDEEKVAEKKQPSPEESETTEEDEKPGGTERASVASV  
PPSPYFARKLAKPIQVEKKDTPVEHYVVASGAAAAASPTHQSNRAFVKKFNLGDIQER  
EKAAMNVTENISEKIPGKAHHNKPAEDLGFSESGIAMAESSGRRRSEGVGNDEFNGAE  
FQSRVTGGEAGVTASAGHNASEQKNDKNSYQQFSHEVGSKSAPPKPLSRTGPALFESQR  
FVEQSPKQFESTPEDRSKSGSIGSHDCSESDGIRGGFETSPAVPDPIMALGGGLMSKPS  
FQRPANKESALVANGWIEQFRRSKMRHVWKEVLASLVEGRKPGEVTTLWIQREVADPITG  
QKKLEALHRIPLKMLEDVSLTEHSTDNQFRLKLFNGTEDFVFRCSDAPIIDAMRWVQMLKQ  
HEQLAKGTIKNATNGYHKESNVPVQQQRSPPTTKGMAIRDLRAICHGAGINTAGMERAQLE  
AAAAEVQSRGTYFDQRGAPTAPSPARYPTQQEKQHQPSHYPPVQADHSNDHARNAPAS  
SAEYPPQQQQEQQAEPKRLAIKDLRAICHGAGINTAGMERRELEAAAREVESRGTYFPST  
IAGTPAPSEETRARQEEYRRQQLQQQEELRRRQESDAALKRHQQEVEESRRRAAEMEAR  
RQEEARRRAMEEEQRRRAAEEEAARRRAADEARRRAAAEEQARRQREAHVAQERYAQQQA  
AWQQQQQAEQQRRRHAAEQQAQERRRREEMRKEQQWAAAAPGAHPQQQWQQHQQQYQA  
YSQQQQQHPPQQRWQQQQX  
>comp14440\_c0\_seq1; 327 1 1077 LEN=1077; translated  
DQFCDSRHLNFRFRQMMKSI GRKSCGSMFRRLVEVAGAGALLSPSCSNAFAGASSFS  
RPIGQASDASLGSAQRQYSTTKLSAVGEVAFPKPVSVAPGESPVVEEQPSLNPIDDCTI  
LVVGSRRGIGLEFVKQCLDKGATVIAAHFPKETPDTLSELKSRHQGKLHTIHMNLEDEES  
ISSAASELTGMENLPSLTHIHNAGIYLSGASFDGAARAGRAATAKVTKEVLMKTFEVNT  
VAPLLIAQSFVPLLQKRSESLFPVMAFVSSKVGSVDDNGSGGAYAYRSSKCALNQVAKSL  
SVDLADEARVLLHPGWVRTDMTNGNLIDTDES VSGMLKAVEATDASTGFRFVDYKAC  
>comp14440\_c1\_seq1; 217 186 872 LEN=1162; translated  
MISGSDATNRRSIGANDGMENNGDSNGKIIQSVLNLVKKHHRILYRFEGGVMIPFEADFR  
VILVTTQTQEFPC TLSVLTGTGSTMTE DLSLSSPVTSTKTKLELRESLANGRSVASKNGS  
PMKFSSAILEQAQKDFLERRQRCHGPSASSVLPGEDDFHRWLTTLTKLQTKNRRSRGNKIT  
SNKNAAALVEGETGTDSSSPTSPKKTWEPTVNDWKAALNLDDDIRLTA  
>comp14440\_c1\_seq2; 241 1 1168 LEN=1458; translated  
XDDDDDDSKVEWSGFPKDESSLVPSAFAFLLOEGTSPVPRSAPWIRALWMCLLSEADRC  
PDTDGMQQIMRAGPAERALGSI SLRLSAPDVT SARSLFRRLAESVLPDVCPIVAAVDLTT  
ATKTFPNNTSFFPRKDENGR LQPCPLQLPKGSVLLIYCP LNMISGSDATNRRSIGANDGM  
ENNGDSNGKIIQSVLNLVKKHHRILYRFEGGVMIPFEADFRVILVTTQTQEFPC TLSVLT  
GTGSTMTE DLSLSSPVTSTKTKLELRESLANGRSVASKNGSPMKFSSAILEQAQKDFLER  
RQRCHGPSASSVLPGEDDFHRWLTTLTKLQTKNRRSRGNKITSNKNAAALVEGETGTDSS  
PTSPKKTWEPTVNDWKAALNLDDDIRLTA  
>comp14441\_c0\_seq1; 359 92 877 LEN=1726; translated  
MSLLQINNAVPLMEPLIEQKTGEDTKR TNRDFSVNR TKFAFLGVITGFFIQV I SLGAYAF  
LLVHYRDVPLELSEDFQTDA AFLTESGFFRTPTSENEDDDAMFGTKTFLYAI VSVLT  
QIDLIAVFIWFAFTCTMTHNGMACIR SQFFGQPQQQFDEEDCNKQRNKNSKLIKRRDIF  
VSGVCFVLGIVLGAFAAWSAIDL YLGFPIPFKPIISTVVVDLMLCYLMVWCYDLGGKKG  
NEGSKDNEEDED EDCQEQEICC  
>comp14442\_c0\_seq1; 612 133 2250 LEN=2538; translated  
MDSNSHPHFSWHRPSGILKTLFFVLAVVLGRS IAGA QGDGKDARALLWSSTGGGWRAMFS  
DVAFANLFQQAGLMDQTSTKFAVSTVSGASWFSTQLFYSQQFYDRTVLAQTPEELESFV  
LQWIQTYYSKVSTVLDNETIAEC DMSDVTSPVLR LYSGEHDPLEIMSEICELAKEFDLDW  
TKFVHVMLEAASNYS DPGFVDTIANSENRIEPMKQTNLLIQTALMPNSRIRENNTTEST  
AVYVGYD TDEDGMSSPQLFTVALSAAWVGNNSADFWYGTDDKTDQLKTYTAPTVEHSW  
DTFESFFLYPNGGKISINGSDILAKSGGDQNDAFV GKPLRPPFGGPEATTVAHVASASS

AAAGGRSPLAPSVYNQSFSSISFYISIEGSKVRLIWRVLLGISVGLVTTVLVGWLVEYCARC  
RKKKSDGDSNNDTKEPSNVE SNGQDENGQSV DVNTSSVRKPAIASGVCCGILAGCLAGLY  
FGFGSILLPTVYDVGVGLAYENPHFDKFAVCSQWPNPCGTQDAQFNDGYYIDNPAVVVN  
GYYLQENGVDNQTIKLIVTNTNDEWDNDYNLQILHFFNTTFNEGVEPGEFLWGPDLQA  
PYRSPQIFEEYLDKEELNNSLVPLPDSNMTTATFSVTTLDNPSFGVLAGQPVDILLNVN  
AGITTLIVGRTAIDTTTQSLDMTLGVAFNEELLKRVKDF TNGAD  
>comp14443\_c0\_seq1; 70 1 1243 LEN=1975; translated  
XPTNFTKQYYGVISLFLSIRQIRYEFEYLQSTKSRMRTAKGDKRWILLVFLG SICFSLYS  
SSRLIFPMDIPATNCQEGETLPVECTPRINRSDDIFKRKGWDNGHNRARNSQPGEIFPAE  
YTPPPIDWSDDI FKRKGWDNDPIVIESHKLLFFAVPKNACTTFKKLFRMMGKPD XLEAS  
AHDPEKNGLKYLGNYTREQQEEFMTSPEWTRAI FVRDPIERTLSAYMDKGLLI THKYWQP  
PVTGAYIKRVCCLMTPETTDPSKLRSDVSDRCKHPLWPYETNMTIDNFPFESFVDGFLA  
KCRNGPDPHWRAQYDRMKEANWAHINFVGRFETKKADTHRLLKQIGAFDEYGS SSGWGEDA  
SGNMALPIFETNLAPHKTDSGAKIKKHYTEKMKKVVLKFYSRDYESVLFNF TKP  
>comp14444\_c0\_seq1; 624 109 1806 LEN=1958; translated  
MADWAFDSGSPAIQASAAAAGGSDELSDRTAVITGRLKAIYRKT VLPVEKRFKYDYFYES  
PFLSDCEFDKQVMLIGQYSVGKTSFIRYLLGRDFPGQRIGPEPTTDRFTV LINGPEER  
VIPGNALSVHPDL PFRGLERFGVSFLSRFEGSQMPSSVLR SVTLVDTPGILSGEKQRVNR  
GYDFNKVTGWFAERADLILVLFDAHKLDI SDELKGAIDSLKGNEDKIRCVLNKADQIDRQ  
QLMRVYGALLWSLGKTMSSPEVARVYVGSFWQEPLKSMDS ELFEMEEQDLMKDLAILPR  
QSAVRKINELVKRIRKVKTLAYVIAHLKQQMPTLMGKEKKQNKLIADLPNVFRTV LKKYS  
LAPGDFPDITSFSSKLRETKFAEFNTLSQKQIDALDEVLNKDIPALMEELP SERDSPETL  
RAKMGAAVARGANNIPIPQTA AKFGKKDQHE SNPFGPSQDN TSQYWALQESADRLAGSF  
EALGPEGGFLSTTKARNVLVKTGLEK DQLRQIWNLSDLDRDGLFDLDEYV VAMFLCDAVI  
QKGRPIPAELPATVI PPSKRHLVRK  
>comp14445\_c0\_seq1; 1005 1 3204 LEN=3302; translated  
FHSFFRVAIRGDFPGYKRPSVAAAASEGIDALVQTPSWLVPVPRVEQEAENSWNRNCEHSY  
SSARTEEDLSNSFGVDIRNGSLRDWNEELQVAREMPMDNLLERIERARV LNKVLTDFGEA  
VLLGVKAISQGV TAMNPNEPLRSQVFLHNNIFFSRAVDAGLET FKVAKGDKAARKSASR  
DLHCLGALHRMERTGLHTLATAVVDYLGSRFVCQSILPGILSGEKHTHTLLYGAVESGVPL  
VWDKEMHDLFETTLGKGLMIATRMPKQPLTAERLAEIEDAKIEPLSIKYGKDEDEKRDE  
DESLTIDL CAPLEAKGIRGSDQRKYVLDMTRLTPRDANWVPREQGGT GKWDPEVGANGGS  
SDDGLIPSSLDDEEWTLAVLRNELVSHFAQVKMARYVQEKKASAE EDEKAAAEGEKKNPS  
DEKVEQNKGEDNDKETGNNDKKDEKPAETASAGRKKMS EDDLAYLNSLRFNVN VFLPDVI  
TLEGIDDGALEQIKKDEEMVREASVYLWNDVIPGV TNEIRMGTVHTVPHDGKSLTEFIHQ  
RGINCRYLGRLATLAQVEEEKDRKQIKAYKENKVSELARRKMP LFWLELLECEMVARASK  
HVLDRYLSVN NYANIGSLSQIVASF L CALVSEGEETA AQTEKRTEKAGPEEPDEDDL AGL  
SLFQTGASAFPLRSRHEVWSDIEE IGRFRYGLSIFNRGSANRKAPFLPL LRRVCQRNG  
IRLVARSYEIGAKCVCSAPGSSGGSSLVASHPI SALDVVDV VPLMKHAAAHNEG FVACGV  
VPTTGLPPLHISLPDARATLEQAHL YHNKRLLSRALDLAQEAAGLYQRVSETPAHPGVVR  
CIDLIASILYDAGEPGLAAQNASKALGYQTQISGF DSPDVINLHFV MFQFLLATGEP SRA  
TKHIKAAIYLMELIGGRNHLELSNAYHKAGTVYHG VNDLRTALRFYQQATAK DSCDRLLE  
AMISKSSALVLAGV GDFKQAFEHEKRAFGLFSVLLGPGHTLTKQSDLALNNFMRAA VEHG  
SKMVDDLK KREEEA EAI AFEIEAEEAAEEVRRKKKNQ KKKKGGKH  
>comp14446\_c0\_seq1; 321 124 1830 LEN=1886; translated  
MTGQKRPSIDLSIQDSAFLTHELDAIDPLQLTKCQRQMKNNPHQHPQE EENENQRNVSL  
HYAINDLPITATADENKICDDSGGGFWEEARLFFELAGV SCLMNLA FIMSPLLTASYIG  
RSFTFPVYLSAFTLANLTGNLCTFSLMAGLFSASDTLSPQAFGRKDYPEVGYIAIRGFVVA  
FTLLFPINACLFFFMTDIMALGQNAEASSHATAWFR IYIFNMPFSILYNCLWKFLTAQH  
IMKPLILV SILCMGFVLPVSLTLCINTMGFLGSAVAYVLFQASQSLFLLGYV VVWKHPHHS  
GTWPGLSWKSMQNALEWRMNEFFHLGMGGIVAQCEWVFW EAI GLIVGKLGVVALS VHTI  
PNQTIMAFCMVPPAFGVALAIRMGVILPISVGH TQSVVIVTSGLSTLLFGLVSVAVYVYR  
DVIDLFTIDNAVKELADVIWSEVSLFNINVS LFGILAGIATGLGKQWALGVIN FVFLWL  
FGLPMIYYSVIVLDEGLGAAWFWMNIPYLCMNSSLILLFLFTDWNKIQE QILLKKDG IKD  
DDGCCANKGCGQVDKIYMVASEATSLI  
>comp14447\_c0\_seq1; 103 99 688 LEN=688; translated  
MVLADITDACRQHGA IMSGHNHVYSRTKMLKSVGTESGDDPVPINPTNTDN SMLVVTEG  
RTMSITTGMGYDGSCNGIYRNATWMEKCIARGSDHRGAVIAEFDEDDTRLGTFRYMN SL  
MDGKVVDEFQIFSKLSGSKAPSRKPTRKPTRKPTRKPTPTPTPAASAPAPAPAPAP  
VPAPAPSPIPVAPVPA

>comp14447\_c0\_seq2; 388 245 1812 LEN=1812; translated  
MVKLALHSMLLAASITLPM SQGVKIAFVGDTGMDDPEYNGYGHLTMSMIEDESVDLVVDV  
GDFDYWGRCTETYEYVKSPTAIRSLSGENMEVPSNSVVKRVTWQDGS HGS IAGWQVGIKLD  
DESTAKPNTVTLDDDELFLQLHTISDKTWENLSDNIELKAGEQDCEGEPWDGAWEWNK FVSD  
YSFDFL GASGNAEVKDAPEYGST EI WATHQQYMHRLYMERIYNKKRGACHGYSNQTEPGA  
VNEYGERFSCYYNNNSGKEDFQFLFLGWWQGSNERTDNKSKENRKKTI EFIEREFSDERS  
KNVRWRF CIHHMTSAKLSGGGKNRDIMVLADITDACRQHGA IMSGHNVYSRTKMLKSV  
GTESGDDPVPINPTNTDN SMLLVVTEGRTMSITTMGGYDGS CNGIYRNATWMEKCIARG S  
DHRGAVIAEFDEDDTRLGTFRYMNSLMDGKVVDEFQIFSKLSGSKAPSRKPTRKPTRKPT  
RKPTRKPTPTPTPAASAPAPAPAPAPVPAPAPSPPIPVPAPVPA

>comp14447\_c0\_seq3; 305 245 1980 LEN=1980; translated  
MVKLALHSMLLAASITLPM SQGVKIAFVGDTGMDDPEYNGYGHLTMSMIEDESVDLVVDV  
GDFDYWGRCTETYEYVKSPTAIRSLSGENMEVPSNSVVKRVTWQDGS HGS IAGWQVGIKLD  
DESTAKPNTVTLDDDELFLQLHTISDKTWENLSDNIELKAGEQDCEGEPWDGAWEWNK FVSD  
YSFDFL GASGNAEVKDAPEYGXV GIMHVTEILSQDARYELVGRRCIKFIVVLILNKFYGN  
LFILGIRSILNSTVPPGST EI WATHQQYMHRLYMERIYNKKRGACHGYSNQTEPGA VNEY  
GERFSCYYNNNSGKEDFQFLFLGWWQGSNERTDNKSKENRKKTI EFIEREFSDERSKNVR  
WRF CIHHMTSAKLSGGGKNRDIMVLADITDACRQHGA IMSGHNVYSRTKMLKSVGTE S  
GDDPVPINPTNTDN SMLLVVTEGRTMSITTMGGYDGS CNGIYRNATWMEKCIARGSDHRG  
AVIAEFDEDDTRLGTFRYMNSLMDGKVVDEFQIFSKLSGSKAPSRKPTRKPTRKPTRKPT  
RKPPTPTPTPAASAPAPAPAPAPVPAPAPSPPIPVPAPVPA

>comp14448\_c0\_seq1; 1789 166 3765 LEN=3939; translated  
MGTTESV FYDETPAETLPSPTRPSHAIATEPEPVLSAKPRNIRFQPHSKNGNVALRSQPP  
RRRRAPRET KPIIRMEGLVVGRPKTGKRTLLSRLRGVDFVVFVFKHPPNENSSNETSEKN  
NQKSNPSIIIPYKPPKECPTWDR IKLRIGSTERFDGDEVLSGNNIDFLVIMINPND SRDT  
AQTYVEEVVLSYLERSGQVEQVPGHTFNKEGREKAGDSRSTSAANPNSNSDAVIEALCIA  
ILFNFRDLQDDEKAKEFDNEVVSRS GMERFINKTLEARNAPAHRVIEVFDTSL LNCYGL  
DGLHRFIYRAYLQRGRDIERK LHI VRNQIQLVEENDSKSKPMRYDEFKKEILQEESGRT  
SQQQQQDNDK EAINHRKRQPQDEKEEKHQSSTRNLNLRQFRRQHNAGSTSPSRIGKDAL  
EAF LASSSDEEDQKIPANRMDGISSKNMVG IASSSSDDDDSDDDFFYDENGDRRHGQKNTN  
ALRATAGPGRDKRIMVQSRPNSNSFSASSDDDRSGNEQAQILSSPSQTFVKHDALNQSSS  
DVTQLDQENHMMANSSDHDHDVANPLNERATTIEPSATKERMLRKEKRTNAIRNANAVAK  
QSGETVERQNCQQISTKVAKSRTEREKKQEDVEQAREVVAPQQHV TIPA I KEKQQLSKE  
KEGAI VVSNTSSDTNLLGN DVENKSI LQNSDNIGNDGNDIKADTIDNK AIDRVAETEDA  
DVTIDDCDIHHRNRKDSNDATGV DLDNGTVAYSTVGAI STVRVMSGDLADGTLRSREDND  
DGVDTTDSL VVTRQVDKEPSDEKDATEIRCEQSVGKKLCDGNEDGEDSDGDYMIALVHSN  
NEDDDSDSDNCIIVSASVNEKGEDDGD DDDYMIGSRRANDKKEDDDDEIDISMLGSTPLD  
EEKQDNNGDVYMI RPTRANDNEEGDNDDCKTYMAEFTHMNEHDDDDGDCLSVSKPTKN  
ELDEHENH SKDYMVDSAIPSKGQEESGRYAENSTPANDEIEDHVDDGND SMMNFV PNDG  
TDNDDDDYMIQCTF PSMQKSGQDDDEDSAYIIASARMKYDEEINAPLTGTLNRQEDSIQ  
KSSSDTAVSMDRNNMDKKIPQSILITSTTKARQRNGRAPSQPPPYAKPISSSGISEAAAA  
AIAAAQKEAEAMVRKQQQQLYSHPSREKKS KSKSKKKKDEKNSEK KKKKKKKEKETSSQG

>comp14448\_c0\_seq2; 130 166 827 LEN=827; translated  
MGTTESV FYDETPAETLPSPTRPSHAIATEPEPVLSAKPRNIRFQPHSKNGNVALRSQPP  
RRRRAPRET KPIIRMEGLVVGRPKTGKRTLLSRLRGVDFVVFVFKHPPNENSSNETSEKN  
NQKSNPSIIIPYKPPKECPTWDR IKLRIGSTERFDGDEVLSGNNIDFLVIMINPND SRDT  
AQTYVEEVVLSYLERSGQVEQVPGHTFNKEGREKASRTSTX

>comp14449\_c0\_seq1; 667 1 1799 LEN=2361; translated  
XTPLQQIGCGRHEKTSTLALLCNTNPNGNHDPGAXKSAESES SVSVEDDPKPFEPDFQ  
FRSHEQH KPSXFAMGNMPPGGEGGPPADRSGKDDPDGAEK KKKKKRFEPRPATRQGRRR  
RRKGP SGLNKTP TIVPTSKCKLRLLKLERVKDYLLMEEEFIRNHEVFKPHEERDQEEREK  
LEELRGSPLGVGTLEELIDDNHAI VSSVSGPEYYVNI LSSVNQDLLEPGCSVLLHKNK TMS  
VVGILADDTDPMV SVMKEKAPLESYADIGGLEEQIQEIKEAVELPLAHP ELYEDIGIKP  
PKGVI LYGEPGTGKTL LAKAVANHTSATFLRVV GSELIQKYLGDGPKLVRELFRVADDLS  
PTIVFIDEIDAVGSKRYDSSSGGTREIQR TMLLELLNQLDGFDERGDVKVIMATNRIESLD  
PALIRPGRIDRKIEFPLPDTKTRHIFNIHTNKMTLAEDEVFCD SGAGERRRRRRRRSM  
MVF CRQ RDPNGTREPCLLEQVVS LFI LRRCFILALIRSQLNTFN RSLRDHFFKMKQVDLE  
KFIQSRDELSGADIKAVCTEAGMLALRERRMKVCQEDFDKAKEKALYRKKGNIP EGLYL

>comp14449\_c0\_seq2; 692 1 1566 LEN=2128; translated  
XTPLQQIGCGRHEKTSTLALLCNTNPNGNHDPGAXKSAESES SVSVEDDPKPFEPDFQ

FRSHEQHKPSXFAMGNMPPGGEGGGPPADRSGKDDPDGAEKKKKKKRFEPRPATRQGRRR  
RRKGPSGLNKTPTIVPTSKCKLRLLKLERVKDYLLMEEEFIRNHEVFKPHEERDQEEREK  
LEELRGSPLGVGTLEELIDDNHAIVSSSVGPEYYVNISSVNQDLEPGCSVLLHNKTMS  
VVGILADDTDPMVSVMKVEKAPLESYADIGGLEEQIQEIKEAVELPLAHPELYEDIGIKP  
PKGVIYGEPTGKTLLAKAVANHTSATFLRVVGSSELIQKYLGDGPKLVRELFRVADDLS  
PTIVFIDEIDAVGSKRYDSSSGGTREIQRTMLELLNQLDGFDERGDVKVIMATNRIESLD  
PALIRPGRIDRKIEFPLPDTKTKRHI FNIHTNKMTLAEDVDLEKFIQSRDELSGADIKAV  
CTEAGMLALRERRMKVCQEDFDKAKEKALYRKKGNIPGLYL  
>comp14450\_c0\_seq1; 393 236 897 LEN=897; translated  
MGRPNKNKKRQGGQHQAQQRPKKKQKRERFWIEDCREASSLLSSNEKQASLEVLITQ  
VQLFDDYRQVPQQOPENNEVQSKEAATVTREDLNDNSVSGKDGEAKPKEILTGSOQEQE  
QDDENTHEVVKEKDDERDSSNAKDGTKGTNSPVASLHNPRKDSANESHPEKNSEGKPKPV  
PDESRQHEQGVNNAEEDTKGGSTDGLDFRDAFISIKRSKSA  
>comp14450\_c0\_seq2; 323 1 1004 LEN=1501; translated  
XKVPVDESRQHEQGVNNAEEDTKGGSTDGLDFRDAFISIKRSKSAKKPTRVTADSVEHFK  
PLPNGDCGDGVVNPYDDKVVDPKFWQRRRLFTLFDHGIQLDKESWYSVTPEAIANHISA  
HLVSNRENAIVLDPFCGCGGNAIAFARMDEVKLVVICDKDIEKLMMAASNAAIYNVPAKK  
MVFVHDNAARILSLYENKALTGKSVGGDYTENQERSEEFRI GGTELLPKAIDCIFLSPPW  
GGIDYGVKGRNYTLEICISVDGTERNTQIGGEEILKRAAKAMGRDGPALFLPRNTNGVA  
LGRSVLRAGYDSPLVMEKNVNLNGKLTITAYIGL  
>comp14451\_c0\_seq1; 1748 59 6148 LEN=6573; translated  
MTTAAATEDEGNEIDWGSEAAAASVSVSASSVNVNADVNVNADAEADAEADVDAETPRTEG  
NGDVEVVEEPRERSPPFFQFLSDVVPKRYLQDDRLESIRFYSRAAGLLGAVFVCNPL  
LVLRTIWEILGRILGTAVGIGLGAGLALHVFQQLQKWQTEYDRQKQESKRVALSNRQKT  
LEEQIAASRRRHRMRQKAMGFGGASSLPTQNASISGDASHNPNSDQSTDSDRKNSHGSNN  
HNHNHNTHSFFASATAIGDAVAVGAEDGDSYVGLMGQAGYPFHDRIMRGQVLRDHFVFS  
KLYKFTDDTI PRQLGVLVAAEWEPSLPGAVTRELGRFIEHVMRDFVSSWYSLLDPGISFR  
LEQEKRDEGI PRDAQKPSDGARGTDDSVNSNGAPGAPADRPASGGSDKDGDKESGGDKAS  
SQQRKKMVFSTLTHRRAPMIDCCYKMMSSVGNLATRAEHVNLELVLLKWTQVLGQTLN  
EYRTLKVAQDKRRASGANSQTRSSGSGNGKHPSSAFQSSVSSTASTKSTKSKPTTEQP  
PPSEVEVTREFFLAGKLHRAITFGLDVPSSLFADASGKECGLGIEANEGNSDTRTSNNSN  
AATNTHHDPRTVLEHRLYHTDILRECQIDYHRVLNRLIRALMPKSETNSQCVVAMLTEI  
IGGAVLTPVYNLWVPNFMNDCIVKVLTTATAPAAPSDVRSANHQNSSSKTTAAAAAKTPG  
DSGNTNNDKALANATYRLEDSIHLGDAQNSFSHAAEASDSDAMENAARTDQPTQQQK  
PATDSHLEQQIPHTSTNSVASRDSERPLSKNSNSGTKEKASEYTTDTGRLTRS YKLLKLS  
SIALKDLAKHTSLNPSQNQDESSEARESV DWN DANCQHSALKSAMVIEAILLDGRCAFNE  
KEEKEVFPDLLAGAENDPTVTETEPEGDPNSLALDTSTPGNNGTFGSADCTSATEHRDNR  
SFADLLMEMSSDMEAFEDKLRNTPAPASHALSVPRHGRSSPDFEPDVDEVAKLRSLICAW  
LHTGQLFEAVRLISKAVDTIFAPYYAGDAFLKQDQREIFTRQMQLDKVEIMVDAMTVR  
IFPRLVVEEFDQLVSDLTEAAPQKQASKPTTAKASSNSGVVQLAAVKDTHIATNDSYHY  
YGHQFTPRYLNFQRNEAFAASLRAERKRRRAWETRTMEKDVQTVMRNKASARDYELHSE  
MHNLSRFLFYNGTAIMTVRDAARKNERVEEKVSLTVEIASRRRIEVPDDSSFFLLRAQS  
RQLSPVSVHLDDRNDMGYKCFLATYEEPALTQGSTRYSDGRYIRRCFLQYYP SDR TARI  
VLQNDARKLDRKEIGGNEHSTENQISSFSRAFLNQRYLCQKVGVAQSFMSSTLMEPTD  
FSAFPRSGKALDFVYRMSLFNRP IVDLGGKQFKIQDSSSRGIHRADASSFEVTDASLSYV  
LLKIGKSLGINQQEELGDGKPTGGFRNVETGPDGYVFLRFTKTGEKGGTEFKPYRLSF  
VRAALMVT SARQEAQLGTLIECVRAGSAKSATKARTEEQLRPVKKILHFANERSDQNFNQ  
DLKLGQFLDRGQLQRNGLNLRHPTSILQLEAKVEGTALAKEVPLASASTKSYNPDTVLY  
RIRCTVVVELVENNGTLTDFEPYALDDGSYARFYREEYIVHRSMTEFQTLHKQLKSQVAL  
TESTMSTGNRIVGAASAALHVGSQSTSINRRNKKILIPSLAQAGKIGALGMTKKLILKRM  
ELLGEYIDYLLASNSLMNRCSELLFLGASHFPPEVTMTKAQTNI MDLLGRTN FVRSIA  
LKDIAGSKLMMKISTHGRPRYRSASERSLIEKPNENGREPAESIKMDPIILNKVDQIPLA  
EVRNRILELFRLSFNFEHASFMRSQLLTALETASFLAVAKQSDFRRLHDIHTKHLSGEA  
IGGLIERVLDILWPDGIFMKPAPLPTPEEEIALRDAAKKLEHGFDPDQVRTLLGKEMTEE  
GLNVIHEMLQNRVILKSLFYMLLDLLWIEVFPEL RDALPCASALDLDLL  
>comp14452\_c0\_seq3; 200 183 452 LEN=1358; translated  
MDEKKKTHRKQSSGNFYFVTKLPGLSESVRDAGDDVAVIE TKRSGASEAEYEPKPVNRN  
LVSLIKTEWIPSVFNRIESNGKQKTGWN  
>comp14452\_c0\_seq4; 200 183 452 LEN=1068; translated  
MDEKKKTHRKQSSGNFYFVTKLPGLSESVRDAGDDVAVIE TKRSGASEAEYEPKPVNRN

LVSLIKTEWIPSVFNRIESNGKQKTGWN  
>comp14452\_c0\_seq5; 319 183 845 LEN=1139; translated  
MDEKKKTHRKQSSGNFYFVTKLPGLSESVRDAGDDVAVIETKRSGASEAEYEPKPVNRN  
LVKGVSLMKESERIVSSAPRMNPLSRTLFAVFGGSKPQSFDFKEGAKKVDPKVYFSNERTF  
LKWMNVSVWVAGISIGLSSIVGSSVKYNAWQSWLSLLFLALAIIVVSCYSMFQYAKRSLMI  
VKRSPGPFDDRS GPIVIGSLFILSFTAQYCIFIASLSTEK  
>comp14452\_c0\_seq7; 268 183 569 LEN=849; translated  
MDEKKKTHRKQSSGNFYFVTKLPGLSESVRDAGDDVAVIETKRSGASEAEYEPKPVNRN  
LVKGVSLMKESERIVSSAPRMNPLSRTLFAVFGGSKPQSFDFKEGAKKVDPKVYFSNERTF  
LKWMNVSVW  
>comp14453\_c0\_seq1; 1293 91 4170 LEN=4583; translated  
MRRSKSDPAKYARNYRKISQRRMTQYDGLDEEKEMQRLRSILRTSERHLKDVNSSSSTQE  
DGENKKRKRVRNDEKAKNEDTSMLSKEFLAEQGHGEFGDDNPLIVIPKKKKKKEKKS  
QLTPQEIKEARALQKKTARKLQQLLETRAAQKKKRAELYKKLKEQESQAALQPLLLASGK  
LSRKETDTKKQAVKKIFNKERAGLSITKEEEELLYPERTVAANDEPSMSLHNSNMF  
SNSSEVPMESKYAKNTGGRKNKSRSEKRSTEDVERDAKDISGSKRNSNSDGGKSDT  
SKAMPAGADFAAQMMASLSQIKERAKEKQPEQESEQIRPDVTPNAAPTCKYVPTNPT  
VLKTAATLGLKSTGQYKLRVLEVKRPAEVEKNRYDLPTAMEFEIMDAIRNNDVTIIC  
GETGSGKSTQIPGFLYEGGMCLSPGSDSKSFLVGVTPRRVAAVSTAKRLCYELGQ  
GDGQSIMGSGRKGNLVAYKTRYESAGCGDSTRIQFMTDGIILLSEIQTDLLLRYS  
VIVLDESHERNLNTDVLIGLLSVALPLRKKAAEEDPTIPPLKLVMSATLRVEDFT  
KNEKLFPSGTPTVVTVPGRTHPVTIHHKSVTELENYEDVAFKKICKIHRKLP  
GGILVFLTGKAEIIRMVNRLLRSLTDNGNHKKFKALEVDGALQSEESAIDAPRE  
MDEELDGETENVDDYNDIDDDFDDSDMI  
PSYEDDNIPEACVLPYSLLSAEDQAKVFAPTPDTHRLIVLATNIAETSITIPGISY  
VVDAGRQKCRNYSNGTGVASYDIMWISKASADQRAGRAGRTGPGHCYRLYSSSLY  
SRHMDDFALPEVLRPLEDIVLAMKAMKISNVANFPFPPTPDNTQIQAAVKLLANIG  
CVDISNIERDGGDGEVTRLGKAVAKLPLGVRYAKMLLVAAQAGVLDYAIIVIVAIL  
SEASPFNSHVLVKSS EHDNEESDDDLDEVKLVVEEREKKFKRNLRQWYNHGGD  
VLAAMLAVGAYTYAGRGAGGASEKLANSKFCEENGLSYPIMCRIQKMRSHLAMI  
AKNRLGTANALASKTGGFSCKMAPPKIEEMLLVQAIASGLLDNVALLATPGSIS  
GEYPIDLRSAYIDSSSSI  
STPLFLDKASFYTRDYRQLPRWVCYDSIVRKTAKDGTPLNVMKNITPIDPTW  
LGEISKGTQMIALGSPLPSPPIYDDEQDEILCSVTTKYGAAGWEISPTKVGMYD  
VLNSNRKETGDFLRDDSF  
RWFARFLWEGKIIPEFSDLQQFMNDSPSLITQRTPSKVSMLVSVLSDAGVDSAR  
ALRKHWA  
EKNSKFLFLQLKHWIKREDHKQAKKIWIEGVRQNI  
RKWKDASSST  
>comp14454\_c0\_seq1; 1380 144 2903 LEN=2972; translated  
MSLRSGNRQRAAQFTRKQKQYRIESDSEEDDDDETEMQSSNLRYGGGVLA  
ILKNNNTNGT  
RRQRRNGSEKGNRGRGNITSSPLQKSRKENFEAVADENNRTPPPRNVIMTR  
SAMRAISPLTTQKANQQRGRNKVSNVSVVEENSRADSFDDSVEDDEDETRPQ  
TLSSSEDNEKNSST  
SRENEHDDEGEEESYEDSYGPESSSEFEFVGVDDEEFIPDEEDEDDESSP  
MSDFIVEDDSDDIYISRGNTSNDASTRNNDEIDVVDGGNGDDDVQFCDDTV  
VNESAINESPYLSATNPEDSIDDNTF  
DAEQTPTKFELPKKNLSFSSEPEQMAMIVDENDEDEDEDVLFATI  
IDSDTVDGD TVVLT  
FDEDEENDAEETESTGVHVSEQQSNRDNHISAGKTK  
EAVDDNQESRTQPSLLAN  
KNSQPIVFQEEHEGHAKKNEPEPSK  
DITLVAPETSKEVSTRKNDKHYRQEGTV  
KRKWLALGAKIGVGSFGEVHVGMNTQT  
GVLMAVKKFRMEGAVMKDIRTEVELMR  
SFKHVNI  
VRYLGAQMDKDFLHIFQEWVPGGSVAS  
LLSKFGAFSIEVIKSYVSQTLNGLVY  
LHENNIM  
HRDIGSNI  
LVNDEGIVKLD  
DFGASKKLNLS  
NDMMMSLTV  
RGTPYFMAPE  
VFEEKYSA  
KADVWGIGCV  
VAIQMATAKPP  
WKELGFTNPI  
SLFNYMTKQ  
KGPPMEHPQ  
KESFSKQ  
QEVSWTLFE  
QFVCRCFEY  
EPSKRPSARE  
VQDDQFFFTS  
IIGDADDD  
ESMDCRGLF  
SPGNE  
SKKFFSPKQ  
FSSPAKQSSA  
ARHLRPRKSD  
GRQEMTFLS  
PPLPKKNIE  
RSKSPFAK  
CTTSRAEP  
KTENSP  
SLDTREWP  
AWAKTELEK  
QNNCKVIV  
AEAKETTQ  
GNLTKLMD  
SLALSE  
DSSDTSQ  
RTSNER  
RSSTFGSL  
IGIDFLDN  
SSA  
>comp14454\_c0\_seq2; 837 144 1397 LEN=1397; translated  
MSLRSGNRQRAAQFTRKQKQYRIESDSEEDDDDETEMQSSNLRYGGGVLA  
ILKNNNTNGT  
RRQRRNGSEKGNRGRGNITSSPLQKSRKENFEAVADENNRTPPPRNVIMTR  
SAMRAISPLTTQKANQQRGRNKVSNVSVVEENSRADSFDDSVEDDEDETRPQ  
TLSSSEDNEKNSST  
SRENEHDDEGEEESYEDSYGPESSSEFEFVGVDDEEFIPDEEDEDDESSP  
MSDFIVEDDSDDIYISRGNTSNDASTRNNDEIDVVDGGNGDDDVQFCDDTV  
VNESAINESPYLSATNPEDSIDDNTF  
DAEQTPTKFELPKKNLSFSSEPEQMAMIVDENDEDEDEDVLFATI  
IDSDTVDGD TVVLT  
FDEDEENDAEETESTGVHVSEQQSNRDNHISAGKTK  
EAVDDNQESRTQ  
QIGRA  
>comp14455\_c0\_seq1; 940 182 2515 LEN=2677; translated





SITDLHEYAAMRLVSVTVNVMKKHAKLGLAASHNNTSAKKDKSDHDGDVADSFLGPLEMH  
SEVAHTLLGLIKHGLSLKNI EGNIHMIYALVYHQTDLINLSKTNCAVGGKKKKLYASAQT  
NRIVSVILRASEAIQEEGARTAPKALKVLERQMKSLKTAVMAADGEMMSRSTSNRKQHMK  
NGSNQNGCGGDHENDVGKENGASASLPIPEEEFTFSYEEEEADPEVFFVPYIWDLVVSTVTA  
SIMDWKKDDIEVFELLDIASEEDIMGTEDSPSNFDP SATDGEFSKKADEM V  
>comp14458\_c0\_seq1; 804 5 2140 LEN=2217; translated  
MDEVRSSELRSNNVTAIVPETIEGLVRKRVLVMDFCHGFVPKDTASMDERGVDRRELLERV  
CRAWAVQMHVGGFLFNADPHGANILVSTADPKDASVPVLLDFGLTKRLDPPIKLAFARLMH  
SSYEGVDALLRSFEEMGLKMNHRDPMEDMANMQRGFGDTVPQSRARDARKQKSADYKRR  
VEAQRTEEGLEKQGKLRNPVEAWPSELVFFGRVTNMLRGLCSQLDVSYPYLQTMVAVAARE  
TLKSSVPIEEHATTLVHRDCPPLAGDDATSGSRVSTDLEEKLREALPLLAKEGHMGVLQL  
CVLRDGKEIANIAAGTIGVANPRVPTSTLFNVFVSKGVLTVGVLRLVQDGRIESLDDP  
VCKYWPFAFKPTVTVRHLLTHRAGLSNAYPEDATLDTLLDWSEMTRFMAEDAQPSHEPG  
TETLYHALTYAWLVGGLIEAVTHRPEEFFDELFRSHTSLGTDPTTQRLFLAGISRLEY  
ERELAVLSMNRSGNQREQRDTQHRSTRNKERAAAPNAETQERA EKTEEERKKEAKKMLA  
KYRGMQHLMNPSVFNMKKVKREAKLPSANGHASASALAHFFDALVRPEDPLLSPGILAQAR  
TPSSSSSSSAPEVGNAAVLDDASSDFGLGFQLHNFVRS GGERATSIGHSGVGGSVVLAIP  
EERAVVALTVNHLSSDCVARQRLLGIVFDELGWRAPPSMPVQQKPQEQPQA  
>comp14461\_c0\_seq1; 448 241 1998 LEN=2053; translated  
MLCHRLLLCRMGIVFLGLVLVQPLISSCSAFVGHAYRQGR TAATKFNKNIVCNPCTSYQA  
TIFGPSSSELQ TIRDIVNRKRKRIS SHQPTGR TVAAGTSTTQLMLHPTAGASLALVGS SLF  
GMQVSRWFPSGGILGTLLSAAFFGNILTKWIPNQHP LYDLCF TLFLPGSLTLLLLL AYQP  
KQLLDDKSNGTAEKGVSR TTTGPSQHSIAACIRRIAMPFLITSLSSLVGCWLSYRCALA  
FRWFRE CAGASSGAGKAASELARIT TGCMASASYVGGSVNFVSTARLIGAPAELLGSLVTA  
DLFTMAIYFSLSSSLEWDWLVG MFSRAPVELSPTTDQGVGQSDALENASVTQQRQQASK  
VTDKNVPSSPSSGSTFPSNWRDSVYLASVPLLMATMFI VQIANRIEDFLGDFVPGTACAV  
IAVVAPLLNSLVQAKEFWTPFSKAASVWSDFFFLSFFASIGVAANLSSALSMGPACLLFS  
AIALTVHVFGTVIGCILWKKIIFAIDARFRRDQKSDSSPPSLDLEDVVIASNA AIGGPAT  
AAAF CGQM KKRDPGKLGRTISATVWGVVGYAIGTMIGVGM YRIV  
>comp14462\_c0\_seq1; 932 115 3282 LEN=3412; translated  
MARSANKTRKKSIEPKRKAVATSTTSKSTSSSLNRI VVGGQLLGSRSKPF LDNQSNVASW  
NTFEP IITPEVTC DQRKKTERFVLLPHSR YISVLSYK TGIKVGTLVPSLKDD SNEKNV I I  
ECVSMVKYQRNVSETTVQDVLDRMDLEDDDEIDGIEGTSSSVDETLIMVGCHDGSVREFS  
LRELGNHGNASKQVDLGPYSISGSCFHPRRVIRVLK KDP IAHMTVPHIRTPQIRK DGLV  
MYVAARRLERKEEEEKDHPSKSTRVKSQK KDM SFTFEVIRVLVPHFDGSTRDVR LSSSKE  
SMRSLDKFKCKVSANKNKNYADMLPFRMMSAAKALSGDNNTNTDNISIFVILARADSI S  
VYYDQLHALEYAPMSIAMP SNNPLTVASISLNKADITCGHHHGNICVMN NILNDIELYH  
IAMKKEKRLTG DSSI STSKTVILPPDPRKNMITSRVHWHALP VTSI VYDAMSYPMDPLLY  
SGGDESVLVTWQISQGRDRPVHVHPR LALGGIVHLSSSDRCDDNPASGILVYCEDNTLQL  
LESHNKGCVWKVQGLACAQNESTKGS LHADPRSDGQKNSQLVVTGLTQAPGYIHWFDPSR  
ERLASSLEVVPFNRI SKTEPDESPLPKPSITAHVFSNGEDLITIDESQTENTYIGALDE  
PIKSI EYGTVSTIRFWSW NDSSTKNDSAPPYNEIASMTYPHGPKNRI SAIDMSKDG SFA  
CTASCNEKAFRVWKKIVGSNKSISWACRYKVKIPAGFSNCSIRANGLTFSDDNSLLVIAF  
GQTGTIWDTDGARLLTTFDHFQGNNDIEFVQFISPLGHKDLLLIQSKSCVSLRSPYGPY G  
SSRSFKGWNWSSQKNCIITAVEFIERLGCIALAVYSAVEDQSRVVFVDINTGREGVNDRE  
FSLCSVENIDGRISSLCAV GKQRLKSNWDNTTHKGAKSPLTLYALTSIGELMLITENRSN  
HONTATSNE SFMATGPRLEIASNEHSRRKRQRTNSFSAATS GSGEFFRPKKLALDIFGFG  
ANN DSTLV PSTAELPSLSANFVKTFVGRNLRKSIE  
>comp14463\_c0\_seq1; 521 338 1546 LEN=1711; translated  
MNEQSQQQQPLPGGVE SPLFSVGM IADIQYAPI PDGFSYTGTPRYRHS LTATKHAFET  
FCGNGGTRGV DLV VNLGDIIDGKCLDIAGNGGEGFPTEEPHHPGILSLSEVEAAMEPYSG  
TTTEQKMKILHSYGNHCLYNLNRTELREKLGIPFRSEAAHSDTNVSVNVHGNSTIARSDE  
DDTGDNDGDLVGYYSYVHPP LQPQOSSIKFLVLDGYD ICLMRRCPKHS AKRKAAL EILQR  
ENGVNLGAGNENSPEGLEGLQKRFVAFNGAVGPAQLEWLRDELEATR KANHNGGDQKVI  
VLSHQPIHPGSSNPVCLIWNYDAVLQTLREYSDVVVASFAGHAHKG GYVHDEDSGIHFRV  
VEAVLESKPPTTTFGILNVYGDRL ELEGHDCASAVYKYKTI  
>comp14464\_c0\_seq1; 307 197 691 LEN=1037; translated  
MMKHTPVL FVALVAFLSGANAANRKL RVGGAERQNSDD SSTM SRIKQRYLRQRHDARMRE  
HKRISY NPGNIGYYDGA AKTAVIFPETPSPT EMSMSMSPMSMSM SIPMSMSMSPADI  
IEVDI IKAAPKTAELMSMSMSPMSMSEMSPMSMSMDMSMSM

>comp14464\_c0\_seq2; 311 197 703 LEN=1049; translated  
MMKHTPVLFVALVAFVFLSGANAANRKLVRVGGGAERQNSDAIADDIDSSTMSRIKQRYLRQRH  
DARMREHKRISYNPANIGYGAAKTAVIFPETPSPTMSMSMSMPMSMSMSIPMSMSMSM  
PADIEVDIIKAAPKTAELMSMSMSMPMSMSMEMSMPMSMSMDMSMSM  
>comp14465\_c0\_seq1; 327 1 1500 LEN=1577; translated  
XQTLRDHQEEARTCTADRDGCGTVRHDTHAHERMGLRAADQLVAELAANRVGNLKPTEEQ  
RELNI PRFLVYLLGIAIAEDEYQQNGNEKPPGRNPPAADEKNRSPSHPRPHCFSHAREKR  
FAALQKKYWAALNGPGAGAPSAEQASWMASSLTSEPYRLTARVHPSNKQNEIVRRDLWRE  
CEKLESLSRAALESLLREESRASARNK PAGGKKQRKNKQNKHQPDAGKKEDNTPPDD  
TGDGEKRNAREREGGRTAENSPCGDNKAEDSPWVEIKRRGDERAERNSSLGDAIPEGRDT  
IGQDVAIPVAVSKRDPGLPPERDGI EHGTGQNNAPLPERDLRSDPVDTIIRSISPPGP  
QPE SPFLNPNNASAS IADDPKPGGLSERTEALERDLSAANDLLERERLTHAKALREQKEK  
YENLIQALQLRLYISENKLRTYEEALEGHVQAVSAVCSSGKASAKRSEEAEERIPGSPSLI  
SRVLEHNKKGNGKAGDRIW  
>comp14466\_c0\_seq1; 160 1 1367 LEN=2019; translated  
XATDTEASTSVASTTDRPSRYAWTCLSWATAGTADTDAIAAFLPQHIQQPDSWSCGYRNY  
QMMLSALLPRLLLLRRRAREPPEHHFLFSKLLPLRLPPTPTELPTVKQLQGSLERFWEEG  
RDPEGARHYRHSLSGKTGRGAKIGALEVAHLWCYHGDAAVLQFIRCPCSRGMLPYLVLA  
YFARNPRTLSCHSAPSLAGSLLSEARLSSEFASPVPALPERTVAPRKPSGVHGEFGFVHS  
PPLPLYLQWEGHSVTVVGIEADVGVGPTHDXAAGLSPAGAGSIGTERGSAQRSPVGLAA  
VGKDPAQGGPPDRPVHGTVPGLSRAKRGSGGKDLHRVGGGGPASGLGLAGNESGRKRKRF  
AKRSETQTVRGSMAXGPPRVHGSARSDEAHDDATQRNKQHSSTQFNQAQHTIQPTET  
VWRIGHEDHRGRGEAQEERIALRRIAWNASGFVPDF  
>comp14467\_c0\_seq1; 640 648 3596 LEN=3902; translated  
MGQNTATVEALAKAWTPRLLKLETNSSGNSLDHEQSQHWRACLAAVQRTLPFQTTGSQN  
GGASAASVPFVCRYRADLIHPLATQQVHELQSMVAKHEALQSLR TKLVEHFPCNSSSSNNN  
EMRNRILTSTSRAELEDDL YAPFKPPAKGSILERITSEHPKLVETIDELWNAKDEPDDKRW  
SRLGPRQAVVQVLGNKIAAEPQVAWVMEELRKHCVRKTTEVKKKSNGDGNTKKPNPKES  
SAKKHVSNDSSKAIKYSVTYGEFSGNLLFLKDHQVLAIRRGVKEKALKMAFEIDSGKMES  
YLLWRFNRNETKNKRSNIQKDENTV TASKTRIVPAALLRHRSLLEEGVHDAWNRLRRRTT  
TRLWGDKCAEAQDRACVVFEDNLQRALLAPPYPRNPRLLALDPGFAAGIKSALLASDGT  
VVDFDTVRFLGPQRASAVTKLEFLLKSVKGTAEQINDEKKEVIVALGNGHGSTDCRQLVE  
EASANSGISVNIQLVNEAGASVWSVTENARA EFPPEHPPSAIAAASIGRRLQNPLFELVKV  
PPRSLGLGMYQHDLSEKELDEKLERTSVDAVATVGVVDVNSGSLEILQKVPGLSERLSKKI  
IASRPIQRSDLLTRIDGLGPKTYENCAGFVRVSNNGPEALDDTLVHPESYELARWLLKEF  
SWELSDHGDKNPATNLPPREHWKTEWKDLVAKAAKKHGVTDQDRVLAVMKNLVDSISKEDP  
RWKILENNDALSGKDSSTGSGISGLVESCKPLDAEWSSTKRLAEI IKNGGPIRGIIGTIS  
NVADFGAFIDLGNQHNLHVS KLGPSRLRQGLLIGQRVGVDILMVATDTGRIALGLHGC  
NLQATGSKPPPKRSTSNGSAAAQEHVFEDPPRRQNSAITLEAVVSRGPLRQPQVGKEKV  
VALRDENGNKDADPGNNGLDYFFDSXDEEINAADKKMGFLLEVEAIDPAMRKQPEDSDGW  
KMRRMLSTFTLEEQKASLNRSN  
>comp14468\_c0\_seq1; 142 1 313 LEN=487; translated  
XALPIYKIRVIPPSTELLLSGRRRRATAACMQALDNDIGETNMKLNELYSEGNILQNEVDA  
LTQQVQYMESNLQEARDEEWNIRNTEDEAIDSSSVATSNNRFLF  
>comp14468\_c0\_seq3; 480 1 1496 LEN=1670; translated  
XGGFGPSKGGGGFGASKGVPVGGFGASKGAPGGGGFGASKVPQGGGVGGPKAPGGDFGTS  
KGI PGGGFGAPGAPGANGFGRTQNNQGFSSQSSSATPFGRGGAIQGRPSTPMADSGFG  
IDNLKERVETQSSPSFGQLGRNPRQGGQSSAQQGLKNGSSQSGNFNSGSRQGEIRIDT  
SAEAERVRGDERARRLEQARMVGI EQDRIEEQRRRKAEE TRLQQQLQSEARARMEAEKI  
MSDGKYEAVKRAIAASDDNYVPPQTVLDSRSPDPLLEQVDGSPLLKYEGKEMTYNGRST  
KVYGGSTLDVPIRVTPAGSVVEYTI EKSYDFGLGIIAKLDQGGTTIVKPMTPFDGKDVV  
ADRPRQKTQSDQVLVAGSVPC TLNFKFENKFSWITEVTYKIRVIPPSTELLLSGRRRRRA  
TACMQALDNDIGETNMKLNELYSEGNILQNEVDALTQQVQYMESNLQEARDEEWNIRNTE  
DEAIDSSSVATSNNRFLF  
>comp14469\_c0\_seq1; 1266 215 3229 LEN=3343; translated  
MASQAAL EKSSPAAASPPVDSKTSTAVDSTPDPSNSDSTAVLAPETTSSSDIKSDAINKN  
TPSSSPSISVRPRRGSSDEFGATGSLGSIAGSAVGFSSVGYDGLLSGLGVSSNSSSHD  
KNSNKDGKNKNSGNRDVGVGNSNNNNNTIGIINTHSSLKHRTSPNGRRPFRKRKASVDFS  
FPALSIDDGDSSYSVSQLLPQHHPGLAPKGPMAAAGVAVSSSVLMLPSNANRSRLYS  
LTIPESLLASTPKNNPNSSSSSKQORLQHQHQOQKEKDKDNPQKPNQDQPPNDDKHQKIL

QSV DALPAMGEDDSIPPIDNDTHSLLANHPPSPINSANPSFPSSRKDRGLSFASLHSQGG  
GLDRLDNLGVEAAISAARIRKGSVESDNKSQTSKDTSYDGTLSQSHRFLMEAF LGDGT  
ESLVLNPSQRERLASFDAATEAAGKPPHVASSSKDNHGNSHQNMNNTLMSRERLNSIGGR  
RNRLESWGMSDL SVGNFRADQNLESFGFGFLTGDTKNNSNNNNSPAAVASSPAAGASTD  
KTAALAATIYTSLANDVGTGAANADGGESVSSFFVNDERIPTKISINNRDLNSIASIGTD  
ASALLRYSAMNGELTDAEFPADVHTFIQATMNSVEDQLADLATAVEAVSKDTKGDNDEI  
SSTASPLIGAASDVGSNRSTDSL TGRPRSSSINSMLQISVDYDAVA AVHAAEAAAAGCLD  
LTNFSLADGSSTSSLSQRNHKKRSLPIHKKPPRINKKKGASMGTLKKKRASITESLASA  
KRQCVDFCQKSQSPTLT KMDDQEMAKLRERARAAAGYVPPVGGNGSVKMSGLPPKKRSSL  
APTTP LHPARPSIAGSANNFNTPTISNTAASKHTTTPGSLYSSGTPASSTKGQSSQKWESM  
FECLLQFIEQRREDSTAGMTEEQKSEWTW DGNVPTTYKTKDGKALGRWVNNQRSASKSGT  
LKEEREKRLVDAGLKW SVLASNSWNEMLEELRLYVADQNKQGGKW

>comp14469\_c0\_seq2; 1648 215 4625 LEN=4697; translated  
MASQAAL EKSSPAAASPPVDSKTSTAVDSTPDPSNSDSTAVLAPETTSSSDIKSDAINKN  
TPSSSPSISVRRRGSSEDFGATGSLGSIAGSAVGFGGSSVGYDGLLSGLGVSSNSSSHD  
KNSNKDGKNKNSGNRDVGVGNSNNNNNTIGIINTHSSLKHRTSPNGRRPFRKRKASVDFS  
FPALSIDDGDSSYSVSQLLPQHHPGLAPKGPMAAAGVAVSSSVLMLPSNANRSRLYSD  
LTIPESLLASTPKNNPNSSSSSKQQLQHQHQQKEKDKDNPQKPNQDQPPNDDKHQKIL  
QSV DALPAMGEDDSIPPIDNDTHSLLANHPPSPINSANPSFPSSRKDRGLSFASLHSQGG  
GLDRLDNLGVEAAISAARIRKGSVESDNKSQTSKDTSYDGTLSQSHRFLMEAF LGDGT  
ESLVLNPSQRERLASFDAATEAAGKPPHVASSSKDNHGNSHQNMNNTLMSRERLNSIGGR  
RNRLESWGMSDL SVGNFRADQNLESFGFGFLTGDTKNNSNNNNSPAAVASSPAAGASTD  
KTAALAATIYTSLANDVGTGAANADGGESVSSFFVNDERIPTKISINNRDLNSIASIGTD  
ASALLRYSAMNGELTDAEFPADVHTFIQATMNSVEDQLADLATAVEAVSKDTKGDNDEI  
SSTASPLIGAASDVGSNRSTDSL TGRPRSSSINSMLQISVDYDAVA AVHAAEAAAAGCLD  
LTNFSLADGSSTSSLSQRNHKKRSLPIHKKPPRINKKKGASMGTLKKKRASITESLASA  
KRQCVDFCQKSQSPTLT KMDDQEMAKLRERARAAAGYVPPVGGNGSVKMSGLPPKKRSSL  
APTTP LHPARPSIAGSANNFNTPTISNTAASKHTTTPGSLYSSGTPASSTKGQSSQKWESM  
FECLLQFIEQRREDSTAGMTEEQKSEWTW DGNVPTTYKTKDGKALGRWVNNQRSASKSGT  
LKEEREKRLVDAGLKW SVLASNSWNEMLEELRLYVADQNKQGGKW DGNVPTNFRIKVTKD  
KTKSFLKDDDEDKNLGRWVNRQRSMFQAGKLRKDRQLALEKIGLKW SMLATTSWESMFET  
LCQYIKEKKKGGNEWDGNVPANYRTE DNPPRALGRWINRQRSAYGKSKLKP EYVVKLNEI  
GLKWSIHERPTYHYKADGSKSSSAKATAASNAAKPPPSKKGTPAVPAAQKASKSPVT  
AQONAVKSSTPASQTGAKPPSAVTESSVKSPPAVLQSGPKATPITVQSAPNPTSSVVPST  
TATIP TTVQSSAKTLATVAQNSMKPPPTGTQ NATKPIATVAQ NATKPPVATQANPAKPV  
ATPQKTELNPSQTVVSSPAIKTEVSNDSGTIVSGNPHSR IKKAPNESRSSK VDEKSKPSS  
PRPMARAPGIETMKTDSAINGNPASGLKSIPEAKRNFDPFSSQFRLEVQRQRTKLWRFT  
KNFGRKQEAIELCLDLKRKIRVASRSNMY

>comp14470\_c0\_seq1; 666 97 1645 LEN=1738; translated  
MELRKTEEKINELLEAYEGIRRSPLLDPGQTALLPPVPSSELGAGKSAGTLAPGAHADDSS  
LVRSLRATEAALEDLAPRAEKFRKRLF EIDPVTEQPRYGPKSRARVRKLVGGHDFLCAQF  
VATFPEERERWRLLALDEYRRQQLDLREQRQEERRREHRKRQELLEQQREQERQDNLEESG  
RGKELPEPVADANTNPDGSLIIDPSGCAFDDNDVKEEQTPPCREASPASLLFAKLKEQH  
DAREQEKL RREASEKDARIKTEETRRRMAEDEARQKDLERQRAERRAAEKAQRDLLHQ  
QAEEARVRRREQE EARREAERNYLD SIRKGP EGVKHYLGVLLRPEASGDRGEQGAQEGR  
APKALDPERIVALRSLCTLF EQIQKHPEE INNRKIRCANPNFHRDIGRHEGGIELLIAAG  
FRPTMLPAPDAPGAGAGTGENSPGNATGGAAGDGESEEPDVAFLVSKEPNLEHDMDGW  
MAWF DLNKATLEILQTE LQTKKERTNAAGDGGEL

>comp14471\_c0\_seq1; 999 316 2934 LEN=3013; translated  
MAAFFSISQRKTNNGANFSGDQSAYPKNEQSM DPWNLGVSTSTSTAESNTEYSSTDDASR  
YNSLSAPPTPEGLRPRKSIQRIRKEVFGSNHYKNERINPRHRLPLNNTKETNTLCLSQR I  
CLDSSPFAPQVQSPAPPFSSSGPSFQRQPNIAVLPPFYHQ RATSSINSSSSFYEQSIEEN  
GHINDEFEMDSSLDYSYSRRNQVAVSPDLNRGGRAKTAVGALLVAMTETCDQPMVGNDF  
KPKIQNEISRHSILPRTWLDNHPRDEKYL ANRYADEDDTIREDFDEFVERGHAYHEDNQ  
SSLHASPSSLRRKAYDASWAHQREKHEQDTSFTRRILGDDPSSSRLEERSIVDQCTYNFN  
SIMTEEKLDMNAAGAPRILSLIKD TDGMDLSAISHSLSHQNVIESVNTSLADTVDDQEDEY  
QEIPRYYQALTD DIPARNVANDALLAKAQNERQRKENLLRSVFERLQGS LDVLEVYP  
QSTIDNSFFLDMGKAGIVIYNFLETLLAGLENNDSCEAQRALRFCMSILQNT EVLHHRQ  
NPFNLNLSKPLWVPTPGFRSSLGLEEEPQSPSVARGADTSLFSLP SDSANDATPHTSNVS  
ITSTLT TIVSPEKYGSDVYK LKLGIRKTIESLARLLHKL EASCVNLSVMTT TENS MVG

NILRIYFDLINLPLVDLEWITDSFEIDFTKQQLSRTVVSADQGVAAASALAHTRPFVHDNE  
RNEAKESIPFTRDDLINVVQCNNENVDDNNHIQSI ECDLWSP TTNDMRSLVSPDSTEAT  
INATNGDYAALVDTEEPVDDLRRTVGSFDYDRSEEEEREAPQGDENEDQRDYRGAFPATF  
GRRVVVQRPRKSRFWKKRFLALKNRGRQVTAE

>comp14472\_c0\_seq1; 297 498 1391 LEN=1636; translated  
MEPTKSHAATDATLVSADNNPNTIKEDLENPRSPKASMSHTDEPQKSI EDDGKASASD  
ADTASDMERDSNFVVDSPKGFVNRVVKPEEEEEITFSVDSKASLHGRRASILSLES DLGTS  
SKPLKVWYRSMVIRQSCHSHLADKYISKDMYFNTASITITAITSSAIFTSLVPSAAAKAA  
QAGTYNSLAVTAGILAAFNTVLQAIMKTTAYHRRGENHLIAFKQYTKMRFQLENLIGDKM  
SYHHSEIDDRMLDVWIEKYEELLESEPMIPQHILESITQREDDAGLKWTRQTIETE

>comp14473\_c0\_seq1; 486 1 1594 LEN=2091; translated  
XESSAPVVGSGKKRGRPRKSV DGGNLPVAGSVKKRGRPRKVPDGGPLVPVSSDTKLVDGI  
MSTPVIIVKKRGRPRKSIDGCTSHQKRVKTEESEELVFKFKISSFKSAYKDPDSTKIRK  
I IKSALRDPDSKAVDKACEMLRKCAKSAESVEKIILFGGVEIICKAMIDHPDKSILQAE  
ACCTLAEMLWVYPAIATKLIHMDAIKLVVTSIQNCTKNAKVQQMGSGALGAFSDVPETIP  
YIINAGGLRAVISAMERFPRKLDVQKEGCFLLQNLVVR SADTFDAVLNSKVVSIIIFDAMA  
QVEAGTEFLLSAYGLIGNLASNKDVKSLIGQSNGIQTAISALRNTADVEVKTAACIALKLL  
LASKSIDNQNKILKEGGLDAIFDAICSF LAVPAFLAPSFALIKELCVDEDEVASEVAQHTR  
IKIILKIMKEYIDLPAIQIAACEVIGFLVFKGKNESHAPKLVSAVIAAMKQHS DNTHIQI  
QACDALFELSRVPTTRLILK KKETQELLLRAKNNYKACESDVDDIVAASNN

>comp14473\_c0\_seq2; 564 131 2319 LEN=2961; translated  
MAATVDTIPTATNPKSKKFRSETGSAENAAGPRKGRPNRSRNKVPPRKKVVVNHKLFEGE  
HDDDCYICYLGGELICCFDCEKAFHLACHIPPLPFVPEGIWKCECLAVERTKMSRCGEC  
KACTREDCGTCKHCLDKPKFGGPNRLKQVCIEKVCPYPR LAPPASKTTVAGAMTGRSSRK  
APPAPGTGKKRGGPRTSVEESSAPVVGSGKKRGRPRKSV DGGNLPVAGSVKKRGRPRKVP  
DGGPLVPVSSDTKLVDGIMSTPVIIVKKRGRPRKSIDGCTSHQKRVKTEESEELVFKFK  
ISSFKSAYKDPDSTKIRKIIKSALRDPDSKAVDKACEMLRKCAKSAESVEKIILFGGVE  
I ICKAMIDHPDKSILQAEACCTLAEMLWVYPAIATKLIHMDAIKLVVTSIQNCTKNAKVQ  
QMGSGALGAFSDVPETIPYIINAGGLRAVISAMERFPRKLDVQKEGCFLLQNLVVR SADT  
FDAVLNSKVVSIIIFDAMAQVEAGTEFLLSAYGLIGNLASNKDVKSLIGQSNGIQTAISAL  
RNTADVEVKTAACIALKLLASKSIDNQNKILKEGGLDAIFDAICSF LAVPAFLAPSFALI  
KELCVDEDEVASEVAQHTRIKIILKIMKEYIDLPAIQIAACEVIGFLVFKGKNESHAPKLV  
SAVIAAMKQHS DNTHIQI QACDALFELSRVPTTRLILK KKETQELLLRAKNNYKACESDV  
DDIVAASNN

>comp14474\_c0\_seq1; 182 1 705 LEN=795; translated  
LVELLSDPSLLGEDVLVNHVGTIHALPGAHAQYWH TDGPYVYHEDDEAGGGVRVAGHDLP  
PYAINMFTPLVPPAVTPEDGPTEFC LGSSYL RGHDYEADLPVADQGLLTRKDGIVEDLQE  
FEWAVEHYGHLGGIECPGVLRRAPLLGTGDALLFDYLVTHRGGANTNQG NPDGRSMVFAS  
YSRRWFRDTNFDSDFGHGSDDPTELEELTKLTRYAVVVEGEDPRNERAGYK GDA

>comp14474\_c0\_seq2; 611 1 1530 LEN=1620; translated  
YALVLLTLVLVVSALVDGSDSHEVKSTATAEPGGEDKTSVAITDAAKRLIRLGLLFELD  
DRRLDFDSRSSWIEDLTIVLGP SFRREEIESLVHEVKSETTERATGTKGTSTTSTGSVD  
RTVDGECSSAAASPTLTPEENPGNGQP NKHDNNTFTGDRHAAGLLEIVDDPDCMHGELDA  
SSPSFDIDDAKRILVKCRMLVLRNLF PKEVTDVAVLPKYARYVQDIRGGAIRSDAGTTTFG  
GDYFILKEDHDESFRFN LKELVQQSVGLLDSEVLVELLSDPSLLGEDVLVNHVGTIHA  
LPGARAQYWH TDGPYVYHEDDEAGGGVRVAGHDLP PYAINMFTPLVPPAVTPEDGPTEFC  
LGSSYL RGHDYEADLPVADQGLLTRKDGIVEDLQEFWAVEHYGHLGGIECPGVLRRAPL  
LGTGDALLFDYLVTHRGGANTNQG NPDGRSMVFASYSRRWFRDTNFDSDFGHGSDDPTEL  
EELTKLTRYAVVVEGEDPRNERAGYK GDA

>comp14475\_c0\_seq1; 439 190 2175 LEN=2722; translated  
MNWNYSTDNGNENGNQECHT MFSNRKRNSSSKNASTE LSSNKDGVPLMMFENLRVGP TTA  
AASAAPTTDSDYGVDR TFLPSLIQPQKSQERQRSIPPATHLNGNRDHITTTNSSGN NYHE  
HSSRNVP TPPSHRQSPSRSTHDHNNRRRSRPEHHHHYHQP HHHYQHETQLKEPPAYS I  
TPNAVVIQGNDSNKSYPKTKDPPKGPALPSIYK KDS SDCLLP SHSNRDKNKNRNNHDC L  
AHDQVPRPAEPLSSQMHRK DSSIPRAINLSFERPNDPTS SLPVPAISPISFSPSIFRKR  
TAAGPLYPSGDAIQEQLSRTAQEFLPRSVILPSTTQTGGDIPGNPSENQDAMAAATTSHY  
STQVDPRSRLETRPQKPLRFD SFYPSVSQQKQARPR SPLQQPRNLRTIPQQVQQHIQQ  
QVFP CPMPLNGITNGTATS IHSK TNSRERKILIGTQREYNLEALLPTIQKHKKGN GN  
GPSQQADTAGNYRFSNVPKANPFPNPPANIAIAKNT EEKEVFSQYLSQDPSLP IPLSSSN  
PSNIPSVSHAPNQLTNVDAATRTEAILRRPPPTSSFSKSVKVEIYPGVFHVLRISKGITL

VVDRSFAVSTCVACTTKHMCIADAAYTICPSCLVVYSLTEGLPDSGLGTASRWGVAMGF  
I  
>comp14476\_c0\_seq1; 477 254 1960 LEN=2076; translated  
MPYSAVNRGSVHHMNYCIKVLVTTICLISIREVLLERYRRKVMQILSTPIELRQHGYLSP  
PVAFKVADKRHNSTNDKSATSHTNDKSTETNEDVNQISDEDFNNVLWPQIRQKLCPPGGV  
PDHSLGPTLFDLGRKEMGIPGTSDDSARMFNRSVKNRKKGRFTTEFFYSGDFGFTVFID  
GQDPTNTVIFYAPIWKANDQIHSYLHQIFNRKSSGDVRRPDLVPGNDNDFYLETLKYSKM  
SRLFGKQMRSSLQDSKDGKMGDNQNTSTATTNNDGGDYFRFNQTERDKPCSFTVIRDP  
VSHFLSGYNEVEFRLITGASDAPPASKHDELAPYSRISVFENASSNAGSEEHEESAWING  
NHTASRKLREKRFERFVRDVL EEHPSFVDFPYYIHFASMTRILPTLSRLDLLPAPAPSLP  
SSSSPKSPNSNNGSNHHWFVPTLKNLTETFPAPFLARRCPVAVNYNRQAKGTDGHEGLH  
SLPPMPVRGKHASSEDYGYTAAKDVWNRGGEVARSLCQLHAIDYACYSGSYDNDGDYD  
GGAMLHGLEIPPVCRDVYSSDVFLDAIL  
>comp14477\_c0\_seq1; 185 1 1516 LEN=1516; translated  
AIVCELPATKPSPISSFAPSTSPSEIPSNDPSVEPSIFPSKEPSFSPSLHPSVVPSSFP  
VAPSDVPSLKP SAIHSSLPSRSAPVSGSPSAVPSIMPSFSPSLSRLPSLHPSQPSTSPS  
ASPSQSQKPSFDGQTYAPTASPSSGPSLIPSTNPSFSPSSQPSNSPSPASPSHSQKPSFDG  
QTYAPTASPSSGPSLPSFSPSQAIPSTTIPSTTSVTNAFFQGTQSTQVEVAYFTVI  
SSSLSSSTLSSRRMLQTLGLVDVEALQRACTFEAPLDLSDEVCEYEVKVVITAPVYTGVTNTEE  
AISNMESSVQDGSFATKLEEQGLLGAFFVALPPSQEPSSKPSAFPSISMKPSVMASNQPSM  
SGSPSVAQSSEPSLSFQPSQPTSMRSSTPSLIPSTVPSATPSISTKPSIVLSSQPTVSL  
KPSASAMPSSIFSAAPSTSGRPSVVPSSQHSIQPSASVKPSTQPSVMPSLNPSPAVPSIAP  
SISAKPSTMGSSQPSLSLRPSSQPSX  
>comp14478\_c0\_seq1; 786 440 2482 LEN=2541; translated  
MASSSDIPNWRLVPKDADDYDTYLSERPPWSEEQYKESLDLYEQLMSCKDSYVSPAIQSA  
LNTLDHAYRLYGPSSVVCFSNGGKDAVVILHLVRAVHAKYYNSTGTTPIRPRAVYFNNDN  
EFTEVTSFLRESVDEYDLEMIAFEHGVGFASGLNILVENNYFQGTKEARPMFVLTRES  
DPNAVQDSFCPSHWMPPFMRVNPVLRWNYGLVWHFLRLFKLPYCSLYDQGYTSLGTTK  
DTPPCPALAVNRGETNDKINDHDGEGDTTNANLPKFWPAYMLVDWDQERAGRVKKEKPGD  
TNSNDSTTKTKKDLVRTNSGLSAVSELRSKNPTLKNAEVLSDNATVDDGTVQTLGTEDL  
NDYAGEAKTVGIVVIGDEILKGMTDTNTQTAARSLRKECLKLSRVVVVSDDVNEIATEI  
RRLRNEVDVITSGGVGPTHDDVTIKGVAEALDRELVYNEEMGDFLQKMNANSTSTENK  
GLTSAQIKMATLPSNAKRLYLSTDEWPVLQCRNIFVLPGIPEFFAKKIENVAAYLSSQLE  
RSTVYKIVLSVDEQSIVDVLLNNVVEKHPKVSMSGYPFVSHPEFKTVVTLEADLVDSIYQ  
VNDQRNDINEGLPSTTSKSVSLISERMDVSRNSLFLGRDAIILPKDERDQNVRLALDDLI  
SELPKGSILRVENDDLDPFV  
>comp14479\_c0\_seq1; 559 1 801 LEN=855; translated  
TSRCRDPKEVGGALGADYVCESTGVFLTKEKAQAAILDGGAKKVIYSAPAKDDSQTIVMG  
VNQEDYDGSDEFISCASCTTNGLAPMVKAIHDEFVIEEALMTTVHAMTATQAVVDSSSRK  
DWRGGRAASGNIIPSSGAAVAVTKVIPSLTGKITGMAFRVPTIDVSVVDLTCRLEKATT  
YEEICAHIKARSEGSKGFLGYSDEPLVSTDFEGDLRSSIFDADAGIMLNPNFVKLVAWY  
DNEYGYSGRVVLDLMDKHA AVDAK VSA  
>comp14479\_c0\_seq2; 808 40 1179 LEN=1275; translated  
MKFSAAVLIATVGSAAAFSGSSFSGLSLKAANNDSAMTMSATGMGVNGFGRIGRLVTRIM  
MEDDACDLKAINAGSATPEYMAQYKYDTIHGKAKQTV EVDGDFLVLDGKKVQTSRRCRDP  
KEVGGALGADYVCESTGVFLTKEKAQAIDGGAKKVIYSAPAKDDSQTIVMGVNVQEDYD  
GSEDFISCASCTTNGLAPMVKAIHDEFVIEEALMTTVHAMTATQAVVDSSSRKDWRGGRA  
ASGNIIPSSGAAVAVTKVIPSLTGKITGMAFRVPTIDVSVVDLTCRLQKATTYEEICAH  
IKARSEGSKGFLGYSDEPLVSTDFEGDLRSSIFDADAGIMLNPNFVKLVAWYDNEYGYS  
GRVVLDLMDKHVATVDAK VSA  
>comp14480\_c0\_seq1; 206 336 1974 LEN=2413; translated  
MKQGQLPEPPLPESDDPPLRLDPCVSRPTGLTVLPPCRSSGTAGESASPGLSVDLVNANP  
LRCFQAYARIREMAPVDLGHHPGWGLVYFAVVLPRVGEREFAMPHEESA EKVAVKRLSK  
AAVEEFLARGHENPFREIORMQWLGDNQHVLGIVEALHDEDYLYIVMPYCEGSLVRWI  
FGDRDRIGDALGGSAAVYHNLLENIEYLHRHGVCHRDFSPDNMVLKNHRIVLNLDLAMS  
RMPPGDLTATDPGGGFFGKPAYLPPEVVSgyrcfsasgCDLWGTAVVLFNLVTGEVAVRE  
SLPTDLRFRYLVLVLAGGLSSSRGGRSLPNERAAEVLADDGSGGLRSLAEKCLDLNPLVSD  
LEGVLRDLPNERWETRVRKSSWL EAFRQWGNTGETAAFGSDRIGPRGAASAEGTPEGEF  
QPRtidtyTVGERHRHRTARQLCPLPRKGALLRRQPAVRYGTCDACAPVLREAALPLFAV  
WSAAGVAALRGWGRAAWVRGKGARRDKTLEPPILPFGHARRGPGAPVCTTSRVVFAIASC

GTIPQ

>comp14480\_c0\_seq2; 161 1 1959 LEN=2398; translated  
QVRYEVLHFNHCCASIAATSCRTLPRTTAHCYCIALHPIFCSIDDADAVSRNALQGYG  
VGTRDPNXNKRNTAFATAGPSGLFHQPLPPNPGTLPAGGLAHAARGRMKQGQLPEPPLPE  
SDDPPLRLDPCVSRPTGLTVLPPCRSSGTAGESASPGLSVDLVNANPLRCFQAYARIREM  
APVDLGHHPGWGLVYFAVVLPRVGEREFAMPHEESA EKVAVKRLSKAAVEEFLARGGHE  
NPFREIQRMQWLGDNQHVLGIVEALHDEDYLYIVMPYCEGGSLVRWIFGDRDRIGDALGG  
SAAVYHNLENIEYLHRHGVCHRDFSPDNCMVLKNHRIVLNDLAMSFRMPPGDLTATDPG  
GGFFGKPAYLPPEVVSgyrcfsasgCDLWGTAVVLFNLVTGEVAVRESLPTDLRFRYLVL  
AGGLSSSRGGRSLPNERAAEVLADDGSGGLRSLAEKCLDLNPLVSDLLEGLVRLDPNERW  
ETRRVKSSLWLEAFRQWGNTGETAAFSDRIGPRGAASAEGTPEGEFQPRITIDTYTVGER  
HRHRTARQLCPLPRKGALLRRQP AVRYGTCDACAPVLR EAALPLFAVWSAAGVAALRGWG  
RAAWVRGKGARRDKTLEPPI L PFGHARRGPGAPVCTTSRVVFAIASCGTIPQ

>comp14481\_c0\_seq1; 406 62 1006 LEN=1454; translated  
MNARNVDKEEFGRIDNSVNGKYQNWRLQKTIVDLERRAAGATADLRSVTLSSQQFTEKY  
EPGMGTNFDIVRRVENNKDEYDEKSRRLLDGYVPVFTKLDERGRRFLQFQKDEQATTYFK  
EVIGLNPDYEPADVKNLLSFGANVELLGNDRANFEFPNIERLARLLDCTYVDSLRLPPLA  
ASYKLAPDEDGVAHPRNVFWAEYKAMVAAKTMTFVITGAWVNSKNCFEELWAAAALRS  
DRSKYKTLFVFTKRNHFELEDQDTRFRVIDGKVYQYNWTQLKTALGFTGRPIVAPDVES  
IAELVGGSI RSFNA

>comp14481\_c0\_seq2; 2270 1 7260 LEN=7708; translated  
HFLEERQFSKVINSDFLEQQSKM TSNNPIFDARVVLPGLNLT P S SKEVVVPDSVTSVIDDG  
SIVVFLK KFDGNLSIFRDQKILLCATYQSRGTPQNSGVNDEKHQGDNEPEGEDEEPEWEK  
ELDDEFNDQPYENILVEEWEWANKRIDSPSIDGYDSFLIKPGEAWKSTEKSMEEVVLFCFY  
FTETDILPSESLSSENRVVEVGESFVIDVTDDSNPISNRVILLEWDFNCTLMKEVFSPK  
EKEVLKRESEICDEVL L LGMHGGQNFQPSKNLVLHVHLNEYLSGGQGNLKLKLYNCEIE  
PDAKKT FDEMVDGCIQKSCEYDSVGSFSASGIFGDYITFDIDSNSLIQILEGCSKGSDDN  
LISVLEE QNDEVKQVQTI IDAIEAAQFAAVIEDENSRELVAKFLSSITSNSIFFDNAVQ  
MLKSPKNRSFEIITDWSMMVTKTAESIWD SIYTDADYKLRSESKLLETGDNALQEF LVT  
IALPEINADVATIDPYNDVEILVENC DPDL SFFDRNENRDFLQVRNPTRKPMSGDDHMI E  
FKWNSIDRRGIERECEIKVSI LIGREGSRQKIGRTISIFREVGGENKQHTALVRLRNMV  
KMGFENASGFQCCFSHFLETMFKT V FALSTNEEQSISSR L FLEKAADDIASRFYKSAADR  
KSDIYEI IQKSPTFSPPNFEDIENVKVIAETDIAELMEDIFGKLNNEMLLIWAASLKLDE  
DSL SFVDDNESIDDLYEKHVGNLRRVLRMDSTELAAQLK KHPKLMENFVTAVQLIRDEID  
NPTIDL PPTRESDLA QMLSESSAKEIEFQTQEILANIEEQILFTPFSDKKDEGSEVLTEN  
VSTLETNLLQMLETTADSCETGIDFLEDSQVMLENISTLLTKLRNFGSNVKTLS SNATSL  
TNFVTRFWNAIKSFSNVCVGPLAAIKTIVSAIKVPMQMLRALKNGKAKISSLGKKIDTK  
LKKLVDKSMIDKIDKVSQTI GKPKTALEKVV EIVDMLISVASLGVLPASLISEFASSNSL  
SSFFSILSRKIGTVKLYLESAYEQTRLEPHLTSMRNL SNSVASKFNFLRPLDAGLKKFQ  
PFADTIQGLYRRFSGWLRRL LAAAMWPVEQTINALLYPFRAQINRMIAELNPF GKIDDLT  
ARLVAPLNNAINDTILTGQLNLLESFQNM TISEELKEPFFQMAKSFTL CVAI IQRGFYGL  
LEGLLIQGSNDVGFQELMGAAEVKTIKQLLVDMQKESAVVTMGDAI INMKKSIDS PLEM  
CDSYLLMHASNDRHTFIDDFTDHKLASYVKRSDYDLTHCAINPSLDKASALFEYKTEDG  
SAKNSWVMASIAAILHHSRVTGQAEQIGILAPDSTILTPFIPEDQGGGYTISLHPKLFM  
PMQMYDVSRLPIRKVVYPSLESFEFPTDIFDYANERIRAEVYPIFSEKYSFALIEKLI  
ACELNMTETESVGTAMHLLSGNVQHGFCHKRESNRDEWMRYNCIKADSQTEKYDRVALQL  
TDAEKKTENELVNYMKSRSMSKEQVELLD SLYHNSLGDEKKTATAYDRSSLEEAMQDLTI  
FVVVASDPSRSAFPILYTDNTPKTHLVYADGPQIKPLLNLSVFSEVWEYSISGFHSPNT  
ILGSLETKIQTG EVT PRVTTATFYTNPWITR LSSGDDGIPETGTDSSIGRLIGPLLAHVR  
ERGAVPIFKRAIMTTMDQVSSSNKSRRTIFKGDYVKKTKSSNLYKVIKVNVTKKDIGK  
PDGKKRYRTVTENYATLVL SRGSKVETLEGMQTKKLT YREELNNDKILRNEKIFYGKGL  
AQVDLTKQADRRRALQWPVDTKQNVKYCGM TLRNLKDYVDHCKERYPFLWLECKNERGTN  
KFVSVNDLCETF IKPHTSSSEACIALNMKDV LGSTIKKAEV FVSL SWEENIEQVIKLLYD  
QIGETKIGRPNFTEDTVIWLSPFSIYQGGGRGSLQDQLLIGVFQEITKSVTDMFVIQT  
GVCNSYSRLWCVSEFSAAADNNEVKIHHLFSSDWRDKYIRTQNKGFAYDWKEIEYNGTKS  
NVL RKL FVDEDLSTKIRIAGSKVPEYFTSVNYFLMEEEEWGEGPGVGAQPILRLNVMEG  
LSKNGMNARNVDKEEFGRIDNSVNGKYQNWRLQKTIVDLERRAAGATADLRSVTLSSQQ  
FTEKYEPGMGTNFDIVRRVENNKDEYDEKSRRLLDGYVPVFTKLDERGRRFLQFQKDEQA  
TTYFKEVIGLNPDYEPADVKNLLSFGANVELLGNDRANFEFPNIERLARLLDCTYVDSLRL  
LPPLAASYKLAPDEDGVAHPRNVFWAEYKAMVAAKTMTFVITGAWVNSKNCFEELWAA

AALRSDRSKYKTLFVFTKRNHFKELEDQDTFRFVIDGKVYQYNWTQLKTALGFTGRPIVA  
PDVESIAELVGGSIIRSFNA

>comp14481\_c0\_seq3; 2184 1 7327 LEN=7775; translated  
HFLEERQFSKVINSDFLEQQSKMTSNNPIFDARVVLPGLNLTSSKEVVVPDSVTSVIDDG  
SIVVFLKKFDGNLSIFRDQKILLCATYQSRGTPQNSGVNDEKHQGDNEPGEDEEEEPWEK  
ELDDEFNDQPYENILVEEWANKRIDSPSIDGYDSFLIKPGEAWKSTEKSMEEVVLFCFY  
FTETDILPSESLSSSENRVVEVGESFVIDVTDDSNPISNRVILLEWDFNCTLMKEVFSFK  
EKEVLKRESEICDEVLLLGMHGGQNFQPSKNLVLHVHLNEYLSGGQGNLKLKLYNNCEIE  
PDAKKTDFEMVDGCIQKSCEYDSVGSFSASGIFGDYITFDIDSNSLIQILEGC SKGSDDN  
LISVLEEQNDEVKQVQTIIDAEAAQFAAVIEDENSRELVAKFLSSITSNSIFFDNAVQ  
MLKSPKNRSFEIITDWSMMVTKTAESIWDIYTDADYKLTRESKLLETGDNALQEFVLT  
IALPEINADVATIDPYNDVEILVENCDDLSFFDRNENRDFLQVRNPTRKPMSGDDHMI  
FKWNSIDRRGIERECEIKVSILIGREGSRQKIGRTISIFREVGGENKQHTALVRLRMV  
KMGFENASGFQCCFSHFLETMFKTVFALSTNEEQSISSSLRFLLEKAADDIASRFYKSAADR  
KSDIYEIIQKSPTFSPPNFEDIENVK VIAETDIAELMEDIFGKLNEMLLIWAASLKLDE  
DSLSEFVDDNESIDDLYEKHKVGNLRRVLRMDSTELAAQLKHKHPKLMENFVTAVQLIRDEID  
NPTIDLPPTRESDLAQLMSESSAKEIEFQTQEILANIEEQILFTPFSDKKDEGSEVLTEN  
VSTLETNLLQMLETTADSCETGIDFLEDSQVMLENISTLLTKLRNFGSNVKTLSNATSL  
TNFVTRFWNAIKSFSNVCVGPLAAIKTIVSAIKVPMQMLLRALKNGKAKISSLGKKIDTK  
LKKLVDKSMIDKIDKVSQTIQPKTALEKVVIVDMLISVASLGVLPASLISEFASSNSL  
SSFFSILSRKIGTVKLYLESAYEQTRLEPHLTSMRNLNSNVASKFNFLRPLDAGLKKFQ  
PFADTIQGLYRRFSGWLRLLAAAMWPVEQTINALLYPFRAQINRMIAELNPFQKIDDLT  
ARLVAPLNNAINDTILTGQLNLLSEFQNM TISEELKEPFQMAKSFTLCVAIIQRGFYGL  
LEGLLIQGSNDVGFQELMGAAEVKTIKQLLVDMQKESAVVTMGDAIINMKKSIDSPLEM  
CDSYLLMHASNDRHTFIDDFTDHKLASYVKRSYDLTHCAINPSLDKASALFEYKTEDG  
SAKNSWVMASIAAILHHSRVTGQAEQIGILAPDSTILTPIPEDQGGKYTISLHPKLFM  
PMQMYDVSRLPIRKVVVPSLESFEEFPTDIFDYANERIRAEVYPIFSEKYSFALIEKLI  
ACELNMTETESVGTAMHLLSGNVQHGFCHKRESNRDEWMRYNCIKADSQTEKYDRVALQL  
TDAEKKTENELVNYMKSRSMSKEQVELLDSLYHNSLGDEKKTATAYDRSSLEEAMQDLTI  
FVVVASDPSRSAFEPILYTDNTPKTHLVYADGPQIKPLLNLSVSEVWEYSISGFHSKPNT  
ILGSLETKIQTGEVTPRVTTATFYTNPWITRLLSSGDDGIPETGTDSSIGRLIGPLLAHVR  
ERGAVPIFKRAIMTTMDQVSSSNKSRRTIFKGDYVKKTKSSNLYKVIKVNVTKKDIGKG  
PDGKKRYRTVTENYATLVLRSRGSKVETLEGMQTKKLTREELNNDKILRNEKIFYGKGL  
AQVDLTKQADRRRALQWPVDTKQNVKYCGMVSPSLMYTSLFVLCVLTFLNLQTLRNLKDY  
VDHCKERYPFLWLECKNERGTNKFVSVNDLCETF IKPHTSSSEACIALNMKDVLGSTIKK  
AEVFSVLSWEENIEQVIKLLYDQIGETKIGRPGRNFTEDTVIWLSPFSIYQGGGRGSLQD  
QLLIGVFQEITKSVTDMFVIQTGVCNSYSRLWCVSEFSAAADNNEVKIHLFSSDWRDKY  
IRTQNKGFAYDWKEIEYNGTKSNVLRKLFVDEDLSTKIRIAGSKVPEYFTSVNYFLMEE  
EWGEGPGVGAQPILRLNVMEGLSKNGMNARNVDKEEFGRIDNSVNGKYQNWRLQKTIV  
DLERRAAGATADLTRSVTLSQQFTEKYEPGMGTNFDIVRRVENNKDEYDEKSRRLLDGYV  
PVFTKLDERGRFLQFQKDEQATTYFKEVIGLNPDIYEPADVKNLLSFGANVELLGNDRAN  
FEFPNIERLARLLDCTYVDSLRLPPLAASYKLAPDEDGVAHPRNVFVAEYKAMVAAKT  
MTFVITGAWVNSKNCFELEWAAAALRSRDRSKYKTLFVFTKRNHFKELEDQDTFRFVIDGK  
VYQYNWTQLKTALGFTGRPIVAPDVESIAELVGGSIIRSFNA

>comp14482\_c0\_seq1; 341 1 1667 LEN=2885; translated  
XNTILHHKYPQGYGGIEYQVARLVSPWIKILGTIEGYFGPRSKELPTADPSASIASATVFQI  
DAHNEEA AVLSGCVSPLPFEIELFQTI SCDLFDEFQVSSREAEIVIVDIFINNDEDCAEK  
TDDSNRETEGQKRSHHTFGMAPMKSSIFRETAIADANSLTDGVKLRSMNDNESTDSVILP  
FIGYGTYKLGREIARSKTLEAFEQGYRCIDTAFIYGGETIETQVGLAIQDAIEQKILENG  
RNDLFVITKHWKRYHYEETNQCLRLSLRRLKLDYIDLWYVIRNFLQSVNRQGASSDLFQ  
LIPLLNRPXVRLMHWPGPAWNTMNRKDLIKEYGPWHYAVHSEKDMPRIAETWRAMEDA  
MKS GKVKAIGVCNFTIKHLES LKKTASIWPPAVNQIECHPLFPQKELVEYCRKEGIVVQA  
YSSLGGQDVGKFWRTLYPPPPKRGEPKPE SVTKLSNTPPVLNLSKEKNRTSAQILLRW  
ALDKNFVVIKPTSSKERMLENAGIFDFSLSTYELDKLESELEHALFEVAKAEKKDVDSMA  
RLCWRNDPLRDLLFD

>comp14482\_c0\_seq2; 396 1 1572 LEN=2790; translated  
XNTILHHKYPQGYGGIEYQVARLVSPWIKILGTIEGYFGPRSKELPTADPSASIASATVFQI  
DAHNEEA AVLSGCVSPLPFEIELFQTI SCDLFDEFQVSSREAEIVIVDIFINNDEDCAEK  
TDDSNRETEGQKRSHHTFGMAPMKSSIFRETAIADANSLTDGVKLRSMNDNESTDSVILP  
FIGYGTYKLGREIARSKTLEAFEQGYRCIDTAFIYGGETIETQVGLAIQDAIEQKILENG

RNDLFVITKHWRKYHGYEETNQCLRLSLRRLKLDYIDLWLMHWP GPANTMNRKDLIKE  
YGPWHYAVHSEKDMPRIRAETWRAMEDAMKSGKVKAIGVCNFTIKHLESLKKTASIWPPA  
VNQIECHPLFPQKELVEYCRKEGIVVQAYSSSLGGQDVGKKFWRTLYPPPPKKRGEPKPES  
VTKLSNTPPVNLNSKEKNRTSAQILLRWALDKNFVVI PKTSSKERMLENAGIFDFSLSSTY  
ELDKLESELEHALFEVAKAEKKDVS MARLCWRNDPLRDLDFD  
>comp14483\_c0\_seq1; 329 1 871 LEN=1101; translated  
XSHGNSHPFSSSLCQKVPWGKHS PAGDRDFREKHKT VKDKDVDGNEIMPVVTIRDPLVWMK  
SMCRHKYTARWFGFLDPNCPNFS LGDLTTSVKYAEFTLEYDSLIDLWKNYYLEYKNIDIP  
FLLVRFEDLVFHAEVTRKVC ECAGGKIYRKNFRYVLD SAKKGAAGAM SERTGYVDAL  
VRYGTLAKRYKGWNSRADLEYIREHIDPTIMGMMQYAEIDPNWVGKPNHEKTGVQADPE  
NND DANDNEEEENGKDDDARENKEGGESNDDKDQDDKEGGKEDDNDDEVR  
>comp14483\_c0\_seq2; 238 102 849 LEN=1098; translated  
MRSNGTPSSKQRQTATAASPRSSGSYATDDSRSSMEGSRDRRSKRNRGKGGGARLRQG  
LEMKHIMTPTVGVLFLGLLLALADVLYIMKHLEQKSEELSNPGDTAPVSPSLSMLPPTD  
GKGGKPNGKPNKHGSELRQMLADREPIIKLIRDAGISFDPVADAELIEELPTWADVEMY  
GPEPVIYGINEGNCKRFQGGTDPGDHFLGTAGTFNTGTNFMSELLIQNCLMPERMKKHGP  
KGGGFDGR  
>comp14483\_c0\_seq3; 654 102 1673 LEN=1903; translated  
MRSNGTPSSKQRQTATAASPRSSGSYATDDSRSSMEGSRDRRSKRNRGKGGGARLRQG  
LEMKHIMTPTVGVLFLGLLLALADVLYIMKHLEQKSEELSNPGDTAPVSPSLSMLPPTD  
GKGGKPNGKPNKHGSELRQMLADREPIIKLIRDAGISFDPVADAELIEELPTWADVEMY  
GPEPVIYGINEGNCKRFQGGTDPGDHFLGTAGTFNTGTNFMSELLIQNCLMPERMKKHGP  
KARGIRWQVPWGKHS PAGDRDFREKHKT VKDKDVDGNEIMPVVTIRDPLVWMKSMCRHKY  
TARWFGFLDPNCPNFS LGDLTTSVKYAEFTLEYDSLIDLWKNYYLEYKNIDIPFLLVRF  
DLVFHAEVTRKVC ECAGGKIYRKNFRYVLD SAKKGAAGAM SERTGYVDALVRYGTLA  
KRYKGWNSRADLEYIREHIDPTIMGMMQYAEIDPNWVGKPNHEKTGVQADPENND DAND  
NEEEENGKDDDARENKEGGESNDDKDQDDKEGGKEDDNDDEVR  
>comp14484\_c0\_seq1; 656 1 2682 LEN=3267; translated  
KNRMERKTDLLGWQEISLESTLLPNMFP SDFVQDISPVDILSEGFDHSSLTRNSSLVKDD  
QIPYLGVLDDAGRHYFPIDWIKRMIDVISVMNFNLLHFRLTDDQTFNVQLKSQPRLAYPT  
TLNNNTKVYSPDELKDIVKYAKKKGIDIVPEINVP GHSGSWG GIPDLLVQCP IFCNKGY  
GIPLNVS NPKLRPILKDVLEEV IDIFDDPPYLHLGGDEVNMARPCFDEVGETMPNYNEFE  
STLRTILAELOYDES RVIRWEMSHYLP HLSRAGDITHFWYMFPGETKWQRTYPGNFSAPI  
FLSSGLYFDTNEEDSAYDVYVTKR LKHLKHIRSPNLGIIGGTFELSTGFWHDRNVIGRL  
LAVSMGATGMNITNRF EFFF DHYGRICRSIGFDDTMCKLYGVPPIRYSIHRQQLKSGGQDC  
VWANWIRNTCDRLTVEKTVKTKQMSRDFRSILSAKESFWETYVDKPKWFMFNATNNTYYF  
QSKWANEEFRGKRLVDHTGLIMDISRYPPDHFQSLGAIITRSMYPLGLNLIQLRLVSDFS  
FIYFSANHPKLFYKPAVKFVEGQNTNFHPTLNLDYAFRNTAAEFGVSIMPEIAISTNAG  
GLYRSSFSVDCPNFLCKHGEYIPQNITEKDYIPLIFSLVTELAKFSSSKYIHLGHEREM  
SAYCFLEATKNRTSPDFEKFETTLRLLDFAGLTPDRVVRWENKEKRHYAGRFGDITQCR  
AQEGCQQGSLQTDSTANTPWF GTVDVRRGGPFDIYSLTRDLASKSPTGLMAEIGPMSTE  
KYEANNIKYRLLAFSIGTLDLPVMTKDKFENFYTKACYQLPPNSKTQQEMHVSFCRSFAT  
TNTDAVDHINNVEKQKEAITEARCNDQSYSAKVATMRDPETIATAISMQRHR  
>comp14485\_c0\_seq2; 202 1 705 LEN=1070; translated  
MPAAKARLLYYFPRQHHHQQQQEQQLQQRDSLAAKGDDNDDDDDVFDWCGWHTDHGSLT  
ALLPGMLCGDGDNDAVLHSHSQPHSQPPIDSSIERRGSGPSSPRRRAGLYIRATGGARPC  
APGSGPSELVRVDLRADSLGFQLGETLEILSRGRFRATPHAVKAPGAASAARGRSLALF  
LQPLPGTVLPPLAVLPPGNGNGNDSTAADPFLASRWRGTFGEFQAATIASFG  
>comp14485\_c0\_seq3; 196 1 723 LEN=1088; translated  
MPAAKARLLYYFPRQHHHQQQQEQQLQQRDSLAAKGDDNDDDDDVFDWCGWHTDHGSLT  
ALLPGMLCGDGDNDAVLHSHSQTHSQTHSQTHSQPPIDSSIERRGSGPSSPRRRAGLYIRAT  
GGARPCAPGSGPSELVRVDLRADSLGFQLGETLEILSRGRFRATPHAVKAPGAASAARGR  
ASLALFLQPLPGTVLPPLAVLPPGNGNGNDSTAADPFLASRWRGTFGEFQAATIASFG  
>comp14485\_c0\_seq4; 1014 162 2951 LEN=3316; translated  
MAATDFSSLRDEYDNFLRQERFQYVDKISTVLDYAHRSKSLNVEGWGCPRVEIRMAELR  
SMGNGGLSQRRLTDPLPHIRALE SACHEVAVEARPGYDKNGIKIKVAFSGPVGAKPMSPR  
SLTSSSLRQLVCVEGVATKVS AIKPKIVRSVHYCPETKQHLEREYRDATDPELGLHAIDA  
QGRELPDRMIGITPTAFPPQKDKDGNPLETEFGLSEFKDHQTVVLQEMPERAPMGQLPRSV  
ELILDHDLVDKIKPGDRVQIVGVYRALSRGNNPSGGGAFKTVVLVNNVQILGRDTSQL  
TFSPQDVRMIKELGKNPDILSILGRSLSPSIHGHSVIKKALALQLLSGCEKNLKNGTHLR



GDINILMVGDPSTAKSQLLRSAMTIAPLAVSTTGKSSGVGLTAAVTSADTNERRELEAG  
AMVLADRGLVCVDEFDKMGENDRVAIHEAMEQQTVTIAKAGIHASLNARCSVLAAANPVY  
GQYDRSRRIQENIGLPDLSLRSFDLLFVVLQDQMDPETDRKIANHVILGHRYRSDRGGAGH  
DSDYDDEDEDSDDDDMDGDKVHSIWQRNRQSDPSEAADPHSSDILQHDFLRKYLHFAKT  
RMKPHLTEGAREFIANRYAEMRCRQDERTLPVTARTLETVIRLATAHAKARLSGVVEAAP  
DCEAAMDVLGFALYHESGGDKNQNDPSEGLTDGNEQAAAEVSDDGEASSASGEPsAKRR  
RTAVTDDDDNDVDDWCGWHTDHGSLTALLPGMLCGDGDNDAVLHSHSQPHSQPHSQPHS  
QPPIDSSIERRGSGPSSPRRRAGLYIRATGGARPCAPGSGPSELVRVDLRADSLGFQLGE  
TLEILSRGRFRATPHAVKAPGAASAARGRASLALFLQPLPGTVLPPLAVLPPGNGNGNGD  
STAADPFSLASRWRGTFGEFQAATIASFG

>comp14485\_c0\_seq5; 1102 162 2558 LEN=2899; translated  
MAATDFSSLRDEYDNFLRQERFQYVDKISTVLDDYAHRSKSLNVEGWGCPRVEIRMAELR  
SMGNGGLSQRRLTDPLPHIRALESACHEVAVEARPGYDKNGIKIKVAFSGPVGAKPMSPR  
SLTSSSLRQLVCVEGVATKVSAIKPKIVRSVHYCPETKQHLEREYRDATDPELGLHAIDA  
QGRELPDRMIGITPTAFPQKDKDGNPLETEFGLSEFKDHQTVVLQEMPERAPMGQLPRSV  
ELILDHDLVDKIKPGDRVQIVGVYRALSRSNNPSGGGGAFKTVVLVNNVQILGRDTSQL  
TFSPQDVRMIKELGKNPDILSILGRSLSPSIHGHSVIKKALALQLLSGCEKNLKNGTHLR  
GDINILMVGDPSTAKSQLLRSAMTIAPLAVSTTGKSSGVGLTAAVTSADTNERRELEAG  
AMVLADRGLVCVDEFDKMGENDRVAIHEAMEQQTVTIAKAGIHASLNARCSVLAAANPVY  
GQYDRSRRIQENIGLPDLSLRSFDLLFVVLQDQMDPETDRKIANHVILGHRYRSDRGGAGH  
DSDYDDEDEDSDDDDMDGDKVHSIWQRNRQSDPSEAADPHSSDILQHDFLRKYLHFAKT  
RMKPHLTEGAREFIANRYAEMRCRQDERTLPVTARTLETVIRLATAHAKARLSGVVEAAP  
DCEAAMDVLGFALYHESGGDKNQNDPSEGLTDGNEQAAAEVSDDGEASSASGEPsAKRR  
RTAVTDDDDNDVDDWCGWHTDHGSLTALLPGMLCGDGDNDAVLHSHSQPHSQPHSQPHS  
VMTEENDEGTLDFVPVSD

>comp14485\_c0\_seq6; 302 1 1152 LEN=1152; translated  
XRRRNREHSTKETESTPCGWFAATEEGIGKTRQDXDTIRYDMIRYDTDMALSTHAGRPR  
GGQRRRSLPLSLLGLSLLVAGCGAGKAFVVVDRQPAKISYGDLSSEVFGDLDEGGCGEAA  
ISLLEGRREKILPLLDKIGEAFTASAASSRTCGVASDATGPTRKASAPHRGPGNPLGFL  
EVTGIPSEMAELRERLLPRASHLANLPRSELEQLERPDTGYSVGWSHGREAFRSTTTSS  
DDDGDGETDTPSQTKRYDTAKGSFYLDPFVTGSANANVFPPSLQPRLEAELLRMTRFMSR  
VGLWIALLCDYYLLVYGDKRDGNDTVDGTGFQTDGVDDEELMVYKSLVSGMPAAKARLLYY  
FPRQHHHQQQQEQLQQRDSLAAGK

>comp14485\_c0\_seq7; 1020 162 2933 LEN=3298; translated  
MAATDFSSLRDEYDNFLRQERFQYVDKISTVLDDYAHRSKSLNVEGWGCPRVEIRMAELR  
SMGNGGLSQRRLTDPLPHIRALESACHEVAVEARPGYDKNGIKIKVAFSGPVGAKPMSPR  
SLTSSSLRQLVCVEGVATKVSAIKPKIVRSVHYCPETKQHLEREYRDATDPELGLHAIDA  
QGRELPDRMIGITPTAFPQKDKDGNPLETEFGLSEFKDHQTVVLQEMPERAPMGQLPRSV  
ELILDHDLVDKIKPGDRVQIVGVYRALSRSNNPSGGGGAFKTVVLVNNVQILGRDTSQL  
TFSPQDVRMIKELGKNPDILSILGRSLSPSIHGHSVIKKALALQLLSGCEKNLKNGTHLR  
GDINILMVGDPSTAKSQLLRSAMTIAPLAVSTTGKSSGVGLTAAVTSADTNERRELEAG  
AMVLADRGLVCVDEFDKMGENDRVAIHEAMEQQTVTIAKAGIHASLNARCSVLAAANPVY  
GQYDRSRRIQENIGLPDLSLRSFDLLFVVLQDQMDPETDRKIANHVILGHRYRSDRGGAGH  
DSDYDDEDEDSDDDDMDGDKVHSIWQRNRQSDPSEAADPHSSDILQHDFLRKYLHFAKT  
RMKPHLTEGAREFIANRYAEMRCRQDERTLPVTARTLETVIRLATAHAKARLSGVVEAAP  
DCEAAMDVLGFALYHESGGDKNQNDPSEGLTDGNEQAAAEVSDDGEASSASGEPsAKRR  
RTAVTDDDDNDVDDWCGWHTDHGSLTALLPGMLCGDGDNDAVLHSHSQPHSQPHSQPHS  
QPPIDSSIERRGSGPSSPRRRAGLYIRATGGARPCAPGSGPSELVRVDLRADSLGFQLGETLEILS  
RGRFRATPHAVKAPGAASAARGRASLALFLQPLPGTVLPPLAVLPPGNGNGNGDSTAADP  
FSLASRWRGTFGEFQAATIASFG

>comp14486\_c0\_seq1; 374 1 1099 LEN=1535; translated  
XNMGWSHRKRQVKADTMIANNCRKFAMLSLLQLLLVLAYDNRSIFSSALSVANAASTPT  
PECAVVGVLGTSLCKQLLRDPMKDWKVTGITKSNKRHEQILKDVLDGDDRYSDRFE  
RTADDNAKSEQKFNHCVFCAPPSGFEDYPAAVKEAVDGLWMQNGENEGGAFVFTSSGGI  
YSGSGDEIEVSPIVTESTPLTTVTPRIEKLNAEKEVLKHKGGSVLRLAGLYLLDRGAHN  
FWLGDTAELTREEISGRPDGVINLLHYDDAAGSVVAALKKTSKNSDIDDDAKGGKIFLVS  
DGHPQTRLQICSSLNKRYSDRTI PRFTGSKENGDP IGKIYDGSYTNKYLDWTPRYESF  
DKFMSS

>comp14487\_c0\_seq1; 678 185 2316 LEN=2592; translated  
MKEDRVEEQRQTESLQMWNGPSSARMSSKDP SHMKVDTSRSIAHVNGASIRSISPRMREE

DADLLESMHYASSQVSQYTPDGTPLLRPKDRSLPMQDVPFMEMPLASTKELFVMKQDGS  
KFCDISRSFSFRGNEKKDSAVPDSGGSVGNASLNASGLSHSELGANEPRSVPSTPGRNH  
DCSIRKLLSGEIRTVPGEAEENHILEPRDDGSTCDQFAMLDTNLQQNNSREKREGREHGK  
PSDVTAKEVSLTQTDKDAERRRVS DALLFAQSVRERISMHPDDL CIIDDSEIDDDDDDD  
DDEIDKEDTEESKEKAALNHSFHESVLSSEYLIGLSPMASKKTKPKIQISXETPIKSSS  
TNSLSFGHRRKARTKSLDIEFSSMKHLSGGDDR SNFVYK GICANPPVITKRGLQRGNHA  
QLHRKAWLEVSDKYHRYGKNLRLYYRFWERLGFPTNQFFDWLDSKGEAAGQPLPNLEEC  
RSVLDSDTVLYIANHEVTEGYALDIIPGEDGRGLVLNVDGDPVQTGPTGWIFILRDNVTY  
GAPKITSVSGHSKQRFHSSFFGGKAVASAGIFITDSKGYLTRLYPHSGHYRPGEAHMQR  
MLFSLYRNGIDLRTFDVDTQQLSHVS RDKDAGKGTENGGEVKEKKMKKVDSLHLEKAVD  
VACFLAHKADFIGKGFIDNIHQIRKADVTNVSEVLDLVPNGKQSKIAAVS

>comp14488\_c0\_seq1; 367 541 2067 LEN=2289; translated  
MVDKRGSRALSKPLMNRPT ESSGKCRNDAGSKTKTYKFYADMTPSSPHEICQSYDVLKS  
TGNQRDGDIDSMMQQHLSSSQDRKQEGMEKNHAQINSISTTSLSGRRGDQKSGTSFHIRLS  
IGYMTGLKVKQIHKRTKQPTNNRITVGFVELASSGKYTALSKPLL TNVEDKIETTKIFWS  
NEQEKEDISKSRRRRLHFSLQLKREEARDDKGDLLIASQAPFVPEVVTLLIGLKCGDER  
IPLGIGNLVVHGRRERVEQKMDLDVLPVPNTS GEQKLRGLFGKKHWSTFKDGLAYKLAS  
SAVLRVKTDIKLGYPGQDGA EVWGSDESSII TKWTF AAGTPSLYCSPPACGFNFSTPISP  
KLGHEKLRSQLLFDQKSQVEQRIDNSMRTCSGTSYRRRRRQNHVRPMPFISIDPSNEVVS  
VLSSVSDTGCEASWTCSPVCCGGEMSLSKNRHRSFP GSSSVESSQMLESAVDIFNDEL  
TFDSSWNYASNRHPGSSARHRNNGRRQP

>comp14489\_c0\_seq1; 284 331 1755 LEN=2052; translated  
MNADRDPGKEPPELVRTKSIKKKNGKKTGKKRTEKLSPAQR RMFEVDGHPLDHKK  
DNFKPTRDATCRTVYEPKEGKQFFQKALKIEDYDIMRGNKANLEQPYFSKYNRFFPKVGH  
FCKKACGNPLYSHDTKFDIDDGWPAFGACVLGAIGIISAADRKAQIETEDKACIKIQAFV  
RGSQCRSRVTAMLDKLI EEMLR RDGGSTTIVEKPIESDSDSESEDDDDDESLEGKHTGYV  
LSRTLGENYAEI HCHRCKSHLGDVYVETNTGIHGETFREHHRVNGRAMKYMHANLPKRTD  
VYASLLFADHSQRRRLGLPDTFQK KLEDEDRQVVS PFVRYESMMIRPRRPSESLNRS DHE  
TINKTNQLNRGPTDPLSVSSHASLNSYGKSKSLRPVRGKKAPSGLSVSMHSLGSPSIGTN  
HLLPLRGNRSCH EPMTT PPSRRRPMRRGGTNSRIDIEKRKAYLESTLNLKVSFH

>comp14490\_c1\_seq1; 467 430 1416 LEN=1828; translated  
MKTSFCSVIATALLSLYLADAFSTTNAVGTSSNRVQRPALLTPKFARGRGLASSPSD TT  
TVFPIPGKAEKEEKQAKTVAKKEASDDEKSMLSVSTKAAVTMGMVLA FNAGVINSATLSG  
LLSQGTKQASAAVTGAWTNSALGAASLMASTSSAASSAAIHQFLFNAK CIVCYMFGSVIS  
GLLTPKPQAFKIDVPKSLSTFAIASGLLTASVLSRASNINYLFLCCLATGIQNSFTSTM  
SANMCR TCHF SGLTSDMGTF LGQVLRGNLTNMSRLKTSALLCASFWTGGFLAFASLKKFG  
STVLLGTAMVHLAFASYLGFKKYMP SKE

>comp14491\_c0\_seq1; 527 1 1550 LEN=1768; translated  
XKEDERDAGNIQTTRRRIDDNEVIIMFTPSLVKNAASHLRLPGNFVGVRSARQDFRNP TT  
IAPSFQAINPKDAAGEENSARLKASNDVKFCV VDEHGNERRMTKAEKKAKKFQMAQAKKE  
AKKKANSKRKRKLEDVATD ICSSRSDANAKAESEAIRQKDEQLKGDGESAKTYHQLP LN  
PTTIEQELAEFKGRGNTPPQILSPAMALQFVSKSMHSTSAQSPVKT TG DATFAYDHNLS  
QEWANRLKEQCVLPAEAVRQKEDLRPLAYRLOPEPWRQLRPNLDENPVFTTNRNRDDKNK  
ESISKAAGPIIANSDLKSHDWVSLICRPRLNPSVSSPEQLGIKHDDMLSIVFEYIHRQTP  
FHVSCGSKFGADFLVYDGRDKRHAFAGLRVLSRFTNSTTTLP SSTKPLSENVSSCNQL  
RLPLPTAYS LTGFVRCLNTAGKLALLATVDEVSNEHGDGQDLSSFSRACRKKYRVAFVD  
VALEKVL DVHIRKNRGRSDK KKLQKRRDVTTLT LSKN

>comp14491\_c1\_seq1; 532 418 2457 LEN=3416; translated  
MSTTTSATSASSDTLSSIVLDNSWPRELSPETPENLEKSRNIERLSADDDNRSKRPVFN  
GHYVLVKPTGLANPKMVLVSDDVASNLLKLSPEQVESDHFLQFVSGNAVLNDGTAETWAT  
PYALSIMGSRYTNNCPYGTNGYGDGRAISIAEFSGHELQLKGAGKTPFARGADGRAVLR  
SSIREFLASEAMHALGIDTTRALSLVRS DNGDTS LRPWYSDDAVLQIPDIDDPRLAQY PV  
EERRQIIQQLRATRKA DPNMMI SEPCAITCRVAKSFVRI GHIDL FARRVLAQQQASSQQK  
YDTTDDVRRVCEPDRWTKKFFLYITNSXFRAVPLCVKISAWKELEDLIWHACKREYRSEA  
FDPYFESKNLDQAATLLDLAAVRIADMVTGWVRVGF AQGNFNADNCLVAGRTMDYGPFG  
WMDEFTPLFAKWTGSGQHFGFLNQPSAGFANYQVLVESVAPVIAVARRTAGVTDTEMTDK  
LLASFMTKAQVIFNQKLEGVFNKLG LPEADAGEDLWGS LQDLLATTRTDWTLFWRQLT  
YVMRDIQDL DSTEYESMLKLI EGGDSVSNSSPFYEPLTPQQRKDWVDWIKEWRETLKITK  
RPSDEIYKQMKINNP KFLREWILVDAYSAAATGDFSLVEELHELCKSPYDEGTPDQIKK  
FYRRQPESTIAKGGTAFMS

>comp14491\_c1\_seq2; 601 418 2358 LEN=3317; translated  
MSTTTTSATSASSDSDLSSIVLDNSWPRELSPETPENLEKSRNIERLSADDDNRSKRPFVN  
GHYVLVKPTGLANPKMVLVSDDVASNLLKLSPEQVESDHFLQFVSGNAVLNDGTAETWAT  
PYALSIMGSRYTNNCPYGTGNGYGDGRAISIAEFSGHELQLKGAGKTPFARGADGRAVLR  
SSIREFLASEAMHALGIDTTRALSLVRSNDGDTSLRPWYSDDAVLQIPDIDDPRLAQYVP  
EERRQIIQQLRATRKAADPNMMISEPCAITCRVAKSFVRI GHIDL FARRVLAQQQASSQQK  
YDTRDRSWKELEDLIWHACKREYRSEAFDPYFESKNLDQAATLLDLAAVRIADMVTGWV  
RVGFAQGNFNADNCLVAGRTMDYGPFGWMDEFTPLFAKWTGSGQHFGLNQP SAGFANYQ  
VLVESVAPVIAVARRTAGVTDTEMTDKLLASFMTKAQVIFNQKLEGVFNLKLGLPEDADA  
GEDLWGS LQDLLATTRTDWTLFWRQLTYVMRDIQDL DSTEYESMLKLI EGGDSVSNSSPF  
YEPLTPQQRKDWVDWIKEWRETLKITKRPSDEIYKQMKINNP KFVLR EWILV DAYSAAAT  
GDFSLVEELHELCKSPYDEGTPDQIKKFYRRQPESTIAKGGTAFMS

>comp14491\_c1\_seq3; 541 418 2444 LEN=3403; translated  
MSTTTTSATSASSDSDLSSIVLDNSWPRELSPETPENLEKSRNIERLSADDDNRSKRPFVN  
GHYVLVKPTGLANPKMVLVSDDVASNLLKLSPEQVESDHFLQFVSGNAVLNDGTAETWAT  
PYALSIMGSRYTNNCPYGTGNGYGDGRAISIAEFSGHELQLKGAGKTPFARGADGRAVLR  
SSIREFLASEAMHALGIDTTRALSLVRSNDGDTSLRPWYSDDAVLQIPDIDDPRLAQYVP  
EERRQIIQQLRATRKAADPNMMISEPCAITCRVAKSFVRI GHIDL FARRVLAQQQASSQQK  
YDTRDRSWKELEDLIWHACKREYRSEAFDPYFESKNLDQAATLLDLAAVRIADMVTGWV  
RVGFAQGNFNADNCLVAGRTMDYGVXVLRARTWVGRRCY EKMIASILTCDL CSPGPF GWMDE  
FTPLFAKWTGSGQHFGLNQP SAGFANYQVLVESVAPVIAVARRTAGVTDTEMTDKLLAS  
FMTKAQVIFNQKLEGVFNLKLGLPEDADAGEDLWGS LQDLLATTRTDWTLFWRQLTYVMR  
DIQDL DSTEYESMLKLI EGGDSVSNSSPFYEPLTPQQRKDWVDWIKEWRETLKITKRPSD  
EYKQMKINNP KFVLR EWILV DAYSAAATGDFSLVEELHELCKSPYDEGTPDQIKKFYRR  
QPESTIAKGGTAFMS

>comp14491\_c1\_seq4; 472 418 2543 LEN=3502; translated  
MSTTTTSATSASSDSDLSSIVLDNSWPRELSPETPENLEKSRNIERLSADDDNRSKRPFVN  
GHYVLVKPTGLANPKMVLVSDDVASNLLKLSPEQVESDHFLQFVSGNAVLNDGTAETWAT  
PYALSIMGSRYTNNCPYGTGNGYGDGRAISIAEFSGHELQLKGAGKTPFARGADGRAVLR  
SSIREFLASEAMHALGIDTTRALSLVRSNDGDTSLRPWYSDDAVLQIPDIDDPRLAQYVP  
EERRQIIQQLRATRKAADPNMMISEPCAITCRVAKSFVRI GHIDL FARRVLAQQQASSQQK  
YDTRDRSWKELEDLIWHACKREYRSEAFDPYFESKNLDQAATLLDLAAVRIADMVTGWV  
RVGFAQGNFNADNCLVAGRTMDYGVXVLRARTWVGRRCY EKMIASILTCDL CSPGPF GWMDE  
FTPLFAKWTGSGQHFGLNQP SAGFANYQVLVESVAPVIAVARRTAGVTDTEMTDKLLAS  
FMTKAQVIFNQKLEGVFNLKLGLPEDADAGEDLWGS LQDLLATTRTDWTLFWRQLTYVMR  
DIQDL DSTEYESMLKLI EGGDSVSNSSPFYEPLTPQQRKDWVDWIKEWRETLKITKRPSD  
EYKQMKINNP KFVLR EWILV DAYSAAATGDFSLVEELHELCKSPYDEGTPDQIKKFYRR  
QPESTIAKGGTAFMS

>comp14493\_c0\_seq1; 553 56 1489 LEN=1605; translated  
MERKLIDTQDGNSCFRSSAARALATAQELRESNATSSGVGTTSEPRRAIDYRTENKTTKS  
NLEILRNLINENADKFWREDQKRDC KDSSGSDCDNRDMDVGNKMNSYENDLVFFTDNRSE  
SQSLEKRKRPE SNDS DGESHYQAFHVPKRRKVT DNSNS SGN SILNTRHQLQAGTGKSQNS  
NNGCIP SREDRAILSLVGDWLEDSIATVQKQQAQQT HGGSPSLATTTATTAMEMLSEVV  
KLKQTKTITRSASLEVTQQTQE QKQSKANSSSTSIESEDIENEGSTFLPFLSNTERTNAP  
NNNEDDDEDKKTALHYEIGGKTASALVKDMSKILRAIAAVSRSSGTEVNALEEHNKRGS  
NSSNGSTKEGSLICNEIFENEDDVDDDDDEVAEISP DENYVEQNLVCRESGLFDGDGDK  
STRDPDEDRRQTTPQLIEQKVALLR TMCLIRSKTLVLT KRMRNFHEKTS AIENPL

>comp14493\_c0\_seq2; 553 56 1489 LEN=1664; translated  
MERKLIDTQDGNSCFRSSAARALATAQELRESNATSSGVGTTSEPRRAIDYRTENKTTKS  
NLEILRNLINENADKFWREDQKRDC KDSSGSDCDNRDMDVGNKMNSYENDLVFFTDNRSE  
SQSLEKRKRPE SNDS DGESHYQAFHVPKRRKVT DNSNS SGN SILNTRHQLQAGTGKSQNS  
NNGCIP SREDRAILSLVGDWLEDSIATVQKQQAQQT HGGSPSLATTTATTAMEMLSEVV  
KLKQTKTITRSASLEVTQQTQE QKQSKANSSSTSIESEDIENEGSTFLPFLSNTERTNAP  
NNNEDDDEDKKTALHYEIGGKTASALVKDMSKILRAIAAVSRSSGTEVNALEEHNKRGS  
NSSNGSTKEGSLICNEIFENEDDVDDDDDEVAEISP DENYVEQNLVCRESGLFDGDGDK  
STRDPDEDRRQTTPQLIEQKVALLR TMCLIRSKTLVLT KRMRNFHEKTS AIENPL

>comp14494\_c0\_seq1; 249 679 1251 LEN=1306; translated  
MRIAHNFAQRYGLKSCIRHSDTSGMKYAQRDKMSYLWTF LRDPTDRAMSVVGATLSQQL  
LQSSNRDSFDPTMSTNLTGQTDN ILVYRTLHMLQ NATNDGILGQGGYQLEVCMQDYTK  
INEVIYPSNPTEVADVSQLIDSVSRVSSSGMKGFSIGVLF AFFDAKGNFHFNNRAVVS IH

NALGMFGFTF

>comp14494\_c0\_seq2; 304 219 1511 LEN=1829; translated  
MMRRKGFYRRFRNYVFLTLAIGYAVAYFYFSSNSHAVLLSDEVYHVDHHDMAAATGAVVD  
LHSTKIQQEASTIAHVYKPVHPSTWCIDSKLKRQKPGQPRGLSYLRISHSASATLKGIN  
MRIAHNFAQRYGLKSCIRHSDTSGMKYAQRDKMSYLWTFRLDPTDRAMSVVGATLSQQ  
LQSSNRDSFDPTMSTNLTGQTDNVLVYRTLHMLQONATNDGILGQGFGGYQLEVCMDYTK  
INEVIYPSNPTEVADVSQQLIDSVSRTFQAYDFVGLVERFDESLEVAMKLLGLLETSDILYF  
AAHRKEDWQQSRVGKKLICRKQFDWETDLLTQPLVKNFLTESKEWHAQNYGDYLFYQAAN  
QSLDRITILRIGLESFTNELKQFRAILERSRKECTPIFPCSPGVDQFNESRHDCMGGFVC  
GHRCLDRISA

>comp14494\_c0\_seq3; 304 219 1151 LEN=1206; translated  
MMRRKGFYRRFRNYVFLTLAIGYAVAYFYFSSNSHAVLLSDEVYHVDHHDMAAATGAVVD  
LHSTKIQQEASTIAHVYKPVHPSTWCIDSKLKRQKPGQPRGLSYLRISHSASATLKGIN  
MRIAHNFAQRYGLKSCIRHSDTSGMKYAQRDKMSYLWTFRLDPTDRAMSVVGATLSQQ  
LQSSNRDSFDPTMSTNLTGQTDNVLVYRTLHMLQONATNDGILGQGFGGYQLEVCMDYTK  
INEVIYPSNPTEVADVSQQLIDSVSRSVSSGKMGFSIGVLFDAFFDAKGNFHFNNRAVVS  
IH  
NALGMFGFTF

>comp14494\_c0\_seq4; 249 679 1611 LEN=1929; translated  
MRIAHNFAQRYGLKSCIRHSDTSGMKYAQRDKMSYLWTFRLDPTDRAMSVVGATLSQQ  
LQSSNRDSFDPTMSTNLTGQTDNVLVYRTLHMLQONATNDGILGQGFGGYQLEVCMDYTK  
INEVIYPSNPTEVADVSQQLIDSVSRTFQAYDFVGLVERFDESLEVAMKLLGLLETSDILYF  
AAHRKEDWQQSRVGKKLICRKQFDWETDLLTQPLVKNFLTESKEWHAQNYGDYLFYQAAN  
QSLDRITILRIGLESFTNELKQFRAILERSRKECTPIFPCSPGVDQFNESRHDCMGGFVC  
GHRCLDRISA

>comp14494\_c0\_seq5; 138 219 464 LEN=576; translated  
MMRRKGFYRRFRNYVFLTLAIGYAVAYFYFSSNSHAVLLSDEVYHVDHHDMAAATGAVVD  
LHSTKIQQEASTIAHVYKPV

>comp14495\_c0\_seq1; 380 150 1550 LEN=2214; translated  
MTPASYGRWDLICKFLFFSSQMCYTGFRVATATGEQQYIKASTKYWSVAMFGGGGPMVI  
GRHDRPGRFEDGVSPILKGHTGTVLDMDWNPFDSSMLATASEDSTIKLWSIPDDWEPTNE  
KGMGRKGDSESLIDLEGHRKRVTLCRFHPTASNTLMSTSAADYTVKVDIEAGSAISS  
ECSNLTQDIVDVRGDNYATSNKDKSVKIIDARTGEQTTKIDVAHEGSKSTKIQLCNEG  
AAGKLLTTGANKQSGREMKIIDLKNSKPLQVEPVDASGALMPLYDQGTKVIYLCGKGD  
GQIRLYEFDESKQPHLHKLNDGFRSTTPGKGYCMVPKRGLDIMSCETVRLKITNTDGIH  
PLKFIVPRKSEAFQDDIFPPCPAPSAHTCAEWVGGSSKMPKTMPLDPKSAENGVNGAA  
NGAKKLVTIPLMTKENAKLKTHTIQTLETCLKDANIAEYEPYVFDEE

>comp14495\_c0\_seq2; 351 312 1706 LEN=2370; translated  
MFKIRQSKYRHVYCDAPKQCMCYTGFRVATATGEQQYIKASTKYWSVAMFGGGGPMVIGR  
HDRPGRFEDGVSPILKGHTGTVLDMDWNPFDSSMLATASEDSTIKLWSIPDDWEPTNEKG  
MGRKGDSESLIDLEGHRKRVTLCRFHPTASNTLMSTSAADYTVKVDIEAGSAISSLEC  
SNLTQDIVDVRGDNYATSNKDKSVKIIDARTGEQTTKIDVAHEGSKSTKIQLCNEGAA  
GKLLTTGANKQSGREMKIIDLKNSKPLQVEPVDASGALMPLYDQGTKVIYLCGKGDGQ  
IRLYEFDESKQPHLHKLNDGFRSTTPGKGYCMVPKRGLDIMSCETVRLKITNTDGIHPL  
KFIVPRKSEAFQDDIFPPCPAPSAHTCAEWVGGSSKMPKTMPLDPKSAENGVNGAANG  
AKKLVTIPLMTKENAKLKTHTIQTLETCLKDANIAEYEPYVFDEE

>comp14496\_c0\_seq1; 750 255 2750 LEN=2784; translated  
MKMKNPRSELVFSGFCQIEVTADDFRKTVKNEGVAKGSEKKNTTHSKSMTKRIGQILN  
SRKKKCPNTANEHNDNRNLSLGSFNNGQSVANKSIDSGTTINASNLFHEKIYSTKTAT  
PTCEISSLSKTAVVVGKREDNELINDKNNENERRVRSQRTWKSRLRLVNGRNSKQQSQ  
SVASLEYSDTNARKPFHRRHAKSHDGAVSLGVIPSSSFLNTSYPMRKRFRYSEGIGTEEQK  
RQHYRANKSFGGIHYGSKSRHAFDQVIRGRLDGIDLSSLGPVCRTSLPDKSLDIMSKVE  
TNKSNPPAQCNISDGDSENESEFDP IHYSFTTLQRTLSPGKLVDEMIWSSAVVDQSEVIL  
EGFYPGNDRWSVRIPSSSSLEEQLVSKSSEAAENSNQSLSPSAFITKASSDSDDDSTA  
VSSWHTHTDFDGTNIPIDELWNSLWGLVATPPPISHMNTQMVTMVAKAADCNEEYH  
MVNEEEI IQIVETCNVPVLDLDDAFI IDCQHLQSIHELMLVPLQSRCFDSVVSIFKKV  
LRGLQGNKKLKHLNGSTNHNIGMIHLRCRNYKDAMQSFQKAVDIRKGCLPSYHPDIVVSL  
QRKGMAGFGLGLVDALVSFESSLAIYTPVDNTRAKILNINIGVARYQLEDYGQALKSFTA  
ALEIQRPWIEGPIRRESVVSASTILSNIGKVVYLEKGDHDLAYFVFEEAYLMQTSTFSKD  
HSIALSSLDNMARSLAKNGYVEALRIFTSLYRSQEAKFDPDSEICIEVGMIGIAHYKL  
LEYEEAEKCMKRVDTWIKHGIDQYHPSALIKDKQFKLIKEGLQGNEMWV

>comp14497\_c0\_seq1; 316 238 1509 LEN=2290; translated  
MARDAHWRWGRQLARIMIISLHVLLGQVRLSSCFCDANRCSRRQKFDSVQGSLLHRRPR  
HIGHEQLNLGQVLPDDNGDTEETQQGPLDGLSAAATLVPLVITSLFFLPHSAFAIDNLL  
GDSQIIAVNPMNGPDPFRYFLAGGLCASISHGITTPIDVVKTRIQSDPKKYEGLGVVEASK  
FILQEDGSGALLKGLAPTUVVGYGLEGAAKFGLYESLKPIIVGLLDLESPIAYVVASVVA  
GGVASVILCPMERTRIRLVTDRSFSKYNNLLTGIPRLVEESGLASLFYGLPAMLSKQCPYT  
LGKQVTYDAICTALYLIVTTVSDASTKIEVSLVAASCASVVACVLSQPGDVILTETTYKEK  
SGPSASRSFPQVVSKEYNERNGVNGFYSGIARLIQVGGIITSQLLLLYDFIKQSLGLPAT  
GSS

>comp14497\_c0\_seq2; 316 238 1509 LEN=1977; translated  
MARDAHWRWGRQLARIMIISLHVLLGQVRLSSCFCDANRCSRRQKFDSVQGSLLHRRPR  
HIGHEQLNLGQVLPDDNGDTEETQQGPLDGLSAAATLVPLVITSLFFLPHSAFAIDNLL  
GDSQIIAVNPMNGPDPFRYFLAGGLCASISHGITTPIDVVKTRIQSDPKKYEGLGVVEASK  
FILQEDGSGALLKGLAPTUVVGYGLEGAAKFGLYESLKPIIVGLLDLESPIAYVVASVVA  
GGVASVILCPMERTRIRLVTDRSFSKYNNLLTGIPRLVEESGLASLFYGLPAMLSKQCPYT  
LGKQVTYDAICTALYLIVTTVSDASTKIEVSLVAASCASVVACVLSQPGDVILTETTYKEK  
SGPSASRSFPQVVSKEYNERNGVNGFYSGIARLIQVGGIITSQLLLLYDFIKQSLGLPAT  
GSS

>comp14498\_c0\_seq2; 368 188 940 LEN=1042; translated  
MTTSIATKGRQGRWSTPGNSLGRKHAVAMLLLPFLLLLLPDGLFLAGALCLGSSSTHYF  
RASFGHRSGLYRLGSHRARTLERMQVQWRLRKQSLGEQSPTPTMRDRSSSYWFSVGDV  
RVVEDVYATTTTSIATSSNNNDNDNPAPPPTTKVRQNLGRGTGTVVETWEKCDVDPCCC  
AEQVDTDMAVRVALDGPQSREVSCGITKENKTENENETLPGATTASAPVDPFGEDCFYYY  
FAEDELVRLR

>comp14498\_c0\_seq3; 537 1 1053 LEN=1152; translated  
SSNNNDNDDDSDSIVDHTGEASGGAHVTTIVIDQEEQDRRGRILVLSVEIAESQNNVKM  
LSLLLVMICAMRLALFSAITGAAEPIIDPYNTHQANALHNHTGDHPRNGIYPSDFSD  
GTTNAGAYFNDYDYDEGFEPVWETPDYFDLLVSALGFYVGCGLKATVENTSLLATGYA  
LGTILVIGIWNLWNVWEFLRFYEEQSEYEREREALHHHNATEPGBSANASATGTPPD  
FSHGGYNDDDDEKAYPPPLTRDDFVTVAFFITLMLPVVWFLCCVRAFEFRLLLEAEDEA  
AERIRNEYVFREDGTSTSSDLDQDQDGDGHETEFYFGGEHRDRVARAIV

>comp14499\_c0\_seq1; 481 207 1730 LEN=1933; translated  
MATTLFAHASGTRKRLGIVHRVTEKRVSTIPIYASQKQLQWRGRCTATTSCCHSMTGCL  
GSKPRDQKQQRQTHRCYSDQKEIDTNEASISTSSRQFLWGEPTPETRRLARSILSQR  
SIHADDDFGCNECDGNDSDGDKKGSNQQTAVQMHPRAISRITLMEKSHRHHKKKQGDLL  
LTFLLSLSSCSSTSLQONKSGNTTDSAGAEAQPSLLSTETLRIGFAGPPGAGKSSLMEAF  
GMKLLQEDPAMKLAVVICIDPSSNISGGSILGDKTRMTRLSRQTDALVRPSSNSGILGGL  
AAYTDDVRLTLCAGYPLVFVETVGLGQSEIEVAQSVDLVLLIPPSGGDELQGVKKGIV  
EMADILAITKTDELEAAANQTAADYKALRVLHQSHSGSGNGDKWIPPVVRTSSVTEL  
GLEDLWLTILRYQQHLLTTGNWGVRRRKQVKYWMWQQLSRMIQNKMKDDPTLNERANELE  
RKMLDGLLTPRVSAQVLMEEFMFETEK

>comp14500\_c0\_seq1; 1355 106 2636 LEN=2636; translated  
MPSSNGRGGYKKNKNSKTDSAMLENLRGACPPHKKKDLKLFKQLNGDETKIMEKIQQWW  
EEPAPTQEESEAVSKREKPKKRAMGGRGRGGRGDRDQGGRGNGRGGPRGGGGGRGKR  
DGDRDRNRDRNGKQDHKKSFPKTEGGDNAAAAGATATAPQVAEAPVPPVGIPTPVVAPAL  
KGAWGARAKTAASGPTASAKSSAKALAAARDDSAATEVPSTATAAASEASEPAAPAAP  
NAEAAANPALSSMDPGSAVPVSLPPGISSATSTAPALVPSGNVWATKSAHLIQAEPV  
APTAPVIAPEEPTPEEPAAAAATEPAPTPTASEPQQPPTLETGIPSSWGKEESAPEPTPA  
APSSMELPIPTPEPPAEPQAEQPIVEKPVVSEPPAPVSVQPPAPPAPPKVLNMGRWDTG  
GSDDTNDIDFGFGSFGAVSDSNTKDIVQQVSSSNNGSKDQPKPTASSLSASATTATTSV  
SPARPPPGLSIGGMPPMPASAVMVHELETKLEGASLTNNSKNVTEQQQVPTVTHAPPAMG  
QNAVLPTGLTQQNYTQQQQLHQQQHVMPMSMYNYNTGGAYLGGMPVLLGGMPQQQPGKPDQ  
LGHSNSLPQQGLYGTQAPPVSSAVNASRGSATGNSASDNASTPAPSAGVPPGMP  
IPYANPAALHYGAQAAAAHQFYAMGGHQQGIYNYGYGGHQQFGGVQGGFGYPQSMG  
QNLGYGASHNHYDDQGHQGS SHHSGSGGYQNKSGGGGYRGRNAHSNNQYQNYNPQQHG  
GYGGHGGQPYGMGYHGAQGAMSDPYAAMQPQQQQQHEPHGGIHSGFQDDDHNKGRKGR  
GGAX

>comp14501\_c0\_seq1; 715 320 2752 LEN=3237; translated  
MSNNSTSSISLATATTLFFCAFVPRGVVHGLSVPLASDPTNVRNQWDLDLQGSFGTVTI  
PGASLNSESYSRGRFFDNDGDFSYSPLLPIDSDSAVPYSHHYADHDGYEYTTGAYAPSS

FGSRRFPGSSLSMMASSPPTQVWKYNNLFVGGHKKRNGWGNRRSHSRPLASPALSMANYMQ  
NGGPGKGGNNRRRSNGYNNNNYDDYNDNYNDRNNRNNRNRDGYGNNDRLRQQPSSRNNT  
PRGSNRFNVTGGLGSVNGANLSQDGRSLQFQNRSDSNTAGRSGRMMDDSFQFAPDNNR  
FESRPPNDNYARGGYRQDSRDGYWKDPNNYVQNGPGYNSGGNNSYASSSVPSTGFRPIP  
PGDYVSAPAVRGPFFNYEYGRNNVGGGNVPHYDSAYYNNDYSSGNFNGYNTIDGDDEYYSRN  
GNVMDNRRRSGGGRGEAPGGDQYYNLDYRDSNRRMDRGGGLMNYRPNYNQRGGNEYDNQR  
GDEYYDDPYDSSGSFYNEHEGKRVRRFDPVYDRPDGYYPDDITNDSTDPERMIQNRQR  
DGRDVKSGAHLRRYNPEWDSNQGLYNEASLYGNDVKGTRQYSNGYGDDINNRVSPRRRPN  
TQDGSWGNRDQYSIRPNNGQYNDYRDDRFVEDGYDRGPNRFDNRQGNRDERYIDRRGGDY  
YDQYDEYDGNRSRRDSPRRGLGRRDMDGERDYRGEYGGPNIRRDSDMERFRQKDVK  
KNDFYGFETGNTPSKKRIRTRDPRMSNNSQRGNSRQVRGPMQRGREDPRTGRGSTVNG  
SYNGSRNGRINGSGGRDRGLSLDDLNELL

>comp14502\_c1\_seq1; 753 456 2888 LEN=3303; translated  
MAAATATPLPIGSNDDDSQTGIIDSIDSSNESPRTRTKRQKTKTNDADQTNGEKMGCG  
EETEHSNGSSSTTTNNNNNRDGDPLLVIPNDILTSDLRNSDGSPLLELPTKLAYPF  
WYDPHPHIAKWAERLKEELPPYHSEGESGGNEATTTTASIALGKMYGVLVVRVGNTEKET  
NNNGSHVQNDANAPLGYLRAYSGMTMPRQYGGDQTTAALDSKAGFCPLVYNRFRERDSDGF  
SYEEEEELNGYTSEIERLESCGERSQRETLWVEMQTKLRNQLSEAKKKQKSQKRERKER  
RKVFRKLLDGRSGSSICDTLRSMTDKESHRYFLEHSEEYRAMEEELVQESALDQRKFKT  
LKAGVQDELQRIEGLAEHHELEDLKRLRREGSIHLQRRLFHEHYHLKNAHYTDDEIGRE  
NQOQTTSTPLEIFRDTPLRVPPAGTGDCAAIKLFQHAFFGKGYTPVALAEFWWGPSPHNSQ  
SNDFGDGIGNDVARTHGNYPPCCRKCEPILTRHMLIGTRVESDPLTEGLARSWSEKKER  
QKHQQSQGGASPFETTPVAVVIPLEIVFEDEWVVVKNPHDVLVSPGRTVPTSIQTELO  
KRANAGTETDAPRTFPKLVHRLDYSTSGLLLAAKDAETHKQLQAQFIERTVRKRYTALLE  
GELLVDNIKRNKFNNSNAISDADGNTPRSSTIDLPLAGDYLNRPMPQKVERGPEGKPAVT  
RFEIVASNDGSLDTQKPKRTRVHFYPLTGRTHQLRVHASHPEGLGLAIVGDDIYGVR  
DERLCLHAGFLQIVHPHMETLTFEAKDPF

>comp14503\_c0\_seq1; 506 1 1775 LEN=1853; translated  
XLQHFLVSIHSIIHTPKRVGQFVSATSARKAYTGGGRGAGNYGFSRDSRETTLANGRRRIQ  
EVASRLRLGGHYVDAHRLFTIAVEKNFVQGRRTIHVVAACLYISCRQEKSQHMLIDFSD  
ALQVNVYTLGTFCFLKFRLLGLKLAILDALYIYRFAAHLDDLDDKANEVALTALRLVGRM  
KRDWIVAGRRPAGICAAALLIASRAHGFSRHSQDVTRILRVCGMTVSTRMKEFEQTPSAS  
LTLEQFNKVELENEADPPAFTKNRIMEARARAIQDNNIELLTSGALDDPMKSKRHSSKWR  
ETASSEKTEAFEKLYKSLEKEMKNKNEKSEDDDGNEFEEDDENDDRKPKGKDMQD  
CGQKEDGKSEQPGEDDELKSSTKSSETEKKNPDDSTAKNEENQIVPSTNIVQSKWEKAY  
PKNSYGKKIILPDHATPEERLPPTQPVETGLDISVWRKDMQPIMIDDIESMFRTPTEVAQ  
KEAIFNKINQDYIILEAQKEKNRAEAEQAIDNADKDLIEQAQGMERYRKRKGRSKDGTTE  
EALLEVVANRKISRKINYDAMSSIFDDGSFSGGTALEDPFASKENPGADYV

>comp14503\_c0\_seq4; 96 656 1222 LEN=1384; translated  
MSELTCPNCGSKNIESQGAAGNCVCTECGVIVEENAIVSHMEFVEGAGGSSSMVGQFVSA  
TSRKAYTGGGRGAGNYGFSRDSRETTLANGRRRIQEVASRLRLGGHYVDAHRLFTIAVE  
KNFVQGRRTIHVVAACLYISCRQEKSQHMLIDFSDALQVNVYTLGTFCFLKFRLLGLKLA  
ILDPALCK

>comp14503\_c0\_seq5; 578 656 2536 LEN=2614; translated  
MSELTCPNCGSKNIESQGAAGNCVCTECGVIVEENAIVSHMEFVEGAGGSSSMVGQFVSA  
TSRKAYTGGGRGAGNYGFSRDSRETTLANGRRRIQEVASRLRLGGHYVDAHRLFTIAVE  
KNFVQGRRTIHVVAACLYISCRQEKSQHMLIDFSDALQVNVYTLGTFCFLKFRLLGLKLA  
ILDPALYIYRFAAHLDDLDDKANEVALTALRLVGRMKRDWIVAGRRPAGICAAALLIASRA  
HGFSRHSQDVTRILRVCGMTVSTRMKEFEQTPSASLTLEQFNKVELENEADPPAFTKNRI  
MEARARAIQDNNIELLTSGALDDPMKSKRHSSKWRRETASSEKTEAFEKLYKSLEKEMKNK  
KNEKSEDDDGNEFEEDDENDDRKPKGKDMQDCGQKEDGKSEQPGEDDELKSSTKS  
SETEKKNPDDSTAKNEENQIVPSTNIVQSKWEKAYPKNSYGKKIILPDHATPEERLPPTQ  
PVEGTLDISVWRKDMQPIMIDDIESMFRTPTEVAQKEAIFNKINQDYIILEAQKEKNRAE  
AEQAIDNADKDLIEQAQGMERYRKRKGRSKDGTTEALLEVVANRKISRKINYDAMSSIF  
DDGSFSGGTALEDPFASKENPGADYV

>comp14504\_c0\_seq1; 412 343 1595 LEN=2285; minus strand; translated  
MRSVSLFVALAFVALGTTVGFTQYRRVEFDGARKTASAALNRRLVACAMSSLDYYSIRN  
TTLEDEREALKSRMPPPVNEDMTKFQVEFRELLEGILYTPPEELSTVLNPRMRAILEGITA  
SYEFVYHAFEIYEDYIPLRLAGRVVYRELKRVVDESKNYKESQINAAMEGTGMPRSE  
VEACWSTFAEIVSDRRLPLEDLESYVGTMTLKYVLDGSGESIGNRAREEGGVSFEELLVC

LNNYRIRYSGNDGEETNATAFMGKPATGNLLQQUALNPSGDAAAQARKGHELSPKRQKYNQ  
KYDDMLVQVFSKWKPLIPSGEGRRLQILKGCDFVSGENPAVVEALRIIYVDYGALRLSGDWI  
FKVVSALMGXDRAPAQPAKKEAAAATVARTAALAAGICGSSIRASRLFLYGALGVDVR  
>comp14505\_c0\_seq1; 645 216 2090 LEN=2182; translated  
MGGKLNNTNHFPSRLHDMLEAEAKGHSHKVVSWTQDGKAFKIHSEKMPVILKTYFRQTK  
YKSLLRQLQGYNFRVTHGINKGEVSHPLFVRGRKSETVKMKRSPKTLKESLKSSTPKV  
SSSDVVIIPTRIGSIKAENSISEAIPSSLRNSTSQYKTKSVIGVQPSTIKAISGFQPPPTAP  
MTKPSQVEIQFQMGQNERQPQQKSLSSNKDHMSIYNTAGHQHCYQQGLKQGLDAALRVE  
IGCTLSTSSSTDSKQTNASSIKSFSLKRNASLQQEKHHLAQGSIAPNFHTQYFKRQRNH  
ERVERQNSQKIKFERSHHNASFPISMMQHLYRKQKQESQILEGKKMQFQNYQADQREQFR  
EVRKMTQLPSQVPSSSSFASQPQKHQIFQQGKPFDPVSGALDLDISLTTTTTTTTTFHSNG  
NSSVETQICKEFAFHPELEPTPFRTPHNDSTCNITIIINNSKNNVLSNPTGKVTLGLTS  
GVSDIDIGIAQAFDDEPVLNPTIAFDSVRDGEESKEVDSWTIAVENIVFGGKSDCVKEP  
ELFQQEADSLFLNNNNNSHCQPILQQQNQEMMLMDHKQRNIYNINDGGRNPLPQHLISK  
QFPLPILSTPMLRDNRLIHPHNI  
>comp14506\_c0\_seq1; 1054 232 3490 LEN=3975; translated  
MNGRQQFLPLARRLAAFGASGRTVNSYPRRLARRQILAVSGVDRSISVSRRKTATEPSFFR  
KEQCRYYGARDENDDESHDAIEQKTAFLRALEGKNEKRNKRSGHRNTTTVNRNPGDMK  
RAPENRRRNGDHNNYSRATTSSGSSKRLTLDEFFSDLAKQSTEESSNSKFGTKRISRTRP  
YGKGEQQQRKNRRRDQQRNSNNNNNRMQSRPTMREAPAPGLGSFFDEVDALMERNQKEKE  
EIKEKGWTKASMPSETRPSIADIISPLPPISRANAKDGAATDGEDRVSFHPFTQSGDE  
SFDQYNELLEEMEGPKFLVRLQKKKTINDDNNEERNRQIQQIVEWLRSEVSVIETRLP  
TLSNALKGEDEIVEATHAENGLAIDEKRNITNATIADVADR SARFREELSDQKERFTT  
EMGWTGQYDVASGALVALGGLCAKRCMASPLDVAWSKLEMGYPMRNKDVLHNYLYVSS  
TFSLPKRRNISTNNKATPNLGFVGEERIENDYLSSEGEDGSSLSALDLLNGTSTLPSNV  
DGDEEEIEEDGIDVSAEVALCHDFHFHEPTEQSIGIHVRRLVHLGKANEAEERLLEATMVSL  
TLELQVHRSNFQSLSSPFSNKLNRIFPYRTFSLSCMXPHGSLSDLKKSDDLRLRTYAPI  
YQSYLDQGDIAFAFKLVKMSDAENVLLQTETVYVQLIAGIAENGYFRLGAEIEISDIENLH  
YSVKSGPELNFELASELAEHSVEITSASTKRLYNAFQRFKGHDSRTNLKQLHLLLESRLV  
ENDLAKPDELIASRVRIDETTGKCARSGSQLRLINLDSAQKKKFRDGLLYLVSSSYQERH  
RNARKVDVAEKLKRFQDWLQKKDGKSFTAIIDGPNIAAYMQNFQQGTFNYHQIKFVADAL  
ENMGEKILVVLPPKTYTDSFTIQVGGRTVKQTLSEKQIRDDLKSKGKACVVPVGSLLD  
YYWMFASVSMDEEFVPPNNAEGRWPGNRPMLISNDKLRDHKMSLLEPRLFRRWYSNLFVN  
FTFSAFVNDECTDREIGFRTADFYREIQGNSDENGTTWHFPVTDWDENESMCIRIPTKK  
GAAEY  
>comp14506\_c0\_seq2; 1168 232 3339 LEN=3824; translated  
MNGRQQFLPLARRLAAFGASGRTVNSYPRRLARRQILAVSGVDRSISVSRRKTATEPSFFR  
KEQCRYYGARDENDDESHDAIEQKTAFLRALEGKNEKRNKRSGHRNTTTVNRNPGDMK  
RAPENRRRNGDHNNYSRATTSSGSSKRLTLDEFFSDLAKQSTEESSNSKFGTKRISRTRP  
YGKGEQQQRKNRRRDQQRNSNNNNNRMQSRPTMREAPAPGLGSFFDEVDALMERNQKEKE  
EIKEKGWTKASMPSETRPSIADIISPLPPISRANAKDGAATDGEDRVSFHPFTQSGDE  
SFDQYNELLEEMEGPKFLVRLQKKKTINDDNNEERNRQIQQIVEWLRSEVSVIETRLP  
TLSNALKGEDEIVEATHAENGLAIDEKRNITNATIADVADR SARFREELSDQKERFTT  
EMGWTGQYDVASGALVALGGLCAKRCMASPLDVAWSKLEMGYPMRNKDVLHNYLYVSS  
TFSLPKRRNISTNNKATPNLGFVGEERIENDYLSSEGEDGSSLSALDLLNGTSTLPSNV  
DGDEEEIEEDGIDVSAEVALCHDFHFHEPTEQSIGIHVRRLVHLGKANEAEERLLEATMKSD  
DLRLRTYAPIYQSYLDQGDIAFAFKLVKMSDAENVLLQTETVYVQLIAGIAENGYFRLGA  
EEISDIENLHYSVKSGPELNFELASELAEHSVEITSASTKRLYNAFQRFKGHDSRTNLK  
QLHLLLESRLVENDLAKPDELIASRVRIDETTGKCARSGSQLRLINLDSAQKKKFRDGLLY  
LVSSSYQERHRNARKVDVAEKLKRFQDWLQKKDGKSFTAIIDGPNIAAYMQNFQQGTFNY  
HQIKFVADALENMGEKILVVLPPKTYTDSFTIQVGGRTVKQTLSEKQIRDDLKSKGKA  
CVVPVGSLLDYYWMFASVSMDEEFVPPNNAEGRWPGNRPMLISNDKLRDHKMSLLEPRLF  
RRWYSNLFVNFTFSAFVNDECTDREIGFRTADFYREIQGNSDENGTTWHFPVTDWDENE  
SMCIRIPTKKGAAEY  
>comp14507\_c0\_seq2; 458 169 2290 LEN=2290; translated  
MVFADPEPNSDSFLTDELLQEEVEYGRFQQRSSRGRGILGLGPDQDDGTHGNNDPLPRS  
RQSPRRSKHKQRSQYQEDGLPRNHKKGDQFYEEVGPDEEDYRERAHCDTPLRAQHD  
QYQYHYNPHLPQDGTSNNENINVISRSDDYFDSNEDFSVQETTKNLVIGEEMLGQKLCW  
RSNPSQSLSDWKLNVFNSTKTFETYHVHRVVLALGPRRCEYFQDVFRQAEAGTSASSAS  
KITRVPLIAESCKLVGSFLDYVYGNQFEITNENALGMCYLADIFLNHSLWDLATDFIEG

DLQTVAGRENLGQYYTDSVYYDQDEFDLHILSVCSLHLLPMLLEEGISCTNLLEEITPTHM  
LQVLGEIEQGDQLSKPTTSLYLTRLITEYCCLHRHELIVTFSHFMSRVKSLDYSSALTL  
LETSLEYDLGTFATENDDDENRKGSISSLILFQRQCIATLSEWEHLVGHNEHRVTRIMR  
VLALREEHQSMMLVDWFQTTLVQASKLLVSQQESETARQQVQPLTDR CETMANDLEAAQK  
ETATAERNHNTTKSEMKTQISSWMRKNEATNQORRAEQQLEHERLRWEIERQQWKHEKS  
RLKRELRLRQGS AHQYSSNRDNYDWEHSSSHSLNRHHQHQQYYHDDENRGREAITTST  
SDSGHQHDRPFVIPPND CDSNNINDDSR SYVT DSSSISNSLVDVPGGAX  
>comp14507\_c0\_seq3; 311 169 1243 LEN=1243; translated  
MVFGADPEPN SDSL TDELLQEVEYGRFQQRSSRGRGILGLGPDQDDGTHGNNDPLPRS  
RQSPRRSKHKQORSQYQEDGLPRNHKKGDQFYEEVGP DDEEDYRERAHCDTPLRAQHD  
QYQYHYNPHLPQDGTSNNENINVISRSDDYFDSNEDFSVQETTKNLVIGEEMLGQKLCW  
RSNPSQSLSDWKLNVFNRSTKTFETYHVHRVVLALGPRRCEYFQDVFRQAEAGTSASSAS  
KITRVPLIAESCKLVGSFLDYVYGNDQFEITNENALGMCYLADIFLNHSLWDLATDFIEG  
DLQTVAGRENLGQYYTDSVYYDQDEFDLHILSVCSLHLLPMLLEEGISCTNLLEEITPTX  
>comp14508\_c0\_seq1; 1177 1 4071 LEN=4104; translated  
AGIDIHSEKAAKPFESTNPFSESEDEEDASPPRRINPFDDVGD AQDFKMSPGPTPSWLDE  
SESCDKEGMSASKESATNASIPENPMPWEVSSEKDSGAEINVGETGSSMFRSMVPKQNLK  
EESKLETETSDHGSRKNEDENSQRHFFDGYDEHPGEDQRREHGGFITFLTTSRWSETRTL  
FVPFVPLRVSHISKWNMELLWVIGEFQSLLRMDSTGPVPI SIRDDLIVRRGNEEADLL  
QAATGSNLTELAGDFEFENELLPVS IKKFQILPVDQAVTSSIPRLLCASSTGINPPCIL  
ELYTDPGSHSDPLNSFRDGSEAFQQPLHRSHNQPALVLLKTLGYFTPRGTAVLRHAPSH  
VAKITISQSEMASNGDMSCVGDPIIDEASIWAEQGGWSLLGTNRCKYFICWEGSTLLQG  
AYVNEFN CM DLSAAKNISSADILPFSLTPKVRVQDVASSYFINGNDEQEAFKNPQRF S  
STACQM QVIDEFQLYQSNEAVGGPIDRAFFSMKGSIGRTKQLRRSTISSRRQHSEHLLQQ  
CSSWTQLEETLDDRIRLERQAPVLCRRGTAGSPHNVLSLRQLVVDNGTSSPFQQVLSWL  
AKRKNFFVAAGIALDLLQSADSLYHLWKHAEMINEEDEETKLLGLLDGISSVRLLDNYK  
NTNECKHSVTATHLSEMTVGC FIKGGVSMANTLVQFLETNKLYD PARVSLMLSLTTINLF  
SNDSTTRFSDSNQKEFNFD ELLWPVECLLAIGTEREYLHEVLSLLNDTIPDELRRHQRE  
EQEEGKEQIVWTPNMALTKKLIKMMLEADPVAIDILMSFVDDQSQVHFVQSLDHNTRLAL  
SLMEIESSFPFLRQPEVRSWAREELDSLNRKSNLPTIWLQELTLACL RNAHCDLDGLKI  
SRSTDEDKALMSSSDTISERTRVNDNLCSKLATSDTEETSGSSRTDDFVETMNF EIERIR  
NSLLASNEAMCSLDFDLVIPTLLSLENHGFWLHPSTSTAILET P SSKLESSTCTVMNKD  
IFTSTQALMNAACYLAGRASVSGSRAAWTSHVDSVDLNSGNEPFLFAAFDSKSKAMKQCFI  
ANNIVAGAYLVGGTNGFILHICDVLNRRRTGISIPDAESYLVSDRDLQLLEESRIDDIAD  
KKPSSCFEVTSGHQKLLMLLDEHVLRI RTFGDFFAHNRGNVDPVFAARSILRAWLLMSV  
GEKAAASNWLGEWLGDR LGIRCDRCRVPSPLVSPKASTPRSKISANGSAFEDADTFTSNR  
DDR GKHS DAANQDRYEEFGSASQHG FACASLARSLLWPNDLPTTAMSKQKDGPPPTNGAD  
ALPLADAMQFETKLLLELCQSC LGLVESVPPSMVEM  
>comp14508\_c0\_seq2; 883 379 2679 LEN=2679; translated  
MSEFSDVRKRIAAIEEKL RDGPKPETMEEQQQGGHEHEHEHEQVQLFNTELEPEPEPLAK  
DRIDASPEPIDDEQNQQQKQQQHETENDTEPRRNKHKVWPQLEWKNPRWTSSSPLGEPQ  
TNE SADNGDDSTIVGLTTAQLAPEETSYILRYSQNLEEDSDSHGPRTDCHYLLSVTLLGC  
CSSASSTAPALASEVSI EVLEV PSSDSEEGGATDGATPTTSVLRSKQLRWPE SIFDDAGA  
ATTSVSSHTEFDRGA AKKAKPKPKNFLASVFLPLIGIDEEDDHETAGHPQGQWPRPSP T  
NGIVSAA LCRRPLDDGPTQMATKD VVDLMSFGGSGGMDPIGVAAGASGGGNERTGLPIER  
EREGSLDEHGAGSSTDAHGVQASTGGELSVACVSNKGEVFVYDP IKLLLGVEDDSP L S D S  
RPNLNSLREAKRDLEEATSFFFGREL FQNLQESWKPLAEPSTRIHLSL FQHDRHQHREE  
KTNKTKTTTTNNDISTTSSLGSEAKNSRDNTTTEHLLHTNQELSDLAAQSGV GSCADSTS  
DASSAVSSALD TVRTLASEWQSGIDDNLSMLPYLLNPLVEPATLRDRTICNSPLAIRVA  
GSSVYVIGSGRKYARKDAEDGCNRRGFTKRRSRHRSNKSSDSCSQTSPVPPRDRSVDND  
DVSLEGA AERSLSHSIEPNSSGAASKPKGGPETAEQRKDAASQSPMTVGYREDTDLPGIS  
VTNL PDDGKNKAFDGAETATEDAI ESSSAEQDEHKPYKPPYEATNPF  
>comp14509\_c0\_seq1; 457 91 2109 LEN=2212; translated  
MSNLPRSGPESHGAGPANR SSSSRSSIRCDQECYRWSRVPYSSGDGKYGINDKDEL CIP  
PPRSGAASVVLNDKLYVFGGFGGAGRLDDFY SFD FATSSWEEIKPAGDEKPGCRENNGV  
VISSSR TII LFGGYNGRRWLNDLWSFDITTKRWT CIQESSDSRRADSIHETSAGLGRPT  
AADGSLSGNDAIANMALTAGGHNSTQSRRSISGKR PCCRFGYVSVTHNNKFIVWGGFE GS  
DWLNDMYIFDFESL TWSEIQQHGTLP SRRSCPAWAKDEKFIY LHGGYDGN ERKDXVSTTE  
TTVKD VLI IKTNQGDLEVVLDQKPPISFFRFCLDTQTWTQMNNKGSKPSPRYFHSCVLYE  
NKLITFGGFGSKRLSDMHTYDFKSNYWSEVDLSNDNVPSGRSSSLVAQTYKNYLYL FAGY



NGTSMNDMYKCRCLKPIAVPPSSIADDFRRLMNDSDTADVCFLEIGKEIHGHRAVLGVR  
QYFQAMFFNGHMSESSNNHVP I EIPDISYQTF LKVVVEFLYTDTVSDVSPELAINLLIASE  
LFMLERLKAKCED IIRKEINLENATSVLLTGHQH NAPGLKDIALEFITHNLNQKSIQIGL  
DELKTEPDLLVDI IKLTSMQLTSFTYQEESRH IPQLSNP GPQGPQDFLQWQDQRGNHSL  
GGPFGIGRDQDA

>comp14509\_c0\_seq2; 521 91 2013 LEN=2116; translated  
MSNLPRSGPESHGAGPANRSSNSSRSSIRCDQECYRWSRVPYSSGDGKYGINDKDEL  
CIP PPRSGAASVVLNDKLYVFGGFGGAGRLDDFY SFD FATSSWEEIKPAGDEKPGCRE  
NNGV VISSSSRTI IILFGGYNGRRWLN DLW SFDITTKRWT CIQESSDSRRADSIHETS  
AGLGRPT AADGSLSGNDAIANMALTAGGHNSTQSRRSISGKR PCCRF GYVSVTHNNKF  
IVWGGFE GS DWLNDMYIFDFESL TWSEIQQHGTLP SRRSCPAWAKDEKFIYLHGGYD  
GNERKDDFFR FC LDTQTWTQMNNK GSKSPRYFHS CVLYENKLITFGGFSGSKRLSDMHTY  
DFKS NYWSEVD LSNDNVPSGRSSLVAQTYKNYLYLFAGYNGTSMNDMYKCRCLKPIAV  
PPSSIADDFRRLMNDSDTADVCFLEIGKEIHGHRAVLGVR SQYFQAMFFNGHMSESS  
NNHVP I EIPDISYQTF LKVVVEFLYTDTVSDVSPELAINLLIASELFMLERLKAK  
CED IIRKEINLENATSVLLTGHQH NAPGLKDIALEFITHNLNQKSIQIGLDELKTEP  
DLLVDI IKLTSMQLTSFTYQEESRH IPQLSNP GPQGPQDFLQWQDQRGNHSLGGP  
FGIGRDQDA

>comp14510\_c0\_seq1; 432 198 1628 LEN=1851; translated  
MEPDVRRYQGVLPNEICDQLIELGEKEGFLEFDSIDAEQHSYKTNQV SQAIDVVD  
EDGT VNYPEMFALLEPYIPKMAELIVNQRDEQIHRKVVGEMTQQTPSDDSNDFL  
PKL GWIFYR KYAPDSKRNSLI PHFDSNLHTINIALNDDFEGGGVFYIRPAYARNPD  
WRDPKRHNDLYRG IDGDGVPIEDHQLTYRWNRLKHENTSDVVFPLLNKGDAVIHNY  
TVWHAVAPLTKGIRY SMVLF FDMHNPLLPEYSYDDDEYDGDHESQNEGQDDDDN  
GYDSGIEEDHSEDNIYRIQ ITLRHGLKECDPATGTVP MKDNVHIVLVNRTELE  
RQKGEQTEHDV DKIMVGKISDGDGE SSSQNDLFAVVATNLRPGNFYRNLSV  
PGEIYRAIRSKRLTTTEGSNIQNKEHGGSEVFE VLDEFRTIGKRYEYANSEEA  
SECKAAHLASSVGT VGHSPERDSDAKQGSTNEL

>comp14511\_c0\_seq1; 310 524 1489 LEN=1614; translated  
MYGITYGT SVRMAHVASGKGYVRAKTYQSEAQAFGISPMRPRPITRALSPFVQSS  
WAGCS QRAGSIGGERLAVRRHNNNSKKYSATTKRSMSSSAQPVIEIREDFLAPQ  
HARSYFEV VSE DFRV VHPNLRFLSRQELGGDRNVATRAYYEGGLAELQEQEILAE  
ENEIHHDDLNVFIQ SQHRSVYVEAPLLKEQSEFVIGLGGNTAAGVDNNE DCILEL  
RKYHLKLG YDTPNFDLY GAGLP SKLHASGTDTKTSLVTLTYSEVGR LNEVIEV  
WRHNGGIRGMERSRVAARTAH EWR NAIASIADLAIEFRSTIHRPVW

>comp14511\_c0\_seq2; 310 667 1632 LEN=1757; translated  
MYGITYGT SVRMAHVASGKGYVRAKTYQSEAQAFGISPMRPRPITRALSPFVQSS  
WAGCS QRAGSIGGERLAVRRHNNNSKKYSATTKRSMSSSAQPVIEIREDFLAPQ  
HARSYFEV VSE DFRV VHPNLRFLSRQELGGDRNVATRAYYEGGLAELQEQEILAE  
ENEIHHDDLNVFIQ SQHRSVYVEAPLLKEQSEFVIGLGGNTAAGVDNNE DCILEL  
RKYHLKLG YDTPNFDLY GAGLP SKLHASGTDTKTSLVTLTYSEVGR LNEVIEV  
WRHNGGIRGMERSRVAARTAH EWR NAIASIADLAIEFRSTIHRPVW

>comp14512\_c0\_seq1; 876 92 3814 LEN=3972; translated  
MPKPKDARVWNE DLIKALEARYQLALREGKRNALSWRVGRDKIQAVRKDIYQFR  
TGTIAN MPRGLTKTVERLCEDIIRGIKNVFPDGHVPTNGGCNYTNSSAIQKDLR  
PDSKDDVFI SPV SPRISRSSSRANTNNHCDDSNPFHNYNYMKMKIRGGAFAILMA  
FHYSRTEVLRKNQICH EAQRFCDEMEANFHAGRPYGAWASMKTLKQH QFVTEQ  
GYTTFTPNGFRDRPHTYSLTKN GELFNEALFANRPEAMEAAIQAIGALGVPKAR  
VTAGHTRAVNGSRGIQFREVSHSGKDSI SAELPFATGKNCTNKNADRVQLE  
DWIVTANVGD TKEFPV GKDRRKHLHDLCDLSLQMRQPG LLLTHGSSGSSRG  
RTLCLVSKPSRALQSVASSIMPYPYAGKSSMSLDPTISSSAF SWP GRPVSFGE  
SPAHLSSPIRSARENAALAAMKREAEARENI ELKKAIAESMKT VNTTHNTRK  
TQNVLF DGKNCRAS FHNQETIKAEDNVSQNTREPSRQESRKRSTVNMAIFSVES  
SDDEH TLLLPQKRRKILLQEKRELTEKEICFIDTSDGSMIEPPAVRKNNQSWK  
LATKPRAVMS KKL SAPP SGQSIDLCESSDDDLHATEVCKTKETC VEP IELP  
RTDKKGP IYLSNGRLMDEE DREVEIVDDSEPLPMGVLTRTKNDDQLTVVIDN  
RERNRNATPRTL RMELTRHLS SSGLSA VWP PSLPTAQVEEARLDWGD FQYKI  
QSGNSQPRRLGVSV ERKRVNDLVQRSSDGDHLAQL FRMRQHCSLSILLIEN  
DTRVTS SITPYNSQNSDRFDPLDSIITCEDDVFRMFGRIMLSGN GIKFIQSK  
DKQASLRAVGALGLIALFASENYRKEIDHQLNGKYRKSSFMCHGFKALRDKL  
IQAGIPWRIAKRIASVVGSDQELKSLYGCCSEKAKSDLLSHLIVNGTDEDQGD  
LKSSAT GWSNAIYRIVTSPVLPKRKLSGQAALLLHKELVQDHGIYLS TLYQD  
HSHEETLELLLDN PVACPKSNCTSRRHVIINLSGEQARKYFNPRLHERAFYKLS  
IEPDCKARDYSVPIIMRAV NEDYSLSSKALLVFELEGSDMIDLVRDNWSTK  
KRND FVGLVKRIAHLVDNICYGSGRFVT

TGASGDKRILLCLQSALDANAKRSGYATETRILIDLLVAELLLCYNITIIQATCKKME  
DRKNI IHQLALACFHFGFLIQENNGINVEGQSDSHHFGPN  
>comp14513\_c0\_seq1; 716 237 2891 LEN=3390; translated  
MNPFLGSEPSNGGEKEELSSFTKMSSSDLRTKSKKSKKSKRNKSKKSKKDRIRSKSTDDIT  
PRKSRKKQEQTQTPRQHSQARSRRANPMSSKKHRADLPTLERCLYGAKRRSPFIPDDC  
DASGRLDSDGTDSDHIDMAMLRKICSHGGGPIPEESEETCDANNRSDDDPSSNAPQKGFQ  
RGVVWRVLLLEQLSDGIDITSSWPWEVPLQRKLYRDLVNQYLGDANDPGKNLKDHRHLESDR  
RSSRHDNNNRDNREEQSKVETPQLIREEIEDNDDEPSECSSIGDEFDLAPLSSMFLSPK  
AATVSNDDDEGETETNNAVNSSTRWSESKSLDSAHIRVTEDIYDGFSPNSKYREMWRRS  
ITLNKGHSAAGIMNHLKIPEELYCDDSDDEGEFAENETLNDSTTTTSSISIDNKKDRLEFR  
YCRDAKLLLEIRKDVVRTHPQLRFFQEPHNLGIRRHAAIERVLFVWAKLNGNLYVQGMN  
EIVGTIYYVLARDRCTS SVSGNKRHCWADHAEEDTYHLFHGLMTNMDIRDFVADLDHDC  
TVGLHARIQKIEDLLALHDPEVHHHLTKYLGLSSSYFALRWLTTLLSREFPLADTIRLWD  
GMFASTHKENFLRYVCASVMMAIRDRLFRGDFGTCKMLLQNYPSGDISMDELLESRALW  
IYETQISLARQKGGVSLHHALSVLPPPGIIMAFGRPGRGQEASTASSGSSWLPNQNSTT  
DAVGEMTLGAAAVANRMMGRAKRMWNYGWNNGTTEGDKQDKANHKNSSGTENEGKNSNTT  
KTSSGASEENLWDLIDSIIDGDGNVDGTTSGTGATHQGA VAPGNRNPGYQEPSYSLLGW  
RGSNETNNGGNNPSGNQNRNNNTDNSNSNGRFSRIRRSIA  
>comp14514\_c0\_seq1; 1121 102 2885 LEN=3830; translated  
MGQASRRRKGKGGSRSSSTPTPTSTTHGETAEDNDETIKVGKDSNETKRRHGGESEIDDA  
SLMVLTSKRRGIYECYCHSDISQQPRIRCAVCSDFDLCLCFTTSDHGAMMARIKAN  
QTQTELNKDGIESSIMDVAISSAAAHHEHDHGYRVC DSTRYP I FPTGRIAAPWSVPRGK  
KGAEEDVKEEGKNDEMAVDGDEKKSPPVGSKNDIATIPPRKNISMELSLSDDPKTIWT  
AEEDLRLINAIATYGLGNWVDIAEAIGNGSVGKTPKRCMERYLDDYLGRYGHILPQWTV  
ADNTTDDL SAGTDSNPKKTQIEGTSKDLVSYDAASTENNHASITDGGVVRVQDSNKG  
NDKNEVQGTGNEQTQPDQRKKNQGDQAAAALPSKAIAPSSVSNISTIKVIADDEDVRT  
SKRRSAANISSSSSRKKLKVVPQTQSVPGFEKVVWPKPYLPSISGAVLGKEVARDLSCKAE  
LAFVKATLGAPSKTEADKIRQTWIDTKLGRGTGAPT VLP RPHDAVHLLGSELAGFMPRRG  
DFDVEWENDAEALADMEFIRGDKPEDKELKLVQIYCEKLDEREKRKFFVLRHLYDY  
RTYIQDDLKLPVDERDLIHRMRLFERRFHTPDEHKQFITDILKAKRLRKEIAKLQTYRRIG  
IRSLAEAEAMYELDKDRRQFHKKLEMDAKAKAAALANAKSGTKGGGLSSNASSTGTSRTPS  
QFKGSESLWKQYQPNDRKRRSNGRSGTFLDSIPSKSSEGTIMTNADGTKEGKKEEKQE  
ENASTIDEKKSEIAVEEAVAHEPNLVKDNAAVANEQDDPMEVEVLEKKEFDMSTARCKDL  
LSRKELKLCRRLKVYPVQYLKIKKALIHESMKGGLLNKDSNSGKTLIMIDVERRGNIIE  
EFLVRAGWINRKLGDAAAMRVVTPQPAL  
>comp14515\_c0\_seq1; 276 58 1314 LEN=2399; translated  
MKPRSKRNRKRPRSEVNRLEQDPVYETSVRKLELDGKPI SAPQKWL RVIKPYPYTYSTFA  
KGRWEGRTILDVYSTEFSGYPSYERAIDQGRILVSDKKVSATYLIKGGDVLCHTVHRH  
EPGVAVHSNVDPHVTIINETSELVIVEKPGTMIHPCCGYNMQSLMNILEKYYSKYKDG  
ISDVKKLYTIHRLDRLTSGLVILGKTSSVAQSYSKCIMNRSCQKVYLARVAGKFPLKYPW  
KKLSSKKPLHGEISLDGEWKLERSDYRDKGDIREQQNPSSSGKDSNDASRLRKLHALAC  
WIEDGNQASIFENDCDSQKNMLDQVFRCRHSVDEWLQSIDSKIEEEKQREKKIWFHLACP  
TRIAKHKDGVC EAGSFDHLDLDDLYKKT V KPAHSSFGVVSYDEMTDSTLLVVRTIRQCNE  
>comp14515\_c0\_seq2; 178 1812 2294 LEN=2748; translated  
MWAYNPDGKQACKIAQDRLSI IKSAGDAEAQSLTGISINGKKMCVTVDKPPHEGTRTSAI  
DVPATESEVQDEIARAVRQNDSEIHSFIERTCVWCARSRSVPSEDRSVLEFLIRSPGIWL  
HALQYTF'TTNNDSNDDDEGKRKVVQSFRTQLPDWHDISVN  
>comp14515\_c0\_seq3; 185 58 1053 LEN=2492; translated  
MKPRSKRNRKRPRSEVNRLEQDPVYETSVRKLELDGKPI SAPQKWL RVIKPYPYTYSTFA  
KGRWEGRTILDVYSTEFSGYPSYERAIDQGRILVSDKKVSATYLIKGGDVLCHTVHRH  
EPGVAVHSNVDPHVTIINETSELVIVEKPGTMIHPCCGYNMQSLMNILEKYYSKYKDG  
ISDVKKLYTIHRLDRLTSGLVILGKTSSVAQSYSKCIMNRSCQKVYLARVAGKFPLKYPW  
KKLSSKKPLHGEISLDGEWKLERSDYRDKGDIREQQNPSSSGKDSNDASRLRKLHALAC  
WIEDGNQASIFENDCDSQKNMLDQVFRCHR  
>comp14515\_c0\_seq4; 94 58 549 LEN=2565; translated  
MKPRSKRNRKRPRSEVNRLEQDPVYETSVRKLELDGKPI SAPQKWL RVIKPYPYTYSTFA  
KGRWEGRTILDVYSTEFSGYPSYERAIDQGRILVSDKKVSATYLIKGGDVLCHTVHRH  
EPGVAVHSNVDPHVTIINETSELVIVEKPGTMSKYKLPNRT  
>comp14515\_c0\_seq5; 263 58 1964 LEN=2418; translated  
MKPRSKRNRKRPRSEVNRLEQDPVYETSVRKLELDGKPI SAPQKWL RVIKEVAQLGSTLI

LGRRLTNIVPSHLTGFYAIQLKAIPTYSTFAKGRWEGRTILDVYSTEFSGSYPKSYYER  
AIDQGRILVSDKKVSATYLIKGGDVLCHTVHRHEPGVAVHSNVDPHVTIINETSELVIVE  
KPGTMP IHPCGGYNMQSLMNILEKYYKSKYKDGISDVKKLYTIHRLDRLTSGLVILGKTS  
SVAQSYSK CIMNRSCQKVYLARVAGKFP LKYPWKKLSSKKPLHGEISLDGEWKLEERSDYR  
DKGDIREQQNPSSSGKDSSNDASRLRKLHALACWIEDGNQASIFENDCDSQKNMLDQVFR  
CRHSVDEWLQSIDSKIEEEKQREKKIWFHLACPTRIAKHKDGVCEAGSFDHLDDDLYKKT  
VKPAHSSFGVVSYDEMTDSTLLVCRPYTGRTHQLRLHLQYLQHSIANDPNYGGDMWYANP  
DGKQACKIAQDRLSI IKSAGDAEAQSLTGISINGKKMCVTVDKPPHEGTRTSAIDVPATE  
SEVQDEIARAVRQNDESIHSFIERTCVWCARSRSVPSSEDRSVLEFLIRSPGIWLHALQYT  
FTTNNDSDDDDEGKRKVVQSFRTQLPDWHDISVN

>comp14515\_c0\_seq6; 94 58 549 LEN=2647; translated  
MKPRSKRNRKRPRSEVNRLEQDPVYETSVRKLELDGKPI SAPQKWL RVIKPYPYTYSTFA  
KGRWEGRTILDVYSTEFSGSYPKSYYERAIDQGRILVSDKKVSATYLIKGGDVLCHTVHRH  
EPGVAVHSNVDPHVTIINETSELVIVEKPGTMP SKYKLPNRT

>comp14515\_c0\_seq7; 121 58 1154 LEN=2511; translated  
MKPRSKRNRKRPRSEVNRLEQDPVYETSVRKLELDGKPI SAPQKWL RVIKEVAQLGSTLI  
LGRRLTNIVPSHLTGFYAIQLKAIPTYSTFAKGRWEGRTILDVYSTEFSGSYPKSYYER  
AIDQGRILVSDKKVSATYLIKGGDVLCHTVHRHEPGVAVHSNVDPHVTIINETSELVIVE  
KPGTMP IHPCGGYNMQSLMNILEKYYKSKYKDGISDVKKLYTIHRLDRLTSGLVILGKTS  
SVAQSYSK CIMNRSCQKVYLARVAGKFP LKYPWKKLSSKKPLHGEISLDGEWKLEERSDYR  
DKGDIREQQNPSSSGKDSSNDASRLRKLHALACWIEDGNQASIFENDCDSQKNMLDQVFR  
CRHR

>comp14515\_c0\_seq8; 301 696 2018 LEN=2472; translated  
MQSLMNILEKYYKSKYKDGISDVKKLYTIHRLDRLTSGLVILGKTSSVAQSYSK CIMNRS  
CQKVYLARVAGKFP LKYPWKKLSSKKPLHGEISLDGEWKLEERSDYRDKGDIREQQNPSSS  
GKDSSNDASRLRKLHALACWIEDGNQASIFENDCDSQKNMLDQVFR CRHSVDEWLQSID  
KIEEEKQREKKIWFHLACPTRIAKHKDGVCEAGSFDHLDDDLYKKT VKPAHSSFGVVS  
YDEMTDSTLLVCRPYTGRTHQLRLHLQYLQHSIANDPNYGGDMWYANPDGKQACKIAQDRLS  
I IKSAGDAEAQSLTGISINGKKMCVTVDKPPHEGTRTSAIDVPATESEVQDEIARAVRQN  
DESIHSFIERTCVWCARSRSVPSSEDRSVLEFLIRSPGIWLHALQYTFTTNNDSDDDDEGK  
RKVVQSFRTQLPDWHDISVN

>comp14515\_c0\_seq9; 250 797 1570 LEN=2655; translated  
MQSLMNILEKYYKSKYKDGISDVKKLYTIHRLDRLTSGLVILGKTSSVAQSYSK CIMNRS  
CQKVYLARVAGKFP LKYPWKKLSSKKPLHGEISLDGEWKLEERSDYRDKGDIREQQNPSSS  
GKDSSNDASRLRKLHALACWIEDGNQASIFENDCDSQKNMLDQVFR CRHSVDEWLQSID  
KIEEEKQREKKIWFHLACPTRIAKHKDGVCEAGSFDHLDDDLYKKT VKPAHSSFGVVS  
YDEMTDSTLLVRTIRQCNE

>comp14515\_c0\_seq10; 327 58 1863 LEN=2317; translated  
MKPRSKRNRKRPRSEVNRLEQDPVYETSVRKLELDGKPI SAPQKWL RVIKPYPYTYSTFA  
KGRWEGRTILDVYSTEFSGSYPKSYYERAIDQGRILVSDKKVSATYLIKGGDVLCHTVHRH  
EPGVAVHSNVDPHVTIINETSELVIVEKPGTMP IHPCGGYNMQSLMNILEKYYKSKYKDG  
ISDVKKLYTIHRLDRLTSGLVILGKTSSVAQSYSK CIMNRSCQKVYLARVAGKFP LKYPW  
KKLSSKKPLHGEISLDGEWKLEERSDYRDKGDIREQQNPSSSGKDSSNDASRLRKLHALAC  
WIEDGNQASIFENDCDSQKNMLDQVFR CRHSVDEWLQSIDSKIEEEKQREKKIWFHLAC  
PTRIAKHKDGVCEAGSFDHLDDDLYKKT VKPAHSSFGVVSYDEMTDSTLLVCRPYTGRTHQ  
LRLHLQYLQHSIANDPNYGGDMWYANPDGKQACKIAQDRLSI IKSAGDAEAQSLTGISIN  
GKKMCVTVDKPPHEGTRTSAIDVPATESEVQDEIARAVRQNDESIHSFIERTCVWCARS  
SVPSSEDRSVLEFLIRSPGIWLHALQYTFTTNNDSDDDDEGKRKVVQSFRTQLPDWHDISV  
N

>comp14515\_c0\_seq11; 168 1509 2212 LEN=2666; translated  
MAFVKQVLXDHLDDDLYKKT VKPAHSSFGVVSYDEMTDSTLLVCRPYTGRTHQLRLHLQY  
LQHSIANDPNYGGDMWYANPDGKQACKIAQDRLSI IKSAGDAEAQSLTGISINGKKMCVT  
VDKPPHEGTRTSAIDVPATESEVQDEIARAVRQNDESIHSFIERTCVWCARSRSVPSSEDR  
SVLEFLIRSPGIWLHALQYTFTTNNDSDDDDEGKRKVVQSFRTQLPDWHDISVN

>comp14515\_c0\_seq12; 185 58 1053 LEN=2410; translated  
MKPRSKRNRKRPRSEVNRLEQDPVYETSVRKLELDGKPI SAPQKWL RVIKPYPYTYSTFA  
KGRWEGRTILDVYSTEFSGSYPKSYYERAIDQGRILVSDKKVSATYLIKGGDVLCHTVHRH  
EPGVAVHSNVDPHVTIINETSELVIVEKPGTMP IHPCGGYNMQSLMNILEKYYKSKYKDG  
ISDVKKLYTIHRLDRLTSGLVILGKTSSVAQSYSK CIMNRSCQKVYLARVAGKFP LKYPW  
KKLSSKKPLHGEISLDGEWKLEERSDYRDKGDIREQQNPSSSGKDSSNDASRLRKLHALAC

WIEDGNQASIFENDCDSQKNMLDQVFCRHR  
>comp14515\_c0\_seq13; 301 797 2119 LEN=2573; translated  
MQSLMNILEKYYKSKYKDGISDVKKLYTIHRLDRLTSGLVILGKTSSVAQSYSKCIMNRS  
CQKVYLARVAGKFPLKYPWKKLSSKKPLHGEISLDGEWKLESDYRDKGDIREQQNPSSS  
GKDSSNDASRLRKLHALACWIEDGNQASIFENDCDSQKNMLDQVFCRHSVDEWLQSID  
KIEEEKQREKKIWFHLACPTRIAKHKDGVCEAGSFDHLDDDLKKTVPKPAHSSFGVVS  
YDEMTDSTLLVCRPYTGRTHQLRLHLQYLQHSIANDPNYGGDMWYANPDGKQACKIAQDRLS  
IIKSAGDAEAQSLTGISINGKMCVTVDKPPEHGTRTSAIDVPATESEVQDEIARAVRQN  
DESIHSFIERTCVWCARSRSVPSEDRSVLEFLIRSPGIWLHALQYTFTTNNSNDDDEGK  
RKVVQSFRTQLPDWHDISVN  
>comp14515\_c0\_seq14; 121 58 1154 LEN=2593; translated  
MKPRSKRNRKRPRSEVNRLEQDPVYETSVRKLELDGKPI SAPQKWL RVIKEVAQLGSTLI  
LGRRSLTNIVPSHLTGFYAIQLKAIPD TYSTFAKGRWEGRTILDVY STEFGSYPKSYER  
AIDQGRILVSDKKVSATYLIKGGDVLCHTVHRHEPGVAVHSNVDPHVTIINETSELVIVE  
KPGTMP IHPCGGYNMQSLMNILEKYYKSKYKDGISDVKKLYTIHRLDRLTSGLVILGKTS  
SVAQSYSKCIMNRSCQKVYLARVAGKFPLKYPWKKLSSKKPLHGEISLDGEWKLESDYR  
DKGDIREQQNPSSSGKDSSNDASRLRKLHALACWIEDGNQASIFENDCDSQKNMLDQVFR  
CRHR  
>comp14515\_c0\_seq15; 212 58 1415 LEN=2500; translated  
MKPRSKRNRKRPRSEVNRLEQDPVYETSVRKLELDGKPI SAPQKWL RVIKEVAQLGSTLI  
LGRRSLTNIVPSHLTGFYAIQLKAIPD TYSTFAKGRWEGRTILDVY STEFGSYPKSYER  
AIDQGRILVSDKKVSATYLIKGGDVLCHTVHRHEPGVAVHSNVDPHVTIINETSELVIVE  
KPGTMP IHPCGGYNMQSLMNILEKYYKSKYKDGISDVKKLYTIHRLDRLTSGLVILGKTS  
SVAQSYSKCIMNRSCQKVYLARVAGKFPLKYPWKKLSSKKPLHGEISLDGEWKLESDYR  
DKGDIREQQNPSSSGKDSSNDASRLRKLHALACWIEDGNQASIFENDCDSQKNMLDQVFR  
CRHSVDEWLQSIDSKIEEEKQREKKIWFHLACPTRIAKHKDGVCEAGSFDHLDDDLKKT  
VKPAHSSFGVVS YDEMTDSTLLVVRTIRQCNE  
>comp14515\_c0\_seq16; 94 58 549 LEN=2554; translated  
MKPRSKRNRKRPRSEVNRLEQDPVYETSVRKLELDGKPI SAPQKWL RVIKYPYTYSTFA  
KGRWEGRTILDVY STEFGSYPKSYER AIDQGRILVSDKKVSATYLIKGGDVLCHTVHRH  
EPGVAVHSNVDPHVTIINETSELVIVEKPGTMP SKYKLPNRT  
>comp14516\_c0\_seq1; 492 8 937 LEN=4137; translated  
MTMATLRTFVRRASPRVMAVATQQTRGMATEKQIFNQIQSTKNIKKITSSMKMVSAAKLK  
GDEQRLAAAI PFNNWSYEIYSEPTLIEDATFEELPQKVLVVPFTSDKGLCGGINSFISRG  
TRDMVNK LKAQGKEADIVIIGDKGRSQMRRTVGEHV VRSATEEVESPGTYALASALSTELI  
AAGAEDYDAVVM IYNSFVNAAVYNQMYKVVTPLKPS EDGSEILPTYDFDSDKAESMTDLY  
EFVLSTQLFHCFMDGAASEQSARMTAMENASNNANEMIDSLTLRYNRARQARITTELIEI  
ISGASAIIEE  
>comp14516\_c0\_seq2; 492 8 937 LEN=4036; translated  
MTMATLRTFVRRASPRVMAVATQQTRGMATEKQIFNQIQSTKNIKKITSSMKMVSAAKLK  
GDEQRLAAAI PFNNWSYEIYSEPTLIEDATFEELPQKVLVVPFTSDKGLCGGINSFISRG  
TRDMVNK LKAQGKEADIVIIGDKGRSQMRRTVGEHV VRSATEEVESPGTYALASALSTELI  
AAGAEDYDAVVM IYNSFVNAAVYNQMYKVVTPLKPS EDGSEILPTYDFDSDKAESMTDLY  
EFVLSTQLFHCFMDGAASEQSARMTAMENASNNANEMIDSLTLRYNRARQARITTELIEI  
ISGASAIIEE  
>comp14516\_c0\_seq3; 492 8 937 LEN=2289; translated  
MTMATLRTFVRRASPRVMAVATQQTRGMATEKQIFNQIQSTKNIKKITSSMKMVSAAKLK  
GDEQRLAAAI PFNNWSYEIYSEPTLIEDATFEELPQKVLVVPFTSDKGLCGGINSFISRG  
TRDMVNK LKAQGKEADIVIIGDKGRSQMRRTVGEHV VRSATEEVESPGTYALASALSTELI  
AAGAEDYDAVVM IYNSFVNAAVYNQMYKVVTPLKPS EDGSEILPTYDFDSDKAESMTDLY  
EFVLSTQLFHCFMDGAASEQSARMTAMENASNNANEMIDSLTLRYNRARQARITTELIEI  
ISGASAIIEE  
>comp14516\_c0\_seq4; 492 8 937 LEN=2188; translated  
MTMATLRTFVRRASPRVMAVATQQTRGMATEKQIFNQIQSTKNIKKITSSMKMVSAAKLK  
GDEQRLAAAI PFNNWSYEIYSEPTLIEDATFEELPQKVLVVPFTSDKGLCGGINSFISRG  
TRDMVNK LKAQGKEADIVIIGDKGRSQMRRTVGEHV VRSATEEVESPGTYALASALSTELI  
AAGAEDYDAVVM IYNSFVNAAVYNQMYKVVTPLKPS EDGSEILPTYDFDSDKAESMTDLY  
EFVLSTQLFHCFMDGAASEQSARMTAMENASNNANEMIDSLTLRYNRARQARITTELIEI  
ISGASAIIEE  
>comp14516\_c0\_seq5; 492 8 937 LEN=3837; translated

MTMATLRTFVRRASPRVMAVATQQTRGMATEKQIFNQIQSTKNIKKITSSMKMVSAAKLK  
GDEQRLAAAI PFNNWSYEIYSEPTLIEDATFEELPQKVLVVPFTSDKGLCGGINSFISRG  
TRDMVNKKAQKQKADIVIIGDKGRSQMRRTVGEHVVRSAATEVESPGTYALASALSTELI  
AAGAEDYDAVVMYINSFVNAAVYNQMYKVVTPLKPSGSEILPTYDFDSDKAESMTDLI  
EFVLSTQLFHC FMDGAASEQSARMTAMENASNNANEMIDSLTLRYNRARQARITTELEI  
ISGASAIIE

>comp14516\_c0\_seq6; 492 8 937 LEN=3736; translated  
MTMATLRTFVRRASPRVMAVATQQTRGMATEKQIFNQIQSTKNIKKITSSMKMVSAAKLK  
GDEQRLAAAI PFNNWSYEIYSEPTLIEDATFEELPQKVLVVPFTSDKGLCGGINSFISRG  
TRDMVNKKAQKQKADIVIIGDKGRSQMRRTVGEHVVRSAATEVESPGTYALASALSTELI  
AAGAEDYDAVVMYINSFVNAAVYNQMYKVVTPLKPSGSEILPTYDFDSDKAESMTDLI  
EFVLSTQLFHC FMDGAASEQSARMTAMENASNNANEMIDSLTLRYNRARQARITTELEI  
ISGASAIIE

>comp14517\_c0\_seq1; 459 229 1715 LEN=1715; translated  
MGRYHFRRDDEEDDEHHIDATDNDHNSNGMHHCYGSSELEGEIEEEEGDMTRDYRRTNHH  
NSHHGMDMDMDIDVVVDDTNCDDYESRCSQTRWQAPKRSAVEFCIDIDRYDDVNDADFHD  
GNRKRPFSSVPSFASLAGGRAHGDRCGDSQNNCRKAREDDGGHDGVDPPDERCRGSQ  
DQNSSETQNEYRLIASKYDRNYDRDDFFRSGTNAFSEGEQDHEHNDVNNGNTHNTHCPQ  
HDGSNQIVRSPFSNRQLASNTSNAKPEIHYHIYVSESQASRWFPPVEDEINSRHDDGT  
EKDRRTRRIGGIKRITSMALLTHLLALLAYRYNLIPAVPEWMSVSPPPSYLTWDEYYHDQ  
FRLVKRVSREANSLWKHLLTTARARSSNIKSSRTSSDIAAPIYDFPESWWSFPEKQQASQ  
TNIDVDGGFEDGQYNSFDVDRYYPHGGWLHGHQVLEDLRIGLNAWSSKKANQREARQRQ  
RKRHGYHSSSSSSSSX

>comp14518\_c0\_seq1; 460 258 1178 LEN=2016; translated  
MTTASMSPYNENTSLLEPEETDVEGVETSARLAFERSNGDASRRYHQKRTRPSPEHDSEE  
EPWHQSAGLLQPVIFGGDLGILTSFAIVAGAAGGGLSITAVLVLGFSNIFADALSMGVG  
EFLSSKANNEWILSEKKREEWEMENYREGEIQEMIDIYVVKGLTPKDAKLVETMAKYDD  
FFVDIMMQQELELQVPEEDHVEQSMKEGFVMFCSFAFFGTAPLLGYTLIPWLFPHLESEI  
LFRSACAVTGLVFLFLLGSIKSNFSGTNWFWSGCETLILGGTCATVAYTI GFFVNSMLDED  
DSAGTL

>comp14518\_c0\_seq2; 305 1 757 LEN=1595; translated  
EEAKINDDFMDVLSFVPAFVFLDEFSLGKGHDIAAYDIELLHSSNSLNRVVENILSVVSFH  
SMGVGEFLSSKANNEWILSEKKREEWEMENYREGEIQEMIDIYVVKGLTPKDAKLVETM  
AKYDDFFVDIMMQQELELQVPEEDHVEQSMKEGFVMFCSFAFFGTAPLLGYTLIPWLFPH  
LESEILFRSACAVTGLVFLFLLGSIKSNFSGTNWFWSGCETLILGGTCATVAYTI GFFVNS  
MLDEDDDSAGTL

>comp14519\_c0\_seq1; 672 101 1789 LEN=2011; translated  
MAPRSGALALVLFVCRGWLLPWSGVRAFRGETSDRVRSRSHHHRPRDGCFLVVEPKNPWQ  
RGGIAGRWTTHLHPHRFHGGYDPSPLQWTPQQAEEFTIFHNGSPLHAGMQLRTAIQHWS  
GADLAEFLTRLYLGQLEEPDIAAEQRARARNPSLAAHNYGETNSQQKKIVYEPQNI RSPR  
WKGLETRREGILALKDLLRESLSRDLLSAQEIARFGEAFLLEKEYRWP SGIELAGSKSTENN  
SRNPTSSAPQGARAGEVVFEEDTFYGLGHARTLARVLLAVRRDRGCNEFHQNDIALMLTL  
PEKRDEDRETTPLRLIEFLRTIAARSQLEADKAGIVRHMALSGWSSGGI PRFMAELFPI  
ESPAQNHAAEQMCRLOGDSFFDFPSAETLASELESKRTRTNAAAIAVANDPRGRSAKGT  
KKKETAEAPAENSEDARESEQFEDELVQSYWKKVEVKTP IKPKIQPSYGVPRTKS IKKR  
TIPKKGFGVSIKTVVNAETKTVETSKTTSSVGSEAKHSVGSKTKPVVKSSTSSVVKSKA  
KFVAKSKTKSIKSETKPVVQS

>comp14519\_c0\_seq2; 673 101 1813 LEN=2035; translated  
MAPRSGALALVLFVCRGWLLPWNHGTRLVPSGVRAFRGETSDRVRSRSHHHRPRNGCSLV  
VEPKNPWRGGIAGRWTTHLHPHRFHGGYDPSPLQWTPQQAEEFTIFHNGSPLHAGMQL  
RTAIQHWSGADLAEFLTRLYLGQLEEPDIAAEQRARARNPSLAAHNYGETNSQQKKIVY  
EPQNI RSPRWKGLETRREGILALKDLLRESLSRDLLSAQEIARFGEAFLLEKEYRWP SGIELA  
GSKSTENNSRNPTSSAPQGARAGEVVFEEDTFYGLGHARTLARVLLAVRRDRGCNEFHQ  
NDIALMLTLPEKRDEDRETTPLRLIEFLRTIAARSQLEADKAGIVRHMALSGWSSGGI PR  
FMAELFPIESPAQNHAAEQMCRLOGDSFFDFPSAETLASELESKRTRTNAAAIAVANDPR  
GRSAKGT T K K K E T A E A P A E N S E D A R E S E Q F E D E L V Q S Y W K K V E V K T P I K P K I Q P S Y G V P  
R T K S I K K R T I P K K G F G V S I T K T V V N A E T K T V E T S K T T S S V G S E A K H S V G S K T K P V V K S K T  
S S V V K S K A K F V A K S K T K S I A K S E T K P V V Q S

>comp14520\_c0\_seq1; 193 1 1192 LEN=1365; translated  
XKNSHVVFMRLYLWWTVQESRSIELTRFQKDIPPVLFPLFENLNENDLDCVLNFSFADS

PIDPDNDFEIKKSGIWDEVKKYALRENKRAFPEDEGEFPWQEFEHVVDQMOTRTRNNVDASALADVTWPELWQELSLNQIAEAVHGEYPCSLQAALVDKLFREGISPCCGNPYRSNKDFNGLQGRDIADINTWSFRVVGPIINFALKWYEGMPRPEEVAMLIKAGELTTEKDGVPAGVVSIIKELGGLPGSNAAEFTAYENGCP IHPSWPAMHSAASTLSFWLPAIVELTGEQYCQALRTDFAVSYGRTVAGVHYPPQDNLAGLNIGMKI IHMKLPEFLAENFGFDKTIVEDRLNKLWFDWNTFDAKNCKIGNESAAERIAKVNGYTPNVNPDGMGVTIEL

>comp14520\_c0\_seq2; 289 39 1256 LEN=1429; translated  
MIRLSHSIIFNFFVAVSVYTRSAQSQMEESRSIELTRFQKDI PPVLFPLFENLNENDLDCV LNF SFADSPIDPDNDFEIKKSGIWDEVKKYALRENKRAFPEDEGEFPWQEFEHVVDQMOTR TRNNVDASALADVTWPELWQELSLNQIAEAVHGEYPCSLQAALVDKLFREGISPCCGNPY RSNKDFNGLQGRDIADINTWSFRVVGPIINFALKWYEGMPRPEEVAMLIKAGELTTEKDGVP AGVVSIIKELGGLPGSNAAEFTAYENGCP IHPSWPAMHSAASTLSFWLPAIVELTGEQYC QALRTDFAVSYGRTVAGVHYPPQDNLAGLNIGMKI IHMKLPEFLAENFGFDKTIVEDRLNKL WFDWNTFDAKNCKIGNESAAERIAKVNGYTPNVNPDGMGVTIEL

>comp14521\_c0\_seq1; 766 1 2688 LEN=2889; translated  
VQTARNYSKRDPKSHIFVEHGTLDLDEAHLTLTPAKGGGYYSGGLLEAKLAVATNNASGKTW FCRMTNHYLTPSPRSPPLVVLVILMVICFAVVALADDVETITCSGGWAGDSQQIIPKAWIN DGYCDCPYDGKDESNTNACSGSSNWPVGAASVAAGLPETGANDFSCPQQKNLVLVPASRVH DGI CDCCDGTDEEGYTSCPDVCDEVLRAREVLAKITNEFLIGSRKRAMDLVQF SERRAS ELVEVSKLEQELKNCNNDIELIEGTEIVELKRSYVRSRMATMKDKVVASQMATDLLAGLE DSELEDLIVHLCQLSGEIAKANGDTAADDNTCAALRIAAMDMLSWNDHEDFEHYETSMA XKVMTRSMNIVFNAMDANSKGGSPALPLRWKEVHSGKRNKRRRRLDEVLEDDFME DEWDVHDDAFDHDYHDDHDDFEDRHRDRDLERHRNRNEHHSGLLEASGDAVGKEREILE KIQDSIFSTTRAKFLEQSQIIDKVNKILDTPSTEDDDETDAEVEEGTESGDRTEAQSDE SEAVSASPSTIDPAA YGMVRNKLREKQSI IKKGFRWAASAELLFAFSSLSSESSEKLR LAIGTIFYGQISSIQVWQILLAILPEYNASSISDKENTCASPWVDYCPPTQVRTMLGTEYPP SFLIDVAKTFCDEEALKFGRDGNDAPECSDSIDTIAESTLDFGYTIPRRRNQENDPLHS MFAPIIISLPIDAEGLSLEDTKEKLEAKKTDLTRSINDIWKAIIGKDGTELGRDGELHSI ANECFEIVAGKYTYSACIFGKAQQKDGSSKTNLKGFKGIEYVSDDSAGHTHTRILK WEN GARCWNGPDRSATVHMCKGSKHKLISADEPDTCRYVFEMESYIACDESYKRLMGL

>comp14521\_c0\_seq2; 677 1 2279 LEN=2480; translated  
XESINYNGXRNLDSLKHCSGLPETGANDFSCPQQKNLVLVPASRVHDGICDCCDGTDEEGY TSCPDVCDEVLRAREVLAKITNEFLIGSRKRAMDLVQF SERRASELVEVSKLEQELKNC NNDIELIEGTEIVELKRSYVRSRMATMKDKVVASQMATDLLAGLEDSELEDLIVHLCQLS GEIAKANGDTAADDNTCAALRIAAMDMLSWNDHEDFEHYETSMA XKVMTRSMNIVFN NAMDANSKGGSPALPLRWKEVHSGKRNKRRRRLDEVLEDDFMEDEWDVHDDAFDHDYH DDHDDFEDRHRDRDLERHRNRNEHHSGLLEASGDAVGKEREILEKIQDSIFSTTRAKFL EQSQIIDKVNKILDTPSTEDDDETDAEVEEGTESGDRTEAQSDESEAVSASPSTIDPAA YGMVRNKLREKQSI IKKGFRWAASAELLFAFSSLSSESSEKLR LAIGTIFYGQISSIQVW QILLAILPEYNASSISDKENTCASPWVDYCPPTQVRTMLGTEYPPSFLIDVAKTFCDEEAL KFGRDGNDAPECSDSIDTIAESTLDFGYTIPRRRNQENDPLHSMFAPIIISLPIDAEGL SLEDTKEKLEAKKTDLTRSINDIWKAIIGKDGTELGRDGELHSIANECFEIVAGKYTYS ACIFGKAQQKDGSSKTNLKGFKGIEYVSDDSAGHTHTRILK WEN GARCWNGPDRSATVH MKCGSKHKLISADEPDTCRYVFEMESYIACDESYKRLMGL

>comp14522\_c0\_seq1; 904 1 3188 LEN=3421; translated  
XAPSKTGSPAAPPMSSQAPT PFGNKPPAAAVSKNGSTAAFPMTSKSPTPFGSKPATAV PSKADSSAAPPMSKAPT PFGTKPTVKPISSNSFTLPGSNGGGKVLSSSPFEKQSNRFP QATHNPTGQIKSHGKPLTKLELQFGSVINSFSFTISEVSKMRVETFIADNELRHEIEELT IQVEQERTKLLNVDDSLAKNRSETAFLLSRKTDSRQLDITTKGIIQEINESNVEGIQSIAN AQALDRESETRRRRFAASSRNLVRRMELAKERATLLEENNADPAIGQNLLLRRLDLRYR RAKAFEMVSSRIRRDVSAVSEKNPFRGRAKRTRAGSTYSLDNSLSPKGYNKLRPIDIE NKRKPFAREVSKSSVSHWKNIESAMTQLSNENMKMDRFDTLSEVNSEQATPDRKKE FRQHSAPCGLLISASAKSQSNRMQEQSLSVSKRVSIFSPPSKPRARSGWDQPATIDVDR VTRFSLDAPQDLKKTTLSDSRDLASFGTTPERLKAADIKKESTSLPLSTVGSQSKDV PTKRSTIETAALPPLASTAPSNPFSNASGKKRETVASVATTKSIAQKSTSSSAALPPMPK QAPSNPFSKGPINPSSAAKSNRPEAKSPLPPPQKASLKEKEATSTSFSGMKVLGQSLSS ESMKSDAKQAPSGAMKSTSATETSTGKDFKITLTSFYQKYNASKIGEVDKTLQKYKGRE PEMFQKLSAKYKVPNPLQESQAPLNSTSMTMTNQSTSPMGFGNSGSTMAASPSSSTTT QQNSNPPAAPFNQSKNSSPFGTSTGTSAASKSNVFGTQAQSPFGAMNTQASATPFGGSQ PPAQSPFGKTASSVNSSTPFGTSGGLSSASPFSGSAAAPSPFGVASPSPMQPN SQRLFN GK

SARELLHQFYQEKNPSKLAEVDKLLAKYSGQEEQMFRNLAKKYQLDPSVFGVSTTAPSHG  
MGSSAVTSGFGQTSAMGGATNSFGQSPGGFGQPSSLGGGSMSSSKPQGAGSFGSGASSGF  
GSSGFGSLAQSSNPSFPGGQSSGFGVPAPAFGSATPFGAPRR  
>comp14523\_c0\_seq1; 249 224 1759 LEN=2918; translated  
MGKSTGKPNNGNLSSEIAMAAIALTCGGI WALRRREKHLRSRWIEAE EEPKRSDSENAGQS  
LYEYSVIEHFKSLELGSQSTILEANRRRTTSYYEKAREAEHQSLVLGIPNYSTLLEKRRK  
DLNRLMFYHNEGKSLRVTIVMLDQSSQRVLSEARQKILQPLNYSWDIYSKGVWIPEINI  
IPKEDMHVSIACPWVHTIREGNDLKNKDLNRLKQALVIDFHHPFFLELERIILLGGKT  
LVALWRVTGERMVVENGAYTVCDRHATSIDPMIRLRREIVDCF TNEEHEYNFHLPLTHQHR  
AESMDKQGGQEGTKLESNPNGTQGGGIEQAIDDSGAQPPIPGKPGMKRRHTIELKTPGL  
GSGDGF IHTTLCRLPLDCLSTQDVELEPIHRLCREATATYSGHRMLVHEFRFLETTGAGG  
DSNPCTSP LFD ETMAAPSKVVYKQSTLGARCTSDSLEGASRENSGDGRSNAERNALTTGH  
AHNLTLRRNAASATAPQTAVGGIEGLFEPK  
>comp14524\_c0\_seq1; 747 257 1579 LEN=1828; translated  
MMKPTTAAIALALAGSKHSAEAFVFNHSATSATKATTTSLSMAGPGDTATKDIPYGETS  
RQFRRTVYTHDDVWKHRSPNRFVKNLFSIGSSGIYKNVGREVSTTTTVATIIFLWNMLTV  
GYDDFNQIHHAPIIDNYYVPGTLPLTPFTLASGSLG LLLVFRNTAYQRWDEARKNWGM  
NINHTRDLVRMGNAFYDSTDVDPATRQADLERLSVCTWAFVRSMKRHLSPEWEDEASFR  
ELYERLPESQANAIINAHRPNRALFDLSMAIENLPMHFMRKNE MHKALTI FEDNLGSSE  
RLLTSPVPLIYNRHARFLSFWLLMLPLALYKPFESTWNHVGMI PATAIISLFLFGIEEL  
ATQMEEPFTILPMQAFCDKIGNWCNEIVSWEEGDNGMATNKS YQGHSEVYFENLGSSPGV  
VNGNNGNSFVEPQLQEWGRQ  
>comp14524\_c0\_seq2; 761 81 1355 LEN=1788; translated  
MARLFFSSPSLLLAVAAAAATTGSVSAFVPSAGKTKTAAVAPSPLSEATQLFASDINS  
DI PYGEESRK YRRTVYSHDDVWKHRSPDRFFNNILSTTKSGIYKNVGREVLAVTLIATL  
VMLWNMLS GEYTDLTGAVHPGILRGQYTPVLSLPMNPFTLSSSFLG LLLVFRNTKAYQRW  
DEARKNWGMNINHTRDLVRMGTSFYDDSQS SPEQREADLDRLSKCTWAFVRSMKRHLS  
PEWEEDEE DFKAELYQR LDPEQAQAI IDAHRPNRALYDLSLAI EQLPMHFIRKDE  
MHKALTI FEDNLGSSERLLTSPVPIFYNRHVARFLFVWLSFLPFALFDPFKESWNH  
VMMIPTTAIISLFLMFGIEELATQMEEPFTILPMQAFCDKIGNWCNEIVSWKDG  
DNGIYKPKQNHMAPGHNSVYFEAEP  
>comp14525\_c0\_seq1; 232 23 1309 LEN=1758; translated  
MSLSSRA FVFATTSCYRFSLSRALQRCDANVGTTRFLSSNSDPFRFQKIGIELEPLKYP  
LYSENPPQLRNAVRERSLADSPIDIQND FETNKNETEREISFLIEELADRNEWRRV  
FPE NKPFWKGGQFKKVVLDQLLRDERLNRKKVRIKAMMPDIWKRWKKFNLT  
TIAEAVNSEYPALHQGNLLEFFASGSLRYPNPNFRSLNDFVGLQARLACINTWAFH  
AVAPVNFGLKWIYGM PRPEEVAFAITEDKLTDDGIPRDVEMVKEMNLGSAPEFTAYE  
KGC PFHPSWPAMHSAGSTLSTWLPVAVDLKPEQYEQALRTDYAVSYGRSVAGVHYNQ  
DNLAGLNIGMKIMQLKLPQYLAKEFGYNENTIRERLDALAFDWN DYNPRQCKIGDLT  
AGEHLAKIARTGELSFDPEVRAGRASW  
>comp14526\_c0\_seq1; 1863 189 4553 LEN=4713; translated  
MSRNRNRSSPSSSSSSSSSVSIQSLLEKTEHYDKDERYMATSDLCCELLKRSNNNS  
RGGSVG TSSHQQQPPATKIFDSTTERRICTAVLRLLDHKSNDVQAVAVKTLGVLLQ  
TVPQELVVEIADSLADRVL DADKSDLRDVYAI GLRTL IKTIPPQMGDRTSERLSGR  
LLEGI RTSSGEGGQEQHDASEDIILSCLDILTDLLERFGATSISVTRRHEPILQICL  
RLLTASDASVVVRKRAGNALGCLSVVLS DALLVSAVERLLS QIEESESSENTRALIR  
TTCTISRWVGDR LQQPQIDRIPIFLKFTNPEKASTGDDDDDEDNGSDGAPMDDDD  
NSLDSANDEALAMANELRESCFMGFESFVQKCP SQVEPHLDKIVQAALAYMSYDP  
NYSYGV EEDGTGMDDGGDGEDYD GDDYGYDDDEYGE EDDFYDDEDEDES  
WKVRRSAIRSLTAVVETKQDDPGFLWSRYPYVRKNKSVDCVASALVVRFKERE  
ENCRVGILETFTKLEVTTKKVAGGSSTASNGGGEHSSATLR FVTARDDEEMK  
DGDAAVVVDLRNNYAPKLVKACEKLLGDNKKSKGVGERSKSQLGLLS TLCKAP  
GGVGGETEII SIFEHVQSM LGGAEGDNHGGTPNSSKALRLDALSLVAMLESS  
NHDPTSVRKALSLALLPQLCASVQE QYKVI SEALRALAAV PKFFATAGDDDP  
SGFTVAN LLYGSVEPLLA AHDVDQEIKECALLATGNLLSELAGGAEAKKHQ  
LTQEQTNR L TSLLLERLKNETTRIPAIKTL SVSSSNPGLVFQDGILSESIR  
TMAGFLKLAARSLQQTAL EALDVVVIHHGKTIADETALYAELLKELADL  
VSDLHISHLALKYNFMEHREMPRQHPVSI IHPDNXVSL LFIQLVDFYRRV  
SISALKVCPACGSSVRENFLPKVLV LSTSPLLQDLALDSLLASLEQVVV  
SNAVEFTELLSMLRDR LQGASKNKHAIYNLAECIAVISKASTPENLKA  
VVLECL ETLENC PKSTGNEEINAELKKVQLALLISGNIGRMVDLDSVAAD  
VPGKLNAIYMRYFEFS SEDLKNASSYALGQAAVGTQSVFLPAIVNSLEET  
NNSDKKQYLLLSALRDFIKSSYQESG

GEGIASNLSVIMPHLETHASDEKEGVRSMVAECLGSLTCIQTAMSEKLCKIAEDHSGIA  
VCENGTVDPADDTSKKNAFVCCTVAMSVKLA VAGKADSSQLAPFVPRFLKLLDHKELGVR  
NATLLMIYSTVHMPQLVAGVMKEQIMPTLYEVATFQLKRKIDLGPFSTVDDALPLRKA  
VLSIFVSCLENIPRSLDITAFMPVLAATLKDVEDIQLQAHQIVINMCMRQPTYVVGAVET  
FAEPLKTLFRKQGTGTGTELERLIEWKSSLRAMVALSRVEGTMNNPKFAEFVERTKNN  
AKFQPALQAIEEDL

>comp14526\_c0\_seq2; 1939 189 4442 LEN=4602; translated  
MSRNRNRSSPSSSSSSSSSVSIQSLLEKTEHYDKDERYMATSDLCELLKRSNNNSRGGSVG  
TSSHQQQPATKIFDSTTERRICTAVLRLLDHKSNDVQAVAVKTLGVLLQTVPQELVVEI  
ADSLADRVLADKSDLRDVYAI GLRTLTIKTI PPQMGDRTSERLSGRLLLEGIRTSSGEGGQ  
EQHDASEDIILSCLDILTDLLEFRGATSISVTRRHEPILQICLRLLTASDASVVVRKRAG  
NALGCLSVVLS DALLVSAVERLLSQIEESESNNENTRALIRTTCTISRWVGDRLQQPQI  
DRIIPIFLKFNTPEKASTGDDDDDEDNGSDGDAPMDDDDNSLDSSANDEALAMANELRESC  
FMGFESFVQKCP SQVEPHLDKIVQAALAYMSYDPNYSYGV EEDGTGMDDGGDGEDYGGDD  
YGYDDDDDEYGEEDDFYDDDEDDESWKVRSAIRSLTAVVETKQDDPGFLWSRPYVVRKN  
KSVDCVASALVVRFKEREENCRVGILEFTFKLLEVTTKKVAGGSSTASNGGGEHSSATLR  
FVTARDEEMKDGDDAAVVVDLRNNYAPKLVKACEKLLGDNKSKG VGERSKSQALGLLS  
TLCKAPGGVGGETEIIISIFEHVQSM LGGAEGDNDHGGTPNSSKALRLDALSLVAMLESS  
NHDPTSVRKALSLALLPQLCASVQE QWYKVI SEALRALAAV PKFFATAGDDDP SGFTVAN  
LLYGSVEPLLAHDVDQEIKECALLATGNLLSELAGGAEAKKHQLTQEQTNRLLTSLLLER  
LKNETTRIPAIKTL SVSSSNPGLVFQDGILSESIRTMAGFLKLAARSLQQTAL EALDVV  
VIHHGKTIADETALYAELLKELADLVVDSDLHISHLALRVSISALKVCPACGSSVRENFL  
PKVLVLSTSPLLQDLALD SLLASLEQVVVSNAVEFTELLSMLRDR LGQASKNKHAIYNLA  
ECIAVISKASTPENLKAVVLECLETLENC PKSTGNEE INAE LKKVQLALLISGNIGRMVD  
LDSVAADVPGKLNAIYMYR YFEFSS EDLKNASSYALGQAAVGTQSVFLPAIVNSLEETNNS  
DKKQYLLLSALRDFIKSSYQESGGEGIASNLSVIMPHLETHASDEKEGVRSMVAECLGSL  
TCIQTAMSEKLCKIAEDHSGI AVCENGTVDPADDTSKKNAFVCCTVAMSVKLA VAGKAD  
SSQLAPFVPRFLKLLDHKELGVRNATLLMIYSTVHMPQLVAGVMKEQIMPTLYEVATFQ  
LKRKIDLGPFSTVDDALPLRKA VLSIFVSCLENIPRSLDITAFMPVLAATLKDVEDIQL  
QAHQIVINMCMRQPTYVVGAVETFAEPLKTLFRKQGTGTGTELERLIEWKSSLRAMVA  
LSRVEGTMNNPKFAEFVERTKNNAKFQPALQAIEEDL

>comp14527\_c0\_seq1; 1302 199 4002 LEN=5024; translated  
MFRPSIIRHPARRLSACYGRSFSKIASGSATSFPNRRGEILTTAIRGAASTTLPLNAHTK  
SELSRQECRQLSTNVRTNHPSMAPTKAVDVSEAPFQKLMAANRGEIATRIDRAGSELGI  
NTVGIYSFEDRFTQHRYKADQAFQLDESKSPVAQYLDIDTIVKICVNNGVQAVHPGYGFL  
SENTNFARALRENGVAVFGPTVENLDHFGNKATARNLAI AADVSVVAGSEEA FETVRQAR  
DWIADPVNKCSPVIAKALMGGGGRGIRIVPTEADLEAMFTQASNEALTAFGDGRCFIEK  
YVENPRHIEVQCLGDGTGNVVHLWDRDCSVQRRHQKVV ECPAQDLPKKTRENILNDAVA  
LLKSDNYLNAGTVEFLVDKHGQHYFMEV NPRVQVEHTVTEEVTGIDIVQSQILIASGKTL  
PELGLTQDKIPEPNGFALQCRVTTEDPSQDFRPDTGTISVFR LPTGMGIRLDDGPGFPGA  
KITPHYD SLLVKITAKARTRREAAAKLIRALNEFRVRGVKTNKSFVLNVL ENEQFLDGVV  
DTGFIAQNPDLLAPLHERDRAQKVLKFIANIIVNGTPSALGAVGDPVSVDPYIPEIPVA  
ETCGKKS LKQIFDEEGPEAFASAVRNNNGLLVTDTTWRDAHQSLLATRLRTV DMLNIAPA  
TSAALANCYSLECWGGATFDVAMRFLRECPWDR LADLREKVPNIPFQMLLRGANAVGYTS  
YPDNVNYQFCKLAKETGMDVFRIFDSINYIENMKLGIDCVGEAGGIEAAVCYTGDISDP  
NRGMYTLEY YLDFVEQLNDLGIHVLAIKDMAGLLKPKAA TELITAIRAQHPDLP IHVHTH  
DTAGTVASMLSCAKAGADVVDACSDAMSGTTSQPSMGALIASTSGTPHDTGLKLSDVQS  
LNEYWEECRGLYAPFESGQKTGSSDVY YHEMPGGQYTNLLFQSSQLGLTGQWSKVKKAYA  
TANELLDGI IKVTPSSKVTGD LAQFIVANDLTKEEVVEKADT LSFPKSVIEYFQGLGIP  
PFGFPEPFRSKVLKGQTI EGTDGLVCFEGRPGAELASFD FEKERNKLEEIWGEDTGGLSG  
DVKSGQKIRDVDVLSALYPAVFDEFMAHKEKYGKCSILNTRTFLTGMQVGEDLEISLEP  
GKQLMIRLVAQSEPNQEGFVTLQFELNGTPRTVSVKDKSAGGETSSERP KALQSVEGSIG  
APMPGVVLETKVKKGDKVSVGSPLVSL SAMKMETMVASPVNGVVDRVVVTAGDEVAGGDL  
LLDVTEE

>comp14527\_c0\_seq2; 307 124 1092 LEN=2114; translated  
LGLTGQWSKVKKAYATANELLGDI IKVTPSSKVTGD LAQFIVANDLTKEEVVEKADT LSF  
PKSVIEYFQGLGIPPFPGFPEPFRSKVLKGQTI EGTDGLVCFEGRPGAELASFD FEKERN  
KLEEIWGEDTGGLSGDVKSGQKIRDVDVLSALYPAVFDEFMAHKEKYGKCSILNTRTFL  
TGMQVGEDLEISLEPGKQLMIRLVAQSEPNQEGFVTLQFELNGTPRTVSVKDKSAGGETS  
SERPKALQSVEGSIGAPMPGVVLETKVKKGDKVSVGSPLVSL SAMKMETMVASPVNGVVDR



RVVVTAGDEVAGGDLILLDVTEE

>comp14528\_c0\_seq1; 1040 118 2694 LEN=2878; translated  
MRVVDIKFLKDI EFADSDSDTKSFESFQOEILREREF CNIDWRDSEGNQPILSSDVFP  
YNFPDDSSPKLGGTLKEISPTKVMDFDDGFAMGSSGVSSSPAEEKSNNQDDFNPSLKHS  
WCDIHQSDNFESHKQSNLNFDIPEVEEEFPPKLLFGDEPKENILSKDLRKDWIEAENFAF  
STTDDETRKGWWSRDFDDNEEGNEETVTAFGKLSFDDKIKERMERKPNSVVCDDLHAAK  
EKMGSCNLDLHGFP ISTTECTDKEQQEMIRNDPCPKPDDISIPVSVTSRSTKWKSSSSKGA  
RSRFSKKCLSLPICSDYYIQTEDQVDTDSAKQTVGNQENQEAKNNNDWSKKEGSQWERLL  
AKVPMGTRVKANILQVRQTIMACHEPDLQKSSSSDIVKEASVENEDSAATKGSQDECVCE  
STEQKLNDSVLSYKSVQVITSVLSTSQEAISIPSDASTPIRTQTKRDLKVELNSSSSQL  
VHNLLDNLMNLKHKNRDFNDSKLLKLCIDHYKQSAFKALMSNLKDNLEITELHIFRSWD  
GNSERSRNSEDIAALLFKTIQSLPNLEILNLANFLTEEIHFVALTQWQNQNLSTVRIHVCK  
GAI SQRLNLAELPALQDLTLEMNESFPFHILLSSRTLESLTI IANDFNVDNLHAMETV  
HSVPKNKILKKLTI EPPLELRTFKLLAAALRKN TGIEDLKFSLIPGNHADTNSAICELAR  
TLTTNSSLKTITNINPSDIKVRERTCDVMRALAENFIEEFVAFDEEPWFRTKKNLLA  
ENKGEIEPLFPQIFNCVEDTGRNPPGDDEDDVDDASSDDGESYSVSDGVAMIGNMKSQA  
KRAVSGVTGALDLVGIQM

>comp14529\_c0\_seq1; 2273 123 5309 LEN=5361; translated  
MAAPVPLLFSEALNLQQLGVPEGSIKHGLTTMESDHFIVCREEGQVAMIDLRQGAQVDRK  
PIQAEAAIMNPAQKILALRSNVGSATRVQLFNLDTKAKLNSHDMSEPLVFWKWTSPTNLG  
MVTATAVYHWSLEGQGPVVFDRHATMGANTQI INYRVSPDGKWCLLGGISAGGQGVVN  
GNMQLF SMDRKVSQPLQGHAGAF AHLKLAGRSDLAQVLFVHEKKAENPGAPPQLYIREIG  
RDP SLGAPFVIPPQIPVPPPEAASDFPVNLTISKDDIAYLTTKAGYVYMFVHSGSIIYR  
AKISNETIFLTCASDSAGAVFGITVVRTGKVLRLQLNTQHVVPIYIMQTLRNAELAVKLAGR  
LNLPGAEQLMAAQFEQLIGAGQVREAAALVVASSGTALRTPATIARFQQIPAQPNGVPPVL  
QYFSVLLSEGRLENEQESIEVAKPVIQQQRTPLLEKWLKEDKLCQSEQLGDLIMPVDVGMA  
LSVYLRAESHAKAIQCFAQRGEYDKIVPYSTSVGFKMDYSQMLSQLLFNNPAGALDLAKG  
LVSAEGGPYIDIQQTAEAFSSNR IQETTAFLLEALKDNKPEHNYLQTKLLEINLIGGAP  
QVADAIMQQGTLTHYDKNHVAKLCERAGMWQRAAENFSEIADIKRCFKNSHQMSQEFVVD  
FFGKLSRDQSI SLLKDMMSRGPQNMQVCVEVAKKYHEELGSEALVEVFEQNKATEGLYYY  
LGSIVNFSEDSFVHFYKIQSSCMLGQFKEAERVCRDSNVYVPKEVKDYLMGAKLADPRPL  
IHVCDRDFVDELTDYLYLNSLLQYVEVYVTKVSPQKTPQVIGKLFDLGANEDFIKRILM  
AVGTACPVDLVEIAETRNLRLQLPWLEARVATGSTEQGTHNALGKIYITLNRDPKAF  
TNNMFYDPKVLGPYCEALDPLAFTAYKKGAGECDEELISISQKHGLFRDLAKYLVERQD  
LELWAKVLNKEEGQEESEDEGSRRQLIDQIVEWALPESTSADDEVSTVKAFMAADLPGELI  
TLLEIRIVLQGSDFSDNKNLQNL LILTAIRADATRVSGYIDQLDNF DAKDIALICVSESHN  
LFEEGFSIYTKFSKPEYTDKDEQVELQVLAIGVLVDFMKDLDRAKSYATQCDEKPVWSK  
LGKAQLDAKEASEA ILSFINAEDASEYIKVCAEANEGE I WSELIPYLKMARKSMQENVID  
TELIYAYAKTNNL TELEQFVTGPNVSNIQNIGDRCFSEGLYHAAKILFISINNSKLALC  
HIHLEEFREAVAAAQKANNVSTWKHVCFACLRAEEFRLASTCGLEVIKYPDHIDEVVAYY  
SDLGCF TQVIALFEQIGIGIEDAHIGIFTELGVLYTKHVPDKAMEHCKVFFSKLNVSKVVR  
ACERARLWDPVYLYTHDKQHDSA I KIMIERANSFDNDIFLDAVVKVRNNEIMYKAVNYY  
LTMHPDLFTRLMEVLEESIDHSRVVSQLRRSGDHALQLGQDYLSVQKNNLSPVNEALNE  
LYVEDEDYESLRKSIDGFNNFNMIALASKLATHELLEFRRI SAYVYRCNKKWSQSIDLK  
NDRMWKDCIDTANESGDSEIIE SLLRFFCDSSEKECFCAALYTCFSHISPDVVI ELGWLN  
GYTNFVMPFLVQTFKRTHQRI EDLEKRTEPPKEDDAQDGI AATYGNLNGF GGGVLMLENG  
GMGMPMPQMGGMGGPDMSFVGGMPPNPGMMPNGGMNGAMPQMGMPQM

>comp14530\_c0\_seq1; 233 1 941 LEN=1569; translated  
XSLPKAAMLPPAGDPDGPGRSSSSSSALVVS PRGQPSTPEPAAGGSRALPVAADAGTPGP  
YIHALQETRRGLVQNHVYVFLAGAPLSASNETGRLLGLPAGSLVKDVLGDLRTVRGGFGA  
GEEASALRVVAQRTARAARGHRERRRRRRRAAASAAARLGP CERATA CCPAGAVECRAV  
RCGAVVCL ETGAFPSAASAMPVAVLPILSYPELAAAFL EAASVDALCFPGAFFQREETV  
WEA DEHGVLHEEPTLFRATRRTHRVD SFAP SIRGQSL LTKSLGARKGSI APRVCF AVRPA  
EANGFGIHSATGS

>comp14530\_c0\_seq2; 404 1 1425 LEN=2696; translated  
EVQGPFRASKRRASELHRPLEAKESFGEIQRASSQDMGVQGLEVSDFEQMRPDVSLSTT  
TTTSSSSSRNNKNTSSYANSTIHGGDEATGSGGNSYFCIGSGAGCVDRSVSQTCLTRELD  
QLP INHREHVQDLYGLAECEIPNIDESLSEFEEAIVS LLEKSDSKASSV PAPS GTGG  
GSLPI TDSVPELQSLVPYHAYRLALS MSPSYVKNPEFRLMFLRATEGDVKKA AKRLTRHF  
KTKLRLFGEDKLVRDIVLDDLSEDDMESLKS GGFQVLSKRDAAGRSVLFGRYTS MRYKTI

DNMLRALWYIWMSILEDPTNQKKGVALGYEVGRVPLDRFDGTEEGEGLAGFELGEDATD  
HNMSGGFDRTLARKIVSVPLSVPARVPGYHLCTDSHQVWGLNLMVMVTLCKFIRLRMRIH  
HGTDVECKYALMTHGMPTDSVPVDEAGCVSLAQHMEWIEGRRVLDARKTKGRTH  
>comp14531\_c0\_seq1; 745 1 2214 LEN=2455; translated  
LGGQLKRENIFVVIGAAPFPISSTVSVQPPIATIPDFSRFEPKHKLTVGVCLFNQYRHR  
TTQSGSMATNCGRQSFMQHIWHRLVGARGAGSIFPDPLSSLTEPAEPKHPNFGKISEHPS  
KDIARHKLVLFLGIEHSMPPIIISFQREIQAEMNKQADKLVILEHFSFDLQGLLDRYMND  
IDFEQLVDEYHSRGEEGHLEPYRDLEDAKRQGVHLHAGFLPRKYARMLMKDGEKPALE  
AASEWLPENVNLDSSDFHYNVFESELLSGRSIYDSIVHNNGKNDSSNGGNGGGCTREQEGSL  
PNSNEPSDQFRNIFKAQVLKDEAMAHRTGLIKKEEDGTGASNEKFLVIAGNGHLLHYCG  
VPERVLRNPEIAADTCLVISENTTSDSLMGGENHNRDVCERHSGHCNNNI INNNNNKIN  
KNADGECVNHKEKTDITAFLOSRFGREGSNPADFMFYFYEIPEEILTEWDVKEETKSAYDK  
VGDTANIPGNLSKAAWIMHSLGYTEEQFDAAGPDVYNFQGVGNPHLQANIQKGDVLDVG  
SGLGIDSTIACHATGPEGIVIGIDISEKETKHALRRAREQNLNAHFVADMENMSHKIPS  
NSIDVVISNGAFCLAPNKEKAFRELYRVLKPGGRISVCTTTTQEEENLEPGISWPLCMKM  
IAKNDLKPLCEKIGFTDVVIDDSNSEMSMEIPDEILEESNPGRSKVHVGGSDFDHLEDYD  
MDAICARVCVAKKPLA  
>comp14531\_c0\_seq2; 239 1 2214 LEN=4554; translated  
LGGQLKRENIFVVIGAAPFPISSTVSVQPPIATIPDFSRFEPKHKLTVGVCLFNQYRHR  
TTQSGSMATNCGRQSFMQHIWHRLVGARGAGSIFPDPLSSLTEPAEPKHPNFGKISEHPS  
KDIARHKLVLFLGIEHSMPPIIISFQREIQAEMNKQADKLVILEHFSFDLQGLLDRYMND  
IDFEQLVDEYHSRGEEGHLEPYRDLEDAKRQGVHLHAGFLPRKYARMLMKDGEKPALE  
AASEWLPENVNLDSSDFHYNVFESELLSGRSIYDSIVHNNGKNDSSNGGNGGGCTREQEGSL  
PNSNEPSDQFRNIFKAQVLKDEAMAHRTGLIKKEEDGTGASNEKFLVIAGNGHLLHYCG  
VPERVLRNPEIAADTCLVISENTTSDSLMGGENHNRDVCERHSGHCNNNI INNNNNKIN  
KNADGECVNHKEKTDITAFLOSRFGREGSNPADFMFYFYEIPEEILTEWDVKEETKSAYDK  
VGDTANIPGNLSKAAWIMHSLGYTEEQFDAAGPDVYNFQGVGNPHLQANIQKGDVLDVG  
SGLGIDSTIACHATGPEGIVIGIDISEKETKHALRRAREQNLNAHFVADMENMSHKIPS  
NSIDVVISNGAFCLAPNKEKAFRELYRVLKPGGRISVCTTTTQEEENLEPGISWPLCMKM  
IAKNDLKPLCEKIGFTDVVIDDSNSEMSMEIPDEILEESNPGRSKVHVGGSDFDHLEDYD  
MDAICARVCVAKKPLA  
>comp14531\_c0\_seq3; 239 1 2214 LEN=4295; translated  
LGGQLKRENIFVVIGAAPFPISSTVSVQPPIATIPDFSRFEPKHKLTVGVCLFNQYRHR  
TTQSGSMATNCGRQSFMQHIWHRLVGARGAGSIFPDPLSSLTEPAEPKHPNFGKISEHPS  
KDIARHKLVLFLGIEHSMPPIIISFQREIQAEMNKQADKLVILEHFSFDLQGLLDRYMND  
IDFEQLVDEYHSRGEEGHLEPYRDLEDAKRQGVHLHAGFLPRKYARMLMKDGEKPALE  
AASEWLPENVNLDSSDFHYNVFESELLSGRSIYDSIVHNNGKNDSSNGGNGGGCTREQEGSL  
PNSNEPSDQFRNIFKAQVLKDEAMAHRTGLIKKEEDGTGASNEKFLVIAGNGHLLHYCG  
VPERVLRNPEIAADTCLVISENTTSDSLMGGENHNRDVCERHSGHCNNNI INNNNNKIN  
KNADGECVNHKEKTDITAFLOSRFGREGSNPADFMFYFYEIPEEILTEWDVKEETKSAYDK  
VGDTANIPGNLSKAAWIMHSLGYTEEQFDAAGPDVYNFQGVGNPHLQANIQKGDVLDVG  
SGLGIDSTIACHATGPEGIVIGIDISEKETKHALRRAREQNLNAHFVADMENMSHKIPS  
NSIDVVISNGAFCLAPNKEKAFRELYRVLKPGGRISVCTTTTQEEENLEPGISWPLCMKM  
IAKNDLKPLCEKIGFTDVVIDDSNSEMSMEIPDEILEESNPGRSKVHVGGSDFDHLEDYD  
MDAICARVCVAKKPLA  
>comp14531\_c0\_seq4; 239 1 2214 LEN=4214; translated  
LGGQLKRENIFVVIGAAPFPISSTVSVQPPIATIPDFSRFEPKHKLTVGVCLFNQYRHR  
TTQSGSMATNCGRQSFMQHIWHRLVGARGAGSIFPDPLSSLTEPAEPKHPNFGKISEHPS  
KDIARHKLVLFLGIEHSMPPIIISFQREIQAEMNKQADKLVILEHFSFDLQGLLDRYMND  
IDFEQLVDEYHSRGEEGHLEPYRDLEDAKRQGVHLHAGFLPRKYARMLMKDGEKPALE  
AASEWLPENVNLDSSDFHYNVFESELLSGRSIYDSIVHNNGKNDSSNGGNGGGCTREQEGSL  
PNSNEPSDQFRNIFKAQVLKDEAMAHRTGLIKKEEDGTGASNEKFLVIAGNGHLLHYCG  
VPERVLRNPEIAADTCLVISENTTSDSLMGGENHNRDVCERHSGHCNNNI INNNNNKIN  
KNADGECVNHKEKTDITAFLOSRFGREGSNPADFMFYFYEIPEEILTEWDVKEETKSAYDK  
VGDTANIPGNLSKAAWIMHSLGYTEEQFDAAGPDVYNFQGVGNPHLQANIQKGDVLDVG  
SGLGIDSTIACHATGPEGIVIGIDISEKETKHALRRAREQNLNAHFVADMENMSHKIPS  
NSIDVVISNGAFCLAPNKEKAFRELYRVLKPGGRISVCTTTTQEEENLEPGISWPLCMKM  
IAKNDLKPLCEKIGFTDVVIDDSNSEMSMEIPDEILEESNPGRSKVHVGGSDFDHLEDYD  
MDAICARVCVAKKPLA  
>comp14531\_c0\_seq5; 239 1 2214 LEN=4620; translated

LGGQLKRENIFVVGAAFPFISSTVSVQPPIATIPDFSRFEPKHKLTVGVCLFNQYRHTTQSGSMATNCGRQSFQHIWHRLVGARGAGSIFPDPLSSLTEPAEPKHPNFGKISEHPSKDIARHKLVLFLGELIHSMPPIISFQREIQAEMNKQADKLVILEHFSFDLQGLLDRYMNDIDFEQLVDEYHSRGEEGHLEPYRDLEDAKRQGVHLHAGFLPRKYARMLMKDGEKPALEAASEWLPENVNLDSSDFHYNVFESLLSGRSIIYDSIVHNNGNKNSNGGNGGGCTREQEGLPNSNEPSDQFRNIFKAQVLKDEAMAHRTGLIKKEEDGTGASNEKFLVIAGNGHLLHYCGVPERVLRNPEIAADTCLVISENTTSDSLMGGENHNRDVCERHSGHCNNNIINNANNKINKNADGECVNHKEKTDITAFLOSRFREGSNPADFMFYFYEIPEEILTEWDVKEETKSAYDKVGDANIIPGNLKAAMIMHSLGYTEEQFDAAGPDVYNFQGVGNPHLQANIQKGDVLDVGSGLGIDSTIACHATGPEGIVIGIDISEKETKHALRRAREQNLNAHFVADMENMSHKIPNSIDVVISNGAFCLAPNKEKAFRELYRVLKPGGRISVCTTTTQEEENLEPGISWPLCMKMFIAKNDLKPLCEKIGFTDVVIDDSNSEMSMEIPDEILEESNPGRSKVHVGGSDFDHLEDYDMDAICARVCVAKKPLA

>comp14531\_c0\_seq6; 239 1 2214 LEN=4200; translated  
LGGQLKRENIFVVGAAFPFISSTVSVQPPIATIPDFSRFEPKHKLTVGVCLFNQYRHTTQSGSMATNCGRQSFQHIWHRLVGARGAGSIFPDPLSSLTEPAEPKHPNFGKISEHPSKDIARHKLVLFLGELIHSMPPIISFQREIQAEMNKQADKLVILEHFSFDLQGLLDRYMNDIDFEQLVDEYHSRGEEGHLEPYRDLEDAKRQGVHLHAGFLPRKYARMLMKDGEKPALEAASEWLPENVNLDSSDFHYNVFESLLSGRSIIYDSIVHNNGNKNSNGGNGGGCTREQEGLPNSNEPSDQFRNIFKAQVLKDEAMAHRTGLIKKEEDGTGASNEKFLVIAGNGHLLHYCGVPERVLRNPEIAADTCLVISENTTSDSLMGGENHNRDVCERHSGHCNNNIINNANNKINKNADGECVNHKEKTDITAFLOSRFREGSNPADFMFYFYEIPEEILTEWDVKEETKSAYDKVGDANIIPGNLKAAMIMHSLGYTEEQFDAAGPDVYNFQGVGNPHLQANIQKGDVLDVGSGLGIDSTIACHATGPEGIVIGIDISEKETKHALRRAREQNLNAHFVADMENMSHKIPNSIDVVISNGAFCLAPNKEKAFRELYRVLKPGGRISVCTTTTQEEENLEPGISWPLCMKMFIAKNDLKPLCEKIGFTDVVIDDSNSEMSMEIPDEILEESNPGRSKVHVGGSDFDHLEDYDMDAICARVCVAKKPLA

>comp14531\_c0\_seq7; 249 471 1267 LEN=1928; translated  
MAHQRTIAFXALKATEIPAASPAEAIKIDIKSKIDTEIKPTKRGLSASPDERAKIDSLVRSLEELCPYDEPARMPNMEGKWIVEYTTAPPPSNGKLGPFEGIARQIIDLENGTYVNYLSVPGDIEKEFLSAKLEATFEEDWGTLLKDDRDGDSQGDSTDAIGDSSVSVSTEPASTNWFQSSINSIFQTQNKAAVDYDADSWKVDFTLTIKLFGFTLIQKSFDEGTSRVWKMYSYLDSSGTRIVRAGRTGKDEDAMLFYMKKE

>comp14531\_c0\_seq8; 239 1 2214 LEN=4606; translated  
LGGQLKRENIFVVGAAFPFISSTVSVQPPIATIPDFSRFEPKHKLTVGVCLFNQYRHTTQSGSMATNCGRQSFQHIWHRLVGARGAGSIFPDPLSSLTEPAEPKHPNFGKISEHPSKDIARHKLVLFLGELIHSMPPIISFQREIQAEMNKQADKLVILEHFSFDLQGLLDRYMNDIDFEQLVDEYHSRGEEGHLEPYRDLEDAKRQGVHLHAGFLPRKYARMLMKDGEKPALEAASEWLPENVNLDSSDFHYNVFESLLSGRSIIYDSIVHNNGNKNSNGGNGGGCTREQEGLPNSNEPSDQFRNIFKAQVLKDEAMAHRTGLIKKEEDGTGASNEKFLVIAGNGHLLHYCGVPERVLRNPEIAADTCLVISENTTSDSLMGGENHNRDVCERHSGHCNNNIINNANNKINKNADGECVNHKEKTDITAFLOSRFREGSNPADFMFYFYEIPEEILTEWDVKEETKSAYDKVGDANIIPGNLKAAMIMHSLGYTEEQFDAAGPDVYNFQGVGNPHLQANIQKGDVLDVGSGLGIDSTIACHATGPEGIVIGIDISEKETKHALRRAREQNLNAHFVADMENMSHKIPNSIDVVISNGAFCLAPNKEKAFRELYRVLKPGGRISVCTTTTQEEENLEPGISWPLCMKMFIAKNDLKPLCEKIGFTDVVIDDSNSEMSMEIPDEILEESNPGRSKVHVGGSDFDHLEDYDMDAICARVCVAKKPLA

>comp14531\_c0\_seq9; 239 1 2214 LEN=4309; translated  
LGGQLKRENIFVVGAAFPFISSTVSVQPPIATIPDFSRFEPKHKLTVGVCLFNQYRHTTQSGSMATNCGRQSFQHIWHRLVGARGAGSIFPDPLSSLTEPAEPKHPNFGKISEHPSKDIARHKLVLFLGELIHSMPPIISFQREIQAEMNKQADKLVILEHFSFDLQGLLDRYMNDIDFEQLVDEYHSRGEEGHLEPYRDLEDAKRQGVHLHAGFLPRKYARMLMKDGEKPALEAASEWLPENVNLDSSDFHYNVFESLLSGRSIIYDSIVHNNGNKNSNGGNGGGCTREQEGLPNSNEPSDQFRNIFKAQVLKDEAMAHRTGLIKKEEDGTGASNEKFLVIAGNGHLLHYCGVPERVLRNPEIAADTCLVISENTTSDSLMGGENHNRDVCERHSGHCNNNIINNANNKINKNADGECVNHKEKTDITAFLOSRFREGSNPADFMFYFYEIPEEILTEWDVKEETKSAYDKVGDANIIPGNLKAAMIMHSLGYTEEQFDAAGPDVYNFQGVGNPHLQANIQKGDVLDVGSGLGIDSTIACHATGPEGIVIGIDISEKETKHALRRAREQNLNAHFVADMENMSHKIPNSIDVVISNGAFCLAPNKEKAFRELYRVLKPGGRISVCTTTTQEEENLEPGISWPLCMKMFIAKNDLKPLCEKIGFTDVVIDDSNSEMSMEIPDEILEESNPGRSKVHVGGSDFDHLEDYDMDAICARVCVAKKPLA

MDAICARVCVAKKPLA

>comp14531\_c0\_seq10; 745 1 2214 LEN=2469; translated  
LGGQLKRENIFVVGIAAPFPISSTVSVQPPIATIPDFSRFEPKHKLTVGVCLFNQYRHR  
TTQSGSMATNCGRQSFQHIWHRLVGARGAGSIFPDPLSSLTEPAEPKHPNFGKISEHPS  
KDIARHKLVLFLGIEHSMPPPIISFQREIQAEMNKQADKLVILEHFSFDLQGLLDRYMND  
IDFEQLVDEYHSRGEEGHLEPYRDLEDAKRQGVHLHAGFLPRKYARMLMKDGEKPALE  
AASEWLPENVNLDSSDFHYNVFESLLSGRSIIYDSIVHNNGKNDSSNGGNGGGCTREQEGSL  
PNSNEPSDQFRNIFKAQVLKDEAMAHRTGLIKKEEDGTGASNEKFLVIAGNGHLLHYCG  
VPERVLRENPEIAADTCLVISENTTSDSLMGGENHNRDVCERHSGHCNNNI INNNNNKIN  
KNADGECVNHKEKTDITAFLOSRFGREGSNPADFMFYFYEIPEEILTEWDVKEETKSAYDK  
VGDTANIPGNLSKAAWIMHSLGYTEEQFDAAGPDVYNFQGVGNPHLQANIQKGDVLDVG  
SGLGIDSTIACHATGPEGIVIGIDISEKETKHALRRAREQNLNAHFVADMENMSHKIPS  
NSIDVVISNGAFCLAPNKEKAFRELYRVLKPGGRISVCTTTTQEENLEPGISWPLCMKMF  
IAKNDLKPLCEKIGFTDVVIDDSNSEMSMEIPDEILEESNPGRSKVHVGGSDFDHLEDYD  
MDAICARVCVAKKPLA

>comp14531\_c0\_seq11; 249 471 1267 LEN=2334; translated  
MAHQRTIAFXTALKATEIPAASPAEAIKIDIKSKIDTEIKPTKRGLSASPDERAKIDSLVR  
SLEELCPYDEPARMPNMEGKWIVEYTTAPPPSNGKLGPFEGIARQIIDLENGTYVNYLSV  
PGDIEKEFLSAKLEATFEEDGTLLKDDRQDSDAIGDSSVSVSTEPASTNWFQ  
SSINSIFQTQNKKAADVYGADSWKVDFTLTIKLFQFTLIQKSFDEGTSRVWKMYSYLD  
SGTRIVRAGRTGKDEDAMLFYMKKE

>comp14531\_c0\_seq12; 239 1 2214 LEN=4701; translated  
LGGQLKRENIFVVGIAAPFPISSTVSVQPPIATIPDFSRFEPKHKLTVGVCLFNQYRHR  
TTQSGSMATNCGRQSFQHIWHRLVGARGAGSIFPDPLSSLTEPAEPKHPNFGKISEHPS  
KDIARHKLVLFLGIEHSMPPPIISFQREIQAEMNKQADKLVILEHFSFDLQGLLDRYMND  
IDFEQLVDEYHSRGEEGHLEPYRDLEDAKRQGVHLHAGFLPRKYARMLMKDGEKPALE  
AASEWLPENVNLDSSDFHYNVFESLLSGRSIIYDSIVHNNGKNDSSNGGNGGGCTREQEGSL  
PNSNEPSDQFRNIFKAQVLKDEAMAHRTGLIKKEEDGTGASNEKFLVIAGNGHLLHYCG  
VPERVLRENPEIAADTCLVISENTTSDSLMGGENHNRDVCERHSGHCNNNI INNNNNKIN  
KNADGECVNHKEKTDITAFLOSRFGREGSNPADFMFYFYEIPEEILTEWDVKEETKSAYDK  
VGDTANIPGNLSKAAWIMHSLGYTEEQFDAAGPDVYNFQGVGNPHLQANIQKGDVLDVG  
SGLGIDSTIACHATGPEGIVIGIDISEKETKHALRRAREQNLNAHFVADMENMSHKIPS  
NSIDVVISNGAFCLAPNKEKAFRELYRVLKPGGRISVCTTTTQEENLEPGISWPLCMKMF  
IAKNDLKPLCEKIGFTDVVIDDSNSEMSMEIPDEILEESNPGRSKVHVGGSDFDHLEDYD  
MDAICARVCVAKKPLA

>comp14531\_c0\_seq13; 239 1 2214 LEN=4568; translated  
LGGQLKRENIFVVGIAAPFPISSTVSVQPPIATIPDFSRFEPKHKLTVGVCLFNQYRHR  
TTQSGSMATNCGRQSFQHIWHRLVGARGAGSIFPDPLSSLTEPAEPKHPNFGKISEHPS  
KDIARHKLVLFLGIEHSMPPPIISFQREIQAEMNKQADKLVILEHFSFDLQGLLDRYMND  
IDFEQLVDEYHSRGEEGHLEPYRDLEDAKRQGVHLHAGFLPRKYARMLMKDGEKPALE  
AASEWLPENVNLDSSDFHYNVFESLLSGRSIIYDSIVHNNGKNDSSNGGNGGGCTREQEGSL  
PNSNEPSDQFRNIFKAQVLKDEAMAHRTGLIKKEEDGTGASNEKFLVIAGNGHLLHYCG  
VPERVLRENPEIAADTCLVISENTTSDSLMGGENHNRDVCERHSGHCNNNI INNNNNKIN  
KNADGECVNHKEKTDITAFLOSRFGREGSNPADFMFYFYEIPEEILTEWDVKEETKSAYDK  
VGDTANIPGNLSKAAWIMHSLGYTEEQFDAAGPDVYNFQGVGNPHLQANIQKGDVLDVG  
SGLGIDSTIACHATGPEGIVIGIDISEKETKHALRRAREQNLNAHFVADMENMSHKIPS  
NSIDVVISNGAFCLAPNKEKAFRELYRVLKPGGRISVCTTTTQEENLEPGISWPLCMKMF  
IAKNDLKPLCEKIGFTDVVIDDSNSEMSMEIPDEILEESNPGRSKVHVGGSDFDHLEDYD  
MDAICARVCVAKKPLA

>comp14531\_c0\_seq14; 239 1 2214 LEN=4715; translated  
LGGQLKRENIFVVGIAAPFPISSTVSVQPPIATIPDFSRFEPKHKLTVGVCLFNQYRHR  
TTQSGSMATNCGRQSFQHIWHRLVGARGAGSIFPDPLSSLTEPAEPKHPNFGKISEHPS  
KDIARHKLVLFLGIEHSMPPPIISFQREIQAEMNKQADKLVILEHFSFDLQGLLDRYMND  
IDFEQLVDEYHSRGEEGHLEPYRDLEDAKRQGVHLHAGFLPRKYARMLMKDGEKPALE  
AASEWLPENVNLDSSDFHYNVFESLLSGRSIIYDSIVHNNGKNDSSNGGNGGGCTREQEGSL  
PNSNEPSDQFRNIFKAQVLKDEAMAHRTGLIKKEEDGTGASNEKFLVIAGNGHLLHYCG  
VPERVLRENPEIAADTCLVISENTTSDSLMGGENHNRDVCERHSGHCNNNI INNNNNKIN  
KNADGECVNHKEKTDITAFLOSRFGREGSNPADFMFYFYEIPEEILTEWDVKEETKSAYDK  
VGDTANIPGNLSKAAWIMHSLGYTEEQFDAAGPDVYNFQGVGNPHLQANIQKGDVLDVG  
SGLGIDSTIACHATGPEGIVIGIDISEKETKHALRRAREQNLNAHFVADMENMSHKIPS

NSIDVVISNGAFCLAPNKEKAFRELYRVLKPGGRISVCTTTTQEENLEPGISWPLCMKMF  
IAKNDLKPLCEKIGFTDVVIDDSNSEMSMEIPDEILEESNPGRSKVHVGGSDFDHLEDYD  
MDAICARVCVAKKPLA

>comp14531\_c0\_seq15; 239 1 2214 LEN=4148; translated  
LGGQLKRENIFVVIGAAPFPISSTVSVQPPIATIPDFSRFEPKHKLTVGVCLFNQYRHR  
TTQSGSMATNCGRQSFQHIWHLVVGARGAGSIFPDPLSSLTEPAEPKHPNFGKISEHPS  
KDIARHKLVLFLGELIHSMPPIISFQREIQAEMNKQADKLVILEHFSFDLQGLLDRYMND  
IDFEQLVDEYHSRGEEGHLEPYRDLEDAKRQGVHLHAGFLPRKYARMLMKDGEKPALE  
AAEWLPEENVLDSSDFHYNVFESELLSGRSIYDSIVHNNGKNDSSNGGNGGGCTREQEGSL  
PNSNEPSDQFRNIFKAQVLKDEAMAHRTGLIKKEEDGTGASNEKFLVIAGNGHLLHYCG  
VPERVLRNPEIAADTCLVISENTTSDSLMGGENHNRDVCERHSGHCNNNIINNMMNKIN  
KNADGECVNHKEKTDITAFLOSRFGREGSNPADFMFYFYEIPEEILTEWDVKEETKSAYDK  
VGDANIPGNLSKAAWIMHSLGYTEEQFDAAGPDVYNFQGVGNPHLQANIQKGDVLDVG  
SGLGIDSTIACHATGPEGIVIGIDISEKETKHALRRAREQNLNAHFVADMENMSHKIPS  
NSIDVVISNGAFCLAPNKEKAFRELYRVLKPGGRISVCTTTTQEENLEPGISWPLCMKMF  
IAKNDLKPLCEKIGFTDVVIDDSNSEMSMEIPDEILEESNPGRSKVHVGGSDFDHLEDYD  
MDAICARVCVAKKPLA

>comp14531\_c0\_seq16; 239 1 2214 LEN=4162; translated  
LGGQLKRENIFVVIGAAPFPISSTVSVQPPIATIPDFSRFEPKHKLTVGVCLFNQYRHR  
TTQSGSMATNCGRQSFQHIWHLVVGARGAGSIFPDPLSSLTEPAEPKHPNFGKISEHPS  
KDIARHKLVLFLGELIHSMPPIISFQREIQAEMNKQADKLVILEHFSFDLQGLLDRYMND  
IDFEQLVDEYHSRGEEGHLEPYRDLEDAKRQGVHLHAGFLPRKYARMLMKDGEKPALE  
AAEWLPEENVLDSSDFHYNVFESELLSGRSIYDSIVHNNGKNDSSNGGNGGGCTREQEGSL  
PNSNEPSDQFRNIFKAQVLKDEAMAHRTGLIKKEEDGTGASNEKFLVIAGNGHLLHYCG  
VPERVLRNPEIAADTCLVISENTTSDSLMGGENHNRDVCERHSGHCNNNIINNMMNKIN  
KNADGECVNHKEKTDITAFLOSRFGREGSNPADFMFYFYEIPEEILTEWDVKEETKSAYDK  
VGDANIPGNLSKAAWIMHSLGYTEEQFDAAGPDVYNFQGVGNPHLQANIQKGDVLDVG  
SGLGIDSTIACHATGPEGIVIGIDISEKETKHALRRAREQNLNAHFVADMENMSHKIPS  
NSIDVVISNGAFCLAPNKEKAFRELYRVLKPGGRISVCTTTTQEENLEPGISWPLCMKMF  
IAKNDLKPLCEKIGFTDVVIDDSNSEMSMEIPDEILEESNPGRSKVHVGGSDFDHLEDYD  
MDAICARVCVAKKPLA

>comp14532\_c0\_seq1; 752 202 2106 LEN=2265; translated  
MSPQIDNKETGLRKRNIHRQEKRTGIGGTPDTKNSKESLLRSLIPTPLRHCLSGQENDK  
TQNMMLLKPHEHEDTDSMPPTKSCSDFSSSSTSLSDKEGDNSTCGKAFPPDRSECTPLN  
VSYNTCTTVSSNSESSNLDSYDALDSECDYETGDNRFSLTFRLSYLFTVTLVVMADGL  
QGTHLYVLYEGYGFVSVASLYCLGFITGALTAPITGPLIDRFGRKKSALLYCALEVGINML  
EQFPFLSGLIVSRVVGGITNLLSTVFETWLDTEYRNRGFAKEDYETLMRDSVVVSNLAA  
IASGYLAHVLAESFGNTGPFEGAVTCTAVAFVVIFFLWNENYKIGQEAEGDENNSKSSL  
TQLSETLTFIRSDSRVLRVCITQGLTLGSLHIFIFLWSPLLKEFAAGSNGAVWGLDTQGE  
PAYGLIFGAFMAAGVLGGLCSSTVRKFVTFILSPLTKGQVPETVTVDDDEEPPVRAMDI  
EFQ GALCYFFCAML L LAPSLLPATGEYTF SIALF SFIAYEF SVGIYSPCEGVMRSIYIP  
PESR GSVMTVPSIIVNVAVAMAVVSTEAI SRQSALFVIAMMMTTCGLLQLSLVSKKEWAS  
LFR IDRVRQSMSSRLSLSSFGDDMSWTSALRREKVE

>comp14533\_c0\_seq1; 637 186 1466 LEN=2258; translated  
MNLNSKSPMKLSLIAGTIIAVGAAIAGKGSVTPPNIPAGSSTGLIPPWF AFKIGCKLHE  
IFSFLAFATQPPDAYIMDLSTAFWQSEVAYTLSYHKVDFVSKNSATCEEVADGLELQA  
FVVCQYMEAGKNLNLFAKDASTKQFSLTPHGTLVTEGLADFLLMINGQQRHGWRAVTT  
DLIKNGGGETKKS GF E IHHGKPVWDYYASHPEEEAEFGAMKSLSPVASGALLLDWHPPS  
EDAVVCDIGGGIGSLLEGEILLHYPKMSGIVFDLPDVAKRAGEYMASIGLSDRTEAIAGSF  
LEEFPAELSKCDAFIMRYVIHDWGDEENVKILENIRAVASKTEKKKVVVMDQILDGAP  
SFLETAKSLMSLNMVAACSYGARERSTADLVELFQEQAGYDKLDFDGSTGTFIPLRTIHS  
LLQVEV

>comp14534\_c0\_seq1; 364 886 1707 LEN=1936; translated  
MALRNERPILETRLDADDGLHKQFIEYIQHTALKRFQPSKDDEDAEDGNIIPRWLYWCSR  
RHIEWHSDTDASVPDEEKRRIGSPGLGYMNVVQHNLKCVTPGITVGYNVGTDKKSNNIVD  
VPQYDHDKLYKNVRNSLDCYSTNDRKNIPDAAEDETNGSCLELVEDFLFAIRSRTWTS  
GMLGVNLVSDNVLFGGDGDRQEDFGRMVVSFSEDAFVTEAKVEETQRFLIENKKRIAHE  
NLLGQCSSGHSKDTAKKELQQIIDDLERKHKG

>comp14534\_c0\_seq2; 364 759 1580 LEN=1809; translated  
MALRNERPILETRLDADDGLHKQFIEYIQHTALKRFQPSKDDEDAEDGNIIPRWLYWCSR

RHIEWHSDTDASVPDEEKRRIGSPGLGYMNVVQHNLKCVTPGITVGYNVGTDKKSNNIVD  
VPQYDHDKLYKNVRNSLDCYSTNDRKNIPDAAEDETNGSCLELVEDFLFCAIRSRTWTS  
GMLGVNLVSDNVLFGGDRQEDFGRMVVSFSEDAFSVTEAKVEETQRFLIENKRIAHE  
NLLGQCSSGHSCKDTAKKELQQIIDDLERKHKG

>comp14535\_c0\_seq1; 842 254 2782 LEN=2796; translated  
MSSTAPTTHSWEAQKENAAPLERGRNVSSFGLRQSVTDKQDLQEKLQNYESLVRPSEDPK  
VKEMDDPLSHWLSYIKFYQNSFPSTRENFLIIERCVRALVKMKYRNDDRFVSVCAKY  
ADKTKDPGQVFKYLHQQKVGQAIALFWIAWAFVAEKDSDFPFAEQIFKKGISKSAEPLQM  
LKL RHKQFQRRMSRHWLNSKSTNDQLNDEYDSGEQNRPSRSTLGGIPRDLRRNDRSQR  
VQHGTSENTLTRRPNGTMRPGNNKNSNTVCNKGGFSIFVEEEGENAYNLDQDLTENKRG  
IARDSDRKENTLAAERWNERGGIQPTYAKTSAAPSQSKGMPAFSVFVDEECAQENDRQ  
EKEQEKQIDLHRQVRDRRTFKERHSEGMAEKLFRDPVRYMKNPNQLQSENLELQKLPENQ  
KVDKLEIERKNRAGFNKRLKLTENGKEQCFFEARAKAGGYTLQSDSSNNFNLLQNTSKAD  
QSSQMDLDDGEAIIIDVSMSEFLSRSMQCTTDRKIIIPNERLESDETEGKRLFGHADESFGA  
GLNQTAISHASSTVNEIDIVGVGLHGKQEEETINTKFAMRELSMMFSSPAFGVGSERRLV  
DHSASKIDELATYEGQPDESFGNVGDEIRLDNSICNSGREGICGKDRNNNDKSGFVIFQ  
DENACDSNKVQISGGFQIYDEGNEDPTRRETNTTGENNELRAGFQIYVEGNENGIGRRS  
AEKSRENTHSIGFQIYEEEEYQEEENIDENKLESGETASISDAIALLDGKIEPDGEASLSS  
SEENKKNLNGGEDTADLSLFNEIFQEKSREDEEKSNGCQMKRFKVAASSELHTGDEGGYNS  
VR

>comp14536\_c1\_seq1; 750 280 2679 LEN=2679; translated  
MVPTPPVPRREEERVVHAGVAPEGWDPMPRQANESTEKLMDDPPIPVSDPYGWLRRDDKRE  
SKEVFQHLAENHYTQEVTKHLKGLQEELYQEFLSRIKETDYTTTPRPRGNWYYSRTFEG  
KSYTQYCRAPKTSEKYGTIDWDGSKESPILPGEAYLDVNDLGKDKPYCSIGGISSSPSL  
KLIAYSVDYSGDEKYEMYVRNLETGEDTPIKILGGEQDGELETSGDLAWGKDDSTLYYM  
TMDDQHRPYRLYQRKDWNGTETTDTLLKEESDDLYWCGVGKSLDGNYIFFEAASSETSEI  
WYLP TSEEKTTSEMRCIAPRRNKVLYEVDHGHGNWWIWTNVDESPNMKLMKAPARANCAD  
DWKLVEDADGKPLFDGSLSRSLDSVTVLGSHVVVQGREGGIPRIWVHATDTKSVERLEFE  
EAAHDVCLGAHYEFDANSIAVHYDSLTPPQSLEISLDEKESGGERTVLKSKTVPGYEKDS  
YGC DRLEVL SRDGTTKIPISVVYRKSTMEKVENGERVPVHLYGYGSYGSCCEADFDSTR  
LPLERGMIVYIAHIRGGGEMGRQWYEEPNGAKYLCKKNTFNDVFDVARFLVSGWTTDLL  
SIEGRSAGMVLGSSINQAPELFRVAILGVFPFVDVATMTDSTIPLTSGEWVEWGNPNEE  
KYFDYMEYSPMNSVQSGARYPSCWL TGG LHDPRVAYWEPAKFAATLRHANPGSEHPVCL  
KMDLSAGHFSASDRYKYLRELAIDYSFLLDQLGLVGGEASSGVRPQREIGSFETKQRYSN  
NNAAAATVLRNILKNNDDAA

>comp14537\_c0\_seq1; 493 295 1884 LEN=2396; translated  
MVIHRTPNGTRRSRTNKEASPVLLAAAVVVS LAAATANTNSFVSAWTTGNNGRSTHRSHA  
GGIIATATALRMSAVNETESSTASLPDFGKTTVEVDKIKLEKRRKREPKEYDTKVG  
I EENKWRSDLFGSSLVDQTMDELKNDKDFQTTQKRIKEVGLAGISKEERKQRRRALDKL  
VQPFKFLTEQITNKKEEDAATPTIGTKSVKPYRLQRKPPTILQINIGLYCNQACGHCHV  
ESSPLMTAEMMTAETAARCLELLKNTPSITTLDTITGGAPELNKHFRYL VSTARAIRGKDL  
I I IDRCNLTVLQEPGQEDLVDFLKEHDVHVIASLPCYSAENVDTQRGSGVFERSIAALLA  
LNEAGYGRDGREAETDDGPRQLQDLVYNPLGAFLLPPPQENLQVQYQKQLADNFGILFDQL  
FTITNMPIKRFADFLHRRGELAEYMDLLVRNFPNPD TVQQLMCLDTINIGWDGKIYDCDFN  
QQLYAVGVDSIHRGGKTVFDIESLDDLDRVIRTDNHCFCGTAGMGSS

>comp14538\_c0\_seq1; 499 156 1367 LEN=1946; translated  
MNNFILPFLAIASLFGNYRYASVGLV LALSEANKSSTIVSNGLRNVGNTCYMNAQLQCAFH  
IEAVRDIATSVTPSQMLSSADANDDESVEVDREETTEAALALKEVFENMIEAATNQS  
LPYMPRSFCARLGIPPMVQDSQEFWKLLLPAAAGVEELSDLYKGYEDYISAIDGSGREK  
RRDEVFLDLSLDVATR  
KGLPPILQFHLKRFNYDWQTDTTKLNRF TFPKSLDLASICVDVEGSDPRAEYELQAVI  
VHMGEFDIGHYYAYVRPDIESNTWYRFNDDNVDEVT FEDVTADSFGGQHQNSDKGGGLHR  
RIGRLFRNRNKN SFGWGGRTSNAYVLQYVRRNGTKCLDHTYD

>comp14538\_c0\_seq2; 322 156 746 LEN=807; translated  
MNNFILPFLAIASLFGNYRYASVGLV LALSEANKSSTIVSNGLRNVGNTCYMNAQLQCAFH  
IEAVRDIATSVTPSQMLSSADANDDESVEVDREETTEAALALKEVFENMIEAATNQS  
LPYMPRSFCARLGIPPMVQDSQEFWKLLLPAAAGVEELSDLYKGYEDYISAIDGSGREK  
RRDEVFLDLSLDVATR

>comp14539\_c0\_seq1; 647 168 1479 LEN=1533; translated  
MEQEAKAEKQKEAERKQREQDEKQSRKSQLNALKAAMTEIKQTQVDEPPSSLRRAVMSN

SNSQVQILKKEHAPATTAKQKSQPSFARVEKEDASIDGSWRRAPAPPKASSHSAPLPPK  
HSYTI GPPPAAPSQQNNKIPHKAE LQPDRSSVKFTRNRSKPSDDTKAKEKAKENGSGDKS  
DNNKTAEDTVQGDRGRNQQRVIVAFDDASGHPSSKTKNNNRKNRQNKISKNDNGDDGENA  
PTAQKSKAQRDCCNDEDVASTKTSSSRGSSTLHSRSSRGGRTAGGGRNKKNAHRDRSR  
NSKGGRRGRGREGRGLQQKPSYKTNASSGNDGESYGNRAKNDDEEKRHKTRIGEAEAP  
GVGKELVA ILGEGEGGDRQVGI AEEAMHPVDVVKAAAEEMVTVEEEGEKEEEEGADQVRD  
LMGNQSTVTKLVKTSR

>comp14539\_c0\_seq2; 895 120 1863 LEN=1917; translated  
MSSPMRWADSDSEDSDEEYQIEKQESSDTEEAPLPERSSDKTDGNSYLQRRERQQQHHQRP  
SSFRNPKKGGQQQHYGGGGNYGGGRGKNRVPQQKQRHPNQNRGRQGPDNWKELAKASSRF  
ASDSNNSQNIDGSAWMAQRKAKMEQEAKAEKQKEAERKQREQDEKQSRKSQLNALKA  
AMTEIKQTQVDEPPSSLRAAVMSNSNSQVQILKKEHAPATTAKQKSQPSFARVEKEDASI  
DGSWRRAPAPPKASSHSAPLPPKHSYTI GPPPAAPSQQNNKIPHKAE LQPDRSSVKFTR  
NRSKPSDDTKAKEKAKENGSGDKSDNNKTAEDTVQGDRGRNQQRVIVAFDDASGHPSSK  
KNNNRKNRQNKISKNDNGDDGENAPTAQKSKAQRDCCNDEDVASTKTSSSRGSSTLHSRS  
SRGGRTAGGGRNKKNAHRDRSRNSKGGRRGRGREGRGLQQKPSYKTNASSGNDGES  
YGNRAKNDDEEKRHKTRIGEAEAPGVGKELVA ILGEGEGGDRQVGI AEEAMHPVDVVKAA  
AAEEMVTVEEEGEKEEEEGADQVRDLMGNQSTVTKLVKTSR

>comp14540\_c0\_seq1; 375 92 1360 LEN=1527; translated  
MLSKRSIISALLTGAGTATSTFALPIAHEVDVERIVNGVQSEPGDFPYFVHYGRCCGALV  
APDIVLTAHCGNMRGMVIVGAYELNSTAEGAQLRHCDQYIADPMYNIDTNNDNFALCK  
LDEPVTIDQSFVTLELNEDDAFPAEGMDLLVMGLGATSGMLSGPDDNFPLPDYLNVTIP  
AISDESCVEFFLSGIQLLYPHDLTETLCAGDIENGRDSCFGDSGGPLVKRTYRGDGTFFV  
DTLVGIVSGGPAFLTETGGLFACFGPGIYSRTSRAKWKSTSCVLNLSVASFCDDIKRK  
PLPSSGAGKHLSEIEVSGNDASAIQWLSLQDSNGQFVMIRKYSTWQEQMYLDPDECYTWR  
NTASYDASIEVSYKIALNGETITGHGQFGSSKTTETICTSALPEMKSTKAPKMKKKGKHS  
KA

>comp14541\_c0\_seq1; 403 320 1306 LEN=1715; translated  
MTTTPRTTITTA AAAAKTSGKSSSSPTSAQHLHRDWHLHLHPMDGEFNE SDSFSMLLLD  
PRSCILRVGADAGRLCTVGNQMLLDQRSNASCGIDQAGGTKETPTPTSASGDEHLIHALS  
ELFVDLCFTAQSLGLDWVKSIRSKMALNAKKYPVEHCKGKSGKYTSYSHLTGITTTNQST  
MDYGGDTKDDDGNGESDACSDTDNVHTALRSLESFAGEHLPTLSEDIREFAEARLWAR  
YHKPRNLILALLGEAGELAEVLQWDGDDEKGGANTRPTIDPSTLDKLSQELADVSIYAIR  
LATVCGVVGGLGDSLLVRATGPPTRLFPE

>comp14541\_c0\_seq2; 244 1 707 LEN=1116; translated  
XGTKETPTLKATATSASGDEHLIHALSELFVDLCFTAQSLGLDWVKSIRSKMALNAKKYP  
VEHCKGKSGKYTSYSHLTGITTTNQSTMDYGGDTKDDDGNGESDACSDTDNVHTALRS  
LESFAGEHLPTLSEDIREFAEARLWAR YHKPRNLILALLGEAGELAEVLQWDGDDEKGG  
ANTRPTIDPSTLDKLSQELADVSIYAIRLATVCGVVGGLGDSLLVRATGPPTRLFPE

>comp14542\_c0\_seq1; 138 1 395 LEN=645; translated  
GLGGRRSGQSPEASPWTRLGSVACFSPMLLAIFIAVSRVHDNFHHPADVVGALLGGS  
IASLMFGIWIYVLDLRLRFVGRVGRDCDCXNNNNNNGNASGAMFAAIRQEFPHSPMWF  
GVFVALDALPAQRL

>comp14542\_c0\_seq2; 173 1 977 LEN=977; translated  
XCNNKFRIDRPPTQHFTNEQEPSTTKQRGCKQRMQRHRKAAHLRKGPNKTKTTATATA  
TETKAERTMSFDYDEADPSPADDESAGNPVDRNGSDRGRCSPSGTSRAGRWIEVLLCFL  
VPAGIALEFGTQPHQRMPVEQTTTEDGDSITIE SYLFGFPRRDET VSPPLMFALAI  
AVPFLLQVGLIAVLQKRGA SLRRDALHKTLCVYFMATGWTQTLTNLAKLYVGYLRPV  
FFFEYCQPDGDYGECTDES GAHKGRVSPSGHASMSVCGLLLFSLFLEDTLGLSAW  
ERGLGGGRRSGQSPEASPWTRLGSVACFSPMLLAIFI

>comp14542\_c0\_seq4; 70 1 213 LEN=437; translated  
GLGGRRSGQSPEASPWTRLGSVACFSPMLLAIFIAVSRVHDNFHHPADVVGALLGGS  
IASLMFGIWR

>comp14543\_c0\_seq1; 588 92 1714 LEN=2807; translated  
MADLTVFAESLIATVARAFYDDDAVCLIDVLIRDKFLRDDMAKRLTMPAKKLRSTLQFL  
QDEQLVKWETVDDL NQGSQSTKFWYIDYNHAVHTIRLRLHLLRKELEADENR  
SRSSSYFLCDGYKARRCNGRYSEEEAQMVDMNTGAFLCQECYLNYNPNP  
GPPVDTYTLRLVDNAD ELRRAVNNIRRVNQLSGKTVGSQQLRAGIYDLIQKVRGK  
GKAPITSNLPSENFALGRGS KRIEGTGRTAGIKTRKLQKEGVADTADSARNILV  
GGGKRTGFQSDLTFLKNAMGDGVHFC IEKGG SARANLLSQHHSNLQRK  
KRLLDAAATRVTTLLEQKENEEREK RKQEEEEER

ERREQENQTGENGRDNGDEHSNKHTKKEENGGGKTDEKTKKAVNGKVLLGTTGMDWLNDN  
ISSRAELDREMEKLRQQDREQEMLLLAATAEQNDVSHNARSKYIFLSDYIDPALQAPSLW  
DEKTRKMTFQSLYKKEIGRQASLLELPEYRETAGTFSSPPKGLMPSANVVDDRAVAWEDG  
>comp14543\_c0\_seq2; 530 92 1919 LEN=3012; translated  
MADLTVFAESLIATVARAFYDDDAVCLIDVLIRDKFLRDDDMAKRLTMPAKKLRSTLQFL  
QDEQLVKWETVDDLQGGGSQSTKFWYIDYNHAVHTIRLRLHLLRKELEADENRSRSSFY  
LCDGYKARRCNGRYSEEEAQQMVMNTGAFQECYLNYNPNPVPVDTYTLRLVDNAD  
ELRRAVNNIRRGXVSLGKKWFHTILKECRVVICALKDLRSGLEFYHCALLRESGKGRAXD  
LTEKLFSSISIVYWFRRWYDVVNVQLSGKTVGSQQLRAGIYDLIQKVRGK GKAPITSNLPS  
ENFALGRGSKRIEGTGRTAGIKTRKLQKEGVADTADSARNILVGGGKRTGFQSDLTFLKN  
AMGDGVHFCIEKGG SARANLLSQHHSNLQRKKRKLDDAAATRVGTTVTLLLEQKENEEREK  
RKQEEEEERERREQENQTGENGRDNGDEHSNKHTKKEENGGGKTDEKTKKAVNGKVLLGT  
TGMDWLNDNISSRAELDREMEKLRQQDREQEMLLLAATAEQNDVSHNARSKYIFLSDYID  
PALQAPSLWDEKTRKMTFQSLYKKEIGRQASLLELPEYRETAGTFSSPPKGLMPSANVVD  
DRAVAWEDG  
>comp14543\_c0\_seq3; 464 92 1857 LEN=2950; translated  
MADLTVFAESLIATVARAFYDDDAVCLIDVLIRDKFLRDDDMAKRLTMPAKKLRSTLQFL  
QDEQLVKWETVDDLQGGGSQSTKFWYIDYNHAVHTIRLRLHLLRKELEADENRSRSSFY  
LCDGYKARRCNGRYSEEEAQQMVMNTGAFQECYLNYNPNPVPVDTYTLRLVDNAD  
ELRRAVNNIRRVNVQLSGKTVGSQQLRAGIYDLIQKVRGK GKAPITSNLPS ENFALEEVR  
SELKGKYTXQELLIPCSVFECEQFLPDLTTGEWTVIHRSVYLPCHHFHNAEPGXTAGI  
KTRKLQKEGVADTADSARNILVGGGKRTGFQSDLTFLKNAMGDGVHFCIEKGG SARANLL  
SQHHSNLQRKKRKLDDAAATRVGTTVTLLLEQKENEEREK RKQEEEEERERREQENQTGEN  
GRDNGDEHSNKHTKKEENGGGKTDEKTKKAVNGKVLLGTTGMDWLNDNISSRAELDREME  
KLRQQDREQEMLLLAATAEQNDVSHNARSKYIFLSDYIDPALQAPSLWDEKTRKMTFQSL  
YKKEIGRQASLLELPEYRETAGTFSSPPKGLMPSANVVDDRAVAWEDG  
>comp14543\_c0\_seq4; 406 92 2062 LEN=3155; translated  
MADLTVFAESLIATVARAFYDDDAVCLIDVLIRDKFLRDDDMAKRLTMPAKKLRSTLQFL  
QDEQLVKWETVDDLQGGGSQSTKFWYIDYNHAVHTIRLRLHLLRKELEADENRSRSSFY  
LCDGYKARRCNGRYSEEEAQQMVMNTGAFQECYLNYNPNPVPVDTYTLRLVDNAD  
ELRRAVNNIRRGXVSLGKKWFHTILKECRVVICALKDLRSGLEFYHCALLRESGKGRAXD  
LTEKLFSSISIVYWFRRWYDVVNVQLSGKTVGSQQLRAGIYDLIQKVRGK GKAPITSNLPS  
ENFALEEVRSELKGKYTXQELLIPCSVFECEQFLPDLTTGEWTVIHRSVYLPCHHFHN  
AEPGXTAGIKTRKLQKEGVADTADSARNILVGGGKRTGFQSDLTFLKNAMGDGVHFCIEK  
GG SARANLLSQHHSNLQRKKRKLDDAAATRVGTTVTLLLEQKENEEREK RKQEEEEERERR  
EQENQTGENGRDNGDEHSNKHTKKEENGGGKTDEKTKKAVNGKVLLGTTGMDWLNDNISS  
RAELDREMEKLRQQDREQEMLLLAATAEQNDVSHNARSKYIFLSDYIDPALQAPSLWDEK  
TRKMTFQSLYKKEIGRQASLLELPEYRETAGTFSSPPKGLMPSANVVDDRAVAWEDG  
>comp14544\_c0\_seq1; 713 256 1953 LEN=2487; translated  
MANVYGLDFLRSEHVLDEVHSNRNPRHPSSSGNIDDEDRASNSGGIDDIDTEALAAAAAN  
KSDTEKQYDILNFKAHR SAGWMPPTVIYQRTGIDLEEDTELAEKLRNHYKIKVETVPDP  
ENPSLTIDTYSYQATYNHVRDRKTL LAQINRCKNGVLMKELEDSYDTVQSDLDALVCAGD  
VLALFNPERKDKVLFPRGEPFLVELDGI VALPLEQKPQLDPVANTGADGAVKAEPVAPNG  
AAASEAAGETPSVAADKIPSEVESGTHITPAAASKPIYTIEMDSNPTTQIRRGEAVQIGG  
TWFVRVSDVKGHKNQPVRAKAPLSV VARKDIALSKNNRLDGFVRTFDSRELPIDAPLPPS  
AIENVQKAKEAREKLLKLSHGGRAGGAASQLLGTNAHSSNPVALASTLGTSHAAGSRRRP  
QVGSLSGAASSARKAQQEAI AKLREAALDPYLSLYSHPKRHGCTKD VRELYLGTRSKV  
PSTEAAALKAALVEHKLLEPG EELRRARLQKRANVDNDGPKPKRRYYERKNQRMNTNTHLEG  
TEIGAVLRRATEKQQQQQVGDGGM  
>comp14545\_c0\_seq1; 268 354 1250 LEN=1339; translated  
MENNESNRPNQTLTSPSASAVAPYYLVWSPGF AKKFLATTFLLVVRSIHLSEWDYLR  
FAQHSSLSGSALFSHPAFVSNLLPLSSCCALQLLINAVSTLIGAGAGCVGFNSFLGP  
VRPYLMAVLLVSNATTGIVKPTLGS IAGLVLRSSIAFLPELVFWRNEILRSKWRNRNTS  
DQPTATSATPAPEDGATGTLRATLVVDVPSMGCVACINKIESSLRQCS PKNIDGATSWL  
NDEETNNSQTGKKGGRAKIEVRAESRDELDAVTRSIVGAIEDAGFRGNTVRS LDRST  
>comp14546\_c0\_seq1; 435 280 1299 LEN=1367; translated  
MQSSSCFGSSWKDVFCGRNDGASGDHPNQP GAEIDGEADC GFSDDDGYEEDDEDYLDY  
DSNKIVELTVRRELLLVELQELVDARTPQAAAAIAAMDRESGNDDQLLRFLLRAGTLRI  
LRNRLLEKEDEDEGGPDES FHQEKKEDDAGRADAGASADXLRVVLLRAHTLALGGAASS  
GETFLPPRAAIIAAPGEETTTEFLDQDGDWDFVGA AETTQRRRCFAIYDSDKRGGTGRDGS



GQAFVWEQRQGAGQLHGSCMPGCAGELHRLNRLGSEHPAKAQRFGTELAFFGTNEQAPQ  
RHYLSAVPLLEQGRPSAFADPFKTMMDNGQGTIETICGR  
>comp14547\_c0\_seq1; 496 1 1122 LEN=1830; translated  
ARSQHCPSSLKRNHI IRPHSCSPYISAAQRNKDFMMSAAPFLWAAALVFLACLSCMNTSA  
FTSDCCYGRQRLQIYAANEGENVDPDLFEYFDPLLSPHAYPSGISPENKPAVNNDKVQEE  
RKREPAPSYKGSFNFVNDVNQPNESGSTPKARNEEKSEDDLFDYFDPLRSPHSYPD  
GIKSKQESMASMKAPPAALDIVEDPVSIGAASSNDGKKKKVGVLMDHGSRKEKSNARL  
QEMARLYQLTLEHNEDEDDENTTTEIIVRAAHMEIALPSIPDGLKELKDLGVDEIVCHPF  
FLSADGRHVKEDIPQIIGDAIEDIWGESTGAKKIPITTTAPVGSNTQLMLGAIHSLVREN  
SQILNTRSGVNNQ  
>comp14548\_c0\_seq1; 1028 92 2224 LEN=2678; translated  
MGKKDKKDDKKKKKEKKEKKEKDDDEGDKKKKKKDDKKDKKKADDSGSEASDKKKKKDKK  
KEVEEEVADLKIDSSDDSDSDSDSDSDSDSKPEFSSSDFDFGTVEYFDARLAEIRYEC  
QRLLSLESKEKKAFFSMCQNYDAWTEKRDVQKLSLDMTDDTPAREIKRLQEGSKEFSA  
RIEKTAKRQKWCVSALAVFGGLKPDVMEKVESKLAEGAI IAQAAPQKLSDFQAQESKEN  
KKVLKRLFDPPDLMKDMLTHGGVTGNAYGEAARIYDECMEDVEDEDDDDFKKVHSKIAMA  
CALELASPIYEFDETVRVDPIYERYEHFVDAHREGELDPAFPFFSIWEMRQIVNCDATNEQ  
MEWIRMTIINYAPFFTLLEDFTRQYLHI INSDVKHRNPTWDKSPRTYQMILSGGGNANIH  
AWFGRFILKSYGIPCWSATENKKEGYAFWSPEGWKVMNGIDWDNSSWKGNRDFKTEIE  
ARNKAPPKEYFKKLITLQCLADMFDGDPNAIPAGERDVLHPDRIWRSMSVVSMLLLDEAD  
AGTENKFLRTGDSLVTNCEIYLEKYHADAEDDEVTFDDVTGKLVIPASRCEKAEGNFLI  
NDAFEGGKQVNFAAFAGTAFLEYKIPDEVPKTYTISLEICTVSSQQVPLKVEFGDSVETC  
YNVKMHYTEGYWEKTRAVPVKVEGGQILRISRPKLSLGLAIKKMVFNPLF  
>comp14549\_c0\_seq1; 426 72 2598 LEN=3076; translated  
MMARIGGDHSGSCLVPFVIAVWGFAISTVVVDAVIPSVEVGLR'TTDRGSDSVTTSVLLLS  
QAYYGPSPPIQNNNSDNDNSNNSNKRLVSPDDNYFLCKE PGDAMIDREVLESTKGAWMLV  
PRGSCTYEYKWTQAQTIYEASGVIYNTLESRYSFNGTDSSILWPMEYHDYDCTNARAEI  
PSNNLAFSSPSEANSKSONGPYDFRTNDPLLSGDTFDNLCKLHDANDLRNCPKSRCLVA  
HDYDTTTSDDTTTCCAWDIRLNPYPDVLENNVTVTIPTLFATMEQGDIFREAMAESSSS  
LTIGVYSRWRPAYNVSAVLIIVLLGAVAFAAFSFRSADDYHYGAFKLWKKASRDKSRNAKG  
SGNLGGRQSERQDTLVPRNPNPLSDESLELEPIHALMFLMSSISLFLVFFFKIYNVAKV  
MYAFGCSNSFIQIIVYPLLSRLLCSRFFVSSRMGKHCFRERIVRSDEFDITNWHVLAG  
VIGYSVGMVWLYMALCIPQAGEKYAFYWIAQDVLGTMCVTFGLGLIQLNSIQVASVLLIV  
AFFYDIFFFVITPYIFKGRSVMIEVATSGGPPKADALWCEKYPSPDPCKGGDPMPMLFSI  
PRLFDYLGSSMLGLGDIVLPGLLLSFAARLDASRLVCTLYSACQNQSSRAISPASGSGA  
GQQDCGVPTPMPVWYALLFGGYGYFVPLVVSYTI GLIMANLAVYLMEMGQPALLYLVPC  
TLGTMAYKGWKRNELMSLWNGPKILKQADYVCHGGPSAQT DGS GGEGYSASAGTDEALEL  
QEDFVDERVEDVPLIQSTMDSSRGDRLNSNDYHEKANEERNGIRETLISAFHLLGPAFV  
V  
>comp14550\_c0\_seq1; 404 188 1708 LEN=1731; translated  
MARTKLMITALKVFLVIITGLIVGTNFGAYEIKSGAFSTANASGGSLNVAKATGADAGKD  
DASQMHVVFSTACSLSHDQSYLFFFHAMLHEQKGDVTRIVSGCSPEDVCKMRELHEKQF  
TIMNPKFLLHFTPEFGKQLSSEGFYSYQQT KYWNKPFGLRHWMEHRFGYVWSDTDAEISVP  
EWDHDIIVLVDPDMLMQRPVFNDFNTNIPLNQWNTYYRKNHGDELIGKVTQGHQAGQDYS  
FGSKWLNPKVEHLEEIVGPDSPVHDVTEEDAKYVFAAGPPYWMTARDAFRISYKWTEFLP  
GIFKHHPVFMAEMYGYCMAAAHLGLRHQMARGMMISNVEMTRGEGWAFLPKDSKACDVAR  
YTETVPHVLHFCQRYSIGDFFINKYLFPTDILSCEHPLELPSKDILEDTWFSHYGDGRV  
DKWDKSEDKIQRYNAFMICSLFPAVNKA AKFYKDNHCDKNDSENTVYDATWNHFRSERGI  
ELEKKGLARNKNKNEYSRTSKTMAKA  
>comp14551\_c0\_seq1; 311 93 1145 LEN=1405; translated  
MRSMFSIYI AVATTVVVALVAATIVQKIPSAGAFGVPLPSSSSASLLSISSKSRL LAKPK  
KVKERRKKAANSNKNFDAAVASPI PANLKRKVD AKRPPLGHIVPEDTRTKSGSGSANPKL  
RPQGKAREAGLNNPSNLKIFGGTARGRRLDSPSVYLRPMMGKVREAVYSTLLSFGLYDYP  
VRHLDCFAGSGSVGLESLSRGAKHCTFCDLAEDCCAAISRNI PWCQFDGPEYSTRIVNAD  
VLRLLREPLAVGMPEGEKFDIVTICPPYEEVTYADLLDATANSPLVKEDTIVLMEYPVEL  
WGELPHVYSGESVTMIGIRNRKYGRTVIAMYICNPTGRIELAESRPEEFI  
>comp14551\_c1\_seq1; 1192 104 1782 LEN=1782; translated  
MVRMSVLTFDQTFETAIAVSATLIVLSAAWIIRVLIQIEKSKAVALASVLEDDGTSGDLE  
FEESTAEGAIEMSPTRTSGPKEDDAEAAGGAPSPASPDAKPVIARKVRQRORRITWMF  
LNVQLASVGVLLTYLLLVASNAPVFLRMLGSICVFGVFLRYQIGDEIRRQRVDRIMLL

LSLFLLIASMLSTLVYSFKTLSQGEIYEGPARIVGYDLEQYNNTRHDPTTRTDIEVSWGK  
DWGCPMSGGKVCQAKIQGALCQTHPDKEQTKHKPHYDNTRRRRRKQRRLEDAQKEDNDKE  
NDNDNKADDKDKAEENDNDQEEAEDNQKDDDEDEEIEEAELEEDLEDEEKSNOELQOTENENL  
AEQNKLEKEMKEENEIEDEENQSLVDEENSEMDEMADEYNEDIMVVEEEMYEYEDAQDYED  
AEYKEDDEEALEDKIAAATDDDDVKDDLNEKLVEEEKEQEELDEEYEEDEELLDEYADEYEE  
AADEEYDEFLEADETDNLEAEKDEKKEEAAETEAEINDMKSSSSSSSSSGADDDANEKM  
AEEFYEEEEAAIEEEYEEEX

>comp14551\_c1\_seq2; 1536 104 2225 LEN=2493; translated  
MVRMSVLTFDQTFETAIIVSATLIVLSAAWIIRVLIQIEKSKAVALASVLEDDGTSGDLE  
FEESTAEAGAIEMSPTRTSGPKEDDAEAAGGAPSPASPDAKPVIAKVRQRQRRIWTF  
LNVQLASVGVLLTYLLLVASNAPVFLRMLGSI CVFGVFLRYQIGDEIRRQRVDRIMLL  
LSLFLLIASMLSTLVYSFKTLSQGEIYEGPARIVGYDLEQYNNTRHDPTTRTDIEVSWGK  
DWGCPMSGGKVCQAKIQGALCQTHPDKEQTKHKPHYDNTRRRRRKQRRLEDAQKEDNDKE  
NDNDNKADDKDKAEENDNDQEEAEDNQKDDDEDEEIEEAELEEDLEDEEKSNOELQOTENENL  
AEQNKLEKEMKEENEIEDEENQSLVDEENSEMDEMADEYNEDIMVVEEEMYEYEDAQDYED  
AEYKEDDEEALEDKIAAATDDDDVKDDLNEKLVEEEKEQEELDEEYEEDEELLDEYADEYEE  
AADEEYDEFLEADETDNLEAEKDEKKEEAAETEAEINDMKSSSSSSSTSSSSSSGTDDD  
ANEKMAEEFYEEEEAAIEEEYEEEVYEEEEEWYWDEYPEYYDDDSYEDDYWDYDWDVWVW  
DYACEDLFDSDVAGKTYDLNTPAGGDDEWPFVNIYGSCKTCEAYILDYFAEEAFEETQEF  
KQQAIVYLAGALAGFVWSLLSYIKYRVMPTAENEISLMGFDGGVMA

>comp14551\_c1\_seq3; 1144 1 1794 LEN=1794; translated  
XHPSTAKAPISAPRSKHKPKTERPEAQQRQPATQRNATMVRMSVLTFDQTFETAIIVSA  
TLIVLSAAWIIRVLIQIEKSKAVALASVLEDDGTSGDLEFEESTAEAGAIEMSPTRTSGP  
KEDDAEAAGGAPSPASPDAKPVIAKVRQRQRRIWTF LNVQLASVGVLLTYLLLVAS  
SNAPVFLRMLGSI CVFGVFLRYQIGDEIRRQRVDRIMLLLSLFLLIASMLSTLVYSFKTL  
SQGEIYEGPARIVGYDLEQYNNTRHDPTTRTDIEVSWGKDWGCPMSGGKVCQAKIQGALC  
QTHPDKEQTKHKPHYDNTRRRRRKQRRLEDAQKEDNDKENDNDNKADDKDKAEENDNDQE  
EAEDNQKDDDEDEEIEEAELEEDLEDEEKSNOELQOTENENLAEQNKLEKEMKEENEIEDEE  
NQSLVDEENSEMDEMADEYNEDIMVVEEEMYEYEDAQDYEDA EYKEDDEEALEDKIAAATDDD  
VKDDLNEKLVEEEKEQEELDEEYEEDEELLDEYADEYEEAADEEYDEFLEADETDNLEA  
EKDEKKEEAAETEAEINDMKSSSSSSSSSGADDDANEKMAEEFYEEEEAAIEEEYEEEX

>comp14551\_c1\_seq4; 1535 104 2363 LEN=2631; translated  
MVRMSVLTFDQTFETAIIVSATLIVLSAAWIIRVLIQIEKSKAVALASVLEDDGTSGDLE  
FEESTAEAGAIEMSPTRTSGPKEDDAEAAGGAPSPASPDAKPVIAKVRQRQRRIWTF  
LNVQLASVGVLLTYLLLVASNAPVFLRMLGSI CVFGVFLRYQIGDEIRRQRVDRIMLL  
LSLFLLIASMLSTLVYSFKTLSQGEIYEGPARIVGYDLEQYNNTRHDPTTRTDIEVSWGK  
DWGCPMSGGKVCQAKIQGALCQTHPDKEQTKHKPHYDNTRRRRRKQRRLEDAQKEDNDKE  
NDNDNKADDKDKAEENDNDQEEAEDNQKDDDEDEEIEEAELEEDLEDEEKSNOELQOTENENL  
AEQNKLEKEMKEENEIEDEENQSLVDEENSEMDEMADEYNEDIMVVEEEMYEYEDAQDYED  
AEYKEDDEEALEDKIAAATDDDDVKDDLNEKLVEEEKEQEELDEEYEEDEELLDEYADEYEE  
AADEEYDEFLEADETDNLEAEKDEKKEEAAETEAEINDMKSSSSSSSTSSSSSSGTDDD  
ANEKMAEEFYEEEEAAIEEEYEEEVYEEEEEWYWDEYPEYYDDDSYEDDYWVVISLVRNT  
MYRRALQSVLSRAATTRVYPLPQFVFSFRSVALSCLQDYDWDVWVWGDYACEDLFDSDVAG  
KTYDLNTPAGGDDEWPFVNIYGSCKTCEAYILDYFAEEAFEETQEFKQQAIVYLAGALAG  
FVWSLLSYIKYRVMPTAENEISLMGFDGGVMA

>comp14551\_c1\_seq5; 1488 1 2237 LEN=2505; translated  
XHPSTAKAPISAPRSKHKPKTERPEAQQRQPATQRNATMVRMSVLTFDQTFETAIIVSA  
TLIVLSAAWIIRVLIQIEKSKAVALASVLEDDGTSGDLEFEESTAEAGAIEMSPTRTSGP  
KEDDAEAAGGAPSPASPDAKPVIAKVRQRQRRIWTF LNVQLASVGVLLTYLLLVAS  
SNAPVFLRMLGSI CVFGVFLRYQIGDEIRRQRVDRIMLLLSLFLLIASMLSTLVYSFKTL  
SQGEIYEGPARIVGYDLEQYNNTRHDPTTRTDIEVSWGKDWGCPMSGGKVCQAKIQGALC  
QTHPDKEQTKHKPHYDNTRRRRRKQRRLEDAQKEDNDKENDNDNKADDKDKAEENDNDQE  
EAEDNQKDDDEDEEIEEAELEEDLEDEEKSNOELQOTENENLAEQNKLEKEMKEENEIEDEE  
NQSLVDEENSEMDEMADEYNEDIMVVEEEMYEYEDAQDYEDA EYKEDDEEALEDKIAAATDDD  
VKDDLNEKLVEEEKEQEELDEEYEEDEELLDEYADEYEEAADEEYDEFLEADETDNLEA  
EKDEKKEEAAETEAEINDMKSSSSSSSTSSSSSSGTDDDANEKMAEEFYEEEEAAIEEEY  
EEEVYEEEEEWYWDEYPEYYDDDSYEDDYWDYDWDVWVWGDYACEDLFDSDVAGKTYDLNTP  
PAGGDDEWPFVNIYGSCKTCEAYILDYFAEEAFEETQEFKQQAIVYLAGALAGFVWSLLS  
YIKYRVMPTAENEISLMGFDGGVMA

>comp14551\_c1\_seq6; 1487 1 2375 LEN=2643; translated

XHPSTAKAPISAPRSKHKPKTERPEAQQRQRPATQRNATMVRMSVLTFDQTFETAIAVSA  
TLIVLSAAWIIRVLIQIEKSKAVALASVLEDDGTSGLDFEESTAEAGAIEMSPTRTSGP  
KEDDAEAAGGAPSPASPDAKPVIAKVRQRORRITWMFLNVQLASVGVLLVLLTYLLLVA  
SNAPVFLRMLGSI CVFVFLRYQIGDEIRRQRVDRIMLLLSLFLLIASMLSTLVYSFKTL  
SQGEIYEGPARIVGYDLEQYNNTRHDPTTRTDIEVSWGKDWGCPMSGGKVCQAKIQGALC  
QTHPDKEQTKHKPHYDNTRRRRRKQRRLEDAQKEDNDKENDNDNKADDKDKAEENDNDQE  
EAEDNQKDEDEEIEEAELEEDLEDEEKSQELQ TENENLAEQNKELKEMKEENEIEDEE  
NQSLVDEENSEMDEMADEYNEDIMVVEEEMYEADAQDYEDA EYKEDEEAELEDKIAAATDDD  
VKDDLNEKLVEEEKEQEELDEEYEEDEELLDEYADEYEEAADEEYDEFLDEADETDNLEA  
EKDEKKEEAAETEAEINDMKSSSSSSSTSSSSSSGTDDDANEKMAEEFYEEEEEAIEEY  
EEEVYEEEEEWYWEYPEYYDDDSYEDDYVWSISLVRNTMYRRLALQSVLSRAATTRVYP  
LPQFVFSFRSVALSCLQDYDWSVWGDYACEDLFDSDVAGKTYDLNTPAGGDDEWPFVNIY  
GCKTCEAYILDYFAEEAFEETQEFKQQAIVYLAGALAGFVWSSL SYIKYRVMPAENEI  
SLMGFDGGVMA

>comp14552\_c0\_seq1; 449 215 1351 LEN=1828; translated  
MSKKPIRISKRGWSPHQHLTRRKKLDGDLGRLTTSCGLLALSDDDDEEEDFLKQSLEAI  
GRGEGKTTGSGRAGSKSPKRGKRPTVSARLPPTDEPATGETEPAAPKKNNTKHCYSSTK  
PNTSGKTPPAPPRNRSKSPKPLAGRSVPKARTPTRSRVSVASRTNANKQNIPMDIQK  
LYRITDPDITIKEKVLLELEFNMGTPEEKETYLRYYKQFDRKQFVDCRAKEEEERTEKIE  
ADALREQFIEEEFQKEVDIKRRGEQRRLEKKKAKEEKMLDSIRRYKAESVIKTMEGIKDA  
ALEASNTVPRNQMITKEREDAERKLIDDFRKNEGKDLHHAERALREAAMLQKDPAEVRA  
LREERSKHKRKLHTAR

>comp14552\_c0\_seq2; 449 283 1419 LEN=1896; translated  
MSKKPIRISKRGWSPHQHLTRRKKLDGDLGRLTTSCGLLALSDDDDEEEDFLKQSLEAI  
GRGEGKTTGSGRAGSKSPKRGKRPTVSARLPPTDEPATGETEPAAPKKNNTKHCYSSTK  
PNTSGKTPPAPPRNRSKSPKPLAGRSVPKARTPTRSRVSVASRTNANKQNIPMDIQK  
LYRITDPDITIKEKVLLELEFNMGTPEEKETYLRYYKQFDRKQFVDCRAKEEEERTEKIE  
ADALREQFIEEEFQKEVDIKRRGEQRRLEKKKAKEEKMLDSIRRYKAESVIKTMEGIKDA  
ALEASNTVPRNQMITKEREDAERKLIDDFRKNEGKDLHHAERALREAAMLQKDPAEVRA  
LREERSKHKRKLHTAR

>comp14553\_c0\_seq1; 1074 163 2331 LEN=2752; translated  
MPLAAIATNTRKKKMTKKTAPAKKRKRENIKPEKVLSSSTAKAKTKQTAAPPKKELKK  
LDKAERLQYAMQSFLWNAKEPPAGCQWEKMEHAGVSFPDPYQPHRVRMKYDGKPIDLNP  
IQEEAATFFAAMDPDGMHLGNPKTAKIFIKNFADFATLGRGHVIKDFKKCDFEPIRKH  
LEEQKIRKAI SDQERKANKDDRNMAMFKYGFQAQVDGHIKVGNYNMEPPGAFRGRGHEP  
KMGKLSRVAPEQVSLNLSECAAVPRCNVPGHAWGDIRHDPGQWLATWKENINNQSKYM  
QLAAQSSFKGKSDRLKYNKAAKLCDKIVSIRKSYKTDLKSDEIKQLATATWIDRLAL  
RVGGEKDTDEEADTVGCCSLRVEHLHFDPNGEGDNKEIELEFLGKDSMLFKQTFIDFGAP  
MYNENSGMGDKVFANLKSFCSSKKKTEEVFDGINPTMLNHLKQFMDGLSAKVFRTYNAS  
RTLQEEELRKTESSDSRWKKMNAAEKVV EYNNANREVA ILCNHQRSVSKAQETQLSNIEEK  
LTLKQKQKSMKMLTHLTKGKNTDKFPIKKHDEKLAEEAAKGI ERAKKMKDKAKTNEE  
KIKATEADEKAKQKREVASIKFQQAHLWDKVP TTDQVAKIQNWSAKISKMEMNLKHKD  
DNKEVSLGTSKINYM DPRI TVAWCKRNEVPIEKVFSKTLRDKFNWAMAVTPDWEFNAKIA  
EE

>comp14554\_c0\_seq1; 108 1 937 LEN=1711; translated  
XFLIEAPTSHSAGIAQENQPSKPPKLPFAISPNSIDMCLPRSHKTPSANSTSLQGRKP  
QPATNNSEEQDISGCI FDSKHEPRPIWSISTSKFIPRNIPESDSMVQSVPSERRSIARS  
ASVKKYTKIDKEGKNRTVAVVQHHTDYSGESEATFCNVISKSRGGVAIPFPQKLHDMLE  
KALTDGYGSIVSWQPHGRSFIHHPQEFQEVVLPKYYNLTKLSSFQRQLNLYGFQRLTLG  
RDRGCYYHELFLRNKFLTRHIYRVQVKGTVRARSNPDQEPNFWTMKWCESRVTAVTSD  
DDEKEMGILVL

>comp14555\_c0\_seq1; 435 343 1583 LEN=1807; translated  
MDTLFQFVDAHLFALLIDMKDNGEYEFDFKTYLEIYRNIRESVDLCHR DGVIKDEVARN  
PEKYLVL DKGMI PMLRRYKDKGMKLFLLTNSFW EYTTAMNYIYHGKVD EETQKKNEWL  
ELFDVAKLNHF MNVWTQCETS NYASSVKSARPNIFFRNSIFYAGIGLLDHVKPAFLLD  
PYLQLFRVNMEDGSLKNTDGVFEMKATPNGVEGFLEKGVFQGGNWQHLHKL MGVTSGDE  
ILYVGDHLYSDVLR SKRTL GWRSLF IMPELEDEM RVFAETLPLRKKIEYLRLREELSRK  
AEDIRRENDND DPSIQKILDEMEDEASIKATLSPLVEQWHR SFHPLWGAMFNAGYQDSR  
FAFFVQNY SCLYTSRASNLGLVSTKKSFRVTVMESVPNDRLVFD PQTTLDDSDPW

>comp14555\_c0\_seq2; 562 71 2198 LEN=2422; translated

MAPKRSPAHGGLKALS IQFISVGLFLGSEFEVSAFVD TTPSFASRTISRVS GPMGTARRI  
PFP SLHQSFSS EDGIVSSADVDAE DAEQRLGGEYNSETTNGAGDGKFAVEGSDRWKGLL  
ASTGLEGLRHVSDLPKERK VSTFDIFCNRELKVENLKAIGFDMDYTLAQYQQPAFDKLA  
FDGAKEKLVKNLGYPAEVLDFEYDHERWTRGLIIDTERGNFLKIDRHKYVRVAYHGMEKI  
DSRTRKVLVSKNFNKVESFSEKSYVNMDTLFQFVDAHLFALLIDMKDNGEYEF LDFKTYL  
EIYRNIRESVDLCHR DGVIKDEVARNPEKYLVL DKGMI PMLRRYKKGXEA VVDFEVLG  
VHIDCHELYLVSFVCD AF SAGKSAKRN SKLFLSYNISLFSHGK KVEETQKKNEWLELFD  
VAKLNHF MNV VWTQCETS NYASSVKSARPNFIFFRNSIFYAGIGLLDHVKPAFL LDPYLQ  
LFRVN MEDGSLKNTDGVFEMKATPNGVEGFLEK GKVFQGGNWQHLHKL MGVTSGDEILYV  
GDHLYSDVLR SKRTL GWRS LFIMPELEDEM RVFAETLPLRKKIEYLRLREELS RKAEDI  
RRENDND DPSIQKILDEMEDEASIKATLSPLVEQWHR SFHPLWGAMFNAGYQDSRFAFF  
VQNYSCLYTSRASN LGLVSTKKSFR TVMESVPNDRLV FDPQTTLDDSDPW  
>comp14555\_c0\_seq3; 370 1 805 LEN=1029; translated  
XHGKKVDEETQKKNEWLELFDVAIAGSCKPAFL LDPYLQLFRVN MEDGSLKNTDGVFEMK  
ATPNGVEGFLEK GKVFQGGNWQHLHKL MGVTSGDEILYVGDHLYSDVLR SKRTL GWRS LF  
IMPELEDEM RVFAETLPLRKKIEYLRLREELS RKAEDIRRENDND DPSIQKILDEMEDE  
EASIKATLSPLVEQWHR SFHPLWGAMFNAGYQDSRFAFFVQNYSCLYTSRASN LGLVSTK  
KSFR TVMESVPNDRLV FDPQTTLDDSDPW  
>comp14555\_c0\_seq4; 385 998 1672 LEN=1896; translated  
MEDGSLKNTDGVFEMKATPNGVEGFLEK GKVFQGGNWQHLHKL MGVTSGDEILYVGDHLY  
SDVLR SKRTL GWRS LFIMPELEDEM RVFAETLPLRKKIEYLRLREELS RKAEDIRREND  
ND DPSIQKILDEMEDEASIKATLSPLVEQWHR SFHPLWGAMFNAGYQDSRFAFFVQNYSC  
CLYTSRASN LGLVSTKKSFR TVMESVPNDRLV FDPQTTLDDSDPW  
>comp14555\_c0\_seq5; 593 71 2109 LEN=2333; translated  
MAPKRSPAHGGLKALS IQFISVGLFLGSEFEVSAFVD TTPSFASRTISRVS GPMGTARRI  
PFP SLHQSFSS EDGIVSSADVDAE DAEQRLGGEYNSETTNGAGDGKFAVEGSDRWKGLL  
ASTGLEGLRHVSDLPKERK VSTFDIFCNRELKVENLKAIGFDMDYTLAQYQQPAFDKLA  
FDGAKEKLVKNLGYPAEVLDFEYDHERWTRGLIIDTERGNFLKIDRHKYVRVAYHGMEKI  
DSRTRKVLVSKNFNKVESFSEKSYVNMDTLFQFVDAHLFALLIDMKDNGEYEF LDFKTYL  
EIYRNIRESVDLCHR DGVIKDEVARNPEKYLVL DKGMI PMLRRYKKGXEA VVDFEVLG  
YTTAMNYIYHGK KVEETQKKNEWLELFDVAKLNHF MNV VWTQCETS NYASSVKSARPN  
FIFFRNSIFYAGIGLLDHVKPAFL LDPYLQLFRVN MEDGSLKNTDGVFEMKATPNGVEGF  
LEK GKVFQGGNWQHLHKL MGVTSGDEILYVGDHLYSDVLR SKRTL GWRS LFIMPELEDEM  
RVFAETLPLRKKIEYLRLREELS RKAEDIRRENDND DPSIQKILDEMEDEASIKATLS  
PLVEQWHR SFHPLWGAMFNAGYQDSRFAFFVQNYSCLYTSRASN LGLVSTKKSFR TVMES  
VPNDRLV FDPQTTLDDSDPW  
>comp14556\_c0\_seq1; 557 115 1593 LEN=1593; translated  
MYAFRSMVKFNAIGILAAAVAGDWRLF AAANPLVRGEGASIVKRRRWYMRSDDSFVLYL  
REMEFPDHDEETWCCEIPQDAAESLGISPMICDFEGISQES IETAKPLSGNFIMKAEGAY  
VERSSSNFETKIVVPRETSIIIEEMSESDSRKRRRLASSLGPKTVLVIRATDGDGVSPTA  
TLAELESDIFLDSECLSRYE EC SHNQMTIQPANIGTGGVVDISI QSTVASSRQTVIEKD  
IIFTAQQMYDASSFDLVIYCFPPGSGGWIAYAFSNGYQSFYNDGMCKSMSVVVHEVGHNL  
GLAHS GF GDNWYADTSGMMGYSNP SDDYPRQCFNAAKNYQLGWYDNQSAEVNPLSLPNR  
QTFVLNGVNWYKTDGSAPDKIVTMR LVEYGD SGGNDYYIGYNDAVGINS GTTRAQNKVTI  
VQKAGGPAAWGVSWAVADLDV GQSYTIENFMDSDSVYINYISLSGNDATIEIGTGTAPTL  
APTLQPSLPPSLP  
>comp14557\_c0\_seq1; 848 297 3092 LEN=3569; translated  
MRQRNKP NPPWPHAMW PFTIANALSIFL VSHFDEQVQALSSNSFYLKSPSKSSSYSNR  
YHGS SYGCRRAKNINIYTKRR TANNNNYTRRSK SDFSLTMAMDIDVNAIPDIAS TIERI  
HQTIPSF SNVLADATDAVQLSPATEGVPSTEEGSLGHDI FVFLTASV FVVPICKSLKITP  
VLGFLFAGCVLGPYGLGLFDNSEQDLVLGDFGILFLLFNEGLSLSPERIKELGRFTGLGA  
FQLIISIGLIFLGSILMGPILVEYAKEIGLPVNIKLLKPLFDNPIESFCIASAGALSSSA  
FVLPFLKEKDWEERPEGIAGLSILLQLDLSVAPLLVVLPLLAGGPSAPQSSLELGLILVSK  
ATIGFAVLVVGSYVLR YAFDVASARSTETFVAASLLVAVGMGQVADYLGLSAT TGAFA  
AGVLLASNRYRAQIQADIKPFEGILLGIFFITAGANLDPLLVLREWPTLTAGIIFILTK  
AGIIFASGPSLGLTTAESARVSLVLSGGGEFAFVVFQLAQDLGILPDKIANLLIASV IIS  
MSLTPILGEIGAAAGNFIESQSGVVRADGLTAE E EIALFDKIDIDKSETIEIEELREALV  
KLNFSYPAIAEVFEKFD TNGDGVISREEWKVGTESGILSDACKKDMAESAMPTSDLSFSD  
DAIICGFGQVGQELYQILDGFGLSGTKRSNVICFDLNPKRVLGATLNGAPVVF GDGARS  
ELLKAAGVKNPKAAIVAFASDDRRISATMRLRSFLPEGTP IYVYEGKSRIAPKLI EAGAT

EVIVEKTETSIRFASLLGVCTTNTTEASRLRELSMNRIALKALATANDESETLVLPGISDE  
LIIDLCEELGCSRKNIEELYLSFRSIANGKDYVPISELKDNMMRQSSDGPLNESQLTTCM  
TLEDEDGGDITFIEFLRANWNSECPIDLPP  
>comp14558\_c0\_seq1; 259 226 1176 LEN=1843; translated  
MSSLTPKQQRIAKERLVYSGDSLFGHIEKLGQTRPFGSFLDAGTGLHSLRWIATLGG  
DEDGEKNMTDFTAVTADETMRRNVQREADELGISHLGRVVIGNWFPPDNDDRQSL  
SIDNEIDSGETAAAAEGRATKLYDTILADYLIGAMAGFPPGHFSQDQMIIEKLAR  
RLKPGGRLYIVGLQPIPDVYDAKNPGAPQNIICKVRQVRDACILLAGDRCYREYPK  
DWIERQVDRLAAGTAAPRLKHIDSKEFPILYRHTTIVKQINVARHKLPRFPSRALAN  
EMKKTLDLDDLEQQSYAATEKIQGRRIELGFDYV  
>comp14558\_c0\_seq2; 438 226 1260 LEN=1432; translated  
MSSLTPKQQRIAKERLVYSGDSLFGHIEKLGQTRPFGSFLDAGTGLHSLRWIATLGG  
DEDGEKNMTDFTAVTADETMRRNVQREADELGISHLGRVVIGNWFPPDNDDRQSL  
SIDNEIDSGETAAAAEGRATKLYDTILADYLIGAMAGFPPGHFSQDQMIIEKLAR  
RLKPGGRLYIVGLQPIPDVYDAKNPGAPQNIICKVRQVRDACILLAGDRCYREYPK  
DWIERQVDRLAAGTAAPRLKHIDSKEFPILYRHTTIVKQINVARHKLPRFPSRALAN  
EMKKTLDLDDLEQQSYAATEKIQGRRIELGFDYV  
>comp14559\_c0\_seq1; 460 358 1761 LEN=2289; translated  
MDGERQAQEHTIVHRPQTVSSLSIDTTGYDQSDVDSGNALQSTLGSPLPPLPCLTET  
AGSSSTIVSSTTTAATAGVDANFGLAPTINSTSYIGGSAPVAVQNQESAAPAALNLAG  
SGAMQISTSTGVLVAATPNTNTVPEFLYQLTKMLTDNNRDIIEWSNGKIEVHSPHKLE  
THVLNRYFRHSKFASFQRQLNYFGFRKLAGKGMPCSYVNDATTTDELGSLLLIKRKQ  
GNEMKTKAGGKKRARGGKEQKSDGSASNKTNGDPVNPVLAGILYRSASSDNASATTT  
NTNNGTLQQSQKAIARVAVGKGVHRGYVPPQQSKDRKNGDSSSSSLYTQQAAAPGTF  
ASSPVEVSLNALTONFNQSMHQTIASSDGSLLNSAVHQGHQDTNHYTLPTPAPVSAN  
NTGRVPYVPGSLHRDLSLVDLAMIPIVGDGNTGDSNVATSSGFSFVDFPFSSIFSNE  
DPQI  
>comp14559\_c0\_seq2; 106 1 492 LEN=492; translated  
RKQGNEMKTKAGGKKRARGGKEQKSDGSASNKTNGDPVNPVLAGILYRSASSDNAS  
ATTTNTNNGTLQQSQKAIARVAVGKGVHRGYVPPQQSKDRKNGDSSSSSLYTQQAA  
APGTFASSPVEVSLNALTQNFNQSMHQTIASSDGSLLNSAVHQGHQDTNHYI  
>comp14559\_c0\_seq3; 225 358 1068 LEN=1105; translated  
MDGERQAQEHTIVHRPQTVSSLSIDTTGYDQSDVDSGNALQSTLGSPLPPLPCLTET  
AGSSSTIVSSTTTAATAGVDANFGLAPTINSTSYIGGSAPVAVQNQESAAPAALNLAG  
SGAMQISTSTGVLVAATPNTNTVPEFLYQLTKMLTDNNRDIIEWSNGKIEVHSPHKLE  
THVLNRYFRHSKFASFQRQLNYFGFRKLAGKGMPCSYVNDATTTDELGSLLLIKVCN  
VK  
>comp14560\_c0\_seq1; 385 125 1189 LEN=1551; translated  
MGDEPKSEMIENSDCPTPSTSSISDDEQGEDGSSLCSSDQQRPESDQSPVNNDE  
DNDNKKYFEVGDHVYSWCFLGIPRAYQHHGIVIDRDLNEMVITILDFSCLV  
DGNENRLSAAGSGKMRSSTSWRSTSEIHDELEQSAILREYTTIDESIVKTVWRK  
VRYDATLMERWFWRAGTVSKATPDPVEMVLARAFLARQHKESSCLSSYDLFQAN  
CEHVAVWCKTGRFCSLQLSSVMAVGTALAAVPTVAVSQATTTISAAGLWGWLGYTT  
TVPLAVAVPWLIIPATILGPAAAAAGKTAFDRKRWEQTTDALNSSFREDQLMR  
TGGKCVVYRAVSNSTNGAQLYEKKAFFPM  
>comp14561\_c0\_seq1; 585 183 2321 LEN=2682; translated  
MSLSFSSPSPGTKRRRFLPNTNPSANDTTADNCRICNDKDNRRKWNPNPNNE  
DIEDNKHPNNYNETQFSPLGNPTLLGQLNPYIESSNDQNGRDASLDPLHYPQQH  
MESPPGELPEAEGIPHMLMSEGTGEMIQNRHLFVLPVLLLEFLAIALTRAVLPSI  
LIEEYGSNVYVVLGVADIRGILAFFACPMFGKLSVDLGRKICLFVTVLGS  
CAPICSLAFFKWDSEERTAAAAEDLLNETVSTIVAPDTSTAISSALPPMAIPLF  
VVLLSLSGIFSSTFPLVFAYISDSVQERNERTAYGLALATFGLSFTIGPMAGG  
YLANSKTDYVFRCSLGLTILDLLYIYVILPESTAPRIVMFSSNRDATATTASR  
SSDASSFKSASRATRKMILLEVADSIWNPWDSIWLVLHDPFLRKVGVQVAFF  
YYTGLWAVISTLSLYAVQHFKMTPQMLGELMSALGLSTMVAEAVLVRFMVPLV  
GEEKQAIRIGLVSFGLQCFVLGAANQSWQLFFCVGLSLLGNLVYPSLSSLVSGI  
VEPKTVGEALGAINGIKALTEGLGPLIFGTLMTFSEHTAFPGSPYLAGILVFA  
HHLADKLPANSESELALSSFSYPDEPSMISPPEKEYIHELEFKRRYPRSGSTR  
KRHHASAEDNDDCLSAMFPTQSRDDDEEYQGLLESEIDEDSDDKLEEVH  
VIPSTAVIDEQEVEVHSFAIKPV  
>comp14562\_c0\_seq1; 1220 80 5354 LEN=5607; translated  
MASEASWNPSPWMMKRADNKKKSVEEDCVLHRKRLAAILRYIASMHESVSSSG  
ESSRQHFVREVDDDDNIPDDDFQRETFAADTVENGVLFTSTNDFRKLISVDAI  
GDNQGSQPFAYAPAQNAFNDCGQVVEGRNSKRMGVYGLSSVFTHSKNPRGGR  
NCDGRGIWLRRLTRIGPSSLLQQPNYDHPSLQHLYLNVLKESSTACSI  
DELLTLHNLDRAPSISSTTSMRNHKRIEHFLRTYKS

YLRMKLYQQTLEPIYNSLFEWNQQQENNEEIVWGLGHAKMLTYDGRLINGPLLEVLVEV  
ELAFD GALLIRPREHTGVTLNREVIAALVATGADPSSLNAVLSQLHKAVANIEISSISPA  
QPQTYVPFLKRIAVELSAGGAFRASSGTVTPGTNTKSKRKEDDKMTEL GKLEVSEAWCLY  
ARSKPSSIWARDANLLADRVGNHRELLPLATWSLTHGSTKLEQVLQEDLIRENDDLDSM  
KKKAIATWLQSNLLFAAKDLTEASRKKKEHFSNKPIFPLATSDSQIRIADLLLRQNYPAV  
IAEGPPGTGKTHTIANIVGEXEIFSVITSGLIFVIISSSGSLQIPAFFQSAYLCKGKRVL  
VTSKNANALSVLRGRLPQSVRELVDVSMSELHGMRQLQQTVERLAVRVSVASADIE TEK  
CSMLQHTIDDLLEIKLEEIDKEVMAESERVRNLLQQPDGMTLIEKASYLITSAPWLMRSLA  
EMNLNSIKSLAGEMTKLRDLDDPVL SVTGFDSPPSKSLISLASARSGSSLSLQVTKA  
TLSSLP IIGPAMDSHIKQVYKELDKLNLNGTKPESKDDWKTIAKALKHSLAVCTFEDTIW  
RSLVKEKKWPQACFQDQKRLKEIHDLDDIAVEVKELHILLNVKTAIKAI AKCRKLDAMRT  
RISRQIRYHSEDLTDSAVVAELSRFSFSDAQSALIKFAQIAGASKFSRSSKPSKMSQRQR  
RRRQEYLTAFDRCRFRIPCWILTTSQISDYLPAECLFDLVVIDESSQSDVTVLPGMMRGK  
QWLVGDGKQVSPTEEVDWIIIPVLSFCFCPKHTFPHSLFXAFVSEENIENIRATLPESPL  
EDALLPGRSFFDMCAQAFPRGRVVLNEHFRCAP EIIIGFSNVQFYDGRLIPLRLPTALERM  
KPSILDVRVVGSGKVGK VNEKEADKIVEMIKHIVMESSEKSKPKSIGVISLVGDEQSRL  
IRGRLLDSCGPEHIARHDVLIIGDPPLFQGAERDIVFLSMVCSRGNMVTQSQQFHYQRANV  
ALSRRARDRVVLRSIDLRDVP SLDDVKIPIIEFFINANVSTRSSTASDEHQDNANSNRPK  
QFFGREIVRSFLVGKGYRTVDMSMIWKNAFCVEDQKSDIRVAIMIDCEERQKSDWVLSYS  
QQKAIERVGWKCLRIDT LSVVLDFTRVVNVVTQFLTANGLGDPREHYGHDEEEGGEDDIE  
HLKESQKVIDVEDMDEAIGTSSFSEENDIISEHVHVNDTRPDQTKSSVDFITGETIEPWQ  
FGEVVNLDFLRSKTDPADGFGYDDGDGDDDDGNGNNDKNHIVTSIKRRTILDQSGKATE  
KQLKHYP SDSNICYQQGEDMKLHQCNDSVVDNSKVNKSVTSTVNGRSRKRRIAKYSQNE  
HLSQGRQMSDKVDNKFSDRNDDNDIPSNDDDDDDASDNDVGSENESENSIYDDNVSG  
KDNEIGKEHEDVIVRHISNDSNDSIDEINFDVGRDDLAFGGALCGADLNDLDERKSMI AK  
KDSQDSNNGSTYEVYMY

>comp14562\_c0\_seq2; 1180 80 5496 LEN=5749; translated  
MASEASWWNP SWMKRADNKKKSVEEDCVLHRKRLAAILRYIASMHESVSSSGESSRQH FV  
REVDDDDNIPDDFFQRETFA DTDVENGVLFSTNDFRKLISVDAIGDNQGSQPF AFYAPAQ  
NAFNDCGQVVEGRNSKRMGVYGLSSVFTHSKNPRGGRNCDGRGIWLRRLTRIGPSSLLQQP  
NYDHP SLQHLYNLVWLKESSTACSIDELLTLHNLDRAPSISSTTSMRNHKRIEHFLRTYKS  
YLRMKLYQQTLEPIYNSLFEWNQQQENNEEIVWGLGHAKMLTYDGRLINGPLLEVLVEV  
ELAFD GALLIRPREHTGVTLNREVIAALVATGADPSSLNAVLSQLHKAVANIEISSISPA  
QPQTYVPFLKRIAVELSAGGAFRASSGTVTPGTNTKSKRKEDDKMTEL GKLEVSEAWCLY  
ARSKPSSIWARDANLLADRVGNHRELLPLATWSLTHGSTKLEQVLQEDLIRENDDLDSM  
KKKAIATWLQSNLLFAAKDLTEASRKKKEHFSNKPIFPLATSDSQIRIADLLLRQNYPAV  
IAEGPPGTGKTHTIANIVSAYLCKGKRVL VTSKNANALSVLRGRLPQSVRELVDVSMSE  
LHGTSLQQHV FIRKTTGSIVSPFDLVI FVLSPLPFVRSRFSNTCFTLVVDENQECGNFS  
KPSNALPSAYRLHLQILK LKKFYVAGMLGNVAFSLNFDSLWLTNXITCFDETATIDDL E I  
KLEEIDKEVMAESERVRNLLQQPDGMTLIEKASYLITSAPWLMRSLAEMNLNSIKSLAGE  
MTKLRDLDDPVL SVTGFDSPPSKSLISLASARSGSSLSLQVTKATLSSLP IIGPAM  
SHIKQVYKELDKLNLNGTKPESKDDWKTIAKALKHSLAVCTFEDTIW RSLVKEKKWPQAC  
FQDQKRLKEIHDLDDIAVEVKELHILLNVKTAIKAI AKCRKLDAMRTRISRQIRYHSEDL  
TDSAVVAELSRFSFSDAQSALIKFAQIAGASKFSRSSKPSKMSQRQRRRRQEYLTAFDRC  
CRFIPCWILTTSQISDYLPAECLFDLVVIDESSQSDVTVLPGMMRGKQWLVGDGKQVSP  
TEEVDWIIIPVLSFCFCPKHTFPHSLFXAFVSEENIENIRATLPESPLEDALLPGRSFFDM  
CAQAFPRGRVVLNEHFRCAP EIIIGFSNVQFYDGRLIPLRLPTALERMKPSILDVRVVGGS  
KVGK VNEKEADKIVEMIKHIVMESSEKSKPKSIGVISLVGDEQSRLIRGRLLDSCGPEH  
IARHDVLIIGDPPLFQGAERDIVFLSMVCSRGNMVTQSQQFHYQRANVALSRARDRVVLR  
SIDLRDVP SLDDVKIPIIEFFINANVSTRSSTASDEHQDNANSNRPKQFFGREIVRSFLV  
GKGYRTVDMSMIWKNAFCVEDQKSDIRVAIMIDCEERQKSDWVLSYSQQKAIERVGWKCL  
RIDT LSVVLDFTRVVNVVTQFLTANGLGDPREHYGHDEEEGGEDDIEHLKESQKVIDVED  
MDEAIGTSSFSEENDIISEHVHVNDTRPDQTKSSVDFITGETIEPWQFGEVVNLDFLRSK  
TDPADGFGYDDGDGDDDDGNGNNDKNHIVTSIKRRTILDQSGKATEKQLKHYP SDSNICY  
QQGEDMKLHQCNDSVVDNSKVNKSVTSTVNGRSRKRRIAKYSQNEHLSQGRQMSDKVD  
NKFSDRNDDNDIPSNDDDDDDASDNDVGSENESENSIYDDNVSGKDNEIGKEHEDVI  
VRHISNDSNDSIDEINFDVGRDDLAFGGALCGADLNDLDERKSMI AKKDSQDSNNGSTY E  
VYMY

>comp14562\_c0\_seq3; 616 331 1581 LEN=1834; translated  
MSMIWKNAFCVEDQKSDIRVAIMIDCEERQKSDWVLSYSQQKAIERVGWKCLRIDT LSVV

LDFTRVVNVVTQFLTANGLGDPREHYGHDEEEGGEDDIEHLKESQKVIDVEDMDEAIGTS  
SFSEENDI ISEHVHVNDTRPDQTKSSVDFITGETIEPWQFGEVVNLDLFLRSKTD PADGFG  
YDDGDGDDDDDDGNGNNDKNHIVTSIKRRTILDQSGKATEKQLKHYPSSDNCYQQGEDMKL  
HQCNSVVDNSKVNKSVTSTVNGRSRKRRIAKYSQNEHLSQGRQMSDKVDNKFSDRND  
DDNDIPSNDDDDDDASDNDVGSENESENSIYDDNVSGKDNEIGKEHEDVIVRHISNDS  
NDSIDEINFDVGRDDLAFGGALCGADLNDLDERKSMIAKKDSQDSNNGSTYEVYMY  
>comp14562\_c0\_seq4; 1273 80 5421 LEN=5674; translated  
MASEASWWNP SWMKRADNKKKSVEEDCVLHRKRLAAILRYIASMHESVSSSGESSRQH FV  
REVDDDDNI PDDFFQRETFADTDVENGVL FSTNDFRKLISVDAIGDNQGSQPF AFYAPAQ  
NAFNDCGQVVEGRNSKRMGVYGLSSVFTHSKNPRGGRNCDGRGIWLRRLTRIGPSSLLQQP  
NYDHP SLQH YLNVWLKESSTACSIDELLTLHNLDRAPSISS'TTSMRNHKRIEHFLRTYKS  
YLRMKLYQQTLEPIYNSLFEWNQQQENNEEIVWGLGHAKMLTYDGRLINGPLLEVLVEV  
ELAFD GALLIRPREHTGVTLNREVIAALVATGADPSSLNAVLSQLHKAVANIEISSISPA  
QPQTYVPFLKRIAVELSAGGAFRASSGTVTPGTNTKSKRKEDDKMTEL GKLEVSEAWCLY  
ARSKPSSIWARDANLLADRVGNHRELLPLATWSLTHGSTKLEQVLQEDLIRENDDLDSSM  
KKKAIATWLQSNLLFAAKDLTEASRKKKEHFSNKPIFPLATSDSQIRIADLLLRQNYPAV  
IAEGPPGTGKTHTIANIVSAYLCKGKRVLVT SKNANALSVLRGRLPQSVREL VVDVSMSE  
LHGTSLQQHV FIRKTTGSIVSPFDLVI FVLSPLPFVRSR SFNTCFTLVVDENQECGNFS  
KPSNALPSAYRLHLQILK LKKFYVAGMLGNVAFSLNFDLSLWLTNXITCFDETATIDDL E I  
KLEEIDKEVMAESERVRNLLQQPDGMTLIEKASYLITSAPWLMRSLAEMNLNSIKSLAGE  
MTKLRLDLDDPVLSVTGFDSPPSKSLISLASARSGSSLSLSQVTKATLSSLP IIGPAMD  
SHIKQVYKELDKLNLNGTKPESKDDWKTIAKALKHSLAVCTFEDTIWRSLVKEKKWPQAC  
FQDQKRLKEIHDL LLDIAVEVKELHILLNVKTAIKAI AKCRKLDAMRTRISRQIRYHSEDL  
TDSAVVAELSRFSFSPAQSALIKFAQIAGASKFSRSSKPSKMSQRQRRRRQEYLTAFDRC  
CRFIPCWILTTSQISDYLPAECLFDLVVIDESSQSDVTVLPGMMRGKQWLI VGDGKQVSP  
TEAFVSEENIENIRATLPESPLEDALLPGRSFFDMCAQAFPRGRVVLNEHFRCAP E IIGF  
SNVQFYDGR LIPLRLPTALERMKPSILDVRVVGSKVGVK VNEKEADKIVEMIKHIVMESS  
EKSKPKSIGVISLVGDEQSRLIRGRLLDSCGPEHIARHDVLI GPPPLFQGAERD IVFLS  
MVCSRGNMVTQSQQFHYQRANVALSRARDRVVLVRSIDL RDVPSLDDVKIPIIEFFINAN  
VSTRSSTASDEHQDNANSNRPKQFFGREIVRSFLV GKG YRTVDMSMIWKNAFCVEDQKSD  
IRVAIMIDCEERQKSDWVLSYSQQKAI ERVGVKCLRIDT LSVVLDFTRVVNVVTQFLTAN  
GLGDPREHYGHDEEEGGEDDIEHLKESQKVIDVEDMDEAIGTSSSFSEENDI ISEHVHVND  
TRPDQTKSSVDFITGETIEPWQFGEVVNLDLFLRSKTD PADGFGYDDGDGDDDDDDGNGNND  
KNHIVTSIKRRTILDQSGKATEKQLKHYPSSDNCYQQGEDMKLHQCNSVVDNSKVNKSV  
VTSTVNGRSRKRRIAKYSQNEHLSQGRQMSDKVDNKFSDRND DDNDIPSNDDDDDDDDAS  
DNDVGSENESENSIYDDNVSGKDNEIGKEHEDVIVRHISNDSNDSIDEINFDVGRDDLA  
FGGALCGADLNDLDERKSMIAKKDSQDSNNGSTYEVYMY  
>comp14562\_c0\_seq5; 1291 80 5416 LEN=5669; translated  
MASEASWWNP SWMKRADNKKKSVEEDCVLHRKRLAAILRYIASMHESVSSSGESSRQH FV  
REVDDDDNI PDDFFQRETFADTDVENGVL FSTNDFRKLISVDAIGDNQGSQPF AFYAPAQ  
NAFNDCGQVVEGRNSKRMGVYGLSSVFTHSKNPRGGRNCDGRGIWLRRLTRIGPSSLLQQP  
NYDHP SLQH YLNVWLKESSTACSIDELLTLHNLDRAPSISS'TTSMRNHKRIEHFLRTYKS  
YLRMKLYQQTLEPIYNSLFEWNQQQENNEEIVWGLGHAKMLTYDGRLINGPLLEVLVEV  
ELAFD GALLIRPREHTGVTLNREVIAALVATGADPSSLNAVLSQLHKAVANIEISSISPA  
QPQTYVPFLKRIAVELSAGGAFRASSGTVTPGTNTKSKRKEDDKMTEL GKLEVSEAWCLY  
ARSKPSSIWARDANLLADRVGNHRELLPLATWSLTHGSTKLEQVLQEDLIRENDDLDSSM  
KKKAIATWLQSNLLFAAKDLTEASRKKKEHFSNKPIFPLATSDSQIRIADLLLRQNYPAV  
IAEGPPGTGKTHTIANIVSAYLCKGKRVLVT SKNANALSVLRGRLPQSVREL VVDVSMSE  
LHGTSLQQHV FIRKTTGSIVSPFDLVI FVLSPLPFVRSR SFNTCFTLVVDENQECGNFS  
KPSNALPSXSVASADIETEKCSMLQHTIDDL E IKLEEIDKEVMAESERVRNLLQQPDGM  
TLIEKASYLITSAPWLMRSLAEMNLNSIKSLAGEMTKLRLDLDDPVLSVTGFDSPPSKSL  
ISLASARSGSSLSLSQVTKATLSSLP IIGPAMD SHIKQVYKELDKLNLNGTKPESKDDW  
KTI AKALKHSLAVCTFEDTIWRSLVKEKKWPQACFQDQKRLKEIHDL LLDIAVEVKELHIL  
LNVKTAIKAI AKCRKLDAMRTRISRQIRYHSEDLTDSAVVAELSRFSFSPAQSALIKFAQ  
IAGASKFSRSSKPSKMSQRQRRRRQEYLTAFDRC CRFIPCWILTTSQISDYLPAECLFDL  
VVIDESSQSDVTVLPGMMRGKQWLI VGDGKQVSPTEEV DWI IIPVLSCFCPKHTFFPHSLF  
XAFVSEENIENIRATLPESPLEDALLPGRSFFDMCAQAFPRGRVVLNEHFRCAP E IIGF  
NVQFYDGR LIPLRLPTALERMKPSILDVRVVGSKVGVK VNEKEADKIVEMIKHIVMESSE  
KSKPKSIGVISLVGDEQSRLIRGRLLDSCGPEHIARHDVLI GPPPLFQGAERD IVFLSM  
VCSRGNMVTQSQQFHYQRANVALSRARDRVVLVRSIDL RDVPSLDDVKIPIIEFFINANV

STRSSTASDEHQDNANSNRPKQFFGREIVRSFLVGKGYRTVDMSMIWKNAFCVEDQKSDI  
RVAIMIDCEERQKSDWVLSYSQQKAIERVGWKCLRIDTLSVVLDFTRVVNVVTQFLTANG  
LGDPREHYGHDEEEGGEDDIEHLKESQKVIDVEDMDEAIGTSSFSEENDIISEHVHVNDR  
RPDQTKSSVDFITGETIEPWQFGEVVNLDFLRSKTDPADGFGYDDGDGDDDDGNGNNDK  
NHIVTSIKRRITILDQSGKATEKQLKHYPSSDNCYQQGEDMKLHQCNDSVVDNSKVNKSV  
TSTVNGRSRKRRIAKYSQNEHLSQGRQMSDKVDNKFSDRNDDNDIPSNDDDDDDASD  
NDDVGSENESENSIYDDNVSGKDNEIGKEHEDVIVRHISNDSNDSIDEINFVGRDDLAF  
GGALCGADLNDLDERKSMIAKKDSQDSNNGSTYEVYMY

>comp14562\_c0\_seq6; 1384 80 5341 LEN=5594; translated  
MASEASWWNPSSWMKRADNKKKSVEEDCVLHRKRLAAILRYIASMHESVSSSGESSRQHFV  
REVDDDDNIPDDFFQRETFADTDVENVLGFSTNDFRKLISVDAIGDNQGSQPFAYAPAQ  
NAFNDCGQVVEGRNSKRMGVYGLSSVFTHSKNPRGGRNCDGRGIWLRRLTRIGPSSLLQQP  
NYDHPSLQHYLNVWLKESSTACSIDELLTLHNLDRAPSISSTTSMRNHKRIEHFLRTYKS  
YLRMKLYQQTLEPIYNSLFEWNQQQENNEEIVWGLGHAKMLTYDGRLINGPLLEVLVEV  
ELAFDGAALLIRPREHTGVTLNREVIAALVATGADPSSLNAVLSQLHKAVANIEISSISPA  
QPQTYVPFLKRIAVELSAGGAFRASSGTVTPGTNTKSKRKEDDKMTELKLEVSEAWCLY  
ARSKPSSIWARDANLLADRVGNHRELLPLATWSLTHGSTKLEQVLQEDLIRENDDLDSSM  
KKKAIATWLQSNLLFAAKDLTEASRKKKEHFSNKPFIPLATSDSQIRIADLLLRQNYPAV  
IAEGPPGTGKTHTIANIVSAYLCKGKRVLVTSKNANALSVLRGRLPQSVRELVVVDSMSE  
LHGTSLQQHVFIRKTTGSIVSPFDLIVFLVSPSLPFVRSRFSNTCFTLVVDENQECGNFS  
KPSNALPSXSVASADIETEKCSMLQHTIDDLEIKLEEIDKEVMAESERVRNLLQQPDGM  
TLIEKASYLITSAPWLMRSLAEMNLNSIKSLAGEMTKLRLDLDLDPVLSVTGFDSPPSKSL  
ISLASARSGSSLSLSQVTKATLSSLP IIGPAMDSHIKQVYKELDKLNLNGTKPESKDDW  
KTIKALKHSLAVCTFEDTIWRSLVKEKKWPQACFQDQKRLKEIHDLDDIAVEVKELHIL  
LNVKTAIKAIKCRKLDAMRTRISRQIRYHSEDLTDSAVVAELSRFSFSDPAQSALIKFAQ  
IAGASKFSRSSKPSKMSQRQRRRQEYLTAFDRCRCPICWILTTSQISDYLPACLEFDL  
VVIDESSQSDVTVLPGMMRGKQWLIVGDGKQVSPTEAFVSEENIENIRATLPESPLEDAL  
LPGRSFFDMCAQAFPRGRVVLNEHFCAPEIIGFSNVQFYDGRLIPLRLPTALERMKPSI  
LDVRVVGGSKVGVNEKEADKIVEMIKHIVMESSEKSKPKSIGVISLVGDEQSRLIRGR  
LLDSCGPEHIARHDVLIIGDPPLFQGAERDIVFLSMVCSRGNMVTQSQQFHYQRANVALSR  
ARDRVVLVRSIDL RDVPSLDDVKIPIIEFFINANVSTRSSTASDEHQDNANSNRPKQFFG  
REIVRSFLVGKGYRTVDMSMIWKNAFCVEDQKSDIRVAIMIDCEERQKSDWVLSYSQQKA  
IERVWGKCLRIDTLSVVLDFTRVVNVVTQFLTANGLGDPREHYGHDEEEGGEDDIEHLKE  
SQKVIDVEDMDEAIGTSSFSEENDIISEHVHVNDRPDQTKSSVDFITGETIEPWQFGEV  
VNLDFLRSKTDPADGFGYDDGDGDDDDGNGNNDKNHIVTSIKRRITILDQSGKATEKQLK  
HYPSSDNCYQQGEDMKLHQCNDSVVDNSKVNKSVTSTVNGRSRKRRIAKYSQNEHLSQ  
GRQMSDKVDNKFSDRNDDNDIPSNDDDDDDASDNDVGSENESENSIYDDNVSGKDNE  
IGKEHEDVIVRHISNDSNDSIDEINFVGRDDLAFGGALCGADLNDLDERKSMIAKKDSQ  
DSNNGSTYEVYMY

>comp14562\_c0\_seq7; 669 1 1932 LEN=2185; translated  
CAPEINVQFYDGRLIPLRLPTALERMKPSILDVRVVGGSKVGVNEKEADKIVEMIKHIV  
MESSEKSKPKSIGVISLVGDEQSRLIRGRLLDSCGPEHIARHDVLIIGDPPLFQGAERDI  
VFLSMVCSRGNMVTQSQQFHYQRANVALSRARDRVVLVRSIDL RDVPSLDDVKIPIIEFF  
INANVSTRSSTASDEHQDNANSNRPKQFFGREIVRSFLVGKGYRTVDMSMIWKNAFCVED  
QKSDIRVAIMIDCEERQKSDWVLSYSQQKAIERVGWKCLRIDTLSVVLDFTRVVNVVTQF  
LTANGLGDPREHYGHDEEEGGEDDIEHLKESQKVIDVEDMDEAIGTSSFSEENDIISEHV  
HVNDRPDQTKSSVDFITGETIEPWQFGEVVNLDFLRSKTDPADGFGYDDGDGDDDDGNG  
GNNDKNHIVTSIKRRITILDQSGKATEKQLKHYPSSDNCYQQGEDMKLHQCNDSVVDNSK  
VNVKSVTSTVNGRSRKRRIAKYSQNEHLSQGRQMSDKVDNKFSDRNDDNDIPSNDDDDDD  
DDASDNDVGSENESENSIYDDNVSGKDNEIGKEHEDVIVRHISNDSNDSIDEINFVGR  
DDLAFGGALCGADLNDLDERKSMIAKKDSQDSNNGSTYEVYMY

>comp14562\_c0\_seq8; 1313 80 5279 LEN=5532; translated  
MASEASWWNPSSWMKRADNKKKSVEEDCVLHRKRLAAILRYIASMHESVSSSGESSRQHFV  
REVDDDDNIPDDFFQRETFADTDVENVLGFSTNDFRKLISVDAIGDNQGSQPFAYAPAQ  
NAFNDCGQVVEGRNSKRMGVYGLSSVFTHSKNPRGGRNCDGRGIWLRRLTRIGPSSLLQQP  
NYDHPSLQHYLNVWLKESSTACSIDELLTLHNLDRAPSISSTTSMRNHKRIEHFLRTYKS  
YLRMKLYQQTLEPIYNSLFEWNQQQENNEEIVWGLGHAKMLTYDGRLINGPLLEVLVEV  
ELAFDGAALLIRPREHTGVTLNREVIAALVATGADPSSLNAVLSQLHKAVANIEISSISPA  
QPQTYVPFLKRIAVELSAGGAFRASSGTVTPGTNTKSKRKEDDKMTELKLEVSEAWCLY  
ARSKPSSIWARDANLLADRVGNHRELLPLATWSLTHGSTKLEQVLQEDLIRENDDLDSSM



KKKAIATWLQSNLLFAAKDLTEASRKKKEHFSNKP I FPLATSDSQIRIADLLLRQNYPAV  
IAEGPPGTGKTHTIANIVGEXEIFSVITSGLIFV I I SSSGSLQIPAFFQSAYLCKGKRVL  
VTSKNANALSVLRGRLPQSVRELVVDVSMSELHGMRQLQQTVERLAVRVSVASADIE TEK  
CSMLQHTIDDLLEIKLEEIDKEVMAESERVRNLLQQPDGMLIEKASYLITSAPWLMRSLA  
EMNLNSIKSLAGEMTKLRDLDDPVL SVTGFDSPPSKSLISLASARSGSSLSLQVTKA  
TLSSLPIIGPAMDSHIKQVYKELDKLNLNGTKPE SKDDWKTIAKALKHSLAVCTFEDTIW  
RSLVKEKKWPQACFQDQKRLKEIHDLLDIAVEVKELHILLNVKTAIKAIKCRKLDAMRT  
RISRQIRYHSEDLTDSAVVAELSRFSFSPAQSALIKFAQIAGASKFSRSKPSKMSQRQR  
RRRQEYLTAFDRCRFRIPCWILTTSQISDYLPAECLFDLVVIDESSQSDVTVLPGMMRGK  
QWLIVGDGKQVSPTEAFVSEENIENIRATLPESPLEDALLPGRSFFDMCAQAFPRGRVVL  
NEHFRCAPEIIGFSNVQFYDGRLIPLRLPTALERMKPSILDVRVVGSKVGVNEKEADK  
IVEMIKHIVMESSEKSKPKSIGVISLVGDEQSRLIRGRLLDSCGPEHIARHDVLIIGDPP  
LFQGAERDIFVLSMVC SRGNMVTQSQQFHYQRANVALSRARDRVVLVRSIDL RDVPSLDD  
VKIPIIEFFINANVSTRSSTASDEHQDNANSNRPKQFFGREIVRSFLVGKGYRTVDMSMI  
WKNAFCVEDQKSDIRVAIMIDCEERQKSDWVLSYSQQKAIERVGWKCLRIDTLSVVLDF  
RVVNVVTQFLTANGLGDPREHYGHDEEEGGEDDIEHLKESQKVIDVEDMDEAIGTSSSE  
ENDIISEHVHVNDRPDQTKSSVDFITGETIEPWQFGEVVNLDFLRSKTDPADGFGYDDG  
DGDDDDDDGNGNNDKNHIVTSIKRRTILDQSGKATEKQLKHYPSSDNQYQQGEDMKLHQCN  
DSVVDNSKVNKSVTSTVNGRSRKRRIAKYSQNEHLSQGRQMSDKVDNKFSDRNDDDND  
IPSNDDDDDDASDNDVGSENESENSIYDDNVSGKDNEIGKEHEDVIVRHISNDSNDSI  
DEINFVGRDDLAFGGALCGADLNDLDERKSMIAKSDSQQSNNGSTYEVYMY  
>comp14563\_c0\_seq1; 1283 89 3925 LEN=4011; translated  
MVSPSLSTSFASASSSSTKGGMRAPTSPAATASVQVVVRVPLNDREKKHGTLPVVSAST  
SDKTVTVIKGTGSRQIKSSYKFDNVFTSFSTQEDVFEATLQPIIRDVLMGYESTVFAYGQ  
TGTGKTHMEGDL SQADQHGVI PRSAAAFDALNKNPEYTS SAVYCSLLEIYNEELSDLL  
VVDNGSTCGNTKSSKRGGSVSSSKSGNAAATKLAIMEGEHGPFCRGLSETKVTSASDLLA  
LMQTAHQQRQTGETLMNKESRSHCIFTLRVEAKRQLVDG SVLEVGGKHLHCVDLAGSECA  
KSCGNAGKQQAARERERMNINRSLTLGRVVKLLKERSQQSGSGSSVRIPYRDSKLRITRI  
LQESLGGRCCTCLIATISPSVTAIEESMSTLNAYAQAANGI INKPVTSLMTVGGGSSFAF  
DGSNKSSAEGAGGAAGTSVEHHEMECRLEYMQSQVEEAQQALARKHIQQQELVERAEQA  
EMAKQLAERNFEKATHEISILERKVEEITEQLEETENSLRDTRIILGATQQTEVSLTKEA  
TALIQVLKTTIKDGNMHQELLEKRKEELDRKAATKDYKAKQISLLNELLOHLELIEETQ  
QRYRVEIESANKDHSSRELELLQNHSTVVKQIKKNCVSEIEAFQKSTKNNLLP IVHGLVS  
SAKEKLDALSAQFKHGDEILQSRCQSVLSRLSENCNAISKLESAYLSSSESVLDTLATQL  
EASKENLSTAVAEITAKLEEDRGIRQIHRDELVKSTGTGFQSHCHTSIDQMKNSTAFHTAT  
LNKFVEGIKENQLSRNLTQSLSSMDGYLKDKNAEYVKKLEHQCSVLKEQHEALVAAHQ  
QQKMNKALVTNVMSGMQLSVEKEMRAIDQFQSDSFGSLLAANEKSKDSNAAIHQTSLDV  
DYLGTNGHLENDIRNNFNGQDQLGSALQQESSAFDANMKT SFEGLRNPIDTFANETMNT  
LQSLKEDLNTTESI IHTTRLQVETATNQ SASRIQEGAKKGISSLNESTEQGWKYVKEEV  
LDTVRNDLCQIQGDQSQVCSASKESITGIGETLDADENAASEQIRKGOEYISLVEKHLED  
GIDGSFAGSVDQHREHIEDSQWLETALQKQVEAMGGHLCNSKDAVSMSSKQLENLAHNIH  
RLHEEPVDIPCRNIPEYSESLTFTKDPQAILRESQFENSDCGESSKENTPMTSKDSALSN  
NLHADKKKVHSTSQKGAVLNDRSGSLNSQPTPTSRMKNIRLNANESPLKRTAAENNVKT  
GIPCGLRKRKRKTKVSQK  
>comp14564\_c0\_seq1; 910 202 2550 LEN=3098; translated  
MNANTKRP GAVPSI AVASMFVIGILFSVVQVNGIRPGATSSVSQVTRSSPSWRPPLASPG  
LCGKPSLELSSSSSRFRFTQLFDASSDSREEEIRKKIEKLKEEGRIANNKSQQASPDGLR  
EKKASAYDDYADKVQKKMKRKGQILGFMGDGTKNWNKR PSTGQETESDIDDFIAEEDKL  
DAERATELERGRDEKPEEDERGRQVSS TDGRGRRVGT LGTLPEDLRPSNEAETT VSPSS  
GNDGKDKISINPDLFDLPNTEPDPEL TEDELVELVAEKLAAKRAEAEIEASLAAKRE  
AARKRREEKNANTATD TDTRTTTG VGGSWNKNETKAEADYTPKVGWGWFARPKSIS  
EAYGGGRRIGAGYDNVDNENEK LKTQQRLKEYRAKVGIEVPSEKEHAAE IETALAIQORA  
MQRGIYATAVSALEKVTIWCSTNSKVGSKVYLELAMAYEAVGRTKEASQIYKTLSECRME  
DVKYNARLLYGLEAMEVMKDVSSDFTRKKTRNAFIDATGLDNFASNFDDVYQTAYVDM  
NGFYKLLTESVRSIREARQILIQAGKGEVSRTRIVQALRCINRNYEELLQNEINMSTT  
QEPTAFLNGKPIETDKASDSGKSMAALGDFQLLGADEMIQNM DGEWKLQLLADKTGDGVS  
FFNTTTAIQRFSDDMTFS AEGPSGLTTERCSGNIEMDAARLLSRSGVES SNDGVGGLL  
SMIGGGKNSGFSAAVSRQQQIVCVDSLFLITRRSRKSRGSGDL DKEYFGVWRRVLPDETD  
AP  
>comp14564\_c0\_seq2; 1187 187 2535 LEN=3083; translated

MNANTKRPGAVPSIAVASMVFVIGILFSVVQVNGIRPGATSSVSQVTRSSPSWRPPLASPG  
LCGKPSSELSSSSSRRFRQTQLFDASSDSREEEIRKKIEKLKEEGRIANNKSQQASPDGLR  
EKKASAYDDYADKVQKKMGKRKGQILGFMGDGTKNWNKRPSTGQETESDIDDFIAEEDKL  
DAERATELERGRDEKPEEDERGRQVSSSTDGRRRVGTGLTLPEDLRPSNEAETTVSPSS  
GNDGKDKISINPDLFDLPNTEPDPPELTELDELVELVAEKLAAKRAAEDAEIEASLAAKRE  
AARKRREEKNANTTATDTRTTTGVGGSWNKNETKAEADYTPKVGWGVFARPKSIS  
EAYGGRRIGAGYDNVDNENEKLTQQRLKEYRAKVGIEVPSEKEHAAEIEETALAIQORA  
MQRGIYATAVSALEKVTIWCSTNSKVGSKVYLELAMAYEAVGRTKEASQIYKTLSECRME  
DVKYNAKRLLYGLEAMEVMKDVSSDFTRKKTRNAFIDATGLDNFASNFDDVYQTAYVDM  
NGFYKLTESVRSIREARQILIQAGKGEVSRTRIVQALRCINRNYEELLQNEINMSTT  
QEPTAFLNGKPIETDKASDSGKSMALGDFQLLGADEMIQNMDGEWKLQLLADKTGDGVS  
FFNTTTAIQRFSDMTFSAEGPSGLTTERCSGNIEMDAARLLSRSGVESNDGVGGLL  
SMIGGGKNSGFSAAVSRQQQIVCVDSLFLITRRSRKSRGSGDLDEKEYFGVWRRVLPDETD  
AP

>comp14565\_c0\_seq2; 589 281 2261 LEN=2261; translated  
MPSPFRRSRGRSFALVAAFVSSFRNSDPIPFMSVRAASHTNEEAEPNLPGLDMNVVLT  
VHSWASHRHQEPYDADLGDVLSFWELLKERVEGDRNKGRDIFFVNNGDFVDGTGLSRT  
IDSQNDPSALLPPEKMPYDAVNVGNHELYSKSTIEAMTRAGGYVDWVGDRYLTSTNIHAV  
EPKQTGGASEKRPLGNHYKVLVSGGGRLAFGLYMGNYARGAGIGVEHVESVAVAGAW  
FRKALEEERYDAVLVLAHMDLVDPLVEKLRSAIRGVIGNETPIVFTVGHYRQVQQLDD  
RAVTFEAGRYMDTVGFVSFPRKGSAAEGGSASSLFRHRFLDTNRGVLFNETLGLSHPGEWA  
TSNGAELSSFVDRTRKKLGLEREIGCAPRSYYLEKPVDDPDSLWGLYRDEVVPGVFSGDP  
AATASGEDLPVAMLLSSESWRYDLYSNATLWVDDIVAVAPFNDTVVHLGTFEREVILGAN  
ATLNQHRNQGGGDFSWHPVPRFVLIGNLDGSESPGEDAAVATKYHLYTHEFGAETVRR  
AVEKAAPPDEPVEIRREHTSTLIWLAFVKEYWPCNGSESGAGKIHRHKLPPATHPAA  
VAMAAGHRGEYPGCGTVFAWAGVLCWILSVLWRMPKKHPAHRTPGAGRGGNKDGLGDQL  
X

>comp14566\_c0\_seq1; 257 1 999 LEN=999; translated  
XFHRAYALINARRWHLPIPDDES DYDHDCGDDDDPVLDMGMSAPPSLEEETDPPGAGGETQ  
ESFSDREAPPAATPTDEWVVTKDRRQKDGEARVLPNGSSPRAGETTTNTKTNTNPKPNPS  
PLPVARSFLLPLADLLNFGPPCTR GAYNASTDAFEIVAACDFSTGQELTFWYTDACEDV  
VANYGFALPGMVHKCDQDDRRGYLKAGEKGHRYDGS GSGGGPGSDNSHAPGDPSSPAEDD  
GSLEDEL LGAYDELDRLDQHVDLLLRVIEDCHCENQTAALDRSSAAPDFDSFSDSSSEG  
GPGDEEAEAATRSATGPTEAEGRAAKPGGNGGR

>comp14566\_c0\_seq2; 330 456 1262 LEN=1262; minus strand; translated  
MAETKETKHPQTPSVXWQOHNNTQRTERAPVAPTNNKNNFDGSSSSSRSTSTSSSKLWE  
TVTPSKHAYLSTAPIAPHERESNRGALASARAEPSRAEARLLKLGALAAPALVVPVAVP  
PGRRPRPGVVVVVVVLLLLLPLPPGFAARPSASVGPVADRVAASASSVPRPSLAAGI  
VGKIDAGGCAASVKGGLVLAVAVLDDPEEEIDVLVQPIELVVCAEQVLVQGAIVFRG  
RRVARGMAVAAA VVAAGFPAAAA SVVAVA

>comp14566\_c0\_seq3; 142 628 1020 LEN=1020; minus strand; translated  
MGNRDTVQARVLVHGPTLHPTRGNRIAVRSPPEPSRAERNETKLLGALAAPALVVPVA  
VVPVGRRPRPGVVVVVVVLLLLLPLPPGFAARPSASVGPVADRVAASASSVP  
RPSLAAGIVGK

>comp14567\_c1\_seq1; 607 128 2029 LEN=2735; translated  
MAKTIRKPLTQLTVRGNSTAASDIETAIAAVAAASHNNIDASDNANDGAI TAVKNG  
GAGGNTLDLYDVFLTPTLVEEVIELIRLHSEWESIIVWNCAGDPGLCADLFLACTTHQN  
IKSFALKPTPGNTSMPTPAATMDALAYGIKYNRSLTKLEMRGLRLNVAVADLISRALLRN  
TTLRELGMDETHFLLEPDTGDNVQKNSAVQILSFGLRFNKSIECLSFYCVNLEDEDVAM  
LINAVNSYDTILRRLSLQYSPCMSEGMGAIADLLRGNVIEDLDLSYLVRRRKRPKKETE  
KEDETKTKEDDDKEAAQEETQSEEEESDGGESTTDAEPKSEPETEKTDDVDRAEQQVKG  
AESDKEDDPHKLRLNTSLKRLAMVGNGLNDDYLVGLLDIFTPKRKKGNPGELEYSNLEELN  
LFGNRFSNYGIKELLKSLPRFPFMQRLYLGFQQA PAVSPLLARLASGTRTEPFPGPSLE  
KEFVRAVADV PENFRLAEVHIMAKTKEDKAVNRILRYYTRLNSAGRRILAAPP GSSGGS  
GNPCPVPTKNVPLGLWPLVLERANKLHPLSSSSPGSAVQAKEPSDDPENALHAGDVAF  
LLHGPMLEFENRTWWATMDNNTANHG VGFPLVSR

>comp14567\_c1\_seq2; 604 128 1996 LEN=2702; translated  
MAKTIRKPLTQLTVRGNSTAASDIETAIAAVAAASDNANDGAI TAVKNGGAGGNTLDLY  
DVFLTPTLVEEVIELIRLHSEWESIIVWNCAGDPGLCADLFLACTTHQNIKSFALKPTPG  
NTSMPTPAATMDALAYGIKYNRSLTKLEMRGLRLNVAVADLISRALLRNTTLRELGMDET

HFLLEPDTGDNVQKNSAVQILSFGLRFNKSIECLSFYCVNLEDEDVAMLINAVNSYDTI  
LRRRLSLQYSPCMSEGMGAIADLLRGNVIEDLDSLVLVRRRKRPKKETEKKEDTKTKEDD  
DKEAAQEETQESEEEESDGGESTDAEPKSEPETEKTDVDRAEQQKVGKAESDKEDDPHK  
LRNTSLKRLAMVGNGLNDDYLVGLLDIFTPKRKKGNPGELEYSNLEELNLFGNRFSNYGI  
KELLKSLPRFPFMQRLYLGFQQAPAVSPLLARLASGTDREPTFTPGSLEKEFVRAVADVP  
ENFRLAEVHIMAKTKEDKAVNRILRYYTRLNSAGRRILAAPPGGSSGGSGNPPVPTKNV  
PLGLWPLVLERANKLHPLPSSSSPGSAVQAKEPSDDPENALHAGDVAFCLLHGPMPLFENR  
TWWATMDNNTANHGVPFLVSR

>comp14568\_c0\_seq1; 974 294 3026 LEN=3179; translated  
MVSVDTLKQEEVRLMASDLSKEEEDDAKGGDTVSLSTCSMSTNPNTTPENPLFAASYK  
SGGGIAPNFTEVAAQNCSSRDGIDGVIGSTKRLTIADDNYNCKISDNNDHSSCLPRSVVT  
TAALHEDFHKSPEPVPQQVQKSSSVGAISENNELSHNYHMLHQIQESRTNSQNDGLGA  
YDGVGSAENMSPPVSPIGISRPIGEGVAASPIGASFLLRRENKTLSDDSLSTNYNGCSS  
KSSSPTKIPHAKSFSSSKKSFIPHYGCTRITYAISRYIFDDTNDYAVATWLGFWALFN  
VSCANYILKPIIMDSIVLQLGVENLASLTFAGTILSFLSSVPIGWLFEAPDPKRRKVFKKM  
GMTRGETQGTSLALFYRFFALSALSAYAVGFQLVDWVRKLEWIKNYVIKWIIFGINEDGTN  
KDAIIPFLLDKLGQFMVYAFFLLVTLMTRHSTSLVWGVTEAMEYEEIARKQHGNPSKPN  
KTQLERLNRIQFGATIGGIWGRYVGLYIANLVLFADVNILSSCFRCSVLASSLAKI  
LHLPGLLVSAFLLEISAELSIELGRIMEQHWEQIRYRSNQDLTSLDSSMKRSSSVGSM  
KRVASGNSIFAAQQAQQQQAMKRVASGNSIHSATNRSSGSLSSMANTDQQAATTNDVI  
DDNTFWQRLLRGITITILDSYLLMTIFTYNALFSSTTTLLSFQRAELVANRKKDRAVDVSA  
DTAFLARVNMGSSVAMFAIQSSGAGASITHRIGLRGSLALMPFIRLGLSLICLCWHRSTS  
GRPPNLI LFLMLDEFTKIINLAVAKPVRESLWRGMSSEARYEAKPIIDVLANRWGAGSAS  
VCVHAVSWVLLVLGQTNADNADATDPVVFGLPPVFLFLGLIVSAWWVGVSLDLGDRRIKCD  
SELEQRKKNQ

>comp14568\_c0\_seq2; 973 294 2939 LEN=3092; translated  
MVSVDTLKQEEVRLMASDLSKEEEDDAKGGDTVSLSTCSMSTNPNTTPENPLFAASYK  
SGGGIAPNFTEVAAQNCSSRDGIDGVIGSTKRLTIADDNYNCKISDNNDHSSCLPRSVVT  
TAALHEDFHKSPEPVPQQVQKSSSVGAISENNELSHNYHMLHQIQESRTNSQNDGLGA  
YDGVGSAENMSPPVSPIGISRPIGEGVAASPIGASFLLRRENKTLSDDSLSTNYNGCSS  
KSSSPTKIPHAKSFSSSKKSFIPHYGCTRITYAISRYIFDDTNDYAVATWLGFWALFN  
VSCANYILKPIIMDSIVLQLGVENLASLTFAGTILSFLSSVPIGWLFEAPDPKRRKVFKKM  
GMTRGETQGTSLALFYRFFALSALSAYAVGFQLVDWVRKLEWIKNYVIKWIIFGINEDGTN  
KDAIIPFLLDKLGQFMVYAFFLLVTLMTRHSTSLVWGVTEAMEYEEIARKQHGNPSKPN  
KTQLERLNRIQFGATIGGIWGSVLASSLAKILHLPGLLVSAFLLEISAELSIELGRIME  
QHWEQIRYRSNQDLTSLDSSMKRSSSVGSMKRVASGNSIFAAQQAQQQQAMKRVASGN  
SIHSATNRSSGSLSSMANTDQQAATTNDVIDDNTFWQRLLRGITITILDSYLLMTIFTYN  
ALFSSTTTLLSFQRAELVANRKKDRAVDVSADTAFLARVNMGSSVAMFAIQSSGAGASIT  
HRIGLRGSLALMPFIRLGLSLICLCWHRSTSGRPPNLI LFLMLDEFTKIINLAVAKPVRE  
SLWRGMSSEARYEAKPIIDVLANRWGAGSASVCVHAVSWVLLVLGQTNADNADATDPVVF  
GLPPVFLFLGLIVSAWWVGVSLDLGDRRIKCDSELEQRKKNQ

>comp14569\_c0\_seq1; 135 1 1289 LEN=1430; translated  
XPRSYSSDELEDLIHQRTGRSISVSSASSVSLSSSSSSCSSSSWTDDSLVEDERQVER  
LLAYLKLVLQARDEAKHAAGEPAASHTTSRTGKRRKARRSIPDADGVLEVRSSSPIAARS  
PFFLEALHRGRKELVVAVHHGPASAEERDRIRGLLAGIGDRGLAPLDRGLADRLAGDLLE  
TFPGSTGGHTLVLCGHSLGAALACRVGAAVRAARPGLSVRVYAFGLPPCGEAPGPTGDHS  
WVTCVNNHDCVPRWTRENLSALGGLLRWNMHRKFLHFRRHYYHSCPGYGCANDHGGRP  
APAAIPRFALSPGEWAAFWRGRGGAGEKVRSGGEPGPACIVPGRVVCVWNHNSNDPSIL  
GAKVHQPAGTGPQASSAAQTHAQTQAQTQAQTYGVLDRLWIDESMFRDHTLEAYRSNLEL  
LLGQVANTI

>comp14570\_c0\_seq1; 775 535 2454 LEN=2605; translated  
MFPFKATLVSWMLLLSFCNSPVESYAATTAQTRRQQRVGVNGIKDEKRYYSNDSGDNSR  
NALNNIKNIRIGHRKLMLQIKSLELPNSRSLSLTDIGGKTFEGEDFWMFEDDKPMKVPKQ  
DKRPNPYKYKTPPPKGPNSPSSDSNDMEINNNTNNDENTNDSNNSNNGSDSDSDTSEIE  
NVDNSLNEGESHIEAESDLPVPDGEDLICVSILLEDPITSPEIEAQTRNASFSTSTNVTY  
RANITSSQEIENLLDGTNIAMAYEIAAGCAEKSNESDRNKRGLEDELTPIITYVVVEPWSN  
TGFCVENAVERTTKNDNDDFVEGLLATTVSCEQPFASSIRIQVQTLGDEKDSLTSYLLN  
QITQAFESALKPIFEGQPGIIGVELVGINEEVDQEYTDQSNKSSSEDSNRNHRVMIVIF  
SVLAAGCFMCIVVVVLTAFRRRQKSLPGGYPKFLGAHQERVAHVPFEDYPIIPAGNYDD  
DDEDKDLVLDSTHAIAPHEGGRASKFSSMPRPAYGNNDTEEESYDSESSPMAVISCP

FEPTPPPDKAPFDEHEKPPCDGQVCSSTPCQYCERRRQSGIPRTSRFSFMVKSISQSTETPK  
IPMNMKMPNDVTAPRFDRLPLSIDAERSRRKYILEDLVEL  
>comp14571\_c0\_seq1; 599 206 1892 LEN=2466; translated  
MFSLLNGIYDSYLAPTQLNLLVVGAPAEAGKTTLLERLKAATDLGKGGSSGGRNPLGAEFP  
PEALREALFATGAASRLRHRSGTMASSSGSLAGSGGSGNGNSHGNGTGRARVQRNAGPVP  
TGHGKTNGAAASPVVRRRRRFSICPAPERYSRSARDEDQDEVYLMNDGDVDEAEGLL  
LGGASANHHRNGGPPGRRRNHSKEFDVDTLDLITDGIDLAQHQP PPPPPGRNQTRATSMQ  
SIDLVGVVGGGSDPSLGKDPQAQPQPQPPLPRGPALHQSTPEEYHRKAKAKMLPLRM  
IRPTSEFLLGMQPATVLCAWNRCWDSAGTSRFAFFSDRSTLTRIPFFRVVFAAVLCCAS  
IRCLVSTRVTVLVWPTALLAVSLETIVGTNLAKLDMYGAKCHIFDVGGKLQDLWERYDD  
CDAVIFCWKLGEDPDKPPREPDSDDDDDSDAEDEDEKIEAIYKKQQELLNTRKSVPEV  
PFLILGHVFGNASTEIVDEMFC TDVLLPRYHNPMGTGFCCVSAKNGAGVRSAMEWLIPLAK  
RQLRERISSKKEPALHEKAEI  
>comp14571\_c0\_seq2; 560 206 1645 LEN=2219; translated  
MFSLLNGIYDSYLAPTQLNLLVVGAPAEAGKTTLLERLKAATDLGKGGSSGGRNPLGAEFP  
PEALREALFATGAASRLRHRSGTMASSSGSLAGSGGSGNGNSHGNGTGRARVQRNAGPVP  
TGHGKTNGAAASPVVRRRRRFSICPAPERYSRSARDEDQDEVYLMNDGDVDEAEGLL  
LGGASANHHRNGGPPGRRRNHSKEFDVDTLDLITDGIDLAQHQP PPPPPGRNQTRATSMQ  
SIDLVGVVGGGSDPSLGKDPQAQPQPQPPLPRGPALHQSTPEEYHRKAKAKMLPLRM  
IRPTIGTNLAKLDMYGAKCHIFDVGGKLQDLWERYDDCDAVIFCWKLGEDPDKPPREPD  
SDDDDDSDAEDEDEKIEAIYKKQQELLNTRKSVPEV PFLILGHVFGNASTEIVDEMFC  
TDVLLPRYHNPMGTGFCCVSAKNGAGVRSAMEWLIPLAKRQLRERISSKKEPALHEKAEI  
>comp14572\_c0\_seq1; 594 304 1800 LEN=1914; translated  
MKTSTSLILVIAILAASCFQPLTYTKTPSTMFSGSSTELRQSAEGMSNDAPPLKRNPP  
KKVFLMVEPTPFTHVSGYANRFKEMLKFLSKAGDEVEILTVDSKTPKKDLPKESFGFKIE  
HTLGFTFPLYNQISLTLDLPEMKGSSMLDKFKPDLIHVTSPGFVLAALIFYSRTMCIPLV  
MSYHTLPLPAYGANLGFIPGIEEFAWKLLRFANRADLTLVTSPQIKNELLENGISRVDV  
WRKGIDTERFNPRFKDAEMRKLMSDNNPDDFLMVYVGRGGEKNIKYVRDMMKMPNARF  
AVVGKGPQKDELVKYFEGTKTVFLGQRSGDELSQAFASADAFIMPSETLGFVVLESMA  
SGVPVVAANAGGIPSIITNEKDGFLVETTDIDGYVARLKQLEDKFRDDIAKAAAEAEER  
WGWEAATSVLNRVQYEKAMVNFHSRAFGGFGKPRTRGLLRLFAFRLKNVFRRLGSKLGLV  
SKSKDNFGGEKEAQAASN  
>comp14573\_c0\_seq1; 505 273 1265 LEN=1837; translated  
MADSTPIQPIVIDGKKTAAAIRAELAEIKNLQASHGITPGLAVVLVGQRVDSATYVRMK  
KKAEEVGIHSDVLEETISEDALLEEIEKLNADPAVHGILVQLPLPDHMDEAKVLR  
DYAKDADGFDVAVNIGNLWLRGGEPPLAIPCTPAGCIELLQRYNIPISGKECVVLGRSNIV  
GMPVAALLQSCNGT VTVCHSRTANIPETVKRADIVIAAIGKAEFVRGEWLKEGAVVIDV  
INDKPDPTKKRGYRLVGDVNYQEAVDAGVSAITPVPGGVGPMTIAMLLKNTVNLCLHSGK  
LPRQLRDRTL DGDYKADASSKLVNTSTTK  
>comp14573\_c0\_seq2; 551 273 1451 LEN=2023; translated  
MADSTPMYVSVQSTFLWLGNTWRRCFCVMMMLVCIALATTTTTTNSGLPVVEGWQPPV  
RHP SRANPRQPIVIDGKKTAAAIRAELAEIKNLQASHGITPGLAVVLVGQRVDSATYVR  
MKKKAEEVGIHSDVLEETISEDALLEEIEKLNADPAVHGILVQLPLPDHMDEAKVLR  
AIDYAKDADGFDVAVNIGNLWLRGGEPPLAIPCTPAGCIELLQRYNIPISGKECVVLGRSN  
IVGMPVAALLQSCNGT VTVCHSRTANIPETVKRADIVIAAIGKAEFVRGEWLKEGAVVID  
VGINDKPDPTKKRGYRLVGDVNYQEAVDAGVSAITPVPGGVGPMTIAMLLKNTVNLCLHS  
KGLPRLQLRDRTL DGDYKADASSKLVNTSTTK  
>comp14573\_c0\_seq3; 677 273 1688 LEN=2260; translated  
MADSTPMYVSVQSTFLWLGNTWRRCFCVMMMLVCIALATTTTTTNSGLPVVEGWQPPV  
RHP SRANPRYGRDSSRSGVVASSWLFQSSLP SLSLFT HSSSSCVVRRDRHCRPLF  
SASNDNDNDKSKNIDSDSNTNNHGNDSQPIVIDGKKTAAAIRAELAEIKNLQASHGIT  
PGLAVVLVGQRVDSATYVRMKKKAEEVGIHSDVLEETISEDALLEEIEKLNADPAVH  
GILVQLPLPDHMDEAKVLR AIDYAKDADGFDVAVNIGNLWLRGGEPPLAIPCTPAGCIELL  
QRYNIPISGKECVVLGRSNIVGMPVAALLQSCNGT VTVCHSRTANIPETVKRADIVIAA  
GKAEFVRGEWLKEGAVVIDVVGINDKPDPTKKRGYRLVGDVNYQEAVDAGVSAITPVPGV  
GPMTIAMLLKNTVNLCLHSGK LPRQLRDRTL DGDYKADASSKLVNTSTTK  
>comp14574\_c0\_seq1; 408 516 1777 LEN=2072; translated  
MQTL SWACSARNKAKAENVLSGLVETVAVRSGNDISSISPEILQVDLLCKTDEEESKLR  
NIVQSTNVCLTCSGPFELYGKLVQICAEEGVHYADITGETDFVREMIVKYDETARNSGA  
CII PHCGNDCIPSDLTVFEMNSYAKKNGLKLI EVQLYEEHGADA AWSSGGLATASYQMGK

NRKNIKKTDFDPLFTTAKGSKSEFITKNATPKKSADAKDQVGYGTSQPWVMGPMVNCIK  
RSNALMGYAKDLKCGDSFLVKEDSWSAKFKLIKNGAILYAAIMLPQLFGAFVPPQGDGPD  
RKTMEEGSLTVHGIATMVSATAASSGSDEKINSVEKKVKSTFRFNKDVSYLYTAVLLVET  
GMLLVEKASSTEASLKGLFTPASALGSDLTQRILTEMDTSIELREFDIEESDDGVGFSC  
>comp14574\_c0\_seq2; 506 48 1412 LEN=1707; translated  
MTANSKKYDIVLFGVTGFTGKLAAYLLDRCRNDYANLSWACSARNKAKAENVLSGLVET  
VAVRSGNDISSISSPEILQVDLLCKTDEEESKLRNIVQSTNVCLTCSGPFELYGKKLVQI  
CAEEGVHYADITGETDFVREMIVKYDETARNAGACIIPHCGNDCIPSDLTVFEMNSYAKK  
NGLKLIQVLYEEHGADAAWGGTLATASYQMGKRNKNIKKTDFDPLFTTAKGSKSEFIT  
KNATPKKSADAKDQVGYGTSQPWVMGPMVNCIKRSNALMGYAKDLKCGDSFLVKEDSWS  
AKFKLIKNGAILYAAIMLPQLFGAFVPPQGDGPD  
RKTMEEGSLTVHGIATMVSATAASSGSDEKINSVEKKVKSTFRFNKDVSYLYTAVLLVET  
GMLLVEKASSTEASLKGLFTPASALGSDLTQRILTEMDTSIELREFDIEESDDGVGFSC  
>comp14574\_c0\_seq4; 232 362 922 LEN=1217; translated  
MVNCIKRSNALMGYAKDLKCGDSFLVKEDSWSAKFKLIKNGAILYAAIMLPQLFGAFVPPQ  
PGDGPDRKTMEEGSLTVHGIATMVSATAASSGSDEKINSVEKKVKSTFRFNKDVSYLYTA  
VLLVETGMLLVEKASSTEASLKGLFTPASALGSDLTQRILTEMDTSIELREFDIEESDD  
GVGFSC  
>comp14575\_c0\_seq1; 374 132 1251 LEN=1251; translated  
MTRLAILAVTLGALTWSGDAFVSTTATAASSETTTNEPPSHPPRCHACRASNPNPSTLPR  
KRERPASVPVASVHPPSGSPALFYLSSHRRSSSLKAALLNDSSSPGRGKRGRPKPDGADK  
KGPWHRRIILSKISWRRQAGGPTASSSSSLPSAPVEHEEPDVVVESFAVYRDAFVSQDFD  
ALTPGSLVLPVQIDPKAGSKAGFVLEKAHRNSPEAAPVLDSEFSGVSITPALPSAPRKT  
TKARKPFSDTKTKTKTNTNTNTSPVTDNTNENTIANSSRKGMMVARVLEGILTERIGQRWTV  
EEPEGLEVDVRTSPNYNNIAKLLFRGLYRADATLSSGRIIFPNIRFSSVRLEMEQVTLNL  
MGFFLHKDNNNSNX  
>comp14576\_c0\_seq1; 707 316 2016 LEN=2154; translated  
MSSFSAIDLEEKFLKEIEKSERTRSPTPAASSSSHQRDNPTKRDSHSRSRRAPRRPSNYA  
SDNHSYNSNESSNESKDFDLNYDYGVENSPSTVSLTNSMSVSFPNDRKPPSSSDKYSS  
KRIEKDHAKDERTRRTRTTGILPSGGGPMIEISKITALVEEELQTRDKHKDQLNRTVAK  
FKERREKYQEENQLRAQRDEARKELEKVKKDYASQKRAAERNRQLHQQKSRIELEEQ  
RELFEELQAERDALLDEISRQQHQKTKDELSSLKVRVREDSQKRLAVMESLSLSWDTE  
QKEAKQKEALLNSELDIMSKTLAAEHEFLKNKNKEFDKLEAQYRSTKKELRSIKMTLIAK  
KEEMDEIKRERESHNRVNEEHKQILKLNDEIFMAETTIRNMKAELKSTREKVALKEKS  
MASLSEEMKKRIERNSSDPEADALREENRLEAEIKELQKQVESYLANMALQQEFCNSL  
KSRIYKEQENEQEVEEIHKLKRIKQKQKELSAKDLQISQLKALLGEPKGDSSSRVSSK  
TGSSPAIKKSSLKAKGGRKGGYRSS  
>comp14577\_c0\_seq1; 499 1244 2650 LEN=3837; translated  
MAGGKDAGFKAECTLEWMQEISETKGFDTMPNETTYNICINAWARSKHRDAPIRAENILR  
RIVTLSEGGSPIEPTTEEAFTAVMNTWVNSSSNHGNKRKQVKEATQRVVGGILDLMEHISGN  
SEKIPMSVIPYTTILIKAWEKVAQHSSGIEKQECGDEILLVMERMANGIDPTTEVYNSIL  
TALTEAAAINSVLYFLKLEQEYSYGHVHLDTRTFNCGLNAAALNRPDAVKRATDVLRM  
FEYHETDPTILPSNLTFNILKILSRSTSHIPDAAAKADDLLEMDAMPSTPDFISYVT  
CIIAWGRSDEQNKMKRVANLLHRFISSIEGDQDETNRKSGIAVFNALSVCHHNSPEYI  
DESLHTAQVTMNELRNVOGITSQITYSYLFQVMKEKLPDLSPESFFIALVEEEFIHCV  
REGFITREIVIALHHIVPDSLFAKLVGKIKDPRSFVIPKAWCRNASRH  
>comp14577\_c0\_seq2; 499 1256 2662 LEN=3849; translated  
MAGGKDAGFKAECTLEWMQEISETKGFDTMPNETTYNICINAWARSKHRDAPIRAENILR  
RIVTLSEGGSPIEPTTEEAFTAVMNTWVNSSSNHGNKRKQVKEATQRVVGGILDLMEHISGN  
SEKIPMSVIPYTTILIKAWEKVAQHSSGIEKQECGDEILLVMERMANGIDPTTEVYNSIL  
TALTEAAAINSVLYFLKLEQEYSYGHVHLDTRTFNCGLNAAALNRPDAVKRATDVLRM  
FEYHETDPTILPSNLTFNILKILSRSTSHIPDAAAKADDLLEMDAMPSTPDFISYVT  
CIIAWGRSDEQNKMKRVANLLHRFISSIEGDQDETNRKSGIAVFNALSVCHHNSPEYI  
DESLHTAQVTMNELRNVOGITSQITYSYLFQVMKEKLPDLSPESFFIALVEEEFIHCV  
REGFITREIVIALHHIVPDSLFAKLVGKIKDPRSFVIPKAWCRNASRH  
>comp14577\_c0\_seq3; 499 1256 2662 LEN=3877; translated  
MAGGKDAGFKAECTLEWMQEISETKGFDTMPNETTYNICINAWARSKHRDAPIRAENILR  
RIVTLSEGGSPIEPTTEEAFTAVMNTWVNSSSNHGNKRKQVKEATQRVVGGILDLMEHISGN  
SEKIPMSVIPYTTILIKAWEKVAQHSSGIEKQECGDEILLVMERMANGIDPTTEVYNSIL  
TALTEAAAINSVLYFLKLEQEYSYGHVHLDTRTFNCGLNAAALNRPDAVKRATDVLRM

FEYHETDPTILPSNLTFNIIKILSRSTSHIPDAAAKADDLLEMDAMPSTPDFISYVT  
CIIAWGRSDEQNKMKRVANLLHRFISSIEGDQDETNRKSGIAVFNVLVSVCHHNSPEYI  
DESLHTAQVTMNELRNVOGITSQDITYSYLQVMKEKLPRLDLSPESSFIALVEEEFIHCV  
REGFITREIVIALHHIVPDSLFAKLVGKIKDPRSFVIPKAWCRNASRH  
>comp14577\_c0\_seq4; 499 1244 2650 LEN=3865; translated  
MAGGKDAGFKAECTLEWMOEISETKGFDMPNETTYNICINAWARSKHRDAPIRAENILR  
RIVTLSEGGSPIEPTTEEAFTAVMNTWVNSSSNHGNKRKQVKEATQRVVGGILDLMEHISGN  
SEKIPMSVIPYTIKAWEKVAQHSSGIEKQECGDEILLVMERMNRANGIDPTTEVYNSIL  
TALTEAAAINSVLYFLKLEQEYSYGHVHLDTRTFNCGLNAIAALNRPDAVKRATDVLRRM  
FEYHETDPTILPSNLTFNIIKILSRSTSHIPDAAAKADDLLEMDAMPSTPDFISYVT  
CIIAWGRSDEQNKMKRVANLLHRFISSIEGDQDETNRKSGIAVFNVLVSVCHHNSPEYI  
DESLHTAQVTMNELRNVOGITSQDITYSYLQVMKEKLPRLDLSPESSFIALVEEEFIHCV  
REGFITREIVIALHHIVPDSLFAKLVGKIKDPRSFVIPKAWCRNASRH  
>comp14578\_c0\_seq1; 341 279 2225 LEN=3174; translated  
MCQGCNITAKANANADGSANENVRASPDVTVMPPASSLDETSSIDIGTVTAPVPPPSLAPP  
RADQCKSTEATIPSVVWIDHILPFLDRPAWNSLVEASKEIYMLTFLSKLNADYENYKTAR  
NDEGHTKTQPSATPVARARVQPPWPTHRLPQPKKSGGQQAIESFCLSHDGEYLAVRVRH  
RKHRAVEPADWKARLEEPREERERAHIRGAPVPDHEGRRFSGTAHGEPAEILSHRARPGVW  
VREQDRPLGYPSPYPPPPQARQAVPAIAPEQNSIPCAAPPATAGGVRPGLQALQSAEGPE  
EDRQHQSFTTLEIECRKGIYEVTYLGFSAEARRLIARYGKTAYIWTRFPAAEADDRSG  
YCLTQKVSLLSSRSLMVFDPDLARLAMATNGGIGASSTTNSNPHGGRANNTNRNDAASTAD  
RSPGESSSSGGTRGCGKGIWNLWNLEEEPENECCRRTVPTVRNSSNQILAYQNHVVRGLEF  
LRLGSDKQDVCLVSASLQGEVFWKKQRQQLAYGCTAQDDYVVCVCFQSPGKIFSLASYS  
SIPQQGCFHGHGKIFLAAGEARGGVRVWVSPAGSSAMQPFISSGALPANDENDADHYAY  
RLTECLATEVGDHVHYDNKMLSFPTDGRSLVASRAYDAKIWFQTIWQ  
>comp14579\_c0\_seq1; 666 227 2281 LEN=2622; translated  
MTPLRSLVSRIRARGAAIGLGGTVVAGGTAVTAYACTERGLGLRREVRFWGGVAPIVVDYV  
WHASSSSPLVFRFRKRFSGSEKNGESGGGETDGTETEEESDSSSSSSDDVFGDEDETGTTRSTT  
FRKLHERNAPRIYSIMIELGGLYIKLGQVLSVTALPVPKQYRELFRTLQSGVPGHEEFV  
VVRPTLEAELGRPLEEVFESIEEIPCGAASIGQAHRARLVRGGGETGNEDRDEDKNDNG  
SSRDVVIKQYPPDAKWQVPADVCKVGFDFLDLCVYFGVVDDESSAKLSYEEFSRQFLAELDY  
RREASNLEVEYESSLDPESPYAKRGVEVPRAFPELCTGRVITMSYLPGPKFEEEEARRQLE  
ALGIDTSRQVQSVVRGESTETNTNANANANSYAGTDSKKSARKPSLPGWLSNNSSEPTNSW  
AMKFAERVGMFVGVNDNILLVRLARRALLWSRALAVQTIARAASKTAPSVMPVSESWLEWA  
RNHENAASQAEMLNWTSDAIDALFDVHGYQIFHEGLFNADAHPGNILLVIQSESGETNKS  
AKLGLIDYQCKRLDPEERKKVARLMLGVANDESDAE IADLCRDIGFVTKNDSTRFLSSF  
ARLMFGKFRSEYLKRDWHKALHDEDEIVYFPNELSMVYRASLLLRGLAMSFQLNVSVGEK  
WRDHAQALLDRNEPQSRVAGGREN  
>comp14579\_c0\_seq2; 666 245 2299 LEN=2640; translated  
MTPLRSLVSRIRARGAAIGLGGTVVAGGTAVTAYACTERGLGLRREVRFWGGVAPIVVDYV  
WHASSSSPLVFRFRKRFSGSEKNGESGGGETDGTETEEESDSSSSSSDDVFGDEDETGTTRSTT  
FRKLHERNAPRIYSIMIELGGLYIKLGQVLSVTALPVPKQYRELFRTLQSGVPGHEEFV  
VVRPTLEAELGRPLEEVFESIEEIPCGAASIGQAHRARLVRGGGETGNEDRDEDKNDNG  
SSRDVVIKQYPPDAKWQVPADVCKVGFDFLDLCVYFGVVDDESSAKLSYEEFSRQFLAELDY  
RREASNLEVEYESSLDPESPYAKRGVEVPRAFPELCTGRVITMSYLPGPKFEEEEARRQLE  
ALGIDTSRQVQSVVRGESTETNTNANANANSYAGTDSKKSARKPSLPGWLSNNSSEPTNSW  
AMKFAERVGMFVGVNDNILLVRLARRALLWSRALAVQTIARAASKTAPSVMPVSESWLEWA  
RNHENAASQAEMLNWTSDAIDALFDVHGYQIFHEGLFNADAHPGNILLVIQSESGETNKS  
AKLGLIDYQCKRLDPEERKKVARLMLGVANDESDAE IADLCRDIGFVTKNDSTRFLSSF  
ARLMFGKFRSEYLKRDWHKALHDEDEIVYFPNELSMVYRASLLLRGLAMSFQLNVSVGEK  
WRDHAQALLDRNEPQSRVAGGREN  
>comp14581\_c0\_seq1; 1178 28 2619 LEN=2669; translated  
MVNFVTEQMRSIMDLKHNIRSMSVIAHVDHGKTTLTDLSLVQKAGIISAKAAGGARYTDTR  
ADEAERGITIKSTGISMFFEYDMKAGEAAGLSEEEAAKIAQDIADKKDAEANVNISENSY  
LINLIDSPGHVDFSSEVTAALRVTDGALVVVDITIDGVCVQTEVTLRQSLSERVKPVLNVN  
KVDRALLELQLPAAEELYQAFRAIESVNVIVATYNDEALGDVQVDPTKGTVAFGSLHQW  
AFTLKKFAKTYGAKFNVPPEEKMITKLWGDWYFDAGRSVWTTSDKGGTLERAFQCFIASPI  
TTLFEAIMAEKHGKVKMLKAIQVELKGEKEYTGKQLLKRVMQKWLPAAGDVTLEMIVLH  
LPSPVKAQSYRVDFLYDGPLDDQTATAIRTCDTSEGAPMCMYISKMIPTSDKGRFYAFGR  
VFSGKIATGQKVRIMGPNYVAGKKTTELWVKNIQRTVIMMGKYTEQVSDVPAGNTCALVGV

DQYLLKSGTIATADDAHCIKTMKFSVSPVVRCAVEPKNSADLPKLVEGMKRLAKSDPMVV  
CSVGESGEHI IAASGELHLEICLQDLQNDFMGTEVKVSDPVVSYRETVQAKSSVTCLAKS  
ANKHNRLFLEAEPMSPELCAI AIEDGAVNTQADAKTLGRQLADEYEWVDVTEARKIWAFFPD  
QNGPNTYVDTTKGVNYLLEIKESVVAGFNWACGAGPLCEEQLRGCRFNLMDVVLHADAIH  
RGMGQLMPTSRRVIFSSMLSGEPCLEPEVFLANISVPQDAMGNVYGVLTTRRRGHVFSEDQ  
KPGTPQVTL LAYLPVLESFGFTADLRSH TGKAFPQMSFDHWEPMMSGSPHDAGTKCNETV  
VSVRKRKGLKDGVP ELSQYLDKL

>comp14582\_c0\_seq1; 189 943 1305 LEN=1389; translated  
MGSGAWSDEVIAHQSSGQNSLGRFFSRLTSQMRQQEQQMSGTPEVSMGSDDATASGAPRP  
GRVIKPSPTTNHQPNASTSAIPTSGGQQLGGSSRMQNI DPRQARLQALERRIGNTSVG

>comp14583\_c0\_seq1; 364 204 869 LEN=1110; translated  
MTTVALS PKWLMCIFIMASYSDWFRPPLYCRALSSSSTPALAYPTTTLASLGKSQLAVLD  
GAEWNSIQNILREDRRSSASANDEPTPLTKYGYMKVVTGRDENRRRVVAMQSMGNDDSQ  
SSASVYEDSVAEIPNKVSDADAIATYIASLSAVHCALPRLQNIGGADSDSSAWTSK GKAV  
VLGSGDLACFSAEGLASLGLEVYLVNKNKSGNVRKNVGVKCKW

>comp14583\_c0\_seq2; 625 204 1946 LEN=2100; translated  
MTTVALS PKWLMCIFIMASYSDWFRPPLYCRALSSSSTPALAYPTTTLASLGKSQLAVLD  
GAEWNSIQNILREDRRSSASANDEPTPLTKYGYMKVVTGRDENRRRVVAMQSMGNDDSQ  
SSASVYEDSVAEIPNKVSDADAIATYIASLSAVHCALPRLQNIGGADSDSSAWTSK GKAV  
VLGSGDLACFSAEGLASLGLEVYLVNKNKSGNVRKNVGVKLVIKPEVGD DDLGFASYLGE  
FDSLVDITIGNERTSFTEDGDGMLALGESVLQMLKSRHKCYNYVSTLTNSQDIVASDGLFG  
GPGKADGNCEKVG NLSFLTRSRDCRSIEPPRIDIGSTMEKLMKNGVILSDKQRSKACSKKS  
DAIRGWSLSDFWEQMSWPRDSSSGSTTRFGLPVRDDPDDDELMI SEAPYDPSQAYRKGYR  
DDDNYDDVGEFGKSATPTSPNPTNRAIQKNPYVLDIMDIDGLQSEVIGPGKTCIMFMSAR  
FCKTCKTINPAYTRMARI GAENGAENFSFVKAETSGASGKELAAKLSVKAVPSFVFRD  
GKILGQTYVSKLPSKKIQQAVQILTTGADWDNALDDNKK

>comp14584\_c0\_seq1; 795 272 2383 LEN=2793; translated  
MIASAE DNETNDDGAKSAEQDGTQEFRSRYVLQKEIAKGGYGT VWLCNPI SDIEKEYAV  
KVIDRNSLREKDVQAVFREVE MMKELREVP HVITLVDFMVEPQHLYVVQSYARGGDLFFR  
LSQKKQYTEKNARDIALVLFKTLDEMHTKYRIVHRDLK PENL LLEGDDIDGTKDVYLADF  
GFARRVTEKGLKTRCGT PAFVAPEIILGRNYNEAADMWSIGVILFVLLGGYNPFI EGAND  
LRTLFRKIRGGDFMFRQSQWINSREAKYLIARLLTVDPDYRYTAKQALESDWIRKMKKK  
SLESNDLKDSLILIKEFNRRLSLKAAMSAVRFAVSANFWNPETTTFSKWSTRINMDDAV  
NAALHSP TKSTFYDEYELLHKIRDGACASVHECRHKKTGEMFAVKI IRRKKLRHSEDEFV  
LNEASILQSLSIHKKFV VQACDFYEEEDFFYLIREYMNGGNVFDRLSKKSKYTEKDAKEL  
TRSILGAVKCMHDAGIAHRDLKPQNLLRLQDDDSNIKVADFGFARRVYAPNCLTSRCGS  
PTFVAPEILKNIPHDRADLWSVGVIIYLLLVGYPPFAKETHAELFAQIRTCDWKFYQED  
WENISPDARDLIENLLIADPEQRWTASESLECSWLQSGATDEKEGE EVDLIASLVSMRDQ  
TDNLRRSSLSIRWDKDKNIPSDVPLQNLVSI AKPESGDEMDDP

>comp14585\_c0\_seq1; 657 375 2360 LEN=3358; translated  
MSCAIDKTQTL YDGNRRNRHSLAAATTTITSIISRTRTRTRKR TSSAIGMRNDPPVQQTAL  
LVDLTTVRFFSSANTHHGNTNENESVNSTGSDEKGGPVTRK LDELISEGGIQPD AHQWFA  
AKELDRLYLDL MNAKRTTHTETETGHEQQGTS PGFFGRFFGQAFSDATASDNHQAEVGS  
QGIYTYGGVGC KTFMLMELFYHALDDETWGKDKQIVHYHKFMLNVHQFMHTSRQGQNGI  
GDGNPIEPVVDHILESGRLLCLDEFQVTDVADAMILKELFGRLWKKGCILVTTSNRPPRD  
LYLHGLQRDRFLPFVDLLEEKCSV VSLMDNETDYRMVISAQDDEIEDGEDTQYDKEHESA  
SANDSGELPKPSARRRAKQVYFCGKDKKVLQKFFYERAKGRPSNPSTLETQGRKVKIPM  
ACKAKSICMFSFEDLCQKALGAADYLVIGQQFSTVFVYGI PKMTVNEINWLRRFITFVDS  
MYEWKVRLLLQTNAESVEEIFRVDDKEAYQQDEVFAFDRTRSR LGEMSSTKYLSSQWLGA  
GTTSTATTKLELNPSMADQWFQLVGGNLSQQSDDDDTKDNTTDTEEYRQLFDGFDL NKD  
GVLDKDEIKALMHTAFGYEPVDLVNEMIASIDMDQNGVIDLEEF CALLAKIKQHRRTQT  
G

>comp14586\_c0\_seq1; 676 249 2027 LEN=2027; translated  
MPVYRGDMSSDDITSDDGTSSWFSSEDEDVLSWMKRFSLAAAAAATSEP NLEPKTPNST  
PKDSMQKFEKIPRRQSLPNTCASSRRNHKTKVERV GREALDILQSPSDPDW MYKFSAPH  
LDGKERTNNGLEPDARKDGEPEPSVRSRRRAKRRVRIRKNLSKLRREHERSKLERSESPT  
GKRWESPSRRRGKQRSDPPARDRRRMI DEKSGNGTDPSEHGRGRRQRGADPPEDKRKDY  
PVCPTESRKKQIGIDPPEEKTRRRRSKQQIRK TASKLRSR SRQKTVPSQINATYSLNLP  
SRDDSKDKKADNTTKKGLK KDVFDLSSLSHSEVAKSSCIDA AVKTPRETTQE QVVAKP  
KEQKKIPNHPVASTPPESMKKSSSDKTANNGIANKKNEKKESTRQPPKLPAAATTTSKAVA

GEQDVESTAKEDTPEPETKTKTFESIPQFTIETTQOPENLFGMWGNTLKVNKDAETARMDY  
RTL MNQKDRMKDRIAKAKKEHGIP I VVKNNVHYKSAIEESSDTEVESNDDAAAMFN SAKE  
DKKKDSE TEDAAALFHSGGKKTDDAAAAYGAYGASTTKTDDAAAAYGAYGASA  
>comp14587\_c0\_seq1; 897 212 3448 LEN=4816; translated  
MPPGRHRSGPRRRMRVNGASVSGLLNAGARTEEEVRANARRVFGLLGAVLAVDLASAVS  
VVAMACSQQSRCWSGGTSVWRCLVDSVLHASFGASKGLPPHGPQGETETETELGDFVVL S  
LCRCAL TLLLLWVGVRFGNEGTHRREPPEGESGGRSASGIAIPSGSDRSETETEAE TETE  
SNGAPGSLEEPLLAGRQDRELD TGEPSLRGNRERGGTPSGSLPATESPPARERSLGC PA  
SVPRDPKAVKKMVLV LVVVVCTLYQVYAGFRVATMQDGGGACADTGSSDDHHHHTGRL  
WSVLRIVLLCSTILWINAEAYLVSVLVVELTRDSEEGLLFLPPEIHRHPLYLET DHR SMA  
MHWCDLCGQKIQQATPAAPNRGGSSNRNNGSHQTAAPTAVCRVATTPSANSAGSKSAGY  
CYRCALCDFDICLKCSARTDAAVGEHVLRGDRGVRAEASLSTRKYVERS LGVAGRTEWP  
WLALSFFLLALSSATRLLLPHVQGR I IDEVVPVTGANHTFYGGAGGENGNGSGSDRYDRH  
GFVRCIT IYVFMIAIQGALSTLYSAIFTLVSRK LKFTVRNALFEKILVQDVAYFDGTE SG  
RLLSRLTNDLDVMMSP IQSSLSNLLSNLLLMGMMAVCF LKSYRLSMLAFSTVGP I SHLW  
EQYALWSKGLAKEMLSHWAQGN SIA SQALSHIRTVKAFGCEEVLRKYSETNRMALDCGV  
KDAWNGVTSALTGYLDLGTGVLILYFGG LLVYRGEMTVGDLV TYQLFWNMMNGAYQNLQ  
GLVTSFTRSAAGA EKVFALWDSHPDIDPSVGT DVVEDQIQGHLQLQGVGFY YQMRPDNQV  
LED FDL EIPAGKTLALVGRSGGKSTI INLLRFYDPKNGRILLDGKPYPSFKVHQLRRL  
FGVVTQDTELFAS TVEENIAYGLDEDEYTFEDVVSAAKKAHAHEFI SAMKDG YQTRIGER  
GGRISGGQRQLAIARVFLRKP K I ILLDEATSALDERSQEAVQEALADLIAESSATVVMV  
AHLRSTV V NADSI CVIDGGRVQE QGSHEELLQREGGIYASMV SQAVKKQDEL PSELR  
>comp14588\_c0\_seq2; 86 1 464 LEN=464; translated  
XDCRRARATELLREKATGSFIIRPH PQDHGVFTISFKTNLVPSGESETTNQGFSSSESGVG  
SASRPTQTSETRPIKPD DVVQHAIIRLSDSGFRCGSFGPFGT LMDLLEAVSLSLPFDLRF  
DLPPTEGI IKEEGSKPSPNSAFIRKLG MQKT D IAI  
>comp14588\_c0\_seq3; 90 1 284 LEN=335; translated  
XGLGSGGQLEEWVPLKTETQGINWFARIRLTLRFELMCLPQKDQSMASIDKLAPSAGRMR  
IQQLCSVGAQFDLQSVSTPDILSYFESYFETD  
>comp14588\_c0\_seq4; 826 1 3355 LEN=3518; translated  
XSFDARPPPKPAVSTPASGEMSSSIFDSFDTRPPPKPPI LAPASGAMQSSICNQYDPSPP  
KNGAHVSSDAKKKEDPLRKVIDSCDDNFCETGKLRSPPSLWIQRNDLVVDAASRRLIRE  
LSTLCAPYYCDKFDERDFCKRPLVTSEVSQVLQFHCDGEDLINEVCDVLKHL SKVSKLER  
TIIVDRAIHLLHSPYQFYRTVYVILL LLLATKQEELAE DVLR IASKSVIDKCHSNAFSNNH  
VTNGRR CAGYFSTLSSQKFAAHMSWQLELCLWIHRGGALPLSGLALNEAICAVRIGYFVA  
SRNREFKVQEMLIRQPPDCLMDAKV GKQLWSS LK I I SGGGRRENKVIGTGGGWEFLVDC  
RRARATELLREKATGSFIIRPH PQDHGVFTISFKTNLVPSGESETTNQGFSSSESGVGSAS  
RPTQTSETRPIKPD DVVQHAIIRLSDSGFRCGSFGPFGT LMDLLEAVSLSLPFDLRF DLP  
PTEGI IKEEGSKPSPNSAFIRKLG MQKT D IAIKSEDNHFFDDSNQESVACEEEKENTVTE  
RAMKYKQRTETFGFLFLELAF LHM LRKQLSAVAVAEYDTDEWIDDVMDVDVDSIGSISDASL  
DTGVEQEYATASRIVRPLLTWTRMMEIEFGNYLAPSFSSKFLERSPPI SVVESEQCIEK  
STIEKSSKLD TGDSI IRRMMQPNSGVEFR TLR LGDGGENAMVMLFSKKEAITWFLES G I A  
VIEEDALKRLSLMEEARIIEPVDLRLLAPKAYKKSTKRGEDEELGKGD SLAVSDIRYRLV  
DPWEVEPLESREAETRGASL GRECVLAFSLPRVASCCEEQMESIGGLP LLELWVALKGNL  
SLSKSIATVQPPWERSAGD LLLCDGVNAEPSIYDNSIRVHLYRNSL FERLKLPLRFVSL  
IQVELLDLKNLTSPGGSLSLAVYSLRLKRARSSAPLTSKARTLDSVSTEPVKLAKTSGP  
NAPASWGS LVRFRFLPENTDIAGKCYDKDCESL FKGPPSVLQVSVYEKKFMSD TYLGGA  
DIKLNGLGSGGQLEEWVPLKTETQGINWFARIRLTLRFELMCLPQKDQSMASIDKLAPSA  
GRMRIQQLCSVGAQFDLQSVSTPDILSYFESYFETD  
>comp14588\_c0\_seq5; 97 1 309 LEN=472; translated  
LGGADIKLDGLGSGGQLEEWVPLKTETQGINWFARIRLTLRFELMCLPQKDQSMASIDKL  
APSAGRMR IQQLCSVGAQFDLQSVSTPDILSYFESYFETD  
>comp14589\_c0\_seq1; 911 1 3013 LEN=3111; translated  
XQQQLLQSAHGSFAAAAAARHASFVQHQQQQLQINQLN NPAAI VAELQRRSHSLPTAA  
TAVLTELQLRKALMEG SNP I FGANPTQENMQESNEVSTMTAATTNTASPTNSKSQKSQDK  
HSATAFQFPWKLHDM LDRTKAEGNENIVSWVEGGKAFRVHVTEAFVNDILPRFFKQTKYK  
SFQRQLNLYGFTRLHNGPNKGGYKHTYFQQGQRSLCQLINRNSSTQNSIGVLSNTISES  
EAIRDALSKYRNKKNHSNDINISDSCNQDSNDAATGATSSAQLISPRSQPILSNQVPSF  
TRIQGHDAAIRIKQFQNLQ I LAAKQMQRKEEEERLQRLKGYEAERQLLQLQQSREDEGK  
TCATGLFDTSTLMGNDPRILSPGVNRESSLPASCTERDVAPTIDIDALGTKATLDTN NNA



SDRNFRTTEESDDKIKDVADACVSVSSAASIRENTNKLGPQKNSLVFHFPPYKLYEMLQ  
EAEANNAFAHTISWLPGTSCFKVHDTGNFVNRIMPSYFKQTKLKSFQRQLNLYGFI RISSG  
FCKGGYCHPNFIRGRKDLLNAVLRMKIKGTGKARGKYRSSASANSKRSASSMASLAQNKL  
LVDTCRGISTTSLMCDVPTSPGGNSATESGIDVILEAIKTRERKDTHTNSNVQPIEDDLP  
GSSNSSRCSVPSTIDVNINDSADVRNADGLSWRMDPSESYSWDTIDVVS DERVSYHVHRR  
VLAVGPKKSDYFAKIFKSNI EAKNSTNRNQLHLR KSEAAVFP MILDYIYADVEFDLDT EK  
AFALYSVGDKIENESILKRVTDYAKGCM SKVNI VDFIRL GQSF DNTILLDTALLQCSKD  
IWSMDYEKVADMEPGMLYQVLI FALARDEENAEKNTIKLSEIVATCISNATQATLTPEIF  
RSLTDKSMLPYIDPIAAIKLLATENIILNGIHESPLEGDSLHERCISAI SENWGLRQ  
LAKNGELSNMMRSLSSILLFKILMKATQPERRCSVNSSDSSITF

>comp14589\_c0\_seq2; 720 1 2359 LEN=2409; translated

XQQQQQLLSAHSFAAAAAARHASFVQHQQQKQLQINQLNPAIIVAE LQRRSHSLPTAA  
TAVLTELQLRKALMEGSPNPIFGANPTQENMQESNEVSTMTAATTNTASPTNSKSQKSQDK  
HSATAFQFPWKLHDM LDRTKAEGNENIVSWVEGGKAFRVHVTEAFVNDILPRFFKQTKYK  
SFQRQLNLYGFTRLHNGPNKGGYKHTYFQQGQRSLCQLINRNSSTQNSIGVLSNTISES  
EAIRD DALSKYRNKKNHSNDINISDSCNQDSNDAATGATSSAQLISPRSQPILSNQVPSF  
TRIQGHDAAIRIKQFQONQQIILAAKQMQRKEEEERLQRLKGYEAERQLLQLQQSREDEGK  
TCATGLFDTSTLMGNDPRILSPGVNRESSLPASCTERDVAPTIDIDALGKATLDTNNA  
SDRNFRTTEESDDKIKDVADACVSVSSAASIRENTNKLGPQKNSLVFHFPPYKLYEMLQ  
EAEANNAFAHTISWLPGTSCFKVHDTGNFVNRIMPSYFKQTKLKSFQRQLNLYGFI RISSG  
FCKGGYCHPNFIRGRKDLLNAVLRMKIKGTGKARGKYRSSASANSKRSASSMASLAQNKL  
LVDTCRGISTTSLMCDVPTSPGGNSATESGIDVILEAIKTRERKDTHTNSNVQPIEDDLP  
GSSNSSRCSVPSTIDVNINDSADVRNADGLSWRMDPSESYSWDTIDVVS DERVSYHVHRR  
VLAVGPKKSDYFAKIFKSNI EAKNSTNRNQLHLR KSEAAVFP MILDYIYADVEFDLDT EK  
AFAVSS

>comp14590\_c0\_seq1; 80 406 976 LEN=976; minus strand; translated

MPTDVYRQRCILPQSTGGDGRSFPVPTEFPREPIARSVSGFVSGGRTTPPAWQGLVAFE  
CGYHSLFPKTTTEATTARSTTAYDAQGIRAPRGSDES VGSASSSLSTMVLISSGVLPRTRT  
EISATLLPKFPAQNLLSLPDTDTTNLGRPPNRPGISARGP RSNTREARSQCTPASTPVE  
SGGALASLPSX

>comp14590\_c0\_seq3; 131 406 1130 LEN=1233; minus strand; translated

MPTDVYRQRCILPQSTGGDGRSFPVPTEFPREPIARSVSGFVSGGRTTPPAWQGLVAFE  
CGYHSLFPKTTTEATTARSTTAYDAQGIRAPRGSDES VGSASSSLSTMVLISSGVLPRTRT  
EISATLLPKFPAQNLLSLPDTDTTNL GKXPKPAGNLRG SQIEHEGGPLPVHARLNNPGG  
KRGGPGFSPVEENGLQTKDARAIPPPGVARRDLYANHGGGSCRGFAETEELGQVDPLFH  
G

>comp14590\_c0\_seq4; 334 175 2105 LEN=2225; translated

MTALNDDQRLLLFNGVQCAICKAIFGEDDHPDLPKDLIRSTHKLRSKVNDLIDQHKLLEET  
KEENQKQSRDYLYREAMRKHAFYLC SHCNDPYYGGTIDCADA FRPPAVETTGRSNSD  
SNSNSTAPERKLCSCGAPQSQTVCRNPSHGAF L TWKCRYCCQPGTYVVCYGNVHFCKDCH  
DKNSRGEVLTVPVSCPGDSCPYPKPEASSG FHTNGPTQDCEQVYSCSLCESIPVDASAE TW  
TTEPGSRNFVVPNSGEDGLRGWVSN GSPWMVERGAPGAYPSRLLPTPVVGEAEREPIITN  
FVSSFRFSTMEQRIDLAKFLRLGEAATRT P SPVVRIEVSARYTRRWDCPSVFRLEAVLLD  
GREARAPPLSTGVVEAGVHWERASLVFDLGPLAEIPGRFGRFPKLVVSVSGKDSRFWAGN  
FGSKVADISVRVLGRTP EEIKTMVLSEEEAEPTDSSDPRGGTDALGVVRGGAPGGGCLRG  
LWEQRMVAAFESHQPLPCRRCRSPGDKTGDGSRDRFAGKLG DGERARAI PPRRLRKDA  
PLPVHIRGHGIDAAGPFRGIGWGRAGAGLVGN GTPDRTRRTHAPSNTV RTENKLLSFPSG  
KGRFGTHDQTPAKAPECDTAETVRPANERASNGPTPFSEHGNA

>comp14591\_c0\_seq2; 434 216 1802 LEN=2615; translated

MTKAILRTLIAIIGSQASTCGAFHIKHHHLRLVGRNDASKWTVNCDKEPLQVDRNRVKLS  
MSNQFDITKPVFDPLSLRSVRGDAIVRYDATNQSEPLRIILYAFGLTLTLLSAPFIVEAIG  
YEPMNTPTTIASLALASASAALFVRECTRRARQLNRIEKELNTESLPIRLPTNAFSEMPF  
SKPIPLKVFRGMDKPPRIIAICGDQPKLIRVLKDLAIYRQRF TQASVYVAVSTDGSTAR  
DWQDLQNSYKSWLADSYQVWLDYFRGLANDESGGDFGFRWFLNSNGRSFGSGDGEM  
QMIQLMGQFLRPTDFLDISDDSN TKLSSETTAAEKELVEAVEVFYNALTTGDQDSIDAI  
FSQNTTEELSEVRFLSHRFKKTWILSDSIHILTSSKKASPIYFFCYLNDSSQVIDLGRI  
DSWKDCLVEGARPSGMQVSKPDVTIFSDTEAYTTCVEFPANTGMDSASLLAIQRFV RADK  
QDPWKLDLHQ TIPWSVEAKAQGTLKCDRCGVALTREKERTFGGIIG

>comp14591\_c0\_seq3; 409 216 1679 LEN=2492; translated

MTKAILRTLIAIIGSQASTCGAFHIKHHHLRLVGRNDASKWTVNCDKEPLQVDRNRVKLS

MSNQFDITKPVFDPLSLRSVRGDAIVRYDATNQSEPLRIILYAFLGLTLLSAPFIVEAIG  
YEPMNTPTTIASLALASASAALFVRECTRRARQLNRIEKELNTESLPIRLPTNAFSEMPF  
SKPIPLKVFRGMDKPPRIIAICGDQPKLIRVLKDLAIYRQRFQASVYVAVSTDGSTAR  
DWQDLQNSYKSWLADSYQPQVWLDYFRGLANDESGGDFGFRWFGLNSNGRSFGSGDGEM  
QMIQLMGQFLRPTDFLDISDDSNTKKLSSETTAAEKELVEAVEVFYNALTTGDQDSIDAI  
FSQSNTELESEVIDLGGRIDSWKCLVEGARPSGMQVSKPDVTIFSDTEAYTTCVEFPAN  
TGMDSASLLAIQRFVVRADKQDPWKLDLHQTIPWSVEAKAQGTLKCDRCGCVALTREKERR  
TFGGIIG

>comp14592\_c0\_seq2; 557 98 1764 LEN=1796; translated  
MIAPEEEDNEPSWLDTEKDEQHRNEVEPLLFGTGKLSLNDPDENDGGANAFGVPGRSTSD  
DASETVARSKGSSQPTKTPKKQDYGSIDGERKSFWTLPTDATTPLKQSNEKAEDENPFAG  
ASESSGNHKNNAEKEADDSHGNSPNSGGPEPPPQNYCVKIFSTITVFALVTNLSMIVSQ  
VLPMEFLYPLDDFEPSSLALKIYMCVFAIIFIVVEVDNDSVFFRDAVFLKTYSTRGFLYT  
FFGLVCFELAHSEETQKMIIEESKRKYATFDVAWFALIDTIAAWELISLGILYFLMGILCL  
QNIRDRWVREERRIWKKYREEAKRWETENGFDSGELQLFAVAXALFRLNREGSVRSQGQR  
NVEWSSKLRMSLLGGGLNRGSSFPTEWQSGSKPRIQCPCMRAPVGVGKVLKLLDDTMIV  
XLQHEVLCQLLVILFVRENLRNNFKPLSFTVLAIVGRSHPVAAGSIPARVGVRFPLSPAP  
IGGHFFQQPLSLEPLLAAVVRAAAARVLEALALGLAREALPGPAGDRPDEGPGHVLDQGL  
GSFLLELAAASGHGQ

>comp14593\_c0\_seq1; 433 1 1498 LEN=2392; translated  
XTGRKSKQGEDENTKPTNHNKTKIEIHQTRNSRMGGLTVLKYLLLLLVVALSATMLVIQMH  
VLEHHVSAVSSHVWSPSHSSPIFLAEGRKAMPDGRNLKKRDENENDNDNGNENDNESGGG  
VDDDDNDRGDENGSAKDPNGELGDVEFDIDTAKDIEDDLKPIPKILEQGGYDVSEKNKG  
IDRSKLPWSEVLAAYGPPRVVGLFCQHYRDVPPHKNRMAPAGMFNSGTNLLAQLLHA  
NCDFSLRSKVLWQPIWGHKHPGNSRTNHTISFKKPGQAKLYRDKPYHTTLPVVSIRDPTYT  
WMQSMCRQNYAAQFAFAKDQCPNIIIPYPSDIKAHPRYGNKKYVPVNVKYTKGWTVHHESL  
VHVWNEWYQSYLEFEGDDGDRPEGTLPLKKAPEMPYVMVRMEDLVFHGPTVVPQLCECAG  
SKYLWGNNTDLFRHTSTVANANHGIDVSAGMDTGLLRSIVKYGNIANRRIGYPANQLEAV  
KELLDPRMMDILGYTYEEP

>comp14594\_c0\_seq1; 871 460 2319 LEN=2545; translated  
MHYNHPRSFMSLQYSIPRIPEKLLERHHPHPSNNKQRSIQQFIRNQRYPPPRIKAATEH  
HNQER IAMEIEDRTSSTALLERQHKNHIAEIMIRNAKSFAASAKTSSDPLGSSARSSGGN  
STTSTKSNNGNSNSSSSNNSNNSKSKSDEKNNGDKANNSGNSDNNRGERKMNTGRWSADEH  
KRFLNGLDQFGTGNWKKITDMVGTTRCTQIRTHAQKYFIALQKPANDGTNENGGYSRKK  
KMLIGADHHLNSNIKTGSSAIITGYGGGGTPIHPSGIVPVTGTMGVSMGRSKNGTGSNPM  
MKQFWGVERNISGLTGMEVLAQAAITGEKRLQTLAAQKDDHLASLHGVSHSHFNQYESSLD  
KAVAE LRKKMASENDGKAKTSASSAVQPSITSSDDAAKQGGSGESSKRKLDDARAAAVV  
SMHAAEEHQKLLKQKEQHPTDHINYAAAVQDIDRKEVLDKLAQAAERQEFMRLKQENKN  
LNQTVLQLQQQSI ESEN RVMEAITDRRVTLNECKNLREINVQLKQELRRMVLLFEHSGAQ  
TSNSSALMAAATQGANVELMQARL TESELRYHTVTELSRQTGVLT DQHRAILELNSQLE  
KERAKCQALEFELKQLKKN

>comp14594\_c0\_seq2; 832 342 2000 LEN=2226; translated  
MEIEDRTSSTALLERQHKNHIAEIMIRNAKSFAASAKTSSDPLGSSARSSGGNSTTSTKS  
NGNSNSSSSNNSNNSKSKSDEKNNGDKANNSGNSDNNRGERKMNTGRWSADEH KRFLNGL  
DQFGTGNWKKITDMVGTTRCTQIRTHAQKYFIALQKPANDGTNENGGYSRKKSKMLIGAD  
HHLNSNIKTGSSAIITGYGGGGTPIHPSGIVPVTGTMGVSMGRSKNGTGSNPMMKQFWGV  
ERNISGLTGMEVLAQAAITGEKRLQTLAAQKDDHLASLHGVSHSHFNQYESSLDKAVAE LR  
KKMASENDGKAKTSASSAVQPSITSSDDAAKQGGSGESSKRKLDDARAAAVVSMHAAEE  
HQKLLKQKEQHPTDHINYAAAVQDIDRKEVLDKLAQAAERQEFMRLKQENKNLNQTVLQ  
LQQQSI ESEN RVMEAITDRRVTLNECKNLREINVQLKQELRRMVLLFEHSGAQTSNSSAL  
MAAATQGANVELMQARL TESELRYHTVTELSRQTGVLT DQHRAILELNSQLEKERAKCQ  
ALEFELKQLKKN

>comp14594\_c0\_seq3; 579 197 1456 LEN=1682; translated  
MVGTRCTQIRTHAQKYFIALQKPANDGTNENGGYSRKKSKMLIGADHHLNSNIKTGSSA  
IITGYGGGGTPIHPSGIVPVTGTMGVSMGRSKNGTGSNPMMKQFWGVERNISGLTGMEVLA  
QAAITGEKRLQTLAAQKDDHLASLHGVSHSHFNQYESSLDKAVAE LRKKMASENDGKAKT  
SASSAVQPSITSSDDAAKQGGSGESSKRKLDDARAAAVVSMHAAEEHQKLLKQKEQHPT  
DHINYAAAVQDIDRKEVLDKLAQAAERQEFMRLKQENKNLNQTVLQLQQQSI ESEN RV  
EAITDRRVTLNECKNLREINVQLKQELRRMVLLFEHSGAQTSNSSALMAAATQGANVELM  
QARL TESELRYHTVTELSRQTGVLT DQHRAILELNSQLEKERAKCQALEFELKQLKKN

>comp14594\_c0\_seq4; 832 351 2009 LEN=2235; translated  
MEIEDRTSSTALLERQHKNHIAEIMIRNAKSFAASAKTSSDPLGSSARSSGGNSTTSTKS  
NGNSNSSSSNNNSNNSSKSDKNNNGDKANNSSGNDNRRGERKMNTGRWSADEHKRFLNGL  
DQFGTGNWKKITDMVGTRSCQIRTHAQKYFIALQKPANDGTNENGGYSRKKSKMLIGAD  
HHLNSNIKTGSSAIITGYGGGTPPIHPSGIVPVTGTMGVSMGRSKNGTGSNPMMKQFVGWV  
ERNSGLTGMEVLAQAAITGKRLQTLAAQKDDHLASLHGVSHSHFNQYESSLDKAVAE LR  
KKMASENDGKAKTSASSAVQPSITSSSDAAKQGGSGESSKRKLDDARAAAVVSMHAAEE  
HQKCLKQKEQHPTDHINYAAAVQDTIDRKEVLDKLAQAAERQEFMRLKQENKNLNQTVLQ  
LQQQSI ESEN RVMEAITDRRVTLNECKNLREINVQLKQELRRMVLLFEHSGAQTSNSSAL  
MAAATQGANVELMQARL TESELRYHTVTELSRQTVLTDQHRAILELNSQLEKERAKCQ  
ALEFELKQLKKN

>comp14595\_c0\_seq1; 265 341 1720 LEN=2244; translated  
MVPSSAIKRLMLILLMASTVWASQSGLGQGEIAETGSAKPSLRGGDRRRELEGDSFPKKR  
PRIIGGQVADSGRFPYYALMNGSNLCGAVLISPRFALTAHCQDADRDFAIIFSQTRKIGT  
EIGVVDRAVHPLYDDFTYSNDVAIFELSE DATDEDGTPAPFVRLSPTEIDTVGTAMTVIG  
YGDVDPDEDVTKFSDNLHRVDVRYITNPECNRDHRGEISEEMMCAEDTGRDACYGDSGGP  
LLLTPDESDFNQDVMVGIVSWGRGCADAEFPGVYTRISYFYDWIVGTMCVLNAEKVPPYV  
DCVEILGIDVTDPNNDVNREEEELLEEDDEQEQQPSPQEEVDDSPPEEVPPVTEPPRTSP  
PTPAPVPVETSPPTPAPITVETSPPTPVPVSLTAPCGGRNADCTGGGDCCSGRCNIFSKK  
CYPASNANRDRISSGMGGSAGGVTLRRIKKNVYAGASYFP

>comp14595\_c0\_seq2; 268 687 1967 LEN=2491; translated  
MNDDDYDAIVVHNCILFVSMQLQFPKKRPRIIGGQVADSGRFPYYALMNGSNLCGAVLISP  
RFALTAHCQDADRDFAIIFSQTRKIGTEIGVVDRAVHPLYDDFTYSNDVAIFELSE DATD  
EDGTPAPFVRLSPTEIDTVGTAMTVIGYGDVDPDEDVTKFSDNLHRVDVRYITNPECNRD  
HRGEISEEMMCAEDTGRDACYGDSGGPLLLTPDESDFNQDVMVGIVSWGRGCADAEFPGV  
YTRISYFYDWIVGTMCVLNAEKVPPYVDCVEILGIDVTDPNNDVNREEEELLEEDDEQE  
QPSPQEEVDDSPPEEVPPVTEPPRTSPPTPAPVPVETSPPTPAPITVETSPPTPVPVSLT  
APCGGRNADCTGGGDCCSGRCNIFSKKCYPPSNANRDRISSGMGGSAGGVTLRRIKKNVYA  
GASYFP

>comp14596\_c0\_seq2; 126 1 731 LEN=907; translated  
XRCLSLWGTAAAAALPAARGAPGGFRGRSLGGSVERGGGSGRAGRGTALARAKRHRPVV  
RRLWVARDARRNYVAVRDKAPGLRETRLWHEATETLGSRPAEGRGIARAGRPRIESAGAE  
SGTTAHERGERGAAPRLVRGKHRGRAFPCCRDPQRGPRRADRAEGDAGAPAALSGRPCAGRK  
TRPGDCRIEKVRELETIARLLARPGPASPGYIGIAAGYDGIIGIGIGIVPSKPSAFPYEPQ  
NTQ

>comp14596\_c0\_seq3; 227 1 1569 LEN=1745; translated  
XWGRTEIGAARYGIDQALCRTGIVLVSAAPCSTSDGNKATGTPAFPGKGPVTITHQPMFL  
GSRPSPGESPFTRSGGGIPSLPAGDSGRFRSLRGAAGAKTAALAPRHSFVAVKTIHNAIE  
VGGGAGAGGPARPSPGKHLALSDEVRENEVRALRLLEGHPNIVPLVAVFPGGTSGSLSLA  
FSYAPIDLREVLEERRRAFRQPLAFRFLRAVLRDVFSAVHCHARRVLHGDVVKPGNLLVA  
PDGTVQLCDFGLAKPFGPPGDGRGAI PAAVEGERQRQQYPTATNNDRGLCTLHYRPPV  
LLGGSAGDPSVDLWSAGVLAELVAGRPLWQGRNVIDQLSAVFGSLGTPDETTWRSVTKL  
PDYGKLGFGTRPPKPLDRVLPRAAESQELVDLASNLLVLPERRLTASEALHHGWCGGST  
AGGPSPVATRREVRDELIVPREMQVPLLFPGDRVVGKLGGLGIAIXIEKVRELETIARL  
LARPGPASPGYIGIAAGYDGIIGIGIGIVPSKPSAFPYEPQNTQ

>comp14597\_c0\_seq1; 953 2220 4064 LEN=4099; translated  
MNDEIHRERTFGTSNSEEGVGGDKMKELSSDIQDTTNELTTEKDSDEEMSCVEDDRDGAE  
RDENENEADDDNDGHCAKSKNNPLKPKQRYHTPKIFRDAITVFIPLDVTADLNIAIKHTR  
AKRISSIYKRFPSLQKEAKKLDEKNSMKDDDDPMIDDEEDNAKEKEDKQLLKKRKKLEH  
VPQPEQFGSVLDYLEAKYVKGVMLEEEEDGPNLDDNKSEGQGSVYSKDSFLDDTDLQRDV  
AEQVMASSTTLTKLELEHEHDGDFVNVGALEVENDDYGENYDPLQDKENKTTKKRKKPSAT  
VATSKSSSKSSSKSSSKSSDVKTPVQKSKGKTQQAQKKEPTSAKSKSTTSIASTKSK  
KPEDKASKLVAKKASRWESLFFKAVAMIKKLTPEELPRMKTQKVALKCPKNKKPGDDI  
TFANPHNPGQKLRVKVPKDCFPGGTFKVTVPVKHRPGD TDNEKDRNKLPRDLQEALDVY  
KAYDEWCTAQSKVDSTFETFKMKQGFKDLAKLFPKDLITPIDTHYLKQVRRARQNKYK  
RSKTAAAAAAKSEKESMKDKSPAKSLDEEASVKEESDEEEYEQPPKKYRIVKMPPTGLKY  
GNKRFSSSDFNWSM

>comp14598\_c0\_seq1; 681 405 2409 LEN=2497; translated  
MIPGADHCSRSLVFRIRSRSEISNASHRPSGEGSDPRDEIRRPLLHRPTLSVSGDTGDR  
HDGTPDAQAHAQAPACFCFPSLAPSLEYEEGSESSSSLSPEDEDEQSGGFGE DATKPTDWK

LCVVF CFLVASGVGNVIFAKLQSLPMYVPLDDAADD SFLCWRRKQAIRSCRSRSCFFSCFS  
FSLVRFMLCWSITLVFSCSIAYQKQSDTIGTGRYNYPTFLNIYANGMYVVISFAYILPVC  
TLGLFGNSIPRVI PRRTLKPFVFMGALDALGAAMQVLATVYLP GTLLVLIPQVAIPLSMA  
AGSLVLGEKYTIRQYAGA AVVFCGILVVLHPILSHEREAEFYCKAIDS DTDICI CREETT  
QQECLSHNAKNSNPDP SFLFRYQ TETNFTDGEDGNVYYCAWVS REEESVRDEDFLVFFWS  
IVMLLSCVPSVMSTVYKQVALQTASSMDPILINGWVSLCQLVCGLFLVVP SGMVSSPRVH  
PFELGSNWIAGMGCLFSQTNSIEVGCHPDDCSAAALWVHVS LINGVVYALSMLFVLKYGS  
CDLMYLGLTLVPLGHLAFDYHSSFSDLRAYDTAGLAVV VAGLALYRFGHGDWKGPRTAG  
EDDNGHPYALLSNHGDEGVGSGDAAASSRQRSGPAAAADAAAGNGGAHDKSGFLEFLREP  
FMLVGDI

>comp14598\_c0\_seq2; 692 405 2207 LEN=2295; translated  
MIPGADHCSRSLVFRRI RSRSEISNASHRPSGEGSDPRDEIRRPLLHRPTLSVSGDTGDR  
HDGTPDAQAHAQAPACFCFP SLAPSLEYEEGSESSSSLSPEDEDEQSGGFGE DATKPTDWK  
LCVVF CFLVASGVGNVIFAKLQSLPMYNYPTFLNIYANGMYVVISFAYILPVCTLGLFGN  
SIPRVI PRRTLKPFVFMGALDALGAAMQVLATVYLP GTLLVLIPQVAIPLSMAAGSLVLG  
EKYTIRQYAGA AVVFCGILVVLHPILSHEREAEFYCKAIDS DTDICI CREETTQQECLSH  
NAKNSNPDP SFLFRYQ TETNFTDGEDGNVYYCAWVS REEESVRDEDFLVFFWSIVMLLSC  
VPSVMSTVYKQVALQTASSMDPILINGWVSLCQLVCGLFLVVP SGMVSSPRVHPFELGSN  
WIAGMGCLFSQTNSIEVGCHPDDCSAAALWVHVS LINGVVYALSMLFVLKYGSCDLMYLG  
LTLVPLGHLAFDYHSSFSDLRAYDTAGLAVV VAGLALYRFGHGDWKGPRTAGEDDNGHP  
YALLSNHGDEGVGSGDAAASSRQRSGPAAAADAAAGNGGAHDKSGFLEFLREP FMLVGDI

>comp14599\_c0\_seq1; 310 120 827 LEN=1624; translated  
MASNTN NNIPLITTDTLQYRLDTQNF GKNGGQRGSLTRCAQKYGRLRVALCSDTMDAEAI  
ETSKDDL VREVELFNLEMTKLI AFQRNLEVQAKRNQLAEIAREQEIKEAQEQTRKSRELA  
NKSIQR SNCLSEYESLARVIYENHPTSSTELQSQIDEIRSEISKLEDEIASKDETLRIRE  
AQYRSLIQSMLDLKQTLMEDEENKNLEGGDSKSMESRNADRPQPMETDDLYGDLL

>comp14599\_c0\_seq2; 310 120 827 LEN=1081; translated  
MASNTN NNIPLITTDTLQYRLDTQNF GKNGGQRGSLTRCAQKYGRLRVALCSDTMDAEAI  
ETSKDDL VREVELFNLEMTKLI AFQRNLEVQAKRNQLAEIAREQEIKEAQEQTRKSRELA  
NKSIQR SNCLSEYESLARVIYENHPTSSTELQSQIDEIRSEISKLEDEIASKDETLRIRE  
AQYRSLIQSMLDLKQTLMEDEENKNLEGGDSKSMESRNADRPQPMETDDLYGDLL

>comp14600\_c0\_seq1; 255 309 1500 LEN=1500; translated  
MPFGLAGSGSNRTSSRSMNFKNIKHNESGR LNM S GIMHDGQSKKPSKIRQQQR PQYHFQ  
HGSTSKQTPPRSKRSPGTSNSQRNMPGNRLTTHQYQQLKHQHQQYHTPQKIQQHQYSMQN  
LHGSIQQSHSNTSQGSRQSSHSKQSSTSNMHRRTNSNNSGSGHSR SSSSGNSRQYHQHQH  
QHHRVPSGNSDMG SVHSLPTVTSRSTISDPSSHARNGGFYNANNGNYGN SHSRSHSS  
QSRGNTPTDRSPHLLNHNGSVAEHRDPYGETTHNRKNQYTQYQNSDHYHQSN SAFPMPR  
HPSSTIMIKTTPHKSSNASVESHQSRGAASYNSSVGR TTGSSTPLNISTAAPRVSTDKHA  
IKSTKKVIEGTFYILCHLLMTGLNLLLPHNGIFYFLTX

>comp14600\_c0\_seq2; 845 309 3719 LEN=4076; translated  
MPFGLAGSGSNRTSSRSMNFKNIKHNESGR LNM S GIMHDGQSKKPSKIRQQQR PQYHFQ  
HGSTSKQTPPRSKRSPGTSNSQRNMPGNRLTTHQYQQLKHQHQQYHTPQKIQQHQYSMQN  
LHGSIQQSHSNTSQGSRQSSHSKQSSTSNMHRRTNSNNSGSGHSR SSSSGNSRQYHQHQH  
QHHRVPSGNSDMG SVHSLPTVTSRSTISDPSSHARNGGFYNANNGNYGN SHSRSHSS  
QSRGNTPTDRSPHLLNHNGSVAEHRDPYGETTHNRKNQYTQYQNSDHYHQSN SAFPMPR  
HPSSTIMIKTTPHKSSNASVESHQSRGAASYNSSVGR TTGSSTPLNISTAAPRVSTDKHA  
IKSTKKVIEELRKSADHSYPVEKRI IALTNACAEFDHLDDSRHNLELQNGAALVLCVLA  
VIVNDIDANL KSCGYDFDVEHNYDQKSTGSDQSNHYG VGE GKNENHEEKNIKENHTTYE  
EDQRAKSGTARKVITNSNEDDSRDDND DALRMIATALEMVFRGQAI FVHSAYDKCGGTP  
TEHAEGLVGATPPGLVPLLLRLIDRAEGLNCGRRMKRYNADVTLVNTTKVLLYLSRVPEL  
RMQLARQEALIDVLSRVAKNEIYTNNH FENSEFGSSGCTALNREAI TKVRVIANLVNQE  
ENKPLLLNHGLSEESH SNGNDGSRSAIGLLDALLRVAHMDPNMRAREYAGLALMDLASSP  
SNQIPMAKNGRLLGTLVKMILVETNAGMRESAITALQNLAFAKENRILLVSFKHGIVLEA  
LIKALSNGNGYNEKSRRAAGALTNLACEESTELMGRHKGLLRSLAIVSTKDESPEVQS  
RAAMALTKLAASVTVMESH TFAKPEYEINSQENHLPDTSTESEGIYATLLDALVVASLS  
PVSNSVSAVLRVKARDPENRCLMAQHPGILDTLADMCLYDDNRGDEGDGVVRNVRSGIRGR  
NANNLLQKDGKETHMYEIDILKDRDNATR ALMHLTNE SKNRIVMCTPPVLNALVRGASVT  
DEEIQVNN TNQLKQQLTDVRNSAIRAIERLATEFSNR RVM AHHEGLLVAIALATEREAK  
LEAHELMIAGGSCEDSMYGASNLSVSPMKARTLQEQSPHYAYLAKPLLMSLLVAM

>comp14601\_c0\_seq1; 268 435 1565 LEN=2167; translated

MRPASSIAIATAVTTAATVAATLALATVAIAGTTKGI EGPGLPFALSLAGSGPSVRGGR  
PTSGNQQRDLHEAAFEHNIYRPPFADDLGSAFGEASTGAPTTWYEFDDDEYNIDDGA  
IDEAMIEGRKDLYERERSDPDSGIGGSDGGDQTVETAQALQSGAAGGLPAGALXGAA  
AAARGTCPFLLRTRARRTNGMGLDSDSRSLVRPSTDP SRNKESIGMAAELVASIQCDSTHR  
IESTGQSSAGLALQRLSGEGKDDQSHGIQRDLGTEKATEKHVAVYENSKRRDALFVQD  
FSISQSEQTPVAANPTRGCAIRRSTHARMRPPSISLSFAGIARRQTKTAVVGD CFSIGAV  
SAQAPPYCWNKRHR

>comp14602\_c0\_seq1; 890 199 2133 LEN=2192; translated  
MTATTRASLVALLSLVWTSRLHRPCEGFVPAGRNGVATRSRLYVISSPPPPPAGSSSRTS  
DDEDENEHGALFTLDESSAGDFFQVDEEKEALPPMSDRPLPEYTDTP EPIQEAGGIAAED  
EDDL SFFYRDEDDMLTEREDRLYTDEKIRREIEKCIILVGVEDLAAQRRAKKAELYDPL  
DSGAEAPIFSLEESMIEMRELVRTAGMSLEGEIVQRQKEVNPKTYIGSGKVEEARALMDE  
HDACTIVFDAELSPGQQTLEKIFNRDALQNDFLGEDQEI KVVDR TALILDIFAQHAKTR  
EGKLQVDLALHEFRKPRLT KMWTHLERQSGAGGVGLRGPGESQLEIDRR LVRDRIIVLKK  
KIDDIQKQRSIHRGRQRTGLPLLSLVGYTNAGKSSVLNSLTRAGVMAESMLFATLDPPT  
RKVKLPGESAHPEFLLTDTVGF IQKLP TNLVAAFRATLEEVEMADVLVHVIDVANP SWEK  
QERAVRSVLSEMGVGDKPVVRVLNKIDLLDEDEAEMLTYEAAFSDDTVAVSALTGEGMED  
FVVAVEESLNSLLAPIELVIPYNGQELSIIHEQGVVETIDYRPEGTYVLGRAPPAVANR  
LQMYSMADSATGDDTQQSTNTKATADTDDEIDWVALGRGRHGQD

>comp14603\_c0\_seq1; 458 171 1541 LEN=1686; translated  
MALASRRRDQGGSLPVGLALAQRLLLTAGLGLL CGGAAPGHRHRALALALEQGAGGTL SW  
EERAAFPGGRRHPITFANETHGFVLSGSTQTETYSDFWAYEAATDKWNTLTGTDAAFP  
GAPRSFGYGVASTMDCGNTKAYVGLGAGENYQRFTDFWEFDMVTHAWRELASF PGLGRRH  
PAMNFI EPVGEIHVGLGDGLLGNKYDYWAYS IETDEWRQLEDFPSSERHHPFYFAIDANS  
YLGLGHSNGYDPFIERDWRYDAIDGTWEREEDFASYPLGIPGAPGPGATPRSGASPVTT  
EARVAGTQF SVAGSCDADLALGFVLSGDGDDHRAMPTGEFHVFDPSSEWHELPPHPGSS  
RWAPGSFVLRGTTRAYLVGGYDRNERILYSDLWTIDLEPLFVGANATGTFADVGLDDVDY  
GYKSLQPSEPERLETEYGYGFAGPSSPAVATGVAREW

>comp14603\_c0\_seq2; 464 171 1526 LEN=1671; translated  
MALASRRRDQGGSLPVGLALAQRLLLTAGLGLL CGGAAPGHRHRALALALEQGAGGTL SW  
EERAAFPGGRRHPITFANETHGFVLSGSTQTETYSDFWAYEAATDKWNTLTGTDAAFP  
GAPRSFGYGVASTMDCGNTKAYVGLGAGENYQRFTDFWEFDMVTHAWRELASF PGLGRRH  
PAMNFI EPVGEIHVGLGDGLLGNKYDYWAYS IETDEWRQLEDFPSSERHHPFYFAIDANS  
YLGLGHSNGYDPFIERDWRYDAIDGTWEREEDFASYPLGTPGATPRSGASPVTT EARVA  
GTQF SVAGSCDADLALGFVLSGDGDDHRAMPTGEFHVFDPSSEWHELPPHPGSS RWAPG  
SFVLRGTTRAYLVGGYDRNERILYSDLWTIDLEPLFVGANATGTFADVGLDDVDYGYKSL  
QPSEPERLETEYGYGFAGPSSPAVATGVAREW

>comp14604\_c0\_seq1; 857 242 1762 LEN=2083; translated  
MNTKNNSHNMVLLPLLLMAGSKLHQADAFQPPARIAAAAALSGRPAVTTSQLGAAIPPLH  
DAASSLDPQELSTHAHALHGFLQHHTSTFLSDAAAATLDPSGSNPLEAIEAVIESTETAL  
ESFEGTEAAI VADEGWKAYLNIFKTTIEFVHVIDEPIHSLGWEGGTWGF SIALFTAGV  
RSLLIPLSFQQSKSTELLKALKPYVDEINAKFKDNENKKNQLVGKLYQDANQNPLSGCFL  
SLLQLPIFLGLYRGVRL LAMDGKLEPFLWIPSLGEPVTAETDYRGLDWLTQGW TQVDGL  
WTPSLGWETT LAF CIMPVVLVLGQKLTMEALAPPDPEDETMDEEAKKQAETTKNALKFLP  
LLIGFFSLQVPAGLTIYWF TSNIFTLSQSLAVRTYYEQNPPEIELPEYWDALSEDEDMMT  
PEERRAAAKAGVAKGPSLEDWIATSMFHTVVERDSASLREASASWKALNGDEL SVPAEFQ  
SWVGETAAPVNGSSAEAKETEAVAQA

>comp14604\_c0\_seq2; 537 1 1284 LEN=1605; translated  
XLLCRGTIADRPAGMLFLMSVTAPRRTCDLSCIGCKASNFSLAYRFCRFVSGLVVSLWL  
SVLYQKCDXINADCSADATTLKTKRKFQTQTIQNLNKKQQASDLXLIPLSFQQSKSTELL  
KALKPYVDEINAKFKDNENKKNQLVGKLYQDANQNPLSGCFLSLLQLPIFLGLYRGVRL  
AMDGKLEPFLWIPSLGEPVTAETDYRGLDWLTQGW TQVDGLWTPSLGWETT LAF CIMPV  
VLVLGQKLTMEALAPPDPEDETMDEEAKKQAETTKNALKFLPLLIGFFSLQVPAGLTIYW  
FTSNIFTLSQSLAVRTYYEQNPPEIELPEYWDALSEDEDMMTPEERRAAAKAGVAKGPSL  
EDWIATSMFHTVVERDSASLREASASWKALNGDEL SVPAEFQSWVGETAAPVNGSSAEAK  
ETEAVAQA

>comp14605\_c0\_seq1; 188 78 737 LEN=1451; translated  
MSETTPLTKETKADAVPSTEGGTPKPPDYAKISIVVTVILAIGTG IAYAATAFDGSKELR  
DAKIAGLKEQDLQWVFLALVVLGRSIQLLNFVPTGYKSGLGNIRSNPFFYETHDGKKT  
VYYQEESKGMYNRSNRSIQHMVENFGAFLASIGPVGYVFP RQVLGVVVVFSLGRILHQK

GYSGGYGGHALGFVLATLSMVTMEGLSLLTFLKAEQIIA  
>comp14605\_c0\_seq2; 188 78 737 LEN=1437; translated  
MSETTPLTKETKADAVPSTEGGTPKPPDYAKISIVVTVILAIGTGIAYAATAFDGSKELR  
DAKIAGLKEQDLQWVFLALVVLGRSIQLLNQVPTGYKSGLKGNIRSNPFFYETHDGKKT  
VYYQEESKGMYNRSNRSIQHMVENFGAFLASIGPVGYVFPQVGLGVVVVFSLGRILHQK  
GYSGGYGGHALGFVLATLSMVTMEGLSLLTFLKAEQIIA  
>comp14606\_c0\_seq1; 404 1 2017 LEN=2344; translated  
XKYMSHAQNGTCHMREGTFQARVTSSVCHTSHSKHNNLNQTPSDPFHFLYEPVVNLLFN  
TIMSSTLEPSPDPKEESNPPATLDVTSSVASSDLALQGPTVHGTTKAEQMEAAKFLSKQ  
KEKKNRRKKGRRQKETCLDVFYVCLCVLAASAIASSILVIQSCQFFSYIGKETSKT  
TTNTISVTSATMVAPENDNESEGESSNSERVEKNNIFLRNNSSSKASQSNHEEHDEETMP  
SPRFNPSVIGAFRRNKHDPVMEETEELEVQGGKAEAAEQETQVFDEFVQAQONATSKEN  
DETENEDADSDSSYESYYYSPFEDLPEATVGLFSYSMGNDIGSYDHVCFRYYDETSDYNL  
FRGNNSNSIDYWIVARYCSICAPIAAFLAVMQLVLEAICCNNGIKSRNPDSEAAAPRTHL  
RCRNIIFTLWFVAVAGFLQLGTFVVMFAPPVLSGMEDEQENFCLSGSTIRCSMDTGAWFSL  
LSALAYLIVATFSAMLRMSPTTVGTMFCDDYDYFNYYNADTDHYRVVKIRNRNGNDREI  
FLNSSSKIYDDFSTDSVSSLSINSNYERRKEKERKRALEAEYKDLDFNEYLVNTIDAPS  
RRSPSKPIEHLNATKARGSRHLQQGLMCSFAGLEEGITRSTKKRGLPVAKAPPGCAFIPP  
QDSSPWFCSCAL  
>comp14607\_c0\_seq1; 532 134 1231 LEN=1363; translated  
MPVLRFGFRFCNSFFANVVVIDCFKRIESGLVLPLLLLANRSIFGPFVAVKKHRRGGT  
GEFKAPFGVAYNGIFYATKEEAEASGTHIASKRRKQQQQLAGGDVPGESENNEDDDDD  
EEGNLGLFRLGVICIPKPGWSRAIIFAGGIQEPKDDTEEEKASTGAEAAPKKKPKKK  
SLVAKIFGILPKWLVLHLLSNRFLDSDLAFHLHYQEQRERRYTDLNPGASANEYYYMPAQAD  
RCISALRRWIPRHTDYLGGDGVTSNHSYQLPPPIDSRAVLFDYKQHTSHCKHCQEGLEW  
LTTTVRKTASLVLVGSVLAGHCFLRFAGFKLLAKLVALASLGLVGLVSRIEPAFRVGEFK  
HYQND  
>comp14607\_c0\_seq2; 308 200 847 LEN=1568; translated  
MRAIRKDDTAKTPSTHRRTSKRPSATLLRRTILPNLSNGLFFAAVLVLSVWFGFDNPCA  
NNQHKNSSSSISNHGNGSKPIVETIIDSIEHTPHKAMHPSILPPVTPELEAEHALFCS  
QRKALALAEAGATAAGTNGRPAPRENGPERRSASRSCSCSCSSSSPSVLGVPVLLWTCL  
LLFAAGTIAYAVAVALGFNPDPKDPARPAAGGGG  
>comp14607\_c0\_seq3; 618 462 2453 LEN=2585; translated  
MEMDTNANRNTGIHRSMPLFLFYSCLAAGFFVSKGLGFSFPPSIPANRPGARALHRRGGGR  
SAALLPFLPPQAATGAGQSRALSMVANATVAADPSARGPDPPAKTKPLSKNQEALSRRY  
FPRTWVPLASAYELDPDRPTPLEFLDQKYVCHYDHPSTESGWVVDDACPHRLAPLSEGR  
NRSSGGKEPGQRETTLMCSYHGWFDGGNGGACTAIPQATPEVRSRACNSPRAAVATYS  
VRVHKNVWAWLWPEPLSILQDFPRGHPEGIAEGITGGGEYPSTYTRDLPYGWDTLLEN  
LIDPAHIPFAHHGLQKREDAIPIDMTVPESFCGDDGSEGFLFEWQDRMTMKKHRRGGTGE  
FKAPFGVAYNGIFYATKEEAEASGTHIASKRRKQQQQLAGGDVPGESENNEDDDDEE  
GNLGLFRLGVICIPKPGWSRAIIFAGGIQEPKDDTEEEKASTGAEAAPKKKPKKKSL  
VAKIFGILPKWLVLHLLSNRFLDSDLAFHLHYQEQRERRYTDLNPGASANEYYYMPAQADRC  
ISALRRWIPRHTDYLGGDGVTSNHSYQLPPPIDSRAVLFDYKQHTSHCKHCQEGLEWLT  
TTVRKTASLVLVGSVLAGHCFLRFAGFKLLAKLVALASLGLVGLVSRIEPAFRVGEFKHY  
QND  
>comp14607\_c0\_seq4; 117 221 803 LEN=803; translated  
MAVVKGSALHKAFGPAGERDEEREPLPCQKYLAPLARRNKKKAVDLEAIGSRANNQLLDL  
LRCRNRFHARSKSSGQSCRAAESAYDACHSSVMGTGSFRGRRHCGRELGDYLECVAAAA  
AASAATEPSGEPDRGDEGLPCRCLGAGVENRRHTARSEPSRSGSAIRPIQSNPIQPNPTK  
PIRRGREAHAPQRE  
>comp14607\_c0\_seq5; 354 120 941 LEN=1095; translated  
MADDSTAGSPESLLODLKDELGPECEGVRDEYLLAFLWVKPDVGRAAGRYREFLSWK  
SSNKHFDESRLSKDPELERLIVSEVVVSPPELTTKEGGPILVGRFRNNDMTDGRITVDG  
CCRMLFYTLQDIIQRPEAQKQGVVVHDLRGFDKGNARVEIAKCLFHLHYGHFPILKAI  
YICHAPPIFMAFFAVVSRIIMTKKVRERIRFVDDLKDLGDDKLDVVDPDHLLVEMGGTMD  
WKVKDWVQEQKLKEQDPSVWRSFTEIEPVAKEQ  
>comp14607\_c0\_seq6; 618 478 2469 LEN=2601; translated  
MEMDTNANRNTGIHRSMPLFLFYSCLAAGFFVSKGLGFSFPPSIPANRPGARALHRRGGGR  
SAALLPFLPPQAATGAGQSRALSMVANATVAADPSARGPDPPAKTKPLSKNQEALSRRY  
FPRTWVPLASAYELDPDRPTPLEFLDQKYVCHYDHPSTESGWVVDDACPHRLAPLSEGR

NRSSGGKEPGQRERTTLMCSYHGWEFDGGNGGACTAIPQATPEVRSRACNSPRAAVATYS  
VRVHKNVWAWLWPEPLSILQDFPRGHPEGIAEGITGGGEYPTSTYTRDLPYGWDTLLEN  
LIDPAHIPFAHHGLQKREDAIPIDMTVPESFCGDDDGSEGFLEWQDRMTMKKHRGGTGE  
FKAPFGVAYNGIFYATKEEADEASGTHIASKRRKQQQQLAGGDVPGESENNEDDDDEE  
GNLGLFRLGVICIPKPGWSRAIIFAGGIQEPKKDDTEEEKASTGAEAAPKKKPKKSL  
VAKIFGILPKWLVLHLLSNRFLDSDLAFLLHYQEQRERYTDLNPGASANEYYYMPAQADRC  
ISALRRWI PRHTDYLGGDGVTSNHSYQLPPPIDSRAVLFDRYKQHTSHCKHCQEGLEWLT  
TTVRKTASLVLVGSLVLAGHCFRLFAGFKLLAKLVALASLGVGLVSRIEPAFRVGEFKHY  
QND

>comp14607\_c1\_seq1; 611 256 1342 LEN=1342; translated  
MTPPDIEKYVILASDASDLRLQQQANVFLNQWVASSSDAVLADAMTELVRILTQREVVLFY  
ALTVFSRLDHAGPERRSAFRSEIFSQLLRSSLSQGDAAVIPLVSTGNNYHNRSSWSPTY  
LRTKIGVLLARFVQLDFPHAWPSAFDDLRAPLLLQTESDIFLRTLVALTDDFGRDETEVN  
TKIKDLMRGYDDSSSLVVAPDQSIGHLLDVTLSILERALVETSGRPDEQM QVYSVLSLT  
VLKGFLSWVDITLVTGNEKVLRLIYAALAKGSKVDAERAADAGVVAVECMEELIARGMND  
EKKLSMLVHTKVLEKIHAAHVDLVTVDASSIDVMEVARFINRTGLEILPIVFERQAQQQQ  
QQX

>comp14607\_c1\_seq2; 611 435 1521 LEN=1521; translated  
MTPPDIEKYVILASDASDLRLQQQANVFLNQWVASSSDAVLADAMTELVRILTQREVVLFY  
ALTVFSRLDHAGPERRSAFRSEIFSQLLRSSLSQGDAAVIPLVSTGNNYHNRSSWSPTY  
LRTKIGVLLARFVQLDFPHAWPSAFDDLRAPLLLQTESDIFLRTLVALTDDFGRDETEVN  
TKIKDLMRGYDDSSSLVVAPDQSIGHLLDVTLSILERALVETSGRPDEQM QVYSVLSLT  
VLKGFLSWVDITLVTGNEKVLRLIYAALAKGSKVDAERAADAGVVAVECMEELIARGMND  
EKKLSMLVHTKVLEKIHAAHVDLVTVDASSIDVMEVARFINRTGLEILPIVFERQAQQQQ  
QQX

>comp14607\_c1\_seq3; 307 178 1239 LEN=1709; translated  
MRSTAVTTTTVVLMAALSTTANGFSLPSVKTS SSPATVVKMASGGKGFNTPAPEPPK  
SPPPVASAQQQPEQGEKEIYNPFDDRNPTPTDTSRGKAAEQMRREKAEQRNAELQKMN  
EVVQQDQLVRESGGEAAVIPEKVAQRMGKRMLPFVGIPLFGSMGAFVFFWYMATYRDMF  
QPVLVAGTTIALLRSDWLIVPTCLEAYPLRGIDTKTTTFGF XEPVLPKENVGDVVKDSII  
VSLFFRPSLIFLSPFFRLYVEMWCGCNP IHRKGITYSMMSASWDPEREGLVGGDEF SR  
NVNNIKEGLGRSRENAQIREQMMFEDNIAMQKQAKEKKASPTSFAEKMGDGM E

>comp14607\_c1\_seq4; 349 178 1014 LEN=1484; translated  
MRSTAVTTTTVVLMAALSTTANGFSLPSVKTS SSPATVVKMASGGKGFNTPAPEPPK  
SPPPVASAQQQPEQGEKEIYNPFDDRNPTPTDTSRGKAAEQMRREKAEQRNAELQKMN  
EVVQQDQLVRESGGEAAVIPEKVAQRMGKRMLPFVGIPLFGSMGAFVFFWYMATYRDMF  
QPVLVAGTTIALLAIGLVGITYSMMSASWDPEREGLVGGDEF SRNVNNIKEGLGRSREN  
AQIREQMMFEDNIAMQKQAKEKKASPTSFAEKMGDGM E

>comp14608\_c0\_seq1; 491 98 1888 LEN=1990; translated  
MPAVFNSEQLFDGDDRSEEAATFLPIESPEMLFSWVRATSKQMLLQMF DGDARNTASTQS  
YRWWWRFPPDLSYAKDFREWMGIDPKDVVILVLI GLFTCSWYATRRDRKIIERNMKQELE  
EEDQDSNSGKNQKRDDKGF SYHRLEKAI SASSMSMSSMLHNTIHNTLGFSTGT SWERRLQ  
TLAMFSCSLAFLMPGTLFAVAVALHHGLFRPLHIFVFSKDSGSSSKIGNETDPVPELET  
AIAAILVWMYLVYIYAIDESPTQGSRRPWLRSRGRWVWVKQQPGRGANRRTGGGWWWNNAC  
DFLPVVLVKTADLPATKIIRSPGDLGQTTTTEPQTYVLGYHPHGI IAIGAFCAFATEGARV  
LDLSKTMNTNRDALSSKGMPEPKDWKDESDENDSDCTTDDGEEDKELLTHLPLRPSSLS  
LLDDGND SNKHDAARQPEKITR TSI SRIQPNQTQSPKRGFGSVFPGLDRRIVTLP INF T  
IPFLREYFLAMGAVTSQKETFRKYLDHSNHAAAKNNDAGDPGRALVVVVGGAAESMMAHE  
GGIELVLNSRRGFVREAIRAGANLVPVLGFGESQIRKQRI VDCCALDVSSVASQSI

>comp14608\_c0\_seq2; 542 98 2406 LEN=2487; translated  
MPAVFNSEQLFDGDDRSEEAATFLPIESPEMLFSWVRATSKQMLLQMF DGDARNTASTQS  
YRWWWRFPPDLSYAKDFREWMGIDPKDVVILVLI GLFTCSWYATRRDRKIIERNMKQELE  
EEDQDSNSGKNQKRDDKGF SYHRLEKAI SASSMSMSSMLHNTIHNTLGFSTGT SWERRLQ  
TLAMFSCSLAFLMPGTLFAVAVALHHGLFRPLHIFVFSKDSGSSSKIGNETDPVPELET  
AIAAILVWMYLVYIYAIDESPTQGSRRPWLRSRGRWVWVKQQPGRGANRRTGGGWWWNNAC  
DFLPVVLVKTADLPATKIIRSPGDLGQTTTTEPQTYVLGYHPHGI IAIGAFCAFATEGARV  
LDLSKTMNTNRDALSSKGMPEPKDWKDESDENDSDCTTDDGEEDKELLTHLPLRPSSLS  
LLDDGND SNKHDAARQPEKITR TSI SRIQPNQTQSPKRGFGSVFPGLDRRIVTLP INF T  
IPFLREYFLAMGAVTSQKETFRKYLDHSNHAAAKNNDAGDPGRALVVVVGGAAESMMAHE  
GGIELVLNSRRGFVREAIRAGANLVPVLGFGETNLYTLYDDIDDISAGNSDGGDAGA QAS

HSPSLASTVVSGLQGFVVRKTFGVAVPLFXGTVDLFFQQPWGDAEAAAARGRRRQANPSRA  
QPDTPRTIRNQNHKSLDIWDLFAQDRSLQRHTNERPRKAVDRVAREICQAGRIVPPTQG  
CQLELPRKQSKAIDGNRTVKNTSRKEDPLEQNQRYYFSMYLMAQCPRK  
>comp14609\_c0\_seq1; 161 169 1119 LEN=1206; translated  
MGVIALCISFHTAQTLLGWNLQLFTMCPRLILFTSEYYRIFTSVFFHGLSMHIGVNMLST  
SAISGALEKRLGTIRLLFSIWWSIVWTAVIYLLVAYVSFATLGYEGWYQHAVGFSGIIF  
HLSVLESYLQPGPRSIFGIFSVQSYVYPWVLLVVLQLIMPNLSFLGHLSGILTGTLEYYG  
AFDGLFVSDDFMVELESMQMRPLSMLESFVATSRGGQRLRSENLLSLSHSMLRITRI  
VVKFFYNVLETILLCTCGKGCRIISRNTSMRFWERQSARNDMECRAIRPPEFYESDVEVD  
DDTDYDELEPLASRLV  
>comp14610\_c0\_seq1; 831 100 2139 LEN=2234; translated  
MTNLRLLLLAVASACFFAGVASAQDPLVLYLDGKTSVVKEFIPERHDPRLLPSPVKRPRV  
VEFYSPHCPVCVSFSQNYVQLAHNTKNTYPKIDFFAVSCDHYPDVCDSYNVNDPFTIRLF  
REDDGPSSKGRLLDMEDEAVNLKTPKIAEFLGVEYGVGMDSKSGGDATENPSQFSGKI  
RGAKVDDGDDDDGDDGDTSGSDEEKKDGDGDISSDEDEEDGDDDNSDEEEEEVYSKGTK  
FSELQKTAVEKYMQRQGVGKYIRREDETKDKQGETIERAKFGEMTKGMKQNSVGTKEYED  
RKKRFLDRLQKVGKNTLQTDVTRANLPWWKEAKKGDWLGWKKMNEEELIWDTTLSLIM  
SLHSGMTMGIEDITSKAMKDWLNLSSVSLPPEWKIHELIDYLRFNFEVTESSDRFRDF  
VLQYPRPLGGFSKSCRNRELGTDFSCGLWKLHVVTMGVAEQRGRNLIESGMMAPTIV  
VFSPKSAADTIRNYLDKFFTCRCPREHFIKTYDDCKNNQRCRLKAGNAEDPADWKAISLW  
LWDLHNDVSVRLARERISKTFTKGVKNTAKASDEIAVVWPNVRDCILCFENDGTWNKGEV  
FRFLERSYWPDSETPMDTKLLRFENESNFVNRILLMAILFIWIVYMVLSKRSHAIRQP  
LLAARLLISQGVAQKARTS  
>comp14611\_c0\_seq1; 409 1 1281 LEN=1515; translated  
AAATENFQDVRPSHCKTSPLMTSETSNTNSDGAMAMADETVDSSGNGTSESVASNDVTVG  
QRLPAFGVDDRPILCILEEEQTYASATMKFVATKKRQRCRMFRVVRSRGKAMASGGFGVT  
VVSGLSGNEQGEEDNDDDDNGSEKQGAMVVPSEVTEKTKTNTTNTTVRSAEYLFIE  
EVLFLHEKGLLALLPSSLLASEEEGGGTADANTNGISGATPLTTSQLYQLLPSMGISLS  
VYRVYSHLRSQDFRVLRHDPNRYDILCQQQQDQEERRKRRIERQKQQVQVEKTSGSDP  
LPLLRNPRRQSLRLRRRIRESIQNAPPAIPDPNGSGSGALALCWDAYTPNSNFGKTHPG  
LPDFYVTATYFNVPTVRFSDLKALVRDKCNGIPLKVATVSDSGTVVMFGVTDYGIPIPLEK  
KSTSSK  
>comp14611\_c0\_seq2; 380 1 1215 LEN=1733; translated  
AAATENFQDVRPSHCKTSPLMTSETSNTNSDGAMAMADETVDSSGNGTSESVASNDVTVG  
QRLPAFGVDDRPILCILEEEQTYASATMKFVATKKRQRCRMFRVVRSRGKAMASGGFGVT  
VVSGLSGNEQGEEDNDDDDNGSEKQGAMVVPSEVTEKTKTNTTNTTVRSAEYLFIE  
EVLFLHEKGLLALLPSSLLASEEEGGGTADANTNGISGATPLTTSQLYQLLPSMGISLS  
VYRVYSHLRSQDFRVLRHDPNRYDILCQQQQDQEERRKRRIERQKQQVQVEKTSGSDP  
LPLLRNPRRQSLRLRRRIRESIQNAPPAIPDPNGSGSGALALCWDAYTPNSNFGKTHPG  
LPDFYVTATYFNVPTVRFSDLKALVRDKCNGIPLKVATVSDSGT  
>comp14612\_c0\_seq1; 528 1 1633 LEN=1760; translated  
VNFADRPKRESSYNNRAEQKTAQHSVAQLAAIAI IHCTQISGNNEHRRRAATSTSTNANQ  
RQAHQQGNKTERRVTNKDSGTTKNQTAHSGGETTNKHSLATSTTPHHAKQHAKQHATLHY  
TQRKMSDEMFTTPSGRLEEGSGSPDAGGFATPEGLGSAAPNTPYLSEPPASGGLRQGE  
GSASFSSWTEGQGGSTRVLLVLGAFVAVVVAVGVAVR IWKRRKRRRAMEKNRALALS  
NLRFYANSECSSQGSISMGLPLARKKGRKQKHSRRKGSKAAAYRFGTGPTYSVGSSSGD  
DGWHERDEDEDSADVERGSRHRDWLGGVGYDPNRESEGIDFSDPSTHHPDDSDAILN  
NSSSDGGSSDDGSAVLQHRNPVRTKPTDLLSDLPVPSAVEVGPDPPLAAGSETEKSTA  
STARHSSKSRRAKARPPSSSSSTSKSDLQKEQEALNAMLIELSDELVRQQRELEEEAKA  
MSKKMTRRKHKECYNHKKINDEIARLENERRDKKERLRAVQKQIKSQRRERRKKLFS  
EDYGO  
>comp14613\_c0\_seq1; 234 226 1296 LEN=2777; translated  
MTTLSTKTPSSHPTPKATIGENEKTTDGLPTREFWSSRLAFYFATAGAAIGFNVWRFP  
LSVEYGGGAFFIPYMLALFLIGIPLTILEIGFGQFFQTDIGVFGGFHPRLRGVGVCSIA  
CAFVSSYYVVLIGVVNAFVSSWDEEAPWNKPLGTGQEAVNIFYSEIIGMDTVIGPDLA  
PTRIVAENVGYTAFVWTLVFLVLSFGLQTTGRITYVTMGLPFVLLFVFLGRAATLPGAED  
GVQAYIGVWDVSVLGTDETVWSVACSQVFFSISLTFGLLTSFGSHCKQDEPVLLNSCIV  
TLNSAYSVISGFAVFCALGHLSTLSGVPVTELPFGGFLVFGTWPVVLGTLPGGIHW  
>comp14613\_c0\_seq2; 259 226 960 LEN=3020; translated  
MTTLSTKTPSSHPTPKATIGENEKTTDGLPTREFWSSRLAFYFATAGAAIGFNVWRFP



LSVEYGGGAFFIPYMLALFLIGIPLTILEIGFGQFFQTDIGVFGGFHPRLRGVGVCSIA  
CAFVSSYYVVLIGVVNAFVSSWDEEAPWNKPGLTGQEAVNYFYSEIIGMDTVIGPDLA  
PTRIVAENVGytaFVWTLVfIVLSFGLQTTGRITYVTMGLPFVLLFVFLGRAATLPGAED  
GVQA

>comp14613\_c0\_seq3; 275 226 1419 LEN=2786; translated  
MTTLSTKTPSSHPTPKATIGENEKTTDGLPTREFWSSRLAFYFATAGAAIGFGNVWRFP  
LSVEYGGGAFFIPYMLALFLIGIPLTILEIGFGQFFQTDIGVFGGFHPRLRGVGVCSIA  
CAFVSSYYVVLIGVVNAFVSSWDEEAPWNKPGLTGQEAVNYFYSEIIGMDTVIGPDLA  
PTRIVAENVGytaFVWTLVfIVLSFGLQTTGRITYVTMGLPFVLLFVFLGRAATLPGAED  
GVQAYIGVWDVSVLGTDEVWSVACSQVFFSISLTFGLLTSFGSHCKQDEPVLNLSVIV  
TLNSAYSVISGFAVFCALGHLSTLSGVPVTELPFGGGLVFGTWPVVLGTLPGGIHWVRL  
LFFNLFLLGIDSAFAFVESLVTVLKDEFFKDTPRKT

>comp14613\_c0\_seq4; 259 226 960 LEN=2895; translated  
MTTLSTKTPSSHPTPKATIGENEKTTDGLPTREFWSSRLAFYFATAGAAIGFGNVWRFP  
LSVEYGGGAFFIPYMLALFLIGIPLTILEIGFGQFFQTDIGVFGGFHPRLRGVGVCSIA  
CAFVSSYYVVLIGVVNAFVSSWDEEAPWNKPGLTGQEAVNYFYSEIIGMDTVIGPDLA  
PTRIVAENVGytaFVWTLVfIVLSFGLQTTGRITYVTMGLPFVLLFVFLGRAATLPGAED  
GVQA

>comp14613\_c0\_seq5; 259 226 960 LEN=2904; translated  
MTTLSTKTPSSHPTPKATIGENEKTTDGLPTREFWSSRLAFYFATAGAAIGFGNVWRFP  
LSVEYGGGAFFIPYMLALFLIGIPLTILEIGFGQFFQTDIGVFGGFHPRLRGVGVCSIA  
CAFVSSYYVVLIGVVNAFVSSWDEEAPWNKPGLTGQEAVNYFYSEIIGMDTVIGPDLA  
PTRIVAENVGytaFVWTLVfIVLSFGLQTTGRITYVTMGLPFVLLFVFLGRAATLPGAED  
GVQA

>comp14613\_c0\_seq6; 234 226 1296 LEN=2902; translated  
MTTLSTKTPSSHPTPKATIGENEKTTDGLPTREFWSSRLAFYFATAGAAIGFGNVWRFP  
LSVEYGGGAFFIPYMLALFLIGIPLTILEIGFGQFFQTDIGVFGGFHPRLRGVGVCSIA  
CAFVSSYYVVLIGVVNAFVSSWDEEAPWNKPGLTGQEAVNYFYSEIIGMDTVIGPDLA  
PTRIVAENVGytaFVWTLVfIVLSFGLQTTGRITYVTMGLPFVLLFVFLGRAATLPGAED  
GVQAYIGVWDVSVLGTDEVWSVACSQVFFSISLTFGLLTSFGSHCKQDEPVLNLSVIV  
TLNSAYSVISGFAVFCALGHLSTLSGVPVTELPFGGGLVFGTWPVVLGTLPGGIHW

>comp14613\_c0\_seq7; 410 226 2214 LEN=2661; translated  
MTTLSTKTPSSHPTPKATIGENEKTTDGLPTREFWSSRLAFYFATAGAAIGFGNVWRFP  
LSVEYGGGAFFIPYMLALFLIGIPLTILEIGFGQFFQTDIGVFGGFHPRLRGVGVCSIA  
CAFVSSYYVVLIGVVNAFVSSWDEEAPWNKPGLTGQEAVNYFYSEIIGMDTVIGPDLA  
PTRIVAENVGytaFVWTLVfIVLSFGLQTTGRITYVTMGLPFVLLFVFLGRAATLPGAED  
GVQAYIGVWDVSVLGTDEVWSVACSQVFFSISLTFGLLTSFGSHCKQDEPVLNLSVIV  
TLNSAYSVISGFAVFCALGHLSTLSGVPVTELPFGGGLVFGTWPVVLGTLPGGIHWVRL  
LFFNLFLLGIDSAFAFVESLVTVLKDEFFKDTPRKTLALCILPNFLLSLLYCTDSGFY  
FLDVIDFYINFVMLLVGFLEAFGAAWACGILDLYKSIQVATISYMVANFFPILIAAGFW  
FSDYEAWVGFVVMVLLGGFVIGFLGTHWYLMERMEQQPDEWTVRSIWFECAYGNISRLREQI  
QPVIGHIPFVWVILMKNFVFPQVLVLFINLCASSNGAGSYGGYAIRPYQLLGLLCFIFAI  
FLFLVGLLVPEVYEPLALPQTKIVLSGVTPTLLLDQSKRGESLGNRSLTSTSSRDKMGDQ  
KI

>comp14613\_c0\_seq8; 259 226 960 LEN=2779; translated  
MTTLSTKTPSSHPTPKATIGENEKTTDGLPTREFWSSRLAFYFATAGAAIGFGNVWRFP  
LSVEYGGGAFFIPYMLALFLIGIPLTILEIGFGQFFQTDIGVFGGFHPRLRGVGVCSIA  
CAFVSSYYVVLIGVVNAFVSSWDEEAPWNKPGLTGQEAVNYFYSEIIGMDTVIGPDLA  
PTRIVAENVGytaFVWTLVfIVLSFGLQTTGRITYVTMGLPFVLLFVFLGRAATLPGAED  
GVQA

>comp14614\_c0\_seq1; 335 154 1429 LEN=2088; translated  
MIVEATLSLIAFVVLVSLVTASSPPSSAGRDPDLLRAARGESVERIPVWMMRQAGRHMQA  
YRDLVEKYPTFRQRSETPEVSRDISLQPLERCKYCSFDDVVSASVDDKIRTILIHFSVLH  
LSSIHKDGLDGVILFSDILTPLPAMGIDFDISEGGKILIVPIRTREDLNKRLRRVSREDF  
EDNCHFVGSVLEDLRCRFEISSPDTTLLGFVGLPFTLASYLVEGKTGVSDGFPVHRELNR  
ENPDILHDILSVLADNIVDYACYQIDSGAQVVQVFDVSWAGHICDEDYEVFCEPYQRRVVK  
GIKQQYGDTPVIIYMAPGPHSTGRRRLKLLATGVDIVSVDHTLDIKSGLEMLDDFNNGV  
QGNLDPQILRDGPLGAIRRETLTILENMKGRKRCILNLGHGILPNTPEAHAECFVETVKS  
FRID

>comp14614\_c0\_seq2; 371 154 1323 LEN=1982; translated

MIVEATLSLIAFVVLVSLVTASSPPSSAGRDPLLLRAARGESVERIPVWMMRQAGRHMQA  
YRDLVEKYPTFRQRSETPEVSRDISLQPLERYGLDGVILFSDILTPLPAMGIDFDISEGG  
KILIVPIRTREDLNKRLRRVSRDEFEDNCHFVGSVLEDLRCRFEISSPDTTLLGFVGLPF  
TLASYLVEGKTGVSDGFPVHRELMRENPDILHDILSVLADNIVDYACYQIDSGAQVVQVF  
DSWAGHICDEDEYEVFCEPYQRRVVKGIKQQYGDTPVLIYMAPGPHSTGGRRLLKLLATGVD  
IVSVDHTLDIKSGLEMLDDFNNVGFQGNLDPQILRDGPLGAIRRETLTILENMKGRKRCI  
LNLGHGILPNTPEAHAECFVETVKSFRID

>comp14615\_c0\_seq1; 985 290 3481 LEN=3676; translated  
MNYLGSDFNSSGSVIAKEELRAARTKRGEVTCGRKCFRKKLKFIVPLDVQGVNLGRCL  
NCKPLQPKDISVSSLLKANASSYPDLQSPSPNPNVGRSLGRNGSHNRGLVSARMHKKKS  
NSRKLKLLKHSQPSNHHLRHHLQDHLRKCQSNKEVTEAVLGGTRNQYQPARTNSTPLAHVN  
RENTGSNGNVAANTVVNTNNTNQHGSTHSNTTANTALTTRPSIASASLNVATSNSSSTRS  
LGSSSSSNVAAGTKRPLTPCNSNGSSRSLATSASKKRTSQPKEITWTPPAPLDEEGVAK  
TTNDNTTETNESENNAVRRPPTRLSSLKSISSASNRTPPTREDLERAALTLMAAQHG  
VTGADELYDIFDGVANSSRSPGNQIEDEDDDEGDRKEPTTPRDEDEDREIVILGSDTDVP  
ETISASTSQENDENEVFPDRQRILNRGGAFQPRCGHGNSRPGIGTNYVTSSSRTLSSMS  
SIGEEDHLLVPKSSQPPPQSPQHQLGRMGFSRIRSCRTLGSLSSTIEVIDEESEFDMQS  
SLGDTNNGSVSISAPTHGHPTNENGI AFEEDEECLDHRDSASMSSKTGDGLCNPFKEQLN  
FLRECSDSPQQTQKAMEILSETSDENDIEELDLYGMEIIVTSMESHGDVRDVQLWGCRT  
VWNLSSSSPRARHNLTRAGAANAITQAMNKFLETGEDLQEWAITAISNLAIDAQNTKYLI  
GKGDDAVEAIIITGMGYHSAMTGQQKGCEALMNLASHDDPSLRLKIMEKGAGEAILFNSM  
AMHADDSTVQESALLAVRNLCTNCNENQMKFLDLGVVDPILSAMQKHRRVRSVQKAGAGA  
ISILAGNNYEGKTVIEDNGGIVLILRAILDHNSKNSIDSGDSGMI EWCTRAMMVLAVDFVC  
ESNDSDTVAVDTVVDALCNAPDEKNAQKLSLAIAAVITTMESHESIPVQETGCAI  
LGGLSELFEEGVATNTAQTKMDIVDSGALDAINMAMVLHKSEQRVQERACSLLLSLAIEE  
NHTAMQAAVGVRLQDVARNHPEQCKDPVEKMMRLFGVEETIA

>comp14616\_c0\_seq1; 287 68 805 LEN=1175; translated  
MSKEETA VATATPDMCKVVPATLEEGATFEATVDGKTFVTVPAGGVKKEDVFEVPPYPV  
NEAAAFVVP SKKFRNGLCDCCSQCCALFMMGWCCYPC LMAQVIERLNFNWTGCPRLNADG  
SPDTSKRPSICLTYTIIITAVMIIIASVLNGVFANSESLRGLGSLIYYPWAFYIFVVSVCT  
RMNMRKKFDIDPSCCGDCCGDCLAVYCCPCCSAIQMASHTHEKENYGYDCGSKTGLPAG  
APEIV

>comp14617\_c0\_seq1; 525 404 3672 LEN=3672; translated  
MDSLVS PKVLLLGISYDPVKGHMAEHKFDDCILENSDLSVDQAIECVRRKILTEMDGRDL  
ARCVATEQAGGHEVYTVSKEMGGIYRSDRHVYASFNNSRGMRKAMLQAFGHIQFQQVIL  
DYYWMPGTGLVTRWAKSLFQETLPDLVRYNMLAYPGSRPRSPRKTRVKKGQRTADNDNIQ  
NNRTDMQLEEGVIFLFP CAHVCKELVGGIDILEKYFAITFVKKSELPGHALWKGTMNIDE  
NDMQHRLGKRLDQEEIYCTFQPKDIYESMEDAHVSKDEV MRMLLSIEDFENIRMIRLRPL  
RQHEPPSVFRKT VVKPEIGGFVGLNWKKGRLFKFEFRGRGKNKPLPEPPKPIPPKRKVL  
KSTKKKKLIAASCDGSEVETEKS DSESSSWEIDTESDFSSDENSVERDEKPFDFLIPDK  
IPLVTNFYYPALDLESYMGAKEIMVNDRVMTSWAKTWGPKSSRKKNRKQIDKVG YQRF  
RQKQRDYLCRNCRLPDPAEQEDGYKWTLVDEM MEMVDEESEDEQEKRNI RSVRHNVRGWK  
KTLKGD DPERDHVPKII ELAKRDNEMIA CRQLFEMKNPGLKSF SRTWLNT PFLSCYQIPQ  
HSVLMKMNLA EKKKQKSEYNYT SERTIHTKELK KYHQNDSDDRCGRGSTIVTPGND SLLK  
SLLSSSILFQFVDVASSAP T LSDDLKCLCKGSKGLVDVKHDVILPPYKPR LIPKHLFYD  
LNPHKCFPRELFRLLQDAEKNVIEHICWQERGRSFIVKHHEL FETIILSQCSEEKNATY  
KSFVSTITRYGFSEIQIGKRKGGYRHNLFQRGKPGRIDFLTKRIETFFDVSNVELSKATS  
QKSEVAHERVTRKHFIEKLHEL LHKSKSLGCGDV IYWEADGKSFKVHKLNETFSTKVLKD  
FFSLVQYNNFKTELMDRGFCKDGK KYGIFQHPRFIRSHSSGNTFDQIKLKRKRNSDSR  
EDNRGKAEPKSTRIEASQKRRKGNEAVQNNSEL CRNKMSKRSTPEERKICVYRYNEVGK  
SWKAI SKHIPDQASTQVKSHAADFVTKLNRDNSTWVEKIMQNSPENQNKPPAEISRVRN  
LRRDNSTRTX

>comp14618\_c0\_seq1; 995 1 2855 LEN=3003; translated  
XVLSSSSDPEILQKTVVRCKKAQAIARPFTHPNKVDAGRTVEEKMIGLLKMTQEREYGE  
LTDELRLSAILILDMQKGVLEQLLDSVETIERRVVAYNDKLSGSETEDTTDFSTQESASA  
GERMDEGTVD RSEPS SRGWRIEETNTMTQQR FMDRLRSFVSFQRTAAERARTVDSHGKIA  
AIRMKPQSRGGI KEKNGTYKSGYRQQDVHGKPIRHLSDLYAAANEAKPEFQNL MHSIRKS  
ISGLTASDIEIASVKQWSRASKKARDEYSHRDPGPAEAWLYDILRAS IYCRSAQMNDVN  
KHLREHAHIVDCSNHFATPRFDGYRDILYHVSIPYKGETAFICEIQVHHKDFKRFYNGIN  
SHMHLRPYFAKDSRETAEVVRDLEMLLQVGEVDENLMDFLLESNPSQLKLFARIFFEQL

EETRKSLSLFRVLDLEESIYGTEHLVVGTTTHLYMGQILLKLGADRAMVHLKEALPVFT  
RNLGSKHLDAATRVMAGDARSLKGDANGALDEQLRALLELREECLGEDHILVAESHILVA  
KAQCGQGEYQKGMDECRTALAIQESILGENSIETTRSYSTMGEIFDLQGEHDRAMCYNE  
VLLIQEEVYGGKKHREIADTLTEIANLKLKENKYDEAETSHRKALHIRETVLGNQHPDCA  
ISHGNIGKVLFRKGQKQEGKLLELALQITMDGYGKKHLSTSNCFADLGSVMLKNNDDDD  
ALNQYKECLAIRNRVCGKNHPKTAEAFNLLGHVHILEGNHKSALTNHKSALGIVTQTLGP  
DHPHVATAYEHLGKLYENQMDHKLALDYHTKALTIRNAMLGRQHPATAASCFAIAGVLEK  
KEDYAGATMAYKQALLARLCLRGEHHAATTDARLKLGRCLIQEKEFDAAEEVVMVLSVK  
EETLAGQDLQTAAYRLLGTILNHQKGFEEAISIHKRALKIRKDHLEDEDHS

>comp14619\_c0\_seq1; 498 293 1945 LEN=2120; translated  
MPSSKKTIRIVPDERSVLSQLFLSSKEDTVSTPSDSNRNSSNETTLPSEYFEPSPASPAI  
RDSAAATRETEAGGIREMLKNSVFLGIDPTPDVVAIATIYFVEGALGLARLAQKFLKKNEL  
HLGPAELSALTGVFTLPWTIKPLYGFLSDGFPLFGYRRRSYLVLAGMTGCLSYSVAVGSNF  
WGLLGDIEISLTTTVAALVSSACIAVSDVVADGIVVQKTRESADTDPALAGGLQSLCWGS  
AALGGLLSAYFSGSLLEVMKQPQDVFALTAALPFLVATIGLLIDEERVSESTSSVTSNDDA  
VATIDGVNHNDFPAGVKSQISLLVEAIKKPEIYKPAAFIFLWRSTPTSEGAMLFFLTDDL  
GFGPEILGRVSFIAAVSSLFGVLLYNNYLKSKSIKIDILFWSTIVSFPLGLLDLVLISHAN  
RAVGIPDTWVFVGGDDVLSVLGEIAFLPTLVLAARLCPKGVAVLFLATLMSINNGAGTLG  
TEVGAFLTALGVTESNFDNLGLLSFVCNLTSLYPLLFIGWLDGVGVSVEQEIIEEAAAAA  
AVGAIDTDAV

>comp14620\_c0\_seq1; 432 1 1988 LEN=2097; translated  
XSPQMTRAVALAADLFCVLGEQTQRAPTRLRPTGITPHRTKGLQSGTDPGQPATTGMEEA  
SREERGGDGGAKRSLVRKRVPVSGVSRNFHGNVYTLGSAAGDGSSTTTAASKDAFADA  
RLSLGHPGGRESTSGNEGGAGDRRMVAMVGVPEHVPEGILSLIRSHRPFVEHVRVVISD  
DCRDGDDVGEKKEENTLGGNGDRTYLVLVQLVREEDALS FVEDLDGKPYIAFDDRDKCRI  
ERVVHLETTTTTPVASTKTPPKRNPMPQPDYGRCTIARIPEEESKEPMATTGARSNRDAA  
SHNASLLDRPVHSLARVADNQICAVCQEDLEPKSGRAASRGPRLGAAALLTVCNHTFHT  
QCLQRYTGPCPVCRYDHSGLNETLSRCHLCGTTEHNYVCLICGAISCGVAYTAEAAAPPAA  
SSSSSTTTAPAPRFCTLSHAGQHYSQTLHAYALDTETQHVYDFCGQGYVYRLVQNKQDQK  
LVEVSNPRHSETNGAGPGRRPGERSLTPGLSDNQEGEVVHRKLEGAARYNSLLKSQLE  
NQRAFYEERLGRMKREFSAEASNASNRADLVSVLKQEKQVDQRLSSLRKTEVAEAEV  
AFLKSTNEGLEANKPVLKHRILQAGRENERLDRVFRKSVPELEERLEVLMLKQLEEAAYTQ  
EG

>comp14621\_c0\_seq2; 925 1 2144 LEN=2144; translated  
XKQAEEDGPPKDDPEYAKYFKMLKMGMPKEQVLHAMTRDEKDHKILDFDPNKSLSQEN  
QTKEAEDDGPPLKDDPEYSKYFKMEKMGPKGAVKNALVRDGDPSIIDLDPNKSLKAQL  
GGNSIEEKDVGTPLKDDPEYAKYFKMEKMGPLPRDAVKNALLRDGDGKDPGIIDLDPSMSLEY  
QRKKSISISAAEKTIVKKKKKVRKKIYWNPIDPSKLLKDSLWSIVRNHVEMGSLDYDQ  
KEFEELFTESAESNVKKKKTAPAEKKEKLVQSIDPKRSMNGGIVLSRIKTDHKKIAEYV  
NSMEHNKFDATQLKNLREYLATADERRGLTAYMSKGANSEKKEKELYKYLSETEKYMVTL  
MEVPDAEAKLHTMEFRNGFKTRFADMTASVRI LNRAEQLRSSSEKFRKLMAVILTVNQI  
NTGGEGNLAMGFTLDALLKLNKAFDCKTSLVHYVVKLVKKNDESLLCFETDLTCVIPA  
ESVLLDTVIGDLKGLQAEVVDIKKIVSKEAEALEKAGIKPKPTLADLMEQKSIVQYVGGV  
AQFNKITHLTGRTSMERFTMNAQVACEQAMESVESVKAKYLLVLGYFGEDETMTATGDFFG  
TLRRFMLEWKKAIQVVEKIERLQAKEKKREARRAAKAAKSKSKKAKGSSSLKRSQKQEPID  
SFAKPTVGGLAALAAEAALKKTKQAPPPGGIAALAAEAALKKSKQAPPAGGIAAL

>comp14621\_c0\_seq4; 300 1 1278 LEN=1278; translated  
XLQTFREEQSREESCPLSSRMSSQEHRDLNNGCQQLSGLCVKETGYLVPSILYPYRGDI  
SRSFQLHGKSEREENPGSPLSILQSQAELKVSNPKPRLPYFSSDKPKLLPPPSDHIRD  
RLNDVVRDRKVPTYDLGLEAAREIHSKIRHTGVTVDMLVELERVSKQWGSTVTADESDLP  
PDPDPIENAEMKDSEELRGDSTMNREEKKEKEWQDAQKAEAEKLLKSKEKMSREKE  
KAAEQEAERKRIEEDESAKEVPLRDDPEYGYFKMLGAGLAREQVIHMQRDEKDPKILD  
LDPSSLSESQLPDTDPYKDENPPLKDDPKYAKYFKMIKMGMPREQVLHAIKRDENDPIIL  
DLDPNKSILKVQLPPPLKEDPEYAKYFKMLKMGMPKEQVLHAMTRDEKDHKILDLDPNKS  
LSQENQX

>comp14621\_c0\_seq5; 259 1 861 LEN=861; translated  
XLQTFREEQSREESCPLSSRMSSQEHRDLNNGCQQLSGLCVKETGYLVPSILYPYRGDI  
SRSFQLHGKSEREENPGSPLSILQSQAELKVSNPKPRLPYFSSDKPKLLPPPSDHIRD  
RLNDVVRDRKVPTYDLGLEAAREIHSKIRHTGVTVDMLVELERVSKQWGSTVTADESDLP  
PDPDPIENAEMKDSEELRGDSTMNREEKKEKEWQDAQKAEAEKLLKSKEKMSREKE

KAAEQEAERKRIEEDESAKEVPLRDDPEYGKYFKMLGAGLAREQEAEX  
>comp14622\_c0\_seq1; 277 47 1402 LEN=1781; translated  
MVEGPGATRNGCKVQPVVGLVLRDFTIQKPCGKSDKDKKVELEGRRLESFAFSVGKEVFL  
LLGPFVCFNEKNGNTVEEQEQRSEFDTKPIAIRLHFGMNGVLTVRKLGGPSRLSPWRRND  
KSLPKCTIKFSKSDSVDGKSNRSISDTNETVVIETVSSCTVSSVVARSKLNRLQRKD  
VCADATTFEPELVLEDIFEKRSTAMVCDAILDQERFPGVGNIIKIEGLHKAGVHPRRLVE  
TLSREELKRTILECRAYAMGWLSTGRAPAKQVYNRTKCGSCNVGRVVMVKMGKDLRVTF  
WCEKCQPFAGMDVAKPRTRVLQNKTSINVTVPEVHAPPVLTSCCPQHGSKTVVLRVRKA  
ASPNINRLFRTCKVQGCOPYFSWADSHLPLCGCHIKTILRVSKTERTGGRWFLSCAAASSR  
SHKKQKSNCAFFQWVTPGQMAPLQGLSPLS

>comp14623\_c0\_seq1; 778 266 2827 LEN=2935; translated  
MVNNNEAGKN DATSLAGKLR IAI FLLSALSFLSMVISQMHGSLLVAYHQDFESLMNVPK  
KSHPFGEKQPREQTQRKKEKKRKRSPPTPAPASVHAETALAENGDI I I TRVSRNAEGKL  
MRREMIRQKKT DSETGLGSLSDSSATPTKKASPATESASQ QEDAGTDTKRTTDPNEKLL  
SKHNTFVTNTTAADYDANPRSGGTFALMYPVGLPGGFRNQVMRFIGFLKTADGDGLTKML  
LPTIVWSSRYDSKVDGERNKDSSSSSHLSSINPKVAFWVVPFDELFDVDHWN SYHHP SRN  
STLNP SLPLL VSTVEGGGDSGGESESDHYNHTVCWRPKMDPNI ISVEALEANSKYNTFS  
KSFVPLLTYRMLFEREAFMMAPLQNKVLEYLLGDTVIQRNKVDNRPLVENCTLPYAYGGI  
NVAMWYVYVAMERRAPGVLPKNL GIDAPPLEHQ PAPTRS QKRQNRNLHFPHDDEKSRYET  
RFVNTVNEALIPAKPWRDLADHCVVHHLGSGESNADTSGEEKNRGVGYIALHARVEPEML  
SHKCGKMEWNLTTILNLVETLALDYNSESGIGAAFNGTAMSENERDDGSPWLFNSFLGP  
GKQPTKASAAATPSF SIPATYSNPI SASLRKELGNRRKLG VVAVGRDEM QHWDRWKGV  
ANITKYN YETLNRRLSYDDEGNE LFTSSLEEEERNPTST SATKSTRDSLPMFECGDGWV  
EHAFYASEERQRLLS PQGIDSDSETRLHGLYKRYGSPDGEKNALLPLPNNYFGDMLSS  
ILNFWLAVNADIFVVGAMKSSWSNDVWMTMRYYQKGDSNFQYTP TGGIVPIANGLPPPHQ  
NCADYKTGVVQQQ

>comp14624\_c0\_seq1; 762 1 3608 LEN=4229; translated  
XRADHQLTGTIRIRMTDTRSSGLHRHRLRRKAPRSVVLVDKAFVIAIGLGAIFSTDLPKW  
AVVPSFKCKSRSSPSRYASAFVVRSRNSKGN SKRNSDNRYSKKIPWPI SFDDTPVVS LA  
ATESDCPSSHG PPLLSKRLEGLDAPT VWHFESPLSAEHQS INLGQGFDPDWP PKFLIEEL  
KRSTDPEYERVSHSNDTASLTETLP IQTANQYARSY AHLPLATALRNDYANYQWRSDLP  
ASTLES LDAASN VATATGVTNVLYCALQGLIDPGDEVLLMEPFDIYSSQVALAGGKCVY  
CPLRSVPLGVATDPKSTGDNALIGASEFFKLDLEELASKISPRTKVLILNTPHNPTGKIF  
SRTELEGIADLVASHPNLVVISDEVYQHIVFDGCGDGE GNPSS ENGNRQLPHIS IATVN  
RGKIWNQTLTMS SAGKTF SCTGWKVGWAIGPSHLIKAVTAIQWCNFS PVTP TQDAIARA  
LVLARKPYQDYN SYEWLAADYGRKRS ILIDALENAGS IPGNGSDEKSNLQO EKRN NRE  
KIFRAVVPDGGFFIMADTSGIDFPYEEIAATQVTSATPRMVVPSGGSDSQPPTTKMPRD  
WALSRWLT TDVGVT AIPPCAFYGP DHLHLASDMLRFAFC KNEDTLMEASKRLKVHFSGSA  
TDSSPHVEKQNC DSEASATKTSETSLTQVVRSDTNDNLSEDQPQAKPWTSAIVRISYDG  
SKFTGWSAANKGNSGNNTQKRRKHSRRRGYVEEHAGRLPAGFVRSVEGV IKENLAKLYGD  
VDPNTRIVVEGC SRTDKGVHATCMIAQVYCLKEGFSTANGGKVSSLSEARDGAVIDE DE  
MSSIVVPGKRIPHPSTPTDN SCFEP LPMNSNLSRIAFAFNRMRPSDIQVTGIAPT PKMVP  
SEQQASQPQVFHASLSSKSKTYVYRLSTGYLPDPTQRKATWHVGSMAVSSNSFEGDLA  
SIRQACALLGTHDFSAFQGAARGAEERKRRIKQQQSKEGSDGDGLSNSKNCVCTLYDL  
RIELQDPLGIHNDFYFPGMDPPLQNYRILVRGDRFLYKMRFLVGLSLVAVGTGKLR IEDI  
ERAIVTGSWVEDGKRTEFECAPAHGLT LSHVDYGEELALIGNPSGIQAVNRGIRNIDSQI  
WAEQTDETHPLSSMSADADWIGLDLLESEYRTAQQPRYRIGDRSQSAFDMNRMRFASV  
LD

>comp14625\_c0\_seq1; 685 25 1458 LEN=1704; translated  
MKFATSIVAALATTGA AFTAIPNKKVSTAGFGLKHQNPLYASSTSDSISSLTAESPSEVL  
SRVKNTGLTTLNPNNDLYMVD FCKEKYNGDYYP IKTVC DGESIDVKFYCPFEP SLS  
HYLELYGSRDQRASMYETTMEKYNRINCEKTS AICTPYSSYGDTQIVAYFY SMMYYINDQ  
TAHLKLPENQIEAELVDILNDDIL IYLN EFLSIFEPKNDEDLERIWDFLDFYQPYNKVD  
GKIVLDEKYQVRTPSQMP LIKTICEYISENFASEKNITQVIWEVIRYIKGVKDEIHIRGD  
KSFTLSLQ EYDDFRDKVTASPMAHAVSDLTHERFTYKAYTNPLFMELENRCSEIITYFND  
VCTSDRERLDEDPFNSVFI LMDLPSLNF AKSCDLVVQHAYDKMQAFLK LKDEIILESASD  
EEERLALAQM IKTREDSLIGYVLHEVCCVEEGYARDHKPLMKAFLEEEELAKSLSEKA

>comp14626\_c0\_seq1; 1015 139 3516 LEN=3959; translated  
MDSAGNESGAVAAPENDNDNDNDNDSDVELEGMDLEGDDGEDADDGDAEMEPATAPDAPS  
VEDATTTDKLATEDQDELEAARKERKELMAEERKKVAAPAQNEATMAEKLQYLLSQSEVF

AHFLAGSVAATDKKRGGGKKKGGSRGKKNRMTEAEEDAQLLKTAEKRSVIRLDKQPSCL  
AAHCKMHGYQLEGLNWLIKLHCNGLNGILADEMGLGKTLQTISFLAYLREGRGVKGP  
HIVVPKSVVGNWMRELKKWCPAIRAIRMGGTKDERQRFKEHELPVDPATGKHKWDV  
LVTSYE GMLNERSKLAKIKWRYLIIDEAHR IKNENSSLSKAVRMVDVDHRL  
LLITGTPLQNNLRELW ALLNFMPEVFGDAEQFDAWFSLSEDEGAKENVIK  
KLHTVLRPFMLRRVKKDVATSLPPKK ETKLYIGLTKMQQEWYVSVLRK  
DAHELNKLGPEKSRLNLNVLMLQLRKVCNHPYLFDGAEA GPPYSDGPHL  
WENSGKMMLLHKLLKKEKDSRVLIIFCQMTRVLDILEDYCRLVGHQYCR  
IDGNTTGEMRDSQMDEFNAEGSSKFLFLLSTRAGGLGINLATADIVVLYDSD  
WNPQVDLQ AMDRAHRIGQKKPVQVFRFITEGTVEEKI IERADRKLFLDAAV  
IQQRLAEQNTSLNKDD VMKMVRFGADQILSGKGGTYTDEDIDALIAGEERT  
NEINAKLQTNQHNLADFKLIDDT DDGKDTFSFDGKNYRKDSQSVGNF  
INLPQRQRKRNVDVNEYFRDAMSTGGPTGGMKAHA TDAAAKRRKKGPA  
FHQYQLFNRRERLNAIAAKERSLAAQKEEQIKIIGELRERAKQSPEHT  
RAELTARSVELEKRLIDFKLSPREEVEKSKLRQEGFPDWSKKDFKSFCTA  
TERHGRYDF ASILNDMRNETGKDHEIVRYAAFWTNYRRIQDWKKILEKIRK  
GEKKILRLRQIRNAIQ EKVERHLEDVYGPQFADLKDGE LPPINELIEHSW  
CKMKFNYGAGTKGRSYQEEEDAFLVAMMYRHGYGAAERIRMSIRRAWQFR  
FDWYFKRSRQAQEIQRCDVIVKIIIEKENYDIREELR KKEEQERAQAT  
RMNESSNTDNAQTGEAVPAGTTTAAATIPGSGVP  
>comp14626\_c0\_seq2; 599 139 1916 LEN=1916; translated  
MDSAGNESGAVAAPENDNDNDNDSDVELEGMDLEGDDGEDADDGDAEMEPAT  
APDAPS VEDATTTDKLATEDQDELEAARKERKELMAEERKKVAAPAQNEAT  
MAEKLQYLLSQSEVF AHFLAGSVAATDKKRGGGKKKGGSRGKKNRMTEAE  
EDAQLLKTAEKRSVIRLDKQPSCL AAHCKMHGYQLEGLNWLIKLHCNGL  
NGILADEMGLGKTLQTISFLAYLREGRGVKGP HIVVPKSVVGNWMRELK  
KWCPAIRAIRMGGTKDERQRFKEHELPVDPATGKHKWDV LVTSYE GMLN  
ERSKLAKIKWRYLIIDEAHR IKNENSSLSKAVRMVDVDHRL LLITGTPLQ  
NNLRELW ALLNFMPEVFGDAEQFDAWFSLSEDEGAKENVIK KLHTVLRP  
FMLRRVKKDVATSLPPKK ETKLYIGLTKMQQEWYVSVLRK DAHELNKLG  
PEKSRLNLNVLMLQLRKVCNHPYLFDGAEA GPPYSDGPHLWENSGKMML  
LHKLLKKEKDSRVLIIFCQMTRVLDILEDYCRLVGHQYCR IDGNTTGEM  
RDSQMDEFNAEGSSKFLFLLSTRGKYAVAAISYASGKNQFGLQP  
>comp14627\_c0\_seq1; 833 1 2159 LEN=2244; translated  
XKSTNYNTLLVTNLKAVGRTKSSYITMKFCEFQQLLQIILLSSTAVAGATA  
STEADRRSR LRKDVHILLHENPNLERDPTSPVHFFKERSKTASLRRTTVY  
GGQLKHHGFGDKLRLLRPF LEVANRNELMVIATARDVVLNVPDNEKSATE  
AVDSFLKTFNKLTENHPHAVIMSAAEEKCC AAAMSHARPGDYFDPVAKER  
KERACSSGKKDCLPEENDNIVSWKEMMRNRALDDTLLSGL EEYNNVFLN  
SGILAGYPADLLKLLQLSDIGFSEDDQAVFTDLMLTFPEMIQLDYHQEMF  
G NNHVQKGLKEGCVFEPQARDKPLINF EQMTQPLILHTPDMFYDCLDSL  
IDGLGGESKRRY LVDYGS GDTGVQKRSLQFQDELIAKIEIDEDNKEVYH  
IYNEEGLNQEGLFSYLSNLVDSY LNYGQYGNYGQYGNYGQYGNYGQYGN  
YGQAGNFGE LGDNGFFFEGLPTAEAEEMAYYE WYNEISGGDDIMGRNT  
TFETLSPTSGSSSGSSSSSSSSSSSMGSSSPTSSGESSPSSSE GLPPA  
GTRTGNDAAALASAAALFAPVGAETLGSEAPSAAPSEAPSSSSSSSSSS  
SGSSSGSS VFSDRVTVAGRIDNSTAAAQAGTQAPTSGSSSGSSSSSSSS  
SGTFSFINMNFNETFSNETLSD EAAFEELFEVDDSDSVVPPGGRTIGK  
ERKPAPTEETLTDEHYRDFWFSMLEHIWPSN  
>comp14627\_c0\_seq2; 825 1 2171 LEN=2256; translated  
XKSTNYNTLLVTNLKAVGRTKSSYITMKFCEFQQLLQIILLSSTAVAGATA  
STEADRRSR LRKDVHILLHENPNLERDPTSPVHFFKERSKTASLRRTTVY  
GGQLKHHGFGDKLRLLRPF LEVANRNELMVIATARDVVLNVPDNEKSATE  
AVDSFLKTFNKLTENHPHAVIMSAAEEKCC AAAMSHARPGDYFDPVAKER  
KERACSSGKKDCLPEENDNIVSWKEMMRNRALDDTLLSGL EEYNNVFLN  
SGILAGYPADLLKLLQLSDIGFSEDDQAVFTDLMLTFPEMIQLDYHQEMF  
G NNHVQKGLKEGCVFEPQARDKPLINF EQMTQPLILHTPDMFYDCLDSL  
IDGLGGESKRRY LVDYGS GDTGVQKRSLQFQDELIAKIEIDEDNKEVYH  
IYNEEGLNQEGLFSYLSNLVDSY LNYGQYGNYGQYGNYGQYGNYGQYGN  
YGQAGNFGE LGDNGFFFEGLPTAEAEEMAYYE WYNEISGGDDIMGRNT  
TFETLSPTSGSSSGSSSSSSSSSSSMGSSSPTSSGESSPSSSE GLPPA  
GTRTGNDAAALASAAALFAPVGAETLGSEAPSAAPSAAPSEAPSSSSSS  
SSSSSGSS SGSSVFSDRVTVAGRIDNSTAAAQAGTQAPTSGSSSGSSSS  
SSSGTFSFINMNFNETFSNE TLSD EAAFEELFEVDDSDSVVPPGGRTI  
GKERKPAPTEETLTDEHYRDFWFSMLEHIWPSN  
>comp14628\_c0\_seq1; 533 1 2005 LEN=2005; translated  
LNQRTEAASIPRRRLAGIRQGTPIAKSHDTIETIFKCIPNRLNERPIASEL  
GSSCRGQRR LFDKRRRKQAMHVS MNRIILLWAAVLLPPERQRIAMGYVLP  
SSLRTKNCHPSPSTNALYS SPNTYSGLTSTGWGDDDDDDDES NKMKNK  
NKHRIEFSNFWGSKYAIGDNEEDEKQGTVPFV PSLDPHDGPLPPGAYV  
LEGKPEF DAKPTCRIAVGVRLGTTGASASQNDSDPDEAVRRLQA

CVDAGLNTFQPLDQTREALDLVRRMKENTPSYVQTHWSFAIKAAQTTSASLGDESSDKNI  
NNDFDTRNSRSDLRHSVLDLIERGTGSDALDSLVDVGTESGRVPSPTSSLSHGATLEV  
FEHLADLQREGWIRSIGIGGTEAPPGLLRDIAAYFGDHIDFEQREGSLLVPPSFSFRGGL  
SVPSDNSHKNKVRMGNALAGLLTDLYDSDARRQTNYGPRPPLLTNENMRVLNEWASRE  
KWREESPETTGPSTQNPVWVWQYQEHALGPMARIAASKHDVSI AVALRWALECAGTNGL  
SGGKIVSSALADLVFVGGPADGGPPFRRKTTELGRVFRFELEEDREVLGILATGGDEQ  
AGSSGDGDGFGGDDGGDGYPAIDFDNPKFXAVNPPTRAMVLPFPHASGLPGRYAGGPTK  
RRGEARRGX

>comp14629\_c0\_seq1; 243 1 1610 LEN=1718; translated  
RILRSHRAGMNSYVVRVERSCKGMQAAGDVETAHGVDFVGFALVLSKKAHRVPTKRKPTG  
GTRPHTNDTLDGTVRVVAFHCVPLRDAADAALRCVSPNPVLRFRADSGCSIPCGGSEGAP  
PQTQPRPTAAVAPQKGSKEPDAPPSPIVVGRNAQNFNGRGSLLYLD SRMREGMVCQSE  
MEGGACALLWDWSTVETLWAAQIFGGVSTPSGGCIIILLDDTTDDHGGSSQKKRGPQRS  
PEWNVCSPCGILLRGS SVYQAGLMSRRLVPTIRRQTPSMPSIAQILKIVMSNKEDKGEIP  
ATVSFVGVGTVYKVSRLDLPDMLSRMVSETWMDVQKKDQEEEEAIFIDRNGERFQ  
HVLDMRDGQKVTLPATVSKASFLKDLEYFGFQNV DASSVTEGPSLRAYMAMFERMDVFG  
TELDKRNGEVEIHDLAYYCFLMVMRYRRFKFHVSTSNFDQLYALGHFKYHESNEHFLK  
QNTVLKVEVAGEERALFDKSLQRYGLECEKITLYSRNHNSKYDGENYDFTVRLTE

>comp14629\_c0\_seq2; 257 1 1575 LEN=1683; translated  
RILRSHRAGMNSYVVRVERSCKGMQAAGDVETAHGVDFVGFALVLSKKAHRVPTKRKPTG  
GTRPHTNDTLDGTVRIVAYRCVSLQTPCCGF AWSLGVAFRAVVPRGPRRKP SHDRPQRL  
LRKRATARNRTHHQARSLWDATHKTSETVAPFIIWTRECE RAWVCARVRWRGGACALLWD  
WSTVETLWAAQIFGGVSTPSGGCIIILLDDTTDDHGGSSQKKRGPQRS  
LLRGS SVYQAGLMSRRLVPTIRRQTPSMPSIAQILKIVMSNKEDKGEIPATVSFVGVGT  
YKVSRLDLPDMLSRMVSETWMDVQKKDQEEEEAIFIDRNGERFQHVLDMRDGQK  
VTLPATVSKASFLKDLEYFGFQNV DASSVTEGPSLRAYMAMFERMDVFGTELDKRNGEVE  
IHDLAYYCFLMVMRYRRFKFHVSTSNFDQLYALGHFKYHESNEHFLKMQNTVLKVEVAG  
EERALFDKSLQRYGLECEKITLYSRNHNSKYDGENYDFTVRLTE

>comp14630\_c0\_seq1; 376 282 1901 LEN=2161; translated  
MASDHNLCQIQSDQGSPNSSHDCDVM SLDQVRVSLITVYNRLEAMEVSDACNEG YLRNNP  
HLERGV EEEKTASESQSEEFQDTSRSLDL SISKSKFLNNVVGSSQSSDCRNKEHCRIAT  
YRKR FVQYDIRRLRLVEREASTV GSSSVTDIRPSQIKNYKLLLSSEKDKRKISRKIEVK  
TVVAQEVDESLENLRCLSKARFLIRSSGLTNEQSTDS AIFSQENQDGSEK IASSWNA  
SRHYE SLNPLRGENLQNI DHPQNMVDESSEINSPSLIQFQAF PGLDTLEAESKIDFECM  
DGFPSVFEHKNGHCRVSNDIISLGP IHVQWQSNE LRGIPAFDPFVLSGPEAIEWQETPWC  
DPSYSFDSESPAADDDICEDLSSVDVVKGSKD SKTTSSTQKFLAKTTISNDKDSNARTVG  
LFPEKACFS PFHNGDEISLEKADDD EGQKSLCTEQSS FQSGSSFGAPASPIIRKS  
GKRRKRLSFLRWSRPKSANKEWLVAANASDWHVLR SRDVRMKEWLSRSEVSEEHKMI  
AVFFD

>comp14630\_c0\_seq2; 372 282 1886 LEN=2146; translated  
MASDHNLCQIQSDQGSPNSSHDCDVM SLDQVRVSLITVYNRLEAMEVSDACNEG YLRNNP  
HLERGV EEEKTASESQSEEFQDTSRSLDLKFLNNVGGSSQSSDCRNKEHCRIATYRKR  
FVQYDIRRLRLVEREASTV GSSSVTDIRPSQIKNYKLLLSSEKDKRKISRKIEVKTV  
VAQEVDESLENLRCLSKARFLIRSSGLTNEQSTDS AIFSQENQDGSEK IASSWNA  
SRHYE SLNPLRGENLQNI DHPQNMVDESSEINSPSLIQFQAF PGLDTLEAESKIDFEC  
MDGFPSVFEHKNGHCRVSNDIISLGP IHVQWQSNE LRGIPAFDPFVLSGPEAIEWQ  
ETPWC DPSYSFDSESPAADDDICEDLSSVDVVKGSKD SKTTSSTQKFLAKTTISND  
KDSNARTVGLFPEKACFS PFHNGDEISLEKADDD EGQKSLCTEQSS FQSGSSFGAP  
ASPIIRKS GKRRKRLSFLRWSRPKSANKEWLVAANASDWHVLR SRDVRMKEWLSRSE  
VSEEHKMI AVFFD

>comp14631\_c0\_seq1; 187 176 1021 LEN=1182; translated  
MCRPIGNTRLRLTIILGCLAFIFQSINNKNCE FVYKVDEETDDYVETGTLNFGLFYEGY  
NYCFCFNTQGYIAIDDDANVLSIARDAHIVSMTAGGIATFLVAIDWLACKVPCGTILEGL  
AFFVAWVSGLIVYAVFGMEGCGTDFIATELLNDVDAAAAYKNQLDAATD TLTSVGTYPG  
MDATELGADLGLNLMNTGVNITESLLEKGFPIEIAKKIPFGTKCNWGP GASFNLM  
AVLIYFVSGALLCCLPDPTVCEGRKELEQERKSTNLSRSVGRNVV

>comp14631\_c0\_seq2; 145 930 1364 LEN=1525; translated  
MEGCGTDFIATELLNDVDAAAAYKNQLDAATD TLTSVGTYPGMDATELGADLGLNLM  
NTGVNITESLLEKGFPIEIAKKIPFGTKCNWGP GASFNLM AVLIYFVSGALLCCLPD  
PTVCEGRKELEQERKSTNLSRSVGRNVV

>comp14631\_c0\_seq3; 145 607 1179 LEN=1340; translated  
MTAGGIATFLVAIDWLACKVPCGTILEGLAFFVAWVSGLIVYAVFGMEGCGTDFIATELL

NDVDAAAAYKYNQLDAATTDLTSVGTYPGMDATELGADLGLNLMNTGVNITESLLEKGFPIEIAKKIPFGTKCNWGPASFNLMVLIYFVSGALLCCLPDPTPVCEGRKELEQERKSTNLSRSVGRNVV

>comp14631\_c0\_seq4; 145 772 1206 LEN=1367; translated  
MEGCGTDFIATELLNDVDAAAAAYKYNQLDAATTDLTSVGTYPGMDATELGADLGLNLMNTGVNITESLLEKGFPIEIAKKIPFGTKCNWGPASFNLMVLIYFVSGALLCCLPDPTPVCEGRKELEQERKSTNLSRSVGRNVV

>comp14632\_c0\_seq1; 874 65 1825 LEN=2075; translated  
MSLNSTTVKTAPIAGQKPGTSGLRKKTKEFMTPNYLENFVQAAYDSIKESGTDVVSQGSLLIGGDGRYFNPEAIQTIKMGVANGVKRIWVGENGLMSTPAVSATIREKGPVWQKAFGAFILTASHNPGGPEEDFGIKYNCENGGPAPDEMTDAIYDKTTKIETYNICKDFPDIDITKPGVTTIVEGSDVVNVEVISSTETHVNLLKTAFFDFDAIKALLDRPDFSMIYDSMHGVNGPYATEVFNQQLGQSADVCMNAVPKDDFNNGHADPNLTYAKELVAIMGLNRKGEIIDTGDKAVPSFGAAADGDGDRNMILGTKFFVSPSDSLAIIAANANAIPFFKSQGGLKAVARSMPTSGAVDLVAKDMGFDFLFTPTGWKYFGNLMDSKAIYKGDYTPPICGEESFGTGS DHVREKDG IWAYLAWLQILASQNADASKPLVTVEDITTAHWKKYGRNYYCRWDFEGVDKSKAQEMMAKMKSEFEANTGKKVGSYEISKADDFAYTDPVDGSEATGKGIRFLMACGSRVIFRLSGTAGSGATIRMYIEQYEKEKIGAVASEALSGLVRVALDLSAIKEFIGTEEPTVIT

>comp14633\_c0\_seq1; 340 345 1760 LEN=1985; translated  
MDVAPPPRYSMESRLSVSATPRTSTKAAAAATARKIVFSESPSSSHTKNGASPACLPLQKFKTDDYPNSHKKTMDLFGIHNPGQKNYKRLVFLHMRKAGGTTLYSYLKKVTSSRRTTLKEFIACEGLKDCLELNYYEDGFHKYNDDERNATMLWKNRNEIPYPRPFPSLNWDDSGSTFYVTHLREPIARAI SHYKYDQRWSCDISESRNSLRYMNISRHVTRELARANNSTKHDKFTFYAPSRATNKTYFVPSSENQKMEIEEWATELFPFIKDKKGRGNHMDLAYRPKRDKLWHCSTNCYARWATGMYHPDQIYESSFPSRAEYNRYPFSNYKYKQKGNKNRPWLLRKMSEMIGNDGDQEETQSSNEEQELTDFGKTLTEEALKILLRYDLIIVLEWLKDPYVHHIEGIFAGIHGLQDKTPSFCQDESKEYANNLAPPRISNETRELIWSRNEIDRNLYERLTS CAEQG

>comp14634\_c0\_seq1; 1030 95 2899 LEN=3251; translated  
MIKANSRENTKKTAPASSSGSSDGHSDLHSSITPEEDKMSRGVVWGRLLFSVCLLVLVGILVGS LYWYDRARKADDIQRANEHYEVIMNRAMISTARLMTNRLEGASAMASLASYAAPTKEEWPVVRVDSWVAVGEKVQVAGLNGGYS LAPIVTPENQVDFEVFAEEFLNETYPGEESGVSSFGFGIWCNKTTSEEDTKYHHTNGFPYSYESENAFATPKYQHTKGNHRLMLMDVHCFPQOGKSIDDAYTCSKNRAAMKLAPSESGEASTDFANENCQALS DLTTPPKDPLARTGPGAFVSTCVFPARDSSECVAMIFAKMNIYEVLD DTFPDFVGGIDCVVDTTFSTASYRMENGLAMYRGDEDVHDEAYDDMGVSMR LFSGSNLTDGSI SYMTCYPTDEFYEDYSTETPWAAIVGVVCIVAGLCVCFFLYDYVWRREFRVKELLKAKRQFVRVFSHEVRTPLNSVCMAL TLLQEEIAQSLGYDTIEDMEKVHTHVDEATSGTVDAAASTGTGATAADPSG SNKKMLEIGWFNLAKEVQVNAESSVEVLNDDLNYDKVESGKLAL ELTAIPIWDTIRQTVSEFRLPAQSKDIKDL SLPTNAAPT DGT SIESPIPLKDRKVVGDSIRLVQVVRNLVSNAIKFTPSGKSVNVNVRWV PSPPEQTQDNRTFRYKTNEIVSVPPCGEMVLSVQDEGAGLSPEQLSKLFGVGVQFNVNQLQAGNGSGLGLFIAKGIIEQHEGTLVCHSAGLGRGTSFTVTLPVYNI PDPVPEHPEVDDYFQQTYHQSSLKILIVDDARSNRKLLRLLTKRGNVCDEAENGLEGVEMVRAAADKGGIQYDLVLLDYEMPVMNGPVAATKIREILASKEQHSFLVGITGNFMDEDIQYFKQCGANAVLPKPKFKVQELENLCVEYHITGSIATGEGKSVKLEMP EL

>comp14635\_c0\_seq1; 317 173 1150 LEN=1209; translated  
MTGVEHFYLYDNSEAHSKDISLKF IADIFPDDVTIINWPSKVCNNNQNNVDS PGERSSQYAAEASCR LRFGPHTDWIAQFDIDEYL VPMGELTSLHQLLDTLDEEGTKIISFGSWRAWPRKRFIEDPELTRMNGRANCGRNDGCFQLTVPKNY TMLQAYNCDRQPPGKKKEKMPAEKQIYRADYVLH HFIHYSTVTGLSNLNKEDFEKRGLKWNARNPFPDPLSRFGDEEKEALMLHTK AVAHQDTLFWDETCKTEYEGHAFCR LGNPPFDVANGVDVGDGKGLKYNCYVNKKIDNYFVKELESK LKDHVPEIARRMESESKS

>comp14635\_c0\_seq2; 214 173 550 LEN=1426; translated  
MTGVEHFYLYDNSEAHSKDISLKF IADIFPDDVTIINWPSKVCNNNQNNVDS PGERSSQYAAEASCR LRFGPHTDWIAQFDIDEYL VPMGELTSLHQLLDTLDEEGTKIISFGSWRAWPRKRFIE

>comp14635\_c0\_seq3; 530 254 2522 LEN=2581; translated  
MCLIANHTKSIAAPDESS TAKRKGDAKHHIPDQQKNPHKNKGDRVLTAFV EPIDRSQWQQKPLPKRTSTAKDLKAKRFPKVN SCSNLI EQWPADEYPDEDPFLPWIHDVFP SHDGKFIQI VAQNRRCNTGKSPENKEIHWKRG PQLS LFNVAVKRVSDPDSSTKTRYRLSSHEE ADEDGVATRFICRFSNGEETLSVFNFDYEWASFRKKQAQIFHENDSDNKQIHTSQLLFRCPVPE

SLVDTVRTGSSVIDDFATIFLIDLVP IRTPPRFGPPNEFLKPYKFEFLSPKPFDTLHEWGT  
DHVLPKIEDSGRWQNIPICKPSLLTYGKQGDDTALITPTSPKEPDAAPVKQHRLVLSCLWA  
SAGYSTRGERFAINDGQRRLLLEWITYNKMTGVEHFYLYDNSEAHSKDISLKF IADIFPDD  
VTIINWPSKVCNNNQNNVDS PGERSSQYAAEASCRLRF GPHTDWIAQFDIDEYLVP MGEL  
TSLHQLLDTLDEEGTKIISFGSWRAWPRRKFIEDPELTRMNGRANCGRNDGDC FQLTVPK  
NYTMLQAYNCDRQPPGKKKEKMPAEKQIYRADYVLHFFIHYSTVTGLSNLNKEDFEKRGL  
KWNARNPFPDPLSRFGDEEKEALMLHTKAVAHQD TVSWHYNRNSEIVVTYLSDRKCNQTI  
VSLVVG IASIALDLFQKLFWDETC KTEYEGHAF CRLGNPFPD VANGVDVGDGKDGLKYNC  
YVNKKIDNYFVKELESKLDHVPEIARRMESESKS

>comp14635\_c0\_seq4; 542 254 2395 LEN=2454; translated  
MCLIANHTKSIAAPDESSTAKRKGDAKHHIPDQQKNPHKNKGDRVLTAFVEPIDRSQWQQ  
KPLPKRTSTAKDLKAKRFPKVN SCSNLIEQWPADEYPDED PFLPWIHDVFP SHDGKFIQI  
VAQNRRRCNTGKSPENKEIHWKRGPQLSLFQNVAVKRVS DPDSSTKTRYRLSSHEEADED  
GVATRFICRFSNGEETLSVFNF DYEWASFRKKQAQIFHENDSDNKQIHTS QLLFRCPVPE  
SLVDTVRTGSSVIDDFATIFLIDLVP IRTPPRFGPPNEFLKPYKFEFLSPKPFDTLHEWGT  
DHVLPKIEDSGRWQNIPICKPSLLTYGKQGDDTALITPTSPKEPDAAPVKQHRLVLSCLWA  
SAGYSTRGERFAINDGQRRLLLEWITYNKMTGVEHFYLYDNSEAHSKDISLKF IADIFPDD  
VTIINWPSKVCNNNQNNVDS PGERSSQYAAEASCRLRF GPHTDWIAQFDIDEYLVP MGEL  
TSLHQLLDTLDEEGTKIISFGSWRAWPRRKFIEDPELTRMNGRANCGRNDGDC FQLTVPK  
NYTMLQAYNCDRQPPGKKKEKMPAEKQIYRADYVLHFFIHYSTVTGLSNLNKEDFEKRGL  
KWNARNPFPDPLSRFGDEEKEALMLHTKAVAHQD TLFWDETC KTEYEGHAF CRLGNPFPD  
VANGVDVGDGKDGLKYNCYVNKKIDNYFVKELESKLDHVPEIARRMESESKS

>comp14635\_c0\_seq5; 208 728 1240 LEN=1299; translated  
MLQAYNCDRQPPGKKKEKMPAEKQIYRADYVLHFFIHYSTVTGLSNLNKEDFEKRGLKWN  
ARNPFPDPLSRFGDEEKEALMLHTKAVAHQD TLFWDETC KTEYEGHAF CRLGNPFPD VAN  
GVDVGDGKDGLKYNCYVNKKIDNYFVKELESKLDHVPEIARRMESESKS

>comp14635\_c0\_seq6; 439 254 1795 LEN=2544; translated  
MCLIANHTKSIAAPDESSTAKRKGDAKHHIPDQQKNPHKNKGDRVLTAFVEPIDRSQWQQ  
KPLPKRTSTAKDLKAKRFPKVN SCSNLIEQWPADEYPDED PFLPWIHDVFP SHDGKFIQI  
VAQNRRRCNTGKSPENKEIHWKRGPQLSLFQNVAVKRVS DPDSSTKTRYRLSSHEEADED  
GVATRFICRFSNGEETLSVFNF DYEWASFRKKQAQIFHENDSDNKQIHTS QLLFRCPVPE  
SLVDTVRTGSSVIDDFATIFLIDLVP IRTPPRFGPPNEFLKPYKFEFLSPKPFDTLHEWGT  
DHVLPKIEDSGRWQNIPICKPSLLTYGKQGDDTALITPTSPKEPDAAPVKQHRLVLSCLWA  
SAGYSTRGERFAINDGQRRLLLEWITYNKMTGVEHFYLYDNSEAHSKDISLKF IADIFPDD  
VTIINWPSKVCNNNQNNVDS PGERSSQYAAEASCRLRF GPHTDWIAQFDIDEYLVP MGEL  
TSLHQLLDTLDEEGTKIISFGSWRAWPRRKFIE

>comp14635\_c0\_seq7; 305 173 1277 LEN=1336; translated  
MTGVEHFYLYDNSEAHSKDISLKF IADIFPDDVTIINWPSKVCNNNQNNVDS PGERSSQY  
AAEASCRLRF GPHTDWIAQFDIDEYLVP MGELTSLHQLLDTLDEEGTKIISFGSWRAWPR  
RKFIEDPELTRMNGRANCGRNDGDC FQLTVPKNYTMLQAYNCDRQPPGKKKEKMPAEKQI  
YRADYVLHFFIHYSTVTGLSNLNKEDFEKRGLKWNARNPFPDPLSRFGDEEKEALMLHTK  
AVAHQD TVSWHYNRNSEIVVTYLSDRKCNQTI VSLVVG IASIALDLFQKLFWDETC KTEY  
EGHAF CRLGNPFPD VANGVDVGDGKDGLKYNCYVNKKIDNYFVKELESKLDHVPEIARR  
MESESKS

>comp14635\_c0\_seq8; 439 254 1795 LEN=2671; translated  
MCLIANHTKSIAAPDESSTAKRKGDAKHHIPDQQKNPHKNKGDRVLTAFVEPIDRSQWQQ  
KPLPKRTSTAKDLKAKRFPKVN SCSNLIEQWPADEYPDED PFLPWIHDVFP SHDGKFIQI  
VAQNRRRCNTGKSPENKEIHWKRGPQLSLFQNVAVKRVS DPDSSTKTRYRLSSHEEADED  
GVATRFICRFSNGEETLSVFNF DYEWASFRKKQAQIFHENDSDNKQIHTS QLLFRCPVPE  
SLVDTVRTGSSVIDDFATIFLIDLVP IRTPPRFGPPNEFLKPYKFEFLSPKPFDTLHEWGT  
DHVLPKIEDSGRWQNIPICKPSLLTYGKQGDDTALITPTSPKEPDAAPVKQHRLVLSCLWA  
SAGYSTRGERFAINDGQRRLLLEWITYNKMTGVEHFYLYDNSEAHSKDISLKF IADIFPDD  
VTIINWPSKVCNNNQNNVDS PGERSSQYAAEASCRLRF GPHTDWIAQFDIDEYLVP MGEL  
TSLHQLLDTLDEEGTKIISFGSWRAWPRRKFIE

>comp14636\_c0\_seq1; 282 88 621 LEN=763; translated  
MDARVEEFYREIYIDL RVDDNEAARLSAYFAELNPPPKLLWLRSTAFRLGSEFLTGGDK  
DKNVSVLKCIN YVVHAI ESICMEPALPEGNSGYDGEVTE DYYREVFSDLAVNREESEELS  
AFFRNNIPPSDSL VAMRAAAFKAAIDFLSEDGDRES DVSLRCINAVVHNFEFACYK

>comp14636\_c0\_seq2; 552 88 1621 LEN=1669; translated  
MDARVEEFYREIYIDL RVDDNEAARLSAYFAELNPPPKLLWLRSTAFRLGSEFLTGGDK



DKNVSVLKCINYYVVAHAIIESICMEPALPEGNSGYDGEVTEDEYYREVFSDLAVNREESEELS  
AFFRNNIPPSDSLAVMRAAAFKAAIDFLSEDGDRESVSLLRRCINAVVHNFEFACYKPRQ  
YTLKKKFDLTVGLSEAVQEMWNLDNRLTPNRDYVIDVQEGKKPYRKEDAAEDPLFARVD  
RSALNRPTYRAFVALLDNYRRATGGRETIGSREEREIDAFLEAILQTAPLQYCYAYLREQ  
KGDDIPPSLSEFGELLRDIWFDLYRRQSANDSSGFEHVFVGEVKNKGVSGMHNWIQLYLL  
EKEGDLDRGYIKPRSQSDAETNSDDHLLTLQFRWDGVEKSVGTCLIGTSPEFEVALYTT  
CFLLDGDNNEVTLDGTGDI FDLNVRKYKHDGDKIGTAFPEVNAHWEEEQRARLTAKQQG  
ATCLELPRRTRACKLEIRNKTCNELFVDL

>comp14637\_c1\_seq1; 286 36 1064 LEN=1064; translated  
MPIIHHHQQIIPSONQQIPIIQQSYPTTTVSQIPIQPVMIQPLSTIQQAYDVIPQQHPQ  
NYHQNHQYSQVPIINNHQHYQQSHYLQPTVQYSQIPVHPHPHGQQYIQYTTTSVKRHR  
DLSNQSTFTAVSEPKTVVIAQEQVATTHNPQHPSSAMHSYTTAAAVPNNKADSTLVQP  
HYHHHRRRAVSSGANFPTNQPPPTNSQSSHNMPSSPTTPVGSTSTSSPLPNRSSTHSS  
LPNAPIPKPPISTTEKSQHTKTVLATKPKKTTIQGRSSSSSSGKLPQSFDSNGTVSSVGLG  
KVFYLLDQMKIEVTSADQSIKTFQTDIKLLVSI PFVYQEICLV

>comp14637\_c1\_seq2; 667 36 2258 LEN=2727; translated  
MPIIHHHQQIIPSONQQIPIIQQSYPTTTVSQIPIQPVMIQPLSTIQQAYDVIPQQHPQ  
NYHQNHQYSQVPIINNHQHYQQSHYLQPTVQYSQIPVHPHPHGQQYIQYTTTSVKRHR  
DLSNQSTFTAVSEPKTVVIAQEQVATTHNPQHPSSAMHSYTTAAAVPNNKADSTLVQP  
HYHHHRRRAVSSGANFPTNQPPPTNSQSSHNMPSSPTTPVGSTSTSSPLPNRSSTHSS  
LPNAPIPKPPISTTEKSQHTKTVLATKPKKTTIQGRSSSSSSGKLPQSFDSNGTVSSVGLG  
KVFYLLDQMKIEVTSADQSIKTFQTDIKLLRDKNKELEAKNRDLGKLRREEQALREKAEL  
RNKDLWKKLREAMEEIKASKQQPQEEAEGSGRNGQVVEKPVSGTVAVEMKPPASVKVP  
QTAISINGASPIRHTISSDSTPQNPVVKQLPNPITPKSKGSKGIGSKAYTPKIDLGLKEK  
PDQLNGSDAVRRLSKSQNFAKEIDTKNAASTIDSSVPSNGIKDGI STHRRNESLSTTST  
PPLIPPLRPSMTASKSSGQSSHKHSQSLHNLHEFDPLKSTVISIPTS SVLENLPVKNPST  
SESTSI PHQLGSTYMSQNPLVVPLTIGMTQTAVSSSDGSIVHHQSPMTERQGFVTNEYGG  
LHQQQFMVVPQPPQIVFNQMGGGMQQQIVDNTYPTQLRANALRSQPLHHHLHNQSHQHFQ  
QHTTQQQMHTNPVNDFFDFS

>comp14637\_c1\_seq3; 317 1 1280 LEN=1749; translated  
TVCTHVNSLSPLPIFSXDKNKELEAKNRDLGKLRREEQALREKAELRNKDLWKKLREAME  
EIKASKQQPQEEAEGSGRNGQVVEKPVSGTVAVEMKPPASVKVPQTAISINGASPIRH  
TISSDSTPQNPVVKQLPNPITPKSKGSKGIGSKAYTPKIDLGLKEKPDQLNGSDAVRRLS  
KSQNFKEIDTKNAASTIDSSVPSNGIKDGI STHRRNESLSTTSTPPLIPPLRPSMTAS  
KSSGQSSHKHSQSLHNLHEFDPLKSTVISIPTS SVLENLPVKNPSTSESTSI PHQLGSTY  
MSQNPLVVPLTIGMTQTAVSSSDGSIVHHQSPMTERQGFVTNEYGG LHQQQFMVVPQPPQ  
IVFNQMGGGMQQQIVDNTYPTQLRANALRSQPLHHHLHNQSHQHFQHTTQQQMHTNPVN  
DFDFDFS

>comp14638\_c0\_seq1; 268 64 1335 LEN=1755; translated  
MKLPPTTRAAIHGIALHSVVFLTICYNLLWLLNYGARDAGDADQKLSVELRKDRVRWPVTS  
IEESHHRGSRGQNI AVVHMGPQKTGSTSIQSASALYADQLKEDGYEMPWPKYPRKDV MHY  
PNIDQNVARFATCFLPPP KREDRYACIQELLFSSAQIAERGNLLISAEHFDGIDATGLD  
ALSSFLSYWDSATVI IYYRRLYDWIHSFYNQHVKFRTFDDFGLSGPRLRKWEFTFHYYLK  
EHWLVTVPPPEYSAYVISRVREQYGHDDTKNIVVMDFHNK EVDIAEAFFCNAIPNATHTCN  
AIRNATARARHNQGEFLHYGDLAYAAHKTNIMNITSHEHMMKVTEKIKMHYENTLGRTRK  
DFKQICLPEKLSLLWSKTVGYEKQIFGDGAQARLADLKSDFERQSASALCVVDINATMQ  
EEEW

>comp14638\_c0\_seq2; 268 64 1335 LEN=1814; translated  
MKLPPTTRAAIHGIALHSVVFLTICYNLLWLLNYGARDAGDADQKLSVELRKDRVRWPVTS  
IEESHHRGSRGQNI AVVHMGPQKTGSTSIQSASALYADQLKEDGYEMPWPKYPRKDV MHY  
PNIDQNVARFATCFLPPP KREDRYACIQELLFSSAQIAERGNLLISAEHFDGIDATGLD  
ALSSFLSYWDSATVI IYYRRLYDWIHSFYNQHVKFRTFDDFGLSGPRLRKWEFTFHYYLK  
EHWLVTVPPPEYSAYVISRVREQYGHDDTKNIVVMDFHNK EVDIAEAFFCNAIPNATHTCN  
AIRNATARARHNQGEFLHYGDLAYAAHKTNIMNITSHEHMMKVTEKIKMHYENTLGRTRK  
DFKQICLPEKLSLLWSKTVGYEKQIFGDGAQARLADLKSDFERQSASALCVVDINATMQ  
EEEW

>comp14639\_c0\_seq1; 1509 227 4068 LEN=4224; translated  
MAQAEDGDKTIPVELPDSEKPTTGTISNRSTRNSHNNNNNRHSNAPAEIAQDPPLNDSAS  
DIGDDRKLAAEASIGSLGASADTKHPAENFNESNYNGGNDTIGNVDGTNAGPEVIVVG  
PVADTTRAVSSASLMGSSEEEESVAELGTIEQHVDVGAEEAVQGDCSDGNIADNKRRKERKQ

HKEVEGEGGRSVSSPSSSTLPQQRQREGHQNRDEYNSTHNSDGNSAGMCTDPI SPHPSS  
MPVAPQHCTHAPTSLPTFNEPRSCMWTSSHAANAPSEDRSASLVNVLLQPLPHTNFDSET  
QIQDNFNDGEYRSLIRLNLWSVIDGHGGGCVATYASEVLLPHIAASISRAMGCAIVSRGV  
CLVNGQLRDANALDLGLIKTTGSDRSQSNPNSIHYRSPYEATANMSNTDFSDKDDEDD  
DNATKPKVVEVKQRKRQGRPKHPVPIGDHPQHQHNNSDIRSHGCGVSPASATPSQHASP  
SPLQQRQRPQQQARSRLSTDDTRA EVTSSINRSESSVKTSVKTSASVGVARDGAPPGTH  
SPQEQSAI INAITQSFLSVDEGWINSIDPLLPKPRANPMADGTAVLALLPYECPEARVD  
QRFVVIKANNED EYDGGGGLGAGDGGDGGHDTSQNKDAARRRRIDHNENRALKMSSLS  
TISSTSSLTTTDDRIHNNASGLESEITETEGEEDDHSGRDSGDKPKKSRWRTNPHHSARN  
DSANVPKASLISAPGGCSCHCYRAYDAMLTAHVGD CRAVMLGSAPPRTINVRGSASSTK  
STGTTNASPIGTGGPGNQTTDESSHSSDETECLSSSDHDADSSDDEDIMLGIEDRQRRQ  
NNPHLDGSAAVTKSTVAAGNSSSASAPYMTLMRGRQPAPRRSRRRRYEDLGMAAPYIAL  
PPLESFRSIEIEIDPDYEKNQRRRHRHRNHSNSKSKNGSNDKNDGVNNGKGLSANGNNG  
EQSEASSSSSSPSSQDSREFFPAIILPPNVRPIDLTTDHSAYNPAEVTAVLRRCNNAPR  
AISAGLGGGIKRVAGSLAVTRALGDAYLKT PRLSFFPYKTHTPYITARPEVNCRPLVKGG  
DKVLM LATDGVWERAGGEDVLRWLRTFYSERLAEAEERRKNIGRLNKIENQHIHQSSSDK  
GDMSVDNASNATATNNSIDDEDSVDSQHGDRKADLPQMDATGGTSATEASGSKKREALSP  
PTAANAARRRKLTRRATPF GSRNSTVADVIVRRVLNKVRRARNISSLHALMSLPPGRAR  
RSKHDDITVCVVDLAAAFIS  
>comp14640\_c1\_seq1; 224 335 826 LEN=859; minus strand; translated  
MATIALQCMEVRVPSLRFVVCASPLLWVFLVSHREGFAAPALALGVGVLEGE LARELG  
FLPVHDGPDVVEECHGLDKDRDPVGLHPEVLLRLLKGVVEGVREAVAAPALDAQDPDRS  
PGVVSLQDCLYPLGRLFRLCVVLRFWIVRLSIVVSLNRNRLFA  
>comp14640\_c1\_seq2; 174 1 856 LEN=1289; translated  
XAHNNKNNKNNSSNSKSNHQAIARYPAHPRTPQRPQPVASEQTEIPKGGHGAQRQSLRSF  
LLVSRVLVLFRRFRGPRFPVVC SAPHRTAQGCIPGRRRGQQESPPAFRAEERTDRPPSA  
QASSRRTTAAFALALATSEIAFRKGGPPPAGAXSSAAAAAKGEGPPAPRRRALPTKDPV  
LTEQAAERIKAILLEGDNARGAVGIRLGVKRRGCNGLSYTLNYAFEEPEKDLRMEAHGVTV  
FVEPMALFNVVGTVM DWEETELSSSEFTFKNPNSKGECCGESFTV  
>comp14640\_c1\_seq3; 179 1 426 LEN=835; translated  
KQNKTKQTEMR SREQTIAIQRNDNRQTNDPKPQHNTQTEQAAERIKAILLEGDNARGAVGI  
RLGVKRRGCNGLSYTLNYAFEEPEKDLRMEAHGVTVFVEPMALFNVVGTVM DWEETELSS  
EFTFKNPNSKGECCGESFTV  
>comp14640\_c1\_seq4; 197 137 1179 LEN=1265; minus strand; translated  
MRQRE RHDFIAFDCFAAGSAFVLRFE DRRRVAEAHTNTHTQAARSVPKTRHCLVSRRSDF  
VAPHGIAPFRGLLRFASLHFTSPRLVWVFLVSHREGFAAPALALGVGVLEGE LARELGFL  
PVHDGPDVVEECHGLDKDRDPVGLHPEVLLRLLKGVVEGVREAVAAPALDAQDPDRSPG  
VVSLQDCLYPLGRLFRQHDRV LGGQGXSSGGPVGLPPLPPPQT TGPGRGSSLPKGD LR  
GGERERKRCGRSSRGLRRRGPVRAFFRPKGGWRFLLPAPP PGNASLCGAVRCAANDRWK  
RPSETKTKKDEHPANQEEGTEALSLSRSGVLWGFPFAPMRPAVSAAVFW  
>comp14640\_c1\_seq5; 270 1 905 LEN=1338; translated  
XTVHYKTANPTSRRAKASQEQEQQRQQRQEQEQEQEQEQPPSDRTVPRPSQNTAAETAGRI  
GANGIPQSTPERSDKASVPSSWL GARPF SFSFRKAFFTGRLQRSAPQTRMHSRAAARAA  
RIATRLSGGRTHGPAPRGASVLSKNDRSVRARHLGDRLAEGRTPPYRGLSSAAAAAKGEG  
PPAPRRRALPTKDPVILTEQAAERIKAILLEGDNARGAVGIRLGVKRRGCNGLSYTLNYAF  
EEPEKDLRMEAHGVTVFVEPMALFNVVGTVM DWEETELSSSEFTFKNPNSKGECCGESFT  
V  
>comp14640\_c1\_seq6; 270 1 905 LEN=1314; translated  
XTVHYKTANPTSRRAKASQEQEQQRQQRQEQEQEQEQEQPPSDRTVPRPSQNTAAETAGRI  
GANGIPQSTPERSDKASVPSSWL GARPF SFSFRKAFFTGRLQRSAPQTRMHSRAAARAA  
RIATRLSGGRTHGPAPRGASVLSKNDRSVRARHLGDRLAEGRTPPYRGLSSAAAAAKGEG  
PPAPRRRALPTKDPVILTEQAAERIKAILLEGDNARGAVGIRLGVKRRGCNGLSYTLNYAF  
EEPEKDLRMEAHGVTVFVEPMALFNVVGTVM DWEETELSSSEFTFKNPNSKGECCGESFT  
V  
>comp14641\_c0\_seq1; 618 131 2080 LEN=2264; translated  
MSSNPELSRVRPQPTS TITALMLTYRPIIFMLFVGP TLIMSLPLMSMVFGSILDSTTDQ  
HSFLAICIAA ISSKQLEQYITKAAPTKEKAMNSLEQNRGMVMLAA FVTSVF AIWLVVVPF  
EKVLGLRSILTWSPSISFAVAIRLAFGGFLLGLSIVARYIGPQSIVRCSSSPLLVPYIR  
TFRSILRSAGSTINAPQKICQPDEIQPKQLSKRQETNPRRLQLPLSSSLAAQIIISIVAA  
VVVAFTCVLPFVHDESFGDNSSLVKTKLIMSCIIISITLQLLATTIQGMNHEIDPTQYRSK

SVVTLTSLNLSLKSAGPFIFAIPILGVSIYIQNATFQWSDVLVCCIILPSVIMLYMYLFD  
YILRVFICKTPANIKKLVEEASGGDARLEIFVDVILHSLHLSNEDLVVAIGKISTNSSAW  
MDLEQEERKRNNVAIEKMAQTLHKTSTKDEVTPHLEDDILRLAILTSFEGIARQNWIQST  
SNKIADGGGYSIDSFVAVPVRALCAYAGGIGEALRLIADSENKTSFDDSWVIPPALFMS  
GLSIRGATRWILQSNLPGRSNSLAILIPALLNSVHKLEAGVVQYSQAISSGVAIGETEK  
KLLQNVTPQLLSLFNTCND CARSVVEATKAKPGFRRLDFLGSLDTECQKW  
>comp14641\_c0\_seq2; 492 1 1789 LEN=1973; translated  
XRVLFRSHSFLAICIAAIISSKQLEQYITKAAPTKEKAMNSLEQNRGMVMLAAAFVTSVFAI  
WLVVVPFEKVLGLRSILTWSPSISFAVAIRLAFGGFLLGLSIVARYIGPQSIVRCSSSPL  
LVNPIYIRFRSILRSAGSTINAPQKICQPDEIQKPKLSKRQETNPRRLQLPLSSSLAAQI  
IISIVA AVVVAFTCVLPFVHDESGDNSSLVKTKLIMSCIIISITLQLLATTIQGMNHEID  
PTQYRSKSVVTLTSLNLSLKSAGPFIFAIPILGVSIYIQNATFQWSDVLVCCIILPSVIM  
LYMYLFDYILRVFICKTPANIKKLVEEASGGDARLEIFVDVILHSLHLSNEDLVVAIGK  
ISTNSSAWMDLEQEERKRNNVAIEKMAQTLHKTSTKDEVTPHLEDDILRLAILTSFEGIAR  
QNWIQSTSNKIADGGGYSIDSFVAVPVRALCAYAGGIGEALRLIADSENKTSFDDSWVIP  
PGALFMSGLSIRGATRWILQSNLPGRSNSLAILIPALLNSVHKLEAGVVQYSQAISSGVA  
IGETEKTKLLQNVTPQLLSLFNTCND CARSVVEATKAKPGFRRLDFLGSLDTECQKW  
>comp14642\_c0\_seq1; 936 1 2539 LEN=2605; translated  
XAPNSTICTDFGRKSVKGLFQRSSRDEDDPGSLESIERASEKSSRKKQRPPSLRDIPLRLT  
RELTMQNSKSTSLREAQEKAIQA AKTLYELCDVGHKANREPMVASGQYDVIGPLTQCLLH  
EPIYFHEAYNGNSITSASASASASNVSDPLSLSEETGGTSAAPEVSAEVPQQPEIKDDA  
ADGESVETDAADNKTGGDSEGENNHIDSTQDEVSKPITPTGDEQTAAPIPPAAPADAED  
RLSSPNPQSCSDSISTVNQKQKQRKKQPRVDHKLHFVCLTLNLSIPHDKRVMVMERGA  
KRLIENLCKVIALGKKEAHLCCIVLMNLSFYEPALAVIGQFSPPRRLNIAQAPPKPEPVS  
PAASNAEGNGQSNNSGSGPNKAAKAGKKALATTTTVLKRAAAAVSSKPQKLTPLENPRSL  
LRILQDLVCSAERETSDFRWFGLLANLSRYPENALLIGLTGIPRVAVDNLRKAKTPSSQ  
WATNSLEDFSLYFLLHLAEVCPSSSLKGALEVATKIMNNSDDHYIRSYTDGQVQEEESKDA  
SDGNMNRNHNHGNHELHAGSNHRSGIQNLKATMICAFLGLDWKEFPDHGVIAAGAVSELMA  
NTFERVGGKATYTDSDFLLR TAVSAYAALAKAAAKADYSEAASNLTSESKINKNTLTPA  
TAAAAAKDPAPAKANGSSPSSSSSGSSCVHTKVMALPTSVCLLFKIINAIALHWGEDNNK  
NSGGSSHGSSHGTTGGGELPSSYSETYHWDIKAGDLAVAAMSLLPALLEGTGDGKPSMGT  
QQACADLSKMFVFFSFKKTNSIAVRARSLEVAEKFTESASGSALPLLEASYDLCRNYGIHR  
LQKNFL  
>comp14642\_c0\_seq2; 1009 300 2804 LEN=2870; translated  
MKSVKGLFQRSSRDEDDPGSLESIERASEKSSRKKQRPPSLRDIPLRLTRELTMQNSKSTS  
LREAQEKAIQA AKTLYELCDVGHKANREPMVASGQYDVIGPLTQCLLHEPIYFHEAYNGN  
SITSASASASASNVSDPLSLSEETGGTSAAPEVSAEVPQQPEIKDDAADGESVETDAAD  
NKTGGDSEGENNHIDSTQDEVSKPITPTGDEQTAAPIPPAAPADAEDRLSSPNPQSCSD  
SISTVNQKQKQRKKQPRVDHKLHFVCLTLNLSIPHDKRVMVMERGA KRLIENLCKVIA  
LGKKEAHLCCIVLMNLSFYEPALAVIGQFSPPRRLNIAQAPPKPEPVS PAASNAEGNGQS  
NNSGSGPNKAAKAGKKALATTTTVLKRAAAAVSSKPQKLTPLENPRSLLRILQDLVCSAE  
RETSDFRWFGLLANLSRYPENALLIGLTGIPRVAVDNLRKAKTPSSQWATNSLEDFSLY  
FLLHLAEVCPSSSLKGALEVATKIMNNSDDHYIRSYTDGQVQEEESKDASDGNMNRNHNHGN  
HELHAGSNHRSGIQNLKATMICAFLGLDWKEFPDHGVIAAGAVSELMANTFERVGGKATY  
TDSDFLLR TAVSAYAALAKAAAKADYSEAASNLTSESKINKNTLTPATAAAAAKDPAPA  
KANGSSPSSSSSGSSCVHTKVMALPTSVCLLFKIINAIALHWGEDNNKNSGGSSHGSSHG  
TGGGELPSSYSETYHWDIKAGDLAVAAMSLLPALLEGTGDGKPSMGTQQACADLSKMFV  
FFSFKKTNSIAVRARSLEVAEKFTESASGSALPLLEASYDLCRNYGIHRLQKNFL  
>comp14643\_c0\_seq1; 320 308 1171 LEN=1529; translated  
MLITELMDAIHMAQPPIGPKYGESAVVNEETCLLLTQNARRIADLCMELEKTKLQKQEQ  
DNTPISTSEGNDENDLLGDEIDRTEQAPVEKKDVTGMPTQSCLINKLKEQNSRIQSRCDS  
LERSMSSLRHNHAEHELRSVLTIQNMRSQMDLKMERRRMDMQADAEERAFRLQKELSE  
TRKNKSDIVRSQQLQVDAQSVVVSLEEREYDGEETLCYSSSSSSATSATS SDTSDASSDSM  
GNKAARGPGLCREAVLTKKELLRSHRHHQRSFPPLLVTVSEDEDD  
>comp14644\_c0\_seq2; 469 265 1386 LEN=1930; translated  
MDLPSTNDTAGHQQAIDEPSAGSETYTARYPNGSAAFDSAASSAVESSVGKNQHRITRTK  
VNGTDLNSDPNHKCTENDERD TDATVKGISANNTNASLKTWQDGNFVETSEDGSELKDDP  
NDNSRKDNLMSTGDIHGEKNGSEHASSTDTKDEKKNIFSERRIAKRFRVSTTNRRLHNK  
IFKVNRIFFGAVEGAIPGNVELWKIYDDGDVDVFSRPQLIAALNYYDANKKFDTDNFCK  
KQSSLSQLDNGE EEEEEKINTASTKRRGRMTNAKASPPKAKNRKTKAAKPEPVPVWEGI

PDEEIEGGWPKGWVKKLYSRKAGATKGHTDKYYYYSPKQKIKLRSLVQVRKFLKALKEANG  
DEITAKENMGKIS  
>comp14644\_c0\_seq4; 469 265 1386 LEN=2436; translated  
MDLPSTNDTAGHQQAIDEPSAGSETYTARYPNGSAAFDSAASSAVESSVGKNQHRITRTRK  
VNGTDLNSDPNHKCTENDERD TDATVKGISANNTNASLKTWQDGNFVETSEDGSELKDDP  
NDNSRKDNLMSTGDI IHGEKNGSEHASSTDTKDEKKNIFSERRIAKRFRVSTTNRRLHNLK  
IFKVNRIFFGAVEGAIPGNVELWKI IYDDGDVDVFSRPQLIAALNYYDANKKFDTDNFCK  
KQSSLSQLDNNGEEEEKINTASTKRRGRMTNAKASPPKAKNRKTKAAKPEPVPVWEGI  
PDEEIEGGWPKGWVKKLYSRKAGATKGHTDKYYYYSPKQKIKLRSLVQVRKFLKALKEANG  
DEITAKENMGKIS  
>comp14644\_c0\_seq6; 469 265 1386 LEN=2514; translated  
MDLPSTNDTAGHQQAIDEPSAGSETYTARYPNGSAAFDSAASSAVESSVGKNQHRITRTRK  
VNGTDLNSDPNHKCTENDERD TDATVKGISANNTNASLKTWQDGNFVETSEDGSELKDDP  
NDNSRKDNLMSTGDI IHGEKNGSEHASSTDTKDEKKNIFSERRIAKRFRVSTTNRRLHNLK  
IFKVNRIFFGAVEGAIPGNVELWKI IYDDGDVDVFSRPQLIAALNYYDANKKFDTDNFCK  
KQSSLSQLDNNGEEEEKINTASTKRRGRMTNAKASPPKAKNRKTKAAKPEPVPVWEGI  
PDEEIEGGWPKGWVKKLYSRKAGATKGHTDKYYYYSPKQKIKLRSLVQVRKFLKALKEANG  
DEITAKENMGKIS  
>comp14645\_c0\_seq2; 230 1 519 LEN=1099; translated  
KSTSDGRIMVEEDGVLYEGVIDSDGRIMVEQDGVLYEFQVDGDDDGHQGDAEVQNKQGIP  
TAAEMHNTNIGQHIVVQANNVRTLYGCQEPVYALRDIKAGEGTIHSFVLYSFVECCAA  
VLSFVVLQNQKSFLATMLATSTLAHTQRASSFLDWIELDWIELNSVSQQQQS  
>comp14645\_c0\_seq3; 36 1 219 LEN=758; translated  
HQGDAEVQNKKDIPTAAEMHNTNIGQHIVVQANNVRTLYGCQEPVYALRDIKAGEELR  
MSYGDFSEPEGEFW  
>comp14645\_c0\_seq4; 122 1 357 LEN=896; translated  
KSTSDGRIMVEEDGVLYEGVIDSDGRIMVEQDGVLYEFQVDGDDDGHQGDAEVQNKQGIP  
TAAEMHNTNIGQHIVVQANNVRTLYGCQEPVYALRDIKAGEELRMSYGDFSEPEGEFW  
>comp14645\_c0\_seq5; 439 160 1037 LEN=1037; translated  
MRGVKTSIANSFIVAPLLLLLSCFVSFVVERVEATATEAATPQPEHEASCPNQDTGDDDDAA  
AEFFLALWEKSDRSHPVYESLVDLSAISAAALHCDDDTGEDPRFPTDANYALMIEAYVHAS  
KLNPNPRGRPPTATEYNPEAFFVPVEVRASSEMGRGVFSLGDVAKGTMVNRPSNAMEFYN  
RETIRDYIVYLLRKRSPQLICDSFEWFYATKASSEPNDYIICLDADDASMINSAHDSLWD  
ESQDDDDGFSGKSTSDGRIMVEEDGVLYEGVIDSDGRIMVEQDGVLYEFQVDG  
>comp14645\_c0\_seq6; 144 1 381 LEN=961; translated  
HQGDAEVQNKKDIPTAAEMHNTNIGQHIVVQANNVRTLYGCQEPVYALRDIKAGEGTI  
HSFVLYSFVECCAAVLSFVVLQNQKSFLATMLATSTLAHTQRASSFLDWIELDWIELNSV  
SQQQQS  
>comp14646\_c0\_seq1; 239 273 716 LEN=789; translated  
MGEAVGSSLSLIAPAEDKAHSKIIVASLSVPFASKVLLDGRLLTSSQERVALASKIYTVGE  
MEQKTNSHNRWFHEMAKEADLELDDGMLDEADDRSEKEQMQLVLEAKRARAQLARLLKPEM  
KTQKFGKFLSTNSAALQNQLKQNTARK  
>comp14646\_c0\_seq2; 1015 70 2541 LEN=2614; translated  
MGRNRKRSRSPSSSTNAGPWKSVSVNISSQGDADGDGHQNMGTQPEMTKYSSNHYDD  
PKLIKKAELDLEMKPGEDCGMFYGLEVLDASEYRVEESGSSKRLIIGESNDATPKTKETK  
QSAPAVDTSKNKLSDSNESEQPKKKRKKKKKDKAAGVGDDTATKETSATSQLEQESVTP  
EQLYQIQASWSQSTGG AHLHDLRLKSMHRLGFDSPPTIQAATLSASTMGRRLVGAAPTG  
SGKTLAFLLPILDSMLKSRDKDGEENS SDGHTTQKNLQALIITPTRELATQIHAECEKLV  
PSQCVTLVGGIALVKQKRLLATKRPPIVVATPGRLWAMLSSGDNKHLQDLSQIQFLVLDE  
ADRMTQEHSFPQLVKILDLVNEANPNEEDSDDDSDDESDDGSRLMGLPGIRGEAKLTM  
LTDDILNQVQAQKSKTAEPIDVPDEDYDDELDDIEDDIAEDVFANPESRVHRQTFIYSA  
TLTLPTSTNTTANSKGGKRRKLGIDGGIADILEKTNAMGETKVVDLSSSSPSSSLAN  
HKNNTGVRLP PGLSLAQIKCTQRHKDSHLYAYLMTTVQGSSGPCLVFCNSIAAVRRVVGAT  
FQTLGFVNRILHAHMQRARFKAVESLKKSGERVLVCTDVAARGLDIPSVATVVHYDVA  
RAVDTFVHRSGRTARGMGEAVGSSLSLIAPAEDKAHSKIIVASLSVPFASKVLLDGRLLTS  
SQERVALASKIYTVGEMEQTNSHNRWFHEMAKEADLELDDGMLDEADDRSEKEQMQLVLE  
AKRARAQLARLLKPEMKTQKFGKFLSTNSAALQNQLKQNTARK  
>comp14647\_c0\_seq1; 413 208 1170 LEN=1575; translated  
MHRSNYGI PREVSIIIGSDEEQSSSESSVGDDGTGGRSRGFYLFVVESTYNDLENSNR  
GPPQSLEDNRNDQKLDKQIKDHTDDPAIDTTFS PGDRSTSLARDKFPEIGYENANDDERR

KLLVAENEYTPVDTKIRRQKNHCFDVACVSWEVLATLPREDTTHSTKKRRKKQFMSNLR  
ARVERMQCQMKKPFCTVSKMNLCSAGRFOHIVCQVPPDRRLQYDMNQYLLQKGNKSRILL  
SDDYDDDEKDCPIPHVVSLGSSDTEKGEFSSCGQFQEILTNEDESERLGKKSVLSHGNDE  
KHKSDLELRWLYARQLLPVND

>comp14648\_c0\_seq1; 615 1 1144 LEN=2074; translated  
XNKQQQSRGASISNGKTTQLHKERNNCIGVHKNTTRHDTMSSVLGSLRRAREWAYPQLT  
ESAFLEKGVLTPEEFVRAGDELVFRCPTEWESGAPSSKKEKSYLPPDKQYLITRNVPC LH  
RVSSLETNLKMEGVAGGGDGEDEWMISSVLAEGEDEDNLGDDFDILDGDGELVETETL  
EAAAPEPGAGGTSNANANANANDGEDEYGDMDYEDVDLVDDDAALPQAHNEGASSA  
NIVKTRTYDLSITYDKYYQVPRVWVGRDENDQPLSSGQMMEDVISDYANKTVMETHPH  
VGSSCPHASIHPCQHARVMKAIVRNLTKTGAAGKEPLDGDEAPSGPSVENYLFIFLKFVS  
SMIPTISYDFTMEVTADTSK

>comp14648\_c0\_seq2; 395 1 1144 LEN=2230; translated  
XNKQQQSRGASISNGKTTQLHKERNNCIGVHKNTTRHDTMSSVLGSLRRAREWAYPQLT  
ESAFLEKGVLTPEEFVRAGDELVFRCPTEWESGAPSSKKEKSYLPPDKQYLITRNVPC LH  
RVSSLETNLKMEGVAGGGDGEDEWMISSVLAEGEDEDNLGDDFDILDGDGELVETETL  
EAAAPEPGAGGTSNANANANANDGEDEYGDMDYEDVDLVDDDAALPQAHNEGASSA  
NIVKTRTYDLSITYDKYYQVPRVWVGRDENDQPLSSGQMMEDVISDYANKTVMETHPH  
VGSSCPHASIHPCQHARVMKAIVRNLTKTGAAGKEPLDGDEAPSGPSVENYLFIFLKFVS  
SMIPTISYDFTMEVTADTSK

>comp14649\_c0\_seq1; 827 188 2838 LEN=3376; translated  
MISIPFLSSSSLLLLLALVFLSVEGRSTAPWQRRHGHGSHFPLFGRSVFSQGTNTKASPNL  
GILRGGDSGLGGTPPGAHSALPTPAAARIHAVVGGASASASSSSSSSSSGTSTSTSSAAE  
MALAGGHIKTKAKGAPASPEATAATSVSATSGGAQVAAIDDFVSKEEKKVQKRKDKERI  
EKKKEIKQHKKIAKKLKRNATNKRRKFLHFSWGMFLFASCNHFI PRRIFLPGMTFFFTGLN  
LTIELLLRYRKGFEWMNLLHFFLGLKALRKNEMDGKFTGGMYFFGGVTITAF LFPKSCATL  
GICQLAIADPTASFFGRATR HVYWSRINNGFFGLGRNKGILGFLGGAICCVPLNYRLLSL  
AAVKNTVGP IAKPTVLAISLALGLAGALADLMVPTPALTLPKTVCGVRVPPFHLDDNIAI  
PILSGWACTRILGLASIGPTDLVLSKYLVLWQERNGAEQNGTERNDTVRIADIAIRMQNP  
KSFTLNEYEYXVIVSRRPKFGYXLQHPSTHPLNFGSTSIVYSIWLEQEGYRSNLRENYLL  
LLWTANCDTVDQEPSSAPNQESETTNSQPTRTTGAEIIF SASSNXKQLLLLLLSLIQLA  
IGSHTATISSFSTPIQRRRSAPTSGGSNSASSIQNGSGTAAINGPSSSSSSMDQFDSLKRE  
ATKLESLKEDKVARYQQLVQSIPDATASNDLLLAESGMGASSAAEAEALRHDIQRTMT  
NLQDLVNTQLQPAAERSGKSLLVKRYREILFDLSGDFEKSQAHRKMERAKLMEGASAN  
RRKSPLEIDNMGMDHLMRERSHISNSQSAAA AVINQAVEIRNDLRSQGFSLGRAQGAMGQ  
IANNIPGINTLVEQIRKKRSKDDMIVAGVIASCILFTLWYLF

>comp14649\_c0\_seq2; 204 90 809 LEN=1460; minus strand; translated  
MGRGFVLQSNPIDTGAVLFCVLFVRSCLDEVLGQNGQIRRADRGQPEYPRAGPAAEDRNG  
NVVVQVEGRNADAADGFRQGEGRRRNHEVGGQGRQSQGKGDGQNGRLCNGPNGVLD RRQR  
QQPVVEGHAADGSTQESQDALVSAESEKSVVDPAPIDVAGGPAKEAGGGVRNQLANPEC  
CARFGKEKGGDRDPTEI IHASGKLAVHLVFAEGLSEEKMEEIVHPFESLAVPQQLDGQV

>comp14649\_c0\_seq3; 343 634 2588 LEN=3126; translated  
MTFFTGLNLTIELLLRYRKGFEWMNLLHFFLGLKALRKNEMDGKFTGGMYFFGGVTITAF L  
FPKSCATLGICQLAIADPTASFFGRATR HVYWSRINNGFFGLGRNKGILGFLGGAICCV  
LNYRLLSLAAVKNTVGP IAKPTVLAISLALGLAGALADLMVPTPALTLPKTVCGVRVPPF  
HLDDNIAIXDPQRLGLHEDTRAGLDRPDGSGSVQVPRPLGKNGTEQNRTERNGTTQYESR  
HCNSYAKSKIFYIERVVRVIVYGDPNLDTSATSIHPSIEFWIDFDCLFYLVGTGRISIK  
SAGKLSLTAVDSELRYRRSRTIELGSKXKNQKLLTHNRQERQERKSFSAPVSNXKQLLLLL  
LSLIIQLAIGSHTATISSFSTPIQRRRSAPTSGGSNSASSIQNGSGTAAINGPSSSSSSMD  
QFDSLKREATKLESLKEDKVARYQQLVQSIPDATASNDLLLAESGMGASSAAEAEALR  
HDIQRTMTNLQDLVNTQLQPAAERSGKSLLVKRYREILFDLSGDFEKSQAHRKMERAK  
LMEGASANRRKSPLEIDNMGMDHLMRERSHISNSQSAAA AVINQAVEIRNDLRSQGFSLG  
RAQGAMGQIANNIPGINTLVEQIRKKRSKDDMIVAGVIASCILFTLWYLF

>comp14649\_c0\_seq4; 290 2305 2865 LEN=3403; translated  
MGASSAAEAEALRHDIQRTMTNLQDLVNTQLQPAAERSGKSLLVKRYREILFDLSGDF  
EKSRQAHRKMERAKLMEGASANRRKSPLEIDNMGMDHLMRERSHISNSQSAAA AVINQ  
AVEIRNDLRSQGFSLGRAQGAMGQIANNIPGINTLVEQIRKKRSKDDMIVAGVIASCILFT  
LWYLF

>comp14649\_c0\_seq5; 828 188 3115 LEN=3653; translated  
MISIPFLSSSSLLLLLALVFLSVEGRSTAPWQRRHGHGSHFPLFGRSVFSQGTNTKASPNL

GILRGGDSGLGGTPPGAHSALPTPAAARIHAVVGGASASASSSSSSASSSGTSTSTSSAAE  
MALAGGHIKTKAKGAPASPEATAATSVSATSGGAQVAAIDDFVSKEEKKVQKRKDKKEERI  
EKKKEIKQHKKIAKKLKRNATNKRRKFLHFSWGMLFASCNHFIPRRIFLPGMTFFFGLN  
LTIELLYRKGFEWMNNLLHFFFLGKALRKNEMDGKFTGGMYFFGGVTITAFLEPKSCATL  
GICQLAIADPTASFFGRATRHHVWSRINNGFFGLGRNKGILGFLGGAICCVPLNYRLLSL  
AAVKNTVGPIAKPTVLAISLALGLAGALADLMVPTPALTLPKTVCGVRVPPFHLDDNIAI  
PILSGWACTRILGLASIGPTDLVLSKYLVLWQERNGAEQNGTERNDTVRIADIAIRMQNP  
KSFTLNEYEYXVISVRRPKFGYXLQHPSTHPLNFGSTSIVYSIWLEQEGYRSNLRENYLL  
LLWTANCDTVDQEPSSAPNQESETTNSQPTRTTGAEIIFSASSNXKQLLLLLLSLIQLA  
IGSHTATISSFSTPIQRRRSAPTSGGSNSASSIQNGSGTAAINGPSSSSSMDQFDSLKRE  
ATKLESLKEDKVARYQQVGSWFGVRREEELAEKAYSNFDAYSSHVLSNLTCSAILLRNEF  
FLVAWHGFLEFVWSEIETNRIGNNHEFELIRDATIHPSIRDCNXLYRLQLVQSIPDATAS  
NDLLLAESEGMGASSAAEDEAALRHDIQRTMTNLQDLVNTQLQPAAERSGKSLLVKRYRE  
ILFDLSGDFEKSRQAHTRKMERAKLMEGASANRRKSPLEIDNMGMDHLMRERSHISNSQS  
AAAAVINQAVEIRNDLRSQGFSLGRAQGAMGQIANNIPGINTLVEQIRKKRSKDDMIVAG  
VIASCILFTLWYLF

>comp14649\_c0\_seq6; 561 188 1540 LEN=1710; translated  
MISIPFLSSLLLLLALVFLSVEGRSTAPWQRRHGHGSHFPLFGRSVFSQGTNTKASPNI  
GILRGGDSGLGGTPPGAHSALPTPAAARIHAVVGGASASASSSSSSASSSGTSTSTSSAAE  
MALAGGHIKTKAKGAPASPEATAATSVSATSGGAQVAAIDDFVSKEEKKVQKRKDKKEERI  
EKKKEIKQHKKIAKKLKRNATNKRRKFLHFSWGMLFASCNHFIPRRIFLPGMTFFFGLN  
LTIELLYRKGFEWMNNLLHFFFLGKALRKNEMDGKFTGGMYFFGGVTITAFLEPKSCATL  
GICQLAIADPTASFFGRATRHHVWSRINNGFFGLGRNKGILGFLGGAICCVPLNYRLLSL  
AAVKNTVGPIAKPTVLAISLALGLAGALADLMVPTPALTLPKTVCGVRVPPFHLDDNIAI  
PILSGWACTRILGLASIGPTDLVLSKYLVL

>comp14650\_c0\_seq1; 224 582 1693 LEN=1700; minus strand; translated  
MNIHQFEKYIRVSTTQHWSHTVVPKGTASPQASRYIDCSYRITLLGGGWSSVDPVIGLAPP  
AGLEDQGGPVDVAVPLPRRKGHRPGVDPPVVKDVPQVAPARPAADLPPVQGGPDRIEVLGL  
DPVQGFRTPARPRVELGAALAEVFRAPGAGIDPFLVLGREGVEDRGPLPLGPAPPQDV  
VLGTAQDVGPLALGVLDGVPVRAALSGASGDGAPRPGGHAGGARACGRRGQDLPPVVRTG  
GRCRRLVCVSFSAFAFAVSRFGGGTEFQGAPTRPHSRKPRCRKKGKERTVGGRARHRT  
RARQQKTNSRQNYGGPHREGQGFIRCEKRTTSTGVAAAFSHADHDVDDVIEELALLVSYG  
VVFAQCLEVD

>comp14650\_c0\_seq2; 224 562 1673 LEN=1680; minus strand; translated  
MNIHQFEKYIRVSTTQHWSHTVVPKGTASPQASRYIDCSYRITLLGGGWSSVDPVIGLAPP  
AGLEDQGGPVDVAVPLPRRKGHRPGVDPPVVKDVPQVAPARPAADLPPVQGGPDRIEVLGL  
DPVQGFRTPARPRVELGAALAEVFRAPGAGIDPFLVLGREGVEDRGPLPLGPAPPQDV  
VLGTAQDVGPLALGVLDGVPVRAALSGASGDGAPRPGGHAGGARACGRRGQDLPPVVRTG  
GRCRRLVCVSFSAFAFAVSRFGGGTEFQGAPTRPHSRKPRCRKKGKERTVGGRARHRT  
RARQQKTNSRQNYGGPHREGQGFIRCEKRTTSTGVAAAFSHADHDVDDVIEELALLVSYG  
VVFAQCLEVD

>comp14651\_c0\_seq1; 485 61 1777 LEN=1976; translated  
MSSDEDDSVFTEDMDYRAVYLGWNEDELAHKEDDDDEMGMFDEAFNETIDRETHLQNVKVV  
TSLQLQNSKFPAPVRRQIKHSLKSFLFQVEESLRMCLDFNVEDEMHNHYGGRVDHLYADT  
DVQDEDSNEMWTEQLTTAIDYFPRVLKIRRPNSNLDEMPKTPILAACGYLDTISGFVPH  
QMKRSDSPLPVSVFVLLAKLAIKHKTFDETLRGGLLTNQSSDRLFVLRHLVRCGVNCLPN  
RNPDLTPNIDHEPDEDDFFEPADYDLVINTEKSYLNVLKQLREMNLFRKEDIQEFDLRLD  
SLMCNEPNLEMNFSILKYLVKWDPEALKHSLHSEHPVLHRCIHNEHIVLLGLEEDPRFE  
AALHAGLRYPQIEIGFYFHTTTFNNCYGYPYRENPHHFGYNLEDLQEKLEIQKRKSKR  
EAGKCKFSLPSRETLLSAATDDAIHLDSLIEQLCHDPALIRILQETTMEWAHYVDNQTF  
CTGKSSNGTSEKEEAPNGNNRCVKHTGEDPQSMARNEEEATTTKREAEPPGPKRQKTLMN  
VGSGLDNSAFWIGQIQSFATHYTNRHSNECF

>comp14652\_c0\_seq1; 701 236 2662 LEN=2681; translated  
MTSATNSRDGDCCSSESENQNHETERLDELFDKGEVVKVENLEFIPGNLQGAFTVRL  
AKRTFKSSSTDSSSSGYVGSNDNARTANNQRSVKRSLNQKSCSMPLGRIFRSDSLDLTQ  
NNNATSNNAHNRNRYRPAVNSSGFHLFRSRSDSIRENLFDDSYNDDDQLVAVKIFSKSN  
LKRRRTIERDKSTNRVVKVTALQQVEREIALMKKLSHPNLVRLYEVIINSKSDSLYMLVE  
YMLPGEILTFQEHGDTFKRSDSLRHKQIDGLIDGGYFDEEHAALYFVDILHGLAYLHQHH  
ICHRDLKPENILLSNSGIKVGDFGVSHIFEEEDHAHRRLSASETSEARNIFKKSWSSTS  
YSLFSSDEDDQEKNPVLTQRQTDSDAYSMMGRMAGSILTKTEGTWCFWSPMCSSESNRSG

FSGYAADLWAAGICLHIFVVTGKLPFYNTIPLDLFAMIVHKNVQYKGLGLSNSLVDLLKCC  
LEKDPNLRAGVGDCLHHAFLKAREQRIRELGPEFESSLSVIQISEEDIRMAFRVTVTSVP  
GQIMRTASKKIQEGLAHTRENLRARIPSLASTNNSGDEQSTASKNNINMSATISDPNNGN  
SISTNKHSNHVVFYSRQASGDSINSLPFSDDKKEKLYGSKSDAMSDANRIVIRKNGNESE  
TDTHVSRLLSSGISLSTGTDDLPTKEMSSRVSFSSNADDLDMRLEENGDKDDNAEER  
GECPGSNDKHEQSKI SKGSLKNSHFVSSNDLQEI AKKHSTIYKPEDHPTTVSRTYNDFPS  
VSTACLSEEGIALDQDEENDVNLGCLIQ

>comp14653\_c0\_seq1; 293 211 1601 LEN=1883; translated  
MTRVESIEQLTAEAFSEILKENWSEAVPKIGYLSAAKVDQGVLSDVYRVHLDYATCGKPE  
NNRKKDASSSIKATPRDALRSTESMPADWLVKFCRSDLDLDSWMIRNETIFYSRIVPEI  
LAPASNSSGGNGQLSLSRISLPFAIPTFLSGSDRHLIIQEITNVKTYPLTEGCPPDKIDF  
LLKSLAAWHAACWESTPVLKQLDLGNPAEIIHAAGERLVFPAGMGQRLPPLQKEGLFISSW  
EETVDHMIQEDGQREEKLLDTELMDYITKYAKNCAPLGFDXDIEHKVHNHLVTCVHGDIYHI  
SNWLFPTNEDQDKKPVLDYATAGYGNPLVDLVFFIIVVSTNDEVVSNSQLCLEKYYQFLI  
ECDPNLSPKVSLATLQEWFPWAILCQFMILVAYDGCIRNIAKAEPDEQKRENQTRHFCNV  
NRRMILAIRSIENWDAILSELGTTSGEDRKEAQKFCETTALTI

>comp14653\_c1\_seq1; 239 719 1375 LEN=1512; translated  
MAIWCSSYYWAGFPFDNLCPNDKPVNASYVGNFTLKAHLNNTNKFVEENITIFEDATEYRY  
CNMDFLDTAPYFSFPFVPSMGNPHIQPREYMRDQIVSTSYCGWSAFVAVLVAIFMKHCVR  
WYRKYKQLTGSSYKAVGETQGINFSDVPSRSAYIPQVISPVFAYPLIACKVDGIDEELFE  
FRDPDRTRFRYYDLSDMAKRLKSLDINDPPGFSIVKCW

>comp14653\_c1\_seq2; 289 96 1280 LEN=1417; translated  
MTNNEIVHRSESSKQGSLYFKIALFRWVTTAIVIFLVTPFADTIRDGSEGI IAQVFALFI  
SDMTLTNAVAVLDPAGHLQRHLLAPRAKTQDAMDILFQGTPTYELAERYTDMTKILLCLF  
YCSIFPSSFFLCAISLTLKYYCDRFNLMNTWKRAPIGPEISKISRIYFFGFACMMAIW  
CSYYWAGFPFDNLCPNDKPVNASYVGNFTLKAHLNNTNKFVEENITIFEDATEYRYCNMD  
FLDTAPYFSFPFVPSMGNPHIQPREYMRDQIVSTSYCGWSAFVAVLVAIFMKHCVRWYR  
YKQLTGSSYKAVGETQGINFSDVPSRSAYIPQVISPVFAYPLIACKVDGIDEELFEFRDP  
DRTRFRYYDLSDMAKRLKSLDINDPPGFSIVKCW

>comp14653\_c1\_seq3; 774 1 3200 LEN=3337; translated  
EVCTSETNLSLACRNRFEQPFPRFPRHLNLKQKINDEIKTSIGNTHXKAALQFWTDTLGN  
PDEYMMGFLLSSKGSNEKSSDSVQSNPKSMMTGTLATNYSKGLNDVAVVESHKCDESFY  
HCDDDSASHDQRSYEGEDDPGQIIDFMNDVVKDMTYGRRIALRLMKYKWWYPGTRDPNEK  
EGDSTDEEEEDSAPLDDFDEHTTPQKPCPKRGWEFFEHQALFRYLVDKNDPSSNSLCPNS  
SRKYNRADPGEDLVPTRLYPWFSLPHKQLGDFGLGIGLYFSTLRALIFLCLTCGLISMYN  
IIYFASEKYDHEGFNVPADTSFSNFFMAGSAVCHAVEWVPCNCTCIALPVDEWGALGS  
NRCAAASSSSGANMTFVMKNNCDGTPWQLATTNFVTVVFTVFAFMLMGRYMKNEEVMFDE  
DEQTAQDYSVLISNPPSDAKDPEEWRFFHDNLDGAKVTVCTCAVRNLLIQSLVERRER  
IRSIQSINPEISLDALDLARTSAEIERGRGIFGRFLSKLAPGIPHEFSRLVALKARVEGL  
AQLEYPTNVFVTFETEEDQRYVLENLSVGSSAWGTGKGGNASALKSPKHLFRNDRVLS  
VTEPEEPNTIRWEDLNVGHLKQLKLLTVTTLITLGAVFVVAIAIYLTNQVNVLWCAYSIT  
FFGMI FPMFAKLMNTNNEIVHRSESSKQGSLYFKIALFRWVTTAIVIFLVTPFADTIRDGS  
EGIIAQVFALFISDMTLTNAVAVLDPAGHLQRHLLAPRAKTQDAMDILFQGTPTYELAERY  
TDMTKILLCLFYCSIFPSSFFLCAISLTLKYYCDRFNLMNTWKRAPIGPEISKISRIY  
FFGFACMMAIWCSSYYWAGFPFDNLCPNDKPVNASYVGNFTLKAHLNNTNKFVEENITIF  
EDATEYRYCNMDFLDTAPYFSFPFVPSMGNPHIQPREYMRDQIVSTSYCGWSAFVAVLVA  
IFMKHCVRWYRKYKQLTGSSYKAVGETQGINFSDVPSRSAYIPQVISPVFAYPLIACKVD  
GIDEELFEFRDPDRTRFRYYDLSDMAKRLKSLDINDPPGFSIVKCW

>comp14653\_c1\_seq4; 641 1 2267 LEN=3432; translated  
EVCTSETNLSLACRNRFEQPFPRFPRHLNLKQKINDEIKTSIGNTHXKAALQFWTDTLGN  
PDEYMMGFLLSSKGSNEKSSDSVQSNPKSMMTGTLATNYSKGLNDVAVVESHKCDESFY  
HCDDDSASHDQRSYEGEDDPGQIIDFMNDVVKDMTYGRRIALRLMKYKWWYPGTRDPNEK  
EGDSTDEEEEDSAPLDDFDEHTTPQKPCPKRGWEFFEHQALFRYLVDKNDPSSNSLCPNS  
SRKYNRADPGEDLVPTRLYPWFSLPHKQLGDFGLGIGLYFSTLRALIFLCLTCGLISMYN  
IIYFASEKYDHEGFNVPADTSFSNFFMAGSAVCHAVEWVPCNCTCIALPVDEWGALGS  
NRCAAASSSSGANMTFVMKNNCDGTPWQLATTNFVTVVFTVFAFMLMGRYMKNEEVMFDE  
DEQTAQDYSVLISNPPSDAKDPEEWRFFHDNLDGAKVTVCTCAVRNLLIQSLVERRER  
IRSIQSINPEISLDALDLARTSAEIERGRGIFGRFLSKLAPGIPHEFSRLVALKARVEGL  
AQLEYPTNVFVTFETEEDQRYVLENLSVGSSAWGTGKGGNASALKSPKHLFRNDRVLS  
VTEPEEPNTIRWEDLNVGHLKQLKLLTVTTLITLGAVFVVAIAIYLTNQVNVLWCAYSIT

FFGMI FPMFAKLM TNNIEVHRSESSKQGS LYFKIALFRWVTTAIVIFLVTPFADTIRDGS  
EGIIAQVFALFISDMTLTNAVAVLDPVGFECIRFI  
>comp14654\_c0\_seq1; 549 176 1978 LEN=2062; translated  
MSSPMHLTTASNVTLTLYSDWHFCSGCGFPRAKDGKTAGKCAERETVNDVATKQEGAEQR  
RVCQKKLSICRRCKTAAAYHDSECQRIHWKRGHRYDCNKLAKAIQPLKDI IASFHRRDVT  
RGNRRPQRYWWDLLDPRDAAYSNRLWKESAVRWNRYGEYLEAMEGFQTALAQTKMWNHDH  
SVTIANNAHDTSHLEKTQDDKRSLS SSPVQDGDGTD DDDNSSISSGIHLARKLLFCAYCE  
ADGNQIQSARSRLAQCVSILLEGCCSSSLLSPSDPNNRELQKRQQLHKTINPLLD DAWME  
LMLS YEEEEKSPEVRR IARHVAHMAIQSSRGPGLYRCEWKDPLQRPGYMAVLGTICDRNG  
TKLHPFQSSVMMQPYIPPEAHPWCETLESNWETIAKELSELVAAGKASSKQRWAAVGS  
DRGSGGDDHRVVSAGGKWTEYVLFGTGAIGSGSSEDRDEAPSTKRLLRSCIPDAISLAE  
SGGGEVIFSKLAPRTRIEAHCGPTNFRLTAHLGLVIPDEEAGECKIRVKNEWHRWETGKV  
MLFDDSYEHEIRNDTDQVRIVL LLLRLWHPLLS PDRRQKELMEARRRRELAVSKRYHPSEH  
>comp14654\_c0\_seq2; 460 176 1763 LEN=1847; translated  
MSSPMHLTTASNVTLTLYSDWHFCSGCGFPRAKDGKTAGKCAERETVNDVATKQEGAEQR  
RVCQKKLSICRRCKTAAAYHDSECQRIHWKRGHRYDCNKLAKAIQPLKDI IASFHRRDVT  
RGNRRPQRYWWDLLDPRDAAYSNRLWKESAVRWNRYGEYLEAMEGFQTALAQTKMWNHDH  
SVTIANNAHDTSHLEKTQDDKRSLS SSPVQDGDGTD DDDNSSISSGIHLARKLLFCAYCE  
ADGNQIQSARSRLAQCVSILLEGCCSSSLLSPSDPNNRELQKRQQLHKTINPLLD DAWME  
LMLS YEEEEKSPEVRR IARHVAHMAIQSSRGPGLYRCEWKDPLQRPGYMAVLGTICDRNG  
TKLHPFQSSVMMQPYIPPEAHPWCETLESNWETIAKELSELVAAGKASSKQRWAAVGS  
DRGSGGDDHRVVSARLTAHLGLVIPDEEAGECKIRVKNEWHRWETGKVMLFDDSYEHEIR  
NDTDQVRIVL LLLRLWHPLLS PDRRQKELMEARRRRELAVSKRYHPSEH  
>comp14655\_c0\_seq1; 160 268 966 LEN=1741; translated  
MTRQSGMADREPCPWRIIDVGGAF CMGNIGGLWHSIKGARMAPAGARLAGSLSAIQAR  
APVLGGQFAIWGGIFACYDCSLTAVRQKEDPWNIIISGAATGGTLALRAGPQAAA SAAMV  
GGVLLALIEGMGIMLGKMFAPPSPDQMIADQQRYP TAPPTQGGFLPAGIGGPTAPPPAT  
SAPPPSSASTSNTTGD PFDPTPTTFSTNDSSTSF SNTQEEPSGGSSWPFPGN  
>comp14656\_c0\_seq1; 610 326 2380 LEN=3027; translated  
MEGDETKDLDTPKTMMTSDSSSCDAHYLET PPMHGRLGRIILSSGAYPTSSDGSTATS  
CCSEHIETGCPDGPSPNSQLHRSIRRAGNHSQLQRVSTPLFSQEIDENDESLEMLLNALN  
KLNRLATLDSA EYQQRLENSLPSLEGEKSNSIYCPSLSQGNTRTQIRLPSQPIL TPLVQ  
LSMSIHR LHAVIANVTREIDGHTDEVKELQSQLEVLKKNRNLKLESATKIVHKRN LK LKKQ  
SQHDRKVAKLLQHKVHKYEAQIESQDFELMASKVYQHEIQ LQLTKSQKNNATGCSGISDD  
HLTRERLDSNM SDFDVEKEIEGVALASVQSDLSETTAENIEKESSDIIADTSRSAAISK  
TNAMSDYSSSALRFSADRSVVTKKSTNSSNKEASSPQSIRHPPSTPETGDRKSSLD AVDK  
LDKNSSKDAKTPKAENKGAMLSNRF SMFLGQRSIPNYNLKMTPPCNLQFVELEVKS IYQE  
NEEGGKQSQVPESQGLVEDHGILQTHDSSQSLTRDNATSQKKDTIFAVCGFEGFNTEIN  
MKPTLGARLAKINGRTIDRDWTL EKLYRDLEGISNNTKGGKTKPIVLTFRNEIWDKEQAN  
RLSTAIRQGITEAAGTIPQKNPAGTQHHRCLSN TKSSNERDGSYKSNASEHFQRARTASA  
DSVGKAINGFGSFLQNFQIESGC  
>comp14657\_c0\_seq1; 766 58 2881 LEN=2906; translated  
MTETIQDMVAKCAPWESNDVDFMDQQEYLISLLSTRREDSNHSNNNNEELLQIVDQFFE  
SPEHSQQLLELWITSF DV AIVENS GSDSDTGT TTAITKLG LVDAGSRIDATTIGSETQSV  
SLAEDPRNIKDKQNKTTQRRTRNKDRSNRKKKSRSPRGRKPE TNRTHHTGEGRDGNEN  
ESLREAVSRIHDASNLDLDDTDDFATAWRDAQDAGRVWGGRGYGGRGVNRGLGTYKGRDA  
VVDGLTLFFSGRELLSRTHLVVANGHRYGLWGKNGV GKSTLLRRIATGRVPGWPMHLSVR  
MVGQEVLTGTSKTVRECM LGVESIKHGNTRMMLEEELASMETQLATLV DENDAEALEKLS  
EQMSELYEELEDIERTEVKKEERKNESGEGAASRRKLFAGFEDSAVA ILRGLGFE G SML  
DTPVDHLSGGWRMRVALAEALYFKPDVLLLEPTNHLDASAIVFLEDHILEHDVTLVVVS  
HDGHFLDAVCTDMIKFENQKLEYHVGNFSTFRQREEELWAKNRSIADATARKEKKAMEFI  
QKQKSMSNSKRRDDNKQRARERERKLGRIGLYSENGKFKLLAQGRGCVGVN RANHIQ  
SYTNTAGFSSAFVNNSGTTFGEQHQLLNFRFPSAPPLKGATAEHAPLITMENC RFRYPPT  
SYSDDSETHNTDPLLRDLT LSVSVGSRIA IILGKNGSGKSTLLKLLCGKLAPDKNGGTLRF  
HSNNLKIACVSQH HIEQLGSFLGQSPVEYLLGQSEGRDNGCKNEFEARRFLGGFGLCGPL  
ALQP IGTLSGGQKARLAFASVLCGDAPHVLVLDEPTNHL DGDSSLSSEALSDFGGAVVA  
VSHHQGFLSGIAREVWTVGDDGTGVERVASAKEDDRSSQ QSDFDLLYAAIEKACGENRG  
ERETGRGSE RERNDGEKRDAAPTKEYLLAARYATGAYVLF  
>comp14658\_c0\_seq1; 456 130 1035 LEN=1070; translated  
MRSTLAPGVDAWAVSLRYLMGAVLAGGGVILGAFSHMQRNIVPTLAKNKGTSPKPTK KKK



PKMSMKESAKFLMSSPYIRNLAMLVISYGMGINIVEVSWKAKLKQAFDPDNPNSYSAFMGNF  
SSTTGLVTLIMMLLGRITIFSKYGWRVAALVTPVNLGITGLLFFALNIFSDFFAPMTAALG  
TTPLMLAVIVGAAQNILSKSAKYSLFDPCKEMAYIPLDQESKTKGKAAIDVVGPNPLGKSG  
GALIQQFLIFGVGSLSAATPYLGVILSGIVFTWIKSANSLAGMFMNKAMEANEDEGETAT  
A

>comp14658\_c0\_seq2; 578 1 1775 LEN=1810; translated  
XEALKQLIVSCDMFFLFRHFYLIAPRMLIFDHSLLFIFMDVQQLVXEILKPDQVKSIVP  
PEEERKKLVPLALMFFAILFNYTILRDTKDVLMVTAPKSGAEVIFPIKTYVNLPAAGFT  
GLYASLTNKMEQKDVFYTCVWPFLAFFSMFALVIYPQRALLHHPAFCDMLASALPAGFSA  
PLAIIRNWSFAAFYVMAEMWGSVVASLLFWGFANEVTTVDEAKKYYPLFGLFANVALIFS  
GQYVRWVSNMRSTLAPGVDAWAVSLRYLMGAVLAGGGVILGAFSHMQRNIVPTLAKNKGT  
SPKPTKKKKPKMSMKESAKFLMSSPYIRNLAMLVISYGMGINIVEVSWKAKLKQAFDPD  
NSYSAFMGNFSSTTGLVTLIMMLLGRITIFSKYGWRVAALVTPVNLGITGLLFFALNIFSD  
FAPMTAALGTTPLMLAVIVGAAQNILSKSAKYSLFDPCKEMAYIPLDQESKTKGKAAIDV  
VGNPLGKSGGALIQQFLIFGVGSLSAATPVKFNHVHSDGMANGDTLLAISFWLFRNMVES  
LTSTYLFLCLQYLGVILSGIVFTWIKSANSLAGMFMNKAMEANEDEGETATA

>comp14658\_c0\_seq3; 761 274 2067 LEN=2102; translated  
MKSTLAISFSIFLGLVVDPCFCFQHRQIQPSSCSFNCRSKSMHSSLPSVADKFSRFGGR  
PTSVSQRQWRKNDKDKKLIIGPLMSDVSASAGDEKKSGLFDKVKSIVPPEEERKKLVPLAL  
MFFAILFNYTILRDTKDVLMVTAPKSGAEVIFPIKTYVNLPAAGFTGLYASLTNKMEQK  
DVFYTCVWPFLAFFSMFALVIYPQRALLHHPAFCDMLASALPAGFSAPLAIIRNWSFAAF  
YVMAEMWGSVVASLLFWGFANEVTTVDEAKKYYPLFGLFANVALIFSGQYVRWVSNMRST  
LAPGVDAWAVSLRYLMGAVLAGGGVILGAFSHMQRNIVPTLAKNKGTSPKPTKKKKPKMS  
MKESAKFLMSSPYIRNLAMLVISYGMGINIVEVSWKAKLKQAFDPDNPNSYSAFMGNFSST  
TGLVTLIMMLLGRITIFSKYGWRVAALVTPVNLGITGLLFFALNIFSDFFAPMTAALGTTPL  
MLAVIVGAAQNILSKSAKYSLFDPCKEMAYIPLDQESKTKGKAAIDVVGPNPLGKSGGALI  
QQFLIFGVGSLSAATPYLGVILSGIVFTWIKSANSLAGMFMNKAMEANEDEGETATA

>comp14658\_c0\_seq4; 607 1 1650 LEN=1685; translated  
XEALKQLIVSCDMFFLFRHFYLIAPRMLIFDHSLLFIFMDVQQLVXEILKPDQVKSIVP  
PEEERKKLVPLALMFFAILFNYTILRDTKDVLMVTAPKSGAEVIFPIKTYVNLPAAGFT  
GLYASLTNKMEQKDVFYTCVWPFLAFFSMFALVIYPQRALLHHPAFCDMLASALPAGFSA  
PLAIIRNWSFAAFYVMAEMWGSVVASLLFWGFANEVTTVDEAKKYYPLFGLFANVALIFS  
GQYVRWVSNMRSTLAPGVDAWAVSLRYLMGAVLAGGGVILGAFSHMQRNIVPTLAKNKGT  
SPKPTKKKKPKMSMKESAKFLMSSPYIRNLAMLVISYGMGINIVEVSWKAKLKQAFDPD  
NSYSAFMGNFSSTTGLVTLIMMLLGRITIFSKYGWRVAALVTPVNLGITGLLFFALNIFSD  
FAPMTAALGTTPLMLAVIVGAAQNILSKSAKYSLFDPCKEMAYIPLDQESKTKGKAAIDV  
VGNPLGKSGGALIQQFLIFGVGSLSAATPYLGVILSGIVFTWIKSANSLAGMFMNKAMEAN  
EEDEGETATA

>comp14658\_c0\_seq5; 732 274 2192 LEN=2227; translated  
MKSTLAISFSIFLGLVVDPCFCFQHRQIQPSSCSFNCRSKSMHSSLPSVADKFSRFGGR  
PTSVSQRQWRKNDKDKKLIIGPLMSDVSASAGDEKKSGLFDKVKSIVPPEEERKKLVPLAL  
MFFAILFNYTILRDTKDVLMVTAPKSGAEVIFPIKTYVNLPAAGFTGLYASLTNKMEQK  
DVFYTCVWPFLAFFSMFALVIYPQRALLHHPAFCDMLASALPAGFSAPLAIIRNWSFAAF  
YVMAEMWGSVVASLLFWGFANEVTTVDEAKKYYPLFGLFANVALIFSGQYVRWVSNMRST  
LAPGVDAWAVSLRYLMGAVLAGGGVILGAFSHMQRNIVPTLAKNKGTSPKPTKKKKPKMS  
MKESAKFLMSSPYIRNLAMLVISYGMGINIVEVSWKAKLKQAFDPDNPNSYSAFMGNFSST  
TGLVTLIMMLLGRITIFSKYGWRVAALVTPVNLGITGLLFFALNIFSDFFAPMTAALGTTPL  
MLAVIVGAAQNILSKSAKYSLFDPCKEMAYIPLDQESKTKGKAAIDVVGPNPLGKSGGALI  
QQFLIFGVGSLSAATPVKFNHVHSDGMANGDTLLAISFWLFRNMVESLTSTYLFLCLQYL  
GVILSGIVFTWIKSANSLAGMFMNKAMEANEDEGETATA

>comp14658\_c0\_seq6; 427 130 1160 LEN=1195; translated  
MRSTLAPGVDAWAVSLRYLMGAVLAGGGVILGAFSHMQRNIVPTLAKNKGTSPKPTKKKK  
PKMSMKESAKFLMSSPYIRNLAMLVISYGMGINIVEVSWKAKLKQAFDPDNPNSYSAFMGNF  
SSTTGLVTLIMMLLGRITIFSKYGWRVAALVTPVNLGITGLLFFALNIFSDFFAPMTAALG  
TTPLMLAVIVGAAQNILSKSAKYSLFDPCKEMAYIPLDQESKTKGKAAIDVVGPNPLGKSG  
GALIQQFLIFGVGSLSAATPVKFNHVHSDGMANGDTLLAISFWLFRNMVESLTSTYLFLC  
LQYLGVILSGIVFTWIKSANSLAGMFMNKAMEANEDEGETATA

>comp14659\_c0\_seq1; 239 239 970 LEN=970; translated  
MRLYHFLLVVAIVGGATSHPIEKSSCTDDRRLKFRVKRLRKKKKCRWVAKKPNKRCNK  
RSPDNGGKKLILCPAACDNCDDTPTPTPSAPVNAPTLSPVSAPTAPINSSEGCCSLD

YKNCIDWCGSTYDSCINCDNSDGVAWLPDGAAPATCGERWLGCEEDNNTGHSGCCSGLLC  
QANSNDNWKACLPPVDPTPAPVNAPTPAPVDSPTSPVDAPTSPVVKPPTAPPVKPPTPSP  
VESP

>comp14659\_c0\_seq2; 288 1 985 LEN=985; translated  
TSAPVKPPTPSPVKEPTEAPVRPPTPSPVKAPTAAPVKPPTPSPVNPPTTAPQTSPTPSP  
VSQPTDGGGGGDPIDGKATFYGGNPNGNACGYNDLPQVTFPKGFSVAIGGDEFDGGYCGG  
ACYEVTGAYGNNPGCFCEGSGKNTVIVQATDQCPECSSTHFDLNKEAFTSIVKQSSG  
MAGTCGVIETKFRRVSCQFESNIKIRSKSGTSGYWYGLHIDDVAGYGAISSIKLREKRR  
QNGLTDFDIRCDKSQGASFWICDRPGGRKIEAPLDVHLTDSAGRTLQKNNVITDLGGNME  
FDFRTNFGPIDGSNPPPTTPTTTPISQPTX

>comp14659\_c0\_seq3; 341 1 1216 LEN=1216; translated  
TSAPVKPPTPSPVKEPTEAPVNAPTPAPIINSKGCCLDYKNCIDWCGSTYDSCINCSNS  
DVTWLPNGAAPPTCGERWTGCEENNDTNHSGCCSGLTCMMREGYGYKACLPGDSSPVTTP  
SPPSPTATPQTSPTPSPVSQPTDGGGGGDPIDGKATFYGGNPNGNACGYNDLPQVTFPKG  
FSVAIGGDEFDGGYCGGACYEVTGAYGNNPGCFCEGSGKNTVIVQATDQCPECSSTHF  
DLNKEAFTSIVKQSSGMAGTCGVIETKFRRVSCQFESNIKIRSKSGTSGYWYGLHIDDV  
AGYGAISSIKLREKRRQNGLTDFDIRCDKSQGASFWICDRPGGRKIEAPLDVHLTDSAG  
RTLQKNNVITDLGGNMEFDFRTNFGPIDGSNPPPTTPTTTPISQPTX

>comp14660\_c0\_seq1; 315 1 1698 LEN=1698; translated  
ENKHI IASANVIQWTPRERNVTGSENI SVSNRNENENKHISASPLVTQGTGKRNITGSD  
NDFISNRHENENKHMNASLVTQGTGGERNITGDENISVSNRNENKKNHTSDPPLVIRGK  
SYEYRSDYRFEHIQRSTTCKGRQGIENRTLLRIDTSKEGSFPETQFTDYINKTIISNFNT  
NPRSDFCNAFTFSINEGKSNAQIEIADIGNKRLRRTLGHYMKLFDNYVFSDCERNVPRS  
PSVLGETEQTLVGFVLGDVAEEVDHNFQCLALGSTAGTFFSTFNFETVRDLVGNHYHTAKL  
DNRFAHLAEVPWEKRDPVWRGTLWGKDYGERFFMQEKRGRLLPEIIDHWFTPDNPNT  
HHQRVPLTGFSLKRPDLLNARGKMERMVSKHYPTAQFLAAVEKLTNTTKFTIDDI FLPF  
QIPQSDYYSKFQVVVVMGGIGAAFRTADHLAMGSAVIMQDYPYKEWFFPYMTPYVDYIPL  
EMHLGNLEETLRVWKDNPQHVKRIARNRGLFYERYLSYEKIEEFYELFYRLVEARIYRG  
IQYIEAERKKPVKKVTKKSKRGR I

>comp14661\_c1\_seq1; 197 364 483 LEN=483; translated

MSTETKHEEESNHEEDTDDDDNDDEESDDEESDDESDSD

>comp14661\_c1\_seq3; 197 546 665 LEN=665; translated

MSTETKHEEESNHEEDTDDDDNDDEESDDEESDDESDSD

>comp14661\_c1\_seq5; 197 330 449 LEN=449; translated

MSTETKHEEESNHEEDTDDDDNDDEESDDEESDDESDSD

>comp14661\_c1\_seq6; 197 442 561 LEN=561; translated

MSTETKHEEESNHEEDTDDDDNDDEESDDEESDDESDSD

>comp14661\_c1\_seq9; 197 408 527 LEN=527; translated

MSTETKHEEESNHEEDTDDDDNDDEESDDEESDDESDSD

>comp14661\_c1\_seq11; 197 468 587 LEN=587; translated

MSTETKHEEESNHEEDTDDDDNDDEESDDEESDDESDSD

>comp14661\_c1\_seq14; 161 1 942 LEN=1256; translated

DSDSDSDSDYDSKPLLSGVLGKMSINIPKNNPQIKKKKKRKKDQQQEEKHQI  
NSNNNDSTIDRGVLKEYLCVVPTLRLAAMEEVSLAATARWSRLEGLMLRPSASSTSKELY  
GIGTHRRWQQQKYNSRRRKGKSVKIVRRWHDKEGESREPEHKAFYEYNHSTDHAIMRPV  
GVEWRVVDVPGMDPTCSLLLVRTSEGARHMVRALLAQVGGCPVIGDVRYWTNRKRETGAT  
QSSI IDGEDNADRAVPLRDRSVALHAYSVSFDERRLQLGSLDIFEFRAPIPETWKSFFGI  
DNSDIEGYLRETD

>comp14662\_c0\_seq1; 190 38 754 LEN=754; translated

MRFAIGSLATLATLGSCRNDEGHNGNHDRGDGKNNLSGSKTMKLSSPILDAQVFDGTRTK  
VLRNRNNPTEITNSHARENDHLSASPDFGIFNSSRDRVDNKDRFNNFHQAYSTDPITYN  
HSRNKEYRKLQKRNNCITSCPNRGPVIGVNGNDFWAQISTCISYDNTDCNYSLPLNCWD  
TSGVTDMSRTTYASYDEYSEEDYFFDENIDCWNTSSVTSMRGMFFVTRYFNQPIGDWDV

>comp14662\_c0\_seq3; 172 89 805 LEN=805; translated

MRFAIGSLATLATLGSCRNDEGHNGNHDRGNGKNNLSGSKTMKLSSPILDAQVFDGTRTK  
VLRNRNNPTEITNSHARENDHLSASPDFGIFNSSRDRVDNKDRFNNFHQAYSTDPITYN  
HSRNKEYRKLQKRNNCITSCPNRGPVIGVNGNDFWAQISTCISYDNTDCNYSLPLNCWD  
TSGVTDMSRTTYASYDEYSEEDYFFDENIDCWNTSSVTSMRGMFFVTRYFNQPIGDWDV

>comp14663\_c0\_seq1; 529 148 1854 LEN=2073; translated

MKSIVPFLINFLALALLAPGALSFLVLPKVVRRPVVSSSGLSVSLSEADMKFDLESDPEN

PEYDERLTGNAAHKCRANQIEI IKYNNRAQQPKRWCPFYFFQCQTQRSISNPRTKALHMD  
DELKRIESKFYRLEGEDLSQINFPLGYGLDNYNGNVVRPNVRVYELVTRAYSRAHIGQEG  
VDLAEDVVARYEKYYSQKATTKMMTFVMKVCISAGTLERAHWNRIEKRYEITRRNED  
LPGYYVYNPFIKGLNTMSGVSARTAAKRSMEVVKKIHLYSKFTEDQQQLFPGRAIYIDIMS  
HQASGYRGYAAFERIQTVFRELQKNYHLSDEHPKPKPSIDAVAPVFVAASGCVFPRDDL  
IKSVNVLDFEYHRLYKETGDDAFQPNGTVC DALNLIYSKMRRKDLDLKEFAKRTMILIER  
MAEYNVFKDDRDKTSAFNRI LLATESQLPRIPMSDPLKTRELFVTALDVFKKFHDESS  
DNVPPNRATYQIFLRLCAKLPEGETRSKLSAKAFELCKQKLVITIDTVSQLNEANPEYAL  
SLVDSADDFGFDK GALDFLSMNI AKEDF

>comp14664\_c0\_seq1; 506 175 2153 LEN=2936; translated  
MSPLEESSQTEVFHREKEKETSD LKMDEELQEEESFEELAVSSSLDNNNDSSASDSDSG  
SYGKAHDGNNAMQQQSPSFDEVSTNHEVLS PAPVVEKGGDNEFVKVSHLASVQVKTVP IQ  
GMVTNKYQKQKAANTRMKLPKMSDSTGTRGSLRNTRKNINNHSTDN TGDSFDEDELYMDI  
IEISPYEPEGCAEFGEALFQEMRDMLLEDSETSPRTIQIFGQGNAECLK KACTLVEKSGM  
LYSQNWTGKGTIHGNPVGIIPNHLLLLVLAPTRFVKANPLLLSGMCRDLKVCKSVNEALDL  
WGWSEKYKLVGIGKATLYMVRVS SVVRVCFPFEXTGQLLALSSPLSALCLLYSFPRLIIA  
SLVSQVRETEKNYKFKTKNRNCFKCAV FVARAHTCFVIFGKRKLESVMMDKLT KCLDIME  
YHLAEAATSSHYGQISAAAGHTHTAAATNRKKRKMPIPDGVGSTHTTASGSN SSSGTKSK  
GAHRFNHRRQYSHDTSVGKRKR GKSSNDLDHVL MNERKLRSSSRVTQVEPNPSYRQPKNE  
KKGARSD EDNKFP SASSRQNRHSQPDKTKGATNITDGTDSVVSQAPQKVSGGSAPS IQEL  
ISRFEKQHSEMGQQAEMGLLLAQMKTALAENRQQTEQEIRRELLDEVQMSILRSLPKK

>comp14664\_c0\_seq2; 522 175 2138 LEN=2921; translated  
MSPLEESSQTEVFHREKEKETSD LKMDEELQEEESFEELAVSSSLDNNNDSSASDSDSG  
SYGKAHDGNNAMQQQSPSFDEVSTNHEVLS PAPVVEKGGDNEFVKVSHLASVQVKTVP IQ  
GMVTNKYQKQKAANTRMKLPKMSDSTGTRGSLRNTRKNINNHSTDN TGDSFDEDELYMDI  
IEISPYEPEGCAEFGEALFQEMRDMLLEDSETSPRTIQIFGQGNAECLK KACTLVEKSGM  
LYSQNWTGKGTIHGNPVGIIPNHLLLLVLAPTRFVKANPLLLSGMCRDLKVCKSVNEALDL  
WGWSEKYKLVGIGKATLYMVRVS SVVRVCFPFEXTGQLLALSSPLSALCLLYSFPRLIIA  
SLVSQVRETEKNYKFKTKNRNCFKCAV FVARAHTCFVIFGKRKLESVMMDKLT KCLDIME  
YHLAEAATSSHYGQISAAAGHTHTAAATNRKKRKMPIPDGVGSTHTTASGSN SSSGTKSK  
GAHRFNHRRQYSHDTSVGKRKR GKSSNDLDHVL MNERRLRSSSRVAQVEPKPKNEKKGAR  
SDEDNKFP SASSRQNRHSQPDKTKGATNITDGTDSVVSQAPQKVSGGSAPS IQELISRFE  
KQHSEMGQQAEMGLLLAQMKTALAENRQQTEQEIRRELLDEVQMSILRSLPKK

>comp14664\_c0\_seq3; 545 175 1971 LEN=2754; translated  
MSPLEESSQTEVFHREKEKETSD LKMDEELQEEESFEELAVSSSLDNNNDSSASDSDSG  
SYGKAHDGNNAMQQQSPSFDEVSTNHEVLS PAPVVEKGGDNEFVKVSHLASVQVKTVP IQ  
GMVTNKYQKQKAANTRMKLPKMSDSTGTRGSLRNTRKNINNHSTDN TGDSFDEDELYMDI  
IEISPYEPEGCAEFGEALFQEMRDMLLEDSETSPRTIQIFGQGNAECLK KACTLVEKSGM  
LYSQNWTGKGTIHGNPVGIIPNHLLLLVLAPTRFVKANPLLLSGMCRDLKVCKSVNEALDL  
WGWSEKYKLVRETEKNYKFKTKNRNCFKCAV FVARAHTCFVIFGKRKLESVMMDKLT KCL  
DIMEYHLAEAATSSHYGQISAAAGHTHTAAATNRKKRKMPIPDGVGSTHTTASGSN SSSG  
TKSKGAHRFNHRRQYSHDTSVGKRKR GKSSNDLDHVL MNERRLRSSSRVAQVEPKPKNEK  
KGARSD EDNKFP SASSRQNRHSQPDKTKGATNITDGTDSVVSQAPQKVSGGSAPS IQELI  
SRFEKQHSEMGQQAEMGLLLAQMKTALAENRQQTEQEIRRELLDEVQMSILRSLPKK

>comp14664\_c0\_seq4; 529 175 1986 LEN=2769; translated  
MSPLEESSQTEVFHREKEKETSD LKMDEELQEEESFEELAVSSSLDNNNDSSASDSDSG  
SYGKAHDGNNAMQQQSPSFDEVSTNHEVLS PAPVVEKGGDNEFVKVSHLASVQVKTVP IQ  
GMVTNKYQKQKAANTRMKLPKMSDSTGTRGSLRNTRKNINNHSTDN TGDSFDEDELYMDI  
IEISPYEPEGCAEFGEALFQEMRDMLLEDSETSPRTIQIFGQGNAECLK KACTLVEKSGM  
LYSQNWTGKGTIHGNPVGIIPNHLLLLVLAPTRFVKANPLLLSGMCRDLKVCKSVNEALDL  
WGWSEKYKLVRETEKNYKFKTKNRNCFKCAV FVARAHTCFVIFGKRKLESVMMDKLT KCL  
DIMEYHLAEAATSSHYGQISAAAGHTHTAAATNRKKRKMPIPDGVGSTHTTASGSN SSSG  
TKSKGAHRFNHRRQYSHDTSVGKRKR GKSSNDLDHVL MNERKLRSSSRVTQVEPNPSYRQ  
PKNEKKGARSD EDNKFP SASSRQNRHSQPDKTKGATNITDGTDSVVSQAPQKVSGGSAPS  
IQELISRFEKQHSEMGQQAEMGLLLAQMKTALAENRQQTEQEIRRELLDEVQMSILRSL  
PKK

>comp14665\_c0\_seq1; 2914 578 10307 LEN=10406; translated  
MTRQKVEKNQTDQHVIGGTDKNYTELSGTAEDKEDALFYGLKDKRKEEFEDKSRKAWGD  
GKRAEKVQTEKYVDIDFLNRAGRQQLATDGNSDSNND CVMEDVGVGEDGSSSKDVRV  
SNEEKESDSL FYSCEEFSEFSETE DNVGPDFTFKVAKNQYLSNK FDMGLLQDCIAG

EECLRQIEGKDVILIVGKTGSGKSTLIQGIAGKKFSKSFYSCGSEYDYAGTKEVFDKAD  
PVPGFVGVHAKSSKTKSIKCYVRNGNGINSEPTYLDTPGFQDTSGEVVDIATSAMLAQV  
AKKCRSMRFVILIHVYVSLLEDRGGAFRSTLKFMRNFVSDFDKYKKSFMFLF SHADEMKYV  
PVSLEGARMSLLSEINLTFEGTMDGDDARELLKFMRMSSLKKRYPFVNI FHPLKTD FSEMT  
KFI EEK LQKT DIVDAAKRDKTASCILT KLSQMRLIEVVRSL LADLNMALKANPVNVLVT  
EIQKSF EFGKYIQFKEMREAI AEHNYLIRSHVKYLRETLEKEVEMGTTI SADSLFNDVN  
VTSVKAALSQKAI DPTNF DLRAERDRITQRIDKFKQKSI IFDTS DGIQGD TTFDFHGLPT  
NLVKLHAWCTVEP MYK E T F F D P V V A S A N E V V D K V T F I V S K F D A E M I C A P S T E F D T L Q K L F  
LSLAVLKS IHENAQCLSLHLEGISLASVLYNDFVVRKLRNCFEKWHAKLSPPSGKELIDIW  
NPKAIQALGNVFRSLKNVSELIDSVKLQDDLLLLVNGVHELLVYLTTENYSVACSDIKEK  
YFHKPNLLREKLNVLREVMSILSQINGSQWNEIERYSAAIDRVKSFLKAKSGELEEMSQ  
NARLRGVKCGERD GKALSTFFERYLWFDDFLLEENRFIKRFLAKIRIAYNDLFALRAQHIT  
EIMRRLTTESQTQGARNLVSQIRKVKELLPEIAQYKRFSGSVTSVEYLEHHSVAVFANVRD  
YLRQRM SDWKYALKLWKEQVYTI EGDWEKLTASTKTLDVAIGEISEAIDMPTEKGGDEVK  
VTAQSIKDEIMVAFSDFKNYTQRSSDSKMTYNEIATILFRVRALVGDFFPYAAPHL PQLED  
LKEATRQRISRDAQKIEDMVEQTSEYDTIDRLLQEF EKGSVLDEFVVSQKVASRVRPLQHL  
RKKKESDANV I I SKMIESNDF SGLGGFLQPLAQSKSQILQNK FESSIKKISDSLK LIEAK  
LQNEIIGKMTDEKVLKIASYTQILEQAHEAGDYLPKWNASVYRSEINAKVSTLQDRMSD  
SIVRADFV LVARQNHETDI I TRHLGRYLTKRSKAKMDRNR TTF SILKKSIPQHIEKYVKS  
CFSQSAEIMKILDGLKPTTRIDEPIFDDLSQLYLNSTKILADKVKGIIQEMRKWTE DTRC  
YHDSISQFNKLMTSLDMGMKEHLPEAIVDESKSLETTWTDACREQESSMNFEGNFEREIR  
EWAKRLDKWSSVSFGLGFLSRFLTGRKTTLT YDRTRI QVKKKVQQR YDSGCMALARRDFT  
RLKESLEFLRLVDSLAKHLSSAFKHLQELESETKDFFLSICKHSQQALQAEDCRAFEPL  
FSDFRGFV LNVCCMLKCPNLVKNFHLTNQLVYERFCDDILSLK KALDGF E F I I M K Q K I E D  
IRKFGGFVADRYSLFHEELKGYNHVEADEWLEHLKNEIWKFHQNGRDLKRIKYYARLGVV  
PSSSVKEVRSGYRKKCKTCHPKCKDEDAARFLLVKEAYDELNTNILSDEDRLMKPFDD  
EVRGLENRLRDVTRIALNEQHYGLVETLIFKLP GIEVLEHLVSPKLEAEKIRRSIIDLVK  
NHVRKVRTEIDTNWSE RQYEELNQ NIRDIKMMEDKFKSHENIFPTSWNTGILEKVKLEIK  
KLGMGARNLIKDKKTANNRDEFRRYFMEGAVLVELPVFKDHTKKVMSDVLESCLTSNW  
GYSFVFDLGLSLSKSGMDTEEEARIAQNLVNEFTHFQEVLT MVWNEETIQKPPEDTIKD  
IIGHCLTDDLNPSSI ELDTDELKQYNEFN SQYTFLFLGEYLSPEADLKVLVQKTIGCCE  
RLKPLSCDDGFGTKTKRALPAIMAGVFALFTVLKSGGSYNRFEQDANDCAIKANMLMKP  
HNIQVLTLLCMFGCGVSKSNALKSQLMQIRTGEGKSIILGAAVILGLFGFRVRCICYSE  
YLSNRDYDLFRDIFDHFNLLSSIKYSKITTLESETTASKNIRDLTISLLHQNLPNVRHS  
TRHTEPMDADISNHAKSNSISSRTRSARRATRNTEHTDTGVSKHAKSNSTSKRTRSALRA  
TGIKQPTDNSILNLI ESNDTRKRKR IALERNATKSKE SRNISKKVQGFIEEIMLVDEVD  
VFFGPEFYGRKYNCNCLLLVMILTS PKHCNHTSFPLTYPDAETYNQVAELNEEEVAKILK  
RIWEVHKQGRSSLD DIKAMPEYKNL KAKIPSHSYLIDNEIKLMLDQVRRVND E P Y Y Y L D  
RSTDKIGYKVQDTICYNVTYGYRTVFAYLKEADNSNLRDRNATLSRVLTMPISCGQFSYA  
NIKPKRILGVSGTLEVMNDYEKGVLRKYGVNQYLYVPSVYSASNLTFDKSGDGVAIEKGI  
GDFFHITITTEISNVTKKQKRAVIVFFKESKQLEKYMSSALYRKLGRKKEILSENMS PNEK  
SFVISKAAATSGQITLSTAVFGRGTDFFCKDETLERNGGVHV IQTFLSTDMSEEIQIRGRT  
ARQ GKQGSYKLLILLDKDLEDDFDIKCGLTDNWP RKEYYSKLCSARKKSLEEKYS AVEENL  
LAAKEQDEATHEYFDALLDSNYQVATGLL KELYLNKKKANVGLMDL DLAF AIDITGSM AV  
YGNVSAIVANLLIGPNSIIAKLES GFSDIKFNIRVAVLGRFDIDDGSKQYQ EICLNGSS  
HFSEN LQQAHRFVDTITSASSGGDMAEDHLGALLHCLS WNSTCDWEGTIKALLLLTDAP  
AHGYS PYGNSTNTIDKYDVRHPRGVTVD SVVEKALEKGVDLILCSFDPVATEKFEE EISN  
AYLGHESNVEEREVTVPLVPKTAIGTTSRGLNGSKKHNI FVLDES DSKMHDWPGVVS V  
YNKYLENRRRRQHHLDSVSVVQFDNGARV ICELENIADAPVNL CMSAGGTFAPAAELAY  
AVARKTPPSHTPVIIFISDGCADDSEQAASFFETLNQEMKNRYGDI ELHVIGFRGTDSS  
QLQKISRASANGRVHTADDIDSLTKV FVQIASGD AVASALEEEIGKRISDAVTDRI SA EY  
LG

>comp14665\_c0\_seq2; 2981 578 10210 LEN=10309; translated  
MTRQKVEKNQTDQHVIGGTDKNYTELSGTAEDKEDALFYGLKDKRKEEFEDKSRKAWGD  
GKRAEKVQTEKYVDIDFLNRAGRQORLATDGNSSDNNDCVMEDVGVGEDGSSSKDVRV  
SNEEKESDSL F Y M S C E E F S F E S E T E D N V G G P D T F K V A K N Q N Q Y L S N K F D M G L L Q D C I A K G  
EECLRQIEGKDVILIVGKTGSGKSTLIQGIAGKKFSKSFYSCGSEYDYAGTKEVFDKAD  
PVPGFVGVHAKSSKTKSIKCYVRNGNGINSEPTYLDTPGFQDTSGEVVDIATSAMLAQV  
AKKCRSMRFVILIHVYVSLLEDRGGAFRSTLKFMRNFVSDFDKYKKSFMFLF SHADEMKYV  
PVSLEGARMSLLSEINLTFEGTMDGDDARELLKFMRMSSLKKRYPFVNI FHPLKTD FSEMT

KFIEEKLQKTDIVDAAKRDKTASCILTKLSQMRLIEVVRSLLADLNMALKANPVMVKLV  
EIQKSFEEFGKYIQFKEMREAI AEHNYLIRSHVKYLRETLEKEVEMGTTISADSLFNDVN  
VTSVKAALSQKAI DPTNFDLRAERDRITQRIDKFQKSIIFDTS DGIQGD TTFDFHGLPT  
NLVKLHAWCTVEPMYKETFDFP VVASANEVVDKVTFFIVSKFDAEMICAPSTEFDTLQKLF  
LSLAVLKS IHENAQCLSLHLEGISLASVLYNDFVVRKLRNCFEKWHAKLSPPSGKELIDIW  
NPKAIQALGNVFRSLKNVSELIDSVK LQDDLLLLVNGVHELLVYLTTENYSVACSDIKEK  
YFHKPNLLREKLNVLREVMSILSQINGSQWNEIERYN SAAIDRVKSFLKAKSGELEEMSQ  
NARLRGVKCGERD GKALSTFFERYLWFDDFLLEENRFIKRFLAKIRIAYNDLFALRAQHIT  
EIMRRLTTESQTQGARNLVSQIRKVKELLPEIAQYKRFGSVTSVEYLEHHSVAVFANVRD  
YLRQRMSDWKYALKLWKEQVYTI EGDWEKLTASTKTL DVAIGEISEAIDMPTEKGGDEVK  
VTAQSIKDEIMVAFSDFKNYTORSSDSKMTYNEIATILFRVRALVGDFPYAAPHL PQLED  
LKEATRQRISRDAQKIEDMVEQTSEYDTIDRLLQEF EKGSVLDEFVVSQKVASRVRPLQHL  
RKKKESDANV IISKMIESNDFSGLGGFLQPLAQSKSQILQNK FESSIKKISDSLK LIEAK  
LQNEIIGKMTDEKVLKIASYTQILEQA HDEAGDYLPKWNASVYRSEINAKVSTLQDRMSD  
SIVRADFVLVARQNHETDIITRHLGRYLTKRSKAKMDRNR TTF SILKKSIPQHIEKYVKS  
CFSQSAEIMKILDGLKPTTRIDEPIFDDLSQLYLNSTKILADKVKGIIQEMRKWTE DTRC  
YHDSISQFNKLMTSLDMGMKEHLPEAIVDESKS LLETWTDACREQESSMNFEGNFEREIR  
EWAKRLDKWSSVSFGLGFLSRFLTGRKTTLT YDRTRI QVKKKVQQR YDSGCMALARRDFT  
RLKESLEFLRLVDSLAKHLSSAFKHLQELESETKDFFLSICKHSQQALQAEDCRAFEPL  
FSDFRGFVLNVCCLMKCPNLVKNFHLTNQLVYERFCDDILSLK KALDGFEEIIMKQKIED  
IRKFGGFVADRYSLFHEELKGYNHVEADEWLEHLKNEIWKFHQNGRDLKRIKYYARLGVV  
PSSSVKEVRSYGRKCKTCHPKCKDEDAARFLLVKEAYDELNTN ILSDEDRLMKPFDD  
EVRGLENRLRDVTRIALNEQHYGLVETLIFKLP GIEVLEHLVSPKLEAEKIRRSIDLVK  
NHVRKVRTEIDTNWSE RQYEELNQ NIRDIKMMEDKFKSHENIFPTSWNTGILEKVKLEIK  
KLGMGARNLIKDKKTANNRDEFRRYFMEMGAVLV ELPVFKDHTKKVMSDVLESCLTSNW  
GYSFVFDLGLSLSKSGMDTEEEARIAQNLVNEFTHFQEV LTMVWNEETIQKPPEDTIKD  
IIGHCLTDDLLNPSSIELD TDELLKQYNEFN SQYTLFLG EYLSPEADLKVLVQKTIGCCE  
RLKPLSCDDGFGTKTKRALPAIMAGVFALFTVLKSGGSYNRFEQDANDCAIKANMLMKP  
HNIQVLTLLCMFGCGVSKSNALKS QLMQIRTGEGKSIILGAAVILGLFGFRVRCICYSE  
YLSNRDYDLFRDIFDHFNLLSSIKYSKITTLSEETTASKGNIRDLTISLLHQNLPNVRHS  
TRHTEPMDADISNHAKSNSISSRTRSARRATRNTEHTDTGVSKHAKSNSTSKRTRSALRA  
TGIKQPTDNSILNLI ESNDTRKRKR IALERNATKSKE SRNISKKVQGFIEEIMLVDEVD  
VFFGPEFYGQTYNQVAELNEEEVAKILKRIWEVHKQGRSS LDDIKAMPEYKNL KAKIPS  
HSYLIDNEIKMLDQVRRVNDEPYYYLDRSTDKIGYKVQDTICYNV TYGYRTV FAYLKEA  
DNSNLRDRNATLSRVLTMPISCGQFSYANIKPKRILGVS GTLEV MNDYEKGVLRKYGVNQ  
YLYVPSVYSANLTFDKSGDGV AIEKGI GDFHFTITTEISNVTKKQKRAVIVFFKESKQL  
EKYMSSALYRKLGRKKEILSENMPNEKSFV I SKAATSGQITLSTAVFGRGTDF FCKDET  
LERNGGVHVIQTF LSTDMSEEIQIRGR TARQKGQGSYKLILLDKDLEDDFDIKCGLTDNW  
PRKEYYSKLC SARKKSLEEKYS AVEENLLAAKEQDEATHEYFDALLDSNYQVATGLL KEL  
YLNKKKANVGLMDLDAFAIDITGSM AVYGNVSAIVANLLIGPNSIIAKLES GFS DIKF  
NIRVAVLGRDIDDGSKQYQEICLNGSSHFSEN LQQAHRFVDTITSASSGGDMAEDHLG  
ALLHCLSWNSTCDWEGTIKALLLLTDAPAHGYS PYGNSTNTIDKYDVRHPRGVTVDSVVE  
KALEKGVDLILCSFDPVATEKFEEI SNAYLGHE SNVEEREVTVVPLVPKTAIGTTSRGS  
LNGSKKHNI FVLDES DSKMHDWPGVVS VYNKYLENRRRRRQHHLDSVSVVQFDNGARVICE  
LENIADAPVNLCMSAGGTFAPAAELAYAVARKTPPSHTPVII F ISDGCADDSEQAASFF  
ETLNQEMKNRYGDI ELHVIGFRGGTDSSQLQKISRAS ANGRVHTADDIDSLTKV FVQIAS  
GDAVASALEEEIGKRISDAVTDRI SAEYLG

>comp14666\_c0\_seq1; 35 1 540 LEN=1379; translated  
PPPPPPASSRRKRSETPVTSANRSNDAEGVLLSPKSTVPQPLPYSTNVGNDSAAVGST  
TKLRVRIKSFHGVARWTWNVNGSDDEVCIGICQSAFEGCPPGVKYPGDESPVVFGT CGHA  
FHLQCVATWLN SNKQTCPI CRAEWEYGNSGDQQSQSQSQSPSGTAPANQTAGE SGGPP

>comp14666\_c0\_seq3; 11 1 721 LEN=1560; translated  
PPPPPPASSRRKRSETPVTSANRSNDAEGVLLSPKSTVPQPLPYSTNVGNDSAAVGST  
TKLRVRIKSFHGVARWTWNVNGSDDEVCIGICQSAFEGCPPGVKYPGDESPVVFGT CGVL  
RLLRFLTVACIGIFHYAVRCIAFCCVVVSVRAENTSYPNFSCVPFSSAASRPNRSRHRSR  
LSPA VRGDLAQFEQANLPDLRAEWEYGNSGDQQSQSQSQSPSGTAPANQTAGE SGGPP

>comp14667\_c0\_seq1; 485 451 2532 LEN=3157; translated  
MSVLASELLLSNIMLTKSNP IGRNLAKTLLKKNKIQQTRCLSGAALY GKISISSRSDA  
FGTAIGTAREYSYRYRTKLETAPKERNLGSNGYIFGIGNSYAQAQVRAPPKRFFSSDSVT  
EQSASTEADMTAKETHGKSTGNVTKTTS GTNDTDKDYDYDLFVIGAGSGGIASAMRASGT

WNKRVAVAEARRLGGTCVNAAGSVPKVMWNAASIAESVHEMHRYGFFYYGDEDAITFDWSF  
LKDQREAYVRRNLNGIYERNLKNVGRFLGTASLAKEPNTVHIEVVEEVKNWTKEKALNI  
TKIKTTKVVTAKHILIAATGGSPVLPVSENGINEHCITSEGFEELEEQPLTAVVVGAGYI  
AVELAGILQSLGTDTKLVLRKECALRTFDPILRDTLDEEMTKQIEIYRNTGGLQSVVEV  
VNEHEDLTKVTTLKDRVLENDVIVIVATGRAPLVQSLNLGNRGVAQRPSGHILVDERTS  
ETSATGVFAVGDVVGPIELTPVAIATGRRLADRLFPGPHETHGHKHNLPHTHTSVSSDNPV  
TVVFSHPPIATIGLTEPEAIKIHGKGNIKVYQSKFANMHYGIWNAEETEKEQQAKPMPYS  
SLDEPSAKTVPSIDDKPKTAMKLIICGPTERVVGLHVIGMGADELLQGFVAIAIKMGATKA  
DFDNCMAIHPTAAEELVTLHPWGLKESDKGSET

>comp14668\_c0\_seq1; 871 265 2640 LEN=2697; translated  
MALLLGQRFNAIVFHTRSHGKNLWSVEPGAVVFLRHCSLAPDNEFQLPIARSRTLYYSK  
LRYFQGVEDRFETKGFSSHLRCPDCVGLLLKSHRKRQFSSVARKSTGRNDTTGAFAD  
TGDHGFDTDSASFYGNDSNEESIPDEDLYSLQPWKLLEAPARASWRATDPRKDPPEHLV  
DAMHRILDDGDRTSKQLRRAHRKVLISQSDLADLREKERRIMVNGKRHFQKORQQQQQQEQ  
QLSDDDEDPGVDDVDDASYYSSNRNQSAPLSVSPVYGYDETLSTLKHRLTPNYAITKR  
VLAECRSLGGKLTAVANSVSGKDSNESDAIYSFNWNPKRILDFGIGCGSASAAAMDLF  
RGENDFGSGVEWIHGIDPSQPMRECSMKLIEGMSRHSNRNNSDSQSLPPLTPRITFS  
NSLSPSSDDSSSSSSAAGSFDLALFVYASDLPDVASCLAAAAMAFKLPNGVFMIEP  
GTPDGFNSTRAVRNMLLDCPPHDSDFEWEDRCHIAPCTHNGTCTPMERHKNFFGAHKK  
PIGKLGHDLPQDFDNEELSKRTTENDGYESGDDYDGDGFDASDYDQDHIDVDSPLKMS  
TEAFNSSFCSFVHSVSGDSRRKGEKFSYLVAQKQRFQPENGANGERIDPSTEGDPFRDD  
NVTKLLTDALDAASFEADDLAHRTFEEARLSSRYIDSDNDLGLLELLQGEAKRQSMGRI  
IRAPIKKGHVYIDYCAAPGRIIRSRVTKALSGSAAPGIYGAARKSRWGGLWPDMDRIF  
SAYHDTEPRKK

>comp14669\_c0\_seq1; 591 1 2632 LEN=2632; translated  
DKSKKEVASTETKQLEMSRSSSSFTKSSSRLSKFHEEGSKQKVEDNQSKDNPHLRLLKS  
LRPFQREAYDYATKGVVSARQFHAPDKYDTASIKARNIRTHRKTSAVGAQMKNKHLGKM  
NGKLLLADEMGLGKSITSLAIMCHYMTEWPLLILCPASLRHIWPNEIEKFLPGLPPSSVY  
VVQGFDDVGFENEEKRNKIKIVVATYSLLRKQASARCLQEFKFCVIADESHNLKQKN  
SQRTQLALPLLQKAKRLALLSGTPALARPVELWTQLHAIAPDLFGAYTAYTKQYCKARKG  
RFGWDVNGLSNADELHSAIKQVMIRRLKADVLELPAKQRSIVPIQILNKAKRKECEALM  
NELRETRMSIDDLIGEEADGAHFEARRLMMQAYQTSQVAKASAASEYLVLDWLRGSGTQKV  
LVFAHAKAVLDILEIAVAKELKGGGHVIRIDGTVSSQDRAIRVQKFQTCSSVRVAIILSMTA  
AGVGLTLTAASCVIFSELHWTPGVLAQAEDRCHRIGQRNAVNVLYLVCEDESKLSVDMQLW  
RMLGRKVNLLGRIVDGERNANMGAQKAGQEFTESSVSVQDELQSFSEAKVTDGTSKVP  
AKGTIMSFFAKQRQKTPQSLNKLKSTKSTEMSKKCKPQFTSASKKAKISSKAFFAIRK  
IVEWDCESCTFHNIKQLDSEKMIKVCCTQKINIIDISSDDDDITIQKVTSPSHGRSRGN  
SRQPYCIEKNQNIARRRSEILNVDDMKEESNNDIIPRKLDSYSYLQNPVLSVDEEELSH  
TTKQKQVNHNPHEIVHTNAFQTSVEEESIAMPATLLSFSFSKNTGRITIHARSCESS  
QINFVQKQIVTQETVDRLEARNRSHALSSIALTYX

>comp14669\_c0\_seq2; 550 1 2615 LEN=2615; translated  
DKSKKEVASTETKQLEMSRSSSSFTKSSSRLSKFHEEGSKQKVEDNQSKDNPHLRLLKS  
LRPFQREAYDYATKGVVSARQFHAPDKYDTASIKARNIRTHRKTSAVGAQMKNKHLGKM  
NGKLLLADEMGLGKSITSLAIMCHYMTEWPLLILCPASLRHIWPNEIEKFLPGLPPSSVY  
VVQGFDDVGFENEEKRNKIKIVVATYSLLRKQASARCLQEFKFCVIADESHNLKQKN  
SQRTQLALPLLQKAKRLALLSGTPALARPVELWTQLHAIAPDLFGAYTAYTKQYCKARKG  
RFGWDVNGLSNADELHSAIKQVMIRRLKADVLELPAKQRSIVPIQILNKAKRKECEALM  
NELRETRMSIDDLIGEEADGAHFEARRLMMQAYQTSQVAKASAASEYLVLDWLRGSGTQKV  
LVFAHAKAVLDILEIAVAKELKGGGHVIRIDGTVSSQDRAIRVQKFQTCSSVRVAIILSMTA  
AGVGLTLTAASCVIFSELHWTPGVLAQAEDRCHRIGQRNAVNVLYLVCEGYATMEDVGRK  
VNNLGRIVDGERNANMGAQKAGQEFTESSVSVQDELQSFSEAKVTDGTSKVPKGTIM  
SFFAKQRQKTPQSLNKLKSTKSTEMSKKCKPQFTSASKKAKISSKAFFAIRKIVEWDC  
ESCTFHNIKQLDSEKMIKVCCTQKINIIDISSDDDDITIQKVTSPSHGRSRGNSRQPYC  
IEKNQNIARRRSEILNVDDMKEESNNDIIPRKLDSYSYLQNPVLSVDEEELSHTTKQK  
VNHNPHEIVHTNAFQTSVEEESIAMPATLLSFSFSKNTGRITIHARSCESSQINFV  
KQIVTQETVDRLEARNRSHALSSIALTYX

>comp14670\_c0\_seq1; 868 232 1602 LEN=1872; translated  
MSDVQPTTGMTDQITIDAHKPHQQVEAKPEMVAANAANVQVQVQVPTVNPANSAEASST  
VAAAAVAAAAAAAVPEQAVAVPETLVDHVAVPPSEVPTDADTSAMIAEAAAAAVFAVGD  
VQLAVDAALAADGNNDGAAAAAAVAAASVKAEGVNGMDVAVTAAELEAIDAENKKNQQR

RKRYREKSVEEEVPPPMKKQSTTGHSHEDQLATRRMKDRQRYANMTPDQRQTYNAKRREQ  
YHRQSENSRQRRRERERERYHSLGTEDAKTRNARRAKLERERYQRLTPAQLKAKNRKRRE  
RAAAARNKKSQERNADGNSVAAEVAATAVAMAPPDMTGVMTEPPAAKIAEAAVANA  
NVNINANVNADINPNINANMNVNPNVNPVAVPMPVVEQHPPPPQQTVETAAVEAAVAVQAA  
EAQQHAVEETQRANAAMNQAAVDAAVQVVDNHTISV

>comp14671\_c0\_seq1; 432 564 2204 LEN=2420; translated  
MDALNPNFELTAILESIQDDPQTSEKFLKTIQGLCNRNTVAATERKSGIGNEDANRPQTN  
AGLLPGRDHYNLVLNSWRMFQPPSAKRLQRLQEYMESRAGINYDSESCNLILETWAEKGN  
AERAQAFFDNVMVRKKIPVDVVSFHVLSNAWSKSKSAVATKRADTLDRMEAFPNLKPSA  
ECYLHVIECWAKSKRLRSEVRIEALVRSMKQRFFESKKLVS CDGTRSV DKGILQTAVLNL  
LQAYHHIENAHRAEELLFEFVDDFQTKRNLNYPPTIEMCISVLSTWSKSASSNKTNRSE  
KLLRLMEENPSLPRPDTASYTAVLN CIASSK KLSAKRAEALLRRMDRKENIESNMVSLT  
CVLIAWARSEDSNAALKAEQIFGEILDRGMEPDRFVFFAGLITAWGRSKREESMVKVEEYF  
HLIKGLDNSKPTVVEYTA VIQAYANFVSRNIDKSRESVERAEELLD EMLASEDKNLRPNI  
LTYAAVLKTI AAARRIPDRGKHADAVLQKMYAERVEVAPFILNLVSRSRNHTHSSKQAAQ  
KISSSD

>comp14672\_c0\_seq1; 627 1 1458 LEN=1458; translated  
NNSNNNNNTSATSTNPNATEEDTISGVFYHPPELEDWNLDPEDDSKMQDRRKRHRRYQ  
WNANSNANENAKTARTTRSAANESLDSNATTTTRKPAANFNVNANATENGNSDGDANPNA  
EDGRHTAGTATNTIATGDSSTLQSRKSTANANENKNSDAISNGNANVTQSPASATNGSRS  
FDISDDNDS DVESFPHHRLFQPFQKRNELWEFVRLVAPADSPPPGRYAWRSKEAIAAYC  
LKCR TTFPYNHGSSTQISRHLKTC SVIRAE EGARKQE QSSIATATNAIEKDRNLHRIRAA  
VENDLDRFRAGSSSIDDGAHSASSANAVVADAGADATWDGEASMASTEPRFSKKRKTEP  
SLVTS PGSTATVRPTPKTKQVRNREGICPSPGPRAVGVADDTVPQTATATIDSDA INNRI  
AAPLPLLNPTATNPKPPQELAQAAQQQEQQQSQLQAQQQAQRQAQQQAQORAQQRAQQQAQ  
QHAQQH

>comp14672\_c1\_seq1; 269 106 1428 LEN=2294; translated  
MPREQPDPMRQRMPPFGRHGIGPAARPPARRTRQTQLPAAFAVLVALSLLGVPEAADGFA  
PTARRAVRPPEATGSGFGGNNANANANANAIAHRNPGPIRGFGAAKTNATPTRLGMLRMP  
ALPVASTSWLFNDRIMRVAESWAPSVGVLMATLIY LAPAKAVWRIVQKARKGKAGGSTTE  
GDPDPLNGLNPLPIAIMP AVAVSWFAYGLVASDPYLV LGNLPGAVLSVAYLIGILPVMQY  
NASYPD SPALARVAAGAMENPAETLLKPPKRSGR LFWTHFTVLLSAAATLGLWATLALM  
TSGAYGDFHVGGLFEGMGYAGMQRKGI AIEGLGVYAAGLFILLGV SPLSTIRTVLETKNS  
QSILG LLTAAQV VNTGLWTAYGLAGNDV FVWGP NVIGFTLGLIQMALKLLFP SRKPPKNS  
MKARRRTGGKAPGEERVIRT

>comp14673\_c0\_seq1; 338 1 1284 LEN=2305; minus strand; translated  
HRIQVDLEDITLDFVKYFQKVTGEENLCIAGGVGLNSVLNGKLSRDLGFKNTFISPYPGD  
DGI AVGCCAYGLFGNERLDKLNQGS DTTKGGKI QPPIWKSPISP YLGPDPSEIAIKEAI  
DAAMPWLEVDMIRDEGTRLDMAVAE IEMGGVVALYQGRSELGPRALGHR SILADPRKKGL  
VRF INEHVKKRESFRPFAPSALAEHVSDWFETDEYNDN NFPFMSLTAMVKKEKRARI PA  
VTHVDGSSRLQTVTREADGLYHRLITK FYELTGVP MVLNTSFNTLPGEPIVESPKDAIRS  
FLCSMGSI EMLVMGDYVIKRKKADLRALLGETDQREQEFIVEPTCPRRAGPTTFETTFEA  
DDEMDTSQVVTTTRVRMPDRPMSHSDKGGSWFYLLDELEGE LLSICDGSANFDQLVMKII  
IENGYNT

>comp14673\_c1\_seq1; 940 78 2838 LEN=2861; translated  
MTGSRVGDTFVLYCLLFGAALLCGCSAWVTTTNP TVHKS KTLFSTPFELDYEDSENYPG  
SEDVSSLACSPDTKLVIGLNKYTHDTS LCAADAKTGEVLF AISKERLSRKKHDAGNVASM  
VEACLDALDLDYDDAIEKVVMNHHHRILPLEKDRMHM QWEVGLNINGGSEGDEYNDEFN  
LLDVVEDDNKME LSHHLAHAYSTATQSPFDKGMVVVM DGMGESYRTMLQARKTKDSTYVS  
DLSFPSKEEDDGDGFADFCIPSNLAEQAQYTPFDWREAE TVYTFKKKANTIDLKPVFKRF  
TPERSPPTLYNHGFENMDSV GALYSRASSHIFGDWNACGKVMGLAPWIIHSWKKKESLL  
SEDESVEVKPEEETRILQGTLYSEDEESKFQKNTNVI TGMPLIARMDADLFDGQGNLLP  
KRRYDFDDSEENDEQKVGGKPLPTKVAIEAISLAHRIQVDLEDITLDFVKYFQKVTGEEN  
LCIAGGVGLNSVLNGKLSRDLGFKNTFISPYPGDDGI AVGCCAYGLFGNERLDKLNQGS  
DTTKGGKI QPPIWKSPISP YLGPDPSEIAIKEAIDAAMPWLEVDMIRDEGTRLDMAVAE I  
EMGGVVALYQGRSELGPRALGHR SILADPRKKGLVRF INEHVKKRESFRPFAPSALAEHV  
SDWFETDEYNDN NFPFMSLTAMVKKEKRARI PAVTHVDGSSRLQTVTREADGLYHRLIT  
K FYELTGVP MVLNTSFNTLPGEPIVESPKDAIRSFLCSMGSI EMLVMGDYVIKRKKADLR  
ALLGETDQREQEFIVEPTCPRRAGPTTFETTFEADDEMDTSQVVTTTRVRMPDRPMSHSD  
KGGSWFYLLDELEGE LLSICDGSANLNEILAEYTA AKYSEDEKEDANELENDRVEETQVM

LQNIHVHRLVRLYEHTLISW

>comp14674\_c0\_seq1; 434 37 1473 LEN=1626; translated  
MNMLQPASFRSSLLSSCRRVKVSNACKHRFSSAPAIREEENTTERIDELSSIPPSALIVE  
DVPGSSGHKSKQKPRLEALRRQLRKERNNPPLTLQSFGIKKNTEKSIMQKPPSSSVVEDED  
TKQRNSLDELIEKLDVPLPKPEPLTDTFGRHHSYLRISLSERCNLRCQYCMPEDGVPLQP  
AENLLTNAEIMKLATWFNROGVNKIRLTGGEPLLRKNLVDLVAKLNELENPVEQIGMTTN  
GVTLSKNLPDLVDAGLTHVNISLDSLKPKDFAKLTRRPATYFDRVMQAIIGDCAAYLPNQT  
KINCVMPENADELQDFVELSRMPVDIRFIEYMPFNDNRWGTDDFLSYRQMGEQIKGLE  
REEDGPNDDTKWWRLLKPSQDFPSKSMGRVGFITSMSEHFCGTCNRLRLTADGQLKVCLFG  
KTEVSLRDLMRQGGSDLELLQKIIHYSVQRKNFKLGGHKMEDLQAHSDENRPMTLIGG

>comp14675\_c0\_seq1; 654 238 2292 LEN=2487; translated  
MGGKEKTEKKAKTSSFFRRFSDVLNAEGVTGDTGFLSTTGGRVIDSRLHLSNALFSSTKE  
PPVGCFASTTSCSDSVDETVSLASSFSMSSEFSSIHNPAAKHLVSGTTHIFPATSPRS  
LPLIRHEDESPLKANAKAEVSADNSANTILSSNGSSYKNINSRNEWKNKRSNFTSRSSKI  
HNFKTRESIRQLRPQLPSQILHAILS LNRRDDVVWEEIEDDLFILLDGNVDRLLIFEEFF  
LRKKHHSREGRASRRWSELMRSLAYLLSSESNRDMTMHDEHVSRISSFLSTGRHPRDLK  
LAAVECLAMQCLLKTNEYSNSNNSVKLYLERMFELTSRRAAWDDDLAENLSPITMPLLC  
EIRARCLRDLDLERERIRSVTDKGNNTAILIAAGAKIVEIGIKKSNAKAEIEEQIHSVGNM  
RVWMDGERDVEQCERQNNQSPRKAGKEITCYGDAVVLRAFSGSAKRASEYARQGSTLVAQ  
STLDRTLSSLCEIGNKFDETTNTMTDHISPESEIRIRATGKVGMAVGAVALVADAVLET  
SKSVSSKTVGVTADIVGHKYGSAGDVARDTADTYDNVLQTMGNITLVSNGTKLVKKVTK  
NVGKNQIDGDIQAKRIVGQLERRGAFVAKHALGIQWAEGLTKELICGPAFDGSDSENE  
DLGSELPHQTSMSNAKAVAANDQQ

>comp14676\_c0\_seq1; 362 1 1762 LEN=2224; translated  
XVLSTLWIGNRTADETAGIMVSTASVRSASSSTNAESNTLRYGAIPLSERTSASHATHAS  
MEEAENASLLLEERAKFDPRCVFESEAWGTGVAGMGDEISNLLKNIVGSGGLSIPGGIA  
TFANSPSAILPSVVVLWIMGFVNAYSFSLGRICAITKSHTYGMWERTAGRRYGSRSQ  
FVDCVVFVKAILGTWFSFIIIASTCTPLVRYVLFSTTNGTIDSNSSSIPLSPIENGRHVD  
NDMFLYEVEVSPDVVLTITLFLVLLPLCLSQRLLGSLVFSIAIGTLGTFTVITITMLLRF  
DGSYQEGGEGFGLDLEPRQRPSFGTERGAAFFTSLSKSLTLVLSILSTGYVAHYNAPKYYYE  
LKDHTTGKFNVVVTFGFLFAAITYTTLTATLGFLTGFQNSLGFILDNYSYRDPMATAARFG  
VAVSVIFAYPLLFGGRDGLLDLLKTLSSSSASANTHVRVDDTADAGADAGTGADADADT  
SRNTNTLWVGHRSRTESNVVTVLLLFTVTVSLAISVNDLTFVLSFSGATMSSLIIYIFPPLM  
FSALVKNCCCYVNEEDTDREVKLGAMMIAGIVLGVAGAYVAVERAFF

>comp14677\_c0\_seq1; 2731 1 8434 LEN=8458; translated  
XTNQTVNEGKSGKWFRRQQRKCKATLSYSHTESKQDQDYSVQXTQAEAMPSSIRKIDLIEA  
LRNYHQQQCRGIGGRCSSSNSEDEAIETSGRHSAAATSAEFVSGWDETVADDVGGDGN  
SSSDAGLATSLOQRFHNSRSTSI PHAVANVSWVYGIAEAEKEGGCVTRNHDGIDNVSSK  
QSGRSQSEWRFRWKTSLAPHR IHQIASNESGTIIAATTDNGTVSIRGHDRILATRKV  
AETTTEDDNTMNSSCSLLEMAPEVSFVTQKASSNKKLDNVRDALLVQTPNQPALVSN  
QGDRLNDDNDAVVTQATKSMNLQVLQIPSIQPADVECMRGYFFSSGSDDEKNEQNTKDS  
YCEKIRLVLIHQDFSGEERLALAEYDLGTQLCHLRQKDLVSPDRSSWEIDTFVGLRLTST  
VGRFVLALVHPKTCQTVNHEKNLQKQLACSKILWLDPDNDLEDMHQQGQLSADPDVSN  
FVAIKEEYPLVAALKEDGVTHEHSTRYQRSRVQALEFAHAFNSHEAIAMIVAAEEAGGGS  
SPDIQILQAHVQNNSDGVLFQGRAHMVYRIQMPSTMAPTRSICLCPLDSNVYGPYSFCSK  
TSLGWNRIEEMHMFETRMRDEYRTDGSAGVIRLLITKNEFDRARALVHENGMEVLLGDK  
FAQFHPAEIVLERLRQILSKSLERVAMPSSDEELDDDDWYESLIGLERSAGNTKGQRVLL  
EAADYLLHWPSNSKLVSDCGAMTKRLGSLSSFFVKMMTNASEDFDQDVPTWISATYNN  
RVLALAEKMTAITYLNSKITAAVMVSSILQIPSTIHPRKYANLLDGIVLPSLSINHELIPSIL  
NWACQMAKFDVAENEGLNKSIFLLETIVRATKRLRLKVHSSFAYYSPFVDRITISANKKG  
RLFMSKERNNNNMSMSGILSLDASFGETESRSLVSHPSDDSLSLNGRAKKKARTSNNNERS  
NPTILEFGRMKGGAARLQVHALRVDTIDENEESVETKLETARWLKLARSLGLGRELVSL  
YNFEDQGGVGYISKELTRHYSSAASSHEERHNGLTNEVQKFCASHAKYDEALMEYSKEL  
CRGKSTSSQAIIEEVA SVARCCLNSTAKCQITKIALQAALFCRFSPVWLTDL SKDAIEWSA  
GSSSLRSELEEASRLLLIDGIVGRYCGNGAKELFHVDNPFHATSLLDVFSKHLHDHDSVLS  
DILDLCFAFHLSVEDGCGRLIQNTILRGHRDKARSILESLYDRNASSAHSVFSRVISFC  
IDLIQENSSFLGPFDPGSMSSVSSMRLKESKVVTNCAYDLTMIALENAGMISSHFGSGF  
TNSQFNESRLQSLFLDLERLIALQQDHNI FVSLADLND SKVMIGMASKLLNNLGIMYTKG  
EFNAASTIATKTRRACSLLSRPPQLTESDLLFTAANPVACQLALRTNGFEAFDFLSDLRI



LEASQCENLAARCCLSVALSYSYCMKLSKSSSSCLLDTMKGLVMASSLIQDYILSRCPIDILG  
VAVDFSQLCDIVSQVLARADEGYGEQLDDFRKMLVQRAAEKRWSFALSNNITRSGIGESL  
RVSQPILHPSWYIGDGLLLPPEEALKKGIEYCKQSMGLQLMDEPSMGIHAFVANRGAHAL  
ALRILSHSTTTQLCLPQSDIALSELEDNFQOIGIALLERYLGGTNGGITSGVVDSQLAAS  
FLLSLPLKLAFKIYRSSLPTAVSTRDFSRVVILATIGKVS GSKNSILSPTGAQLGNWTRQ  
SKFVSQCDSLAMKASWWNVLEENNVNFNPHNFEERVEIEHAEDSYVASMIPALIANKMSK  
KDGDIDCTLSLAIQFAKFSLPKDLPARRFIQYLLVPSKAYNGQFIKKNVSCLSDTVRRLL  
LHHLTCASERIKILRQCLMLVEGQDDCVDYERLCVIYGLYQTELSTVISKKTNEENELLD  
NLLIELEAIDRRRDALAILSSYFQGEKKDERPSFSMFFTPLKGSIDDNSNEKFKFKKIRS  
RVLGWEVEPEPDTDFDPLDPLEKILRSTCSSAITSGLSPLCIPLGVPRGYIRVRS LIARFQ  
KSKNEGASLPTFDEDEVMPILNQLRAPSDVAELAEWC SNQYGLDSSDKLSCLDYALNFAIK  
ASTEAEERGASQQSQGIETHIECDEAKALARVKRITVAKDLLGDRLEITSILQPHPQATKN  
PCPVSRLLLEKLMAKLEEQVWSKSDPFVPERFVTTILTEASLLVANATLCEDESLVGGQFR  
QLSLLVHRVCNCIAGKYSHVQTGYIARRVTKRWLFHGDQADEIDEKDKFMIPVIPQSNS  
LIPDIDEDDTMNFQMDLSILKEGSDWASNFSVGASRSIDDKKLTSEEEPPSSLEASSGRE  
MSEEAHRSSLRIAFVMAFADGYHRSLTDDSNEGDGNNENWKPEVNRKTKPTKTPRRGLLSR  
MKKPKAKDKEDQHTSVLEHARDLVRVVFVAKSKSGDRVLKGLNASFDSIVVGTNRSNPATI  
TFAMRHRCLRVASILVPEALEEVLNEDEFAPSSSLKVC SFGSFCAKELEEMGLPIPHSD  
LSQLSKMHFPSYARALWRHHRDIKRGKGRLLLLILELYLKETISDNSFFISIMHEIETLN  
LPRTFLLSFECIVRYMDKIGPANTPSFLEVNASELSRFSDRLLQMVYADLKRKIETSNSD  
SNGTIGSNLGDSTLNTLSRLGHVLFAGSDTSEGQRALLRYCQELLRICHFAPSNDHEQRL  
RFIIEYSMFQVTDKSVQVDLFGKLSKLLGDGVAGQGKEKATGVEYLSPTLQ  
>comp14678\_c0\_seq1; 257 1 899 LEN=1565; translated  
XPISNTVETSIAYSTTMQLLLPITIAVAPLVGRASAFATNKNIARTHTTGLFSSVPSDVS  
SAPSLTLELADLVRCTSEKSSSLSEIRSLVQEELEKAEMVGEQSSSSSSGLLSGEWE  
LLYSPEDETRSSPFFWAFEQAFPDNSDQIFGITDSIPAPIKEVGPAYQTI DGLTEGVTG  
KLISRKVVATLGGGLATSIMTTRADITGTVGVDGLTIQIESTKPEESTALEKLGPLGNLLN  
ENLPPFPSPGQALEQVVPGSSTVIMRTTFCDDGLRISRND SKYDEPFVWRRKKFSGTQDL  
>comp14678\_c0\_seq2; 167 576 1144 LEN=1810; translated  
MATTTLATXELLYSPEDETRSSPFFWAFEQAFPDNSDQIFGITDSIPAPIKEVGPAYQTI  
DGLTEGVTGKLISRKVVATLGGGLATSIMTTRADITGTVGVDGLTIQIESTKPEESTALE  
KLGPLGNLLNENLPPFPSPGQALEQVVPGSSTVIMRTTFCDDGLRISRND SKYDEPFVWRR  
KKFSGTQDL  
>comp14679\_c0\_seq1; 570 326 1561 LEN=2398; translated  
MARHRECKRSRPMHAVPLWAVLVAGLSTVLLASTGGNPP LAEALSXAEPPEENALDAEK  
KRPVHLEKPPGGTQHEAEEEEQSRSSSTSSPLIVFYGSLMDRMLPRQANSNGNRSGSTGENN  
NNNNHENPNRTKNDEELFAEDMRNRKQEFIQRYEHIRGSGRWGGYALQGIQOTKAVASAK  
ASTKKDARAAPLPVVSSTSEAGPKKGGERSRKP KKR PAMIQIRDIQHYKEEVVDARDAS  
LVVVRFYASWCKACKAIESSFHRLPQEF PDTVKFVEVPLTKENAYLHKGLGVSSLPFAHV  
YYNEDHPDNALRNKRSGGLEEIVIDNSRSSSGERNGAPAE EESSSSCTLVEELKISRNF  
SEFRVRLRSYVDGECNVYFSSSPDDDDNNDNDKVVTVLSASPRRSRTSVPI  
>comp14680\_c0\_seq1; 112 1 801 LEN=1282; translated  
XPSPMLIAFYRNTSHRIMSLFLDQYGHGLSEGTRFYIPTWQECRDDLIWFLKLVAGKHTK  
SIPMFISGESFGGCLTLLVARYFQDRPEEAPPNLDASLLICPAIVGDVPGFPVYQLLRYV  
LAPLAPTWT PFFMPNTVSGDRIWKDPKVVELYTDPKKVKMGLDAIGQPFRLGTAVNLLKA  
LEDARGNAIPGFSRPF CIVHGDAVAVPIDGSKLLFEGSDTAAEDKELNVLD DDCYHGVL  
ADPKAE EAMEKIVAFVDARMKKFVPE  
>comp14680\_c0\_seq2; 176 98 523 LEN=608; translated  
MSENNTAMSTNFESRELFGKTVQVQIPPEDFPTQEQIDAIDATTGAGCQHGWYESCSDG  
AGGAKANLHYRYWLPESGNSIKGVLVYTHGISSECGHASRIDGRPLDVAILVDTFRAKG  
FAVYARVSGDLLIGSSSSSLVW  
>comp14680\_c0\_seq3; 114 1 732 LEN=1213; translated  
QYGHGLSEGTRFYIPTWQCRDDLIWFLKLVAGKHPKSI PMFISGESFGGCLTLLVARYF  
QDRPEEAPPNLDASLLICPAIVGDVPGFPVYQLLRYVLAPLAPTWT PFFMPNTVSGDRIW  
KDPKVVELYTDPKKVKMGLDAIGQPFRLGTAVNLLKALE DARGNAIPGFSRPF CIVHGDA  
DVAVPIDGSKLLFEGSDTAAEDKELNVLD DDCYHGVLADPKAE EAMEKIVAFVDARMKKFV  
VPE  
>comp14680\_c0\_seq4; 316 98 1210 LEN=1691; translated  
MSENNTAMSTNFESRELFGKTVQVQIPPEDFPTQEQIDAIDATTGAGCQHGWYESCSDG  
AGGAKANLHYRYWLPESGNSIKGVLVYTHGISSECGHASRIDGRPLDVAILVDTFRAKG

FAVYARDQYGHGLSEGTRFYIPTWQECRDDLIWFLKLVAGKHTKSI PMFISGESFSGGCLT  
LLVARYFQDRPEEAPPNLDASLLICPAIVGDVPGFPVYQLLRYVLAPLAPTWT PFFMPNT  
VSGDRIWKDPKVVELYTDPKKVKMGLDAIGQPFRLGTAVNLLKALEDARGNAIPGFSRPF  
CIVHGDADVAVPIDGSKLLFEGSDTAAEDKELNVLDCCYHGVLADPKAEEAMEKIVAFVD  
ARMKKFVVPE

>comp14681\_c0\_seq1; 411 348 1742 LEN=2225; translated  
MMVGAIGVLSIFVLVQTYFYTYDSPGDIVAAHAHASTSTAVTIGGALYRDSEVEPKHSWMD  
NIVFHRSSLAGVSHELKRRKQRRDRKNNITTKGHKEKNTKAAAANDANDDIGDYSSMMED  
ISVLYDAVAQTVRDIGVRGLLFEVLSDDFEYVYVYNDESNSDETGDSSSSSDSLDELHTY  
WRKCSSKHGKDCNEWDVWWTYHYVGIVITDMLLQDNEELLWDGSSGEKITAASAGPDDQ  
DTSMATLLDKIHHLQATLPYL TQASFHTQHALIWRYVERSSGRLSSSYPDVVSIRFCRGD  
GSREKGI VGRPVGKIDHECFHGFHGFHAMFYAVA AKQIRQRHEKQHRRATKSKNKDEGRE  
PFLVLAPHSGFTLSQKSYCEVYELCRGASPTKEERRAMPNGEARANSYRICFEGVVHSV  
RLMSEDSKMT HKQSAIDIVDKEMKRCASAKKKKTKKKGHDNERR

>comp14682\_c0\_seq2; 928 206 2413 LEN=2814; translated  
MFRRGKKKSEGSSSAATPERKKKGRMFRKANKNKQRYEEEPQEAANDYDYETGLPEFPPG  
SNDGSE RNVLLDADIDHSSGMDEFYQRGTAEEAEYESSPQVSEDEFEEAEPPPAPFVEP  
ELDRKARARLAVEERKRKAREAVAARKARKPSGKKAPALPPVVENEAAKI QKQQSEKRL  
ASEQRARMLAAEA EKRAEEEEELRREAAEMRALEELKREEEAAKIAAKLSPNGSAEQ  
EAYVVQVETV GSEEDGDEAE IRAEKAREEISERLRAKAEKRF AKLEAEAEARFAKLEAER  
ERKEQVEAEKRLAKAEQRVRKEEMAKLEAELKEDAERL KNAEDDKAREEEEKRAEEAL  
KAIQQFVTVETTPDDDQVVEDLGDVIDDGNTPRSTRSSALLDELDT PRSSVPNL DALLD  
DLDDDAFVDGSEHTSSNSPEKVESKSNKKNADRKPKEPKADLAKSRYKELIKPSPPPKR  
KPLATTSPQRATKPKPRKVAPPKPKPRKVAPPKPKPRTVAPPKPKPRPRSRPKPEPRPTA  
PPKRTVKPKSTQRIVNTTPRSPDKAPSSRPKPDSSVFRQRPVPGKQKTSAEKPSPSLPSID  
SMGSQCTISSIPSPFLPLRDPGCEVCENKYIPNLHPDVQGCQVCIFKLSDAEREQY EKA  
GRHLRVVPTSGGCRDCNIFPSEDEEAPVRLCKKCFDTHLLAARQEEAFGGTGPLVGARD  
IHKEFRSIYTMKKRW

>comp14683\_c0\_seq1; 349 85 765 LEN=1440; translated  
MSDSGSPYDTMPPTSSSSSSTGTAE GVALWATLLLVVSSLVWLRFRDRAWHPAVTKE  
GSEAKRVPDAGDDGDGDIRSHGASDALVRAGDGEIDDDDDDMDFGEYDVVFAVDGSLLAG  
AASKGSALLRDLVESTRSAPAAPASPQRRSRIRSLDPDHKTRVETKIREFYDTIAKHEG  
RFLRQQKPHGSSAGEDSFYTMIDNEALNIVHVAIAV GSCDEPIALG

>comp14684\_c0\_seq1; 418 127 1662 LEN=1709; translated  
MGGV GIDNVGTAFIDE PSSAIHRAFYYANAYSDFGFGNDY NANDHPDATEILGNTSDQCSS  
PVLNLNDHMASCHELYPENKPIWRLVLRWMI VAYNINRSYRAKPI LLVMAPLTLGITIG  
YFIGRWQQSSSLRTIETGRRQQQPEQGGGILHVYLG NLAERISLLWFRLCLVASRWF SRE  
DISTRRCFATKGSLSLSSLPSSLSTKEIPTDCLLVASGSDGTAHSGAHVSKCGSIANDKEN  
NVSIDTSTNTGLKARESNTRKFLKSDEGTSRESGVPLEQVPKHVAVIMDGNRRY GKNKYG  
SAARGHWDGSSKLVFAKWCMAEHIAVLTVFASFSENWKRDP AEISSLMQIFATYCDEL R  
MEAIERNIKIMVLSTDYEKIPAHVRVNVKRMVNETQHCNGMIMNICSYSGSRGEIVGATK  
LLVDDVLRKLDPETIDEKTIGERLLTHNCGGDPDVM LRTSGELRISNFWLLWQLAYTEFF  
FVDKFPWAMEKTDLIDVIQNYAKGRKRRYQ

>comp14685\_c0\_seq1; 394 1 1861 LEN=2336; translated  
XCTRMVSYFSIWFVFKLLYGSSQTHAMV TAGTPTPLSTGNLLMESSRTTTTTTALSSSPSD  
DAERNRDPVYFSPKNAGEVETNFQTFTEACLFAAESHRLHLLQDVEDLPETIVLRKRQY  
LTIHGRT PSSVPSPSSSPRGTTQTRISGKSHSLFLLNNHSQRLRLDLELVHEEDDEPDDC  
DCRKVGAAVNLRYKSKVWIEDCSIRSHVGFCCWAVQKASIGLERSYLEAPLRSALVCFGQ  
ARLEGRSSTIANAGVHGVCARGECLRLRSDCSVTDSAVRGLYAYANASVRLEGCTVSGTV  
RPDTAAIEVSSALPASGLAACQESKHNTSGSGKKN SCAVQKTS SLMNCRVTDNAGVGV  
RIRGGVRYDIKLNENDTSGGLNGNCFVRNSGGNEIDLK PASGEESTSRENEDAAEANE  
NQNGHGNESKVQSSSEEWNRKPQRDASGSSFRKGDW WCPVCLPRRIVPTTKDSCPCQA  
QKSDGKFLSTEEVIKLN RGTLSVPSIHTTGACETPAAAGV PSESIADPRAGGTPTWWFD  
ADDDVGWVRYD TESIRMLERAFQLRLCLEENDSKPGAEEGIHESGSPIVLLCNGKYRVNL  
ETMEQINTDSHFLRLVQRRT

>comp14686\_c0\_seq1; 504 61 1498 LEN=1850; translated  
MVTSSLSYGILFWLSLAPSHVVS AFSASSIAAPQPTTSTGLRNPILDEENDNVY NKIVK  
NVAVPGLKCGMDYVRLGGSDLIVSKVCMGTMTYGIQNTLEEGVALLDKSFDDYGINFLD  
TAEIYPIPPNAETQGDTRCVCEFLKKNRSDVILATKVAGRQ PMLKYLPRGENSNPEEG  
ADLTRQQIILDSVDESLKRLGTDYIDLLQLRESFLLFLFDSNDTNSHNSHPVFLFRLVDWP

GRSTGGLFGASDFSPSEYEAQFRKHAPVALKEQLSALKELIDSGKVRYFGVSNETPYGIC  
AMAALSDHFPELYPKCVSIQNSYSLVVRKDYEAGCAEACYHHDVSLLPYSPLAGGTLGK  
YRKDLPDDSTARLTKFPGYMARYLESENEAAVNAYCELAERYNLPTPTQFALSWCYHNELV  
ASTIIGATTMEQLEENIKAYDLHLDEIDVEDGSMLDEISKIYKRYTDPTKAKNDPPKK  
>comp14686\_c0\_seq2; 453 449 1613 LEN=1965; translated  
MTYGIQNTLEEGVALLDKSFDDYGINFLDTAEIYPIPPNAETQGDTDRVCVCEFLKKNRS  
DVILATKVAGRQPMLKYLPRGENSNPEEGADLTRQQILDSVDES LKRLGTDYIDLLQLRE  
SFLFLFDSNDTNSHNSHPVFLFRLVDWPGRSTGGLFGASDFSPSEYEAQFRKHAPVALK  
EQLSALKELIDSGKVRYFGVSNETPYGICAMAALSDHFPELYPKCVSIQNSYSLVVRKDY  
EAGCAEACYHHDVSLLPYSPLAGGTLGK YRKDLPDDSTARLTKFPGYMARYLESENEAA  
VNAYCELAERYNLPTPTQFALSWCYHNELVASTIIGATTMEQLEENIKAYDLHLDEIDVED  
GSMLDEISKIYKRYTDPTKAKNDPPKK  
>comp14686\_c0\_seq3; 493 61 1413 LEN=1765; translated  
MVTSSLSYGILFWLSLATPSHVVSFAFSASSIAAPQPTTSTGLRNPILDEENDNVYNKIVK  
NVAVPGLKCGMDYVRLGGSDLIVSKVCMGTMTYGIQNTLEEGVALLDKSFDDYGINFLD  
TAEIYPIPPNAETQGDTDRVCVCEFLKKNRS DVILATKVAGRQPMLKYLPRGENSNPEEG  
ADLTRQQILDSVDES LKRLGTDYIDLLQLHWPGRSTGGLFGASDFSPSEYEAQFRKHAPV  
ALKEQLSALKELIDSGKVRYFGVSNETPYGICAMAALSDHFPELYPKCVSIQNSYSLVVR  
KDYEAGCAEACYHHDVSLLPYSPLAGGTLGK YRKDLPDDSTARLTKFPGYMARYLESEN  
EAAVNAYCELAERYNLPTPTQFALSWCYHNELVASTIIGATTMEQLEENIKAYDLHLDEID  
VEDGSMLDEISKIYKRYTDPTKAKNDPPKK  
>comp14686\_c0\_seq4; 453 350 1514 LEN=1866; translated  
MTYGIQNTLEEGVALLDKSFDDYGINFLDTAEIYPIPPNAETQGDTDRVCVCEFLKKNRS  
DVILATKVAGRQPMLKYLPRGENSNPEEGADLTRQQILDSVDES LKRLGTDYIDLLQLRE  
SFLFLFDSNDTNSHNSHPVFLFRLVDWPGRSTGGLFGASDFSPSEYEAQFRKHAPVALK  
EQLSALKELIDSGKVRYFGVSNETPYGICAMAALSDHFPELYPKCVSIQNSYSLVVRKDY  
EAGCAEACYHHDVSLLPYSPLAGGTLGK YRKDLPDDSTARLTKFPGYMARYLESENEAA  
VNAYCELAERYNLPTPTQFALSWCYHNELVASTIIGATTMEQLEENIKAYDLHLDEIDVED  
GSMLDEISKIYKRYTDPTKAKNDPPKK  
>comp14686\_c0\_seq5; 442 350 1429 LEN=1781; translated  
MTYGIQNTLEEGVALLDKSFDDYGINFLDTAEIYPIPPNAETQGDTDRVCVCEFLKKNRS  
DVILATKVAGRQPMLKYLPRGENSNPEEGADLTRQQILDSVDES LKRLGTDYIDLLQLHW  
PGRSTGGLFGASDFSPSEYEAQFRKHAPVALKEQLSALKELIDSGKVRYFGVSNETPYGI  
CAMAALSDHFPELYPKCVSIQNSYSLVVRKDYEAGCAEACYHHDVSLLPYSPLAGGTLG  
K YRKDLPDDSTARLTKFPGYMARYLESENEAAVNAYCELAERYNLPTPTQFALSWCYHNEL  
VASTIIGATTMEQLEENIKAYDLHLDEIDVEDGSMLDEISKIYKRYTDPTKAKNDPPKK  
>comp14686\_c0\_seq6; 442 449 1528 LEN=1880; translated  
MTYGIQNTLEEGVALLDKSFDDYGINFLDTAEIYPIPPNAETQGDTDRVCVCEFLKKNRS  
DVILATKVAGRQPMLKYLPRGENSNPEEGADLTRQQILDSVDES LKRLGTDYIDLLQLHW  
PGRSTGGLFGASDFSPSEYEAQFRKHAPVALKEQLSALKELIDSGKVRYFGVSNETPYGI  
CAMAALSDHFPELYPKCVSIQNSYSLVVRKDYEAGCAEACYHHDVSLLPYSPLAGGTLG  
K YRKDLPDDSTARLTKFPGYMARYLESENEAAVNAYCELAERYNLPTPTQFALSWCYHNEL  
VASTIIGATTMEQLEENIKAYDLHLDEIDVEDGSMLDEISKIYKRYTDPTKAKNDPPKK  
>comp14687\_c0\_seq1; 457 363 1562 LEN=2036; translated  
MVDILYKIDRPSVVPFNYGDDTSSSNQNETDSSSNIVYQSSTTSLASSRDLSSRSRAKTK  
LTPQRVDMAGNLAISDRKLDDFHNQFQAVLKSQGYDGLSPHRVEE EWASSSDEESSLGFD  
HYPRGTNEHTSIDRPLTANAANSSFASKENSQNKSNQKSDGKNSSPDSETESGKRSLSGSDVD  
IEVNSTDNSGVVIGDKSILGNDLPSEQAFLESSRRLAEMKRKLD EMRGLKNSIGVLTES  
YLERGAKRDEPQTAKNDIEWQPEPSVSSASSVPPPTHEAAEDSVLSSDRVGERAATPERS  
VSMTTAAAATAHATRTEVFDGREVATGAPSEEDHTDLKTEVSILLNTTTTSTIGEESHIDQ  
KTERRPCRLALIVLAVFGLAGVGIYIGYMSYMIHMNKQ  
>comp14688\_c0\_seq1; 786 276 2162 LEN=2391; translated  
MSPPTTKGRANGFGFGMDALLTAQ GKALKS GEEIRFVLVKGPSSSKTPTKDPHAKAPME  
AFPLVAKFSES SVSPDFGGSPWNTARLYQREVPKAEDDSDEAASGQPGAQVKKRRWRARN  
QKETRWEEVWLQEKEEFIQDIKKARQEAAGKDGAPK KETSSVYEGMPERNESQFILLEAN  
TQRDNNIQVTVLPTPHATIAFSQPKAVKTLMS EAEAAIDNQRSKTSRFMMHDQKRIFEG  
QAPTHQSRNRLGKLM AAREDDADV DVKSGKSSGLKRKRLPYGREDGEDDVMADLGRN  
RSGKSSAKARRELLSFGDGM RVDADGVLGGANDAI FQQRGQRFGSFVAGKDASNDKGS  
GAGSRKAAGNDGNAMADDFYQRDVAAEYEELDYDASEQFDDDDVNVGETSGVTGDSHF  
GYEEEEEDDNL EDDIQGERSTGA EGLASLAGLHL LNRKTRGDITAEQLAEQVDKNKWQVEE

EAKRLAESDRRNKDRNSGNDHLAKIMEDEEKVRLAEESKAASAAEAAAASTTSGSSGENG  
ARGDVKQRKTLKSVDENGLRIISLEAVRHEIWLTTGGKMMAMKLSKVFPVKKKDRQKLLKD  
VILELCTIEHDPVEGSMVVLKQHYTRGD

>comp14689\_c0\_seq1; 765 1 2410 LEN=2460; translated  
XVLDQ TALIGFLTFDCFLPYXKLEHVLELLEYVDIDAFEDDDNDEAKGDSVVEKRPMSD  
QLNAALIRHLSNGGASSSSPIDMPATGITTRCALCGKGLGPIHLAEHMAVCTGLMEEDI  
VHDEEDDVVKPAAFSTPQFLAVEKNSSFADANFEDYDDYDIDESQAVANFVFQELPESPE  
QDLVEEEKKWDGEGIFETNVAQEVVLTKKQEKYLKCYQTMYPDDEQINTELLLEILHYINK  
SSQGE GAILVFLPGWQEISEVSMLLENTIPFSNRSKFLVLP LHS GIP SQDQRKVLRRPPA  
GSRKIVLSTNIAETSLTIDDVAFVIDSGRAKEKDYDPHLKTSTLQPVWISQSSSKQRKGR  
AGRTKAGVCFHLFSSXTAPINASICGKRIAPNSVGKFCNAAVVSTNIAFAYELIKMMLLH  
SIKGGNVLD AKKLG LAPGGPEDEDGIPAFLSKAITPPHVKSINNALELLVNLGAVLPETN  
DLTTLGECLSVLSLEPRVGMVIWSYLLGCTKAASQMAVAMAYKSPFVLP PPHMRREA EK  
SQLTSLDNSESDQVTVLNAI IKRDQLMRKSKGAYRAWCQQNFLGASSLQMI GDLRKNLTR  
ELSSLGFADPMGGGYQNRHNKQHALWQAAIAAGLYPNVATRKGQDVNFSTMTNRKAKIHV  
SSVNALKGQPLNSKCQVPKGEIEFVCY GEMVKGSHFFTL SQTTHLPSVLPILL LCGTSL S  
IQPIDDAEQKHSILNLDWIIFKCTTDVASRLVILRKRLEGAFWNAIAKPSQDPRQSLTH  
IEQDAIETLGLVLESALKSSEVR

>comp14689\_c0\_seq2; 1046 115 3930 LEN=3980; translated  
MSQEGWKPTGNKGGNGRRGNRGGRRGGRRGKGGRRGGNGQSPRSYGDHKGNRPPQR  
PPPLPNKKKNGEKGADAHTVSEKTRIQFTQVLMDFREDDRRRFEPADLTNTERKFLHE  
LASQLGLKSKSSGKGENRRIVVTKPDDIKKKTAGGESLPLLRLGKGGTRALAQHVLRFP  
TRTEQLESKETGASLVEAMASQQNTQNEEGASPEDKEVLDALNRLGLGGGHGSTGDHAS  
KKIRSPNVGRRVDVSRKERHAFYQQQKQNSKDYKQMLKNRSKLPAYSREAEIVATVRAN  
PVTVIQGETGCGKSTQCPQFILDANPTASIAVTQPRRISAI SIAERVAQEQLVSSSDAT  
RGIGSQIGYQVRLESACSKDTQLLFLTPGVLLRKLQSSPMLSEYTHIIIDEVHERDKYTE  
FLLIRLRDLLPLRPDLRLILMSATLQTEVLMNYFSPGNESNTSSNSDFYSVHPPVMLSIE  
GRTFPVQEFFLEHVLELLEYVDIDAFEDDDNDEAKGDSVVEKRPMSDQLNAALIRHLSN  
GGASSSSPIDMPATGITTRCALCGKGLGPIHLAEHMAVCTGLMEEDIVHDEEDDVVKPA  
AFSTPQFLAVEKNSSFADANFEDYDDYDIDESQAVANFVFQELPESPEQDLVEEEKKWDG  
EGIFETNVAQEVVLTKKQEKYLKCYQTMYPDDEQINTELLLEILHYINKSSQGE GAILVFL  
PGWQEISEVSMLLENTIPFSNRSKFLVLP LHS GIP SQDQRKVLRRPPAGSRKIVLSTNIA  
ETSLTIDDVAFVIDSGRAKEKDYDPHLKTSTLQPVWISQSSSKQRKGRAGRTKAGVCFHL  
FSSXTAPINASICGKRIAPNSVGKFCNAAVVSTNIAFAYELIKMMLLHSIKGGNVLD AKK  
LGLAPGGPEDEDGIPAFLSKAITPPHVKSINNALELLVNLGAVLPETNDLTTLGECLSV  
SLEPRVGMVIWSYLLGCTKAASQMAVAMAYKSPFVLP PPHMRREA EKSQLTSLDNSESD  
QVTVLNAI IKRDQLMRKSKGAYRAWCQQNFLGASSLQMI GDLRKNLTRELSSLGFADPMG  
GGYQNRHNKQHALWQAAIAAGLYPNVATRKGQDVNFSTMTNRKAKIHVSSVNALKGQPLN  
SKCQVPKGEIEFVCY GEMVKGSHFFTL SQTTHLPSVLPILL LCGTSL S IQPIDDAEQKHS  
ILNLDWIIFKCTTDVASRLVILRKRLEGAFWNAIAKPSQDPRQSLTHIEQDAIETLGLV  
LESALKSSEVR

>comp14689\_c0\_seq3; 710 1 2513 LEN=2563; translated  
XVLDQ TALIGFLTFDCFLPYXKLEHVLELLEYVDIDAFEDDDNDEAKGDSVVEKRPMSD  
QLNAALIRHLSNGGASSSSPIDMPATGITTRCALCGKGLGPIHLAEHMAVCTGLMEEDI  
VHDEEDDVVKPAAFSTPQFLAVEKNSSFADANFEDYDDYDIDESQAVANFVFQELPESPE  
QDLVEEEKKWDGEGIFETNVAQEVVLTKKQEKYLKCYQTMYPDDEQINTELLLEILHYINK  
SSQGE GAILVFLPGWQEISEVSMLLENTIPFSNRSKFLVLP LHS GIP SQDQRKVLRRPPA  
GSRKIVLSTNIAETSLTIDDVAFVIDSGRSVVCKYYLSTSNFFVLNVSVLSNDCDAHG  
WAGAKEKDYDPHLKTSTLQPVWISQSSSKQRKGRAGRTKAGVCFHLFSSXTAPINASICG  
KRIAPNSVGKFCNAAVVSTNIAFAYELIKMMLLHSIKGGNVLD AKKLG LAPGGPEDEDG  
IPAFLSKAITPPHVKSINNALELLVNLGAVLPETNDLTTLGECLSVLSLEPRVGMVIWSY  
LLGCTKAASQMAVAMAYKSPFVLP PPHMRREA EKSQLTSLDNSESDQVTVLNAI IKRDQL  
MRKSKGAYRAWCQQNFLGASSLQMI GDLRKNLTRELSSLGFADPMGGGYQNRHNKQHALW  
QAAIAAGLYPNVATRKGQDVNFSTMTNRKAKIHVSSVNALKGQPLNSKCQVPKGEIEFVC  
Y GEMVKGSHFFTL SQTTHLPSVLPILL LCGTSL S IQPIDDAEQKHSILNLDWIIFKCTT  
DVASRLVILRKRLEGAFWNAIAKPSQDPRQSLTHIEQDAIETLGLVLESALKSSEVR

>comp14689\_c0\_seq4; 745 1 2426 LEN=2476; translated  
XVLDQ TALIGFLTFDCFLPYXKLEHVLELLEYVDIDAFEDDDNDEAKGDSVVEKRPMSD  
QLNAALIRHLSNGGASSSSPIDMPATGITTRCALCGKGLGPIHLAEHMAVCTGLMEEDI  
VHDEEDDVVKPAAFSTPQFLAVEKNSSFADANFEDYDDYDIDESQAVANFVFQELPESPE

QDLVEEEKKWDGEGIFETNVAQEVVLTKKQEKYLKCYQTMYDDEQINTELLLEILHYINK  
SSQGE GAILVFLPGWQEISEVSMLLENTIPFSNRSKFLVLP LPHSGIP SQDQRKVLRRPPA  
GSRKIVLSTNIAETSLTIDDVAFVIDSGRSVVVCKYYLSTSNFFVLNVSVSLNSDCDAHG  
WAGAKEKDYPHLKTSTLQPVWISQSSSKQRKGRAGRTKAGVCFHLFSSTRHQSMRQFVE  
SELLRTPLEEMCLMTKKLGLAPGGPEDEDGIPAFLSKAITPPHVKSINNALELLVNLGAV  
LPETNDLTTLGECLSVLSLEPRVGKMWIWSYLLGCTKAASQMAVAMAYKSPFVLP PPHMR  
REAEKSQLTSLSDNSESDQVTVLNAI IKRDQLMRKSKGAYRAWCQQNFLGASSLQMI GDLR  
KNLTRELSLGFADP MGGGYQNRHNKQHALWQAAIAAGLYPNVATR KQGDVNFSTMTNRK  
AKIHVSSVNALKGQPLNSKCQVPKGEIEFVFCY GEMVKGSHFFTL SQTTHLPSVLP ILLLC  
GTSLSIQP IDDAEQKHSILNLDWI IFKCTTDVASRLVILRKRLEGAFWNAIAKPSQDPR  
QSLTHIEQDAIETLGLVLESALKSSEVR

>comp14689\_c0\_seq5; 1026 115 3946 LEN=3996; translated  
MSQEGWKPTGNKGGNGRRGNRGRGGRGGRGKHHGGGRGGRGNGQSPRSYGDHKG NR PQR  
PPPLPNKKKNGEKGADAHTVSEKTRIQFTQVLMDFREDDRRRFEFPADLTNTERKFLHE  
LASQLGLKSKSSGKGENRRI VVTKPDDKIKKTAGGESLPLLRLGKGGTRALAQHVLRFP  
TRTEQLESKETGASLVEAMASQQNTQNEEGASPSSEDEKVL DALNRLGLGGGHGSTGDHAS  
KKIRSPNVGRRVDVSRKERHAFYQQQKQNSKDYKQMLKNR SKLPAYSREAEIVATVRAN  
PVTVIQGETGCGKSTQCPQFILDANPTASIAVTQPRRISAI SAERVAQEQLVSSSDAT  
RIGISQIGYQVRLESACSKDTQLLFLTPGVLLRKLQSSPMLSEYTHII IDEVHERDKYTE  
FLLIRLRDLLPLRPDLRLILMSATLQTEVLMNYFSPGNESENTSSNSDFYSVHPPVMLSIE  
GRTFPVQEFFLEHVLEL TEYVDIDAFEDDDNDEAKGDSVVEK RPMSTDQLNAALIRHLSN  
GGASSSSPIDMPATGITTRCALCGKGLGPIHLAEHMAVCTGLMEEDIVHDEEDDVV KPA  
AFSTPQFLAVEKNSSFADANFEDYDDYDIDESQAVANFVFQELPESPEQDLVEEEKKWDG  
EGIFETNVAQEVVLTKKQEKYLKCYQTMYDDEQINTELLLEILHYINKSSQGE GAILVFL  
PGWQEISEVSMLLENTIPFSNRSKFLVLP LPHSGIP SQDQRKVLRRPPAGSRKIVLSTNIA  
ETSLTIDDVAFVIDSGRSVVVCKYYLSTSNFFVLNVSVSLNSDCDAHGWAGAKEKDYPH  
LKTSTLQPVWISQSSSKQRKGRAGRTKAGVCFHLFSSTRHQSMRQFVESELLRTPLEEM  
LMTKKLGLAPGGPEDEDGIPAFLSKAITPPHVKSINNALELLVNLGAVLPETNDLTTLGE  
CLSVLSLEPRVGKMWIWSYLLGCTKAASQMAVAMAYKSPFVLP PPHMRREAEKSQLTSLD  
NSESDQVTVLNAI IKRDQLMRKSKGAYRAWCQQNFLGASSLQMI GDLRKNLTRELSLGF  
ADP MGGGYQNRHNKQHALWQAAIAAGLYPNVATR KQGDVNFSTMTNRKAKIHVSSVNALK  
GQPLNSKCQVPKGEIEFVFCY GEMVKGSHFFTL SQTTHLPSVLP ILLLCGTSLSIQP IDDA  
EQKHSILNLDWI IFKCTTDVASRLVILRKRLEGAFWNAIAKPSQDPRQSLTHIEQDAIE  
TLGLVLESALKSSEVR

>comp14689\_c0\_seq6; 1081 115 3843 LEN=3893; translated  
MSQEGWKPTGNKGGNGRRGNRGRGGRGGRGKHHGGGRGGRGNGQSPRSYGDHKG NR PQR  
PPPLPNKKKNGEKGADAHTVSEKTRIQFTQVLMDFREDDRRRFEFPADLTNTERKFLHE  
LASQLGLKSKSSGKGENRRI VVTKPDDKIKKTAGGESLPLLRLGKGGTRALAQHVLRFP  
TRTEQLESKETGASLVEAMASQQNTQNEEGASPSSEDEKVL DALNRLGLGGGHGSTGDHAS  
KKIRSPNVGRRVDVSRKERHAFYQQQKQNSKDYKQMLKNR SKLPAYSREAEIVATVRAN  
PVTVIQGETGCGKSTQCPQFILDANPTASIAVTQPRRISAI SAERVAQEQLVSSSDAT  
RIGISQIGYQVRLESACSKDTQLLFLTPGVLLRKLQSSPMLSEYTHII IDEVHERDKYTE  
FLLIRLRDLLPLRPDLRLILMSATLQTEVLMNYFSPGNESENTSSNSDFYSVHPPVMLSIE  
GRTFPVQEFFLEHVLEL TEYVDIDAFEDDDNDEAKGDSVVEK RPMSTDQLNAALIRHLSN  
GGASSSSPIDMPATGITTRCALCGKGLGPIHLAEHMAVCTGLMEEDIVHDEEDDVV KPA  
AFSTPQFLAVEKNSSFADANFEDYDDYDIDESQAVANFVFQELPESPEQDLVEEEKKWDG  
EGIFETNVAQEVVLTKKQEKYLKCYQTMYDDEQINTELLLEILHYINKSSQGE GAILVFL  
PGWQEISEVSMLLENTIPFSNRSKFLVLP LPHSGIP SQDQRKVLRRPPAGSRKIVLSTNIA  
ETSLTIDDVAFVIDSGRAKEDYDHLKTSTLQPVWISQSSSKQRKGRAGRTKAGVCFHL  
FSSTRHQSMRQFVESELLRTPLEEMCLMTKKLGLAPGGPEDEDGIPAFLSKAITPPHVKS  
INNALELLVNLGAVLPETNDLTTLGECLSVLSLEPRVGKMWIWSYLLGCTKAASQMAVAM  
AYKSPFVLP PPHMRREAEKSQLTSLSDNSESDQVTVLNAI IKRDQLMRKSKGAYRAWCQQN  
FLGASSLQMI GDLRKNLTRELSLGFADP MGGGYQNRHNKQHALWQAAIAAGLYPNVATR  
KQGDVNFSTMTNRKAKIHVSSVNALKGQPLNSKCQVPKGEIEFVFCY GEMVKGSHFFTL S  
TTHLPSVLP ILLLCGTSLSIQP IDDAEQKHSILNLDWI IFKCTTDVASRLVILRKRLEG  
AFWNAIAKPSQDPRQSLTHIEQDAIETLGLVLESALKSSEVR

>comp14689\_c0\_seq7; 401 115 1611 LEN=1611; translated  
MSQEGWKPTGNKGGNGRRGNRGRGGRGGRGKHHGGGRGGRGNGQSPRSYGDHKG NR PQR  
PPPLPNKKKNGEKGADAHTVSEKTRIQFTQVLMDFREDDRRRFEFPADLTNTERKFLHE  
LASQLGLKSKSSGKGENRRI VVTKPDDKIKKTAGGESLPLLRLGKGGTRALAQHVLRFP

TRTEQLESKETGASLVEAMASQQNTQNEEGASPSSEDKEVLDALNRLGLGGGHGSGTDHAS  
KKIRSPNVGRRVDVSRKERHAFYQQQKQNSKDYKQMLKNRSKLPAYSREAEIVATVRAN  
PVTVIQGETGCGKSTQCPQFILDANPTASIAVTQPRRISASIAERVAQEQLVSSSDAT  
RGIGSQIGYQVRLESACSKDTQLLFLTPGVLLRKLQSSPMLSEYTHIIIDEVHERDKYTE  
FLLIRLRDLLPLRPDLRLILMSATLQTEVLMNYFSPGNESENTSSNSDFYSVHPPVMLSIE  
GRTFPVQEFFVSFHQTFN

>comp14689\_c0\_seq8; 800 1 2323 LEN=2373; translated  
XVLDQ TALIGFLTDFDCFLPYXKLEHVLELLEYVDIDAFEDDDNDEAKGDSVVEKRPMSD  
QLNAALIRHLSNGGASSSSPIDMPATGITTRCALCGKGLGPIHLAEHMAVCTGLMEEDI  
VHDEEDDVVKPAAFSTPQFLAVEKNSSFADANFEDYDDYDIDESQAVANFVFQELPESPE  
QDLVEEEKKWDGEGIFETNVAQEVVLTKKQEKYLKCYQTMYPDDEQINTELLLEILHYINK  
SSQGEGAILVFLPGWQEISEVSMLENTIPFSNRSKFLVLPVLSGIPSDQQRKVLRRPPA  
GSRKIVLSTNIAETSLTIDDVAFVIDSGRAKEKDYDPLHKTSTLQPVWISQSSSKQRKGR  
AGRTKAGVCFHFLFSSTRHQSMRQFVESELLRTPLEEMCLMTKKLGLAPGGPEDEDGIPAF  
LSKAITPPHVKSINNALELLVNLGAVLPETNDLTTLGECLSVLSLEPRVGMVIWSYLLG  
CTKAASQMAVAMAYKSPFVLPVPPHMRREAESQLTSLSDNSESDQVTVLNAIKRDQLMRK  
SKGAYRAWCQQNFLGASSLQMIIGDLRKNLTRELSSLGFADPMGGGYQNRHNKQHALWQAA  
IAAGLYPNVATRQGDVNFSTMTNRKAKIHVSSVNALKGQPLNSKCQVPKGEIEFVFCYGE  
MVKGSHFFTLSQTTHLPSVLPILLCCGTSLSIQPIDDAEQKHSILNLDWIIFKCTTDVA  
SRLVILRKRLEGAFWNAIAKPSQDPRQSLTHIEQDAIETLGLVLESALKSSEVR

>comp14689\_c0\_seq9; 991 115 4033 LEN=4083; translated  
MSQEGWKPTGNKGGNGRRGNRGGRRGGRRGKGGRRGGNGQSPRSYGDHKGNRPPQR  
PPPLPNKKKNGEKGADAHTVSEKTRIQFTQVLMDFREDDRRRFEFPADLTNTERKFLHE  
LASQLGLKSKSSGKGENRRIVVTKPDDKIKKTAGGESLPLRLGKGGTRALAQHVLRFP  
TRTEQLESKETGASLVEAMASQQNTQNEEGASPSSEDKEVLDALNRLGLGGGHGSGTDHAS  
KKIRSPNVGRRVDVSRKERHAFYQQQKQNSKDYKQMLKNRSKLPAYSREAEIVATVRAN  
PVTVIQGETGCGKSTQCPQFILDANPTASIAVTQPRRISASIAERVAQEQLVSSSDAT  
RGIGSQIGYQVRLESACSKDTQLLFLTPGVLLRKLQSSPMLSEYTHIIIDEVHERDKYTE  
FLLIRLRDLLPLRPDLRLILMSATLQTEVLMNYFSPGNESENTSSNSDFYSVHPPVMLSIE  
GRTFPVQEFFLEHVLELLEYVDIDAFEDDDNDEAKGDSVVEKRPMSDQLNAALIRHLSN  
GGASSSSPIDMPATGITTRCALCGKGLGPIHLAEHMAVCTGLMEEDIVHDEEDDVVKPA  
AFSTPQFLAVEKNSSFADANFEDYDDYDIDESQAVANFVFQELPESPEQDLVEEEKKWDG  
EGIFETNVAQEVVLTKKQEKYLKCYQTMYPDDEQINTELLLEILHYINKSSQGEGAILVFL  
PGWQEISEVSMLENTIPFSNRSKFLVLPVLSGIPSDQQRKVLRRPPAGSRKIVLSTNIA  
ETSLTIDDVAFVIDSGRSVVVCKYYLSTSNFFVLNVSVLSNSDCDAHGWAGAKEKDYDPH  
LKTSTLQPVWISQSSSKQRKGRAGRTKAGVCFHFLFSSTAPINASICGKRIAPNSVGKFC  
NAAVSTNIAFAYELIKMMLLHSIKGGNVLDAKKLGLAPGGPEDEDGIPAFLSKAITPPH  
VKSINNALELLVNLGAVLPETNDLTTLGECLSVLSLEPRVGMVIWSYLLGCTKAASQMA  
VAMAYKSPFVLPVPPHMRREAESQLTSLSDNSESDQVTVLNAIKRDQLMRKSKGAYRAWC  
QQNFLGASSLQMIIGDLRKNLTRELSSLGFADPMGGGYQNRHNKQHALWQAAIAAGLYPNV  
ATRQGDVNFSTMTNRKAKIHVSSVNALKGQPLNSKCQVPKGEIEFVFCYGEMVKGSHFFT  
LSQTTHLPSVLPILLCCGTSLSIQPIDDAEQKHSILNLDWIIFKCTTDVASRLVILRKR  
LEGAFWNAIAKPSQDPRQSLTHIEQDAIETLGLVLESALKSSEVR

>comp14689\_c0\_seq10; 392 115 1044 LEN=1162; translated  
MSQEGWKPTGNKGGNGRRGNRGGRRGGRRGKGGRRGGNGQSPRSYGDHKGNRPPQR  
PPPLPNKKKNGEKGADAHTVSEKTRIQFTQVLMDFREDDRRRFEFPADLTNTERKFLHE  
LASQLGLKSKSSGKGENRRIVVTKPDDKIKKTAGGESLPLRLGKGGTRALAQHVLRFP  
TRTEQLESKETGASLVEAMASQQNTQNEEGASPSSEDKEVLDALNRLGLGGGHGSGTDHAS  
KKIRSPNVGRRVDVSRKERHAFYQQQKQNSKDYKQMLKNRSKLPAYSREAEIVATVRAN  
PVTVIQGGGE

>comp14690\_c0\_seq1; 413 514 1812 LEN=2953; translated  
MPETSGLRKRANVMELDIQILFPKKSFTFIELGLDPVDPGYRDIYDLEIDAMGRRRI  
SDMDYLLQSDFRPPGKDRDDGNDAYYAFDDYLRGTEGTMNENVEGFSFCRRTSLHRRN  
MQNCNTIFETEFLDNKVKYLDAGSYRQVFSLEHSFLQQQESLVIKDMYSGNNYQAIDFEF  
IRMDAMVAERLTASPRIYDIYGFGLSILSEFFPHGNIIEEAVITDGYILDKEERDELED  
EDLKIWNEIPSERKLLLSLQMAEGLADLHGDPLGAIHVQDVQLSQFLFNEDKTTLKLND  
NRAEFMLWDDKNGDYCKYGEYAGNWRSPPEYFERELNEQVDVYSFGNNMYSLLTGLWV  
FYDEDDYSEVQKRKVKGEKPYIDPRYTEKSLADAKLVEIIDRCFAFRPEDRPSIFEVVEF  
LRDAIQEVTDSR

>comp14691\_c0\_seq1; 793 396 2360 LEN=2943; translated

MASNESTKLLNKQRDADQHNAWNGEETLSNLMTDSSDFARSVRSHTIGKLGSSSSMGNFK  
VHLGEELTKSLPRSYSATMDGQVANLTPSQMGQQEMYTQVPFVAIPGLQKKEREVASTFA  
NYAADLDVASIRGLSEMDKTIRHASSTMLILDEMEDSKVVTAPLIFTVIIVSASMFLVGH  
NTSVMNAPEKVVFPGHISITLWALAVAAFAIGGPFSGMGKGLADKRGRRGAMLIGIWIWIFL  
LGGLIQSVAQDMLTIILARFIIIGFASGYTTVLVPVYLGEVAPPSLRGTLGTLTQFALVVG  
ILFADIVAFPFATPSGWRVMFSFTAIIAVGQLLLSPFLLES PRWLLNRDPNSLRARYIIK  
KLRGLRNEQDVEREVGNFIIIGESAQHHEEGHDADTLKEILSHRKRKLLISCLILQMAQQ  
LSGINAIFFYSTSILEGVIDNPLVGTIIIGAVNVLATYVALLIMDSTGRRSLILWSSGLM  
FASCIIVVLALKGILSNIFALLAVNLYVFGFEIIGLGPWPWLIVAEMFDGKYVTVAMSLCS  
QLNWACNFIVGMVFPYINAYLGPYSFIPFAIILAMTFLFSLFVLPETQGKTPEDLIAEMV  
RRNSQSMVYEINADSDAGAINEEWKKAMEQLMEEDQNRMNAGNYDYGFKPIENA  
>comp14691\_c0\_seq2; 729 840 2570 LEN=3153; translated  
MDGQVANLTPSQMGQQEMYTQVPFVAIPGLQKKEREVASTFANYAADLDVASIRGLSEMD  
KTIRHASSTMLILDEMEDSKVVTAPLIFTVIIVSASMFLVGHNTSVMNAPEKVVFPGHIS  
TLWALAVAAFAIGGPFSGMGKGLADKRGRRGAMLIGIWIWIFLLGGLIQSVAQDMLTIILA  
RFIIIGFASGYTTVLVPVYLGEVAPPSLRGTLGTLTQFALVVGILFADIVAFPFATPSGWR  
VMFSFTAIIAVGQLLLSPFLLES PRWLLNRDPNSLRARYIIKKLRGLRNEQDVEREVGNF  
IIIGESAQHHEEGHDADTLKEILSHRKRKLLISCLILQMAQQLSGINAIFFYSTSILEG  
VIDNPLVGTIIIGAVNVLATYVALLIMDSTGRRSLILWSSGLMFASCIIVVLALKGILSNI  
FALLAVNLYVFGFEIIGLGPWPWLIVAEMFDGKYVTVAMSLCSQLNWACNFIVGMVFPYIN  
AYLGPYSFIPFAIILAMTFLFSLFVLPETQGKTPEDLIAEMVRRNSQSMVYEINADSDAG  
AINEEWKKAMEQLMEEDQNRMNAGNYDYGFKPIENA  
>comp14692\_c0\_seq1; 143 56 989 LEN=1471; translated  
MTESYEDYEREYNASLSRIRSF LAAGTRSPETLRECE RLLGQARKHATALQGLAEVEGNP  
LKIREASQKIERDVQPLAREVERALGRDSSGSDASGRAGSGDREELFYQAPSLDGSGLPV  
SADMEALIXELGGHAEGIPLVSRPRIFRCRGGGFCVWACRGLPECALSCPVLSCALPR  
RVGFLSCPLHSVPTLTQTAMPPLFSFRATNQQYNAIQYNXNPMQCNTNRNRLTMETERIG  
NSTITQMYHQREQLRGASTNLVTRRELHVHQAGLVLTEIGRKAFYNKIFLYAALGTLGLLN  
LWALVRLLNKH  
>comp14692\_c0\_seq2; 136 121 1052 LEN=1534; translated  
MPCHAMQCRPTDPPLQEYNASLSRIRSF LAAGTRSPETLRECE RLLGQARKHATALQGLA  
EVEGNPLKIREASQKIERDVQPLAREVERALGRDSSGSDASGRAGSGDREELFYQAPSLD  
GSGLPVSADMEALIXELGGHAEGIPLVSRPRIFRCRGGGFCVWACRGLPECALSCPVLSC  
LALPRRVGFLSCPLHSVPTLTQTAMPPLFSFRATNQQKQCNAMQSNTRNRLTMETERIGN  
STITQMYHQREQLRGASTNLVTRRELHVHQAGLVLTEIGRKAFYNKIFLYAALGTLGLLN  
LWALVRLLNKH  
>comp14692\_c0\_seq3; 107 1 375 LEN=857; translated  
RAGSGDREELFYQAPSLDGSGLPVSADMEALIGSSEDMLRESLSLTMETERIGNSTITQ  
MYHQREQLRGASTNLVTRRELHVHQAGLVLTEIGRKAFYNKIFLYAALGTLGLLN  
LWALVRLLNKH  
>comp14692\_c0\_seq4; 98 121 1072 LEN=1554; translated  
MPCHAMQCRPTDPPLQEYNASLSRIRSF LAAGTRSPETLRECE RLLGQARKHATALQGLA  
EVEGNPLKIREASQKIERDVQPLAREVERALGRDSSGSDASGRAGSGDREELFYQAPSLD  
GSGLPVSADMEALIXELGGHAEGIPLVSRPRIFRCRGGGFCVWACRGLPECALSCPVLSC  
LALPRRVGFLSCPLHSVPTLTQTAMPPLFSFRATNQQKQCNAMQSNTRNRLTMETERIGN  
STITQMYHQREQLRGASTNLVTRRELHVHQAGLVLTEIGRKAFYNKIFLYAALGTLGLLN  
LWALVRLLNKH  
>comp14692\_c0\_seq5; 181 56 969 LEN=1451; translated  
MTESYEDYEREYNASLSRIRSF LAAGTRSPETLRECE RLLGQARKHATALQGLAEVEGNP  
LKIREASQKIERDVQPLAREVERALGRDSSGSDASGRAGSGDREELFYQAPSLDGSGLPV  
SADMEALIXELGGHAEGIPLVSRPRIFRCRGGGFCVWACRGLPECALSCPVLSCALPR  
RVGFLSCPLHSVPTLTQTAMPPLFSFRATNQQKQCNAMQSNTRNRLTMETERIGNSTITQ  
MYHQREQLRGASTNLVTRRELHVHQAGLVLTEIGRKAFYNKIFLYAALGTLGLLN  
LWALVRLLNKH  
>comp14693\_c0\_seq1; 325 142 1563 LEN=1638; translated  
MWHLTIPRSNVTAFILIPWLAELVLLIFYRVLLPRFQRLRPPAEYRDYARDRKKLFMR  
IIKRIETNCETNNTPIVPCFVSFIRDYFQPTGANANAVPHHEFYPKKGDVDLFFAWAFFG  
KDVDELELWMRNDLEDIYKTLLELDYNFSFEEGTTPDYKPMRLTLDPLDPSYRPFVYCMF  
SLVKLMSDFSRAVGFYKCKTSSGLNYFYRPPKHKLYKCCDENIDNSGKLPILFLHGIAP  
GGLAFYLPVYFYLGGDGRPLFLFENPDITFCFAFCGGDPPNERQTVHGVWEAVDHHLSVQ

DISVVGHSFGSCPITWLVHSAGSDRIRQIVLVDPVSI CLSEPDMQNFLYQRRCLRANKM  
PIKIGVISNEIYTEHYLRRHFAYWYNSELWLEDLPEQAKVLVCLSEKDPVIVVRKVQQQVL  
RRPSVDVLLWEDAGHAHCITKPKTWRQMSVMKRQEKLIAQESSMSLDKKYP  
>comp14694\_c0\_seq1; 286 1076 1843 LEN=2395; translated  
MEIGTSPLTIEFMGSELIVVNQIKGGMAAYTLGMICSLFVIVLLRLDKTTIYGIHESMCC  
EQNEQYHVEKTRSNLEFEWSWDVQSNALFSALRGTNATTKQRKASNDEREELSSPLLQNE  
SCTGDHAEIDRRWTSSI IDGAAEETDDRTAERHSLKAGVLPFWKRFFLYELGVLSTVLWL  
PALFVPLFQLDYGGFASEFMPEVSMSIRLVDIPVELWECGTAAGTSRIFILVVVEILFLSF  
VFLGPMVANLLAIGAW  
>comp14694\_c0\_seq2; 335 1 1627 LEN=2179; translated  
VDWNSRNIHSYLGLSSDLCSMNRDELRRIEDGQPNFASPLVAEAGEKEVPSLGGTASLEP  
SRNNEQQSFLEQLIEQSTLEQRGDYFSASALWNDTVVGSWDQNTLPSASLQPQMPLLSTT  
DADSNAPKASLLTLAATTCCLLQVGF TWASFLSPSWLDTRFFADVGVPSIRIKPNQOQL  
LHSASLGSFMGDILGAGQHWAAIAFVLTSLVLPCLCVITGAAWIAEDRKERIRILRAIDI  
SKNNNAISFRRLRRYNSGQNCWSSPRLFVEYIARIGVSVLFIYIMEIGTSPLTIEFMG  
SELIVVNQIKGGMAAYTLGMICSLFVIVLLRLDKTTIYGIHESMCCEQNEQYHVEKTRSN  
LEFEWSWDVQSNALFSALRGTNATTKQRKASNDEREELSSPLLQNESCTGDHAEIDRRWT  
TSI IDGAAEETDDRTAERHSLKAGVLPFWKRFFLYELGVLSTVLWLPALFVPLFQLDYGG  
FASEFMPEVSMSIRLVDIPVELWECGTAAGTSRIFILVVVEILFLSFVFLGPMVANLLAIG  
AW  
>comp14695\_c0\_seq1; 860 196 2700 LEN=2712; translated  
MLKITTTQALTIVLLRATTHHAFAPNLHRHHVVERLNGRGLPIGVFSTTLLSDSERDVASVE  
YGRGSSIDYITAEQEDFEDFVETITRQILSDDDDDEPSTILTNTMILSILSYSNLETVE  
GAETIEKILRRLETESGNDENFYSLHCGHYTIAVTAWSKSGHPKSAEKATQIVNRMRELD  
INLNEVTYNTWMNAYVIQND SARVKEILQEMEEKIPDKMRVQDYNVLILANSRQGRAKEA  
EQIVKKMVDKYSAGKSLVLPDLISYQMLLEAWSKSNEEGRGVRAEKILDSIEERQISYDN  
AACGDEDYDDQESTTFGIYVAAMRAIIHSEEDI IQRVENIYERIVEQGLIPDAHVYATW  
LDAYAIAHPADASKKVSEILALMEKNLVDISFEDEIVVYNTALKVLKETREPDSVAQAE  
QFEKMKSEGIVDEVTYGTMIALHANNGGNMSSAKRAEELKEMGNENSFEASTQHINS  
AMNSFIQTEEISKASDMLDKMEEYKNGNQSMRPNVVSATLMNGWVKSDDPDRSKKAEM  
VFDKMVTMFESGNEAAKPNFISYVTLVDCIVKSGEVGAAERVEGIVRNMMEAYKQGESDV  
KPNAQLISTVINCSKSGDNAGERAEMLNWLIIQIYEEVKDPELMPTAFQFTSAITAWG  
KSRKFKAARAEAILNKMKSLYESGVIKSPPNAYCYTAVINACAYAERDSIEKRDALQVF  
VKTYKEIIESEKIDPNHITFATALALRNLLPADEKRVAAVKTVEKCTEMGMFDHLVAR  
RLQSILDTEQLKGLVGDDKVDEKGVIDLALIPAETRNVLTQQNNRKGPNRR  
>comp14696\_c0\_seq1; 1686 38 3157 LEN=3213; translated  
MSLEEKFAGLSMDDVSSIVD TVKADGVVKSGLADSVATLSARCASKDEAEALAAALKVVKE  
LAETVPTALPFVKDCLGACLQGAIAKSKDVTAATKETAFACKNTTFFAIKSLLPPIIFAC  
LPVEKKWQIRELALQCLGLFKDVPKQLADSLPLVVPEVTACMWDTKKQVKKASTETMKS  
ALEVIGNRDI EHMTGKILTAITKPKPEVPEIMHVMAGVTFVQSVESPALAMVVP LLLRGLR  
EKSTATKRQAAVI IDNMSKLVNDPLD AAPFLPLLLPALETNAESIADPEARSVTETAVAQ  
LNRLKVLAEKHAAIRGDVSKTEELFLEKFGCKDAAGGKLELIKYLCTISTTLMDLKYMED  
LQWAKNLSTYAAIYFDKDTSEKVIIEVRVECEKNMEIPDDDDDDDAEELCNCTFTLAYG  
TKILLHNTKMKLLRGRNYGLLGPND CGKTTLMRSIANNQVEGFPDVSQVKTVFVEADIQG  
EQSHLSCVDYVAIDPSIAALGIEKDKIREVLGTVGFTDDGKAKPDHAVSTLSSGWRMKLA  
LARAMLQNADILLLEPTNHLVDINVAWVKTYLNSLPNVTCIMVSHDTGLLNDCCCTNIIK  
FENLKLRSFKGNLDEFVKVDPSARSFFSLKASKLKMSPPPGPIEGVKS K GKALMKMGNC  
TFTYPGNTKPTLYNITVQVSLSSRVACIGENGAGKSTMIKLLVGEIAPQEGDVWKHPNAR  
VAYVAQHAFHHIEDHLNKT PNEYIRWR FANGGEDKESLVKVTLOQFTEAELALQKKPFELT  
FVDEDSGKITKVKVSELVGGGRKMNSKEYEYEVKYAGSTVDSGEFLGAKVLKMGWEK  
AMKGVDLKLAQLAGMFKVPLSAKNVESHNGCGLAPEFGTHYRMSALSSGQKVKVVI AAA  
MWMQPHIVILDEPTNYLDRESLGLAHAIETFDGGV I IISHNNEFVSTLCPETWVMDAGH  
LETKGDADWMLKQDTKIDDDQQLQEMTDAAGNKVEVQGTGPKKLSKKEEKALVKRIKKKIK  
DGIDLDTDEEELAFEKDLL  
>comp14697\_c0\_seq1; 749 1 3416 LEN=3450; translated  
XSNSNSNSHSHSNRRTOQFQPREQHSATNKPYSQFVQPKRQQHRDENSASSGDAVPTFLQ  
MPKAEDRSHQARARQDKMHAYEGEMEP EGVGQEA KAVADSESGSSRKSQPFQRLQPMST  
PPAKQPMVAVRKFTNSGTSTSESSQLLPIRQVVSNSRKQPRDSSLVLPQKDEENQYEDD  
HLFLLENESPLKPPPGYTGNRTTFASTPSATPVDLTKSFQSPDPYRNNGDDEYSEDINSQ  
NRDDVDKRYRQEDDSRSLSTRSMILEKEKQKEREVRALFAAEQKETNONGYSGRNNGRGE



VKKFHNVSPLSTPSRSQRRSAPVSVDDASFENPLEHIQGINAMAMEHVTKGEFDMALQAF  
TQVLDVYIQQHGEAHLPTASAHNLGTVHTKRAGLLPEHTLHQRHCREQALTCFQAAARS  
ARDCPSLGNHPNVAVSLVRI GFLLLQSRQYRNAVITFEALRIRTENYGP THALVANLY  
NNLGVCHMHLQNFDRGRTFLQQUALDIQKELLGQGEDDSTALLELADTLCNIGGLNLEWIR  
RQGPDARRALDAESAFLEALELRSKVLGEDHVLTTQVRS LHDMVRSIPMPKSAEKPKESL  
DRTPSWSSPNSTNQKIASYRPEYSPAASDMTTSEFTTSKHSGHTARSRNVEANADTSR  
LDLPVLRTPNRPDSDRPPDPNKVYNFNFDGYDATEESCVLRKPAEDGETASQVGGFVSYA  
QSTVSI GSGVESDRIAMMKHAKNVLD SHQDFMDSPNVNSRVDASGIERTIDERDGNANED  
GLAPLAGDWPGSRDTSRLSPDCLQNPSRNLHTIHNCAAAAYISKGRYNEAVTLLMEMVVECQ  
KTRNGELHPDVGSAVHNVGIAYLRMEEHYDAFQAFEEAVRVRKATL GREHPEVAVSLVKF  
GIALMLLQRHEDALWIFRDALSIRKQTLGDLHPSNARIYNNIGCVHVELGNLRDARKEFE  
SALDIQRNTLIQNPENGP MIFGASTTLQNLGYLYGKSEMYEKAAMVLR ESSLQEKIMYP  
EHPTVLATLES LAETCLDAQRFTHALKYFRELFDRTQSMDSMDCVKQAQTLTYTISTIYGQ  
LDDTKEQKKKLEMALRFSRSEDVRLQDGNLQERLTIEKKIQGDLEMVKGKLR SKNNWV  
>comp14698\_c0\_seq1; 488 207 2246 LEN=2445; translated  
MLYRSLARASFRFSAPRNRLPGQALARGLFAGPTPPLPSASGVDDDEEAPWNSVEGVYTE  
AGDEWDGCRRNFMAPIEIGTRGADILHNPFFNKGTAFKSEERDLRFRGLLPPRFNNISM  
QKARFLKALRSIESDIQKNIKLEDLHDTNETLYHRILVDHIEEMAPLIYTPTVGQACQEL  
SLRFRFRPRGMFYFTEQDRGQMASMVYNWPQKDVRVIVVTDGSRILGLGDLGANGMGIPIGK  
LSLYCAAGGIPPHRVLPVVLDVGTDNEELLNDEFYIGVGKKRLRGKEYYHLVDEFMNAVR  
YRWPNVLVQFEDFDSSVAQRLLDKYREDHLCFNDDIQGTGATALAGLLGALRAKGEDVNS  
LGEQR IAIAGAGSAGIGIAQVLYEAMLEQGYSEEKAKDAFYIVDQKXVSSITKPSFRCTF  
VNLKQAKKKYATSCVLIREFFLAFLCTPSVGGYRILGKDRADELNAEQLVFARDKDNELP  
LIDVIKKYKPTILLGVTAVGGIFTEELVKEMASHVDKPIIFPLSNPTVKAECTAADAYKW  
TNGNLVFASGSPFDPVMDGDRVFNISQCNNMYIFPGLGLGASLCGAKRVTDRMLYLAAK  
ALAECLTPEEAADGQVFP HISKIRSVSHKVAVAVIEEAIATGLATKISADERKDVS GYVS  
RKMYFPEYVPLIEKRTVSI  
>comp14698\_c0\_seq2; 553 207 2105 LEN=2304; translated  
MLYRSLARASFRFSAPRNRLPGQALARGLFAGPTPPLPSASGVDDDEEAPWNSVEGVYTE  
AGDEWDGCRRNFMAPIEIGTRGADILHNPFFNKGTAFKSEERDLRFRGLLPPRFNNISM  
QKARFLKALRSIESDIQKNIKLEDLHDTNETLYHRILVDHIEEMAPLIYTPTVGQACQEL  
SLRFRFRPRGMFYFTEQDRGQMASMVYNWPQKDVRVIVVTDGSRILGLGDLGANGMGIPIGK  
LSLYCAAGGIPPHRVLPVVLDVGTDNEELLNDEFYIGVGKKRLRGKEYYHLVDEFMNAVR  
YRWPNVLVQFEDFDSSVAQRLLDKYREDHLCFNDDIQGTGATALAGLLGALRAKGEDVNS  
LGEQR IAIAGAGSAGIGIAQVLYEAMLEQGYSEEKAKDAFYIVDQKILGKDRADELNAE  
QLVFARDKDNEPLIDVIKKYKPTILLGVTAVGGIFTEELVKEMASHVDKPIIFPLSNPT  
VKAECTAADAYKWTNGNLVFASGSPFDPVMDGDRVFNISQCNNMYIFPGLGLGASLCGA  
KRVTDRMLYLAAKALAECLTPEEAADGQVFP HISKIRSVSHKVAVAVIEEAIATGLATKI  
SADERKDVS GYVSRKMYFPEYVPLIEKRTVSI  
>comp14698\_c0\_seq3; 476 207 2398 LEN=2597; translated  
MLYRSLARASFRFSAPRNRLPGQALARGLFAGPTPPLPSASGVDDDEEAPWNSVEGVYTE  
AGDEWDGCRRNFMAPIEIGTRGADILHNPFFNKGTAFKSEERDLRFRGLLPPRFNNISM  
QKARFLKALRSIESDIQKNIKLEDLHDTNETLYHRILVDHIEEMAPLIYTPTVGQACQEL  
SLRFRFRPRGMFYFTEQDRGQMASMVYNWPQKDVRVIVVTDGSRILGLGDLGANGMGIPIGK  
LSLYCAAGGIPPHRVLPVVLDVGTDNEELLNDEFYIGVGKKRLRGKEYYHLVDEFMNAVR  
YRWPNVLVQFEDFDSSVAQRLLDKYREDHLCFNDDIQGTGATALAGLLGALRAKGEDVNS  
LGEQR IAIAGAGSAGIGIAQVLYEAMLEQGYSEEKAKDAFYIVDQKXVSSITKPSFRCTF  
VNLKQAKKKYATSCVLIREFFLAFLCTPSVGGYRILGKDRADELNAEQLVFARDKDNELP  
LIDVIKKYKPTILLGVTAVGGIFTEELVKEMASHVDKPIIFPLSNPTVKAECTAADAYKW  
TNGNLVFASGSPFDPVMDGDRVFNISQCNNMYIFPGLGLGASLCGAKRVTDRMLYLAAK  
GMSNKS VVLXRSNALLELTQPIFEIVLLFPAHVFLLFVRQLCSPPTRMFLSALAECLTPE  
EAADGQVFP HISKIRSVSHKVAVAVIEEAIATGLATKISADERKDVS GYVSRKMYFPEYV  
PLIEKRTVSI  
>comp14698\_c0\_seq4; 541 207 2257 LEN=2456; translated  
MLYRSLARASFRFSAPRNRLPGQALARGLFAGPTPPLPSASGVDDDEEAPWNSVEGVYTE  
AGDEWDGCRRNFMAPIEIGTRGADILHNPFFNKGTAFKSEERDLRFRGLLPPRFNNISM  
QKARFLKALRSIESDIQKNIKLEDLHDTNETLYHRILVDHIEEMAPLIYTPTVGQACQEL  
SLRFRFRPRGMFYFTEQDRGQMASMVYNWPQKDVRVIVVTDGSRILGLGDLGANGMGIPIGK  
LSLYCAAGGIPPHRVLPVVLDVGTDNEELLNDEFYIGVGKKRLRGKEYYHLVDEFMNAVR  
YRWPNVLVQFEDFDSSVAQRLLDKYREDHLCFNDDIQGTGATALAGLLGALRAKGEDVNS

LGEQRIAIAGAGSAGIGIAQVLYEAMLEQGYSEEKAKDAFYIVDQKGILGKDRADELNAE  
QLVFARDKDNELPLIDVIKYYKPTILLGVTAVGGIFTEELVKEMASHVDKPIIFPLSNPT  
VKAECTAADAYKWTNGNLVVFASGSPFDPVDMGDGRVFNISQCNNMYIFPGLGLGASLCGA  
KRVTDRMLYLAAGKMSNKS SVVLXRSNALLELTQPIFEIVLLFPAHVLLLFVRLCSPPTR  
MFLSALAECLTPEEAADGQVFPHISKIRSVSHKVAVAVIEEAIATGLATKISADERKDVS  
GYVSRKMYFPEYVPLIEKRTVSI  
>comp14699\_c0\_seq1; 229 211 1029 LEN=1794; translated  
MEDDTPAVPTNPYLALRAAKIARNQARLKLGLHKAISKANRNRKPGQPSKRKKRPDI  
SGASVAEPRRRSRRISGLSSVPNYIETKDFKERGSPHTSTRQTRKELPLDETNAHSVLSM  
SPPRPSTPSRQOTSPAPAAANSVRTITLDVSVMLQKFLAKPMETFGKYFVIERSFGGEAAC  
PVDQDRLQGVRLS FNKFSGVQPWKNVTFWLVINVG GPAGANALVNEFTHKGSRVTFWGGG  
RMTEDSPVIQNLIRLGKEAASTPSSTSSGILLW  
>comp14700\_c0\_seq1; 506 238 2217 LEN=2549; translated  
MSTDEPVGGNEPLSPPTVAVIGGGPGAMFLCHALEMQKCELLASGGDVSGFPVSCYERA  
PGPGGVWRS DRIHEETESAGSSYTDARPADILSFSEEKKEEDFENAQMRPEQKKMKVEGS  
VKNQSSGLCEISTKPVNQTPNMYSALWTNGPKEMFEFPDYTFVDHFGKVEMPTFLPRKFV  
LEYILGRCTKNCPNFFDKYFSFRTTVLNVQYIEGDGSDANTKKFRVHTRNENSGIEETKF  
FDKCIWAGGVNGIPNMPQKTVDLFRKGGFKGPIVHSSDTTNFKRDVDGKNVLI VGGGLSA  
EDLTLMAIKEGVSQIHCTFRSENKEMNHVEQWPYNKVYPADTTVKKVEGNTVTLTYVYR  
DVYHQSYKIWKKKDEIILKNIDTVIFCTGYSNLSMLDSSLSEAVDAKECDDDWYFAVPD  
DWRMKEKFLDATVGVKDFGHVPAKYLYKASDYFYSDYPKLYRGCISTENPNMMFFLLQF  
TDTPLIEIDIAAWMMVRYITGQRALPTQKEMREENYRVCVMAMDNISVRYNIDYKFRHAL  
DRAIDWDAISEKTMELWWEHFYGP LLMNYRLLGEIMNEHAYPVSHLCEDEGKTPTEYNKK  
CRNIAMNDTTREFKSPKEGMTFRDAPLNDLDFVSHFTGTRSCPLPKPWLELNEDDDDTLW  
>comp14701\_c0\_seq1; 372 1 1761 LEN=2055; translated  
XEDEDENHALLVELWPLIQDYIPWKACERLYLRIQNLHLIPLHTAWAQKTIFELTT  
EELEASWSVHQNIDAQTKRISKDIIPLOSNRLHTSKLWLDVRANIPERFVGVLI EDPLKI  
TNGDEANDPSIEKNSTRDQISSVLQLPRRYQSCLPNTCLEINASYTMEEQIMQLGTSQGH  
ENQNICCRWIALYDLTKAESETEGMYLSSMPKAKNCNCFRCAHEKKS MVCSLENDKPIEI  
NLNENLYQAQRLAHSYFQQEAF EKAMALYETCYCYCKKSVANHTETEPKDEFSQWLANTA  
DLWHIMGAVLLSQQK FARAQQHWKNGNHYKRAHEELSNQLSKQEAYHYFLPERKCPVSKL  
SYRRIDRSESHSRQSAISAATQSVFVASDAIDPSTCRKLIWWALDYASNNGGWTTSRHY  
SVPTTDLPIHQVPRLLEWFQSWMQEVLFP LLRDQYGSTSGSDDRRRFYVHDAFLVRYEAT  
GSNCFPLPHLDESSHSCVVALNDDFDGGSYMYSLGQSVVPPTGGLV SFLGNRCLHGGTP  
VTRGVRYILAFFLYLDEDL SHGRSPKANLNGIQSNKTSREEVVXEPK  
>comp14702\_c0\_seq1; 300 79 1175 LEN=1507; translated  
MTLLPNSDDKNLLKGI IHSIALVKEXKSSLDPKNREIITSIIKSIQAMMSFTLSPSSAM  
ASIKNTKSHQGNKRSRNSDWTGYVFFVTAMF SVLMTLSHPINQDGGIPSNNNLSFFPKT  
AGVSAAVATTAVSLIPPRTNAA SRPSMMAISSGSSRTLIELKGETNNTNTDHGMRCGIEN  
NCGYKIDATYLD EYDQGLLILRRVSI VDEPYAVAASKTTATPMGLIGPVRRAFGHATKV  
AKNPIVALVLVGNLATMIGILPTGIAGFLPAAGVVFGRKTRWMTRAASAVAKRGRFLARR  
GPVTKLVNTANKPVFSKFRLLKTLKLVSKLYKNRSKYSMLS DYCWYVQGNEEKAGGNKIT  
ATPSS  
>comp14703\_c0\_seq1; 526 1 2317 LEN=2604; translated  
XLI IYAYCLVNYFQKSTSRPATSEELSGGVMITTTGTFKRFRPGSTGVRAGGVTDSDCERL  
RENIRRRPSTLAAKEFF FANGMREWWNL PQRCEKLV RVLEAWNETADGNDPAQELSYSFS  
ADPNESRRQAMTAAIMVYADPTFSQAFYKFFCRSLRNRQSDSNHKLEEDLSFFRNLR TL  
GWIRADGMLQRPLGEALHQ TILHWVRNVI SKEFE EEGMFDHAMEYKQSVILPWLEAFV GK  
EAFELDWDARLDFAVAECYCLVRFDEVFELIAEY PDSHPAVLELKKVLEKTNMHQSMAKA  
LKEALIKRLNHPGANTSQI IDVYINTIKV FREIDASDRLLQVVAEPVRSYLRQRQNTVRC  
IITSLTDSEVGGDLYEELRRQDARPLEHGEADSDEEEPPDMNWT PAPPISKERGSFLAT  
GTKGNSADILSMLVSIYGSKDLFVNEFRLMLADKLLGNLSFN TDQEVHTLELLKLRFGDL  
SMRSC EIMIKDIDDSKRAISNIHNTIKAKQRAIAVMKEREPVDPVVDAAIVSHIFWPTLQ  
NTQFKH HARIQTELDQFSTEYGLKNPRRLVWMNQLGT VQLELDVLEVNPDGTAAIETRE  
FTVAPLLATLISHFEDKNQW SLEDLSNETGLAEHTIQKRMQYVWNNRVIKLLNGAPVQYE  
LATREYMLQGDKEQSTVSSMLDDDGSGEQAVSVFAQEEEEEME IYESYIYGMLTNLGLGL  
SRIHEMLKMYVSGGSDVKYTKTPQQLAMFLQHLCKQEKLERGPDGMYKILKK  
>comp14704\_c0\_seq2; 1177 129 4091 LEN=4227; translated  
MSVEVLPEAMAPANSEIIGDPSQNGDQQIREKQHALGGYPAIMLPFPSTFASDPTNPTI  
FLAPLRDNRSNYS AVSKTCLLLNQFAANGSSKATTTANANASIGSMAYVDSSSLFHESSE

AQTISESFAALLECIREHHRRCRVISCKTIATVARAAYARLRKSPHTTTGLRDDTTANV  
NINSNGNITSNTAGSNYMNRLDDEVGNDVPMALCTAALDDADDGVAATAMSGLGTIILS  
TPTLGLTLNDELWTEARAIQIGLQPYAPTIRQLLDDDDSTALQSELQVRIFENVICPRL  
MQLVSRCLVLNHPHTLSMILPILTASLVYRSKTTLPMTKSLGSDGGKPNILKRRTHEQL  
DCHSLMSTVVDEILLPLMQESTVATMGASLTAALSSIRLIHACPTATWVKEISHWAITVL  
KDECRNECMCVETRLQILSTLMILSRVPLAERVNAVLEFVVDRVMELPSTTKAPLGVVS  
AGLLELDNLHSIDTNVGMQYRTPSRPAFWAEIALSFFMDGPLELNGGNKTDKVRKST  
LAKFLECSTIADILEERNDDDDSTIGTHSKIREELVTAFCMVAFQVGRRYKTGSKSSRASS  
LTARQDEIDEWVRLSLTVLNAFIACTEWGAAPLYIEEEITMLTASQAAYTRLLQEVLHTA  
GLLDTNSITLKMITSITCPPHLLWGQMEEDSEYLLRFETMPLIKNMVEPLGELIDNLVKRE  
MKAAGIASHHMRISLMSLAADQWIQARNAASKGSSSSSEIGMNIDSAKQLLVTVSPRRM  
LGKVVDSNKNQIEDYSNKMMDKYKAAQDTSVCIACIESMALMACYYTKKFGNTNDTRA  
VLNYSIKALQKGAGNDSHVLPLCEAAIERIQSAFASSGETATNSISLSPLVPVEFVRR  
SII SNVSI SQPDAFNEG YITQLSRLIITSRADRCIYSFPLIHNLP SKVRKQNWLR LSPS  
PLPQSRSPHNALAHIPKFKWGSNVAVCTAGSDPVAVTLAYYLRRGMRYDGEDEFRLMITM  
RVDNLTAVEIPNGLRVELGFTEENIATSANAQDADSLEVSNALGEGYEKSVGKSAFGSSV  
ATFKQELKGGDHISWDIMMNPLPMTGSLSLNPSIVFRSLDKETPYAAWVSTELQQKDGE  
TSVTSSNSKAVSVGTDDNDSKVRKQNVSIACEPMQLSPMIGLQPCPFVFFRDSQGDVESF  
RFLWSRMPCLRTAFKLVADPNPGEAPARLYDAMRLATISKVKFRGDPRTGEAITHLWAFV  
NPRGKRALFALGKQDQGKILHVRGDDKQLLLCCLGTSTSRSSVISLTPGLKPLHRDIFK  
>comp14705\_c0\_seq1; 528 295 2007 LEN=2573; translated  
MTVNVTSIYAPEPLAELQKAMPTPKCSDKDGEVAIDQLGLEQTSPPRKDTEPSLLKFPDT  
TNNYARGMVRTPKTQFFDQLDIGVPMMPAKAGDSVDLILYNREKALPDDYYDTSLLSKAV  
QYDDDRNSESSSSIPSIGTKDALKNCDYVNVVLSYHEGRANYCTAIVPQYESYHIQKWMR  
LGDGKEKKGVDP SAELQLVSRGMQSNQKQFEPPVDRNRREAWGMLTTYSSFADATAVL  
KPLVKKVATRKKTVTMVSNFQGSELLVNFVCAARSRNM DISSILVFATDMETKELAESL  
GLTAFYDKWNFDSIPSEAAARYGDRKFTLMMMAKVMCVH MVSSLGYNILFQDVDIVWYKN  
PIPFEDKSNKSLQKFDMMFQDDGGHSTRYAPYSANS GFYYVRSNPRTKHFFSSLLNAAD  
LVLKTD SHQQALIALMNEHVS LFG LKVKVFSRDTDEFPGGWHFHQKSGKYMRRMLAGEAD  
PYIFHMSWTLNKDNKLLFLEQIGEW HVKEECVHKTPRELSLLRDESHESPFADACCLAE  
SFKCHYRDKPSKLPCKDSPPIDKNGKSWWK  
>comp14705\_c0\_seq2; 545 184 2088 LEN=2654; translated  
MVTQRIRRGSPSPSTSLADSSLVFVLAVAMVSFFAGTLFAAHMNMDCLGHDVTIRGGSIT  
GDHFMNARVEELAQRVRELQKAMSTPKCSDKDGEVAIDQLGLEQTSPPRKDTEPSLLK  
FPDTTNNYARGMVRTPKTQFFDQLDLGVPMMPAKAGDSVDLILYNREKALPDDYYDTSL  
SKAVQYDDDRNSESSSSIPSIGTKDALKNCDYVNVVLSYHEGRANYCTAIVPQYESYHIQ  
KWMRLGDGKEKKGVDP SAELQLVSRGMQSNQKQFEPPVDRNRREAWGMLTTYSSFADA  
TAVLKPLVKKVATRKKTVTMVSNFQGSELLVNFVCAARSRNM DISSILVFATDMETKEL  
AESLGLTAFYDKWNFDSIPSEAAARYGDRKFTLMMMAKVMCVH MVSSLGYNILFQDVDIV  
WYKNPIPFEDKSNKSLQKFDMMFQDDGGHSTRYAPYSANS GFYYVRSNPRTKHFFSSLL  
NAADLVLKTD SHQQALIALMNEHVS LFG LKVKVFSRDTDEFPGGWHFHQKSGKYMRRMLA  
GEADPYIFHMSWTLNKDNKLLFLEQIGEW HVKEECVHKTPRELSLLRDESHESPFADACC  
LAEPSFKCHYRDKPSKLPCKDSPPIDKNGKSWWK  
>comp14705\_c0\_seq3; 448 184 2283 LEN=2849; translated  
MVTQRIRRGSPSPSTSLADSSLVFVLAVAMVSFFAGTLFAAHMNMDCLGHDVTIRGGSIT  
GDHFMNARVEELAQRVRELQKAMSTPKCSDKDGEVAIDQLGLEQTSPPRKDTEPSLLK  
FPDTTNNYARGMVRTPKTQFFDQLDLGVPMMPAKAGDSVDLILYNREKALPDDYYDTSL  
SKAVQYDDDRNSESSSSIPSIGTKDALKNCDYVNVVLSYHEGRANYCTAIVPQYESYHIQ  
KWMRLGDGKEKKGVDP SAELQLVSRGMQSNQKQFEPPVDRNRREAWGMLTTYSSFADA  
TAVLKPLVKKVATRKKTVTMVSNFQGSELLVNFVCAARSRNM DISSILVFATDMETKEL  
AESLGLTAFYDKWEVCDGTATATPCFMTSLRFRCKSTTTVSSSESDVSFLITFRCLA IANN  
KFYCDAGTIIIFLFPPTTEFRALDSSEAAARYGDRKFTLMMMAKVMCVH MVSSLGYNILFQD  
VDIVWYKNPIPFEDKSNKSLQKFDMMFQDDGGHSTRYAPYSANS GFYYVRSNPRTKHFF  
SSLLNAADLVLKTD SHQQALIALMNEHVS LFG LKVKVFSRDTDEFPGGWHFHQKSGKYM  
RMLAGEADPYIFHMSWTLNKDNKLLFLEQIGEW HVKEECVHKTPRELSLLRDESHESPF  
DACLAEPSFKCHYRDKPSKLPCKDSPPIDKNGKSWWK  
>comp14705\_c0\_seq4; 431 295 2202 LEN=2768; translated  
MTVNVTSIYAPEPLAELQKAMPTPKCSDKDGEVAIDQLGLEQTSPPRKDTEPSLLKFPDT  
TNNYARGMVRTPKTQFFDQLDIGVPMMPAKAGDSVDLILYNREKALPDDYYDTSLLSKAV  
QYDDDRNSESSSSIPSIGTKDALKNCDYVNVVLSYHEGRANYCTAIVPQYESYHIQKWMR

LGDGKEKKGVDPESAELQLVSRGMQSNQFEPVDRNRREAWGMLTTYSSFADATAVL  
KPLVKKVATRKTVTVMVSNFQSELLVNFVCAARSRNMDISSILVFATDMETKELAESL  
GLTAFYDKWEVCDGTATATPCFMTSLRFCRKSTTTVSSESDVSFLITFRCLAIANNKYC  
DAGTIIFLFPPTTEFRLDSSEAAAARYGDRKFTLMMMAKVMCVHMVSSLGYNILFQDQDVI  
WYKNPIPFEDKSNKSLQKFDMFQDDGGHSTRYAPYSANSGFYVRSNPRTKHFSSLL  
NAADLVLKTDSHQALIALMNEHVSLFGLKVKVFSRDTDEFPGGWHFHQKSGKYMRMLA  
GEADPYIFHMSWTLNKNKLLFLEQIGEWVKEECVHKTPRELSLLRDESHESPFADACC  
LAEPSFKCHYRDKPSKLPCKDSPPIDKNGKSWWK

>comp14706\_c0\_seq1; 363 202 1368 LEN=1722; translated  
MRGDIDHLNWAFPYQAFEAQSSIIIGIGATPEGIDQNPMYYDFLYDQNFPEPVENLTAHL  
IGLAHKRYGIQTSDENVDLAWWHLRSLSSYNSDFSVQDLTGVAHLNPRPSSSLFEDDRSTP  
KPLMCSLFHAWNYLIHAGDNMKSSTDPFLYDLVNVGREVLAQLSTPMALNFSARSKDSM  
DYQELVQGTGESYIDLIDLDLGLTNI AFLVTPWLESARRLAREDATGGTQNDCFSPILG  
NQSNPGSCSRFYEFNARTQITTWNP THGADEVPPGPIDYAAKQWNGLIRGYVNRKIL  
LDQALEDDQKQGPLNSTTVKRIFAAHAYEWTTAESSDSVPPSTSLLNERRSILRGTL  
MSKEMLKKYSTWLKTCGHEINESQHSKS

>comp14706\_c0\_seq2; 588 1 2974 LEN=3328; translated  
XRIYPPGPRSKGTKQSRKDLKSPPTWRSCSIMLCPHYVELPSISWTERKTSAMVTKTTL  
SPALLLFFSGISLSGLLLRLGLGSNFVLAGAFRSAAEHGREATKVPEGNVVAHVAAA  
ATGTSGSPALVGSVDAVYDLMDRVLKDPTAKNSFRRLRIVSESETDNENENESDAEDNKNG  
RDSSSAPTAGSWFRLEQKQQQKQQQESNGDPPGTGDTTIVVTATSASELTAGLGYFFKH  
YCNFTIEWSSGGRAGGSHIALPEAWPVPLGPGPAVRRRTTQWSYLMNVCTHSYSLVWHD  
WSAWQSLIDNMALRGINMVLALTGQEEIQYRVFSKLGGLGHDIRSWFNGPAFLTWSRQON  
EYSGIAGPLPRSFMSQWALQRDHILPRLRSLGMVGI LPAFQGNVPVQLANLYKDSNMT  
KEGDTGWIDALDPLFLEIADLWMAQLIEDFGTDHYYQLDGFNGGVPWMTTPRGGLTTS  
QTRRRRSLETQSSSVRRTAGAI PPTVPRDEDWYRRGQAAAYAGLNRTDPDAHWMYQGF  
VWETQE QASYVKGFVDSVPHGKFIVIDMEYSPDGEWQKWANASFFGAPFIWTKLHNFGD  
TTGMRGDIDHLNWAFPYQAFEAQSSIIIGIGATPEGIDQNPMYYDFLYDQNFPEPVENL  
AHLIGLAHKRYGIQTSDENVDLAWWHLRSLSSYNSDFSVQDLTGVAHLNPRPSSSLFEDDR  
STPKPLMCSLFHAWNYLIHAGDNMKSSTDPFLYDLVNVGREVLAQLSTPMALNFSARSK  
DSMDYQELVQGTGESYIDLIDLDLGLTNI AFLVTPWLESARRLAREDATGGTQNDCFSP  
ILGNQSNPGSCSRFYEFNARTQITTWNP THGADEVPPGPIDYAAKQWNGLIRGYVNRKIL  
KILLDQALEDDQKQGPLNSTTVKRIFAAHAYEWTTAESSDSVPPSTSLLNERRSILRG  
TLEMSKEMLKKYSTWLKTCGHEINESQHSKS

>comp14706\_c0\_seq3; 556 1 2959 LEN=3313; translated  
XRIYPPGPRSKGTKQSRKDLKSPPTWRSCSIMLCPHYVELPSISWTERKTSAMVTKTTL  
SPALLLFFSGISLSGLLLRLGLGSNFVLAGAFRSAAEHGREATKVPEGNVVAHVAAA  
ATGTSGSPALVGSVDAVYDLMDRVLKDPTAKNSFRRLRIVSESETDNENENESDAEDNKNG  
RDSSSAPTAGSWFRLEQKQQQESNGDPPGTGDTTIVVTATSASELTAGLGYFFKH  
YCNFTIEWSSGGRAGGSHIALPEAWPVPLGPGPAVRRRTTQWSYLMNVCTHSYSLVWHD  
WSAWQSLIDNMALRGINMVLALTGQEEIQYRVFSKLGGLGHDIRSWFNGPAFLTWSRQON  
EYSGIAGPLPRSFMSQWALQRDHILPRLRSLGMVGI LPAFQGNVPVQLANLYKDSNMT  
KEGDTGWIDALDPLFLEIADLWMAQLIEDFGTDHYYQLDGFNGGVPWMTTPRGGLTTS  
QTRRRRSLETQSSSVRRTAGAI PPTVPRDEDWYRRGQAAAYAGLNRTDPDAHWMYQGF  
VWETQE QASYVKGFVDSVPHGKFIVIDMEYSPDGEWQKWANASFFGAPFIWTKLHNFGD  
TTGMRGDIDHLNWAFPYQAFEAQSSIIIGIGATPEGIDQNPMYYDFLYDQNFPEPVENL  
AHLIGLAHKRYGIQTSDENVDLAWWHLRSLSSYNSDFSVQDLTGVAHLNPRPSSSLFEDDR  
STPKPLMCSLFHAWNYLIHAGDNMKSSTDPFLYDLVNVGREVLAQLSTPMALNFSARSK  
DSMDYQELVQGTGESYIDLIDLDLGLTNI AFLVTPWLESARRLAREDATGGTQNDCFSP  
ILGNQSNPGSCSRFYEFNARTQITTWNP THGADEVPPGPIDYAAKQWNGLIRGYVNRKIL  
KILLDQALEDDQKQGPLNSTTVKRIFAAHAYEWTTAESSDSVPPSTSLLNERRSILRG  
TLEMSKEMLKKYSTWLKTCGHEINESQHSKS

>comp14707\_c1\_seq1; 1590 56 4236 LEN=4299; translated  
MSAAYDSRNGRPSSRSRGRNNIGGPSTIADKADAFHLGPGNDQPSSIWTRHVEMPPIST  
ISLANYQKLYKASREAGTLGLIAEDPGSGIGSTGNAAKASSGAAASNSGGTSGGDDKNG  
KGTGPGGGGGASATAGSNTGAGGESSYFSGFGRVLTNANDSNSSKGDSDPILSASGS  
SVRPLRPPRNGCVATANSWMAAVECPGTGAAGFSSPRADANPSGANASTTLRLVTRWNV  
RRTSGGVQDQWMALPPP VAGGDGRIVHVFVDPTGHTLLSARNGEAYYHSSSLKELQKLN  
GFGRNADGTWPSKEKLNIGSASSQVVTGSGGGSSNKNKKKNSKFTLPIQQGLSVGSYV  
TAVAWDREKGTGTSR KILLGTSAGEIYEYMLVSPNEMAAATSSGAKDATSKSSTSKSAI

DDPDEVALLTKNPVLLHQLRSDAPVTGLIFERLRTGLLVMCCTSGRKKRTRFYTFYSAHN  
SSFRMAMADEAHASLVLPGLSLNRAELKLCNDHICMRTETGIYYGNIDRAQSGPAFAGGS  
MIVDSGILPYDGDKHHGSLSNNTSSGHI PVSLAVTPHHIITLENNEVRFINRVSQKAIQTE  
RIDFQSMTSDRALDDSIMGIGELMSDIRRPDQVWLRKARSLVHISSSQEDRDVWKYTLNK  
SLNMP IKRAAAGSHNVLSEEEKAQELMFEQAKSLCTNPSQKAVVTAVRAEYHLSQGRAEL  
AAKYFSQCPPALEPFADTAVRLALMNLGIDDPHSYSGSPLARDALKSNLPLITYLSDKMR  
VGKNNNDKMTCTMIGAWLTELYLHERDTPGAKQSLTQFLSQNVHTMDAKTIMKILTSHD  
VGATDCAAYA AVSGDIATAVNAALRVSPDAQDGVVEALRILNESPFEISESLYYRYASTL  
LARAPNLAGKSFLSRYTHGLSPTRLLPSFMHYERLRVERNRAKHVAQAAKGKNPYKGSR  
DNVDSAGSRDMFSGGVEVQIMNRVGSFVDEPVTTKYLEGVIKLGCQSSAIFSLISLYVD  
MVDEEPLYKFLSEHVPSAAVASEAARNAGLGAFADDGLSGPLDMSYALRTILGTGRHFERS  
AIKLYMGFGMRQQAVELALKVDPSLARDLAQDSVELEERRRLWLMIAARSAASEGVRGGDV  
DVVSKVSVLKDCCGPDVLSIEDVSKKKXDESLSALCFHILLNVALVNTYNSISSALALAL  
LLVPGYLQVLPFLPDFAQIDQIKDEICEALTSYSSKIEGFLKEMSNCDQNC DALRGEISR  
LRTHRMELKSDARCAFTTKKAVLSSGEPFYVFP SGYVVLESALKHEIKPHLNEKQRSRVE  
IEQALLRNKNDRSLSLQNVDSLQAELDGLIAAECPLTGSAMVESIDQPFADSMEIEDILS  
AGASGGRGTTACV

>comp14707\_c1\_seq2; 1526 1 4288 LEN=4351; translated  
XARLPATGDCARHQQSKQIQREIPLQ NATRRGADAMSAAYDSRNGRPSRSRGRNNIGG  
PSTNADKADAFHLGPGNDQPSSIWTTRHVEMPIPGTISLANYQKLYKASREAGTLLGIAE  
DPGSGIGSTGNAAKASSGAAASNSGGTSGGDDDKNGKGTGGGGGGASATAGSNTGAGGE  
SSYFSGFIGRVLNTNANDSNSSKGDSDPILSASGSSVRPLRPPRNGCVATANSWMVAAV  
ECPGTGAAGFSSPRADANPSGANASTTLRLVTRWNVRR TSGGVQDQWMALPPP VAGGDGR  
IVHVFVDPTGTHTLLSARNGEAYYHSSSLKELQKLNFGFRNADGTWPSKEKLNGISASSQ  
QVVTGSGGGSSNKNKKKNSKFTLPIQQGLSVGSYVTAVAWDREKGTGTSRKILLGTS  
AGEIYEYMLVSPNEMAAATSSGAKDATSKSSTSKSAIDDPDEVALLTKNPVLLHQLRSDAP  
VTGLIFERLRTGLLVMCCTSGRKKRTRFYTFYSAHNSSFRMAMADEAHASLVLPGLSLNR  
AELKLCNDHICMRTETGIYYGNIDRAQSGPAFAGGSMIVDSGILPYDGDKHHGSLSNNTSS  
GHI PVSLAVTPHHIITLENNEVRFINRVSQKAIQTERIDFQSMTSDRALDDSIMGIGELM  
SDIRRPDQVWLRKARSLVHISSSQEDRDVWKYTLNKSLNMP IKRAAAGSHNVLSEEEKAQ  
ELMFEQAKSLCTNPSQKAVVTAVRAEYHLSQGRAELAAKYFSQCPPALEPFADTAVRLAL  
MNLGIDDPHSYSGSPLARDALKSNLPLITYLSDKMRVGKNNNDKMTCTMIGAWLTELYLH  
ERDTPGAKQSLTQFLSQNVHTMDAKTIMKILTSHDVGATDCAAYA AVSGDIATAVNAAL  
RVSPDAQDGVVEALRILNESPFEISESLYYRYASTLLARAPNLAGKSFLSRYTHGLSPTR  
LLPSFMHYERLRVERNRAKHVAQAAKGKNPYKGSRDNVDSAGSRDMFSGGVEVQIMNRV  
GSFVDEPVTTKYLEGVIKLGCQSSAIFSLISLYVDMVDEEPLYKFLSEHVPSAAVASEA  
ARNAGLGAFADDGLSGPLDMSYALRTILGTGRHFERSAIKLYMGFGMRQQAVELALKVDPS  
LARDLAQDSVELEERRRLWLMIAARSAASEGVRGGDVVVSKVSVLKDCCGPDVLSIEDVS  
KKKXDESLSALCFHILLNVALVNTYNSISSALALALLLVPGYLQVLPFLPDFAQIDQIKD  
EICEALTSYSSKIEGFLKEMSNCDQNC DALRGEISRLRTHRMELKSDARCAFTTKKAVLSS  
GEPFYVFP SGYVVLESALKHEIKPHLNEKQRSRVEIEQALLRNKNDRSLSLQNVDSLQA  
ELDGLIAAECPLTGSAMVESIDQPFADSMEIEDILSAGASGGRGTTACV

>comp14707\_c1\_seq3; 1579 56 4099 LEN=4162; translated  
MSAAYDSRNGRPSRSRGRNNIGGPSTIADKADAFHLGPGNDQPSSIWTTRHVEMPIPST  
ISLANYQKLYKASREAGTLLGIAEDPGSGIGSTGNAAKASSGAAASNSGGTSGGDDDKNG  
KGTGGGGGGASATAGSNTGAGGESSYFSGFIGRVLNTNANDSNSSKGDSDPILSASGS  
SVRPLRPPRNGCVATANSWMVAAVECPTGAAGFSSPRADANPSGANASTTLRLVTRWNV  
RRTSGGVQDQWMALPPP VAGGDGRIVHVFVDPTGTHTLLSARNGEAYYHSSSLKELQKLN  
GFRNADGTWPSKEKLNGISASSQQVVTGSGGGSSNKNKKKNSKFTLPIQQGLSVGSYV  
TAVAWDREKGTGTSRKILLGTSAGEIYEYMLVSPNEMAAATSSGAKDATSKSSTSKSAI  
DDPDEVALLTKNPVLLHQLRSDAPVTGLIFERLRTGLLVMCCTSGRKKRTRFYTFYSAHN  
SSFRMAMADEAHASLVLPGLSLNRAELKLCNDHICMRTETGIYYGNIDRAQSGPAFAGGS  
MIVDSGILPYDGDKHHGSLSNNTSSGHI PVSLAVTPHHIITLENNEVRFINRVSQKAIQTE  
RIDFQSMTSDRALDDSIMGIGELMSDIRRPDQVWLRKARSLVHISSSQEDRDVWKYTLNK  
SLNMP IKRAAAGSHNVLSEEEKAQELMFEQAKSLCTNPSQKAVVTAVRAEYHLSQGRAEL  
AAKYFSQCPPALEPFADTAVRLALMNLGIDDPHSYSGSPLARDALKSNLPLITYLSDKMR  
VGKNNNDKMTCTMIGAWLTELYLHERDTPGAKQSLTQFLSQNVHTMDAKTIMKILTSHD  
VGATDCAAYA AVSGDIATAVNAALRVSPDAQDGVVEALRILNESPFEISESLYYRYASTL  
LARAPNLAGKSFLSRYTHGLSPTRLLPSFMHYERLRVERNRAKHVAQAAKGKNPYKGSR  
DNVDSAGSRDMFSGGVEVQIMNRVGSFVDEPVTTKYLEGVIKLGCQSSAIFSLISLYVD

MVDEEPLYKFLSEHVPSAAVASEAARNAGLGAFADDGLSGPLDMSYALRTILGTGRHFERS  
AIKLYMGFGMRQQAVELALKVDPSLARDLAQDSVELEERRRLWLMIARSAASEGVRGGDV  
DVVSKVSVLKDCGPDVLSIEDVLPFLPDFAQIDQIKDEICEALTSYSSKIEGFLKEMSN  
CDQNC DALRGEISRLRTHRMELKSDARCAFTTKAVLSSGEPFYVFPSPGYVVL ESALKHEI  
KPHLNEKQRSRVDEIEQALLRNKNDRSLSLQNVDSLQAE LDGLIAAECPLTGSAMVESID  
QPFADSMEIEDILSAGASGGRGTACV

>comp14707\_c1\_seq4; 1515 1 4151 LEN=4214; translated  
XARLPATGDCARHQQSKKQIQREIPLQ NATRRGADAMSAAYDSRNGRPSRSRGRNNIGG  
PSTNADKADAFHLGPGNDQPSSIWTRHVEMPIPGTISLAN YQKLYKASREAGTLLGIAE  
DPGSGIGSTGNAAKASSGAAASNSGGTSGGDDDKNGKGTGGGGGGASATAGSNTGAGGE  
SSYFSGFIGRVLNTNANDSNSSKGD ESDPILSASGSSVRPLRPPRNGCVATANSWMVAAV  
ECPGTGAAGFSSPRADANPSGANASTTLRLVTRWNVRRTSGGVQDQWMALPPP VAGGDR  
IVHVFVDPTGTHTLLSARNGEAYYHSSSLKELQKLN GFGRNADGTWPSKEKLNGISASSQ  
QVVT HSGGGSSNKNKKKNSKFTLP IQQGLSVGSYVTAVAWDREKGT EGTSRKILLG TSA  
GEIYEYMLVSPNEMAAATSSGAKDATSKSSTSKSAIDDPDEVALLTKNPVLLHQLRSDAP  
VTGLIFERLRTGLLVMCCTSGRKKRTRFYTFYSAHNSSFRMAMADEAHASLVELPGSLNR  
AELKLCNDHICMRTETGIYYGNIDRAQSGPAFAGGSMIVDSGILPYDGDKHHGSLSNTSS  
GHIPVSLAVTPHHIITLENNEVRFINRVSQKAIQTERIDFQSMTSDRALDDSIMGIGELM  
SDIRRPDQVWL RKARSLVHISSSQEDRDVWKYTLNKS LNMP IKRAAAGSHNVLSEEEKAQ  
ELMFEQAKSLCTNPSQKAVVTA VRAEYHLSQGRAELAAKYFSQCPPALEPFADTAVRLAL  
MNLGIDDPHSYSGSPLARDAL KSNLPLITYLSDKMRV GKNNDKMTCTMIGAWLTEL YLH  
ERDTPGAKQSLTQFLSQNVHTDAKTIMKILTSHDVGATDCAAYA AVSGDIATAVNAAL  
RVSPDAQDGVVEALRILNESPF EISESLYRYASTLLARAPNLAGKSFLSRYTHGLSPTR  
LLPSFMHYERLRVERNRAKHVAQA AKGNPYSKGRDNVDSAGSRDMFGGGV EVQIMNRV  
GSFVDEPVTTKYLEGVIKLG CQSSAIFSLISLYVDMVDEEPLYKFLSEHVPSAAVASEA  
ARNAGLGAFADDGLSGPLDMSYALRTILGTGRHFERSAIKLYMGFGMRQQAVELALKVDPS  
LARDLAQDSVELEERRRLWLMIARSAASEGVRGGDV DVVSKVSVLKDCGPDVLSIEDVLP  
PFLPDFAQIDQIKDEICEALTSYSSKIEGFLKEMSNCDQNC DALRGEISRLRTHRMELKS  
DARCAFTTKAVLSSGEPFYVFPSPGYVVL ESALKHEIKPHLNEKQRSRVDEIEQALLRNKN  
DRSLSLQNVDSLQAE LDGLIAAECPLTGSAMVESIDQPFADSMEIEDILSAGASGGRGT  
ACV

>comp14708\_c0\_seq1; 446 1 1279 LEN=1723; translated  
SQRKKKDKRRHTKNTVQPSFFTALLLI AVPTSKKNYGESNNDYGEKTGQYDQH HGVPDYI  
WISESQAASNHSFLFVLVANFSRLITIAIFAVLAMSGTKTMMFGDEKSI SNRKNNISMF  
LAIKPIRNLHV TYRGQHTTIREGVTTVKELTAQFERLSNNNMNIGNHVP AKGIVWKGKIL  
KPGDDLSEAGIKHGDRVMILPGDHDAGVDILAVYLFLLSNEKAIDEA IANVKEEQPEL  
FESMQDIPSSLLSVINEMKRKDVADFFRTSLDASYHRLRGW WERP SLRQGLHDPDR IENY  
RKVISTNLSKGFLKKYFPPSMQKAIQK PDLWRREFAKVVTKAIRVGD T ILEGLD LLDL  
LKDILKGGSSAASAAMNGYTTTQSLPVDEPSASSLADSI TDQMNDPSLANNLLFELSESEDDY  
GEEEF

>comp14708\_c0\_seq2; 473 27 1145 LEN=1589; translated  
MAYQTIFGFQSRRRRTIHSSSCSVANFSRLITIAIFAVLAMSGTKTMMFGDEKSI SNR  
NNISMFALAIKPIRNLHV TYRGQHTTIREGVTTVKELTAQFERLSNNNMNIGNHVP AKGI  
VWKGKILKPGDDLSEAGIKHGDRVMILPGDHDAGVDILAVYLFLLSNEKAIDEA IANV  
KEEQPELFESMQDIPSSLLSVINEMKRKDVADFFRTSLDASYHRLRGW WERP SLRQGLH  
DPDR IENYRKVISTNLSKGFLKKYFPPSMQKAIQK PDLWRREFAKVVTKAIRVGD T ILEGL  
LDLDDILKGGSSAASAAMNGYTTTQSLPVDEPSASSLADSI TDQMNDPSLANNLLFEL  
SESEDDY GEEEF

>comp14709\_c1\_seq2; 596 122 1906 LEN=2941; translated  
MISHTLKR LPRRNFRVCVIVNNKLENDVITGIGNVRTAKSFSSSMVETSTIRNNGSATSE  
VVSFPSTAPGNEMKNQPILLDSKEHAVGYLNRILNARVYEA AIETELQHAKNLSTHLKNT  
VLLKREDTQPVFSFKIRGAFNKMAHLSSELENGVVAC SAGNHAQGVALSSKMLNIRAVI  
VMPLATPTIKVNAVRAHG GPTVEVRLFGNNYDEAAAEAKRLMTEEGMTIVHPFDDPHVIA  
GQGTIGLEILKSCVSRPLDAIFVCCGGGMLAGIAAYVKRVRPSVKVIGVEADDAAGMTA  
SLKEGKVVTLDHVGLFADGA AVKTIGEETFRVCNKLVDEMITVGTDEICDAIKLSYNDAR  
VVLEPAGALGVAGMKKYVAENEISGQTLVAITSGANMDFDR LRFVSERADGSERTLVVDI  
PETPGSFRLLYSLIWRNVTEFSYRYDDQGDHVLISFQP VVNIDNDFEGIISTIEDNGF  
TCADVTDSELTKVHIRNMAGGRSNV PDERLFRFNPEAPGALQRFLSLDIEWNVSLFHY  
RNHGDDFGRVLVGIQVPDGKETNARLGRFLDTLHYDYVEETDNPIYHKFLRCEI

>comp14709\_c1\_seq3; 517 313 1671 LEN=2706; translated

MAHLSSELENGVVACSAGNHAQGVVALSSKMLNIRAVIVMPLATPTIKVNAVRAHGGPTV  
EVRLFGNNDYDEAAAEAKRLMTEEGMTIVHPFDDPHVIAGQGTIGLEILKSCVSRPLDAIF  
VCCGGGMLAGIAAYVKVRVPSVKVIGVEADDAAGMTASLKEGKVVTLDHVGLFADGAAV  
KTIGEETFVRCNKLVDIMITVGTDEICDAIKLSYNDARVVLEPAGALGVAGMKKYVAENE  
ISGQTLVAITSGANMDFDRLRFVSERADGsertLVVDIPETPGSFRLLYSLIWRPNVTEF  
SYRYDDQGDHVLISFQPVVNIIDNDFEGIIISTIEDNGFTCADVTDSELTKVHIRNMAGGR  
SNVDERLFRFNFPEAPGALQRFLSLDIEWNVSLFHYNHGDDFGRVVLVGIQVPDGKET  
NARLGRFLDTLHYDYVEETDNPYHKFLRCEI

>comp14710\_c0\_seq1; 223 882 2123 LEN=2569; translated  
MTIAGVTKLLQPLSTLTKAQCQNCENEAIAPSYGGRKRCRRSDPEVLNIKMNKAKAPN  
NQNGYVEEPSSNYATESRTRERLQLRFQHEKNMSRMEKSSSTLSFATQNKDVLKVLKLE  
YLDTESLLFGVAGVSKAFRQSIQYHQVVCSCMSTDRGHKIMDMIVSLIQKKCIYIPSPMR  
LLRLVIGKRCEQCNCCTKTVPVKNLGLFMCRACTEFLVGDISTRGTGCSRKQTETIQPQLKL  
NAGLAASVIDDGRFATLESKGLRGLYGGRSRWTMYAGKTPFLEHGSGEAVGPLLSLEHLT  
TELANPAMNPDNQSILDALYRSRNETDPRRGSFRILEAYDTFEPATKLFYEHCGIVNHR  
GPFWHRGRYSMEILVQWKNRERSWEPLRKFADIDYESCVOYAEANNLLETKGW

>comp14711\_c0\_seq1; 795 134 2470 LEN=2590; translated  
MASTSLRSSSVKLDNIDDYLAPSQACVNPAPFQSTKMGKSNRKDGELTTKESSTNLIVP  
RRRRRIVQKKLISSTTDAAGRLETTTASIGVRATTSMPQSPPPTPLQGKEGTPKPKNAVK  
ASMADCLACSGCVTTAETVMMEERHSLKSLRKLSSSSKEGDKRPRIVTISPNSWADMCR  
HWNLPKTKLNGGDENGNKEQKSCQRDDGEPKSNVNQNSEQYDHHFYLSRFSTLLWKILSV  
EYVVDGNIPLQWTWIDEAEFEFCQIYNETNKNYSTFHVDPPEPKTKQDVLDSPLPSMAID  
SSKTLKYKSDGSSEIRENAKRPTPNLPLISGSCPALVCLVEKTLRLVPHLSQSTSPMSL  
VGMILKREDGENDCDETFTELIETDSMDPTKNVENGTSTRSNASNWDHWAIMPCHDKKLE  
ASRKDFASSNDSKEQAVNLVISTQECVELVEEWIKIEQKQWQQQHQHDEDIQATTEFPNSM  
SVVSYLEALTPSDVNTTVLEPEDLLQRLSTHTIKDKSLPLLLTTAAFYCREVTTKFAKT  
GIVQNHQMAFSSGGHANFIFRYAAKCLFGCTLFDDNVDNHDLGKGINVRWHPASLVTKNV  
RSARLGLKLLKQHYETKLYRYRDSYGTVPVADNGEESSTTVLRFIAIAHGMQTMQRALK  
QVVEVP IRNTANSDDATSTLHYLEAMACPHGCVNNGGGSARSSKTNETANIRETPTEQR  
VRSTLGNLQIPFVIQNDTLVVPKHKQNFVPSLRGTGYHVPAMNYKTGAVAGEKVENMVW

>comp14712\_c0\_seq1; 996 408 2822 LEN=2936; translated  
MASDNEHSSDASASSEDLADHRRGAKAKTEVKDTDKDLSDNDDNDADSSSKVASAGLTE  
TTKKGPSSEIAAVILGVSTNAKPTTEKTSSDNEGVKAKDATKHKIPHDDGESTATEDEYS  
LEENSRDEENLNAARPAGKELSLNEKTI AEDLVGFVAKFKDLPASEAKEGQSTETE QPFS  
SDTNADPAESSQKSTNPRNSSVGKDSFKMELNFQHQNLAQDQLRSDHLRSTHFP SRLHN  
MLDDAERMGHADIVSWYKGGDCFKIHKPTQLIHVLKNYFRQSKFKSFLRQLQGYDFKRIT  
RGVDRGVVSHPLFVKGRRSFCTYMKRKRVAKMTVTQMTKDNNRRTSTSQITQSVDSKPK  
MVFGLLNRTAINPVAQDVLVCPVVPNVHLFQGNKKLASIVKKITVHYKTADASVKRMIVNE  
ITTRLQKGGSRFLKLSNDGLFWTECNPEEIIKKVTSCFETEIRTSVHEHPGTIDLTS DGD  
NVENSTRSDDELKRSMSGAAPSVGARLGSTSKQEP RQDQVVL RGGQSSEKEGNTYLI TM  
IQANVGQQVDSNEMKRIKCRAILDRMKRRGSRFFLKLKDTGADDDMYQLSDTEAQEVIMT  
AFSVEQKIIAATNGARSASSALQGLGEGHSGLDKSTFGAISAHQNEASAVLNRLRANNE  
QMNLMSQASLKRPM EAHATLKMMEKRAKVEADERIKLFMERARQQQQAAL TASGFMNN  
LPLNSGNNLLASSMSNSLYGANQMEQLLKERQAKEMFLKTVAARNQFAAGQMGQLAALGE  
GGMPNGNSHFVDLLKKYSGQDTPW

>comp14712\_c0\_seq2; 967 408 2955 LEN=3069; translated  
MASDNEHSSDASASSEDLADHRRGAKAKTEVKDTDKDLSDNDDNDADSSSKVASAGLTE  
TTKKGPSSEIAAVILGVSTNAKPTTEKTSSDNEGVKAKDATKHKIPHDDGESTATEDEYS  
LEENSRDEENLNAARPAGKELSLNEKTI AEDLVGFVAKFKDLPASEAKEGQSTETE QPFS  
SDTNADPAESSQKSTNPRNSSVGKDSFKMELNFQHQNLAQDQLRSDHLRSTHFP SRLHN  
MLDDAERMGHADIVSWYKGGDCFKIHKPTQLIHVLKNYFRQSKFKSFLRQLQGYDFKRIT  
RGVDRGVVSHPLFVKGRRSFCTYMKRKRVAKMTVTQMTKDNNRRTSTSQITQSVDSKPK  
MVFGLLNRTAINPVAQDVLVCPVVPNVHLFQGNKKLASIVKKITVHYKTADASVKRMIVNE  
ITTRLQKGGSRFLKLSNDGLFWTECNPEEIIKKGASIVSRIFRFLFGIQSKYMTAAAILEI  
VHNVLTLRFLCMLWLHAVTSCFETEIRTSVHEHPGTIDLTS DGD NVENSTRSDDELKRS M  
SGAAPSVGARLGSTSKQEP RQDQVVL RGGQSSEKEGNTYLI TM IQANVGQQVDSNEMKR  
IKCRAILDRMKRRGSRFFLKLKDTGADDDMYQLSDTEAQEVIMTAFSVEQKIIAATNGAR  
SASSALQGLGEGHSGLDKSTFGAISAHQNEASAVLNRLRANNEQMNLMSQASLKRPM E  
AHATLKMMEKRAKVEADERIKLFMERARQQQQAAL TASGFMNNLPLNSGNNLLASSMSN  
SLYGANQMEQLLKERQAKEMFLKTVAARNQFAAGQMGQLAALGEGGMPNGNSHFVDLLKK

YSGQTPW

>comp14713\_c0\_seq1; 669 208 1872 LEN=2719; translated  
MSSKTSLLTRRLYRNLRTSSPFTTSPNASVLVSLHRTGIDDHIRDWDFAVAQDLEGS  
GGPSGDTGRGDNAEEKMVSIDRARDLSRSYAPDPNNGQDSSPAKSRKKPPSNRTYQRLFR  
RLLREVVTGNDGYGKMFVPSQADTTRLRKVIQREFRANINNCNTSNNSNGKDDDEDTEMDA  
TTPTTATETNQNKRYQHSTTPAASIHFDDETRRQVAFGALRELNKCLSYYDWLEQHSKPK  
QLPQQAARHVSALSTHPPASYLRPGVFLVSHPYMQDSYFSKTVICILEHNRLGNGGTRAE  
NSDEATDTDTAAGDRPTKKSTPRRSATPPGQTYGVIIVNRLSTHNDTGTNRTLREVFREHM  
LPGPMADVFGDSVVREGGPHVALQMVHSLSGQRRDELAPVIGGTVVPSVDDGDDDDDEGR  
TACSDRSTYFQGNMFKVMSQVEEGKMNGEDISFFVGASIWSPGQLAAEIAQGYWIPCRGP  
PEMALDGI CEHEQQATDSSSGNKTRPLADLWLSMMSACGEDEARLSHLFHPDHWDENGKA  
CDAFDEDDDDIVVF

>comp14713\_c0\_seq2; 674 208 2037 LEN=2884; translated  
MSSKTSLLTRRLYRNLRTSSPFTTSPNASVLVSLHRTGIDDHIRDWDFAVAQDLEGS  
GGPSGDTGRGDNAEEKMVSIDRARDLSRSYAPDPNNGQDSSPAKSRKKPPSNRTYQRLFR  
RLLREVVTGNDGYGKMFVPSQADTTRLRKVIQREFRANINNCNTSNNSNGKDDDEDTEMDA  
TTPTTATETNQNKRYQHSTTPAASIHFDDETRRQVAFGALRELNKCLSYYDWLEQHSKPK  
QLPQQAARHVSALSTHPPASYLRPGVFLVSHPYMQDSYFSKTVICILEHNRLGNGGTRAE  
NSDEATDTDTAAGDRPTKKSTPRRSATPPGQTYGVIIVNRLSTHNDTGTNRTLREVFREHM  
LPGPMADVFGDSVVREGGPHVALQMVHSLSGQRRDELAPVIGGTVVPSVDDGDDDDDEGR  
TACSDRSTYFQGNMFKVMSQVEEGKMNGGAYFKTCFVFFALGRIVMFCVVCVCFHSDV  
CMMEPTYINWLLFGLFSLKNKYLEDISFFVGASIWSPGQLAAEIAQGYWIPCRGPPMAL  
DGI CEHEQQATDSSSGNKTRPLADLWLSMMSACGEDEARLSHLFHPDHWDENGKACDAFD  
DEDDDDIVVF

>comp14713\_c1\_seq1; 568 88 2498 LEN=2942; translated  
MRSARGTAKRSLLLTYRRRTLRSQPGESSGSSCERASAFRQPMVGSIRRLSNLPPFRASM  
ERSHSHVRPNRLSPPIVLRQHQQRTLSFSLP SHKDKLDDNDGVVKTDISMPLRKTDAEFL  
GYHEENQAALQNFKKVRQEVFELDSPVGSFSWPQFSSLLNQLCDETTIYNAFELLDRA  
AMEPAADTRITHEMVDQVVRQWLNGYIAQQKNIDKPKQSKSYRRRKRRTARKSQSNGTNDT  
NNSHRKRSHRMSPLKVVNKKIKNYQQIGIPMESPTYHKIMEGTTHAKPKTFNLPGPRLA  
ETILEEIMDQSKRKNPLIRPSAHAFTIAMSWEQTAIYSPAENREAPQALALLNKLKS  
LYASGWGNEFMPDKNAYRRVMNIFAHRGDGDQVEALLEDLTYMYLDHYEQGHENSSSLMP  
TSSFFSLVLYAWSKSRDPDAAERAEAVLEHMLEMQSEEIPNLKIQSNFFNIVMVCWSKQ  
RTKESAAKVQKIFDRLVELSESDPTKAPVGASYLALITTWRSRFDPKKSEEFFWKWKEEHE  
KGCSEMRIDSDLIRMLVSSWCKSDEPDAAERGERLIHFAIDEPEWEPSTDFVFNIVINKWC  
HQKTLDFGERAEELLRQMIAYHELNPGSDAKPRNLSYLP IVRSWAEIGQLERSEELLVDF  
FTQWHSVDGSDKSFSSPGGSKQARDKQNDLTRLFNCVLKGLAKVPTMPEAVVRAEDIL  
LLTKTYGVRPNYASFQYVLDAWRTTANDSGFGRSWSRDRPRADAVLELLDREYNREDDAK  
DXTVFESETGMEAAFAMSSLDV

>comp14714\_c0\_seq1; 612 126 1904 LEN=2146; translated  
MSPQNKLTRRAVATRRRNTGETTTTFETERTTGKVVHPRHNDLADKKNELQESECGATND  
KTRRR IYAH IYRDRESALFLVLSSIGAVFIVIA CFMFMLAHQKNGSTTAFGNMIDTSS  
YFDQKSNHGESDGT SIVTSTKHKEPLHVD FHETESKYFVESFDDTFRVWRKFDEE I I EED  
ILPDFGGLQLNFSNTKSTGSSSTRQIKYDPLDMLSDYRDYRTVERDDDQDNYYAYDDDYT  
RNPF I EDYDDDGSASEVDGFNCRR I SEHRLYFPNCNSFHETPLMESQGT I I GAGTYRQAM  
VLKKSFGQE QET FVVKDIHFSYDFLYDVY EYTRMDSIVAERLTSSKRIYNIYGT CGVGM  
SEFFPHGHIEAFTLRDDHGKRQFMDQNDDEGLICYNLNSGLAKLELA AHMADALADLH  
GYTGGVIVHQDVKLDQFFLNADKTGVV LNDNFNRAEFMLWDDYEEQYCPYREGFGAGNWR  
PEEYDEYLTEKVDVYSLGNNIYGLLTGLMAFE EADS YDEVQDHVRAGERPYIDPRYEER  
SLAEAKLVEVIDKCHEYYPEDRPSIFEVVDILWQALEE IYDEM DRLKTVSKS

>comp14714\_c0\_seq2; 439 126 1487 LEN=1515; translated  
MSPQNKLTRRAVATRRRNTGETTTTFETERTTGKVVHPRHNDLADKKNELQESECGATND  
KTRRR IYAH IYRDRESALFLVLSSIGAVFIVIA CFMFMLAHQKNGSTTAFGNMIDTSS  
YFDQKSNHGESDGT SIVTSTKHKEPLHVD FHETESKYFVESFDDTFRVWRKFDEE I I EED  
ILPDFGGLQLNFSNTKSTGSSSTRQIKYDPLDMLSDYRDYRTVERDDDQDNYYAYDDDYT  
RNPF I EDYDDDGSASEVDGFNCRR I SEHRLYFPNCNSFHETPLMESQGT I I GAGTYRQAM  
VLKKSFGQE QET FVVKDIHFSYDFLYDVY EYTRMDSIVAERLTSSKRIYNIYGT CGVGM  
SEFFPHGHIEAFTLRDDHGKRQFMDQNDDEGLICYNLNSGLAKLELA AHMADALADLH  
GYTGGVIVHQDVKLDQFFLNADKTGVV LNDNFN

>comp14714\_c0\_seq3; 323 126 1043 LEN=1121; translated



MSPQNKLTRRAVATRRRNTGETTTTFETERTTTHGKVHHPRHNDLADKKNELQESECGATND  
KTRRRYIAHIYRDRESALFLVLSSIGAVFIVIA CFMFMLAHQKNGSTTAFGNMIDTSSS  
YFDQKSNHGESDGT SIVTSTKHKEPLHVDFHETESKYFVESFDDTFRVWRKFDEE I I EED  
ILPDFGGLQLNFSNTKSTGSSTTRQIKYDPLDMLS DYRDYRTVERDDDQDNYYAYDDDYT  
RNPFI EDYDDDGSASEVDGFNCRR I SEHRLYFPNCNSFHETPLMESQGT I I GCVQKFKV  
NHPVP

>comp14715\_c0\_seq2; 223 133 726 LEN=983; translated  
MWR T AKTLDGDETKGGGAPGAGDPVLFGR L PVP SNAFQPRMADGVSVP TLRQRLGSFLAP  
VPALFRAGTIASGVGYGIVAVLVALRSRLVPSFQTQTVPVNVLYASVYTGCFMAVVS NLR  
YQVLQGVVEPIAIDRWIFSGIGDGGEPGAKAPRNKRVRSLAAARSVLIFAVRWANGLLGS  
VLAISGMRL LGLQRLKG

>comp14715\_c0\_seq3; 149 283 1375 LEN=1632; translated  
MFGRRVRFV FALGYCHTTLTLYSIAWIELPTCDRVYKLARAKHSSNANRQENIEEQY E  
EEYRSDAIS PQT LQRSTVSNPARSACALFFYPILRLSAWKEAIRKGYLRRTNADPYFIGK  
SVTEVLVAAGTQLMAEWNRRGASRM I HELDFVVPVAVLTAVFGKYYSMWR T AKTLDGDETK  
GGGAPGAGDPVLFGR L PVP SNAFQPRMADGVSVP TLRQRLGSFLAPVPALFRAGTIASGV  
GYGIVAVLVALRSRLVPSFQTQTVPVNVLYASVYTGCFMAVVS NLR YQVLQGVVEPIAID  
RWIFSGIGDGGEPGAKAPRNKRVRSLAAARSVLIFAVRWANGLLGSVLAISGMRL LGLQR  
LKG

>comp14716\_c0\_seq1; 956 416 1945 LEN=2280; translated  
MIHSINPPSSADDDAAEVVIVSPVISTDKDNTTAAAVTSEASNISSPSATQVLEKETETN  
ENHSSNNGTNQGVQDSINSFEEDPTMTTTT TKNNGTKNEKKTMTMQTQQDQEQRNEQVLED  
TPEEDQNDNASTLPREELSQDEEKSKSVAEEIKSKDFIDSQKNSDKSIMKKNDERSSDAD  
VTSDQEGTNNNGTEQKASNIQDGGDI EWLKPSPKESDDNSNKSNDSSTDKAIAKPLKMLKKG  
AVAVAGGTMVGVGLVMIPLPTPF GAVVASSGLAVLGT EFG EAKQLNDRIIDGAKGHFNSA  
RDKIVEGIENMNSDGGDDDDGGGGLDQSENVKKEG DGGAVIKVDARSIANSSSADGAKF  
QGDKRKNNTSISGSSENKDVSSSESINTSSDTPPVWLHMNPIERARQMKLAKAKYRREN  
QSPLSQAKEAFTKKTGKFLSKNILPFIKKKKEKPPQVEEVVDFTGKTAISVVESKEQ I I IN  
GTSEVTAQNSSFVEGNKEEQIQPPQIKQM

>comp14717\_c0\_seq1; 268 293 1116 LEN=2055; translated  
MNSKFTGMIMGYFRPTDPXVAASAIPGRVPLGFVCGYPVGTGGELYGGSMFMKSAASD TD  
QGKAIQSINEKWGEIGSNRPWGGRETIGIQVCKKKYSPFLFTIDTLNGDENDANAINDN  
STTSSEKRRTVRVVRMF GCPHHSHLRKEKIERNGIRNGWEPFGQWSLQKALLLARNATI  
QLNKNDEAGNECDDRDKQISGFASDGN GAVSKKVGMSRRKNNCLAIEELKSICHNGKCL  
WKKRNKYDDIFDEITRQAGFSCEEETSGRSTFSS

>comp14717\_c0\_seq2; 268 293 1116 LEN=2546; translated  
MNSKFTGMIMGYFRPTDPXVAASAIPGRVPLGFVCGYPVGTGGELYGGSMFMKSAASD TD  
QGKAIQSINEKWGEIGSNRPWGGRETIGIQVCKKKYSPFLFTIDTLNGDENDANAINDN  
STTSSEKRRTVRVVRMF GCPHHSHLRKEKIERNGIRNGWEPFGQWSLQKALLLARNATI  
QLNKNDEAGNECDDRDKQISGFASDGN GAVSKKVGMSRRKNNCLAIEELKSICHNGKCL  
WKKRNKYDDIFDEITRQAGFSCEEETSGRSTFSS

>comp14717\_c0\_seq3; 276 462 1213 LEN=2643; translated  
MNLXVIFFRFEGYPVGTGGELYGGSMFMKSAASD TDQGKAIQSINEKWGEIGSNRPWGG  
RETIGIQVCKKKYSPFLFTIDTLNGDENDANAINDNSTTSSEKRRTVRVVRMF GCPHHS  
HLRKEKIERNGIRNGWEPFGQWSLQKALLLARNATIQLNKNDEAGNECDDRDKQISGFAS  
DNGAVSKKVGMSRRKNNCLAIEELKSICHNGKCLWKKRNKYDDIFDEITRQAGFSCEE  
ETSGRSTFSS

>comp14717\_c0\_seq4; 276 462 1213 LEN=2248; translated  
MNLXVIFFRFEGYPVGTGGELYGGSMFMKSAASD TDQGKAIQSINEKWGEIGSNRPWGG  
RETIGIQVCKKKYSPFLFTIDTLNGDENDANAINDNSTTSSEKRRTVRVVRMF GCPHHS  
HLRKEKIERNGIRNGWEPFGQWSLQKALLLARNATIQLNKNDEAGNECDDRDKQISGFAS  
DNGAVSKKVGMSRRKNNCLAIEELKSICHNGKCLWKKRNKYDDIFDEITRQAGFSCEE  
ETSGRSTFSS

>comp14717\_c0\_seq5; 276 462 1213 LEN=2152; translated  
MNLXVIFFRFEGYPVGTGGELYGGSMFMKSAASD TDQGKAIQSINEKWGEIGSNRPWGG  
RETIGIQVCKKKYSPFLFTIDTLNGDENDANAINDNSTTSSEKRRTVRVVRMF GCPHHS  
HLRKEKIERNGIRNGWEPFGQWSLQKALLLARNATIQLNKNDEAGNECDDRDKQISGFAS  
DNGAVSKKVGMSRRKNNCLAIEELKSICHNGKCLWKKRNKYDDIFDEITRQAGFSCEE  
ETSGRSTFSS

>comp14717\_c0\_seq6; 276 239 990 LEN=2420; translated

MNLXVIFFRFEGYPVGTGGELYGGSMFMKSAASD TDQ GKAIQS INEKWGEIGSNR PWGG  
RETIGIQVCKKKYSPFLFTIDTLNGDENDANAINDNSTSSSEKRRTVRVVRMFGCPHHS  
HLRKEKIERNGIRNGWEPFGQWSLQKALLLARNATIQLNKNDEAGNECDDRDKQISGFAS  
DNGAVSKKVGMSRRKNNCLAIEELKSICHNGKCLWKKRNKYDDIFDEITRQAGFSCEE  
ETSGRSTFSS  
>comp14717\_c0\_seq7; 268 293 1116 LEN=2151; translated  
MNSKFTGMIMGYFRPTDPXVAASAI PGRVPLGFVCGYPVGTGGELYGGSMFMKSAASD TD  
Q GKAIQS INEKWGEIGSNR PWGGRETIGIQVCKKKYSPFLFTIDTLNGDENDANAINDN  
STSSSEKRRTVRVVRMFGCPHSHLRKEKIERNGIRNGWEPFGQWSLQKALLLARNATI  
QLNKNDEAGNECDDRDKQISGFASDNGAVSKKVGMSRRKNNCLAIEELKSICHNGKCL  
WKKRNKYDDIFDEITRQAGFSCEEETSGRSTFSS  
>comp14717\_c0\_seq8; 276 239 990 LEN=2025; translated  
MNLXVIFFRFEGYPVGTGGELYGGSMFMKSAASD TDQ GKAIQS INEKWGEIGSNR PWGG  
RETIGIQVCKKKYSPFLFTIDTLNGDENDANAINDNSTSSSEKRRTVRVVRMFGCPHHS  
HLRKEKIERNGIRNGWEPFGQWSLQKALLLARNATIQLNKNDEAGNECDDRDKQISGFAS  
DNGAVSKKVGMSRRKNNCLAIEELKSICHNGKCLWKKRNKYDDIFDEITRQAGFSCEE  
ETSGRSTFSS  
>comp14717\_c0\_seq9; 276 239 990 LEN=1929; translated  
MNLXVIFFRFEGYPVGTGGELYGGSMFMKSAASD TDQ GKAIQS INEKWGEIGSNR PWGG  
RETIGIQVCKKKYSPFLFTIDTLNGDENDANAINDNSTSSSEKRRTVRVVRMFGCPHHS  
HLRKEKIERNGIRNGWEPFGQWSLQKALLLARNATIQLNKNDEAGNECDDRDKQISGFAS  
DNGAVSKKVGMSRRKNNCLAIEELKSICHNGKCLWKKRNKYDDIFDEITRQAGFSCEE  
ETSGRSTFSS  
>comp14717\_c0\_seq10; 276 462 1213 LEN=2547; translated  
MNLXVIFFRFEGYPVGTGGELYGGSMFMKSAASD TDQ GKAIQS INEKWGEIGSNR PWGG  
RETIGIQVCKKKYSPFLFTIDTLNGDENDANAINDNSTSSSEKRRTVRVVRMFGCPHHS  
HLRKEKIERNGIRNGWEPFGQWSLQKALLLARNATIQLNKNDEAGNECDDRDKQISGFAS  
DNGAVSKKVGMSRRKNNCLAIEELKSICHNGKCLWKKRNKYDDIFDEITRQAGFSCEE  
ETSGRSTFSS  
>comp14717\_c0\_seq11; 276 239 990 LEN=2308; translated  
MNLXVIFFRFEGYPVGTGGELYGGSMFMKSAASD TDQ GKAIQS INEKWGEIGSNR PWGG  
RETIGIQVCKKKYSPFLFTIDTLNGDENDANAINDNSTSSSEKRRTVRVVRMFGCPHHS  
HLRKEKIERNGIRNGWEPFGQWSLQKALLLARNATIQLNKNDEAGNECDDRDKQISGFAS  
DNGAVSKKVGMSRRKNNCLAIEELKSICHNGKCLWKKRNKYDDIFDEITRQAGFSCEE  
ETSGRSTFSS  
>comp14717\_c0\_seq12; 268 293 1116 LEN=2450; translated  
MNSKFTGMIMGYFRPTDPXVAASAI PGRVPLGFVCGYPVGTGGELYGGSMFMKSAASD TD  
Q GKAIQS INEKWGEIGSNR PWGGRETIGIQVCKKKYSPFLFTIDTLNGDENDANAINDN  
STSSSEKRRTVRVVRMFGCPHSHLRKEKIERNGIRNGWEPFGQWSLQKALLLARNATI  
QLNKNDEAGNECDDRDKQISGFASDNGAVSKKVGMSRRKNNCLAIEELKSICHNGKCL  
WKKRNKYDDIFDEITRQAGFSCEEETSGRSTFSS  
>comp14717\_c0\_seq14; 138 122 589 LEN=1453; translated  
MSSAARAFEQRSAAAVAQVIAELDNAASAPDTPEAASPAVDGAGSLDFRGAQIEEDAKLA  
EQLQREYQKEEARVQRQRERRAAAAAEQNMSWTEWLMGTTPSTSAAGPQSSASSGGARV  
AQP SG SIFACVAQSIGSAMGPAHEQVRGVDSSSL  
>comp14717\_c0\_seq15; 677 123 1979 LEN=2634; translated  
MPNLSGDKSMYERLLGSGSDMNMSWLC SHAI PEDSAIEMKSDSNRGAQWLRKTRESA  
ARSKTVIWGPTHFS SDEADEASNKPKVLYGEENNETNLDQRFGTTPSKPAVGNNNSNNQS  
QDTASTKSSHESNPPTDSDEHRIEPMGTVQVTLGRVWNNIQCLEDTTTDPAKEVGENENR  
MMNLLSVCS PCKPRNLGDTFSVNCEDDTPLGISRLAPPNPCLQPPNDSNKNNTVACDEK  
STNTVETAADRRRQRHKRRQLKSGAGDDTSPQEAYEVTPDQVMMMRKEQKKPSMILPRP  
LPLKSLLELNSNQAVELERCISELTMRSSYGEATAKIAENRRMAYYAVGKHHRQSGRGGNR  
RCYFTGKLI LGGAPFYAGSVQQGLRTL VVFLPSAVGLPKEVQATSSNS SRAPTIASLGS  
GRRSNMSSSNASVAQSLGVGNPRSVAGASLLSRKNSRVSR LSSVDDATSLGCSVEEELD  
PNWELDREYLLGVLPDPTQELLDEMAMRYPTQFETLPVQVRSPSCWSL FVKFCFFSGLPI  
AEGEMHYKVRDNIADRYGEEIILSHEVMEAVNGESAEILRLPNLKTFRYL RKHYHQSAK  
LPDNC FQRQAWEMVRPEV  
>comp14718\_c1\_seq1; 448 188 1414 LEN=1910; translated  
MVPGTTRQRQPPPMGREGERTPLVPLPREAGADRVLAAAAPSRKNPWLSPKRLVVGAG  
AVAALVAAVWIHP ELVGRAAVAIGGSERVGVKCKDVYMPDLTAATRFYRSRVCYPDDG

KKHPLHFFAHGDFGGGPF SFAYRGI VNDIASR GFV VSMYLS CAIDQCDDGNASFL EILK  
SMSFLESEAGWWTELIDFDAGYSASGHSTGGRAVLMLAALVDNPTRYLAGTKYASMIT EA  
QRTSLQKFRAVVGDHPDIYLPGFNPVDVANFVVDKTPMTIVTGTNDYIEPELSAWKDFEA  
VSPTANKLYVDMKGTGHLGPLL SHKEGPIYAFYCSCFLGGPRGGDGACDRVFGTSGAGAM  
RNAIPMAAAGDRNTGDGVVGF LGCRRDKGGGESVPEGLEGYCKQTLHR

>comp14719\_c0\_seq1; 783 325 2190 LEN=2295; translated  
MTSARCMAKKATAFQTP EELKSVKSLAVQIQMKNYV VAPRKF PKTLIIASIAIYMVYMVM  
PLNAF SRAMGFERRLFSANSRTNDVKGISGAI VCRNILRIVRNGSSSLGERQCLSMVLGGP  
PMEDHDQDYSDNSNDSKEYQRPLSRKTSDFQTALAI VPPLEDWDR LQRARHYARDPVFREW  
PPAIRL FHPFDKAQNI AFDIAQLIEDLELEPFEVTLDSWVIVPNVEATKKEWEDQQFLPE  
VVDGDTLDSY YGKLSEQSEQEIQDLIKSEERK GKIKAMKKNANAL AARGNRQDEKEELPR  
GTARRK KSPAQLREEQRKSIEEDFGGPCVLCLEPDEESKEKLI ELRGILLEGLGIESYSS  
PSSLYAWDYVDDMDMGYRPLIPISKFDTFHSAMEKASRLKGLWGDPLTINVKCLDILSCK  
PPEESTEDS DDESDDWESFGMPNSSRFSQ QASQVEIKKDAWACNARIMLAGEEIQQDD  
SANENMIEQLLESGEIGGADISMDFTILEDEEESTSNLEKWLDEDEDEFDEGTQVIIGRTH  
FFTGDQRNYKGPATS VVDAKDRSLGEAGSVSGVARRRGSTSRKQNVWEDGEYGRRSKDF  
LPWGLRERKEKEKHKWSEDEI

>comp14720\_c0\_seq1; 239 1 1685 LEN=2365; translated  
XLSKRIRITILGTHCYVGMVTRKLLYTRDDSSPVALDSLPLVSSHHRNEAEAFDIDEEN  
CIGRYGTGSHTSVETITKVTA FEKVGSSDDSRDAASIAPETAPHKSLGWLWGRLLLLFVLG  
VYGSLNVSMMRVFARPNPPTPSASSTIQGF SVLGFLLP LLLWKNARNAKNQNHRAGTLP  
KQRHCQTCRTILFGSSDSNIFYDPINGANDQELDRSKQRQTQNYQARLVWFALELALWN  
FGTQALINTSLLVTRGARASFLVSTSVVWTPIVSSVMTLACRDHKNTTHPPQSQRGRRAI  
VWGACVLALLGTWVISKGENRSGDEPVALAAERNDASAA RANGNSSLSLSPSPA WGDLC  
CLLAALCWSLYICRLSALGDSFDETTTQFVKNVFLAILYSIWMVASVWYHNASEDTADDS  
SSYDAH FSSWSLWKDWKIDSVAWGIL IY TALGPCTIADVCQQT AQASVPAAETNVILSME  
PVFTTLLGLLILGETPSQPELVGGALILVASLLAADAVRSRRVDDHCCTQQPIYFAGMNS  
LFYIRLGRIQRDNNQFPSALL

>comp14721\_c0\_seq1; 469 784 2073 LEN=2531; translated  
MEGIDLGANQSVTLHLAGRGNRNLVKWRCNYG PVRNNQVNTFERDVRKQIAKELKEWGI  
DPKKS KDHEDFWREVS NQAVAATKHSSSCAIS IETLFTNTIALSREVAEAVRQVLRNELE  
DSVEFTFTNASDLLEFDKPFYFVFDKSSRS NVLQRRFELK KYKLKELDPFHRFEGIEHS  
AEDWFRKIWKTTSLGGYVFEALVAHMHVHMVQCKSCKCRNQMF WNGGINISGSWADV VCR  
KCKASYEIKSVSSDDAIEKRIFNSFP GGSFRQYYKNPAQFKERYLVIVSRKETYVKKLE  
MVHRVSLARIRNVEPRLCGESFVGRGSHIRI ISNINIEKGSLEKAWCYVKPIADYTAMAK  
EVFN NFYGDGAWTKENSKEIENNEHESPSKSRLEIATPNEEEKVEQLREN LKQELRVSSD  
DDEDWESLY

>comp14721\_c0\_seq4; 458 904 2106 LEN=2564; translated  
MSIYDYRNNQVNTFERDVRKQIAKELKEWGI DPKKS KDHEDFWREVS NQAVAATKHSSSC  
AIS IETLFTNTIALSREVAEAVRQVLRNELEDSVEFTFTNASDLLEFDKPFYFVFDKSS  
RSNVLQRRFELK KYKLKELDPFHRFEGIEHSAEDWFRKIWKTTSLGGYVFEALVAHMHVH  
HMQCKSCKCRNQMF WNGGINISGSWADV VCRKCKASYEIKSVSSDDAIEKRIFNSFP GG  
SFRQYYKNPAQFKERYLVIVSRKETYVKKLEMVHRVSLARIRNVEPRLCGESFVGRGSHI  
RIISNINIEKGSLEKAWCYVKPIADYTAMAKEVFNNFYGDGAWTKENSKEIENNEHESPS  
KSRLEIATPNEEEKVEQLREN LKQELRVSSDDEDWESLY

>comp14721\_c0\_seq6; 458 733 1935 LEN=2393; translated  
MSIYDYRNNQVNTFERDVRKQIAKELKEWGI DPKKS KDHEDFWREVS NQAVAATKHSSSC  
AIS IETLFTNTIALSREVAEAVRQVLRNELEDSVEFTFTNASDLLEFDKPFYFVFDKSS  
RSNVLQRRFELK KYKLKELDPFHRFEGIEHSAEDWFRKIWKTTSLGGYVFEALVAHMHVH  
HMQCKSCKCRNQMF WNGGINISGSWADV VCRKCKASYEIKSVSSDDAIEKRIFNSFP GG  
SFRQYYKNPAQFKERYLVIVSRKETYVKKLEMVHRVSLARIRNVEPRLCGESFVGRGSHI  
RIISNINIEKGSLEKAWCYVKPIADYTAMAKEVFNNFYGDGAWTKENSKEIENNEHESPS  
KSRLEIATPNEEEKVEQLREN LKQELRVSSDDEDWESLY

>comp14721\_c0\_seq7; 458 922 2124 LEN=2582; translated  
MSIYDYRNNQVNTFERDVRKQIAKELKEWGI DPKKS KDHEDFWREVS NQAVAATKHSSSC  
AIS IETLFTNTIALSREVAEAVRQVLRNELEDSVEFTFTNASDLLEFDKPFYFVFDKSS  
RSNVLQRRFELK KYKLKELDPFHRFEGIEHSAEDWFRKIWKTTSLGGYVFEALVAHMHVH  
HMQCKSCKCRNQMF WNGGINISGSWADV VCRKCKASYEIKSVSSDDAIEKRIFNSFP GG  
SFRQYYKNPAQFKERYLVIVSRKETYVKKLEMVHRVSLARIRNVEPRLCGESFVGRGSHI  
RIISNINIEKGSLEKAWCYVKPIADYTAMAKEVFNNFYGDGAWTKENSKEIENNEHESPS

KSRL E I A T P N E E E K V E Q L R E N L K Q E L R V S S D D D E D W E S L Y  
>comp14721\_c0\_seq8; 458 1093 2295 LEN=2753; translated  
MSIYDYRNNQVNTFERDVRKQIAKELKEW GIDPKKSKDHEDFWREVS NQAVAATKHSSSC  
AIS I E T L F T N T I A L S R E V A E A V R Q V L R N E L E D S V E F T F T N A S D L L E F D F K P F Y F V F D K S S  
R S N V L Q R R F E L K K Y K L K E L D P F H R F E G I E H S A E D W F R K I W K T T S L G G Y V F E A L V A H H M V H  
H M Q C K S C K C R N Q M F W N G G I N I S G S W A D V V C R K C K A S Y E I K S V S S D D A I E K R I K F N S F P G G  
S F R Q Y Y K N P A Q F K E R Y L V I V S R K E T Y V K K L E M V H R V S L A R I R N V E P R L C G E S F V G R G S H I  
R I I S N I N I E K G S L E K A W C Y V K P I A D Y T A M A K E V F N N F Y G D G A W T K E N S K E I E N N E H E S P S  
KSRL E I A T P N E E E K V E Q L R E N L K Q E L R V S S D D D E D W E S L Y  
>comp14721\_c0\_seq9; 469 613 1902 LEN=2360; translated  
M E G I D L G A N Q S V T L H L A G R G N R N L V K W R C N Y G P V R N N Q V N T F E R D V R K Q I A K E L K E W G I  
D P K K S K D H E D F W R E V S N Q A V A A T K H S S S C A I S I E T L F T N T I A L S R E V A E A V R Q V L R N E L E  
D S V E F T F T N A S D L L E F D F K P F Y F V F D K S S R S N V L Q R R F E L K K Y K L K E L D P F H R F E G I E H S  
A E D W F R K I W K T T S L G G Y V F E A L V A H H M V H M Q C K S C K C R N Q M F W N G G I N I S G S W A D V V C R  
K C K A S Y E I K S V S S D D A I E K R I K F N S F P G G S F R Q Y Y K N P A Q F K E R Y L V I V S R K E T Y V K K L E  
M V H R V S L A R I R N V E P R L C G E S F V G R G S H I R I I S N I N I E K G S L E K A W C Y V K P I A D Y T A M A K  
E V F N N F Y G D G A W T K E N S K E I E N N E H E S P S K S R L E I A T P N E E E K V E Q L R E N L K Q E L R V S S D  
D D E D W E S L Y  
>comp14722\_c0\_seq1; 359 1 1189 LEN=1750; translated  
X E A M K K K L S K L K E E E R K V D H Y L A Y L K E Q A A V Y N G R H P P S R E Q L M Y L P G G I S N V P E H M Y V R  
F D D I T R M P A Y K S E T V I G I R A P A G T A L E V P N P E D A D G R Y E M Y L N S K G T G H P T A R G A K G E P I  
N V Y V V Q P R V D Q Q D G S Q Q D E A R A G A P G F A Q E T P P S P Q R S S K A T A S E G S S K T A S S K T E P T D Q  
Q Q E Q P P Q Q G P F R P P S R D H P D H H M Y E M P G H G G G E Y G S E R I P P Y P P P H V D P S W G P Y G H G P H G  
Y Y G H P P H R Y P G P S D P H L Q R E G G D P E S R G S N R R E A F R R R P A G G P H P Y P H A H E M G R T A S A G  
G E A P P G R P P S P S S Q Q N N Q L L T M P L Q S P N E Q H L L H F A S P A G G F T P P R G S R E R V A I R T G S P E  
A F P I L S L P N D S S S R E Y T D G W Q P P R P K L S K G P Q G S H R  
>comp14723\_c0\_seq1; 427 317 1792 LEN=1906; translated  
M I V S W S A V I A S L L L F L F I C S S G V H P C L G D N S E D S I V E K W K A T V P S T R S Q R F P S I E S R I K L  
Y L S N W Y S P P C K D D L D G F I Q Y S L G G W D T N T T S N S A K R W P T L E V A G L K D H P T V N Q T M R I M S N  
I Q S I V E P D M L F F M D K E T I V N C A N F S Y D E E W G E Q T N D P Y R E R I K F R H N M R M Y C E D V E G L L M  
P A W D H I Q W E E K D A D K D Y L P P P V L I Q F G D N K Q S H V F K D V Q V P H I K K F R S A A L T P N D L E A V T  
S K D C Y S S R G E G I R E A L N S A H G T Q R F Q P I V W K L A T D R H F K K L K D V Y R Y D T Q W S H K K D Q A V F  
R G Q L T G S R D G Y N K Y K S D D E N C Y N M K R C R L V Y N H A N S T L I H A R L T S T R G R L P D V L N G V E L L  
A D K V K I D S L L E Y K G I I M I E G N D V A S G L K W A L L S Q S I V L M P I P K H T S W C M E E L L E P W V H Y V  
P L D D Y A T N V E E R M Q W V I D H D E E A R R I S E R A T L W M E D L V F H P D A A E D D R L I Q E E L L R R Y K A  
H F L E A G D A E V P  
>comp14724\_c0\_seq3; 449 158 1882 LEN=3830; translated  
M E E T I S A S P E Q E I P L A R S A P E P E P V Q N G H E T S E E P G P E N D H G S S V P D A I F N F T N S I V G A G  
C I G L G G A I A L S G G L I S I A L V I F F A V L T K L S L D L L I R L S V E S T S A S D G S V A N A S Y E D L A E R  
G M G Y W K G R V P V M V C K L S Y S F G C L V A Y V I V I K D N C G P A L L S L I Y G E G N D N G P G A D T D A D S V  
S V S V S V S F T Y S G G E D S Q S D N S E W F H R F L E D Y S F V T W A V S L A L I L P L C L L R D M T P L A F G S L  
I S V V S M V T I V G I V I Y I Y F A C P E V R Q E P T G G F Y E N W L E I R P G V L S N L G T F I F T F V S Q H T V H  
L V F S S L K P S L R T V A K W K V V S S L S I L A A A T V S L L V G V F V Y I T F W Q N T K S D I F Q I Y P H G W M I  
D T A K L L L C V T M V F T F P L P F F T C R E L L I L T V V H P L C G I H R K R S S E E S R G N D A G R V G T D A E  
C P E V H E D E N D S M S G L Q R P L L S E E P A S T D N L S V D D D T M N A L P S E N S E P R S T P S I A T P Q K W L  
L P D D D R Q L V L S G H V F L T T Q I W L V V T G L A I A A P S L G D I L D L V G C A S G T L I A F V I P G L L S F S  
V E G Y T H L G M L I F T V G G A V G T V G T Y Y S I K Q L V N D L  
>comp14724\_c0\_seq4; 715 196 2868 LEN=3058; translated  
M D N H N R F S G R S N E F V P R G G G R N N G P W F G G N R N Y G R G R G R G R W G G R R P D H R S G R G R N N  
R N N N S N S R K G R G D L H Y R R S A F D P I E E I G D T V F C S P C G G G D S N T K P S L S S S L V R I A V E G C C  
H G E L D L I Y D R L L D H Q R T S G H A I D L L V C C G D F Q S L R S P A D Y H S S I P P K Y R R L G T F A K Y Y S  
G E K V A P I L T V F I G N H E A S Q P L R E L H Y G G F V A P K I Y Y L G A A G V V R Y R G I R I A G I S G I Y K S  
H D Y V C G Y H E V A P Y S D R R S V K S V Y H V R R I D V E R M K L L S R G N N D D S S N N N S K H T I D V F A S H D  
W P L G I E Q H G D T Q G L I R R K P F F R R E I E R N E L G S P P N R E L L D V L K P T H W F A A H L H V K F H A T L  
V H R T Q E P A T L A R K N D Q T N P T P Q T Q V S T T P P T S S V L M P S Q V R S K P V I S A P L L L P P P P P V N  
V A N K M A S I P F D E N N A S D T D T S T N V K T D T E A D V D G T A A T A S V P S S T T E F H A M E G S E A T C K L  
G N D S I P D L T E Q M T R F L A L D K C L P R R Q F L S V L N V R L L D T D G S G E G N E L S S Q L P D E R S G T T I  
D Q H P N N P G D A S S S D I E A T A T M R T P T Q V Q P Q E E P S T S E E Y H L E Y D P E W L A I L K Q T H H W N T T  
E R G P V S V P S F N H S N A Q Y D A S W R N R F K K T N F E N Q N K P A K E D L P S L A S A T P N E K K A Q Q D E R  
G A A R A V D S K S N S A R Q K T P Y L E I P R D F V P T V P Y Y T N E A F R G G K S G S T T D P P S L P A M G N P Q T

DHLRLVLELEHILTRPYDPALTPDVISAQWRDRTSKRRTIGGSIYAYNNASTSIRGRSSV  
HNNGNPSNRITIIIDDENEIDIDDEDTAKEEIDDNEIQLESDDDHDDGDASNWDRDNGG  
KGSSEAEKDEGDENEIDLDSSEGDNADSDNNGDSIETNTAVFKKARLEN  
>comp14724\_c0\_seq6; 687 253 2484 LEN=2824; translated  
MDSRNNPSENSQQDNASDNRASPOQLPQMLHQWGA VNPSP IYPTREVGLHQPPQQQLTA  
GDASRLRHSFVPTLPRMDESINRNEQKAYSFKSNSTAMGNATATAAAPDTKPTIEKSGR  
TSDVVAQSRSEFPKILFNVLQEAKYLKVMGWSRDGKAFYLNQNQSEMKT VLSKYFNVSAF  
SSFYRYLETNGWTKLQKGNANMMYNPHFHKNMADKDFEAMFDSHF SRQKNSNDSQTTS  
KKHPETKNKKEKKVAVAKKAGATVAKKKIDNVAKKKNDKAQKTA AATKVGKSKAAAKTAA  
TGTQSSNNKRRKTSNVQASTSKNKATKKEPSVTKLDEAKMVKKRLREHKKLHELFTQWN  
MWNLPEGLDVFLRSGKVHAIRKKTQKTDVVEAADAEP EMGDDCTQDQINALLCHEELPQS  
VMDNTSDSQALADLVERIRQDRVQQRKFNEILASTVAPNVKGKRLRQSQFVKPKKKWKKV  
RVGDR LGVHWRDNKTLCKAIVQKQQGNTSYFQMRCEADGSK EWFDL SRERFQSYGSRQNP  
EPVARFHTQLATMPSISSVTDNTPQKDNTRGRKREDEPEKLDLSIYMPDYSHLGFVRY  
WKGLGLGRKVGTPSYNDYIRKRDPSAPEVTTLEILNDLRLGRQGLMGVLSQDEINNID  
TTRNRNNA LFNQLNLRDEISTKHKAISATKQFDQTLNGVRKVTEKWNIP TLRKNLRIIE  
TQILDLEKETTIIMKCKEKGW  
>comp14724\_c0\_seq7; 449 158 1882 LEN=2426; translated  
MEETISASPEQEIPLARSAPPEPVQNGHETSEEPG PENDHGSSVPDAIFNFTNSIVGAG  
CIGLGGAIALSGGLISIALVIFFAVLTKLSLDLLIRLSVESTSASDGSVANASYEDLAER  
GMGYWKGRVPMVCKLSYSFGCLVAYVIVIKDNCGPALLSLIYEGENDNGPGADTDADSV  
SVSVSVSFTYSGGEDSQSDNSEWFHRFLEDYSFVTWAVSLALILPLCLLRDMTPLAFGSL  
ISVVMVTIVGIVIIYIFACPEVRQEPTGGFYENWLEIRPGVLSNLGTFIFTFVSQHTVH  
LVFSSLKPSLRTVAKWKVVSSLSILAAATVSLLVGVFVYITFWQNTKSDIFQIYPHGWI  
DTAKLLL CVTMVFTFPLPFFT CRELLILT VVHPLCGIHRKRSSEESRGNDAGRVTDAE  
CPEVHEDE NDSMSGLQRPLLSEEPASTDNLSVDDDTMNALPSENSEPRSTPSIATPQKWL  
LPDDDRQLVLSGHVFLTTQIWLVTGLAIAAPSLGDILDLVGCASGTLIAFVIPGLLSFS  
VEGYTHLGM LIFTVGGAVGT VGTYYSIKQLVNDL  
>comp14724\_c0\_seq10; 1035 105 2018 LEN=4394; translated  
MRTTTAAFLAAAAASVDKGFYANAVTIEDAQACNADVP AIDFLVLEGDANA EAEI EDEVR  
GDLEKLGFKVETRMLGKNDFNQARARGDFGLSFSETWGT PYDPHSYVSAWEAEDNANHNA  
LVNLDGGASREELLTMI EDTLQ EEDMAVRKSKWKDVHNY YHEQAMMLPLWGRRVAVINN  
RLGGYEPGHQQDFDPVHKLVPLEGSTTVTISP GALTGRFETVGNLDPHTYNPNEFFANNW  
VYEGLVQYGP EGEILPALATSWEVEDFGPGSKYTFQLRENVTFHDGAAWDCTAAIMNFDH  
VLGALKEPVWHGWYGVPKYLDSEWCSDMELT LTTSAKFYFPFLQELTFIRPLRFLSPNAF  
AEGPDSDPYTANSCERGWGTLEAEDTTQPDVVCAGISNISGTGPF AFVVSREQSMLTTMDF  
DETRVDDVVEFAANKDWWGGAPAIETLKVVRYDSDAIQA ALLDGS LDVMWGDGVLSSNA  
ITELDQKRSENP HLNVFIGDDIQNVLLNTGT PPLDDIRVRKAVIHAINKKALIEKELG  
GFLDPVDNVFGRDMPYCDVDLTPHWDHLEKAMLLSCNLEGANAQQIGAEDNSSLAIGLG  
VGLGALCLILLAVSATFFKSKDLEAKLVEPKEAVAA  
>comp14725\_c0\_seq1; 626 99 2476 LEN=3124; translated  
MIVLQEKENKALLDLGANNTFHLEKDAGNAFTLVI PRREEHLADLENAYS DYDGNFQ EHR  
RLRDM SAFSDRVALASSCQRTGRPLPSTQILMSMANETKTNGNISGSSSTTGPSSLLKK  
FYESVGKKEDIPVVKNKNTIPNDSEQETPTIDEINDPSFSTIKIGHHRRYLQ LTKNTQE  
QKQSSQPRHLQKRELKKLQSMIVKEQASYRLALDKFHRYKSRYL VGFESRFSNGRSIVN  
ANANRNVDGFSRWACSHAESINREWKKALAASSNNTTPSSSDQMSNECYSHALPRCYGKV  
RQTLALHPRAHRS SLDVQDLTCSVVYESKPLL RPTSSMTRTTEIPEFSPNETDHNTCQA  
IPPTIESAPAVQLLRNDPKALELAAQYSANIIT TSETLETLLRRPGDYSCNWMLPCTSV  
TVPDPKSKSPVSSSIQITILDFPIAHGFSSPRACLERGLQEGLYQLFQQTQQRANRTT  
TSETIENSKEQEDGSSGERLSSLP AIQYVYSLWTLPGNKIGGNI SKKPIKVIIVRTLVR  
LKDSASKLPVRMRARVEYFASPVNLYDEIREAVT SRAHREIPNSYEKSLWILDQVLF GH  
QAFCLQYRIDPVTCKILGWDTT SIAHFAESSANGG SNRSLNPQC DGIGPLDHWKGLIQ L  
LQSI PAIDVPETLLCLPGLVGERGRSEISTNGKTL LGQGS HSSSNEQKDGLQTQQQEQD  
VRLDPFSVSVHAACKDILARTTSEARHGSNL LKASSSSNATIFLDETILGRACTVRLG  
QNALVECRRDWEW  
>comp14726\_c0\_seq2; 323 1 1183 LEN=2410; translated  
XVSI AHRSTTSVILTQTQTRTQTQNTQTQTQTKQAAPGVHYPQWHNALAGGIAGAGAR  
LFTAPLDLVRIRAQLERRDVYPRPSVLGRMRGVYRAEGGFTALFRGNLAASYLWVGYTTV  
QFSVYGTTKDALEAIRCSRGDGLAGGEAAPVPAGLLANPSAVAFVSGAIAGVCATMVTYP  
FDICRTV FASRGAPATQPQHQPQQQPQKTRAARTGSAAAATAIAANNATTTATTAIRPPST

IKECAVSMYRKDGLRGFYAGSAPAVVQIVPYMGLNFAYDFLVDGDTNSKSVGLSGYAGS  
ISGAVSKVAVYPMDTIKKRIQIQSVFGTACSQPGGVVYSGIGDCFATTVRTEGVRGLYRG  
LFPSVLKTTLGSGLSFAFFRRTKNLLENVHDYQH

>comp14727\_c0\_seq1; 564 147 2504 LEN=3023; translated  
MAPSRPGFDNRDL SAKNASFRRTAPMWYSFVAVCALSVLTYGNI FWNIPSFVYPYALIGKD  
HYSIDQQDRALGHHVLSLSSNSTNEI YGVPREQDRCGIWMAPSSLRPIPGYGI FTTRDIDQ  
GDSILRAPDAVSIPLRDMRRRNTHLPLDKERRRMWHNVFANYVVAHGMPDHSRYDHPDPT  
VDFQPGFGSLPNHHCVLESLGQAPARVSPYDDGLLDSNHSDSSSGRKS PGIGAFSYHLGR  
DFYAKRDLKAGEE IFLNYGYCRRNKPVNKKRSEDANI PWHQKFIYPEDIKEAARVLQLYE  
PFGSKPWPKGKTTAALLNVI AEESLSSPTDLTQYSDPQFVLSILKEVNDRFDRQSLYDTV  
NKINVQSKESLAKMMGHRVVHKSDSYDTLATKKLWFELSNLSLKRDPDWIKGNGLCLEH  
LVPKKSTLPNAGFGAFAQYGVKDEIVVPTPVLHVVNKKTLSLYRQSIAGDEDIRLLKNN  
PESFKVGTSLLLNYCFGHPRSSMLMCPMTSTMLINHCSYRTKECGPKGPNAEVQWSSGWD  
PASHEWRNK TIEEIDHQMGRILSLEIIALRDIAPNEEVFIDYGI EWENAWSEHVRWKPP  
DEIRNFVSATQANLREGPILHDLMSNDRKTVHHPYLFTGCQYDARPDVENIGNYTKRWK  
GKWKQLSDQEILEKFSAPGADFVYQKGEKYKGHKEFSHWPCSVLYAEKEKGRYTVRIHMS  
PLKDVEPHDTSWNRNEVPRILTNYSQESIHYFVNPSATDQTL PNAFRHAIGFPENLFPKQ  
WENLG

>comp14728\_c0\_seq1; 383 473 1594 LEN=1744; translated  
MEGRIMTTSMVSRTRGRSPSPYRQSNCDRKTDDVDVLEKSLQSSHVIGVDRPRSEDEIAS  
LVFLGSDDTSSDDSSFSGYAFETTSGRRRLRKRNNENITNDIESYTNAKTQKECEVGK  
YMAAREMTPFQERMNALTVPSTYYCIMFFLSGSWLSKSFIEEHVNGLIDYTKFDVSQCI  
HSTWFPNLHALPPAAPVAAA V GILCHAPFSMIYHWRYAHLRPPGLPRTTHWSRRMDQAMI  
HFCCACLSYASSGRFDFFFVNALFNAECMYLLFLEKVVPKRNQKRIAMSILLFAIPILHK  
GDFASF SKLIVIFALAGWLFGGYP IGGWSHAAFHIVLAFVPPVMFAYALNLPASLPQLDV  
AARCAIMSNDSLV

>comp14728\_c0\_seq2; 383 861 1982 LEN=2132; translated  
MEGRIMTTSMVSRTRGRSPSPYRQSNCDRKTDDVDVLEKSLQSSHVIGVDRPRSEDEIAS  
LVFLGSDDTSSDDSSFSGYAFETTSGRRRLRKRNNENITNDIESYTNAKTQKECEVGK  
YMAAREMTPFQERMNALTVPSTYYCIMFFLSGSWLSKSFIEEHVNGLIDYTKFDVSQCI  
HSTWFPNLHALPPAAPVAAA V GILCHAPFSMIYHWRYAHLRPPGLPRTTHWSRRMDQAMI  
HFCCACLSYASSGRFDFFFVNALFNAECMYLLFLEKVVPKRNQKRIAMSILLFAIPILHK  
GDFASF SKLIVIFALAGWLFGGYP IGGWSHAAFHIVLAFVPPVMFAYALNLPASLPQLDV  
AARCAIMSNDSLV

>comp14728\_c0\_seq3; 383 1043 2164 LEN=2314; translated  
MEGRIMTTSMVSRTRGRSPSPYRQSNCDRKTDDVDVLEKSLQSSHVIGVDRPRSEDEIAS  
LVFLGSDDTSSDDSSFSGYAFETTSGRRRLRKRNNENITNDIESYTNAKTQKECEVGK  
YMAAREMTPFQERMNALTVPSTYYCIMFFLSGSWLSKSFIEEHVNGLIDYTKFDVSQCI  
HSTWFPNLHALPPAAPVAAA V GILCHAPFSMIYHWRYAHLRPPGLPRTTHWSRRMDQAMI  
HFCCACLSYASSGRFDFFFVNALFNAECMYLLFLEKVVPKRNQKRIAMSILLFAIPILHK  
GDFASF SKLIVIFALAGWLFGGYP IGGWSHAAFHIVLAFVPPVMFAYALNLPASLPQLDV  
AARCAIMSNDSLV

>comp14729\_c0\_seq1; 738 108 1591 LEN=1591; translated  
MTRPDYNEPRFQSTIPRALRLLVVTSLATLPATKTADAFAPVPKNSQQHRPVPTRTTEW  
ASPTTTELSMVFDFFKQRSSEGIEQLSKLTDAAAKGNLGQGLADAASYTAATNEAFAAGL  
ALSRNRF LNLDGLFGGASSASTIDELLEDLQDVLLQADLGVATSEDIVAEVKSLENNNS  
EEGKDPRLLSREDLMSVMRGVLIETLDFETPDGAVAAVEETAGDGDDASEESEPSPNSI  
PGASAIRFASKESKIPTVLFIMGANGMKTTTIGKLANRLKIEGDQKVLLAACDTFRAGA  
VDQLQMWADRAEVDLLGPTPDGTSSPTTIKAACEKALAEGYDTVMIDTAGRLSNNWELN  
EELVRMKGAIQEALGSGDEKNEDVPHEALLVLDAAQGRMALDSARVWNKEIGLSGLVLT  
LDGTARGGSVVAISKELDLPVKLIGVGEIDDLRDFEGEAFVDGLLGIGSAGGKASGTEG  
AELASRLEALRKERV

>comp14729\_c0\_seq2; 809 108 1751 LEN=1866; translated  
MTRPDYNEPRFQSTIPRALRLLVVTSLATLPATKTADAFAPVPKNSQQHRPVPTRTTEW  
ASPTTTELSMVFDFFKQRSSEGIEQLSKLTDAAAKGNLGQGLADAASYTAATNEAFAAGL  
ALSRNRF LNLDGLFGGASSASTIDELLEDLQDVLLQADLGVATSEDIVAEVKSLENNNS  
EEGKDPRLLSREDLMSVMRGVLIETLDFETPDGAVAAVEETAGDGDDASEESEPSPNSI  
PGASAIRFASKESKIPTVLFIMGANGMKTTTIGKLANRLKIEGDQKVLLAACDTFRAGA  
VDQLQMWADRAEVDLLGPTPDGTSSPTTIKAACEKALAEGYDTVMIDTAGRLSNNWELN  
EELVRMKGAIQEALGSGDEKNEDVPHEALLVLDAAQGRMALDSARVWNKEIGLSGLVLT

LDGTARGGSVVAISKELDLPVKLIGVGEIGIDDLRDFEGEAFVDGLLGIGSAGGKASGTEG  
AELASRLEALRKERAKRTPVVSQVSENKEAITPRTFNHVSPQGAAPPKRTSKRSNRKK  
AKKGKKR

>comp14730\_c0\_seq1; 1013 96 3500 LEN=3556; translated  
MAIEGVGDNWERQDDVDDSNGTASQLASTNAADLFEEQEKAQYIRDLCAESPDGKDYRY  
NDQALVKLRSIFDKYLEMPSSLDDHHLVKLVDTLTDAACSLGASTLELQATTSSNSDGN  
SKGEDEDTTQDTTNNADHDWFDWDSPLPRILSAMYALSKVRGRKRVQKFLPHQVENVEPVL  
NCLVVLVDGLAKKQRTKGFVLGENSIDDDIPGGPQLWESTYTLWNWMEILGKVPFDCEVVI  
DRSQVTELLRLATSHLSETGPTREMAASCLARWLTRPDLEESEFRSSFQHWSMNILGDYV  
GEIRSLKEERTNGDPAVSIQSSTFTTMGVLTQTLVTILKISTSDREKVLTSIRSYWPLIER  
IPGAKNRPSNLLLRRKYLKWWARIGVLYLPPRIASWRYQRGRSLKRNLRQLQHNRNE  
SLPKAKTIATTEEVNYKDNPDYFFAVPDKVEICMEQLLVSLKDTSTAVRWSAAKGVGRVT  
ERLPAVCAEDVIDAVMEFFDDMENDNDWHGACLTAEELARRGLLLPHRLKDVIPIKIVEAI  
HYDLPRRRTSVGAHVDAACYAYWALARAYSPRILKPFVQQLGQSVVAVFLFDREVNCRR  
AASAAFQEMVGRQGAHNFKNGISILTVADYFALGNRKDAYTEIALHIAQYEEYQTAIINH  
LYQVKVSHWDPSIRLLVVSQSLNKLTLVNPRFMVDKVPYLLSCLDEKNLQLRHGATLAL  
AEITFAFGRINQDQCGLSPDLQKLI AETVPIIEKKRLYRKGGEQMRAAVCRLEICIAIS  
HIYLTVPQQVRLDSDIDACLPHPNQTIQEHAGDALFAHTRSYPVSSKGPSRLQNRVVD  
KYVKASRTNINPAATRGSALGRLLPPLKLLAPSSSEVLDMTSLCCLCRISRPAARVGTEDKA  
ETRKNALVSLRRVCENVGIIPKRDESACIVGLSRKQLNHVFTAYVRAMEDYNTDQRGDVG  
SKCRLAAMNGLVSLAVLTTTQNCSEGVTRATFFSNQCTQIIGLFLKQFSEKLNFRVCEAA  
KCILALLVDNISVGKYVTKRQMLLDALTPPSFDGAYQSVNWADASITYQMVMKAAEIDEY  
FEYVISGLILSTGGLTKAITENSSVLVIQWARNVDEVKLRRLGAGKPIIMYSISK

>comp14730\_c0\_seq2; 1169 96 3953 LEN=4038; translated  
MAIEGVGDNWERQDDVDDSNGTASQLASTNAADLFEEQEKAQYIRDLCAESPDGKDYRY  
NDQALVKLRSIFDKYLEMPSSLDDHHLVKLVDTLTDAACSLGASTLELQATTSSNSDGN  
SKGEDEDTTQDTTNNADHDWFDWDSPLPRILSAMYALSKVRGRKRVQKFLPHQVENVEPVL  
NCLVVLVDGLAKKQRTKGFVLGENSIDDDIPGGPQLWESTYTLWNWMEILGKVPFDCEVVI  
DRSQVTELLRLATSHLSETGPTREMAASCLARWLTRPDLEESEFRSSFQHWSMNILGDYV  
GEIRSLKEERTNGDPAVSIQSSTFTTMGVLTQTLVTILKISTSDREKVLTSIRSYWPLIER  
IPGAKNRPSNLLLRRKYLKWWARIGVLYLPPRIASWRYQRGRSLKRNLRQLQHNRNE  
SLPKAKTIATTEEVNYKDNPDYFFAVPDKVEICMEQLLVSLKDTSTAVRWSAAKGVGRVT  
ERLPAVCAEDVIDAVMEFFDDMENDNDWHGACLTAEELARRGLLLPHRLKDVIPIKIVEAI  
HYDLPRRRTSVGAHVDAACYAYWALARAYSPRILKPFVQQLGQSVVAVFLFDREVNCRR  
AASAAFQEMVGRQGAHNFKNGISILTVADYFALGNRKDAYTEIALHIAQYEEYQTAIINH  
LYQVKVSHWDPSIRLLVVSQSLNKLTLVNPRFMVDKVPYLLSCLDEKNLQLRHGATLAL  
AEITFAFGRINQDQCGLSPDLQKLI AETVPIIEKKRLYRKGGEQMRAAVCRLEICIAIS  
HIYLTVPQQVRLDSDIDACLPHPNQTIQEHAGDALFAHTRSYPVSSKGPSRLQNRVVD  
KYVKASRTNINPAATRGSALGRLLPPLKLLAPSSSEVLDMTSLCCLCRISRPAARVGTEDKA  
ETRKNALVSLRRVCENVGIIPKRDESACIVGLSRKQLNHVFTAYVRAMEDYNTDQRGDVG  
SKCRLAAMNGLVSLAVLTTTQNCSEGVTRATFFSNQCTQIIGLFLKQFSEKLNFRVCEAA  
KCILALLVDNISVGKYVTKRQMLLDALTPPSFDGAYQSVNWADASITYQMVMKAAEIDEY  
FEYVISGLILSTGGLTKAITENSSVLVIQWARNVDEVKLRRLGAVFLDIFEKHQHEGRV  
LPLKKTIDMLMNRGCVEESLINERSFSSLLERLWEESSQCNVDKRLTVILSVSTGLIVSA  
KGSKEALTFVCKFLEHEYPRIRSVAEKLYVRLLETDLLELGGDHAATRILLEHNWESDFT  
SIQMDRRTTAIQEVTRAFKIEDGIL

>comp14731\_c1\_seq1; 1730 1 4383 LEN=4620; translated  
QQQPQSLLYDMSSFDPLQAQALQLSASAGLTPADLLAAAAAPTASGLNNGVGGVGGPVG  
GPVGSAPVVSAPQPVVSVPSYTPPTAGASVSIAPATETSQGGQLQPIQPVPPTPAPLPHAP  
APQQQAHTQAHTQEQGTAAQALAQSI PHTQNHTHTTHANPHAQATAAPATAAPNPYIFIQP  
QQIAPGAALSTTAFPTAPSPAASNALLLPAASTTAAGVPAAASLAASNQATAQAQAAVA  
AAAAGFGTHPLLFNPVFFSAAAQGVQGLAATTAQGHVLQQQHHHSQVPVAAAPKPQAQQ  
AAALPANPLSPPLILPAGINPLPAAPGQHSKKRPLGMSMPVNMGMNMGIGMNVGMNMMN  
GMATTSGGLMNEISSVSVSSSTVPPTSAKEGSKNRQRQTKKTTGQEGIPGPEDPAEKRRY  
ERNLREQQRSSKISSQIKELREVLADCNVFPKPNKYSILLKVVEYIKQLQSRAIMLDAEH  
QKLITTVRQTNEMIASAANNNSNNNAMSSTTGGVTDNESSDATCHDAWQHGRESNHGRMR  
GGDSELCFVKGIDYRSIFEQCPTAFGIAALDGRILECNVEFQNLGYNTRDILLKQSLFN  
LVHNNQDIFRAMAQLKTAEEPTVPQTQQQQQQQSSSTTSTSHKNKKRQKQSHLLFDNVE  
GGFWKSTTTTDDPNIRNIDHYNDSHAGNSSSFPFLALCLTGFERDAIDDACRRANAGDDE  
VHRNDPLRFRCSMTSENPPNGIFYSLKQLHDWAFPERPNGQKSGIGNNHGNNDVDSMD

IDSPFTTKVSTGRWCCFQHLLIKYAIHHANVLVVITYPYLLDPMTAMMIGNAIYDVPQLKNN  
KDGDNDKENDKSSNNNTTAIKSEELTNKTNAIVVFDHAHNIDAACVDALSATVNLQDLEQA  
TRSLDKLSAEISRLSQHRKQQQQQLNSSSETPDIKTEDNNSNNKCDDIPRPLKDEYDDL  
VGKPIDHGMYRPILFPSEDEVVNEPVPGNIRRMKHFIGCMKKIVEHFVRLRWATETKRQP  
TTDNKSKKKMGTTVSPPLAFHLQMMNATALDSKTLRFVYSRVVSMRLTLNVSRETFTTEL  
INVAYVTSLLGFTNTLESSKFAIVLEQTSVVIIGHAKYQPQNHHNSGGGNGVYGSNTGSH  
DEGRRSECLMMLQVACLDP SLAIKPIFDRFETVLLTSSTLSPIHFYPKILQFEPVVVESI  
PMSTIRPSVNPIMISRGSDQLIMSTGYKERFTMGCIRNYGKMLVDLVSTIPDGVVVYFPS  
YSYMEALICEWDAIGIMREMTEWKLVFVETKDNLELNTIALDNYRASCDIGRGGVFFSVA  
RGNISEAIPFDLHYGRAVVMIGIPYEYTL SKVVRARLEYIQTHFDIREQDYLTFDALRQV  
AKCFGRVIRSKIDYGVFVADSRFHRNDKKTLPGWISQFLAEGQQDLTTDMAVAQIKSF  
LRQTGQPVDQKLLQNL LAHG

>comp14731\_c1\_seq3; 793 131 3025 LEN=3262; translated  
MKLDFDKDGDKNKYNSGETKTKPGDPEEFDVLFYDRIYPEQQQYIECAKRALHEKGGH  
LIEVPPGTNQLCLLSLLTSYQQQNSAKPPSDTHRNGNSLPPRRRIVYATNSAPETRR  
VIGEVAVIMNHRQQQQQQSSTTSTSHKNKKRQQSHLLFDNVEGGFWKSTTTTDDPNIR  
NIDHYNDSHAGNSSSFPFLALCLTGFERDAIDDACRRANAGDDEVHRNDPLRFRCSTDS  
ENPPPNGIFYSLKQLHDWAFPERPNGQKSGIGNNHGNNDVDSMDIDSPFTTKVSTGRWCC  
FQHLLIKYAIHHANVLVVITYPYLLDPMTAMMIGNAIYDVPQLKNNKDGDNDKSSNNNT  
TAIKSEELTNKTNAIVVFDHAHNIDAACVDALSATVNLQDLEQATRSLDKLSAEISRLSQ  
HRKQQQQQLNSSSETPDIKTEDNNSNNKCDDIPRPLKDEYDDL VGKPIDHGMYRPILFP  
SEDEVVNEPVPGNIRRMKHFIGCMKKIVEHFVRLRWATETKRQP TTDNKSKKKMGTTV  
SPLAFHLQMMNATALDSKTLRFVYSRVVSMRLTLNVSRETFTTELINVAYVTSLLGFTNTL  
ESSKFAIVLEQTSVVIIGHAKYQPQNHHNSGGGNGVYGSNTGSHDEGRRSECLMMLQVAC  
LDPSLAIKPIFDRFETVLLTSSTLSPIHFYPKILQFEPVVVESIPMSTIRPSVNPIMISR  
GSDQLIMSTGYKERFTMGCIRNYGKMLVDLVSTIPDGVVVYFPSYSYMEALICEWDAIGI  
MREMTEWKLVFVETKDNLELNTIALDNYRASCDIGRGGVFFSVARGNISEAIPFDLHYGR  
AVVMIGIPYEYTL SKVVRARLEYIQTHFDIREQDYLTFDALRQVAKCFGRVIRSKIDYGV  
FVADSRFHRNDKKTLPGWISQFLAEGQQDLTTDMAVAQIKSF LRQTGQPVDQKLLQNL  
LAHG

>comp14731\_c1\_seq4; 896 1 2196 LEN=2384; translated  
QQQPQSLLYDMSSFDPLQAQALQLSASAGLTPADLLAAAAAPT LASGLNNGVGGVGGPVG  
GPVGSAPVVSAPQPVVSVPSYTPPTAGASVSIAPATETSQGLQPIQPVPPTAPLPHAP  
APQQQAHTQAHTQEQTQAQALAQSI PHTQNHTHTTHANPHAQATAAPATAAPNPYIFIQP  
QQIAPGAALSTTAFPTAPSPAASNALLLPAASTTAAGVPAAASLAASNQATAQAQAAVA  
AAAAGFGTHPLLFPVFFSAAAAQGVQGLAATTAQGHV LQQQHHQSQVPVAAAPKPAQQ  
AAALPANPLSPPLILPAGINPLPAAPGQHSKKRPLGMSMPVNMGMNMGIGMNVGMNMMN  
GMATTSGLMNEISSSVSSSTVPPTS AKEGSKNRQRQT KKTGQEGIPGPEPAEKRRY  
ERNLREQQRSSKISSQIKELREVLADCNVFPKPNKYSILLKVVEYIKQLQSRAIMLDAEH  
QKLITTVRQTNEMIASAANNNSNNAMSSTTGGVTDNESSDATCHDAWQHGRESNHGRMR  
GGDSELCFVKGIDYRSIFEQCPTAFGIAALDGRILECNVEFQNL LGYNTREDLLKQSLFN  
LVHNDQDI FRAMAQMLKTAEEPTVPQTQQQQQQQQSQQSPTQAQHNNNNNSGANPSTVGA  
PTPAGTAPVNDGSTARVADQNNSSSKSMDIFWTGPVTSKQNVKLSMNI TLTAGDNGTPK  
FFSCALTHSAY

>comp14732\_c0\_seq1; 956 67 2538 LEN=2707; translated  
MMINEASTLPKETVCESQLQSNFTTEDSNFGGSRATSVSRRNSEVGGQGSTSSNENSL  
NLNFSYQATSAGPMDPPMHSEQHAE LMKKLN EASRTSVKNHHTNHQAAAAASSACVNNPG  
VSPQNGRSLSDPLELFLVQLQKQKAEASNRMGGSNSTCSGSSLQNSVSFSPMSSSRINT  
IGSISNVGSFANMGSLSKLSGNLSMVLSQGAANRPMNGMNNQSWGNLHLNNTHMSNNMN  
MNDRMQSSLPGMNIAETFGGANVNNLRSMNMAGIGRNMNVGAGVGD RSNDPFLMADRIGA  
TFHDLGNAPFPNTSNPTVGGSANFRRETEGFFSSEGFASNAANNNTSSSSSGGTNNAV  
ASNLSNDFSKLTTEELRQIIMRDVWNNRSSNNNSHNDNSNNGGQRRIQORRATGTNT  
YANNTSNIITSNSNATEFNSRSGNPFLKNLGTMDYRNHVLPLSLQHSSKARRRASMG  
LVQGRQPTSSSSDATMDHISSTGMFSNETCGDSSGSAFPFQSSSELSQQHGSSVSS  
SHSRQGTMPGEDES YIAAENGLAPWSDRAAGLLGDMMEQSNEDKARKASRKKPKDKPK  
RPLSAYNIFKERSRILEARAAGNAASTPEEVPQDGTSNDSGGIGDSGATGKKGKSKAK  
QKGTAKHGKIGFESLAKLIGQRWQELDDDSFAMYKSKASVMDRYNREMEAWNTKRGTT  
RKRSSRSSSGNSSNGTRRRLSSSGTNQAEAPREEQLEEQASAPHNDTEQSVPTGGDL  
TSKTQASGPDSNSGGSNNGGWFRKLEKESRLQSALFQLGVEED

>comp14733\_c0\_seq1; 840 142 2896 LEN=2896; translated



MDAPNEELDSAFASSEKKRKHVCESENGTARSLRPSVFIGSTGHDLAINGRILDLT  
DFGVEECTALGKLLSANNDSTEDRECEQTTIEELLMGRLGIGPGGGAALAESL  
GANQAVTYLDLERNGLGATGGCAIFRALAANRTLRLKLNMNLNLDLKAATSAGN  
HEATDALGDALRTNSTLTKELLLVRSGLGPRGGNLAQGLSSNTSLLSLDLAGND  
VMADGGQAIAGEALKTNTTKE LNLRWNRI GCGGDRGIESLADSLRTNTHLQRL  
DMSVNELYSEGAI AFGRALAINRSLHL SLERNEIGSVGATAIAAALKVNNTI  
EKLVLSGNPMMGDNGVEAIGLGLAENQGSALKILE LVDCGIGGEGARGLSEAL  
KSVGTSLSDLRLERNRIGVTGCRAIAAGLEENSSLRHLNLR NGLQMGGNALAAAL  
QKNNTLQSLDVSNNDIEIENVDADDDR VHIVESVVGHP SLQLVNL SDNALEI  
IIPIDCQLKLARIYESERELDIDLSDNPLSSPPLGRRANIEGLKDYLKMLLSES  
TSVNRIRLMVLGFGGVGKSTFCDAVTQKNEDLPYFHGSLIPLLEWDFKMIASWARR  
LGTQWAQFIGSVLETNQISGKDLPKLIGNTKSDEIDKIGHDRDECYPSEKLQALVDS  
FDTSGY RMDSSHMKS FARAIESLMRKG YFSTVGAVKME SLELEKLGEDS  
SNSNDRAGRACSLVDFAGQMEYL VSHQLLLSSLHTLCVVLQPAPSFGNPQSRHSGS  
WYWSRFLRALGDRRRGSLLLAISQQDRVSGFEDGTLSDIDAAIEDELSAIRSKI  
PNITECPPLRLNYPRI RQTVQEVRGALSNAADIVARDWVWPASAYERLAELVRR  
LEDEKKAKREVPILSREELRGELPSAGLHRMHEDPQLFKRGIEYLEAVGX

>comp14734\_c0\_seq1; 286 473 1522 LEN=1674; translated  
MDVDKALVMNRSIQDSVKSFKQILLNHHRSSKDVNENSPPPRSQITRQRRKIQR  
PSESNDYEDKCTRGRKRNIGNGYEDKKDLPIQRKMQSRNYSRMKKTTELQKLCIEY  
NIPKTGNEQELIDRMRFQSMWNAEVDSIEPKTPSDLAVELKKNELHAQRDERKRALI  
TGAAGDMNCIKKLNENMKSGNITSGNAKFDKKINSNFDSL VKQLRDRKEKESGSSTI  
AVKAPCDERND CGENDSHKRILSDHCEDQTSSTKPCRSSPDVIDIEACPDPVPHSG  
TRNPVVNSIKTPRSSSRESVSSSIPTPSAPLPPTTSYRVNKS KRTKIVDEQSNRTRR  
STPSPLVSMNRIDW

>comp14735\_c0\_seq1; 446 312 1856 LEN=2603; translated  
MSGEASPHSPNNFSLAPPSSSQEDSADSELLDENDLTRSLLADGNSDNNENNNNDTDQ  
INDNVGDND EGLSVE SRQHSRIRLIMRSIGPHVANTTLLAMLLLPLVIYQALSDGK  
GEVAAFHSAGVMVIGTLIMSVRLIYLHFTHWYMPGVQKYVIRIILMVP IYAVQSWL  
SLRFHHA RIYIDAIRDLYEAFVIASFVYYLIELLGGEDALVRTLRKKVRDDPALADH  
LAQHTFPLSLVLEPWELGVEFMLQCKHGALQYVVAKTGFTIMTYIFQSLGMYGEGQF  
VWTSPPYPLAF LMNISVMYALYSLVKLFHAVQDELRYPINWHPLGKFLCIKGVVFF  
TWWQGVLI FYLKAHGVIGDVGSWTGDEVANGLIDYICIVEMVMFAIAHSFTFTYKE  
YLPSTVENAIGDYEQQVQHNPIDDAEDNSRNDNDGDQGPSYNPPEMLDRPARFKDA  
FWSSTVPSETLHDIRRMQNRVNS SASRITIPGGISLQGLTSSLGNENDNDEDATDLT

>comp14737\_c0\_seq1; 367 153 1922 LEN=2410; translated  
MSHAFVGMVSFYIGVAVNINGLWTSIGIETSRLSLRLGEEQYPIAAQHLDKSFSGP  
ESVTTA SAATAANIAASIVKNVQQNPQTSPEQAQDP PRRKSPFPRTSDRILVDFAT  
VSRDAFNELLDVGVP LDYTEKGAEDVVVLYTNGLAMPNNLGYHHDKTGIEPSKALEN  
CHEVKVILQAPSRKNHQCFAILPQWQSYNVHKWMRIPPPGMPKNVTATDLAYPLQSV  
GRNRQPDGKDAYLSGVPKEKRKEESNQLLIEYLKNRDRVLPDLTDFLRNTVMKNSM  
DPSLKTTLVILTCNKGQSV MFRNFVCNARAKGLDLSHLVMFATDEATFQLSQELGI  
HAWYDEDIMGSIPEESAKKYGDQTFAKLMMAKVYCVHLAMSSGYHILFQDVDVI  
WHRNPLPYLLSNEFEDWDMIFQDDGSRVWR YAPYSPNSGFYFVRNPTTSFLFET  
LLRMGDMIHVAKSHQHILNDLLIQFTSWKGLKVKVIRKGDNDVFPGGVEFHNK  
PQFMKQILNGTKRYPVFHMSWTNNKDNKKRYFEQLGEWYAREESDTGSSCVGMGCCL  
PAANITCHYRDKPSKLPDPSRIDGDKSNKSF

>comp14739\_c0\_seq1; 1179 1 2670 LEN=2966; translated  
DDPTDDNFFFVVGSTGPHDSLWQEELGAMGGRIDGHDAVLQPAKGSTFAFVQRRNSK  
TLEMDWGKIWGARKPADQPATVSATAACKALPDGTL YVAGIVEDGAHLKRDRGDG  
SNHQRYGDDVFAIRFVGSNGAVGWIAQFGSLDGSEGLAPGGAI AVDKNQNLVLFGET  
TGSLYRKGKRGDKTGTSDIFLTTLTSTGSHDLVIGEE SFLDATTAGNIYGPKGIFP  
SLSEEEKAI FGFNEGKWNEDQIYGDKNWFDQEGIGVQQGNP GALFAGGMIYNPQDKAV  
YMTAVAFPGDGEPN CLLTKLPVGGGGA AVKDFSRATFRS IGSSDEALEVCSVAMH  
NNDVVVVGSAEQSTLAS PDSMPGGYAMALDNKELGTIDSALLSSRTRYPTNVLSD  
GENLYILALTPTDDEF SREYKEVLEVSKTNKLYSPDWMNMQYGTSLNMAITKLSL  
RQELVDGVPIAGTT FARAWSKNFP IR ADEKGLLPRVALAGAVIKKDRGFLAVAG  
STRGTGYAYGPKEGDDEDGFLALISLQTDLA TSEIRNTIREGTA EYDDVLGICDDP  
ADDGSLYLVTTKGSMASSTQGSITIPAGSLQAYI RKVSTKNLATSSWTVQLGAVR  
KDSLDGEDNADDDGVFTIPTTAKAIDCVVSGDNFYVAGI VDDNARMVKDDL PRL  
TRGGDDVWVAQIHAQTGKLGWLRQVGS PGNHDLAPHGALALTEEG NILVYGD  
TNSRFHRDRPEDDDKLTETFLMEFGPSGRHKSHVRHYKQPRTPPAAEENPVP  
IDIVNAGKFDGKGLSMGGIIGITV SLLIVLSGLAYYFLHAGLVVRRSAILRNQV  
EDMVEDLDGVVSTDKSGTYSDAWSALSESEVPSEYDDAGNTDLNQTGYESKEIV

>comp14740\_c0\_seq1; 1011 238 3071 LEN=3225; translated  
MSSSDNKPPENGSEEKLSNLRAILGYEIPRARLVQILEASNGSLEHAIEIYFHQENQEME  
RTNVKDTDDVKGDYSPLDQHDCCSSKNERKPEISNRNEYEDVESVAANKKRSQTRMASNHT  
KKSPSKQARLDSFFRVDSAKVIGSLKQLGRKDLTGTIVKRETLETIQNSDLENFNRTYEE  
TMDKTPTAEDTAKTKMFAPKVCNDNDMCKGCPDACSDTSYVSFRRLCEALQEMTDTTKRL  
TKLKVLETFIREVVYSDPTVDKRCNRGERSHVS MRVNTLSSALGLMLGGGTSSPLNISGS  
AVSKALQTSLGITRNQISKAYRHYGDLGDCAASFFQKKTFLVTSNARRQLSILQVTEGL  
SKVTEETTGRDAKQHVHLHSLLSQCKSKIECRFLVRLLLRNMRIGANIKTVLAALAMAMVPA  
SINAVVGDENKERNECNLSLKKPGMDTKDAITMVQKTYDVC PDISKIVAALLEGGFDQMQR  
VCSIQVMTPIAPMLAHPVHSFDELKERIGNDGEIAIMEWKYDGMRCQAHYDGVNIQLFSR  
HMLDMTNQFQDVVKYLLDTRSSSPNCCRSFIIDAEIVGIEGGRDSRLLPFQDLSTRRK  
KMDDGKGIKVKXVFDLFFNGKSLVNEQFHKRRSLLQKMFVETTNFTFVSSQNLMYSYDE  
NVITSYLSEAIAGGAEGLMVKLLGEKPI SATNEGIKSFYEAGTRSHCWLVKVRDYVAGFS  
DTIDVVP IGAWWGTGRKAQKSF LSPVLLAVYDDEEEVFRSICRCMSFTDAMYESIRKFYF  
NGIEYPTFFDSGVLENENINPEKKVINGGGLSSKEDDGDGSCGKKGIDDLQDQDTSIMA  
EGGEEQKDRNRVHCFPDRPSSAFVITNESPPIWFKPMEVFEVAFADLSLSRQHTAAAGLV  
DEEGRGVALRFPFRKRRRDPKPEQATTSIEIAQLFAKQSKIKK

>comp14741\_c0\_seq1; 203 1 1915 LEN=2209; translated  
QTVTAISXPYTVSSEAASTRPAALHDPTSSREPVPVSLILTI FEVIRVNRKRDQGSRMIR  
RRPQNSLSETTDDSTNGSKTESASNGATRRSPDQSSCHRFLSSKLLQAATLAACIIVLFET  
ANYLDSVYTINTSYKPNMIDGTERNIIGAANKNDHGAKVAGTTDSRVRALSISDIPDVR  
HEAGAFKAIKARFDYATSIGQSENRRNFNNTSGQYLLDFGIIGFPKCGTTTMSKLPVSVS  
SAFIEEVLDTSGEETKIHXAQVPLPSTLIALENQILLQRKXIVEPGNSETLFHAPFRNET  
VKWLNMEHMAVLD FEITALQKNHPARILNYMIRDLP EGRFRRGYKSPTDVEDGRARNKL  
GVHYGKTKLLVGLRHPVLWFESFYNHRVQNGYEMPDI LEVIRDRGRVLLNECPGNFRGV  
CFSRANFHHALAKWGKTPLLFLPGNDTDKRFGYTNYDNDREFSLFTGKSKQNLLKDMNNT  
DVSPNPMFLYDVNQLRMPPSVMGNDKGAIEQERVYDDFVNLNLQGF LNVPQNVSAMPMTI  
KEKPGKTKGIDASEQLRRDGLKIDMCDEKFAMPRKWLLEIGANVHLWIRDYFSKSPHNVF  
AGGSRGSPSASQFLTILQSYAEDPCPERVQKRKQLEQN

>comp14742\_c0\_seq1; 325 127 1227 LEN=1329; translated  
MSLSMGP LSLLPDGLVGGMLIGLSAATLLLGNGRILGAAGIARSFLHQSP LATLFSRDPD  
TAWRLHF LAAFLCLASGLFQKHAETSGSGGGGEAASVSSAGYALAGLLVGF GTTMNGCT  
SGHGICGLARFSKRSLSAVLAFMATGMLTSTVCEPDCPWIREPSGSTGGPHLAWIGTGLT  
GALVAASGYASLFPFASAASASPRDKKEGTPPQQPPGVRSTLVAVASGGLFSLGLGLSGM  
VKHKHIAGFLDAKGLANGTWDPTLVFVMAGLLVSTASYQFVPGFNVLWKNAPALNEPWS  
SKQYRVPATTTIDKLLLGAALFGLGWGIGGVC PGPVYHAATGNPSVLAYWWPCFWLGS  
WLPSLL

>comp14742\_c0\_seq2; 178 1 818 LEN=920; translated  
XLVV LHSTTRNATRCNNPLQMGNGCTSGHGICGLARFSKRSLSAVLAFMATGMLTSTVCE  
PDCPWIREPSGSTGGPHLAWIGTGLTGALVAASGYASLFPFASAASASPRDKKEGTPPQQ  
PPGVRSTLVAVASGGLFSLGLGLSGMVKHKHIAGFLDAKGLANGTWDPTLVFVMAGLLV  
STASYQFVPGFNVLWKNAPALNEPWSKQYRVPATTTIDKLLLGAALFGLGWGIGGVC P  
GPGVYHAATGNPSVLAYWWPCFWLGSWLPSLL

>comp14743\_c0\_seq1; 521 179 1702 LEN=1860; translated  
MWTLSLSLSTALLAATTASASDWVPEDERQEAYGRSSPTSKKQVKLDPLQVCLYPTYLT  
LPEGVLRSDLRQTVGNLVSERLEKDLGDEFVYFALTADASIDWYSGEEGASCGSLGHRLP  
VARKGDGDGPGSRNLAARTDDPCTCALYS GAVVLLLEGKGASPE SLEPGIASSLAKGLVG  
ALRDGPQAQEQQRPFYTELK GALVSWSAERKPGGKLYVAPTLDQDEAGQQQLAGESS  
DGKDP IIPVVLVDEGTNPEGTYIGVNALEEQQEGDRANAFETKRKILAGVLGGLLLVAL  
CAICVCLRRRRGRDRTTGP GSGSTDP RSAKDAGTVVCDDEEEGFRRDGVDEEIANPL  
TVVRPRRVREGLPPPPAAEDSEDASATAQYAGRQHGDSSSSHGASLLDCVSVGSEWTLT  
TNGVASALGRLSSGGRDRGAETVAARETFDRDRQITLQK DMLQSEW TAGLQASGHHPSAA  
GGSALPFQDATGQGEEIFLVEPARSRR

>comp14744\_c0\_seq2; 399 340 1764 LEN=2110; translated  
MRPSMATTLS PGDPTWSPTNFPDEMLGLPGGSRTNPPSKRPTISPVEEPTELPTKQPTS  
SPTKEATKSPTKTPTTQPTNLPSSKPIEGVLDCQALENLGHGFSEATGSPHYSRRCYPEI  
KGAHF EAI PGNDSDVAVFAGGDFIGRRAAEVEGNLVVLGDLK VETNGPGNFVSVGVGTHV  
LPNSGGDCIIVGGDISADRSIQVFNQATWMKCDIVYKGAATNLEHWKIGRGSKRHEPNYD  
MSRYEKMKYVFMKKSQYWKTL PSTATVNFEDWGNPTGETNFICTSNNEVQVFNIMPQHD  
FLSRTHDLKFGDDCEGKTILINVHGDAIHANAAAMSFKTRMGYEGGGFPTCMTSSIMWN

FPDAAAVDLGNGRTSEWHGSVLIGSGDLTLSTSGHSGRAIVVGNIIYHSDSLGSEFHSYPF  
DPP I PLPDPDDICVLP SNWRSYPAIPYPTTAPTAPTHAGCVHIPQSDLP SGSW  
>comp14744\_c0\_seq3; 314 483 1907 LEN=2253; translated  
MRPSMATTLSPSGDPTWSPTNFPDEMLGLPGGSRTNPPSKRPTISPVVEEPTLPTKQPTS  
SPTKEATKSPTKTPTTQPTNLPSSKPIEGVLDCQALENLGHGFSEATGSPHYSRRCYPEI  
KGAHF EAI PGND SVAVFAGGDFIGRRAAEVEGNLVVLGDLK VETNGPGNFVSVGVGTHV  
LPNSGGDCIIVGGDI SADR SIQVFNQATWMKCDIVYKGAATNLEHWKIGRGSKRHEPNYD  
MSRYEKMKYVFMKKSQYWKTLPSTATVNFEDWGNPTGETNFICTSNNEVQVFNIMPNQHD  
FLSRTHDLKFGDDCEGKTILINVHGDGAIHANAAAMSFKTRMGYEGGFPTCMTSSIMWN  
FPDAAAVDLGNGRTSEWHGSVLIGSGDLTLSTSGHSGRAIVVGNIIYHSDSLGSEFHSYPF  
DPP I PLPDPDDICVLP SNWRSYPAIPYPTTAPTAPTHAGCVHIPQSDLP SGSW  
>comp14745\_c0\_seq1; 382 1 1999 LEN=2449; translated  
XKVCFSNTSSSQTANAERSHATTQSLQGTQRTGVHAYLLLN SNGGRVGRRTTETSSSLC LL  
DHRTAMSEGRGGIARVVF FCIVASAVIANATLPLSHALAVRPQRRQTDR AHKGRRTTTGG  
PNKQQRERLATSHRGLGSALASGESGEGSSSSWEKEDRRRRLGMAVALGLANF SVMGAKCA  
LPSVMSLLLSPDRGLTFGGT SVSPPRERFAGLLGCSTLAVALGKLLLGLPLIDNMGGIRAL  
QLALVLLTGLLATVSVAQTFGVFCVCWILVDFV FSSCWASCIS SIQQSF PKGEWGSQIGH  
LATGARLGNVAVSFLFAAILFALEKSSPTQAVKSASIFVRQPWRVVFVGVSTLMQIVPLGL  
LLRFGGKTLEQKRND SNTSSAATGITRPVSPRLRDSVEILRREATTP EFWLHLVSRSCLM  
VFASFLLFVPTLMNDVYKCSNAVAQAAYSLGCLLAVSFGSGLYSKLETARSRIASLV  
GLMGLATAASLVQLTHVSGLV PNLHVKASTASMFVWGF AFSLPFYLPSSLYALARGGRE  
GSASIADCFDVF GFLLAWFNRFVASISARTDGDPSAWISCFVVTTL CALVAMLTQSLAV  
GLEAKAKTKEEAKXTTPRVQSRASRIVLNVDL KQKQQHTGDTTTGTALTKRETNAVVT  
ATLLAM  
>comp14746\_c0\_seq1; 2766 1 13791 LEN=14094; translated  
XPSISAI ESSE EASNKIKQVYXSSVDQYYRLEGDVERGILKNNGDNTIRKSATTPSNSAM  
STGTGLSGTPAFSASPGPYSSLESNNDSGRSRMNWEPVRSRLTGNDLDDALKAARELREG  
IEIVHTVEFPLMLSALLPAFSTILATNPNQOTS AKESMKGNNSINPAAKRAAGIPSAKKE  
PSPGPAAEAKRPDETT PSSPPKQHDIEFQRRQQRHYQLRNTILEIISRMP SNEVLRPHA  
PHLVAVALDVLIHRRDY EENALLASRIIFDLYKAYKSLPQDIQPALDFVVSAYKALPLA  
VQRSFSFEVLSATSSNMDSKVPTAVIATPPGDKKRKSPPGALSGSQNPQKSIKQTDSTTM  
DTTDSNARIQPTGARPLMMESASVTDTRMAISSFHEVSLSPRSNSSFRVLTEWPLIVMLM  
FQLYPKFLKANIPILIKVMTEALGLRAPSIELIEQQQKQLQQLTSAGASSEQQPQSGLGE  
TARRLYSSKSRELVAQA KTL SFLTFLLRRFVNELKPYEDRLASNVAIM SICPRELLST  
RKELLVGT RYLLHSDHFKNGFFRHVDSL LDEKILIGWSSKHQHRHRYLCDHNSEQTVLRP  
LGYAVLSELVHNARNTKVLSLMQISKIVTIFSRVLHDSTLPMSTQYTGVTLLSVLDR IY  
SNTDRNPQLGRDLLVRI LRTFMEKLSLRNASDTEAKATASSSNKDPGSDESQYSPGRNE  
TGSGGKTSSESANDEHNREHSYSTEPKNEPLKDKKSMVRIIVVGSKTLIWIYINNYRQQR  
EKER IENRHPPAGVNNEEVYSGLSKITHSEHALIDQYIVLGFPCIKILKESNQGEGSRT  
GALAAATGERQATEQFRD TLTYFAAAFTTLDGHDLRRTMGRRLDVLVEAVKDDPTAIVPR  
HLLSANATTSFEFC SMMLNFLVERMDNLVLEKNENICFLSVPSENETDRLHVFEELMKEK  
AKIKREDMEKTSNSYLQ LFERILKSLSSYPENEARLPYLKEIVSTCLRSSLEKTDVKAD  
NYCMLLR YVFRSISAGKFEDSYRELLPLIPAVLNGLFRVLLSTEDITLRHTLIELVLTIP  
ARLSSLLPHMNL LRIILALKSN SDDL VNLGLRTLEFWVDNLNPEFLFP ELSKQKAVFV  
SLMKALS IHLRPAPYPYGLLTLRLLGKLGKNRRVLR EPIIDSKAIMENS V GKLSLGF  
TWSANTSQMGEESNGTEGLSSESVEIHLPIKRCELLKRVSTVNLFGSEVALPGE GSSL  
VKIEENS DDEGLEQQGITVLLSTDVCDIDL LRYCKAVTEKTMSQVKA AIQVLKSSLTRI  
IDVPNSSLKNIHMTGAGNLDNTEGHTEGGIFDMQAIATRLANYNNEFHTIVMGLMFCGSF  
LPTREKELCFMKGLLTSIYVTITSNQGSIRVDANGSSIHQPKNDTETKSEFGDDGLGSL  
KPFYFELNGPLKYTTDPLTINRSLAEFLTQPSPALISVGMNILDHVLRLPVSFKNTNTD  
EKSKSGELDRGSMIFFESL SALCGRCVSSDW SERCGLYKGIILMVEVLGQSWAKKYEIE  
IMNVALYSVKSVAEMS IAGVKSFEFLVKLCSTLYGKPYINENQDDKIPFIVDMLSLLRR  
RDEKATEPRTSITTPCDDVLQILINEMASTIPLMRFAARFVFEQYFLNAKTAADAKSVLG  
KHITLIRRVLFSRSLRLLPLQE QVGAVEALNVLVDQVPHLIPLEDQPLLAFLSELLKMSS  
VADGEMTDN NLI GSVVDKNGFVLP GADQRYRAKNNDMNDTHPSLRPSSLFLRRDCILSTD  
CHKILIGEELPHGVQLRVSSIQLLRSIRGHDPNFFNAESSTPVGNIRPHIISLLFRSLV  
SQPVQAVIASHDALRDVLR LRSVVTTDGPEGSRSKSR LRKELLQTCIRPVLLNLRDYTRLS  
TCLLRGLS QLLSLLS S WFNKTLG EKLIDHLQKWTNPSVIRSHKIWKEGEEPVAAAIVGL  
FALLPHASN FVDPIVKLTLKLEACLPA YKSRHVRSPYRKQLALYLNKYSQYTANFFLPR L  
KTPLYTELFQDIVNFQGSQ LRQYLSAKCSDSILNV SFKCPLAIRSEKASVTSASPTKS

LKSDTSLSLYGIHSYSTLQQQEAMRDLAMKKKTFQYLHQEYTKARTAASAKNAPPEAKVA  
FEETTKKLTAKVSLERVTVTEIEKRRKAEKEQMGQESPSSDLKGATPMTIDSLELQF  
QGFNLIETLVKYDHSYLKHHNDVLRALRWLWRKGRYLRMQHEESICPRYQGESKALASF  
LLSYKDSPNVDLLFELIRIFLQPTSGDFSFVRSFLQEISSGLGEVQKDQIMQRFFSLM  
AGESTEEIKLLSLQLVHPMLHSSFHAKDEANNKTSGFNEDGSSGDRVISEKNVDTCEP  
RESIRFLNPSIVQKFVSDVLFHNGSVNPGERLKVIGILQICDLFLEFIPNMIGERRIDLL  
NFCLSLKSDDPCKNWSYLVLCRYISVIDTQQSVILQVYYALLRAHQHEGKDLVKAGLN  
LLVSALPKRLDSAFAFKSAIDKTYRVMFEEGNSVPLSHVWYIVVNNPDI FVHRRCLVRY  
MINSLNRLGLPPNSSSENRLAISIEELVWVDEEQTKACNHVEQSPNAMDIDLVISS  
KSSHSQVQSLNVKQNTNYSASDDSMNLNLDKSMVETILNLFIRLKLVLADPKVDTSSACIG  
PKLDVLLRRATRRWNGSDIRPAYFEKVVSCKEDDEYFTQDNKTKGKAKAKDPDKSNSK  
PSKPDPTKKSVTGLSDILTACLEIFLMLAEEDPYNFFLIENPDQLKCILSTCFRYSRPT  
EIRIREKLETFLVAFSLGSRMDQRIVQPIVWIEKLLTEADIEYRKNHGQVNETPRQAR  
FRHTTYTEELRPEDCAVLFGLGIKKVGSVSPSPFKTFTTSLISLLSTIVKKHTHQAAAK  
QKQNGVAYNAQTGTMSIREMYSTPIAGILQQVFPENVRSPVAGIARSSQGRQHDLSKDLK  
DFDCMLQAAVILEILGNSDAAAYLFSNNRILLNLLQSIFYMSNNVRLLLSAIRVVGKWL  
VAGRSGPLTTKERNSSFFWKISSFFDFNGLSDPISQPLSDLVCHYMSVLLTKSDTFSENGKD  
DNGGMITSRSITACLMTADDSARQRMLSFFQRSRCQTGEKARRPTDILWQLFHSDFEGLG  
GRHWVVFVEMLLECVVPLCEIKNVAPAGCDFRVKRRLPNPVTGSESSNLDVGLSVVSTY  
EAFRSSMKRECSNLGKDAGYFLGALRRLAHGDSFMCQSLMQTLLPASWRDSHEGSKYRL  
VSAMESFLSRPFHSQTFKKETSETLLPSNAIKSFLSSLVNMNPLPTIDVDLLVTLAQSHN  
SWYEVLSILENQHLVLSPSNLSSEGSTRCDKILLAIRHCYRQLGENSIWSTLALKSCALP  
GTSYATSLEIYGKVDKALEAYSGLIDLVESEGSANATYFEMDYWEERWVNLQQQEQQLEV  
VSEYATQSKNEEVMLECAWRERDWDVSRALCSAPRIVA AVESGDPAMKICETLSAVADGK  
LGDVENLHAQSSQLALYKWNLPFSGGSCAHAKLLHYFHRLVEIRESGQIMVETNNHST  
GKTLPLDKNLLNAWRHRLPNDEEELTVWDEIFTWRAHMFNAITSNFHWSEPTLATLHDR  
PWTAIMSTVARKHGMQAAFLLLNRITDSRAMDVSDVYLKLEQIILLYNNPRSELERTG  
GLNLINTNL SYFDSLQKSELFRKAI FLASLRRTSKSNQAYCHSVQICPSHTKSWISWG  
GLCSSLGTMTKEQAEQARSSGADNARDSRTDSTKKVAQYLAQAMGCFIEAQIDPNEKSRI  
HLPRCLWMLTKDGSSPGVLCQTLNENRGTKLPPWVWLPWMPQLLTGLCRLEGRTRIVLLSR  
VIKAYPQAAYSLRAFYLERRDVERAKGGNVAPGQHMASVAYAEEMMSTLRRSHASLWSS  
LEAILEELIVKFRPSYEEELLATISALLERAESHAEKQSLPDEKRAEDEEAMVASWSKTL  
SRIAAKFFRET DSTSSSRDERVKKTADFKRKYKADFELDFKVTTPDRKQGATTKASKA  
QFRLAEYITKQIWKERLEIQVARTPSYPLIESHSLAIFHGSFPNLWPGSCDTRYSYG  
NDRSSKEDSQSSRTPSSTSSSAATARKASLGAALMAANAAAREGVGGEYGGGSAIEIPG  
QYCPNTSMSTDIKPCPELHAKLIKFEPHVEVLRNDQLVRRCGMIGSDGRTYKFLQFAI  
PYWTRTERAAQISYVIEKFLRQNI VSARNYINI OPTAAIPVAQRLRMTDPDPCRIALDE  
VWRTSKYETNEKKSIAFFSKELTKKLEAISHDSSGESKRNIEKEVRLKVYNEICKSKV  
DDRILLRYLMKILDSQELFFLLRRSFAVQLAANSLQYVFSVAERTPQRFVFLQSNKIL  
SPDFRISYSNQGFI EGFNQVPPFRMTPNIQRVLGEHYIQGIFVRSMAIAGAVKEHKDEFD  
PILRLLMRDDILAWYSKSLAKTDSKTQELERQLIERVSKNVHTLQSRFSECSPPKGGDETY  
GDSNKTAPLDHRVNELVQAATDPEKLCMTRIGYQGWL

>comp14747\_c0\_seq1; 1015 263 4357 LEN=4528; translated  
MDGYLQQQGF IKS NPLSWIRGQLSRQSLQTSQQGSSRSQNDDGEDSSDRNAQSLVGSKT  
ASKTKQVKISDASPIDRRGKLSATNSFNSDISLGSIGGSNHSSRSVEFEVLVDLHTSWKV  
VDRSVTSESPSLSQSNNGQSQSASSYFSFGESLDIYIQDDEFWCWIPAKVLEYNADHAI  
AINLPYKWEDSTIWGDDL RVGFDIHPMSMESMAFEKMDLLAVENQVSSSMLRKVYKDYEL  
GEMPRQNI DESSNQTRFSEKTVSDLADLAKELNMATILYNLKERHF IQKPYTRVGDILI  
AMNPFVWLDL SVKRDIIYQNL IWNNTQKDQIPGLTQSIYNRLGFDPHVYEISSLAYR  
DLAISNQQTILVTGESGAGKTE TVKILMDHLACAQLSRPALNDDAQSR TTTSSDSKDI  
HRI IQSSPVFEAFGNAKTIRNDNSSRFGKFIQLQFAIEPRAVARREGRDVPYTELFGSRV  
STYLLEKNRVVFHSEGERTFHFIFYQLLAAPSDFKQAMWPFPGDL DANDFLYTAESADET  
TEDEHELWSKTKKALETFKVKNVSLTVLMRALGIVLQLGNLVFEHDSSEYEQSTISSK  
DQLERLSEMMGVESHDLQETITSRTRLRTPNEEPIKVQLTPEVAKEACDGLAKEIYARIFE  
AVVQRVNKYTMPNEQNVDNESGTLKQISLLDIFGFENFEVNKFEQLCINYCNEKLQGRYV  
EDNFHEIKDQYIEEGVDLYDFKLVNDSILHLLEGTHGLITILNEECFRPKGNDES FVFK  
AKKRHVGSTGKLIDKNLHTRTEFDINH FAGSVCYDAQNFVLSNTDKLPPDLIACAANSTN  
VIIRDEFKLLVSEEDATGPKRRKNTRKTVLSKFQVQLNSLMSAMEGTKIRYIRCIKPNK  
SMIPKMTDHASAMRQMECSGLLTALTISRESYPQSMEEYFILNRYSCLPDNYEHSEGTGD  
MELREKVVSHMLTKCLKPISRKNRDGSRIMPFACGKTRVFFKAGAQQDQLEDLIGQYYDTNA

RVIQSWCRGSMARLKIRKKKAIYTIQSFSRMALAILYFRLHRSAAATTICNWVRCCFAVA  
VLRKRYEDSILEAQRQVQTTYSSKPLSKTDGPHILETNREFVSASGSSSKETLQKLEEQI  
GELSNINIGLTKEIFKLRHEKNRMRQQHQSTVVQMSSKFSVLKKELESTNRKYQRQKQGS  
DKVICKGKDKDISREIACLKEKHSLAVMKLKDDELYDTRKSHQQYLTRLVDVLETTNMR  
EEIAKVSRELISIKKEKDDKIMSLRREIKALKKVNTSKLSSSNGVGRKDTDDSKHFNDA  
AADLENFVIQSTTQEHQNNNTDAVKQQQKMLDMIRSLKILYQNK  
>comp14747\_c0\_seq2; 1014 263 4461 LEN=4632; translated  
MDGYLQQQGFIDKSNPLSWIRGQLSRQSLQTSQQGSSRSQNDGESSDRNAQSLVGSKT  
ASKTKQVKISDASPIDRRGKLSATNSFNSDISLGSIGGSNHSSRSVEFEVLVDLHTSWKV  
VDRSVTSESPSLQSNSNGQSQSASSYFSFGESLDIYIQDDEFWCWIPAKVLEYNADHAI  
AINLPYKWEDSTIWGDDL RVGFDIHPSMESMAFEKMDLLAVENQVSSSMLRKVYKYDEL  
GEMPRQNIDESSQNTRFSEHKT VSDLADLKLNMATILYNLKERHFIQKPYTRVGDILI  
AMNPFVWLDDLYSVKKRDIYYQNLIWNSXVIKIVKGTDEFGKQSFYQKISTIFFLSFLLT  
KIDTQKDQIPGLTQSIYNRLGFDPHVEISSLAYRDLAISNQGQTILVTGESGAGKTETV  
KILMDHLACAQLSRPALNDDAQSRTTTTSSDSKDIHRIIQSSPVFEAFGNAKTIRNDNSS  
RFGKFIQLQFAIEPRAVARREGRDVPYTELFGSRVSTYLLEKNRVVFHSEGETTFHIFYQ  
LLAAPSDFKQAMWPFPGDLANDFLYTAESADETNTEDHEHELWSKTKKALETFKVKNVSL  
TVLMRALGIVLQLGNLVFEHDSSEYEQSTIISSKDQLERLSEMMGVESHDLQETITSRT  
LRTPNEEPKVKVLTPEVAKEACDGLAKEIYARIFEAVVQRVNKYTMPNEQNVDNESGLK  
QISLLDIFGFENFEVNFQELCINYCNEKLQGRYVEDNFHEIKDQYIEEGVDLYDFKLV  
NSDILHLLLEGTHGLITILNEECFRPKGNDES FVFKAKKRHV GSTGKLIDKNLHTRTEFDI  
NHFAGSVCYDAQNFVLSNTDKLPPDLIACAANSTNVIIRDEFKLLVSEEDATGPKRRKN  
TRKTVLSKQVQVQLNSLMSAMEGTKIRYIRCIKPNKSMIPKMTDHASAMRQMECSGLLTAL  
TISRESYPQSMEEYFILNRYSCLPDNYEHSEGTGMELREKVSMLTKCLKPISRKNR  
SRIMPFAKTRVFFKAGAQDQLEDLIGQYYDTNARVIQSWCRGSMARLKIRKKKAIY  
TIQSFSRMALAILYFRLHRSAAATTICNWVRCCFAVAVLRKRYEDSILEAQRQVQTTYSSK  
LSKTDGPHILETNREFVSASGSSSKETLQKLEEQIGELSNINIGLTKEIFKLRHEKNR  
MRQQHQSTVVQMSSKFSVLKKELESTNRKYQRQKQGS DKVICKGKDKDISREIACLKEKH  
SLAVMKLKDDELYDTRKSHQQYLTRLVDVLETTNMR EEEIAKVSRELISIKKEKDDKIM  
SLRREIKALKKVNTSKLSSSNGVGRKDTDDSKHFNDAAADLENFVIQSTTQEHQNNNTDA  
VKQQKMLDMIRSLKILYQNK  
>comp14748\_c0\_seq1; 331 1 606 LEN=829; translated  
EAKELKKVAGWYLPERPVE SDGFAAARNYFTRPSAPEPEGEDCEQVLAETKELKKLATD  
YLHPENPVAPSSVNCARNYFDRPSAKGHAEQIHTQGFANHHSIEGDYVHDGYDYLHHHH  
DEHFHDDVSHQSFHSQSDHFEMDEDAFHGFRDSMHAFHDSVVAVHDPEHIPMIKEEGDG  
KEGNLSRSPSSIMLFDEQAAV  
>comp14748\_c0\_seq2; 486 63 754 LEN=754; translated  
MGSSQSVPTSEITYASDHASNVKEYKASTKNGPKTQPMQTNQISIISENE DSDFS  
VVS AESDYSSDEDEDFDSDDDEDEAEERRMILEEARQLKEMAGFFLRPEAPVANDPTACAR  
CYF SRYSAPIASEDELEDEMERKLILADAKNLKELADFYLHPEKPVVSTDATAACGRNFF  
TRPS APEYEDDEDIDEERELILQEMKQLKTTAGWYMHEKPVAVDSTACGRNFX  
>comp14748\_c0\_seq3; 782 1 1369 LEN=1369; translated  
XTRPSAPISEDEEERELILEEMKQLKTTAGWYMHEKPVAVDSTACGRNFFARPSAPEYE  
DDMDEERELILEEMKQLKTTAEWYMHPEKISIVDPTACGRNYFNRP SAPVNEEEERELI  
LQEMKALKTTSEWYFNPEKPVAVDASACGRNYFSRPSAPVMDEDEMEERERILEDTKQLK  
M TAEWYMHDPKPVAVDSTACGRNYFSRPAAMDDDAGACSWETSSGKHLSLDFESNYTDE  
ME EERKRVLADANQLKEVASWYLEPEKPVKVDPTLYGRNYFSRPSAPEQEDES DTQERE  
QIL ADLDELKKVADWYMHEKKT VTFATACGRNFFTRPSAPEYEDEEDADEREQILADAA  
ELL QVAKWYMHPEKPVTVYATATGRNFFSRPSAHVSDDEEKNQILAEAKELKKVAGWYLN  
PE QPVKSDGFASGRNYFTRPSAPEYDDEELEEERDQVLS  
>comp14749\_c0\_seq1; 398 176 2158 LEN=2289; translated  
MKNNAKNKRSRNKHPAAIELSEIDNGTDAERSDLADDTISIDTSSSAWTIPLPPTRSPA  
RRHHSRRLKPLYESNANTKTPLLRLVRRQQHHDKKNRDNERNMHQNSLDGYGNDGIEQGG  
SLPTNRLFSDVLS PAAATKTRQPLVASISKATNKP DGLAGWFFGFMYEDDYNESFDFD  
GDEDEDIDGLASPWNPLNVAIFASYALTTAATALPVLLIPTIGQDFLEDENAVSGFSSRA  
ASSAVLGIACGKFLNGQVADVLGARRTSSLYSMLLATALLGLAMSRSAASATNACFYVE  
FQSVQWPCIVLLGTHYNPPHHTTQYKGI FMTS IASRFGALLGPIFSELLRQSNWRLV  
CLVGAWIAAIGSSITYLYISDSPMKANEPQNPLNPNLMQQA STLDPIKRPKRCLVVSIV  
K LRSVISNNVMP SFKHVLS SGTFWVVALAHTGSSMVRSSSTRILGTYFYDTSFGYLSKTRAG  
GLAIFLSLGTVLGLGIAGNLFARNERQRKKLVYRLYVVTIVSCYSLALLAIPRLRHFI

SPDLVLFQIACSLFMGFGISVAYFLIPGLVGSFAFGRHRGSYIAYTDGVAFGISSLVWKI  
VANAVADGNPEGGGWAYGWAVALLVVLCVLMVEFMEHYFVRSRPGSGRSAYETILFV  
>comp14750\_c0\_seq1; 1184 299 2338 LEN=2796; translated  
MSDEKKDSDAVMANSNNEEDDSDAEAEFLKQLDAKAAAEGAASDPDPAPKPGSGWSNGDI  
SQQMFSTRNGRLELYASNRRWIGLNKGWSRVGGDDGGGKTTDQYSHRTRRSSQMGSLLN  
LSSSSSSTEKERKKAMDDARSVRCLIAQLSETFYNFWSAGTAGGISIRVGGPSENRP  
RVFCMPSGIQKEDMIGDDLFEELMDQNVVHGPKTEGLRLSACNPIWYICIFKHRPSAMCAI  
HTHGMNAKLATLLDPTEQSKTLKLTHTMEMLKGVGGHAYDDILEIPILDNRPSEDLLQPQM  
EEALKNYPNVNVCVLRHGLFVWGDSEWQAKTQAESFDYLFDAAIIGMRKIGVDFSAIPPG  
GTFRTDFDEYHGTTTTNKRDAAEAGGEQPPAKRSKASEEKTAATSGGSSNGWNAAGNVD  
NLDDLKANTIPLLPRDYKYLLEDIEGCTTAISFVKDVLFPYVVEHAEAYISKNLGDDEEKD  
ALSAALTKDLTPEQRIESGAEALAPGANPASI IKYMQNDLKVASLKSFGQKMWKDG  
YAN GTLKGHVYDDFVPMLDWMKAQGVKVIYSSGSVQAQKLLFGKSTKGDLCGYFSGHFDITT  
SGNKKQSGSYTNICADLGI PPSELVFCSDAVAELVAAKEAGVGKCIIMTVRPGNAPLSEED  
AKAHPQVFSLLQLCGSGM  
>comp14750\_c0\_seq2; 799 299 2705 LEN=3163; translated  
MSDEKKDSDAVMANSNNEEDDSDAEAEFLKQLDAKAAAEGAASDPDPAPKPGSGWSNGDI  
SQQMFSTRNGRLELYASNRRWIGLNKGWSRVGGDDGGGKTTDQYSHRTRRSSQMGSLLN  
LSSSSSSTEKERKKAMDDARSVRCLIAQLSETFYNFWSAGTAGGISIRVGGPSENRP  
RVFCMPSGIQKVSMSVRKAXAQGREAIAPACGCGCAKNFSCRNIVPIAIFALWSEIKFL  
SRSYGIGKLLCVVQLCILPFI VVPGFSPERPITXPMDTQSIIDGSINXNKYKTKTMNAIA  
ITTTKTTSTTTNPEDMIGDDLFEELMDQNVVHGPKTEGLRLSACNPIWYICIFKHRPSAM  
CAIHTHGMNAKLATLLDPTEQSKTLKLTHTMEMLKGVGGHAYDDILEIPILDNRPSEDLLQ  
PQMEEALKNYPNVNVCVLRHGLFVWGDSEWQAKTQAESFDYLFDAAIIGMRKIGVDFSAI  
PPGGTFRDFDEYHGTTTTNKRDAAEAGGEQPPAKRSKASEEKTAATSGGSSNGWNAAG  
NVDNLDDLKANTIPLLPRDYKYLLEDIEGCTTAISFVKDVLFPYVVEHAEAYISKNLGD  
EKDALSAALTKDLTPEQRIESGAEALAPGANPASI IKYMQNDLKVASLKSFGQKMWKDG  
YANGTLKGHVYDDFVPMLDWMKAQGVKVIYSSGSVQAQKLLFGKSTKGDLCGYFSGHFD  
ITTSGNKKQSGSYTNICADLGI PPSELVFCSDAVAELVAAKEAGVGKCIIMTVRPGNAPLS  
EEDAKAHPQVFSLLQLCGSGM  
>comp14751\_c1\_seq1; 898 102 2751 LEN=2809; translated  
MSNESDFVSGALSSVEGIQNLDEDTIAYVSGVLTEDPFDEEDARS AVRDLIVDALSEEAVD  
GVSVCEFFALLDLNDPNKNDKANGSGDSNSSNAQNNPGGLRKLSTITMKEKDVETFAM  
GLKVKEDDAIGNSYGSAGGTSKIAAFFANMIDPEQNEHAMSERNNRRKARQKELRIQLEEE  
ERQRXNNEAMNMFQELKAGENSDDQHANEQRLNSDGTDATMSDESQMRDVRLNFDLPLN  
RGGGPNLLSGASLILARGRYGLMGRNGCGKTTFTLALSQRQIDCDDTDGGVPTNVRMLL  
VRQEIIGNEWSAVDVTVLKSDVQRESCKYIAWIDQELDKLDNPPADESKDPGNGDKDNS  
DDETQPASKSKTKESAKERRQLKDRKLTLEQRKALKANKKKNKSTGNTNVSTMTESQK  
DDRRKKLREQLVRAHQRMSEIEQLEGGDPEPRARKVLSGLGFTKEMQDKPTSALSGGWRM  
RVLSLSCALFANPSLLLLDEPTNHLDEAVLWLERYLTKTFTGTLVVVSHDRHFLNEIVTD  
VVHFHNTLATYRGDITNYESVIVENKIRQQRQREQQEAKRAHLQKYIDLHAQAGENGVK  
ASKQRKSRMKLDDKIGVMAQDGKRWKASYDGAQEEVEVEVEVEVEVEVVLNFPDPSFDDKMI  
KLERVKFGYDQSNILLEGVDLTVDLTSRIALLGRNGCGRVXLVKLCVGLKPLSGEAKID  
PRCKIEYLAQHOLEQLDPDGTPLSTMVDRYPGDRSNTHIGELRRYLANFGLGGTVLPVQK  
IHTMSGGQKCRCLACAMYRKPHELLVLEPTNHLDELTTEALIEAIRNFKGGVLLVSHDQ  
HLLTSVCKTLLVVENRKVQVLQGGRSNKDAFEDYKQVAGRR  
>comp14751\_c1\_seq2; 447 102 939 LEN=939; translated  
MSNESDFVSGALSSVEGIQNLDEDTIAYVSGVLTEDPFDEEDARS AVRDLIVDALSEEAVD  
GVSVCEFFALLDLNDPNKNDKANGSGDSNSSNAQNNPGGLRKLSTITMKEKDVETFAM  
GLKVKEDDAIGNSYGSAGGTSKIAAFFANMIDPEQNEHAMSERNNRRKARQKELRIQLEEE  
ERQRXNNEAMNMFQELKAGENSDDQHANEQRLNSDGTDATMSDESQMRDVRLNFDLPLN  
RGGGPNLLSGASLILARGYVSMRETGVFSIFILGSLQELA  
>comp14752\_c0\_seq1; 625 160 1821 LEN=2777; translated  
MTLSETPAWKALTAHYEETNTHMTKDMFAADPERFSKFNLEFESILLDFSKNRINEETMK  
LLYGLAKQQDVSGLAKKMFSGEKINETEGRAVLHVALRNQSNTP IIVDGKDVMPVNEVL  
GRIKAFTEKVRSGEWEKQTGKSI TDVVNIGIGGSDLGPVMVCEALKPYSKRDLKMHFCSN  
VDGTHIAEILKSVDPETTLFLVASKTFTTQETMTNAGTAKAFVLKAFDGEDESSVAKHFAA  
LSTNAAGVSKFGIDTENMFGFWDVWGGRYSLWSAIGTPIALSIGFDNMEMHAGAHAMDN  
HFLNTPAEKNLPMTLALIGI WYNNFYGSETCAVLPYDQYMRFAAYFQQGDME SNGKYIN  
KDGEKVDCQTGPIIWGEPGTNGQHAFYQLIHQGTKLIPCDFLAPCKSHNDVTTGIGGPTD

HHPILMSNYFAQTEALAFGKDAATVRAELAASGMDEAAIEKLLPHKVFEGNKPTNSFLFE  
KLTPTLGLSLIALYEMKIFTQGAIWNNINSFDQWGVVGLGKQLAKAIYPELTAEGEVNSHDS  
STNGLINYFKKNM

>comp14753\_c0\_seq1; 967 1 3475 LEN=3515; translated  
XDTERATLGGLDNPBKPRKDRTREKYAENRNPKHPCGGMVEAGSPVIFSGVAAATDLRFF  
SGGSANGDSNSNSDGNDSNDNGNDNGNGKDNHKNNDNNDNDRPYFPAIVPSKVPS  
RVGYGDEAPRMPHVLALPVTNRPLFPGVVTSVTLTEPATIDALEKLORESEGENVYISAF  
LRQKNPTGVSEGGVLLPSPEVITDPSDLYSVGTFAQIHRLTRGVGSGSVAPHHGGVPGGS  
GGLGDDEAAPAGGHGGDSSAGGGAGGHSDEEGSSSAASVLLL AHRRVNLESVDSLGPPI  
ATISHWPRLDYTGPMSSPDDTIRALINEILSTIREVAQINPLFRENVOFFSGRLDANDPY  
RLADFAASVCSAGSNPEDLQAVLEEKDAEMRLHKALVLLSKEREVSKLQOEIQSKVEEKM  
SESQRRYFLMEQLKSIKKELGEMERDDKEAVIEKYRKQLANYSEIPEEVNKTIEAELEKLS  
SLEMNSSEYSITRNYLDWLCGVPWNVTSDENFDIQDARKILNRDHYGLDDVKDTILEFIA  
VGKLGKSVQGKIICLSGPPGTGKTSIAKSVAALGREFYRFSVGGLSNVSEIKGHRRTYV  
GAMPGKIVQGLKKTGTFTNPVVLIDEIDKLGHS HQDPASALLEVLDPSONNAFLDHYLDE  
PVDISKVLFMCTANELERIEPELLDRMEVIRLSGYDFPEKVAIGEQLVLPKSMRENGLLV  
EKTSAGTTDADAEPSEAGDAETPDRAGIDDPESSDQAGSSSESSTDRPELTTPLGTFV  
LPESVPPTLGISRDIAESLVRWYAREAGVRNLSKYIDKPTRKALQVVAEGEGTELTKKS  
RRKSDSWTVTENNLEDYVGKHI FTSDRLYDRDPLPDGIVMGEQSTACAAREHARKKRKAP  
VFRDAAAAPANLTSFLLLLLFSMMIFLRSQAGVTAMGGSSALYIETQGIKRLDEKGNPRG  
GGTLKATGNLKDVMKESQIAYTVARARLSEIDPSNDFFDKTDLHMHVPEGATPKDGGFA  
LIDLMSRVARNLSMVCRYANNFCHPLAILLALAYRXIEGPSAGIAMVTSMLSLALGKPI  
RNDLAMTGEVSLTGKVLAVGGI KEKIMGRRAGIKLIILPDANRRDYDEIPDYLKEGLEV  
HFAENYETVYEEVFGNE

>comp14753\_c0\_seq2; 1043 1 3346 LEN=3386; translated  
XDTERATLGGLDNPBKPRKDRTREKYAENRNPKHPCGGMVEAGSPVIFSGVAAATDLRFF  
SGGSANGDSNSNSDGNDSNDNGNDNGNGKDNHKNNDNNDNDRPYFPAIVPSKVPS  
RVGYGDEAPRMPHVLALPVTNRPLFPGVVTSVTLTEPATIDALEKLORESEGENVYISAF  
LRQKNPTGVSEGGVLLPSPEVITDPSDLYSVGTFAQIHRLTRGVGSGSVAPHHGGVPGGS  
GGLGDDEAAPAGGHGGDSSAGGGAGGHSDEEGSSSAASVLLL AHRRVNLESVDSLGPPI  
ATISHWPRLDYTGPMSSPDDTIRALINEILSTIREVAQINPLFRENVOFFSGRLDANDPY  
RLADFAASVCSAGSNPEDLQAVLEEKDAEMRLHKALVLLSKEREVSKLQOEIQSKVEEKM  
SESQRRYFLMEQLKSIKKELGEMERDDKEAVIEKYRKQLANYSEIPEEVNKTIEAELEKLS  
SLEMNSSEYSITRNYLDWLCGVPWNVTSDENFDIQDARKILNRDHYGLDDVKDTILEFIA  
VGKLGKSVQGKIICLSGPPGTGKTSIAKSVAALGREFYRFSVGGLSNVSEIKGHRRTYV  
GAMPGKIVQGLKKTGTFTNPVVLIDEIDKLGHS HQDPASALLEVLDPSONNAFLDHYLDE  
PVDISKVLFMCTANELERIEPELLDRMEVIRLSGYDFPEKVAIGEQLVLPKSMRENGLLV  
EKTSAGTTDADAEPSEAGDAETPDRAGIDDPESSDQAGSSSESSTDRPELTTPLGTFV  
LPESVPPTLGISRDIAESLVRWYAREAGVRNLSKYIDKPTRKALQVVAEGEGTELTKKS  
RRKSDSWTVTENNLEDYVGKHI FTSDRLYDRDPLPDGIVMGEQSTACAAREHARKKRKAP  
VFRDAAAAPANLTSFLLLLLFSMMIFLRSQAGVTAMGGSSALYIETQGIKRLDEKGNPRG  
GGTLKATGNLKDVMKESQIAYTVARARLSEIDPSNDFFDKTDLHMHVPEGATPKDGP SA  
GIAMVTSMLSLALGKPIRNDLAMTGEVSLTGKVLAVGGI KEKIMGRRAGIKLIILPDAN  
RRDYDEIPDYLKEGLEVHFAENYETVYEEVFGNE

>comp14753\_c0\_seq3; 1058 1 3197 LEN=3237; translated  
XDTERATLGGLDNPBKPRKDRTREKYAENRNPKHPCGGMVEAGSPVIFSGVAAATDLRFF  
SGGSANGDSNSNSDGNDSNDNGNDNGNGKDNHKNNDNNDNDRPYFPAIVPSKVPS  
RVGYGDEAPRMPHVLALPVTNRPLFPGVVTSVTLTEPATIDALEKLORESEGENVYISAF  
LRQKNPTGVSEGGVLLPSPEVITDPSDLYSVGTFAQIHRLTRGVGSGSVAPHHGGVPGGS  
GGLGDDEAAPAGGHGGDSSAGGGAGGHSDEEGSSSAASVLLL AHRRVNLESVDSLGPPI  
ATISHWPRLDYTGPMSSPDDTIRALINEILSTIREVAQINPLFRENVOFFSGRLDANDPY  
RLADFAASVCSAGSNPEDLQAVLEEKDAEMRLHKALVLLSKEREVSKLQOEIQSKVEEKM  
SESQRRYFLMEQLKSIKKELGEMERDDKEAVIEKYRKQLANYSEIPEEVNKTIEAELEKLS  
SLEMNSSEYSITRNYLDWLCGVPWNVTSDENFDIQDARKILNRDHYGLDDVKDTILEFIA  
VGKLGKSVQGKIICLSGPPGTGKTSIAKSVAALGREFYRFSVGGLSNVSEIKGHRRTYV  
GAMPGKIVQGLKKTGTFTNPVVLIDEIDKLGHS HQDPASALLEVLDPSONNAFLDHYLDE  
PVDISKVLFMCTANELERIEPELLDRMEVIRLSGYDFPEKVAIGEQLVLPKSMRENGLLV  
EKTSAGTTDADAEPSEAGDAETPDRAGIDDPESSDQAGSSSESSTDRPELTTPLGTFV  
LPESVPPTLGISRDIAESLVRWYAREAGVRNLSKYIDKPTRKALQVVAEGEGTELTKKS  
RRKSDSWTVTENNLEDYVGKHI FTSDRLYDRDPLPDGIVMGLAYTAMGGSSALYIETQGIK

RGLDEKGNPRGGGTLKATGNLKDVMKESSQIAYTVARARLSEIDPSNDFFDKTDLHMHPV  
EGATPKDGPSAGIAMVTSMLSLALGKPIRNDLAMTGEVSLTGKVLAVGGIKEKIMGGRRAGIKLIILPDANRRDYDEIPDYLKEGLEVHFAENYETVYEEVFGNE

>comp14753\_c0\_seq4; 982 1 3326 LEN=3366; translated  
XDTERATLGGLDNPHKPKRDRTREKYAENRNPKHPCGGMVEAGSPVIFSGVAAATDLRFF  
SGGSANGDSNSNSDGNDSNDGNGNDGNGKDNHKNNDNNDNDRPYFPAIVPSKVPS  
RVGYGDEAPRMPHVLALPVTNRPLFPGVVTSVTLTEPATIDALEKLQRESEGENVYISAF  
LRQKNPTGVSEGGVLLPSPEVITDPSDLYSVGTFAQIHRRLTRGVGSGSVAPHHGGVPGGS  
GGLGDDEAAPAGGHGGDSSAGGAGGHSDEEGSSSAASVLLLHARRVNLESVDSLGPPI  
ATISHWPRLDYTGPMSSPDDTIRALINEILSTIREVAQINPLFRENVOFFSGRLDANDPY  
RLADFAASVCSAGSNPEDLQAVLEEKDAEMRLHKALVLLSKEREVSKLQOEIQSKVEEKM  
SESQRRYFLMEQLKSIKKELGEMERDDKEAVIEKYRQQLANYSEIPEEVNKTIEAELEKLS  
SLEMNSSEYSITRNYLDWLCGVPWNVTSDENFDIQDARKILNRDHYGLDDVKDTILEFIA  
VGKLGKSVQKIIICLSGPPGTGKTSIAKSVAALGREFYRFSVGGLSNVSEIKGHRRTYV  
GAMPGKIVQGLKKTGTFNPPVLLIDEIDKLGHS HQGDPASALLEVLDPSQNNAFLDHYLDE  
PVDISKVLFMCTANELERIPPELLDRMEVIRLSGYDFPEKVAIGEQLVLPKSMRENGLLV  
EKTSGAGTTDADAEPSEAGDAETPDRAGIDDPESSDQAGSSSESSTDRPELTTPLGTFV  
LPESVPPTLGISRDAIESLVRWYAREAGVRNLSKYIDKPTRKLLALQVVAEGEGTELTKKS  
RRKSDSWTVTENNLEDYVVKHIFTSRDLYDRDPLPDGIVMGLAYTAMGGSALYIETQGIK  
RGLDEKGNPRGGGTLKATGNLKDVMKESSQIAYTVARARLSEIDPSNDFFDKTDLHMHPV  
EGATPKDGGFALIDLMSRVARNLSMVCRYANNFCHPLAILLALAYRXIEGPSAGIAMVT  
SMLSLALGKPIRNDLAMTGEVSLTGKVLAVGGIKEKIMGGRRAGIKLIILPDANRRDYDE  
IPDYLKEGLEVHFAENYETVYEEVFGNE

>comp14754\_c0\_seq1; 968 168 3659 LEN=4274; translated  
MPAHLFGKRTLLGGDDLHVPALATVLRVQVLSWVFLPLGIYVWKQAVFTSTVTDGDGG  
GDGDGRWPLWKYLFDDWGEVNASRAAGDEGWDGTAPCTESFFARYYPLMSVLHLVSTAV  
FCVHSVSLEYRIWYWSGQGTPTMRQPRTKKVQEFLEFKLGTCTVLLGLVVAGTYGVASAC  
FARSYHRCYFRTISLNFHTAGYDGDGNAAFRYLAQYDDFYDDFYDGMWQEDATGEV  
FSGTKQSGDWVGSASWYAIGALLAVSQMAEVVVAALYYSRLITKASPASPVASDGLFRSS  
SFQNDGSNNGTDNHQIVHHELVEELWADRCQSLFRCLSI STCFLFGGHDLLGKSQHAYRH  
VAQALADYLETGKGLDVPVPTDLLTGLLVLQVRQRHRRLLAIQSVRCHENQPPGSLARWGA  
PSVSTDGNSGGLTKGAVPETITTTVARTTEPSGGHPRDSRSDYHLTTHSPEIRNRRLRS  
RGVSNNSRRYLLNRRSPSPSGPPPQQGLDVRGTASVPGNHPAATPLPCPTVQSSTQQ  
QYQQPQQQOHERQKNIYRRRNPSGSPINGTDSVFPVGASPDTHNGNGASFYRATMRQI  
LDPDDPVAATLEEGARMCTYALSITYWMLYVVFVHPVTGFPRLVCRCGSGSVASLGKAA  
DRCGSCSCRMCSVLGRGQNHRSFNSVSMPLNQORSAGAPPQGGSYDTNTNTQQQSS  
PSSSSSSDLSSSSSSNSRSRVRSRRGSGVSSDSEGEHYANEARDYGLRTSGDNLCEW  
HKRALLLVAGIPEADLVYAQFNNRLLSSVPCILLDHERSLVVVSIRGSLSLLEDVVTDTLV  
LPESLEELGERYGFDRGQYCHAGVLACFENVLRDLERHGWLERLLEQQYQGYSLRIVGH  
SLGAGVCTLLGYVLRSKYRSLRVFGFSPPGCTMTWDLATKCAEWSTSFVLDSDIVPRLSV  
LALEDLRDEVLELIGRIKVPKYKVFQNFLLKGGDRRKGCLRGNIESNDDAQSAAYNDDLEK  
LTQIKETLYDVPDPTIYQRQLDFLRVQAERKEVRGETNSRSLRLYPPGRMIHLVKTGE  
EGGCANMINKCLTCTTSNSGFLYTPVSI SNDDLDEIVVNATMGTDHFIDRMDELHRISN  
DYLERGGTIPAENPRVGLRTGIV

>comp14754\_c0\_seq3; 982 168 3671 LEN=4286; translated  
MPAHLFGKRTLLGGDDLHVPALATVLRVQVLSWVFLPLGIYVWKQAVFTSTVSDGDGG  
GGGAGAGDGRWPLWKYLFDDWGEVNASRAAGDEGWDGTAPCTESFFARYYPLMSVLHLV  
STAVFCVHSVSLEYRIWYWSGQGTPTMRQPRTKKVQEFLEFKLGTCTVLLGLVVAGTYGV  
ASACFARSYHRCYFRTISLNFHTAGYDGDGNAAFRYLAQYDDFYDDFYDGMWQEDA  
TGEVFSGTKQSGDWVGSASWYAIGALLAVSQMAEVVVAALYYSRLITKASPASPVASDGL  
FRSSSFQNDGSNNGTDNHQIVHHELVEELWADRCQSLFRCLSI STCFLFGGHDLLGKSQH  
AYRHVAQALADYLETGKGLDVPVPTDLLTGLLVLQVRQRHRRLLAIQSVRCHENQPPGSLA  
RWGAVSVDGNSGGLTKGAVPETITTTVARTTEPSGGHPRDSRSDYHLTTHSPEIRNR  
GLRSRVSNNDSRRYLLNRRSPSPSGPPPQQGLDVRGTASVPGNHPAATPLPCPTVQS  
STQQQYQQPQQQOHERQKNIYRRRNPSGSPINGTDSVFPVGASPDTHNGNGASFYRAT  
MRQILDPPDVAATLEEGARMCTYALSITYWMLYVVFVHPVTGFPRLVCRCGSGSVASLG  
KWAADRCGSCSCRMCSVLGRGQNHRSFNSVSMPLNQORSAGAPPQGGSYDTNTNTQQQ  
QSSFPSSSSSSDLSSSSSSNSRSRVRSRRGSGVSSDSEGEHYANEARDYGLRTSGDN  
LCEWHKRALLLVAGIPEADLVYAQFNNRLLSSVPCILLDHERSLVVVSIRGSLSLLEDVVT  
DTLVLPESLEELGERYGFDRGQYCHAGVLACFENVLRDLERHGWLERLLEQQYQGYSLR



IVGHSLGAGVCTLLGYVLRSKYRSLRVFGFSPPGCTMTWDLATKCAEWSTSFVLDSDIVP  
RLSVLAELEDLRDEVLELIGRIKVPKYKVFQNFLKGGDRRKGLRGNIESNDDAQSAAYND  
DLEKLTQI IKETLYDVPPDTIYQRQLLDFLRVQAERKEVRGETNSRSLRLYPPGRMIHLV  
KTGEEGGCANMINKCLTCCTSNSGFLYTPVSI SNDDLDEIVVNATMGTDHFIDRMCDLH  
RISNDYLERGGTIPAENPRVGLRTGIV

>comp14755\_c0\_seq1; 1013 272 2782 LEN=2803; translated  
MNLTPAFGPGRGGPFRRGGGFPMMNGRGGGPVNNFPPGGRGPPGKFFGRGMGQQQQPYHR  
NQMHPPPPSQQHL SHGNHGQPGPPPHRGGPPSGMMGRGRINMGQNSFIGGRGRGRNNMMPG  
RNPFAGRGGMQQQRGPPPPFRGGGPPPPPPRRLPHPSTMNGNSQPYQQQMQAQSPSYGN  
PSALSGINQRQPQTYQQQPSQQPGPPAAPPYQQVQTHHPQQSLS PNNNSFTGYQQVTNPA  
HVPQNQLPLQAAGTGSYQNILTQPTTSIVTPSSNTANRSTGNPSAQHINEGWKEYTAPNG  
VKYYYNDVSKESTYVKPEALKMLEQTNRTSSTESSTASSSTKRTWHEHEDATTGKKYYS  
GVSTTWEKPEGFVSPETIVANTSSGSKREEHNLHDAPATKRRKQSSNAVASANTSSDYN  
CAFSENKKEAIAAFKGVLLLEKGISPTFKWNEVLKVCEADSRWDSFENILSMGERRQALAEY  
QTKRTNELRNEQRQERIRANKAFGELLADILPSVPGFSARTSRFTDIKDALAKDDRFFAI  
EDDSTRESLFFDFCDDFKKRDERNKRNRREIQKSFVSFLQEKEGKGTLSYNSTWESFLP  
TLFEEELKLSRFATSHELTSDRRLYFADFIAELKKAEDKRRRIQDERRAEKAQRDKY  
RELLRELAVQGKILPYSRWREIEEFIAQDDSFQQVEEQDRSAPRELFEIFVDNWDSIYRL  
ERSFLLQLLRPPGKPDIVISAGIGFDLFFKILIEEAAYSSEIQDETSRIINRKDYVSSAQ  
VLYNELTAQKSRDLRQSSRRGSTNDSSSEDEGEIEEIGEITDNNEQSGDNDNKPE

>comp14755\_c0\_seq2; 669 272 1998 LEN=1998; translated  
MNLTPAFGPGRGGPFRRGGGFPMMNGRGGGPVNNFPPGGRGPPGKFFGRGMGQQQQPYHR  
NQMHPPPPSQQHL SHGNHGQPGPPPHRGGPPSGMMGRGRINMGQNSFIGGRGRGRNNMMPG  
RNPFAGRGGMQQQRGPPPPFRGGGPPPPPPRRLPHPSTMNGNSQPYQQQMQAQSPSYGN  
PSALSGINQRQPQTYQQQPSQQPGPPAAPPYQQVQTHHPQQSLS PNNNSFTGYQQVTNPA  
HVPQNQLPLQAAGTGSYQNILTQPTTSIVTPSSNTANRSTGNPSAQHINEGWKEYTAPNG  
VKYYYNDVSKESTYVKPEALKMLEQTNRTSSTESSTASSSTKRTWHEHEDATTGKKYYS  
GVSTTWEKPEGFVSPETIVANTSSGSKREEHNLHDAPATKRRKQSSNAVASANTSSDYN  
CAFSENKKEAIAAFKGVLLLEKGISPTFKWNEVLKVCEADSRWDSFENILSMGERRQALAEY  
QTKRTNELRNEQRQERIRANKAFGELLADILPSVPGFSARTSRFTDIKDALAKDDRFFAI  
EDDSTRESLFFDFCDDFKKRDERNKRNRDRKSVV

>comp14756\_c0\_seq1; 258 289 978 LEN=1272; translated  
MLFARAGTLLSRAAASLPLCKRLASRPASGQTSQRRLVHVRKRLEDLGIELPPPAGPRAN  
YDVVCADAADQGLLYVSGHLPFTNDGTLMTGRITSDGERGVYGYKAARAAALNIVSTLS  
DRLDGDLDLDRVEKIQKVFQVQSTDEFKEQHLVMDGASDLFLEVFGTTVGYHARSAIGTST  
LPLDIAVEIECIVRIKLPGEPEPDQTSGLTSTLGTASASPLEGGDSELRR

>comp14756\_c0\_seq2; 241 1 879 LEN=1173; translated  
DRRISKKGTPKTEKETETETETQTE TRIGLPSATAHQCPVPKTPPPKTPNQTTPIRFP  
PSIMLFARAGTLLSRAAASLPLCKRLASRPASGQTSQRRLVHVRKRLEDLGIELPPPAGP  
RANYDVVCADAADQGLLYVSGHLPFTNDGTLMTGRITSDGERGVYGYKAARAAALNIVS  
TLSDRLDGDLDLDRVEKIQKVFQVQSTDEFKEQHLVMDGASDLFLEVFGTTVGYHARSAIG  
TSTLPLDIAVEIECIVRIKLPGEPEPDQTSGLTSTLGTASASPLEGGDSELRR

>comp14756\_c0\_seq3; 241 1 879 LEN=1206; translated  
DRRISKKGTPKTEKETETETETQTE TRIGLPSATAHQCPVPKTPPPKTPNQTTPIRFP  
PSIMLFARAGTLLSRAAASLPLCKRLASRPASGQTSQRRLVHVRKRLEDLGIELPPPAGP  
RANYDVVCADAADQGLLYVSGHLPFTNDGTLMTGRITSDGERGVYGYKAARAAALNIVS  
TLSDRLDGDLDLDRVEKIQKVFQVQSTDEFKEQHLVMDGASDLFLEVFGTTVGYHARSAIG  
TSTLPLDIAVEIECIVRIKLPGEPEPDQTSGLTSTLGTASASPLEGGDSELRR

>comp14756\_c0\_seq4; 258 289 978 LEN=1305; translated  
MLFARAGTLLSRAAASLPLCKRLASRPASGQTSQRRLVHVRKRLEDLGIELPPPAGPRAN  
YDVVCADAADQGLLYVSGHLPFTNDGTLMTGRITSDGERGVYGYKAARAAALNIVSTLS  
DRLDGDLDLDRVEKIQKVFQVQSTDEFKEQHLVMDGASDLFLEVFGTTVGYHARSAIGTST  
LPLDIAVEIECIVRIKLPGEPEPDQTSGLTSTLGTASASPLEGGDSELRR

>comp14757\_c0\_seq1; 688 152 1927 LEN=2272; translated  
MLASAATAAFTGSSYMNATSTDC EEA PKGLPTFKGWRHRSDGSIVGRIYNSSSYVDGDV  
WTSPITQGTVKENCEVSTESGSRYYLSSLASEEPPTEDTKAPEPPKPPAATLKNINTMKV  
TPDNLA AVLKGITGAVSEIESSLGLASSGSSKSSSSSSSKSNQSIDVVLGAQWGDEGK  
LVDMLSQEYDVCARVAGGSNAGHTIVVDGVKYKFHLLPSGILNPDAIGIVGNVVIHLPS  
FLKEIEGLAKEGVAHEGRVVISDRAHLVDFHQTVDGSLEDRLGRNKIGTTKKGIGPAYA  
SKISRNGVRVGDLDADWEYFEQRFRALAEHMRSYEGLKIDIEAELAYYKKIAPKVLAMTC

DTIELTNKKYDEGKRILVEGANAAMLDIDFGTYPYVTSSNPSVGSVLTGLGVSPKKLGGI  
YGTVKAYCTRVGEGFPFTELNLVVEGSHLATVGHFETTTGRPRRCGWLDMPQLKYSIT  
INGYTSINLTCLDVLVSLKEIPLGVAYKAKDGTILETMPASLKQLEGVEVQYETMPGWDE  
DISKCRTFDELPLNCKRYVQRIEELAGVPIRWIGVGNRLDVIDRGEAFEN  
>comp14757\_c0\_seq3; 452 152 889 LEN=889; translated  
MLASAATAAFTGSSYMNATSTDCEEAPKGLPTFKGWRHRSDGSIVGRIYNSSSYVDGDVV  
WTSPITQGTVKENCEVSTESGSRYYLSSLASEEPPTEDTKAPEPPKPPAATLKNINTMKV  
TPDNLA AVLKGITGAVSEIESSLGLASSGSSKSSSSSSSSKSNQSIDVVLGAQWGDEGKGL  
LVDMLSQEYDVCARVAGGSNAGHTIVVDGVKYKFHLLPSGILNPDAIGIVGNVVIHLPS  
FLKEIE  
>comp14758\_c1\_seq1; 222 317 1823 LEN=1823; minus strand; translated  
MNRFMTAIEAIMQSLAKNPFYKKAFSRIPKLNKMMFIHAVQSLIFNKATSHRIAKMGRE  
NVVAGDLVPSNDEDTKSRVHIVTESDIENKKYTI EDVLPVVGSKTVFPTNELGTVLKE  
VTDLGLTLDMFKNLQDREISVNGDYRNAVIHPKDFDYSVREYNHPLQPLLQTDLMKMNGE  
EIRIDPKQTEEDPTLIAMIVGFTLPSSAYATVALRELMKSPTSNEFQKTMKLKYYKQYDX  
ADAHTVLSSTNQLSLFMNPPPLRRSVSDSDPGGFRGDIRTAPRVLRAVAPLRERARVAPLR  
WGFERSPAARFRSVDVHGIPPLQHPHGVSHLDGLSLEPPDRDRVLAEKDGPVFRGAPKGGP  
EGLHRLEGLHRLAHRSGGLVRAGLLAPRARLDDGKDDVADRHDLPAVFLKGLYGAPLYHD  
VGP ELAHGYRLVPSLVYQPLVDDVQRGLRGDQDRKAVRERGLAEGPAVPRLLGVGRDVGPG  
FRPALEQPTLTDGFPVLIASEA  
>comp14758\_c1\_seq2; 310 68 1486 LEN=2579; translated  
MPPTLSIADAMAAASEGLDSRAAAVALASIALSFLGAPPWSTSSGGXAAWFRLGVFLIGG  
GTTVGTVSDLYVHPVKSMRATRLEESALDRKLENDRRFMVYERPLPAHKTEWGKTDTT  
HRFLTQRQCPSLATI STAITDVRTDDGKAERVLVLEQATVAPSSAPKVSVRVPLARLDG  
KPETTYLAGIWDVVAVEDLGEKAAFLQAIADADEELAASFEGGRRPVVRLVRESLSP  
LSSLLGKGGPETRAYVPAYAKAWHGGALGKPTLTDGFPVLIASEASLDVVNQRLLVHKGG  
HKPISMSQFRPNIVIKRGSIEPFEEEDRWKVVAIIGNVVFAIVKACPRCKQSCTDQTTGTVS  
KAMEPLETMKAFFRAFGSAPKNGSVFFGQNAIPIGRLEGKTIKVGDPVRVLERGDPVYID  
ERKRAAGERKPHRSGATRALSPQRSNGSQHARGCANVPAETTGVAVYGPCKRW  
>comp14759\_c0\_seq1; 473 329 2344 LEN=2568; translated  
MGDDQQSVKEETQGSDAQGDVAVIQPSFDDDGFRKKPSEMSDDKCSSPNHRGGHKQNLSE  
HFQDATNLSNGSPAKTGQKHSRAYSGDASNPAQAHRRIDSVGKSAAIKRAKPHRRIDSSG  
LDALTAADF SREELQASATGRHSWNNHPNFIRRSP IETTFDHTVHGPAPP SHQQPPPQL  
PGSVRSPMETATTFDHTVHGSAPPPHQPPPQLPGA AHHRHYSLNSSGGLPARTVYYTHP  
SYPQPPYHPAYHYPPHPVSNGYPRHHGPPHGGPPPPASYPVQYARPRGQDPYTKHHTPLQQ  
PTLERPHSENPARTSPTVASIDHKHSAVKVNETMGPPAPHQWPRGGSTQGVQTYVTAIAV  
DSRQPGPPAPRSSPSAGHHRKLSSFSNLGPLLWGQSSQPESIGSGRAHHRSTSSSISFLD  
SADAAFLRNLQETTGTAAVYDATSLQEKSESSSVKQPSSAPASAASKLMAGGTSKRVR  
KCTVEGCHNRVVQGLCISHGAKRKLCKYPGCKKHVKKAGLCSTHGPAKRCELEGCTKV  
AVQGGRCIAHGAKKKLCSVDRCTKQAILSGMCKKHHQKQAGENPTCTIIDPKKSRPSKG  
PKKPGHTRGLSIFQEISVDAVGDLLTADAATKQNSGKGAPTADR TISSSVEKNEASHHHR  
STASQVLVDMV  
>comp14759\_c0\_seq2; 424 329 2368 LEN=2679; translated  
MGDDQQSVKEETQGSDAQGDVAVIQPSFDDDGFRKKPSEMSDDKCSSPNHRGGHKQNLSE  
HFQDATNLSNGSPAKTGQKHSRAYSGDASNPAQAHRRIDSVGKSAAIKRAKPHRRIDSSG  
LDALTAADF SREELQASATGRHSWNNHPNFIRRSP IETTFDHTVHGPAPP SHQQPPPQL  
PGSVRSPMETATTFDHTVHGSAPPPHQPPPQLPGA AHHRHYSLNSSGGLPARTVYYTHP  
SYPQPPYHPAYHYPPHPVSNGYPRHHGPPHGGPPPPASYPVQYARPRGQDPYTKHHTPLQQ  
PTLERPHSENPARTSPTVASIDHKHSAVKVNETMGPPAPHQWPRGGSTQGVQTYVTAIAV  
DSRQPGPPAPRSSPSAGHHRKLSSFSNLGPLLWGQSSQPESIGSGRAHHRSTSSSISFLD  
SADAAFLRNLQETTGTAAVYDATSLQEKSESSSVKQPSSAPASAASKLMAGGTSKRVR  
KCTVEGCHNRVVQGLCISHGAKRKLCKYPGCKKHVKKAGLCSTHGPAKRCELEGCTKV  
AVQGGRCIAHGAKKKLCSVDRCTKQAILSGMCKKHHQKQAGENPTCTIIDPKKSRPSKG  
PKKPGHTRGLSIFQEISVDAVGDLLTADAATKQNSGKGAPTADR TISSSVEKNEASHHHR  
STASREFRLYIPVLDLIDL  
>comp14759\_c0\_seq3; 537 829 3060 LEN=3284; translated  
MVPANDTVWNTKLMADQSLIVHNFMYPCRTHRKIGLGLFSLRPNYRFSSRRRREEEFEP  
IDILLSKQHSSVMGDDQQSVKEETQGSDAQGDVAVIQPSFDDDGFRKKPSEMSDDKCSSP  
NHRGGHKQNLSEHFQDATNLSNGSPAKTGQKHSRAYSGDASNPAQAHRRIDSVGKSAAIK  
RAKPHRRIDSSGLDALTAADF SREELQASATGRHSWNNHPNFIRRSP IETTFDHTVHGP

APPSHQPPPQLPGSVRSPMETATTFDHTVHGSAPPPHQPPPQLPGAHHRRHYSLNSSG  
GLPARTVYYTHPSYPQPPYHPAYHYPPHPVSNNGYPRHHGPPHGP PPPASYPVQYARPRGQ  
DPYTKHHTPLQOPTLERPHSENPARTSPTVASIDHKHSAVKVNETMGPPAPHQWPRGGST  
QGVQTYVTAIAVDSRQPGPPAPRSPSAGHHRKLSFSNLGPLLWGQSSQPESIGSGRAH  
HRSTSSSISFLDSADAAFLRNLQETTGTAAVYDATSLQEKSESSSVKQPSSAPASAASK  
LMAGGTSKRVRKCTVEGCHNRVVQGGLCISHGAKRKLCKYPGCKKHVKKAGLCSTHGPA  
RKRCELEGCTKVAVQGGRCIAHGAKKLLCSVDRCTKQAILSGMCKKHHDQKQAGENPTCT  
IIDPKKSRPSKGPCKPGHTRGLSIFQEISVDAVGDLLTADAATKQNSGKGAPTADRTISS  
SVEKNEASHHHRSTASQVLVDMV

>comp14759\_c0\_seq4; 488 829 3084 LEN=3395; translated  
MVPANDTVWTKLMADQSLIVHNFMYPCRTHRKIGLGLFSLRPNYRFSSRRRREEEFEP  
IDILLSKQHSSVMGDDQQSVKEETQGSDAQGDVAVIQPSFDDDGFRKKPSEMSDDKCSSP  
NHRGGHKQNLSEHFQDATNLSNGSPAKTGQKHSRAYSGDASNPAQAHRIDSVGKSAAIK  
RAKPHRRIDSSGLDALTAADF SREELQASATGRHSWNNHPNFIRRSP IETTFDHTVHGP  
APPSHQPPPQLPGSVRSPMETATTFDHTVHGSAPPPHQPPPQLPGAHHRRHYSLNSSG  
GLPARTVYYTHPSYPQPPYHPAYHYPPHPVSNNGYPRHHGPPHGP PPPASYPVQYARPRGQ  
DPYTKHHTPLQOPTLERPHSENPARTSPTVASIDHKHSAVKVNETMGPPAPHQWPRGGST  
QGVQTYVTAIAVDSRQPGPPAPRSPSAGHHRKLSFSNLGPLLWGQSSQPESIGSGRAH  
HRSTSSSISFLDSADAAFLRNLQETTGTAAVYDATSLQEKSESSSVKQPSSAPASAASK  
LMAGGTSKRVRKCTVEGCHNRVVQGGLCISHGAKRKLCKYPGCKKHVKKAGLCSTHGPA  
RKRCELEGCTKVAVQGGRCIAHGAKKLLCSVDRCTKQAILSGMCKKHHDQKQAGENPTCT  
IIDPKKSRPSKGPCKPGHTRGLSIFQEISVDAVGDLLTADAATKQNSGKGAPTADRTISS  
SVEKNEASHHHRSTASREFRLYIPVLDLICL

>comp14760\_c0\_seq1; 431 102 1577 LEN=2257; translated  
MITSIMDSSSRNTRNTWLSNHKCYLINAVTASLIGSFGFFYAVSSFLERTFGTTTYTS  
SNRLHHRHHHLYFSTRFQYSLEAGVEVEPEESYQTSVQYPWKRAIIDYSGANEYIEAHYGR  
HPSLQSDSWTNASVSYSFSSGGVVRGDRAEEDIYDARELMAKTKSTSSNTSCSSLYHRRFME  
SYGMTLLNAPTSVTEWRNEREIEDIYTKELEDMPLSLFSSKIMMHCFWNPMLRGENLEVS  
SPRSQQDDNVDRAGKHSVSI STANVAPAVHIDTDVGAYASLDEF LAIVEKNRVIGQREG  
DEASF DREWCKTCITMDRKRFAVNFWRNTNRNVPVTKRPLAVLSTRYSVVDSGSIANRS  
LPAFPYSRPMEQSKWYTYPNMTNDEVLFYQYDRLVTQPSDLWHCAVSIDEDRAPENNE  
YIGITSLSDNAERLTTTRMHPPRESFDIRALIVFDEKVPDPKDRYHSERLRPVLTFFESG  
CFCDEQASLRT

>comp14760\_c1\_seq4; 333 271 1182 LEN=1199; translated  
MRRNPKRCLTTAHEQFGKDDCTEWGLMHEENEKCPVTPVQVVNEVFEAIAGTLYGKQKL  
DPSIVSNVRSKGLYNRPLRSDGNDGRIGIEIDGTEFMFPWRVVSQRAQRIFSLILAAKL  
SRDLWSKEYENTDYSADSF RPVALCFNTIKEALLARQEMQILQRDWRKSKRDAFGSVII  
QTISDGI PKDLHPPKTGKRKYRSLKNLSVNATKGLLVVVQPTDFNKDFD PARPSLHSLND  
FQKVVASAYVETPVVVISPRFLSYDEKDAPYNEINQSGFQQASFYGGIEPPRGP NLFIL  
RDL

>comp14760\_c1\_seq7; 351 271 1339 LEN=1605; translated  
MRRNPKRCLTTAHEQFGKDDCTEWGLMHEENEKCPVTPVQVVNEVFEAIAGTLYGKQKL  
DPSIVSNVRSKGLYNRPLRSDGNDGRIGIEIDGTEFMFPWRVVSQRAQRIFSLILAAKL  
SRDLWSKEYENTDYSADSF RPVALCFNTIKEALLARQEMQILQRDWRKSKRDAFGSVII  
QTISDGI PKDLHPPKTGKRKYRSLKNLSVNATKGLLVVVQPTDFNKDFD PARPSLHSLND  
FQKVVASAYVETPVVVISPRFLSYDEKDAPYNEINQSGFQQASFYGGIEPPRGP NLFIL  
RDFSPPSYCWIGDALAVGSGDGYGKTLSSRLILKNSVMDEGHPWHMYASNNDV

>comp14761\_c0\_seq1; 1284 298 2640 LEN=2882; translated  
MNPQTKLALVALLARAGSAPYADAFVPASLTPAGPARSTSVTANANALANLNLNLP  
SPSSALNMSSG SYLGMDDDEDEDDDDDDYDLSSRFGEVRSPTGLVLD PDDPNPLIKPR  
PSRYFRNEDKEKDRI PDDQLVQKMSPEERKENLTVMRQIRKSDLPLRLRKYDAGVVEAN  
NDLKRRTVRDPWFGVNERLRDAIQMGEPQEKVEHLKDLAKKLGPPDPVEMNEKAYALHT  
EIIDIGISPARAARMVEEEMRLERVARGRAMMAERIKNEEKKKQYEEEDMQNPGAKEERE  
AKERRERTMQRIMGEIEEDRKKQERAKEILGKYPDAPNSRHELMQNALKAAQDDVKAAR  
RRQLGLGKKG VASTDDASTGDAASGGGSAARAREAAAAEAAGGRPRLPGDEDVIRGEIDV  
PVESSSSTATGPLTVEVSSVYNKEQSDPPMRKHCFQYTIKINTSPTDTIQLVGRRFEIQ  
TVGSSMKDVVQEGEVTGRTPVLKPEVFEYTSAPLSVRPIGTTIVAARMKGEYRYEILP  
EGQTTASDMQTD TASNETAELGVFHFIFPEDQRVKPYRAEED EEEEEDEEDTKAAVA  
PEAPKKEAKSSKSPSSTLPGDDMKTGNI SVPLNDTSEVVTD SVRVALKSSYRPERSESS  
QDKYCFAYSIRITNESSNPIQLVSRRFEIQSVGLPHKDVVSGPGVTGRQPIPKPGESFEY

TSTAPLNVKPM LDKTPVLARMSGEYNFVILGEDGTTPLSSNPLQAKLGLFHFILPALSTS  
>comp14762\_c0\_seq1; 219 269 1579 LEN=1579; translated  
MGHSAKSI I I I QTLIAAVLFSVVS NFFSFRKFAGESSGTGNAGIVKKVAPVFSNEQLANQP  
EEVIQDQIEH HFEYETSPNKVDIPIFYNLFIKEESDLVRVKKIVAEQFGEFLNVHKPVYV  
NSIGVPLDFNEDDVSNGMPP LNTTRNPVELLAHYKEASEHVTLKALWDY CQVPEHNEQKV  
AYLHSGKSFTATSENVRLRRFLTLSTLSEECANMPIDTCNICSGRFSPIPHPHNSGNMWV  
ARCSYIKKLINPEKFE LAMDRMQYDDGDI FLACDGRKRYSAEHWAHSHPKVRPCDLYTKP  
HFTWGYDGLPNRKRFKGNI ELHAGPRFELIQYLKTDVGYCRGRGISKQWRINEYIALYNE  
TPGRKWFHGHGFLKDQQDWWPYKDYGWVQQTME SREELIKLGYNYHLWEQPRSRPYPLWGK  
KWHELTKQQRKKWHELT

>comp14762\_c0\_seq2; 620 269 2914 LEN=3282; translated  
MGHSAKSI I I I QTLIAAVLFSVVS NFFSFRKFAGESSGTGNAGIVKKVAPVFSNEQLANQP  
EEVIQDQIEH HFEYETSPNKVDIPIFYNLFIKEESDLVRVKKIVAEQFGEFLNVHKPVYV  
NSIGVPLDFNEDDVSNGMPP LNTTRNPVELLAHYKEASEHVTLKALWDY CQVPEHNEQKV  
AYLHSGKSFTATSENVRLRRFLTLSTLSEECANMPIDTCNICSGRFSPIPHPHNSGNMWV  
ARCSYIKKLINPEKFE LAMDRMQYDDGDI FLACDGRKRYSAEHWAHSHPKVRPCDLYTKP  
HFTWGYDGLPNRKRFKGNI ELHAGPRFELIQYLKTDVGYCRGRGISKQWRINEYIALYNE  
TPGRKWFHGHGFLKDQQDWWPYKDYGWVQQTME SREELIKLGYNYHLWEQPRSRPYPLWGK  
KWHELTKQQRK VLEDVFVYSSATWDEEIRREYKDRNRVNNFGKKWIPNVSFDRCDAKSAN  
DTQKIESWYQRTGDNDKSLRSYVYEAPKKPTDKKRVLI IAAVPSSEIRIITLWSELECFE  
EAVDHV IITAPLWAE PFI SHVIRLAKKIYPHFINGQVTIESKYFMNNRYDVGLWCDAYNS  
LKPGSYDEYGMINDSVLALRKFSAIFDNVAHRNVSLSSISYSYTSKGNVGYGPEHYVLS  
IFRVFDNEGINIFKGHSCKTEEHPMFCPLDDNKACI IDNFEIDLAKKEYPCQKVHGLYPA  
DSMGPLVRRDET KRIWIKNTRYWRLLDVDMGFPIAKSNEAEQFGAQFILSENIPFFKNNP  
LMKNCTSKILPHLDEL YGIEIPSFKIAKSFYKLSWADLPAEMQVNVKEMLGFDEETWDRK  
EYSRSLVGKKWDDL SRKQQALLIKLECSKLRFNKDRCFQDP

>comp14763\_c0\_seq1; 88 1 319 LEN=319; translated  
XAGGGTTTAAMGGNRTAGKKA AAAVGT TAGAAEDGRGVASSSNEETAEVREAMVATAV  
ATRHGLRSNPAIRAGSLYRKTKENRTKQNTTKE SKLKPQIQIQIX

>comp14763\_c0\_seq2; 502 1 1404 LEN=1663; translated  
WRMEWLLRQVIAS PFCVLVMLQWHRRVRSFLPTCLLFSKHRWQQNKPAYVRARKGNHDL  
GLDEFDTDEENLKA WDCFDKKT PHFSRTIGDR TLLLGLSTVFRDAPYSSHEVHVDDQ  
IEWFRDMVESHPESEGWKILVFSHAPITG SGLRVLQSVHVTNGCAWLNHCSP TDVRNSFV  
RIVKENPQIKCWL SGHFHLSDYQDALVQAVPGSPCAFLQVGMGPGSSRDRRRQSRMIR  
GCGGEFLQIF SINHHQREDCGTTDASRARVRLDATIDLRTGELTHGKGDEASPPPGSSGD  
ATETATATAGRDPDFWQAYVPQPEDGCYLEDVGGDI STGGKTVCWWHMADGKVLGLHEGQ  
LVEYDAETLSPLG VVVTKEQLAAKPSAGHGDETTGPPRTKEILVVQNKSTLVLVDDDETQD  
VEVVHPNADGSYWRKFQRNKKIRLEEKAREEVAMRWMSQNTVAKKET

>comp14763\_c0\_seq3; 601 1 1968 LEN=2227; translated  
ALALLVAATTTAAAAATTTASGR LPLLLLLLPSTAAFSLPQRGPLSKGHRQRGRPGAALN  
QEPLPGRVRNHRPLRAKTGSGAPFSAEETPDGEPHPTFRDSWSLVVLGDLHMEDDMRHE  
EARRDCLEALAGHPLLASPLGPNGRDKYKYKYNDNALPALDGERLSAICEKPGGALSE  
EELELLLARKK HRYLKSHIVSLGDLGRKDIRHEPGDAGTTKSFLDAKAYFDGFEGIPYDL  
VTGNHDLEGLDEFDTDEENLRAWMDCFDKKT PHFSRTIGDR TLLLGLSTVFRDAPYSSH  
EVHVDDQIEWFRDMVESHPESEGWKILVFSHAPITG SGLRVLQSVHVTNGCAWLNHCSP  
TDVRNSFVRIVKENPQIKCWL SGHFHLSDYQDALVQAVPGSPCAFLQVGMGPGSSRDR  
RQSRMIRGCGGEFLQIF SINHHQREDCGTTDASRARVRLDATIDLRTGELTHGKGDEAS  
PPPGSSGDATETATATAGRDPDFWQAYVPQPEDGCYLEDVGGDI STGGKTVCWWHMADGK  
VLGLHEGQLVEYDAETLSPLG VVVTKEQLAAKPSAGHGDETTGPPRTKEILVVQNKSTLV  
LVDDDETQDVEVVHPNADGSYWRKFQRNKKIRLEEKAREEVAMRWMSQNTVAKKET

>comp14763\_c0\_seq5; 511 1 1456 LEN=1715; translated  
XPDRSFSFADAFFPFFSAKQIPCTESIS CQFDGFAGRKDIRHEPGDAGTTKSFLDAKAYF  
DGFEGIPYDLVTGNHDLEGLDEFDTDEENLRAWMDCFDKKT PHFSRTIGDR TLLLGLSTV  
RFRDAPYSSHEVHVDDQIEWFRDMVESHPESEGWKILVFSHAPITG SGLRVLQSVHVTN  
GCAWLNHCSP TDVRNSFVRIVKENPQIKCWL SGHFHLSDYQDALVQAVPGSPCAFLQV  
VMGPGSSRDRRRQSRMIRGCGGEFLQIF SINHHQREDCGTTDASRARVRLDATIDLRTGE  
LTHGKGDEASPPPGSSGDATETATATAGRDPDFWQAYVPQPEDGCYLEDVGGDI STGGKT  
VCWWHMADGKVLGLHEGQLVEYDAETLSPLG VVVTKEQLAAKPSAGHGDETTGPPRTKEI  
LVVQNKSTLVLVDDDETQDVEVVHPNADGSYWRKFQRNKKIRLEEKAREEVAMRWMSQNTV  
AKKET

>comp14763\_c0\_seq6; 599 1 1956 LEN=2215; translated  
ALALLVAATTTAAAAATTTASGRPLLLLLLLPSTAAFSLPQRGPLSKGHRQRGRPGAALN  
QEPLPGRVRNHRPLRAKTGSGAPFSAEETPDGEPHPTFRDSWSLVVLGDLHMEDDMRHE  
EARRDCLEALAGHPLLASPLGPNRDKYKYNDNALPALDGERLSAICEKPGGALSEEELE  
LLLARKKHRYLKSHIVSLGDLGRKDIRHEPGDAGTTKSFDAKAYFDGFEGIPYDLVTGN  
HDLEGLDEFDTEENLRAWMDCFDKKTPHFSRTIGDRLLLLGLSTVFRDAPYSSHEVHV  
DDDQIEWFRDMVESHPESEGWKILVFSHAPITGSGLRVLQSVHVTNGCAWLNHCSPDVR  
NSFVRIVKENPQIKCWLSGHFHLSHDYQDALVQAVPGSPCAFLQVGMGPGSSRRDRRQ  
RMIRGCGGEFLQIF SINHHQREDCGTTDASRARVRLDATIDLRTGELTHGKGEASPPPG  
SSGDATETATATAGRDPDFQAYVPQPEDGCYLEDVGGDISTGGKTVCWWMADGKVLGL  
HEGQIWEYDAETLSPLGVVVTKEQLAAKPSAGHGETTGPPRTKEILVVQNKSTLVLVDD  
ETQDVEVHPNADGSYWRKFQRNKKIRLEEKAREEVAMRWMSQNTVAKKET

>comp14764\_c0\_seq1; 1295 65 2257 LEN=2363; translated  
MKFSFSIFSLVLMGSAVDAAVKPHRGAALRNEHKKFKQQQDFMRAIHADGKLAASRKKR  
ENERKRKLMKMEKAVTKAEHEKRQKRHLDQYNSEYSFDEYEWMPVYQEMIQDGVFDL  
TARFVKYSGCAAIAKAYDPDRAAENGNPMVVDTYSVFRLCPEDSCNKYSLTGCCKNYGEYV  
VEMSTYLEFMLEFYETHYGAYCDYCYPCDYNQIQKKQTQGCYEDMAQADYAMEQDQQA  
MAWEDYKQNFQDMSQYTQAKQQYQQQMQQMNNAYQSGNNNAYNNAYNANSANGYNANN  
GGNRKLDGYYSNFAAYSQENNSNDDAVNSGNNAWQNGGQVNGQSYNMMNQMQMNGQNP  
TYGYIDENGEYVDLDCANGYTDENGKEYNINCDAYQSKMMKCSGDNLCDYCEYQVDQYD  
PCDEYVCKDYNYCSLDYEPNYKQMYNDGNQNNNNNGQYNYQQAQEAQSDLYQFLECS  
QYVDEYQGFEFVYVPHCGSDHYTISLGVFSDENCVNYMGETISLSKVLGYGYDEESFFHLP  
HECISCDGAQQFEDEERYQEMYTGQGFYGEYVEAPNSEFDDVVMCAALFERSAQCNH  
MTNYGMMSKYMETIDTEYEQRFCNFIDNIVYGTYNENGEIKLKAFAFDNDWRNPDQYK  
MEMPVGQAVGLALSULLVVALSALAFVTRSLTRGGSTPWRPRRMFKKNKDLLEGQEGISM  
DRAATNPPLI

>comp14765\_c0\_seq1; 1349 103 4581 LEN=4669; translated  
MDGENNRKSKRGRRTATGLRKHQQIDGVVVEELFPLFDPSSTEQKVGDIYVSATTTGNN  
KRFYGVLIQSSSLKEASSLFFQDQSDSLRLNERMNVLMKRESELTTKKGSDDAATAVAA  
TEQKGDGLSTKRNLEEFSSYNGSTYNGTTDATESSDQNSLLVPPAKKARLSSKEDTSGN  
DEKNNISTESQGNRTGIAKAGPLESFLTEERPIQKFYVEEKEGKSHKIERRGQGEDNK  
RNSNSGNSYRILVATFSSIYEAACGDHTKARLIHEACEKGGNFLAGSSNASDSYYYQYEM  
LPPSLRMDSDAASKLAVIRTSMGFHSFLQGTALPPWYPLSNLYSQSKVLNLLNMKQGSNG  
KIEWDTTGNASKIITGSSTSNANDVATMGGGTKLPMQTRVQKQYQIGVIGGGIAGLACCQ  
ELITALKNDGIHAKVTLEARSRLGGRIATDRSWKTEKDKVFPVELGASWIHGIDNPLA  
TLAQNAGIEFVRASEEVKMGVGRGLKEIDSKMDEKTGKLFDDLLDHATEDIWTSAMNEQSV  
ALHKKDQDPQSAVRWYASCFSQNDANKSRPSGIRLTTTASKTPGHRRSDDRSVDCEIGR  
VIARHKLREFSKLSAEHRMLLWNSKNVEYALGSNLDLSMKYWDVDDRHAFAEGDHVLLK  
EGYSTVIDRMLQSLTTVGPDKFEYFLNFPVGKVEYGRKSATQKYSRDQFGRDRHLTELS  
SCSITSEDGQTKYFDLVAAPVPLGVLKESVERESDVYFGKMTFIPSLPFSKIDAIRNV  
GFGLLNKVYVQFPTPFWRIPGFKEEDDCLFGNVTGVNPHHYMFFDVGKRLGSQDDSPAI  
LMSLVSGKEAVALCLSDDDVIKEVVETLRVMFEEQISIPDPIGFRITRWGKDRFSRGSY  
TYLPPGSTDQDFQLQSPVNGNGDSFLLEGNMEVMRLFFAGEHTTALHPSVTHGAMLSGI  
RAAQEVVSNIQSKSKGDKIDKVIPISIFRHMNPTIPLQCNLCHKFGWRTREGPLLAFKR  
GNRQVLVHNNCAEFCPEVEVLNSKWKVIRAVNRGKTFTCCHCAQNGATIGCSSANCFRM  
FHFSCAEDTGWRFEQDGAFFCDSCRVSTVKRCDRISTKFSYMKTNIDLISLACQLCRMP  
ENDMLGELLAFQQQGMQKQKQVRMCCVHLNCVKHTNIVDTSESQNARMNHEYRNVFEVL  
DHSKICSSCSNTGASIRCSADNCDQIFHYHCAIGDAGWDFERKGRKKFYCKAHRNITNTK  
HANGAETSLPRTLAATMHGETGGEAAATKGNAGGLAFHNLSTFGGTSKSLTHL  
KTSVPGNLMSGAVHSPQSSPPKIGNSTHKTAAATTVDISDESSYADDDDDSFVLEPE  
DNAGEVLDLPLSQNVSGSTQPIRLERSSREEFWNVSLKVLKTNDGFVVMVASSGNDLP  
RNDDAFSLQANDIIVSLNGSKVGSRGLETREILLRLKQEVLDLMLLEIVRNKG

>comp14766\_c0\_seq1; 513 1 1737 LEN=2109; translated  
RKSCSPETMEVDNLDEMIQLLLDEHYVFTGIVVAIAFVWKCKPWRROKHNDRASHGE  
SKETESLQSKGKRTLLRGHLRNELDILQSEKEELEVLMQLRTEMEWKDLQLSEATSKIL  
AAAKYKPLGVSTRLAREFETLGTCTLLVFLGLCLINSKRRTNMKRDRYPIQRTITTARE  
CSSFLDEYTRHVAFPILSKNATIAAKEVHAHVTSNETVIGRGVARAFESIIEVASEKIVP  
VVIIHKNLFTQNAQLLVSAILAVELPGAKEKDGLLNMIEGLEQQI SELEESLLKEEKSKR  
ALELKLRLDGALEGEKALLYDERMKTRTWKLYAEVKLEWEEVVRQNEAQKQEEIAIAAV  
AENQKRLHALLDEHMRCRRQEQEIRLFVAASNKNMFLPVPVIVQGISAAIYNNSDRDRS

SKNKYELNLDNLRELYNKYSTPSGRETKFSQKGLGTDYEIVSRDDATDTRDNFAGSQNE  
EQDQRDESNEGYSVLNTVRRERIVQSKSTSQATWLVTDNSKKQPLLSFPLVAANSVDKRIE  
NPAIRSLITGHGRATNSEEVKQSSWTEISTRIGMPTNE

>comp14767\_c0\_seq1; 300 114 1853 LEN=1870; translated  
MIFLYFPVFLSVLSNLVVLGSSQQOTARVIKGRCLCSSKILRNGPDASLLPTLKNTPVDN  
NSRDIFFPYCPDGYFCRVTNHHHPGFGDNVGLCTPCPGRPERCLSNIYDISVFIDGQTVS  
RASAGECWENCGLESNRCSSSTKPCGDGLFCNPDGGDENGGYCEGCPTHIFYCQEKNLTAA  
GQHACLSSCALSCHFSSTIVTNETEIFDQGISLSPKQRSLSLHSGSPQGSVTGPVVD  
CGLGLEPCKDANNSICLIERGKVAFFKVISCSAGGGIGAIIFNIESKCGNFNGTLGTAD  
TFIPSLSISHLEGRAILEEISSNSPLIVTSLVGDGDLAEHWCEVQCYEGKLCCEGMNTTCN  
FDQGEKGCMSCTPTKKNFQCQVYCNNTLCADGLFCDYAITTAGTCKPCPEGTGQKCFY  
SDLTQAGTKECSDVCGNGQDQLEALPCKFCPKVDFTFLDISDGSIAALSKNNDVGPCEF  
CPLSETPTCLKEKRWNMTYPNRIILRSFGGGVECWVVAEFFRNLNIRADDPRCRNARLHNY  
LCGCSESPGYAGANTKAKQLALVWMPRVSAILSFLVRTA

>comp14767\_c0\_seq2; 389 359 1294 LEN=1396; translated  
MNKKVGMVLGNLLRALSLFDLTGAVGYAFTSFPSPKDDFLLGANGNEATCKAQGFFIQM  
GTISSYMNVSMSFYLLTIRYGWRDEKLRKSKYRYLLFVVPVIAVGAFFAFIGIPFYDNMV  
LWCNNTAYYWPEVPVVVAIVVAVMANLWCWFVYQEEKASLRWRQHNANTRDLSLKKFFI  
QSLSFLLAAFYLTWPPYLLALQFMLASGAAYSNYKFFLFACTFVPLQGFWNFLAYYRTRKIT  
FLSRMTVTITARVEAVRTSAFSSKSKFSESVEPRPHHNEGFATDVNAEGINSERVQKRRD  
TNETSSLRGEN

>comp14767\_c0\_seq3; 376 189 1124 LEN=1226; translated  
MNERLGKIVLGNLLRALSLFDLTGAVGYAFTSFPSPKDDFLLGANGNEATCKAQGFFIQM  
GTISSYMNVSMSFYLLTIRYGWRDEKLRKSKYRYLLFVVPVIAVGAFFAFIGIPFYDNMV  
LWCNNTAYYWPEVPVVVAIVVAVMANLWCWFVYQEEKASLRWRQHNANTRDLSLKKFFI  
QSLSFLLAAFYLTWPPYLLALQFMLASGAAYSNYKFFLFACTFVPLQGFWNFLAYYRTRKIT  
FLSRMTVTITARVEAVRTSAFSSKSKFSESVEPRPHHNEGFATDVNAEGINSERVQKRRD  
TNETSSLRGEN

>comp14767\_c0\_seq5; 603 114 2804 LEN=2906; translated  
MIFLYFPVFLSVLSNLVVLGSSQQOTARVIKGRCLCSSKILRNGPDASLLPTLKNTPVDN  
NSRDIFFPYCPDGYFCRVTNHHHPGFGDNVGLCTPCPGRPERCLSNIYDISVFIDGQTVS  
RASAGECWENCGLESNRCSSSTKPCGDGLFCNPDGGDENGGYCEGCPTHIFYCQEKNLTAA  
GQHACLSSCALSCHFSSTIVTNETEIFDQGISLSPKQRSLSLHSGSPQGSVTGPVVD  
CGLGLEPCKDANNSICLIERGKVAFFKVISCSAGGGIGAIIFNIESKCGNFNGTLGTAD  
TFIPSLSISHLEGRAILEEISSNSPLIVTSLVGDGDLAEHWCEVQCYEGKLCCEGMNTTCN  
FDQGEKGCMSCTPTKKNFQCQVYCNNTLCADGLFCDYAITTAGTCKPCPEGTGQKCFY  
SDLTQAGTKECSDVCGNGQDQLEALPCKFCPKVDFTFLDISDGSIAALSKNNDVGPCEF  
CPLSETPTCLKEKRWNMTYPNRIILRSFGGGVECWVVAEFFRNLNIRADDPRCRNARLHNY  
LCGCSESPGYAGANTKAKQLALVWMPRVSAILSFLGSLFIIIDVSMNKKVGMVLGNLLR  
ALSLFDLTGAVGYAFTSFPSPKDDFLLGANGNEATCKAQGFFIQMGTISSYMNVSMSFY  
LLTIRYGWRDEKLRKSKYRYLLFVVPVIAVGAFFAFIGIPFYDNMVLWCNNTAYYWPEVPV  
VVAIVVAVMANLWCWFVYQEEKASLRWRQHNANTRDLSLKKFFIQSLSFLLAAFYLTWPP  
YLALQFMLASGAAYSNYKFFLFACTFVPLQGFWNFLAYYRTRKITFLSRMTVTITARVEA  
VRTSAFSSKSKFSESVEPRPHHNEGFATDVNAEGINSERVQKRRDTNETSSLRGEN

>comp14768\_c0\_seq1; 664 499 2214 LEN=2528; translated  
MIAPTSLSYSRRQYVLC AFLLGALVSPSDAFTPDALRFRGKTALVSNGKSQQSSSALGV  
ASLKKTVIDIQKNTGDSIQISNGDELMADQAVAVDQGLNNMMGMNGMEQSPNQPNERYRA  
ISLQAVDKIADKHPEIIPLLDDIKLSGLIFPFKASPYFVDELIDWSVGSEKVRNDPFYRL  
VFPTLDMLSDEHREKLVAAKAAEDPVNLMKVVG EIRSDLNPHPAGQKTLNAPKTKEGTDE  
EIAKAEKLAKQLTGQVHKYSETTLVFPAAQTCCHAYCTYCFRWAQFIGDDELRFQKEAN  
SLFDYLDADHEEVSDILMTGGDPMIMQTRSLKQYLEPLCDPDLPHIKNIRIGTRSLSFWP  
QRFTTDKDADELIEMRRVREEGRHLAIMAHLGHPRELSTKKVKAVERIQKEAFATIR  
SQSPVMRGINDDADVWAEKWRKEVQMGII PYMF MARDTGAQAFDVPMEKAQRIYSDAL  
RNC SGLIRTVRGPSMSCTPGKVEVTGVEEILGHKAFVLRFLQCRDEDWIGRPFPAKYDPK  
AVWFDDLEPLPGMELPWDENGIPKPVIPALN

>comp14768\_c0\_seq2; 664 499 2214 LEN=2382; translated  
MIAPTSLSYSRRQYVLC AFLLGALVSPSDAFTPDALRFRGKTALVSNGKSQQSSSALGV  
ASLKKTVIDIQKNTGDSIQISNGDELMADQAVAVDQGLNNMMGMNGMEQSPNQPNERYRA  
ISLQAVDKIADKHPEIIPLLDDIKLSGLIFPFKASPYFVDELIDWSVGSEKVRNDPFYRL  
VFPTLDMLSDEHREKLVAAKAAEDPVNLMKVVG EIRSDLNPHPAGQKTLNAPKTKEGTDE

EIAKAEKLAQKLTGVQHKYSETTLVFPAAAQTCHAYCTYCFRWAQFIGDDELRFQAQKEAN  
SLFDYLADHEEVSDILMTGGDPMIMQTRSLKQYLEPLCDPDFLPHIKNIRIGTRSLSWP  
QRFTTDKDADELIEMRRVREEGGRHLAIMAHLGHPRELSTKKVKDAVERIQKEAFATIR  
SQSPVMRGINDDADVWAEKWRKEVQMGIIPIYYMFMARDTGAQAFFDVPMEKAQRIYSDAL  
RNCISGLIRTVRGPSMSCTPGKVEVTGVVEEILGHKAFVLRFLQCRDEDWIGRPFFAKYDPK  
AVWFDDLEPLPGMELPWDENGIPKPVIPALN

>comp14768\_c0\_seq3; 663 499 2337 LEN=2505; translated  
MIAPTSLSYSRRQYVLC AFL LGALVSPSDAFTPDALRFRGKTALVSNGKSQQSSSALGV  
ASLKKTVIDIQKNTGDSIQISNGDELMADQAVAVDQGLNNMMGMNGMEQSPNQPNERYRA  
ISLQAVDKIADKHPEIIPLLDDIKLSGLIFPFKASPYFVDELIDWSVGSEKVRNDPFYRL  
VFPTLDMLSDEHREKLVAAKAAEDPVNLMKVVG EIRSDLNPHPAGQKTLNAPKTKEGTDE  
EIAKAEKLAQKLTGVQHKYSETTLVFPAAAQTCHAYCTYCFRWAQFIGDDELRFQAQKEAN  
SLFDYLADHEEVSDILMTGGDPMIMQTRSLKQYLEPLCDPDFLPHIKNIRIGTRSLSWP  
QRFTTDKDADELIEMRRVREEGGRHLAIMAHLGHPRELSTKKVKDAVERIQKEAFATIR  
SQSPVMRGINDDADVWAEKWRKEVQMGIIPIYYMFMARDTGAQAFFDVPMEKAQRIYSDAL  
RNCISGLIRTVRGPSMSCTPGMYALVCLHTRQESLSNRSLFRGFAHIILFGALCVSRHFLA  
GKVEVTGVVEEILGHKAFVLRFLQCRDEDWIGRPFFAKYDPKAVWFDDLEPLPGMELPWDE  
NGIPKPVIPALN

>comp14768\_c0\_seq4; 663 499 2337 LEN=2651; translated  
MIAPTSLSYSRRQYVLC AFL LGALVSPSDAFTPDALRFRGKTALVSNGKSQQSSSALGV  
ASLKKTVIDIQKNTGDSIQISNGDELMADQAVAVDQGLNNMMGMNGMEQSPNQPNERYRA  
ISLQAVDKIADKHPEIIPLLDDIKLSGLIFPFKASPYFVDELIDWSVGSEKVRNDPFYRL  
VFPTLDMLSDEHREKLVAAKAAEDPVNLMKVVG EIRSDLNPHPAGQKTLNAPKTKEGTDE  
EIAKAEKLAQKLTGVQHKYSETTLVFPAAAQTCHAYCTYCFRWAQFIGDDELRFQAQKEAN  
SLFDYLADHEEVSDILMTGGDPMIMQTRSLKQYLEPLCDPDFLPHIKNIRIGTRSLSWP  
QRFTTDKDADELIEMRRVREEGGRHLAIMAHLGHPRELSTKKVKDAVERIQKEAFATIR  
SQSPVMRGINDDADVWAEKWRKEVQMGIIPIYYMFMARDTGAQAFFDVPMEKAQRIYSDAL  
RNCISGLIRTVRGPSMSCTPGMYALVCLHTRQESLSNRSLFRGFAHIILFGALCVSRHFLA  
GKVEVTGVVEEILGHKAFVLRFLQCRDEDWIGRPFFAKYDPKAVWFDDLEPLPGMELPWDE  
NGIPKPVIPALN

>comp14769\_c0\_seq1; 412 294 1481 LEN=1988; translated  
MNDSMKKISCTTSETTVVSEL T ALNQRADYPRDVSAANRTLRSFTIYSFLFAANPCA AVAC  
LSL ATARLGQDGA FSSAILYLAYTLSSVTGATYIVKQMGGRKAMMAGMSMYCCYVWC FWI  
AVTYREIGTVAVAGGAF IGGIGAGVTWTAQGSYFSSAAEDHALNLGCDWSQCTASLSGIF  
AFAYLIEESILHVSSYFLLQWGVWRNEIFAIYSMIAVLSTASMMFVKDYPPSREDDNALQ  
NQCSSVIVTLNLLLRDRKMPFLIGLNAVFGFAGSFLNSFVSGEVIRTALDDQKSETIGLF  
AAWTAGVASVSSLIIGKITHDYGKMPVVVFGNMAFFSVSMLFVLRPNLAFWTWKL LLLLVY  
TLHGIGRATFESAVKATFADLFPFEKVKLFWRFILW

>comp14770\_c0\_seq1; 1758 231 3434 LEN=3684; translated  
MIRLFVGN SGLRNQLPPTRRSAASPGSVLRACFSSKPAEDAPARGTPYSKLTVGIPKERF  
PLEKRVAATPE SVKRLAKPGFTVLVEDGAGESAYFSNADYESAGATIVSGGSA AEDVWKQ  
SDIVLKL RPPTAEQMDLLDSSKTLFSFLYPRQNEEILKQLQDKGTTAFAMDMI PRTL SRG  
QTYDALSSQANISGYRAVLEASNEFGRFFAGQMTAAGKVPPAKVLVLGTGVAGLAAVQTA  
KNMGAI VRAFVDVRPVTKEQVEAMGGQFLEVDFEEDGSGAGGYAKEMSAEWHAAAREMLTK  
QCEEVDIVITTALIPGRKAPIMVTKEMVSKMKSGSVTVDLAAEAGGNVETT VADQKIVTD  
NGVTCIGYTDLP SRLPTTSSSLYANNISKLLLSAGPQTTKVPEYFYIDHDDEAIRGMLVV  
EKGKLMFPPPAPAPPVVEKKA EEEVVVPEIDYKKEYLDGAKQAAYVSTSILALGAVAPN  
AAF SNMFTTFWLSNVI GAQVVMGVVAHALHSPLMAVTNAISGTTALGGMHLIAHSTSPTAT  
LLGATATTLSTVNI VGGFIITSKMLDMFKRPDDPPEYYKYTYPTLGLVGLY GAGTMSGK  
FPEIDTAASTLASLLCIGGILASQSTARLGAVSGQAGVALGI ASTFGHLHPSFGTTAS  
LVGLMGVGGVAGQAI AQRVELTSLPQTVAAFHSLVGVAAASAAAIGDYINSDFAGLDGVHM  
SSIYLATVIGSVTTTGS LVAFGKLDGRMESAPL KLEHRDKINAGLGAATVGAGALFAGAS  
GPGVGVAAALTGALGTSGALGWHMTASIGGADMPVVI TVLNSYSGWALCAEGFMLDMPIMT  
TVGALIGCSGAALTKIMCDAMNRDIASVILGGYGTKATGSGEAVQFEGETTMTNVEDTVQ  
LLSDAESIIIVPGYGLAVAKAQYPLQELADTLIKNGKSVRF AIHPVAGRMPGQLNVLLAE  
AGVPYDIVEELEEEINDDFSADAVTLVIGANDTVNSAAEDDPNSQIAGMPVLRVWNSKQVI  
VMKRSLAAGYAGVDNPFVFKDNTDMLLGDADKDTVEQLASGVKGIYGK

>comp14771\_c1\_seq1; 402 1 1356 LEN=1987; translated  
QLLESRAMLLIEENGSNIMFSGTEDPKGNNSFTSSTEYLVPLEGADDDTELEGLDFADKT  
TPRNRTFSSSPGDSSKGRNSFDEYFSAPESMEKYADDNDNDYDSSDDDDVFAYKQTLPEPQ

TGGYDYRSSMNQNNQQQTQQYGKDTAPIQPTRRTRSDRAVSFQESGVT SYMNGLDHAKAKE  
NANYFHCSPNKFKKRSMEIRMDGQIKECTHTNIGKRLISTIRPDSPTNSNDIMSPSVVNS  
VTSLSLADSDMLDINNDGGMPDIRNLEVEESNRNRPPSFAAPDDSDASNTTGTRFVLA  
DRVLGLFNFRRISVAIVKWFPCFWFWCSRHNQLHGGTLSDRFILARLNVMSFFFATVQL  
AACVWLCVVLVFDGPEQAFRHGFHLWNNNCIVAFIGVLAIFLLCTCFWTKRIIKEVDLVG  
ALRFLWLLLWILPIATFLNIVAFDYHGVTKTW

>comp14771\_c1\_seq2; 497 1 1779 LEN=1840; translated  
QLLESRAMLLIEENGSNIMFSGTEDPKGNNSFTSSTEYLVPLEGADDDTELEGLDFADKT  
TPRNRTFSSSPGDSSKGRNSFDEYFSAPESMEKYADDNDNDYDSSDDDVFAFKQTLPEPQ  
TGGYDYRSSMNQNNQQQTQQYGKDTAPIQPTRRTRSDRAVSFQESGVT SYMNGLDHAKAKE  
NANYFHCSPNKFKKRSMEIRMDGQIKECTHTNIGKRLISTIRPDSPTNSNDIMSPSVVNS  
VTSLSLADSDMLDINNDGGMPDIRNLEVEESNRNRPPSFAAPDDSDASNTTGTRFVLA  
DRVLGLFNFRRISVAIVKWFPCFWFWCSRHNQLHGGTLSDRFILARLNVMSFFFATVQL  
AACVWLCVVLVFDGPEQAFRHGFHLWNNNCIVAFIGVLAIFLLCTCFWTKRIIKEVDLVG  
ALRFLWLLLWILPIATFLNIVAFDYHGVTKTWIKHYWNSAQLWWFREQFCEPDTAETLCT  
VPIRDEEEEEEWCEDRYNTTGCANIRNEAQDKTEFFLLIFYRALASWGCIIYLFIMFLIVK  
CLERIISKPMVQKSREVN VVGWLTFFVFCTAIFGGINLFTSYSLDKLDEQR

>comp14771\_c1\_seq3; 402 1 1356 LEN=2527; translated  
QLLESRAMLLIEENGSNIMFSGTEDPKGNNSFTSSTEYLVPLEGADDDTELEGLDFADKT  
TPRNRTFSSSPGDSSKGRNSFDEYFSAPESMEKYADDNDNDYDSSDDDVFAFKQTLPEPQ  
TGGYDYRSSMNQNNQQQTQQYGKDTAPIQPTRRTRSDRAVSFQESGVT SYMNGLDHAKAKE  
NANYFHCSPNKFKKRSMEIRMDGQIKECTHTNIGKRLISTIRPDSPTNSNDIMSPSVVNS  
VTSLSLADSDMLDINNDGGMPDIRNLEVEESNRNRPPSFAAPDDSDASNTTGTRFVLA  
DRVLGLFNFRRISVAIVKWFPCFWFWCSRHNQLHGGTLSDRFILARLNVMSFFFATVQL  
AACVWLCVVLVFDGPEQAFRHGFHLWNNNCIVAFIGVLAIFLLCTCFWTKRIIKEVDLVG  
ALRFLWLLLWILPIATFLNIVAFDYHGVTKTW

>comp14771\_c1\_seq4; 522 1 2235 LEN=2380; translated  
QLLESRAMLLIEENGSNIMFSGTEDPKGNNSFTSSTEYLVPLEGADDDTELEGLDFADKT  
TPRNRTFSSSPGDSSKGRNSFDEYFSAPESMEKYADDNDNDYDSSDDDVFAFKQTLPEPQ  
TGGYDYRSSMNQNNQQQTQQYGKDTAPIQPTRRTRSDRAVSFQESGVT SYMNGLDHAKAKE  
NANYFHCSPNKFKKRSMEIRMDGQIKECTHTNIGKRLISTIRPDSPTNSNDIMSPSVVNS  
VTSLSLADSDMLDINNDGGMPDIRNLEVEESNRNRPPSFAAPDDSDASNTTGTRFVLA  
DRVLGLFNFRRISVAIVKWFPCFWFWCSRHNQLHGGTLSDRFILARLNVMSFFFATVQL  
AACVWLCVVLVFDGPEQAFRHGFHLWNNNCIVAFIGVLAIFLLCTCFWTKRIIKEVDLVG  
ALRFLWLLLWILPIATFLNIVAFDYHGVTKTWIKHYWNSAQLWWFREQFCEPDTAETLCT  
VPIRDEEEEEEWCEDRYNTTGCANIRNEAQDKTEFFLLIFYRALASWGCIIYLFIMFLIVK  
CLERIISKPMVQKSREVN VVGWLTFFVFCTAIFGGINLFTSYSLDKLDEQRWIAFLYLI  
AAGLFLIALLMGWYLSAFSIRSNDKQKKRTANLILIGVLFVNAFVLLTIFVTSILWSHR  
LDLTPEERGGIACIMNRNECTNCNATIGEDQCPWEFDDVEVIVRRQLKESAILAAIFIL  
YDLNVMKYGLSLRKHLRMYEIDYV

>comp14771\_c1\_seq5; 402 1 1356 LEN=1593; translated  
QLLESRAMLLIEENGSNIMFSGTEDPKGNNSFTSSTEYLVPLEGADDDTELEGLDFADKT  
TPRNRTFSSSPGDSSKGRNSFDEYFSAPESMEKYADDNDNDYDSSDDDVFAFKQTLPEPQ  
TGGYDYRSSMNQNNQQQTQQYGKDTAPIQPTRRTRSDRAVSFQESGVT SYMNGLDHAKAKE  
NANYFHCSPNKFKKRSMEIRMDGQIKECTHTNIGKRLISTIRPDSPTNSNDIMSPSVVNS  
VTSLSLADSDMLDINNDGGMPDIRNLEVEESNRNRPPSFAAPDDSDASNTTGTRFVLA  
DRVLGLFNFRRISVAIVKWFPCFWFWCSRHNQLHGGTLSDRFILARLNVMSFFFATVQL  
AACVWLCVVLVFDGPEQAFRHGFHLWNNNCIVAFIGVLAIFLLCTCFWTKRIIKEVDLVG  
ALRFLWLLLWILPIATFLNIVAFDYHGVTKTW

>comp14772\_c0\_seq1; 331 526 1587 LEN=1587; translated  
MCKQAMLQNLTVAKANCNVQKDQHCCGHEDSLEAQIRFAKRTVYDFVACEREMYDAMAT  
DYYDYVVTLRDSAMRYLSHWNHVRRTAQYNRKYSKPRNESKNNSTGKKIPVAGRMLSRDQ  
RTLQTASELFARFKNLNYQKGSRTHQGLLAKPPAQEIRLKDINLNDINEKYYFVRQGDY  
FVGNFSAWWEHQVDNYNTRMICGSKCSNPKFQLTSELFYTLERLSRFSHILFLENMAE  
SYYNFSGYVGWKTGRKISRKNKGIDVGDGDKKSLAEMMADSNLAYDPWMTVLDDALYEF  
AKYRYDTNYTNSGNRTLLIQQYVNSRATKDYFRDGAKRNAKIHAVAIVPCGDDG

>comp14773\_c0\_seq1; 505 385 1647 LEN=2230; translated  
MPINNEQHTDWNQYAMPSPNPNRIDSNEVEVTRKIAPAMITPSLGPMPPIPAGMLSSSSS  
QPDHFINAYPRKASPPFYHERTSSSFWSKLTSPVLPESHRSVERSAAFVPAEPIEVSSR  
ISDMLRERSIQAQYENGKAKVKCTTNEGVDVFRIRLYRGRGRYNHGIIIVEVQRIFGTSLMF



HSDTQAILEGAQGKTSASIPPTKAYLPEVSEEDTQEHQVNVISNAESSFTVVEKMMQLS  
GFDSQYLALQMLSPLVDSKRLSASTARAAATILFHPD SKVGKNVMNYVANKKVVVSKPKK  
RGPFDDEDDSDSEDES YLVLRLNLCNLILANA AKSYGQAPTFLRERLRSVLI EDLSEAETH  
PNTAFLAAKCLEHVIPGDECTAELNRAFVAHN VVGARHANLMRQAKKCM DATDSVSIKR  
>comp14773\_c0\_seq2; 505 385 1647 LEN=1963; translated  
MPINNEQHTDWN GYAMP SNPNRNIDS NVEEVTRKIAPAMITPSLGPMPPI PAGMLSSSSS  
QPDHF INAYPRKASPPFYHERTSSSF SWKLT SVPVLPESH RVERSAAFV PNAEPIEVSSR  
ISDMLRERSIQ AQYENGKAKVKCTTNEGVD FRIRLYRGRGRYNHGI IVEVQRIFGTSLMF  
HSDTQAILEGAQGKTSASIPPTKAYLPEVSEEDTQEHQVNVISNAESSFTVVEKMMQLS  
GFDSQYLALQMLSPLVDSKRLSASTARAAATILFHPD SKVGKNVMNYVANKKVVVSKPKK  
RGPFDDEDDSDSEDES YLVLRLNLCNLILANA AKSYGQAPTFLRERLRSVLI EDLSEAETH  
PNTAFLAAKCLEHVIPGDECTAELNRAFVAHN VVGARHANLMRQAKKCM DATDSVSIKR  
>comp14774\_c0\_seq1; 315 329 1699 LEN=1947; translated  
MGTPLP IQSMNVP MELL LLDNPHSISQTT LRGSNASTFFH PPLTSLRSTETDSD DSTVLLC  
LDHQPSVIGD TIKQGS DPKRLMEHQ SADCNGRLRRNLHNPPLSEHARNIEAHQSDCSL  
PLATHHFDNT FGLGSHI ILWQQA MCNGMETRFRMR SHAPLWLWLDQEHCDMQQEAVVSPL  
LCYFPSS EDRCESEFQ NQQEILG SVDAGAMTTT GGRKLPVDS DSSHKV GELSLEKNITDPR  
NKADWCGMA KESEESKAALRAS STEYLFQ SVSPLVIREAKRQIGVLF PGGVVPEDLVTVH  
IRWGDKFWEMDLPPIQ EYIDGVHSIL SHRASNAKANTTNHANVTEANIY LATEDPRAHQE  
FMDAKPDGKWKVYADITLLE INAFRPTKGNRASWAARNTRGRSGLVALASLLVAMEANMFV  
LTTKSNWSTIMNHLRTNIVDPRCSNCTSMVDLRPGFW  
>comp14775\_c0\_seq1; 208 434 895 LEN=1061; translated  
MMAAFKDLGAKPGATITLTKERKERDAKAAAQAIEKAKPRATFSLFGFGGGDEAPSPRK  
EQSPKAI PGKPKAAPKKKLPVNKAPARKGKSAPKGVPTMNRWQMNSDGSISGII SGPSPNF  
RDGERVTTSMITKGRIDQGEIVTTGSGSRYFLA  
>comp14775\_c0\_seq2; 356 1 930 LEN=1096; translated  
KAKAAAAEAKRQAEEDRKAKAAAIAGQRKAAAEAKKQAEQQRKAAAEAKRQASQQKRSA  
PAKSPAFFKRKESTPPRAASPVGEQAPKGV PVIKSWKKRSDGGISGRIY GSPNFS DGDVV  
ETSPISR GKIENG SVVSTKSR SRYFLSAEPATKKS NMMAAFKDLGAKPGATITLTKERK  
ERDAKAAAQAIEKAKPRATFSLFGFGGGDEAPSPRKEQSPKAI PGKPKAAPKKKLPVNKA  
PARKGKSAPKGVPTMNRWQMNSDGSISGII SGPSPNFRDGERVTTSMITKGRIDQGEIVTT  
GSGSRYFLA  
>comp14775\_c0\_seq3; 233 1 804 LEN=970; translated  
RKAAAEAKRQAAQQKRSAPAKSPAFFKRKESTPPRAASPVGEQAPKGV PVIKSWKKRSDG  
GISGRIY GSPNFS DGDVVETSPISR GKIENG SVVSTKSR SRYFLSAEPATKKS NMMAAFK  
DLGAKPGATITLTKERKERDAKAAAQAIEKAKPRATFSLFGFGGGDEAPSPRKEQSPKA  
IPGKPKAAPKKKLPVNKAPARKGKSAPKGVPTMNRWQMNSDGSISGII SGPSPNFRDGERV  
TTSMITKGRIDQGEIVTTGSGSRYFLA  
>comp14775\_c0\_seq4; 208 560 1021 LEN=1187; translated  
MMAAFKDLGAKPGATITLTKERKERDAKAAAQAIEKAKPRATFSLFGFGGGDEAPSPRK  
EQSPKAI PGKPKAAPKKKLPVNKAPARKGKSAPKGVPTMNRWQMNSDGSISGII SGPSPNF  
RDGERVTTSMITKGRIDQGEIVTTGSGSRYFLA  
>comp14775\_c0\_seq5; 1303 289 2931 LEN=3061; translated  
MKSSISLSVLV TILGASSHAFVPPSSSIKSKENIYPGPAPHTLVASKGHTS IETRRSEWR  
LLSEPNDDKEKETPKPPIPPPTPPTSEAPVEDTAEKEADSAPPAEII IEQERP KVAVPE  
PPKPPQPMPWQQNKQKEQKQIKK LQKTTKGLTPEEEKMAVASGLGGLVAGAFV GFL  
INAEFPNIDL YIAPALTPAFGAVFLSTFGYVLGVTDGFLGKVVRTTLGGT TSAIGKAIVS  
IIDSVIDSAVTS AKNVKETTDEIIAIPGKVADEIKAVPGKVADA AVETATDIVDEIKAT  
PGRVADA AVETATGI ADEIKATPGRVATKTKQAVEDAVDDTLDAVEDFVDDVKAIPKKA I  
TEVESALGIQPSPLAPPK APEPPKDLPGKTSQKKS FVPSISTLKIPEPPKLDLPKADAPK  
PKVAPPKKSPPK KIEYSFPSEAPPPPKSPA K KIEYSFPSETPPSKTESTPKFEMP KIDI  
PKKKPPAPK KAPPK K KDEAPKLNLSLPKVGT PKPPAPK KAPPK KKAAPMFNFGAPKKA  
PPAPKVAPPAPKQAAPK FGLGAPKTGSPKPAKAA PAPPKQAAPLFGFGAPKKAAPT PA  
PSPPKKQATAKFGFGTPKPSKESPAKKVEYIFPSEAPA EKTEAPKFQMPKFGGGSPPKKT  
AAPKSDPSKLASEAAAKR KREAEAKAEANRLRQEKADELKRQKQLEAKQAEEAKQAAAE  
RKR IQEQKQEKLEAQR LAAEKRKQDAEEKRQV ELLREKQAAKAKQLQKERA AAAEKSQ  
RQRAAAKSVGQAKSR TTIISLGNLFGGNDKEKEVKVDVPSQKMNAPP GVP IVSNWKQNP DG  
SISGKISGSPNFKDGFVTTSAVPSGAVSNSVVKTTSGSR  
>comp14775\_c0\_seq6; 1828 289 3323 LEN=3323; translated  
MKSSISLSVLV TILGASSHAFVPPSSSIKSKENIYPGPAPHTLVASKGHTS IETRRSEWR

LLSEPNDDKEKETPKPPIPPPTPPTSEAPVEDTAEKEADSAPPAEEIIEQERPKVAVPE  
PPKPPQPPQMPWQQQNKQKEQKQIKKKLQKTTKGLTPEEEKMAVASGLGGLVAGAFVGF  
INAEFPNIDLYIAPALTPAFGAVFLSTFGYVLGVTDFGLGKVVRTTLGGTTSAIGKAIVS  
IIDSVIDSAVTSANKVKETTDEIIAIPGKVADEIKAVPGKVADA AVETATDIVDEIKAT  
PGRVADA AVETATGI ADEIKATPGRVATKTKQAVEDAVDDTLDAVEDFVDDVKAIPKAI  
TEVESALGIQPSPLAPPKAPEPPKDLPGKTSQKKS FVPSISTLKIPEPPKLDLPKADAPK  
PKVAPPKKSPKKIEYSFPSEAPPPPKKSPAKKIEYSFPSETPPSKTESTPKFEMPKIDI  
PKKKPPAPKKAPPKKKDEAPKLNLSLPKVGTPKPPAPKKAPPPPKKAAPMFNFGAPKKA  
PPAPKVAPPAPKKQAAPKFG LGAPKTGSPKPAKAAPAPPKQKAAPLFGFGAPKKAAPT  
PSPPKKQATAKFGFGTPKPSKESPAKKVEYIFPSEAPA EKT EAPKFQMPKFGGSSPPKKT  
AAPKSDPSKLASEAAAKRREAEAKAEANRLRQEKAD E LKRQKQLEAKQKAE EAKQAAAE  
RKR IQEQKQEQKLEAQR LAAEKRRQDAE EKKRQVELLREKQAAKAKQLQKERAAAAEK  
SQRQRAAAKSVGQAKSRTTISLGNLFGGNDKEKEVKVDVPSQKMNAPP GVP IVSNWKQNP  
DG SISGKISGSPNFKDGFVTTSAVPSGAVSNSVVKTTSGSSYYLEEEQKKSTGFGFG  
FKIPKAVAEAPPTPVKQPSVQSF AERTKAAA EARRKAAEDKRAAAA AVA EERKAKAAAA  
EA KQAE DQAKARAAVAEQR KAAADARRQAE EERKAKAAAAAEAKRQAEEX  
>comp14776\_c0\_seq2; 394 405 1415 LEN=2314; translated  
MVL SAVFHPSEKVEPEDIVKICDEIDAISDSSGSSNIRVKALET KRYEYLAKLMQKDYE  
AYVATASF LSPSRIPRRQLPNLQDVTIDKNSVPNDYEVKEDG SVPLVADCELEPKIFND  
NIDLTVLLAIFRKLVEKNTNGVSSEKKGIDGLLEQGRTFMLQPGQTPEAQHKMVS  
DTLAGLMTPLVLPFYRIFMSGIVPEIGTKWDGKQIGPWYAPWLT TIVTPTFFGFLV  
GSPYPNRRKDG NLGGLVVEKCKFLQESGCKGLCLHQCKLPAQQFFQENLGLPLTV  
SPNFVTQECQWSFGETPLPPEDEKSF PKGCLVGCESRKALAA SGSTADACN  
>comp14777\_c0\_seq1; 909 355 3171 LEN=3485; translated  
MVKVSFSQQSVENEIHGSSKQPC HGS CVSSDMSSNHGDHWHSDENSSQASSTWSS  
STQP HRSRSASLSSYPGGLKQKHKRNPAA PLPPV LVYHESARSIVFRDHVHRVAST  
VKEQATS VLLDSVPEP ASSNGIGFSALLSDTDSGRARADSEYATDDDGASNSLDPK  
QSSQPSESLVLD EMIHRNNAYSVDIKGFQPPVPLPRLQLGRNDEF EPLIFSEESKQ  
EQYWTESEKEVHRI IMDQRATIKTIKNT EWTVFLNRFKTSKPPRHGEQFRNKRDDI  
GPHCGSDDCDASTSGDFP YNSFFTSTLLPSGGKMR AFGSTSSY TIGCVFAIPSYD  
NDELEDEAVKTSHTWSWPSGY SAKTEFNIDERNL INGREEALVPLSRLRMLNDDY  
VNKSEYVVGGRVIKGG LKTVPYNEV FLRVGGRGRRSPDGASMSNEERSFEKGV  
GLPV AIFCRTASFGHLFSLLRARARLLHAFGE NHMKGLP LLMITPDL SVRVLTE  
KLQHELLKVAARHLNPFQNSLIAHKTKIDDTDPNCMQT KLEELIDLDEKMRETLT  
TDELARIAGGFGATD DSVAQILRDAMIQDKQYRSVGEHNGEGY KERHELQDIVNE  
GLAASGGKSQSFWYNPLPPSXI SYNDELELEMSSFFELVELISFSLTT DSSH  
FVTVRASDY YTSRQLLILYSLVSS EDDHVP TVPAITSRKANANASSDDEDNDEHKS  
QLDSEAMLLDYS GEGDEATLHQISKGSIPRPPPPPLDTDR LRSATNSDGLLAVL  
GAAQILRAMQDGGAKKRTKESWEAVEEWVEHGEQNI AFRLASWRDQRAAQDDLEIA  
VDQDSRFMAFVSGKAITNRKSFARQLHQAVEQ TDFNNMRFLLAIDEMISRMHSPCL  
RLELLQYVLGLDNRYSIEHVKRAVELAATCLNISCKPEHLSGNTYLLNGRDA  
>comp14777\_c0\_seq2; 1010 355 3021 LEN=3335; translated  
MVKVSFSQQSVENEIHGSSKQPC HGS CVSSDMSSNHGDHWHSDENSSQASSTWSS  
STQP HRSRSASLSSYPGGLKQKHKRNPAA PLPPV LVYHESARSIVFRDHVHRVAST  
VKEQATS VLLDSVPEP ASSNGIGFSALLSDTDSGRARADSEYATDDDGASNSLDPK  
QSSQPSESLVLD EMIHRNNAYSVDIKGFQPPVPLPRLQLGRNDEF EPLIFSEESKQ  
EQYWTESEKEVHRI IMDQRATIKTIKNT EWTVFLNRFKTSKPPRHGEQFRNKRDDI  
GPHCGSDDCDASTSGDFP YNSFFTSTLLPSGGKMR AFGSTSSY TIGCVFAIPSYD  
NDELEDEAVKTSHTWSWPSGY SAKTEFNIDERNL INGREEALVPLSRLRMLNDDY  
VNKSEYVVGGRVIKGG LKTVPYNEV FLRVGGRGRRSPDGASMSNEERSFEKGV  
GLPV AIFCRTASFGHLFSLLRARARLLHAFGE NHMKGLP LLMITPDL SVRVLTE  
KLQHELLKVAARHLNPFQNSLIAHKTKIDDTDPNCMQT KLEELIDLDEKMRETLT  
TDELARIAGGFGATD DSVAQILRDAMIQDKQYRSVGEHNGEGY KERHELQDIVNE  
GLAASGGKSQSFWYNPLPPSXI SYNDELELEMSSFFELVELISFSLTT DSSH  
FVTVRASDY YTSRQLLILYSLVSS EDDHVP TVPAITSRKANANASSDDEDNDEHKS  
QLDSEAMLLDYS GEGDEATLHQISKGSIPRPPPPPLDTDR LRSATNSDGLLAVL  
GAAQILRAMQDGGAKKRTKESWEAVEEWVEHGEQNI AFRLASWRDQRAAQDDLEIA  
VDQDSRFMAFVSGKAITNRKSFARQLHQAVEQ TDFNNMRFLLAIDEMISRMHSPCL  
RLELLQYVLGLDNRYSIEHVKRAVELAATCLNISCKPEHLSGNTYLLNGRDA  
>comp14778\_c0\_seq1; 706 380 3045 LEN=3045; translated  
MSRWGERDNHRRKTAVFNKLLNDESAEMRGHRQAVRFLEGMDSFDSKSKLLNMLDKRKN  
GAKRVEEILSFLNDEQDVEELVVP LLLHG INPQTSKPLFRANREKYLHSIYLVPGFID  
FLAQDFLVEKLN SADSADLICKFLIFVSKAFGEARSDES IATITKNLMQRGDV SQAD  
TLGMIL

LLKEKDALKAHMEKRGRVEESLDVEAEVACVATDRIPPGDRHTNDHFNFRDISLVPPADE  
LRCQVPQYLPPLASEENAILEDPVSRLLDNRNFRLLREDAVSSMRTCISEKRRLWYNARIIG  
MESYGGNDETSFVTQLDPPQRAISDWHRTKALNFQSVVAFLDREGIVKRTGIIITLSRDDA  
RDKWLNPNPNGPVIGISFDDEVAFGGEASEEMVLNRKLNQEVYAAKNNMNRQSVKETLSTMK  
TYQMVEISRSFFAYQPILKALQNLGDGIPFRCELLGSGNPSETVPSYLPVIRFPPTLGDNRN  
GFEPFNDAEEQTLKAACRIDTRFVTGSGCVNVLTSRVALVQGPPTGKTFIGGVIAQII  
LENSSEKILCVCYTNHALDQFLEHMVDAGKTSIVRLGARTKSKKLEKYQLRVLARSKGRN  
NDEVNQTIKRIDAQRYKLRNELAKHLEEIESTITWNSPNGGIKAVLEDEFPDEFEYLSIP  
REDFGFQIVGAGGKRMKQDYLNWNRKGSNIPPFATSSDPQGLRNFWSMAIEKKTKLI  
KEVERSVLQISKKNIRDVLQELKELSNERDTARRVSDMQILKDASIIGATTSGAAKYRDI  
LSEVSPGVIIVEEAGEVLESHILTSLSKSVDGVSKDTHLILIGDHLKQLRPKVETYKLT  
KVARGGYNLVSLFERLILRDLPSASLHVQHRMRPSISLHVRSQTYPN

>comp14779\_c0\_seq1; 607 431 1981 LEN=1981; translated  
MPQKETCDWEARIALEIIIEKTWEEIMMVGEPNTSGVKNKEFVKNSFARDEDAKRQVSRSE  
STTDTKDAISAVERTSEETNTENKTRNNEKRIEDDAKNIKFVSDAYRIPNEGVCVKEKA  
TSVDAIEAHKEAAASIVEKSCEDGKEDEKKGLETKEKDDAFLGTIDESGNEYEPTAGIAA  
ALITTSPLPAIDGIDGLQYLSDSNNSRRIAEVMDNTRCIFPEASEIAAATTTGNNTTS  
HELRRPHNQLDDQRKRKETFITINPFYLSVSGDELLVAFDEIMAMACRDPSSDDPCSFIL  
PEETTSASWLDLVRASYASTDTSGSSSTRSIPLYMLLVCHFQFNLAITYSERSLSSSDSTD  
RVDVDHQSSHKSRAAWLSALMTRIRESGESIEKEKIRSKLASILPRFPCNDSSDNDNG  
NLENYLLRPFVLTVEYQENKPTESSEQDHASQEIHSIEDVSDGKVARMEDVSVTNADNP  
QDGDALSNDPDLARENESQTTVINNSYNSSSGVKKG

>comp14779\_c0\_seq2; 725 323 2209 LEN=2209; translated  
MSTDQTFRTTADVGTEEPIEAIASRNRFQDEVRQWFTAMAPAERSAALGFEDDGRMMATL  
FAKVAAGGVPSCHPTSNNKNDGNGRRGQTTSGNIFQQHPNTLFPKQTADRLDFNETCD  
WEARIALEIIIEKTWEEIMMVGEPNTSGVKNKEFVKNSFARDEDAKRQVSRSESTTDTKDA  
ISAVERTSEETNTENKTRNNEKRIEDDAKNIKFVSDAYRIPNEGVCVKEKATSVDIAEA  
HKEAAASIVEKSCEDGKEDEKKGLETKEKDDAFLGTIDESGNEYEPTAGIAAALITTSPL  
LPAIDGIDGLQYLSDSNNSRRIAEVMDNTRCIFPEASEIAAATTTGNNTTSHELRRPHNQ  
LDDQRKRKETFITINPFYLSVSGDELLVAFDEIMAMACRDPSSDDPCSFILPEETTSAS  
WLDLVRASYASTDTSGSSSTRSIPLYMLLVCHFQFNLAITYSERSLSSSDSTD RVDVDHQSS  
SHKSRAAWLSALMTRIRESGESIEKEKIRSKLASILPRFPCNDSSDNDNGNLENYLLR  
PFSVLTEYQENKPTESSEQDHASQEIHSIEDVSDGKVARMEDVSVTNADNPQDGDALSNDP  
DDLARENESQTTVINNSYNSSSGVKKG

>comp14781\_c0\_seq1; 578 201 2267 LEN=2267; translated  
MPRIKRRTQRASPSESASFVYVVTGAAICLCIMSIKSCRAFQHNGKTLQHTPTRRFQAPP  
TSSSWVRLYDHSNENRGASLFESEIELEEYPAQEKNSPLNEMERRNLLATAATMAFFPL  
QSANASEGSKSLENLQVGRGSWNPGRQMTGEPVPIIDENLLASAGDTNGVQNGNVVVT  
VPACFTTYLTRFLINYYDDGVAAWWQQRISYSLLPDEQQQSRLGRDFGGLAVSIQEAQVI  
YLKKAASSNRQGYEQLFDRFAATYADAANKNEDVKRQLCMLAATLPVDQQRDLIRKIIPT  
GLTMSKEGDSASLADLSTLLPREYNPVFSSSDGFVSIQPPISLYQVGVGEEFGQAATATT  
FGPLALNALRRELPRYTFDIYALFGISGATGCALTHSVVPLDVKTRAQTSTESTMNIV  
TEIVEKEGVAGLLTGAQATLAGYAWYGVSVYPSYAFFKRFLANTVLTPELAVAHANDVAL  
IAGALAAVASLGLTPLEAARIRVVSEPTRYRAMGLSGTLQAIASEGVANGSSSLGSLYK  
GLPSLMTRQVIFGVSVKFLAFERACEFIYQTPMLKDATWTALTVSLVAGAFSGALSCVVS  
QPADAVLTYVAQESTESNDGSSKGLGVLEGSRLMIEESGFSSLFRLGSRSLWAASIIISG  
QFLLYDIFRNSFGVNSDDLSQIFITIDLXW

>comp14782\_c0\_seq1; 382 78 2417 LEN=3001; translated  
MIDDKIGSDYHHQQPYNPGRTOEQEQTFMSSDSNYPSEHQQQNMILPENHLSYDNSNIN  
SSSSSDFLHADARSVDRLLASELNLSLFDREAMIEEMHGVRSLAPSENASMIRASLQ  
DLERIEHELLRDKLLSFGGGFQSPSNTYRYLSGLLAFASLAASEANSKPAETGNSSIGQAE  
TQSLPHALHACNASPVPTPIEAFSLSATTEQQNHQQQQHHEYPSPFTLSSQVFTGQYG  
TSTHPQNVPSDNSLPRYRPSNNTDHGRECDHQKYRYAVSDHFRKFLRADLFDVPAKAAAR  
YVKCIDFLVEYFGEVALERPICLRDLNKEEQKLLREGRAQLMPSRDRFGRRIIAFLGAMG  
AGHSHTNFRVVMYLVFQVASDDATTQRNGLVALYHSGGDHQQQLLDFFKLAVHQNESL  
RFFAAAPVRYSAFHCFPTTSGGIGIILNSIGKRTRLITRVHAGTYPTAQDTAIVSCFCF  
LSVVPFRCPVQYICWCLVCFVTGERLDVSRRLYGDLFSMIIQFEVPHSNRVDVDSVRYET  
KSTSLNLYSIVSSVTETS YKLRFCGIPDDDFVPTSSGSKTKKLMKWKILRLAIEKAREK  
EEKNQYLSATDSTPPSQFMVTDLSAMLSPSCFIIIECPDLDSVIFRNGGVAWDHPANVKFR  
AILTRREQERSSQKTIAQKSALLDEIVEEAWSIGLNFIFYDEVNEWYKLIRDYAFLRKKV

FQALRDQSARRKRGLAGPGSCKRRKIALCQVGDSSSTTLFMNLDNAKSRKQRVSRSAIR  
>comp14782\_c0\_seq2; 495 78 2156 LEN=2740; translated  
MIDDKIGSDYHHQQPYNPGRTOEQEQTFMSSDSNYPSSHEQQQNMILPENHLSYDNSNIN  
SSSSSSDFLLHADARSVDRLLESELNSLFDREAMIEMHGVRSLAPSENASMIRASLQ  
DLEREIHELLRDKLLSFGGGFQSPSNTYRYLSGLLFASLAASEANSKPAETGNSSIGQAE  
TQSLPHAHLHACNASPVPTPIEAFSLSATTEQQNHQQQQHHEYPSPFPTLSSQVFTGQYG  
TSTHPQNVPSDSNLPRYRPSNTDHGRECDHQKYRYAVSDHFRIKFLRADLFDVPKAAAR  
YVKCIDFLVEYFGEVALERPICLRDLNKEEQKLLREGRAQLMPSRDRFGRRIIAFLGAMG  
AGHSHTNRFRVVMYLVFQVASDDATTQRNGLVALYHSGGDHQGQQLLDFFKLAVHQNESL  
RFFAAAPVRYSAFHCFLPTTSGGIGIILNSIGKRTRLITRVHAVSSVTETS YKLRFCGIP  
PDDFPVTSSGSVKTKKLMKWIKLRLAI EKAREKEEKNQYLSATDSTPPSQFMVTDLSAML  
SPSCFIIIECPDLDSVIFRNGGVAWDHPANVKFRAILTRREQERSSQKTIAQKSALLDEIV  
EEAWSIGLNFYDEVNEWYKLIRDYAFLRKKVFQALRDQSARRKRGLAGPGSCKRRKKI  
ALCQVGDSSSTTLFMNLDNAKSRKQRVSRSAIR  
>comp14783\_c0\_seq1; 1043 154 2442 LEN=2615; translated  
MLSSSLTAVSRRVSSRVATGGSPMASTATATVSTVSAMCERIQNSGNISCHLRSSRRCPQ  
RQRQSGRRCLGTSGKNKKRAMMRQKKNLPSSTSTSTLSSASIDSGEQPTNYGDEYLSSSR  
IISDPAITTTSSGTFDRTAGLSKLQLRPSLDDYLEKYGLDAESHNSSSSVNANISTTAPT  
WESNKGMLPPPGLGTTNAASGSRLRRSSSTLATGERQNRNVLNDADDDGFLVDRDSMFD  
SIHLPHAPKDWKGYEPSTPLSEFLMQRIGVSGQPISTAEYMRHALTHPLYGYTAKDRQE  
ETADDWDDYSDDDDAEKGPAQGRSSIFGRGGDFVTAPELSSVFGHSLCVWFMTLWQQEP  
MGKPDQIQFVELGPGRGTLMADLLELAHSSKLMDFGQAIRTVHLVEASHEL RHEQRSTLT  
KALSHLIRLEFAEDDGGESEPSSEGASEDSSKDNSTSTNDGKTFVNTIRIEWHDDFSSF  
QSKRDKSMPMTVLMQEFLDALPVHQFQKTEDGWRRERMIDVVSVDETNEAGVIPKTQASN  
QNNSDGEDGPQLIPRLRQVLAPNITPAVDLLLSSSYDQYAHFPDGTVVEICPDGLFLIQD  
VAKILEESQGAALI IDYGEETDTLRAF SRHQVPLTSRPGQVDVTADVDFFAIKNCLS  
VDAFKKNKGHSSTENTDQVNE TVPSSIHAFGPVPPQGEFLMKMGAGELTMNAIEKDETE  
EQAQALADALKYLVMPHEMGQKFKVLALSRRKRDGLFGPAGME  
>comp14784\_c0\_seq1; 1376 32 4225 LEN=4370; translated  
MVRIQNRPRPGDFAGRESSFESSLSGDMTPKNTYTKRTLDTSSLSLSDTSKWHLPLNLSKE  
DELVLLRRRIQAYERCEEQLNIDLVRTKRELESCKESVIRWKEAVRGDVRPGSHYRQEV  
CLKHELDEKNGIIQQRDTTIQNMAGGSHPSFVEHHEINETSVCSSILDEAVENPTAREM  
ERLLENSKFVYRLRERDEEVIRLRNQITLLEQERINSELSPLSMPFSPFQEQEDESSTY  
QLGTANNSYGHGDSLRTTKRLMELQNELSKRTEEVYDYSFQCKLEQFQDEAKRLRMSQAKK  
IRGMISELNGAKLALHAAEVKAKDSASAI AHKATIRDMKTEMKRDAATLELRKAMKQK  
KESNLSTQQVEVQELKQALDESLEEL ENATKVATEQRKTIQNLRKESNDNEINYLQVQRY  
LEVETENLENTKKELKQESKMKEVNNSKSELEETMSSDVESLKNKIQLRNKIERLQQD  
LFSTDAQNHSLELKLVEKETEINELNLLLRLRPTLDSERKKGKVEGRDTRANLQESLKE  
YEYLLQKTNRQNIQLHNTDKILLEKEQE KARLKASLEELCAKLDRFEAEKDASERKIVDE  
NDEIVSRLQEERDSLRSLEQKLADQDAMVKDVTILQKHLEEKDREVGNLRETLRSNTKT  
IESQLSKIQEIEKLLVEKDKRIADIERMKIESRTENKSESIESKEQNRGITKEIKDRNQS  
STMDVEYNRRFTFNMQMDQLILKDEQIARLQANEKSRDDLQMTLIDQIYDDKEKVELHSI  
LMNLKKEKVELTDSLAKAQKELDVKASIVLTLESRIETITTKMKDKQYEMDILVKNFGQL  
GEKNEVIEKRCQCMDNVVNRLAQEI LHI REGLVGENCDIEPIAKYVEMLLDIYAAACNGN  
TATNDMIKELETTRVELLNALNSL FENSRVLHQREEVFDNNSNELSSLREIKKENKSLAE  
MVLMTETLHTEREKENVERNLA RETRVMKESMEAMEVKNRCKLEKDMMTKISSLEKLN  
EVQAKTAEVNNLQKEIARRNNLMAENSSLKTQNARIKKCIDELSNEVQDLNGKLAKITIA  
NEDSSSLKSLAEAKKSENELVTSYERQISSLTMNKDVTIDTLRKDLAASRSRSAEEVAR  
LTNELSEMRELNDSLERRCNEDSMRVKDQRIHALEHTLCAQEKTVESLRYQLDQVQLSMR  
DVSEQRKRDLEELQSELMESKSRAMDQDRENTCLKVKLDECKIEYENEIKRLKLDLPISK  
SMKDLKDTNTMLEVKQRLEQLRVVNI ELKEDNIKLSAKLERALIKIRGLEAESEISAEME  
KEYGNVRKQKLDLECLLEQSIQHKKQRSRAEESNCKNENVQNRTRKGGKGRGKQGGSRNTL  
LGWGSKVPVPLEESD  
>comp14785\_c0\_seq1; 440 574 1680 LEN=3383; translated  
MSRNNHNSSTISQAQNFTEQSLLDNSNTKVLIVTSSLDNGARDDISTKGQDLLFDQ  
HLAVMIDGVE SMVGTSSVNLEVDVFLVCGFPLT SEREERIRKHL PNNVGFQFWDNATPLA  
YEREESTGSMIEYKRALARQHRFVIRDKLDYDLFLAFKDDVLRGEHVHYYLQLSAELE  
RLALASQKEEKMKDDSEVNHEVAKFNNTDLTKQEI EHFVPGFIQVEACCSGEEKRILLDSS  
SIPADHDFNNDGGRRAVNIDPTICCHPKQYESINTKGFERPHPDLLI AWDTNIKLFSL  
QQFPPESDLLDWVLM PGPKRGPPTTDKTI GSFLSSKKGAFNGKEKSDTGKDFARTQMFIYQ

MISFVILY

>comp14785\_c0\_seq2; 440 574 1680 LEN=3488; translated  
MSRNNHNSSTISQAQNKFTQSLSDSNSTKVLIVTSSLDNGARDDISTKGQDLLFDQ  
HLAVMIDGVESMVGTSVNVLEVDVFLVCGFPLTSSEREERIRKHLPNNVGFQFWDNATPLA  
YEREESTGSMIEYKRALARQHRFVIRKLDYDYLFLAFKDDVLRGEHVHHYLQLSAELE  
RLALALSQKEEKMKDDSEVNHEVAKFNTDLTKQEIIEHFVPGFIQVEACCSGEEKRILLDSS  
SIPADHDFNNLDGGRRRAVNIDPTICCHPKQYESINTKGFERPHPDLLIAWDTNIKLFSL  
QQFPPESDLLDWVVLMPGPKRGPTTDKTIQSFLSSKKGAFNGKEKSDTGKDFARTQMFYQ  
MISFVILY

>comp14785\_c0\_seq3; 558 574 2016 LEN=3302; translated  
MSRNNHNSSTISQAQNKFTQSLSDSNSTKVLIVTSSLDNGARDDISTKGQDLLFDQ  
HLAVMIDGVESMVGTSVNVLEVDVFLVCGFPLTSSEREERIRKHLPNNVGFQFWDNATPLA  
YEREESTGSMIEYKRALARQHRFVIRKLDYDYLFLAFKDDVLRGEHVHHYLQLSAELE  
RLALALSQKEEKMKDDSEVNHEVAKFNTDLTKQEIIEHFVPGFIQVEACCSGEEKRILLDSS  
SIPADHDFNNLDGGRRRAVNIDPTICCHPKQYESINTKGFERPHPDLLIAWDTNIKLFSL  
QQFPPESDLLDWVVLMPGPKRGPTTDKTIQSFLSSKKGAFNGKEKSDTDVPHNLWQQQGG  
WMATKIQIIRMHNQLCKSSILPPFRRIGDNDQGHDDFGPNGAEFWLDSQQIFAGGDQHCN  
MQR IISMNP DHFSNHL LYLHLLNNKQKQVDQEDAVRVNNLFGQFNHIQKTAEKGAALQTS

>comp14785\_c0\_seq4; 489 574 1788 LEN=3407; translated  
MSRNNHNSSTISQAQNKFTQSLSDSNSTKVLIVTSSLDNGARDDISTKGQDLLFDQ  
HLAVMIDGVESMVGTSVNVLEVDVFLVCGFPLTSSEREERIRKHLPNNVGFQFWDNATPLA  
YEREESTGSMIEYKRALARQHRFVIRKLDYDYLFLAFKDDVLRGEHVHHYLQLSAELE  
RLALALSQKEEKMKDDSEVNHEVAKFNTDLTKQEIIEHFVPGFIQVEACCSGEEKRILLDSS  
SIPADHDFNNLDGGRRRAVNIDPTICCHPKQYESINTKGFERPHPDLLIAWDTNIKLFSL  
QQFPPESDLLDWVVLMPGPKRGPTTDKTIQSFLSSKKGAFNGKEKSDTDVPHNLWQQQGG  
WMATKIQIIRMHNQLCKSSILPPFRRIGDNDQGHDDFGPNGAEFW

>comp14786\_c0\_seq2; 245 585 1289 LEN=2473; minus strand; translated  
MTTAGIQKELLRRHRRGRNIQCRSTLFPNRFQKIKICNFQMLISPLVQTVTILVMGLLVL  
LAFDANDTHSTTLARAQHDGTGIDSVSADKICACSPSTYTFVLDFSSTCPPTNITTFGVA  
GVSCLVSPFGAPTNNLVPVVIDSVSILELDQANSVLVEERIDGELFNGESYRYSIIINNL  
QVAASIEQDQVPKALQLNLRGRNKDGISLLNVFIITFTNECDTSPVLRMGESVWG

>comp14786\_c0\_seq3; 134 416 549 LEN=549; translated  
MATRDGTKDEANAGMVAEPMGPEYKDNMTMAMFIMAGMVVSSAGFA

>comp14786\_c0\_seq4; 182 167 757 LEN=1404; translated  
MPGQRAVSSAPSARRLDFGDDEKDTQRVHSVQPVGSTSLESSVQTNLVAGTPQKKRRT  
DSGIAGYFSSPPPATTAVVTPPEKDSLDGETEDDAHVPRYIHKNLGYKRRGDAVLDPVSE  
AAFALVEEHCGIPPGFENDRKYGPLSGTCFEQRLLDAYDKGMVRPKIGPGGNTTGIEICT  
HCASLGHGRDECPVLI

>comp14787\_c0\_seq1; 493 315 1375 LEN=2147; translated  
MASLANVEHRNQEATVYVGNLDAVCTEKILLELFAQVGRVKSVMPTDKITSTHNGYGFIE  
FLDTQDAEYAIQILNMMKFYNRPLKVSKSSLHNSKTDMSRVDGANLFGVNLDPVDVDE  
HLLYDTFGAFGLTIKQPKIMREEDTGESKGFVSVYDSFEASDTALECMNGQYLGNRQIV  
VQYAFKKDTAGGQHPGGNPGGSHERHGSRAERMLAAQRNSRREEQRAQGGGSAGPPPPGR  
GMPPPPPPAAPGGGFGAYGRGGYYXAGAGRDDAPAAAADGGRRDEPDGRRRATASSSAPA  
ATHDATGTRDGGRNATASSAATSTDGKFRDAAPTAPSSATDGDAITKVANSK

>comp14788\_c0\_seq1; 333 173 1852 LEN=2549; translated  
MITIPSVANATPANTSADAIPITWNQESGRRRRRRRDSNTRSVRISSLSYRCFLLSVLV  
LLKFHDSEWRSRSASWKTFPTAEAFVPTTAPRIIPTSNANANANHRQCRKRTRHDTANA  
DTKRNRNTALWFFS IGRNKQNVNYNEGDPDLPLARYVDLSANYTLAATPEDYIDLQNGQR  
LVCVGDVHGLDALSKFLETAGVYDPTQSWCGGNTVLVQCGDVLDRGFEELACYQLLAR  
LSHEALAEAGRLVLLIGNHEVLNAMGLFQYACTDQEHEQYIGSAVDDAINGAQNKRIOY  
VGNQPTRWASYPGGLLAHSLMRNMKVAIRVGKTCVHAGLKPQHLLKDHGGIEGMNAEFR  
EWITLGEPTSVPYKQGGGEQRSVAQQLKDNPLVYNHGGQY PANMVSPEEQPWIDAKRQ  
TFYIQSTPSFLASNPDQPGPIWMREYSSPHDVPDADGSLRAMLDETLALLDADRMMVG  
HTIQRKINAFFGGKAWRIDVGASKGCLNGKPEVLEVVGNDGPEVTVFVLTSGSAPGIGTK  
IPARERMVDSYTA AAVSMM

>comp14788\_c0\_seq2; 313 1 1769 LEN=2466; translated  
XTMLPSTTTFSYFDNSTTIEERDKRIDERKMITIPSVANATPANTSADAIPITWNQESG  
RRRRRRRDSNTRSVRISSLSYRCFLLSVLVLLKFHDSEWRSRSASWKTFPTAEAFVPTTA  
PRIIPTSNANANANHRQCRKRTRHDTANADTKRNRNTALWFFS IGRNKQNVNYNEGDPD

LPLARYVDLSANYTLAATPEDYIDLQNGQRLVCGDVHGDLDALSKFLETAGVYDPSTQS  
WCGGNTVLVQCGDVLDRGFEELACYQLLARLSHEALAEGRVLVLLIGNHEVLNAMGLFQY  
ACTDQEHEQYIGSAVDDAINGAQNKWRIQYVGNQPTRWASYEPGGLLAHSLMRNMKVAIR  
VGKTCVHAGLKPQHLKDHGGIEGMNAAFREWITLGEETSPVPYKQGGGEQRSVAQQLKD  
NPLVYNHHGQYPANMVSPPEQPWIDAQKRQTFYIQSTPSFLASNPQDPGPIWMREYSSPH  
DVPPHDADGSLRAMLDETLLELLDADRMVMGHTTIQRKINAAFGGKAWRIDVGASKGCLNGK  
PEVLEVGNHGDGPETVFLVLTSGSAPGIGTKIPARERMVDSYTAAAVSMM

>comp14789\_c0\_seq1; 329 127 1233 LEN=2058; translated  
MTEYEAAAYTAKDLILYALSLGMGSQVDDASELKFLYERDDKFGVGVPTFCFAFTFWAMRNR  
KENRIGISTTQRIPPPPPVMSDEEVI PRRFRNNTDISNMPVIHTWQSIVWHRPIEVPT  
SNLAVTVHINSETIATQPKTIGTFVTSQSNVTRPNNRQPLCTMQSTALVLGMDPKNVIS  
FNAGIKRLTSNPKIPSKSEQTEGKKTPIFEWYQTTQSQALLYRMASGDSNNIHVDTSAS  
EMLGTNKKAPLLHGLFTLALAFRAILKLFADPYRSSLRHEFGGVEDCEFFFRKLEGAFK  
APGFVGDCLSIKIWDLSSSTPEGVKTNTKFRFLFVIINNDSGRKLVDNGYAEIEIASKTL  
SSASRSL

>comp14790\_c0\_seq1; 395 100 2209 LEN=2653; translated  
MEDTKKPKTTIEYAEWPRDAPSALERKVLISII CGNSRLHWALHEGSVNKFIPILFWHTAH  
VDEIEGAYEDEEPCDLLEAHIASQAHALIFGDSENRGF IHNVSETAAKRDAPGISVFFVVS  
SNPAMEEKICYMFRDVPKIFKLRNTDFFTEEQGVYPTMGVDRVAALYGAKLHYGCPALV  
IDGGTAMTYSAVDYDGRIIGGGISPGVKVRLQSLADYTGALPNIDHKKFKALVEGNIAAK  
TPFPFLFAKDTETAMISPICGELACQLRSIVRQFVSRCSNQPTSLTSSNEGEVTEKEPTE  
QNNCKEGEVKEKESPEQKLP IIFTGGDAKFLYDLLKTDASGIVSMEPSEAPTPTNIYTK  
IVRNLVTYAIGNIVHEKFLQKPMTPQEKLKLIQGLRIAAPAIDPDDVFTRGCVFNITPA  
SII EGYAFHARFDNGMQKDLTTELYGKIFLVGMAKLQMLWDSAHKLSVFLANEDYLVLY  
NEIGEEMWSGSVGSVDEDEDWVTEKKTWSSKVQEELCNVSRP IRSRTRELKPHIERGEVHK  
LFRKRSIGWKQSRSNKRVRKRDVRKLQKPIGKR IANMFP IESADGQDLADTIFFGTVKHVS  
DPHLEWYFIQYDDGDVEEIDLNEVMNGIALYKEHKGNDBGKADSTAGGSATSSATTTKLVS  
QKVTVTKETNTFTDMSLLLSASSPAFGNEDTRRISEHKEDID

>comp14790\_c0\_seq2; 316 100 2326 LEN=2770; translated  
MEDTKKPKTTIEYAEWPRDAPSALERKVLISII CGNSRLHWALHEGSVNKFIPILFWHTAH  
VDEIEGAYEDEEPCDLLEAHIASQAHALIFGDSENRGF IHNVSETAAKRDAPGISVFFVVS  
SNPAMEEKICYMFRDVPKIFKLRNTDFFTEEQGVYPTMGVDRVAALYGAKLHYGCPALV  
IDGGTAMTYSAVDYDGRIIGGGISPGVKVRLQSLADYTGALPNIDHKKFKALVEGNIAAK  
TPFPFLFAKDTETAMVKYDACREREREKESRPFEPAPKSANQSMFVSNGCYFAKISPICGE  
LACQLRSIVRQFVSRCSNQPTSLTSSNEGEVTEKEPTEQNNCKEGEVKEKESPEQKLP  
IIFTGGDAKFLYDLLKTDASGIVSMEPSEAPTPTNIYTKIVRNLVTYAIGNIVHEKFLQK  
PMTPEKELKLIQGLRIAAPAIDPDDVFTRGCVFNITPASII EGYAFHARFDNGMQKDLT  
LTELYGKIFLVGMAKLQMLWDSAHKLSVFLANEDYLVLYNEIGEEMWSGSVGSVDEDEDWV  
TEKKTWSSKVQEELCNVSRP IRSRTRELKPHIERGEVHKLFRKRSIGWKQSRSNKRVRKRD  
VRKLQKPIGKR IANMFP IESADGQDLADTIFFGTVKHVS DPHLEWYFIQYDDGDVEEIDL  
NEVMNGIALYKEHKGNDBGKADSTAGGSATSSATTTKLVSQKVTVTKETNTFTDMSLLLSA  
SSPAFGNEDTRRISEHKEDID

>comp14790\_c0\_seq3; 316 1 2085 LEN=2529; translated  
XVLAEVSKTEVFDCVYAASALALHTNAATALRISPSARVHGDAVRTNRSTAHVDEIEGAY  
EDEEPCDLLEAHIASQAHALIFGDSENRGF IHNVSETAAKRDAPGISVFFVVS SNPAMEEK  
ICYMFRDVPKIFKLRNTDFFTEEQGVYPTMGVDRVAALYGAKLHYGCPALVIDGGTAMT  
YSAVDYDGRIIGGGISPGVKVRLQSLADYTGALPNIDHKKFKALVEGNIAAKTPFPFLFAK  
DTETAMISPICGELACQLRSIVRQFVSRCSNQPTSLTSSNEGEVTEKEPTEQNNCKEGE  
VKEKESPEQKLP IIFTGGDAKFLYDLLKTDASGIVSMEPSEAPTPTNIYTKIVRNLVTY  
AIGNIVHEKFLQKPMTPQEKLKLIQGLRIAAPAIDPDDVFTRGCVFNITPASII EGYAF  
HARFDNGMQKDLTTELYGKIFLVGMAKLQMLWDSAHKLSVFLANEDYLVLYNEIGEEM  
WSGSVGSVDEDEDWVTEKKTWSSKVQEELCNVSRP IRSRTRELKPHIERGEVHKLFRKRSIG  
WKQSRSNKRVRKRDVRKLQKPIGKR IANMFP IESADGQDLADTIFFGTVKHVS DPHLEWYF  
IQYDDGDVEEIDLNEVMNGIALYKEHKGNDBGKADSTAGGSATSSATTTKLVSQKVTVTKE  
TNTFTDMSLLLSASSPAFGNEDTRRISEHKEDID

>comp14790\_c0\_seq4; 237 1 2202 LEN=2646; translated  
XVLAEVSKTEVFDCVYAASALALHTNAATALRISPSARVHGDAVRTNRSTAHVDEIEGAY  
EDEEPCDLLEAHIASQAHALIFGDSENRGF IHNVSETAAKRDAPGISVFFVVS SNPAMEEK  
ICYMFRDVPKIFKLRNTDFFTEEQGVYPTMGVDRVAALYGAKLHYGCPALVIDGGTAMT  
YSAVDYDGRIIGGGISPGVKVRLQSLADYTGALPNIDHKKFKALVEGNIAAKTPFPFLFAK

DTETAMVKYDACREREREKESRPFEPAPKSANQSMFVSNNGCYFAKISPICGELACQLRSI  
VRQFVSRQCQSNQPTSLTSSNEGEVTEKEPTEQNNCKEAGEVKEKESPEQKLP I IFTGGDA  
KFLYDLLKTDASGIVSMEPSEAPTPTNIYTKIVRNLVTYAIGNIVHEKFLQKPMTPQEKL  
KLKIQGLRIAAPAIDPDDVFTRGCVFNITPAS I IEGYAFHARFDNGMQKDLTLTELYGKI  
FLVGMAKLQMLWDSAHKLSVFLANEDYLVLYNEIGEEGMWGSVGSVDEDEDWVTEKKTWSS  
KVQEELCNVSRPIRSRTRELKPHIERGEVHKLFRKRSIGWKQSRSNKRVRKRDVRKLQKPI  
GKR IANMFPIESADGQDLADTIFFGTVKHVSDPHLEWYFIQYDDGDVEEIDLNEVMNGIA  
LYKEHKGNDGKADSTAGGSATSSATTTKLVSQKVTVTKETNTFTDMSLLLSASSPAFGNE  
DTRRISEHKEDID

>comp14790\_c0\_seq5; 325 100 2241 LEN=2685; translated  
MEDTKKPKTTIEYAEWPRDAPSALERKVLSSIIICGNRSLHWALHEGSVNKFIPILFWHTAH  
VDEIEGAYEDEEPCDLLEAHIASQAHALIFGDSENRGFIHNVSETAAKRDAPGISVFFVVS  
SNPAMEEKICYMFRDVPKIFKLRNTDFFTEEQGVYPTMGVDRVAALYGAKLHYGCPALV  
IDGGTAMTYSADVYDGR I IGGGISPGVKVRLQSLADYTGALPNIDHKKFKALVEGNIAAK  
TPFPLFAKDTETAMVKYDACREREREKESRPFEPAPKSANQSMFVSNNGCYFAKISPICGE  
LACQLRSIVRQFVSRQCQSNQPTSLTSSNEGEVTEKEPTEQNNCKEAGEVKEKESPEQKLP  
I IFTGGDAKFLYDLLKTDASGIVSMEPSEAPTPTNIYTKIVRNLVTYAIGNIVHEKFLQK  
PMTPQEKLKLKIQGLRIAAPAIDPDDVFTRGCVFNITPAS I IEGYAFHARFDNGMQKDLT  
LTELYDYLVLYNEIGEEGMWGSVGSVDEDEDWVTEKKTWSSKVQEELCNVSRPIRSRTREL  
KPHIERGEVHKLFRKRSIGWKQSRSNKRVRKRDVRKLQKPIGKR IANMFPIESADGQDLAD  
TIFFGTVKHVSDPHLEWYFIQYDDGDVEEIDLNEVMNGIALYKEHKGNDGKADSTAGGSA  
TSSATTTKLVSQKVTVTKETNTFTDMSLLLSASSPAFGNEDTRRISEHKEDID

>comp14790\_c0\_seq6; 404 100 2124 LEN=2568; translated  
MEDTKKPKTTIEYAEWPRDAPSALERKVLSSIIICGNRSLHWALHEGSVNKFIPILFWHTAH  
VDEIEGAYEDEEPCDLLEAHIASQAHALIFGDSENRGFIHNVSETAAKRDAPGISVFFVVS  
SNPAMEEKICYMFRDVPKIFKLRNTDFFTEEQGVYPTMGVDRVAALYGAKLHYGCPALV  
IDGGTAMTYSADVYDGR I IGGGISPGVKVRLQSLADYTGALPNIDHKKFKALVEGNIAAK  
TPFPLFAKDTETAMISPICGELACQLRSIVRQFVSRQCQSNQPTSLTSSNEGEVTEKEPTE  
QNNCKEAGEVKEKESPEQKLP I IFTGGDAKFLYDLLKTDASGIVSMEPSEAPTPTNIYTK  
IVRNLVTYAIGNIVHEKFLQKPMTPQEKLKLKIQGLRIAAPAIDPDDVFTRGCVFNITPA  
S I IEGYAFHARFDNGMQKDLTLTELYDYLVLYNEIGEEGMWGSVGSVDEDEDWVTEKKTWS  
SKVQEELCNVSRPIRSRTRELKPHIERGEVHKLFRKRSIGWKQSRSNKRVRKRDVRKLQKPI  
GKR IANMFPIESADGQDLADTIFFGTVKHVSDPHLEWYFIQYDDGDVEEIDLNEVMNGI  
ALYKEHKGNDGKADSTAGGSATSSATTTKLVSQKVTVTKETNTFTDMSLLLSASSPAFGN  
EDTRRISEHKEDID

>comp14790\_c0\_seq7; 325 1 2000 LEN=2444; translated  
XVLAEVSKTEVFDCVYAASALALHTNAATALRISPSARVHGDAVRTNRSTAHVDEIEGAY  
EDEEPCDLLEAHIASQAHALIFGDSENRGFIHNVSETAAKRDAPGISVFFVSSNPAMEEK  
ICYMFRDVPKIFKLRNTDFFTEEQGVYPTMGVDRVAALYGAKLHYGCPALVIDGGTAMT  
YSAVDYDGR I IGGGISPGVKVRLQSLADYTGALPNIDHKKFKALVEGNIAAKTPFPLFAK  
DTETAMISPICGELACQLRSIVRQFVSRQCQSNQPTSLTSSNEGEVTEKEPTEQNNCKEAGE  
VKEKESPEQKLP I IFTGGDAKFLYDLLKTDASGIVSMEPSEAPTPTNIYTKIVRNLVTY  
AIGNIVHEKFLQKPMTPQEKLKLKIQGLRIAAPAIDPDDVFTRGCVFNITPAS I IEGYAF  
HARFDNGMQKDLTLTELYDYLVLYNEIGEEGMWGSVGSVDEDEDWVTEKKTWSSKVQEELC  
NVSRPIRSRTRELKPHIERGEVHKLFRKRSIGWKQSRSNKRVRKRDVRKLQKPIGKR IANM  
FP IESADGQDLADTIFFGTVKHVSDPHLEWYFIQYDDGDVEEIDLNEVMNGIALYKEHKG  
NDGKADSTAGGSATSSATTTKLVSQKVTVTKETNTFTDMSLLLSASSPAFGNEDTRRISE  
HKEDID

>comp14790\_c0\_seq8; 246 1 2117 LEN=2561; translated  
XVLAEVSKTEVFDCVYAASALALHTNAATALRISPSARVHGDAVRTNRSTAHVDEIEGAY  
EDEEPCDLLEAHIASQAHALIFGDSENRGFIHNVSETAAKRDAPGISVFFVSSNPAMEEK  
ICYMFRDVPKIFKLRNTDFFTEEQGVYPTMGVDRVAALYGAKLHYGCPALVIDGGTAMT  
YSAVDYDGR I IGGGISPGVKVRLQSLADYTGALPNIDHKKFKALVEGNIAAKTPFPLFAK  
DTETAMVKYDACREREREKESRPFEPAPKSANQSMFVSNNGCYFAKISPICGELACQLRSI  
VRQFVSRQCQSNQPTSLTSSNEGEVTEKEPTEQNNCKEAGEVKEKESPEQKLP I IFTGGDA  
KFLYDLLKTDASGIVSMEPSEAPTPTNIYTKIVRNLVTYAIGNIVHEKFLQKPMTPQEKL  
KLKIQGLRIAAPAIDPDDVFTRGCVFNITPAS I IEGYAFHARFDNGMQKDLTLTELYDYLV  
LYNEIGEEGMWGSVGSVDEDEDWVTEKKTWSSKVQEELCNVSRPIRSRTRELKPHIERGE  
VHKLFRKRSIGWKQSRSNKRVRKRDVRKLQKPIGKR IANMFPIESADGQDLADTIFFGTVK  
HVSDPHLEWYFIQYDDGDVEEIDLNEVMNGIALYKEHKGNDGKADSTAGGSATSSATTTK

LVSQKVTVTKETNTFTDMSLLLSASSPAFGNEDTRRISEHKEDID  
>comp14791\_c0\_seq1; 331 57 1099 LEN=1677; translated  
MDITASVRS AEGSSASNPICVDDYLS DIVTEAESASSSHPICVDDFLSDTESETKTELAS  
SSHPICVDDYLSETESETKIELVDLQECNNSSSLPRDDYSYYSEEQAANKKSGXYEEHIL  
RSMDEESRRENRRKQRCERAKRQRMSTLMWFAVALLLLEVAAATIAIMNHKELIECCGRS  
IFSEDESTAERWNTILYYIGVCYLLIIILVEFPTLIIAQEPLFVFNPMVG YLLVMQMMYA  
TDPRNAYIIFGLEVCAMIGQSTVLGAMHRTPEMCIHSILNYTLAGITIIYLLLRLLTGQGGY  
CIVNDRIQSIFSEMTCNVSCTDGESCFQCLEDGNEDISISTQCFIHF  
>comp14791\_c0\_seq2; 331 57 1099 LEN=1447; translated  
MDITASVRS AEGSSASNPICVDDYLS DIVTEAESASSSHPICVDDFLSDTESETKTELAS  
SSHPICVDDYLSETESETKIELVDLQECNNSSSLPRDDYSYYSEEQAANKKSGXYEEHIL  
RSMDEESRRENRRKQRCERAKRQRMSTLMWFAVALLLLEVAAATIAIMNHKELIECCGRS  
IFSEDESTAERWNTILYYIGVCYLLIIILVEFPTLIIAQEPLFVFNPMVG YLLVMQMMYA  
TDPRNAYIIFGLEVCAMIGQSTVLGAMHRTPEMCIHSILNYTLAGITIIYLLLRLLTGQGGY  
CIVNDRIQSIFSEMTCNVSCTDGESCFQCLEDGNEDISISTQCFIHF  
>comp14791\_c0\_seq3; 331 57 1099 LEN=1293; translated  
MDITASVRS AEGSSASNPICVDDYLS DIVTEAESASSSHPICVDDFLSDTESETKTELAS  
SSHPICVDDYLSETESETKIELVDLQECNNSSSLPRDDYSYYSEEQAANKKSGXYEEHIL  
RSMDEESRRENRRKQRCERAKRQRMSTLMWFAVALLLLEVAAATIAIMNHKELIECCGRS  
IFSEDESTAERWNTILYYIGVCYLLIIILVEFPTLIIAQEPLFVFNPMVG YLLVMQMMYA  
TDPRNAYIIFGLEVCAMIGQSTVLGAMHRTPEMCIHSILNYTLAGITIIYLLLRLLTGQGGY  
CIVNDRIQSIFSEMTCNVSCTDGESCFQCLEDGNEDISISTQCFIHF  
>comp14791\_c0\_seq4; 449 113 1390 LEN=1738; translated  
MDITASVRS AEGSSASNPICVDDYLS DIVTEAESASSSHPICVDDFLSDTESETKTELAS  
SSHPICVDDYLSETESETKIELVDLQECNNSSSLPRDDYSYYSEVTYAETVSETEVTVT  
EKESVHDAEQILNDRNDLPDSDGNEKDKNGSDDGRSND SVVSEAENGESTHTRKRRNVS  
FAGAGSEEQEWTYEEHILRSMDEESRRENRRKQRCERAKRQRMSTLMWFAVALLLLEVAA  
ATIAIMNHKELIECCGRSIFSEDESTAERWNTILYYIGVCYLLIIILVEFPTLIIAQEPL  
FVFNPMVG YLLVMQMMYATDPRNAYIIFGLEVCAMIGQSTVLGAMHRTPEMCIHSILNYT  
LAGITIIYLLLRLLTGQGGY CIVNDRIQSIFSEMTCNVSCTDGESCFQCLEDGNEDISISTQ  
CFIHF  
>comp14791\_c0\_seq5; 449 113 1390 LEN=1584; translated  
MDITASVRS AEGSSASNPICVDDYLS DIVTEAESASSSHPICVDDFLSDTESETKTELAS  
SSHPICVDDYLSETESETKIELVDLQECNNSSSLPRDDYSYYSEVTYAETVSETEVTVT  
EKESVHDAEQILNDRNDLPDSDGNEKDKNGSDDGRSND SVVSEAENGESTHTRKRRNVS  
FAGAGSEEQEWTYEEHILRSMDEESRRENRRKQRCERAKRQRMSTLMWFAVALLLLEVAA  
ATIAIMNHKELIECCGRSIFSEDESTAERWNTILYYIGVCYLLIIILVEFPTLIIAQEPL  
FVFNPMVG YLLVMQMMYATDPRNAYIIFGLEVCAMIGQSTVLGAMHRTPEMCIHSILNYT  
LAGITIIYLLLRLLTGQGGY CIVNDRIQSIFSEMTCNVSCTDGESCFQCLEDGNEDISISTQ  
CFIHF  
>comp14791\_c0\_seq6; 449 113 1390 LEN=1968; translated  
MDITASVRS AEGSSASNPICVDDYLS DIVTEAESASSSHPICVDDFLSDTESETKTELAS  
SSHPICVDDYLSETESETKIELVDLQECNNSSSLPRDDYSYYSEVTYAETVSETEVTVT  
EKESVHDAEQILNDRNDLPDSDGNEKDKNGSDDGRSND SVVSEAENGESTHTRKRRNVS  
FAGAGSEEQEWTYEEHILRSMDEESRRENRRKQRCERAKRQRMSTLMWFAVALLLLEVAA  
ATIAIMNHKELIECCGRSIFSEDESTAERWNTILYYIGVCYLLIIILVEFPTLIIAQEPL  
FVFNPMVG YLLVMQMMYATDPRNAYIIFGLEVCAMIGQSTVLGAMHRTPEMCIHSILNYT  
LAGITIIYLLLRLLTGQGGY CIVNDRIQSIFSEMTCNVSCTDGESCFQCLEDGNEDISISTQ  
CFIHF  
>comp14792\_c0\_seq1; 264 220 1398 LEN=1852; translated  
MRNNNQNNRSRCTLVAF LFVAHFVWPSCLAFV VVSPLSVPSTLKSIRSPTAVFSSSNNG  
NDSNEPFENVA AAVIVPGFLTGADEFEP LCKALTEQGIPTVAVPMPNWHWLPCLGGRSAR  
PILERIDFAVKHIIANYENTGNPIIASNAVLNIPKYKYSVWDCWMDFRNNP GGVSKVGG  
SRVDEY PVVEPRGDFPPPLSFRKGGDGTQPKK KIALIGH SAGGWISRVYLS SSPYGGKAY  
EGSKYI HSLVTLGTPHSNAPGPA FEGISWINQPENEH DRIQHVRTLAVAGSGFKGGEWGS  
LTQGAYS FCCPKGTDGTGYDGDGVTPTFSALDVP GSESLVLEGTTHHFCWSDVFGDFVA  
PELTEDHKQGRSWY GSEGILEQWSKFIQE QSR  
>comp14792\_c0\_seq2; 231 220 925 LEN=990; translated  
MRNNNQNNRSRCTLVAF LFVAHFVWPSCLAFV VVSPLSVPSTLKSIRSPTAVFSSSNNG  
NDSNEPFENVA AAVIVPGFLTGADEFEP LCKALTEQGIPTVAVPMPNWHWLPCLGGRSAR



PILERIDFAVKHIIANYENTGNPIIASNAVLNIPKYKYSVWDCWMDFRNNPGGVSKVGGSSRVDEYPVVEPRGDFPPPLSFRKGGDGTQPKKKIALIDTGAYGAMRAERDGSTS  
>comp14793\_c0\_seq1; 352 1 1061 LEN=1061; translated  
RRRSPLVDEEGNAGDALDEQGFERFYRSIDDLFDDDDDDDEAGDNIDSAKSQDNTDTNKSS  
TANAATETGSKNPRAREDLEVEYLEHLQSLCEDSEDGDVNVGERRPWGLDCSDKERFRILE  
YLQALLVDGNQRNLLAGGNASPVRSAKDLTKHILGTWELKYTSSRTMIINKSLSGLGRST  
SDLARNLGLQLTLTSGNYYYGKAEFVERFGSNTGENSENDNAGDDPITLEATVTGEWILE  
TGTRVDSRTGRPSVSLRIEVETIAYGPTKSSADQWDSLSPIKLVDVLYLDEEVMVLRGNS  
NADALFVYALADGEARGPLLLWGIARACPGTAHGDDRRRLARAPIAVFGRTLRSRX  
>comp14793\_c0\_seq2; 552 1 1567 LEN=1567; translated  
XTTPAVEAERLVPDPAGCHRDRRRQNNWHKVRFRPVLLVADTILPFPELRRSYFAKRIR  
ARGSIAAKEPAVSSALQECAPDSRRLHDKNSTPTATDPALAASGSPGGGSTQQVVYSVFS  
KPKKTVFRELEEASASDGLRLLDIAKAWDELNEIVEDGDVTVEELQEFYKALVDEEG  
NAGDALDEQGFERFYRSIDDLFDDDDDDDEAGDNIDSAKSQDNTDTNKSSSTANAATETGSK  
NPRAREDLEVEYLEHLQSLCEDSEDGDVNVGERRPWGLDCSDKERFRILEYLQALLVDGNQ  
RNLLAGGNASPVRSAKDLTKHILGTWELKYTSSRTMIINKSLSGLGRSTSDLARNLGLQL  
TLTSGNYYYGKAEFVERFGSNTGENSENDNAGDDPITLEATVTGEWILETGTRVDSRTGR  
PSVSLRIEVETIAYGPTKSSADQWDSLSPIKLVDVLYLDEEVMVLRGNSNADALFVYALA  
DGEARGPLLLWGIARACPGTAHGDDRRRLARAPIAVFGRTLRSRX  
>comp14794\_c0\_seq1; 507 294 2450 LEN=2677; translated  
MRQLPKAPSATGSKRSSNGSASPHSQERPLLHLVHGPWNRKSMATILSQQQHSYYGGSDR  
GTSTPTQAETERQHPPGASAEPSYTLWDLVSVGVGGTVGSGIFVLAGYIANHYAGPATFL  
SFAISGLAALCSGISFAEFSGRLPRIEGSTYTYAYVSMGEYAAVLAAACLTYEYGVSGAA  
VARSWGDKVLEWTAKLRHGEEVDHVGQHEAFFNPLAGLISLGSVVVLACGVQESKRVTNF  
FTVTKLLLVGIMVIGGLCFFSASNTTPILVPFDGTSYGVAGVLRGATSSFFGYLGFDEV  
CLASEAKNPGDTPRAVLYTLAIVTCIYILASIALSGMLPYTEISDTSGFNPAFGALGYP  
LANLTALGEVVTLPVVVLISLLAQPRCAAMARDGLLPEIFCRRSGRDGNLFWSSILCGI  
PMTLLATFVFPFSWMDDAISVGILFAFNMTNTALITMRCSSCASSSDKLGSRRDGGMTEFH  
SQHTHTNEGEVVTIDEANGIVSSSYDPNPNYGVCRGRWPLPMLHLCYHFVALAAGLTSHV  
GSLSSPNWSIQIGAAALTLGYAAGLHSQFPAGGTFGDASFQMHHSNVDMDLGDQSN  
TISNRSTIAGDIFRVPFCPFLPLVGIYLNWYLISQLEWSGMVLLFVFLVLIISALYGLCIS  
GTSQTTSSYSALPQLGFVNDATVTSAPSTATSVQSFVDADGPVLLREMSMPSRRSVT  
>comp14794\_c0\_seq2; 158 420 785 LEN=952; translated  
MATILSQQQHSYYGGSDRGTSTPTQAETERQHPPGASAEPSYTLWDLVSVGVGGTVGSGI  
FVLAGYIANHYAGPATFLSFAISGLAALCSGISFAEFSGRLPRIEGSTYTYVALRCVERA  
V  
>comp14794\_c0\_seq3; 507 294 2450 LEN=2607; translated  
MRQLPKAPSATGSKRSSNGSASPHSQERPLLHLVHGPWNRKSMATILSQQQHSYYGGSDR  
GTSTPTQAETERQHPPGASAEPSYTLWDLVSVGVGGTVGSGIFVLAGYIANHYAGPATFL  
SFAISGLAALCSGISFAEFSGRLPRIEGSTYTYAYVSMGEYAAVLAAACLTYEYGVSGAA  
VARSWGDKVLEWTAKLRHGEEVDHVGQHEAFFNPLAGLISLGSVVVLACGVQESKRVTNF  
FTVTKLLLVGIMVIGGLCFFSASNTTPILVPFDGTSYGVAGVLRGATSSFFGYLGFDEV  
CLASEAKNPGDTPRAVLYTLAIVTCIYILASIALSGMLPYTEISDTSGFNPAFGALGYP  
LANLTALGEVVTLPVVVLISLLAQPRCAAMARDGLLPEIFCRRSGRDGNLFWSSILCGI  
PMTLLATFVFPFSWMDDAISVGILFAFNMTNTALITMRCSSCASSSDKLGSRRDGGMTEFH  
SQHTHTNEGEVVTIDEANGIVSSSYDPNPNYGVCRGRWPLPMLHLCYHFVALAAGLTSHV  
GSLSSPNWSIQIGAAALTLGYAAGLHSQFPAGGTFGDASFQMHHSNVDMDLGDQSN  
TISNRSTIAGDIFRVPFCPFLPLVGIYLNWYLISQLEWSGMVLLFVFLVLIISALYGLCIS  
GTSQTTSSYSALPQLGFVNDATVTSAPSTATSVQSFVDADGPVLLREMSMPSRRSVT  
>comp14794\_c0\_seq4; 304 420 2699 LEN=2926; translated  
MATILSQQQHSYYGGSDRGTSTPTQAETERQHPPGASAEPSYTLWDLVSVGVGGTVGSGI  
FVLAGYIANHYAGPATFLSFAISGLAALCSGISFAEFSGRLPRIEGSTYTYVALLALKEQ  
CNAVLGVACCIGQLVSGAVDDAMRCDAIKFETEQDSTPNDALPSIPMHHLHTQQYSLLF  
DVFSSVSFFLRCSYAYVSMGEYAAVLAAACLTYEYGVSGAAVARSWGDKVLEWTAKLRHG  
EEVDHVGQHEAFFNPLAGLISLGSVVVLACGVQESKRVTNFFTVTKLLLVGIMVIGGLC  
FSASNTTPILVPFDGTSYGVAGVLRGATSSFFGYLGFDEVCLASEAKNPGDTPRAVLYT  
LAIVTCIYILASIALSGMLPYTEISDTSGFNPAFGALGYPFLANLTALGEVVTLPVVVL  
SLLAQPRCAAMARDGLLPEIFCRRSGRDGNLFWSSILCGIPMTLLATFVFPFSWMDDAIS  
VGILFAFNMTNTALITMRCSSCASSSDKLGSRRDGGMTEFH  
SQHTHTNEGEVVTIDEANGIVSSSYDPNPNYGVCRGRWPLPMLHLCYHFVALAAGLTSHV  
GSLSSPNWSIQIGAAALTL

GYAAGLHSQFPAGGTFGDASFQMHHSNVDMDLGDQSNNTISNRSTIAGDIFRVPFPC  
FLPLVGIYLNWYLISQLEWSGMVLLFVFLVLIISALYGLCISGTSQTTSSYSALPQLGFVN  
DATVTSAPESTATSVQSFVDADGPVLLREMSMPSRRSVT  
>comp14794\_c0\_seq5; 479 294 2699 LEN=2856; translated  
MRQLPKAPSATGSKRSSNGSASPHSQERPLLHLVHGPWNRKSMATILSQQHSYGGSDR  
GTSTPTQAETERQHPGGASAEPSYTLWDLVSVGVGGTVGSGIFVLAGYIANHYAGPATFL  
SFAISGLAALCSGISFAEFSGRLPRIEGSTYTYVALVALKEQCNVAVLGVACCGIGQLVSG  
QLMMQCDXDAIKFETEQDSTPNDALPSIPMHMLHTQQYSLLFDVFSVSSFFLRCSYAYVS  
MGEYAAVLAACLTLLEYGVSGAAVARSWGDKVLEWTAKLRHGEEVDHVGQHEAFFNPLAG  
LISLGSVVVLACGVQESKRVTNFFTVTKLLLVGIMVIGGLCFFSASNTTPILVPFDGTSY  
GVAGVLRGATSSFFGYLGFDEVCCLEASEAKNPGDTPRAVLYTLAIIVTCIYILASIALSGM  
LPYTEISDTSGFNFAFGALGYPFPLANLTALGEVVTLPVVVLISLLAQPRCAAMARDGLL  
PEIFCRRSGRDGNLFWSSILCGIPMTLLATFVPPFSWMDDAISVGILFAFNMTNTALITMR  
CSSCASSSDKLGSRRDGGMTEFHSQTHTNEGEVVTAIDEANGIVSSSYDPNPYGVCRGR  
WPLPMHLGCYHFVALAAGLTSHVGSLSPPNWSIQIGAAALTLGYAAGLHSQFPAGGTFGD  
ASFQMHHSNVDMDLGDQSNNTISNRSTIAGDIFRVPFPCFLPLVGIYLNWYLISQLE  
WSGMVLLFVFLVLIISALYGLCISGTSQTTSSYSALPQLGFVNDATVTSAPESTATSVQSF  
VDADGPVLLREMSMPSRRSVT  
>comp14795\_c1\_seq1; 502 1 1323 LEN=1323; translated  
GEAATIRNETMVEPQQQQEQEQEQSPPHRVQTTIEDDWNINIVALSEYDAAVAIAESTFD  
RFRSGNQGERDAEHGDEHGDGGAPPLDRDVIAEIEYEAARASLLANVARVVRPVHDNDYSD  
YVDRYHFVLDSDDDDDNDNDNDNNEEEDSDGGESEEEEEQEIDEEELVDAKAWENARELRTR  
VRTMAARVQSVRERVLKHTEEGVSSAVSGNLIDPQVRVVFGEPEGDGDKDKNDLTSPCA  
SEDKENLVDNNDGTRGSIRQRRNKPACPLRNSLEELSELLKDPKASLPNRIQSLQETI  
ETVQRETSEDRVMSQTETAITSRYKNTIDASERRRVFGEDSGEDGDSLLAGSASMDPMDR  
LALFGQIFSYGSSPWCRERLELDLGYSNAYHQQRILVAECAQDTTAKQRDGCCTSRGLS  
DASPLSWFLAAAAAAPCVLVP  
>comp14795\_c1\_seq2; 532 1 1335 LEN=1335; translated  
GEAATIRNETMVEPQQQQEQEQEQSPPHRVQTTIEDDWNINIVALSEYDAAVAIAESTFD  
RFRSGNQGERDAEHGDEHGDGGAPPLDRDVIAEIEYEAARASLLANVARVVRPVHDNDYSD  
YVDRYHFVLDSDDDDDNDNDNDNNEEEDSDGGESEEEEEQEIDEEELVDAKAWENARE  
LRTRVRTMAARVQSVRERVLKHTEEGVSSAVSGNLIDPQVRVVFGEPEGDGDKDKNDLT  
SPCASEDKENLVDNNDGTRGSIRQRRNKPACPLRNSLEELSELLKDPKASLPNRIQSL  
QETIETVQRETSEDRVMSQTETAITSRYKNTIDASERRRVFGEDSGEDGDSLLAGSASMD  
PMDRLALFGQIFSYGSSPWCRERLELDLGYSNAYHQQRILVAECAQDTTAKQRDGCCTYS  
RGLSDASPLSWFLAAAAAAPCVLVP  
>comp14796\_c0\_seq1; 420 1 1887 LEN=3141; translated  
LGSNDGKQISVIRITYSHNIRSKMARKLHHLIIIGLTILVFLPVLKLSFLVFDQDDVEDQFI  
SPDVTRSSSSSTSSDTNSSLGKGVKGQPPSPVSLRASSPSTKSSAKSSLLDENVAEQSA  
SPAPKGSFSSLTNSDTNFPKTLVIYFPQYHRDPLNDKNWGENFTDWSLQKTDYNNKLNQ  
SIPRPLLSTGTSMANGSISGDLPPPLGYDLSETEPRRIQGILAKKFGIDGFIYHHYWF  
YDQSHKGNLAKPLENMLKDGHPDVPFMFNWCAVKWVNVWVGKAIQTIPTNKNRAITLQ  
DQYFDVTQEMIYEHYLLWPKPFFNHPNYIRVDGQPAFFLYYYDDRALPILESLRRFAIEDG  
FSGLHFIVGRSSHNEQLYDTSHEEREKKSLSNRKAQGLDLVDPSTEVKTKSILPVLVFN  
TETSMSLLQLDISGAQQEKGAPREMQTWDYNPFNQMTYYPYPLDYLTRPLEVPAWCTDP  
SKNFTTLDSEGYIQPHHPEIIGIITTFDNTPRRQLNGATVWNGGLKDAVESPDDAIERFT  
KSYTAALYHQKCCIDIALARQQEKQTKGRNSNPDLKFNVKSSRFVTINAMNEWAEGMSI  
EPSDIYGYRWLEAIKAVQKTVKNQPCR  
>comp14797\_c0\_seq1; 290 1 964 LEN=1736; translated  
XGEQLLRFCGWYFSSLIIVVCIFFVMPLSSSLLPEIRGAAIAPTNGSHDMTRLVVIAPTF  
YSDTSDIRYLLGLESCRKAAEYGIIEFILVDASPSQTIIRDALEQAGRSGGGHSFVRVLQQS  
SKGKGAALREGISHAVEQLREGSDGNNNQKQTKSMIGFQELEKVDLIRHWKLIASHAN  
ELNADVVPREDKYFRESYPIEQYHSEQFGNMFLNALGEKIGFPSIDWLNGPFAFDVSM  
ANSWLENDGEIWDACLVPVMDCLFKHKANFVSFEIPYVHPSTMKEEEEGNVTFIEKRLYQ  
VNSLTDKVGKLMKDAVAATK  
>comp14797\_c0\_seq2; 314 348 850 LEN=889; minus strand; translated  
MHPKCTISCRGEQAKQQQAKYKXAVDNECNEQKQVKHTCKELERRNITVQQAKEEQ  
IKKRAIDPALRTRKPKLSLTSGLIQLSLQACLKACTGLSMTWKTLVMELGRHFGLTGRDN  
IVFLEWQFMKHGFSFSKMESDWNVVIAPSGAFDKGESAWFEQSNCE  
>comp14798\_c0\_seq1; 581 390 1853 LEN=2157; translated

MQSGKLLSLQRVTYVVMDEGDRMYDMGFAPQISAILAAVRPDRQTVLFSATFPKTVENLAR  
KSLKYPLEIIVGGRSVASDNVSQYAELVEEDDKFFRLLQLLGENVDEEKKAIIVFVDTQV  
RADNLFEOQLLRNGYVLSLSLHGGKEQEDRDSTISDFKRKDGPGVLVATGVAGRGLDVPSCR  
CVINYSCPNHLEAYVHVQVGRTRANKKGVAYTFVNSTDEAKYAPNIVRALSETGQSENIS  
PELKALSDSFKEKVAKGEAKYAGSGFKGRGYTYDKSEMSEAQKVAQSEKRQALIEAGLLD  
PDEDPLMEKNDDADKSTNDENGEKSSSESSDADKVLLELHAKLTPELLALPGMKDAILRR  
AGIVKDGEENDPSLGRPVQMGNHFLQEFEEINDYPREARWKVTQKETTTRLQDEFQTAVT  
LKGVIYVAHGQTPDEGQRRLLYLHLEATSEMVLQNCVVEIKRLLNEETLRVGAKSSSGTSSH  
KYSVLGK

>comp14798\_c0\_seq2; 1028 128 3418 LEN=3722; translated  
MDSAAAAERKRRLAARWRKRAASNNAASSAPAKVPTVKVLSLSLNSKATMKLKSCTIKKT  
KGLAKSRAAGLLSRPLNPFQDVGDDDDGDGEGDDSDDDNHNKRGTMMGLGFMTTFSESDAQ  
PNTDKGGEDTATSGPPSKRRRRGRWDSAPKPEPVAAPASMLLEEGMSSRQEEKAVGDALD  
KFMDKLEAGALGNVATQVRVGTGDKIGKEMLSIDVGGSMRVPKLFHNKQPQSPVSGGV  
ITPDMIAKLSSTASIPKATPVSKAKQANPEALYTPSDWESGAGTAEADENDTDDDTKE  
LEDEEKARRAFIEALKTATGRVDDANDTEKPGQGEAVLAAEVKSEKTRREQRFRDLEREA  
ENARTMAELAGAPEIGRLYNDVEGGVMEEAERNLGAAMAAPDALQVLAELNKKKELKSVD  
HSMVDYIDFKKNLYIVPRALAKLNNDDEVANLRGKLVKVRVGRGAPAPVASFEQCGLSERI  
MRVLEKQGIQPFVQAQCLPCIMAGRDVIGVAKTGSGLTSLYLLPMLRHITDQPPLEPH  
ESGPIGLVLPARELAYQIHLVCKSLTKPLGLKSAAVYGGASVAEQIGDLKRGTHIVVAT  
PGRLLIDILTMQSGKLLSLQRVTYVVMDEGDRMYDMGFAPQISAILAAVRPDRQTVLFSAT  
FPKTVENLARKSLKYPLEIIVGGRSVASDNVSQYAELVEEDDKFFRLLQLLGENVDEEKK  
AIVFVDTQVRADNLFEOQLLRNGYVLSLSLHGGKEQEDRDSTISDFKRKDGPGVLVATGVAG  
RGLDVPSCRCVINYSCPNHLEAYVHVQVGRTRANKKGVAYTFVNSTDEAKYAPNIVRALS  
ETGQSENISPELKALSDSFKEKVAKGEAKYAGSGFKGRGYTYDKSEMSEAQKVAQSEKRQ  
ALIEAGLLDPDEDPLMEKNDDADKSTNDENGEKSSSESSDADKVLLELHAKLTPELLALP  
GMKDAILRRAGIVKDGEENDPSLGRPVQMGNHFLQEFEEINDYPREARWKVTQKETTTRL  
QDEFQTAVTLKGVIYVAHGQTPDEGQRRLLYLHLEATSEMVLQNCVVEIKRLLNEETLRVGA  
KSSSGTSSHKYSVLGK

>comp14799\_c0\_seq1; 221 1 1307 LEN=1668; translated  
XLFLLLWWTAAASLLPLQDLGMRATINLLDYFANKSAQTNGIASSNAGRTKKVVLTAATTG  
DTGPAAVRAVQDRNSPSLGIIVHYPEGQISDFQRKQMTTVQSDRVRIVSFEGGGDDMDRP  
IKRIMTSSCGGDERDPGVVVCVNSYNIGRPLMQMVHFVWVWYLRVIEYIEKETGEPIDHG  
TFRLDIVIPTGAMGNLAGCYMAKKGIPFGRMCAGVNVNDFTDRTFRGLVKRADTMKPS  
LSDAINIQLPYNLERLLFYATGGDHEQVRNWKYQKLEGGDAKSRWFDLSETSQRWVNQLQA  
EFKSARVTDDELVCVTIRRVLEDYGYWADPHTGVAFAAAEEKLYNNSQVNNNNKNTAVAIM  
ATASPCKFQNVLTVALGPRQWNEYEREHFPSRGKDLGKPEIPVVMYAADRKKTLEENQI  
VWEAKTRELIDQLGK

>comp14799\_c0\_seq2; 343 1 1886 LEN=2247; translated  
XKAIGGATHIIPSMKYKSTRDPTKLYTFEEALFSGYAPDGGFLVPEELPSEILFPPTTK  
NSVLSQWPGGLGYLDLATEVLHPFLGTETIARNELKALLRDALAGFDTNDKNLVPVPLV  
SKHTNTATNKGKNGTLCYVAELFHGPTYCFKDLGMRATINLLDYFANKSAQTNGIASS  
NAGRTKKVVLTAATTGDTGPAAVRAVQDRNSPSLGIIVHYPEGQISDFQRKQMTTVQSDR  
VRIVSFEGGGDDMDRP IKRIMTSSCGGDERDPGVVVCVNSYNIGRPLMQMVHFVWVWYLR  
VIEYIEKETGEPIDHGTFRLLDIVIPTGAMGNLAGCGVEYNCWLDLSKPDTQEKCKMPIIA  
CIQCKIPSSYFVLYRYPGPGVGFASSAVRKQYMAKKGIPFGRMCAGVNVNDFTDRTFR  
TGLVKRADTMKPSLSDAINIQLPYNLERLLFYATGGDHEQVRNWKYQKLEGGDAKSRWFDL  
SETSQRWVNQLQAEFKSARVTDDELVCVTIRRVLEDYGYWADPHTGVAFAAAEEKLYNNSQ  
VNNNNKNTAVAIMATASPCKFQNVLTVALGPRQWNEYEREHFPSRGKDLGKPEIPVVMY  
AADRGKTLEENQIVWEAKTRELIDQLGK

>comp14799\_c0\_seq3; 21 1 1479 LEN=1840; translated  
XLFLLLWWTAAASLLPLQDLGMRATINLLDYFANKSAQTNGIASSNAGRTKKVVLTAATTG  
DTGPAAVRAVQDRNSPSLGIIVHYPEGQISDFQRKQMTTVQSDRVRIVSFEGGGDDMDRP  
IKRIMTSSCGGDERDPGVVVCVNSYNIGRPLMQMVHFVWVWYLRVIEYIEKETGEPIDHG  
TFRLDIVIPTGAMGNLAGCVSEYNCWLDLSKPDTQEKCKMPIIACIQCKIPSSYFVLYR  
PGPGVGFASSAVRKQYMAKKGIPFGRMCAGVNVNDFTDRTFRGLVKRADTMKPSLSD  
AINIQLPYNLERLLFYATGGDHEQVRNWKYQKLEGGDAKSRWFDLSETSQRWVNQLQAEFK  
SARVTDDELVCVTIRRVLEDYGYWADPHTGVAFAAAEEKLYNNSQVNNNNKNTAVAIMATA  
SPCKFQNVLTVALGPRQWNEYEREHFPSRGKDLGKPEIPVVMYAADRKKTLEENQIVWE  
AKTRELIDQLGK

>comp14799\_c0\_seq4; 392 1 1714 LEN=2075; translated  
XKAIGGATHIIPSMKYKSTRDPTKLYTFEEALFSGYAPDGGFLVPEELPSEILFPPTTK  
NSVLSQWPGGLGYLDLATEVLHPFLGTETIARNELKALLRDALAGFDNDKNLVPVPLV  
SKHTNTATNKGKNGTLCYVAELFHGPTYCFKDLGMRATINLLDYFANKSAQTNGIASS  
NAGRTKKVVLTAATTGDTGPAAVRAVQDRNSPSLGI VVHYPEGQISDFQRKQMTTVQSDR  
VRIVSFEGGGDDMDRPIKRIMTSSCGGDERDPGVVVCVNSYNIGRPLMQMVHFVWTYLR  
VIEYIEKETGEPIDHGTFRLDI VIPTGAMGNLAGCYMAKKGIPFGRMCAGVNVNDFTR  
TFRTGLVKRADTMKPSLSDAINIQLPYNLERLLFYATGGDHEQVRNWKLEGGDAKSRW  
FDLSETSQRWVNLQAEFKSARVTDDEL CVTIRRVLEDYGYWADPHTGVAFAAAEKLGYN  
NSQVNNNNKNTAVAIMATASPKFQNVLTVALGPRQWNEYEREHFPSRGKDLGKPEIPP  
VMYAADRGKTTLEENQIVWEAKTRELIDQLGK

>comp14800\_c0\_seq1; 1788 1 3241 LEN=3291; translated  
XPLSSRSSRLLRILTRTLDP CSAQP GANNNSDPYKQQQSKKKMSRFWAGDDSSDESAS  
DSDSSFYSSDEDVGRNAAGNAANRWADLSDSDSDDDDEARVVKSAKDRALETFQNSIIAIR  
TAMRKRDIYVIQTEFDDLAKAMIKNKKVLQAGVPRPLVKLLVDLEDYI PERLADKAAFK  
KLSARQGRSLNRMKLTLLKKNKPYAVVMDHYRKS PDDDDDDHVDLLGDAAGDDDDSDSD  
SSSSSSSSSSSSSSSSSSSSGSDSDSGSDSDSEIDWDAPDSDSDSDSDSDSDGLGELKGRAK  
WLKKA VVKKKDKDTGAKTGDDTKKRELALKKEAMVSSKDHEAIRAPKSVIPVEGLTAA  
LLNKKVQEIASRRGRGTDP RHLLRQFEGLSRLAMKFGRVEVPILMYVISAQFSLQRTM  
DDYMDTATWKSCTYLERITRFISEDGYKLGVTIDEADMILGSGKAKNRMKAAAALGGA  
MEAVA ADEKLVNPHTEPETADERLERERVEKEEAMTEEEKTI PVVGLALHMSRLEEE  
YTKSLQKISHHTQEYVTRLRDESKLVSLAKAQAYFEREGMVNETAQMAQLYLEHIYYRH  
DSIGRQVDKAAEFYDKFGEVDM LHPVCVTKHAATGTEIDTATTHPAASSGK PALDDAASA  
AENTDY TALVGLCTYIYNHGTEQSKKRSTICHVYHHALHDFIEARDLLLMSHIQEVYI  
DVDDITTMIMFNRMVQLGMCAFRDGR IWESHQCLTEICSSRVRELLAQGM SMGRYSKDT  
PEQEKA EKRQVPPYQHINLDLLEGCHLISAM LLEIPNIAAASVAGADPRRTRPISRSFR  
KFQDIYSHQVFTGPPEQTRDHVMRAANALSKGDWKT CVDLCTGLEVWNLVPGDGS AEKIK  
TMLASKIKLEGLR TYLFAFFKQYDSL SLSQLCAMFDMTKNEVH SVVSKMIINRELLASWD  
QPTETIVLRKADPSPVQMMALQYSEKAVSLVEANERLLDSFSGRKDDQWRGGRGGGRGG  
RDGRSGYNNNNMNNNAEDAVVAEAVEDAAAVDVA VEKVD AVEATS SVVTRQPIGTAGI

>comp14800\_c0\_seq2; 1787 1 3253 LEN=3303; translated  
XPLSSRSSRLLRILTRTLDP CSAQP GANNNSDPYKQQQSKKKMSRFWAGDDSSDESAS  
DSDSSFYSSDEDVGRNAAGNAANRWADLSDSDSDDDDEARVVKSAKDRALETFQNSIIAIR  
TAMRKRDIYVIQTEFDDLAKAMIKNKKVLQAGVPRPLVKLLVDLEDYI PERLADKAAFK  
KLSARQGRSLNRMKLTLLKKNKPYAVVMDHYRKS PDDDDDDHVDLLGDAAGDDDDSDSD  
SSSSSSSSSSSSSSSSSSSSGSDSDSGSDSDSEIDWDAPDSDSDSDSDSDGLGELKGRAK  
WLKKA VVKKKDKDTGAKTGDDTKKRELALKKEAMVSSKDHEAIRAPKSVIPVEGLTAA  
LLNKKVQEIASRRGRGTDP RHLLRQFEGLSRLAMKFGRVEVPILMYVISAQFSLQRTM  
DDYMDTATWKSCTYLERITRFISEDGYKLGVTIDEADMILGSGKAKNRMKAAAALGGA  
MEAVA ADEKLVNPHTEPETADERLERERVEKEEAMTEEEKTI PVVGLALHMSRLEEE  
YTKSLQKISHHTQEYVTRLRDESKLVSLAKAQAYFEREGMVNETAQMAQLYLEHIYYRH  
DSIGRQVDKAAEFYDKFGEVDM LHPVCVTKHAATGTEIDTATTHPAASSGK PALDDAASA  
AENTDY TALVGLCTYIYNHGTEQSKKRSTICHVYHHALHDFIEARDLLLMSHIQEVYI  
DVDDITTMIMFNRMVQLGMCAFRDGR IWESHQCLTEICSSRVRELLAQGM SMGRYSKDT  
PEQEKA EKRQVPPYQHINLDLLEGCHLISAM LLEIPNIAAASVAGADPRRTRPISRSFR  
KFQDIYSHQVFTGPPEQTRDHVMRAANALSKGDWKT CVDLCTGLEVWNLVPGDGS AEKIK  
TMLASKIKLEGLR TYLFAFFKQYDSL SLSQLCAMFDMTKNEVH SVVSKMIINRELLASWD  
QPTETIVLRKADPSPVQMMALQYSEKAVSLVEANERLLDSFSGRKDDQWRGGRGGGRGG  
RGDRDGRSGYNNNNMNNNAEDAVVAEAVEDAAAVDVA VEKVD AVEATS SVVTRQPIGT  
AGI

>comp14801\_c0\_seq1; 222 1 1335 LEN=1589; translated  
PASSAVVFSVGDYRIGINSIREATKTRMNEATGTHRCRHRQRPLQLQASTRASAFGFV  
CVALCVCICSRSGNNRHGMVVTGFSSGRATSWHAGSTAERAIGGFHGKTNRNVAGSPGSR  
LRSASGRDGRDAPPAPHRNHLDAIRRDEKALKHRFFALRHGQSLANVAGVIASDPDVAC  
QKYGLSEEGKKQAKKAGDGLVRDFLAARAADPCLRGIAVVASDLLRARETARFAADAIRS  
HNRRQETDERESKSIPLYSGAVATDTRLRERGFGEWDGGS DAHYHDVWKDDARDPYHTIR  
GVESVWSVTRATDCVLDWERRLGDEGGGGGDG GYYVVCVAHGDVLQILQTA FHADLD  
PSQHRSMEHLETATAEAPRAGLTTGINQNEGTELPLLVLAGSGSMSAAIRQRAIQRGLMN  
KEINRQLQIQILHDGLLSNATDDL

>comp14802\_c0\_seq1; 251 154 1035 LEN=1925; translated

MGDSNDGNDNFLTWSWCCNDEQTVFLLLYIAYVALALLTWKSFIAKPIRLVAVFVHEWC  
HAIMCWLTCGDVRKINVFENEGVTTTFVGGCRCLIIIPAGYVGCISCSMIFVILSGHTSA  
LIGCILFLLSLLMTLSYSPNRLTVFLCCLGYAVVNITVAIMDYWYNLLLQCLFLYYGVTI  
GIFSIADTYDDTVLRENRGSDSVACSRVPCPCPSKICIGLQWAMLAIFFQFIGMWFALVA  
MSPECEDLSWMNCMDPEDDGIWDVWEVLFGGERHLDGFWWHQFAESIEWNNH  
>comp14803\_c0\_seq1; 2818 1 9637 LEN=9800; translated  
VPLLLKLYVEENDGLKPEITNDEKCLGDLTNYSLLEVAKKCRFQSLESPLIEAETPKSFDI  
VTDLLLSALQLYSDHVKNYDLLEEECHFLTLYIIAFPTFEEENLKILILKTIIEFVVTGVT  
GSKALQPFVSVLSEVFGICRSLLEESLKSANANEKLGKILKGLFTDSDLINESLEKIFRF  
DGKVGQPIMQSGRITSMVDRIADMLTSELNTHKDSWQTFEDKEGNLFIIPPITPFDTV  
CAAILRVFALVMGFQAKRGASLLTVCNDKEQERGISYLLMASIKELGDES VIAALS VFQA  
IIASRENHLLVLDMEYCLKTIDYFTNMTSKSCGIPEAAKILSKKKLKDSTVDEIKFAP  
TRKLNNAVVLQRISWICTTLKHALESSSLAREAFRLTDGFNTILNVVLSLGGCADHCKDSK  
ETSTLLDLFRHLLSLVDTSIGFTGRKEVKDMFEGALIPITLPPYTLVDPVSSQHGPCSSS  
TSNLYHLRLKSFYLDFAIAISQTRIMKASGNAVQILELAMSLPENKEGDKLAKRAFDQII  
RLCDPSRVGTTLPQIAKCGMVWSITNPKEFGPILDDTSHRLYPRFTLLLRRIAAFSMSHS  
DFVSVFRGIAGPLLRDERTDSKIRLPVISSSIRQRITKKNVIDPESFEEKETDFCRRLE  
SLCAIAERGQRPVFPCTMGGDTINTLSILLHKTKEVDRLYKASEAGRLNFLEVDCLDLSSL  
KPGGFLSAGVAAPGSSGGERIWTMSTTGFSFSMWFKYSRPIDDTREGNIYLFVSNPTV  
STSDGTHTPQSAVFLSVWYDALAQQFNVVSSSSTKGEPLCFVPSPLVPGVWHHVLLTYTP  
TKRMMGRKSLVAMYVDGRPLEAEMKIESINIAPNARVLI GAPNAVIAASGMIRGMILNW  
ELGPTLLLSTVLMELDATAIF IYGPDFEGLFWGDRPQRLSLSATGTSAFALLSETGEPGS  
VASALRRRDIARLEAAGTISREMGVNRSGDDNDLSLGLLCTIPPDCVVFAYRASTTN  
QNSIRESRESSSLRKRNTIGKLVNLARINNGNDCISTDASLFGKAGAVNPRCFEDNIQWA  
GGPEVLMPLVYAAPSARSALATLRLFRASTNRHPPNLEAMQGGGGFQVLAAILIQGKKFVD  
IKIEQAFAFVHGFFVPPSADSSPSPAILQIPIATNWVFSDDLAMKQLLLNHQVWDLKN  
THPDLPLRLITLVNGLVGQKSMHKAFNSRRLHLVGIIRWTLHLMVEAAELYSAGEIASQT  
LKKTTSSSDELDLDDTPKTLNPNWHIEAPCIDAICVGADPDNPLLQASKTLLRRVLTFM  
LTPGDLEAIAEATMYTVSIGAFSAKTNTVDQQAHDGSGSEPERLLPGSVTRIYLLRLIEE  
LIVDGVNEIIASGEKKIEGETGKDIIPAAHAGGVANVNQAYFSTALLGGKIMDGEIHPK  
HQQAQNFLLAAGSIFTPVWFALLEGCNDEATASAVLRLLILMIQSSPSFAAAFDANGGF  
APLVISIPKFSTCSTIIIALLSELLHVSILHLPSPFILDASQLNEIFEQESEVSEKVSNK  
FAESATESLDPSCGVFALLAECIGRNVQLSTSDNDLGKKARQTNIAILELLKHRHNLSSA  
FQSFCTTQSFRLPLIHTMCLVHDEKFORMQSESKSVQSATDAEAQKESRRGSLKDVPSDV  
SPVERFVGGDCELGSDAGVAMVHLLRIIANAVVAGPVAPPLVYSLFSSYPEHTMVDQVG  
AYHLLLLDLIKTTIEDAVDLGEATALSACTGLCSVLLDKMMRGFFTSELILHTVAMTLFL  
LDGLTSSSSMALTNVGTAEARAIITADAAHIARMACLCGIRRSRPMNAEDIGSDQLDQTLV  
QMTAKNIDELMIVPKNTGLRRNAGVHSAPSTNSSKYPLWAACNISRCSQENVVLTYPCLC  
GMEEPLQPFIIGLMAEVAYLLKDERDEIRLATITIVVILLQHGRGMLSSHLIKEVQIADN  
QVETIDVMNRGGFGALLVAHEVAQASGAASANKNYKPFVWYKHKAKVQIIFDGI EKES  
VRIFPGLTMGTHTADEAVEIEQMAIAMKTTSNDAADRITIGGLERAELAQRIDKTAEGH  
VHWKRQGFDDLASGAMHWKFLRLRLKGSYSIWEGDTRSASVQIYNRHHQLYTTLMKESG  
KSVVNKDDDEEGRELVRWRKLDLSEGYERQRRRLPNYEFHGLYNIDESLDDLEDTPNA  
GSGIDAETRRRYSSNSPDNQDGFATGSGVEATTELLKELNIKKIHRGDDFDEDYDDGE  
EDTQTLVTEATGGSAAEGANEANVDEVNGDNAKDEEGEDDTDNLDVKATQEDHNETENVA  
SSYELITGLLHAGEWPEQSYNVRRTGLEVRKALLWCRDSIYIDGFEQSGEGLEGRIV  
RVEKEESSFNINLRPKDFKASDDVSVSDTESIVESNDGDKSSERMKSSKTSQGESSNNE  
VAYQRSQRI SFSELHSVFRRRYQLQOIALEFYDIHNSGTLVAFANNDEREEVLSKILAA  
PLPNSIFSSFMGTSINRKFMSNWSKIVSQVWNGRMTNFELMYLNSFAGRITYNDLTQY  
PVFPWVIADYESDEIDLNDPKTYRDLKSKPMGALGEDRARQFRDRFEALQQTYISEDDPPP  
FHYGTHYSCAAYVLYLMLRLEPFSRLALALQGGRFVADRFLFHNI GSSWKSASEENLQDV  
RELIP EFFYLPDFLTNTNHDFGATQKGKHVHNVTLPKWAKGDPETFVRINRQALESEHV  
SKHLHLWIDLIFGCKORGEQAVKSLNTFVHVTYEAGEVDLESMTDVVQRESTIAQIQNFGQ  
TPSRLERRSFPQRIIYSALKENEKNIDYNALSYLAPLTPPFCVVGASHRCTVKRFSSEQC  
KLGVSQSDKAVGDMCLIKGQLVGVGRMCSLNIAAKTFYRFGGPNNGICVHNASTVNRNR  
EANKLLTVHDGLHSGEVSVAKASLNGQWLVTGSIDSTVRLWKYENPTLKLQASLIGHGGW  
KITCVDISTVFGTIVTGCAQGRVILWDLRRTLTFVRRLRHVFKDESGSGDGGQRSHMTSST  
SVSINQKNGNIVTLVGPYLSVFDINGNLRGTVNSLGAKPSCAIATDCPEWQDEGIVVVTG  
HINGEVRFWKLNPITRELVVHYLMVDREHVTEITSLRATGNERQDTLLVGDKSGKMSICR  
TIQIDNISSNELAEVIADLKERRRLATSSQA

>comp14803\_c0\_seq2; 3371 169 11174 LEN=11337; translated  
MRSWIFGNKGGNKEDEKETSNGNSSAIESTGIGSTRINQTLSSDGAEPQTSRGFFFRGIGKQ  
DAEIDRRVSLSARNLCNGVQRIVMAAKGKSGMEWKSELLTLLGGSDEEPEKIPGDNNSSGG  
DVGGDSSATTHCDMDVLLAAPKTEKYLMRCLLENELPPNMIHCLRLLRVLELQHAAETYKE  
YEAQKVDQPIKPISSRATAKVSQLLCNLCTNPSVGEQLRLHLFGLLALSGASYPSSGVH  
VARAASQVIAFAQNCLSNLVLFLHDKMI IHMTDDIKELCATKGDSENASVGEHSVSS  
SSNNNFSLYGSDAEEAGYGQSSLSSTVVNLVYYSRHDCKELLNDFDSANGYQVLKGAAIL  
QSKSMHGKLMELLPLLGTCQRSTAIEDKKNNEIAGNPEDSKEGQNTSIFTIFEIAYES  
VPLLKLYVEENDGLKPEITNDEKCLGDLTNYSLVAKKCRFQSLESPLIEAETPKSFDI  
VTDLLLSALQLYSDHVKNYDLLEEECHFLTLYIIAFPTFEEENLKILILKTIIEFVVTGVT  
GSKALQPFVSLSEVFGICRSLLEESLKSANAEKLGKILKGLFTDSDLINESLEKIFRF  
DGKVGQPIMQSGRITSMVDR IADMLTSELNTHKDSWQTTFEDKEGNLFI EPPITTPFDTV  
CAAILRVFALVMGFQAKRGASLLTVCNDKEQERGISYLLMASIKELGDES VIAALS VFQA  
IIASRENHLHLVLDMEYCLKTIDYFTNMTSKSCGIPEAAKILSKKKLDKSTVDEIKFAP  
TRKLNNAVVLQRISWICTTLKHALESSSLAREAFRLTDGFNTILNVVLSLGGCADHCKDSK  
ETSTLLDLFRHLLSLVDTSIGFTGRKEVKDMFEGALIPITLPPYTLVDPVSSQHGPCSSS  
TSNLYHLRLKSFYLDFAIAISQTRIMKASGNAVQILELAMSHMDPSFNLTKV DVEKSNKV  
QMMRNPDAARLVGLVFLPENKEGDKLAKRAFDQIIRLCDPSRVGTTL P QIAKCGMVWS  
ITNPKEFGPILDDTSHRLYPRFTLLLRRIAAFSMSHSDFVS VFRGIAGPLLRDER TDSKI  
RLPVISSSIRQRITKKNVDIDPESFEETKDFCRRLESLCAIAERGQRVFPCTMGGDTIN  
TSLILLHKT KVEDRLYKASEAGRLNFLEVDCLDLSLKPGGFLSAGVAAPGSSGGERIWT  
PMSTTGFSFSMWFKYSRPIDDTREGNIYLFVDSNPTVSTSDGHTPQSAVFLSVWYDALA  
QQFNVVSSSSTKGEPLCFVSPLPVPGVWHVLLTYTPTKRTMMGRKSLVAMYVDGRPLEA  
EMKIESINIAPNARVLIGAPNAVIAASGMIRGMILNWELGPTLLLSTVLMELDATAIFIY  
GPDFEGLFWGDRPQRLSLSATGTSAFALLSETGEPGSVASALRRRDIARLEAAGTISREM  
GVNRSGDDNDLSGLSGLLCTIPDCCVVFAYRASTTNQNSIRESRESSLKRNTIGKLV  
NLARINNGNDICISTDASLFGKAGAVNPRCFEDNIQWAGGPEVLMPLVYAAPSARSLATL  
RLFRASTNRHPPNLEAMQGGGGFQVLA ILIQGKKFVDIKIEQAFAFVHGFVPPSADSS  
PSSPAILQIP IATNWVFSDL DAMKQLLLNHQVWDLKNTHPDLPLRLITLVNGLVGQKSMH  
KAFNSRRLHLVGIIRWTLHLMVEAAELYSAGEIASQTLKKTSSSDELDLDDTPKTL SN  
PWHIEAPCIDAICVGADPDNPLLQASKTLLRRVLT FMLTPGDLEAIAEATMYTVS IGAFS  
AKTNTVDQQAHDGSGSEPERLLPGSVTRIYLLRLIEELIVDGVNEIIASGEKKIEGETGK  
DPIPPAAHAGGVANVNQAYFSTALLGGKIMDGEIHPKHQQAQNF LAAFGSIFTPVWFAAL  
LEGCNDEATASAVLRLILMIQSSPSFAAAF DANGGFAPLVISIPKFSTCSTII IALLSE  
LLHVSILHLP SFPILDASQLNEIFEQESEVSEKVS NKFAESATESLDPSCGVFALLAECI  
GRNVQLSTSDNDLGKKARQTNIAILELLKHRHNLSSAFQSFCTTQSFLRPLIHTMCLVHD  
EKFORMQSESKSVQSATDAEAQKESRRGSLKDVPSDVSPVERFVGGDCELGSDAGVAMVH  
LLRIIANAVVAGPVAPPLVYSLFSSYPEHTMVDQVGAYHLLLLDLIKTTIEDAVDLGEA  
TALSACTGLCSVLLDKMMRGFFTSELI LHTVAMTLFLLDGLTSSSSMALTNVGTAEARII  
TADAAHIARMACLCGIRRSRPMNAEDIGSDSLQDTLVQMTAKNIDELMIVPKNTGLRRNA  
GVHSAPSTNSSKYPLWAACNISRCSQENVVLTYP ELCGMEEPLQPFIIIGLMAEVAYLLKD  
ERDEIRLATITIVVILLQHGRGMLS SHLIKEVQIADNQVETIDVMNRGGFGALLVAHEVA  
QASGAASANKNYK PFFVWYEKHKAKVQIIFDGI EKESVRIFPGLTMGTHTADEAVEIEQM  
AIAMKTTSNDAADRTIIGGLERAELAQR YIDKTAEGHVHWKRQGFDDLASGAMHWKFLLR  
RLKGSYSIWEGDTRSASVQIYNRHHQLYTTLM EKKSGKSVVNKDDDEEGRELVRRWKLDL  
SEGYERQRRRLLPNYEFHGLYNIDESLDDLED TDPNAGSGIDA EKT RRRYSNSNPDNQD  
FFATGSGVEATTELLKELNIKKIHRGDDFDEDYDDGEEDTQTLVTEATGGSAAEEGAN EAN  
VDEVNGDNAKDEEGEDD TDNLDVKATQEDHNETENVASSYELITGLLHAGWEPEQSYNVR  
RCTGLEVRKALLLWCRDSIYIDGFEQSGEGLEGRIVRVEKEESSFNINLRPKDFKASDD  
VSVSDTESIVESNDGDKSSERMKSSKTSQESSNNNEVAYQHRSQRISFSELHSVFRRRY  
QLQQIALEFYDIHNSGTLVAFANNDEREEVLSKILAAPLPNSIFSSFMGTSIN YRKFMNS  
WKS KIVSQVWNGRMTNF EFLMYLNSFAGRTYNDLTQYPVFPWVIADYESDEIDLNDPKTY  
RDL SKPMGALGEDRARQFRDRFEALQQTYISEDDPPPFHYGTHYS CAAYVLYYLMRLEPF  
SRLALALQGGRFDVADRLFHNIGSSWKSASEENLQDVRELIPEFFYLPDFLTNTNHFDFG  
ATQKGKHVHNVTLPK WAKGDPETFVRINRQALESEHVSKHLHLWIDLIFGCKQRGEQAVK  
SLNTFVHVTYEGEVDLESMTDVVQRESTIAQIQNFQQTSPRLERRSFPQRIIYSALKENE  
KNIDYNALSYLAPLTPPFCVVGASHRCTVKRFSSEQCKLGVSSQSDKAVGDMCLIKGQLV  
GVGRMCSLNIAAKTFYRFGGPNNGICVHNASTVNRNREANKLLTVHDGLHSGEVSVAKAS  
LNGQWLVTGSIDSTVRLWKYENPTLKLQASLIGHGGWKITCVDISTVFGTIVTGCAQGRV  
ILWDLR TLTFRRLRHVFKDESGSGDGGQRSHTMSSTSVSINQKNGNIVTLVGPYLSVFD

INGNLRGTVNSLGAKPSCAIATDCPEWQDEGIVVVVTGHINGEVRFWKLNPITRELVVHYL  
MVDREHVTEITSLRATGNERQDTLLVGDKSGKMSICRTIQIDNISSNELAEVIADLKERR  
RLATSSQA

>comp14804\_c0\_seq1; 758 1 2676 LEN=2941; translated  
DEERKTVGDRKQSDRLVAIARWCANKLCDGFIPIDKLNILQVDCIVHSILSMPEHRSLVL  
NWPMLRAIRSENPOQGETEREDTATQRILLRILATSAELERQTVAEIENRDSTMTGTT  
KALTSRTRKKSSKHAATEASLDQLSTALLKNLPHLLELFKSDVVSLRDVTKLPPTIGLSA  
LGLPSRKSDLQTLVKTLQCQLYLDSTDERVLQNIQAQTLRWRVEGDHTRVSEVKINLKRLSR  
AMQDRMLDLFRESDPQNNYGEKSRSSRRSSKTRRRSSSSQTDGASTAGGSTIFSASPQ  
ADLEHSISLLMLRWNILLMQCQARYLFETPDEDEDENEVDGLFFTI SEAMGKRLSDRMPT  
LDRDTSDDATAVTPPIWSEYDPDVHEAVSRTIGRSLKVLILLI SYELHDTLMDRKEFES  
SESETTDDVEVDEYSLPVLKLRDNLIKLLGLCFDQHLPRIEGVAYSSEQHDFATAVQAGA  
GEVASDLRTLFPWDWSKAADPVRSLALTNGEDFTLMLSGFARWFQSREEEISED TDDAS  
PDSLLREAILPLARVTNMFEGYFRKEAMIMQHISGSGSLASQTILALSRLKKTNPVR  
MLESQMACLRRAFENWLDNEPDIPEETSPTTEELQAFEEAEKYHFDSFLSMEQVASRLSS  
TLGVAGRISNAGLRKSI FGFMRGIRYAFDGI EGNQDDNLMIGSRLAFLSILSKYAIWI  
KKEKEHLEHVSDYLI EKESELRHPEFDEVEHEEDLNTLADFKKALGIKRVTEISYETDDG  
ASRVDAASYSVATPTTTASGSSRRRVSSATSRGSVSSRRSGTSVQSELSPLYEEDNTMV  
GEDDTESSPTQQRRQRSRSQSSRRERSGRSGTKGAHGRETILEENEQESRA

>comp14805\_c0\_seq1; 589 1 1328 LEN=2160; translated  
XDETVDDNKEDDDDETVDMMNKGKKDDDEDDGTNDDSNQDDDETGDANGKEDGDDNNDND  
DDSNTNDDGNIANDDGNIANDDGDNNGSSGSSDKPKPTREEVAASNMAIYNNITSGNTT  
SLINGLEFVDDVDETGHFVHRLAQPRPVSALKVPTPIFVLSLSKSGTTTVHQYFQCGLGI  
GASAHHRYPYKKQPKLRYVGKTMANRIADQPLLSWRPGRDKPEKKKKNRKGGGGSSSY  
NNVNAKTYDSYMDAFDETAVAGMSEAE LAATIGTVAALAGIVGSLVGSRLGGGAERSASG  
GQHASRGSSILG SVGSVVGGMVASEIASSSVRALHQDSMKRLSYREECRAVERGEPPPE  
PPKASF IGKQIGEALKNTMSSVSNF ASEAADQNN SNRHSTNFDGTNQNND SERREGSKKS  
KAANLWRMAAAGV KAAQAANQR

>comp14805\_c0\_seq2; 747 1 1346 LEN=1464; translated  
XDETVDDNKEDDDDETVDMMNKGKKDDDEDDGTNDDSNQDDDETGDANGKEDGDDNNDND  
DDSNTNDDGNIANDDGNIANDDGDNNGSSGSSDKPKPTREEVAASNMAIYNNITSGNTT  
SLINGLEFVDDVDETGHFVHRLAQPRPVSALKVPTPIFVLSLSKSGTTTVHQYFQCGLGI  
GASAHHRYPYKKQPKLRYVGKTMANRIADQPLLSWRPGRDKPEKKKKNRKGGGGSESSN  
GNESREFTEEELVPDVLEDYQVFSDFDLYRPGKKSIDFMVDNLDNIGRFYPNATILYLNR  
DAASWYNSAKNFGSLLRRWKNF SVSPLVDSLFGQGGRENLPNPKDPEAEAEAWVSFYEKYT  
ELVRGFATGRAGDDLHLPHTNHSITYLEIPLDDRTGGVLEETVGLPGECFGHANLGTLD  
KREKGLKTKGGLPEAHPREWTVNTYAEA

>comp14805\_c0\_seq3; 337 123 1013 LEN=1845; translated  
MNNTAKTYEILEVDPNADAATIRKSYLKKSLKYHPDKPNPNVVEAKARFVEIGQAYETL  
SDPDKRRVYDRELRSRTPNSSSGFGGGGGSSSYNNVNAKTYDSYMDAFDETAVAGMSEAE  
LAATIGTVAALAGIVGSLVGSRLGGGAERSASGGQHASRGSSILG SVGSVVGGMVASEI  
ASSSVRALHQDSMKRLSYREECRAVERGEPPPEPPKASF IGKQIGEALKNTMSSVSNFA  
SEAADQNN SNRHSTNFDGTNQNND SERREGSKKS KAANLWRMAAAGV KAAQAANQR

>comp14805\_c0\_seq4; 713 1 1325 LEN=1443; translated  
XDETVDDNKEDDDDETVDMMNKGKKDDDEDDGTNDDSNQDDDETGDANGKEDGDDNNDND  
DGNIANDDGNIANDDGDNNGSSGSSDKPKPTREEVAASNMAIYNNITSGNTTSLINGLE  
FVDDVDETGHFVHRLAQPRPVSALKVPTPIFVLSLSKSGTTTVHQYFQCGLGIGASAHHR  
YPYKKQPKLRYVGKTMANRIADQPLLSWRPGRDKPEKKKKNRKGGGGSESSN GNESREF  
TEEELVPDVLEDYQVFSDFDLYRPGKKSIDFMVDNLDNIGRFYPNATILYLNRDAASWYN  
SAKNFGSLLRRWKNF SVSPLVDSLFGQGGRENLPNPKDPEAEAEAWVSFYEKYTELVRF  
TGRAGDDLHLPHTNHSITYLEIPLDDRTGGVLEETVGLPGECFGHANLGTLDKREKGLK  
TKGGLPEAHPREWTVNTYAEA

>comp14805\_c0\_seq6; 549 1 1307 LEN=2139; translated  
XDETVDDNKEDDDDETVDMMNKGKKDDDEDDGTNDDSNQDDDETGDANGKEDGDDNNDND  
DGNIANDDGNIANDDGDNNGSSGSSDKPKPTREEVAASNMAIYNNITSGNTTSLINGLE  
FVDDVDETGHFVHRLAQPRPVSALKVPTPIFVLSLSKSGTTTVHQYFQCGLGIGASAHHR  
YPYKKQPKLRYVGKTMANRIADQPLLSWRPGRDKPEKKKKNRKGGGGSSSYNNVNAKT  
YDSYMDAFDETAVAGMSEAE LAATIGTVAALAGIVGSLVGSRLGGGAERSASGGQHASRG  
SSILG SVGSVVGGMVASEIASSSVRALHQDSMKRLSYREECRAVERGEPPPEPPKASFI  
GKQIGEALKNTMSSVSNF ASEAADQNN SNRHSTNFDGTNQNND SERREGSKKS KAANLWR

MAAAGVKAQAANQR

>comp14806\_c0\_seq1; 315 1 1388 LEN=2442; translated  
XSSSSSSSSLLLTPTS IHNGDKIALPPSVLETLTSSQLTSSMEDGNPWTFRIGVLNPSYE  
FPASPSFRNLAAPAEIDDDDDMSDEDDENDNEEEKSRLYLDELDELDHKYLSYTHCTVVEFTQE  
EGHVGI PRHVARALLDPSNRRSGAEIPSTTTVDPAASRADADADAEGNDEAMGVDDGTEQ  
TPGHLAWGA FEIPEAQLEITMVKLPKGTGCTLVPTEEAVRSNFYGLKDVKLVLEQSLIRT  
RATLSRGDKVSTWHRGTEYLLTVSKVIPSSFHAVTCINTDIEVEIGETNAKPDQPQADPS  
PAEKEPAESGATNHAGSGFRLGTGQSLASPPQQRRVDSQPGETIVAAAALLAEPPIEQ  
KDGVCVVQIRFSGGHGKRRFAIGTARTKDLFAFAASLVHRNERTFRLVTRFPRREFSLAG  
NGADDDSAMDDGSGNHARPLAELTLEQAGIQQGQEMFMVEDL

>comp14806\_c1\_seq1; 146 167 415 LEN=415; translated  
MMDFDNAARLARDQSKMRGRRRGLAISARAQAEYQKKQQARLRAEREQKKRKEAHR  
QQCLHECRRLWKEKPLAGGSSSS

>comp14807\_c0\_seq1; 508 106 1329 LEN=1469; translated  
MTITQINRKSANSLVRNARRVQQNNNGNYEGYYNGNAGGGGGQDMKEAWFLADYSLKMIS  
CLPNEQSVNYERGEVESSTVIFRLCPKDTCTGSDGSDTLGCDSGFGDFAIGINTFVQAYT  
ESVKDNYSNMQFYSYSYGEFNVVEEYTRECKLFEGDEGEGANNNYNNYSYIGVACTEDG  
KDIRLASFSQYCAQESTTSFASSHNGMELPYASGGLVPDTCMNCITTNENYENEITEMC  
RSTYEDATSRCEQNMESYNSYYGQDTRGCEYIESKLPSSSTSKNTVSGFFRNQPEGLKLA  
EEYIALLVVAGLVGAGLVFFFTKKAVCKHRSGAGKEQPDGEFQDEPEFTQPSITLSIPPA  
VSDIAVSVKSAVQDTAAKVVSMAGPSTAEQTGNYSAMNDVTGVAEA

>comp14807\_c0\_seq2; 506 106 1350 LEN=1490; translated  
MTITQINRKSANSLVRNARRVQQNNNGNYEGYYNGNAGGGGGQDMKEAWFLADYSLKMIS  
CLPNEQSVNYERGEVESSTVIFRLCPKDTCTGSDGSDTLGCDSGFGDFAIGINTFVQAYT  
ESVKDNYSNMQFYSYSYGEFNVVEEYTRECKLFEGEGEGAGGDRNNNYNNLYNMSYV  
VACTEDGKDIRLASFSQYCAQESTTSFASSHNGMELPYASGGLVPDTCMNCITTNENY  
NEITEMCRSTYEDATSRCEQNMESYNSYYGQDTRGCEYIESKLPSSSTSKNTVSGFFRNQ  
PEGLKLAEEYIALLVVAGLVGAGLVFFFTKKAVCKHRSGAGKEQPDGEFQDEPEFTQPSI  
TLSIPPAVSDIAVSVKSAVQDTAAKVVSMAGPSTAEQTGNYSAMNDVTGVAEA

>comp14808\_c0\_seq1; 379 1 961 LEN=1399; translated  
XSSSSSSQATSKEETTTALSMYS DAPPFSSYGASGSRLLVVVCPVVEAEDDATSKKFPDA  
FVGRGASVVRATEDDDKEAGDGADDTATQKGCFTYVTMEGSRRIEFSPGGWTLQFPFGG  
KANRGRASKLRFYLDLETDLRRNDVFLPAGTRLYFAASAWRELDYEQGLAKMRPLKAALE  
EAQAVLDERLSHETGDRRLDGTDPVETLKAYGDMTGLILDRDRKRAAVRAALDRDGHGYP  
GSEDLPEGPWPGTTEWLTVTERNPIYARVPGDATDGGSSGTAKKNFLQQLMEAGGEKAYR  
YGRVGTWTGEAISSLLLDDE

>comp14809\_c0\_seq1; 478 170 2071 LEN=2472; translated  
MNSMLPIINDQSNRSVQAITVGF DGVVRAAGDNSRNIDSTRSIDSTSTRSTLSDSNTTGH  
SYTDSNIHGKHSTNNNGNNTTINTTNNNDNNDNNSYTSNTSNTNNTNDTNRGDGVAALGS  
EVDYENQSVGDTYHKNNTVSFLDASAAASAYGYNNQFNNSRNRLQDSGQRSDFSHTPFRR  
RSSLSERERLDKLENDPLEFTNWGGRKAITRQTSIWRVGKEKAPQLGGSNRKFDSDSGS  
KLSIKFEEGRMPKPSVWARTVRFQKDSSEGLIKNDQLREQIAEQCEEPFYRILFHFK  
GTVLKV IATDILFWSTIAIFIGNRWYIRFTDLQENVEIYENLASNLVYVGGFMTFFLVFY  
VNQNHARYFELHKESMVL MGRVNDVATISKACMPIERARRIVRYMNI AHICTYTGLSEYY  
SRDNL DPLDQRFALLTDAEYQRITVDINADCGPQAVFEVLAWAMMDIREAKNHGCIDPM  
EAKQLRDQVLQFRSTVAKIFVTCTLPPIFFYIHFLSLLTVCYLPLFAIVVAHETGGSNAS  
WQHEVLSLLVVALQALFTIGLRS LGQKLSDPFGSDTIDLQVARYVLMIVKGSNQILSATK  
VPGVSRIVERKLEDMTFIGKAYERTEDDEGNIW

>comp14809\_c0\_seq2; 251 178 1023 LEN=1424; translated  
MTFFLVFYVNQNHARYFELHKESMVL MGRVNDVATISKACMPIERARRIVRYMNI AHICT  
YTGLSEYYSRDNL DPLDQRFALLTDAEYQRITVDINADCGPQAVFEVLAWAMMDIREAK  
NHGCIDPMEAKQLRDQVLQFRSTVAKIFVTCTLPPIFFYIHFLSLLTVCYLPLFAIVVAH  
ETGGSNASWQHEVLSLLVVALQALFTIGLRS LGQKLSDPFGSDTIDLQVARYVLMIVKGS  
NQILSATK VPGVSRIVERKLEDMTFIGKAYERTEDDEGNIW

>comp14809\_c0\_seq3; 485 170 2056 LEN=2457; translated  
MNSMLPIINDQSNRSVQAITVGF DGVVRAAGDNSRNIDSTRSIDSTSTRSTLSDSNTTGH  
SYTDSNIHGKHSTNNNGNNTTINTTNNNDNNDNNSYTSNTSNTNNTNDTNRGDGVAALGS  
EVDYENQSVGDTYHKNNTVSFLDASAAASAYGYNNQFNNSRNRLQDSGQRSDFSHTPFRR  
RSSLSERERLDKLENDPLEFTNWGGRKAITRRVGKEKAPQLGGSNRKFDSDSGSKLSIK  
FEEEGRMPKPSVWARTVRFQKDSSEGLIKNDQLREQIAEQCEEPFYRILFHFKGTVLK



VIATDILFWSTIAIFIGNRWYIRFTDLQENVEIYENLASNLVYVGGFMTFFLVFYVNQNH  
ARYFELHKESMVL MGRVNDVATISKACMPIERARRIVRYMNI AHICTYTG LSEYYSRDNL  
LDPLDQRFALLTDAEYQRITVDINADCGPQAVFEVLAWAMMDIREAKNHG CIDPMEAKQL  
RDQVLQFRSTVAKIFVTCTLP I PFFYIHFLSLLTVCYLPLFAIVVAHETGGSNASWQHEV  
LSLLVVALQALFTIGLRLSLGQKLSDPFGSDTIDLQVARYVLMIVKGSNQILSATKVPGV  
RIVERK LKEDMTFIGKAYERTEDEGNIW

>comp14810\_c0\_seq1; 688 379 2052 LEN=2317; translated  
MLHPRLSMLVPPQKVLRLTTTRALPAVAPWTTTTPTTTTTIPTATRCKSSAVPKISSSPS  
AALHKQKHKDTFFCSQHCAHCKPGRPGHRSFASTARAASSGGSSEHIRSYDKQYINGTWI  
DSTNTE TTTIDVFD SNTGTVAATVPDGT EEDTLAAIAAAKAALPGWSRGTS LPERMEAIQS  
FLGHFLQRQDEICDRLA VELGCPAGLSRTVQFGSFPFHGSTLMKLLGDDNEKAFWEYSA  
GNSTVVREPIGVVGAITPWNYP LHQIALKVIPALVAGCTVVLKPSEVTPLVAYSIAEALD  
ESGSFPEGVFNMVVGGGPECGEV LARHPDVNLVSFTGSTKAGQILVRAAAESGTMKPVRT  
ELGGKSAALLLEDADLESVVP SFVKHVTVNTGQSCNALS RMLV PRAHYEAVLGIAEATME  
SEIVGPGTDPETT VGPLASRAQYDRVVS YIETGISEGARLV TGGVPSNNKYEGGGYFVAP  
TLFADVTNDMTIAREE IFGPVL CVIPYDDESEAVRLANETPYGLNNAVASSDVKRALGVA  
SQLESGMMAKRHLVGTN

>comp14810\_c0\_seq2; 688 389 2062 LEN=2327; translated  
MLHPRLSMLVPPQKVLRLTTTRALPAVAPWTTTTPTTTTTIPTATRCKSSAVPKISSSPS  
AALHKQKHKDTFFCSQHCAHCKPGRPGHRSFASTARAASSGGSSEHIRSYDKQYINGTWI  
DSTNTE TTTIDVFD SNTGTVAATVPDGT EEDTLAAIAAAKAALPGWSRGTS LPERMEAIQS  
FLGHFLQRQDEICDRLA VELGCPAGLSRTVQFGSFPFHGSTLMKLLGDDNEKAFWEYSA  
GNSTVVREPIGVVGAITPWNYP LHQIALKVIPALVAGCTVVLKPSEVTPLVAYSIAEALD  
ESGSFPEGVFNMVVGGGPECGEV LARHPDVNLVSFTGSTKAGQILVRAAAESGTMKPVRT  
ELGGKSAALLLEDADLESVVP SFVKHVTVNTGQSCNALS RMLV PRAHYEAVLGIAEATME  
SEIVGPGTDPETT VGPLASRAQYDRVVS YIETGISEGARLV TGGVPSNNKYEGGGYFVAP  
TLFADVTNDMTIAREE IFGPVL CVIPYDDESEAVRLANETPYGLNNAVASSDVKRALGVA  
SQLESGMMAKRHLVGTN

>comp14810\_c0\_seq3; 672 389 2041 LEN=2624; translated  
MLHPRLSMLVPPQKVLRLTTTRALPAVAPWTTTTPTTTTTIPTATRCKSSAVPKISSSPS  
AALHKQKHKDTFFCSQHCAHCKPGRPGHRSFASTARAASSGGSSEHIRSYDKQYINGTWI  
DSTNTE TTTIDVFD SNTGTVAATVPDGT EEDTLAAIAAAKAALPGWSRGTS LPERMEAIQS  
FLGHFLQRQDEICDRLA VELGCPAGLSRTVQFGSFPFHGSTLMKLLGDDNEKAFWEYSA  
GNSTVVREPIGVVGAITPWNYP LHQIALKVIPALVAGCTVVLKPSEVTPLVAYSIAEALD  
ESGSFPEGVFNMVVGGGPECGEV LARHPDVNLVSFTGSTKAGQILVRAAAESGTMKPVRT  
ELGGKSAALLLEDADLESVVP SFVKHVTVNTGQSCNALS RMLV PRAHYEAVLGIAEATME  
SEIVGPGTDPETT VGPLASRAQYDRVVS YIETGISEGARLV TGGVPSNNKYEGGGYFVAP  
TLFADVTNDMTIAREE IFGPVL CVIPYDDESEAVRLANETPYGLNNAVASSDVKRALGVA  
SQLESGMVRA

>comp14810\_c0\_seq4; 672 379 2031 LEN=2614; translated  
MLHPRLSMLVPPQKVLRLTTTRALPAVAPWTTTTPTTTTTIPTATRCKSSAVPKISSSPS  
AALHKQKHKDTFFCSQHCAHCKPGRPGHRSFASTARAASSGGSSEHIRSYDKQYINGTWI  
DSTNTE TTTIDVFD SNTGTVAATVPDGT EEDTLAAIAAAKAALPGWSRGTS LPERMEAIQS  
FLGHFLQRQDEICDRLA VELGCPAGLSRTVQFGSFPFHGSTLMKLLGDDNEKAFWEYSA  
GNSTVVREPIGVVGAITPWNYP LHQIALKVIPALVAGCTVVLKPSEVTPLVAYSIAEALD  
ESGSFPEGVFNMVVGGGPECGEV LARHPDVNLVSFTGSTKAGQILVRAAAESGTMKPVRT  
ELGGKSAALLLEDADLESVVP SFVKHVTVNTGQSCNALS RMLV PRAHYEAVLGIAEATME  
SEIVGPGTDPETT VGPLASRAQYDRVVS YIETGISEGARLV TGGVPSNNKYEGGGYFVAP  
TLFADVTNDMTIAREE IFGPVL CVIPYDDESEAVRLANETPYGLNNAVASSDVKRALGVA  
SQLESGMVRA

>comp14810\_c0\_seq5; 704 389 2200 LEN=2352; translated  
MLHPRLSMLVPPQKVLRLTTTRALPAVAPWTTTTPTTTTTIPTATRCKSSAVPKISSSPS  
AALHKQKHKDTFFCSQHCAHCKPGRPGHRSFASTARAASSGGSSEHIRSYDKQYINGTWI  
DSTNTE TTTIDVFD SNTGTVAATVPDGT EEDTLAAIAAAKAALPGWSRGTS LPERMEAIQS  
FLGHFLQRQDEICDRLA VELGCPAGLSRTVQFGSFPFHGSTLMKLLGDDNEKAFWEYSA  
GNSTVVREPIGVVGAITPWNYP LHQIALKVIPALVAGCTVVLKPSEVTPLVAYSIAEALD  
ESGSFPEGVFNMVVGGGPECGEV LARHPDVNLVSFTGSTKAGQILVRAAAESGTMKPVRT  
ELGGKSAALLLEDADLESVVP SFVKHVTVNTGQSCNALS RMLV PRAHYEAVLGIAEATME  
SEIVGPGTDPETT VGPLASRAQYDRVVS YIETGISEGARLV TGGVPSNNKYEGGGYFVAP  
TLFADVTNDMTIAREE IFGPVL CVIPYDDESEAVRLANETPYGLNNAVASSDVKRALGVA

SQLESGMVMVNSTNVDGEAPFGGYKLSGNAREWGLAGLEEFLLITKTLNVPLREYRAAVYG  
EHI

>comp14810\_c0\_seq6; 704 379 2190 LEN=2342; translated  
MLHPRLSMLVPPQKVLRLTRTTRALPAVAPWTTTTPTTTTPTATRCKSSAVPKISSSPS  
AALHKQKHKDFFFCSQHCAHCKPGRPGHRSFASTARAASSGGSSEHIRSYDKQYINGTWI  
DSTNTEETTIDVFDSTGTVAATVPDGTTEEDTLAAIAAAKAALPGWSRGTSLPERMEAIQS  
FLGHFLQRQDEICDRLAVALGCPAGLSRTVQFGSFPFHGSTLMKLLGDDNEKAFWEYSA  
GNSTVVREPIGVVGAITPWNYPHQLKALVIPALVAGCTVVLKPSEVTPLVAYSIAEALD  
ESGSFPEGVFNMVVGGGPECGEVLRHPDNLVSFTGSKAGQILVRAAAESGMTMKPVRT  
ELGKSAALLLEDADLESVVPVSVKHVTVNTGQSCNALSRLVPRAHYEAVLGIAEATME  
SEIVGPGTDPETTVGPLASRAQYDRVVSYIETGISEGARLVTGGVPSNNKYEGGGYFVAP  
TLFADVTNDMTIAREEIEFGPVLVPIPYDDESEAVRLANETPYGLNNAVASSDVKRALGVA  
SQLESGMVMVNSTNVDGEAPFGGYKLSGNAREWGLAGLEEFLLITKTLNVPLREYRAAVYG  
EHI

>comp14811\_c0\_seq1; 339 390 1373 LEN=1639; translated  
MASSIRSSSLSSKPGPLAKAGNKSPKPFHGPKFFKVLGRIDEESSFRSSSISNLMSQDIS  
RDYSTTSSDEASTELWEMPLSPSERCGSGSNDPTGEEQKCGEPSVPMGLGHRLCQATIVTT  
IDDRSEPDTDVAEGRQDQSSPAIPPSLPPTAVDVVSAAGTPSPHRDQRDPNQYRQKRQR  
LLERQRSENDALRAECEALERTILQMRNKGNNLRMRTSLRLNFKDEIERATSAKQALEE  
ECRGLQDQIRRVREVEKAGQEKIRQAEEDLRERRRRLREERERKLEQQRRYSGASVATS  
SSSSSSSSSTRSSNHRHRQFHGGDFG

>comp14812\_c1\_seq1; 299 1494 2280 LEN=2959; minus strand; translated  
MSFCIQSLNMLQLLLVLVLLVDVSYSSHTWGGKSSSASSKKSVSFHPPLAADLKKNTDFAV  
IEGMQTCLLIDTYITNPKDRELLFSAHTRVPSVEKKAKWAQRYIGSDASFAERLVAFAAV  
EGIFFSGAFCSIYWLKKRGLMPGLTFSNELISRDEGLHCSFACQLYSKLERLSEKDIHQ  
LIGEAVEVEKEFVCDALPVSLIGMNKSLMAQYIEFVADRLLGDLGYRPMFGSKNPFDFCE  
FPSFPRSEVLFVVLVLFVAVFL

>comp14812\_c1\_seq2; 299 1632 2418 LEN=3097; minus strand; translated  
MSFCIQSLNMLQLLLVLVLLVDVSYSSHTWGGKSSSASSKKSVSFHPPLAADLKKNTDFAV  
IEGMQTCLLIDTYITNPKDRELLFSAHTRVPSVEKKAKWAQRYIGSDASFAERLVAFAAV  
EGIFFSGAFCSIYWLKKRGLMPGLTFSNELISRDEGLHCSFACQLYSKLERLSEKDIHQ  
LIGEAVEVEKEFVCDALPVSLIGMNKSLMAQYIEFVADRLLGDLGYRPMFGSKNPFDFCE  
FPSFPRSEVLFVVLVLFVAVFL

>comp14812\_c1\_seq3; 485 1468 2814 LEN=3493; minus strand; translated  
MSFCIQSLNMLQLLLVLVLLVDVSYSSHTWGGKSSSASSKKSVSFHPSSRSRLEEKYGFRR  
DRRNANSFKLHNVLNIRGGDTNNNNDIQPLRGGSLKTEKGQISENISLKNKKVHNIAL  
NAAAAEAASTWSRKSMSYADGFVEPICRQDDDGTRFSLFPIEHPDLWSMYKQHVASF  
DEIDLSADLTDWQENLTKNEKHFISMVLAFFAGADGIVVENLAERFCRDVTVPPEARCFY  
FQMAMESIHQETYCLLIDTYITNPKDRELLFSAHTRVPSVEKKAKWAQRYIGSDASFAER  
LVAFAAVEGIFFGAFCSIYWLKKRGLMPGLTFSNELISRDEGLHCSFACQLYSKLERL  
SEKDIHQ LIGEAVEVEKEFVCDALPVSLIGMNKSLMAQYIEFVADRLLGDLGYRPMFGSK  
NPFDFCEFFPSFPRSEVLFVVLVLFVAVFL

>comp14812\_c1\_seq4; 485 1494 2840 LEN=3519; minus strand; translated  
MSFCIQSLNMLQLLLVLVLLVDVSYSSHTWGGKSSSASSKKSVSFHPSSRSRLEEKYGFRR  
DRRNANSFKLHNVLNIRGGDTNNNNDIQPLRGGSLKTEKGQISENISLKNKKVHNIAL  
NAAAAEAASTWSRKSMSYADGFVEPICRQDDDGTRFSLFPIEHPDLWSMYKQHVASF  
DEIDLSADLTDWQENLTKNEKHFISMVLAFFAGADGIVVENLAERFCRDVTVPPEARCFY  
FQMAMESIHQETYCLLIDTYITNPKDRELLFSAHTRVPSVEKKAKWAQRYIGSDASFAER  
LVAFAAVEGIFFGAFCSIYWLKKRGLMPGLTFSNELISRDEGLHCSFACQLYSKLERL  
SEKDIHQ LIGEAVEVEKEFVCDALPVSLIGMNKSLMAQYIEFVADRLLGDLGYRPMFGSK  
NPFDFCEFFPSFPRSEVLFVVLVLFVAVFL

>comp14812\_c1\_seq5; 299 1468 2254 LEN=2933; minus strand; translated  
MSFCIQSLNMLQLLLVLVLLVDVSYSSHTWGGKSSSASSKKSVSFHPPLAADLKKNTDFAV  
IEGMQTCCLLIDTYITNPKDRELLFSAHTRVPSVEKKAKWAQRYIGSDASFAERLVAFAAV  
EGIFFSGAFCSIYWLKKRGLMPGLTFSNELISRDEGLHCSFACQLYSKLERLSEKDIHQ  
LIGEAVEVEKEFVCDALPVSLIGMNKSLMAQYIEFVADRLLGDLGYRPMFGSKNPFDFCE  
FPSFPRSEVLFVVLVLFVAVFL

>comp14812\_c1\_seq6; 485 1632 2978 LEN=3657; minus strand; translated  
MSFCIQSLNMLQLLLVLVLLVDVSYSSHTWGGKSSSASSKKSVSFHPSSRSRLEEKYGFRR  
DRRNANSFKLHNVLNIRGGDTNNNNDIQPLRGGSLKTEKGQISENISLKNKKVHNIAL

NAAAAEAASTWSRKSMSYADGFVEPICRQDDDGTRFSLFPIEHPDLWSMYKQHVASFMTA  
DEIDLADLTDWQENLTKNEKHFISMVLAFFAGADGIVVENLAERFCRDVTVPEARCFYG  
FQMAMESIHQETYCLLIDTYITNPKDRELLFSAHTRVPSVEKKAKWAQRYIGSDASFAER  
LVAFAAVEGIFFFSGAFCSIYWLKKRGLMPGLTFSNELISRDEGLHCSFACQLYSKLERRL  
SEKDIHQILIGEAVEVEKEFVCDALPVSLIGMNKSLMAQYIEFVADRLLGDLGYRPFMGSK  
NPFDCFEFFPSFPRSEVLFVLLVFAVFL

>comp14813\_c0\_seq1; 534 1 2693 LEN=2796; translated  
XLVETTSAQVTAFTVDLERCGASIRGEWEELGEFDNLFVTLTDASKMNGAQAPLMKDYH  
LQHGAKMWDTDKEKRVPEEDGFSFPRKRFVGVVIRGCMVMQVRDEHGTILSDPGVSI  
PKDKGSTKKIFRVAMDTQCQYSSDKLGGASDLYKSFNLVRRRHGRENNFKSILETIRGLTEG  
AGSISRVLPKWLQSILLGAGDPKSASYNNDNMKSYALHTVGVNKPDTYLDGDFDQKH  
LRASFPEQKIKLDGNELTGDGDSIDGRPRS NFKIRFSQDLENGSEKQLVEAVSLPFPKDI  
SGNPVPFPTPAQVEAVRSGLSPLGLTLVVGPPGTGKTVDVAVQIIASLYHSFPTQRTV  
IITHSNAALNDIFTKVMARGDIDERYLVRLGAGERDLDTNSDHDFTKIGRVAYSIQRRGK  
LLEKVCQCLSESLGISGKAQRGADGSSSYTCESADYFRKLHIERKKLDFESNARKAGLSS  
DGDVTEIFPFTSYFQTKGVTLTQAREHFGAIDGIFSELAEYRPFEMLSRQRQRSDYL  
INKQARVAMTCTHAALARSNLIKLGF EYDNIVMEESGQMLEIETFIPMLLQKSSDES  
VSGRSRLKRVCM LGDHNQLPPVVKNASFSKYSNLDQSMFTRLIKLGVPIQLDKQGRAR  
PELKNLYGWRYNLDGNLSHVVESEFQRANPGFLHTFQAINVEDFQKGESTPSAYFYQNL  
GAEYVVALFQYMLIGYPPEKISILTTYNGQRGLINDIVSQRCGPGTLAGIRPKAVSTV  
DQYQGQONDFILLSLVRTKTVGHRLDVRRLVVALSRARLGLYV FYRQSVFARCHELKK  
SICQFEENKGNKLCVMGETYPCERKTDDIEDKQRIYEVDVSVLGLTLVHNMQEDMMAD  
GGEATN

>comp14813\_c0\_seq2; 337 1 1376 LEN=1376; translated  
FVSHHFAEGAYANESFFFESVSHSNDDLAAIEKFLSTILYKTEQSDFDLQTQIVHFLDVA  
LCRSGNRDDELQFQIGILLHVSGIHLWHWMPDRQRELELKK SAGLRKFAGSTKGDNKI  
WIVNNLRTILNLLEGNSKFGALVKFKADETIDLPEDSVDIPPGVWFLHRSLELLIDLL  
SMASRRFFLVAYLNSIDFSVRCRLAVGNEFAVPENLRLVQYLLTKINSLLAFFPIQDS  
NHRSLKIDVLSMHARATTLQKMAHRHYPQELQQVIYAGVGLLCGQGSINVSYLERFFV  
GFSKLNLAHLLYRMRLIPESDESQSRETMLQILSYLLSIPPYPTDQLKLYPLYPTEEV  
LWDL SIIPASSQLRPTQVLALPKLNAQYLSFQDYLRNFELVRLESAYDIRSDLVDAI  
RRVRPVL RQSSLEEDETITLKTEFNGWSRMALELVEPMNIEVRPPKLV

>comp14813\_c0\_seq3; 216 40 771 LEN=874; translated  
MINSWRYNLDGNLSHVVESEFQRANPGFLHTFQAINVEDFQKGESTPSAYFYQNLG  
EAEYVVALFQYMLIGYPPEKISILTTYNGQRGLINDIVSQRCGPGTLAGIRPKAVSTV  
DQYQGQONDFILLSLVRTKTVGHRLDVRRLVVALSRARLGLYV FYRQSVFARCHELKK  
SICQFEENKGNKLCVMGETYPCERKTDDIEDKQRIYEVDVSVLGLTLVHNMQEDMMAD  
GGEATN

>comp14813\_c0\_seq4; 268 1 1917 LEN=2020; translated  
XDGDSIDGRPRS NFKIRFSQDLENGSEKQLVEAVSLPFPKDISGNPVPFPTPAQVEAVR  
SGLSPLGLTLVVGPPGTGKTVDVAVQIXSIPLSFLSNAENCIITHSNAALNDIFTKVM  
ARGDIDERYLVRLGAGERDLDTNSDHDFTKIGRVAYSIQRRGKLEKVCQCLSESLGISG  
KAQRGADGSSSYTCESADYFRKLHIERKKLDFESNARKAGLSSDGDVTEIFPFTSYFQ  
TKGVTLTQAREHFGAIDGIFSELAEYRPFEMLSRQRQRSDYLINKQARVAMTCTHAAL  
ARSNLIKLGF EYDNIVMEESGQMLEIETFIPMLLQKSSDES VSGRSRLKRVCM LGD  
HNQLPPVVKNASFSKYSNLDQSMFTRLIKLGVPIQLDKQGRARPELKNLYGWRYNLDGN  
LSHVVESEFQRANPGFLHTFQAINVEDFQKGESTPSAYFYQNLGAEYVVALFQYMLIG  
YPPEKISILTTYNGQRGLINDIVSQRCGPGTLAGIRPKAVSTVDQYQGQONDFILLSL  
VRTKTVGHRLDVRRLVVALSRARLGLYV FYRQSVFARCHELKK SICQFEENKGNKLC  
VMGETYPCERKTDDIEDKQRIYEVDVSVLGLTLVHNMQEDMMADGGEATN

>comp14813\_c0\_seq5; 476 101 1761 LEN=1761; translated  
MPVRRRPRPSKSVEDERAPKKVALEPNAVF DKS DKHGAIDLHDLYKRCVLES DKIRRL  
KNIQRHEEQGALEDI IWPFLKQNFDSKDYFHACHLLVLFVSHHFAEGAYANESFFFES  
VSHSNDDLAAIEKFLSTILYKTEQSDFDLQTQIVHFLDVALCRSGNRDDELQFQIGILL  
HVSGIHLWHWMPDRQRELELKK SAGLRKFAGSTKGDNKI WIVNNLRTILNLLEGNSK  
FGALVKFKADETIDLPEDSVDIPPGVWFLHRSLELLIDLLSMASRRFFLVAYLNSIDF  
SVRCRLAVGNEFAVPENLRLVQYLLTKINSLLAFFPIQDSNHRSLKIDVLSMHARATTL  
QKMAHRHYPQELQQVIYAGVGLLCGQGSINVSYLERFFVGFSDKNLAHLLYRMRLIP  
ESDESQSRETMLQILSYLLSIPPYPTDQLKLYPLYPTEEV LWDL SIIPASSQLRPTQ  
VLALPKLNAQYLSFQDYLRNFELVRLESAYDIRSDLVDAI RRVRPVL RQSSLEEDET  
ITLKTEFNGWSRMALELVEPMNIEVRPPKLG

>comp14813\_c0\_seq6; 312 1 1953 LEN=2056; translated  
KKIKLDGNELTGDGDSIDGRPRSNFKIRFSQDLENGSEKQLVEAVSLPFPKDISGNPVPF  
TPAQVEAVRSGLSPLTLVVGPPGTGKTDVAVQIIASLYHSFPTQRTVITHTSNAALNDI  
FTKVMARGDIDERYLVRLGAGERDLDTNSDHDFTKIGRVAYSIQRRGKLLLEKVQCLSESL  
GISGKAQRGADGSSSYTCEASADYFRKLHIERKKLDFESNARKAGLSSDGDVVTEIFPPTS  
YFQTKGVTLTQAREHFGAIDGIFSELAEYRPFEMLR SQRSYLINKQARVVAMTCTHA  
ALARSNLIKLGFYDNIVMEESGQMLEIETFIPLMLLQKGSDES SVGRSRLKRVCM LGDH  
NQLPPVKNASFSKYSNLDQSMFTRLIKLGVPIYIQLDKQGRARPELKNLYGWRYNDLGNL  
SHVVESEFQRANPGFLHTFQA INVEDFQKGESTPSAYFYQNLGEAEYVVALFQYMLLI  
GYPPEKISILTTYNGQRGLINDIVSQRCPGTPLAGIRPKAVSTVDQYQGGQNDFILLSL  
VRTKTVGHRLDVRRLVVALSRARLGLYVYRQSVFARCHELKK SICQFEENKGNKLC LV  
MGETYPCERKTTDDIEDKQRIYEVDDVSVLGTLVHNMQEDMMADGGEATN

>comp14814\_c0\_seq1; 477 355 2143 LEN=2336; translated  
MHIWMGTFSEKGEQKPTSTTHTHNDADQFIAIDGNKTI FNSSLHEPPSSTTSTIASTNK  
RHRVQVQPLNLI PNQELVVNDYF SASWLLPKERFYELDWNILTC EGASFLAIREKGDDKP  
SEHAKMLVDWTEFNVEHMSKWWGMLGLLYNNNNLGKDDSQKRTKWRWLNRLIQKNR SKNN  
GESTKRIFSHVISMMDDFTRRSLLOPHYRSTELERAIAMIAFMPVNERRLSTLSAEESAL  
YRPRSKIIITHSLAATIASIFAAGFGRVVVGLGESDHHYTQGA VQVLNSILLSNETNGR  
SQTVVLVDEHGSNNNSIATIGHPSSSLPGHEYTKGDLDRPMEIAHV RVTPNPMYVSRYVQ  
QNLPRAAVAGMHVAMFGETNTTSDNERIQWL GSGARYHKWQRQGT LVLELYLSDKPD TI  
LNLNLDLLPSIRHTLDKGISLFPRIHPIPHENNLPPNELNPGLYLPNAPPFEVTELDP  
LGSSANGDHIACCDAGWWPGIKCSSRDY LKQNC SKEEIKNAAPNNRCGQWWE CGLKVIK  
NSKEYSVNDIINGHHALLEYKWMRLKHGIGVIFGSSNNGRTCIPSKTACDQKMTA

>comp14815\_c0\_seq1; 994 1 1748 LEN=1748; translated  
AILESGMDVGIVNAHEL LDYNLMESDMRELCENLVFNKTPDATEEMLERTAYERSVIEAR  
KKKLP IPRKPRGKIKNI PRKRFEWDTDEKTPQKEPPTPVSDAARNHVPSHYDYTKLTHEK  
IIAERAKSTLDGDVNIDYSQDPTLYPEGFPYFVRGRDSLRTYVTKLFTTKIAMYDGAMGT  
MIQNYAKKNKLDEAEFRGEKFKDWGVNVKGNNDMLGITQPKVIKDIY MAYLEEGESDFIG  
TNTFSGTTIAMADYEMENYIYELNYENARLAREACDEVTAKDPSQPRFVIGAI GPTNRTG  
SISPSVEDPSARNVTFDELVDAYFEQCVGLVDGGCDILMVETIFDTLNAKAAVYAVGEYL  
EMSGLDIPLFISGTLVDQSGRTLSGQTGEAFYASLRH SKPMCIGFNCALGATHMVPFVER  
LHKIAECFLQVYSNAGLPNAMGGYDDTPEDMANSNEVFFKNGWLN MVGGCCGSTPPHIKA  
IKECAANYPPRKL PDLGRPKMWLSGLEDLVDDVHNLGLPFLNVGERCNIAGSMKFKKL  
MMAGNYAAAMDI AKKQVEDGAHVVDINVDGMLDGLATMLLRX

>comp14815\_c0\_seq2; 324 1004 1915 LEN=1934; minus strand; translated  
MKSLSQNHIPRSLTSLRARQPNDFSCNQNKHHRQQLQIQQNPGLVNTSNISSGSSNNLIQ  
SNSIQNQFTALSNQKEAFVSENNLAKKELQIQI KEHQSVNMEHDHLIELGRQAKERLGQG  
MEKLGILKEQEARILQLTKNEFRAIHDCTNHSNLLDRIKQETSEKYSGEMDPLNFELATL  
LEGR LQNETKRCLSLRSIEAIVLPEIDKASKEQNR PQLLSEKENIYHSIGRLQEATAQRK  
EIIAHLRYLYGTLVQQRKYGSTEGNLHRL ENRVTVSTRDIFETETNKEPSKHMDLFYGP  
CGE

>comp14815\_c0\_seq3; 360 646 1776 LEN=2553; translated  
MEASFRNRLNVHGASSNNYNATPLSPGGSTISKND DAKGVATKRELPTNSVGMHPFASPF  
SSHRVDRTCKSYTSANTSLLDGYAEHDLSTTLSSSIPLPLHVPTMVANGCSTLLGSTIST  
SSNSSSIGLPTKYPGSASHDRDNSLESIVMEELQDFDDIFGKCTISGEASSSVKCSKNR  
CGDNAITNNVSPSRIQTGHQNYDDDDLYTLSQSPRAVYDSPCREESLLHRSRNHGDGNA  
CSNIASDDEYDHKNATTCEFLSRIQIEHQKNEEADDLELPSHQSFPTSRATDRRPSSGS  
IGYEF SASSPYPSVESLVKSKSTNHSNSSPNHRHQRSSSSSGLLSASSTSTKSHRRSSN  
FAMGSSQFLDSVLKDL

>comp14815\_c0\_seq4; 342 646 1809 LEN=2586; translated  
MEASFRNRLNVHGASSNNYNATPLSPGGSTISKND DAKGVATKRELPTNSVGMHPFASPF  
SSHRVDRTCKSYTSANTSLLDGYAEHDLSTTLSSSIPLPLHVPTMVANGCSTLLGSTIST  
SSNSSSIGLPTKYPGSASHDRDNSLESIVMEELQDFDDIFGKCTISGEASSSVKCSKNR  
CGDNAITNNVSPSRIQTGHQNYDDDDLYTLSQSPRAVYDSPCREESLLHRSRNHGDGNA  
CSNIASDDEYDHKNATTCEFLSRIQIEHQKNEEADDLCTLSRSRTEAGELPSHQSFPTSR  
ATTDRRPSSGSIGYEF SASSPYPSVESLVKSKSTNHSNSSPNHRHQRSSSSSGLLSASST  
SSTKSHRRSSNFAMGSSQFLDSVLKDL

>comp14815\_c0\_seq5; 342 540 1703 LEN=2480; translated  
MEASFRNRLNVHGASSNNYNATPLSPGGSTISKND DAKGVATKRELPTNSVGMHPFASPF  
SSHRVDRTCKSYTSANTSLLDGYAEHDLSTTLSSSIPLPLHVPTMVANGCSTLLGSTIST

SSNSSSIGLPTKYPGSASHDRDNSLESIVMEELQDFDDIFGKCTISGEASSSVKCSKNR  
CGDNAITNNVSPSRIQTGHQNYDDDDDLTYLTSQSPRAYDSPCREESLLHRSRNHGDGNA  
CSNIASDDEYDHKNATTCEFLSRIQIEHQKNEEADDLCTLSRSRTEAGELPSHQSFPTSR  
ATTDRRPSSGSIGYEFSSASSPYPSVESLVKSKSTNHSNSSPNHRHQRSSSSSSGLLSASST  
SSTKSHRRSSNFAMGSSQFLDSVLKDL

>comp14815\_c0\_seq6; 360 540 1670 LEN=2447; translated  
MEASFRNRLNVHGASSNNYNATPLSPGGSTISKNDDAKGVATKRELPTNSVGMHPFASPF  
SSHRVDRTCKSYTSANTSLLDGYAEHDLSTTLSSSIPLPLHVPTMVANGCSTLLGSTIST  
SSNSSSIGLPTKYPGSASHDRDNSLESIVMEELQDFDDIFGKCTISGEASSSVKCSKNR  
CGDNAITNNVSPSRIQTGHQNYDDDDDLTYLTSQSPRAYDSPCREESLLHRSRNHGDGNA  
CSNIASDDEYDHKNATTCEFLSRIQIEHQKNEEADDLELPSHQSFPTSRATTDRRPSSGS  
IGYEFSSASSPYPSVESLVKSKSTNHSNSSPNHRHQRSSSSSSGLLSASSTSSTKSHRRSSN  
FAMGSSQFLDSVLKDL

>comp14815\_c0\_seq7; 908 211 1751 LEN=1751; translated  
MAPTPSKLFPKRFYDDVEPRPATEPPLPVSDCARNHVP SHYDYTKLTHEKIIAERAKS  
TMGDVNIDYSQDPTLYPEGFYFVRGRDSLRTYITKLFTRIAMYDGAMGTMIQNYAKKN  
KLDEAEFRGEKFKDWGVNVKGNNDMLGITQPKVIKDIYMAYLEEGESDFIGTNTFSGTTI  
AMADYEMENYIYELNYENARLAREACDEVTAKDPSQPRFVIGAIGPTNRTGSISPSVEDP  
SARNVTFDELVDAYFEQCVGLVDGGCDILMVETIFDTLNAKAAVYAVGEYLEMSGLDIPL  
FISGTLVDQSGRTLSTGQTGEAFYASLRHSPMCIGFNCALGATHMVPFVERLHKIAECFL  
QVYSNAGLPNAMGGYDDTPEDMANSNEVFFKNGWLNMGCCGSTPPHIKAIKECAANY  
PRKLPDLGRPKMWSGLEDLVDDVHNHLGLPFLNVGERCNIAGSMKFKKLMAGNYAAA  
MDIAKKQVEDGAHVVDINVDDGMLDGLATMLLRX

>comp14815\_c0\_seq8; 342 761 1924 LEN=2701; translated  
MEASFRNRLNVHGASSNNYNATPLSPGGSTISKNDDAKGVATKRELPTNSVGMHPFASPF  
SSHRVDRTCKSYTSANTSLLDGYAEHDLSTTLSSSIPLPLHVPTMVANGCSTLLGSTIST  
SSNSSSIGLPTKYPGSASHDRDNSLESIVMEELQDFDDIFGKCTISGEASSSVKCSKNR  
CGDNAITNNVSPSRIQTGHQNYDDDDDLTYLTSQSPRAYDSPCREESLLHRSRNHGDGNA  
CSNIASDDEYDHKNATTCEFLSRIQIEHQKNEEADDLCTLSRSRTEAGELPSHQSFPTSR  
ATTDRRPSSGSIGYEFSSASSPYPSVESLVKSKSTNHSNSSPNHRHQRSSSSSSGLLSASST  
SSTKSHRRSSNFAMGSSQFLDSVLKDL

>comp14815\_c0\_seq9; 360 761 1891 LEN=2668; translated  
MEASFRNRLNVHGASSNNYNATPLSPGGSTISKNDDAKGVATKRELPTNSVGMHPFASPF  
SSHRVDRTCKSYTSANTSLLDGYAEHDLSTTLSSSIPLPLHVPTMVANGCSTLLGSTIST  
SSNSSSIGLPTKYPGSASHDRDNSLESIVMEELQDFDDIFGKCTISGEASSSVKCSKNR  
CGDNAITNNVSPSRIQTGHQNYDDDDDLTYLTSQSPRAYDSPCREESLLHRSRNHGDGNA  
CSNIASDDEYDHKNATTCEFLSRIQIEHQKNEEADDLELPSHQSFPTSRATTDRRPSSGS  
IGYEFSSASSPYPSVESLVKSKSTNHSNSSPNHRHQRSSSSSSGLLSASSTSSTKSHRRSSN  
FAMGSSQFLDSVLKDL

>comp14815\_c0\_seq10; 1489 1 2559 LEN=4934; translated  
LAAMQKFVKIAVTEPEIAKVPFMLDASKFEIVMAGLKWQCQKPIVNSISLKVGEELFKEQ  
ATLLRKHGAAVVVMFAFDEEGQAASESEKVRICKRSYDILVNEVRFPPEDIIFDPNVLITIG  
TGMEEHADYGVAFINATKTIKEICPYAKISGGISNLSFGFRGVTKIRESIHAVFLHHAIL  
ESGMDVGI VNAHEMLMYREVDSDIRECAENLIMNLDNATEKMLDLTKREKEAIELRKKG  
GGPKVVKKSQRTEAPKKRLEHSLIHGISEFVDGDVEEARQEC SKPLEVIEGPLMDGMNVV  
GDLFGAGKMFLPQVIKSARVMKAVAYLLPFMDEEKRONLI AKGLDPDEVENDDSNFAG  
KVLMATVKGDVHDIGKNIVAVVLGCNNYKVYDIGVMCSELILEKAKEYNVDVIGLSGLI  
TPSLDEMVTVAKELFKGGFKQPLMIGGATTSKMHTAVK IAPNFFSSDHPVIHVLDASRSV  
TVVSSLLGKNKAEFVEDLEEEYDEMREDYAGLEDRNFLT FDEAKAEKKVIDF DAVPPAP  
TPNKLGITVIDSVNLADVVPYIDWNPFFQTWELRGRYPNRYPKIFNDKAVGEEAKKLF D  
DAQDMMKQI I EDGSMWLKGVGTGLFPANRSECGEDVDVFESEEDRAAGKIAAKFCMLRQQA  
EKESDDPYLSQADFIAPKGYSDHIGFFAVSCFGCDALVTKEYESENDDYSKIMAQALADR F  
VEAFAEFLHREIRIDLWGYAKDEQLDES DLLKVKYDGIRPAPGYPSQPDHTEKSTMWDIV  
KVKDSAGIELSDLSMMPASSVSALVFAHPQSEYFAVGQIGKDQVTSYAERKKMDLELCE  
RWLSPILNYDRD

>comp14816\_c0\_seq1; 299 127 1158 LEN=1399; translated  
MEGVWDPSPIYITGFAVTGITTL CVFIAWVFLYIHRKNQIVAMGQPEMLYVLCGLTLL EQ  
LSVLFYLGVAQKKPTNLDVYCSLGFWTNYIGLVLITAILLGKLYRSFKVVQFRRGQTIL  
PRHIFAPFFVVLV LIVGILTAWQLMFP IHYESKNFHFDRDPDEAVGICRRSGEKYEAI AF  
EAVVDAILLLSVGILVLAYKIRRTDEIISDSRRILQLFLFFTASQIIFFAIKYPVTKTT

GIEDSTKWAVLFIAWLLFNNACTLAIYFLFLPRLYYVWYERVHGRLPENVQIYGSGRVR  
VTVSSGPHTSSNHDESSTIERSAMQLSAVNAATTSKRNSNED  
>comp14817\_c0\_seq1; 197 411 1825 LEN=2099; translated  
MPALVTPCLSSKKKHSRASKFASSIENETTQGDKKPTRNPLKKAYRIYTYATQLWKETEP  
SERTKIANDKIAKTVRDMQHVLTSHEHETISMLSSSSSSNGCGEASKQLLESCENMLSVLE  
ETKEMKKQIKKSAGSSSTEVAATTTSHGNSEAPKKEKKQRSILFGALMGAAVACWVFSGNY  
IFTGLFCLVTILGQLEYRMMVMTGVFPARRISVVGATSMFLTALFAPDLHELCLPMFGA  
WAMIWKL SVRRKIATIP EIAATFTTGMFYLGYVPSFWVRIRTMGSTMMEPTRLFPVTVAMR  
TYLEXKFGFLVPKTLVHLPITSGAVFIFWSWISLAFSDVGAYFVGRKFGKTKLGALSPAA  
GATSPNKSVEGVIGGCVVSSLFSVAGAWAQWPHFWLTGAIHGTILALLGLIGDLTASML  
KRDADLKDFGNLIP EHGGMVDRVDSFVWTAPYSFLVCAIIPALKA AVKVP  
>comp14818\_c0\_seq1; 504 1749 3252 LEN=3252; translated  
MIALRWH SLLFLFSFLLATFPDRASGERSPEDFLILGNKELSM DVYGKAI EIFYESGIAAV  
EKDPDAASLVTLVSLETNLATAYSTIGGQDEQAL THYERAI SAYVSKHEVMEDKKDAIEA  
KSIVSQTAFFYAMELQERDASKAVEMYQAVVLDPNLWAAWANLGSV FQDNFKNFDEALQ  
AYNKAYELLTETDDATDPPAEPRF ILSQLQYRIGLCLSHDLERSCATTTDPQTPVSCKEM  
AAHAFSLAVQFSDSDNSSAKHMLATVTADATMKRAENSYIKTLFDDYAQNFEHSLVEELGY  
DGYARLRRGFDRSFGGRESVPVFDTVIDAGCGTGLVGEQFRNVSSH LIGVDLSEAILDEA  
EKLRPKLYDERIVGDVTEI IREKKPVSLIVAADSF IYFGDLEPLFDSIQEGLGDN GYIAF  
TLENVSNED EATLAETKPDWRWQLTASGRFAHRKEYIAAIGRSHGLAILHYESLDGFRHE  
HGKDVRGHMFVMKKDSESKKDX  
>comp14818\_c0\_seq2; 504 1576 3079 LEN=3079; translated  
MIALRWH SLLFLFSFLLATFPDRASGERSPEDFLILGNKELSM DVYGKAI EIFYESGIAAV  
EKDPDAASLVTLVSLETNLATAYSTIGGQDEQAL THYERAI SAYVSKHEVMEDKKDAIEA  
KSIVSQTAFFYAMELQERDASKAVEMYQAVVLDPNLWAAWANLGSV FQDNFKNFDEALQ  
AYNKAYELLTETDDATDPPAEPRF ILSQLQYRIGLCLSHDLERSCATTTDPQTPVSCKEM  
AAHAFSLAVQFSDSDNSSAKHMLATVTADATMKRAENSYIKTLFDDYAQNFEHSLVEELGY  
DGYARLRRGFDRSFGGRESVPVFDTVIDAGCGTGLVGEQFRNVSSH LIGVDLSEAILDEA  
EKLRPKLYDERIVGDVTEI IREKKPVSLIVAADSF IYFGDLEPLFDSIQEGLGDN GYIAF  
TLENVSNED EATLAETKPDWRWQLTASGRFAHRKEYIAAIGRSHGLAILHYESLDGFRHE  
HGKDVRGHMFVMKKDSESKKDX  
>comp14818\_c0\_seq3; 504 1799 3302 LEN=3302; translated  
MIALRWH SLLFLFSFLLATFPDRASGERSPEDFLILGNKELSM DVYGKAI EIFYESGIAAV  
EKDPDAASLVTLVSLETNLATAYSTIGGQDEQAL THYERAI SAYVSKHEVMEDKKDAIEA  
KSIVSQTAFFYAMELQERDASKAVEMYQAVVLDPNLWAAWANLGSV FQDNFKNFDEALQ  
AYNKAYELLTETDDATDPPAEPRF ILSQLQYRIGLCLSHDLERSCATTTDPQTPVSCKEM  
AAHAFSLAVQFSDSDNSSAKHMLATVTADATMKRAENSYIKTLFDDYAQNFEHSLVEELGY  
DGYARLRRGFDRSFGGRESVPVFDTVIDAGCGTGLVGEQFRNVSSH LIGVDLSEAILDEA  
EKLRPKLYDERIVGDVTEI IREKKPVSLIVAADSF IYFGDLEPLFDSIQEGLGDN GYIAF  
TLENVSNED EATLAETKPDWRWQLTASGRFAHRKEYIAAIGRSHGLAILHYESLDGFRHE  
HGKDVRGHMFVMKKDSESKKDX  
>comp14818\_c0\_seq4; 209 1 740 LEN=759; translated  
XQFRVGDVDDFKANAFSYGVIPCPGTEIDLFD DACFVAVLLLQLLIAGSV FQDNFKNF  
EALQAYNKAYELLTETDDATDPPAEPRF ILSQLQYRIGLCLSHDLERSCATTTDPQTPVS  
CKEMAAHAFSLAVQFSDSDNSSAKHMLATVTADATMKRAENSYIKTLFDDYAQNFEHSLVE  
ELGYDGYARLRRGFDRSFGGRESVPVFDTVIDAGCGTGLVGEQVRIRSVVDLAGVVPFAP  
CFCRNA  
>comp14818\_c0\_seq5; 411 1799 2887 LEN=2906; translated  
MIALRWH SLLFLFSFLLATFPDRASGERSPEDFLILGNKELSM DVYGKAI EIFYESGIAAV  
EKDPDAASLVTLVSLETNLATAYSTIGGQDEQAL THYERAI SAYVSKHEVMEDKKDAIEA  
KSIVSQTAFFYAMELQERDASKAVEMYQAVVLDPNLWAAWANLGSV FQDNFKNFDEALQ  
AYNKAYELLTETDDATDPPAEPRF ILSQLQYRIGLCLSHDLERSCATTTDPQTPVSCKEM  
AAHAFSLAVQFSDSDNSSAKHMLATVTADATMKRAENSYIKTLFDDYAQNFEHSLVEELGY  
DGYARLRRGFDRSFGGRESVPVFDTVIDAGCGTGLVGEQVRIRSVVDLAGVVPFAPCFR  
NA  
>comp14818\_c0\_seq6; 504 1972 3475 LEN=3475; translated  
MIALRWH SLLFLFSFLLATFPDRASGERSPEDFLILGNKELSM DVYGKAI EIFYESGIAAV  
EKDPDAASLVTLVSLETNLATAYSTIGGQDEQAL THYERAI SAYVSKHEVMEDKKDAIEA  
KSIVSQTAFFYAMELQERDASKAVEMYQAVVLDPNLWAAWANLGSV FQDNFKNFDEALQ  
AYNKAYELLTETDDATDPPAEPRF ILSQLQYRIGLCLSHDLERSCATTTDPQTPVSCKEM

AAHAFSLAVQFSDSDNSSAKHMLATVTADATMKRAENSYIKTLFDDYAQNFEHSLVEELGY  
DGYARLRRGFDRSFGGRESVPVFDTVIDAGCGTGLVGEQFRNVSSHLIGVDLSEAILDEA  
EKLRPKLYDERIVGDVTEI IREKKPVSLIVAADSFYFGDLEPLFDSIQEGLGDNQYIAF  
TLENVSNEDATLAETKPDWRWQLTASGRFAHRKEYIAAIGRSHGLAILHYESLDGFRHE  
HGKDVRGHMFVMKKDSESKKDX

>comp14818\_c0\_seq7; 411 1749 2837 LEN=2856; translated  
MIALRWHSLFLFLSFLLATFPDRASGERSPEDFLILGNKELSMVDYGAIEFYESGIAAV  
EKDPDAASLVTLVSLETNLTATAYSTIGGQDEQALHYERAISAYVSKHEVMEDKKDAIEA  
KSIVSQTAFFYAMELQERDASKAVEMYQAVVLDPNLWAAWANLGSVFDQDNFKNFDEALQ  
AYNKAYELLTETDDATDPPAEPRFILSQLQYRIGLCLSHDLERSCATTTDPQTPVSCKEM  
AAHAFSLAVQFSDSDNSSAKHMLATVTADATMKRAENSYIKTLFDDYAQNFEHSLVEELGY  
DGYARLRRGFDRSFGGRESVPVFDTVIDAGCGTGLVGEQVIRSVVDLAGVVPFAPCFR  
NA

>comp14818\_c0\_seq8; 411 1972 3060 LEN=3079; translated  
MIALRWHSLFLFLSFLLATFPDRASGERSPEDFLILGNKELSMVDYGAIEFYESGIAAV  
EKDPDAASLVTLVSLETNLTATAYSTIGGQDEQALHYERAISAYVSKHEVMEDKKDAIEA  
KSIVSQTAFFYAMELQERDASKAVEMYQAVVLDPNLWAAWANLGSVFDQDNFKNFDEALQ  
AYNKAYELLTETDDATDPPAEPRFILSQLQYRIGLCLSHDLERSCATTTDPQTPVSCKEM  
AAHAFSLAVQFSDSDNSSAKHMLATVTADATMKRAENSYIKTLFDDYAQNFEHSLVEELGY  
DGYARLRRGFDRSFGGRESVPVFDTVIDAGCGTGLVGEQVIRSVVDLAGVVPFAPCFR  
NA

>comp14818\_c0\_seq10; 411 1576 2664 LEN=2683; translated  
MIALRWHSLFLFLSFLLATFPDRASGERSPEDFLILGNKELSMVDYGAIEFYESGIAAV  
EKDPDAASLVTLVSLETNLTATAYSTIGGQDEQALHYERAISAYVSKHEVMEDKKDAIEA  
KSIVSQTAFFYAMELQERDASKAVEMYQAVVLDPNLWAAWANLGSVFDQDNFKNFDEALQ  
AYNKAYELLTETDDATDPPAEPRFILSQLQYRIGLCLSHDLERSCATTTDPQTPVSCKEM  
AAHAFSLAVQFSDSDNSSAKHMLATVTADATMKRAENSYIKTLFDDYAQNFEHSLVEELGY  
DGYARLRRGFDRSFGGRESVPVFDTVIDAGCGTGLVGEQVIRSVVDLAGVVPFAPCFR  
NA

>comp14818\_c0\_seq11; 324 1 1155 LEN=1155; translated  
XQFRCVGDVDDFKANAFSYGVIPCPGTEIDLFDACFVAVLLLQLLIAGSVFDQDNFKNFD  
EALQAYNKAYELLTETDDATDPPAEPRFILSQLQYRIGLCLSHDLERSCATTTDPQTPVS  
CKEMAAHAFSLAVQFSDSDNSSAKHMLATVTADATMKRAENSYIKTLFDDYAQNFEHSLVE  
ELGYDGYARLRRGFDRSFGGRESVPVFDTVIDAGCGTGLVGEQFRNVSSHLIGVDLSEAI  
LDEAEKLRPKLYDERIVGDVTEI IREKKPVSLIVAADSFYFGDLEPLFDSIQEGLGDNQ  
YIAFTLENVSNEDATLAETKPDWRWQLTASGRFAHRKEYIAAIGRSHGLAILHYESLDG  
FRHEHGKDVRGHMFVMKKDSESKKDX

>comp14819\_c0\_seq1; 824 60 2800 LEN=2855; translated  
MSGSKRKRKRPSSDFKRIKAKVGKKAQRQNDTDFVSFQASLHLGQAIQGDADPQKSPNSIL  
LSSRGKSLYELVATASSHPAAAARCSSLKGILDIVKSHPPGALLPNLSALIPTCVHSCVD  
EDQDTRSVIAIEVLLALLSQLQEKAIKPFGILLVARVSSALHSLDAPTRMDGVKMKLVST  
ACPILTASSIDQLMPPXFAEAKFSDSVVSYHITPTGHPFGNKKENIDRDHYPDMIYFSGG  
RSRNAILKSGRPVHTLPRAIESVSQLSGLDQSTLSSRDGREVKYKTNLMAKLRLDILIESV  
NLGDEPNLPSTNRMARSSTIELLGNINYSRIILLRSVRLLRHSFSTGNVRCLDEDDDET  
DFAKFTQQIVSVLMDIFPFHDHLSENNSAAGNKPSSVDDINATIAITILDLSYEDGANST  
RGVDNAKDPKAIYSYVIPRMNRLQDETYMSSDLDITCKFLRHLCIDHGYSKDLISVS  
FTLQELFFSNYDAKLARSNAGRRI SLAVMDLVDLTNYSLLEDHSTSLISKSFVPPFITAMPL  
YLEAWGADFVYESERILEGLATLVREVKEDYNNPMLSEFRANWHNLVVDNSNKSQSI FEMY  
PWHLQKKWLGLLVLLRNPTDQTLQYLASICARSKKLTLSKKIIEAVQGVKSVPMQRFLT  
FLLKSAGITRHVKVKVQFHGNSNLDSSSMNIFDKTFFETDQSLDRATARALTELGSIQVLR  
MISSQLSSWQKEIKAEEGTSLSEFLSKARASYIILAYFFLVHNSRQKNQNLDDQHSIFDV  
MNGEITVDSLNDISICRFIRCI VNSEEAI AFHSKLTSPIIAILSSHYGVSIVIRKISDWF  
ENEELSKFEQNNVVLVVGWMMKNPLLDALKRQSSTTARMLIEDIDAISQNRALKDNELAQ  
SLVPLLKAVSRLS

>comp14819\_c0\_seq2; 893 60 2882 LEN=2937; translated  
MSGSKRKRKRPSSDFKRIKAKVGKKAQRQNDTDFVSFQASLHLGQAIQGDADPQKSPNSIL  
LSSRGKSLYELVATASSHPAAAARCSSLKGILDIVKSHPPGALLPNLSALIPTCVHSCVD  
EDQDTRSVIAIEVLLALLSQLQEKAIKPFGILLVARVSSALHSLDAPTRMDGVKMKLVST  
ACPILTASSIDQLMPPVSLADSRTRKYIDDILQSLTSLLRVSVAEAKFSDSVVSYHIT  
PTGHPFGNKKENIDRDHYPDMIYFSGGRSRNAILKSGRPVHTLPRAIESVSQLSGLDQST

LSSRDGREVKYKTNLMAKLRDILIESVNLGDEPNLPSTNRMARSSTIELLGNINYSRIIL  
LLRSVRLLRHSFSTGNVRCLEDEDDDETDFAKFTQQIVSVLMDIFPFHDHLDSENNSAAGNK  
PSSVDDINATIAITILDLSYEDGANSTRGVDNAKDPKAIYSYVIPRMNRLQDETYMDSS  
SDLIDITCKFLRHLCIDHGYSKDLISVSFTLQELFFSNYDAKLARSNAGRRI SLAVMDLVD  
LTNYSLEDHSTSLISKSFPVFFITAMPLYLEAWGADVFVYESERILEGLATLVREVKEDYNN  
PMLSEFRANWHNLVVDNKSQSIFEMYPWHLQKKWLGLLVLLRNPTDQTLQYLASICARS  
KKLTLISKKIIIEAVQGVKSVPMQRFLLFLLKSAGITRHVKKVKQFHGNSNLDSSSMNIFD  
KTFEFTDQSLDRARALTELGSIQVLRMISSQLSSWQKEIKAEEGTSLSEFLSKARASYI  
ILAYFFLVHNSRQKNQNLDDQHSIFDVMNGEITVDSLNDICRFIRCIVNSEEAI AFHSK  
LTSPIIAILSSHYGVFSVVRKISDWFENEELSKFEQNNVVLVVGWMMKNPLLKDALKRQ  
SSTTARMEIDIDAI SQNRALKDNELAQSLVPLLKAVSRLS  
>comp14820\_c0\_seq1; 257 112 819 LEN=2290; translated  
MSSDSDLKLNKKYFDPKDVRAQVPSFIANPARAEDQDHHKFKEDPRSVDSFMAKEILKLS  
LSDRNEILEETHGLRCAPEESPEMIKDALDELAIEIDKFPNHKKHAYLLSQRAPTRILP  
DGTKTTSDFVNSREFRLRFLRAKLFDARKAASCLLHYLEVAKECCGKYALFRPIRLSDF  
KNEMQVFRKGLVQLLPYRDHHRRI IAILISEQVEEVPEIIRVRLGKNELLSNQ  
>comp14820\_c0\_seq2; 321 112 1650 LEN=2131; translated  
MSSDSDLKLNKKYFDPKDVRAQVPSFIANPARAEDQDHHKFKEDPRSVDSFMAKEILKLS  
LSDRNEILEETHGLRCAPEESPEMIKDALDELAIEIDKFPNHKKHAYLLSQRAPTRILP  
DGTKTTSDFVNSREFRLRFLRAKLFDARKAASCLLHYLEVAKECCGKYALFRPIRLSDF  
KNEMQVFRKGLVQLLPYRDHHRRI IAILISEQVEEVPEIIRWKILLYMGCVIGADGAEQ  
QRRGVVLMWWLNDAAAYQFKLTPNSTRIQPHEFVPMRASAFHICTPDRPFRRFVRAAAI  
AVGRDNLRSRIRFHIGESMEIRYSLSSHGINTDLIPITWTGNIKQQFCKQWIRLRQILEDD  
RYPYDLPIIDCPGLNDVIFRKGSTSIYHPGNVIFRSRMSMYEQTEPCTMDRCKTSLVTK  
LIADIQKNGRVLIWYRSKNGSDSWWTELTDKDLIYTKIQHLVKELKFSETQAINRGEYH  
TTINSSTSLFLQSREQDCCTNSRAPKRLRHED  
>comp14821\_c0\_seq1; 117 1 337 LEN=479; translated  
XLFRSETVALGKLSSEASVLLATEPLWAAVFASFLINEQLSLWDG VGGALIVAACVVTA  
IDPVWLREKLQIDYVGADVGADVAVAII EATSDENDVIDTFIEVKTSATSE  
>comp14821\_c0\_seq2; 324 435 1823 LEN=1965; translated  
MTPLQSTSTNTEAQMGAQKNNPPKEAAANLENRTYASGDVDDFFENPEGVVCARGVCAV  
SEEGAPESCYNLEDLNEVVCTANPNNQVQPGFTLAYLWPRTELLICSVLYGTNFP LGR  
MNDLSPASAATSTRMVLASLALSPFLFQLKPNLRKSAACGTF TALGYISQSIALVDTPA  
ATVSFLGALVVIVCPALAVIVDKKKMGFADAPQTWIAAITCLIGVGVLELGGDEGLVGQV  
GWGDLWSVLQAVGFGTSSFFITERMMAKEPSQALPITAMQCAMSAAFAGMWAGLDGTGFMD  
GALSFGSPHGAWLLNESDAGSSFALPGLFFDANFRNVALAAFTGFVTTAGNRVGETVAL  
GKLSSEASVLLATEPLWAAVFASFLINEQLSLWDG VGGALIVAACVVTAIDPVWLREKL  
QIDYVGADVGADVAVAII EATSDENDVIDTFIEVKTSATSE  
>comp14821\_c0\_seq3; 324 545 1933 LEN=2075; translated  
MTPLQSTSTNTEAQMGAQKNNPPKEAAANLENRTYASGDVDDFFENPEGVVCARGVCAV  
SEEGAPESCYNLEDLNEVVCTANPNNQVQPGFTLAYLWPRTELLICSVLYGTNFP LGR  
MNDLSPASAATSTRMVLASLALSPFLFQLKPNLRKSAACGTF TALGYISQSIALVDTPA  
ATVSFLGALVVIVCPALAVIVDKKKMGFADAPQTWIAAITCLIGVGVLELGGDEGLVGQV  
GWGDLWSVLQAVGFGTSSFFITERMMAKEPSQALPITAMQCAMSAAFAGMWAGLDGTGFMD  
GALSFGSPHGAWLLNESDAGSSFALPGLFFDANFRNVALAAFTGFVTTAGNRVGETVAL  
GKLSSEASVLLATEPLWAAVFASFLINEQLSLWDG VGGALIVAACVVTAIDPVWLREKL  
QIDYVGADVGADVAVAII EATSDENDVIDTFIEVKTSATSE  
>comp14822\_c0\_seq1; 2473 179 9919 LEN=10406; translated  
MAKDALLDVLQQTIGKYVKDLDPNKLNLAIWKGKIELKTELDVESINSMLDKKAKEAPN  
LAIPFKVVS GHFELFEVVPWNKITSKSVILQARGLSVVVEPLDRGSPQAFDDDEMAESD  
VDKNSKRVARQHELREKIEESDKYRVQAYALKKIALKPEENEENKSTFAQRLAYKIIQN  
IQIEISEVHISLRSADGAMGVVLSVKLVTTNSEGKPVYVNETEADRRNSSLSVDVTSFQ  
YKMLQIQFGIYLDDEDFENARKSLQSIYEDSTSIISDNSSISSARTQLHTYILAPLDFE  
TKLRIADSKVCAEYSMYQLRSNLSMLSFRLTRNQVDFVRKLAKIMSPSILGPTILFPEYR  
PVPVKGHAREWKKYAGRCIGRINGRRLWVEFFEAFTKRRKYIPLYKRHKHKECPWVKP  
LTDDEANDLVLEQDRSISIEGLMTRNRIADGQIDKEREKRP SRDQKASDSYFSFVFGSS  
QPSGTEAKQ MIDDEEPPIVLSVEEMKELEGVSVLDIFGKDMAKDWSYCDVTFVLDAMKID  
LVGYDLKHVALLDMGKVTIDFETSMDGAFKTSFDLYDLEVFDRTPDSL FASVLK KIESD  
TESNMSEAIHLEVTKSPIGDQSVDLKMVGFLVASKLMAQELQKFFQDSSNGSASMVKVS  
NPLLRSMTGSIDIFYDASQGDSFRAPQNFEEATDDTKTKMTP EATEILSNKLIDAWKKK



SQSEVSWMLDLYVIAPVVI IPEACNDPRANVMVFDLGKLVAVKYGKGDPTPEIKRWFDKYP  
RESLNDKKFEAGTINVKHLTF SVQKANCLQPIHPYQENEAPIIDPISISIDFAIEDIGPN  
FEPRSCFVGVPIPTISSKISPFQGSQVLGVVNSWTDMSGGEDDDQIQRPTVPPTTSPESKV  
LTNTPLSVPIASVPEGESVSSGEEGRAMFYCRIGLQHLEVAIVDKGQTQLEAHLVSVYAS  
MLQCSDESSEIKLTMGWFWILDWITSSYVRNQRLLVIHNSLPCSAKSFVERNANNVVEELN  
KKGVFKLDYSGSTELADVTFKTLPRKINRSEDANIYQIHGQISISAKEIQYVLDVKFRSLV  
VHWNPHAIKEINALSNRFLEIFVNDDSAKEDGALILSPGDYEDSLKSERNNKNSRVEDIE  
GSDPLLI IAEMESLGIILNSARDDLPLFTLTVSNTRVSIIPRSVGQEISLSLGLDQIATP  
EQAGKTLPVYRTLLGIEDGSLGSLLEIKYCEGREAIESLNLESPGMENFEAIAGIELSPM  
RFCYIQSQVLTLVNYITEGVLGALTAKAAVSAEAAKELGNSVSGNSFYFIRATSFQAVV  
PEAAAYREERMCLKTTSLNVDYRMFSDARGSDIRAALANFMVTGNHQKELQEAPIYLSIDV  
NMPQVGIGSLDDQAMKVLANIPEAKFVLRNQSQMMNTLEKNFSETALFLRKDDWSGQI  
ITSAKETHSGVQLDESTQRIRFKLNIGEFSLLELNDRSREDPIVRLTATETAISINMIPDL  
EKFSMEALLKLNLCEDRRLSRPRHSRYLINRSNQDGNVRHTDFFQIEYSQEANKTNIDL  
KLGSPQVVLIPDLILEILLFFGETKGEDGVESQAPPTISQDEVSSLNERLAQVDSDDNDV  
VLEANLRRSKYTTTTMSAKTGTCTRFILIDLGTQYTMSTATNRPLSSNSKAQLSEAVVTQ  
GIFAAATLSMESDIDSGATIASTFEFNSDEMEIFTAFGRELKSPLOILEPAFASACGSLNT  
ITGDTEIEIRASALTIHFSLSTHNAALLLAIVESVNDSIKHFEEKSTSIEAKEPSASAQ  
KDKKNLDNYLDSRTSSRRLQEAVT SERNTASITTKIKVNLTMPEATVTIINDLQGFDEA  
LFRISVKEFVAGGQYQSPKTFDFKCNTSIVADYFDSVNLWNMLLIEPWKIDI IAERKH  
SENYKPRAI STFYLESPCHVSFSEQFLLSLASTTRMWMKMYSAATNGSSDQDGDNSNTTA  
TAAARNRNL SFLPNAIANHSGIDVSFSLESSEIKHRQCPKECVKYFRFDPPKGGHYGGT  
RVYGGQDVKVPKIVQIEAAGSVAMVNMDELELNLPPRGHKVGNKLVLFTRVAKEGETTVLHL  
KSHVEVVRNRTLIPFQIDFLYDKETSSDETENYRNVVSSSVIHAGKIKPEKASNFVVPVPL  
LRNFHRDWAKKGEVELSLALTPLLSDSNLSGKASMLISRQKMRRAPNRRIKASTEVIKCS  
DQHLVHNMHPIVLRVEFTMTLTNREHAFIEVSLQPRAKIENKIPIMRICTPMPQTFSTC  
KKEEDMNEETS YVVKRNEFIEVFTPGPSIAIKIRTQDNPISGLKLGWMDSEWVFLQLEKD  
RLQDP IVGLFPLETGYSIPSEVMGTNREAGAEFFVVGQGNKRLNTLADFNPDTKSNVET  
NDVIDYPFTFILTVRNYGVDHTGHILFEQRMDVRDISSSGQLQPSASVNESHRISRRGSQ  
EISRSF SLLPRGSSRKLNGGEP LSLGAFSSPNHRRRISLLPNPQFPRLRLRYLTIEGTEGF  
KRTKPFMIENLPIGDGGASSMPIQWENKQQSGLFAYGILINEHQFEVHIVPEFLVFNNGK  
SEVLVKEESMPDIIIEPGDTRQLRVSTRPDGLKLSFDFIRLQCETGILTVSKAGLETGFI  
TSNVTSYERRYRGNVCVQTTFTDFGDSRLVVKIGEVALGSQVSPVIKEKSIFDGDVCRFL  
VRSQKLSLILNEVDQKRELVRNSTSTAITPSMATLSDPRGSKLSKRASTINVLK HET  
QNRMSSWNRVMMHEIMAVVFTRF SIEFKRVFKKEDERRRPERSQIEVKVGNIQIKDLTP  
DSHYPVVFNGT S NSDFNVFDLCIQIRGPLSANIVEVDL FHL LLAHKDRRSSKMSLT TSEE  
YVWRILDVNRILGASGEVAGFTLKYENDDDDNYVFKIEDAGGKSRSKSVEKNQYTTPTS  
DTLYDVARVLVSPFTVVVVSFRGANLTRYEKVKDVP GSSAINYFTRKLFKFTIDRAELNFT  
GYEV RALKGPLDRLVEVMKTVYIDKIKYKIVPLLTAA TINDWKGLAAREGEDEYVEGDIL  
RATGNVAGKAAGSIVGYAGNGVGGGFKRIASFVGDGVESGAGKIGARKFGTGFNSAVTGI  
GYGVGDTVSGVATGANKIIEGAGMGVGH IAGGVTS GALQMGQIGK GITTGDGKAVVEGI  
AKGVSSIGGGIKSGAEKAVTGTAGGV LQVGK GIFS GGRNIVRGIGGAVTGKKPSSFQQNN  
KSQGRK

>comp14822\_c0\_seq2; 94 1 159 LEN=929; minus strand; translated  
TSLKQYNLVVTTVVYQKMLKLQRNLDDYFCLEFDDMTPLHKYVDLLGDSLRI

>comp14822\_c0\_seq3; 2405 179 10005 LEN=10492; translated  
MAKDALLDVLQQTIGKYVKDLDPNKLNLAIWKGKIELKTLLELDVESINSMLDKKAKEAPN  
LAIPFKVVS GHFELFREVVPWNKITSKSVILQARGLSVVVEPLDRGSPQAFDDDEMAESD  
VDKNSKRVARQHEL RKEQIEESDKYRVQAYALKKIALKPEEENEENKSTFAQRLAYKIIQN  
IQIEISEVHISLRSADGAMGVV LNSVKLVTTNSEGKPVYVNETEADRRNSSLSVDVDTSFQ  
YKMLQIQGFGIYLDEDDFENARKSLQSIYEDSTSII SDNSSISSARTQLHTYILAPLDFE  
TKLRIADSKVCAEYSMYQLRSNLSMLSFR LTRNQVDFVRKLAKIMSPSILGPTILFP EYR  
PVVPVKGHAREWKKYAGRCIGR INGRRLWVEFFEAFTKRRKYIPLYKRHKHHKECPWVKP  
LTDDEANDLVLEQDRSISIEGLMTWRNIADGQIDKEREKRPSRDQKASDSYFSFVFGSS  
QPSGTEAKQ MIDDEEPPIVLSVEEMKELEGVSVLDIFGKDMAKDWSYCDVTFVLDAMKID  
LVGYDLKHVALLDMGKVTIDFETSMDGAFKTSFDLYDLEVFDRTPDLSL FASVLK KIESD  
TESNMSEAIHLEVTKSPIGDQSVDLKMVGFLVASKLMAQELQKFFQDSSNGSASMKVKS  
NPLLRQSMTGSIDIFYDASQGDSFRAPQNFE EATDDTKTKMTPEATEILSNKLIDAWKKK  
SQSEVSWMLDLYVIAPVVI IPEACNDPRANVMVFDLGKLVAVKYGKGDPTPEIKRWFDKYP  
RESLNDKKFEAGTINVKHLTF SVQKANCLQPIHPYQENEAPIIDPISISIDFAIEDIGPN

FEPRSCFVGVIPITISSKISPFQGSQVLGVVNSWTFMFGGEDDDQIQRPTVPPTSPESKV  
LTNTPLSVPIASVPEGESVSSGSESRAMFYCRIGLQHLVAVIVDKGQTQLEAHLVSVYAS  
MLQCSDESSEIKLTMGWFWILDWITSSYVRNQRLLVIHNSLPCSAKSFVERNANNVVEELN  
KKGVFKLDYSGSTELADVTFKTLPRKINRSEDANIYQIHGQISISAKEIQYVLDVKFRSLV  
VHWNPHAIKEINALSNRFLFIFVNDSDAKEDGALILSPGDYEDSLKSERNNKNSRKEDIE  
GSDPLLI IAEMESLGIILNSARDDLPLFTLTVSNTRVSIIPRSGQEISLSLGLDQIATP  
EQAGKTLPVYRLLGLIEDGSLGSLLEIKYCEGREAIESLNLESPGMENFEAIAGIELSPM  
RFCYIQSQVLTLVNYITEGVLGALTAKAAVSAEAAKELGNSVSGNSFYFIRATSFQAVV  
PEAAYREERMCLKTTSLNVDYRMFSDARGSDIRAALANFMVTGNHQKELQEAPIYLSIDV  
NMPQVIGISLDDQAMKVLANIPEAKFVLRNQSQMMNTLEKNFSETALFLRKDDWSGQI  
ITSAKETHSGVQLDESTQRIRFKLNIGEFSLLELNDRSREDPIVRLTATETAISINMIPDL  
EKFSMEALLKLNLCEDRRLLSRPRHSRYLINRSNQDGNVRHTDFFQIEYSQEANKTNIDL  
KLGSPQVVLIPDLILEILLFFGETKGEDGVESQAPPTISQDEVSSLNERLAQVDSDDNDV  
VLEANLRRSKYTTTTMSAKTGTCTRFILIDLGTQYTMSTATNRPLSSNSKAQLSEAVVTQ  
GIFAAATLSMESDIDSGATIASTFEFNSDEMEIFTAFGRELKSPLOILEPAFASACGSLNT  
ITGDTEIEIRASALTPHFSLSTHNAALLLAIVESVNDSIKHFEKSTSI EAKEPSASAQ  
KDKKNLDNYLDSRTSSSRRLQEAVT SERNTASITTKIKVNLTMPEATVTIINDLQGFDEA  
LFRISVKEFVAGGQYQSPKTFDFKCNTSIVADYFDSVNLWNMLLIEPWKIDI IAERKH  
SENYKPRAI STFYLESPCHVSFSEQFLLSLASTTRMWMYSAATNGSSDQDGDNSNTTA  
TAAARNRNLSSFLPNAIANHSGIDVSFSLESSESIKHRQCPKECVKYFRFPKGGHGYGGT  
RVYGGQDVKVPKIVQIEAAGSVAMVMDLELNLPPRGHKVGNKLVLFTRVAKEGETTVLHL  
KSHVEVVRNRTLIPFQIDFLYDKETSSDETENYRNVSSSVIHAGKIKPEKASNFVVPVPL  
LRNFHRDWAKKGEVELSLALTPLLSDSNLSGKASMLISRQKMRRAPNRRIKASTEVI CKS  
DQHLVHNMHPIVLRVEFTMTLTNREHAFIEVSLQPRAKIENKIPIPMRICTPMPQTFSTC  
KKEEDMNEETS YVVKRNEFIEVFTPGPSIAIKIRTQDNPISGLKLGWMDSEWVFLQLEKD  
RLQDPVGLFPLETGYSIPSEVMGTNREAGAEFFVQGNKRLNTLADFNPDTKSNVET  
NDVIDYPFTFILTVRNYGVDHTGHILFEQRMDVRDISSSGQLQPSASVNESHRISRRGSQ  
EISRSFSLPRGSSRKLNGGEP LSLGAFSSPNHRRRISLLPNPQFPPLRLRYLTIEGTEGF  
KRTKVRMWIAMPTCII LSIQTFVLLTFPDSXPFMIENLPIGDGGASSMPIQWENKQOS  
GLFAYGILINEHQFEVHIVPEFLVFNGGKSEVLVKEESMPDIIIEPGDTRQLRVSTRPDG  
LKL SDFIRLQCETGILTVSKAGLETGFITSNVTSYERRYRGNVCVQTTFDTFGDSRLVV  
KIGEVALGSQVSPVIKEKSI FGDVCRFLVRSQKLSLILNEVDQKRRELVRNNTSTAIT  
PSMATLSDPRGSKLSKRAS TINV LKHETQNRMSWVNDRVMMHEIMAVVFTRFSIEFKRV  
FKKEDERRRPERSQIEVKVGNIQIKDLTPDSHYVVFNGTSSNDFNVFDLCIQIRGPLSA  
NIVEVDLFHLLL AHKDRR SSKMSLT TSEEYVWRILDVNRILGASGEVAGFTLKYENDDD  
DNYVFKIEDAGGKSRSKSVEKNQYTTPTSDTLVDVARVLSPTVVVVFRRGANLTRYEK  
VKDVPGSSAINYFTRKLFKFTIDRAELNFTGYEVRALKGPLDRLVEVMKTVYIDKIKYKIV  
PLLTAA TINDWKGLAAREGEDEYVEGDILRATGNVAGKAAGSIVGYAGNGVGGGFKR IAS  
FVGDGVESEGAGKIGARKFGTGFNSAVTGIGYGVGDTVSGVATGANKIIEGAGMGVGH IAG  
GVTSGALQMGQIGIGKITTGDGKAVVEGIAGKGVSSIGGGIKSGAEKAVTGTAGGVLQV GK  
GIFSGGRNIVRGIGGAVTGKKPSSFQQNNKSQGRK

>comp14823\_c0\_seq1; 958 714 4010 LEN=4230; translated  
MEKCSGSTPPAKSDAEVGTAAASKAAPQVITVETSSNKLHGKPSLALEGTTTTARTPKH  
ANKTTNGAPTSGRVPQHGGQGGPHGNSGFYPPYEGRPVGGNGAFQPHDSRRQPPPHSRPND  
QYYSQNPPIHVSPGGAGGSAAA YGDRRGHNGGPPYNNRRGPGGYPPHGPPP GYYDQRGGYN  
DYGPPQHMSMPSSHPPGQRYDGRHSQHIRGQHQPYPQPYPTQSYNNYQADPRNGPSYGGG  
PPPNYPGVSQYPAGRAPDQHYARENHGYPVEHHAGVNTGAFSRSVSTSFDRSVKEKPN  
TTTKRSEPHQQSECKKSSAPDDRDRQGDAYMASDDVSWKQLNQVHSVDDSAIQEHLGLKK  
SGAAKTSNQDEDVPSNSSSLTNSPTDGSTRQANLAESIAAAAAA VAATKTNDIQKTS  
DELSSVASAQAPMTEASNNKRSSSDIADPTSPGIADSDSLDLMKCSSDGSGLLNLVPSK  
GGEGLLYEDKHGEIEERGDKGESAKGGEELRRAPPDLEEKPRKKV KIESNDTSKVEKSPL  
SITCSPSAAMTKKSMTRKAPSSQTSTINKADFHVSPNLGDNSLYDKPSAYSYSMSDAPP  
IPRSGKKNKHSVNPTLPPRPTSSSSSLTPGMHIDNNDPANAVVSSIPSWEINA VDSFGG  
GSVGGGQGLSNNFSFYQDY PMLPASESNLGTGADNRGTMHSHLPNAPQHPTMSPGQPYGN  
MHNHRMNHQQNNHPAIESRNQSFEGGHYHGGSGFHRTDSVDVNYGRGPGPAYHDSGYKH  
GHQGAFFPHAPSWGTVGSTQSHPSYQQQHQP YMGGRMGDYPPVMRNYSDSGHRASPPPG  
PGGPHGRHYMHRPPQNFQPPPEFVAPHNPHLTRRPPPAVYIMSSQGVNHPNSKRGTGVFS  
WSKEDDTRLTEIMKKYKNPRDWEPIAKEHGMGKTAKDCHERWIRYLKPGVRKQWTDQED  
SIVIDAVQNSSEQPFTRWSDLAQRLPGRVGKQIRDRWVNHLPNINHL PFSREDDLK LWE  
GHKKLGKRWEISTKSFNSTRSENHIKNRWYSASFKKFIANEF GPDAYS GGKSKGKDDKS

KTKMKKINEDPATKAVGS

>comp14823\_c0\_seq2; 899 1 3454 LEN=3674; translated

XXXSTTPSLAHRFRLRSEIENQILASGKPRQKEITPSNGPGIHRNWRKNGSKMEKCSGS  
TPPAKSDAEVGTAAASKAAPQVITVETSSNKLHGEKPSLALEGTTTTARTPKHANKTTNG  
APTSGRVPQHGQGGPHGNSGFYPPYEGRPVGGNGAFQPHDSRRQPPPHSRPNDQYYSQNP  
PIHVSPGGAGGSAAAYGDRRGHNGGPPYNNRRGPGGYPPHGGPPPGYYDQRRGGYNDYGPPQH  
MSMPPSHPPGQRYDGRHSQHIRGQHQPQQPYPTQSYNNYQADPRNGPSYGGGPPPNYPP  
GVSQYPAGRAPDQHYARENHGYPPVEHHAGVNTGAFSRVSTSFDRSVKEKPNNTTKRSE  
PHQQSECKKSSAPDDRDRQGDAYMASDDVSWKQLNQVHSVDDSAIQEHLGLKKSAAKTS  
NQDEDVPSNSSSLTNSPTDGSTRQANLAESIAAAAAAATAATKTNDIQKTSLSDELSSVA  
SAQAPMHTEASNKKRSSSDIADPTSPGIADSDSLDMKCSSDGSGLLNLVPSKGGEGLLY  
EDKHGEIEERGDKGESAKGGEELRRAPPDLEEKPRKKVKIESNDTSKVEKSPLSITCSPS  
AAMTKKGSMTKAPSSQTSTINKADFHVSPNLGDNSLYDKPSAYSYSMDSAPP IPRGSGK  
NKHSVNPTLPPRPTSSSSSLTPGQMHIDNNDPANAVVSSIPSWEINAVDSFGGGSGVGGGQ  
GLSNNFSFQDYPMLPASESNLGN TGADNRGTMHSHLPNAPQHPTMSPGQPYGNMHNHRMN  
HHQQNNHPAIESRNQSFEGGHYHGGSGFHR TDSVDVNYGRGPGPAYHDSGYKHGHQGAFF  
PHAPSWGTVGSTQSHPSYQQQHQP YMGGRMGDYPPVMRNYSQDSGHRASPPPGPGPHGR  
HYMHRPPQNFQPPPEFVAPHNPHLTRRPPPAVYIMSSQGVNHPNSKRGTGVFVSWSKEDDT  
RLTEIMKKYKNPRDWEPIAKEHGMGKTAKDCHERWIRYLKPGVRKGQWTDQEDSIVIDAV  
QNSSEQPFTRWSDLAQRLPGRVKGQIRDRWVNHLNPNINHL PFSREDDLKLWEGHKKLGK  
RWVEISTKSFNSTRSENHIKNRWYSASFKKFIANEF GPDAYS GGKSKGKDDKSKTKMKKI  
NEDPATKAVGS

>comp14823\_c0\_seq3; 138 1 610 LEN=830; translated

XWNGENSKEDDTRLTEIMKKYKNPRDWEPIAKEHGMGKTAKDCHERWIRYLKPGVRKGQW  
TDQEDSIVIDAVQNSSEQPFTRWSDLAQRLPGRVKGQIRDRWVNHLNPNINHL PFSREDD  
LKLWEGHKKLGKRWVEISTKSFNSTRSENHIKNRWYSASFKKFIANEF GPDAYS GGKSKG  
KDDKSKTKMKKINEDPATKAVGS

>comp14823\_c0\_seq4; 958 401 3697 LEN=3917; translated

MEKCSGSTPPAKSDAEVGTAAASKAAPQVITVETSSNKLHGEKPSLALEGTTTTARTPKH  
ANKTTNGAPTSGRVPQHGQGGPHGNSGFYPPYEGRPVGGNGAFQPHDSRRQPPPHSRPND  
QYYSQNPPIHVSPGGAGGSAAAYGDRRGHNGGPPYNNRRGPGGYPPHGGPPPGYYDQRRGGY  
DYGPPQHMSMPPSHPPGQRYDGRHSQHIRGQHQPQQPYPTQSYNNYQADPRNGPSYGGG  
PPPNYPPGVSQYPAGRAPDQHYARENHGYPPVEHHAGVNTGAFSRVSTSFDRSVKEKPN  
TTTTKRSEPHQQSECKKSSAPDDRDRQGDAYMASDDVSWKQLNQVHSVDDSAIQEHLGLKKS  
SGAAKTSNQDEDVPSNSSSLTNSPTDGSTRQANLAESIAAAAAAATAATKTNDIQKTSLS  
DELSSVASAQAPMHTEASNKKRSSSDIADPTSPGIADSDSLDMKCSSDGSGLLNLVPSK  
GGEGLLYEDKHGEIEERGDKGESAKGGEELRRAPPDLEEKPRKKVKIESNDTSKVEKSPL  
SITCSPSAAMTKKGSMTKAPSSQTSTINKADFHVSPNLGDNSLYDKPSAYSYSMDSAPP  
IPRGSGKNKHSVNPTLPPRPTSSSSSLTPGQMHIDNNDPANAVVSSIPSWEINAVDSFGG  
GSGVGGGQGLSNNFSFQDYPMLPASESNLGN TGADNRGTMHSHLPNAPQHPTMSPGQPYGN  
MHNHRMNHQNNHPAIESRNQSFEGGHYHGGSGFHR TDSVDVNYGRGPGPAYHDSGYKH  
GHQGAFFPHAPSWGTVGSTQSHPSYQQQHQP YMGGRMGDYPPVMRNYSQDSGHRASPPPG  
PGGPHGRHYMHRPPQNFQPPPEFVAPHNPHLTRRPPPAVYIMSSQGVNHPNSKRGTGVFV  
WSKEDDTRLTEIMKKYKNPRDWEPIAKEHGMGKTAKDCHERWIRYLKPGVRKGQWTDQED  
SIVIDAVQNSSEQPFTRWSDLAQRLPGRVKGQIRDRWVNHLNPNINHL PFSREDDLKLWE  
GHKKLGKRWVEISTKSFNSTRSENHIKNRWYSASFKKFIANEF GPDAYS GGKSKGKDDKS  
KTKMKKINEDPATKAVGS

>comp14824\_c0\_seq1; 247 10 540 LEN=2151; translated

MAPSTKCRKTWVPLVKIAASSLLDLSGDWKFYKAIGGLDPRIVDKYEGPAYTVFFLGCIM  
NVLLLF TLLCRGFAPKDRGLEGPFEELCMQHLYKRVSQLLILD IILEDVPEIILTALVKHD  
KGKLTPALIFNAATCLVHFVVISDILAPDDEDEDDKTA AEATDPERQRLIETASA

>comp14825\_c0\_seq1; 465 386 2811 LEN=2811; translated

MHFRRPHQQRVSIHRSALAVGAENDENGKGRENGKPRKGPLGSGCRKRLWNAVGIVGIC  
ACVDVFAYVLFQQGVHRVGLLQDPVFSYPSFVASMVVTGKSDSVDRAPSHTLTNEYGRG  
RTSGERRKPLANRWTAEEKLMVAGMKRDFETLNSTGKLLPCRLDEGNACFDD SARHRVLL  
YNPLAEGTRCEKPRVVCFSXMNSELDSAPLLSATEKDLYVMFFLYPFVHQFINRFVDRWI  
IKIGSGAGNALSEXGGTLEVREFPRDCRDKNRISLPYVYSRGPPIPREGSPTDDIQAI  
ELSWNTDSTFDDYAKLLQCSIPCRTNDPEHQNVHTIYARSGFQSVNTIYIRNTNLEIKHS  
MEGEQIYPEVHIRAAAYRENIFYATTFRSEIPVPPFFSWNEYDIRHTAVDFETAIKGASF  
LAANCESSNKREQLVEALIRSRRLRVDSLSSCLRNAKAPPGVDMRNKTAIMELYLFHLAFE

NQNADDYITEKLGWGLAAGTLPVYFGARNVKDHVPDINSIIVAEDFKTYQELSEYLIIRLTNDKELYESYHTWRSQPFDDAFRSKYGFCTKTHSSCRICKWAFERHGLAWNHHKQTVTEPYIDHKTCRNKVG LIGHPFKEYWFSSSKSSKADAPIASTHAMKTCTLDSDNRIEIDHGAI RRKVFDGDGVTDLIIDVAKRKSHDPTSMGNNNADSYILRLEMLNTAGANQGPALNDSVW WFQDDQSRFYVMVHSSNADSRLSVNKSGMADIKIRPSLESSTTTGRIATTTTRVRLVENVDHFHAKTKKTASFFGDVMMRDFEFEPVQSFX

>comp14825\_c0\_seq2; 533 386 2645 LEN=2645; translated  
MHFRRPHQQRVSIHRSALAVGAENDENGKGRENGKPRKGPLGSGCRKRLWNAVGIIVGIC ACVDVFAYVLFQQGVHRVGGLLQDPVFSYPSFVASMVVTGKSDSVDRAPSHTLTNEYGRG RTSGERRKPLANRWTAEKLMVAGMKRDFETLNSTGKLLPCRLDEGNACFDD SARHRVLL YNPLAEDRFWCGKRIIRGGGTLEVREFPRDCRDKNRISLPYVYSRGPPVPIREGSP TDD IQAIELSWNTDSTFDDYAKLLQCSIPCRTNDPEHQNVHTIYARSGFQSVNTIYIRNTNLE IKHSMEGEQIYPEVHIRAAAAYRENIFYATTSFRSEIPVPPFSWNEYDIRHTAVDFETAIK GASFLAANCESSNKREQLVEALIRSRLRVDSLSSCLRNAKAPPGVDMRNKTAIMELYLFH LAFENQNADDYITEKLGWGLAAGTLPVYFGARNVKDHVPDINSIIVAEDFKTYQELSEYLI RLTNDKELYESYHTWRSQPFDDAFRSKYGFCTKTHSSCRICKWAFERHGLAWNHHKQTVT EPYIDHKTCRNKVG LIGHPFKEYWFSSSKSSKADAPIASTHAMKTCTLDSDNRIEIDHG AI RRKVFDGDGVTDLIIDVAKRKSHDPTSMGNNNADSYILRLEMLNTAGANQGPALN DSVWVWFQDDQSRFYVMVHSSNADSRLSVNKSGMADIKIRPSLESSTTTGRIATTTTRVRL VENVDHFHAKTKKTASFFGDVMMRDFEFEPVQSFX

>comp14826\_c0\_seq1; 324 393 1865 LEN=1976; translated  
MILIEEETSTELVMQRSEYLDKIADNKAVGAENKPWSGGADGKINAEGNDHGSSTSPVRS SNFGDEGEPGNGTKKEKESEGDVEEVSIEDEKSCWDGINKFRKICGRMVNNPYVQVTMI I FIFINAAMMGWATFPYIKDNDTRRTAFEICDLVFLIIFTIELFFQFIYLGFR LIFDPWLN FDLVILISISWITINQAAGLQIFRAFRIFRTFRLITRVKVMRDLTALGSSVPRMSA IILM LFLILYIFAVMFTQLFADAGEIGEFQHNHYFGTMQDTALTLFQMMTMDGWADINRGLMDAG YSYSPVLI IAFVLIISGFIVVNLIVAVICDGISDLEDEKQKLGFGGENASADYE EPIELR EQLDMIEDQIGDLTRIQAQTFHTLSFLSQQLQAQKEKRDKNPNDSDDDKPNDS SSKPAGGKS NPNGNHCEDIQKPSGQSDTRQNYRDMWTQEGSMKRLRNEAVSTFAKAASDLKKVRESE GK MSYEPSSKTL

>comp14827\_c0\_seq1; 2161 183 7166 LEN=7387; translated  
MKKSNKSSGASRYQRQFGQGNQQQLQSENISKAEEAAARRRVRQE QSERIDSKFGYHRL EDQFQEQQNDLALRAEGGDGAAVNKLTQRRGWLFNMAATTRIDSSSGDEL SGLDLYFVDS DGGNFKTTVLHRPYFFLLTKKEDETLGQLLLKFFAGVLAHVEQVAMRDLEAPNHLSPKHT HRMVWKLIFQNVSQLMDVRNQLRDMLKSQESNTNENGNNGYGNNE SVDINSILSSQDSGR VLDSWTNIQELREYDVPYVARVCMNINIRAGTWYTVTLEKTDDASPPHPVLSDPDIETKA TPRVLAFDIECSKAPLKFPNADVDEIYMISYMCSDGKGTPOGYLITSR SIVSEDIADFEY TPKPKYPGPFKIFNEKDEKALIARFITEFQKYTPQIVVTFNGDFFDWPFLQKRANSYDID LWTEIGICMLGGGGSDQEGEFRGKCCVHMDAFSWVQRDSYLPQGSQGLKAVTKYKLG YD PVEVDPEDMLPMAMERPVMATYSVSDAVATYYLYEKYVHLFIFSLCTLIPFGPDDVLRK GSGTLCEILLMVQANDLDIICPNKQVDPLAKFHKGHLLSEITYIGGKVECLETG VYRSDV QYEFDLVPSAFQQLIDNIDRDLCFAIEVEAGIDRSEITNYEEVRSKIIEALELLRDRPKR VENPYIYHLDVYGAMYPNIIILSNRLQPSAIVDDATCAACDFNQAKNDCRRMEWVWRGDYS PSGKQYKRIKQDLSRETMDGRHFKDLASNEQEQMVASRLKEYSRNVYRRTKITTEEVTR KDIVCMRENDFYVETVRRFRDRRYDYKKMTKTWKKRIGSASDAVSKKEAEDKALVYDSLQ VAHKCILNSFYGYVMRKGARWRSMEMAGIVTKNGADLITQARVLVEQIGRPLELDTDGIW CILPKSFPDIYTFKGRDGSKLKLEYPCVMLNADVHDNFTNHQYQTLKDPKRGVYETRSDN SIFFEVDGYPYRCMVI PSSTEEGKLLKKRYAVFNFDGSLAELKGFELKRRGELELIKTFQS QIFERFLDGNLEECYDSVAEVANHWIDVIDTRGESLDDDELVELISENRNMSRQLADY G DQKGTSTTARRLGEFLGAEIKDKGLNCKFI IAEQPYGAPVTERAIPTAIWKAEPVAMR HFLRKWLKSPAIDGDGFDIRNILDWDYMERLAKNIQKIITIPALQKVRNPVPRVSHPA WLLSKVQQMNDKYQOKSILSMFGRKKGMAQISNNSNESIPPVPMIEDIVSGSVPSKVG R PVVHKTKRPSQRTLKEITEADENEQIEDEDRIELTNGGDNFSSWLTQKKKLWRKSRNQ RK IARLTDNRESQSSQTGTHSKSMSTLEDFVKEASLHLSQKEWQIIELEREMTSHDTGKRKK SSSGFIWVMVGGSLRKIQISVPRTIYI STTEVCCNLKQKIDFRKVDKHLPHSKNVQF LYELTMPEFVYQTQSNWTSSIVPLDKNFEDRKKILREVYETSAPLMSKLLSQLGSISKFSQ VNGSKKNKSFNLRDLKVMNKPTGYLLNNTLYTKRCFLYVRINPTSKTGLVALFTIEGG SGKQRVGDNDLTVPSKSGIDSFDISTSCQLWIVRPGSSMGQKNVSKRQASELSELLATI TIEEDDFESEYSCVSKASKCDITDLTFVDEENVAYSTANESVNKYLQSNQGTFMVTSS RSLTHLRRFIPSLNSLPTISSPFPPEHNPVASSLPALNWEQPIVQRCLEAYLYMSVVS

FPKRVEYARYGNLPIGNLGDENLTLYDSSLNRMISKNRAVSWASTVSGQPD LGASFFPS  
SDGKFRPSIQLVGSDGVNSED I WSDENELLSPVIRRP GSYRTL CVDIDLQYLAIAAL TDT  
ANLAINTRVKNDFG SPTSVMQSESSGGAFK LSEPLGDEMSTATSLPMVRALVEGWLRDAS  
KSNSSVADSM LHN IYRLISSPEALMHD PALHRALHSLMRGTFMRL LRELQRLGCIIVYAN  
FHKITVATNKSSLEDAE EYINFVISTIRSHIGENGESSGLARVELRPRQYH THLLFMDE  
YNFGTMQLNREYKDDVRGGFLIEDDSNQEAVVVP SVVTAWSLMNYMGSEIAE EYFR IIVG  
RFSRDVLKKE TELRNKNGNVGLPSLFDME LNEEV LAYKKK MISKLFASTL TRAVGEIVKE  
EEDNRNDNDL SRRNLLTSSD GANN SMLEFVKSVIA ILELDDEVGKEIHV LKRSLLAQIG  
VAEYSSMAKWQNPCPTMMLPDCYCKE CQESRDVNV CYIPPVEE DEETQIHWFCENC GA EY  
DVDAIERRLIDQAHKMLRYQLQDLRCTKTNRVSTHLLAKVSQCSADW

>comp14828\_c0\_seq1; 177 248 2747 LEN=3482; translated  
MKKASGEWKGESDQEHDGIPLGGSTSNSEGYASNSLV EEP AALVGHSYGS LPGAKEQQLP E  
KRPDGNANAPLRSGGSGSRKKSGGLPPLSLYIEAGNFRRASERARKHPGEVKAWAPIPIK  
SSPRSFSGDGKTLKRLALHHA CLKVSDSVIEWVDFFXGKKPSIIVVTIYT TAATAIVNGA  
SSFAISYSNVMPNHKLQCSXFLATNHRIQLRAASGRKTMDEDPFVELCRLILL LIE LH  
PRACAERETR HGCMPLHLVAFASCAGP SERARGASATDNH HGGSGSVNAPRVLS P S S TFS  
TSALSSALPSPASHCEPRNSPKLSRPVILSHNQRSVSEGTAA TQRTTMSVAIAE EKYTG  
IQSEYHELQQHQGGQPQIQSQSVSMGNNV FVSAEREEWAVKVVNALLDAFPRAIKMSSE  
GGRLPLHWA AGRATPRVVSTLITAYPDAAKHRNKDGCLPVHLCAHWGISHSAVVVSM LR  
SYPDATYGNRWERSPLEEALCMAGENGRPHQAVLVRALRKHSHWTRPEGVLFHQ PQTS  
RRDPMRNLVD TDETVD SMENSFVDAEAIYEDSLFRDERGAYGKPPPKNGLQEFDLQTLIV  
QQNWESVAHRLDSSPTEARVSLRVPTRGGFTSSSGFAPLHSACENIPPK EIVEKMIHLHP  
EVVTQR FMPGGK LPLHVACTWHAPKESIDVLLAANRNACKIPDELGNLPLHLACFSGAPP  
AVVEILLKAYPKAVLYRNNQGS LAEDITKRLKHDSRTLSISLLHLCRDEVNRKRQMKHRR  
NRSDGYI HSAQEGAVMHSRDSQVNPTHYLIDHCESEEIEVTYSGESEAKKELVW

>comp14828\_c0\_seq2; 152 248 2551 LEN=3286; translated  
MKKASGEWKGESDQEHDGIPLGGSTSNSEGYASNSLV EEP AALVGHSYGS LPGAKEQQLP E  
KRPDGNANAPLRSGGSGSRKKSGGLPPLSLYIEAGNFRRASERARKHPGEVKAWAPIPIK  
SSPRSFSGDGKTLKRLALHHA CLKLRASGRKTMDEDPFVELCRLILL LIE LYPRACAE  
RETRHGCMPLHLVAFASCAGP SERARGASATDNH HGGSGSVNAPRVLS P S S TFS T S A L S S  
ALPSPASHCEPRNSPKLSRPVILSHNQRSVSEGTAA TQRTTMSVAIAE EKYTG IQSEYH  
ELQQHQGGQPQIQSQSVSMGNNV FVSAEREEWAVKVVNALLDAFPRAIKMSSEGGRLPL  
HWA AGRATPRVVSTLITAYPDAAKHRNKDGCLPVHLCAHWGISHSAVVVSM LRSYPDAT  
YGKNRWERSPLEEALCMAGENGRPHQAVLVRALRKHSHWTRPEGVLFHQ PQTSRRDPMR  
NLVD TDETVD SMENSFVDAEAIYEDSLFRDERGAYGKPPPKNGLQEFDLQTLIVQQNWES  
VAHRLDSSPTEARVSLRVPTRGGFTSSSGFAPLHSACENIPPK EIVEKMIHLHPEVVTQR  
FMPGGK LPLHVACTWHAPKESIDVLLAANRNACKIPDELGNLPLHLACFSGAPP AVVEIL  
LKAYPKAVLYRNNQGS LAEDITKRLKHDSRTLSISLLHLCRDEVNRKRQMKHRRNRSDGY  
I HSAQEGAVMHSRDSQVNPTHYLIDHCESEEIEVTYSGESEAKKELVW

>comp14829\_c0\_seq1; 185 1 769 LEN=1263; translated  
XPPLSQSIFLFLTSSPNPFADSSFP ISSNATMIRVKSFMRSRVVCLNEPFPFRLLYLLATT  
IVLAFVTMGPSCLGFTASSPCCFFGSS FSSMVARESSRGYPHPGTGRQLLHLKSDGLTPE  
ERDIKIGKATKAMTAFTNSYLKNTNTTLCSEKSIAAVVIKGLAEHKVDLGAPLCPCR FYD  
DKEKEVKDGYWNCPCVPMREEKVCHCMLFLTEDNAFAGDCKVSLNESKHALALRSTGHAC  
RTSSTIHTELRKH MID

>comp14829\_c0\_seq2; 203 1 709 LEN=1069; translated  
XPPLSQSIFLFLTSSPNPFADSSFP ISSNATMIRVKSFMRSRVVCLNEPFPFRLLYLLATT  
IVLAFVTMGPSCLGFTASSPCCFFGSS FSSMVARESSRGYPHPGTGRQLLHLKSDGLTPE  
ERDIKIGKATKAMTAFTNSYLKNTNTTLCSEKSIAAVVIKGLAEHKVDLGAPLCPCR FYD  
DKEKEVKDGYWNCPCVPMREEKVCHCMLFLTEDNAFAGDCKTITVDEVIELSEKSK

>comp14830\_c0\_seq1; 183 315 1199 LEN=1507; translated  
MRSCCSITERTTLAAVLLLAISGVSNGFVNGPNTNPRSLASETIATTPPFAYQNLPTFN A  
NTALATSSDSEDVLYSFGAEV VPEGQRPVNEYLD MKRAPLFGWGSNEVGLQGLLIRLGIS  
YAAIFALVCYPIAGATFTQDGYLLQKIAAANVGALGF EIALLVRIYSGWGYVGSRLQSKV  
IEYEETGWYDGNFEPKTEAELKRDKFLFQSDVQPAVDRLKLVTLGAAALWVGSCVALNAA  
NSLKPKFNEYDPRVLKMMVQDEDFANAAAKAAGNRPTYCDNRYR AVANGGQGC

>comp14830\_c0\_seq2; 148 1052 1627 LEN=1935; translated  
MRFETRAHYRCRIRYYCIQQTNNHSCYPIAGATFTQDGYLLQKIAAANVGALGF EIALLV  
RIYSGWGYVGSRLQSKVIEYEETGWYDGNFEPKTEAELKRDKFLFQSDVQPAVDRLKLVTL  
LGAAALWVGSCVALNAA NSLKPKFNEYDPRVLKMMVQDEDFANAAAKAAGNRPTYCDNRY

YRAVANGGQGC

>comp14831\_c0\_seq1; 727 184 3048 LEN=3099; translated  
MSWGKSRTILRLLSLSRNRHRPDIRGIATRRRDLWPPRRNEDSRALGSSLIHHVPPGRRS  
WSSSAFFSTAPSAEFSDEEDGYDETLRENPSARKRGRRKDVPGTSTITSMNTDYEEESTIDR  
IVSSGIGEYQSLDVRTAVTEGYLQRLVDDHISNKSkipPNPMLLNMLELMHNEETHLSN  
DTVLKIFREVVRSKRVKLLERAEDVVVKNRYDPRLLRMLVTGYLNAGAPRKAYQLMEWP  
TESMLHQPGIESYRRVLAGLGEARNRPKRTRPAPSERNRNRNNGEGRKPDRTGTTDNSHCS  
DDDTDAQRDDEKNYLHAHQLLQHMCRTHAKFPELSLAPDRDCFHEALGSCSSIGSLSTAK  
GILEDMQRFATSPERPLDADLETTGRNNGIRMPAALDTPNASTIRVFNNAVGNKRNRK  
EATDAHEEAFGLRRIIEETLTWPTDNGSQPIVDIDCYNVLLNVPaelGRFELAEKLFRL  
LMMDYLGDRSNVQPDEVTLNTVLKSHVKANTEPAAVSAEFLDRLDHFQEQRRLQKKK  
HGCPDPPRVVHDIQPTARARSTISNLWIKLRQPEKAI EVLSKAESVYREKEEKLASFREH  
YPNNSHMYRTDSIKQFKPDKITYRQIIGALSKELEDPPTAALAMKAE EIAERKFQMGHRLN  
LRTSNTIILNCWAKAGQPERAERFLEDEMVERYQVIPDIVSYNTI IHGYARLGNLDRALEL  
LTRLLEDLSLGGQAQSRYPKPNARTFTNIVVALSKEHSIEAEEEAERLLLKMHELNDAPY  
NLNTRPNNITYNAV MNCWASLSLPS S IRERRYKLQH QEKLNKGKAKKESNVHGDGVC DNK  
NEHHRFGRKAEFVLRSMQGLGADEMP SAISYNIVIRAYSNDMVKA EKLLRDMI ANGLEPT  
EHTFNTLVHVLNRDFRIVDKEKKLEELKQNYFSSQLQFAARDRSPSHRNRKVTLK

>comp14832\_c0\_seq1; 734 1 2578 LEN=2847; translated  
XLCGAAQE QEVTERIKSSIDDPLGLELAGHALLDMYAERRGSLFSDEIYRLTKAGDATT  
AEDGNNGNQLPNNKFSKNDVILLTLQPLGSGDFDPRHLPTSSSSTRVEARVLRNGPGY  
IDVA INAGAF EANFGPAPNNEGPSGRGDP SMRLRADRFFSSIPYERMVEALTRISIPER  
EPQPSPEGTDQKRGDGKHSKSKADDARNTNAAPYSNICMDDLREAVISSHSFTDPTSP  
MFHDVDSVDLVSLERRLSQPPMPSSVMLANQVLN VYQANSVGDKAFKPLNAPQLAAIGAA  
LTRKLTLIQGGPGTGKTTTASVIGFGYTHKCRSLSPNAKVLACAFSNAGADNLAEGFLQL  
GLKVVIRIGKASAI SEGLWDFTLDAADADPDARKAMQSAASATATLMKIRKDKKNRNSNG  
AGMSERAAQEIATTAVKRSIWACNIAATKAMREADIIVSTCTGAADPRLMAACGLNADPD  
ELLEREERHANGDRTKQRQAVPKSGTDKPVDRTIAPDGLPPLSLPFVIVDEACQSVEPGT  
LIPLTASNCRSLVLLGDPCQLPATVKSDPRSSFVSLSMERLAATLPAPRIKMKQENIQI  
DLEFADALPAKQARSYLI SQSRDNANVSYRKRFA GCLLLSLQYRMHPSIAAFSSAIFYDG  
LLGSPASVAGQRPFPVSVLSEMMPCVDPSVGVRMIDVGGRCNEMKGESNQYTETVFSNTN  
SIAQDTSTTYRNEVEAVRVVSLVKEILEFDHKYNPHDAKKIGIISPYNGQVHLIKSLLAD  
DRDIISLVRSTSAIIEVNSVDGYQGRERDVIIFSTVRSNHQGNIGFLTDWRRLNVALTRA  
KSALLVVGDKDTLSEGDKYW

>comp14832\_c0\_seq2; 990 142 3084 LEN=3443; translated  
MNATLRFLLAAMAASHPSCLGFSVSSLSGFHGTKLRPSEPERGPASSGSRGGSSPARGCI  
TMRKQKASDRRTRRMQRGGEELAQDMILGNLSRREVTITSSPMSKKGWQKRRRTSDRIDP  
RIKSGRGRSRKRSLLYNSLSLYHNKFLNFLTTEEYKAEQE VTERIKSSIDDPLGLELAG  
HALLDMYAERRGSLFSDEIYRLTKAGDATTSAEDGNNGNQLPNNKFSKNDVILLTLQPL  
GSGDFDPRHLPTSSSSTRVEARVLRNGPGYIDVA INAGAF EANFGPAPNNEGPSGRGDP  
SMRLRADRFFSSIPYERMVEALTRISIPEREPOPSPEGTDQKRGDGKHSKSKADDARN  
TNAAPYSNICMDDLREAVISSHSFTDPTSPMFHDVDSVDLVSLERRLSQPPMPSSVMLA  
NQVLN VYQANSVGDKAFKPLNAPQLAAIGAALTRKLTLIQGGPGTGKTTTASVIGFGYTH  
KCRSLSPNAKVLACAFSNAGADNLAEGFLQLGLKVVIRIGKASAI SEGLWDFTLDAADAD  
PDARKAMQSAASATATLMKIRKDKKNRNSNGAGMSERAAQEIATTAVKRSIWACNIAATK  
AMREADIIVSTCTGAADPRLMAACGLNADPELLEEREERHANGDRTKQRQAVPKSGTDK  
VDRTIAPDGLPPLSLPFVIVDEACQSVEPGTLIPLTASNCRSLVLLGDPCQLPATVKSD  
PRSSFVSLMERLAATLPAPRIKMKQENIQIDLEFADALPAKQARSYLI SQSRDNANVSY  
RKRFA GCLLLSLQYRMHPSIAAFSSAIFYDGLLGPASVAGQRPFPVSVLSEMMPCVDPSV  
GVRMIDVGGRCNEMKGESNQYTETVFSNTNSIAQDTSTTYRNEVEAVRVVSLVKEILEF  
DHKYNPHDAKKIGIISPYNGQVHLIKSLLADDRDIISLVRSTSAIIEVNSVDGYQGRERD  
VIIFSTVRSNHQGNIGFLTDW

>comp14833\_c1\_seq1; 337 1 1309 LEN=1544; translated  
XQQQQRQQQKLLKKKPTKIIAGKGFDDGKTQTNQWSKKPENNARKSPTGDPNKAQKE  
WNKPSYERTKINQNQSSGSHTKQTNAKTTQTKSYQNNSRQGGNWDFIARVQSRDTADT  
IRKFLTVSNAYPEQVKYALGTATLELDQQREFVVKQDPSDKVNYNALRKMLQKNALPGW  
LEWFQRRGWV MATNKTPVNYHREIHEAYTTAMRSLKADPDLKRCLVVLVYKPDPLT  
QENGGCPRNGVRQNTHTLWKAAEKESLQDAVGKVRPFLEVLRYFCTDPKDKWTTLPWL  
PSINRSDCAKRLDRISDIVFRLMRTSERGPDVPVHWAHPPLNHYPRSTITSKTMDLVI  
GLTNIISNLFLCYPITVDNLDGKVKVLRKFSSTSLLAGSGGDSAMRRSSSGRAKADN

IDPLENLNGLSISND

>comp14834\_c0\_seq1; 1380 476 4212 LEN=4379; translated  
MNNNGSSKXNLQIGGFSSIDFDLDLNEINNRSKSRQPQSRQSQTEAPGNKPDGRFIQR  
QKRSDDNYDTGGENNISPKVVPTPKPPVTPDVEFNDDDYDVVVLDLDMVEWDYTEDEPGP  
IDNLINRPTFAPTTKAQILNDVDDDDYTAVVIEDDVPWDDVVVKETAKDAFDAIEAENI  
EVDVDFDANSNTSNDDFDYETEPTITPRPSNSFRPTPLASTMPTNEPTTKSSQTPSVQP  
SSYPSFLPTNHPSMVPSISPTNSCYDDVTYRSPINGLSCSQHHGTNCLNWRFIGLNMTEL  
DELVGACPETCNIDCGSFDLFMASVTFRISRVSGFMGPEVIDDFLMFSINHLESYVRNIG  
WNVNSDEVSRSDLLIESSNPDGCCQEDDFKDDVVDGRPVVFEIEDAELTRQDLVEDPT  
GRFENSREDHRSELSHNSNDGGAFRKHRALRMRGLNDLQRTKQKPGGESILKTDEALDVN  
VKFEGFTIGMNPESMSELLVLGIDDDVDFTRKLLQKSGIDFFSDATVSSAMETEEDDLPFEE  
NFTEENRSNSTFTVVISYMVPIVVIGFALGVSFYHRCYKKGQTTTYQDRHHQRHTERAQ  
FGGMSATPIAVGIDNSDNSNSNSIIGSSESDGRFFSSNRQTSSVDCGINAKEGDKQSAFS  
KLISTLNLNLTLTKSKNSTDEDADDTTEEIPNPDDGTSRSSSSSDEPEAKQRREIPVIGSPL  
VSPMSDGSEGKESSENKEAFETFENILPPMIVIDNIDVPDSEAVTPVMSATNASGRGLV  
KDTSFRRSSGSQMEELDTFASEFRKQLLTKSDQAVHSRHSFTGKLYNGYSNSSTDLRSQ  
ANIFGNSRYVGDEDEDQDQIIDTVSEDWDGDDLYPPIPSNITAEGDGNQAGLDDEFDR  
DQAASKSIWTSSPINLSKKRAYGTWDGNPSSSSDMPDADTDLSTSSIPEALHRSVKPEIL  
PRRRSSLPPKRPTPERGNTRKNAGGGININEKSPVGKNSAFSFTPIARAFVGSNSTDS  
GGHRRKSSADTNDLHLVKNSSLSALSSDDANTSTKSNSSSNKDNRAARLEFEAPRQGN  
WGLVLESSSKTGPRYAVKDYSPFLGFLIQKGDKLEIDGKNVTQSNLTEVTKILKGKSSS  
YQYHRTSSTSMPIVVSRRHPSNDESRSAEPPVIGSFAYNTSFSSDDHTAYNQDQNSKYGS  
WGSMSRVLEDIDEDHYNVINDDVQDQLQQLFQHHLPYDSNEI

>comp14834\_c0\_seq2; 974 1 3051 LEN=3218; translated  
FLPTNHPSVQSSYPSFLPTNHPSMVPSISPTNSCYDDVTYRSPINGLSCSQHHGTNCLN  
WRFIGLNMTELEDELVGACPETCNIDCGSFDLFMASVTFRISRVSGFMGPEVIDDFLMFSI  
NHLESYVRNIGWNVNSDEVSRSDLLIESSNPDGCCQEDDFKDDVVDGRPVVFEIEDAE  
LTRQDLVEDPTGRFENSREDHRSELSHNSNDGGAFRKHRALRMRGLNDLQRTKQKPGGES  
ILKTDEALDVNVKFEFTIGMNPESMSELLVLGIDDDVDFTRKLLQKSGIDFFSDATVSSAM  
ETEEDDLPFEEFNTEENRSNSTFTVVISYMVPIVVIGFALGVSFYHRCYKKGQTTTYQD  
RHHQRHTERAQFGGMSATPIAVGIDNSDNSNSNSIIGSSESDGRFFSSNRQTSSVDCGIN  
AKEGDKQSAFSKLISTLNLNLTLTKSKNSTDEDADDTTEEIPNPDDGTSRSSSSSDEPEAKQ  
RREIPVIGSPLVSPMSDGSEGKESSENKEAFETFENILPPMIVIDNIDVPDSEAVTPVM  
SATNASGRGLVKDTSFRSSGSQMEELDTFASEFRKQLLTKSDQAVHSRHSFTGKLYNGY  
SNSSTDLRSQANIFGNSRYVGDEDEDQDQIIDTVSEDWDGDDLYPPIPSNITAEGDGN  
NQAGLDDEFDRDQAASKSIWTSSPINLSKKRAYGTWDGNPSSSSDMPDADTDLSTSSIPE  
ALHRSVKPEILPRRRSSLPPKRPTPERGNTRKNAGGGININEKSPVGKNSAFSFTPIAR  
AFVGSNSTDSGGHRRKSSADTNDLHLVKNSSLSALSSDDANTSTKSNSSSNKDNRAA  
RLEFEAPRQGNWGLVLESSSKTGPRYAVKDYSPFLGFLIQKGDKLEIDGKNVTQSNLTE  
VTKILKGKSSSYQYHRTSSTSMPIVVSRRHPSNDESRSAEPPVIGSFAYNTSFSSDDHTA  
YNQDQNSKYGSWGSMSRVLEDIDEDHYNVINDDVQDQLQQLFQHHLPYDSNEI

>comp14835\_c0\_seq1; 503 464 1792 LEN=1938; translated  
MATPRVGLVGLPNVGKSTLFNAVARTADLARAANFPFCTIDPQKSPVPIPDPLYEELSKR  
FVVVPDGGTLRPARIELVDVAGLVKGASRGEGLGNQFLAAIRECQIVHVLRVYFEDGDVM  
RHESI EASSTDGSDRATVVVDPVFDAAIVDNELLADLAHVERRLGRIKDETPKQALNK  
ALLALRDSIPVRLAGLSRDEEFAIKSMGLLTLKPVIIYAFNVDELDFANRGSVTETIRRE  
FMPQIRKNNNCDEASGASSAPQHQDDFVLVSAKVEEDLLSLGESEDQDEYISELMSMSTTT  
TVGHDANDTPLEWHYQDLSYRVLPILVCRLLSLSLCYTGPVPSERSQTTKSYLFSNN  
SNDQNEADQEMGSASSGMTVFLGGRIGHDLQKGFVRAEVIKADELLRFDSFREAREAGS  
VRTEGKYTIENPNTVLIKWRQ

>comp14836\_c0\_seq1; 1324 1 2607 LEN=2856; translated  
XSGGGAGLSTGAGTKVDVTMKLSQLQNLVCRDPDSGYREDYEAQIRRLRTECEILTISPV  
GIVGGGDASSAVRKTSKSSSSGGKLEELIQFAAATASSSYKGESDRVAIIIGLLVGER  
PSEDNDVAVEEPETKGNKQKQKVRNEDLHMTTILPSAALQLPRDIRKTCVSALILMR  
NKGAL EPLRVLELFFRLMAVVPDKTLREILYKHMVNDIRNINKKGRDERVNRAIQSFLH  
RVVATHGQEQRRGGGAENNEEAATDIAAKRATDMVCELYRRQVWTDRTVAILATAVESK  
NMTVASRAMRFFLNIEEKMALDSSVKEEEDWASQKVNYHSFSRKTKNRVNHVRRQLKSR  
NRMQRKREGTETDDWMDVRDDEGVESAKKLYPAIELLRDPQGLAESVLKRLKNPKSSIPF  
KNKLLMMNFVTRLVGNHELMVLSLYPFLQKYMGGHQKDVTVGLAYSVQACHESVPPDEVY  
GILKTIAHNFVTERCSEEQMAVGINAIRAICARTPSVLSIEDSEDSMETSADFVEAFVRD

IAAYSNHRDRSVSIAGKSYQNFIRETHPSLLQGNRGLRGSALHKAKAKPMRYGEAKVNY  
GVEGADLLLEYEAKKAWEREQERLEAEGIDGSDDEGETEEAMNDEEAAEDEDDEEAP  
DLIVVDPDEKEDETEGEKEDEVMDLSKMTQEERNKLLKQEISATRIFASDFAKMRKLV  
EERARDPREAARRKRAIAQGREFDELSEDDWSEDDDXDSEVRIKGA VNPDSIMAEAKR  
KRKSKAERLQKVLGREGKFESENDRAGGSTNTEKERKKNFLMSKTSKRARSKGRGKGLTP  
ARGHGGMGQKTQGKTQNYMREARKRRRKT

>comp14837\_c0\_seq1; 456 186 1823 LEN=2166; translated  
MHKYAEILVLLLCLGGSIFVLDNQMYQALFSYVDILEANDAVATSNYSSGGNLRKPPPLS  
SLTDTPESSFLSPTGTSLLEPIDKKISMSLGFSNITTFEETMQQRGEEKPKDMNNEN  
SNTFMKDNNATHTMQSASSGSKQTLVWNMDAHEAIRTGAQLDTKGIKIFLVEDEKGYVNSN  
GKLVVDVNETYLFWDDGQEKLCNLLQNMTLSRPLDKINGTPIPSTVLNVTMDCIDHNQNK  
QGFQGNWITAVYAARMAAYLAGVDFNFQCLDGDQSKMSLLLPWFDKYQEAQPTNRKLWP  
HGGIRPTEKEACTPKYPFLRIDKMAFEIQDELKMAVTLVGTDRDQVRQHPDVPIDATPLI  
PGVELDDVALHFRCGDVLGGFKRSDFGMIRFSEYKKWIPNNTESIGILTQPFDIRYNRLK  
DRKNAEKCRIVVNVLVLDYLDQDFAPNAKISIHNGVNETHPLAYARLVMANISITSLSSFGI  
FPIIGTFGDGYFQKGNRGNVNFATHIPKILPNIHEMRADVRATGQMLGKSMENIVEWFVN  
DTTIP

>comp14838\_c0\_seq1; 333 1 1461 LEN=1725; translated  
GMHWQWSGKGA MAPVQERNNTSTTNVNSDVNRRSSRTPPRKDVGFSSHYSRKQTQSVM  
NISRMARNVYVKDFLFLVLLLFVVASIYIFVLECSQSENVKSRMFSMNSLGNKNMNYHGSGL  
KITVHPKHLFRESYQDAPKCHPLVEREVTFSLAIALSEKEISMVSHHCKRWGAAPISIA  
VWTNLSPEDVMKKIQSFKYNECREEQMTIATLSSNHEFSESSVNYPLHRLRNLAIQGVQT  
THVVPLDIRMWPVSELYETLNTPSVVRELSKNPHLAIVLPSFEVNMKKCSSHKKCIKHIP  
PTFESLVMKLSDKSVDVMDPLDNSRQGSTLYRSWVKQSNGELVDIDCVSSNYEYEPFLAVR  
YCESLPPFQEVFRVEADDTDEGLEVGTKDDLSTWTLHLLRIGYSLKQIGGAFLVNIPRE  
KKANTGPDTS GDAVGSKSRVSHLRKTNHQVHRRADFVQWLGRITIPDRRVVQKCDDFEASE  
DAPPPV

>comp14839\_c0\_seq1; 135 457 1365 LEN=1877; translated  
MVHDTQAYRIVPANGCASSTEGSRRRLGSPATRLFGRGKNRSSSSRQEPPLPMLRSLFD  
SAFGGGGDTGFLAQFTASRKKTSVLEAGAEALVLGDKRRRKEWTRDVGRRQFPWIPAEV  
LSACTDGLATAFASIAPRDLKRALRPGGLEEARSRIGRDLVRSLEDQPVVRNLPPLPREDR  
KKLLSQIVGLSLEFFLRDLESAMAEP SAKLLELDREVRDLQARMPFWKLAWYRLRHRPRS  
TLFVALLSLWSLCATLALARQHPDVPGVLLRRSRRAWFVSAAGSLWAPAAKRGGRFVLR  
PP

>comp14840\_c0\_seq1; 626 1 3765 LEN=4200; translated  
HQNQKPDLSRRLVLLQLPYYWFAILEALSGRLPSCDRSKSCGNLASLSLPKKIMLRDRI  
SHVPNAKSSVELLRESLLKESRRAIQRKRESAKFLSSLLDTNETSPSPSTSTSTSTSTLT  
LISTLTSTSSQTI RSASDSGAQKENFETKSRSSKVSKRSSSETKLMNSFNQFLSTETAKSC  
SHSNRPLASGTMEENTENCDSVAPDQQA EAVTDSNSASRSYRSRARYHSSRYTATLYSTK  
VSYKPKKDFPEKKEAEYESSKTQSRWRKTVESIMRTRSKSRSRVKSESPSRSQSTSRSKK  
TNSRRRLKSESPSRSRFLGNSNIITHSRRLKSESPTRSNNTSGSEKTSSRRRLKSNSETR  
SESPSESNANSRRRLKSESPTRSER TLVSKRTKSRRRMRSETRPGHKTSTSSSRGGEDKE  
KQTDGIKEIEYETFLDCSNSFNSPVVKSTNPRNIESEKNEQLQWHYAIMRHDWDDIKTMLQ  
SYDHTKYRKQNTTQQRSRILNIVRDKTKIIQRSPLLNVDKGRTPHLHWACKENMPYWL  
FRLLFVVRTAASIQDNDGRYPLHLAVINCPDNKILDRVIRAYPDALCSPDYLNHIMPQYA  
LLKADRSRQGNKCITWNHPITKEHASDQLSQTESFETVLFILQTMASRRKGFTMSLQNSC  
LIPSIRLFA PPPVHLIVSLSMKILEKDQTMSEDLGLVFRKYLNVVNVKVL EITSKII  
PRSHFLKVI RQELNDHFNEGWVEFSIEGSQGEDICDCFAQQFANSIRSDSQVEEVETYS  
AQEWGEKLRYLITKSSNQPSGSKNDTLHTALSNTSQPSMIEYICRLNPGARYKIDNST  
GALPIHIACMYWHPEKYGVGDEISRKA FNLLLAGDFDLVRRSCNGRIPLHYAILHGKPL  
SFVQSLSLDLTTLIPDPVTKLLPFQLASMSNEYEDYILANTASSRSLRLDSKLGHT  
NVIYHLLRANPRVLSSTKKNDEPESEMNLTRHVLKLCYDIVPCGDKMVVNLNFKRKYMV  
RHAIEKHHPDEMKEWFMTLEELIWDACDARKGPDSDSTTKLRRSDDNFLYATLLNSTDI  
PHFAIELILEFFPTAHRNGHVATLPLHTAAQVTPYLPPLPFEQPLSMDSTLEMITLMDSS  
SLIILKTKDGR LPIHLAIASGKGWKHLRAMVAIAPQTLIRDPSSGLFPYQMAACGSAIIP  
NNREISAKMADPKLKS VSTKDNAQLLRSLCNKHELEKLN SIFHMIRAKPSVIGM

>comp14841\_c0\_seq2; 324 169 1311 LEN=2058; translated  
MHGRTSDIVLLNVGGTLFTSSVSTLVSSSSYFESRLSKEWQEODTISEEPIVIDQDPKVF  
SILLSYMR LGYINADEITTPVLLL ANFFGIEQLIRAVKAEARRSKFEGQNLEIFYTAQAA  
FLVTENDVRKEFASVSMYNPDFLSFVDYLGPNMNEGFLPVPDFVVSVEIPREDGTVEKV



PNCVTFIDALNYLNKLGTRYEKDMIETTTTHYTEIQARLWFSKLILHDVEDMEVDSKEEF  
FALNKTIIRSPTRDKQKSYPRQFCVTESHCVRDLDEDGRSVLEAQVGTTETRQIHHS  
ESVEFQISNVQVRSSVQNMNSRIKQFNWLQRQGYIHSEAEIAKAYIVAICKLKAKWFPN  
KIGPEKVISIWSRPLDKKIDIT

>comp14842\_c0\_seq1; 564 211 1389 LEN=1938; translated  
MKVFRGALIFLSLPKVAAAFSTRHQRSKAKDRDPFLLDHISEWRDMIFDNAPQKLIAD  
SDGEPVREVCIFFPPTDVLVQGETKELCLYEQRFHNLFKKATDDHAGIVAMGFIAPPSG  
MLQFMPLCEVENFQTMEGDTGFGNTSILATIRVIGRAKLLDVQEPEEGIEEGFMKGWCTE  
LSDDTTNIGRDEDLIDVYNDLANQCEVLFNSIVTLQEKISSLEEKQKQKEAFEKSGSSEVL  
SEATLKRMKLEAELGLDDDEEEDDDDDYLDGAGDGGPRSFQKAFQTAKASDTQGYT  
VSLFDNSIDSTIPSKTSTAKTRSIQDLTALSWAYFSKDLWGEENDNTFDSLLKFRQA  
LNTVDLSDRILVSKMLIEQKKLNKKYQELQ

>comp14843\_c0\_seq1; 742 87 1751 LEN=1953; translated  
MVNYGIEPTFSNDESVEYPPPPDDYSAPYADEAAVDDAGYSVEPGYLDDAGHSVEPGY  
SAEPGYVDEPNLDSFHEDEFEHLEHKLKAEPYEDEVDEEELNSVSDIESVESAKREHV  
SKKALLGSLTLLLLLIVAAALGAALAAKNRQVNEQSEAAAIAEANAALIAPTLAPAKASTR  
RPTKSPVRAPMAPAKNSESECKSVLDVMCETSGLTVCDFKSSCGISDFDDICGAITS  
TDGGAFTVFAPRNEAFDRISERTQNILEDRLSVLNEVLLSHVVGRKIVEEELYCGNTVHME  
STYPTRTICSYNDVYQVQGNRSRFAFKITEYDLSTCNGVLHVVDNLIMPVAYHHRPDIY  
PVSPPSRKVPAAPNHKMPSRFEPSTQHHGTSGKDRLPMKPIRDKVLIDKTQPSFPDGF  
EDKIEVSKSCYTFGESIEITYQTCSPGKEDWFGVFRSHSHNTETKQMRTRPMYEWACGG  
NGETSSCGDQHPRWGKLTIDQPLGGGRYSVYTFSDVARPYTSVSYTESFHVARYCPTNHG  
SSSNKKYYREGKSL

>comp14844\_c0\_seq1; 400 1 1435 LEN=1690; translated  
XQQQQQPGSTPQAESTHKKRQRAARRMGDFMAGVAAGLSARKNAASA AVLPTHLDFSIRD  
RTDVSAKRRFQVKVPCRLMAILAVVFLVFPGLVFFHREIHIHDGNYEYHFKSEQYVNVDT  
EEVWESFRLANTKDDPVPAGHVAAEHSDDTPEMDAEQSRLGPNPPPVEKS AVVVVAAAK  
NTTEHLPASAEGDGHAAHAHAHDEPASENREEDYLPREDGSPPEDEGGEREAGVEASKEEQS  
PRGYESSPVLDTPEPSTSLTTKVLTVPQQNVLAEPDAAQGIHYKNTTHTQANTXDYKQSL  
SSVMVRTQCAAILFEITVRSLSLQAPRDIPTGASHPRLARMPSESVSSLSLTPRCASRC  
SGRQKWFPIGARGENLFFHRDAKSARARFAGNLSGTTTTTYTNALTSNFPSASGSITPFS  
VMIPMLQSGVTSKAGFQQGIPAGAFEVEINSSEERSSIGMLLPDSSVMSSEVMGAAT

>comp14844\_c0\_seq2; 430 1 1474 LEN=1729; translated  
XQQQQQPGSTPQAESTHKKRQRAARRMGDFMAGVAAGLSARKNAASA AVLPTHLDFSIRD  
RTDVSAKRRFQVKVPCRLMAILAVVFLVFPGLVFFHREIHIHDGNYEYHFKSEQYVNVDT  
EEVWESFRLANTKDDPVPAGHVAAEHSDDTPEMDAEQSRLGPNPPPVEKS AVVVVAAAK  
NTTEHLPASAEGDGHAAHAHAHDEPASENREEDYLPREDGSPPEDEGGEREAGVEASKEEQS  
PRGYESSPVLDTPEPSTSLTTKVLTVPQQNVLAEPDAAQGIHYKNTTHTQANTXDYKQSL  
SSVMVRTQCAAILFEITVRSLSLQAPRDIPTGASHPRLARMPSESVSSLSLTPRCASRC  
SGRQKWFPIGARGENLFFHRDAKSARARFAGNLSGTTTTTYTNALTSNFPSASGSITPFS  
VMIPMLQSGVTSKAGFQQGIPAGAFEVEINSSEERSSIGMLLPDSSVMSSEVMGAAT

>comp14844\_c0\_seq3; 342 1 1730 LEN=1730; translated  
XQQQQQPGSTPQAESTHKKRQRAARRMGDFMAGVAAGLSARKNAASA AVLPTHLDFSIRD  
RTDVSAKRRFQVKVPCRLMAILAVVFLVFPGLVFFHREIHIHDGNYEYHFKSEQYVNVDT  
EEVWESFRLANTKDDPVPAGHVAAEHSDDTPEMDAEQSRLGPNPPPVEKS AVVVVAAAK  
NTTEHLPASAEGDGHAAHAHAHDEPASENREEDYLPREDGSPPEDEGGEREAGVEASKEEQS  
PRGYESSPVLDTPEPSTSLTTKVLTVPQQNVLAEPDAAQGIHYKNTTHTQANTXDYKQSL  
SSVMVRTQCAAILFEITVRSLSLQAPRDIPTGASHPRLARMPSESVSSLSLTPRCASRC  
SGRQKWFPIGARGENLFFHRDAKSARARFAGNLSGTTTTTYTNALTSNFPSASGSITPFS  
VMIPMLQSGVTSKAGFQQGIPAGAFEVEINSSEERSSIGMLLPDSSVMSSEVMGAATXK  
RNLVKGGNDGKVVGTDFVRRISVRADTVGTNHACIDLGLHQGTRGGIADELSTRHFLFQ  
DFKGRQARSLVVGSGFQRRDALQLFHLLQAPRDPQGGP

>comp14844\_c0\_seq4; 393 1 1642 LEN=1642; translated  
XQQQQQPGSTPQAESTHKKRQRAARRMGDFMAGVAAGLSARKNAASA AVLPTHLDFSIRD  
RTDVSAKRRFQVKVPCRLMAILAVVFLVFPGLVFFHREIHIHDGNYEYHFKSEQYVNVDT  
EEVWESFRLANTKDDPVPAGHVAAEHSDDTPEMDAEQSRLGPNPPPVEKS AVVVVAAAK  
NTTEHLPASAEGDGHAAHAHAHDEPASENREEDYLPREDGSPPEDEGGEREAGVEASKEEQS  
PRGYESSPVLDTPEPSTSLTTKVLTVPQQNVLAEPDAAQGIHYKNTTHTQANTXDYKQSL  
SSVMVRTQCAAILFEITVRSLSLQAPRDIPTGASHPRLARMPSESVSSLSLTPRCASRC  
SGRQKWFPIGARGENLFFHRDAKSARARFAGNLSGTTTTTYTNALTSNFPSASGSITPFS  
VMIPMLQSGVTSKAGFQQGIPAGAFEVEINSSEERSSIGMLLPDSSVMSSEVMGAATXK  
RNLVKGGNDGKVVGTDFVRRISVRADTVGTNHACIDLGLHQGTRGGIADELSTRHFLFQ

FSLSHAEVCFSTNALTSNFPASGSITPFSVMIPLMLQSGVTSKAGFQQGIPAGAFEVEI  
NSSEERSSIGMLLPDSSVMSSEVMGAATXKRNLVKGNDGKVVGTDFVRRISVRADTVGT  
NHACIDLLGLHQGTRGGIADELSTRHFLFQDFKGRQARSLVVGSGFQRRDALQLFHLLQA  
PRDPQGGP

>comp14844\_c0\_seq5; 451 1 1347 LEN=1602; translated  
XQQQQQPGSTPQAESTHKKRQRAARRMGDFMAGVAAGLSARKNAASA AVLPTHLDFSIRD  
RTDVSAKRRFQVKVPCRLMAILAVVFLVFPGLVFFHREIHIHDGNYEYHFKSEQYVNVDT  
EEVWESFRLANTKDDPVPAGHVAAEHSDDQTPEMDAEQSRLGPNPPPVEKS AVVVVAAAK  
NTTEHLPASAEGDGHAAHAHAHDEPASENREEDYLPREDGSPPEGGEREAGVEASKEEQS  
PRGYESSPVLDTPEPSDEAHPDAPSLTTSLTTKVLTVPQQNVLAEPDAAQGIHYKNTTQT  
QTQANTTTTNNRFRVDGADAVRGYFVRNYCKEPSVAAGTAGYPDRRIPSTPSAHAVRIGV  
FSLSHAEVCFSTNALTSNFPASGSITPFSVMIPLMLQSGVTSKAGFQQGIPAGAFEVEI  
NSSEERSSIGMLLPDSSVMSSEVMGAAT

>comp14844\_c0\_seq6; 363 1 1603 LEN=1603; translated  
XQQQQQPGSTPQAESTHKKRQRAARRMGDFMAGVAAGLSARKNAASA AVLPTHLDFSIRD  
RTDVSAKRRFQVKVPCRLMAILAVVFLVFPGLVFFHREIHIHDGNYEYHFKSEQYVNVDT  
EEVWESFRLANTKDDPVPAGHVAAEHSDDQTPEMDAEQSRLGPNPPPVEKS AVVVVAAAK  
NTTEHLPASAEGDGHAAHAHAHDEPASENREEDYLPREDGSPPEGGEREAGVEASKEEQS  
PRGYESSPVLDTPEPSTSLTTKVLTVPQQNVLAEPDAAQGIHYKNTTHTQANTTTTNNRF  
RVDGADAVRGYFVRNYCKEPSVAAGTAGYPDRRIPSTPSAHAVRIGV FSLSHAEVCFSTN  
ALTSNFPASGSITPFSVMIPLMLQSGVTSKAGFQQGIPAGAFEVEINSSEERSSIGMLL  
PDSSVMSSEVMGAATXKRNLVKGNDGKVVGTDFVRRISVRADTVGTNHACIDLLGLHQG  
TRGGIADELSTRHFLFQDFKGRQARSLVVGSGFQRRDALQLFHLLQAPRDPQGGP

>comp14844\_c0\_seq7; 421 1 1308 LEN=1563; translated  
XQQQQQPGSTPQAESTHKKRQRAARRMGDFMAGVAAGLSARKNAASA AVLPTHLDFSIRD  
RTDVSAKRRFQVKVPCRLMAILAVVFLVFPGLVFFHREIHIHDGNYEYHFKSEQYVNVDT  
EEVWESFRLANTKDDPVPAGHVAAEHSDDQTPEMDAEQSRLGPNPPPVEKS AVVVVAAAK  
NTTEHLPASAEGDGHAAHAHAHDEPASENREEDYLPREDGSPPEGGEREAGVEASKEEQS  
PRGYESSPVLDTPEPSTSLTTKVLTVPQQNVLAEPDAAQGIHYKNTTHTQANTTTTNNRF  
RVDGADAVRGYFVRNYCKEPSVAAGTAGYPDRRIPSTPSAHAVRIGV FSLSHAEVCFSTN  
ALTSNFPASGSITPFSVMIPLMLQSGVTSKAGFQQGIPAGAFEVEINSSEERSSIGMLL  
PDSSVMSSEVMGAAT

>comp14844\_c0\_seq8; 372 1 1769 LEN=1769; translated  
XQQQQQPGSTPQAESTHKKRQRAARRMGDFMAGVAAGLSARKNAASA AVLPTHLDFSIRD  
RTDVSAKRRFQVKVPCRLMAILAVVFLVFPGLVFFHREIHIHDGNYEYHFKSEQYVNVDT  
EEVWESFRLANTKDDPVPAGHVAAEHSDDQTPEMDAEQSRLGPNPPPVEKS AVVVVAAAK  
NTTEHLPASAEGDGHAAHAHAHDEPASENREEDYLPREDGSPPEGGEREAGVEASKEEQS  
PRGYESSPVLDTPEPSDEAHPDAPSLTTSLTTKVLTVPQQNVLAEPDAAQGIHYKNTTQT  
QTQANTXDYKQSLSSVMVRTQCAAILFEITVRSLSLQAPRDIPTGASHPRLARMPSESV  
SSLSTPRCASRCSGRQKWFPIGARGENLFFHRDAKSARARFAGNLSGTTTTTYTNALTS  
NFPASGSITPFSVMIPLMLQSGVTSKAGFQQGIPAGAFEVEINSSEERSSIGMLLPDSS  
VMSSEVMGAATXKRNLVKGNDGKVVGTDFVRRISVRADTVGTNHACIDLLGLHQGTRGG  
IADELSTRHFLFQDFKGRQARSLVVGSGFQRRDALQLFHLLQAPRDPQGGP

>comp14845\_c0\_seq1; 494 580 2040 LEN=3519; translated  
MPSAHRLSMYLDKDWDEFYDYLSTYGAHIALWAILSAVTVFRREISCNRSYHEDDEGDTNN  
HRMIDDERSQIAGQKMIVSIDNEEKELMTEELLDGAGLYCSGKPLLNFATLLRLGFDNDY  
RTGNEKINMNGFSAEDLLDRVGNATPEPIIATIAFFMVWKKTQGLDISEPLSSPLCTPP  
LPSSRYGNDGCDPLGRLLPPDVHVQIASFLHPRDVVTLSCVSKAYHCITDDPNNETSAAI  
WKTLDWRDFS WIVFKWIKIGKEALQRSKCKQWTF SKDFYFLFEQSYLDYVLAGHNTFQSCL  
VGIHSHIYDITPFLFSHPGSPDTLMVHSGRDATGFFDDMGH SVGARRLAMS MCVVVNRSA  
QSENNECGLFPTTHTKIDGDDNDESHRLPLRLEDGEDKLLNVRRLGAPIRGTGNKSITN  
GGTTLHRMRARFLEEREHVRNQNNRKYCNDSTILGHEVNTYFDPFTRRWRIWYTDTLRT  
IYLPAS

>comp14845\_c0\_seq2; 494 707 2167 LEN=3646; translated  
MPSAHRLSMYLDKDWDEFYDYLSTYGAHIALWAILSAVTVFRREISCNRSYHEDDEGDTNN  
HRMIDDERSQIAGQKMIVSIDNEEKELMTEELLDGAGLYCSGKPLLNFATLLRLGFDNDY  
RTGNEKINMNGFSAEDLLDRVGNATPEPIIATIAFFMVWKKTQGLDISEPLSSPLCTPP  
LPSSRYGNDGCDPLGRLLPPDVHVQIASFLHPRDVVTLSCVSKAYHCITDDPNNETSAAI  
WKTLDWRDFS WIVFKWIKIGKEALQRSKCKQWTF SKDFYFLFEQSYLDYVLAGHNTFQSCL  
VGIHSHIYDITPFLFSHPGSPDTLMVHSGRDATGFFDDMGH SVGARRLAMS MCVVVNRSA

QSENNCEGLFPTTHTKIDGDDNDESHRLPLRLEDGEDKLLNVRRRRLGAPIRTGNKSITN  
GGGTLHRMRARFLEEREHVRNQNNRKYCNDSTILGHEVNTYFDPFTRRWRIWYTDLRT  
IYLPAS

>comp14846\_c0\_seq1; 2197 1 7038 LEN=7115; translated  
HETKDTGGSFVRGADARGEHRGKIRKGS DXTP LI EGTKDKTETDVM EVFGMGEDRHSSRI  
DDSSFSFDYLRDAGASNGVTQRRGPNQTVDTNDSVSFLLDASIIAGTTPGLADTSSNNMS  
ADAETAAPPSVASTAASNPSATPRFRKPKIYSLDDTSVVSQFLTASPSTRSLQNPKANST  
RSDRISKAASF TTTTAAAAASAKNSRNF LDHNR RFQSKLP PRRVSTGAAPSSPSPSRSLSS  
PMATVEVITAVPTTAAASAGTNSTKSPVTRKSPLRPPQPLSTSFSSGGGVQKNTTKTLFS  
PSSFQRTPTQTPGGLWTVNTESKSFVNGLLSPFSPLLRSPRNGSKTNLPTIRSFDDDENEN  
ENEKNVNINPADSEAQE QDFFSYQRKQYLQFASLQPCRKVSIVVRVTAIDDDDDDNKRCI  
FPHNTDPPAKARNESPEVSSAFATPNRLTSDKATPIKSSRHVRDMVVVNPTAFGKFVPSK  
DTMETAKLVAQVANIPSEWARLYEFHHVIWPSTSRPSPDRKDIHNTPNSAHSNTSSSSS  
YNTLDSVTRAVVQDLMNQHKSSLLISLGHENSCFGTLNNA SKNTNANANANDNIGLWTKI  
INQCSAMLETGKGVRLSMVELIEPNIGGRNHSRHDYFRDLLAPPDQKSTSISLRHEDMK  
GAKLEGLCTVEIDSMPALLEALSTGRHESRNRNSDDGASATIIGTLSYWENAVAYKMEK  
KPCSTVTCVEMASPNHNKGTIESISHRKSIVSLGQALRQLLLQQAMEKHAAEHTSEVAPV  
ISYRETTLTKVLQRYMESSKIVLIASVSPLSKDYHQTVTTLNLYLRLLLVKPGTPLTSPFG  
GGKENPNTSRGGITTPKTAKMSNR TNGDRSRPNLLSPEVLSPEIKETMIESLVADPRQL  
AKTFQVGT PPSRTAKKTLDES LAATIVEHEELLEKALEEDDKLMEDLVTDPRQLARS  
FPQGT PPSRSAAAMNSYVSASAI DNSTV ASDHSATQPNNYTG PPEEIRQVNHYPNKDEY  
QGHRQPLWQQKDHDGDDDKHSNSGVYDGN GSDPYEEVYPADGHVNSNKDYTYHNDQDLSK  
EWASEEEIKRDLLRNARHSGQYSPVEINEVLGTQFSNQEKDIVTKSYEAE EFR TAHQIES  
DTYDLASNESENHVEYVGEIEMPSEHHGKNVRREAAALQSQIIGEENENNQHTST EYYALI  
ETEGGTEGNDFLEDEEKQDTE NVGIKSSLHENEDEQE QE QD TVGDEYELELEERP VGEY  
GFCEEKITRGLATLPLDQSNTKPNHLDQEFVTNGDGNGLNVEDDDITL DLKPLECDDDS  
FSRFTADKWQDGMDEEANNRERSEPSNVLGVSTAENDAADSRKVETVSSSFWDLNPENAE  
DSMDGEAKQTEYDLPDDPFTSNQLEGLFQHQISQSSQNHSP TSSGG EKPLSSHRRESACI  
SFTSPYSVTSRSKEQEELIVERDQLRSVVETLKDDLQKASVKNENCVQQHEEQLDLYLQ  
LRKAHDTNKELASTQOELQNLALEREEMEHTIESLQCQLSELSENRSRESQRNEKDIAVF  
HSKLSEEREKQOVLKAI AEEAVTARDTQIEEIKMLAAKREGLOGEIETLRNTMKTMDKEQ  
DDHATKYQQEILQLYTKLEEVTNEKRS LQQAADDARFRLETQSEKMRAMNLEREELRSTL  
SSVKGSAKKAYGDHSEYTRRFREEIQQLHEKLD DAIRDKLEVAKSADEIRFAKDDL ERKV  
KNLENDLSVSQTNLSRL EDMIKGEVETIRELNAELHKRDS DNIDLEHFRSEAQR LKSKND  
HLESLISHKNIEYSAALQKLEDDLTEEKSRNLKLEELSLVKTELSSCKKQKRELEENLG  
SLSDNKSKLIHEL NKKHEVLENLQSRYNLDESLOFTNQGVIANLREELQKQESSESVTCGQ  
LRAQMSSIERERDSLRELMETQRAEHEK SMAERESELSTYLGQLYSAKEDIRKSKNSEER  
YRTDAKTQLRLLLRESESSVRHRDGKIERLQNELETQKKEMMSLRDLESSKSRSDQIEHL  
KQNL CNIEIALK KTSNEKEDALEK LKKESH SRKLVLDELEIARDEAHRYKLEFVNLKENS  
DRRHQDDQRVEDIISKMESTLKAFKEAKEELGSSAFHRKDSASVLQERTLQEKRDLTNNL  
HHLNEMVEKLR RERD IC LQNIHDGEEKLSKLSK KAKHLPDDMFSTPANEHRRRYRESRS  
TPQPMKTPMPV I IPEIYVTKYHIGPSSRAEERAE EIAACLAISAKKAMEENFDEVSQ LRS  
QIHRLEDERSEQVSALRTRVRDLQQELSYEKVLNPP TSVMGQSSTTQMRKEHHSFNGDE  
EKYSF

>comp14847\_c0\_seq1; 332 210 779 LEN=1271; translated  
MSDCEELARLNSSKRKDRNDIGPSEETISRKARNETSSYGNIFASITAFSPLVLATKLCV  
FPSTTSVSFCEESSSPSVAAPPPLPERLPHGGTKEGESLSSLTEYERRRMLQQLEEEPC  
ACKYTGMTLCAGMSLYFLKLGIEETAGATTI AKA AKNAASTASKSNNKLFFYGGAVTWAI  
AGLYRSVLD

>comp14848\_c0\_seq1; 1223 555 3395 LEN=3439; translated  
MSDEQGGF SMLREVQDLAEKFKEDDEQYLSPYAHLEKASVLQEARVFDPTVVRENPRKC  
CTVIAQLLHLQNTGQYMTSTEGTEVFFGVTKLFMSDDASLRRMVYLF IKDVAETCEHDDI  
IIVIQLTKDMNSDADLYRGNALRVLARIVDASILGSIERYVKQALVDSSPLVSSSALVS  
ASHLYNSSPECATIVKRWITETTEATQSANEMVQFHAMQLLYQIKAHDRLGISKLVSQFS  
SRNTLRSPALVLLVRYTAKLIHDESADGRGSKQD GSPAVQQGYQFLEASLRHKSEM VVY  
EATRAICSLPGAEPQDLGAVSVLQFLSSSKPATRYAAMRTLAKLANTQPRVVSKCNE  
LESLLGDPNRSIATLAI TTLKTGSENSIDRL LKQISAFLTEIADEFKITVVKSLQKLC  
TYPAKHRVLVGFMSNFLREEGGDFKKSIVSSIIISLIRQVPETTESLLHLCEFIEDCEF  
TRLSTEILHLLGELGPTTSAPARYIRFIYNRVILENAAVRAAAVSALGKFAANCP SLRSS  
ILTL LKRS LYDEDETRDRAALNVAILEAAMEANPYVPPPEDAEPEDIPDDVPVDGDAAA

YALLE SMPMTFEKLEERSMTAYLNTPVSMESPDAITFETLP IVEDTAE EIVAAMGGGDAFT  
DDIAGFDQPAKKKESVDPAAVIYAIPELASLGRAFRSAAPVMLTESETEYVVQCTKHI FQ  
SHVVLQFSVQNTIEEQRLDNVTVLIDDSESEVFTASGEIATDGVSYGETKNCFTVLERNT  
DESLPLTTSNFTCELRFVVEVDPSTGEEEGGTFEEEEYPLEDELEISTSDFMAKVTVPDFR  
KAWETAGNGNEVLEKFALQFKKMDEALAAVISFLGMQPCDGTGQLKPENLSGAKPHMLHM  
SGAFVTGSQV LARAQVAMQPTGGVILKIAVRSDDSAVSRIVADCIH  
>comp14848\_c0\_seq2; 1223 892 3732 LEN=3776; translated  
MSDEQGGF SMLREVQDLAEKFKEDDEQYLSPYAHLEKASVLQEARV FHDPTVVRENPRKC  
CTVIAQLLHLQNTGQYMTSTEGTEVFFGVTKLFMSDDASLRRMVYLF IKDVAETCEHDDI  
IIVIQLTKDMNSDADLYRGNALRVLARIVDASILGSIERYVKQALVDS SPLVSSSALVS  
ASHLYNSSPECATIVKRWITETTEATQSANEMVQFHAMQLLYQIKAHDR LGISKLVSQFS  
SRNTRLSPLALVLLVRYTAKLIHDESADGRGSKQDGS PAVQQGYQFLEASLRHKSEMVVY  
EATRAICSLPGAEPQDLSGAVSVLQFLSSSKPATRYAAMRTLAKLANTQPRV VSKCNED  
LESLLGDPNRSIATLAITTLTKTSENSIDRLKQISAFLTEIADEFKITVVKSLQKLCL  
TYPAKHRVLVGFMSNFLREEGGFDFKKSIVSSIIISLIRQVPETTESLLHLCEFI EDCEF  
TRLSTEILHLLGELGPTTSAPARYIRFIYNRVILENAAVRAAAVSALGKFAANCP SLRSS  
ILTLKRSLYDEDETRDRAALNVAILEAAMEANPYVPPPEDAEPEDIPDDVPVDG DAAA  
YALLE SMPMTFEKLEERSMTAYLNTPVSMESPDAITFETLP IVEDTAE EIVAAMGGGDAFT  
DDIAGFDQPAKKKESVDPAAVIYAIPELASLGRAFRSAAPVMLTESETEYVVQCTKHI FQ  
SHVVLQFSVQNTIEEQRLDNVTVLIDDSESEVFTASGEIATDGVSYGETKNCFTVLERNT  
DESLPLTTSNFTCELRFVVEVDPSTGEEEGGTFEEEEYPLEDELEISTSDFMAKVTVPDFR  
KAWETAGNGNEVLEKFALQFKKMDEALAAVISFLGMQPCDGTGQLKPENLSGAKPHMLHM  
SGAFVTGSQV LARAQVAMQPTGGVILKIAVRSDDSAVSRIVADCIH  
>comp14849\_c0\_seq1; 254 117 963 LEN=963; translated  
MAAPLGIETPELKAQSEQKQEESESEGPQRSRLKEHGTQLTGIYCTCRHATL CDKCGNPMS  
TKEDTKRAIDTLVHDRPPLANVFGNGPLLVSNI PDSALTS DRNSDSAGVVLGIDEAGR G  
CVLGPMVYG CAYWSVDVDASIPKGF RDSKQMKESERDKLFEELKEHPEIGYAMRSILPSE  
ISRNMLRKSTEVYNLNEMSHDAAIVLIHKIVHKGVNVKKA FIDTVGNPKSYKRKLEREF  
PNIDFVVESKADANYAPCSAASV GKTSKDKAAVCLDVARLTSX  
>comp14849\_c0\_seq2; 473 117 1262 LEN=1761; translated  
MAAPLGIETPELKAQSEQKQEESESEGPQRSRLKEHGTQLTGIYCTCRHATL CDKCGNPMS  
TKEDTKRAIDTLVHDRPPLANVFGNGPLLVSNI PDSALTS DRNSDSAGVVLGIDEAGR G  
CVLGPMVYG CAYWSVDVDASIPKGF RDSKQMKESERDKLFEELKEHPEIGYAMRSILPSE  
ISRNMLRKSTEVYNLNEMSHDAAIVLIHKIVHKGVNVKKA FIDTVGNPKSYKRKLEREF  
PNIDFVVESKADANYAPCSAASV VAKVMRDRMLENWKFS ESCEISHDFGSGYPSDPKCKK  
WLATLHEPVFGYSDILRF SWATSKQKLEEISDAVPVVF RADLDDDDALEQQKGMTQFLQK  
KRKRFGYFEKRNIRTKNRLEE  
>comp14849\_c0\_seq3; 182 117 464 LEN=486; translated  
MAAPLGIETPELKAQSEQKQEESESEGPQRSRLKEHGTQLTGIYCTCRHATL CDKCGNPMS  
TKEDTKRAIDTLVHDRPPLANVFGNGPLLVSNI PDSALTS DRNSDSAGVVLGIE  
>comp14849\_c0\_seq4; 402 117 1379 LEN=1878; translated  
MAAPLGIETPELKAQSEQKQEESESEGPQRSRLKEHGTQLTGIYCTCRHATL CDKCGNPMS  
TKEDTKRAIDTLVHDRPPLANVFGNGPLLVSNI PDSALTS DRNSDSAGVVLGIDEAGR G  
CVLGPMVYG CAYWSVDVDASIPKGF RDSKQMKESERDKLFEELKEHPEIGYAMRSILPSE  
ISRNMLRKSTEVYNLNEMSHDAAIVLIHKIVHKGVNVKKA FIDTVGNPKSYKRKLEREF  
PNIDFVVESKADANYAPCSAASV VAKVMRDRMLENWKFS ESCEISHDFGSGKSENRLKTL  
FDQQAVSPYCIRRYLHPXTKFLALLDIKTGYPSDPKCKKWLATLHEPVFGYSDILRF SWA  
TSKQKLEEISDAVPVVF RADLDDDDALEQQKGMTQFLQK KRKRFGYFEKRNIRTKNRLEE  
>comp14850\_c0\_seq1; 476 1 1826 LEN=1826; translated  
XLKQFDPRPNNETAIVAVVTFSSIAGKQNSIQHSGR TSTFTNATSHFCCPDSFRREN NRT  
RGFLHLRILRTRHALPTIRAGEILFAMDRNTDYRND DVLVTTSLKFS AVDTTAGLEDGNI  
YFSGDEERILMVYDQWRNEYGKDFD GTRYQNFRSNYIKLMTANAAELTVAR DMGYPDPE  
PLSLNEYGDYSPEEFHSMQNGQYAAPTSSDSAVP ASLNGYGSQPQTRSPYGENYYS AEEQD  
RIRQIYKEWCYNNNGKNYDESRLEIFANNLRVVENYFKQTGKKAELN QYADVSP EYKEIV  
TLESQNTQSQYNAPHVETMSTNRHTSPSTLYNFYDENEVERIQQAYMAWCS DYGKDDSR  
LDIFAVNLF AIENYRTETGKNVNLNAYADLSPDEFNSIRSSGAEIPFDGGNSYAGTL PNN  
GSEYYGELNGVSSGTNYGSGSLSEENPLATTDEGIHTMYTKWCAYYGKVP SDDGFYFKT  
KYAILEKGYLETGVEFTMNEYADLPEQTETQQPGLTGV EGERMHTEDARLAE EEEERRAEA  
AKLEKEQNERLELARRAE EERIQAEEQORRAEEARLKE EEEKRAEAIRLEKEQNERLEQA  
RRAEEERMQ

>comp14850\_c0\_seq2; 1199 1 4046 LEN=4309; translated  
XLKQFDRPNNETAIVAVVTFSSSIAGKQNSIQHSGRTSTFTNATSHFCCPDSFRRENNRT  
RGFLHLRILRTRHALPTIRAGEILFAMDRNTDYRNDDVLVTTSLKFSAVDTTAGLEDGNI  
YFSGDEERILMVYDQWRNEYGKGFDFGTRYQNFNSNYIKLMTANAAELTVARDMGYPDPE  
PLSLNEYGDYSPEEFHSMQNGQYAAPTSSDSAVPASLNGYGSPQTRSPYGENYYSAAEQD  
RIRQIYKEWCYNNGKNYDESRLEIFANNLRVVENYFKQTGKKAELNQYADVSPPEYKEIV  
TLESQNTQSQYNAPHVETMSTNRHTSPSTLYNFYDENEVERIQQAYMAWCSDYGKDDSR  
LDIFAVNLFAIENYRTETGKNVNLNAYADLSPDEFNSIRSSGAEIPFDGGNSYAGTLPNN  
GSEYYGELNGVSSGTNYGSGSLSEENPLATTDEGIHTMYTKWCAYYGKVPSSDDGFYFYT  
KYAILEKGYLETGVEFTMNEYADLPEQTETQQPGTLGVEGERMHTEDARLAEERERRAEA  
AKLEKEQNERLELARRAEERIQAEQQORRAEEARLKEEEERKAEAIRLEKEQNERIEEQ  
RRKAEQQRAQEMIQAEEERKRREEARLQNEKMEREFEEARRRVEEARLLEQKRNTAA  
AKASLEEIEAAAEKVIAEESALIDNDSNLMQLTSENRLLQERERIEEALKVDRARLNEE  
KRREELARIALEDTNRKLQEKLENEEDSVDEPDPIIVPRASYLDAVAKTWWDRATAYLEA  
LQEGRVGVLPGELNLPQKPIPKATQEEKETRIKRSESLIDSIWNFMKEDGSDVSTRSSNY  
SNRLIRQADKLIIEASTQSTGVMGEELRYLKKAVDAMRRRNDDRAAERAIVEAKDWEQI  
QKGLEKEAKRAKKRREHEERLAGEAREKARSLKSEKREHDKHAEERKEERALQKQNGES  
TEDNKDIFSFSSPFQANESTNGSKEENMFSFFSAGKSDVRKNAPPANKPAMNTPPKNPP  
PPNSMTQAVKVKKTEDSWINAVFGFFAGEKEEETTPGLGTITLEPAPRKSVFDLTVSPDE  
IAPAREAGRSITIDNSKEPSIFSFARFGISQKKEKEVDPVRLKRLMDYEKKVRVREEK  
LSRLRAGRSRILEEKDRKMSRKEARKLQRELDALAAGNFTSSARNTNIPQLAKWTSTPEG  
RITGFISDSAGGPYKLGSKITTSPIKGIKAKPGITVTTITGSKYRLGMIAPRDAIDSASG  
SRETASKRSSDQISPMGSFFGRLFPENIPCLVEWTQNEEDGTITGFINNKEGFEDGTQIT  
TSPVQKGARRGMVIQTRGGSKYKLMKPQ

>comp14851\_c0\_seq1; 244 199 1179 LEN=2883; translated  
MSEAEKRKTQMDHRRRAEMNDDEPALEGYERTDMIGQGAYGIVYKGGKEDTGDVVAIKRIP  
FADSTPEGGVPCNVIREISLLRELDHPNVVLLDIIQAHPGGLYLVFEYVAHDLKTYMDQ  
YQTSDDISERVGLPHATVKSFLRQIIAGVGCCHTFRILHRDLKPHNLLITGDGKQVKLAD  
FGLARLSAIPNGPYTFEVVTLWYRAPELLGANRYSTSVDVWSIGCIFAEMATGMPLFPG  
RSDIDQIFKIFQRKGTPTSEMWPAVARLPHYNAEFPQWRERPIDQVPMSSLGNSNAVDL  
LTKLLMYDPDRRIACKTALQHPYFFE

>comp14852\_c0\_seq1; 186 424 660 LEN=660; translated  
MKNSSRTIENNPEAKYVEYYLSLEEPDVPDPEQPMTGDAFSLQEADDNPKGNEETESKSVG  
GNGASLGHGAGDEEQNMP

>comp14852\_c0\_seq2; 945 424 2839 LEN=2839; translated  
MKNSSRTIENNPEAKYVEYYLSLEEPDVPDPEQPMTGDAFSDPEQPMTGDTFSLQEADDNPK  
KGNEETESKSVGSNGAVSLARHGGGDEEQDIPTDIIVDDPLSQKGEETHPKDTNETKES  
EANDVETDDEYKTHEETKSESAFSGNDLTECNDTYPKDCYSFMSLHGPDNRNPIFFSYGMV  
VFAFQMSLLVLMVISALDTKWSNKLSDSNPHNSAIGMIIPANASPYVKATQIISILCYVS  
FAKFSVMDVVNAVQTFPVGKGATKFMVFSIARGLQGFIAMLATLLLILISDSVIDIVLN  
FTAVNFISELDNVAFDLARKGKYGRLEDEAKRIETLVLPCCMSRCDKMKRFLFAVGVSG  
VILLSMAGAVIHAQDSKKTWMTQIFRVEFGDEKLQDYSGCYELDEKATISNNGYNRNIYQ  
KVQKDSLDFHQFGYCIIEERRWILFIVEKDVAGDVTYDPCAFERIAAYSTRMQAFDISTTF  
SEGWFSAVGTPLDLYFLQDEDHMKGMLCEAWNNGICNDELNHEKNGYRFDGGDCCSATCS  
NSNCGIGAVTQPFGLLGNTPGHGFPCQDPMVPIITIRLNNFTLSRWAGKDADPVAPT  
FQCENKSVLIVDLSPMINKNEIVHVS DGATCNIELEDIFVYVNVNLTIFQGHGNMMDTKI  
ARMTGYDKSSFTFFFTIPNCTVQKLSDYTTISDIHNNKDHSLDTAKWMNDDKSGNSFCHDE  
FFAERFALKMLKLFKLNSTQSLQHCLWNGIECSKEGALEVMDSLKIKGIRRLPDQIGSLK  
NLKILIIIPNSDITKLPSQIGDLTSLX

>comp14853\_c0\_seq1; 177 1 1174 LEN=1387; translated  
XAKAAEGWPLPGSTPGSAALLWSPPRIRRGWHGNGDGQGGPPFEREPFARIVPAVAVAF  
PPTGPAANARGLPDAREEPGPAPALSPSRPSSLPGTGSSCAADYRRRLEAVRERRALLRD  
SPDRRWVVAKAATATDAKAKEAKATATNATTNAPRGRPD RDGYRPHSLPLHHHPFP  
TNGTIGRNLSPGKPHWRTGAMVGDGPKASGNLSAVVASSTGSPLCNDRSLPDGKSRNDS  
QDDSKDNTGIDTDMENNNNSRQGHGILERRSDQHFPFAEAALAATGANGHRGSTHHR  
APAVRPHTKRARSSLRRVLCRPEPAVDTGFAQIWTQAEAGGGVLRERPVSSGARPGADP  
WYKRPAGTGGRDHPFERVMHVWFVTEPEQ

>comp14854\_c0\_seq1; 428 1 1498 LEN=1939; translated  
XLYSYRCLNSNTYSHSQNRNPPDPNTFYQCPTNDISAMSEAGPDQNTGDLRKALQHAVC  
QIVWDQDRQDGARTAPSAIAALTELTQYATKSLIPDLYAFSTHG NRKSTISPDDVALAL

RKLGPDRLSEFKSEFCSNNGSKKLPARDTNASAAAKLGKKNILKRSAAISGHGQDERRRK  
RNETDVLSLGSSSSSSSDEETYGHPSHRNTNRKRRSVCNTTSGAFATGRTHFAGSSPLHN  
KQ TSAATSTTNTNHSTMSRTSNQRESLLNKFRIPVSTRNKKCSNKNLEQEDSSSSDCNDI  
GRLPMKPLVTTATRKSVAAKSDLQTDSSPMLSLKRIQNRQQSKVKSTSSTHYGRNDPLL  
LDDSDSTEDEDEYPNKKLTMPKSVHTNTVSHQTHQKKQLEIEADDDDI SERYEFDYSAG  
QGGNARRQSSTDDSNTNRES DGAKPQSQAETLANLSSDSGMDDNGSENETEDEL RVGFK  
KSASGSRNHPVIESDDEDD

>comp14855\_c0\_seq1; 764 146 2325 LEN=2446; translated  
MNI P P P P P P P P P P P P P P P P T N E G V H G A L D S S M P P L P P P I V T F T G E E E E A A I R N A L L S S C  
K I L E E A R C L K S E S E A N L M M S S S L S N N G K A D V D I S D L P G G V Q D A W A L S N I T Q P A R G N S S  
T V D T P S I S L Q D K S Q K S S T I L P I G Q G Q L G K V A A V A A L S S C I Q R T S Q L S N R I F Q E Q Q R D G T  
V L K S A I E T T K R K H I S S S S S S N T Q A T A A M T N L W M S V L D D R L R E I R S Y H A R H S S N E V T P N N R  
N F L F M N N R I N N S N K R A R L G N P G A D G Y D L A S S L V E S L S G I K E G T S F L S E E V M G K Y L D L Q P I  
Y E S Y V L P I K R I M M K E P S S S F G I V D F L A F L S K G E S G L I E G I P E N S K L K H R K K Y V R F L A A L E  
N Y L E E F L K R I Q P L L S K N Q V T Q A A V N A F E E T W S K Q G G S P G W E A K P S E A V L V N R E S S T K G T  
S N A P N D G A I N G S V P K I D L S S Y A T A A D L E K A L N G D L L K A E L T R L G X K M W G H G H R S S E K V I L  
T K D T P L S E L P K K L F A K K K P T T T E S S N E N T G V T S T A H V N V K N E R R V D I A K R E V L V M A Y I N Q  
L K P V L E A T L R R T G R R E T Q T T K E R E K E I D E D L H G S A I E E S K K K T S G E G K Y D S D D D T D D E D A  
P I Y N P K G V P L G W D G K P I P Y W L F K L H G L N H F Y P C E I C G G E S Y R G R K N F E Q H F A E A R H S Y G M  
K S L G I P N T K H F H G V T K I E D A Q N L W E K L K D Q L Q Q D Q F D G T K G E E Y E D S H G N V L S R A T Y E D L  
A R Q G L L

>comp14855\_c0\_seq2; 121 1 440 LEN=561; translated  
X R R V V S G E Y D S D D D T D D E D A P I Y N P K G V P L G W D G K P I P Y W L F K L H G L N H F Y P C E I C G G E S  
Y R G R K N F E Q H F A E A R H S Y G M K S L G I P N T K H F H G V T K I E D A Q N L W E K L K D Q L Q Q D Q F D G T K  
G E E Y E D S H G N V L S R A T Y E D L A R Q G L L

>comp14856\_c0\_seq1; 187 292 597 LEN=806; translated  
M P L A S N S S S G L A S A R R R G K A E G G G K R K G G T D K W G K K T S K D S G P S H Y E G G R N I L F M V G G L  
S Y A E L R V A R N I M E K E S R E I I A G A T K F I S P D Q F I D D L K T L V D

>comp14856\_c0\_seq2; 612 1 2132 LEN=2341; translated  
P R P P H P G P T P R P P H P G P T P P P D R L A R L L P D R P A L L L L D Q P P S R N T N P R L R A R V P G E E V G G  
P A E K P T S P G A P S K N P S G A L M E M V H K R F T E D V F N T A A K A H P G W K V L I V D E P G M K V V S S A V G  
M Y D I M E Q Q V S V V E S L E K K R A P F K H M G A V Y I I S P T Q D S I R R L L E D Y E D K K K V L Y G D A V F L Y  
F L A P V P K I W M E D L K Q C K Q L V K R L K A M A E I N V D F L V R E Q R A F V L D M K D P F V S L F Q G N G M K A  
V E L K S A Q K L V T L C A T L N E Y P Y I R Y K Q N S N I C S G I A S I F K M K M D E F V G N N P G W W Y H G S G N C  
P S R N S E R D R S T L L L L D R S N D C L T P L M H D F N Y Q A M V N D L L H V E G D K I T Y K A D S K E N P K K E  
E K D V L L N E K D K L W V E L R G D H V A K V I E I L T N R I S E I Q N S S T S M V A R K D K K S S N M T L A Q L A S  
A L K D L P E Y Q E V T A K L Y Q H M H L A H E C M D E F K K A G L L E L S D L E Q T L A T G K D E D D R N T K L S D T  
I S R C E A D L I R I R E P T D R L R L V L I A I I S Q N G L T S G D K E R L L R A A Q L G R P E L Q T L E S L R K I G  
I K T M N N P G S S S N E K K G G F L G G L R N R S S I D S D A D N E Y T S S R Y T P P L K R I L K D L V A N Q L S  
T Q E Y P S V I P M P L A S N S S S G L A S A R R R G K A E G G G K R K G G T D K W G K K T S K D S G P S H Y E G G R  
N I L F M V G G L S Y A E L R V A R N I M E K E S R E I I A G A T K F I S P D Q F I D D L K T L V D

>comp14857\_c0\_seq1; 597 272 2086 LEN=2801; translated  
M K V K K I S N L L V F L P V I L H I S T A L I R P F L N P L K A S G K L K Y I N V Q F E L P L A A E F R P L T K I A R  
K G D A L V S L S L T L S N R N N D D N H T R N E T D D K D V T Q I Y T P G N K N F S S S E S P L Q G H R D I N H S N  
H S D V A S I N L D M N S N D K S Y Q G S L L E S Y F P F L Q S S Q P T A R T D Y Q S V S D L G I G D N N S S T A S K I  
L K K E A N D A I T V A D L E V I L S Q M E L P L Y K N R V R D L K S N A L P V R S K S A S F S K Q T A N T K M I P D S  
S H V A F P Q P S I L S E H E L Q R G T S I A G C F L G M I I G I T I L P N L W L V G M I M G S F Y G Y D L T K G I S T  
E G N T R E D P N I F G K F L I S C G R K L A K A Y L Q L V D Y W K G L W F L Y K T G Q L S Y E Y K T Y E N L D K K F  
A I Q S K V D A W N R I F V Q G K Q K F D A W E Q E N E V G R T V L A G L R T A W L V D E Q S R Q R A A G R S K Y R L V  
Q A A Y D V N N S I S R S L R N L F L S I K S L F E E G E I K S F L K G L R T D M S Q K G S I A T R I G A V A V A I V A  
V N I S G A I F S I S P A F S N I L A I V L A I I W P S W A A D L A S R A Q E V G M E I K S R G L K E Q K S L S G N S V  
K V F D P V K F I R R R C K E H R S D N P K Q S T R N N K R N R K Q K F A S K A F F S P F H L I G D G G K R R P T T S A  
K V G T W

>comp14858\_c0\_seq1; 542 106 2297 LEN=2871; translated  
M T T T M V M R S W L L L Q I L S L S S L V G N S T A L Q T P S G R C A A S A S Y A I R S V G R G H R G P R P A S K L R  
G Y Y G P G D D G M E M E R E E Q R E P R P R P T M D P P T E T A F D F L G P K S I P E K P K I V V L G A T G R V G R H  
V V R Q L M E M K D V D M E I V A F V R S F G K A T K V L Y E D E F M P V L A K R S S N P R G P K L T I V K G D L V P P  
E E L P G F V Q E D T E E D L L W R E R A E S A S L F Y G N G I E D Y D N G L P D V N E A L E D S I R D C T T I I S C V  
G S V R R T H L W H D V L A R P L V R L L G A D V S S W C R D G R H P Y Y V S Y A S T R K A L G Y A E R E Q L R R E A A  
A S A V A E E E G L D Q D E I H V P R I R F V R I S D L C V G N R P W D I V P V V A N A V H S L V F R Y H E M A E H L L

EESALVESVVLRLPGDLVDEERDPKTTTSVQVSCTGRVPGPALVGREDVAALAVAAATFVTO  
NKTSNADPDAGRRPADAFHYTFGCRWVGETLDSYPPQGRKRDGHENPFVAFRRALRTQRQ  
NEREQERAERINSYEKRGSHPTDGI PSMAEKLDKRRQKRRRPKPYGVCVAIPTYLLLLALF  
ARVAILLSALQLVPGGKEIALPXAGPGKSGGPGSFVAAAPVARPPAIDGSAETLLHPDLN  
ALGQARPGQIRVERGGGGIGIQHTSNQANGVPQDHAATSASEPGASNGASLCSVFFHGRG  
AQIDSVAVGHHRPLPVALATPNRRWVSWQMMEQKQWSSGGRSLARGLPLARFDTHRSPENA  
IGRVDRTSAH

>comp14859\_c0\_seq1; 369 193 1607 LEN=1836; translated  
MRDHFDPVSVVYQNHHLNKRMSQGPCHTTSTSVVQEHFHSEKQPNGFDAGVSSQDAAPA  
AFEFPSWKSNIYPPQNDESGNIRSNTAHTPGTKRTSRSEREEFLDCNVLQSSSLKRVRLS  
HCPGEFRLKRDCLKTLDPQWSTSESNVAFSSITWIHRSSGARLAMVDSLRIKCLFLPGT  
TMHSNANQQQQQFQHASYHRDYRWRIMVQLPRMPHRPPEVTRIEGLSLESIAIQXAPP  
GGTMRQTRAITGARSPLLFTEEQRLARSSSLTGTVNTNANTIKNANENTRDARKALEW  
NEWSPVSGLGELLDLFLVAAAASHPSTVVSNAADKRRIFGTVSSSASSTWGNHDPAGADN  
NHASHNRSNPSVFFGGSSNHAVMMEETEPEKARESVDGASFLLPNRFVGVYGRYGYEYKY  
NQNPASFAGASRGTSADTSTRSNTSLGARLPANTIAAYRDHHHDEDEDAGMELG

>comp14860\_c0\_seq1; 186 1 866 LEN=991; translated  
EQTKKWYVTFNSNMDSCNCIIEKNADRYLLAYKTFSLLLNLRLKFQGDRDQKKPDSDSDD  
DIHLESLFGRSKKHSSGRPIGLSDRDFDKLSKTLRRAESLGRDDNISVSSSHDEFSQS  
SEGNQSSEMSDDRDRDRDRSSSLTRRRSSRARFVNKALVRLYDRRAFTGGLVFSRGHFLG  
DVSKMVAGFLASGDSSVAGEISMKGEDSIPSYGFGEKKTSKKSKNVRISNMVIEHKDGE  
RVMHTSTLTAEHEGCIVLVFPRESLTRFLDAHPLGLLSLLGTQVIV

>comp14860\_c0\_seq2; 422 1 1505 LEN=1630; translated  
XSSDLRVEAVNKNDIVVPSICRNLLCVWEGTCVERKARSNLVVIEDDELFFQTDSPNF  
AVWHSGDWTGPALQPEKRLSGASDKAKTHDIVATSKEGVKMIILEFKSLHRILKNGSPL  
YRKYLERQKSFTSNFEGPVPDNITPRTEKLFKESKKNILDLIDMNTALRKL SAVQKRH  
LECIAEGPVAFNPGERLWRAGAPVDKAFVAVAGTAAAFVIRRRNSAHPLALEHSGMLDNFD  
GMMKSKKSETESGTDEEVFQGDRDQKKPDSDSDDDIHLESLFGRSKKHSSGRPIGLSDR  
DFDKLSKTLRRAESLGRDDNISVSSSHDEFSQSSEGNQSSEMSDDRDRDRDRSSSLTR  
RSSRARFVNKALVRLYDRRAFTGGLVFSRGHFLGDVSKMVAGFLASGDSSVAGEISMKE  
DSIPSYGFGEKKTSKKSKNVRISNMVIEHKDGEGRVMHTSTLTAEHEGCIVLVFPRESL  
RFLDAHPLGLLSLLGTQVIV

>comp14860\_c0\_seq3; 1168 274 4598 LEN=4723; translated  
MKIRAFKRLFGRKKRGKGPSSSQYKSQSDEPQSKPTPFLDEDLADMAYHKEQQDSPKRIT  
TRKKEETTSEKPFYVGGGRKEENPNVQIAPQKALDERRHLSNPTATRNSTFTSTKSISIE  
PPGKRSNLSEKSQSDTVNDLSSTAATGGKDNKKLISQGGNGVSPCQVDEVIFPESDV  
DYRHSTISRAYSIPLEQTKLPRGGISIETEAVGRVQFGIPPETIKDSMRLGIPVPQIY  
IVPVERFCRDLGALGVNLAEFEPAYFNFFVRQKCTLLVDSQEAEDNIRLVFEETLLG  
PKKFRRGVDSVAFDEHDFDPEYPEERIPNLEKELRHFRSTPDGGELSVDLMLKFCHFVQP  
DDGFCHKNLGVPPNLDAINDDEVHEL VQDYDEAIDEFEHVEREESEQTTVPFQGEVVK  
DEREIRAMEKTKSKWSYGRARWVGDVATIWSSSATDEEKKNSVPRVEIFKMPSGTEYII  
HDIDENNIVIGKARFSGNMKVNETMGLEGFSDSSVLDVFEDEDDSNRESRSLIPRSPPSF  
YPPSFGVTILGNSHGFDPSSVSGYVLWINGRGLMIDPPYASAALEREGERPRTIVGII  
ITHTSDHDAGAFQKVLGTGSPVVVITPTIYKSFIRKYAALSSLNPAALLRHCHRYKPAII  
GQDLRFQGATFKFFYSLSHIPCVGFRVEWRGRSIVFSGDHLHDPVILRNLQEKGVLSRGR  
ADELLNRPFQNTDLLLHEAGVPPIHTSLSTLNNFPKHVKKRMYVVHTAKIPDEFNLRKAP  
TGAGTLRLDESHRGSNDMTRCGVSMFVNESANKKRNAVLRFEDEVSFDSGGDEYVDNE  
ESRDQITSQAAGASHRFGRASSIVISGRKSSIPLVSLRTASNTDSWYMLNLLQAVPFLQ  
GXAKVLISPINVYRAAMDXPVIFIFSIAASYSLPYTSTMEVLESARVEAVNKNDIVVPSI  
CRNDLLCVWEGTCVERKARSNLVVIEDDELFFQTDSPNF AVWHSGDWTGPALQPEKRL  
SGASDKAKTHDIVATSKEGVKMIILEFKSLHRILKNGSPLYRKYLERQKSFTSNFEGPVP  
DNITPRTEKLFKESKKNILDLIDMNTALRKL SAVQKRHLECIAEGPVAFNPGERLWR  
GAPVDKAFVAVAGTAAAFVIRRRNSAHPLALEHSGMLDNFDGMMKSKKSETESGTDEEVFQ  
GDRDQKKPDSDSDDDIHLESLFGRSKKHSSGRPIGLSDRDFDKLSKTLRRAESLGRDD  
NISVSSSHDEFSQSSEGNQSSEMSDDRDRDRDRSSSLTRRRSSRARFVNKALVRLYDRRA  
FTGGLVFSRGHFLGDVSKMVAGFLASGDSSVAGEISMKGEDSIPSYGFGEKKTSKKSKN  
RISNMVIEHKDGEGRVMHTSTLTAEHEGCIVLVFPRESLTRFLDAHPLGLLSLLGTQVIV

>comp14860\_c0\_seq4; 1257 274 4506 LEN=4631; translated  
MKIRAFKRLFGRKKRGKGPSSSQYKSQSDEPQSKPTPFLDEDLADMAYHKEQQDSPKRIT  
TRKKEETTSEKPFYVGGGRKEENPNVQIAPQKALDERRHLSNPTATRNSTFTSTKSISIE

PPGKRGSNLSEKSQSDTVNDLSSTA AKTGGKDNKKLISQGGNGVSPCQVDEVIFPESDV  
DYRHSTISRAYSIPILLEQTKLPRGGISIE TEAVGRVQFGIPPETIKDSMRLGIPVPIY  
IVPVERFCRDLG PALGVNLA EFEPAYFNFFVRQKTCTLLVDSQEAEDNIRLVFEETLLG  
PKKFRRGVDSVAFDEHDFDPEYPEERI PNLEKELRHFRSTPDGGELSVDLMLKFCHFVQP  
DDGFCHKNLGVPPNLD AINDDEVHEL VQQDYDEAIDEFEHVEREESEQTTVPFQGKEVPK  
DEREIRAMEKTKSKWSYGRARWVGDVATI WSSSATDEEKKNRSVPRVEIFKMPSGTEYII  
HDIDENNIVIGKARFSGNMKVNETMGLGFGDSSVLD FVEDEDDSNRESRSLIPRSPPSF  
YPPSFGVTILGN SHGFDP SGVSVGYVLWINGRGLMIDPPPYASAALERE GIRPRTIVGII  
ITHTSHDHDAGAFQKVL TGSPVVITPTIYKSFIRKYAALSSLNPALLRHCHRYKPAII  
GQDLRFQGATFKFFYSLHSIPC VGFRVEWRGRSIVFSGDHLHDPVILRNLQEKGVLSRGR  
ADELLNRP FQNTDLLLHEAGVPIHTSLSTLNNFPKHVKKRMV VHTAKIPDEFNLRKAP  
TG TAGTLRLDESHRGSNDMTRCGVSMFVNESANKKRNAVLRFEDEVSFDSGGDEYVDNE  
ESRDQITSQA AIGASHRFGRASSIVISGRKSSIPLVSLRTASNTDSWYMLNLLQAVPFLT  
SLPYTSTMEVLESARVEAVNKNDIVVPSICRNDLLCVWEGTCVERKARSNLVVI EDEL  
FFQTD SNPFVWHS GDWTGP IALQPEKRLSGASDKAKTHDIVATSKEGVKMIILEFKSLH  
RILKNGSPLYRKYLERQKSFTSNFEGPVPDNITPRTEKLFKESSKKNLIDLIDMNTALR  
KLSAVQKRHLECIAEGPVAFNPGERLWRAGAPVDKAF LVVAGTAAFVIRRRNSAHP LALE  
HSGMLDNFDGMMKSKKSETESGTDEEVFQGDRDQK KPDSDSDDDIHLES LFGRSKKHSSG  
RPIGLSDRDFDKLSKTLRRAESLGRDDNISVSSSHDEFSQSSEGNQSSEM SDDRDRDR  
DRRSSLTRRRSSRARFVNKALVRLYDRRAFTGGLVFSRGHFLGDVSKMVAGFLASGDSSV  
AGEISMKGEDSIPSYGFGEKKT SKKSKNVRISNMV IHEKDGEGRMHTSTLTAEHEGCIV  
LVFPRESLTRFLDAHPGLLLSLLGTQVIV  
>comp14861\_c0\_seq1; 96 1 339 LEN=532; minus strand; translated  
RESSARELGFPAEKSI ALSG TKVRGNRGRIERKPKQLEENNCCFYGLKKHLP MYIRIGD  
STPFKFQTYKFN AWNEDSRKPR TIVAKMYFWIGIAASWNILIPQEYHNTKTK  
>comp14861\_c0\_seq2; 793 1 1973 LEN=2141; translated  
XKGEQGQDTEGAPV GNEGKGNNNNKNDHNNNNNNKKNNGEGQGQNN DGPPSNANNK GEG  
QGQGQDTEGAPDGN EGKNGQGKNNETPPPEVSNNVDKGESEVESEGQSNESPPSVANND  
EDQGGDEGQPNETPPPPEAGKDENEAEQONDEASEAMPSPPPSKAHSNEDKGEQGQPNE  
APAPPPSGANN NEDKGDEATVAPTSTGTSSGTSIRRLEKNSSTSKQILDIVVFMLPTDCK  
KDIWGNCDWVSLGVGAYDYDMEGGMSYCCSRDTATRGICDTHSTGKLMVDHNI FDGEHRK  
VEIPSQPLTDF TMDDPDFDISVSGDYVMVIANCDDDGLGVI TLGTMEWKS VGGYLP GDIV  
GLMYFFAAMAGTYFVLV LWYSCGMRI FQEA AIP IQKYILATIVLGFLESSFQALNLYVWN  
LNGVESPIL IYIALGLKILEHGF SRCLGVMVAMGWGVVRDSLGS SLYKIVFLGLAYAGVV  
FARDYFGIT AATSINSVSLTKEEELVDISLILSAVVVAIDMVFFWWII SSLKATTEYLRN  
MNQHSKLR RHYK LKCLILTALWI IGAMIVVTLVQFFTQYLTRDQM WILQAIGHANYLFVL  
FGVSVLWRPNPDAKNYVMQLEVSAGEGESDLELSCV VPSAGDMESDHGYNASNGTMG  
>comp14861\_c0\_seq3; 194 1 350 LEN=350; translated  
GONDEASEAMPSPPPSKAHSNEDKGEQGQPNEAPAPPPSGAINNENKGGDEEQNETTP  
PEADKDENQGEQONDEATVAPTSTGTSSGTSIRRLEKNSSTSKQILDIVVFMLPTDX  
>comp14861\_c0\_seq4; 538 1 1148 LEN=1282; translated  
XKGEQGQDTEGAPDGN EGKNGQGKNNETPPPEVSNNVDKGESEVESEGQSNESPPSVA  
NND EDQGGDEGQPNETPPPPEAGKDENEAEQONDEASEAMPSPPPSKAHSNEDKGEQGQ  
PNEAPAPPPSGANN NEDKGDEATVAPTSTGTSSGTSIRRLEKNSSTSKQILDIVVFMLPT  
DCKKDIWGNCDWVSLGVGAYDYDMEGGMSYCCSRDTATRGICDTHSTGKLMVDHNI FDGE  
HRKVEIPSQPLTDF TMDDPDFDISVSGDYVMVIANCDDDGLGVI TLGTMEWKS VGGYLP G  
DIVGLMYFFAAMAGTYFVLV LWYSCGMRI FQEA AIP IQKYILATIVLGFLESSFQALNLY  
VWNLNGVESPIL IYIGKCFN P  
>comp14861\_c0\_seq5; 275 183 1052 LEN=1220; translated  
MAGTYFVLV LWYSCGMRI FQEA AIP IQKYILATIVLGFLESSFQALNLYVWNLNGVESPI  
LIYIALGLKILEHGF SRCLGVMVAMGWGVVRDSLGS SLYKIVFLGLAYAGVVFARDYFGI  
TAATSINSVSLTKEEELVDISLILSAVVVAIDMVFFWWII SSLKATTEYLRNMNQH SKLR  
RHYK LKCLILTALWI IGAMIVVTLVQFFTQYLTRDQM WILQAIGHANYLFVLFVSVLWR  
PNPDAKNYVMQLEVSAGEGESDLELSCV VPSAGDMESDHGYNASNGTMG  
>comp14861\_c0\_seq6; 633 1 1319 LEN=1453; translated  
XKGEQGQDTEGAPV GNEGKGNNNNKNDHNNNNNNKKNNGEGQGQNN DGPPSNANNK GEG  
QGQGQDTEGAPDGN EGKNGQGKNNETPPPEVSNNVDKGESEVESEGQSNESPPSVANND  
EDQGGDEGQPNETPPPPEAGKDENEAEQONDEASEAMPSPPPSKAHSNEDKGEQGQPNE  
APAPPPSGANN NEDKGDEATVAPTSTGTSSGTSIRRLEKNSSTSKQILDIVVFMLPTDCK  
KDIWGNCDWVSLGVGAYDYDMEGGMSYCCSRDTATRGICDTHSTGKLMVDHNI FDGEHRK



VEIPSQPLTDFMTDDPDFDISVSGDYVMVIANCDDDGLGVITLGTMEWKSVGGYLPGLDIV  
GLMYFFAAMAGTYFVLVLWYSCGMRIHQEAAIPIQKYILATIVLGFLESSFQALNLYVWN  
LNGVESPILIIYIGKCFNFP

>comp14861\_c0\_seq7; 675 1 1802 LEN=1970; translated  
XKGEQGQDTEGAPDGNKGNQGNKNETPPPEVSNVNDKGESEVESEGQSNESPPPSVA  
NNDDEDQGGDEGQPNETPPPEAGKDENEAEQONDEASEAMPSPPPSKAHSNEDKGEQGQ  
PNEAPAPPPSGANNEDKGEATVAPTSTGTSSGTSIRRLEKNSSTSKQILDIVVFMFLPT  
DCKKDIWGNCDWVSLGVGAYDYDMEGGMSYCCSRDTATRGCIDTHSTGKLMVDHNI FDGE  
HRKVEIPSQPLTDFMTDDPDFDISVSGDYVMVIANCDDDGLGVITLGTMEWKSVGGYLP  
DIVGLMYFFAAMAGTYFVLVLWYSCGMRIHQEAAIPIQKYILATIVLGFLESSFQALNLY  
VWNLNGVESPILIIYIALGLKILEHGFSRCLGVMVAMGWVVRDSLGSLSLYKIVFLGLAYA  
GVVFARDYFGITAATSINSVSLTKEEELVDISLILSAVVVAIDMVFFWWIISSSKATTEY  
LRNMNQHSKLRRRHYKLLKCLILTALWIIIGAMIVVTLVQFFQYLTRDQMWILQAIGHANYL  
FVLFVSVLWRPNPDAKNYVMQLEVSAGEGESDLELSCVVPVPSAGDMESDHGYNASNGTMG

>comp14862\_c1\_seq1; 268 111 947 LEN=1267; translated  
MKDRGEKRRRSEEDPECCSEAGACESQAAAAAGGSPTAAAGSAGGHGNSGITPAASESPG  
GGSSNRNINNTNDNTNDNTNGTNTNDNGSTPIDADPLRQQDEGHEDFDPVPLAFDAGEG  
ACGFIGSSRTPSPWARVPFDPGDLHPLRVFGEDELAFSLAPPTPRNELPPPSGPLGLLPP  
PGPASGAPVCQPCPKPAGSGSLGLVLGNRAIHTLDDVAALTPEDLSEDLVLCSSAGVPLSIE  
EMMDLLERAEAREREDRFDFRVQLRQKRRKGAGAPAGA

>comp14862\_c1\_seq3; 59 1 439 LEN=759; translated  
XDPGDPLHPLRVFGEDELAVSLAPPTPLNELPPPSGAGAPSGPLGLLPPPGPASGAPVCQ  
CKPAGSGSLGLVLGNRAIHTLDDVAALTPEDLSEDLVLCSSAGVPLSIEEMMDLLERAEAR  
EREDRFDFRVQLRQKRRKGAGAPAGA

>comp14864\_c0\_seq1; 518 1 3214 LEN=3749; translated  
XQQQPQALADTSPTGTSTSTSTTTTTTSTTTNNGRPQTTFQRCILHRICDRFGMTRENS  
YTADAHGACYLIRVCKGPDSSKPSRLLHVKESEYQTGAGSNSFPGHNSPHSNSNSNQNG  
SGSGSNPNHLNQLSSAFHQMNLSAPSPHSSSSGGPGVIGIGNPKAGSKGKKMKIMRRS  
SSNVSNSSSGSGSGSNNGNGSRAKPAAGAKKGSTLSEKERKYAEARARIFEQQDDQPAD  
HRASSDGESESNPNANPNANPSTGGMAANHPTSSHYSNSGQNHDKNGGSSSNLNGGVSAA  
PLHTNSNASLNSLASNQSTSDGDRDQQQQQQQHGNENNQHQKQHNNEHPCFKPPEEVH  
SGQRCIPGHSDLPTKLLILWPQPPSICVGSHEFRVPECISQVFRTRTREKSPLHQSLM  
VLQQVELSLNIDFIFEVYCXNFRPIPWLGYEIQILLDTARGDRYEVHWSIRWTEGTNDEP  
EIKRFNKKAYVXKSQASRHRDPETHENDRSWHKELRQGWTEDEPDIRIQWRQILL  
EMTVFARKLFRMDLFQYFSHMSFLHTPFYSCLFRFVAPCLLRTQLDENYDLESCYNPMC  
EPTETYHMDTCNPEICSWSEGETFIVKHPKKFEQEIIPQFFKHSKFSFVRQLNFYAF  
RKIKTNSIRIDAALAEATANYWRFYHPKFQKGPDWLQEIKRSSSTPRGSGTKKANGTM  
GANNNRKMTPDGDVSSASIGKENIELKSEVTSKLERIEAMNKNIDLLTTMVQNVISIAQK  
MKTEVTDTSPLVNENNKRAKTTKLQSNPTKGCVPDEISSRIALPDDALSMPLPPLPSFPL  
DSADNDARAPCSAVPPNIKSDMSVRESSMSSEFSALLPERDDILDVMDLATDTSMMMLGN  
NYSFSASSSTTNPNDANKNRPRAEMLNRLSDALSLLPRDIQELIVDRLIEAITS PKDTQE  
SAQVAGALQEI VETSTAAASSVPMSVPSQSPRQSAACCDASAMTTDDDRSTAAASVVPASA  
AASPASKPVPNPSLPLAAATLAALLSQYGKEPQCTAAVVAATNTLIPVHV

>comp14864\_c0\_seq2; 1016 162 2526 LEN=3061; translated  
MTRENSYTADAHGACYLIRVCKGPDSSKPSRLLHVKESEYQTGAGSNSFPGHNSPHSNSN  
SNQNGSGSGSNPNHLNQLSSAFHQMNLSAPSPHSSSSGGPGVIGIGNPKAGSKGKKMK  
KIMRRSSSNVSNSSGSGSGSNNGNGSRAKPAAGAKKGSTLSEKERKYAEARARIFEQQ  
DDQPADHRASSDGESESNPNANPNANPSTGGMAANHPTSSHYSNSGQNHDKNGGSSSNLN  
GGVSAAPLHTNSNASLNSLASNQSTSDGDRDQQQQQQQHGNENNQHQKQHNNEHPCFK  
PPEEVQVNDASQDIPIFLRKYHMDTCNPEICSWSEGETFIVKHPKKFEQEIIPQFF  
KHSKFSFVRQLNFYAFRKIKTNSIRIDAALAEATANYWRFYHPKFQKGPDWLQEIKR  
SSSTPRGSGTKKANGTMGANNNRKMTPDGDVSSASIGKENIELKSEVTSKLERIEAMNK  
NIDLLTTMVQNVISIAQKMKTEVTDTSPLVNENNKRAKTTKLQSNPTKGCVPDEISSRIAL  
PDDALSMPLPPLPSFPLDSADNDARAPCSAVPPNIKSDMSVRESSMSSEFSALLPERDDI  
LDVMDLATDTSMMMLGNYSFSASSSTTNPNDANKNRPRAEMLNRLSDALSLLPRDIQEL  
IVDRLIEAITS PKDTQESAQVAGALQEI VETSTAAASSVPMSVPSQSPRQSAACCDASAMT  
TDDDRSTAAASVVPASAAASPASKPVPNPSLPLAAATLAALLSQYGKEPQCTAAVVAATN  
TLIPVHV

>comp14865\_c0\_seq1; 643 85 2802 LEN=2802; translated  
MHRLYQSRKRLTQSIASAATAEDKLLASMAAEKPTS AKARVEGLEASVSTSEKLS PSTHN

QNNTNNDKRKRQLEEHDPQANKTSVMTERS RDVVLNGDDSGDSSLGPPPHKKT'TTTT'TMV  
TDSPQSRNAADGTISSTVASEMAATITPGGCAESPVNKGNKNND SQAMVIDLATSRSS  
PGPLEDHSEVCIVAPPPPGSLENCTTNE SNGDDDDNEDEIQIVSSTTINPNIQYPHKRTD  
CGLHDFQADPQKFCRKYCVVCDIPASECTYWKDHC SLTQRPRDDSENE DGYGGENDCDN  
NPADDTLLESPTATARNYHLQAQGRAMPEQQOHL LHEEQEQPMSMWERQREEDRARQERH  
EETDTRNMCIADVLALKISRTLQLAEQHSNQRVELK LSEGGRENS SVEKNTANNYSQGAA  
ATAAPATASKVGIVQKNDMEGDIPQLGLHTAFFVEGIKIGWPFPEIMTPQRQMAIHI IKA  
LKRKLHVLESPTGTGKSVAILCSVLAWQRYHIQT TTAIDGGSKVVTDPVSMEEEEEEGT  
PRIIYLSRTHSQVSQMVASLKKTPYRPKMTILGSRERLCIHKEVMNRSTNKLPINMACKD  
RRKNTDAERRLRIKHKDYDDDDPKPPQHNGDGDPSDLPNDNDDEHDS SNVGRPQKPKLT  
CPHYRQLTSNRTAHKVVRQFIGGHRIQQHKSSTAIDGCGCSSTVGGEE SAFGIHDVEDL  
VRFGKNPHKEENIAIYRGETGKFGFLINNTNPQSGEEVRCYVVS LVEGGAAAFEARLR  
NGDRLLKVNKGKDVRTWNKRRVVELLAYAEGPAARLDVLRDDADTPEILDAQQEAETQEDP  
NGQELGARSGMQENDIYSDHSVCPYYISRTLHKHAEITFSPYNYILDPSIRRSLNISLRN  
NIFTLX

>comp14865\_c0\_seq2; 1097 85 4936 LEN=5246; translated  
MHRLYQSRKRLTQSIASAATAEDKLLASMAAEKPTS AKARVEGLEASVSTSEKLSPSTHN  
QNNTNNDKRKRQLEEHDPQANKTSVMTERS RDVVLNGDDSGDSSLGPPPHKKT'TTTT'TMV  
TDSPQSRNAADGTISSTVASEMAATITPGGCAESPVNKGNKNND SQAMVIDLATSRSS  
PGPLEDHSEVCIVAPPPPGSLENCTTNE SNGDDDDNEDEIQIVSSTTINPNIQYPHKRTD  
CGLHDFQADPQKFCRKYCVVCDIPASECTYWKDHC SLTQRPRDDSENE DGYGGENDCDN  
NPADDTLLESPTATARNYHLQAQGRAMPEQQOHL LHEEQEQPMSMWERQREEDRARQERH  
EETDTRNMCIADVLALKISRTLQLAEQHSNQRVELK LSEGGRENS SVEKNTANNYSQGAA  
ATAAPATASKVGIVQKNDMEGDIPQLGLHTAFFVEGIKIGWPFPEIMTPQRQMAIHI IKA  
LKRKLHVLESPTGTGKSVAILCSVLAWQRYHIQT TTAIDGGSKVVTDPVSMEEEEEEGT  
PRIIYLSRTHSQVSQMVASLKKTPYRPKMTILGSRERLCIHKEVMNRSTNKLPINMACKD  
RRKNTDAERRLRIKHKDYDDDDPKPPQHNGDGDPSDLPNDNDDEHDS SNVGRPQKPKLT  
CPHYRQLTSNRTAHKVVRQFIGGHRIQQHKSSTAIDGCGCSSTVGGEE SAFGIHDVEDL  
VRFGKNPHKEENIAIYRGETGKFGFLINNTNPQSGEEVRCYVVS LVEGGAAAFEARLR  
NGDRLLKVNKGKDVRTWNKRRVVELLAYAEGPAARLDVLRDDADTPEILDAQQEAETQEDP  
NGQELGARSGMQENDIYSDHSVCPYYISRTLHKHAEITFSPYNYILDPSIRRSLNISLRN  
TVLVLDEAHNVESTLCESGSGKYGEIDLFQVASALGPYARRTVCTGNTGLINSDINVDTA  
IIAHDLLLFVEKIIIFHLKGLREKFENGPSKQKLEDEYK KYHNTPDNHEVELTYDGP TGYG  
IKGAAVGCQPLLTRIGITIKECSRLL EYALSLEQSI FGGNSESDGAILDRTAQGDTSN I L  
NNLIQQLTKLLTAAENPEHYMSCIVQANGNLDHAFGLEDDNNQNTPRRRFKKKPRRAF  
MSPKTSTRPDAFLNDCNIGCPNAGRAHG DYCDGSTPPWECHLIIRLLSPGLLMREISQE  
CRSVVFASGSLAPIPSMCAELNLF GKDQSTSSLLTSPSSKSNLSHLSTPPIRSRITGAKL  
PEISQALLDSLKSTHGGIKKLYTNRLQMTPKPLEANHVVNLPKQLLAVAI GNFPDGERM  
TISYSNYKFPFFPKLGDASVIESVPKGGCLVFFPSY SLLQKCVSCWNATGYSRFQVS  
SPQVWNRILRSKGKIVVEPTGSQEDFESARDDFQDTIRETGSCVLLAVFRGKMSEGISFN  
DDYARAVICIGMPLPNLIDRRIKAKKVYNDEQRKLRHKTCLLPGE EYKQQAHR AIAQAL  
GRCIRHGADYGTVILMSDRHCDDGSPNGGICLAHKNLPKWMRGSVRTLSMSSRQGP GKQP  
ILCGYMGLKRTMRSFFATAPIASQAVRDKWKADLEAARQRSKAGGSGMVFHRD TGNW

>comp14865\_c0\_seq3; 1054 85 5123 LEN=5433; translated  
MHRLYQSRKRLTQSIASAATAEDKLLASMAAEKPTS AKARVEGLEASVSTSEKLSPSTHN  
QNNTNNDKRKRQLEEHDPQANKTSVMTERS RDVVLNGDDSGDSSLGPPPHKKT'TTTT'TMV  
TDSPQSRNAADGTISSTVASEMAATITPGGCAESPVNKGNKNND SQAMVIDLATSRSS  
PGPLEDHSEVCIVAPPPPGSLENCTTNE SNGDDDDNEDEIQIVSSTTINPNIQYPHKRTD  
CGLHDFQADPQKFCRKYCVVCDIPASECTYWKDHC SLTQRPRDDSENE DGYGGENDCDN  
NPADDTLLESPTATARNYHLQAQGRAMPEQQOHL LHEEQEQPMSMWERQREEDRARQERH  
EETDTRNMCIADVLALKISRTLQLAEQHSNQRVELK LSEGGRENS SVEKNTANNYSQGAA  
ATAAPATASKVGIVQKNDMEGDIPQLGLHTAFFVEGIKIGWPFPEIMTPQRQMAIHI IKA  
LKRKLHVLESPTGTGKSVAILCSVLAWQRYHIQT TTAIDGGSKVVTDPVSMEEEEEEGT  
PRIIYLSRTHSQVSQMVASLKKTPYRPKMTILGSRERLCIHKEVMNRSTNKLPINMACKD  
RRKNTDAERRLRIKHKDYDDDDPKPPQHNGDGDPSDLPNDNDDEHDS SNVGRPQKPKLT  
CPHYRQLTSNRTAHKVVRQFIGGHRIQQHKSSTAIDGCGCSSTVGGEE SAFGIHDVEDL  
VRFGKNPHKEENIAIYRGETGKFGFLINNTNPQSGEEVRCYVVS LVEGGAAAFEARLR  
NGDRLLKVNKGKDVRTWNKRRVVELLAYAEGPAARLDVLRDDADTPEILDAQQEAETQEDP  
NGQELGARSGMQENDIYSDHSVCPYYISRTLHKHAEITFSPYNYILDPSIRRSLNISLRN  
TVLVLDEAHNVESTLCESGSGKYGEIDLFQVASALGPYARRTVCTGNTGLINSDINVDTA



KSIGKDDNFFSLGGTSLSAVVVSRMINQELQMELSVHDVFIHQTIHSLAQFIREKEKNVE  
DSTSDPHPLHFLPGGRCELHPLLFAFLQLIGLILMSIIATVPIIATVSLSVRSFIWFGDL  
GAVLFPLCLVGGCLFHCTLVILCKWIVVGRYKPGKAKTFSFYFLRWLVRRVLQVTRLYT  
WILDETPLSGIIILRFLGASIGSNVSEQPFLFEPDLCKIGDNTVIEFETQFCTSEIKSGY  
LELRGVTIEDNVKIGVRSILLGGAHIHRNSQVVAKTTVDYCTSTTREGQTLVGSFAVLDS  
SAEHVPPRKTSECSTPKKWRPQRNGYLFQCMVAALTIIEVMTAIAYVGSFIGGYVNERF  
GSIGLVVFLGSAFQIICCFMWLCVVALLRRLIIPDLECGKLYSSSWFALRKWFLDRIFLS  
PLFIYASQRVLQTSSTFPWYKLLGAKVGKAWINHPIVRVGVEHITIGDDFHIGMHAYF  
STERQESDGVWFDRMQVGNYSFQGRSVALGGTTVGSYVTIGAETVLPFDFTAEEGSTAF  
GSPPMKFTSTALFKDIVTQSQCYAKEFLLDHTHEGKCDETELVAKRIGEEGETSGSSCDE  
NAPSRMQDIGTGKFFWLYITTMILLIQGCLPLVIGGAYGSYYLLTTWLGQLRFEYLLATV  
PFIYIVGSVVMFVVMKVMQVAGGNFSIGTAVFFSFRFFYWHIFADMVYLCTSTIIPFSG  
TELYCVWLRFMGATIGKKVFI SPENGGFREIDFMNIGNNCVMMTPNIHAHYTDHGKQLQFC  
PVKLEDGCEINIGATVMPLTTYGKNCRLRPFAVTVKGQHCCEENTSYEGNPCKAVKAPSEK  
VAVLFAGQGSQYPGMLDSLTHNEEAKKLLKTACEHLDMNIIEICSIATADTKAIENTRIAQ  
PIVVFADLMAAEMMRQKAALDFSKTIAVAGYSLGELSALCFKAISYKDALSIVKVRADA  
MASCNGGSMCNLRGASRKDADNLAKKFKCKIANIVSDHHDQIERNLYVIAGPSSSIDHLI  
SHVNVDFEGGLRAKCLRVSAAFHTNDMKQAQLKFKQALENVKISLPSDVLVYSNVTGRPY  
SSEERRLPLQISSPVQWHGTVLDMVEKEGISKFIECGPMDTSLKMLSLIFPDIITSDK  
ILTSDDCN

>comp14867\_c0\_seq3; 2283 1 7760 LEN=8213; translated  
XNMQETIKVLFPPWAGGTSRVYQSLCEETRKHLVREESSVSSSLVGPQPYDALTYFKDLKP  
ILSQFNVEFLAIDLPGRLIRPNPESQEILSDFASLSRVLIHEIFLDAADGDANQQNTVKK  
GESYVLFHGSFGAMLAFEIAKQVGTYGLPPPLALFVSASRPPSAVSLTSSKTKPVSSMNF  
EEMRAYFVSRGSNATFFDTRVRENEEFKNLFMKSVQADYTCLETYESNEDQIDCPLAIGS  
EKDCIVSVKDTDGWKKHAANSFDSLILKDKGHFYLDLLEAVVALAESISLNVGKTLSTTL  
QEEIGVITNIYSKVLRIDADLLRLESDFFEIGGTSLDTIALISQIKAHIGIHIPQNEFFL  
NPKIVQLAIRARTIKNTSFVAPELVAVKSSVTGEQWFPASPQEQMFSCWEMAPVVYNMP  
TTIEFVNSAVDIERLREAFYHVVKQPSLRTIVAIDSKTNAVMMQRVLPQSQAGECFKLDI  
LKAGDIDEAKSMVEKESLYKFDLSNPPIVRGVLVEIENSLVSYFLLNQHVVGSQDGSRTQ  
LRRQLLQAYTELCNSQEVSSDLTIPHPNYVDWTLYLGKWLHHYQQESQLEYWKDKLAG  
LTVLNLPTDKPRPAILSSRGVRIPVFMRELTEQFSLFVSEKGANLYAGLIAAYMLMLHR  
IGGGDDFAIGIALANRHHEGMQNLIGYFANEVAIRANFDEKMSFVDDLQMI RTNILEGMA  
NADVPFHKVTEELKVKRDSRTPVFQAMFALQERAWHSLDDLCPKSGDICFQLNQNHNT  
SKFEVHLQLRHDGNGALEGLHIATDLFQPKSGERMAEMFVNLVRSCTECPKTI RSHSI  
MTESDAELIERCNGTSRTYEKTSIVDFQHSSPDDVALVVDGSCVQEVTFQEFQGFISNVS  
SFLHHESLRHQERVGLLIKSSANAMAVIYGINIACAIIVLDPEKTPIDRCKMIFDDAN  
ANVVIIVDDEYHSAFQELASDVIGRKLCLISEVVSFNSSSDSSTAKVEALPEDIFGIFYTSG  
TTGTPKGVVIKHSNVLNLVCWKEFFDVTHKDSILLFSSLSFIMSLRQYIPTLHAGATVV  
IPETALDFESAIVAGKVNKLVCPTPSALAALDMERVANRIEAIQLAGEAPRKNLTDVWSTK  
VSKVFIGLGPTELCAHAVCSQYDGETLCIGYPAANVKLYIVDPNTGLQCPVNVPGELWIA  
GENVSFGYLNREEATKKSFGYDNFSGSSDRLYKTGDLAKRLPCGRIQFIGNDQQIKVNG  
FRMEAGEIYNAMPKTVEKSHVMVQNNALTLFASPTSINVNELKSHLLKILPTYMVP TVIH  
TLDDFPLNKNRKL DVQSLLLMVGT SQPEEEEAQEDADFGLSNR TETTLKLIWCQILNKDV  
KSIGKDDNFFSLGGTSLSAVVVSRMINQELQMELSVHDVFIHQTIHSLAQFIREKEKNVE  
DSTSDPHPLHFLPGGRCELHPLLFAFLQLIGLILMSIIATVPIIATVSLSVRSFIWFGDL  
GAVLFPLCLVGGCLFHCTLVILCKWIVVGRYKPGKAKTFSFYFLRWLVRRVLQVTRLYT  
WILDETPLSGIIILRFLGASIGSNVSEQPFLFEPDLCKIGDNTVIEFETQFCTSEIKSGY  
LELRGVTIEDNVKIGVRSILLGGAHIHRNSQVVAKTTVDYCTSTTREGQTLVGSFAVLDS  
SAEHVPPRKTSECSTPKKWRPQRNGYLFQCMVAALTIIEVMTAIAYVGSFIGGYVNERF  
GSIGLVVFLGSAFQIICCFMWLCVVALLRRLIIPDLECGKLYSSSWFALRKWFLDRIFLS  
PLFIYASQRVLQTSSTFPWYKLLGAKVGKAWINHPIVRVGVEHITIGDDFHIGMHAYF  
STERQESDGVWFDRMQVGNYSFQGRSVALGGTTVGSYVTIGAETVLPFDFTAEEGSTAF  
GSPPMKFTSTALFKDIVTQSQCYAKEFLLDHTHEGKCDETELVAKRIGEEGETSGSSCDE  
NAPSRMQDIGTGKFFWLYITTMILLIQGCLPLVIGGAYGSYYLLTTWLGQLRFEYLLATV  
PFIYIVGSVVMFVVMKVMQVAGGNFSIGTAVFFSFRFFYWHIFADMVYLCTSTIIPFSG  
TELYCVWLRFMGATIGKKVCFSTSSLSYQFSFIDTIRNNVLT SFSTIXRFSYPPKMEVSE  
KLVSRASDVQLFLISHVHICLTARVLYVEDFMNIGNNCVMMTPNIHAHYTDHGKQLQFCPV  
KLEDGCEINIGATVMPLTTYGKNCRLRPFAVTVKGQHCCEENTSYEGNPCKAVKAPSEKVA  
VLFAGQGSQYPGMLDSLTHNEEAKKLLKTACEHLDMNIIEICSIATADTKAIENTRIAQPI

VFVADLMAAEMMRQKAALDFSKTIAVAGYSLGELSALCFAKAISYKDALSLVKVRADAMA  
SCNGGSMCNLRGASRKDADNLAKKFKCKIANIVSDHHDQIERNLYVIAGPSSSIDHLISH  
VNVVDEGGLRAKCLRVSAAFHTNDMKQAQLKFKQALENVKISLPSDVLVYSNVTGRPYSS  
EEEIRRLPLQI SSPVQWHGTVLDMVEKEGISKFIECGPMDTLSKMLSLIFPDITSDKIL  
TSDDCN

>comp14867\_c0\_seq4; 2291 1 7678 LEN=8131; translated  
XNMQETIKVLFPPWAGGTSRVYQSLCEETRKHLVREESSVSSLVGPQPYDALTYFKDLKP  
ILSQFNVEFLAIDLPGRLIRPNPESQEILSDFASLSRVLIHEIFLDAADGDANQQNTVKK  
GESYVLFHGHSFGAMLAFEIAKQVGTYGLPPPLALFVSASRPPSAVSLTSSKTKPVSSMNF  
EEMRAYFVSRGSNATFFDVTRENEEFKNLFMKSQVADYTCLETYESNEDQIDCPLIAIGS  
EKDCIVSVKDTDGWKKHAANSFDSLILKDKGHFYLDLLEAVVALAESISLNVGKTLSTTL  
QEEIGVITNIYSKVLRIDADLLRLESDFEIGGTSLDTIALISQIKAHIGIHIPQNEFFL  
NPKIVQLAIRARTIKNTSFVAPELVAVKSSVTGEQWFFPASPQEQMFSCWEMAPVVYNMP  
TTIEFVNSAVDIERLREAFYHVVKQQPSLRTIVAIDSKTNAVMQRVLPVLSQAGECFKLDI  
LKAGDIDEAKSMVEKESLYKFDLSNPPIVRGVLEIENSLVSYFLLNQHHVGS DGSRTQ  
LRRQLLQAYTELCSNQEVSSDLTIPHPNYVDWTLYLKWLHGHYQQESQLEYWKDKLAG  
LTVLNLPTDKPRPAILSSRGVRI PVFMDRELTEQFSLFVSEKGANLYAGLIAAYMLMLHR  
IGGGDDFAIGIALANRHHEGMQNLIGYFANEVAIRANFDEKMSFVDLLQMIRTNILEGMA  
NADVPFHKVTEELKVKRDSRTPVFQAMFALQERAWHSLDDLCPKSGDICFQLKNQNHNT  
SKFEVHLQLRHDGNGALEGLDHIATDLFQPKSGERMAEMFVNLVRSCTECPKTI RSHSI  
MTESDAELIERCNGTSRTYEKTSIVDFQHSSPDDVALVVDGSCVQEVTFQEFQGFISNVS  
SFLHHESLRHQERVGLLIKSSANAMAVIYGINIACAI VVLDPEKTPIDRCKMIFDDAN  
ANVVIVDDEYHSAFQELASDVI GRKLC LISEVVSFNSSDSSTAKVEALPEDIFGIFYTSG  
TTGTPKGVVIKHSNVLNLVCWKEFFDVTHKDSILLFSSLSFIMSLRQYIPTLHAGATVV  
IPETALDFESAIVAGKVNKLVC TPSALAALDMERVANRIEAIQLAGEAPRKN TLDVWSTK  
VSKVFIGLGPTELCAHAVCSQYDGETLCIGYPAANVKLYIVDPNTGLQCPVNVPGELWIA  
GENVSFGYLNREEATKKSFGYDNFSGSSDRLYKTGDLAKRLPCGRIQF IGRNDQQIKVNG  
FRMEAGEIYNAMPKTVEKSHVMVQNNALTLFASPTSINVNELKSHLLKILPTYMVPTVIH  
TLDDFPLNKNRKL DVQSLLL MVGTSQPEEEEAQEDADFGLSNRTE TETTLKLIWCQILNKDV  
KSI GKDDNFFSLGGTSLSAVVVSRMINQELQMELSVHDVFIHQTIHSLAQFIREKEKNVE  
DSTSDPHPLHFLPGGRCELHPLLFAFLQLIGLILMSI IATVPIIATVLSVRSFIFWFGDL  
GAVLFPCLLVGGCLFHCTLVILCKWIVVGRYKPGKAKTFSFYFLRWLVRRVLQVTRLYT  
WILDETPLSGIILRFLGASIGSNVSVEQPFLFEPDLCKIGDNTVIEFETQFCTSEIKSGY  
LELRGVTIEDNVKIGVRSILLGGAHIHRNSQVVAKT TVDYCTSTTREGQTLV GSPAVLDS  
SAEHVPPRKTSECSTPKKWRPQRGNGYLFCQMVAALTIIEVMTAIAYVGS LIGGYVNERF  
GSI GLVVF LGS AFQI ICCFMWLCVVALLRLLIPDLECGKLYSSSWFALRKWFLDRIFLS  
PLFIYASQRVLQTSSTFPWYLKLLGAKVGKAWINHP IVRVGVEHITIGDDFHIGMHAYF  
STERQESDGVWFD RMQVGNYS SFGQRSVALGGTTVGSYVTIGAETVLPFDFTAEEGSTAF  
GSPPMKFTSTALFKDIVTQSQC YAKEFLLDH THEGKCD ETELVAKRIGEEGETSGSSCDE  
NAPSRMQDIGTGKFFWLYITTMILIQGCLPLVIGGAYGSIYYLLTTWLGQLRFEYLLATV  
PFIYIVG SVVLMFVMKVMQVAGGNFSIGTAVFFSFRFFYWHIFADMVYLCTSTI IYPSG  
TELYCVWLRFMGATIGKKVCSTSSLSYQFSFIDTIRNNVLT SFSTIMVFI SPENGGFRE  
IDFMNIGNNCVMMPNIHAHYTDHGK LQFCPVKLEDGCEINIGATVMPLTTYGKNCR LRP  
FAVTVKGQHCEENTS YEGNPKAVKAPSEKVAVLFAGQGSQYPGMLDSLTHNEEAKKLLK  
TACEHLDMNI EEIC SITADTKA IENTRIAQPIVFVADLMAAEMMRQKAALDFSKTIAVAG  
YSLGELSALCFAKAISYKDALSLVKVRADAMASCNGGSMCNLRGASRKDADNLAKKFKCK  
IANIVSDHHDQIERNLYVIAGPSSSIDHLISHVNVVDEGGLRAKCLRVSAAFHTNDMKQA  
QLKFKQALENVKISLPSDVLVYSNVTGRPYSS EEEEIRRLPLQI SSPVQWHGTVLDMVEK  
EGISKFIECGPMDTLSKMLSLIFPDITSDKILTSDDCN

>comp14867\_c0\_seq5; 1915 1 6361 LEN=6361; translated  
XNMQETIKVLFPPWAGGTSRVYQSLCEETRKHLVREESSVSSLVGPQPYDALTYFKDLKP  
ILSQFNVEFLAIDLPGRLIRPNPESQEILSDFASLSRVLIHEIFLDAADGDANQQNTVKK  
GESYVLFHGHSFGAMLAFEIAKQVGTYGLPPPLALFVSASRPPSAVSLTSSKTKPVSSMNF  
EEMRAYFVSRGSNATFFDVTRENEEFKNLFMKSQVADYTCLETYESNEDQIDCPLIAIGS  
EKDCIVSVKDTDGWKKHAANSFDSLILKDKGHFYLDLLEAVVALAESISLNVGKTLSTTL  
QEEIGVITNIYSKVLRIDADLLRLESDFEIGGTSLDTIALISQIKAHIGIHIPQNEFFL  
NPKIVQLAIRARTIKNTSFVAPELVAVKSSVTGEQWFFPASPQEQMFSCWEMAPVVYNMP  
TTIEFVNSAVDIERLREAFYHVVKQQPSLRTIVAIDSKTNAVMQRVLPVLSQAGECFKLDI  
LKAGDIDEAKSMVEKESLYKFDLSNPPIVRGVLEIENSLVSYFLLNQHHVGS DGSRTQ  
LRRQLLQAYTELCSNQEVSSDLTIPHPNYVDWTLYLKWLHGHYQQESQLEYWKDKLAG

LTVLNLPDKPRPAILSSRGVRI PVFMDRELTEQFSLFVSEKGANLYAGLIAAYMLMLHR  
IGGGDDFAIGIALANRHHEGMQNLIGYFANEVAIRANFDEKMSFVDLLQMIRTNILEGMA  
NADVPFHKVTEELKVKRDSRTPVFQAMFALQERAWHSLDDLCPKSGDICFQLKNQNHT  
SKFEVHLQLRHDGNGALEGLDHIATDLFQPKSGERMAEMFVNLVRSCTECPKTI RSHSI  
MTESDAELIERCNGTSRTYEKTSIVDFQHSSPDDVALVVDGSCVQEVTFQEFQGFISNVS  
SFLHHESLRHQERVGLLIKSSANAMAVIYGINIACAI VVLDPEKTPIDRCKMIFDDAN  
ANVVI VDDDEYHSAFQELASDVIGRKLCLI SEVVSFNSSDSSTAKVEALPEDIFGIFYTS  
TTGTGPKGVVIKHSNVLNLVCWWKEFFDVTHKDSILLFSSLSFIMSLRQYIPTLHAGATVV  
IPETALDFESAIVAGKVNKL VCTPSALAAALDMERVANRI EAIQLAGEAPRKNLTDVWSTK  
VSKVFIGLGPTELCAHAVCSQYDGETLCIGYPAANVKLYIVDPNTGLQCPVNVPGELWIA  
GENVSFGYLNREEATKKSFGYDNFSGSSDRLYKTGDLAKRLPCGRIQFIGNDQQIKVNG  
FRMEAGEIYNAMPKTVEKSHVMVQNNALTLFASPTSINVNELKSHLLKILPTYMVPTVIH  
TLDDFPLNKNRKL DVQSLLLMVGTSQPEEEEAQEDADFGLSNRTE TTKLIWCQILNKDV  
KSI GKDDNFFSLGGTSLSAVVVSRMINQELQMELSVHDVFIHQTIHSLAQFIREKEKNVE  
DSTSDPHPLHFLPGGRCELHPLLFAFLQLIGLILMSIIATVPIIATVSLSVRSFIWFGDL  
GAVLFLPLCLVGGCLFHCTLVILCKWIVVGRYKPKAKTFSFYFLRWVLRVRLQVTRLYT  
WILDETPLSGII LRFLGASIGSNVSVEQPFLFEPDLCKIGDNTVIEFETQFCTSEIKSGY  
LELRGVTIEDNVKIGVRSILLGGAHIHRNSQVVAKT TVDYCTSTTREGQTLVGS PAVLDS  
SAEHVPPRKTSECSTPKKWRPQRGNGYLFQCMVAALTIIEVMTAIA YVGS LIGGYVNERF  
GSI GLVVFLGSAFQI ICCFMWLCVALLRRL LIPDLECGKLYSSSWFALRKF LDRIFLS  
PLFIYASQ RVLQTSSTFPWY LKLLGAKVGKAWINHP IVRVGVEHITIGDDFHIGMHAYF  
STERQESDGVWFDRMQVGNYS SFGQRSVALGGTTVGSYVTIGAETVLPFDFTAEEGSTAF  
GSPPMKFTSTALFKDIVTQSQC YAKEFLLDHTHEGKCDTELVAKRIGE EGETSGSSCDE  
NAPSRMQDIGTGKFFWLYITTMILIQGCLPLVIGGAYGSIYLLTTWLGQLRFEYLLATV  
PFIYIVG SVVLMFVMKVMQVAGGNFSIGTAVFFSFRFFYWHIFADMVYLCKPLYFVDFSM  
FQLLFAHTILTFLRKQVHRPS

>comp14867\_c1\_seq1; 218 769 1483 LEN=1483; minus strand; translated

MEVSEKLVSRASDVQLFLISHVHICLTARVLYVEDFMNIGNNCVMMPNIHAHYTDHGKL  
QFCPVKLEDGCEINIGATVMPLTTVRISNAEHYYPFMRFSNQ MSTILFIVWEELSSSPFA  
VTVKGQHCEENTS YEGNPKAVKAPSEKVAVLFA GQGSQYPGMLDSLTHNEEAKKLLKTA  
CEHLDMNIEEICSITADTKAIENTRIAQPIV FVADLMAAEMMRQKAALDFSKTIAVAG

>comp14867\_c2\_seq1; 1128 232 2210 LEN=2210; translated

MSNPFQFAVDVQAALPSAAPGAPPAGDPGNPFASVFADAPAPAPAPTESKPV MNTFQPP  
PQQPPMGMMMGQPPMMGGMNGFGAPPQQQAPPPMGSM MAPDQANPMGMYGQPPAAPPQ  
QPPAASF GAPAPPAPAA YGAPPPAQAPGMPTAAPLPPASPNPYGAPPPAAMPMPSTV  
PPSPTPNPYGAPPMMPAAPPPAQSPNPYGGPPAASDPFGAAPAAPGKPFGLSAPPAG  
MPPQQPPQPPQPPQYGD PFGAPQQPPPPADPGMGALVLSNQSNPYAQALPPQQQQQAM  
YPPQQQQQMVPAADPF SVFESAPAPPPAAPVPPPAASNALVPAQGPAPAPSDGDLWGD  
MGFDAPTPQAAPAHQE EKKEGDL PAGGEYYDARIFTPTLGV MFFK PQELTDSLFLNTDRS  
IVDGLAERP VVAFIVEGSSARSAGVELGHVLLK VNGVDVKNPKEASRLIKEGPRPLPLLF  
YVPNTDVVVAEGEHMVKYDTKET TAPNSSKDWKPKYVVIGGIIAQPWMMNMYR SKSEYDI  
AVIETQARRPVSVKVKQFSLQGARIQNDWQGPQMVKYKNKLHPWKYIVVLPVARNP IKIS  
SPNLAQLKPVHEGIRRVLLAQQRSGGRSSGGRPGRPANSSRNSSSSQRHDSYNQRPPPQR

>comp14867\_c2\_seq2; 1140 232 2231 LEN=2231; translated

MSNPFQFAVDVQAALPSAAPGAPPAGDPGNPFASVFADAPAPAPAPTESKPV MNTFQPP  
PQQPPMGMMMGQPPMMGGMNGFGAPPQQQAPPPMGSM MAPDQANPMGMYGQPPAAPPQ  
QPPAASF GAPAPPAPAAADPFAAYGAPPPAQAPGMPTAAPLPPASPNPYGAPPPAAP  
MGMPSTVPPSPTPNPYGAPPMMPAAPPPAQSPNPYGGPPAASDPFGAAPAAPGKPFGLD  
LSAPPAGMPPQPPQPPQPPQYGD PFGAPQQPPPPADPGMGALVLSNQSNPYAQALPP  
QQQQQAMYPQQQQQMVPAADPF SVFESAPAPPPAAPVPPPAASNALVPAQGPAPAPSD  
DGLWGD MGFDAPTPQAAPAHQE EKKEGDL PAGGEYYDARIFTPTLGV MFFK PQELTDSL  
FLNTDRSIVDGLAERP VVAFIVEGSSARSAGVELGHVLLK VNGVDVKNPKEASRLIKEGPR  
RPLPLLFYVPNTDVVVAEGEHMVKYDTKET TAPNSSKDWKPKYVVIGGIIAQPWMMNMYR  
SKSEYDIAV IETQARRPVSVKVKQFSLQGARIQNDWQGPQMVKYKNKLHPWKYIVVLPVA  
RNP IKISSPNLAQLKPVHEGIRRVLLAQQRSGGRSSGGRPGRPANSSRNSSSSQRHDSYN  
QRPPPQR

>comp14868\_c0\_seq1; 815 257 2718 LEN=2877; translated

MQSIGSAPSIGDANSRSDSNAKTNPNSSYSSHDDHITTP EAGTRSGPGSLEGE GSSHGNL  
GTPFFADM TLDISVAHDIAETPEAVARATMDHNTSAGLLSDVPSMPPLPEFQHEQLQSQP  
GRQSSSLSQRPEEPFVPSKLVYSNGSSDAPLDHHRQQQTPLEKSEPRSLSP EEHFDSNHF

DEEDEDHDIQIMARVTSSNHTRGGRFRPFGNSNGNWRNRLRRKQWPKDISWAVAFWMIWV  
GLLVPLIWIYGGSSNGNAGATTSSSSSETLWLAAMSPRSATLHTLAWGVIVAALILPRLLY  
RTSGGVGQGDARHFASQLLLVSAPVSACVYLGLLVGIYVMLPNAFWPFLIPLWYLSRD  
LYLFRRWKMTSTTPGGRQAFFQALACAALDILSRSLKRKVFYRAVVIVILGQFGVILWR  
LSLMAALRSGSVVWAAIAFVGGKWATGTVARLLTLTACGGVSNWFQEQTSLIEGMGQMEG  
RRERRHQEDSDETIETFTSISSSKDQYDASNSSVHNTTAQNSIEDSMPEAYRMADASQYAPA  
VNVGVDGDFESDDDESDDEENYAGFLNDSARRTTTTQLYSQRRQRERHQRRERRDARSST  
VRQLMGSALSVSFGSVTKCGLLGLLAQFVWSQIRKIDHARETLGGMRGMPVGDPSSSPSP  
HPSRVIMQRINAIARDFVVRTHSDMAMSYVADYQMSYTRAAQEVAILVDEAGVEPIIHDDI  
STHMSSCVGGSVSGIIILFTGPIILVHQNRNRFDEVPDVAVALDMVIAFFFFCYTLIFTVME  
PLRASIKAVYVCFQAQHPREALSQAFPLIYHRLTRMSRNLQ

>comp14869\_c0\_seq2; 74 1 298 LEN=769; translated  
XLPWLASKEATPTLSIGRSAIAHQPTAVVAGQEQAAGGTESVWFYEAHREQRDRAPGFAE  
REGSDASALAMRCDVMHVMRCMRWLSLVSSALARTDPRGMW

>comp14870\_c0\_seq1; 1176 78 3500 LEN=3553; translated  
MKLLKLVKVPFHSRRGERTVGNKKNKKESSRNDRSIPPSDLEKKPSDDSSVFSGLADNAN  
ALNKIESAKLPIPPPPPPPPNPPPPKETRQPKGILRAPTRAIQPTQLPPSTPSQESGDP  
FLNTESDLSESQLSNMGRMPMADVESTLGNSTISTVSSFRMRTNSNSVLSTDSMESELM  
KTIRNVASSFPDGETQMTWASANQLARPKGVVLLSSVTYKDEAAAGEQKKIDGQVITE  
CESNGSDSGIEAILDNFEKQMDSNIRTDQVEDETDVLADFNKDLMPQSLKVQSKESSESE  
YFLTPHKARKLQAILHRARIEVQVLKDNNNQCKSSIEQMVEDQKLLKLVEDRAKHELKE  
IQONLYQDEINSIMQEKEAAEQKHAEIMINEFEKLKEAAALEIGEKIEQERQAAAIDKEEE  
IAALKESYEYEFEKLRREFDERLDIEIEEATSSEANRIASEQDGLINILTAQIESLQNER  
YSSIELAKSVKKQLEESHPEEMIQFMDISMGCEGLQTSLDENSLELIKEAFHMFTFVLQ  
NTEKRAQLSAEFNAESQKQIRQRAEIEQLKQEREEKNQQFWDLEEEFKALSRKTILLE  
ERYRTESESHLKLKRLDDEKKTFFVNIERTRKDLEHAMAVGQRELANQKVIMERRQFSTR  
AKRDDVETTLDFDIRFAQSIP SARFSRNSSGFSKTKGKKQDSEGQTSKLTPEKTDKCEERR  
DNHSMSSHQSIESPVRKLRFSHMRNSKYASRHSVSNHPSNSNPSIKSPEKACQVESDKK  
LCVVTKIKDSSEFGNELEEAEDILTSPHAMNPENQGETASDIHVKLEEQKKIEDLASNE  
ERKQVEEKKQDDSTNLSLEQKIKMSREKPKRSASIPKRKKPGTTPRSVQSNKEFNRTFLTY  
SKKSEEKEEIEEKSESVDLRRARMFRITYREDSIRRSRRSIDDEISCSKCNDNNGSDEL  
EDLRKHSNGKPNEDNGPSNASTQIKKHVSPVQPDADTKCSKVI TNHEPFAQEKVENVVE  
RNPELDIFDRDISSIESKDDLEIPPPPTCHSITDDGRDKVQGFQEEEAQPFKECSSHLN  
SKRSPVVDVDCSMKSTSPRVSTGKSNSNSGSKNRF SALKSRARVKAKISMFEKKVENKGSF

>comp14870\_c0\_seq2; 1176 20 3442 LEN=3503; translated  
MKLLKLVKVPFHSRRGERTVGNKKNKKESSRNDRSIPPSDLEKKPSDDSSVFSGLADNAN  
ALNKIESAKLPIPPPPPPPPNPPPPKETRQPKGILRAPTRAIQPTQLPPSTPSQESGDP  
FLNTESDLSESQLSNMGRMPMADVESTLGNSTISTVSSFRMRTNSNSVLSTDSMESELM  
KTIRNVASSFPDGETQMTWASANQLARPKGVVLLSSVTYKDEAAAGEQKKIDGQVITE  
CESNGSDSGIEAILDNFEKQMDSNIRTDQVEDETDVLADFNKDLMPQSLKVQSKESSESE  
YFLTPHKARKLQAILHRARIEVQVLKDNNNQCKSSIEQMVEDQKLLKLVEDRAKHELKE  
IQONLYQDEINSIMQEKEAAEQKHAEIMINEFEKLKEAAALEIGEKIEQERQAAAIDKEEE  
IAALKESYEYEFEKLRREFDERLDIEIEEATSSEANRIASEQDGLINILTAQIESLQNER  
YSSIELAKSVKKQLEESHPEEMIQFMDISMGCEGLQTSLDENSLELIKEAFHMFTFVLQ  
NTEKRAQLSAEFNAESQKQIRQRAEIEQLKQEREEKNQQFWDLEEEFKALSRKTILLE  
ERYRTESESHLKLKRLDDEKKTFFVNIERTRKDLEHAMAVGQRELANQKVIMERRQFSTR  
AKRDDVETTLDFDIRFAQSIP SARFSRNSSGFSKTKGKKQDSEGQTSKLTPEKTDKCEERR  
DNHSMSSHQSIESPVRKLRFSHMRNSKYASRHSVSNHPSNSNPSIKSPEKACQVESDKK  
LCVVTKIKDSSEFGNELEEAEDILTSPHAMNPENQGETASDIHVKLEEQKKIEDLASNE  
ERKQVEEKKQDDSTNLSLEQKIKMSREKPKRSASIPKRKKPGTTPRSVQSNKEFNRTFLTY  
SKKSEEKEEIEEKSESVDLRRARMFRITYREDSIRRSRRSIDDEISCSKCNDNNGSDEL  
EDLRKHSNGKPNEDNGPSNASTQIKKHVSPVQPDADTKCSKVI TNHEPFAQEKVENVVE  
RNPELDIFDRDISSIESKDDLEIPPPPTCHSITDDGRDKVQGFQEEEAQPFKECSSHLN  
SKRSPVVDVDCSMKSTSPRVSTGKSNSNSGSKNRF SALKSRARVKAKISMFEKKVENKGSF

>comp14871\_c0\_seq1; 231 110 1092 LEN=1412; translated  
MGLTDNDSVARNEHKKPPAAKARRQTGSR LHSKHSQAMIEYADRLTKKGPAGAKTKARRP  
ERRTSGRAKIQKHNRALLLGSDDLALGIYAVLALFLWIRELWVWLVNGVGVLLLAQAGDILLD  
WFWHMAGGHEIQQCKGWLWVWWWKIGLDFATRITIEGHTLHRVLVANTLNFVWNLVGNKNTLH  
WFGDIHKKGRASVLDRARERLEQSSENHRNFAAXPPGEPGKAERLSEAGVRVRRRGLED  
RRVAGRTAPRGP MRRKGTERNKGQAKATRADPCINPRTAAESPCKTTKWLRKSCTMQQI

RVGPPVSHSRSPGANSRNRHRGRFVGL  
>comp14872\_c0\_seq1; 643 1 2263 LEN=2493; translated  
XEYVYQAYSRLMFFRTQOKDSAPAKTLAETTINASETFQSKNIFASLKMVDTSSDEPQMAA  
VYLPQFVFKPEKYSEAYFEHRIASLRSKIQQVIASKEELSDSIFSSVILSLEAAKQTLT  
TSKTIVTALQNEQIKHPDDDDSWKDASVVDPSAKAVKDAQAVIDRLEEAGTNTGSALVRAS  
GLLDGGLSQIEHDLLLECTVLIQATPKKLATWCAESPGANPKLLDQFLGRENNSTTLMELF  
LASGGPSNGNYGPALNIYDKLQNEGVDDGGTASMTSTEPFSLKQRLALAVALELSTPIPI  
FQQENEFVDPVERFRYFAKAFADNKNKGKNDIENCKITFIDTLDDAFFTLVWELRKYVDA  
NATNDLWGRSFLRNYRDPQIFMEDQRWRYVMSVRSVGYRHPDHEFRDYPALLSAGGE  
CGARAWFGRFISKAWGIPTWGVVRQPGHAAMTRWTNDRSIGGWTVCLGAPWQYSWWDNRY  
GANTRRGPDFLEETQARTSADRPRYYEKVILLECLAESLGETVEEDFVSAKVWRSLALS  
QRKMSRSFCSTSVKSLGTGDTNGDKFELNGSVCNEFGFPRASKIQHQKTIKEQKSSYDF  
SNKDTNPDRLSKGNHDLIQPDGTIIPATSFVDPKRPPKNVMVTKSFLGGNQLHLEHDGQ  
VEYILPHSIVAAGTYAMSAKVNVVHRDQKPLIVQIENPPVPPNHSYTDGYEIVHLPQGGQ  
MEVQYTKGKWEQTKSIRVDLIPRGRRLRSRVTPCW  
>comp14873\_c0\_seq3; 841 1 1345 LEN=1345; translated  
XEIEAGAENAEAPSEEVASEALAAKTEEEAASEAILDSEAIQEGKEEIIIPETPVDAEGP  
AEEIVGAEIPVREVAAHMAAAEKTAPVSPVNTEATAEMTKETHPETSAAAAEELIDEAEI  
KPVPEVVVDIQTTEGEEAEDEEGPIAPVNAEGPSQVEVAEVAPELLVVEEVGSEALVNAKT  
LSEEVKAAEAPELPLEGEAGPEALAEVEVPSEETQESPLESEAEGLPAEAPGDTQVEEAV  
YESPMNTEAEVVAPEALVNAGKLSKDIIEESTPEAPTQTEALDQKEGEETVPESPM DAGV  
PVGDVSEEEKETTPEAAVKTKAPSEAAEDESAPESSADKGAKEKATESPEEIEAEDEAAP  
QAHIPGPDDESLPESPVESEAEAAAAEAPESPGDAEVPSEVAEDEAVPKSSMETETEEA  
VPETPVETEAEKEVPETPVEIDASSEVTE  
>comp14873\_c0\_seq4; 1696 1 2429 LEN=2785; translated  
XTEAEDEASLESLVVAEVPDLDTKETEIDEAAPQAQSEDIEEEEALVETEAEETVSETF  
ADNEVQSDDAEEEEALMETEASKAAPEISVDNEAQSEEADEEEGFVETEAEAAASEALVN  
NDTTSSEDLDEEEARVETEAVEAASEVLVNNNETTSEDLDKKEALVETEAEAAVSEVPVSP  
LPVEDAAPLLL VGDEAPSEEAEEEDAAGEPPVDIEAEESASEAPVHTEPPAEVVAPEWPLN  
AEALSEMPAAEASLVL PADMEAPAPELDDKTGCDARLETEALAEAAKDKAGSEASLDNEV  
EELSREDIDVIQVANEAVVDSKALCEEVEVEVGSEVLVDTEETEEAAHEARLDTEVQSEEA  
EEAEAEADPDAPDEEEAVSKEAKEEVTKATKEVREVEETESIVGGPHGETCGLVQEEPR  
EEDTSVSI EGGVEGERKENEASAEIDI ADEVTAKLEDEL SLKTPNDEKPTNEAKEDKSVE  
AETEECTLGEEKHLGETVEAPVVAEASVEDEEFANASTPAFVEAGAEEEKHTEKNRLVE  
QEAPDEDSSALVGAGAEEEHMEAEVGEVGEVVDTTNETEEKVEKRIAVETSAAEAVET  
TTANDAASETHEELARPGEDEGGNEKAEEDVPMDDPPNASRVDSVVEACIVAAGEENIST  
EETSENSETAEAAKTTPKESTLEPDVELAPDGEETRVIPEGEQKSEDEAATEACVDAGE  
SAVDAINTEEKSHVDTDKENVAVADVVEAIIHESKEEAVLDSGAYDTEEIVENKVVVEEVK  
NEMTALAEAPGHAKEYGEHSDAPQVVEDE  
>comp14873\_c0\_seq5; 1732 1 2442 LEN=2798; translated  
SESPLETEADEAAPESPVDAEVPDLDTKETEIDEAAPQAQSEDIEEEEALVETEAEETV  
SETFADNEVQSDDAEEEEALMETEASKAAPEISVDNEAQSEEADEEEGFVETEAEAAASE  
ALVNNDTTSEDLDDEEEARVETEAVEAASEVLVNNNETTSEDLDKKEALVETEAEAAVSEVP  
VSPLELPVEDAAPLLL VGDEAPSEEAEEEDAAGEPPVDIEAEESASEAPVHTEPPAEVVAPE  
WPLNAEALSEMPAAEASLVL PADMEAPAPELDDKTGCDARLETEALAEAAKDKAGSEASL  
DNEVEELSREDIDVIQVANEAVVDSKALCEEVEVEVGSEVLVDTEETEEAAHEARLDTEVQ  
SEEAEEAEADPDAPDEEEAVSKEAKEEVTKATKEVREVEETESIVGGPHGETCGLVQEE  
EEPREDTSVSI EGGVEGERKENEASAEIDI ADEVTAKLEDEL SLKTPNDEKPTNEAKED  
KSVEAETEECTLGEEKHLGETVEAPVVAEASVEDEEFANASTPAFVEAGAEEEKHTEKN  
RLVEQEAPDEDSSALVGAGAEEEHMEAEVGEVGEVVDTTNETEEKVEKRIAVETSAAE  
EVETTTANDAASETHEELARPGEDEGGNEKAEEDVPMDDPPNASRVDSVVEACIVAAGEE  
NISTEETSENSETAEAAKTTPKESTLEPDVELAPDGEETRVIPEGEQKSEDEAATEACV  
DAGESAVDAINTEEKSHVDTDKENVAVADVVEAIIHESKEEAVLDSGAYDTEEIVENKVVV  
EEVKNEMTALAEAPGHAKEYGEHSDAPQVVEDE  
>comp14874\_c0\_seq1; 232 1 1158 LEN=1970; translated  
XARLNTQDHHLPHTQDTMKAQKELGAIDTMLTVEDIEIPSLDDLPSKKKKTHVIRRT  
RAVALACGDCRVLSGKTRKFGPPSFPYIPGGDCSGIVCKIPPEASNDPDPFKVGDRA  
SRFTEGPRGALAEFAVVDTTVMKIPSNISFEEGAILASVCPATLLAERIKEGERVLMG  
AGGGVGSACQIMRKQGASLLVGASLQPDRLLOEPLKYDKAVNYSKEDPFSMKEFKDDPF  
DVVVDLAGGSWLRLLLEDCKNKEKSIVKPASQGGRYLTLTADAEIFXAESIMEILKPFLLF



PLWRFLKSRLWGRGHLPKYTFHAHSIEFERSHLTRTMMAENGLKAVMDSRGPFSFTTEG  
VRKAFRLQETRHHVHGKTVIKIKDEND

>comp14875\_c0\_seq1; 596 315 1820 LEN=1951; translated  
MISSEGGHSDNTSSHSANMKSPEEPPPIIPSTLFDLEALERDQGELEYHREIALVTLKRDA  
SAIQPTPYFGIVNENNPIDTSSNVCYSTVALRKALRVADSKGPLHLQNDHEATLAETKIP  
KSNKSDYVSVSTASTTCSISGESTYEDESDETEQDEEEVPIITSSPPDALFTVQGAEPFCHT  
KMLLKESRPLLDILSRDGLERKVKRRRTGSQNPADHDQDQRQDQTLAWSSPSGITVVRL  
PNDINSSYFQVIMEYLYTKEIKLGIHDEQIGGENVEDAWLVDGENVLEGRTRLVFDSDEET  
ELSECFDDVVFVSGDPIFTTRQDTPQSEDSLMNNLQGVFLLAEQFGCVSAKQAI EAKLYDE  
CLFAFTAELLKWADEHNCAFLKEKAMDKLI AVSLKKSSEDQSGCKLSRASSADWKRLQN  
ELFLYEKEGCHKIHYNESPDNLESSNANGGKFFYKVEYLRHRLSDMGLDSDGSRQSL  
RLEPHLDSRSRSLPTKLTRI

>comp14876\_c0\_seq1; 589 27 1745 LEN=2191; translated  
MVCVLNYVVP I I SLATAFQDTSNRMLGLRNSLPSGCRLSVPSDGEDSNSVADPYAELTI  
VDNNDIPCEDESGSKTGSASSNNRVTNAPLVTHIIVLIHGWMGNPAEMGYIKESI QNAANK  
NVACTEDNVRHRFI I HSAAACNEDRTDDGIAVGGTRIAAEINDLVRHIVLDGDCSSSASLT  
SSPETAKFTLSIVGNSLGGLYARHALAGINWTITDESSLSPPTLLPLIFVTTATPHLGI  
SQHTYIPLPRAAEFVVAQGMKETGRDFFRFTPVLEDLFHKEYFVDPLSKFLQRIAYINVT  
GTDFQVPTATAAFWAPGSDSPHHRVPAHPMASENDNTMKENDADIDSEEPVCPKAI VMT  
LSTPRRLDLLNEEEDGKSEADVDEEKKEGKQDNNDPSELYRSWSKRLDRLGWTKVLDV  
REDVPTVNVVPGTSEEFKSNENSKKEEDKGTDTSDGGEKEKGMDTAEAVEDAESEKDEKDP  
NLNKDTWTA AELLA EFQGLL TAGATS AKRRS SFWDLKPRIPLGHTVMIANAKDEFNKKV  
TSGGKPVMDYLGLSMVRTLTSPNYSTDVEKAA

>comp14876\_c0\_seq2; 541 27 1571 LEN=2290; translated  
MVCVLNYVVP I I SLATAFQDTSNRMLGLRNSLPSGCRLSVPSDGEDSNSVADPYAELTI  
VDNNDIPCEDESGSKTGSASSNNRVTNAPLVTHIIVLIHGWMGNPAEMGYIKESI QNAANK  
NVACTEDNVRHRFI I HSAAACNEDRTDDGIAVGGTRIAAEINDLVRHIVLDGDCSSSASLT  
SSPETAKFTLSIVGNSLGGLYARHALAGINWTITDESSLSPPTLLPLIFVTTATPHLGI  
SQHTYIPLPRAAEFVVAQGMKETGRDFFRFTPVLEDLFHKEYFVDPLSKFLQRIAYINVT  
GTDFQVPTATAAFWAPGSDSPHHRVPAHPMASENDNTMKENDADIDSEEPVCPKAI VMT  
LSTPRRLDLLNEEEDGKSEADVDEEKKEGKQDNNDPSELYRSWSKRLDRLGWTKVLDV  
REDVPTVNVVPGTSEEFKSNENSKKEEDKGTDTSDGGEKEKGMDTAEAVEDAESEKDEKDP  
NLNKDTWTA AELLA EFQGLL TAGATS AKRRS SFW

>comp14877\_c0\_seq1; 797 770 3097 LEN=3313; translated  
MPSFDSNELHKNQLRSSLDLQLYFRDVRQGKRPITVRPWSTRIGDVKKIIHQKIHVPIQS  
LHLFFGPHLTSGKALPNHRSLHDAGIYRSGETLLLDVKDRSSALTTSLSSFTDKYNSSDI  
DISSSVYKSTPKPLRSLVNEARRALNLKPSFILDGSGGTYFLHNSRKAKIAVFKPADE  
EPYAENNRPGYIRQPGQDMFLREGVIPGEACIREVA AFMLDHSFGVPMTTLVECRHPS  
FNINGSRLSLSEGGASIGRHSGLTLNQSMSSSPSSSTVLPKKGVSFQEFVRTECSMDI  
SPSKISVEEVHKIAVLDIRLMNADRNSGNLLVRRRKS DNSLELVPIDHGFCLRSVADTSW  
MDWCWLDWAQLKEPMSPKTKKYILNLDIERDAEMLRDRNLNICEALAYFYASSTILKEGT  
KAGLSLYDIAVMCCRNNDNLGEVESKFEVLFAMAGELAESAIRDDRWF AVASKALQEQLS  
PHGGSLLNRPKSNIVRKAVSAFDLTCFASSEDPKIPTAIPAMTQSAGSEDS SSSCSDEPE  
NQEAEQWALRVLEKVSQGNSTKLMKPRSESFESDSDTSSEGGGLWHKSPYTQSDSDALP  
YIQSDSEEDDSTNWDISPKNPPESSFLNENAMTATSMAPVDVSCNLFHDHGSRASNFQEV  
PPTRPVQKQLSPLLQRVSFANLNNVKFESDVPANDEIDVKEKHENFSVRPLAKMGRSRSY  
SALSSTSIGENQADDEKKTVKRSSVTEDQYREYFLKFIDL VVVREITAAAATSGL

>comp14877\_c0\_seq3; 55 145 426 LEN=426; minus strand; translated  
MDTDTDCPLSLCRGLCWVCVPRCGGSCNCNCRNGSDPWRTAGVMILTNGVLHVLLVTEL  
LRAASITFRKEAGERRTSTVEVREQTSYLPVNF

>comp14877\_c0\_seq4; 497 142 1347 LEN=1563; translated  
MSPKTKKYILNLDIERDAEMLRDRNLNICEALAYFYASSTILKEGT KAGLSLYDIAVMCC  
RNDNLGEVESKFEVLFAMAGELAESAIRDDRWF AVASKALQEQLSPHGGSLLNRPKSN  
IVRKAVSAFDLTCFASSEDPKIPTAIPAMTQSAGSEDS SSSCSDEPENQAEQWALRVLEK  
VSQGNSTKLMKPRSESFESDSDTSSEGGGLWHKSPYTQSDSDALPYIQSDSEEDDSTN  
WDISPKNPPESSFLNENAMTATSMAPVDVSCNLFHDHGSRASNFQEV PPTRPVQKQLSPLL  
QRVSFANLNNVKFESDVPANDEIDVKEKHENFSVRPLAKMGRSRSY SALSSTSIGENQAD  
DEKKTVKRSSVTEDQYREYFLKFIDL VVVREITAAAATSGL

>comp14878\_c0\_seq1; 449 1 1099 LEN=1099; translated  
XDLVRLDEDEDEEDDANKPQEI NGGNHHHGNSTENDSVSTVSRVHSPAVTNRLTSLVR

AEQDAGIKVSLSGADSIMFASNQESGHVRSSTISDLMEATSNPFALSASEALLAATILCA  
ERKCYAMVEVLPSVLPSWITLKVEKGSIVVAAKIQYYASAAPSAAAPNEMTGLDATQTSR  
GAAKPIILSSPTPVVLFRLTCDSTRTGSFVPTFSGSTSLLRHMACNDVRAASDTLLRIANL  
AKHRRRSSSKSVAAGAVFGSGRGRVDAFQSLSRSMNVLGQRTGVGGAWKDHDRSTLLRQ  
RAIGLACKDVKVSLSMCCGMAVLYGLSPVAIGVATGIQASPEMAGGKLDLLALQKAAAKL  
GVSDKKT

>comp14878\_c0\_seq2; 561 56 1184 LEN=1184; translated  
MVQMPKRSCLLVATVFLRAWGTVRCANDNDNDNAHLCARATANLVSLDDVIDEYEASLE  
SNTDGDWTWTFGFDPDAFEAYEKACGRIEGDSSIWLQALDTAAFECDLPALGVEGRAVEFY  
GIGKCLAKTAACESTDPLDLVETVWKNAGMECRTPGESRRGGSGSDEEHENGGDGNSE  
TISPG EEDQDSNGSNNDNDNDKGGQFLGPDGNDQAQKSGSGPSITQMPFLTDDDIACLN  
ATASFYKSRPGLQSAQATYDHSVHEDRNDLLGGAMVIGYPGDNVAAMKAACQIGRGHWT  
EGPPLANLTCVVHGTETAALVFNFGVCLAKVEECLSVDPVHFLQKDLAEGDGMACWPD  
DDQTDGGGEGNDNDX

>comp14878\_c0\_seq3; 1077 1 2851 LEN=3074; translated  
XASHKALTHVAALTASNHI EYPTANLARFVDVSTKALTHARTAWIQNDECQDALYFFHG  
RLFSLRAGPHDVY GALDFMTTKTSSSQSSQTKPAVDGSDANDNDNDNTNTNHSGPEEE  
HNPATAPRSSFWYDLPSDLRLETDRYETSVEKQWSKQEVSDRWQMAVRRKLLLLGEVWMA  
GRKQPAGSRVPWKISLRGGIVRLMHGPKKTTIDNSTGKTKTLYPLEAILTVLSTDTEGNE  
PPSNADSENKTTSGDQSNTEAEWTLISVDVCAQAKTGQSNHQLD'TTNKQRYNLHRLCAL  
AMTREEKQIRLRNTQREEQRQQEEQQSSNTEPQTTPPPMMVAKPLNALFRVAQYFSLSW  
QLEILSEQAKALSKGNWNGEGGGI AVPGLSRGNAALVSSAGYSIVVTPVKFFENRTSRI  
LGVLSISFWAIDDRYGPSPMGDLVRLDEDEDEEDDANKPQEINGGNHHHGNSGTENDSVS  
TVSRYVHSPA VTNRLTSLVRAEQDAGIKVSLSGADSIMFASNQESGHVRSSTISDLMEAT  
SNPFALSASEALLAATILCAERKCYAMVEVLPSVLPSWITLKVEKGSIVVAAKIQYYASA  
APSAAAPNEMTGLDATQTSRGAAPILSSPTPVVLFRLTCDSTRTGSFVPTFSGSTSLLRH  
MACNDVRAASDTLLRIANLAKHRRRSSSKSVAAGAVFGSGRGRVDAFQSLSRSMNVLGQ  
RTGVGGAWKDHDRSTLLRQRAIGLACKDVKVSLSMCCGMAVLYGLSPVAIGVATGIQAS  
PEMAGGKLDLLALQKAAAKLGVSDKKT VSSFLASPPSVLVDQKLVEHASWTS DGERIKR  
SLAEQERFGICCSVDDDSGLTLYGAEIEVELESPSSTPTRKSFGLVPPFVASVSSSLDSNP  
TDAGGLVEGNPPAKRAKIDTSNRAVPVTKTRDLIDEVEYFATMLAKTIGI

>comp14879\_c0\_seq1; 621 345 4024 LEN=4895; translated  
MNLASNDVERFLLASLFI SYLIWSPLQAI AILVVGWFQMGPAFAVGFCLLIFGFVFPQFY  
LSNRFAFLRSKIAAITDQRVNFVSQAVQGARVMKMSGYEYRFFDRI SKGRHREVAQIIRA  
TNLKALNEALFFACNIVVSLVIFLMHVG VFDGTLSPGNVYTVFTLVNILQLELTKHVSLG  
VMGVSEVYVVISRIQKFLFPERPAGNTSKCVANLLSGEGKMDRGPKGADDLIASSTDSE  
PNDQKIAISLSNVDCYWNQVKACDSRSDEKVSPTGPELDMVKPASTSSSEKEEETESAI  
SGLVSALSDISLDLERGRRLTCVIGTVGSGKSALLQAVVGELPAYRGSISFISEEGSYQTS  
NSSRQKISYAAQDPWIMDGTVRENI TMGLSFRQEWYDKVVDACGLRMDFSLFRDGDSTIV  
GDRGVQCSGGQRARIGLARAIYRDAEVLVADDPLSAVDAKVGRQIFQEALLGLCVNQIC  
VLLATHQH QYVHNYRCVLMVDGRIGCRGSYAECLDAAGGKLSIHEAADIDDT SINKSQLG  
EDDAEEQMRTPIRDARESVVKT SNDEIGNIEVEVEKSAGNTAAKEESKEGTNRGVVEFET  
YKNYIYAMGGWPVAAFLFTFCTTQGVALWTIITMGLWAE LPPQEQRSWNIVGLIIGQVC  
MAILLSTFRAFLSFFMTIKASKNLHDDMAKAVLRAKISFFDTNPTGRILNRF SADVTND  
DLLPQTLFDFSVIFFMVI GAVFTTLITLFPVLLVMPPLIYYFIVMRRIFVTSSRELKRLE  
GVARSPIFAMMNE SLSGIGTIRANEAGDYFTKKFEEVHDSPPPEPSFLLHYQYVSFKSSR  
MKMLVRFVSNCRNISHFMIHFWQDFTEAMGWFS DGCACILADVFCMLFLSIFPNQGW  
TVDPAILGLSISMLLQLCSAFQWCIRQSAEVVNQMVGVERVLGFGKLEPEAPLELES DNN  
LDEFWPMEGAITVKDLAVRYRPSLPLALDGVTF SVPSGSRIGVVGRTGSGKSTIVQALFR  
LLEAEDGQINVDGFNIAEVGLHRIRTSISVIPQHPTLFSGCTVRENLDVFGHSEEEIYK  
ALKSAHLGEVIAELPKGIDSVVTEGGSNFSVGQRQLLCLARAILSKNKILILDEATASVD  
RRTDQMLHESLHESFGNATI IAVAHRLDTVIDYDYLVLGKGVLEFGSPADLLRKNNGGA  
FHTMVEDTGEITSNELRERAFVNER

>comp14879\_c0\_seq2; 637 345 4167 LEN=5038; translated  
MNLASNDVERFLLASLFI SYLIWSPLQAI AILVVGWFQMGPAFAVGFCLLIFGFVFPQFY  
LSNRFAFLRSKIAAITDQRVNFVSQAVQGARVMKMSGYEYRFFDRI SKGRHREVAQIIRA  
TNLKALNEALFFACNIVVSLVIFLMHVG VFDGTLSPGNVYTVFTLVNILQLELTKHVSLG  
VMGVSEVYVVISRIQKFLFPERPAGNTSKCVANLLSGEGKMDRGPKGADDLIASSTDSE  
PNDQKIAISLSNVDCYWNQVKACDSRSDEKVSPTGPELDMVKPASTSSSEKEEETESAI  
SGLVSALSDISLDLERGRRLTCVIGTVGSGKSALLQAVVGELPAYRGSISFISEEGSYQTS

NSSRQKISYAAQDPWIMDGTVRENI TMGLSFRQEWYDKVVDACGLRMD FSLFRDGDSTIV  
GDRGVQCSGGQRARIGLARAIYRDAEVLVADDPLSAVDAKVGRQIFQEALLGLCVNQIC  
VLLATHQH QYVHNYRCVLMVDGRIGCRGSYAECLDAAGGKLSIHEAADIDDT SINKSQLG  
EDDAEEQMRTPIRDARESVVKT SNDEIGNIEVEVEKSAGNTAAKEESKEGTNRGVVEFET  
YKNYIYAMGGWPVAAFL LFTFCTTQGVALWTIITMGLWAE LPPQEQRSWNIVGLIIGQVC  
MAILLSTFRAFLSFFMTIKASKNLHDDMAKAVLRAKISFFDTNPTGRILNRF SADVTND  
DLLPQTLFDFSVIFFM VIGAVFTTLITLFPVLLVMPPLIYYFIVMRRIFVTSSRELKRLE  
GVARSPIFAMNESLSGIGTIRANEAGDYFTKKFEEVHDSPPPEPSFPLLHYQYVSFKSSR  
MKMLVRFVSNCRNISHFMIHFWQDFTEAMGWFSDGCACILADVFCMVCDWFPVFFVFL  
LKLTSDXDARLLIAKQFHFSSSTVPTQYIFVPPFFYSFFSVFFQTQGWFTVDPAILGLSIS  
MLLQLCSAFQWCIRQSAE VVNQMVGVVERVLGFGKLEPEAPLELESDNNLDEFWPMEGAIT  
VKDLAVRYRPSLPLALDGVTF SVPSGSRIGVVGRTGSGKSTIVQALFRLLEAEDGQINVD  
GFNIAEVGLHRIRTSISVIPQHPTLFSGCTVRENLDVFG LHSEEEIYKALKSAHLGEVIA  
ELPKGIDSVVTEGGSNFSVGQRQLLCLARAILSKNKILILDEATASVDRRTDQMLHESLH  
ESFGNATI IAVAHRLDTVIDYDYLVLGKGKVL EFGSPADLLRKNNGGAFHTMVEDTGEIT  
SNELRERAFVNER

>comp14879\_c0\_seq3; 693 325 4900 LEN=5771; translated  
MCNYAEIKKEKSDTDISDSNGRKRERARNDNMDNESK DPLHPTRSDGDNDRIGTESR PAN  
MMASAPWWSRVIFRWPYPLLKLG LERPLEEIDLPEILPKDTSRYNREYLMELWDREKERC  
RKKNQCRTSGSSQPPLKPSLHRAILRDF FHSMWYIQPCMFLSSTAKIVQALFLGK LIES  
FEVSGANTSGYIFAGVIVACGIVVLF EHHHIFVVTWRKGMQLRVSCVGA IYGKCLKLSST  
HQETNANSGRIMNLASNDVERFLLASLFI SYLIWSPLQAIAILVVGWFQMGPAFAVGFCL  
LIFGFVFPQFYLSNRFAFLRSKIAAITDQRVNFVSQAVQGARVMKMSGY EYRFFDRISKG  
RHREVAQIRATNLKALNEALFFACNIVVSLVIFLMHVGVFDGTLSPGNVYTVFTLVN I L  
QLELTKHVSLGVMGVSEVYVVISRIQKFL EPPERPAGNTSKCVANLLSGEGKMDRGP KGA  
DDLIASSTDSEPNDQKIAISLSNVDCYWNQVKACDSRSDEKVSPTGPELDMVKPASTSSS  
EKEEETESAIDSGLVSALS DISLDERGRLTCVIGTVGSGKSALLQAVVGELPAYRGSIS  
FISEEGSYQTSNSSRQKISYAAQDPWIMDGTVRENI TMGLSFRQEWYDKVVDACGLRMD F  
SLFRDGDSTIVGDRGVQCSGGQRARIGLARAIYRDAEVLVADDPLSAVDAKVGRQIFQE A  
LLGLCVNQICVLLATHQH QYVHNYRCVLMVDGRIGCRGSYAECLDAAGGKLSIHEAADI  
DDTSINKSQLGEDDAEEQMRTPIRDARESVVKT SNDEIGNIEVEVEKSAGNTAAKEESKE  
GTNRGVVEFETYKNYIYAMGGWPVAAFL LFTFCTTQGVALWTIITMGLWAE LPPQEQRSW  
NIVGLIIGQVCMAILLSTFRAFLSFFMTIKASKNLHDDMAKAVLRAKISFFDTNPTGRIL  
NRF SADVTNDLLPQTLFDFSVIFFM VIGAVFTTLITLFPVLLVMPPLIYYFIVMRRIF  
VTSSRELKRLEGVARSPIFAMNESLSGIGTIRANEAGDYFTKKFEEVHDSPPPEPSFPLL  
HYQYVSFKSSRMKMLVRFVSNCRNISHFMIHFWQDFTEAMGWFSDGCACILADVFCMV  
CDWFPVFFVLLKLTSDXDARLLIAKQFHFSSSTVPTQYIFVPPFFYSFFSVFFQTQGWFT  
VDPAILGLSISMLLQLCSAFQWCIRQSAE VVNQMVGVVERVLGFGKLEPEAPLELESDNNL  
DEFWPMEGAITVKDLAVRYRPSLPLALDGVTF SVPSGSRIGVVGRTGSGKSTIVQALFRL  
LEAEDGQINVDGFNIAEVGLHRIRTSISVIPQHPTLFSGCTVRENLDVFG LHSEEEIYKA  
LKSAHLGEVIAELPKGIDSVVTEGGSNFSVGQRQLLCLARAILSKNKILILDEATASVDR  
RTDQMLHESLHESFGNATI IAVAHRLDTVIDYDYLVLGKGKVL EFGSPADLLRKNNGGAF  
HTMVEDTGEITSNELRERAFVNER

>comp14879\_c0\_seq4; 714 325 4787 LEN=5658; translated  
MCNYAEIKKEKSDTDISDSNGRKRERARNDNMDNESK DPLHPTRSDGDNDRIGTESR PAN  
MMASAPWWSRVIFRWPYPLLKLG LERPLEEIDLPEILPKDTSRYNREYLMELWDREKERC  
RKKNQCRTSGSSQPPLKPSLHRAILRDF FHSMWYIQPCMFLSSTAKIVQALFLGK LIES  
FEVSGANTSGYIFAGVIVACGIVVLF EHHHIFVVTWRKGMQLRVSCVGA IYGKCLKLSST  
HQETNANSGRIMNLASNDVERFLLASLFI SYLIWSPLQAIAILVVGWFQMGPAFAVGFCL  
LIFGFVFPQFYLSNRFAFLRSKIAAITDQRVNFVSQAVQGARVMKMSGY EYRFFDRISKG  
RHREVAQIRATNLKALNEALFFACNIVVSLVIFLMHVGVFDGTLSPGNVYTVFTLVN I L  
QLELTKHVSLGVMGVSEVYVVISRIQKFL EPPERPAGNTSKCVANLLSGEGKMDRGP KGA  
DDLIASSTDSEPNDQKIAISLSNVDCYWNQVKACDSRSDEKVSPTGPELDMVKPASTSSS  
EKEEETESAIDSGLVSALS DISLDERGRLTCVIGTVGSGKSALLQAVVGELPAYRGSIS  
FISEEGSYQTSNSSRQKISYAAQDPWIMDGTVRENI TMGLSFRQEWYDKVVDACGLRMD F  
SLFRDGDSTIVGDRGVQCSGGQRARIGLARAIYRDAEVLVADDPLSAVDAKVGRQIFQE A  
LLGLCVNQICVLLATHQH QYVHNYRCVLMVDGRIGCRGSYAECLDAAGGKLSIHEAADI  
DDTSINKSQLGEDDAEEQMRTPIRDARESVVKT SNDEIGNIEVEVEKSAGNTAAKEESKE  
GTNRGVVEFETYKNYIYAMGGWPVAAFL LFTFCTTQGVALWTIITMGLWAE LPPQEQRSW  
NIVGLIIGQVCMAILLSTFRAFLSFFMTIKASKNLHDDMAKAVLRAKISFFDTNPTGRIL

NRFSADVGTNDLLPQTLFDFSVIFFMVGAVFTTLITLFPVLLVMPPLIYYFIVMRRIF  
VTSSRELKRLEGVARSPIFAMMNESLSGIGTIRANEAGDYFTKKFEEVHDSHTRAFFSFT  
SLSRWVGFMRDALAFLMSSVWYVIGFLVFFCVAQTHFGSDARLLIAKQFHFSSTVPTQ  
YIFVPPFFYSFFSVFFQQTQGWFTVDPAILGLSISMLLQLCSAFQWCIRQSAEVVNQMGVVE  
RVLGFGKLEPEAPLELESDNNLDEFWPMEGAITVKDLAVRYRPSLPLALDGVTFVSPSGS  
RIGVVGRGTSGSKSTIVQALFRLLEAEDGQINVDGFNIAEVGLHRIRTSISVIPQHPTLFS  
GCTVRENLDVFGHLHSEEEIYKALKSAHLGEVIAELPKGIDSVVTEGGSNF SVGQRQLLCL  
ARAILSKNKILILDEATASVDRRTDQMLHESLHESFGNATIIAVAHRLDTVIDYDYILVL  
GKGKLVLEFGSPADLLRKNNGGAFHTMVEDTGEITSNELRERAFVNER

>comp14879\_c0\_seq5; 739 325 4644 LEN=5515; translated  
MCNYAEIKKEKSDTDISDSNGRKRERARNDNMDNESKDPLHPTRSDGDNDRIGTESRPA  
MMASAPWWSRVIFRWPYPLLKGLERPLEEIDLPEILPKDTSRYNREYLMELWDREKERC  
RKNQCRGSSQPPKPSLHRAILRDFHSMWYIQPCMFLSSTAKIVQALFLGKLIES  
FEVSGANTSGYIFAGVIVACGIVVLFHHHIFVVTWRKGMQLRVSCVGAIIYKCKLKSST  
HQETNANSGRIMNLASNDVERFLLASLFI SYLIWSPLQAIAILVVGWFQMGPAFAVGFCL  
LIFGFVPPQFYLSNRFAFLRSKIAAITDQRVNFVSQAVQGARVMKMSGYEYRFFDRISKG  
RHREVAQIRATNLKALNEALFFACNIVVSLVIFLMHVG VFDGTLSPGNVYTVFTLVNIL  
QLELTKHVSLGVMGVSEVYVVISRIQKFLFPERPAGNTSKCVANLLSGEGKMDRGPKGA  
DDLIASSTDSEPNDQKIAISLSNVDCYWNQVKACDSRSDKVSPTGPELDMVKPASTSSS  
EKEEETESAI DSGLVSALS DISL DLERGR LTCVIGTVGSGKSALLQAVVGELPAYRGSIS  
FISEEGSYQTSN SSRQKISYAAQDPWIMDGTVRENITMGLSFRQEWYDKVVDACGLRMD  
SLFRDGDSTIVGDRGVQCSGGQRARIGLARAIYRDAEVLVADDPLSAVDAKVGRQIFQEA  
LLGLCVNQGICVLLATHQH QYVHNYRCVLMVDGRIGCRGSYAECLDAAGGKLSIHEAADI  
DDTSINKSQLGEDDAEEQMRTPIRDARES VVKTSNDEIGNIEVEVEKSAGNTAAKEESKE  
GTNRGVVEFETYKNYIYAMGGWPVAAFLLFTFCTTQGV ALWTIITMGLWAE LPPQEQRSW  
NIVGLIIGQVCMAILLSTFRAFLSFFMTIKASKNLHDDMAKAVLRAKISFFDTNPTGRIL  
NRFSADVGTNDLLPQTLFDFSVIFFMVGAVFTTLITLFPVLLVMPPLIYYFIVMRRIF  
VTSSRELKRLEGVARSPIFAMMNESLSGIGTIRANEAGDYFTKKFEEVHDSHTRAFFSFT  
SLSRWVGFMRDALAFLMSSVCFVFFSVFFQQTQGWFTVDPAILGLSISMLLQLCSAFQWCIR  
QSAEVVNQMGVERVVLGFGKLEPEAPLELESDNNLDEFWPMEGAITVKDLAVRYRPSLPL  
ALDGVTFVSPSGSRIGVVGRGTSGSKSTIVQALFRLLEAEDGQINVDGFNIAEVGLHRIR  
TSISVIPQHPTLFSGCTVRENLDVFGHLHSEEEIYKALKSAHLGEVIAELPKGIDSVVTEGG  
SNF SVGQRQLLCLARAILSKNKILILDEATASVDRRTDQMLHESLHESFGNATIIAVAH  
RLDTVIDYDYILVLGKGKLVLEFGSPADLLRKNNGGAFHTMVEDTGEITSNELRERAFVNER

>comp14879\_c0\_seq6; 658 345 4054 LEN=4925; translated  
MNLASNDVERFLLASLFI SYLIWSPLQAIAILVVGWFQMGPAFAVGFCLLIFGFVPPQFY  
LSNRFAFLRSKIAAITDQRVNFVSQAVQGARVMKMSGYEYRFFDRISKGRHREVAQIRA  
TNLKALNEALFFACNIVVSLVIFLMHVG VFDGTLSPGNVYTVFTLVNILQLELTKHVSLG  
VMGVSEVYVVISRIQKFLFPERPAGNTSKCVANLLSGEGKMDRGPKGADDLIASSTDSE  
PNDQKIAISLSNVDCYWNQVKACDSRSDKVSPTGPELDMVKPASTSSSEKEEETESAI  
D SGLVSALS DISL DLERGR LTCVIGTVGSGKSALLQAVVGELPAYRGSISFISEEGSYQTS  
N SSRQKISYAAQDPWIMDGTVRENITMGLSFRQEWYDKVVDACGLRMDFLFRDGDSTIV  
GDRGVQCSGGQRARIGLARAIYRDAEVLVADDPLSAVDAKVGRQIFQEALLGLCVNQGIC  
VLLATHQH QYVHNYRCVLMVDGRIGCRGSYAECLDAAGGKLSIHEAADIDDT SINKSQLG  
EDDAEEQMRTPIRDARES VVKTSNDEIGNIEVEVEKSAGNTAAKEESKEGTNRGVVEFET  
YKNYIYAMGGWPVAAFLLFTFCTTQGV ALWTIITMGLWAE LPPQEQRSWNIVGLIIGQVC  
MAILLSTFRAFLSFFMTIKASKNLHDDMAKAVLRAKISFFDTNPTGRILNRFSADVGTND  
DLLPQTLFDFSVIFFMVGAVFTTLITLFPVLLVMPPLIYYFIVMRRIFVTSSRELKRLE  
GVARSPIFAMMNESLSGIGTIRANEAGDYFTKKFEEVHDSHTRAFFSFTSLSRWVGFMRD  
ALAFLLMSSVWYVIGFLVFFCVAQTHFGSDARLLIAKQFHFSSTVPTQYIFVPPFFYSFF  
SVFFQQTQGWFTVDPAILGLSISMLLQLCSAFQWCIRQSAEVVNQMGVERVVLGFGKLEPE  
APLELESDNNLDEFWPMEGAITVKDLAVRYRPSLPLALDGVTFVSPSGSRIGVVGRGTSG  
KSTIVQALFRLLEAEDGQINVDGFNIAEVGLHRIRTSISVIPQHPTLFSGCTVRENLDV  
FGHLHSEEEIYKALKSAHLGEVIAELPKGIDSVVTEGGSNF SVGQRQLLCLARAILSKNKIL  
ILDEATASVDRRTDQMLHESLHESFGNATIIAVAHRLDTVIDYDYILVLGKGKLVLEFGSP  
ADLLRKNNGGAFHTMVEDTGEITSNELRERAFVNER

>comp14879\_c0\_seq7; 130 325 987 LEN=987; translated  
MCNYAEIKKEKSDTDISDSNGRKRERARNDNMDNESKDPLHPTRSDGDNDRIGTESRPA  
MMASAPWWSRVIFRWPYPLLKGLERPLEEIDLPEILPKDTSRYNREYLMELWDREKERC  
RKNQCRGSSQPPKPSLHRAILRDFHSMWYIQPCMFLSSTAKIVQALFLGKLIES

FEVSGANTSGYIFAGVIVACGIVVLF EHRKFAKSRMVESLW  
>comp14879\_c0\_seq8; 683 345 3911 LEN=4782; translated  
MNLASNDVERFLLASLFI SYLIWSPLQAI AILVVGWFMGPAFAVGFCLLIFGFVFPQFY  
LSNRFAFLRSKIAA ITDQRVNFVSQAVQGARVMKMSGY EYRFFDRI SKGRHREVAQI IRA  
TNL KALNEALFFACNIVVSLVIFLMHVGVFDGTLSPGNVYTVFTLVNILQLELTKHVS LG  
VMGVSEVYVSI SRIQKFLFEPERPAGNTSKCVANLLS GEGKMDRGPKGADDLIASSTDSE  
PNDQKIAISLSNVDCYWNQVKACDSRSDEKVSPTGPELDMVKPASTSSSEKEEETESAID  
SGLVSALS DISL DLERGR LTCVIGTVGSGKSALLQAVVGELPAYRGSISFISEEGSYQTS  
NSSRQKISYAAQDPWIMDGTVRENITMGLSFRQEWYDKVVDACGLRMDFSLFRDGDSTIV  
GDRGVQCSGGQRARIGLARAIYRDAEVLVADDPLSAVDAKVGRQIFQEALLGLCVNQGIC  
VLLATHQH QYVHNYRCVLMVDGRIGCRGSYAECLDAAGGKLSIHEAADIDDT SINKSQLG  
EDDAEQMRTPIRDARES VVKTSNDEIGNIEVEVEKSAGNTAAKEESKEGTNRGVVEFET  
YKNYIYAMGGWPVAAFLLF TFC TTQGV ALWTIITMGLWAE LPPQEQRSWNIVGLIIGQVC  
MAILLSTFRAFLSFFMTIKASKNLHDDMAKAVLRAKISFFDTNPTGRILNRF SADVTND  
DLLPQTLFDFSVIFFMVIGAVFTTLITLFPVLLVMPPLIYYFIVMRRIFVTSSRELKRLE  
GVARSPIFAMNESLSGIGTIRANEAGDYFTKKFEEVHDSHTRAFFSFTSLSRWVGF RMD  
ALAFLLMSSVCFFSVFFQTQGWFTVDPAILGLSISMLLQLCSAFQWCIRQSAE VVNQMVG  
VERVLGFGKLEPEAPLELES DNNDLDEFWPMEGAITVKDLAVRYRPSLPLALDGVTF SVPS  
GSRIGVVRTGSGKSTIVQALFRLLEAEDGQINVDGFNIAEVGLHRIRTSISVIPQHPTL  
FSGCTVRENLDV FGLHSEEEIYKALKSAHLGEVIAELPKGIDSVVTEGGSNF SVGQRQLL  
CLARAILSKNKILILDEATASVDRRTDQMLHESLHESFGNATIIAVAHRLD TVIDYDI L  
VLGKGKVL EFGSPADLLRKNGGAFHTMVEDTGEITSNELRERAFVNER

>comp14879\_c0\_seq9; 677 325 4757 LEN=5628; translated  
MCNYAEIKKESD TDISDSNGRKRERARNDNMDNESKDP LHPTRSDGDNDRIGTESR PAN  
MMASAPWWSRVIFRWPYPL LKGLERPLEEIDLPEILPKDTSRYNREYLMELWDREKERC  
RKKNQ CRTSGSSQPP LKPSLHRAILRDF FHSMWYIQPCMF LSSTAKIVQALFLGK LIES  
FEVSGANTSGYIFAGVIVACGIVVLF EHHHIFVTVWRKGMQLRVSCVGA IYGKCLKLSST  
HQETNANSGRIMNLASNDVERFLLASLFI SYLIWSPLQAI AILVVGWFMGPAFAVGFCL  
LIFGFVFPQFYLSNRFAFLRSKIAA ITDQRVNFVSQAVQGARVMKMSGY EYRFFDRI SKG  
RHREVAQI IRATNLKALNEALFFACNIVVSLVIFLMHVGVFDGTLSPGNVYTVFTLVNIL  
QLELTKHVS LGVMGVSEVYVSI SRIQKFLFEPERPAGNTSKCVANLLS GEGKMDRGPKG A  
DDL IASSTDSE PNDQKIAISLSNVDCYWNQVKACDSRSDEKVSPTGPELDMVKPASTSSS  
EKEEETESAIDSGLVSALS DISL DLERGR LTCVIGTVGSGKSALLQAVVGELPAYRGSIS  
FISEEGSYQTSNSSRQKISYAAQDPWIMDGTVRENITMGLSFRQEWYDKVVDACGLRMDF  
SLFRDGDSTIVGDRGVQCSGGQRARIGLARAIYRDAEVLVADDPLSAVDAKVGRQIFQE A  
LLGLCVNQGICVLLATHQH QYVHNYRCVLMVDGRIGCRGSYAECLDAAGGKLSIHEAADI  
DDTSINKSQLGEDDAEQMRTPIRDARES VVKTSNDEIGNIEVEVEKSAGNTAAKEESKE  
GTNRGVVEFETYKNYIYAMGGWPVAAFLLF TFC TTQGV ALWTIITMGLWAE LPPQEQR SW  
NIVGLIIGQVCMAILLSTFRAFLSFFMTIKASKNLHDDMAKAVLRAKISFFDTNPTGRIL  
NRF SADVTND DLLPQTLFDFSVIFFMVIGAVFTTLITLFPVLLVMPPLIYYFIVMRRIF  
VTSSRELKRLE GVARSPIFAMNESLSGIGTIRANEAGDYFTKKFEEVHDSPPPEPSFPL L  
HYQYVSFKSSRMKMLVRFVSNCRNISHFMIHFQWQDFTEAMGWFS DGCACILADVFCML  
FLSIFPNQGWFTVDPAILGLSISMLLQLCSAFQWCIRQSAE VVNQMVGVERVLGFGKLEP  
EAPLELES DNNDLDEFWPMEGAITVKDLAVRYRPSLPLALDGVTF SVPSGSRIGVVGR TGS  
GKSTIVQALFRLLEAEDGQINVDGFNIAEVGLHRIRTSISVIPQHPTL FSGCTVRENLDV  
FGLHSEEEIYKALKSAHLGEVIAELPKGIDSVVTEGGSNF SVGQRQLLCLARAILSKNKI  
LILDEATASVDRRTDQMLHESLHESFGNATIIAVAHRLD TVIDYDI LVLGKGKVL EFGS  
PADLLRKNGGAFHTMVEDTGEITSNELRERAFVNER

>comp14880\_c0\_seq1; 538 128 2116 LEN=2620; translated  
MPVTSRVARSWMLQLQFMVFLYFCTAAFFWRASVQFSFADGKSISGMFSNTST SPEYIDP  
IEPSPRIINGHEAPPMPGYPLA I LNQHVLKCGGVLIAPDI ILTAHCSESVNEAQLGRH  
NRSDETEVEYESLIVEKLITHPRYFRNRFLDADPHDFAIVKLF GQSKKVTPIRINQNPQVP  
VPDQKMLVFGWGSFDPDDLTKQSDVLRGATAYMTNEKCKTFVGSYGFHQVDFQRYVINA  
TLCASNFE EQMDS CRGDSGSLV VQGRALKDDVLVGI VSAGFGCANPTLPALYARVSEVH  
GWIRDRVCELSVSPPLYFECPTFPFLSMCQNFPIGRDVT PCIEILEPQTRITL ELFLDSR  
PKETGWILRRSTEGGQWVTEVERPILSYENIHSESLFSETLSVTDDR DYKLVLLDSYGDI  
NATVKITDEYGNELLSVKESTINGGAKYSVSFPFTVGVPPSSAPTISSPPSVTTAPTLQP  
TQIMPVSVVISFDENPENIGFQLQRLINGTNATKEENS IYEP IHNVPYPGTFSSDLKGSN  
VTLKVPLQPKGKEKEIYRFVMTSNEGRGFASGGYEVWLGDPLDGDLLF IGDKFYLEDANT  
FYFEPKSTEEPSASPTSLISL DLNTWDDNDTSAMTVSASSSQIGTFAIFSGIIIVSTVLC

TA

>comp14880\_c0\_seq2; 514 128 2228 LEN=2732; translated  
MPVTSRVARSWMLQLQFMVFLYFCTAAFFWRASVQFSFADGKSI SGMFSNTST SPEYIDP  
IEPSPRIINGHEAPPMGYPYLA ILNQGHV LKCGGVVRTILLEVTRFGNERAVNVKLSLCY  
LRHFLLNDFLKLADAPDIILTAAHCSESVNEAQLGRHNRSDETEVYESLIVEKLITHPRY  
FRNRFLDADPHDFAI VKLFGQSKVTP I RINQNPQVPVPDQKMLVFGWGSFDPDDLTKQS  
DVLRGATAYMTNEKCKTFVGSYGFHQVDFQRYVINATL CASNFEEQMDSCRGDSGSGLV  
VQGRALKDDVLVGVIVSAGFGCANPTLPALYARVSEVHG WIRDRVCELSVSPPLYFECPTF  
PFLSMCQNFPIGRDVTPCIEILEPQTRITLFLDSRPKETGWILRRSTEGGQWVTEVER  
PILSYENIHSESLFSETLSVTDDRDKLVLLDSYGDINATVKITDEYGNELLSVKESTIN  
GGAKYSVSFPFTVGVPPSSAPT ISSPPSVTTAPTLOPTQIMPFVSVVISFDENPENIGFQ  
LQRLINGTNATKEENSIYEP IHNVYPGTFSSDLKGSNVT LKVPLQPKGKEKEIYRFVMTS  
NEGRGFASGGYEVWLGDPDGLLFI GDKFYLEDANTFYFEPKSTEEPSASPTSLISLDL  
NTWDDNDTSAMTVSASSSQIGTFAIFSGIIIVSTVLCTA

>comp14881\_c0\_seq1; 918 87 3575 LEN=3671; translated  
MKRPRRERRIFVEPSLFLGRTTTNTKDATGMSISSLGRKRAKQLAALFLMSTIATMWTAS  
NVQPVHSLSLNTSGGVANRAHLNIYTHSDSSKRKRSRGHACFSISPPAIPSSSLLLATPS  
SPSQSSSTSGAKRKPRHNQONPNRRNNNSNRNKYRNGNAAAAPTDPVADSRWQRAVRIET  
RTQIALENLQQRNNINTMNETNTITKHKTEDESNOQDTEKNSTSDQRLSPTGKNTVI IRR  
RNSGVFSSVPPDNKSDDTASAPQTPVQRNPSVFPFDIRECNFALAAFGDRGDLRLALRLY  
FKMRKATQIALSATTDAANPEATTLVPTPTLVTYSTLMSRAISVGKQPVALRLWKIMR  
KQVDFFSYASYSTTAAATGTGSVASIKATDLQNLIVPDVKATNILMNTYAKMGDLEAAED  
LMLQMQRTPVLQQENEITGNVGVNGIDNDNPKTKSSPTTSSLQQVVFVGGGMDVPFLKPNL  
VTYNTLLDACQKSGELEKALYKGVLEHESKKMGRGSGRTNITYRTGQTL SIRLQPDVRT  
YTSLIGTVARKSRPLLSSAAETSNSNNSSTNHNSQFYGTHDPSLAFSLLNEMKTKHRI  
APSPLTYSALIDVCGRCRRSDLALKALRLMLRDEQMRKMRRLAEKNNTNSNKNRPGPG  
AAAPEVSMDDQQTVGAWTAAINACGKTGRIDTALKIFFVSMRPFKVQPNVITCSCLLDSLL  
KQGKTAESLDVLRVMKSHNLQPSYIYTSLMTYASRLAGLEQQKGMRRNQNYFPREEQQD  
TTYNPRSTANTGTSEDESDNTNRWPSSLDSVQENENAI EEKVRDAFDDKQNGEEDDTKA  
VDIYSELMSTLIATTKTSQQSSSIPKFPDVSVAASNELYQVSMVFREMKASGVVDPDLS  
YHTLLRSCANAGDIDRAQEILKEIQDSAVDLQPNDRTWRAVLRAAGKAKRSDLVLKTNWS  
AVADMENSENDEVEVGAPATSKSSSSSTSTAWKKKRRKANKLSIHTFRTLLTALLVCAW  
SLRESHDYTSVELYKIVIKCYNTLRSTAASNPTKSCSGQSVIASSKLTTSYMGLHLLDS  
NAAMENPQIMASILQAVVNLESLEKDDDEWKGLKRLGVSLARTSCLRESLQPSSDNQQT  
KSVTPPLSYFDKKALRIAITWS

>comp14882\_c0\_seq1; 493 1 2004 LEN=2203; translated  
LEYRMI SYIRPNLLGSSDREFLREYS DPHAGMGTDAPEDKKA EADGLLESFFETLRPF  
VHRDASLLLRDLPSLQQVVLHLRPTKVQRALYRAYNEHQKAANDRNFLKR FVTLRSVHN  
HPGTLLPDQRDNDPSAPRRLSAGSKHSATGRSFAETKIDRFPAAGGGA AKPPGKESSDSV  
IEILSSSDEDDTDGYESCTEGTREWWT RVANTFGTDAMKDVESGNKCILLHLI LAHADEM  
GEKTVVFSQSLKTLDFLSELLASKDWHKLCPSLDKSF PWRKRGGWIKGRDFLRIDGATPG  
DERTELLRDFVDFKCFKFLFLISL TAGGIGINLV SANRVILFDSHFNP SIDIQAIYRCYRY  
GQQRNVFAYRFLTQGSMEEKVYSRAVSKIGLGNRVIDGKELRRCFRKDEIDSLGKEDDWV  
ECVRCRQWRMFP PGHTADIANLPDEWYCEMMDEHDAR MNMTCGFEEKDSVWYDRHF KPN  
VKISLPSNPGATATEASSKISAAQSDELVEKDEILK KILSIPTRSKKAALIVSKHYFHEA  
LVSDFDPSKTTATNTAATIATAEGARDPKEDTEVSSTLEGNSMKGSDEEKESATLKQNR  
KSDDETTNRKYATSRMHSQKNLDTPRPGQMRFKKSKNTANMERVTGT ELSTRRLSPVNS  
SDELYF

>comp14883\_c0\_seq1; 636 177 2105 LEN=2332; translated  
MISRRETI SVFARGAIVDGGDIHKTEDDEEDFSTIGNTSRSSRNMLAISEEMESTAEYPE  
TSDKDIQSSQKARVRNFLHRLGQKSKLLPKKLYQQSNII FRPTINAVAEYQEMEENEDES  
KTIVTIRSTRIDVGTGRSMLVKQNAQVVRNPSSAEGTWDAPKLD SFDDNSRRNLGLREK  
SLILDDGSLGMSDITEDTFFFSGSKMDHLASKRSPMFAKNPTTYRI EEEIEEEEEKRENNSE  
KKGINSASDVVIERAYDFRKL SPLNDNMECGRYDLRATIHNPIDAEREFSL LFIDDRPR  
RRSFSDSRIDFRRGDI STENSVMNLFPLSPSSNLSNEEQFESLLDQLKLS SHDRSFTD  
SYETPEFFEEAPEVETGSTHSIHRTTIDSWPFRTRSYSSGPRLQQTRKSD ELAEFLPN  
RSSHSMFAKDEEKYFPDVKSSRYSVSTRIP SQHEISHQASLPKRSSHSMFEREDKHFPDV  
RRRSTTKKSLQKEPIEILWNPQTPSLLDLNETPNSNEVPFESFGFDRSGIESQPQRTASA  
PIIGQRNATAKDNMPLQEP LVRNPPSKIVNAASLTVAALRPAPTQSLPALPTQKESDQY  
YWGNIHEDDLCS EDNHRKNGESDSEELKDLCWSSES YDDIL

>comp14883\_c0\_seq2; 672 177 2216 LEN=2443; translated  
MISRRETISVFARGAIVDGGDIHKTEDDEEDFSTIGNTSRSSRNMLAISEEMESTAEYPE  
TSDKDIQSSQKARVRNFLHRLGQKSKLLPKKLYQQSNIIFRPTINAVAEYQEMEENEDES  
KTIVTIRSTRIDVGTGRSMLVKQNAQVVRNPSSAEGTWDAPKLDSDSNNRRNLGLREK  
SLILLDDGSLGGMSDITEDTFFFSGKMDHLASKRSPMFAKNPTTYRIEEIEEEEKRENNSE  
KKGINSASDVVIERAYDFRKLSPLNNDMECGRGYDLRATIHNPIDAEREFSLLFIDDRPR  
RRSFSDSRIDFRRGDI STENSVMNLFPLSPSSNLSNEEQFESLLDQLKLSHSDRSFTD  
SYETPEFFEEAPEVETGSTHSIHRTTIDSWFPFRTRSYSSGPRLQQTRKSDLAEFPLPN  
RSSHSMFAKDEEKYFPDVKSSRYSVSTRIPSQHEISHQASLPKRSSHSMFEREDKHFDPV  
RRRSTTKKSLQKEPIEILWNPQTPSLLDLNETPNSNEVPFESFGFDRSGIESQPQRTASA  
PIIGQRNATGTSTKTIGDETIHPRLQTNVSLATLSDSNNGSAGTFLAKDNGMPLQEPVLR  
NPPSKI VNAASLTVAALRPAPTQSLPALPTQKESDQYYWGNIHEDDLCSEDNHRKNGESD  
SEELKDLCSWSSES YDDIL

>comp14884\_c0\_seq1; 469 1 1513 LEN=1555; translated  
XDDEEFYLPFEIKHKPRKSKHIKIAGGDTTHGMMIDAGSQGTRLHIYEWKRKFLLEDDEDL  
IEQTKGRKLSYPTSHNRWTDKYTPGLDAFGSIKHPHLEQAVGDYLGALLDFAREVLRDK  
EAEWSTYPIYLKATGGLRTPQLPERLRMLDCVRKLFHNTTFNPF AFEDERARVISGEEEA  
IYGWVG VNF AKGLLIENSMGTGTGKDPRRTYGMLEMGGASTQVAVFENNGDLMANLFLKLO  
LGGARHWNVYVHSYLYFGINGAWSRLNAWLHGENKTTNPCLPLGKEVVFDSWIHVGPRGH  
FYPRSDDPKSVPYSVTMVHEAPPSSGGSEPYDAEANFQDCSNRTFALLRKGTNSEWCDFQM  
DGNCGFAGIYQPPMPQTNSENDEFIATSNFYDVVFQFLQLGETANVSQIGKAARDVCMMDW  
PALVDYNEANEMFTVKTDHELAQFCFRSLFVYHLIRNGWEFGDDYRMTAVDVIDGHKLGW  
ALGCMLEYEINTRESQLRKPNDRTN

>comp14884\_c0\_seq3; 604 1 1822 LEN=2111; translated  
XDDEEFYLPFEIKHKPRKSKHIKIAGGDTTHGMMIDAGSQGTRLHIYEWKRKFLLEDDEDL  
IEQTKGRKLSYPTSHNRWTDKYTPGLDAFGSIKHPHLEQAVGDYLGALLDFAREVLRDK  
EAEWSTYPIYLKATGGLRTPQLPERLRMLDCVRKLFHNTTFNPF AFEDERARVISGEEEA  
IYGWVG VNF AKGLLIENSMGTGTGKDPRRTYGMLEMGGASTQVAVFENNGDLMANLFLKLO  
LGGARHWNVYVHSYLYFGINGAWSRLNAWLHGENKTTNPCLPLGKEVVFDSWIHVGPRGH  
FYPRSDDPKSVPYSVTMVHEAPPSSGGSEPYDAEANFQDCSNRTFALLRKGTNSEWCDFQM  
DGNCGFAGIYQPPMPQTNSENDEFIATSNFYDVVFQFLQLGETANVSQIGKAARDVCMMDW  
PALVDYNEANEMFTVKTDHELAQFCFRSLFVYHLIRNGWEFGDDYRMTAVDVIDGHKLGW  
ALGCMLEYEINTLPWDFHPELLYKGTSKILVALYVVLGTLGGSIVGLMIAMRLNKRINEAV  
RKSVIFQNHPEFANNPLVRKSLALPKMDLDELESLYNDGDEDQDQDDRQEDQTAALNRSK  
TPGYSAT

>comp14885\_c0\_seq1; 380 917 2392 LEN=3143; translated  
MTPSSSTEMYAIQLQPTTFFSTPVHIIHDLQYVQQNTFNNTNGSLHSTTSTTSKHKLPHGLT  
VYELKEMTKARLQSEAAEKSNRNEVQEICRDRVSPLD FDSGDQVRDRTFSRDSSLSSRM  
NNNPVEFY PQNQFAPNATQVQGPQS QLLNSGLHPVPSMLGGGAAPSSFRTRSRRTDTW  
ESTSVASHNSTIHSENLSSESTSEVGSF SHSGHRNRAFTCPAVQPKPLDAMSNTTSGLY  
NDRSRFSSPSPVQASPRRGP GMIGGTS LFNAAVGGNRCRAVTLSPNTDSILED RPFHYDA  
FESGDRLEIPNFSGGISGATTL SAATPSQTRQRDYSPVLEQLGLDSSYLSNGTDSNSVFR  
SLATSSMSPLQGITQTGSRELD SLNEFQPI TKNKSDIFSEQAIETRIAAPPPGFVTASS  
PIGNTAFSIVGSLDGYSNINRSHLL SEDNVLSDFGSLLDL SGP RDDRERANTYTFGSNEF  
RSMNDNQSGGH

>comp14885\_c0\_seq2; 349 124 1602 LEN=2353; translated  
MTTYSYARMTQQLQSTTFFSRPVHIIHDLQYVQQNTFNNTNGSLHSTTSTTSKHKLPHGLT  
TVYELKEMTKARLQSEAAEKSNRNEVQEICRDRVSPLD FDSGDQVRDRTFSRDSSLSSRM  
MNNNPVEFY PQNQFAPNATQVQGPQS QLLNSGLHPVPSMLGGGAAPSSFRTRSRRTDT  
WESTSVASHNSTIHSENLSSESTSEVGSF SHSGHRNRAFTCPAVQPKPLDAMSNTTSGLY  
YNDRSRFS SPVQASPRRGP GMIGGTS LFNAAVGGNRCRAVTLSPNTDSILED RPFHYD  
AFESGDRLEIPNFSGGISGATTL SAATPSQTRQRDYSPVLEQLGLDSSYLSNGTDSNSVFR  
RSLATSSMSPLQGITQTGSRELD SLNEFQPI TKNKSDIFSEQAIETRIAAPPPGFVTASS  
SPIGNTAFSIVGSLDGYSNINRSHLL SEDNVLSDFGSLLDL SGP RDDRERANTYTFGSNEF  
FRSMNDNQSGGH

>comp14885\_c0\_seq3; 461 188 2173 LEN=2924; translated  
MPYSRVGVMPEPARSKDVKGYNR SRGNRSKGITMEDLKKQTALRLAQEQQEPHQHQS NHG  
RGIGWEEQYRPSHPRFYPSKTKKGYPFALADPSVVNSRNVFNHQNYSSHHSQELNPSANA  
NLNIESQEHHLSHEQH QYHNQNQHSMNRGFS AVPVFDHTNNTLPSQDQNMTPSSTEMYA  
IQLQPTTFFSTPVHIIHDLQYVQQNTFNNTNGSLHSTTSTTSKHKLPHGLT VYELKEMTKA

RLQSEAAEKSNRNEVQEICRDRVSPDFDSDGQVRDRTFSRDSLSLRMNNNPVEFYPO  
NQQFAPNATQVQGPQSQLLNSGLHPVPSMLGGGAAPSSFRTRSRDTWESTSVASHNS  
TIHSENLSSESTSEVGSFSSHSHGRNRAFTCPAVQPKPLDAMSNTTSGLYNDSRSFSSPS  
PVQASPRRGPMMIGGTSLFNAAVGGNRCRAVTLSPNTDSILED RPFHYDAFESGDRLEIP  
NFSGGISGATTLAATPSQTRQRDYSPVLEQLGLDSSYLSNGTDSNSVFRSLATSSMSPL  
QGITQTSRELDLNEFQPIITKNKSDIFSEQAIETRIAAPPFGFVTASSSPIGNFAFSIV  
GSLDGYSNINRSHLLSEDNVLSDFGSLDLGSPRDDRERANTYTFGSNEFRSMNDNQSGG  
H

>comp14886\_c0\_seq1; 157 1 1032 LEN=1133; translated  
XGCESGGEACVHMDETTQQQQSQQQSTPKSNAKSDGNESSMFLSSASEWFYERMISIPLA  
LLSDPSKRRIQKNALVSATRSSSRSSNTSVCLYLHPPLRSDIDRTLFAIVSQAQRGLVF  
RSACTAWCSTLGGGYFGVRDLAKSLRSLRHLRALALRAGDVPLARQCTVHEAYNHMYAGM  
FGAARALLGLEREVEASREGAARYTAGDERILGQSASARECLRRLEESAGSGLGAYRWG  
EATEGNRSPSAPVVSRTVDDFQRLRIVAFEEVSRRAAQCGGSAWLGQNKAPDPVCGAGT  
HRPASRAGQKRARFLVQLASKYTMFMGCEEERRMTSTEQQEFF

>comp14886\_c0\_seq3; 81 311 774 LEN=774; translated  
MEGTGAPSFQDGDKEDDTKAGVDRVRIHHHRRRLGTARTGGKRARRKTQTQLQAQGHRRGK  
EPAAVSVLVRIPKHSSVLPYLLDCHRNHYRHHHRLPGAEESIDAKFADSQPCQDLYVSC  
RPGVLWRGLLPLVFSSLSAAEEEEAAATPRGTPSQR

>comp14886\_c0\_seq4; 153 1 846 LEN=1122; translated  
GALDRAQSGRNGHGCEESGGEACVHMDETTQQQQSQQQSTPKSNAKSDGNETSMFLSSASE  
WFYERMISIPLALLSDPSKRRRIKKNALVSATRSSSRSSNTSVCLYLHPPLRSDIDRTLFA  
SIVSQAQRGLVFRSACTAWCSTLGGGYFGVRDLAKSLRSLRHLRALALRAGDVPLARQCT  
VHEAYNHMYAGMFGAARALLGLEREVEASREGAARYTAGDERILGQSASARECLRRLEE  
SAGSGLGAYRWGEATEGNRSPSAPVVSRTVDDFQRLRIVAF

>comp14886\_c0\_seq5; 145 1 1069 LEN=1170; translated  
GALDRAQSGRNGHGCEESGGEACVHMDETTQQQQSQQQSTPKSNAKSDGNETSMFLSSASE  
WFYERMISIPLALLSDPSKRRRIKKNALVSATRSSSRSSNTSVCLYLHPPLRSDIDRTLFA  
SIVSQAQRGLVFRSACTAWCSTLGGGYFGVRDLAKSLRSLRHLRALALRAGDVPLARQCT  
VHEAYNHMYAGMFGAARALLGLEREVEASREGAARYTAGDERILGQSASARECLRRLEE  
SAGSGLGAYRWGEATEGNRSPSAPVVSRTVDDFQRLRIVAFEEVSRRAAQCGGSAWLGQ  
NKAPDPVCGAGTHR PASRAGQKRARFLVQLASKYTMFMGCEEERRMTSTEQQEFF

>comp14886\_c0\_seq6; 165 1 809 LEN=1085; translated  
XGCESGGEACVHMDETTQQQQSQQQSTPKSNAKSDGNESSMFLSSASEWFYERMISIPLA  
LLSDPSKRRIQKNALVSATRSSSRSSNTSVCLYLHPPLRSDIDRTLFAIVSQAQRGLVF  
RSACTAWCSTLGGGYFGVRDLAKSLRSLRHLRALALRAGDVPLARQCTVHEAYNHMYAGM  
FGAARALLGLEREVEASREGAARYTAGDERILGQSASARECLRRLEESAGSGLGAYRWG  
EATEGNRSPSAPVVSRTVDDFQRLRIVAF

>comp14887\_c1\_seq1; 187 78 767 LEN=1517; translated  
MRLYSNQTKHALVLLVARTVWTGTPLPQSSALVIHQNHYNRAAPPRTAPPVGVSSRPFR  
SAQVALFAKPKKAGSTVDSYQTVSVNCGSCRERLFYKKNKNGTKSNLVKCYVERVSEDCA  
GILAGAAEAAKASSGSDHDGDGNGHREAGSRKNP SGRRAGGKPKPPGSAKPAAEPEP  
DGAVPVLQSLDPGYSWECPCGTFKARSSVIHGRPALKLIGGKTRMTTK

>comp14888\_c0\_seq1; 858 82 1749 LEN=2337; translated  
MSTLPPVADPTASMPPASATAPAPAAPVSTLAPSAAAHPARSGRSPVLAARPASVSQAS  
TTTTTVKSSSKSKKSGGNSASVTMATATTAQSGGGSGGSGNGENTGRWTAEEHNLFLQG  
LELHGKGWKKIAGLIKSRVVQIRTHAQKYFQKLAKAKQNGEDVSMAGGSGSNGGVVAGS  
AMMMGDGGRSALNGGVGVNGAGSALASTSSSGAAHANAHASKRRKQTSGTRKKAIQSVVA  
SARRLGNKKS AVTSTRKTPHYEQASDGTGVAMNSVAPALSPYVLP TPLSTMVAQQSSAN  
SGIATQSSQGAAL EESLFRYLTP TP IVSPETQVNPVARQAGANPITLPTDQPGNANTLAV  
GESSPTGVNDLELYPGWTFD FNKDAPT WY SKGNDVDALFDVADSLDWFADTGD LNETYEEA  
ERMNATVEAAPQASVQVTESEPSKDAAPIGGESFYVSSNNTTGMSMNNLPRIDSGAVN  
VPPLPPLFADGAIDSGVDPAGSKNKLHMTSAPSVTNLDEHIFSSPIDEQEFVNTILEEN  
GSGSAVCLSGLAVAP

>comp14888\_c0\_seq4; 858 434 2101 LEN=2689; translated  
MSTLPPVADPTASMPPASATAPAPAAPVSTLAPSAAAHPARSGRSPVLAARPASVSQAS  
TTTTTVKSSSKSKKSGGNSASVTMATATTAQSGGGSGGSGNGENTGRWTAEEHNLFLQG  
LELHGKGWKKIAGLIKSRVVQIRTHAQKYFQKLAKAKQNGEDVSMAGGSGSNGGVVAGS  
AMMMGDGGRSALNGGVGVNGAGSALASTSSSGAAHANAHASKRRKQTSGTRKKAIQSVVA  
SARRLGNKKS AVTSTRKTPHYEQASDGTGVAMNSVAPALSPYVLP TPLSTMVAQQSSAN



SGIATQSSQGAALLESFLFRYLTPTPIVSPETQVNPVARQAGANPITLPTDQPGNANTLAV  
GESSPTGVNDLELYPGWTFDNKDAPTWYSKGNVDVDFVADSLDWFADTGDNLNETYEEA  
ERMNATTVEAAPQASVFQVTESEPSKDAAPIGGESFYVSSNNTTGMSMNNLPRIDSGAVN  
VPPLPPLFADGAIDSGVDPAGSKNLLHMTSAPSVTNLDEHIFSSPIDEQEFVNTILEEN  
GSGSAVCLSGLAVAP

>comp14889\_c0\_seq1; 704 100 1929 LEN=2028; translated  
MVSSFFCGTTPRQLEPPSVTRQNSGIGDAYSVAPSTHSITTVSRYHDEPEVDYDEGPTEL  
YRRIEEKDWEGASLRLESHPF EAKTWIYRKELGSKNIRWRLLP IHATCIFRAPLGLIEGL  
IELYRDGPQMDDQGMPLIHLACRNGGSKGVILALLNGFPDSCVKDKKGRTPALVQKS  
ESQNAEAVCAAIRNFEQQFQKNSKMKIVNMI PDVGSISQANEVDYENRTVLFRLLLKDW  
NGAIQRAESNPEEAATWIVTKGFNGNLRFLPLHKACVLSPPGEVVEKLLLEAYPEGSKCRD  
QDGWLP IHACAFY GACGKVIITLLEFHHPKGSQKDDDEGR LPIHYACLKSASQEVVDILLG  
NYPKGAMSKDDEGR LPIHHACSKGAPEGVISALLKASGKGAQSKDDQGR LPLHHACR KSL  
SDRIVRM LLRVYPRAAQIKDDQDKLP IHYACQNGSTPEVVTILLAAFPE SINVKNGFGYT  
PLAEASSTENSKMEPIIHTLKKFKEEHDKVKEKSGQTG ISETKLDALTKRVDHLEKLLGQ  
VSDIGHEMKGKIKR GKDPLLLVNRLAEKLI ALDVSH TDSLSDSDFSSERARKARSRSRGP  
FGRKKKQIV

>comp14890\_c0\_seq1; 269 425 1576 LEN=1936; translated  
MGPQATSPYHPSNNYRIRPRQFEYGSTAPEQHHC EAGTPTRTPTIPLTPSSLHSCGSVR  
AVVPESGKKNSTSNKENSNLNRNLHSYPVVDP CDSININHKNPSRSM SVVASPTVK  
SASALAPMASPEVVAETTLQEKHPQH QKCKHQHQQRQPQKTPKRLEQQKQTKPSRGT KP  
SSSKKAATPQQMVAFLKRLFRCFMTRRRRRRKR RGLATRKMKNNNFQTV DGSQEGSGSKP  
YGSIPCNETEMYLM LRSKRVPGGIAAPPSSQSSSART AQRSNSNPGRVPSAGSSERTGAR  
APVGPSQGGRRGGYRSQPSAAATSCLPTPPPRHHRHRTMSAESHYPTTIAITRDRASTIG  
SVSPRLVFI EPFQEPESH LVALS

>comp14891\_c2\_seq1; 392 35 1573 LEN=1662; translated  
MKIANQRSIFAWILLVCLGSSSIFRVFSSNPEQSKGTVALRGRAVPERKLAGAKCGCDSC  
TDQVLNLTADGHSCGRIDWAI GNMGLSESEACGLIGGEEYPSKCGGCNPSSCPAPSSHC  
NCNRC TDAVWNAIADGHSCGDRISWLEQTDVATLLSLGIADGPF DQASACRAVSEQFPGT  
CTCDCSSTPAEPPPASPPTPLLTGEPIDNTMCGCSSCTDQVLNSVAEGHTCRDRIEWIKA  
NQGLSEADSCQIVADEFP SICGKCDVDRCGSSPPPPAPVSNIGSIKAMSYNTEYSGYADG  
RLPDFASKIREVDPDVVGIQECQDANALASASGYDVVRQTGPQNYIFYKPGRLQVLES GF  
MSIPRDNYSERTITWGKFRVVS GDGIGNEFWFFNTHLPHRHNEASDPNTHARIGRLLVAK  
RAELNAANTPTIVVGD CNPFASDGAPEGSFESNLASGGIPKVYQARGNTGGHAGLDKIFA  
SAGHW TASNAA DRGTGRSDHPAIFVDLLTKDA

>comp14892\_c0\_seq1; 404 211 2208 LEN=2972; translated  
MARLTSVLASLFLARAAAIDSELARSTQLRGSSSNYHHNEPRDLSSALVPSRDARPNSAV  
DFCPDESPQVGSRCRTTGQRCHYD RYSGCTWEDLSCSPGQSCSCLKSSRNGSDISTWQC  
MILDVPVCSVIATPANPTPEGLPEGDCEAGTALPTRPVA IDEGEVGDLCPAAMP RPSSC  
QAI GEQCDFGYVYKGTWDTLSCSPSRTCF CRENGIWACRIMESQPCSLAATPANVPAG  
LPEGDCDSNAALPTEIDSGEETS IDTCPASMPQPGSRCKTTGERCDFGHKYNGCTWESLS  
CVATR VCKCDQRNDPTVSLWACRVLDVQPCSFLASFTDLRVPENLPEGDCDASLALPGP  
DGDIDETDVQPNEDGII CPRSPVNSGGCDASQVGATCNYDYVYSGCTWDELQCSWTTSC E  
CVPDRSTNSRGGNWFCLARAAA PCFGGFSNGREIDPALFSSAFDSELDDGSNATDVEDSL  
PSDQLFAESLPEGLPYGQKCDPSAELPTEPAFEFRPVVENGNFTFRPEPENATEPVFVFR  
PEVDEADATDSSESLVGRLSDECPVEPPPPGSSCIESHQSKLSCPYNHIYTGCFWD AIQC  
NPIQWCTCDNFGDGTWACASMMACTTKIPGLPTFQSCNPDDPLPLPRSASVVRDIAKG  
GGLP

>comp14893\_c0\_seq1; 751 644 2956 LEN=3168; translated  
MQSKDGV EFLWQKDPINPKRSSFKVTD AEKRYNVSFVTYLSRFLLSFDPKAQQWMDRAK  
EIPKKT PREDIFDIREEQFARFAASVEVGLQDDFLGEDGPKRLL ESLLNQFGKPHDDAG  
SSTGTPTGDESDKLTKEQKEARRQLALLFGLLEESQPVEEITALLASIDNGSIDAVELRE  
DARSAGLLKGFSPEDVPMIMFPPPEAGSSYKQATGKALLKPTGELLRIEIIDGEGY TQP  
PDISEEISGIMDGGEAATFDTAIAKGVLSIKLTKKSGYSQDCIVKMTLKPPTKNTGKP  
AVIRIVPEMEISKVEMDEVGSGYAVEKPIKVTLVSKARGEPQLIGVGYPKGKMG SFMAAR  
QPS ENKIRNFERELISEEIKVVS GASSGNLPSTPFPEKASSSQQLLALLPQGFLEFDT  
KKKYVLSVNKEYQSLYPSMALKAPNRPSVPDFGPRGRNPIERDQRIDVSTFLRFVLSGA  
ICCGVNVALTPLDLVKTKVQIDPSRYPKVLP AFQSVWKDEGPSTLYTGWVPTLSGHFIA  
GGVLYATTEVIRRLTEAVGVNAMSLEVP IILAAAGFSSGVAAVLYCPFD AVRIRLVAQP  
DYGKNAFKTVSRMVKEEGIDSLTNAIPV FVAKQVPYAAVKFLIFDLSTEYLYKAFPLAQE

DLKLSLVISLTTGGILAGIAAAFVSNPADAVISELKKAKSDQSPQEALQALLDRGGSEALF  
KGLSIRMVLYSLTAAFQFLIYDGVRFALGVGPDLLRLYLVDLGEALTTNA  
>comp14894\_c0\_seq1; 408 385 1767 LEN=1898; translated  
MDNNILKAISVLQKAKFPVLLREKIEELAKQTLDAISIFEQDSTSPSDFVVRKIDLLI  
HTFLQSVEDMLQDIFYANDGLKRNRSYDEVEFAIRCFPRILSAKVLGCRSLNTHCAIMF  
QAQPDNLNIGTRNVNCSFVPLLARMGIELGQFEKDQRGGLLFKDIWGSNNVLQMLAATNL  
RHHNLCYSEQHEIIDDLYLDAIKRLREMNLFKKEDLREYFVLRMCDYLVLPKRFLYLV  
DWDPTLSQPDMHGRLPLHYWASISNILGLGDFRTVLKAGMRHLSVKEGIGMLFYKDNTG  
VTPFQLACKPSLFLASMECWKVEDVTKDIEHSVDTEAFVLFACLNEQIHVDGVYFLLRRQ  
PELLLALSNTQTRRRSAATIEAIVPGKTSVTRRMKEDQETPQTKPNRHRDPDEYKRRKRT  
DSSTNHPRSRRFCSAEGLSTECLHVSSLRNTSATMEKY  
>comp14895\_c0\_seq1; 263 1 1227 LEN=1343; translated  
SALQRQNLVSGDETKCPSKMNSVRHSPSRKNSTLWNGSRVLVTLFPLFVAFAAIQLSHSF  
TPSAVRSMHDSRSCQAITTTGLKQQLTQIEPIRNKGVRGEIGIDKSVRNSNNNTESTATSQ  
PKKNDVFGSFNLSKARIESAVDEMMSKSTRITIGLIGETSVPREESFYQLPKGNTVLATAA  
QNSARVASPMDDLDIANLRLSVFSNPNPESRQLFCDRSCALLNSRRQRGATCIVATSNKK  
RDEELSMDAVGQRRRNSEHIIGTAEISFHEFSQTLLGYSRPKDSLLYVTEVAVDSNQRRK  
GVAKLMMEGIDTLAKIREVETIYLHVVDVTNDGAVRLYEKAGYSKMDSSDPMYLEFTTKLN  
LHDGATKGRCHYLMKDIQRPTWLNVDKQKGYRSHHRTLGIEMPTF  
>comp14895\_c0\_seq2; 312 198 1367 LEN=1483; translated  
MNSVRHSPSRKNSTLWNGSRVLVTLFPLFVAFAAIQLSHSFTPSAVRSMHDSRSCQAITTT  
GLKQQLTQIEPIRNKGVRGEIGIDKSVRNSNNNTESTATSQPKKNDVFGSFNLSKARIES  
AVDEMMSKSTRITIGLIGETSVPREESFYQLPKGNTVLATAAQNSARVASPMDDLDIANLR  
LSVFSNPNPESRQLFCDRSCALLNSRRQRGATCIVATSNKKRDEELSMDAVGQRRRNSEH  
IIGTAEISFHEFSQTLLGYSRPKDSLLYVTEVAVDSNQRRKGVAKLMMEGIDTLAKIREV  
ETIYLHVVDVTNDGAVRLYEKAGYSKMDSSDPMYLEFTTKLNLHDGATKGRCHYLMKDIQ  
RPTWLNVDKQKGYRSHHRTLGIEMPTF  
>comp14896\_c0\_seq1; 312 217 945 LEN=1730; translated  
MAQFFSMVLLLIGAIAGVHGWSAPAQARTSTGLDMVEYRRRDFLGTSAFTTAAVLSSPA  
ASFASYIDPVSDPPKVTKRVYLDVAFGSNDAEKGRLVIGLFGDLMPKTTQNFQQLCASNA  
YAGTNFYRVISDFSIQGGAIIGDSTGKTGQSSFEQGGKPFEPDNFNLKHTKYGLVSMVRGIG  
GGVDSRFFVNTQDDAGWADDRYAAFVIVEDGLDLVKSIEKVPVKPPKNSPISEVKIVASG  
VL  
>comp14897\_c0\_seq1; 357 1 1663 LEN=1845; translated  
XNDGKSKSIDGKNNNDGNSIHKAANNADNSDNMEAENKDAKKEGPATPSQPPTLKTPKPT  
SESGRNDGMSWFLHTGNERIDRAYRLAMDELENNIAYSDDSGNATSPFFIAGAGWDQL  
WTRDTAYAVELAGGLVRPDSRQSLGTCTEDVVLOKTHGNSSFHATVWYQDKCGHFGGWP  
NLSDAIVGARGAWHLTYLTGNTTFLEWAYETTISLLRAEQQVLIIEGKDPARSFENALFG  
GCSSFMESENSGYPKYRMNGTLVGKTKALSTNIIYNGYYYAYKMGKLLMENSETVDAK  
QRFKALKRSIRDRLWMEGKGLYAYFEDEDGRLVEQTEGLGIALALLSEEFSEHRVKMIL  
ERTYRTGVGVPSLWPRFDLGDWPNDDDHHISQRYHNGRIWPFVSGYFALAAARHGRLDIF  
AQEMASLVDLSEQQDTFAEFYELDKSFPPKRRRQLWSDTGYLGMVYKGVFGMNFQPDGIE  
FSPSKDDGKSTGLAMDDTISLLNVKYRGCILDIVYVTVGVGNVMSFKVNGKVRESKIDSN  
STGRYLIEIEVAPS  
>comp14897\_c0\_seq2; 228 1 1198 LEN=2046; translated  
XNDGKSKSIDGKNNNDGNSIHKAANNADNSDNMEAENKDAKKEGPATPSQPPTLKTPKPT  
SESGRNDGMSWFLHTGNERIDRAYRLAMDELENNIAYSDDSGNATSPFFIAGAGWDQL  
WTRDTAYAVELAGGLVRPDSRQSLGTCTEDVVLOKTHGNSSFHATVWYQDKCGHFGGWP  
NLSDAIVGARGAWHLTYLTGNTTFLEWAYETTISLLRAEQQVLIIEGKDPARSFENALFG  
GCSSFMESENSGYPKYRMNGTLVGKTKALSTNIIYNGYYYAYKMGKLLMENSETVDAK  
QRFKALKRSIRDRLWMEGKGLYAYFEDEDGRLVEQTEGLGIALALLSEEFSEHRVKMIL  
ERTYRTGVGVPSLWPRFDLGDWPNDDDHHISQRYHNGRIW  
>comp14898\_c0\_seq1; 665 108 2798 LEN=3337; translated  
MKIDRRLGAPVALNGHQVSVEEMCRRDADRFLSSIERKVHRRRQKPPKSIEIVQRERHQS  
YQNTYKHDRTIASSTHPYVHACDYKSNIEGVHANDTKTIGERSVSKRDAGYRQKKSQFLR  
QQQQKQQRTRQNSGSI SGRKKRPNVIERRLKHSGGLGSSFILSDLHNI GDEGPTQRNNN  
ISKEEREVEQTKERKLERGEERDANDNEATRLQVQSTTYITNVSTSNVVLNSDKAYTQHS  
LWKLLWERRWEWAERLHLYPEEAKHPVDLQOIIIGNEITKSNITDDKNNIEDSVYPLHLAC  
WLRPLPPTSLVRKLIDVYPKACVHPHPSSGLLPIHMAVDLSDLGHSRYENTKSSNSCRNI  
HRHGDIVSLLLDQHPESILMKDNLQOMTPMHVAASTASAENGVVTPVAARVFEVLVAASE

HLADNCNSPLATTTCRDKHGLTPSDWAHNVDDYYCSRCGRENMTTRGSGRRNAGDYIESVN  
NEGKNDSDSAGEKLFVHNASIRCEHQVVSVARSCVHPLLRTIYSHLNLAEKNTPNANA  
NATKISLSTSTSNVSEHVVGPAIRYEPIDFMSLPPKAWQQQKQGSISIAHAPSIPQSI  
SHLPKSRMDMSGNDGMPTTAPFLWQQTINGFYSSNYQWNDKDNFTFAKAHYMTDDSSPN  
KDQNRGGDDLLAGLEKQCKDREEQEIEETSTLSPRSLEFIMDQVVDARTIRSESKIET  
TATLRLKIHLSELIHPSQQGRRRRNGVNDRLSRKRNKIPVPYFELFAAHRSGMSKTFYK  
SYPILGGSTEGTWEDAFDLGLTHEQLQNGTHGAGHVEVGFVVMHCPPKKGSGSQLIGTCQ  
VSLETLERQQRDLLMVTRCGCDDVTATHSLQEPEKLPILNGFEVGTGRLQVLSLSIE  
>comp14899\_c0\_seq1; 505 1 1354 LEN=2249; translated  
ATLASSGDVNTKAHEACLGVHNAACKGAWEKTVPGLPGAPVETSGGGALTEEPFCYGGTT  
MYMEGFHWIQTTCVWVWLPSPWILLDTAGKYAAAVIGTVFLAVGLEKFIQORRKTMAYPEA  
GPRRLVVS AVFYGIQLTIGYLLMLVIMIYSVALFASVILGLVLGHVMFNAKDAIWP IHEL  
PGFDDLGS DSGIDDESESGVNLSEMDSP LGS PKAAKAAGSASGSATTACGNSR SCTSGRS  
SSGGG SFCNASTSISTRFS GASGGEERAMREGSTHCQDFDCDTIHQEQQEQQQQHDGRW  
NSQFLERAMVKLQSKIDPEYKRPLQPWENERWENLEEV RWKGRSFQLTGEEAAAADPYRQ  
RFRDESVP RAGSSSSSNDRSSNSNGNDDDPNEQLVQFIMTSS TDSSVRDEPPRNTDGEV  
CECSCCLQGGSNRSFIDKEQRMRYIFGEGA  
>comp14899\_c0\_seq2; 259 1 1899 LEN=2408; translated  
XQNRSNRKC NFRNATRPTIPPEALRTPPGARREKPRRIEQNAPDVPADGNTRTFLFHTG  
GQCRRRRRRCERGS DRFAASTSSSGAAR PVCQPGASGTT SXDP SVTVEDWLRRFARLHRHV  
FEECFHGGAFQPLEVVPVRI FVAGRGFFAGERPKPV PPLLPFHPDARLWDCIAGVGYFRR  
YAGYIYLRILARRPRVDRGVRGTAVAVAQPPAAAATNRRGKSSSSSSISNNNNNNHYHY  
PPFRSFCIPPSHKDDNTRLRKETLRFARKILEDYPKFVTPIVPFQNP ARHCHQSPQAMR  
IFFGKEYPKHCRNQSKHKH KHARGPPKKEVLR SIYGPLSVLRTTGFHPMRDFKVRPFTPE  
IAAICRLLLEQELSRHPRFSKQEEAREFDNFLEIKLYKGRDIFTDPLTKRPFDDHNQPI  
RVDCNKSVGLHNDCSFDDDNQDPRDTARGDHP IATITIGSPRELT FVQMEKRKSPARNG  
STARGRWTVCHPARRRFLWDHGSVFC LMPGDEVPTLSRAKVPCGDRGRTLYKTMHKAEFK  
ADGVSIGLVFRSVRTSSCFCQRSHRWLRDRPRYRTKVEEHLASKKGVYETYARQQAQP  
APSALAPGGRQAPPREVDLIHGNIDRYLQTL  
>comp14900\_c0\_seq1; 707 1 2479 LEN=2582; translated  
XKINEYYSTNDMTRQQTAILHLQRQVTRYHCS SLVQKRLHSAIAFRNPLSLLLPSSFVRL  
FPRSTLKR TISSPLGTSNGQDSN ILKSRSELVKFTRTR LAYPSNNLTDHGSPIDHIAGR  
SKHGDTNFTMKTRLLSASKLLVDDFAISLPNVATTGNPDTTENYCAEYNEESRGVAIVG  
RNGSGKTL LGKAI FEEAKISSAKRK DERSNRN PYVLSGSIHIGLADDNDNDNDNPKRKA  
ALEQRHLRGRAGSPI SRATSSALATHVSFDSHRKLL EETDPTTGAPITAFKTIAMRGNAP  
GRLNPAARFLVVRFGLYPLLHRTVDLSTGEIRKVL LVRALSQKPRLLLLDNAFDGLDVP  
SRKVLQDIISKTLKGFTNDLLVQGVSSKDTADSTQV VLMTHRAEELDEIQEMDTV VVWDR  
DSEHKKNNSNCNPELSLSILRRRNIGSDDIDREGLGHSR DGSRGNDSSRWTS GKEVLQ  
RAMGLEWLP SVVNATNSESNWGDDPRLPDRQSVQCWWTFGE SNQGRGDGKTIDVTADNQT  
VKEDILVAANDLTVRRGDATLLKSLSWTVRKGERWIVGGNGAGKSTLSRLLALSPITTF  
DNEKDQDSTDNCEEDPKQLRGGRS PVSSLRILPNYNPDDSR AVGVVSTESHMQQELDL  
NDDETLGNPMSIKDFLISKSRNASWENTILPVL DWLGIVDHHGFENSRKCGVDFPITFLS  
MEQPFRLSQGEQKMIMIAAALALRPLLVLDEPCQLDLIHRERMLRVVEGICRSTNMA  
LIYITHHFEELLPSISNALHLKERH AVYKGP ISSYCPNDYVDDNE  
>comp14901\_c0\_seq1; 457 287 2110 LEN=2281; translated  
MSDSAVPKNDYYNSGSNEASTDTALVINRLEARRKLTKN SDRLVIVLVGLPARGKSFVAR  
KLVNFWLEWHGSYCKIFNVGRYRRKASGGACDANFFSAENK GAAALREEVAELALRDMLRW  
MDGEDEADSDAETKQSCSRSVNSRNSNSSYVEQRDR IAFDATNSTDKRRRWILEECTN  
PQKRPGKPTGVV FVESICDDELLQENFKFKI SNSPDYQGM DKEAMADLKKRVKYYEQ  
YETITDDSLSYIKIFNLSTKLLVNH IYGRMSKVI VPALMAWNI GTRPILLCRPGQTLSDV  
FTDRDDYVTAISMHIQSDFLNL SNHTQKRLLRGDSL GPHGKKFSEALYDFVAEESMDFL  
LRRASVCDMSNTGTSISGVANAYPNHVDSGTPFPLKIYSSTMPRASETVTWMDYDFPVNE  
LSTLNPMDKGFAGKELLEIQNTHPEWYGRLEKDPFHTRFP GGESYKD LIQRLESVVVDL  
EQQVIPTLVVSHVSVLQMLIAYLRKSPVEEAMQIEVPMHTVIKFTPARGGGWQESSHNLA  
PVHDGSNSSVTERKIVSIEGIKELKTGENGENVQVTMSP IWGDHMRQASYS PVTRKVTKS  
LEIPLTG  
>comp14901\_c0\_seq2; 226 1773 2318 LEN=2489; translated  
MDKGFDFAGKELLEIQNTHPEWYGRLEKDPFHTRFP GGESYKD LIQRLESVVVDLEQQVIP  
TLVVSHVSVLQMLIAYLRKSPVEEAMQIEVPMHTVIKFTPARGGGWQESSHNLA PVHDGS  
NSSVTERKIVSIEGIKELKTGENGENVQVTMSP IWGDHMRQASYS PVTRKVTKSLEIPLT

G

>comp14901\_c0\_seq3; 333 287 1567 LEN=2488; translated  
MSDSA VPKNDYYNSGSNEASTDTALVINRLEARRKLTKNSDRLVIVLVGLPARGKSFVAR  
KLVNFWLEWHGSYCKIFNVGRYRRKASGGACDANFFSAENKGAAALREEVAELALRDMLRW  
MDGEDEADSDAETKQQSCSRVNSRNSNSSSYVEQRDRIAIFDATNSTDKRRRWILEECTN  
PQKRPGKPTGVVVFVESICDDEELLQENFKFKISNSPDYQGMDKKEAMADLKKRVKKYEEQ  
YETITDDSLSYIKIFNLSTKLLVNHIIYGRMSKVIIPALMAWNI GTRPILLCRPGQTLSDV  
FTDRDDYVTAISMHIGSQDFLNLNSHTQKRLLRGDSLGPHGKGFSEALYDFVAEESMDFL  
LRRASVCDMSNTGTSISGVANAYPNHVDSGTPFPLKIYSSTMPRASETVTWMDYDFPVNE  
LSTLNP

>comp14901\_c0\_seq4; 278 583 1663 LEN=2584; translated  
MARELLKIFNVGRYRRKASGGACDANFFSAENKGAAALREEVAELALRDMLRWMDGEDEA  
DSDAETKQQSCSRVNSRNSNSSSYVEQRDRIAIFDATNSTDKRRRWILEECTNPQKRPGK  
PTGVVVFVESICDDEELLQENFKFKISNSPDYQGMDKKEAMADLKKRVKKYEEQYETITDD  
SLSYIKIFNLSTKLLVNHIIYGRMSKVIIPALMAWNI GTRPILLCRPGQTLSDVFTDRDDY  
VTAISMHIGSQDFLNLNSHTQKRLLRGDSLGPHGKGFSEALYDFVAEESMDFLLRRASV  
DMSNTGTSISGVANAYPNHVDSGTPFPLKIYSSTMPRASETVTWMDYDFPVNELSTLNP

>comp14901\_c0\_seq5; 333 287 1567 LEN=2393; translated  
MSDSA VPKNDYYNSGSNEASTDTALVINRLEARRKLTKNSDRLVIVLVGLPARGKSFVAR  
KLVNFWLEWHGSYCKIFNVGRYRRKASGGACDANFFSAENKGAAALREEVAELALRDMLRW  
MDGEDEADSDAETKQQSCSRVNSRNSNSSSYVEQRDRIAIFDATNSTDKRRRWILEECTN  
PQKRPGKPTGVVVFVESICDDEELLQENFKFKISNSPDYQGMDKKEAMADLKKRVKKYEEQ  
YETITDDSLSYIKIFNLSTKLLVNHIIYGRMSKVIIPALMAWNI GTRPILLCRPGQTLSDV  
FTDRDDYVTAISMHIGSQDFLNLNSHTQKRLLRGDSLGPHGKGFSEALYDFVAEESMDFL  
LRRASVCDMSNTGTSISGVANAYPNHVDSGTPFPLKIYSSTMPRASETVTWMDYDFPVNE  
LSTLNP

>comp14901\_c0\_seq6; 402 583 2206 LEN=2377; translated  
MARELLKIFNVGRYRRKASGGACDANFFSAENKGAAALREEVAELALRDMLRWMDGEDEA  
DSDAETKQQSCSRVNSRNSNSSSYVEQRDRIAIFDATNSTDKRRRWILEECTNPQKRPGK  
PTGVVVFVESICDDEELLQENFKFKISNSPDYQGMDKKEAMADLKKRVKKYEEQYETITDD  
SLSYIKIFNLSTKLLVNHIIYGRMSKVIIPALMAWNI GTRPILLCRPGQTLSDVFTDRDDY  
VTAISMHIGSQDFLNLNSHTQKRLLRGDSLGPHGKGFSEALYDFVAEESMDFLLRRASV  
DMSNTGTSISGVANAYPNHVDSGTPFPLKIYSSTMPRASETVTWMDYDFPVNELSTLNP  
DKGDFAGKELLEIQNTHPEWYGRLEKDPFHTRFPGGESYKDLIQRLESVVVDLEQQVIPT  
LVVSHVSVLQMLIAYLRKSPVEEAMQIEVPMHTVIKFTPARGGGWQESSHNLAPVHDGSN  
SSVTERKIVSIEGIKELKTGENGENVQVTMSPIWGDHMRQASYSVPVTRKVTKSLEIPLTG

>comp14902\_c0\_seq1; 656 110 1578 LEN=2049; translated  
MSEKNHDDQHQHHDYKDKCHRGLKVI FYGARGCLAVKESAERSQAHA AELLDMAVLP  
AWSSLXRLEDPASPPFEGFLSPPREPARGQRQQQQQQQLLQCFNSNSNSIHMNMNNAWKR  
NLLPDFKLATDAMIKDTSMFTFGSNLTLFQFLMGNTNFNLRYKPSSSKATAVAASSSKFQ  
GVLNPKPSKAKKQAVKSAANS SKERNKKNKSSYAIKITERGTNKKHNNGSNI SVYAAR  
PSKKQRLQSAATLLLDKVLQRRDDVQKLTVENVVDEQTRII EHTWDHNYNRLVKFYEANG  
HSNVLRSDPDKQLSGWVKRQRNLDKQKLSASQIQKLDLDFVWNRLEGAWYDKYDMLVA  
FESRHGNCEIPTKYDRSLAEWTRQRREYRNKAPTMSLQRI SKLNEIRSWNWD SKVWKNR  
GKKKKQSLAHRQVHRSIQELFHQLGSSIGSAGVAKNDRPAAHAAGKSSNHAVATAAFLP  
NDVCSFSLI

>comp14902\_c0\_seq2; 357 110 1480 LEN=2016; translated  
MSEKNHDDQHQHHDYKDKCHRGLKVI FYGARGCLAVKESAERSQAHA AELLDMAVLP  
AWSSLXRLEDPASPPFEGFLSPPREPARGQRQQQQQQQLPAQQAAPLGLWGNCACLTFDS  
YKVYFDIDADDIVRRIRGSLMTFYKPEHFRNNIMGPVKTAELKGPDLYGPFWITMTLIF  
IGVSLGLFC SVLVCSVLGPRRQLDQTRPDEEKAKFFLVWDPTXIVARADPI FLFLVLLAX  
LLVFLSHSMQHNHKTTRQNAMPNDSATYVPQVTANI HGYVHRNDVEEFDYDINHLLHAA  
SVLVTFAFALPVVLMWTTTHCCMSMNALQLAEWL CIYGYSLVPYMPAVVLSI IPLSLVAWI  
TLGMATGASCLMVI RNVAPALLSSDTSGTGNGMGGQAKGPP IILVILGCHLVFFLVLFKFT  
FYHFTPAHSTEAPFAAPSIAPVAAPVAAPVAAPTADP

>comp14902\_c0\_seq3; 403 110 1212 LEN=1748; translated  
MSEKNHDDQHQHHDYKDKCHRGLKVI FYGARGCLAVKESAERSQAHA AELLDMAVLP  
AWSSLXRLEDPASPPFEGFLSPPREPARGQRQQQQQQQLPAQQAAPLGLWGNCACLTFDS  
YKVYFDIDADDIVRRIRGSLMTFYKPEHFRNNIMGPVKTAELKGPDLYGPFWITMTLIF  
IGVTANI HGYVHRNDVEEFDYDINHLLHAA SVLVTFAFALPVVLMWTTTHCCMSMNALQLA

EWLCIYGYSLVPMYPAVLSIIPLSLVAWITLGMATGASCLMVIRNVAPALLSSDTSGTG  
NGMGGQAKGPIILVILGCHLVFFLVLKFTFYHFTPAHSTEAPFAAPSIAPVAAPVAAPV  
AAPTADP

>comp14902\_c0\_seq4; 1034 494 2407 LEN=2878; translated  
MEMTLPFFRNGGGSTKSKGITTRNAIAKAIDIANDSIRNINGKTTENKPKSKNPGDCDFD  
EDGDDANSTSTPLLLPPLKRSRSDSPTGVMDVHFFQEDKNSNKLDDDDDGFGLLPFSTL  
TFPDDDSEATSCHSDAFNAENHYTDAGMAHPFLEEINKAASSSSSIEPLPLLASVSRELS  
DLLHQYLPKTKLELYEGPMEFEDEIEDGLASGMQIQNTTMATKALPNIDANKNTNSYSKQ  
QQQQQLLQCFNSNSNSIHMMNMNAWKRNLPLDFKLATDAMIKDTSMTFGGSNLTLFQFL  
MGNTNFNLRYPSSSKATAVAASSSKFQGVLNKPSKKAKKQAVKSAASNSSKERNKKNKS  
SYAIDKITERGTNKKHNGSNI SVYAARPSKKQRLQSAATLLLLDKVQLRDDVQKLTVEN  
VVDEQTRIEHTWDHNYNRLVKFYEANGHSNVLRSDDPKQLSGWVKRQRNNLKDQKLSAS  
QIQKLDLKFVWNRLEGAWYDKYDMLVAFESRHGNCEIPTKYDRSLAEWTQRQRREYRNK  
APTMSLQRISKLEIRSWNWDKSVWKNRGGKKKQSLAHNRQVHRSIQELFHQLGSSIGSA  
GVAKNDRPAAHAAGKSSNHAVATAAFLPNDVCSFSLI

>comp14902\_c1\_seq1; 54 1 201 LEN=201; translated  
XQPPPLQQQPQFSQPPPLPQQPQQPQAPQQPQFLPQVVPTPVAPSNPNMPAGLMAPPMTA  
AVPQQQQX

>comp14902\_c1\_seq1;a 54 1 201 LEN=201; minus strand; translated  
AAAAAERQRSSGEPGRPACWGWTGPPGLARPAAGTAAAVLVAVVVAAGAAGAAKATAA  
AGGAGAG

>comp14904\_c0\_seq1; 657 47 2260 LEN=2328; translated  
MPSGAPDIAKPQTAPHQGLTIKETVPSPMKKVIAPNEIALPALDTAPRSVTESTTSGNRR  
STRSRPPKTPPSARQKRSTPKRAAPNRSVTHRECVCGRGVACLGMTQAFRMLQDPRCYFV  
ELPRYRKDPPAFKYVFRNLRQAYLRELVRQNPTCEKLVEMDTSQSDVPKQRKYVALHH  
FHPTVVRAFYEENPLTSAQKHKVPISITHELSELNMVCREEDRILSVSSIPTGGYYFTPN  
YPHEKAHSDLKVLIQAVRNARVHGSNKKRSRKKKIEDPNVPTNIEITSSKSDVSNDQAV  
SATVLNEEKETEDKNDNEVHVKEKSFLLKESDGISETDVRTGVLDSDGDGDADEFDKIWEK  
SSRREIESSLLNETIIIEEYAIADEGMANIADQPHSDAISPKPRRESLSSRRSVDRPWA  
TPKYRRDRDTAPRRASSAAHYIDPDQTGELNDKLATEIVDDGEDIARIAAGMTVIAQDKL  
NIVSPTPAPVSPKRDYREPPSSRFSPSRSPYSPFRRTVDDAVSLGSADSGLQNYTKLD  
HQLPGADPTLRIQVHNDLIAWESKRRSDLVQQLLEYNRERWRAASDVLADGIAEAKYAERL  
ILGISKASRLFADSLRAVYDDKLLDDKGNVAVKNTFLRNRLAKQRSFAFEYSIENTGEDFKE  
GSLGSLVLLDSIVSAQLDIANAFVENS DHMEREILPELTELKEEVQKNAQRLQAIGDTVI  
SELKQSEIEVKNIWGY

>comp14904\_c0\_seq2; 1050 47 3400 LEN=3563; translated  
MPSGAPDIAKPQTAPHQGLTIKETVPSPMKKVIAPNEIALPALDTAPRSVTESTTSGNRR  
STRSRPPKTPPSARQKRSTPKRAAPNRSVTHRECVCGRGVACLGMTQAFRMLQDPRCYFV  
ELPRYRKDPPAFKYVFRNLRQAYLRELVRQNPTCEKLVEMDTSQSDVPKQRKYVALHH  
FHPTVVRAFYEENPLTSAQKHKVPISITHELSELNMVCREEDRILSVSSIPTGGYYFTPN  
YPHEKAHSDLKVLIQAVRNARVHGSNKKRSRKKKIEDPNVPTNIEITSSKSDVSNDQAV  
SATVLNEEKETEDKNDNEVHVKEKSFLLKESDGISETDVRTGVLDSDGDGDADEFDKIWEK  
SSRREIESSLLNETIIIEEYAIADEGMANIADQPHSDAISPKPRRESLSSRRSVDRPWA  
TPKYRRDRDTAPRRASSAAHYIDPDQTGELNDKLATEIVDDGEDIARIAAGMTVIAQDKL  
NIVSPTPAPVSPKRDYREPPSSRFSPSRSPYSPFRRTVDDAVSLGSADSGLQNYTKLD  
HQLPGADPTLRIQVHNDLIAWESKRRSDLVQQLLEYNRERWRAASDVLADGIAEAKYAERL  
ILGISKASRLFADSLRAVYDDKLLDDKGNVAVKNTFLRNRLAKQRSFAFEYSIENTGEDFKE  
GSLGSLVLLDSIVSAQLDIANAFVENS DHMEREILPELTELKEEVQKNAQRLQAIGDTVI  
SELKQSEIEVKNIWDFDAMVTGDLMEYTTGSSHGSSHGSSHHSSSMNTGGSGSVHGF  
LTPADENEAPIVSSASPLVKSTFLQLGRIEDGWLIEYMYKSAVAFQRSVFGAAEMELCNL  
LVQEI SMLEEMRFQKLHQFMLAFAPRQRRLFNKLPEQLKTVLENMVGLRIDEESLQKVLDE  
ESVKDRSKDHLKGSTAHKSSILNRSKINARVDSAESIEYMEKTFGSPFASPMIVLSKMV  
ELKTTGLKLVNTAWKPSLVCVVTSEGNILVFETS GNPNTPEAFKSLYPQMNFDDENTWL  
AGRKADIVKSLTPTVSFRLSKDFSSISQIRKSQIEITEERDTAAGSRFMKAVKSGVRKCT  
LRLPSSSDATDWMSLLQRTKKVLSSQATSRRRSRLRV

>comp14904\_c0\_seq3; 402 1 1190 LEN=1353; translated  
XNLTLEMSLYIVSDVFDAMVTGDLMEYTTGSSHGSSHGSSHHSSSMNTGGSGSVHGF  
LTPADENEAPIVSSASPLVKSTFLQLGRIEDGWLIEYMYKSAVAFQRSVFGAAEMELCNL  
LVQEI SMLEEMRFQKLHQFMLAFAPRQRRLFNKLPEQLKTVLENMVGLRIDEESLQKVLDE  
SVKDRSKDHLKGSTAHKSSILNRSKINARVDSAESIEYMEKTFGSPFASPMIVLSKMVE

LKTTGLKKLVTAWKPSLVCVVTSEGNILVFETSGNPNTTPEAFKSLYPQMNFDENTWLA  
GRKADIVKSLTPTVSRFLSKCDFSSISQIRKSQIEITEERDTAAGSRFMKAVKSGVRKCTL  
RLPSSSDATDWMSSLQRTKKVLSSQATSRRRSRLRV

>comp14905\_c0\_seq1; 681 578 2545 LEN=2608; translated  
MPFPYVFDGDRSVPSELPSWMLPQRTRVLTETETVSNKGKAKGKGDCCVYWMQRDVRTV  
DNWGLLLAQHLAQEKGLPLRVVHVLASPSPLPDTGGEDDETSSSEDTPPPLESRLTTERH  
GKFLGGLKCVHDELKQKNVDFVHHTSETPEDESNAYVLEKFNHVKPSVVVCDTSVL  
RNPRRWNESPSFRDALDAMGVPLYQVDAHNVVPIWYASPKREVGARTLRSKHLKVVDECL  
QNKDYKGLIPDFVGNHVNLSKAMEKEASKDFDYDSHVRFLWDDSVKSVLREKPGTEA  
GIKKFEAFKTKGLRHFSLRNDPNDLVCGLSPWFNHGHLFSFATCMRILKGNRDAEGK  
ASFVEEGFVRRELSDFNLWYAPDITYDTLEAGAQAQDSLELHRHDPREYIYSLREFERAK  
THDDLWNAQLQVVRTGKMHGFLRMYWAKKILEWTSPPADALRYAQYFNDKYALDGRDPN  
GFCGVAWSIFGNHDMGWKEREIFGKIRFMNYNGCKRKFVQDFVKKHPPAAKNAMKAAVN  
KEVASRTIHRNQIAIANTPAVPASSTSSDSEAEQTPKRRKTTLNKARKRQKTSASADDSE  
DEVEDLSGLSKSAASRKTVKVLKAYIQSKGVS IKDDNGKPLLKAGLVDALMSMS

>comp14906\_c0\_seq1; 859 324 3119 LEN=3706; translated  
MTLYGHRSHVYEDHGSTANYAMLAAFENNYIPDLKSKRIGGFVSPPTLTSITEAPEIYSYD  
VRDNDQDGDNPYNQKDNNIENDDDDGLDDITKKLTPPEERYNQFKLDVYNSSKNIPIFYN  
LFVGNFEDAPRVNQIVSEQFRNVLP IHKPIYVNSIGTPLDFNSRDTVHNVPLNTTKNPV  
EILGYKTAAEHITLTKTLWDYCRIPENANRRVVYLHSGKSYTATIDNGKLRFLTSGALS  
NECATMPKDTCNVCSRRFSPVPHPTSGNMWMAHCSYVKKLIDPEQFEEAMEGLQYVGGY  
DFLACDGRGRYSAEHWIHSHTVKPCDLYNSANFTWNYDGVPTVNVQFKANMELKVAPRFE  
LEAFLKTKIRICTGRGASKNFR IKEYIGLYNEYPDSDWGHNF LKQEDWPHRDYGWAQ  
LPQTVRNKLI EFGFDDHLWTIRHHPYRLWGKTWHELTSQDRQTLTDVFVYTEETWNNEIK  
SEETDANHILDSVRRFEPNLSFDRCNTDKEGRDSTTGKVKPWYPRKEENENRPLKSFYI  
EASTKPPNKKRLIIAAVPRDETHLLTLWSELECFAESVDHVLISAPMWGQVYIEHILL  
AKKIYPHFINGKVTMEGKYFVNRYDVGLWCDAYESLDSYGTIDEYGLINDSVYALRKF  
AVFDNLEHKNVLSLSSHSYSAKWNIDFGPQYYWVESVYRAFDRNGIQIFNDHSCVPEDN  
PKFCPEEENKACI INNFEDLANEYACDKVAGVYPADSVGALVPEDMRVATWIKNIGYW  
RMLVDHMGFPVAKANEREQVAIQSTLEEKILSWQNNPLLKTCTSHIMDRLELDFNKDLPT  
FKSAKPFKRRWVNLPPNLQELAEKTLGYNEKIWNRANDSPILAGKKWKDLTVTQQALQ  
KLECSMLQYNQDGHVPMRRLKMMRQGIFK

>comp14907\_c0\_seq1; 801 118 2862 LEN=2907; translated  
MSSRRSRMSLGGALRRAGSPLTDSSSRFNSRPTNTSDDEYGATPRKSPVSSYTSTRQRS  
SSVPRRQSFQGGDGLLSRNKYVTSSSAASGTPIRDRRAMLEQWRQSRAAEASNGGVRTHTD  
DGSSVDTRKRYRGDPPLPPSSKQHRSMASHTSHYGYSQETNYYSNGGTIECYDDMDNRT  
TGYGATTSVLSGRTPSSSRRTMGSALRKTPLLGRSVVQSNREEMSQPEPLSOLTQDYEP  
DQSSMKYDTIDSVEGAGIASQMERMKQRVEQLEKEKMELSMSKAPLEARFRQKEDLWQKD  
RTSLMDQIEAAKSSLREADEKYCDLKAQYETATEEVIHLRHEVRKASSSTRFGTGVPGSS  
AAASNKSLWGRQLQNDRLAEMKEKLRATAEEEEIGGIRLAKVSLEKELHATRIELRCLER  
NYDELKVEYDDIAAQTSONNEAEIKLEVLTEEHIATTAALNAVYADLDATKARADAAMKE  
KVDSHKKEIEQLQFDLSVIKTRASKVQIDVNAANLSIEGEDDAVLRARIEERDRRAELE  
NELLLKGEQQRREMHNAIQELRGNIRVYVTRPFLPGDKQTDDSPIDVTPDGESLTIIDRR  
SGNPVGFKFDKVFPPSAGQEFVDFEVSDFVQSALDGYHVCLFSYGQTGSGKTHMTMQCGN  
GPMRGIIPRSVSKILDQARVMNKQKWNFNLSASFLEIYNENLNDLLTSMRPSGENSNKKL  
SIKRDREGKSFVDGLIKIPIDVQDSQSGMEQLEALMGVAARSRSVASTKMNSQSSRSHSV  
FMLHLNGYNDSDGAI VSGALNLCDLAGSERLDRSGADADAKRLKETQSINKSLSCLGDVF  
NALATGASHVYPYRNKLTYYLLQDCLSGDGKALMFVNLSPTTASCGESVCSLRFQVRNVQV  
ELGKATKHVQYKX

>comp14908\_c2\_seq1; 292 1 1007 LEN=1726; translated  
XQQQQQQYFQQQQQQQEECEEAAGPVSFLCGITAGVLQAGLFPDRALYLSITNEVPFL  
RRENFRNPYTGFLQSVGHRALSGGLYYPLENFFCGALLGAHSHQPHEEHASIHSHHHHH  
AAPHSLSHSQPHPEGHLPLHPAFANFLAGTLAGTTNAMIVNPITAIKYKTWGREVNRGM  
ATEVVEMFRKGGFRPFRNGLVPTVLRDLFCGGTYTFLRLEIQYVFLRPDQQWGANTVAA  
SLATIVSAPFNLVRNVQYATRSRERADGVAKILGDFAREVASQATTWRSLRYFQTRLRIG  
WGTVRVGVGMAGHSVYDRLMGAYHELDGRKRS

>comp14908\_c2\_seq2; 292 1 1007 LEN=1677; translated  
XQQQQQQYFQQQQQQQEECEEAAGPVSFLCGITAGVLQAGLFPDRALYLSITNEVPFL  
RRENFRNPYTGFLQSVGHRALSGGLYYPLENFFCGALLGAHSHQPHEEHASIHSHHHHH  
AAPHSLSHSQPHPEGHLPLHPAFANFLAGTLAGTTNAMIVNPITAIKYKTWGREVNRGM

ATEVVEMFRKGGFRPFRNGLVPTVLRDLFCGGTYTFLRLEIQYVFQLRPDQQWGANTVAA  
SLATIVSAPFNLVRNVQYATRSRERADGVAKILGDFAREVASQATTWRSLRYFQTRLRIG  
WGTVRVGVGMAGFHSVYDRLMGAYHELDGRKRS GT  
>comp14909\_c0\_seq1; 639 131 1894 LEN=2169; translated  
MKS VNADNMLPVFRWVGDETKKKTREIQSPKTTAQEFHRAGSAEGGAFNPTEPGKIVAVP  
GDRPTSPSSSPSPSPSPKTKTSPRTPSTRASSSYGSSSTGSSPSTRILQSPAAEPRD  
VRKDPDVREGRSCMHKQLVETVGAGAHQNSQAEPATAARWNQGLDDIRQTRTEGRDRR  
IKELVEQDEMLGRQFSQNPEEETEQLRREP KTKREAGAE TKQRELSQQNESIREQLRAAG  
PLFTHSDDFETE AQGRKEPPTTKPPRQRFDEKRRKRYRGNPKPCPARTATDDQFEKKVAE  
LESKRRL EEEKRRKEIAAQNKLFQRLKQAESPIKSYKKVDKVTQQQREMLREQRRKFAE  
IKQLELKAHEVALKRRYCKRSSTKGVVREMKLSPKTEAVRTAKQKERRAKTERKNKELA  
ERNVLMRKILEGAKGRDQKTL DSSVERARLEMERSRRREAEKRTKALVRRNAEHRERLAG  
TKCKVEKNLDEDFEFDRL EKEMFHNEEAVHRERELARKNHELKQRL ESARARDTKQLHYD  
VEAKRTEYTRARFEQAQSRKKELAAHRARLRKLVKGAKSPIKTALAC  
>comp14910\_c0\_seq1; 429 267 1809 LEN=1809; translated  
MGGGASRLDETLWEEETKHLTKGLTDDSNLSKSTAVADGGLDPTRTDQTL DGCQP TTSY  
RFLEIRKKGGAHNQRDFEVVDVSTSEVLYTTC SVPGLCWFVDVLPASCNGFRDLKLRVG  
PSGPAKKNWTVYRYDNPVFEQGLEASRELTHQSLHGGNE DENSESNNGKRSIDSNTNVNT  
NSSIDSSESETEIESCHKLYKTA AVTVSWSRYVAIMARYGPPKMEDYLDDDNQDDNDYGN  
FSNSHTGAKLDGACMEDSAAAKFSPNSSNEYNPEKNTTEIKENTDIISATTEPDDDN TLI  
TPSNGNSIEKITPITTKRSENTRTLEEMKTKTEKEKRRQTTMRLREHFGLPSTRMATS  
KNNGNEEDASSNKTIDEKMNHDFENEQNNNVPVLPRLTLQQKSKYDL DREGVLVLDIDD  
EYSPPMIVQCQEIHNKMIGNHQTFRMTREELIEKLSLDQKQDLKNPTSKEEQNTNPSCGD  
GGNNGSENENCKRRNSSS WFSRFRPSSKILSHEX  
>comp14910\_c0\_seq3; 229 1 566 LEN=792; translated  
XNPSCGDGGSNGSENENCKRRNSSS WFSRFRPSSKILSHEVLAMGDEIKKSEQVEAKDN  
NSESFQPETLESTMANLPGE GTDCAAVATTTGSLKNND EQLVLSSQGDRENKTLTSYF  
FWKNAAFNLGQHKMQMHLAKNSDLALQV VFSIIVNQVRSERNHTVFLATGLHPAWVFIDP  
RNPIAVFT  
>comp14911\_c0\_seq1; 672 125 1841 LEN=1841; translated  
MTEEDTTAQGETPTEIAEESKTSEGETAEKPEKGQLPAYLRPPPQGE GSATNHDGGGTER  
QHLLGEKIGGETDEL LALLSGNGARGCTGS AFDAVFVGGADGR LHQNSDFLIDFR LPKR  
VEKKMASMNT RIVAKIQKGKDTETAGWFRVHEGDKANAGEPSGDDPMVALRILLAPGPN S  
VVYYLLEDETETPGVVLSSATANIYLWKHTDALVISDIDGTITKSNAKGALGTTILPTNEH  
FYDKVSHEGICHLLSSLATREGATADERTTRVVYLTSRPI TLANQTRDFLSGLKQKTPAL  
GGSASVLPGLLGFGGKFSKVLKMELLTKSTQKFKAGKLSQVIEPYREANEGTNSDAP  
PILAAFNNLNDVQAYHFIGTSL ENIYMINKKSMIVTFDKPVG DGGDENGEKESFFSHQW  
YKGRIGAEFEGYADAKLRYLGLFDGDEEKKK NVEKYL VQRQSPSRLLPTIVVGLRAVFN  
GVGTTGLQNTGSTCHAMMEVPREKVL SVIDAVVFWMEWLQEPSRREKRQGR TKRELTEQS  
RENPMLELFVELVDKGGKPSGEAQHRLLRAAS  
>comp14912\_c0\_seq1; 735 1 1622 LEN=1687; translated  
XGSQMLGWELCSVPWHIFVFFRFFLPSARPWDKQOHAMVIAQLIDGDGKH RGIHNFLVQL  
RSMEDHTLMPGVKTGDIGPKIGYNNMDNGFAYFKNVV IPRNMAMRFASVDEN GK YRKK T  
MSDAASKISYITMMQVRSIIVVGAACKLGMACVINIRYS AVRKQGF AADGKTENQVLDYT  
QQQHRIFPLLAFSYCTFFSGRR LAKELKAMEDKLIASKPVRKEDVSDVHASSSALKSFTT  
MITADGIEE CRKACGGHGFLQSSGLPELFTTYLQSP TVEGDNHMLPQQVVRVLLKVVQAV  
KTNKGVENFKNCSYDLVPSLRAILSGRKEQCSAINAKDLCDLPKLLVAFRHRARLLVV  
VASQMNKDIAENGTEPQQAWNNALVAMSKASKAYS LYFLRNTMEGILDEQRTGVIGRAEA  
EVLGDLARLFALYWMEKDLGDFLEDGYIRPNQAKWVSPNV LKYLA AIRKNAVALVDAQDF  
SDFRLKSALGRYDGNVYPHILKAAEKDPLNAVDPGPGYNPELKR LIAGGAGVYAGTASRL  
>comp14912\_c0\_seq2; 191 1 808 LEN=808; minus strand; translated  
XQPASKQRTKLQSVRFSTHVRGPAQRPGPELPAGQGGAVDHPGASLLAPLRFRQKGGGGF  
QGPDVRSVPQLRLRVATDHLPVAAQGEPTGLLFLVAQADDVGLEHHPVE CQRDIVRHRLE  
DHLEIPALGDPPVALVADPQLAADLDEPDALGHRPLVFLGPVQVVVVVLVGKDP RRVPRDD  
GLQVPAALRPGAAAVEDVGDLFHVEGGV GALPLQVRVHGGKVL LLLLLVSFALVESPDCLL  
VWTWMRMVQANETRQMRVLMLELLPYRISS  
>comp14912\_c0\_seq4; 846 157 2271 LEN=2336; translated  
MNPDLKRERANATFDVEKITNVL DGGRRARTERRRYLEAVIARDPTGVFSNEDNHYLHRTQ  
KHQRAVAKGVRLIEVCRKLGIGDECHGRITERSDFQVILEAVADDIPLALHWVMFQPNI V  
SLCDEEQQSRWLPLCRDWKMIGCYAQTELGHGSNIRALET TATFLPESKGGQKGGSWIN

SPTLTSGKFWPGTLGRTANHAMVIAQLIDGDGKHRGIHNFLVQLRSMEDHTLMPGVKTD  
IGPKIGYNNMDNGFAYFKNVVIPRRNMAMRFASVDENGKYRKKTMSDAASKISYITMMQV  
RSIIVVGAAKCLGMACVINIRYSAVRKQGFADGKTENQVLDYTOQQHRIFPLLAFSYCT  
FFSGRRLAKELKAMEDKLIASKPVRKEDVSDVHASSSALKSFTTMITADGIEECKERKACGG  
HGFLQSSGLPELFTTYLQSPTEVDNHMLPQQVVRVLLKVVQAVKTNKGVENFKNCNSYD  
LVP SLRAILSGRKEQCSAINAKDLCDLPKLLVAFRHRARLLVVVASQMNKDIAENGTEP  
QQAWNNALVAMSKASKAYSLYFLRNTMEGILDEQRTGVI GRAEAEVLGDLARLFALYWME  
KDLGDFLEDGYIRPNQAKWVSPNVLYLAAIRKNAVALVDAQDFSDFR LKSALGRYDGNV  
YPHILKAAEKDPLNAVDPGPGYNPELKRLIAGGAGVYAGTASRL

>comp14912\_c0\_seq5; 793 210 2015 LEN=2080; translated  
MMRDEALHWVMFQPNIVSLCDEEQSRWLP LCRDWKMIGCYAQTELGHGSNIRALET TAT  
FLPESKGGQKGGSWVINSPTLTSGKFWPGTLGRTANHAMVIAQLIDGDGKHRGIHNFLVQ  
LRSMEDHTLMPGVKTDIGPKIGYNNMDNGFAYFKNVVIPRRNMAMRFASVDENGKYRKK  
TMSDAASKISYITMMQVRSIIVVGAAKCLGMACVINIRYSAVRKQGFADGKTENQVLDY  
TOQQHRIFPLLAFSYCTFFSGRRLAKELKAMEDKLIASKPVRKEDVSDVHASSSALKSFT  
TMITADGIEECKERKACGGHGFLQSSGLPELFTTYLQSPTEVDNHMLPQQVVRVLLKVVQ  
VKTNKGVENFKNCNSYDLVPSLRAILSGRKEQCSAINAKDLCDLPKLLVAFRHRARLLV  
VVASQMNKDIAENGTEPQQAWNNALVAMSKASKAYSLYFLRNTMEGILDEQRTGVI GRAE  
AEVLGDLARLFALYWMEKDLGDFLEDGYIRPNQAKWVSPNVLYLAAIRKNAVALVDAQD  
FSDFR LKSALGRYDGNVYPHILKAAEKDPLNAVDPGPGYNPELKRLIAGGAGVYAGTASR  
L

>comp14913\_c0\_seq1; 688 274 2527 LEN=2595; translated  
MRNVKGRNYHGALFVKNISFMTIWLLLQVTD RSI R VVCQSSNHVLLGNDNRLATFREYLD  
RAGISPSIGKTVIAPTGDADFDRFRVEDPERYDKWMTQGDYFVHFRDMIEYHLVIDEVLTK  
DEIFDGVRSQ LNTNQGNITINQELQ TIDNVNINDFLDADIESSDGV IHVVDEVI FPPFLA  
QDMIDQLLSNRQEKYSFSNMANLALYVGLDDRLNAAAYEGGITFLVPPNRRFRNRAEIDFPS  
LLKPEMFQYTKDFILCHMIEESYHQAKVFSINEESGEEQILIKSELGTHMWITSTEDMVR  
FQSQELLLPDQPTKHGYVKIRVDRKGWMMRNPIDIRCNEFC LXEMMIANEAKRNTLT Y  
RLRFCLFFHSIFHGLNYPLFPPIITDFAFFTP ISTNVDTSDCYRFFAQCLLSSEDI SEMF  
NSTLTLCPTREAFYFNNEDFNRLLSPDWYRHACEFLFNHMTMGDHTRAELIAMAPSR I  
TMLNGEIYNLRRSGDRPRIQNGLEEARSEFGDLIAMDGYLHTIDNTITPVAVSNSIYDRI  
QYYHDTTLFKINIDFVDLTDLIAMDIP LTVFAPDNKAFQ RVEFN AVDGGPI I VRHVL RGL  
WFCDVLANHTEVTTVDGVVLEIEVKND ELWVG GAKVYNC DILAHNGVLH HIDRV IGLDFD  
SPAPTQSPAPTITGAPTASAPSRQPVPLFDQEFDNGGVPIYLPPEPPIYKVQAHPT EA  
PGSNAERIAVYTPFLLTAVGTILIVGFAAVM

>comp14913\_c0\_seq2; 771 274 2367 LEN=2435; translated  
MRNVKGRNYHGALFVKNISFMTIWLLLQVTD RSI R VVCQSSNHVLLGNDNRLATFREYLD  
RAGISPSIGKTVIAPTGDADFDRFRVEDPERYDKWMTQGDYFVHFRDMIEYHLVIDEVLTK  
DEIFDGVRSQ LNTNQGNITINQELQ TIDNVNINDFLDADIESSDGV IHVVDEVI FPPFLA  
QDMIDQLLSNRQEKYSFSNMANLALYVGLDDRLNAAAYEGGITFLVPPNRRFRNRAEIDFPS  
LLKPEMFQYTKDFILCHMIEESYHQAKVFSINEESGEEQILIKSELGTHMWITSTEDMVR  
FQSQELLLPDQPTKHGIFHGLNYPLFPPIITDFAFFTP ISTNVDTSDCYRFFAQCLLSSE  
DI SEMFNSTLTLCPTREAFYFNNEDFNRLLSPDWYRHACEFLFNHMTMGDHTRAELIA  
MAPSRITMLNGEIYNLRRSGDRPRIQNGLEEARSEFGDLIAMDGYLHTIDNTITPVAVSN  
SIYDRIQYYHDTTLFKINIDFVDLTDLIAMDIP LTVFAPDNKAFQ RVEFN AVDGGPI I VR  
HVL RGLWFCDVLANHTEVTTVDGVVLEIEVKND ELWVG GAKVYNC DILAHNGVLH HIDRV  
IGLDFDSPAPTQSPAPTITGAPTASAPSRQPVPLFDQEFDNGGVPIYLPPEPPIYKVQ  
AHPTEAPGSNAERIAVYTPFLLTAVGTILIVGFAAVM

>comp14914\_c0\_seq1; 337 150 1632 LEN=1866; translated  
MDXKGDANNSNDNDNLVLRKRSKTAPEAVVLGGPAAVATPIAADGFLPGASDRPANLGL  
RGLGPDPRGRAAVDAQAPGRHRNSCHPLGWKGASGPGDEPHRDFAGPPPGGILAGRKQQR  
EEALFRAAGSQAQGLPWELEGP GTGRSEPGL EPQE QSYGDEQEEDVKEVIDAFLTRDS  
RNSFIARVYGILSVQLGFTALVCLLFGTYPPLTNIYVLD SLTGRASPFVLVPLAGVFLST  
IAWFRVAASPRARQKSPNKWWWLAIFTAGEAVSIGALSSLYKLSVVTAMGATALATVTV  
SVYTTIAQKNSKYDLSQWGATLSSWATILLVYLMGLAQEVGWLP RGF L PFSHVLCSV FST  
CLFSLFLAYHTKLIVGKHKAKYRMNEKDYVFGAMALYVDIVNIFLNILALIGEERDARES  
GATRSAGAGSKPRRPVLVLMAGGRGFLCPWMVSYGTIEHRNCLLRREECVPLDGILGRNR  
FACHEAVQRDNG

>comp14915\_c0\_seq2; 853 1 3315 LEN=3436; translated  
XVLLRVCSVPGRNMQSNENTGNWEAGILNDHNKLN PQRLSEGLYSRPGECQLRVLESTRR



RIKEDNSGVTSSKNTREASTAPSSNGNXFVVVIDAQQAALSKMRNVYGGSLVRSRRGYGF  
KRKQRAFRTFCIFQLLGSLSVCSGLLMSLWLMQALEETLKSNIATPDKMGKLRPKPEPKR  
TTSNDFLAYEYERKSSRQAMHHPQTEQMKS LVGNPGSHPSIEENTNESVINQITWRQRN  
QLISSPSPLFPLLPPLSLDYLGLVLDAGRHYFPVPWLYQHLYLHDLGYNIIHFRLTDDQN  
FILNITIPKLGIERNRNRSISDTSFAFVARWEQEQKNLHGTHNGTADEGDRHVYYQPHEL  
KFVEFARDEYNITVVPINVPGHAGAWGANTAVPDLVVPCKFACSNNGYGVPLNLTHPEL  
PKILEHVLTEVEIFHHPFLHLGGDELHMSLPCLEEAGIADTSSWLSDSVARFEKETLG  
PIVEGLGYGPHQILRWETPNQKRRSEPEEYRFGGITHYWESTPPSQNDGRGDVTPYMVST  
GLYLDVMSTSKIYGYGDFLAAQKLVSEARSNPPFAIVAGAFELGTEFWEDRNVLGRLF  
RMGVATASETPSEAIPTQYEFKSYLSKCKSIFHFSNADSIKESAGLPLEDRSYQAKW  
KLFWKEWKTGLCEGLTYPEQSPHIHPSSVDPKVQRTANHNFWESVLSSSQSLGVTRQHIH  
TNVTAPKSIDSNIPHVGLVNVLVENSISQQNLFRLLOTIELLGMNLIQLNLADDFGQVVE  
YDSVSGIGYSTALSEANQKYAKIALPLYDRHRLEQIIGWAYQAGIQLVPEINLATNNGGW  
FKTGMLIDCPKVLCEKGGHIAFDVINKIESVLPVLSVVAELRDIFASPLNKFHMLGFD  
EREMAVGGCFSEGLDASEVHAALHRFETKLFDAISLIGADHHNIIRWQNEEKVEYRDRT  
GKITQFTSIDDADKYDISIDLTPFFGTVLITEKNTPEVYQATLCWTTKSSPPHGLVAK  
GTHGQVPQIDQLVAFTMGLRDRAKTDTTFDGFQTDFAVACEKLRCREAAQYFGRNTANRA  
QLKDLNLRESCIERTTNTTSRRSKK

>comp14915\_c0\_seq3; 851 1 3442 LEN=3563; translated  
XVLLRVCVSPGRNMQSNENTGNWEAGILNDHNKLNPNQRLSEGLYSRPGECQLRVLESTRR  
RIKEDNSGVTSSKNTREASTAPSSNGNXFVVVIDAQQAALSKMRNVYGGSLVRSRRGYGF  
KRKQRAFRTFCIFQLLGSLSVCSGLLMSLWLMQALEETLKSNIATPDKMGKLRPKPEPKR  
TTSNDFLAYEYERKSSRQAMHHPQTEQMKS LVGNPGSHPSIEENTNESVINQITWRQRN  
QLISSPSPLFPLLPPLSLDYLGLVLDAGRHYFPVPWLYQHLYLHDLGYNIIHFRLTDDQN  
FILNITIPKLGIERNRNRSISDTSFAFVARWEQEQKNLHGTHNGTADEGDRHVYYQPHEL  
KFVEFARDEYNITVVPINVPGHAGAWGANTAVPDLVVPCKFACSNNGYGVPLNLTHPEL  
PKILEHVLTEVEIFHHPFLHLGGDELHMSLPCLEEAGIADTSSWLSDSVARFEKETLG  
PIVEGLGYGPHQILRWETPNQKRRSEPEEYRFGGITHYWESTPPSQNDGRGDVTPYMVST  
GLYLDVMSTSKIYGYGDFLAAQKLVSEARSNPPFAIVAGAFELGTEFWEDRNVLGRLF  
RMGVATASETPSEAIPTQYEFKSYLSKCKSIFHFSNADSIKESAGLPLEDRSYQAKW  
KLFWKEWKTGLCEYVVIILRFEGDVIQSTGFLIQPSFFVSI FLKNLFIGFIQKCRGLTYP  
EQSPHIHPSSVDPKVQRTANHNFWESVLSSSQSLGVTRQHIHTNVVTAPKSIDSNIPHVGL  
VNVLVENSISQQNLFRLLOTIELLGMNLIQLNLADDFGQVVEYDSVSGIGYSTALSEANQ  
KYAKIALPLYDRHRLEQIIGWAYQAGIQLVPEINLATNNGGWFKTGMLIDCPKVLCEKGGH  
GIAFDVINKIESVLPVLSVVAELRDIFASPLNKFHMLGFDEREMAVGGCFSEGLDASE  
EVHAALHRFETKLFDAISLIGADHHNIIRWQNEEKVEYRDRTGKITQFTSIDDADKYDIS  
IDLTPFFGTVLITEKNTPEVYQATLCWTTKSSPPHGLVAKGTHGQVPQIDQLVAFTMGL  
LRDRAKTDTTFDGFQTDFAVACEKLRCREAAQYFGRNTANRAQLKDLNLRESCIERTTNT  
TSRRSKK

>comp14915\_c1\_seq1; 522 171 1769 LEN=1792; minus strand; translated  
MSATADRSGINSNNTWSIAEKSPPSYPDHSGSYESKTGASSALSPLPSSPPAPSRDFS  
SNDTPGTSHSCESANETRQHRTRAARHRPAAPPKTTVAFEGRELLVVTVAEPLLHPV  
DPDSALVVRADLI PPWHPHSHTSQQPRRRPHLQKQRTPRKEQKQDQQTQOTHQHLHREESSN  
KAGKWGNQQQQRAPVHRRNHQATVGCCHNFRHLSCLHVLYQSSTAKAKHRGRSSWLRNA  
IATATATSASGGKHSMTLPMVSYPLLLLGGFFFFLLVAMGGLSPEHAGHPFPFAVGRVGA  
LPLSPRAFPGANKRKS GPPKGGEPSETKHSPTTLAFVLPHPDQGAASAHLVSGSGSEQ  
IRYDLNEESEGVFRSMAQRAGAEGRDIRAVARKKDRFFLVVGRNRGEEGEEQSGPLASGS  
EVFLLCHRRVPSSGTGKGRAMGGTDERAGLPAEKASGHPPAFSTPSEAAEHKHKHENENG  
VCTAVRLGRRSIVPLTTHRDPDRPEEMPTVARSPYEPERYVVPKQRLGSSVS

>comp14916\_c0\_seq1; 270 151 1230 LEN=1463; translated  
MSIRSDSNCSRLDCPSHFPRKVRLI IREEACSDNLFARLSPGLAHDLLRRIHCSEES  
FSGYPVRRPNGWTHLDEDVNGSISFLPLSISDGNSTVIYASYNGGTCGLSSEQESI ELP  
SIVSDRFKDVPEYVSVHLSNIEYAASVHVEPANVEDWELLEIYSGFMENGGLLRQVSVV  
YPNQLLTLRIGGIDRVKVTVKEFATGRSLKPNLPSVSSDSFVSDNRSRVFSKEQSIQR  
ALLIQDTEVIVSPKTRLRKKMWSWSKPLRLIPSDSDWGASYDNFSKLTETESFHVEPGFV  
LVHCNQWPFETKWAQLKVDECHANDTRLVGVTTSSRIPQNNAGKSDYGSSIIVNRFFIG

>comp14916\_c0\_seq2; 621 1501 3630 LEN=4041; translated  
MSTREVSMEITLTLHLQYNKIEVPAWNVADIDLATYHEMRYPDWLCQNTQHVLPVGAV  
IPI PSTHVTSDNIDFSDQWFRITSEEADDRDEGCIVQLNTDDFSLLSKRLRLARSTEFSSL  
SISRRQTPQAQIPRETIVSSNWLTPIIDRVKYFTTTTFVTLCGVNGSGKTHHALFLSALMS

FYFHRPTFYLDCKRKLQKSKPRMSEILKELDSVFAQAREERNAIIVLDDIDVLSPNLFIGD  
ENIVSEGTHAVNPAAIDQSKLIADRLSHLCEAAIIEGIKSKHCHLSLIATCLREDSMNSS  
ILQSSQFPPIHAKVPHMKPEDQGDLMAMIRRYHPRIRKIFDNSKISGRTEGFIPRDFEK  
LCLRAIRSYIMNPRIGSLTDSFVAELDDFTPIARISNSGPDDSNHTLWSDIGGLFHVKEK  
LEATVRHPILYHHIYSRARIELPRGILLYGPPGCGKSYLVPALARECNYPLVTCKGPEVL  
DKYIGASEAKVRELFERASQMAPSILFLDELEALAPRRGSDSTGVTDREVVNQLLTFLDGV  
ENVSSGTVFIVGATSRPKVDPAIIRPGRLEQHLYVGPPPESTKEWSDLFIKISKQWNLKP  
ETLDALMDGEEIPKMANDVPRLCPADIRAAFDTAHLNAVHRFLAGEATINDDEKIEMGVE  
DIKFGLETKASLSESEAKILKSLYSSLRGHIQSNSSRKCIEHQKISLR

>comp14916\_c0\_seq3; 621 1501 3630 LEN=4065; translated  
MSTREVSMEITLETLHLQYNKIEVPAWNVADIDLATYHEMRYPDWLCQNTQHVLPVGAV  
IPIPTHVTSNDIDFSDQWFRITSEEADDRDEGCIVQLNTDDFSLLSKRLARSTEFSSL  
SISRRQTPQAQIPRETIVSSNWLTPIDRVKYFTTTFVTLCGVNGSGKTHHALFLSALMS  
FYFHRPTFYLDCKRKLQKSKPRMSEILKELDSVFAQAREERNAIIVLDDIDVLSPNLFIGD  
ENIVSEGTHAVNPAAIDQSKLIADRLSHLCEAAIIEGIKSKHCHLSLIATCLREDSMNSS  
ILQSSQFPPIHAKVPHMKPEDQGDLMAMIRRYHPRIRKIFDNSKISGRTEGFIPRDFEK  
LCLRAIRSYIMNPRIGSLTDSFVAELDDFTPIARISNSGPDDSNHTLWSDIGGLFHVKEK  
LEATVRHPILYHHIYSRARIELPRGILLYGPPGCGKSYLVPALARECNYPLVTCKGPEVL  
DKYIGASEAKVRELFERASQMAPSILFLDELEALAPRRGSDSTGVTDREVVNQLLTFLDGV  
ENVSSGTVFIVGATSRPKVDPAIIRPGRLEQHLYVGPPPESTKEWSDLFIKISKQWNLKP  
ETLDALMDGEEIPKMANDVPRLCPADIRAAFDTAHLNAVHRFLAGEATINDDEKIEMGVE  
DIKFGLETKASLSESEAKILKSLYSSLRGHIQSNSSRKCIEHQKISLR

>comp14916\_c0\_seq4; 764 151 3378 LEN=3789; translated  
MSIRSDSNCCSRLDCPSHFPRKVRLIREEACSDNLFARLSPGLAHDLLRRIHCSEES  
FSGYPVRRPNGWTHLDEDVNGSISFLPLSISDGNSTVIYASYNNGTCLGSSEQESIELPR  
SIVSDRFKDVPEYVSVHLSNIEYAASVHVEPANVEDWELLEIYSGFMENGGLLRQVSVV  
YPNQLLTLRIGGIDRVKVTVKEFATGRSLKPNLPSVSSDSFVSDNRSRVFSKEQSIQRC  
ALLIQDTEVIVSPKTRLRKMMVSWSKPLRLIPSDSDWGASYDNFSKLTETESFHVEPGFV  
LVHCNQWPFETKWAQLKVDECHANDTRLVGVTTSSRIPQNNAVLFIGTRLDLRLITLTKDR  
VCLRPLMSTREVSMEITLETLHLQYNKIEVPAWNVADIDLATYHEMRYPDWLCQNTQHV  
LPVGAVIPIPTHVTSNDIDFSDQWFRITSEEADDRDEGCIVQLNTDDFSLLSKRLARST  
TEFSSLSISRRQTPQAQIPRETIVSSNWLTPIDRVKYFTTTFVTLCGVNGSGKTHHALF  
LSALMSFYFHRPTFYLDCKRKLQKSKPRMSEILKELDSVFAQAREERNAIIVLDDIDVLS  
PNLFIGDENIVSEGTHAVNPAAIDQSKLIADRLSHLCEAAIIEGIKSKHCHLSLIATCLRE  
DSMNSSILQSSQFPPIHAKVPHMKPEDQGDLMAMIRRYHPRIRKIFDNSKISGRTEGFIP  
RDFEKLCLRAIRSYIMNPRIGSLTDSFVAELDDFTPIARISNSGPDDSNHTLWSDIGGL  
FHVKEKLEATVRHPILYHHIYSRARIELPRGILLYGPPGCGKSYLVPALARECNYPLVTC  
KGPEVLDKYIGASEAKVRELFERASQMAPSILFLDELEALAPRRGSDSTGVTDREVVNQLL  
TFLDGVENVSSGTVFIVGATSRPKVDPAIIRPGRLEQHLYVGPPPESTKEWSDLFIKISK  
QWNLKPEETLDALMDGEEIPKMANDVPRLCPADIRAAFDTAHLNAVHRFLAGEATINDDEK  
IEMGVEDIKFGLETKASLSESEAKILKSLYSSLRGHIQSNSSRKCIEHQKISLR

>comp14916\_c0\_seq5; 764 151 3378 LEN=3813; translated  
MSIRSDSNCCSRLDCPSHFPRKVRLIREEACSDNLFARLSPGLAHDLLRRIHCSEES  
FSGYPVRRPNGWTHLDEDVNGSISFLPLSISDGNSTVIYASYNNGTCLGSSEQESIELPR  
SIVSDRFKDVPEYVSVHLSNIEYAASVHVEPANVEDWELLEIYSGFMENGGLLRQVSVV  
YPNQLLTLRIGGIDRVKVTVKEFATGRSLKPNLPSVSSDSFVSDNRSRVFSKEQSIQRC  
ALLIQDTEVIVSPKTRLRKMMVSWSKPLRLIPSDSDWGASYDNFSKLTETESFHVEPGFV  
LVHCNQWPFETKWAQLKVDECHANDTRLVGVTTSSRIPQNNAVLFIGTRLDLRLITLTKDR  
VCLRPLMSTREVSMEITLETLHLQYNKIEVPAWNVADIDLATYHEMRYPDWLCQNTQHV  
LPVGAVIPIPTHVTSNDIDFSDQWFRITSEEADDRDEGCIVQLNTDDFSLLSKRLARST  
TEFSSLSISRRQTPQAQIPRETIVSSNWLTPIDRVKYFTTTFVTLCGVNGSGKTHHALF  
LSALMSFYFHRPTFYLDCKRKLQKSKPRMSEILKELDSVFAQAREERNAIIVLDDIDVLS  
PNLFIGDENIVSEGTHAVNPAAIDQSKLIADRLSHLCEAAIIEGIKSKHCHLSLIATCLRE  
DSMNSSILQSSQFPPIHAKVPHMKPEDQGDLMAMIRRYHPRIRKIFDNSKISGRTEGFIP  
RDFEKLCLRAIRSYIMNPRIGSLTDSFVAELDDFTPIARISNSGPDDSNHTLWSDIGGL  
FHVKEKLEATVRHPILYHHIYSRARIELPRGILLYGPPGCGKSYLVPALARECNYPLVTC  
KGPEVLDKYIGASEAKVRELFERASQMAPSILFLDELEALAPRRGSDSTGVTDREVVNQLL  
TFLDGVENVSSGTVFIVGATSRPKVDPAIIRPGRLEQHLYVGPPPESTKEWSDLFIKISK  
QWNLKPEETLDALMDGEEIPKMANDVPRLCPADIRAAFDTAHLNAVHRFLAGEATINDDEK  
IEMGVEDIKFGLETKASLSESEAKILKSLYSSLRGHIQSNSSRKCIEHQKISLR

>comp14917\_c0\_seq3; 204 1 1126 LEN=1126; translated  
XSSMRQIRKTIVKEIAKGRLSIRADRDVAVDVQLQKKLVSLLLSYTTPWLRRLALEVMFGE  
CIEPAPFSESSPKTYLGRMKLALKTFVKKRFLSDDDTLQKFTKGRCNVPSGRFETQYKAE  
MRNLVLSRIMTLVFFLDRAKAANVLENVPRFLTSSNVKSTRDVLITICRECLSAEGDIT  
KHLSRIGLKVSYIQDPIDEVNFQVANLATDLRDGVLLTRLAEIITGASFKSYMHSRLRIPV  
VSRLQKKFNVNLMKSIKDFGIIADGINAHHIMDGHRDMVLALMWCIIAQCCIEKLLQG  
DQVEQEIQNVIQSSQAREKVQGRRYTKLICASQNLPFSSPVGRDSSPEKILKDLLLRWSQ  
AVCSSFGLTISDLSDS

>comp14917\_c0\_seq4; 1390 94 7221 LEN=7320; translated  
MKIHDDGVVAATNPSRKSVSFGNLEIAEQSGRTPLQDQNRVMHKSPYVQNNSGSKSTLF  
KSPSSVNKRAITSNSFRQDLRKGCTPSSTKTKPRTLGERDKENNLNNTTSTRGERQSR  
LQQSHQSNPKTEAKTPNSASALRRTLSTVEPQQVQSLQQSETLLQRNRISLRASSTVGS  
SNQPFQSLTTAMTSSLVGRSRLGKGLAPGKTAMGGLGPPARVAPKTPNTLLRNELEDE  
DDEFDESMLLSPPPGALWDALNLSGGGDNKRYAISPTVTTGLIVVSPQAAEQIHTWSSA  
KERLPTSNTPEVTNDKFSPTVPRALMQTPHATASQPVTTSVTTAVAAQSTSQVKICRQN  
SSIIIEIEEVTEREIIYIESTEDSIQDEHNHLENDEQLFAANDMQSMVTSNDEDPDMPQRNS  
TTPTS IQKSTKGGIALDLTALFSTEKDNCRQLQQQSERKEKKWVENTPLST SMPATLLSK  
LNSNRPTSKKQVQGKEKKEIRSVPPRATTSKTKSTFTKTKPSTTKGSTTRVARERNISR  
KPTMQNNAKGNPKKVLATAKSNLSTKITQKATSKDVVKPWIKTENLANAKEKENNESV  
LSETSSVRHDSATEENVRHRGGLAFDVGFTDVTVPKPIQLPPSNFKSRTGGTVSTAMATKE  
PKPTGSWADRQCQVFTGWLNYTLNPEEMDINNEGCIASGLRALI IHRRLAEGRVHAMNLY  
QGSSMRQIRKTIVKEIAKGRLSIRADRDVAVDVQLQKKLVSLLLSYTTPWLRRLALEVMFG  
ECIEPAPFSESSPKTYLGRMKLALKTFVKKRFLSDDDTLQKFTKGRCNVPSGRFETQYKA  
EMRNLVLSRIMTLVFFLDRAKAANVLENVPRFLTSSNVKSTRDVLITICRECLSAEGDI  
TKHLSRIGLKVSYIQDPIDEVNFQVANLATDLRDGVLLTRLAEIITGASFKSYMHSRLRIP  
VVSRLQKKFNVNLMKSIKDFGIIADGINAHHIMDGHRDMVLALMWCIIAQCCIEKLLQ  
GDQVEQEIQNVIQSSQAREKVQGRRYTKLICASQNLPFSSPVGRDSSPEKILKDLLLRWS  
QAVCSSFGLTISDLSDSFANGKALCLLIHYYHPSLIRVEEIFHASLEPQPGDSTEDLLEK  
ERINWRRASTSMQQLGGIPDMLPICDSENPPNEKSMLLCLTYLCSRLMESSQEIFAAILI  
QACYRKYRRKVLLEKKVAAASTIFRFWTLHKDNYFRKQKRKYKAVATLEEFLLSHKHAL  
VRLKKIRLKKERTIRCTINIQRVYRGYLGRVRYERAVLKFATMIQRTFRRYMAMRISA  
DLCKKRDSAVVIQSAFRFRVAYESFLDCRFYIIELOQRTFRGHLSRRELKERKHAALVIQK  
AWWSYLVALESELAIFIQKVRGILGRKRWVENENRRDAACSIQKIWRGYYQSLKYFIT  
FESSIVIQKTIRGFLVRKAIPVNMYSHAATS IQRIWRGFSVQVQFQLDLFDIVCVQSLVR  
KFLAKRTYMKRINALSILQCSYRCFIAQRMMVEKIKDREQEILQHRSAV I IQAHARKIIT  
QQNLYSLHYSAYVIQNNWRFTLWHRLSMSSTKIQSFYRGWKCRCAFMHKRKAVVDIQR  
WRGFVCRQNDEILHFASTLIQSAWRRYWIYTDYIILYVKESKAATLIQAHVRRMAARRMID  
TQNLLVQIQSQWKNYKQFKTE TNAATKIQAIVRSNLSRSDFLSKRLTLILQQT VRAYQ  
ARKLFRIKYNERLREQSATIQSLWRCFSKQVQFQVDVMDIVCVQSECRRYLAFRTYKRI  
VLATTVVQRAFRCAAAKQELSMRKLVMDTMVMESSTKIQTVVRAHIARSNFFRIKSSII  
LQKCWRGHNIRRNLRNL CIKSTIVQNTWRMYQLRAKYVSI V DSTTKIQT SFRLHSTRSRY  
SAMKDSMVCVQRCWRGYKARVNLSKLSYAAIKIQSHWRRSVAQNNYLLDLEIKSATLIQ  
ASFRMYVRRLDYMVVKYSAQTIQRFTRGLLSRVDLAVQNF AASEIQRVWRGYCTYSTKDI  
ICALVKVQSVFRMASEKNKIDELRLLYWVEVCNRRNAVTIQQSFRKYVQRKRRDNAAARV  
VQNAYSYSQ LKKIQ AASRGMIRLQSRVRGALIRKKRSKRIEELARRIKEETRAILDPT  
LRLGYRTSRALEILQTSQSLTKIMDAVKELEASTRLSVVCCQVFTKVNAANILLQLIQSC  
NRSVPHMELKEHILLTLENVAQYPSLIGSFAHCRYAEVFLDNVQVFRDKDGFCLAVVLL  
DRITKAEHDVAQFCSTHEHLKRLKEVYRVVSRRRFRFQKNRALSEKARRLRKYGLAKRDN  
FDREVSTKMLGKMIEVFTEIATPTSHRNCFFFEFEG

>comp14917\_c0\_seq5; 1390 94 7221 LEN=7384; translated  
MKIHDDGVVAATNPSRKSVSFGNLEIAEQSGRTPLQDQNRVMHKSPYVQNNSGSKSTLF  
KSPSSVNKRAITSNSFRQDLRKGCTPSSTKTKPRTLGERDKENNLNNTTSTRGERQSR  
LQQSHQSNPKTEAKTPNSASALRRTLSTVEPQQVQSLQQSETLLQRNRISLRASSTVGS  
SNQPFQSLTTAMTSSLVGRSRLGKGLAPGKTAMGGLGPPARVAPKTPNTLLRNELEDE  
DDEFDESMLLSPPPGALWDALNLSGGGDNKRYAISPTVTTGLIVVSPQAAEQIHTWSSA  
KERLPTSNTPEVTNDKFSPTVPRALMQTPHATASQPVTTSVTTAVAAQSTSQVKICRQN  
SSIIIEIEEVTEREIIYIESTEDSIQDEHNHLENDEQLFAANDMQSMVTSNDEDPDMPQRNS  
TTPTS IQKSTKGGIALDLTALFSTEKDNCRQLQQQSERKEKKWVENTPLST SMPATLLSK  
LNSNRPTSKKQVQGKEKKEIRSVPPRATTSKTKSTFTKTKPSTTKGSTTRVARERNISR  
KPTMQNNAKGNPKKVLATAKSNLSTKITQKATSKDVVKPWIKTENLANAKEKENNESV

LSETSSVRHDSATEENVRHRGGLAFDVGFTDTVKPQIQLPSSNFKSRTGGTVSTAMATKE  
PKPTGSWADRQCQVFTGWLNYTLNPEEMDINNEGCIASGLRALI IHRRLAEGRVHAMNLY  
QGSSMRQIRKTIVKEIAKGRLSIRADRDVAVDVQLQKKLVSLLSYTTTPWLRRLALEVMFG  
ECIEPAPFSESSPKTYLGRMKLALKTFVKRFLSDDDTLQKFTKGRCNVPSGRFETQYKA  
EMRNLVLSRIMTLVFFLDRAKAANVLENVPRFLTSSNVKSTRDVLITICRECLSAEGDI  
TKHLRIGLKVSYIQDPIDEVNFQVANLATDLRDGVLTRLAEIITGASFKSYMHSRIP  
VVSRLQKKFNVNLMKSIKDFGIIADGINAHHIMDGHRRMVLALMWCIIAQCCIEKLLQ  
GDQVEQEIQNVIQSSQAREKVQGRRYTKLICASQNLPFSSPVGRDSSPEKILKDLLLRWS  
QAVCSSFGLTISDLSDSFANGKALCLLIHYYHPSLIRVEEIFHASLEPQPGDSTEDLLEK  
ERINWRRASTSMQQLGGIPDMLPICDSENPPNEKSMLLCLTYLCSRLMESSQEIFAAILI  
QACYRKYRRKVLLEKKVAAASTIFRFWTLHKDNYFRKQRKYKVAVATLEEFLLSHKHAL  
VRLKKIRLKKERTIRCTINIQRVYRGLGRVRYERAWVLKFAATMIQRTFRRYMAMRISA  
DLCKKRDSAVVIQSAFRRFVAYESFLDCRFYIIEHQRTFRGHLSRRELKERKHAALVIQK  
AWWSYLVALESELAIFIQKVWRGILGRRKVENENRRDAACSIQKIWRGYYQSLKYFIT  
FESSIVIQKTIRGFLVRKAI PVNMYSHAATS IQRIWRGFSVQVQFQLDLFDIVCVQSLVR  
KFLAKRTYMKRINALSILQCSYRCFIAQRRMVEKIKDREQEILQHRSAVIIQAHARKIIT  
QQNLYSLHYSAYVIQNNWRFTFLWHRLSMSSTKIQSFYRGWKCRCAFMHKRKAVVDIQR  
WRGFVCRQNDLILHFASTLIQSAWRRYWIYTDYILYVKEKAAATLIQAHVRRMAARRMID  
TQNLLVQIIQSQWKNYKQFKTETNAATKIQAIVRSNLSRSDFLSKRLTLILQQTVRAYQ  
ARKLFRIKYNERLREQSATIIQSLWRCFSKQVQFQVDVMDIVCVQSECRRYLAFRTYKRI  
VLATTVVQRAFRCAAAKQELSMRKLVM DTMVMESSTKIQTVVRAHIARSNFFRIKSSII  
LQKCWRGHNIRRNLRNLCLIKSTIVQNTWRMYQLRAKYVSVVDSTTKIQTSLRHLSTRSRY  
SAMKDSMVCVQRCWRGYKARVNLKLSYAAIKIQSHWRRSVAQNNYLLDLEIKSATLIQ  
ASFRMYVRRLDYMVVKYSAQTIQRFTRGLLSRVDLAVQNFAASEIQRVWRGYCTYSTKDI  
ICALVKVQSVFRMASEKNKIDELRLLYWVEVCNRNRNAVTIQQSFRKYVQRKRRDNAARV  
VQNAYRSYSQLKKIQAASRGMIRLQSRVIRKIRKRSKRIEELARRIKEETRAILDPT  
LRLGYRTSRALEILQTSQSLTKIMDAVKELEASTRLSVVCCQVFTKVNAANILLQLIQSC  
NRSVPHMELKEHILLTLENVAQYPSLIGSFAHCRYAEVFLDNVQVFRDKDGFCLAVVLL  
DRITKAEHDAVQFCSTHEHLKRLKEVYRVVSRRRFRFQKNRALSEKARLRKYGLAKRDN  
FDREVSTKMLGKMI EVFTEIATPTSHRNCFFFE

>comp14918\_c0\_seq1; 387 158 2257 LEN=2296; translated  
MSSNSREDCDVFETERKDYLSDHEVLSTDIGHNSDEVDASDSTQYISMKKNALDYHEDD  
LSPATSIKTCPICFNPAKEFVSGPCHHSLCVECMEVLYANGAVERWPPAAADTHLSAP  
TLGRCPICRSVLSLFEVVNTKTLEPLYPDTESWKPHEEDENSIRKLVKNCSSPSHPLEN  
AVYIPYRGIPEGELSFHWDWRKLPDEEYEITQRPFLNLTALAIRRRPQFWRLEDQSIAPP  
IIFMEEGCHFHEPSRTFHGTILWPFPLKGSYEWDIILGFSKDYRFISSGRIHHRGRILK  
PGDIPKTYTNEERELCKNPMDGRWTVVWKNQFGEEQRNEINVINNEFKQARWSFYLNFD  
PSNVFVQWPRSKHRQTIQVEGIDLIRKPLGPRPGDKIRWVSDQNAPELFWIRQTIQPVAT  
EKVHHYGMGEDKFLYQLDAEMRNCIPKYNSSVWGNIFIKRMCIGSASYHFLSPTDSFI  
SYRHPACRDLPLDDGSPLPTRVNFHNKWNKEDRILTASIEWEKDFGTSWNDNIRWKL  
MYFDEEFMVILKGGIQVEWCRERRARPRPRPEPRHRPAPVPVYVPPPEENPETTATPDR  
NEEWVMSGYGYDQVYVNAASLERYRTVERCRRQDGLDFLRGDTECNEEEIEVDFAIAEL  
HQORLEKEGATERSIGFLSHLFLKADHNPVNPIDFL

>comp14919\_c0\_seq1; 740 245 2782 LEN=3192; translated  
MLFSSSCKQWRRRLRLLSLAILCSYYDSVLDRSAGGSMLVAAAATTTAPEEEKDNHFVCG  
VYLAKSTLPGTGIGMYAGRNGYRKDELITKQLGDHVIPIITDLKETHIDTGLYDEDANDMR  
KYFLWDQYTNARVFGLENVENLAAHEPAMASAGFGAAANSFMDFVNVEEGVKFGLMDSE  
DSNDDGNDDQNYNIHRSKDPGAGSFPFHSAWASKEIGPYSEFFVSYGDRWFTDRAW  
LGIIPVSGDHEDAERLWKSADRNLGGRKRQEQERERERNLEKLQQQAESKTDEDIEEDE  
NENENNEDEDEDEIEDDDKFDSTLLKNIYREFWDTVIIPIGKDTWGESRVFAALPEAGSD  
HYEQMLKYPGGFLPFKQSLMKRSASWLEEHGVCADAVRIGRSTLPNKQAGHGAFSRTHFE  
PGDVPVLTAPLIHIHPRDILDYTYVFEENYNQFERDPDSDDDGEKDDENKNPDRIDYDALHE  
DRFFQYQLRVGMNKTGTQLLMNYVFGHNESTLLSPYGPVQVLVNHNTLQNLKLQWAE  
HRSNHHPELLEKSVDVLTDRDPLGSLVLTLELIATKPIAPDDELFLDYGDADAWEDAWNEHVR  
NWKPYPGKHSTYVSAIDLNRDEHLREPLPSLYTMKDHTLLPPSVRLMVSNAWRNEEYR  
RKYGDHSITAKVMFDEFEYEPVEVVFSGKRSDPQDGSATDDDDHKLYPELDPTLYT  
VVVNVRIEDEEEKDEEEKDEENEGDDEEPKYQRVTFSHVPRRAFMFEDMTGTQDLYLPN  
AFRHPILIPDDIFPEAWKNRKHGNSNDDKKGDAFP SQYGGYAAFTAQKAKKEAKSQS  
ELPAV

>comp14919\_c0\_seq2; 689 245 2749 LEN=3159; translated

MLFSSSCKQWRRRLRLLSLLAILCSYYSVLDLRSAGGSMLVAAAATTTAPEEEKDNHFVCG  
VYLAKSTLPGTGIGMYAGRNGYRKDELITKQLGDHVIPIITDLKETHIDTGLYDEDANDMR  
KYFLWDQYTWNARVFLNVENLAAHEPAMASAGFGAAANSFMDFVNVEEGGVKFGMLDSE  
DSNDDGNDDQNYNIHRSKDPGAGSFSPFHSAWASKEIGPYSEFFVSYGDRWFTDRAWR  
LGIIPVSGDHEDAERLWKSADRNFGLGGRKRQQEQRRERERNLEKLQQQAESKTDEDEIEEDE  
NENENNEDEDEDEIEEDDDKFDSTLLKNIYREFWDTVIPIIGKDTWGESRVFAALPEAGSD  
HYEQMLKYPGGFLPFKQSLMKRSASWLEEHGVCADAVRIGRSTLPNKQAGHGAFSRTHFE  
PGDVVLTAPLIHIPHRDILDYVFEENYNQFERDPDSDDDGKDDENKNPDRIDYDALHE  
DRFFQYQLRVGMNKTGTQLLMNYVFGHNESTLLSPYGPVQLVNHNTLQNLKLQWAET  
HRSNHHPELLEKSVDVLRDHPGLSVLTLELIATKPIAPDDELFLDYGDWEDAWNEHVR  
NWKPYPGKHSTYVSAIDLNTRDEHLREPLPSLYTMKDHDTLPPSVRLMVSNAWRNEEYR  
RKYGDHSITAKVMFDEFEYEPVEVVKSGKRSDPQDGSATTDDDDHKLYPELDEPTLYT  
VVVNVRIEDEENEGDDEEPKYQRVTFSDVPRRAFMFEDMTGTQDLYLPNAFRHPILIPDD  
IFPEAWKNRKHGNSNDDKKHGDAFSPSYGGYAAFTAAQKAKKEAKSQSELPAV  
>comp14919\_c0\_seq3; 1212 1 3457 LEN=3560; translated  
XETRTGPRTRCLWNHPWPIISSGRFIYLEEKCRKSDQIRSDQIEIEIDPMSSSSSSSN  
NNSMSALAVGAAGALGLQAAKRLSSSSLMQDSEGRRSWSSSPRKNKDNVILAMEVYT  
PSTYITQSDLEEHSVSKGKYTLGLGQEGGLIGCGDAEDVNSLALTVVHSLLEKYQIDPSE  
VGRLEVGTETLVDKSKSTKTILMDLFPNGTNI EGATVVNACYGGTAALLNAFMWVESDGW  
DGRYAIVVAADIAAYARGGARPTSGAGAVAVLVGRDAPIVFNPKDRATHAANVWDFFKPD  
HTVEYPTVDGKLSQVCYRALEDVYTRFCDKLGTNSSNGRAEEKKTGTDDGSDCDIFDA  
TSHDYFVFHAPYNKLVQKSFGRMLFDARKRFERTGKVDEAFGEELLSKPIEETYADRAL  
EGILKKQSAADFKKRLEDSNMTSKLVGNTYTASVFLGLASLIDRAGGRGDLTVGKSI AVF  
SYGSGALATMYRLSVREPYSSRFSIQKMA DSLNLMERLASREKVHPSEL DHALETRARMH  
RAGSPYSPVYPTVGRFLFPGTYLNGIDSSWRRTYSRVPLDAKMDPHGTPLAPPVIMRLAE  
RDQMSHPVTGKLAVLSSTEEGNADKATEARRRIACVITGTAAGLPGNEAVFSPKNMDRLI  
NAENCIDPISGSLKMAFLEKNVQVKKFPDGTSKRVKVDTEEQVIKLAGMLGSFDLTASY  
GVPRGLAETMDIAAQVAVAAAGMEALKSAGLVSGKSNDKSKWMLPEQYRDCTGVVYASSFP  
AMDAAVGEVMRFLQSKTVGAAPTMRLVLTALRSRMLRSSPDRELSDEAS FARLMARAGE  
TDGEKSQEYVFDKFLFRVLVLGNAQLAQLAGCRGPNTQTNAACAGTTQAIAMAQDMLIS  
GRAERVVVVAGDNASGDTLFPWLGS GFALGAATTEGAVKDAALPFDKRRSGMIMGAGGI  
GLVLETELSSLERQKNPNPFEIKARLLATQYSNSAFHGAALDRKHIASELKRFLTDIEL  
IHGISKAEIATHGVYFSHETCTHASSASSCSGNEAAALRDAFGDKLLSKLLILNTKGYTG  
HPMGVSFEDVTAVEVLMRQTVPVPPVNYEVKDEYLGDLNISKGGAYACRYALRFAAGFGSQ  
VAFALYATSQFE  
>comp14920\_c0\_seq1; 1079 187 3651 LEN=4346; translated  
MFSASAGHRNSGYRSVRSVRREQANCAAI SKMSKAKRILLLVIFLALSMTILLPIVLLEL  
STTTGHGLNHAPSSIHNVIVQSKEAVENGRNGNSLDAKPVEKPESAKISPKVKEKPTKAN  
KTEGNAKESKHFP SKGKEEGPKNDLPKDVLDPIMNKLTDSEKKNREVLARGVAGLPMS  
QTPALEGAKWGHVECDVDVDDIVYWNQPQGT RDQNFESP FRAQAMELKTNDREKRKPRYM  
TFEPDPGGWNNIRMSMEIIFIFAATTGRTLVLPPKAPFYLLGMGEKNARSFGSFYDISNE  
AFQKEVEVISMEEFFEREVFSNEGGGHERLLSFLT DKEITELKANETAKLCLYRDGAGNH  
CENIYKHLRKAGYQPPLESSVNCVFVDQHVFNNGGDVGEDLEQRANRFCGEKRTPVVYNS  
LHEPDLIHWDSTGVDPNKGGHRLLNHFYSFLFFSDPVVDNHYKRFVRDFLHYKDTLYCAA  
GKIVQALNSEGKEWSTLHVRRGDLQYKEVKISAEWYENLKEIWN DGEILFIATDERNK  
FFDPIKKYHDVRFLLDDYWKVSNLGDLDPYFLSMVDTIVASHGRTFAGTWFSFTFTGYINRM  
RGYLGYSIKDSWYSYLKRKDAVRDYKYPTGNYGAREWPIGWIAIDGDEVIEHEGTPLEL  
DNGEQINQEDFQRKLPARIEISDLSTDEM FYKGLKRLAGRSEETPALKGASRG TIRC  
DVNVDSMAYWNDPQGV RDQEFITPFAPNSNDEKYSFGTDRGGWNNVRMSMEIIFVIAAA  
TGRTLVLPPKEPLYRLDADKAHKQRFADFFPLSTPEFSKRVKTIISTAEFIKREGGIDGR  
LPIPEEMREQVMASADLCVNRKKEKNFCDNIKNYFHEVGHTPEVGANND CVIFDEALYSG  
KSTNSSESSISSFCGDRNRFIWTSELNDHTLLHFRADDKKELRLLAHFYNIHFTNSSL  
DNHFKRPFVRDFLHYNDEIYCAAGKIVKALQAEARERNFVTDEEGGGGYSAMHIRRGDFQY  
KKVKIPAEWYENTKDIWKPNEIIF IATDERDKSFFDPIAKHHDIRFLDDYWDLAGLDI  
DSNYFGMIDTIVSSRARAFAGTWFSFTFTGYINRMRGYHGMTMMDSWYSFLDRKTKMHHE  
TVNKSAYAYEWPGEW  
>comp14920\_c0\_seq2; 1116 187 3696 LEN=4249; translated  
MFSASAGHRNSGYRSVRSVRREQANCAAI SKMSKAKRILLLVIFLALSMTILLPIVLLEL  
STTTGHGLNHAPSSIHNVIVQSKEAVENGRNGNSLDAKPVEKPESAKISPKVKEKPTKAN  
KTEGNAKESKHFP SKGKEEGPKNDLPKDVLDPIMNKLTDSEKKNREVLARGVAGLPMS

QTPALEGAKWGHVECDVDVDDIVYWNQPQGTRDQNFESPFAQAMELKTNDREKRKPRYM  
TFEPDPGGWNNIRMSMEIIFIFAATTGRTLVLPPKAPFYLLGMGEKNARSFGSFYDISNE  
AFQKEVEVISMEEFFEREVFSNEGGGHERLLSFLTDEKITEELKANETAKLCLYRDGAGNH  
CENIYKHLRKAGYQPPLESSVNCVFDQHVFNNGGDVGEDLEQRANRFCGEKRTPVYYNQSL  
LHEPDLIHWDSTGVDPNKGGRLLNHFYSFLFFSDPVVDNHYKRFVVRDFLHYKDTLYCAA  
GKIVQALNSEGKEWSTLHVRRGDLQYKEVKISAEWEYENLKEIWNDGEILFIATDERNK  
FFDPIKKYHVRFLDDYWKVSNLGDLDPYFLSMVDTIVASHGRTFAGTWFSTFTGYINRM  
RGYLGYSIKDSWYSYLKRKDAVRDYKYPTGNYGAREWPIGWIAIDGDEVIEHEGTPTELE  
DNGEQINQEDFQRKLPARIEISDLSTDEMFKYKPLKRGLAGRSEETPALKGASRGTIRC  
DVNVDSMAYWNDPQGVDRDQEFITPFAPNSNDEKYSISFGTDRGGWNNVRMSMEIIFVIAAA  
TGRTLVLPPKEPLYRLDADKAHKQRFADFFPLSTPEFSKRVKTIISTAEFIKREGGIDGR  
LPIPEEMREQVMASADLCVNRKKEKNFCDNIKNYFHEVGHTPEVGANNDCVIFDEALYS  
KSTNSSESSISSFCGDRNRFIWTSELNDHTLLHFRADDKELRLLAHFYNIHFTNSSL  
DNHFKRFRVDFLHYNDEIYCAAGKIVKALQAEARERNFVTDEEGGGGYSAMHIRRGDFQY  
KKVKIPAEWYENTKDIWKPNELFIATDERDKSFFDPIAKHHDIRFLDDYWDLAGLGD  
DSNYFGMIDTIVSSRARAFAGTWFSTFTGYINRMRGYHGMTMMSWYSFLDRKTKMHHE  
TVNKSAYAYEWPDGWIGIDADTAPTCTEF

>comp14921\_c0\_seq1; 542 74 2081 LEN=2276; translated  
MDLFLPSSAAGVTDEQVLARSRQQIVSLMQFRFRIRQCICKSAKNLLRVDEVFLKAQQAV  
LYPFTPLYDLDIGKLSQRAFRTRIFRMYDRDHDGLLSHSELDRFQHETFHVPVYERDL  
TGWKKVVSRRNPNEEVVRDQKFTVAGFLAIFDVFISQNRLDVWPQALRTFGYDDNLKLQV  
PERVYIGPEDASWSLTQSARRFLSDFHQFSDHDGVLSDDDMDAIFSIIPESLPPWHP  
IRSRKLFGDSFSLPMPYSELPTSESTESTSSHFGISQCLSTSGITIIISNETFSPVSDISS  
IDRATLVSTPLTFDLWMGLWHASVISPEQTRAEFLRGLHNEKLTNRRGRGRKRSVSPL  
RDSTPDSSTLPSRELRLLLGSPSSGKTALINSLCGCRTKDKPLKTSKTATPETTNTFVRM  
RRKYKSSKGEYETIVVHLIITEVPEVEAENRAMQQKQVFKMLSDGGCDLVVLAFDSTN  
SASLAYAKHLESSLLTEDLARVYVATKSDQCGPAEDHDDPEDDEWQPKTVIDEAAMHCRE  
LDIEPPLITSATESMLGAADESGEQNRSQALGHLARCSLKEQGIDPLRAKPHEEQKRREA  
SKRRNRKMIWFGVGVGAAAVVGYLWTGASGGKGTPTSTNTDGRKGGGLLDGFAAFLPEQ  
SLQVDCTV

>comp14921\_c0\_seq2; 777 731 3437 LEN=3632; translated  
MTNINLVSQRATGDQGSRRRNAMPQNRSSITMLVLGDEGVGKSSLISTFVSRHFSEV  
VPGIMTRVRLPPDPENSCITTIIVDSQRGDAALISAVANMATGTGATGASVASPTTAAASA  
IDGGNGVDGGERGALDNLTIASSPSASMSMATTPGSAFLRHNNFNSNTSLSSLSRFSASA  
RSGMGGIENVDSIILYDLDRDETFFRLENHWLPLIERCYNGELPVIVAGNKMDLFLPS  
SAAGVTDEQVLARSRQQIVSLMQFRFRIRQCICKSAKNLLRVDEVFLKAQQAVLYPFTPL  
YDLDIGKLSQRAFRTRIFRMYDRDHDGLLSHSELDRFQHETFHVPVYERDLTGWKKV  
SRNNPNEEVVRDQKFTVAGFLAIFDVFISQNRLDVWPQALRTFGYDDNLKLQVPERVYIG  
PEDASWSLTQSARRFLSDFHQFSDHDGVLSDDDMDAIFSIIPESLPPWHPIRSRKLF  
GDSFSLPMPYSELPTSESTESTSSHFGISQCLSTSGITIIISNETFSPVSDISSIDRATLV  
STPLTFDLWMGLWHASVISPEQTRAEFLRGLHNEKLTNRRGRGRKRSVSPLRDSTPDS  
TLPRELRLLLGSPSSGKTALINSLCGCRTKDKPLKTSKTATPETTNTFVRMKRRKYKKS  
SKGEYETIVVHLIITEVPEVEAENRAMQQKQVFKMLSDGGCDLVVLAFDSTNSASLAYA  
KHLESSLLTEDLARVYVATKSDQCGPAEDHDDPEDDEWQPKTVIDEAAMHCRELDIEPPL  
ITSATESMLGAADESGEQNRSQALGHLARCSLKEQGIDPLRAKPHEEQKRREASKRRNRK  
MIWFGVGVGAAAVVGYLWTGASGGKGTPTSTNTDGRKGGGLLDGFAAFLPEQSLQVDCT  
V

>comp14922\_c0\_seq1; 527 1 2910 LEN=3125; translated  
NQSPSIEITIFRTSKRPVQQNDSALNKTTQONKIIAIVEDFKERESKGNHRQHSCKTIVPET  
KQEKTRWPITFVTPSVEYKRRRASSKSIISYLEEFRXVKKVKPNKRKQDDSKKKKKKKKQS  
TMYAQYQQYQNKHQYQYHQHQPSVPHQSQTVVPADPVPTFTTRYHGWTKRVEELTNA  
LNQHQGSSSDERQTAEHDRNWAYAEESSRAAHFYQNPHATTAPFALPPSPNEPPT  
HNHAASSTNNYSSNSDASGHRAAATKSYASAARSSTGTVNHQPASASGGKHPPGSI TRYV  
KRNMERHRVQNDPGLKKYVQTEIESMIAAAIQKKTLSQONWDLVPLVALPGEESTSTGE  
GTPDPVAARGDSPRQHQPHRQHNGPQSHSGRHCYDHDSSYASSPARKNKYSTNNSYYS  
NATAGSSSENNNNNSYGPASSHTDNNHNNNHTTVRSTNNFRKLHSPGNKNNNNNSLNSSV  
IGKSKKKNKGRNQEEDFMSFGHYGPDAGSRSSPSGTSSSHKSKKHHPKTHRTKPAIPG  
TMHNDGMDYSQAMTKRANRFSGRGGIREAASANHRMGI GSGSGHDRYMGRGTIGGTNV  
ALSETDFEQMTVKGT CRTLEKQYLRLTAPPRAELVRPLEILQQHLRNLQSEYFCCGKGD  
HSNPVLERMQTPPEEQWKTIGGDGEEHNSSSDGSGRSRPQRHHDYLFCSQLKSIRQDCT

VQRIQGD LAVDVYETHARIALQEGDLNEYNQ CQTQLKELYKTLP SADS RNKSVLVRGDGI  
CSNWKHREEFFVAYRLLYYVFLSTNEVYSGGSSDIYHIMLSLTATEQNHPAIRHALKVREA  
VALSDYFWFFRLHKTSPNLGIFLTEHLVPTMRLRALRRIAKAYRPSIDLKVCFEQLGFYN  
RKSATDGKEEEDWDSKSDGIENDGVEIDEEAKSWLISCGGVIDGSKFVTKDSEIHAPVT  
EDKKKNSLI

>comp14923\_c0\_seq1; 551 484 1964 LEN=2120; translated  
MQWKL PDHSLYLHDDAAVYKLF EYSTNDRYGNELVKNLTRAATCMTNGATLSDLWRYLML  
YHYGGIYTDLNSPGVNYTSDLIQPD TDSFFFVENLGTMSQYYMASSKHHPILLQILKSA  
VHSLHSATGNVMVNNPAHVTPGPAVKRGMIAFRHAVNAESNGYENEGIYD GALGVETESA  
LPWYNFNHIVDDTIDKEYPSPSELSNRVTVTLGQKKMASKYIARSGLKPRAKRHAWKKMN  
MTHYHGDRKIFTKRNQIS CQQHASRMMTLVSMNTSFYFNKRIPDLVAKYEYRWTYTDQYN  
DTIGDNYFDVNTDEMMIPWKKEKEDKKQKKKKKKRGRNKKKSEXGNSDRRKENNMTKVL  
NDHKQQEKEQHNENDTAISKIVDMVDNDSYEQND SNEKSI SANDNTTIAFDESTDIVNQT  
KGIDVND SVAIVEENRAVAASNSVTIVNQNKTIDVNKNTNIMKQERDMELDESATVGNET  
TKIDIEETTRMQL

>comp14924\_c0\_seq1; 437 460 2136 LEN=2535; translated  
MVL SFSIVATTQRQVRPSAFSFFQRMGTQPTITSRSHLNNIGSFRFHSGLD TFFETGGGM  
DRLVKELSVRQE QNQEQKKMRSSSDNTKTKV KIKSEKSNWRDALDLSV EEQRDKQDKVRQH  
QISSPSPVEIRTIRGR TVHVKHDDQLRLAGSGISGNKARKMWT LNEIPAEFFPSCLVSYG  
GPQSN SMLALAAIAN SKNRELVLQSKSAIELSSDKDNEDSTSKNETGLPIRFVYYTKKLP  
RFLRKQPNGNLFRA LSLGMELEREVSHGEYKSLFEHRSDEFEGEGRPPLGLEAPGPD SLWV  
PQGGAFAPAQV GSHRLAQEIYTYWLENGNDRPLTV CVPGGTCTTAVLLHHGLKQLLQLRV  
DGGDD DGLREDDYDDFSNAAIWPKKTAMDIEVVVVPCVGDAA YAGRQMRSL SARIGASPN  
DIPTILQPEPDEAMSERHGASGTNSLRQKYFRFGK PDRDILETFQELQDDFNLVVDLIYG  
APSF AIMWRHWGRKGQNSLSPDLSFDPNQPLVGREIMYVHSGGLEGINSQLLR YRYDGLV  
EIKDVQLPGRKNRSKHKK

>comp14925\_c0\_seq1; 1336 40 4905 LEN=5568; translated  
MSALPPAKLKAYLSDVKERFLDSSPPKSLGDSFFGV LKMELLLRGVLVADEKKIWSQVQ  
SSVGKSTLVEQPASKIPKALLAGANVIAGR VVEVFYKKLTT SVLPSVARDADGSRNCDFL  
NDIVTNAETEGARQRAEDVQDDR WLFLLLRQTTPSSSSSRPPPHSSNVICVDDYVSGLLQI  
ALGYTTAALIQS DTPPMWKKIWDVWVNLAKGASLPNSYNANGADDQPPHEAQIAIENLI  
RIALLKNNIRRASELQLRLVQSYLNP NRIVLVETSFLSSKKREKTYIPTTIAECFGDSVT  
KELPLNKDKVTEKLM LAEKARSTLQISRLYEEEMRKLKGDHNSAKMSSDLMLYQVLCVE  
TVLAEDDAKVQQEANEMYRRSTTGISLAD CVEICRTSMEISSCNSSGKSGFEQATILRDM  
TITAWNSAAASIDSETELDFLTSLGNIQSVHL CFHWVNQSI LRLKNRAEII SRKKSHYFE  
PWNELLEFILPILKEVEECQITKFTSMLS VKDDIQQRMPVIMMWNQSLGENSAEYNDWSR  
CALLK LIDVVFSLLPNVLWMLSGDESRTI PHLDQEMKLAADVLSGLMLWEERAELQRQRS  
EKEAPT LGSKQSQGASRKSEWQHAKVSAMCFICQGS PDIYQITNDSISSSKKKKTGGFL  
SFLRCMVAWSGW FQNPWPYCTNLGDARRLVANA ELDLGRDLTTLEEILLQIAKADAELLN  
GGFIQEANELYISVLAKLQCNECSIDKNSTLLLQAHCCNGLTRI QHADQQYTDPN DANVS  
YTTNSLNI LENLDLPEIPPLSIWNMRSIFSASKVHEL SVTRQLIADSLIHFGRFEEAQF  
FLQKAVADSPSDPNAALALGAFLLRLTIYIHKERN TDKEKEAQIQLLKA AKLDPSKSNPF  
ALLGVWYEENRDLKRALKCF AKSLTLDACNPIAGRGMMRLSRDGANRDVFDLAINRSSPL  
NGAWRAVGLR KAYNDGD DALAVVA IILKALRCRDIALPEKESLGLFYNT PSSVMANEKSI  
ALAEVGM CYRRLGRMTASVRAFRASIEAAGVDSTQSTTLISCAQVEQELGLFDEAAEKFA  
IVIDREETHGRSVALYGHAVALFSIAERDLTDGKAGVAFARLQLAIDNCQRSSILSGCEL  
KLLGDLYSFGALFPTDIFCDEKTQNHDLNLCVINQLEFISKGEDAFRSSLITRSDCS DTD  
DEGIAIKSILCDIASNILLQCQLLSSQGNL DIKKVSDTYNLAE EAFRHAIEFNPIHAASW  
CGLGCSVLKTDPLLAQHAF SRCVQI ENTFPD AYANVGFLYTSKLAFHASRSTMEAL TQVA  
DTPMMWNCALILEREAE RSLKGDHVGRPEDFISQAADAYRASLQVMRNPEAQLGLSLTS  
RVLLSHNETNDDNASSVFALKRKDSYSFMKEYVAASSHDTVISSIFQCVMSMEK GIMGP  
PHAMWQSQIYTEGKEKIRLVQTSQS SVVGKSFSDPLSQR LAASAKNLTENEK KKKETLPLP  
ATENLQREMLLHPDRADLWLSLAKLFI ENDAIESARTAA SRAVDILSLELMASSQSLGKN  
LQHVDANMISEALSLRCWLHETQKKAVASCDMQLAL LMDPTNLVARRGLLLEAKAGSTCS  
Q

>comp14926\_c0\_seq1; 1030 201 2579 LEN=2676; translated  
MTVVSPLVH SYLMSSFFVATALVWLD MATKSVTCLAYVTPQKRLVAPFRHPSAFVTGHRF  
ERYRSSSSCLHQSGNGHAEELPNFGLNELETLLREAVSKEDFME AASFDELFRRLYSDE  
VALGDMSPEEKRAKRRMSWRGQGAS PVLVDRLDALNYTLPTTIQINTMAAVNKILSEKS  
GADETDDDDDEDDDDMSMEEKLEASGKDMGIVISGSTGSGKTLAFLVPLLSTLSDSL FAR

QRIRVGAEESVGDVSGDLVERISIVTSPAINSNARRQLRPGGAIAGASNPNP SLGKSGA  
NVDVKSPALALIVVPMRELGLQIAMLLYELVGGSVKKDPTEIKGKANMFYKGPKGIRVGC  
ILDDEEASFGLKLQTDVAIVMPKYVGVKVMADGDVKKPSSLKVVVFDEADLALAIMAPDDLK  
TLFDTKSRSLSATGEGEDDGDYVPYEDRDLTKRLTFMAGASVTESLGNLAVKSRILPEGK  
SYIATAFENHRIEGESLDDGSGVDANLAVGDQPKKASLKDLNVCLNPGLTHHRVLVEDN  
ASGLLVLTRLLRKELEDYDKLKRKIKGSPRVVVFPPDEPSAKAAIAPLRDALWGEHRLC  
VLLPKTGVNPLTMMEQFRDNDTVMMLATPNSVRGLDFPQVTHVYTYLPTEDPREYIHLA  
GRVGRVGQTGSKRGTGGQVYSIVKSEDAKME SLATELGFEFIDAKAVEVDVPRLKTPLS  
DDDDDDDEDGEEVNLNATDLDKMRRLLEDTVSLVTVTEGEDEESIDDSSALDTIDTGDADD  
DVEDSNNDFEQ

>comp14926\_c0\_seq2; 790 1 1780 LEN=1841; translated  
XFLVCHKQLDFKILTIAIGIKVQMSQFEDAKDVERPNADELEGYVLYDEDEDDEDDDDYY  
DEDDNPIGGGGGGGGGGASKMKNINISGANTKMNF SHSVSNTVSKMQSIEVKKRTLHTS  
RDDRATSEQCLDPRTRLMLFKMLSNGILDKIDGCLSTGKEANVYAKAGKAAQFKLAKG  
KKNNDNEPILNMNTAIGDVKEFAIKIYKTSILVFKDRDKYVSGEHRWRKGYCKSNPRKMV  
KVWAEKELRNRYRRIHAAGIPCPTPIFLKAHILLMEFLGENGWPSRLKDAQLSEKHMREA  
YVQTILIMRHMYYQRCKLVHGDLEYNLLWHKKQIYVIDVSQSVETDHPAALDFLRK DASN  
VNDYFAKVGNLNVMTTTQRLFETTVIPIPEKNTHERSEDAEAAAEMNYLEDVMKEVEASF  
KEMSTKSIQERRKNDQONLVDEAVFMSSFLPRSLNQVADYDIKQIEKGNVEETYAHAVAA  
LTGNQDVVENYKNYKAGEGLSSQAKEVGGDANNSDATDEENPAGDS DSDDEPRFVKVPR  
KEQLDAEKAALRASRKANKKAVKEDKAERLTKIKKKDKKRAIKKAKAGNRAR

>comp14927\_c0\_seq1; 367 113 1786 LEN=2510; translated  
MRSNTTTVLAAILCALVLVHGKGDNGRETQPVTQRERSQDWTVSEDLRHLAVNETDGEE  
EDSHADHDDHDDRDDHDDHDDHHLHVEDLDRSNKPWGQVIAASLLINVTTLVGGPSGG  
WALAAKLNVPKREYQPFREGPAGRGLDPYVCLRXFALRSVWSSLSLAKPSVLRCSFNVV  
DCCV SXQNQKPTIWSVPFVWPLSCALWYIELSSFAADAF CWPIGTGAKQRIFCFSAVLTF  
LSRIMNKCMATKTNRNLHTYCNPNQ GALFATTFIIFPESYLIVSSVFTGEGGHRRFLE  
EGDGHEEHNESAGTWRWGS AIMGGFWIPIFLQACFGNGHSHSHEKENGEPAAPESPRPES  
ADPETAKAIEKNESANSEAMAQDSAKHHDQEGKYVTLCGFVRLRNLPLFISYNLGEIFH  
NFTDGI FVGVAFLGCGRDIQISIIIVSTILHELPNQLAGYLV MVNQCGMNPVALLVNFVF  
GLSIMFGGLLVLVFNFSHLAVGCLLAMGGGTFLHVAISELLGNAERNTKGGFEIVYMF LA  
FLLGAVPIGLILLNHEHC

>comp14927\_c0\_seq2; 430 113 1450 LEN=2174; translated  
MRSNTTTVLAAILCALVLVHGKGDNGRETQPVTQRERSQDWTVSEDLRHLAVNETDGEE  
EDSHADHDDHDDRDDHDDHDDHHLHVEDLDRSNKPWGQVIAASLLINVTTLVGVLVVA  
GHWLRNLMCRNASINHSGKVLLVEVLIPMFACGALFATTFIIFPESYLIVSSVFTGEGG  
HHRRFLEEGDGHEEHNESAGTWRWGS AIMGGFWIPIFLQACFGNGHSHSHEKENGEPAAP  
ESPRPESADPETAKAIEKNESANSEAMAQDSAKHHDQEGKYVTLCGFVRLRNLPLFISY  
NLGEIFHNFTDGI FVGVAFLGCGRDIQISIIIVSTILHELPNQLAGYLV MVNQCGMNPV  
LLVNFVFGLSIMFGGLLVLVFNFSHLAVGCLLAMGGGTFLHVAISELLGNAERNTKGGFE  
IVYMF LAFLGAVPIGLILLNHEHC

>comp14928\_c0\_seq1; 483 214 1338 LEN=2196; translated  
MRTTLQRTVVWHGDGEGTCKANGDVNTNVTIEEDLVLLFLGCEALPPYGPYDHTALLFLDL  
IASALSYTLQPNHERTIVLEVYAVSEEEGPTRYPSDEDMERCDGVIIPGSFSAAYDKEKQ  
WILVLKDWIQTNLVARSVPTLGVCFGHQLYAHSFSSSCLSNGGIGDEAPNHNHNSSEKHNGD  
GVAIKCPAGPQAGRKTTELTAAGRAFVKGTLLNNGKYSTTCTDTGLDLFYTHGDMVESLPS  
QGVSLGGNKNVPIQAAIYFSAPVSDSCDSTLRDILCGNVGDEEDNKDKEAKDGRPKVIAV  
TFQAHPEFSSLGNESKGDETLHKTMKLMKENGDLSEQDFLAAKDDAYASVLRVKEHSVNA  
MITAGRLLDWFRT

>comp14929\_c0\_seq1; 1071 59 2662 LEN=2806; translated  
MPTDDRESVIPILEKYFNMSKYKSFLRQLQAYGFQRSMNPNDKDPNRD SKPKRDCYRGKW  
RHKLFRRDKMNLCKNMTRDGKSKQQESGKDRSGSSNSSISSDGSSGSGSSKRFP RPSKI  
SSSTATDDR IKA AEAVIKQDQQIQNQGLLLKNHLIHHQHQLGGPSPA AFHDARFSQQQT  
YLLPQGREPSPYSAHALGGFSQESSVLAQVKQQQIQQQQDEERHRQLTLQLNQLKEEQLL  
SSILAARTASGANLNASPVVGGAAASASSEIAHTAAVSAALNPPPSMLGGVNYNEAKRKA  
PSESPASSLPSSVSKIPLVHDPVSEARELRRALALLERRKRFVEAQEQAKKDAQAR  
LREDEVEAATKRLIEQSTATTVAGLLNQHHRHLVGAPPTAHGQFSTTGASGQGEKQAIN  
LPSELLQDLDNAFRSSGAMPTNTAINSGNRTIANSNDSNNNFKITPEELRRISEESISTG  
KIPIDHNYLGRNAPAPATLASSDKKELLMSQLTDIERLWLREQQQKQTLTHTDQQQQFL  
LRMALEERERLERERAVLGNASNVSNDAVRDAIRNAALGLITGHGNNDGDKNNSSGIHGR



HSPHDLRQGTVTAPDShLHAAGVGLDgSKNSRKSAGTGAAALHTASTGLLPAEVMdVFAQ  
TAAAAIAKkNEStNLVPSVSLPASAPSTLVTVTAPTSPSNPPSILAAADKASMEKSGILY  
GVSGASNMPTASDSSAKTRQGAVAIVANPQKPIAPKPSSSDELEAARALMRFPgSVSQS  
KGPPVrGHwELVRPEVLRADGPLAKQLPEAVVKAVGLSYESYKQLAMNMSPPRVMQIPDA  
WNPNNepMYLVVDPVNASAVTQIVNKE

>comp14929\_c0\_seq2; 1138 277 3063 LEN=3207; translated  
MTDTPDPSSSSDANAKSSGPPLSQSLYFIEHLFPSKLWRILDDADRCGYSDIISWVDDGL  
AFQIHDRESVIPILEKYFNMSKYKSFRLRQLQAYGFQRSMNPnkDDPNRDSKPKRDCYRGK  
WRHKLFRrdKMnLcNKmTRDgKSKQqESGKDRSGSSSNSSISSDSSGSGSGSKRFPPrPSK  
ISSSTATDDRIKAAEAVIKQDQIQNQGLLLKNHLIHHQHQP LGGpSPAafHDARF'SQQQ  
TYLLPQGREPSPYSAHALGGFSQESSVLAQVKQQQIQQQQDEERHRQLTLQLNQLKEEQ  
LSSILAARTASGANLNASPVVGGAAASASSEIAHTAAVSAALNPPPSMLGGVNYNEAKRK  
APSSESPASSLPPSSVSKIPLVHDPVSEAARELRAELALLERRKRFVEAQEQAKKDAQA  
RLREDEVEAATKRLIEQSTATTVAGLLNNQHHRHLVGAPTTAHGQFSTTGASGQGEKQAI  
NLPSLLQDLNDFRSGAMPTNTAINSGNRTIANSNDSSNNNFKITPEELRRISEESIST  
GKIPIDHhNYLGRNAPAPATLASSDKKELLMSQLTDIERLWLREQQKQTLTHTDQQQF  
LLRMALEERERLERERAVLGNASNVSNDAVRDAIRNAALGLITGHGNNDGDKNSSGIHG  
RHSPHDLRQGTVTAPDShLHAAGVGLDgSKNSRKSAGTGAAALHTASTGLLPAEVMdVFA  
QAAAAIAKkNEStNLVPSVSLPASAPSTLVTVTAPTSPSNPPSILAAADKASMEKSGIL  
YGVSGASNMPTASDSSAKTRQGAVAIVANPQKPIAPKPSSSDELEAARALMRFPgSVSQ  
SKGPPVrGHwELVRPEVLRADGPLAKQLPEAVVKAVGLSYESYKQLAMNMSPPRVMQIPD  
AWNPNNEpMYLVVDPVNASAVTQIVNKE

>comp14929\_c0\_seq3; 1138 299 3085 LEN=3229; translated  
MTDTPDPSSSSDANAKSSGPPLSQSLYFIEHLFPSKLWRILDDADRCGYSDIISWVDDGL  
AFQIHDRESVIPILEKYFNMSKYKSFRLRQLQAYGFQRSMNPnkDDPNRDSKPKRDCYRGK  
WRHKLFRrdKMnLcNKmTRDgKSKQqESGKDRSGSSSNSSISSDSSGSGSGSKRFPPrPSK  
ISSSTATDDRIKAAEAVIKQDQIQNQGLLLKNHLIHHQHQP LGGpSPAafHDARF'SQQQ  
TYLLPQGREPSPYSAHALGGFSQESSVLAQVKQQQIQQQQDEERHRQLTLQLNQLKEEQ  
LSSILAARTASGANLNASPVVGGAAASASSEIAHTAAVSAALNPPPSMLGGVNYNEAKRK  
APSSESPASSLPPSSVSKIPLVHDPVSEAARELRAELALLERRKRFVEAQEQAKKDAQA  
RLREDEVEAATKRLIEQSTATTVAGLLNNQHHRHLVGAPTTAHGQFSTTGASGQGEKQAI  
NLPSLLQDLNDFRSGAMPTNTAINSGNRTIANSNDSSNNNFKITPEELRRISEESIST  
GKIPIDHhNYLGRNAPAPATLASSDKKELLMSQLTDIERLWLREQQKQTLTHTDQQQF  
LLRMALEERERLERERAVLGNASNVSNDAVRDAIRNAALGLITGHGNNDGDKNSSGIHG  
RHSPHDLRQGTVTAPDShLHAAGVGLDgSKNSRKSAGTGAAALHTASTGLLPAEVMdVFA  
QAAAAIAKkNEStNLVPSVSLPASAPSTLVTVTAPTSPSNPPSILAAADKASMEKSGIL  
YGVSGASNMPTASDSSAKTRQGAVAIVANPQKPIAPKPSSSDELEAARALMRFPgSVSQ  
SKGPPVrGHwELVRPEVLRADGPLAKQLPEAVVKAVGLSYESYKQLAMNMSPPRVMQIPD  
AWNPNNEpMYLVVDPVNASAVTQIVNKE

>comp14930\_c0\_seq1; 212 155 1439 LEN=1571; translated  
MRPGGRAAGGRGTTAPPERSARHLPRRPPRRAGTSALVCFGVVLPALCALCHALVVVYRS  
AGVAAGGSGWALPVAEPFETYGGANGDAHHRYLCDDETNDRNTNGADTETTTFVGNSSAVR  
RHwELIDStVERNfPKARVSGGIFLYPHQSSILTGLIRRIVRYKNGRKEPRRTTVcETGF  
GSGHSMALFREALADAAGDHPsrGRVVSFDKfDRPYQLPIWHHLNDTNANEDASRHKQTN  
GKANDAGPLLsLDFVQGNsCRtVPRHLSEMDCDVLHGSSLCPTDNIDLVEHSPCGVVLTs  
TAMDSLRSgVYfGYGGQWRtLRERncIGSVACFAEDGPLDLRRDYVFAQKGESRGGEFCV  
AVTTGVCQKAGSRRGREPKPEQHGDCAETVKRMESLLGLDKIVRGIGSRsRRDADGTAM  
RETMcQ

>comp14930\_c0\_seq2; 152 1 1602 LEN=1734; translated  
XVSHRTSTPDDECTPPKQSIHLERQKKHEKQRRTVQTLQLQEENRSEALLDRKPHGHDS  
VKDNGPEPLGLILPSGRALYFXGTVEPALGRNEEAGGNATQRNGTMMRPGGRAAGGRGTT  
APPERSARHLPRRPPRRAGTSALVCFGVVLPALCALCHALVVVYRSAGVAAGGSGWALPV  
AEPFETYGGANGDAHHRYLCDDETNDRNTNGADTETTTFVGNSSAVRRHWELIDSTVERNf  
PKARVSGGIFLYPHQSSILTGLIRRIVRYKNGRKEPRRTTVcETGFSGHSMALFREALA  
DAAGDHPsrGRVVSFDKfDRPYQLPIWHHLNDTNANEDASRHKQTN GKANDAGPLLsLDF  
VQGNsCRtVPRHLSEMDCDVLHGSSLCPTDNIDLVEHSPCGVVLTSTAMDSLRSgVYfGY  
GGQWRtLRERncIGSVACFAEDGPLDLRRDYVFAQKGESRGGEFCVAVTTGVCQKAGSRR  
GREPKPEQHGDCAETVKRMESLLGLDKIVRGIGSRsRRDADGTAMRETMcQ

>comp14931\_c0\_seq1; 409 353 1801 LEN=2483; translated  
MISSSFFCFMLLLLLQKLDTSLGLVAPSSQTTKDRtQQQPTALYSAPPPTQRsKTRNHKR

NRKSSDMMLEMRADIDRMKREAAERLEALSEKLVVVSKQKEEETLRARERQEALKKK  
KQREIANGKTQKPWATAAEKPAATTGTTTPGRDAATDDDDSKTLDLAEMADEFRDMTRM  
EESLQKETQNESLASTNLLPLSTLTTDTRHPLKLLDDTRWRCLNVGRVPGTWMPKTWGA  
SGDKLHLKLEVEFTPDELYEREDFFGGVSDGSKVLRVVHGEASLAPSMNEGGRTVRIADG  
GWRVCPGEGPLGTHVLRFFYFDVEEEARHLGSDVYLPRGRVFGTCGYFPMAGRSNLDGRQA  
SKREIYGREIRQMEVRYQSLQTELESNPWFSLGKLRCFREMRDLRRDARKIHKAMDDL  
VREPCKSTLRMSRDQSVGLTHRGGISCRKLTGLSEEYHVLGKFEVASIENREHSDYRDAL  
LP

>comp14932\_c0\_seq1; 1081 100 3834 LEN=3961; translated  
MAAMAAMDELRLQVLAATPQPPTAPNSNPNIHAHAALQALRDEGDSRFLFLRTILEIRGIVA  
QQSQPQSQRLVAQQNEELLFHCITGMRHVLTWKWAFCGAFRRLVRDYFMALGCCNSAD  
ISAPIFSRTIRLALFNASTSFWKRQWNEESNNNAPDSNKAMSQAEQALMETIQNQHQSQ  
SSSSLRLQIPELQKEDLFRFLDAAMTTPRLEMASAASYLNIIVGEFAGKSASQYNMPLF  
FHKRAHATFEKEEWLDRSLQMSMKALSEVVGMLNNSSATIEKAKENLALAVVQLTIDVIGW  
EFGTDAWDSGGFPTFKGSVLVRPPVAWRSVLVQPEFVKAIIFLVHSRVAHNSNGQPSSSPE  
LAHSIRQLILLSSLFGPIFPTPEDQTTAFSLLEGILHLLITTTKTVAERHEESSELLD  
TLSMVSRLIVNYKLTILVQLPLTQSLQGMADLGRYLLQENLKECQSVQGDMSMEHREW  
RDEALALLLEGIVLLCSDPWLLFSGSEDSRKGQAALAKTLGPLYIEFVTCRTMAYLEET  
YLMAHETDLEEVREEIYAVDLEEMTSLAAVGRLDIQASLSCLSAFFGEMIPQLQALWDS  
PTTNAVTAEAAGVLEQSRIVTLYIGHLLTDENAGETRVIPEIILACQDNQVACDAVVA  
VQLLQQFAEYQVSKITANPNQRLSPLLAKTFLWFFNRWAPSYILPDVYGSSTTPSTITL  
AWSNSERVQQAISFLITLCIHYNQWYQEQGVQENAAALMLLSLAKRGSKMRLAIVGCPQF  
RQLVIYHCLTCGIRHSVPQEEFETTVRTRKAGNIQNMNLDMMIRGYHKLPEYIKGKLLTG  
IIMACGEKEDEASNALLNDCFTATHDAFSSLVNVLSSKQMKADNVDAKEMACLCISLYDG  
VALAGDMKGSERIPKFITPSLAHLSGLMEFYAEDLTICEGLLRFRRDYSYQFISILDSSS  
CLSLFQACSNLLKSYSTNHCSNRVVSNTGGTSEEEQKYSVDLCAIELLVQLGSKDFFY  
SGEQSIDSSKVSEMIFFVGLQQIILLMTRGLLQYPTLCSQFLQLVGFMLESYANQLKILPY  
ELFDALVESLLYGMTYHDASIAKSSLQGISGIAKEHLSTRVLDVHIAATPPNQEGLIDKC  
SRRLLEVVFNQNIWDRLEPAGMALLPLAIDINSFGRVVQGIQQIAPEHQQRLLISNFE  
SLIRADIVAKITTTKGHEGRKNRILFKKNFEAFCHEIHSFMLKK

>comp14932\_c0\_seq2; 422 59 1156 LEN=1283; translated  
MKADNVDAKEMACLCISLYDGVALAGDMKGSERIPKFITPSLAHLSGLMEFYAEDLTICE  
GLLRFRRDYSYQFISILDSSSCLSLFQACSNLLKSYSTNHCSNRVVSNTGGTSEEEQK  
YSDVLCALIELLVQLGSKDFFYSGEQSIDSSKVSEMIFFVGLQQIILLMTRGLLQYPTLCSQ  
FLQLVGFMLESYANQLKILPYELFDALVESLLYGMTYHDASIAKSSLQGISGIAKEHLST  
RVLDVHIAATPPNQEGLIDKCSRRLLEVVFNQNIWDRLEPAGMALLPLAIDINSFGRV  
VQGIQQIAPEHQQRLLISNFE  
SLIRADIVAKITTTKGHEGRKNRILFKKNFEAFCHEIHSFMLKK

>comp14933\_c0\_seq1; 726 615 2414 LEN=2966; translated  
MTLPPCFAAPTSPRRTAHVIHNNGLFLQPHNDQSYDNALRICDTRLKQHQEREHHQATV  
AAQQQPLQTQLFSPPKASSMPPSSYAPRPATPDHPDPRGEAESLDCEQDDDDAARMMLL  
GLSKLVTKEMSCNSEWMARKNSEKNHESRVAGGDSTIGTHSTESMNASSASSFLIPKSIT  
IDHSYDCSDSANGNGNANANGSSHLIRVTSNESMEHTHSRTNTSNKAPKPMAVLSSKSP  
STPPSLPRSTNRCFQTGVTSSTIDALRASQAHSMEQRTRTVSLAGEDMVPVASSGGSAS  
KEALSPLLLPLSPSRDLSLLGIHENVSSRSHLPRFQHPLFRQELQLEQKQQQLQQEHQR  
RRTEALRLAAAASAAAIITPIPRQRPVFLGGGDASMGSNMGSNTNRDHQQMHSPLFFP  
PLLLNVKMNQATKKKANNHLPERPPTSSGVVVRNRKPGVIPGRERKPERSATRSKKT  
IAAKKATKRQYKTGKKFSWKAYPELEEFLLISNREEYLSFSARNYTIQRDYNRLTAQLL  
DHAAASGYPDLFKNCAFSAVRDRIRSYYKSYVQSFKRRKERQQQLRKKALQREAVVRS

>comp14933\_c0\_seq2; 706 615 2393 LEN=2945; translated  
MTLPPCFAAPTSPRRTAHVIHNNGLFLQPHNDQSYDNALRICDTRLKQHQEREHHQATV  
AAQLFSPPKASSMPPSSYAPRPATPDHPDPRGEAESLDCEQDDDDAARMMLLGLSKLVT  
KEMSCNSEWMARKNSEKNHESRVAGGDSTIGTHSTESMNASSASSFLIPKSITIDHSYGD  
CSDSANGNGNANANGSSHLIRVTSNESMEHTHSRTNTSNKAPKPMAVLSSKSPSTPPSLP  
RSTNRCFQTGVTSSTIDALRASQAHSMEQRTRTVSLAGEDMVPVASSGGSASKEALSPL  
LLPLSPSRDLSLLGIHENVSSRSHLPRFQHPLFRQELQLEQKQQQLQQEHQRRRTEALR  
LAAAASAAAIITPIPRQRPVFLGGGDASMGSNMGSNTNRDHQQMHSPLFFPPLLLNVK  
MNQATKKKANNHLPERPPTSSGVVVRNRKPGVIPGRERKPERSATRSKKTIAAKKAT  
KRQYKTGKKFSWKAYPELEEFLLISNREEYLSFSARNYTIQRDYNRLTAQLLDHAAASG  
YPDLFKNCAFSAVRDRIRSYYKSYVQSFKRRKERQQQLRKKALQREAVVRS

>comp14933\_c0\_seq3; 764 485 2284 LEN=2836; translated  
MTLPPCFAAPTSRRTAHVHNNGLFLQPHNDQSYDNALRICDTLRKQHQEREHHQQATV  
AAQQQLQTLQFSPKASSMPPSSYAPRPATPDHPDPRGEAESLDCEQDDDDAARMMLL  
GLSKLVTKEMSCNSEWMARKNSEKNHESRVAGGDSTIGTHSTESMNASSASSFLIPKSIT  
IDHSYGDCSDSANGNGNANANGSSHLIRVTSNESMEHTHSRNTSNKAPKPMVLSKSP  
STPPSLPRSTNRCFQTGVTSSSTIDALRASQAHSMEQRTRTVSLAGEDMVPVASGGSAS  
KEALSPLLLPLSPSRDLSLLGIHENVSSRSHLPRFQHPLFRQELQLEQKQQQLQQEHQR  
RRTALRLAAAASAAAIITPIPRQRPVFLFLGGGDASMGSMGNTNRDHQQMHSPLEFP  
PLLLNVKMNQATKKKPPANNHLPERPPTSSGVVVRNRKPGVIPGRERKPERSATR SKKVTI  
AAKKKATKRQYKTGKKFSWKAYPELEEFLLISNREEYLSFSARNYTI EQRDYNNRLTAQLL  
DHAAAAGYPDLFKNCAFSAVRDRIRSYYKSYVQSFKRRKERQQQLRKKALQREAVVRS  
>comp14933\_c0\_seq4; 744 485 2263 LEN=2815; translated  
MTLPPCFAAPTSRRTAHVHNNGLFLQPHNDQSYDNALRICDTLRKQHQEREHHQQATV  
AAQLFSPKASSMPPSSYAPRPATPDHPDPRGEAESLDCEQDDDDAARMMLLGLSKLVT  
KEMSCNSEWMARKNSEKNHESRVAGGDSTIGTHSTESMNASSASSFLIPKSITIDHSYGD  
CSDSANGNGNANANGSSHLIRVTSNESMEHTHSRNTSNKAPKPMVLSKSPSTPPSLP  
RSTNRCFQTGVTSSSTIDALRASQAHSMEQRTRTVSLAGEDMVPVASGGSASKEALSPL  
LLPLSPSRDLSLLGIHENVSSRSHLPRFQHPLFRQELQLEQKQQQLQQEHQRRRTEALR  
LAAAASAAAIITPIPRQRPVFLFLGGGDASMGSMGNTNRDHQQMHSPLEFPPLLLNVK  
MNQATKKKPPANNHLPERPPTSSGVVVRNRKPGVIPGRERKPERSATR SKKVTIAAKKAT  
KRQYKTGKKFSWKAYPELEEFLLISNREEYLSFSARNYTI EQRDYNNRLTAQLLDHAAAAG  
YPDLFKNCAFSAVRDRIRSYYKSYVQSFKRRKERQQQLRKKALQREAVVRS  
>comp14933\_c0\_seq5; 744 505 2283 LEN=2835; translated  
MTLPPCFAAPTSRRTAHVHNNGLFLQPHNDQSYDNALRICDTLRKQHQEREHHQQATV  
AAQLFSPKASSMPPSSYAPRPATPDHPDPRGEAESLDCEQDDDDAARMMLLGLSKLVT  
KEMSCNSEWMARKNSEKNHESRVAGGDSTIGTHSTESMNASSASSFLIPKSITIDHSYGD  
CSDSANGNGNANANGSSHLIRVTSNESMEHTHSRNTSNKAPKPMVLSKSPSTPPSLP  
RSTNRCFQTGVTSSSTIDALRASQAHSMEQRTRTVSLAGEDMVPVASGGSASKEALSPL  
LLPLSPSRDLSLLGIHENVSSRSHLPRFQHPLFRQELQLEQKQQQLQQEHQRRRTEALR  
LAAAASAAAIITPIPRQRPVFLFLGGGDASMGSMGNTNRDHQQMHSPLEFPPLLLNVK  
MNQATKKKPPANNHLPERPPTSSGVVVRNRKPGVIPGRERKPERSATR SKKVTIAAKKAT  
KRQYKTGKKFSWKAYPELEEFLLISNREEYLSFSARNYTI EQRDYNNRLTAQLLDHAAAAG  
YPDLFKNCAFSAVRDRIRSYYKSYVQSFKRRKERQQQLRKKALQREAVVRS  
>comp14933\_c0\_seq6; 764 505 2304 LEN=2856; translated  
MTLPPCFAAPTSRRTAHVHNNGLFLQPHNDQSYDNALRICDTLRKQHQEREHHQQATV  
AAQQQLQTLQFSPKASSMPPSSYAPRPATPDHPDPRGEAESLDCEQDDDDAARMMLL  
GLSKLVTKEMSCNSEWMARKNSEKNHESRVAGGDSTIGTHSTESMNASSASSFLIPKSIT  
IDHSYGDCSDSANGNGNANANGSSHLIRVTSNESMEHTHSRNTSNKAPKPMVLSKSP  
STPPSLPRSTNRCFQTGVTSSSTIDALRASQAHSMEQRTRTVSLAGEDMVPVASGGSAS  
KEALSPLLLPLSPSRDLSLLGIHENVSSRSHLPRFQHPLFRQELQLEQKQQQLQQEHQR  
RRTALRLAAAASAAAIITPIPRQRPVFLFLGGGDASMGSMGNTNRDHQQMHSPLEFP  
PLLLNVKMNQATKKKPPANNHLPERPPTSSGVVVRNRKPGVIPGRERKPERSATR SKKVTI  
AAKKKATKRQYKTGKKFSWKAYPELEEFLLISNREEYLSFSARNYTI EQRDYNNRLTAQLL  
DHAAAAGYPDLFKNCAFSAVRDRIRSYYKSYVQSFKRRKERQQQLRKKALQREAVVRS  
>comp14934\_c0\_seq1; 1379 455 2611 LEN=2926; translated  
MSTAMKASILASRQAARLNPLRSFASTASSNSIVFHLTSIDRDEKNNLSVSSQRRAFS  
IPNAASSTFRKNAALPPIDVVSKSSQKHSASTKAADDENDTLSKAPVRKAASDQSSGMD  
ILGIGTMIPEWKKMFNKDTLFTDVSAGLTVGCVAVPLNLALASGVPAEVLVTAASV  
VAAGLMGGTTLAVTGPAAAISLLVVGAVEQHGLEALPLITLGCALQLASGASKLVVAK  
LCPVSVIAGFTTGVTILITNQLPKALGMTAPSGLNPIELGFIGEHFAAHANPASAA  
IGTSAAMFALPKVHPKMSALVAVGGATIATHALGLDVSLIGTIPSGLEAFQFGIPVLP  
VGAIPSLAATTFIYSMTSVESSLSCAALEKMKKTSYKHNPQDELIGQGLGNI GSALFM  
MPVTSVIARSSLNARLNANRLPALIQSGFVSTVVFMSSIAMVMPALSGVLMTTGIG  
MLNPAEFKHCYAVQKSDAIPFAATIAGMVSMLAEGIGCATAIGMNAYQTYANNAAT  
SPEAQSDSKMAFELIQLPATASEEAASDAMIWEARCGSQLPVSLDARGMHTMTAASGEK  
TFADSDDAKMIASAAQDPTRNTIWQLNGPVNFLSMFEIDNMIKKIENRDATTD  
SIVVDMQGVMTVEFTGAELVNRLIEASDDYGSCPIQMINLTPDIEKALDQCDPKGRIARVSYRQ  
>comp14934\_c0\_seq2; 1379 471 2627 LEN=2942; translated  
MSTAMKASILASRQAARLNPLRSFASTASSNSIVFHLTSIDRDEKNNLSVSSQRRAFS  
IPNAASSTFRKNAALPPIDVVSKSSQKHSASTKAADDENDTLSKAPVRKAASDQSSGMD

ILGIGTMIPEWKKMFNKDTLFTDVSAGLTVGCVAVPLNLALALASGVPAEVGLVTAAVSG  
VAAGLMGGTTLAVTGPAAAISLLVVGAVEQHGLEALPLITLGCALQLASGASKLGVVAK  
LCPVSVIAGFTTGVGTLILTNQLPKALGMTAPSGLNPIELLGFIGEHFAAHANPASAAALA  
IGTSAAMFALPKVHPKMPALVAVGGATIATHALGLDVSIGTIPSGLEAFQFGIPVLPE  
VGAIPSLAATTFLLIYSMTSVESLLSCAALEKMKKTSYKHNPQDELIGQGLGNIGSALFMG  
MPVTSVIARSSLNARLNANTRLPALIQSGFVSTVVFMSSTIAMVMPALSGVLMTTGIG  
MLNPAEFKHCYAVQKSDAIPFAATIAGMVMGLAEGIGIGCATAIGMNAYQTYANNAAT  
SPEAQSDSKMKAFELIQLPATASEEAASDAMIWEARCGSQLPVSLDARGMHTMTAASGEK  
TFADSDDAKMIASAAQDPTRNTIWQLNGPVNFLSMFEIDNMIKKIENRDATTDIVVDMQ  
GVTMVEFTGAEELVNRLIEASDDYGSCPIQMINLTPDIEKALDQCDCPKGRIARVSYRQ  
>comp14934\_c0\_seq3; 1379 593 2749 LEN=3064; translated  
MSTAMKASILASRQAARLNPLRSFASTASSNSIVFHLTSIDRDEKNLSVSSQRRAFSIK  
IPNAASSTFRKNAALPPIDVVSKSSQKHSASTKAADDDENDTLKAPVRKAASDQSSGMD  
ILGIGTMIPEWKKMFNKDTLFTDVSAGLTVGCVAVPLNLALALASGVPAEVGLVTAAVSG  
VAAGLMGGTTLAVTGPAAAISLLVVGAVEQHGLEALPLITLGCALQLASGASKLGVVAK  
LCPVSVIAGFTTGVGTLILTNQLPKALGMTAPSGLNPIELLGFIGEHFAAHANPASAAALA  
IGTSAAMFALPKVHPKMPALVAVGGATIATHALGLDVSIGTIPSGLEAFQFGIPVLPE  
VGAIPSLAATTFLLIYSMTSVESLLSCAALEKMKKTSYKHNPQDELIGQGLGNIGSALFMG  
MPVTSVIARSSLNARLNANTRLPALIQSGFVSTVVFMSSTIAMVMPALSGVLMTTGIG  
MLNPAEFKHCYAVQKSDAIPFAATIAGMVMGLAEGIGIGCATAIGMNAYQTYANNAAT  
SPEAQSDSKMKAFELIQLPATASEEAASDAMIWEARCGSQLPVSLDARGMHTMTAASGEK  
TFADSDDAKMIASAAQDPTRNTIWQLNGPVNFLSMFEIDNMIKKIENRDATTDIVVDMQ  
GVTMVEFTGAEELVNRLIEASDDYGSCPIQMINLTPDIEKALDQCDCPKGRIARVSYRQ  
>comp14935\_c0\_seq1; 681 602 3034 LEN=3296; translated  
MLSESPSGPRSKSRNRHVPPIKILEGAEKMLRERVKESKTHDDYDTFSFNLILSAWA  
RQRSLEGAERADRLQLLTKTSDDKSKNIVADSYSNVNLNAYAKSGGKRKAALRAEEL  
LHQMELTMKITTDICHNAVMDCWLSGEDDAGRRAQILLTKLEENKERNRKSRSRNPIT  
SSSLLPEPTKISYNICLKAWARSINGAIEAHALLTRMQESKDEDLHPDKISFSTCIDAYC  
RSTGTTNLTIMATEKAEELLFQMEQASPKNPSIRPDVVSYSYTSVLYSYAKAGVDIDRAMSLI  
NRMKKHAGEGPNNTTFLNLIHLFAKQGGKDHAEAILKSMKQNDLADKISYTSVIAAHANV  
GNATRALALFHELEGLYKSSLLSSSSNRFSGNRFMPTEKFTFTSLIHAIKSKSKEVGKTSL  
DEVDAIVDRMDSLYNETKNPELLPSTATYSTLFYLLSKMRDTRVPIRAVEMLEEMKRRQQ  
HQEYLRPDATTYAYLINIFTKTRVREAAEKATEYLGAVEEGFAAGDDNLRPTKLLYSAAL  
QAYAKSASREGAELAEELLQRTKDLYKQGRITYAKPTTLYYNAVMDGLARSRQKGTGALRA  
ESLLDELEARGRAGDPELSPTSRSYNAVILAWKMSNYTEAPQRAEAILKRMNERYRSGDK  
GCRPDQVTINSIIGVWANSRQEGAAERAETYLRFMEELYEADDES LKPDISISNSVIDA  
YAWCPGKGAAYRAEEVYNRMQEKFLASGDDELRPNIITLTTLTNAWSRSQDEKAE LKLN  
LRYLISERRKLDREEREMASILNVSGKSSA  
>comp14935\_c0\_seq2; 681 602 3034 LEN=3359; translated  
MLSESPSGPRSKSRNRHVPPIKILEGAEKMLRERVKESKTHDDYDTFSFNLILSAWA  
RQRSLEGAERADRLQLLTKTSDDKSKNIVADSYSNVNLNAYAKSGGKRKAALRAEEL  
LHQMELTMKITTDICHNAVMDCWLSGEDDAGRRAQILLTKLEENKERNRKSRSRNPIT  
SSSLLPEPTKISYNICLKAWARSINGAIEAHALLTRMQESKDEDLHPDKISFSTCIDAYC  
RSTGTTNLTIMATEKAEELLFQMEQASPKNPSIRPDVVSYSYTSVLYSYAKAGVDIDRAMSLI  
NRMKKHAGEGPNNTTFLNLIHLFAKQGGKDHAEAILKSMKQNDLADKISYTSVIAAHANV  
GNATRALALFHELEGLYKSSLLSSSSNRFSGNRFMPTEKFTFTSLIHAIKSKSKEVGKTSL  
DEVDAIVDRMDSLYNETKNPELLPSTATYSTLFYLLSKMRDTRVPIRAVEMLEEMKRRQQ  
HQEYLRPDATTYAYLINIFTKTRVREAAEKATEYLGAVEEGFAAGDDNLRPTKLLYSAAL  
QAYAKSASREGAELAEELLQRTKDLYKQGRITYAKPTTLYYNAVMDGLARSRQKGTGALRA  
ESLLDELEARGRAGDPELSPTSRSYNAVILAWKMSNYTEAPQRAEAILKRMNERYRSGDK  
GCRPDQVTINSIIGVWANSRQEGAAERAETYLRFMEELYEADDES LKPDISISNSVIDA  
YAWCPGKGAAYRAEEVYNRMQEKFLASGDDELRPNIITLTTLTNAWSRSQDEKAE LKLN  
LRYLISERRKLDREEREMASILNVSGKSSA  
>comp14936\_c0\_seq1; 660 149 1648 LEN=2340; translated  
MSYKQNTSANRDALFGGAGKSSGEGKKKSSSKSKSTSSGAPVAAPKGPSTSRGYKYV  
SSKKKPSMSVGLTGTAKAEAKLKEAAEFCDKAKKAMQKGFISRPDPLAASTYYKRAADSYQ  
KCNEYRLERMYRISSADCQVRCGSYATAAAEYTRAAELFEVAEDETTEMKREVGRKCLLN  
AADAWLNMGEPGKAASSKVDAAALALTWGDDSQVLPKMALAALEESVEAHVPDPLNPYARY  
RQTGISAYINPDSDETVENPSARTLEFAEQHIVSRPYAHESVQEVVYILVSFGEYPSALY  
AQGAVSTILGRDGISSLTLRSFVAETILTTLAMGDPAAEQEFLNRHVQKTAYLSSRECK

LGEELFRAVKMRDEEAELEETRSTAMSNRAAIGNLHESLRDVLTMIRISGVARRNVESSSK  
KESSKSHSKKSTSSKSSSSSGSKTTPSLAELSNMKTGYEKDVAANAVIDSKALQDEMDA  
LDFGDDSESDLDDDELDLR

>comp14937\_c0\_seq1; 403 40 1962 LEN=2926; translated  
MTKLRIGPLIFSAIAAVALQPLSKTAVDAFVPSALSRKGTNGIAPSGAGGAYRIGGQN  
PTRLLSTTEAPPMSKTGSRKQSSADVVICGGGPAGLLTAIMLAQKFPNQSIIRLYDRLPA  
PYSPTDETIVWSEVAKFYLIIGLGGRGQMALGKFGVWDPVEAVSTAVVGRKDWAPGSEEGVE  
RIFEGRNKRKFTTQVLPDRDKLVAVLHKHI IENYSNTIELNHGFVVPVSLDDGNNDKKQG  
ALVDVFQCQEQEEINVECQVEATERISTNLLIAADGTARTVANYMEEADRKERESRNP IV  
NLFAGKPFVTRYEDDNRVYKTIIPMKLPKDWRPDLNYSARSQKGGMNIDALPANREGNY  
CGVLLKEDDPAQPDVKPETLRGFLDEKLPQFSAFLDDEVVAQVAKKPPSFLPSFRFVVG  
PRLNQGDHTLILGDCAHTVKPYFGLGANSALDVSIFSDCIDESGNDMAAAVHEFSRRRA  
KNSETLVRISRDLDRPGAIGAITFIPIIILDSIFNKINPKLFAPNI ISMLQRDDLTFFNQV  
ARRKRIDRAVQVGI ISSFLTAAAWTAKKIGLVAKALGRRPSTVTGAVAGLFAGALFFKK  
ALAI FNP EMAPADV LAKMKTPI TEENETMSKDGAPSSATA

>comp14938\_c0\_seq1; 406 300 1769 LEN=2764; translated  
MTTFWIEDVLRMAPNEADYDYSLGSRGLQYESQESSGPQSRDAPLPYLLLTSLMSIFA  
SIVVVRISAKLESAYQRIVFMLNIALVMNSIFLGMHPFLVDRNSGYSPAGTPASCTAMG  
FFLVFGLAVSLYHTVAALYFYFVLSISREYKQLVADAADKDGETPSPEKPSMEEKYCP  
GAEIAGNSLCLVPLVISGAAISSGSFGYDPRVGLCTVYGAGYFGDLSWYFVRDIYRWTL  
VASGALTILVTLIIRIHVLI FEKKECSSGGDDDDAGDDKSHGGSSMTDPDEAEDEEEKEI  
TRQKLTISAQCLFYTTSYLSSYIWFVTL SFLSKGSGVPLNEDLIYAFKVM TVIFYP LLG  
VFNCAIYVRPRLQTLRIMYPQDSVTVSMRVAMSKAGDPEEIEEVRAKIYGDDYSRARESR  
DGTPADEDLEGGDANLSDLP SVVHFDPSCAHSVKS LVTTGEDEDTKENGTDKDKKQDKK  
QSKKQDESC

>comp14939\_c0\_seq1; 224 1 1767 LEN=2010; translated  
RKLLPANNRDCGFGNDDGAPRRSLGRSRSPSVEHSDCPSRNRNETIRIPFREQRCILPWA  
RAAHGVFLVGV DAPPFAAPAWIDNASLPPEPSDDLGGNSGFRSPIPVGSSGDDLRAWERE  
CHALFAVLASKDVIKTDQLRRAIEDLTPKQYSEWSYGRWSAAMATLLLDRLGISDDDLR  
RSLFGNENNAGSSSVKPPPEFRAGDSVRIKSFQDGVWRRPHIRTPGYVYGVNGRIVDVCG  
RFGDPSFLALGLEAPEVWLYRVEVQCEQNETGSLISFGSVVQHKSASYFDSWTMIHHFRA  
AFFAFNPHCQEISMEDLWPEQVSEKNTLSIEVYEHWLVP SDKNSGHGYQEMKLFNHEDDG  
RDCSHQDVHSHGGNSHDPRTITEKRAVEDEGPPRPGEDFFRGLLQ TILDKKIVSGEEVRA  
MIEGLDSAGRTMAGRDLIARAWMDPVFEERLLEDAAGAALELGIHTSNPNAPT VLT VVKN  
TSKEHNLI VCTLCSCYPSGLLGIAPPWYKSSEFRSRVAVREP REVLNEFGTQLPQTQSIRV  
HDSTADHRYLVMPQRPKGTGDG WSENLKQLVTRDSMLGVALPMAPLE

>comp14939\_c0\_seq2; 291 1 1621 LEN=1864; translated  
RKLLPANNRDCGFGNDDGAPRRSLGRSRSPSVEHSDCPSRNRNETIRIPFREQRCILPWA  
RAAHGVFLVGV DAPPFAAPAWIDNASLPPEPSDDLGGNSGFRSPIPVGSSGDDLRAWERE  
CHALFAVLASKDVIKTDQLRRAIEDLTPKQYSEWSYGRWSAAMATLLLDRLGISDDDLR  
RSLFGNENNAGSSSVKPPPEFRAGDSVRIKSFQDGVWRRPHIRTPGYVYGVNGRIVDVCG  
RFGDPSFLALGLEAPEVWLYRVEISMEDLWPEQVSEKNTLSIEVYEHWLVP SDKNSGHGY  
QEMKLFNHEDDG RDCSHQDVHSHGGNSHDPRTITEKRAVEDEGPPRPGEDFFRGLLQ TIL  
DKKIVSGEEVRAMIEGLDSAGRTMAGRDLIARAWMDPVFEERLLEDAAGAALELGIHTSN  
PNAPT VLT VVKN TSKEHNLI VCTLCSCYPSGLLGIAPPWYKSSEFRSRVAVREP REVLNEF  
GTQLPQTQSIRVHDSTADHRYLVMPQRPKGTGDG WSENLKQLVTRDSMLGVALPMAPLE

>comp14940\_c0\_seq2; 657 84 1745 LEN=2132; translated  
MANLIWTCAA AVVIGT LSGAEAFAPSSPLTRSAKGYVASLNMVPFDVNSAIDV TSLMSSN  
MMADAGTSVNAAIESNSLLTSFTDQGNLAGIFFQQSLLPYLLFLYFLSFRANKIPAINSN  
FGFQFILLFVLSTIPAGIVSKSVYETSLANVDWLHGWAELLLTVSNLLMVWGLKEASTSP  
NQTPAGT PRLVALGIFGLFAAGCALGPGF IGWEAHTGFMAGIGNLDTATVQSLPWVTHSE  
PINALTIPTWAIHFSSVIEYLVAMNLVWKYAEVTGNEKWKGMTWGMLPLHASGVCATYH  
FFYNPSSLQFLVDMQAGFTLLGNITCAIAAFRIALSNGWTLGEVNPFRKEDDPAILAVDS  
IAGEALVLRPEVESNAVLGAKLLVSTLFLSYAVKYGSLGLDLPFSENGAVGLAMVLGIPG  
ITAFSYYQRGNTAAEDGESKPF SFQLGDTSLSMSDVKKYGAAGTVAYVLT ELAFWVFAFP  
VAATALYQSTGHWPDVINETGDRAAVLGFIFAGANIARLFVPVRLGAAIALAPWVDENIL  
NRDGAIDADAEEV

>comp14941\_c0\_seq1; 647 186 3981 LEN=4005; translated  
MAERTHTHHEQTARKSRRRVPTVMMIDHTGSFTPTNNNQIRNKSVVQGGQLRDYKGI  
SSEHRRSSKKLGS DQRRVSDHIRIRESLHHQLQKLGEGDAESSRRKLSYGDRSKSGESK

RGEGDGNSDNVSHGRRGLNGRSGSNRELRVTS DHTRPGLERSGSSLKSIRSFRRIQSETS  
AKENTAVGNLTKTSASEHAKPSDGLKENDLKKASDHTRPNATDIYRSSSAKFKDSRQRS  
SSSDKQDSKRRLRSSRSLSRDKSTDSARRIKSQSPRSSRKIHPASSILEKFRYDPNNVS  
ARMKAPPSSPSSSANVLKRRHPSTRSLNRSNGSSRVNPSLNDAKNNIAARRKMGTFRPYF  
VPIKKKRELLGPTSHHNC SRKMI EGNSSDIDNSPGLILQEGMKNVSVAPFLHEGIPVIK  
VSHNPKGKCHRRYLTLSEDQTTFLTHSKMPKGMKPKQPSWTPSKGFGGSYIRSIDIAN  
ICSFQVGAITSRYLELAMSKYSKPSKTKDVK SREESTKSVKSELFASEQERITAAVTIFH  
VDSTTGRMVSLDFFIENKDHQGLIATLALMKHTYAEAGQLVGNEIMLLRYILKMEFGT  
NGDGVIAMNEKEFSTLCCRLNFTAENIGKEFRDYCKMQSDQYDSSFRGKKGKNTLTFECL  
QLLQLMKGTENPSLEAWRACFGNATCVKAVTVLEIFLHGPQQERTTCGMQDARDLVNIMN  
ATELGELVSNRKGSLLTQWQFEFLRSEWNDIYDPAKRVIDRTRLLTEPLSHYWINSSYN  
SSSMIDGTYSVESYTRALIRGCKSIDLKCWDGTVLPDETHMPVVCPTKDSNDKLTFRSIV  
LAVRKYLDNDRNSYPIMINFENNCTKPFQRSLAQITKEVFGRHLFV PNSXDRKKELP SPE  
DLRGMIVINERKPPSPKLETLEPNPSGVSEDVYAQFNP IKPGSNKMVTFVVSQSNGSTESD  
AEIEKELSELTLFHDADFTGHFLES MNLVCSQMHDIKDTKVLNIANKYSENSALWRKFNE  
SHLTRIYPNEQSQGSFKTPVPSQPNFSPVVAWAMGCQMSLNFQVHDTDLAINDGLFRQI  
GGIGYLPKPLWLLGLGEKPPSIKLRIRVLSGSCIPKPFLLDDKDTPNEDTCIDDPVVLEL  
HDVVVRPDHGENLRVSKHKISCKNKNFCPIFDDYSGKKFDIETPDVASLVFRVEQNTKQ  
GKLLAQTAIPVNCLRRGYRSVQLYDMDNXQTGPFRFLVARISRVDCCYDAQEF EIKRDT  
HNSHV

>comp14942\_c0\_seq1; 1354 241 3496 LEN=3496; translated  
MAMHP IIVNNEGRDASAGYRAQQTKRQCEMNEAPLTFGLPSLTTPTTNATAKVAATRKF  
SSFTKLMTATVVAVYVSSVSAFTQTQNGIQIGIKSRTRATAKLQSM SMIGKMSFMAPTWT  
PSKSSSLSTRQSRMILSAETKSSSTGSSKSDQKEFKAVFLALQLYKAAYGDLKVPARFV VPS  
AAPWPEPAWGMKLGQKVGAIRETGLYVDKSKKRREQLKLGFIWKLRAPTDTSIQFDQIY  
DALTVYRAEIKPSGPLTVPTEFSVPDAEPWPESTRGLPLGRS IKQLRSKAYLKKNP GAE  
KLKQIGFETDKKLSANDKRFQAVYLALERYKETYGDLLVPQPFVVP SDSA EWPEESWGLR  
LGARVNAIRSQGTFIKNNSERQDMLDALGFVWTPPEKETKKRGRKTL DQIDQEEKEAILE  
AESKTKGASSVEKKSDEDSADSFLSFFDFKENDQDSSDNDETQGGQPTWGLEAGREFDRLP  
NNNQDAAEQDFDEDEYEA PRSLGESLGAARERALEAGVIEDTDSKRPTKRKREPEIPWFN  
DDFGGYFVFEDVVEALTLYKQGYGDFS NLTSGEFVIVPKDEPEHSFDDDFDEMAINGMD  
ERAMTDEEIEAEMLRLESGLTSTDDAENNDMKELEWPEHLEGMRLGDIVKRMKDGSLEV  
KHLPERKAQLDAIGFDWGPEKYFLDVPFEKAMCAMA YAFYVMVRGDMFVPADYVMPDEDPWP  
RALAGYELGKAVRRIRELQNF FEAFHVEKVALLRMIDFVWFPTLALPIDPDEPAVSAEML  
LLGALGHPDYHQLDEFPMGLPEKIMADGPFHVSDDPREWRTWHNWDYVADIWASMGTKD  
RAVSLRKS GYPRMAKEHEEKYGPGLFQQIDEYLENILEE IGEVQLEAMIGKEDVETFYGV  
VDKYDGM I KEWDSLTHEERMDAPGIHLTNFTLYGRKGGLPAILKVFTDTFEDSERQRTDL  
SDKLLDVRDTL FNYLDELSDCTDMDD FELDVLWRFR IKLYLSLVLNDHFNTKAMDRQKQE  
ATARQIDDMESQLDTQLMSFGT DDEDFE EEESEEDFEVEEYSDEEVDDSEFDEEEEEEIEEE  
VGIFRX

>comp14943\_c0\_seq1; 434 57 671 LEN=2390; translated  
MLFRSLFSLFLALSSLFAITAAKKQDEDVTAQALRDMQAGMAGLKEAASNPA MLAQLMRD  
LQDPDLMAEAQKMMQNP AFQKQMKEMSNDKAFKESVQKS IEMMKNPAAAAEMEAKMEHML  
KLGDEQLKNKAGNMEEAMKAMNNEVMAEVAKMVQDPNFQNLQMQMAKDPQFKSYIDAM  
KDMANNPEKKRQMEALASKMRAEL

>comp14944\_c0\_seq1; 858 241 2463 LEN=3149; translated  
MVPSS TTKKSVATKRKNFKSTTSLTSKAKSKRVTKAKQGNASSSSLLSNRKQKPSLAA  
TKAATKPTVLT PNPVTSQAPRFP AEASALRPGSLLRNCSGSDIQLARSACAPVNF EKG  
KGFLLVFPGNFSFGGSKPNDEANRDNPQPSGALVATALGEDSDK SCHAGDQGHPTPAK  
TTAKKAGLPSNGTVTATPTMGR IEGLRTSTPSFRIPFPHLKKSLVFPGKNIPPTSKYLSL  
SCSNKKKGT VQCKNIFSSAIVFGIPKWESSLVTEKEISISYPSASLSASVND SNGESDEK  
KNDSETLPNF SHYGGSERTIDGAARSRSNVTKKNKNTSRSDSQMNRIPIWSNHRDIDDNS  
NNKQHS AFDFSRMPKSEVKAPLPKSKRETTKYHDS SSGNDDNDSSNGTIDDDSDASFR  
IGTPKRRKTI ISSSTTTTDFSNVSATKTR SAPRRQASEKKRYVEQQEETSDDDGESLHD  
EESPSNSVSEDEDEDQAVDNKKSTTKKHKNTHAHSSSRQKIVKNQAKGAGEKSVIKKD  
IIDVDNGGDDWSASDSSFASVGDKDTSESIVRRTRARRITRVTKQTSYKEINE SDSEEND  
DDDNSESEEMKNSSSKAKGSDPKERQDKTKRCSASTAPRGRPKSHKKNASSGKRKPS  
SRLRAAASRSKRQSIQETTSSNGVGSNGAKLITQSPSSFSPTV GAKSPFRRRHKKSSP  
AKKARINVLDLT EDDAFDG

>comp14945\_c0\_seq1; 319 63 1100 LEN=1740; translated

MIPKRSVAVNDRKIPPEYSIEMEAMKRKETLAYLSTVLTTNPPQVSEETTKSSMNEMETWG  
EITNRDRRLSDEELASVMDHSMAILGERICEATNTYNFRESLKSFERSLGRFRNAEIVLG  
RRIANGSFADIYTIKSFQRGEDDAAIETYGPAYTREQANAAAQIKRNKAHKYVVKVLRSN  
LLINSSLFATAAADFLTEGNLLASLNHPNILSIRGRSVASVEGFSTGKRDSVFFVLERVD  
GTLSHKLDEWYERSSEIGLFGKSRSDSSTILRERLVAMGDLASALAYLHERRVIHRDIS  
LSNVGYVVLQEKVKLLDFGLAKILPPATDENERFLLTGNTGSPR  
>comp14945\_c0\_seq2; 409 63 1406 LEN=1621; translated  
MIPKRSVAVNDRKIPPEYSIEMEAMKRKETLAYLSTVLTTNPPQVSEETTKSSMNEMETWG  
EITNRDRRLSDEELASVMDHSMAILGERICEATNTYNFRESLKSFERSLGRFRNAEIVLG  
RRIANGSFADIYTIKSFQRGEDDAAIETYGPAYTREQANAAAQIKRNKAHKYVVKVLRSN  
LLINSSLFATAAADFLTEGNLLASLNHPNILSIRGRSVASVEGFSTGKRDSVFFVLERVD  
GTLSHKLDEWYERSSEIGLFGKSRSDSSTILRERLVAMGDLASALAYLHERRVIHRDIS  
LSNVGYVVLQEKVKLLDFGLAKILPPATDENERFLLTGNTGSPRYMAPEIGLKEPYNLKA  
DLYSFAILLYEVLCLKAFSNWYASEIFENVHRKKHRPRMSMFWSKQLKQLLKSCWAQDP  
ADRIQFEEVARILQKEAAGLKTDFYR  
>comp14945\_c0\_seq3; 322 63 1124 LEN=1148; translated  
MIPKRSVAVNDRKIPPEYSIEMEAMKRKETLAYLSTVLTTNPPQVSEETTKSSMNEMETWG  
EITNRDRRLSDEELASVMDHSMAILGERICEATNTYNFRESLKSFERSLGRFRNAEIVLG  
RRIANGSFADIYTIKSFQRGEDDAAIETYGPAYTREQANAAAQIKRNKAHKYVVKVLRSN  
LLINSSLFATAAADFLTEGNLLASLNHPNILSIRGRSVASVEGFSTGKRDSVFFVLERVD  
GTLSHKLDEWYERSSEIGLFGKSRSDSSTILRERLVAMGDLASALAYLHERRVIHRDIS  
LSNVGYVVLQEKVKLLDFGLAKILPPATDENERFLLTGNTGSPRYALS RKG V  
>comp14946\_c0\_seq1; 251 47 484 LEN=676; translated  
MKRPGVDEFVLVEMAKHYEIVIYTA SLNKYADPLDLLDPHKTIYRRLFRES CVFYEGNYV  
KDLSVLDRLDLSKTIIDNSPNSYLFHPENAI DCSSFIDDPRELDQIGSFLTGIKNARD  
VRGLAPQWKDWPVIDPIEEDELI R  
>comp14946\_c0\_seq2; 401 712 2156 LEN=2348; translated  
MPLDLIFDAVPFSESPHALPNNNNNXPLYLTNTNNALERRRSSHRQVSPNAEELKTHYN  
KADEDRRYHAKQQRSSRRLSGGRKNQVHPAAMTRNDGNSPSTTQQRRLKKKPNLTVDT  
SNGASNGGDHHEHRSPSTPHGVRGSRDLRSPGMQNSPVAAAGAI PDFITQTDAGNATTP  
RSAKAIEGATRAAATKARSRS HRGRKQHEEDASDSSSDASKDAAGEACDTLVDSFRMICC  
CLAPTGMVQSGATTKSRLSSKETQDSEENIDDAKDSVADDHNRPKLLGAIHPEDTGKKCL  
VLDLDETLVHSSFRAVEGADFVIPVKIDDVVHFVYVMKRPGVDEFVLVEMAKHYEIVIYTA  
SLNKYADPLDLLDPHKTIYRRLFRES CVFYEGNYVKDLSVLDRLDLSKTIIDNSPNSYLF  
HPENAI DCSSFIDDPRELDQIGSFLTGIKNARDVRGLAPQWKDWPVIDPIEEDELI  
R  
>comp14946\_c0\_seq3; 381 142 1050 LEN=1050; translated  
MGGERRRSSHRQVSPNAEELKTHYNKADEDRRYHAKQQRSSRRLSGGRKNQVHPAAMT  
RNDGNSPSTTQQRRLKKKPNLTVDT SNGASNGGDHHEHRSPSTPHGVRGSRDLRSPGMQNS  
SPVAAAGAI PDFITQTDAGNATTPRSAKAIEGATRAAATKARSRS HRGRKQHEEDASDS  
SSDASKDAAGEACDTLVDSFRMICCCLAPTGMVQSGATTKSRLSSKETQDSEENIDDAK  
SVADDHNRPKLLGAIHPEDTGKKCLVLDLDETLVHSSFRAVEGADFVIPVKVCSGDFSL  
WLF  
>comp14946\_c0\_seq4; 286 712 1724 LEN=1724; translated  
MPLDLIFDAVPFSESPHALPNNNNNXPLYLTNTNNALERRRSSHRQVSPNAEELKTHYN  
KADEDRRYHAKQQRSSRRLSGGRKNQVHPAAMTRNDGNSPSTTQQRRLKKKPNLTVDT  
SNGASNGGDHHEHRSPSTPHGVRGSRDLRSPGMQNSPVAAAGAI PDFITQTDAGNATTP  
RSAKAIEGATRAAATKARSRS HRGRKQHEEDASDSSSDASKDAAGEACDTLVDSFRMICC  
CLAPTGMVQSGATTKSRLSSKETQDSEENIDDAKDSVADDHNRPKLLGAIHPEDTGKKCL  
VLDLDETLVHSSFRAVEGADFVIPVKVCSGDFSLWLF  
>comp14946\_c0\_seq5; 123 142 1482 LEN=1674; translated  
MGGERRRSSHRQVSPNAEELKTHYNKADEDRRYHAKQQRSSRRLSGGRKNQVHPAAMT  
RNDGNSPSTTQQRRLKKKPNLTVDT SNGASNGGDHHEHRSPSTPHGVRGSRDLRSPGMQNS  
SPVAAAGAI PDFITQTDAGNATTPRSAKAIEGATRAAATKARSRS HRGRKQHEEDASDS  
SSDASKDAAGEACDTLVDSFRMICCCLAPTGMVQSGATTKSRLSSKETQDSEENIDDAK  
SVADDHNRPKLLGAIHPEDTGKKCLVLDLDETLVHSSFRAVEGADFVIPVKIDDVVHFVY  
VMKRPGVDEFVLVEMAKHYEIVIYTA SLNKYADPLDLLDPHKTIYRRLFRES CVFYEGNY  
VKDLSVLDRLDLSKTIIDNSPNSYLFHPENAI DCSSFIDDPRELDQIGSFLTGIKNAR  
DVRGLAPQWKDWPVIDPIEEDELI R  
>comp14947\_c0\_seq1; 214 99 1154 LEN=1663; translated

MAPLQRDNDTISRCSAAKLETKTTPLTNEATNSAESTRKPAAAAFDVSSFPAMPWMSAI  
MWPLMLTVPLVLSTSGSPLHYSNVFPESWYIIEDSMAENISSPKPLGLCLGLI AVAVGQL  
LCLFVVFYFFKYGYMSPKGEPELSIQTRGARKYEYLEGLTTHLSQPEGFVLLGGYLSGTWM  
FQLMPAAYYSFEGGIEWAKVFLCLVIQDGIQFVMHLL EHNVS PAFYKYSHKPHHRFTNPR  
LFD AFNGSMLDTIFMILVPLYATANLVDCNVWSYMAFGSLYANWLT L IHSEYTFPWDGLF  
HSVGFGTSGDHHVHHAFFKYNYGHLFTWFDRVWGTYRHPAEYAPKQFNELR  
>comp14948\_c0\_seq1; 199 1 1363 LEN=2064; translated  
XKPTRVPTKKPTKNPTKSPTRKPTPKPTLRPTYKPTLSPTKRPTKKPSRKPTYKPTQIPT  
KRPTRKPSRKPTKPKSKRPTRKPTKPKSKRPSRKPTKPTKNPTKKPTKTPTKIPTLPPI  
QTLPPTMPPTVPIESLTMSILISVPPLVPSEVVATRV E EALVDILTEGGSGNRVRR LQRR  
PKGGNGGGNGGGGGGGGGGNKNQNNNTFNPVNRVSTFAVPESCGTIQAATTSGYKCLR  
VVVTLTGTSPATLSAFESTIEESVQTN AFENVLAKRGLSAYTE LPSQPV LSTDSPTGVPT  
DSPTFAPTAITSTATSAPT KYVDPCPPLSGDCTKCL ENKACY YCREPPGT CFNKNPKRR  
AIKDEEEVLQTRFLEEMKCSGILATSKLMCEAQT FAPS VSEIGD TDDERDDVVERPESDT  
QTNNEKKSTAGPLPVITSSVIGAVSVILLYTV  
>comp14949\_c0\_seq1; 156 1 493 LEN=493; translated  
XEWFLDRPAIETISLYEIIYDLVCWALFDGRNQEHLTTHELNDLEGFVEDLEYRSLQMYG  
AIDETGPDIVSIGENEEVLLDGLGENNSPRIHDL PVNRRRSYSDDATASE TDMIESYNND  
LNSADGTQYGSPLKYRMHSIESTERETPTSLGILGESVIN FSSPT  
>comp14949\_c0\_seq2; 621 604 2901 LEN=2943; translated  
MMKSYYGCR LVDVWCII EAVFFIYCNLKIRYLQAKDPLEACLSAAPMQDPDERKALWEHI  
MAVETEPSWIQEWFLDRPAIETISLYEIIYDLVCWALFDGRNQEHLTTHELNDLEGFVEDL  
EYRSLQMYGAIDETGPDIVSIGENEEVLLDGLGENNSPRIHDL PVNRRRSYSDDATASE  
TDMIESYNNDLNSADGTQYGSPLKYRMHSIESTERETPTSLRSGSWASPSSISRPRPKKL  
FRFRDIEREGPSVFS DLYEAYKVR YDKYKNMIENVD FNPVQDLRNLVAETAQQA AKMSH  
SAEESALKSAQNMYETIVQPGSQMEKHLSAFGHATSLQLTEAWKSVKGMKERLDTANFLS  
ERRKALMKQVRGNRAMLTRMREMSYAVNSKQMAALMRTITEAHEALESIEAAAKDGFISA  
AGKLADNSLFKRQEP RRYARYSSDPILGIASSPLCITLFLLISTESILRTLKRRGFERR  
NIGPVTYYYHPGSNYASESMNSENIDHNGLPPRDGSKTIPVVF IHGIGVGLIAYIPVIDA  
LMESGRPLFLPELPYVSAFRPWQSSRNVLSPADVASTMTAMLAYHGFSKGTFIGHSYGT  
WLSYVCKYAHSAVAALLFLDPICFCLHHPHLTKSFVYHRPDGSI AFIVRTDMMVNWITIQ  
RAFPWAWIALFLDQVNVPC TIFLADKDALVPSEKIMNYFRSNGVPLSDAATVDSSYFEEK  
GDIKSVVWRGACHGAFTEQPELVPII AVACNSL CNKVEEQDFMQS  
>comp14949\_c0\_seq3; 510 604 2289 LEN=3042; translated  
MMKSYYGCR LVDVWCII EAVFFIYCNLKIRYLQAKDPLEACLSAAPMQDPDERKALWEHI  
MAVETEPSWIQEWFLDRPAIETISLYEIIYDLVCWALFDGRNQEHLTTHELNDLEGFVEDL  
EYRSLQMYGAIDETGPDIVSIGENEEVLLDGLGENNSPRIHDL PVNRRRSYSDDATASE  
TDMIESYNNDLNSADGTQYGSPLKYRMHSIESTERETPTSLRSGSWASPSSISRPRPKKL  
FRFRDIEREGPSVFS DLYEAYKVR YDKYKNMIENVD FNPVQDLRNLVAETAQQA AKMSH  
SAEESALKSAQNMYETIVQPGSQMEKHLSAFGHATSLQLTEAWKSVKGMKERLDTANFLS  
ERRKALMKQVRGNRAMLTRMREMSYAVNSKQMAALMRTITEAHEALESIEAAAKDGFISA  
AGKLADNSLFKRQEP RRYARYSSDPILGIASSPLCITLFLLISTESILRTLKRRGFERR  
NIGPVTYYYHPGSNYASESMNSENIDHNGLPPRDGSKTIPVVF IHGIGVGLIAYIPVIDA  
LMESGRPLFLPELPYVSAFRPW  
>comp14950\_c0\_seq1; 1105 1 4099 LEN=4135; translated  
XKNPDLKAVASIVVKL SAVHQKRVDEIDFDTV IPELLSFAEVEKENG TWKDL CVRS DSKP  
IFLTP IIN VFFN FLHNEDGVI SRAAFNGLKALVLTASSNISTKNEHTHAWTKMVESVVIP  
LSRSGLQCKDTKSRRFYILLIRELAINLRELSSPNLCGDLATLCNVENEDLDFFLGITHV  
QIHRRARAFQRLRKT LSEMDIDRSKTQLT SQLSNVLLP IAVHPIYECKMRSEEGFV LDS  
IATLGAIARHLPWNKYN SMLWILS QFD RYPEQERY SVGALCAI IDGFNFELTTQSNDGS  
MVKTSVWRSL ENRIIPKVEGILSKETTGDGSGQKTIRPAIILALVKLFQKFPEDFDMK  
LHSILAVICDALRNKDSTARDVARN TMAKIVCSVDLKYLG DVIREVTITLNEGYKLVHRS  
ATLHTILLKLLDIYEPPSNENA EKESTPLDDCTAAIMDLIQDDLFGVANERRESRDTNVR  
FVKEAGNKSVHSIEMLSRMISFAPLKARSGNQSKSAVHCVVSPLLERLRQPDIDAKMIR  
KVKELLSRVAIGFSNNKSLKGSQ LFPFVYATIHPFIGNGAITTIVDDEDESEDDGNGFG  
IKVSGRTKVKSSNTEPASTKAAVVEWRPSTMNAAQSGKSAVTMKKTESHELKRVQDGAN  
APKLTGSSRHDL DTFDIRTINEPATITAI VFG LNMNACLK K LHIRDEQSLVMMDPFVP  
MLTACVCHCRDTEVALVAMKCLLVLLRCNLPSIPSCSKSLGSKAL TLLTAAGASLSTNH  
LTQACFR TLLTHLIGNSTKLREGVEPTITSSSKFYDEHGITGSFPLNVEQMKVLISLIRGS  
ITDSDQHNPALNLIKVVLIHRYTSPEFYDLMESMMKLVVRS PKGT LRQECSRLFVRYLLE



YPMGEGKFEQHLKQVVANISYEYQEGRMSGIMLLHLLIEKVPQELLQKNCQNI FLPLVLQ  
LLNDDSKDCRQQVSNCI ILLFKRSSTDILRTFQDYCSRWSKQTGPLRLASLQVFGLLLD  
RAEFIKSSSLELPWIHHLKQTLLEDRESEWETTYFSLVCI EKLLKDFENVLIEQLELLTS  
VTECLIDPHPWIKLSASRILSYLLKSDSAVKLFSQKKGMLFEVVRNIVFQIGVSEQEQSE  
ELSDLGIKSLKTVLPLMTKHPCLCYTDEKLQEDDPEAENGRDPVFWLLRRLSQIAKNKGS  
KRRIAVFKCYAAFSDSDFDIVAPHELMLEGLHRSSTEAKNEIENQSFSQKAFSQQRKSS  
SFGHQGASDADVPLTEHSFAEEVLLLEEKCTSSTDFLNAYAEVKRRAYSKKQRRKTEQK  
AEAVHDPVAAAQRKMKKQEGNKLRKKRRSQEKARERRRGEEKKYRYK  
>comp14951\_c0\_seq1; 564 312 1533 LEN=1778; translated  
MTHTKSNELGFFRTWDGEKCTLRMGGADQSREEKCSLRNAHTVKAGVPSPTATVSGKQ  
AQTSETXSYTVYGEEVAFSIIKAIPEFRALASGTVVLDGKGRFLFEWAPMDNSSGGDY  
GTGRKYRWDATTRFALTAEEAASLLARLDRGDPVELSRRLAGDHYQNPTGMPVVDKIFMA  
KLVELEDDDDGGPDADGVGGEGGEEAGGMAKAAKKNNGISLLVDYVDPDNQRLGQIPHPG  
SGGDGGDGMFDASEGFVSSPKQKRLFVXXIACSSLGWKKLSFFSRSNLDCCRTSIIALC  
CIQLSSIGLEWIGFHFAAPHNTKHNNQQRGPFIEIRLMIGEYQVLRISILEYSIPRLVWGST  
MFDRNIEQAINRSLQGGNNYRGGGGGGYRGPSPHNYQGS DGGGGY  
>comp14951\_c0\_seq2; 508 312 1321 LEN=1566; translated  
MTHTKSNELGFFRTWDGEKCTLRMGGADQSREEKCSLRNAHTVKAGVPSPTATVSGKQ  
AQTSETXSYTVYGEEVAFSIIKAIPEFRALASGTVVLDGKGRFLFEWAPMDNSSGGDY  
GTGRKYRWDATTRFALTAEEAASLLARLDRGDPVELSRRLAGDHYQNPTGMPVVDKIFMA  
KLVELEDDDDGGPDADGVGGEGGEEAGGMAKAAKKNNGISLLVDYVDPDNQRLGQIPHPG  
SGGDGGDGMFDASEGFGRGPFIEIRLMIGEYQVLRISILEYSIPRLVWGSTMFDRNIEQAIN  
RSLQGGNNYRGGGGGGYRGPSPHNYQGS DGGGGY  
>comp14952\_c0\_seq1; 1217 169 4563 LEN=4703; translated  
MGKSKSKKGGSKGAAPPAKCLCEHLYKDCGNRPERPSKGHRWNPETQEWGGKGHKQKG  
GSGQTSVVGQEAKITAKGKTELAQWQKLP SGILKEYCQKQKRPPKFKELLNDRHSPNK  
FKSRVIVPDKTNRDKDLIFIPAKHVANEEQAKEEAALLALLHLTPKLPHERKLPPEPYRT  
TWMAAVESLNKSKASGTQSAETNTAIKQSNNNKGGDKGSRKEPLKNGGASANTNLSLG  
SSFTSLSEKRLNADQRRHARNARIRKHEAVRMANRDHPVFLSARLREQIQKILRGDFASL  
LNEEKDDEDSPELDTFSDLQAYVEERLHHEGFTKRQARTAFQAQKGKAKTVGEDQWEHIY  
EDCLQWLCIHLEEHQLPEGFDPGATLEVVKAGTNSDSKNSTEALAAARFGISTKDSNW  
LLQQQKEHSSRSLESFLWEQICKIANVELSGGNGSDEDENREVAEEFEAVQAMFSDC  
KFKPDPGGKSSTLTIKLPIDIHMSYIPGKYPSMYPKHVLSIGKWERPVGVAFHVEMAK  
FLSGMTLGDPMFEEIYGEQQNLFQTIDELPLPLSSTSLPKSINKSSGSSTPTSSTLLTE  
KSPLKRTALSMRKRPKARSVFWSTLPTETTPATPFNWSTSMERQRKALPAWKARTDFLTK  
LKKSSSESRVVLVTGDTGCGKTTQIPQFILEENPDTAKIVVAQPRRLAATGVAARVADER  
GETQTGTGVSQVYVVRGDSAFCKDTRLLFCTFGILLRQLQSEGALDSITHIVIDEVHERNL  
DGDVLMGLLREALKTVPHLKVILMSATLDADRFAAYWGNAPRMHIPGRTFPVEDFMLEDV  
LEKTGYNPPKRRKHGGFNAGNRRSTAWNDSEISDDEMEDHHEDESTLEKNASENKV  
KQPEVPLEERVKRVDTSDVYYLLGFLVKYIVQTNQMGSDGSILVFLQGVGEISQAQTVV  
ANITKGMISLLLPLHGLSQPQEQRKIFRKTGQVKVILSTNVAETSITIPDCTVVIDSCR  
EKQSSYDPVNRMLLLDHFASKASLKQRRGRAGRVRKGYKLI SRDTHSRLPDHTAPEI  
SRCALDQTLSSLLFLGAEDGSGNFLQNLDDPPSAASVKSAAATSLQKLGALAEAGPGKMLL  
SPLGMHLAGIPAPPTIGKLLIMGSILGCQTGALAMAAGLSVGRSPFLKIDGRSNDERNQS  
ILQERAKLFDTCGNSDHSMIAAAFMNWKKTPNGAGRKKRYCESLGLSFNGMRDINQLVQQ  
YSSLSRSRSGFPASVEDSDRNSQSWRVLR TCAIASMAPEQLVRVYRPSTKYEETAEGAKLKE  
GEAKGHKFYIRTEDSNDTEKRSEERVFLHPSSAMFVSGSYSCPWLVFHSMVVRTSKPFLRD  
ATECSSYALLLFGGALTVEARNSVIHVDGWVRLSANARIGALIQGLR SKMDEL LQRKIDK  
PNISISETPEMKLI V KLLITDGLG  
>comp14953\_c0\_seq1; 568 1 1793 LEN=1851; translated  
XGDEIDEQDKTLDVTPVNXGVDSVFSGIDTTFGTSSVLS PSSISSPKSMMTGFTCASG  
STVRASNI PKKHKNTTNPKSPAGGSVFAFLDPIADNDDDDHDELELMERAQPAIKSSE  
GQNNSSPVNSKNTTDKSESSSSLEGVSI SLPAKPNKENEMEEDTASTEPVSHVLADLENM  
EATMTSTPRDSTPSKALHAAEANNAQDLTPSKNGESTSPSESEETNLEDGHLKQTLVDT  
GASNKLSRFSSTQRKNKSTPNPVLARTKTGTRSAPGSPVNQAGRPHWLKAFSKKTSRIP  
RSPKFENNDYEMDLNPSPTKEDYVEGRELHNLVKNMKIVDRPPQDSEDFDHSGRRRH  
VGDNVVDGSALYQASAMHPTDWSYKSSDADSDGASTIDEEGSQNRQKLLSKDGTSTNKAL  
MDGKKSTSASRQLIDDLVWLEKKIATVKKETATSGSRGGIETDDSLSFDKDKYDEADTS  
HEDSDSDVSNIVCRDLVAPPGLHIVIHSTKDGPEVHTVRDESSLQGEIFPGDLIIA VDD  
IDTRTSTAEEVMTMMDPEGIESEKSPSCVSKKTSEQELFNREIPEGANIFLSPRISL

>comp14953\_c0\_seq2; 926 77 2891 LEN=2949; translated  
MKNHSTLERMATLLLLLVPGIAYGQGMNTNPIYHVRSVVGKRDLOTQLNPLDMLLSFSDDG  
ADKEDEFYLDLFDTPALLTNSDTPLLISNAMNTFLLAELNGRFDDLNSVEKVSSEIFSL  
ERNGTYNSSGLEDTRIGTETRMKVTLSEFLLPSPKTDEVIDLLKDIMSNTLYFVTNLT  
SVSDDNELSGVYEAIRREIRKPAFVTPDQTIIVVDISGQNKNGRIGNTTKKYVLSAVPIV  
LVVAVLAAVIVFFVFKKKRKTVESESVKDSSELMHMDVENDVYSIDRSVGSAAESPKSVISK  
LSSTKQDESSIQHSMSNGSGLIPGILNTPGTPGTPGTPGTPGTPGTPGTPGTPGTPGALC  
GDSVFSGIDTFTTGTSSVLSVSSISSPKSMMTGFTCASGSTVRASNIPKKHKNTTNPKS  
PAGGSVFAFLDPIADNDEDDHDELELMERAQPAIKSSEGQNNSSPVNSKNTTDKSESS  
SSELEGVSIISLPAKPNKENEMEEDTASTEPEVSHVLADLENMEATMTSTPRDSTPSKALHAA  
EANNAQDLTPSKNGESTSPSESEETNLEDGHLKQTLVDTGASNKLSRFSSTQRKNKSTP  
NSPVLARTKTGTRSAPGSPVNQAGRPHWLKAFSKKTSRIPRSPKFENDDYEMDLNPNP  
TKEDYVEGRELHNLVNKNMKIVDRPPQDSEDFDHSGRRRHVGDNVVDGSALYQASAMHPT  
DWSYKSSDADSDGASTIDEEGSQNRQKLLSKDGTSTNKALMDGKKSTSASRQLIDDLVWL  
EKKIATVKKETATSGSRGGIETDDSLSFDSKDKYDEADTSHEDSDSDVSNIVCRDLVAPP  
GKLHIVIHSTKDGPEVHTVRDESSLQGEIFPGDLIIA VDDIDTRTSTAAEVMTMMDPEGI  
ESEKSPSCVSKKTSEQELFNREIPEGANIFLSPRISL

>comp14954\_c0\_seq1; 604 181 2616 LEN=2855; translated  
MHSKWLDLATEIAAFHYQSRRYDAFKPPAFGANPEVQNL DVRESDISRLTNSGLHMSTVN  
QRGSDPHMSFDDTLPSVSVSEKESLPTALPLQKKYNRQNI SRNGLIRHAKSPTMMDLMQE  
MDDSEAKQTEMRKHNAMELNDYYTESSGRSHYTSGSEETSTKGSWLKKIRERRSEAKLMR  
KLAKEEKHRNQSDSLAENLPMNLNNVKG IHRTSNAVNLSGRDTRVGRQTPRRRTRHTRKT  
AIQNFYSKRKS IARTKASALREGQQLFRDRFDSKTGKPYSLFTAVSRKHLREGNLDPDS  
IPPLLFLEECAHMLMSLMSAVAFSTLRNDLPEAESPLTVFEPGLPWPVHVPDPSYRGKVRKG  
WYQSKFRVYAVLQYILGRSRNDKARTLYNAARPF RVIIGNVSDAEIEKLEARGPLAKVTL  
VSMWLELISREYQAGSTGDVAPPIISRIYQFVSDGLAGYNQARKIAYIPFPFPHAQIT  
LFMLVVDFLVTPLMSTYVTNGTLGFFLNFAVSMCFTGLHEVAREIENPFQNVPNVPLN  
NYQAQFNEGLMVMFYGYHPDAYWNNGTSE RNI DPVLHSLSSQKTSQKSDIHAVPDGRLSA  
SSGSELPKNNASDP PRQEQNSQSVPRVSFQSSPTDTSTFLKVRPFATSLMSTITEKDSKS  
SDDLSPRRPDSHVVDVRDISIESELNNKFHQIPIGMSVREEEPPLKYESNKTSLTRTSDV  
MSSVGS DAMKTD SFLHHILSSTEHS SDSVRSNQSVQDIPKAKIGQVPASRQFRIPNRSSM  
SSNNLPAAHDDFFNNSLIFKNLSEEEDEEEL

>comp14954\_c0\_seq2; 635 207 2912 LEN=3151; translated  
MIPYVNSSFGVRI LRWFHGSALWKS VLPALISTIIYEIIYHVGKKRHDLGEIFLHPYPMQ  
ALVTAFTFLVFRANYSYNRWWEAYTAVYLMHSKWLDLATEIAAFHYQSRRYDAFKPPAF  
GANPEVQNL DVRESDISRLTNSGLHMSTVNQRGSDPHMSFDDTLPSVSVSEKESLPTALP  
LQKKYNRQNI SRNGLIRHAKSPTMMDLMQEMDDSEAKQTEMRKHNAMELNDYYTESSGRS  
HYTSGSEETSTKGSWLKKIRERRSEAKLMRKLAKKEEKHRNQSDSLAENLPMNLNNVKG I  
RTSNAVNLSGRDTRVGRQTPRRRTRHTRKTAIQNFYSKRKS IARTKASALREGQQLFRD  
RFD SKTGKPYSLFTAVSRKHLREGNLDPDSIPPLLFLEECAHMLMSLMSAVAFSTLRNDLP  
EAESPLTVFEPGLPWPVHVPDPSYRGKVRKGWYQSKFRVYAVLQYILGRSRNDKARTLYNA  
ARPF RVIIGNVSDAEIEKLEARGPLAKVTLVSMWLELISREYQAGSTGDVAPPIISRIY  
QFVSDGLAGYNQARKIAYIPFPFPHAQITTLFMLVVDFLVTPLMSTYVTNGTLGFFLNFA  
VSMCFTGLHEVAREIENPFQNVPNVPLN NYQAQFNEGLMVMFYGYHPDAYWNNGTSE  
RNI DPVLHSLSSQKTSQKSDIHAVPDGRLSASSGSELPKNNASDP PRQEQNSQSVPRVSFQ  
SSPTDTSTFLKVRPFATSLMSTITEKDSKSSDDLSPRRPDSHVVDVRDISIESELNNKFH  
QIPIGMSVREEEPPLKYESNKTSLTRTSDVMSSVGS DAMKTD SFLHHILSSTEHS SDSV  
RSNQSVQDIPKAKIGQVPASRQFRIPNRSSMSSNNLPAAHDDFFNNSLIFKNLSEEEDEE  
EL

>comp14955\_c0\_seq1; 278 643 1962 LEN=2285; translated  
MASSLGDPWFGRGDCSGASKPDSNVTRCGTTDRSTVNTSRAALRSVASPNDLTATNPPTN  
NTAATATTPGAISTDIAASNSYRHPNFTVDFPLCLVHVKGKTAGSSISCGLGLMYADCEGM  
PRQPAIPHVNIYHMRNNNCFP IRGNSADPDDGTTTRHTATFLMTIRNPLTRIWSWFDFE  
KDRLPTRRNKQDENRLRWKRGLLFS ECDNFVDLVTNGLEPIWTAPSGSNSNTTNKRTS  
EVSAERPVDMTQCERAWA AVLGVREFSYHEWYNYEHYWTMLTGTMNLYKFPFKGSSPPAL  
PPPSLVLRTEHLAEDWSKLSSEDLFRKVN RGSYRNGTSDADSDSRNAFSRFPVANSQ  
RFWTNLCRAMCPEVKVYQQILEHADNLNKSDVVE SMRDVRAMCPRYEPKECPDIPEFPSL  
RIPRRKYRGETKKRLFAIQ

>comp14956\_c0\_seq2; 370 269 1591 LEN=1703; translated  
MTRAILALIAGATIYVLLFRIFVRKIPQYNNLAQGGNAAVSKACLLRDSVTSRSHTQVSH

QSFDSRKRDYKSAKKGDLFRILCTSTRRKIRWGSYQLRCRDLKAWASKCTKNVNIVTDIS  
FEDLQSQRWIRYLFQGLREEEEKIPYDATVFIKSFPRKGIKLPYIGKMYIDMVDAYGYGDE  
DVPNEMNLILQTEWQGREVFPSHNFTAVEHWYNSFPADMALSGPPENIPSIHQANIKIA  
TVWNTTRRGKVPTEGGCPKISSQLNVSQYCLDKPFDISSWYLELKFKEGKDKCEMEQTLANP  
QLGPGMLYINVFRKFDALVVLAKNDTMKLYGNVQRAVSQMRSGVPVLEIRGKVLQDFV  
ERFNYPCFQRYDDDISSTKSSGDRMYKHWSFNFAVEQLKDPTIRQKCQEQLVIAKNYA  
PSRIAKKFLRAVGFTGDFLC

>comp14956\_c0\_seq3; 370 307 1629 LEN=1741; translated  
MTRAILALIAGATIYVLLFRIFVRKIPQYNNLAQGGNAAVSKACLLRDSVTSRSHTQVSH  
QSFDSRKRDYKSAKKGDLFRILCTSTRRKIRWGSYQLRCRDLKAWASKCTKNVNIVTDIS  
FEDLQSQRWIRYLFQGLREEEEKIPYDATVFIKSFPRKGIKLPYIGKMYIDMVDAYGYGDE  
DVPNEMNLILQTEWQGREVFPSHNFTAVEHWYNSFPADMALSGPPENIPSIHQANIKIA  
TVWNTTRRGKVPTEGGCPKISSQLNVSQYCLDKPFDISSWYLELKFKEGKDKCEMEQTLANP  
QLGPGMLYINVFRKFDALVVLAKNDTMKLYGNVQRAVSQMRSGVPVLEIRGKVLQDFV  
ERFNYPCFQRYDDDISSTKSSGDRMYKHWSFNFAVEQLKDPTIRQKCQEQLVIAKNYA  
PSRIAKKFLRAVGFTGDFLC

>comp14956\_c0\_seq4; 370 1216 2538 LEN=2650; translated  
MTRAILALIAGATIYVLLFRIFVRKIPQYNNLAQGGNAAVSKACLLRDSVTSRSHTQVSH  
QSFDSRKRDYKSAKKGDLFRILCTSTRRKIRWGSYQLRCRDLKAWASKCTKNVNIVTDIS  
FEDLQSQRWIRYLFQGLREEEEKIPYDATVFIKSFPRKGIKLPYIGKMYIDMVDAYGYGDE  
DVPNEMNLILQTEWQGREVFPSHNFTAVEHWYNSFPADMALSGPPENIPSIHQANIKIA  
TVWNTTRRGKVPTEGGCPKISSQLNVSQYCLDKPFDISSWYLELKFKEGKDKCEMEQTLANP  
QLGPGMLYINVFRKFDALVVLAKNDTMKLYGNVQRAVSQMRSGVPVLEIRGKVLQDFV  
ERFNYPCFQRYDDDISSTKSSGDRMYKHWSFNFAVEQLKDPTIRQKCQEQLVIAKNYA  
PSRIAKKFLRAVGFTGDFLC

>comp14956\_c0\_seq5; 152 1039 1496 LEN=1496; minus strand; translated  
MEEGNAKINAI FEANLARSGR TKPTNLADGPTRERY IRDKYERRKFYDPAGFSFN S GSA  
APVAGGTTGAGCSEVQVRPGAPSDIARRRVANRQAKMKPPNVATREARTVRTTKVAQAPV  
SAPVDFDLLDFGSPTTTTTPAPATNARGGGDVFS

>comp14957\_c0\_seq1; 411 86 1516 LEN=1989; translated  
MAPRHTSHSVRKADRLNPSSHGPMASRKNRRQSKAASDEDSRRLFVPGIGPRRPRPAPAL  
SLRNLWPLRKRNRNGSAGAAAGVGLLALFSLLLALWNHRTRGEFGYRLGMLAPGSGGHPFP  
GVC SHQVLNPPVARSGGGQASPLSPAEGSLEAMTALWDTGGVSCFDIDVVTLSDGSMVAS  
HPRRLNAAIERARLERSAEGKDGRALEEHTLGSIRELLGLRKGDEGNLRRGVDTGAAAC  
PFPLFDEEVLPHFAGLVRGVPGAFSSEASAAPEWTIKGPMLNIDLKQGPYLTEARVLKL  
AEQIHTLGLDYAAVCVNPPPAEKETSTGSPPLDLLEVMHGHNTTEGRHKREGSGRGRPT  
IPLALVLRDLVPEDGDTDRVRKVVEELYPESIRSLVPSFKFPIEWYRSIRQGGKDGAGGA  
RKNELWKLPMPTVWTIDSAEDYRYVSSVTMEDATSGSGVNYPLASAVVANKPMELIR

>comp14958\_c0\_seq1; 634 1 2495 LEN=2662; translated  
XLVEKIVIRKKIFHNFTPEMTKLPSTSTAVLLALSGAWRTCLAEPLWADVCTDNETKNLP  
FCDVTLIDIDARILDYVDRIPLNKIFMMGHNASGYEALNIPPYQWWSEGLHGPLEPCVQY  
KDSCVCPTNFPSPSAMGNFNR TLYRLVGQAIGIQGRAISNLRVHNLIDIGDLTYWSPTI  
NMQRDPRWGRNQEVPGEDPFLTGQYSKAFVQALQGTDFRDDKTKKKSMTDNKDNSDINMA  
ACCKHFLGNSLEHWGKYDRYNFNAEIDDYDLNYYLPPFEECTKHAVGVMCSYNAVNGKP  
TCASDWLLKDVLRDRMNFTGYLVTDCGAVSSIVHGHHYAIDNVQASALAKNATVDVNCGS  
QFQDHLFTAYSEGWVEELTINESFQRMARIQFRLGLFDSTKKDAVNPEADMASIDSPQH  
QLALEAALQSI VLLQNQNTLPLDKTDKSLAVIGPHINARGALMGNYHGAKCGCRSDGG  
RSHDFSCVESPLEAIKRTTKFPDQVKS VVGCTIGDDSIDGVKDATELAQNSDAVILLGL  
DQWQEGEEHDRNETSLPGLQAKLMDDILDVAGGKTIVILIHGGTVSLGDARHKAGAILST  
GYGGQAGASAIASVLFGDYNPTGKLAATVYPPSFVHELPLTEMGLRVGVGRTYMYTGEA  
EFSFGHGLSYSEWKL DWVNDTHGNI SRFKSPQALVLDSTIRFHLRVQNSGPHTPGSRQ  
TILLFWHPTNSIGDTHRGKETTRKIRRKLIDFQETSFLQTGESEVLEFELAWNDLAMWE  
TGSNAYTVLPGSYELVIQAADAYLTRPLKVVSSKGLNSSSRLRHPNATSFD

>comp14958\_c0\_seq2; 628 824 2605 LEN=2772; translated  
MAACKHFLGNSLEHWGKYDRYNFNAEIDDYDLNYYLPPFEECTKHAVGVMCSYNAVNG  
KPTCASDWLLKDVLRDRMNFTGYLVTDCGAVSSIVHGHHYAIDNVQASALAKNATVDVNC  
GSQFQDHLFTAYSEGWVEELTINESFQRMARIQFRLGLFDSTKKDAVNPEADMASIDSPQ  
HQQLALEAALQSI VLLQNQNTLPLDKTDKSLAVIGPHINARGALMGNYHGAKCGCRSD  
GGRSHDFSCVESPLEAIKRTTKFPDQVKS VVGCTIGDDSIDGVKDATELAQNSDAVILLGL  
GLDQWQEGEEHDRNETSLPGLQAKLMDDILDVAGGKTIVILIHGGTVSLGDARHKAGAIL

STGYGGQAGASAIASVLFGDYNPTGKLAATVYPPSFVHELPLTEMGLRVGVGRTYMYTGEAEFSFGHGLSYSEWKLDWVNDTHGNI SRFKSPQALVLHDSTSIRFHRLRVQNSGPHTPGS  
RQTILLFWHPTNSIGDTHRGKETTRKIRRKLIIDFQETSFLQGTGESEVLEFELAWNDLAM  
WETGSNAYTVLPGSYELVIQAADAYLTRPLKVVSSKGLNSSSRLRHPNATSFD  
>comp14958\_c0\_seq3; 522 1394 2731 LEN=2898; translated  
MARIQFRLGLFDSTKKDAVNPEADMASIDSPQHQQALALEAALQSIVLLQNQNNTLPLDKT  
DKKSLAVIGPHINARGALMGNYHGAKCGCRSDGGRSHDFSCVESPLEAIKRTTKFPDQVK  
SVVGCTIGDSDIDGVKDATELAQNSDAVILLGLDQWQEGEEHDRNETSLPGLQAKLMDD  
ILDVAGGKTIVILIHGGTVSLGDARHKAGAILSTGYGGQAGASAIASVLFGDYNPTGKLA  
ATVYPPSFVHELPLTEMGLRVGVGRTYMYTGEAEFSFGHGLSYSEWKLDWVNDTHGNIS  
RFKSPQALVLHDSTSIRFHRLRVQNSGPHTPGSRQTILLFWHPTNSIGDTHRGKETTRKI  
RRKLIIDFQETSFLQGTGESEVLEFELAWNDLAMWETGSNAYTVLPGSYELVIQAADAYLTR  
PLKVVSSKGLNSSSRLRHPNATSFD  
>comp14958\_c0\_seq4; 554 1 2621 LEN=2788; translated  
XLVEKIVIRKKIFHNFTPEMTKLPSTSTAVLLALS GAWRTCLAEPLWADVCTDNETKNLP  
FCDVTLIDIDARILDYVDRIPLNKIFMMGHNASGYEALNIPPYQWWSEGLHGLEPCVQY  
KDSCVCPNFPSPSAMGNFNRTRYRLVQQAIGIQGRAISNLRVHNLDIGDGLTYWSPTI  
NMQRDPRWGRNQEVPGEDPFLTGTQYSKAFVQALQGTDFRDDKTKKKSMTDNKDNSDINMA  
ACCKHFLGNSLEHWGKYDRYNFNAEIDDYDLNYYLPPFEECTKHAVGVMCSYNAVNGKP  
TCASDWLLKDVLRDRMNFYGLVTDGAVSSIVHGHYAIDNVQASVSLVISSHLVSRIR  
SDCGLNHPFDTGFIYSHHFLDSCSKFAXALAKNATVDVNCGSQFQDHLFTAYSEGWVEEL  
TINESFQRMARIQFRLGLFDSTKKDAVNPEADMASIDSPQHQQALALEAALQSIVLLQNQN  
NTLPLDKTDKKSLAVIGPHINARGALMGNYHGAKCGCRSDGGRSHDFSCVESPLEAIKRT  
TKFPDQVKS SVVGCTIGDSDIDGVKDATELAQNSDAVILLGLDQWQEGEEHDRNETSLPG  
LQAKLMDDILDVAGGKTIVILIHGGTVSLGDARHKAGAILSTGYGGQAGASAIASVLFGD  
YNPTGKLAATVYPPSFVHELPLTEMGLRVGVGRTYMYTGEAEFSFGHGLSYSEWKLDWV  
NDTHGNISRFKSPQALVLHDSTSIRFHRLRVQNSGPHTPGSRQTILLFWHPTNSIGDTHR  
GKETTRKIRRKLIIDFQETSFLQGTGESEVLEFELAWNDLAMWETGSNAYTVLPGSYELVIQ  
AADAYLTRPLKVVSSKGLNSSSRLRHPNATSFD  
>comp14959\_c0\_seq1; 319 338 1846 LEN=2504; translated  
MTRIKDLIANGKSRHNQEDKQLIKNKLAQNSLVELKLGYYDDDEFKSKRQVSLVKVINE  
KFYHRLSQDKHSCLTSSISIGWRLPKFALGPVLQLVIPAFLEHPVRITHLQLILNDNPPIP  
EWCLKDILSWSHLESVDLRSVSLRIPVCEKRPSSRTQLVPMEQKQPNVRRSSMRNHHLV  
EISHSSSISKDERDDSMNWIKGSIIELVPHLSSRVKCLKLMNCGITKHHIPKLCESIRRK  
LYGLKILCLRQNFNTLNGGYHHLFALRGIKILDLSLCDLDTNDGSLIVDAMKASENKDLEH  
ISLAGNYRLSTVLP EIVREAAATKLGMDCSYCCVSSKSQQEIFDIFAKESSLQLPSSPLA  
STSKSFLKNCTIQYFRMRGLMPLDVEGLIRCIRHNTSLRYLVVDNHHELQICIGFEAMQKI  
ASALEWNYSL EILRFDVI PRKFMGAVLEKIEFWLQLNRCGRRALLQTNEGSKSWSHII SQ  
GGMTKDPNIFWLLKHGSVMSA  
>comp14960\_c0\_seq1; 130 225 1073 LEN=1816; translated  
MPSPRVWIMGVAAIVLPVLHTHSRAVDALSASASTPGTTVATEVPPLLDVPVWSMATFN  
DDGLEGDSNEKTATETEIGAGNKTKRKRRTNMNLLTYATPVSIRPDRLYALGLYKETKSR  
ENFLREKSCVLQLLSSDVEGDRESPEVFAACVRLGGASGADVCKEDELDDLGMELQELP  
TDDNTDLPRVLP GCIRYLKLSMVGDAIDCNDGEGSHDVVCRVDMWTSAASTKPTMS  
PGARTGGARGIAPVVPLSTGRRLRELGLITEQGRIAPEAPTSE  
>comp14961\_c0\_seq1; 429 845 2477 LEN=2583; translated  
MAMATATASNDAKKEHEHETDQKKTAPTDPVTKIRDDDDKTTDAQWKRVRTIRVPEF  
GPDADRAVRS LQNARKERAXGQDLRQRPEGVVREHADLRCKAGSVGIQRKQHDGVCVS  
VPSRPTVYCYDRNPVLSNHKHSFLHVSFAVTNALLPLIFIPNQFITDTXVVD CGNQSL  
LIGLRGSQNAADNRHPYGYGKSVYFWALVSALGTFMAGVSMHSVQTLFNPTLVENIS  
SEVWFVLA MSFVVDGYVLYRTVG DVEEARPKGVPMKLYVSKLRDPATLAVLLEDGAACLG  
IVIAIAGIAASHASCNPIYDGLAGVGISCLLAAVGVTLARVNHSFLIGQVEREMLEGIE  
KIIRNRRIENVSGIQSQWTPETFSFKAEVDFDGTYSALLMPRYRAEFISAGDDLDEE  
LGVLLSWY AEDVIRAVEREVRHIEAMIRQYPGA EYIELEPMSKFVDRFAIDDSFEKLL  
DIEKKELKKWV LVLYENKEENAWRSVNTKGGTSNIKTPDQNVVSGAVPSDTLSESGSMTG  
DTKT  
>comp14961\_c0\_seq2; 496 845 2329 LEN=2435; translated  
MAMATATASNDAKKEHEHETDQKKTAPTDPVTKIRDDDDKTTDAQWKRVRTIRVPEF  
GPDADRAVRS LQNARKERARVKT SVNVQRALYGNMLICVAKLGAWVSSGSSSMMAEFVHS  
VVDCGNQSLLLIGLRGSQNAADNRHPYGYGKSVYFWALVSALGTFMAGVSMHSVQTL

FNPTLVENISSEVWFLAMSFVVDGYVLYRTVGDVEEARPKGVPMLKYVSKLRDPATLAV  
LLEDGAACLGIVIAIAGIAASHASCNPIYDGLAGVGISCLLAAVGVTLARVNHSLIGQG  
VEREMLEGIEKII RNRRS IENVSGIQSQWTGPETFSFKAEVDFDGTYSALLMPRYRAEF  
ISAGDDLDEELGVLLSWYAEDVIRAVEREVRHIEAMIRQQYPGAEYIELEPMSKFVDRFA  
IDDSFEKLLDIEKKELKKWVLVLYENKEENAWRSVNTKGGTSNIKTPDQNVVSGAVPSD  
TLSESGSMTGDTKT

>comp14961\_c0\_seq3; 356 160 1128 LEN=1234; translated  
MSHSVQTLFNPTLVENISSEVWFLAMSFVVDGYVLYRTVGDVEEARPKGVPMLKYVSKL  
RDPATLAVLLEDGAACLGIVIAIAGIAASHASCNPIYDGLAGVGISCLLAAVGVTLARVN  
HSFLIGQGVEREMLEGIEKII RNRRS IENVSGIQSQWTGPETFSFKAEVDFDGTYSALL  
MPRYRAEFISAGDDLDEELGVLLSWYAEDVIRAVEREVRHIEAMIRQQYPGAEYIELEP  
SKFVDRFAIDDSFEKLLDIEKKELKKWVLVLYENKEENAWRSVNTKGGTSNIKTPDQNV  
VSGAVPSDTLSESGSMTGDTKT

>comp14962\_c0\_seq1; 478 127 1653 LEN=2018; translated  
MELCSGKSPEPLALRNVGRISTPISVYPPPIENWYVVVRESSGESRIYSSWENYQEDSSS  
SENREAIQDGGPPEVAAPPTMAQAQKQLKRYNSEYKLFPTLSSTIEKLNCKSDSKNGND  
RNNIHTRVSPQPQSGSTSKSNATIATRIIDSLVSNDSIGGSLPMPFAAFAAVPPANQIIIVN  
SGEGDNRRERLTATALKSTPRSILSSNEEKMGTRMTQATKTPYGITIPSVPLNKIIVPTV  
PASMSTRMARTDMSDPKRSKLDTSNLDALAIANNSTADRSMACVMGRGAVTSCSKILA  
KNSNFMGDAQPPASIIAGRGAACSADARTISSNLLIGLQNSTMNRSPSPDPVKDANL  
HKPLSTTLRIPEVPTALSGSLKIPEVPRGIMTTKAPDSLNTLSSLKRSNDASSSSLSN  
VLMSTQPPQSQTLDYFYSQQKQEQYALYNRRILLSHLDSTASYRNQLLHPQMDTFRQRV  
ELNSFSSNDSEVLLNSGGDSFEQKRKRT

>comp14963\_c0\_seq1; 852 125 2269 LEN=2311; translated  
MNEILNDVYAHVEMRDDCPSTEESDISTFLEYARDVIAENNRSYDSASFLEFENLLQECA  
ANHFLDSNGDGINDSMTSESTYSGYMNDGSESGSRYKKTPLLKDDIMSDNAYNRMKGI IA  
RKRTASN RATRIEEIDA VTI TSNHDVSSFSRNQSESDVTDSEDEVITELMVSKMNRSSY  
RQRCDSDSSDIADNTAVRQIRQRRARRRSNKKILRGESLSGNDPKFLDDERFSAILESP  
TRKDQALSFLSRRAPDLYDSVVAHLDRACDDGTTFRENFANHPSEEQSLQRNVDMISIE  
SSTRAKLEIDTTNTILPSLVKKGIVYYDLPKIERALDRIVQKIDVTTKTKQKMLNQLVERF  
EMERGERNLGQKGMASLHKL RARKATLQAKFLRYAREQKYQHQS FEFELQSSSTGTDYSS  
EPTTLGASDSEAI VRLVQHNPLTQPPVSAAPVLTSSGETKRLKLLLEKRKRSI SHSRKFR  
EKKSPLESQFMEQCLNSYRLEETASISKSSPFYKISFNRPKGDANYEVLSPDSSLTNDIS  
LTSDYFSSSVDDIRPRYNGEIQVQSSDDSAWSEMSFQSESNRFTVSSTAPLLEKGNRGA  
GQKFQVRRPLSVQTKHKTINDSFEDIVLRNTPKPGSKGCWILFGGDSPTGVEDIFSLQ  
EGKGIGDALAFVDDDEGDHVFADKDDSFLIKSFEEEMILPEYHPVFFSPNRFEI

>comp14964\_c0\_seq2; 217 1 520 LEN=842; translated  
XRLGTRQGT RPRPVEPQQQAQHLARASPETEPPGSASPALETAPVPAPGGELADRGPQA  
LPPPLPSDAPAI PDSPPGGFPDAAPLRPEPPVKKATVPPPPPPPPPPPPAALPPPPPPMD  
PPAENHCGGEHDDNEDDDDDGSDYTEDEDDDYTDDES GGTSPSKKTGSGLFGF

>comp14964\_c0\_seq4; 391 298 1458 LEN=1458; translated  
MSLLCPVLVLSVSVSVTIPQAKPRKRKKQKQKQKHKRKP TPIQMLIRPQFTEDPQKKQK  
KQQRQESAMGNSASGEDGGDYNHGYDEEEDDADEYAKQFDGIDTLGYRVLGVQPDSPAS  
KAGLVSFDFDIVGANQEMLL GSGADLQEGDEYDDVDFPRLLREN LHQTVELLVWNIKARE  
QRVVQLVP SDDWGGAGLLGVTIKLDDYGGADERLVRVLEASEGGPAALAGLVPNEDFLG  
TTMATLSTTDVLAGLLHQYLGRVVELYVYNSKTDVVRIVGLHPTYGWGDGDSLGA AVGT  
GYLHRLPESCRGTTGSSVERTVRIVDHGGCPSAPGSNSDNGNGNHHS GFGTHGADRIRIE  
PTLEMEVEEDGDERVAQPHRLGTRQGT

>comp14964\_c1\_seq1; 1153 64 2839 LEN=3141; translated  
MHCWIGICAMLFARNESGICPSGITNKSMAITRTQNNKWTAPIQNR SVGAHRRAFATARR  
SATATKASDSNDDGPPTTDS SPDDTI IPEKIRWIFEEADGDFLDEDDDDSFDDLFLT  
DDEEYDDYDDTGGFLVDDSDDEGPGAGLSEDDLME LHADVADTSLPRDPAEAPPATEPM  
ASGSP IPPGAEE SIAASTVAAAQTSGKTTNAVSMENILASLES DLSYFYLRDELGITED  
TMWKITNDAPSVLGFKANNVRNKVKVLQSLVGLTDDEIRQLITLQPTLLQLSAKKNLAPT  
ILYWIRRLIEIGKEELRTLILGCPNLLKFSRANIHRKLVFFQTTMGYTVSECRKILLKDR  
LLTCSVKTGLIPRLRFLHKEVEISLPDIRKIALKNPSILRMSVEQNLTPKCIFYFILTLH  
MENKDVAKMLLKYPRILNYNLEHHILPIHHYFLSLEFSTYEF SYILQRYPRLITYSLMRI  
KRRIGYLR YELSLEAKAVRRILHYCPQIISLQDNLEETIGFLLNAVAPGATLSATTTST  
STSESGRRSFGSDSPADELVE TDDR DALAI VQILVTS LPTLVALSIENNLSPKVDYLRE  
KLGQEELSGALLRMPALLGYSLEKRIRPRLERLEECGIPLGTITQAITLRQDLYEEWEK

RVRKQAKQREQPAKQRKPRGLARKKTKTAAATRARKRSTVSKRKP AEGVPPAVSAAAGSA  
SDVDVDVDNNDNNEGESEPSFLPPQQTAPTKESSAAETADASSTTTIGGRIDTNE  
GTLPPDDGDEEETETEAEVEATPAPSEMQTDTPQIEPPSAPAVIDDDLLFNHMEAFRAWQ  
ASNRI SDDTEDDNDGDHSSSSSSSTTTNNDQDDEETTTGKREGSV EGGTDDDYEVKEGS  
EIVAPHHIYVEFDDDLLDGLGLGM

>comp14964\_c1\_seq2; 374 1 1830 LEN=1830; translated  
XRLAVESTPPTSKGRCPLTTATRKKQKQKQKQTQKPDHSAEPPGQDSIENENNSKNNNAMT  
MTRSMALVLLVALQLQMQTATR TLQTTDAAFLGGVQNPNPNTN CNRNNFANPKPGPR  
PKPKPKRDRKSMTARKQKPKRPRYVFQKTSATATAKDESYEY EYFTATGNLPPLQAST  
GRSGSASGSASASGAN EHTQNHHDVLVYTYTNDPSTVGEWLASNLPGSKRDGRVRSFLG  
FDIERLPARRSTHPDPSDRSDFAHAAVVQLSTIHA CLVVHLL EGGQNKQKQKQKQKQ  
RHRPRHSGACAEILASVLEDPTVVKAGCSIDEDLVLLHXVVEGQVPPSQQKLQQQLHREGE  
PQKNE DRQGQKAQTGFLDAFAEGEVEFDLGCVVLPKKQYFANNATGGMPPLVLP SNQTQ  
AQTQTQTAPAVAPGRKIAAANI TTHASSSGKSPCHHKPLIRNKSGLQGLCRAILGIELP  
KEASDCKSDWTAFLPTDDQITYAARDAWAGVAIATELERDHEVFERSNLASVLGANETPL  
PELARRHRQRKEAKVELEALLHPYAEKFLLIQEQLLEEQE QEPFKVEKTAP EHDRHRPP  
TIPEHEDEDE

>comp14964\_c1\_seq3; 762 64 2398 LEN=2490; translated  
MHCWIGICAMLFARNESGICPSGITNKSMAITRTQNNKWTAPIQNR SVGAHRRAFATARR  
SATATKASDSNDDGPPTT DSSPDDTI IPEKIRWIFEEADGDFL DDEDDDDSFDDDLFLT  
DDEEYDDYDDTGGFLVDDSD EDDGPGAGLSEDDLMELHDVYADTSLPRDP AEAPPPATEPM  
ASGSP IPPGAESIAASTVAAAQTSGKTTNAVSMENILASLES DLSYFYLRDELGITED  
TMWKITNDAPSVLGFKANNVRNKVKVLSLVGLTDDEIRQLITLQPTLLQLSAKKNLAPT  
ILYWIRRLEIGKEELRTLILGCPNLLKFSRANIHRKLVFFQTTMGYTVSECRKILLK DPR  
LLTCSVKTGLIPRLRFLHKEVEISLPDIRKIALKNPSILRMSVEQNLT PKCIFYFILTLH  
MENKDVAKMLLKYPRILNYNLEHHILPIHHYFLSLEFSTYEF SYILQRYPRLITYSLMRI  
KRRIGYLRYSLEAKAVRRILHYCPQIISLQDNLEETIGFLLNAVAPGATLSATTTST  
STSESGRRSFGSDSPADELVE TDDR DALAIQILVTS LPTLVALSIENNLSPKVDYLRE  
KLGQEE LSGALLRMPALLGYSLEKRIRPRLELEECGIPLGTITQAITLRQDLYEEWVEK  
RVRKQAKQREQPAKQRKPRGLARKKTKTAAATRARKRSTVSKRKP AEGVPPAVSAAAGSA  
SDVDVDVDNNDNNDHNDTKSRATAKGESTDGKNTATTEGGRVVEDGGKIIHWRRR

>comp14964\_c1\_seq4; 251 1 1273 LEN=1273; translated  
XSASASASGSGANEHRQNHHDVLVYTYTNDPSTVGEWLASNLPGSKRDGRVRSFLGFDIER  
LPARRSTHPDPSDRSDFAHAAVVQLSTIHA CLVVHLL EGGQNKQKQKQKQKQKQKQ  
SGACAEILASVLEDPTVVKAGCSIDEDLVLLHXVVEGQVPPSQQKLQQQLHREGE POKNE  
DRQGQKAQTGFLDAFAEGEVEFDLGCVVLPKKQYFANNATGGMPPLVLP SNQTQAQTQT  
QTAPAVAPGRKIAAANI TTHASSSGKSPCHHKPLIRNKSGLQGLCRAILGIELPK EASD  
CKSDWTAFLPTDDQITYAARDAWAGVAIATELERDHEVFERSNLASVLGANETPLPELAR  
RHRQRKEAKVELEALLHPYAEKFLLIQEQLLEEQE QEPFKVEKTAP EHDRHRPP  
TIPEHEDEDE

>comp14965\_c0\_seq1; 834 283 3213 LEN=3548; translated  
MAMHSFTRLRSPPRKFCRCHVLSLSIFLCIIISLSQQLCEGRLSGRDETENVEDIVYPRG  
DFLPLACNERLD DDDPCITPWSRVFGNQLVFPTAVEIPC GKCVVMYPLKDRQRLTFSGGLR  
VLGKLVIHNSNDIFTT SILVHGE LVI ES LKPIDGVDPV SITWIDTKPNRTLFFQSP EGGDE  
SNSICGSGRGACGMGRKPFV VAGGKLNIRGLPSPYMP TWVPLYDVDRRVSTSEDPLVSI P  
AIEDTTHKYKPPKPGCPKDDSLIHYDYLDSDLDFKGSYGSISTFTLNGGLKVTNRSHS  
QHCPVIDLNHIRRCLEPDKLYLMTMKVLLTRDGI VDETDCAKKGDDHCMSIYQSRMSAR  
GIGRTTSLWKERESFGSMLGEETTIAVDFNFTSKQLSESNIYEMIQLRGP GPVDMELLE  
FTLRAPPKEAFPKNVCDLVPTNGNAELLGLSPYFR TNNDTFLSVVAEGNNNYFEVTG  
RKFAAKVKKGRSANAGITWDIPLSCMNAHANYTFHADVRMRSLDPASSEWKMKAYFP GK  
KRPKIKIVVASC PKMGMTWVGCDFE HVSEDLVEANRIE IFL ETDASSCDVDYDVNDLSFK  
LVERSVDHLILPKSVENLWSVGAEIMITSHTSEWNGHSTRRISSIENHDEDDGYVSVGLNE  
AIDGPLTVGSHPFYATEVALLSRNIVFSGEGGAHLTVLKT PGQDQIQGVDFNGFGEEGV  
HRSYPIYFDCNNPNNSIVSKNTIRESNQRCIVIDETNNMLIEGNIAFGNKGHCFV VQTG  
TEVGNVFKSNLGAFCQKSKLLLSARNNKKEETDDTPATFWIGSPSNHWIGNVASGSEGS  
FWIQPKNDRQTGFAGSSHILSLTEFRDNVAHSTDEESLKITGYSPTQMASIKNFRSYLTN  
KGFHVSRSSNIAAEKTM LDTPIESEYFPMIGTTIVPIEGGEEYLI EEDTEEGSFHHISS  
NPTDVFNLQSSPSLLE

>comp14966\_c0\_seq1; 1359 76 3450 LEN=3764; translated  
MDTITYSNKMFDDLCLQDLFIEQAKKSPDAVALVDYNS SYSAAGDDDKGPIELTYREVDE

ITDALAVKIIEDYGVGPDAVVGILLPRCAQYVLACVAAILKAGGAYMPLELVYPKPLLERA  
VKETNAKLVFTNDTYAGRIDPSLVLFTTDEAPFFVDDFSGERPSYPPPSYVHPNADNLAF  
CVMSSGTTGTGPKGICQTHRAAVHSYLDRTIRFPFQTNAETGDVEDRAGAGVFFVWELFRP  
FLKGATTVVI PDHVLFDPEAVTKFVRDRAITRILWTPSLQLVMDTLAPEDVKERLAGLR  
YLWLCGEVVSRLDLAGVFTSLLPNVELMNLYSISECHDVSIGDLKRELGPSEGGEVRKYAT  
CGKAI PGVKFYIVDLEQNDDHESHTKNGVMKLVPEGEKGEVYVGGPVVGRGYLNMPEKTA  
DRFVKNPFLGLDGDSDNIHAPRLYRTGDLGRILPDSKELEILGRCDFMVKIRGYSVVLGA  
VETALAKHPKLSSAVVLAVGGEGSRDKKLVAIVVPASWEDAPSASSVREFLKEHVPPYAI  
PSTFCVIDALPVAASAAGKLDKRLPSHETAQRLRAFSIDDADLDDGNKETNKSNSRIKP  
ENDTEKGI LDIVSLLLDLPAEELSVDVSFFEVGGHSLLATKMVTMINEQFSKELSIITVM  
EAPTVRDISNSILNEGSTETDVTANKVDMQAEALS DPSIYPFATRKG DAMSRFRFESSA  
LLKPRVFLTGGTGYLGSILSELLKIPGLTTICLARAENDAAARERLLKTMDDKYKLLQS  
TLQALQSPDEEKKSDDEVADIKTSENVLDSRLVAIAGDFSKPLLGMNDVQFKSLALEIDS  
IHCGAEVNLIKPYSSLKSNVLGTQEVLRRLATTNGFIKTKVKPVHYISTNGIFPVDKAY  
FSEAELEAERSTVHLKEDVDLDFSPFLSEGYAMTKWVAERMCAVAESRGLPVSVMRPGN  
MAGSSLTGVSNPDDLNYLLIQGILETGCAPTVDTNYALDLTPVDFAAKAVTELATQSPHL  
AIGQR IHLQSPNKPVGLDKVVEWLNQRDTSKPIESVTRAEMWKRIATTNEKLSGWSLSE  
KYFLAYTWLEMSDNLQRALKDSSIECPDFDLDLLEKWFPTSSQ

>comp14967\_c0\_seq1; 128 193 1560 LEN=2503; translated  
MTDQTKHDRKWIRGVNIGGWLMAERFITPYLFAVNSCHVQGS L CYYPGQVGFDR ESITKE  
LCDTEAVCQ PMLVVKAKDPTDYHLIHGFKGDGSPTRIRSGITENGMDYPVDEFTLGQVLR  
SSSGG METATKYMERHWNDFLTYDDLKTLKANGVTHLRIPMGYWIRGIPGLSIVEGEPYI  
PGGWKYFVRAAKWCRELGLIVWADLHGAPGSENGFDNSGHYLG GSTCDGWSKNPANVQRT  
LDILTDIAHG VLEAGLEDVVTGFGILNEPFADCDLEVL RKYDNLSTVLRAILGQSTS VF  
VGDTFRAYRFNDGEFWTDP SIYHDTYLD SHPYHVFFEEGRSFTPRQHIA YVCRHDTRS VS  
DCCFQDGD AKQIP SAGISRLTGEWSAAF DALPTALVPDLMEG ISKTGQLPQRNRTLSSGR  
VGF LRNFCEAQMIAYEAADSGGVSAGWLFWNFKME

>comp14967\_c0\_seq2; 212 193 1977 LEN=2354; translated  
MTDQTKHDRKWIRGVNIGGWLMAERFITPYLFAVNSCHVQGS L CYYPGQVGFDR ESITKE  
LCDTEAVCQ PMLVVKAKDPTDYHLIHGFKGDGSPTRIRSGITENGMDYPVDEFTLGQVLR  
SSSGG METATKYMERHWNDFLTYDDLKTLKANGVTHLRIPMGYWIRGIPGLSIVEGEPYI  
PGGWKYFVRAAKWCRELGLIVWADLHGAPGSENGFDNSGHYLG GSTCDGWSKNPANVQRT  
LDILTDIAHG VLEAGLEDVVTGFGILNEPFADCDLEVL RKYDNLSTVLRAILGQSTS VF  
VGDTFRAYRFNDGEFWTDP SIYHDTYLD SHPYHVFFEEGRSFTPRQHIA YVCRHDTRS VS  
DCCFQDGD AKQIP SAGISRLTGEWSAAF DALPTALVPDLMEG ISKTGQLPQRNRTLSSGR  
VGF LRNFCEAQMIAYEAADSGGVSAGWLFWNFKMEGGAF AEWDFLRGLSEG WMP S IPEPT  
VSSES LYGR CED IY NRTD DSYSIVNEY PDPRTL DWNQWQGS ANDDFVMSDPNIPVDHIR  
HSPRQWWDPRRIADARWFFPASC GF AVAMAFLLHRKLR SCLRKGERLGYTELKV

>comp14968\_c0\_seq1; 735 1 1847 LEN=2450; translated  
XQQQQQQQQQQQALQOQQQQQALQVQALLNGLTNGSNPVATMILSQLAQOQRQQQARQH  
QQLSSVIAAAAALQRQQQQQQQHKKFVITKPTPIPQISSMRPLSMAPTCLVRNPVATAA  
SISAPSTRINGAMNQKQQQQQLTKTVRCVLNQHKKQAKAT TSAAPVSAKRAAFLNKRSRA  
TGAAAYRNP NKKQKRANKAPSAASI IKNRKNVVLKSSSHLVKNGGSAKINAFTLNEDFKM  
KEMPDLLFPWKLHDM LDDSERKEDIKTNVVSWQADGV SFNIHDKDRFVNEVLP EYFTEIS  
KEWDAFINILSSWGFVRFTSGTQKGAFIHRLLVKGKRSICKQMRINGKTVSDWMKQHGQF  
IGRLHALLSHAEKEGKQ EIVSWTPDGKKFTVHDPFGFMNSVFP MYFDSLTYSSFEQKLRR  
WGFMRSPANHTKLDKEMKLEN AVYSHPHFVRGKIPNLVWVK TETKIPRTLQQHNFVRLR  
VMLS DASRRGNHFV VSWAPHGKAFMIHDRPYFSSNIMP NYFKSKFTSFRQSLRNHGFAQI  
GGNGWDEGAYYHKLFIKEEPQLCQGLTQNMKKAMPEWIPVEE EPNFYSEDKQQA AVAM  
VSLKSMT PATGQQKI

>comp14968\_c0\_seq2; 638 1 1967 LEN=2570; translated  
XQQQQQQQQQQQALQOQQQQQALQVQALLNGLTNGSNPVATMILSQLAQOQRQQQARQH  
QQLSSVIAAAAALQRQQQQQQQHKKFVITKPTPIPQISSMRPLSMAPTCLVRNPVATAA  
SISAPSTRINGAMNQKQQQQQLTKTVRCVLNQHKKQAKAT TSAAPVSAKRAAFLNKRSRA  
TGAAAYRNP NKKQKRANKAPSAASI IKNRKNVVLKSSSHLVKNGGSAKINAFTLNEDFKM  
KEMPDLLFPWKLHDM LDDSERKEDIKTNVVSWQADGV SFNIHDKDRFVNEVLP EYFTEIS  
KEWDAFINILSSWGFVRFTSGTQKGAFIHRLLVKGKRSICKQMRINGKTVSTAQNMI GET  
LXPIMRNLGHQISPNTHFIGIFFYWSCFSGVRLDETARAIHRSPSLLSHAEKEGKQ EIV  
SWTPDGKKFTVHDPFGFMNSVFP MYFDSLTYSSFEQKLRRWGFMRSPANHTKLDKEMKLE  
NAVYSHPHFVRGKIPNLVWVK TETKIPRTLQQHNFVRLR VMLS DASRRGNHFV VSWAPH

GKAFMIHDRPYFSSNIMPNYFKSKFTSFRQSLRNHGFAQIGGNGWDEGAYYHKLFIKEEP  
QLCQGLTQNMKKAMPEWIPVEEENPFYSEDKQQSAAVAMVSLKSMTPATGQQKI  
>comp14968\_c0\_seq3; 443 1055 2613 LEN=2824; translated  
MCWMLLVEEEEGAIKKKNNXKHQQQQQQQHIQQLQQQLHLEQLKQVQQMQYPAVPI SQ  
QMPVVASPIPIIHNLIPENLQASALAASMNGTAGYAPALILPVNNNQKYVNALNNMMLA  
AATSLSSNAAVAATQLNAATLPAPQLIPQQQYFQQEQQQQQPVVSIPLTVQELPSV  
LTPVFNGVNLAYPGVEPLGVDPPIIYLVRDFLTHAECDFLIQAAEGAWQPAPVVGKGAGEI  
SPSRTSSTCFLAREDLDYMTKVSALTSKPVDHCELPQVGRYLPTQQYRHHSDAFDLSNE  
DGRRFAENGGQRVVTVLVYLNDCAQGGQTDFFVMNLKVS PRKGTAVVFFPATVDGYLDR  
ALHAALPAVDTKYVSQVWIRQHAYTGSPTKRLAQPMINVPIRSTIDSRKGAEKPV EADA  
NDAKPLPPVDGTASKGTTGTSNARTTGTVRRGVVPATTVSHESTTGREFCGRRHRKSYA  
HAGENPFRVRARGVAFAATGIQRGPRKRCSLPDAPVPAR  
>comp14968\_c1\_seq1; 463 193 1929 LEN=1929; translated  
MEQIEDMFVKPERIGDGKCDTLAIHRQESPGRSPE SNFLRMSARSNNTVGKIFPHQPNEV  
DVWDS SRDPDTPDRKRKTSDDRQPESPEIERKHAANSWHREKDFQVHPGPLNTDSPASF  
PKHSMGHNEPSRYHREVTPHHQPELQSVNSKNGT PSLASEEDRSLHGGYDAPAYHGTYN  
NGGNYVHENGHYQGHTPNRNQGHYLPDMEPSQQYNQNNQQDNYLRRRWACDYCNVATFV  
SYEEACAHEEQCARQYFERYGRHPPSRGPVPQYDRPQPQQQQQHPPTPPQGVLVTPP  
QGHTGNLSHGNDVGGQRNWGSRGGPPMPPLAPTSHDPGHHPHHQYHPHQMHQPVYPHH  
QQHHGYHGHSMHHPHPPPHHNP HHGYQHHPYGGYHGYDAGPSGQRRDAYQINPQK  
RLLLAMGTDQDLSDRQCYVRAEMVEIFAATEKDV SARHSGAQLKLVGQV GIRC VHC A H  
LRPRDRAERAVCYPSSISRIYQTVADMQRFHFEQCREIPP KIRKIYKSLKTTTRPGVGS P  
QTYWVQSAKLLDLVDTESGIQFGADV KVKKEEKDQQQQP  
>comp14968\_c1\_seq2; 481 193 1833 LEN=1833; translated  
MEQIEDMFVKPERIGDVGKIFPHQPNEVDVWDS SRDPDTPDRKRKTSDDRQPESPEIER  
KHAANSWHREKDFQVHPGPLNTDSPASF PKHSMGHNEPSRYHREVTPHHQPELQSVNSKN  
GTPSLASEEDRSLHGGYDAPAYHGTYNNGGNYVHENGHYQGHTPNRNQGHYLPDMEPSQ  
QYNQNNQQDNYLRRRWACDYCNVATFVSYEEACAHEEQCARQYFERYGRHPPSRGPVP  
QYDRPQPQQQQQHPPTPPQGVLVTPPQGHTGNLSHGNDVGGQRNWGSRGGPPMPPLA  
PTSHDPGHHPHHQYHPHQMHQPVYPHHQQHHGYHGHSMHHPHPPPHHNP HHGYQH  
PPYGGYHGYDAGPSGQRRDAYQINPQKRLLLAMGTDQDLSDRQCYVRAEMVEIFAATE  
KDV SARHSGAQLKLVGQV GIRC VHC A H LRPRDRAERAVCYPSSISRIYQTVADMQRFH  
FEQCREIPP KIRKIYKSLKTTTRPGVGS P QTYWVQSAKLLDLVDTESGIQFGADV KVKKEE  
KDQQQQP  
>comp14969\_c0\_seq2; 726 98 2069 LEN=2069; translated  
MASPQPKLDNKSSSVVDRNDEEGRLWKTSFPADAEP PARSDHSIRGMPGTVSSTRLPQFF  
GKERQSERSDEDGGTLTTEELSSCPVAKHEKVGVNDDGAAASAKTNHHCIVEGGNHLEST  
DSNTGEIPPTPKLVVPNDAKRIDEIDPNATAGLDGGFGSLHSDNETQHLAAMPSTPGGK  
KHGRLSIRMGDATENHAAENRDSVTDLSLSGRSFTSHNSCISHHDSINSGLSVRSHEESG  
VAIPMGAVTGTTRTDLVVNSSGDTSTNDVIGFSLPFSSVTAASTRAELPGRKPHTLRDLM  
FDSDIFGARRDHQKHNAKRNNSSSRHSLAIDDFGASEHDLEPATNELSENNSFADDLF  
TTGIQYFGTRKPEHAETNDRHKTIRFVEGHDSGQDLILRDDSGVKAKNKERVLDIFDQL  
DGESYNMDKRYTGS DGYYSWQGGIMYDDGEKENG GYFSD EDEDDEDDAEKKIVRSM L  
YTGASIALVGLFGGMTQLFRKSSDDQVGVADVGVEDAGNEA IETGIDSLINAQRSANAAS  
LNTSSASTSASTSASTSASTSASTSVTSTSSSVAMP GSSNMLVTSASSSSTSATTAANTT  
MVAQTASLNSATSASMTSANTAALGANASAA SASTSAASAASASTTAASASMSAASX  
>comp14969\_c0\_seq4; 659 1 1655 LEN=1655; translated  
ASAASASAIASAVSASAAAAMGASALGASTVGVGASSAAAASALAVQATAASMAIGAA  
GTATAMGLAAGATAGAIGAATAATAAAATI STTATVMAAAVAATGVVAVATTELIPESK  
PSALLPPCAEIPVEMEARLKIIFNADSPALDIFESEKIDVTS LGETITTYLYNEVSDECFE  
TYQRRLMNCTYVGIERQDEDSVILNWDPWII CNSSCPAEDPLFGIDSPDIVERLLQERLL  
QDFDLATFVSNLEKTLAEVDGSGFKGYKPKVASASKASTPDQHRSEFPSEIPSSVPSTSS  
GKPSTIPSNIPSTVPTIPSEFPDVPSEVPSVTPSTVPSGVPSELPSLVPSWHPSTLPS  
ELPSESPSEIPSDNPSATPSMVPSAIP SALPSKVPSEIPSEKPSWVPSETPSEKPSRQPS  
EIPSVKPSAIPSKLPSNVPSDIPSTIPSTIPSSLPSENPSVTPSAVPSQVPSDVPSTPS  
ILPSATPSNVPSGMPSEIPSELPSNIPSGFPSITPSTIPSDIPSGTPSELPSIDPSANPS  
DLPYVTPSMIPX  
>comp14969\_c0\_seq5; 731 98 2084 LEN=2084; translated  
MASPQPKLDNKSSSVVDRNDEEGRLWKTSFPADAEP PARSDHSIRGMPGTVSSTRLPQFF  
GKERQSERSDEDGGTLTTEELSSCPVAKHEKVGVNDDGAAASAKTNHHCIVEGGNHLEST



DSNTGEIPPTPKLVVPNDAKRIDEIDPNATAGLDGGFGLSHSDDNETQHLLAAMPSTPGGK  
KHGRLSIRMGDATENHAAENRDSVTDLSLSGRSFTSHNSCISHHDSINSGLSVRSHEESG  
VAIPMGAVTGTTRTDLVVNSSGDTSTNDVIGFSLPFSVTAASTRAELPGRKPHLRLDLM  
FDSDIFGARRDHQKHNAKRNNSSSRHSLAIDDFGASEHDLEEPATNELSENNSFADDLF  
TTGIQYFGTRKPEHAETNDNRHKTIRFVEGHDSGQDLILRDDSGVKAKNKERVLDIFDQL  
DGE SYNMDKRYTGS DGGYQSWQGGIMYDDGEKENG GYF SDEDVEDEDDAEKKIVRSML  
YTGASIALVGLFGGMTQLFRKSSDDQVGVADVGVEDAGNEAIETGIDSLINAQRSANAAS  
LNTSSASTSASTSASTSASTSASTSVTSTSSSVAMPGSSNMLVTSASSSSTSATTAANTT  
MVAQTASLNSATSAAASMTSANTAALGANASAASASTSAASAASASAASASTTAASASMSA  
ASX

>comp14970\_c0\_seq2; 300 344 1185 LEN=2450; translated  
MSLDTSRIPFGSFIDRIRQDKNNDDDFETAYTYGQSEEEENDRPGVELFLVLLLFLVVVMV  
LVRYGCILFIDYVILCKCRRNRANRYNGNQNDDRDNSSNDNDNADGVDIELAECNDSTK  
EFLEGLTTLTEKRSLFSSILECRKATKSDIQIWKQANHNSDGGNNRKTEASSGVPE SNRSV  
ATSDTPDL SLHDKNRSRSDTMGSADLCCPICIQDIQVGDVVCYSKYCEQHLFXPGLHRQL  
VEYGVDPMPVLPTCDPYQDHAGGIAARDVPPQKKIDEDKN

>comp14970\_c0\_seq3; 300 344 1185 LEN=1320; translated  
MSLDTSRIPFGSFIDRIRQDKNNDDDFETAYTYGQSEEEENDRPGVELFLVLLLFLVVVMV  
LVRYGCILFIDYVILCKCRRNRANRYNGNQNDDRDNSSNDNDNADGVDIELAECNDSTK  
EFLEGLTTLTEKRSLFSSILECRKATKSDIQIWKQANHNSDGGNNRKTEASSGVPE SNRSV  
ATSDTPDL SLHDKNRSRSDTMGSADLCCPICIQDIQVGDVVCYSKYCEQHLFXPGLHRQL  
VEYGVDPMPVLPTCDPYQDHAGGIAARDVPPQKKIDEDKN

>comp14971\_c0\_seq1; 306 1 1050 LEN=1335; translated  
AAGYWPAPAAKAQSEVTTSMDSYGNRGNAAQQQRRHQQQYAAGVLRNHVPGSINSNEH  
SISGLHATPSPAHLSPRGGNYSAGSSSNNSAAMANMMKTPPSPEHPALKRIPPNKIIAE  
TMARLQGRGIRLVAHGVCDPKRVWIRLQDESNSHNSPNDGSSSTKRKEPSVTWQTEFPRR  
VPDQNGQVSIVLMRGLSHSISLKNVLYIDVGKKTALQLTKGGSIPDVTCLSLLTQNGSL  
DLQANSKLERDSLVSFCFSMILDDIHEEDWRALYEASPEPSLASSATGGFGGNI SYLYNNN  
NLSSSMTPGSNGAGNFQTPGSNETSGLSDMDRHRERGTGGKKNMLQML

>comp14971\_c0\_seq2; 496 50 1516 LEN=1801; translated  
MADHEMGLQGNRLSMPASSLSSSLGASTESLLVRHQQQPSYSYAVDPSSSETNGILRKNQ  
LPQQLQYQSQSSQPIPETQLSIPAALNPFPEVSFYTFIFLASCLCLWVLYLLLPRGVRK  
QYFGANRKYAQRDLKNNMPAAGYWPAPAAKAQSEVTTSMDSYGNRGNAAQQQRRHQQQ  
YAAGVLRNHVPGFINSNEHSISGLHATPSPAHLSPRGGNYSAGSSSNNSAAMANMMKTP  
PSPEHPALKRIPPNKIIAETMARLQGRGIRLVAHGVCDPKRVWIRLQDESNSHNSPNDG  
SSTKRKEPSVTWQTEFPRRVPDQNGQVSIVLMRGLSHSISLKNVLYIDVGKKTALQLTK  
GGSIPDVTCLSLLTQNGSLDLQANSKLERDSLVSFCFSMILDDIHEEDWRALYEASPEPSL  
ASSATGGFGGNI SYLYNNNNLSSSMTPGSNGAGNFQTPGSNETSGLSDMDRHRERGTGG  
KNKMLQML

>comp14971\_c0\_seq3; 138 1 392 LEN=677; translated  
XLFRSIPDVTCLSLLTQNGSLDLQANSKLERDSLVSFCFSMILDDIHEEDWRALYEASPE  
SLASSATGGFGGNI SYLYNNNNLSSSMTPGSNGAGNFQTPGSNETSGLSDMDRHRERGT  
GGKKNMLQML

>comp14972\_c0\_seq1; 360 422 1843 LEN=1936; translated  
MVTEGYQEEIVMFDGRTRTNQNSHGIGDADVDDAESNPGSNASSYFCSKVENATPWSDLQ  
RIKKEANEVAMSSSERNLDTTDASCQSPLLNPSESKNTVSSNHIVRDESQEYTMERFDE  
LLERNGRDPVAMDHETHVSNNDGETKTVVTDNDDPETHKEKSEDLDFCKQKHRTVWSNRMF  
RSPGLVADAPSGILLVFDRI LDCIDPHCGPNHFREFGSLDEDDQSSLWLSVSRNSHRES  
REDSSSACSLTTDERSLEAHPLFNHRLANDWATS YERHKANPIPKEELKDG YEWIFPCWE  
DPERKSALPSRSLRDLAASDVGRKRK WAGKDLMSIRSHRPATTSTTLPSIHSEIFEAEVF  
GEVSWGKDEKCKSDPSKPCDDAPDEPYDFPSRESSLLVLHQP IPLDAPYVVCKLSTSD  
DSSLSELFDGLMVSTPSDERQQEEEEELERITDRTSITEETSTLSFSYSMSGSH

>comp14973\_c0\_seq1; 960 225 3907 LEN=4016; translated  
MANGNSDGKRANSGGDGSKKKKKNKGAKKSVFPPTVERMEDMALT SRVTEAMSPHLNGLT  
DKTLTEFIVHLTETQLKKGAAAVVWQEGYNLGLHLLLEESQKQKQRMSENGAPDLP LSL  
CKSLLEWVNGQSPRIQRWAKKQRQKAEARQARDGNKFKSTVEGASHPMSTNFPGLAKPN  
LQNSVPLESGFYEHNSSTSKDSKPPPVVSSGGGAVESSRRRGI SNLPAWMTNKSDNNDG  
NLKRPRSAPTLEVHQIYTGRVEQVLDGIRISLDDFKTNNNSGMICYKNQLPNNYERRDFR  
KGQSVWVKLISMTTSNNGDKKLILS IKDQVDTGKDLMPFRRTAAMESSLSSVDINTKT  
ATKASMSSTAVVHPGLDVDKLRAQQRDSNLAGRGRPTKQALTEHELFEAQQLIKSGVLP

VEQYPTFDPEHGMLAVEETEETEVELEAETEPNFLRGQTKRSGRRDLEPIKIVKNPDGSL  
QRAALQQGTMAKERREL RQAQANQLIDSIPKDLNRPWEDPLPEAGERHFAQELRSINVMS  
QLEGAP EWKQKAENKTL SYGII SNKSIKEQRESLP IYRLKNELI SAVTKNQILVVI GETG  
SGKTTQMTQYLD E M G I T K R G M I G C T Q P R R V A A C S V A K R V A E E Y G C A L G E Q V G Y S I R F E D V  
TSSDTI IKYMTDGLMREYLADNDLKRY SALMLDEAHERTIHTDXPFWPLKDL CRRRPDL  
KII VTSATLDAEK FSTYFFMCP IFTI PGR TFPVE ILYTK EPESDYLDACLITVMQIHLSE  
PAGDILVFLT GQEEIDTCCETLYTRMQALGDLAPELIILPVYSALPSEM QSRI FEPAPPG  
SRKCVVATNIAEASLTIDGIYYVDPGFSKQKAFNPKLGMDSLVVTPI SQASARQ RAGRA  
GRTGPGKCYRLYTEHAFKTEMLSTNIPEI QRTNLGNVVLQLKAMGINDLLGFDFMDPPP  
ATLVGALETLYALGALDEEGLLSRLGRKMAEFPLEPNLSKMLILSVDLSCSEEILTITAM  
LSVENPFYRPKDKQS QADMRKAKFHQAEGDHLTLLAVYQGW EAAKFSNPWC FENFIQARS  
MRAAQDVRKQLVTIMDRYRLLLIRAGKNHKLICKAITAGFF TNTAKKDPQEGYRTLVDQN  
PVYIHPSSALFNKNPEYVIYHELVLTTKEYMRNIMVIDAKWLTE LAPNFYKPADPNKITK  
QKRKEKIEPLHDFRNPKDAWRLSRRKG

>comp14974\_c0\_seq1; 587 484 2415 LEN=3013; translated  
MAPPTTPSTSQYTPQQPLRRATYVHVS DLISAYNIDHAQLEKEISRVNEKRTKLRAMSST  
AAATGAGKDRIGTGRSDYRSDDSSDGVSAPEEDPDI EDTLGP IAPQKRLQPPRGGFNLCV  
LVGNINLVVDKRRVDQSRVRLAEVEIGDE TGTVSFRARDQQIDLLEKVRSEGKPGAVVMR  
NCTLELYQGKHIRLAVTKWGLTEYPDNVSSTPPPPS AMNSDRNFSLIDL SVVASEISEK  
EHTDSMAYANSTTTTTSGGRQ GKSSLETRTSGSSASSPMASSASSMQGKSGAKNQOQGS  
RRGNRSSTGEQRRQNRNPQYGGTKTDK SQPLRSDPMMYRGMQGYHAYGEQGGHMRQHYPP  
HAQYAHHPHTRAHSQPQQHQDVASVQFALHQQYEMQQRQLQQLYSREQNRAVGQVPQQPP  
PQQTSPMLVNVDP SFDGSEIGNSPVLVPNPEHYSQLPKMEGH SRMQQDAPQGM AHPATAG  
YPSLGVMSGYQIGKMNPEATSFAPTYLSAAQGS DSKQHMSYMPYPPQPSYYAMSQQQQQP  
PFLGGSVYSLPPSGHHP SLLVPSGVDATHHHMMAQQATSFDALMDQQQETGSGAATATAT  
TTSQSHRPRYQQHYVSHYPPAVPPAKESSSSKDKENVT SKPGS

>comp14975\_c0\_seq1; 643 1 1726 LEN=2036; translated  
TECVAESPSKEVYNGNNATRHSITPYSTAPHRKNSTKPDHKTSNALRENAMSSSSSGSGPY  
GTGSSASTNRGLARPPPRKSTAAGGEAAGGSTATSAASTTASGPRKTTAATAATAAARS  
RRAREAYGRTSRASDGSSTAASSVSGSTGVSSSRGSARRSGAAAVAKGATGTTSLAASGS  
SSSTTG TAKDRSARLSGAARKAPVASR PVGSYSSSPAPMAVPTAEGNNPNGSGSGNIYS  
NSNTSDENENDAWEDWGS PAKPAADSADPAKTAATTNDWYSAPVTTSSPYTSTGFAASD  
QSQQQS QNHQIPMQPGSGFYQPSSAVQQQQQQPLLSGAMDVSAHTMSAGGATTSATTSAG  
ATPSFSMFMPSAFAQAPGENAAA SHGNAYAPSI EDEAPLLEELGINVDHILLKMKTVVLP  
FSRFGGNQIDPAAICKEADLPGAIALLFLLGGEMVLTGKLRFGYIYVYGLLGCIAMTLVA  
NLISPT EAI SFWTVT SIMGYSLLPVN IALVKIFVINLVHLNTLGNILGALTVAWSTMAS  
TRLMELGCGLRDQRYLIMYPLLLFYSAFVLMTIF

>comp14976\_c0\_seq1; 487 227 2206 LEN=2275; translated  
MTCSRLLSKAVRKERRCCPLKLISSDLVTGTTTRQGVNNVPLLSTVPTPSSFPPTPAPTSRV  
LMKAPLILRHYQNQHHTSSSHEIQIHHQPQHYKIRHQNPATTAHVVEYSYPHLIQQQST  
NSGPGCGSHKSSSKTGVV KRVANRRHAHTHATAQGLVARGTNNPPASGWKKP IVSLLGSGS  
FSLSSVHSSSSKSSSEAVAKDNASDPEPLFSLPTSASNKPPLPETVGVDM EELMKLASK  
KTTPLALKDMYKYAIVDANNREQRIRNAQFLHSEL PVRVAQRAVDLLTLPHGLNEIPAVL  
RVAHVYLLYLEKFQECPIPTDVESENKFTDMLQSMVLERSSIPNAIAQGVDAWMKNDTWT  
VQGDGDDNNEEDVETREKERKRRVKEMEDALYRFF TARVGLRFLTEHHILSSPTRAAKL  
PLGEEKVDEDDSF LGCIEPDCCPTREVRKVVEAVRKQTM EYYGDGVCPEIQIVDGDIAAH  
RKELNNFTYVPHHLHYMVGELLKNACRATV KRHIESKSTEKIPPIKIVIVKGAEDVTIKI  
ADRGGGIPRSKMSEIWHFAHSTSAQDEIENETDFGVDEITGAAIRGFGLPLARIYARYLG  
GELTLKSLEGYGLDAYLHLPRLGNKCENLPHVRFSPSNLTSNPLRSSALRRAQALLK

>comp14977\_c0\_seq1; 436 100 1802 LEN=1859; translated  
MKAGKPSNVR SASKASFDASTNVSHLRAGALNSGETRET TKAPKPLEILTASNSRSLSFPT  
SFWE PGVRRDPVLATI QNAHDEISDRGVVIKLNARPSEIRAALKASRAAVKAELEQQKA  
DKDKQQSLVKEQQGAYVKMNKIRAEIEAIKQKETKEKGF'TT DNGGWD RGKFS SSSNRMAP  
SPQKASESDERGVVNNFKEFRKFSLE RETIRGSTGGKILVSSPNVVSEMQRRTSKNDRSFY  
SDQSKSTDHQPSLSTSEVPK VRET PTRSLPMTARRGSTSPIKQRLFLAREGDEKHNLEAQ  
RKKLEEAKGYFDEGYQLCWFQDSRRALEQYRKALTVREGLLGKYHDETGXVRI IQYTLI  
GKSLSSGHLRRWF SRTLNL LCHLFLFLSRTYYWIGRSLCKLKEHDEALVALSRSLRIFVR  
VMVTNQYLTWTEVAIDEVFKTMGATQACHDSFKAGIDASIAHEIKGDDFTKSKKYAQAI  
AEYRMAIETIQNLHPDSADLH SKIAIILRGMGEIEKSLEENKSALEIYELSLGPEHPETV  
RARNRTL RKKRLNQLSLALEEKLNTGS

>comp14977\_c0\_seq3; 455 100 1946 LEN=2003; translated  
MKAGKPSNVRASASKASFDASTNVSHLRAGALNSGETRETTKAPKPLEILTASNSRSLSFPT  
SFWEPGVRRDPVLATIQNAHDEISDRGVVIKLKNARPSEIRAALKASRAAVKAELEQQKA  
DKDKQQSLVKEQQGAYVKMNKIRAEIEAIKQKETKEKGF'TT'DNNGWDRGKFSSSNRMAP  
SPQKASESDERGVVNNFKEFRKFSLRETIRGSTGGKILVSSPNVVSEMQRRTSKNDRSFY  
SDQSKSTDHQPSTLSTSEVPKVRETPTRSLPMTARRGSTSPIKQRLFLAREGDEKHNLEAQ  
RKKLEEKAGYFDEGYQLCWKQFQDSRRVSAISFCRGKPCDHNSNFDDSLIEKRCYISFLN  
KPFNSNLI LNDFQALEQYRKALTVREGLLGKYHDETGXVRI IQYTLIGKSLSSGHLRRW  
FSRTLNLCHLFLFLSRTYYWIGRSLCKLKEHDEALVALSRSLRIFVRVMVTNQKYLWTW  
EVAIDEVFKTMGATQACHDSFKAGIDASIAHEIKGDDFTKSKKYAQAI AEYRMAIETIQN  
LHPDSADLHSKIAIILRGMGEIEKSLEENKSALEIYELSLGPEHPETVRARNRTL RKKRL  
NQLSLALEEKLNTGS

>comp14977\_c0\_seq4; 236 150 527 LEN=584; translated  
MGATQACHDSFKAGIDASIAHEIKGDDFTKSKKYAQAI AEYRMAIETIQNLHPDSADLHS  
KIAIILRGMGEIEKSLEENKSALEIYELSLGPEHPETVRARNRTL RKKRLNQLSLALEEK  
LNTGS

>comp14977\_c0\_seq5; 502 100 1689 LEN=1746; translated  
MKAGKPSNVRASASKASFDASTNVSHLRAGALNSGETRETTKAPKPLEILTASNSRSLSFPT  
SFWEPGVRRDPVLATIQNAHDEISDRGVVIKLKNARPSEIRAALKASRAAVKAELEQQKA  
DKDKQQSLVKEQQGAYVKMNKIRAEIEAIKQKETKEKGF'TT'DNNGWDRGKFSSSNRMAP  
SPQKASESDERGVVNNFKEFRKFSLRETIRGSTGGKILVSSPNVVSEMQRRTSKNDRSFY  
SDQSKSTDHQPSTLSTSEVPKVRETPTRSLPMTARRGSTSPIKQRLFLAREGDEKHNLEAQ  
RKKLEEKAGYFDEGYQLCWKQFQDSRRALEQYRKALTVREGLLGKYHDETGRTYYWIGRSL  
CKLKEHDEALVALSRSLRIFVRVMVTNQKYLWTWEVAIDEVFKTMGATQACHDSFKAGID  
ASIAHEIKGDDFTKSKKYAQAI AEYRMAIETIQNLHPDSADLHSKIAIILRGMGEIEKSL  
EENKSALEIYELSLGPEHPETVRARNRTL RKKRLNQLSLALEEKLNTGS

>comp14977\_c0\_seq6; 521 100 1833 LEN=1890; translated  
MKAGKPSNVRASASKASFDASTNVSHLRAGALNSGETRETTKAPKPLEILTASNSRSLSFPT  
SFWEPGVRRDPVLATIQNAHDEISDRGVVIKLKNARPSEIRAALKASRAAVKAELEQQKA  
DKDKQQSLVKEQQGAYVKMNKIRAEIEAIKQKETKEKGF'TT'DNNGWDRGKFSSSNRMAP  
SPQKASESDERGVVNNFKEFRKFSLRETIRGSTGGKILVSSPNVVSEMQRRTSKNDRSFY  
SDQSKSTDHQPSTLSTSEVPKVRETPTRSLPMTARRGSTSPIKQRLFLAREGDEKHNLEAQ  
RKKLEEKAGYFDEGYQLCWKQFQDSRRVSAISFCRGKPCDHNSNFDDSLIEKRCYISFLN  
KPFNSNLI LNDFQALEQYRKALTVREGLLGKYHDETGRTYYWIGRSLCKLKEHDEALVA  
LSRSLRIFVRVMVTNQKYLWTWEVAIDEVFKTMGATQACHDSFKAGIDASIAHEIKGDDF  
TKSKKYAQAI AEYRMAIETIQNLHPDSADLHSKIAIILRGMGEIEKSLEENKSALEIYEL  
SLGPEHPETVRARNRTL RKKRLNQLSLALEEKLNTGS

>comp14978\_c0\_seq1; 324 510 2136 LEN=2186; translated  
MRLGASAPVPLFSLISLLLTRNPSACFWISSLECSGASDPDRNGDRKNRNGDKSVTEHSE  
DVGKLVIAATSKENDGDDNAGGNFFGELSTLEDVVRVLKLMVNRGTGYIQPSANVIAD  
FEYVVLDMMTIGHRNKNYRGNWKEEKGSTKINNYFNSDGESESGNSFGNGSDLLGSHFPHS  
PPRSCDEIDLRLSKDKYLIGTFVDGDNGRKYCVLATTSIAYPWGTVIIDLDPSSDTKNLS  
FDCPHPKFDAETGEQGIRLLKGTNARSWVAVGSHRMANNRSLGTCQPQYSHFPSDAAHSV  
DSCFLAAVAAIKFYYESIVHEDYTSVQLHGMSKTTCCSIDTFFSHGSCSESI PFKAVAAT  
ATTRLNIGNIGDVYMEKIEILRNIATSHPLDQGHVVFASKSSRTGGCELCGTTNIQGRFIN  
GVTRTDLCGTAASSYNGRFIHLEQKRDIRRESRAEFWNDVFNTAYPLFSTPPAATTAADG  
NDSTESENCNPPPHDERNAELADFI LFSVLVLLFFFETLGPICFGGIQKPYSVLYSSKRYR  
M

>comp14979\_c0\_seq1; 274 259 852 LEN=852; translated  
MVPVVPVAHALRFDLGLPGIGSVSYRDGLLRIPSEQKVSQPLSSEASAADQSLWLKVPD  
RAFLGPSAAADWNAEGGVSIEHRLTADKGYGAFLAPSQDPLPPGTFLGLYEGELLSSRSD  
LDGLHASRRQAANKPDI VGDYVMSLDGGGHFLDGYDLRYDPTNEESFPFTPAHLNHASRD  
TPGCNVVRRLLVYVPDDL R

>comp14979\_c0\_seq2; 203 1 733 LEN=1363; minus strand; translated  
XYENRNAKNLGAIEVPLSSVDIESQEVIKQDDCGDESGVVQSSRATGIQCDLNILNEKTD  
LES DLHLRDEDPHTVLAPGSAEPPSIVDESNIDSSDHTTASCIICFEDLKVGETFVWSES  
NP IRNHTSGDIGNNGNRDGHGCSHVFKTCMVRYLASNARRSVRKLHSAFRSSSGRGGNL  
TADNPDLLVGLDNPCPICRRRFFCTLSQEDATDVLPIEPPHRLSSPFPCIASPTVQDPSST  
ILVE

>comp14979\_c0\_seq3; 203 1 733 LEN=1486; minus strand; translated

XYENRNAKLNLAIEVPLSSVDIESQEVIKQDDCGDESGVVQSSRATGIQCDLNILNEKTD  
LESIDLHLRDEDPHTVLAPGSAEPPSIVDESNISSDHTTASCIICFEDLVKGETFVWSES  
NPIRNHTSGDIGNNGNRDGHGCSHVFKTCMVRYLASNARRSVRKLHSAFRSSSGRGGNL  
TADNPDLLVGLDNPCPICRRRFCTLSQEDATDVLPPIEPPHRLSSPFPCIASPTVQDPSST  
ILVE

>comp14979\_c0\_seq4; 279 235 828 LEN=828; translated  
MAPVVPVAHALRFDLGLPGIGSVSYRDGLLRKIPSEQKVSQPLSSEASAADQSLWKVDP  
RAFLGPSAAADWNAEGGVSIEHRLTADKGYGAFLAPSQDPLPPGTFGLGLYECELLSSRS  
LDGLHASRRQAANKNPDIVGDYVMSLDGGGHFLDGYDLRYDPTNEESFPFTPAPHLNHASR  
TPGCNVVRRLLVYVPDDL

>comp14980\_c0\_seq1; 617 105 1835 LEN=2344; translated  
MKTLELPRSSTGSSVRNCQRRNRSPLEVFLSGFILVGFVVTQLHSGPGGSGIIRSTAAG  
ATASTSNLPYEKLARIVQNKVDADARDRDPPIISRLTRVLSKLANQQTFFKGLDGAHE  
AYQRTHSADDVHDVSVS GRAQRSAARLA AVAEALYACELVEVAERPELVWGEEGDEVLR  
EKEVVLNNTLAASDEAGRRSGDEKDLSSVLVIYEPLYNGGIGLEHGTIQSLTRPAETA  
PGRGRLLVVLGDSSSLTVPQKIEILDETPKKIKLSSGLVTNEVASVQPTLYKKAGKLLTL  
LEPQLRQYNASAVHFVGHSLAGGVASLAATIFDGSIPMPKKRSKGRASGSKGKRKKKPA  
SGEEELPDDSPNDDGSEGGSEGEPEGGEDSEEDDVPLEPLNGLGRARASALTGSPCLSS  
NVVAAAYCTSFVYGDILCRTTKESIGRLVKRIERNLHSGFIGKQLGWVSDTMSMTVSGLQ  
SHAHGSEGEKLAIPGRAYLVRPRRLGCICSIHEVGNLKKGGREALRESLLWSMHDVLL  
SMSMLKHHRLSEYIQGLDRTQLRGVADDEMQPVDLA

>comp14981\_c0\_seq1; 822 474 2267 LEN=2672; translated  
MNTSIPGNENAVTDSDSNEKMDKINDNDNDHRSLSLDSLQRKKKAEEAEFTHENHTSS  
LTLTSCDGDFFEEKIWSRDNNNRNSNNRQERRASQLSDITYESDDQQGVSDLDAQTTD  
DQHIASDFDAQTTDDQQTSDFDAHTMDSNDSSWADNYSALLHTASLMGGQRFSLNETSK  
AGIEDGQRPANTAAPVIPRRRVSVNINQRGMTAADINTSTENDGRTVTKANAAAPTIPQR  
SSSHTSKLSSNKYQASKSNSFDSASFADNMIFDGRDYNMGDTASFAEDAVSIGGRSSK  
SIASGTNQDINTITTKTALSATTNSESTINVTALHIENENEHYQYRRSSNGGSHRDLVA  
GNLSVDPPIAPARRASRSLPCPTEDEESREASTKDAQQLFLSHCRIDDSNDDSYISR  
RNACLSSSSTNASPRVKNNKPEIPLRTDLDSPWPNFNPMSRIYPEENINEPPTCPIRKY  
SSHKSNLPAATNTRFSNRHSFSTISASISQSSNQPPALPKRRSSDSTPCKNLPLLESPPSS  
TTVTHSMHPSSSQTLIVQDEISNQAPTIPMRKDSNSTCKLSKNNSMESSASRTEV

>comp14982\_c0\_seq1; 860 65 2461 LEN=2541; translated  
MTSIMKRNSIINQDDQRLVEEFASLASVANPADEKAVRRASRASLQFFQRETSKREIASD  
LPVAPAPRRTSRNSFIQDQGVQDEYIQKRALNKPTTKLEDKIPVLADLTEAESITRV  
DGNVLAQMFVSGYAKLNANVEYLNKINVFPIADGDTGANMKVCKLPSRNLDDPSPSVL  
RVASNMAADVLLNGQNSGTILSHFYVSLAEERDFPAATFYESLSIDEFAACLASTGRK  
MAEAVPNPVEGTLSSVARDSCSKLMDEAEQKMNEEDCEPKYANLKDILLEIWNLAQSEL  
QKTPDQLVVDGKVKVLEKAGVVDGSAQGFVYTIIEGMWLASKGELPEASDPTLFKTAVKRSG  
EASFEGFVDDHSICDTRYQFCTEAVVLLKEGVTKEQVMEVINEECKESCDGCEKDPGDS  
VVCVGAPEKEGGNMLKIHITNDPETFFSKLKTFSRDPVLKKEKVEDMKIMREIEHESNS  
AVDLENAKFNIIIGLSSMLPPTVKAVNSDLMNTFPMFLVPQDTNEPIDIRYSTDTEALVA  
LNQQRNPSTAMRYTTATSSPMQMKIELLAALAKGKPVLCFVFTDKKLSAFGRNVQLAVE  
MLDSQKQKMFVHGWGHDGPFLEAIKCAKEGKTIDEAIEACEDVAQRTYSKVGFMDC  
DMFRKMKAWRPALFPDGFDIPEGHHMLSGPPSKIRPDGIAIEKRTQLMMAPIGMGSSRED  
AFEKAAKHIDGLAPGQKLGVMIPCVGRPDYGHLMVQKMEEGAGIEFTPEPPYVFNEGIIA  
VIMGSWGSINIMYKVVVEE

>comp14983\_c0\_seq1; 2869 1 7610 LEN=7807; translated  
XDDDDVNEEESDGRKRGRKGNKNQKSPSTNGKNKKESLIEYEYLVKYKNLSHMHLEW  
KSGADLES MNKSAKTYMRYRLKKAQGGDDDIESPDPFDPFVVVQKVLAEQEELELEVQ  
GEELLKWEWEREKELAEEDLSEEREREEEEQRQEEEARKKASETAGEGENTVAGAEKAN  
KDKDLQADTKNETQKLSNDEEEKKDDALDDWRKEDIDFSQLTLEKLLKIVDLDEAYPKI  
EGCDNPYRDGYITEPPKKPRASYLFFQCTMRAYFSMRNP NATNSELMTILGEQWASMSEE  
KGQGPFL ELAKEEYKQYEKERALLERAQRPNEMWQP IRRCKMVLERLSQDGFANIFLEPV  
NLDDFPDYEDVIDFPMDLQTVRRKLETRKYQMP EQFARDMRKIWNCKIYNRHGSAIWHV  
ADYMSKQFERLYHAWVQFRERYLRWANPRARPWEHTCRQHDGKCNTKDEDLVLCDHCD  
AYGYKCLKPPLEKLP SGVWHCPDCAKLR SVRGVQMMSAVSEQAVRKRAELGEIPTRKVK  
KTMYLKWKWAGLGYEFCTWETKEDIGNPELIAEFRKLN DIVSEEPFITENAVSKVLEETE  
HINPKNAGGSTCIPDLRTRLYSQTRAFQFVKFGLDVPKNVAAECGPVLKASHQLSLVDKKT  
PYHSKEIQLCLNELVERVALKGTLPVMVKLDP SLPPCLTGEYDVVVPITAKGLMMNVGEI

HGSVAFLGYRQFPDGSKGAELNLIIRGTGDKIIAVDGVSTVNKTFKDVI GMLRVAGKNK  
YSVMRFLESQYANIDNDLTSYGKRGFRFTIETLSNKFSTDRKRLLVQRYIHAENESKEEGE  
KEAIDGEEDEDESEGEFQPESEDEADQDEVLNRTTDL SKEMKLETDEDFKTGKSDAPPAT  
PEKSETKVMVQTEEEKAPPNGNGTTEQPDVVPNSPINADASAEESKMELMSPSGLPPVK  
TAESLVR IHSENTHSLAYRMLNIDVGYSSDEAGDEDGAFYIDGLDNTFTSEKEVRKYLNI  
VTPEKEENPDEDGEDNEDAVEESLVPVRRNDFSSLGDRRKL LVSVAVSSSAPDPEDCDEN  
FPFP SKS I KAKEAAKEAEAKKADEAIAPGSPEKLLKRS AVKLEQISPD TSEVLNIWAN  
VESAAATLQLPLNEIKRVL RGD LGEDF SDEVGGYRWQYAAAGAVVTAGETTRKGSKKRKE  
AWNEFRDRLYDPSEPHNYKNNR LRDYQVEGVNWLSSTFYRKTGCILADEMGLGKTVQIV  
TYLEHLFRVEKIRGPFLLVVVPLSTVEHWRREFEGWTD MVCCVYHDRQRQWRDVLREYEWY  
YEDKPRNAEFLKFHVLVTTYD TLI GDFDVI GQIPFRVAVVDEAHLRNQK GKLL ECKMEI  
SAKGT LQHGYQSRVLM SGTPLQNDL TELW TLLNFIEP FKF PDIDNFMQHFGNMKSKEQVE  
NLQQQISPFMLRRVKEDVAKDIPAKEETVIDVELTSIQKQYYRAIFEHNHAF LNMGATRV  
TAPKLMNIQ MELRKVCNHPCLLEGVEHREQDR LFKEFLEAGKFEGKSPDEQQYMMNENLQ  
VQTS GKMVLM DKL LPKLRQEGHKILVFSQMVKMLDLI SEYCEFRFPYERLDGRV RGTDR  
QKSIDRFNKDPSAFLFL LSTRAGGVGINLTAADICII FDS DWN PQNDVQAQARCHRIGQT  
KDVRIYRLVTSRTFEQEMFDRASKKLGLEQAVLGSFGQDEDDDKPNSKEMEELLKRGAYA  
LLEDDEKVKQFCADDIDSILATRTRTRVVEGAKTASWLNKQGMVVS KSKFTSDSKSAGL  
DMDDPLFWQKVPDFVTPMLMTQQQLQDLSHEILGT VKKVGRGRGRWKKKYEEEEKAKKEE  
EAKKRDEDMQSSNPESEDPVKEDDAVADISKADEVPVNDEGSGVENNDEGDG VKNFQLT  
KTQKRKVAKFMSDLKSMMEGLFDEAEDDNLAGEEKAAAQK LLLTVSMKEKLFNEDQRHYA  
LITLKRLEGDRRRRCRTGDPGGRSTPRKQIFDDDSVQIREELRIVSSKKVKRRRRKGGGD  
DDNERKRRKSSAIGDDGYKVHSDDEAEWSDVDDSVYGGK GK KLTISRKEANRRRQWAAE  
GDAAVAAGRWPALPRTEVSKVLKTL L DAVLKHDEEKGGIFSVVPV PREEFPEYYEQVKNP  
MDYGTMKKLEND EYRSAQSMQKDFRLVMQNCLQFNAYESEICQEARQQALLRPGQLRAA  
AMANDLFLAEDGTVLQIVDEKNAATPVKKRKRRTKEEMRRDAEAAAAEKEKKKAKKVVND  
EDTIDLVEEDDVLPTSMKKKPRIKINLRNPVPDDDEEMNVISSDEKSKRKKAPVSRQK  
RGRKSAMWNN AETNLDVAPKKIRKRSGKSKATNSSDADSF DVAFLKKEREKIGSDLPFD  
VSRKFFTKRGPWSLPAPLLPTKFRDVASAMFKKLEKIDRYAVFAEPVSD EDAPDYS D IVK  
NPIDLSTMNSKLETGVYGE GSAASKLYSDYLLMFDNCR LYNEDDGEVTEEAARIMALVP  
EIIYAGACVAVLKKQK

>comp14983\_c0\_seq2; 2869 1 7610 LEN=7732; translated  
XDDDDVNEEESDGRKRGRKGNKNQKSPSTNGKNKKE SLIEYEYLVKYKNLSHMHLEW  
KSGADLES MNKS AKTMYRRYLK KIAQGDDDI ESPDFDPSFVVVQKVLAE EEEQELELEVQ  
GEELLK WEMEREKELAEEDLSEEREREEEQRQEEEAR K KASETAGEG DENTVAGAEKAN  
KDKDLQADTKNETQKLSNDEEEKDDALDDWRKEDIDFSQLTLEK LKKIVDLDEAYPKI  
EGCDN P YRDGYITEPPKKPRASYLFFQCTMRAYFSMRNP NATNSELMTILGEQWASMSEE  
KGQGFLELAK EYKQYEKERALLERAQRPNEMWQPIRRCKMVLERLSQDGFANIFLEPV  
NLDDFPDYEDVIDFPMDLQTVRRKLETRKYQMP EQFARMDRKIWNCKIYNRHGSAIWHV  
ADYMSKQFERLYHAWVQOFRERYLRWANPRARPWEHTCRQHDKCNTKDEDLVLCDHCA  
AYGYKCLKPPLEKLP SGVWHCPDCAKLR SVRGVQMMSAVSEQAVRKRAELGEIPTRKVK  
KTMYLVKWAGLGYEFCTWETKEDIGNPELIAEFRKLN DIVSEEPFITENAVSKVLEETE  
INPKNAGGSTCIPDLRTRLYSQTRAFQFVKFGLDVPKNVAAECGPVLKASHQLSLVDKKT  
PYHSKEIQ LCLNELVERVALKGTLPVMKLDPSLPCLTGEYDVVVPITAKGLMMNVGEI  
HGSVAFLGYRQFPDGSKGAELNLIIRGTGDKIIAVDGVSTVNKTFKDVI GMLRVAGKNK  
YSVMRFLESQYANIDNDLTSYGKRGFRFTIETLSNKFSTDRKRLLVQRYIHAENESKEEGE  
KEAIDGEEDEDESEGEFQPESEDEADQDEVLNRTTDL SKEMKLETDEDFKTGKSDAPPAT  
PEKSETKVMVQTEEEKAPPNGNGTTEQPDVVPNSPINADASAEESKMELMSPSGLPPVK  
TAESLVR IHSENTHSLAYRMLNIDVGYSSDEAGDEDGAFYIDGLDNTFTSEKEVRKYLNI  
VTPEKEENPDEDGEDNEDAVEESLVPVRRNDFSSLGDRRKL LVSVAVSSSAPDPEDCDEN  
FPFP SKS I KAKEAAKEAEAKKADEAIAPGSPEKLLKRS AVKLEQISPD TSEVLNIWAN  
VESAAATLQLPLNEIKRVL RGD LGEDF SDEVGGYRWQYAAAGAVVTAGETTRKGSKKRKE  
AWNEFRDRLYDPSEPHNYKNNR LRDYQVEGVNWLSSTFYRKTGCILADEMGLGKTVQIV  
TYLEHLFRVEKIRGPFLLVVVPLSTVEHWRREFEGWTD MVCCVYHDRQRQWRDVLREYEWY  
YEDKPRNAEFLKFHVLVTTYD TLI GDFDVI GQIPFRVAVVDEAHLRNQK GKLL ECKMEI  
SAKGT LQHGYQSRVLM SGTPLQNDL TELW TLLNFIEP FKF PDIDNFMQHFGNMKSKEQVE  
NLQQQISPFMLRRVKEDVAKDIPAKEETVIDVELTSIQKQYYRAIFEHNHAF LNMGATRV  
TAPKLMNIQ MELRKVCNHPCLLEGVEHREQDR LFKEFLEAGKFEGKSPDEQQYMMNENLQ  
VQTS GKMVLM DKL LPKLRQEGHKILVFSQMVKMLDLI SEYCEFRFPYERLDGRV RGTDR  
QKSIDRFNKDPSAFLFL LSTRAGGVGINLTAADICII FDS DWN PQNDVQAQARCHRIGQT

KDVR IYRLVTSRTFEQEMFDRASKKLGLEQAVLGSFGQDEDDDKPNSKEMEELLKRGAYA  
LLEDDDEKVKQFCADDIDSILATRTRTRVVEGAKTASWLNKQGMVVSkskftSDSKSAGL  
DMDDPLFWQKVMDFVTPMLMTQQLQDLSHEILGTVKKVGRGRGRWKKKYEEEEKAKKEE  
EAKKKRDEDMQSSNPESEDPVKEDDAVADISKADEVVNDEGSGVENNDEEDGVKKNFQLT  
KTQKRKVAKFMSDLKSMMEGLFDEAEDDNLAGEEKAAAQKLLLTVSMKEKLFNEDQRHYA  
LITLKRLEGDRRRRCRTGDPGGRSTPRKQIFDDDSVQIREELRIVSSKVKRRRRRKGGD  
DDNERKRRKSSAIGDDGYKVHSDDEAEWSDVDDSVYGKGGKGLTI SRKEANRRRQWAAE  
GDAAVAAGRPWPALPRTEVSKVLKTLDDAVLKHDEEKGGIFSVVPVREEFPPEYYEQVKNP  
MDYGTMKKKLENDYRSAQSMQKDFRLVMQNCLQFNAYESEICQEARQQALLRPGQLRAA  
AMANDLFLAEDGTVLQIVDEKNAATPVKKRRRTKEEMRRDAEAAAAEKEKKKAKKKVND  
EDTIDLVEEDDVPLTSMKKKPRIKINLRNPVDDDEEMNVISSDEKSKRKKAPVSRQK  
RGRKSAMWNAETNLDVAPKKIIRKRSKSKATNSSDADSFVAFLLKEREKIGSDLPFD  
VSRKFFTKRGPWLSLPAPLLPTKFRDVASAMFKKLEKIDRYAVFAEPVSDPADYSDIVK  
NPIDLSTMNKLETGVYGEESAAASKLYSDYLLMFDNCRLYNEDDGEVTEEAARIMALVPE  
EIIYAGACVAVLKKQK

>comp14983\_c0\_seq3; 1525 142 3861 LEN=4058; translated  
MVCCVYHDRQRQWRDVLREYEWYEDKPRNAEFLKFHVLVTTYDTLIGDFDVIGQIPFRV  
AVVDEAHLRNQKGLLECMKEISAKGTLQHGYSRVLMSTPLQNDLTELWTLNFI EP  
FKFPDIDNFMQHFNGMKSKEQVENLQQQISPFMLRRVKEDVAKDIPAKEETVIDVELTSI  
QKQYYRAIFEHNHAFNLGATRV TAPKLMNIQME LRKVCNHPCLLEGVEHREQDRLFKEF  
LEAGKFEKSPDEQQYMMNENLQVQTSGKMLMDKLLPKLRQEGHKILVFSQMVKMLDLI  
SEYCFREFPYERLDGRV RGTDRQKSIDRFNKDPSAFLFLLSTRAGGVGINLTAADICII  
FSDSWNPQNDVQAQARCHRIGQTKDVR IYRLVTSRTFEQEMFDRASKKLGLEQAVLGSFG  
QDEDDDKPNSKEMEELLKRGAYALLEDDDEKVKQFCADDIDSILATRTRTRVVEGAKTAS  
WLNKQGMVVSkskftSDSKSAGLDMDDPLFWQKVMDFVTPMLMTQQLQDLSHEILGTVK  
KVGRGRGRWKKKYEEEEKAKKEEAKKKRDEDMQSSNPESEDPVKEDDAVADISKADEV  
VNDEGSGVENNDEEDGVKKNFQLTKTQKRKVAKFMSDLKSMMEGLFDEAEDDNLAGEEKAA  
AQKLLLTVSMKEKLFNEDQRHYALITLKRLEGDRRRRCRTGDPGGRSTPRKQIFDDDSVQ  
IREELRIVSSKVKRRRRRKGDDDDNERKRRKSSAIGDDGYKVHSDDEAEWSDVDDSVYG  
GKGGKGLTI SRKEANRRRQWAAEGDAAVAAGRPWPALPRTEVSKVLKTLDDAVLKHDEEK  
GGIFSVVPVREEFPPEYYEQVKNPMDYGTMKKKLENDYRSAQSMQKDFRLVMQNCLQFN  
AYESEICQEARQQALLRPGQLRAAAMANDLFLAEDGTVLQIVDEKNAATPVKKRRRTKEE  
MRRDAEAAAAEKEKKKAKKKVND EDTIDLVEEDDVPLTSMKKKPRIKINLRNPVDDDD  
EEMNVISSDEKSKRKKAPVSRQKRGRKSAMWNAETNLDVAPKKIIRKRSKSKATNSSD  
ADSFVAFLLKEREKIGSDLPFDVSRKFFTKRGPWLSLPAPLLPTKFRDVASAMFKKLEKID  
RYAVFAEPVSDPADYSDIVKNPIDLSTMNKLETGVYGEESAAASKLYSDYLLMFDN  
CRLYNEDDGEVTEEAARIMALVPEIYAGACVAVLKKQK

>comp14983\_c0\_seq4; 1525 142 3861 LEN=3983; translated  
MVCCVYHDRQRQWRDVLREYEWYEDKPRNAEFLKFHVLVTTYDTLIGDFDVIGQIPFRV  
AVVDEAHLRNQKGLLECMKEISAKGTLQHGYSRVLMSTPLQNDLTELWTLNFI EP  
FKFPDIDNFMQHFNGMKSKEQVENLQQQISPFMLRRVKEDVAKDIPAKEETVIDVELTSI  
QKQYYRAIFEHNHAFNLGATRV TAPKLMNIQME LRKVCNHPCLLEGVEHREQDRLFKEF  
LEAGKFEKSPDEQQYMMNENLQVQTSGKMLMDKLLPKLRQEGHKILVFSQMVKMLDLI  
SEYCFREFPYERLDGRV RGTDRQKSIDRFNKDPSAFLFLLSTRAGGVGINLTAADICII  
FSDSWNPQNDVQAQARCHRIGQTKDVR IYRLVTSRTFEQEMFDRASKKLGLEQAVLGSFG  
QDEDDDKPNSKEMEELLKRGAYALLEDDDEKVKQFCADDIDSILATRTRTRVVEGAKTAS  
WLNKQGMVVSkskftSDSKSAGLDMDDPLFWQKVMDFVTPMLMTQQLQDLSHEILGTVK  
KVGRGRGRWKKKYEEEEKAKKEEAKKKRDEDMQSSNPESEDPVKEDDAVADISKADEV  
VNDEGSGVENNDEEDGVKKNFQLTKTQKRKVAKFMSDLKSMMEGLFDEAEDDNLAGEEKAA  
AQKLLLTVSMKEKLFNEDQRHYALITLKRLEGDRRRRCRTGDPGGRSTPRKQIFDDDSVQ  
IREELRIVSSKVKRRRRRKGDDDDNERKRRKSSAIGDDGYKVHSDDEAEWSDVDDSVYG  
GKGGKGLTI SRKEANRRRQWAAEGDAAVAAGRPWPALPRTEVSKVLKTLDDAVLKHDEEK  
GGIFSVVPVREEFPPEYYEQVKNPMDYGTMKKKLENDYRSAQSMQKDFRLVMQNCLQFN  
AYESEICQEARQQALLRPGQLRAAAMANDLFLAEDGTVLQIVDEKNAATPVKKRRRTKEE  
MRRDAEAAAAEKEKKKAKKKVND EDTIDLVEEDDVPLTSMKKKPRIKINLRNPVDDDD  
EEMNVISSDEKSKRKKAPVSRQKRGRKSAMWNAETNLDVAPKKIIRKRSKSKATNSSD  
ADSFVAFLLKEREKIGSDLPFDVSRKFFTKRGPWLSLPAPLLPTKFRDVASAMFKKLEKID  
RYAVFAEPVSDPADYSDIVKNPIDLSTMNKLETGVYGEESAAASKLYSDYLLMFDN  
CRLYNEDDGEVTEEAARIMALVPEIYAGACVAVLKKQK

>comp14983\_c1\_seq1; 403 252 775 LEN=775; translated

MSEQNANDTSGQSPQLQSGRRSRRARKKVVVDYAKEQEFSDDDLFEDGPKAPESIVAATAV  
SKKRKSKGGRKSKGGRKSTSKKQQNGNSNGPMDALDPYDDNDEDEDVPSKPIYTEKGYDP  
SLPPIRERFPFLPEYELDGSPRIDMIIGRRPMDSNDDDKKDKKDGSSDDDEKSAX  
>comp14983\_c1\_seq2; 368 191 714 LEN=714; translated  
MSEQNANDTSGQSPQLQSGRRSRRARKKVVVDYAKEQEFSDDDLFEDGPKAPESIVAATAV  
SKKRKSKGGRKSKGGRKSTSKKQQNGNSNGPMDALDPYDDNDEDEDVPSKPIYTEKGYDP  
SLPPIRERFPFLPEYELDGSPRIDMIIGRRPMDSNDDDKKDKKDGSSDDDEKSAX  
>comp14984\_c0\_seq1; 1147 317 5411 LEN=5677; translated  
MERNIWRFFYPSKGFYPIGKCINLDISERSLALTGGLNVIGKLVISTAVDIETPFVIVQ  
GELQLNSNKIWDGTQAITITLTGTSPKTFQPADSNASKCRGQPCSIGKKPFVAVAGKLLV  
DGMPSSDYDTPTWVHIQDVLANTAGSGASVAPIEVYPGVVDLPLCSEDGKIIHEDFSTPS  
KPTTSFYHVDSLSGNSFEYTESLKVSAARRDVSHGPIFDLLDVIRCIKPNVRYELNARVK  
TYRDDTGPNEIQESNCSDDGSGCLDIMFEWKRMNGSTGREYPYHEEESYKWRYGDEIIIS  
ETIVFSEEMLEPSNIYSIFHLYGPDPGVTIEVYEFQFKLAPEAAAYRKPGDVCGDLALPNG  
DAEMDPLSSFPYKADAYYSNVFVTQDEDNLSNHYFRISGRGNSHHGGLRWNTGIGCMSTN  
SVYRVKVDYRLHPNQERPNETYGFVRVRLKVKRETDRDNWF EIARCGNPEDESSTWQSCD  
KQFTVPGGLVNHGDLEYEIIFETERFIDYVDNISIIVQLSGPVNAIKVDDSVNGKWVGVA  
ELLITSHNTRWDEEQVRSITKIEPSNEAGYVNIIVLNETIKAPTTLKDDNRYATEVAVLSR  
NIKVQGAEDDPDPLHGGHIMIFLTPGGGQSVVGLVETNMGQAGELGRYPLHFHVC GDVTG  
SRLSKNLIRGTNRCAVHGTDNLLVDNNVAYDTFGHCFMVEDGFERFNTFSNNLGARTK  
RATQIIPNQPTKNNGETDRSAATFWITNPMNYFENNVAAGGEFSGFWFELNRNRPRGKLS  
HLYEGKEWSLRQMSLGMFKGNVAHSYDSAGIRTYPHGYVPDNVAVFENSRSYRNDASGMF  
IHNSRNITLTGFHFADNEQGVLDLDRIDLFEMHNSEIVGRSTDYRDKVLSQKAPNVC GGNP  
TYVRGVEMHTFRAARGLESTLQGFNNVKFSGFNDTGCSDSAVFWADDEV RVQSWDYWTS  
LENSEVEGSFEGYIANFCRAVNVGILDSYIIDKSAFNAFGSSVEGPSTIMTYTNTNKK  
MQSFVEPTLCHDYPESCYSYCENTCLRTVTFRVDPAWSKDKLICKKNDPQNRCEVFNS  
WYNADTGDRFRIFSPALPAGSYVAEFIDELDQTVWPRGLNVTYETDMCNQGG LSEG DVEW  
TVPKIDPNNCKNLIANGDAEASDTPDISWVFERNMGIEIINLAGIDGSNAFGDIKTESHD  
DGLTQHLDRCLSHNIGRQYEVKAYVKLIDNNGKAVYCDPSVKGSWHCPRIMLHYGMHRR  
DNERFLRDREIEIGVTRSRHTNNEGYQLVNGIIVTISESLADSTNVRLYVERRSNSLEMFV  
DDVSMTLLSESSCDEDEDELVSNGGFNDGSSSELWNDYDAEGLQIVSPGTGGTGYALKMTT  
GSAEHSIKNNCIVAGNRYIAQAKYRLLDRGGNPTSCDPQTNNPRCP EMSLR LFD ESN NYL  
GYVGGIARALDSTSDTADNFSTLWGVFEATDLIESAADVRIFFQRTGSNMILDSVSVKEI  
GTASEALMGKTLTSSQGELIVNGDNELGVANFWTGSQDKISTVNGFGGTGVAVRV TG  
RNHYHRGMWYSGEKYVDKENRLIPSSRWKISAQIRLLEPGTDNGAECDISERTDASKRCP  
RFRVRFYDKSDRYTPVREEI IYSYIGTWNTNGWNRFEQVEVPSTSTYTIIDKIVILVSDA  
RKNVDIAVDNLSMVPFP  
>comp14984\_c0\_seq2; 714 317 3338 LEN=3338; translated  
MERNIWRFFYPSKGFYPIGKCINLDISERSLALTGGLNVIGKLVISTAVDIETPFVIVQ  
GELQLNSNKIWDGTQAITITLTGTSPKTFQPADSNASKCRGQPCSIGKKPFVAVAGKLLV  
DGMPSSDYDTPTWVHIQDVLANTAGSGASVAPIEVYPGVVDLPLCSEDGKIIHEDFSTPS  
KPTTSFYHVDSLSGNSFEYTESLKVSAARRDVSHGPIFDLLDVIRCIKPNVRYELNARVK  
TYRDDTGPNEIQESNCSDDGSGCLDIMFEWKRMNGSTGREYPYHEEESYKWRYGDEIIIS  
ETIVFSEEMLEPSNIYSIFHLYGPDPGVTIEVYEFQFKLAPEAAAYRKPGDVCGDLALPNG  
DAEMDPLSSFPYKADAYYSNVFVTQDEDNLSNHYFRISGRGNSHHGGLRWNTGIGCMSTN  
SVYRVKVDYRLHPNQERPNETYGFVRVRLKVKRETDRDNWF EIARCGNPEDESSTWQSCD  
KQFTVPGGLVNHGDLEYEIIFETERFIDYVDNISIIVQLSGPVNAIKVDDSVNGKWVGVA  
ELLITSHNTRWDEEQVRSITKIEPSNEAGYVNIIVLNETIKAPTTLKDDNRYATEVAVLSR  
NIKVQGAEDDPDPLHGGHIMIFLTPGGGQSVVGLVETNMGQAGELGRYPLHFHVC GDVTG  
SRLSKNLIRGTNRCAVHGTDNLLVDNNVAYDTFGHCFMVEDGFERFNTFSNNLGARTK  
RATQIIPNQPTKNNGETDRSAATFWITNPMNYFENNVAAGGEFSGFWFELNRNRPRGKLS  
HLYEGKEWSLRQMSLGMFKGNVAHSYDSAGIRTYPHGYVPDNVAVFENSRSYRNDASGMF  
IHNSRNITLTGFHFADNEQGVLDLDRIDLFEMHNSEIVGRSTDYRDKVLSQKAPNVC GGNP  
TYVRGVEMHTFRAARGLESTLQGFNNVKFSGFNDTGCSDSAVFWADDEV RVQSWDYWTS  
LENSEVEGSFEGYIANFCRAVNVGILGEIFYNLQPCTCSFSTCIRIL  
>comp14985\_c0\_seq1; 128 288 800 LEN=1150; translated  
MTADVDPVMIHIGSYVSTVSVFFLAVSTTIWSSCFFVILLSLGEAIWSPRLNDYTVSVS  
EEGREGTYMALSSAPLFLAKLPV GILSGYLLQKYCPETLGEGEVVRH SKIMWLIIGLITAT  
SPVLLTCCGWYVSKMDRGSSDEF RAGLAYTELPQARS GDDAREQPQVTMI  
>comp14985\_c0\_seq2; 341 299 1987 LEN=2337; translated

MKNNQQFHDEVNIDDP IENMNGKHP SGIDANGNI SNRNS IGIGNYGIRKKNWKTQVLAGF  
TSLKNAPPELYKYVYALKFLDSYSYFSFSIVFTLFLSDDFGFSDIEAGAIYGAWGAMITVY  
GFCTGFLVDNLGVSKSLKLGYSLLARCGIFATTSRNVLLLHLIYATLPLGNCLGIPVLM  
TGVRRYTHE TNRGFAFGIFYVMNVAALVSGPAVDAMTIWYKGSEGENNDSNSESDNTE  
WSLTSYRAIILSGIVANVIACCITMTVREIKVENPLARSADQNNSDVATGQQAGVGIETD  
QQSNSNVTHGVTIFRPKTGSPWKILSEIWRSPSFRRYLVVILIMLNVRQIFRHLDTGTPK  
YMIREFGPDVPGGTIYAINPALIIILVPIVSAMTADVDPVMIHIGSYVSTVSVFFLAVS  
TTIWSSCFVILLSLGEAIWSPRLNDYTVSVSEEGREGTYMALSSAPLFLAKLPVGILSG  
YLLQKYCPETLGEGEVRHSKIMWLI IGLITATSPVLLTCCWGYVSKMDRGSSEDFRAGLA  
YTELPQARSGDDAREQPQVTMI

>comp14986\_c0\_seq1; 366 200 1090 LEN=1320; translated  
MSFCWTVALVLLGTESSVANAFIVAGTGTLPSTPIEAHGTRASHLWADKIERDSIIQEEL  
EPQANVPARREFLQQTVLAASATVLLGVSSPSPALAE STATDVDGFTTVKTD SGLKYIDL  
EEGATTVGGRPGATPKYQQLCVISYTGMYQLPKDNKTKFASQSGFVLKHGNGKLIPLGLD  
EGLHTMRRGGKRRLIIPPKLGFTVGGGLGPVPEMPWERRTLNDQLAKMVEQRGGNLVYDVT  
LERFFDDEADQGYEDDEISPEEFAELNRRLNRKQSLDAVGNDIEIEDRDRAKPIV

>comp14987\_c0\_seq1; 1537 414 5435 LEN=5530; translated  
MLSIDTSRDDGETEEDSNQNKSELSNEIKLKSPTYGMHLFPTEAHKQKQKQQLHVARTC  
STTGSITSHEYSSHTRSCHSKNSGTTRGSCADSNNKIVVSSFSNLATQSI RQGYQQALE  
YYQLALQDYRTESTKTTIVELVNAATCFNLGALAKKLRHYSMAADYFTEAQDVYLR SRS  
IIESYVRSGGAGSLSTAASSASCSSASIYSCQVCLLQLIVETLHARAHLHYKYQSQIDDA  
VECHEEAVELLED SNVKRDNSSNKQPRFPADHDIVFQRIHFSILPQELRWQLLVTSYQAL  
GKFYMEKGELEDAIVAYKETLSVLRKLNDFKIESTVQRQEEILQILRALSDFYWKNHSES  
TDIVKLERVAVYQEDLECEWEKAMQCWEHILHCQSKQHGNESYEVSVTLGQLARVMVLEGN  
LEGGLDLYQATADISLKNKIKENSSNLKDAVFSIPEDV FASIMDLHNELDRIPDAINWL  
KSLLSKSERREDQARIQLELGLKLYLHQGF IHAASDALYLSLELFDGEDASAFELLKKVKF  
LGERRDHGDTEGDSSSERVDAAAADLMDCRNTGVDCLKAIT EDGESAFGSTLDPSKSVKENE  
AFDTSYDESEDL SKLMANVDYECGDDIDLQRIDIDPNISGNSTLNCKNDLEEHLELIDDE  
KKEEEGPKSLSTGAETLGYGIQYISDDVPLTSDEEPVSSFGGSPVKQTSVSTKSVATNE  
LYSEKMDIADIYSSSTSSPSNKIESIEPIQNGAETLEMHDTGPTTDSKVEAEENESSAEQG  
PRFRFQERPIITQTEASGFEDTPISTSN SADSRTALLNPAGKSVAAQTSIHLPLLMISPK  
NPIDDKVSRGKKCYAEISDKQSMRTGRSRLVKALSSPFRRSRSKSRSTTSNRLVPLDEEK  
EVRQSMPTRRSQNELDEESCNSKEAPI SYIDIRGGPDDDRSLVSQLT FREYEMLSKKKEK  
QSENGHWWWGVSSEGLEGWFP SNYVNQAVEAAEGFLSAKAIHDRVKSRLPLDFDSEDESEL  
DELDEDDFSLKDSFSKESKAQVATVDSGKKISITKPM EVPVKSRRHLLLESSGQNEWNEV  
TNVGDIEPLCLESQIHQKQLQVECSR TQNGQEDISVAMLLFDLAKLYMQKRASADALLYS  
HQALRIQKSTLHLPEACKSLNLM AEVHCREQRYKDALS CYEARRIQGSLYGYFHQEIAR  
NLNNGQVRLARQGEFDLAMDKHKEALRIVKECCGENVKNPLVSDTLIQIGAVYYKERNSL  
ANIQQSQNDGYKTFIEGGMLEVIGRAHEDRGSYRMAIAFFEEKLQFLNATENSDDLEDVA  
ETLNSLGM LSCRAGMYLEAIDYDRALGIQMKLGCDDVQLAMARVLAGSVQYSLGHFTKA  
LKLFDALSTLRQVLEHETVAATLFHIGLVYAALCNYDEAMSNLRDALDIQSKLLGMEH  
PATFRTRREIGNLHAVYDSEIKSAFE EYNNIIVAQKR IHGEKHPYVAETLHSIGCAQARQ  
GNLSDALRTLEDCYNMRLPFLGMDHPQQASTLHEIAKIQ LKRGRLKKAIHIIDASLNIRV  
ESLSEHHIDVALTMTTKASCLVAKGNFVDANKLFQ EALPVAKTAVGCMHPSIAWIQVQIG  
VMNLRKCD FDRAMIAVKS AIEIYSNSNLDQDHPGIKEATDELERIERAEMLCV

>comp14987\_c0\_seq2; 1537 414 5435 LEN=5540; translated  
MLSIDTSRDDGETEEDSNQNKSELSNEIKLKSPTYGMHLFPTEAHKQKQKQQLHVARTC  
STTGSITSHEYSSHTRSCHSKNSGTTRGSCADSNNKIVVSSFSNLATQSI RQGYQQALE  
YYQLALQDYRTESTKTTIVELVNAATCFNLGALAKKLRHYSMAADYFTEAQDVYLR SRS  
IIESYVRSGGAGSLSTAASSASCSSASIYSCQVCLLQLIVETLHARAHLHYKYQSQIDDA  
VECHEEAVELLED SNVKRDNSSNKQPRFPADHDIVFQRIHFSILPQELRWQLLVTSYQAL  
GKFYMEKGELEDAIVAYKETLSVLRKLNDFKIESTVQRQEEILQILRALSDFYWKNHSES  
TDIVKLERVAVYQEDLECEWEKAMQCWEHILHCQSKQHGNESYEVSVTLGQLARVMVLEGN  
LEGGLDLYQATADISLKNKIKENSSNLKDAVFSIPEDV FASIMDLHNELDRIPDAINWL  
KSLLSKSERREDQARIQLELGLKLYLHQGF IHAASDALYLSLELFDGEDASAFELLKKVKF  
LGERRDHGDTEGDSSSERVDAAAADLMDCRNTGVDCLKAIT EDGESAFGSTLDPSKSVKENE  
AFDTSYDESEDL SKLMANVDYECGDDIDLQRIDIDPNISGNSTLNCKNDLEEHLELIDDE  
KKEEEGPKSLSTGAETLGYGIQYISDDVPLTSDEEPVSSFGGSPVKQTSVSTKSVATNE  
LYSEKMDIADIYSSSTSSPSNKIESIEPIQNGAETLEMHDTGPTTDSKVEAEENESSAEQG  
PRFRFQERPIITQTEASGFEDTPISTSN SADSRTALLNPAGKSVAAQTSIHLPLLMISPK



NPIDDKVSRGKKCYAEISDKQSMRTGRSRLVKALSSPFRRSRSKSRSTTSNRLVPLDEEK  
EVRQSMPTRRSQNELDEESCNSKEAPI SYIDIRGGPDDDRSLVSQLTFREYEMLSKKKKEK  
QSENGHWWWGVSSEGLEGWFP SNYVNQAVEAAEGFLSAKAIHDRVKSRPLDFDSEDESEL  
DELDEDDFSLKDSFSKESKAQVATVDSGKKI SITKPM EVPVKSRRHLLLESSGQNEWNEV  
TNVGDIEPLCLESQIHQKKLQVECSRTQNGQEDISVAMLLFDLAKLYMQKRASADALLY  
HQALRIQKSTLHLPEACKSLNLMAEVHCREQRYKDALSCY YEARRIQGSLYGYFHQEIAR  
NLNCGQVLARQGEFDLAMDKHKEALRIVKECCGENVKNPLVSDTLIQIGAVYYKERNSL  
ANIQQNDGYKTFIEGGMLEVIGRAHEDRGSYRMAIAFFEEKLQFLNATENSDDLLEDVA  
ETLNSLGM LSCRAGMYLEAIDYDRALGIQMKLGCDDVQLAMARVLAGSVQYSLGHFTKA  
LKLFDALSTLRQVLEHETVAATLFHIGLVYAALCNYDEAMSNLRDALDIQSKLLGMEH  
PATFRTRREIGNLHAVYDSEIKSAFEEYNNIIVAQKR IHGEEKHPYVAETLHSIGCAQARQ  
GNLSDALRTLEDCYNMRLPFLGMDHPQQASTLHEIAKIQKRGRLKKAIHI IDASLNIRV  
ESLSEHHIDVALTMTTKASCLVAKGNFVDANKLQFQALPVAKTAVGCMHPSIAWIQVQIG  
VMNLRKCDFFRAMIAVKS AIEIYSNSNLDQDHPGIKEATDELERIERAEMLCV

>comp14988\_c2\_seq1; 427 603 2408 LEN=2569; translated  
MTPSAQKRFPNPNGTNIIVQKEDTIQHQHREMIRKITSGIFFDVSRTPPLAKGVHTANEKE  
QKHSNHDKAQEEVPIMEPEVDTQDTSSSRLPMMPLHRMLEVESPSVMEEHLEKIAAAEVT  
STIRTGTNKTRRGAI S RLSRNRDSMSSQSLNVSATPVSSSSSESKGTITPSKSRTKSTISC  
CIQRTSTRKYKLLTLSAYRKPEETVCLTGCDASRLLENEYNLRAPGCKIIGHGAFSTVRS  
ALRITDGTKVAIKSISKFDALRARRLRPKGSKHMDEWEIMKLLRNNPHVLTLYDVFETD  
EEIHLVTEFCRGGELFDAIKRKSTQRSSFRGRFSEAQAARITNQILKAIVELHALGIVH  
RDIKAENILLNDESDMKVKLCDFGMARLYQQTQQLPEVSSDGELSPSTPGLLFGCSV  
NTPPEGFHGSTIGPATDIFSLGVTLYILLCGFPPVFCENFVEFPEAYWNDISEEAKDVVR  
SMLHHDPPQQRISAVDLLKKS WIRHDTSRFRGSI SADLEMVRVQLIRSL EEAAGCPSKGT  
SKRRGFGTGGPNKRPRLSLSDISLSALYSCTKKRDIRVIEERVESRTIGGEERGE MAC  
S

>comp14988\_c2\_seq2; 427 1004 2809 LEN=2970; translated  
MTPSAQKRFPNPNGTNIIVQKEDTIQHQHREMIRKITSGIFFDVSRTPPLAKGVHTANEKE  
QKHSNHDKAQEEVPIMEPEVDTQDTSSSRLPMMPLHRMLEVESPSVMEEHLEKIAAAEVT  
STIRTGTNKTRRGAI S RLSRNRDSMSSQSLNVSATPVSSSSSESKGTITPSKSRTKSTISC  
CIQRTSTRKYKLLTLSAYRKPEETVCLTGCDASRLLENEYNLRAPGCKIIGHGAFSTVRS  
ALRITDGTKVAIKSISKFDALRARRLRPKGSKHMDEWEIMKLLRNNPHVLTLYDVFETD  
EEIHLVTEFCRGGELFDAIKRKSTQRSSFRGRFSEAQAARITNQILKAIVELHALGIVH  
RDIKAENILLNDESDMKVKLCDFGMARLYQQTQQLPEVSSDGELSPSTPGLLFGCSV  
NTPPEGFHGSTIGPATDIFSLGVTLYILLCGFPPVFCENFVEFPEAYWNDISEEAKDVVR  
SMLHHDPPQQRISAVDLLKKS WIRHDTSRFRGSI SADLEMVRVQLIRSL EEAAGCPSKGT  
SKRRGFGTGGPNKRPRLSLSDISLSALYSCTKKRDIRVIEERVESRTIGGEERGE MAC  
S

>comp14989\_c0\_seq1; 1188 82 3537 LEN=3698; translated  
MIHVSSALRNASRALSTRTLQKLRNSVSLDRRVSARGIKTLTVNSGSTTLKYSLYDVNRK  
SEACTLDAELVCSGLVDKVGTCENGTITHNSSIVFQGEPIPSHTDGFRLMLLDILQKKENI  
CTNEIECVGHRVVHGGSSFSKPTIIGNGELEEEIKQLIPLAPLHNPAAGIEASRESFPL  
ATQVAVFDATAFHATMPSSYRYAIPKKLYEDYGIRKYGFHGTSYQYVMETTAKYLGKNSD  
DLNLI VMHLGGGASMCCIKNGKSIDTTMGLTPLEGLVMATRSGDIDLGIYDYMLKNGYTK  
DEVYETLNKKSGLLGLAGDTSDMRVIKKNALKGSDCRLAREVFAERC RKYLGSYFVKLG  
GDIDAI VFTGGIGEGDAEIRQSILEGLNENLQIGVDPKKNKNAISPNGSMSISRFSSTVE  
VLVPTDEEISIAMQSSNLVLPKPKVKAIDSLPKLSEVKTNLFCHSLGSTYTA FGEIGLM  
SIFAASVDKIGYFRPIAKRSGADDYRIQLMKEHFQLSTPESTMYGVTEDEALQMLAENRE  
DELVEFIIKKYLEYSSTNDFVMVSTYTESDDSLHWAAKLCSTFNIPAI FMGDASHS QSLG  
IAQTAFQSHGSECLGVVSDVDELEAERKDLVNHNLPALIPRSEILSRRTVREVLES  
DNGICLYGEKYLDSSIDKIWIHTMQVGDITELKEDQLAVVSHKRVDVLSLLLAAQSSN  
APNLGILCTYHKLGDMDPSVISVLNGLRDIRLPVIATSADTFEAATKIEDTPAFVTARS  
REKLDQAITLV TENLDYSLDRFESEHLETRRDIGPRLFQYSAFLRARQLQKNIVLPEG  
ADPRVVEAASILTKRKL CNVILIGDPEVINR NAKKLRVSLDGVTICDPKNFDGLQDMIGS  
FVEARKSKGLTPLEAEKYLLEDVNYFGTLMHMGLADGMVSGAMHSSANTIRPALQILKT  
APGASVSSIFFMLLEDGVKVF GDCAINVAPNAEQ LAEIAISSAKTSIQFGIEPRVALLS  
YATGDSNSGHLIDKVV DATAMAKKAAEEEGFMDPALIEGPLQF DAAVDPAAVAVKAKDSL  
VAGRANCLIFPD LNAGNNGYKAVQQASKTIAVGPVLQGLKPKVNDLSRGATVEDIVNTAV  
FTALQAAGVDK

>comp14989\_c0\_seq2; 118 1 216 LEN=377; translated

RSASFFSLIFPDNLNAGNNGYKAVQQASKTIAVGPVLQGLKPKVNDLSRGATVEDIVNTAV  
FTALQAAGVDK

>comp14990\_c0\_seq1; 1173 154 3450 LEN=3597; translated  
MSAQRKEKEIRVSLGLEEGDDDEDADDEPRRFLRLPSGHLLCYGGDNGNVSCLLPRVKDS  
SSKKTNESEKPKFVVVQRYDDAVRCIDVSDDGKRLAIGFDTGKTQVHCFDEYIVQDNNVN  
SNDDGGNKSHPYVKALEKFKDPQESDGDGIGKNDFFLLSQDPNCNINDNTFGYFAGPDL  
GAPARDVLFPLNHSRCDGDPGSSPSYLLAVASEAGMFVVDVASKETMDGADRWLEQEA  
KEAHDRCGIRGLATGTLDKITVLAASLAMDGRLLCLWDVTGKTLLQREHMPCVPPKDVGEIH  
DADAFDRSCRPLLDHCARTKGLVIGTPGKLSPCFRTLASNEKDEPMDIKTVPDSSFGDAA  
DAENGHVQSIVVMLLCTDRLLVTSGRDGRVLVWEGIAADANADDSFRSLEWKVVGKHQLA  
SPATDLIVERPASTGKVSLSFACANGSLRVLDISKHYQKQAQSSTTRSKESTNTTVVKAN  
SREGEGDQTKRLSGSTSAPKILKKGFRSDNSEDDSVDFSSSEQPKNVHFLDEAQEDDTE  
SVGRNNKPSTRSAEFSSVEFGSNSDGDGDDDDSLIDNDLDRLLVLPNRTGFTNLVVKPQAAFS  
PSSTPLDLTRRFLCWNHIGSVTLLQGDNNRNTIDINFADSAFKRPISTFDNINFIIGSIG  
ESGGIFASDLMEEDTEEDDVGLEDELNMSERTKQAVRRDRRKRKSKNAEGSKPTGSSIFFY  
RFETSNLVNRNKNKDWHLILPDGERVLGAACGDGWAAAMTSRQFLRFFSPGGNQNQMVLK  
GEPVTIVGRGRFLAVFYHESPLADRTQQLGYTLWDAAEFKILSRGSVSVCLSKGSSLSWV  
GFSNDFSLMVMMDTDGMLSMLISTTRESNDDAFMWEWAPILDTVGLRKSTDDCHWPVTVHD  
GKLVCIPLKGGNTYPDATRRPVTSMGLRMLPLAKSVVSKNSMLEELSVRSNIALSQKNFV  
REVERDNEDLEDEYVALCAQVDKVTLLRFGSMVDGGKLETAFDLISRLNLEKSYDIAIRI  
ADREHKLADEIEKAKEFKFSTRDSDCEEDEGITTNDFRGSNKYNRKQISPSSSRSHKR  
PVDLHQPVGAGNKRSRFD

>comp14990\_c0\_seq2; 1100 154 2976 LEN=3012; translated  
MSAQRKEKEIRVSLGLEEGDDDEDADDEPRRFLRLPSGHLLCYGGDNGNVSCLLPRVKDS  
SSKKTNESEKPKFVVVQRYDDAVRCIDVSDDGKRLAIGFDTGKTQVHCFDEYIVQDNNVN  
SNDDGGNKSHPYVKALEKFKDPQESDGDGIGKNDFFLLSQDPNCNINDNTFGYFAGPDL  
GAPARDVLFPLNHSRCDGDPGSSPSYLLAVASEAGMFVVDVASKETMDGADRWLEQEA  
KEAHDRCGIRGLATGTLDKITVLAASLAMDGRLLCLWDVTGKTLLQREHMPCVPPKDVGEIH  
DADAFDRSCRPLLDHCARTKGLVIGTPGKLSPCFRTLASNEKDEPMDIKTVPDSSFGDAA  
DAENGHVQSIVVMLLCTDRLLVTSGRDGRVLVWEGIAADANADDSFRSLEWKVVGKHQLA  
SPATDLIVERPASTGKVSLSFACANGSLRVLDISKHYQKQAQSSTTRSKESTNTTVVKAN  
SREGEGDQTKRLSGSTSAPKILKKGFRSDNSEDDSVDFSSSEQPKNVHFLDEAQEDDTE  
SVGRNNKPSTRSAEFSSVEFGSNSDGDGDDDDSLIDNDLDRLLVLPNRTGFTNLVVKPQAAFS  
PSSTPLDLTRRFLCWNHIGSVTLLQGDNNRNTIDINFADSAFKRPISTFDNINFIIGSIG  
ESGGIFASDLMEEDTEEDDVGLEDELNMSERTKQAVRRDRRKRKSKNAEGSKPTGSSIFFY  
RFETSNLVNRNKNKDWHLILPDGERVLGAACGDGWAAAMTSRQFLRFFSPGGNQNQMVLK  
GEPVTIVGRGRFLAVFYHESPLADRTQQLGYTLWDAAEFKILSRGSVSVCLSKGSSLSWV  
GFSNDFSLMVMMDTDGMLSMLISTTRESNDDAFMWEWAPILDTVGLRKSTDDCHWPVTVHD  
GKLVCIPLKGGNTYPDATRRPVTSMGLRMLPLAKSVVSKK

>comp14991\_c0\_seq1; 440 268 1971 LEN=2615; translated  
MTDALNP'TTGFAEEHKEQKSDSDSVSSDVLSSPSSFFLDDFDCIEAEISDEECDGSLIRN  
GVSGDHHSPDALLAYELNQLSLEERGLLDNDIIGHIHPRPLEETPDFLREKIDQLSVKLDS  
MPERDKSAYKVSQAFPKTYVNTKEFRMLFLRCEQFDVQKAATRLLLFLDTIRESFQDVV  
ERRIRFSDLDEPAAETVSKGMLQMLPGRDRSGRRVAGNFPFVIQCGIPASSRIQAALYI  
ITSITRENDVQRDGI VGLFWVLDYNI VIRDFNDI IDDFKTRSLVHGTLINCI PVRFVSL  
HMCLPNTSEMLQERLCQIAKAMYIYAIGPENRKRRLRVHFGSPVECLYALQTFGIASHGIP  
INTNTGKIKLHQHHLQWLEVQRQKDKAYQKNESFLGIECPAQNDILFGRGWPKMSPGNAI  
FRNLIETRLEEYNSARSKKDKTMIGLSIVCELKESGARFLKQGEHGLWLEVSSNEARQKV  
SIGFRDVRKAKIKSAKLAAGDAERNCPSSVTKRKSQQTDPNPTKNNNPRSQTKTHP  
MQYDEGSFAFVQMDGSKRMRCGPCKDE

>comp14991\_c0\_seq2; 389 268 2051 LEN=2695; translated  
MTDALNP'TTGFAEEHKEQKSDSDSVSSDVLSSPSSFFLDDFDCIEAEISDEECDGSLIRN  
GVSGDHHSPDALLAYELNQLSLEERGLLDNDIIGHIHPRPLEETPDFLREKIDQLSVKLDS  
MPERDKSAYKVSQAFPKTYVNTKEFRMLFLRCEQFDVQKAATRLLLFLDTIRESFQDVV  
ERRIRFSDLDEPAAETVSKGMLQMLPGRDRSGRRVAGNFPFVIQCGIPASSRIQAALYI  
ITSITRENDVQRDGI VGLFWVLDYNI VIRDFNDI IDDFKTRSLVHGTLINCI PVRFVSL  
HMCLPNTSERLCQIAKAMYIYAIGPENRKRRLRVHFGKISFVRFLPLLFRTGCFPDXMNSL  
DVILLTGSPVECLYALQTFGIASHGIPINTNTGKIKLHQHHLQWLEVQRQKDKAYQKNESF  
LGIECPAQNDILFGRGWPKMSPGNAI FRNLIETRLEEYNSARSKKDKTMIGLSIVCELK  
ESGARFLKQGEHGLWLEVSSNEARQKVSIGFRDVRKAKIKSAKLAAGDAERNCPSSV

KRKSQQTDP TNPTEKNNNPRSQT KTHPMQYDEGSFAFVQMDGSKRMRCGPCKDE  
>comp14991\_c0\_seq3; 436 268 1959 LEN=2603; translated  
MTDALNPTTGF AEHKEQKSDSDSVSSDVLSSPSSFFLDDFDCIEAEISDEECD SGLIRN  
GVSGDHSPDALLAYELNQLSLEERGLLDNDI HGIHPRPLEETPDFLREKIDQLSVKLD S  
MPERDKSAYKVSQAFPKTYVNTKEFRMLFMRCEQFDVQKAATRLLLFLDTIRESF GDVVL  
ERRIRFSDLDEPAAETVSKGMLQMLPGRDRSGRRVAGNFPFVIQCGIPASSRIQAALYI  
ITSITRENVDVQRDGI VGLFWVLDYNI VIRDFNDI IDDFKTRSLVHGTLINCI PVRFVSL  
HMCLPNTSERLCQIAKAMYIYAIGPENRKRRLRVHFGSPVECLYALQTFGIASHGIPINTN  
TGKIKLHQHHQWLEVQRQKDKAYQKNESFLGIECPAQNDILFGRGWPKM SHPGNAIFRNL  
IETRLEEFYNSARSKKDKMTMIGLSIVCELKESGARFLKQGEHGLWLEVSSNEARQKVSIGF  
RDVRKAKIKSAKLAAGDAERNCPSSVTKRKSQQTDP TNPTEKNNNPRSQT KTHPMQYD  
EGSFAFVQMDGSKRMRCGPCKDE  
>comp14992\_c0\_seq1; 563 85 1707 LEN=1904; translated  
MNRASFTRRNEKAKKTPSVGRLSFRKLNAINLPFGGGSFRSKKIKKGGKPSMIDI FAETT  
NDQNSQAHAQMSEKAKGTRLAPSSVNPDKEDWGLLYELACQYDR LKLQEIEELKNPDTNA  
GKQKKEETKTTVPGNKRKSMKKEKSIKNALKGIFGGTNFTANGSFLNEAFFDQYLI ESPE  
FSSVTFDFSNKSGLYRRFNKDEEQKNISRKFAAALLKHPKAPKI THLHMSNALLPDAFL  
EALSDECLGSTSGGLPMLQVLNLESNVLRKDGIDALAKCIADPKVWPRLQVLKLENQKKD  
ITYEAEEVLGSAILESSSLVVIGLHVKG GIPKQOIENTIASNVDKLRQARRKHASKTGTL  
KARKRNDMEQFFDTIASNTDPSIVEVDLTGDLKFLGLKAAERTKTGASFKTNTTVTKVKM  
VKLKLDDDFAEAFGDALATNTTLETVVLDNSFSGKGMKALLKGLGTNTSIGNFQVRHQ S  
KTLPSDEEIIPELLSENKTVIKLGIDVRNPLIKTKLDRKTNENRDHQKLRVAARKQKK  
>comp14992\_c1\_seq1; 232 65 517 LEN=1055; translated  
MWRRTNTRFTGGTLVAMVAMKLFCLLSVTDSSTVLAMTNAVPKVKHIVMFTLKDGV SDE  
DVQAMKSGLLGLPGVLPEITEHELADLLLEGGQNHPAGKNQSVVWSATFASVEDYETYE  
TSEEHVAVVTNLIKPIIVPGSRAAIQYHTK  
>comp14993\_c0\_seq1; 1323 63 3398 LEN=3452; translated  
MAKYAYAPLSIEEQRRRAAGGYPSGGGGTTTDDDEDKLIQERMPMCVGFVLLAIVYVLS  
RTGVNQDVMLDRNSRINNGQVQSLRTGEPVNGFVPASTQP VASSNGLNPTE SAVSTAAI  
PKEEGCDCPESQTI IKTVYQPAPVQTSATAATTGEDTNALMGR LRQEALSNTPPHIECA  
AAEAGESQSACHLPKETRYAALGQKGATLWMTGCSGAGKTTIATALEDILVKNYGKHVYR  
LDGDNLR TGLNRDLGFSEFDRAESVRR TGE LATLFSDSGVI TLVGLISP YRKDRDEV RKR  
HEDQGI PFYEVFLDVPVKELFERDPKGQYARVKS GELKHFTCIDDPYEEPLNAEITL KTH  
ELEIEESVAQLFQRLERDGI LMGAPKVT PPLPNPDGDKIVDLHVPADQKAARTLEAEGL  
PKVLI TDIDLNLWLTIGEGWAAPLKGFMREGT LLET LHFNSVLIDPFNVTGNEDRLETKT  
DFNNFPENRPRNRVSMPI PITLSLSDYTKGRIESSGKEDVALVTRMGETVAIMRNVEIYE  
NRKEEIVSRMYGVIDMDHPYIHNIYMGGDYLI GGEIELLDRIRYNDGLDKWRKTATELMQ  
EFQDKGADTVYAFQTRNPTHAGHAYLMKSAGEDLRKKGYK KPVWLWLSPLGGWTKSDDVPL  
DVRVNQHEQVLEAGISHPGGLDPETTVMAIWPSPMVYAGPTEVEFHAKSRRSAGASYFV V  
GRDPAGMKGSPNAVAHPDDDLYDGNHGRYV LQNSPGIGDMKMLS FVKVMYD TTDNVMKLP  
DESRMQDFISISGSKMRL LARNGAVPCAPDNIPTDLVAANCVP SGFMV PKGWDGVVDY YK  
NIDDTTRWTPWSQPHT EAPAAGGTAQVGSFGFSTFSMTSTEYGSWWHDVPI RPAGEAES  
PILNMVTEIPMYMTAKMEVDKSFAGNAIRQDINKDGS PRYYSYGTTF FNYGLIPQTWEDP  
EMMSMGYGGDNDPIDMIELGDKPLAMGSITPCRVI GELELIDEGETD HKILCIALTDPLS  
NTVHTMDDL ERAKPGTLELLKNWLKRYKTTD GKPVNSLASETPRTVEGALEVVAEVHSRW  
RTL CGKDGTRRTALSSKTEDFWL ASPNCRGA  
>comp14994\_c0\_seq1; 233 144 1475 LEN=1904; translated  
MAILISTKVHQLWILTKYSLPQSTPYELDI AKPKTPSF PFLPQLGRNESFGACL MVKGDN  
DLLTEWIPYHYTVLPLRHVVVSDAGNHERPVEVLEK WTEANTDLEWVVVDYTVIEDAYS  
AFDEEYARRRYEQKAGRHSVSSSKRTATYNATHASPGKINGIDDDPELIKDLAHHHLVHKQ  
KVMVRYCAKFMKERGVHWSMFDTDEF LVVNRMETEEGRIPQAKNSTTTDSKTDAPDEKY  
GPRPFLPPMESNATVVDMISSLKDGG RPLRSCHTM PRVSFGANENFTCPG SVRIKDFARS  
NFRYERLSTLRFQKHAKTDDFSKNRWGKVMVDLSLLPEATLSKVPPNIHRPFHDECTRP F  
AFVEKAPFYLAHYSGGWERFEARGDRRRGYGGWKKLAAVGDSASCCREELYRWLPRFVET  
VGLDRARFLLGAAAAGQVSIAGA  
>comp14995\_c0\_seq1; 391 307 1662 LEN=2083; translated  
MSLPPSSWIVSSLDDEDGPPTRSSATEPVPAHLFLHFDINETILLGDEAGGDSRHES  
THKMLAKSAFCRIPEPEASRASGDTTKVDTKALTP THWWDGQEIGGETSVPKLYTGFEPW  
PGCVPYRTASKKHAKSFARDANDGAVYKPVLEACEAALAGAPT IQTKPTRDADADGTKG  
RNDTILPAFYETLCHLIGGPARAEAQT PCGSTGGSNTEGARDSQPPPPFTVVFRTFGSDL

PEIAEKVTAFAARGEHPDYPGIDAPSLCLPRDRLYQGRWKEVDTPDADTGDGPCCEEGSPQK  
AVYQLWNYHDETELVASGDAEILELLGSGHGVSFGIRDDYDFWKKHDYSPTAGKPVWVPEY  
PDTGRNTPGALYGHLLFDDNIHGLPDDGIACVRRRESGGSFEIVSGAGTAAAYHGVNLVRV  
PTVEPVLNPRWYIEQIAGAGERLRDRMRGPL

>comp14995\_c0\_seq2; 428 307 1959 LEN=2089; translated  
MSLPPSSWIVSSLDDEDGGPPPTRSSATEPVAHLFLHFDINETILLGDEAGGDSRHES  
THKMLAKSAFCRIPEPEASRASGDTTKVDTKALTPTHWWDGQEIGGETSVPKLYTGFEPW  
PGCVPPYRTASKKHAKSFARDANDGAVYKPVLEACEAALAGAPTIQTKPTRDADADGTKG  
RNDTILPAFYETLCHLIGGPAREAQTPCGSTGGSNTEGARDSQPPPPFTVVFRFTFGSDL  
PEIAEKVTAFAARGEHPDYPGIDAPSLCLPRDRLYQGRWKEVDTPDADTGDGPCCEEGSPQK  
AVYQLWNYHDETELVASGDAEILELLGSGHGVSFGIRDDYDFWKKHDYSPTAGKPVWVPEY  
PDTGRNTPGALYGHLLFDDNIHGLPDDGIACVRRRESGGSFEIVSGAGTAAAYHGVNLVRV  
PTVEPVLNPRWYIEQIAGAGXAAAGPDASALTNGRAPQKATNNHGIALHGIARHDIALH  
SWRAGWLWGGTVFGAFVAEGELPVPKDAEAGGRDARRRGKRRTTQGRPPVDRRTALP  
TPLHRRFVSL

>comp14996\_c0\_seq1; 784 183 2630 LEN=2934; translated  
MEKAPTTQGGPAPKPKAHPVTQVGKSRPSKDSTPHYHPHPPHMYAMMPIPPGPYSHDKV  
PPPQHLYPKGYPPTNGMAPPPHHRMSYPPMPHYHPSGGYIPYPRHMPSTSKSSKSSKTP  
SAGAGSGSSSKLMSKPGEPMPMLLPMPQMHTMPHHTPTPGPYASGKKQAIKWTK  
QEDETLLKDSVEEHGAKNWKLISSRLPGRSEVQCLHRWQKVLKPSLIKGPWTAEDRKVVE  
LVKKHGAKKWSLIATSLPGRIGKQCRERWHNHLNPEISKEAWKEKEDRIILESHVALGNR  
WAEIAKMLPGRTDNAIKNHNWSSMRKIEKYLAKKQGVDETNIIRYTEDGRFDFMGDLGVS  
LNAVRGRDSSGRMKTAKDRSRSTAKKSSTAKNRRDKHHKLGPVSMALNYMPYGMAPPY  
PGMPPHHAMYAREMAYPHQGSSENLMYPYQPSYKPKQAGSKRKNIPAPRPLASVDKPKTP  
SKDGKYNYGVPVPTSKLDKSPDPAVSFLTSAQKSSPLSPKQTDNLHMMGLNSPDVNLHIG  
TTPLSTLRGAFESFYDGGNDEVFNGLSPEENISLNKALFADDDGRQYLKTPREMKSFSIGM  
TGAASNSAFIKRMKSNRVSISPMSMKGYKKSASDIDIGLESALKCDKMPQSVTRSIHFA  
EKNENESKVTNTVSNTNAEVTDPATTTTFFKTGGQTPMAVTQNSINSRISGMSPPFSGPLTP  
IGFDWGFSPSGETTDFTPFKSPSIGSGDPMSLKKSERLFFERSPFTKISTNLVPKSSVKQ  
GTRKPTKEESMAADITKKGSTPKRQRVDSAVDVQH

>comp14997\_c0\_seq1; 697 1 3842 LEN=3905; translated  
XITTLRPEKRGRTTWALPRETILARVGRFFTLPTKAGGANRPCSSSIIPDRAAACRIVR  
GKTKKDPAAMTSEQPFRGDPESGSECECDCHSSDDVSVIRPLGFPQPPSNAPGLAVDQPD  
NDDVTVGSTISSHSAVGGGFAQNNRQITRRVSNQGQITTTKIGSRDWSSTEERHKTNSQ  
TTTRDRQSRGQRKFCRTRSVHGYQTQPSFDDGNSAEYSSRNSGSRSSHSSSMKSSEGRN  
SLGRSRSLRSDGSLRVHTGPNYNHTEPNYDHTDSDIDSASQSENDSGALQLRESAHRK  
LIFAGEDGVHNRKVI FVGGEEEDGFGGSVRKPCNPVAEASEYFPYTSAKLAASSGSASSHK  
SRNYTPPTSAEYYSSSFSNDAGSRATRSEVAGNHYPYDDEGTFGSGTASAKAGVSIVAEV  
VDEAKLEAEI AARLWSRIVQATEIRPSETISESVVSSCGRKRKRVRNRRCCHRCCKPGEFL  
MKRVR IILCVVIWSVALVVASIVVLVLPKESNGEASEVAIPINTTHVQNSTKHWETL  
PEINTNIYGIGNGMNPNVEGDRLDANESLTKESYLREMAKQMSGSPIPIAEATPQGLALE  
WMLKDPYTI SGIVDQEGNPEAKLAERYALATLYYSTSGDGWFDGMGFLNASSVCDWHGYS  
SDYKEPLHTQPPNGVVCNHRSDVVGLRLDHNLMGTIPIELEFLSQIKTLQMSNKGVLG  
TIPTIEIGRLVHTTALTFSSCNLIGTFPDALRGLSDLTLFSVYQNQLTGTLPKKFLEAVTG  
LQYGFDSNQFKGAI PNTFERLSALQTLYLNDNYFSGTIPSSLYFSPSLQILDIFSINDLE  
GTIAPQISAMENLRHFALDQNFSETLPSQLAQLTDLEYFSASYNDFSGTFPMDASKLQR  
LTHLDLSFNFTSGGNPDVINELSSLVFLNLESNPLYDGLF SVGASDFKLSSLVEARLK  
NTRAGLNQTFCGSDGIIPGLMLGSGVRIQADCLEEGGSI ECGCCTSCCESGGTDCIANT  
DAICNLHRAEFQGMWDDILQQRRENFSMECHCRSDSKNPKGLHNIMCNDRYQIIDQNATA  
KIDTKNYVCLKDSSFHDHIAHNASHNALVCAANTNYGFTFDGILGEELSFQNTIVYG  
ENSARWNGT SVLFRSYKEEGPYCDVWIDGQCEECIPRHCGERHDGKEDIGFAISCQNL  
DNGYTFDSCSDDL SFAGRQAKNGYLEIFHAALNASIAECHDQPSCTTGKLP IFLKFLQK  
GKERGFMPNSKSGTKNSGLT

>comp14998\_c0\_seq1; 601 122 2740 LEN=3000; translated  
MRLFYTAVAI FVVIATAPT VRAISEDYSKGNDADEGIRRS GHRRWLGVQQREQNVQEQE  
RELQSTSCTRCRKGSAAFRSNFDTREEIFDQLNPSEYKSVIDFVTS DGANIADGTKEDIG  
NANRALNRNYVVFVQLFPPPKA EAIAYLDRRTDTPPERYAI VTVNRGRQRPRDMMQYKIG  
PLVNGRVR SQNTVVEKLLRDNEIPWAMRGNYHSVTDHFDEAIHKSAYVLRLELFKATTGGF  
CIGGPECDDKMR YIQYANMATSPTRRVSTVHFILRDDKREFGPSCLLPVPM SFHVVED  
PDRDPSEWETT NF EYCYQGFESPEALLDAIYAGEVRACRVPSRNKEWTSVDPVEPIRPD

ATIKEPISFHSSGKRYVINSSTSDRRILSEDHQNTSNENEKPVQEGDTTAARKRQLRFTD  
FVSETEPSESSENQKKSTTNRNLQTVRGGGGDGTGHRVSWLGWSFHVSSDQMHGIVLRNLS  
FKGERLAYELSFQEFFASYSAMGSPGQTVYFDTNWEVVKYSPLELGLDCPEDATLLPMIQ  
HDGDRAEISKNLLCIFEQPYGEPMWRHEFSKENDKIKGIPRTALQIRVSVLGNVDYIPT  
LSLMADGVLEVKVKEMGGYLQAGYSVENSNNPEVPWFTRLRDNMAGLMHDHLVGVKADL  
DVGGPSNTLKAGKIKYGYTVEEATGGKHPYPGWHSYNGVKYMDWTTIDSERGISHSYDAI  
VVESENTKNRWGAHRSYEVFEHSVPRQVFPESHPLAAATAWQYSNVAITRQKDSERYCSF  
PTNYQIGQSVPSYDLREFQRDQEDVVNQDLVFWIMFGLQHYPKAEDVPLVSNFSGSGLLK  
PRNMYDRAAFEDLPDNREQDHPECVSPTIFKR

>comp14999\_c0\_seq1; 380 230 1522 LEN=2454; translated  
MVIRNGNIPERAPLPPDGLADNPNDVKELLSKFPISATDVAKVKVDDILSSELLQLSLQD  
RNAINEEIHGVQNFAPPEETPEMLSKALRDMQDEINRTPNKIAYDHSQEFPPQTYVNSEGFR  
LRFLRSDLFEVREAAKRLMSFLDLLLEIFGDFALRRQIQMSDFNREEMQLFRAGRMQLLP  
FRDRSGRRIFVAVGGFGIKSSLVTRVKILIYMLLSASEDVETQRKGITSVVWPGTKMPEG  
DKVNNIKLDRVIFLKRVDNLPVRTCSLHFLCLPDTFFFHMMRTLFLVLSLSHYMQRMKFHV  
GENIELQYCVKGYGIPVELIPLTDTGNIKTYYLKQWIKLRRMIEVVKMTGGNNDSSSII  
ECPGSNDVIFRSGTSMCHGGNVFRFCMIESKHEIPSIQSQTQAELAEQLIEEIESLGG  
RFLEWDNRGYW

>comp15000\_c0\_seq1; 570 385 2043 LEN=3009; translated  
MNESVTSLSRSASGLSLPTKPSLGRPNFMTRKRNDRKDNDCVKSSSLARFLEETEDEDLLF  
MESKENDSKRKNDEEYDDAMTVQSDVLFNRDALNVARSRVVMRKSKEPSSANRGSNQAV  
KDRRRRKKTDPEERRLRAPRGRSRGKRVKERDSSGKSKNSVDTTGNETSTSSSLATLDDAS  
NSSLELDSRRKNFRTRKPSGRSLSSSTREKRGKPRRTEDLGDSFNLSGSDCMKKTFRSR  
RQTSSKSLTTLTTSERNRKSRRSRVAADKEKTKGNQPKSLSAGLRDLDDKTRRGRKSSDG  
ASVASNYTTGTYKTSMTANTTQTSRSSYKPSGLEGGALNAFLGNERNVGRSSSFRLSGGAS  
VASTPAELKYMKERKAQQDMILDVAVKEKWRKEKKAEEEEKELEKPPASDDDESEKGIKAEK  
LKKAAIKTAKKAKCRAAVSEKKEKKKSSKSKSRKTGKKAKGKTKVAQDVSDILFSPDDNND  
EYDSKSLTDRQMLNFAERLTLDSDRKKTLKKGRRNSIASMGIDSSSEYLVAMNITDTNS  
LRSRQDYWDITK

>comp15001\_c0\_seq1; 659 160 2070 LEN=2585; translated  
MVAIGDESTDRRPRRTREERKKRAANRRAPSSVNTIVFNPFLLMLLALATISCLISFFLV  
LSHPAAQPAADAMPVTKAGLRIPPRDKANPLPHKLSDEEQRRLITGKKEDDENASGDDE  
ASGDDEEDSKEKVVNQVTTKKQLKMANHEPKLTPITYTDIKPFDTSLPTPHLIPKVPPLP  
IFNEVPNGDALIDLLHNNKPTVAGVIAFFNRYLQKLHTQNKENSKEHRDKTGQNIDEM  
SLINSYFDLTVKEIEPLEQAYRGTIFPVRDDESLYISLAAFREHLLGKSLMSAFDKAKD  
PSKLFFGAVVQNCFLDGTVCVTGMVVVGKDKNGRDKTSISPKPPDENGIEEFCTHKDYK  
KYCDSGQVRALYVHDTDALGPPQARFYASKLWGGETYFMQMDAHLEFAPNWDQYYIDEAK  
ASKNYPKSVLSAYPPGFQKYDGSYKGGTPGARLCKAVFSDSPVEHHILRINQGTGNTPRDA  
KFPTQIPFIAAGFFFAHAQFLVDVFPDPYAPWCFMGEEIALSLRAWTSGWNIYAPRKNMI  
AHQYRPGRLGLPKFWESVGRDSGRASLNTRLQKHVLRVVKYMLGYPTDSEEAIARDGDSV  
ALTLFENYSLGHERTLEEYLEWTTIDPIHEKVGMEW

>comp15001\_c0\_seq2; 659 76 1986 LEN=2501; translated  
MVAIGDESTDRRPRRTREERKKRAANRRAPSSVNTIVFNPFLLMLLALATISCLISFFLV  
LSHPAAQPAADAMPVTKAGLRIPPRDKANPLPHKLSDEEQRRLITGKKEDDENASGDDE  
ASGDDEEDSKEKVVNQVTTKKQLKMANHEPKLTPITYTDIKPFDTSLPTPHLIPKVPPLP  
IFNEVPNGDALIDLLHNNKPTVAGVIAFFNRYLQKLHTQNKENSKEHRDKTGQNIDEM  
SLINSYFDLTVKEIEPLEQAYRGTIFPVRDDESLYISLAAFREHLLGKSLMSAFDKAKD  
PSKLFFGAVVQNCFLDGTVCVTGMVVVGKDKNGRDKTSISPKPPDENGIEEFCTHKDYK  
KYCDSGQVRALYVHDTDALGPPQARFYASKLWGGETYFMQMDAHLEFAPNWDQYYIDEAK  
ASKNYPKSVLSAYPPGFQKYDGSYKGGTPGARLCKAVFSDSPVEHHILRINQGTGNTPRDA  
KFPTQIPFIAAGFFFAHAQFLVDVFPDPYAPWCFMGEEIALSLRAWTSGWNIYAPRKNMI  
AHQYRPGRLGLPKFWESVGRDSGRASLNTRLQKHVLRVVKYMLGYPTDSEEAIARDGDSV  
ALTLFENYSLGHERTLEEYLEWTTIDPIHEKVGMEW

>comp15001\_c1\_seq2; 217 172 590 LEN=590; translated  
MATKIVVHGGELARDVAEQIEALRPKECGTVEVTLRCASERPKTLLDYKTGRGGDDEKVV  
VLCFILQTIENAAPTEEGSVLRFFKRKTHPGDLLESPALSFAVLGLGDSNLLLDLDRQTTA  
AKDCNQAAEQLDARLAALGG

>comp15002\_c1\_seq1; 177 339 797 LEN=1725; translated  
MSFRRWDPVTDALRVLGLSGRPPREEIERAFRIAACKHHPDGNAQAGSPDPARFRRCLEA  
RNLLLDRLHGKHRARASHPRPSWDPPPRTGHGTGSGNKAFFAKGFPFQTLHVLTTTRSKVA

VKGATGVLVLAMGLYDGYRRHRSRAANHALAP

>comp15002\_c1\_seq2; 177 339 797 LEN=1704; translated  
MSFRRWDPVTDALRVLGLSGRPPREEIERAFRIAIAKKHHPDGNAGASPDPAFRRCLEA  
RNLLLDRLHGKHRARASHPRPSWDPPPRTGHGTGSGNKAFFAKGFPFQTLHVLTRRSKVA  
VKGATGVLVLAMGLYDGYRRHRSRAANHALAP

>comp15003\_c0\_seq1; 2264 158 7587 LEN=7642; translated  
MDSNQKKNDSRSSDWTIPKKKSSSSSLDGSIPRRKSEISNNSHQQSITIPRKPXFGD  
SGNGFGSSSIGSTIPRKRSLTDAIPRRNSGKSSSVGSSRPSINGSIIPRKGSASSLYSNA  
HAYGHSRNANGHSTDRDFHRSHSGQNKRLSFKIPSQLREDKAKASSKRSSYNEPFRSQAS  
SHLPSPKDQPLPNIVSERPFIISVDLSGVDMMNGGIPRAPEILPDAAPKRERKQTQTIEY  
KEFDDTSSEGELTDEDDDYGKNKKKRIIVSKAKKPPSSAKASTSTNLKFAAEKFAAIT  
ASGVSAYQQTPLYGPSVTNVGTLPAWLELGNNSFESPPTGALPSLWYSREVFANIVV  
EKILTWRRRKVTRLEWDPASYSDDTKPPMPVLDTTEAAKLSEIARSSPLIWRDPKCRNE  
ISRIAQEQCPIVMAMAVQAQHAEGKHLIGGATQTEELQEQDFTTTTNASIKPTYRIKATP  
HTGATEREEVYLIKWRGKSYLHNSWERSGDIIRTDPTNNTARSKIRKYNQAQEIAGLIHW  
KKVIEEERKASNATALHDPVPATNVDTGKMDTPQEEPDEEFYPPANTEVERILACDESE  
MDLSLYAKQRALNILDDQEQMKQKESGTTKLWNSKEGLKEILTEIPWDPEDNVRYVVKWK  
GLPFAEITWEYWKDIKTATDEAEDFWIRQQPPDEETLARN SQPHPMQDFQKIKESPPF  
GISKRRLVADSINGQLVPKDVEDEREPRFRNYQLEGVNLLFNWNRSCILADEMGL  
GKTIQSVGLIKLLQDTPNTGVRGPFLLVAPLSLIGQWQSEMKSAPDLHIVLYHGSADAR  
DFLVKNDFFFTDQFVSKATATKLRKQHVTKFHILITTYEVVLKDVDFVTKIKWKALIVDE  
AHLRKNSSSKLFEELTSVPRDYCLLLTGTPLANATEELWALLKFANGSVFDSKDDDFLEKF  
GQLTDSGQVDQLHAVLKPYLRRVKEDVEKSMPPKTETILEVSLTPSQKKFYKAIYERNT  
TFLFKGAKPKNQPSLMNMMELRKCENHPFLIRGAEEKLLEATQQIRANDPVAELNHLQ  
IFHDQLVKSSGKMLIHKLLPKLYANGHKVLIFSQMVRLDLEELLKMMRYKYERLDGS  
TRSSSTRAAAVDRFIRKSCQRFVMLLSTRAGGLGLNLTAADIVIFDSDWNPQNDLQAMAR  
AHRIGQTKAVRVYRLLTAKTYEMHMFHSASMKLGLAQVLSQQRDQGGEGTDGKKS KSKS  
EREAQAKKIDQLLKKGAYDVFRDDDEEAKKFMETDIDQLMESSAKDVTYGNQSKLSSG  
LGSFSKASFVTDGGEKDVLDLDDPDFWSKAVGLEQPTETPEEISHMIDDGVKRSRKQVE  
QFDPYADVREERIKQEKIDIKMKADKDEKERQREEKRAKKLEKSKKRKSREEKEADELR  
NKEARTLPPPNTLKKRKKLKTGKAGEIGETKTKSLLKKTGNKKALPITKKESTLMSQP  
SQKKSRSRLERKRALRKAENENPMIENLKQWEISHRNRAVAACIRFGFSRFSKLRHESN  
LQCLPVQDIEIFVRQFVYQQLAVIFLQKLSDDPDGLIDENLKTNLQEYLGPPSSDEL  
QWLSDCILIRGIRDFLEVEKQRRFLRPLVLVAEQNYVADLRRGAALRSLRRVFMACRVERV  
IGSCVDIAISKLYEQLAQRGCQTSNMATLDTDLKTRLVSTEELTSLINLLFTQVNHKPP  
AAWWRSCDIALLLGTFVHGLGNYEAMLHDETLPTFKIRKHSISDSLCCDAHKRFAKAT  
SAAKQVCDDALEKSKLKAQKEVQKAVAAAAAALKREKEAAALREGGDAADAVINNMGEQ  
PLDHLIEFQEGKDDHFIITLPRVKEAIVSSIRSVSLGSDLDSKVNCSGKKEAKGIEESKGR  
RKRNYFHSPLMPDARVLDLFRLLKLVLEIEKCHSESRKCDEYKDEFTTPKVWPTSGETVFAN  
QSMRDFSARFLQEKTLKQADQVIEYAGIGLNGTQCGVTHRTVDDRADYSIGAASPDLFQ  
VAHGPESPRYLRALGVPMTFGRFGMVALAHANDKCLNSLLANERKESNASNETKGEFMQN  
GSTSTFDPPNMPGPIEATLVGDKKEEPSIKGEAEVAPGTALTNKLI SHPTLSSTLPMAFQ  
SNATLRAGVSCVLLYFGFPQQDGEINMAYDIWSCLRETSVPVQLSEASNPMFGTNRFLQLL  
KHFCGDTKIPENVIKEYIEGHFLPHCLKCLYGNSTTQITRGSKEGEYETYDGTCCYPE  
PTEKLSPLPDPCLPLFEQSI EAVGIIASAIIRFRMLRMCILNISKGVQAKNIQEI LHSK  
TMRKSMGDLPVWVWCPWIHDTALLVHASTHGLFSILKDRASELSDSAGIIFSQEAIKRHI  
RTTFFESERMVQPSILNASSGDDIAAWIERYANEFPSLNVIERRLAFLCAKATENLSDS  
RFDNLPMYDHGGWPRN

>comp15003\_c0\_seq2; 1589 158 5197 LEN=5291; translated  
MDSNQKKNDSRSSDWTIPKKKSSSSSLDGSIPRRKSEISNNSHQQSITIPRKPXFGD  
SGNGFGSSSIGSTIPRKRSLTDAIPRRNSGKSSSVGSSRPSINGSIIPRKGSASSLYSNA  
HAYGHSRNANGHSTDRDFHRSHSGQNKRLSFKIPSQLREDKAKASSKRSSYNEPFRSQAS  
SHLPSPKDQPLPNIVSERPFIISVDLSGVDMMNGGIPRAPEILPDAAPKRERKQTQTIEY  
KEFDDTSSEGELTDEDDDYGKNKKKRIIVSKAKKPPSSAKASTSTNLKFAAEKFAAIT  
ASGVSAYQQTPLYGPSVTNVGTLPAWLELGNNSFESPPTGALPSLWYSREVFANIVV  
EKILTWRRRKVTRLEWDPASYSDDTKPPMPVLDTTEAAKLSEIARSSPLIWRDPKCRNE  
ISRIAQEQCPIVMAMAVQAQHAEGKHLIGGATQTEELQEQDFTTTTNASIKPTYRIKATP  
HTGATEREEVYLIKWRGKSYLHNSWERSGDIIRTDPTNNTARSKIRKYNQAQEIAGLIHW  
KKVIEEERKASNATALHDPVPATNVDTGKMDTPQEEPDEEFYPPANTEVERILACDESE  
MDLSLYAKQRALNILDDQEQMKQKESGTTKLWNSKEGLKEILTEIPWDPEDNVRYVVKWK

GLPFAEITWEYWKDIKTDATDEAEDFWIRQPPDEETLARN SQPHPHMQDFQKIKESPPF  
GISKRKRLVADSINGQLVPKDVEDEREFPRLRNYQLEGVNWLLFNWWNRRSCILADEMGL  
GKTIQSVGLIKLLQDTPNTGVRGPFLLVAPLSLIGQWQSEMKSAPDLHIVLYHGSADAR  
DFLVKNDFFFTDQFVSKATATKLRKQHVTKFHILITTYEVVLKDVVDVFTKIKWKALIVDE  
AHLRKNSSSKLFEELTSVPRDYCLLLTGTPLANATEELWALLKFANGSVFDSKDDFLEKF  
GQLTDSGQVDQLHAVLKPYPYLLRRVKEDVEKSMPPKTETILEVSLTPSQKKFYKAIYERNT  
TFLFKGAKPKNQPSLMNVMMELRKCCNHPFLIRGAEEKLLEATQQIRANDPVAELNHLQ  
IFHDQLVKSSGKMLVIHKLLPKLYANGHKVLIFSQMVRVLDLLEELLKMMRYKYERLDGS  
TRSSTRAAAVDRFIRKSCQRFVMLLSTRAGGLGLNLTAADIVIIFDSDWNPQNDLQAMAR  
AHRIGQTKAVRVYRLLTAKTYEMHMFHSASMKLGLAQAVLSQQRDQGGEGTDGKKSKSKS  
EREQAQAKIDQLLKKGAYDVFRDDDEAKKFMETDIDQLMESSAKDVTYGNQQSKLSSG  
LGSFSKASFVTDGGEKDVLDLDDPDFWSKAVGLEQPTETPEEISHMIDDGVKRSRKQVE  
QFDPYADVREERIKQEKIDIKMKADKDEKERQREEKRAKKLEKSKKRKSREEKEADELR  
NKEARTLPPPPNTLKKRKKLKTGKAGEIGETKTKSLLKKTGNKKALPITKKESTLMSQP  
SQKSKRSRLERKRALRKAENENPMIENLKQGWEIFSHRNRAVAACIRFGFSRFSKLRHESN  
LQCLPVQDIEIFVRQFVYQQSLQLAVIFLQKLSDDPDGLIDENLKTNLQEYLGPSSSDEL  
QWLSACLIRGIRDFLEVEKQRRFLRLPLVLAEQNYVADLRRGAALRSLRRVMAAELKG  
>comp15004\_c0\_seq1; 544 234 1517 LEN=1683; translated  
MVTLTATTAANTVELAHNASVPPLRQEYHIAARHLHLPVKSGGHHSSYKGLGYSDSELV  
WIFPGQAPNC SWLHSGDSSGSDSNSGSGGGSISSSSGGSSNGGSYGFDDGGNGNEYWAYED  
YRGHGGGNGQGDNSGYDDEQIISNEDIYDGNSDYDPIDDFDIEKNTYENLWLWDL SLS  
NMTAGDISLSGCNCTFAEELMDDGLLTCDDAALCPSNCICSTCLKLLGCGTDPNQPGMS  
RSMSTAVVLYVVGAAVALLIFGLASYARRKQDHNLNRLSIEKRKNRMIDIEDGPGFM  
YINGDLTWKPLPSDQQYAAAQIQPVCTMSTASSGKYLEERIQPSSGGCLSGASEEDKESC  
SNGETSSIEFGTSGPEETNVPTVETLNDIENRALSPLPQTGKSSMIDSPDDQSYVFEDA  
IQSPTSS  
>comp15005\_c0\_seq1; 694 164 2159 LEN=2309; translated  
MSSTRGPPQLMFDDGSRVMMEDSESNVVVPNESSEQPLVPIQRGSIPLHVYYEINRMSTE  
TIDLLVSESSNSTESTTVLRIALQFPDELLQDSPEVCWLEEDKIREELEGRSRTNIIPF  
CFVLGDTTVNSCCPDEVAALHLNADVLIHYGHACLSPGTLPVLYSFGKLEFGDL DGTVS  
QLQAARSERSKDDTTNNKFLVLYQVGYHHAMKELQERWMNEDTEKSLQVVVAEIPALSQM  
QPATENNRPTVNSTRTGCCQSDNSPKNNTGSSGCCGDSSESPSEKNIVLPSSSSCNSRE  
KGENCLSAVSSEAGTLQEGEPDQSDPGSNEAPLRPMVVGLELPRDKISSWDDLVDYTVL  
FIMGNPESDADKYSTDNTTPQQRHANSMLCFLSLPHGEPQGGYWIYSPKSKALRTNVS  
PPPAIRRQLKRRFFLTQKARDANVFGILVSNLSQQYLVDVVKSLQRIIQDADR TAYSFAV  
GKINPAKLSNFAEIEETFVMVACRENSLLDQEREYPIPVITPMELEIALENLQWGMQPYSL  
DCQDVMIRLGEERQQKQLDAMGGNTDGENANDNCSVENEYDNDSDAPYFMSMITGRYESR  
KSKTSSNDLDRALPGQGQVTEYKSEANFLKQREYQGLESKVGETEAKAAVLGMRGIAS  
GYDK  
>comp15006\_c0\_seq1; 519 137 2008 LEN=2706; translated  
MNRRPPDSESRPSLRMTTKNAIMIGSCMLLAFQLKFAPPSPFLSDPEQTLPLPLTSSMMF  
EQYENGLYKTHFEAPYTEYPCQPRKIHLSPSSDVPDGSNVFNATVSNLDAKGVVQHSD  
VVTVEYGLGNTEGKIVIRYDNLNNTITDDFTILRFNYTNPETGEFYQSDLIHHVLLK  
DLKAGRERYWYHIKVELVEQRLFSESAMIQPSVHSILLSQTNPNNNAPLRGSPRLDLERY  
GHATRSMMNRREEQPQSKTSGDAAATVVVGETPVYEF TTPPLYGQPTSIALVGD LGQTKN  
STRTMARILDAKGVVDHDDLSSDEPQGVGLVTNLFIA GDLSYSDGDPHRWDSWLDLAEPL  
LREVPFASIPGNHEIECNKVTRET FVPYESYFRNPNRIEKPIMIPSEDIINHNYCTTPS  
EFLEGHYDYGNAIYSYKQGLVHAIFLNSYTSLMEGSRQRKWL VETALPSVDRSLTPWL VV  
VFHTPLYTTFLNHFNELNPTVMKESGLREVFQNHKVN LVLSGHDHAYLR TKPLMPDG SVA  
ADGKVAPVFWTLGAGGNREGHATYINPFWQEKWVAKRNDFEFGFLFFAPNRTHARLRWM  
RDDDNGPTDGAASTKSMVVRDSVW  
>comp15007\_c0\_seq1; 969 294 3351 LEN=3351; minus strand; translated  
MDAPNEELDSAFASSEKRRKHDVCESENGIARSLRPSVFIGSTGHDLAINGRILD LTPRK  
DFGVEECTALGKLLSANNDSTEDRECEQTTIEELLMGRLGIGPGGAALAESLGANQTVT  
YLDLERNGLGAIGGCAIFRALAANRTRKLNMMNLNDLKAATSAGNHEATNALGDALRTNS  
TLKELLLVRSGLGPRGGNNLAQGLSSNTSLLSLDLAGNDVMADGGQAIGEALKTNTT LKE  
LNLRWNRIGCGGDRGIESLADSLRTNTHLQRLDMSVNELYSEGAI AFGRALAINRSLHL  
SLERNEIGSVGATAIAAALKVNNTIEKLVLSGNPMMGDNGVEAIGLGLAENQGSALKILE  
LVDCGIGGEGARGLSEALKSVGTSLSDRLRLERNRIGATGCRAIAAGLEENSLRHLNLR  
NGLQMGGNALAAALQKNNTLQSLDVSNNDIEIENVDADNDRVHIVESVVGHP SLQLVNL

SDNALEIIPIDCQLKLARIYESERELDIDLSDNPLSSPPLGRRANIEGLKDYLKMLLSES  
TSVNRIRLMVLGFGGVGKSTFCDAVTQKNEDLPYFHGSLIPLLEWDFKMIASWARRLGTQ  
WAQFIGSVLETNQISGKDLPKLIGNTKSDDEIDKIGHDRDECYPSEKLQALVDSFDTSGY  
GMDSSHMKSFARAIESLMRKG YFSTVGAVKME SLLLELEKLGEDS NSNDRAGRACSLVDF  
GQMEYLVSHQLLLSSLHTLCVVLQPAPSFGNPQSRHSGSWMYWSRFLRALGDRRRGSLLL  
AISQQDRVSGFEDGTLSDIDAAIEDELSAIRSKI PNITECPPLRLNYPRI RQTVQEV  
GALSNAADIVARDWVWPAS YERLAELVRRLEDEKKAKREVPILSREELRGELPSAGLHRM  
HEDPQLFKRGIEYLEAVGDMADHRLDCLLLDPI SWFASFLAHFIRDDDIVTSVQLDSRF  
VKRGMVSL EDIVRALRHDYVVKPREQVAQVMSLVCRLELCVLQKHQINDESDGGDGASDAX  
>comp15008\_c0\_seq1; 817 132 2351 LEN=2779; translated  
MIASDAAAVDNCRAIDGDGNSYEQISKRNLNNTNARLASRLSTS SVTSATSLSDTTD  
DDEFRLPKRVVALNIVRPVKRISEQFYDDAYRKGF TLR ETNQAAMMAHDWNRKWRDQDE  
TYHTMPEEDFYRSSAAVVPASYCHGVFSDL DYKGGPPAYTDADIDIDQH QVANGLLLLLLE  
REEGAKNPSLGSPEEGKRKRYSSRTAEVRLSRHHSITEQQKQHNQPSLEQWQLGAFNKTI  
PNSAHKGTNVISSTEASTWGDSMNTIEPNGCERCHSNATEEKQDNEIFSEFCELEQDDK  
TDNEPGHNQKALGIQRPLPLRPMPIRPLAIRANRSRHIVPQPTYAKLSPFAQESRNGSTG  
RGI PRGIVM SHSNRAEGVSPMSFSQLTGSSPMSSGSEMMGVTVINSDHENLHYVEDDDLF  
DIAKDSAIQPVMNIEKARDDILRVL AISDGDSESEDFKKKVDPLEKHFLGREIDTR AISV  
PSNRGTLASSASASSAAESINGMWL TLSKPNFFGKLGQNDNGDPMYTLGRMSFDMF SPTN  
LVCSLQGNFNHVEIVDEGDRKAMLEKVPK KLR EEVESGKTTLR TYHVVTAF TIEPSLAAY  
PNAPNKDVMRPIKIGIMTTYGYSLPDPSTPNRHSVWFTGGRIEPNNDKTDV LGWNNFFQLH  
PPKHSFTEKAKLLAVKLLMGATIPTEVDPVDG SFNYVFTRPLGGHGMVYIDVIYLD ESLR  
IVRGQRGTTTFVFSRVPDTS  
>comp15009\_c0\_seq1; 1183 1 2438 LEN=2592; translated  
XALPISELQELKNLYAKAGEDHERAINDIKSCLDSNASDSAEKISQLQKAVEEKSFELEE  
MAKAQTKTEEDYRNAFTKLKAATKVTVEKMNNLKKDIEDKSIELEEVKNSKTKADEDHQK  
DLVNLKENLKSASDASQKLQELQEAI AAKDKQLADSKANHEAKVGVFMEKQSCLEKEKI  
SLENLKEAESQDNDTSEKLEELALGALRIEMKEHHDQEMTNAKEVLNAEKEELKSKFESQ  
IAELASKNKKQOETLTENHSDKIENLKKK MADHV DKM KDQLKSKLVEERAKSKKFVDEAD  
AKDKKREEQMTKLAGQLKQMSEAIKKERDEKLSLNRTIKEQKSKEQRLTMDLAASRKS LD  
ETIANSESAAQSL LAEQDKLKR TAQSMQAETEKS KSLFKQKSNEAEELSGKLQALTQNLN  
AMAEDIKKKEIGLAESEKQKAKLSSSENEVAELRQQINKL KLEHTKNSQLASRLQSEKEA  
SERNHGQRTAMMGML ESQ LAE INEKNTAANAKLEAALYDLSQKDEMLESKENKLOEIEAC  
LVKTQKEKNAAIEHLAQ AQKGA AKNSVQLENLQRELLQFKQSSARKSAAAQRMIQENEA  
ECARLRTANKK LQOEV DKGSLSDRKIFELAA MQSNRDTAKILDIEVRDKALARLNEALTE  
RDGALASAEKKIDEVEDQVAELGR IQRREDVNMDYLKSI VVQFLSKAPGT SERAALLPVL  
ATLLQFDENDYGMIEQGKSKISWWSVPEVEIGKGS AQNAASSTDYLFGLT SYISGAPAP  
APSSAGPTASAEVSI SNQVASTPSGRGTS LQF  
>comp15009\_c0\_seq4; 3041 1 6075 LEN=6229; translated  
SKHGLSLSKHGSKHGAPAPAPDPATPAASGGPTS IATASKEELVEVLTKMNKKVKALSMI  
RTQMTEKLQTTQEQRDQLKSLVINSSVMTKRPTPLVDGDDANNGSSTPTTMTVAELSKLW  
KVMESQEEQEV LALKQALSQSPPPQKQNGSSNGSDSALES LTQQHQKEIVQKDEI IARLR  
SNSQQPATDELKQRHAAEIEKLK KVAALQLANF KKKVAAARSLELEKVKKESREAEAEKE  
FAANQPASITAAGGDSASVEAVEELKQQHALEIQSLQQKLGTEYKRKLEMEQTEARQKAE  
QNHKKQVEELKTQMAQAVENAKKEGAEESNKSTNEQINKLLSTMKLQTTHEHEAELANIEK  
EHERKLQOSIKEVEATAAENLSQSQIKDSQVHQQLDAKIKELQTOHSAQLEAKEKEWET  
KSQEQ LKRVIEEGAKSKNEQEVAASEKMQEHNAQLEKLRSELTQQFETEKTKLQEDSQK  
SLEEEQKTLQOSTIEFKDHLEKQKKQLIEESQRNLAAALEKKKAELEAASAEKANLVKA  
SEDGKSNALNALKEKFTAQAKQFQT TSAQKLKDAVAAAKKETEASIRELMEKEVKEIQSK  
LQAE TANHEASLQQLQSEAAKQMEDANNRLLSAERSLEENAAK LKAAQEELTKVESQSS  
EQLKIMADAHKKEILALEERCKKESATEKKEMQLSHASEISKLR ESMDADFKDQIEQINR  
KAAADTEKAVSKIRIELEEEEMNKLEASDET RTKEVEKAREDGKLM LKKSIEAAVSKSE  
TIDSMKDEFEKKIETLEKETEKIKREHASSIENGKDL EGKVENLQSKITALQDEKVAILA  
SAKDGERDSQKAI EGSLSKQRESY EKMMKDQOARQADKLQQLQTSIEELS GFREKYTQLM  
KDHKLTEQRNASNEKEKSKIEELESKSVSLQRELELSKSKLQEV EKEASETSKALEVK  
SELSQEIQKLSEELGEASKKIMEEQDKAQKMSTELQNKLLESEGE SSKILATFRDKNATL  
VEENQKLKVDLEEMKTFKETNDVNSGKKIADLNETLSQFKLEKERSENALIESRKKMEQD  
VSSLTQQIENLKA EFEE SVKAREAEQSTSSKEISDLERHLDEAQKQIVSLKENHQKAVDD  
IKSSAVSDASIA TEKITELQNVIGEKDSMLEKA EKQLASEKENYERTIEQLKSSTQSDTS  
QTTDRINALEKTIQDKTSELQELKNLYAKAGEDHERAINDIKSCLDSNASDSAEKISQLQ



KAVEEKSFELEEMAKAQTKTEEDYRNAFTKLKAATKVTVEKMNNLKKDIEDKSIELEEVK  
NSKTKADEDHQDLVNLKENLKSSASDASQKLQELQEAIAAKDKQLADSKANHEAKVGVF  
MEKQSCLEKEKISLENKLKEAESQDNDTSEKLEELGALRIEMKEHHDQEMTNAKEVLNA  
EKEELKSKFESQIAELASKNKKQQUETLTENHSDKIENLKKKMADHVDMKMDQLKSKLVEE  
RAKSKKFVDEADAKDKKREEQMTKLAGQLKQMSAIAKKERDEKLSLNRITIKEQKSKEQRL  
TMDLAASRKSLEDETIANSESAAQSLLAEQDKLKRTAQSMQAETEKSKSLFKQKSNEAEEL  
SGKLQALTQNLNAMAEDIKKKEIGLAESEKQKAKLSSSENEVAELRQQINKLLEHTKNS  
QLASRLQSEKEASERNHGQRTAMMGLESQLAEINEKNTAANAKLEAALYDLSQKDEMLE  
SKENKLEIEEACLVKTQKEKNAAIEHLAQAKGAACKNSVQLENLQRELLQFKQSSARKS  
AAAQRMIQENEAECARLRTANKKLQQEVKDGSLSDRKFELAAQMSNRDTAKILDIEVRD  
KALARLNEALTERD GALASAEKKIDEVEDQVAELGRIQRREDVNMDYLKSI VVQFLSKAP  
GTSERAALLPVLATLLQFDENDYGMIEQGKSKISWVGSVEPVEIGKGSQAQNAASSTDYLF  
GLTSYISGAPAPAPSSAGPTASAEVSI SNQVASTPSGRGTSLQF  
>comp15010\_c0\_seq3; 125 1913 2025 LEN=2025; minus strand; translated  
MASQCLEDKADTIKDLVKRINVPQTLSSNLGHLNEAGG  
>comp15011\_c0\_seq1; 551 242 1771 LEN=2252; translated  
MFEARESIFKPRQLRDNDGGKVEGELGGKTQIQTKIYDATMISTETEIVRNRSHDTQT  
TDSSSGMHSMNSSGIHSLDLLKEIYPPFSDSELEHEDTMEECDDKETVIHTNSTKGSTLK  
TDKHDEEVAGNDLFLSYNKYLSLNEIGITSQWEEGKPFDEESLRALSEIASEQGDRVGI  
VNSKDVHPVEEYILPPVTGQDILKDISRYDTKSYDFVKKSSDTTNTTAPIVHSLRRDEGY  
QDQSGSEPLSSSIVGDNGAKESQKSKQKFRFIAILLIITLLASGLLIGLLSRKKRNGNS  
LNNETAAASSNLNDTSVAKDLTNSPTDSTQLDVPPTAPSPIAPSGRPWNDNLPPAPTNSF  
IETRSWGTLVTYLDPVPDNFFPLEQCTGDCDNDDCDGLICFQRGANDPVPFCYGGEND  
YTATDYCTFPDYDSNAYVVEPPSEREELIECTTTISAVQDCYFAEANVLVDFENCNPEE  
EDWIGVFPDGMSFDDGSSATEWVSDDWIDW  
>comp15012\_c0\_seq1; 1774 293 4552 LEN=4728; translated  
MVNLDREVMLRSGNDGSANVSAATEEETATALMAIQKHQQTMAVRDRISMRRDSMSLSSD  
GDENREEVRDTENAKEDSREGAEDIILEARVTNDAEDNGTEAVEAATARLQIVEIEPEME  
DGI EVEYDGNFAYCPTTESTHDDAETDTTETETETETETETEKEIENEIENENENENEN  
EVESQFTQEMKETVKDSSPDEAELEPTEETQEVGESFEEKAEDIKTDPIIQLEECAAISN  
SADASVVEDEKTSPEEPSDTDAIPSLPTEATWSFDSTLKRRTSKKKTRVAKPNIFFPGF  
EEGDETDVALDATWSKKKEKDAIKNSASDEAEKQDDSDADAEKPTEEQDSSESEEPKRE  
ESSQPVEANENKHVSSDQIQNELSNESHSDASQTVEFDAILESVAEQIESSDWRFTATIF  
ARPSLATLSSVDFFPSECSGFLGVGASENLLLHEVCKNEPTLEAVKTLIEVHEAAVKVAG  
QWGYLPIHCACASGASDDVILALLEAYPESIQSFGDDNMFPLHLACKKEASASIIKQLVT  
AHPPACVAKDVYDKTPMDYVLAQAKGSQRAEKLEVLGRYIQSMHISSTALEKSLRESEEK  
CTSIRKELGGRHERISSLETELKDLQKKSVSLEGLWKEKEESKTQLHIQLKVSGEKIIEL  
EQEIGAERAKASVFGENLKKELNKSCRLEGLRDERKKSSTLEKQLKKNCDSEWSVLAKDM  
EEEFKKSAAELKKERQRIEELEKKLDFDEQEKCSILDAQLRSQCDKSSSLGNSLDSERQRT  
AAVEAKFEATKLRWLIIKKQKTYEKADSF LAEAQKLLDQAEYTAMAERWVTQRNSIYEK  
NATQLAEAYKAIGEIKNELNEKHAKILEEKEDACKKTEAKLVDAYKTI SDKEIDLKLEQS  
KWLFERQKILEKNLNLAAAFGCVHEMQIQLDEKTNLVNESEKLLERSRQQVAKECGKSK  
VLIRQLELTKAVNSEKIKGLGDELNAQKSFSDSQSQIEALEASMELKLSSSGDHEEAQY  
QRLMYEKSLTDEIKDRINEKKTLMKENQEMIHVLAKSNEMKEKLLLEAQKKVEALDNARR  
EKENQLKLNQQAVKELEESIARKKALEREVEVERTTKLAGTRASSRAAIEIEEEQIKELDF  
TIARKQALIELEKMKEKTLQQTIAKKQELIDTEVKRIKELEAIVA EKQIHLTLERSAIQS  
LKTAKAEKRELLVAERNVTIELQKVRENEKILNSKLKAQELIKSDVEVREALLASKQAV  
IDSVKAAQVRLDEEIKNQEDAAAAL EKQITKKKTLITKEEYVEKCLKQFVLRKNEIMPNG  
PTSYYFSAIFGAQFSANFGMQSILKETHLVSNYIKTQIREQSEAVRERRNNV LALVPSVS  
VPSISLSSVPSLSSVATGPRSLMARLSFGIKLNINLNDK  
>comp15013\_c0\_seq1; 371 410 1717 LEN=2223; translated  
MAISKTSRRCALLSTMAAISPGSCLAEAEASPLPQPEAYQQR LVDWIRSGENGFFHPSV  
WKRLGPDGKSGPYAMHTTVDIPKGEKLLVVRSHITIDSLKTHENCFTIARMLDEYEKGGD  
SFYAPYLSYLFDDTEGGTTSGLLPTSWSEGDQNL LDQVLYGREGKSAVASGLEPKIYSHA  
TVFEDCGTNFRSQHPDGEIEDETLRRAEDAYYFMLSRSWADKLI PVLDMYNHRNGASKN  
VESTTVHYSNDNITAFALRDIKAGEQLQNTYSECMDDDCNWGKMQYEYLT PNI FMDYGF  
ELYPRRWE LGPTNHEIVA EVDEDELETGEKEFKWIFQKPTSTALRWI SNHLERLQSMEEEE  
REGVERHRRRGSEHYARYHNI EHEADSILEMYEGYVEVLSMAHEHRNDGIGVTREQFEEL  
LEDARNTNDEQYDEL  
>comp15013\_c0\_seq2; 375 199 1284 LEN=1857; translated

MTSIGPIAISGAGRIFRRARNHPFRHCTALDGKESYSQSSFHNVYVFQKASLCIVAAQNH  
DFELVRTSVDRTNSTYSFQKRSQSTHKALATDGDDIHRYYRYKLYQYKICPFPSNIAKVFL  
TYQRIPFESVEVNPLTKAELEFSENYRQVPIVTVLDTDPYTPAAEAVQQLNGTEEILLHH  
HPNANSNDGDDQTSGDSSTRWQNFARTKLAPELLYPNICSSSLGDSFRAFRYVHNSPNNSFST  
VQRFISIQCIGSVAMYFAASKIKEKYKIDDVKVALDDALEELEESELTNEGKKFLRSPPTGP  
DLGDLAVFGVLKGLEGLPLWNTIFDNDLQPRFPNLRKWYANVDEVVESRKSQTPRYGYN  
D

>comp15013\_c0\_seq3; 375 166 1251 LEN=1824; translated  
MTSIGPIAISGAGRIFRRARNHPFRHCTALDGKESYSQSSFHNVYVFQKASLCIVAAQNH  
DFELVRTSVDRTNSTYSFQKRSQSTHKALATDGDDIHRYYRYKLYQYKICPFPSNIAKVFL  
TYQRIPFESVEVNPLTKAELEFSENYRQVPIVTVLDTDPYTPAAEAVQQLNGTEEILLHH  
HPNANSNDGDDQTSGDSSTRWQNFARTKLAPELLYPNICSSSLGDSFRAFRYVHNSPNNSFST  
VQRFISIQCIGSVAMYFAASKIKEKYKIDDVKVALDDALEELEESELTNEGKKFLRSPPTGP  
DLGDLAVFGVLKGLEGLPLWNTIFDNDLQPRFPNLRKWYANVDEVVESRKSQTPRYGYN  
D

>comp15014\_c0\_seq1; 846 1 2772 LEN=2880; translated  
VRDRTIHLMDFLQGPVSLSSAIALADFFVVDVNHIESNLLSDTKIILKDVRLKPQRS  
SLPENSGFKRTKICVTGFVREVSTWSWESMTSSSKSWKDAVLQIIGCNFKAHLTEEDI  
GDDNNNNETNSDSGKEEEEIKKSSQPVADVDKRAVQTIANETGIYAYLTKQIEMVMDALT  
LTVIDFQLTVEMPSPTMIDSLILGKGVTVFEDPRETGNIIEVELEPQEPSAKENNGDGD  
DDYTVSIVVGGNEINMVSLSGRYHGDKDEQLKEDICLSSLFINVETFHKTNSTVSSGNET  
LTPTRRIVCKTYPLLPFSYGFVTRTNGKRFDGIGRQVVEGGQPQAAIPINNIASDTT  
EKKGDGGLSLHLARPQMEGFGQLIGLVLAPREDTAETKAATNVTSKKNVVDTTLRGDVS  
TFDFSIEGAVIDINGDIIALAGVNICYAADGTDLVANADILRYAEIPKENNVHGTSMITF  
NIVASVRPSVAVTIGSVSSLCFPGAFELRNPVENIQARLLGETWTFQTNSLDGSLLTPEF  
EVEGDDLEGLSTASNLMPFPVSCNIRIRLVKQDEETEVIITDCELMNPKPIECSTE  
LAGFVKSMESKLVNVSININIMDIPTATQEV DVIRNFALS LDNMAISGGYSTHDWIKTFS  
VVKRPRSKKKSKANDNKQKQYLNIPYASVAPLKRITYNAMSVMSIKETAFLVRAYKGN  
ENTTVKSLIDFYTAECLARTPNFLQADLLGMNIENAGVFGLGATLGFTSPIGPFVGVAA  
VVGVDVAVRGSIEAGKRSRMAKEGEVANVGDFFRGIGYSAVEATQKGLRGGCQYKGN  
FDWMVGASANTSDYIGNNKDTIGSAGGAGAGVLVGTVLGGPVGAVIGGMVGGITTTGTAIR  
QFDKDIMTSEEKNDKSKHKAQKQ

>comp15015\_c0\_seq1; 666 376 2478 LEN=2804; translated  
MTPRSPNSILLAWLTASTASLLASASNNHLRNQRQKHYYEQQRIVGGSRSTAGDYPYFVEM  
GGCGGALVAPDVVLTAAHCGNLTGRQLSIGAYRKGSLAEGAQPRFCASWIRDPLYGSHGS  
PLNYDFALCKLDYPVSINTTFVTLELNEERAIPI SIGTDLIVMGLGTL SMGGYSPQIVHNA  
TVPIYIDTPACNAMFSQDDDVVTDAMLCAGFEEGKDKTCQGDSSGPIVKRTYNGDGTFS  
DAHVGVSWSWEGECAMPNRPVYARTSERASWIKSTICGTLNSVASFCEERSEQTPNVCTTGE  
ELTIELTTDMYAFETCWALWELSGSLLASFIYLINNYTNVHTMCLEPATCYVWEVVDAYM  
DGFNGTYSFLLNGETIGSGTGTDFDKSKTETICTTGGS LAPAASPTISHTPPFVGI VSP  
IPPTVAPTSDDSPITLPTVIVPPDQWLTNAPDSFRLVPTNVPTIIDSDDYLSPTIQPSV  
PPEQWLTNAPDSFRPVPTNVPTLIDDLSPITFPVTVQPDQGP TIAPNSIVLGPTNAPT  
FVVDLDDYLSPTTFAPTDTILETTFPSESPTRLRTNAPTNPSPDPPTNTPTDLPSTVPTIM  
AMAPPEDCVDDPTFRYRNSKKKTC SRWVKKKGTTRTKKIRKKCKKKWKKRRVY EYCAETCG  
RLVGLGRCAALS NENDGSQAEISREVP SRAKKKNDSGIIL

>comp15015\_c0\_seq2; 466 376 1895 LEN=1895; translated  
MTPRSPNSILLAWLTASTASLLASASNNHLRNQRQKHYYEQQRIVGGSRSTAGDYPYFVEM  
GGCGGALVAPDVVLTAAHCGNLTGRQLSIGAYRKGSLAEGAQPRFCASWIRDPLYGSHGS  
PLNYDFALCKLDYPVSINTTFVTLELNEERAIPI SIGTDLIVMGLGTL SMGGYSPQIVHNA  
TVPIYIDTPACNAMFSQDDDVVTDAMLCAGFEEGKDKTCQGDSSGPIVKRTYNGDGTFS  
DAHVGVSWSWEGECAMPNRPVYARTSERASWIKSTICGTLNSVASFCEERSEQTPNVCTTGE  
ELTIELTTDMYAFETCWALWELSGSLLASFIYLINNYTNVHTMCLEPATCYVWEVVDAYM  
DGFNGTYSFLLNGETIGSGTGTDFDKSKTETICTTGGS LAPAASPTISHTPPFVGI VSP  
IPPTVAPTSDDSPITLPTVIVPPDQWLTNAPDSFRLVPTNVPTIIDSDDYLSPTIQPSV  
PPEQWLTNAPDSFRPVPTNVPTLIDDX

>comp15016\_c0\_seq2; 617 1 1621 LEN=1621; translated  
GTGEDHEQKEEKSEDFILLGAIEGADDPNPEKTWACQFDKQYALEVLGLSDPLVDLIG  
VPLADFGTLEDSTITNDFLSRRRRNRHVESGKTIMTFKNAIDRKDNTMYVDLPSTKLET  
PGYTQDDTRRRRLAPPTIVPFAGEKRTL VVRLTMADAMYLESSRGGPALSEHDVRKHVYEN  
PVSLKRKYEECSYNKTKIVPFDGTTESNARVQGGVATIELPRHSDEIQQEIDELSGAVP

RAKLVRYAREAEESELGDLEKQDFVFLFCLPEGVTGFLALAILNRFDSYYTSPWCTRPSF  
QLHEAGHSIGMDHAGEEGVYDDKVGVMGFSYNNVDGSPMCFNPSNNYYLGWYEEQADWYD  
PLSDVSPQGRKFLMVGVDYDPTKTVAKINHSCRHPVTVSELVVLQLHQTDDEDTDFYIGY  
NRNTGINSGTSENINEVLILQRMGLANQSATTKKIATLKLVDIHEIRDFNGEXRALRLC  
VFR IAGPERDGRRRAGLEGKAGPDRPGRPRRPSGLFVEGQPQGLHLGGKETGEPLPEVV  
X

>comp15016\_c0\_seq4; 104 98 450 LEN=450; minus strand; translated  
MGHQNVATLSPLCFVLHTRFLCLFFFAATQWQFFLESKLSKPGLSKALLQSMSTVMST  
PAQVAGHQWAPTFFFIHDLRQRFSGFFPTQVQSRLGLPFHKSARSTGASGSIGAGFS

>comp15016\_c0\_seq5; 689 1 1890 LEN=1962; translated  
GTGEDHEQKEEKSEDFILLGAIEGADDPNPEKTWACQFDKQYALEVLGLSDPLVDLIG  
VPLADFGTLEDSTITNDFLSRRNRHVESGKTIMTFKNAIDRKNNTMYVDLPSTKLET  
PGYTQDDTRRRRLAPPTIVPFAGEKRTLTVVRLTMADAMYLESSRGGPALSEHDVRKHVYEN  
PVSLKRKYEECSYNKTKIVPFDGTTESNARVQGGVATIELPRHSDEIQQEIDELSGAVP  
RAKLVRYAREAEESELGDLEKQDFVFLFCLPEGVTGFLALAILNRFDSYYTSPWCTRPSF  
QLHEAGHSIGMDHAGEEGVYDDKVGVMGFSYNNVDGSPMCFNPSNNYYLGWYEEQADWYD  
PLSDVSPQGRKFLMVGVDYDPTKTVAKINHSCRHPVTVSELVVLQLHQTDDEDTDFYIGY  
NRNTGINSGTSENINEVLILQRMGLANQSATTKKIATLKLVDIHEIRDFNGESGRSVYV  
SFESLAPNGTGVVVRVSREKPAPIEKPAIDPDAPVDRADFLWKGNPNRDCTVWGKKPEN  
RCRRSWRKKSVGAHWCPATCAGVDITVVDIDCSRAFDKPGFDFNFDSRKNCHWVAKKKR  
QRNRVCKTKHRGESVATFWCPMACKRCA

>comp15017\_c0\_seq1; 133 278 743 LEN=761; minus strand; translated  
MYLVELRVIIVREFCTVGSRAKALGIFDPGTFDHDLSLKMEEFFVEMRRTKYMFYIGFDT  
GLGLLFFKNYADARTAHHVGHVPVGGHGGHGDAGESVPPKGGQDEGLEADVDKGPLHDL  
PLVPAPVDRPQGGLGGVSGPRQVEPDSKPPYQQ

>comp15017\_c0\_seq2; 390 714 1769 LEN=2242; translated  
MVAANCSLVMRYAYCLAAIAWISSPTVGSMSKVPASVAHKGRGLMRPKRQQQPQRRQEQ  
QRESHRGPLGFSLRSSTREDLGEGTISDSLGMVAATGNRDTGDENENEDKDDPAKAAAGE  
TSNDNSGSSDEVVIALLERDGAALDSLPPGRELASARWRRRKQVAAGLVASIATTAWIAS  
EGWLPGPAGGGAYTLAMIARDAGMAGLTSVLAVALNRGITTFFERGAYGSKTARKLTHIL  
SAPLFIATWPFSSDAAGARVFAGLVCLTNMLRLYLGTGDAESSLARTIYRSGDKREVM  
QGPFIHVCIFQAFILTFWRDTPFGVVAMTTMAAGDGMADVGRRTCIRASS

>comp15017\_c0\_seq3; 118 1 348 LEN=1150; translated  
FPGVVAMTTMAAGDGMADVGRRFGRKGYKWPFSDEKESLAGTAGFFAFALAGNLAVCSW  
LAANGCLETSLGLPALALRIAGLSAACAVVEVLPVGGDDNYTVPGTAALLAALWLR

>comp15017\_c0\_seq4; 118 1 348 LEN=1125; translated  
FPGVVAMTTMAAGDGMADVGRRFGRKGYKWPFSDEKESLAGTAGFFAFALAGNLAVCSW  
LAANGCLETSLGLPALALRIAGLSAACAVVEVLPVGGDDNYTVPGTAALLAALWLR

>comp15018\_c0\_seq1; 176 1 980 LEN=1540; translated  
XCARRWFSVKELSWCAPKGSPTRRPARYRGSEDKDDRSDAATKANQTLRDPRETPPSS  
KALPIGAFGIVAAVCRPAYGTERTNSSGIIGVNGRLPWGSLPRDRALFERLTRNRLVVG  
RRTLLDERDGDALDHVRHAKHCIVVSGSISCTESDPRIARHREEHGLGVEVAGSLDEALCI  
ARTLAAKDDEERRGGTDDPGGRGAPTFRASDNGKGEEPIEPPMGVSLSTDSIPCWVAGG  
ERLYEEALKHGSALHLHLSVVD FEVDLTAPAVKKVARFPAKYRWDHNYEAVAETLFPNH  
GDAGQESAKEPGFAYRVYNRILRKKP

>comp15018\_c0\_seq3; 168 1 1004 LEN=1564; translated  
XCARRWFSVKELSWCAPKGSPTRRPARYRGSEDKDDRSDGICVSGPTEAATKANQTLRDP  
RERTPPSSKALPIGAFGIVAAVCRPAYGTERTNSSGIIGVNGRLPWGSLPRDRALFERLT  
RNRILVVGRRLLDERDGDALDHVRHAKHCIVVSGSISCTESDPRIARHREEHGLGVEVAG  
SLDEALCIARTLAAKDDEERRGGTDDPGGRGAPTFRASDNGKGEEPIEPPMGVSLSTDS  
IPCWVAGGERLYEEALKHGSALHLHLSVVD FEVDLTAPAVKKVARFPAKYRWDHNYEAVA  
ETLFPNHGDAGQESAKEPGFAYRVYNRILRKKP

>comp15019\_c0\_seq1; 1021 137 2854 LEN=2994; translated  
MIGCPSIAIVSFWNLLVSSANGFLPLTISKNDGSTSFANTDSGCITFNREAPVRRQFGI  
PAHYFDSKISITSSLRNTKNGNDQVFPRLHIDLALDAQIIIEVARHTGTRRGYEALLSTV  
QRKPSRRESSSTTPLFLSNRQRERYGVADMLGPSSLSPIAKSFEEVQSEYALVEEATLLL  
SPNRNEIDSSGCLTYPPLYGDSEGFDIHVASQTDDDEWFLPSEEYTAENILQAEQVIK  
RLLIIREWSQQETMKTWAPTLAQMGSTIDEDDENTLSQVYDDIAGTIEIVRIKSLTSSSG  
KSSFVVRDDAFVPLRLLREKEQKLLDNGGKELDKDLVAIRAEIEGTTFQIVSSQAQKV  
VSVSKSIDQGLNIAARLDIIMAKAAYGMSLNGIVPFVNTNGEIAIENFLHPILLRTIEDR

DRVVPIDLRSSDTGERALVISGPNNGGKTLMSKSFGLVSIILTTLGIPIPVKEGSARPRV  
DYFDEIFVNVGDQQSVLDGESTWTSILNSCALMLKRIGEQRREEGEDPSHLVLLDELGTGT  
DPESSGAVAQAVLEEMIEKSCKVVVTTHLPRLKALSYNDERIGCAAVLLDYSDSSTFRRP  
SFKLEYGLIGESHALGAASRCVPSLPESVLSRAADLMNDTNETEEDGTHKSYIQALTKSM  
EDQLERSMATSSIEEDAIDSSRCREAMVSLARSYEVHLDRRLDSLESTFQKLREKKLSD  
YELVGTTLAELKAVKKKIISQEEELAAGLQVLPVSYTLSPGESVIIISKDEWEGMTAKV  
ISDGSTGASSLGNQVLRPFSFLHAWDDVILNSNIEPMAERSLILQRQDIAIWQLDSIY  
DDNAYQSKPATSI SNSKQKVNSLLSTLDSVSKSRPKKAVKKNQAGKKKFQSSRQRKAAN  
KAKKR

>comp15020\_c0\_seq1; 830 185 2413 LEN=2606; translated  
MPGKRKADDMASSESRDRPSKAARLKAARERASQYAKRDKESLEKQKAKKNAPAASQKHT  
KAEAAAPKAAATKSPDKMTSTAERKRIARENAKKFAARDMEKLESKKKSSPSAVGLKKER  
KSKETKQLRKSSGKQKTEAIAPLALDPAETNRTAHSIEPMRVVESTPSQGNFPHIASYQ  
NTMPNYQNFVMDPSQIASLQHQIQHQFQQHQLHQHQIQHQMQIQRMQELAWRQQQQ  
EQREALQQMLQRQQQEELMKAVSIPMFQEDSELSASQIDKTVFSSDSIAPQAATKNE  
SHVLPASASSDPNIATKAEVDDVGKRPPSDPLAQTEVSQVISSNALIGTDDSVHRSSPEKE  
KDNKEGKEKHAVDDENENTEPITSA LGIEEHSEPSQNAVENEEKMESTKQKMNWRQTSVA  
VIVALLAIVFFQIVPAPNTDVSQIPDENSTDSKEMLCYDFDFPESEVDVPCLLDGNEGVEC  
PERGVCENGYFVGCNVQFENRSDQGDKCVLNEIDLKRAITNQLMRQASQICDQTSKPKFKY  
SMLQEIDSAIPETNDDVQKVLREVGFVVEEREDGLYVALPEDFNMSLPIHCAIGNIGQWF  
LEKLGILLILGLFGSACSFAYAYKLSLAFATLFLCGMKYHDHLATKARRQEDVKRTRALA  
YKTLLEESPAVEHWAIHIRDEIALALYPDSKLRLLTLRKDVWPKIVDDVKRDIRKQCQL  
NEDGNVWDKWQTAVAKSSSES

>comp15021\_c0\_seq1; 256 204 1424 LEN=1933; translated  
MTLEAYDWRLGMQILEERDSYFTHLKNRIEAYHKSAGKKVITVHSMGAIVVHFFFAWVT  
EPKRRGGGGGKKWVDEHIHAYVSIAGAHLGVPKAASALMSGEISDMVFMGGMGSVLERF  
IPRKARRDLYHTWGLWAMPLPKGGDALWSIGADDFSETQSCDGS DGACPWYQHEIEKNL FV  
MSSEKTEDDAPNHPHICNRNDLIDKKSESTVN LALQQLASGIGHTTQSIIDFLLTWGGGF  
GPGTSPAKLYSFHQSPREKLSGRTWHDVTQTPLPYAPKMKIYCLYGVGVETERAYFYKRN  
PGEHGLFAQDNSSDNGKKNQT IADPPFIMDTSIEDPNLGI VHGIKYTDGDG SVPLLSLG  
YMCAGPWRDKTSGMNPSGSKVITREYNHRTEFLADDPLRKGPHSGE

>comp15021\_c0\_seq2; 308 282 2561 LEN=2780; translated  
MNVLQGQYGSNVIKRARSLSL MITRIAADGEASKVVIYSSLDEQSIGSSQSTTEDNVQ  
PLKSKLNRWILWLSLVSVVVLVAQSTV SITLKHNGIISRDLHDIVSERVSPVAERVIPELQ  
QRLEL FENRMLDTLEMARYMAPNFNETLFWRRMNSTSLDREEIAMTATTNQM RPFQLA  
QKVGAKGQYPVVMVPGFVTSGL EVWKGKSCMQNLFRRERVWGLSSAQYWL RERFCIMENL  
ALDPFTGGDPEGIKLRSSQGFSAADFFVGS DMMWGNVWWSKILENLADLDYDTNSMTLE  
AYDWRLGMQILEERDSYFTHLKNRIEAYHKSAGKKVITVHSMGAIVVHFFFAWVTEPKR  
RGGGGGKKWVDEHIHAYVSIAGAHLGVPKAASALMSGEISDMVFMGGMGSVLERFIPRK  
ARRDLYHTWGLWAMPLPKGGDALWSIGADDFSETQSCDGS DGACPWYQHEIEKNL FVMSSE  
KTEDDAPNHPHICNRNDLIDKKSESTVN LALQQLASGIGHTTQSIIDFLLTWGGGF  
GPGTSPAKLYSFHQSPREKLSGRTWHDVTQTPLPYAPKMKIYCLYGVGVETERAYFYKRN  
PGEHGLFAQDNSSDNGKKNQT IADPPFIMDTSIEDPNLGI VHGIKYTDGDG SVPLLSLG  
YMCAGPWRDKTSGMNPSGSKVITREYNHRTEFLADDPLRKGPHSGEHVDILGNHDMMEDF  
MKIVSDEDVDSVTD SFVSDIENIVQRIKDHDPDGLPRPKRRKR

>comp15021\_c0\_seq3; 286 204 1595 LEN=1814; translated  
MTLEAYDWRLGMQILEERDSYFTHLKNRIEAYHKSAGKKVITVHSMGAIVVHFFFAWVT  
EPKRRGGGGGKKWVDEHIHAYVSIAGAHLGVPKAASALMSGEISDMVFMGGMGSVLERF  
IPRKARRDLYHTWGLWAMPLPKGGDALWSIGADDFSETQSCDGS DGACPWYQHEIEKNL FV  
MSSEKTEDDAPNHPHICNRNDLIDKKSESTVN LALQQLASGIGHTTQSIIDFLLTWGGGF  
GPGTSPAKLYSFHQSPREKLSGRTWHDVTQTPLPYAPKMKIYCLYGVGVETERAYFYKRN  
PGEHGLFAQDNSSDNGKKNQT IADPPFIMDTSIEDPNLGI VHGIKYTDGDG SVPLLSLG  
YMCAGPWRDKTSGMNPSGSKVITREYNHRTEFLADDPLRKGPHSGEHVDILGNHDMMEDF  
MKIVSDEDVDSVTD SFVSDIENIVQRIKDHDPDGLPRPKRRKR

>comp15021\_c0\_seq4; 278 282 2390 LEN=2899; translated  
MNVLQGQYGSNVIKRARSLSL MITRIAADGEASKVVIYSSLDEQSIGSSQSTTEDNVQ  
PLKSKLNRWILWLSLVSVVVLVAQSTV SITLKHNGIISRDLHDIVSERVSPVAERVIPELQ  
QRLEL FENRMLDTLEMARYMAPNFNETLFWRRMNSTSLDREEIAMTATTNQM RPFQLA  
QKVGAKGQYPVVMVPGFVTSGL EVWKGKSCMQNLFRRERVWGLSSAQYWL RERFCIMENL  
ALDPFTGGDPEGIKLRSSQGFSAADFFVGS DMMWGNVWWSKILENLADLDYDTNSMTLE

AYDWRLGMQILEERDSYFTHLKNRIEAYHKSAGKKV IITVHSMGAI VVHFFFAWVTEPKR  
RGGGGGKKWVDEHIHAYVSIAGAH LGVPKAASALMSGEISDMVFMGGMGSVLERFI PRK  
ARRDLYHTWGS LWAMPLPKGGDALWSIGAD FSETQSCDGS DGACPWYQHEIEKNL FVMSSE  
KTEDDAPNHP IHCNRNDLIDKKSESTVNLALQQLASG IGH TTQSIIDFL LLTWGGGFGP GT  
SPAKLYSFHQSPREKLSGRTWHDVTQTPLPYAPKMKIYCLYGVGVETERAYFYKRNPGEH  
GLFAQDNSSDNGKNTQTIADPPFIMDTSIEDPNLGI VHG I KYTDGDG SVPLLSLGYMCA  
GPWRDKTSGMNP SGSKVITREYNHRTEFLADDPLRKGPHSGE

>comp15021\_c0\_seq5; 186 282 1580 LEN=1626; translated  
MNVLQGGYGSNVIKRARSLPSLSMITRIAADGEASKVVIYSS LDEQSIGSSQSTTEDNVQ  
PLKSKLNRWILWLSLVSVVVLVAQSTV SITLKHNGIISRDLHDIVSERVSPVAERVIPELQ  
QRLELFENRMLDTLEMARYMAPNFNETLFWRRMNSTSLDREEIAMTATTN QKMRPGFQLA  
QKVGAKGQYPVVMVPGFVTSGLLEVWKGKSCMQNLFRERVWGLSSAQYWL RERFCIMENL  
ALDPFTGGDPEGIKLRSSQGFSAADFFVGS DMMWGN YWVWSKILENLADLDYDTNSMTLE  
AYDWRLGMQILEERDSYFTHLKNRIEAYHKSAGKKV IITVHSMGAI VVHFFFAWVTEPKR  
RGGGGGKKWVDEHIHAYVSIAGAH LGVPKAASALMSGEISDMVFMGGMGSVLERFI PRK  
ARRDLYHTWGS LW

>comp15021\_c0\_seq6; 164 204 614 LEN=660; translated  
MTLEAYDWRLGMQILEERDSYFTHLKNRIEAYHKSAGKKV IITVHSMGAI VVHFFFAWVT  
EPKRRGGGGGKKWVDEHIHAYVSIAGAH LGVPKAASALMSGEISDMVFMGGMGSVLERFI  
IPRKARRDLYHTWGS LW

>comp15022\_c0\_seq3; 556 1 2155 LEN=2246; translated  
RTQHPQLGIERSFAGSGPRKAQAGGRDRAEHAQPTERTQH KELPECKELTKHTEQAKHHE  
EFADSI RS IQTHSTRSGRSKRNDENNDNDCDNDDVENDKDGIANNDSSRS DSKRKAI IA  
GSRSA YVEDDQESSHSHKYKYDPEKELAVARPVPLDDD LERNIHVYNKLDVKQVATPAF  
EYDPGDLGDKKSCRRYALLLGGCAML LIASIVLLVLFVLPKVGLRASDKESNLPPSVA  
PTVSPTAFSQETLVREYLAQKVSPRVLVEGTPE SMAADWILYRDLYRSGLDNVEALVQRF  
ALSVLYFASTENGARPWRS CNPPPSALASSGEP IANATD TDSTERN TCTFLFRVQVGTSI  
QYQEVPGRIRWMSDYDECEWEGVECL ENRVQ TISLFG RGLGGNLDLRLEGDN GNNGNAGD  
DDSGFLVRAFPNLKSINLSYNE LTGTIPAFYAGFSNLASLELHGNSLTGEI PPSCFDDL R  
LLQLLNLGDNNLGGTIGTKIGQLSGLRGLHLFQNNFGGTFPTEIGTLKPSFTHLTLVGNE  
FSGPLPTEIGRLTNLVDLQFSNNRFTGVIPTQFGQLTKAETLR LDHNQLSGSIPTELCSM  
ESARVIMLDHNNLVGPLPSAELPQLDRLVRFQV NENQLTGPLPSQLGGMLSLRLAWLHLN  
LFTGAMPSEVCLAASVPD TGLNFLQADCAPTENPPNPCRCCSACCDRSTGICLTAMN

>comp15022\_c0\_seq4; 518 1 2303 LEN=2394; translated  
RTQHPQLGIERSFAGSGPRKAQAGGRDRAEHAQPTERTQH KELPECKELTKHTEQAKHHE  
EFADSI RS IQTHSTRSGRSKRNDENNDNDCDNDDVENDKDGIANNDSSRS DSKRKAI IA  
GSRSA YVEDDQESSHSHKYKYDPEKELAVARPVPLDDD LERNIHVYNKLDVKQVATPAF  
EYDPGDLGDKKSCRRYALLLGGCAML LIASIVLLVLFVLPKVGLRASDKESNLPPSVA  
PTVSPTAFSQETLVREYLAQKVSPRVLVEGTPE SMAADWILYRDLYRSGLDNVEALVQRF  
ALSVLYFASTENGARPWRS CNPPPSALASSGEP IANATD TDSTERN TCTFLFRVQVGTSI  
QYQEVPGRIRWMSDYDECEWEGVECL ENRVQ TISLFG RGLGGNLDLRLEGDN GNNGNAGD  
DDSGFLVRAFPNLKSINLSYNE LTGTIPAFYAGFSNLASLELHGNSLTGEI PPSCFDDL R  
LLQLLNLGDNNLGGTIGTKIGQLSGLRGLHLFQNNFGGTFPTEIGTLKPSFTHLTLVGNE  
FSGPLPTEIGRLTNLVDLQFSNNRFAEVKLG FVRACVRAR TTTTRNGGSSQASSLRSLFR  
RLTLFFDDRKKT SIQGVIP TQFGQLTKAETLR LDHNQLSGSIPTELCSMESARVIMLDHN  
NLVGPLPSAELPQLDRLVRFQV NENQLTGPLPSQLGGMLSLRLAWLHLNLFTGAMPSEV  
LAASVPD TGLNFLQADCAPTENPPNPCRCCSACCDRSTGICLTAMN

>comp15023\_c0\_seq1; 672 190 2055 LEN=2239; translated  
MEIVEEESIATANTTSGKPF DNPRHPNHQALGYNR SNLSMMM QMNVS SNGSSSNLSVETH  
PASSNSQS SNNNGNFFASSPLSSEL RDSRHDS PKEDETSQE ECDDAMMLSEVPDAPT  
NHNNSRFILPPPPVHNCLAKSSTLLSRGQTSSAGGLSLGRIITEGSTATTATSGGTSGNA  
FVREEKVSLTPRFGSAPPQKGGIGSSESNHRQGPQGPDDL DSEHLFSISGMSSEFLEHQ  
HHNPDHQHDYGT PHERQSEMGMKSPTSTTARDLLREVQCPSLPSTHGNSHGNAQGRTRSA  
SLPFLGTPPLHHYLSDNATASN RQTFQLQPRLPDGPMLSSNHQHYNPPSL SSTSPTSTF  
HQKPSHHP TLMREHQQPQALSSSPTSSSQALPGSGSFC DGNNGREK PVI SRCFAWSQDSQ  
DERRITKRARLVLPENGNKNAVASSSPLSPDSRGAPHTESSSFSSAPT TLESIVRGAKGT  
GDRGRQPRYHIDEHKTEHEASRGDRKGNDRHGHGLERKDKNSVPVGGAGSL SASPSPTR  
VHWEKVGNSIELMRRVPPQVLF GDNTTNSNSEDVAMGDDDSHPATNSSQVPMIHTTSS  
NGFPPPI TA AF SASQYSFESI

>comp15024\_c0\_seq1; 788 273 2768 LEN=4535; translated

MSDHINNSAFDVLSTVLVSSLDYVVKDSQKLVNDHVN IHTQNYPYDNLPSDDFSSPSLSY  
SRFLNNDTNRRTIASIEKVNGTTSTLGGGGKNNDRNTTTLRDIARGAAKNTTGGGDEWNP  
QGLTDGEILTQTLMLYGNFFLVCLFLFCLLRKAYPKAYNLRSGWISQDVIEPNPRAQNP  
AMGRFSWLKWKVWVADTELSDDCGMDALCLSRVLEWGARLTLFGSLVGCILLMPVYATAD  
GDYSMKGGVEELNTSNVPDGAEGRGRFLATVLAAYLIFGYTMYSILHEFEWFYTFRYEFL  
SRPIPRNYTVYVRNLSEEWYTSKALEEYFSNFEVIRSGYHRYDDFSLGTEGTALYPGYSK  
TTQQYLSKNAMKARVALKIPKLSKMAKRVCLQKLEHAINVEDILNKVPKTIDAASGLE  
ITVVDYLFGELKELNKEITTTMIETIDRRSKLDNPLDDYHAEDYQNPVLEGS DHGDYDFE  
YGNNTCTYHNGVIDMRRNGPKRRKPPDAFFDSKSVEHSTSFQGKPASVAAA EFMTVPHTI  
EDTDHLFQEDITVAENNADLTMDSL EDYNLNRNMNDS ENESNRNGYATKSPLMIIDQVGK  
VANAGISHVGKAANLGIQVIGTQMERAAALVSNRND DGAPTTAA FVTFSSLMACQAAKQM  
MHSRDVFGMEVIEAPGCDDILWKNV GKEHKELQMGLLLSILLTSTLCLFWTIVITFISTL  
SSVEGLTGLIPELEELLQTHAWLYTLLAQISPLMIVLTNSLLRVILEALSGLEGHVSNAL  
IQASLFSKLSAFMIIQTFFVNAISGSLIAELSAIVQNPSAIIELVSCLP IV

>comp15024\_c0\_seq2; 957 197 3439 LEN=4336; translated

MSDHINNSAFDVLSTVLVSSLDYVVKDSQKLVNDHVN IHTQNYPYDNLPSDDFSSPSLSY  
SRFLNNDTNRRTIASIEKVNGTTSTLGGGGKNNDRNTTTLRDIARGAAKNTTGGGDEWNP  
QGLTDGEILTQTLMLYGNFFLVCLFLFCLLRKAYPKAYNLRSGWISQDVIEPNPRAQNP  
AMGRFSWLKWKVWVADTELSDDCGMDALCLSRVLEWGARLTLFGSLVGCILLMPVYATAD  
GDYSMKGGVEELNTSNVPDGAEGRGRFLATVLAAYLIFGYTMYSILHEFEWFYTFRYEFL  
SRPIPRNYTVYVRNLSEEWYTSKALEEYFSNFEVIRSGYHRYDDFSLGTEGTALYPGYSK  
TTQQYLSKNAMKARVALKIPKLSKMAKRVCLQKLEHAINVEDILNKVPKTIDAASGLE  
ITVVDYLFGELKELNKEITTTMIETIDRRSKLDNPLDDYHAEDYQNPVLEGS DHGDYDFE  
YGNNTCTYHNGVIDMRRNGPKRRKPPDAFFDSKSVEHSTSFQGKPASVAAA EFMTVPHTI  
EDTDHLFQEDITVAENNADLTMDSL EDYNLNRNMNDS ENESNRNGYATKSPLMIIDQVGK  
VANAGISHVGKAANLGIQVIGTQMERAAALVSNRND DGAPTTAA FVTFSSLMACQAAKQM  
MHSRDVFGMEVIEAPGCDDILWKNV GKEHKELQMGLLLSILLTSTLCLFWTIVITFISTL  
SSVEGLTGLIPELEELLQTHAWLYTLLAQISPLMIVLTNSLLRVILEALSGLEGHVSNAL  
IQASLFSKLSAFMIIQTFFVNAISGSLIAELSAIVQNPSAIIELLANSLPNRSSFFIQIM  
LVQTSVDLSMELLRISPVGVAFVRSVLVGPKLTEDE RRTTWMGLRPFADPMEFQHASVLSG  
IVFYFVVFVYATLAPITSIFTFVCFVFMGAS YRHQFIFYPTLPDSSGGKLWIQFMQIVP  
TSLIIGELTIVGFLALKTAPLASSLMIPLLLVTILFNIYIRQM HFAVTNFLPGCVCAEVD  
RKNKMDGQMHMKFLSMNQYKQPELRDKELYPKNASFERQLQH GILCYEDPETDDRELVPR

>comp15024\_c0\_seq3; 957 273 3515 LEN=4412; translated

MSDHINNSAFDVLSTVLVSSLDYVVKDSQKLVNDHVN IHTQNYPYDNLPSDDFSSPSLSY  
SRFLNNDTNRRTIASIEKVNGTTSTLGGGGKNNDRNTTTLRDIARGAAKNTTGGGDEWNP  
QGLTDGEILTQTLMLYGNFFLVCLFLFCLLRKAYPKAYNLRSGWISQDVIEPNPRAQNP  
AMGRFSWLKWKVWVADTELSDDCGMDALCLSRVLEWGARLTLFGSLVGCILLMPVYATAD  
GDYSMKGGVEELNTSNVPDGAEGRGRFLATVLAAYLIFGYTMYSILHEFEWFYTFRYEFL  
SRPIPRNYTVYVRNLSEEWYTSKALEEYFSNFEVIRSGYHRYDDFSLGTEGTALYPGYSK  
TTQQYLSKNAMKARVALKIPKLSKMAKRVCLQKLEHAINVEDILNKVPKTIDAASGLE  
ITVVDYLFGELKELNKEITTTMIETIDRRSKLDNPLDDYHAEDYQNPVLEGS DHGDYDFE  
YGNNTCTYHNGVIDMRRNGPKRRKPPDAFFDSKSVEHSTSFQGKPASVAAA EFMTVPHTI  
EDTDHLFQEDITVAENNADLTMDSL EDYNLNRNMNDS ENESNRNGYATKSPLMIIDQVGK  
VANAGISHVGKAANLGIQVIGTQMERAAALVSNRND DGAPTTAA FVTFSSLMACQAAKQM  
MHSRDVFGMEVIEAPGCDDILWKNV GKEHKELQMGLLLSILLTSTLCLFWTIVITFISTL  
SSVEGLTGLIPELEELLQTHAWLYTLLAQISPLMIVLTNSLLRVILEALSGLEGHVSNAL  
IQASLFSKLSAFMIIQTFFVNAISGSLIAELSAIVQNPSAIIELLANSLPNRSSFFIQIM  
LVQTSVDLSMELLRISPVGVAFVRSVLVGPKLTEDE RRTTWMGLRPFADPMEFQHASVLSG  
IVFYFVVFVYATLAPITSIFTFVCFVFMGAS YRHQFIFYPTLPDSSGGKLWIQFMQIVP  
TSLIIGELTIVGFLALKTAPLASSLMIPLLLVTILFNIYIRQM HFAVTNFLPGCVCAEVD  
RKNKMDGQMHMKFLSMNQYKQPELRDKELYPKNASFERQLQH GILCYEDPETDDRELVPR

>comp15024\_c0\_seq4; 788 197 2692 LEN=4459; translated

MSDHINNSAFDVLSTVLVSSLDYVVKDSQKLVNDHVN IHTQNYPYDNLPSDDFSSPSLSY  
SRFLNNDTNRRTIASIEKVNGTTSTLGGGGKNNDRNTTTLRDIARGAAKNTTGGGDEWNP  
QGLTDGEILTQTLMLYGNFFLVCLFLFCLLRKAYPKAYNLRSGWISQDVIEPNPRAQNP  
AMGRFSWLKWKVWVADTELSDDCGMDALCLSRVLEWGARLTLFGSLVGCILLMPVYATAD  
GDYSMKGGVEELNTSNVPDGAEGRGRFLATVLAAYLIFGYTMYSILHEFEWFYTFRYEFL  
SRPIPRNYTVYVRNLSEEWYTSKALEEYFSNFEVIRSGYHRYDDFSLGTEGTALYPGYSK  
TTQQYLSKNAMKARVALKIPKLSKMAKRVCLQKLEHAINVEDILNKVPKTIDAASGLE



GEKDNQNRASDFIYSSTSPNGDNVKTIEIFDPCIYVIVPAWTQFAAFFECISPPVFLS  
EQEIGSSIQVGDWRWYQISDNDNIASVNDISSGINNVGKKKFSWITSEPTPEASRRSLVAQ  
TPPVRQIKLLLTWPRIILSSVTADEQPTRVILRMNHADFLQTVDGREFKKIRSLFLHDVE  
VYTSSQKSSTHSTTKKEESNSLIRPWSLSAITTTTCNGESIGDCQEHTYKLSCDILRARAA  
YSDMSIATDVFLSVLHSKRETSNPAADKMPQQQIISSDSFDYNQSTRIGSDNAEDINGK  
DENKYCRKPTCIYDIQCDGFELKIADDSGRHFSTRYQDLVILSVGQTLFSRHDSKNQTTSM  
KLWLDCLDLFDCLQPANSTFRTAASSYSEVMGIRNSIDDEGHMSELNNVHRSISRVMPWK  
DFGTFKFDGKRYFEVSQTFLNRIDETSRQCSHYLWGEEGEGPTPGLIEIACKFNEDSYQEY  
DVRFRKFAVQWNPSTIIAMQRFLGRLRKESKTIIVQVVHSQLDNTIDKSNVDQTEESQEK  
DIDADNSGKHPLIRAKIQIDSLTVCMNKEHQRRLLALTLSSCNLFMHSSEEGMTVEGQI  
GDLSAFNDKYKVADLDGDFITDRNRSVLSVLTDDGVENTENFLYIHYKTFTKKATSASK  
ADVPKWIKSNLPSDDIDDFLSLKVATIRFTYLKERTDELLDYLSNGLPGKGMGATSRAA  
KGFISRRIQTRSFLELRVNSPQIFVPQHEMTEQGLGLKLGDNVQSWFEEALSGKKHVG  
SEWWRVLSLKLSGFSYGMIRKGSFDSLSATYPIDLGILLRKPTIKGRTLSIRGTMSCF  
EAVLHYEDYVLLRAVARDNIGRYVNTDKWDNVEKAYWMEEEKSSAEKDVGESVSQHG  
NKVAYSANARFVRYGKGRKGLKQKYPTNDISSLDQSENVSTNTLDVRFDLAVALKLR  
NDLPEGII EEDDIAKAFHYDVMLLRVRMVEVQATANAAGDFSFNLSLFRIGLFDLGDNGR  
LIRQRYHSLPNDRFGGKRKKALRQPCPFIVLTEGYLSADDSDAVVI GESDIDGPEFV  
ITVDRCSASTTNGFQPLSDTGLPDPKVTSAKVVMMNYLSFNAIARPFREIADFLSCKWST  
SLESSTLCKEDNDIETPIAEKKIVTHDGHADSFQGFQLKVVAHYPRVFFLADES  
DLHSRALVLKGLAVVNI SNVNKEVYGGKNADSDVQRI TMVGAQLHGLEYINPDVSATLRFSE  
RHSEMFEARDSPSFKPASDERSIDDPDTLGVALI QPVTIGIEYQMERGLFPTRRSLQVN  
IDPVSTMLSFEDLELVEVVLKRWSSDRTKNPSDGTNPPPELLHKPNVTDKESVAQEK  
INFEVSFNTTRLGLGLRTEDSRVVVSSIQKSEYARQINDGDTLISVGSSENVRSKTL  
EQIVSVLVGSERPVVVGFERIRKREESEKVLGTPFDDEKPASSYIDEDSENEYFIS  
CYSLHFRRGMQLGLFFERSMCGQFPVVKMVSTIDDTVVLSGSADRIDSEQIEVVD  
SIFKSENKRLPRIGAVIVAVDDIPVEEIGAEETWNILAKVQEIDSTVEFMGTAIG  
SNSTFSLTFQETPASTWGNI DSIEVSSAGMALSFIDDLNGRDMPIFRGLKDSVQV  
HIDRGLGINAHILDNTIPSLTPLYSVSDEQNPEMTLSEDOVRDIQTESIISFSAIS  
ICSLDYFRSRVSCWEPLLEPSQLFFHFEKQDGSVQANRPAQVALEVSDRLLHNQ  
FTRPSFTQNNHFGAAMVSVNVTDAAAEVLVEAS TRWKDWRKSLLEPEGEDDFD  
YADNLILDERYNHNSKNDGSMHEVDGEQQIEEEVIEDKQRQLAKRAAAKAAQGA  
LNFAQKRGAE TSKKSDSAKPFIFRNR TGISIAFVQQGRGMR SRGYSWRGM  
RQDQONSTIGEYDGLLEEYEQEFITELADQEDAKFNMELIEEDFRNDGGAKN  
ANNKIRSYEGRYPDLMAVIAQAVAGVLVEPITNLQVFKVGSTIRILTVKKDSG  
SYPGSDSTRNDIQVWNVEIQENRRILTLSTAVRVVSAGLNMPIEIGFRDLNEH  
DRDQSLESSTTSIGIARPNPCPFYMWLWALKLEPISIIYVRPIPTNAVEYSW  
SESSVLHFGSFVEERIMISGRGLNTSATGKWTWEETFSHLGCICCDSGADG  
SNPMWFSVFGSSLAKRSENAFDKHXOREILKEELGKQKSEFEAYEVL SVTL  
D SGLTIRNMLPCMGLLEVIQRIEPLSDSEPFDNIRSHFSFNEVEP  
DVSKFDTLKGGECTEIFEVNYTATVPKIRIKQONYNWSTWASLRNLKACILN  
QDDVVP RSEKTASELTAPSQVNVQIPDCSFGIPTTFGIRVEPKMTIADPQV  
GHVYGLEVI IYAEIWRIRNITSLPLSFGCPSYQIHEPEQAFGKSNNSSDD  
SEAKFTAESALMELTSLFEVGDKGTVLKQGTGKQFLERNVIERLPQGE  
CRKLTTEEVEFYVEIENSTVKKWASESHYGYHKQIFDVDDTGANWKWL  
DEKWSIDCSGGAKPNVGGWESCKGLYTGNGSFGGKREFNPSDGFRRR  
FFRERSGCFELSTTSSPMDLESRNIRYLGGIQAHFQPLNDSFSREQR  
RMKQONNVDDGKFVSQSVLNDKLIKAIIRCGDGAWSAAAEISNSGTCYGV  
TRVLASRWPTLTQRHGDISQPI LLPKLFVKRNSYSMLNPTEMCDFKT  
GCLAPDLYEFCYTVSDVDGEWGEF SRSMEVSPRFLIRNDSNTVSMKVK  
QTGAPNSTCMILKPGAEKPFYWADFRLPKLVSTIPFDISGSENERFR  
WGGFDLCNLGMTPVRI RTDKIGTNTQNNSTVVT SVRVLVEVRPGTGGH  
GINVSLREEEPNGDGS LFR IENLSPFP I WLSQDGVLANPSSSLRSAGN  
NTSISDGDHLPPNSKAAAFALDVPYRQGYAHRKEASLSELMHVRVAL  
APLSSRAGIESVKVIGLATMGESIRLNPMKLSKLT SKDREIIQNI  
RVLVVATDGPTRVLRFLCLMVHKS DLAFHNAIPDISYVTSTQLPQIE  
DVRRTNRRDYTNEVIKGLNEATRMASMGKIPLEIEAKREALFLDLKSNK  
NGDGYNDGGASDKIFSFRIEFSGFI FSFVDSAPSEIAVTSLRNMNALAR  
WNSLRST DATVLLSIGWLQIDNHVPSAPFKVAVRPDTSKQQGEEGKSN  
SSPLLVAIAAFAPKHKTKILVLRSVTVAPRDIVIALDLAFLVRLQRFF  
MGLQDHLRNRQHDAQLGLQPDGLVTEQKKIAFPNFASPKKQLEQIA  
AFNENRKIYFQGLTILPTNIKLSVASAKALTS DQASLEGKETAAIHTAVR  
KGDVLVGSKSGPLGVRVGGKNRTALAVVRGVFKSIVVDALLRLNGASL  
NFHGVFLRNHIATSTQLSTYLAAHYLSSLKHNPALLGSLSAIGNPLGL  
IRGIGDGVNDFVTEPMKGFKRALKELDPGYAVDGVARGTESLARHTV  
GGIADSASLLMETFSKYMAVVTLDRRYAQKRDRRKS LRMKSDAKV  
TLVGGVESGFLKLVTFREGVTGVVRAPIRGAEKRGLEGFAGLGLKGLL  
GLLVKPIIGIT



DAATDVMIGVKSTVEYKEVQKENLALLRNQFRPRRPMYGRDKVLRPFCMEDAAAATLMLK  
TRCAGENYLSHLDNMNDRVALLSVKRLIILGPRGEEQLALKYDHVDSLEVRSIRQADGLSY  
GWGIIVILNTPRRNGSDVEVITCRSEQEATDLCMMIQQGVLDLVALDSIQOI  
>comp15026\_c0\_seq2; 2404 1 9192 LEN=9243; translated  
TCALPISTSRAAKGFISRRIQTRSFLELRVNSPQIFVFPQHEMTEQGLGLKLGDVNVQSWF  
EEALSGKKHVGDSEWVRVLSLKLKSGFSYGMIRKGGSSFDLSSTATYPIDLGILLRKPPTIKG  
RTLSIRGTMSCFEAVLHYEDYVLLRAVARDNIGRYVNTDKWDNVEKAYWMEEEKSSAEKD  
VGESVSQHGEVSNKVAYSANARFVRYGKGGRRKGLKQKYPNTDISSLDQSENVSTNTLDVR  
FDLAGVALKLRRNDLPEGII EEDDIKAFHYDVMLLRVRMVEVQATANAAGDFSFNLSLF  
RIGLFDLGDNGRLIRQRYHSLPNNDRFGGKRKKKALRQPCPFIVLTEGYLSADDSDAVV  
IGESDIDGPEFVITVDRCSASTNGFQPLSDTGLPPDTKVTSAKVVMNYLSFNAIARPFR  
EIADFLSCKWSTSLESSTLCKEDNDIETPIAEKKIVTHDGHASDFQGFQLKVVAHYPRV  
FFLADESDLHSRALVLKGLAVVNI SNVKNKEVYGGKNADSDVQRI TMVGAQLHGLEYI  
NPDVSATLRFSEHSEMFEARDSPSFKPASDERSIDDPDTLGVALI QPVTIGIEYQTQMER  
GLFPTRRSLQVNIDPVSTMLSFEDLELVEVVLKRWSSDRTKNPSDGTNPELHHPNVTD  
KESVAQEKINFEVSNFNTTRLGLGLRTEDSRVVVSSI QKSEYARQINDGDTLISVGSSENV  
SKTLEQIVSVLVGSERPVVVGFERIRKREESEKVLGTPFDEKPASSYIDEDSENEYFI  
SCYSLHFRRGMQLGLFFERSMCGQFPVVKMVSTIDDTVVLSGSADEIDSEQIEVVDSIF  
KSENKRLPRIGAVIVAVDDIPVEEIGAEETWNILAKVQEIDSTVEFMGTAIGSNSTFSLT  
FQETPASTWGNIDSI EVSSAGMALS FIDDLNGRDMPIFRGKLDSVQVHIDRGLGINAHIL  
DNTIPSLTPLYSVSDEQNPEM TLSEDQVRDIQTESIISFSAISICSLDYFRSRVSCWEP  
LLEPSQLFFHFQKQDGSVQANRPAQVALEVSDRLLHNQFTRPSFTQNNHFGEAHMVS VNV  
TDAAAEVLVEASTRWKDWKSLLEPGEDDFDYADN ILDERYNHNSKNDGSMHEVDGEQ  
QIEEEVIEDKQRLAKRAAKAAQ GALNFAQKRGAE TSKKSDSAKPFIFRNRTGISIAF  
VQQGRGMRSRGYSWRGMRQDQGNSTIGEYDGL EEEYEQEFITELADQEDAKFMELIEEDF  
RNDGGAKNANNKIRSYEGRYPDLMVAIQAVAGVLVEPITNLQVFKVGSTIRILTVKKDSG  
SYPGSDSTRNDIQVVVWVEIQENRILTLSTAVRVVSAGLNMP I EIGFRDLNEHHRDQS  
LESSTSIGIARPNC PFYMLPLW LALKLEPISIIYVRPIPTNAVEYSWSESSVLHFGSFVEE  
RIMISGRGLNTSATGKWTWEETF SHLGCICCDSGADGNSPMWF SVFGSSLAKRSENAFDK  
HQREILKEELGKQKSEFEAYEVLSVTLDSGLTIRNMLPCMMGLEVIQRIEPLSDSEPFDN  
IRSHFSFNEVEPDVSKFDTLKGGECTEIFEVNYTATVPKIRIKQONYNGWSTWASLR LNK  
ACILNQDDDVPRSEKTASELTAPSQVNVQIPDCSFGIPTTFGIRVEPKMTIADPQVGHV  
YGLEV I IYAE LWIRNITSLPLSFGCPSYQIHEPEQAFGKSNNSDDSEAKFTAESALMEL  
TSLFEVGDKGTVLKQGTGGKQFLERNVIERLPGQECRKLTEEVFEYVEIENSTVKR KWWA  
SESHYGYHKQIFDVDDTGANWKWLDEKWSIDCSGGAKPNVGGWESCKGLYTGNGSFGGKR  
EFNP SDGFRRRRFRFRERSGCFELSTTSSPMDLESRNIQR YLGGIQAFHQPLNDSFSREQR  
RMKQQNNVDDGKFVVSQSVLNDDK LKIAIRCGDGAWSAAAEI SNSGTCYGVTRV LASRWPT  
LTQRHGDISQPI LLPKLFVKRNSYSMLNPTMCDFKTGCLAPDLYEFCYTVSDVDGEWGE  
FSRSMEVSPRFLIRNDSNTVSMKVKQTGAPNSTCMILKPG EAKPFYWADFRLPKLVSTIP  
FDISGSENEFRWSSGFDL CNLGMTPVRI RTDKIGTNTQNNSTVVT SVRVLVEVRPGTGG  
HGINVS LREEEPNGDGS LFR IENLS PFIWLSQDGVLANPSSSLRSAGNNTSISDGDHLP  
PNSKAAFALDVPYRQGYAHRKEASLSELMHVRVALAPLSSRAGIESVKVIGLATMGESI  
RLNPMKLS SKLTSKREIIQNI RVLGVVATDGPTRVLRFC LMVHKS DLA FHNAIPDISY  
VTSTQLPQIEDVRRNTNRDYTNEVIKGLNEATRMASMGKIPLEIEAKREALFLDLKSNKN  
GDGDYNDGGASDKIFSFRIEFSGFI FSFVDSAPSEIAVTSLRNMNALARWNSLRSTDA TV  
LLSIGWLQIDNHVPSAPFKVAVRPDTSKQQGEEGKSNSP LLVVAIAFAPKHKTKILVLR  
SVTVAPRDI VIALDLAFLVRLQRFFMGLQDHLRNRQHDAQLGLQPDGLVTEQKKKIAFPN  
FASP KQLEQIAAFNENRKIYFQGLTILPTNIKLSVASAKALTS DQASLEGKETAAIHTA  
VRKGDVLVGSKSSGPLGVRV GKNR TALAVRVGVFKSIVVDALLRLNGASLNFHGVFLRN  
HIATSTQLSTYLA AHYLSLKHNPALLGSLSAIGNPLGLIRGIGDGVNDFVTEPMKGFK  
RALKELDPGYAVDGVARGTESLARHTVGGIADSASLLMETFSKYMAVVTLDRRYAQKRDR  
RKS LRMKSDAKVTLVGGVESGFLKLV TGFREGVTGVVRAPIRGA EKRGLEGF AKGLKGL  
LGLLVKPIIGITDAATDVMIGVKSTVEYKEVQKENLALLRNQFRPRRPMYGRDKVLRPFC  
MEDAAAATLMLKTRCAGENYLSHLDNMNDRVALLSVKRLIILGPRGEEQLALKYDHVDSLE  
VRSIRQADGLSYGWGIIVILNTPRRNGSDVEVITCRSEQEATDLCMMIQQGVLDLVALDSI  
QQI

>comp15027\_c0\_seq1; 430 1 1430 LEN=1669; translated  
XKNKPGSQVSWHPGHRWHHFLGRRLALVLL EALTVAFERWEEGIAKEGLPLATS YWHVGE  
SYKVI RQNLRTHITTPKDGKKNARSECEKLI PWPRLCRVQMHGFGMWT PRAHVDYDLL  
NIVHEAPNGYKPDYKENNAYDGF D LPLNQAIPDGEIDVHAI AIATTSVPPDL DHTWIEE

DSAGDLPESTEAPPPTRRWLREASELGFRKAAKLFPPSTVVNSRILSAEKKKNSVAATFE  
TLQLRRGLDAAAPEPAATSAIVPGRGWEVGGWTTLKGYCDGSAQSECHRNDNDCLLSG  
HNDMHLNLWGDAMSGWL VFTVPKVREGIILARMEWWCGRKEGTDLTREWTEVNGGTTDDT  
TPWNPNDHRVMAASISPASEDEQQRERKLLKPTLDQLVPSDFEMDIAINGVITTMKREEW  
IVYTKEFTKNAAFWPLLNDETMAERDWDGEPVEVGIRFRSELMPKQTYCVSHVYYA  
>comp15027\_c0\_seq2; 438 1 1448 LEN=1687; translated  
XKNKPGSQVSWHPGHRWHHFLGRRLALVLLLEALTVAFAERWEEGIAKEGLPLATSYPWHVGE  
SYKVI RQNL RTHITTPKDGKKDNARSECEKLI PWLPRLCRVQMHGFGMWT PRAHVDYDLL  
NIVHEAPNGYKPDYKENNAYDGFDDLPLNQAI PDGEIDVHAI AIAIATTSVPPDL DHTWIEE  
DSAGDLTNAGDLPESTEAPPPTRRWLREASELGFRKAAKLFPPSTVVNSRILSAEKKKNS  
VAATFETLQLRRGLDAAAPEPAATSAIVPGRGWEVGGWTTLKGYCDGSAQSECHRNDN  
DCLLSGHNDMHLNLWGDAMSGWL VFTVPKVREGIILARMEWWCGRKEGTDLTREWTEVNG  
GMTDDTTPWNPNDHRVMAASISPASEDEQQRERKLLKPTLDQLVPSDFEMDIAINGVIT  
MKREEWIVYTKEFTKNAAFWPLLNDETMAERDWDGEPVEVGIRFRSELMPKQTYCVSHVY  
YA  
>comp15027\_c0\_seq3; 864 210 3170 LEN=3409; translated  
MGVLEMETEAEMESLVPGGNTRNPGASDDAVTSCGGMTNNQSRFLT VFFVLAAMVGM YLS  
AVDRSVIEATMGVDGGPSGSDHVEKKEKFKHPGGSFGGINNLAHPGGAKAANKGQGI AFA  
DIVIPKSNVGHAI PSVNRPNIVNSWGHYVHDEHRSPYASHLYDATQEELNERQQKYVEKM  
KKVREEWGAWDFRDPDDENGDTTTPKKKDCGDRSIADFS DAPYKDLALDEFPPDSWQADE  
EYVARFLDEAKKLVHRVKEGIYAEYGWPTKGKEGDKDYLEKKERVVKLHISDCSGESSGS  
CIKKPKEGIAVLEKVAFEGLVKLLHSLMTNDNFFAVLAGHSAAAGHGNDFFQQNR IITFH  
HLMEPVFDFKLGMR LISRNMGMGGVGT LQFTVAGGDLYGETDILEWDSGMTEKGPPVDL FN  
KQAVLSGERVPIIMSDFHFNIMKETNGTAWIGKYIGGF EKAIVEDTTYENAASQPYAARW  
INEKEEKYNAICWEPRSDFTPEKNQKNKPGSQVSWHPGHRWHHFLGRRLALVLLLEALTVA  
FERWEEGIAKEGLPLATSYPWHVGESYKVI RQNL RTHITTPKDGKKDNARSECEKLI PWLP  
RLCRVQMHGFGMWT PRAHVDYDLLNIVHEAPNGYKPDYKENNAYDGFDDLPLNQAI PDGE  
IDVHAI AIAIATTSVPPDL DHTWIEE DSAGDLTNAGDLPESTEAPPPTRRWLREASELGFRK  
AAKLFPPSTVVNSRILSAEKKKNSVAATFETLQLRRGLDAAAPEPAATSAIVPGRGWEV  
GGWTTLKGYCDGSAQSECHRNDNDCLLSGHNDMHLNLWGDAMSGWL VFTVPKVREGIIL  
ARMEWWCGRKEGTDLTREWTEVNGGTTDDTTPWNPNDHRVMAASISPASEDEQQRERKLL  
KPTLDQLVPSDFEMDIAINGVITTMKREEWIVYTKEFTKNAAFWPLLNDETMAERDWDG  
EPVEVGIRFRSELMPKQTYCVSHVYYA  
>comp15027\_c0\_seq4; 856 210 3152 LEN=3391; translated  
MGVLEMETEAEMESLVPGGNTRNPGASDDAVTSCGGMTNNQSRFLT VFFVLAAMVGM YLS  
AVDRSVIEATMGVDGGPSGSDHVEKKEKFKHPGGSFGGINNLAHPGGAKAANKGQGI AFA  
DIVIPKSNVGHAI PSVNRPNIVNSWGHYVHDEHRSPYASHLYDATQEELNERQQKYVEKM  
KKVREEWGAWDFRDPDDENGDTTTPKKKDCGDRSIADFS DAPYKDLALDEFPPDSWQADE  
EYVARFLDEAKKLVHRVKEGIYAEYGWPTKGKEGDKDYLEKKERVVKLHISDCSGESSGS  
CIKKPKEGIAVLEKVAFEGLVKLLHSLMTNDNFFAVLAGHSAAAGHGNDFFQQNR IITFH  
HLMEPVFDFKLGMR LISRNMGMGGVGT LQFTVAGGDLYGETDILEWDSGMTEKGPPVDL FN  
KQAVLSGERVPIIMSDFHFNIMKETNGTAWIGKYIGGF EKAIVEDTTYENAASQPYAARW  
INEKEEKYNAICWEPRSDFTPEKNQKNKPGSQVSWHPGHRWHHFLGRRLALVLLLEALTVA  
FERWEEGIAKEGLPLATSYPWHVGESYKVI RQNL RTHITTPKDGKKDNARSECEKLI PWLP  
RLCRVQMHGFGMWT PRAHVDYDLLNIVHEAPNGYKPDYKENNAYDGFDDLPLNQAI PDGE  
IDVHAI AIAIATTSVPPDL DHTWIEE DSAGDLPESTEAPPPTRRWLREASELGFRKAAKLF  
PSTVVNSRILSAEKKKNSVAATFETLQLRRGLDAAAPEPAATSAIVPGRGWEVGGWTTL  
KGYCDGSAQSECHRNDNDCLLSGHNDMHLNLWGDAMSGWL VFTVPKVREGIILARMEWW  
CGRKEGTDLTREWTEVNGGTTDDTTPWNPNDHRVMAASISPASEDEQQRERKLLKPTLDQ  
LVP SDFEMDIAINGVITTMKREEWIVYTKEFTKNAAFWPLLNDETMAERDWDGEPVEVG  
IRFRSELMPKQTYCVSHVYYA  
>comp15028\_c0\_seq1; 361 181 1530 LEN=1635; translated  
MKRFVINYRARRNKQLPSSCEVGI PSIKSIKQRNITNGTVDEIVVFTENNKDNI ED RQTA  
PVSTGRYRSESVRENNANTNDGKCGATSEGSRVFVPTNTKFEHETQLESPPKLQEILRRK  
RPKMHQTRRTMVPSEISCHASLASTADSELETGSQAQTP IAPATAAPHEETRD SHNKIC  
LALLESDWFDDNFVGMELQVAMANHEL VNSSKFLVPGSDTNHGESI PPLLSSTLAYS LVC  
NCKSNSVLGETFSARLRAIFPTFLCDGIAGRND EDRDQNDYSSSSTSSSFSCSQENENE  
DCNRQNHVSLKLPALRIIVSSLELVL RTRPTRLDHSYSNGRFPSIDLDEFWRFTL AYM  
TDCLQAFSLNVGNSTDTPSRCNKVEAALVVKGFRLLYKLPQKMGPIYVRFSLLPFVSNAC  
ELSKQRQGTKHSAGDVMVRECE RLLKIL

>comp15029\_c0\_seq1; 295 160 765 LEN=1686; translated  
MADTVFAVSYEGGVVIAADQSNGRSILTYQKNLDKIAKLTEHSMMGVSGANCDLVNFTEY  
VAKNISLYELANEGTKLSTHAQANFARGEMAKALRKGPFQVNVLLGGYDAGKGASLYYLD  
YFGALHKVKSGAQGYAQYFCSSIFDKECTDNMTEDDAIKVVEKCINEMQTRFMLSQPNFI  
IKKVDKDGVSVVSFGEDPADT

>comp15029\_c0\_seq3; 295 160 765 LEN=1584; translated  
MADTVFAVSYEGGVVIAADQSNGRSILTYQKNLDKIAKLTEHSMMGVSGANCDLVNFTEY  
VAKNISLYELANEGTKLSTHAQANFARGEMAKALRKGPFQVNVLLGGYDAGKGASLYYLD  
YFGALHKVKSGAQGYAQYFCSSIFDKECTDNMTEDDAIKVVEKCINEMQTRFMLSQPNFI  
IKKVDKDGVSVVSFGEDPADT

>comp15029\_c0\_seq4; 295 160 765 LEN=1568; translated  
MADTVFAVSYEGGVVIAADQSNGRSILTYQKNLDKIAKLTEHSMMGVSGANCDLVNFTEY  
VAKNISLYELANEGTKLSTHAQANFARGEMAKALRKGPFQVNVLLGGYDAGKGASLYYLD  
YFGALHKVKSGAQGYAQYFCSSIFDKECTDNMTEDDAIKVVEKCINEMQTRFMLSQPNFI  
IKKVDKDGVSVVSFGEDPADT

>comp15029\_c0\_seq5; 1020 70 2943 LEN=4459; translated  
MPSSSIESYCTFTLASDVTAGGLPSEEDIKDLSDNNDNNVKKHALKAAIMAMLGGEAMPR  
ILMQVIRFCINSDDKPLKLTMLYWEVVPKYQDLTGEELIQQAAGTSIVRKLLEPEMILVC  
NALMNDLNHANEYVIRGSMRLRFLCKVKDEEILGPLIPSIKSLTHRHSYVRKSAALCVFHI  
SKLHADHLIPDGPELIAQFLANETDMCARRNAFLMLINENEEFAFEFLGQHIQEGITQFG  
DGFCLCVLELTRRVCRRDPNQSRFVRVLFQMLSSNSAAVSYEASWTLVLSNAPTIRA  
AAVTYTNLLNGQNDHNIQLIVLDRLEALQIKHGKIVQELLMDILRALSSPNPDICQKVLE  
IAMESINTRNVGSVITTLKRELQKSLAEDSEKSLGTRHMLVAAIHDCAKKFPVEVAESVVG  
ILMELLSSTDRTSLQVAMFVRAIIQEHPPLRQTLVSKLLDSLEDISSPPVMCVLWILGE  
FTDPEDAEDTFDEIVKEVGSTPFVVEETTEETSEESDTPKLVTKNVVLADGTATQTSYA  
QTNTAEDTDKTPKLRKMIIVHGDVFAETLASCLTKLALQFPTVDPKPRATAKVVLILCAIC  
KLAESGSTVSMQRSSASDCQDRCSMCCRVLLEKSRDLLKPIIMEDGKKQLANYLEKVA  
QHQPQKKNVAEVPVTQADDLIHFRQLKSMVNSGDVDLDDGGDLARATGSEKSSTLAEEL  
SHCYPLSGFADPVYAEASVTVDYDIVLKIILINRTPNTLADLTVELSTMGDMKIVERPQ  
AHTLGPNDQTTIRASIKVSSSTETGHIIFGTIVYTDMTTQEQKLINLNDIHMDIMDYIRPAT  
CSDMFRSMWAEFEWENKVAIATSIPELSDFLDHIVESTKMKCLTDRPTDNKSTFLAANL  
YARSVFGEDALVNVSVVEKKEDNDGKLAGYIRIRSKTQGIASLGDRTSVQREAADK

>comp15030\_c0\_seq1; 867 510 2684 LEN=2855; translated  
MGNGTDVVKQNSEGREGNEPNTRKHRYRFGDHLQVLDHRDLIDYYQDVQRHLGSGERESNE  
PPRFSLQYLQPRHLKSMVRCILNHHPRDREGGQHPPELVVSKSDLQHWLRSIEVRRRWKLT  
RILLFGEHTLFDSDHTASYNFASEPETTSQSEQQPLVTNQWWWQTEGIAEQAAPGFTET  
ILGMYRYGHANATIHPPKFLSRLASGRAFKGDFRALLEEHCRLSRTAATAPMTSTDGFTT  
DGPDQDVHPEKSRPVSQRDLNSKLNMIALYDEIVGDQSKGEDREHHDLELIGWFVDELE  
ESFQNRHLRHCDASSVEQFVGDHEHSGTSQKIPAFASLPTVGREQLDLLRAVCDLPVGN  
ASSSSSSPANWATSQTSDDGLSVGKKGGERDLASFLAETHALPCPRQVRLAPVWVRHRAKN  
RRNTKKGKRCVLELPERNEAQTGGLKILPASHAVSMGTTTEYDAMVVRIVGEEENDSGI  
ELTTDCNGQRTMVIDEVWEAKATLDPSALLDALEKKVRSRLRAILLSSDSGLVNLDAEGGS  
GTNIPAYDNATASFVILPQPRHHGLVAPAAAGLSSKSLAMVYRAGIQPSFRSSVLETFDK  
ECSHSNNYGNDEDLRTNECDKLPQIGAFASRMIGPRAGARRIQTIVYERLLETDLTVR  
AVIAGNSTTDNGNEPSTHGLVREDSLELVERILRLVRAVRPVVVVGTLPSEEARDVPAPS  
KTAP

>comp15031\_c0\_seq1; 531 1 1902 LEN=2351; translated  
GSSNRLGTGIIALWAATTTTSLTTPNTRYGMVASLQSSRSGYLDHRPSSSELLATDDAN  
PCEREKESESIPDIQELRDEIRKWSRTRTLDAPSKATSALKAMFRYHGSTEKKRSQNAPS  
CVDVIDCTQVINAWSKSRRRDSPPQALTILKIMIAIHKKNGNDRIRPNTITYSSVINAYA  
RRGDFYGALDVFAMQVNDFKRRGNEEAKPNAYAFNSLINACA KSKSEDMSKTAEKLLATM  
NDWYLRGDLEDGPDAYTYSSIINCFSKSNEKNAPSKARKILETMVSEYGYGNKDSRRNTV  
TYAAVMNAYARQGDAMGATEVFKMMEKDYQFGNKEAKLDVQIYNILVDAWSKSSQKDAPS  
RSRDILKIMLAQYEAGNKNI RPDVTYATVMNTYAKQDIFGATETFEMMTGDYQSGNAN  
AEPNVNAYSILIDAWSKSEK DAPRRARDILDTVIAESITKSLRPDAIVYNSVLNAYAT  
RGYVNGATEVFEMMKKDHRTGNKNAEPNIRTYNILMDAWSKSTQKDAPIKSRNINLTVVN  
ESKTKKNMSPDAITYNSALNAHANHGDFEGA AKIFEMMKKDYN SGNENAKPNAITYNILT  
DILPQFNNGKIQKQAPDGVSTQVANAKVKKRKV

>comp15032\_c0\_seq1; 726 1 1572 LEN=1982; translated  
VVGGLQQALSSAADKAEADRVTWIGVAVNLLLSVGKLCIGITAHSSALVADAGHSLSDLV

SDFITLWSVNVARLPPDEDHPYGHYKFEAIGSLFSLTLLATGGSVGLMANKQLMEVLQA  
SASTQAAGAAVQIPGPLALLMAGASIFSKEWLFTRITKQVGERLRSPVVIANAWHHRSDA  
YSSVLALLSIAWAMMGFPAADAAAGILVAGMICMTGGEILVESVKQLSDSADSALQSEIQ  
EILNELDDDDVICTTSVRARQMGAASVDIVVEIPSVLSTTATS SAVEERVRQRLLGELAK  
RRGNSNRGSSAGIIATVSAKPYLEISPRMDDYEHDESAFAKLAFEFKDRDSDGKLTIDELK  
LGLERTLNIQLSDERVQRLLEEFVNDKGYLDLEEMVTIDEFRSKIEAFSREGAANAQNT  
MPSTSYIEQQVRNQAQLMYPRVRNVEGVTVHYTSQNSVTVDVNIRSSSTVLETVRQHAK  
FKRNLETELDEIESARVYLDLNEDDSTEAEATIKEPAVQKLAP

>comp15032\_c0\_seq2; 994 328 2744 LEN=3154; translated  
MASAATTTTAAAPAKMGAGTCLLLLAIVHNPLSASAYAPPMGKSVAQRIPFSALPQQEA  
PESSASAFSGRNGNGSNRRFLRPPVSPALYHMGHSHSHSHSHSHSHSHSHDHHHGNSS  
KAIDRKRVRKLLALVLFVFCWVATCGTKLVTANASASLEANRKFVGLAQNDWISFVVTSVAL  
TSANKITRAIQKSVDRFRLFVDGIRKHSSTSLEASHDHSQQALSSAADKAEADRVTWIG  
VAVNLLLSVGKLCIGITAHSSALVADAGHSLSDLVSDFITLWSVNVARLPPDEDHPYGHY  
KFEAIGSLFSLTLLATGGSVGLMANKQLMEVLQASASTQAAGAAVQIPGPLALLMAGA  
SIFSKEWLFTRITKQVGERLRSPVVIANAWHHRSDAYSSVLALLSIAWAMMGFPAADAAAG  
MYVAGPNADAVAAQRKAAQRDTRSRKHSIRVRLSLFGTLFSSLCFSQSPRVCLSXLVDV  
VGTLRCNLSLVAGMICMTGGEILVESVKQLSDSADSALQSEIQEILNELDDDDVICTTSVR  
ARQMGAASVDIVVEIPSVLSTTATS SAVEERVRQRLLGELAKRRGNSNRGSSAGIIATVSA  
KPYLEISPRMDDYEHDESAFAKLAFEFKDRDSDGKLTIDELKLGERTLNIQLSDERVQ  
LLEEFVNDKGYLDLEEMVTIDEFRSKIEAFSREGAANAQNTMPSTSYIEQQVRNQAQLM  
YPRVRNVEGVTVHYTSQNSVTVDVNIRSSSTVLETVRQHAKFEKRNLETELDEIESARVY  
LDLNEDDSTEAEATIKEPAVQKLAP

>comp15032\_c0\_seq3; 706 1 1772 LEN=2182; translated  
VVGGLQQALSSAADKAEADRVTWIGVAVNLLLSVGKLCIGITAHSSALVADAGHSLSDLV  
SDFITLWSVNVARLPPDEDHPYGHYKFEAIGSLFSLTLLATGGSVGLMANKQLMEVLQA  
SASTQAAGAAVQIPGPLALLMAGASIFSKEWLFTRITKQVGERLRSPVVIANAWHHRSDA  
YSSVLALLSIAWAMMGFPAADAAAGMYVAGPNADAVAAQRKAAQRDTRSRKHSIRVRL  
SLFGTLFSSLCFSQSPRVCLSXLVDVGTLRCNLSLVAGMICMTGGEILVESVKQLSDSADS  
ALQSEIQEILNELDDDDVICTTSVRARQMGAASVDIVVEIPSVLSTTATS SAVEERVRQ  
LLGELAKRRGNSNRGSSAGIIATVSAKPYLEISPRMDDYEHDESAFAKLAFEFKDRDSDGK  
LTIDELKLGERTLNIQLSDERVQRLLEEFVNDKGYLDLEEMVTIDEFRSKIEAFSREG  
AANAQNTMPSTSYIEQQVRNQAQLMYPRVRNVEGVTVHYTSQNSVTVDVNIRSSSTVLET  
VRQHAKFEKRNLETELDEIESARVYLDLNEDDSTEAEATIKEPAVQKLAP

>comp15032\_c0\_seq4; 1014 328 2544 LEN=2954; translated  
MASAATTTTAAAPAKMGAGTCLLLLAIVHNPLSASAYAPPMGKSVAQRIPFSALPQQEA  
PESSASAFSGRNGNGSNRRFLRPPVSPALYHMGHSHSHSHSHSHSHSHSHDHHHGNSS  
KAIDRKRVRKLLALVLFVFCWVATCGTKLVTANASASLEANRKFVGLAQNDWISFVVTSVAL  
TSANKITRAIQKSVDRFRLFVDGIRKHSSTSLEASHDHSQQALSSAADKAEADRVTWIG  
VAVNLLLSVGKLCIGITAHSSALVADAGHSLSDLVSDFITLWSVNVARLPPDEDHPYGHY  
KFEAIGSLFSLTLLATGGSVGLMANKQLMEVLQASASTQAAGAAVQIPGPLALLMAGA  
SIFSKEWLFTRITKQVGERLRSPVVIANAWHHRSDAYSSVLALLSIAWAMMGFPAADAAAG  
ILVAGMICMTGGEILVESVKQLSDSADSALQSEIQEILNELDDDDVICTTSVRARQMGA  
ASVDIVVEIPSVLSTTATS SAVEERVRQRLLGELAKRRGNSNRGSSAGIIATVSAKPYLEIS  
PRMDDYEHDESAFAKLAFEFKDRDSDGKLTIDELKLGERTLNIQLSDERVQRLLEEFV  
NDKGYLDLEEMVTIDEFRSKIEAFSREGAANAQNTMPSTSYIEQQVRNQAQLMYPRVRN  
VEGVTVHYTSQNSVTVDVNIRSSSTVLETVRQHAKFEKRNLETELDEIESARVYLDLNEDD  
STEAEATIKEPAVQKLAP

>comp15033\_c0\_seq1; 458 1 1589 LEN=3287; translated  
XNGLFLGRLLFVGSHEPPIISGVDPGVPGILQRDLYQYYDVSPEIIGQGSFGYVRRVKLLP  
NATINKIDNDGVDSSSKDAALHNCYACKTIPKSNHHNRSLFLQEVYNLNRQKAASTGL  
YNNEDNSNFVIRLVVDIEDRSIHIITELCQGGELYDYVVEKERRTGRGLRGKALSPSS  
HGDNCGDDDDDELRCATVIFQILTAFETIHERACVCHRDMKASNFFVVRKPSFIPNSLNL  
RVIDFGLSKFVGKEPEKEKRVQKNDNERKQDDPSTILPERKSPSLNANGVSEKTASCEIE  
DDNPNTYSKQFRYMTSGVSPYVAPEVLIIHHHQHERESSIASTKPTETGNNEEQDDL  
FDSIGGGYTTKCDIWSIGVLAFLTLTGTLVIGKDEEETVQKLMPEMEVDFSDDTVWEQ  
HHLKNNSDKAPNEDNDNKHYNHTGSKDNKRAKPKISASAREFCETLLQRDPKKRPSARE  
ALEFDWIVKHCGYSSLTPASPTDLGNSFETRLENRSYLDRLPSLSTQIP

>comp15033\_c0\_seq2; 458 1 1589 LEN=3273; translated  
XNGLFLGRLLFVGSHEPPIISGVDPGVPGILQRDLYQYYDVSPEIIGQGSFGYVRRVKLLP

NATINKIDNDGVDSSSKDAALHNCYYACKTIPKSNHHNRSFLQEVYNLNRQCQAASTGL  
YNNEDNSNFVIRLVDVIEDRSAIHIITELCQGGELYDYVVKHRRTGRGLRGKALSPSS  
HGDNCGDDDDDELRCATVIFQILTAFETIHERACVCHRDMKASNFFVVRKPSFIPNSLNL  
RVIDFGLSKFVKGPEKEKEKRVQKNDNERKQDDPSTILPERKSPSLNANGVSEKTASCEIE  
DDNPNTYSKQFRYMTSGVGSPPYVVAPEVLIHHHQHERESSIASTKPTEETGNNEEQDDL  
FDSIGGGYTTKCDIWSIGVLAFLTLTGTLPVIGKDEEETVQKLMPEMEVDFSDDTVWEQ  
HHLKNNSDKAPNEDNDNKHYNHTGSKDNKRAKPKISASAREFCETLLQRDPKKRPSARE  
ALEFDWIVKHCGYSSLTPASPTDLGNSFETRLENRSYLDRLPSLSTQIP

>comp15033\_c0\_seq3; 458 1 1589 LEN=3298; translated  
XNGLFLGRLLFVGSHEPPIISGVDPGVPGILQRDLYQYYDVSPEIIGQGSFGYVRRVKKLLP  
NATINKIDNDGVDSSSKDAALHNCYYACKTIPKSNHHNRSFLQEVYNLNRQCQAASTGL  
YNNEDNSNFVIRLVDVIEDRSAIHIITELCQGGELYDYVVKHRRTGRGLRGKALSPSS  
HGDNCGDDDDDELRCATVIFQILTAFETIHERACVCHRDMKASNFFVVRKPSFIPNSLNL  
RVIDFGLSKFVKGPEKEKEKRVQKNDNERKQDDPSTILPERKSPSLNANGVSEKTASCEIE  
DDNPNTYSKQFRYMTSGVGSPPYVVAPEVLIHHHQHERESSIASTKPTEETGNNEEQDDL  
FDSIGGGYTTKCDIWSIGVLAFLTLTGTLPVIGKDEEETVQKLMPEMEVDFSDDTVWEQ  
HHLKNNSDKAPNEDNDNKHYNHTGSKDNKRAKPKISASAREFCETLLQRDPKKRPSARE  
ALEFDWIVKHCGYSSLTPASPTDLGNSFETRLENRSYLDRLPSLSTQIP

>comp15034\_c0\_seq1; 639 261 2555 LEN=2592; translated  
MTSSSSPRETIQISLGTSANAITAHLNLQGLASTSSSSDHVFCDAVTTHYVQGSGLGGG  
GTLVPRVLLIDQATHQVPASMTTATEGAATNASSLSVNLADAYLTNLHTDSFWNGQIQVL  
GNGTMAFSTGHQALDPSQSTSPLLKAASSMAYSSHSRYMDRGNNYPDRQYRTDPSNSRH  
VWDDDEEYDEEDPYERLQREQQNERRWRQTSLALGQELNNLMAENFQEEERNEVPLESG  
QSSAQRF CFNHWTDIWMPPRDEKSKVILPFSSQSQVLPHWNVTYQCNGDSCGNSVFPFLRE  
WKEDVLFENVRHMLEACDHGIQGVSIATEGHGIYASLATYLLDELKQECKSAGRLIYHVT  
GDGKESENETTSSRKNPRSDDDVSFSAPSSRSWQEAQVDRIRQQICLGLVLNDFTEKAHA  
VLPLQLPGDCYTGTSGSSLSWFRSTARVAMALEASTLPFRLNENNTNSVGGCLPAHRIG  
LQNAFLASHGSSDSSWGTTASRLTFSEFLQVLQPSSSHSMLELDVLTQHMGNQELYNLI  
QEGTSVQRDQMRQSRGHSYRTRPRDVSFGAWMQNRSRGLLSYLSHPSSDKNSHLNLDRT  
LHHHFALSTSVRPILSLPSDKTEGISMSNYLTCLVQGMGIQYRPERSMATVLNQLSGQLT  
FGDDGGGRNYGAGIYWKYVVPVHVETPVLAVLGNTRSFQQLNRRTANDMKAAMRTPRFRGF  
YNRDVSNGVLPPEMEDCDEALEACFNKRDRVYQPPSGSGLDFDEDY

>comp15034\_c0\_seq2; 639 277 2571 LEN=2608; translated  
MTSSSSPRETIQISLGTSANAITAHLNLQGLASTSSSSDHVFCDAVTTHYVQGSGLGGG  
GTLVPRVLLIDQATHQVPASMTTATEGAATNASSLSVNLADAYLTNLHTDSFWNGQIQVL  
GNGTMAFSTGHQALDPSQSTSPLLKAASSMAYSSHSRYMDRGNNYPDRQYRTDPSNSRH  
VWDDDEEYDEEDPYERLQREQQNERRWRQTSLALGQELNNLMAENFQEEERNEVPLESG  
QSSAQRF CFNHWTDIWMPPRDEKSKVILPFSSQSQVLPHWNVTYQCNGDSCGNSVFPFLRE  
WKEDVLFENVRHMLEACDHGIQGVSIATEGHGIYASLATYLLDELKQECKSAGRLIYHVT  
GDGKESENETTSSRKNPRSDDDVSFSAPSSRSWQEAQVDRIRQQICLGLVLNDFTEKAHA  
VLPLQLPGDCYTGTSGSSLSWFRSTARVAMALEASTLPFRLNENNTNSVGGCLPAHRIG  
LQNAFLASHGSSDSSWGTTASRLTFSEFLQVLQPSSSHSMLELDVLTQHMGNQELYNLI  
QEGTSVQRDQMRQSRGHSYRTRPRDVSFGAWMQNRSRGLLSYLSHPSSDKNSHLNLDRT  
LHHHFALSTSVRPILSLPSDKTEGISMSNYLTCLVQGMGIQYRPERSMATVLNQLSGQLT  
FGDDGGGRNYGAGIYWKYVVPVHVETPVLAVLGNTRSFQQLNRRTANDMKAAMRTPRFRGF  
YNRDVSNGVLPPEMEDCDEALEACFNKRDRVYQPPSGSGLDFDEDY

>comp15035\_c0\_seq1; 525 87 2129 LEN=2263; translated  
MSNHPVRKATRNRCDYLRVVLFCCKGAGADKDTYRPGSDESQWVGRRDALVRCVASFLFG  
ANASANKELVLLFDDDLARLHMSIGGGDRADEKDNNGASVFPKEQTI IQLWKRAAQNL  
KPVHLNGMCTIHLDPALSLKATTPSSNSGSRSANHGSIEQIDTKRAVLEYIQKHVSMD  
FLREHKINSHPEVVLKRNKQKLLKIWAQWKQSQTSTNSADESDDENDGNRRRLRTIYR  
NLLEFPDKTPGTGGSSPEVPRVAGTTLHETSEEFPCFGPQTRQEDDGESSGASYRVCLF  
LGAVRDMSREHDILGRVCGASNIPLVGVRFVGTVPFEFTSKILSLLAFHHANHVLDASLKR  
LLVAAGSGERLHRSRSTAI EQQQQQHQQSTCLSI ICTVPTHSTEISIDGNKRDEIHWRL  
VRVIVCSLWRSKLVSSKSQVGHANILHLVFGDGVVVTLNEREFVGRADQHQAAPEFQI  
LTALIHEIKHQRFTPPVSSKKQSSDGSDSGWSRKKLAKRLVKKVLESSTVTVTSAIGI  
ESSAPNEIVSRFYDGPTRDNALAPADSDRGVLMALYIAPATNHSKGS�FDRLQQRQDKAE  
EQHKHDSRKMREII SASRKLQIPTIEQNVIPNRCWDREAASIIALQQMCYQNRVFPATRC  
TRSRNTAPPKTAGEKRKKPI

>comp15036\_c0\_seq1; 753 325 2568 LEN=2969; translated

MSHSQRRSQHRSHGTNASWMSLSDSSVHSNHNSYSSFGDYDNQRHHQQHQHKNQYTYYPK  
CTEVPQFDALHNAAEFHCDEKLHLRNLNCNDTARCSGLTAVHVAAWSASTIPSSLLEEGE  
EHVFQTGLPSTNSNHNGRIGLHRRNSMDEFDNGGGVSDADEEDANEQLLLLQRFGNRSK  
IVLDYSRQOVTGETMELLFDLADAVRFTEERRQAFRTGEKINVTEGKPVLLHHVLRMPRGYD  
FPPIKTGSSRNASNNTGVGGNDAFHNDANGYAQQPKNTMDSQPESSEDLAAVHEIRDRI  
EVFSRQIRSLDHSVGLRGVTKRITDTVVVSSAGGTHLGTEFVHQALSADKRACKAAEGR  
RLHFLSNIDPVDTFNTRDLDPERTLVVVISKDFDNSIELSNFRSIRHWLTSQLQSSPGG  
EIVTEAEITEKHIVGVTCTTPEQCLGIPEQNLFRIDWVIGRFVCSAVGVLPPLSLQYS  
YEIVSEFLSGAHMDEHFFNAPLRDNI PVLLGLLGFWNSTFMGYTTRALIPYAEALRGLS  
TYVQLVDMESNGKRVAVDGTMLMHLTGEISLGEPPGGTNNHPFFQLMHQGRVIPADFIGF  
MESPRPLDLPGEAIISSHDELMCNFFAQPDALAYGKELMDLVSEGVVPTLREHMVFAGNRP  
SSSILMTRLDPFVSVGLVALYEHRTAAQGFVWLGINSFDRYGTQLGCFMSSKIRSQLAVSR  
GTGATVQGFNQSTTSLLEVYLAHGK

>comp15037\_c0\_seq1; 343 90 1327 LEN=1680; translated  
MEDIAVTNDLACSSIEMGHYRTALEVLNRCLACVKKLKNCRHSIQGDQKHSYAYRYKIEE  
SISLILKETQRKLLPSTESSTTSIADSARKKATRTHSCSQQSNYSLPKRRRGEQGSNFVL  
DHNSHSENNKNTRDDSESRTPFIYRKPTRLTEPQWDRIRQYQVLIRATKNTGKPEIQK  
LEREIELTISNLLFNIALSHHMAVASSSSTQEEEAXAYSDSDSNSEDESDDDSSNGYD  
EPCSSCSQSEQHLGGALRLYELGFWIYSKRIAIVASQSPESAFPLPLPSSPVELEETNF  
SEQQEQQQPRSVLRSHGNASGCISNSTSFQAQANRYALAMINNCAHIHECLGNFDRASA  
YRNRLSLLMVIIDSGQSVRDVVGDDGILCGYLSVAFKTGVFPKEKILAAAA

>comp15037\_c0\_seq2; 343 90 1327 LEN=1701; translated  
MEDIAVTNDLACSSIEMGHYRTALEVLNRCLACVKKLKNCRHSIQGDQKHSYAYRYKIEE  
SISLILKETQRKLLPSTESSTTSIADSARKKATRTHSCSQQSNYSLPKRRRGEQGSNFVL  
DHNSHSENNKNTRDDSESRTPFIYRKPTRLTEPQWDRIRQYQVLIRATKNTGKPEIQK  
LEREIELTISNLLFNIALSHHMAVASSSSTQEEEAXAYSDSDSNSEDESDDDSSNGYD  
EPCSSCSQSEQHLGGALRLYELGFWIYSKRIAIVASQSPESAFPLPLPSSPVELEETNF  
SEQQEQQQPRSVLRSHGNASGCISNSTSFQAQANRYALAMINNCAHIHECLGNFDRASA  
YRNRLSLLMVIIDSGQSVRDVVGDDGILCGYLSVAFKTGVFPKEKILAAAA

>comp15037\_c1\_seq1; 519 1 1475 LEN=1927; translated  
ACSIIDDHSHYRMGHGQTSTEPALYIPFFPRFMYGTRNDESF LAKASRHVPADRTPDAA  
IAANRRNSYRFLGFLATPALVFPLLVQLQLPLGASCYLFQGSGTGHLPRTPAAMSLLO  
TDHCRCAFVTSGVRRRLRSGWDL SIHSCRSSNLGTDSCRSD EEDSSSSSSSSLSRRVGI SE  
EANENSASNSTADAAASTASSNDATSQMESESGDGVMPMPNSKNSKTGVESFSSFSSTET  
PILAE LLQLDGN DSETAKN NIGALS LQSDSLPVAPATAPT T MPEWRRSERYSEM VVVG LA  
VGSLSGILGDLLANYEWVQTLRYFWPLSLGLYYGLLWNQPF A APEATEAFYEEYGS DAAT  
SASFRNDDNDTAAVLLQIGYVFGGLGLFVGGGLADALLPVWMTGPNLLTHAGLAPDCAVLL  
LALS LG EKYFWGNDDNNEPVGGSIAFASKETSNSMLPLLLR IALWAELYKLGESSLDEVL  
SLLQTTFLSAT

>comp15037\_c1\_seq2; 519 1 1475 LEN=1948; translated  
ACSIIDDHSHYRMGHGQTSTEPALYIPFFPRFMYGTRNDESF LAKASRHVPADRTPDAA  
IAANRRNSYRFLGFLATPALVFPLLVQLQLPLGASCYLFQGSGTGHLPRTPAAMSLLO  
TDHCRCAFVTSGVRRRLRSGWDL SIHSCRSSNLGTDSCRSD EEDSSSSSSSSLSRRVGI SE  
EANENSASNSTADAAASTASSNDATSQMESESGDGVMPMPNSKNSKTGVESFSSFSSTET  
PILAE LLQLDGN DSETAKN NIGALS LQSDSLPVAPATAPT T MPEWRRSERYSEM VVVG LA  
VGSLSGILGDLLANYEWVQTLRYFWPLSLGLYYGLLWNQPF A APEATEAFYEEYGS DAAT  
SASFRNDDNDTAAVLLQIGYVFGGLGLFVGGGLADALLPVWMTGPNLLTHAGLAPDCAVLL  
LALS LG EKYFWGNDDNNEPVGGSIAFASKETSNSMLPLLLR IALWAELYKLGESSLDEVL  
SLLQTTFLSAT

>comp15038\_c0\_seq1; 319 231 1346 LEN=2549; translated  
MSVHKVLLLLLIGTIIHNGSIDAYVTSPALSLLVKGRGLEDCAMSNRVPRSNLVRVLSGD  
HASSDDSSSSSNSINNPLDENSAPPSSPLFAEPDAPTVAQKARFGDVTPISSRTSSSPA  
PAQFGDVVSIRKRSPEAPQATSVTTATTKMNTGQAALSDKELLRQRRMRNIGVAILLSIFL  
AVGNAYAYQWTHPVTP IQLLVNMERTSAPLSDIGKNSKPTVIDFWAPWCENCRYMAPTLLQ  
VEESYKDKVNFVMVNGDDPNWPLIEALGVDAIPH LAMVESDGTVD TALIGTVPKEWLSR  
DIDVLLANAKTKPQECDALEKNLVDMATASDAEKLCKGKQKLPYQMLDVFANRNPEDRKL  
V NLD AIVGSARR

>comp15039\_c0\_seq1; 656 249 2174 LEN=3653; translated  
MKSYSFPLTIFVLSSLALSASAAASEASQPRKLLDGFVLESSEQGLLGNWVASMNEGA  
SNNLKP SDGSLRLGNDLEVQKTKEEDLSFAIEDVSALQKMRGTNLRGANDTWRRNRGKG

KGSKKGCKKQKSEKSKSGGKGGKDGKNFGFNRRLLPTNRPTSRPTNRPTSPVGNAD  
ICPEGYEPSGAESTKTKRPTSSSPTMEPTDSPAPTESPAPTTFSDRTOAPFVPAGNEP  
LCEVFPASRTSESI AFWSESNAQGRTSNGS AALAQVVASPVQRSDTDESKI SVSISVDMT  
AGANDADADMNGDSTFDTVDVGLHFDAIVTEPIALYVVGCPKESLKTAEAYYWSHKN  
GDA RVLESNESQFVSLMWNWNCYAVNENSSCDNGNVCEVKCTTVLNYLGDLERFDVDER  
IAWS IKEYFSLMDDVTAWYPMQQIGTVTI EEKDTDDSGVNAIEDSNLSQAKQMKAGPF  
IGAATG L LALILLVLFVRRRRNRNDIEQISHLKLDESADDNTFYNGSDGNSEGGI  
AKHEYNTRDIH IVGEGDSVISHWTGYTGNVRSPTQPNNYDAEY NKSSLVKGI  
STDVHQCSSATCEICALQR QAGLNFVPTGVTD MNECLPARVPSLP  
SDASREYAAEDTVEL

>comp15040\_c0\_seq1; 1079 814 5634 LEN=6194; translated  
MSGAPAGSANNNGSI INRSR SRNSGSSTSGKSSRSTRSGEASDEAVQGSQDPLMQHTRYQH  
EQQHHADRQQQPWHAHRDQQQIYQRYHQELQPQRHPQQAHYIQYYSGDANMRI PQQP  
PLQQQYQQDPYSYRGN SYNSGSQNSSSHHQVQHQFNSSYN SKDQSSHYSN ILGSI  
SGSH QSLDKDDAYQRLGQRLSWSAHGQKSTEF SRSSSRIVVPPKCI EFRSPSSS  
FKPFGEALQD AIRDREKLNSSSQSGNLKSDRNLLRNVTIKANGLYR  
IWYAEHSRIHQRRRRKSNE SNIR ASTKPHNRINNHNKSDNFAMSPHQ  
RSFAQMSLVGNSSNHDP SHNTIISASSKKQHGSLSA VIESAQNSSTATH  
SKNPRGSGGTGGSTRSENQSRASSSIATRSMGTRNSIRSFGLTLP  
RGKCLTQPSEGVSNDNNDNSEGNLIVYENDNISVPPKQVHVLTGKIPRGH  
KSSDFRIQ SLLGQGTFAQVFKCLHTQTGQLVALKI IKNKPAYTRQAAVE  
IDVIRVANETNP NHNKKTG STEGPLQHKSKASSTDY MIDLVCFYMYK  
DHLCLAFELLGQNL YEVLKRRQFRGLPLSVT QNLVVRQVVMGCKALARK  
SIVHCDLKPENILLVDENDEDSVMSAGDSKRLISALSSTSLDK KEQNH  
LHKFAAGGNDTEKAENDANSSEKNNGEASDNSKSTNETDNTNRYKDQEQ  
RTETT VSTNTRASPEDKMNVRTKSPMDSTIATNDVHNERIKLIDFGSAC  
FEGQMSHTYIQSRFYR SPEVILGLAYDS AIDMWSLGCVAEFLGLPIL  
PGVHEHDQLVRISEMIGETPDWMLDQG TKSSKYLLKHLPGVTS  
AHTPPVQSSSVSPEDPFERNGR TSGRSTSEGPRPLPQWKVKTQH  
EYIASLTQSEIKKKGGLVKLEKQPGNRYFKRKLSDIILHKGQSGKPEEL  
RLLKNFIHFL YGILD PDPWRWTAYQVISHPFFT GAMMRENVDPADIKDQ  
NHANRLLNMYWEAPSDPTIY QRKLR SVQKTREKQQAARGYNRSYSR  
SRSEPPNQDGMPTVRNALS KNNTSTDQTSTVT DHIDEAINAVARPMRQ  
GSYQGSYQECTHMSSMSQFGIDQGIQLLRYGSSFSGGPQSFSE  
AGNCIALPE SFNEADFALALRRPGVPMGDSVTTATTSTTSISSGN  
NSRSNYQGNIQISQ VGSFGSHRVL YSQAQRRVGAASNPRTSR  
SFGEADAVPAVSTTVPTVIGSLHQQVYASS QESGIDAVPSMVVKA  
ELEIRADPPMEIKDDTI PKRPKSATS AKSVGEGINGEHSQKSDT  
QSSFNP SVDATQKLEAFDAQAYQQQLAAMQHOFQQQQLILQQQQA  
ALAIQQEQQLRAYYS AAGIGTHQFNLASAPTTVA AAVNTQQFGLT  
GTPATTTAGMISLQGNPSTSLSSGQOFTAHTPAPALQVQHFGLSG  
TPGGGYLVPAADGTQILVPASNPGAGIHMPSQVPGIAPIPGMM  
TGQVQRLSASGAAQLQGIAPTGLPPVGLTSQQAIPGIVDVAAGMPV  
IPGLHPVGINIPA MSPNTGMTAAPPVLNNTNSSTAPPNDGVSDT  
NNNNSTQQRNHRQP

>comp15040\_c0\_seq2; 634 814 3705 LEN=4588; translated  
MSGAPAGSANNNGSI INRSR SRNSGSSTSGKSSRSTRSGEASDEAVQGSQDPLMQHTRYQH  
EQQHHADRQQQPWHAHRDQQQIYQRYHQELQPQRHPQQAHYIQYYSGDANMRI PQQP  
PLQQQYQQDPYSYRGN SYNSGSQNSSSHHQVQHQFNSSYN SKDQSSHYSN  
ILGSI SGSH QSLDKDDAYQRLGQRLSWSAHGQKSTEF SRSSSRIVVPPKCI  
EFRSPSSSFKPFGEALQD AIRDREKLNSSSQSGNLKSDRNLLRNVTIKANGLYR  
IWYAEHSRIHQRRRRKSNE SNIR ASTKPHNRINNHNKSDNFAMSPHQ  
RSFAQMSLVGNSSNHDP SHNTIISASSKKQHGSLSA VIESAQNSSTATH  
SKNPRGSGGTGGSTRSENQSRASSSIATRSMGTRNSIRSFGLTLP  
RGKCLTQPSEGVSNDNNDNSEGNLIVYENDNISVPPKQVHVLTGKIPRGH  
KSSDFRIQ SLLGQGTFAQVFKCLHTQTGQLVALKI IKNKPAYTRQAAVE  
IDVIRVANETNP NHNKKTG STEGPLQHKSKASSTDY MIDLVCFYMYK  
DHLCLAFELLGQNL YEVLKRRQFRGLPLSVT QNLVVRQVVMGCKALARK  
SIVHCDLKPENILLVDENDEDSVMSAGDSKRLISALSSTSLDK KEQNH  
LHKFAAGGNDTEKAENDANSSEKNNGEASDNSKSTNETDNTNRYKDQEQ  
RTETT VSTNTRASPEDKMNVRTKSPMDSTIATNDVHNERIKLIDFGSAC  
FEGQMSHTYIQSRFYR SPEVILGLAYDS AIDMWSLGCVAEFLGLPIL  
PGVHEHDQLVRISEMIGETPDWMLDQG TKSSKYLLKHLPGVTS  
AHTPPVQSSSVSPEDPFERNGR TSGRSTSEGPRPLPQWKVKTQH  
EYIASLTQSEIKKKGGLVKLEKQPGNRYFKRKLSDIILHKGQSGKPEEL  
RLLKNFIHFL YGT

>comp15040\_c0\_seq3; 968 814 5749 LEN=6309; translated  
MSGAPAGSANNNGSI INRSR SRNSGSSTSGKSSRSTRSGEASDEAVQGSQDPLMQHTRYQH  
EQQHHADRQQQPWHAHRDQQQIYQRYHQELQPQRHPQQAHYIQYYSGDANMRI PQQP  
PLQQQYQQDPYSYRGN SYNSGSQNSSSHHQVQHQFNSSYN SKDQSSHYSN  
ILGSI SGSH QSLDKDDAYQRLGQRLSWSAHGQKSTEF SRSSSRIVVPPKCI  
EFRSPSSSFKPFGEALQD

AIRDREKLNSSSQSGNLKSDRNLLRNVTIKANGLYRIWYAEHSRIHQRRRRKSNESNIR  
ASTKPHNRINNHNKSDNFAMSPHQRSFAQMSLVGNSSNHDP SHNTIIISASSKKQHGSLSA  
VIESASQNSSTATHSKNPRGSGGTGGSTRSENQSRASSSIATRSMGTRNSIRSFGLTLP  
RGKCLTQPSEGVSNDDNCDNSEGNLIVYENDNISVPPKQVHVLTKGKI PRGHKSSDFRIQ  
SLLGQGTFAQVFKCLHTQTGQLVALKIIKNKPAYTRQAAVEIDVIRVANETNPNNHKKTG  
STEGPLQHKSKKASSTDYIMIDLVCYFMYKDHLCLAFELLGQNLVEVLKRRQFRGLPLSVT  
QNLVLRQVVMGCKALARKSIVHCDLKPENILLVDENDEDSVMSAGDSKRLISALSSTSLDK  
KEQNHLHKFAAGGNDTEKAENDANSSEKNNGEASDNSKSTNETDNTTNRKYDQEQRTETT  
VSTNTRASPEDKMNVRTKSPMDSTIATNDVHNERIKLIDFGSACFEGQMSHTYIQSRFYR  
SPEVILGLAYDAIDMWSLGCVAELFLGLPILPGVHEHDQLVRISEMIGETPDWMLDQG  
TKSSKYYLKHLPGVTSAHTPPVQSSSVSPEDPFERNGRSTSGRSTSEGPRPLPQWKVKTQH  
EYIASLTQSEIKKKGLVKLEKQPGNRYFKRKLSDIILHKGQSGKPEELRLLKNFIHFL  
YGTVTKRGYCCVVL PFLKFDTSLWMKIKLIDLNLFRYAFTGILDPDPWKRWTAYQVISHPF  
FTGAMMRENVDPADIKDQNHANRLLNMYWEAPSDPTIYQRKLRVQKTREKQQAARRGYN  
RSYSRSRSESPPNQDGMPTVRNALSKNNTSTDQTSTVTDHIDEAINAVARPMRQGSYQGS  
YQECTHMSSSMSQFGIDQGIQLLRYGSSFSGGPQSFSEAGNCIALPESFNEADFALALRR  
PGVVMGDSVTTATTSTTSISSGNNRSNYQGNIQISQVGSFGSHRVLYSGAQQRVGA  
SNPRTSRSFEGGDAVPAVSTTVPTVIGSLHQVVYASSQESGIDAVPSMVVKAELEIRAD  
PPMEIKDDTIPKRPKSATSAKSVGEGINGEHSQKSDTQSSFNPSVDATQKLEAFDAQKA  
YQQQLAAMQHQQFQQQLILQQQQAALAIQQEQLRAYSAAGIGTHQFNLASAPTTVA  
AVNTQQFGLTGTATTAGMISLQGNPSTSLSSGQQFTAHTPAPALQVQHFGLSGTPGGGY  
YLVPAADGTQILVPASNPAGIHMPSQVPGIAPIPGMMTGQVQRLSASGAAQLQGIAPT  
GLPPVGLTSQQAIPGIVDVAAGMPVIPGLHPVGINIPAMSPNTGMTAAPPVLNNTNSSTA  
PPPNDGVSDTNNNNSTQQRNHRQP

>comp15040\_c0\_seq4; 689 814 4473 LEN=4473; translated  
MSGAPAGSANNNGSIINRSRNRSGSSTSGKSSRSTRSGEASDEAVQGSQDPLMQHTRYQH  
EQQHHADRQQQPWHAHRDQQQIYQRYHQELQPQRHPQQAHYIQYYSGDANMRI PQQP  
PLQQQYQDPYSYRGNYSNGSQNSSSHQVQHQFNSSYNSKQSSSHYSNILGSI S  
GSHQSLDKDDAYQRLGQRLSWSAHGQKSTEFSSSRIVVPPKCI EFRSPSSSFKPFGEALQD  
AIRDREKLNSSSQSGNLKSDRNLLRNVTIKANGLYRIWYAEHSRIHQRRRRKSNESNIR  
ASTKPHNRINNHNKSDNFAMSPHQRSFAQMSLVGNSSNHDP SHNTIIISASSKKQHGSLSA  
VIESASQNSSTATHSKNPRGSGGTGGSTRSENQSRASSSIATRSMGTRNSIRSFGLTLP  
RGKCLTQPSEGVSNDDNCDNSEGNLIVYENDNISVPPKQVHVLTKGKI PRGHKSSDFRIQ  
SLLGQGTFAQVFKCLHTQTGQLVALKIIKNKPAYTRQAAVEIDVIRVANETNPNNHKKTG  
STEGPLQHKSKKASSTDYIMIDLVCYFMYKDHLCLAFELLGQNLVEVLKRRQFRGLPLSVT  
QNLVLRQVVMGCKALARKSIVHCDLKPENILLVDENDEDSVMSAGDSKRLISALSSTSLDK  
KEQNHLHKFAAGGNDTEKAENDANSSEKNNGEASDNSKSTNETDNTTNRKYDQEQRTETT  
VSTNTRASPEDKMNVRTKSPMDSTIATNDVHNERIKLIDFGSACFEGQMSHTYIQSRFYR  
SPEVILGLAYDAIDMWSLGCVAELFLGLPILPGVHEHDQLVRISEMIGETPDWMLDQG  
TKSSKYYLKHLPGVTSAHTPPVQSSSVSPEDPFERNGRSTSGRSTSEGPRPLPQWKVKTQH  
EYIASLTQSEIKKKGLVKLEKQPGNRYFKRKLSDIILHKGQSGKPEELRLLKNFIHFL  
YGILDPDPWKRWTAYQVISHPF FTGAMMRENVDPADIKDQNHANRLLNMYWEAPSDPTIY  
QRKLRVQKTREKQQAARRGYNRSYSRSRSESPPNQDGMPTVRNALSKNNTSTDQTSTVT  
DHIDEAINAVARPMRQGSYQGSYQECTHMSSSMSQFGIDQGIQLLRYGSSFSGGPQSFSE  
AGNCIALPESFNEADFALALRRPGVVMGDSVTTATTSTTSISSGNNRSNYQGNIQISQ  
VGSFSGSHRVLYSGAQQRVVG

>comp15041\_c0\_seq1; 1078 1 3918 LEN=4038; translated  
RGDRKNSISKSEWIPEKGIHSPPIVHNMKTTGEEGHTSCYDEL FQKWKIEVLSINENAA  
VAEETEKTNSDLQEQESRSFFFECLTVKYEVEVLAKLIRDLSPAFTSTNLPTRLRGMVVLFGA  
LEGCRDKNISNSCLALLGDFLTLQCGPIVDDEYEEDYDSMIRDISINCLSVLVGTPTTMM  
VSDGKEFTEALERRVNLAKKGVLELRCVAPDDMYIEDQADTENDNSYKDIRGGLSRLPR  
SKRSLCFALLDSAVLGTSKVSKPSSLLIRQQMHQQQSESFNSVQSHLVQFADF TARC  
IHGESDPRCLLQLLQLLHHTQLTFCDWFRDNNNTYNPTLVFP HEDYFDAVAPYYP  
IQFTPPPNNVHGITREGLHSALISVLSFTEMDEPARRYRKPTMLGC SLNLFLEQLLPVQ  
SNEEKSSPLEKLESLECI S RLLFPTRNENKQKQTDGMKSECLNLSLGDVENLSTALIG  
SHDEASVAVSHGTGDLCDQNKVLAESCRNLA SRVARELENPQKDESNGLWLR FVSEPL  
DREMOKKLKLPAYARTSIAYEASLATSGGPRTLRI CLAKGLDALLGYLREHIKTSDDNT  
LAAIRGVAAAFISSQVAVSKSRNEGVELTPHLPQPF AEETCDLLLTIVESKVT  
PHSRALKIAAASCLECLFRSSPQKDLDLDELLKRICNFKLGLLETTLIRRQNDASGDDYDF  
VDYQFVSSQTIGRIVGVSSTECDDKAPNCTISK SILSAQMVQDCLQNEIFPKL  
KAAAFDEADGYNGERYDRALALSTACSS



STRASSVIGSHLETLLHGLKHSTSSRSVQECLAPLSYILRSCVGDVINSFHENDVDE  
ILDVLCDDVINSASAQIRDSISQVALSPTTTTNEIMKSKIESVIQIERALLPAYRSLVPR  
ERLKKLLKAI SDKFPPLSKADEGVLLVRLPILSTALEGAESSLLEEVVSEININDGPPVS  
QLLQDLTEYVLSDDHISNSARNAGASCVHSLKSGFNRLDCPTEPLLVDVNKRILSPSI  
SLIEMKNCLNYLSLLGSASALRGASSSSTADTIASFLSKISCEGFSRVPFSSGSEDEIFE  
LSKFFFEERYSQTAIRLVSSSAHGAIMLEDGMKPLMIQRLTHNI IKYIKKLSDRMNDPVKS  
TSPSETGLLLVVCNVVCACDPKFDQATTRL LAAFLVEGLTSDLFQPSQLGGKMPAEAK  
NSRIQVISALLKFLCICPTAFDAYVLEIVSGLLRSYAISDPSEVGCCKLISLQTLQAVSR  
LDESKESILAVKPAVIALLSAMSQKNGLLRSAAVDVRNAWCLAA

>comp15041\_c0\_seq2; 999 1 4001 LEN=4121; translated  
RGRKNSISKSEWIPEKGIHSPPIVHNMKTTGEEGHTSCYDEL FQKWKIEVLSINENAA  
VAEETEKTNSDLQOESRSFFECTLVKYEVLAKLIRDLSPAFTSTNLPTRLRGMVVLFGA  
LEGCRDKNISNSCLALLGDFLTLQCGPIVDDEYEEDYDSMIRDISINCLSVLVGTPTTTM  
VSDGKEFTEALERRVNLAKKGVELRCVAPDDMYIEDQADTENDNSYKDIRGGLSRLPR  
SKRSLCFALLDSAVLGTSKVSKPSSLLIRQMQHQQSESFNSVQSHLVQFADFTARCIGH  
ESDPRCLLQLLQLLHHTQLTFCDWFRDNTYNPTLVFPHEHYFDVAVAPYPIQFTPPPNN  
VHGITREGLHSALISVLSFTMDEPARRYRKPTMLGCSLNLFLQQLLPVQSNEEKSSPLE  
KLESLEICISRLFPTRNQNENKQKQTDGMKSECLNLSLGDVENLSTALIGSHDEASVAVSH  
GTGDLCDQNKVLAESCRNLASRVARELENPQKDESNGLWLRVSEPLDREMOKLKLTPAY  
ARTSIAYEASLATSGGPRTLRI CLAKGLDALLGYLREHIKTSDDNTLAAIRGVAAAFISS  
QVAVSKSRNEGVELTPHLPQFAEETCDLLLTIVESKVTPHSRALKIAAASCLECLFRSS  
PQKDLDELLEKRICNFKGLLETTLIRRQNDASGDDYDFVDYQFVSSQTI GRIVGVSST  
ECDDKAPNCTISKSILSAQMVDCLQNEIFPKLKAADFDEADGYNGERYDRLALSTACSS  
STRASSVIGSHLETLLHGLKHSTSSRSVQECLAPLSYILRSCVGDVINSFHENDVDE  
ILDVLCDDVINSASAQIRDSISQVALSPTTTTNEIMKSKVRPLTETCSSKTFSLSHLDNL  
NIXSPTQIESVIQIERALLPAYRSLVPRERLKKLLKAI SDKFPPLSKADEGVLLVRLPIL  
STALEGAESSLLEEVVSEININDGPPVSQQLQDLTEYVLSDDHISNSARNAGASCVHSL  
KSGFNRLDCPTEPLLVDVNKRILSPSISLIEMKNCLNYLSLLGSASALRGASSSSTADT  
IASFLSKISCEGFSRVPFSSGSEDEIFELSKFFFEERYSQTAIRLVSSSAHGAIMLEDGMK  
PLMIQRLTHNI IKYIKKLSDRMNDPVKSTSPSETGLLLVVCNVVCACDPKFDQATTRL  
AAFLVEGLTSDLFQPSQLGGKMPAEAKNSRIQVISALLKFLCICPTAFDAYVLEIVSGL  
LRSYAISDPSEVGCCKLISLQTLQAVSR LDESKESILAVKPAVIALLSAMSQKNGLLRS  
AAVDVRNAWCLAA

>comp15042\_c0\_seq1; 511 153 1610 LEN=2471; translated  
MKATAAAAGDDHVLPAIAVSSVKEADSALTEELLKLSYKDRKAIDEEIHGVYNVAPEET  
AELVQTSIDLAAELSKIQTKDAFVKSQTLFPNDNYVNTPDFRLRFLRCDLFDARKAAFR  
IVVYLDLDFDELDFDEVLRRLIRLSDLSREEIKILRLGFIYQLLPYRDRSGRPIFVNVGAMG  
FAYDFKMRARIATYILFVAGNDVESQRKGVVMVAWPMGDFSKTNMPFTKENRLLKAMIS  
SSALRIAALHVCFPNTLYFRLLIRSFVVLVLYGPRVRYKFHDGTMERRYSVHGYGIPTM  
IPITDSGNIKTHLYQWIKVRKFLSEDTTNSDGEDSIIILLPNSNDVLFRRSGTTTSAHPG  
NAFFRGLIEMKHDEFKSGSLSTQAVLAEDIVKEIEQLNGSFLQWDSRGYWTMMKSRKIL  
FKVEVAIRDFKGRATTSSNRQSVQSSSTYSFQRQDGSVAKRRKKSQTTTSDSGSMETELIG  
CGFVC

>comp15043\_c1\_seq1; 620 1 2075 LEN=2337; translated  
XQLYDRENHLLIIVTNQGGIQGAHTGKKATLLKSLIDWLES LVERPLVVVSSTKSLKKYK  
ERSFHKPTPKLWTKVLVPYFGKKSARFDRSASFVGD SADEDDAQGGVDKFFASSVGLGA  
FYTPPEEYFGASHRDLREKRAQLGGRDEGVVPE TPASALEARKALLGGYLNP IEGNEQREQ  
NKKPILLILTGIQSGKSTFCRRVLFGRNMSDNESGDEKNGVWVLSQDTINNGKPGKRE  
KVEEQAREALRKGFVLLDRMHLDAEERGTMINNVVLGHEDLKS RVRIHSVVLNPSRDVV  
ARRVKNR TNHPGKVEGDAGVRIALGSMGR LAMPTYTEASEEGKGFELISVASSEHATVQ  
LALRYHYTAGGTGESKSRFSGFQSAERVPLPISSPNSNIPSI PSLSLGTMNGRRCTET  
VQLMLASGFRSIDTAPTYKNEDKVG EALRGSGLSDDVFVIAKVPKRATDAEQVREEFEKT  
LRELDGRSVDLLLLLHWP SDVIAQNTLGEVWGCMEGFVRDKRCKALGVCNFNEGALLKLLR  
CCTIPPVLNQVERHPLLPQFSLLEV CARHNVLVQAHTPLGGAKNSGELL SHATVERVAKE  
TGLAPAQVLVRWNLQQGVLVVARCSQEGHARELLACTTNEQHQTIPELTPAQMQALDGLT  
NDKKKTKRFVAPPFMMFGSKAVYCWGQKPSW

>comp15044\_c1\_seq1; 421 104 1954 LEN=1954; translated  
MASSLGERISNGQLDDYTI EYYDYDYDYEQDGE EWSSSAIEIQLGGETEAPDDVTVSSR  
QQRQINLCFIKVGPDICSP TMAPSMAPSLSMAPSFSSAPGDPRPSVPSPI SRVPTRTPT  
INPTSNTTARPNRTPPPSPKVPDPRTEDPTPASTRAPTNPPTPRRTPSPTEESTSWGKG

KGKYSKGGGGYGYYSKGGKGNKSKGGKGNKGDGKNSHVSQEP L SDDGCRTKTGKT  
GKVGKTHKSGGQERRLCESENEPETENNGDNDGSGDPDEKPKSVPWEERPRDRAVIDV  
IIQRQIDNVCTPSTEPSIAPSTSRPPSMVPSQMPSPSLTPSLSGAPTNSASPSVSAEP  
SGQPSLSFTPSAAPSVSYPSPVSMSPTRSSSEPTATPSLSGLPTITSSPSHSDRPSDVP  
SAAPTSTAPSLSTNPSHEPTVSDSPTTSQSPSTSPQMTSSPFPSQRPTFSYEPSKSEIP  
SGRPSSSMSPMSKDP SNVPSVTSAPSTSTNPSKVPSPD RDRSE SPTDAPQRPSAPFPTQ  
RPTLSQKPSQSAIP SARPSSSSSPSMSSSPSNPSESSAPSI STNPTMSALPSARPSSSS  
SPSISKGPSNEPTASQA

>comp15044\_c1\_seq2; 296 1 1582 LEN=1656; translated  
XDAKPNPSTLETMLRDRGKTRHRGRGLLDRGRRTL VVALAWLCLLARSVPALSRESQSS  
GAGADDRAGPRSAGNSTGTATEARELLEEKRGLLAGPSADDHSLFSDHSCTCHPPASPR  
HGDDRPPAVCTGSHEGGAGSDGPCLARIFYLIGIHNER TLEDALYLFRAIRHPRNTILVH  
IDAKFGLGPYHGSPLQKEIEACPCGSFVEVDSVYDCEWGGWSMNLPTLWAMEKAVREHAG  
DWDVLVNLSGDSL PVYSQDR IARLFGGPLRGTFNVT SIACETGLVPTPILD FPKKWHKRS  
HYSHHPPTNLEYVDDTGTIHHDTNVDIYFGSQWVSLTPGFCGFLVGLARPDSLPSRFRD  
WLVDTEKLMADETFFTSMLMRYFPETVPR LGDDGIFLDADPGLSMYAIRYERMD EHVPTS  
KGYYPTEQRYEVPASTGIGKPRPWGPYFLGT YDLN NIRVSGALYVRKVARAIDPNMYTIL  
PVDRPDQIPPI SWPAEVEIGPVPDWEKTKAELIDKAKKKRAEKAKKH

>comp15044\_c1\_seq3; 1338 1 2921 LEN=3116; translated  
XXXXXXXXKANKGTTKTKNNENETPKPEPKVGKKIGKRDAKNTGDRRGDVERNDGNRKGK  
VERNDINNDNDRDAELVVRNLQSDSVAAAASPSAFAPPAEASKIILLPDDL DVEDDEDE  
DDYYDEEDNDYED EDEDEDEDDYYEDDYDYDYDMTDEKRDGQDEFERYNQRLKSYSFVN  
VQTVEEDDDSGDEYTYEEETIEVTMGDTTFGGDDNDMDSTAVPPPLPAYRANTTTPKA  
SMPGASTTSASMNTAPAGKPIAVEVPASPIARASGNPVTASQFYGTESRHKTNESNFSQK  
EESPSVVDCLSPSQQRARSANAAGLSELSKQLRILQAKNESQSVDIHRLERQLRILADLQ  
GISVANLRKALEDACASEAFGELQNRVAKLKHELEAATLAKKAELRKDAMAPHIANLELR  
VGELEEVEEKQTREIRKLYDDLREERARSMRLESEQEPLKQALKDMILKCQSETARAKKL  
EEGFHKQVHDMRNLQSKMQEAGAYATKVPMEMATEYEHMVQLLKKKDEELKDARAKLHA  
EEIKRAKLLKDAEERARQAETVLKVEKDKFAITVKELEDADGQSGRLAQFRARFAVQDE  
RIVDMGQQLDSLYTGFTLLKEEIDSERGRHEAMMSNLNDADAEIARQTNKEQEKTNNV  
RDNRQGGLSHASPFEDESVPFRINTSPGVEYQGHADVAMAPVSPATPVTAREYASPYVH  
PHIGPAPRSEASEYNYADETPTTYATALPYNPSPTRTPSTWDL LPPNGRSPSGRRDRSRE  
ARAASHNDSPLRSEAMDQFERDRGDVDSL YPMISGTLIVESNTMLRRWPKHCKIYMRG  
EGYQWEVGPKRSYPLEFGVSKVEFHPNHPLSFVVYLDPSSECAPVIRAAAESEREYHSMW  
AALYKATSGVEYQGGQSSDNPSPLCPPSVSDCGRSSLYPTLPQASSGQVVQLGAEDQEAA  
DLQRVLELSKHET

>comp15044\_c1\_seq4; 643 1 2222 LEN=2222; translated  
XXXXXXXXKANKGTTKTKNNENETPKPEPKVGKKIGKRDAKNTGDRRGDVERNDGNRKGK  
VERNDINNDNDRDAELVVRNLQSDSVAAAASPSAFAPPAEASKIILLPDDL DVEDDEDE  
DDYYDEEDNDYED EDEDEDEDDYYEDDYDYDYEQDGEWSSSAIEIQLGGETEAPDDVT  
VSSRQQRQINLCFIKVGPDICSP TMAPSMAPSLSMAPSFSSAPGDPRPSVPSPI SRVPT  
RTPTINPTSNPTTARPNRTPPPSPKVPDPRTEDPTPASTRAPTNP TPRRTPSPTEESTS  
WGKGYKYSKGGGGYGYYSKGGKGNKSKGGKGNKGDGKNSHVSQEP L SDDGCRTK  
TGKTGKVGKTHKSGGQERRLCESENEPETENNGDNDGSGDPDEKPKSVPWEERPRDRA  
VIDV IQRQIDNVCTPSTEPSIAPSTSRPPSMVPSQMPSPSLTPSLSGAPTNSASPSV  
SAEP SGQPSLSFTPSAAPSVSYPSPVSMSPTRSSSEPTATPSLSGLPTITSSPSHSDRPSD  
VPSGSAAPTSTAPSLSTNPSHEPTVSDSPTTSQSPSTSPQMTSSPFPSQRPTFSYEPSK  
SEIPSGRPSSSMSPMSKDP SNVPSVTSAPSTSTNPSKVPSPD RDRSE SPTDAPQRPSAP  
FPTQRPTLSQKPSQSAIP SARPSSSSSPSMSSSPSNPSESSAPSI STNPTMSALPSARP  
SSSSSPSISKGPSNEPTASQA

>comp15044\_c1\_seq5; 1116 104 2653 LEN=2848; translated  
MASSLGERISNGQLDDYTI EYYDYDYDYDMTDEKRDGQDEFERYNQRLKSYSFVNVQTV  
EEDDDSGDEYTYEEETIEVTMGDTTFGGDDNDMDSTAVPPPLPAYRANTTTPKASMPG  
ASTTSASMNTAPAGKPIAVEVPASPIARASGNPVTASQFYGTESRHKTNESNFSQKEESP  
SVVDCLSPSQQRARSANAAGLSELSKQLRILQAKNESQSVDIHRLERQLRILADLQGISV  
ANLRKALEDACASEAFGELQNRVAKLKHELEAATLAKKAELRKDAMAPHIANLELRV  
GEL  
EEVEEKQTREIRKLYDDLREERARSMRLESEQEPLKQALKDMILKCQSETARAKKLEEGF  
HKQVHDMRNLQSKMQEAGAYATKVPMEMATEYEHMVQLLKKKDEELKDARAKLHAE EIK  
RAKLLKDAEERARQAETVLKVEKDKFAITVKELEDADGQSGRLAQFRARFAVQDERIVD  
MGQQLDSLYTGFTLLKEEIDSERGRHEAMMSNLNDADAEIARQTNKEQEKTNNV  
PNRDN

QGGLSHASPSFEDESVPFRINTSPGVEYQGHADVAMAPVSPATPVTAREYASPYVHPHIG  
PAPRSEASEYNYADETPPTYATALPYNPSPTRTPSTWDLNPNRSPSGRRDRSREARAA  
SHNDSPLRSEAMDQFERDRGDVDLSLYPMISGTLIVESENTMLRRWPKHCKIYMRGEGYQ  
WEVGPKRSYPLEFGVSKVEFHPNHPLSFVVYLDPSSECAPVIRAAAESEREYHSWMAALY  
KATSGVEYQGGQSSDNPSPLCPPSVSDCGRSSLYPTLPQASSGQVVQLGAEDQEAADLQR  
VLELSKHET

>comp15044\_c1\_seq6; 255 1 1278 LEN=1423; translated  
XDTRLDADAILQVEHIIVLIVRHKPRVTEVLDTRDNKGTKEERNKGSQARNENARPP  
PPAPSNRPPVSVGGTRTTKSNLRRDSSGRAFLAGTTAFQRAPPELLQATGNDNDNDTDE  
YEYDQSLDYDYDYDYGEPGSGPALTAVVSSGCLGRAIAHHLSGDLGVRVIGADVRPPGE  
EDLPLLGGFVELPSGDPWGDASGKTDPGAPRPASLPDLTVALEEGLRGLLPEGLDAL  
VCASGAWEGDPSGPEDALSQALVAERMLGANLYPVLAAAGSVAGSFFASGGLFVALGATAA  
LGGTPGMLGYGASKAAVHHALTTLGESTGRAVTGRSKRRATRKMRREKEHLKDLTVLGV  
PSTIDTPANREAMPDQDASEWTKPGDLAKEIGLWLAEPSPSRPHSGSLLKVRPSKNGNGAD  
FSVAR

>comp15044\_c1\_seq7; 322 603 1871 LEN=1871; translated  
MNHNDPQNPDATAIAMAATTTNEIRLESXSILAGHEHTVQNPNNHRGDVCRNKQINLCF  
IKVGPDDICSPMAPSMAPSLSMAPSFSSAPGDPSPVSPISRVPTRTPTINPTSNTT  
ARNRTPPPSPKPVDPRTEDPTPASTRAPTNPPTPRRTPSPTEESTSWGKGGYKSKGK  
GYYGYYSKGGKGNKSKGKGGKGNKGDGKNSHSVQEPSSDDGCRKTGKTGKVGKTHKS  
GGQERRLCESENEPETENNGDNDGSDPDEKPKSVPWEERPRDRAVIDVIIQRQIDNV  
CTPSTEPSIAPSTRPPSMVPSQMPSPSLTSPSLSGAPTNSASPSVSAEPSGQPSLSFT  
PSAAPSVSYPSPVSMSPTRSSSEPTATPSLSGLPTITSSPSHSDRPSDVPSGSAAPTSTA  
PSLX

>comp15045\_c0\_seq1; 222 1 751 LEN=1951; translated  
XSTVSTTGNSAHQWRDRKSLCHKIYQNNAAATMSLSQGGKTEKSFLTEKSTLWVTLVRLAL  
IMVPYFLSSTPFGLWLHDPSSLVLRPHQRLAQLEEARAIQTLASVPLNKFSSVYHAND  
SIRIPPLLLAMFSPILEVTTIPGIWLSILLLLIDFSIAYLLEQVGIQLLGLRSDIKTSSQ  
SQRPIHEEDIQQQLPESIRPPFSHIFPIYRDSKTSSSRMLSKEGSKSPIIEREPLISMRT  
LPLLSAQLYYW

>comp15045\_c0\_seq2; 222 1 751 LEN=1852; translated  
XSTVSTTGNSAHQWRDRKSLCHKIYQNNAAATMSLSQGGKTEKSFLTEKSTLWVTLVRLAL  
IMVPYFLSSTPFGLWLHDPSSLVLRPHQRLAQLEEARAIQTLASVPLNKFSSVYHAND  
SIRIPPLLLAMFSPILEVTTIPGIWLSILLLLIDFSIAYLLEQVGIQLLGLRSDIKTSSQ  
SQRPIHEEDIQQQLPESIRPPFSHIFPIYRDSKTSSSRMLSKEGSKSPIIEREPLISMRT  
LPLLSAQLYYW

>comp15046\_c0\_seq1; 385 462 2291 LEN=2623; translated  
MAIPFCRSRIFVLVGLLTSSFLEASWVDPDTPMNSRSTESLYKEDTRKYELVFSDEFEQD  
GRDMKDGNDPRWTAINKNDYTNAALHYYSNENAKTEDGLLKIKTETKVNSYRAFNEKTKK  
FYNDKKYIQSGMVQGWKFCFTGGIVEFRAKLPGSPRIGGLWPALWMLGNLARATYVGSS  
DYMWPYSYNKCDASNRLSQEISSCSRHHYGMEDYRGRGAPEIDVIESMQGDAEKLPTN  
ITRYPYQASYSYQVAPGIERDRPVLGLKPKQGHWYSGMEYNHNNLTRSELNPFYGVTLVHK  
LKSPTYQADALSANRGLNTSHYTNQHTYRVEWEPPAEDGSGGYIRWYTDVDFMYGISGSN  
LQTTGSEIPSEAMYLMLMNTAVASSWGFPMPCPDGCSCECYECGNPEACALPTGYCENFP  
ATFEIDYVRVQAVGEEKHTLGCSPKNRPTSLFIKGHQKRYMETGDTAPLQPVQNGGAPC  
RENNDCGSNANGYCSSRGFCVCQKQFTGPTCMAHNGFYINESVSEEEFSFGLNNLYMPTS  
FIAWIVGLFIFLLFSAYLAMRERVKSRHRRSREQPPHSPVNYQNSSDYALPPKQKVVTYC  
VVDGRLIDK

>comp15046\_c0\_seq2; 364 462 2359 LEN=2691; translated  
MAIPFCRSRIFVLVGLLTSSFLEASWVDPDTPMNSRSTESLYKEDTRKYELVFSDEFEQD  
GRDMKDGNDPRWTAINKNDYTNAALHYYSNENAKTEDGLLKIKTETKVNSYRAFNEKTKK  
FYNDKKYIQSGMVQGWKFCFTGGIVEFRAKLPGSPRIGGLWPALWMLGNLARATYVGSS  
DYMWPYSYNKCDASNRLSQEISSCSRHHYGMEDYRGRGAPEIDVIESMQGDAEKLPTN  
ITRYPYQASYSYQVAPGIERDRPVLGLKPKQGHWYSGMEYNHNNLTRSELNPFYGVTLVHK  
LKSPTYQADALSANRGLNTSHYTNQHTYRVEWEPPAEDGSGGYIRWYTDVDFMYGISGSN  
LQTTGSEIPSEAMYLMLMNTAVASSWGFPMPCPDGCSCECYECGNPEACALPTGYCENFP  
ATFEIDYVRVQAVGEEKHTLGCSPKNRPTSLFIKGHQKRYMETGDTAPLQPVQNGGAPC  
RENNDCGSNANGYCSSRGFCVCQKQFTGPTCMAHNGFYINESVSEEEFSFGCKSNRIILQ  
FASLQSLXNYSSSVNNLYMPTSFIAWIVGLFIFLLFSAYLAMRERVKSRHRRSREQPPH  
SPVNYQNSSDYALPPKQKVVTYCVVDGRLIDK

>comp15046\_c0\_seq3; 254 412 1608 LEN=1940; translated  
MEDYRGRGAPEIDVIESMQGDAEKLPTSTNITRTPYQSASYQVAPGIERDRPVLGLKPKQGH  
WYSGMEYNHNNLTRSELNPFYGVTLVHKLKSYTYQADALSANRGLNTSHYTNQHTYRVE  
WEPPAEDGSGGYIRWYTDVDFMYGISGSNLQTTGSEIPSEAMYLLMNTAVASSWGPFMP  
PDGCSCECYECGNPEACALPTGYCENFPATFEIDYVRFVQAVGEEKHTLGCSPKNRPTS  
LFIKGHQKRYMETGDTAPLQPVQNGGAPCRENNDCGSNANGYCSSRGFCVCQKQFTGPTC  
MAHNGFYINESVSEEEFSFGLNNLYMPTSFIAWIVGLFIFLLFSAYLAMRERVKSRHRRS  
REQPPHSPVNYQNSSDYALPPKQKVVTYCVVDGRLIDK

>comp15046\_c0\_seq4; 233 412 1676 LEN=2008; translated  
MEDYRGRGAPEIDVIESMQGDAEKLPTSTNITRTPYQSASYQVAPGIERDRPVLGLKPKQGH  
WYSGMEYNHNNLTRSELNPFYGVTLVHKLKSYTYQADALSANRGLNTSHYTNQHTYRVE  
WEPPAEDGSGGYIRWYTDVDFMYGISGSNLQTTGSEIPSEAMYLLMNTAVASSWGPFMP  
PDGCSCECYECGNPEACALPTGYCENFPATFEIDYVRFVQAVGEEKHTLGCSPKNRPTS  
LFIKGHQKRYMETGDTAPLQPVQNGGAPCRENNDCGSNANGYCSSRGFCVCQKQFTGPTC  
MAHNGFYINESVSEEEFSFGCKSNRIILQFASLQSLXNYSSSVVNNLYMPTSFIAWIVGL  
FIFLLFSAYLAMRERVKSRHRRSREQPPHSPVNYQNSSDYALPPKQKVVTYCVVDGRLID  
K

>comp15047\_c0\_seq1; 549 279 3113 LEN=3749; translated  
MDTAEPPVNDSDYALRFEDLTVDDDLPLLDRIVRYCRSGIALQRLVHVKMLAETAETVG  
TKATLSTLIPILGSLVTDQESVIRQHLSLQLLPVSLVSMVRNVGTGQKHSVADMLEDKTL  
PKIYDSEGYHTVTTVVIGQYLQALVMDVDVDRRSASDSLGLAFHVRDDVGSVIFPI  
LRLTRNKRKADQQREIQQITDES LAEELRITAAANLLAELGGAGENESIPRSLVQGM  
LPAVLALCRDPGFRVRAAAQALPRVLGGTTVEESKNKILPAFEILSKDEVYRVRKSTGE  
CLVDMRSMMILAKTNDASSINALRRQTLPIAESLLTDANKFVRHGMMQFLGPFPLASFY  
PFVYSALRITLPGTSESDGNSHSGIVAQFFPHASSMVSRLNSSAAATTSAPTPTLSSIGT  
KREFTQIQELQRALPVFVRVDRSSSVSLKAVVAHRRKDAPDAEDIRAVMCKLLDHFGLA  
RVNTNDNDTDAEMRVYCAYSYPAVLLLLGPDHWEGRLSDCFKTLNPSYSGSKNRNVGPSA  
PPLPVKRCLASSLHTIAHILGPEITAKDIMPIFRDHFLKDNDESVRLNMIRNFPTLVSL  
EPTIRIQYILLWCETIRGEEVLGAMKRSATNPLVLNWRQRDYVSRCLPDLIVMVDVAVFY  
NHLWPIKILLTDTVNLVREDAIWAIPLLLKAFVENVIDLDGGSSQKAKEVWSNGACQE  
VTKWLKETIPKVSTTNSKKGSSSGKAGNFSQRQLYCVCSAMALAIRLGDGLDDPDDPVV  
ELESKLTSTLQSRYSKILIEEHGYPYRKITKGERKHMLRLLAIDILPLALEFKDDRVTNVR  
LSLRKTLMLPSDLAKSSAYQEVLSLQEEVETWESFSGGIESCLPHDQPMHASKSIVTNP  
DSMTATTSNGTDPVTKGVKKGSKRDKKKGSNNERGDNGMAHI

>comp15048\_c0\_seq1; 1759 462 7142 LEN=7270; translated  
MPRFGFGSGGNSGISLNSPRNFFSSRSRGSDQARKEKESKSSGKARRRNFGLKSGIGKT  
EKSGIENKLSISRREHAKQLANLAYSDDPTSIAATTATSTSTSSQQHHHQQLNMFASFAQ  
VPPLVPQKSRKIVSRPRTASNKSQASSNSLSSEVDAFGSSDPFASFDAGFAAGDT  
SASAPSSAAGFPDGSREFSEMDFSDQMAGAVTPAKQSLQKKKQKPKASTPASTTNTL  
VSTEKTFFTDDETAFFSSNHTNSERTKSSQNSVSVAAARRRMRSHMQRAANGQGNHDT  
SSSASSVGSASFASQESHSPPLHTQFPFGSPMAQNRKNRVAAYSARNSSGSLGSGSNHN  
NDPHSSPFRDPFGGSAGSVGSSNANHSVSSPGVNLFDGSGEIGGGGFTFDFAGLDQSQV  
EREVDAMQDILGDGGFSIFVEKGSVVGSAAGSGHQSNSSFGQNSDFSGHQTDASDDSFV  
PQHWDSSPNTSRNASPVPLYHPQSGSKTGHHHHQGNHSSSFADGFHVDNYPTTPQREPL  
PHQPQSAQQRRMERRMQGADFTPSKGTNPLRNAVSEPPKSRVARSSLDFAKDAFDSST  
TNWKESDPWEDDPFASDGGGRISELFSGRGSNDSFSGPTARRLYSETQSNVQDYHSGT  
AAAANSLLDVMSPTSPSSKAGNNEHMQASAFSDTKSDVGFSGNRFSFEASSPSFFELPPP  
EEDAGNQSESDQDDMDQDDLAHEFARDIVRKTISPAAARSQQSSQSRNRNYFGGDHID  
ENDREQNSEYPSQINNTQDFNRANTPKETTEPTKRYGNFRSRYESQSKSRLEASESASI  
EATKASTSVPKWKQQAALRNQEELPIEEKKEEERAHPVNREQTQPRRISLKRWEA  
KTRPPPEKQIPRASPKAIERSDHTRRSISMMDNSFEMLTDPDMVEQRRQERNKNKFDNLRK  
SMGVMEEEITVDDQTPKSDSGWRDGSTVANAALNRMHEASSPGKFQSSGTMADSKSDIG  
SSPSYVANVRLRKVSSPHAVPRSPMMDRSDVSTLSAENNYSPSPAYQSPVVEAPPERKL  
TYRERRERELKAHREKKAEEAAEAANQKPVKMTYRERREMELELNQREQEKAQAQSPV  
PDKQKERKLTYRERREMELEKQREQEETNLQSTSQSHDVASLIRKRI SANKSKGRASS  
HETSSRSLPNVQEQEEENNSRVPQHCPSPSRQHSMLNKNAPSELKVSTNEGIYEEED  
AAINAIDNHRSPQRNPAKMLENMLATRAPPPTKQSPKVSSSPSTSRNSAQMLENMLAA  
RAPPPIERPPSDEEPGSLSSSRKDSAKMLENMFARAPPKIQNAAKKPSQAKSPHVML  
ENMLSAKQNPKPDVQSKTAPGDEAPQGDVKSMLSGFLSKRAPPALQSPARKGDTESLQK  
DNVRSQTVESDDVPAPATPSTHKPSSGLPVIKDDPKFEKYFRMLKMGLPKEVVKHAMVRD

GLDPSILDLDPNKPAGVPLKEDPKFQKYFRMLKIGISVDQVKNCMERDGLQPSILDQDHN  
LPVIAIEKPKKETHRRARLHWKTIQTVVKNLWAEVQSEVGGIDIDEEEFRLDFQA  
DLKASKVMKSPSSAAKKGAAVRVIDSKRANNGGIIILARVKLTHDQMAEAVDQIDDDSTLT  
AEQIENVIEYLPKTEERDALEKYMLDGGQDAAQKFDGLCECEKFMVSMMTVKHAKRIRA  
LLFKLQFMTCMESIAKDAQMIDTSCDELVNSNRLRQLLGIILQFGNRLNTAGNSSKKGAG  
GFSLESLSKLSVAKAFDKKTTFLHYIVLIVQRNNELLLKFYDDIPTVMESTSVFWDQCQQ  
DLEEVENQLENVRRISLHEARSHHQASEISDDDSLGEMLTLEEEVISLRATQTGLFTLG  
AIKQVSVLREKIERTKAKCLRMNEYFGVKDTEPQEIFTAFADFTRDFQKAKEQVFSSTAHK  
KLREERKKARQKTPTKAKSLPSAGSKRAPPKPLIRASSHQPNMGKLFGDIKKRQSTSTDD  
NIQSSRADLLSSINGRKASGNTNTPSARTSLLSSIKERQSPSENNDPRAGLLNAIKERKS  
PENGKGGLEAISLSRSSSGSNEERKPSFENNRAGLLNSIKNRQPASEFKNSNTSTESAR  
EKMRQKAMRNQRSYSNPRINAAAEAI PSQASLKP ISTRSPRDTMRNRRRVADAVRARN  
NAQGTQ

>comp15049\_c0\_seq1; 564 548 2539 LEN=2855; translated  
MNTLRVAVFSLIVLLPKVDKYCECLGDYAVADSFMDLIDVCGFAQWEFLVAYICLAVTH  
WIDIFFYGFTHIISMTCCHHKLTANAKLKFASSERKCSLLMKCCIGCTGIFTGCGILGGDEA  
VRSDFANFSLLMANYLKANGRLNLTVSDIYVGLYMVALENRLKKIETKNRLRHDHGLVSK  
EHSKKSCLSMRSESTLNSDNNRAEEEGEKMAIEVLPDGKVFESVQQKPIDMDAQSDKVE  
RGGEKLTTEMLSKLNSKEVDLINEAARFMILAESAYTIAGYMLRYPFTGSCSFFSLLLRN  
CACFSTARSDHIEKDNGCRSHTIALKALSGLTDKDIVYAYYRDTVEEIPYMILLDHEWKS  
IVISIRGTMSLESAVTDFNVSPKCLTIEDLGESESDAVEKYCHTGMLSTAKWLYKDMKK  
HSKLEKAMADYEGYKLRIIGHSLGAGVASILSVLLRPKYPC LHCLAFSPPGCTMSENLA  
ETEKFTTSFVVNDIIARLNVENFEELRDRVLEMIYRIKIPKYQVTNLVKKYDDYSVEGI  
SRAIDEILYKKEEINDSQFKREVEEFLTNQSRIKAENRDQYIKLCPGSLVQLVRTDDVV  
NAHGEKLGQHVARWAKRSDFANIELSSKFFADHETSGVTDKLRLLAEESFALLPPFKPLR  
TQA

>comp15049\_c0\_seq2; 656 106 2439 LEN=2755; translated  
MPALKIFGQKLAMAGDDLRLVIMHSIWTVLQATFASGLFVATLESDELLENCYDEGTD  
EIVWAWLYATTSLILCFLTLCLAVPLFYFSGKGTPTDDSPRKP IKRLCYFDTIVMNTLRV  
AVFSLIVLLPKVDKYCECLGDYAVADSFMDLIDVCGFAQWEFLVAYICLAVTHWIDIFF  
YGFTIISMTCCHHKLTANAKLKFASSERKCSLLMKCCIGCTGIFTGCGILGGDEAVRSDFA  
NFSLLMANYLKANGRLNLTVSDIYVGLYMVALENRLKKIETKNRLRHDHGLVSKHEHSKKS  
SCLSMRSESTLNSDNNRAEEEGEKMAIEVLPDGKVFESVQQKPIDMDAQSDKVERGGEKL  
TTEMLSKLNSKEVDLINEAARFMILAESAYTIAGYMLRYPFTGSCSFFSLLLRNCACFST  
ARSDHIEKDNGCRSHTIALKALSGLTDKDIVYAYYRDTVEEIPYMILLDHEWKSIVISIR  
GTMSLESAVTDFNVSPKCLTIEDLGESESDAVEKYCHTGMLSTAKWLYKDMKKHSKLEK  
AMADYEGYKLRIIGHSLGAGVASILSVLLRPKYPC LHCLAFSPPGCTMSENLA IETEKFT  
TSFVVNDIIARLNVENFEELRDRVLEMIYRIKIPKYQVTNLVKKYDDYSVEGISRAIDE  
ILYKKEEINDSQFKREVEEFLTNQSRIKAENRDQYIKLCPGSLVQLVRTDDVVNAHGEK  
LGQHVARWAKRSDFANIELSSKFFADHETSGVTDKLRLLAEESFALLPPFKPLRTQA

>comp15050\_c0\_seq1; 925 1 3058 LEN=3154; translated  
XSNDFNSHMEKAIKMMSMANLLDHSNAMVQNHLANHYFWKWTPMAGTVEVTQGSKTVKGS  
QSIPLDEGDRVRIGMEFETYVDDSDADGDGGVTFQMKAEAWKGETTSGLKVWKKDYDRV  
IALAKGAYNSTQVTEIQAESLFFLARVYHVRGMEDAGKVYDRSCKLNPNLTPARFGLAQ  
VLVYQEYEPAAAHLQLVLTGTSNTATDALATLGLLKVRSGRKTQDGLAHLRKAIDLPLN  
PDLIFLEALALQONESNFPKALERYNKAVELMERQGSKIPFAIHTNIGVLSHETRKFDES  
LTSYVRALNALDEDGTRKRVATLENSGVEGGTIRHDDNNMFFGYVDSKLVENPAKDGDE  
EGSTVLKIIIESEGKEASDFSLKVGDDIRLGEFTTRVAGIEKEDKALVLKIDDAYKHEPL  
KKNEDDENKMEEDSKEEPPVEKVKDISVLVKRENSRMEDPHAISIAFNLARLHETSGRNL  
AAIELHKA I LKRNPAYVNSYLR LACIAIDCGALNECAGWLKIAAEIAPGNPEVLTIGNL  
HLSLDCDWQPAQQIFDGLLGKKIPNVE SYALLSMGNIYFANLDIPKRYASYLYGAGDYKR  
ILTKDNANAYAANGLGTVIAEKAE LFKAKEVFN RVREVTGDTISDTHLNLAHIYLAQPKH  
PEALQMYQSYLKRTEGDTTPIITSKSR LDDKVDVLHYIAFAYFDWARQTELFNNAKAPAD  
ERYKKAMEHIELALIDNTSESKNGLTYNLCMTKLQAANCVLQKLRNIRRTAQEVEEAL  
NGLQHSLETVETILKNKKEGAKVLISTSILNDFITHCKSNIESAKSHLEDERKREEEANE  
IRELQRMAAESKREEQKLQKELKMQEETKKQEERDRRAREKMRKLEDLRSGWEHEQAIK  
AAVEKRNQNKAPPAP EHTENINNLELEEDDAK PASAGLFEDSSDDEEEEPK DENEENKE  
IAADTTQQDLFGDSSDEDSDEELKPSSGTRKGSVDKEEDEDQEQPSSKKQKTEEVEDSD

>comp15051\_c0\_seq1; 537 108 1364 LEN=1859; translated  
MLFKITSDGIGNNAYGRYVSPKSFHDPTARAFSAIEVKSITRQLRKL DANVVWKIEEELR

EVDKDCDGRVDADDLTNLLKRHQPTFTDAEIVEFSELYAGKAGASMSVTDFIETLDQVA  
SGDEEGFRRHPILDGNCSAEYIYRKSHDSYQEDLDIKLTHRKPETLSDRAAFQAVKVVR  
GIFDTATGWSNEKIVTQEKILNRVIFLETVAAVPGMVAAVTRHFRSLRRMERDGGMLHLF  
LEEANNERMHLLSFIKLKDPGMMFRGAVIFSQFGFGTAFFLAYMASPKTCHRFIGYIEEE  
ACHTYTTIVNAIERAPAGSELDAWKTEKAPAIARAYWKLGESGTVLDELVYAVRADEAEHR  
DVNHVCGDLQALDCGSKPTNPFNDPDTKVSDLLRKYVKDIMARNKPDGNSDKKLSF  
>comp15051\_c0\_seq2; 369 403 1586 LEN=2043; translated  
MTDKTLXINSFDFSVDADDLTNLLKRHQPTFTDAEIVEFSELYAGKAGASMSVTDFIET  
LDQVASGDEEGFRRHPILDGNCSAEYIYRKSHDSYQEDLDIKLTHRKPETLSDRAAFQA  
VKVVRGIFDTATGWSNEKIVTQEKILNRVIFLETVAAVPGMVAAVTRHFRSLRRMERDGG  
LMHLFLEEANNERMHLLSFIKLKDPGMMFRGAVIFSQFGFGTAFFLAYMASPKTCXEMIL  
PKLKSHKHQEILRSLWISLRFHSFEGHRFIGYIEEEACHTYTKIVNAIERAPAGSELDAW  
KTEKAPAIARAYWKLGESGTVLDELVYAVRADEAEHRDVNHVCGDLQALDCGSKPTNPFND  
PDTKVSDLLRKYVKDIMARNKPDGNSDKKLSF  
>comp15051\_c0\_seq3; 455 403 1493 LEN=1950; translated  
MTDKTLXINSFDFSVDADDLTNLLKRHQPTFTDAEIVEFSELYAGKAGASMSVTDFIET  
LDQVASGDEEGFRRHPILDGNCSAEYIYRKSHDSYQEDLDIKLTHRKPETLSDRAAFQA  
VKVVRGIFDTATGWSNEKIVTQEKILNRVIFLETVAAVPGMVAAVTRHFRSLRRMERDGG  
LMHLFLEEANNERMHLLSFIKLKDPGMMFRGAVIFSQFGFGTAFFLAYMASPKTCHRFIG  
YIEEEACHTYTTIVNAIERAPAGSELDAWKTEKAPAIARAYWKLGESGTVLDELVYAVRAD  
EAEHRDVNHVCGDLQALDCGSKPTNPFNDPDTKVSDLLRKYVKDIMARNKPDGNSDKKLSF  
>comp15051\_c0\_seq4; 451 108 1457 LEN=1914; translated  
MLFKITSDGIGNNAYGRYVSPKSFHDPTARAFSAIEVKSITRQLRKL DANVVWKIEEELR  
EVDKDCDGRVDADDLTNLLKRHQPTFTDAEIVEFSELYAGKAGASMSVTDFIETLDQVA  
SGDEEGFRRHPILDGNCSAEYIYRKSHDSYQEDLDIKLTHRKPETLSDRAAFQAVKVVR  
GIFDTATGWSNEKIVTQEKILNRVIFLETVAAVPGMVAAVTRHFRSLRRMERDGGMLHLF  
LEEANNERMHLLSFIKLKDPGMMFRGAVIFSQFGFGTAFFLAYMASPKTCXEMILPKLKS  
HKHQEILRSLWISLRFHSFEGHRFIGYIEEEACHTYTKIVNAIERAPAGSELDAWKTEKA  
PAIARAYWKLGESGTVLDELVYAVRADEAEHRDVNHVCGDLQALDCGSKPTNPFNDPDTKV  
SDLLRKYVKDIMARNKPDGNSDKKLSF  
>comp15051\_c0\_seq5; 455 403 1493 LEN=1988; translated  
MTDKTLXINSFDFSVDADDLTNLLKRHQPTFTDAEIVEFSELYAGKAGASMSVTDFIET  
LDQVASGDEEGFRRHPILDGNCSAEYIYRKSHDSYQEDLDIKLTHRKPETLSDRAAFQA  
VKVVRGIFDTATGWSNEKIVTQEKILNRVIFLETVAAVPGMVAAVTRHFRSLRRMERDGG  
LMHLFLEEANNERMHLLSFIKLKDPGMMFRGAVIFSQFGFGTAFFLAYMASPKTCHRFIG  
YIEEEACHTYTTIVNAIERAPAGSELDAWKTEKAPAIARAYWKLGESGTVLDELVYAVRAD  
EAEHRDVNHVCGDLQALDCGSKPTNPFNDPDTKVSDLLRKYVKDIMARNKPDGNSDKKLSF  
>comp15051\_c0\_seq6; 451 108 1457 LEN=1952; translated  
MLFKITSDGIGNNAYGRYVSPKSFHDPTARAFSAIEVKSITRQLRKL DANVVWKIEEELR  
EVDKDCDGRVDADDLTNLLKRHQPTFTDAEIVEFSELYAGKAGASMSVTDFIETLDQVA  
SGDEEGFRRHPILDGNCSAEYIYRKSHDSYQEDLDIKLTHRKPETLSDRAAFQAVKVVR  
GIFDTATGWSNEKIVTQEKILNRVIFLETVAAVPGMVAAVTRHFRSLRRMERDGGMLHLF  
LEEANNERMHLLSFIKLKDPGMMFRGAVIFSQFGFGTAFFLAYMASPKTCXEMILPKLKS  
HKHQEILRSLWISLRFHSFEGHRFIGYIEEEACHTYTKIVNAIERAPAGSELDAWKTEKA  
PAIARAYWKLGESGTVLDELVYAVRADEAEHRDVNHVCGDLQALDCGSKPTNPFNDPDTKV  
SDLLRKYVKDIMARNKPDGNSDKKLSF  
>comp15051\_c0\_seq7; 467 108 1471 LEN=1928; translated  
MLFKITSDGIGNNAYGRYVSPKSFHDPTARAFSAIEVKSITRQLRKL DANVVWKIEEELR  
EVDKDCDGRVDADDLTNLLKRHQPTFTDAEIVEFSELYAGKAGASMSVTDFIETLDQVA  
SGDEEGFRRHPILDGNCSAEYIYRKSHDSYQEDLDIKLTHRKPETLSDRAAFQAVKVVR  
GIFDTATGWSNEKIVTQEKILNRVIFLETVAAVPGMVAAVTRHFRSLRRMERDGGMLHLF  
LEEANNERMHLLSFIKLKDPGMMFRGAVIFSQFGFGTAFFLAYMASPKTCXEMIVPKLKS  
QFDPKTPGNLTFSLDLPFFCKAIDSLATXEEACHTYTTIVNAIERAPAGSELDAW  
KTEKAPAIARAYWKLGESGTVLDELVYAVRADEAEHRDVNHVCGDLQALDCGSKPTNPFND  
PDTKVSDLLRKYVKDIMARNKPDGNSDKKLSF  
>comp15051\_c0\_seq8; 385 403 1600 LEN=2095; translated  
MTDKTLXINSFDFSVDADDLTNLLKRHQPTFTDAEIVEFSELYAGKAGASMSVTDFIET  
LDQVASGDEEGFRRHPILDGNCSAEYIYRKSHDSYQEDLDIKLTHRKPETLSDRAAFQA

VKVVRGIFDTATGWSNEKIVTQEKILNRVIFLETVAAVPGMVAAVTRHFRSLRRMERDGG  
LMHLFLEEANNERMHLLSFIKLKDPGMMFRGAVIFSQFGFGTAFFLAYMASPKTCXEMIV  
PKLKSQFDPKTPGNLTFSLDLSPPFFCKAIDSLATXEEEACHTYTTIVNAIERAPAGS  
ELDAWKTEKAPAIARAYWKLGESGTVLDLVYAVRADEAEHRDVNHVCGDLQALDCGSKPT  
NPFNDPDTKVSDLLRKYVKDIMARNKPDGNSDKKLSAF

>comp15051\_c0\_seq9; 537 108 1364 LEN=1821; translated  
MLFKITSDGIGNNAYGRYVSPKSFHDPTARAFSAIEVKSITRQLRKL DANVVWKIEEELR  
EVDKDCDGRVDADDLTNLLKRHQPTFTDAEIVEFSELYAGKAGASMSVTDFIETLDQVA  
SGDEEGFRRHPILDGNCSAEYIYRKSHDSYQEDLDIKLTHRKPETLSDRAAFQAVKVVR  
GIFDTATGWSNEKIVTQEKILNRVIFLETVAAVPGMVAAVTRHFRSLRRMERDGGMLHLF  
LEEANNERMHLLSFIKLKDPGMMFRGAVIFSQFGFGTAFFLAYMASPKTCHRFIGYIEEE  
ACHTYTTIVNAIERAPAGSELDAWKTEKAPAIARAYWKLGESGTVLDLVYAVRADEAEHR  
DVNHVCGDLQALDCGSKPTNPFNDPDTKVSDLLRKYVKDIMARNKPDGNSDKKLSAF

>comp15051\_c0\_seq10; 467 108 1471 LEN=1966; translated  
MLFKITSDGIGNNAYGRYVSPKSFHDPTARAFSAIEVKSITRQLRKL DANVVWKIEEELR  
EVDKDCDGRVDADDLTNLLKRHQPTFTDAEIVEFSELYAGKAGASMSVTDFIETLDQVA  
SGDEEGFRRHPILDGNCSAEYIYRKSHDSYQEDLDIKLTHRKPETLSDRAAFQAVKVVR  
GIFDTATGWSNEKIVTQEKILNRVIFLETVAAVPGMVAAVTRHFRSLRRMERDGGMLHLF  
LEEANNERMHLLSFIKLKDPGMMFRGAVIFSQFGFGTAFFLAYMASPKTCXEMIVPKLKS  
QFDPKTPGNLTFSLDLSPPFFCKAIDSLATXEEEACHTYTTIVNAIERAPAGSELDAW  
KTEKAPAIARAYWKLGESGTVLDLVYAVRADEAEHRDVNHVCGDLQALDCGSKPTNPFND  
PDTKVSDLLRKYVKDIMARNKPDGNSDKKLSAF

>comp15051\_c0\_seq11; 369 403 1586 LEN=2081; translated  
MTDKTLXINSFDFSV DADDLTNLLKRHQPTFTDAEIVEFSELYAGKAGASMSVTDFIET  
LDQVASGDEEGFRRHPILDGNCSAEYIYRKSHDSYQEDLDIKLTHRKPETLSDRAAFQA  
VKVVRGIFDTATGWSNEKIVTQEKILNRVIFLETVAAVPGMVAAVTRHFRSLRRMERDGG  
LMHLFLEEANNERMHLLSFIKLKDPGMMFRGAVIFSQFGFGTAFFLAYMASPKTCXEMIL  
PKLKSHKHQEIILRSLWISLRFHSEFEGHRFIGYIEEEACHTYTKIVNAIERAPAGSELDAW  
KTEKAPAIARAYWKLGESGTVLDLVYAVRADEAEHRDVNHVCGDLQALDCGSKPTNPFND  
PDTKVSDLLRKYVKDIMARNKPDGNSDKKLSAF

>comp15051\_c0\_seq12; 385 403 1600 LEN=2057; translated  
MTDKTLXINSFDFSV DADDLTNLLKRHQPTFTDAEIVEFSELYAGKAGASMSVTDFIET  
LDQVASGDEEGFRRHPILDGNCSAEYIYRKSHDSYQEDLDIKLTHRKPETLSDRAAFQA  
VKVVRGIFDTATGWSNEKIVTQEKILNRVIFLETVAAVPGMVAAVTRHFRSLRRMERDGG  
LMHLFLEEANNERMHLLSFIKLKDPGMMFRGAVIFSQFGFGTAFFLAYMASPKTCXEMIV  
PKLKSQFDPKTPGNLTFSLDLSPPFFCKAIDSLATXEEEACHTYTTIVNAIERAPAGS  
ELDAWKTEKAPAIARAYWKLGESGTVLDLVYAVRADEAEHRDVNHVCGDLQALDCGSKPT  
NPFNDPDTKVSDLLRKYVKDIMARNKPDGNSDKKLSAF

>comp15052\_c0\_seq1; 847 306 2649 LEN=2916; translated  
MTGPRRSARVASRPAPEEATAPAPEPAKPKKQAPKEPPKPKKATATKAKPKAAPKPKKAAPE  
KKKAAASSSTKPVVVVEAASNEAAFKTRANKIAKAVGDRATVEINKEKVRRLVPGIEPPE  
RLLCEVRLLSIAERCSVSRRMGHDTHAVDRVLFKHE TLNGAWFFGVLR ISSAKKKTKN  
NLHHSPEEXNFVVTVEGTDEPIVSLLGMKRPFPAKALDMDEINAKVLEALXVEGGVVRGQ  
KTPRRGPGRKAPAATARSALCWNDGVSTAPFGRLATGGEGSRRHSFGASRRRAAGLEPPE  
TEGRTE TRTKRNERKRK GSRQGTCDANPGAKGWNRIESNR IKRRPERRCGTKTKNITNTP  
TITNTSTNTSPHKTHKPKRQYNTIQYKTKQNKMPSTPPKQKRKVLSWGCGTDDVSVNS  
SCASWHPDFPEIEHEHEDQPSFTFGAEAYKATEVSRSEEEAVSSTEGCSVISQEGIEVEA  
LEFAEGGAVLYKTHKHKHHSQKAFRHGETYWTVCGEKTYDLPRRLVLLILAFLLTM  
AASATAGFWVLATKEKDTGGLASSSAEAARAEGQAASEAVGGSSQNAASDFEFTFVEDED  
LDLEDPSDPLEETWSGAETETDPPREPAEATEAPVAAPTAVPTARTTTTAPVEAVPEE  
PEGLPWDNDEEPEGLPWTDEASLSVSECSGDASATKASFRFDDPRDGDWYWMRSADGN  
ADADADANAYDSWDYAETTEGDLVFASLEEGDYVIVSLVRDSLAPYDVILSRDF'TVPVC  
G

>comp15052\_c0\_seq2; 811 355 2468 LEN=2735; translated  
MTGPRRSARVASRPAPEEATAPAPEPAKPKKQAPKEPPKPKKATATKAKPKAAPKPKKAAPE  
KKKAAASSSTKPVVVVEAASNEAAFKTRANKIAKAVGDRATVEINKEKPGRGNFVVTVEG  
TDEPIVSLLGMKRPFPAKALDMDEINAKVLEALXVEGGVVRGQKTPRRGPGRKAPAATAR  
SALCWNDGVSTAPFGRLATGGEGSRRHSFGASRRRAAGLEPPETEGRTE TRTKRNERKRK  
GSRQGTCDANPGAKGWNRIESNR IKRRPERRCGTKTKNITNTP TITNTSTNTSPHKTHK  
PKRQYNTIQYKTKQNKMPSTPPKQKRKVLSWGCGTDDVSVNSSCASWHPDFPEIEHEHE

DQPSETFGAEAYKATEVSRSEEEAVSSTEGCSVISQEGIEVEALEFAEGGAVLYKTHKHK  
HKHHSQGKAFRHGETYWTVGCGEKTYDLPRRLVLLILAFLLTMAASATAGFWVLATKEKD  
TGGLASSSAEAAAEAGQAASEAVGGSSQNAASDFEFTFVEDEDLDLEDPSEDPLEETWSG  
AETETDPPREPAEATEAPVAAPTAVPTARTTTTAPVEAVPEEPEGLPWDDNDEEPEGLP  
WTDEASLSVVSECSGDASATKASFRFDDPRDGDWYWMRSADGNADADADANAYDSWDY  
AETTEGDLVFASLEEGDYVISLVRDSLAPYDVILSRDFTVPVCG  
>comp15052\_c0\_seq3; 823 306 2431 LEN=2698; translated  
MTGPRRSARVASRPAPEEATAPAPEPAKAKKQAPKEPPKATATKAKPKAAPKKAAPK  
KKAASSTKPVVVVEAASNEAAFKTRANKIAKAVGDRATVEINKEKPGRGNFVVTVEG  
TDEPIVSLGMRPFPALKALDMDEINAKVLEALXVEGGVVGQKTPRRGPGRKAPAATAR  
SALCWNDGVSTAPFGRLATGGEGSRRHSFGASRRRAAGLEPPETEGRTETRTKRNERKRK  
GSRQGTCDANPGAKGWNRIESNRKRRPERRCGTKTNKITNTPTITNTSTNTSPHPKTHK  
PKRQYNTIQYKTKQNKMPSTPPKQKRKVVLSWCGTDDVSVNSSCASWHPDFPEIEHEHE  
DQPSETFGAEAYKATEVSRSEEEAVSSTEGCSVISQEGIEVEALEFAEGGAVLYKTHKHK  
HKHHSQGKAFRHGETYWTVGCGEKTYDLPRRLVLLILAFLLTMAASATAGFWVLATKEKD  
TGGLASSSAEAAAEAGQAASEAVGGSSQNAASDFEFTFVEDEDLDLEDPSEDPLEETWSG  
AETETDPPREPAEATEAPVAAPTAVPTARTTTTAPVEAVPEEPEGLPWDDNDEEPEGLP  
WTDEASLSVVSECSGDASATKASFRFDDPRDGDWYWMRSADGNADADADANAYDSWDY  
SWDYAETTEGDLVFASLEEGDYVISLVRDSLAPYDVILSRDFTVPVCG  
>comp15052\_c0\_seq4; 811 306 2419 LEN=2686; translated  
MTGPRRSARVASRPAPEEATAPAPEPAKAKKQAPKEPPKATATKAKPKAAPKKAAPK  
KKAASSTKPVVVVEAASNEAAFKTRANKIAKAVGDRATVEINKEKPGRGNFVVTVEG  
TDEPIVSLGMRPFPALKALDMDEINAKVLEALXVEGGVVGQKTPRRGPGRKAPAATAR  
SALCWNDGVSTAPFGRLATGGEGSRRHSFGASRRRAAGLEPPETEGRTETRTKRNERKRK  
GSRQGTCDANPGAKGWNRIESNRKRRPERRCGTKTNKITNTPTITNTSTNTSPHPKTHK  
PKRQYNTIQYKTKQNKMPSTPPKQKRKVVLSWCGTDDVSVNSSCASWHPDFPEIEHEHE  
DQPSETFGAEAYKATEVSRSEEEAVSSTEGCSVISQEGIEVEALEFAEGGAVLYKTHKHK  
HKHHSQGKAFRHGETYWTVGCGEKTYDLPRRLVLLILAFLLTMAASATAGFWVLATKEKD  
TGGLASSSAEAAAEAGQAASEAVGGSSQNAASDFEFTFVEDEDLDLEDPSEDPLEETWSG  
AETETDPPREPAEATEAPVAAPTAVPTARTTTTAPVEAVPEEPEGLPWDDNDEEPEGLP  
WTDEASLSVVSECSGDASATKASFRFDDPRDGDWYWMRSADGNADADADANAYDSWDY  
AETTEGDLVFASLEEGDYVISLVRDSLAPYDVILSRDFTVPVCG  
>comp15052\_c0\_seq5; 859 355 2710 LEN=2977; translated  
MTGPRRSARVASRPAPEEATAPAPEPAKAKKQAPKEPPKATATKAKPKAAPKKAAPK  
KKAASSTKPVVVVEAASNEAAFKTRANKIAKAVGDRATVEINKEKVRRLVPGIEPPE  
RLLCEVRLLSIAERCSVSRMGHDTHAVDRVLFKHELTNGAWFFGVLRISSAKKTKTKN  
NLHHSPEEXNFVVTVEGTDEPIVSLGMRPFPALKALDMDEINAKVLEALXVEGGVVGQ  
KTPRRGPGRKAPAATARSALCWNDGVSTAPFGRLATGGEGSRRHSFGASRRRAAGLEPPE  
TEGRTETRTKRNERKRKGSRQGTCDANPGAKGWNRIESNRKRRPERRCGTKTNKITNTPT  
TITNTSTNTSPHPKTHKPKRQYNTIQYKTKQNKMPSTPPKQKRKVVLSWCGTDDVSVNS  
SCASWHPDFPEIEHEHEDQPSETFGAEAYKATEVSRSEEEAVSSTEGCSVISQEGIEVEA  
LEFAEGGAVLYKTHKHKHHSQGKAFRHGETYWTVGCGEKTYDLPRRLVLLILAFLLTMA  
AASATAGFWVLATKEKDTGGLASSSAEAAAEAGQAASEAVGGSSQNAASDFEFTFVEDED  
LDLEDPSEDPLEETWSGAETETDPPREPAEATEAPVAAPTAVPTARTTTTAPVEAVPEE  
PEGLPWDDNDEEPEGLPWWTDEASLSVVSECSGDASATKASFRFDDPRDGDWYWMRSADGN  
ADADGNADADANAYDSWDYAETTEGDLVFASLEEGDYVISLVRDSLAPYDVILSRDFT  
VPVCG  
>comp15052\_c0\_seq6; 823 355 2480 LEN=2747; translated  
MTGPRRSARVASRPAPEEATAPAPEPAKAKKQAPKEPPKATATKAKPKAAPKKAAPK  
KKAASSTKPVVVVEAASNEAAFKTRANKIAKAVGDRATVEINKEKPGRGNFVVTVEG  
TDEPIVSLGMRPFPALKALDMDEINAKVLEALXVEGGVVGQKTPRRGPGRKAPAATAR  
SALCWNDGVSTAPFGRLATGGEGSRRHSFGASRRRAAGLEPPETEGRTETRTKRNERKRK  
GSRQGTCDANPGAKGWNRIESNRKRRPERRCGTKTNKITNTPTITNTSTNTSPHPKTHK  
PKRQYNTIQYKTKQNKMPSTPPKQKRKVVLSWCGTDDVSVNSSCASWHPDFPEIEHEHE  
DQPSETFGAEAYKATEVSRSEEEAVSSTEGCSVISQEGIEVEALEFAEGGAVLYKTHKHK  
HKHHSQGKAFRHGETYWTVGCGEKTYDLPRRLVLLILAFLLTMAASATAGFWVLATKEKD  
TGGLASSSAEAAAEAGQAASEAVGGSSQNAASDFEFTFVEDEDLDLEDPSEDPLEETWSG  
AETETDPPREPAEATEAPVAAPTAVPTARTTTTAPVEAVPEEPEGLPWDDNDEEPEGLP  
WTDEASLSVVSECSGDASATKASFRFDDPRDGDWYWMRSADGNADADADANAYDSWDY  
SWDYAETTEGDLVFASLEEGDYVISLVRDSLAPYDVILSRDFTVPVCG



>comp15052\_c0\_seq7; 859 306 2661 LEN=2928; translated  
MTGPRRSARVASRPAPEEATAPAPEPAKAKKQAPKEPPKATATKAKPKAAPKKAAPKKA  
KKAASSTKPVVVEAASNEAAFKTRANKIAKAVGDRATVEINKEKVRRLVLPGIEPPE  
RLLCEVRLLSIAERCSVSRMRMGHDTHAVDRVLFKHEITLNGAWFFGVLRISAKKKT  
NLHHSPEEXNFVVTVEGTDEPIVSLGMRKPFPAKALDMDEINAKVLEALXVEGGV  
KTPRRGPRKAPAATARSALCWNVDGVTAPFGRLATGGEGSRRHSFGASRRRAAGLEP  
TEGRTETRTKRNERKRKGSRQGTCDANPGAKGWNRIESNRIRRRPERRCGTKTNKIT  
TITNTSTNTSPHKTHKPKRQYNTIQYKTKQNKMPSTPPKQKRKVLSWGCGTDDVSV  
SCASWHPDFPEIEHEHEDQPSETFGAEAYKATEVSRSEEEAVSSTEGCSVISQEGIE  
LEFAEGGAVLYKTHKHKHKHHSQKAFRHGETYWTVGCGEKTYDLPRRLVLLILAFLL  
AASATAGFVWLATKEKDTGGLASSAEAAAEQAASEAVGGSSQNAASDFEFTFVEDED  
LDLEDPSEDPLEETWSGAETETDPPREPAEATEAPVAAPTAVPTARTTTTAPVEAVPE  
PEGLPWDDNDEEPEGLPWTDEASLSVSECSGDASATKASFRFDDPRDGDWYWMRSAD  
ADADGNADADANAYDSWDYAETTEGDLVFAASLEEGDYVISLVRDSLAPYDVILSRDF  
VPVCG

>comp15052\_c0\_seq8; 847 355 2698 LEN=2965; translated  
MTGPRRSARVASRPAPEEATAPAPEPAKAKKQAPKEPPKATATKAKPKAAPKKAAPKKA  
KKAASSTKPVVVEAASNEAAFKTRANKIAKAVGDRATVEINKEKVRRLVLPGIEPPE  
RLLCEVRLLSIAERCSVSRMRMGHDTHAVDRVLFKHEITLNGAWFFGVLRISAKKKT  
NLHHSPEEXNFVVTVEGTDEPIVSLGMRKPFPAKALDMDEINAKVLEALXVEGGV  
KTPRRGPRKAPAATARSALCWNVDGVTAPFGRLATGGEGSRRHSFGASRRRAAGLEP  
TEGRTETRTKRNERKRKGSRQGTCDANPGAKGWNRIESNRIRRRPERRCGTKTNKIT  
TITNTSTNTSPHKTHKPKRQYNTIQYKTKQNKMPSTPPKQKRKVLSWGCGTDDVSV  
SCASWHPDFPEIEHEHEDQPSETFGAEAYKATEVSRSEEEAVSSTEGCSVISQEGIE  
LEFAEGGAVLYKTHKHKHKHHSQKAFRHGETYWTVGCGEKTYDLPRRLVLLILAFLL  
AASATAGFVWLATKEKDTGGLASSAEAAAEQAASEAVGGSSQNAASDFEFTFVEDED  
LDLEDPSEDPLEETWSGAETETDPPREPAEATEAPVAAPTAVPTARTTTTAPVEAVPE  
PEGLPWDDNDEEPEGLPWTDEASLSVSECSGDASATKASFRFDDPRDGDWYWMRSAD  
ADADADADANAYDSWDYAETTEGDLVFAASLEEGDYVISLVRDSLAPYDVILSRDF  
TVPVC

>comp15053\_c0\_seq1; 363 538 1803 LEN=2318; translated  
MGKDRVSYFYHPETPLHYGSPHMKPHRLKLAHHLILAYKLYTKMECYRCHPATPGEMA  
QFHSDEYVQFLSKITPDNLRTYASVLQKFNAGDTTDCPVFDGLYDFVQLYTGASLDGAV  
LNQQQADICINWSGGLHHAHAKKSESSGFCYINDIVLAILELLKVHARVLYVDIDVH  
EEAFYTTDRVMTLSLHKYGDFFPGTGHIQDVGAKGEGVGSVNAPLQAGITDETYLNDL  
PVFDKIMEVFQPGAVVLQCGADSLTGDRLGCFNLTTTHGHADAVKHVKSYPVTLVLGG  
YTIRNVARCWAYETSVLLEEPIDNNIPFNDYEEYAPDFELHLKPDSSMDNANKNLNSIR  
TELLQQLKDLQGAPSVQMQQVPPFRFTTSAAKNNGDDNDGEGKSRKRIKTHASELYD  
D

>comp15053\_c0\_seq2; 615 140 2545 LEN=2616; translated  
MPPKSRIKRSQSYLSSVMANRQQAQRQMAAATLLVFCFLLLFSAENGHAFTEPSSGR  
SSRLLNCGSPGLSFKDENDFVPSLRSLTPSSSLAMATTTSSSTRLSNAELDRKIVGLG  
RKGKTDEALRIFESIDRPNIRIINGAIDACARARPTLKKAFEILEKATSESSNYNIKPN  
VFTFGSLMNACNRARDAEKAIQTLRSMEKKYGVVNAVYSSAISACARSEPPKPDALK  
LLKEVVEEKKLPMSVVGFNAAISACAQASDWENAISSLTRMEEANSDDNSVSDSDSDND  
DNESKFLVDPDPVVTYGTVLAACERGGEWKILKNAESMQERGLPLDGLSVMTCCLHACA  
ELGLAYEALRYLDMMKSVKEVTPRTARYQRYGARKPLMGDPVAYRCAISACARGAWRE  
GIQLLQECKNVTGTPANTVAYTAAITGCEYAGWEKAEFFLLDKMRKEGVEPNELTMGAVI  
GACATAIAKKDRDHETWTENMPLPQKKAIQLLSIMKKDPKIVKPNIQVYNAAIRVCAE  
DTKRAFRLQDAKDSNIERTQFTYGSMTACERIGSVEKASKAFRLMKEDGKIPNEIY  
AAISCCRKAKEPKRALLLRKMISEELSPNAATINTVMLAQTDGKSSNSEKVLQVYKIM  
QSEYVGARGKPNRYTYNINLYFADMKEPASAEAFDKMRKEGFKPDVDLFTKTVSAYER  
KNQPLKALNLMERMQNDGYDFYGNKVFNEAFKKGVAVLNSVVGQTFAGSDEEKQIIS  
RTDEYDIENDPYDINGTSEE

>comp15053\_c0\_seq3; 342 870 2000 LEN=2515; translated  
MECYRCHPATPGEMAQFHSDEYVQFLSKITPDNLRTYASVLQKFNAGDTTDCPVFDGLY  
FVQLYTGASLDGAVQLNQQQADICINWSGGLHHAHAKKSESSGFCYINDIVLAILELLKV  
RVLYVDIDVHGDGVEEAFYTTDRVMTLSLHKYGDFFPGTGHIQDVGAKGEGVGSVNA  
PLQAGITDETYLNDLFI PVFDKIMEVFQPGAVVLQCGADSLTGDRLGCFNLTTTHGH  
ADAVKHVKSYPVTLVLGGGGYTIRNVARCWAYETSVLLEEPIDNNIPFNDYEEYAPDF  
ELHLK

DSSMDNANKNLNSIRTELLQQLKDLQGAPSVQMQQVPPPFRTTSAAKNNGDDNDGEGKSR  
KRIKKTHASELYDGVD

>comp15054\_c0\_seq1; 599 353 3021 LEN=3021; translated  
MGIKGLHKALSFCVTKDNLNRNHRNSIIAVDTSSWMHKS SVYSASEKFVEATNNGRVDHGCV  
RVSARYIITRCKELIEAFGIKAVYLVMDGKRIPLKAEESQDRDQKRLQNLAEARRLKRAG  
QRWKAEDKYKSCIRIKDNFTEAVIREVEKAFSNGRVFFVNSPHEADSQLTRLVLDGVAD  
AVITEDSDVLVYSAAAHKPPFILFKLDRRTGACDSINMKWLISPSSQETARAVTSKNTLE  
FILRRFASKQVNTKGLGVRLFVQGCILSGCDYRKNIEGIGTTNAFKLVSENAFRGASVRF  
RKILESLPKKVRQKIEINEHEEILAKSEAIFFYHPVLHKDCQIKPLLEPRISPEESSVGK  
CHSDHYPCMSRFKGDWSFLGNIDSSSRVIPNSYDANNCNTVQKSMAPSILSKPNSMSST  
LPTKNPDFSHSSASNRSQTLQNPYKFKICDNNRHKPLGERNINIRFNTEKKLETQKNMG  
TGSITKFLVKPDPYAKRTFSSTTVTKRDTQCSRLRNF SVAGSSFQLSRRSNASQKPPGQ  
SFFEKRATKKTHTTSSKTTNSRIEQRRFDYSPIESNGKKEISFSYPSFNLPSPECESI  
RTKRASSDIKRDGLKNLDRNLQDFFDLTNSNSSDMDNSEIRTKIAETKMEATLCDDQAVS  
VVPNDTFEETEKEKESNAIGVKICSTFTSEEPNDNERDHTKNAGKATSKYFSKRRSDPRRV  
TLDSSIRRPCDGLPSVACTTPVRPQSIDDEMNL PATRKNELRDYEWALDECIDDPEEEVQ  
VAKPKSGFESGSFANKCKIRHPLPQENS NKSCSESKGSIRSFFKRQEIFANQLKRSIEPN  
KRSQPKRSKPNDFFSPDRYSKSKKSNNNSSHRFKQNPSTDILSKPNDFFS

>comp15054\_c0\_seq2; 645 353 3091 LEN=3306; translated  
MGIKGLHKALSFCVTKDNLNRNHRNSIIAVDTSSWMHKS SVYSASEKFVEATNNGRVDHGCV  
RVSARYIITRCKELIEAFGIKAVYLVMDGKRIPLKAEESQDRDQKRLQNLAEARRLKRAG  
QRWKAEDKYKSCIRIKDNFTEAVIREVEKAFSNGRVFFVNSPHEADSQLTRLVLDGVAD  
AVITEDSDVLVYSAAAHKPPFILFKLDRRTGACDSINMKWLISPSSQETARAVTSKNTLE  
FILRRFASKQVNTKGLGVRLFVQGCILSGCDYRKNIEGIGTTNAFKLVSENAFRGASVRF  
RKILESLPKKVRQKIEINEHEEILAKSEAIFFYHPVLHKDCQIKPLLEPRISPEESSVGK  
CHSDHYPCMSRFKGDWSFLGNIDSSSRVIPNSYDANNCNTVQKSMAPSILSKPNSMSST  
LPTKNPDFSHSSASNRSQTLQNPYKFKICDNNRHKPLGERNINIRFNTEKKLETQKNMG  
TGSITKFLVKPDPYAKRTFSSTTVTKRDTQCSRLRNF SVAGSSFQLSRRSNASQKPPGQ  
SFFEKRATKKTHTTSSKTTNSRIEQRRFDYSPIESNGKKEISFSYPSFNLPSPECESI  
RTKRASSDIKRDGLKNLDRNLQDFFDLTNSNSSDMDNSEIRTKIAETKMEATLCDDQAVS  
VVPNDTFEETEKEKESNAIGVKICSTFTSEEPNDNERDHTKNAGKATSKYFSKRRSDPRRV  
TLDSSIRRPCDGLPSVACTTPVRPQSIDDEMNL PATRKNELRDYEWALDECIDDPEEEVQ  
VAKPKSGFESGSFANKCKIRHPLPQENS NKSCSESKGSIRSFFKRQEIFANQLKRSIEPN  
KRSQPKRSKPNDFFSPDRYSKSKKSNNNSSHRFKQNPSTDILSKTKRFALSQDLKGGQS  
QSSDDYLWNGTP

>comp15055\_c0\_seq1; 413 1 1712 LEN=1905; translated  
XHPPHNTVLYIWMHCPRYDILAMEEDKFTNEYKYRPSHHLRPYQHHRRTQAYQFDNGSQS  
QLLKKETLKRTHPFLNINTT SIHDEKTAFASSNSSTNFISGSNSCDQNVIHVRKNNC  
IRGMVAVKNHLRGMVAVKDDDEKCYLNDKDHNSKDHTIVRGMTAIENDGDHNSPSVNNNN  
IHLDIYDNAPISSTKDSNSKTSRLLEEVNDFLFDYERRFYRQSLTERAKELLD RARKTNT  
FTSDVIGNREKLALCTEALKLCRQANRDQEEALHGNDHNVGGSYLVTGDIRIRYK GELL  
AAKIYCVRASVLYRTGEYSDCLEDCDAAIAIWNQHEQRCSSTSSRAFGVFKRRTSSV RTM  
QRNKMLSSDRCSSPRSAQIKPNSMLSKGKLSHKHLYILRGRTLAAMGRYKEATGWLTHPN  
ELPVRKFHGTSQLLQNDGVMF SVIDQIACRDRRELDTEQHLQHQNSDQNAV VETIPVFPT  
KKQEQRVIVPTNKLLWAHLLHSIDQRLTRGTVRSDGCLTTTSPSCISDKTTGSSNAIYQ  
MLRYGPALFHHFEEEPKLLTTATTKLGGGE

>comp15056\_c0\_seq1; 877 138 3311 LEN=3360; translated  
MKKARTWSLLLLWSIAQDKADSF LPNRNTVPVLDSSLWPKHSSRNVEFRLFFSSTNNSPS  
QDGVDRDAKQSSIRGNAQVEETYGSTKNTANSNKYLGSGKSGNTGMNGKRKNR SAQAPTSK  
GNSFPRNERWLEDATAETLDSLVMPLGHLTEDDVVSITSLMIEWSRRKSLEAAMMVETLL  
KRIVDDL RAGNRDIYVSTKIYTVAI EAWGKSDEAAGAERAQSIHDAMIQTYRKT RDGR IK  
PTTKSFNALMLAWAKSKNTN SISAEEKILRVMLTESDGASVVRPDAVTF AIMLDLYARN  
SEQSITKAETLANSMNGLQVKKTNAVYSALQDVYVRSGRKDAPKMTMAVLQDMLNAYS KG  
EERARPNIGNYNNVL SAYSRTPSKHSALRAVEMVNRIEE PLEGGYDVPDRLTYFLAILA  
CSRCPNSTFGANKAEPLLERMEGKSKDEAKRREELSIAAPPLVSLDIECFNVVLTCLSKS  
RDPNAVERIFNII SRMEEYADEGQEHLRPSTRSFNAALNALS YKKTQDAAKRAEETLERM  
FQLHAGGASSKPDFTSYTAILRCYQRLATPEAAQRGNDILSRMEELYERQILEDPD TYH  
YTIVCSTWLSRSKHAPQKCLKLLSRMKEKDREGWPRVKPNTRTYNALLDCLSRSHQATR  
AEELLYHMLSLAKSGDTEARPD PFSFNAVINAFLYSKVRDAGRRAESVLERALEYAEEDG  
GKMPEIKSFTSILGFYSRQRTMDS PYRARYLLNRLLSLYKAGHHHLSPHVSCFTNVMESY

ASQRHREAGECSEEEILRNMI SLQKNHNASHLVINTGVMNCVLNSWAESIGNDDAGNRAEM  
ILLDLMERKSAAGDTSMVPNHRSYNMVIKTWSKSNASNKAERALAILERSRRRHSQQLHD  
PPEYTHSLVIQACAFSRNIDPKVEMVAFEIALDVMDELISDVPVGRAEPSSATYAWFFQ  
VCSRLQIPDSSKNEAVKRIFFRCEKGRVNEFVLQSVKDASSDALFSELIAECEEMMEVS  
GDPGLKEMIIQFSQSPEKRVAEDFPSGTNRKRKLKRN

>comp15057\_c0\_seq1; 832 1 3136 LEN=3324; translated  
XIRKKLTGDIQHGGTTSGFQPPNLGSAKDTTAWLRMTPLLQSGNIVVVDDDDINKTDEE  
INQWTWTFANKTWQVHKFGGTSVANADCYRSAARI IEDQLGIHNNVCHIMDDGETNGTTA  
QMGVVNEEQCLAVVVSAMGGKPKTTDLLLESVQAAARREQNEVDRLLEFVLKKHATCLED  
LFGADGCSGSSNSDYRELLKIVREDLEDIKDILKTVSLMKWQAERISELVSGYGELWSA  
RILSRVLHNRSVHRHQRSQERDHFDEFVVIDARRII I IDEEAIQDGAVEWNTSREKLEEV  
YETEVSKYNTTKTKTRLHFVVVTGYVASNTEGVATTLQRDGS DYSAAIMGRLLQSTNITIW  
TDVDGVL SADPRRVP GAYAVPEVSYNEAMELAYFGAKVIHPKTMQPAISSNPQIPIFIRN  
TFNAKFRGTRIFTSSVTDHQSDSCVCGFSSIDHMALINVEGSGLIGVQGVAKRFLGTLN  
MGINVVLISQASSEHSITFATPEEDAARAKETIEEEFQKELEKNRISNIEVNTPCSIVAA  
VGDGMKQVTGVAGRFFSALGDAQINIFAI AQGCSERNISVVVATSQATRALRALHAAFRL  
SHTTVRVGIVGMNPLGESLLRLLLEVQRRKLWGSFEIDLQVCTVAMDSHDTDILELKNHD  
GNESINLGTVRDAMKPVSSSSSESRI SFERDTPGGDLTVVRSSHKDLEPLVESLVRDDCA  
HHVIFDCTDDVDASRFHPQWLSQDIHVVTANNTGISGSKEIRDEI HAAETARGKLSAHL  
KEVTVCGGLPVI STIRTLNLSGDKIRRVGDITSVAMSYIMFRISPPPEITRSGRFDKECT  
KGSFKGDIIGDDAMGKPCSFSQAVKEAISMDLMEKDL SLDLGN DYVSCVLMVLAKELGVD  
RNVTHDVIRDRSETLVDFPKGEHMVDHHA FEGAIDEMVRVRVEEAAQRGCVLRHVGSVDV  
AMESVEIKIMDVPNTHIFAITPPTVECVRFFTHRYQPYPLVIQGPSAGMDCTSSALLAEL  
LSMMRSKVGPRTGILTKSNSSAYLK

>comp15057\_c0\_seq2; 536 1 2062 LEN=2250; translated  
XLLPSSLVLSADPRRVP GAYAVPEVSYNEAMELAYFGAKVIHPKTMQPAISSNPQIPIFI  
RNTFNAKFRGTRIFTSSVTDHQSDSCVCGFSSIDHMALINVEGSGLIGVQGVAKRFLGTL  
ENMGINVVLISQASSEHSITFATPEEDAARAKETIEEEFQKELEKNRISNIEVNTPCSIV  
AAVGDGMKQVTGVAGRFFSALGDAQINIFAI AQGCSERNISVVVATSQATRALRALHAAF  
RLSHTTVRVGIVGMNPLGESLLRLLLEVQRRKLWGSFEIDLQVCTVAMDSHDTDILELKN  
HDGNESINLGTVRDAMKPVSSSSSESRI SFERDTPGGDLTVVRSSHKDLEPLVESLVRDD  
CAHHVIFDCTDDVDASRFHPQWLSQDIHVVTANNTGISGSKEIRDEI HAAETARGKLSA  
YLKEVTVCGGLPVI STIRTLNLSGDKIRRVGDITSVAMSYIMFRISPPPEITRSGRFDKE  
CTKGSFKGDIIGDDAMGKPCSFSQAVKEAISMDLMEKDL SLDLGN DYVSCVLMVLAKELG  
VDRNVTHDVIRDRSETLVDFPKGEHMVDHHA FEGAIDEMVRVRVEEAAQRGCVLRHVGSV  
DVAMESVEIKIMDVPNTHIFAITPPTVECVRFFTHRYQPYPLVIQGPSAGMDCTSSALLA  
ELLSMMRSKVGPRTGILTKSNSSAYLK

>comp15057\_c0\_seq3; 314 1 1078 LEN=1155; translated  
XIRKKLTGDIQHGGTTSGFQPPNLGSAKDTTAWLRMTPLLQSGNIVVVDDDDINKTDEE  
INQWTWTFANKTWQVHKFGGTSVANADCYRSAARI IEDQLGIHNNVCHIMDDGETNGTTA  
QMGVVNEEQCLAVVVSAMGGKPKTTDLLLESVQAAARREQNEVDRLLEFVLKKHATCLED  
LFGADGCSGSSNSDYRELLKIVREDLEDIKDILKTVSLMKWQAERISELVSGYGELWSA  
RILSRVLHNRSVHRHQRSQERDHFDEFVVIDARRII I IDEEAIQDGAVEWNTSREKLEEV  
YETEVSKYNTTKTKTRLHFVVVTGYVASNTEGVATTLQRDGS DYSAAIMGRLLQSTNITIW

>comp15058\_c0\_seq1; 519 1 2078 LEN=2147; translated  
XPTAMEGGSGSDLQDRWVSLPEDGPTSFYDEDEDEGAIFFFEFPI SKDVATDDNVDV SF  
YDQGCRYNDGDPKVEIFKGIS ENVSFRGTENTIFADLNMRLGTSETNLP SLLQEYPTLWD  
EESQISFCVRFSLVTDGIEVNFL ETVVILKVNVLVAGFQIIDVSVAPKEKIESFAGVSYD  
VTAYLCGGNYKPLEEETTGLVEMLYEVC DADN IQITISEVTEITNTA QVGQEQEYQELSES  
QKVEKEPIIYPQGSVV RVCI RPD DTVYGEVSMRTIEALVFE GTYTAAIDYQIVAAPPLTT  
KSNGVFTQYAVKDGSTDV SF DLSYMSCESNRLEGHDDVVCAVDTVLVAAFFWRTPGVTA  
TVTAYGVATLQFGTPASDERNLERTVTSELHLQSGEDRPSQRQAEVDLEKIWSMDRPIVD  
FSTMREEGGFDFDMEYTFSDAISNEMILVEAYNKECEQPGEPIATYPFLNNSQASSDLL  
EVSF TKAYKTGTGQGTQKVKVTAQWKRQEKGFMRSLQDSELYSENSDGSFVQISVCIRCQ  
LHTRS DGGIEVNFL ETPVILNIDLKAGVDFGINFGLVPDDDKCLAELQRM SGGGFDSL Y  
ENALYWKPGSSSVDP SMPMP SVFGSYSSRYGTSSYGGSGSGYRSSHTRAQPGNKFFGSR  
PSSATSTASLYIGARTTAIGFAVSLLVVLSPM

>comp15058\_c0\_seq2; 358 400 2414 LEN=2483; translated  
MAPRVSDYDEDEDEGAIFFFEFPI SKDVATDDNVDV SFYDQGCRYNDGDPKVEIFKGIS  
ENVSFRGTENTIFADLNMRLGTSETNLP SLLQEYPTLWDEEKSQISFCVRFSLVTDGIEV

NFLETVVILKVNLVAGFQIIDVSVAPKEKIESFAGVSYDVTAYLCGGNYKPLEEETTGLV  
EMLYEVCADADNQTISEVTEITNTAQVGOEYQOELSESQKVEKEPIIYPQGSVVRVCIR  
PDDTVYGEVSMRTIEALVFEGTYTAAIDYQIVAAPPLTTKSNVFTQYAVKDGSTDVSD  
LSYMSCESNRLEGHDDVVVCAVDTVLVAFAFFWRTPGVATVTVAYGVATLQFGTPASDERN  
LERTVTVSELHLQSGEDRPSQRQAEVDLEKIWSMDRPIVDFSTMREEGGFDFDMEYTFSDA  
ISNEMILVEAYNKECEQPGEPIATYPFLNNSQASSDLLEVSTFKAYKTGTGQGTQKVKV  
TAQWKRQEKGFMRSLQDSELYSENSDGSFVQISVCIRCQLHTSRSDGGIEVNFLETPVIL  
NIDLKAGVDFGINFGLVPDDDKCLAELQRMSSGGGFDLSYENALYWKPGSSVDPSPMPGP  
SVFGSYSSRYGTSSYGGSGSYRSSHTRAQPGNKFFGSRPSSATSTASLYIGARTTAIGF  
AVSLLVVLSPM

>comp15059\_c0\_seq4; 131 558 815 LEN=2746; translated  
MPNTIVTQKEKILADRAKRVVHLEHSMAQVQKQLDDHRSRKKRYPANRVKSLESRLASYK  
SQIYDYSRDLTDEELEELVNVNHP

>comp15059\_c0\_seq5; 230 1 932 LEN=1031; translated  
IVTSRDRLENRSNHSTDAIEQSINDPPYHSLALHCIALPSSPIDAPGIVSSNDNPIESN  
XNPTESVPRRMPGDRKKKQSYRSIHTDYKPFLLKYIRNHSIDDDTTVERLEKKYGGVASNG  
LGDLAGTNTNTNTNTNTNTNTNTNTNTNTNTNTMDTRGTGASFSQAQAAAASRKERDDA  
RHADLHANYQHGSYTDGDKIFLLKREIDTLRSKLLKDSKTNTKKNRSLAPGGSALAPLSAL  
LAVGLLLVVARTLRRRIARARAGGSLLEEEGPASVELGVAGVTANANANANAGQSTTGG  
WRPLVPLEDA

>comp15060\_c0\_seq1; 196 628 1487 LEN=2252; translated  
MHSTLCXILADENFVLSADSLDTRREKNAKSYEEDTKTSQGSVDSRHDLSSCSNIITVE  
DESWKIPDQSQSSTSNDRGTGRFDNGADEEERFILPEPGLSYCSSIDETGANENPNLASN  
NTTSGEILNIPRSMRRAVIECPICLCDYQVGSDIVWSSNPQCEHVYHKSCIEQWLMKGR  
DGPLCPCRRDFVIDPLDSMSEEMGDLEKGTREAVRGNPRRMVPTSTLTSTRSIEIPSNL  
NNYNDAMIAMFLRASIANPVSVSTLTAATRDSEERGEPATDGS LNPE

>comp15060\_c0\_seq2; 329 132 1259 LEN=2024; translated  
MVNPGEDDPSAAGRIVLAVFYLSMLCVCFLVPIFFYLRVLCQARRNRRLVQLEIATVAQV  
IIESQTIQRRESIAARQKYQDERRARLVQLFAPVRMILADENFVLSADSLDTRREKNAK  
SYEEDTKTSQGSVDSRHDLSSCSNIITVEDESWKIPDQSQSSTSNDRGTGRFDNGADEEER  
FILPEPGLSYCSSIDETGANENPNLASNNTTSGEILNIPRSMRRAVIECPICLCDYQV  
GSDIVWSSNPQCEHVYHKSCIEQWLMKGRDGPLCPCRRDFVIDPLDSMSEEMGDLEKGT  
REAVRGNPRRMVPTSTLTSTRSIEIPSNLNNYNDAMIAMFLRASIANPVSVSTLTAATRD  
SERGEPATDGS LNPE

>comp15061\_c0\_seq1; 314 119 992 LEN=1665; translated  
MKDDTAEREQVIKRLKIATCALCFMIVEISGGLLSGSLAILSDDAAHLLDMTSFAVAIAA  
SYLASLPPTARHTYGLKRTESLAALFSMTSLAFVSIALAYEALQRLISPPEEGIDGNLMT  
LIAGFGVVINVILAIIVLGENHVHLPGGDHGHDHSHDHGGHGDDHGHGHGHNHQTIDHHDV  
HDHNNHCHGNKEKENTHDHKKDHHFHDEEDGHGHEHGHNHGHNETKHEKSPLIVSKGG  
HDHEGDDDDHSHKHEQRNVNLHAAYLHVLGDLAQSFVAVFFGGVVIWVKPEW

>comp15061\_c0\_seq2; 192 119 584 LEN=1962; translated  
MKDDTAEREQVIKRLKIATCALCFMIVEISGGLLSGSLAILSDDAAHLLDMTSFAVAIAA  
SYLASLPPTARHTYGLKRTESLAALFSMTSLAFVSIALAYEALQRLISPPEEGIDGNLMT  
LIAGFGVVINVILAIIVLGENHVHLPGGRLRFVFR

>comp15061\_c0\_seq3; 314 119 992 LEN=1504; translated  
MKDDTAEREQVIKRLKIATCALCFMIVEISGGLLSGSLAILSDDAAHLLDMTSFAVAIAA  
SYLASLPPTARHTYGLKRTESLAALFSMTSLAFVSIALAYEALQRLISPPEEGIDGNLMT  
LIAGFGVVINVILAIIVLGENHVHLPGGDHGHDHSHDHGGHGDDHGHGHGHNHQTIDHHDV  
HDHNNHCHGNKEKENTHDHKKDHHFHDEEDGHGHEHGHNHGHNETKHEKSPLIVSKGG  
HDHEGDDDDHSHKHEQRNVNLHAAYLHVLGDLAQSFVAVFFGGVVIWVKPEW

>comp15061\_c0\_seq4; 192 119 584 LEN=1801; translated  
MKDDTAEREQVIKRLKIATCALCFMIVEISGGLLSGSLAILSDDAAHLLDMTSFAVAIAA  
SYLASLPPTARHTYGLKRTESLAALFSMTSLAFVSIALAYEALQRLISPPEEGIDGNLMT  
LIAGFGVVINVILAIIVLGENHVHLPGGRLRFVFR

>comp15061\_c0\_seq5; 258 119 993 LEN=1807; translated  
MKDDTAEREQVIKRLKIATCALCFMIVEISGGLLSGSLAILSDDAAHLLDMTSFAVAIAA  
SYLASLPPTARHTYGLKRTESLAALFSMTSLAFVSIALAYEALQRLISPPEEGIDGNLMT  
LIAGFGVVINVILAIIVLGENHVHLPGGDHGHDHSHDHGGHGDDHGHGHGHNHQTIDHHDV  
HDHNNHCHGNKEKENTHDHKKDHHFHDEEDGHGHEHGHNHGHNETKHEKSPLIVSKGG  
HDHEGDDDDHSHKHEQRNVNLHAAYLHVLGDLAQSFVAVFLEVRIFTPAVL

>comp15061\_c0\_seq6; 197 744 1147 LEN=1820; translated  
MAATGMITDMIMGTTTTKPIITTRTTMTTIIATAIRKKKTHMITNMNIIHXHDEEDDGHGHE  
HGHNHGHDNETKHEKSPLIVSKGGHDHEGDDDDHSHKHEHQARNVNLHAAYLHVLGDLAQSF  
AVFFGGVVIWKKPEW

>comp15061\_c0\_seq7; 258 119 993 LEN=1646; translated  
MKDDTAEREQVIKRLKIATALCALFMIVEISGGLLSGSLAILSDAAHLLDMTSFAVAIAA  
SYLASLPPTARHTYGLKRTESLAALFSMTSLAFVSIALAYEALQRLISPPEEGIDGNLMT  
LIAGFGVVINVILAIIVLGENHVHLPGGDHGHDHSHDHGGHGDHGHGHDHGHNHQTIIDHHDV  
HDHNNHCHGNKEKENTHDHKKDHHFHDDEEDDGHGHEHGHNHGHDNETKHEKSPLIVSKGG  
HDHEGDDDDHSHKHEHQARNVNLHAAYLHVLGDLAQSFVAVFLEVRIFTPAVL

>comp15061\_c0\_seq8; 197 744 1147 LEN=1659; translated  
MAATGMITDMIMGTTTTKPIITTRTTMTTIIATAIRKKKTHMITNMNIIHXHDEEDDGHGHE  
HGHNHGHDNETKHEKSPLIVSKGGHDHEGDDDDHSHKHEHQARNVNLHAAYLHVLGDLAQSF  
AVFFGGVVIWKKPEW

>comp15062\_c0\_seq1; 947 135 2753 LEN=3030; translated  
MTKISYLERQREVDPFYRVVNAEYITGSAKTRFSQTVEETKRGEDPEGRDSDIYKTLLS  
KNSSGDLDFNPRMVHIMDFESDCRDDSERDQVPTSTTTPLEPPAAAPEEVYTGMSKEY  
KGILKKDEPEQDEQETSPENETNQSSEDFSTASAPQREAPPSEPPPTPRKNVFPNATAPVYK  
RQSSKPWEKKQVAQLAKRFEHNDDAQEDEDGDKTPIRPPPRYSISKIQQAQAGPVPKS  
DDFYSELKRWHKNYSLRDVEKPEQITVTVSPVPATEPSEPSEQEEISDYYLQSSNSIEA  
GKKKSWFRMKNRNSQNDSSHDDETAKVATTEKPMKRFPRRASKLQKAKEKRRKRSWSLK  
NLFGKKNKSSNSDSESSSSSRSGSLEAEAKNAQAAPSEPRPDPPSDVPEAYSMLGIARS  
TATKKPIKDPKMPSEANLSRFLKLQEDDQSTATASSKTDKACNATVAVAAATAATDRRL  
QMQLMQQIVGASRSELNAVETNASSKDAKVAEKVNSDKPIEPTKEEAIDTESEKCKSQQ  
MLDDDEKNSAVEVDEEKSVIQRKDESSWLTRATKMLKRLAAAEVLDSSDAIEVNVLDLKG  
LTPNQSFNTTDLGSSSLDKDSVSEGVAMPETARTSSLLDLSTASQSQSLQRMETDSKG  
IDASFTESLSCADSKSNSKPSLPTSEADADLKNLDTANVLSSESHSCADSKKITGRSKE  
ETRKSASIGSRDSESAWAKDASRKLKVSVASLEDESSEVWASLPSAKAGKPADTVVVK  
KSKNKDKGEATTPLAGKTQKENRRETKEKREKAMAASLFGKLDKDRKQKKKSNQAATL  
FGTPQRKTKATKSKMDAKNKKRRRQRTSASLF

>comp15063\_c0\_seq1; 640 142 2139 LEN=2339; translated  
MEDPQRLPNDVGDDEAAELQRQAEAEAMEQMLLAQEDEDIDFQDGGINIDGANIENRIHDE  
NVFVDGGDGADVDRQPDFAIEEDGNILNGNMGLDDELIRNRANDHDVATPRKNPFTYVS  
LSLWAAVFLIYYSYRSRQWYLALVFLSSSKYAYVIMGNFVATLIWIFRVTTNFFLNGL  
RLNEAEGLTDFRWHITETCLALTI FRLELNKTFVLFVLFVLAQCLHYIVEQREAHLRM  
TEEIVVNPSPGKWFALRLQHVLFALISFLQFSDVCAIILCGQDIMEHGSPSVSILFAFES  
AIMLVSVISNCLLWYLHLLDGI FHAMHETSLPGALFHGWYIPWKDYKATLVFAVELQAQA  
AKFIFYLTFASVMAYYGLP INLIREVYVSFLALKQRVMAFNKYRQLMASMNRFKSPTTE  
ELEAEDRICIICRDEMTVETSKRPLPGCGHIFHKSCLEWLQVQQTCPTCRGDISAMEARQ  
KAQDQMNARIQEQLQEETDEAEAGEGIEEDKKSAAAQTNQTEQPTASDGEFQPGSLKVE  
SDSDEKAPICKGAQETEAKAKSNTGLVDKERSAFPAYRVVSNAGASVYLDQDADLALAV  
VRVVASGVVILGIEMEYRKCNEEYRMMIKIPDGWVSEDDVERIVAVPLEALPPP IQCDDF  
GNGIK

>comp15064\_c0\_seq1; 833 92 2353 LEN=2538; translated  
MDGKIPKNSCDGMTATDGDVGGSSLSPSGVPRPIPVESVPPDTKPMTTETKKNIIVFQN  
EQNFSLVEVLEEKEHKEEDRVRVTALCLHLEPKACSRVVKELSATLPLEDGLSHLKRVR  
RRVLPMPSSLPEAKPALETETSQATKSTTTTSTKTKHQHTKEGNPSFPVKKEEGETGAKS  
KAAAEATLSSSGQKRPKRRKSSSKQNFVLEILIGTRSHLVQRSKQONPSSELSLTKVH  
PIVREFGPLYEVVVPKYEPRESEQEWKEHNQSWPTHYYPLKFDEHLQHIQQQSALSQHEI  
DDMRELMERCIEITMSVLIIVDPNHESRNRKESAAAASDAIHATNEKKRQNKTTASDHCTIGII  
ESDNNKYNDRRRRVEAGIVSISTNEQELQGANQQKFHNPLATPVLFAIQGVSRREAREATA  
GIQSSDKDVAEGSRNDAYSVMKRAIAEQQLDTAISAGSTPTTDDLPAAAASGRHNSYPL  
GTRLKFFAKQRAWYLGITLSYDTESEFYFIKYDDGDTEELEHHEIDTNLSDLPSTSKYEE  
GFQYETRKAYKTKRKRTRGNSKAHADLVCWVIGTVKSRYFYAPKAKGFWCYRVVLEGLN  
GDITQDVDEEFITRSIEDAKSKGHLAHLGSPSVATSEPSHAKPEFTISNGGTGRDQPQ  
DATKTNADHDHGDHGDNDQQLPTGGGKELGEKSEKPKQEQTGQYICTGYDMYSFYEPSV  
FEAMACLHSRLRRLIYFVPSKGSDIQSTANNAVW

>comp15065\_c0\_seq1; 387 425 1390 LEN=1918; translated  
MNFCKPSSEPKPTPAASSSRGESVDLGEFSYQHASGGSGYNSHYYDYDYSGHGTPHTPKP  
IISEDYGLSSEFYTDTTGGLARPDISISNSGRVIGGEGATAHAAGGIDGAHLPRMRGDA

KLRPNTGNSNQNDGALLGKSLEITAFRLRTTIVSTVAAIVWEGFAPMRLIGMALVHPA  
QFVLGAYLGVFCLLVLGAELNIEALKDNFGFLYDPLSRGFVLLMMSGMSLGILSTWWESL  
LGLAFLVVGTYIYTYLQYPEYRTWKSYNERTAPWQEGKMYWTGGDAAVQTAAWATPTK  
ASVAVAAAVVGSETKSLLGNA

>comp15066\_c0\_seq1; 121 504 1546 LEN=2700; translated  
MLIKREPLVDGIADPTGSNSDPNSNSPDGSDSVTYNFARLHLPEDVDTILSNELLQLSI  
KDRNAIDEEIHGVRQMAHKENPEFLKAALLRRLSEEIDRIPDTNPIKNAYNKSQKIGETYV  
NKEDFRLRFLRCDLFDAKKAAMRLVKFLDLAFSLFGHEVLERPMKISDLSIEEMKLMRLG  
PFQVLPYRDRSGRPVVTWVDDFATKHGDKRFRVRFYLYLIERFRKGILCDRMKLSNSRGNV  
AVRSSALSILHLFFAPFLSLRTQAKMTMYMMYALSDDIESQRRGFVHITWPGSKPIAAVP  
DLDELQMLQVLP IRLCAGHFCVDPKPFHII RSMFAITMXFYHEE

>comp15066\_c0\_seq2; 200 504 2063 LEN=2404; translated  
MLIKREPLVDGIADPTGSNSDPNSNSPDGSDSVTYNFARLHLPEDVDTILSNELLQLSI  
KDRNAIDEEIHGVRQMAHKENPEFLKAALLRRLSEEIDRIPDTNPIKNAYNKSQKIGETYV  
NKEDFRLRFLRCDLFDAKKAAMRLVKFLDLAFSLFGHEVLERPMKISDLSIEEMKLMRLG  
PFQVLPYRDRSGRPVVTWVDDFATKHGDKRFRKMTMYMMYALSDDIESQRRGFVHITW  
GSKPIAAVPDLDELQMLQVLP IRLCAGHFCVDPKPFHII RSMFAITMGSTMRSLKF  
HIGEPVELEYALRSFGIPFELIPVTGTGNVKTGYHRQWIRLRKAIDNERTKSGDDDCSMI  
EIPRSADVVFRTGNLSLTCHPGNSIFQDVIQSKIQQHSTATQVEKMAITKEIEQIQRNNG  
RFLQWDKNGWWIEIEGRSHIHAKVAVAVRDFKSKVVAKANRQNCQSGTSVFNQDQKRRK  
VTHNFDSDDDVNEMRCSLLSLDTSAMFSKPFIGTCNPSL

>comp15066\_c0\_seq3; 197 504 2216 LEN=2557; translated  
MLIKREPLVDGIADPTGSNSDPNSNSPDGSDSVTYNFARLHLPEDVDTILSNELLQLSI  
KDRNAIDEEIHGVRQMAHKENPEFLKAALLRRLSEEIDRIPDTNPIKNAYNKSQKIGETYV  
NKEDFRLRFLRCDLFDAKKAAMRLVKFLDLAFSLFGHEVLERPMKISDLSIEEMKLMRLG  
PFQVLPYRDRSGRPVVTWVDDFATKHGDKRFRVRFYLYLIERFRKGILCDRMKLSNSRGNV  
AVRSSALSILHLFFAPFLSLRTQAKMTMYMMYALSDDIESQRRGFVHITWPGSKPIAAVP  
DLDELQMLQVLP IRLCAGHFCVDPKPFHII RSMFAITMGSTMRSLKFFHIGEPVELE  
YALRSFGIPFELIPVTGTGNVKTGYHRQWIRLRKAIDNERTKSGDDDCSMIEIPRSADV  
FRTGNLSLTCHPGNSIFQDVIQSKIQQHSTATQVEKMAITKEIEQIQRNNGRFLQWDKNG  
WWIEIEGRSHIHAKVAVAVRDFKSKVVAKANRQNCQSGTSVFNQDQKRRKVTHNFDSD  
DVNEMRCSLLSLDTSAMFSKPFIGTCNPSL

>comp15066\_c0\_seq4; 124 504 1393 LEN=2547; translated  
MLIKREPLVDGIADPTGSNSDPNSNSPDGSDSVTYNFARLHLPEDVDTILSNELLQLSI  
KDRNAIDEEIHGVRQMAHKENPEFLKAALLRRLSEEIDRIPDTNPIKNAYNKSQKIGETYV  
NKEDFRLRFLRCDLFDAKKAAMRLVKFLDLAFSLFGHEVLERPMKISDLSIEEMKLMRLG  
PFQVLPYRDRSGRPVVTWVDDFATKHGDKRFRKMTMYMMYALSDDIESQRRGFVHITW  
GSKPIAAVPDLDELQMLQVLP IRLCAGHFCVDPKPFHII RSMFAITMXFYHEE

>comp15067\_c0\_seq1; 867 157 2787 LEN=2905; translated  
MATFANQASNLSALESKLENLLTVPDPDDKSQDCFRSKEEKLNAAFFASQSNRVEKVE  
KEIAGATVSI FSPSSKESKTI TELAECLRLTQEFTREKLEILKSRLESEGYTVTSPKTTQL  
FSDKIATASSATHHSLDPRYNQLKLGAAANDRFSWPLTANVGGPLESVLEADYETDGLTTP  
GSCLQSPTWSSSHQISSALESDDHCDHALATPTASAGKKMEPNQRKSSSFRTSPITPP  
ALDNLMSSTSTSTFLQHI EHEGENKEKYDHLHYHTQQQQEEQQQHLHEFRDEDDMITLDTQ  
STMTKTHNPYSPI IIGNMGSVPTVDERSHFLTRIEDMLERVEETILDASPSPRRYVRK  
DGDTSRPSDEYYEMEGKEDQQERRRNTSTSSKNYMTTQSHHYTMKAVYEDDELASTDDE  
KESVTNNSDDSTNVVATQIAENRPLTSVGRSEKKEHHNERPTHILVETGTSSPTHNIT  
MDATMMNDTYDVSLMERQERRSGETKAI IQEPSKTLDFDDELNDLSTVTPVLDRYRLDPS  
DGNLSLVKVPNKRSARHRVDQKRRTTPTQGLPTIAQLSPSLDSILRAETPKKESNESSF  
KSPSTSATATPRNQNRKVYRKT PFPKRKSAIMEEDDSNHIVRDENNHPNLSTSLSAIDSP  
EPFRSSVPSFSISVPPLRHRSFERNRGDESRLKLGNRKTFSLPLNCNTKDETKMSIHKSL  
GMPSPFTDSLQCTQGVDSIQQIDGTNERATAASITPSGIMVPTLGRDDPVPKTISKACS  
DLSFLHITEAEFDSAPRIVRTHVDRDLANTALNEIKKKFSDSTSELKSLEFTEEEGRTIL  
GVSEQKNKSILISLCHWRRLKMKKDPSRGMVFAVNN

>comp15068\_c0\_seq1; 275 1 1340 LEN=1340; translated  
FCNADGMRDGFSGMGRSIGSIYRLKFSSDSSSDSGADEMPSLAPSDMPSAIPSVAPSDPP  
SVAPSGTPSDSPAIPVTESQYTHVRYDFPPTTDLFLHGFVKGSSENGIQVTSNENA  
HYEVTGEFGAGTVLFGDRTYVAGTLSHPTSMCEGGLYVQPNLVKDHPRGTSISLNVMPST  
SGPVTLCAFVETRGRSRSVGGWDSVLPDGDGFTEDEFWDGGDLLPPDHLTVARWYCKAFS  
HDEIEFVQLGCTGYHHGVISYTI RPLVLYSDVNPVNHSSGDFSIYPCYEACREQGYQFFG

FECPSGGEVSCQCYSNVVVGSRAVENKDCQSLVPDGAANHCTGDAMIDGYSMGGASVGS  
YTVKKYEQLGCTPYDTPGDTSLPPIVFFYSANGVGFADPCYESCMSDGYEYFGFEC PQS  
DKVYCQCFSAEQAGDPQTVEDADCKAX

>comp15068\_c0\_seq2; 158 1 884 LEN=1175; translated  
XVSGGDKHCTGPGIYNGFSLGGADIASRYRLSDSRVPVDMMSGVEFEQVGCTGYVSGAYN  
FDIRPLRVIYEDSGMPSGDFSMYGCFHACRTQGYDYFGFECQAKRVYCNCYSNSRVEPA  
VPEIADCYALGPADHHYCDGDGTRDGYSMGGAWVGSYIRVKPTYVFPATTTAEFVHGLVV  
KGSSVDGITPFSTETSLSYSLIEDYEEEEGILLWGDYRSESLAGNNMYNGGIFLQPSK  
HKEIQMGTVISLSIMPSGNDPIVLCWCNTDGSMRGGWPTSLLDAGFVDAGVFTW

>comp15068\_c0\_seq3; 186 1 1104 LEN=1104; translated  
XVSGGDKHCTGPGIYNGFSLGGANIASRYRLSYSLAPVDMVVEFEQMGCTGNLSGAYD  
FIVRPLEVYYDTSWATGDFSMYACYACSIQGYEYFGFQCPQANNVGCNCYSNSRVEPVV  
PEIADCNALVPAGQETFCNADGMRDGFSGMGRYVGSYIRVKPRVLEFVQLGCTEYDTSVD  
GFSIQPLRLQYGVPSNNAYSIGEFSVNTCYEACREQGYQFFGFECPKATEVKCNCYSNVV  
VGSRAVENKDCQSLVPGGAAGSCTGDAMRDGYSMGGASVGSYITVKKYEQLGCTPYDTPG  
DTSLPPIVFFYSANGVGFADPCYESCMSDGYEYFGFEC PQSDKVYCQCFSAEQAGDPQT  
VEDADCKAX

>comp15068\_c0\_seq5; 204 1 803 LEN=803; translated  
XELSEMPSLAPSVMPVPSVTPSDGPGSIPKEPSAIPSLLPNLPSIVPSQSPSQLPS  
TLVLEFVQLGCTEYDTSVDGFSIQPLRLQYGVPSNNAYSIGEFSVNTCYEACREQGYQF  
FGFECPKATEVKCNCYSNVVVGSRAVENKDCQSLVPGGAAGSCTGDAMRDGYSMGGASV  
SIYTVKKYEQLGCTPYDTPGDTSLPPIVFFYSANGVGFADPCYESCMSDGYEYFGFEC  
QSDKVYCQCFSAEQAGDPQTVEDADCKAX

>comp15068\_c0\_seq6; 18 1 354 LEN=354; translated  
XVSGGDKHCTGPGIYNGFSLGGADIASRYRLSDSRVPVDMMSGVEFEQVGCTGYVSGAYN  
FDIRPLRVIYEDSGMPSGDFSMMDAFMPAGPKAMIILVLSVLKQKGSIAIATAIPVLE

>comp15068\_c0\_seq7; 341 1 1432 LEN=1432; translated  
FCNADGMRDGFSGMGRSIGSIYRLKFSSDSSSDSGELSEAPSMTPSVSDKPSMFPSKLP  
LAPSKELSEMPSLAPSDMPSAIPSVAPSDPPSVAPSGTPSDSPSAIPVTESQYTHVRYDF  
PPTTTDLFLHGFVKGSSSENGIQVTSSNENAHYEVTGEFGAGTVLFGDRTYVAGTSLSHPT  
SMCEGLYVQPNLVKDHPRGTSISLNVMPSTSGPVTLCAVETRGDSRSGGWDVLPDGD  
FTESDEFSDGGDLLPPDHLTVARWYCKAFSHDEIEFVQLGCTGYHHGVI SYTIRPLVLY  
YSDVNPNHSSGDFSIYPCYEACREQGYQFFGFECPSGGEVSCQCYSNVVVGSRAVENKDC  
QSLVPDGAANHCTGDAMIDGYSMGGASVGSYITVKKYEQLGCTPYDTPGDTSLPPIVFFY  
SANGVGFADPCYESCMSDGYEYFGFEC PQSDKVYCQCFSAEQAGDPQTVEDADCKAX

>comp15069\_c0\_seq1; 1130 155 3821 LEN=4375; translated  
MPGDSASSWSNMDMNIEMDENSTSDRSKSIYSYSSASAVSTSTSI SRFTTRQQQIIED  
ESLAVRDSEHLTKLRFLLITILFWSTVGVGLAVWIYFTEDIENKFDDLYHDDSLEVLQEL  
ESRFIVALGAIDSFVALCTLSSEWPFVTAPHFSVRAQKLRKMSHAFVTTYPVEDSQ  
REEWEYSSANDNWLEEDLKKQEDEKGIILQKNVLYGREPTDEFVQKTIGNTSGFMPRWQ  
QSPVTETSAYNRDGFQYKALANAWATFQHHPQOVVMSYVNNIPTTEDPNLNVEEQIKVME  
RFFAHNDSYHAEPFGDIFYPILHDAEAIHANGSNKTSSSLTNSTLVGVTAVTFYWRDLL  
KNMLSDEIDGMHVVENNENCNQFTTYTWFESEPLYLGIIDLHEPVYDQLQQSFLLDIEGI  
NTYTGLPLSSAGCQYIEHLYPSTDMIRNFEMNEVSPVAFGTIAVIFIFTMVFVYDCL  
VESRQRKVYTSAVRNNAIVSSLFPKSGMSFPLSFGICIESLYSHESVERKSLILKSLLLF  
APSVDRDLYQENDPTPKKSQPAKTRLKTFMHEDNGVGEPKKEFDAP IADLFSNCTVLFAD  
ISGFTSWSSERSPSQVFLLETIYGAFDKIADRRGVFKVETIGDCYMAVTGLPNPKRDHA  
VIMARFARDCRNQMNALTKSLEVTLPETSDLSMRFLHSGPVTAGVLRGQKSRFQLFGD  
TVNTAARMESTGVRNQHISEDTARLLNDAGKSSWLTPRKETVQAKGKGLTTYWAFQKS  
HNKRGSTVATAATCDDSSLSGSYSPAIDQRAKVGKQILCDRRARLIDWNVDLFAGLIRK  
VVARRGAI VNVKGP ISEDSKSIQTTTDGMMLDEVVEIIELPVFDPRVINSQEDPHSI  
LLGDEVMAQLRSYIFAISNSYNENPFHNFESHVTLVAKLLSRIVAPDLEISTCEHNV  
YSTLHDHTYGITSDPLTQFACILAAIHDVDHQVGNKTLVEEEDPVAKKYKGRSVAEQN  
SVDIAWALFLEPQFSAVRKAVCRTDKELDRRLQLIVNTVLA TDIMDKDLKQLRNQRWDKA  
FSPDLKDNENNQDRINRKATIVLEHLIQASDVCHTMQHWVYRKWNERLFEEMYLAYKT  
GRANVDPSTFWYQGELGFFDHYIIPLSKKLSDCGVFGVSSDEYLYASRNKKEWEQRGEA  
IVAEMIDKFKDKIYVESREVC

>comp15069\_c0\_seq2; 740 155 3106 LEN=3106; translated  
MPGDSASSWSNMDMNIEMDENSTSDRSKSIYSYSSASAVSTSTSI SRFTTRQQQIIED  
ESLAVRDSEHLTKLRFLLITILFWSTVGVGLAVWIYFTEDIENKFDDLYHDDSLEVLQEL

ESRFIVALGAIDSFMVALCTLSSEWPFVVTAPHFSVRAQKLRKMSHAFVTTYPYVEDSQ  
REEWEEYSSANDNWLEEDLKKQEDEKGIILQKNVLYGREPTDEFVQKTIGNTSGFMPRWQ  
QSPVTETSAYNRDGFQYKALANAWATFQHHPQQVVMYSYVNNIPTTEDPNLNVEEQIKVME  
RFFAHNDSYHAEPFGDIFYPILHDAEAI IHANGSNKTSSSLTNSTLVGVTAVTFYWRDLL  
KNMLSDEIDGMHVVENNCNQFTTYTWFESEPLYLGIIDLHEPVYDQLQQSFLLLTDIEGI  
NTYTGLPLSSAGCQYEIHLYPSTDMIRNFEMNEVGKXKKKQYNAIRVKICAQREESSGFL  
SDXTWFLPYFSTNKNSPVAFTGIAVIIFIFTMVFVFDCLVESRQRKVYTSAVRNNAIV  
SSLFPKSGMSFPLSFGICIESLYSHESVERKSLILKSLLLFAPSVRDRLYQENDPTPKKS  
QPAKTRKTFMHEDNGVGEPPKEFDAPIADLFSNCTVLFADISGFTSWSSERSPSQVFL  
LETIYGAFDKIADRRGVFKVETIGDCYMAVTGLPNPKRDHAVIMARFARDCRNQMNALTK  
SLEVTLGPETSLSMRFGHLHSGPVTAGVLRGQKSRFQLFGDTVNTAARMESTGVRNQIHI  
SEDARLLNDAGKSSWLTPRKETVQAKGKGELTTYWAFQKSHNKRGSSTVATAATCDDSSL  
GSYGSPAIDQRAKVGKQILCDRRARLIDWNVDLFAGLIRKVVARRGAI VVNVKGP ISE  
DSSKSIQTTTGDGMLDEVVEI IELPVFDPRVINSQEDPHSILLGDEVMAQLRSYIFAISN  
SYNENRKSWKTIESNTISIIQRFL

>comp15069\_c0\_seq3; 1038 155 3943 LEN=4497; translated  
MPGDSASSWSNMDMNNIEMDENSTSDRSKSI VSYSSASAVSTSTSI SRFTTRQQQIIED  
ESLAVRDSEHLTKLRFLLITILFWSTVGVGLAVWIYFTEDIENKFDDLYHDDSLEVLQEL  
ESRFIVALGAIDSFMVALCTLSSEWPFVVTAPHFSVRAQKLRKMSHAFVTTYPYVEDSQ  
REEWEEYSSANDNWLEEDLKKQEDEKGIILQKNVLYGREPTDEFVQKTIGNTSGFMPRWQ  
QSPVTETSAYNRDGFQYKALANAWATFQHHPQQVVMYSYVNNIPTTEDPNLNVEEQIKVME  
RFFAHNDSYHAEPFGDIFYPILHDAEAI IHANGSNKTSSSLTNSTLVGVTAVTFYWRDLL  
KNMLSDEIDGMHVVENNCNQFTTYTWFESEPLYLGIIDLHEPVYDQLQQSFLLLTDIEGI  
NTYTGLPLSSAGCQYEIHLYPSTDMIRNFEMNEVGKXKKKQYNAIRVKICAQREESSGFL  
SDXTWFLPYFSTNKNSPVAFTGIAVIIFIFTMVFVFDCLVESRQRKVYTSAVRNNAIV  
SSLFPKSGMSFPLSFGICIESLYSHESVERKSLILKSLLLFAPSVRDRLYQENDPTPKKS  
QPAKTRKTFMHEDNGVGEPPKEFDAPIADLFSNCTVLFADISGFTSWSSERSPSQVFL  
LETIYGAFDKIADRRGVFKVETIGDCYMAVTGLPNPKRDHAVIMARFARDCRNQMNALTK  
SLEVTLGPETSLSMRFGHLHSGPVTAGVLRGQKSRFQLFGDTVNTAARMESTGVRNQIHI  
SEDARLLNDAGKSSWLTPRKETVQAKGKGELTTYWAFQKSHNKRGSSTVATAATCDDSSL  
GSYGSPAIDQRAKVGKQILCDRRARLIDWNVDLFAGLIRKVVARRGAI VVNVKGP ISE  
DSSKSIQTTTGDGMLDEVVEI IELPVFDPRVINSQEDPHSILLGDEVMAQLRSYIFAISN  
SYNENPFHNFHASHVTLVAKLLSRIVAPDLEISTCEHNVYSTLHDHTYGITSDPLTQF  
ACILAALIHVDVHQVGNKTLVEEEDPVAKKYKGRSVAEQNSVDIAWALFLEPQFSAVRK  
AVCRTDKELDRRLQILVNTVLA TDIMDKDLKQLRNQRWDKAFSPDLKDNENNQDR INRK  
ATIVLEHLIQASDVCHTMQHWVYRKNERNLFEEMYLAYKTGRANVDPSTFWYQGELGFF  
DHYI IPLSKKLSDCGVFGVSSDEYLNYSRNRKEWEQRGEAIVAEMIDKFKDKIYVESRE  
VC

>comp15069\_c0\_seq4; 832 155 2984 LEN=2984; translated  
MPGDSASSWSNMDMNNIEMDENSTSDRSKSI VSYSSASAVSTSTSI SRFTTRQQQIIED  
ESLAVRDSEHLTKLRFLLITILFWSTVGVGLAVWIYFTEDIENKFDDLYHDDSLEVLQEL  
ESRFIVALGAIDSFMVALCTLSSEWPFVVTAPHFSVRAQKLRKMSHAFVTTYPYVEDSQ  
REEWEEYSSANDNWLEEDLKKQEDEKGIILQKNVLYGREPTDEFVQKTIGNTSGFMPRWQ  
QSPVTETSAYNRDGFQYKALANAWATFQHHPQQVVMYSYVNNIPTTEDPNLNVEEQIKVME  
RFFAHNDSYHAEPFGDIFYPILHDAEAI IHANGSNKTSSSLTNSTLVGVTAVTFYWRDLL  
KNMLSDEIDGMHVVENNCNQFTTYTWFESEPLYLGIIDLHEPVYDQLQQSFLLLTDIEGI  
NTYTGLPLSSAGCQYEIHLYPSTDMIRNFEMNEVSPVAFTGIAVIIFIFTMVFVFDCL  
VESRQRKVYTSAVRNNAIVSSLFPKSGMSFPLSFGICIESLYSHESVERKSLILKSLLLF  
APSVRDRLYQENDPTPKKSQPAKTRKTFMHEDNGVGEPPKEFDAPIADLFSNCTVLFAD  
ISGFTSWSSERSPSQVFLLETIYGAFDKIADRRGVFKVETIGDCYMAVTGLPNPKRDHA  
VIMARFARDCRNQMNALTKSLEVTLGPETSLSMRFGHLHSGPVTAGVLRGQKSRFQLFGD  
TVNTAARMESTGVRNQIHI SEDARLLNDAGKSSWLTPRKETVQAKGKGELTTYWAFQKS  
HNKRGSSTVATAATCDDSSLGSYGSPAIDQRAKVGKQILCDRRARLIDWNVDLFAGLIRK  
VVARRGAI VVNVKGP ISE DSSKSIQTTTGDGMLDEVVEI IELPVFDPRVINSQEDPHS I  
LLGDEVMAQLRSYIFAISNSYNENRKSWKTIESNTISIIQRFL

>comp15069\_c0\_seq5; 1156 155 3709 LEN=4263; translated  
MPGDSASSWSNMDMNNIEMDENSTSDRSKSI VSYSSASAVSTSTSI SRFTTRQQQIIED  
ESLAVRDSEHLTKLRFLLITILFWSTVGVGLAVWIYFTEDIENKFDDLYHDDSLEVLQEL  
ESRFIVALGAIDSFMVALCTLSSEWPFVVTAPHFSVRAQKLRKMSHAFVTTYPYVEDSQ  
REEWEEYSSANDNWLEEDLKKQEDEKGIILQKNVLYGREPTDEFVQKTIGNTSGFMPRWQ



QSPVTETSAYNRDGFQYKALANAWATFQHHPQQVVMVSYVNNIPTTEDPNLNVEEQIKVME  
RFFAHNDSYHAEPFGDIFYPILHDAEAI IHANGSNKTSSSLTNSTLVGVTAVTFYWRDLL  
KNMLSDEIDGMHVVENNCNQFTTYTWFESEPLYLGI GDLHEPVYDQLQQSFLLLTDIEGI  
NTYTGLPLSSAGCQYEIHLYPSTDMIRNFEMNEVSPVAFTGIAVIFIFTMVFVFDCL  
VESRQRKVYTSAVRNNAIVSSLFPKSVRDRLYQENDPTPKKSQPAKTRKTFMHEDNGVG  
EPKKEFDAPIADLFSNCTVLFADISGFTSWSSERSPSQVFLLETIYGAFDKIADRRGVF  
KVETIGDCYMAVTGLPNPKRDHAVIMARFARDCRNQMNALTKSLEVTLGPETS DLSMRFG  
LHSGPVTAGVLRGQKSRFQLFGDTVNTAARMESTGVRNQIHISEDARLLNDAGKSSWLT  
PRKETVQAKGKGETTYWAFQKSHNKRGSTVATAATCDDSSLGSYGSPAIDQRAKVGGKQ  
ILCDRRARLIDWNVDLFAGLIRKVVARRGAI VVNVKPKP ISEDSSKSIQTTTDMMLDEV  
VEI IELPVFDPRVINSQEDPHSILLGDEVMAQLRSYIFAISNSYNENPFHNFHASHVTL  
SVAKLLSRIVAPDLEISTCEHNVYSTLHDHTYGITSDPLTQFACILAALIHVDVHQVGN  
KTLVEEEDPVAKKYKGRSVAEQNSVDIAWALFLEPQFSAVRKAVCRTDKELDRLRQLIVN  
TVLATDIMDKDLKQLRNQRWDKAFSPDLKDNENNQDRINRKATIVLEHLIQASDVCHTM  
QHWVYRKWNERLFEEMYLAYKTGRANVDPSTFWYQGELGFFDHYI IPLSKKLSDCGVFG  
VSSDEYLNYSRNRKEWEQRGEAIVAEMIDKFKDKIYVESREVC

>comp15069\_c0\_seq6; 766 155 2994 LEN=2994; translated  
MPGDSASSWSNMDMNNIEMDENSTSDRSKSI VSYSSASAVSTSTSI SRFTTRQQQI IED  
ESLAVRDSEHLTKLRFFLITILFWSTVGVGLAVWIYFTEDIENKFDDLYHDDSLEVLQEL  
ESRFIVALGAIDSFVALCTLSSEWPFVVTAPHFSVRAQKLRKMSHAFVTTYPYVEDSQ  
REEWEYSSANDNWLEEDLKKQEDEKGIILQKNVLYGREPTDEFVQKTIGNTSGFMPRWQ  
QSPVTETSAYNRDGFQYKALANAWATFQHHPQQVVMVSYVNNIPTTEDPNLNVEEQIKVME  
RFFAHNDSYHAEPFGDIFYPILHDAEAI IHANGSNKTSSSLTNSTLVGVTAVTFYWRDLL  
KNMLSDEIDGMHVVENNCNQFTTYTWFESEPLYLGI GDLHEPVYDQLQQSFLLLTDIEGI  
NTYTGLPLSSAGCQYEIHLYPSTDMIRNFEMNEVGKXKKKQYNAIRVKICAQREESSGFL  
SDXTWFLPYFSTNKNSPVAFTGIAVIFIFTMVFVFDCLVESRQRKVYTSAVRNNAIV  
SSLFPKSVRDRLYQENDPTPKKSQPAKTRKTFMHEDNGVGEPKKEFDAPIADLFSNCTV  
LFADISGFTSWSSERSPSQVFLLETIYGAFDKIADRRGVFVKVETIGDCYMAVTGLPNPK  
RDHAVIMARFARDCRNQMNALTKSLEVTLGPETS DLSMRFGLHSGPVTAGVLRGQKSRFQ  
LFGDTVNTAARMESTGVRNQIHISEDARLLNDAGKSSWLTPRKETVQAKGKGETTYWA  
FQKSHNKRGSTVATAATCDDSSLGSYGSPAIDQRAKVGGKQILCDRRARLIDWNVDLFAG  
LIRKVVARRGAI VVNVKPKP ISEDSSKSIQTTTDMMLDEVVEI IELPVFDPRVINSQED  
PHSILLGDEVMAQLRSYIFAISNSYNENRKSWKTIESTISIIQRFL

>comp15069\_c0\_seq7; 1064 155 3831 LEN=4385; translated  
MPGDSASSWSNMDMNNIEMDENSTSDRSKSI VSYSSASAVSTSTSI SRFTTRQQQI IED  
ESLAVRDSEHLTKLRFFLITILFWSTVGVGLAVWIYFTEDIENKFDDLYHDDSLEVLQEL  
ESRFIVALGAIDSFVALCTLSSEWPFVVTAPHFSVRAQKLRKMSHAFVTTYPYVEDSQ  
REEWEYSSANDNWLEEDLKKQEDEKGIILQKNVLYGREPTDEFVQKTIGNTSGFMPRWQ  
QSPVTETSAYNRDGFQYKALANAWATFQHHPQQVVMVSYVNNIPTTEDPNLNVEEQIKVME  
RFFAHNDSYHAEPFGDIFYPILHDAEAI IHANGSNKTSSSLTNSTLVGVTAVTFYWRDLL  
KNMLSDEIDGMHVVENNCNQFTTYTWFESEPLYLGI GDLHEPVYDQLQQSFLLLTDIEGI  
NTYTGLPLSSAGCQYEIHLYPSTDMIRNFEMNEVGKXKKKQYNAIRVKICAQREESSGFL  
SDXTWFLPYFSTNKNSPVAFTGIAVIFIFTMVFVFDCLVESRQRKVYTSAVRNNAIV  
SSLFPKSVRDRLYQENDPTPKKSQPAKTRKTFMHEDNGVGEPKKEFDAPIADLFSNCTV  
LFADISGFTSWSSERSPSQVFLLETIYGAFDKIADRRGVFVKVETIGDCYMAVTGLPNPK  
RDHAVIMARFARDCRNQMNALTKSLEVTLGPETS DLSMRFGLHSGPVTAGVLRGQKSRFQ  
LFGDTVNTAARMESTGVRNQIHISEDARLLNDAGKSSWLTPRKETVQAKGKGETTYWA  
FQKSHNKRGSTVATAATCDDSSLGSYGSPAIDQRAKVGGKQILCDRRARLIDWNVDLFAG  
LIRKVVARRGAI VVNVKPKP ISEDSSKSIQTTTDMMLDEVVEI IELPVFDPRVINSQED  
PHSILLGDEVMAQLRSYIFAISNSYNENPFHNFHASHVTL SVAKLLSRIVAPDLEISTC  
EHNVYSTLHDHTYGITSDPLTQFACILAALIHVDVHQVGNKTLVEEEDPVAKKYKGRSV  
AEQNSVDIAWALFLEPQFSAVRKAVCRTDKELDRLRQLIVNTVLATDIMDKDLKQLRNQR  
WDKAFSPDLKDNENNQDRINRKATIVLEHLIQASDVCHTMQHWVYRKWNERLFEEMYLA  
YKTGRANVDPSTFWYQGELGFFDHYI IPLSKKLSDCGVFGVSSDEYLNYSRNRKEWEQ  
RGEAIVAEMIDKFKDKIYVESREVC

>comp15069\_c0\_seq8; 858 155 2872 LEN=2872; translated  
MPGDSASSWSNMDMNNIEMDENSTSDRSKSI VSYSSASAVSTSTSI SRFTTRQQQI IED  
ESLAVRDSEHLTKLRFFLITILFWSTVGVGLAVWIYFTEDIENKFDDLYHDDSLEVLQEL  
ESRFIVALGAIDSFVALCTLSSEWPFVVTAPHFSVRAQKLRKMSHAFVTTYPYVEDSQ  
REEWEYSSANDNWLEEDLKKQEDEKGIILQKNVLYGREPTDEFVQKTIGNTSGFMPRWQ

QSPVTETSAYNRDGFQYKALANAWATFQHHPQQVVMYSVNNIPTTEDPNLNVVEEQIKVME  
RFFAHNDSYHAEPFGDIFYPILHDAEAI IHANGSNKTSSSLTNSTLVGVTAVTFYWRDLL  
KNMLSDEIDGMHVVENNCNQFTTYTWFESEPLYLGI GDLHEPVYDQLQQSFLLDIEGI  
NTYTGLPLSSAGCQYEIHLYPSTDMIRNFEMNEVSPVAFGTGIAVIFIFTTMMVVFYDCL  
VESRQRKVYTSAVRNNAIVSSLFPKSVRDRLYQENDPTPKKSQPAKTRKTFMHEDNGVG  
EPKKEFDAPIADLFSNCTVLFADISGFTSWSSERSPSQVFLLETIYGAFDKIADRRGVF  
KVETIGDCYMAVTGLPNPKRDHAVIMARFARDCRNQMNALTKSLEVTLGPETS DLSMRFG  
LHSGPVTAGVLRGQKSRFQFLGDTVNTAARMESTGVRNQIHI SEDTARLLNDAGKSSWLT  
PRKETVQAKGKGLTTYWAFQKSHNKR GSTVATAATCDDSSLGSYGSPAIDQRAKVGGKQ  
ILCDRRARLIDWNVDLFAGLIRKVVARRGAI VVNVKGP I SEDSSKSIQTTTDMMLDEV  
VEI IELPVFDPRVINSQEDPHSILLGDEVMAQLRSYIFAISNSYNENRKSWKTI ESNTIS  
IIQRFL

>comp15070\_c0\_seq1; 604 1 2026 LEN=2730; translated  
SASASASVSLSSQLPSQEPSSWMRCTHRLPVTRANRGSSRSSSSGPFSSASGSRSTSGT  
RTAARQQGRHSLLDGNACKASDRARARFGAEHRYRNPSCWIDTDVGFDDLLAIECCNGYS  
DGGSEEPGKETGAEKSGNETDVSPVVGISTVGTGII SDPLDGVAILTGLLMPGTGGRENS  
NNIEREETNGSSCDASTHSGRNPVAFPI LPRKTRTRTEGHNEANRECNAGDPPWLRV  
RDQITAFCSSEGILLPSQKNLVSETEETETENAPTDDSSNGTTVTTS DHGEATAAVVSA  
APANTENENSRDDKHGGHDQIDLVPRAADQSGSVARRDAGLCVRSLELGVDPGRKPPGSA  
PGTNENTEAEVRAEFNFARDPEAVRRVFSHEGLHGIP IHLVPQEVCDRSAFEASF LRHY  
QQQQQQNARTGDPTIANSLPKVSAAKI IEDWLQSSLLPPETQQVRQPHARKSVRTTTRDS  
IATTSTVSSLLPTWIVRLIQTRTYSVYGDPI CIYVRDNCYDYISTSHPNNAVGAKTNGD  
CESNSEEEKSAAERRPPKIRWKEYSTKRTCDNAKDV I K VDSGRLVFWDAHDSNWKEADG  
SVPSTTNTADSV DGNFNDQQSILQSP TDEEASSLEHGGGSD ESITIRVAHEVELGPI YLD  
WLTKALTSSAPEDA

>comp15070\_c0\_seq2; 370 1 2022 LEN=2022; translated  
EKQRSFAHAHDCYTNHWFQHL S QSATRTEKPAEDSVLGFTGECVRSDEVDPDGSIVGEKK  
AKTGSIRSQSGSRHKRRNPGKATATPI YRDARFPAALVPVDFFLPDSLGDPIRQAKACA  
RRTARILGERTSLKLEGGIGCAFDETA VPFLLELLTG NKAGNADGTLFLMFVSTTGDGEQC  
DTIRTTWKSLLQKSLPRNLLAEGNEKFALFCLGDRAYGNQFCAAGRKLAVRLLRLGMP SF  
CEVGYGDDNTPNGGVFRDLDDWLEGVLLPGLLESWPRVPLAGGESADREAACRPFVEIL  
GERERERERIGSNGETTERTTAPKSERCETETETENDKESEAPEWKREFFRDSYRDYFAA  
RGPITAYSYPTRGDRTTASTVPGARAAPLLGRIAANDRITASDWNQDTRHLEIRLARPE  
PRPLPPSGCRNEARTGTSPKGPSPLPYAAGDVASVLPFNSREEVNRFLGVLPDSISSRPD  
APIRIDLDDFYATDSRFTRWPGRCTLRGWLTYCADIQSLPEREDLRALSVYCAPGDNGSL  
DQSNKLRSLSETSEALYADYILREKR SWIDVFHDFESLRTQGSRLTLESLLVLLPPMRT  
RDFSIASSPSMGRILGDFNRGGGVGPD SRAGAGGVDEWFSIELCVAVVEGKTRLGRSYHG  
LCSKFLSRIAPSDV

>comp15070\_c0\_seq3; 487 99 1881 LEN=1881; minus strand; translated  
MAETTMKSSTNVHRVHFASCNNHNLKNKLWPI IESRSPDAFVWAGDAIYGGKKKIXNQPN  
KPIFERICFLMVSYCTIVDEEVPSADRNRWIPVPTKKTVCCTPDRRLRAYYAKQRNVPGYR  
FAVLNPNVTVFGTDFDDHDYGC DNADKTFPYRYESGLAYMDFIEGDNPDETTREESLMRYR  
AKAGYGVYGVKLFDFDRPQGNIEVPEMEAMIDPDAQASGRSFQSVYSYGEKTVAIFVLDV  
RTNKDPWKKGLEAYRLDHNGDFLGERQWRWFESAIRQSRASVNI VVSGLQIHGSIFPNSN  
INESWNKFPKARERLYNAILQANAKTPILVSGVRQRL EMDI WYNXVALMRTGISRFSSSP  
LSSQDVHMTQFHRRHCVPKDNSNSLKYRPLIEMTTSGMTHTWGTLPSPLVTTDVKRLSP  
SWSARFGLFVRSNTIQLLHR IHPWKS L MNSEETTTSGSGALYPNGGGENAKTGLQF SLEK  
NFGEIEVD FEQRVVLRSIGEDPDAPLLMAMMAMDELNP NATDAYEHVFGQEHESNWIC  
VDYRSKGNQQSSIVTASLGTEMKNTANFQAI VLF AALLFVTASCQKEKIVLLRL

>comp15070\_c0\_seq4; 239 1 1329 LEN=1329; translated  
EKQRSFAHAHDCYTNHWFQHL S QSATRTEKPAEDSVLGFTGECVRSDEVDPDGSIVGEKK  
AKTGSIRSQSGSRHKRRNPGKATATPI YRDARFPAALVPVDFFLPDSLGDPIRQAKACA  
RRTARILGERTSLKLEGGIGCAFDETA VPFLLELLTG NKAGNADGTLFLMFVSTTGDGEQC  
DTIRTTWKSLLQKSLPRNLLAEGNEKFALFCLGDRAYGNQFCAAGRKLAVRLLRLGMP SF  
CEVGYGDDNTPNGGVFRDLDDWLEGVLLPGLLESWPRVPLAGGESADREAACRPFVEIL  
GERERERERIGSNGETTERTTAPKSERCETETETENDKESEAPEWKREFFRDSYRDYFAA  
RGPITAYSYPTRGDRTTASTVPGARAAPLLGRIAANDRITASDWNQDTRHLEIRLARPE  
PRPLPPSGCRNEARTSTSPKGPS

>comp15070\_c0\_seq5; 573 99 1878 LEN=2880; minus strand; translated  
MAETTMKSSTNVHRVHFASCNNHNLKNKLWPI IESRSPDAFVWAGDAIYGGKKKIXNQPN

KPIFERICFLMVSYCTIVDEEVPSADRNWRIPVPTKKTVCGTPDRLRAYYAKQRNVPGYR  
FAVLDPNPVTVFGTFDDHDYGCNDADKTFPYRYESGLAYMDFIEGDNPDRETREESLMRYR  
AKAGYGVYGVKLFDFDRPQGNIEVPEMEAMIDPDAQASGRSFQSVYSYGEKTVAFVLDV  
RTNKDPWKKGLEAYRLDHNGDFLGERQWRWFESAIRQSRASVNIIVVSGLQIHGSIFPNSN  
INESWKNFKKARERLYNAILQANAKTPILVSGVRQRLEMDIWINXVALMRTGISRFSSSP  
LSSQDVHMTQFHRRHCVPKDNSNSLKYRPLIEMTTSGMTHTWGTLPSPLVTVDVKRLSP  
SWSARFGLFVRSNTIQLLHRIHPWKSMLNSEEETTTSGSGALYPNGGGGENAKTGLQFSLEK  
NFGIEVDFEQRRVLRSIGEDPDAPLLMASMAMDELNPNATDAYEHVFGQEHESNWIC  
VDYRSKGNQOSSSIVTASLGTEMKNTANFQAIIVLFAALLLCYCQLSKGKKS LA

>comp15071\_c0\_seq1; 1620 154 4257 LEN=4334; translated  
MATGNLVLGEATPLLGDAPAAEQEGPSGPSISDRITSEIRARAMTLADRATEAAREVAA  
RTERAGERLLEFGTEVSARAQRAREVAALVEQSKEPVWFELEARTPAGALYERFMIGLIL  
TNVLAFLVGLSFAEPYNETLGYPWVLRGTEESLCGNTCDALWFGNHADNPFPAEWLGIGAT  
SVLEVFTVAVFTVEYLLRVLTFRQEGYSNPIAFVLTDFFSWVDLASTIPFYLDAAFVFPSE  
NAFGATGFLRMFRLFRMMRGEQNYDSALSLCGEVYRAQKAVLGTAAFVGGATTWISVASL  
YYLVERENPDMIYCGSCDDVDTSLCTMDDWIVDCSSAGCPGTEELPEPCYNLYRSIPSA  
SYYSLLNLFGEFPLFDQHSVGGQVVGTTITAVVAVTFFALPVGIIGNGFESEIEKRRRTSTG  
GEGPIVERGVATAGHVAAGTGCAPGLYNFFVAGTGEGLFFEHLLINALVVGTAALTFMIDT  
IDDLVPVGYRFLQSWFEFAAVLVFTVEYVLKFIATVAVDPMYNSGGGGGGSVSPRPKWSYA  
TCFLPMVDLLGFLPYWIVLFGFGGSSVVDTSGPSGMGDTFVKALRLLRIFRFEKYTHAFTS  
FDDVFSRNYDVLVSTFFSSVLLWVFFGALLYATERDNPDEMAANYNSVPNAMWMTLLNL  
SGEAPLAQYSVVGKIATGILGLFATAIFGIPIGVLGGGFEEVVEEETEDCAVEIEAAPEN  
QAAATGSAVEASNPGLPGTDAERWCYNIANGQGSAAARSIEETLIYVLI FVAIAIGAWQT  
VDGHEDDFSTIESLTVYAFTLEYVVRIGVGDPAFARSGRASGVVSRLAYVVSFYVID  
LLAILPYVALALPESLIDQYDEYLRMARILRLLKLDKYVPSFTLIDNVIRYKWDLSLQVA  
GYAAISLWTFISGLIYLFYTDSSNEIDPVPLYGTCTDDCTMMDRFQNYFDSFYFTGIHL  
TGDYPIITYSWPAKLVNFCMVVAAGVVSIPSGLIANGFVEIVQSKHKAKKKSADKDVPS  
ASADPGAVEGDDWYEERYALEGVSPSSSWGPTVDGYQNAVNNFLNGTKDRRGKTKHTR  
IGMAGRIFIFTVIVANVVAVMLESVPSIDRAVGNPEGNFFDVFERFSIAVFTLEYIARLF  
CASKNRESLYSSRVYAQTFFGIVDLLSTAPWYIEQILLATGTITEGGEVGVFRIFRIVR  
LLQLEDFVTAFSKLDNVFRASMDVLKSCFLLALI IWIGGSLFFIFERNPNPFRCDSDI  
PDLSTGNGSSFVPGCFDFPSTAACNDYYGEGMVCQKVFVNMPNTLYMTAVFLGGEWGVT  
FTWPGRILCILCYVGIYALYAI PAGTFFDKFGAILGLDGDDEEEEEE

>comp15072\_c0\_seq1; 519 388 1485 LEN=3744; minus strand; translated  
MSDVLSKKTIFYSTCIPFFIFFALFDAVIYPNADRLHPSLASVESFLGIANGSEGGLSIL  
ASIVAHWTSALFYVMAEYSSVSVGLLFWQFANDVVSVDQAKRFYPLFAQMSGLAPVLAG  
QYAVHFASRADTFATSLHRLTAAISFAGCMICFFYNASTKFIKKEGVKLVSSSSDGAPA  
PTKPKKPKMSMVESIKFLASSQYLRRLIASLVLGYGLSINFTEVMWKS LVKPKYPNPLDYQ  
RFMGNFSSAVGASTCVVILFGVHVIRILGWKVGAMATPAIMAVLAAPFFACILMGLDSPA  
RLHVAVILGTVQSLLSKTSKYALFDPTTQMSYIPLDQDSKVKGKAAIDVLSRIGKSGGS  
FIQQM

>comp15072\_c0\_seq2; 519 388 1485 LEN=2891; minus strand; translated  
MSDVLSKKTIFYSTCIPFFIFFALFDAVIYPNADRLHPSLASVESFLGIANGSEGGLSIL  
ASIVAHWTSALFYVMAEYSSVSVGLLFWQFANDVVSVDQAKRFYPLFAQMSGLAPVLAG  
QYAVHFASRADTFATSLHRLTAAISFAGCMICFFYNASTKFIKKEGVKLVSSSSDGAPA  
PTKPKKPKMSMVESIKFLASSQYLRRLIASLVLGYGLSINFTEVMWKS LVKPKYPNPLDYQ  
RFMGNFSSAVGASTCVVILFGVHVIRILGWKVGAMATPAIMAVLAAPFFACILMGLDSPA  
RLHVAVILGTVQSLLSKTSKYALFDPTTQMSYIPLDQDSKVKGKAAIDVLSRIGKSGGS  
FIQQM

>comp15072\_c0\_seq3; 519 388 1485 LEN=3727; minus strand; translated  
MSDVLSKKTIFYSTCIPFFIFFALFDAVIYPNADRLHPSLASVESFLGIANGSEGGLSIL  
ASIVAHWTSALFYVMAEYSSVSVGLLFWQFANDVVSVDQAKRFYPLFAQMSGLAPVLAG  
QYAVHFASRADTFATSLHRLTAAISFAGCMICFFYNASTKFIKKEGVKLVSSSSDGAPA  
PTKPKKPKMSMVESIKFLASSQYLRRLIASLVLGYGLSINFTEVMWKS LVKPKYPNPLDYQ  
RFMGNFSSAVGASTCVVILFGVHVIRILGWKVGAMATPAIMAVLAAPFFACILMGLDSPA  
RLHVAVILGTVQSLLSKTSKYALFDPTTQMSYIPLDQDSKVKGKAAIDVLSRIGKSGGS  
FIQQM

>comp15073\_c0\_seq1; 422 1 1136 LEN=1638; translated  
XTSIRGFASVHHDNPYSIISLIEGESIAIVLALVGAKPIKEGTGRIVRFDLIPLEELNRP  
RIDVLASLSGIFRDSFANVVDLLDDMFERCAISDEPIDMNFVKKHALELSEDGVERPAAR

LFSNPPGDYGSVMNEVVSGDWEDSESLGETWKGRNVFSYGRNEGS GEGISGTARPDVLE  
KLLTTTDRIVQEIDSVEYGLTDIQEYYANTGAMKKAENRKPIDSVTKKRKAVALSVVEA  
FSSPNESEQKVPVRNVEDVLRLEYSKFLNPKWRDAMIDQSGGAYEVSQRMTAMVGWAA  
TASVDNFVFDEAAERYALDEDVARKLQKANPEAFKNVVRRLLEANGRGMWETDDRTLEKL  
RDLYSDVDDTIEQVDSL

>comp15073\_c0\_seq2; 365 1 1232 LEN=1734; translated  
XTSIRGFASVHHDNPYSIISLIEGESIAIVLALVGAKPIKEGTGRIVRFDLIPLEELNRP  
RIDVLASLSGIFRDSFANVVDLDDMFERCAISDEPIDMNFVKKHALELSEDGVERPAAR  
LFSNPPGDYGSVMNEVVSGDWEDSESLGETWKGRNVFSYGRNEGS GEGISGTARPDVLE  
KLLTTTDRIVQEIDSVEYGLTDIQGKLLQFYASNAXNKSTHSEFPVFLQLITMLPEYYA  
NTGAMKKAENRKPIDSVTKKRKAVALSVVEAFSSPNESEQKVPVRNVEDVLRLEYSKFL  
NPKWRDAMIDQSGGAYEVSQRMTAMVGWAATASVDNFVFDEAAERYALDEDVARKLQK  
ANPEAFKNVVRRLLEANGRGMWETDDRTLEKL RDLYSDVDDTIEQVDSL

>comp15073\_c0\_seq3; 1405 186 4526 LEN=5028; translated  
MIRMKLLGLTLTVTILSSSSFTTFSGNGIARKTSELIRFPNQRSSFQTLYSSQLERSPAF  
GQREEGGADNPNIVLVAGFESFNKELYVKA AKSLGDVHLKVFADNEIRVSPTETNPVFAA  
AMKNADIFVGLSIFDYDDVIAVEALLPHVKGPRLLFECSELEMEYNEVGTFNMKKSSTGE  
KAGPPPAVKAILSQFGSGKEEDRVAGYVKKLKFDPDLKFPVGEKASDLKIWLEAYRYWN  
QGGSTNVKYMIDLLQKAYTNKDISHLPKVLVTPDVGLLHPLNNEYFTSPREFLEWRNSAD  
CSARALQEGFTLAPKDAPRVAVLLYRKHVITDQPYIMDLIRLMEQNGICPVPIFINGVEG  
HTIVRDLLTSEHEIKGVDSGTI IRESSFQSIKAVSVDIVNTIGFPLVGGPAGSMEAGR  
VAVAEKLLRDMVPIVIVASPLLLQSIKQWKEGVLGLQSVVLYSLPELDGAIDTVVLGGL  
VGDKIALVNERVRKLVSRKIGWVKLRRTLKDRKLSIMVYGFPPNVGAVGTAALLDVPRS  
LENMLTQMHEGYNVGDVFTDPNACGESIIAALGILSEEAVIAGGAGRMKEALASRIERA  
TNGDITIAETLAKPGGGLGGAEVRALDLSFDDLEKVMGKHMATKVRRAWSEKDRGPGTSS  
NGHLVVSGLQIGNIWIIVQPLLGVEGDPMRLLFQRDLTPHPQYCACYEFMKLPEEDGGFG  
AQAVVHLGMHGTVEWLPQPLGNDRESWSDELGGIPNIYIYAANNPSESILAKRRGYGT  
LVSYNVPPYGRAGLYLELASLRDLIGEYRTGASGLKQPIWSTCQRCGIDTDVPLLMIEG  
DEESKVVDPDLPELSSETFDKWWIQLADYLDVLRERLFSGLHVLGSKPSEDDLKSFLS  
AFFNDKLTEEDYEKILNDENKHKRERNLDFLADFGKSFVTNFDSQEEENDEGDIAIAKD  
IVSLLNRNTEELDGILNLLDGGYIPAPGGDLLRDGTAVLPTGRNIHALDPYRMPAEGAW  
IRGNIAEETIRQHLSNDGAYPETIACTLWGLDTIKTRGESIAIVLALVGAKPIKEGTG  
RIVRFDLIPLEELNRPRIIDVLASLSGIFRDSFANVVDLDDMFERCAISDEPIDMNFVKK  
HALELSEDGVERPAARLFSNPPGDYGSVMNEVVSGDWEDSESLGETWKGRNVFSYGRNE  
GS GEGISGTARPDVLEKLLTTTDRIVQEIDSVEYGLTDIQGKLLQFYASNAXNKSTHSEF  
PVFLQLITMLPEYYANTGAMKKAENRKPIDSVTKKRKAVALSVVEAFSSPNESEQKVP  
VRNVEDVLRLEYSKFLNPKWRDAMIDQSGGAYEVSQRMTAMVGWAATASVDNFVFDEA  
AERYALDEDVARKLQKANPEAFKNVVRRLLEANGRGMWETDDRTLEKL RDLYSDVDDTIE  
QVDSL

>comp15073\_c0\_seq4; 1462 186 4430 LEN=4932; translated  
MIRMKLLGLTLTVTILSSSSFTTFSGNGIARKTSELIRFPNQRSSFQTLYSSQLERSPAF  
GQREEGGADNPNIVLVAGFESFNKELYVKA AKSLGDVHLKVFADNEIRVSPTETNPVFAA  
AMKNADIFVGLSIFDYDDVIAVEALLPHVKGPRLLFECSELEMEYNEVGTFNMKKSSTGE  
KAGPPPAVKAILSQFGSGKEEDRVAGYVKKLKFDPDLKFPVGEKASDLKIWLEAYRYWN  
QGGSTNVKYMIDLLQKAYTNKDISHLPKVLVTPDVGLLHPLNNEYFTSPREFLEWRNSAD  
CSARALQEGFTLAPKDAPRVAVLLYRKHVITDQPYIMDLIRLMEQNGICPVPIFINGVEG  
HTIVRDLLTSEHEIKGVDSGTI IRESSFQSIKAVSVDIVNTIGFPLVGGPAGSMEAGR  
VAVAEKLLRDMVPIVIVASPLLLQSIKQWKEGVLGLQSVVLYSLPELDGAIDTVVLGGL  
VGDKIALVNERVRKLVSRKIGWVKLRRTLKDRKLSIMVYGFPPNVGAVGTAALLDVPRS  
LENMLTQMHEGYNVGDVFTDPNACGESIIAALGILSEEAVIAGGAGRMKEALASRIERA  
TNGDITIAETLAKPGGGLGGAEVRALDLSFDDLEKVMGKHMATKVRRAWSEKDRGPGTSS  
NGHLVVSGLQIGNIWIIVQPLLGVEGDPMRLLFQRDLTPHPQYCACYEFMKLPEEDGGFG  
AQAVVHLGMHGTVEWLPQPLGNDRESWSDELGGIPNIYIYAANNPSESILAKRRGYGT  
LVSYNVPPYGRAGLYLELASLRDLIGEYRTGASGLKQPIWSTCQRCGIDTDVPLLMIEG  
DEESKVVDPDLPELSSETFDKWWIQLADYLDVLRERLFSGLHVLGSKPSEDDLKSFLS  
AFFNDKLTEEDYEKILNDENKHKRERNLDFLADFGKSFVTNFDSQEEENDEGDIAIAKD  
IVSLLNRNTEELDGILNLLDGGYIPAPGGDLLRDGTAVLPTGRNIHALDPYRMPAEGAW  
IRGNIAEETIRQHLSNDGAYPETIACTLWGLDTIKTRGESIAIVLALVGAKPIKEGTG  
RIVRFDLIPLEELNRPRIIDVLASLSGIFRDSFANVVDLDDMFERCAISDEPIDMNFVKK  
HALELSEDGVERPAARLFSNPPGDYGSVMNEVVSGDWEDSESLGETWKGRNVFSYGRNE

GSSEGISGTARPVDLEKLLTTTDRIVQEIDSVEYGLTDIQEYYANTGAMKKAENRKPID  
SVTKKRKAVALSVVEAFSSPNESEQVVPVRNVEDVLRLEYSKFLNPKWRDAMIDQSGG  
AYEVSQRMTAMVGWAATASVDNFVDEAAERYALDEDVARKLQKANPEAFKNVVRLLLEA  
NGRGMWETDDRTLEKLRDLYSDVDDTIEQVDSLY  
>comp15074\_c0\_seq1; 84 1 520 LEN=764; translated  
XIHPRWLSGNKSLTCFIASRCGLDDNHLGCMLRHLPLRLEELRIFGNKCRSKGLASLTRM  
IKNRRAKLKILDLSFQHIDPGEFDTITNFAEALGNKSLTILDLNDSLDDNHLTLIVEA  
LCKNKTLEEIMLNHNKITGEGVAMLAAKFGEMKGLKKISMYSNLFDATSTTV  
>comp15074\_c0\_seq2; 344 214 1626 LEN=1870; translated  
MIRGFSEKLLGASRKKVEDDGGTNEKPKGAGRPSLLSHYSLRMKNFQSFVSDVSAGSESD  
EYSVSSIVEEDEDNSDAGDDSDLSSVYTTLTVETIRTAENENVKPLAAPNSRSTQIFV  
GANSPTADLKASLNDVGKLSIYAKEVTISKSVACAFLELVRGDNRSWEAIAVDILRQKAR  
WDSIVLDGCSSTGPGSTSNESAKQDNDEANEKNGDDDDKENDDKGEENKEDTNIPTATP  
KFLDLVLSGILNVDNCSYLHLTGLEWRSSTAFTMQSIFSQCLKKQLDFLDLSKHVPAL  
VAGLSGNKSLTCFIASRCGLDDNHLGCMLRHLPLRLEELRIFGNKCRSKGLASLTRMIKN  
RRAKLIKILDLSFQHIDPGEFDTITNFAEALGNKSLTILDLNDSLDDNHLTLIVEALCK  
NKTLEEIMLNHNKITGEGVAMLAAKFGEMKGLKKISMYSNLFDATSTTV  
>comp15074\_c0\_seq3; 214 214 869 LEN=869; translated  
MIRGFSEKLLGASRKKVEDDGGTNEKPKGAGRPSLLSHYSLRMKNFQSFVSDVSAGSESD  
EYSVSSIVEEDEDNSDAGDDSDLSSVYTTLTVETIRTAENENVKPLAAPNSRSTQIFV  
GANSPTADLKASLNDVGKLSIYAKEVTISKSVACAFLELVRGDNRSWEAIAVDILRQKAR  
WDSIVLDGCSSTGPGSTSNESAKQDNDEANEKNGDEDDX  
>comp15075\_c0\_seq1; 1124 1 3301 LEN=3372; translated  
XASGNAEIEYEEYELWMESLGVLLSHSRPARAAGAPTAALAAGDAGTCPDADGSNGSEPS  
PSEKAGASKGRSAYDDLGVRRADDPIDYNGAIASHECTNLFAQYTYETSCTFYAELEWTRS  
YIGGSIIRGRHHQEHQEQEQEPKREQDTCLHLNVLHSCLAFRPHVHEILIHYPASFLP  
RDGLKRVLYVGGGDLVLLHELLRYESIELVIGMELDQMLRDSFRHYGIQPKFEDERVHW  
WFGDAAKSLSLPPPEEFFGTDFDLVLDLVEIFDALRVGDQNERLVDYMAKLLKPEGILV  
RQEDYPHHSVDFARYTVDLNVFGMPHTCSQYFTMASDTIDFANHQRVDHGLEGVWYEP  
NVGSNDHFSMWGNRNNLVPPNRI CDQTVNTDPVHVLPKGI FVAIEAENVTLALDDASL  
VQTTAKKALEEIGFTGIRIHSISTGSSSSSLTSSMVLSFEEGYLGLRSYPANRYCSMDLQ  
LWNDISNHKLAVSKLVEAVGGTTTGDSTSSFLITTTGMLGLSNFQQPQDRIVPSSWCDGD  
GLSESSSKSSEGNEMDGIETVIQNILARITGKKGSVVFLCPNKSSRCRVREDVDYGS  
AEVVSFEACPATTEPNDAASLSECEEQMVQRIQDSFSLRNSQNKIEAIVMDPRAPRELQ  
ITKVFVTDPRSRYRWSHDYVVLAPSTVESRLEDFWSSWKYQLLERFRTDHVEFNPLYH  
ATAAFRDPSSSDVWTMGLVLSAGNPRFYDQLVSSFQAIRGEISREVLLVETKTGAI  
SHIPDYQPSKWATPSDYDLEPAELQWSDQRPLGGQAMLQYEGVPPVDDNIDPGTTV  
LHFRIEDHDWCVGKVVEMVDEGYVVSNGVDYPEVVERKDVLYDKEAILAGETIPFGS  
FVVADGEEHLDLELFYEQINGVHHDGRYKVFYFLSDGTSALLDPSRVVLKPTPSFSS  
PAEAKLFSSCSEFFDFVFGSQQDFSVFPEGSGPNPEIYRRSVGNGLVVSQDHEDGSG  
APTTIVATYDGIHVTNVFQSMEEVSGQLLNHIANLIPGMELKQNDSHPRGYGRV  
VNFREDMDKAYFGTEYPVALLLDDDDDEEEDDEDEEEY  
>comp15075\_c0\_seq2; 1775 1 4170 LEN=4241; translated  
NTLGLWGPDSGSEEQVCADPASPNGKGPDPVFSYPDP TTFRSTLETVLERGWNGRMV  
PIYHWIPRASDPETFNVVHSEVLVDDEAYTKLKVLRKKEESDEYD TDYDARAYQLRAS  
RTIRAGEAIVLPFHSAVQRFATTGQVHVAGEGTSKTERRETDGADASYRFAQTMHDQ  
EGHDLVYVELQDSDLDPYEDHLVWDYYPSTQRIEWHKSWGANRTLLGEDDETEDGDND  
KDN DNGANPRDSGEALRFTQRAVLQAQYLRRLRGLAEELKAALLGDEGKNRTAFATG  
EASGNAEIEYEEYELWMESLGVLLSHSRPARSAGAPTAAPAAGAAGACPDADGSNG  
SEPSCPSEKAGASKGRSAYDDLGVRRADDPIDYNGAIASHECTNLFAQYTYETSCT  
FYAELEWTRSYIGGSIIRGRHHQEHQEQEQEPKREQDTCLHLNVLHSCLAFRPHV  
HEILIHYPASFLPRDGLKRVLYVGGGDLVLLHELLRYESIELVIGMELDQMLRDS  
FRHYGIQPKFEDERVHWWFGDAAKSLSLPPPEEFFGTDFDLVLDLVEIFDALRV  
GDQNERLVDYMAKLLKPEGILVVRQEDYPHHSVDFARYTVDLNVFGMPHTCSQYFT  
MASDTIDFANHQRVDHGLEGVWYEPNVGSNDHFSMWGNRNNLVPPNRI CDQTVNT  
DPVHVLPKGI FVAIEAENVTLALDDASLVQTTAKKALEEIGFTGIRIHSISTGSS  
SSSLTSSMVLSFEEGYLGLRSYPANRYCSMDLQLWNDISNHKLAVSKLVEAVGGTT  
TGDSTSSFLITTTGMLGLSNFQQPQDRIVPSSWCDGDGLSESSKSSEGNEMDGI  
ETVIQNILARITGKKGSVVFLCPNKSSRCRVREDVDYGS AEVVSFEACPATTEPN  
DAASLSECEEQMVQRIQDSFSLRNSQNKIEAIVMDPRAPRELQITKVFVTDPRS  
RYRWSHDYVVLAPSTVESRLEDFWSSWKYQLLERFRTDHVEFNPLYHATAAFRDPSS

DVWTMGVLSAGNPRFYDQLVSSFQAIRGEISREVLLVETKTGAI SHIPDYQPSKWATPSD  
YDLEPAELQWSDQRPLGGQAMLQYEGVPQVPDDNIDPGTTVLFHRIEDHDWCVGKVVEMV  
DEGYVVSNGVDYPEVVERKDVLYDKEAILAGETIPFGSFVVADGEEHLDLELFYEGQIN  
GVHHDGRYKVYFLSDGTSALLDPSRVVLKPTPSFSSPAEAKLFSSCSEFFDFVFGSQSD  
FSVFPEGSGPNPEIYRRSVGNGLVVSQDHEDGSGAPTTIVATYDQGIHVTFNVFQSME  
EVGSGQLLNHIANLNIPGMELKQND SHPRGYGRVNVFREDMDKAYFGTEYPVALLLDDDD  
DEEEDEDEY

>comp15075\_c0\_seq3; 1105 1 3289 LEN=3360; translated  
XASGNAEIEYEEYELWMESLGVLLSHSRPARAAGAPTAALAAGDAGTCPDADGSNGSEPS  
P SERAGASKGRSAYDDLGVRRADDPIDYNGAIASHECTNLFAQYTYETSKTFYAELEWTRS  
YIGGGSIRGRHHQEHRDQEQEPPKREQDTCLHLNNVLHSCLAFRPHVHEILIHYPASFLP  
RDGLKRVLYVGGGDLVLLHELLRYESIELVIGMELDQMVLRDSFRHYGIQPKFEDERVH  
WFGDAAKSLSLLPPEEFFGTDFDLVLDLVEIFDALRVGDQNERLVDYMAKLLKPEGILV  
RQEDYPHHSVVDFARYTVDLNVFGMPHTCSQYFTMASDTIDFANHQRVDHGLEGLVWYEP  
NVGSDNHFSMWGNRYRNNLVPPNRI CDQTVNTDPVHVLP SKGIFVAIEAENVTLALDDASL  
VQTTAKKALEEIGFTGIRIHSISTGSSSSSLTSSMVLSFEEGYLGLRSYPANRYCSMDLQ  
LWNDISNHKLAVSKLVEAVGGTTTGDSTSSFLITTTGGMLGLSNFQQPQDRIVPSSWCDGD  
GLSESSSKSSEGNEMDGIETVIQNILARITGKKGSVVFLLCPNKSSRCRVREDVDYGS  
AEVVSFEACPATTEPNDAASLSECEEQMVQRIQDSFLSRNSQNKIEAIVMDPRAPREL  
GQITK KVFVTDPRSYRWLSHDYVVLAPSTVESRLEDFWSSWKYQLLERFRTDHVEFN  
PLYHATAA FRDPSSSDVWTMGVLSAGNPRFYDQLVSSFQAIRGEISREVLLVETKTGAI  
SHIPDYQPS KWATPSDYDLEPAELQWSDQRPLGGQAMLQYEGVPQVPDDNIDPGTTV  
LFHRIEDHDWC VGKVVEMVDEGYVVSNGVDYPEVVERKDVLYDKEAILAGETIPFGS  
FVVADGEEHLDLELFYEGQINGVHHDGRYKVYFLSDGTSALLDPSRVVLKPTPSFSS  
PAEAKLFSSCSEFFDFVFGSQSDFSVFPEGSGPNPEIYRRSVGNGLVVSQDHEDGSG  
APTTIVATYDQGIHVTFNVFQSMEEVGSGQLLNHIANLNIPGMELKQND SHPRGYGR  
VNVFREDMDKAYFGTEYPVALLLDDDDDEEEDEDEY

>comp15075\_c0\_seq4; 1100 1 2728 LEN=2799; translated  
XSQNASVSSAGVVAHIARVLPNKTGMELDQMVLRDSFRHYGIQPKFEDERVHWWFGDA  
AKSLSLLPPEEFFGTDFDLVLDLVEIFDALRVGDQNERLVDYMAKLLKPEGILV  
RQEDYPHHSVVDFARYTVDLNVFGMPHTCSQYFTMASDTIDFANHQRVDHGLEGLV  
WYEPNVGSDNHFSMWGNRYRNNLVPPNRI CDQTVNTDPVHVLP SKGIFVAIEAENV  
TLALDDASLVQTTAKKALEEIGFTGIRIHSISTGSSSSSLTSSMVLSFEEGYLGLRS  
YPANRYCSMDLQLWNDISNHKLAVSKLVEAVGGTTTGDSTSSFLITTTGGMLGLSN  
FQQPQDRIVPSSWCDGDGLSESSKSSEGNEMDGIETVIQNILARITGKKGSVVFL  
LCPNKSSRCRVREDVDYGSAEVVSFEACPATTEPNDAASLSECEEQMVQRIQDSFL  
SRNSQNKIEAIVMDPRAPRELQGITK KVFVTDPRSYRWLSHDYVVLAPSTVESR  
LEDFWSSWKYQLLERFRTDHVEFNPLYHATAA FRDPSSSDVWTMGVLSAGNPRFYD  
QLVSSFQAIRGEISREVLLVETKTGAI SHIPDYQPSKWATPSD YDLEPAELQWSD  
QRPLGGQAMLQYEGVPQVPDDNIDPGTTVLFHRIEDHDWC VGKVVEMVDEGYVVS  
NGVDYPEVVERKDVLYDKEAILAGETIPFGSFVVADGEEHLDLELFYEGQINGVH  
HDGRYKVYFLSDGTSALLDPSRVVLKPTPSFSSPAEAKLFSSCSEFFDFVFGSQSD  
FSVFPEGSGPNPEIYRRSVGNGLVVSQDHEDGSGAPTTIVATYDQGIHVTFNVF  
QSMEEVGSGQLLNHIANLNIPGMELKQND SHPRGYGRVNVFREDMDKAYFGTEY  
PVALLLDDDDDEEEDEDEY

>comp15075\_c0\_seq5; 1785 1 4182 LEN=4253; translated  
NTLGLWGPDSGSEEQVCADPASPNGKGPDPVFSYDPDPTTFRSTLETVLERGWNGRMV  
PIYHWIPRASDPETFNVVHSEVLVDDEAYTKLKVLRKEESDEYD TDYDARAYQLRAS  
RTIRAGEAIVLPHSVAQRFATTGQVHVAGEGTSKTERRETD RGADASYRFAQTMHDQE  
GHDLVYVELQDSLDPYEDHLVWDYYPSTQRIEWHKSWGANRTLLGEDDETEDGDNKDN  
DNGANPRDSGEALRFTQRAVLQAQYLRRLRGLAEAKAALLGDEGKNRTAFATGEAS  
GNAEIEYEEYELWMESLGVLLSHSRPARSAGAPTAAPAAGAAGACPDADGSNGSE  
PSCP SERAGASKGRSAYDDLGVRRADDPIDYNGAIASHECTNLFAQYTYETSKTFY  
AELEWTRSYIGGGSIRGRHHQEHRDQEQEPPKREQDTCLHLNNVLHSCLAFRPHV  
HEILIHYPASFLPRDGLKRVLYVGGGDLVLLHELLRYESIELVIGMELDQMVLRDS  
FRHYGIQPKFEDERVHWWFGDAAKSLSLLPPEEFFGTDFDLVLDLVEIFDALRV  
GDQNERLVDYMAKLLKPEGILV RQEDYPHHSVVDFARYTVDLNVFGMPHTCSQY  
FTMASDTIDFANHQRVDHGLEGLVWYEPNVGSDNHFSMWGNRYRNNLVPPNRI  
CDQTVNTDPVHVLP SKGIFVAIEAENVTLALDDASLVQTTAKKALEEIGFTGIRI  
HSISTGSSSSSLTSSMVLSFEEGYLGLRSYPANRYCSMDLQLWNDISNHKLAVSK  
LVEAVGGTTTGDSTSSFLITTTGGMLGLSNFQQPQDRIVPSSWCDGDGLSESSKS  
SEGNEMDGIETVIQNILARITGKKGSVVFLLCPNKSSRCRVREDVDYGS  
AEVVSFEAC

PATTEPNDASLSECEEQMVQRIQDSFLSRNSQNKIEAIVMDPRAPRELQITKKVFTDP  
RSYRWLSDHYVVLAPSTVESRLEDFWSSWKYQLLERFRTHVFEFNPLYHATAAFRDPSS  
DVWTMGVLSAGNPRFYDQLVSSFQAIRGEISREVLVETKTGAISHIPDYQPSKWATPSD  
YDLEPAELQWSDQRPLGGQAMLQYEGVPQVPDDNIDPGTTVLFHRIEDHDWCVGKVVEMV  
DEGYVVSNGVDYPEVVERKDVLYDKEAILAGETIPFGSFVADGEEHLDLELFYEGQIN  
GVHHDGRYKVYFLSDGTSALLDPSRVVVKPTPSFSSPAEAKLFSSCSEFFDFVFGSQSD  
FSVFPEGSGPNPEIYRRSVGNGLVVSQDHEDGSGAPTIVATYDQIHVTFNVFQSME  
EVGSGQLLNHIANLNIPGMELKQNDSHPRGYGRVNVFREDMDKAYFGTEYPVALLLDDDD  
DEEEDDEDEEEY

>comp15075\_c0\_seq7; 1119 1 2740 LEN=2811; translated  
XSQNASVSSAGVVAHIARVLPNKTGMELDQMVLRDSFRHYGIQPKFEDERVHWWFGDAAK  
SLSLLPPEEFFGTDFDLVLIDLVEIFDALRVGDQNERLVDYMAKLLKPEGILVRQEDYPH  
HSVVDFARYTVDLNVFGMPHTCSQYFTMASDTIDFANHQRVDHGLEGVWYEPNVGSDNH  
FSMWGNRYRNNLVPNRI CDQTVNTDPVHVLP SKGIFVAIEAENVTLALDDASLVQTTAKK  
ALEEIGFTGIRIHSISTGSSSSSLTSSMVLSEEGYLGRLSY PANRYCSMDLQLWNDISN  
HKLAVSKLVEAVGGTTTGDSTSSFLITGGMLGLSNFQQPQDRIVPSSWCDGDGLSESSS  
KSSEGNEMDGIETVIQNILARITGKKGSVVFLLCPNKSSRCRVREDVDYGSAAEVVSFEAC  
PATTEPNDASLSECEEQMVQRIQDSFLSRNSQNKIEAIVMDPRAPRELQITKKVFTDP  
RSYRWLSDHYVVLAPSTVESRLEDFWSSWKYQLLERFRTHVFEFNPLYHATAAFRDPSS  
DVWTMGVLSAGNPRFYDQLVSSFQAIRGEISREVLVETKTGAISHIPDYQPSKWATPSD  
YDLEPAELQWSDQRPLGGQAMLQYEGVPQVPDDNIDPGTTVLFHRIEDHDWCVGKVVEMV  
DEGYVVSNGVDYPEVVERKDVLYDKEAILAGETIPFGSFVADGEEHLDLELFYEGQIN  
GVHHDGRYKVYFLSDGTSALLDPSRVVVKPTPSFSSPAEAKLFSSCSEFFDFVFGSQSD  
FSVFPEGSGPNPEIYRRSVGNGLVVSQDHEDGSGAPTIVATYDQIHVTFNVFQSME  
EVGSGQLLNHIANLNIPGMELKQNDSHPRGYGRVNVFREDMDKAYFGTEYPVALLLDDDD  
DEEEDDEDEEEY

>comp15076\_c0\_seq1; 1011 150 2621 LEN=2749; translated  
MKSFLFGRKGSKAKEESGKGFYKGF PDTGIPSSDTGIGASGELQLAKTGTGGENSCDNY  
QEGIDQSPSEHSSAYESSYNQYLSKIENDHGVQSFEAMGPGATPASPEAYS GPAGDPV  
MPQGA IAGVADPLSLSGGTS SPASSGANSNAHSISYVTQTPEHGYVEGCEDDLSTLGDES  
I IRRGRQNRQKQQLKERQLKHQEELLLKQKSDLQDISKTRTASTQDMGTSPQSSGLSF  
SFTNVMDVHEKIPISSRLGDDIIEENRLHRDKDVLDLVIGEGGPGDDDDTLLSKRRNES  
CCRRHKWTIIRVMIFLGF FMLISAAAVLVLSILQMKKNNAIANS SDAAYVDNDGNGGEF  
FNKPIFVMPDPSDSSL PDGIGDTFIVTSLSPVLP IAPETA VPEPVTGKMDAEDADDDTTP  
SAVTEPPIANNEEVPDENIFTGTDPTEVIGDIINSIDSNNTNYEVEAFDPDLTKIGTD  
LKFIIANKSPQSLSYLDDKASPQFKSFDWMSKDPDYWDMTIDTIVQRWTLGVLYYSTGGP  
NWKTDQLPVAFLGKQPWLSYSDECEWESSNEGYQKICDENNKYFAIHLRNIGLAGSLP  
PELGLLSDSMRLFFNNNDLSGSLPSELGQLTGLEKINIQYNNIGGSLPSEIGNLEKLT I  
ASMGNQLTGSIPSELGMWASVATIGLENNQLNGTLPEELENMVNIEKLSIEKNLLSGKI  
PNSWNNMFQLTSLTLQSNDLSGNMPWGLCPGCYSMETLKVDCDEIKCKCCTECFGE SKKE  
KEHKNKERDAKEPVPAMDEPATTTGLLPVSSNSSATTGGVRA

>comp15077\_c0\_seq1; 956 1 2571 LEN=2757; translated  
ARNRSVFPVIGKTTKMSEWTGQGEDAREGSSPTMTFQDGVNTLLMQTEELRRKLD SVAVV  
ANDVCFQMLDDVDGLLARLYSPPLAINPENGVAADKIEVEMRNLCLOKTT SVAMQALRLA  
VKKKETDPEDEGYHAEKEEQSATARLAELNLVLCDDGDGEGKLESTKKNVDEIIDIYA  
SYQRQVIRQRATPSIARLVDRKRQKEMSGMIANSTEEDDNDNSSSRQIHVLA TILGQA  
SALIHPLMMWRSNLPPQSALFKM CVRSVNTLDEQAQSLAKTVAMWFMEDFRIDEYWMVQM  
STVENNHEDHSSSRPVEIDLSDLDGMVDRLAFCCQIFDRYIEVVVKENESYSDNDSRTTI  
LQELSPewTWKYASLERFLTTQQLRSALHPNNT PVEIIFGASIQVPSVEDAQYLSTRA  
LKRAASTRSDQAI GTVAHSIASDVWTTDTGGNGIHQALVEQRGCYDPRNEESSK PQRNS  
SEGSSVNGGISSPPKSGNYSNSFAQALLGALDEDTGVPSSSPAKAIARAPSSGGLLGSLS  
SSLASSVTGGGVFLQIRLDTHL CALNGIHSASAACSSLVEFLNSLLESAD EEESEQAPQQ  
ETQRGGNNSMVLHAREELLRYSRNYEDLLQSQVSFLVNEFCGGLDDAPAYKGD TIVPVL R  
YYLERESFDILDAQHLSSAEDDARLYKTLIRPMEDCNLLQQFEKCDVDMRAICQEIARV  
LSELFLDIITSTAIPKRFTDWGSLFLSKEVRLVQNHLLQSLMQRALSTASASHQDQAGPVP  
VLTSQWERLSQAVTILQLEKPSDWSIYYQTTSLSFSPQELKTILSLRVDFSSDVIQKVVAS  
ATEYTASNSNTKDPSM

>comp15078\_c0\_seq1; 250 295 834 LEN=1899; translated  
MTNVGDGGRHDASINKETTQATATPLSSVEGDSSNGGPKAAAALLSLGQDLTKGPTVAAV  
ASAVAMVPASCGTVIGANQGQHASQPNHMENTLELVATGDI PMLPTDIEPRIPEAATT

IVAAINTYNDVSAKKQKKRKRITPEGNENDQGDPPDLWHWLAPEENIGNWDVLCGRGGK  
>comp15078\_c0\_seq2; 440 295 1518 LEN=1755; translated  
MTNVGDGGRHDASINKETTQATATPLSSVEGDSSNGGPKAAAALLSLGQDLTKGPTVAAV  
ASAVAMPASCCTVIGANQGOQHASQPNHHMENTLELVATGDIPLMLPTDIEPRIPEAATT  
IVAAINTYNDVSAKKQKKRKRITPEGNENDQGDPPDLWHWLAPEENIGNWDVLCGRGGES  
NNFIGNKRYRKVVCEKKEEYRRIDVKQRKMKTNFVREIVQHIQDRGGRFIDIGPGGKYYV  
VTNERARKKTSQALRETKELKWLVGDDENDKDDQCHEIRMKRKKNVSNKDAVCPFCGKTG  
HKTKIAKACLKHEHLHGNSASDRTGAGAINNPVVLPPCHPTIIKHLVDGNSTGMNFIPG  
SLPLKPSLQNKGEAIPITLPRFGGIKIGRPETNLKTAKQNSSIQSSN  
>comp15078\_c0\_seq3; 250 295 834 LEN=2008; translated  
MTNVGDGGRHDASINKETTQATATPLSSVEGDSSNGGPKAAAALLSLGQDLTKGPTVAAV  
ASAVAMPASCCTVIGANQGOQHASQPNHHMENTLELVATGDIPLMLPTDIEPRIPEAATT  
IVAAINTYNDVSAKKQKKRKRITPEGNENDQGDPPDLWHWLAPEENIGNWDVLCGRGGK  
>comp15078\_c0\_seq4; 321 295 1047 LEN=1864; translated  
MTNVGDGGRHDASINKETTQATATPLSSVEGDSSNGGPKAAAALLSLGQDLTKGPTVAAV  
ASAVAMPASCCTVIGANQGOQHASQPNHHMENTLELVATGDIPLMLPTDIEPRIPEAATT  
IVAAINTYNDVSAKKQKKRKRITPEGNENDQGDPPDLWHWLAPEENIGNWDVLCGRGGES  
NNFIGNKRYRKVVCEKKEEYRRIDVKQRKMKTNFVREIVQHIQDRGGRFIDIGPGGKYYV  
VTNERARKKT  
>comp15079\_c2\_seq1; 1037 1 2499 LEN=2652; translated  
LLPITWRLGGNAWTDISLELCDNYNWNENGRVAVSGCAGLVCPPGTFSLLEGFHTAQNPCEP  
CTTAAAYFGTYECFDADDRAALLDVYSKLGGESWIHNDGWATAPRLVADDDWSEEWNDYCG  
WYGVCEWDLGDAKDGRVRKVKLGANNLKGSMPEITFAIEHMTTLDVSNNPELVVGFVRNVG  
RAEHIYSINVGQTQTKDYDGIQHANFFKRLYADHTPISGTVPSEITRIHNLQVLSLQDC  
DLNGELPVSFLFAMSSLQELYLAQNNFQGFVPDRWAALKNLEVLSLAQNFRGNIPESLGF  
APSLRALTLKDQVTKGGGFTGLLPSFGKSRTLQLLVSDNKLEGLTLPKLLQLADTSENY  
FVVDLANNKLTGVPVHGTYERFDRLDLYLEGNLITEIDERLCNNPMWMMNGAVGAYGCEAIL  
CPAGTSNRDGRMYTDDACSPCGDDKSASSSLDGSYLGQTTGDAEASYDLQGVVDVSEAA  
DDETSALAQSMERGVLEAIFDQTTGGPEGSWKTSTGWKTDSSVCTWYGIDCDENGVSASI  
QLGSNGLKGPVPSLIWTLPNLVHLKIYGNPISLDFENIAFAKKLQTLGLDDTGVKSLDGI  
GKARSLTSLNVAANGLTGNLPEELSRVLNQLNDVSHNKYTGVPVFWFKNFYALSSFSAS  
HNKLSGEVPTFASMVELSYLNLSHNEFKGKIPTLLAGVVPENKVVVDLSYNKIDGVVPG  
ELSRLSRLSIQLEENQIVGIDVQVCATDGWDFDAMTYGCDGILCPIGTWNNLGRQSNV  
SCEPCKKAKYMGATTGCGSETSTVSGGARTTAPSTTTAAALGAAALALWGTVL  
>comp15080\_c0\_seq1; 684 327 2999 LEN=2999; translated  
MAAGAECTQEGTGIGVEKSLAVTDTETMQSTPSTTTTTSKPSTGENNEHQSQTOPLDAAAA  
CMSSTRTNVMEPSVEPANKRIKLEDGVATEVPIGTATPLAGNTSEQSADIQTNDRTPIL  
TTTTSISISSSIQKPSLPLGSTTKPAVVKSESMHGNQDSTTTGAATIDPGSTTKPRHAPT  
PKPAAAAQPPQQPQEIKPPVMGVCPSATTQLPKNIPVKDEASSNNSQGGTTSVVTASD  
ESLPQNTSNSDNRSSNSSHESLQESTATAVTNSTSATSTTTRPPNASNGATLPASAATIR  
PVASIPPPPTQLSNRATTALKDPPSSTTIPPAASKPTPVRTQVAPSQTTTATLASHTIAGV  
PNSREVPKSLNFRHLRIKYLGELEYMLREFRKLRLGAKGAQQLEESQGSRRERREKL  
HSFILHLEDTIRQIELGCKLEGEKGSATTENRNVAAGSIGGAVNASNTANDGSALANATL  
DKAAREAKKQMAEESALSNTKEKEEEEETVQKLEEHILANLLPVKVRLLKQLAAQQGATQ  
NPPGMPARRGSMQPSAARGKTFVEAVEKRRKHAESLRLAAQAQHERQVRSVTDPTQFG  
KPLSGVGSSTLTKLHGSTLGSKQRRGTGHGVGSIAPQDRSERKILHAGMVPKSSQGESGL  
SAASGVHEIVTSQSQKNNPKTINKSIPTSAIPAAAMADKAKPAQTFQAEAKNTTLAAKPK  
PAIDPKAEPATTAVSGASTSDTVKKSRLDHSSTTAPMSEEDKLFKHHRLRKLKRLKRR  
RERELARQQQSKTQQQIPNSSQSAASPNVAVRKKPGHCKPGQKKKGRVVEYLCSCQSEAY  
SSTCFNPWWALAQHKCPKCGKTQVSRKSIFSFVAWSSLRLEFQKILKIFS  
>comp15080\_c0\_seq2; 1329 327 4529 LEN=5607; translated  
MAAGAECTQEGTGIGVEKSLAVTDTETMQSTPSTTTTTSKPSTGENNEHQSQTOPLDAAAA  
CMSSTRTNVMEPSVEPANKRIKLEDGVATEVPIGTATPLAGNTSEQSADIQTNDRTPIL  
TTTTSISISSSIQKPSLPLGSTTKPAVVKSESMHGNQDSTTTGAATIDPGSTTKPRHAPT  
PKPAAAAQPPQQPQEIKPPVMGVCPSATTQLPKNIPVKDEASSNNSQGGTTSVVTASD  
ESLPQNTSNSDNRSSNSSHESLQESTATAVTNSTSATSTTTRPPNASNGATLPASAATIR  
PVASIPPPPTQLSNRATTALKDPPSSTTIPPAASKPTPVRTQVAPSQTTTATLASHTIAGV  
PNSREVPKSLNFRHLRIKYLGELEYMLREFRKLRLGAKGAQQLEESQGSRRERREKL  
HSFILHLEDTIRQIELGCKLEGEKGSATTENRNVAAGSIGGAVNASNTANDGSALANATL  
DKAAREAKKQMAEESALSNTKEKEEEEETVQKLEEHILANLLPVKVRLLKQLAAQQGATQ



NPPGMPARRGSMQPSSAARGKGTVEAVEKRRKHAESLRLAAQAQHERQVRSVTDPTQFG  
KPLSGVGSSTLTKLHGSTLGSKQRRTGHWGVSISAPQDRSERKILHAGMVPKSSQQESGL  
SAASGVHEIVTSQSQKNNPKTINKSIPTSAIPAAAMADKAKPAQTFQAEAKNTTLAAKPK  
PAIDPKAEPATTAVSGASTSDTVKKSRLDHDSTTAPMSEEDKLFKFKHRRLRKLKRLKRR  
RERELARQQQSKTQQQIPNSSQSAASPNVAVRKKPGHCKPGQKKKGPRVVEYLCQSCSEAY  
SSTCFEFPWWALAQHKCPKCGKTQIPRIDISSPANTIEYHPALLSHLEDGGRGNAGSIPS  
NGVRAVVPAMPIVSQIPDGASDVNSESDSDLSELSDDNISIGSLKAAELESDDLRSMTPEAE  
RAEHETFGESEYKGPVLSDEHASKLLILMGHAATCPCQHKLEKHRDVCRSVKYMLLHVRDC  
PGTTSTFDVCPFPWCRKVKHLLYHLVSCKEPDQCAICSPKELPKGLKGLVGLNGHRMKKH  
RERMIAAAKASLAKNTKSNAASKQTATKKAASPMQVNNVRKSDVVAKMPVADQNPATQK  
PALGLAPAAALVVKTEPVGNAHQFVSRTAKASSIGTGSSNEEQIQKAVATVPHPAFKAG  
VQPGAQPGAQRIVTEEGENLDVLDNIYEDMAKIDVEAAEEVDCGFLVADAVPTENTSGAD  
PDFATALEPSMALPESIHPTFVVAIKMEGDYLGHPDPGLGDLDDLGMDDVFAIRDDG  
MNKGGPAQHPLNDPNPDLASINHEI IIDPSDIPPSVMVPPATDTTACCGPKQEYSEATN  
STSVPASGVPTATAATTIT

>comp15081\_c0\_seq1; 967 1 1952 LEN=2141; translated  
XCALPICKTYDEDEDSVFNRSKSYDQGRKARDFLDFIGAARPKNQKILDTPPLPPDLLSP  
SVAFFDIQRKAKSTVTFKSNEIQDSRDDENEQKKGPEKQSDRYSSIVDSGSDSDSDWS  
DGENEGTAEDDFKTYIDNIVSNRDERKTTSTIRSKFGSVISNAHISKYAVKQAKEQPELLT  
IVESSEYEDDKDEDLAEVLSGILKKEEQKNDDEHEDTKKNGVVEEDDYSTSAASESSFFSS  
FEERHNKSFVYESAVSYAVSGDSFYEESMYDEDESFNSHTGSSIENEDSLIDGDEKDEIC  
IPGASESLEIEESSSEEEEDSVTRRNQSIGSVGSVEKCGNFGSTKSSVAETLPEEGGET  
EQREDVEETPGFGSSHDHIYPADSI FSGTQDDATDRDTIFDFGDEEIPENLLIKTNIQD  
ESIKGCETLLDEEDDEQEYFRESEEEENDRVERDQGREEAEPETQGREKTSEQGHTETEETEE  
HEHHNGIKSYFGTLRIDPSETREGVQDRLQNEQEONIKNLQNEEMSRVSKPFLTVLYGES  
ETLASKTVSEHCRQLPRRRYPAPNESVSQTEETYFCGDPKSSSHSSESSSLSSQVDSNV  
QKARTEKTMNKVKLISQTIHQVMKQRGLARVRKYNQKGYAAKCSQNSE

>comp15081\_c0\_seq2; 1107 405 2708 LEN=2897; translated  
MNSPYALSKTTQVLTPEPKGRVDNSREPRRKEPEGDKQDPLTEDSNSVTEEPDADKNEY  
EHWGGGETAENGNCRAACSDGTETVAAFGDAVSEVFDLINELAFPGVIDVAAQERLDRDV  
NRVSKTYDEDEDSVFNRSKSYDQGRKARDFLDFIGAARPKNQKILDTPPLPPDLLSPSVA  
FFDIQRKAKSTVTFKSNEIQDSRDDENEQKKGPEKQSDRYSSIVDSGSDSDSDWSGDE  
NEGTAEDDFKTYIDNIVSNRDERKTTSTIRSKFGSVISNAHISKYAVKQAKEQPELLTIVE  
SSYEDEDKDEDLAEVLSGILKKEEQKNDDEHEDTKKNGVVEEDDYSTSAASESSFFSSFEE  
RHKNSFVYESAVSYAVSGDSFYEESMYDEDESFNSHTGSSIENEDSLIDGDEKDEICIPG  
ASESLEIEESSSEEEEDSVTRRNQSIGSVGSVEKCGNFGSTKSSVAETLPEEGGETEQR  
EDVEETPGFGSSHDHIYPADSI FSGTQDDATDRDTIFDFGDEEIPENLLIKTNIQDESI  
KGCETLLDEEDDEQEYFRESEEEENDRVERDQGREEAEPETQGREKTSEQGHTETEETEEHEH  
HNGIKSYFGTLRIDPSETREGVQDRLQNEQEONIKNLQNEEMSRVSKPFLTVLYGESETL  
ASKTVSEHCRQLPRRRYPAPNESVSQTEETYFCGDPKSSSHSSESSSLSSQVDSNVQKA  
RTEKTMNKVKLISQTIHQVMKQRGLARVRKYNQKGYAAKCSQNSE

>comp15082\_c0\_seq1; 719 1 1827 LEN=2075; translated  
XQQQQQQQLALDRSEEEPPDYKHTARTRFVSVRKP IAYRIAPYPAQLNTRHPKPVAEMM  
AQGRRPWQSHIDMYRKIPTDLMEGTGRGSILSYLSLLLMAVFLWESKAYFTSSTVTDL  
ALDKSDDRFLRLNFNITMTDLKCDWAVIDVSVLGTQDQNVTAHLTKWNLGDGEGVRKGYKG  
RNRNQKDIEMFDSSIEDTLEDLHEDGVDAIPMDEATLEHYKRNHDYVVFVDFASWCSCQ  
ALAPTWEVLAEIMADASANAVEDKHDTHEHFSDDEEYHALKVNLPVVIKGVDCVVKHKT  
CNQKENIRAYPTLRLFVDGKQWESGSDYNGHRTIMEMVDWLKFMEDHKSARMENNGAVGE  
ATRKLHAAHDSAKEYMEIEDYDNLHGSGNNQKRTYYEWKESHPGCQLAGHLLLDLDRVPGN  
FHILARSKHHDLAPHLTNVSHQVHSLTIGDPHSAKVADMAGTNGIPSDVSSKIAPMDGN  
VYTTNHLHESYHHYLKVVSTRIPDKKVHANRNNGANAYQIIPSSQLAYYQKDMVPEAKFV  
YDLSPISVTYRASSRRWYEVVTSLFAIIGGVFTIIGMVESTIHATVSKAKRRSTASNYPP  
QRADPNRY

>comp15082\_c0\_seq2; 1412 454 4431 LEN=4620; translated  
MATSDKSSAPRSLDNHVKVDSTDEEREKSESSFFQTAAGSARSKDQGDATPYGQNETQN  
SANTAIDTATRQAQPGAAGIPEDASVEPGTMKTEVKEKESVAPGGRSVDEGIESLPRELP  
IGTQDRDKAKSMPSSQEHQATVAEMHNTKSDEAESVASAPAVVNMATPPAPPSGAVDIS  
LERMGSVDEASHLQELLTSQNVKNQIVERSPGERYVRFSEKLGSGASKDVYRAYDTEEGI  
EVAWNVVHLGVPKNERNRIVNEVRLRLRHHQNIISFHGSWINREQQQVNFVTEILSSG  
TLKSFINKVQVIRWKIAKRWAVQILKGLEYLHSQDPPVIHRDLKCENIFINGTSGDLRIG

DLGLSTVHRNGKALSVLGTPEFMAPDMYEEGSYDEKVDIYAFGMCLLEIFTKEIPYKECT  
NPAQIYKKVTRGAPPDSLGRLLKSTHARKFIELCLGYRTDDGKYVRPSAKELIDHPFLVKR  
AVDDEEVEVDPPINEQTILETVTRSSERSTESKVANANTTTSTNPSQSQSSSLTPSKGSSP  
AMRHLRQNSMEEEESDRFEEMPDESEVNNMKKVKVMMGRGEELKEDDGVVEADSDNKKQST  
MDVNSSVEVGSISSLQNLQHSTDANGKLLHYLVAAAVIEENEQNNSFQQQPPYHDDILKL  
VITLPEVEGETQNVQFDFDLVEDDP IQVAKEMVAELNIP EEA VLE VSETV SGLARVARTKK  
HKFHSAKAQQTTPGHTRGNSIISTISTSTS QPPQIGQTAVAQQQ QHMGQTMMQSASQQQTM  
QDYLPSSQQQMQQPSAHP IQQQSLTRQDQSVAMHGQQIVDNTSIPPQM QHIQQQRARTQT  
NDAESLHQAPVPYVQGGMEINPQMEAPNHRHNHQHQQAQMNGKYHHQGHVSSEAKHPLAP  
YGQSPLPPPIPSLPTQSTSSQSSHQVTTQQRLSQQTHGTHDSQSNPSGATYPPAAPSQRQ  
PQAVQYPPNIVQQPSAHVAQQVGSQQTLPSLQPPQH I QNQQIHGGSQGLGQGYPPHQ  
LQPSMQRTOQSFQKQQQPQMVQQPGQSIQQPVQQM QNIPQQQHLQNDVQRPQTLQLQMN  
HQTSTTQQQPVTQKQHLMQGLPQQMDPHQQQQQQPATHSSHALNPQPNRSNAHMAEYQ  
VPSNQGPPQQRISTGPD SINVP I PHVPAVQKPE SRKLR SQGIVATTGPSTTTKSKGMSA  
SLAHHQRGNSQGEIVGVLEGLSIDTSLEYEPTDEVCAAE LRKLDQDFQNNLKRAKKVFAG  
RMDNLQRTQVQREAQHQTLEQHKKDRTA FEKRLQQEAIEQNRRIELMQQEWDRKREEVR  
LKDKT

>comp15082\_c0\_seq3; 685 1 2069 LEN=2317; translated  
XQQQQQQQLALDRSEEEPPDYKHTARTRFVSVRKP IAYRIAPYPAQLQNRHPKPVAEMM  
AQGGRRPWQSHIDMYRKIPTDLMEGTGRGSILSYLSLLLMAVLF LWESKAYFTSSTVTDL  
ALDKSDDRFLRLNFNITMTDLKCDWAVIDVSVLGTQDNVTAHLTKWNLDGEGVRKGYKG  
RNRNQKDIEMFDSSIEDTLEDLHEDGVDAIPMDEATLEHYKRNHDYVVFDFASWC SHCQ  
ALAPTWEVLAEIMADASANA VEDKHDT EHEHFSDEEYEHALKVNLPVVI GKVDCV VHKTL  
CNQKENIRAYPTLRLFVDGKQWESGSDYNGHRTIMEMVDWLKFMED EHKSRMENN GAVGE  
ATRKLHAAHDSKXKQNEAKTCDAMRCRAEISRAGLATAAARGNRNRCGLWVGVPRIASGLT  
RLSFCSEFFVCR LVANAPPLVWLLVFLRSATTGAKEYMEIEDYDNLHGSGNNQKRTYYEWK  
ESEHPGCQLAGHLLDRVPGNFHILARSKHHD LAPHLTNVSHQVHSLTIGDPHSAKVVAD  
MAGTNGIPSDVSSKIAPMDGNVYTTNHLHESYHHYLVVSTRIPDKKVHANRNNGANAYQ  
IIPSSQLAYYQKDMVPEAKFVYDLSPI SVTYRASSRRWYEVVTSLFAIIGGVFTIIGMVE  
STIHATVSKAKRRSTASNYPPQRADPNRY

>comp15083\_c0\_seq1; 1083 382 3291 LEN=3432; translated  
MEDLLMASDSDSDNEEA VVVAPPAAAPRPAPVAAQAPAQVQARIPAPATNANVPMNRSPG  
MAGNPRQQAPTHNERLKSLSYKSKSTAPSMVPGGSGGAPSSQAGRSVGNPMQQGMGVPPP  
MQQSQLPPQRQQPRAQPMQQQPQIRQQPLQQPQQQLSRSQPQQRP SHRQHGGQQQPP  
QYSRSQQV RPQYSQPQQHRQSSQQGSHHQQPPIGHRPQPSQPTH LGRQQIRTQPQSRGV  
ASSQPQQADPYAPTPLDDIKKGHSHSQSRRSYQPQLQVQQPQSSQPSSSVRGRQPGLT  
SHPRATPMTSQEIKKQKEKFLMFTRVLIKYLEQKDKQLHLDAKKT IKMCAENNKQVPGF  
ESVTVSMRKHRLDLVGD SYWKKAEQYLQHF I KQKRANIQQQQQQSQARRAIAASQNNRQQ  
APTIVAPQQSSQPRTAARESQAR PRAAPA ASTRAPTAVA IQDKREPQTSQPAPT VTA KGT  
SKSRSKASTTAKGAASGESKSTTKTKTKTKTVRRKSAGDSSATTRKASTKTGSGQTVVTT  
IVKRTIIEEPPREYKELMEEIDHAVEYDWP SIGQLLGSKADLKLSD EERQLLYGDSPPDS  
LVSNNKKVTKTPTKTA AVIPATPSPAGQE QSSKEEAAEDKSPQQGDKEAPSGRVRPGW GK  
SNVLSARA AWSRIRLDELQRKLEAESAAPVVAGGLLTLPSLAPPQQQPESK PATNKDAE  
KTLEAGETEDET TANNSTAEADVTVPDAPKPTIEG SWIDDES AEQDEALALLSEGCQI  
YLKRVLEKAVQCARQRQNL DGI RLWHSQYAHGKGTA VTTT SVLSKENKNKNSDKSKKPPL  
SLRLGCDVSRQVAQAQGNAA LTVKRMEALVRQTGIPMQARELQIDTFCEATSMGDL SWR  
PLLKQGADKADLHAKRAFEIYGGKEAKTPPLGRVPKAKLLVEDFVIGSELVSNGPYHKA  
HTASSFIAF

>comp15084\_c0\_seq1; 539 287 1085 LEN=1085; translated  
MSSVNSGDLPPASNEDDIAPSGGEAGSTSPVPEVKGGEATEKSAPATATSNDTTAASTTP  
KKPTKSGSQPSANGPPSAIEFEPVACVRRILKKTLPSSNVGKDAVA AFARASGIFII  
YLTACANDFARENRRQTITANDVLA AIKELEFEFEFAPELTTFLERYRELEKNKNKNAKLAS  
KAAAEKEKSLNND DASKEDVAARDGAKKSGDEKDESSKPEEEEEESTTTAQQPNDADAGD  
NDVSMDEDEDEDIGGNKNDDDDDDDX

>comp15084\_c1\_seq1; 394 128 1492 LEN=2071; translated  
MTISTSRFLFYMPESQSESELEQEENDSF CDDDDDDGDGDN AVDNDNEGNQQHQHCQPTL  
IDIDMHPYVSLSSLHEHDCLVVLGFLAFQDLN N FSLVSKQCYNARSHETLDQTR EGS I  
YLKGKIKSIDELVQKIRQKGWDKHFEGNRTHLHLSGLNSLSNIESIDGFEIENFP PLEH  
VKS LDCSTFHVHCRSYRNRIRGNNRNTNCQIKSGSDHESPSSEATDETLITHDSSNSRPF  
PPSPTSWLFPYRDYIDKGF AHGLVLSLLVPNLREIDMSNLPLTSIGVAWIAENSPKLEVL

TWNGSLIWPINEDIMRACLNLKELYIDDARLLFDHNSRRQRSRLLQIGDRNSNETDNHE  
IADENNNNSNNYDTEAILSSMAQNFQSLVRVSCRRIQWYNENSRFTNIRETKQGQASLMR  
FVRLAANLKWFRSDLTIENTIAILKEERPDVIFCC

>comp15084\_c1\_seq2; 561 128 1651 LEN=1759; translated  
MTISTSRIFYMVPESQSESELEQEENDSFCDDDDDDGEEQRNAGVASFSVEKDDIDEDEND  
CSGAADDNDGLVSSLTRAALHSSGRTEPRLVQAREDIRVVDHALHFINDLLRNMLDMN  
RAASKKLVKVFAPADLLQDVLQPIAGMLHRGGENIGGGNGVNSKVRIIVDCPENIIVNTD  
VLRKQVILNLSRNSVKFIDEGFIRLRAEVLERDGDDDLSDLSNDFDIEANTMKSLS  
TVKIYVEDSGSGIPIEKQENLNFNKYQESLDDLGGGTGIGLHCKTLIDLMDGEISLDPTY  
CSGIPGYPGARFVIDLRSSPIGSSVFTPYVDGVRICENDDECIENDTGGDTECKKVDTSE  
TTNTNQKQNDKGSATTLPELPKHLKVLFIIDDRILRKLFAATMKTVAPEWTIREAANGE  
TAILLVEEEFFDLIFCDMYMASVEKQLLGTETVAELRANGITSRICGLSANDKETEFLEA  
GSDAFLFKPIPCGKKALRETLQQVLYG

>comp15084\_c1\_seq3; 422 128 1510 LEN=2089; translated  
MTISTSRIFYMVPESQSESELEQEENDSFCDDDDDDGDDGDDGDDGDDNAVDNDNEGNQQHQ  
HCQPTLIDIDMHPYVSLSSLHEHDCLVVVLGFLAFQDLNNSLVSQKQCYNARSHEITLDQ  
TREGSIYLGKGIKSIDELVQKIRQKQGWKHFEGNRTHLHLSGLNSLSSNIESIDGFIEN  
FPPLEHVKSLDCSTFHVHCRSYRNRIRGNRNTNCQIKSGSDHESPSSEATDETLITHDD  
SNSRPFPPSPTSWLFVYRDYIDKGFAGHLVLSLLVPLNREIDMSNLPLTSIGVAWIAENS  
PKLEVLTWNGSLIWPINEDIMRACLNLKELYIDDARLLFDHNSRRQRSRLLQIGDRNSN  
ETDNHEIADENNNNSNNYDTEAILSSMAQNFQSLVRVSCRRIQWYNENSRFTNIRETKQG  
QASLMRFVRLAANLKWFRSDLTIENTIAILKEERPDVIFCC

>comp15085\_c0\_seq1; 369 219 1583 LEN=1641; translated  
MVSSSKLIYTFSGVVLGYLLGSQHALFSSQYDSMATTVSIQSPQVQSLDKFKSAANVGSV  
DDPNVYKLSRVQLSEDELFANIVNPLVQNLMATGKPNCSGEVVDVYFDILKNIENPS  
FYEDTPNNTNQTCPLVFMFYFEGGIKLVQSFYTYYSNIQTKRCMKFIVSKRWKDHNETME  
IMDNHGYEMLPGSAIQQGMTIINGLNATFKQYQDEVVVSINDLDHLMVWFDLEGGKPHRYS  
SYTDMVRLYMYEFLATRGCPDKKNVHERYVIPCTCLMKNNNTNYVAVPDGDVLSQYGLTN  
RFHPTANFYLNNTLEKYSLGHDVGTVYSNLRNMKLGNIHVHKKIGRKTCTVTRATMVG  
IHARTDNMIQSLAKYQHFLKNSLKNHRDSESTIADAMKCSIVSPEEMIYNVKTCSRVSKE  
FSNILAIGHQKLAACLNAGYSEEHCLSDMSCCVTD

>comp15085\_c0\_seq2; 993 1 2680 LEN=4723; translated  
XRDKSIVLSLFGNRENSRQSDGKTKNRERERELKMNDSKDNIVETPHLHEILTAERVT  
EVTAPSKRHSPKSGLDTI EPHDNDVLR SFKDAPKHLTQHEGNLYLQQVLEIYASTFVEAL  
YDSDSDVLI NFRTEAIVCDIQKTRKPLGRFLEYSTREKQWVEMDQDEIFFEVKRSFLRRL  
KRKKARVRQEASENKKKSHKRSRSEQGATKLSNTNTPERRLGEQNGITKPHLHDFLLNYEG  
KSHLGNMAFHEIVCKYKAQYDQLESAGLSSDLLLLKTRSEFASLMLKDYLSIFANPPGRFL  
QFNKESQWINDIGYEKAKKKMIELFLDTTLDPPVEGQIRQLQQMRTPKATMRKKISVAIA  
GSMDDSQRSQHSQHSQQSQQLKQMNQLQRSKNKPNIEFNNTSLNVAEEELIKRLKKNWEKQ  
NQOTSCLATQNDTLRPSHQQQQLLPHSDAQPFVAIPDSIPEPTPISLDGKNRNQNMNPTS  
TGDESSRNDSIQKQANRRMPHQQQASLPNFGGQTTMNGTIQEWMLNNGIVDKQIKNLQWQ  
SFQALQFQEKYVKQATNLQQQIQLLQTYEMQLNQFPKQLQQQQNAEACKQWLQQLQTEFQ  
GQLQQLQAQQQKEQLQHQHIQQEKLQQLQKKQGAEVQQNQKQQQQCEGQLQRQIQKQYAT  
QQQQLSVQQQMNNQTPSPQFQTVNQQQQQYEQQNQQHHYANLLDRQKQMGQQMEQKMQH  
QIKQNSQQATQHAFATQQQKLMNAEHQKQDQVALINHQIEIALRQQNHQQILFLQQQLNQK  
NEFQNNQNTTRQIMNLQQKERELANLQNALQKTQAQSHSAVANLQETSCKIVASSVNRA  
TNNKVIELSDSESDADLFTLSFSELSKTRKETGNNGGDEYASDNSDESLVF

>comp15085\_c0\_seq3; 334 219 1755 LEN=1813; translated  
MVSSSKLIYTFSGVVLGYLLGSQHALFSSQYDSMATTVSIQSPQVQSLDKFKSAANVGSV  
DDPNVYKLSRVQLSEDELFANIVNPLVQNLMATGKPNCSGEVVDVYFDILKNIENPS  
FYEDTPNNTNQTCPLVFMFYFEGGIKLVQSFYTYYSNIQTKRCMKFIVSKRWKDHNETME  
IMDNHGYEMLPGSAIQQGMTIINGLNATFKQYQDEVVVSINDLDHLMVWFDLEGGKPHRYS  
SYTDMVRLYMYEFLATRGCPDKKNVHERYVIPCTCLMKNNNTNYVAVPDGDVLSQYGLTN  
RFHPTANFYLNNTLEKYSLGHDVGTVYSNLRNMKVSFLLGARQSKISMPVLSLHSCIFQ  
IVRRLVFRASKHLFDVSHLSRSMVYLFDAARQHQRSSQDRSQDKENGDTGNNGMIHA  
RTDNMIQSLAKYQHFLKNSLKNHRDSESTIADAMKCSIVSPEEMIYNVKTCSRVSKEFSN  
ILAIGHQKLAACLNAGYSEEHCLSDMSCCVTD

>comp15085\_c0\_seq5; 993 1 2680 LEN=5100; translated  
XRDKSIVLSLFGNRENSRQSDGKTKNRERERELKMNDSKDNIVETPHLHEILTAERVT  
EVTAPSKRHSPKSGLDTI EPHDNDVLR SFKDAPKHLTQHEGNLYLQQVLEIYASTFVEAL

YSDSDVLIINRFTEAIVCDIQKTRKPLGRFLEYSTREKQWVEMDQDEIFFEVKRSFLRRL  
KRKKARVRQEASENKKKSHKRSRSEQATKLSTNTPERRLGEQNGITKPHLHDFLLNYEG  
KSHLGNMAFHEIVCKYKAQYDQLESAGLSSDLLLKTTRSEFASLMLKDYLSIFANPPGRFL  
QFNKESQTWNDIGYEKAKKKMIELFLDITLDPPEVGGQIRQLQQMRTPKATMRKKISVAIA  
GSMDDSQRSQHSQHSQQSQQLKQMNQLQRSKNKPNIEFNNTSLNVAEEELIKRLKKNWEKQ  
NQQTSCLATQNDTLRPSHQQQQLPHSDAQPFVAIPDSIPEPTPISLDGKNRNQNMNPTS  
TGDESSRNDSIQKQANRRMPHQQQASLPNFGGQTTMNGTIQEWMLNNGIVDKQIKNLQWQ  
SFQALQFQEKYVKQATNLQQQIQLLQTYEMQLNQFPKQLQQQQNAEECKQWLQQLQTEFQ  
GQLQQLQAQQQKEQLQHQHIIQQEKLQQLQKKQGAEVQQNQKQQQQQECGQLQRQIQKQYAT  
QQQQLSVQQMNNQTPSPQFQQTVNQQQQQYEQQNQQHHYANLLDRQKQMGQQMEQKMQH  
QIKQNSQQATQHAFATQQQKLMNAEHQKQDQVALINHQIEIALRQQNHQQILFLQQQLNQK  
NEFQONQNTTRQIMNLQQKERELANLQNALQKTQAQSHSAVANLQETSCKKIVASSVNRA  
TNNKVIELSDSEDDADLFHTLSFSELSKTRKETGNNGGDEYASDNSDES LVF

>comp15085\_c0\_seq6; 334 164 1700 LEN=1758; translated  
MVSSSKLIYTFSGVVLGYLLGSQHALFSSQYDSMATTVSIGSPQVQSLDKFKSAANVGSV  
DDPNVYKLSRVQLSEDEPELFANIVNPLVQNLMATGKPNCSGEVVDVYFDILKNI EENPS  
FYEDTPNNTNQTCLPLVFMFYFEGGIKLVQSFFTYYSNIQTKRCMKFIVSKRWKDHNETME  
IMDNHGYEMLPGSAIQQGMTIINGLNATFKQYGDEVVVSINDLDHLMVWFDLEGGKPHRYS  
SYTDMVRLYMYEFLATRGCPCDKKNVHERYVIPCTCLMKNNNTNYVAVPDGDVLSQYGLTN  
RFHPTANFYLNNTLEKYSLGHDVGTVYSNLRNMKVSFLLGARQSKI SMPLVASLHSCIFQ  
IVRRLVFRASKHLFDVSHLSRSMVYLFDAARQHQRSSQDRSQDKENGDTGNNGGMIHA  
RTDNMIQSLAKYQHFLKNSLKNNAHRDSESTIADAMKCSIVSPEEMIYNVKTCRSVKEFSN  
ILAIGHQKLAACLNAGYSEEHCLSDMSCCVTD

>comp15085\_c0\_seq7; 369 164 1528 LEN=1586; translated  
MVSSSKLIYTFSGVVLGYLLGSQHALFSSQYDSMATTVSIGSPQVQSLDKFKSAANVGSV  
DDPNVYKLSRVQLSEDEPELFANIVNPLVQNLMATGKPNCSGEVVDVYFDILKNI EENPS  
FYEDTPNNTNQTCLPLVFMFYFEGGIKLVQSFFTYYSNIQTKRCMKFIVSKRWKDHNETME  
IMDNHGYEMLPGSAIQQGMTIINGLNATFKQYGDEVVVSINDLDHLMVWFDLEGGKPHRYS  
SYTDMVRLYMYEFLATRGCPCDKKNVHERYVIPCTCLMKNNNTNYVAVPDGDVLSQYGLTN  
RFHPTANFYLNNTLEKYSLGHDVGTVYSNLRNMKLGNI NVHKKIGRKT KKT VTRATMVG  
IHARTDNMIQSLAKYQHFLKNSLKNNAHRDSESTIADAMKCSIVSPEEMIYNVKTCRSVKE  
FSNILAIGHQKLAACLNAGYSEEHCLSDMSCCVTD

>comp15086\_c0\_seq1; 1021 184 3618 LEN=4322; translated  
MVYKPSGGREFYDDQYEDDDQVLNNRVLFPKDKVYGRKELEILTDLFDQLYDNNDTED  
EDEEDSDSESRSSPVVAIQAPSGTGKSAMICSFQLEETE QKTKNYSNLHVR YTTVCHM  
RGRFERTCTDPFSAILEGLNDFDRLLQNE DTRNLVIRSAIVDSLASETLSISALVPRL  
GDILKTTNDEKEIRNRAMIMGANPNGVLRPRRSISASNSEENDSDAADIPGQNSRNRIRY  
LFNALFCAICNEQYPLIMFLDDCQWADDESLGLIESLIKDPACRYFMFIGNATRGI TEAK  
EDET NFALMTKIEGPNQRVTRINLLNLSIDEIGEF IADTLQLTIDE CRPLTEI IYGKTR  
GNIFFS IQAIEELQRN ILYFSMIVFRWENLAGVEFQNALSDLSDDVGT YVSSKI QSLP  
KKLQRALVIASHTKTTFDVETLEALMI EDGCDIDFKELNGLLDLAVLLGLLTNTIGTGLY  
QFANDRVQQATYVWVSSSQERAKLRVMIGRKL YELYFQPKGKEWMLFVAADHLNSCIGHG  
GKDDLSLAKLNLQC GK KARFLGAYVPASLYMRLALS YLRKLDKNPWESHYDLSLQIYREI  
SDSELCLGKFEKGEELAQIVLNETRNL EDKLP TYLALAEAKGKQKHAESFSLCHQALVR  
VEAIPKMHYFHVKKDSNVIKRFKSHSDYDILMMPICYDKNNMVMMDLLSQASRRAHHC  
GNMTEYRFCIARQLRLTFEFGFSRTSAQAFASYGKLLQSDNDVKNALRMAGLAREIMAK  
TDEISSMKSETLFVVGYWIEAWSYPREHVMETLQEAHSAGMAKGNIEIGFQCIVFCNII  
AQSSGYPLEPEKGTGAQLIQQLSLYNVESVLT YLMASRVSVLCLMGKRKIDWNELEPPED  
VGRGESDYTTVFSLISRLELGVLFGNIEFAVRMSESISSLVGFERSYICGSKELFYSGL  
AYLELARKTGSKYERKAMKFIKTLRYFCRTRGLNALHKCLLLEAEVLSLECHDVQKLT  
AYDEAIIAAVKIGYTQDAAHGSELTGAVMKALNEDDLADQYLNQACKLWKEYGAHVKVRQ  
LSLQRNPSATEEHEPVSFSRNFNSKDISKSCAAVDLELLVGIEMKKDIKFDASKSDLS  
FQRS

>comp15087\_c0\_seq1; 892 176 3085 LEN=3321; translated  
MVRPTSNYSYPRSQRSARTTAATPRALWMTASIFSALGSCSLAGASETAKSCERLQATLM  
FTQEEAPRDLSSVLPVVVEKINRVLGDGVVDEVEWGTGAELHGRVGEHLIETRVRTLTGSG  
HEPGFDVRKDEFGRDVTSRCFHVPLKITDDECSLPPDHPMSHTCHSSTECVNTDGSYAC  
ACPRLSTSHEDSDLNEWEVSFSSAAKTSCPWL PDTWDCCPRNAHSTEGKRCRERFRCPVD  
PCGTTGKVIHDCSSATCVRAESPNGIATEEHNSSGSSSPSAHLYTCQCPEDLMGNKSC  
RPGIDPQPKPMVMFDGVTPTALTIKNNFYCGCTRPKIDVCSGFPPEGKHEVCTVVEK

KCACRPGYIHHETYGCVDVSPPTLKLNRDRHGDQTLRLKQGDEYREHMVDIVDDNAEDYL  
RSLKVAYSKPLPPGCLLDVGEFHVNYTVAMPWANPPYVRITRRVIEDIDECAVLSNTKI  
LKRIEATCPQLIPQCDTEAGAKCINTVGSYACKCPTRTSGDGLKSAEFDASDTSYPIPS  
SFKGGTSCDTSKPEITLKGPNPKTFRIAKYGGGLSGVMNEYSGRGINDRADEKKQISAN  
LEADIREMIRATAGAELCATHENPRVKASDCFKAIDKTYKGDVDLSGRVVIIGDPIQRSHL  
HWVVPYDVKDDAGNEATTIYRDVVL EEVSLFGLEKKIRDEVANEKRRKTKRAIDNAVKA  
RKKWDAENKAATNRSRRNTASSNDAKSCPACPACSCPETDIPDGTSCSAFCTSLSETCRQ  
LGDDNFVYKLLLVL EDDFFPVQLVPMVLSFVAAVCLYVMRWVLTLI FNPKAHTNYDYGNY  
NGINDEMVLATAPEPRQQAMPAQTQGAGAGNPASTPRPPTASLSLSGYNGQNGTSGAANG  
TNGSFFSPGSQMGSPGRFDGSAGLRSPNTPAQAGFRDQYDGGSSYQSPPLIVPSKNGE  
GARRRTPYR

>comp15087\_c0\_seq2; 812 697 3350 LEN=3586; translated  
MASXDVEVEWTGAELHGRVGEHLIETRVRLTGSHEPGFDVRKDEFGRDVTSRCFHVPL  
KITDTDECSLPPDHPMSHTCHSSTECVNTDGSYACACPRLSTSHEDSDLNEWEVSFSSAA  
KTSCPWL PDTWDCCPRNAHSTEGKRCRERFRCPVDPCGTTGKVIHDCDSSATCVRAESPN  
GIATEEHNSSGSSSSPSAHLTYCQCPEDLMGNGKSCRPGIDPQPKPMVMFDGVTPTALTIK  
NNFYCGCTRPKIDVCSGFPPECGKHEVCTVVDEKPKCACRPGYIHHETYGCVDVSPPTL  
LRNRDRHGDQTLRLKQGDEYREHMVDIVDDNAEDYLRLSLKVAYSKPLPPGCLLDVGEFHV  
YTVAMPWANPPYVRITRRVIEDIDECAVLSNTKILKRIEATCPQLIPQCDTEAGAKCIN  
TVGSYACKCPTRTSGDGLKSAEFDASDTSYPIPSFKGGTSCDTSKPEITLKGPNPKT  
FRIAKYGGGLSGVMNEYSGRGINDRADEKKQISANLEADIREMIRATAGAELCATHENPR  
VKASDCFKAIDKTYKGDVDLSGRVVIIGDPIQRSHLHWVVPYDVKDDAGNEATTIYRDVVL  
EEVSLFGLEKKIRDEVANEKRRKTKRAIDNAVKAERKKWDAENKAATNRSRRNTASSNDA  
KSCPACPACSCPETDIPDGTSCSAFCTSLSETCRQLGDDNFVYKLLLVL EDDFFPVQLVPM  
MVLSFVAAVCLYVMRWVLTLI FNPKAHTNYDYGNYNGINDEMVLATAPEPRQQAMPAQTQ  
GAGAGNPASTPRPPTASLSLSGYNGQNGTSGAANGTNGSFFSPGSQMGSPGRFDGSAGL  
RSPNTPAQAGFRDQYDGGSSYQSPPLIVPSKNGEGARRRTPYR

>comp15088\_c0\_seq1; 318 1 1113 LEN=1872; translated  
XNFPDEIYGGRFMEANKETXQKQSTSERNQTYSLTQPSTSPMDDSVLPRDEDGNFVAHV  
PGL EYYRDFLSLKEQTELLDLIYANPWQEGVIARRQQFYGEVYYHTSFKSKVLQGDHRDE  
SGTTEGRQPTNNNADNRSGEMDIAENPCNNDGNNNGNIPIDDSGMRKWLDKTMPFFEKE  
GLKVPQSQVLINEYKNNMGIASHFEDFDFAGFPVILTISLISPVYMTLKKPTTAPTIEPVG  
TEHNEDKDKDNKTINACDSYDDVVKILLEPGSLLIMKDDARFKYRHGIGKYKWNLPPT  
LGHQGRSGAPSSSEAVGSGVGLPTTSSAPGTRIKRDDS YRRVSLTIRHLLSTRKVKDHED  
ESDTIKDPSVY

>comp15089\_c0\_seq1; 355 254 1453 LEN=1804; translated  
MASPSPSLRLVCLHDAGSNSLELSRRIDALGHQLYQKHGIDL VFDAPLVVERPKNATG  
EREPNCCSHFRPRDVL DHPRAWWEAENDKRDFPSLTERALRNDGGGDAKPENEEAGTEV  
AETGDP TREEQNKENESGVTATPSPPRYVGLDASLLLLRQVWASSPFWGV LAVGQAAGVA  
SLLP LLLPKTDGRQPQPPAFMVFVNGGALLSEEEALAEHLHLPCLHVIDKDSPGLPSAERL  
VRQFGGSVVEGDGSLQRSATPCSSASFNNHVGRFLVARKRDLRRNTCDAAVLALRHELH  
RTEADAAQLVARHVAENPPDALMAVITPRDVGGFRDKRRGNEDGGGAPCPSEFLLHRAK  
RSTTRAHQATPEEEDHEAEQTPVAGNGSEASRHHPNQH

>comp15089\_c0\_seq2; 190 254 968 LEN=968; translated  
MASPSPSLRLVCLHDAGSNSLELSRRIDALGHQLYQKHGIDL VFDAPLVVERPKNATG  
EREPNCCSHFRPRDVL DHPRAWWEAENDKRDFPSLTERALRNDGGGDAKPENEEAGTEV  
AETGDP TREEQNKENESGVTATPSPPRYVGLDASLLLLRQVWASSPFWGV LAVGQAAGVA  
SLLP LLLPKTDGRQPQPPAFMVFVNGGALLSEEEALAEHLHLPCLHVIDKDSPELPSAEX

>comp15090\_c0\_seq1; 307 264 1049 LEN=1995; translated  
MTVAGVCTSLGLGAMQMVAGLQRLGWVDPEREDLEDVYVILIWVITAVATISVVSGLSFG  
IKILANIAFYLGCLILFLCFVMENTKFLNLLVQTTGSYLQWCIFQVPFFTDAGALTEG  
EGRAVDGNGSASWFIGAWTVFYMAWVVAWACFVGMFVGRISKNRTLREVI FSVFICPVLY  
SLIWF SFGGIGLRQQRQALELQQIGTDSFNDSYFVSEEFVSEFCYDVPQEDVVVNGTTFV  
TNQLVGITPVCTFNSGNADGAW

>comp15090\_c0\_seq2; 664 89 2659 LEN=2766; translated  
MSTPPDPSTMESQGGNSDIEVEEDIVLQEGPRDPIDDEKKPTASSDGKSPFQFPMRSFEV  
KL PFLKNSMTFNPVVSIALAVLWGLTAYCIAQPEKASETLNFWFNNTIDLFTWFIYVAN  
PILTF FIFWVAYRFGNIKLGEKDAEPEFSNASYFAMIFSAGVGVGLFFYGVSEPLWHVRP  
DNYFSNAGYRSQNEIDEWVSLVITLYHWGFAGWSVCKXQKFCCELCKHNVVVPSRFDCCLN  
SKYRHSCGSCYWI SKLSLRTTDDDPINILPDFGRLLLGLDGLIDSYSIVMTVAGVCTSL

GLGAMQMVAGLQRLGWVDPEREDLEDVYVILIWVITAVATISVVSGLSFGIKILANIAFY  
LGCLILFLCFVMENTKFLNLLVQTTGSYLQWCIFQVPPFTDAFGALTEGEGRAVDGNGS  
ASWFIGAWTVFYMAWVAVACFVGMFVGRISKNRTLREVIFSVFICPVLYSLIWF SFGG  
IGLRQQRQALELQQIGTDSFNDSSYFVSESESEFCYDVPQEDVVVNGTTVFTNQLVGITPV  
CTFN SGNADGAWFNVMYSFSYPTDNGFGGFGPFLSGLSIFTLAIYFITSSDSGSLVVDTL  
ASNGESDHHWIQRVFWAVTEGAVACALLIAGKDKALKALQAASIVFGLPFNLMLIMCLS  
VYVMCKAIEEGKNPNKIEPNVLLPKVQSWTTPFLGGIFNVFEFIIISLGFVHESRKEKGM  
HLPTSEQSVEFLKALFLPFLSFYQVYTSAVMDPKQKNKTRNALLTVVYALCYVGWIVLFS  
LGAINHGFIALGWSLFFTNACILTVLRMNFARLTIRGNFIGDFFASSFMYPQALAQMVI  
QLNSDAASELVEVETR

>comp15090\_c0\_seq3; 298 89 838 LEN=1152; translated  
MSTPPDPSTMESQGGNSDIEVEEDIVLQEGPRDPIDDEKKPTASSDGKSPFQFPMRSFEV  
KLPFLKNSMTFNPVVSVALAVLWGLTAYCIAQPEKASETLNFWFNNTIDLFTWFIYVAN  
PILTFFIFWVAYRFGNIKLGEKDAEPEFSNASYFAMIFSAGVGVGLFFYGVSEPLWHVRP  
DNYFSNAGYRSQNEIDEWLSVITLYHWGFAGWSVYILVALATGLASYRFGLPMTIRSTFY  
PILGDYCWGW

>comp15090\_c0\_seq4; 595 89 2758 LEN=2865; translated  
MSTPPDPSTMESQGGNSDIEVEEDIVLQEGPRDPIDDEKKPTASSDGKSPFQFPMRSFEV  
KLPFLKNSMTFNPVVSVALAVLWGLTAYCIAQPEKASETLNFWFNNTIDLFTWFIYVAN  
PILTFFIFWVAYRFGNIKLGEKDAEPEFSNASYFAMIFSAGVGVGLFFYGVSEPLWHVRP  
DNYFSNAGYRSQNEIDEWLSVITLYHWGFAGWSVCKXQKKFCELCKHNVVPSRFDCCLN  
SKYRHSCGSCYWI SKLSLRTTDDDPINILPDFGRLLLGLDGLIDSYSIVMTVAGVCTSL  
GLGAMQMVAGLQRLGWVDPEREDLEDVYVILIWVITAVATISVVSGLSFGIKILANIAFY  
LGCLILFLCFVMENTKFLNLLVQTTGSYLQWCIFQVPPFTDAFGALTEGEGRAVDGNGS  
ASWFIGAWTVFYMAWVAVACFVGMFVGRISKNRTLREVIFSVFICPVLYSLIWF SFGG  
IGLRQQRQALELQQIGTDSFNDSSYFVSESESEFCYDVPQEDVVVNGTTVFTNQLVGITPV  
CTFN SGNADGAWFNVMYSFSYPTDNGFGGFGPFLSGLSIFTLAIYFITSSDSGSLVVDTL  
ASNGESDHHWIQRVFWAVTEGGKLTGKHEVAVVSXNWPANVASLFLKIAFNDTLAVACAL  
LIAGKDKALKALQAASIVFGLPFNLMLIMCLSVYVMCKAIEEGKNPNKIEPNVLLPKVQ  
QSWTTPFLGGIFNVFEFIIISLGFVHESRKEKGMHLPTSEQSVEFLKALFLPFLSFYQVY  
TSAVMDPKQKNKTRNALLTVVYALCYVGWIVLFSLGAINHGFIALGWSLFFTNACILTVLR  
MNFARLTIRGNFIGDFFASSFMYPQALAQMVIQLNSDAASELVEVETR

>comp15090\_c0\_seq6; 686 89 2671 LEN=2778; translated  
MSTPPDPSTMESQGGNSDIEVEEDIVLQEGPRDPIDDEKKPTASSDGKSPFQFPMRSFEV  
KLPFLKNSMTFNPVVSVALAVLWGLTAYCIAQPEKASETLNFWFNNTIDLFTWFIYVAN  
PILTFFIFWVAYRFGNIKLGEKDAEPEFSNASYFAMIFSAGVGVGLFFYGVSEPLWHVRP  
DNYFSNAGYRSQNEIDEWLSVITLYHWGFAGWSVYILVALATGLASYRFGLPMTIRSTFY  
PILGDYCWGWIGDLIDSYSIVMTVAGVCTSLGLGAMQMVAGLQRLGWVDPEREDLEDVYV  
ILIWVITAVATISVVSGLSFGIKILANIAFYLGCLILFLCFVMENTKFLNLLVQTTGSY  
LQWCIFQVPPFTDAFGALTEGEGRAVDGNGSASWFIGAWTVFYMAWVAVACFVGMFVGR  
ISKNRTLREVIFSVFICPVLYSLIWF SFGGIGLRQQRQALELQQIGTDSFNDSSYFVSE  
ESEFCYDVPQEDVVVNGTTVFTNQLVGITPVCTFN SGNADGAWFNVMYSFSYPTDNGFGG  
FGPFLSGLSIFTLAIYFITSSDSGSLVVDTLASNGESDHHWIQRVFWAVTEGGKLTGKHE  
VAVVSXNWPANVASLFLKIAFNDTLAVACALLIAGKDKALKALQAASIVFGLPFNLMLI  
MCLSVYVMCKAIEEGKNPNKIEPNVLLPKVQSWTTPFLGGIFNVFEFIIISLGFVHESR  
EKGMHLPTSEQSVEFLKALFLPFLSFYQVYTSAVMDPKQKNKTRNALLTVVYALCYVGW  
IVLFSLGAINHGFIALGWSLFFTNACILTVLRMNFARLTIRGNFIGDFFASSFMYPQAL  
AQMVIQLNSDAASELVEVETR

>comp15090\_c0\_seq7; 496 89 1657 LEN=2797; translated  
MSTPPDPSTMESQGGNSDIEVEEDIVLQEGPRDPIDDEKKPTASSDGKSPFQFPMRSFEV  
KLPFLKNSMTFNPVVSVALAVLWGLTAYCIAQPEKASETLNFWFNNTIDLFTWFIYVAN  
PILTFFIFWVAYRFGNIKLGEKDAEPEFSNASYFAMIFSAGVGVGLFFYGVSEPLWHVRP  
DNYFSNAGYRSQNEIDEWLSVITLYHWGFAGWSVYILVALATGLASYRFGLPMTIRSTFY  
PILGDYCWGWIGDLIDSYSIVMTVAGVCTSLGLGAMQMVAGLQRLGWVDPEREDLEDVYV  
ILIWVITAVATISVVSGLSFGIKILANIAFYLGCLILFLCFVMENTKFLNLLVQTTGSY  
LQWCIFQVPPFTDAFGALTEGEGRAVDGNGSASWFIGAWTVFYMAWVAVACFVGMFVGR  
ISKNRTLREVIFSVFICPVLYSLIWF SFGGIGLRQQRQALELQQIGTDSFNDSSYFVSE  
ESEFCYDVPQEDVVVNGTTVFTNQLVGITPVCTFN SGNADGAW

>comp15090\_c0\_seq8; 405 89 1744 LEN=2983; translated  
MSTPPDPSTMESQGGNSDIEVEEDIVLQEGPRDPIDDEKKPTASSDGKSPFQFPMRSFEV

KLPFLKNSMTFNPVVSIALAVLWGLTAYCIAQPEKASETLNFWFNNTIDLFTWIFYIVAN  
PILTFFIFWVAYRFGNIKLGEKDAEPEFSNASYFAMIFSAGVGVGLFFYGVSEPLWHVRP  
DNYFSNAGYRSQNEIDEWLSVITLYHWGFAGWSVCKXQKKFCELCKHNVVVPSRFDCCLN  
SKYRHSCGSCYWISKLSLRTTDDDPINILPDFGRLLLGLDGLIDSYSIVMTVAGVCTSL  
GLGAMQMVAGLQRLGWVDPEREDLEDVYVILIWVITAVATISVVSGLSFGIKILANIAFY  
LGCLILFLCFVMENTKFLNLLVQTTGSYLQWCIFQVPFFTDAGALTEGEGRAVDGNGS  
ASWFIGAWTVFYMAWVAVACFVGMFVGRISKNRTLREVIKICPVLYSLIWF SFGMG  
IGLRQQRQALELQQIGTDSFNDSYFVSESEFCYDVPQEDVVVNGTTVFTNQLVGITPV  
CTFN SGNADGAW

>comp15090\_c0\_seq9; 307 264 1049 LEN=2189; translated  
MTVAGVCTSLGLGAMQMVAGLQRLGWVDPEREDLEDVYVILIWVITAVATISVVSGLSFG  
IKILANIAFYLGCLILFLCFVMENTKFLNLLVQTTGSYLQWCIFQVPFFTDAGALTEG  
EGRAVDGNGSASWFIGAWTVFYMAWVAVACFVGMFVGRISKNRTLREVIKICPVLY  
SLIWF SFGMGIGLRQQRQALELQQIGTDSFNDSYFVSESEFCYDVPQEDVVVNGTTVF  
TNQLVGITPVCTFN SGNADGAW

>comp15090\_c0\_seq10; 755 89 2572 LEN=2679; translated  
MSTPPDPSTMESQGGNSDIEVEEDIVLQEGPRDPIDDEKKPTASSDGKSPFQFPMRSFEV  
KLPFLKNSMTFNPVVSIALAVLWGLTAYCIAQPEKASETLNFWFNNTIDLFTWIFYIVAN  
PILTFFIFWVAYRFGNIKLGEKDAEPEFSNASYFAMIFSAGVGVGLFFYGVSEPLWHVRP  
DNYFSNAGYRSQNEIDEWLSVITLYHWGFAGWSVYILVALATGLASYRFLPMTIRSTFY  
PILGDYCWGWIGDLIDSYSIVMTVAGVCTSLGLGAMQMVAGLQRLGWVDPEREDLEDVYV  
ILIWVITAVATISVVSGLSFGIKILANIAFYLGCLILFLCFVMENTKFLNLLVQTTGSY  
LQWCIFQVPFFTDAGALTEGEGRAVDGNGSASWFIGAWTVFYMAWVAVACFVGMFVGR  
ISKNRTLREVIKICPVLYSLIWF SFGMGIGLRQQRQALELQQIGTDSFNDSYFVSE  
ESEFCYDVPQEDVVVNGTTVFTNQLVGITPVCTFN SGNADGAWFNVMSFSYPTNGFGG  
FGPFLSGLSIFTLAIYFITSSDSGSLVVDTLASNGESDHHWIQRVFWAVTEGAVACALLI  
AGKDKALKALQAASIVFGLPFNLMLIMCLSVYVMCKAIEEGKNPNKIEPNVLLPKVQGS  
WTTPLFGGIFNVFEFIIISLGFVHESRKEKGMHLPTSEQSVEFLKALFLPFLSFYQVYTS  
VMDPKQKNKTRNALLTVVYALCYVGWIVLFLSLGAINHGFIALGWSLFFTNACILTVLRMN  
FRARLTIRGNFIGDFFASSFMYPQALAQMV IQLNSDAASELVEVETR

>comp15090\_c0\_seq11; 497 264 2063 LEN=2170; translated  
MTVAGVCTSLGLGAMQMVAGLQRLGWVDPEREDLEDVYVILIWVITAVATISVVSGLSFG  
IKILANIAFYLGCLILFLCFVMENTKFLNLLVQTTGSYLQWCIFQVPFFTDAGALTEG  
EGRAVDGNGSASWFIGAWTVFYMAWVAVACFVGMFVGRISKNRTLREVIKICPVLY  
SLIWF SFGMGIGLRQQRQALELQQIGTDSFNDSYFVSESEFCYDVPQEDVVVNGTTVF  
TNQLVGITPVCTFN SGNADGAWFNVMSFSYPTNGFGGFGPFLSGLSIFTLAIYFITSS  
DSGSLVVDTLASNGESDHHWIQRVFWAVTEGGKLTGKHEVAVVSXNWPANVASLFLKIAF  
NDTLAVACALLIAGKDKALKALQAASIVFGLPFNLMLIMCLSVYVMCKAIEEGKNPNKIE  
PNVLLPKVQGSWTTPLFGGIFNVFEFIIISLGFVHESRKEKGMHLPTSEQSVEFLKALFL  
PFLSFYQVYTSAVMDPKQKNKTRNALLTVVYALCYVGWIVLFLSLGAINHGFIALGWSLFF  
TNACILTVLRMNFARLTIRGNFIGDFFASSFMYPQALAQMV IQLNSDAASELVEVETR

>comp15090\_c0\_seq12; 405 89 1744 LEN=2884; translated  
MSTPPDPSTMESQGGNSDIEVEEDIVLQEGPRDPIDDEKKPTASSDGKSPFQFPMRSFEV  
KLPFLKNSMTFNPVVSIALAVLWGLTAYCIAQPEKASETLNFWFNNTIDLFTWIFYIVAN  
PILTFFIFWVAYRFGNIKLGEKDAEPEFSNASYFAMIFSAGVGVGLFFYGVSEPLWHVRP  
DNYFSNAGYRSQNEIDEWLSVITLYHWGFAGWSVCKXQKKFCELCKHNVVVPSRFDCCLN  
SKYRHSCGSCYWISKLSLRTTDDDPINILPDFGRLLLGLDGLIDSYSIVMTVAGVCTSL  
GLGAMQMVAGLQRLGWVDPEREDLEDVYVILIWVITAVATISVVSGLSFGIKILANIAFY  
LGCLILFLCFVMENTKFLNLLVQTTGSYLQWCIFQVPFFTDAGALTEGEGRAVDGNGS  
ASWFIGAWTVFYMAWVAVACFVGMFVGRISKNRTLREVIKICPVLYSLIWF SFGMG  
IGLRQQRQALELQQIGTDSFNDSYFVSESEFCYDVPQEDVVVNGTTVFTNQLVGITPV  
CTFN SGNADGAW

>comp15090\_c0\_seq13; 274 89 709 LEN=1239; translated  
MSTPPDPSTMESQGGNSDIEVEEDIVLQEGPRDPIDDEKKPTASSDGKSPFQFPMRSFEV  
KLPFLKNSMTFNPVVSIALAVLWGLTAYCIAQPEKASETLNFWFNNTIDLFTWIFYIVAN  
PILTFFIFWVAYRFGNIKLGEKDAEPEFSNASYFAMIFSAGVGVGLFFYGVSEPLWHVRP  
DNYFSNAGYRSQNEIDEWLSVITLYHW

>comp15090\_c0\_seq14; 496 89 1657 LEN=2896; translated  
MSTPPDPSTMESQGGNSDIEVEEDIVLQEGPRDPIDDEKKPTASSDGKSPFQFPMRSFEV  
KLPFLKNSMTFNPVVSIALAVLWGLTAYCIAQPEKASETLNFWFNNTIDLFTWIFYIVAN

PILTFFIFVWVAYRFGNIKLGEKDAEPEFSNASYFAMIFSAGVGVGLFFYGVSEPLWHVRP  
DNYFSNAGYRSQNEIDEWSLVITLYHWGFAGWSVYILVALATGLASYRFGLPMTIRSTFY  
PILGDYCWGWIGDLIDSYSIVMTVAGVCTSLGLGAMQMVAGLQRLGWVDPEREDLEDVYV  
ILIWVITAVATISVVSGLSFGIKILANIAFYLGCLILFLCFVMENTKFLNLLVQTTGSY  
LQWCIFQVPFFTDAFGALTEGEGRAVDGNGSASWFIGAWTVFYMAWVAVACFVGMFVGR  
ISKNRTRLREVIFSVFICPVLYSLIWF SFGGIGLRQQRQALELQQIGTDSFNDSSYFVSE  
ESEFCYDVPQEDVVVNGTTVFTNQLVGITPVCTFNNSGNADGAW

>comp15090\_c0\_seq15; 566 264 1964 LEN=2071; translated  
MTVAGVCTSLGLGAMQMVAGLQRLGWVDPEREDLEDVYVILIWVITAVATISVVSGLSFG  
IKILANIAFYLGCLILFLCFVMENTKFLNLLVQTTGSYLQWCIFQVPFFTDAFGALTEG  
EGRAVDGNGSASWFIGAWTVFYMAWVAVACFVGMFVGRISKNRTRLREVIFSVFICPVLY  
SLIWF SFGGIGLRQQRQALELQQIGTDSFNDSSYFVSEESESEFCYDVPQEDVVVNGTTV  
TNQLVGITPVCTFNNSGNADGAWFNVMSFSYPDTNGFGGFGPFLSGLSIFTLAIYFITSS  
DSGSLVVDTLASNGESDHHWIQRVFWAVTEGAVACALLIAGKDKALKALQAASIVFGLPF  
NLLMLIMCLSVYVMCKAIEEGKNPNKIEPNVLLPKVQSWTTPFLGGIFNVFEFIIISLGF  
VHESRKEKGMHLPTSEQSVEFLKALFLPFLSFYQVYTSAVMDPKQKNKTRNALLTVVYAL  
CYVGIWVLFSLGAINHGFIALGWSLFFTNACILTVLRMNFARLRTIRGNFIGDFFASSFM  
YPQALAQMVIQLNSDAASELVEVETR

>comp15091\_c0\_seq1; 465 218 1462 LEN=2017; translated  
MASSERSLCCDESENSSNKSSSVVPLPSSSGTEVLWRQHPRQARMRIGRKNISLASDAFV  
SALISFLLLYLSCCCSGFGPVASSTSPSTREHHILKMTDPDIATTTLAAAATDGTDP EEHC  
AESNNKNHSDENGFATACCQGEATGTAYTHIETRFVLETRHPGNV GASARSMTMGFN  
DGLVLRPGRDDRVLGRKKCKEAASGAGNVLEGAILVLDENENDGNGGNNNNNATSLV DK  
AMELAF AAREEQPNNDQHEIPTKVD SERDYPLTTTTTIVCGTGMPVDMGRERVAQRVVE  
PRIFFDELLRRKEPLRRTTATTASSSSANHANTTMMETTKSVAPATNECERHVLRI AFLFG  
NEKHGMPQDTEKCDVMLGIP TNPDFGSLNLATAVQIIAYDWRQALGGFPSPAD

>comp15092\_c0\_seq1; 625 99 1433 LEN=1836; translated  
MTKHSSIIYMLWVFIAS IATGSALSAPSPVVKAPPVTASVYEETL PMLYASRLVYNFADIV  
ERARDDKIDLKLPEDFPLKDL SRFQEE SIDLREFNGGNGISFAQLNDV LNLNAEVIAAKF  
NDKDSEYTKSVVTDIRDYFANSEGDEGSEKNYFLSTYRSLQNKIACVYGVV KDTQNKRII  
VSFRGSQNPFTNRDWKTFNNAKLV ELKTPKKVRDKMEGV LQKRVLVHRGFY EYLF DNKKL  
DGMQKYDEIISDIEPLMEDGYSLYVTGHSLGGALATMFSFKLAGAGKKRDWVPKPVSCIT  
FCAPFSGTSGYRTAFEQMELDGLIRSLRVNNGEDIVPAIPTNSIGIGKRRSMKHTGINLR  
LTKKGMRL LHSSNSGLTNAIRNSFLKPIWKGLTWHGLPLVEDRLNNNADKLTAVTLDDLY  
KDDSI VSSSFKEGQVNHDKDEKDL

>comp15092\_c0\_seq2; 311 1 706 LEN=1109; translated  
NLPNSESVALTNTQHNI SPFSEYLF DNKKLDGMQKYDEIISDIEPLMEDGYSLYVTGHSL  
GGALATMFSFKLAGAGKKRDWVPKPVSCITFCAPFSGTSGYRTAFEQMELDGLIRSLRVN  
NGEDIVPAIPTNSIGIGKRRSMKHTGINLRLTKKGMRL LHSSNSGLTNAIRNSFLKPIWK  
GLTWHGLPLVEDRLNNNADKLTAVTLDDLYKDDSI VSSSFKEGQVNHDKDEKDL

>comp15093\_c0\_seq1; 1021 180 2567 LEN=2797; translated  
MASTAAAGVPSSSSAATPVSSSGDAAASSAAGLSAGASTVPDSVA AVFQKTRHVS IWDED  
GPGVDAWIGKIPGPF RSVGTKGETPGGPDQATSNASSTVNKTSLSPEVTKQTWSNLRRGV  
DQLGITLRKKEEGTDGHANDDGPPLAKRQKRSADDATTGKATTGD KKKPKEMYSV VDPYN  
LYRHTMRVVDGEENEDDEDLLEIEDDAARDLKT TIGGKFTQLTISGLINGLAGHLGGIV  
NRKEQPLPNVDATLLNAIPTAGGASLAVLRQLAHSLSHSIQ TQIEADV LITTPLR IKDML  
AKDATAVEFKNYQKRVDYD TVVLGNGLSQPEEIDIPTAAANSQGVHVLEKFKK CASCNTD  
QSLFVLD RKNGDIICSACGTVNSESLMHEG SQFRKFEGEVDRNH HGDTONPLYSNAHNMS  
TTLGGVQVNTGAGVGGFGSQRGRNLETILRNAHAYTELNISQFGKEDRRTRQGYKDKKKK  
DAFIQMANVGDALNLHEAVIQRAKELYACFREDRELLQHEKGI IAACLCIAFDQMSKDGQ  
NILKQKQLTIAETSYNPRASRRNKLHHTKLAGKGLLLDMSIAKEKGTGKKESLAKK  
TISSWTLED CRSWLMEASKSIAQEWVEGRKNGEKNIPPGSMQELEGKLV LNSIALCNTLE  
NELNRANNGTASARGGRGRVVTPRVNDMTKLGIKWQHSHERGSGGKGGVGGSGNRS PQGT  
NSRRTAGQVLI LKTAKKLGQIVQDKTAGEA IHKELRSLVNKQQALKRQELRNEATRQRLV  
QMKRKPWLQARAQID

>comp15093\_c0\_seq2; 638 576 2762 LEN=2992; translated  
MDF TIRASEYPNDADGYEKHGXTATSNASSTVNKTSLSPEVTKQTWSNLRRGV DQLGITL  
RKKEEGTDGHANDDGPPLAKRQKRSADDATTGKATTGD KKKPKEMYSV VDPYNLYRHTMR  
VVDGEENEDDEDLLEIEDDAARDLKT TIGGKFTQLTISGLINGLAGHLGGIVNRKEQPL  
PNVDATLLNAIPTAGGASLAVLRQLAHSLSHSIQ TQIEADV LITTPLR IKDMLAKDATAV



EFKNYQKRVDYDVTVVLGNGLSQPEEIDIPTAAANSQGVHVLEKFKKCASCNTDQSLFVLD  
RKNNGDIICSACGTVNSESLMHEGSQFRKFEGEVDRNHGDTQNPLYNAHNMSTTLGGVQ  
VNTGAGVGGFGSQRGRNLETILRNAHAYTELNISQFGKEDRRTRQGYKDKKKKDAFIQMA  
NVGDALNLHEAVIQRAKELYACFREDRELLQHEKGI IAAACLCIAFDQMSKDGQNILKQKQ  
LTIAETSYNPRASRRNKLHHTKLAGKGGLLLDMSIAKEKGTGKKESLAKKTISSWTL  
EDCRSWLMEASKSIAQEWVEGRKNGEKNI PPGSMQELEGLVLSIALCNTLENELNRAN  
NGTASARGGRVVTPRVNDMTKLGIKWQHSHERGSGGKGGVGGSGNRSPQGTNSRRTAG  
QVLILKTAKKLGQIVQDKTAGEAIHKELRSLVKNQQAALKRQELRNEATRQRLVQMKRKP  
LQARAQID

>comp15093\_c0\_seq3; 638 417 2603 LEN=2833; translated  
MDFTI RASEYPNDADGYEKHGXTATSNASSTVNKTSLSPEVTKQTWSNLRRGVDQLGITL  
RKKEEGTDGHANDDGPPLAKRQKRSADDATTGKATTGDKKKPKEMYSVVDPNLYRHTMR  
VVGDEENEDDEDLLEIEDDAARDLKTITIGGKFTQLTISGLINGLAGHLGGIVNRKEQPL  
PNVDATLLNAIPTAGGASLAVLRQLAHSLSHSIQTQIEADVLTITPLRIKDMMLAKDATAV  
EFKNYQKRVDYDVTVVLGNGLSQPEEIDIPTAAANSQGVHVLEKFKKCASCNTDQSLFVLD  
RKNNGDIICSACGTVNSESLMHEGSQFRKFEGEVDRNHGDTQNPLYNAHNMSTTLGGVQ  
VNTGAGVGGFGSQRGRNLETILRNAHAYTELNISQFGKEDRRTRQGYKDKKKKDAFIQMA  
NVGDALNLHEAVIQRAKELYACFREDRELLQHEKGI IAAACLCIAFDQMSKDGQNILKQKQ  
LTIAETSYNPRASRRNKLHHTKLAGKGGLLLDMSIAKEKGTGKKESLAKKTISSWTL  
EDCRSWLMEASKSIAQEWVEGRKNGEKNI PPGSMQELEGLVLSIALCNTLENELNRAN  
NGTASARGGRVVTPRVNDMTKLGIKWQHSHERGSGGKGGVGGSGNRSPQGTNSRRTAG  
QVLILKTAKKLGQIVQDKTAGEAIHKELRSLVKNQQAALKRQELRNEATRQRLVQMKRKP  
LQARAQID

>comp15094\_c0\_seq1; 464 1 1436 LEN=1454; translated  
SSFTLFIIYIRTHPNQRETIPNTTTHGRKHNSDRNKKMETSCPCSANNNGEGSFEVNLTHQ  
GKSRTIRVSAATTGLELHRRTLEAVFGVATATDPDGSPTTELLKLLFKGKRITPQAEIPIF  
AGLSASKNKKTPKIMVIATNTSAIEELATKRSDPTIRGFQDERDAIDRRKAASASSRHW  
DSMVQDRDYKFVRMKACTDHSFGHRSTKTPHAFQAMELLEKMATDPGVVAIMRERELVV  
GTLGEMPIDDRIMQKTEEHGGCLLGYNTNRGLRIDLKLRTDDLSGFRPYPELVKTLIHE  
LSHNWVGDHNLFWTNYAQMRAEYLATHARLRSVAVVRGKKTAEAGLDDRELGDVFGS  
ITAELVREMAQHGLHPGAIIEGPLRQRIAELEEETLALDRAGGNRLGGATSGALSSARELA  
WAAAEERRAREQQQQQQQQQKRNGGKXPVTPVECEKEEGSSVLHRENEARIALLCD

>comp15094\_c1\_seq1; 816 63 1832 LEN=1933; translated  
MTADELNNDISKNSNSSSSSHKKNKTSKQERRRRTMPSFQLYQKPENLTPQRCQRIVK  
YARKRLRGQDNNSTDSQDYTTMNHWATRVI PHHKIVLGDVLRGAFSSVYAIQSIAGEEP  
AIEEYEDDETDRMVVKFLRTKLYDNHGLFAASAADLVKEGNILSTLSHTNVIRLHAVAS  
NYGVNSYLNHHDYSYFLVLERLECTLTDRLSRWQRRHRELF FASECESDATAQFVDASLL  
SSTRSANGKGRKRLSLFRSSKNKTDPLFEDSARTATTQASSCDGSIHGSSEEDNRDAL  
AKSYLLEERVDVTLQLADALAYLHSKNVMHRDLKPDNIGFDADGILKVFDIARVVPTS  
KLREDDFCGEDDSEVFATSSCSLRPTKAEDVFRMTQKVGSPRYMSPECANREAYNLKAD  
VYSYALLAHQILTLQKPYDDITDEDHDEMVFRCRGPVFPVPLGLPSRVRELLSNAWSPTIS  
HRPTMEVVRSVLASERSDVLRLGLTLERTSPAVPVANTTGYVWVSCSFEPVSDNHRMLRKIR  
RATRKAQAKSASSGSGKPHRFVFRSSGTTGGSIDGTRS YHWSAIAA

>comp15094\_c1\_seq2; 87 154 930 LEN=930; minus strand; translated  
MWYQSKHGVIILFCHKTINVEITNVAPAAIGSDRCGNPSKPVAGVSTEVFVLSCPALSCPS  
LVPPRVSSSLVPSAALKVEAAGVGI LRGRVLPQAPQAPALHGPPGEAAAGRGGRIAAIA  
LGRGQARPQHPIAGSLFVGVGVGVQKQNPASGGGLPGRDARFPVLDLLRDPPLPEPH  
QGGRRPARAPGPQDVPAGFVDPVPLQRVENPSAADSVAERRCGCGCEGKASPVRFASPIG  
SPVEAIRPRMVPMSRSRX

>comp15094\_c1\_seq3; 113 1 597 LEN=597; translated  
XDGVLSHLHRRILDHVVAAGGASIVLLDRVDCSCHPTDDSDAAAIRDGMHSATGCTCG  
GEHSGRWWQGLRMFIASQPAVFENTIVLMTSHVGTATAEKWTRKRLQQRASASEMRSKKS  
ELESLLRYEIHNYHHGSSGRSGHGTDDTRVDGLGTDDXAHRS DGTLDAMDGTILGRMAS  
TGDPMGDAKRTGEAFPSHPX

>comp15094\_c1\_seq4; 13 1 324 LEN=652; translated  
XRRKACVPSGEAPPSPWILLDDADADEKSGDRLVLRSCLPATEGDGGDPSPPSGRGLA  
XEDRGGPAPGVLGGGPFRRGGLRLLPLPVSAAGDTRLDKHEAGR

>comp15094\_c1\_seq5; 178 1 452 LEN=452; translated  
SSSSSSSLHAPPLVIYASGGKGVGKRSLARLLLGQLLRTQRTNGNEMDTRKVPNTSLDD  
CEDVWAQQKAAATAATAFRWDETFQEENVARSERGRSRYCPLLHLTPSDYYLEEEQEDV

HSGQGHGDDGVLSSHLHRRILDHVVAAGGGA

>comp15095\_c0\_seq1; 418 532 1632 LEN=2051; translated  
MDKNSTPTVPVCLEAADLTWHDFVSVYDPFYAGDDGLNATQRLAIVKSSLAISEHNYQN  
TSSYTLGLTPYSADSQLEYEQRSGYFYVNTSMTKDELVPFDPMTWAAADIPKQVDWVAAG  
VVTPVVDQGRCGASWAIGVCGAIEGAAFLGDGFNQSVSFQQFLSCNKRNLGCDGGSATVA  
AMYAANNWFGGVTTLDGYPYTDADGTTTEFCNLTKKEYPPLALEATDVITVVGLDAEIRFQ  
RRMEDFKLALAIEKPIAVIMKSSCVLFSNYISGILTDGDCSCSDSTCFDHTVLMVGFDDK  
VDTPYFKLKNSWGTRWGEEGYFRVAQTKKGFGLFGILGEGLMIDAQQSQGNADMI EVVE  
YKQFPTW

>comp15096\_c0\_seq1; 598 344 2533 LEN=2651; translated  
MTSSYYLPRNGRYNKYGHQDQAPERKPYEYSGRANGNRNNAMERNRNSGMMWF SFCLMVW  
ALSLQFGGVLRARPSSRIPAQDGFDP RPQQQLPPSMEQRRRIHPQQARRMHQQHPSRQ  
IQQQHLLDNKQQKRRRAEEISDTGEIILDEVVVTDPLEGFRNYSKAADPKAWENNEKIQ  
TISSMEGKLRATLLQKYDRNSYPWEWAWDQNFEEYDREGENEGDNRTESSKIRQGLPVD  
FGLNFHKVHDLDAESTADLVIWVRISWVDPRLAWDPNDFNGLKNCWFFVTDGIGGGEVS  
EIIWTPDIYLNQEDTMANSLANTYAI VSSDGSVYWSRPGRLKSTCKYLGLNFPPDDLSC  
ALEFGSWAHSGLYIRPSKLDGTGYSIGNSETSGSSFVEFEIHDVEVESVYPPFLAAPEE  
DWPVLIYTLTFKRASAPYLRGVLLTNILLNMAAFACFWMPPHVGERMGLAITCVLAAVAG  
ELVMASNLPNCSEMSWYNKFMFGSSGFALLVVFQSAVVIYFFFLT KDDDLVPGYIKWLKRK  
LLNEKKKKEYSSVEKAKDQHTNDMTQDDEEDNFPTNLNRKASINSVEEEEDSDAQTQSP  
ENERMFQRPKLLPSQSEKSIDIFQSTTNRARRRVTLNLNDSMVNGSTLAQFLHTQNALTG  
DTTPRYRDDAEDDAEKEAAKERENQKRWMKVGENIDSACRVIVPAGYLAFLALIFKDTGHE  
FEGFYSLFN

>comp15096\_c0\_seq2; 468 344 2707 LEN=2825; translated  
MTSSYYLPRNGRYNKYGHQDQAPERKPYEYSGRANGNRNNAMERNRNSGMMWF SFCLMVW  
ALSLQFGGVLRARPSSRIPAQDGFDP RPQQQLPPSMEQRRRIHPQQARRMHQQHPSRQ  
IQQQHLLDNKQQKRRRAEEISDTGEIILDEVVVTDPLEGFRNYSKAADPKAWENNEKIQ  
TISSMEGKLRATLLQKYDRNSYPWEWAWDQNFEEYDREGENEGDNRTESSKIRQGLPVD  
FGLNFHKGEPVICVLVVGGSVEMMIRFDSTMQCNVKAKSLFPHLLVSIENPMQHDAPO  
HNAKKVHDLDAESTADLVIWVRISWVDPRLAWDPNDFNGLKNCWFFVTDGIGGGEVSEI  
WTPDIYLNQEDTMANSLANTYAI VSSDGSVYWSRPGRLKSTCKYLGLNFPPDDLSCAL  
EFGSWAHSGLYIRPSKLDGTGYSIGNSETSGSSFVEFEIHDVEVESVYPPFLAAPEEDW  
PVLIIYTLTFKRASAPYLRGVLLTNILLNMAAFACFWMPPHVGERMGLAITCVLAAVAGEL  
VMASNLPNCSEMSWYNKFMFGSSGFALLVVFQSAVVIYFFFLT KDDDLVPGYIKWLKRKLL  
NEKKKKEYSSVEKAKDQHTNDMTQDDEEDNFPTNLNRKASINSVEEEEDSDAQTQSPEN  
ERMFQRPKLLPSQSEKSIDIFQSTTNRARRRVTLNLNDSMVNGSTLAQFLHTQNALTGDT  
TPRYRDDAEDDAEKEAAKERENQKRWMKVGENIDSACRVIVPAGYLAFLALIFKDTGHE  
GFYSLFN

>comp15097\_c0\_seq1; 827 271 3756 LEN=3921; translated  
MGCSQSSDGAANLSPSFSMPVPEQSEHSTANGSHHNSKANGTQSVSLGAAIEQTKQPEKA  
VVSNSNEASVNLAHGGAGNSQVVRNGQNGNSSIRVGAAPIPAMTISNGGLVGGATAALAS  
VTASSASASSGTSGSFAVPTAEGATAALAASAGTDDISSIGSMTAGSLGENKSNDGVNGN  
ANNNGALDRSHRSSSGLHRSRISLGNSSSVIGLDSMIESRREEGGLTANVVHMEVFPFGKP  
IEEVYDGVQTPVLGSGISGVVRLVTHKATGVKYAVKCLDLGLVDTEEGLMQLREEIYIM  
CQLDHPNIVRLEEVEYHSEIYL VQELCLGGELFDRLDEQPDYHYTEAECAKLIKQMLCA  
VRYLHSGKIIHRDLKLENFLFSSSAPDSELKMIDFGLSKHFQYGEIQQAVGTPYTVAPE  
VIRGRYDERCDIWAIGVIAFLLLSGEPPFGGCGGPEPLMTVRANILNGAYEFEPFEI WDL  
VSDSAKDFIKALLVTDPKFRPTASNAQKQPWLTEWAHKT KDNDHILNPNVVRALVNFKE  
FSDMRKLLCEVLSFTLLPEQIKDLRKEFETLDTEGSGEISLLSLKQVLVTNAGAGSLGAL  
TEEEVEDIFNAMRVKKTETTIRWHEFIAAGLSQCEVDDRNLRLAFDRLDNDHKGVKCMGK  
PLRHSTGSPKLVRFLLDASSYNQTSRDFVCP SFLDVTLLDDIMDLMGSDAVQGEALRK  
MWGDSMKDCNCSLARITYEDFV LIMKGQTRFEDGEGVARSDSGQRLNGALMHAVNEVDE  
AETTLRSSLKSNRKSLSMEENETDQAGETVMASTPQLMKPLTGFLNPSAPDGEYQES  
PFSMDDDDDVAMPAAFPVPTFSPSTPKRGPSSPRTEPKIRPLSVMDEVMAQTINSDEP  
TNIHPLIPNPKPNIHVRVKSRSFDEREMKSFCDVDSRRAVALPEHDPDRKSLIMNDK  
QMSALQVNRQLYRSHRQMR LSVIDACKRFEDHQARHAHVLLAEKNMASMGATAGLVMRR  
VDNKTVSSEI IKQRLEQNRQQQLMDKANRRSGRRSSRKKTVSDLSTMMGSLSSSEEM  
TKISIQAHDTPTPLTANAPNRVENTTMYNSTIIPTVIE TKPLENTSDDTNRFPATVPGE  
FRRVNDPFGSHGKYASMMTSK

>comp15097\_c0\_seq2; 920 271 3630 LEN=3795; translated

MGCSQSSDGAANLSPSFSMPVPEQSEHSTANGSHHNSKANGTQSVSLGAAIEQTKQPEKA  
VVSNSNEASVNLAHGGAGNSQVVRNGQNGNSSIRVGAAPIPAMTISNGGLVGGATAALAS  
VTASSASASSGTSFVPTAEGATAALAASAGTDDISSIGSMTAGSLGENKSNDGVNGN  
ANNNGALDRSHRSSSGLHRSRISLGNSSSVIGLDSMIESRREEGGLTANVVHMEVPPFGKP  
IEEVYDGVQTPVLSGSGISGVVRLVTHKATGVKYAVKCLDLGLVDTEEGLMQLREEIYIM  
CQLDHPNIVRLEEVEYESHSEIYLVQELCLGGELFDRLDEQPDYHYTEAECAKLIKQMLCA  
VRYLHSGKIIHRDLKLENFLFSSSAPDSELKMIDFGLSKHFQYGEIQQAVGTPYTVAPE  
VIRGRYDERCDIWAIGVIAFLLLSGEPPFGGCGGPEPLMTVRANILNGAYEFEPFEIWDL  
VSDSAKDFIKALLVTDPKFRPTASNAQKQPWLTEWAHKTCTDNDHILNPNVVRALVNFKE  
FSDMRKLLCEVLSFTLLPEQIKDLRKEFETLDTEGSGEISLLSLKQVLVTNAGAGSLGAL  
TEEEVEDIFNAMRVKKTETTIRWHEFIAAGLSQCEVDDRNLRLAFDRLDNDHKGYVTLDD  
IMDLMGSDAVQGEALRKMWGD SMKDCNCSLARITYEDFVLIMKGQTRFEDGEGVARSD  
SGQRLNGALMHAVNEVDEAETTLRSSLKSNRKSLSMEENETDQAGETVMASTPQLMK  
PLTGFLNPSAPDGEYQESPFMDDDDVAMPAAFPVIPTFSPPSTPKRGPSSPRTEPKIR  
PLSVMDEVMAQTINSDPETNIHPLIPNPKPNIHVVRVKSRSFDEREMKKSFCDVDSRRAV  
ALPEHDPDMRKSIMNDKQMSALQVNRQLYRSHRQMRLSVIDACKRFEDHQARHAHGVL  
AEKNMASMGATAGLVMRRVDNKTVSSEEIKQRLEQNRQKQKLMKANRRSGRRSSRRK  
KTVSDLSTMMGSLSSSEEMTKISIQAHDTPTPLTANAPNRVENTTMYNSTIIPTVIETKP  
LENTSDDTNFRPATVPGEFRRVNDPFGSHGKYASMMTSK

>comp15098\_c0\_seq1; 523 209 1483 LEN=1861; translated  
MSSPETEETEPKFANTSGNGEIPSFNGDEQAKATDFANYFCSYAQLYHQQLADHNRMA  
AYHSAI LGNSDVFKDKVMDVGTGSGILSVWAAQAGARKVYAI EYTDMAKHARQVMKANG  
VEDIVTVIQGAVEEIKLPIEEDSLESDCPEHPERVVDIVISEWMGYFLLRESMLDSLIRA  
RDKYLK PATGLMFP SHCTMYVAPVNDEEERRINCSHAATMSDWDEFQETTKQVYGVNME  
VLKKDFDKEQRDYFLWSSRWRELPQESVLANPKAIKYDMMTCTVEDSKGVQASEELSSF  
EFGVSGDRKQGPISGIAGWFTSDFKSRTEDEGGDAPKLSAPAFSTGPENGYTHWGQQVF  
YFQSGIPLMKGQTTHLKGGLMTRTKENARLYNCR IKHTATRTANESGNVLMSSGESEQV  
YMIP

>comp15098\_c0\_seq2; 521 1 2863 LEN=3269; translated  
TNGMSXDYNTVMI PNGSDDEIAAKSGKGRYCRYQQLGAPT LIYEGSRRDNRRFHVESK  
LPLDNSRELHETLKR SNRVKARWQFSLDVNQIDSISIPGYGRGRKRYGS AKLKTNYEDGS  
GSSGSETEGKMIQR LDKKRQQNRLAMLLED DAAMARHRKCLEDHAKFEHPYMKANFN RVG  
GTKEPRIK PSTYLKSKQF SVTQR INANPSYLA PFDLDCIDEANS GHDT EKNLKG RSTAFR  
RKIASNTCDGPPQGNALLSVPCPCDSCSKG TKRYMLLHPKGGCLERLCVSSVVLPLDRN  
IGDIDTAI IKHRTSMDQSQENFSTSEVGEICLGDTILEIKQCGVWGAENQICIFAIRTGT  
HISV VNIKCKRLNLEAEQE QDSELSRCCGWYTLKEMERLDLRSFSPKIP SFRPVSLASHP  
KYGSAFTPSRFAFASHSESSGSSSYNVVHSCFTFGTERTITNRHDINNLRSISFIDFSNR  
NPMCLWSAASSYVRPALALGPVSKVTRQAKAPFGLGSSLFMIDLRSNSAVFQWSPSAEEM  
MTEGVHSINGISTDWTRENTVFTVST SAGKTWEIDGRMPCRAVNAWSLTSICEEYRGITL  
PKKAFYGEASLLTRPLTQFGSSDLPLLKVD TDLRATGIHLFQKPV RKPRFQ TDSLEICGT  
AGLDVTE TASIATSSFFDLTGVSDDTFTCGISSIRVPLSLYVDADENIWPQYLKENLNLV  
STMTIDNNGDIYSHSLLECN DKVELPDECRRFDGLPIGTRAINIPK KLMVERNFXLNGHW  
KQTGGMNLNLF LSNVYPVCRNAI LSNGGDAGDINGHDVGN SNKILLNTSKKKK IDEGNAV  
VQITKKPRKTGLI RTEDNNGNCNGMI EPGGDRTLIMPLSHSKGIESKT VVYPASNN SN  
DSDGSDGTVVIGMDGNGSKSRSDLSKDI IKNLTDTWEDTASEQDSLDEKDCISY

>comp15099\_c0\_seq1; 986 430 3039 LEN=3220; translated  
MESPLLS CSTKSVIAALLWLSY MAGYAGAASASMHVHARNNTGSHNENNYSHLRSASSPN  
NAPSPADHDGSSQLNELKEIVLFLSEKMDDADLRIRSLEQKIKGQESV IETLKT EVSEAT  
SFHRSLQSN SNDCA PKFRLTPFGPRCDFQYVTRFQNKTF FNDDAVFNENVEFDSDSNCMP  
VFNSTTRMCSYNNNI TFSDGD INFDRDVRFS DTVKFDDNASFRDHVEMRSDVDFNGSRGK  
VNFYKDVKFTEDVLMKNDDHDIELRLEDKVKARFYQDRSIEIDTHTNFYQD VDMKKNLEV  
DEKLRVKKKSTLDDLELYGYLWVDGYTKLENTLEVKKQCTMKDKVKIESGGLEVTQH GAS  
ISGTTKLTGILNLYGNGFVNQDF TVDQKFQASSVLIQPTNALQRNLQFQPAPVPAPAPLL  
QVRGNAKINGELVADKIRSDDINGDIDVMDIYNKIKVEMRDDTVVFGDVRIKSSFSSEQV  
LTGTRMMDQMR SANLRVAKLI ANEA EVGGQDISGSGSMTGNEIVEK LKGKSLVDLLSVE  
SLTMSANSATIGGKEITPEGIPADLDDVVTRLQLYEGETL PYLSAHR LNMYNI IQPPPV  
QNIIPAKILVDGVDVALQTDIEELDRKIDALDTSSSVSVTNTGMTQDEIVGVLAGASLSL  
NSLDASSISKSSAELATIGE VNMVSDAYVPRDSAATSCTCDSASIEDSILSKIDASYVE  
DLGFVTNTDISVLDLGGGGDCTCSQSDVQAFIDQPFL EALGV SFSGEPQCGCAAEDIQ  
NAVDAGYIQGVLDNLGISGGGGDATCTCSAD DVRAVDYNYVSDLGFSAEASECTCDVEG

IVTKDYISGLGFLDSCPCDDVFQFNPDER  
>comp15100\_c0\_seq1; 853 1 3590 LEN=3619; translated  
XLGGSSSAKGNRDDFFFFNSALEWKPNVPLRVPVYCDFTASHRPLQSI EDYIRHTCLPF  
YGNTHNTSVTGGQSSAFVSEARQI IAEVCNAKITGKASQDVVLFAGNGTTAAVRLIDC  
LGLKHFCSNTATTNGSTSTTRGKKPLIVLGPFEHHSNLLPWRELGADKFSIETARLTRD  
GSAVDMADLERILVSHRRDNPDCPFMIGSFSAASNVTGTVVDDIAITRLLHKKHGALSFWD  
YATGASYLVNVMNPTSSNDKAADIAKDALFFSGHKLLGGGGTGPVLI AKKRLVSSLNPP  
GQACGGT VFYVTKDRHRFLSDRIERYEGGTPNVVGIWRLGLVWRLKLSLKIAAGKILSS  
DRKPDETGNKDAMMQEDVSSLLHYDLNRAESI QERLKEIPNLVLLDGKFSNNVPKLP IY  
SFLVRCGRSFLHYNVVCALLNDVFGIQSRGGCQAGPYSQYLLGMNSSGKSGNDCDGVCG  
SNEAVEDWLVHTKDELMRPGATRLSLPSMGTTLQEEYVIEAIRWVATHGWKLLHVYRCN  
HRSGEWRHKSRQSSPLGTNERRWLSHYRLKDNAQKEAGNVGDSTHDSKDVGSSLNALKN  
ANEMLLLVTNDQSSI SQALKMVEEESPSLRWYVYPKDVARYINESLEEVPGTEDPSNI  
QGALRPIALGTDI IGTTEFEKIDGDDTFTT VTVENDKNHSSGMLNFRDGEHSGEAILE  
EIIIEGHDDGELS DHCQIYDLASDSWLRIDSFLEKENYNGDNDDGSAEPKDPICEEESML  
EPTPKAMPSIEIEPNDDFQYIAKNDQKKPKRDETAWGKGHVQPLTTNAEGNENAETEKT  
SRRKSKHTKPPAKLMRLCTQAMIQWDMLEDGDRMLGLSGGKDSMSLLHVLLFQKLLP  
IRFEIEVCTIDPMTPSFDPSP LIPYVESLGLKYHYIRDDIVERAASAGKDGLVSSLCAF  
CARMKRG NLYSCARRNNCNKLVLAQHLLDLAESFMMSVMHNGFLRTMKANYKINAGDLSV  
IRPLAYCRESLMTEFAK SANFP IINENCPACFE EPPERARMKLLSKEETLYPSFYDNIK  
RAMLPLMHDDSTAIMRSYTEEAIAKSRKGVKKKPSDYQKKGDGAVAKSEANVNESTSLEK  
ASEEMLIRELARRRADKFRLAGSMPSHTPEGPADPTGQVCTLNNGNGTIPCRELME  
>comp15101\_c0\_seq4; 507 524 2432 LEN=3273; translated  
MASLDRNGLLSMDALSLSRAIREEGKITCEQLMQATLDI IDELNPHYNAI IMLKDRGVL  
MEQARDCDRALSAAKKANSKRKPLDIGELDNPRYDHSDDDRDLDMQAFGWLYGIPVAI  
KDVSNAESFPTTMGGSP LFCSGNPGDANLPLPATVSDPYVAAI IRDGAI IIGKTNAPEGG  
LGSNTFNDLWGKTLNALVSRGDGSM AETTKKAVSAGSSGGA AVAIATHMLALADGTDNMG  
SLRNPAGWNGIYSHRPTAGWIQSAAKVGDNNCKQSVRDSKESNVHTNSGDDT PFFSSVSR  
VLPHPASTPGPMARTPLDCARLLQTMVGDQDRFDANALILPPNIGWLGDWQGLPIEDGI  
LSVCQTALDEWSARSGNGNHRRCFERRNHTKVVVNIANVTSALSEENSTACGNLFDLEL  
LWESYNAIRFASTYETYSTQFDVKHLLSQQRHLIKRELAWELEQQQAIASSNDRRKARL  
ERARDVYDAYEGWLKGI FRQRKNGDGEGGGNEVQNEYQGLKVDVLALPSAQVWPFPIEDR  
YPKEICGTTMDTYHRWMEICVPVSFGGLPCVTVPI TGTSPSIPESNGKNNIENEWVERKRI  
PMGLQLFATR GKDLQLLNLAA DYYHCQMTKREARD  
>comp15101\_c0\_seq5; 412 231 2394 LEN=2853; minus strand; translated  
MTYPSLSMWHFYLLPCQARPIESKTEMDWHREIIEISHYSKSISDAIRVXFFFVIDQR LI  
SLGXAI VFDLLEDYERHRIELREAVSHGTLATVEAEVNLXGVPLAQSPAGQPETGTKAAG  
SSLARLKAGHKRNRKSAAAHKAGFGERRAVLGLARVFSNESDTEDPWRQRS AIPLSTDPL  
ELLLSRAFR EAVRLLSLDPSQPSGSSSLRGSPCPGEGTLDGQQFDVAVHNEPELSIERLC  
FFRMVAGKEGNGDTSNADLN VYWPAILIKDPTTFPVAIAARRQERSATEQRAANRSETTG  
VDDPLCSLLWRD TVMVLSAAGTNRNGRTCIFLFGDPPPSLWNDARRILPYDCERVKSSAF  
VSYAVVARNCLISGYPAASSEASWVVARSAAGNYHDDNVAAATERATASGDGPD RSHHL  
PEEKDQAGSTDSARQKEKRKAPPSSARKRKNKPASGLRDVPNASTARPSKAKPRKLR TT  
KEAKKISMDNDTSYLTNRVTNP SLLERYSRDVQQIPNFYDVSQTLKEAGHVFCSTAAA  
SSRDEEETNTSTTGR TYKMPGGETFSSLHYRSHMCEHGVPLKRGIKDR TAKKEERFQA  
LMAWVCYHRVERLLGSKDVSVISNRLDQQSPTSAGNGSSARITHLFRRLGMDYNQVQGT  
WSIPGHGPVRDLTDFLGR TGIDPALVEQSDXDKGGAPPPRAVRLMPVPAEQPEPTIFQGS  
GV  
>comp15101\_c0\_seq6; 163 515 1061 LEN=1287; translated  
MRRTARGGGAPPLSDRFAQPEPDDAGPTEKVC EVSNGAVARDAPGSLNLIVIHAEPTKEV  
CYPGRRSIPPSRRRRLLVETVRNHGNVLAPEESFD AVVADPRHECLKAFLLLGGSVFDAS  
LEGDPVLAHVGTIVVEGGKGFPPRH LIGSAGGGVRFLLFFVSTRGSSSGAAKDMPGLFES  
L  
>comp15101\_c0\_seq7; 389 474 2690 LEN=3149; minus strand; translated  
MQAQSNTQANCTAPELTAPRRAGTSLTTSISTSTSTSTDNAMRRLRGKGVFVTLIDYPL  
ERIPSFRTTDT PAMCALTSWP AIVFDLLEDYERHRIELREAVSHGTLATVEAEVNLXGV  
LAQSPAGQPETGTKAAGSSLARLKAGHKRNRKSAAAHKAGFGERRAVLGLARVFSNESD  
EDPWRQRS AIPLSTDPLELLSRAFR EAVRLLSLDPSQPSGSSSLRGSPCPGEGTLDGQQ  
FDVAVHNEPELSIERLCFFRMVAGKEGNGDTSNADLN VYWPAILIKDPTTFPVAIAARRQ  
ERSATEQRAANRSETTG VDDPLCSLLWRD TVMVLSAAGTNRNGRTCIFLFGDPPPSLWND



MMTLWKRLKAMFPATALDKLDNPDNFFNQYVDESKRITLNQTKEYENRLKSRLTDLCSH  
PELYEKLRVAQEPPLKAKTVDVSDLYDVVKQLKSSDLLPAVAFQLNTYGAQFDMFKKVL  
RLESDQVSEFPTYRKDLIRVAREKAQMRKVAEGKANRENAEAEADAQAGFVDDSLVNE  
TTRPHEKYVLSVAGKRLNYSEVENIISDMKKSAGEKVDINHALIRGLRRGVAIYTNEVGF  
CYRRQVQMLASQGRVAVVSDSALAYGVNMPFRSCIFCGDMGDDLTPLIAQQMQGRAGRR  
GMDVQGNVIYLGMDWPYIENMLGQISQVTGKEPRHPLLSLVGALAAANDPGDTKKFLFD  
DEDENSAFAFAIRKIQRAQNCFPVTEDQINWMTSSTLEDFCKGDTKEYLSISEKVVGT  
LGYTHDDGTLAMDHNVLTMVAELHEYLPIAVNMSALLEQMYLRFVYQKSKQYKESDATQN  
EFLSILIHVVDRHPPAEGSESLQQLRVEESQDGKLNEDARAMWVETEDILRKQKALIDG  
LDIPDEEKAKLNLELPPSTEEGSGFPPLDKGVYEMLVSKQKGFLESQNMERRNELKNRIV  
RLGQICQSAHNNIQPHGKYAELEVMFRRMFSNIKYSVADMMQQLTDQDDLTEV  
>comp15104\_c0\_seq1; 396 1 1286 LEN=2447; translated  
XLIHRHHYFAPNAKQLAQPATRESRKIVANPGTMIPTTSTSITATQWAAIDPNPTTSKF  
TRDLIAEALSGREGSVDVALESLFPSNGERIGFGTAGLRSEMKGPLGMNDLTVQCQAQGL  
AKYCLKKGQRQGTASKEKSSSRLCAVVGVDHRSNPSMNISSLSFAILTAIVFAEAGIDC  
ILLDGFVFTPLVPFALQQLGAI CGIMITASHNPKKDNKYKVYASDGCQIRSPMDKDIAD  
ILGNLQPWTDYGTIIQQRQSY PEDPCLGLGHPQRTKELIDDYFIGLASSGLKTGQGSIK  
HDARSLVRSPEFAYTAMHGIGHPFAKRAFEVFDLKPFAVPEQMKPDPSFPTVPFPNPEE  
KGALDLAKNYASENGCDIVLANDPDADRLAVA EKDRATGEWTVFSGDQIGAMLGLWLWET  
IGMKS NKV  
>comp15104\_c0\_seq2; 418 1 2124 LEN=2361; translated  
XLIHRHHYFAPNAKQLAQPATRESRKIVANPGTMIPTTSTSITATQWAAIDPNPTTSKF  
TRDLIAEALSGREGSVDVALESLFPSNGERIGFGTAGLRSEMKGPLGMNDLTVQCQAQGL  
AKYCLKKGQRQGTASKEKSSSRLCAVVGVDHRSNPSMNISSLSFAILTAIVFAEAGIDC  
ILLDGFVFTPLVPFALQQLGAI CGIMITASHNPKKDNKYKVYASDGCQIRSPMDKDIAD  
ILGNLQPWTDYGTIIQQRQSY PEDPCLGLGHPQRTKELIDDYFIGLASSGLKTGQGSIK  
HDARSLVRSPEFAYTAMHGIGHPFAKRAFEVFDLKPFAVPEQMKPDPSFPTVPFPNPEE  
KGALDLAKNYASENGCDIVLANDPDADRLAVA EKDRATGEWTVFSGDQIGAMLGLWLWET  
IGMKS NKPVAMCASTVSSKILAEIGRREGFHVEETLTGFKWKAERLLYKPRDIAIFFAT  
KKQLDLHGKGA VVLFFLIFNSTSENHDYHTYLIXNPF EQYWN DNISGDTNFDKDGVSAMV  
VMSELALYLYREQGISLKD HMLNLYEKYGHFVSKNGYYFMHDQSTVKVIMERLRSGGTYE  
ALKDMVAPYEIESFRDLGEPGYDSLQADKRPKLPTSTTAPMMTIRLTNGCIIQLRPSGTE  
PKFKYYTEMKGQPGVPKENVEEELTMTVNTLLDRLLLEPVKNGLIRKA  
>comp15104\_c0\_seq3; 542 1 2009 LEN=2246; translated  
XLIHRHHYFAPNAKQLAQPATRESRKIVANPGTMIPTTSTSITATQWAAIDPNPTTSKF  
TRDLIAEALSGREGSVDVALESLFPSNGERIGFGTAGLRSEMKGPLGMNDLTVQCQAQGL  
AKYCLKKGQRQGTASKEKSSSRLCAVVGVDHRSNPSMNISSLSFAILTAIVFAEAGIDC  
ILLDGFVFTPLVPFALQQLGAI CGIMITASHNPKKDNKYKVYASDGCQIRSPMDKDIAD  
ILGNLQPWTDYGTIIQQRQSY PEDPCLGLGHPQRTKELIDDYFIGLASSGLKTGQGSIK  
HDARSLVRSPEFAYTAMHGIGHPFAKRAFEVFDLKPFAVPEQMKPDPSFPTVPFPNPEE  
KGALDLAKNYASENGCDIVLANDPDADRLAVA EKDRATGEWTVFSGDQIGAMLGLWLWET  
IGMKS NKPVAMCASTVSSKILAEIGRREGFHVEETLTGFKWIGSRAASLQAEGRNIFCY  
EEAIGFACGDTNFDKDGVSAMVVMSELALYLYREQGISLKD HMLNLYEKYGHFVSKNGYY  
FMHDQSTVKVIMERLRSGGTYEALKDMVAPYEIESFRDLGEPGYDSLQADKRPKLPTSTT  
APMMTIRLTNGCIIQLRPSGTEPKFKYYTEMKGQPGVPKENVEEELTMTVNTLLDRLLLEP  
VKNGLIRKA  
>comp15104\_c0\_seq4; 396 1 1286 LEN=2601; translated  
XLIHRHHYFAPNAKQLAQPATRESRKIVANPGTMIPTTSTSITATQWAAIDPNPTTSKF  
TRDLIAEALSGREGSVDVALESLFPSNGERIGFGTAGLRSEMKGPLGMNDLTVQCQAQGL  
AKYCLKKGQRQGTASKEKSSSRLCAVVGVDHRSNPSMNISSLSFAILTAIVFAEAGIDC  
ILLDGFVFTPLVPFALQQLGAI CGIMITASHNPKKDNKYKVYASDGCQIRSPMDKDIAD  
ILGNLQPWTDYGTIIQQRQSY PEDPCLGLGHPQRTKELIDDYFIGLASSGLKTGQGSIK  
HDARSLVRSPEFAYTAMHGIGHPFAKRAFEVFDLKPFAVPEQMKPDPSFPTVPFPNPEE  
KGALDLAKNYASENGCDIVLANDPDADRLAVA EKDRATGEWTVFSGDQIGAMLGLWLWET  
IGMKS NKV  
>comp15104\_c0\_seq5; 386 1 1241 LEN=2429; translated  
XLIHRHHYFAPNAKQLAQPATRESRKIVANPGTMIPTTSTSITATQWAAIDPNPTTSKF  
TRDLIAEALSGREGSVDVALESLFPSNGERIGFGTAGLRSEMKGPLGMNDLTVQCQAQGL  
AKYCLKKGQRQGTASKEKSSSRLCAVVGVDHRSNPSMNISSLSFAILTAIVFAEAGIDC  
ILLDGFVFTPLVPFALQQLGAI CGIMITASHNPKKDNKYKVYASDGCQIRSPMDKDIAD

ILGNLQPWTDYGTIIQQRRQSY PEDPCLGLGHPQRTKELIDDYFIGLASSGLKTGQGSIK  
HDARSLVRSPEFAYTAMHGIGHPFAKRAFEVFDLKPFFHAVPEQMKPDPSFPTVFPFNPEE  
KGALDLAKNYASENGCDIVLANDPDADRLAVA EKDRATAACCDVCVDSFLKNV S  
>comp15104\_c0\_seq6; 286 21 869 LEN=869; translated  
MIPTTSTS IDTATQWAAIDPNPTTSKFTRDLIAEALSGREGSVD ALESLFPSNGERIGFG  
TAGLRSEMKGPLGMNDLTV CQTAQGLAKYCLKKGQRQGT TASKEKSSSRLCAVVG YDHR  
SNPSMNISLSFAILTAIVFAEAGIDCILLDGFVFTPLVPFALQQLGAI CGIMITASHNP  
KKDNGYKVYASDGCQIRSPMDKDI ADEILGNLQPWTDYGTIIQQRRQSY PEDPCLGLGHP  
QRTKELIDDYFIGLASSGLKTGQGSIKHDARSLVRSPEFAYTA  
>comp15104\_c0\_seq7; 380 1 2038 LEN=2275; translated  
XLIHRHHYFAPNAKQLAQ PATRESRKIVANPGTMIPTTSTS IDTATQWAAIDPNPTTSKF  
TRDLIAEALSGREGSVD ALESLFPSNGERIGFGTAGLRSEMKGPLGMNDLTV CQTAQGL  
AKYCLKKGQRQGT TASKEKSSSRLCAVVG YDHRSNPSMNISLSFAILTAIVFAEAGIDC  
ILLDGFVFTPLVPFALQQLGAI CGIMITASHNPKKDNGYKVYASDGCQIRSPMDKDI ADE  
ILGNLQPWTDYGTIIQQRRQSY PEDPCLGLGHPQRTKELIDDYFIGLASSGLKTGQGSIK  
HDARSLVRSPEFAYTAMHGIGHPFAKRAFEVFDLKPFFHAVPEQMKPDPSFPTVFPFNPEE  
KGALDLAKNYASENGCDIVLANDPDADRLAVA EKDRATAACCDVCVDSFLKNVAEIGRREG  
FHVEETLTGFKWKGAERLLYKPRDIAIFFATKKQLDLHGKGAVVLF FLIFNSTSENHDYH  
TYLIXNPF EQYWN DNISGDTNFDKDGV SAMVVMSELALYLYREQGISLKD HMLNLYEKYG  
HFVSKNGYYFMHDQSTVKVIMERLRSGGT YEALKDMVAPYEIESFRDLGEPGYDSLQADK  
RPKLP TSTTAPMMTIRLTNGCI IQLRPSGTEPKFKYYTEMKGQPGVPKENVEEELTMTVN  
TLDRLLEPVKNGLIRKA  
>comp15104\_c0\_seq8; 439 1 2095 LEN=2332; translated  
XLIHRHHYFAPNAKQLAQ PATRESRKIVANPGTMIPTTSTS IDTATQWAAIDPNPTTSKF  
TRDLIAEALSGREGSVD ALESLFPSNGERIGFGTAGLRSEMKGPLGMNDLTV CQTAQGL  
AKYCLKKGQRQGT TASKEKSSSRLCAVVG YDHRSNPSMNISLSFAILTAIVFAEAGIDC  
ILLDGFVFTPLVPFALQQLGAI CGIMITASHNPKKDNGYKVYASDGCQIRSPMDKDI ADE  
ILGNLQPWTDYGTIIQQRRQSY PEDPCLGLGHPQRTKELIDDYFIGLASSGLKTGQGSIK  
HDARSLVRSPEFAYTAMHGIGHPFAKRAFEVFDLKPFFHAVPEQMKPDPSFPTVFPFNPEE  
KGALDLAKNYASENGCDIVLANDPDADRLAVA EKDRATGEWTVFSGDQIGAMLGLWLWET  
IGMKS NKDENCTENLRFDFLPVDESMDASSFSRLQPVAMCASTVSSKMLAEIGRREGFHV  
EETLTGFKWIGSRAASLQAEGYRNIFCYEEAIGFACGDTNFDKDGV SAMVVMSELALYLY  
REQGISLKD HMLNLYEKYGHFVSKNGYYFMHDQSTVKVIMERLRSGGT YEALKDMVAPYE  
IESFRDLGEPGYDSLQADKRPKLP TSTTAPMMTIRLTNGCI IQLRPSGTEPKFKYYTEMK  
GQPGVPKENVEEELTMTVNTLLDRLLEPVKNGLIRKA  
>comp15104\_c0\_seq9; 504 1 1923 LEN=2160; translated  
XLIHRHHYFAPNAKQLAQ PATRESRKIVANPGTMIPTTSTS IDTATQWAAIDPNPTTSKF  
TRDLIAEALSGREGSVD ALESLFPSNGERIGFGTAGLRSEMKGPLGMNDLTV CQTAQGL  
AKYCLKKGQRQGT TASKEKSSSRLCAVVG YDHRSNPSMNISLSFAILTAIVFAEAGIDC  
ILLDGFVFTPLVPFALQQLGAI CGIMITASHNPKKDNGYKVYASDGCQIRSPMDKDI ADE  
ILGNLQPWTDYGTIIQQRRQSY PEDPCLGLGHPQRTKELIDDYFIGLASSGLKTGQGSIK  
HDARSLVRSPEFAYTAMHGIGHPFAKRAFEVFDLKPFFHAVPEQMKPDPSFPTVFPFNPEE  
KGALDLAKNYASENGCDIVLANDPDADRLAVA EKDRATAACCDVCVDSFLKNVAEIGRREG  
FHVEETLTGFKWIGSRAASLQAEGYRNIFCYEEAIGFACGDTNFDKDGV SAMVVMSELAL  
YLYREQGISLKD HMLNLYEKYGHFVSKNGYYFMHDQSTVKVIMERLRSGGT YEALKDMVA  
PYEIESFRDLGEPGYDSLQADKRPKLP TSTTAPMMTIRLTNGCI IQLRPSGTEPKFKYYT  
EMKGQPGVPKENVEEELTMTVNTLLDRLLEPVKNGLIRKA  
>comp15104\_c0\_seq10; 432 1 1466 LEN=2515; translated  
XLIHRHHYFAPNAKQLAQ PATRESRKIVANPGTMIPTTSTS IDTATQWAAIDPNPTTSKF  
TRDLIAEALSGREGSVD ALESLFPSNGERIGFGTAGLRSEMKGPLGMNDLTV CQTAQGL  
AKYCLKKGQRQGT TASKEKSSSRLCAVVG YDHRSNPSMNISLSFAILTAIVFAEAGIDC  
ILLDGFVFTPLVPFALQQLGAI CGIMITASHNPKKDNGYKVYASDGCQIRSPMDKDI ADE  
ILGNLQPWTDYGTIIQQRRQSY PEDPCLGLGHPQRTKELIDDYFIGLASSGLKTGQGSIK  
HDARSLVRSPEFAYTAMHGIGHPFAKRAFEVFDLKPFFHAVPEQMKPDPSFPTVFPFNPEE  
KGALDLAKNYASENGCDIVLANDPDADRLAVA EKDRATGEWTVFSGDQIGAMLGLWLWET  
IGMKS NKPVAMCASTVSSKILAEIGRREGFHV EETLTGFKWIGSRAASLQAEGYRNIFCY  
EEAIGFAW  
>comp15105\_c0\_seq4; 262 1 1031 LEN=1433; translated  
XSQGPSQGPSQGS SPRHLRLRYCSSPPQGPSCSSANHTVLVYSGGRPRGNSENDDNDSD  
DENAYWRNLVVTMMKFLARPSVERVNLVLRREGEDEDAANEQDKQDTRNGTTTAVASVLRN

KYRARIEAWRDTDAVRVVEASLFGAIDGLDVPSEGLVWVDAERERERERGSSPGAGHRGGV  
RGMRRDTAILFRWRELPSALVLPSPGPPGAADAPEPVVCPSSLHGTVMHKHYLCYLNH  
PVVGSDLRRRLAADKKFGWETAETAMGMLLLAIGEAYVLVQVEDHHRGERPGGGPVPGPD  
ARELSEYFFGCGGPCAPPGEAAAAPVPAIPRWNPPSEGDRECK  
>comp15106\_c0\_seq1; 274 1 1441 LEN=1695; translated  
XDDDDDDDATRGMCSRSPRVPTTEILPGPHPSVGRPMPSLVTSPVAGATEPLPGARLGLI  
APDETI VNRVRPGMFGYKEPEHRQHHQEGTVALKSRPEAPLSTPEKIPVTRGETDNKN  
IDGFDKDSYSPSIGNGQNGVVLVRNEMWSPGLSTDCGGGAI VDDGLDDSEDDHRHT  
IPSYGAAPGAHNDHDI ESQRFGSGDGGGEARPLLKGILPTVDVPVQSRFSWNSFRSI  
RNTDDLNSLAESLFS DIRSESTATRMSISNEAEDYLACSVFQRAFPERMFALTVTLVFEM  
PTLFMISGGSRLCGLIGRTRYTTLVALLPIVSAVSGNVGLQASTLTTRAISHGQVKVAN  
YTNWLFREVGAAALYLGNGVVTGFIAFLMGGFSVPFALS IASAQFIGIVTAGCTGT LAP  
LLFTFIFEKDSGKWGGPLETAVQDVVGSFAMIVISYRIMLWFGPYEIEPEDACSVVPAVD  
>comp15106\_c0\_seq2; 259 1 1674 LEN=1928; translated  
XDDDDDDDATRGMCSRSPRVPTTEILPGPHPSVGRPMPSLVTSPVAGATEPLPGARLGLI  
APDETI VNRVRPGMFGYKEPEHRQHHQEGTVALKSRPEAPLSTPEKIPVTRGETDNKN  
IDGFDKDSYSPSIGNGQNGVVLVRNEMWSPGLSTDCGGGAI VDDGLDDSEDDHRHT  
IPSYGAAPGAHNDHDI ESQRFGSGDGGGEARPLLKGILPTVDVPVQSRFSWNSFRSI  
RNTDDLNSLAESLFS DIRSESTATRMSISNEAEDYLACSVFQRAFPERMFALTVTLVFEM  
PTLFMISGGSRLCGLIGRTRYTTLVALLPIVSAVSGNVGLQASTLTTRAISHGQVKVAN  
YTNWLFREVGAAALYLGTHSALYCWSWAFAGLLCCLLFAVFDAIRNHLHKPRTKAGQSLT  
HIRLFPDXAFMSPHFLVARALRCVSFRFAPTGLNGVVTGFIAFLMGGFSVPFALS I  
SAQFIGIVTAGCTGT LAPLLFTFIFEKDSGKWGGPLETAVQDVVGSFAMIVISYRIMLW  
FPYEIEPEDACSVVPAVD  
>comp15107\_c0\_seq1; 172 180 503 LEN=703; translated  
MNDFVIEHPDGLATYRVYDKEPHLDGDRQSLESDFSFDVGMGLGQERVLWRTLVR LGCQVD  
SNGGWDDSEAI AECTELTDVALQMKKILIALMQSLENEGKEIPVQGV  
>comp15107\_c0\_seq2; 366 394 1737 LEN=1937; translated  
MVPNIQTNATAEGESTLVTSALEGKENLLPIPTDIKASSNAKNKSRIKNLSRTPSWREA  
STIEPQYKIGLILDSTKINDPHVSTINKPATRCQLTSIVVLQPDNETTPTDINESVGKW  
LTSNKVTEGIEHLEFIGIGEEGCDKMLRSESIDAVYI IALSSQKQYVLQSLNAKKHVLN  
DPTSVKLP EFMEELCAKKNKFIQTTAMFVHQYRVQRFMNHVIQDDKFRITDVESSIK  
LNYNQVERVGATLPLQPEHG CIRVLGRFCVLASTMFFNRVGSYAESAQVKS WKHGHSGEI  
VAADCYVKFTNDRKLN FYVAYIESGTRQSI ELKGTSR YATMNDFVIEHPDGLATYRVYD  
K EPHLDGDRQSLESDFSFDVGMGLGQERVLWRTLVR LGCQVDSNNGWDDSEAI AECTELTDV  
ALQMKKILIALMQSLENEGKEIPVQGV  
>comp15107\_c0\_seq3; 177 1377 1898 LEN=2098; translated  
MFFNRVGSYAESAQVKS WKHGHSGEIVAADCYVKFTNDRKLN FYVAYIESGTRQSI ELK  
GTSRYATMNDFVIEHPDGLATYRVYDKEPHLDGDRQSLESDFSFDVGMGLGQERVLWRTLVR  
LGCQVDSNNGWDDSEAI AECTELTDVALQMKKILIALMQSLENEGKEIPVQGV  
>comp15108\_c0\_seq1; 278 1 1185 LEN=1293; translated  
XTTSRLSFSTIENFEGKTATVRAAISMLHHELKGGNIPTFRFIPLNGIEVRHPSDIYIRF  
WEAL TER THLGPHERACERLEAFFTSTTSESDL PNNCTTIVLLDEIDYLVTDQSI LYNL  
FDWPKRAAELSSTSR LIVIGISNTLNLIDHLMASVQSRMGTEKCVFKAYSLDDTISILRS  
KMKEGSPNFMFFEDDAILFAAKKTAALSGDIRKAFQICRSAAELVTRRFEEKKAIDSNGT  
DDFPKIRISDVQKASLESFN MAMVTAVSFSSPFETLLLVSLASLSRSSGHEVGGFDVNDI  
LIKMEALASAGNPQYI PAPSFGETIRLLHRLGEMNLV ELNTRKSSSRTFRQSHGGSGGA  
WPLTSLAIDELTLLKGLKNTSHKDLAKKHLPSMF  
>comp15108\_c0\_seq2; 1459 49 6255 LEN=7029; translated  
MAPLTSNNILPSSGAIHTTTTETKRTFYSSSLVIDHGSKTVQSRWKVHLGDVVVVAKKDL  
NQTALELI ETWKNHYTKKSLEWKVGLVIALRKVVSRHGVEDKNGVGGGTVFECHTQWLD  
KALDLDVAEMKVANLKS VYRPNNTNSKEMGSQLPHVLINCP RQYGIVSMIPVSESN E EYN  
VLLPVTIRMKTNRDFMKNGIKEEESRYELQFCCTKTRRPLHKLKTSRGEKNVKSILSER  
DPDAWVELNCP SFNLTSENS IDDDATPVLQNKIPEPLQQAWKGWLRN ESGIDISSDDNAV  
VSKLALDEKVT PEDTISSLDALMRGWIQSR RERYNKAVLLREEQRRKVLGTGKTIESDP  
SIETEDVPKATRVVGAQRFIPEELKATATLIRSAPLDQLAGTSEAKSDAGNKNRSVANLE  
HGSNKRKRKELRF SADTKQPPSKRISKIMLANPSRRNVSSWQQQAKTSGVMDGR TKDSVE  
FGETNRQLNRVTVNKNAGNQGINEDDLASTTTRDTHSTDTLPTRGAGRGRNKHKLRTKIF  
STNDDDVADDNNYDENETI ISSNTTKLQSMKRTCKIDKPTSPLNVLDTFNEWQLNTSFIQ  
DAVPFYQTKHRDFRELQIMIPFAVVC SLDDDEGGIVNDIHSNDNANLPFVIKIGSVVAI



HYKESISTTSSWSPFRLPWGVAQITNIFRERNNKTDWRLTIRWFYRLPELQAERWTQTL  
KSMNKTYGVLETYESDCDSVKELLPASIQLTSDSDIFSTRPKVKGENDFPIVRMLCQHL  
EHSHGKITRNLWDNYDHATCLERSQTDLDKDVLPGP IKRAIQKMPRQLKRKYTEWLTKSSK  
TTKAHSLHKTSTTNAFFFDIVPESIGVFCNELGNKYVDAVCLNVRKKDLRQLRHSKCCCR  
WTLAVGHI IAVHCKNAKLSEVKSEVKSADAWYPFEKKWCPCGQVVSLSYQKECESWMMMEVRFW  
DRYDEILQTHKSSLNALNKDYVLFETEAYEHLPI SDALPGR I ILTSVEESENWDVTISDV  
TGLPLIPRLCTHICFDEEIGTSTDWTNYDLTLPQIPPGLSRGLLLRPTNRQKELVPKLS  
QFYTRALMRGSDPDHHLRCRWSEERNVMGQRKWTDISFKSEEITVELGEHFFFTINPEKG  
SQDFYRSISVSSPIAYLVSPMEMKRRRKTLEFEMPGDIVCYFDSNASVPETYASAQHIK  
FPWYPRIPFSYQILSIRKESIVGDKDSIKIEIRRFYKLSSELSNDAKQFLPLHTEGTHE  
QIFESNDIELGIAANFLGLTVNVILGNQVFSGSTGEKNIICCRCNFFYLKTFQRLQPIYW  
SALSPARWKQGLRERGCROSSFLHECNRLGDELPAKYQLPNIGPTCDALPSAKNSQEGS  
CVGLKNQTSSSSANISFYEEALLCPHWLSLFHATNYLPLADCSERKVWKLKIGDVVAVND  
ETPQSSASFYPTVPWFPAQILAIYTESKAGGHEIARFEIRCLKFEVSIENDDHNEKRKI  
AEHHPKTMTVTSTDLGLPLTLYSPDAICATDLTKIHIHLPLSEFLAAKSLKFDRETASS  
LSKLNRRDKPRTDTEAKDENSHVCESSLIIPVFNVERNSEHRCNSNAFRVDALHFRAF  
YTKMTLVPNFRVCLRGNIYQNFSTRTIKIGDTIQVRFEGSKRYPYDCNWGVAEVAIFK  
EFLSHDEFHREHLLTPKEQRNKQFQIEIRWFYERSDLSLVALSADDSSEFIEVYETDHCQ  
IVDASHAILDHVKLVEDTIGIKRGDVKHFVCTRFWSTKRRSLIPCSGLNGRIKRGLIHST  
LGLEEDLEKSDSTELKRSLTNWKDSMVNLIWKLTLKDASKNAYKRETLVGREKELSQLL  
AFLRAALLEDHKSKGYKSSMFLAGPPGVGKTATVRAAISMLHHELKGGNIPTFRFIPLNG  
IEVRHPSDIYIRFWEALTEALTHLGPHERACERLEAFFTSTTSESDLPNNCTTIVLLDEID  
YLVTDQSIYLNLFDPKRAAELSSTSRILVIGISNTLNLIDHLMASVQSRMGTEKCVFK  
AYSLDDTISILRSKMKEGSPVRILVLI EW

>comp15108\_c0\_seq4; 1695 49 6852 LEN=6960; translated  
MAPLTSNNILPSSGAIHTTTTETKRTFYSSSLVIDHGSKTVQSRWKVHLGDVVVVAKKDL  
NQTALELIETWKNPHYTKKSLEWKVGLVIALRKVVSRRHGVEDKNGVGGGTVFECHTQWLD  
KALDLDVAEMKVANLKSIVRPNYNTNSKEMGSQLPHVLINCPROYGIVSMIPVSESNEEYN  
VLLPVTIRMKTNRDFMKNGIKEEESRYELQFCCTKTRRPLHKLKTSRGEKNVKSILSER  
DPDAWVELNCPFSNLTSENSIDDDATPVLQNKIPEPLQQAWKGWLRNESGIDISSDDNAV  
VSKLALDEKVTPEDTISSLGDALMRGWIQSRREYRINKAVLLREEQRRKVLGTGKTIESDP  
SIETEDVPKATRVVGAQRFIPEELKATATLIRSAPLDQLAGTSEAKSDAGNKNRSVANLE  
HGSNKRKRKELRFSADTKQPPSKRISKIMLANPSRRNVSSWQQQAKTSGVMDGRTKDSVE  
FGETNRQLNRTVKNAGNQGINEDDLASTTTRDTHSTDTTLPTRGAGRGRNKHKLRTKIF  
STNDDDVADDNNYDENETIISNTTKLQSMKRTCKIDKPTSPLNVLDTFNEWQLNTSF IQ  
DAVPFYQTKHRDFRELQIMIPFAVCSLLDDEGGIVNDIHSNDNANLPFVIKIGSVVAI  
HYKESISTTSSWSPFRLPWGVAQITNIFRERNNKTDWRLTIRWFYRLPELQAERWTQTL  
KSMNKTYGVLETYESDCDSVKELLPASIQLTSDSDIFSTRPKVKGENDFPIVRMLCQHL  
EHSHGKITRNLWDNYDHATCLERSQTDLDKDVLPGP IKRAIQKMPRQLKRKYTEWLTKSSK  
TTKAHSLHKTSTTNAFFFDIVPESIGVFCNELGNKYVDAVCLNVRKKDLRQLRHSKCCCR  
WTLAVGHI IAVHCKNAKLSEVKSEVKSADAWYPFEKKWCPCGQVVSLSYQKECESWMMMEVRFW  
DRYDEILQTHKSSLNALNKDYVLFETEAYEHLPI SDALPGR I ILTSVEESENWDVTISDV  
TGLPLIPRLCTHICFDEEIGTSTDWTNYDLTLPQIPPGLSRGLLLRPTNRQKELVPKLS  
QFYTRALMRGSDPDHHLRCRWSEERNVMGQRKWTDISFKSEEITVELGEHFFFTINPEKG  
SQDFYRSISVSSPIAYLVSPMEMKRRRKTLEFEMPGDIVCYFDSNASVPETYASAQHIK  
FPWYPRIPFSYQILSIRKESIVGDKDSIKIEIRRFYKLSSELSNDAKQFLPLHTEGTHE  
QIFESNDIELGIAANFLGLTVNVILGNQVFSGSTGEKNIICCRCNFFYLKTFQRLQPIYW  
SALSPARWKQGLRERGCROSSFLHECNRLGDELPAKYQLPNIGPTCDALPSAKNSQEGS  
CVGLKNQTSSSSANISFYEEALLCPHWLSLFHATNYLPLADCSERKVWKLKIGDVVAVND  
ETPQSSASFYPTVPWFPAQILAIYTESKAGGHEIARFEIRCLKFEVSIENDDHNEKRKI  
AEHHPKTMTVTSTDLGLPLTLYSPDAICATDLTKIHIHLPLSEFLAAKSLKFDRETASS  
LSKLNRRDKPRTDTEAKDENSHVCESSLIIPVFNVERNSEHRCNSNAFRVDALHFRAF  
YTKMTLVPNFRVCLRGNIYQNFSTRTIKIGDTIQVRFEGSKRYPYDCNWGVAEVAIFK  
EFLSHDEFHREHLLTPKEQRNKQFQIEIRWFYERSDLSLVALSADDSSEFIEVYETDHCQ  
IVDASHAILDHVKLVEDTIGIKRGDVKHFVCTRFWSTKRRSLIPCSGLNGRIKRGLIHST  
LGLEEDLEKSDSTELKRSLTNWKDSMVNLIWKLTLKDASKNAYKRETLVGREKELSQLL  
AFLRAALLEDHKSKGYKSSMFLAGPPGVGKTATVRAAISMLHHELKGGNIPTFRFIPLNG  
IEVRHPSDIYIRFWEALTEALTHLGPHERACERLEAFFTSTTSESDLPNNCTTIVLLDEID  
YLVTDQSIYLNLFDPKRAAELSSTSRILVIGISNTLNLIDHLMASVQSRMGTEKCVFK  
AYSLDDTISILRSKMKEGSPNFMFFEDDAILFAAKKTAALS GDIRKAFQICRSAAELVTR

RFEEKKAIDSNGTDDDFPKIRISDVQKASLESFNMMAMVTAVSFSSPFETLLLVSLSLSRS  
SGHEVGGFDVNDILIKMEALASASGNPQYIPAPSFGETIRLLHRLGEMNLVELNTRKSSS  
RTFRQSHGGSGGAWPLTSLAIDELTLLKGLKNTSHKDLAKKHLPSMF

>comp15108\_c0\_seq5; 1598 49 6702 LEN=7030; translated  
MAPLTSNNILPSSGAIHTTTTETKRTFYSSSLVIDHGSKTVQSRWKVHLGDVVVVAKKDL  
NQTALELIETWKPNNHYTKKSLEWKVGLVIALRKVVSRHGVEDKNGVGGGTVFECHTQWLD  
KALDLDVAEMKVANLKSIVRYPYNTNSKEMGSQLPHVLINCPQYGIIVSMIPVSESNEEYN  
VLLPVTIRMKTNRDFMKNGIKEKEESRYELQFCCTKTRRPLHKLKTSRGEKNVKSILSER  
DPDAWVELNCPFNLTSENSIDDDATPVLQNKIPEPLQQAQWKGWLRNESGIDISSDDNAV  
VSKLALDEKVTPEDTISSLGDALMRGWIQSRREYRNKAVLLREEQRRKVLGTGKTIESDP  
SIETEDVPKATRVVGAQRFIPEELKATATLIRSAPLDQLAGTSEAKSDAGNKNRSVANLE  
HGSNKRKRKELRFSADTKQPPSKRISKIMLANPSRRNVSSWQQQAKTSGVMDGRTKDSVE  
FGETNRQLNRTVNKNAGNQGINEDDLASTTTRDTHSTDTLPTRGAGRGRNKHKLRTKIF  
STNDDDVADDNNYDENETIISNTTKLQSMKRTCKIDKPTSPLNVLDTFNEWQLNTSFIQ  
DAVPFYQTKHRDFRELQIMIPFAVVCSLLDDEGGIVNDIHSNDNANLPFVIKIGSVVAI  
HYKESISTSSWSPFRLPWGVAQITNIFRERNKTDREWRLTIRWFYRLPELQAERWTQTL  
KSMNKTYGVLETYESDCDSVKELLPASIQLTSDSIFSTRPKVKGENDFPIVRMLCQHL  
EHSKGITRNLWDNYDHATCLERSQTDLDKDVLPGPVKRAIQKMPRQLKRKYTEWLTSSK  
TTKAHSLHKTSTTNAFFFDIVPESIGVFCNELGNKYVDAVCLNVRKKDLRQRLHSCCCR  
WTLAVGHI IAVHCKNAKLSEVKSDAWYPFEKKWCQVVSLSLYQKECESWMMMEVRFDRYD  
EILQTHKSSLNALNKDYVLFETEAYEHLPI SDALPGR IILTSVEESENWDVTISDV TGLP  
LIPRLCTHICFDEEIGTSTDWNTNYDLTLPQIPPGLSRGLLLRPTNRQKELVPKLSQFYT  
RALMRGSDPDHHLRCRWSEERNVMGQRKWTDISFKSEEITVELGEHFFTINPEKGSQDF  
YRSISVSSPIAYLVSPMEMKRRRKTLEFEMPGDIVCYFDSNASVPETYASAQHIKFPWY  
PFRIPFSYQILSIRKESIVGDKDSIKIEIRRFYKLSELSNDAKQFLPLHTEGTHEQIFE  
SNDIELGIAANFLGTVNVIILGNQVFSGSTGEKNIICCRCNFFYLKTFQRLQPIYWSALS  
PARWKQGLRERGCROSSFLHECNRLGDELPAKYQLPNIGPTCDALPSAKNSQEGSCVGL  
KNQTSSSSANISFYEEALLCPHWSLFHATNYLPLADCSERKVVWKLKIGDVAVNDSETPQ  
SSASFYPFTVPWFPAQILAIYTESKAGGHEIARFEIRCLKFEVSIENDDHNEKRKIAEHH  
PTKTMTVTSTDLLGPLTLYSPDAICATDLTKIHIHLPLSEFLAAKSLKFDRETASSLSKL  
NRRDKPRTDTEAKDENS HVCESSLI PVFNDVERNSDEHRC SNKAFRVDALHFRAF YTKM  
TLVPNFRVCLRGNIIYQQNFTSRTIKIGDTIQVRFEGSKRYPYDCNWGVAEVVAIFKEFLS  
HDEFHREHLLTPKEQRNKQFQIEIRWFYERSDLSLVALSADDSSEFIEVYETDHCQIVDA  
SHAILDHVKLVEDTIGIKRGDVKHFVCTRFWSTKRRSLIPCSGLNGRIKRGLIHSTLGLE  
EDLEKSDSTELKRSLTNWKDSMVNLIWKLTLKDAKSNAYKRETLVGREKELSQLLAFLR  
AALLEDHKS KGYKSSMFLAGPPGVGKTATVRAAISMLHHELKGGNIPTFRFIPLNGIEVR  
HPSDIYIRFWALERTERHLGPHERACERLEAFFTSTTSESDLPNNCTTIVLLDEIDYLV  
DDQSILYNLFDWPKRAAELSSSTRLIVIGISNTLNLIDHLMASVQSRMGTEKCVFKAYSL  
DDTISILRSKMKEGSPNFMFFEDDAILFAAKKTAALS GDIRKAFQICRSAAELVTRRFEE  
KKAIDSNGTDDDFPKIRISDVQKASLESFNMMAMVTAVSFSSPFETLLLVSLSLSRS  
SGHEVGGFDVNDILIKMEALASASGNPQYIPAPSFGETIRLLHRLGEMNLVELNTRKSSS  
VGGFDVNDILIKMEALASASGNPQYIPAPSFGETIRLLHRLGEMNLVELNTRKSSS

>comp15108\_c0\_seq6; 1459 49 6255 LEN=7111; translated  
MAPLTSNNILPSSGAIHTTTTETKRTFYSSSLVIDHGSKTVQSRWKVHLGDVVVVAKKDL  
NQTALELIETWKPNNHYTKKSLEWKVGLVIALRKVVSRHGVEDKNGVGGGTVFECHTQWLD  
KALDLDVAEMKVANLKSIVRYPYNTNSKEMGSQLPHVLINCPQYGIIVSMIPVSESNEEYN  
VLLPVTIRMKTNRDFMKNGIKEKEESRYELQFCCTKTRRPLHKLKTSRGEKNVKSILSER  
DPDAWVELNCPFNLTSENSIDDDATPVLQNKIPEPLQQAQWKGWLRNESGIDISSDDNAV  
VSKLALDEKVTPEDTISSLGDALMRGWIQSRREYRNKAVLLREEQRRKVLGTGKTIESDP  
SIETEDVPKATRVVGAQRFIPEELKATATLIRSAPLDQLAGTSEAKSDAGNKNRSVANLE  
HGSNKRKRKELRFSADTKQPPSKRISKIMLANPSRRNVSSWQQQAKTSGVMDGRTKDSVE  
FGETNRQLNRTVNKNAGNQGINEDDLASTTTRDTHSTDTLPTRGAGRGRNKHKLRTKIF  
STNDDDVADDNNYDENETIISNTTKLQSMKRTCKIDKPTSPLNVLDTFNEWQLNTSFIQ  
DAVPFYQTKHRDFRELQIMIPFAVVCSLLDDEGGIVNDIHSNDNANLPFVIKIGSVVAI  
HYKESISTSSWSPFRLPWGVAQITNIFRERNKTDREWRLTIRWFYRLPELQAERWTQTL  
KSMNKTYGVLETYESDCDSVKELLPASIQLTSDSIFSTRPKVKGENDFPIVRMLCQHL  
EHSKGITRNLWDNYDHATCLERSQTDLDKDVLPGPVKRAIQKMPRQLKRKYTEWLTSSK  
TTKAHSLHKTSTTNAFFFDIVPESIGVFCNELGNKYVDAVCLNVRKKDLRQRLHSCCCR  
WTLAVGHI IAVHCKNAKLSEVKSEVKSDAWYPFEKKWCQVVSLSLYQKECESWMMMEVRF  
DRYDEILQTHKSSLNALNKDYVLFETEAYEHLPI SDALPGR IILTSVEESENWDVTISDV  
TGLPLIPRLCTHICFDEEIGTSTDWNTNYDLTLPQIPPGLSRGLLLRPTNRQKELVPKLS

QFYTRALMRGSDPDHHLCRWSEERNVMGQRKWTDISFKSEEITVELGEHFFTINPEKG  
SQDFYRSISVSSPIAYLVSPMEMKRRRKTLEFEMPGDIVCYFDSNASVPETYASAQHIK  
FPWYFPRIPFSYQILSIRKESIVGDKDSIKIEIRRFYKLSSELSNDAKQFLPLHTEGTHE  
QIFESNDIELGIAANFLLGTVNVILGNQVFSGSTGEKNIICCRCNFFYLKTFQRLQPIYW  
SALSPARWKQGLRERGCROSSFLHECNRLGDELPAKYQLPNIGPTCDALPSAKNSQEGS  
CVGLKNQTSSSSANISFYEEALLCPHWSLFHATNYLPLADCSERKVWKLKIGDVVAVNDS  
ETPQSSASFYPFTVPWFPAQILAIYTESKAGGHEIARFEIRCLKFEVSIENDDHNEKRKI  
AEHHPTKTMTVTSTDLLGPLTLYSPDAICATDLTKIHIHLPLSEFLAAKSLKFDRETASS  
LSKLNRRDKPRTDTEAKDENS HV CEDSSLIPVFN DVERNSDEHRC SNKAFRVDALHFRAF  
YTKMTLVPNFRVCLRGNIIYQQNFTSRTIKIGDTIQVRFEGSKRYPYDCNWGVAEVVAIFK  
EFLSHDEFHREHLLTPKEQRNKQFQIEIRWFYERSDLSLVALSADDSSEFIEVYETDHCQ  
IVDASHAILDHVKLVEDTIGIKRGDVKHFVCTRFWSTKRRSLIPCSGLNGRIKRGLIHST  
LGLEEDLEKSDSTELKRSLTNWKDSMVNLIWKLTLKDASKNAYKGRET LVGREKELS QLL  
AFLRAALLEDHKS KGYKSSMFLAGPPGVGKTATVRAAISMLHHELKGGNIPTFRFIPLNG  
IEVRHPSDIYIRFWEAL TER THLG PHERACERLEAFFTSTTSESDLPNNCTTIVLLDEID  
YLVTDDQSILYNLFDWPKRAAELSST SRLIVIGISNTLNLIDHLMASVQSRMGTEKCVFK  
AYSLLDDTISILRSKMKEGSPVRILV LIEW

>comp15108\_c0\_seq7; 1455 49 6243 LEN=7099; translated  
MAPLTSNNILPSSGAIHTTTTETKRTFYSSSLVIDHGSKTVQSRWKVHLGDVVVVAKKDL  
NQTALELIETWKNHYTKKSLEWKVGLVIALRKVVSRHGVEDKNGVGGGTVFECHTQWLD  
KALDLDVAEMKVANLKS VYR PYNTNSKEMGSQLPHVLINCP RQY GIVSMIPVSESNEEYN  
VLLPVTIRMKTNRDFMKNGIKEEESRYELQFCCTKTRRPLHKLKTSRGEKNVKSILSER  
DPDAWVELNCP SFNLTSENS IDDDATPVLQNKIPEPLQQAWKGWLRNESGIDISSDDNAV  
VSKLALDEKVT PEDT ISSLG DALMRGWIQSR RERYNKAVLLREEQRRKVLGTGKTIESDP  
SIETEDVPKATRVVGAQRFIPEELKATATLIRSAPLDQLAGTSEAKSDAGNKNRSVANLE  
HGSNKRKRKELRFSADTKQPPSKRISKIMLANPSRRNVSSWQQQAKTSGVMDGR TKDSVE  
FGETNRQLNRVTVNKNAGNQG INEDDLASTTTRDTHSTDTTLPTRGAGRGRNKHKLRTKIF  
STNDDDVADDNNYDENETI ISSNTTKLQSMKRTCKIDKPTSPLNVLDTFNEWQLNTSFIQ  
DAVPFYQTKHRDFRELQIMIPFAVCSLLDDEGGIVNDIHSNDNANLPFVIKIGSVVAI  
HYKESISTTSSWSPFRLPWGVAQITNIFRERNKTD EWRLTIRWFYRLPELQAERWTQTL  
KSMNKTYGVLETYESCDCSVKELL PASIQLTSDSDIFSTRPKVKVGENDFP IVRMLCQHL  
EHSHGKITRNLWDNYDHATCLERSQTDLKDVLPGPIKRAIQKMPRQLKRKYTEWLTKSSK  
TTKAHSLHKTSTTNAFFFDIVPESIGVFCNELGNKYVDVAVCLNVRKKDLRQLRHSKCCCR  
WTLAVGHI IAVHCKNAKLSEVKSDAWYPFEKKWC PGQVVS LYQKECESWMMEVRFWDRYD  
EILQTHKSSLNALNKDYVLFETEAYEHLPI SDALPGR IILTSVEESENWDVTISDVTGLP  
LIPRLCTHICFDEEIGTSTDWNTNYDLTLPQIPPGLSRGLLLRPTNRQ GKELVPKLSQFYT  
RALMRGSDPDHHLCRWSEERNVMGQRKWTDISFKSEEITVELGEHFFTINPEKGSQDF  
YRSISVSSPIAYLVSPMEMKRRRKTLEFEMPGDIVCYFDSNASVPETYASAQHIKFPWY  
PFRIPFSYQILSIRKESIVGDKDSIKIEIRRFYKLSSELSNDAKQFLPLHTEGTHEQIFE  
SNDIELGIAANFLLGTVNVILGNQVFSGSTGEKNIICCRCNFFYLKTFQRLQPIYWSALS  
PARWKQGLRERGCROSSFLHECNRLGDELPAKYQLPNIGPTCDALPSAKNSQEGSCVGL  
KNQTSSSSANISFYEEALLCPHWSLFHATNYLPLADCSERKVWKLKIGDVVAVNDS ETPQ  
SSASFYPFTVPWFPAQILAIYTESKAGGHEIARFEIRCLKFEVSIENDDHNEKRKIAEHH  
PTKTMTVTSTDLLGPLTLYSPDAICATDLTKIHIHLPLSEFLAAKSLKFDRETASSLSKL  
NRRDKPRTDTEAKDENS HV CEDSSLIPVFN DVERNSDEHRC SNKAFRVDALHFRAF YTKM  
TLVPNFRVCLRGNIIYQQNFTSRTIKIGDTIQVRFEGSKRYPYDCNWGVAEVVAIFK EFLS  
HDEFHREHLLTPKEQRNKQFQIEIRWFYERSDLSLVALSADDSSEFIEVYETDHCQIVDA  
SHAILDHVKLVEDTIGIKRGDVKHFVCTRFWSTKRRSLIPCSGLNGRIKRGLIHSTLGLE  
EDLEKSDSTELKRSLTNWKDSMVNLIWKLTLKDASKNAYKGRET LVGREKELS QLLAFLR  
AALLEDHKS KGYKSSMFLAGPPGVGKTATVRAAISMLHHELKGGNIPTFRFIPLNGIEVR  
HPSDIYIRFWEAL TER THLG PHERACERLEAFFTSTTSESDLPNNCTTIVLLDEIDYLV  
TDDQSILYNLFDWPKRAAELSST SRLIVIGISNTLNLIDHLMASVQSRMGTEKCVFKAYS  
LDDTISILRSKMKEGSPVRILV LIEW

>comp15108\_c0\_seq8; 1425 49 6237 LEN=6237; translated  
MAPLTSNNILPSSGAIHTTTTETKRTFYSSSLVIDHGSKTVQSRWKVHLGDVVVVAKKDL  
NQTALELIETWKNHYTKKSLEWKVGLVIALRKVVSRHGVEDKNGVGGGTVFECHTQWLD  
KALDLDVAEMKVANLKS VYR PYNTNSKEMGSQLPHVLINCP RQY GIVSMIPVSESNEEYN  
VLLPVTIRMKTNRDFMKNGIKEEESRYELQFCCTKTRRPLHKLKTSRGEKNVKSILSER  
DPDAWVELNCP SFNLTSENS IDDDATPVLQNKIPEPLQQAWKGWLRNESGIDISSDDNAV  
VSKLALDEKVT PEDT ISSLG DALMRGWIQSR RERYNKAVLLREEQRRKVLGTGKTIESDP

SIETEDVPKATRVVGAQRFIPEELKATATLIRSAPLDQLAGTSEAKSDAGNKNRSVANLE  
HGSNKRKRKELRFSADTKQPPSKRISKIMLANPSRRNVSSWQQQAKTSGVMDGRTKDSVE  
FGETNRQLNRTVKNAGNQGINEDDLASTTTRDTHSTDTTLPTRGAGRGRNKHKLRTKIF  
STNDDVADDNNYDENETIISSNTTKLQSMKRTCKIDKPTSPLNVLDTFNEWQLNTSFIQ  
DAVPPFYQTKHRDFFRELQIMIPFAVCSLLDDEGGIVNDIHSNDNANLPFVIKIGSVVAI  
HYKESISTTSSWSPFRLPWGVAQITNIFRERNNKTDREWLTIRWFYRLPELQAERWTQTL  
KSMNKTYGVLETYYESCDCSVKELLPASIQLTSDSDIFSTRPKKVKGENDFPIVRMLCQHL  
EHSHGKITRNLWDNYDHATCLERSQTDLKDVLPGPIKRAIQKMPRQLKRKYTEWLTKSSK  
TTKAHSLHKTSTTNAFFFDIVPESIGVFCNELGNKYVDAVCLNVRKKDLRQRLHSHKCCCR  
WTLAVGHI IAVHCKNAKLSEVKSDAWYPFEKKWCPCGQVVSLSYQKECESWMMMEVRWFDRYD  
EILQTHKSSLNALNKDYVLFETEAYEHLPI SDALPGR I I LTSVEESENWDVTI SDVTGLP  
LIPRLCTHICFDEEIGTSTDWNTNYDLTLPQIPPLSRGLLLRPTNRQGKELVPKLSQFYT  
RALRMRGSDPDHHHLCRWSEERNVMGQRKWTDISFKSEEITVELGEHFFTINPEKGSQDF  
YRSISVSSPIAYLVSPMEMKRRRKTLEFEMPGDIVCYFDSNASVPETYASAQHIKFPWY  
PFRIPFSYGQILSIRKESIVGDKDSIKIEIRRFYKLSSELSNDAKQFLPLHTEGTHEQIFE  
SNDIELGIAANFLLGTVNVILGNQVFSGSTGEKNIICCRCNFFYLKTFQRLQPIYWSALS  
PARWKQGLRERGRQSSFLHECNRLGDELPAKYQLPNI GPTCDALPSAKNSQEGSCVGL  
KNQTSSSSANISFYEEALLCPHWSLFHATNYLPLADCSERKVWKLKIGDVVAVNDSETPQ  
SSASFYPFTVPWFPAQILAIYTESKAGGHEIARFEIRCLKFEVSIENDDHNEKRKIAEHH  
PTKMTVTSTDLLGPLTLYSPDAICATDLTKIHIHLPLSEFLAAKSLKFDRETASSLSKL  
NRRDKPRTDTEAKDENSHVCEDSSLI PVFNDVERNSDEHRC SNKAFRVDALHFRAFYTKM  
TLVFNFRVCLRGNIYQQNFTSRTIKIGDTIQVRFEGSKRYPYDCNWGVAEVVAIFKEFLS  
HDEFHREHLLTPKEQRNKQFQIEIRWFYERSDLSLVALSADDSSEFIEVYETDHCQIVDA  
SHAILDHVKLVEDTIGIKRGDVKHFVCTRFWSTKRRSLIPCSGLNGRIKRGLIHSTLGLE  
EDLEKSDSTELKRSLTNWKDSMVNLIWKLTLKDAKSNAYKGRETLVGREKELSQLLAFLR  
AALLEDHKSJKYSSMFLAGPPGVGKTATVRAAISMLHHELKGGNIPTFRFIPLNGIEVR  
HPSDIYIRFWEALERTHLGPHERACERLEAFFTSTTSESDLPNNCTTIVLLDEIDYLV  
DDQSILYNLFDWPKRAAELSSTSRILVIGISNTLNLIDHLMASVQSRMGTEKCVFKAYSL  
DDTISILRSKMKEGSPMTLFLYQ

>comp15108\_c0\_seq11; 1455 49 6243 LEN=7017; translated  
MAPLTSNNILPSSGAIHTTTTETKRTFYSSSLVIDHGSKTVQSRWVHLGDVVVAKKDL  
NQTALELIETWKNHYTKKSLEWKVGLVIALRKVVSRRHGVEDKNGVGGGTVFECHTQWLD  
KALDLDVAEMKVANLKSIVRPNYNTNSKEMGSQLPHVLINCPROYGIVSMIPVSESNEEYN  
VLLPVTIRMKTNRDFMKNGIKEKEESRYELQFCCTKTRRPLHKLKTSRGEKNVKSILSER  
DPDAWVELNCPFNLTSENSIDDDATPVLQNKIPEPLQQAQWGLRNESEGIDISSDDNAV  
VSKLALDEKVTPEDTISSLGDALMRGWIQSRREYRNYKAVLLREEQRRKVLGTGKTIESDP  
SIETEDVPKATRVVGAQRFIPEELKATATLIRSAPLDQLAGTSEAKSDAGNKNRSVANLE  
HGSNKRKRKELRFSADTKQPPSKRISKIMLANPSRRNVSSWQQQAKTSGVMDGRTKDSVE  
FGETNRQLNRTVKNAGNQGINEDDLASTTTRDTHSTDTTLPTRGAGRGRNKHKLRTKIF  
STNDDVADDNNYDENETIISSNTTKLQSMKRTCKIDKPTSPLNVLDTFNEWQLNTSFIQ  
DAVPPFYQTKHRDFFRELQIMIPFAVCSLLDDEGGIVNDIHSNDNANLPFVIKIGSVVAI  
HYKESISTTSSWSPFRLPWGVAQITNIFRERNNKTDREWLTIRWFYRLPELQAERWTQTL  
KSMNKTYGVLETYYESCDCSVKELLPASIQLTSDSDIFSTRPKKVKGENDFPIVRMLCQHL  
EHSHGKITRNLWDNYDHATCLERSQTDLKDVLPGPIKRAIQKMPRQLKRKYTEWLTKSSK  
TTKAHSLHKTSTTNAFFFDIVPESIGVFCNELGNKYVDAVCLNVRKKDLRQRLHSHKCCCR  
WTLAVGHI IAVHCKNAKLSEVKSDAWYPFEKKWCPCGQVVSLSYQKECESWMMMEVRWFDRYD  
EILQTHKSSLNALNKDYVLFETEAYEHLPI SDALPGR I I LTSVEESENWDVTI SDVTGLP  
LIPRLCTHICFDEEIGTSTDWNTNYDLTLPQIPPLSRGLLLRPTNRQGKELVPKLSQFYT  
RALRMRGSDPDHHHLCRWSEERNVMGQRKWTDISFKSEEITVELGEHFFTINPEKGSQDF  
YRSISVSSPIAYLVSPMEMKRRRKTLEFEMPGDIVCYFDSNASVPETYASAQHIKFPWY  
PFRIPFSYGQILSIRKESIVGDKDSIKIEIRRFYKLSSELSNDAKQFLPLHTEGTHEQIFE  
SNDIELGIAANFLLGTVNVILGNQVFSGSTGEKNIICCRCNFFYLKTFQRLQPIYWSALS  
PARWKQGLRERGRQSSFLHECNRLGDELPAKYQLPNI GPTCDALPSAKNSQEGSCVGL  
KNQTSSSSANISFYEEALLCPHWSLFHATNYLPLADCSERKVWKLKIGDVVAVNDSETPQ  
SSASFYPFTVPWFPAQILAIYTESKAGGHEIARFEIRCLKFEVSIENDDHNEKRKIAEHH  
PTKMTVTSTDLLGPLTLYSPDAICATDLTKIHIHLPLSEFLAAKSLKFDRETASSLSKL  
NRRDKPRTDTEAKDENSHVCEDSSLI PVFNDVERNSDEHRC SNKAFRVDALHFRAFYTKM  
TLVFNFRVCLRGNIYQQNFTSRTIKIGDTIQVRFEGSKRYPYDCNWGVAEVVAIFKEFLS  
HDEFHREHLLTPKEQRNKQFQIEIRWFYERSDLSLVALSADDSSEFIEVYETDHCQIVDA  
SHAILDHVKLVEDTIGIKRGDVKHFVCTRFWSTKRRSLIPCSGLNGRIKRGLIHSTLGLE

EDLEKSDSTELKRSLTNWKDSMVNLIWKLTLKDASKNAYKGRETLVGREKELSQLLAFLR  
AALLEDHKSCKGYKSSMFLAGPPGVGKTATVRAAISMLHHELKGGNIPTFRFIPLNGIEVR  
HPSDIYIRFWEALTERTHLGPHERACERLEAFFTSTTSESDLPNNCTTIVLLDEIDYLV  
DDQSILYNLFDWPKRAAELSSTSR LIVIGISNTLNLIDHLMASVQSRMGTEKCVFKAYSL  
DDTISILRSKMKEGSPVRILVLI EW

>comp15108\_c0\_seq12; 1429 49 6249 LEN=6249; translated  
MAPLTSNNILPSSGAIHTTTTETKRTFYSSSLVIDHGSKTVQSRWKVHLGDVVVVAKKDL  
NQTALELIETWKPNIHYTKKSLEWKVGLVIALRKVVSRHGVEDKNGVGGGTVFECHTQWLD  
KALDLDVAEMKVANLKSIVYRPNYNTNSKEMGSQLPHVLINCPQYGI VSMIPVSESN E EYN  
VLLPVTIRMKTNRDFMKNGIKEKEESRYELQFCCTKTRRPLHKLKTSRGEKNVKSILSER  
DPDAWVELNCPNFNLTSSENSIDDDATPVLQNKIPEPLQQA WKGWLRNESGIDISSDDNAV  
VSKLALDEKVTPEDTISSLGDALMRGWIQSR RERYNKAVLLREEQRRKVLGTGKTIESDP  
SIETEDVPKATRVVGAQRFIPEELKATATLIRSAPLDQLAGTSEAKSDAGNKNRSVANLE  
HGSNKRKRKELRFSADTKQPPSKRISKIMLANPSRRNVSSWQQQAKTSGVMDGR TKDSVE  
FGETNRQLNRVTNKNAGNQGINEDDLASTTTRDTHSTDTLPTRGAGRGRNKHKLRTKIF  
STNDDDVADDNNYDENETI ISSNTTKLQSMKRTCKIDKPTSPLNVLDTFNEWQLNTSFIQ  
DAVPFYQTKHRDFRELQIMIPFAVVC SLDDDEGGIVNDIHSNDNANLPFVIKIGSVVAI  
HYKESISTSSWSPFRLPWGVAQITNIFRERNKKTDEWRLTIRWFYRLPELQAERWTQTL  
KSMNKTYGVLETYESDCDSVKELLPASIQLTSDSDIFSTRPKVKGENDFPIVRMLCQHL  
EHSHGKITRNLWDNYDHATCLERSQTDLKDVLPGPIKRAIQKMPRQLKRKYTEWLT KSSK  
TTKAHSLHKTSTTNAFFFDIVPESIGVFCNELGNKYVDAVCLNVRKKDLRQRLH SKCCCR  
WTLAVGHI IAVHCKNAKLSEVKSEVKS DAWYPFEKKWC PGQVVS LYQKECESWMM EVRWF  
DRYDEILQTHKSSLNALNKDYVLFETEAYEHLPI SDALPGR IILTSVEESENWDVTISDV  
TGLPLIPRLCTHICFDEEIGTSTDW TNYDLTLPQIPPGLSRGLLLRPTNRQ GKELVPKLS  
QFYTRALMRGSDPDHHLRCRWSEERNVMGQRKWTDISFKSEEITVELGEHFFTINPEKG  
SQDFYRSISVSSPIAYLVSPTEMMKRRRKTLEFEMPGDIVCYFDSNASVPETYASAQHIK  
FPWYFPFRIPFSYQILSIRKESIVGDKSIIKIEIRRFYKLS ELSNDAKQFLPLHTEGTHE  
QIFESNDIELGIAANFL LGTVNVILGNQVFSGSTGEKNIICCR CNFFYLKTFQRLQPIYW  
SALSPARWKQGLRERGC RQSSFLHECNRLGDEL PNAKYQLPNIGPTCDALPSAKNSQEGS  
CVGLKNQTS SSSSANISFYEEALLCPHWSLFHATNYLPLADCSERKVWKLKIGDVVAVNDS  
ETPQSSASFYFPFTVPWFPAQILAIYTESKAGGHEIARFEIRCLKFEVSIENDDHNEKRKI  
AEHHPKTMTVTSTDLGLPLTLYSPDAICATDLTKIHIHLPLSEFLAAKSLKFDRETASS  
LSKLNRRDKPRTDTEAKDENS HVCEDSSLI PVFNDVERNSDEHRC SNKAFRVDALHFR AF  
YTKMTLVPNFRVCLRGNIYQQNFTSRTIKIGDTIQVRFEGSKRYPYDCNWGVAEVVAIFK  
EFLSHDEFHREHLLTPKEQRNKQFQIEIRWFYERSDLSLVALSADDSSEFIEVYETDHCQ  
IVDASHAILDHVKLVEDTIGIKRGDVKHFVCTRFWSTKRRSLIPCSGLNGRIKRGLIHST  
LGLLEEDLEKSDSTELKRSLTNWKDSMVNLIWKLTLKDASKNAYKGRET LVGREKELSQLL  
AFLRAALLEDHKSCKGYKSSMFLAGPPGVGKTATVRAAISMLHHELKGGNIPTFRFIPLNG  
IEVRHPSDIYIRFWEALTERTHLGPHERACERLEAFFTSTTSESDLPNNCTTIVLLDEID  
YLVTDQSI LYNLFDWPKRAAELSSTSR LIVIGISNTLNLIDHLMASVQSRMGTEKCVFK  
AYSLDDTISILRSKMKEGSPMTLFY LQ

>comp15108\_c0\_seq13; 1691 49 6840 LEN=6948; translated  
MAPLTSNNILPSSGAIHTTTTETKRTFYSSSLVIDHGSKTVQSRWKVHLGDVVVVAKKDL  
NQTALELIETWKPNIHYTKKSLEWKVGLVIALRKVVSRHGVEDKNGVGGGTVFECHTQWLD  
KALDLDVAEMKVANLKSIVYRPNYNTNSKEMGSQLPHVLINCPQYGI VSMIPVSESN E EYN  
VLLPVTIRMKTNRDFMKNGIKEKEESRYELQFCCTKTRRPLHKLKTSRGEKNVKSILSER  
DPDAWVELNCPNFNLTSSENSIDDDATPVLQNKIPEPLQQA WKGWLRNESGIDISSDDNAV  
VSKLALDEKVTPEDTISSLGDALMRGWIQSR RERYNKAVLLREEQRRKVLGTGKTIESDP  
SIETEDVPKATRVVGAQRFIPEELKATATLIRSAPLDQLAGTSEAKSDAGNKNRSVANLE  
HGSNKRKRKELRFSADTKQPPSKRISKIMLANPSRRNVSSWQQQAKTSGVMDGR TKDSVE  
FGETNRQLNRVTNKNAGNQGINEDDLASTTTRDTHSTDTLPTRGAGRGRNKHKLRTKIF  
STNDDDVADDNNYDENETI ISSNTTKLQSMKRTCKIDKPTSPLNVLDTFNEWQLNTSFIQ  
DAVPFYQTKHRDFRELQIMIPFAVVC SLDDDEGGIVNDIHSNDNANLPFVIKIGSVVAI  
HYKESISTSSWSPFRLPWGVAQITNIFRERNKKTDEWRLTIRWFYRLPELQAERWTQTL  
KSMNKTYGVLETYESDCDSVKELLPASIQLTSDSDIFSTRPKVKGENDFPIVRMLCQHL  
EHSHGKITRNLWDNYDHATCLERSQTDLKDVLPGPIKRAIQKMPRQLKRKYTEWLT KSSK  
TTKAHSLHKTSTTNAFFFDIVPESIGVFCNELGNKYVDAVCLNVRKKDLRQRLH SKCCCR  
WTLAVGHI IAVHCKNAKLSEVKSEVKS DAWYPFEKKWC PGQVVS LYQKECESWMM EVRWFDRYD  
EILQTHKSSLNALNKDYVLFETEAYEHLPI SDALPGR IILTSVEESENWDVTISDV TGLP  
LIPRLCTHICFDEEIGTSTDW TNYDLTLPQIPPGLSRGLLLRPTNRQ GKELVPKLSQFYT

RALRMRGSDPDHHHLCRWSEERNVMGQRKWTDISFKSEEITVELGEHFFFTINPEKGSQDF  
YRSISVSSPIAYLVSPMEMKRRRKTLEFEMPGDIVCYFDSNASVPETYASAQHIKFPWY  
PFRIPFSYGQILSIRKESIVGDKDSIKIEIRRFYKLSSELSNDAKQFLPLHTEGTHEQIFE  
SNDIELGIAANFLLGTVNVILGNQVFSGSTGEKNIICCRCNFFYLKTFQRLQPIYWSALS  
PARWKQGLRERGCROSSFLHECNRLGDELPAKYQLPNIPTCDALPSAKNSQEGSCVGL  
KNQTSSSSANISFYEEALLCPHWSLFHATNYLPLADCSERKVWKLKIGDVVAVNDSQETPQ  
SSASFYPTVFPWPAQILAIYTESKAGGHEIARFEIRCLKFEVSIENDDHNEKRKIAEHH  
PTKTMTVTSTDLLGPLTLYSPDAICATDLTKIHIHLPLSEFLAAKSLKFDRETASSLSKL  
NRRDKPRTDTEAKDENS HVCESSLIIPVFNVERN SDEHRC SNKAFRVDALHFRAF YTKM  
TLVPNFRVCLRGNIYQQNFSTRTIKIGDTIQVRFEGSKRYPYDCNWGVAEVVAIFKEFLS  
HDEFHREHLLTPKEQRNKQFQIEIRWFYERSDLSLVALSADDSSEFIEVYETDHCQIVDA  
SHAILDHVKLVEDTIGIKRGDVKHFVCTRFWSTKRRSLIPCSGLNGRIKRGLIHSTLGLE  
EDLEKSDSTELKRSLTNWKDSMVNLIWKLTLKDASKNAYKGRET LVGREKELS QLLAFLR  
AALLEDHKSKGYKSSMFLAGPPGVGKTATVRAAISMLHHELKGGNIPTFRFIPLNGIEVR  
HPSDIYIRFWEAL TER THLG PHERACERLEAFFTSTTSESDL PNNCTTIVLLDEIDYLV T  
DDQSILYNLFDWPKRAAELSSTSR LIVIGISNTLNLIDHLMASVQSRMGTEKCVFKAYSL  
DDTISILRSKMKEGSPNFMFFEDDAILFAAKKTAALS GDIRKAFQICRSAAELVTRRFEE  
KKAIDSNGTDDFPKIRISDVQKASLESFNMMAMVTAVSFSSPFETLLLVS LASLSRSSGHE  
VGGFDVNDILIKMEALASASGNPQYIPAPSFGETIRLLHRLGEMNLVELNTRKSSSRTFR  
QSHGGSGGAWPLTSLAIDELTLLKGLKNTSHKDLAKKHLPSMF

>comp15108\_c0\_seq14; 185 1 1047 LEN=1375; translated  
XTTSRLSFSTIENFEGKTATVRAAISMLHHELKGGNIPTFRFIPLNGIEVRHPSDIYIRF  
WEAL TER THLG PHERACERLEAFFTSTTSESDL PNNCTTIVLLDEIDYLV TDDQSILYNL  
FDWPKRAAELSSTSR LIVIGISNTLNLIDHLMASVQSRMGTEKCVFKAYSLDDTISILRS  
KMKEGSPNFMFFEDDAILFAAKKTAALS GDIRKAFQICRSAAELVTRRFEEKKAIDSNGT  
DDFPKIRISDVQKASLESFNMMAMVTAVSFSSPFETLLLVS LASLSRSSGHEVGGFDVNDI  
LIKMEALASASGNPQYIPAPSFGETIRLLHRLGEVSFEPKSDTVTKNP

>comp15108\_c0\_seq15; 1602 49 6714 LEN=7042; translated  
MAPLTSNNILPSSGAIHTTTTETKRTFYSSSLVIDHGSKTVQSRWKVHLGDVVVAVAKDL  
NQTALELIETWKNHYTKKSLEWKVGLVIALRKVVS RHGVEDKNGVGGGT VFECHTQWLD  
KALDLDVAEMKVANLKS VYRPNYNTNSKEMGSQLPHVLINCPRQY GIVSMIPVSESN E EYN  
VLLPVTIRMKTNRDFMKNGIKEEESRYELQFCCTKTRRPLHKLKTSRGEKNVKSILSER  
DPDAWVELNCP SFNLTSENSIDDDATPVLQNKIPEPLQQAWKGWLRNESGIDISSDDNAV  
VSKLALDEKVT PEDTISSLGDALMRGWIQSR RERYNKAVLLREEQRRKVLGTGKTIESDP  
SIETEDVPKATRVVGAQRFIPEELKATATLIRSAPLDQLAGTSEAKSDAGNKNRSVANLE  
HGSNKRKRKELRFSADTKOPPSKRISKIMLANPSRRNVSSWQQQAKTSGVMDGR TKDSVE  
FGETNRQLNRTVKNAGNQG INEDDLASTTTRDTHSTDTTLPTRGAGRGRNKHKLRTKIF  
STNDDDVADDNNYDENETI ISSNTTKLQSMKRTCKIDKPT SPLNVLDTFNEWQLNTSF IQ  
DAVPFYQTKHRDFFRELQIMIPFAVCSLLDDEGGIVNDIHSNDNANLPFVIKIGSVVAI  
HYKESISTTSSWSPFRLPWGVAQITNIFRERNKTD EWRLTIRWFYRLPELQAERWTQTL  
KSMNKTYGVLETYESCDCSVKELLPASIQLTSDSDFSTRPKKVKGENDFPIVRMLCQHL  
EHSHGKITRNLWDNYDHATCLERSQTDLKDVLPGPIKRAIQKMPRQLKRKYTEWLTKSSK  
TTKAHSLHKTSTTNAFFFDIVPESIGVFCNELGNKYVDAVCLNVRKKDLRQLRHSKCCCR  
WTLAVGHI IAVHCKNAKLSEVKSEVKS DAWYPFEKKWC PGQVVS LYQKECESWMM EVRWF  
DRYDEILQTHKSSLNALNKDYVLFETEAYEHLPI SDALPGR IILTSVEESENWDVTISDV  
TGLPLIPRLCTHICFDEEIGTSTDWNTNYDLTLPQIPPGLSRGLLLRPTNRQ GKELVPKLS  
QFYTRALRMRGSDPDHHHLCRWSEERNVMGQRKWTDISFKSEEITVELGEHFFFTINPEKGSQDF  
YRSISVSSPIAYLVSPMEMKRRRKTLEFEMPGDIVCYFDSNASVPETYASAQHIKFPWY  
PFRIPFSYGQILSIRKESIVGDKDSIKIEIRRFYKLSSELSNDAKQFLPLHTEGTHEQIFE  
SNDIELGIAANFLLGTVNVILGNQVFSGSTGEKNIICCRCNFFYLKTFQRLQPIYWSALS  
PARWKQGLRERGCROSSFLHECNRLGDELPAKYQLPNIPTCDALPSAKNSQEGSCVGL  
KNQTSSSSANISFYEEALLCPHWSLFHATNYLPLADCSERKVWKLKIGDVVAVNDSQETPQ  
SSASFYPTVFPWPAQILAIYTESKAGGHEIARFEIRCLKFEVSIENDDHNEKRKIAEHH  
PTKTMTVTSTDLLGPLTLYSPDAICATDLTKIHIHLPLSEFLAAKSLKFDRETASSLSKL  
NRRDKPRTDTEAKDENS HVCESSLIIPVFNVERN SDEHRC SNKAFRVDALHFRAF YTKM  
TLVPNFRVCLRGNIYQQNFSTRTIKIGDTIQVRFEGSKRYPYDCNWGVAEVVAIFKEFLS  
HDEFHREHLLTPKEQRNKQFQIEIRWFYERSDLSLVALSADDSSEFIEVYETDHCQIVDA  
SHAILDHVKLVEDTIGIKRGDVKHFVCTRFWSTKRRSLIPCSGLNGRIKRGLIHSTLGLE  
EDLEKSDSTELKRSLTNWKDSMVNLIWKLTLKDASKNAYKGRET LVGREKELS QLLAFLR  
AALLEDHKSKGYKSSMFLAGPPGVGKTATVRAAISMLHHELKGGNIPTFRFIPLNGIEVR  
HPSDIYIRFWEAL TER THLG PHERACERLEAFFTSTTSESDL PNNCTTIVLLDEIDYLV T  
DDQSILYNLFDWPKRAAELSSTSR LIVIGISNTLNLIDHLMASVQSRMGTEKCVFKAYSL  
DDTISILRSKMKEGSPNFMFFEDDAILFAAKKTAALS GDIRKAFQICRSAAELVTRRFEE  
KKAIDSNGTDDFPKIRISDVQKASLESFNMMAMVTAVSFSSPFETLLLVS LASLSRSSGHE  
VGGFDVNDILIKMEALASASGNPQYIPAPSFGETIRLLHRLGEMNLVELNTRKSSSRTFR  
QSHGGSGGAWPLTSLAIDELTLLKGLKNTSHKDLAKKHLPSMF

IEVRHPSDIYIRFWEALTERTHLGPHERACERLEAFFTSTTSESDLPNNCTTIVLLDEID  
YLVTDDQSILYNLFDWPKRAAELSSTSRLIVIGISNTLNLIDHLMASVQSRMGTEKCVFK  
AYSLDDTISILRSMKKEGSPNFMFFEDDAILFAAKKTAALSGDIRKAFQICRSAAELVTR  
RFEEKKAIDSNGTDDFPKIRISDVQKASLESFNMMAMVTAVSFSSPFETLLLVSLASLSRS  
SGHEVGGFDVNDILIKMEALASASGNPQYIPAPSFGETIRLLHRLGCVSFEPEKSDTVTKN  
P

>comp15109\_c0\_seq1; 270 1 965 LEN=1211; translated  
XGKSQEIIVPEEVGILPTQPRNVCESIQTSLSVNSFQIDSHRSSYMQVEPEKDSRRSQHT  
INLVDNDNVNKEESNLTQGGGGSQQDANDNPNYMDILSKCFEQVSKIEDNSQDQKTRF  
DDGAEKRGVPLRSGHSTARHNKYSDRLGSEQHDKVKKSSDRQDKEDNCNGKERAQPRVES  
TPEKRRRRKKKSRKAKDDSTRVARGGEIYVTTDRNSNESKPGDNAVRKKRQKDTETSHSG  
RDPKNRSVVPSDIETTDRVAHCALSESQYLFVDEGHSPDKIIFIGGSHRSRRRNGNMTE  
ERVERTAAKTAIANLLQDLIE

>comp15109\_c0\_seq2; 604 1 3809 LEN=4055; translated  
XCGSLTPNDWVECARSRVLQVRSWEDRFAIKYHPVFCYYFKMFQFGVPLEAVKHNVSIDG  
YPTRIMDLNPNQSLELQDLQDLATALETTLRFKGVINDAETNEKNHRETERNNLTNIASNI  
AGSEYPGFYLLDDSNHNPPDQSVPTMVMLVSAFRRSSQIFAAAALFDETKHGLEGRD  
ERLLASSDDKNDSMETLFDTEIGRILKNQKNEPISDISTVGTGPSIGGIITSPLNPPVL  
QKEYSVGLHKNSQYKQRIAGYFDSHGRHRHRGKSRGADSQRSLRTSNKSGHRRRDKQRS  
SKELDDSLGYNDHSRQKSSKGLGDHSHSFKQRSSRELDISGYNNHSSHSGSRRLDGRSN  
HKRRHKEKSSTEFDNNSGHTSQRSFRVLDEKSDLKMRFSQRRRQQLDEKVANSERRIQRG  
LSDSDDKSGHKNCHSQRTTSSRAFAVALDSISDDKPQHNQKNTLSPGQDLDSVLGFT  
HRENQSTFGIATRSQEKETHDVEIPRVSSTHEDDLKLSNSTTDSNGIDDPPIKEIVL  
FDSSIDHSFVKCRSVESELEDELLKREPAANDTTRGKPDFAYDISLINYKGDHLTPVKRTK  
NEHSTSRGQSARRKGIAPISRDSLADLEDYLMDALSVISERNKVIGDLRQQLTKKDRENN  
GLRRHIEELNRESRRRQRSSRRSRHHSKNASRQDLPKNEISATYGAEARGGVVLQQTNST  
HETAFADSEIYEDKNRVSENVCSYRDISNFNTDSGERRLYSIAWGSNESNGIEPSVESD  
LRKSQSARPYKSRSTSDAFTGSRSYHDGRNTTKIELHRGYFAHTRERSRKQSLKKVHRNN  
SSKFEQPASSPGRRLERDDRNESSRRTQHTDRSDYDQPRNTSRRSGRTAYSPDGRQKKEER  
NDSRRSRNTARSSERSVRNDSHRSGRTDRKEPGNSSRRSRYYTNTSTEKRLRKHSNSTGHA  
AQRELNRSSRRSLHAASLSVNSFQIDSHRSSYMQVEPEKDSRRSQHTINLVDNDNVNKE  
ESNLTQGGGGSQQDANDNPNYMDILSKCFEQVSKIEDNSQDQKTRFDDGAEKRGVPLR  
SGHSTARHNKYSDRLGSEQHDKVKKSSDRQDKEDNCNGKERAQPRVESTPEKRRRRKKKS  
RKAKDDSTRVARGGEIYVTTDRNSNESKPGDNAVRKKRQKDTETSHSGRDPKNRSVVP  
SDIETTDRVAHCALSESQYLFVDEGHSPDKIIFIGGSHRSRRRNGNMTEERVERTAAKTAI  
ANLLQDLIE

>comp15110\_c0\_seq1; 1400 1 2908 LEN=2950; translated  
XKYTMMELYDCVQYCPNVLRLYLQICAASALIRSGEVGARWVKDIEAVKCVQNPVRG  
LFLRHYYLQAFRDKLPDVGIPVDQIGSLIRGTEGAPPPAAPTGEDVIPLNVSVPALQLS  
TASLVDHAEPGTVKDSYEFVLANFIEMNKLWVRIQHLPDQRTKAVRRRREKDRNELRIL  
VGTNLVRLSALESVTSTIYGQVILPTVLDQIVICADPLSQAYLIDCIVQVFPDEYHETM  
KILLRVCPLRDKVNIRTIILISLMTLRLANYLADEELLDEKDSNMVKKTIALDSFWTFDEC  
VQNVYNARGPKLNAKEVIRLQATALLEFSMKCYKGNIEQITLCLKNCVLALQQARDNA AFL  
MPPPPPQQYGLPPSPSQLP PPPPTALDPVATKELEKLLSIPMEELALGVLTLDHYADL  
IAFLPWSNRREVALNLLKAATDAGTPPQSVREIEQLFSAIAPVLRGEDESAPPPSTAAAG  
GSEVDRATADLMAGLGVAVDNSYGYPQQQQQQMHQQQQMQQQQMPGGFSDGIDPVQYEQ  
DSALVSKLIGMLDNPDTDVLFEMLSVARNHMNAGKSIALRSSTAHAAALVFASLRLARRVF  
GEDHQKKEEEAEPVEEASEEKPSEEAEGETEQAEASEPPEEPTTGGEAVPEDGEADGET  
KPAIAETEGEAPAVVEASAETPAAPETADETPAAVAATKEPEAPKLVSCRKVFVQQTIA  
AFFAQSNVERGIKLYLEAALTADKLGASLEGSNGSDDQDSYGSIANELMTQACALYEQCV  
MADMRLQRSCVLPLITTLTACRSLGKEDYEGLIMKTSKYAAKMVRKTEQCEAVTLCSHLF  
YVVDNDGSTVVYSNPQRCLQALRKLANACTTADPSNLGLFVELLDIYLYFFFEKKNPS  
ITGNYITGLVALIKEHANSIPQQHQYGGPSPTAEARAHFLEIVRHVKASKLKEETSEMFR  
GIDVSAVET

>comp15110\_c0\_seq2; 711 1 1378 LEN=1420; translated  
XQQQQQQMQQQQMPGGFSDGIDPVQYEQDSALVSKLIGMLDNPDTDVLFEMLSVARNH  
MNAGKSIALRSSTAHAAALVFASLRLARRVFGEDHQKKEEEAEPVEEASEEKPSEEAE  
TEQAEASEPPEEPTTGGEAVPEDGEADGETKPAIAETEGEAPAVVEASAETPAAPETADE  
TPAAVAATKEPEAPKLVSCRKVFVQQTIAFFAQSNVERGIKLYLEAALTADKLGASLE  
GSNGSDDQDSYGSIANELMTQACALYEQVMADMRLQRSCVLPLITTLTACRSLGKEDYE

GLIMKTSKYAAKMVRKTEQCEAVTLCSHLFYVVDNDGSTVVYSNPQRCLECLQRALKLAN  
ACTTADPSNLGLFVELLDIYLYFFEKKNPSITGNYITGLVALIKEHANSIPQQHQYGGPS  
PTAEARAHFLEIVRHVKASKLKEETSEMFRGIDVSAVET

>comp15111\_c0\_seq1; 732 124 3198 LEN=3668; translated  
MTPESTGMKNRLNEKGLTTMEYNNRNTVDDPPNLGVLDLDFLTANGPRSVTIKAEYNSPK  
TNSEMSCLSSPDVVSFLPAPENRPRDAATHSSSDNDAEGISNNDCSISRNLVVRVKIESSV  
AQNSASFHITVPIILQREVEMQAAARANNVGKERWTSRIFRMWKSQRAKQQQKILSSIE  
HESSTTKSQKLESIVLRMTPEVSLQHSNSSCSFFRWKPWLTTTCIQTYNTGNLTIPDECS  
GDDILVAMEYFGILTASPGHFVHFSRDAYARVQAWSRYFTYRVGLVESLLEAYDDVEVEE  
SKNLSWVLEENGHDEKDDYYYQYDIREKTKRDLNNGQQKGSLEFHSENRAARKLIVGGV  
GGLYELFCETNESKGRDVMNPSADDSCEKRSGESFSSKVTSLRIRQDFCLHLRHFLPWS  
VVRFDMELVKSTSKVRINGEKTIDTTIHTKPVIRIEHDQCGTLKTLPHYHKGNCTFVNTT  
SEITLADDKVTTSAKSSVDKIKISLDSIKNTKRYDYDKDMNGTYMLFEIDSALTHEKGFNG  
SDGLNRKNDTAHLTREHRILESVAETSSSKTPITHVNMELGDLRSVTSVLSEPLDDIGT  
VHEMSTMKSLNRRGRKENHGGGANFTTKRIVQERSGKVEQKNDEEFSSLSRHLVSRSD  
LDDHIETPPRTRRLVFPWWLDQYPDETKVDADGANRIEKDETVIKDHHEGAERDER  
INKSKGKVVETKGEWDDDEHSGSKSEAGATDLHGSWGQLLASVCEVLIPVDSRNALSSSPI  
RNFTIRSNKSTESTVASSDEENRFHNCQGRGHTCQSQASGFVDQAKKIGNDLSNHFDE  
LMKIAAYNEKDTEDHSDGKGYNSLSPVLQEVPEILAIIDTGEDNTLSSCLTTSIVGQPLKIR  
GSDTFEKSREMNLHSHIPTVTNDTYGIPKSKSFELDPFVNSGIAVPRRTMQGRGSQLA  
LSVARKKSNYRPIISGQRTKPNILGRQNLKLPDHVSPVTQEPPIAKKSYNKENRHSRHK  
RFYS

>comp15111\_c0\_seq2; 732 124 3198 LEN=3885; translated  
MTPESTGMKNRLNEKGLTTMEYNNRNTVDDPPNLGVLDLDFLTANGPRSVTIKAEYNSPK  
TNSEMSCLSSPDVVSFLPAPENRPRDAATHSSSDNDAEGISNNDCSISRNLVVRVKIESSV  
AQNSASFHITVPIILQREVEMQAAARANNVGKERWTSRIFRMWKSQRAKQQQKILSSIE  
HESSTTKSQKLESIVLRMTPEVSLQHSNSSCSFFRWKPWLTTTCIQTYNTGNLTIPDECS  
GDDILVAMEYFGILTASPGHFVHFSRDAYARVQAWSRYFTYRVGLVESLLEAYDDVEVEE  
SKNLSWVLEENGHDEKDDYYYQYDIREKTKRDLNNGQQKGSLEFHSENRAARKLIVGGV  
GGLYELFCETNESKGRDVMNPSADDSCEKRSGESFSSKVTSLRIRQDFCLHLRHFLPWS  
VVRFDMELVKSTSKVRINGEKTIDTTIHTKPVIRIEHDQCGTLKTLPHYHKGNCTFVNTT  
SEITLADDKVTTSAKSSVDKIKISLDSIKNTKRYDYDKDMNGTYMLFEIDSALTHEKGFNG  
SDGLNRKNDTAHLTREHRILESVAETSSSKTPITHVNMELGDLRSVTSVLSEPLDDIGT  
VHEMSTMKSLNRRGRKENHGGGANFTTKRIVQERSGKVEQKNDEEFSSLSRHLVSRSD  
LDDHIETPPRTRRLVFPWWLDQYPDETKVDADGANRIEKDETVIKDHHEGAERDER  
INKSKGKVVETKGEWDDDEHSGSKSEAGATDLHGSWGQLLASVCEVLIPVDSRNALSSSPI  
RNFTIRSNKSTESTVASSDEENRFHNCQGRGHTCQSQASGFVDQAKKIGNDLSNHFDE  
LMKIAAYNEKDTEDHSDGKGYNSLSPVLQEVPEILAIIDTGEDNTLSSCLTTSIVGQPLKIR  
GSDTFEKSREMNLHSHIPTVTNDTYGIPKSKSFELDPFVNSGIAVPRRTMQGRGSQLA  
LSVARKKSNYRPIISGQRTKPNILGRQNLKLPDHVSPVTQEPPIAKKSYNKENRHSRHK  
RFYS

>comp15112\_c0\_seq1; 1159 98 3790 LEN=4006; translated  
MLSYELLQALLSPDAGIREQAE TVYRSMSVREVRVQSLTNLLACTNSTSDSDIAVALLGA  
VLLRRDILKLTDP SMLNELVAPLLQCYSNTKTATTANASNTKVALGHCLAEICSSLSVIE  
SGSASTSEPSSVDSII SKLVATVGASDV SAGSESETVCF LKLLAALADRAMP PFARVGI P  
LSGIVNTCLQNMSTNSAMD TTNLWTKLVEVVVNGAVATSVTEVSP IHGAAAAIKDLDEV  
LVDEHSAQAQMGFHL LLLPILRK INESGAAMTNRVSLLELLQCLTHASVTCP SLFCGGG PSL  
EVLTA LVKMCLDL SCTTANDENYQDIALAALQVLASLVSVGDVRHRVISPAMAQSLAEKV  
VPACAQLMARAGAGDEDAQDWI SEPATLVEDGV DDEGESEDSAF AEALVESFFQYLAAP  
ALAVAMP IVRQFLDPATANANWKHVRAGLA ILESGLVAAPFALAPNVPEILASAANILGG  
SSGAASEHQHPRVRYQALRLLGTICETHPEVRSNHGQI ILERTAVALGSNVSKLSALGSQ  
VISSYCRGSEDLATEDEEEMKEHCLVPFLPDLLKALICGPLSNSGFDTGSVTVRVRAMNA  
TACLAEACEEAFQPYAHVMPG LLESVKLPQVDVASAALQCLTILGQAVGKEMFQHDAEQ  
VLSWIVPVLPHVNSETSSSSSFANEELLSACARIASVLEEDFVVPYVDAVLP SLYQLAK  
APADISIEEGNESGWQGDNNGFSGIDDDGTMTVAIPGRGFQRITINTSAILEKATNNRIM  
FELTKALGA AFGRVRESIDTFLPLTKFSYSPEVRSTAAQALSALFDSACTYQDVGDMS  
VPQHYLPLLSDTISEQIANEDPSDVEALYALADSLSEIYYIAYGFKDDGLDETIFQNLMS  
PMRVEVVKRCMTTMS SCLERRDGIARILQGNLSGADEQEDYASQLRGEDSLLTPLVDSIG  
YLLKFSKTEFVVPVFETYVVPKLGKYLSSSTDIRASVAAMCLFDDVVEHCGPEAAATYSPA  
LLKAATMVMSEPSKYDRDLIQAAVYGIAQMSRYAPSSTISSSMQTIHVHQLMTITQGNKEN



AGDGVVLYEIAVSALASLVLFPGPKDLKVFVNRNAVTEIFLKSLEPLEQDEDEAKICHAGLC  
SLVENGQIDLRANAPTIIRIAGSILSDVQEGIDIAAADTCERLVKILYDIQSQNSEVMQK  
TFVALDPGVQNIISYAVQDFSQSRASVVT

>comp15113\_c0\_seq1; 682 221 2239 LEN=2263; translated  
MASNGQPREAPASPPAGGNPSKPKPKSLSQLLKVRDAKRETMCHLFEEKKKIIERMKAMN  
DELSELDEIEALEEARELRRLSRITNASASASSNEAPNHSPVPVPVKSEPGDASGPAAT  
ESPPPLTMNPDEVLTEPTQSFTQIRDDEQLTDPLTWTQAEPTQGASSDGTRTSAASSAFV  
SVSDSGPQHEQQRRREEEDIEDYYSYDSGDDRYVEESRYPVEPAHAPEPVPVPAPAAAAH  
QKRKSSMGTLNDFLIPSFQRNSSNNHGSNQNQQYNQYASTPAAAASGSCQYSSHDIHQTL  
RQSFRLQNFRENQFEIIRSTLSGKDTFVLMKTGGGKSLLYQLPAVLES PRVTIVVSPLLS  
LIQDQEDQMNGFVRNSCVSFTSGMGTAQHTENWNRVRDAAGGVVMVLVTPERVFQSGKLR  
SELQKLDQNLGRFVIDECHCACQWGHDFRPDYAKLKVLREHFPRIPIMAVTATASKQV  
RDECVKIFQLSRDYDFRSTANRPNLSYQVRPKEANVIEDMVDFIKNKPPGSAGIVYTYS  
RKDADTVASELCDHGIVAESYHSDVTPVRKKAVHKSWMANRTQVVVATIAFGLGINKPDV  
RFVLHHTLSKLTLESYYQESGRAGRDNPADCVLYYSPKDVPRMLSMIHGDSTEDLFLTMV  
RYASNVRSTTP

>comp15113\_c0\_seq2; 794 221 3133 LEN=3219; translated  
MASNGQPREAPASPPAGGNPSKPKPKSLSQLLKVRDAKRETMCHLFEEKKKIIERMKAMN  
DELSELDEIEALEEARELRRLSRITNASASASSNEAPNHSPVPVPVKSEPGDASGPAAT  
ESPPPLTMNPDEVLTEPTQSFTQIRDDEQLTDPLTWTQAEPTQGASSDGTRTSAASSAFV  
SVSDSGPQHEQQRRREEEDIEDYYSYDSGDDRYVEESRYPVEPAHAPEPVPVPAPAAAAH  
QKRKSSMGTLNDFLIPSFQRNSSNNHGSNQNQQYNQYASTPAAAASGSCQYSSHDIHQTL  
RQSFRLQNFRENQFEIIRSTLSGKDTFVLMKTGGGKSLLYQLPAVLES PRVTIVVSPLLS  
LIQDQEDQMNGFVRNSCVSFTSGMGTAQHTENWNRVRDAAGGVVMVLVTPERVFQSGKLR  
SELQKLDQNLGRFVIDECHCACQWGHDFRPDYAKLKVLREHFPRIPIMAVTATASKQV  
RDECVKIFQLSRDYDFRSTANRPNLSYQVRPKEANVIEDMVDFIKNKPPGSAGIVYTYS  
RKDADTVASELCDHGIVAESYHSDVTPVRKKAVHKSWMANRTQVVVATIAFGLGINKPDV  
RFVLHHTLSKLTLESYYQESGRAGRDNPADCVLYYSPKDVPRMLSMIHGDSTEDLFLTMV  
RYASNFGDDEACRATILRQMGEPNQDLEKHKGVSDVEVEKRNVTPHAITFLELLMTFQNK  
MTMMLVTEWRKAPSTAVTCVKNP PGKDLTRED CERLIIGLWTNGMIEPKYRFTKYSTV  
VYLQCTESSTMFLVSDKACMILALPKPANKKRKSNANTPAMDKD GWVESNASKRRRVSKA  
LVPSSKKKAAAKTKKRATTKKAAAKKSTAKKTTKKTTKTTTASTRRDTARGAKPKGKLR  
SKGEQNEVIELIEDSDSGSSELEIVKSTRNVRPHRAAAAASLNRIAVARDSNDFLSDVD  
DDSVSEAEFE

>comp15113\_c0\_seq3; 475 1 2035 LEN=2121; translated  
PRGKADAGVSNKAVHLVLLVLDEAQEGGHHGDGLRADED RRRQEP SLPAPGRPGEPKGHH  
RGVPPPEPHPGPGGPDERLCSKLLRQLYLG DGHGPAHGELE RVRDAAGGVVMVLVTPERV  
FQSGKLRSELQKLDQNLGRFVIDECHCACQWGHDFRPDYAKLKVLREHFPRIPIMAVT  
ATASKQVRDECVKIFQLSRDYDFRSTANRPNLSYQVRPKEANVIEDMVDFIKNKPPGSA  
GIVYTYSRKDADTVASELCDHGIVAESYHSDVTPVRKKAVHKSWMANRTQVVVATIAFGL  
GINKPDVRFVLHHTLSKLTLESYYQESGRAGRDNPADCVLYYSPKDVPRMLSMIHGDSTE  
DLFLTMVRYASNF GDDEACRATILRQMGEPNQDLEKHKGVSDVEVEKRNVTPHAITFLELL  
MTFQNKRM TMMLVTEWRKAPSTAVTCVKNP PGKDLTRED CERLIIGLWTNGMIEPKYR  
FTKYSTVVYLQCTESSTMFLVSDKACMILALPKPANKKRKSNANTPAMDKD GWVESNASK  
RRRVSKALVPSSKKKAAAKTKKRATTKKAAAKKSTAKKTTKKTTKTTTASTRRDTARGA  
KPKGKLSKGEQNEVIELIEDSDSGSSELEIVKSTRNVRPHRAAAAASLNRIAVARDSN  
DFLSDVDDDSVSEAEFE

>comp15113\_c0\_seq4; 250 1 1141 LEN=1165; translated  
PRGKADAGVSNKAVHLVLLVLDEAQEGGHHGDGLRADED RRRQEP SLPAPGRPGEPKGHH  
RGVPPPELIQDQEDQMNGFVRNSCVSFTSGMGTAQHTENWNRVRDAAGGVVMVLVTPERV  
FQSGKLRSELQKLDQNLGRFVIDECHCACQWGHDFRPDYAKLKVLREHFPRIPIMAVT  
ATASKQVRDECVKIFQLSRDYDFRSTANRPNLSYQVRPKEANVIEDMVDFIKNKPPGSA  
GIVYTYSRKDADTVASELCDHGIVAESYHSDVTPVRKKAVHKSWMANRTQVVVATIAFGL  
GINKPDVRFVLHHTLSKLTLESYYQESGRAGRDNPADCVLYYSPKDVPRMLSMIHGDSTE  
DLFLTMVRYASNVRSTTP

>comp15113\_c0\_seq5; 237 1 609 LEN=695; translated  
LLTRFPTNHSTVVYLQCTESSTMFLVSDKACMILALPKPANKKRKSNANTPAMDKD GWVE  
SNASKRRRVSKALVPSSKKKAAAKTKKRATTKKAAAKKSTAKKTTKKTTKTTTASTRRD  
TARGAKPKGKLSKGEQNEVIELIEDSDSGSSELEIVKSTRNVRPHRAAAAASLNRIAV  
ARDSNDFLSDVDDDSVSEAEFE

>comp15114\_c0\_seq1; 627 1 2202 LEN=2919; translated  
KGANEXLKVRNGSRNFPNIRGNSMLPXLRDASAPTEACNFLEKQRELFAARRQKQVDAIE  
LLHQYRADDELVLRKAEAAARRSLGSRSYKFSARHNVTNGMSLSPSKLGPWQPDAKSSLH  
SYAIYPTLTPTKNKSDIVMKDTISKDSHRTRSHDVPANIDQKPICFESAFEVLGIIAKEA  
SRIPLPEETDEFGYKTFQTTDPLVGITDQGMRFQDGNERSNEKDDSIHSTEEAESNRVNG  
NQNSHGDYLNQNEESDELEKIEENESDHSILIIISSEMGAHVHTEEKRDSRVPLMEKLSLDA  
NPPSDGTEEFIPFEAFSKLGESESLVMESSLSSNIPEXDNDNSNLTQVETDDDSIIPGDSFMQ  
LGATMMANDLICSKVENGQIDNIKRELLQCSRQYGVVSTRRIVEVGGKLGARPSPLRVD  
TDICVQRSDCASKDTTCQEKKSQNIQLGMLKPAEEDSCLNSKQSMQLEACSSSEVKKQEH  
DEPYLRFENMHKMOVESAIVKTPKKSNLAEERSCNVERKDIHRNSTEEMPQSSRIEVNEG  
KIQMSANEELNAVDPKKSSEEEIKESGCVGNAKETSQGDDEELNMIDQFGDHKGTSRIS  
SGKESVGSENEELRDKDRRIDDESSATDRTSLVEDVSKERKHEEAVDARKMMTAEESPP  
SNDNEDANAFDPI SNVKEKPEESEHRSAGENTDTRPLLVRDEVRRSRQNRKKKKKKDKYNY  
PSSGLFFSRQFLSR

>comp15114\_c0\_seq2; 784 91 2327 LEN=3044; translated  
MEYAPVVPHADYRSKAEDRRRELEKLQEKGLTKAKASRLRDASAPTEACNFLEKQRELFA  
ARRQKQVDAIELLHQYRADDELVLRKAEAAARRSLGSRSYKFSARHNVTNGMSLSPSKLGP  
EWQPDAKSSLHSYAIYPTLTPTKNKSDIVMKDTISKDSHRTRSHDVPANIDQKPICFESA  
FEVLGIIAKEASRIPLPEETDEFGYKTFQTTDPLVGITDQGMRFQDGNERSNEKDDSIH  
TEEAESNRVNGNQNSHGDYLNQNEESDELEKIEENESDHSILIIISSEMGAHVHTEEKRDSR  
VPLMEKLSLDANPPSDGTEEFIPFEAFSKLGESESLVMESSLSSNIPEXDNDNSNLTQVETDD  
DSIIPGDSFMQLGATMMANDLICSKVENGQIDNIKRELLQCSRQYGVVSTRRIVEVGGK  
LGARPSPLRVDTDICVQRSDCASKDTTCQEKKSQNIQLGMLKPAEEDSCLNSKQSMQLE  
ACSSSEVKKQEHDEPYLRFENMHKMOVESAIVKTPKKSNLAEERSCNVERKDIHRNSTEEM  
PQSSRIEVNEGKIQMSANEELNAVDPKKSSEEEIKESGCVGNAKETSQGDDEELNMIDQ  
FGDHKGTSRISSGKESVGSENEELRDKDRRIDDESSATDRTSLVEDVSKERKHEEAVDA  
RKMMTAEESPPSNDNEDANAFDPI SNVKEKPEESEHRSAGENTDTRPLLVRDEVRRSRQNR  
RKKKKKKDKYNYYPSSGLFFSRQFLSR

>comp15115\_c0\_seq1; 886 191 2026 LEN=2120; translated  
MKWSSSAIFALIAGSASQAWGFAPYTPVGTSVKSESSLVMKDYPKPNVENTDNYRLYNEL  
SSSFNNKCLKINGTDQKKKVAIIGGGLSGLACAKYLS DAGHEPTVYEARVLDGKVS AWQD  
EDGDW IETGLHIFFGAYPNMMLNFDELDIHDLQWKI HQMIFAMQELPGEFTTDFDFIPGI  
PAPFNFLAAILLNQKMLTLGKELQTAPLLPMLIEGQSFIDAQDELSVTD FMRKYGMPER  
INSEVF IAMAKALDFIDPDKLSMTVVL TAMNRFLNEDNGLQMAFLDGNQPDRLCAMPKEH  
IEARGGNVVMNSPIQEI VVDEADGKSIKHL LRSGEKIVADEYVSAMPVDIVKRMPKEW  
QQMPYFRQFDELEGI PVINLHMWFDRK LKAVDHLCFRSRSP LLSVYADMSVTCKEYYPDA  
SMLELVFAPCSP IAGGNTNWISK TDEQI I DATMGELARLPTEIAADDKWPSTKNQGPNG  
QARLRKYSVVKVPRSVYAAIPGRNKYRPGQRSP I PNLTMAGDWT SQKFLGSMGAVLGGK  
LAAEIVAKKAKGIELPEYKEIQQHI IDGAKDYEPKKPWGKGE GAI AFGAGATLTTKAED  
LLKEVDPVQFA

>comp15116\_c0\_seq1; 193 63 749 LEN=955; translated  
MAASSELKPTRFYLTFTVIYDSFKPKGKSTVRILDPDYATVQTKVSMKKYFAEGLAYYK  
DTLVQVTWKSHQGFVY NITNLEKIDEFTFKTTLN EGWGITWDRCKDELIVTDGSENLFHW  
DPKTMKEIRRVSVVERMDGKKALEMNEIEFWRGRILANIWFEDVILVIDPETGIVEKEYDF  
SELWPKHERKKYGADVLNGISISGNPDVLYITGKLWNRMYKIIILLPEL

>comp15116\_c0\_seq3; 402 189 1877 LEN=2189; translated  
MDSDEIE MNDLLGHSEQIMSWEKNDVSQDEGIGPLARSEQHPRKRGRFLCLFLFVLLVA  
AVSYLADTM YLSREHVDTLLEPDDETR NAKPNKIDDETVRVDDEPEAETHETQKAEPNKT  
EGMGVEVEDKPKPGKQETPKAKPNKIEGTGVEVDNPKPKPKRES PKAKQNKVKG TGIDVQ  
GSLSAGNPQKENAMEKHSIQSGKCADNVDFRFDKPEKDCNWWATKKEKVCHKNRIKGC  
PATCGVCAQDDQEI QVKAPGSSSVDDGSDTVSN NIAEGHEESDTKNAEDGEHQPTLVAGV  
PDQDLYCEDLSRYEEWHKIKISKDSGKMF SVVDVLKHDRNSFTQGLTYARGTLFESAGLF  
GKSTVRILDPDYATVQTKVSMKKYFAEGLAYYKDTLVQVTWKSHQGFVY NITNLEKIDE  
FTFKTTLN EGWGITWDRCKDELIVTDGSENLFHWDPKTMKEIRRVSVVERMDGKKALEMNE  
IEFWRGRILANIWFEDVILVIDPETGIVEKEYDFSELWPKHERKKYGADVLNGISISGNP  
DVLYITGKLWNRMYKIIILLPEL

>comp15116\_c0\_seq4; 402 189 1877 LEN=2083; translated  
MDSDEIE MNDLLGHSEQIMSWEKNDVSQDEGIGPLARSEQHPRKRGRFLCLFLFVLLVA  
AVSYLADTM YLSREHVDTLLEPDDETR NAKPNKIDDETVRVDDEPEAETHETQKAEPNKT  
EGMGVEVEDKPKPGKQETPKAKPNKIEGTGVEVDNPKPKPKRES PKAKQNKVKG TGIDVQ

GSL SAGNPQKENAMEKHSIQSGKCADNVDFRFKDKPEKDCNWWVATKKEKVCHKNRIKKG  
PATCGVCAQDDQEIQVKAPGSSSVDDGSDTVSNNAIEGHEESDTKNAEDGEHQPTLVAGV  
PDQDLYCEDLSRYEEWHKIKISKDSGKMFVVDVLKHDRNSFTQGLTYARGTLFESAGLF  
GKSTVRILDPDYATVQTKVSMEKKYFAEGLAYYKDTLVQVTWKSHQGFVYVYITNLEKIDE  
FTFKTTLNEGWGITWDRCKDELIVTDGSENLFHFWDPKTMKEIRRVSVERMDGKKALEMNE  
IEFWRGRILANIWFEDVILVIDPETGIVEKEYDFSELWPKHERKKYGADVLNGISISGNP  
DVLVITGKLWNRMYKIILLPEL

>comp15116\_c0\_seq5; 323 189 1265 LEN=1331; translated  
MDSDEIEEMNDLLGHSEQIMSWEKNDVSQDEGIGPLARSEQHPRKRGRFLCLFLFVLLVA  
AVSYLADTMYLSREHVDTLLEPDETRNAKPNKIDDETVRVDDPEAETHETQKAEPNKT  
EGMGVEVEDKPKPGKQETPKAKPNKIEGTGVEVDNPKPKGKRESKAKQNKVKGTGIDVQ  
GSL SAGNPQKENAMEKHSIQSGKCADNVDFRFKDKPEKDCNWWVATKKEKVCHKNRIKKG  
PATCGVCAQDDQEIQVKAPGSSSVDDGSDTVSNNAIEGHEESDTKNAEDGEHQPTLVAGV  
PDQDLYCEDLSRYEEWHKIKISKDSGKMFVVDVLKHDRNSFTYVFFLSGIRTIISMY

>comp15116\_c0\_seq6; 193 63 749 LEN=1061; translated  
MAASSELKPTRFYLTFTVIYDSFKPKGKSTVRILDPDYATVQTKVSMEKKYFAEGLAYYK  
DTLVQVTWKSHQGFVYVYITNLEKIDEFTFKTTLNEGWGITWDRCKDELIVTDGSENLFH  
DPKTMKEIRRVSVERMDGKKALEMNEIEFWRGRILANIWFEDVILVIDPETGIVEKEYDF  
SELWPKHERKKYGADVLNGISISGNPDVLVITGKLWNRMYKIILLPEL

>comp15117\_c0\_seq1; 922 151 4502 LEN=5156; translated  
MATVLVDQESHGHPQMPSSSTPPVTHVHVHVHTTANVNDKKFKGITNRNRSEGCNNTKDS  
WQSSSISGRSISCSKNSTLDSATTRHTANTPSCFSDTMSAACTDTSISSDVTSTTADG  
YVTKNDMHVYLHGDQEATTSFKSCSMQEPHCLKKEHSSTLHDKEKNDQIHHSSESQQHHQ  
SQSSQRPKSAQQDLDSFLKNGYLFDRREEQKQLLSSFYRTNLNSNSIELNTKKEFVLVS  
GLSGTGKTALVEATLKDIVTNHQAGNGYFLSGKLDQWNNSQC�HTSSKSPQRPYAPFVA  
AFSNFVDLVLKNNNEVERIRELTCSSMSKGDIDLLETFSSLTRIIQPTHEGQQEHQCR  
DESTNTERGPLYSQKKAATTPKNI IQSRRKQQQCKSNSTNINNTSSSIETQATTHD  
RQKQLARVVRTFLKSVCDPRTRPVLLIDDLQWADPGTLVLLHSLLLTDSESKLQAQTSR  
KIENYELRNEFTKTTEENGSIHSPSGLLVGTCTRHNEVELDHDHLAKLLRTLEDEDNVTIR  
QIEVSNLSRSVCKELVANVLGIPTDHSEWKDSLDPVDIAYDQTKGNVFFLLQFLRSLHD  
EGYLQAQQRPRAISSQVIRRTTTIETAQTQAEKCSKTIKSSLPAAEDSCSSSTNSLDR  
QRQLSSSLETSWLWNEAIRCSALHGVAHTSQDAVSILAYLMRRLPSDVQETLKVASCLG  
SEFSAKLLLRAMPNRSNQHL SMMGYAYCPGLLSESLDMIEKELVRMNTGSGSFRFCHDK  
IQQAAAALI QDDQRDVFYTNVGRRLGHAQRQADTNSNYSDADYCI FLIVNLLHGLSA  
NIINDKAEKMMVASILLEAGELAIMGDFVTAATYLDLGIKCLKSNFVDVQNGYWRDEYD  
FSLAIYSAAAEVEYCTANFERMDNLIKEILLNAKNLRDKMAYFAMINSLGSRERLCEAI  
AQGFSLLEVLGERFPKRTNKMF LFLDLMKTKRMVKSSFDIYSDIGQVPLMQNENKLAAMR  
ILNLIYPYICIVLKHKAPFACFRMVQLSLKYGFTSTSATGFSGYGFI LCAMGELINGNRN  
GRLAVSLVDHFDDRQLVPRVTAVYGYIKSWTTP LRFVLEPLMECHKMAFCTGDI EFALV  
NASLWAANAFHAGLPLDQMEAEVSKFVTVAIKFRQTSCTSVITPLLQOIYNLQANDSSNT  
SINQQQIPWILTGKACDEERLMGEALLSNNILCVAAFHFRLKWLAYVFHNYEF AFEMARK  
CYITMKSNPAAFTVFSYKFFESMTCLALAADATTKNKRXKFTKIATRSLQFMKKHAIHCK  
ANCQNKVLMVEAEFRIAKGDLNGGLELFEKSASF AEGLVHEQALAYERAGLTVLKHAQ  
TLKNRRSLSDAQNVYRDANDYFEKSVELYRLWGAIAKVDHLIAEGYVTRSRPDAFRVAY  
LTNITEGHAT

>comp15118\_c0\_seq1; 1054 456 3549 LEN=3714; translated  
MKSSILSAVPLLVYGVISLTGVDSKLADRSRVVKARHDSGKSNRFHDNGRPIEQSYRS  
VKIEEDSTRIMENREKQPRKLDQRPRFQAQEKQQRRTNAADAEQRKAPWERNYPRMEDS  
AKEQNGRLKLGDVPLFPQADALGNGQPSSESSSVEEYDEHGRKLSSQLTGCCYDYQNY  
YAADMICALYGNDCESGETPSHSDGEDDCSODGLSFIGISFSVNTASSNPYSYQLCDQFPM  
ENI IDRDYDYVMSMDETGWL VGGGYKTFDYSGKMPYIDSSHTELLRIGNLDPDKGNTSID  
QVYEAMTSITFPFISIFPEYLG GGGGHSGDDGDEVP SVDVTMIVSVVETYEEDDNTSYSA  
YEYFLDDLFDALDANGGGPCMDHDHDTDPHVSMRSGVKFWSSYHKNQYMYQTNLEIAVWQA  
MYPYGTPIGSSGYAAFP PGRHGSKQQVGYGNLYFFFDRANITKAFSPNRDLTSNEEYYAT  
LYMGSDVSDFYASVTEVDFDYSGSHDDGDEYEHNYPGFNAQMAKHDMTDGWNLPNCLQ  
EGETFFGIPLSRASDKLQSSSFQEQDFEYLVDRNGTYVQSFGTNHGWL VGEELGNAV  
GSIVDKDTAHIPIFYAXDNKSKFSKFEVSRDLYGRTLWDASIVKLTSNICSDYSPCIFXG  
GMSLSDMIKIARKIDFGTLYIKPAFVVDGDGHVKLQFEADTSSALAYLYDSFCKEMGIS  
WNYESPENSYGVYSNCAMHGADDRAAYGCGPDGTNQG GFCPQMTLAYQPEFGSEDLAAAY  
LERCNVYDYWRSLYPSGVAVGTTSFCPDGGCMALFLNRIDVYEVFKPDLGGSWVEYNGA

SMPPTFSPAPTWAGGCDEPHNFHLDKCFRKRYKPKASAVAWDALGTVGQFSVMLVVFMAV  
TLISISIFLARARKRRRREGESYLGFFFRDLSRKRKKRRKTKNASLNEKMLDGSRRRSKSS  
RRSSRSRSKSSRRRSKSAAGREGSRSRSRPSETKKSRSRGRSSSRSRKKESSGVFDLTVN  
AGDKDNRQQLV

>comp15118\_c0\_seq2; 1146 456 3443 LEN=3608; translated  
MKSSILSAVPLLVVYGVISLTGVDSKLADRSRVVKARHDSGKSNRFHDNGRPIEGQSYRS  
VKIEEDSTRIMENREKQPRKLDQRPRFQAQEKQQRRTNAADAEQRKAPWERNYPRMEDS  
AKEQNGLRKLGDVPLFPQADALGNGQPSSESSSSVEEYDEHGRKLSSQLTGCCYDYQNY  
YAADMALYGNDCESGETPSHDSGDEDCSQDGLSFIGISFSVNTASSNPYSYQLCDQFPM  
ENIIDRDYDYVMSMEDDGWLVGGGYKTFDYSGKMPYIDSSHTELLRIGNLDPDKGTSID  
QVYEAMTSITFPFISIFPEYLGKGGGGHSGDDGDDEVPDGDVTMIVSVVETYEEDNSYSA  
YEYFLDDLFDALDANGGGPCMDHDTDPHVSMRSGVKFWSSYHKNQYMYQTNLEIAVWQA  
MYPYGTPIGSSGYAAFPGRHSGKQQVGYGNLYFFFDRANITKAFSPNRDLTSNEEYAT  
LYMGSDVSDFYASVTEVDFDYSGSHDDGDDEYEHNPYGFNAQMAKHDMTDGNLPPNCLQ  
EGETFFGIPLSRASDKLQSSSSSQEQDFEYLVDRNGTYVQSFGTNHGWLVEELGNAV  
GSIVDKDTAHIPIFYAGTTNPNLGGMSLSDMIKIARKIDFGTLYIKPAFVVDGDGHVKL  
QFEADTSSALAYLYDSFCKEMGISWNYESPENSYGVYSNCAMHGADDRAAYGCGPDGTNQ  
GGFCPQMTLAYQPEFGSEDLAAAYLERCNVVDYWRSLYPSGVAVGTTSFCDPDDGCMALF  
LNRIDVYEVFKPDLGGSWVEYNGASMPPTFSPAPTWAGGCDEPHNFHLDKCFRKRYKPKA  
SAVAVDALGTVGQFSVMLVVFMAVTLISISIFLARARKRRRREGESYLGFFFRDLSRKRKK  
RRKTKNASLNEKMLDGSRRRSKSSRRSSRSRSKSSRRRSKSAAGREGSRSRSRPSETKKS  
SRGRSSSRSRKKESSGVFDLTVNAGDKDNRQQLV

>comp15119\_c0\_seq1; 518 725 2568 LEN=2568; translated  
MGPVLAIRIDGSEHRCYTNVSVTYIDFRGGSFLDGNFKDRHQSSVYSASTRANIEALR  
LRLETICERVNSSTSTINASLFAVLSRLLMLLNLQTRVLLLLPSPEPSRSLRRNPPPM  
ALPRPWLASEKISHLAAIHQERGGDASVVDVAILLVRCAAVGRYREVFLNPLPPASPRSF  
FAVGGGEREWLVNRIWKATERCYHPSCKKRPKSRNHPHQQQQQRLVSETTKQRSAPL  
PMLRECEQELVGFHSLPWRQKVTVVQKNKTDRI SHKEGGFVFEVCLDLEDNKNKDD  
DQKHQQQDPTTEIIDDDASYSPRFARLCRKHGSLTAYHGTHMDHAW SILNNGFCMSDD  
ESTGGRRQRFAKNGAVLGSVYVLSRRVATFFATAAANQRNAPRRALAEALYHESLVE  
LLLRAAQAPGGEARASRGILRDAIGAVGEKASLRDRYDVNCPVFEAKIVRPPPEASEVDN  
LGGKGTLPSPNNDATTIDPGYRPTRRDGTVCVVPDXEGRPDHEAPPDGRAGMQAAGEHV  
APQGPAPAGLPPVLSRLGPPRPRHRWPGGFRGVPEFFHPARDDGLKSIYRTQFNLLRGL  
RNGCKPIKLYSVIFA

>comp15120\_c0\_seq1; 298 1 1267 LEN=2057; translated  
XPTKAPTTPPTMPVSTKAPIVPPTTPPTNPPTMSPTQITYVPGKLRMENLSEGLL  
SRVIAQSGDPVNYSGGTTSEIGFHVLPDAGATFPDTRWVNPGGWIYVSNSEAKNETEGGV  
GAIPTFRNGKVIDYRMVLEDTYMNCGGGRTPWNTWVSCEEIEFTGKIYQVDPTGQRP  
AEVMTLGSDDGRWESFAYDVRDKLRPRFFSTEDHNKGTTRRFPDVVHWGGDEWKMLHEE  
GVV DYLIIIPNVNRTGGTFVWTDIQAAKSSAKLFYYPQSEIDVQDGIMYIVCKKIQQ  
LFI FDLDRMIFRNVSTVSGLFDFGNPDQMQRILGKEGGLLYFTEEGGKDAGIHARDNL  
GRFFTFILESPIYSDETTGLSFPDGGKHYIAYQENGILFDVVFREDGLPFDKSLDV  
KYHNSISSRRLNSQW

>comp15120\_c0\_seq2; 212 241 767 LEN=767; translated  
MANTNGTEPDETPDGVDPPTAKRSCPSSSFDCVSPLSNALTNKNECLPAASRATKASL  
WD SLWDASYGKRISILAWLLFSLCILGGGFGVWAI GKQKTASQLRVDEMKSGLRNDKTV  
S EGDRTVSNLSLTETGSPTEYPTGSPIAAPTAMTTTAPTATPTTMTPTPTPTPTPTPT  
TPT

>comp15120\_c0\_seq3; 264 1 514 LEN=2169; minus strand; translated  
XVAFSPMEASYLDSLKNKQNAADEKGNSSNNQNGKESQASSRQSPASWNEIFKEFDHRR  
FITFGVINGLLTRVHSYPPFFHGAFPEKRKYVPAYELGSSHVIPPESARLHRKKELTEE  
KN YQFARSVSVMMDGTMFDELACLFKPFNVLDVMEKHSGEKVVQIFARSG

>comp15121\_c1\_seq3; 376 532 1290 LEN=1783; translated  
MASALLVMGNAVLVPVTPDDEEDDLLLLAGGGRALLPADLLDPNERESSEAEATPALP  
LDTPTRCGVENAKAKANAKSKHKLDLFGFSFSSPCSSPSLWRYSEGPAWVSPVDPDPV  
VVVSGGGDRPAPSWPLLPPEAPALRGGQQQLHPPERDNDNEEKEERRFHRAGPPCVI  
RCRRLSVCGLSAGSGGGHLLSPHCSFPSSNGDGDGDDVSLDADDPDEDDQCLLPHST  
YGVLATVLDGDI

>comp15121\_c1\_seq4; 305 1 910 LEN=1284; translated  
XSSNGDGDGDDERMGEQNLHTFTASKPEQTKRLQLGKQTAKGQAGTGRRRAPPSSNTQRT  
GRYVRALPTDKPTDLALDATALRSAAANGLDAETGMPIVHPENYRRKVRQSPTDTLVLFV

DASGMSARKRMETVKGAVLALLTDAYQQRDRVGVISFRGIKAEVLLLEPTVSVELAERRL  
QRLPTGGRTPLAHALS LAHDTLQRSHRNEPDLAVLLVVLSDGKANVPLPGDGS GSDVW  
GQTEQVARKLASLAVPTLFLD TDAGHVRVGRGGELAKVLRADYLRLEDLGADGLAYTIRQ  
ARD

>comp15121\_c1\_seq5; 376 571 1329 LEN=1822; translated  
MASALLVMGNAVLVPVTPDDEEDDLLL LLAGGGRALLPADLLDDPNERESSEAEATPALP  
LDTPTRCGVENAKAKANAKSKHKLDLFGSFSSSPCSSPSLWRYSEGPAGAWVSPVDPV  
VVVSGGGDRPAPSWPLLPEAPAALRGQQQLHPPERDNDNEEEKEERRFHRAGGPPCVI  
RCRRLSVCSGLSAGSGGGHLLSPHCSFPSSNGDGDGDDVSL LADDPEDDQCLLPHST  
YGVLATVLDGDI

>comp15122\_c1\_seq1; 337 1 1017 LEN=1076; translated  
KQSSATSGHEAAAAGAAAPRFAPRNVYRRDRVHSDLSANRFSRKT'TTLHSTMELQQPQRI  
EIEREDALDILACLVEQGIADWKTHSAGEGTERAASSETAVDDPTETKPRANDPGAGENS  
MTPSTRSGASDRPTANGDDPMANEREEKPDDRVSQVSTEP SLGVEQSDETSNNHFDRDS  
VLTDLIDSFKKWSKDADSGPGAGEETGRQRQNSRQIELLEELVKSHAYAVEMKRASTSAS  
TWLKSIGRRQSTVNSGVLSTGKQTPGAESTCAGQNKENKENNTNKIDKMDIVTLKATLHS  
AQLELTKTKQTN SILNEELSNCR AEIGRIKTVSRSEVS

>comp15122\_c1\_seq2; 755 1 2709 LEN=2947; translated  
KQSSATSGHEAAAAGAAAPRFAPRNVYRRDRVHSDLSANRFSRKT'TTLHSTMELQQPQRI  
EIEREDALDILACLVEQGIADWKTHSAGEGTERAASSETAVDDPTETKPRANDPGAGENS  
MTPSTRSGASDRPTANGDDPMANEREEKPDDRVSQVSTEP SLGVEQSDETSNNHFDRDS  
VLTDLIDSFKKWSKDADSGPGAGEETGRQRQNSRQIELLEELVKSHAYAVEMKRASTSAS  
TWLKSIGRRQSTVNSGVLSTGKQTPGAESTCAGQNKENKENNTNKIDKMDIVTLKATLHS  
AQLELTKTKQTN SILNEELSNCR AEIGRIKTVSRSECLQQVDKSVLDDSEGSSHVSVKCE  
SGTKEEGRSDFV PNNRPVAERFFHSATENEARDKIEASAQRDILVLKNALEKANETIRRL  
HNELHENEGMEDITADLEPVP IVDIPDIQLRKS DSSSAPGTPDSLQRTVNVRLDAENFVT  
DWYDLKTLPPPDHDLHSP I VSAVLEQWTQDRSLHESLMRWIENVMRSDDLEDLPLPTIS  
SLDHQVRDGF SMHVLPHLLRRADIHVAVQTRAHRQTSYDMCVTVSQKKDFAASSFPVGFQ  
SQYQVSLLDAGDSLSEDEWINRFEPRISSAESVAHSAVTEAISNIPPSTRTPVDIKDPF  
EPPKTPTYTEYSSFP SRMRSYSGSADTFDESSLQYQRHNAQQGGATNGTIMGALGGALS  
GLLSRNKYAASPGRLYQAHNQY YAPGSAPDGLPENLRVQMDLTSSPTVGTTRYQYAGEP  
AMNVLGAAGDHHHQDEAEPYHRVVSAPPGRIGVTFVEFRGHAMVSDVATDSPLAGWVFP  
DILIAVDDMPVSGMRVRDIVNILSTRKDRQRAMRVISSHAMTEFTMMSQVGGPLNEETGE  
GD

>comp15123\_c0\_seq1; 731 155 1753 LEN=1959; translated  
MTGSTNEALADACSGVVGT LVSLWCFYPIERLKTNVQAGTSTG SFSSSSSFSSPASALSST  
EEILEVLKRSFRGCGTKSLHATASSFCYFYFYSWIVSDYQRRRRQRTNEKGDPQRRTGEG  
QGLAPSTRFLFLAAIAAMLNTLVTLPLDVLSSQRTVGADPE SNRDATTKAANRRTA AAFGP  
SDAGKTSHGNE SAALAPPSGSSSSSSSFSSSSSPTTTPSEPSVVELVFHEACSCSEDLFS  
LDGKTNSXEQQQEQQQQQRGTLRGARRRQQHQPVQQQQQPQRSEQH AVHQRGVQDEVE  
PAPAGAQC PQNAEAAAPAPDRTEAFRVAGAAGLAGQSPAGPGPAQEVVRPLEGPGTTPA  
VQQPDIHYTVFDVLKNNLLAWKRQRKNTVGGGSRQQLSASDAFVLGLLSKFVATIVTYP  
LIRAKVLMVQGNNNNNNNGDDDDDDGTGKESTGR TSKARRFVSSRSSSSLLSVLEESYH  
RDGGIKGLYKGDWQLIHTLLKSALMMAIREKITGT SRSLFRVGEAASPSS

>comp15123\_c0\_seq2; 741 155 1765 LEN=1971; translated  
MTGSTNEALADACSGVVGT LVSLWCFYPIERLKTNVQAGTSTG SFSSSSSFSSPASALSST  
EEILEVLKRSFRGCGTKSLHATASSFCYFYFYSWIVSDYQRRRRRKTNEKGD LQKGTGEG  
RGRGQGLAPSTRFLFLAAIAAMLNTLVTLPLDVLSSQRTVGADPE SNRDATTKAANRRTA A  
AFGPSDAGKTSHGNE SAALAPPSGSSSSSSSFSSSSSPTTTPSEPSVVELVFHEACSCSE  
DLFSLDGKTNSXEQQQEQQQQQRGTLRGARRRQQHQPVQQQQQPQRSEQH AVHQRGVQ  
DEVEPAPAGAQC PQNAEAAAPAPDRTEAFRVAGAAGLAGQSPAGPGPAQEVVRPLEGPGT  
GTPAVQQPDIHYTVFDVLKNNLLAWKRQRKNTVGGGSRQQLSASDAFVLGLLSKFVATI  
VTYPLIRAKVLMVQGNNNNNNNGDDDDDDGTGKESTGR TSKARRFVSSRSSSSLLSVLE  
ESYHRDGGIKGLYKGDWQLIHTLLKSALMMAIREKITGT SRSLFRVGEAASPSS

>comp15124\_c0\_seq1; 322 242 1780 LEN=2024; translated  
MNGKDEKRELGSAPSKLMNGHEVSEDEIIVVPSG PLAMEELWAEELSRIQRNEREVNDD  
KVHGIKSWAVGETPEK ITRALNTMQTEINMLSVEEKRAHLRGLKSQSLYTQSKEFRFLRFL  
RATGFNTKDAAIRYCKCLDYLVEVFGEFALTRRLFITDLNEDEISYLHEGNFQILPSRDC  
LGRRIVAYNIHPTSRPYSVEIIFKVYAYLLFAIISEDITQRNGMVYVGVIGKTKLSHG  
NHMPRLRRMFDAIPLRWGAVHL CVPNEPVYRVITALFMAWIGQEGRKVLRIHRGYPIECC

YSLRSFGIPVEDMPEMQSGQFKKNILRLIKVRMAMDKFAKEQEI VSKKLSRKRGAPSAPK  
PFLGIECEPINFVILGSSKKNCSQNDKHIGNASFRRIMFANEGFKNYLKDRDEKGEGNSR  
RAEIKKIAEAILHESWLEGLHFVEYNQEQSFFTEMQSI EDIRQKVVTDMSHQVRHEADA  
FAVSKKRNSRGTESSESASFVDSQRAFFAGCV

>comp15125\_c1\_seq1; 623 210 2675 LEN=3851; translated  
MKNGHVLAHLGAPVVDKSNEEEELEESYMYQTAASEVVKVMVEECLGVLELLYPRQ GK  
SVNTGLVYDNTTPKDEVEDLFLALEQATKRFEIDAVCSGAILSTYQVRVIEHVCNRLGLT  
SLSYLWRLGPQRELLREMLEDGIEAVLVKVCPPGLLPRKHLNKSRLFLSDIGLLERLNQ  
LYQFHVCGEGEYESLVIDSPLHKKKLVLDEVEIMESDAGDGVGELKILSCHAEKVEGD  
VPLLELVPYDNQEQPEQEYSKLSAEQDTEKTHVGGQAVPSVSFVYVYQGTGGLLHFSE  
IMSPVTATSFTSGSKSEAEALAVEEAELEIFAILKRGLDCHGATTKDVFYVHLYLSEISHFA  
TINAHYQAFFGSLPPSRSCVALGRGVLPGGRRVLLDCKVQIGSGEYMRPSTDGAVVGEA  
NCYAVAAHRTKTKSLREVLHVQSI SNWAPVCVGPYSQVNTLRSGVQFLAGQIGLRPETME  
LQPTWTLQLEQCWKNVASVLDALNGGSLNDIFGSLVYLSDKIYPEERSLELLEAISRHEI  
RTNGSIIAGRIDLTDTELEFGGYEDQGTWEEMKSQEEKEKEESMFNPCPILVVSIPEMP  
KGAVVEVEVITSTVEAAKSLDTRDAIFSMDSNRRTSLMHNAPIGWESGHNFVPLSRNKE  
GMRIDSYSRVIGKGC AA AVLVTASCSSNMSEPYEIQPEAMLVDMLSSVKSVLSEARAGIS  
TRNMVHVRFLFYVSSEKSESDGQCIVRNDGVELRSALNGAVNSTNKMENNAATSVIPVRAI  
GTIGAVPKQASNDNRVTLFAMQVLLLDPVHLETEIWIHKDR

>comp15126\_c0\_seq1; 456 136 2211 LEN=2333; translated  
MSPERTNHGYRQDRGPSAYTI IKDLIGIGIFVSLVMNYLNISILSVLDGLDISRNDYLD  
EPRMRQRRPNVDRAQRREASLLNPPREGAVLANQKRPTKRDRKPPRAHRKIDIRKSSQS  
NELLVQEDDIYKGMSSFD SAPIVDEKHKLLFFSTPKVACTTFKFLFRRIMGVEDWDFQ  
DGISGKNLPHNPKHNNLKYLDYDRETATKMMTDPEWTRAI FVRDPKMRFLSAFLDKAVA  
NYGSFVTQHCCPAAEECRTSELNMDMAKATEQCQVDAWDSRKL VVKPRWLEDQPCCTLFK  
ECNEKTMNIEGFMDTIKTCPNHDWEPQNNRMEPKYWKYINFVGRMESINEDTEKLLKRVG  
AWDEYGMGWGPHHNASMTRTSGSYQSHKTGSSSKIYQWFTPEKERMLEKIFYADDYENQV  
FDFKATNLTEPTLGGKILKQNDIYSRNDWDGAPIVVSKYKLIFFTPQKVAATR WKQAFR  
RMEGYNNWKEIGGPNELPHQPQKNGLYLYDFPLKEAEEMMTSKDWTKAIFVRSPKDRFL  
SVYSHLRDNWKQIDDRCCPNQRGCSSTLNMIQFIELMKVCHSTHWIPYSERLDSKWWEH  
INFVGLKLENDVDSENLLKSIGAWAVGKSGWGENGENEPIFIKNINSFESVHNALAKYTP  
QADKLLNDYYEDDYKKNKHLNFKSRKVHVM TQ

>comp15127\_c0\_seq1; 1133 295 2845 LEN=3670; translated  
MYGKGS DNIVGLAMFMLSNNLSRKAGPICARAFSTTTAAFTHRSRSTRSKNSHNEMASF  
IFQDSRNKCYSTTSSLYSGVVDQDLDAALDDLLEGTDFDMTEDIDGDQIAADLVSSVDLED  
EGPIDYTDPKFLSTSNPRWTKAGLDQRVIDVLSGKGI VRFPTVQGEAFDPVAVGRDVIGR  
SRTGTGKTLAFGLPSITRLVKWMEEKGIRD PATGRMQRGRGVSMVLVLCPTRELARQVQEE  
LSAVSKPLGLFTDVFHGGVSYDPQSRALRNGLDILVGT PGRIIDHLDRGTLRLNECDLVV  
LDEADEMLSMGFAEDVETILDGLGEDNGKKPQCLLFSATTPPWVKQIGRQYQEDVKSIDA  
TGDAGGLRVASTVRHTAIQCPWGVESKKAILEDIIAIEISKDIKDVAEVFEDSDSDDEP  
INEIAAAAIAKNAENSAVQQKIFGKTI VFTETKRAADELVSGGIFKSLTAQALHGDVGO  
KQRDATLAAFRAGAFNVLVATDVAARGIDIKNVDLVIQFDP PRDVTYVHRSGRTGRAQT  
NGVSVLMFSPNQSDIVRIERDLGHGFQFELSGPPSTTSVLKAAAKTSAVASMEIPDETA  
EYFKDSAAALLKHGDPEEVVARCLAAISKRTSKAESRSLLTGESGLVTLEMSNNRGRPVS  
AGDVMFTVGLKARMSQREGDDVSFESDVGKI QPNHEQGNCFDMDIEEGKKLVFAKGV E  
AGGADIRILEELEVNRGRNFGQRLVVVAAAAEAAKVVEDTEAIMVEEVEVEEDMIVGVV  
VTEAAMAVVVAAGTDANSVIPVTIKEDQIVMTEEVEETVVDTTVVGAVDMI TMDGKSFQR  
DIKEYGRST

>comp15127\_c1\_seq1; 606 95 2461 LEN=2736; translated  
MNKQSDLFSADSDVVLGNAAASTSRKDRCIPTKHS LPAASRSSNGFQRGFLLSGNDPAKD  
ARRKRREQTPIDVPAPEVPATKTGTPKPSALFFEEFPTTEVDPTRNPETPTPEFLEKTA  
ALTDKSNNSCKDPSATRPGIKKASETNKKDSSGWTGFLTKNTSTSGKIDVYKAKKKKQT  
TTRKPKDSIAPTSIAPK KKKDSGWAKGFLTNNNNNTKKKSNNTITQKNANYDTMQGTRKRGK  
RSTMTDEEAVPLSVP SAQTPISASIPCNKKE SNVKNKRTTRSCELL SIDNNQHERDNRG  
KSCNII GTQAMASIPQTTIASQKAKLV TAGSKKPLISILSEETTDTCNQNVGTGLTSAPR  
EEQRSELSAPALVTESLVPLISVPGRTQDDKETPSSSSSLFLKEVSTTRKTGHEEVREG  
GILHAAKDHVQVSSASKNEIDNNGFVGNFCQFTTGSTNDEENEDPSVATKAPIHAEGGI  
LKFQQDLERLFLRRQHFRKREDGSGRNDNGDEQLQMLGMRSWTLEHRRCAWIYLLQRKQH  
RQQRQHQHEQKKTIDVGSKGSTSVLEKWFSELLDADYCDVIYQQQNGANQDDKTPLESIL  
QCYETEERMAFEGVLVVRHFSQLYRVVEGGNESSALTRKPTTMNAIPRLVPLVVQL

VRSAgnRRRLAQSAWDTsILLIALHIRECGPSVQTLSSSSLTcPLSRNLGVDCLWEQLV  
LILQQQLVWQQSKKKHTNTTVKKTKHLQELERKTKNIVGIVDPDQENTASLSSLLSDIFN  
DLDTILEM

>comp15128\_c0\_seq1; 479 1 1785 LEN=2016; translated  
RQTIKTAIMESLAAMPLQpNTDAtMVDAQHETGPNdTDVVMGSSSVEdSNVPASEHNEAL  
KLAQADALETSLALENLLKGMEAVKRILEGSLEETTSAATSGPNdTALVEGLSKKLVGVL  
GSELIgLLNAAQMARChAKLCAEGADsALQDLQRARDEAQKARDRAHRAERISRRYKKEK  
QLLVREVRALRGDRRVLAKEvKSMRKLVRHNQQLETWRLlQDAMAVHESVLAHKTFtSGF  
GGIDPPGSGTIGTSETSCRDNiVHKADdATVASSASnKENNGQNAFAPRKENTKRERKNN  
IVFGTITNKtNHRskSPELSAVSASEPNSQSTGTkDNGDKPSKVESKRPSQTSPLPKLTS  
PNKLLTKQRKLGfSKGfGNSLSNGLDRfKNVLQDASDQMLHPDNNKfFHHKISLKKQGGG  
GNGLATATeTKINTNDENLSAGKAAGKDVahkaIPSLKNGKDSKLVDDATHTTKSCSfD  
MDSPANDVESDSGLNlNTSMMSCDIPNDLHLQISIDEGCSfLNSSHHLEcSPASRFMITP  
ESSPIlGQSIDKVPKPLfNPNTLkTLSIPSENDGNIGVSASSPALKPRPCSLRQ

>comp15128\_c0\_seq2; 458 1 1773 LEN=2004; translated  
RQTIKTAIMESLAAMPLQpNTDAtMVDAQHETGPNdTDVVMGSSSVEdSNVPASEHNEAL  
KLAQADALETSLALENLLKGMEAVKRILEGSLEETTSAATSGPNdTALVEGLSKKLVGVL  
GSELIgLLNAAQMARChAKLCAEGADsALQDLQRARDEAQKARDRAHRAERISRRYKKEK  
QLLVREVRALRGDRRVLAKEvKSMRKLVRHNQQLETWRLlQDAMAVHESVLAHKTFtSGF  
GGIDPPGSGTIGTSETSCRDNiVHKADdATVASSASnKENNGQNAFAPRKENTKRERKNN  
IVFGTITNKtNHRskSPELSAVSASEPNSQSTGTkDNGDKPSKVESKRPSQTSPLPKLTS  
PNKLLTKQRKLGfSKGfGNSLSNGLDRfKNVLQDASDQMLHPDNNKfFHHKISLKKQGGG  
GNGLATATeTKINTNDVENLSAGKDVthkaIQSLKNGKDSKLVDDATHTTKSCSfDMDSP  
ANDVESDSGLNlNTSMMSCDIPNDLHLQISIDEGCSfLNSSHHLEcSPASRFMITPESSP  
ILGQSIDKVPKPLfNPNTLkTLSIPSENDGNIGVSASSPALKPRPCSLRQ

>comp15129\_c0\_seq1; 572 56 1840 LEN=2168; translated  
MGLWKASSKSFLAFTFFAGYISTIIInRLSNDRILKHIDYDDLENFAATKKNgaiITRGT  
LWDSKRDGGIYKRdASKVQRQRtADEADtIIANPAYSDlKEEIASMVANQTwVFKTSYE  
QSIIIAGKEKTQLVserPPGATTKLVCRETCCVERVWISANQDDRkLLNWRNDIYELGDV  
MIQQFENDDASLHATNLHSEDLIPCFVPNTIIISVDNfGKSIDYfWQQIRPKIKVPfLLVT  
GGSDMNSPYfTKNHATIPGYIADPLLLKwYGTNPLRHEGDHPSLERfREFSASKFRPLLS  
GLSYLHPQERYLSAYLGLTNYTNPFSEPLMKQRFFAKSADHAIDFEQDVfVHFgKkKNPF  
RKRLWNILCPNTKtNTTSCGAETNRAPLHEIYVDMTKSRGSLGQGYKfGISPPGMGYDCY  
RHYEMWYLGIIPIVIdRDPEsYELyENLPVLQLTADQqVLNSRQDFAGVLQEFLESTEF  
RDAVSNGTyERGWNRLfLGDkRRAILKDSGRATVVDdTSGTEYYPAYRYfLREDVSKENG  
PISNARRASGKADDRSVYCYHANANCAVRDGDGGDRSVdWTDDPNHEyNTVDQEW

>comp15130\_c0\_seq1; 364 222 1921 LEN=2479; translated  
MAIMRPYQfCSKEEFIERQELsQVSEMEATLESCHLPQSKRILDPCLAIskYRRSAAGGD  
GDRSVRGREELIATLARLTQICATHRATPRHPKIKNMDTVVSfVTDRLRACQSDATRGMS  
NTQSSVPASWHARVIRILiWLQYTSfACSKRTEESMSASATARTISHMRSTAYDAYWNSR  
EQEQEGALEGEQSLVAIKSTSCDDDEILCYDAMSRICAASKISTTNGATSLETswngILi  
EFskRRQEGMSYPLWtVALEVTshVRREeYyVLWGDKGSVPQKLPILAKSILVRELLLPa  
RHRTVQHYNLSfGKGEMVADMDRLLGIETNSRHSPDATQPTKESAAANSsgwCIeYANIfG  
LPVEEeCKNEKSSGNLTtSKTIKMKLKHVAMPafDSrKVDAKAFEAIRNSSSMDfGKfYD  
GTNDGAMGLSSELVMKfLEfGSPSVSNGSTQTFGfDSACCvLPGDKRDkTLDSINVPASSL  
ARAMAASRVGNSNGISSSRdVDSIDVESRPRATPLTVAPDRIKTGETKKPKKARVvFFFA  
PAAADSETSAISSTRDSGSATKQH

>comp15131\_c0\_seq1; 946 413 2812 LEN=2906; translated  
MAILASEDDGMPGSITsRRRRTRNHGWRQRTILQSSSSPSSSSSTTPPLSAQPQSSKN  
FAQSVLSSPSAAHFAFADsFRNILASKRTSQYRQRfVtGRFPVIVTVEEDNPnRRWLNl  
GRRMQLQPGQGEQISTSImlVNGTNI DRSLASyDRfQWLDEFERRELHdRYATVSMELL  
AEISIDKPGYLQILQSHGAGSSAATSRKIRQqEKEDSAEPLWNRWRNRNEDAGDEEEDL  
QQSQLDPDQSPDRLWSTGfSLTSPKGLIKSVDISDGHIDQINPRSESMITWPNEITKVP  
NNMIKpQRyKtTTTQQQQQQQSHASIPQDALLVADGfLVPGKDRGGIYLvQNPshKQSEW  
SIPLTDPFSTDRWfYHKAVWVDLTGDGRQSILTARAKLRKvASTTSSASTSSTSKKNNR  
DIYLEAMQETEMEENRPKNGQLIWLEMPKPHHYDVETGTPLEKDGtAFDPFDARHLpWKE  
RILATGPDVAFAVANMNPDDENTVEVLASQfFDEKvTLHSIRRGPSPEVIFSRVIDDSPG  
AAFGGILVDLEEGATDLDAADGRPRVINSGSTIKPVGGEENTNSSfSHFLVTSHEFNsNS  
VVESSNSNDPIANNMATEYKGSANGMNKQSSSEKVRGGSLLAYKvPRRSKDAWKTEPWVR  
TTIASGFQVKQQIWNMINPGAPGFAYAFHAHRDDAARGKRPMIAVAGDCAESAYIFRPQQ





HRAWIATPADGDGKWEWDRELQDSSPHLSKNNIV  
>comp15135\_c0\_seq1; 466 259 1410 LEN=2113; translated  
MTLRALPRGRPTSRTITAMFRLLVASILLSGGILVFPSSSTTPSGTCMVMAQKNGNINKRQN  
DKNNDKNNKNNNDKNNKNDKNDKNNKETESPTPEPTTSPTQVPTQFPTDSPTS  
PTGTPTARPTGSPTVRPSYLAVLPQITFDIVTVVDDVFAFATLLEKSNKDEDDLNTFF  
DFLAHLLVASQVSGSDLEFVLDLRIQLLPAESETGGGAETVEASPKMASAFTNPNDTSMR  
IVIDGSMTYFHEVGEEGEGHSVLSLEDKMSHTLAVYFVFWSTDEVVDTMSEYGFQDPRIA  
AVRVDDNVILVAQEEGNASEGADASGNVGGNGLVMPNSNGGNGGFRDKDGAALVSSGHRV  
QSDRMATAVGSTLLCGLWAILIL  
>comp15136\_c0\_seq1; 213 433 1026 LEN=1280; translated  
MAVAANVVLDRYPDVIKNNILMIDLVDVHQGNNAVLVFRQGDSTDETALHKKHADRVTFS  
MHCSGNYFSPKQESDLIELPIGCQDQAYLMTLNHWLKRFRLEHNGEGSKHKLDLIIFQA  
GVDVLESDDLGRMDLSPEAVTRRNELVYEFADHLKPLVICMGGGYPKREDAWKPIIDAH  
ADVYFGAHQFLSRLSQP  
>comp15136\_c0\_seq2; 324 347 1696 LEN=1950; translated  
MATNINLDYHDNCCRFSCRSEPENRIFRQNRRLRQRKYFHSPNPQISNHIHHFGSRYTV  
AFSTSSFDSDIAESPAKAVDDKDVSHQPPSFRVYFNDVYEVTLPPRHRFPMGKYRKYRE  
RVQDLISKLPQDQQSVNCFQVSPLATFDELSTTHDTTYIQRFLKGDQTEREQRNVGFP  
WSKEGVDRALSSVGGTLAAACFVCEQQQRRIKTEEKSEERATPSAPFWAAHIAGGTHHAF  
HDYGEFVSFSDMAVAANVVLDRYPDVIKNNILMIDLVDVHQGNNAVLVFRQGDSTDETAL  
HKKHADRVTFSMHCSGNYFSPKQESDLIELPIGCQDQAYLMTLNHWLKRFRLEHNGEG  
SKHKLDLIIFQAGVDVLESDDLGRMDLSPEAVTRRNELVYEFADHLKPLVICMGGGYPK  
REDAWKPIIDAHADVYFGAHQFLSRLSQP  
>comp15137\_c0\_seq1; 331 107 1135 LEN=2117; translated  
MFRKPKRSACKAGLRARKKTTTSDDEEDKETTQEVQEAALKRAKNEHNGGNGGGKFRKSSG  
TVDDDDDDGVQDGAKSSNSNNSKPNVTVMHRFEADTKTGNQKDLATATAQHHPKAMESIS  
KSASQKDPKRNKFLAGPIRAPTNIRTTCRFDYQPDICKDYKDTGFCGFGDTCIYLHDRGD  
TMSGWQLEQAWEEKQKTKKREQEEMERFMNKVDAMDNNKSEGNESGSSNPIGTATDDG  
IPFACFLSRKAFEDPIVTICGHYFSQGCLQDHFQQQQTGGEGGQRCPICGRDTHGVMNQ  
TKLIAKRRKLLGRKATWQQFMDARGGAAAGMTKGNDDFGAGD  
>comp15138\_c0\_seq1; 1064 713 2890 LEN=3043; translated  
MELDSASAVKPTMYNDEDDGGDNDADVDALVQKQQGDALQQKNKGSNKHNEAIVLRRMRY  
LTFVAAIGGFLFGYDTGVVSGAMLPMKRALDLNEQQEVVVSSTVFAAFVSSFLGAPIN  
DKYGRRTAILGSALVFLGSLVILMLANGYEMLVAGRIVLGLGIGVASLTPVYIAEVAMP  
SMRQQLVTVNTLLITFGQFFAGMVDGILDYWMPETGWRVYMLGLAALPSAFMFVGFNLPE  
SPRWLANNNRYREASLVLRRLRYTVEEADSELREIMGAMSTSKAKPKARRVEAEPQAQKG  
VGSDDSDGENDNVFGEKSNLPSFSSSSLSAGDNNCDCLPYGSNASAVDSDDFEDEIQA  
MQWQRQAQANRSKSSGSSINLWMAMMSDPTRALLLGCGLMAVQQCSGINTVMYYAASI  
YQMAGYDELTAVWLSGFTALAVVGIATSI FLVDRAGRRTLVLSSLGFVALSLAGLAGSF  
YLSRITSGEVVSASGGCASQPAAVWDGLTAYCYDCVLEGCYSGGTCLPGSVAGPLLGG  
VTAAGSNATTWEYDGTGTGGDPGAKKNPYGLLSVVFVLYLLAFGIGMGGMPWTINSEI  
YPLEYRSMVSLSTATNWNIGNLVISATFLTLSSPGVLTAYGAFGLYGAVALIGWVWLFWQ  
LPETKGLSLEDIEELFRPWNENGRGEEQRTTGGGGDVEDDMVPLTGKGDPEEAGGETD  
TFAAG  
>comp15139\_c0\_seq1; 811 1 2840 LEN=2973; translated  
XKXIGTPNGNSHCRYNTASQGS IATMKRPNRYWIALLVLLALLHGTLPFLIRQSLSPDGL  
AIQRLSTTSSLHFRYKPKQLLKKSTSIVETPLGVSSGTDMDNEDDDDSFLELTPRCRIV  
TRSGCIPDPSILPQNVSPYLLDKLDTYYHAKARKVEQDLSPLQAHERELIEGKST  
KQVRGRIIVEEETQTDGDERKPPALRQSLSDSGFELLSQRDIDLCECLNAGYLLRSL  
PDVRELDPIISKEFYFENFHSNGTLKAGIDDMFLDGRVLYVWRGYSQEVTKGRLLLPKLN  
YLQANLVKRAAAWVMNTLDRFESSIFRTVTRTKSRQLRRTFQTRLMKISSKLQIPQFKWI  
ESMVSDETMQDSQVSMATDMDFSGQESRSNTGKRVMRSRYGGSKTMSVEPPDPLDALGPF  
LCEIDYNGQEGNAMNSMGLNGTMYNSTMASSMSINNTVYGGPINSTMSLNGTMSNLDAY  
DSNAVTCAYDGKASAKQDKGLPRMQLLERVSIGSLIDVFNKVGRRGLLNTIFARSELVEP  
TYEEVVVVWRPTMKSKKIIAPPKVSEFADMFDIEGFQPEEDKSGPQSGDLEVRLEFQV  
PMSNLQAVLPKSKLVFRPADAFVFDTISLATLAIVLSIRFENARLDLALVSVTLWLLR  
TVFRYSNKLARYDLLVKTFLTSKISQRNSGAVDYLTYEAAASQRAIRAALVHQWVQQYQ  
KRSKLTISFLEQNCETQVNRLLRDDKEVQIDVKRALQDLQDLNLSFSKTDDRVLVSKNL  
DSSTDAVKELWVDLLENDKFKGNPIKSNMSGSDLRKRAVVTEPDLIDLMLLEEIDAAAAN  
VKKLSTDDWRERRKILASAIIEKKDERIAKAI AALDEKKEENLAKAKAILEEKKEASIAK

AKATLDEKKVESMKKAKAAKDAGIARAREFLVDKKRKNQTRVKEQE  
>comp15140\_c0\_seq1; 228 706 1152 LEN=1577; translated  
MASTSIEEPFGMPGSIKINPLYDLQSKVPDATVGYSLRNTSIKLDARQRKFTLSQVFGKE  
RRNQIVPILTAKAKNIKDGFNLSYSRHLGRGTNIDTVTTIWNPNDSIAVKWTDGNWAATV  
RAPLEGWFGYNGSGIKFSMKQSVGVSLY  
>comp15140\_c0\_seq2; 176 1 588 LEN=1686; translated  
MQSIDCGRRSYWSFIFQSEQNLQQTQPIRKRPELTHFLKMAAKASGLVLFFFLLRETAV  
RRINIPKPDISIGLNLHDHTTTGTFGAAAPRVIWNTEEISIGGWFDLQGGIDSTLTAINR  
APETYVWSEVKRMNKATAIALRGDINANEQDVIDLRLVNANSLRNHAVGLRMLGSAGMY  
HSNHICFDTHVEECF  
>comp15140\_c0\_seq3; 306 1 1014 LEN=1439; translated  
MQSIDCGRRSYWSFIFQSEQNLQQTQPIRKRPELTHFLKMAAKASGLVLFFFLLRETAV  
RRINIPKPDISIGLNLHDHTTTGTFGAAAPRVIWNTEEISIGGWFDLQGGIDSTLTAINR  
APETYVWSEVKRMNKATAIALRGDINANEQDVIDLRLVNANSLRNHAVGLRMLGSADLH  
SKSVALDTVMMASTSIEEPFGMPGSIKINPLYDLQSKVPDATVGYSLRNTSIKLDARQRK  
FTLSQVFGKERRNQIVPILTAKAKNIKDGFNLSYSRHLGRGTNIDTVTTIWNPNDSIAVKW  
TDGNWAATVRAPLEGWFGYNGSGIKFSMKQSVGVSLY  
>comp15140\_c0\_seq5; 254 1 914 LEN=1339; translated  
VFFFPVVFVYPAFCSFLVFRVFAENVFVDAKYXNSQIGLNLHDHTTTGTFGAAAPRVI  
WNTEEISIGGWFDLQGGIDSTLTAINRAPETYVWSEVKRMNKATAIALRGDINANEQDVI  
DLRLVNANSLRNHAVGLRMLGSADLHKSVALDTVMMASTSIEEPFGMPGSIKINPLYDL  
QSKVPDATVGYSLRNTSIKLDARQRKFTLSQVFGKERRNQIVPILTAKAKNIKDGFNLSY  
SRHLGRGTNIDTVTTIWNPNDSIAVKWTDGNWAATVRAPLEGWFGYNGSGIKFSMKQSVG  
VSLY  
>comp15140\_c0\_seq6; 296 288 905 LEN=1330; translated  
MNKATAIALRGDINANEQDVIDLRLVNANSLRNHAVGLRMLGSADLHKSVALDTVMAS  
TSIEEPFGMPGSIKINPLYDLQSKVPDATVGYSLRNTSIKLDARQRKFTLSQVFGKERRN  
QIVPILTAKAKNIKDGFNLSYSRHLGRGTNIDTVTTIWNPNDSIAVKWTDGNWAATVRAP  
LEGWFGYNGSGIKFSMKQSVGVSLY  
>comp15140\_c0\_seq9; 228 715 1161 LEN=1586; translated  
MASTSIEEPFGMPGSIKINPLYDLQSKVPDATVGYSLRNTSIKLDARQRKFTLSQVFGKE  
RRNQIVPILTAKAKNIKDGFNLSYSRHLGRGTNIDTVTTIWNPNDSIAVKWTDGNWAATV  
RAPLEGWFGYNGSGIKFSMKQSVGVSLY  
>comp15141\_c0\_seq1; 2058 166 4167 LEN=4300; translated  
MPPTMEEREAEALQSAFDEYIASSRELEEEELDAELAKMQEKLDSSAANAALSGQLEN  
IAPQLASLEKALSDSRALKKVEQKLRRAEQDQDELEAKYREVEGNLMAIRDECDVHEE  
LAFKESELEETRLELEIERERHAVELEDVRAESAIDNAFDPGSEAKAKPAATPASDVDEA  
YVKKLEDELELVTEQLIETEALLSQTEGKLNSEAAKATTSEVEKLLAEGVKASEKDKEL  
IQVLQEDNATRLEEEHRLRELELTKEELMLTQEELKAVEYDAQEVSSRLDDLRAQHRQE  
INNLKSITEGNANASKVVGRMVAASEETDALKDEISSLNAAALKNAKKDRDAIVEELEAVN  
ERFDEARKEAEKRGRDIASSDIKAQLTKEREGEISGLKDQLKALTEENSALQKKVDDAEM  
SMAITKDSQTRNQEGVEVQSELVKQLQSLSRSKEELSKKEKEMAVLVTGMEDRVANAED  
NVTKLEQELSATKGLAEAEANLIVSKREKEVAQSRDLTREPSSRRKMRTGGSSRSASSSV  
YHPDLVSMDEKQKVKKSRIRSNPNALKRLELKLSEEKKKYAELEKDFDKLQEQQRMGE  
AHVKKLDEDIKVLQKQLYAKGETGVSTNMSRLTAIGSSQGADLLSDDTASKIDELISQG  
DPSAMGEELRTLQKRCNAQRDYNQLLSKMLNLQGNIQVFCRIRPTSIKEIQNGNKNVVE  
SLSETELGCYDERTNKWKSFGFDRVWGPQSQRDIFQDVEPIALSVDGFGNACIFAYGQT  
GSGKTYTMEGVAQNNQRGISFRTIQKVFHLLHLKQQQEKTNAILFKSQEEREPEPANFVF  
NVEIGMLEIYNDECYDLLGASGATLAEKKLEAQKAGGKASLEIRRNEGRIEVPNLTKEP  
VNNIEDVFELLEAKGNKNRAVASTSLNQTSSRSHMVLWVDVTSFGFEGQDGNKGTFLFLVDLA  
GSERVKKVEVEGEHMKEAGHINKSLSALGNVMEALDRKASHIPYRDSKLTYYLLQDSLGGN  
SRTMMIVAVTPVDLAYDESIHALQFATRVRIRINIGAAQRNVTSKNLEETVKALTDMSKTL  
TRQKKKTESQLHTLKKDNSRIQDKLSNISAAKQAQASDSKTLVLRKNNNEMAKRWEKEK  
NAREEVADELEKSRKEMRKLQKDVTSLSRAQESLQKLEDKDKMLEKKTAELEAAKEASS  
AANLRARKAQVLGSRPSTARPSPAKTAGSASVSTGASSSVTSASSTVATEEVAEIRGQV  
LALLEKYDKAKVNRIDIIMEKFRGKEHLLLEKMTQRYENSGGASDADESGLSRSELAAKR  
HAERMRLKREGKK  
>comp15142\_c0\_seq1; 431 1 1511 LEN=1684; translated  
XSSTVRLFLFAYSSSSHIDHHRSTVLQMILSRRCCSAQSIVFLLVALVLRAFGAVEIPLG  
AIIQLRSVAVDTHAELNERVEAITTNYLNQYFKAYYARTEPDDDEYFEKAVISANSFGV

HGVEGSYITTTLEIEGTLSTFTSDEVPTSFFIETLLRNFAGKQNEKFLDQLLKEDEDFLQN  
LTYLIIDINKTKVAESSVEDGAPSGDSSSSGVEASRANERRVLNEKWIALLCVTSLIVA  
LMILACYFYLRRTYTKPIAAKTKKKADSDNEEPMKVIKLPKQSSSTDDNVGGNLLI  
SPTSAGTTPTSAGSLSDHMDHPPSPPIQSLTSHCSSMFTNGDNMSRFAIRKANNDVSKFS  
LDMPSIDLGTWRGGRVDPPEFGSDISAIVTRKDLSLIAEEKSDIESGVDTENNRSRKKG  
FLGSRYSRSSQGEISLRQAQSRSSYRSETYFYNCRNVPNDSDSDCPLDTSAGDVICDL  
KNLSIQIERERNRHRHSTHQ

>comp15143\_c0\_seq1; 642 104 2302 LEN=2505; translated  
MEKMIATVVLVTTTFTSSVATSGPSGYPGAQSYNGYNHQQQYQPQQQQTQWQTGTSYQQT  
QTSSTSAVAASEPATPSDDLEPPPLPEGWSEHFDPNSEQYYYNSADGTTSWDRPSPDG  
AEE SPLVEGESNGEDSQTLDLKPESMDVAGVSQQAQTEQDQPRI PDNLVASGNSQMGEKD  
GIPNTSQEMNSWQSSQSAPTQKPGPNEAGSQVQGDRLQPKDWGAPQQQEEYQPQPEATK  
WGQSNSTESSFVGGEASVQKQREYQNEQQPEIVQQQENAPGWGMPPKAVVDDRPEPMP  
PWGVAPKSPQEQHPRHNGDPRSQQQTSEPPRKESEGGQPPGAVSSVPPSYPGNWGAPKT  
PPSPATQQQGSPPQFRGEATQKPLPEAQQRPPMEQGGPPGNRSPQQQAPPRPQYMQRQYPP  
QQYGNYNQPI PQQGGQPQYGGQGSYGRAYPPPPQAQSPLANTGQLISQGEAGASAVKEA  
LSTTWKGLLGFGRNRTRDVGTAREQVVTGATAAGQTI SARSSSIWEQAKSTVGGVFENSE  
PNGQQPYSLGGQPTPHNRPPPGYPGRPTGPNQGYPNGPIGRGPPQRSPGGPQQPPGRYG  
PPYGGQSPGPGSYGGPPNRGPGSGVPGGQGGPPPSQQEQKPPGYPMKPRRDHPYPTQNS  
QQRGPPMQSQYGNQPGYRPPSQAGGYPPNQRPPFSGPPGQLNRAPTSMEQQKPPSQPKQA  
EPWEHPGLTGEF

>comp15143\_c1\_seq1; 191 83 1126 LEN=2838; translated  
MDNQGIP SARITKEEQQLMATAVEALSSSLPSQVQNSSHAESQDVGDTNAESQEATKVDF  
TTHNKGTAAETRDTHLPVVKSSSVFDRLYKSHTVASKSHSLSSIASLKPSTRANLP IKNT  
SGTSEIAELSNFNRMTISRKRACTPHKIDLEGRKTSSAFFSTPPPSHRRKRPSQHR  
PHTAPSKPSAGSPLYATPRSAKRVEYFSPRMKPLTKLYFVSKFHGPGVLEPVEPISLGYN  
FFQMFCEYETGGIDSEDIAKIICIAFFKKDHSRSIRHWKLNPEVVGKTKANKGRRGGTV  
YPI TMHATYAWGNSYRVVHAKGTVRFKGSTSKEI WVENFTYNVRGDP

>comp15144\_c1\_seq1; 812 172 3249 LEN=3887; translated  
MDDHSQANHKTEGHLCPKHDSEPRRHLRSHYPNFHSRRRHNNHHQQQQFNSSSSGSKSNN  
TNNTYTRRHGRNTNYIHSRNDHPSDCSVGTNSSGEGSF GPINSYRPHNRQPPRFHNKASN  
YHNSRSTNNHKIDRDKRFQMKNTSINAKKSKKYFNDNSNNKENGRRGRSQYTSRKMTSM  
VLSSYLREGRWGLGEDKNGSRNSSNNERNVENDPTSTNGENHKGRASYTSSAAATTAI LSR  
ESESVRTQALKLLERTMCRWAASIEQNASAWQQPRVTLVTFGSYRLRAYRQDSDIDL LAL  
CHPSC TREEFFSSLVEMMENEDAIDDVHPIASAYTPVLKFTIHNIFDMLFGRASGKENV  
ERLKRYQLISISPFVPMGPMKRGVFGSNSTENSEGNTAANSLPEFFIEESFLLGMED  
DSEVRSANGVRVTQFIMRYVVPNQNHFRLLVLCVKEWASLHGIYSNIGLFLGGVNWAIMVA  
FVCKRYPKQQPSTLLTTFFRIFATWNWPKVLLLEDVQNVSTSGPGCAETGSHTPLSVAGG  
GMKPWDPKTNPRDARHVMPVITPVYPRSKCVSFFLVSNASHKPKQILFCFYCFNNSVSVT  
APFLSSHSPSSLWDSFPFSVNSTYNVGI PQQRRIQEELVRAAYLSQDETNRALYSPSDF  
FERHGNFLQISIRAGKNTEDFTKWLRLCESRLRLLVGALDCPEMSVWPFAQVMKREYTP  
EPSDTGNALPNADPSKSSSSSGLQEALFFIGLRFAPNVEIIDLKHHTSEFLINQINSWEG  
RKPDMDFMIHVLQKDLPHDLISDYVVTKPSPFEPNPMFRRTAVYNQNSNSYMTQNI NN  
TDTDSNQIATTTTKAGPSGIPQVPREIRGASGGDNNSVARSTYSSIARSVNSSMPS SEDGM  
ETTVDGIELESRPQSPLGNLITVEGGPHQAQQTYRSNTDGQTKERPTSTEHRDGSKHTPH  
QAQLYEFLTGKIDDLVPGNRSNSAAIAPSEVCTDSQSDQSSTRSPIKKRPRNRS GSNASQ  
QSDNA

>comp15144\_c1\_seq2; 842 172 3093 LEN=3731; translated  
MDDHSQANHKTEGHLCPKHDSEPRRHLRSHYPNFHSRRRHNNHHQQQQFNSSSSGSKSNN  
TNNTYTRRHGRNTNYIHSRNDHPSDCSVGTNSSGEGSF GPINSYRPHNRQPPRFHNKASN  
YHNSRSTNNHKIDRDKRFQMKNTSINAKKSKKYFNDNSNNKENGRRGRSQYTSRKMTSM  
VLSSYLREGRWGLGEDKNGSRNSSNNERNVENDPTSTNGENHKGRASYTSSAAATTAI LSR  
ESESVRTQALKLLERTMCRWAASIEQNASAWQQPRVTLVTFGSYRLRAYRQDSDIDL LAL  
CHPSC TREEFFSSLVEMMENEDAIDDVHPIASAYTPVLKFTIHNIFDMLFGRASGKENV  
ERLKRYQLISISPFVPMGPMKRGVFGSNSTENSEGNTAANSLPEFFIEESFLLGMED  
DSEVRSANGVRVTQFIMRYVVPNQNHFRLLVLCVKEWASLHGIYSNIGLFLGGVNWAIMVA  
FVCKRYPKQQPSTLLTTFFRIFATWNWPKVLLLEDVQNVSTSGPGCAETGSHTPLSVAGG  
GMKPWDPKTNPRDARHVMPVITPVYPRMNSTYNVGI PQQRRIQEELVRAAYLSQDETNR  
ALYSPSDFFERHGNFLQISIRAGKNTEDFTKWLRLCESRLRLLVGALDCPEMSVWPFAQV  
MKREYTPPEPSDTGNALPNADPSKSSSSSGLQEALFFIGLRFAPNVEIIDLKHHTSEFLI

NQINSWEGRKPDMDFMIIHHVLQKDLPHDLISDYVVTKPSPFEIPNPMFRRTAVYNQNSNS  
YMTQNINNTDTSNQIATTTTKAGPSGIPQVPREIRGASGGDNNVARSTYSSIIARSVNS  
SMPSEDGMETTVDGIELESRPQSPLGNLITVEGGPHQAQQTYRSNTDGQTKERPTSTEHR  
DGSKHTPHQAQLYEFLTGKIDDLVPGNRSNSAAIAPSEVCTDSQSDQSSTRSPIKKRPRN  
RSGSNASQQSDNA

>comp15145\_c0\_seq2; 413 423 2378 LEN=2786; translated  
MTKEENEVSGGVAPLAKPNDLEAAVAPETESSAPEVSASTALESAASGPASTTATATLTA  
TVTVP SRLAGNTANS DGNLVEATPVEDIEPVAAVEATVVREGANKTPKNNVLVVVAAVAA  
LVVVVLVVALSLRGSKSQAEGEATAVPPVDPERLESIRSILAPISGEAVFPDPSEEFVS  
DRIEALDWLVEEDRKSPFPLDDETQLWHIRQLYVLAVFYFATGGDDWQHQQYKFLQGTNEC  
DWNAAESQRECIKDIEVDCEDGEECLVSNNDNPRGIVCNDQGRVTNIATCTFFERNKKSQ  
TPNRSCTVLQCVRMCVYGFVGGKCNVPFVFRPAALCVFVCVVT CNAIFLFSHSFLELSHC  
CDVAQLLWFLGTPLSAVVCWTLVLSLAMCLVPEPRDWFLQMANHAVRTNYQFPFDWNGLT  
GTIPEELSYLNETLVEINIGGNSLTGTIPSSIQQLSLLLENFAVHDNCLSGTIPDLSGLPS  
LAILLLYNNIELSGSLNGFCDGPAFKNPKTIALSSDCGCPGGAQALVPAPPIECECCLC  
CEMSRFECDDAAGNSWPSIAFGFNTDDFLESFEKPCLEASKEYVEDECPCFYDSKPDE  
SLFLESARPTAPGPTRFRRIIPGSI AANVQTNLVGASSGPNQLKTKQPNAE

>comp15145\_c0\_seq3; 586 423 1919 LEN=2412; translated  
MTKEENEVSGGVAPLAKPNDLEAAVAPETESSAPEVSASTALESAASGPASTTATATLTA  
TVTVP SRLAGNTANS DGNLVEATPVEDIEPVAAVEATVVREGANKTPKNNVLVVVAAVAA  
LVVVVLVVALSLRGSKSQAEGEATAVPPVDPERLESIRSILAPISGEAVFPDPSEEFVS  
DRIEALDWLVEEDRKSPFPLDDETQLWHIRQLYVLAVFYFATGGDDWQHQQYKFLQGTNEC  
DWNAAESQRECIKDIEVDCEDGEECLVSNNDNPRGIVCNDQGRVTNIATYWNGLTGTIP  
EELSYLNETLVEINIGGNSLTGTIPSSIQQLSLLLENFAVHDNCLSGTIPDLSGLPSLAIL  
LLYNNIELSGSLNGFCDGPAFKNPKTIALSSDCGCPGGAQALVPAPPIECECCLCCEMS  
RFECDDAAGNSWPSIAFGFNTDDFLESFEKPCLEASKEYVEDECPCFYDSKPDES LFF  
GKCTSNCSRADAIPSYSW

>comp15146\_c0\_seq1; 131 456 1424 LEN=2554; translated  
MAAGATGAGATSETTPSHCKEYENFKSADSYERAYFYEPGAYMKHMVDLLWDRLRLESK  
NSTTTPKGS SAGARTRCILDIGGGTGNFAQALMKKQEAGKWSGSSRVVVVDPFLEPTAGG  
SIDGLVSFVKAPAEDFLRAPSLSGDCWRTHRIDREFGGYDQILLKEMVHHLKNEEDRVGIF  
RGMREGLVPSETR TAASPPSLLIITRPQTEIDYPLWDEARSVWKENQPSIEEIEEELREA  
GFTNLERTLETYPCSI SLKQWQTMVKDRFWSTFSNFSDEELEEACERIAREHTRNSKNET  
NNEEEDTVVHFEDRLFLLTAS

>comp15146\_c0\_seq2; 589 103 1515 LEN=2038; translated  
MPQVNP DASDIEKLQAFREITSSFGSIESIMESFGLSDLP IAQRYGILCGFVTFVCTIS  
AVVALLIFGGTFKRIVEQSQTGKPSVESDYRVLRSRPLLLERLLSAQVRMMKLNYSNRPE  
RKEGTTNLTKMLSSEAPPKSKAGEKVENFDFSQQNAESMVGKQNYFMGYRKCQDKPGGK  
ILVGRPEAR YEAFARAYAGCGDTTTL SYRRSYARLYEMVSCETLKSDDKFSALYSERPQD  
IVGKWIRLEPLETKRHLKAVHAVTNGDPIFLK KAYDPEEVWGFQAEGPFSSDEALQKSF I  
FQHHENEAAFAILQNLNDR LVGVIMLTNDNPQNLAIQLDSPITGPSSSGSKEEMEACFLL  
LDRLFANGYRRIQLSIDS KDSQSSKLADRLGFTYEGCLLKDKIVKESSRD SHVYGM LNSD  
WSKGARKVLYKKLYGAAMLKVDEAYNKKEEELDDQQRVLAEEGDK LKKER

>comp15146\_c0\_seq4; 761 309 2219 LEN=2696; translated  
MSLSMSPAGISPASSLTLARSIPQGVDEL TNMGPFDFLQ TQMETGNAEAKIDAMKRLPVV  
AFAMGSSTVSSDLLPYLQQVALQQPPMDDELLLLMAKQLRTFVPALLTKPSQILELLP IV  
ERLAAVEETVVRDEAVVLMNHL CENLKSSSPLESSVITTLVSMAKRLVGADWFTAKVSAA  
GMLPKLQTLTKYSELGYLFKELCMEDETPMVRRAASQHLGHFVETLGNKDKANELVPLQQ  
LCKDDQDSVRMLAVAS IADVGPSYGKTP EWTKEFFLPLLKEGSTDT SWRVHRNLAKHFS D  
VAVNLGFGQNSRYAGDQALVIACFVSLLS DTEAEVRASAVGHFARMVHWGGSALFSSYLM  
PLLPSLADDVMEVRSKTALAIMDSSEGGTLD DSIIVQTFGPLESFLQDEFQEVQLQVL  
GNLHKL SHLLNGMNGVSS I LNMSKATNWRVREGVAKLLPHLAEARGLDFFANVLLLEPAW  
LVLLLDPVASVRAACVSGMPVLVNAAGQDWMVQHILPQHVR IYNHAASGSYLIRITILKA  
HAATAHACETGNAAGGGTLWND SVLQLLRGLVDRVANVRMVA AQGLAKVVTAEDPAQVA  
VVQAQVLPAL ESRMAEEEDVDCRQACSEALSAIPNK

>comp15146\_c0\_seq5; 289 39 470 LEN=1526; translated  
MSEKVI RGRANASGIKHKVSAGLPTAAVNCADNSGAKNLHIIAVCNIGGRLNRLPKASS  
GDMVMCSVKKGKPELRKKVMPGIIIVRQRKSFRRKEGVFIHFEDSAGVIVNNKGEMKGS AV  
SGPVAKECAELWPRIASNAGSIL

>comp15146\_c0\_seq6; 589 103 1515 LEN=1756; translated

MPQVNPDASDIEKLQLAFREITSSFGSIESIMESFGLSDLP IAQRYGILCGFVTFVCTIS  
AVVALLIFGGTFKRIVEQSQTGKPSVESDYRVRLSRPLLLERLLSAQVRMMKLNYSNRPE  
RKEGTTNLTKMLSSEAPPKSKAGEKVENFDFSQQNAESMVGYKQNYFMGYRKCQDKPGGK  
ILVGRPEARYEAFARAYAGCGDTTTL SYRRSYARLYEMVSCETLKSDDKFSALYSERPQD  
IVGKWIRLEPLETKRHLKAVHAVTNGDPIFLKKAYDPEEVWGFQAEGPFSSEALQKFSI  
FQHHENEAAFAILQNLNDRVLGVIMLTNDNPQNLAIQLDSPITGPSSSGSKEEMEACFL  
LDRLFANGYRRIQLSIDSKDSQSSKLADRLGFTYEGCLLKDKIVKESSRDSHVYGM LNSD  
WSKGARKVLYKKLYGAAMLKVDEAYNKKEEELDDQQRVLAEEGDK LKKER

>comp15146\_c0\_seq7; 131 278 1246 LEN=2376; translated  
MAAGATGAGATSETTPSHCKEYENFKSADSYERAYFYEPGAYMKHMVDLLWDRRLRESK  
NSTTTPKGSAGARTRCILDIGGGTGNFAQALMKKQEAGKWSGSSRVVVVDPFLEPTAGG  
SIDGLVSFVKAPAEDFLRAPSLSGDCWRTHRIDREFGGYDQILLKEMVHHLKNE DRVGI  
RGMREGLVPSETR TAASPPSLLIITRPQTEIDYPLWDEARSVWKENQPSIEEIEEELREA  
GFTNLERTLETYPCSI SLKQWQTMVKDRFWSFTSNFSDEELEEACERIAREHTRNSKNET  
NNEEEDTVVHFEDRLFFLTAS

>comp15147\_c0\_seq1; 400 1 2438 LEN=2607; translated  
XSSSEFSCYFCFTRLLKVTPNNIPVYWIWLYWVNI FAWAFRALIVNEYDSGKYDQITDVM  
YLGKNLTVGQVILKNGGFVDPSEGEYSFEWALYSILFSAIICIFAVIGASVALVKVRFAT  
GKSLSNDAYEKADNKDKEVSVVETALPFQRANLTFKDIHYTVASSIGSEKIELLK GIDGV  
VEAGKMTALVSFVFNRYGRITLHANHYAFLYRTLIMI IAFSLCCLSFQDGFRRSWENN  
SDGCPFFEEVDGEITGEVRLNGHLQEERSFRRCTGYVEQFDVQTAQLTIRETCDFSAKLR  
LESTDPAVTPESTERFIDQTLDMLELTPIQHYLVGN DATGGLSFEQKKRLSIAVELVANP  
SILFLDEPTSGLDARAAAIVMRGLKRIALS GRAVCATIHQPSIAIFNSFDSLILLKRGGE  
VVFNGELGNESSNIKYLQCYEATPFIQGENPATWMLTTIGAGNAKVGNQFDYAGAYAK  
SQLHQKCMESITRIESAVSDKNLISFPSMYATTTKTQLTEVIKRTWTVYWRSPSYNRTRI  
ITAALLSLLIGSVFISDRVPTDDTQMRSRMTTIYLSFLIVAINGMNTVLSFFEAERNMY  
RHKSALMYDTFSVSAAYTLAEIPFLVGTSLLYTTIF YFMLGFAADA EKFGY YLFMLLCM  
SLFTYTGQMLVTLCRNAQIAQGFCSLVGSNTGLFSGVLILPQNI PKFWIFMYWLLPGHYV  
LEGLLTTQYDNDTSPISAYPGSGFYQYLVDSGECTQGDAVCTGTAEGWVYYTFDGEFTRE  
NVPFCILYLVGVTVLTRVISVWALGHLN YRST

>comp15147\_c0\_seq2; 437 1 2314 LEN=2483; translated  
XSSSEFSCYFCFTRLLKVTPNNIPVYWIWLYWVNI FAWAFRALIVNEYDSGKYDQITDVM  
YLGKNLTVGQVILKNGGFVDPSEGEYSFEWALYSILFSAIICIFAVIGASVALVKVRFAT  
GKSLSNDAYEKADNKDKEVSVVETALPFQRANLTFKDIHYTVASSIGSEKIELLK GIDGV  
VEAGKMTALMGSSGAGKTTLM DVLSLRKSSGEITGEVRLNGHLQEERSFRRCTGYVEQFD  
VQTAQLTIRETCDFSAKLRLESTDPAVTPESTERFIDQTLDMLELTPIQHYLVGN DATGG  
LSFEQKKRLSIAVELVANPSILFLDEPTSGLDARAAAIVMRGLKRIALS GRAVCATIHQP  
SIAIFNSFDSLILLKRGGEVVFNGELGNESSNIKYLQCYEATPFIQGENPATWMLTTI  
GAGNAKVGNQFDYAGAYAKSQLHQKCMESITRIESAVSDKNLISFPSMYATTTKTQLTEV  
IKRTWTVYWRSPSYNRTRIITAALLSLLIGSVFISDRVPTDDTQMRSRMTTIYLSFLIVA  
INGMNTVLSFFEAERNMYRHSALMYDTFSVSAAYTLAEIPFLVGTSLLYTTIF YFMLG  
FAADA EKFGY YLFMLLCMSLFTYTGQMLVTLCRNAQIAQGFCSLVGSNTGLFSGVLILP  
QNI PKFWIFMYWLLPGHYVLEGLLTTQYDNDTSPISAYPGSGFYQYLVDSGECTQGDAV  
CTGTAEGWVYYTFDGEFTRENVPFCILYLVGVTVLTRVISVWALGHLN YRST

>comp15147\_c0\_seq3; 1036 159 4617 LEN=4786; translated  
MVSCDESGMPSAMDL DINDGSVPQDLQVAILD LLETCKENDIPVPDRLGNEFMDVLS SSR  
KKVAAEMLSFTERL TEDKEAYQKSIYGSPIVVAAKEIDK KKKRFD AHIRVKDGSFKYT  
ERIDPAQSKSRNSIETVYNGGPVQRVWQTLKRTL RGDFTGMKVVEHYVPKNINLYFEQ  
RKTYLVLGAPRSGKSSLLKMIAGVLPEDKSHEVGGVSVNRITTKTKDVVWSNLVGYIDQ  
IERLHPYLTVKETCDFAFNCRMGGTHK SPLQDNGL EAEATVKKMDDEQYLVMTVLKAMGL  
DRVNLTDFVGDQETVRGVSGGEKRVTVGEMCVGQFPILCMDEISTGLDAATTYDICKLLG  
EVNALSQGIKIVTLLQPPPETFALFDDLILLSEGQVIYSGPVEKVVPYFESLGYRLPERM  
DVADWLQALPTKDGAEF IETVDHNGNIEV PKGHLTSDEFHLRFY ESEQKKILEVLGIPF  
EDNKHNKELWASSEDVKKIYTERYKNNSLQSLKLLIVREGLLWWRDKAGIKARIAQDLLM  
GIIAGTVFVWQSEEI TSVLGILFQSMLFISL GAMMKIAPQYAVR GVLYKXQDANFFPTWT  
YVVG RSLASIPASIIDGLLYGTIVYWFVGLAHNDGASFGNYILFVLITMAASTGIGLMFS  
IYSAITKERSAGQAAMSVSLVLLILFSGFTVTPNNIPVYWIWLYWVNI FAWAFRALIVNE  
YDSGKYDQITDVMYLGKNLTVGQVILKNGGFVDPSEGEYSFEWALYSILFSAIICIFAVI  
GASVALVKVRFATGKSLSNDAYEKADNKDKEVSVVETALPFQRANLTFKDIHYTVASSIG  
SEKIELLK GIDGVVEAGKMTALVSFVFNRYGRITLHANHYAFLYRTLIMI IAFSLCCL

FPQDGFRRSWENNSDGCPPFFEEVDGEITGEVRLNGHLQEERSFRRCTGYVEQFDVQTAQL  
TIRETCDFS AKLRLESTDPAVTPESTERFIDQTLDMLELTP IQHYLVGN DATGGLSFEQK  
KRLSIAVELVANPSILFLDEPTSGLDARAAAIVMRGLKRIALSGRAVCATIHQPSIAIFN  
SFDLSLILLKRGGEVVFNGELGNESSLIKYLQCYEATPFIQGENPATWMLTTIGAGNAK  
VGNQFDYAGAYAKSQLHQKCMESITRIESAVSDKNLISFPSPMYATTTKTQLTEVIKRTWT  
VYWRSPSYNRTRIITAALLSLLIGSVFISDRVPTDDTQMRSMRTTIYLSFLIVAINGMNT  
VLSFFEAERNMYRHKALMYDTFSVSAAYTLAEIPFLVGTSLLYTTIFYFMLGFAADAE  
KFGYYLFLMLLMSLFTYTGQMLVTLCRNAQIAQGFCSLVGSNTGLFSGVLILPQNI PKF  
WIFMYWLLPGHYVLEGLLTTQYDNDTSPISAYPGSGFYQYLVDSECTQGDVAVCTGTAEG  
WVYYTFDGEFTRENVPFCILYLVGVTVLTRVISVWALGHLN YRST

>comp15147\_c0\_seq4; 1073 159 4493 LEN=4662; translated  
MVSCDESGMPSAMDLDINDGSPQDLQVAILDLETCCKENDIPVPDRLGNEFMDVLS SSR  
KKVAAEMLSFTERLTEDKEAYQKSIYGSPIVVAAKEIDKCLKKKRFD AHIRVKDGSFKYT  
ERIDPAQSKKSRNSIETVYNGGPVQRVWQTLKRTL RGDFTGMKVVEHYVPVKNINLYFEQ  
RKYTLVLGAPRSGKSSLLKMIAGVLPEDKSHEVGGVSVNRITTKTKDVVWSNLVGYIDQ  
IERLHPYLTVKETCDFAFNCRMGGTHKSPLQDNGLAEATVKKMDDEQYLVMTVLKAMGL  
DRVKDTFVGDQETVRGVSGGEKRVTVGEMCVGQFPILCMDEISTGLDAATTYDICKLLG  
EVNALSQGIKIVTLLQPPPETFALFDDLILLSEGQVIYSGPVEKVVYPYFESLGYRLPERM  
DVADWLQALPTKDGAEFIETVDHNGNIEVPKGHLTSDEFHLRFYESEQKKILEVLGIPF  
EDNKHNKELWASSEDVKKIYTERYKNNLSQLKLLIVREGLLWWRDKAGIKARIAQDLLM  
GIIAGTVFVWQSEEITSVLGILFQSMLFISLGAMMKIAPQYAVRGVLYKHQDANFFPTWT  
YVVGRLSASIPASIIDGLLYGTIVYWFVGLAHNDGASFGNYILFVLITMAASTGIGLMFS  
IYSAITKERSAGQAAMSVSLVLLILFSGFTVTPNNIPVYWIWLYWVNIFAWAFRALIVNE  
YDSGKYDQITDVMYLGKNLTVGQVILKNGGFVDPGEPYSFEWALYSILFSAIICIFAVI  
GASVALVKVRFATGKSLSNDAYEKADNKDKEVSVVETALPFQRANLTFKDIHYTVASSIG  
SEKIELLKGIDGVVEAGKMTALMGSSGAGKTTLM DVLSLRKSSGEITGEVRLNGHLQEER  
SFRRCTGYVEQFDVQTAQLTIRETCDFS AKLRLESTDPAVTPESTERFIDQTLDMLELTP  
IQHYLVGN DATGGLSFEQKRLSIAVELVANPSILFLDEPTSGLDARAAAIVMRGLKRIA  
LSGRAVCATIHQPSIAIFNSFDLSLILLKRGGEVVFNGELGNESSLIKYLQCYEATPFIQ  
PGENPATWMLTTIGAGNAK VGNQFDYAGAYAKSQLHQKCMESITRIESAVSDKNLISFPSP  
MYATTTKTQLTEVIKRTWTVYWRSPSYNRTRIITAALLSLLIGSVFISDRVPTDDTQMR  
RMTTIYLSFLIVAINGMNTVLSFFEAERNMYRHKALMYDTFSVSAAYTLAEIPFLVGT  
SLLYTTIFYFMLGFAADAEKFGYYLFLMLLMSLFTYTGQMLVTLCRNAQIAQGFCSLV  
SNTGLFSGVLILPQNI PKFWIFMYWLLPGHYVLEGLLTTQYDNDTSPISAYPGSGFYQYL  
VDSGECTQGDVAVCTGTAEGWVYYTFDGEFTRENVPFCILYLVGVTVLTRVISVWALGHLN  
YRST

>comp15148\_c0\_seq1; 1475 335 4684 LEN=5005; translated  
MQECFLPDNQSPSAGTALNEKSSKTTCTDIDFADRDGKANSSSTIKKGRTYCERACSV EE  
YPQNKPTPPSSPGGTLSTGTLSSLSSNGTSHSFCVEAIEVSPTRLPISPASPPSSPPPSK  
SQEQETNAGMI IHNQYRSSFKFNDMKSKSVDDKTSTPYNPNVDATQDESSSRFNGTEKN  
KKSMMNNAVPTRS DRHNGGTGNNGTRVWVKRAALEAVRNPRLSFKEKMSRKPPLTSFNSS  
FNAGSSFNASMSMPAMSVASAPYPRSSSFTAYGGASVSSFSQRDFGESDSDIGSIGVSP  
YGNQTRSTRFTDQGWGTSACMLDSPDGNII LQLDEAPINSASSDASSSLVSSSSSTGNDQ  
TVTMPASAWSDGDIVMGNEYELSDNGSPICPDDLISLSNLHEPAVVECLQHRYEEDKIYT  
ATGPFVLLALNPFQNI DDLYGEDTMKKYWEKSENQSKEDLPPHYAIADEAFRNMMRSLDQ  
SLGAVDSQSCDQSILVSGESGAGKTVTTKFVMKYLAALSQRAGSQQKVKRAYQKVADEKK  
KKQSAGYSSTATKNYLPSTSSISSAPSWVSRKSGGLNKGVRKSTDGLSDVTCLAGTD  
ALNSIEAQVLQSNPILE SFGNARTMRNDN SSRFGKFI EI QFTRTGRLVGAQIETYLLEKV  
RLVTQSLGERNYHIFYEILSGGVGADEL RNYFLASTASPDDFKITASGTLDRRDGVSDRD  
TCAALQAAMKAMKFSVIDEQTDVFATAAAI LHASNLTFCDFDQYQCQLDGHNVHLEPVCHLL  
GVTAEDLNQALCHFSITAGRETQVQQNLDIDKA EKGLEALLKATYGALFTYLVRRI NDSI  
CYSESDASKDAPCAAIGVLDIFGFESFKTNSFEQLCINYCNEALQQQFN AFVLKNEQAE  
YEREGIEWSFIEFPENQVDIDLIDKRGSGILCILDQCRAPGTSDRSFALDVYNCKQQT  
RFSANRQOTALLQFCVNHYAGPVVYTTTDFVEKNRDEL PKEATELLHMSFNPFIRLLASL  
MENSSEERSLNTSFS DGLGMKSRGKSTVGGQFRRQLKRLREKIDVMSPHYVRCLKPNDQ  
LVPDNFDKAAIADQLSCGGILEAVRVARAGYSNHYSHEDFLRRYRCLGWDALKTSKPQQR  
IVG SVQPRKFFSGATHNPAPSNDNSCANKSTASAGSLSSCTTLVKHLC SLLQEGMKSD  
NDENEKNSANTTISI SAASSSSAQAKVYKHQVTSAPPSWGRGNSNTSRDTSIWDKKASSDS  
RPPAKIERRSSFSKNIGGTTSESAQLGVQMGKTKVFLRHKAFESLERLRSRQQSRAAVRL  
NSVFRMYLARVAYVHVRNAVRSN MADLQALQSEDWKE SHMEEHDDGRLVEFYNRLNQMRH

SFGGQSFSLVEAWASQMRQKIHNPLRSEWGKTAPSKPFKWMLLEDGLWIKNHDLSDSSN  
EDNFS DGNL

>comp15148\_c0\_seq2; 1475 880 5229 LEN=5550; translated  
MQECFLPDNQSPSAGTALNEKSSKTTCTDIDFADRDKANSSTIKKGRTYCERACSV  
EY P Q N K P T P P S P G G T L S T G T L S L S S N G T S H S F C V E A I E V S P T R L P I S P A S P P S P P P S K  
S Q E Q E T N A G M I I H N Q Y R S S F K F N D M K S K S V D D K T S T P Y N P N D V D A T Q D E S S R F N G T E K N  
K K S M N M N A V P T R S D R H N G G T G N N G T R V V W K R A A L E A V R N P R L S F K E K M S R K P P L T S F N S S  
F N A G S S F N A S M S M P A M S V A S A P Y P R S S S F T A Y G G A S V S S F S S Q R D F G E S D S D I G S I G V S P  
Y G N Q T S T R F T D Q W G W T S A C M L D S P D G N I I L Q L D E A P I N S A S S D A S S S L V S S S S S T G N N D Q  
T V T M P A S A W S D G D I V M G N E Y E L S N D G S P I C P D D L I S L S N L H E P A V V E C L Q H R Y E E D K I Y T  
A T G P V L L A L N P F Q N I D D L Y G E D T M K K Y W E K S E N Q S K E D L P P H V Y A I A D E A F R N M M R S L D Q  
S L G A V D S Q S C D Q S I L V S G E S G A G K T V T T K F V M K Y L A A L S Q R A G S Q K K V K R A Y Q K V A D E K K  
K K Q S A G Y S S T A T K N Y L P S T S S I S S A P S W V S R S K S G G L N N K G G V R K S T D G L S D V T C L A G T D  
A L N S I E A Q V L Q S N P I L E S F G N A R T M R N D N S S R F G K F I E I Q F T R T G R L V G A Q I E T Y L L E K V  
R L V T Q S L G E R N Y H I F Y E I L S G G V G A D E L R N Y F L A S T A S P D D F K I T A S G T L D R R D G V S D R D  
T C A A L Q A A M K A M K F S V D E Q T D V F A T A A A I L H A S N L T F C D F D Q Y C Q L D G H N V H L E P V C H L L  
G V T A E D L N Q A L C H F S I T A G R E T Q V Q Q N L D I D K A E K G L E A L L K A T Y G A L F T Y L V R R I N D S I  
C Y S D E S D A S K D A P C A A I G V L D I F G F E S F K T N S F E Q L C I N Y C N E A L Q Q Q F N A F V L K N E Q A E  
Y E R E G I E W S F I E F P E N Q D V I D L I D K R G S G I L C I L D D Q C R A P G T S D R S F A L D V Y N K C K Q Q T  
R F S A N R K Q T A L L Q F C V N H Y A G P V V Y T T T D F V E K N R D E L P K E A T E L L H M S F N P F I R L L A S L  
M E N S S E E R S L N T S F S D G L G M K S R G K G S T V G G Q F R R Q L K R L R E K I D V M S P H Y V R C L K P N D Q  
L V P D N F D K A A I A D Q L S C G G I L E A V R V A R A G Y S N H Y S H E D F L R R Y R C L G W D A L K T S K P Q Q R  
I V G S V Q P R K F F S G A T H N P A P S N D N S C A N K S T A S A G S L S S C T T L V K H L C S L L Q E G M K S D D  
N D E N E K N S A N T T S I S A A S S S S A Q A K V Y K H Q V T S A P P S W G R R G S N T S R D T S I W D K K A S S D S  
R P P A K I E R R S S F S K N I G G T T S E S A Q L G V Q M G K T K V F L R H K A F E S L E R L R S R Q Q S R A A V R L  
N S V F R M Y L A R V A Y V H V R N A V R N S M A D L Q A L Q S E D W K E S H M E E H D D G R L V E F Y N R L N Q M R H  
S F G G Q S F S L V E A W A S Q M R Q K I H N P L R S E W G K T A P S K P F K W M L E D G L W I K N H D L S D S S N  
E D N F S D G N L

>comp15149\_c0\_seq1; 463 65 1411 LEN=1793; translated  
M N W K K S A L L R L F V I G V S L S K S V S A T T S G T C T A D D P A T C E N T D D K N L S I N D A D K S D C Q D E H  
P K C S E W A A I G E C E E N P G Y M L F N C R R S C I Q C P D Q A E E L A K I L E E K K K S I R V W T A Y E L E I A E  
D M G E E Q L L E N E S F N V S A D Q S S A R I I A A R K H I E E S G I G Q E L E A I C K N K H E H C T T W A V A G E C  
E K N K S Y M E K E C A P A C M L C H M L H I D N R C P I D P N A K P A W E P G D L N A M F E H L V S E P I A S K Y P A  
T I L S R D P W V I T L D D V I S E E E S E R L I Q L G A V E G Y E R S E D V G A K R A D G T Y G S M V S T G R T S S N  
A W C V D E C Y K D P I A M Q V I N R I S E L T M I D E K N S E Y L Q L L Q Y E P G Q F Y E N H H D Y I A H N F G R Q Q  
G V R I L T S Y L Y L N D V E A G G G T M F T D L N I T V M P K R G R A L F W P S V L N D H P D L K D D R T D H Q A L P  
V E K G I K Y G A N G W F H Q Y D F K T A F E A G C S S

>comp15149\_c0\_seq2; 252 65 1673 LEN=2055; translated  
M N W K K S A L L R L F V I G V S L S K S V S A T T S G T C T A D D P A T C E N T D D K N L S I N D A D K S D C Q D E H  
P K C S E W A A I G E C E E N P G Y M L F N C R R S C I Q C P D Q A E E L A K I L E E K K K S I R V W T A Y E L E I A E  
D M G E E Q L L E N E S F N V S A D Q S S A R I I A A R K H I E E S G I G Q E L E A I C K N K H N T A P H G K C R N K L  
S M H K Q R R S N P R C F E V F Q V N F A G L Y P S G X N H R I I N V D T K R A V A G E C E K N K S Y M E K E C A P A C  
M L C H M L H I D N R C P I D P N A K P A W E P G D L N A M F E H L V S E P I A S K Y P A T I L S R D P W V I T L D D V  
I S E E E S E R L I Q L G A V E G Y E R S E D V G A K R A D G T Y G S M V S T G R T S S N A W C V D E C Y K D P I A M Q  
V I N R I S E L T M I D E K N W N I F N Y C S E S D Y Y R T E T Y L N I R V A G K Y A P E K V V V V A K I I N T F S V C  
L R P A D M X P G Q F Y E N H H D Y I A H N F G R Q Q G V R I L T S Y L Y L N D V E A G G G T M F T D L N I T V M P K R  
G R A L F W P S V L N D H P D L K D D R T D H Q A L P V E K G I K Y G A N G W F H Q Y D F K T A F E A G C S S

>comp15149\_c0\_seq3; 283 65 1469 LEN=1565; translated  
M N W K K S A L L R L F V I G V S L S K S V S A T T S G T C T A D D P A T C E N T D D K N L S I N D A D K S D C Q D E H  
P K C S E W A A I G E C E E N P G Y M L F N C R R S C I Q C P D Q A E E L A K I L E E K K K S I R V W T A Y E L E I A E  
D M G E E Q L L E N E S F N V S A D Q S S A R I I A A R K H I E E S G I G Q E L E A I C K N K H N T A P H G K C R N K L  
S M H K Q R R S N P R C F E V F Q V N F A G L Y P S G X N H R I I N V D T K R A V A G E C E K N K S Y M E K E C A P A C  
M L C H M L H I D N R C P I D P N A K P A W E P G D L N A M F E H L V S E P I A S K Y P A T I L S R D P W V I T L D D V  
I S E E E S E R L I Q L G A V E G Y E R S E D V G A K R A D G T Y G S M V S T G R T S S N A W C V D E C Y K D P I A M Q  
V I N R I S E L T M I D E K N S E Y L Q L L Q Y E P G Q F Y E N H H D Y I A H N F G R Q Q G V R I L T S Y L Y L N D V E  
A G G G T M F T D L N I T V M P K R G R A L F W P S V L N D H P D L K D D R T D H Q G M I Q K

>comp15149\_c0\_seq4; 401 65 1537 LEN=1919; translated  
M N W K K S A L L R L F V I G V S L S K S V S A T T S G T C T A D D P A T C E N T D D K N L S I N D A D K S D C Q D E H  
P K C S E W A A I G E C E E N P G Y M L F N C R R S C I Q C P D Q A E E L A K I L E E K K K S I R V W T A Y E L E I A E  
D M G E E Q L L E N E S F N V S A D Q S S A R I I A A R K H I E E S G I G Q E L E A I C K N K H E H C T T W A V A G E C

EKNKSYMEKECAPACMLCHMLHIDNRCPIDPNAKPAWEPGDLNAMFEHLVSEPIASKYPA  
TILSRDPWVITLDDVISEEESERLIQLGAVEGYERSEDVGAKRADGTYGSMVSTGRSSN  
AWCVDECYKDP IAMQVINRI SELTMIDEKNWNIFNYCSESDYYRTETYLNIRVAGKYAPE  
KVVVVAKIINTFSVCLRPADMXPQGFYENHHDYIAHNFGRQQGVRILTSYLYLNDVEAGG  
GTMFTDLNITVMPKRGRALFWPSVLNDHPDLKDDRTDHQALPVEKGIKYGANGWFHQYDF  
KTAFEAGCSS

>comp15149\_c0\_seq5; 432 65 1333 LEN=1429; translated  
MNWKK SALLR LRFVIGVSLSKSVSATTSGTCTADDPATCENTDDKNLSINDADKSDCQDEH  
PKCSEWAAIGECEENPGYMLFNCRRSIQCPDQAEELAKILEEKKSIRVWTAYELEIAE  
DMGEEQLLENESFNVSADQSSARIIAARKHIEESGIGQLEAICKNKHEHCTTAVAGEC  
EKNKSYMEKECAPACMLCHMLHIDNRCPIDPNAKPAWEPGDLNAMFEHLVSEPIASKYPA  
TILSRDPWVITLDDVISEEESERLIQLGAVEGYERSEDVGAKRADGTYGSMVSTGRSSN  
AWCVDECYKDP IAMQVINRI SELTMIDEKNSEYLQLLQYEPGQFYENHHDYIAHNFGRQQ  
GVRILTSYLYLNDVEAGGGTMFTDLNITVMPKRGRALFWPSVLNDHPDLKDDRTDHQGM  
IQK

>comp15149\_c0\_seq6; 379 65 1081 LEN=1555; translated  
MNWKK SALLR LRFVIGVSLSKSVSATTSGTCTADDPATCENTDDKNLSINDADKSDCQDEH  
PKCSEWAAIGECEENPGYMLFNCRRSIQCPDQAEELAKILEEKKSIRVWTAYELEIAE  
DMGEEQLLENESFNVSADQSSARIIAARKHIEESGIGQLEAICKNKHEHCTTAVAGEC  
EKNKSYMEKECAPACMLCHMLHIDNRCPIDPNAKPAWEPGDLNAMFEHLVSEPIASKYPA  
TILSRDPWVITLDDVISEEESERLIQLGAVEGYERSEDVGAKRADGTYGSMVSTGRSSN  
AWCVDECYKDP IAMQVINRI SELTMIDEKNSEYLQLLQ

>comp15149\_c0\_seq7; 314 65 1547 LEN=1929; translated  
MNWKK SALLR LRFVIGVSLSKSVSATTSGTCTADDPATCENTDDKNLSINDADKSDCQDEH  
PKCSEWAAIGECEENPGYMLFNCRRSIQCPDQAEELAKILEEKKSIRVWTAYELEIAE  
DMGEEQLLENESFNVSADQSSARIIAARKHIEESGIGQLEAICKNKHNTAPHGKCRNKL  
SMHKQRRSNPRCFEVFQVNFAGLYPSGXNHRI INVDTKRAVAGECEKNKSYMEKECAPAC  
MLCHMLHIDNRCPIDPNAKPAWEPGDLNAMFEHLVSEPIASKYPATILSRDPWVITLDDV  
ISEEESERLIQLGAVEGYERSEDVGAKRADGTYGSMVSTGRSSNAWCVDECYKDP IAMQ  
VINRI SELTMIDEKNSEYLQLLQYEPGQFYENHHDYIAHNFGRQQGVRILTSYLYLNDVE  
AGGGTMFTDLNITVMPKRGRALFWPSVLNDHPDLKDDRTDHQALPVEKGIKYGANGWFHQ  
YDFKTAFEAGCSS

>comp15149\_c0\_seq8; 230 65 1217 LEN=1691; translated  
MNWKK SALLR LRFVIGVSLSKSVSATTSGTCTADDPATCENTDDKNLSINDADKSDCQDEH  
PKCSEWAAIGECEENPGYMLFNCRRSIQCPDQAEELAKILEEKKSIRVWTAYELEIAE  
DMGEEQLLENESFNVSADQSSARIIAARKHIEESGIGQLEAICKNKHNTAPHGKCRNKL  
SMHKQRRSNPRCFEVFQVNFAGLYPSGXNHRI INVDTKRAVAGECEKNKSYMEKECAPAC  
MLCHMLHIDNRCPIDPNAKPAWEPGDLNAMFEHLVSEPIASKYPATILSRDPWVITLDDV  
ISEEESERLIQLGAVEGYERSEDVGAKRADGTYGSMVSTGRSSNAWCVDECYKDP IAMQ  
VINRI SELTMIDEKNSEYLQLLQ

>comp15150\_c0\_seq1; 370 623 1934 LEN=2168; translated  
MGRNSITNTSINKWRSSKQKQNRPRCLFRDHNNRHRDRWSNNSVLTAKTRSCDL  
GMGSGSLHKTVSFDLSVESDSIQKQKTQWSKSNLKKNSNNLSRKKTPFPPTTSTIDS  
VVALVTRSAISDDDDSYEPREFYGEDSFSTPSITSCETSTSFASINTRNDTFMFHRNN  
PRPSTRKSFPGGDSQCMQPMPQRTKDGIFDAKKAHQRSLSDDCSWFSSSQHTGDSDFS  
IKSRNKKRGAILRSQSTSDSLGRWAAMATTRGFDGPRADSNDTTLHHYLAPRRVPSGSG  
HKKGVFISSDVEESTDDDDSFMDSSLTDERVVISPHQATSFVSIKASDAESLKILLAGT  
MRSSGKELNLGILCGNSDNCMLRYHHDINAPSSKHEMAKFGHENFNIVNLRQRTLATAT  
SAEYVVVEKHIVPTN

>comp15150\_c0\_seq2; 370 727 2038 LEN=2272; translated  
MGRNSITNTSINKWRSSKQKQNRPRCLFRDHNNRHRDRWSNNSVLTAKTRSCDL  
GMGSGSLHKTVSFDLSVESDSIQKQKTQWSKSNLKKNSNNLSRKKTPFPPTTSTIDS  
VVALVTRSAISDDDDSYEPREFYGEDSFSTPSITSCETSTSFASINTRNDTFMFHRNN  
PRPSTRKSFPGGDSQCMQPMPQRTKDGIFDAKKAHQRSLSDDCSWFSSSQHTGDSDFS  
IKSRNKKRGAILRSQSTSDSLGRWAAMATTRGFDGPRADSNDTTLHHYLAPRRVPSGSG  
HKKGVFISSDVEESTDDDDSFMDSSLTDERVVISPHQATSFVSIKASDAESLKILLAGT  
MRSSGKELNLGILCGNSDNCMLRYHHDINAPSSKHEMAKFGHENFNIVNLRQRTLATAT  
SAEYVVVEKHIVPTN

>comp15151\_c0\_seq1; 953 278 2390 LEN=3504; translated  
MEESSPCASRKERQKLSHAKQIYDGLFRMSDNDYDGVLDLEEEYYQHESSHHSPENID



DGLSITEKIKRSKEKQLEQQGALPQPSTMPNSNKGKKVEVAKPWDESMLDGRFGSES SVSES  
IGKESGSI SNLSDLQOKLLQIQNRNKEPSKDYDFGPDGVSDGFAPRLDKNNQNSRSDELA  
KKIAAEASISDRYLDIVRKAERLSKMEQSSSGSDVNANSSKARMVSNMTGLEERLRQIQ  
QD TDVDTNAGTNLPPPELEPNAKRLDDETLAEWEELEYQLQLEAAEKKSTPRPLEPNEEG  
NEEVSVLDEAAILDALRSEAAGSTTSNKKASAKKGSDDSSDTKLGDNLGLNDTPKSYKKE  
KPGYEITDDGGVYLSAEAYQKACETSNSDGSINFDSRKYGNSDVQKPLKSSFVDEGPPM  
APYAQDIKGSKNKRFTIEDLAREASRSIEYARDNPDVQEELHRRIMAEFEAEAEATTNKF  
EKEVLLDPEKARAFWNQEFYEQQQQESDALDELLEKLRQLEEEEREKEAQNSRSDGQR  
KRYERISVSEAYKQQSMSDRNIFASREERIDRRRFIERTRRERAKKIAKIFYQDESNSW  
SITSESEKQKMTERRQDVLRDLNLERANNSTDLESEKQDVGTTKNQENLQDDY GKN  
QSTNLETTKNSDWLVLEDPE SPEDAFYWNEVTGEMSWD SPEDP

>comp15152\_c0\_seq1; 390 331 1110 LEN=2443; translated  
MSDGYHIDFERSQRNIAPFDEWATSCGVQRSEGFRLAPTNPDDQYNQDDFSAMTDV DLP  
AGQPILGIPVDMILTSTNAKLELDSISDSVGDGGVQSAVDLLARLGAGDTIPKFYLF LKV  
LLEYSRGTDSPPYPWLDSMPRLYNSVSMTDFCYECLPPLVFLSRRRERVKFDNFYDALQ  
KIDSSIFPDEIKQDKQSLKWAFFNVHTRCFTGTQNGNSGNEMGIGEGGKNGEEQKIIPM  
ADFVRYTIVDSCHSCFTSI

>comp15152\_c0\_seq2; 543 331 1804 LEN=2177; translated  
MSDGYHIDFERSQRNIAPFDEWATSCGVQRSEGFRLAPTNPDDQYNQDDFSAMTDV DLP  
AGQPILGIPVDMILTSTNAKLELDSISDSVGDGGVQSAVDLLARLGAGDTIPKFYLF LKV  
LLEYSRGTDSPPYPWLDSMPRLYNSVSMTDFCYECLPPLVFLSRRRERVKFDNFYDALQ  
KIDSSIFPDEIKQDKQSLKWAFFNVHTRCFTGTQNGNSGNEMGIGEGGKNGEEQKIIPM  
ADFLNHATEPVAEISYDEEGNCNIFTTSDVPAGSOLTISYGCPTNPSEFFATYGF LDETS  
PATFCKIMNIQPTPELRTIGLDFSRMLFFRETGDISA EVWVLLYSKVLANDIGTKQAFY  
DAHVNGDVDTKNAIHEQYMDQTSTAMLEHVDTFLEQLDVLSAKSEGKDWNEHPR LPLILR  
HNEFVKTTFENVKTLQDPMVDSNTKHKHLQYDDVTPVWQPLKTNEMDPNAKNNINSR NH  
TNDESIQYER

>comp15153\_c0\_seq1; 563 243 1826 LEN=1997; translated  
MHYFRTLRLMIITALILATNGSCYCSSYALPPKGGALKSRKTSFLNQIHRPAYHNHYGF  
RTVSFDKTEDIKISEVVPATEETPTT SKLNSVALKNVDVPGKLSKLD FVVVFTYFCNIAA  
VTLSVVTVPAMAEHNLNPQAASAF CASVAGMASLGGGLGKLVNGFVCQYLGGQRSSWIY  
LVALSSLKLYMSFSRSLAPIGLILV GIDFLASIQWTSISALIMEQYDKSPAKLLRGITVL  
SLSSTIGALAAKTFGAGLLAASGWRTVCRFGSLMALIGSAAMYIGGDVVPVSVNIGNERN  
LLKGRKKQNK SALAAIKSIFSNPIFWMFGIGHSLGLARSSDRLIGPFLQHVGGISSSLA  
AGLTSSVTIGFVFGLLRGNRFSKMDTIKEMEMIKKNRAISVLAALGLAVCGIDGVSQ LV  
GGNTNLLIPAITLLSGLVSSAVSFQFYQFGNLM SVNIFPEHKSVALSFTDAVGFFTTAGV  
LGVNSHLLGNFGWCASWAFIATAFAVGGSCMARAMQPVLVQVSANHQ

>comp15153\_c0\_seq2; 196 1 527 LEN=698; translated  
XFAEGSLAAGLTSSVTIGFVFGLLRGNRFSKMDTIKEMEMIKKNRAISVLAALGLAVCG  
IDGVSQLVGGNTNLLIPAITLLSGLVSSAVSFQFYQFGNLM SVNIFPEHKSVALSFTDAV  
GFFTTAGV LGVNSHLLGNFGWCASWAFIATAFAVGGSCMARAMQPVLVQVSANHQ

>comp15154\_c0\_seq1; 560 241 1446 LEN=1632; translated  
MSGIFLVAAKRTPFGTFGGSLKAFSATDLGTHATKAALETIDL DPEAVDSVFFGNVIQTA  
PDAAYLARHVGLKSGTRLAAPSLTINRLCGSGFESVILGAQSIQLGESKISVCGGAENMS  
DAPLCAAGNDARWGVKLGSLKFRDSLWDGLTDAYAQT PMGITAENLAKQYNITREECDA  
HAVRSQQGWAAANEKGLFQAEIAPVEVPGKKRGTTRLMDTDEHPRPDATLESLAKLPAVF  
DRKHGVVTAANASGINDGAGSIVASEQVAEHNLTPLCRLVSYGVVGC DPTVMGIGPVP  
AIKEALKRAGDLSLEKDVDRIEINEAFAAQFLACAKELNLDMDKTNIHGS AIAIGHPLGA  
SGSRITAHLAHEFAYNQDSNIHVGAACIGGGQGI AVVLERV

>comp15154\_c0\_seq2; 520 1 1265 LEN=1451; translated  
XQNHFTRLVEIQILKILSIAMSGIFLVAAKRTPFGTFGGSLKAFSATDLGTHATKAALES  
IDL DPEAVDSVFFGNVIQTA PDAAYLARHVGLKSGTRLAAPSLTINRLCGSGFESVILGA  
QSIQLGESKISVCGGAENMSDAPLCAAGNDARWGVKLGSLKFRDSLWDGLTDAYAQT PM  
GITAENLAKQYNITREECDAHAVRSQQGWAAANEKGLFQAEIAPVEVPGKKRGTTRLMDT  
DEHPRPDATLESLAKLPAVFDRKHGVVTAANASGINDGAGSIVASEQVAEHNLTPLCR  
LVSYGVVGC DPTVMGIGPVP AIKEALKRAGDLSLEKDVDRIEINEAFAAQFLACAKELNLD  
MDKTNIHGS AIAIGHPLGASGSRITAHLAHEFAYNQDSNIHVGAACIGGGQGI AVVLER  
V

>comp15154\_c0\_seq3; 219 966 1753 LEN=1939; translated  
MLPPDSPSVKNPSQCFLNCFVRVNPPPLVCPTTVFFRNAMP MRSEANXGWAAANEKGLFQ

AEIAPVEVPGKKRGTTRLMDTDEHPRPDATLESLAKLPAVFDKRGVVTAAANASGINDGAGSIIIVASEQAVAEHNLTPLCRLVSYGVVGCPTVMGIGPVPAIKEALKRAGDLSLEKDVDRIEINEFAAQFLACAKELNLDMDKTNIHGSAAIAIGHPLGASGSRITAHLAHEFAYNQDSNIHVGAACIGGGQGIADVLERV

>comp15154\_c0\_seq4; 328 1 1572 LEN=1758; translated  
XQNHFTRLVEIQILKILSIAMSGIFLVAAKRTPFGTFGGSLKAFSATDLGTHATKAALES  
IDLDPPEAVDSVFFGNVIQTAPDAAYLARHVGLKSGTRLAAPSLTINRLCGSGFESVILGA  
QSIQLGESKISVCGGAENMSDAPLCAAGNDARWGVKLGSLKFRDSLWDGLTDAYAQTPM  
GITAENLAKQYNITREVGSKMXLERTMSTENHARTTAVSCGAQCVQMPCKRLKRLNAVWKN  
NMFHEYGEENKGTMMIRMFGSTMLPPDPSVKNPSQCFLNCFVRVNPPLVCPPTVFFRNA  
MPMRSEANXGWAAANEKGLFQAEIAPVEVPGKKRGTTRLMDTDEHPRPDATLESLAKLPA  
VFDKRGVVTAAANASGINDGAGSIIIVASEQAVAEHNLTPLCRLVSYGVVGCPTVMGIGP  
VPAIKEALKRAGDLSLEKDVDRIEINEFAAQFLACAKELNLDMDKTNIHGSAAIAIGHPL  
GASGSRITAHLAHEFAYNQDSNIHVGAACIGGGQGIADVLERV

>comp15155\_c0\_seq1; 220 133 1257 LEN=1986; translated  
MSENTVATEDRRSRRRQPQQRGKPSLPTEDPLPRQSLLRITTTGIASGGERWRNDRRTTNK  
YAAIAFGALVVFVAVCFVLLAVRGGGKLRFGENREAAAGTTTVAALSSSMVGVHDIAEKYR  
SAIEHHQRGKLIAMQKQKQQTVERARDNISGNRNLKPLPRKTVSKPHLVSARKPNNVVA  
TADVRGNLGPASVVVQAKPGTDWIHDRWQAASDMHGSNIPGAHWIQLEFKDVGGGVVADK  
IVLDWETAYADKYVLEASLEPFNGNEHDSVGNKQKQKQGTVWTLFDGRNPGHARDMKS  
SESGQSPGVEEKRLPHVVHEIRLSAATDEAVRAVRRRPFYRLRLHILKSKTGWVSLWQF  
DVYGFRSDELLTSR

>comp15155\_c0\_seq2; 117 204 689 LEN=1402; translated  
MHGSNIPGAHWIQLEFKDVGGGVVADKIVLDWETAYADKYVLEASLEPFNGNEHDSVGN  
GKQKQKQGTVWTLFDGRNPGHARDMKSSESGQSPGVEEKRLPHVVHEIRLSAATDEAVRA  
VRRRPFYRLRLHILKSKTGWVSLWQF DVYGFRSDELLTSR

>comp15155\_c0\_seq3; 117 204 689 LEN=1418; translated  
MHGSNIPGAHWIQLEFKDVGGGVVADKIVLDWETAYADKYVLEASLEPFNGNEHDSVGN  
GKQKQKQGTVWTLFDGRNPGHARDMKSSESGQSPGVEEKRLPHVVHEIRLSAATDEAVRA  
VRRRPFYRLRLHILKSKTGWVSLWQF DVYGFRSDELLTSR

>comp15155\_c0\_seq4; 220 133 1257 LEN=1970; translated  
MSENTVATEDRRSRRRQPQQRGKPSLPTEDPLPRQSLLRITTTGIASGGERWRNDRRTTNK  
YAAIAFGALVVFVAVCFVLLAVRGGGKLRFGENREAAAGTTTVAALSSSMVGVHDIAEKYR  
SAIEHHQRGKLIAMQKQKQQTVERARDNISGNRNLKPLPRKTVSKPHLVSARKPNNVVA  
TADVRGNLGPASVVVQAKPGTDWIHDRWQAASDMHGSNIPGAHWIQLEFKDVGGGVVADK  
IVLDWETAYADKYVLEASLEPFNGNEHDSVGNKQKQKQGTVWTLFDGRNPGHARDMKS  
SESGQSPGVEEKRLPHVVHEIRLSAATDEAVRAVRRRPFYRLRLHILKSKTGWVSLWQF  
DVYGFRSDELLTSR

>comp15156\_c0\_seq1; 1302 1 3250 LEN=3409; translated  
XENKKKATLANSILRKQKQYQGPFDNERSKEIAEDIRRDDTIQYETKQTSTAKHAVTPQA  
IAIATAPPATAAGPAAPPGAARGPPAPGAAIAAPKAQPGKEDEGMPLDFGTGRMFDKIA  
TRYDTINRVLALRMDIGWRRAMTTRLRELLGESDGESESGTGSWRILDVATGTADVALQL  
VDDLSSGGKSGKTTVLGLDPSANMLAVGRSKIERRGLADAI VLEQADARDLGHYYEPGSK  
PTELFDASTIAFGIRNVVFNREKALCEIHRLLKPDGVLAI L EFSQPTYQKDGVMGVAAGL  
FIQHVVPLVGGLLSSGARKEYVHLQNSIRNFPGPPEFRDQLESRLRCLRPDDDDAYFYVG  
HFDMEETVHMNFGSVQLYVGRAAVRPKKEIHADTPPPRGADTKLPPIAAVSGGGAVSNPS  
SPTARWEDTNERTVGGLRNTRPNKTQHNTTLP PRGCSSSVIFVPRVVRVGSLLPMVSGGMT  
ARVESVLADTLDLHVRSEVGACLSMLLDIETTHLQQQLELEQAQKLEKARTERQGV  
ILEAHAERLERYDRRLGMADAFLEKELLEANREVRLEMEWKEAHEHKVRSYDVARLAAT  
EEQLREAHNSNGHAAAAAAAAAEDPGSGGGEAAGAEHHEAGEPARSPIDAAANAESMPEET  
PESTTVGNPTDTATATAAATTTTAAAVHDETPATTDATTKPEPTDPDPAGQAEETEEQT  
NEVATGGQPONASSAEEDQKPPAHDAAVVSIDTEADSKEDVPTLLTLEMEPLMMIFGFLDA  
MDILNTAQINVTMYTKVDNIFGISSEDGQSPVPVTPSKPPPPKPPPPPAVAETPAMKPPPP  
PPPTTEGGGSAAGGASPA SAAGKGRGLFSMMQPAKAETKQSQPLNAKVAQSMASKLSDAEL  
AAIITMTNKLKLEKEGRALRNEKAVLLAKLEGTEGVKQFLIGKVRDVEVKLQRSKEDEI  
KVTTQQIASDQEVIAFLDGRVQLEEQQTESLTMEKTGTQAGLDDLKVSTSKKITMLSDMLK  
YEREKVREDES DWKATKKVLVKEVKS CRAQILALQAERDGLLEQNDMLKRAVVSTGGGGK  
PQR

>comp15157\_c0\_seq1; 740 48 3029 LEN=3090; translated  
MPIPKSHEANSTCQRCTCCEVCYCGPNCQCTETLRCSEATSVLNSLAGSSVETR SR SVSP

VRNPGVLASCCSSPLTKNGSNNGQISYNTFGNDNGVLGVEKEETEISIRGMTCSMCTR  
SVEAII SDTDGVFSVNVSLAFNSAHIEYDPSKITRDDLVD AIEGIGYEVIQQPPSAKINT  
PLQSTRMIVEFIVSDMTCSMCTKAVTKALEMVPGVEDAVVSLSTNQARVEFDSKSTIDD  
LAEAI EDVGYGVLEKLI VRSAGDDNESKPLSRGAGNNTVNSPDRIDRMLEQQEEEVANRK  
RAFLWSLIGTLPILMITMVLPHFPSLKFVQWLDQTIVIKFTNYDFEFVLEALILWVLCPT  
IQFGCGYRFYKSSYYGLRQGVGMMDVLA VAGTTASYGYALWATLTGGMEYHFFETS AVLI  
CFVLLGKWMQTLAVRRTSQAL THLLKLPKTAIKV IISTTNGDKKWNPLNNDPYNEEVVP  
ITSIQTGDLVKILKGSSIPADGI IKFGEMTVDESMITGESIPVLKTPGAVVLGGTICAEA  
GQEAGASFLEVTG VGSNTALSQILKLVQDAQNRQVPIQNFADKVAGIFVPTVVLLSFFTF  
VTWYALIQWGVVPLSLLPSDESPQTF SLLFGISCLVISCPCALGLATPTAVMVGTVGAK  
QGVLMKGGETLELASKIDS VVFDKTGTLTKGKPAVTDFSLVVRENI FWEEVINRDAATAL  
KNTSSLSSKSNMERC LLWLLGSLERNSEHLLAAAI VAYAEDRLGGGTNDVAEELAF AQPS  
NFVAMTGRGASGKILGEIDVSI GNRAFCEFGQFEISKEVENIMQGLERQKTAIVATVNG  
TTVVVMGVADELKPDASAAI IYMKEVMGVDVWVMTGDNNTARAIARELNLP SNRVIAEA  
LPAAKVEKVQELQRHGKIVAMVGDGVNDSPALVQADVGLSIGKGAEIAAEASDMVLVRGN  
VSDVCTALDVS RVIFQRIQVRCLERFFFQIIND

>comp15157\_c0\_seq2; 822 48 3287 LEN=3379; translated  
MPIPKSHEANSTCQRCTCCEVCYCGPNCQCTETLCRSEATSVLNSLAGSSVETR SRSVSP  
VRNPGVLASCCSSPLTKNGSNNGQISYNTFGNDNGVLGVEKEETEISIRGMTCSMCTR  
SVEAII SDTDGVFSVNVSLAFNSAHIEYDPSKITRDDLVD AIEGIGYEVIQQPPSAKINT  
PLQSTRMIVEFIVSDMTCSMCTKAVTKALEMVPGVEDAVVSLSTNQARVEFDSKSTIDD  
LAEAI EDVGYGVLEKLI VRSAGDDNESKPLSRGAGNNTVNSPDRIDRMLEQQEEEVANRK  
RAFLWSLIGTLPILMITMVLPHFPSLKFVQWLDQTIVIKFTNYDFEFVLEALILWVLCPT  
IQFGCGYRFYKSSYYGLRQGVGMMDVLA VAGTTASYGYALWATLTGGMEYHFFETS AVLI  
CFVLLGKWMQTLAVRRTSQAL THLLKLPKTAIKV IISTTNGDKKWNPLNNDPYNEEVVP  
ITSIQTGDLVKILKGSSIPADGI IKFGEMTVDESMITGESIPVLKTPGAVVLGGTICAEA  
GQEAGASFLEVTG VGSNTALSQILKLVQDAQNRQVPIQNFADKVAGIFVPTVVLLSFFTF  
VTWYALIQWGVVPLSLLPSDESPQTF SLLFGISCLVISCPCALGLATPTAVMVGTVGAK  
QGVLMKGGETLELASKIDS VVFDKTGTLTKGKPAVTDFSLVVRENI FWEEVINRDAATAL  
KNTSSLSSKSNMERC LLWLLGSLERNSEHLLAAAI VAYAEDRLGGGTNDVAEELAF AQPS  
NFVAMTGRGASGKILGEIDVSI GNRAFCEFGQFEISKEVENIMQGLERQKTAIVATVNG  
TTVVVMGVADELKPDASAAI IYMKEVMGVDVWVMTGDNNTARAIARELNLP SNRVIAEA  
LPAAKVEKVQELQRHGKIVAMVGDGVNDSPALVQADVGLSIGKGAEIAAEASDMVLVRGN  
VSDVCTALDLNFIW SLLYNCLGIPLAAGVFYPLFHTRL PPTVAALAMALSSLSV VASSLA  
LHLYRPPNVLGTASGLNNETNGGDPDLALHVPL LKLSRVGECSSADSDQMSSLEEGVA

>comp15157\_c0\_seq3; 823 48 3317 LEN=3409; translated  
MPIPKSHEANSTCQRCTCCEVCYCGPNCQCTETLCRSEATSVLNSLAGSSVETR SRSVSP  
VRNPGVLASCCSSPLTKNGSNNGQISYNTFGNDNGVLGVEKEETEISIRGMTCSMCTR  
SVEAII SDTDGVFSVNVSLAFNSAHIEYDPSKITRDDLVD AIEGIGYEVIQQPPSAKINT  
PLQSTRMIVEFIVSDMTCSMCTKAVTKALEMVPGVEDAVVSLSTNQARVEFDSKSTIDD  
LAEAI EDVGYGVLEKLI VRSAGDDNESKPLSRGAGNNTVNSPDRIDRMLEQQEEEVANRK  
RAFLWSLIGTLPILMITMVLPHFPSLKFVQWLDQTIVIKFTNYDFEFVLEALILWVLCPT  
IQFGCGYRFYKSSYYGLRQGVGMMDVLA VAGTTASYGYALWATLTGGMEYHFFETS AVLI  
CFVLLGKWMQTLAVRRTSQAL THLLKLPKTAIKV IISTTNGDKKWNPLNNDPYNEEVVP  
ITSIQTGDLVKILKGSSIPADGI IKFGEMTVDESMITGESIPVLKTPGAVVLGGTICAEA  
GQEAGASFLEVTG VGSNTALSQILKLVQDAQNRQVPIQNFADKVAGIFVPTVVLLSFFTF  
VTWYALIQWGVVPLSLLPSDESPQTF SLLFGISCLVISCPCALGLATPTAVMVGTVGAK  
QGVLMKGGETLELASKIDS VVFDKTGTLTKGKPAVTDFSLVVRENI FWEEVINRDAATAL  
KNTSSLSSKSNMERC LLWLLGSLERNSEHLLAAAI VAYAEDRLGGGTNDVAEELAF AQPS  
NFVAMTGRGASGKILGEIDVSI GNRAFCEFGQFEISKEVENIMQGLERQKTAIVATVNG  
TTVVVMGVADELKPDASAAI IYMKEVMGVDVWVMTGDNNTARAIARELNLP SNRVIAEA  
LPAAKVEKVQELQRHGKIVAMVGDGVNDSPALVQADVGLSIGKGAEIAAEASDMVLVRGN  
VSDVCTALDVS RVIFQRIQLNFIW SLLYNCLGIPLAAGVFYPLFHTRL PPTVAALAMALS  
SLSVVASSLALHLYRPPNVLGTASGLNNETNGGDPDLALHVPL LKLSRVGECSSADSDQ  
MSSLEEGVA

>comp15158\_c0\_seq1; 879 278 3085 LEN=3247; translated  
MRPSPVAPEPTGSQKASNTDGLPPLTSKSYTRKHRV VVATK VETAGSSKKISLVKKHKVKT  
EGFSNDDSSLLASATSSVPVEK DTHDNMNPATSHGDGDSEY PDYKDDL S QPSIDDPYTY S  
DDSASLSDAYFLRQSPDGSVATLNAGHFGSFP LPIVPLNHYGDDRTDSRLAWS D PPIIH  
TNDAMLRSSEMVS DHASGIATSESDNSTKRTSCKEDRRREKRLQKRHAQSTHKRQGNP

ALPSHTVVEEFSITEKTALLRLNNSLRVPVYNRRVKSFANSDAHRRHRQKHELKHKQRN  
ILLQQQQRQEQREREVLEIRGKVQPLSSKKDRFWSFLFLLQLFFVFLCAIKDGLIFYKS  
SGTKLLEDLTSVIQPSFPLASLSTIASTKGTSSVEINPEAGSSTLVMLDFDDDRDDDDID  
AAKLAAFNENESDNGIDGAFTFDYKNVLSLLAISGMYACVTSYLSFALMLIMARSIIPIM  
LVFTILLMLCWGVFGLTIDTTAGSMISLGGFAVFGMSFAYTTANWNHIFPCSTNLFAAIC  
AMRSSIGILVMGISSLFVGLLWLLIWTVALMGIFNRNNYVDCEIFGACETHVYISKDDR  
IEVGLLLLSSLYWTTTVIENMVRVAVAGAIGGPWWFGLLEVNSGTDDAANQAQQQPSEEND  
HSIPYSSSIVSDPLMRACSTSSFGTICFGSLVDRPAQMISKVVGCLCWITDCLVDGDGSSP  
GYGLETNRYPSTTSLARGSESDKALGDEEDVVGSGGDEGEMTGSATTKESGYVTAFFRAHI  
NRLDRAMRSYNRWSYVYIGMYNYSFCEGGEKAIQLFETREWMDIACDNLIHNILFMFSIV  
IGGLTGIVSVVVEVDGYEFTSLHKPIVTSFLIGFFLGSILSNILLGLVGGAVNTILVC  
FAAEPPFEFDRIHPHLSREMREVWSQQVWEPEGDD

>comp15159\_c0\_seq1; 2570 258 10028 LEN=10171; translated  
MSYFPEIKDDRSSDPNLSPLNEIIQELKRKNVVASAASGGPQLALDSRSDPWGSSEAVLG  
IADYEATLKSTMFKPKKASSSIPFGRIDSRANFCGCEKQQQQSTTGNNERMKFPLHQER  
TEREPKCPNCGKLPQSANRVQEIINTNPASPRQKARLNPLLISSPPKHAEDLLQVTPQLRI  
ISSSSTDMNVAGNSASNNFVGMLLSSTPFYHHFNSLNSKSSHTSLPTTADLSYLQRGSA  
VNGNATISATGASGASTGSNTLDYKESLKRDRANHEAATELASLLWICAHEMSLEDYGRV  
ESKTFTSVFALVHSKDNMDRRMAGLAALDALIDAPSADDEERKAIKFANTLSGGLRSARGN  
YEFLSAVSKALGHMATRTANMDFVESEVTRALEWLRTDRSDRRLAATLALKEFAIHAPTA  
FYSKTSQSPFGHGSNEFLDYIFQAVRDPQPIVRACAADAISQCLKILMERQHMSLTGLL  
CQVHFSVMEGLDMQTPKNSWTNSSVTSKVETSQHGSLLIVATMIANTRDFMLPRYDEV  
CNKIMEFMDHPKILIRLELVRLPRLAQRCPRIFFARRYLDQSLDFLLATATTSPPRVGV  
DIPVAFNSIGLMVLALVDPITGDVIGGNVPTVKITDDPQNPGEKHIVQLCDTGSIRKRL  
DEIFELVSNGLKYRSAPSSRKTSAIHIAAFHCAADLIKALGEMAHPIISGLVDDMFGV  
GLSNDLIQCLHEIAECVPEQQSIIEDRLFQEVSIICLAGIQSARVFCPLLFTQNSMDG  
YCKQQPKILLVDNRPSPIEDGTEDPTIRINMSSSPAVVKSLSVLSLQTLGTFGDYMG  
RVTTFDSVVPILPFVQNVAAAPYLSHPSSEVRRRAAVLTCCALLVPPGIMHRKRKRVGS  
QSAVIEHVLDILLQVAVSDTSPVRLCVVRALDSRYDPFLCQVDLIQHLLLLLQDEVLA  
TRAAGVSLGRLASFNPAIILPAMRKFLEMEVIVELQCGVDSGRSREEATRLLVVFLRS  
NSLRRLIHPVLPAMIE TLPLNGKTPRLASAAMEALGELAKTAGVALQPWVNEVVP  
IILDTLQDQSSASKQRASLRTLAQIAGSTGYVIQPYIDYPKLLSQATDILPGTKR  
APWSLRREVIRMLGVLGALDPDLYNIVAPQARKGGAVGGAYFIVQDDNVNTDGDV  
TGPNDDTLNPGANLLSTKNSVNAGRGSRLSFSKSTGKAISSSIQGKKVVSQAES  
FKKVNVFDDDLPHVLSMYEQYAMVAQPVSHTARRMTPNDEFYPTVTIQALMRV  
FKNSSLAVHHGMVMQAIMFIFKSLGLRCVSFLNQVPHVLITIRACGPTNLRES  
LLKQVATLSGIVREHLRPYVADIFNIVESFWTSRHIISTIFSLISHI  
AVGVPDEFKCFVPRLIKLYLKSLEIQUISEWSSDLPVHHRRELQETERVRLIL  
CSIGSLKGVLDYLVLPALLKLGDSLLPLISDQLIGPDNWTSEQEIEENLSILML  
QTTALL ECEGTSNSNKPVMPIYGEKNAYSGLSARIVQPLIRLLRDKCKSNRSI  
GLAVIRTICVARQLGIKTWMQLYHSVVRSVIIDWQESIFYIEIEGONQDKSP  
SQKVSQVQRKTGLQYDEIEEGLETSPQRSYLNPFMTETHRAPPQRQDSMAL  
TGVDDQIFTDNLGIAQHFDNSSSEFDVVTNMYQQTLNQPNKSKINQSQL  
HRAWDVVSQCASRDDWDEWMRRLGIQLLREAPSPALRASLAHAYQPLS  
RELFSAAFVCCWKELNHTYRVNLVHALETAFISDVSP EILQALLNLAEFM  
EHDPSSGGLPIAIPILANLALKCRAYAKALHYKEREHSMNSSSSC  
VEALISINRKLDLQEAALGVLSATMTFEEQQVNDDMSIGTFSSNGFARQ  
QNPHEMFYSVWTTEDRQDKNMNSLDAENKERWLAKLGSWTDALKVYEEK  
LLRDPNDFDAALGCMRCLSSSGEWRKVLKLAEDNWSTISAGTAFQNEI  
LDTSVASHSSLVALREQKKALKMCAKAAWRLGRWDDLEKYSSELTHG  
QGNDSTGAAGPSGTSGSRDGSIPKLDGFAFFSAILHIHREEWQMAATA  
IDAARKAMDGRFTALMAESYNRAYPSIVTAQTLAEMEEIEYRKIEKEFE  
GGAHCHPANRPNIHEARERLLSVWRDRLAGCRVDAEVQYSIMAVRSLI  
LGPEDVDTLTLSELRSQAQRLKLAERVLLAPLERLGVNLDGSEFGFVAE  
FLDLRKELDALKEVSPVSIIDNLVTNENVCAYLPDYTSTHHEWSRKL  
VAKAGGLERLTVQYKLYFAFLKHLWLTDRREEAQHRLTKLCDVVDLTFH  
CEPIEDQSLRSACWLELGEWKLEETTAPNSYIPDELQVEVLSEFKRAAL  
MNGGYKAHWNWALLNFRIAEQLNEDDGSARRKNNSTSSQKNHVIAA  
IKSFVNAISIGTKRWSASVQQDMLNFLTCLFQYGRREIASVINECV  
GSVIPETWLGVLPLQLLAR IHLNPSIRSVLHPLLVRLGEEKHPQAL  
MYPLSVLLKSPVAERKNSAESLMDSLRSHSELVEEALMVSELIRVAIL  
WLETWHEGLEEASRLYFGEENVSGMLDLLLLPLHEKIEKADTRRESEF  
INSFGSDLSQAHQHIKDYIRLVSEGGDSIPTGPNSSSGYDASGRHIRQ  
NEEAETAMNKAWDIYYTVFRRINKQLPLGLTKLELTDSPALSNAWS  
LELGVPGSYRVDGSYIKIEKFI PSVQVITSKQRPRKITLRGSDGKDY  
VFLKGHEDLRQDERVMQLFGLVNALLERDRQTKKHDLRIQRYAISP  
LSHNCGLV

GWVPHDTLHSLIRDYRQTKKIPLNLEHKEMLRIPADYDQLTVMQKVEVFTDALKKTTGK  
GNDLYEILWLKSTNSEEWLERRTRYTRSLAVMSMVGYYLGLGDRHPSNLMLDKLSGRVLH  
IDFGDCFEVAMNRDKYPEKVPFRLTRMLIKAMEVSGIEGYSRSTCERTMTVLRENDRSLV  
AMLQAFLYDPLIGWRLVDLSNNNGSSDPANASTDDDI IAESLLSSAHNGINGNGI LDV  
DTGVPIDVGARPGVLPITEGDEDEDEEGKDDLALSNALNGQIIPSVPIGRNREFPMSATR  
ARSLQMYNSIQIWAANLGTDERIESVTGGGGTHGQMAASGTHSVARSRMVERSMRQRELL  
SILDGDEGLAAEEALNEKALKIIRRIQDKLNGTDFEDHRGENGESLDVVDQVQRLTVQAT  
SVENLSQLFIGWCAFW

>comp15160\_c0\_seq1; 727 174 2132 LEN=2317; translated  
MDSQYEAPESLQKYGGYLVNGVLGREAGIVKVAFGDNKDIRNYAVPLALYGSFFFFFFALI  
WFIVLWALKCNCCAGRKKVGAAGFAFHDTNSPTYEGEQVDEEDDEEEDEEEDGKVE  
AGDEDEESVDVEDGENNVENKSAGTEISQSEEAEEATEGFDDPADGESGDEAVEEDEAG  
DDEEVSKDGNDDTSETSDKETATKSGTNGDVFEDEEKERKLGNCCTKKGWASFFNSMRLC  
FGSARPKDVRNRKYATRFVVICFANVTLLCCALALGKIYAPLEAMSLTAGTVLDETKAMF  
SQAKDSFMLFQNA TRDLETQIFFQIEELPMSSVCPSPRTQFENMAGFNMD SISLKIFQD  
FYDNQDMI ISSRDAARNGVDAIAILRDANSIILTSTDNKWILSLLISFMILIVMSQMALV  
CHAVYKELTGSQIKSIVGRLECCYAWTILPLQIIIVIIIFWILIIAFCFGTVITTTDCLPA  
VTLPASNGTEAMTVTGTTPDDTIMAVFEESVFDNTADNSAVKEIMKQFLTGTCKEDPLGAAF  
DARALLQTTVGYFDSQMKQLED SKGMFDS CGPDQRMDEYVENMVGMRANFAELYDSIGGI  
YESMSCPRVNYVYVETIHGSVCTDLASASADGFVLMIFLSICGMVLITLRS AW

>comp15160\_c0\_seq2; 678 174 2099 LEN=2284; translated  
MDSQYEAPESLQKYGGYLVNGVLGREAGIVKVAFGDNKDIRNYAVPLALYGSFFFFFFALI  
WFIVLWALKCNCCAGRKKVGAAGFAFHDTNSPTYEGEQVDEEDDEEEDEEEDGKVE  
AGDEDEESVDVEDGENNVENKSAGTEISQSEEAEEATEGFDDPADGESGDEEVSKDGN  
D TSETSDKETATKSGTNGDVFEDEEKERKLGNCCTKKGWASFFNSMRLC FGSARPKDVRN  
RKYATRFVVICFANVTLLCCALALGKIYAPLEAMSLTAGTVLDETKAMFSQAKDSFMLFQ  
NATR DLETQIFFQIEELPMSSVCPSPRTQFENMAGFNMD SISLKIFQDFYDNQDMI ISS  
RDAARNGVDAIAILRDANSIILTSTDNKWILSLLISFMILIVMSQMALVCHAVYKELTGS  
QIKSIVGRLECCYAWTILPLQIIIVIIIFWILIIAFCFGTVITTTDCLPAVTLPASNGTEA  
MTVTGTTPDDTIMAVFEESVFDNTADNSAVKEIMKQFLTGTCKEDPLGAAFDARALLQTTV  
YFDSQMKQLED SKGMFDS CGPDQRMDEYVENMVGMRANFAELYDSIGGIYESMSCPRVNY  
VYVETIHGSVCTDLASASADGFVLMIFLSICGMVLITLRS AW

>comp15161\_c0\_seq1; 1218 97 2946 LEN=3187; translated  
MTAEDVEQPAPATDVVDVGLTAKEVATSREKKGWNEIPMAETPLYILFLRQFTGFMSIIIL  
IAAVVAASVEDWTDGVLIMLLVNASLGFHEEYKCAQSLAELSNSLESEIAIRRDGKTE  
ALPTKECVPGDIVLLVGGTILPADVKWVKGDTMSIDTAALTGEP IPRKYPGEHGDVILSG  
TTVVAGECYGEVVATGVNTEIGQAQADVMADKSTSTISVFEKKILTMVKIFVAGSMFMVL  
GVLLVKGFVYSGFTPVGNLAEV NAGSYLSKGVEDTILGALSILIASIPIALPLVLQVNLA  
LGASFLAKEHAAIVTSTPALQDIASMSMLCSDKTGTLTTAKMSVINDRCVPSGNFTKDDV  
VRFASLCSNKDKKDDPIDKAVLDAYERCEASKTDSGYKQTEIIGFNPVVKRVVAFVDHNG  
KTLTIAKGLPAKIIDTEAGGVDDHECQWKVEGYDDNFVASILKEDTALSSAGYKTIAVA  
MCEGDCRKP GNYKWNFVGLMPMLDPREDTPATIASLHHANISVKMITGDHVNNGKETCR  
LIGLGTDMHAGQEI RAAESPSTRNEMILAADGF GAVLPSDKREVVMTLKNFGLVTGMTG  
DGVNDAPALSAAQVGI AVEGATDAARNAADLILTESGLRPIYGAVLESRRIFARIKSYV  
YRMAASAILVLVLSIIVFAGEGCVVDSILIIVLALLNDISMLPVAYDNADATAKPLPNT  
TKLILTSLYYGLFHTAMTLIFIFGLGLQKETEMIDFSECVLDSKGPTAAFIWVHLTIVSE  
LAIFSVRAPSF FFFSMPSISLII SVILTCTIIVSIVGVYALELPGMSLLWIWVFNILAFVI  
VDLGIWFRKAIGDAPGEIIESEDELIEPE SKNEVKIQTEKKERYKVHRESVLPQADFERH  
EVEVGGLFNVRNYDGI AFKQPGARMKSISVAANGHRRRTKTS SAPELNF W

>comp15162\_c0\_seq1; 698 1 1832 LEN=2191; translated  
EERKQLVKEEXQVIGQQGSPAIGQRGTQVINQARGTQVINTATSARGTQVINPSSAPRGT  
QLVNPASPVRGTQVVASSSSTSGTQVIQPIINGGSDAP IGGNDSRGTQRI PSSSGAVTPSD  
EDPVSP TDAGTQIIPSSDSEDRNSVDLGGTIVVDKDDTESWSDILGKLFSDPKKNDEDE  
DEIGSRGTMV I KRSITLPEKEPMKNPFSFFGSSKKEQESTVDEEPVQEGKSSDGNPFFNF  
GSSVAEKEEMTETDEEPVEKEKSSTGSSFLGFGSSSTADEKSV DADVEPMPKEEPSAGNS  
FFSFMSPKSDKVA AETTEQATEEQEDAGSESAPSGGGIFSFFGGSVKSADRSVRATITM  
QKPPSPAKTAATASMAQRKTELVPKESADGMPSILSFFGGAKKVEDENARDPNARPTL  
IVTKPKKKQPWSSFLGNKNKTEKDRGEAPAASTTNKNDVIAKQIARQREGVERAARRR  
EEVAREKAAEQEELKQKRLEATRLREAKAKQRAGKGAGTRAVAPGPASKTPSSSTSSSSS  
PFRFFGAVGRQAAPPTLKRWKQNRDGTITGLIYDSKSFDPDGTTRITTSPIPKGAKSGAVVK

TAGGSKYSLT

>comp15163\_c0\_seq1; 393 1 1404 LEN=1800; translated  
RICRLRGVRIGASPDQKTTAYRMVEYQVLVQYPRQQTRNQQLRESTLYSNMVRVWNSGK  
KSKTSQTLTTTTSANPSATATATATATAKTTLFSFLLLVLFSHGERGSPFCHSFSFDRIG  
SFRKTRTIHNKNTKNKKNIVSSPNSIRALTQMSSPSSSDAVVSKATAEALAGRSVLLTG  
ATGGLGAQLALQIAHHCSPSALVLSGRKPEALEAVAEECRNSGNGNGSEARVVALTADLS  
DRESALALGRSAVEACGGTVDVLIHCGGVSSRSDVDTLLEVDERVMQINFFSGAALAKA  
VVPTMVAAGSGGKILWISSVQGLMGIPSRTSYAASKFAVQGYCEALRAELATEGISVHCA  
SPGYIRTNLSASAVTGDGKAYGTTDPATAAGADPRDVAVEVLDRSVAKGEADFVVAASAT  
ARIALWLRVLLPGVLRSLLVRRHETARAKRGAPEAPPGAEGAGKKLD

>comp15163\_c0\_seq2; 412 1 1416 LEN=1812; translated  
RICRLRGVRIGASPDQKTTAYRMVEYQVLVQYPRQQTRNQQLRESTLYSNMVRVWNSGK  
KSKTSQTLTTTTSANPSATATATATATAKTTLFSFLLLVLFSHGERGSPFCHSFSFDRIG  
SFRKTRTIHNKNTKNKKNIVSSPNSIRALTQMSSPSSSDAVVSKATAEALAGRSVLLTG  
ATGGLGAQLALQIAHHCSPSALVLSGRKPEALEAVADECRNGAKGNGNGKSEARVVALT  
ADLS DRESVLALGRSAVEACGGTVDVLIHCGGVSSRSDVDTLLEVDERVMQINFFSGAA  
LAKAVVPTMVAAGSGGKILWISSVQGLMGIPSRTSYAASKFAVQGYCEALRAELATEGIS  
VHCASPGYIRTNLSASAVTGDGKAYGTTDPATAAGADPRDVAVEVLDRSVAKGEADFVVA  
ASATARIALWLRVLLPGVLRSLLVRRHETARAKRGAPEAPPGAEGAGKKLD

>comp15164\_c0\_seq1; 2594 1 7056 LEN=7208; translated  
XNLKTLSELTARTAATRDIISIDTSIEIQYSLISMPGIISDSSDYGWEEEMMISVPVNDV  
STGSDTDNR'TLDGLLKFNDCSREFFNEKSHMTKDHFFQVCCFTWMQNLIRTSEKGTDD  
PNPVPSPKLLWNVLQQIYASGRKKNSGIIKWILPDIPVMTVNSTGLDSDLDYCASDTDMKY  
TSNIMKFWKQLFQGCENFSSKSLLSFQADAESKRPSKRRRLGLSRSSPVGFNLLKGRYK  
LPVAVYLLISLLKETGIASDFEELYEMTQDLQSIKTFKFAETDIMAGLTLVLANIGSGTPV  
SGLSTSDFFKRYLSGVDSYGLSILSIQDATGLDLYNLRASICRLILDPLDAKWYWS  
YKSEIIDACFSCISQEHPNRFIDDLHKRQLQEHETRRRMRKEARNNSVPEEVTSPGFPL  
LVHIQIWLRRNQKELAAGLTHKIDSSPFLGEEIKDEAWSNMWNYILAEGMLFLDGNDDSP  
GYLKKRDFLYNHIAVRMSQKARLTMMNFYQDVANKIWELEDARLEEKQYVTLACQQT  
VLRLLLKICGLSSTILIFVEETTPVEIPGGSSAKDLNFWGSNFLSKAQKIPSTLIDET  
TGLVELLKLIDTAPEATGEDDHI EAVLILERTQSPSLRRKSSGCLEENDLVGEDDEES  
GEDSFAFNPESSPVGEAEVITYSPAGADTFCEEDGLGQNVINDQEDDEIEFRESDD  
DGNIEIVVIDDDASNDEVINSEDEDGMGDADSHVSDGDDEENYDGNEDDEVICD  
VDDDTYSDDDKNECSEGDNGDRYEEIEVLNDNKVEASSQEKLNATGDDSDQEDDR  
SRSVTCEETNLGPRYENIHPSGHGNDEVDEELKIVTKTGITENSERIGRDI  
GFDNSINLESTVENVCHDQNSWQEKNKENKGVNDSENEALDRVVDVCHSN  
DADLSASVEDTTIFMGFTGTDKTPPEKSMAEVIQKRHSSSVEAPEPNEAGNE  
ECVSKLNADEYYATDGEHEHNINLEKVGTEVAAVGGEFGDTTEEDESERFRAN  
RTAQADRRADALRSGAGYASQVEDGYEPEDTHGYTEEEVSEAFHTEDEEDER  
LLKQKPRLSDTNSDVENGEPKRPFSEGSRVIVENAERQADIEPASDDMDMAD  
ERTEQEEDVTAEFSELEENPEGSSELRIPTSESLQAKTLLFAQKAQMEPI  
LENTDKEIKNCEDDVQPDSEEKSPSDEAGVDSYADDDEYAAEGYRSMETE  
EEDDTEKRTSASGFSPEVPTMTEYEKDRSNIGSENIEISGAKGEDI  
EVENIVDGMKSKTSTEEAAQSSSEDEGDGHLDDNKYIEKSNHEDLSIAS  
GHRQERAGSRNSEDHIELDIVEDSPMADESKTNKNKSHGTEKDLSSKVF  
KDSWVGNNNDVESCNDVNSVPPPERFEEHPVGSNPLEKFEEHQKQILL  
SQSDVSVSDKAEKCDSESAFESKTTGIHDNGVDIEDSSRNVGGNTSADIE  
LIPDQIDVLDSDVAGNTEHDGTGNDYCKRKETMAEDELKTNKQD  
NSNIVGKGSREVTERETNTERNQSNKNNTRDLAEFDDSKPDNS  
SLKKNQILVGGGVAKNFDGENHAALHAVDAALPPESEPVVRI  
EAIKVTEESAESDNTTKAMTSDINAQPKVALYNKEGQPLETS  
IRTDEINKEVDVKPDDINSNDKSVSDSKEIDL  
CGDIVIQETDVGFTDILMDTKGNVGDINEDKDLQSEHIV  
NIRVCDNNYLKQQLVTKETPQDDENAAL  
EKKAREKSDSQLPSVAHLEVNEKMNRDDVVVKNNTNRSI  
NSKPDELGKFGEPVAMNTVATLDDHEVEELVNLQDATE  
LSPAFGQEEDENADQCRCRQVVEPKPVELITD'TTNPL  
GLSVGDCVIVQGKKPGSTEMLKISSVNP  
DGTYGKDPFTRRKRKKA LKPSQIIDVEKRKLDSD  
LPPINEEASEINSMDFHETMELGDEPPDAPI  
PEFIGGEPEQESTRTSNRKRKPKNSDGGSVSS  
GLPPRPPRGRSTVLPLESKQLCARSQKDDT  
ENDDEGS IQTRTSTRSTRNGTRKATVRRRT  
TTAQKDEDIGDSSVQTQSSTRLRSATRKSSARTR  
NAENEDINDEGSVQTQTSMRSTRSSTRKPTRK  
TRTKQKIDDCENSVQTRTSTKSTRSSTRKSSAR  
KRAIEEKDKGSDKEDEVSVQTRTYTTATR  
SSMKKSSSRPSARDKDDDEDASVQTRTSTR  
STRSTAGRTHIHDTILKEKGGCHGNDASVQ  
TRTSTRSTRGKTKSHPAHDEMLKEKDEGS  
VRSRRNSAALPKNEASAGAHISDAFSAWTK  
AKLKEELKKGISHKNSMLKKELV ELLQR  
SMSETN

>comp15165\_c0\_seq1; 347 1 1237 LEN=2034; translated  
XFCVLIGKDREILDLDGVEICIAADSNQHSSIHLLSRQARKKEAETNTQQHRSKFYHIMLF  
QLLLALAASKISSLLRIGTDGFRLRPYLSSSDEEALADICKGVWNGTDYLPATAQAFEE  
DPSCDFVLEHETTGA VIAAGNRRRLPRRDGNRTENAVFWLEAVRVAPEFEGRGIATALT  
RELCRRCREEGAREILSCTVKTNRGMTAVFGKEGIDMHPVGTACIPDFGALSGLPGWSSR  
NDDKASPENILKAMGLEDSVDEAVRSDIWEVVRSEEEELTDILEKRDSGESLAYMPQLGKL  
LWSSDDLVESIREGLVRKLLKGGAGNPPVAVFALVRDSTIQSLRSKYVCSVVASSPQGLDS  
ALWEACNPEYLPLIDGNPAFSFVFEMPLPSGPKPSVAESLPLKTGNAFSYYRW  
>comp15166\_c0\_seq1; 1761 58 4155 LEN=4387; translated  
MTNPPTMNRGWPRRDPVDAESEWEAFSSKKQAMNRMKAGRQDALRRLGSDKSGGRSIVS  
EVSDEREAPGSYHKENYSFSGRKDLRDAPEGNRANPATDSNSRPELDMRKLIEIFTVIKK  
RRWNLDDLLEIYPRSASIPCPKNIQSTAKGNLMLHEVCRNNPPLRVISALIYEYADAVK  
AKGGKGYLPVHYACATNSSPDVVRKLLDFTFASIRMRDTNDLMIPLHFACKWGASSKVE  
ILTGAYPEGRQVRDIYAKTPVDYANELSGEDRGTVLRITLEKSYHSRSHRSLARSVAGSEA  
SIGDAISEASEHMRELQTTKAKLDKVTSELDQRERKFSLYGAEQTKASELQQQKDLLE  
QECLNARMLQDEQKDKINLLQEEVRTLKALQKTHNDKKNMLLEKIEALEQDKVNARKAIS  
ELDQESSAKLKKELTAALVEQEIKFKAMLQAEQRKIDNLEKQSREAELTRHYTMALLQE  
HESEVSKFEELTSRFKILEGQLRREIENERTKRIEAQTESQGAEYRKA VEDEKEKVAFLE  
SHITKVNDLLEAEQKRFIELEAILKETLAIENEQREEIEAEFREKESQYQSRIEIESQKR  
EQLENAYSADIADKLKAEIEKTAGLQAYEIELKKELOMDQEKIEELQKLQDQSLKALERER  
ARVEQMAETE QNSRLLLKTEELKVKLEEKVSEMQLLDNERKSVKDLKDKLESQALYE  
KELSKIAEVEEAERTARTRVQSLNEKVTKLEEEEFVAVRSKKEKEGSNLQATENEFNDLKT  
MLETEKKQVERLTKAQEELRDLINNEEKDKVKTLEEPHDESEMDEMDSQADSQASSIEERL  
MEQQATLDHKKYRVTELEGKHAGLSKELEAGKESNRLECTVNEKTAVLEEERTNFVLL  
KEHGEIQLALSTERSKVLAEAEKAAAFGEQLYFEKETITEMQYMVDQAKIDFQSKLEEVA  
SLEEEERVGR TALDASL KETVTNDEVAELTGALVEVEKEKVTEMAAALREVQDLVQDEKD  
RVAEYKRLLAEQKHLAIADQAKIRQLEHKIEEQDALGVGKAENIKLERDLTATKCLLDE  
ESKKVSELLSAGHNFEEDRASALLETEQNKVKALEHSCEQLMSLLDWEKKHVISLEEKQD  
ELQEQADASSEELIATKTALDRSQRKLAQLSHELENIESMKKEIRLTMVARQRDVMMAA  
MLYAIGDARAIRGKPSIQNAQMHDVGIESRVIGLELAGLDEDFVQDREARQLVAYNAAR  
SKTIRKIIILPLVAVAGGLVEYHHNDPTVLRRELVS SVGQMSGEFRQSF SANLGEISHTLGD  
SSSVGANLSANMGLLAASLKDSTILKESVAQVSGMATRRMNIRQV  
>comp15167\_c0\_seq1; 722 305 3081 LEN=3552; translated  
MKIINEMKKKLHLERAREEMEEIKKDAEMILNKLIYARPLKFTKHFYRRKATEGVDQEE  
EELRESNLEASEEAFVLSVVENHSDFVLSNLEASEIQRLVRAMEKHTAAAGDVLIQQGDT  
GDYLYVVREGTVRFLVDGEDKGTASEGAVVGELALLYDCPRAATVRADTDCVLYRVSQET  
FRRIQASFILSNDDERTLLKSTL FANLHDDLIREMASYMFQKKFTKGQILVEKGDVD  
EIFYVKRGITILGRDVSARGVEYADITLPEGGTFGDHAVLMNHAFATIEGLTDGVVYVLT  
KERFFTCLKGIDLHEMVQRNADSQILVGVFLSMHSPLOFMLQYDIVLHCVFCEMLIEYG  
LLAADFDLFEEKRNMVCCYSLLGALSTKLTRLLSALPFALIHGTNRRNPALQHLPPFFA  
YADIDDVEIREMVKKMEHVTLPEGDTLATLGEVEPALYVVMTRSKDHGYLQSTKDGVI  
RDVRAGEAMGFGKATINISNISQSESCAAAALYGSKKGWVELDTTDAIKESKHNMVLHVK  
VVSQFTVVARGTGTVHLKKLTLKDLSKI IHDPFRLGKDYRVNGSKKTEVTTDVLQRKQLL  
GQGTFGQVWLCREKRKGDYPYALKIQYKRELIQQHQADGVIRETHILOKMHHPFVAGLVNA  
QQDVSCLYLVMPLVPGGELRQQMRSSTRPYLEEPKAKFYAACLEGLGYMHRRKYIYRDL  
KGENVMLDREGYCVIIDFGFAKYVPDKTFTFCGTPIFIAPEVVLNKGHDKSADIWSLGM  
IFEMLMGTNPFDFYNDPTIDQRKLFNRIVRGQIQVPRQQASIDAFDRLSDDAKDLIKKLL  
VVNVRDRLGC MANADLDIRNHPWFANEKTGIDFGKLYRKEIPAPWVPVLSDFDSTNFKH  
TSARSKGLKPLTTEEQKLFEDFC  
>comp15167\_c0\_seq2; 698 305 2818 LEN=3289; translated  
MKIINEMKKKLHLERAREEMEEIKKDAEMILNKLIYARPLKFTKHFYRRKATEGVDQEE  
EELRESNLEASEEAFVLSVVENHSDFVLSNLEASEIQRLVRAMEKHTAAAGDVLIQQGDT  
GDYLYVVREGTVRFLVDGEDKGTASEGAVVGELALLYDCPRAATVRADTDCVLYRVSQET  
FRRIQASFILSNDDERTLLKSTL FANLHDDLIREMASYMFQKKFTKGQILVEKGDVD  
EIFYVKRGITILGRDVSARGVEYADITLPEGGTFGDHAVLMNHAFATIEGLTDGVVYVLT  
KERFFTCLKGIDLHEMVQRNADSQILHLLPFFAYADIDDVEIREMVKKMEHVTLPEGDTL  
ATLGEVEPALYVVMTRSKDHGYLQSTKDGVIIRDVRAGEAMGFGKATINISNISQSESC  
AAAALYGSKKGWVELDTTDAIKESKHNMVLHNVVVSQFTVVARGTGTVHLKKLTLKDLK  
I IHDPFRLGKDYRVNGSKKTEVTTDVLQRKQLLQGTFGQVWLCREKRKGDYPYALKIQYK  
RELIQQHQADGVIRETHILOKMHHPFVAGLVNAQQDVSCLYLVMPLVPGGELRQQMRSST

RPYLEEPKAKFYAACLLEGLGYMHRKYYIYRDLKGENVMLDREGYCVIIDFGFAKYVPDK  
TFTFCGTPIFIAPEVVLNKGHDKSADIWSLGVMI FEMLMGTNPFDFYNDPTIDQRKLFNR  
IVRGQIQVPRQOASIDAFDRLSDDAKDLIKKLLVVNVRDRLGCMANADLDIRNHPWFANE  
KTGIDFGKLYRKEIPAPWVPVLSDFDSTNFKHTSARSKKGLKPLTTEEQKLFEDFC  
>comp15168\_c0\_seq1; 909 109 2247 LEN=2598; translated  
MSTLEDLRDLANRNDVFPFKEYEGATSFPEGEAPLPLWVGTVVIGFGLLFSIITTAI  
VYINKFFGAKGEITSEHFNTAGRMIKTGLTASVIVSQWTWAATLLQSSNVAWQYGVSGPF  
WYASGATIQLVLLFGVLA INLKKVAPSAHTVCEIVKARWGKGAHLTFLFFCFAANIIVTSM  
LLLGGAAATVEALTGM DYRLAAFLIPWGVILY TASGGLQATFLASYIHTV IIFIVLILMVF  
IVYVKVYSSDQIFTFLDQTVSYTEEECQKIYSTGNSVETTFYKGTYACGAVPDNRDGSY  
LTMLSGGLMFGI INIVGNFGTVFVDQSYWQSAIAARPE SAAKG YLLGGICWF AIPFSLA  
TSLGLASTALMLPITASEAGAGLVPPAVATHLLGDVGSALILIMLFMAIVSTGSAESIAV  
SSLVSYDIYREYMNPEATGKQILFVSRVIVGYGLVMGALAILLDYMGLNLGWVYLFMGI  
MIGSAVIPLWNLM TWDKASGKGAIISAWAGLILALTGWIVGAHVQSGSISVSTLGTNEVM  
LSGNLIAILSSGFIHYIYSKCIDPQEFDFSTLDEKITLVEEDTRGLSNDELDDKMLRAE  
RWITRRGYVLTTLVLIIVWPLLSVPAGVFTRDYFAFWVLVAIAWGFGAIIITFLPLVSS  
EESTALSGIWIYAMTCREAPKATDPNLEEQA KELAEDSDGVPAAETA EAAA  
>comp15169\_c0\_seq1; 1305 189 4037 LEN=4098; translated  
MVEKESNMSVVVADGVEIEEYDYIFGFGSIMNRSTHGENILPGIAVILSKDFGYEREWNF  
RSSTGFTALGVSKVAAGSNINGVLFRVTQAMIPIDRREVG YEKVRIPLEYLQFADYDKS  
SSPWHKDLGPDDRLWIYVPLPSH SKMADENHPLLQSYVDTV LQG CLEWGGE PMAESFIQT  
TGGWSTYFLNDTPSSRRPWL YRKDYSTIDRLLQSYASKTYFGDRKHPEEFSSAFHRRMKG  
TWSIPRRNMNFTGREKELQHLWSRFAAVTGGE PNNKLS SPTS RQNQQQ MVVKVEVAGMG  
GVGKTQFVTEYCYRHFPRDYGLVVWLN AESS ESLVADYRQLLMDLAQENASEVIVAANSL  
KNTVKTSSSSTGADFGGSGIRNNNTLTQDTDEIVREVKTR LFRSQVPWLLVFDNLEDRSL  
LNVFVPRGAGTRGHILVTTRLFEME WLDQSCGSLLLGCFTPEESVELLKRAAGNNIKG  
EANLDAASEIATRLGHLPLALGMAAAYMLRCDVNCMEYLER YKVSEKSGTSLLRHGK LQD  
YSLTVASSLSLSLVAIEKESKVGCSMLQLL CFLGPEQITKLLLRHLMNSQIKFHPNTEGC  
FDEILNYENIRSLGLSFLLS CGLFGLTIAAVGKQRFRTNGNRQTIGFALVSLSTLSALLM  
KSVGGEALCNRSPTE SRSL EQVAHP SHFAFSATIYEDADSVWNI LKSYSL LIVKEGK GSM  
HRLLAQALRQSQSEVDYRRNLRVCLHAMQSIWTFKADES DTWKESLQVLDHVKS VVSHIG  
SCDFRCNEARLIAGRLSIEAGVYSAMALNAFLDSQQSFELAISIFDESKHRNK PVMQRAR  
AEALHELGRVFRYQ GKYYDSEQSLTEALRIYQK LKWRNPEAKRRIADTLHELGVLEVKKH  
NLDAATKFLEQSLEMRQLMGNPELSAAHSAATLHQLASIMVARKPPQLDKAKYLLQEALG  
LSRQSGQRAATLQKLARVTIRQGLLDRAETYLEQALDLYMELYGENKNHINIAAVKFQQG  
ALARQREQL EQAGLHFSACLVI RRNVYAYAKPVGREEEENPTHLEVSCVLHEIAGVAF AQ  
LYYSQALSTFKAERLILERI EETSEHHTEKIYQSRMTNLTWLRKCAKELGDEDMAIRFSN  
ERSDLKASFVAGRKKEVGNVLPQNQSDIITTSLOHAAMGCRVAARKFVLERDKN GSKLE  
NLNFALSQ LSEELQISPPGP IKVAAMQFRKEILKWKDQANELRRLHLLDACDVL RDVLR A  
NGLEVSDSICSRSSMIQLNAVR  
>comp15169\_c0\_seq2; 1265 189 3956 LEN=4211; translated  
MVEKESNMSVVVADGVEIEEYDYIFGFGSIMNRSTHGENILPGIAVILSKDFGYEREWNF  
RSSTGFTALGVSKVAAGSNINGVLFRVTQAMIPIDRREVG YEKVRIPLEYLQFADYDKS  
SSPWHKDLGPDDRLWIYVPLPSH SKMADENHPLLQSYVDTV LQG CLEWGGE PMAESFIQT  
TGGWSTYFLNDTPSSRRPWL YRKDYSTIDRLLQSYASKTYFGDRKHPEEFSSAFHRRMKG  
TWSIPRRNMNFTGREKELQHLWSRFAAVTGGE PNNKLS SPTS RQNQQQ MVVKVEVAGMG  
GVGKTQFVTEYCYRHFPRDYGLVVWLN AESS ESLVADYRQLLMDLAQENASEVIVAANSL  
KNTVKTSSSSTGADFGGSGIRNNNTLTQDTDEIVREVKTR LFRSQVPWLLVFDNLEDRSL  
LNVFVPRGAGTRGHILVTTRLFEME WLDQSCGSLLLGCFTPEESVELLKRAAGNNIKG  
EANLDAASEIATRLGHLPLALGMAAAYMLRCDVNCMEYLER YKVSEKSGTSLLRHGK LQD  
YSLTVASSLSLSLVAIEKESKVGCSMLQLL CFLGPEQITKLLLRHLMNSQIKFHPNTEGC  
FDEILNYENIRSLGLSFLLS CGLFGLTIAAVGKQRFRTNGNRQTIGFALVSLSTLSALLM  
KSVGGEALCNRSPTE SRSL EQVAHP SHFAFSATIYEDADSVWNI LKSYSL LIVKEGK GSM  
HRLLAQALRQSQSEVDYRRNLRVCLHAMQSIWTFKADES DTWKESLQVLDHVKS VVSHIG  
SCDFRCNEARLIAGRLSIEAGVYSAMALNAFLDSQQSFELAISIFDESKHRNK PVMQRAR  
AEALHELGRVFRYQ GKYYDSEQSLTEALRIYQK LKWRNPEAKRRIADTLHELGVLEVKKH  
NLDAATKFLEQSLEMRQLMGNPELSAAHSAATLHQLASIMVARKPPQLDKAKYLLQEALG  
LSRQSGQRAATLQKLARVTIRQGLLDRAETYLEQALDLYMELYGENKNHINIAAVKFQQG  
ALARQREQL EQAGLHFSACLVI RRNVYAYAKPVGREEEENPTHLEVSCVLHEIAGVAF AQ  
LYYSQALSTFKAERLILERI EETSEHHTEKIYQSRMTNLTWLRKCAKELGDEDMAIRFSN



ERSDLKASVAGRKKEVNGVLPQNQSDIITTSLQHAAMGCRVAARKFVLERDKNGSKLE  
NLNFALSQLEELQISPPGP IKVAAMQFRKEILKWKDQANELRRLHLLDACDVL  
>comp15169\_c0\_seq3; 353 189 1368 LEN=1368; translated  
MVEKESNMSVVVADGVEIEEYDYIFGFGSIMNRSTHGENILPGIAVILSKDFGYERENF  
RSSTGFTALGVSKVAAGSNINGVLFVVTQAMIPIFDRREVGYEKVRIPLEYLQFADYDKS  
SSPWHKDLGPDDRLWIYVPLPSHSMADENHPLLQSYVDTVLOGCLEWGGEPMAESFIQT  
TGGWSTYFLNDTPSSRRPWLRYKDYSTIDRLLQSYASKTYFGDRKHPEEFSSAFHRRMKG  
TWSIPRRNMNFTGREKELQHLWSRFAAVTGGEPNNKLSSTSRQNQQQMVVKEVAVAGMG  
GVGKTQFVTEYCYRHFPRDYGLVVWLNAAESSESLVADYRQLLMDLAQENASEVIVAANSL  
KNTVKTSSSSTGADFGGSGIRNNNTLTQDTDEIX  
>comp15170\_c0\_seq1; 671 1 3097 LEN=3159; translated  
XDDDDDDPDONLYGNEKSAAFSVTGI INKRNSKRSSHKKKSNKWLEALKEYSDANKYGI  
SREEDWIEYRKFGLDEIKDDDRRYRKTWEATIGIGSYIEKRRIIFKNKEQAEDFKTEIDN  
LRSLSKERAARLEAYKKHQLEIRARQVQAVANIQRPLELATENAGNCNNKTPFLPSIPG  
PKTILGNFGNALTSPVPTLIGSSSTDRKSDQKCLKPSLHKSASLSLEDDINLLVEIVSCS  
DLP IADVTSTDPYVVVFLGVNAIHRDYI PKELNPVWTVHNGSLFMVSCSAEEFFSFSYG  
LVFCVKDYDRGKKDDLVRVELTQEQLLSMTGERVAIELYVPQGMRNHAPNRGNDRKDPL  
YSPKLILRIRKATPADQKFIKFKFREIKRSKREAVYVDTTFNANADLMGLLKRESKILDGV  
ELFCVKPGDPDRPAYQTRWMTKSEIAVENMKPSRSWIESGNGKLGKIFVEVLKCNENLN  
VMFTRKVKSERGCTDPFCCLVFEDAIGYTDAIRNCTKPRWMPWSQRAFVFNVAHASSNLM  
IGVFDHGITGYHHPLGRVSVNVTNLSRTEYVLSFDLYKSALLDNNRKP HGKITIRIRID  
FNNRGISNYTLGAASNLPRTNCLNLPNRFEFMTVYVCHGDEDPTRFSLETLYAYQAELE  
EHFVHVHQVQAALTVMFWRGHHKIKIFGISLNVPMHSAVAFLMGITLIENLDLLPSYLL  
FSIVWLLAATYEARQAHPSPWAGSVTSDMWQSAIYKSFPRSAEFENEEAVLKYEAAA  
RLRYEEEQEIQKERHETAEQLADLYGQGSTEPEDLSAESATKKVGSVIMDKINSVNPLAT  
SLLPIQTTLGNTASFIRILRSILLWDETIYAFIILNASLGLGVLFVFPWGWLVWRISRL  
AIWGF LGPWMLVDLYILPRYFGAGKDKDKILGDYAKEQIDSLGLTKENTLRKREQVYKL  
RAMKRYMFGKFSVMVPRYKDYRYRDTPLPESSATPISQTP EIKVTNTWPGQNL TGEMIP I  
WGVVMDQRK K K K K K  
>comp15170\_c0\_seq2; 352 95 1637 LEN=1699; translated  
MDAMVAEAFVFNVAHASSNLMIGVFDHGITGYHHPLGRVSVNVTNLSRTEYVLSFDLYK  
SALLDNNRKP HGKITIRIRIDFNNRGISNYTLGAASNLPRTNCLNLPNRFEFMTVYVCH  
GDEDPTRFSLETLYAYQAELEEHFVHVHQVQAALTVMFWRGHHKIKIFGISLNVPMHSA  
VAFLMGITLIENLDLLPSYLLFSIVWLLAATYEARQAHPSPWAGSVTSDMWQSAIYKSKS  
FPRSAEFENEEAVLKYEAAA RLRYEEEQEIQKERHETAEQLADLYGQGSTEPEDLSAES  
ATKKVGSVIMDKINSVNPLATSLLPIQTTLGNTASFIRILRSILLWDETIYAFIILNASL  
GLGVLFVFPWGWLVWRISRLAIWGF LGPWMLVDLYILPRYFGAGKDKDKILGDYAKEQ  
IDSLGLTKENTLRKREQVYKL RAMKRYMFGKFSVMVPRYKDYRYRDTPLPESSATPISQ  
TPEIKVTNTWPGQNL TGEMIP I WGVVMDQRK K K K K K  
>comp15171\_c0\_seq1; 235 1 1221 LEN=1281; translated  
XIQRIKKKMAAPEDDVVALTDDSDGNGGEDTSTSFNLFAXQFCKCFDIIIEQFSYNYFH  
RYEEGSKGSWNAALSGVGAAIKGADMIMNGECLNVFCATRPPGHAGRELHPMKAVSNGF  
CILNSAACAAALYATAPISDGGGLGSRVCIIDIDVHHGNGTQDILCSTYDPRFLYVSTHAG  
GADINGVDMEDDDMDQFEHHLGGDEKKGIFPGRCGDYSPHKGVLNIPLGGRVTPHALGT  
ALVTKVNPVAVETFNPELIIISAGFDAHKNDPLNMGGTAEENFGTLTEVICLAYKCCSGR  
VLSVLEGGYGVPCCRPQNFASREGTSGSFGPHSQHLKADKDLTEAKSEKKFVELKCLELG  
SELPPSMTDVISSYALQKRLNRCHEEGFVHCVEHVSALARCNMVQR  
>comp15171\_c0\_seq2; 866 169 3873 LEN=3933; translated  
MTNATE TNDTADGKDSSSPAPT SRIQSMSVIKPKPNPDSAGLVTTESNL SKRKSPEAIA  
ASGGNAEVI AKKLK KETSILQKPPIPSFMPGQQQQQESNKT KPTKHKGSPSKTEET  
RTSGIPE SNGSKEFVTISIGPTKANQSVAA DGKTPSYSKKDEKQSDDEIVTQYTEFEPL  
KGPNEVRPLTSLDTTERIQLEKLF GFDKRKDDSN TWEDDFGVLALCHKEVPNPDGRVAE  
RQKERSLLEWVGLNTEATDSKNGSSNISLRLLFNLLRHLHYHLK LPEQAKLILANIDRK  
DPKSI GDAIHRLSIDPVVLRQDGWITKKAKEPQGASGGAYRIGERIFWEGYAGVVI AF IH  
DDDGLDLWKAIWVEDLMTFDLELEEELESRKKYERKKAASNKKKEA AKAAPKATFFHVEG  
IEHGI VMAASYARGARHG VYWP ARVMHASELSGNTSRRNKHKKKIDVVFLAPYWNSTAS  
GSSRLEPLSMARNGEGLFRSGALFEVETIDANELCVQSYPYDAKTGLDMDEL RSTFKFM  
GLPKAAFP RYLD SQRALALGFKTFSQTE LKSTRASDS DQT TAGLLEGHPLAVQTALFP TSV  
IQLPF SHILSQLPHHEKQSSLETS AVEPALRFDKILGSMKPPSCWGLGQSVALQTKDTPQ  
PKSMMGSPITFLDKNVGNTGDPYNVGRFLHGLLSLQRF LSEKSATSGMLRNSLSEVVGAF

AKKSGLKEQLQSDGNKNYMKFLNRTWVVKSKGETLILAAAKDQKHLPHYILKDWRRCERI  
YKHINVALGTNGASYVITDSRCNLHLTSSECFERAVRLPAALKGVKQATGNIKLVNTIDD  
AYLNLAENEVIVRAHKMSYIQR IKKKCMAAPEDDVVALTDDSDGNGGEDTKGSKGSWNA  
LSGVGAAIKGADMIMNGECLNVFCATRPPGHAGRELHPMKAVSNGFCILNSAACAALYA  
TAPISDGGGLSRVCIIDIDVHHGNGTQDILCSTYDPRFLYVSTHAGGADINGVDMEDDD  
MDQFEHHLGGGDEKKGIFPGRCGDYSPHKGVLNIPLGGRVTPHALGTALVTKVNPVAVET  
NPELIIISAGFDAHKNDPLNMGLTAENFGTLTEVICKLAYKCCSGRVLVLEGGYGVPC  
CRPQNFASREGTSGSFGPHSQHLKADKDLTEAKSEKKFVELKCLELGESELPPSMTDVISS  
YALQKRLNRCHEEGFVHCVKHEVVSALARCNMVQR

>comp15172\_c0\_seq1; 423 161 1642 LEN=1719; translated  
MRSKLAVLSPQNTKRNGNQNFSGASGRTACGFRNFHRKGTSGSISYLSLDESNEDESFSGE  
NENEKSDEDDSNITARFDAEQLSNRIREVEQSESEVTDRTSGLQQRVRELRSAKAIEDR  
FLYTERENRNQNSSSNTTTTTTPSTKQESQSRKLFPLVICFDALLPNQKLEGSTQDPTFI  
RFLLEETGLGGWFVMVSFEYRSRKVRRNGVLCKVEFLDAAAKPDSNNSDASDRGYGAVDD  
HRRIPITSVSFVIVGKRRRCRVEGDENGLQARIGRWRQYDENGEEVSLGWGLERFTDLLPA  
KPNAKRDRLSQSLPPEPPSAMQEAPKISSDPTQWSSTEIATTNLDGDEDATTEPLLLQKA  
ESLIPLVEEWYGLASNVETYRNTNVTVSARVARDQPMLRIDPAVLLARVLGDLEGDQTSE  
PPTTTQRLAPDPAVDPNGFAFWVGALLNPLPPLGVALELRGNLLEVRTLGERLEILEKGL  
LRSIQNLRGEQPL

>comp15172\_c0\_seq2; 430 161 1501 LEN=1730; translated  
MRSKLAVLSPQNTKRNGNQNFSGASGRTACGFRNFHRKGTSGSISYLSLDESNEDESFSGE  
NENEKSDEDDSNITARFDAEQLSNRIREVEQSESEVTDRTSGLQQRVRELRSAKAIEDR  
FLYTERENRNQNSSSNTTTTTTPSTKQESQSRKLFPLVICFDALLPNQKLEGSTQDPTFI  
RFLLEETGLGGWFVMVSFEYRSRKVRRNGVLCKVEFLDAAAKPDSNNSDASDRGYGAVDD  
HRRIPITSVSFVIVGKRRRCRVEGDENGLQARIGRWRQYDENGEEVSLGWGLERFTDLLPA  
KPNAPATATNKAKRDRLSQSLPPEPPPAMQEAPKISSDPTQWSSTEIATTNLDGDEDATTE  
EPLLLQKAESLIPLVEEWYGLASNVETYRNTNVTVSARVARDQPMLRIDPAVLLARVLGD  
LEGDQTSEPPTTTQRLAPDPAVDPPFGW

>comp15172\_c0\_seq3; 432 161 1666 LEN=1743; translated  
MRSKLAVLSPQNTKRNGNQNFSGASGRTACGFRNFHRKGTSGSISYLSLDESNEDESFSGE  
NENEKSDEDDSNITARFDAEQLSNRIREVEQSESEVTDRTSGLQQRVRELRSAKAIEDR  
FLYTERENRNQNSSSNTTTTTTPSTKQESQSRKLFPLVICFDALLPNQKLEGSTQDPTFI  
RFLLEETGLGGWFVMVSFEYRSRKVRRNGVLCKVEFLDAAAKPDSNNSDASDRGYGAVDD  
HRRIPITSVSFVIVGKRRRCRVEGDENGLQARIGRWRQYDENGEEVSLGWGLERFTDLLPA  
KPNAPATATNKAKRDRLSQSLPPEPPPAMQEAPKISSDPTQWSSTEIATTNLDGDEDATTE  
EPLLLQKAESLIPLVEEWYGLASNVETYRNTNVTVSARVARDQPMLRIDPAVLLARVLGD  
LEGDQTSEPPTTTQRLAPDPAVDPNGFAFWVGALLNPLPPLGVALELRGNLLEVRTLGER  
LEILEKGLLSIQNLRGEQPL

>comp15172\_c0\_seq4; 421 161 1477 LEN=1706; translated  
MRSKLAVLSPQNTKRNGNQNFSGASGRTACGFRNFHRKGTSGSISYLSLDESNEDESFSGE  
NENEKSDEDDSNITARFDAEQLSNRIREVEQSESEVTDRTSGLQQRVRELRSAKAIEDR  
FLYTERENRNQNSSSNTTTTTTPSTKQESQSRKLFPLVICFDALLPNQKLEGSTQDPTFI  
RFLLEETGLGGWFVMVSFEYRSRKVRRNGVLCKVEFLDAAAKPDSNNSDASDRGYGAVDD  
HRRIPITSVSFVIVGKRRRCRVEGDENGLQARIGRWRQYDENGEEVSLGWGLERFTDLLPA  
KPNAKRDRLSQSLPPEPPSAMQEAPKISSDPTQWSSTEIATTNLDGDEDATTEPLLLQKA  
ESLIPLVEEWYGLASNVETYRNTNVTVSARVARDQPMLRIDPAVLLARVLGDLEGDQTSE  
PPTTTQRLAPDPAVDPPFGW

>comp15173\_c0\_seq1; 132 1 688 LEN=811; translated  
XGGDGPLSSGSHTGFLYDPGQKVGACGDWLLDASIAGAWTSGRRLAHLVVEEKKRGP  
NPPQREERQREREPSSLVGFHNGRFEP SARVKNLGLASLDGPMNEESGGGNRKKQRNN  
AGAGXEGPPHEERQSKPRKKQKQAPTKQERKTKRPGPEQGTGLGIFSLTRFIRGKGRATLV  
EKEQTNLISPNICTAQHSKHRMGEPEEEQTTASFVAAEVGGNCRSTGND

>comp15173\_c0\_seq2; 582 329 2265 LEN=2304; translated  
MSLPNDNDDDRRPPWRGSGFGPDGHTSSGIYPIKKTIVVADGEEMDNENENDNDASER  
TAAETSIGSMSFSSDITSVHVGSGSGLVLPQAAATPISALTLDRRTAGENDSSSSVQS  
SGSSVSVSRLSNDEVALRERRRRNLRQLQQLGIATGVSFSIFLYLLIPTALLMSMILFGG  
VSVAFVTRLAIYMQWEFQRSVLEGRGIGEYLPAGVYEALTSTSLHDFLSDPEGIFGVSEH  
MPYIMLYLIPGLTLEQRNEYVNRLSPIHQRLLRNQQLLGYLHNRNRHRPNEAGDSSFL  
MRLVMGDERLRQQMQNLRPPGSSNNNGNHRLELPPTIPEGASWGDASELAADDDPAS  
TMPNDNSDTHANETIDTNTDLVPFDAPAPVPSALQSLTAEIPAIVSPIVGRAVVLDDPPP

GATGARRRRPPPPTVETTGSREPRASTAPVPSVGGENSEQNAPIPEDVVLFD AIGAAISN  
IVGEAAQTVRTRARESLASSLGGPVFRASVGATALGLGIGAFGLWSGTYDAESLXKAGGA  
APPRPGPGKPCFATERGHEYGHGLLAAGRLGAGGSDARERDHGRGSGSLWDLPPREPRGQ  
TAVRAKELNRRLLGGHGAGCRRSGIASVGVTKKASGPF EASACARG

>comp15173\_c0\_seq3; 160 329 556 LEN=1092; translated  
MSLPNDNDDDDRRPPWRGSGFGPDGHTSSGIYPIKKLTVVADGEEMDNENENDNESENHR  
HSWDSSTTEGSSPRRG

>comp15173\_c0\_seq4; 453 1 1984 LEN=2023; translated  
XGGDGPLSSGSHTGFLYDPGQKVGACGDWLLDASIAGAWTSGRRLAHHLV EEEKKRGPEG  
TLHNENENDNDASERTAAETSIGSMSFSSDITSVVHGVGGSGPLVPQAAATPISALTLD  
TRRTAGENDSSSSVQSSGSSVSVRSLSNDEVALRERRRRNLRLQLQLGIATGVFSIFLY  
LLIPTALLMSMILFGGVSVAFVTRLAIYMQWEFQRSVLEGRGIGEYLPAGVYEALTSTSL  
HDFLSDPEGIFGVSEHMPYIMLYLIPGLTLEQRNEYVNRLSPIHQRLLRNQQLLGYLHN  
RNRHRPGNEAGDSSFLMRLVMGDERLRQQMQNLRPPGSNNNGNNGNHRLELPPTIPEGA  
SWGDASELAADDDPASTMPNDNSDTHANETIDTNTDLVFPDAPAPVPSALQSLTAEIPAI  
VSPIVGRAVVLDDPPP GATGARRRRPPPPTVETTGSREPRASTAPVPSVGGENSEQNAPI  
PEDVVLFD AIGAAISNIVGEAAQTVRTRARESLASSLGGPVFRASVGATALGLGIGAFGL  
WSGTYDAESLXKAGGAAPPRPGPGKPCFATERGHEYGHGLLAAGRLGAGGSDARERDHGR  
GSGSLWDLPPREPRGQTAVRAKELNRRLLGGHGAGCRRSGIASVGVTKKASGPF EASACAR  
G

>comp15173\_c1\_seq1; 474 1 1996 LEN=2611; translated  
STSTSTSLVYDREYYKYYKDGPD SVETFI SEELLKLSLKDRNAIHEEAHGVRCLAPEENQ  
AFLDRALKQLALELDHRLPVARKEAYLQSQQALTYVNTRDFRLRFLRAELFDARKAALR  
LALFLEFAAGVLRSLRPGAPFPQRLHGVRASDGAEGAGAVSAVSGPLWPPCARATGGQA  
NGGAVGIHQGTCAKAVVCATVCCACACACGSGSVGVKQRTTTDPSHLYIVHFSFLPFLD  
IHI IHVEPRSNSVRCAASVPEKTL LYFAYVASNDDADLQRKGFV GILWFLDFSFELKSAP  
ERNRVNILDIMPLRISAIHICTPDT PFFRFVVRGMWAVAXRQGEDFADK VSHRCVGVGALV  
CDALRCVLQCR IELHLYGLRNERRILVRRVLVLDWIGLDLIRVXPVLVVF TIDGRNIFLS  
AIDAFRFLAFGSAGESVELRYALESHGIGTDQMPITWSGSVKLQHTKQWMRILQLLEEGG  
MGTGTIVECPGLTDV VFRKGTAAKHHPGNALFRSRIQALYEESEAF TTARATRTIVTKIR  
DETRQAGGRFLVWQQLLGNQDCWWTEL RDADKIYEKIEHLVREFKYSKAKHQVINRGGD  
KTLRPSSAVAATANDKTSQRYS DSSTDLFLQSGSSDLCTFDCCSPNNS SRGRKRLDEYS  
NSNSS

>comp15173\_c1\_seq2; 498 1 1539 LEN=2154; translated  
STSTSTSLVYDREYYKYYKDGPD SVETFI SEELLKLSLKDRNAIHEEAHGVRCLAPEENQ  
AFLDRALKQLALELDHRLPVARKEAYLQSQQALTYVNTRDFRLRFLRAELFDARKAALR  
LALFLEFALECFGPCALVRPFRLSDF TASELRTVRKGLAQFLPFRDRYGRV LVLVLAGKQ  
MEELSEFIRIKTLLYFAYVASNDDADLQRKGFV GILWFLDFSFELKSAPERNRVNILDIM  
PLRISAIHICTPDT PFFRFVVRGMWAVAFGRERISRIRFHIGESVELRYALESHGIGTDQM  
PITWSGSVKLQHTKQWMRILQLLEEGGMGTGTIVECPGLTDV VFRKGTAAKHHPGNALFR  
SRIQALYEESEAF TTARATRTIVTKIRDETRQAGGRFLVWQQLLGNQDCWWTEL RDADK  
IYEKIEHLVREFKYSKAKHQVINRGGDKTLRPSSAVAATANDKTSQRYS DSSTDLFLQSG  
SSDLCTFDCCSPNNS SRGRKRLDEYSNSNSS

>comp15173\_c1\_seq3; 522 1 1783 LEN=2398; translated  
STSTSTSLVYDREYYKYYKDGPD SVETFI SEELLKLSLKDRNAIHEEAHGVRCLAPEENQ  
AFLDRALKQLALELDHRLPVARKEAYLQSQQALTYVNTRDFRLRFLRAELFDARKAALR  
LALFLEFALECFGPCALVRPFRLSDF TASELRTVRKGLAQFLPFRDRYGRV LVLVLAGKQ  
MEELSEFIRIKTLLYFAYVASNDDADLQRKGFV GILWFLDFSFELKSAPERNRVNILDIM  
PLRISAIHICTPDT PFFRFVVRGMWAVAXRQGEDFADK VSHRCVGVGALVCDALRCVLQCR  
IELHLYGLRNERRILVRRVLVLDWIGLDLIRVXPVLVVF TIDGRNIFLSAIDAFRFLAFG  
SAGESVELRYALESHGIGTDQMPITWSGSVKLQHTKQWMRILQLLEEGGMGTGTIVECPG  
LTDV VFRKGTAAKHHPGNALFRSRIQALYEESEAF TTARATRTIVTKIRDETRQAGGRFL  
VWQQLLGNQDCWWTEL RDADKIYEKIEHLVREFKYSKAKHQVINRGGDKTLRPSSAVA  
TANDKTSQRYS DSSTDLFLQSGSSDLCTFDCCSPNNS SRGRKRLDEYSNSNSS

>comp15173\_c1\_seq4; 450 1 1752 LEN=2367; translated  
STSTSTSLVYDREYYKYYKDGPD SVETFI SEELLKLSLKDRNAIHEEAHGVRCLAPEENQ  
AFLDRALKQLALELDHRLPVARKEAYLQSQQALTYVNTRDFRLRFLRAELFDARKAALR  
LALFLEFAAGVLRSLRPGAPFPQRLHGVRASDGAEGAGAVSAVSGPLWPPCARATGGQA  
NGGAVGIHQGTCAKAVVCATVCCACACACGSGSVGVKQRTTTDPSHLYIVHFSFLPFLD  
IHI IHVEPRSNSVRCAASVPEKTL LYFAYVASNDDADLQRKGFV GILWFLDFSFELKSAP

ERNRVNILDIMPLRISAIHICTPDTPFRRFVVRGMWAVAFGRERISRIRFHIGESVELRYA  
LESHGIGTDQMPITWSGSVKLQHTKQWMRILQLLEEGMGTGTIVECPGLTDVVFRKGTA  
AKHHPGNALFRSRIQALYEESEAF'TTARATRTIVTKIRDETRQAGGRFLVWQQLGNNQD  
CWWTELRDADKIYEKIEHLVREFKYSKAKHQVINRGGDKTLRPSAATAANDKTSQRYSDS  
STDLEFLQSGSSDLCTFDCCSPNNSRGRKRGLDEYSNSNSS

>comp15174\_c0\_seq1; 383 1 1194 LEN=1344; translated  
XPNHEKHRTVQLPLPLPWNAANPAITETRCGFESSAANATAVDSTRSFLVRVDVFDVHV  
HVRVRPDGVPVARTAPAAAAPVGGVSEARPFATVPSGGVAFATTRGTRRQLRRLFSASA  
PASGKDPNGTEPGSTKSYSLEGVGTTGTSVRVSTNGHGNGNGNTNTNTNGHGTEGHQITT  
DVPKSMGGQNLGPQPVELLASWVGCTQATASFVGRQLLAEKPRDRTPREDPTAGTGEPE  
PRNQTAQTSKRRRRRSTVELLLAFERIRAFRDERGALELPVIVRTPETPSRLQRITGRI  
LVAHRVDHHTTPARRDKDNKNDHGRGRGAPNTTTRTELRLDPDELSILKEQTEARCP  
IANMILASGCEIDVEWVLRDTPDGPSTTEGSTDPSSPA

>comp15175\_c0\_seq1; 619 320 2296 LEN=3127; translated  
MSYPVHLENDGSDMNPFAPEGKMFPSGNNSSILEDSPYPLSSYYQTSASISTSTHGG  
MESPRLLTREAERQLQLHRQRGAREHPHYSATSTAPAAVTPTPRAGSLVMRSTTSPHP  
LASAMKPRGQSGGTGETNAAAPEPSIVTPHGSNGDELVLSARKEWKRHGALTDLEET  
RRRDEDRPGTLTVRLVSAENRSDVTNRKYTAYVLRVRLPGSSQNQNVLQLEHRYSEFVKL  
RDAFERCDIHLDAFPFKHLGRVGNWQLARKWAPDQHEELVRYRQVLDLAVLTARY  
NLGDMPHSLARLVYDFLTLSDRPPCDMENTVDDLSSRADGTSGGVLRNNPISFTLGS  
SIRQACRIVETMCMPSRTGIKSDQSIPLDLLQSAKGLIFLTVIKAGFVVSGRIGTGLLIA  
RVDGEDGARSNPQKWSAPCALGTIGMGWMLAGGDI THYLVLTTEDAVEAVLSGGKVQ  
LGTELGVAIGPVGRMSQVSASASNTEWALHPAYSIAHSGKLFAGMSIEGAVLGARNDVNA  
KFYGRSNLTPADLVLDGLMPPPKAAEPLYAALERALATEIPQKGFPSQLFRESSWSSPG  
EDYNGSGDNGHPYRWSMSEAGTPSESGFDSYHPSPEDPHGRGGSLASNVPTPDFYRAY

>comp15175\_c0\_seq2; 619 339 2315 LEN=3146; translated  
MSYPVHLENDGSDMNPFAPEGKMFPSGNNSSILEDSPYPLSSYYQTSASISTSTHGG  
MESPRLLTREAERQLQLHRQRGAREHPHYSATSTAPAAVTPTPRAGSLVMRSTTSPHP  
LASAMKPRGQSGGTGETNAAAPEPSIVTPHGSNGDELVLSARKEWKRHGALTDLEET  
RRRDEDRPGTLTVRLVSAENRSDVTNRKYTAYVLRVRLPGSSQNQNVLQLEHRYSEFVKL  
RDAFERCDIHLDAFPFKHLGRVGNWQLARKWAPDQHEELVRYRQVLDLAVLTARY  
NLGDMPHSLARLVYDFLTLSDRPPCDMENTVDDLSSRADGTSGGVLRNNPISFTLGS  
SIRQACRIVETMCMPSRTGIKSDQSIPLDLLQSAKGLIFLTVIKAGFVVSGRIGTGLLIA  
RVDGEDGARSNPQKWSAPCALGTIGMGWMLAGGDI THYLVLTTEDAVEAVLSGGKVQ  
LGTELGVAIGPVGRMSQVSASASNTEWALHPAYSIAHSGKLFAGMSIEGAVLGARNDVNA  
KFYGRSNLTPADLVLDGLMPPPKAAEPLYAALERALATEIPQKGFPSQLFRESSWSSPG  
EDYNGSGDNGHPYRWSMSEAGTPSESGFDSYHPSPEDPHGRGGSLASNVPTPDFYRAY

>comp15176\_c0\_seq1; 588 1 2223 LEN=2398; translated  
XAAVSPVLFVFTASLYPSLGPQDQTKKQANNRTSVSVVSGRIALEIQIPILIDCRKKTAY  
XSLKGDKNWKNMSLRPMDIDPIDGGPKEIKQPARISNASNNNHANIVPMQITEEEEAR  
QAIDMLRGDDMSARVAAANRLEAVASLLGEQRTREELLPFLLTDGADDEDEVLLALANSLG  
KLIPLVGGGDHVQTIPLPLELLLTVEENAVRDAAAASTLLVANALPDEVFRDKYVSMILIR  
LAQKEWFTARISSAGLIAKAYPRLKSSQHEEFVKLFTDLCKDETPMVRVAAQSLGIMVE  
NVVEATGRASLEEGMVTTTLIPLYETLSSNEQPDVRLQTTENCVVFRVIGKLVSDGK  
ILTENERSLVQRLPLIVATIDDRSWRVRWTAATAAKFADIKAYNPIPGAMDTLIPAYEKL  
LQDPEAEVRTAASFNLAVVAGGCDMSMILPLGSDELDEAAAANFTGKRVSAAERLVKRVTS  
LTEDDSEHVRAALAMVATELAPVLGRDGTITHLVPPILLLLRDAASEVRLNLISSLES  
LVIGVDLLSQSLLPAILDLAQDGKWRIRLAIIEQTPLAKQLGKDFFTDKLSSICVNWLG  
DEIASIRDAATTNIKELTALFGTDWACEYLLPSIDDIRQNSSYLRLRLTAVQACGKMAIEM  
DPAIAQIEVLPILILEMATDTVANIRFNVVAHALGEMGHICETNVYNQIQIHPILSLQDDPD  
RDVRFYAEKASSKLEDFEQK

>comp15176\_c0\_seq2; 417 1 1698 LEN=2504; translated  
XAAVSPVLFVFTASLYPSLGPQDQTKKQANNRTSVSVVSGRIALEIQIPILIDCRKKTAY  
XSLKGDKNWKNMSLRPMDIDPIDGGPKEIKQPARISNASNNNHANIVPMQITEEEEAR  
QAIDMLRGDDMSARVAAANRLEAVASLLGEQRTREELLPFLLTDGADDEDEVLLALANSLG  
KLIPLVGGGDHVQTIPLPLELLLTVEENAVRDAAAASTLLVANALPDEVFRDKYVSMILIR  
LAQKEWFTARISSAGLIAKAYPRLKSSQHEEFVKLFTDLCKDETPMVRVAAQSLGIMVE  
NVVEATGRASLEEGMVTTTLIPLYETLSSNEQPDVRLQTTENCVVFRVIGKLVSDGK  
ILTENERSLVQRLPLIVATIDDRSWRVRWTAATAAKFADIKAYNPIPGAMDTLIPAYEKL  
LQDPEAEVRTAASFNLAVVAGGCDMSMILPLGSDELDEAAAANFTGKRVSAAERLVKRVTS

LTEDDSEHVRAALAMVATELAPVLGRDGTITHLVPPILLLLRDAASEVRLNLISSLES LN  
MVGVDLLSQSLLPAILDLAQDGKWR  
>comp15177\_c0\_seq1; 727 303 2549 LEN=3266; translated  
MNINSVALSNFLVFASLTVSTDAFVPRQAIGPVRTSSSLFVSGLEKEKVEEEDLHQDG  
DDYTPFHFNEGIPTRLRVEGRGIPNRQDKIQLVDTSTYEASLLERWDTDPSRQKGFDEI  
EKMRRYAAGLRMREDGAWVKKPTFFEFVSKQRVNTGAVGPPANAMDTAILFLVQMLSY  
VGLSAFGLTSVPTAEIQKYEGSYISFIKGVLGDDLQTLAGGPLFLLL NKYFLENGPIFN  
LAFGPKSFLVSDPSMAKQILRTAPSDQYCKGMLAEILEPIMGKGLIPADPTTWKVRRA  
VVPAPFHKKWLNRMITLFNRAEILCADLEKKEGKVVDMEERFCSVTLDIIGKAVFNDFG  
SVTKESP I V KAVYRVLREAHRSSSFI PYWNL PYASQWMGGQIEFRDMTMLDDILADLI  
NKAVTTRSEATVEELEERDNDSDPSLLRFLVDMRGEDLSSMVLRDDLMTMLIAGHETTA  
MLTWLTFELAKGDPAMFQEIQNEVRTVLKDKDRPDYDDVVAMKKMRYALIEGLRLYPEPP  
VLIRRARTEDTLPQGSSEMKGDIKVLRGTDIFVSTWNLHRSPDLWEDPYTFDPTRWERPY  
KNPKVKGWAGYDPDKVTGLYPNENAADFAFLPFGGGARKCVGDQFAVLEAAVTF SVLIKN  
FDFEFEGSPDDVGMQTGATIHTMNLKMRPAKVNADDPLHSTGGWVERQHLKRGLNASGR  
PYHSKEEVEYQNKPKHERPDDPGIPMSH  
>comp15177\_c0\_seq2; 293 303 1184 LEN=1244; translated  
MNINSVALSNFLVFASLTVSTDAFVPRQAIGPVRTSSSLFVSGLEKEKVEEEDLHQDG  
DDYTPFHFNEGIPTRLRVEGRGIPNRQDKIQLVDTSTYEASLLERWDTDPSRQKGFDEI  
EKMRRYAAGLRMREDGAWVKKPTFFEFVSKQRVNTGAVGPPANAMDTAILFLVQMLSY  
VGLSAFGLTSVPTAEIQKYEGSYISFIKGVLGDDLQTLAGGPLFLLL NKYFLENGPIFN  
LAFGPKSFLVSDPSMAKQILRTAPSDQYCKGMLAEILEPIMGKGLIPADPTTW  
>comp15177\_c0\_seq3; 506 70 1380 LEN=2097; translated  
MITLFNRAEILCADLEKKEGKVVDMEERFCSVTLDIIGKAVFNDFG SVTKESP I V KAV  
YRVLREAHRSSSFI PYWNL PYASQWMGGQIEFRDMTMLDDILADLINKAVTTRSEATV  
EELEERDNDSDPSLLRFLVDMRGEDLSSMVLRDDLMTMLIAGHETTAAMLTWTLFELAKG  
DPAMFQEIQNEVRTVLKDKDRPDYDDVVAMKKMRYALIEGLRLYPEPPVLIRRARTEDTLP  
QGSSEMKGDIKVLRGTDIFVSTWNLHRSPDLWEDPYTFDPTRWERPYKNPKVKGWAGYD  
PDKVTGLYPNENAADFAFLPFGGGARKCVGDQFAVLEAAVTF SVLIKNFDFEFEGSPDDV  
GMQTGATIHTMNLKMRPAKVNADDPLHSTGGWVERQHLKRGLNASGRPYHSKEEVEYQNK  
PKHERPDDPGIPMSH  
>comp15178\_c0\_seq1; 476 1146 2120 LEN=2795; translated  
MGRRLQSPISSRERNRIHARKTRQRKKEQLQSLQKKAESLKGEQINLKLSINEKNTANI  
LCCLFSNSQASQSSSAEDPRIEALLTRPEEEIPDPSNLSALQPLILPSGAQH SKRGNNNI  
NNLQQLQNL PNDGIDYELLGKDRSKCTPAELDQIRRERNRMHAKRTRDRKRLFMEEMAEMC  
KLLGENLLLHQHLNELNGVKTTPETQPTLPGATQTKSSTSSVAMVSPSLSPPTAPTEYE  
KCPLRCKSALPLTSRNGESFDQMKTL LDAAGVFDLNNNTNMHGSSNKDVTTI SCGDSTDHS  
TRPLKKQRQLHNC SASSSDEDTAE  
>comp15178\_c0\_seq2; 534 274 1368 LEN=2043; translated  
MAQLALGVAHSTNASKK GILDSKRFTESDVLNSTNVAAPKKRNHGERIQR SRERNRIHA  
RKTRQRKKEQLQSLQKKAESLKGEQINLKLSINEKNTANILCCLFSNSQASQSSSAEDPR  
IEALLTRPEEEIPDPSNLSALQPLILPSGAQH SKRGNNNINNLQQLQNL PNDGIDYELLGK  
DRSKCTPAELDQIRRERNRMHAKRTRDRKRLFMEEMAEMCKLLEGENLLLHQHLNELNGV  
KTKPETQPTLPGATQTKSSTSSVAMVSPSLSPPTAPTEYEKCP LRCKSALPLTSRNGESF  
DQMKTL LDAAGVFDLNNNTNMHGSSNKDVTTI SCGDSTDHSTRPLKKQRQLHNC SASSSDE  
DTAE  
>comp15178\_c0\_seq3; 534 127 1221 LEN=1896; translated  
MAQLALGVAHSTNASKK GILDSKRFTESDVLNSTNVAAPKKRNHGERIQR SRERNRIHA  
RKTRQRKKEQLQSLQKKAESLKGEQINLKLSINEKNTANILCCLFSNSQASQSSSAEDPR  
IEALLTRPEEEIPDPSNLSALQPLILPSGAQH SKRGNNNINNLQQLQNL PNDGIDYELLGK  
DRSKCTPAELDQIRRERNRMHAKRTRDRKRLFMEEMAEMCKLLEGENLLLHQHLNELNGV  
KTKPETQPTLPGATQTKSSTSSVAMVSPSLSPPTAPTEYEKCP LRCKSALPLTSRNGESF  
DQMKTL LDAAGVFDLNNNTNMHGSSNKDVTTI SCGDSTDHSTRPLKKQRQLHNC SASSSDE  
DTAE  
>comp15178\_c0\_seq4; 476 1293 2267 LEN=2942; translated  
MGRRLQSPISSRERNRIHARKTRQRKKEQLQSLQKKAESLKGEQINLKLSINEKNTANI  
LCCLFSNSQASQSSSAEDPRIEALLTRPEEEIPDPSNLSALQPLILPSGAQH SKRGNNNI  
NNLQQLQNL PNDGIDYELLGKDRSKCTPAELDQIRRERNRMHAKRTRDRKRLFMEEMAEMC  
KLLGENLLLHQHLNELNGVKTTPETQPTLPGATQTKSSTSSVAMVSPSLSPPTAPTEYE  
KCPLRCKSALPLTSRNGESFDQMKTL LDAAGVFDLNNNTNMHGSSNKDVTTI SCGDSTDHS

TRPLKKQRQLHNCSASSSDEDTAE

>comp15179\_c0\_seq1; 335 160 1875 LEN=2068; translated  
MTGGVNIALVGLPESWSASWSASWCYQSLLISSVATDSTSLPSLAFLSSMNLTREDLYER  
NFFYQAWMADANTKRNASSEDAVAQLNPIDGNDQKMRMSHPLAPMDVLIRYISEHSHQRLE  
QEWNEACQHNTQQQOGATASACRLDETTGSHRKYLVASYSCPIESGNRLHRFMHGLMWAV  
LTNRFTLWRYQTKEICEEYDEPACANEYNTNLITGPSDCDGLERSPWIPSYDEWRDRLG  
MAKDHSDLVRAQTHKDKADATTQPYDDPDGSGAIRVLRSGKQVLLNPGDILTVPISKTKF  
LVQPESRERLRDLRTEGIYFLYGMFLFESIFTMDPSLDPPPELLHHTHPSFAAKANSTGGND  
PAVTTTDTETIFIHRSRHSQHADDYVWPDHMCLELRLYPSNETDSSSSWSAVQAYLRQPRPA  
RCHIYVMSDRSITLKLHHEEIEENMTGCTSSSSDQAPGNNSTATKTTGVSFSEHGVVRAGR  
GYWEDVALAVHARNGMIAFSMYHRHQGLVRTSTALLREIEFRRRMEHHRHHENGPPARA  
LPEFYECTNPWVDDKNFNIRKNREREGGQR

>comp15180\_c0\_seq1; 456 170 1573 LEN=1894; translated  
MKFHGLKCLFLAAVASLVVAEDEPVEYGVVDSFPMHYFDVSTNYPWLPHNVDPVSLVPVEE  
YRDMVPQPLGNKKDFYKDFIQGCIDKFKGKGARCTQNELDRVAMTLRQPQSMQNYTKVGY  
KKIRAPPEVWKMVKKFWANKDNPKSENWGVGNTYTNWKTTHSKMVSVEDSGLRGGGYGL  
KQKLWDAAYDTIAEWTGQELTQCSTLYGIRVYIEGSLVLAHVDRPLVSSAIINVAQDLDE  
PWPLEVIGHDGKAVNVTMEPGDMVLYESHSHVIHGRPFPLQGRFFANIFVHFPEPTGHTLRH  
HNHKT DAGSDVDQKYRDSLARGSGGHENEQNGLPYIIVPGTPEEAHWRAHPGGQKSKGK  
SFTTGSTPAHAAQGGDLKTLKKEVSNMKELIHAKDANGWQPIHEGARAGHLEVVKFLVE  
NGADVNAMTHGDLGGTALYYAKRTFEDDHPVAYLESIGGLDIGPDL

>comp15180\_c0\_seq2; 142 140 262 LEN=583; translated  
MTHGDLGGTALYYAKRTFEDDHPVAYLESIGGLDIGPDL

>comp15180\_c0\_seq4; 212 170 640 LEN=841; translated  
MKFHGLKCLFLAAVASLVVAEDEPVEYGVVDSFPMHYFDVSTNYPWLPHNVDPVSLVPVEE  
YRDMVPQPLGNKKDFYKDFIQGCIDKFKGKGARCTQNELDRVAMTLRQPQSMQNYTKVGY  
KKIRAPPEVWKMVKKFWANKDNPKSENWGVGKIKN

>comp15181\_c0\_seq1; 558 220 2175 LEN=2843; translated  
MHGDNDLNLSQQLDGYETFESHLSDRNMCQKIRKHLDQEEHQHLDEEQIMELTPNIRAS  
DRPINSKRKSNDISITRQMISSRFKQENDELHNPCTPNRSMYFIARNTKATNFEKNLR  
QTQRKMASQRQHSRLEEKQKDGANLLISRVGKSGLLGNQFPSFDETHQLTHSPTSVIN  
NNTNSDFAIKESISLKSFSFSEQRMLNELKKT SRLLDMERNKNLTLTNKLEDTECQLRAI  
RKPQSTDLVIEEYARQIRKLQDRITHYQEALTEKKMRAETEAEELETRRQNRCAEQMD  
MLIFQHIPSVA PVFKDIGPVKYTIEDSFDFVGSYRLGEVLGEGYYSVRVGSLSMOMKF  
AIKILKKT SINRFKDLQIALEAHVLTQYQHONIVRLKEVLHTAHNIYMVTEFCFMDLHK  
YHNDVGLSIESARQVVFVILDP IHHLHRHGICHLDLKPENILLTKPLGSHNAKYEHVRI  
DFGLANMARKPDKNKDI IREGYACGTPGFYAPEMVIQDKFEGRCADMWSLGCILEITLG  
FTQEWIDSYNKADDNPETFQKGLKFCLEISIQYYPGHANLLDLIHACLSIDPLKRITSQ  
DALLHPWLASIEKKLAVGRNVDQLQEERKKELAHAYS DRIALLEGQAGFCA

>comp15182\_c0\_seq1; 163 1 595 LEN=950; translated  
XSNTSSNIEEHFLNSPTCTDGYKQIVTKASTSHLKNPMASKAFKNLPPEVRRELLRHVKP  
PPSASTSFSQQSADHLRRKHKRLEAVGGQRSKSAQYWLMGCVGFVGAATLPYFATKKIG  
NLTD RDDPLTAAQVRRGAFNNSGSRDAGKDHNDLKTGTIYIPKGF AEHLKMQDPDDIDL  
GPDMPVIVQA EKKQRSKQ

>comp15182\_c1\_seq1; 372 1 1957 LEN=2320; translated  
XTIGAGRTEFVAVSEEFQSIHAERQGWHSWMNHAEVMEQYSEQQNIMNSTGQICDESR  
CVSRALPGRYSNKSFTCYGDENGEYYPMMCADGYEPWVVDVVKELSVENSYPWLINM  
IDHFPIDKSTLGDISLKYFTCCSPGMQLLDVNLTRHCSDPISSTIDSENTTMI CDNTHP  
YSRRMEPRLDGNNEWADNSYVCCDSATTKGKNTTSSFLDEAKCVPYHDRYKYELVRNRY  
GKIVPLSCTDPDFKFRQVEKEISVPGSDVKLLVWSWECCKTGSPSVLIKDSAFNTTIYP  
QLALSCSVSILSMTIILGLLIPLLVAIKNESENNGSMRSRSMRLSSTAAGGYVTYNM  
YLLFLAIPDFVANLFFVIVYGSYAKNGTADFQTNVISTFHDNRLALMNETGLMLWVSTN  
SYINAIVCYELLGLLRNCFKRRRCAPPSKKKVALQAATANLLSAVPPFTWWLYCVLTFQA  
EEEVEGSSERDERTRHVWNLMLVISVILPFLVFCYTGITWRNGYMKFQKITPCGAISAR  
DKAFKQLAYYFSRIILIFIVVWVPMISLSMIPSFYKESPEGTAILLLLAIQPIVSYCL  
VLT KPDVRSIFDLLT LSCFRPNTMAQHHLASTNSMGGIASTNSISGIASIR

>comp15183\_c0\_seq2; 541 206 1516 LEN=1516; translated  
MPLSPLHVASSSIAATATTGIEKDEKATADFGAEWKTGNWCWEEPLPNDSDRCTVASGDS  
PPSKVKSEQGERNEPVAKSERSETVPKSERNEPVPKTEADPPP IKAENVRSTGSPDSVPS  
SSLSSPPLAQDSGVKAETKQPLERPKKQEDPGASSLQLPTPPPQGPPEVKPEVKTESHAS

PKMEDEQGDTAHENWAPGCFCWLPDASDLVPEKRRKRKRVPEDDDAEARDVDAPEEKDC  
VSSSTAAMSKKNTTEGSNKKSRRLPPRFPQAAALGCYRDDDESNCDIWSDGDATFDDIVSE  
SDDESQGSILDPNGTIRDAKWEKMYQYLVQYKQKHGTTTHVPSRYKADPKLGQVWTKQRSQ  
CKRKDRIDRLNKIGFVVRVLSSSGYDDDSWETMYQRLVEFKQQHGTTQVPHKYKEEQKLA  
RWVSRQRACRRKDRID

>comp15183\_c0\_seq4; 556 265 1548 LEN=1548; translated  
MGFGPEWKTGDWCWEDQLPDDKNRCTGTNGDSLPRAIKNEEGEREESKSPSIKTDDIGST  
SPPDLVPSSSLPPPPAQGLEGKSELAAEIHEASNSPKKEEPPSVSPTLSSAQGPVKPEV  
EAETHRAASPKKEEQSASSSPQTAPPLPPSQGPEVYPGLKKTNHATESRKKEEPPSAE  
ENAEWTPGCFCWLPDPVASGLDAPERKRKQVPVEADGAEEDLNPRYEDEDVFPSTAAA  
MSNKKITRSNKKLRKFRPQLHRAAVLKSSKYRNDYVSDSESCSDDDATFVDVSSSDHDS  
LESIFQPKDTRNETNAQSLSSAYASQNSIEYESKWPQKEWLTTSNKKWEIMYQRLVEY  
KQKHGTTCPVQYKADPKLANWVRHQAHCKKEDRIDLLNQIGFVWEVMCANNWDEGAWD  
RMYQCLVE

>comp15183\_c0\_seq6; 508 206 1215 LEN=1215; translated  
MPLSPLHVASSSIAATATTGIEKDEKATADFGAEWKTGNWCWEEPLPNDSRCTVASGDS  
PPSKVKSEQGERNEPVAKSERSETVPKSERNEPVPKTEADPPP IKAENVRSTGSPDSVPS  
SSLSSPPLAQDSGVKAETKQPLERPKKQEDPGASSLQLPTPPPQGPVKPEVKTESHHAS  
PKMEDEQGDTAHENWAPGCFCWLPDASDLVPEKRRKRKRVPEDDDAEARDVDAPEEKDC  
VSSSTAAMSKKNTTEGSNKKSRRLPPRFPQAAALGCYRDDDESNCDIWSDGDATFDDIVSE  
SDDESQGSILDPNGTIRDAKWEKMYQYLVVEFKQKHGT

>comp15184\_c0\_seq2; 436 152 1204 LEN=2076; translated  
MDTDYDNDSTRYEEETKGDSSNAFRVVFVARALGYLVGFGSLMLYTPIAVRISLQKHADGL  
VMSTWWLKLSSYLLSDAYVVRKRYDLSTYAETVIITIESLVVLAALVAWYQKTRACFWV  
NLSLLAIGSLCAFTIAPDGVLAAGQLGSVLVNTAALLPQCHHNLSTRTKGDYSPLTATLA  
AVGCLVRIFTTATLNGSDPVLMTFFAAFCANFSLLLQILYFGMAVEGLSFWSVFLADVA  
GSGGSNRSGSDHGNPNHGDLYDAIAEPPPGSGDASTASRPREPAELPSSSERVALRRRPAI  
ELAGCGPQAGGSEFSTVVEAGEAEAGYGTENGGSGSSRGSTPYRNAGVLT

>comp15184\_c1\_seq2; 243 1 1393 LEN=1746; translated  
XARNRNSRCGRNPTATLDRPVYRPCAILQHCHNAPHHAPT KVHPNPSHLLCHIALIRYLP  
PMEEKRPADFPLPPSSRSAYDALTEKNKNGTHNGGTMNRNRELLASTLFWIGFGLFGWYF  
PRSLVHRETSILSLEPPYQ MAGGGTVIVDFELNQPLVDPPTVGNFLLRSTSIGLPLIFLV  
IHAWLSETPAINDAENAGDTNSSPNLNDPGATSTALRFR IQRVANVISAFSAAMGLSEGC  
TVMVKLWVQRRRPNFYALCGFDAANQKCMGTL EHIREFANFSFSGHSSLICCGMTFLVWY  
VHGAANTNGCLRTVLRPFNDTHARGRRFAGLFSPSPRFCSLVVGTCLPWGWALFVAASR  
LVDHWHHPSDVLAGLALGFSACTIAYHHWYPPVWSPNAGIPLDLIPATNIKCNNDTGYSS  
KTNAGLHTTATGSSMITASTVSTSIGAASSTTKRRPNTEPSPSV

>comp15185\_c0\_seq1; 361 543 1850 LEN=2576; translated  
MISILLLVKLLPNVFFSPIGGILADSYDRRNVQITL DVASSWVLVFLWSYHRKSVPICY  
LANFLLDVLAGLYLPNNAIVPQLVGNP SNTEEEENDEELKATTLTGLTWSLMAALGSS  
LGGVMVAVVGIEGCFVIDSVTYLISAGFLYFGVQGNYNVKS KKKTAQSVGTVADETPLL  
LEVQKGSSEETTQEEGEKRLTATNDGDGKSAGTLAMFVRGLQFAFVQEPLVGAYALLKG  
TGALTWGAVDVLNVTF SERGSQTNPSLTALKLGLLFASTGVGCIVGSVITDIF SILSHPK  
CIVRLCVLGYLAISMGLIQMSWFPNVFWSICLSGIVRSNGAAI VWINSTLLIQKFTPEL  
LGRINSIDTSLALLGEALSALGGGWLMDHMGVSPEGLAKMLSLVALWLGILWSPLALRAP  
ITPQEADGGDKDEKE

>comp15185\_c0\_seq2; 443 31 1701 LEN=2427; translated  
MISASDDNKTRAEGEQRRKQTPAPQDKDKSKNANDYKSTVENENKTC SQIVSTKTTLSSE  
QKCNDETENENAYLRLLR TNKNFRYFWLSYVNRIGEWMSYLASISLIQEVTNNRSDDN  
IMISILLLVKLLPNVFFSPIGGILADSYDRRNVQITL DVASSWVLVFLWSYHRKSVPICY  
YLANFLLDVLAGLYLPNNAIVPQLVGNP SNTEEEENDEELKATTLTGLTWSLMAALGS  
SLGGVMVAVVGIEGCFVIDSVTYLISAGFLYFGVQGNYNVKS KKKTAQSVGTVADETPLL  
LLEVQKGSSEETTQEEGEKRLTATNDGDGKSAGTLAMFVRGLQFAFVQEPLVGAYALLK  
GTGALTWGAVDVLNVTF SERGSQTNPSLTALKLGLLFASTGVGCIVGSVITDIF SILSHP  
KCIVRLCVLGYLAISMGLIQMSWFPNVFWSICLSGIVRSNGAAI VWINSTLLIQKFTPEL  
LLGRINSIDTSLALLGEALSALGGGWLMDHMGVSPEGLAKMLSLVALWLGILWSPLALRA  
PITPQEADGGDKDEKE

>comp15186\_c0\_seq1; 620 272 1534 LEN=1534; translated  
MPKTCSCRGVGDGYLQSDDTCMCGGTYPNGWAPILAVQALALCGMIFSVAAALADCSFL  
ELDHRLFFPEDMDENLPLEVTQTQFVGLFTWKKLDGSCYWYNYGSDMEGQVATFHDILGT

DMEKAFFFAAVSASLSFVYFIYLLISFTCSAQVRGVRYFNALFLSVVLTVLQGLTCLAFDS  
SFCYDYGCTFSRSAGLSVVSIIFFFSSGLCFFFTTDYPGSEWNNKPKVLPVPMRTKIAPDE  
PKDKSVPEADQMERGILGDLNDEGTPDIEEVMPDFEDEFIEEEVIDDVEEEVVGEGGEEV  
PKANEETEEKEVAVDATGDEKVLETVNETNQNGDEAEQVARSMEESNDNTETAGDAAPTA  
VTSPEVAAAASPDPESGNGDNTEAIAADPPASPKPQAGGSEEAVEGNEKTEAAAVDPPVS  
P

>comp15186\_c0\_seq2; 553 189 1130 LEN=1130; translated  
MEGQVATFHDILGTDMEKAFFFAAVSASLSFVYFIYLLISFTCSAQVRGVRYFNALFLSVV  
LTVLQGLTCLAFDSSFCYDYGCTFSRSAGLSVVSIIFFFSSGLCFFFTTDYPGSEWNNK  
PVLVPMRTKIAPDEPKDKSVPEADQMERGILGDLNDEGTPDIEEVMPDFEDEFIEEEVID  
DVEEEVVGEGGEEVVKANEETEEKEVAVDATGDEKVLETVNETNQNGDEAEQVARSMEES  
NDNTETAGDAAPTA VTSPEVAAAASPDPESGNGDNTEAIAADPPASPKPQAGGSEEAVEG  
NEKTEAAAVDPPVS

>comp15186\_c0\_seq3; 297 1 459 LEN=649; translated  
EAVEAVEVTLDESSENTETANDAAATTPEAAAATTAEEAATATTPDPESGTDNTETTTAD  
ASPSPPEPEAGGGEPAAESVEVTLTLDQSNENTEASNVEVAASPDPEAGAGESDPAPAAASDGN  
DGSNETAAEAPAASPEAAAAEAVEVTPEEPQT

>comp15186\_c0\_seq4; 629 272 1558 LEN=1558; translated  
MPKTCCSCRGVGDGYLLQSDDTMCGGTYPNGWAPILAVQALALCGMIFSVAAALADCSFL  
ELDHRLFFPEDMDENLPLEVTQTQFVGLFTWKKLDGSCYWYNYGSDMEGQVATFHDILGT  
DMEKAFFFAAVSASLSFVYFIYLLISFTCSAQVRGVRYFNALFLSVVLTVLQGLTCLAFDS  
SFCYDYGCTFSRSAGLSVVSIIFFFSSGLCFFFTTDYPGSEWNNKPKVLPVPMRTKIAPDE  
PKDKSVPEADQMERGILGDLNDEGTPDIEEVMPDFEDEFIEEEVIDDVEEEVVGEGGEEV  
PKANEETEEKEVAVDATGDEKVLETVNETNQNGDEAEQVARSMEESNDNTETAGDAAPTA  
VTSPEVAAAASPDPESGNGDNTEAIAADPPASPKPQAGGSEEAVEAVEVTLTLDQSNKTEA  
AAVDPPVSP

>comp15186\_c0\_seq5; 584 272 1499 LEN=1499; translated  
MPKTCCSCRGVGDGYLLQSDDTMCGGTYPNGWAPILAVQALALCGMIFSVAAALADCSFL  
ELDHRLFFPEDMDENLPLEVTQTQFVGLFTWKKLDGSCYWYNYGSDMEGQVATFHDILGT  
DMEKAFFFAAVSASLSFVYFIYLLISFTCSAQVRGVRYFNALFLSVVLTVLQGLTCLAFDS  
SFCYDYGCTFSRSAGLSVVSIIFFFSSGLCFFFTTDYPGSEWNNKPKVLPVPMRTKIAPDE  
PKDKSVPEADQMERGILGDLNDEGTPDIEEVMPDFEDEFIEEEVIDDVEEEVVGEGGEEV  
PKANEETEEKEVAVDATGDEKVLETVNETNQNGDEAEQVARSMEESNDNTETAGDAAPTA  
VTSPEVAAAASPDPESGNGDNTEAIAADPPASPKPQAGGSEEAVEAVEVX

>comp15186\_c0\_seq6; 556 189 1157 LEN=1157; translated  
MEGQVATFHDILGTDMEKAFFFAAVSASLSFVYFIYLLISFTCSAQVRGVRYFNALFLSVV  
LTVLQGLTCLAFDSSFCYDYGCTFSRSAGLSVVSIIFFFSSGLCFFFTTDYPGSEWNNK  
PVLVPMRTKIAPDEPKDKSVPEADQMERGILGDLNDEGTPDIEEVMPDFEDEFIEEEVID  
DVEEEVVGEGGEEVVKANEETEEKEVAVDATGDEKVLETVNETNQNGDEAEQVARSMEES  
NDNTETAGDAAPTA VTSPEVAAAASPDPESGNGDNTEAIAADPPASPKPQAGGSEEAVEA  
VEVTLTLDQSNKTEAAAVDPPVSP

>comp15186\_c0\_seq7; 511 189 1098 LEN=1098; translated  
MEGQVATFHDILGTDMEKAFFFAAVSASLSFVYFIYLLISFTCSAQVRGVRYFNALFLSVV  
LTVLQGLTCLAFDSSFCYDYGCTFSRSAGLSVVSIIFFFSSGLCFFFTTDYPGSEWNNK  
PVLVPMRTKIAPDEPKDKSVPEADQMERGILGDLNDEGTPDIEEVMPDFEDEFIEEEVID  
DVEEEVVGEGGEEVVKANEETEEKEVAVDATGDEKVLETVNETNQNGDEAEQVARSMEES  
NDNTETAGDAAPTA VTSPEVAAAASPDPESGNGDNTEAIAADPPASPKPQAGGSEEAVEA  
VEVX

>comp15186\_c0\_seq8; 547 189 1133 LEN=1133; translated  
MEGQVATFHDILGTDMEKAFFFAAVSASLSFVYFIYLLISFTCSAQVRGVRYFNALFLSVV  
LTVLQGLTCLAFDSSFCYDYGCTFSRSAGLSVVSIIFFFSSGLCFFFTTDYPGSEWNNK  
PVLVPMRTKIAPDEPKDKSVPEADQMERGILGDLNDEGTPDIEEVMPDFEDEFIEEEVID  
DVEEEVVGEGGEEVVKANEETEEKEVAVDATGDEKVLETVNETNQNGDEAEQVARSMEES  
NDNTETAGDAAPTA VTSPEVAAAASPDPESGNGDNTEAIAADPPASPKPQAGGSEEAVEG  
NEKTEAAAVDPPVSP

>comp15186\_c0\_seq9; 626 272 1531 LEN=1531; translated  
MPKTCCSCRGVGDGYLLQSDDTMCGGTYPNGWAPILAVQALALCGMIFSVAAALADCSFL  
ELDHRLFFPEDMDENLPLEVTQTQFVGLFTWKKLDGSCYWYNYGSDMEGQVATFHDILGT  
DMEKAFFFAAVSASLSFVYFIYLLISFTCSAQVRGVRYFNALFLSVVLTVLQGLTCLAFDS  
SFCYDYGCTFSRSAGLSVVSIIFFFSSGLCFFFTTDYPGSEWNNKPKVLPVPMRTKIAPDE



PKDKSVPEADQMERGILGDLNDEGTPDIEEVMPDFEDEFIEEEVIDDVEEEVVGEGGEEV  
PKANEETEEKEVAVDATGDEKVLTVNETNQNGDEAEQVARSMEESNDNTETAGDAAPTA  
VTSPEVAAAASPDPESGNDNTEAIAADPPASPKPQAGGSEEAVEGNEKTEAAAVDPPVS  
>comp15187\_c0\_seq1; 434 1 1634 LEN=1828; translated  
LASSLFPIAVTVTTAEYYELQDXNPVKNLVKKTLDVPEEAFHNTAISLRDSFGPLPLYH  
TRHTACRLRCPDMLMRGLCAPLSGLRRGALLFLLQLQNAFSSSAGLAAEKQCQAAPSAVR  
KNYHHLVVLVHGYMGSYREQEYLGEAVERETEKLRVGIETDGGREPEATGGESSSCRPFDR  
NHRVAVLNSRANSRLELTADGIAEGGARLAAEISDWIRNERAGVEASASNPPAVLTLSL  
VGNSLGGLYSRYALAELEGLFRDPGDERGTDGVLPLVFCCTTSSPHLGVSQETFIELPKW  
TEPWSSAFGQQTMDLDFGVRSSSTVVTDMCHLDGDGPVDFLRPLGRFQKRIAVANAYNTD  
FLVSVSSGAFLLSSSDSVHHHQDSETLATSSIRLMEDTGHVALQVATLPGEEETLVAGGG  
RGTAGAESSGDTIHDLSQCVNNLDRLGWLKIFIDTRSILPEVLNLGVSELEARPSYTSRE  
LQQHFQYGTVLPPIAHPLNMANSKTDWYRTLTKSGQPVDALAEELLVRDMVELSERAEES  
EEGP

>comp15187\_c0\_seq2; 389 1 1536 LEN=1730; translated  
TAISLRDSFGPLPLYHTRHTACRLRCPDMLMRQHSARGPSGWRGLCAPLSGLRRGALLF  
LLLQNAFSSSAGLAAEKQCQAAPSAVRKNYHHLVVLVHGYMGSYREQEYLGEAVERETEK  
LRVGIETDGGREPEATGGESSSCRPFDRNHRVAVLNSRANSRLELTADGIAEGGARLAAE  
ISDWIRNERAGVEASASNPPAVLTLSLVGNSLGGLYSRYALAELEGLFRDPGDERGTDG  
VLPLVFCCTTSSPHLGVSQETFIELPKWTEPWSSAFGQQTMDLDFGVRSSSTVVTDMCHLD  
GDGPVDFLRPLGRFQKRIAVANAYNTDFLVSVSSGAFLLSSSDSVHHHQDSETLATSSIR  
LMEDTGHVALQVATLPGEEETLVAGGGRGTAGAESSGDTIHDLSQCVNNLDRLGWLKIFI  
DTRSILPEVLNLGVSELEARPSYTSRELQQHFQYGTVLPPIAHPLNMANSKTDWYRTLTK  
SGQPVDALAEELLVRDMVELSERAESEEGP

>comp15188\_c0\_seq1; 1459 1 3601 LEN=3769; translated  
XNNEPTLCVVVNHLKFKDKEGVEDEIWCAEAHVKEKEGDPDLIFEAPRLGIGAIVSFQC  
KFLHPHRHRDMQFPNLLPGQRLTDARVRRALKKINNEPTLCVVLSHKLFEDIWCAEAH  
ITVEKEGDPDLIFEYDDSEQAPKGRGNAEKSSAAKTTPEDDDGKGDAAAETDRDSEDS  
DANQDGEEEQEENPMATIRETFSFATTQRAKFNLA VGLFASVCSGFIQPAIAIAFALVFE  
NFADGANTDGI RRLVLI FVGIGVFASASMIVQSSFLETAAAEMTDTMKTKWFNALLRQDM  
TYYDVLDTSGTATIITNNGRKFKRGLGRKLGDIQFTITAIIGGLVFGFYCSWKLSLLLLLA  
VVPLMAVVTGFVIKLNQTKTARANESYAKAGGIVFYAVSSIRTILSLNAVEEVVAKFEKA  
TQEAFIGATGQVISIGANGALMAVFLFAYLPLTLYGTYL MYREVS ENGC DPSGVAPLNP  
PCKATAFEVFGALMGVTFGGAVLPQVAGSIEEFTAARAACYPALAAMYRKTAEEGQRKED  
AQKDENMRKSLAKRSSIASLPTYAIDSSSPNGLKPTTVGDI EFRDVSFRYPTRLEADV  
YNGLNLIKAGTTVALCGPSGGGKSTIIQLLERFYDPFAGSIRLDGIDVRDLNVKWLKQ  
IGLVSQEPRLFALS IKDNIKVGRPNASMEVEEAAARKANAHDFIQSFPDGYDTMVGDDGS  
QLSGGQKQRISIARALIMKPRIILLDEATSALDSESEIVVQEALDKLIKEDEGNQTVIIV  
AHLRSTIKNADMIAVLSGGKIVETGKHAELISKKGTYGLVQAQKGEKEEEADEAGQPSR  
RSSVAETE VGSAAISTDSEKDDLIK FHEVDFTYPSRPEQQIFRGLEMSVKKGETLAI VGP  
SGQKSTVIQ LIEQFYRPDGGQLFYKGVPM TDLNVGWLRSQMSLVAQEPVLFDM SVRDNI  
RFGKEDATQEDIEKAAKEANCHDFISEFPDGYDTIVGSAGTSQVSGGQKQRIAIARALLR  
DPEILLLDEATSALDSESERVVQALDKITLKNKRTVVQIAHLRSTVRNSDRIIVLNNKG  
VRENGTHDEL MALKGHYHRLVGLQNLDDDKDRKAHSEALQDNKVSESLVNSKNGAEKDPV  
GDYEDYEINPEFDKSNACKARTLAKGDEIYFVIGAVGALLAGRKF AFRTFYHALFADKHC

>comp15188\_c0\_seq2; 249 244 708 LEN=1783; translated  
MYMGEDVDTGEEEEKTSGVIVIESLSNIRTVASLSLEDSRSKDFAMALRKEDPTPMKTNCV  
KGLYTGIGPLFQQQWSFALLFWGGWGLIDRYPNTYTSRGYLISMFSLFLSLSGMAAAQQGA  
TDRPKALDAAGRIFELIERKSAIDPLSTEGKKDV

>comp15188\_c0\_seq3; 249 244 708 LEN=1618; translated  
MYMGEDVDTGEEEEKTSGVIVIESLSNIRTVASLSLEDSRSKDFAMALRKEDPTPMKTNCV  
KGLYTGIGPLFQQQWSFALLFWGGWGLIDRYPNTYTSRGYLISMFSLFLSLSGMAAAQQGA  
TDRPKALDAAGRIFELIERKSAIDPLSTEGKKDV

>comp15188\_c0\_seq5; 1691 1 4664 LEN=5574; translated  
XNNEPTLCVVVNHLKFKDKEGVEDEIWCAEAHVKEKEGDPDLIFEAPRLGIGAIVSFQC  
KFLHPHRHRDMQFPNLLPGQRLTDARVRRALKKINNEPTLCVVLSHKLFEDIWCAEAH  
ITVEKEGDPDLIFEYDDSEQAPKGRGNAEKSSAAKTTPEDDDGKGDAAAETDRDSEDS  
DANQDGEEEQEENPMATIRETFSFATTQRAKFNLA VGLFASVCSGFIQPAIAIAFALVFE  
NFADGANTDGI RRLVLI FVGIGVFASASMIVQSSFLETAAAEMTDTMKTKWFNALLRQDM  
TYYDVLDTSGTATIITNNGRKFKRGLGRKLGDIQFTITAIIGGLVFGFYCSWKLSLLLLLA

VVPLMAVVTGFVIKLNQTKTARANESYAKAGGIVFYAVSSIRTILSLNAVEEVVAKFEKA  
TQEAFIGATGQVISIGANGALMAVFLFAYLPLTLYGTYL MYREVS ENGC D P S G V A P L N P  
PCKATAFEVFGALMGVTFGGAVLPQVAGSIEEFTAARAACYPALAAMYRKTAEEGQRKED  
AQKDENMRKSLAKRSSSIASLPTYAIDSSSPNGLKPPTVVGDI EFRDVSFRYPTRLEADV  
YNGLNLKIKAGTTVALCGPSGGGKSTIIQLLERFYDPFAGSIRLDGIDVRDLNVKWLKQ  
IGLVSQEPRLFALS IKDNIKVGRPNASMEVEVEEAARKANAHD F IQSFPDGYDTMVGDDGS  
QLSGGQKQRISIARALIMKPRIILLDEATSALDSESEIVVQEALDKLIKEDEGNQTVIIVV  
AHRLSTIKNADMIAVLSGGKIVETGKHAELISKKGTYGLVQAQKGEKEEEEADEAGQPSR  
RSSVAETEVEGSAAISTDSEKDDLIK FHEVDFTYPSRPEQQIFRGLEMSVKKGETLAI VGP  
SGQGKSTVIQLIEQFYRPDGGQLFYKGVPM TDLNVGWLRSQMSLVAQEPVLFDM SVRDNI  
RFGKEDATQEDIEKAAKEANCHDFISEFPDGYDTIVGSAGTSQVSGGQKQRIAIARALLR  
DPEILLLDEATSALDSESERVVQKALDKITLKNRNTVVQIAHRLSTVRNSDRIIVLNN GK  
VRENGTHDEL MALKGHYHRLVGLQNLDDDKDRKAHSEALQDNKVSESLVNSKNGAEKDPV  
GDYEDYEINPEFDKSNACKARTLAKGDEIYFVIGAVGALLAGLIFPGWGF AFAYMVELLY  
FNVVIYCNEGSAFQINQLIYPPVASPFENCQQYWDYVRDDMREKSFTISYIYIGLMVAAL  
LGNILVFGYFGTATERMKNRVRDASFNNLVRQEVAYFDTRPVSSITSQLSDDAAMIHSFS  
GEPVRTLV MNTASVLVGLVVSFVYMWPF AFVALGVLPFMAFVRYFVRTVKYRKNV SICI  
SLTLLIPSFLSLQGAEAEQRM YMGEDVDTGEE EKTSGVIVIESLSNIRTVASLSLEDSRS  
KDFAMALRKEDPTPMKTNCVKGLYTGIGPLFQQWSFALLFWGGW LIDRYPNTYTSRGYL  
ISMFSLLFSLSGMAAAQQGATDRPKALDAAGRIFELIERKSAIDPLSTEGKKDV

>comp15188\_c0\_seq6; 1750 1 4567 LEN=5642; translated  
XNNEPTLCVVVNHLKFKDKEGVEDEIWCAEAHVKVEKEGDPDLIFEAPRLGIGAIVSFQC  
KFLHPHRHRDMQFPNLLPGQRLTDARVRRALKKINNEPTLCVVL SHKLFED EIWCAEAH  
ITVEKEGDPDLIFEYDDSEQAPKGRGNAEKSSAAKT TDPEDDDGKG DAAA EKTDRDSEDS  
DANQDGE EEEQ EENPMATIRETFSFATTQRAKFNLA VGLFASVCSGFIQPAIAIAFALVFE  
NFADGANTDGI RRLVLI FVGIGVFASASMIVQSSFLETAAAEMTDTMKT KWFNALLRQDM  
TYVDVLD TSGTATIITNNGRKFKRGLGRKLG DGIQFTITAI GGLVFGFYCSWKLS LLLLLA  
VVPLMAVVTGFVIKLNQTKTARANESYAKAGGIVFYAVSSIRTILSLNAVEEVVAKFEKA  
TQEAFIGATGQVISIGANGALMAVFLFAYLPLTLYGTYL MYREVS ENGC D P S G V A P L N P  
PCKATAFEVFGALMGVTFGGAVLPQVAGSIEEFTAARAACYPALAAMYRKTAEEGQRKED  
AQKDENMRKSLAKRSSSIASLPTYAIDSSSPNGLKPPTVVGDI EFRDVSFRYPTRLEADV  
YNGLNLKIKAGTTVALCGPSGGGKSTIIQLLERFYDPFAGSIRLDGIDVRDLNVKWLKQ  
IGLVSQEPRLFALS IKDNIKVGRPNASMEVEVEEAARKANAHD F IQSFPDGYDTMVGDDGS  
QLSGGQKQRISIARALIMKPRIILLDEATSALDSESEIVVQEALDKLIKEDEGNQTVIIVV  
AHRLSTIKNADMIAVLSGGKIVETGKHAELISKKGTYGLVQAQKGEKEEEEADEAGQPSR  
RSSVAETEVEGSAAISTDSEKDDLIK FHEVDFTYPSRPEQQIFRGLEMSVKKGETLAI VGP  
SGQGKSTVIQLIEQFYRPDGGQLFYKGVPM TDLNVGWLRSQMSLVAQEPVLFDM SVRDNI  
RFGKEDATQEDIEKAAKEANCHDFISEFPDGYDTIVGSAGTSQVSGGQKQRIAIARALLR  
DPEILLLDEATSALDSESERVVQKALDKITLKNRNTVVQIAHRLSTVRNSDRIIVLNN GK  
VRENGTHDEL MALKGHYHRLVGLQNLDDDKDRKAHSEALQDNKVSESLVNSKNGAEKDPV  
GDYEDYEINPEFDKSNACKARTLAKGDEIYFVIGAVGALLAGLIFPGWGF AFAYMVELLY  
FNVVIYCNEGSAFQINQLIYPPVASPFENCQQYWDYVRDDMREKSFTISYIYIGLMVAAL  
LGNILVFGYFGTATERMKNRVRDASFNNLVRQEVAYFDTRPVSSITSQLSDDAAMIHSFS  
GEPVRTLV MNTASVLVGLVVSFVYMWPF AFVALGVLPFMAFGAEAEQRM YMGEDVDTGEE  
EKTSGVIVIESLSNIRTVASLSLEDSRSKDFAMALRKEDPTPMKTNCVKGLYTGIGPLFQ  
QWSFALLFWGGW LIDRYPNTYTSRGYLISMFSLLFSLSGMAAAQQGATDRPKALDAAGR  
IFELIERKSAIDPLSTEGKKDV

>comp15188\_c0\_seq7; 1750 1 4567 LEN=5477; translated  
XNNEPTLCVVVNHLKFKDKEGVEDEIWCAEAHVKVEKEGDPDLIFEAPRLGIGAIVSFQC  
KFLHPHRHRDMQFPNLLPGQRLTDARVRRALKKINNEPTLCVVL SHKLFED EIWCAEAH  
ITVEKEGDPDLIFEYDDSEQAPKGRGNAEKSSAAKT TDPEDDDGKG DAAA EKTDRDSEDS  
DANQDGE EEEQ EENPMATIRETFSFATTQRAKFNLA VGLFASVCSGFIQPAIAIAFALVFE  
NFADGANTDGI RRLVLI FVGIGVFASASMIVQSSFLETAAAEMTDTMKT KWFNALLRQDM  
TYVDVLD TSGTATIITNNGRKFKRGLGRKLG DGIQFTITAI GGLVFGFYCSWKLS LLLLLA  
VVPLMAVVTGFVIKLNQTKTARANESYAKAGGIVFYAVSSIRTILSLNAVEEVVAKFEKA  
TQEAFIGATGQVISIGANGALMAVFLFAYLPLTLYGTYL MYREVS ENGC D P S G V A P L N P  
PCKATAFEVFGALMGVTFGGAVLPQVAGSIEEFTAARAACYPALAAMYRKTAEEGQRKED  
AQKDENMRKSLAKRSSSIASLPTYAIDSSSPNGLKPPTVVGDI EFRDVSFRYPTRLEADV  
YNGLNLKIKAGTTVALCGPSGGGKSTIIQLLERFYDPFAGSIRLDGIDVRDLNVKWLKQ  
IGLVSQEPRLFALS IKDNIKVGRPNASMEVEVEEAARKANAHD F IQSFPDGYDTMVGDDGS

QLSGGQKQRISIARALIMKPRIILLDEATSALDSESEIVVQEALDKLIKEDEGNQTVIVV  
AHRLSTIKNADMIAVLSGGKIVETGKHAELISKKGTYGLVQAQKGEKEEEEADEAGQPSR  
RSSVAETEVEGSAAISTDSEKDDLIKFEVDFTYPSRPEQQIFRGLEMSVKKGETLAIIVGP  
SGQGKSTVIQILIEQFYRPDGGQLFYKGVPMPTDLNVGWLRSQMSLVAQEPVLFDM SVRDNI  
RFGKEDATQEDIEKAAKEANCHDFISEFPDGYDTIVGSAGTSQVSGGQKQRIAIARALLR  
DPEILLDEATSALDSESERVVQKALDKITLKNRNTVVQIAHRLSTVRNSDRIIVLNNGK  
VRENGTHDELMALKGHYHRLVGLQNLDDDKDRKAHSEALQDNKVSESLVNSKNGAEKDPV  
GDYEDYEINPEFDKSNACKARTLAKGDEIYFVIGAVGALLAGLIFPGWGFAYMVELLY  
FNVVIYCNEGSAFQINQLIYPPVASPFENCQQYWDYVRDDMREKSFTISYIYIGLMVAAL  
LGNILVFGFTATERMKNRVRDASFNNLVRQEVAYFDTRPVSSITSQLSDDAAMIHSFS  
GEPVRTLVMTASVLVGLVVSFVYMWPFVAFVALGVLPFMAFGAEAEQRMVMGEDVDTGEE  
EKTSGVIVIESLSNIRTVASLSLEDSRSKDFAMALRKEDPTPMKTNCKVGLYTGIGPLFQ  
QWSFALLFWWGGWLD RYPTNTYTSRGLYSMFSLLFSLSGMAAAQQGATDRPKALDAAGR  
IFELIERKSAIDPLSTEGKKDV

>comp15188\_c0\_seq8; 1691 1 4664 LEN=5739; translated  
XNNEPTLCVVVNHKLFKDKKEGVEDEIWCAEAHVKEVEKEDPDLIFEAPRLGIGAIVSFQC  
KFLHPHRHRMQFPNLLPGQRLTDARVRRALKKINNEPTLCVVLSHKLFEDIWCAEAH  
ITVEKEGDPDLIFEYDDSEQAPKGRGNAEKSSAAKTTPEDDDGKGDAAAETDRDSEDS  
DANQDGEQEEENPMATIRETFSFATTQRAKFNLA VGLFASVCSGFIQPAIAIAFALVFE  
NFADGANTDGI RRLVLI FVGIGVFASASMIVQSSFLETA AEMTDTMKT KWFNALLRQDM  
TYVDVLDTSGTATIITNNGRKFKRGLGRKLGDIQFTITAIIGLVFGFYCSWKLSLLLLLA  
VVPLMAVVTGFVIKLNQTKTARANESYAKAGGIVFYAVSSIRTILSLNAVEEVVAKFEKA  
TQEAFIGATGQVISIGANGALMAVFLFAYLPLTLYGTYL MYREVS ENGC D P SGVAPLNP  
PCKATAFEVFGALMGVTFGGAVLPQVAGSIEEFTAARAACYPALAA MYRKTAEEGQRKED  
AQKDENMRKSLAKRSSIASLPTYAIDSSSPNGLKPP TVVGDIEFRDVSFRYPTRLEADV  
YNGLNLKIKAGTTVALCGPSGGKSTIIQLLERFYDPFAGSIRLDGIDVRDLNVKWLKQ  
IGLVSQEPRLFALS IKDNIKVGRPNASMEVEEAARKANAHDFIQSFPDGYDTMVGDDGS  
QLSGGQKQRISIARALIMKPRIILLDEATSALDSESEIVVQEALDKLIKEDEGNQTVIVV  
AHRLSTIKNADMIAVLSGGKIVETGKHAELISKKGTYGLVQAQKGEKEEEEADEAGQPSR  
RSSVAETEVEGSAAISTDSEKDDLIKFEVDFTYPSRPEQQIFRGLEMSVKKGETLAIIVGP  
SGQGKSTVIQILIEQFYRPDGGQLFYKGVPMPTDLNVGWLRSQMSLVAQEPVLFDM SVRDNI  
RFGKEDATQEDIEKAAKEANCHDFISEFPDGYDTIVGSAGTSQVSGGQKQRIAIARALLR  
DPEILLDEATSALDSESERVVQKALDKITLKNRNTVVQIAHRLSTVRNSDRIIVLNNGK  
VRENGTHDELMALKGHYHRLVGLQNLDDDKDRKAHSEALQDNKVSESLVNSKNGAEKDPV  
GDYEDYEINPEFDKSNACKARTLAKGDEIYFVIGAVGALLAGLIFPGWGFAYMVELLY  
FNVVIYCNEGSAFQINQLIYPPVASPFENCQQYWDYVRDDMREKSFTISYIYIGLMVAAL  
LGNILVFGFTATERMKNRVRDASFNNLVRQEVAYFDTRPVSSITSQLSDDAAMIHSFS  
GEPVRTLVMTASVLVGLVVSFVYMWPFVAFVALGVLPFMAFVRYFVRTVKYRKNVSI  
SLTLLIPSFLSLQGAEEAEQRMVMGEDVDTGEE EKTSGVIVIESLSNIRTVASLSLEDSRS  
KDFAMALRKEDPTPMKTNCKVGLYTGIGPLFQQWSFALLFWWGGWLD RYPTNTYTSRGLY  
ISMFSLLFSLSGMAAAQQGATDRPKALDAAGRIFELIERKSAIDPLSTEGKKDV

>comp15189\_c0\_seq1; 529 251 2202 LEN=2344; translated  
MEREVAEAEKTEASTTIA SIEAAAAEVIAXVDAHDVKSIALALISEENTD GSGYEYF  
NNSVVEEGDPLNDSANTESTATSCSEVSINWFHNENDHENGNI LNPNNGDNRIANANA  
NANALYKPRFYYSPLDLLDKATLPTTPRTQVLDALASVKQSWSVIEATTEGTHEEIVEPY  
REHFQARSVPPELLKYVETNVADHECVFEAIRILSWLRSLLAVGQSPTKQYGNKERENTYR  
DINLVFLEAHAVAILVPISSHKTTDGFHLSTHKHVCLFPAIWNLLMEVVLS PQAIAYFR  
DASHSTGLLNIGIFEPTTTKKNHHARRKQKRKHREKQDQIRKLVAAVDLGLDRDEYAMS  
SLWMAQALRLTMLLRTSDDTQTRWAALVSPSTETATTTAATTGLEPNDDVRS AIWERS  
ITSKFQTLLESNTHKNSGGEKDHCCSTQYPWFKYEEVSAGAI SFFWCCLFDRTDALSDSL  
DREALSRFVHVMTNEFPNSKILQSEGIQILSPPREASTHHHKSSANKSDNSSNHHCYCSE  
PSPQYPLSSSFVCPVPFALNGTRTILVGDPTRARCLYDDPLASLSTSYHNLSNGSKSNR  
QHTAPSHHPKRLRLKLLNTTWASCFADLCAFSDEQHENDCDVDGDDGILH

>comp15190\_c0\_seq1; 816 69 2099 LEN=2310; translated  
MKYLSAALVALSASTA QARLPFGFTPVSLPTPTAPAPVAAPVPVAPT DAPT K GAVCDPV  
LDPDYESDSYVVVQYDP SKGDCYNLSSNATLTAIGDAYRAYAQVDGACTQNGAFCEVYG  
AEVKATQPSNTILLRVGTYCNAGTYLNGDKTSCGVGMYTGSDATPLVDFARKMQSAIST  
GEACSCPRPDAATVVATMNEAIRQSIPCPALPAVAGVPTPAPTAL E FITATEQLCVTECH  
NTTKGEFTYSSAGVSEPCDRPKLTRKPSKRPTKYPTRRPTKRPTKYPTKRPTKRPTKFP  
KSPTAEPTAENDPTAAPSEEPAPTDEPAPTDEPVEPTAEVPDPTAAPVEPTAAPVAPTPE

PTPESTNSTGRFLASAGDENFVEVTSQVVKIDTFAFAYEKAEDHNVCSGVDKLVNNAAN  
RAMCENYLNPLVRQDESECSSENAIPKIWYSVSAHNEATLSQVGVAASNPDFEHRHFGD  
EEALAFVKENCGEHVASAYECLAPPAFRGDLFRFCALHTTGGVYMDADMLPLVPIDDL  
YDPCAVATVGHDPQGRPKQMKILAGRAGAPIFKCMLDKIVGNVKSRYYPNTNPLALTGPML  
LHECYEDHSEGVSVTYRDRTRNAAYPYSGMRAGDDLLAFEIPAHNKNYKIDFDDHEVYRDT  
CSFADDAAVGATAGSM

>comp15190\_c0\_seq2; 809 69 2081 LEN=2292; translated  
MKYLSAALVALSASTAQARLPPGFPTVSLPTPTAPAPVAAPVPVAPTDAPTKGAVCDPV  
LDPDYESDSYVVVQYDPSKGDYCNLSSNATLTAIGDAYRAYAQVDGACTQNGAFCEVYG  
AEVKATQPSNTILLRVGTTCNAGTYLNGDKTSCGVGMYTGSATPLVDFARKMQSAIST  
GEACSCPRDAATVVATMNEAIRQSIPCPALPAVAGVPTPAPTALEFITATEQLCVTECH  
NTTKGEFTYSSAGVSEPCDRPKLTKRPSKRPTKYPTRRPTKRPTKYPTKRPTKRPTKFT  
KSPTAEPTAENDPTAAPSEEPAPTDEPVEPTAEPVDPTAAPVEPTAAPVAPTPEPTPEST  
NSTGRFLASAGDENFVEVTSQVVKIDTFAFAYEKAEDHNVCSGVDKLVNNAANRAMCEN  
YLNPLVRQDESECSSENAIPKIWYSVSAHNEATLSQVGVAASNPDFEHRHFGDEEALAF  
VKENCGEHVASAYECLAPPAFRGDLFRFCALHTTGGVYMDADMLPLVPIDDL  
YDPCAVATVGHDPQGRPKQMKILAGRAGAPIFKCMLDKIVGNVKSRYYPNTNPLALTGPMLLHECYE  
DHSEGVSVTYRDRTRNAAYPYSGMRAGDDLLAFEIPAHNKNYKIDFDDHEVYRDTCSFADD  
AAVGATAGSM

>comp15191\_c0\_seq1; 203 162 468 LEN=823; minus strand; translated  
MNALRIPAVATFGTEERLVVVFVCLFVCSAPKQYGTIASRSGWIRQATSTAATSSALDDPV  
RDDLLEPFLVSVWCLLAAFVVRVGIIEERIVAEVSGGRWCW

>comp15191\_c0\_seq2; 254 1 930 LEN=930; translated  
SGXAAGKTPPLFQTYGPGSSAGAHRIDAGAGSTGTGTGAPPACPALAHRPDAIRCARPFR  
CSAAREPLVVLVVGAFGKEGVGLLPALARVVRVPSGPRARLAASSSPARRPGLSPRHKD  
VPRGVLHGLQPAACPGGFFAAPAASGPLPAVPGKPLVPPPGGRGAGHAASRRGGEARVGR  
PLGVDRGRVVLVHVEDAEKVVVEVPEVPELRYRGGVPPGRAPVAAVAVASEAVAAV  
VAEAVVAVAAASGCPRSPATASVAGDSQLAAGSGEESFALELLRDFDEDGALAWGAVNR  
DDGKDEEDD

>comp15191\_c0\_seq4; 235 1 884 LEN=1321; minus strand; translated  
XSSSSSLPSSLFTAPQAMGTVLVEIPEELESEGGFFPASGGKLGVPNGSRRRRGPRASG  
SSSNNSNLGNSSNSLGSNSHSGHRRSAGRDDSSAVEELGNHLGDLNLLSVFHMDD  
EYDAASIYTKGTADTSLSSSSGSSVASTASTRRRHKGAFNRNRKAGSGRGGGKTAGTSS  
WLESMQNSRRNVFVAGGETWTPGRGWGGTRSKTNPGTAWDADPGDCWEADSFFAESTNE  
HWTSGSRAAEQRNRRARQMASGRWAKAGQAGGAPVPLPPPASIRCAPALLPGP

>comp15191\_c0\_seq5; 235 1 884 LEN=1213; minus strand; translated  
XSSSSSLPSSLFTAPQAMGTVLVEIPEELESEGGFFPASGGKLGVPNGSRRRRGPRASG  
SSSNNSNLGNSSNSLGSNSHSGHRRSAGRDDSSAVEELGNHLGDLNLLSVFHMDD  
EYDAASIYTKGTADTSLSSSSGSSVASTASTRRRHKGAFNRNRKAGSGRGGGKTAGTSS  
WLESMQNSRRNVFVAGGETWTPGRGWGGTRSKTNPGTAWDADPGDCWEADSFFAESTNE  
HWTSGSRAAEQRNRRARQMASGRWAKAGQAGGAPVPLPPPASIRCAPALLPGP

>comp15192\_c0\_seq1; 460 297 2509 LEN=2692; translated  
MAKGSVGRRTCLEKNFIVIAALTTGFVLVHPRPVDATLLGETAGIGDTPDPTDVKHRFL  
REDNDFYQSEDEDDYEDDEDEDEYKDDDPYRHTEAPTPDP  
IWKDLDDYEWMFENYHG DY  
GLNNVIFADDFENRDETELLSSYNVDALSYPNRNSVVLNISAGVVHYELLTHIEKNRMTRR  
LLKTMSSVVLNKYETETGLGLPVVVTDRDFLGKEPIERETEHRDSVGNKGSLLGGINI  
THYI  
PKVSDRHLVKMVLHNTIVHTYDWLEMTVIYTVQRKRKDI  
VELPEEDNDTGEEDSPSKIR  
AYMSNFNKPVNRRKIRTKIEHICQYALEDSIDTGLFWDTLGMVFSRGHKS  
MHLILGKTPY  
MPYAKGIGAVRAPGHEYSKQHYCPDQIPVDCGHCCPPPMVSGDVP  
AWVDPNENQSSME  
SNYQHPNGTYVPIADSPLEVEWSIREWVGLGMSFTTVL  
VVVLSLVAHFVSERRNSQRL  
WGAALTSEGVEEMLQVGRFRQGPPTAGDDPRTQQQ  
QELQREFYLVQVDFKGRGPGYNDEN  
SLLKGGIERERNRANGRGTPVSTTAPTSSANTNHQRHDF  
AXLRRAPEVLRRTAASDTEETN  
FVTALQCTAIGCTDGFTRPTIGNVSSMSASGLLIVASSW  
STPARAQVETYVQIRFHPWKH  
TYRSGCIPIALGGSEVGLHRGVYALHHTAWWIGTLVPMQ  
VYGMCSRELWWSGRTHNPRR  
GGKDSGVPRGSTTNRV

>comp15192\_c0\_seq2; 428 297 2704 LEN=2704; translated  
MAKGSVGRRTCLEKNFIVIAALTTGFVLVHPRPVDATLLGETAGIGDTPDPTDVKHRFL  
REDNDFYQSEDEDDYEDDEDEDEYKDDDPYRHTEAPTPDP  
IWKDLDDYEWMFENYHG DY  
GLNNVIFADDFENRDETELLSSYNVDALSYPNRNSVVLNISAGVVHYELLTHIEKNRMTRR  
LLKTMSSVVLNKYETETGLGLPVVVTDRDFLGKEPIERETEHRDSVGNKGSLLGGINI  
THYI

PKVSDRHLVKMVLHNITVHTYDWLEMTVIYTVQRKRRKDIVELPEEDNDTGEEDSPSKIR  
AYMSNFNPKVNRKIRTKIEHICQYALEDSIDTGLFWDTLGMVFSRGHKSMHLILGKTPY  
MPYAKGIGAVRAPGHEYSLKQHYPDQIPVDCGHCCPPPMVSGDVPWVDPNNENQQSME  
SNYQHPNGTYVYPIADSPLEVEWSIREWVGLGMSFTTVLVVVLSLVAHFVSERRNSQRL  
WGAALTSEGEVEMLVQVGRFRQGPPTAGDDPRTQQQQELQREFYLQVFDKGRGPGYNDEN  
SLLKGGIERERNGARGGTPVSTTAPTSSANTNHQRHDFAGCDVPPRSYGGPQQATPKKQL  
RNTSHHGAMQCNCNMHRRFHAPNDWERLLYECFGLAYCCFFLVDSSTSLSGDIRTDPVSS  
LETYVQIRLHPDRFGWIRGGLAPWCVCIAPHRLVDRNVGTDAGIRNVFRSGVVVVVGTHTPQ  
STTRGGKGFSGSKRLDHEQSVTNRTNCMTGWSNQQTRNNSVCKIPSSSLGANDEDNNNNNI  
FIITPPVLFKASVMKMYSVARX

>comp15193\_c0\_seq1; 962 178 2853 LEN=3257; translated  
MTSSSDAAKLRDEIFNLQEKLRAGESSHGDGDSGSDDDDESDVVVTSFVLESTLVPALK  
DLLKDQDESLTSSLSAPNSFSEERKDASETSNDAAADDEDARTDRVAYTEAILECLAS  
FAAATCAAPASNRDVPSPVSSYNSLSFKRNTTTTVPKPKYKTPKKAKPISLSTPREDKLF  
VTCGAFEMAVYLLRVVLEDHTKKVSSSSWSKHKRSALDTFDSIGVEDSVANVQIESTLPT  
NKIPILVMNIVACLTHNACDNLKNDRIPLHLKNIHVHQSMMIFLPSAEVQRYGCWTLKLSLS  
NPLLQELIAAGSVSILVKAMKCHPCDVGVEHGNNALYNLLPLLTVCYKNRSDSPRSNGS  
DSMLPMNQDSNHSSSTPPSPCGKIEIDGKQLEDYSSLVPSLPAIVLRGMEEHPDHLAVQQ  
YGLLVLTRLCQQDQETYEIVVSEGGLTALLNVVSMATHTYSALADTGSGRNSRGAHTDC  
CYSSTSTQSI AERHDCLAQMACQFLRDLRPTNSSMDILRI IAVKGGTQTVLGVLDHYNK  
EHIGGGHAYHAHNRFAVNI IDPAMACLRNLTNEDNRSEIMTSLKQVHAARQQAEESGS  
PKHQLPQASGSVEIVPIVLATMDLYPLDAAIQAYGCDLLGRLTQGEELARMELIESTIVV  
HAQQNEERRSTNGRSRLWNRSTTEQVTGDESLEQSLSSDGAEMIDLSDKFGSMMGSSSSD  
SDCRAVGGSFHGSRTGTVDLSLTVVRAMMNRSHSGVQERSVLLLLAMVLDRAIVASSN  
TSSFRASASPSASSYLIQRLQEVYEGQLEQRDGTGDHTSPTFLSFLQSTSVTPKGAERLK  
KLIQVVEDYDRKTKRASISVNSRGGGETNGRVGTFLARRWNKLTGDGLAQR

>comp15193\_c0\_seq2; 969 178 2868 LEN=3272; translated  
MTSSSDAAKLRDEIFNLQEKLRAGESSHGDGDSGSDDDDESDVVVTSFVLESTLVPALK  
DLLKDQDESLTSSLSAPNSFSEERKDASETSNDAAADDEDARTDRVAYTEAILECLAS  
FAAATCAAPASNRDVPSPVSSYNSLSFKRNTTTTVPKPKYKTPKKAKPISLSTPREDKLF  
VTCGAFEMAVYLLRVVLEDHTKKVSSSSWSKHKRSALDTFDSIGVEDSVANVQIESTLPT  
NKIPILVMNIVACLTHNACDNLKNDRIPLHLKNIHVHQSMMIFLPSAEVQRYGCWTLKLSLS  
NPLLQELIAAGSVSILVKAMKCHPCDVGVEHGNNALYNLLPLLTVCYKNRSDSPRSNGS  
DSMLPMNQDSNHSSSTPPSPCGKIEIDGKQLEDYSSLVPSLPAIVLRGMEEHPDHLAVQQ  
YGLLVLTRLCQQDQETYEIVVSEGGLTALLNVVSMATHTYSALADTGSGRNSRGAHTDC  
CYSSTSTQSI AERHDCLAQMACQFLRDLRPTNSSMDILRI IAVKGGTQTVLGVLDHYNK  
EHIGGGHAYHAHNRFAVNI IDPAMACLRNLTNEDNRSEIMTSLKQVHAARQQAEESGS  
PKHQLPQASGSVEIVPIVLATMDLYPLDAAIQAYGCDLLGRLTQGEELARMELIESTIVV  
HAQQNEEGENEERRSTNGRSRLWNRSTTEQVTGDESLEQSLSSDGAEMIDLSDKFGSMMG  
SSSSSDCRAVGGSFHGSRTGTVDLSLTVVRAMMNRSHSGVQERSVLLLLAMVLDRAI  
VASSNTSSFRASASPSASSYLIQRLQEVYEGQLEQRDGTGDHTSPTFLSFLQSTSVTPK  
AERLKKLIQVVEDYDRKTKRASISVNSRGGGETNGRVGTFLARRWNKLTGDGLAQR

>comp15194\_c0\_seq1; 1162 692 5503 LEN=5596; translated  
MTTEEVNAHSFELAGLLQTKLFHMLQKEGVFHIENDNEEKVHKQDLLLLVATTTLCPLLP  
WYWKHTRQQLNQOENELLWNVYISCFELGRRSLVHPREYDTGRGRRGGDGVFGTGGVAS  
LLRRRALHLLDVITTTTHSTSKEDCLYWKDFILCAETFEMEGERHIVDQIWPVIAKLIR  
EAWKNKNCIHDRNIDGGIPLVTRPWIELLLGRVLSSEQMAVRKLGILRILQAMGRPVT  
DSLQKNVEDEIKTSGSEVDVEMEVSHDTHNENNNNP SNKKRRESKSHKQHRQPKKKKTS  
TESTSLDVLSTEMLLRFLSPETFLWDILVPSWDSLGGSSVGYTIHIVESKHKRKRNNNSGI  
PMEKFSKIDMIPLFCQTI RNYA ILADAASLETYSLLSWSPSLFWKGIWNWNRVGCCHLSA  
KTHLSVFRSVSDLLEAEARNEGK LATNNGASSTIQMVPMDSDLEAIRFTYVKLFRHGL  
MVLTHRKQLLHMLSLMLS KAKLYTNSEKRNWTPKLVLSLLGLFSSSYFPLDSEDEVVDWS  
IEKEEMLMRIGIFIEQLNSQASAKNQOQMPFIVTVGAALATAFVTGQVSLPTNTDGLA  
SPPRWNPVEGSSKSDVEMGWAVSLFCTLAVSRREYTS GELLWPAIHKGLSQSSVILSK  
DHNSKTENVARALLLENGCRLRQLSGLGNGDLVVS PKTQQIMP PPPNIEQMLQNSIDFI  
QWHIRMLLGTDSHRVETEDPKNKRFTGSYASLSQLKILHQSYSPSSQAI SGVMNDVLHNC  
TGNLSVLMEGNDSSSGEGDVKKLLLVLGLIYGACSCGAEPGKSYVSLCRLLMRTGLTTS  
EGQPKAWVKSSRSIIQYGRWAAISCI LPKILEMTSENVCNQTOGEIDNLVDDLIKEGMAA  
SSITPSDAIKPLFDCLIISSRQWICASSKYDPHQVENMYIQNLTDITKTL LSLINQSTRS  
RESAYMLNEFCALIFHSKLLREYERI QSVPLKCMTP IRDAFRQLIKMAGR RRPQITRAV

LCRITVGLGNGNKDSMGISSIPYRDDIVQLLLHKEAKKDESSTNQSAEELPTSGVMEIP  
ANTNELSVTRAFLLVFFCQLPDPEAGLHVDVVKELLHYVILELLKQATPEKGTHTPSLVMK  
GTPTYCIKIRGWQALCILSRFVTNEIAPSVCKTVFQAMNELLHNQIRYFLENFTIRCSMM  
HSTIFGEAFLQDISRTDLSLQHVSSLMIMGGNFILGKYQLDYFTQSDKDKSRAKRILAGV  
IPWLSSTQGFSAIAQLVVYVNLIPRVTSESMTNDNDWFLKSTYNFLDQONREMKRLRNKQ  
TKFFDQYDCESELCTPEGVFSIRVDESQEADPVHMIDAIKESLRNTYDEAHESDAPSWKQM  
EELMADNDANS DSEGENIGSAVQRKIIPLDLNLTLLEDLKEKRLSTATGAHKQNLIVCA  
SLVDKVPNLAGLARTCEIFAAQSLVVPDMSVAKMDNFQISVGAVDWIDMEEVKEEGLLL  
WLEKKTEGFWIVGLEQTSSSIPLHQIDI PNFAANNKTVLLL GKEKEGIPVQYLQAVDT  
CVEIPQFGMIRSLNVHVS GAITIWELTRRRLMQTEKQVMHKN

>comp15195\_c0\_seq1; 749 344 2146 LEN=2597; translated  
MTTVSPTNGSDEALLHTDNDGDS PENTAKKPSLLRNQLLRRTTTRCTKXVSSPEAAERM  
ALNSVAIEADTPFDEAQKDTESNCEVVESIEKSNSEPIDMESATHTKVEDNEESHRTPEN  
PGGVEENDEAIPGTATILES GFAPSRVENEVEDNDTKHEEEGVGEGEAASDPGNALDI  
SDIVSEEGDEMGGDRDNVVEEKEHKTEAEPQQPQQCDDNEEECKAEAEQDEPQPKPSKQSL  
PPAASTGSTVSTTNLSIVVTGHDIVVEYHDDKDGHEKASPGDSVLQQAQQAQAAATPT  
PGSNSIISTLLSPFTVAQPPVAPAKGAGTASSALLQEPQRRPKGIMKRPRDSNITYHHR  
RPLPPPLPPPGFKGKISTLSWSTDDTNSNDALHSSTKSTKRKRVSFDEVSLSKQSOMSL  
LRRQARYREKHSISGILMTLPLVLLPYLIAVLILVASSMVLPTPAAKTNATPHELEPRS  
LPGLDPGSDHAVGGKTTPIFDIASRMWDQRKSLQDAVAPAGIRKPEPRTTGVPESVVA  
ADAVAESIDWEFDDDAFAEFDESGGQVSAATTQAYSVLSKNPFARAIGGLFRLLFRRRRN

>comp15196\_c0\_seq1; 2820 445 6870 LEN=7090; translated  
MATHDTTSSSN DENALLPASPTKLAVAPQAQPLPSVQTNQNLITDTSASSTAGPSRDKAE  
GESTSNKDVATDLCVPSAGSSNFSIDDCHTIGSLSIESYTTTEDEKELAGAAAAGGAAAT  
AEKSSADQTPKALNQMMAKFDLLQASSIDEPHQDRMMQTFDQLLQKSTIQTPRNEDEGDAQ  
GGQAGDQLFQVLAASESQTAEVQQGDDEETDGASSHSSREMYSDLERFRSADSHCDHD  
ASNHNQHINVESSDHSSSSSSKLLSAEQKLEDRVLQLTDQVSLLESRNDELQSKLRIQ  
HDKDVQDMYQNPYSDFPAAASAAPTPEAAGNSGFGGNAFLAATRNLNAAASVQVQAPPV  
IPHVASLGNLSAAASNADTNSDLHRELTELRMQIQGLQNNLKSSERVKERLKKVLATVEE  
EHRAQTNLLSTRRELGESRDREASLRTEL DACKVRLEGFEIAQRQKERAATSSGGEESS  
SNGGPAHSGGRSEQPRKSFSSSSNAAPGGDLATALVVSQRQIEALQAHNEELESANAN  
LQKKCDGLTTKYGLTEPPAGDAKGTQLYSRYLEMKSSLSLSSVLEEVQDKNSALNERVE  
ELESELNEKPSPKASAAEARGSCDEELANATTLOPTISAEQEETLKELEKLEVQILDYR  
KAEERHGKVKAELSAVEKLEEEASELRSIELIEVTSSPPTDQARSSKDEGLKEELNRCY  
KELESRTKEKSDLELSELELLRDAMDAAAEESTHLLNEMEQMLASSREELKQERAKYKD  
LETRYKELLRSTSGALETNQSPQEEDGNAKEALSNSERLLSENSRLNAAIILSLQEQTKQL  
KIDLDKTKMVEKSEKRLLSKHEKSQQLKEVNASLREGIQQLKGHLATISEEASRTENTL  
AKTNEELHSERKAQKLEVTNGSLQTELEVLKASIVQQTNRDEAANSKSMQLSASLAASK  
KELFLEKELVEKVMQEKREVQSQF DATKEDLQTRLHSEKKNNSRLDSEILSLQQESERLK  
LFIAVATKRMEKMDHARSTEKARLRNVEKLLIAERGITRRAVLVDQATESSRQFSELEK  
LLATTQQELTEEERRVESLEEQVDGLTVQVKDLEKGDLLQTSLNEAKAELLTVNAKRLE  
FESLLAATKADLALQIQSVNAEHASSLVKEAEFNANISVKEEIERELTSKLAAAKSEKQV  
LASVAFEQDEDKRSGTISNEFDLRSKKIEELSAKLKSVESSQKELLATIEKISAEKEEAT  
DKAKTLTSELNQRIEEIDALNDKLQQIDIFQGMKMEIPKTESEGTEKDKRLEVLSTMI VFL  
KAKNKS LSELDRKKKEVEDLTDEVQELECSESHHIEKLDEKNGEIEELIAELRKVEVAK  
ERSESQRLELRTL DQEKSGSLSKMIVLKEEKESLASSLKRKEENIGQAEALAKLLGEEN  
AELRSNIEALKREKDLGPLSSVKESVEDKASNDVRLWEVEMLLGSTKRELADVIERNEL  
LMGKNKNLESSIEKCQSTNAQTLKESETHASINNENARKIDLLEKEIATLKEEKESLLKR  
AAALARRDQIQKASLSTNEEIAKLITTMGDFQERFESLAEQVEKQAEKMEHMKEFEDK  
EAKWIAEKEDLNQRINALEAENDVTS CPIQACPTDRSIFNKNISELEQELQLEVLSTLDST  
KQEREDAIVELDDTRAKFVTCEKELEACRDELES MGVRLLKTTSSDRDSAVARSEDASTKL  
ESLEVELKTCRGQIRFFTKIAELESSTSDS QLESLEEELEALKNDKEKLEAAAASQEVSG  
HSLEENKKALELITDELNEAHVREGVLDQMLSSCQKELLACKKIKSFETQVIDEHYAG  
VYDELIARLNKSNDEVIARNKLLKQEVLLKATNGSSPSEDCTEAAAIEAENVALRTEN  
NRCAREKAKLDRELLKCTKERDSLKATAASLQKNVDELKTKIKVARVVS GEANAANADA  
SEPKEDDVERENTALKELLAASQRSVTEAKTMQQQLSKQIEAASAREARLKKEVLSIKSR  
NDEMEKRLEDQEKELDEFESDFALARNDARKVVEELRSQLLQLEKRNKQLEADSSVSKTE  
DLKNKLRQLIQNKRLQKEIEYIRVRERRLESQGLLEPRKK

>comp15197\_c0\_seq2; 267 1 731 LEN=731; translated  
XRKKTAVVVGAGPAGLAAALVLSRVEKEGSSGFFDRVVVLEDPKESYDPSRAYFYINK

RGQRF'TDAFGIDLTRRGLEVTTEFAKRVVPADPAEVFDEEKIVRQKLSEEERKRVGTMYWI  
PRHELVEEIVDSIDETNERNDGTHANIELVRGVRCTHVEPTDEGLVRIVTEGKGDDETED  
HLVADLCVGADGISSIVRQSLLEDGRFDPAEWSNAKNPSKKFGLKKFTTPSTGLRIKGLCM  
QPNFX

>comp15197\_c0\_seq3; 649 1 2319 LEN=2521; translated  
XVGLTKGRIVVASSIRSVVASENKPRDSYNTATMRPFFLLLLLAGALVADAFAPPIASPT  
GAGIARPGSPLWVHTPVAGSDAGSSAKEGGVSRKKTAVVVGAGPAGLAAALVLSRVEKEG  
SSGFFDRVVVLEDAPKESYDPSRAYFYNNINKRGQRF'TDAFGIDLTRRGLEVTTEFAKRVVP  
ADPAEVFDEEKIVRQKLSEEERKRVGTMYWI PRHELVEEIVDSIDETNERNDGTHANIEL  
VRGVRCTHVEPTDEGLVRIVTEGKGDDETEDHLVADLCVGADGISSIVRQSLLEDGRFDPA  
EWSNAKNPSKKFGLKKFTTPSTGLRIKGLCMQPNFAIPKGGPGSDAHEKHELENRYNYSL  
ESATKGDTDALSLIFLPQKDPDAGAGRSVNICTMPGHDLWDTNKVRTDDGGRSAKAYFEK  
AFPRFDWDEIVSEDEWGLFAATEGSRFPQCQYSPSLYVSSKPLQNGGAADGAGVVLVGD  
LHAFPPDLGQGVNAAFCDAMVLGESFGDAVSGALSPGDERPGSFVAGVLGSYQARNGPET  
RALIXAGEVRGALPVQPAVEEDETGQKAVDVKRPPAVVPEQGNDRVVAKAGDSHDDGLTF  
ELPQDNEKSQCPHHGVVLT SVRCGLAGPIEDRRLASADRKGTREHPNGIEPIRVPQRCG  
RQIQTKNAFCPLHNRSEMFP LHRVRANTIRCSWSIALLPISILVWVVRNRGRVRPANYA  
GRNPRRWF'EFAATERDRAVXSILPTRKKTTPGKLEPPHAVSKENNDPAASVGE

>comp15198\_c0\_seq1; 549 1 3014 LEN=3267; translated  
KSCILCCTPNHVNAKRQLDIVHMESPLLSDASRDVGRNERQNLIPRTSESPSCSTPREQ  
QEIHQKVLKKNARPVLLFLVALLLSAIYCEIPSNLSSSTESPGSSGKKKLSGW EIAPCDGY  
PCFEAAEIHVPTTSSGFPSFLNYANRGPISIDYDNRSLKINGDRVFFLGGSMHPARATLK  
TWKLALDEAVEIGLNLITIIYVMWSDHQPIKNREIDWTFPDWSSPENACRDFVADGSCSD  
WNLAEAIRMAGNHGLFVHLRIGPYDCAEYSYGGFPEWLLLEKPHMQLRRPNREWLKTMES  
FVSNIIDYISDNLSWAHQGGPIVISQIENELGSGDDNGDKITGVDRDDNALLYIDDAGNF  
VDPPEQTAGTIRKATLQDYADWCGAI AKKYAPNVTWTCNGLSANNTIHTCNAVNNGAQ  
WLESHGGNGRIQVDQPPLLTEFEEGFQDWGETPNHPNDYFWGRKASAAAKEALKWFASWV  
RKNLINCSTSMVFRSHLPFPYRSNFDLLSSSLSGTHLNYMFWGGYNRGRQAAGGIGNWY  
AVDAALCSSGQRHEPKYSHYQALHRAITSVASTLLSGETALGKEKPVEVLTKDEEWVFGS  
KQRRFDYTGVDVDRKTIEFSATGSTGVPTIEISFIENDENEAVVVRIPVGNVVKYREF'TLS  
PRSAIILVIDGVLAFDAGYIDPKGMSFKREFAQTGAVPELVGWSFWPEPIGTQGS GSGTRI  
DDAPIEQ'TTLNVGSSVWSDYAWYETYLSIETTGLNDAKLYVESQRSNGLLVFVDDL FVGS  
GEDHSHYWEGNFTINVNIGKLSKGKHKLSILSESMGYSNLVGRFGNSGTGPKHKGITGQV  
LLSQGNMKNISLVDGREWSSFPGLHGEKKLDEKHFISAANQPTRNASPTWASVLFKTPG  
FN PANQSLFVQLTVGRGHFWLNGKDLGRYWNITQGETSKYSQEYYFLPIDYLRTDGLVNE  
IVIFDATGGSIVELQNTTKLVLSWITPSPNFEDVSYPLACI

>comp15198\_c0\_seq2; 603 1 2913 LEN=3166; translated  
KSCILCCTPNHVNAKRQLDIVHMESPLLSDASRDVGRNERQNLIPRTSESPSCSTPREQ  
QEIHQKVLKKNARPVLLFLVALLLSAIYCEIPSNLSSSTESPGSSGKKKLSGW EIAPCDGY  
PCFEAAEIHVPTTSSGFPSFLNYANRGPISIDYDNRSLKINGDRVFFLGGSMHPARATLK  
TWKLALDEAVEIGLNLITIIYVMWSDHQPIKNREIDWTFPDWSSPENACRDFVADGSCSD  
WNLAEAIRMAGNHGLFVHLRIGPYDCAEYSYGGFPEWLLLEKPHMQLRRPNREWLKTMES  
FVSNIIDYISDNLSWAHQGGPIVISQIENELGSGDDNGDKITGVDRDDNALLYIDDAGNF  
VDPPEQTAGTIRKATLQDYADWCGAI AKKYAPNVTWTCNGLSANNTIHTCNAVNNGAQ  
WLESHGGNGRIQVDQPPLLTEFEEGFQDWGETPNHPNDYFWGRKASAAAKEALKWFARGG  
THLNYMFWGGYNRGRQAAGGIGNWYAVDAALCSSGQRHEPKYSHYQALHRAITSVASTL  
LSGETALGKEKPVEVLTKDEEWVFGSKQRRFDYTGVDVDRKTIEFSATGSTGVPTIEISFI  
ENDENEAVVVRIPVGNVVKYREF'TLS PRSAIILVIDGVLAFDAGYIDPKGMSFKREFAQTG  
AVPELVGWSFWPEPIGTQGS GSGTRIDDAPIEQ'TTLNVGSSVWSDYAWYETYLSIETTGL  
NDAKLYVESQRSNGLLVFVDDL FVGSGEDHSHYWEGNFTINVNIGKLSKGKHKLSILSES  
MGYSNLVGRFGNSGTGPKHKGITGQVLLSQGNMKNISLVDGREWSSFPGLHGEKKLDEK  
HFISAANQPTRNASPTWASVLFKTPGFNPANQSLFVQLTVGRGHFWLNGKDLGRYWNITQ  
GETSKYSQEYYFLPIDYLRTDGLVNEIVIFDATGGSIVELQNTTKLVLSWITPSPNFEDVSYPLACI

>comp15199\_c0\_seq1; 625 199 2754 LEN=3210; translated  
MTTF'TNWTVEVRDQQQHQQWQHGYKTRCCNASERWILEREFNEACLGVRSIIADDSMY  
RKR IAALAKAAVFS PGRVFTTFDRGLDHDNDNSKNKIESILLLLKDARAVPPGSMTP EQI  
TEAEDALEYWVSASASLPRRRKRKQKHINRSNDDKHRKEYKNCFENAKFLLLRLAQEQRF  
HEEHFDDRANTNTDTPHGMSGQVLLRSDSANANDRGDDKNVLAHQYDGNNPTNCRDDCYV  
VRPFLINRVVDCWRIGWRDERLDFT'PHEIMEWVENKDL DIDNRT'FTMIIDGICLRGDAYE

APLLAQWLLDRRLGQAYEDEDATLRPDTIFFTNVIRAWAKSGRVEAPEMADGLLEMMHD  
LYAKSGWIESAPNAFYSATMEAWSKNRRHPESTARIEELLDKNSSLVQVVPDRVSYQ  
YLLNAWANSKSGNGAQKAYYVLQEMIALYEAGNYLVSPNASNFARVILALAHSGNDEQAE  
SLLEQLQDLYSKTGDPIFRPTDECWKACIIAKAKTGGVAEAQGMLDELIKRALSSNNEKL  
MPRRSYFVDTMVAWTKIKDRVLAAKRAQSVLDRMRELAREDESYRSLQPDAKSFELVILA  
WSRSRHRFAPECIEKLLGDMERQVDLGNHEMOTSLAGYTNLMLAWQRSGRKESSLDSIQRV  
FDQLQNRyatNGEHHLRPDKYVFGILIDSWARGRNFEKAEFVFKEMMREWKNGNELARPD  
IHIFHNILRACSEGNYRPNVSGKCQHYFSLMKDVGLPTTVEAYSHLIRAMTMGNNTERKD  
DVCRESIVLEELLESVRKGTTRLP SKYREYQYFLKTIANS SIPRRNQAKKILATSRRGN  
NRIPKELLPL

>comp15199\_c0\_seq2; 565 500 2569 LEN=2705; translated  
MPKLTLAEKLEKKQRLAEKREAKLAKEKKEKEKAALAASCPDESPYDAKTPDNEATRIN  
AEKCYIFSLSDALNHFFSFLPARELGALTTLTCRQMNKLLVTEETRAFVYVLSRLTQKSAAG  
SFNVDLCRDIDEAQKIVEQSYGGGDTQRLKMKGKANKWKSEFASYARFLQEIVTGHSNL  
NVGGKTPIMLP SFVNGRFVST SPEHTLCRVGGGANS GGGSGVASSGVGKRQGLGHGSR  
DERRLKMIVGGIGYRIRIVQIAAGGGLVVAHSLLLTSTGRVLSFGTGQYALGHGYSGG  
KQLPDILRPHYIDALSGVRCVCVAAGELHSAAVTVGDLYTWGDGFCGQLGHGDKGPCVS  
PLQVTKGGLEDKCVANVSLGARHSLVVTDDGEVFSFGLGHFVGLGRSYTPYDYE PVGALD  
GMDAGDEDEFNFVFNQOQQOQQPGAVNPNNGNQERNTDDFDLVAHLDLISNIKLQDSSD  
QCIPKLIDSLAGVHIVGASAGHRHSLLLDNHGCLYSCGAGMTGCLGHGDNQSHMFPMRIQ  
DFDDKEVHIVQMSAGVDMMAVSATGDVYAWGKTDGGRLGLGTT PARVTLPTKVNLVSDG  
TPMKAVDVECGYVHSVIVGLNGTIHTCGEVGIDGNADGQGGSGEPVQEKDFNIWHRVREP  
IEKVKAERWKKFGKYEKGRQKMMSETG

>comp15199\_c0\_seq3; 849 199 5551 LEN=5687; translated  
MTTFTNWTEVRDQQQHQQHGYKTKRCCCNASERWILEREFNEACLGVRSLIIADDSMY  
RKR IAAALAKAAVFS PGRVFSSTFDRGLDHDNDNDKSKNIESILLLLKDARAVPPGSMTPEQI  
TEAEDALEYWVSASASLPRRRKRKQKHINRSNDDKHRKEYKNCFENAKFLLLRLAQEQRF  
HEEHFDDRANTNTDTPHGMSGQVLLRSDSANANDRGDDKNVLAHQYDGNNPTNCRDDCYV  
VRPFLINRVVDCWRIGWRDERLDFTPHEIMEWVENKDLIDNRTFTMIIDGICLRGDAYE  
APLLAQWLLDRRLGQAYEDEDATLRPDTIFFTNVIRAWAKSGRVEAPEMADGLLEMMHD  
LYAKSGWIESAPNAFYSATMEAWSKNRRHPESTARIEELLDKNSSLVQVVPDRVSYQ  
YLLNAWANSKSGNGAQKAYYVLQEMIALYEAGNYLVSPNASNFARVILALAHSGNDEQAE  
SLLEQLQDLYSKTGDPIFRPTDECWKACIIAKAKTGGVAEAQGMLDELIKRALSSNNEKL  
MPRRSYFVDTMVAWTKIKDRVLAAKRAQSVLDRMRELAREDESYRSLQPDAKSFELVILA  
WSRSRHRFAPECIEKLLGDMERQVDLGNHEMOTSLAGYTNLMLAWQRSGRKESSLDSIQRV  
FDQLQNRyatNGEHHLRPDKYVFGILIDSWARGRNFEKAEFVFKEMMREWKNGNELARPD  
IHIFHNILRACSEGNYRPNVSGKCQHYFSLMKDVGLPTTVEAYSHLIRAMTMGNNTERKD  
DVCRESIVLEELLESVRKGTTRLP SKYREYQYFLKTIANS SIPSEPTGEKDSGDFTSWE  
QSNTERTPASFVKEEMLLYLDKMEPAHCXEMIXNAKIYSLAILVFSKLMRSCVMHSTMSL  
STKADVFQDNHRILVNRVTEQDLFDDNNVCVNTWLI RRRLLRNREEVILSFSSFHMSILI  
FMDGFGDDGTGAEFVLKILLPTYLQLPLLSGLEVRGFDXIP EFRATATSDFFSIVIPQFL  
FSPLRTVSIQFFYFHSRILLTFTVRLRVEPFVFPFLEVRNSTHNLDWRSIHRQILNXIS  
LIDRXLAQGAPNNTKMPKLT LAEKLEKKQRLAEKREAKLAKEKKEKEKAALAASCPDE  
SPYDAKTPDNEATRINA EKCYIFSLSDALNHFFSFLPARELGALTTLTCRQMNKLLVTEE  
TRAFVYVLSRLTQKSAAGS FNVDLCRDIDEAQKIVEQSYGGGDTQRLKMKGKANKWKSEFA  
SYARFLQEIVTGHSNLNVGGKTPIMLP SFVNGRFVST SPEHTLCRVGGGANS GGGSGVA  
SSGVGKRQGLGHGSRDERRLKMIVGGIGYRIRIVQIAAGGGLVVAHSLLLTSTGRVLS  
FGTGQYALGHGYSGGKQLPDILRPHYIDALSGVRCVCVAAGELHSAAVTVGDLYTWGD  
GFCGQLGHGDKGPCVSPLQVTKGGLEDKCVANVSLGARHSLVVTDDGEVFSFGLGHFVGL  
GRSYTPYDYE PVGALDGMADGDEDEFNFVFNQOQQOQQPGAVNPNNGNQERNTDDFDLV  
AHLDLISNIKLQDSSDQCIPKLIDSLAGVHIVGASAGHRHSLLLDNHGCLYSCGAGMTGC  
LGHGDNQSHMFPMRIQDFDDKEVHIVQMSAGVDMMAVSATGDVYAWGKTDGGRLGLGTT  
PARVTLPTKVNLVSDGTPMKAVDVECGYVHSVIVGLNGTIHTCGEVGIDGNADGQGGSGE  
PVQEKDFNIWHRVREPIEKVKAERWKKFGKYEKGRQKMMSETG

>comp15200\_c2\_seq2; 112 1 1134 LEN=2237; translated  
QQQQQQEHQPPTGGFRPLDALLERLPVNLCFALAYIGFHHWVLYGHGICKRPFVPNRTYN  
ARKVLHNALYTVLGIAQWTLVEGAFVHLWRTGGLPLPQEGTATTTTTTTAAGLVWTLLLS  
VAIPPYRDVHFYFCHRLIHLRCLYKYVHSLHRTTDTPEFSGLAMHPVEHAYYYTCYGP  
LVL PALLPPRWAGAVHWPFLFWTGFHAVLSPAASHSGYEDHFSADLAHYLHHRYGECNY  
SGGINFDACFGTHVGALRGGSGSPCPPADPKASLGWLP EHPHYDLGACGLVASGPLLVS



CSAVGPTVAALVATAGPAAWALALYVSTAPQGMPLRKACLAPFEKDPWWSLGLHLGLGFC  
LGVLP AALLASLLLGA

>comp15200\_c2\_seq4; 112 1 1134 LEN=2217; translated  
QQQQQQEHQPPTGGFRPLDALLERLPVNLCFALAYIGFWHWVLYGHGICKRPFVFNRTYN  
ARKVLHNALYTVLGLIAQWTLVEGAFVHLWRTGGLPLPQEGTATTTTTTTAAGLVWTL  
VAIPPYRDVHFYFCHRLIHLRCLYKYVHSLHHRTTDTTEPFSGLAMHPVEHAYYYTCYGP  
LVLPAALLPPRWAGAVHWPFLLFWTGFHAVLSPAASHSGYEDHFSADLAHYLHHRYGECNY  
SGGINFDACFGTHVGALRGGSGSPCPPADPKASLGWLPEHPLYDLGACGLVASGPLLVS  
CSAVGPTVAALVATAGPAAWALALYVSTAPQGMPLRKACLAPFEKDPWWSLGLHLGLGFC  
LGVLP AALLASLLLGA

>comp15201\_c0\_seq1; 654 596 2038 LEN=2348; translated  
MSYDASSLRGYLQRIDGTAPAIQGAAAAMMKHYDKSPGVAVNCWRDMLAQARSDQYLP  
YVANEVLQNSKRNRGNRFLEAFSPVLGQSLTFVCGKSPSTVEGIRRTVKIWAERRVFSV  
RYVNELIKGLEPYRSANRNVPAATHRHQQPASSRSSSSEYYQDHSSEGVRGFRSPNPESV  
AVPVDTSMQSKDDFDAEMGLSNNKSSAMEDDGDDEDMFGGSDDDDDLFGGASNRLLKIDV  
DFDRASAEARKSEGTKKKRRRGSNEPAGDGPSPKPRSKRRANTQQRCSSTSSLMELMNQVS  
AVQANYDRLAAKLGELYEAYDGGDDTGPSAEAPVGGELLAEYKKTGDELELEKHRRLH  
SIAQTRRGLELDALRYLPWLEQALKQDGEDIEFSETYRKQLSLFRNVHKPTREARDKRL  
EEATRIRKEEESKRKKAEEEEERKKFMESAMSKQTEAQPVMVNRATGEYQHLNQEESWRD

>comp15202\_c0\_seq1; 1008 98 4140 LEN=4198; translated  
MGVSAITIVHSCFFVLVGLYIGIGISGFFQNDDSIGTAPLAINHDRIGPNSNRSNKNDT  
EIRNLLKATEEAKRWKSKAQELEKKENTSSETIRRLLEDSCHKDDAKEDYKSSLSLST  
IPKNSANTNHHFPFCQSVLPHAPSAMALWNEHIPKIFAATRVAADNRFQFHDFTAQILQI  
VSPRLPRSVKTAPFDWRPVENTLTVAWERYKYLQLPKKERDAIDPENKPRPLKILIMGGS  
VLVGTNCRMMMRELNFQFRMPKRECNWGFVQFLNAFFLGDGDYKEERTEKLVEVTKVA  
MGGTNTATGSVIWQYDLIPEEARNPDIVLNAYSTNDLHILTVLEAKSSNTTLRDRTFEMM  
QSFVRQIMGTVRCPTSNSGSNTDSNNEPIPLLLHMDDYLGNEQRKIWETTELTQGVQVL  
ANYYGFSMSYADLIREFVYGDYKWFSSSEWVKEKKRKNLIFDRQIHPGMGMHISSVW  
VTAYNLLHLASTYCSLPTDVLAHQASNNINNYQAGMWGLPELNKKFKEPDGRPQPHPKGL  
PPELTKDLLLEDVTSLWRQQSDSASSNDCSDQTKHVVKCPFSWVAGLSLQNNVTFVRE  
YFEEQSSTWKGWELSEDKDKLGFVSPGVAKDADSKIILDFDYSQKIRSVTFFFMSYGT  
KWENSELNKVVWSTPSSSDQQVLLVERNMLGTHSKNTSEMYTEEIEFQPVDAAHKIQLE  
IKLVGGETFKIMGLALCGNTRVQLQSVINQYDADPYGFKRSLTVRAAASIAGLGRQSRKK  
DXLMPMSYSSYVLPYRYGKRNEINKYCNLLLVLTQAYEYRTWSPTPEKLRSYFFGIRQH  
SAKIHGGRRMVFRHGGVIKSRDLMETKKYEKASTETDRRRRLIVLTLRKHQDGIWITK  
LVEGLKESAPPPSSQHRFEIDVIALEDWLGKGLISDEVETNDDDKSSIIIGLVNRVSDA  
ASPALFKACCGLLAVVENVLHIPVWNGSTAYSLAGNKWRHHILFRQANLSAPITMYYYYTG  
YGKDSERTTERAVEIDTGFIRQNEAGRFELLIKPNAGGFVGVIEKQSILPLIASSSSDQT  
HSFGRKKTTRSIRIPESFEDEMALIQQYEQPIDGKLYRVWFVNGKVQCAVERTIHVAKKE  
EEQGLLDVAVATSTAEFTSGCAGGSFCTLPGSARNHSGNISDDAKQTQSNKDSTNGSSVLE  
APKSLASTVAPSNMLPWRVPREVRREIEDQLLPLVADAHCGSIEFLHSSPCRSSATAMIR  
NGDTSEIHENDNDEVEMQTRRGHCPRRLYFDNLLSTLPIIEGPKDVEDSSAIEQAKRAE  
MVWPKDYDPWLELARAIWEFFVTADA

>comp15203\_c0\_seq1; 567 303 2693 LEN=2738; translated  
MAAPEIAPIAPVNPRKPKADVDSSDLFDEKSVKSTRSSRSRSTRSKKSRKIKRI  
PKRDSDDYLAQDSFVLDSSSLTISTKSARTLRSTSTASTAASTIASVRSGRTKQQPMGV  
ELKGEKKSATDQKSI SLRKKRKSXPRIARSQSNAATPSLSPPSMDVRPKISQHRRAE  
VLPSIQLDGVEKEAEERTGLDELISQSVEDHVRESPPMEKPSLRRSKSKNSLGLFRAS  
FSEKIDKGAEDGNSSEKRPVRSKALGFEFFNRKNSTDKNVGTSTPSCIKSMPAGKML  
KLPKSIKEIDGQLWRVDEKGNKIKRVRKSTANATNTYENCAETTTGHSVEEKVEGRLGR  
KIRGRRRNVPSDWLSTEDSGASSVLSYKSNDSRVTRGRPFREALDRLDNSTHGSNDG  
SLSHDEIPSKPRRSQNEKNSDAKPAKRLVPRPKRRPSTPRKTEGTSCLPSSSRISAE  
DDQATAMQMAELQQLMESKHEVWRLKQVAAEQKEEIDGTDSKIAELEANI SDAANERK  
NLVSEVDR LSTKLELREQDLIKKQEELEKEKIAALDRPAGDHLVAQITDLMNENNELMDR  
MTALKLVARQEKDKDEELRFLKSELDRRAERDQONLEKLRPEKPSMQLVDKIWNQKR  
DATEQSYRRQIQDLRDRVRGLEASNCKLRELGRVTVEIKSDDDEETRAKAKEMARAVSRG  
RLTRTRSAQRVDRRCERQLERSKSPHANGENKLSRLIQRSKADMSVVRHRLNRNNDNRF  
CNSEENWWNHRTPNRP

>comp15203\_c0\_seq2; 493 1 2403 LEN=2448; translated  
CALPISAPEIAPIAPVNPRKPKADVDSSDLFDEKSVKSTRSSRSRSTRSKKSRK

IKRIPKRDSSSDYLAQDSFVLDDSSLTISTKSARTLRSTSTASTASTIASVRSGRTKQQ  
PMGVLELKGKKSATDQKSI SLRKKRSKSPRIARSRSQSNATPSLSPPSMDVRPKISQHRR  
ARSEVLPSIQLDGVEKEAEERTGLDELISQSVEDHVRESPPMEKPSLRRSKSKNSLGELEF  
RRASFSEKIDKGAEDGNSSEKRPLVRSKALGFEFFNRKNSTDKNVGTSTPSCI KSMPA  
GKMLKLPKSIKEIDGQLWRVDEKGNKIKRVRKSTANATNTYENCAETTTGHSVVEEKVEG  
RLGRKIRGGRRRNVPSDWSLTEDSGASSVLSYKSNDSRVRTRGRPF SREALDRLDNSTHG  
SDNGSLSHDEIPSKPRRSQSNEKNSDAKPAKRLVPRPKRRPSTPRKTEGTSCLPSSRSI  
AEGHDDQATAMQMAELQKQLMESKHEVWRLKQVAAEQKEEIDGTDSKIAELEANI SDAA  
NERKNLVSEVDRLSTKLELREQDLIKKQEELEKEKIAALDRPAGDHLVAQITDLMNENNE  
LMDRMTALKLVARQEKDKKDEELRFLKSELDRLAERDQQNLEKLRPEKPSMQLVDKIW  
NQKRDATEQSRYRQIQDLRDRVRGLEASNCKLRELGRVTVEIKSDDDEETRKAKEMARA  
VSRGRLTRTRSAQVRDR CERQLERSKSPHANGENKLSRLIQRSKSADMSVVRHRLNRNN  
DNRFCNSEENWWNHRTPNRP

>comp15204\_c0\_seq1; 576 1 1485 LEN=2204; translated  
KRNETNHRMEVSGNADEELHRQQSILLREGLEDLMEHIQQHRHEEPVSSLEERYLLLVSS  
YPPECLRS AVAMTDADLFAYRHS DNDNDKDCPSGAAEVPVPSDGNKNRARAFTQRLPIHL  
ACDKAAPLSIFQSLLEADPSTVGRPKWGDLP IHTACSRAAVSFSESDAGDPLWNGPTSL  
ASAARDETVETIRLLLEADVHKTTLFVRDVYESLPLHTAVRYNAPPCVVEMLLDAEEESL  
ARRDACPRPLAPLSALYTEGLHGQVPLTVACRS GNPSPGVLG LLLDRDDRNGDGFYPST  
ALHRDATGRLPVHVFM LRNTCEVSLR TLLNAMLGCSSNRNKRGGGSRNSILRIGLDAWK  
VQLRRDLIEGTDASGSNKQGLYERDFVTRDKLDVIRAELEVLYEKCIALELVVWKN SMDI  
REKDD ESSAGGTPPEEKCDKSSERDNGFRERCRI VGGAEIIVPNVLSWLEDEPVQNI LDT  
FASYGYLGS DV DKN

>comp15204\_c0\_seq2; 576 1 1485 LEN=2365; translated  
KRNETNHRMEVSGNADEELHRQQSILLREGLEDLMEHIQQHRHEEPVSSLEERYLLLVSS  
YPPECLRS AVAMTDADLFAYRHS DNDNDKDCPSGAAEVPVPSDGNKNRARAFTQRLPIHL  
ACDKAAPLSIFQSLLEADPSTVGRPKWGDLP IHTACSRAAVSFSESDAGDPLWNGPTSL  
ASAARDETVETIRLLLEADVHKTTLFVRDVYESLPLHTAVRYNAPPCVVEMLLDAEEESL  
ARRDACPRPLAPLSALYTEGLHGQVPLTVACRS GNPSPGVLG LLLDRDDRNGDGFYPST  
ALHRDATGRLPVHVFM LRNTCEVSLR TLLNAMLGCSSNRNKRGGGSRNSILRIGLDAWK  
VQLRRDLIEGTDASGSNKQGLYERDFVTRDKLDVIRAELEVLYEKCIALELVVWKN SMDI  
REKDD ESSAGGTPPEEKCDKSSERDNGFRERCRI VGGAEIIVPNVLSWLEDEPVQNI LDT  
FASYGYLGS DV DKN

>comp15204\_c0\_seq3; 576 1 1485 LEN=2230; translated  
KRNETNHRMEVSGNADEELHRQQSILLREGLEDLMEHIQQHRHEEPVSSLEERYLLLVSS  
YPPECLRS AVAMTDADLFAYRHS DNDNDKDCPSGAAEVPVPSDGNKNRARAFTQRLPIHL  
ACDKAAPLSIFQSLLEADPSTVGRPKWGDLP IHTACSRAAVSFSESDAGDPLWNGPTSL  
ASAARDETVETIRLLLEADVHKTTLFVRDVYESLPLHTAVRYNAPPCVVEMLLDAEEESL  
ARRDACPRPLAPLSALYTEGLHGQVPLTVACRS GNPSPGVLG LLLDRDDRNGDGFYPST  
ALHRDATGRLPVHVFM LRNTCEVSLR TLLNAMLGCSSNRNKRGGGSRNSILRIGLDAWK  
VQLRRDLIEGTDASGSNKQGLYERDFVTRDKLDVIRAELEVLYEKCIALELVVWKN SMDI  
REKDD ESSAGGTPPEEKCDKSSERDNGFRERCRI VGGAEIIVPNVLSWLEDEPVQNI LDT  
FASYGYLGS DV DKN

>comp15205\_c0\_seq1; 343 104 1807 LEN=2489; translated  
MIASCNCVGVYQNGGDKMRRGKGFSGAFPLASFVLMHLVLLAFISTDVAVFVGGSDINA  
EGSQPKLDLKVHRNYAKRNLVNGEPVALSEHPFFLRSWPDSVRLTNDVLCGASLIHSDM  
IVTAAHCQGA FN YGVMAYNPFSGELDQYKTVDLQIAYPAYRSDSINYDIMVMRLESPV  
DVQPVALNYDPDFPIRRET KKDEV LAPVSLLEGLGLGITETGDVADGLEIGLFSAL TNDQ  
CFERFGRNTNAAVTEDILCADPSTDESICLGDSGGPLTARLEVGVTS DGDVIEHSAIGGR  
SDSDTPWTD SQTAD FVVDVPLVGIISFGNDCQSDMIPDGFARVSYFADWITVQVCKYSR  
VPPPECKYRQSEAFQNFQAEQNPNGIIPSGIAKVTL E FQHDFLAEETIFVVRNAQNGSI  
EYVGPEYVPQRGARVRSFQWLPKPNYVLEVRDAGGDGLNNPDFVNPDPYPSGSWSLSAEYS  
HGGVLESFVTGDSQFESLQTTVFRLPRQKEVESGPTSSPSEAPSSNYIYTPVPKVT TAAS  
SGDSL SSTMIIHYFSIGLLCWSL LLQHL

>comp15206\_c0\_seq1; 512 305 2323 LEN=2594; translated  
MKSACSLNWCASF SMLFSSAMLP SITILLTTILCTVYGNADATAIPISFAGINYNTRKGP  
DWAPDVERCKTRGEIVRDLTLLSRITNKIRLLS IKDCRQ GALVRSVLEDDSFSDMLWLG  
LWVGKDPNNFADEVQALEEMFLDMTTMAGNNLLTNNQLLGISVGSEAIYREDVTVQEAIA  
NLDTVRDLLSSYDISVPA AIVDI APIYSASPELRLASDMIATNTFPFWEGTPIAYAVDEL  
DKDLQWLLQLPESFGKPFLLGEHGWPSGGYIEGVGEASPENQKRYMAESFCYLKRQQDIN

NWEYYVFTGIDNAWRQVQDPNNTVEGNWGFLLDSNLNLKDHVDFEFECGSGSEKKTYTFA  
SVDWSVPPLPDDNSNIFDSANSSCSLWDTCCQELAGDCCPTVSGGYLGCCREELFLGRNTN  
SGSGGGSGTESGTPVLSVPVTATPTATPTIQLTNPPTLSPSTSAPLPLPTINPTNSDA  
SSTAPSVEIALSPPIILTASPTINSAPSTAPSTAATLAPSVEPTLRTNSSTILPTTAAPSQ  
AQVVPVTNAPSVAPEPSKTDGNSSGTSKSETGEISSSTPSDQDSAVPISPWNENGWDNEN  
GGNNVNRVSNNESESSESQISGTNCINPFTNYIVSKQHTTTGSLQITTAWLLFHGAQLFA  
VSVIIDLIGLYV

>comp15207\_c0\_seq1; 143 2220 2958 LEN=2958; translated  
MEPYGAAETEPDESINKPDFDRNCRASVLTDVKRCGLALRHASDELNRNDREIVLAAVNENG  
EALLHASNELVRDKNFVLAALAEENAWAYSFLPWKDDRDVVLASIRNGCGTAISHAPEE  
FLGDGSSVLAARDNGFLFQHASESLKADRDFVLAVASADQSGHAFRFSSEELKRDRALV  
LACAKECGLVLRAGEDFSRDREIVWAAVSQNGQALEFCADEWRNDRGVVSKAVADKGYA  
LRFASDX

>comp15207\_c0\_seq3; 76 2242 2980 LEN=2980; translated  
MEPYGAAETEPDESINKPDFDRNCRASVLTDVKRCGLALRHASDELNRNDREIVLAAVNENG  
EALLHASNELVRDKNFVLAALAEENAWAYSFLPWKDDRDVVLASIRNGCGTAISHAPEE  
FLGDGSSVLAARDNGFLFQHASESLKADRDFVLAVASADQSGHAFRFSSEELKRDRALV  
LACAKECGLVLRAGEDFSRDREIVWAAVSQNGQALEFCADEWRNDRGVVSKAVADKGYA  
LRFASDX

>comp15207\_c0\_seq4; 160 1 542 LEN=570; translated  
XLRGDRGIVSAAVESSGYALRFASDGLRADRGLAAVAVRGYGGALECVSTELSGDKEIVR  
AAVESDGDALRFASLDLRGDPDIVYAALGESPLALAHASREFFVSGAKRFPNRKCSGTPV  
GNKQDEDEGTLAPASMRDRTQKDGSLSQEPALATGNAPLCEEHDDNRKRRRGSSPEPSGA

>comp15208\_c0\_seq1; 502 228 2264 LEN=2320; translated  
MPQKPQLSTIVPQTSRKNERGDIRRGIKGLHPSLGFHGCRTLYEGFRRGHEVNPLGPCLG  
FRAMSVNGLATPYIYSSYTEVLARVNAFAAGLETLDLVPPTRDDKMVLLGLYMKNCEWFF  
IAEQAIFCVAGATVPFYDTLGPESVEFIFLKQSTSTKTVVSTRAELERLCAVKKNGLCPDFK  
VVVLVNGVTAEEAEMAREAGLEVLSFAKVEAVGAHRIDTEGFQHRPPSGNDVFTFCYTS  
TTGDPKGALLTHENLISAVAGVDKVFQFEGNDRHLSYLAHIFERIVQCQVYMNGASIA  
FFRGDPTLLIEDLQACRPTVFPAAPRVLNKIYDKIQVGIAAAGMKKLFDAAVHTKTKN  
LMATGQLTHGVYDRLLFNKIKKGLGMDCLRTMISGSAPLSKKVMNFYRIMLGISVVEGYG  
QTENSACCTISLPEDMTTSGHVGVMPASEVVLADVPMEGYFHTDTHKQPCQGRGEIL  
TRGPTLFKGYKQPEKTREAIIDEEGWLHSGDIGLWTEGDLQIIDRKKNIFKLSQGEYVA  
PEKIENVIIQSLFIGQAFVYGDLSQALVAIIVPDEEPVRSLLLEASEEPALAKAPLSDIC  
KSDKLKSVMADIKKIGKANGLHGFEMPKAIHLTDKPFVTEGDLTPTFKLKRQARDKF  
EKVIEHMYAVLPKPKSKL

>comp15208\_c0\_seq2; 182 228 905 LEN=1025; translated  
MPQKPQLSTIVPQTSRKNERGDIRRGIKGLHPSLGFHGCRTLYEGFRRGHEVNPLGPCLG  
FRAMSVNGLATPYIYSSYTEVLARVNAFAAGLETLDLVPPTRDDKMVLLGLYMKNCEWFF  
IAEQAIFCVAGATVPFYDTLGPESVEFIFLKQSTSTKTVVSTRAELERLCAVKKNGLCPDFK  
VVVLVNGVTAEEAEMAREAGLEVLSFAKVEAGAYRTKDGAYSIS

>comp15208\_c0\_seq3; 451 228 2526 LEN=2582; translated  
MPQKPQLSTIVPQTSRKNERGDIRRGIKGLHPSLGFHGCRTLYEGFRRGHEVNPLGPCLG  
FRAMSVNGLATPYIYSSYTEVLARVNAFAAGLETLDLVPPTRDDKMVLLGLYMKNCEWFF  
IAEQAIFCVAGATGGDIYERFVWSVRCNEMESAATFGLLRPTDVSIVVVVSGPAPRIFAT  
KDIGKNRKTSHFCTFSLDGWILFIYLSFGGMFIRLFCHATVPFYDTLGPESVEFIFLKQTS  
TKTVVSTRAELERLCAVKKNGLCPDFKVVVLVNGVTAEEAEMAREAGLEVLSFAKVEAVG  
AHRIDTEGFQHRPPSGNDVFTFCYTSGTTGDPKGALLTHENLISAVAGVDKVFQFEGNDR  
HLSYLAHIFERIVQCQVYMNGASIAFFRGDPTLLIEDLQACRPTVFPAAPRVLNKIYD  
KIQVGIAAAGMKKLFDAAVHTKTKNLMATGQLTHGVYDRLLFNKIKKGLGMDCLRTMI  
SGSAPLSKKVMNFYRIMLGISVVEGYGQTENSACCTISLPEDMTTSGHVGVMPASEVVL  
ADVPEMGYFHTDTHKQPCQGRGEILTRGPTLFKGYKQPEKTREAIIDEEGWLHSGDIG  
LWTEGDLQIIDRKKNIFKLSQGEYVAPEKIENVIIQSLFIGQAFVYGDLSQALVAIIV  
PDEEPVRSLLLEASEEPALAKAPLSDICKSDKLKSVMADIKKIGKANGLHGFEMPKAIHL  
TDKPFVTEGDLTPTFKLKRQARDKFVIEHMYAVLPKPKSKL

>comp15208\_c0\_seq4; 122 228 635 LEN=1287; translated  
MPQKPQLSTIVPQTSRKNERGDIRRGIKGLHPSLGFHGCRTLYEGFRRGHEVNPLGPCLG  
FRAMSVNGLATPYIYSSYTEVLARVNAFAAGLETLDLVPPTRDDKMVLLGLYMKNCEWFF  
IAEQAIFCVAGATGE

>comp15209\_c0\_seq1; 419 1 1417 LEN=3181; translated

XFRTKENS S M Q L I S G I C T R M K I T A E V I L A S F F T V A I F N L W L G S N L I S R E D N D Q A K G K D V R  
K T P R R F G T E K N K S N K G Q G L N S T R P H F I L H I G P P K T A T T S I Q C G L Q K W S K E L A D E D S Y Y F V  
G K T C P G S G K R M E N N E T N I P G H Y L M M G L N D A S T T G R G Y V A L K A R M D Y H R L N G N N V I Y S N E A  
F A N H L K D Q N S T W D C L R S M L H G W N V K V I I G Y R H Y F D W I R S F Y Y Q T H K Q N A K L D Q K W P A Q G R  
G R A H P S F L S F L D Y H L Q R K E D G D L S V D G G F A N N A W G H H L T I S A Y N K F S P H F D D V R I L N L H D  
Q E D V V T D F V C E L L P D A E K T C H R L R A T V E D G E N H S T K R P L Q S F D A H R V A E A A F E K G Y I T T A  
S P K E V V V A M L K E E L E K N A M S I R S E F L V C P T P G L V A R L L N A S I E F E Q E M L A I N H E E Q S T S E  
K E K A R N V H K S M Y L Q R A A E G R F C E V D P S L M L K E E T W V D T V K K I G E E A A K K L K I

>comp15210\_c0\_seq2; 726 389 2512 LEN=4119; translated  
M T M T K I S K P A V V L L I L G L L H A G N L V E S F S S T P A P S R I A V C S T T K A T G S H H F Y Q S I V P Q R T  
T R P L H H S F A P K A S S A L G V A T G L A E Q T D E E T S D G D G E G D E G G L P E F G P D G L W H I T N E A E Y  
K A V L E N N K D K L I V L K V F A P W C K A C K G L A P K F Q R L V N D E K Y Q D L P I V W A D L N I Q G N K D F V K  
S I G V L A L P T V Q L Y A G D G L K T D T F P C G P S K V P I L K R K L V K L V N D H V D A K T R T L K S A S P S T V  
E T A N V T A V S N E A A N G T V S V P P V S T K D E V P K N S T T T A G A A A A T A P E P A D T E E T I E E V I E R E  
K S T L R N V K Y L S D M L E S E Y E E L L T K A T L L T F E A G S I V M R E G N V G R T F Y I I L E G E V E I C Q R T  
S F E D P L T T P P S Y L G T V I N Q F T N K G D F F G E R A L I T G E P R A A S I R A S S R T K C L A F D K G S F P K  
S S L L S G L T T K L S S A D K Q Q E I E D I N D K Y G V A F S D I G D I K D E K Q Y R E S L V A S Q V R G S A N T P G  
P I A G V D T D E E Q E A D Q S N V V G D P S A L G V G T E T M V N L L I R L K L I R S I T R C F D Y T V K Y K L K F G  
D P G S R R R R N I L V S K L A P M Q R T Y I E D A F Q L I D D D A S D E I N L M E L R R V M D S V G E S K S D A E L L  
D V I E G P K K N Y A P W Q E N K N D N Q Y K T I T K E D F F G L M A E S E T Y Q L F I D T F K T L D P Q D S G F V R A  
R D L D A I L C G V R D L I S D D R K S I I D V E D E M M V D Y E Q F S R M L L G T A L K S

>comp15211\_c0\_seq1; 398 1 2712 LEN=2757; translated  
X R S Q T Y P N L M D H E S V L E F P N I R G V N E N V V F I D H E N L E D E V E A D S L D A K R S S T T K S N K F E A  
E L C V E I V R Y F L L Q G Y S P E Q I V V L T P Y L G Q L S K I T R V M R R E L K N I D A Y I S E K D L D E F E G E E  
Q D E L A G T K A S E K R G T V R C S S V D N Y Q G E E S D I V I A S L V R C N Q D G S I G F L K E P Q R V N V L L S R  
A R Y G M F I V G S S K T L L R K E S G I K T W S I L F D M M A E R G Q I K R G L P T V C T L H P D D P P K E L K S R L  
E F R S N R P N G G C D R P C G F R L P C G H V C P Q M C H P L D Q N H T F A A K N C S E P C R R I P P A C G H Q H P C  
T K L C R Q A C G P C R T P M G P F T L P C G H V N F T I T C H E T R S E E A I E C F S R S C S E R V E K S F P S D M F  
P Q Q H A Q T L D Q N G L F V Q K N A A R G L N H A A T N V G S Y V T H V T G I M I A N R F A R E R C F V A I F A I D H  
A T L A K N A S R A R R L V W L A A H I Q N V Q S L A V H H V R H A S K N V I G N V N I L E S V S L F A V L L A Q G C L  
V T S G A Q N F S T A D T V V P R S V A N R A X N K K Y C A E C G S D D I K S T V V D F I L L E Q Y A E H D L D S D P V  
I F L P C G H F L G I E T L D G H L E M G K V Y D Q N P E S G E Y L S I K S I L E S G L S D R P K R C P Q C Q F P I T T  
I R R Y G R I L N Y I A L R G L E R K H R E F V E K T L S Q L S Q M K E K N L K T L K E L R K T I E T S P I Q Q V R N A  
C L S L E T A D E V E V P R P S P S L L L K V V R M T A Q V R A G K V E E L N D G N H R K A K N A F L E A I D I A H R S  
Q S W S S S A S I R I E F V E F L W R W M A Q D E P K D L V L K H L D W V E N E M P I A A S Q E V A R A R E L R R E I V  
S N R K L K D V I A A M N I I Q G Y D Y G G G A S G H W Y E C P N G H P Y Y I G E C G Q A M E T S M C I E C N A Q V G G  
G S X S I A G I E S S V A T I S S L S T P G P Q R C S E F V T E L Y D I K A I A D K D G L P G K S A R T Y R T T A L L A  
S Q V L

>comp15211\_c0\_seq2; 247 1 1352 LEN=1385; translated  
X R S Q T Y P N L M D H E S V L E F P N I R G V N E N V V F I D H E N L E D E V E A D S L D A K R S S T T K S N K F E A  
E L C V E I V R Y F L L Q G Y S P E Q I V V L T P Y L G Q L S K I T R V M R R E L K N I D A Y I S E K D L D E F E G E E  
Q D E L A G T K A S E K R G T V R C S S V D N Y Q G E E S D I V I A S L V R C N Q D G S I G F L K E P Q R V N V L L S R  
A R Y G M F I V G S S K T L L R K E S G I K T W S I L F D M M A E R G Q I K R G L P T V C T L H P D D P P K E L K S R L  
E F R S N R P N G G C D R P C G F R L P C G H V C P Q M C H P L D Q N H T F A A K N C S E P C R R I P P A C G H Q H P C  
T K L C R Q A C G P C R T P M G P F T L P C G H V N F T I T C H E T R S E E A I E C F S R S C S E R V E K S F P S D M F  
P Q Q H A Q T L D Q N G L F V Q K N A A R G L N H A A T N V G S Y V T H V T G I M I A N R F A R E R C F V A I F A I D H  
A T L A K N A S R A R R L V W L A A H I Q N V Q S L A V H Q

>comp15212\_c0\_seq1; 280 1 1658 LEN=2638; minus strand; translated  
X G Y T R A V S Y Q R G Q M R L M I F Y D D D E I S L D V L S V K A Q N T G R A G L A N K G G I V A E C E I D S G T R I  
S F L T A H L E A E H G L S K Y N T R C S T I G D I L K G T A S S L L D S Y C C D V S M T S H F M F A M G D L N F R T R  
L P N H A I G S D E H L K E A H K L A E M K D W D A L N K Y D E L S F A L R E K E C F V G F S T P R C D F P P T F K V D  
R K D G Y S Y S K R S P S Y T D R I L Y K A N H R L A P M I D L L A Y G P I D R F T T S D H K P V R G A Y E I Q L N Q  
K L K S R P I L T K R Y K K S M A L I S S T S A L V R K V K L S T S K Q K R A K M A K Q K S N Q V H S E K F H M F L S  
S I S C E I A Q D D S T S S H P P S P R V T L V S T P T D A M T S E N K M N R F K V W Y Q K S A G R F R A Q S V S K W P  
Q T T T I G N T Y C P R W D K E I A I A I Q T H L D C G S P V D L T G A M L H I L V H D A R D F V T L I G S C T L N L A  
S L I T S S D N E K R E S N S S N N T F G Y N S P S F K E R L K R M S E S V M K I T E A S L F T L S E R S S K E M R G  
R S S S V T F S P R S S E K A S S A I G L A D S Y A E I V P L H H V F D E A L L K N G K E V G R I K F K V D T W W L N D  
G D F A H L P A R S M R

>comp15212\_c0\_seq2; 280 1 1658 LEN=2280; minus strand; translated  
X G Y T R A V S Y Q R G Q M R L M I F Y D D D E I S L D V L S V K A Q N T G R A G L A N K G G I V A E C E I D S G T R I

SFLTAHLEAHEGLSKYNTSRCSTIGDILKGTASSLLDSYCCDVSMTSHFMFAMGDLNFRTR  
LPNHAIGSDEHLKEAHKLAEMKDWALNKYDELSEFALREKECFVGFSTPRCDFPPTFKVD  
RKDGYSYVSKRSPSYTDRILYKANHRLAPMIDLLAYGPIDRF'TTSDHKPVRGAYEIQLNQ  
KLKSRPILTKRYKKSMAILSSTSALVRKVKLLSTSKQKRAKMAKQKSNQVHSEKFMFLS  
SISCEIAQDDSTSSHPPSPRVTLVSTPTDAMTSENKMNRFKVVYQKSAGRFRQSVSKWP  
QTTTIGNTYCPRWKIEIAIAIQTHLDCGSPVDLTGAMLHILVHDARDFVTLIGSCTLNLA  
SLITSSDNEKRESNSSNNTFGGYNSSPFRKERLKRMSSEVMKITEASLFTLSERSSKEMRG  
RSSSVTFSPRSSEKASSAIGLADSYAEIVPLHHVFDEALLKNGKEVGRIKFKVDTWLND  
GDFAHLPARSMR

>comp15213\_c0\_seq1; 490 2528 3703 LEN=3793; translated  
MTQPTTVRSHMQDSYKHKVKAITDDEVSRLRGPDGPKYTVLVTGAAGFIGMHTAIELKQM  
GMTPIGYDNVNTYYSTDLKESRIKELKKNLILFERGDVCDADKLKEVIKGNKITRVIHLA  
AQAGVRYSLDHPFEYIHNNDICTVNILEIMKELDLKEHPLVYASSSSVYGNNVKVPFLET  
DIVEDPASLYAATKRSELIARTYYNLHNISISGLRFFFTVYGPYGRPDMPWMFTDRISN  
NETIQVFNNGLSRRDFTYIDDIVQGVVNSLLVDRAKTSLEAEIVNLGNHGPVLLADVFRI  
VEERVGKPAQIQHLGMQKGDVPKTFADISKARYLLGYKPTTTIEDGIDRFVTFWEQHNAS  
RYRMTQTPQSNPKENNTAVGDSKIDAKPK

>comp15213\_c0\_seq2; 493 263 1407 LEN=1509; translated  
MKIPLVLFVGPWALFLFQAIIVSAENECRDDQNYRYGGDDWKDCKWIYDNNRCDRHDNDK  
DHHVGKYYCPKSCGFCKENGAFFSYNGDDKRNDDAVFFFHDGDDYSNGDDQKLQHYDDG  
CSNDNGFRYEGKDWKCDWVAEERFCGRQHNGKNIGEHYCPVSCGYCDDDDWQGGDDDKW  
HYDDDKWHYDDDIWHQDDDKWHQDDDKWHANNHNYDDDKVYHHNSYGCNDDHDFHYEGK  
NWKNCFWMAEEGLCNREYNGKNVGNKHYCPYSCGHCDDDDNHSDNEYFCFRYDNEDFRYD  
GKDWKDCWVAKEKHCNLEQDGKKIGKEYCPWSCGHCDNDKPPXEETYTETLWAHKEAYG  
THEEADTEAHKATNSTRWILL

>comp15213\_c0\_seq3; 490 3278 4453 LEN=4543; translated  
MTQPTTVRSHMQDSYKHKVKAITDDEVSRLRGPDGPKYTVLVTGAAGFIGMHTAIELKQM  
GMTPIGYDNVNTYYSTDLKESRIKELKKNLILFERGDVCDADKLKEVIKGNKITRVIHLA  
AQAGVRYSLDHPFEYIHNNDICTVNILEIMKELDLKEHPLVYASSSSVYGNNVKVPFLET  
DIVEDPASLYAATKRSELIARTYYNLHNISISGLRFFFTVYGPYGRPDMPWMFTDRISN  
NETIQVFNNGLSRRDFTYIDDIVQGVVNSLLVDRAKTSLEAEIVNLGNHGPVLLADVFRI  
VEERVGKPAQIQHLGMQKGDVPKTFADISKARYLLGYKPTTTIEDGIDRFVTFWEQHNAS  
RYRMTQTPQSNPKENNTAVGDSKIDAKPK

>comp15213\_c0\_seq4; 99 1 138 LEN=759; translated  
DDDKWHQDDDKWHANNHNYDDDKVYHHNSYGCNDDHDFHYEGKNW

>comp15214\_c0\_seq1; 235 1 579 LEN=1230; minus strand; translated  
GKRTATSGNRAANGDDCVMPSPPKGLTAQMSDLFASFKEGSTRGRKNSSGRNKNQNF  
NWISQSAADIDDSPLPLPPGGTFEGGLMRSISSLSLVEHPSMVLNMYKSSVSSPAQTA  
FTYQKPPQQQQKHRQPGFGDVSIGDGMAGNSLLGQRAEQRSSLLDDFEETPMEQQLRNA  
QAKRNPEKWSGF

>comp15214\_c0\_seq2; 638 135 1994 LEN=3174; translated  
MPLLTALNKKIAFSAFAIAFFTICFFSIYATIVTLLVLKGGVVDLANSHTAYFPPTAVK  
TGLIPGANSTTIPVAKRNGANYDPLADRPVYFNSGEQKSPLPVIMNTIRTRFSPFLNLS  
IASNNNNNGGVEAFDNITTLEREQMRVLEVLVDHYSKTEQGIDSDVVELRHCRLDMIDYH  
MFSSWASIIQLQDAWPTIERKLRNTGEVKGIRNRDNWDKNMYREFCFGLLEIFATHSIGR  
YNHTICDFEKYSLKIERGDLLSAELKLRVSPSSNNLPRLVFVIAFQDAGHLEALIDAC  
EELKVPYDYWLTGLGNAAYPLLGAEELTKHFLNTRKNIWLGELKQNYGEGANWGYLERKRL  
IFTTGDQKYTQRTKKWKQNDFTPLIPDNIKTNTKKTNSGNQAVFSQKVVKLVASPEVK  
ELLSIAKYGCCCCLEERTWIAAARMIGYGEAEAMEAASMFQVWGGEKCGDGSMMKNALLK  
NASICFKSQDLTQGNIFERHRTDSQNTGDPDFFFFRGDKLLELRLAKERGFLEFARKFNS  
RDRDSLELEIEMIKKNLHND

>comp15214\_c0\_seq3; 1100 160 3449 LEN=4013; translated  
MIKNSCNGTFNRDNYRKSISGTYPSEASSAGGYSTDINTEVKNFGSNALDTGNSSRR  
NQDNHMGNGYQNHNPQQPYNPHHHEKGPSTNLHRRNSGSSGSAKSNKKYVKNKHQQN  
NAKFGNTHHPISKPKKVPTKPKKPLRVLGIALIVDQKGTGARMLARYPTSPSSMKKVD  
EVDNEDGGEAINGRTGLYDRNEDEDAEDDDGDDESDGYDRKRVSKHDDDLFFTLTARQM  
AKLFRTRSLCNQPMTLRVNRTVFCCHAVLLEDPCSRSSNNDISNGTAKDEIGSPDSPLA  
KPKTRNLTQQPKIPLAPSIRVDRDRDNNSMSLSMMASEADDPENEDNKLRLFSVVVAIS  
ASKQQAALPSSFWETGSGEDLVDLERYIROGGMQMKTSDNSVKKKPPKSRAEKTQTDNS

DDNDKRWKLKRREQTAGRVSSSTFLAIRRVHISLARFCRALEREENRCAYVTLQSCALFK  
IRNGRQKQWEAMQINRSSASASVSNCATITTTSSSGSRGDRSPYPDRHNPRHSRTNSFMSS  
YSLPSDAALKKAFDNDNDVSGEVLDTIEKDQEKEQEILELMLACNPQDNHQQQKEKCYLQ  
KGDSSFQQRQYGNLIRDLVAVFHSLSRNDQEYPTPSSLLCERDTVYVNNHFAIPIDAA  
GLNGNSYSPSFSMPSPSVYSQHKYGAQAEGGPVVLPHYTLLFPHASPSXNVADFPF  
FRISASPTLKHLLLSVCPQKSLTQISIDANLPMHTTMAIASFLVAHGACITSPVNSRSR  
LTCLGSNSIQRIRELTLDQAFPGVNLFRVVSFLTSSSRHLGDTMAVLADTDNNEGAWL  
REALLASPKYRFYNHNLHGDDGDNNGANDAAAADIKDTIRNGTHQALFSDEKETYS  
SIHTSFPSSTWRGTPKPSGLAQDTHHPPPPMSVHEWLKDLDFLYAVSVWLLSRELLVQLQ  
EYMAVDIESPSKSSRLEPVDLDESNSLLSPPPMVEDSSSGTTGTPLIPSVASTTGT  
TNTSAATIGNKSRNDLDEKLFKELMAMEYLNQDVSMIALSWQLAIDPRKLRHWGLRHKR  
RVISRVPSRETIGNPM

>comp15214\_c0\_seq4; 638 110 1969 LEN=3149; translated  
MPLLTALNKKIAFSAFIAFFTICFFSIYATIVTLLVLKKGVVLDLANSHTAYFPTAVK  
TGLIPGANSTTIPVAKRNGANYDPLADRPVYFNSGEQKSPLPVIMNTIRTRFPSFLLNGS  
IASNNNNNGGVEAFDNITTLEREQMRVLEVLVDHYSKTEQGIDSDVVELRHCRLDMIDYH  
MFSSWASIILODAWPTIERKLRNTGEVKGIRNRDNWDKNMYREFCFGLLEIFATHSIGR  
YNHTICDFEKYSKIERGDLLSAELKLRVSPSSNNLPRLVFVIAFQDAGHLEALIDAC  
IMPQHLLIVHLEQRSPSSFVKSVHRIAKKYENVAVVQFGSIIYRTDSVSTVNYQIMNWLT  
EELKVPYDYWLTGNAAYPLLGAEELTKHFLNTRKNIWLGEKQNYGEGANWGYLERKRL  
IFTTGDQKYTQRTKKWKQNDFTPLIPDNIKTNTKKTNSGNQAVFSQKVVKLLVASPEVK  
ELLSIAKYGCCCCLEERTWIAAARMIGYGEAEAMEAASMFQVWGGEKPKCGDGSMMKALLKP  
NASICFKSQDLTQGNIFERHRTDSQNTGDPDFFFFRGDKLLELRLAKERGFLEFARKFNS  
RDRDSLELIEMIKKNLHND

>comp15214\_c0\_seq5; 638 110 1969 LEN=3133; translated  
MPLLTALNKKIAFSAFIAFFTICFFSIYATIVTLLVLKKGVVLDLANSHTAYFPTAVK  
TGLIPGANSTTIPVAKRNGANYDPLADRPVYFNSGEQKSPLPVIMNTIRTRFPSFLLNGS  
IASNNNNNGGVEAFDNITTLEREQMRVLEVLVDHYSKTEQGIDSDVVELRHCRLDMIDYH  
MFSSWASIILODAWPTIERKLRNTGEVKGIRNRDNWDKNMYREFCFGLLEIFATHSIGR  
YNHTICDFEKYSKIERGDLLSAELKLRVSPSSNNLPRLVFVIAFQDAGHLEALIDAC  
IMPQHLLIVHLEQRSPSSFVKSVHRIAKKYENVAVVQFGSIIYRTDSVSTVNYQIMNWLT  
EELKVPYDYWLTGNAAYPLLGAEELTKHFLNTRKNIWLGEKQNYGEGANWGYLERKRL  
IFTTGDQKYTQRTKKWKQNDFTPLIPDNIKTNTKKTNSGNQAVFSQKVVKLLVASPEVK  
ELLSIAKYGCCCCLEERTWIAAARMIGYGEAEAMEAASMFQVWGGEKPKCGDGSMMKALLKP  
NASICFKSQDLTQGNIFERHRTDSQNTGDPDFFFFRGDKLLELRLAKERGFLEFARKFNS  
RDRDSLELIEMIKKNLHND

>comp15214\_c0\_seq6; 638 135 1994 LEN=3158; translated  
MPLLTALNKKIAFSAFIAFFTICFFSIYATIVTLLVLKKGVVLDLANSHTAYFPTAVK  
TGLIPGANSTTIPVAKRNGANYDPLADRPVYFNSGEQKSPLPVIMNTIRTRFPSFLLNGS  
IASNNNNNGGVEAFDNITTLEREQMRVLEVLVDHYSKTEQGIDSDVVELRHCRLDMIDYH  
MFSSWASIILODAWPTIERKLRNTGEVKGIRNRDNWDKNMYREFCFGLLEIFATHSIGR  
YNHTICDFEKYSKIERGDLLSAELKLRVSPSSNNLPRLVFVIAFQDAGHLEALIDAC  
IMPQHLLIVHLEQRSPSSFVKSVHRIAKKYENVAVVQFGSIIYRTDSVSTVNYQIMNWLT  
EELKVPYDYWLTGNAAYPLLGAEELTKHFLNTRKNIWLGEKQNYGEGANWGYLERKRL  
IFTTGDQKYTQRTKKWKQNDFTPLIPDNIKTNTKKTNSGNQAVFSQKVVKLLVASPEVK  
ELLSIAKYGCCCCLEERTWIAAARMIGYGEAEAMEAASMFQVWGGEKPKCGDGSMMKALLKP  
NASICFKSQDLTQGNIFERHRTDSQNTGDPDFFFFRGDKLLELRLAKERGFLEFARKFNS  
RDRDSLELIEMIKKNLHND

>comp15214\_c0\_seq7; 235 1 579 LEN=1214; minus strand; translated  
GKRTATSGNRAANGDDCVMPSPPKGLTAQMSDLFASFFKEDGSTRGRKNSSGRNKNQNF  
NWSQSAADIDDSPLPLPPGTFEGGLMRSISSSLFSLVEHPSMVLNMYKSSVSSPAQTA  
FTYQKPPQQQKHRQPGFGDVSIGDGMAGNSLLGQRAEQRSSLLDDFEETPMEQQLRNA  
QAKRNPEKWSGF

>comp15215\_c0\_seq1; 1755 200 7015 LEN=7496; translated  
MSAFEDNGVEDPSWKHPHAFHLNLPNHIHEDGIPYITKYAHKKSRYILKLVEISLVLA  
EMFVSEEGNDVASGIGASEYAHDDLKMDGDGEDQKVDEVEIEEVPYIGAKPRDLAFLR  
LCSRLQSQMSLESLSKYSGLSRIELSKIVLHILRLVTATYSVETTDEPMEKQKRSATIYY  
EDVGYILSSTDKDSEEHRSACIELSDSLERVLQRKFAIPFPGRKILLSLLVNILSNKGP  
LRSVSNAAIFFRLNDADSQDKEQSQEQRFLLIIRWRTLLRMLLRTAPYLDEYKVGNHPT  
ASNLRNRVTRQTVQMIRDARHFFDQGLRPGHTDSQICDNKSACEIWEMVKKDVMFHSHT

NACYRSLVMLYL FHP SRCTSEYYAGVMPVWFDAWTNIDRCPEIDFLWLALFTRARKHLGP  
SFDWGP IRRLLTNSQYWLQVP IGGSLDKSFPNVANARSRSCPSRLKAFAGASSSYEEG  
IDFVAKVAKLLVNLGLGEG IGGISEGTDVLRFLNFVTPYFHP SNLGSWTF TLGAFLHY  
FSYEVSCRMGLAAMNS IKENRPELAKALSEVEPSLTVADLPHEVVVLIDSLPLCQQS  
LYSKNAHVGRAGEAAMVYLAQIDPLRVTPVVIDFAMRALGISAVNLAHQAPAALSALTRL  
LQPSLRDPNILLVRLPELLRLTLGIDSNDQNKTI RTLILYRSLTSWIPVGGTPDDWKH  
LTENNGSEPDRC DGTVVVTGQDLHGHLKPTESSSYLETIEKLPETSLLKQGSYREEFD  
DLLLQEASSALSDWVLEFFDRIYDTLRATGEREKVGN TASGVASRHSSADVQVARNFSRV  
LKECLTQTF AAMDEAVHKLAVNSVKRFLSEETLPNAAKDSSFLCLAACSARVKDGHVTS  
GLNALVPI LMDELEHHSNKTVVYRLRCLAGAVRSCGVAI IKHKNDIKTAINFALESKDKH  
VFKTGCKLLRHTLSTLCE SYLTTGLVPRIAEQKGKIVFGKSAQLHDDPVEWHVPSGDCI  
QFAWELLNHNVLERIQRISPSDDTKESVDSFELRRCLRVLYALRGGAGAMLD FQNDCCD  
DSSDKMDVDSTDKNGDVNLFPEYQAMINLLKTAPKETYESMMTMRCRVSLFTVTLMNVIA  
SESEFKVDEAPQTIDSRDGTSSVLEKKYIASVSSDPKICKEVCDIALLLLTRRGAAFRSQE  
SKNIWKAHKQTVTDFAILAEADHMEESLQRAQMYGSNRLVLFKDGEDSGKTLPRLLVGR  
IQLFHDSLQRTASFEVPRRMRLSMLQKRQKVI FCKDTNVSELCKSMENIKTADPPFAF  
DIYEGVFDGLFALTCHSNKQVRASAI GVVDYAITRFGWLLRVRI PRLLSAIRLQDDGMHG  
KFGIPSCSSLKIAIDSQGRKR LAETMKGVC SMLAIPRASKEILSTEFRRDFIFTMCGN  
EDLVSLMPAEMQKMHVYLSIFSPIRLGFYCVPRASNSDKKFHEDSLTFLLDVLSTDEK  
DVASNEEDGDAKDAHWKLLLACWFLTVMVDSDDLKDSAIATRLWKLCFQILKDEYQGP  
LQRVALGLFGRVMIIRKGPSFELLRQEF LKENFCIIFGKALVYDHKEDSSVGGGHGAQW  
ATGVADIIRDSARNIAPKSLFPFQRTNQSSGTFKVSHAKLVEEILTGLGETDATTVSRYL  
LSFSKDMALSPPESEDQRNQCTSAEIFAGVTRALLQMMDGQTLTDIWMSDLIPFLAESIP  
KFPISLSGAYFDSIRFGIQFSPDKFYPLTQWLFEKIEETLWQPKTEKVIADSSSSDSKE  
PEDDGKNGASQGTGFTTQSKWLYLCCALLIELDETEL DSTTFRTRWYTNGLTKLDMTRN  
TVTSTDES LKKS WKLVSERLLPRLIEALGHYPYESC RDHISGCLFRICYCHRKMSIGTASN  
GPSRTNSAIDLSSLDKNDPGSVIVQKLLSLQSTAETS FENRYSSLITARRFFSYCVHYGE  
AKYEYS DYMIPLPLAFEALKSTVEEGTEVSEPDTVTKRALEAEVVKGYRRTLAEVSIAS  
VISYSGRKGDTDISRVLDTAENAAQHETWQVRHASAHFLRCFQGS HKFLFTKSQADRITK  
IVIGLLGDDRREVSSAAMA AVTGI IAA MQSETVTILVDKYISEANR SKLKS KSKKSSKVEG  
DQVVKMPDVEEAKAKEQKRAKRQSSVFFLCATVLSQPYDTPPFV PKALAAISKHSFKRN  
APLGIRD TVKKCAEYKKT HMSDNWEVHRSVFTQEELEALEDVISSPHYA

>comp15216\_c0\_seq1; 234 1137 1717 LEN=1717; translated  
MKSPYVHCD CPTWMTLILIVPFLLEAASAF LCTDTKFACSHRSADSSSSNIYGNSQLGLG  
GSDGGEEYQDAYGRTIQTSNDAEDEDPLANASKSVILDPLVCGPSGVGKGT LIECLRS  
RFP SDVFAF SVSHTTRQPRPGEVHGEHYHFTNPEDIQRDIDQGLFVEHAQVHGNYGTSK  
QAI EVLQSEISIX

>comp15216\_c0\_seq2; 533 1137 2339 LEN=2540; translated  
MKSPYVHCD CPTWMTLILIVPFLLEAASAF LCTDTKFACSHRSADSSSSNIYGNSQLGLG  
GSDGGEEYQDAYGRTIQTSNDAEDEDPLANASKSVILDPLVCGPSGVGKGT LIECLRS  
RFP SDVFAF SVSHTTRQPRPGEVHGEHYHFTNPEDIQRDIDQGLFVEHAQVHGNYGTSK  
QAI EVLQSEKKITILDIDVQGVISVKESRFPANFIFIAPPSMMELENRLRGRGTETEEAI  
QKRL ENAAKEIEYGEADGNFDHVF FNNDVEETVDEMIKVL LVKYPQLK KFQDAASLEAEQ  
IKGEQTIDDDKEEESGEQSFDFLAESDKMLYFP SVRAGHDKLEVTDRSSNKRRDQPPQRK  
CGPYIVDNEEPDWPHPSSYRDFGKTNPVILDEDIINQED

>comp15217\_c0\_seq1; 472 230 1459 LEN=3430; translated  
MTKKWLSIGKASYIGTLILVFLMYRFLRTASLLSTFSSTSSSATFLAGTAAFMTTGVR  
SESNSDCTTTRMNKLP AHPHPSEFP IGLGTMDITPDQVPSSIASALRLGYRRIDCAPVY  
FNEDKIGDALAENVLGSMKEGI DNERRKDA IREDLFI VSKLASPFHRKEHVKIGLQKT  
LNDLRDYL DLYLIHWPQAFK FVEIDPSIRGYGGEAQYIDDSNNGENIDPGVSVHETWSA  
MEELVEEGLVRHIGVSNFPVSLLELMAGNHTILPAVNQVEMHPYLQO SKLLAYCKKRKV  
HVQAYSPLGTSGYKEKDEPTLLED PVLQKIAVNHGITVAQVCLAWALQRGTSVVAKSASE  
AHQQENFGSSSDGIVLSDDEMVEIEGLERGHRRFRPEEWGDLAMAVFD

>comp15218\_c0\_seq1; 105 326 1528 LEN=2335; translated  
MMEHPAVKNGHRLTPILIVAIA TGI FLAAAMACECD AFVPSVFR TTVVENESSARRVG  
RNIADVRTATPKTETRERNEKKS DGGRGVEPANDDR IKNEQNRNDLDPIEKWCLHKL EY  
YERSQKQVRC PFFRRRYGDVLDKVEDFVRFFLVRPYFRDSSHRTEVGPRMAYRSSSSSGD  
RKTRNLPV GELLA IIRGDWGADR SRRRTVMATDCADEKGYVVTGRLSQR IYRDDCQFLSP  
DPDPLRGRKYVGVASQIFHSKSSFSKLISLEQVPASELV LANDDND SQR IIPQGMVLK  
ATWKL SATINLPWKPQLSEFTGSTLYFLDHDHLIFRHQETWDITVWDAFLAMVNMNRLE

PPARRAVGPKRNAHLPCLEQAIPSVTKNNSRRRYQQIVP  
>comp15219\_c0\_seq1; 665 157 1740 LEN=1926; translated  
MASYAFSRDGEYLRKLSNGKFQNFQFRGNGPFVDATETFYSEFSLAWRFLGFYTD CDVCIE  
GAGDEDNGDDANKAEEDGGDENFVSSSGCLENGEDRTVCRRYALWAAYIDQAYEGDGAS  
EYQYFDHRTKRWDRSACNSSEGRCAKLDCHNPSSKNFKLIGVFKDPKISDFIDNVIDYQG  
DCVWSDDEYKFMKAMTSSYNEKNDENNDYTLNFGSPPTTCTPYQVKGEDGITYSGYYDAI  
PISKGNMGIALYTDSECTESYAGKTHSVEDVMARSMGSTSSVIERKLSWNEAMDALKVC  
QPCVAYSTLGNSSMQPYNANGDRYSIDNENGGDDGNFVCRDNLERDEPVNQCEVFAEQGR  
DSMRVATYRDILLAESQGTVTGIDLSSYSSNRRGKMLGHTFVQPNHIWFSVFFFLLSMG  
FFGYALVQLFEKDRSKHRSNSKNMNEPLVGMEITSKKNKKNENIGAGREQKSAEKAQRKAK  
LGKQDQEQQKKLPKKSILKPKKLDEEDDDSHSYRHF GDDSSFGTKQ  
>comp15219\_c0\_seq2; 232 362 616 LEN=802; translated  
MNEPLVGMEITSKKNKKNENIGAGREQKSAEKAQRKAKLGKQDQEQQKKLPKKSILKPKK  
LDEEDDDSHSYRHF GDDSSFGTKQ  
>comp15220\_c0\_seq1; 147 843 1472 LEN=1765; minus strand; translated  
MGVRTPSLEILPSPARAEAVGEGKEPLHHVALDVVKGQAPARAVLQPLLDVDRVHGVVPL  
GGVVGDPVAVVVPREEGHVPLPALLVLGVVGGQDVVDLFEEGGDHRVLRKGFPMGKVVWES  
LRDQQFQGRVLHGVPGAPRVEDVVHVALVGKASSQQQRGLLGFVVPFGEVDSAVGGSADFF  
AFQVVSEVLYDEEQIVSPGMRVSGFAHGF  
>comp15220\_c0\_seq2; 729 1 1670 LEN=2548; translated  
XWVANLELSLGLWLCADGIDILEDVEVAPPPGGILFPQSPLATGPVARIASAWMAEEVLD  
RFFGAYSAAVEDDDQYRVTRPDWDKEVTLSRRWNGESPGDLYKKCRTMDWYFEKVVDAD  
LVPKPDEGAVGDDGGGDDGGEEEDQGEEDQGEEDQGEEDQGEEDAGTDPPVENEAGKHRET  
EEEVVDPNRRKPTVPLRPANLEIVRLPRQVDLAYVDVSNGHREHPHPALDADGVPGYVH  
DETALRRNPPALDYPLKAGCAERDDNYAMMHGRIVVEPEANNKEDERRDKIFCLVYTIE  
SGHPKIPGIRQTWGPCKDGMVVGSTKTDP SIGAVNIPHEGPEEYDNIWQKVRSMWSYIYD  
NYEYKIDWFHIGGDDLFLIVENLRYYLESEEIRTAANGGIYLPENETKQTPLLLGRRFA  
YQGMNDIFDSSGSGYTMKAALKLLVTEGFPNYFPHRKTFS EDTMVATLFKKIDNVLPY  
DTKDEEGGERYMPFLPGHHYSYRIPDDPTKD WYAMYSIDIKEGLEHCARRSLAFHYVKGD  
MMKRLFALAYGLCPSR  
>comp15220\_c0\_seq3; 182 843 1565 LEN=1587; minus strand; translated  
MGVRTPSLEILPSPARAEAVGEGKEPLHHVALDVVKGQAPARAVLQPLLDVDRVHGVVPL  
GGVVGDPVAVVVPREEGHVPLPALLVLGVVGGQDVVDLFEEGGDHRVLRKGFPMGKVVWES  
LRDQQFQGRVLHGVPGAPRVEDVVHVALVGKASSQQQRGLLGFVVPFGEVDSAVGGSADFF  
AFQVVSEVLYDEEQIVSPNVKPIVFFVVIIVDVTPHRSDLLPNIVVCGVGKSHRNVTEKS  
>comp15221\_c0\_seq1; 491 1 2788 LEN=3184; translated  
XEKEFFVLGVTSEIIGDRRRI SHLGSQITKVLQHKYEMRNGDDR GALTDWGWISRWFHST  
IGINALKSWPSGILVRSKDDYPLWMA SVVWLWKQQAQNR RGISMDGSLPSVRTRAANDK  
LGSSTIINLLVDWVVLGSLLIYKKSREESSCPGDD EDEIPKRNARSEDGKNISERNEETD  
PINELRMLLKQHSTSSSKQLVMPKPGTRTRSTLS SSSQDVYPPPQVLSFKHPPSVQRTTV  
SLGITQGEKHGNQORYAELLVHNVSH TDLVLSLDAPRLPSSTTG FAMDGNDPYCLCRPRF  
SAFDAYSQRLVDFLQGCQRQRELE EAVIHLPRYERNDKTQQPQP SSENFRDDIPIGFRLND  
DRNDKSHRPLRVSPSELHNL RVRGRDASRVDACSSP MSPNSTLNINAVFFP LLATLMPLW  
EDRIHQYNFPSATTQSALKPKQVLILVSGV GQPRNWT HSAKGNSTEQCAELMKMFLKVI  
FPPELVVLIHSDTNI FRYDENIAFVNQELLPRVQ EYRDAHAKGLPYPDEI INLSS TAKDS  
IDQDRPFSTEWKRSFSITISYADGSPARNSAIQAALRTFKPTY YHFHWQLKTFWHESKIVN  
SDVEVHSFEEIETLPPVESNQLQDGS LVKRVVEEMKNFRDDFLKILSNSSDSDSNDIRAFW  
LRKSKFNPXVKEAQN LQVPTWKGRDPMPLLLTPPLPHFLTPEAHKPVIA I LAVQPPNGEL  
KLYRGTNMEVSMPTGSLCAERNVIGTALGKITNTDFR WANFVQINLTSLIFTP SADNP SL  
RRQDLKMVAVLAVPNPKQLQASTSVGGL PRSGLNSV ASLVTATVEDESSLGRPSRKSSL  
GGEDEWIVQDHSIFAGQDNAPV FVDKKTLS SSGQSDPEDVQPNATLDSSSSQSSTPVRRI FL  
YNKPQKQTRKQRRRAVVHSGHVSRNKVGPW  
>comp15221\_c0\_seq2; 514 1 2672 LEN=3168; translated  
XEKEFFVLGVTSEIIGDRRRI SHLGSQITKVLQHKYEMRNGDDR GALTDWGWISRWFHST  
IGINALKSWPSGILVRSKDDYPLWMA SVVWLWKQQAQNR RGISMDGSLPSVRTRAANDK  
LGSSTIINLLVDWVVLGSLLIYKKSREESSCPGDD EDEIPKRNARSEDGKNISERNEETD  
PINELRMLLKQHSTSSSKQLVMPKPGTRTRSTLS SSSQDVYPPPQVLSFKHPPSVQRTTV  
SLGITQGEKHGNQORYAELLVHNVSH TDLVLSLDAPRLPSSTTG FAMDGNDPYCLCRPRF  
SAFDAYSQRLVDFLQGCQRQRELE EAVIHLPRYERNDKTQQPQP SSENFRDDIPIGFRLND  
DRNDKSHRPLRVSPSELHNL RVRGRDASRVDACSSP MSPNSTLNINAVFFP LLATLMPLW



EDRIHQKYNFPSATTQSALKPKQVLILVSGVGQPRNWTHSAKGNSTEQCAELMKMFLKVI  
FPPELVVLIHSDTNI FRYDENIAFVNQELLPRVQEYRDAHAKGLPYPDEI INLSSTAKDS  
IDQDRPFSTEWKRSFSITISYADGSPARNSAIQAALRTFKPTYHFWQLKTFWHESKIVN  
SDVEVHSFEEIETLPPVESNQLQDGLVKRVVEEMKNFRDDFLKILSNSSDSDNDIRAFW  
LRKTHKPVIAILAVQPPNGELKLYRGTNMEVSMPTGSLCAERNVIGTALGKITNTDFRWA  
NFVQINLTSLIFTSPADNPSLRRQDLKMAVAVLAVPNPKQLQASTSVGGLPRSQSLNSVAS  
LVTATVEDESSLGRPSRKSSLGGEDEWIVQDHSIFAGQDNAPVFVDKKTLSGGQSDPEDV  
QP NATLDSSSQSSTPVRRIFLYNKPQKQTRKQRRRAVVVHSGHVS RNKVG PW  
>comp15221\_c0\_seq3; 538 1 2783 LEN=2985; translated  
XEKEFFVLGVTSEIIGDRRRI SHLGSQITKVLQHKYEMRNGDDR GALTDWGWISRWFHST  
IGINALKSWPSGILVRSKDDYPLWMAVWVWLKQQAQNRRGISMDGSLPSVRTRAANDK  
LGSSTI INLLVDWVVLGSLLIYKKSREESSCPGDEDEI PKRNARSEDGKNISERNEETD  
PINELRMLLKQHSTSSSKQLVMPKPGTRTRSTSLSSSQDVYPPPVLQSFKHPPSVQRTTV  
SLGITQGEKHGNQORYAELLVHNVSHDLDLVLSDAPRLPSSTTG FAMDGNDPYCLCRPRF  
SAFDAYSQRLVDFLQGCQRQRELEEAVIHLPRYERNDKTQQPQPSENFRDDIPIGFR LND  
DRNDKSHRPLRVSPSELHNLVRGRDASRVDACSSPMSPNSTLNINAVFFPLLATLMPLW  
EDRIHQKYNFPSATTQSALKPKQVLILVSGVGQPRNWTHSAKGNSTEQCAELMKMFLKVI  
FPPELVVLIHSDTNI FRYDENIAFVNQELLPRVQEYRDAHAKGLPYPDEI INLSSTAKDS  
IDQDRPFSTEWKRSFSITISYADGSPARNSAIQAALRTFKPTYHFWQLKTFWHESKIVN  
SDVEVHSFEEIETLPPVESNQLQDGLVKRVVEEMKNFRDDFLKILSNSSDSDNDIRAFW  
LRKTHKPVIAILAVQPPNGELKLYRGTNMEVSMPTGSLCAERNVIGTALGKITNTDFRWA  
NFVQINLTSLIFTSPADNPSLRRQDLKMAVAVLAVPNPKQLQASTSVGGLPRSQSLNSVAS  
LVTATVEDESSLGRPSRKSSLGGEDEWIVQDHSIFAGQDNAPVFVDKKTLSGGQSDPEDV  
QP NATLDSSSQSSTPVRRIFLYNKPQKQTRKQRRRAVVVHSGHDINPLRPGACNEWLKKL  
AETNPYFTVVTFDTSACNGVYCTPCEE  
>comp15221\_c0\_seq4; 502 1 2750 LEN=3085; translated  
XEKEFFVLGVTSEIIGDRRRI SHLGSQITKVLQHKYEMRNGDDR GALTDWGWISRWFHST  
IGINALKSWPSGILVRSKDDYPLWMAVWVWLKQQAQNRRGISMDGSLPSVRTRAANDK  
LGSSTI INLLVDWVVLGSLLIYKKSREESSCPGDEDEI PKRNARSEDGKNISERNEETD  
PINELRMLLKQHSTSSSKQLVMPKPGTRTRSTSLSSSQDVYPPPVLQSFKHPPSVQRTTV  
SLGITQGEKHGNQORYAELLVHNVSHDLDLVLSDAPRLPSSTTG FAMDGNDPYCLCRPRF  
SAFDAYSQRLVDFLQGCQRQRELEEAVIHLPRYERNDKTQQPQPSENFRDDIPIGFR LND  
DRNDKSHRPLRVSPSELHNLVRGRDASRVDACSSPMSPNSTLNINAVFFPLLATLMPLW  
EDRIHQKYNFPSATTQSALKPKQVLILVSGVGQPRNWTHSAKGNSTEQCAELMKMFLKVI  
FPPELVVLIHSDTNI FRYDENIAFVNQELLPRVQEYRDAHAKGLPYPDEI INLSSTAKDS  
IDQDRPFSTEWKRSFSITISYADGSPARNSAIQAALRTFKPTYHFWQLKTFWHESKIVN  
SDVEVHSFEEIETLPPVESNQLQDGLVKRVVEEMKNFRDDFLKILSNSSDSDNDIRAFW  
LRKTHKPVIAILAVQPPNGELKLYRGTNMEVSMPTGSLCAERNVIGTALGKITNTDFRWA  
NFVQINLTSLIFTSPADNPSLRRQDLKMAVAVLAVPNPKQLQASTSVGGLPRSQSLNSVAS  
LVTATVEDESSLGRPSRKSSLGGEDEWIVQDHSIFAGQDNAPVFVDKKTLSGGQSDPEDV  
QP NATLDSSSQSSTPVRRIFLYNKPQKQTRKQRRRAVVVHSGHDINPLRPGACNEWLKKV  
REDRVHGMILIDVLCS  
>comp15221\_c0\_seq5; 514 1 2672 LEN=3068; translated  
XEKEFFVLGVTSEIIGDRRRI SHLGSQITKVLQHKYEMRNGDDR GALTDWGWISRWFHST  
IGINALKSWPSGILVRSKDDYPLWMAVWVWLKQQAQNRRGISMDGSLPSVRTRAANDK  
LGSSTI INLLVDWVVLGSLLIYKKSREESSCPGDEDEI PKRNARSEDGKNISERNEETD  
PINELRMLLKQHSTSSSKQLVMPKPGTRTRSTSLSSSQDVYPPPVLQSFKHPPSVQRTTV  
SLGITQGEKHGNQORYAELLVHNVSHDLDLVLSDAPRLPSSTTG FAMDGNDPYCLCRPRF  
SAFDAYSQRLVDFLQGCQRQRELEEAVIHLPRYERNDKTQQPQPSENFRDDIPIGFR LND  
DRNDKSHRPLRVSPSELHNLVRGRDASRVDACSSPMSPNSTLNINAVFFPLLATLMPLW  
EDRIHQKYNFPSATTQSALKPKQVLILVSGVGQPRNWTHSAKGNSTEQCAELMKMFLKVI  
FPPELVVLIHSDTNI FRYDENIAFVNQELLPRVQEYRDAHAKGLPYPDEI INLSSTAKDS  
IDQDRPFSTEWKRSFSITISYADGSPARNSAIQAALRTFKPTYHFWQLKTFWHESKIVN  
SDVEVHSFEEIETLPPVESNQLQDGLVKRVVEEMKNFRDDFLKILSNSSDSDNDIRAFW  
LRKTHKPVIAILAVQPPNGELKLYRGTNMEVSMPTGSLCAERNVIGTALGKITNTDFRWA  
NFVQINLTSLIFTSPADNPSLRRQDLKMAVAVLAVPNPKQLQASTSVGGLPRSQSLNSVAS  
LVTATVEDESSLGRPSRKSSLGGEDEWIVQDHSIFAGQDNAPVFVDKKTLSGGQSDPEDV  
QP NATLDSSSQSSTPVRRIFLYNKPQKQTRKQRRRAVVVHSGHVS RNKVG PW  
>comp15221\_c0\_seq6; 561 1 2709 LEN=3105; translated  
XEKEFFVLGVTSEIIGDRRRI SHLGSQITKVLQHKYEMRNGDDR GALTDWGWISRWFHST

IGINALKSWPSGILVRSCLKDDYPLWMASVWVLWKQQAQNRRGISMDGSLPSVRTRAANDK  
LGSSTIINLLVDWVVLGSLLIYKKSREESSCPGDDDEDEIPKRNARSEDGKNISERNEETD  
PINELRMLLKQHSTSSSKQLVMPKPGTRTRRSTSLSSSQDVYPPPVLQSFKHPPSVQRTTV  
SLGITQGEKHGNQORYAELLVHNVSHDLDLVLSDAPRLPSSTTGAFMDGNDPYCLCRPRF  
SAFDAYSQRLVDFLQGCQRQLEEEAVIHLPRYERNDKTQQPQPSENFRDDIPIGFRLND  
DRNDKSHRPLRVSPSELHNLRVGRDASRVDACSSPMSPNSTLNINAVFFPLLATLMPLW  
EDRIHQYFNFPSTTQSALKPKQVLILVSGVGQPRNWTHSAKGNSTEQCAELMKMFLKVI  
FPPELVVLIHSDTNI FRYDENIAFVNQELLPRVQEQYRDAHAKGLPYPDEIINLSSTAKDS  
IDQDRPFSTEWKRSFSITISYADGSPARNSAIQAALRTFKPTYHFWQLKTFWHESKIVN  
SDVEVHSFEEIETLPPVESNQLQDGSVLKRVVEEMKNFRDDFLKILSNSSDSDNDIRAFW  
LRKSKFNPXVKEAQNQLQVPTWKGRDPMPLLLTPPLPHFLTPEAHKPVIAAILAVQPPNGEL  
KLYRGTNMEVSMPTGSLCAERNVIGTALADNPSLRRQDLKMAVAVLAVPNPKQLQASTSVG  
GLPRSQSLNSVASLVTATVEDESSLGRPSRKSLSLGGEDEWIVQDHSIFAGQDNAPVFDK  
KTLSSGQSDPEDVQPNATLDSSSQSSTPVRRIFLYNKPQKQTRKQRRRAVVVHSGHVS RNK  
VGPW

>comp15221\_c0\_seq7; 491 1 2788 LEN=3284; translated  
XEKEFFVLGVTSEIIGDRRRI SHLGSQITKVLQHKYEMRNGDDR GALTDWGWISRWFHST  
IGINALKSWPSGILVRSCLKDDYPLWMASVWVLWKQQAQNRRGISMDGSLPSVRTRAANDK  
LGSSTIINLLVDWVVLGSLLIYKKSREESSCPGDDDEDEIPKRNARSEDGKNISERNEETD  
PINELRMLLKQHSTSSSKQLVMPKPGTRTRRSTSLSSSQDVYPPPVLQSFKHPPSVQRTTV  
SLGITQGEKHGNQORYAELLVHNVSHDLDLVLSDAPRLPSSTTGAFMDGNDPYCLCRPRF  
SAFDAYSQRLVDFLQGCQRQLEEEAVIHLPRYERNDKTQQPQPSENFRDDIPIGFRLND  
DRNDKSHRPLRVSPSELHNLRVGRDASRVDACSSPMSPNSTLNINAVFFPLLATLMPLW  
EDRIHQYFNFPSTTQSALKPKQVLILVSGVGQPRNWTHSAKGNSTEQCAELMKMFLKVI  
FPPELVVLIHSDTNI FRYDENIAFVNQELLPRVQEQYRDAHAKGLPYPDEIINLSSTAKDS  
IDQDRPFSTEWKRSFSITISYADGSPARNSAIQAALRTFKPTYHFWQLKTFWHESKIVN  
SDVEVHSFEEIETLPPVESNQLQDGSVLKRVVEEMKNFRDDFLKILSNSSDSDNDIRAFW  
LRKSKFNPXVKEAQNQLQVPTWKGRDPMPLLLTPPLPHFLTPEAHKPVIAAILAVQPPNGEL  
KLYRGTNMEVSMPTGSLCAERNVIGTALGKITNTDFRWANFVQINLTSLIFTPSADNPSL  
RRQDLKMAVAVLAVPNPKQLQASTSVGGLPRSQSLNSVASLVTATVEDESSLGRPSRKSLSL  
GGEDEWIVQDHSIFAGQDNAPVFDKTLSSGQSDPEDVQPNATLDSSSQSSTPVRRIFLYNKPQ  
KQTRKQRRRAVVVHSGHVS RNK VGPW

>comp15221\_c0\_seq8; 572 1 2671 LEN=3006; translated  
XEKEFFVLGVTSEIIGDRRRI SHLGSQITKVLQHKYEMRNGDDR GALTDWGWISRWFHST  
IGINALKSWPSGILVRSCLKDDYPLWMASVWVLWKQQAQNRRGISMDGSLPSVRTRAANDK  
LGSSTIINLLVDWVVLGSLLIYKKSREESSCPGDDDEDEIPKRNARSEDGKNISERNEETD  
PINELRMLLKQHSTSSSKQLVMPKPGTRTRRSTSLSSSQDVYPPPVLQSFKHPPSVQRTTV  
SLGITQGEKHGNQORYAELLVHNVSHDLDLVLSDAPRLPSSTTGAFMDGNDPYCLCRPRF  
SAFDAYSQRLVDFLQGCQRQLEEEAVIHLPRYERNDKTQQPQPSENFRDDIPIGFRLND  
DRNDKSHRPLRVSPSELHNLRVGRDASRVDACSSPMSPNSTLNINAVFFPLLATLMPLW  
EDRIHQYFNFPSTTQSALKPKQVLILVSGVGQPRNWTHSAKGNSTEQCAELMKMFLKVI  
FPPELVVLIHSDTNI FRYDENIAFVNQELLPRVQEQYRDAHAKGLPYPDEIINLSSTAKDS  
IDQDRPFSTEWKRSFSITISYADGSPARNSAIQAALRTFKPTYHFWQLKTFWHESKIVN  
SDVEVHSFEEIETLPPVESNQLQDGSVLKRVVEEMKNFRDDFLKILSNSSDSDNDIRAFW  
LRKTHKPVIAAILAVQPPNGELKLYRGTNMEVSMPTGSLCAERNVIGTALADNPSLRRQDL  
KMAVAVLAVPNPKQLQASTSVGGLPRSQSLNSVASLVTATVEDESSLGRPSRKSLSLGGEDE  
WIVQDHSIFAGQDNAPVFDKTLSSGQSDPEDVQPNATLDSSSQSSTPVRRIFLYNKPQ  
KQTRKQRRRAVVVHSGHDINPLRPGACNEWLKKVREDRVHGMILIDVLC

>comp15221\_c0\_seq9; 561 1 2709 LEN=3205; translated  
XEKEFFVLGVTSEIIGDRRRI SHLGSQITKVLQHKYEMRNGDDR GALTDWGWISRWFHST  
IGINALKSWPSGILVRSCLKDDYPLWMASVWVLWKQQAQNRRGISMDGSLPSVRTRAANDK  
LGSSTIINLLVDWVVLGSLLIYKKSREESSCPGDDDEDEIPKRNARSEDGKNISERNEETD  
PINELRMLLKQHSTSSSKQLVMPKPGTRTRRSTSLSSSQDVYPPPVLQSFKHPPSVQRTTV  
SLGITQGEKHGNQORYAELLVHNVSHDLDLVLSDAPRLPSSTTGAFMDGNDPYCLCRPRF  
SAFDAYSQRLVDFLQGCQRQLEEEAVIHLPRYERNDKTQQPQPSENFRDDIPIGFRLND  
DRNDKSHRPLRVSPSELHNLRVGRDASRVDACSSPMSPNSTLNINAVFFPLLATLMPLW  
EDRIHQYFNFPSTTQSALKPKQVLILVSGVGQPRNWTHSAKGNSTEQCAELMKMFLKVI  
FPPELVVLIHSDTNI FRYDENIAFVNQELLPRVQEQYRDAHAKGLPYPDEIINLSSTAKDS  
IDQDRPFSTEWKRSFSITISYADGSPARNSAIQAALRTFKPTYHFWQLKTFWHESKIVN  
SDVEVHSFEEIETLPPVESNQLQDGSVLKRVVEEMKNFRDDFLKILSNSSDSDNDIRAFW

LRKSKFNPXVKEAQNQLQVPTWKGRDPMPLLLTPPLPHFLTPEAHKPVIAAILAVQPPNGEL  
KLYRGTNMEVSMPTGSLCAERNVIGTALADNPSLRRQDLKMAVAVLAVPNPKQLQASTSVG  
GLPRSQSLNSVASLVTATVEDESSLGRPSRKSSLGGEDEWIVQDHSIFAGQDNAPVFVDK  
KTLSSGQSDPEDVQPNATLDSSSQSSTPVRRIFLYNKPKQKQTRKQRRAVVVHSGHVS  
RNVKVGW

>comp15221\_c0\_seq10; 608 1 2704 LEN=2906; translated  
XEKEFFVLGVTSEIIGDRRRI SHLGSQITKVLQHKYEMRNGDDR GALTDWGWISRWFHST  
IGINALKSWPSGILVRS LKDDYPLWMA SVVWLWKQQAQNR RGISMDGSLPSVRTRAANDK  
LGSSTI INLLVDWVVLGSL LIYKKSREESSCPGDDEDEI PKRNARSEDGKNISERNEETD  
PINELRMLLKQHSTSSSKQLVMPKPGTRTRSTSLSSSQDVYPPPVQLSFKHPPSVQRTTV  
SLGITQGEKHGNQORYAELLVHNVSH TDLVLSLDAPRLPSSTTG FAMDGNDPYCLCRPRF  
SAFDAYSQRLVDFLQGCQRQRELEEA VIHLPRYERNDKTQQPQP SSENFRDDIPIGFRLND  
DRNDKSHRPLRVSPSELHNL RVRGRDASRVDACSSPMSPNSTLNINAVFFP LLATLMPLW  
EDRIHQKYNFP SATTQSALKPKQVL IILVSGVGQPRNWTHSAKGNSTEQCAELMKMFLKVI  
FPPELVVLIHS DTFNIFRYDENIAFVNQELLPRVQ EYRDAHAKGLPYPDEI INLSSTAKDS  
IDQDRPFSTEWKRSFSITISYADGSPARNSAIQAALRTFKPTYHFWQLKTFWHESKIVN  
SDVEVHSFEEIETLPPVESNQLQDGS LKRVVEEMKNFRDDFLKILSNSSDSDNDIRAFW  
LRKTHKPVIAAILAVQPPNGELKLYRGTNMEVSMPTGSLCAERNVIGTALADNPSLRRQDL  
KMAVAVLAVPNPKQLQASTSVGG LPRSQSLNSVASLVTATVEDESSLGRPSRKSSLGGEDE  
WIVQDHSIFAGQDNAPVFVDK KTLSSGQSDPEDVQPNATLDSSSQSSTPVRRIFLYNKPK  
KQTRKQRRAVVVHSGHDINPLRPCGACNEWLK KLAETNPYFTVVTF TDSACNGVYCTPCE  
E

>comp15221\_c0\_seq11; 549 1 2787 LEN=3122; translated  
XEKEFFVLGVTSEIIGDRRRI SHLGSQITKVLQHKYEMRNGDDR GALTDWGWISRWFHST  
IGINALKSWPSGILVRS LKDDYPLWMA SVVWLWKQQAQNR RGISMDGSLPSVRTRAANDK  
LGSSTI INLLVDWVVLGSL LIYKKSREESSCPGDDEDEI PKRNARSEDGKNISERNEETD  
PINELRMLLKQHSTSSSKQLVMPKPGTRTRSTSLSSSQDVYPPPVQLSFKHPPSVQRTTV  
SLGITQGEKHGNQORYAELLVHNVSH TDLVLSLDAPRLPSSTTG FAMDGNDPYCLCRPRF  
SAFDAYSQRLVDFLQGCQRQRELEEA VIHLPRYERNDKTQQPQP SSENFRDDIPIGFRLND  
DRNDKSHRPLRVSPSELHNL RVRGRDASRVDACSSPMSPNSTLNINAVFFP LLATLMPLW  
EDRIHQKYNFP SATTQSALKPKQVL IILVSGVGQPRNWTHSAKGNSTEQCAELMKMFLKVI  
FPPELVVLIHS DTFNIFRYDENIAFVNQELLPRVQ EYRDAHAKGLPYPDEI INLSSTAKDS  
IDQDRPFSTEWKRSFSITISYADGSPARNSAIQAALRTFKPTYHFWQLKTFWHESKIVN  
SDVEVHSFEEIETLPPVESNQLQDGS LKRVVEEMKNFRDDFLKILSNSSDSDNDIRAFW  
LRKSKFNPXVKEAQNQLQVPTWKGRDPMPLLLTPPLPHFLTPEAHKPVIAAILAVQPPNGEL  
KLYRGTNMEVSMPTGSLCAERNVIGTALADNPSLRRQDLKMAVAVLAVPNPKQLQASTSVG  
GLPRSQSLNSVASLVTATVEDESSLGRPSRKSSLGGEDEWIVQDHSIFAGQDNAPVFVDK  
KTLSSGQSDPEDVQPNATLDSSSQSSTPVRRIFLYNKPKQKQTRKQRRAVVVHSGHDINPL  
RPCGACNEWLK KVRDRVHGMILIDV LCS

>comp15221\_c0\_seq12; 585 1 2820 LEN=3022; translated  
XEKEFFVLGVTSEIIGDRRRI SHLGSQITKVLQHKYEMRNGDDR GALTDWGWISRWFHST  
IGINALKSWPSGILVRS LKDDYPLWMA SVVWLWKQQAQNR RGISMDGSLPSVRTRAANDK  
LGSSTI INLLVDWVVLGSL LIYKKSREESSCPGDDEDEI PKRNARSEDGKNISERNEETD  
PINELRMLLKQHSTSSSKQLVMPKPGTRTRSTSLSSSQDVYPPPVQLSFKHPPSVQRTTV  
SLGITQGEKHGNQORYAELLVHNVSH TDLVLSLDAPRLPSSTTG FAMDGNDPYCLCRPRF  
SAFDAYSQRLVDFLQGCQRQRELEEA VIHLPRYERNDKTQQPQP SSENFRDDIPIGFRLND  
DRNDKSHRPLRVSPSELHNL RVRGRDASRVDACSSPMSPNSTLNINAVFFP LLATLMPLW  
EDRIHQKYNFP SATTQSALKPKQVL IILVSGVGQPRNWTHSAKGNSTEQCAELMKMFLKVI  
FPPELVVLIHS DTFNIFRYDENIAFVNQELLPRVQ EYRDAHAKGLPYPDEI INLSSTAKDS  
IDQDRPFSTEWKRSFSITISYADGSPARNSAIQAALRTFKPTYHFWQLKTFWHESKIVN  
SDVEVHSFEEIETLPPVESNQLQDGS LKRVVEEMKNFRDDFLKILSNSSDSDNDIRAFW  
LRKSKFNPXVKEAQNQLQVPTWKGRDPMPLLLTPPLPHFLTPEAHKPVIAAILAVQPPNGEL  
KLYRGTNMEVSMPTGSLCAERNVIGTALADNPSLRRQDLKMAVAVLAVPNPKQLQASTSVG  
GLPRSQSLNSVASLVTATVEDESSLGRPSRKSSLGGEDEWIVQDHSIFAGQDNAPVFVDK  
KTLSSGQSDPEDVQPNATLDSSSQSSTPVRRIFLYNKPKQKQTRKQRRAVVVHSGHDINPL  
RPCGACNEWLK KLAETNPYFTVVTF TDSACNGVYCTPCE

>comp15221\_c0\_seq13; 584 1 2593 LEN=3089; translated  
XEKEFFVLGVTSEIIGDRRRI SHLGSQITKVLQHKYEMRNGDDR GALTDWGWISRWFHST  
IGINALKSWPSGILVRS LKDDYPLWMA SVVWLWKQQAQNR RGISMDGSLPSVRTRAANDK  
LGSSTI INLLVDWVVLGSL LIYKKSREESSCPGDDEDEI PKRNARSEDGKNISERNEETD

PINELRMLLKQHSTSSSKQLVMPKPGTRTRRSTSLSSSQDVYPPPVLQSFKHPPSVQRTTV  
SLGITQGEKHGNQORYAELLVHNVSHDLDLVLSDAPRLPSSTTGFMADGNDPYCLCRPRF  
SAFDAYSQRLVDFLQGCQRQLEEEAVIHLPRYERNDKTQQPQPSENFRDDIPIGFRLND  
DRNDKSHRPLRVSPSELHNLRVGRDASRVDACSSPMSPNSTLNINAVFFPLLATLMPLW  
EDRIHQYNFPSATTQSALKPKQVLILVSGVGQPRNWTHSAKGNSTEQCAELMKMFLKVI  
FPPELVVLIHSDTNI FRYDENIAFVNQELLPRVQEYRDAHAKGLPYPDEI INLSSTAKDS  
IDQDRPFSTEWKRSFSITISYADGSPARNSAIQAALRTFKPTYHFWQLKTFWHESKIVN  
SDVEVHSFEEIETLPPVESNQLQDGSGLVSRVVEEMKNFRDDFLKILSNSSDSDNDIRAFW  
LRKTHKPVIAILAVQPPNGELKLYRGTNMEVSMPTGSLCAERNVIGTALADNP SLRRQDL  
KMAVAVLAVPNPKQLQASTSVGGLPRSQSLNSVASLVTATVEDESSLGRPSRKSSSLGGEDE  
WIVQDHSIFAGQDNAPVFDKKTLSGQSDPEDVQPNATLDSSSQSSTPVRRIFLYKPKQ  
KQTRKQRRRAVVVHSGHVS RNKVG PW

>comp15221\_c0\_seq14; 515 1 2899 LEN=3101; translated  
XEKEFFVLGVTSEIIGDRRRI SHLGSQITKVLQHKYEMRNGDDR GALTDWGWISRWFHST  
IGINALKSWPSGILVRSKDDYPLWMA SVVWLWKQQAQNR RGISMDGSLPSVRTRAANDK  
LGSSTI INLLVDWVVLGSLLIYKKSREESSCPGDEDEI PKRNARSEDGKNISERNEETD  
PINELRMLLKQHSTSSSKQLVMPKPGTRTRRSTSLSSSQDVYPPPVLQSFKHPPSVQRTTV  
SLGITQGEKHGNQORYAELLVHNVSHDLDLVLSDAPRLPSSTTGFMADGNDPYCLCRPRF  
SAFDAYSQRLVDFLQGCQRQLEEEAVIHLPRYERNDKTQQPQPSENFRDDIPIGFRLND  
DRNDKSHRPLRVSPSELHNLRVGRDASRVDACSSPMSPNSTLNINAVFFPLLATLMPLW  
EDRIHQYNFPSATTQSALKPKQVLILVSGVGQPRNWTHSAKGNSTEQCAELMKMFLKVI  
FPPELVVLIHSDTNI FRYDENIAFVNQELLPRVQEYRDAHAKGLPYPDEI INLSSTAKDS  
IDQDRPFSTEWKRSFSITISYADGSPARNSAIQAALRTFKPTYHFWQLKTFWHESKIVN  
SDVEVHSFEEIETLPPVESNQLQDGSGLVSRVVEEMKNFRDDFLKILSNSSDSDNDIRAFW  
LRKSKFNPXVKEAQNLOVPTWKGRDPMPLLLTPPLPHFLTPEAHKPVIAILAVQPPNGEL  
KLYRGTNMEVSMPTGSLCAERNVIGTALGKITNTDFRWANFVQINLTSLIFTPSADNP SL  
RRQDLKMAVAVLAVPNPKQLQASTSVGGLPRSQSLNSVASLVTATVEDESSLGRPSRKSSSL  
GGEDEWIVQDHSIFAGQDNAPVFDKKTLSGQSDPEDVQPNATLDSSSQSSTPVRRIFL  
YKPKQKQTRKQRRRAVVVHSGHDINPLRPCGACNEWLKLAETNPYFTVVTFTDSACNGVY  
CTPCEE

>comp15221\_c0\_seq15; 479 1 2866 LEN=3201; translated  
XEKEFFVLGVTSEIIGDRRRI SHLGSQITKVLQHKYEMRNGDDR GALTDWGWISRWFHST  
IGINALKSWPSGILVRSKDDYPLWMA SVVWLWKQQAQNR RGISMDGSLPSVRTRAANDK  
LGSSTI INLLVDWVVLGSLLIYKKSREESSCPGDEDEI PKRNARSEDGKNISERNEETD  
PINELRMLLKQHSTSSSKQLVMPKPGTRTRRSTSLSSSQDVYPPPVLQSFKHPPSVQRTTV  
SLGITQGEKHGNQORYAELLVHNVSHDLDLVLSDAPRLPSSTTGFMADGNDPYCLCRPRF  
SAFDAYSQRLVDFLQGCQRQLEEEAVIHLPRYERNDKTQQPQPSENFRDDIPIGFRLND  
DRNDKSHRPLRVSPSELHNLRVGRDASRVDACSSPMSPNSTLNINAVFFPLLATLMPLW  
EDRIHQYNFPSATTQSALKPKQVLILVSGVGQPRNWTHSAKGNSTEQCAELMKMFLKVI  
FPPELVVLIHSDTNI FRYDENIAFVNQELLPRVQEYRDAHAKGLPYPDEI INLSSTAKDS  
IDQDRPFSTEWKRSFSITISYADGSPARNSAIQAALRTFKPTYHFWQLKTFWHESKIVN  
SDVEVHSFEEIETLPPVESNQLQDGSGLVSRVVEEMKNFRDDFLKILSNSSDSDNDIRAFW  
LRKSKFNPXVKEAQNLOVPTWKGRDPMPLLLTPPLPHFLTPEAHKPVIAILAVQPPNGEL  
KLYRGTNMEVSMPTGSLCAERNVIGTALGKITNTDFRWANFVQINLTSLIFTPSADNP SL  
RRQDLKMAVAVLAVPNPKQLQASTSVGGLPRSQSLNSVASLVTATVEDESSLGRPSRKSSSL  
GGEDEWIVQDHSIFAGQDNAPVFDKKTLSGQSDPEDVQPNATLDSSSQSSTPVRRIFL  
YKPKQKQTRKQRRRAVVVHSGHDINPLRPCGACNEWLKKVREDRVHGMILIDVLC S

>comp15221\_c0\_seq16; 584 1 2593 LEN=2989; translated  
XEKEFFVLGVTSEIIGDRRRI SHLGSQITKVLQHKYEMRNGDDR GALTDWGWISRWFHST  
IGINALKSWPSGILVRSKDDYPLWMA SVVWLWKQQAQNR RGISMDGSLPSVRTRAANDK  
LGSSTI INLLVDWVVLGSLLIYKKSREESSCPGDEDEI PKRNARSEDGKNISERNEETD  
PINELRMLLKQHSTSSSKQLVMPKPGTRTRRSTSLSSSQDVYPPPVLQSFKHPPSVQRTTV  
SLGITQGEKHGNQORYAELLVHNVSHDLDLVLSDAPRLPSSTTGFMADGNDPYCLCRPRF  
SAFDAYSQRLVDFLQGCQRQLEEEAVIHLPRYERNDKTQQPQPSENFRDDIPIGFRLND  
DRNDKSHRPLRVSPSELHNLRVGRDASRVDACSSPMSPNSTLNINAVFFPLLATLMPLW  
EDRIHQYNFPSATTQSALKPKQVLILVSGVGQPRNWTHSAKGNSTEQCAELMKMFLKVI  
FPPELVVLIHSDTNI FRYDENIAFVNQELLPRVQEYRDAHAKGLPYPDEI INLSSTAKDS  
IDQDRPFSTEWKRSFSITISYADGSPARNSAIQAALRTFKPTYHFWQLKTFWHESKIVN  
SDVEVHSFEEIETLPPVESNQLQDGSGLVSRVVEEMKNFRDDFLKILSNSSDSDNDIRAFW  
LRKTHKPVIAILAVQPPNGELKLYRGTNMEVSMPTGSLCAERNVIGTALADNP SLRRQDL

KMVAVLAVPNPKQLQASTSVGGLPRSQLNSVASLVTATVEDESSLGRPSRKSSSLGGEDE  
WIVQDHSIFAGQDNAPVVFVDKKTLSGQSDPEDVQPNATLDSSSSQSSTPVRRIFLYNKPQ  
KQTRKQRRAVVVHSGHVS RNKVG PW

>comp15222\_c0\_seq1; 688 397 3117 LEN=3324; translated  
MDTNDGTKQHGV SILPTANDATHSRC SICS GTVNGIFIEPLCFNDVERAI ALKKNEISSQ  
GTNASRYSSQPKQSRKHARDEIEIEAESPYLLLSNGKSSISCSGLSRGQORTGRWTK E  
ESALVDFLVSTFDQGLLPLPHGIKLN EFLGDVLLCKSSRLTKMKNAKLSTRTFVLGNPS  
TQFSTRDREQLSFLQENFLSSISSDSTR LTLKLNLTQWRTHFYNVCLQIGYSHVQEKAW  
NASLQELEKRAAKAEVVRRLRRRKMGLSSQFENPTLTYATKNTMFD MFKVDHKSQPTT  
NDLGTNSSISHVSI VSNQKSR TISPGDDEV LNSSLDDARVLT SRQRAFSTDISISSVGL  
KNGRNRFTSEDFEQLLDVL SSETADDNVKEKNV SIESNTS ISSAPASNFCSSLLGAI VTY  
IEKKNF PFHHVDLWVPSFSSGDTAGH SKSVDVDQLQLYHAGHTSRRD VNADLAHMLNEFG  
VFSSYFSFEPGKGLPGRVYSTGVASWECEVHQKDSNSFGRVEGAELYGIKTALAIPLNTP  
MVGRIVVLIYSCENVPEDASL CREITAE LTNYSLEPKWKLVLGSNAPTKSSQNRMP IPE  
NESSIFSNSAREKTQPVNETIVKSIKYETKPSCEVPNKKDSAQISMVCIDHSSNGVSQNK  
GLQTINYMQTNP TQKSARTVSYDNMTTEDRDLASFLYDNMPASTAFVPEGPLTSSADER  
TLRPYFFSFRMLLLRPFNERTPRENDI IQILKKSFS S YFRDSRRDGKELAKLIVKDWVCL  
KATYSLSGVNTTTNDHIKPKGALSPVTPMLPTLTPSQSIGLYKPIPPPTKLESCVSLDFH  
GGNTVSSTQSDPIPEQ S ISDALEKSSNSSGVAFENPSPVSSKVI VDHTRYLPRTSSVDSA  
QCTNDG

>comp15222\_c0\_seq2; 688 146 2866 LEN=3091; translated  
MDTNDGTKQHGV SILPTANDATHSRC SICS GTVNGIFIEPLCFNDVERAI ALKKNEISSQ  
GTNASRYSSQPKQSRKHARDEIEIEAESPYLLLSNGKSSISCSGLSRGQORTGRWTK E  
ESALVDFLVSTFDQGLLPLPHGIKLN EFLGDVLLCKSSRLTKMKNAKLSTRTFVLGNPS  
TQFSTRDREQLSFLQENFLSSISSDSTR LTLKLNLTQWRTHFYNVCLQIGYSHVQEKAW  
NASLQELEKRAAKAEVVRRLRRRKMGLSSQFENPTLTYATKNTMFD MFKVDHKSQPTT  
NDLGTNSSISHVSI VSNQKSR TISPGDDEV LNSSLDDARVLT SRQRAFSTDISISSVGL  
KNGRNRFTSEDFEQLLDVL SSETADDNVKEKNV SIESNTS ISSAPASNFCSSLLGAI VTY  
IEKKNF PFHHVDLWVPSFSSGDTAGH SKSVDVDQLQLYHAGHTSRRD VNADLAHMLNEFG  
VFSSYFSFEPGKGLPGRVYSTGVASWECEVHQKDSNSFGRVEGAELYGIKTALAIPLNTP  
MVGRIVVLIYSCENVPEDASL CREITAE LTNYSLEPKWKLVLGSNAPTKSSQNRMP IPE  
NESSIFSNSAREKTQPVNETIVKSIKYETKPSCEVPNKKDSAQISMVCIDHSSNGVSQNK  
GLQTINYMQTNP TQKSARTVSYDNMTTEDRDLASFLYDNMPASTAFVPEGPLTSSADER  
TLRPYFFSFRMLLLRPFNERTPRENDI IQILKKSFS S YFRDSRRDGKELAKLIVKDWVCL  
KATYSLSGVNTTTNDHIKPKGALSPVTPMLPTLTPSQSIGLYKPIPPPTKLESCVSLDFH  
GGNTVSSTQSDPIPEQ S ISDALEKSSNSSGVAFENPSPVSSKVI VDHTRYLPRTSSVDSA  
QCTNDG

>comp15222\_c0\_seq3; 688 397 3117 LEN=3342; translated  
MDTNDGTKQHGV SILPTANDATHSRC SICS GTVNGIFIEPLCFNDVERAI ALKKNEISSQ  
GTNASRYSSQPKQSRKHARDEIEIEAESPYLLLSNGKSSISCSGLSRGQORTGRWTK E  
ESALVDFLVSTFDQGLLPLPHGIKLN EFLGDVLLCKSSRLTKMKNAKLSTRTFVLGNPS  
TQFSTRDREQLSFLQENFLSSISSDSTR LTLKLNLTQWRTHFYNVCLQIGYSHVQEKAW  
NASLQELEKRAAKAEVVRRLRRRKMGLSSQFENPTLTYATKNTMFD MFKVDHKSQPTT  
NDLGTNSSISHVSI VSNQKSR TISPGDDEV LNSSLDDARVLT SRQRAFSTDISISSVGL  
KNGRNRFTSEDFEQLLDVL SSETADDNVKEKNV SIESNTS ISSAPASNFCSSLLGAI VTY  
IEKKNF PFHHVDLWVPSFSSGDTAGH SKSVDVDQLQLYHAGHTSRRD VNADLAHMLNEFG  
VFSSYFSFEPGKGLPGRVYSTGVASWECEVHQKDSNSFGRVEGAELYGIKTALAIPLNTP  
MVGRIVVLIYSCENVPEDASL CREITAE LTNYSLEPKWKLVLGSNAPTKSSQNRMP IPE  
NESSIFSNSAREKTQPVNETIVKSIKYETKPSCEVPNKKDSAQISMVCIDHSSNGVSQNK  
GLQTINYMQTNP TQKSARTVSYDNMTTEDRDLASFLYDNMPASTAFVPEGPLTSSADER  
TLRPYFFSFRMLLLRPFNERTPRENDI IQILKKSFS S YFRDSRRDGKELAKLIVKDWVCL  
KATYSLSGVNTTTNDHIKPKGALSPVTPMLPTLTPSQSIGLYKPIPPPTKLESCVSLDFH  
GGNTVSSTQSDPIPEQ S ISDALEKSSNSSGVAFENPSPVSSKVI VDHTRYLPRTSSVDSA  
QCTNDG

>comp15222\_c0\_seq5; 688 146 2866 LEN=3073; translated  
MDTNDGTKQHGV SILPTANDATHSRC SICS GTVNGIFIEPLCFNDVERAI ALKKNEISSQ  
GTNASRYSSQPKQSRKHARDEIEIEAESPYLLLSNGKSSISCSGLSRGQORTGRWTK E  
ESALVDFLVSTFDQGLLPLPHGIKLN EFLGDVLLCKSSRLTKMKNAKLSTRTFVLGNPS  
TQFSTRDREQLSFLQENFLSSISSDSTR LTLKLNLTQWRTHFYNVCLQIGYSHVQEKAW  
NASLQELEKRAAKAEVVRRLRRRKMGLSSQFENPTLTYATKNTMFD MFKVDHKSQPTT



AASLATASVLKQKTKRVSTTTTSTIAKKFSTPKTTVSKGKALINGKEATTQAIQASKK  
PTEKDQEVPLPAPQETLANSISSATNPPITTPERLQFRGLSTVPNRRNGKKKKTLDPVKP  
VRVDLDTDEYIRSILRKKEEFLSLDSPGPNLDSEGMAPLESKTLDSSEATTSSKSGSNS  
IHNNMRYNKSSSTMPGFRQRRTDRAIAYQNGVKIAEQHAGIDFRESPVFKSKRGQSSGQ  
AMYRASKSVPDSLVQFANEIHNVDRI TPKEEIVLGEKTQEAIRLQGIYDGLVAKLDREPT  
DDEWCAAAGKFNMESITQTIIEGLDAKNRLVTSNLRMVQGVVNVYIKNGLQGQYNAGDLM  
QEGIVALIRAAEKFDPTKGFRTSTYAMYWIRAAVKRDQLYQSRVIQIPQRLHENSRIEV  
CRKELTEALDRPPTVSEISNVLGMTTAQIERCDTAMAQRISSLDQQIVNRNPKPMSTDRGM  
ESLHSIIASKTDDDETQKIDLIHLREDLLKALNIHLTQEEASIIITLRFMGDEEYASSKKA  
GRTISEVGDITGLKPKDVKRRIILRSLKLRISIGDDFELYNQEFST

>comp15228\_c0\_seq1; 205 318 911 LEN=2360; translated  
MKLHSM LADPNTADTLLAKTMHHL SLKERNVQEEIHGVRCLAPEETPELLKESLENLAL  
ALDNDLLPQH IKESYLKSQTFSSSTYVND DSFRLRFLRFNAFDINKAALKMVRFLEMLEF  
FFGLTALRRP IRLSDLCNQEMQFMRKGT CQFMPFRDRSGRRILAIMNPHVLNQKIERKDF  
ENLTKREKVGLCNELSE

>comp15228\_c0\_seq4; 258 318 1763 LEN=2151; translated  
MKLHSM LADPNTADTLLAKTMHHL SLKERNVQEEIHGVRCLAPEETPELLKESLENLAL  
ALDNDLLPQH IKESYLKSQTFSSSTYVND DSFRLRFLRFNAFDINKAALKMVRFLEMLEF  
FFGLTALRRP IRLSDLCNQEMQFMRKGT CQFMPFRDRSGRRILAIMNPHVLNQKIERKDF  
ENLTKREKSEKEFFCTGKVL MYMTWTAGYEIETQRRGLVYLVWYDSTFDPKICTERFYSV  
PWERRLQFSSVRPCAIHLCTPDTHQHRFIRALLLRINKVNRSRIKIHLGDSIELRHSLO  
TYGIPSQDIPVFSGTLKSVGIKQWMRLRLALET PVDKNEAGCVSMIVECPSLSDVLFRO  
GKSMFNHPGNVMVRNLIQSKHKEQILAEQKEKVKIKRRKIISEITEEIKHTSRFLVWSEN  
GWWTQLTDQEQLICKIEYMIKDYRKTLRVNQVNVNSSTVLF RSHHPDSYCSTCFTNSNPA  
A

>comp15228\_c0\_seq5; 258 318 1763 LEN=2219; translated  
MKLHSM LADPNTADTLLAKTMHHL SLKERNVQEEIHGVRCLAPEETPELLKESLENLAL  
ALDNDLLPQH IKESYLKSQTFSSSTYVND DSFRLRFLRFNAFDINKAALKMVRFLEMLEF  
FFGLTALRRP IRLSDLCNQEMQFMRKGT CQFMPFRDRSGRRILAIMNPHVLNQKIERKDF  
ENLTKREKSEKEFFCTGKVL MYMTWTAGYEIETQRRGLVYLVWYDSTFDPKICTERFYSV  
PWERRLQFSSVRPCAIHLCTPDTHQHRFIRALLLRINKVNRSRIKIHLGDSIELRHSLO  
TYGIPSQDIPVFSGTLKSVGIKQWMRLRLALET PVDKNEAGCVSMIVECPSLSDVLFRO  
GKSMFNHPGNVMVRNLIQSKHKEQILAEQKEKVKIKRRKIISEITEEIKHTSRFLVWSEN  
GWWTQLTDQEQLICKIEYMIKDYRKTLRVNQVNVNSSTVLF RSHHPDSYCSTCFTNSNPA  
A

>comp15228\_c0\_seq6; 205 318 911 LEN=2292; translated  
MKLHSM LADPNTADTLLAKTMHHL SLKERNVQEEIHGVRCLAPEETPELLKESLENLAL  
ALDNDLLPQH IKESYLKSQTFSSSTYVND DSFRLRFLRFNAFDINKAALKMVRFLEMLEF  
FFGLTALRRP IRLSDLCNQEMQFMRKGT CQFMPFRDRSGRRILAIMNPHVLNQKIERKDF  
ENLTKREKVGLCNELSE

>comp15229\_c0\_seq1; 282 87 1079 LEN=1777; translated  
MKSLAEQSNIQLDVYAVSCVPHRSLCMDLDVKGYPTIKL FVGNDGIEEEEATEISHGDLHP  
FFVLQAI AEKTGNLDSL SMATLGQDGEIYGNKVSENNGGELEDDSPFWLPRTKRDRVNDI  
YLSFHFAMEHGIFVGRDPPNEEARNAFENWII LLNQVLPPTWRLKTLISEIGKNLETVLD  
SEDNLMQILDRHPPVNTWSRSCSRDDPAMGYTCGLWQLFH TTTLGVV EWNLAGTEDFSY  
SPMEVGNIFRSYIEHFFGCQVCRVNFLQEYDSCGFSRCDRLNEELGGLDDWKELSLWLF  
LHNGVNSRLMNERAERDHRTPPTQQELNAVQW

>comp15229\_c0\_seq2; 409 84 1508 LEN=2206; translated  
MKQYPPFRPSGLAVLYFILLCSVKLDRCESSDGKLEQELDIPLSKTKESPSETSGDSRED  
GSYSGSGSEDEETDPPKAEDLYFYRFDKGSTVTEFAAPASKEEKEEPPDFLYKPPQGHVRI  
VEFYAHWCPCALRPHYNI FAEKMKSLAEQSNIQLDVYAVSCVPHRSLCMDLDVKGYPT  
IKL FVGNDGIEEEEATEISHGDLHPFFVLQAI AEKTGNLDSL SMATLGQDGEIYGNKVSEN  
NGGELEDDSPFWLPRTKRDRVNDIYLSFHFAMEHGIFVGRDPPNEEARNAFENWII LLNQ  
VLPPTWRLKTLISEIGKNLETVLDSEDNLMQILDRHPPVNTWSRSCSRDDPAMGYTCGL  
WQLFH TTTLGVV EWNLAGTEDFSYSPMEVGNIFRSYIEHFFGCQVCRVNFLQEYDSCGFS  
RCDRLNEELGGLDDWKELSLWLFELHNGVNSRLMNERAERDHRTPPTQQELNAVQW

>comp15229\_c0\_seq3; 236 84 464 LEN=499; translated  
MKQYPPFRPSGLAVLYFILLCSVKLDRCESSDGKLEQELDIPLSKTKESPSETSGDSRED  
GSYSGSGSEDEETDPPKAEDLYFYRFDKGSTVTEFAAPASKEEKEEPPDFLYKPPQGHVRI  
VEFYAQ

>comp15230\_c0\_seq1; 1163 145 2856 LEN=3742; translated  
MSIHLKLNLSLLHRQIVKGDCLKASSSTPSTQLFFRRYYYKHVSSPLAATLLSPGTDLDRRK  
ETKKYSSSPFSKNVTGSARMDEILKSPKWLI PRKGTGFDNFKRDKNGEDNGDTSNKEK  
NEAPRNEDDADSDAVEKEGNDTSEKKSDEKLFSGSFGSNTRNNSSEGGNGGNGVPPDFGTGA  
SLLATLMLIGFTYFMRNDDENVAPTFDSREITWNDFCNYLLETGQVEKVVVTNNRTMAK  
VFLKRGSYGLPQHQRHFRGTSKNQMFDDSTTQIQREYSSDSTIDNFGGMQNLSDGTANQ  
HQIVYRFAIGSVDSFEKKLEEAQKAVGIDPMQEI PVQYTNETTTKSEVLSVLP SLVLMGA  
AFYFMRFAAGSMGGMGGSGRGGMGGMFQVGKSTHKKIKPEDVKVNFSSVAGCEEAKKEI  
VEFVDFLQSQEFTKLGAKIPKGALLCGPPGTGKTLLAKAVAGEAGVPFFCISGSDFIEM  
FVGVGPSRVRDLFKEARENSP C I I F I D E I D A V G R Q R G R G V G G N D E R E N T L N Q M L V E M D G  
FDTKSGVVLAGTNRVDILDQALTRPGRFDRQITVDRPDLKGRKEIFKVHLKGITLKDPI  
DDVAGRLAGLTPGFAGADIANICNEAAIVAARRKADTVSMDDFEKATDRTIGGLESNKIM  
SDEERAIVAYHEAGHAIAGWFLEHADPLLKVTIIPRSSGALGFAQYLPKEVFLRTQEEIM  
DIVCMALAGRAAEEIFFGRVTTGASDDLRRVTDLVYSTIQLYGMNPRLGQLAFPKDDNAM  
FDERPYSEKTANAMDEEARTIVDEAYQRTLDLLRERKNEVESVAKMLLEKETIVHDDVHE  
LVGPRPFKGDQPQYEEFVRRHREKNNNDNGDNTNELTDSSTVTGDSTSPGLAFQSSQRIHSEL  
PKN

>comp15231\_c0\_seq1; 2112 260 6112 LEN=6378; translated  
MPTKRRIAALSASASGNPSADLASCSMLSSYLSAGNHPVPRIGSSKSEGPVSLPLLEGL  
CDRPGAADRIMKDALDRWKASRHIVRNLELLWNKHKSGLQRGSSGGRQKKRSEAKAEGPP  
PSKRRRRDSGRRCNEAKQQEAVVSRQHRQRQREVEKTYEARYYQQRKRLGASSPYFHWLI  
RSLASPSIRERRVAFKILALGCPLDDASIRSMIQLVLLIKEGNPSRDTDATCIVGMAL  
LKLIVINVLSGSERLAYCVCPIGLAWLCRALWKISSSVASSSTYQQQHSGTGATRVCLS  
LIDLHSLVLSGTDDSIHLIHKVIWSEGRQKEALNCGFDSQVLSPLACLMATYHLWNE  
THRGGKSMDEKYKTMISQLIDPSELLPKVPPAKGTDCANYNGHKSQRLAIFLGKRRETV  
GTSNNKDDSDPEDATETATKERSSSATSNDSSNNPTASAAAARNNDNSDDSNNIAAVASP  
GGDSLTSALGSPRNGTDRSAITTVARLFSSLYGSNNSVNVGSEADAGNSEQPNEEQELVG  
MYSVDHVDVEEADQICETDQMTDDEVQVDPDDGDGNHQPEESKEVTVTSEREPQKKDDKN  
DDVSNHTDNDSSDDNNEINSEDEEIDSDEGEDCVDLNSMIDIEMEDDEDDHEDDGI  
IHEDELPSIEQGLLELQRDFTIRSTNPTSSSGNVSSSTSPYPTASGGQVRRERSQLYKAA  
MEVLAIQHPPISKLKTPLLQHKPKGTPLTFEGEKALMASIMHIVKPEKKPLNGKII LRA  
PTQEEFFRGNLSKNPVFSMLKPPSSGNTQVEPTVRDLRQFIASDLQMGDSAEELLEVLVA  
NKILDVGLKLRVVLQTVWKEHLMQHSGGPPSSNSLSSLLVRESRGGARSFLSSSSGLSLM  
LYSSLERSTGSSGRASLSITEETPVDALPPMVMYRLTGVDGEATEDTVSTLNDPEAPLE  
SSSQEIEELRMEKEYGITRTIMTGRGVFCLLRVQSNILHTLQKIRRDGEGGSENHARRI  
FRQSFYPGLSLLVCCAKLPSNRKLLLRARAPTILLRLLLDVLHLEEDGSDQSSSENSTA  
TALQELITSLASDILLVNGDTSSDHNEESEADEDASTLRLLIQSIETSSLSRSLRNVIAR  
LVPYLTYGKPTLSEELALEFMSHVSDQLEEYEMDGGSNRRNSCKPQTVLMDTFIHASIS  
LPANDVCNSLRIELTKCGFVKRIARHILHGCPGEPFWSPLWSKKGKASKQKQLVLEKK  
WKTYSKRTGLKTCFEILIGLSKEHEPTQALLGELKEGNVSFLQFCHWLESTSDNSSAAIT  
MKGFGLLAETLLDDMAEFKPTSKIKIKALRRRSRDRKKEIAMDRRKKSLMSMNKFGA  
MSGSTSLAAATLNSSSSAAGASPTWTSVLDLFRDSSSAQDNNTTEVAPLPSKSKKKNSA  
KVTGKCGTKASIVKPEWMKELENMEDEAGLTCAVCQEGRKYKSSEMMGLYAYVKKVSIA  
GDISSLDGTNVLTNLPPKLLASLQSNIVSEWYRSGKAAGDELKESARLSRAPTGSSSRH  
RTNYTTTAVTGNAIHISCHAKARKADNNHPKPKSEWEGAALRNSRVKCNII LPLVSSR  
SSSVSLVSVEQALAEHQTAVANLVGVRPKSNLWTVLHDVRLLLLRISYGEALNADCGGGS  
LGSNTQLIYHQLSMAKMFSEEAQVDAPATAQHARNLSAGFLAASEII SAEDYDSLKSSL  
IRGIADSSLMALTSILFHNTKEDDSSCAETSEEAPHRRRWWIGKELFLRGLLNCAGRR  
HTLAIHSSGCVSARNVGNKRTSRSF AEWDNINEDADDTQESSPGTSTTICQTSTRKSTC  
PKTKSSRASIDDFGSAMRPMVVYYAIMDQLSTDFAPDHDDENIEECANRLVEVIESCLGS  
KSIHELLEKAKIDL SHEEINEFQRGMISA

>comp15232\_c0\_seq1; 293 401 1809 LEN=3372; minus strand; translated  
MTTXVVDGLVSALPLFPVAVLVLVLRVIANNPVAVGVGIAIAAVAPVTGPGA EARSILGNK  
PPGDAVPDAGGIRRGRGSLPLVRTDKGHQDGGPADLGGDGLDGTDDLLGGLVGLV  
IAPFGRPQEVALLVLEPVLVPGALDHRPLLVDNVHPVSKESLXGGRCGGGGGACCLF  
RWFDFLCAAGPCAIRVGRMASAPRRKGGGSEHXEEEEDEDEEHASEPSGVWFEPRNR  
LRKPRRALSFGRAGERIHCR LGVVGMAAVRLGSGVGGIFNFNCTGNVGVLERVITRGVV  
EDALEGDAGTLCVSSGGGTRCECSSSSCCCCCGNRFGAVSSRPQSAVATGAGDPTAARR  
AARGPNADHQRVVVTESPPSCLPSGVLFCAVPSGVSVLGS GGQAHEPNPTDAVLVVIIV  
VVVFAVGGAAVVVADADSAFVCRAEWIRAARSAYVAKRLRDSLCAVR



>comp15233\_c0\_seq1; 386 1986 3179 LEN=3808; translated  
MASNILKAAAAAALAANGGVVQECPEGAPWPKYHEPDVCRRRPIYPVDDDGARRVRYEA  
LKESGVGASLVPNTEVTTCMPGCVKSLNPTAMKGIDTSWIVENTSKKSVVLAWIVDGLA  
HSPFHPDMKPMEDSHAILKPGEWAAPVTFESFVYHVHEIDEDGNMGNVVLQHRAGMIPLG  
NTGTFKCGEEYRDVVRGLKRAPLDVAPFAPETVGTVEKPKPKQKEEAGRVTDDGTACNIID  
VGFRNEAGCPLSVYWANKLVDVPEHGFSCHEKYHFHMGLKDAPQDFMFDWASKTKYEGSI  
IGHTFVARLASDPSVVVDTYTLEPTQI IDCPTTKKQQLMTASSDNVDERELESVEETTDE  
DELVNI PDNLVDAEENLMAGAGGSSRAVGDPSPCPSR

>comp15233\_c0\_seq2; 217 1 1322 LEN=3105; translated  
CDDAFHSFKRIDEKVELHTSHCYSVTYSNDFNFYLGITAMTELKRTAVRNRIPLTSSRKA  
RFKYGFVIAFLVVGTKSWRGLQSTDMSNYLPNANELKLPKKYVERHPEKSPKKNSSK  
ARRKEIRHFPVQDGPIDWSDKIFRRMEWDNDPVVIESHKLLFFFTVPKNACSEFKVLFRRM  
MGFKDWKSAGSLSDKTHSPDINGLRYLGSYPRTKQEEFMTSSDWTRAI FVRDPMERLLSA  
YIDKAIKVHKS YFGGIPGGYIKNHCCGILHHTPEKRIKKNKSLEKDKPKCLSLLPFKPK  
VTEELLSFEDFVEYFMAQCRDPHWKAQSNXTESSWKLINFVGYFDNLQEDAHRLLRIR  
AFDEYGSWGWPQNRITIFEKNIQPHATSSKEKLSQFYSGSNSKLRVLEHYRDDYENPVM  
NLTKPKIWEEYMGPRSPDGM

>comp15233\_c0\_seq3; 294 1986 2885 LEN=2963; translated  
MASNILKAAAAAALAANGGVVQECPEGAPWPKYHEPDVCRRRPIYPVDDDGARRVRYEA  
LKESGVGASLVPNTEVTTCMPGCVKSLNPTAMKGIDTSWIVENTSKKSVVLAWIVDGLA  
HSPFHPDMKPMEDSHAILKPGEWAAPVTFESFVYHVHEIDEDGNMGNVVLQHRAGMIPLG  
NTGTFKCGEEYRDVVRGLKRAPLDVAPFAPETVGTVEKPKPKQKEEAGRVTDDGTACNIID  
VGFRNEAGCPLSVYWANKLVDVPEHGFSCHEKYHFHMGLKDAPQGM LSVKVVGSSVTRK

>comp15233\_c0\_seq4; 307 1986 3321 LEN=3950; translated  
MASNILKAAAAAALAANGGVVQECPEGAPWPKYHEPDVCRRRPIYPVDDDGARRVRYEA  
LKESGVGASLVPNTEVTTCMPGCVKSLNPTAMKGIDTSWIVENTSKKSVVLAWIVDGLA  
HSPFHPDMKPMEDSHAILKPGEWAAPVTFESFVYHVHEIDEDGNMGNVVLQHRAGKVDXL  
TGHYSNALYSFNGRIMPRKEFP IQLGALHDPDSXFAVSVFVGM IPLGNTGTFKCGEEYR  
DVVRGLKRAPLDVAPFAPETVGTVEKPKPKQKEEAGRVTDDGTACNIIDVGFRNEAGCPLS  
VYWANKLVDVPEHGFSCHEKYHFHMGLKDAPQDFMFDWASKTKYEGSI IIGHTFVARLASD  
PSVVVDTYTLEPTQI IDCPTTKKQQLMTASSDNVDERELESVEETTDEDELVNI PDNLV  
DAEENLMAGAGGSSRAVGDPSPCPSR

>comp15234\_c0\_seq1; 514 1 1962 LEN=2075; translated  
SICPQTNLAQSKQIASLWNRCGWRIERSAQNGKFLSPTRKVCKLGLLRTASLCIGMAGEP  
NFPFATEDRTRATTPTAAGFTGNPRRGRNPLRERPRASISNPVAPRGHPAGAAAVLWLAA  
ILFWSAGSLEVI AFGTGTPLGTRNSGVLAGIFREGGTAIGRTGLQGRILREAPRARRAPL  
SLAMATDHSGTDHSGTHDDNDNDAPVILLVGSCLDRLLTVASYP SADAKVRTIAYNEE  
GGNSANTASAIKLVASKLFC SAGQQMRVEFLSKVGDDAVGQQLADELNASNVGTSTDL  
FRRGEKGSTTAFTTVVSESEQTRTCIHTLGTGCELSMADDVESLSPDDVDRI FRNVVHL  
HSDSRHTNVSLWMAREAKRRGGITVSCDCEKDRKTKALDELIEVCDVLF TNSNHLGEYLQ  
RLTLEREAATGRQPLSEPTIAIRTEEAKGTD FSSPELPETRKLIETCVGSLAPSSYFARW  
QQPQNAIGKEVVVTHGAMGALHYKLI ELSNNTSNGSDNKPHTNIEIEMAGTKILRIRHSF  
DDGREGATALYETHQVGV LNDPKIVDTTGAGDAFIGGYILASKALGVDREDTNGVGVQIA  
LEIGSFVGRKLGPGARSALPTEADIDRLGSSAAEAKASLRN ILGSFNNIHQ

>comp15234\_c0\_seq2; 488 1 2131 LEN=2244; translated  
SICPQTNLAQSKQIASLWNRCGWRIERSAQNGKFLSPTRKVCKLGLLRTASLCIGMAGEP  
NFPFATEDRTRATTPTAAGFTGNPRRGRNPLRERPRASISNPVAPRGHPAGAAAVLWLAA  
ILFWSAGSLEVI AFGTGTPLGTRNSGVLAGIFREGGTAIGRTGLQGRILREAPRARRAPL  
SLAMATDHSGTDHSGTHDDNDNDAPVILLVGSCLDRLLTVASYP SADAKVRTIAYNEE  
GGNSANTASGSSRRTAPIAASAMICTAHFLRLVSQREMDTFLRSNGVHSVVSRRFVSIV  
PPLARS AIGKLVASKLFC SAGQQMRVEFLSKVGDDAVGQQLADELNASNVGTSTDLFRRG  
EKGSTTAFTTVVSESEQTRTCIHTLGTGCELSMADDVESLSPDDVDRI FRNVVHLHSDS  
RHTNVSLWMAREAKRRGGITVSCDCEKDRKTKALDELIEVCDVLF TNSNHLGEYLQRLTL  
EREAATGRQPLSEPTIAIRTEEAKGTD FSSPELPETRKLIETCVGSLAPSSYFARWQQPQ  
NAIGKEVVVTHGAMGALHYKLI ELSNNTSNGSDNKPHTNIEIEMAGTKILRIRHSFDDGR  
EGATALYETHQVGV LNDPKIVDTTGAGDAFIGGYILASKALGVDREDTNGVGVQIALEIG  
SFVGRKLGPGARSALPTEADIDRLGSSAAEAKASLRN ILGSFNNIHQ

>comp15234\_c0\_seq3; 940 1 2570 LEN=2683; translated  
SSSSNDNSNNHNDNHVFLTTKLWSDHGFYNTLRAFFESHAEINRYHVDGDDAGDGTTN  
AASGDDEEEDETEALPIDLYLIHSPFGKLLLETWDALLYLQKFHPDKVRSIGVSNFGIDH



VPPTPAPVVPPTPAPVVPPTPAPVVPATPPPTDAPTAPPTAQPTVAPVAPTEAPVAGPSI  
VLQAVEPVALFGGNEFNDPSSFQARALARTAIEVPGIETQTPAKIIQYYALYCIFFATNSV  
ANIITESEGILDVPGWIVPSGWDSTTADPCSGWFGVSCNGNGQVTTLLDLFSNLLTGEFPA  
EVTLLASD GARSTGAGALERIDLFDNMLLTNGGDNSWWSQLGSAFAFLFFKNTAFSGPLG  
RLPDNIREFDCSFSFISGGLSQQNFQGLNSLVFANFDGNAYNSTVPSAFSSMPNLQFLYI  
VDGFISGDL SYMIGMPSLREHWADTNPGLGGNLPAGLASVSTLESFSITSCSFSGTIPPE  
FGNFGFVMKQMWYDNDLTGTIPPELARM TALRLLQLEGNAFTGSMPEICANTVFPRPL  
AELGADCFDENFSCDCCTCCSVEECPI

>comp15235\_c1\_seq4; 644 1 1546 LEN=1839; translated  
XTDAPVTPQTEAPT GAPVTVPTATPVPPPTMAPSDAPPTDAPVSTPETPAPVVPATPAPV  
VPPTPAPVVPPTPAPVVPPTPAPVVPPTPAPVVPATPPPPTDAPTAPPTAQPTVAPVAPTE  
APVAGPSI VLQAVEPVALFGGNEFNDPSSFQARALARTAIEVPGIETQTPAKIIQYYALYCI  
IFFATNSV ANIITESEGILDVPGWIVPSGWDSTTADPCSGWFGVSCNGNGQVTTLLDLFSN  
LLTGEFPAEVTLLASD GARSTGAGALERIDLFDNMLLTNGGDNSWWSQLGSAFAFLFFKN  
TAFSGPLGRLPDNIREFDCSFSFISGGLSQQNFQGLNSLVFANFDGNAYNSTVPSAFSSM  
PNLQFLYI VDGFISGDL SYMIGMPSLREHWADTNPGLGGNLPAGLASVSTLESFSITSCS  
FSGTIPPEFGNFGFVMKQMWYDNDLTGTIPPELARM TALRLLQLEGNAFTGSMPEICA  
NTVFPRPLAELGADCFDENFSCDCCTCCSVEECPI

>comp15236\_c0\_seq1; 592 1 1477 LEN=1684; translated  
LAPKLAPKLATTISRAIATS NVAASIASNLAASVASHSATNAATDTASDHAGNIASNIAS  
NFVSHIAAIALHVATNAASHTARNIIPKRASNITADITPNLATNASTNPASNPASKTDFN  
AAPT PANGEPTRNPTKSPTS IPTNNPTNNPTDLPSTLPSAMP SDTPSKTSVTNVAVEDGT  
TAEQVEQAVSSVYNQKLTNIRKLGAVIILADGVDLVVKAFPPQECNFEAQT SLEGGICFEV  
FSTVTAPVASGVSPSAATASVENDVLTGDFAAQLEAQLGAFVALPPSEEPSSEPSAPP  
SVSPKPSSEPTLASSFEPTS NPTGSEVNCENDDSFRLDGRKKRDC KWVAAKKTQRRCNKK  
DRITKLRVKEFCPLVCKEECQQPCGRDSATFRLNGDPSKDCVWVSSKPWKRC DKKDAETK  
AKAEFFCPSACDLRCSCKNSKDEFQLKTGGNTKKCKSIKRSKCTDVAIGKNGEEKTIAEF  
CPKKCSACIEQ

>comp15236\_c0\_seq2; 234 1 325 LEN=325; translated  
LAPKLAPKLATTISRAIATS NVAASIASNLAASVASHSATNAATDTASDHAGNIASNIAS  
NFVSHIAAIALHVATSTASRAATNAASNTARNITPKRAPNLATNASTNX

>comp15237\_c0\_seq1; 608 227 2508 LEN=2738; translated  
MAEEDETE KVENEA VDGPXNRNRDKKNYS DRFFKPAARGELKNHRSGIPKLTGRKGKGR  
GVRGADPHLESEEDQVMGYDNDGNMMEEDYPMQGRQQKAKKKTGSIEKGSQLEDLN  
PEDYQEI TKFYHVYNSLEHLEDEENYYWNEIDYEGRGDVKKQEMFDVLKADATRDADGNL  
VVEVDDETFAMFDDAEPYNESAKKKVHEKPKQHQQMQFNGPPEFIMDTLGVKGFEPNP  
KEYDACTPLVLKGMTMNDFV LAMAEHPTKYGQLRYASPHPESTREPVPDLPVRRRNPPLE  
FVEGHTRFIYVWGI PPLLSVNEQPGDLNPLHALELQKTAAALFDVPPEAVYPASISSAF  
VGFPSRKDQRF AIEFGPVQKVIESPVMLSKYIPADGDKKSFDAEMDKLVI LENLPSGLT  
PSVLASTLFP SGTDTGDILYGG LTPDDFVMLTPHSAVLRFE SPEHAENATKSTIVEERLK  
TFGQHRIRYSKARREL VYTGKHTGPAGTDLERDLGPRLIVDGMPTKNFYLSHATCVHLR  
NLDP SVSKQELSEFFQPF CAMSRDVEGSI EFVTCHEGLPTGRA FVGFDEHGEADSAMEAC  
ESNGRVRGLGHNGVVMKKVRDSRNI ERHNR SARDEDQLLDSLDNWEQYVDPSDLDELLAN  
GINKDALDEAFRAIRYQNP TFS SLDQAIRSETVNPEHESGGMYKELVQTYIATLKECIST  
PENPGAIYESLFLPEEELDTEIFEDEVARQEELQKRREVP

>comp15238\_c0\_seq1; 200 255 1373 LEN=2569; translated  
MSSNSNRDSGYPSGDKKGAEDDYENRIKAAADPLPHAGGAGAGTAVAVAPGATRGP GPPQ  
GTGAAATAIGD TIRLRLEIVGAEAAAGV FQAPEAAPRHAEDATTGDRGRDDYDRRGPP  
GGGYDRGPPDDYHRGGGGRRYDNRGDY GPRGGRGNRPPPHHDNHYHHDNHHGPRGDPYGP  
PRGRGPPPYHNQNRGGGGGRRDRNRDEGIPGISLLVRNIGPQITSHDLGLAFGRIGDV  
RDVYIPRDYHSQQSKGFAFIEYADPEQAREARDEMDFRIKGCELEVVF AQERRKSPNEM  
RGRVVNQNHGGGGRNRDRSSS FERHQRRRRDSNNNKDRNNNDNGEKKMDSSENDGEEK  
KEQSPVANDGEE

>comp15238\_c0\_seq2; 200 255 1373 LEN=2595; translated  
MSSNSNRDSGYPSGDKKGAEDDYENRIKAAADPLPHAGGAGAGTAVAVAPGATRGP GPPQ  
GTGAAATAIGD TIRLRLEIVGAEAAAGV FQAPEAAPRHAEDATTGDRGRDDYDRRGPP  
GGGYDRGPPDDYHRGGGGRRYDNRGDY GPRGGRGNRPPPHHDNHYHHDNHHGPRGDPYGP  
PRGRGPPPYHNQNRGGGGGRRDRNRDEGIPGISLLVRNIGPQITSHDLGLAFGRIGDV  
RDVYIPRDYHSQQSKGFAFIEYADPEQAREARDEMDFRIKGCELEVVF AQERRKSPNEM  
RGRVVNQNHGGGGRNRDRSSS FERHQRRRRDSNNNKDRNNNDNGEKKMDSSENDGEEK

KEQSPVANDGEE

>comp15239\_c0\_seq1; 583 123 2180 LEN=2625; translated  
MRESLRFCFPHRAAVLACFFFLAWLGAVGETAEALKHNYTRRDHRSLIGPLGFPFGFLDSG  
HYNLTVDFELSAAPKKHRHKNGEDHGGSAASDLVLADVLDNVKGAGFLLKKFRDEASFN  
HYMDYIRADPGRCIFQQYLDSNDDAFYDSNSDLDDYTYTDDGNRYGCGDDDFLTKNRSDY  
GYGYGIDDDLFGRHRSLRRQNDQSGRALSAFRGQQRLQEPFRNGGQRATEDTGPEGYGEA  
LFVGGQLDGFILDMPLVPSQWKPSRPVWVAYEFETGQAGFYFLMYQVCYDIEEGLYGPEHVA  
GNSQYDIHSRFELEDFDFSNRDMFGRISYLSRGMILPWLFFLFSIMYALCLYLWHANIKA  
INDGKQGYFDTGEEPTTEAPARSGIPGTPDAPTIYPIHYLMGFLLALKFCSLLFESLRYH  
YLRVTGHAVFFSAVYYTDFDLKGITLFTTVVLLIGSGWSFVKPFLSDREKKMIFGILVLQV  
INNIAIVVLTQETEGETSFDTWTAILHLVDILCCAVLIPIVWQVNQLEKNMDQNNHKGK  
DDFDENGGSEEASFLNSNGDDHIPEDELDVPMEEASSGETERIPDARLASKLKLFRSFYL  
LVIGYIYTTRIVVYLF SATLNYKHTWVSVFVVESATIAFYCAVGYIFRPMNEDPTLPHRR  
RGQSDKGAQVEMKKIDTSTKVALD

>comp15239\_c0\_seq2; 266 159 881 LEN=1326; translated  
MIAVVLLIGSGWSFVKPFLSDREKKMIFGILVLQVINNIAIVVLTQETEGETSFDTWTAI  
LHLVDILCCAVLIPIVWQVNQLEKNMDQNNHKGKDDFDENGGSEEASFLNSNGDDHIPE  
DELDDVPMEEASSGETERIPDARLASKLKLFRSFYLLVIGYIYTTRIVVYLF SATLNYKHT  
WVSVFVVESATIAFYCAVGYIFRPMNEDPTLPHRRRGQSDKGAQVEMKKIDTSTKVALD

>comp15239\_c0\_seq3; 253 1 1084 LEN=1529; translated  
XCMCVISSTKILPWLFFLFSIMYVLCYLWHANIKAINDGKQGYFDTGEEPTTEAPARSG  
IPGTPDAPTIYPIHYLMGFLLALKFCSLLFESLRYHYLRVTGHAVFFSAVYYTDFDLKGI  
TLFTTVVLLIGSGWSFVKPFLSDREKKMIFGILVLQVINNIAIVVLTQETEGETSFDTWTAI  
LHLVDILCCAVLIPIVWQVNQLEKNMDQNNHKGKDDFDENGGSEEASFLNSNGDDHIPE  
EDELDDVPMEEASSGETERIPDARLASKLKLFRSFYLLVIGYIYTTRIVVYLF SATLNYKH  
TWVSVFVVESATIAFYCAVGYIFRPMNEDPTLPHRRRGQSDKGAQVEMKKIDTSTKVAL  
D

>comp15239\_c0\_seq4; 583 226 2283 LEN=2728; translated  
MRESLRFCFPHRAAVLACFFFLAWLGAVGETAEALKHNYTRRDHRSLIGPLGFPFGFLDSG  
HYNLTVDFELSAAPKKHRHKNGEDHGGSAASDLVLADVLDNVKGAGFLLKKFRDEASFN  
HYMDYIRADPGRCIFQQYLDSNDDAFYDSNSDLDDYTYTDDGNRYGCGDDDFLTKNRSDY  
GYGYGIDDDLFGRHRSLRRQNDQSGRALSAFRGQQRLQEPFRNGGQRATEDTGPEGYGEA  
LFVGGQLDGFILDMPLVPSQWKPSRPVWVAYEFETGQAGFYFLMYQVCYDIEEGLYGPEHVA  
GNSQYDIHSRFELEDFDFSNRDMFGRISYLSRGMILPWLFFLFSIMYALCLYLWHANIKA  
INDGKQGYFDTGEEPTTEAPARSGIPGTPDAPTIYPIHYLMGFLLALKFCSLLFESLRYH  
YLRVTGHAVFFSAVYYTDFDLKGITLFTTVVLLIGSGWSFVKPFLSDREKKMIFGILVLQV  
INNIAIVVLTQETEGETSFDTWTAILHLVDILCCAVLIPIVWQVNQLEKNMDQNNHKGK  
DDFDENGGSEEASFLNSNGDDHIPEDELDVPMEEASSGETERIPDARLASKLKLFRSFYL  
LVIGYIYTTRIVVYLF SATLNYKHTWVSVFVVESATIAFYCAVGYIFRPMNEDPTLPHRR  
RGQSDKGAQVEMKKIDTSTKVALD

>comp15240\_c0\_seq1; 580 57 1802 LEN=1884; translated  
MACAVEMSHNQASAATTSFGGGEEDAHDFLKADIGSHQSTDALLAYELNQLSLKERDMI  
NEEVHGVRDQKYLQVESPALLRDSLRLTTELTVLEEKYPQNTAYNISQTKYKDTTWVNT  
EEFRLMFLRHEFFDPKKAARLVAFLELVQEYFGDFGLEREICLSDLSENDRKFLDAGYL  
QVLPGRDRSGRRIFGHFSGDVVKDLDFPARPNENFIDSRKVAIYMSLRIAKDDVDVQRS  
GVVMI FWMHEIRIDDLKVR SFVHKRVVRAILIRVNALHCYIPPSGNTQLLNMVKAMFLLA  
IGSELRSRVRIHVGSAATECCYSMQTFGIQSSQLPINTRKSERQDANHRKWLEQQSIREEY  
IKNKKEFKGIECPRHSDILFGRGWP IRKHAGNTLFRYVLEQRREEYNNAKRNRGRKTMVA  
ASVVRELKESHGSRFLRQDNKCGGFWFVSDSAREKVSVGFDRMRKPKDKGVKGESGNV  
SDTETTSSKRKCDDEGSIMSSSQSPLPMEEDALVNGPDLNSQQSNDYDQDINKHYAFIST  
EGKRQRLFFGTDVGLGCQNDNQNNSGIDDTPLERCSFKWV

>comp15240\_c0\_seq2; 465 57 1982 LEN=2064; translated  
MACAVEMSHNQASAATTSFGGGEEDAHDFLKADIGSHQSTDALLAYELNQLSLKERDMI  
NEEVHGVRDQKYLQVESPALLRDSLRLTTELTVLEEKYPQNTAYNISQTKYKDTTWVNT  
EEFRLMFLRHEFFDPKKAARLVAFLELVQEYFGDFGLEREICLSDLSENDRKFLDAGYL  
QVLPGRDRSGRRIFGHFSGDVVKDLDFPARPNENFMTHEYVLRVFTDDRCQIDAGMVRSM  
KWSLHRTKAIIVILTQSVFCAILFLATLHTVINVVQKIKVAIYMSLRIAKDDVDVQRS  
GVVMI FWMHEIRIDDLKVR SFVHKRVVRAILIRVNALHCYIPPSGNTQLLNMVKAMFLLA  
IGSELRSRVRIHVGSAATECCYSMQTFGIQSSQLPINTRKSERQDANHRKWLEQQSIREEYI  
KNKKEFKGIECPRHSDILFGRGWP IRKHAGNTLFRYVLEQRREEYNNAKRNRGRKTMVA

SVVRELKESHGSRFLRQDNKCGGFVFEVSDDESAREKVSVGFDRMRKPKDKGVKGESGNVS  
DTETTSSKRKCDDEGSIMSSSQSPLPMEEDALVNGPDLNQQSNDYDQDINKHYAFISTE  
GKRQRLFFGTDVGLGLCQNDNDDNQNNGIDDTPLERCSFKWV

>comp15240\_c1\_seq1; 798 333 2504 LEN=3013; translated  
MTAFQRPLRSIIAALSFFVVGTPPTIVGFSLPRNSNVAAHINHRSNGLFLLSGWLGTPPQVA  
IFRRRRQRNAPVEGSCCLNLSEYVGDGDDPRDDSQFFDDDFVVGGENASSDNQADAYGV  
FTEGSGDTSSVLQDRFEQLETMQAQKQIRDNWKEGYWGVWGCSLDPYDFHTSTSSGEE  
QTRQPTPKKIVITSIRQMNDWENLDSDSDVILLVVGRSDGSICWLQMETLSSPSTAS  
TDNDATRSVENRSIYTSFENKLVVSKATSDGGMVVGTALQQSSDDETFGDDNTADSNANG  
HTNSPFELIAQIQATATVETKTTSTTSDAAAIVDMLSLPNARMLWTIAKGTPNHIQGWNLA  
PSGDDDEPGVLLPQESLLQADIDRVHDSPIVGMKVVVNTTGDITNRGRNTEWIASVAVSGQ  
VFLWESTRGAARVRLDANLLHGTQGEEINSGNPVLSPSSSMVSSMDVDDQYLYLGTND  
GRIVIFGLEDFLQKSHDNTEETASPPAAASLPLLQSFVGFANGDPGVSSLLAAGSGTLGG  
VNKSNSNYSSMRPPTKSLIAGSVMGELKQWDLIPAGTGRLEYWPRMTSQKLPGGKPHVYE  
TPRAGSSANNDGETASPAIRGLLCIQQVLLAATDHDLTVWDSMTGKALYDMRGLFEGPV  
RDDNEKVVVALPRPNLVAAKDSILVTNGMEQLVCVHDFAMDRVTFGTSEENGDEDTNDYLE  
QL

>comp15241\_c0\_seq1; 866 1 2410 LEN=2522; translated  
XTGSITNSNLETLLKGEVDLTLQLLESRWQDRKRRQLDSNSVTLSRGSFRSKQRDMQEE  
IQSSDTKIITISVSGSVNYSMEVDGSIPTPDEVEKEWIEAYHDI IAQNQLQGAFDQAQIA  
GVLRVEDVSAEQDLSAKNDGDRNFNEDYDDNESTTNDPANLYQNNTENNNADQSVEVTK  
NDSKQSSRKDELERPSTLSIVFGFILTGI AVLGLFGYAYIFYRKRQKRLKKKKMKESIT  
FSSANLAAAAASAAAPTAGRKNISKYASKARQASARPVPTPHPSQMPFHSMMLSQSESE  
ETSYRGLESSVGSEDITDSFANELKLAASRDQAWDEFQRRKESHEKIEINRYHSTNRKA  
DQNRHSSISASVPSLLTKNTKRTVEDREHPVGFETPLGRDPSFTKSFYPYDEAHGFSAG  
DDEFSELPSVWPWPYNSSLSLGEKKDETSANAFVVKLKDIEKDLAVSGGQATVIPKN  
RSSETKNADDNSDILSEVSELSKYVRRYERRKDRKNKREEF LHERLSAAERAPRQNSMAA  
NSMSIGMDGRVYNPQSSDKNSIPNRSPTTRGPQLAPAPLSSYAESFIGSQKNELSELSIV  
SEDEDDPEGGSPTNSRLGISPYRISYDEVYRKGSVQNEANLSERTATTPSRRAEQDY  
RYSVGYGHDKSKSPSSSSRLANLRANDAIIDNSSSIVNLNMDAAVPTGTSSDSNKNDWA  
GANKGGGVARLNLQRSNKDKNTAAVVAATPQQKTKKAGNPKAKRFDKLRGMFEQKTTEQ  
PNPIFPGENWQYGGGNRSKKNF

>comp15241\_c0\_seq2; 1117 277 3123 LEN=3235; translated  
MQQHGLDVIERKQRILOSGQRLENIIRQQNSKVETLSPELRNDFAEESFSGSQAPNEID  
VASPLTVTTPVDEPDI EPFDYGEFFKKGNPLIRNKLPIDFDMQLLVENTITNELLRVLE  
VFLENYIQNEYKKLIDGNRNGDDGETGSITNSNLETLLKGEVDLTLQLLESRWQDRKR  
RQLDSNSATLSRGLSRKQRDMQEEIQSSDTKIITISVSGSVNYSMEVDGSIPTPDEVEK  
EWIEAYHDI IAQNQLQGAFDQAQIAGVLRVEDVSAEQDLSAKNDGDRNFNEDYDDNEST  
TNDPANLYQNNTENNNADQSVEVTKNDSKQSSRKDELERPSTLSIVFGFILTGI AVLGLF  
GYAYIFYRKRQKRLKKKKMKESITFSSANLAAAAASAAAPTAGRKNISKYASKARQSA  
SRPVPTPHPSQMPFHSMMLSQSESEETS YRGLESSVGSEDITDSFANELKLAASRDQAW  
DEFQRRKESHEKIEINRYHSTNRKADQNRHSSISASVPSLLTKNTKRTVEDREHPVGFET  
PLGRDPSFTKSFYPYDEAHGFSAGDDEFSELPSVWPWPYNSSLSLGEKKDETSANAF  
FVKLKDIEKDLAVSGGQATVIPKNRSSETKNADDNSDILSEVSELSKYVRRYERRKDRK  
NKREEF LHERLSAAERAPRQNSMAANSMSIGMDGRVYNPQSSDKNSIPNRSPTTRGPQLAP  
APLSSYAESFIGSQKNELSELSIVSEDEDDPEGGSPTNSRLGISPYRISYDEVYRKG  
SVQNEANLSERTATTPSRRAEQDYRYSVGYGHDKSKSPSSSSRLANLRANDAIIDNSS  
SIVNLNMDAAVPTGTSSDSNKNDWAGANKGGGVARLNLQRSNKDKNTAAVVAATPQQK  
TKKAGNPKAKRFDKLRGMFEQKTTEQPNPIFPGENWQYGGGNRSKKNF

>comp15242\_c0\_seq1; 716 257 2428 LEN=2789; translated  
MASFCSIEAGFPFVFDGDEAVNGTAVATAGGNGTGSCFFPSATCSPEGRVSDCCGISP  
SAGVATGANYMFLAFAFFMAPLFWAISAIYGSMTPEEREISDQKDEERKPRFITHNRCIP  
EFLKKTLLGVYELGLPFVITARVTIPIFAKKTQORYMTVDQRTSLAASEAFMVPFFFTIFT  
FVEEIVMIRVNYAVSENDKALTDRLVHAGLAGVIVTGTIGGIVGTALGLLPGALEALTIP  
GAENDVAVYPGCNFLEAVDVSMILPYWLLSWELIGKQIGGVLSGFLFGALEFNLLGWIG  
LVGEILYCFIWFGNIAATYGNPVTLGLIAEFVLDWTTPIILLTLFLVTPIGSQIREQTGVEL  
SITKVCSYFLRPLAAFRKPALEQSDEKDGSDDINGDKDNAASSNGDGNDSDDDDDDQRE  
TMSLLIEGLKIMFMDIVIQCMTCSIYALATTDGAIAYQITALQSELPAYGAIYAMGMAI  
NTQILGPIFLSNGMHGLFVKYIKISMACVLVVALICSSSTGPFRRGLALDSGANACTYAS  
SAECLPYFENVFPGNGEGGIYTLFFTYAFPIAASIDAILLVMRATLLTLLDFDYMFYST

IAASISYVPAILVVTLASLSVQNAIGMFSAYYVPQMMLVFCFSARLVFVTRKLEAGETG  
PWSSPQKQKERRSSMQSAQSIRGISQSIRGITAEDAIEAANA EKRAADYSNIHNSHSSSS  
CSA

>comp15242\_c0\_seq2; 2266 1 5533 LEN=5919; translated  
XDDDDDDDDQGGRRKKKARKIRKFRQQEELADEDLDLIREAQGIDLEKERMRKEREERENRK  
VIARSEEDLRKGLFRSDGEDDDDDIMAQPKRKIRSNI EHYDEHGMDDFIEDDIGDQHDIL  
TSDRGNFVGEDGAGGVSQAQMNEASEIFGTDYLN YIAEEDDRDDDDDDDLFGKNRYKERG  
VGVDMGIDSEDDMSSDDDDMFGEDEDDDEMSGQQREALK LKREKRALARKERRKQALAKKI  
AKQKADLRKQFEPVQLVENFCTDRDDEIRQKDAPERFFDWNVPFHGSKEGGELTEDEEEE  
VMWIMQRIPEIRAEYRAPHYENMEELEQRESSILQSI AHALRFMHRDKMEPAFIKRYRKDI  
ITSPA VRNNLYRIMDEDAEWDELLQARAKVSDLLDSVTEKARKVEATGAI SVEINKLDEE  
FTKAQAKLEKIATEEAQLKEEIEQIGPIDEA IKEEDDDELFGDKDDDEAEAMKAKRDKKA  
SLTKHLDTVQTLMESLSEKVTTELQTKKESAETEDAESA VKDDSELANRVQKKT CRDMLWN  
TQDVM EYLCGLENEHQIRDVNNYLKLIKEGNDAIYK KEMPFLGEEDGREKKRSRRFRDR  
FYRTC VSEGH RDIAYRFL LAPKR VGIK LQDTVETGQFNFSKAMPGETDGEPMKWVPTIT  
DKLPSEFATELVDSGELIDLSSMGADAGSGKSSDPLRGCRYVA AELELSQEPRVRRVLRNI  
YKHKAKLTTRPTKKGMEEIDAFHEYFGLQLIHSKPIADHFPPDEDEMNQKKLGRGPEEER  
EIDSEMKEKERN SCLQYLNIYKGDKTGHLSVSIHL PFLDDFGTEWYKADENFTDRQNQDL  
KPLMDVLEKVYFPLEPDSQEW TQERKKVLSQALLTFLLPQFEAETR KDL EEA AFRIGVTA  
AAEDLHGMAMEGYPYRPHSFYAENRFLVPTGDLRMVAISCSNDPKEPTYLASVSEYGEFID  
HLAIPGGVRVDIGKMRQKI IDFLLLSRPAAILVGTSGGFQARHL CRKLN DIVTEATDRWA  
KRDIQGEDEDED FQYRQSAFDKYLPSNMPGMEDEDDDEDLDWKC NADLIDDSV SQVFGHS  
PRGKKEFPDHAPALRVAISIARYGKDPLAE LAYAWN VASDTGLFGTELFYFNINPMQQLL  
KRFKG PLLLLRHYERALCDVVAE V GADV NKCCEYSHLQGLLTFV PGLGPRKAAFLKQKVEQ  
LGSSVPTRRS LLENRFMGPPVYNN SIAFLRIH HFDERTSHQVQLHPLDNTRLHPDVYQKN  
NWASKIATDALERAEEGSRNKEQAGIKALRDVMENSDQEQRLYMGTK EEWEMHYGVGTF  
NASNWNPR TDVPVEHWHDKVEELDLDTYAHMIEENGHGKWHSHMEMIKWEFRLPFVDP RS  
PMDTLAGDKLFR LITGESDQTLRPGKEITGKILANTDFGSKVKLEGLDPAFISLRNLADD  
HVEAAEDVVAVGAI VTA VVTAVKKDHMSVDM SLKREDFIKQPSSWDRPESLPVLDEYFDQ  
IASKTIEEKKTKEREARLEAMQISLSTKVGEDGKRIGRVRRHCAHPAFR NAKGNELDEE  
LKSGGPAMVGEALIRPSSKSADSLAIHWMYSEGKIKIIEVN EKKDL DASI GKV LKIKGE  
SYGSIDELMGRYIAPLNDLVDELVNHRKFSELS EDDLDDQLRKDKAANKNSIPYNICWME  
MHPGYSSLRFILSSTPRQHPIGMCPNGFVWGAKTFKSLD LLLNDFKKNPRGTPTNKQRAP  
PPAASSGSTSKTSRWGTRQHP PPPPREPPPSTWNRPPPPMAATGAAYGQPPPPSGPPPP  
YGRPPPPSGPPPPYGRPPPPSGPPPYHGNQYSYQQPPPPPPYNS

>comp15242\_c0\_seq3; 429 237 1571 LEN=2126; translated  
MGKRRSRIPPRFSAPAN EKKKSKIRAGRLIRGLIIVSLTSV TYFIYFLSLMDYS DISGSY  
HPIADALGYLDANQKQVQVIEEKLKETHIGKNSKIPGAKQIGKQIENNP KIN EDKQAEKT  
MDDEENQMKKIMVKVGGEDIEIPSAQTLLT SKPPFEDSDVITLFPADSKEKLLIKAPNTV  
VTGYFRVKS KYHSSEYD GWMRNMLS LQDAMVIFTEPDLVDQIKELRSHAVNRTIIVPVTM  
DDLPIGRLYSETFWKDQLDRDPEQR IHRSYQLFWI WLSKSWCVTQAIRLNVFDSDLFVWS  
DIGCFRNK KYNSKTLVLHRENVPDHEMLQMAHHPNPPSEVLFNDKYKKPANFYHSGSQF  
VGYKDAWLT FHKYFLETIDRFLKKNM IVEDQAVLQSVCLSHPEICAYVPFKLVNDNH YF  
GLRHVLHYGGNLEYWRYKPNIGSR

>comp15243\_c0\_seq1; 521 26 1366 LEN=1804; translated  
MMSNTIHRCLQPSAVPQSRRQLIQFKSGNNILKCFQSKALLAIAAVVMIGDVTVAVAAT  
VATRHSNLRRERHGRRLVVGVDADPERFPYYTRLDNDGEQDCGGSLISPDFVLTAAHCAL  
PNESENLVAVIGGHYNEG TGLVRPVLEVFYPYFAYDDFN TVNDVALLKIDPIP DYLLGEN  
GNTLLDLT SVVVEEGTDVVVIGMGALEEEGEDAEV LQRADLKIVGDEECDLLFDGEIHR  
KSMICARNFEEGD ACAGDSGGPLVILGKTPEEDIQVGI VSWGERCGEPEYPGVYAEISYL  
RPWIDSILCQNSAYAPEDCKVTVDAGLSPITFDKEEDSCRDFPGAFFVNWWYQFQRCDWL  
RKDTRPSLYCFPENDAWVQCPLTCHSCTYMEDDDVVDNDNDISSPNYYEQSSSPVVFIIIL  
IVVSAILCAVLC SIFAYVCTKMMRKK

>comp15243\_c0\_seq2; 521 26 1366 LEN=1819; translated  
MMSNTIHRCLQPSAVPQSRRQLIQFKSGNNILKCFQSKALLAIAAVVMIGDVTVAVAAT  
VATRHSNLRRERHGRRLVVGVDADPERFPYYTRLDNDGEQDCGGSLISPDFVLTAAHCAL  
PNESENLVAVIGGHYNEG TGLVRPVLEVFYPYFAYDDFN TVNDVALLKIDPIP DYLLGEN  
GNTLLDLT SVVVEEGTDVVVIGMGALEEEGEDAEV LQRADLKIVGDEECDLLFDGEIHR  
KSMICARNFEEGD ACAGDSGGPLVILGKTPEEDIQVGI VSWGERCGEPEYPGVYAEISYL  
RPWIDSILCQNSAYAPEDCKVTVDAGLSPITFDKEEDSCRDFPGAFFVNWWYQFQRCDWL

RKDTRPSLYCFPENDAWVQCPLTCHSCTYMEDDDVVDDDDNDISSPNYYEQSSSPVVFIIIL  
IVVSAILCAVLCSIFAYVCTKMMRKK  
>comp15243\_c0\_seq3; 521 26 1366 LEN=1923; translated  
MMSNTIHRCLQPSAVPQSRRLIQFKSGNNILKCFQSKALLAIAAVVMIGDVTVTAVAAT  
VATRHSNLRERHGRRLVVGVDADPERFPYYTRLDNDGEQDCGGSLISPDFVLTAAHCAL  
PNESENLVAVIGGHYNEGTLVLRPVLEVPYFAYDDFNTVNDVALLKIDPIP DYLLGEN  
GNTTLLDLT SVVVEEGTDVVVIGMGALEEEGEDAEVLQRADLKIVGDEECDLLFDGEIHR  
KSMICARNFEEGDACAGDSGGPLVILGKTPEEDIQVGI VSWGERCGEPEYPGVYAEISYL  
RPWIDSILCQNSAYAPEDCKVTVDAGLSPITFDKEEDSCRDFPGAFFVNWWYQFQRCDWL  
RKDTRPSLYCFPENDAWVQCPLTCHSCTYMEDDDVVDDDDNDISSPNYYEQSSSPVVFIIIL  
IVVSAILCAVLCSIFAYVCTKMMRKK  
>comp15244\_c1\_seq1; 191 1 1038 LEN=1158; translated  
QNNHNRHHLQFRTPNPSVQTSTAATTPATPWCVEEPAEPQREAMRQPSTPTGRKRSIHGR  
SASVASILSRLSADELETAARSSYEYPPSSRSKSDVDPEEDRYRFAGRFVERILESKHGDE  
GPAFAKVREILAFRETAGIDRLVRAFDGGGAGEDTALAAALRRSLSSGKFCVVRGFDREGR  
STLCFVPRNVRRGQHDLGSAALYSIERAIASTRSGDGTINCAVDFGGFSLSKNTPPPEAAR  
AFLAALRTVYAGRIHRIFLANAPASFVLRVFSPLVGTDRGKIVLIAPATSPSESTRG  
EQEVLGLYDHDQVPSWLVPGGTKNRPLDLDEYLCRLPFDAAFDDL  
>comp15245\_c0\_seq1; 309 1 1686 LEN=1964; translated  
LTI FSNERNLFLGYVYPYRHKIPLWEMETDYLLHNL DVEIGKEMKGYQKSFGVLEWNNDF  
DSDGSERISVRRSRIASKKHPNGT NLLV PNQSLKI QKVRERCRTQNKALSAWVKIALQIN  
IQORMWMLGKSPSESM LPPRFERLYQPEKMAQFDRFFARSWATPVRRSHSAQHGGGEIDE  
QVSEFRNIYGRSITPLANSNLKTNQDKWQNPPLDDF ISSHGFEAQERPTLSRFVQQHD  
IFDDGTKSFRPTLSHDGSPSYRYVGD TNWQNERTRDEYVRCVKSSEKLQSSNYNHMAFDE  
FKSALNAMSLNANDVRGIYNLAESGHVGRQIKSGLYKGLDRDFSAIDVSTVVFQNLNAYD  
NISSRGELQECIPLMNAELKQRGFYTDGVKETIADGWKRHLEAEKQYREICFGGSSKFRR  
SDLTTPNSLKL YASFYSPDQIMTTDLTVLLGETLEMTE TMPKPGHADLSERKSEFVTRA  
FKKGISITSHEELARTRSQPLFQFERKRPVPAGFEMINTDLFARKENQFMVFNGPGVDSW  
DGAIPRTKTSGIEQMLSDALR  
>comp15245\_c0\_seq2; 882 118 3960 LEN=4238; translated  
MEATEETRSSISGPSAPQNSKDSVDGKINKGSSEVKSVRKDGSPSLDPYIGKLERYELFC  
TNQSYLVGCNKQNSQYRVIKMDR TLIERRVAVDQNKGGQHQQHQHQSTQYDSNTTNV  
VNASDATHSSVSTSS TAVNQAVLNDAAHNCKPTLRNLKEFIYEDPNVYSQSEIQDMLDMI  
HDGNRLRREDRRAVPVESGGGLKPIAKAYGIVGFIKFLDCYYLTLITRAKVGSI GNG  
IYTIKSTETFPKPAESVNGGTGNGDIDIHADPSSVLLNMWNRGKRSVGLGLTNREIAEL  
RYQGLYQVVDLTKNFFF SYTYDLTRSLQENVLSNTSKPFPFPFPKDMFAWNYFLTRELEE  
CTDSLSSFWQMPIIHGAFVQRKLN DYGRSLNVILLARRSRHFAGTRYLKRGVSEQ GKVA  
NDVEHEQIVHDESKAVSNGVFSSYLQVRGSIPTFWTQESSVTMPKPIELNRVDPYTYTAT  
KLHFEDLLKRYGSPIVVLDLVKQSEKKEREVRVGN EYRHAIDHLNLSIESDAHKIRYCAL  
DYSHISKHRHLDVSTSLNEVSTWAVNQTFGFC SNPQWKISKGGSIEPFSEKDCQAASILT  
EKVGVPTFAMEQTGVLRTNCIDCLDR TNVAQFSAGVEAMEQQLVVMGIRSNRPLDPSSNI  
VRVLIDMYVDIGDHIALQYGGSEAHKKVTAERSESIAGP IGKHKELLTSIRRYYSNAFTD  
RLKQDAMNLF LGYYVYPYRHKIPLWEMETDYLLHNL DVEIGKEMKGYQKSFGVLEWNNDFD  
SDGSERISVRRSRIASKKHPNGT NLLV PNQSLKI QKVRERCRTQNKALSAWVKIALQINI  
QORMWMLGKSPSESM LPPRFERLYQPEKMAQFDRFFARSWATPVRRSHSAQHGGGEIDEQ  
VSEFRNIYGRSITPLANSNLKTNQDKWQNPPLDDF ISSHGFEAQERPTLSRFVQQHDI  
FDDGTKSFRPTLSHDGSPSYRYVGD TNWQNERTRDEYVRCVKSSEKLQSSNYNHMAFDEF  
KSALNAMSLNANDVRGIYNLAESGHVGRQIKSGLYKGLDRDFSAIDVSTVVFQNLNAYDN  
ISSRGELQECIPLMNAELKQRGFYTDGVKETIADGWKRHLEAEKQYREICFGGSSKFRRS  
DLTTPNSLKL YASFYSPDQIMTTDLTVLLGETLEMTE TMPKPGHADLSERKSEFVTRA  
KKGISITSHEELARTRSQPLFQFERKRPVPAGFEMINTDLFARKENQFMVFNGPGVDSW  
DGAIPRTKTSGIEQMLSDALR  
>comp15245\_c0\_seq3; 608 118 2301 LEN=2346; translated  
MEATEETRSSISGPSAPQNSKDSVDGKINKGSSEVKSVRKDGSPSLDPYIGKLERYELFC  
TNQSYLVGCNKQNSQYRVIKMDR TLIERRVAVDQNKGGQHQQHQHQSTQYDSNTTNV  
VNASDATHSSVSTSS TAVNQAVLNDAAHNCKPTLRNLKEFIYEDPNVYSQSEIQDMLDMI  
HDGNRLRREDRRAVPVESGGGLKPIAKAYGIVGFIKFLDCYYLTLITRAKVGSI GNG  
IYTIKSTETFPKPAESVNGGTGNGDIDIHADPSSVLLNMWNRGKRSVGLGLTNREIAEL  
RYQGLYQVVDLTKNFFF SYTYDLTRSLQENVLSNTSKPFPFPFPKDMFAWNYFLTRELEE  
CTDSLSSFWQMPIIHGAFVQRKLN DYGRSLNVILLARRSRHFAGTRYLKRGVSEQ GKVA

NDVEHEQIVHDESKAVSNGVFSYLVQVRSIPTFWTQESSVTMPKPPIELNRVDPTYTAT  
KLHFDLLKRYGSPIVVLDLVKQSEKKEREVRVGNRYRHAIDHLNLSIESDAHKIRYCAL  
DYSHISKHRHLVDVSTSLNEVSTWAVNQTGFFCSNPQWKISKGGSEIEPFSEKDCQAASILT  
EKVGVPTFAMEQTGVLRTNCIDCLDRTNVAQFSAGVEAMEQQLVVMGIRSNPRLDPSSNI  
VRVLIDMYVDIGDHIALQYGGSEAHKKVTAERSESIAGPIGKHKELLTSIRRYYSNAFTD  
RLKQDAM

>comp15246\_c0\_seq1; 656 220 2788 LEN=2788; translated  
MMQASYANQPSDASGMPPQHESPRSMQLQRNPANNTDASSGGHDAGDYPFPPQSSSSSSSA  
SYLGSCLRRCCTFQNFICYIVQVNCGLVLCALIYLAILEYPKIEELEAQVERDKKEIAALS  
EEVREKQEGQIQDLHKAVQKEQQFNFLSLAGFFTLTCLISMFHMTTHVHKMNQPKIQRK  
IIAILWMSPIYSVTSFVTLIFPSVEGWMAILKDFYESYCLFVFLSFLIAVLGEGSRERAV  
GVLAKHADHLGRPTRCLACFYEPPTDSEHAKANAVMTQCQIYCLQFTLVRPLTSIYSVF  
VLHRKKKEGEEKYEEYSADGEFGDEPYGDGNYDNENFDGSGKSSSVNNSISHNATDQFSP  
ADGTGREDAPTPVFSSSLDDPTVSASASETAAADESTREEGPGRMRRTLKTHHKREQD  
YERWHDAPFGAGKRGLNSLLGDPGAANKRNSTINGRVNPAENTIENDDDRAPTMEFFFP  
SVSPIEGGMDVPFPTFATGDGYPPVSAPTETPLTNYGTFEPTGFASLLADPGSVNYTAPS  
GMYDFKNTSGGIGHEVANVSGVTNISLPLVPTMAPSNANETTFDSTELVHQTKNYLKSPS  
FAVAMVVNVSIFFAFSGLLKYHAVQKDLEWCRPFPKFLTIKAVVFLTFWQGLVITLWL  
LTASPEEKKEEALLEARKYQNLLICVEMLLVAICQWCVFPAIEWEPGYEPRQVHTPGLGIK  
DFVSDVGQIVNNRSKRTRIKLGKRRSRRKKYEGLDVQGDNVYSNGVDVFRDDAIGSSSFE  
SDSDDEVDDVSMDEYEYGGGTQALGYGSNYSRDYNDANHNGPLDRNNVVVDTPFPFGD  
RRTAPAQHATVDEDTAX

>comp15246\_c0\_seq2; 174 271 734 LEN=734; translated  
MGAGLRTPPGPHAGTRDQRFVGRWPNRKQSQOTDPDKAWKEKESKKYEGLDVQGDNVY  
SNGVDVFRDDAIGSSSFEESDSDDEVDDVSMDEYEYGGGTQALGYGSNYSRDYNDANHNG  
PLDRNNVVVDTPFPFGDRRTAPAQHATVDEDTAX

>comp15246\_c0\_seq3; 279 335 917 LEN=917; translated  
MLNVSHLLLREIISVSAFFSLRSSLGFVYNHLALSPFKPEWEPGYEPRQVHTPGLGIKDF  
VSDVGQIVNNRSKRTRIKLGKRRSRRKKYEGLDVQGDNVYSNGVDVFRDDAIGSSSFE  
SDSDDEVDDVSMDEYEYGGGTQALGYGSNYSRDYNDANHNGPLDRNNVVVDTPFPFGDR  
RTAPAQHATVDEDTAX

>comp15246\_c0\_seq4; 598 149 1889 LEN=1889; translated  
MTQCQIYCLQFTLVRPLTSIYSVFLHRKKKEGEEKYEEYSADGEFGDEPYGDGNYDNEN  
FDGSGKSSSVNNSISHNATDQFSPADGTGREDAPTPVFSSSLDDPTVSASASETAAADES  
TREEGPGRMRRTLKTHHKREQDYERWHDAPFGAGKRGLNSLLGDPGAANKRNSTINGR  
VNPAENTIENDDDRAPTMEFFPFSVSPIEGGMDVPFPTFATGDGYPPVSAPTETPLTNY  
GTFEPTGFASLLADPGSVNYTAPSGMYDFKNTSGGIGHEVANVSGVTNISLPLVPTMAPS  
NANETTFDSTELVHQTKNYLKSPFAVAMVVNVSIFFAFSGLLKYHAVQKDLEWCRPFP  
KFLTIKAVVFLTFWQGLVITLWLVLTAPEEKKEEALLEARKYQNLLICVEMLLVAICQWC  
VFPAIEWEPGYEPRQVHTPGLGIKDFVSDVGQIVNNRSKRTRIKLGKRRSRRKKYEGLDV  
QGDNVYSNGVDVFRDDAIGSSSFEESDSDDEVDDVSMDEYEYGGGTQALGYGSNYSRDY  
NDANHNGPLDRNNVVVDTPFPFGDRRTAPAQHATVDEDTAX

>comp15246\_c0\_seq5; 212 220 848 LEN=848; translated  
MMQASYANQPSDASGMPPQHESPRSMQLQRNPANNTDASSGGHDAGDYPFPPQSSSSSSSA  
SYLGSCLRRCCTFQNFICYIVQVNCGLVLCALIYLAILEYPKIEELEAQVERDKKEIAALS  
EEVREKQEGQIQDLHKAVQKEQQFNFLSLAGFFTLTCLISMFHMTTHVHKMNQPKIQRK  
IIAILWMSPIYSVTSFVTLIFPSVDVLSDR

>comp15247\_c0\_seq1; 634 258 2633 LEN=2705; translated  
MAQATNPCVPAADYLPQPSPIQRILIAHFNIYELFMDGKKGEDASIEEINEEILYYHCD  
NRVGATVAEDGDWNLTSIGDGLVEEAVGFLGLSKALYTLPNLSKIPDQNDGECPRDN  
GIGSDRNERNNEETTYIYCGNSILVFPLESTLGIYAVVQVSRLYQNGVRSDTGSANPT  
AISASIERTHKLFILRGGGIGLRLTEKRSILTESTIEEQNCPCQGMKLLFGLLRSIRK  
KKNKLSRLGNSANMEQEVNAITRDTMALQKEIEALRKLPIESLRRDLEVHYNEYLNQFL  
ESCIRNAGAGRCLVETMPPPIAQDSGIHAFKVLPSQIETNCLESRLQSTVQILQCYSRGS  
WNQKVSGLLGIAMFQNGQLLHCVSDSKQYDLSNDTASLLMTYMASYKTKMSRAVSVVA  
NAHPASSPSPESQPGLLRLTLHLGPMVDDLIGKAVPGRWEDTKRSKNTQEEINGRGRF  
VPSPPSFMGASEETYSLDYGDTKQDIWAPIVHPLSNSASSSTDQEDTVSDSLRSHMV  
VFEFQKISFLIFVNLQLPAKPTTAGKLSGNKLLFFKLEELSDAVVRAFPEYTRAHSPCE  
SGTTTCRSEPGQINIVYLERAKQRMVLLDPKGASPCDSKRKTYADNRNKSQPRRFMGIGS  
KKRNSMPLSQPASHRSTTLEWLSWGLDCRHLASRLPLDVCLAFDDMISEVARCRATEQA



SLSTSLNNTSGNDNSLTIELCTCIPCGWVYTFATQEKELYIFFDSSIIYVTMADVQSAAQV  
IKERFILAKSC

>comp15248\_c0\_seq1; 574 205 2187 LEN=2733; translated  
MSEITLTGGTLAPSPSSPASGGAGQPADSTGAGHNHEHNHAHGTKEACCDHHKDGIE MVP  
RRHRAHGGLPVEI STATEQELGRILFTLVRF SRFEAVPGVLQKMEEHDRPVASVLQQFDE  
GGHTLFHWAAKRLDDVRFLQTLVDLSTR LGLGSDILKRPSKDNVGMQPIHWACTEGSIPH  
AAVLLSHGADMEARDNSGCTPLLIAAQYGRVEVVAYLLQKGANLKAIDSSRD TALHWAAY  
KGSNEVCGLLTYQQLSLATQDAYGQSPLHLAALRGNTSVVRYILQQLDHS SREEREVLF  
LKDKNGRTPDLAVHKQKRNVENVLKEALAAAEDPRGHFFRKT LFNLSLKDVFSLRSWQFW  
CGMVPQMDEMDAPSRVPYYIVLVNTVLFVFLMVGVMAPFAKAGAGLLW DKSGLLMINFVF  
GTLTAYMHRKTARTSPGYMDESHPDIGKWRRLYEETLES LAENGTNQQKPAYKLCHSCHI  
ARPHRSKHCRVTRKCVLLFDHFCPFVDNTVGLN NYHYFYTFVASMVVGLGSFFVTLV TYV  
SRYHSEHSSYPWLVMALGTQLCLIVVPVGGFLVYHTQLIMKNLTTNEAMNTMRYDY LFPV  
ISGRRVYQNPWDKGFLGNFMDRMNPSRASYEISDDFQSLITKDAPMPTSKCCHNGRCEKM

>comp15248\_c0\_seq2; 486 205 2346 LEN=2858; translated  
MSEITLTGGTLAPSPSSPASGGAGQPADSTGAGHNHEHNHAHGTKEACCDHHKDGIE MVP  
RRHRAHGGLPVEI STATEQELGRILFTLVRF SRFEAVPGVLQKMEEHDRPVASVLQQFDE  
GGHTLFHWAAKRLDDVRFLQTLVDLSTR LGLGSDILKRPSKDNVGMQPIHWACTEGSIPH  
AAVLLSHGADMEARDNSGCTPLLIAAQYGRVEVVAYLLQKGANLKAIDSSRD TALHWAAY  
KGSNEVCGLLTYQQLSLATQDAYGQSPLHLAALRGNTSVVRYILQQLDHS SREEREVLF  
LKDKNGRTPDLAVHKQKRNVENVLKEALAAAEDPRGHFFRKT LFNLSLKDVFSLRSWQFW  
CGMVPQMDEMDAPSRVPYYIVLVNTVLFVFLMVGVMAPFAKAGAGLLW DKSGLLMINFVF  
GTLTAYMHRKTARTSPGYMDESHPDIGKWRRLYEETLES LAENGTNQQKPAYEVASIRXA  
NDGWVRPGPLGGDSGEGSNPVTAFAAVTHLLLCVSCPCPCR WTRQKLCHSCHIARPHRSK  
HCRVTRKCVLLFDHFCPFVDNTVGLN NYHYFYTFVASMVVGLGSFFVTLV TYVSRYHSEH  
SSYPWLVMALGTQLCLIVVPVGGFLVYHTQLIMKNLTTNEAMNTMRYDY LFPV  
ISGRRVYQNPWDKGFLGNFMDRMNPSRASYEISDDFQSLITKDAPMPTSKCCHNGRCEKM

>comp15248\_c0\_seq3; 486 205 2346 LEN=2892; translated  
MSEITLTGGTLAPSPSSPASGGAGQPADSTGAGHNHEHNHAHGTKEACCDHHKDGIE MVP  
RRHRAHGGLPVEI STATEQELGRILFTLVRF SRFEAVPGVLQKMEEHDRPVASVLQQFDE  
GGHTLFHWAAKRLDDVRFLQTLVDLSTR LGLGSDILKRPSKDNVGMQPIHWACTEGSIPH  
AAVLLSHGADMEARDNSGCTPLLIAAQYGRVEVVAYLLQKGANLKAIDSSRD TALHWAAY  
KGSNEVCGLLTYQQLSLATQDAYGQSPLHLAALRGNTSVVRYILQQLDHS SREEREVLF  
LKDKNGRTPDLAVHKQKRNVENVLKEALAAAEDPRGHFFRKT LFNLSLKDVFSLRSWQFW  
CGMVPQMDEMDAPSRVPYYIVLVNTVLFVFLMVGVMAPFAKAGAGLLW DKSGLLMINFVF  
GTLTAYMHRKTARTSPGYMDESHPDIGKWRRLYEETLES LAENGTNQQKPAYEVASIRXA  
NDGWVRPGPLGGDSGEGSNPVTAFAAVTHLLLCVSCPCPCR WTRQKLCHSCHIARPHRSK  
HCRVTRKCVLLFDHFCPFVDNTVGLN NYHYFYTFVASMVVGLGSFFVTLV TYVSRYHSEH  
SSYPWLVMALGTQLCLIVVPVGGFLVYHTQLIMKNLTTNEAMNTMRYDY LFPV  
ISGRRVYQNPWDKGFLGNFMDRMNPSRASYEISDDFQSLITKDAPMPTSKCCHNGRCEKM

>comp15248\_c0\_seq4; 574 205 2187 LEN=2699; translated  
MSEITLTGGTLAPSPSSPASGGAGQPADSTGAGHNHEHNHAHGTKEACCDHHKDGIE MVP  
RRHRAHGGLPVEI STATEQELGRILFTLVRF SRFEAVPGVLQKMEEHDRPVASVLQQFDE  
GGHTLFHWAAKRLDDVRFLQTLVDLSTR LGLGSDILKRPSKDNVGMQPIHWACTEGSIPH  
AAVLLSHGADMEARDNSGCTPLLIAAQYGRVEVVAYLLQKGANLKAIDSSRD TALHWAAY  
KGSNEVCGLLTYQQLSLATQDAYGQSPLHLAALRGNTSVVRYILQQLDHS SREEREVLF  
LKDKNGRTPDLAVHKQKRNVENVLKEALAAAEDPRGHFFRKT LFNLSLKDVFSLRSWQFW  
CGMVPQMDEMDAPSRVPYYIVLVNTVLFVFLMVGVMAPFAKAGAGLLW DKSGLLMINFVF  
GTLTAYMHRKTARTSPGYMDESHPDIGKWRRLYEETLES LAENGTNQQKPAYKLCHSCHI  
ARPHRSKHCRVTRKCVLLFDHFCPFVDNTVGLN NYHYFYTFVASMVVGLGSFFVTLV TYV  
SRYHSEHSSYPWLVMALGTQLCLIVVPVGGFLVYHTQLIMKNLTTNEAMNTMRYDY LFPV  
ISGRRVYQNPWDKGFLGNFMDRMNPSRASYEISDDFQSLITKDAPMPTSKCCHNGRCEKM

>comp15249\_c0\_seq1; 1144 238 3945 LEN=4165; translated  
MVDGGAVRPLRNGSGDSMFDNDNNYFRSDSDFSRDSTERDTEFSEG MERDAGMLYSGV  
NTDRYISASRCIFFSILVLSALLCAVVS YVLYEIEEKENFKRSFESQSEELALYTNHNID  
NVFATFEGLSTATTSLVKEAWISSNLQTPAGFVDIPDIKYQLGQARETTNALAIVYAPKV  
MNDYDAWVEYSESHKNWIPLNQGGPVKITPEIPSF IWQWEDDPDFATSNSMDATNTSE  
SDSASINSRSLRSNMDGLQRPHDCSGDY LHRRQLQEDAKATDAKMEQMDHADASEIQVA  
SPLNETYYTPVWQMPVPVINE THRDVPIINYNLMDRRVFNKAANFLSFSKTPVFLDVC D  
QSAWFGIEEHKEIIQTVVTVPIFRDFQDDAPIAGFVAATIPWAEFFENNMNKDSDEIIVV

MENTCDEIFSVSVSGPYIEMLGEE DLHDPNYDDMAIEAPFAQAYNRKVEREDYKGDICIY  
TMTMYPTASYEASFKNRPWITSLLVVLVVFVFTSLAFILFDCLVTRRQTKLLKTALRQSA  
IVNSLFPKMOVQKLEQVDVKLEAKAEKKS IKRNLVIFLDDSRELSIREPLDTKPIADLF  
PNTTIFADIAGFTAWSSTREPEAVFTLLETIYRAFDEIAKKRRVFKVEVVGDCYVAVCG  
LPDPRKDHFAVMCRFAQECLRAMQIYTKLELVKLGPD TGDLGLRIGLHSGPVVAVGLRGE  
KSRFQLFGDTMNTASRMESTGVSNIQLSQATAGFLIDAGKEHWITKRQDRVRVKGKDEL  
TTYFLLSVRKTSDGNLARTPLSNEVVVSNHDNSNGSSCGGQRWQERNRVADWVVEMLG  
KLLREMAEKRRVANIKPENLSTITKLEKQKLGNSRHLNSNQTVIDEVVECLSI PDCVASK  
AMSTENPAPLDQKVIDELQDYVYGIASLYRKNAFHNFHASHVSMSCIKLLNRIASCDDQ  
LEGKDNSYIGICSDPFTSFAIVFSALIHVDVHTGAPNVQLVKEQAPVATMYKEKSVAEQN  
SIDVWCLLMEPTYAHLRRIYTTAAEFRFRQMVVNCVMATDIVDKDLIKARNQRWDLA  
FNTEKTTEDDCNLRSTIVIEHLIQLSDIAHTMQHWHIYRRWNERLFEESYVAYAE CRAEK  
NPSDYWYQGELGFYDFYIIP LANKIKQCQVFGVSSDEYLSYALQNRQEWEVVRGKDVVQEM  
AKKYESIHHA AISRQLLELERKVEVSGNCQGLGSA

>comp15250\_c0\_seq1; 1505 150 5345 LEN=5807; translated  
MEPREGGSSLSAAEGAAASMDFTAATRSRRVHSNVKNSPQRAYRDGRCSGMYCDGMCSYS  
NNTRNNNCSKSGNNDSDMGGKADDKISGGETRPPIAVGDSFYEDDMADYCCNCNQGEDR  
GNDMGQDEGKNAEGGRFIRGGNEAPKFVDLSTPTLIDEVDIYENEEEEEREMVKLEYERIR  
RNASAPIGSHSRTPDTASIIYNNPRSRFGAMNMTLNVNEAGSVRRTPGAMMYRSNYEATNQ  
NQAASSTASDSQSHPERSDSFERESMRRTPGASKMHASALAGGAAPSPTKLPQDTNRASQG  
TDVSGLGFGTLTSSPLATREERGLSDRTASARSLSSKDPSTTSGGSTTKNSSLDSPWSKA  
PQQKQQDHIPSEGRNLYSPNTLRLTEDLGNLLEDDDNSDETQKISQFVFRSGTSSSSAD  
KGPSTNTSSRGDLNDRITTSITESWTTPIVNMENQHQPSRVPRNAHRGRKSRLDRAGR  
SRGGTDRTASSSLSSSASFYRPGGNSFLPHAPTVPVRKMQPQPFDRNSGGNRNSNTTSSSY  
DPSAPDFSGGILGQGTSSFGFARQQQGHVDMNAPALNFGGAFSPPAKLAGSTPAVTT  
QQQQRQLPPPPVSGPFVGSNQQGNP GFDTSVQYRPFATGSPAFGVSFANPPQVHPMPTPV  
PYFQGTPTFGHTSTFQTVVPHFAESGQHPHNTMFPANTGNHPPPLSHSPTLSFSHHPNAG  
YQMGAPANMHNHGHASLAPDAMLNANAPRGQAVSQQP IHFVPSPPQWASNMSVQYEGMQP  
SSNIDQQYSGHRSNNPYSSHGGWQMQQYRVHHSPOVLLLESPAVSGMVTPTQTWNGQEGEQ  
APTQGDGLQQANTFNSNAGQQRSFPVSRPPSRGKNQRKTKNLSRAQKWANKNNQQKSDN  
GSHKGFQRM DTGPGSGNTQGNPSTSTIGKSSSSAKGGKKKHRDRNTPHLERATSTPVE  
DIATDQSNAAATASSTEAEDPADAKRAELTESPATRS AFKEFYRKL RSEERTSFQAAEN  
FAMLSLSDGSLPESIHWRVYLELADLAKRSNRFEEARRLYQQVYKLPYASQGWLEFSKL  
EEECGNMNACAKILSAGLEYCEYSELSSRAIKHEEKRGNLGRAREFLARLKHVGI EKVW  
RTVLEGAMLEARAGNDVMARRVLKYLMMHVPWYGPLYLEAYKLEKDLGRSKEALAVVERG  
LAAIPRYGPLWFGAFRLCEELDLEEKAYCLPQSMAMIDRATLSISKELIWKVHLEAAQML  
ERSSTENLNSKTDPTFLQVMEMSRKRFALTIVSCPPNLRWKVWLAAGRMEVAAGNSDIAR  
RLFLRAHRVVPDKGRAVALLECARLEEFVGDVELAKSILCRSRNVGGSDWKVWLESVMLA  
IRNGTYSKAI VLSQKALQQHSGTGRLWASLIQLRHLADVEEAQFESLALALNAVPKSGEV  
WCEGAR IHLNPF SHTFDLQRASRHL YFATKFTPOYGDGFLET LRLVILDQLLVPI SVHIW  
EESKGFQSGKDE TWEE DL TNYIFQILLDLNEIRNSVRGEKAESRDSIATNSLLTKSSVD  
MVVERLHSGNSLGLIDISKLELR CANADPNYGPLWFHCRSGPTETARNV LARAVTFILDE  
VKAHAYLYIISSVRRCAVISRFQQKIKQGMKEGTSSWEKAIDKELLSAPSLKEIIQHGM  
NIKTGIELLESSIPPTNFIA GIAELNQHHP IQKLSLPERRKMLFGADSLFS

>comp15251\_c0\_seq1; 577 228 3026 LEN=3108; translated  
MAPPPSPPEPMKVYLRLRPRNKLETMKRGKDCIELHEDPKRITVDS PRLGEHEFSFDQVFD  
EFSSQEEVYRESVSAIP PRLVRGVNTTILAYGQSGSGKTHLLGEGLGVELNTLAAGPQS  
TEYGSTTRDPRERTSNSSMTEDQYGMTTANHLHRKKLDPKQHPNVTAGMIPRAIAHIFDL  
LYESTSSDSSVEFTIRCSYVEIYLDRI TDLLQPARQENAIRVGRTSYGGSEDEACIVGAT  
ELCCVCPEDVYAVLARGQALRTKAANDASVDSRS SHAI FTLRLEKTDKATGKLSR SRMQV  
FDLAGSQGTPNPKAAATSDSATDAERSMVNASLASIHRIVRTTLKHQKHQRNMGQVSYSQ  
PSVSFPLSKVAKILQPSIGGNTYTTMICTGSPSSYSIDETIQTISFAQMMQKIYNM PRGA  
FQGYTLQGYQMQLSLTQQRQH QMSKFI RLLAQECKHGKKSREPKNQKVWDAVLQIVEAD  
KARKEKMANASGNEIAADYDGLCISVFEEGEKEKEIRDLRARLASAENKLRQECAAREKF  
ESAYRDATSELVALKSQRESFGKHKRKLEEKLLMAKAKNEEMSATKTDLEHKLRTSQFRE  
NESILFLRQFRTFYFRLLRNKAAHSGGNTREVMEEAKNKIPGTAPDLEDLLDVDKMMVKS  
GII ESSEIGADTPTS DYSK SALTKSSREAKAAAEEREMALIEDEMAEEFGPSKGLTRGQ  
LIACRQKLLLSPSGLLAI EKEKEVEK TLLQLSEKCMGLQNSLSAEKSMVQALSQRQAMT  
KMKQIQDTIMLKTELERR TNDLLAI VWKMNELHLV NKTLS SSKAATREQYSSYLSDYLSEI  
QAKNQRRVAQVQSEGSRLREENS DLRNQLDAVSLGLWQLGEQLEKAPLWRCSVSFSGEHH

NSTEEIPDCRLSSGKLTETEEIDGLIEVVQCNE

>comp15252\_c0\_seq1; 858 680 2788 LEN=3116; translated  
MATSPTFSAAQTRDKDPSSRNKASLAASVTYDPPPASWFFGRGSNDSPRQESPSLPS  
LLAKEGSEEASVPPAQNENATGCPSPSWGMVSDNEQEDGDAEDHEGFNFVAVSNSLLMA  
GRSFEQVSSSCSEQESGGYGKNRNSNPTESSVSSYSKDCSYEEQVENTGVLIVDGTDNED  
IRFEEPSDPPSHKANSENHGHGPNDAVLTIPGSDSLPSDIGTISHHDEEGEDLLFGDH  
SSCDDQVGVVDTASDPREDHIAWMGGSSLLPLVHRFLKLNHQESFRRLRLVSDVSDQDG  
GVSVDGHDESDSSSPLAKVSRWRYLLSSQQRVLLVLLVLFVASAAYWAGNCFVNRQREIQ  
RTWEERLRLEELQMAKVLAEETNRLREEMQALLEDAAMANAKAESLAKEQERLLHERQILE  
QAAAQAEAEAKRLKELQDEGSSQQERSRYSKNGSWGFEFNFEDEGNDCSGNGDGDPSFT  
LADNCWFKAKASIDLGNCGDDAKDYFRRRWNLWEDWEDFDYFYSTRETSDTGAVEPY  
SFDQEEAEQQDNYDFRYQNMDDTYPPQDPLKDLYSVLHSAGQSFVNKMVQLVTDETE  
EEDGSLSSPSSSDAVAFRGEWSKEEYTNILSTLHAMALNTNRSHGADEEASTAKNPSLQQ  
VTRKGLVDASSALASLSKAWQENAAGSQPPSTVQTSDDGTGQQ

>comp15252\_c0\_seq2; 1008 383 2491 LEN=2819; translated  
MATSPTFSAAQTRDKDPSSRNKASLAASVTYDPPPASWFFGRGSNDSPRQESPSLPS  
LLAKEGSEEASVPPAQNENATGCPSPSWGMVSDNEQEDGDAEDHEGFNFVAVSNSLLMA  
GRSFEQVSSSCSEQESGGYGKNRNSNPTESSVSSYSKDCSYEEQVENTGVLIVDGTDNED  
IRFEEPSDPPSHKANSENHGHGPNDAVLTIPGSDSLPSDIGTISHHDEEGEDLLFGDH  
SSCDDQVGVVDTASDPREDHIAWMGGSSLLPLVHRFLKLNHQESFRRLRLVSDVSDQDG  
GVSVDGHDESDSSSPLAKVSRWRYLLSSQQRVLLVLLVLFVASAAYWAGNCFVNRQREIQ  
RTWEERLRLEELQMAKVLAEETNRLREEMQALLEDAAMANAKAESLAKEQERLLHERQILE  
QAAAQAEAEAKRLKELQDEGSSQQERSRYSKNGSWGFEFNFEDEGNDCSGNGDGDPSFT  
LADNCWFKAKASIDLGNCGDDAKDYFRRRWNLWEDWEDFDYFYSTRETSDTGAVEPY  
SFDQEEAEQQDNYDFRYQNMDDTYPPQDPLKDLYSVLHSAGQSFVNKMVQLVTDETE  
EEDGSLSSPSSSDAVAFRGEWSKEEYTNILSTLHAMALNTNRSHGADEEASTAKNPSLQQ  
VTRKGLVDASSALASLSKAWQENAAGSQPPSTVQTSDDGTGQQ

>comp15253\_c0\_seq1; 1228 190 5094 LEN=5146; translated  
MSIRSSLESAGSSGPVRLSQVVGSPTRSTATNAIAVIPLLSSSHDGSDDPTTHSSKSFE  
DFLRLLQRHNLKINGSMSDITYDNDYDAKVDSDGSPVVVVVVPNSNLTRPSDWKYNETPLRN  
FHWGHGCQRLRFDFGRPYHSRASHDRILINHELTRNWIDLCPSTRRAAVVGVNLIRDCSDM  
ATLERAIQEWQWAERYSTPPYEVTALGRDVERDVTVPRLVFVDSFHEDLSPGVDLQAAT  
KKLNITSNLVAFPSPGEERSQMMDLHVNVLNLDLAVSVFKVLEDKIRESDLLMTGKNPS  
TLPPTKTGFFGRTSANSRGSSEDEAPRGGSKDLSIDTLAKVVGPSKCLASSKTNNLRNL  
EQHRASIRMKLDNASTNNVTDTPSSATSTTSEGSISEATTISASSPRSSVKAQLLTP  
DEFWDYTELSPKDAHEMRKREVARREKFAADLSLLAGSPLDAYERYTKAADLCKTTPDP  
LWYSSALEGCAAHIAMADVGGFNVDYLDSSFQLPEEIMACALIPASEKNGSNDELKCC  
MPQVVQALCEDALNVTSRHPKTACFHAELLLKLAWYTAEVEDGHLRCQWGLGGDEGGGIE  
TYGGDPDSDKRRWDKASATRLNFLDMKDKDGEDIKINTLKRLLQKCSEFMHMAASTACL  
SATRSVALRCISIAWRGLRPTLLPTVRRERSKDRIOQLKRKAFFAVTAAEAMSDVQGHVS  
QORAHALWAQASRLLPQTGNLDVGGNYGWATLRAVALHALVIOGTKESEDAAEQLLTLV  
SRISPPNCPKSEILPTSPVKGGRSNSYFAGARSYLRESAKVAKDARTRSKEIFGNDIS  
SLLVVQAKWVEDDPMQVPMSEFSSDFGLGVIAMPVWSTIRFENCALAQEQLIQQIF  
DLRKNIPACTLQNMISSKNNQNLPIEITSIGIVTSDSSTKLERIKLEPKKKKENAMSTF  
FNPYAKQERKQKPTTIPRGEQYISITFTNKLAVPFEIGSCKLKFDSRSRSDRIKAPSISF  
VIPGQTKNFVQFPFVLDKLENDIDILQVKGICITALSRSIYLPAGEDDEPNKTEGQI  
IPKSLSLYPKRDTYTKTSRVEDQESKVIYSPQLEIIPPQPNIHVSFASSTTPIDSETIIPV  
LLADGEIFTLPKMCSVNDTGLGGIGRIEELQISAVGLPGLSDVVLYDMSRTEGNENDVAG  
LSDDKNSMNDSSPITISAHCVGLDADTLNSSTSDLSSSFIKLFASPSMGAQTASSHLT  
LRFYRSGKAVSSELEVRKYEVQVHILRVKGPKIPSLSFRCDLFWESGYSELNLAIKE  
SDSERLSPRAGSTGDQKIGPKRLDRDRGIHVCSEVVVMISVANESSPIILSRMDGLP  
VGFASKMDTLKVSKGVSAKFPIILPRLERTDDICQRLVAMLKFKWKSEIGASELDDAQE  
TGGPMFPVNYRVREGILEIPRCLQKIIDENPIFLSRICKAPCSIGVSIFFGGSNGNESQQ  
SVKNVQVGKPVDAVSAEIAEWLSADRKDRNTNCTLKFYCARQNSSTNNADGKENASCAN  
QSKDFVWIGQIHKTLTMDGETSSDTHPHRARIVFLSEGNFFVSACLGLSGAEDRDPKEIW  
WAEKAGMVRVSKKG

>comp15254\_c0\_seq1; 487 338 2308 LEN=2409; translated  
MDSNCNYAIGTDDSLDFEYPRGVISFNGNTNGSSDTHMRIGYTHSSIGNGNGQSSSAF  
GRQHNQFNTSLYPMPDFPPSNPSSQDCQIGKMSEQQPKAPNDGTMSDETDAISKMLDM  
WENKKGPNYELGDDTSKALVTSVEKLVAKELFEMENGTREAMLDELHGKSRRAISESPEL

IEAALRAFNIELQNLDHKKVVININQERHSLDQAHLRATMDLQSNYVTSPEFRIRFLRAE  
LFDVKKAVIRYCRNLNVVWDLFGDTGLLRQIYLSDLNENEIRYLKEGRIQCLTSRDKMGR  
RIYFAFGLYNLPPIRERMVEMYLGFVVTGDDVSSQKYGGVVIIFASSEDKKKIMYDEDER  
QIIFNFTRASPIRYTGLHFCMPDETIYKIVKTIGLSLMTSDMRATFRVHTGSHMECNAL  
SQFGIPIEDIPIVNGTVKSRSCCLKMIKARNAVEDYIKQRCSLLETNYVTKAMEELLILS  
PSVLKGFPPSCPGTDCPDIDCIVFGDRALYNHSGNVEFRDYLRKRKRYLQTQRKEEERIRD  
GKQKTEKKRFLFIGEFLDDIIDETSKSYKFAYYNKKTGWYAYIPVDTPENRLEIRKRISQI  
IRDERKRERALEIDTSSVDSYQSAEDNDKDVLSAVSKLGVNNKRFKTNKSCRSCV  
>comp15255\_c0\_seq1; 245 553 1617 LEN=1941; translated  
MPPNVLHHWSDATRRRYRDLPTNDNNVDEDFYHPEFDASNFFLPSKATPLEAKELSDRD  
RVRAMWKNMVRSDASATAVPNGHETIHIEELSDSLSSIIVLRDEEEHSEWLEQFGGQLS  
GVSSELCQELRKHAPDLNLMSTVADFNDNL CYHVQREKGPPEHPAPRTNRAIEEALETTL  
VAEYLGSLFLATKSTIPQPAHVDPWEVLEKHGDGDHQSFGHLKLGFFPLTEEGMFLQVWP  
TACPHQDRSIEIEGQLVFIPIYGKMLVLPASTIHGGGFRTTPFESEYSTVGSRSSTGFCG  
NLRFLHYIATDDASLPAHQNTKYTERCDKTKELSRRYVDSRHMSVLLDHFVST  
>comp15255\_c0\_seq2; 230 553 948 LEN=2112; translated  
MPPNVLHHWSDATRRRYRDLPTNDNNVDEDFYHPEFDASNFFLPSKATPLEAKELSDRD  
RVRAMWKNMVRSDASATAVPNGHETIHIEELSDSLSSIIVLRDEEEHSEWLEQFGGQLS  
GVSSELCQELR  
>comp15256\_c0\_seq1; 381 34 3243 LEN=3378; translated  
MSSLPSPTLLIAPSKAELPPVLCDAIVTRAAEAI RERNAF SIALSGGSLPKFLGKLPDRF  
RERAIDPRWDAWHVFLADERCV PSTHDDSNLKSIRANFLDSPGVAIPDDQIYGIDESLVD  
RLVKEQEEDASAADATTEEIAVKYEEKMRDTLRSSESTLDLAVLGFPGDHTLQLVPRPS  
TPGAGIRQVDRIDVDSPPKPPRRITLTM AFLNENTSHIIVCGAGASKHAITEKVFVLGDG  
DVKEGEASCQTLLPELASPPYPCSMVTPTKSLTWVVDVDMVGEKKYRLGTTATTPGDS  
HRWIPMRMSSTAATLVAFPGPASYNKEEHIQTIPIDWFDLSNNQSSSVWRSPWLTKLI  
YFLIRVDLKFIMIDFCSEPTARARDYGCVHSLVQNSIVFHSSMVWAATMSFALAQYGSPL  
TYS CADDSSLKTKRAPVGTGVPSSSFVERAEGGGLQVPTLRHFPSRRYCLTISGARLME  
PVLAAHRDGMRTAACRVSP TSLLSDEHNLXIYGTALRRFQLQISIDFGANNPIHSVATRS  
VKGV DILCTELSQDMRGARSYRTIPSTVLCDLVRAVRTV VSCR TTVVALPVL MCGCQDVM  
RTIILSYQQVPGTSSTETYIGYIFTAYRYSTRKFPFKRIKSNESTIANKVEESSIINNQ  
NLWNQGXNDVDLGLINAVHSRQRRRRQSCYYPWRRPINKKTKKHSIASMHQSSYPNSPA  
LHSXSLDYTAKSLFFNSSTRQRVHTGTFTSTQKKYSTTSCKLDDAAAAISSKKAVSPALLV  
LLLLLHTAAVVIVEGAYSVAGKTVLVTGSAGGIGKGIKALAEKAKIVVHYHTRETEAL  
AFSRELGP ERCLGALHCDFRNTSSIPSFARAKDLSGKLDILVNNAGAITKLALEDDDEE  
LTVWKDTMAVNLHAPNLLGKLF AEQFREGSEECTDASGGGGGGGVILNVGSIHGDRSNE  
YMGAYAASKAALES LTRTQAI EYGPAYGVRANLIAPGIVPVERTEAFFRENPGVLKSWTD  
RMPLGKEGTVEQVAAASLAMIENEWANGAVWQIDGGMLARGNLPPRRDP  
>comp15257\_c0\_seq1; 345 628 1296 LEN=2101; translated  
MNHYHRFLSIFAIVASL FVVNGVEILRTPSALRVEETGSTEPREEAESGENINIGDDTEG  
RPMKGTMTIAKGFRCAGASKRKKGPSKECEGGFKKTTGVGFQAQELAEDIASELEDMHK  
GMAPVQKSLLPND DIMMELVSLDEVHDIDFDDEECSDESCKKTVKFGGYFKLFWGCNVTF  
SKRGRKMSKTIACGGKSFEGMGKKQNGDDRFDPEGLLAEIEF  
>comp15257\_c0\_seq2; 345 589 1257 LEN=2062; translated  
MNHYHRFLSIFAIVASL FVVNGVEILRTPSALRVEETGSTEPREEAESGENINIGDDTEG  
RPMKGTMTIAKGFRCAGASKRKKGPSKECEGGFKKTTGVGFQAQELAEDIASELEDMHK  
GMAPVQKSLLPND DIMMELVSLDEVHDIDFDDEECSDESCKKTVKFGGYFKLFWGCNVTF  
SKRGRKMSKTIACGGKSFEGMGKKQNGDDRFDPEGLLAEIEF  
>comp15258\_c0\_seq1; 385 1 1431 LEN=2378; translated  
XITITPTTARHDRATDSL VNFETVKHFTGEEYERQRFGESIARYQAGSVNVQATLSFLNI  
TQKFI LQVCLAASLSLAALGIKQRSDCCIDQGCDSGVSGCCQAIDHDTCPGMEVGFDFVAV  
LFTFMQLFQPLNFLG SVYNAIVMAIVDLTNLSQLLAQDPDIKDNPDAMILPLSNETEEDV  
AVEFDNVYFHYPTQPESKGLKGISFKMKRGTTTAIVGPTGTYS AIESDEAFFAKPLLRKL  
GNLNSASNDLSLIAIAGAGKTTISRLFFRFYDVLGGAVKINGKDVRTVSQKSLRSSIGV  
VPQASAMFNDTIRENIRYGRGATQEELEQAARDAQLLGFIESMDNGWDTVVGDRGLKLS  
GGEKQRAAIARCLLKDPPFVLLDEATSALDTITESSVQEALDRLGSHRTVLVIAHRLGTI  
RNADKIIIVLKDGVVHEEGTHDELLEKDGMYASMWRQLHSTSN SSGS QVSLFTEDGEE  
>comp15258\_c0\_seq2; 974 243 2855 LEN=3802; translated  
MDTAASETVCAQATLTHGWVH SCLVLSFALFRLSIDL IQTASAKTRKHFRESHGAAES  
APAAKNKKKATNQKKAGYGSIDTGETAPAGEADPLLPGGEASPSGDTLATWSLRLQSVLL

AVLLVAAWTERSCVLP EGTLR TCAAALAFGLV LTHRDRGRERLGYVSRFFYAATGIGLAV  
PVALACLGKTASAGPWDAAVVLALGLYGV LALAESFGLPLPRPDARDAHAPPGGLSTAAI  
AQLLRPYVWPDKTSESAIVNRVRAILTWVCV VASKACNL TAPILLGKASTALAHQQYGLC  
MYLSSAYAAIQFFGSLFK EGQSLIYLRVAQAGFVQLSETTFVHLHRLSLDWHLRKKLGEV  
MRSMDRGIAACDTLMKYLF LVLVPALAECIIVCVMFATYYSYAPLSIVVFYSVWIYIVWT  
IILTLQRKKFRKAVVRSDNEWHDRATDSL VNFETVKHFTGEEYERQRFGESIARYQAGSV  
NVQATLSFLNITQKFI LQVCLAASLSLAALGIKQRSDCCIDQGCD SGVSGCCQAIDHDTCP  
GMIEVGFDFVAVLTF TMQLFQPLNFLG SVYNAIVMAIVDLTNLSQLLAQDPDIKDNPDAMI  
LPLSNETEEDVAVEFDNVYFHYPTQPESKGLKGISFKMKRGTTTAIVGPTGAGKTTISRLL  
FFRFYDVLGGAVKINGKDVRTVSQKSLRSSIGVVPQSASMFNDTIRENIRYGRRGATQEE  
LEQAARDAQLLGFIESMDNGWDTVVGDRGLKLSGGEKQRAAIARCLLKDPFVLLDEATS  
ALDTITESSVQEALDRLGSHRTVLVIAHRLGTIRNADKIIVLKDGVVHEEGTHDELLEKDG  
MYASMWNRQLHSTSN SSGSQVSLFTEDGEE

>comp15258\_c0\_seq3; 364 1 1318 LEN=2265; translated  
XITITPTTARHDRATDSL VNFETVKHFTGEEYERQRFGESIARYQAGSVNVQATLSFLNI  
TQKFI LQVCLAASLSLAALGIKQRSDCCIDQGCD SGVSGCCQAIDHDTCPGMIEVGFDFVAV  
LTF TMQLFQPLNFLG SVYNAIVMAIVDLTNLSQLLAQDPDIKDNPDAMILPLSNETEEDV  
AVEFDNVYFHYPTQPESKGLKGISFKMKRGTTTAIVGPTGAGKTTISRLLFFRFYDVLGGA  
VKINGKDVRTVSQKSLRSSIGVVPQSASMFNDTIRENIRYGRRGATQEELEQAARDAQLL  
GFIESMDNGWDTVVGDRGLKLSGGEKQRAAIARCLLKDPFVLLDEATSALDTITESSVQ  
EALDRLGSHRTVLVIAHRLGTIRNADKIIVLKDGVVHEEGTHDELLEKDGMYASMWNRQL  
HSTSN SSGSQVSLFTEDGEE

>comp15258\_c0\_seq4; 962 243 2968 LEN=3915; translated  
MDTAASETVCQAATLTHGWVH SCLVLSFALFRLSIDLIQTASAKTRKHFRESHHGAAES  
APAANKKKKATNQKKAGYGSIDTGETAPAGEADPLLPGGEASPSGDTLATWSLRLQSVLL  
AVLLVAAWTERSCVLP EGTLR TCAAALAFGLV LTHRDRGRERLGYVSRFFYAATGIGLAV  
PVALACLGKTASAGPWDAAVVLALGLYGV LALAESFGLPLPRPDARDAHAPPGGLSTAAI  
AQLLRPYVWPDKTSESAIVNRVRAILTWVCV VASKACNL TAPILLGKASTALAHQQYGLC  
MYLSSAYAAIQFFGSLFK EGQSLIYLRVAQAGFVQLSETTFVHLHRLSLDWHLRKKLGEV  
MRSMDRGIAACDTLMKYLF LVLVPALAECIIVCVMFATYYSYAPLSIVVFYSVWIYIVWT  
IILTLQRKKFRKAVVRSDNEWHDRATDSL VNFETVKHFTGEEYERQRFGESIARYQAGSV  
NVQATLSFLNITQKFI LQVCLAASLSLAALGIKQRSDCCIDQGCD SGVSGCCQAIDHDTCP  
GMIEVGFDFVAVLTF TMQLFQPLNFLG SVYNAIVMAIVDLTNLSQLLAQDPDIKDNPDAMI  
LPLSNETEEDVAVEFDNVYFHYPTQPESKGLKGISFKMKRGTTTAIVGPTGTYS AIESDE  
AFFXKTIVAKARQPNSASNDSLHIAIAGAGKTTISRLLFFRFYDVLGGAVKINGKDVRTV  
SQKSLRSSIGVVPQSASMFNDTIRENIRYGRRGATQEELEQAARDAQLLGFIESMDNGWD  
TVVGDRGLKLSGGEKQRAAIARCLLKDPFVLLDEATSALDTITESSVQEALDRLGSHRT  
VLVIAHRLGTIRNADKIIVLKDGVVHEEGTHDELLEKDGMYASMWNRQLHSTSN SSGSQV  
SLFTEDGEE

>comp15258\_c0\_seq5; 391 243 1568 LEN=1610; translated  
MDTAASETVCQAATLTHGWVH SCLVLSFALFRLSIDLIQTASAKTRKHFRESHHGAAES  
APAANKKKKATNQKKAGYGSIDTGETAPAGEADPLLPGGEASPSGDTLATWSLRLQSVLL  
AVLLVAAWTERSCVLP EGTLR TCAAALAFGLV LTHRDRGRERLGYVSRFFYAATGIGLAV  
PVALACLGKTASAGPWDAAVVLALGLYGV LALAESFGLPLPRPDARDAHAPPGGLSTAAI  
AQLLRPYVWPDKTSESAIVNRVRAILTWVCV VASKACNL TAPILLGKASTALAHQQYGLC  
MYLSSAYAAIQFFGSLFK EGQSLIYLRVAQAGFVQLSETTFVHLHRLSLDWHLRKKLGEV  
MRSMDRGIAACDTLMKYLF LVLVPALAECIIVCVMFATYYSYAPLSIVVFYSVWIYIVWT  
IILTLQRKKFRKAVVRSDNEW

>comp15259\_c0\_seq1; 1026 25 4003 LEN=4204; translated  
MIVRKFDRHILTRSSVAHNRRGSRFEHLALSVE SVKSHPKRKVTARPTDDLMI TTKTDTD  
TTAAPSRDQPQDSTQIRTSSLRAHA AVFIP SALVSTALSDDIAAKANSPNALQPRKQN  
GKKNKRFRSNRKHQRQRESNKE TEKPEYSERLESQNKSNRTPSNKDNQRNGRKNKKKT  
RPRGSQRQTKKEPRRRQREPKHTSKSKNKDEFHHTSAIRFESKTQGQRLRDFDEGYDASS  
SDFPALVASPEQFQSL ETTWDAFP GIRDVREQSSQDDSTCAHEETT CWRNGLDRLDMPGG  
RESRLHKNRRQRLEFSAWDNSDDERGTDE VQNMASGGDTNDQLAIKESATLSIITETQNV  
NSSWKRTFDLNRRLRDRWVMVVEKHKKRLTEQRQQEQQLQRQQKLQESEQKEGQVNRVGTY  
DCNDNDVTDSENLHRHYSADNGYSFESYCVPGSNKERYHIEDVNL SALYDRIQSNSSLS  
QTETS KKKLFDIIIEHNDEQALK EMLMRSWKVEAKNLGAEFRHNSSDIGRTQLFEVFDGE  
INEEDAGDFMEYSIEKVIRQNKPRLLR TILSVTNGRIPINSQPLIQAAKLGHEECASILL  
SKQDRDSTILFLKDDTDGNTALHHC CRVNGKKCMVLMMLLKHVAGNTKCKRQELSKLVTSR

NKNLQTPHLHLACQSGRNDLVEVFLTTCKSTLLFKILSMEDAKEQTPLLTAVGSSCYDVVV  
SLLMWRGNHHDHQRQDQPTCYSPAPDFVHHRNGEKKTSNKNIQNSMCPLVWAAKTGNFDM  
IDLLIQFGEQSGNSYLVTREALILLRSDAPTETKLGSDLLVLAGANPFEAIITDNKKKE  
TALSVASECSPNEVICSMISTAMRMITDRQLSRRRDPILQQQPEAFFRTLESKENFEAKS  
AISNALVEALFQGYSSQKVADFSTAMMFYEKIEKIDDSYLARLRFSILNGRIKLYTPASM  
SAMKWCLIAITYEHSTKEITGKKGPKSGLLDCDRTLFAEKSIILLSNIPWVKTEAHNTECSC  
PWMRRTVKKSDDLPMRQIGDDTILIAADDGSEFLVDASIVSEKSGKLASAHRFIEMNRNE  
ESEGQVIKIEVAIPPDFCKLLIQHMYHGSICFGWPDHLHNHEMGRYLLELMLVAEEFLIPS  
LVQEIEMRLLSSNPKTCFCWNCCQALRTVTSDSGEHKAQCLYLVDGHSCLVTHENATDIL  
GVTEYIMGFDYTLCLAPTIHNMCVPRKLWEMHDNGMDSNETNCWKVNKAVVCLRDVAIC  
AMLKEFGSVVVRPDFYLPTEEVLDKESQKQILLQMCLEELPKNSIIAASYQEP IQKLSRQ  
TSKIH

>comp15260\_c0\_seq1; 279 1 972 LEN=972; minus strand; translated  
XPNPRPKDEPRDL SAEALLYEPENMIDVHDVAAHEYDESEIDGESNTPCIVHRLTSDDVR  
DDTLYVISQAAAFLSMVLGGFITVCLTGSVFWKSINLRPIGAGYLVAYFLQSFTFLIFDS  
DICSSQNGCVMSRGGVLSAIASVCWIMSCAASARMETRKLKNEAQQRDLNQVEEKDEDE  
DFELMYQEHMLIMNKIQEDNRNKNASRIESPRAKNEKRQKKKEPGQQRTRFSLGKPEALSS  
RDRGRTEETAIISDDDNDGRSTMVSNEFQKSDVDRLLTTTISPSRSVSVPPPPPPSELPRR  
PRKSKKRPRKDKSDNENQSPRKQXX

>comp15260\_c1\_seq1; 825 186 2426 LEN=2510; translated  
MDSAFSYLQGLVDAFEDVGGNEQRTKRRSACVHQSTALPTCSVNAINCNTQVPNTHSDIE  
EQGSSIEHKRDKREEKLSTKRSRDGSSNNIDLSESTRTPTPSKNPSFAGLVKSKSLEIASR  
MSLFQSFSDNDPYDIKKS GSSVSKTTADSNSDESGFEWAQSLSSNSDNSFDNNHGFVIDD  
ALTKTSHKRKKQRGRGRSGRHIELWSHGIIWTCMAISFGWCGLAFSYVSRKSINFFVLN  
DPMYLDPRYEKIESFGMIQIELCYNTTHLDILEELNDEPNRPRKDEPRDL SAEALLYEPE  
NMIDVHDVAAHEYDESEIDGESNTPCIVHRLTSDDVRDDTLYVISQAAAFLSMVLGGFVT  
VCLTGSVFWKSINLRPIGAGYLVAYFLQSFTFLIFDS DICSSQNGCVMSRGGVLSAIASV  
CWIMSCAASARMETRKLKNEAQQRDLNQVEEKDEDEDFELMYQEHMLIMNKIQEDNRN  
NASRIEGPRAKNDKRQKKKEPGQQRTRFSLGKPEALSSRDRGRTEETAIISDDDNDGRSAM  
VSNEFQKSDVDRLLTTTISPSRSVSVPPPPPPSELPRRPRKSKKRPRKDKSDNENQSPRKQ  
QDHRRRYLQQENGSRTSSRKS NRPLDVTANDDLDRAYNDSVDAKSESIQKQDFLANADGL  
EPPSSGNPKANDWISFKDGKPNTPPQKTI AKDEIEKRRHPRQQRSSRNRPRAKKEPSTT  
SHDDNKTRSKRGSSHKSFNEDKHVEL

>comp15261\_c0\_seq1; 483 505 3028 LEN=3245; translated  
MSILDFDL SHASLNTALKYPNDVETSQKSGTSDIRKETEF AF SHIAAVLLAVSDFNQRP  
SVVPELVSNPSIQQC NFNFG E I I VEDTQHLVSRVTDKLYNYVKHANEPCGMIGSYSHFPI  
QDVSTFASAMKVPMTHTSLGTELSISNMQKYISQSNALASQAMRPMIKHLRDDLGREN  
YSILYSSNRREYLSLAKLLEHKLHNEGIQSHMQGYSSISYISKKISSGADDLYNATGR IK  
EIGYRTIIVIGDNTVLNQFTGWIDQLAIAANSHGMNQGEYFWAFWNDMTLSENGNFLNHL  
PKDDLRYKLLSGAVAFDFIEPFLLDGDDDKFLKHWTQNDMSMVEQLNAINPIADSKPGYY  
APSDDYFQTITPAHGSAFLYDAVIAVGVGACTEAHILGRNGDVSNTLGAEHIQGLQKSVF  
SGASGHFQFDERIGGNVRFSSGIYAAYNLLPFGTQKGYRTNAILDPMVNSMTAATYKEP  
GSDNSTWITIDEFIFYGGLPMGSIPLIDPERMNYLPRAAQISGFTLYSIAVVGFASSMVW  
IVVHRNHPVLLAAQPITLLAMNVGAFMLVSTIPTMSFDETSGLTEADLSKICTANLWFYV  
VGIIFMYGAI FVKLARVNKVLQFRRQTVTFKQIAFPVYIIFTVAVALLIVYTIILHGQQWD  
RDVINQRTGESYKCSKSGPEGMIYTLICISFVPMVLAVAAAWKTKDVEDSFSESWWIFA  
ATFVNTQLFLVLAPMAYILEDANTVGYLCLVFMAWTTAVSTILMVMVPKVLAFHGLFGG  
EAVQKRGARSDQNPRSFEEKISRVPQSRPGTHQSSPTPVPVRALAVDGGSRKRHRADRSN

>comp15261\_c0\_seq2; 490 339 2900 LEN=3117; translated  
MLPSWEWALTA CLVFMCAEVARALVGNAGDCSLMTFFVDVTWNGTSDIRKETEF AF SHIAA  
VLLAVSDFNQRP SVVPELVSNPSIQQC NFNFG E I I VEDTQHLVSRVTDKLYNYVKHANE  
PCGMIGSYSHFPIQDVSTFASAMKVPMTHTSLGTELSISNMQKYISQSNALASQAMRPM  
IKHLRDDLGRENYSILYSSNRREYLSLAKLLEHKLHNEGIQSHMQGYSSISYISKKISS  
GADDLYNATGRIKEIGYRTIIVIGDNTVLNQFTGWIDQLAIAANSHGMNQGEYFWAFWND  
MTLSENGNFLNHLPKDDLRYKLLSGAVAFDFIEPFLLDGDDDKFLKHWTQNDMSMVEQLN  
AINPIADSKPGYYAPSDDYFQTITPAHGSAFLYDAVIAVGVGACTEAHILGRNGDVSNTL  
GAEHIQGLQKSVFSGASGHFQFDERIGGNVRFSSGIYAAYNLLPFGTQKGYRTNAILD  
PMVNSMTAATYKEPGSDNSTWITIDEFIFYGGLPMGSIPLIDPERMNYLPRAAQISGFTLY  
SIAVVGFASSMVWIVVHRNHPVLLAAQPITLLAMNVGAFMLVSTIPTMSFDETSGLTEAD  
LSKICTANLWFYVVGIIIFMYGAI FVKLARVNKVLQFRRQTVTFKQIAFPVYIIFTVAVAL

LIVYITILHGQQWDRDVINQRTGESYGKCSSKGPPEGMIYTLICISFVPMVLAVAAAWKTKD  
VEDSFSESWWIFAATFVNTQLFLVLAPMAYILEDANTVGYLCLVFMATTTAVSTILMVM  
VPKVLAFHGLFGGEAVQKRGARSDQNPRSFEEKGISRVQSRPGTHQSSPTVPVVRALAVDG  
GSRKRHRADRDSN

>comp15262\_c0\_seq1; 589 25 2726 LEN=3638; translated  
MIWMSTSIIRPNERNFXMSVYHRLVHCSSVHRGVSKEQSFQLLDQLTRSTLGSRGVDNDGS  
VDEGSSSHDNNLEERRLCQKVEKQSVPEPLNTILARWKSEYLRSPRTTLHPRQVLDKVDV  
KGLLDNNSGALSRAATTNPGYNDHEHLLQLVRPDIQSYTCIMQAVAASVDHGQSSSSPSQ  
HEINMNKLRFDALLDRLVQDAKSDFSIPPNAASFATVMNAWAHSSSNTQNNTKIQTTVR  
KQKNDFSSSKVEELLQRMEALHEEGLPNLEPNVVVYNILLHAWAKEGKIEKIEDTLQRM  
IHLEIPGVSPDPVSYSTLLSAYSCKMGTPEATQKADSLHQLMELHSHGMESAKPNIISFT  
NVVQCYARLGDGGKAEWLEKLLDLYHNSAATASDDSLVHLDPEWKPVDVGIYNSVIQAWA  
KSGQPHKAERFLRSMIAMDEIANETEPGATRLSKSKHLSGESVPIVEPDSRSFNIVLSA  
WAKAGEAERAEAILMEMHRLHVEEDFDTRPTTVSYNTVLDSYANKAKKIRDAEKKNSLQ  
RNKKASKKSSSTASNNGQDSPWNRAEAILNHMIDLFEFGDRGVKPTTQTWNTVLNVC  
GKIDEAEKVLDRMSTFQTPSAIESGHTKVQRAVVPSTRTWNTLLSSCMAKGDVHRAKQFW  
LRMKESGTQPDIVSYNTLLNCFVRLRNSKASGNSNAIHREVESIFQNLCDQNVSMNHIT  
YLAMINFWINQRAPYKAESFILNMAEESMKPAKMEELNVRKSDLPAPNRS LFHYVLSCWG  
EHKKPKKAEELLLKMAKLSDDHKFDLRPTTETYNRLNLCWAKSMKIESGERAEIILREME  
TLGSLGDNEATPDIYSYNSVLNAWANSGDAAALTRIDGLILEMILTGNPSLLPDSFSYGA  
W

>comp15263\_c0\_seq1; 396 1 1103 LEN=1103; translated  
QQQQQQYKNSLRVQTGPSASLAHSTPRRAPSPSPSHPVVASPWSQKHHARKDDPKSFENK  
NDSRVRQYYNSSWRVESPVNMPRQETQSSASKTPKYGDHNPSSAVPSWQQRCKPRPIDH  
DVPDTPVRSNNVRALPQTNVPKSNTPSSSSVVSFMYSONKKNENTPRRVEPNKVPASS  
IASLMYSQNAKPKDDLPRNEPNDVPASSIVSLMYSQNNKPKDDVPRVEPNNDVPASSIV  
SLMYSQNSKADEETKGASEVAVDWPCDGDENTEQEAVEGEDVDETATDIIQEMLIDDISD  
VGKHTNVAENLGAGEMNQMVQELLHESSSQNKPWENDTKHSVVQTWQNRSSNPNDPSLSL  
PATEGANX

>comp15263\_c0\_seq2; 305 1 677 LEN=821; translated  
XRYFEEAEASTPKANRSLILSKNYEVKKTDPVDDRGSRKSVDNQVIDIOWATSSASND  
ERDEAITFDETDKWLDCDPDIEDSMVVEDASVSSDVEDANKGTGDNKPTSDPGPTPLILK  
KPPQSLRSIEKEQQRKKATTIAMEAKKQPKQEVFDFPFIDGEEAEQLKIDTDDDLFSKNP  
DPFATQESFSPLOWSSETKKEEKSFASSPDEEIGYNSPNSRLEI

>comp15263\_c0\_seq3; 356 1 1016 LEN=1016; translated  
QQQQQQYKNSLRVQTGPSASLAHSTPRRAPSPSPSHPVVASPWSQKHHARKDDPKSFENK  
NDSRVRQYYNSSWRVESPVNMPRQETQSSASKTPKYGDHNPSSAVPSWQQRCKPRPIDH  
DVPDTPVRSNNVRALPQTNVPKSNTPSSSSVVSFMYSONKKNENTPRRVEPNKVPASS  
IVSLMYSQNNKPKDDVPRVEPNNDVPASSIVSLMYSQNSKADEETKGASEVAVDWPCDGD  
ENTEQEAVEGEDVDETATDIIQEMLIDDISDVGKHTNVAENLGAGEMNQMVQELLHESS  
QNKPWENDTKHSVVQTWQNRSSNPNDPSLSLPATEGANX

>comp15263\_c0\_seq4; 901 1 2358 LEN=2502; translated  
QQQQQQYKNSLRVQTGPSASLAHSTPRRAPSPSPSHPVVASPWSQKHHARKDDPKSFENK  
NDSRVRQYYNSSWRVESPVNMPRQETQSSASKTPKYGDHNPSSAVPSWQQRCKPRPIDH  
DVPDTPVRSNNVRALPQTNVPKSNTPSSSSVVSFMYSONKKNENTPRRVEPNKVPASS  
IVSLMYSQNNKPKDDVPRVEPNNDVPASSIVSLMYSQNSKADEETKGASEVAVDWPCDGD  
ENTEQEAVEGEDVDETATDIIQEMLIDDISDVGKHTNVAENLGAGEMNQMVQELLH  
TDAGHFQDTSKSSASQTVQSSSQNKPWENDTKHSVVQTWQNRSSNPNDPSLSLPATEGAN  
EVSKAPAIVESNDNDASPKNEVEQNVPSSELEEKGHETSKEVPPVDSYSDSFIIEKKS  
SIDEDIKILGEKISIDPLEKYEISNEPVAPKNIPFYDDDSYISRGDTTSRGLGASESFKSA  
SARSRTSATYNSDMSVYVEDERIIITKEDKIIISAQFEQMNLEAVGEPNLTAPALTVG  
ATTPRAGSGSLPRLDPSPRDNDKYRLRYFEEAEASTPKANRSLIPSKKTPDVDDRGS  
RKSVDNQVIDIOWATSSASNDERDEAITFDETDKWLDCDPDIEDSMVVEDASVSSDVEDAN  
KGTGDNKPTSDPGPTPLILKPPQSLRSIEKEQQRKKATTIAMEAKKQPKQEVFDFPFID  
GEEAEQLKIDTDDDLFSKNPDPFATQESFSPLOWSSETKKEEKSFASSPDEEIGYNSP  
NSRLEI

>comp15263\_c0\_seq5; 941 1 2445 LEN=2589; translated  
QQQQQQYKNSLRVQTGPSASLAHSTPRRAPSPSPSHPVVASPWSQKHHARKDDPKSFENK  
NDSRVRQYYNSSWRVESPVNMPRQETQSSASKTPKYGDHNPSSAVPSWQQRCKPRPIDH  
DVPDTPVRSNNVRALPQTNVPKSNTPSSSSVVSFMYSONKKNENTPRRVEPNKVPASS

IASLMYSQNAKPKDDLKPRNEPNDVPASSIVSLMYSQNNKPKDDVPRVPEPNDVPASSIV  
SLMYSQNSKADEETKGASEVAVDWPCDGDENTEQEAVEGEDVDETATDIIQEMLIDDISD  
VGKHTNVAENLGAGEMNQMVQELLHRASTDAGHFQDTSKSSASQTVQSSSQNKPWENDT  
KHSVVQTWQNRSSNPNDPSLSLPATEGANEVSKAPAIVESNDNDASPKNEVEQNVPSELE  
EKGHETSKEVPPVDSYSDSFIIEKKSGDLSIDEDKILGEKISEDPLEKYEISNEPVAPKN  
IPFYDDDSYISRGDTTSRGLGASESFKSASARSRTSATYNSDMSVYVEDERIITKKEDK  
IISAQFEQMNLEAVAGEPNLTTAPALTVGATTTPRAGGSGLPRLDPSPRDNDKYRLRYFEE  
AEASTPKANRSLIPSKKTPDVDDRGSGHSRKSVDNQVIDIWATSSASNDERDEAITFDET  
DKWLDCCPDIEDSMVVEDASVSSDVEDANKGTGDNKPTSDPGTPLILKPKPPQSLRSIEK  
EQQRKKATTIAMEAKKQPKQEVFDFPGIDGEEAEQLKIDTDDDLFSKNPDPFATQESFSP  
LQWSSETKKEEKSFASSPDEEIGYNSPNSRLEI

>comp15264\_c0\_seq1; 434 700 2403 LEN=2473; translated  
MIRYSPGAFLLPLSLPSFWTGAGRKPLHVVLCAVLFMHNEKIGIIPGLPRVQALESFYAN  
VTLKANNGDLSAVVYLPNGLKPGERTYYQSTRFDWSSMIGNIKRRTTNPLTGKKETHVLY  
GTQQWRLPHDPYWTESGVGLASEFGVGTGSLCNFMCGWGKESEVTNGILGYQRAKSGES  
FLKIGVGLVKGSCSTCDSAEDYKFNOPYRFPARPPVWTLLEYEGDGKNGDLRSIKLSHKAV  
LGDRKPGYKLEKQITLHDDQLLVKNTLTNLGVEDFSTAWYSHHFFSCDSHPVQYGLSVDV  
DLAATSGEYSEPSTWSWSTPLEDYASVLSTPGDSDDEDEADQLVRIGMQRGVESNVKIK  
EFVDNDQSKGAFTLRACNTKIEETIPEVGDGSSGISMYAYNLYIESGTFSPPEQILLHLR  
PGESTSWTQQLDFFDDYEPVPPAHSSNEMAESLLLQDSAACAESTALAGHPKSKHSHKTS  
GSGGGSSSSSSSTRQTNRWRESTVAITAYALVIAVTLVAHHRSRRTKARHSRSGRLRYP  
PDVDPILCDIGKRDRASRDKRNSDAII

>comp15264\_c0\_seq2; 1334 700 4084 LEN=4517; translated  
MIRYSPGAFLLPLSLPSFWTGAGRKPLHVVLCAVLFMHNEKIGIIPGLPRVQALESFYAN  
VTLKANNGDLSAVVYLPNGLKPGERTYYQSTRFDWSSMIGNIKRRTTNPLTGKKETHVLY  
GTQQWRLPHDPYWTESGVGLASEFGVGTGSLCNFMCGWGKESEVTNGILGYQRAKSGES  
FLKIGVGLVKGSCSTCDSAEDYKFNOPYRFPARPPVWTLLEYEGDGKNGDLRSIKLSHKAV  
LGDRKPGYKLEKQITLHDDQLLVKNTLTNLGVEDFSTAWYSHHFFSCDSHPVQYGLSVDV  
DLAATSGEYSEPSTWSWSTPLEDYASVLSTPGDSDDEDEADQLVRIGMQRGVESNVKIK  
EFVDNDQSKGAFTLRACNTKIEETIPEVGDGSSGISMYAYNLYIESGTFSPPEQILLHLR  
PGESTSWTQQLDFFDDYEPVPPAHSSNEMAESLLLQDSAACAESTALAGHPKSKHSHKTS  
GSGGGSSSSSSSSSGFRRCRKSEKAQPIERSRQKQATQHNTTHCTNQNRNHEPLSERMEA  
LRVGGIVDARAVVLDTGSRGTGAAPTTPPPKQETGEDIDETDPLWQAVLKIISGGDKAAAQ  
KLINDPDSLTKYPEVVALLEGEGGDGMEVDDTETAQLAEAVETKMQIDKPAPPPAPAP  
KKPAAKAAPEKAEVVEVEPVEKGDPREHLNLVFIGHVDAGKSTLSGSILYITENVDKRT  
IERYEREAKELNRESWFLAFIMDTNEEERAKGKTVEVGKAHFETDVKRYTILDAPGHKNY  
VPNMIMGASQADIGVLVISARKGEFETGFDGQTRERHAMLAKTLGVSYLVVVINKMDDP  
TVQWAKERYDECVQKIRPFLKGC GFVIKREVKFIPISGLKGANVKDEVDPVCPWVKNCW  
QSGENNTKVSTLIGLLDSLEISGRDSTAPLRVPIIDRYTDRGTIAMGKVESGVIRPGIKV  
TLMPTRAQFKVDSVWANEDPVAARPGENILVKLSGASTDDVRKGFVMCTEPACRSVDKI  
ICQIYVAEMPNDNTKIMTAGFQAMFHAHVCEEECSIAKIFETNAKGVVVKGARFASVGMT  
CICMISLAQTVPVETYGDYFPLGRFTRTEGKTIAIGKIQLPCKS

>comp15265\_c0\_seq1; 662 1 1702 LEN=2085; translated  
XKDKKRQDKMEVEPRTMRRNIHEKHEYQRYTEKTKRNTMGWNSRSLAVALFLFGIVPAA  
GNPVLGNEPEAKASLCRTRDWDYDLSQTIRTPPGIGSSKASTAATAGLTKQIHAPILGIPR  
GGSGSLGRSGGPQQIVHKQRIKRGVRKNNSYLLKALDDEILRLEQQLRRVHEEKRTLK  
RARAKAKRKPATSKTKPASNNNDKNNNNNEQKQEADEEQLLRLANLERLENERDAL  
LRARDQLESKADCEEKQRALESELTKEGAKRREKERSLRKKVGELEATIRKTTTRAGATV  
GGNSPELDEAIRAACQAAIEGFWAHATERLRQHEADLRVRHNQELEDEQNFAKAALKKQK  
EKMRALARAMAVREQELWEKRKGESLSTKGRKREEPSGPKARARARAPDEKEREKDETLR  
LRAIREEAERKSREEEERLWLELERGLKEEREQLERQKKREEEERLRCEREERERQRILO  
MHAMEEKRQEEHQEQEQAPPPEPSRGFWASLRRRRSAPSSEGRPCPKPLPSPIENYR  
HRVPWPVFLPPELVRITTPAAALDP

>comp15265\_c0\_seq2; 662 1 1702 LEN=2097; translated  
XKDKKRQDKMEVEPRTMRRNIHEKHEYQRYTEKTKRNTMGWNSRSLAVALFLFGIVPAA  
GNPVLGNEPEAKASLCRTRDWDYDLSQTIRTPPGIGSSKASTAATAGLTKQIHAPILGIPR  
GGSGSLGRSGGPQQIVHKQRIKRGVRKNNSYLLKALDDEILRLEQQLRRVHEEKRTLK  
RARAKAKRKPATSKTKPASNNNDKNNNNNEQKQEADEEQLLRLANLERLENERDAL  
LRARDQLESKADCEEKQRALESELTKEGAKRREKERSLRKKVGELEATIRKTTTRAGATV  
GGNSPELDEAIRAACQAAIEGFWAHATERLRQHEADLRVRHNQELEDEQNFAKAALKKQK



EKMRALARAMAVREQELWEKRGESLSTKGRKREEPSGPKARARARAPDEKEREKDETLR  
LRAIREEAERKSREEEERLWLELERGLKEEREQLERQKKREEEERLRCEREERERQRILQ  
MHAMEEKRQOEEHQHQEQAPPGPEPSRGFWASLRRRRSAPSSEGRPCCKPLPSPIENYR  
HRVPWQPVFLPPKELVRLTTPAAALDP

>comp15266\_c0\_seq1; 1020 263 3316 LEN=3481; translated  
MSASTTFPVADNANNNNHRNNNNVSGRPSPPPASLERKFELLERRFTQPIGILHQSNNS  
VSPHPSNEHSHSHSNLSEHSFSFRSSNQSSSQYNLQQPTMTIRSKRNSSNSLRQMTSLDI  
VNRAAAEHMRKVASSSPLNGLPGRITMAGTSATTTTTTGFATSNSSCSSHDTNSQQTVVA  
GNRTQQTQQTQPSATKPEPANGSVSSPPDRRVVEESPPVRNLVSPTRNAGNSGVPSPAPQK  
PNVARALPIGVTSASTATTAATSGLP IQPEQQSSTIGSASKRKSVPKRKISSINDAIGNS  
PIPSIGQGATTRSRSRPHKQRANYPTNTSNTNTTTASNAFVSEHSRDRSNNSNPASSYNKK  
PRLLLPPANNKRIHDFSSSSKKKQPSSNATASHQASNNNATNNIASGSGAISFPSONPPR  
AVPPNSAAAGSSALNKSSNTPRNDASASIHSDPRNTALPNRAGDVGKHPSSVSTSTSTSE  
NFSALLATANASREQWRARCAGLQQKLQDKDQQLKAVTGNKTIILHTALQQALTKTRTELA  
SLKESKAAYDQKARSVLAEALRWKFQKEAKELRASLAADGNRLGRIVSTRAGMRVIDSWE  
EGCASKDWQLRKEKWKQKRTVLLEKQATLQKRLRSRGHPNQSENNDTNSNGDPTLNNKNN  
DNFIDNAPMSQLDVQEAQESI QMHLEALLQEEKELLSEEQALNDEKGAHIRALKRVASED  
ASRFKNRGKLHLDYVLDCLLGGKGGFSEVWKG YDLELREVAVKIHLDPDPRWPTKKENY  
KHVSREYEIHRNVRHPRIVSLYDVFEIDNNSFATVLEYCKGTDLDTLLKRKKRLPERQAR  
AILLQILTMGYLSQPSSDGSRQGI IHYDLKPGNILFDFEGDAKITDFGLSKIVDAPDPA  
ESMELTSQGAGTYWYLPPECFVTGEQVRISNKVDVWSIGVIFYQMLYGQRPFGEKGSQDK  
LLADHTMLNAQEVHLPDKPSISDAGKEFVKQCLTYDQAFRPTIAQLCETPYVLQKGV

>comp15266\_c0\_seq2; 1020 263 3316 LEN=3507; translated  
MSASTTFPVADNANNNNHRNNNNVSGRPSPPPASLERKFELLERRFTQPIGILHQSNNS  
VSPHPSNEHSHSHSNLSEHSFSFRSSNQSSSQYNLQQPTMTIRSKRNSSNSLRQMTSLDI  
VNRAAAEHMRKVASSSPLNGLPGRITMAGTSATTTTTTGFATSNSSCSSHDTNSQQTVVA  
GNRTQQTQQTQPSATKPEPANGSVSSPPDRRVVEESPPVRNLVSPTRNAGNSGVPSPAPQK  
PNVARALPIGVTSASTATTAATSGLP IQPEQQSSTIGSASKRKSVPKRKISSINDAIGNS  
PIPSIGQGATTRSRSRPHKQRANYPTNTSNTNTTTASNAFVSEHSRDRSNNSNPASSYNKK  
PRLLLPPANNKRIHDFSSSSKKKQPSSNATASHQASNNNATNNIASGSGAISFPSONPPR  
AVPPNSAAAGSSALNKSSNTPRNDASASIHSDPRNTALPNRAGDVGKHPSSVSTSTSTSE  
NFSALLATANASREQWRARCAGLQQKLQDKDQQLKAVTGNKTIILHTALQQALTKTRTELA  
SLKESKAAYDQKARSVLAEALRWKFQKEAKELRASLAADGNRLGRIVSTRAGMRVIDSWE  
EGCASKDWQLRKEKWKQKRTVLLEKQATLQKRLRSRGHPNQSENNDTNSNGDPTLNNKNN  
DNFIDNAPMSQLDVQEAQESI QMHLEALLQEEKELLSEEQALNDEKGAHIRALKRVASED  
ASRFKNRGKLHLDYVLDCLLGGKGGFSEVWKG YDLELREVAVKIHLDPDPRWPTKKENY  
KHVSREYEIHRNVRHPRIVSLYDVFEIDNNSFATVLEYCKGTDLDTLLKRKKRLPERQAR  
AILLQILTMGYLSQPSSDGSRQGI IHYDLKPGNILFDFEGDAKITDFGLSKIVDAPDPA  
ESMELTSQGAGTYWYLPPECFVTGEQVRISNKVDVWSIGVIFYQMLYGQRPFGEKGSQDK  
LLADHTMLNAQEVHLPDKPSISDAGKEFVKQCLTYDQAFRPTIAQLCETPYVLQKGV

>comp15267\_c0\_seq1; 1195 1 2581 LEN=3106; translated  
XSSEKRALVASLAAAAGEWRRLEASRAEHDRALEARAENDRVWSGTLSEQLDAKTKSLVD  
NAMDQRWRDVEHSTAGIEEMRKKNAANQKRLREQKALRAERANAQQTELEGEKQKLEALK  
GELKDLGATMEALKEENAKKEREADALKEREERLREKEKSFEETHGRELERLTKI EEDL  
RAREERFSSGEERLELLRKSEKLDSSMVNVARFKKEIEISEKAKLDEIEKQRRVLIDQEK  
QLREIARKRQIELEEQEERLKEGAQKREIELLQQEEEIRKKAQQRKTELAKKEEVLRIQA  
EQRKTELAKREEELEEIARKRDEELKEIENKREIELGQLELEFKEVAKKQDLLLLKRRKE  
ELKKKTLVVSTDNSDAEESQSESPDPNLPDGAEPKASSYRSLFELHEEEEGPEDEMKFG  
RTPASPRAANLLSPIAEDTPVAAPAVALESGGSRQEQRPVVFQSGDEVLM SVTKRLHSG  
AEAVLESKMLMGEQVMPDSLFTSETNVENETPVVDQKQRPQAQPPSSSFRPASLMDLDE  
DDDIESTTSRTVADKEPAAPGAQE QGKDFGEIKERPRPADAAAKITDGSEARAFFPDSMD  
HQNRGTNRMEERDDEDERPQAMADNDMERSWLQPEEARDPIDNTASRKHGRPNHKKHVT  
NSIFDSDSEDDSLSYHIQRDIAKKNRREEELEPDGAYPTGEKATGDRVGRKASPLKEISE  
ALRVYKNADKKSPLGRVDSRACGAAEKPSYTNEIPVSPTSETSSASSNASFTGEIPMSPTA  
TTSNTTDFFKGIRSIHQPSDMSSVNYGDRYGVFVNKAEEREIIPAKDNGSSRRRRSKRDI  
RKNKGRSLVSEDAGVEVIF

>comp15268\_c0\_seq1; 1794 300 5642 LEN=5795; translated  
MSAFAPESALQARPRRRSNTYDSNMDGSNSSMIDESSIVVERILSAIELRGDNGLRPHGG  
PLTNVEIVRLSTLCAKQTEHINRNKGKKIDNHTNDTINDGAILNENLGFSDVDADMMAQL  
VEHLEKHVVLASQINLVQSSYDAIILNLKADGIREVGCRTIDEWIRKGTGSELVGTLSNG

LEAAMVLLSIMTSPGIDRRVVKEDAVVASLVLMKQNLMKNILPAVNNCGHILASMSKSQL  
HASLTPTKRRRRSSASASSSIDASIIKDMGKCYKSMIFKTVSNTVLLMERLDALIQVA  
LDDQHLMTLSAGALVSLEIDPSTDAAIRFTHSLHVATVGI VTSIFRSYRKL RPMI IEDLF  
ALMLKMPSGKKGMRITYTIQYSSVLYPQAALELSKSLLMGATGGGGDTPVHSDKASNIQPI  
CVMIMSLVQSTVIQPSFVDSRQINTGNHACL RDCQAI SDFVSHLLKRC SKKGEDGGASE  
FRPILSNLIEDLLLVLVPEYPAEMILLSIANFMYHDI IQMTSTKVGKESTTTTYFNTI  
FDALGKISA AVARINKWNKEHPVRELELPRIRENGTMKHLGCYCNETEFTGDKFMVKCDRC  
NTWYHGDCIGISRETVP EKWLCDGCQFGRIVEFERDRNSNLGELGCPPNLIDR PYCLRRL  
VIDYLSVLSRNSDLKGVTDAYGFLARWLKEVETTNAKRKEGDIDDTLPLIAGLIELWDP  
RNSMGTFQGN DAGSLSGMLNCSDEGRSRMVVDFICKLSSLLKSFKSQVGRIVKLL ESPS  
NSVRKLSLKAIEK IADADPTLMTHPFVRNAVARRFSDESI SVRDAVSVLVGSYV LNTPEV  
ANAFHPALIHGLSDSGLSVRKRTHVLRDILCTNPTYNGRAEACSVMLRLAADPKEDDTV  
RDLIYDLFSKIWLEQGDKTFDSRSNSSYSIQNLDKLVSPVSRVSNVEDITL KSTPSQPPS  
GIKTPSGASVTPYPNGWTSVTKSTRSTVKKCRSRYLQLRCQAAAEQMVEVVKAANTERD  
LTLFLRELLSATPDSNKSRSKSSARRKRCGLAQNHMSLLVDALFEMILSVEEDYSKSAGEK  
GGELVSIFRTRLRVFTDASPTDVLRHLDTLLPYLKIDNGLKSADANIACSLCGVLSRVVP  
ELDHGDCERLGDSS LADDLVAITKKWGKAASSAVQALCLFSGKERKGI FEKRLVSLAKL  
FHSYLVK IERSGDFATKRKTKNHVSRALS SVLGSICRYCETSSFDL TESEMDEHDENEID  
VQEVTLRLRIAPLCQELFMKFYAKDDVTIKVCAIQALTGIFMAHPREMLKLECSGLL TEVM  
ASTSPEAVQRESLRCWRDILLAEESRVESGEAKAKMDSKKNITVSKKISGDQDADATIFG  
GILTNHSSRLFEMTKREKDIRFAAVDLIGHLLRQGLNPN EATPHLLALQGDVEEIRR  
SALKFLMLEGEKRPDMLRQRLCAGVKQAYLFQIAVNPDLKEVSALIDVRKDG NLHKECVF  
GSVYKNCIASIKKQRRGLFRNLLSSFDPNLNSTEGQQTNSSISRLM LLSYTSQVLAYLP  
YSVASDALYIIYYISSNIALQGADLLDKFASFLRLYSLASDDEFDEVNSEADQLEEA VNN  
HSPYPANHIAAFLEGKLSFDVSKFSDL CSEAGCLILLRLKNFLRVTYNLSESR CIGFNP  
DKKEIGEKPILKSSTASIFDSKLP IFRQYKSTAKEKMN DNDILNACILQYAEFRRLMRSE  
VNNASLNDDSESDVENEGLSE DGKVSLKRPRSDSEGEQTV E

>comp15269\_c0\_seq1; 96 1 165 LEN=885; translated

GTRTKGSDIIMDTASKPSVGKENTLADFHNNIKSNSKDHRNQG VSTPIEERDV

>comp15269\_c0\_seq2; 289 26 1093 LEN=1813; translated

MATDMKND AQTWVQFIWCMIAISLMVTFAAMIFLFTFRRKPIVAMGQPYMLLNMCASML  
LVIAGSVFVWMPAFVGSHEVDVGLCSTA EWAEFVGYTAVMTILHLKLYR TYKV VQFRRGQ  
IILSRHVLVPFYLVLLTMAFSIIKQVFYPTTYVGDP TGVEGLTGYCCNSAPGSI AFWWV  
KQVIITLLQFGLVVF AWKLRNVEDIDGSKRILRFCVFFAVSSTANLFIAGIVRLLSSEI  
SLKTRSTIRNLTFVIFD TSVLALVGFVLPRIYYVWYERVYGS LPENTRIYGTGKTHVN  
AGTRTKGSTNTIMDTASKPSVGKENTLADFHNNIKSNSKDHRNQG VSTPIEERDV

>comp15269\_c0\_seq3; 266 74 1141 LEN=1861; translated

MATDIMHYAQTWVLF I WCMIAISLMVTFAAMIFLFTFRRKPIVAMGQPYMLLNMCASML  
LVIAGSVFVWMPAFV LGSHEVHVGLCSTA EWAEFVGYTAVMTILHLKLYR TYKV VQFRRGQ  
IILSRHVLVPFYLVLLTMAFSIIKQVFYPTTYVGDP TGVEGLTGYCCNSAPGSI AFWWV  
KQVIITLLQFGLVVF AWKLRNVEDIDGSKRILRFCVFFAVSSTANLFIAGIVRLLSSEI  
SLKTRSTIRNLTFVIFD TSVLALVGFVLPRIYYVWYERVYGS LPENTRIYGTGKTHVN  
AGTRTKGSTNTIMDTASKPSVGKENTLADFHNNIKSNSKDHRNQG VSTPIEERDV

>comp15270\_c0\_seq1; 922 202 3866 LEN=3866; translated

MEE SPLDKPAVEP SMSGSTASASESVLSSSPSSSGNYQR RFDGSKRRTELLEKLARTNS  
PTKKT TTAQHAF AEMSNDNNGTESDN PRAETGCFQNKPLSPPK LKTGQAF AHEAKETTTA  
DASFSTPDRSGSIQRKPLHLQAEENEEEQPVRYRIVYRGV VALLSDEPNNGGETNHNNHC  
PNRKTGAYLGYGEIIASGSEKLVEDTTARPQRRLNTSPRLGSAVDSPILTRI WDSKEHED  
KQQHQQQQLQYHSPPRSLVSGACSTVSSFTNHTANSTASNSIPTRKKIRVDRVLTGGY  
AFDANEQENSSTESIDSHSSLKVVASDMTPKRGNTQPSTGTIFPTLNL SLLPISDIGP  
TSPSRDKCEGND DKHRTSKSNHYIFSDQSSVPIALAIPLD TVPRCESGRFLYRVISSTP  
LTILTGPSLDAPKTKAILIPGTIHEVCLRVIASQEGHQSQGGDSTSLTFLRLTRRRGWV  
DGKRIPRKRGTGDGNDANSWVSFMKEISNEEADECGVSVASRTT SRSATSMLATPISAA  
SRRHRPPRRKGGGRREGNDSTSLPHVLGPSLQNGNDTSGITDKSTNTSTNNSQANLDR  
SIVSPSSNISLLSDDTCSIDPVNRSHGALSPDRSIARSTGSVSTNPSFFLMRVNAPRGL  
KILDAPHFQVNNLIHGIHTTSSGKSHDPFSTSMAS TKDSYGKSASSSNQSI FQTMAGHHT  
TTMTSKTSNPAVFD SITKARRLP RGSVFEATKRLEASNAFNQAGLIK LSDNSGWAIVPR  
QSELNEQYRSYGALVY TREGEGRAFEEVGN SMGNRSQDTIFLRVLSRGVTVSLPPLP  
NSGSDIDTSP TSSATGSSIVSAAGHPALNVGVSSDS DVASSVGSSFLDSMFRTPRKKERQ  
PESINENKTEHQHLHHRPQIGERQVISTVIPC GTCVEVDRWVDP TDMEQYVFKNEYARIR

GGQGWIPRFVNGKPVVETISSPEFRFGSIWFRVCDQQGIKVR LGPSKRASSIKSDDGVYF  
RFECGEFLRASEVVTFKHNAEHECFKALYRNRHVRLHSGELRPLSSLTAQAEWVQVFG  
TGRFLEECKTEPRIERHRQGWRYNVVLDARVAVRKGPSFEAETENSVLLGGESVLVNERV  
TGPNDPITWLR LKDGHWVHNVGQNGESLMIAHSLRHRKPTVGRPVKPGRTEQEDIA YNT  
IIARLFHNDIPGESPPRNAKRX

>comp15271\_c0\_seq1; 1094 382 4074 LEN=4380; translated  
MDSRYNIIADDEKPSTSFMLNNDENHLLSRIAPSGSSIESLTSPLEVEEDEGTNEDSVSS  
SSSVSSQSLDLNPNSTIDELDLPGIALLKEIFPEETTDALRELHYQNI IANQTSSSSISQ  
SASSIKVEGTAKSYDEGYQETVRGDREHHQMRQQQKPKFRHRNANITELPDEDFLRLPKS  
VAVLRERKSVGSDNGHDVRYTYELIHDLES RAMQEYKLAARTAMPSSSSFSQTKNPGRHH  
IEYNTYVVD RDQSLGLG MTLQEIVEEGDHLREQQQQYGD PDSHAMPGHIVIRFGLMVVGF  
IPDSKKIQKGEVTNNFPSSPAETAGILCGDVLIGINGTAFVMQVPLSSSFSVDRQSDEYK  
IQKQKVIQLIQNSPTPVV LHIRRHRQRLSGPTPVTTDETESIGKSF SERSVTSLLDTTTF  
DFDEGKFDPLHAQRGSFGKSLPIQLVKEDYPPQRQEPNQVPPTSYSRSLHPSSSSAFHKP  
SPSRTPRRISSNLVRHPLSIELARLKLISCGEDEWRITRRLQQFTDRTRQWESSNSLR IA  
VSGRAPGSKRGS LVP LFDPN DLPPDMAALMVFTQENFVKGEEIQHQDTEARALAADSDKF  
KEHQGVQNYEQSHPQTYIHAEACTRSTPPLPLDSPLIPFEYLQAF CGYEKAQEIRSVPPS  
ATPSTLDRKFAPRRLFWPQGSFEEHSTSQHPRNDTTHLEDV VWIPLHGIRKSL SARILNS  
FVEVSEPNND SNNVSRIAYTIWVYDVETGREWYAPIRYWEDFSDLRDAALELLPSSSDVY  
KEMLNMKSLKEPTIPGDRKAGWGASVFGSPSLSSSMSPSQKRRRQRRNEEFDDSRQQTCQ  
YLEEFLRELIGIVYTCNPLHPNTAEIALYVQSFLGVDAGLEDGNVPI SYERTFNSTSERI  
EDET RQLLKR SIQRYSWRIFLLHTMNAIVRDFVYAARARGPKLHEIESIENGN TSLKTR  
AMNELLQIRKFLDQLVDLIL DSCNDDLRSIAKRQEYSAIHKYFVDES YWERLVRESVREQ  
VEIEVYVPLRSVVSRLLVNGWRNDDMEVLFKIKELRKR PQGMFRINKISPSHWQSVANIL  
KQGVGMSTLPCVKLR AIVDAAKEVSQLYGREHSEQNLLGADEF LPIFIFCVVRAEMERPC  
ALS KSF L PFLSRWIAFLFCIFPDL LVL MAGSSGILLQNLCDRINRIGEIGYFLASFEAAI  
AHIQEIDLTEDREDMLSFLTVP LTEVSLND

>comp15271\_c0\_seq2; 964 382 3408 LEN=4522; translated  
MDSRYNIIADDEKPSTSFMLNNDENHLLSRIAPSGSSIESLTSPLEVEEDEGTNEDSVSS  
SSSVSSQSLDLNPNSTIDELDLPGIALLKEIFPEETTDALRELHYQNI IANQTSSSSISQ  
SASSIKVEGTAKSYDEGYQETVRGDREHHQMRQQQKPKFRHRNANITELPDEDFLRLPKS  
VAVLRERKSVGSDNGHDVRYTYELIHDLES RAMQEYKLAARTAMPSSSSFSQTKNPGRHH  
IEYNTYVVD RDQSLGLG MTLQEIVEEGDHLREQQQQYGD PDSHAMPGHIVIRFGLMVVGF  
IPDSKKIQKGEVTNNFPSSPAETAGILCGDVLIGINGTAFVMQVPLSSSFSVDRQSDEYK  
IQKQKVIQLIQNSPTPVV LHIRRHRQRLSGPTPVTTDETESIGKSF SERSVTSLLDTTTF  
DFDEGKFDPLHAQRGSFGKSLPIQLVKEDYPPQRQEPNQVPPTSYSRSLHPSSSSAFHKP  
SPSRTPRRISSNLVRHPLSIELARLKLISCGEDEWRITRRLQQFTDRTRQWESSNSLR IA  
VSGRAPGSKRGS LVP LFDPN DLPPDMAALMVFTQENFVKGEEIQHQDTEARALAADSDKF  
KEHQGVQNYEQSHPQTYIHAEACTRSTPPLPLDSPLIPFEYLQAF CGYEKAQEIRSVPPS  
ATPSTLDRKFAPRRLFWPQGSFEEHSTSQHPRNDTTHLEDV VWIPLHGIRKSL SARILNS  
FVEVSEPNND SNNVSRIAYTIWVYDVETGREWYAPIRYWEDFSDLRDAALELLPSSSDVY  
KEMLNMKSLKEPTIPGDRKAGWGASVFGSPSLSSSMSPSQKRRRQRRNEEFDDSRQQTCQ  
YLEEFLRELIGIVYTCNPLHPNTAEIALYVQSFLGVDAGLEDGNVPI SYERTFNSTSERI  
EDET RQLLKR SIQRYSWRIFLLHTMNAIVRDFVYAARARGPKLHEIESIENGN TSLKTR  
AMNELLQIRKFLDQLVDLIL DSCNDDLRSIAKRQEYSAIHKYFVDES YW

>comp15271\_c0\_seq3; 964 382 3408 LEN=4612; translated  
MDSRYNIIADDEKPSTSFMLNNDENHLLSRIAPSGSSIESLTSPLEVEEDEGTNEDSVSS  
SSSVSSQSLDLNPNSTIDELDLPGIALLKEIFPEETTDALRELHYQNI IANQTSSSSISQ  
SASSIKVEGTAKSYDEGYQETVRGDREHHQMRQQQKPKFRHRNANITELPDEDFLRLPKS  
VAVLRERKSVGSDNGHDVRYTYELIHDLES RAMQEYKLAARTAMPSSSSFSQTKNPGRHH  
IEYNTYVVD RDQSLGLG MTLQEIVEEGDHLREQQQQYGD PDSHAMPGHIVIRFGLMVVGF  
IPDSKKIQKGEVTNNFPSSPAETAGILCGDVLIGINGTAFVMQVPLSSSFSVDRQSDEYK  
IQKQKVIQLIQNSPTPVV LHIRRHRQRLSGPTPVTTDETESIGKSF SERSVTSLLDTTTF  
DFDEGKFDPLHAQRGSFGKSLPIQLVKEDYPPQRQEPNQVPPTSYSRSLHPSSSSAFHKP  
SPSRTPRRISSNLVRHPLSIELARLKLISCGEDEWRITRRLQQFTDRTRQWESSNSLR IA  
VSGRAPGSKRGS LVP LFDPN DLPPDMAALMVFTQENFVKGEEIQHQDTEARALAADSDKF  
KEHQGVQNYEQSHPQTYIHAEACTRSTPPLPLDSPLIPFEYLQAF CGYEKAQEIRSVPPS  
ATPSTLDRKFAPRRLFWPQGSFEEHSTSQHPRNDTTHLEDV VWIPLHGIRKSL SARILNS  
FVEVSEPNND SNNVSRIAYTIWVYDVETGREWYAPIRYWEDFSDLRDAALELLPSSSDVY  
KEMLNMKSLKEPTIPGDRKAGWGASVFGSPSLSSSMSPSQKRRRQRRNEEFDDSRQQTCQ

YLEEFLELIGIVYTCNPLHPNTAEIALYVQSFLGVDAGLEDGNVPI SYERTFNSTSERI  
EDETRQLLKRISQRYSWRIFLLHTMNAIVRDFVYAARARGPKLHEIESIENGNGTSLKTR  
AMNELLQIRKFLDQLVDLILDSNDDLRSIAKRQEYSAIHKYFVDESYW

>comp15271\_c0\_seq4; 1055 382 3984 LEN=4290; translated  
MDSRYNIIADDEKPSTSFMLNNDENHLLSRIAPSGSSIESLTSPLEVEEDEGTNEDSVSS  
SSSVSSQSLDLNPNSTIDELDLPGIALLKEIFPEETTDALRELHYQNI IANQTSSSSISQ  
SASSIKVEGTAKSYDEGYQETVRGDREHHQMRQQQKPKFRHRNANITELPDEDLRLPKS  
VAVLRERKSVGSDNGHDVVRTYELIHDLESRAMQEYKLAARTAMPSSSSFSQTKNPGRHH  
IEYNTYVVDQRDQSLGLGMTLQEI VEEGDHLREQQQYGD PDSHAMPGHIVIRFGLMVVGF  
IPDSKKIQKGEVTNNFPSSPAETAGILCGDVLIGINGTAFVMQVPLSSSFVDRQSDEYK  
IQKQKVIQLIQNSPTPVVLIHRRHRQRLSGPTPVTTDETESI GKSFSERSVTSLLDTTTT  
DFDEGKFDPLHAQRGSFGKSLPIQLVKEDYPPQRQEPNQVPPTSYSRSLHPSSSSAFHKP  
SPSRTPRRISSNLVRHPLSIELARLKLISCGEDEWRITRRLQQFTDRTRQWESSNSLRIA  
VSGRAPGSKRGSVPLFDPNLPPDMAALMVFTQENFVKGEEIQHQDTEARALAADSDFK  
KEHQGVQNYEQSHPQTYIHAEACTRSTPPLPLDSPLIPFEYLQAFCGYEKAQEIRSVPPS  
ATPSTLDRKFAPRRLFWPQGSFEEHSTSQHPRNDTTHLEDVWVWIPHGIRKSLSARILNS  
FVEVSEPNNDSSNVSRIAYTIWVYDVETGREWYAPIRYWEDFSDLRDAALELLPSSSDVY  
KEMLNKMSLKEPTIPGDRKAGWGASVFGSPSLSSSMSQKRRRQRNEEFDDSRQQTCQ  
YLEEFLELIGIVYTCNPLHPNTAEIALYVQSFLGVDAGLEDGNVPI SYERTFNSTSERI  
EDETRQLLKRISQRYSWRIFLLHTMNAIVRDFVYAARARGPKLHEIESIENGNGTSLKTR  
AMNELLQIRKFLDQLVDLILDSNDDLRSIAKRQEYSAIHKYFVDESYWERLVRESVREQ  
VEIEVYVPLRSVVSRLLVNGWRNDDMEVLFKIKELRKRQGMFRINKISPSHWQSVANIL  
KQGVGMSTLPCVKLRAIVDAAKEVSQLYGREHSEQNLLGADEFLLPIFIFCVVRAEMERPC  
ALSILLQNLCDRINRIGEIGYFLASFEEAIAHIQEI DLTEDREDMLSFLTVPPLTEVSLND

>comp15271\_c0\_seq5; 1086 382 4178 LEN=4484; translated  
MDSRYNIIADDEKPSTSFMLNNDENHLLSRIAPSGSSIESLTSPLEVEEDEGTNEDSVSS  
SSSVSSQSLDLNPNSTIDELDLPGIALLKEIFPEETTDALRELHYQNI IANQTSSSSISQ  
SASSIKVEGTAKSYDEGYQETVRGDREHHQMRQQQKPKFRHRNANITELPDEDLRLPKS  
VAVLRERKSVGSDNGHDVVRTYELIHDLESRAMQEYKLAARTAMPSSSSFSQTKNPGRHH  
IEYNTYVVDQRDQSLGLGMTLQEI VEEGDHLREQQQYGD PDSHAMPGHIVIRFGLMVVGF  
IPDSKKIQKGEVTNNFPSSPAETAGILCGDVLIGINGTAFVMQVPLSSSFVDRQSDEYK  
IQKQKVIQLIQNSPTPVVLIHRRHRQRLSGPTPVTTDETESI GKSFSERSVTSLLDTTTT  
DFDEGKFDPLHAQRGSFGKSLPIQLVKEDYPPQRQEPNQVPPTSYSRSLHPSSSSAFHKP  
SPSRTPRRISSNLVRHPLSIELARLKLISCGEDEWRITRRLQQFTDRTRQWESSNSLRIA  
VSGRAPGSKRGSVPLFDPNLPPDMAALMVFTQENFVKGEEIQHQDTEARALAADSDFK  
KEHQGVQNYEQSHPQTYIHAEACTRSTPPLPLDSPLIPFEYLQAFCGYEKAQEIRSVPPS  
ATPSTLDRKFAPRRLFWPQGSFEEHSTSQHPRNDTTHLEDVWVWIPHGIRKSLSARILNS  
FVEVSEPNNDSSNVSRIAYTIWVYDVETGREWYAPIRYWEDFSDLRDAALELLPSSSDVY  
KEMLNKMSLKEPTIPGDRKAGWGASVFGSPSLSSSMSQKRRRQRNEEFDDSRQQTCQ  
YLEEFLELIGIVYTCNPLHPNTAEIALYVQSFLGVDAGLEDGNVPI SYERTFNSTSERI  
EDETRQLLKRISQRYSWRIFLLHTMNAIVRDFVYAARARGPKLHEIESIENGNGTSLKTR  
AMNELLQIRKFLDQLVDLILDSNDDLRSIAKRQEYSAIHKYFVDESYWERLVRESVREQ  
VEIEVYVPLRSVVSRLLVNGWRNDDMEVLFKIKVNGMGRISTALLXNYFLEKVPNLTRIS  
SACFFATKELRKRQGMFRINKISPSHWQSVANILKQGVGMSTLPCVKLRAIVDAAKEVS  
QLYGREHSEQNLLGADEFLLPIFIFCVVRAEMERPCALSFSKSLPFLSRWIAFLFCIFPDLL  
VLMAGSSGILLQNLCDRINRIGEIGYFLASFEEAIAHIQEI DLTEDREDMLSFLTVPPLTE  
VSLND

>comp15271\_c0\_seq6; 1047 382 4088 LEN=4394; translated  
MDSRYNIIADDEKPSTSFMLNNDENHLLSRIAPSGSSIESLTSPLEVEEDEGTNEDSVSS  
SSSVSSQSLDLNPNSTIDELDLPGIALLKEIFPEETTDALRELHYQNI IANQTSSSSISQ  
SASSIKVEGTAKSYDEGYQETVRGDREHHQMRQQQKPKFRHRNANITELPDEDLRLPKS  
VAVLRERKSVGSDNGHDVVRTYELIHDLESRAMQEYKLAARTAMPSSSSFSQTKNPGRHH  
IEYNTYVVDQRDQSLGLGMTLQEI VEEGDHLREQQQYGD PDSHAMPGHIVIRFGLMVVGF  
IPDSKKIQKGEVTNNFPSSPAETAGILCGDVLIGINGTAFVMQVPLSSSFVDRQSDEYK  
IQKQKVIQLIQNSPTPVVLIHRRHRQRLSGPTPVTTDETESI GKSFSERSVTSLLDTTTT  
DFDEGKFDPLHAQRGSFGKSLPIQLVKEDYPPQRQEPNQVPPTSYSRSLHPSSSSAFHKP  
SPSRTPRRISSNLVRHPLSIELARLKLISCGEDEWRITRRLQQFTDRTRQWESSNSLRIA  
VSGRAPGSKRGSVPLFDPNLPPDMAALMVFTQENFVKGEEIQHQDTEARALAADSDFK  
KEHQGVQNYEQSHPQTYIHAEACTRSTPPLPLDSPLIPFEYLQAFCGYEKAQEIRSVPPS  
ATPSTLDRKFAPRRLFWPQGSFEEHSTSQHPRNDTTHLEDVWVWIPHGIRKSLSARILNS

FVEVSEPNNSNNVSRIAYTIWVYDVETGREWYAPIRYWEDFSDLRDAALELLPSSSDVY  
KEMLNMKSLKEPTIPGDRKAGWGASVFGSPSLSSSMSPSQKRRRQRRNEEFDDSRQQTQC  
YLEEFLRELIGIVYTCNPLHPNTAEIALYVQSFLGVDAGLEDGNVPI SYERTFNSTSERI  
EDETQQLLKRISQRYSWRIFLLHTMNAIVRDFVYAARARGPKLHEIESIENGNGTSLKTR  
AMNELLQIRKFLDQLVDLILDSNDDLRSIAKRQEYSAIHKYFVDESYWERLVRESVREQ  
VEIEVYVPLRSVVSRLLVNGWRNDDMEVLFKIKVNGMGRISTALLXNYFLEKVPNLTRIS  
SACFFATKELRKRPOGMFRINKISPSHWQSVANILKQGVGMSTLPCVKLRRAIVDAAKEVS  
QLYGREHSEQNLLGADEFPLPIFIFCVVRAEMERPCALSILLQNLCDRINRIGEIGYFLAS  
FEAAIAHIQEIDLTEDREDMLSFLTVP LTEVSLND

>comp15272\_c0\_seq1; 563 239 3143 LEN=3173; translated  
MGRHSKQTVDFSEVDRLREELGISDSKNILSSMRKVSSAVGLPPEMMENWAKQAKPIM  
QNMIHTDATPKLSKQVLATAAVVMGTKLSYKQOATHLMNVFVQPLQDVSSFTAPVYPKTK  
AEKNLIREALKANFIFSTSSERELRTFIDAFEESDVTAGDKIIVEGNVGDYFYVLKKGKV  
RFEVNRKAVGYADEGKTFGELALLYSCPRAASVIAETDATIYRVDQKTFRYIMQSQTMTK  
EQAKKELLQGIDFLKILDPTDIDKLVIMTPRVFEEGDCITKLGDEGDTLYVIQEGKVRV  
TEVNVHSIKKVNQELGPGDHFGETSLLHKEEDAKCSTFIAITEVLALCIDTDTFQKVVGD  
IVELATQSKEKAILVRLRICGNCALHSGLAMLLISFCQICVASCVLRFMCFLGGYQADVP  
ILKRSGLSKPIFAALAASFVEIRYPPKSTVMVEGEKTTANLYVVRAGKLVLSQGEERLI  
ESGGIFGEDMLKIDDEGLKTTAEYDSKHTVTTLDGSVVVGALSIESFRKVLDTTALGTKE  
TRSKTDDNPILLEDLVRHTIIGAGTFGQVWLVSHSGEDKERRPYALKVQSKFELIRTHQA  
AVVVQEKKIMEALNHPFLTHLAATFQDKKFIYMLMNFVQGGELYLLHSNTRDGMENHA  
VFYAAGILDGLSHMHRHHILYRDLKPENVMIDEDGYPIVIDFGFGTSSMILGCPHGTTR  
LRSNSIHLPFLLTQPLFLLPFLFAAKYVVRKTYTLCGTPLYLAPEVILNHGHDRGADHWS  
FAVLAYEMIEGTTFFYRPGLDQIQLFRRICRVRYSFPGDSGASPEARLDVGLLLVLDPSQ  
RLGALAGGINEIYAHWPFGGIDFGKLRQKEVTAPWVPALADPLDTANFENWDHLEDQTTK  
GXKRAGRLVGATEDIRILLSAGGSSKQRQEPDANGTAKKNMLLCCCCRYLVSSSTQKQSY  
QQKYVVVI

>comp15272\_c0\_seq2; 576 239 2898 LEN=2928; translated  
MGRHSKQTVDFSEVDRLREELGISDSKNILSSMRKVSSAVGLPPEMMENWAKQAKPIM  
QNMIHTDATPKLSKQVLATAAVVMGTKLSYKQOATHLMNVFVQPLQDVSSFTAPVYPKTK  
AEKNLIREALKANFIFSTSSERELRTFIDAFEESDVTAGDKIIVEGNVGDYFYVLKKGKV  
RFEVNRKAVGYADEGKTFGELALLYSCPRAASVIAETDATIYRVDQKTFRYIMQSQTMTK  
EQAKKELLQGIDFLKILDPTDIDKLVIMTPRVFEEGDCITKLGDEGDTLYVIQEGKVRV  
TEVNVHSIKKVNQELGPGDHFGETSLLHKEEDAKCSTFIAITEVLALCIDTDTFQKVVGD  
IVELATQSKEKAILADVPILKRSGLSKPIFAALAASFVEIRYPPKSTVMVEGEKTTANLY  
VVRAGKLVLSQGEERLIESGGIFGEDMLKIDDEGLKTTAEYDSKHTVTTLDGSVVVGAL  
SIESFRKVLDTTALGTKETRSKTDDNPILLEDLVRHTIIGAGTFGQVWLVSHSGEDKERR  
PYALKVQSKFELIRTHQA AVVVQEKKIMEALNHPFLTHLAATFQDKKFIYMLMNFVQGG  
LYSLLHSNTRDGMENHAVFYAAGILDGLSHMHRHHILYRDLKPENVMIDEDGYPIVIDF  
GFAKYVVRKTYTLCGTPLYLAPEVILNHGHDRGADHWSFAVLAYEMIEGTTFFYRPGLDQ  
IQLFRRICRVRYSFPGDSGASPEARLDVGLLLVLDPSQRLGALAGGINEIYAHWPFGGID  
FGKLRQKEVTAPWVPALADPLDTANFENWDHLEDQTTK GXKRAGRLVGATEDIRILLSAG  
GSSKQRQEPDANGTAKKNMLLCCCCRYLVSSSTQKQSYQQKYVVVI

>comp15272\_c0\_seq3; 565 239 3017 LEN=3047; translated  
MGRHSKQTVDFSEVDRLREELGISDSKNILSSMRKVSSAVGLPPEMMENWAKQAKPIM  
QNMIHTDATPKLSKQVLATAAVVMGTKLSYKQOATHLMNVFVQPLQDVSSFTAPVYPKTK  
AEKNLIREALKANFIFSTSSERELRTFIDAFEESDVTAGDKIIVEGNVGDYFYVLKKGKV  
RFEVNRKAVGYADEGKTFGELALLYSCPRAASVIAETDATIYRVDQKTFRYIMQSQTMTK  
EQAKKELLQGIDFLKILDPTDIDKLVIMTPRVFEEGDCITKLGDEGDTLYVIQEGKVRV  
TEVNVHSIKKVNQELGPGDHFGETSLLHKEEDAKCSTFIAITEVLALCIDTDTFQKVVGD  
IVELATQSKEKAILADVPILKRSGLSKPIFAALAASFVEIRYPPKSTVMVEGEKTTANLY  
VVRAGKLVLSQGEERLIESGGIFGEDMLKIDDEGLKTTAEYDSKHTVTTLDGSVVVGAL  
SIESFRKVLDTTALGTKETRSKTDDNPILLEDLVRHTIIGAGTFGQVWLVSHSGEDKERR  
PYALKVQSKFELIRTHQA AVVVQEKKIMEALNHPFLTHLAATFQDKKFIYMLMNFVQGG  
LYSLLHSNTRDGMENHAVFYAAGILDGLSHMHRHHILYRDLKPENVMIDEDGYPIVIDF  
GFGTSSMILGCPHGTTRRLRSNSIHLPFLLTQPLFLLPFLFAAKYVVRKTYTLCGTPLYL  
APEVILNHGHDRGADHWSFAVLAYEMIEGTTFFYRPGLDQIQLFRRICRVRYSFPGDSGA  
SPEARLDVGLLLVLDPSQRLGALAGGINEIYAHWPFGGIDFGKLRQKEVTAPWVPALADP  
LDTANFENWDHLEDQTTK GXKRAGRLVGATEDIRILLSAGGSSKQRQEPDANGTAKKNML  
LCCCCRYLVSSSTQKQSYQQKYVVVI

>comp15272\_c0\_seq4; 574 239 3024 LEN=3054; translated  
MGCRHSHKKQTVDFSEVDRLREELGISDSKNILSSMRKVSSAVGLPPEMMENWAKQAKPIM  
QNMIHTDATPKLSKQVLATAAVVMGTKLSYKQOATHLMNVFVQPLQDVSSFTAPVYPKTK  
AEKNLIREALKANFIFSTSSERELRTFIDAFEESDVTAGDKIIVEGNVGDYFYVLKKGKV  
RFEVNRKAVGYADEGKTFGELALLYS CPRAASVIAETDATIYRVDQKTFRYIMQSQTMTK  
EQAKKELLQIDFLKILDPTDIDKLVDIMTPRVFEEGDCITKLGDEGDTLYVIQEGKVRV  
TEVNVHSIKKVNQELGPGDHFGETSLLHKEEDAKCSTFIAITEVLALCIDTDTFQKVVGD  
IVELATQSKEKAILVRLRICGNALHSGLAMLLISFCQICVASCVLRFMCFLLGGYQADVP  
ILKRSGLSKPIFAALAASFVEIRYPPKSTVMVEGEKTTANLYVVRAGKLVLSQGEERLI  
ESGGIFGEDMLKIDDEGLKTTAEYDSKHTVTTLDGSVVVGALSIESFRKVLDTTALGTKE  
TRSKTDDNPILLEDVLRHTIIGAGTFGQVWLVSHSGEDKERRPYALKVQSKFELIRTHQA  
AVVVQEKKIMEALNHPFLTHLAATFQDKKFYIMLMNFVQGGELYSLLSNTRDGMENHA  
VFYAAGILDGLSHMHRHHILYRDLKPENVMIDEDGYPIVIDFGFAKYVKRKYTTLCTPL  
YLAPEVILNHGHDRGADHWSFAVLAYEMIEGTTPFYRPLDQIQLFRRICRVRYSPFGDS  
GASPEARDLVGLLLVLDPSQRLGALAGGINEIYAHPWFGGIDFGKLRQKEVTAPWVPALA  
DPLDTANFENWDHLEDQTTKXKXKAGRLVGATEDIRILL SAGGSSKQRQEPDANGTAKKN  
LMLCCCCRYLVSSTQKQSYQQKYVVVI

>comp15273\_c0\_seq1; 972 316 3930 LEN=4270; translated  
MSVKPTSQGDETMSVAGQPSYQIAGLDL SLLWVDLVRQNKVSASMAMPRTNSGEDGSEG  
QTTNIEVEYGIRMVETSKSGSDQSTEHAGTAFE EYVMQKGLGGSEPVSPDPFISSINATL  
AKNRGPATRFERVGNFVSQLQLVRTL RPPPSEGFLDATTSTPPPYDAAIDSFVTGPLRLE  
LRPLVGRLETTGGNDGPPTTTPWDV FHNISPADRRGHFLVLP SLMDKERNWRGQKFLADDC  
HDMVRLAGAI EPAGSMFIGYNSVGAGASQNH IHC HSWPYPNFVTDSGEAFQYAVAGVSKI  
YDFYDIFDGVVEVS YLNYPVFVCVQMS SCKEHLDDL GKAVAACVEAIG EAPHNIGFLNRIS  
VIEGEDDEEEEDDDTTKMGSSPVVA AVFLVACAAAALV LVLGPVSPSVGATHKSKATSTP  
TLRKCSSGKSND CDRAPDYWPRFSGTRRVLLDGIWNASLLRSHPEGFDSMDPDL DASTF  
DTPERVAVPSTIEVVADPDHGYLPGYLGYRGVSVFRTRFSTDESTNGGGGRLLLFQACSFY  
CRVWLVNGIEIGDHRAGGYVAWLDVPREVLDAGAVVQRGITAAAGSSANPTVDSRATGKG  
RTMLVSHDLVVLVDNRFNGT TAPLHTGGDFWHYGGILRSVEWHDRPAKSLLSRHSF IKDN  
RKPFVAASHGNESSAWPWRLYVYPQKDLKTVRLK LQVAGASGNEPGNVAIFFDGDDETN  
ALENNHHGFAGDAGEDDLWESLESHP SRTLEAVAKSPWLETDQLL DLGLVSVPNPRVWST  
TDPQLHTVSASLNGAVVTERFGLRYWDVDPDQSRIRLNGKVLKLVGWNHHTQWPYTGATP  
TTEQLNRDLSLLKEHG HANFVRGAHY PQDPRWLDRLDEQGMVAGVVS KALCGVKGKQKQL  
NERLAICVSCIMDSIDTXLLLRSEQNCVRLTLLCPVTHASKETLGPGISISNLKDEYFLE  
QQDQQLNEMIDNASNHASVAFWAF FNEGPSHKEEACAGYQRSSDAVLARDATRFVTYASN  
RPSVDKCYGAATVISHNGYPGWYHPDEPGRYWNRIADDLRAGKSPSAIGKPFV ISETGAG  
GIYEWHHNDTCVKWTLGYQTNI VIEDVDTAIQNGNVS AIALWHFFDFKVDDQYENETHCD  
YREGVVPPTCGFIDVEHQPKRPGGANHKGSLDFFRRPKPVFAAVASRYRTATTRGSGRGF  
LEGD

>comp15273\_c0\_seq2; 1070 316 3763 LEN=4103; translated  
MSVKPTSQGDETMSVAGQPSYQIAGLDL SLLWVDLVRQNKVSASMAMPRTNSGEDGSEG  
QTTNIEVEYGIRMVETSKSGSDQSTEHAGTAFE EYVMQKGLGGSEPVSPDPFISSINATL  
AKNRGPATRFERVGNFVSQLQLVRTL RPPPSEGFLDATTSTPPPYDAAIDSFVTGPLRLE  
LRPLVGRLETTGGNDGPPTTTPWDV FHNISPADRRGHFLVLP SLMDKERNWRGQKFLADDC  
HDMVRLAGAI EPAGSMFIGYNSVGAGASQNH IHC HSWPYPNFVTDSGEAFQYAVAGVSKI  
YDFYDIFDGVVEVS YLNYPVFVCVQMS SCKEHLDDL GKAVAACVEAIG EAPHNIGFLNRIS  
VIEGEDDEEEEDDDTTKMGSSPVVA AVFLVACAAAALV LVLGPVSPSVGATHKSKATSTP  
TLRKCSSGKSND CDRAPDYWPRFSGTRRVLLDGIWNASLLRSHPEGFDSMDPDL DASTF  
DTPERVAVPSTIEVVADPDHGYLPGYLGYRGVSVFRTRFSTDESTNGGGGRLLLFQACSFY  
CRVWLVNGIEIGDHRAGGYVAWLDVPREVLDAGAVVQRGITAAAGSSANPTVDSRATGKG  
RTMLVSHDLVVLVDNRFNGT TAPLHTGGDFWHYGGILRSVEWHDRPAKSLLSRHSF IKDN  
RKPFVAASHGNESSAWPWRLYVYPQKDLKTVRLK LQVAGASGNEPGNVAIFFDGDDETN  
ALENNHHGFAGDAGEDDLWESLESHP SRTLEAVAKSPWLETDQLL DLGLVSVPNPRVWST  
TDPQLHTVSASLNGAVVTERFGLRYWDVDPDQSRIRLNGKVLKLVGWNHHTQWPYTGATP  
TTEQLNRDLSLLKEHG HANFVRGAHY PQDPRWLDRLDEQGMVGCETLGPGISISNLKDE  
YFLEQQDQQLNEMIDNASNHASVAFWAF FNEGPSHKEEACAGYQRSSDAVLARDATRFVT  
YASNRPSVDKCYGAATVISHNGYPGWYHPDEPGRYWNRIADDLRAGKSPSAIGKPFV ISE  
TGAGGIYEWHHNDTCVKWTLGYQTNI VIEDVDTAIQNGNVS AIALWHFFDFKVDDQYENE  
THCDYREGVVPPTCGFIDVEHQPKRPGGANHKGSLDFFRRPKPVFAAVASRYRTATTRGS  
GRGFLEGD

>comp15274\_c0\_seq1; 262 568 1566 LEN=2546; translated  
MNTNRNEWKDKHKDSCGREPSDEPPGDLPSPSRSALPHFSVLVNPNGNPSLSGVSRFSYFP  
IGGPEPPEHFQISKDSHPIMGYVTSWGGMEVKGMAFAANTVDGIVHRYGGTDLKRECER  
AVSQLSPPLAWWERLLL RAGMGSDKNACNHRRLREGVAVATRVAGPELRAASGYQRLV  
HTVPPFFDNENRAGTTRRKELDATTTRDRENSETLLAECYRNSLEIASSSSSAEASATTT  
PSLQDHENVYIACPLL GAGCRGFPTERAIEVAARTTADWMTTGTGTYEQNEMSSSLQEQQQ  
SVTLAFGIPDAEIRKQLIEAIDREVEQRTTPP

>comp15274\_c0\_seq2; 262 568 1566 LEN=2534; translated  
MNTNRNEWKDKHKDSCGREPSDEPPGDLPSPSRSALPHFSVLVNPNGNPSLSGVSRFSYFP  
IGGPEPPEHFQISKDSHPIMGYVTSWGGMEVKGMAFAANTVDGIVHRYGGTDLKRECER  
AVSQLSPPLAWWERLLL RAGMGSDKNACNHRRLREGVAVATRVAGPELRAASGYQRLV  
HTVPPFFDNENRAGTTRRKELDATTTRDRENSETLLAECYRNSLEIASSSSSAEASATTT  
PSLQDHENVYIACPLL GAGCRGFPTERAIEVAARTTADWMTTGTGTYEQNEMSSSLQEQQQ  
SVTLAFGIPDAEIRKQLIEAIDREVEQRTTPP

>comp15275\_c0\_seq1; 193 254 879 LEN=879; translated  
MPATKIKRLPTQVFIGAYQGVTSAAEIERIITDEEWDAQCVICTNMAICTKDIAGCTKIR  
ELGNPAAMEAAASGAILGGLLGSMSQLMIGNDRPSVTVLAGLEEKDQALAVSKRPSVVAR  
VAEHNITKMDKTRLKKGVDALVRGSSAIVCVFDEVLVVRMSDYETNMKEHRQEMSDLTDHV  
TSKIHEQLRAGNDVAFHVVVDEVTEGEISX

>comp15275\_c0\_seq2; 511 2237 3317 LEN=3317; translated  
MRVYFSTAAAFVAAIVGSILTTSAQEWGGDVSSASLLSGGVTDVVSFEDFSFENLMQNQ  
ALDLNSGISTSFPTSFFYDGYMHPALDVHYDYSMYIDYYITGQAMLNELEAHPAAILFP  
EYYHYNQILVETMDWTWIPEIYLPDVPAGDNRDGLILIVTVGSDMPVNVSYRGDEQGGWR  
VTLGRYQTGLFQVSGGQWFVLDGSGFGGSDTDNFVNLPIVTSVEGEGHPDGLEKLYPEVL  
GGLFQAHNWVIFQSWDHNWAREIMLPPHAPEGSMLRLEVYSSTEVIIVSYHDHNYDGNNID  
SSFSKTVESHSCAEFLMSNGMWKVHVSVTITVTGIGQHD AIDKIEPEMWSKYFEEHKLVI  
FX

>comp15275\_c0\_seq3; 511 2140 3220 LEN=3220; translated  
MRVYFSTAAAFVAAIVGSILTTSAQEWGGDVSSASLLSGGVTDVVSFEDFSFENLMQNQ  
ALDLNSGISTSFPTSFFYDGYMHPALDVHYDYSMYIDYYITGQAMLNELEAHPAAILFP  
EYYHYNQILVETMDWTWIPEIYLPDVPAGDNRDGLILIVTVGSDMPVNVSYRGDEQGGWR  
VTLGRYQTGLFQVSGGQWFVLDGSGFGGSDTDNFVNLPIVTSVEGEGHPDGLEKLYPEVL  
GGLFQAHNWVIFQSWDHNWAREIMLPPHAPEGSMLRLEVYSSTEVIIVSYHDHNYDGNNID  
SSFSKTVESHSCAEFLMSNGMWKVHVSVTITVTGIGQHD AIDKIEPEMWSKYFEEHKLVI  
FX

>comp15275\_c0\_seq4; 322 1 854 LEN=1257; translated  
XTWNHNWAFEIILPPDAPEGSMLRLMVHSARSVMVTEETGGGFHSVTVHTGGYADFLMSDG  
EWMMLTSDWAYISDTLSSSYNTYSPSHYYGISTSFPTSFLMHDSTMVDEETGKRSAFDD  
MRLLNQDGGTFFNEFRRSIQIVHQDVSTVTVLDLEQHWSTSFVDEGA AIDSI FYSFKEGL  
FSQKCYEENVRNNGMAFDTITISCNLLTPVAYLEICVADDSGFVNLEDRAVIPKCCHSQ  
LSAEVPTVCYFVEIQCESLCTNDGNDGMLDRKLRGSETGVTSE

>comp15275\_c0\_seq5; 193 157 782 LEN=782; translated  
MPATKIKRLPTQVFIGAYQGVTSAAEIERIITDEEWDAQCVICTNMAICTKDIAGCTKIR  
ELGNPAAMEAAASGAILGGLLGSMSQLMIGNDRPSVTVLAGLEEKDQALAVSKRPSVVAR  
VAEHNITKMDKTRLKKGVDALVRGSSAIVCVFDEVLVVRMSDYETNMKEHRQEMSDLTDHV  
TSKIHEQLRAGNDVAFHVVVDEVTEGEISX

>comp15275\_c0\_seq6; 231 302 997 LEN=1328; translated  
MATARHVSSLRCLPRLWNEKTLFFWMAMTLALLAVSTAASSEYEDDPDYQYRARRAASK  
PWLMEFLLMEIHESVHQKLVGWLESMMGYDYEPHYADYIPRQIFVSPFTLLLVLVLVAN  
VWSWLSYHLSGSWVEASHILVKDTS PKTLKALVGLKETLGKDGKMFGLTAQQYSQCPSAN  
DKGSLGRFGPGVMAPPFDVAVCFDPQTPLNTTVGPVQTQFGYHLIYIKRKF

>comp15275\_c0\_seq7; 402 1 1149 LEN=1149; translated  
XTWNHNWAFEIILPPDAPEGSMLRLMVHSARSVMVTEETGGGFHSVTVHTGGYADFLMSDG  
EWMMLTSDWAYISDTLSSSYNTYSPSHYYGISTSFPTSFFYDGYMHPALDVHYDYSMYI  
DYYITGQAMLNELEAHPAAILFP EYYHYNQILVETMDWTWIPEIYLPDVPAGDNRDGLIL  
IVTVGSDMPVNVSYRGDEQGGWRVTLGRYQTGLFQVSGGQWFVLDGSGFGGSDTDNFVNL  
PIVTSVEGEGHPDGLEKLYPEVLGGLFQAHNWVIFQSWDHNWAREIMLPPHAPEGSMLRL  
EVYSSTEVIIVSYHDHNYDGNNIDSSFSKTVESHSCAEFLMSNGMWKVHVSVTITVTGIGQH  
DAIDKIEPEMWSKYFEEHKLVI  
FX

>comp15276\_c0\_seq1; 230 56 616 LEN=704; translated

MSSRASVFRSIVRSRKTERRFQPGRRIPKVKEDVLQSTLRSPSSFNLQPSQIILVESQN  
VKDALSEDAMMGIGNQFRAQQASAVAVFLSDLEPTKRVNRIHKLEKDYRHPNYRASFLA  
TSFLIGEGHAANLIKGIATDLLSTVQPMPEIDPVQSWAYKNTGLLAQTYGKKTIVERQSR  
FFFILS

>comp15276\_c0\_seq2; 798 1532 3841 LEN=3925; translated  
MARWSSITRALFLVLFASIEATARTEAVTSSRNIMWLD RPSTLNLLRGS RMLGDR TITTP  
NCDVVRTAPYPAELQLFYTY SVEINDDILLSDMERAMENAVAIELDMCDVEGRPVYKVK T  
GVRHSFSTSGMLRMMW SGILFVVL RGSKLLSSRTLVS LVLVLYFTGKCDPIVDGNTCIVVNG  
ETAVFLDTSSDANFVRNRAHIGILHGLGDS SFLDGF SNSVVSAA LI SEGHASLVETS DSH  
YESFDRRTGSYSSITTTVAVAAASVTIVVASIFFYGF LRRGASDNPSVRHRKNRSLRKSS  
PRTIVSGSHLSVP IRRHFVRLEDMTASPTSFITNTNASPQSSPNKCVPEYIEEEYDHDD  
CDESDYPNVNWSVSDITCDSVSLRSSVSRTPSTLERIEEEIEDEKTLVDSDRDDNSCNF  
SYSEDSTMITNSSSKAGEMDPKNRSGDGNM SHNNTNVAEFDCASERRDRLLDLSDL DACF  
TILPGSNEDVFCDLDDL SSEGSD ESMLESSLLDMEMSL EESDECSLQASVSDTSV VSMVP  
LSDLIQRDLVEDSVDDL SMEHANSQDIMYKYSYNNPKHSVCRNLTPLSSISVDDSLVSTI  
LEMQVFSEQEVYESSSPVKCVNGNLAVSDSKVKGNTEVDAMSVTSR SKSMNAEDDFPTV  
NDDSSSEVCDVQLNLENKSR SLEDASFAFSSGDT PQDILSSLQRHEWFESDMKVTDTPAQ  
NENTDLSLHYCIGEEQIQSIDSSCEGISNEQTSDFHPVDNINEVVQEQA

>comp15276\_c0\_seq4; 827 1532 3739 LEN=3823; translated  
MARWSSITRALFLVLFASIEATARTEAVTSSRNIMWLD RPSTLNLLRGS RMLGDR TITTP  
NCDVVRTAPYPAELQLFYTY SVEINDDILLSDMERAMENAVAIELDMCDVEGRPVYKVK T  
GVRHSFSTSGKCDPIVDGNTCIVVNGETAVFLDTSSDANFVRNRAHIGILHGLGDS SFLD  
GF SNSVVSAA LI SEGHASLVETS DSHYESFDRRTGSYSSITTTVAVAAASVTIVVASIFF  
YGF LRRGASDNPSVRHRKNRSLRKSSPRTIVSGSHLSVP IRRHFVRLEDMTASPTSFITN  
TNASPQSSPNKCVPEYIEEEYDHDDCDESDYPNVNWSVSDITCDSVSLRSSVSRTPSTL  
ERIEEEIEDEKTLVDSDRDDNSCNF SYSEDSTMITNSSSKAGEMDPKNRSGDGNM SHN  
TNVAEFDCASERRDRLLDLSDL DACFTILPGSNEDVFCDLDDL SSEGSD ESMLESSLLDM  
EMSL EESDECSLQASVSDTSV VSMVPLSDLIQRDLVEDSVDDL SMEHANSQDIMYKYSY  
NPKHSVCRNLTPLSSISVDDSLVSTILEMQVFSEQEVYESSSPVKCVNGNLAVSDSKVKG  
NTEVDAMSVTSR SKSMNAEDDFPTV NDDSSSEVCDVQLNLENKSR SLEDASFAFSSGDT  
PQDILSSLQRHEWFESDMKVTDTPAQ NENTDLSLHYCIGEEQIQSIDSSCEGISNEQTS  
DFHPVDNINEVVQEQA

>comp15276\_c0\_seq5; 798 1497 3806 LEN=3890; translated  
MARWSSITRALFLVLFASIEATARTEAVTSSRNIMWLD RPSTLNLLRGS RMLGDR TITTP  
NCDVVRTAPYPAELQLFYTY SVEINDDILLSDMERAMENAVAIELDMCDVEGRPVYKVK T  
GVRHSFSTSGMLRMMW SGILFVVL RGSKLLSSRTLVS LVLVLYFTGKCDPIVDGNTCIVVNG  
ETAVFLDTSSDANFVRNRAHIGILHGLGDS SFLDGF SNSVVSAA LI SEGHASLVETS DSH  
YESFDRRTGSYSSITTTVAVAAASVTIVVASIFFYGF LRRGASDNPSVRHRKNRSLRKSS  
PRTIVSGSHLSVP IRRHFVRLEDMTASPTSFITNTNASPQSSPNKCVPEYIEEEYDHDD  
CDESDYPNVNWSVSDITCDSVSLRSSVSRTPSTLERIEEEIEDEKTLVDSDRDDNSCNF  
SYSEDSTMITNSSSKAGEMDPKNRSGDGNM SHNNTNVAEFDCASERRDRLLDLSDL DACF  
TILPGSNEDVFCDLDDL SSEGSD ESMLESSLLDMEMSL EESDECSLQASVSDTSV VSMVP  
LSDLIQRDLVEDSVDDL SMEHANSQDIMYKYSYNNPKHSVCRNLTPLSSISVDDSLVSTI  
LEMQVFSEQEVYESSSPVKCVNGNLAVSDSKVKGNTEVDAMSVTSR SKSMNAEDDFPTV  
NDDSSSEVCDVQLNLENKSR SLEDASFAFSSGDT PQDILSSLQRHEWFESDMKVTDTPAQ  
NENTDLSLHYCIGEEQIQSIDSSCEGISNEQTSDFHPVDNINEVVQEQA

>comp15276\_c0\_seq6; 827 1497 3704 LEN=3788; translated  
MARWSSITRALFLVLFASIEATARTEAVTSSRNIMWLD RPSTLNLLRGS RMLGDR TITTP  
NCDVVRTAPYPAELQLFYTY SVEINDDILLSDMERAMENAVAIELDMCDVEGRPVYKVK T  
GVRHSFSTSGKCDPIVDGNTCIVVNGETAVFLDTSSDANFVRNRAHIGILHGLGDS SFLD  
GF SNSVVSAA LI SEGHASLVETS DSHYESFDRRTGSYSSITTTVAVAAASVTIVVASIFF  
YGF LRRGASDNPSVRHRKNRSLRKSSPRTIVSGSHLSVP IRRHFVRLEDMTASPTSFITN  
TNASPQSSPNKCVPEYIEEEYDHDDCDESDYPNVNWSVSDITCDSVSLRSSVSRTPSTL  
ERIEEEIEDEKTLVDSDRDDNSCNF SYSEDSTMITNSSSKAGEMDPKNRSGDGNM SHN  
TNVAEFDCASERRDRLLDLSDL DACFTILPGSNEDVFCDLDDL SSEGSD ESMLESSLLDM  
EMSL EESDECSLQASVSDTSV VSMVPLSDLIQRDLVEDSVDDL SMEHANSQDIMYKYSY  
NPKHSVCRNLTPLSSISVDDSLVSTILEMQVFSEQEVYESSSPVKCVNGNLAVSDSKVKG  
NTEVDAMSVTSR SKSMNAEDDFPTV NDDSSSEVCDVQLNLENKSR SLEDASFAFSSGDT  
PQDILSSLQRHEWFESDMKVTDTPAQ NENTDLSLHYCIGEEQIQSIDSSCEGISNEQTS  
DFHPVDNINEVVQEQA





AGTSKYL SHGADGKPACSCPICNSSCDALFLRGNRHKAAAGKAREKKEAAAAPAAAAANM  
SSLPQLFSTYVTDLLQNGVIDAAAQANTAVDDPVAQAQNSFAVAHRLLTNPVQGNMAMR  
HAMQGMGLMGTKIRDGLSIDALRKGRVGD LAVGTRGFDPNPRELQQQLPRQQALVAPQ  
QPPQARPTAGVRPGPATFNHQDIRHFRNKLSVPVDRDTRSPLEVELANAAAAAGGGG  
GAAAVARPCPSVPAAMPPPPAPVSTVSKDPTALDDLPALHPISILDSNSDSSGFLSSY  
YSTGKIQQDIKPVVVKSEFKLPGPLPKHHNGSAVAATPSFARKIWKESVKQSRGNNTPTST  
EAALDLLSVQLTAGDTSTEAMALKKQAQDMENICPNALVKFAKRQLFPNGGKDAVAALNP  
PVNKRLSAAASTGFKRPAARHGLGLGLGLKQVTKRPALSSKAPAAPSKKASSPGDLPSSQ  
SSAGFDYGDSD

>comp15277\_c0\_seq10; 466 93 1727 LEN=1727; translated  
MQSFKRLAILAVTFALANWGQVA AVASAHQKVDTNRRYLQASELVVFLKTIRYISGKSK  
KIWCAQLGTGVMLEDEDSNKKIDSSGAVSGQAKIITHGAYIERSPAAPAGRIVFNDEAS  
FRIEKMAETNAGAVDDIVWNPEPGPPTGIKNAMVVRVTD SAGA QPTADSDKLNDFEDT  
NCLRSQYAAACSKNQLDIRPAAVGNNGGVVELTIGIPAVGSDTTQLESAVSNAAAEGQLNEW  
STAHLVLCYPKGSACSEDGDEWLAAYTNTAYSYYNEDYCSSVSAQVHEVGHNNLDH  
SNVGDEEYGDTSMMGTSDTSDSPPKCFNAAKNFQLGWYRNQD TINPLDFAGSSRTYV  
FNGVDQYQTDGSSTKLITLKLQPGNDYFIFYNEAAGANIDTPEAINMVTVIEKREEAAP  
VGKKEQSWRRAALTPGNVYGITNFRGTTSGVYVKFVSLDGT DATVEIITSTAPVLSCEGI  
GRFRFDLLTDAWSYETSWTLRDSSGVVVAEDNGNQKYSNTQYNFPSAETYYCLEPGGCY  
QFEIR

>comp15277\_c0\_seq11; 355 1 1216 LEN=1557; translated  
XQHFLIVASFFYDDCFFFDVDSIMSRKDPADGVAKIRANAGLSSLTQQERAERPHPSKGG  
SEGYPVFFREQELERKAAGLPTSASKASLSRWSRRLYPYRK TGNRSQGLVGD LFNMVV  
FVWIYPDATNDEIATYIFNMGGPIYSNAVISRRLNKMELTRKSASKEAYQAFTPESMWS  
KIFWTKSPPLGVVGPVRRRFIDVDFGMDMTKTSKGEKGIALKCFRARI PGAYQRTQKLT  
IILAVEAGDPRLPATRGSVENPRRWINVIQQVGT SATVFAHFIDRICKDIEANPVPDGT  
DKERIFLWDNLGSHLSTLVGLKVAIRPDPKPTLLRSIPRPPYQPKYGPVEFKICDLVSAV  
SREARPNWTTSDLEAAIYREAGRSIKGVDATFDHCGYSLDGNYYD

>comp15277\_c0\_seq12; 1121 228 2534 LEN=2874; translated  
MSSNNNNKKPSGATVPSLPLTQTNPLYQAAYFALERKKFLQLAKKKQHLCAIQTIKERD  
VEALFPGNQAKALRKEMLLLHTDIVSVGLGKNKREKAWRSHYVSSILASIYVAMEMRKGM  
EFPTPSAQRASRSRSNATALPLFRSAAKDVKQAVDKQEDIEDIEKLNKRSCIKQKYGNR  
KQDKIPFDPTKLEKAPCPQC GCMACMAITPIDEVNRKNKENWDKYMEEVDEYKQNGGNKK  
PRFPPSEGQWIGYWGKYLHCKYQADGGNCPESCKPGA EYLHQDADGKPACSCPICNSKCD  
AMFLRGNRHKAAAGEAREKKEAAAAPAAAAANASSLPQLFTQYVGNLQNGVIDAAAQANT  
AVDDPVAQAQNSFAFAHRLLTNHD IQGNMAMRHAMQGMGPMGTETRDGLSIDALRKGLSX  
DPTVERARGFGVNPRELQQQPQQQAPVAPQQPPLQARPTTGVRGRGPAGGPPTFNHQD  
IRHFRNKLSVPVDRDTRSPLEVELANAAAAAGGGGGGAAAVARPCPSVPAAMPPPA  
PVSTVSKDPTALDDLPALHPISILDSNSDSSGFLSSYYSTGKIQQDIKPVVVKSEFKLPG  
PLPKHHNGSAVAATPSFARKIWKESVKQSRGNNTPTSTEAALDLLSVQLTAGDTSTEAMAL  
KKQAQDMENICPNALVKFAKRQLFPNGGKDAVAALNP PVNKRLSAAASTGFKRPAARHGL  
GLGLGLKQVTKRPALSSKAPAAPSKKASSPGDLPSSQSSAGFDYGDSD

>comp15278\_c0\_seq1; 660 124 1761 LEN=3990; minus strand; translated  
MRIGANIKTVLAALAMAMVPASINAVVG DENKERNECNLSLKKPGMDTKDAITMVQKTYDV  
CPDISKIVAALLEGGFDMQQRVCSIQVMTP IAPMLAHPVHSLDELKERIGNDGEI AIMEW  
KYDGMRCQAHYDGVNIQLFSRHMLDMTNQFQDVVKYLLD TIRSSSPNCCRSFIIDAEIVG  
IEGEGRDSRLLPFQDLSTRRKKMDDGKGIKVKVVFVDFLMFFNGKSLVNEQFHKRRSLLQK  
MFVETTNFTFVSSQNLMSYDENVITSYLSEAIAGGA EGLMVKLLGEKPI SATNEGIKSFY  
EAGTRSHCWLVKVRDYVAGFSDTIDVVP IGAWWGTGRKAQKSFLSPVLLAVYDDEEEVFR  
SICRCMSFTDAMYESI RKFYFNGIEYPTFFDSGVLENEGINPEKKVINGGGLSSKEDDGD  
GSCGKGIIDDLQD TDGSIMAE GGEQKDRNRVHCFPDRPSSAFVITNESPPIWFKPMEV  
FEVAFADLSLSRQHTAAAGLVDEEGRGVALRFRFKRRRPPDKKPEQATTSIEIAQLFAKQ  
SKIKK

>comp15278\_c0\_seq2; 660 124 1761 LEN=3856; minus strand; translated  
MRIGANIKTVLAALAMAMVPASINAVVG DENKERNECNLSLKKPGMDTKDAITMVQKTYDV  
CPDISKIVAALLEGGFDMQQRVCSIQVMTP IAPMLAHPVHSLDELKERIGNDGEI AIMEW  
KYDGMRCQAHYDGVNIQLFSRHMLDMTNQFQDVVKYLLD TIRSSSPNCCRSFIIDAEIVG  
IEGEGRDSRLLPFQDLSTRRKKMDDGKGIKVKVVFVDFLMFFNGKSLVNEQFHKRRSLLQK  
MFVETTNFTFVSSQNLMSYDENVITSYLSEAIAGGA EGLMVKLLGEKPI SATNEGIKSFY  
EAGTRSHCWLVKVRDYVAGFSDTIDVVP IGAWWGTGRKAQKSFLSPVLLAVYDDEEEVFR

SICRCMSFTDAMYESIIRKFFYFNIEYPTFFDSDGVLENEGINPEKKVINGGGLSSKEDDGD  
GSCGKKGIDDLQCQTDGSI MAEGGEEQKDRNRVHCFPDRPSSAFVITNESPPIWFKPMEV  
FEVAFADLSLSRQHTAAAGLVDEEGRGVALRFRFRKRRRDPKKPEQATTSIEIAQLFAKQ  
SKIKK

>comp15279\_c0\_seq1; 1002 151 2579 LEN=2727; translated  
MNGSQGDDADVMEIAGPSAAAANNSSNADNDDDDAVMSSSPKATTEKESGGREGDSVVS  
VDSTAIIVTSQEAQDPPHQATPQVLASRVPEIWSFFRRLEQIEQLEMVREERVSQSRRRI  
MNLLEQTPSHRRTHLRMFVSHFFDKFKGIWTLAIEGKLLVGNIDHANA AKVDSEGVMSAR  
VVAEGKEDEQKRSKKKRPNDKPTKSSGEKSSNGGAQSSGTAPGSSAATNNPATASATPD  
RSHPSYRIGEKEEPEVQPLVFTHCDFKINVTFRTIYQPRVAASGKTNISSSSASSSKSR  
SNKRKSSGQQVQEEPAAVSPKLLKASDPTKIVWDKNSRREKEDTPETQRTDDCHGFFVQY  
NNHFSERPPPPGMRFHSSIVAKIELYPSRPGTGIGTNKQFRHQDQVDAEPLYQIVHPVLA  
KRFFPRHVLGKSGDGTSMGTGGARSKPSDSGTGTGGNEGDPQKHDSHSPAGSDEPI  
LENDIRVPSFLTYNEISMSIFRYIQDNRLHDPTDRSNILCDKLLKEIFDVESMSFGQLKQ  
LLIQKDLIRRSAGPSSSSAGFLSPQKSSGNSPNEKDPVMPVVLTYVLNEQTTSPHVPAG  
HEVESVVPSPDEPANASATARRRAAYSTPEDPDHNPTVLSFDMVAIPSFNYRARELLR  
RVKKREFEYTTTCRTKARYLLVAAKNEDTIKTRIEKAVSGQGYEADNIPVMLALAKAAMP  
HSEAREAAQIDARTCDVVGRVEEANRSVGLAWEEVEAIRDAMVSGGXEVAKTPRSVWSA  
RAKQRKDPAGLVTARCMLRENDRHDYS

>comp15280\_c0\_seq1; 892 45 2447 LEN=3752; translated  
MARKQEETDADVVTNDYTMNDEMIEELIKVKSLLHLPKSPEKCPVFCCFYAEFDIKTG  
PVVRYQSPENFMDQDINTATTDIHSILEKTFERYKEKQKSKHHEGDGNGDENRKKGNERN  
ITNTSDDHRAGPADLCSGEISANKSAIPKQDQNSPSRELSPSKGSSTEDGRAEKEDRRD  
DGTQEVAGASSVDDNPPEGGQSFFDSTSEYIITGSELTKGIITLSTHDVHMTRPTQITN  
ERYERNALLFSIGIVLRRAADPRPFRPLISKLATTLRSMEVESCVLSDPIKINRVLQPLL  
EHLILISMNSPRWECNLLDRSTALNKLHFPPKPPASPVHDYQVPVLLVRDFQLGYEWD  
LAINWVILHIDGITNARQISVKAQVLEMLVLA CLRVLRRHHCIEVIDMFVYTNRYEETER  
AAAMLAGEGKLLQEMVEFVVKRHQAVHLVPPPIPSRPTIPSLGSGVRDMSGTSDGGNNT  
TSPKSGGSPYYFTNSIRSGGANPSSFPRLNLLGGSGSQRSTHFRHAMIAASSLDRDQV  
HFVEGRRNPENHKYLKSALAECCAFNRNLSFGDLWLSLTTELPTSLDVPNLNKAVPGN  
RGSSLSSTFQRGANMRNDSLTEYDMNENEAVAFSPMEASYLDSLKNKQNAADEKGNSSNN  
QNGKESQASSSRQSPASWNEIFKEFDHRRFITFGVINGLLTRVHSYPPFFHGAFPEKRKYV  
PAYELGSSHVIPPESARLHRKKELTEEKNYQFARSVSVMMDGMTFDELACLFEKPFNVL  
VDMVEKHSGEKVVQIFARSG

>comp15281\_c0\_seq1; 584 109 1986 LEN=2163; translated  
MAEKPNAAPADDWRKSVLQSYRNNEVVAIAKVLADLETSESITPTSKMELAWRFEDSIFK  
AAKSLPDYRKKIERRLNKVRKNFKPAEPAKAEAGADNTDAKEELKNKQVYGNELRYIA  
YNADALEDLRLKLGPEKANKLKEHTDSCEDWAVDLGVLSEELADIRKKRGNTENMRC  
KRSSQSLSFSQLQRIEQHLQARVKNIRSYVVKHADPHRFMQETLLSRDVTFSKHAAGNM  
LRDVLGRMISTQKDKLQOASDATSDRTTAAVSTSRNEDDPLIVLQKALEKALVGVPPPT  
RQDSRQLEASLRHLDKMRAASTAMMNYWLLPGDQRLTSAPRESLEKIFEVIDDGMEFVLE  
AVKKLEQQKRNKPLSSSLREKDTIGEGTTKVSLODAWSKTIELPSNAPIVVDDESTGSS  
SNKRPRNTNSFRPYKTRILFRPNRRTPPQLLAAIRRKGAHLKLANSAGDTNAIHLVLDFT  
AFSMTIYFSPLTVTLRKAVKEATSGNDTNSGPTATWHHLSHGLTPWGSTLSDSDFLHR  
RRDREEQKLSVWGVGTGSYDDIGRVVEERLRDASTHATSVLRQCFRNKVEDKTIIDYEVELL  
EGSALLEFLRLSRSTYTPHWEDKDL

>comp15282\_c0\_seq1; 695 1 2656 LEN=2767; translated  
XSVLRRFKSEITIRNSESFNTILRVSSNLDHITSRFELEVSDLPPVRKDCLLSRPIARLP  
VHIFHEYNRDIICLFRDLNQSASQGLMHDLSLMEALSRIFYWCIHDSKTTKRYIDLRYKA  
DAEENLVGCGMILQIPSNATATNCVNELREIAVAQAASVATEERFESTHAILPNPDIM  
KHLIDRGFSENGARRAVIMTGNAGSNEALAWGVQHTMDADFNDPLVMLKYSNREYIDEGF  
IQLLQKNLIQISDILKNPTQRSTLLQMVGNHFPKYEKSDLPISDAKTKVQPTKSELKT  
SQKLTLRPIRRKAKGKVQKIDPEQSSSNEILDENGSTPTEVNVAVKQKQKPLPPRRNIV  
DKSISTATERNQVTQGEKQPRPPRHKAINENAPTRNEVNQAVEQKQELQPPPKRVTAEE  
NDSTPTGINQAFQKQRPAPAKRIAPEENDSTPTEITPILQQNQPPMSQSQPVTLQEKD  
STSTEISQAVQQPRPPRPVVALEENNSTPTNISPAVQQPRPPRPVTLDENDSTPTEISQ  
VIQKKQRPPPPRVSSRAGIEPMTKSVKQVSKSVAGDKTPDDDKNFDPQSSTKVALKP  
TIDREALRKKAKEALKKLQGNQSATENGVEGGAANAGLSKTKTASDVLKATAQKRNMKG  
SQIVNGDGSTTGKEVKNRVSKIGTVTGMTHNRREDLLKRGQLARKREQTATMKEQTNAST  
AEDGVKSSISNNLVTKIATKTAMDRREALLKAQEAALSRRRNPPTNSSDSRTRLIQEGKE

LRLQTKPSRPTAPNRTGPVTRSRPNTKFATSLPSSSKSTPSSQVRKTIVEPKLAPMSIST  
SEKPSQLENPSPIGTTNGGNTGEP T TNDGNESEDSGWDFDDFDDF

>comp15283\_c0\_seq1; 874 172 2241 LEN=2538; translated  
MPPQQEENIEVPIPSDLERDVKFSFDVADRSSAPASDEKSSPATNTGDGDEKLLSFLT  
GMKNDLVARKPYNMTGGVGDWGPDPNFFTVFNATIFAFVIQLIPALIFADLMDRQTDG  
NLATVETLLSSAIIGIIYAI FSGQPLVIMGITGPVSLLLGTSYGLAAQFDADYFPFFFWI  
CLWAGLMHVL S ACVGLVSLVWKVTPFTSQIFELFIAITFIYSALRDLIVPIHLSQDIDG  
QEVTAELRSAGYASFIIGLITCYTAWSLHFAETWIFFSRQIRTFLLSYNTLIAVVVATAF  
SYIPGLDQNNAIERVNVPWNWEPTADRPWVTNPLQGI GLQGI FGALVPGFMFFLLFII  
DHNVSILTQSPKFNKKPPAYHWDFVFLGITFFPCA VLG LPPGNGLIPQAPLHCRALCT  
RKIETDKYGVSRREVTHCEEQRWSGLGQALLMFAALS SFVVISWIPTGCLFGLLLYL GMS  
ALHGNEIWERLLCGVYEHKRPKIPVVRCAWAKTVQAWTFIQLACAVAIWAVGQYAPVGY  
IYPLLLTLLV PFRSYVLEYFFKPEDTKHLDPVDETEEEFHDEQRMVHHTLGHSTDEDDML  
FPTRAEFRGQGMKRALMNTNRRHTIGGHGGASDDILALEVAKACIDLDDATKLEIVQR  
AAQADARMTASTSITDLMALDNLGKNKQ

>comp15284\_c0\_seq1; 548 284 2629 LEN=3802; translated  
MTAPILSTNISSDDTAISQSSNAPENSARGNIKVAVRFRPLIEDPEQYDRIRKKNAEKTA  
WNIEKVGAMHLLTQKGYGPKVEGRTSFQFDQVFGKDSQTPLVYKSIARPMVNATMNGKHA  
TIFAYGQTGSGKTFM QGEGKIGSGKAGIIQLVTSDFRYTGKGEALKRDFKVKVSYFEI  
YNEQIRDLLASDPENASTDTSSTTTTSGRGVTIRTNASGEIIVNVEQKRVHNVDEALALL  
VQGNMHRTVGATGMNEQSSRSHAFRLTIESRLKTNHQP IENQDNEIVRVSDFNLDLAG  
SESLKLT KATGNRQREGATINKSLLALTSVIQSLSQPLKRPQYIN YRDSKLTRILQPHL  
SGNAEMAILCCASPSSTFVEETRSTLKFASRAKLVQVEPRVNEVMDDGAMIRKLQKEVSE  
LRRQLASMEIELEKSRENIYIESTQVNRKDHTVISHESNDIEIHGSMTELSASASGFQLD  
AADPDIARKAIQRFSRGR LDFSDFPEEFLDSSENSTTDTSDDDITLEGKRDSCLLKTPYGV  
VPVTVESFDTPPSVDAQSSSGKQGGRSNASLIIRSQVSSPDTIRGSGNGENRGGGPVFRSR  
DTMNVSPNGRLQNSLSWDAMDGNDYSLVENGATRVQALKSLLMKKSPIPDEVTIIDTLVV  
PGNKICLDRLEDAESRN VFLVEK LK LLEDANEAGARDLERARHYIHDLVRRNTEMQAQM  
KERQREMIKEDYERGEVIVEQYWILRASLYFSVFFVSGSHEYFLATVFFVWLTLEMSVT  
A

>comp15285\_c0\_seq1; 944 73 2097 LEN=2365; translated  
MTMNLQTLRVNPDFELGINRRKDDATYIISDNDDADEEDRGD TDTGLADEFDEHALKLS P  
LSKSF RDKKAHQYHMMINMTLELVRDMTMAKKNKDKVLTNYGEGVLLSRNGVNGSMEIQLP  
FGKLFHRQPEMVHKLISPAEYEQAI EHLEVRKLSLTELSSQQWNP I VIGEACIACLFDK  
PFCKTGKGISSDSTTIASRSAAAFKSRNMRSWFGRFSSASTSTVQSNSNVAASLVKEQN  
GMLKKKKKTTRTKFC DVCGNPVC SKHIIPSTGGQQFRMCVDCQDFDSQMFETTSSGKMTQ  
GGVNSNLLDL DHI PHLTQTLDRLLTY YTRMSLHLTFCAPNLRELAERL TRTEHTNSKIAL  
GTGGISFVGAALGVAGAAALLTPAGPPLLLAAVATSASSAAIQGGQAGYNALFNMSLKEA  
NQLADRIIGWHGLCLGILDAL EQLRQTL LQVLAITQEERN SGVSGNSL GDTGRIDSFSS  
GTENTEGSESN TSDDGLEDEMALARKNAIKHGQOLEKDALLRQVVNSRSRSTAEQS  
LDV LNTLALGT YHTTRNGLTGVGLTASMGASYSQMLNASIQTVPVVGGAFSLGCMAMDAS  
NIASTVQKLQKPASKAIALHQVLESFTVHIPSTIQSEVEALLGAINELKERQEVVQRNQQ  
QDLIEQELEELNNI

>comp15285\_c0\_seq2; 493 73 1838 LEN=2513; translated  
MTMNLQTLRVNPDFELGINRRKDDATYIISDNDDADEEDRGD TDTGLADEFDEHALKLS P  
LSKSF RDKKAHQYHMMINMTLELVRDMTMAKKNKDKVLTNYGEGVLLSRNGVNGSMEIQLP  
FGKLFHRQPEMVHKLISPAEYEQAI EHLEVRKLSLTELSSQQWNP I VIGEACIACLFDK  
PFCKTGKGISSDSTTIASRSAAAFKSRNMRSWFGRFSSASTSTVQSNSNVAASLVKEQN  
GMLKKKKKTTRTKFC DVCGNPVC SKHIIPSTGGQQFRMCVDCQDFDSQMFETTSSGKMTQ  
GGVNSNLLDL DHI PHLTQTLDRLLTY YTRMSLHLTFCAPNLRELAERL TRTEHTNSKIAL  
GTGGISFVGAALGVAGAAALLTPAGPPLLLAAVATSASSAAIQGGQAGYNALFNMSLKEA  
NQLADRIIGWHGLCLGILDAL EQLRQTL LQVLAITQEERN SGVSGNSL GDTGRIDSFSS  
GTENTEGSESN TSDDGLEDEMALARKNAIKHGQOLEKD XI AFAAGREQQVQEQQEHGGTI  
PGRAQHTGPRNVSHNAKRFDGSGKYCGLEGPCDRNAVHDSEGSQARGL

>comp15286\_c0\_seq1; 539 2583 5513 LEN=5810; translated  
MPESTTETVPDLLLLPLPGKLREGQORSFVVATKRRKRFVWSSSIDXAALAAAVVGGGGGG  
AAPAPAKFESAFVAPLDAFHPGNRCIGSECSRAHG PSEDGGDGSKSPRLRISSTKAQLA  
PLVARTRTSFVGTGTSNIAS TNSLNGGGV LILSPPPTTSTIATNTMMFSDHCHYHPQNT  
SGLRSRTFLLSLRSPRCARTSRQSQDRCGSKRN LHRENHGEETEDPRAEPSLSPIQKPIIT  
DKQPPQPPFTHVPPGSQLPTELSTLAVSIRDRVRILFEHHGVFACRTQGGGWQHNNIR

DGVESITIALPVVISVSGGCDSVALFHALLEWNRSLQGMQNAPRYDPLATGQNHGYNLDL  
SITVVHFHHRQRPESADSDCELVRGMVATATSDGMQRLAFRLEDWKNVTIESDDSFSSFS  
QDRARVWRRTKLEECASEQLRLLHERARSSSSGKRDFFAAPFGVVLTAHDDDSYETVLI  
KLLRGVHLLNLHDKATIASIAPMPSSSVGFCSQKNSDRDGHSEIESSIYLVRPFVTDTT  
PYNHQQGIPLPGHTKDDLRLYLTERNLPWREDESNKDPKYLNRNRVNELIPLLAELSEDS  
FRTRKRLPALLEQSRNLSGEVTPRVEKYLQNALVKPETGTAGVDRGESSTSLFSIKEYSDD  
GNDGSKSSSRWIRSQUALYEWMSRSIAEQLKKRQLTKDEGATIVSNQPNRHVLSYESLQRV  
LKQLEMPDRNQWTLLELGAGWIVQRMGDVLMVQEADAGEDPYDASF DENHHRIDWEWSFA  
TSSNNENDAQQDSDKNKRLPGEEEDDSEQMLLIGVSREFLQTTESDLEGLSFFSTTLRIA  
SATMDGADTVVPNDSSNSGKRKARALRFSPWRNSPLKLRALFRGQKVPMLRDETRLLF  
AELPSDPPNPRLVAVRVKDKWIVSKEFLAESNPDKKCEALSPFSAIIGAEDPEPPSCAE  
NMEIATIALAVYPKNT

>comp15286\_c0\_seq2; 539 2612 5542 LEN=5839; translated  
MPESTTETVPDLLLLPLPGKLREGQQRSFVVATKRRKRFVWSSSIDXAALAAAVVGGGGGG  
AAPAPAKFESAFVAPLDAFHPGNRCIGSECSRAHGSPSEDGGDGSKSPRLRISSTKAQLA  
PLVARTRTSFVGTGTSNIASTNSLGNNGVLILSPPPTTSTIATNTMMFSDHCHYHPQNT  
SGLRSRTFLLSLRSPRCARTSRQSQDRCGSKRNLHRENHGEETEDPRAEPSLSPIQKPI  
DKQPPQPPFTHVPPGSQLPTELSTLAVSIRDRVILFEHHGVFACRTQGQGGWQHNNIR  
DGVESITIALPVVISVSGGCDSVALFHALLEWNRSLQGMQNAPRYDPLATGQNHGYNLDL  
SITVVHFHHRQRPESADSDCELVRGMVATATSDGMQRLAFRLEDWKNVTIESDDSFSSFS  
QDRARVWRRTKLEECASEQLRLLHERARSSSSGKRDFFAAPFGVVLTAHDDDSYETVLI  
KLLRGVHLLNLHDKATIASIAPMPSSSVGFCSQKNSDRDGHSEIESSIYLVRPFVTDTT  
PYNHQQGIPLPGHTKDDLRLYLTERNLPWREDESNKDPKYLNRNRVNELIPLLAELSEDS  
FRTRKRLPALLEQSRNLSGEVTPRVEKYLQNALVKPETGTAGVDRGESSTSLFSIKEYSDD  
GNDGSKSSSRWIRSQUALYEWMSRSIAEQLKKRQLTKDEGATIVSNQPNRHVLSYESLQRV  
LKQLEMPDRNQWTLLELGAGWIVQRMGDVLMVQEADAGEDPYDASF DENHHRIDWEWSFA  
TSSNNENDAQQDSDKNKRLPGEEEDDSEQMLLIGVSREFLQTTESDLEGLSFFSTTLRIA  
SATMDGADTVVPNDSSNSGKRKARALRFSPWRNSPLKLRALFRGQKVPMLRDETRLLF  
AELPSDPPNPRLVAVRVKDKWIVSKEFLAESNPDKKCEALSPFSAIIGAEDPEPPSCAE  
NMEIATIALAVYPKNT

>comp15286\_c0\_seq5; 167 2040 2569 LEN=2569; minus strand; translated  
MKVALICLFTVFSNKGILNLPQAVSANSHSIGCTDDHTFFLDGQKDKCAWAAKEQTRR  
RCRKTDFVTQKKVSHYCPLVCKSECKDRSAKASQAEKFCFSEPNYKFRGKPRKNCEWVK  
KKPNKRCWKKDRKSKRVKEHCPSACNLQCLCRDSTNVTYKTRKKNNTLRKLRWRRS

>comp15286\_c0\_seq6; 539 2896 5826 LEN=6123; translated  
MPESTTETVPDLLLLPLPGKLREGQQRSFVVATKRRKRFVWSSSIDXAALAAAVVGGGGGG  
AAPAPAKFESAFVAPLDAFHPGNRCIGSECSRAHGSPSEDGGDGSKSPRLRISSTKAQLA  
PLVARTRTSFVGTGTSNIASTNSLGNNGVLILSPPPTTSTIATNTMMFSDHCHYHPQNT  
SGLRSRTFLLSLRSPRCARTSRQSQDRCGSKRNLHRENHGEETEDPRAEPSLSPIQKPI  
DKQPPQPPFTHVPPGSQLPTELSTLAVSIRDRVILFEHHGVFACRTQGQGGWQHNNIR  
DGVESITIALPVVISVSGGCDSVALFHALLEWNRSLQGMQNAPRYDPLATGQNHGYNLDL  
SITVVHFHHRQRPESADSDCELVRGMVATATSDGMQRLAFRLEDWKNVTIESDDSFSSFS  
QDRARVWRRTKLEECASEQLRLLHERARSSSSGKRDFFAAPFGVVLTAHDDDSYETVLI  
KLLRGVHLLNLHDKATIASIAPMPSSSVGFCSQKNSDRDGHSEIESSIYLVRPFVTDTT  
PYNHQQGIPLPGHTKDDLRLYLTERNLPWREDESNKDPKYLNRNRVNELIPLLAELSEDS  
FRTRKRLPALLEQSRNLSGEVTPRVEKYLQNALVKPETGTAGVDRGESSTSLFSIKEYSDD  
GNDGSKSSSRWIRSQUALYEWMSRSIAEQLKKRQLTKDEGATIVSNQPNRHVLSYESLQRV  
LKQLEMPDRNQWTLLELGAGWIVQRMGDVLMVQEADAGEDPYDASF DENHHRIDWEWSFA  
TSSNNENDAQQDSDKNKRLPGEEEDDSEQMLLIGVSREFLQTTESDLEGLSFFSTTLRIA  
SATMDGADTVVPNDSSNSGKRKARALRFSPWRNSPLKLRALFRGQKVPMLRDETRLLF  
AELPSDPPNPRLVAVRVKDKWIVSKEFLAESNPDKKCEALSPFSAIIGAEDPEPPSCAE  
NMEIATIALAVYPKNT

>comp15286\_c0\_seq8; 167 2024 2553 LEN=2553; minus strand; translated  
MKVALICLFTVFSNKGILNLPQAVSANSHSIGCTDDHTFFLDGQKDKCAWAAKEQTRR  
RCRKTDFVTQKKVSHYCPLVCKSECKDRSAKASQAEKFCFSEPNYKFRGKPRKNCEWVK  
KKPNKRCWKKDRKSKRVKEHCPSACNLQCLCRDSTNVTYKTRKKNNTLRKLRWRRS

>comp15286\_c0\_seq9; 539 2402 5332 LEN=5629; translated  
MPESTTETVPDLLLLPLPGKLREGQQRSFVVATKRRKRFVWSSSIDXAALAAAVVGGGGGG  
AAPAPAKFESAFVAPLDAFHPGNRCIGSECSRAHGSPSEDGGDGSKSPRLRISSTKAQLA  
PLVARTRTSFVGTGTSNIASTNSLGNNGVLILSPPPTTSTIATNTMMFSDHCHYHPQNT

SGLRSRTFLLSLRSPRCARTSRQSQDRCGSKRNLHRENHGEETEDPRAEPSLSPIQKPIT  
DKQPPQQPFTHVPPGSQLPTELSTLAVSIRDVRILFEHHGVFACRTQGQGGWQHNNIR  
DGVESITIALPVVISVSGGCDVALFHALLEWNRSLQGMQNAPRYDPLATGQNHGYNLDL  
SITVVHFHHRQRPESADSDCELVRGMVATATSDGMQRLAFRLEDWKNVTIESDDSFSSFS  
QDRARVWRRTKLEECASEQLRLLHERARSSSSGKRDFFAAPFGVVLTAAHDDDSYETVLI  
KLLRGVHLLNLHDKATIASIAPMPSSSVGFCSQKNSDRTDGHSEIESSIYLVRPFVTDTT  
PYNHQQGIPPLPGHTKDDLLRYLTERNLPWREDESNKDPKYLNRNRVRELIPLLAELSEDS  
FRTKRLLPALLEQSRNLSGEVTPRVEKYLQNALVKPETGTAGVDRGESSTSLFSIKEYSDD  
GNDGSKSSSRWIRSQUALYEWMSRSIAEQLKKRQLTKDEGATIVSNQPNRHVLSYESLQRV  
LKQLEMPDRNQWTLLELGAGWIVQRMGDVLMVQEADAGEDPYDASFDENHHRIDWEWSFA  
TSSNNENDAQQDSDKNKRLPGEEEDDSEQMLLIGVSREFLQTTESDLEGLSFFSTTLRIA  
SATMDGADTVVPNDSSNSGKRKARALRFSPWRNSPLKLRFLRGQKVPMLRDETRLLF  
AELPSDPPNPPRLVAVRVKDKWIVSKEFLAESNPDKKCEALSPPFSAIIGAEDPEPPSCAE  
NMEIATIALAVYPKNT

>comp15286\_c0\_seq11; 253 1 1286 LEN=1286; minus strand; translated  
XPNKRCWKKDRKSKKRVEKEHCPACNLQCLCRDSTNVYKTRKKKNTLRKLRCEKIKKKR  
HCKRKTDNGERVFORCPVKGCACFEFPPSEPTVAPSHSESPSLRPTFMLTHSSSPSSVPT  
PSPSSVPTPEPTSLPTSRPSTEPSQPSPISQRPTFEGETFAPTSSPSSSPTSIPSTFPTL  
LPSTAPSAMPTGTPAFTSVTNSAFEPGTTIEEVEAAAYTEVMTDTIIDDIATASLEAEATAA  
ARAAAATKTSCLKVAPSI AALLEFIEVVTVCFPVSCSVIVQFDVPGKVCFCVMTVTAPPFT  
RIKPDEAIGQAENGVNEGFGKGALEAKGLVVFVAVELLEPSNEPSSEPTPGPSIPPLPSSGP  
TSLGSGQSGPTSLPPVSLTALPTLSPSKEPSSLQSFLEPTLTPSRPSLTPSSVISLQPS  
IQSSVPTLSX

>comp15286\_c0\_seq12; 539 2418 5348 LEN=5645; translated  
MPESTTETVPDLLLLPLPGKLREGQQRSFVVATKRRKRFWVSSSIDXAALAAAVVGGGGGG  
AAPAPAKFESAFVAVPLDAFHPGNRCIGSECSRAHGPSSEDDGGDGSKSPRLRISSTKAQLA  
PLVARTRTSFVGTGTSNIASSTNSLGNNGVLILSPPPTTSTIATNTMMFSDHCHYHPQNT  
SGLRSRTFLLSLRSPRCARTSRQSQDRCGSKRNLHRENHGEETEDPRAEPSLSPIQKPIT  
DKQPPQQPFTHVPPGSQLPTELSTLAVSIRDVRILFEHHGVFACRTQGQGGWQHNNIR  
DGVESITIALPVVISVSGGCDVALFHALLEWNRSLQGMQNAPRYDPLATGQNHGYNLDL  
SITVVHFHHRQRPESADSDCELVRGMVATATSDGMQRLAFRLEDWKNVTIESDDSFSSFS  
QDRARVWRRTKLEECASEQLRLLHERARSSSSGKRDFFAAPFGVVLTAAHDDDSYETVLI  
KLLRGVHLLNLHDKATIASIAPMPSSSVGFCSQKNSDRTDGHSEIESSIYLVRPFVTDTT  
PYNHQQGIPPLPGHTKDDLLRYLTERNLPWREDESNKDPKYLNRNRVRELIPLLAELSEDS  
FRTKRLLPALLEQSRNLSGEVTPRVEKYLQNALVKPETGTAGVDRGESSTSLFSIKEYSDD  
GNDGSKSSSRWIRSQUALYEWMSRSIAEQLKKRQLTKDEGATIVSNQPNRHVLSYESLQRV  
LKQLEMPDRNQWTLLELGAGWIVQRMGDVLMVQEADAGEDPYDASFDENHHRIDWEWSFA  
TSSNNENDAQQDSDKNKRLPGEEEDDSEQMLLIGVSREFLQTTESDLEGLSFFSTTLRIA  
SATMDGADTVVPNDSSNSGKRKARALRFSPWRNSPLKLRFLRGQKVPMLRDETRLLF  
AELPSDPPNPPRLVAVRVKDKWIVSKEFLAESNPDKKCEALSPPFSAIIGAEDPEPPSCAE  
NMEIATIALAVYPKNT

>comp15286\_c0\_seq15; 539 2880 5810 LEN=6107; translated  
MPESTTETVPDLLLLPLPGKLREGQQRSFVVATKRRKRFWVSSSIDXAALAAAVVGGGGGG  
AAPAPAKFESAFVAVPLDAFHPGNRCIGSECSRAHGPSSEDDGGDGSKSPRLRISSTKAQLA  
PLVARTRTSFVGTGTSNIASSTNSLGNNGVLILSPPPTTSTIATNTMMFSDHCHYHPQNT  
SGLRSRTFLLSLRSPRCARTSRQSQDRCGSKRNLHRENHGEETEDPRAEPSLSPIQKPIT  
DKQPPQQPFTHVPPGSQLPTELSTLAVSIRDVRILFEHHGVFACRTQGQGGWQHNNIR  
DGVESITIALPVVISVSGGCDVALFHALLEWNRSLQGMQNAPRYDPLATGQNHGYNLDL  
SITVVHFHHRQRPESADSDCELVRGMVATATSDGMQRLAFRLEDWKNVTIESDDSFSSFS  
QDRARVWRRTKLEECASEQLRLLHERARSSSSGKRDFFAAPFGVVLTAAHDDDSYETVLI  
KLLRGVHLLNLHDKATIASIAPMPSSSVGFCSQKNSDRTDGHSEIESSIYLVRPFVTDTT  
PYNHQQGIPPLPGHTKDDLLRYLTERNLPWREDESNKDPKYLNRNRVRELIPLLAELSEDS  
FRTKRLLPALLEQSRNLSGEVTPRVEKYLQNALVKPETGTAGVDRGESSTSLFSIKEYSDD  
GNDGSKSSSRWIRSQUALYEWMSRSIAEQLKKRQLTKDEGATIVSNQPNRHVLSYESLQRV  
LKQLEMPDRNQWTLLELGAGWIVQRMGDVLMVQEADAGEDPYDASFDENHHRIDWEWSFA  
TSSNNENDAQQDSDKNKRLPGEEEDDSEQMLLIGVSREFLQTTESDLEGLSFFSTTLRIA  
SATMDGADTVVPNDSSNSGKRKARALRFSPWRNSPLKLRFLRGQKVPMLRDETRLLF  
AELPSDPPNPPRLVAVRVKDKWIVSKEFLAESNPDKKCEALSPPFSAIIGAEDPEPPSCAE  
NMEIATIALAVYPKNT

>comp15286\_c0\_seq16; 539 2599 5529 LEN=5826; translated

MPESTTETVPDLLLLPLPGKLREGQQRSFVVATKRRKRFWVSSSIDXAALAAAVVGGGGGG  
AAPAPAKFESAFAVAPLDAFHGPNRCIGSECSRAHGPFSEDGGDGSKSPRLRISSTKAQLA  
PLVARTRTSFVGTGTSNIASTNSLGNNGVLILSPPPTTSTIATNTMMFSDHCHYHPQNT  
SGLRSRTFLLSLRSPRCARTSRQSQDRCGSKRNLRHRENHGEETEDPRAEPSLSPIQKPIT  
DKQPPQQPFTHVPPGSQLPTELSTLAVSIRDRVRILFEHHGVFACRTQGQGGWQHNNIR  
DGVESITIALPVVISVSGGCDVALFHALLEWNRSLQGMQNAPRYDPLATGQNHGYNLDL  
SITVVHFHHRQRPESADSDCELVRGMVATATSDGMQRLAFRLEDWKNVTIESDDSFSSFS  
QDRARVWRRTKLEECASEQLRLLHERARSSSSGKRDFFAAPFGVVLTAAHDDDSYETVLI  
KLLRGVHLLNLHDKATIASIAPMPSSSVGFCSQKNSDRTDGHSEIESSIYLVRPFVTDTT  
PYNHQQGIPPLPGHTKDDLRLYLTERNLPWREDESNKDPKYLNRNRVRELIPLLAELSEDS  
FRTKRLPALLEQSRNLSGEVTPRVEKYLQNALVKPETGTAGVDRGESSTSLFSIKEYSDD  
GNDGSKSSSRWIRSQUALYEWMSRSIAEQLKKRQLTKDEGATIVSNQPNRHVLSYESLQRV  
LKQLEMPDRNQWTLLELGAGWIVQRMGDVLMVQEADAGEDPYDASF DENHHRIDWEWSFA  
TSSNNENDAQQDSDKNKRLPGEEEDDSEQMLLIGVSREFLQTTESDLEGLSFFSTTLRIA  
SATMDGADTVVPNDSSNSGKRKARALRFSPWRNSPLKLRFLRGQKVPMLRDETRLLF  
AELPSDPPNPRLVAVRVKDKWIVSKEFLAESNPDKKCEALSPPFSAIIGAEDPEPPSCAE  
NMEIATIALAVYPKNT

>comp15286\_c0\_seq18; 539 2893 5823 LEN=6120; translated

MPESTTETVPDLLLLPLPGKLREGQQRSFVVATKRRKRFWVSSSIDXAALAAAVVGGGGGG  
AAPAPAKFESAFAVAPLDAFHGPNRCIGSECSRAHGPFSEDGGDGSKSPRLRISSTKAQLA  
PLVARTRTSFVGTGTSNIASTNSLGNNGVLILSPPPTTSTIATNTMMFSDHCHYHPQNT  
SGLRSRTFLLSLRSPRCARTSRQSQDRCGSKRNLRHRENHGEETEDPRAEPSLSPIQKPIT  
DKQPPQQPFTHVPPGSQLPTELSTLAVSIRDRVRILFEHHGVFACRTQGQGGWQHNNIR  
DGVESITIALPVVISVSGGCDVALFHALLEWNRSLQGMQNAPRYDPLATGQNHGYNLDL  
SITVVHFHHRQRPESADSDCELVRGMVATATSDGMQRLAFRLEDWKNVTIESDDSFSSFS  
QDRARVWRRTKLEECASEQLRLLHERARSSSSGKRDFFAAPFGVVLTAAHDDDSYETVLI  
KLLRGVHLLNLHDKATIASIAPMPSSSVGFCSQKNSDRTDGHSEIESSIYLVRPFVTDTT  
PYNHQQGIPPLPGHTKDDLRLYLTERNLPWREDESNKDPKYLNRNRVRELIPLLAELSEDS  
FRTKRLPALLEQSRNLSGEVTPRVEKYLQNALVKPETGTAGVDRGESSTSLFSIKEYSDD  
GNDGSKSSSRWIRSQUALYEWMSRSIAEQLKKRQLTKDEGATIVSNQPNRHVLSYESLQRV  
LKQLEMPDRNQWTLLELGAGWIVQRMGDVLMVQEADAGEDPYDASF DENHHRIDWEWSFA  
TSSNNENDAQQDSDKNKRLPGEEEDDSEQMLLIGVSREFLQTTESDLEGLSFFSTTLRIA  
SATMDGADTVVPNDSSNSGKRKARALRFSPWRNSPLKLRFLRGQKVPMLRDETRLLF  
AELPSDPPNPRLVAVRVKDKWIVSKEFLAESNPDKKCEALSPPFSAIIGAEDPEPPSCAE  
NMEIATIALAVYPKNT

>comp15286\_c0\_seq19; 539 2105 5035 LEN=5332; translated

MPESTTETVPDLLLLPLPGKLREGQQRSFVVATKRRKRFWVSSSIDXAALAAAVVGGGGGG  
AAPAPAKFESAFAVAPLDAFHGPNRCIGSECSRAHGPFSEDGGDGSKSPRLRISSTKAQLA  
PLVARTRTSFVGTGTSNIASTNSLGNNGVLILSPPPTTSTIATNTMMFSDHCHYHPQNT  
SGLRSRTFLLSLRSPRCARTSRQSQDRCGSKRNLRHRENHGEETEDPRAEPSLSPIQKPIT  
DKQPPQQPFTHVPPGSQLPTELSTLAVSIRDRVRILFEHHGVFACRTQGQGGWQHNNIR  
DGVESITIALPVVISVSGGCDVALFHALLEWNRSLQGMQNAPRYDPLATGQNHGYNLDL  
SITVVHFHHRQRPESADSDCELVRGMVATATSDGMQRLAFRLEDWKNVTIESDDSFSSFS  
QDRARVWRRTKLEECASEQLRLLHERARSSSSGKRDFFAAPFGVVLTAAHDDDSYETVLI  
KLLRGVHLLNLHDKATIASIAPMPSSSVGFCSQKNSDRTDGHSEIESSIYLVRPFVTDTT  
PYNHQQGIPPLPGHTKDDLRLYLTERNLPWREDESNKDPKYLNRNRVRELIPLLAELSEDS  
FRTKRLPALLEQSRNLSGEVTPRVEKYLQNALVKPETGTAGVDRGESSTSLFSIKEYSDD  
GNDGSKSSSRWIRSQUALYEWMSRSIAEQLKKRQLTKDEGATIVSNQPNRHVLSYESLQRV  
LKQLEMPDRNQWTLLELGAGWIVQRMGDVLMVQEADAGEDPYDASF DENHHRIDWEWSFA  
TSSNNENDAQQDSDKNKRLPGEEEDDSEQMLLIGVSREFLQTTESDLEGLSFFSTTLRIA  
SATMDGADTVVPNDSSNSGKRKARALRFSPWRNSPLKLRFLRGQKVPMLRDETRLLF  
AELPSDPPNPRLVAVRVKDKWIVSKEFLAESNPDKKCEALSPPFSAIIGAEDPEPPSCAE  
NMEIATIALAVYPKNT

>comp15286\_c0\_seq20; 539 2596 5526 LEN=5823; translated

MPESTTETVPDLLLLPLPGKLREGQQRSFVVATKRRKRFWVSSSIDXAALAAAVVGGGGGG  
AAPAPAKFESAFAVAPLDAFHGPNRCIGSECSRAHGPFSEDGGDGSKSPRLRISSTKAQLA  
PLVARTRTSFVGTGTSNIASTNSLGNNGVLILSPPPTTSTIATNTMMFSDHCHYHPQNT  
SGLRSRTFLLSLRSPRCARTSRQSQDRCGSKRNLRHRENHGEETEDPRAEPSLSPIQKPIT  
DKQPPQQPFTHVPPGSQLPTELSTLAVSIRDRVRILFEHHGVFACRTQGQGGWQHNNIR  
DGVESITIALPVVISVSGGCDVALFHALLEWNRSLQGMQNAPRYDPLATGQNHGYNLDL

SITVVHFHHRQRPESADSDCELVRGMVATATSDGMQRLAFRLEDWKNVTIESDDSFSSFS  
QDRARVWRRTKLEECASEQLRLLHERARSSSSGKRDFFAAPFGVVLTAHHDDDSYETVLI  
KLLRGVHLLNLHDKATIASIAPMPSSSVGFCSQKNSDRTDGHSEIESSIYLVRPFVTDTT  
PYNHQQGIPLPGHTKDDLLRYLTERNLPWREDESNKDPKYLNRNRNELIPLLAELSEDS  
FRTRKRLPALLEQSRNLSGEVTPRVEKYLQNALVKPETGTAGVDRGESSTSLFSIKEYSDD  
GNDGSKSSSRWIRSQUALYEWMSRSIAEQLKKRQLTKDEGATIVSNQPNRHVLSYESLQRV  
LKQLEMPDRNQWTLLELGAGWIVQRMGDVLMVQEADAGEDPYDASF DENHHRIDWEWSFA  
TSSNNENDAQQDSDKNKRLPGEEEDDSEQMLLIGVSREFLQTTESDLEGLSFFSTTLRIA  
SATMDGADTVVPNDSSNSGKRKARALRFSPWRNSPLKLRALFRGQKVPMLRDETRLLF  
AELPSDPNPPRLVAVRVKDKWIVSKEFLAESNPDKKCEALSPPFSAIIGAEDPEPPSCAE  
NMEIATIALAVYPKNT

>comp15286\_c0\_seq22; 539 2909 5839 LEN=6136; translated  
MPESTTETVPDLLLPLPGKLRREGQQRSFVATKRRKRFVWSSSIDXAALAAAVVGGGGG  
AAPAPAKFESAFVAPLDAFHPGNRCIGSECSRAHGPPSEDGGDGSKSPRLRISSTKAQLA  
PLVARTRTSFVGTGTSNIASSTNSLGNNGVILSPPTTSTIATNTMMFSDHCHYHPQNT  
SGLRSRTFLLSLRSPRCARTSRQSQDRCGSKRNLRHRENGEETEDPRAEPSLSPIQKPIIT  
DKQPPQPPFTHVPPGSQLPTELSTLAVSIRDRVRIIFEHGTVFACRTQGGQGWQHNNIR  
DGVESITIALPVVISVSGGCDVALFHALLEWNRSLQGMQONAPRYDPLATGQNHGYNLDL  
SITVVHFHHRQRPESADSDCELVRGMVATATSDGMQRLAFRLEDWKNVTIESDDSFSSFS  
QDRARVWRRTKLEECASEQLRLLHERARSSSSGKRDFFAAPFGVVLTAHHDDDSYETVLI  
KLLRGVHLLNLHDKATIASIAPMPSSSVGFCSQKNSDRTDGHSEIESSIYLVRPFVTDTT  
PYNHQQGIPLPGHTKDDLLRYLTERNLPWREDESNKDPKYLNRNRNELIPLLAELSEDS  
FRTRKRLPALLEQSRNLSGEVTPRVEKYLQNALVKPETGTAGVDRGESSTSLFSIKEYSDD  
GNDGSKSSSRWIRSQUALYEWMSRSIAEQLKKRQLTKDEGATIVSNQPNRHVLSYESLQRV  
LKQLEMPDRNQWTLLELGAGWIVQRMGDVLMVQEADAGEDPYDASF DENHHRIDWEWSFA  
TSSNNENDAQQDSDKNKRLPGEEEDDSEQMLLIGVSREFLQTTESDLEGLSFFSTTLRIA  
SATMDGADTVVPNDSSNSGKRKARALRFSPWRNSPLKLRALFRGQKVPMLRDETRLLF  
AELPSDPNPPRLVAVRVKDKWIVSKEFLAESNPDKKCEALSPPFSAIIGAEDPEPPSCAE  
NMEIATIALAVYPKNT

>comp15286\_c0\_seq23; 167 2037 2566 LEN=2566; minus strand; translated  
MKVALICLFTVFSNKGILNLPQAVSANSHSIGCTDDHTFFLDGQKDKDCAWAAKEQTRR  
RCRKTDFVTTQKVVSHYCVLCKSECKDRSAKASQAEKFCFSDPENYKFRGKPRKNCEWVK  
KKPNKRCWKKDRKSKKRVKEHCPSACNLQCLCRDSTNVTYKTRKKNNTLRKLRWRRS

>comp15286\_c0\_seq26; 167 2053 2582 LEN=2582; minus strand; translated  
MKVALICLFTVFSNKGILNLPQAVSANSHSIGCTDDHTFFLDGQKDKDCAWAAKEQTRR  
RCRKTDFVTTQKVVSHYCVLCKSECKDRSAKASQAEKFCFSDPENYKFRGKPRKNCEWVK  
KKPNKRCWKKDRKSKKRVKEHCPSACNLQCLCRDSTNVTYKTRKKNNTLRKLRWRRS

>comp15287\_c1\_seq1; 324 1 2196 LEN=2268; translated  
XQQSPTNDSSDKRSRGNHRFFLSRKRILAFHREPMIHRRGHKQNLQVSPMRTTTKATS  
KSFPGGSSEHCHRPEKSRGSKHANTNFNTTRLLVVLVLISSVLCPTAHAGTLPTSSSSQ  
LDSTITVTAESEPNNTLPNPLDPDTFDATITEPIFNKNAKSGRTLRTNHDSIAGKKLAF  
TGTSRGGGARARLKGIVGTAQPAEKQVPSFYWAVLHNWLYFSLGFAVAVNIPYLIREV  
DGNPHNGTSPRSIALSGNVEAVDKILTFGGIAFLSALSADKYGRKPLIVWSSLGFALTNL  
LQALSGSVSPSVTTSILYLADFVDGSSCMGPVCQAYVADCSPPSGLASNLGIFQGLSIG  
GAFILAFPIGGFIGNKHGPKLAIRMAAGFQLLNCLIALILTPESNSKAGGNADKKIRLSE  
VNPITGLQKLFGLGGNNSGSPVSLLRRTASLAYFSLSLARCALDAQFINYTNLRFGWTAQ  
SGPVLVMVGLMLAIVPRIVVPRIGLQRSINYGLIVYALGFCAAGLVSQPAHFVGAIAVIA  
FGCGTYEAIQCNRSSSFCGGIVSSXKHEADDVIFCIMRLILHNSVLTLSIPSNFIPCFV  
AKIVAVAI PALQALLANLAPPGESGALLGAVGSLTELTAIGSSMYATLVATFAVPSSTS  
GVDPEGVLEPPSFFWSGVLPNVDSIPGMHFLVACFLIGWAI STPGLNQNRDHPALKTA  
VDKELLSGSAS

>comp15287\_c1\_seq2; 340 1 2011 LEN=2083; translated  
XQQSPTNDSSDKRSRGNHRFFLSRKRILAFHREPMIHRRGHKQNLQVSPMRTTTKATS  
KSFPGGSSEHCHRPEKSRGSKHANTNFNTTRLLVVLVLISSVLCPTAHAGTLPTSSSSQ  
LDSTITVTAESEPNNTLPNPLDPDTFDATITEPIFNKNAKSGRTLRTNHDSIAGKKLAF  
TGTSRGGGARARLKGIVGTAQPAEKQVPSFYWAVLHNWLYFSLGFAVAVNIPYLIREV  
DGNPHNGTSPRSIALSGNVEAVDKILTFGGIAFLSALSADKYGRKPLIVWSSLGFALTNL  
LQALSGSVSPSVTTSILYLADFVDGSSCMGPVCQAYVADCSPPSGLASNLGIFQGLSIG  
GAFILAFPIGGFIGNKHGPKLAIRMAAGFQLLNCLIALILTPESNSKAGGNADKKIRLSE  
VNPITGLQKLFGLGGNNSGSPVSLLRRTASLAYFSLSLARCALDAQFINYTNLRFGWTAQ



SGPVLVMVGLMLAIVPRIVVPRIGLQRSINYGLIVYALGFCAAGLVSQPAHFVGAIAVIA  
FGCVAIPALQALLANLAPPGESGALLGAVGSLTELTAIGSSMYATLVATFAVPSSTSGV  
DPEGVLEPPSFFWSGVLPNVDSIPGMHFLVGACFLIGWAISTPGLNQNRDHPALKTAVD  
KELLSGSAS

>comp15288\_c0\_seq1; 165 260 478 LEN=830; translated  
MKIEEDLCSFVDSMHTKFKPFLRYDKMGIDYSRITYQHKTTPVRNPIQIDEEELLRLQAKL  
REQIKPLDKEAY

>comp15288\_c0\_seq2; 361 64 1914 LEN=2266; translated  
MPLIRRGNPKPLSIDSRTDVENPSGASPAGTYSSTGTRKPRGRISLTLKQWQEIILQQWLQ  
NVVQKFGNCRSLSVFLLFFSCVVAMGIAIAVLTNMLVIGPPGKNYFSPSYWRRTHSLSTQ  
QLLDLRRHFPIRVDINTEHTESIHPGYLLTDKDRMQELLQAEFELVNMTVPKFWDPVC  
AFGQFDGGVREFLNGGKYLITPTEASAIGSFYEGERTIFIAIASYRDPECSLTVEDIFA  
RAKHPERLRVAIADQRKVDGNDPSCRPPGEDSCREAPDQTLCPYADRIDYIEYPSILMVG  
PVFARHLVNRMYRGEYFAMQVDSHVRFVANWDEDLIDQWDSTGNEMAVLTNYMTDLGRHS  
IDPVTHESAGNRRSLMCKFDYEWNP GSMAMHIKFGEQPVKAPTVEDSPMLQPFWAAGFSFG  
RGHFVVSVPYDHYLPSVFGQEEILQTI RGFSGFYDYAPLRNVAYHMYAVRFNWKKRNEV  
PKFTENQAI FGRAVKEQAYHRLIGISGTS DPAPDYHLHEEERYGLGRIRSREQFFNTFGI  
HPETMKIEEDLCSFVDSMHTKFKPFLRYDKMGIDYSRITYQHKTTPVRNPIQIDEEELLRL  
QAKLREQIKPLDKEAY

>comp15289\_c0\_seq1; 565 105 1661 LEN=4343; translated  
MERERVEAQS AHFKSQSEKAHHLPHPEKATKGNNKNPLAGVYLNNDSEHKADAGVAAAVP  
SSLDLSETEAKPRENNNFDP SLPSRRKSNRDVNSIRLSGVGKTAHTFYRRMHS LFFSNSS  
REEYEALFINGSRRRKRRENNVSTGSDFRPRINTNISGVNSIS IATTSTDSPKQVEGKIQ  
VQRVTKPEEACIYVIDNFLTQKELEYFDEKIRSIPFERSFVDNMRYNNENHDYNDDEQNC  
DEDNIIYSGDGTDAKGILDGKKKEGKDPTITFQIKKQTSSIDKTNEAEIASSGNRENQIS  
VKDEEMKKKIVKKRKRERKTLIDDSHRTSTFYFRKLHDKISGLERRIANMLGCWVHQ  
IEALQLVRYVPGQFFGIHHD LGNLLADDSVELPRKDWACKRRLVTIFCYLNTLKEDEGGC  
TYFPKCSHLRIKPKRGRAVLWCNITQDGKDPDKTIHAGEAVKMNSTNVTSSDNR FATKNE  
KATNGSDRSIGKNASIESISKANVVTTKYGLNIWVCEE

>comp15289\_c0\_seq2; 564 105 1852 LEN=4534; translated  
MERERVEAQS AHFKSQSEKAHHLPHPEKATKGNNKNPLAGVYLNNDSEHKADAGVAAAVP  
SSLDLSETEAKPRENNNFDP SLPSRRKSNRDVNVRYLCKIWHSTFPHSYFNVNDDAKDVS  
DFNRYKYFXKTPIVISVRGSHHPFLIIKYE LSAVKKSIRLSGVGKTAHTFYRRMHS LFF  
SNSSREEYEALFINGSRRRKRRENNVSTGSDFRPRINTNISGVNSIS IATTSTDSPKQVE  
GKIQVQRVTKPEEACIYVIDNFLTQKELEYFDEKIRSIPFERSFVDNMRYNNENHDYND  
EQNCDEDNIIYSGDGTDAKGILDGKKKEGKDPTITFQIKKQTSSIDKTNEAEIASSGNRE  
NQISVKDEEMKKKIVKKRKRERKTLIDDSHRTSTFYFRKLHDKISGLERRIANMLGC  
WVHQIEALQLVRYVPGQFFGIHHD LGNLLADDSVELPRKDWACKRRLVTIFCYLNTLKE  
EGGCTYFPKCSHLRIKPKRGRAVLWCNITQDGKDPDKTIHAGEAVKMNSTNVTSSDNRFA  
TKNEKATNGSDRSIGKNASIESISKANVVTTKYGLNIWVCEE

>comp15290\_c0\_seq1; 587 717 3047 LEN=3745; translated  
MTGSVAGAVGASVHQHHHQHQLPIAPLPPMAVGQKRKLVASNSASAVTSVADLQSTTVG  
PRNNISTQMPRRDTAPAMIKTHSGSSLPPTTPVPSMSPSDYWKGLLGEWNVPILDTVIGIE  
QDDTGDRVEFLETTDPDRIEAYQNI ELLTAVRRRDLATLKRIACDNAANNSTMNACNRFGE  
SILHLACRKGSDVVVQFLVGTDRGCNCSLLLRDDYGRTVLHDACWTISPPWVLIKLILKK  
APVLWRVSDVRGHLALQYIPKSAWPQWMSFLTKNKELLRVMIHSYHRVDIAQQQNHVPQ  
NPPQGDQSSSHAPVAVVGSNP IVANHSSSTVTSTSGGLPQHHQQQTSHPLQHNSHTIPI  
AGDRTNSITGATPALPLTTANHSLSATAPASVTARPSTNSVSISEKAHAVLAKALSQAS  
PAMVQALSQGAQARQLKQGVQAIPPVSSASHTEPARQQTADTTAPPPQTHSQTIIKQEQT  
SVVSRPMATASGAPAPGPATAALDEALKAQAEMRAQKRCEQQQVSAAPNLLPHKQEQPTQ  
EQQSPSKQAPLPYAPSI SMIAQRLAGYK KATTIKEKQLKPPQQKRKAVHHP SHGENGEAQ  
ASAEPILNPLPAVPNPLLTSENEMVQNEEQLASPSVQLQSSMVFSTDRPTAASVPNPIIV  
AGQETSSSIPAASTVENSSEATAGTEAKSSGNPSSSCS SLTMSASP SEREQQETSSENS  
ETTNSDSTNAAATSQK KDPQEGTEINHNDKDGESSMSDADYKSDLSESKKR VVG

>comp15291\_c0\_seq1; 793 350 2761 LEN=2966; translated  
MKTHNDNFHDVDDF SHRKRAAKNNK SCTSVPGVLLGCI AVLMTWSKNGSGNNSQGSMS  
PILCVHALIPFQNKTNNDRLTSRHRIQQQNIHAGGRIRPSRTNYHTNARSYDTASTPTT  
TKWKTETSSLFATVEDNTSPQHSNNEDSGGSPFPEPSPRRTRRVDDILYGEADDFTNRD  
REDMTISSLESSLQKEKERSNTLAIRLAYAEKVIAEQKARLEDKRSSLNTKNQALTETRR  
KLSDLERQLNLQQQSSTKLPPKSSSQATSPPWVAKKPPPLTSNERQYPLEN WALNPNTGE

IRATVTCHPSIPDGTTIVTSGLDKQSFQKAHDPNFEFMEGK PANVVTTQTGSKYQLGVKK  
RVAPAAEIANLQPPAVRRPAVGSPPPLQFQQOQTPTPTQQQAQQQQOQTPLHP SNERYPD  
LEFPLTGQSI SNGLGTYLLAGSPKRKPSGRSEI IMGYKCNEQMSLCDVSTPVVIKLSH  
KEKLLREYKNYQKI QDSIEQRDGRGGLFGGIFGGDDSSSSDSSPSSLPS SSPEDPVL  
CYDFFPVCQGS LKYAQHSALVMEKGYEDLRDFEYRLQIMDDAEYVPVTTIDPAVVQAALK  
VAAKGLQTLHSAKVVYD LKAENLIFMEPQDQLEPPAIATIKGIDLESCIPIRGNPLDY  
TPEASPPFAVYHLQGNPYDFVLDYSYDVWSFGMLAYELATGRPYFRGNTPEEIMHILGD  
PSFVPPQLFPEGGAARGDLPLDLVRSCLQVDPQRISVSKILKHPYFRNPIPPP GGGA  
EESDL DSPFNALDQQQLGGTFW

>comp15292\_c0\_seq1; 516 84 1790 LEN=2147; translated  
MARSSNEVSVSLDDDTATISDFREVDPAEVDRLAEELNGLSLDDRERVMEEVHGIFDIS  
TIQHDGLEDALRAMGNELDDYFYGSGSTA AKITDDSDNNAFDDTSTSSPIKYSAYLEARA  
KNSSLVDRNFRFLAFLLSAGNPNKEAALKMKYLD FIRDLYETSDVLF RPVFLLEDLNSSA  
KQQLVMGSYQILPDRDSSGRRIFCYLRDVSFKKLASYREMQLYIYFHQRIMEDEKGMVAV  
VFLHNSTMFTEGSSTFEYAMKLYNILPHRYSAIHLCPNRP SYHLIRSAIMLIVGKESRS  
RVRCHIGSLVECQYNLRPF GIPVGS LPAALELNTTYRKGNIANHTKWLRTQRAKEIAIRN  
ILSGKQVTVGLCQHPEDVNCDAKCDADHFVAEGNKAAGMQAVNIFRLKFVECPFHEDCLF  
GRGRSTMKHPGNVAMRRLIEEKEELYRVALHRTKAEIAWEVVNTIKNGGGRFLKETNLGL  
YTLVDDDETARKKISVAFRDFKSKTVQRRQQSAEQQTRQLQATARGRKTFTGTTDTPDVAMR  
ANFTNMNSDSFCSPQDNQCFLKHFHKKHL

>comp15293\_c0\_seq1; 598 2346 4058 LEN=4133; translated  
MSLFRRKNSQKGI EKEDILQH QVEDLQAEVKRLSNRLVAMQSRVKS KATVSHRTAKSST  
PSSSPRPSAISPSRLALDRKDQTPNNKSF GKNKSMERVFVPKEIDFVSSEFLQNQKEPSR  
PEPSVSNIFPLTDEPQLPISETIAAKHKGNGCVANAKIKGKDLTECSSSIHKKVVDPHK  
NKIQPSTKLTIDGRISTKGQTPMYTFKDGRKVKRIIRKVRVVRQAPSPIQTTPSSVTITT  
CNKTI SATNPKQLSLSSDEKASAHSRIRISNETNLKNRNISP PKKEENKTNNGADDEVEP  
TDTFTSPAHESTGFKFQSEPKYGYIAKQNEKHTAKTSNSIPQVQ GAKNNGAKHLVTKGSH  
FKKDLLSDIRSG LKLNVERASEKLSSPSENILASMQSGMKRCHATEKVT PDKTPGFVSN  
TGGDVQTC KSVHSIQATINPARGLLADIRAGKDLK KVEKDETESTVASKQVECDVTTPLNF  
SGGLLADIRTVGKLRKAETSAPKAQNQSNLLDDIKAGVKL KQIDRSLFQASKKRETPMS  
ALLAKIQQRKEECLRQE AALVLATEESEIDW

>comp15293\_c0\_seq2; 598 2317 4029 LEN=4104; translated  
MSLFRRKNSQKGI EKEDILQH QVEDLQAEVKRLSNRLVAMQSRVKS KATVSHRTAKSST  
PSSSPRPSAISPSRLALDRKDQTPNNKSF GKNKSMERVFVPKEIDFVSSEFLQNQKEPSR  
PEPSVSNIFPLTDEPQLPISETIAAKHKGNGCVANAKIKGKDLTECSSSIHKKVVDPHK  
NKIQPSTKLTIDGRISTKGQTPMYTFKDGRKVKRIIRKVRVVRQAPSPIQTTPSSVTITT  
CNKTI SATNPKQLSLSSDEKASAHSRIRISNETNLKNRNISP PKKEENKTNNGADDEVEP  
TDTFTSPAHESTGFKFQSEPKYGYIAKQNEKHTAKTSNSIPQVQ GAKNNGAKHLVTKGSH  
FKKDLLSDIRSG LKLNVERASEKLSSPSENILASMQSGMKRCHATEKVT PDKTPGFVSN  
TGGDVQTC KSVHSIQATINPARGLLADIRAGKDLK KVEKDETESTVASKQVECDVTTPLNF  
SGGLLADIRTVGKLRKAETSAPKAQNQSNLLDDIKAGVKL KQIDRSLFQASKKRETPMS  
ALLAKIQQRKEECLRQE AALVLATEESEIDW

>comp15294\_c0\_seq1; 675 277 2031 LEN=2298; translated  
MSPVPPPTNCISKQSAPMPPEAVANVVAQSQSKTKTTTASTTKLAGASSRTPVRGNTTI  
AAASTITNSRLKRPRSTASGK PPLNPGGSGSTTTTQQTKKRPYRRTKRPKNYCDKSTV  
TTVTTPTRTSGDGS DPSHNTGSDGINVYDAVLGECEDLLRASTE AQRLGRLKMASAYQLL  
LHTRMVGLGKRFDRSAMMVDQQKARQQQQQHQA EKQQAQNQRKLDMS SASEPETG SVVAP  
GLHGT PRADAAGIDAITSANAGAAGTPVQRT PQSEAAQTPEAPPV I PVALQQLRSILPGN  
LEM DASMMEHLARA AVELLHHQRTGRKKSADGLLASPLNTAMATNPVTAPSDVAGTSASPP  
PAAAAEPAAEVAPSKKSSVAWTPAETS AVHKALKEGKDPRTIAT TLLPSKTVAQVHAFVK  
NQQLLAKVNKLQKQLGAIKTEGSASKVASSTNTPQQLE TGDDSKNNNSNNNVNDKVIA  
TAIASTATSGSSGVP SLPVNIPTAAANSTKGKPTTKTETGTTVA AKGSSFKKAAAAIPKR  
GGRGRKPTTAMNTV PNVMMDV RALLQRANNAKNASGETPPTKD

>comp15295\_c0\_seq1; 525 159 2249 LEN=2249; translated  
MANNNCVRI RRKSVCDNVVRNRGCSLSLAMS AFWRRSWS SFVGVVFLQLWCVLGFVSDS  
FLASTPWPVPSFSVRPPRSAATLHPKGNPIRASNDAT TLLRAIEWAATTIEFDGFYRSYG  
PPSLWRKLTSSVPRREYALENVTFRLGEINRSETDRNGT IYLLLGASSSGKSTVLKSVLE  
CKSLPPERCRGSVRIDSQWIA PVSGKPTAPKQPIA ILLDDRGDISKGYSSETKSTVGERW  
RDCILRELSGKNND EKDVDNNSASWL VSTLLETMAIEIFELDLDSVLADLTPSERYRFS  
LGTACIESSVGRAVAMGSQE QPPREDEEPVFLLPGXDP PARMDGRGNDRGRPERKAFPA

QDRQRMERRGGIGHQPAGTLRNGNRWESRSLHHAARNPSKADPGCWETPFRGLMCSGVI  
LRQTRKQTEEAHKKKTNCCYSVVDEETNRSQNPKNQNEVDFWKWFRNLXLVLEENGYCDEV  
VAAKKSTVLILHGNMIKASGYYSVMCYSFEGLYLLFVELELTGTLSGAVAAADSEFKRW  
VVLELELGSELVVAWMDEWTGAGVSPVAAANVREACRNADATLVPGTGAPGAVPPLDING  
DPCCSSSCFSCCLEESTGVPFRMLDKAAARATAKGGPPKEYWFDLAGPSSRRQPEPWNSLV  
AYALESTDEVVVDVAAGVNPRLVVGSGAVNTAAGAAAX  
>comp15296\_c0\_seq1; 411 382 1332 LEN=2882; minus strand; translated  
MGRISSAIRVVALFSAVCSSLSFVAPALDSFNQRQCGDNNLHRHQSTRPAFGLDDTTDDR  
LVDIRNALEKMNKLSQSKDESHSMQTFETRIRKVISSGESSIPGAGRGLFATKNIKKGTV  
IGFFPVDGIGVEFDDGSSICCGLTPEDQTYFDNTPKSNYLLNLFGRRLGTADFGEAQL  
FIDVNPGRSTDASTPWNGHLVNDGATVLENSQGM LDYYAASQRRKNCVNI PFGPSPLLA  
VVTTKKVKKGEELFTTYGCLYWMEYILKPDEEVADVTEAVQLQARETAQDLFDAMKDAQV  
TYAKQQAEEIESFAQM  
>comp15296\_c0\_seq2; 411 171 1121 LEN=2671; minus strand; translated  
MGRISSAIRVVALFSAVCSSLSFVAPALDSFNQRQCGDNNLHRHQSTRPAFGLDDTTDDR  
LVDIRNALEKMNKLSQSKDESHSMQTFETRIRKVISSGESSIPGAGRGLFATKNIKKGTV  
IGFFPVDGIGVEFDDGSSICCGLTPEDQTYFDNTPKSNYLLNLFGRRLGTADFGEAQL  
FIDVNPGRSTDASTPWNGHLVNDGATVLENSQGM LDYYAASQRRKNCVNI PFGPSPLLA  
VVTTKKVKKGEELFTTYGCLYWMEYILKPDEEVADVTEAVQLQARETAQDLFDAMKDAQV  
TYAKQQAEEIESFAQM  
>comp15296\_c0\_seq3; 411 255 1205 LEN=2755; minus strand; translated  
MGRISSAIRVVALFSAVCSSLSFVAPALDSFNQRQCGDNNLHRHQSTRPAFGLDDTTDDR  
LVDIRNALEKMNKLSQSKDESHSMQTFETRIRKVISSGESSIPGAGRGLFATKNIKKGTV  
IGFFPVDGIGVEFDDGSSICCGLTPEDQTYFDNTPKSNYLLNLFGRRLGTADFGEAQL  
FIDVNPGRSTDASTPWNGHLVNDGATVLENSQGM LDYYAASQRRKNCVNI PFGPSPLLA  
VVTTKKVKKGEELFTTYGCLYWMEYILKPDEEVADVTEAVQLQARETAQDLFDAMKDAQV  
TYAKQQAEEIESFAQM  
>comp15297\_c0\_seq1; 730 211 3159 LEN=5542; translated  
MVSTPRQTPSAGKQEGPSRPPSPSTSSVSSTSSRVLA AKLHSLDQNSAHKAKTRSPI  
KSTPRNKRPAKRRPEPSPGSNRKTIV IARTRSNRSATQKTNVSGMVGQKNDDDSVGDN  
SVSTLGSTESVFDRLYRQSIRTPRIKTPDKNRRVAGSSASGSRSSFGSPVIRNKKDRLG  
AYGKSPIINTKSAGYGDKTPRRRTNQSNPSSSVCKSSERKSSDLENIDTSSVASSISEV  
TDCDGNASVFNRLYHNSKRTEKLWKKPKQFTPI LSPSSNRKSRRSHGKKSRGSADKAAEK  
LKDQQQNQSKKAEDTIVKKNKNTNIKAHTILEKDCEHNFQMR AQLGNGEVASNSSTNLE  
QCQQENNKLS E EYLATSLAKDLKAVNEIGALLPKVYSGCSP TVAGTSVSSTNWEDGFVVG  
IRCISQVATSANKELNDLVAVDNQLETTKAEQE EFLCSTVVS NKSTNQDQPSVTHHASVP  
VMHQSNVAVASENDS CVGALS NKEGECVEKVHTTGPPSSNDT ISSKSSASD NSGFFSLKS  
NRSYTV DQAILRKKMLFKRADHSSPSIYRKHRSFEETTNRTESAITIQAWRVNRAELQ  
LASSMIHSWDSNIQFEC DSSNL RNYFIHKQQALEQAVRAAKCWWILEGLVIKDNWITIVW  
ENEVHVGGDIRVKINLTCGAKSLLFASRHWDSMKLALLLVKASLKKEIRKEYSARLVAE  
RCQQSNEKTDRSATVLRWYRKQKQRNCRKEHEQPF GNI SDNTEDITLSSIPKDINFSSD  
DTISLTRGEKAVSVNQNEAILSSPEVLPDL DLYEKVIEDIPTKTMPLVDTYLYEHHLAATK  
IQCFRLRILV LKAAVKEWPSAMGQLRAALQTAGSL SWSQTNLSLDEFKAARNILCNTIIAKH  
LSGARCSSVGASTSTNSAFENE FISQRAASRAIHNI VRAHLIGLKKYRDKKRAILIQATF  
RGYSTRKRLELEEFSAVVIQFAW  
>comp15297\_c0\_seq2; 730 211 3159 LEN=5604; translated  
MVSTPRQTPSAGKQEGPSRPPSPSTSSVSSTSSRVLA AKLHSLDQNSAHKAKTRSPI  
KSTPRNKRPAKRRPEPSPGSNRKTIV IARTRSNRSATQKTNVSGMVGQKNDDDSVGDN  
SVSTLGSTESVFDRLYRQSIRTPRIKTPDKNRRVAGSSASGSRSSFGSPVIRNKKDRLG  
AYGKSPIINTKSAGYGDKTPRRRTNQSNPSSSVCKSSERKSSDLENIDTSSVASSISEV  
TDCDGNASVFNRLYHNSKRTEKLWKKPKQFTPI LSPSSNRKSRRSHGKKSRGSADKAAEK  
LKDQQQNQSKKAEDTIVKKNKNTNIKAHTILEKDCEHNFQMR AQLGNGEVASNSSTNLE  
QCQQENNKLS E EYLATSLAKDLKAVNEIGALLPKVYSGCSP TVAGTSVSSTNWEDGFVVG  
IRCISQVATSANKELNDLVAVDNQLETTKAEQE EFLCSTVVS NKSTNQDQPSVTHHASVP  
VMHQSNVAVASENDS CVGALS NKEGECVEKVHTTGPPSSNDT ISSKSSASD NSGFFSLKS  
NRSYTV DQAILRKKMLFKRADHSSPSIYRKHRSFEETTNRTESAITIQAWRVNRAELQ  
LASSMIHSWDSNIQFEC DSSNL RNYFIHKQQALEQAVRAAKCWWILEGLVIKDNWITIVW  
ENEVHVGGDIRVKINLTCGAKSLLFASRHWDSMKLALLLVKASLKKEIRKEYSARLVAE  
RCQQSNEKTDRSATVLRWYRKQKQRNCRKEHEQPF GNI SDNTEDITLSSIPKDINFSSD  
DTISLTRGEKAVSVNQNEAILSSPEVLPDL DLYEKVIEDIPTKTMPLVDTYLYEHHLAATK

IQCFRLRLIVLKA AVKEWPSAMGQLRAALQTAGSL SWSQTNSLDEFKAARNILCNTIIAKH  
LSGARCSSV GASTSTNSAFENEFISQRAASRAIHNIVRAHLIGLKKYRDKKRAILIQATF  
RGYSTRKRLELEEFSAVVIQFAW

>comp15298\_c0\_seq1; 186 1 781 LEN=781; translated  
XQVLR AKTNKPSSAAFFVDLCPPVGS RAGRRRAAGASGTS DLLVKAVGPRKGS GGAGAVVW  
DLTAGLGQDSLVLARNGARRVHMVERN PVVAALLGDAMRRLEWIASQEASLDDSDGQKPA  
TALLE TL SLTIGEGKDEL RKREGDRPECDVVYLDPMFPPRQKKS AVKKGMSILHGLLETH  
VRGDE IDE DQKQREEQELLVSAIDVARLRVVVKRPVNAPPLGDGSKKPSYVVVGSTNRWD  
VYXVPGEDLNSEGIVVKNVVA

>comp15298\_c0\_seq2; 184 1 1209 LEN=2002; translated  
TASIMQLIMQH PACLVVISLCLLASTDSFQLQTLAEC SAWRKNKRGTYP TPLFLSE PAPP  
EDDGSEKQKIFVMVDEDEQDDT LLEHAKTTAAALGVPLFFNSDVAVRRESRDSFGFTHA  
LSLVPY EYGTIPDRSTFALAI EPMESSGSSRRRPK KKKPKTKNKPSSAAFFVDLCPPVGS  
RAGRRRAAGASGTS DLLVKAVGPRKGS GGAGAVVWDLTAGLGQDSLVLARNGARRVHMVER  
NPVVAALLGDAMRRLEWIASQEASLDDSDGQKPATALLE TL SLTIGEGKDEL RKREGDRP  
ECDVVYLDPMFPPRQKKS AVKKGMSILHGLLETHVRGDE IDE DQKQREEQELLVSAIDVA  
RLRVVVKRPVNAPPLGDGSKKPSYVVVGSTNRWDVYVSPVKT

>comp15298\_c0\_seq3; 65 1 746 LEN=1539; translated  
XQVLR AKTNKPSSAAFFVDLCPPVGS RAGRRRAAGASGTS DLLVKAVGPRKGS GGAGAVVW  
DLTAGLGQDSLVLARNGARRVHMVERN PVVAALLGDAMRRLEWIASQEASLDDSDGQKPA  
TALLE TL SLTIGEGKDEL RKREGDRPECDVVYLDPMFPPRQKKS AVKKGMSILHGLLETH  
VRGDE IDE DQKQREEQELLVSAIDVARLRVVVKRPVNAPPLGDGSKKPSYVVVGSTNRWD  
VYVSPVKT

>comp15298\_c0\_seq4; 302 1 1244 LEN=1244; translated  
TASIMQLIMQH PACLVVISLCLLASTDSFQLQTLAEC SAWRKNKRGTYP TPLFLSE PAPP  
EDDGSEKQKIFVMVDEDEQDDT LLEHAKTTAAALGVPLFFNSDVAVRRESRDSFGFTHA  
LSLVPY EYGTIPDRSTFALAI EPMESSGSSRRRPK KKKPKTKNKPSSAAFFVDLCPPVGS  
RAGRRRAAGASGTS DLLVKAVGPRKGS GGAGAVVWDLTAGLGQDSLVLARNGARRVHMVER  
NPVVAALLGDAMRRLEWIASQEASLDDSDGQKPATALLE TL SLTIGEGKDEL RKREGDRP  
ECDVVYLDPMFPPRQKKS AVKKGMSILHGLLETHVRGDE IDE DQKQREEQELLVSAIDVA  
RLRVVVKRPVNAPPLGDGSKKPSYVVVGSTNRWDVYXVPGEDLNSEGIVVKNVVA

>comp15299\_c1\_seq1; 106 1 1291 LEN=1965; translated  
XVSVFVSPSFHGGGLGGT PPRLRVAQIARXVKGGWFLPASKIGQDSPGSRIVREWVPGL  
REKASRAQPWQHGNAGAGASVMVPVEPGSGGAPPLXGDPVVGSCSAPRGRSASVESPR  
TMPVNDNRNRNRNRARRRDCSAGGGKWXLGS GEPGPRRGGPDQRAAAAEPQRGSFAV  
GRIPLTATTQAPSPAPLAKKDCLVLAAPLSPGGLPSSVQTEVSVAVADAAFEGLASVSR  
FPGQGPTRLGKRIRSTVPVATGAPPPLWFLPSLAGPSGFPDALVLGFARGGECGNERG  
REAEFGAGEMRRPARCSCAIRRSVSVPHFLPEHFPVEGAGAFSKDPPVGRGW HGGAGFLL  
GAFAFAPSIASPGGGGSHLSEAAVALGDASFRSGIFPWLPNLEWNRLRHRLRIGPGRTAR  
ASIVLGPVVCV

>comp15300\_c0\_seq1; 386 248 1687 LEN=1850; translated  
MKEVLL EEFVSLLEEAKRLEKTGCNRI EAATKY YEGCYVMRQILATDAAAAPPLESSDSQ  
KTASTLGSSSRRLLETKIDHYTKI ARMYFDDSSICGERQQKHTPGMQEQHGESSRSAQS  
QHQCNPQHQPATSVMI ELLDDAISVLTTPSVPVSHNNFP PETIPLTHPHLSSKDDSI TVG  
SPAQENRNEDSRLRSRGVRWNDTIQKQPTQKQRQQKRPQLQQQQQLQNKRESQSHQQ  
KRTQRVTTP ELVTLERQIHDRMNFANSRLSRAIDLDERQGRVLAANNKNND CPAWQWPSP  
LQFMR TNNP DFNCRDTTIEAYMEASEWYLKAIQLAENQRNKLRSAATENARQRHG NRSS  
ISLGTMDATLQRVLPKLRMLISSLDRVEALKKENKRCSTA AVSVAFSNPLGDRKKDRVQ  
ERVTKAPHDSLPRAVPVGFARLLPNHNSFRQSDRRTDRVPRPDNRTPRNSLPLAIPVSV

>comp15301\_c0\_seq1; 565 525 2099 LEN=2337; translated  
MSPSNAKKSLEGNPATFGHIQQPLLKADVSNIISSSGNTADAAYEEGRKPSGSTDSNIP  
SNVTGEGKVSNSEVDRSVSEAGTSKATLGTQSNILPVSNTPSLTSPPNDRQEIPLESSVI  
ESSILGFPEVLSVANKSEGAMP IKPKPPLSVIKVADAVASEGTTKSPTNNSSTTALILPT  
KSTDRTVGAPSTKSKGTARRRGKWTIEEEYVARVIQDFNSGYL NAPAGYTLRSYLSDKL  
QC DPMRITKFTGESCI GKR V FHPAVRNATNAAAIDKAQSELDALERRRRRLEMQQRES  
AKKAAA SAAAANAANRGAVTVQGV PVSMLGSSSQNP SDSQLQQSAVTQAATWLD RANVIL  
MGKFDNGNQTNSSFRGKNCTGTSQQENKDGSTSTQSSAEDSLEHQMKEVQR LIYEGPII  
QQT TAGLP NVLLQTSASTSTPVYRTTNNANTTNTITATLSNSGMVGTMPKHSSSAHVSPT  
LEPADKRMKTSIT TAPDTTGAEGAEALLGFLSSVRASAAAGQEL

>comp15301\_c0\_seq2; 263 1 785 LEN=1023; translated

XPLSLFQLIDSSLVKQSELDALERRWRRRLEMQQRESAKKAAASAAAANAANRGAVTVQG  
VPVSMLGSSSQNPSSDQLQQSAVTQAATWLDNRANVILMGKFDNGNQTNSFRGKNCTGTS  
QQENNKDGSTSTQSSAEDSLEHQMKVQRLIYEGPIIQQTAGLPNVLLQTSASTSTPVY  
RTTNANTTNTITATLSNSGMVGTMPKHSSSAHVSPTLEPADKRMKTSITTAPDTTGAEG  
AEALLGFLSSVRASAAAGQEL

>comp15301\_c0\_seq3; 565 230 1804 LEN=2042; translated  
MSPSNAKKSLEGNPATFGHIQQPLLKADVSNISSSGNTADAAEEGRRKPSGSTSDSNIP  
SNVTGEGKVSNSSEVDRSVSEAGTSKATLGTQSNILPVSNTPLTSPPNDRQEIPLESSVI  
ESSILGFPEVLSVANKSEGAMPIKPKPPLSVIKVADAVASEGTTKSPTNNSSTTALILPT  
KSTDRTVGAPSTKSKGTARRRGKWTIEEEYVARVIQDFNSGYLNAPAGYTLRSYLSDKL  
QCDEMRITKFTGESCIKRVFHPAVRNATNAAIDKAQSELDALERRWRRRLEMQQRES  
AKKAAASAAAANAANRGAVTVQGVVPSMLGSSSQNPSSDQLQQSAVTQAATWLDNRANVIL  
MGKFDNGNQTNSFRGKNCTGTSQQENNKDGSTSTQSSAEDSLEHQMKVQRLIYEGPII  
QQTAGLPNVLLQTSASTSTPVYRTTNANTTNTITATLSNSGMVGTMPKHSSSAHVSPT  
LEPADKRMKTSITTAPDTTGAEGAEALLGFLSSVRASAAAGQEL

>comp15302\_c0\_seq1; 869 1 3102 LEN=3982; translated  
QQQQQNQTQPMHPTWSMQLPFAPPTRHGPPVNPAMPALHYEQAQMRDHAAAYASAAAAA  
AATAAQIAADMASSTAYHSYHNQQQTHNGIPLHSYPNNVIPPMSPMNSIMFPTSPQMFA  
PPTFMPPITELSYQHQS SVLTPNQRSTSGESSQYANQSPRSSEGNKSSRHRHQHHQRR  
RKRQQRLPSSFSNNRNANPNIDSDPRQLCDLSASTNGNWTQQGQKRRRRRRFWNDAG  
SSDSGDP SYNHSNSNDGYNKNCRNRKMAKAASSSSDGGASWITKKKQRPNDSDLL  
GKTGVSALYEWAMKRRTTPTFSMSQNNFNRKKESERTENETQEKTQKESVDAMQQHLP  
KDDEGKRRRLELEHDFEFTTVS IDGVVMTGRGPTKTSAKHEASRRALMTLLPGVEFDEE  
SGILVKLPGSDSQSSQRFVSESSERTQQKTAAITSLLELAPNLAKQLAIGHNSDDDDFE  
HRKGGKTNICKLPGRDSRKRQKWPVHVSSTSTTSDDEDEDSYASRGAYVCSLLHAMVQ  
IDERLTPPEFKYQVSAVTNEPAGQHSLKLRKACVPIKATSTAI PRGFFQCTGTGLKLRN  
FKSDSTRPEDADGGSFDGSLRPRECYRLLRSSGVGGTKRDARYTAAKLLALLFPCECDGM  
AQVKQAAEAARQNYAETRALKQQSKRAAPLAAASRTKGC LPAIRSNENIGPNLLFTALCK  
NAPKVPDQIHQGF TAVLGNLGLGACTHNHSSVCENE FHNVDTSKETGLLRQLSRHQHLE  
ESIDSALQKLNHEDEEGRSLPEELTADDVGRVLRANVDDIHWLETFLFKTKPSQKYNTD  
MGPLFGTILESEKGPSSLSMKRWSSTIVLLL CRAIAPHEDPPLGCAVLT LGFSMQRGKI  
LRIAQIASKSHQPRERFIETLSKFAANMGCALISSPKTSFANLEKDHLQRMGRQACTL  
NEYRKRQEGLDCEPETIHDNIKMHITSEEKHNRPKPSLQSVQEEVEGIEESDSSSPKDKKT  
KRREKPSKRSRFQ

>comp15303\_c0\_seq1; 1337 385 3816 LEN=3854; translated  
MGWSKRRRSRTEDRAVLPGGIVLLPSCAVFLFLLSCNPEVFSALGYTANHFGRNRNPGA  
RKFRPEATRLHDSQSSQPYDAYDDANGFP SMMDEL SKASGEDCFGQRNGTAAATSQNVIS  
NGPGFVPTNGISEKINGY EYRENYLESLELDQSMKEQGEREEEE SKRLSRQTAP EVNNWT  
SIMKWGLFFQKKKKIETVDEVYKDLRDMSPYDCEQVDIYWDQLMPVVSYLGTERRCAKVYD  
ALRVAYRAHRGQARKSGEPFIIHPVEVA ILLAGLKMDEATVMAGLLHDTVEDTDLTFELV  
EGMFGRTVRGIVEGETKVSKLPKLAIPDYADEQAENLRQMFVAMTDDYRIIVKLADRLH  
NMRTLQHMKPEKQVKISRETLDIFAPLAHRMGIWQFKSELED TAFMYLYPLEYKRLSRKL  
DQRHAKYEDTLENSQKILKERLNSDPTLSSQAADV KVSGRMKEIYSLWHKMETKEERNLD  
HIVDVVALRVIIITPKANPEEDEDSDRQVWLCYHVLGLVQHLDGFPFPTRVKDYISFPK  
PNGYQSLHTALILNGQKIEVQIRTNMTHQVAEYGMASHWAYKDGKRRQDGNDDIYNTPWL  
SSIKEWQDEKLNARDFVDSVRNELLGKRVFVFLRNGQILNLARGSTAIDAAFQIHTEVGL  
NMHGVEINGKPVSI SYELQNGDVVSILTGEGRPATDWIGFAKRSARSKLRSYFREKQKE  
SLSEAGKILLMDYLWMHGPLIEKSSYLEEEFSIPSTIEEVAVLLPGNTHYDDIDDLIKL  
GKQHDRALLHSFVSKLFPKVLINAENRSLIPKSVLDAVHERQKKAQDAAA AVASA  
QSSATFQPAPNTDTENETPASNWPKPKLPNKYAGFDGTSTANGEGSIEYADPEHLCTEC  
LPVLGDDIVGTVPVDDTNEATPTVHRTCCPIAQKAINQEAAGNORTADDFSSDEQGSQKQ  
RIDSVSLRQGGYGRFQEV DVVERPVALRWSAEPGAGDEQEHFYPCIEV VHCQDRKLLLLAD  
CSETVSDLSEI IKTGSLTTNEHATLVFLVKIRCLDDLQKVMNSLRQIPSVMAVERRVSAA  
AAACFVLRVSGFLLRFLLCCLASSHRMRLYQNPACAAVWFGI IATTGVLMHGSFGFYAQAM  
VFH

>comp15303\_c0\_seq2; 1315 385 3695 LEN=3733; translated  
MGWSKRRRSRTEDRAVLPGGIVLLPSCAVFLFLLSCNPEVFSALGYTANHFGRNRNPGA  
RKFRPEATRLHDSQSSQPYDAYDDANGFP SMMDEL SKASGEDCFGQRNGTAAATSQNVIS  
NGPGFVPTNGISEKINGY EYRENYLESLELDQSMKEQGEREEEE SKRLSRQTAP EVNNWT  
SIMKWGLFFQKKKKIETVDEVYKDLRDMSPYDCEQVDIYWDQLMPVVSYLGTERRCAKVYD

ALRVAYRAHRGQARKSGEPFI IHPVEVAILLAGLKMDEATVMAGLLHDTVEDTDLTFELV  
EGMFGRTVRGIVEGETKVSCLKPLAIPDYADEQAENLRQMFVAMTDDYRI I IVKLADRLH  
NMRTLQHMKPEKQVKI SRETLDIFAPLAHRMGIWQFKSELEDTAFMYLYPLEYKRLSRKL  
DQRHAKYEDTLENSQKILKERLNSDPTLSSQAADVVKVSGRMKEIYSLWHKMETKEERNLD  
HIVDVVALRVIITPKANPEEDEDSDRGVWLCYHVLGLVQHLDGFPFPTRVKDYISFPK  
PNGYQSLHTALILNGQKIEVQIRTNMTHQVAEYGMASHWAYKDGKRRQDGNDDIYNTPWL  
SSIKEWQDEKLNARDFVDSVRNELLGKRVFVFLRNGQILNLRGSTAIDAAFQIHTEVGL  
NMHGVEINGKPVSI SYELQNGDVVSILTGEGRPATDWIGFAKRSARSKLR.SYFREKQKE  
SLSEAGKILLMDYLWMHGPLIEKSSYLEEEFSIPSTIEEVAVLLPGNTHYDDIDDLIKL  
GKQHDRALLHSFVSKLFKVPQKVLINAEKNRSSLIPKSVLDAVHERQKKAQDAAA AVASA  
QSSATFQPAPNTDTENETPASNWP KPLPNKYGAGFDGTSTANGEGSIEYADPEHLCTEC  
LPVLGDDIVGTVPVDDTNNEATPTVHRTCCPIAQKAINQEAAGNORTADDFSSDEQGSKQ  
RIDSVSLRQGGYGRFQEVVVERPVALRWSAEPGAGDEQEHFYXVRDRRALPGPEAPGG  
LLRDRLGPVGDHQRDPHHERARHAGVSGEDPVPGRPAESDEQPAADSIRDGGREEVWFG  
IIATTGVLMHGSFGFYAQAMVFH  
>comp15304\_c0\_seq1; 255 1 1391 LEN=1391; minus strand; translated  
XTGTQPITWKLDAAMLQNLILVKTFFDTKPFANIWTRHTPMSEQSDVVLEQTDGSSPTM  
CNKDFPEAGAI EPHFAAPRRYRNGKLRHWSLRYGYRHRRTGVLFGSTKDANVSESMH  
FVFATNPGTSRPQNSLRES DRYNGTTNEKNRVKLVHVCPICLQSF DSESELRKHKSSPVQI  
PSDRNGFFVDAVHSSLLKDESQEEAKLKI KVDDDSIPYVDP SRGAPQRCLGP ILEKLCVT  
NACRGKRLRWFLQHSKFENLKFTRVAELAIKSGLVLLNGEVAHDSSRILKVQDTVSI LE  
KKEGTGSFINHDTLRTGKEVPRGPVTIQKLSKNPKVEILERS SNWL VAMKPSGMRTKGN  
APGTLESSVSEQEGIKYASLSSLETSCSGLCVLAKTSTRTQV SIRHFLT VLVHGHLP RDE  
WFP SCTISLPLEAKWRQKKKIKKRKHS AESNSSAPLRSPSQSSSX  
>comp15304\_c1\_seq1; 665 212 2527 LEN=2682; translated  
MVETLKKIKVLTVG DGLSLSLALS RAYGEHHIDL TASVLES DRETFLRVFPEAPLNELO  
YRRVSVMYGVDATQLHRRFAPFGSEGGRESEHMAKQKVSETPKIWDLISFHHPHLGISNL  
EEDEAKRAILHHCLLSHYLHSAAKVSKLVHVC LTGTQPITWKLDAAMLQNLILVKTFS  
DTKPFANIWTRHTPISEQSDVVLEHTDGS SPTMCNKDFPEAGAI EPHFAAPRRYRNGKLG  
RHWLSRYGYRHRRTGVLFGSTKDANVSESMHFVFATNPGTSRPQNSLRES DRYNGTTN  
EKNRVKLVHVCPICLQSF DSESELRKHKSSPVQIPSNRNGFFVDAVHSSLLKDESQEEAKL  
KIKVDDDSIPYVDP SRGAPQRCLGP ILEKLCVTNACRGKRLRWFLQHSKFENLKFTRFA  
ELA I KSGLVLLNGEVAHDSSRILKVQDTVSI LEKKEGTGSFINHDTLRTGKEVPRGPVTI  
QKLSKNPKVEILERS SNWL VAMKPSGMRTKGNAPGTLESSVSEQEGIKYASLSSLETSC  
SGLCVLAKTSTRTQV SIRHFLT VLVHGHLP RDEWFP SCTISLPLEAKWRQKKKIKKRKHS  
AESNSSAPLRSPSQSSSFLKPDDESSQHENRKT VSAEVYPRESTKLAL EKSLKNPLRL  
STLEVVTPEPSSSICHYFRQEGFPVVGDSFCKQEYSRLKRSIRNRLKDKLCIGCFKVEV  
EVTNGMDQSNDETASRKHVIEIQSPDKFSATFWEKFLEETAASGNAIAT  
>comp15305\_c0\_seq1; 772 354 2201 LEN=3827; translated  
MFASAVKIHP SKLRREGKGEKAKPHYSRNKHRGRRRQNSNEQNTKKGF FEDPIVVVESE  
RHEDSFFSTASEFFRPVRTAFVRI TDDASILLKEVRPVRDALDGVVEAIPLVWKGYYLGF  
ESLLNCSLTGLTENGLGGLVLGATDGSRLLSMTVVGLLAGAYQGVKGIHIVPESIRAMK  
EGKTWDKRLREWFFYSLDAEEQLLVSERENNETDHGHPRTGKTSRVRKKRSLRKNVKDS  
TFYDIFNVPVDANNT EIKKAYYQLALTLHPDKNDELSATERFAQINKIYRILINEELRAI  
YDQSGSCYLDRVTADTELTSDAQVNPYRFFSDLFESNGMGFELYVGEDLAIATLV DNI LG  
LTD RADS RFQSPTKKFWYESPQQRTRQVKIASHLRLRIDNYVKSDFGLVSFEKFEESCRY  
EAEALVAALDVVNNARSLNNGVATGIISETMKYLVPPIKPLLNFFVTRD TVHNFHTNH  
NLSRMAQKAMVKYYRHSVVKVEGTL DGC GDEDKAEDLNTLLKAFSSPKMWKVLQEFNAND  
VHKT LREATKRVLD DDCGSDYTNRLKAKALNTLGRIFYDVANNYEKERVPRDDFDARILQ  
RMVKNALLQSVENEK  
>comp15305\_c0\_seq2; 772 354 2201 LEN=3923; translated  
MFASAVKIHP SKLRREGKGEKAKPHYSRNKHRGRRRQNSNEQNTKKGF FEDPIVVVESE  
RHEDSFFSTASEFFRPVRTAFVRI TDDASILLKEVRPVRDALDGVVEAIPLVWKGYYLGF  
ESLLNCSLTGLTENGLGGLVLGATDGSRLLSMTVVGLLAGAYQGVKGIHIVPESIRAMK  
EGKTWDKRLREWFFYSLDAEEQLLVSERENNETDHGHPRTGKTSRVRKKRSLRKNVKDS  
TFYDIFNVPVDANNT EIKKAYYQLALTLHPDKNDELSATERFAQINKIYRILINEELRAI  
YDQSGSCYLDRVTADTELTSDAQVNPYRFFSDLFESNGMGFELYVGEDLAIATLV DNI LG  
LTD RADS RFQSPTKKFWYESPQQRTRQVKIASHLRLRIDNYVKSDFGLVSFEKFEESCRY  
EAEALVAALDVVNNARSLNNGVATGIISETMKYLVPPIKPLLNFFVTRD TVHNFHTNH  
NLSRMAQKAMVKYYRHSVVKVEGTL DGC GDEDKAEDLNTLLKAFSSPKMWKVLQEFNAND

VHKTLEATKRVLDDCGSDYTNRLKAKALNTLGRIFYDVANNYEKERVPRDDFDARILQ  
RMVKNALLQSVENEK

>comp15305\_c1\_seq1; 735 122 2518 LEN=2633; translated  
MVTCKSLMGRFRNVTATATARLQAFSTSPPTVAPSSNSAHERVVLALYRQLLHWCDDET  
DNNIPLSQSIPPIHLSPQICSSSLKRLAASSGKKS SVGSNHYHYGIFSPRSSLVKETGIT  
IHSVPTSVEAKQLLRAVFRMNAATTEETDRKEQLTLAF EWMKGLNELTQGLEEMKTNRSK  
HENREGVNYRIGQVVKHKAAGWRGVILGNRTDEDVKSSNATSLTSKSYASADLDHGDSN  
DDTIVYDVALDWGDAALLHSAKHPAGLKNVYQSHLTVVDDPDLMRIRSATDQFRRFDLES  
RSFVPGDELAYVYPNDKPEDETEHSSWSSYENPSDES AKNIIDGIQLTAKYLRQIILGFT  
SAPEIRKLHLLSSYLDRLT KLANRDVVPNEDRFRDKQSSNIDNENFDKTEQDDCHQDGI  
STQTLMKWQLQRFTELAVEIEDTMWARRKALETDRSNKFS LGQVVQHKKYGFGRGVVAVD  
PEPAYDVS RDGLQHIDNPEEYPFYHVIPDRND AIVAFGGERPWRYVCEENLEPCPKDNR  
GLDV DLELEWNTDVKNKYVPPPEELKLRHGEQLEDAEMTEKCLGEIKDAINCIFFSIREG  
TRADNEMI EANNIRDIVDRLSMDNLFQILKHVDNSDTAAVVTDAFKEIWKGHKDREIRYK  
FDTGVNYLLTGKTEKALAI FGEVVEDEPMFAEAWNKAATCEFMVGNLDASMAAAQKTLEI  
VPGHFQALNGLGLVYNEKRDLTHARDNFRRSIELDPWSPVAPRLSVCLDTLKRWKDNSIL  
NVEGNPDSPEWKNPITGE

>comp15306\_c0\_seq1; 346 480 2045 LEN=2163; translated  
MVI TNSDSNTTLVSLNDNPKHGTP TSDPCIVIGQSGLLEFVEPSSSTTDTTTSAAAARTT  
VGVPTDLWIATSGQARVPLYLPTPRDPI TVDEYLS ETYAREGHAGHEEGESE TVTGRDL  
RTGARALCESRDRLLSAKRRTLGAATE TPPTASTNPNESSHEAQHRLLYVAQGERANAT  
QAQYDVLASDKATTCHILAFRSSCNSDGSSECHR PQHALPLASITHLDGPNYEECVREMI  
QEHIDHHSRCEGDRSDHTCFDRRKS KRTRCGTSNDSGGITIEVHVVGGFDDCDGSSSDI  
TDWLLRLLANLAGEHSGKGVEMVVKTLAVSSSNNAIDRRGNHTPIGRGLGIDVRSGEVFL  
ASCEHDAMGPAHLLRSVRLWSRCSQEETGGAI SKGLSVVHRSSDAERLLASVRGYGLFWV  
RPFVLR AIPDARALLGLPDELLRMYTSTSP EVEEEGFCRDVRDLSLFLERLCVVEGDDGS  
KLF GKAFDRPLVFGIYRGGE GAPGSGGKASPKKGEWQLLSP

>comp15307\_c0\_seq1; 1382 270 5822 LEN=5990; translated  
MNDPRLGNNGRSTTAPESLLY GSSGSQQCVPIGNPSDAYSSPFVSNYDFLKDEDPDFQL  
MDEVLWGPDTNTTTDELAPKPKPGR LDDPCGCRPKWEDLQTKPKSELMQCRDLSCVLF A  
CLEECRSNCEAGEFCGNRRIQRKQWKQLEVFQTERKKGKGLRVLEDVKQGELVTEYVGKAV  
NKLYLNHLFRRYATERKLY IMAITNDIYLDARKVGGVARYINHSCDPNCQVERWKV R GIM  
RAAVVARKDIPAGTELSFDYQWERKRGRAPT KCYCGAKNCRQTLEVSRSMEEEEIERRLS  
QHWK KPMISRAGKEIVNRCIKLMSKEVQEYYPADVQYDENTGKHLLMYRHLDDEVWEDL  
KTEDWMI LDEEAEQFIIRKKSTNNHPSRPSKNRSLIGGGHATAGMLLQGGQQGTTMNFV  
YTPSYVKSALFDRHLIERCQRSCRVTITPQQLSRDEIQSNKDHPEYNQRMKALKDSDPGV  
VWKMTLAGSDVPKARQILDKNVAYIVSKAAEGNGANGKTPTKANGSLATAAATPAK TAAA  
AMNSNEFVFPRAIVDSIKRRLPTLRERCRSVNIAFAPSDSKSKQIAKLIVEGSLVSDVES  
ATEFLWKQLSTACEEHNTPKTVSGIFEDLGLLGGQMSNSDFNKLLDFDSAGLESMS SPSM  
AGGAGSASSLKHDAKKDL SRCSPPFFPSFEAAQRCTI WVQAESDMGRISRDNRI VNVATPN  
TPRKLYFGCDPKSVSRLWKLIMARAMEVSRGVKYLFLGPDR IYLPQMMQNSGQFFDFVQK  
ASSASVTIDTMTGNHLRIDGEDK KLYHQVINQSSDIPVGQRVTLAEELIRLQIELYRDH  
CIRQDNWIFGRDWSFARKSAKSSNESPNNTSGGVAGRNVLNNNGVNFNDKSLTNACFEIG  
DIVASLKLGDGVAHAASVI IYRFLTVQSQQGSLETQVKIRELLLACVF IANKAQKACRWK  
KLD TILAAAYESFYPGVRFDS SKEESLVWEEKVIAAESEILVRLNHDVVFSEGFSGIAATA  
VESGAMDQRLAKYTLAFAVSGP ILAGGADLWLN YGEEYIFTACAAFLDAKFENLFTALSL  
IPIKVLQTAEIIAASVERTGF GKKNLNNHPIMKEGKGLNDRLAGIKTL CVFLMSNKQGG  
NGQVSIMHSETELRYKIIRD RNKQRR IYPNVSMSVIENLIIPSIDGISAESKCNIFINKN  
RSITSYDLILEG SWRAIAIASYLLKEATNDEAEGKDNLREPDDSGTGAIHEQNSIQAKGE  
PGLLQNMNIEDGWSGTIQSEVSNQAVWGRKTGGKCCVPGK IKAADLRKGGLRWWIPPRYG  
PSTTGSICDMFLNSADDKLV DALKNL CDGSQGESPSF S ILSRSSTEKSSVNGSSDRFSAL  
SLHRWPSEKVAAREQLRAKKDAKKGKSKKAVMQVGFSPAALQEMQTLRQLHGLIKSPRG  
HPNLYLPIGVVLPSEQQNKE S DLASNGIKSGFDLKRIDEDIFSLTRSSLENEAAAQKEKE  
RKEMVNDRHVLVIEPTPFI LQR FVQKRRDCKEEDQKILSPVIFATWCFD LLSAVLHCHGN  
GIILRGTLNLDLILLDHSGVAKVGS LYSKSAFNKDDTKLNMNVGLLKQAREKKKDLDRR  
KENPKFVSDEQDDVLKDPYVPPPEMLLGS PRYTKETDMWALGCLL SHLLLKNKPIYSGKDKP  
NRQALLSAIYKLVGIPAVNNFELGAKFPYKPKPEKRYRPGVEKAI PKLMKGGDDAAYASA  
IDLIRQMLHLDPEKRITAKEALQHEYMAKYIEQSNTQVFQETFVRDWINLKMRLSKSSED  
ESKERERGIKRKAMLMAASRSATSTMEEDDLYDMGDILGVGETKKPKTT

>comp15308\_c0\_seq1; 333 216 1487 LEN=2017; translated

MGPVNIPIAFYSSALLILLLYTETGDEGRGSSAPAVAGWLRGILTAACWLPPLATLCTL  
ADDALRAAAARLWGS GSGGEATGPRALVTGAGRGIGREIAVGLAGRGVHLVVVGRNLK  
RLQQLEELGISC PGVEVFP LRCDSLDPSEIDRLISSLEDKEAPPSVAPGGGSLG AIDV  
LVNNAGLGDSSDF FHEGCRLEKVHAVLSLNVVGTIHLTHRVGRAMRHRKIRVETKSESET  
NANNETSPPRRSKRIVFVSSIMGLVPGNAGCAVYAASKAFQRSFCASL GRELELEAASSS  
GCYNNNIVSVTCVLP GAVASTGF CDAAGMEDSPVFWLPRFCRVALSPREVAGAVVQTA CL  
SPFPPPREIVGVLYRLTGHVVADLFPARATQILGELLTRPWGKGAARRGAGGSNSRSGD  
GDR

>comp15308\_c0\_seq2; 333 216 1487 LEN=2045; translated  
MGPVNIPIAFYSSALLILLLYTETGDEGRGSSAPAVAGWLRGILTAACWLPPLATLCTL  
ADDALRAAAARLWGS GSGGEATGPRALVTGAGRGIGREIAVGLAGRGVHLVVVGRNLK  
RLQQLEELGISC PGVEVFP LRCDSLDPSEIDRLISSLEDKEAPPSVAPGGGSLG AIDV  
LVNNAGLGDSSDF FHEGCRLEKVHAVLSLNVVGTIHLTHRVGRAMRHRKIRVETKSESET  
NANNETSPPRRSKRIVFVSSIMGLVPGNAGCAVYAASKAFQRSFCASL GRELELEAASSS  
GCYNNNIVSVTCVLP GAVASTGF CDAAGMEDSPVFWLPRFCRVALSPREVAGAVVQTA CL  
SPFPPPREIVGVLYRLTGHVVADLFPARATQILGELLTRPWGKGAARRGAGGSNSRSGD  
GDR

>comp15309\_c0\_seq1; 33 1 319 LEN=435; translated  
XRYLTILSSFYPNALHDIHSTPLTHKRFLNRYKGSYGP AIRAGEASFPPGTPVDG LLVC  
GDSTFPGIGVPAVAGSGILAANSVSWDSIGPQM KLLKEMRSSTASV

>comp15309\_c0\_seq2; 546 119 1909 LEN=2025; translated  
MVNLQGSLLSLAFLVTADAFV VTPKIKTGDRTDVKKLNRINGSKHLSSLIDTADQSNASL  
LDNSAYDVVVVSGSIGGLS CAAMLAKYGYSVAVLEKHYIPGGA AHGFKVVRTK GIEGDFLF  
DTGPSFFAGLNPDLAAKASNPLRTVLD AIEESVECYPTTFGLALPEGNFVHTTDFGKSG  
GVIDQVDGKSGTEAWSRL LKNMEPLAQAVDALPTAALRGDLGTALTAAPYLANF SKLNPL  
ENLKLTKPFQNILQNSGVPSSSFAQRWLDLLCFCLSGLTAEGTITAEMAMMMGEFYDEDA  
IMDCPTGGSKSIVEALVRGIEKLGGNVFCNAAVEEII IVEDGKATGVRLSKGRIVRAKKAV  
VSNLSVWDLYGSGIIDQSLFPDSL VKERMATPVGKSFMH LHVGFRA SKAELKELQAHYMY  
IDDW SKGIEGEDNAALLSIPSVHDDSLAPEGYGV LHIYTPATEEFDRWEGLDRKSDEYKS  
LKEERSQYLWKVLEKIIIPDIKDRVVASQVGTPLTHKRFLNRYKGSYGP AIRAGEASFPP  
GTPVDG LLVCGDSTFPGIGVPAVAGSGILAANSVSWDSIGPQM KLLKEMRSSTASV

>comp15310\_c0\_seq1; 352 1 2080 LEN=2633; translated  
XKDTTKQPRGPPWLQFN DSTV I KQRRQVTT P QNLQEAR SNEQPNRDRPKALT KKNQPAL  
RSTHNNIITNTMEESQDEGKSANIALPPNAANSIGGSASTAASVSEALPARVTRRRRPL  
PESQAKRRMEAMVSGIDHKLAAAFILILVLYVGITIGTFLSIDSQDFRHEVIEQASPKRM  
KMIKNVFLSAENKQQDNANKKQIDPHLRAEDISDITTLHSTFPVHASKDLEWIDHPGIF  
LSDPKKIKSILEQFKDKLPQNGKMQVPKFWRPSAYGPEGVRHYLGNYGEK LISPTQALQI  
GSRLPGRGLETVYISVAS YRDEPCQPTVEDIFLRAEYPERLRVAVVEQRVEGEDDELIPR  
CGEPLRPCSEDPDQVMCKYAHQLDVFVVPAILSVGPVFARHIANRMYRGEYFAMQVDSHV  
RFIHHWSDLSIQWKS AKNEMGIITTYLSDITNSIDPVT FENRHPNRPIMCQTGYEGAGK  
LRHLRHGQQPEGLPGIHGPTLHPFWAAGFSFARGHFV VQVPYDQYQPMV FQGEENMGL  
RGWTYGYDYTTAETSVAFHMYAIKDNKAKRKKV KLFWENS NLYPGA AVQGMKRLNGIIGT  
GDPGDVYYK EEEKEYGLG SVRPKEQFYRLYGIHTESKTVEENLCRFV GKPMQKKFKPYLR  
ENRMGIDF SHVAFEFKNPDKLEERKHKRKGHGK

>comp15311\_c0\_seq1; 755 209 1792 LEN=2070; translated  
MTSKETEYTC EEVVLGNRKDASFSGMQTASSHGFTSKGGKIANQLSSSSSLSAKKAKQGL  
PLSTAAINRSKMQASFAERTATEMEEIVN WYK KYEGERLKKTNQSSQSMPD NAFIVDDF  
EDDAANDDANYSGGDCPEQLYDTNCNSFIGVDEEPLHEKLIINDDES VVVKDY YTP IQRA  
RKVATPRTSSLTKKSPRSFFSSAVRSVTRSI SKRDINENSECANVPPRDIKIVITDDDES  
SVISSITTPHFERRKLPQYLP IADGALEGEKSLLCDIKTVEEVDAEFREKEEEVLSMLSP  
PKNEQRSTRPVETSDNYRDEEKEVLAMLSSTSAECCASTQS QNDAGANHTETTFFDSTSGK  
GSRVASTVISNCETTKQAHTQIEAADDLIRRTKEMAEIIAQLPDSSSSSSNDLGSDDGN  
NDIVDVYNTSNGDILANSSVTA FETPSLSSEM KPPIQLEWNLENSCTDHSIQSKAGIGMQ  
RENTVDGSEENLPNQESKGMILGIQPRRYVPYVVPITSMIVGWVMTQ

>comp15312\_c0\_seq1; 2354 139 6423 LEN=6725; translated  
MIGSRAWCALMRRDLLYRRRNIVGTVFELCLPIV FVWFLVLIKGAVEDSESFAPEEIPAF  
FPTNNDAYRFFSFTDYVTA IQAQRKCTPTEGFSFDWSSFAGRTLQTTTCQDNLSEFSACT  
MGGICDCEVLVSMPDSSGCGVYQTD FGETSIDELCPAYCGVCGEGSPPSSMPDGMPTF  
GAESKLGISGIADSGYNWQVPFVKCDSRFCKEDGEDALPFCEYLALGVAPATSDDAVGLE  
QAKAFRDYIYQRHPVLADSSSLPFD FEFVQMMSNKAVEEYVKAEEYGEDVPKLALAVVF



DGKSDPTINYNYAIRANATGFNAPEEEGRPATLTTPPTDKLFETFARRDDESCPDLVGGT  
PDVGPDGTSTCTVRYAANGLLTIQRLVHDFIITDSGAAAAGYSVSDGGVQFVFPFSPKSYVW  
NGFYATINQFAPLLITLGLLYPVSAMVRYIVLEKELRQKELMKMMSVKESDIGSWFVFF  
FVHFHFTAIGTAAVSTLLWEGSSGALLFFFWMFTFGAIVTFMFLASLFSKATRATLVSL  
LVFFVGYFLTLVADFQNSSAGLISMVSLHPVGAFAGLQEIQRLEDAGVGLAVSSMVETD  
SPNGYTFANTLFLNLLFDMIFWGVASWYSNRVSRGDFGQAQPWFYFPPSMSYWCPGRASSPT  
GDDSEIEYPADVPVEPVSSALREQGSQKQKIEIRKLLKVFGEKTAVDDLQMNLYSGQITA  
LLGHNGAGKTTTTISMLTGMLAPTSGYATIGGKDIRSEMDGIREGIGICLQHDCLFPQLTV  
REHVAFFARIKGMYSKMSYKEAEAKVDASIEDVALGEKRNTLSKNLSSGGMKRKLSVAIAF  
CGDSETVLLDEPTSGMDPFSRRFTWNVIRQYRQNRCIILTTHFMDEADILGDRIAIMEAG  
QLRCLGSSFLKKTGYGVYQLTIEKKSRSANKAGTPSDDPAVSKIDEKIKNSVLGSVE  
SANLLTNVGEISFQLPLGASENFAPMFDQLEELVANSEIVTYGVGITTLEDEVFLLVARG  
ATPEKAHLESADLEKEASSKVENDRSVRSKMELENDGLFSRHVSALFKKRAMNFKRDRKA  
WCCTTILPSVFLVIGLFLFAFVTPQRNLDALVMDLDDYNVDIKADLGPKNPIAFNTGDNF  
ACQTGKCIYKVIIVSSEATDELYYFCGTQSYIGNGTQCSISSYEDVMLQIDEAGAEPAQN  
IVTSVNESSFSLSDTAYEYAATQYGGIFFQHDLSSSTVLDLDDTDSATLYDIYSVGSPPMFA  
GMMDGIDMESIQPMLESFGVDTSAFNITQLMGMGFELDFLKDLMPSVNVVGMNYSEAAV  
LRCIEQAGNYSTEADCAQAGAGIYVIQYNHTAIHVAPLYQKLADALVREAVGDSDFKIQ  
SVIHPLPVTSYEDSLGEADDAFTAFLIILSFPFIAGSFATFVVQEKQSKAKHLQTVAGV  
KPTAYWLSTWLWDIANYQIPCWITVILMFAFDVSNLTTTTEGVLGAVITLLILFGPAVAS  
YSYCVSFMFTSPVCNLILISGFLIAFGGTLAAFILRLIGSNPVEKRENLLAASIVEW  
VLRIFPPFNLSRGLYSAINLQITIFLAGQPTSAWDPEACLWEIVFLAWQSVGYLLLAMKI  
DEWAANPRAVMIFRKLFCDCSSTSKVSESNRSGIDDDVAAEEQRVLTGGANDDLIVLSQ  
LGKVVYNGKRAVDLSLGLIPPGQCFGLLGGINGAGKTTTGMMLTAEFPPSSGDATLAGYSV  
ANEPEKTRRTVGYCQFDAHFTNLGTREHVELYASIKGIPVSLVKEAAAALQVGLSDS  
DSDRLAAGYSGGMKRRLSLATATIGNPQIVFLDECSTGVDPVARREIWEMVSNMVS DKRV  
PLEERTSVILTTHSMEECEALCPRIGIMAGGNLRLCLGSAQQLKSKFGQGYQLEMKIKNTE  
TTDKDYLDNLSKLAKFAGVTEEEAIEKGDIEIYLDFAKMEEALTELSPNGFLMANVTENSP  
NPAGHLVWKEAKSPSGIDLDELAEFAASELRMRVLVDFVNQTYPDNILRERQDTKTRYEV  
SSKGVRIIGDIFAAVEANKDRMLVAEYGVQSSTLEQVFNIHAAEAETKQGTNDS  
>comp15313\_c0\_seq1; 636 261 2495 LEN=2701; translated  
MKINHIIPLIATLTVSRVAAEGTDGIDLGGGVVTRSDVKYLADLSLDVDRDIDQSISSGNH  
DDALTIYISGRNSGRKLTLSSELANEPIVEATPLFLFQLYGLGGRSINLSELSGNAAYA  
DSYVRSIAIQNGRSNASMAAMILNVWMYAGDILYKGMSTCEKKTEADNPSQFNVAGGGLDE  
FIALWIGSGQTHGSSEGYSLYALAEADRLFVSAEGTNSDITYVETALAEAPVKNLKLKY  
QEGASIFSVPGVCTKYNPDSPKQFWSVIKRIHTQMYIPLMQMLIISILEQDAVATELHAT  
AII PQVSQCRPSVYDRLKEELLEGEPNFQRTNVILEDLLDFSCFGITCSDIGTVVKDYG  
FKLPECLAPRDNAPMALYKPSSTAQPIARIDLVDLQIRILTSMGFSFRFAKLWYLYGRNSP  
RQRDSENDPHEFYSLSEFAISTSRRNAEPYSAFISYHNDPKYADVLIQNTFDGIGKWD  
TKSIEQRS AVITEASSFLVLYLHLIAQINDAVNYCNNVDEDGAYEMTHPWDEVAAL TIGS  
LEGMNEGGSSSVLDGQMIWGLGSRRGYQFETVKNQGYAKVNSRLEDLIYAGRGEIDAFQC  
DMLGQTAKNIKTITLIPLLQSVLKYAILNDEL PATSSANLALGEIFALAIIPILQIYDP  
PSAQILEENMIHSGIKPVRGGAQQVANAIGSAAYAMGISVREL GSTSEVDP SLLYGGSS  
SPHVHSFQLSSTSLVGTILALLF  
>comp15313\_c0\_seq2; 571 261 2612 LEN=2818; translated  
MKINHIIPLIATLTVSRVAAEGTDGIDLGGGVVTRSDVKYLADLSLDVDRDIDQSISSGNH  
DDALTIYISGRNSGRKLTLSSELANEPIVEATPLFLFQLYGLGGRSINLSELSGNAAYA  
DSYVRSIAIQNGRSNASMAAMILNVWMYAGDILYKGMSTCEKKTEADNPSQFNVAGGGLDE  
FIALWIGSGQTHGSSEGYSLYALAEADRLFVSAEGTNSDITYVETALAEAPVKNLKLKY  
QEGASIFSVPGVCTKYNPDSPKQFWSVIKRIHTQMYIPLMQMLIISILEQDAVATELHAT  
AII PQVSQCRPSVYDRLKEELLEGEPNFQRTNVILEDLLDFSCFGITCSDIGTVVKDYG  
FKLPECLAPRDNAPMALYKPSSTAQPEEITFCSAFFVDKEXSTSELALTSQFVASILMV  
VMRVK IARIDLVDLQIRILTSMGFSFRFAKLWYLYGRNSPRQRDSENDPHEFYSLSEFAIS  
TSRRNAEPYSAFISYHNDPKYADVLIQNTFDGIGKWDSTKSIEQRS AVITEASSFLVLY  
LHLIAQINDAVNYCNNVDEDGAYEMTHPWDEVAAL TIGSLEGMNEGGSSSVLDGQMIWGL  
GSRRGYQFETVKNQGYAKVNSRLEDLIYAGRGEIDAFQCDMLGQTAKNIKTITLIPLLQ  
VLKYAILNDEL PATSSANLALGEIFALAIIPILQIYDPPSAQILEENMIHSGIKPVRG  
GAQQVANAIGSAAYAMGISVREL GSTSEVDP SLLYGGSSSPHVHSFQLSSTSLVGTILAL  
LLF  
>comp15314\_c0\_seq1; 782 1 3230 LEN=3312; translated

RKGRGSDSSSYGVKADIYSLGIVIFEMYHPRFGTYMERSSETLNRLISGKPGERFPADFA  
QNAKDIITWCLERDPAKRPSAKELLKSDLLPRKIEVEQRYLEEALELLSNSQPEGLTQA  
IVDAIFSKKTSIDIDEFTYDTDVAVKANNIGTTTTTRTQTPSEGLMRAFRCIRNGTIDVKSLS  
MSNMSMVAATSAINRTRNATKLGKEIGIKGDSKRSRKQTVGILASRAAAAIAIDGNLDGV  
LGKDRIVEMITRRLANIFQAHGAVHLKSPLLRPRYSSSDKTIIGGPAEVLNRRGVALCL  
SEDLTASFARAVGRGGQSASNLKRYEIDRVYHKSLSGGHPRTKLEASFDITQDESSLKSY  
YIEAEAISVVSHVMSQLEIPNTSDLPFGARPLWYLRITHTRLADGILDICGVKGNALRR  
LCLRLFTEITAPTPSSLFQLLPRPAGRTRATSRDGPVTRTEKLEQFIEAATRHHSMTSS  
VADKLRLLLKDCMPLPVNINKAIEVLKKAIEKLLKAAQVLSKTFDGGKELDSRKILNHLEN  
LTKTLQSIGVRTAFDLHTADEKPTTNGYNCPLLLISLDLGLRQQRKHYHGQLLFQCIAPPS  
NYFNLSLRSTEDVVRTTNDSSLSSSGKGIKVAEGGRYDELVRKSRPPGNFGSALFNITYTAA  
PIPKCVGVRFAGIKLITLLYLETSLSNAAVVESFDAAKGSNANIGYEMGVIRGSLGAPLN  
AMPMP IQCLVSSGNGLDAETAKERLVVSSVLWSEGISCEYLAQSGLMANLLKQRRGECTG  
NSSSDWSLEELCGICAIMKIPFVVVVQPHILNDIGKVQLRHVASVGGTDDDTENYISLGS  
LASTIQDLSRAASDDQLAHRGDLGGASAQSQWGNAYHRYGAAGSGTRASVEPSIECIYIQ  
KDQFFDSERHLSKVDHKAHSAIMKTMRGITQRAEAFARAMVDPGDGASNDLSVFAVTDV  
SFWCLRDFGTHLMKTAGAVQASADTAYKETIGAYPGHKRSLKTLGAAIDSHXEAERVLEQD  
RGPCGGGRGHQGGDVPVAVQARRPVRHGDAAVLAEAAAARDTRFKRTAAHARAASSP

>comp15315\_c0\_seq1; 618 1 2813 LEN=2887; translated  
XVNEKMSQEGKQEGKCDDENNYEANKFISKVKGGIDEQSPASLKREYSILQISMKATKSL  
VYLVPYRHKSGSLRWMTTTTTTRTAFHWVLIWFWTAACFISFLYPHTDAYPIFVKGVAGLST  
RSSPSSHGNNNDKSNQHGKQSPRRKNKNRVTSGGGNKSWYEKRKAGIKVSSRGPKPPKW  
EREGDDLIVSSKNMEMGNMDKNISYETARALLRSIDGTTSGNDESRTTNLSLNPSPKTK  
ASFGTKEKPEGENETGNLRDDKPFLLWGGKLSIGPFWKSRLVAAGYSEPTPIQIAAYNCL  
STKKNQTSVNGNAVIAAATGSGKSLAYLLPFLTSRTTTGRKNKRPAASVTNALGTIWIMT  
PTMELAYQLQRTVDHVLGSSINDNRKSSSNVHLVVEYNRSMVAVGKLLKTRKEESSSPL  
PLSVSYPIADIVQRYYSVNKITCDKNDPSVGSNRYTEPTFLAGTPKLFQLRKEIQKVV  
MTTSLKQSNTRYAAQRKARQREAKEGTVQPPMDTNTNERNENTNQEQLLYRAVALALRA  
NIQTLILDEVDRLLQTTTADARREHKTTKPLAQELLEALVWEKTAKSRPPTS YGRNRNS  
QRYSLPQASSPKTSLQIVCASATIGRALRKQLMYIVKAPSTDKAATLITADVTRTKKDEKL  
RKASLLPSNLKHSYGIIMLQPPKKEGNIKKLDSGTSSNITSSTIKTNAMVEALVTTLRSKE  
EPSPSLVFPGAIGVEAIRESLANAGFQDIRGLSDLREEMDAFDSL PYSSWSCAPVYVVE  
RLARGLDLPEIRTVFLMGVPSNAAAYAHLAGRTARQNAYGECITLCWPWEAQKLISIAKT  
LGLNRMNCINDHYLTHSTRRQSNAPGGNRTDNRNDRKGIPLTEEVIDEWDLSVMTKTAI  
KRKTVSALRKFLASKGVPTTEGLLKSALVDAAMTLKDK

>comp15316\_c0\_seq1; 883 16 2484 LEN=3038; translated  
MSATTSIMLRKATQKALCLSEIVGNKSRILRATYTSWGSNKFPFSTITSSLRDQECLVR  
DSSSSHPRSSNFSTSSTKHPIPEPLPAVAYDYIDDDHADVGREHDLDRSPINTNQDTAK  
PSTQDVTACAGKDDVNYGISRRNSTTNGAVEKLNHMIMENTS VSAKNDAASDPSSFSIFK  
SIQHATATSSNSGGSSNGIGGGDDAPYPPPSEHGKGPSTFRKGSGGGGGRHRCPCGA  
DVTFCNFEDNSFYCAHCAGWFASTRPIEAANHQDQQNLSATDPRSGPTYDQQFARDMM  
KKVPGNPGSDQEIIMRHIPDSRRYVNVVKEGNRQNSNIDHTR IENNQLPNAVDQM  
PPTAERIPTPREIRKGLDEYVIGQSDVKVALSVGVYNHYKRISVVEAKAANEARRAALDS  
QEDYTF SQMQQHHPNRDLSDLNLTQFGTSKNNTSAHATTQDVNNIADSDFATQVEECEI  
DKSNLMVLGPTGSGKTHLIKTLARLMDVPLVIADATCLTQAGYVGEDVESVLFKLYLESG  
QDIERCQKGI IYIDETDKIRKSGGNVSI SRDVS GEGVQHALLKIVEGNVNVVPKEPGRKN  
PRGDFLQIDTTNILFICGGAFAGLERIVNHRTNAASIGFGAEMKKKIEDPKVQGRCFD  
IPKDLVEFGMIPEFVGRFPVIVSTKGLDLNLDNLVDILTVPKNSI IKQYRRLFAIDDVKFHV  
TDCGLKEIANTAFERGTGARGLRSITDQVLMETQYVVPVSLSDVHTVYVDAPAVRGERKPI  
LLKDGMTVEKEYESLTEEAGSQQVSGAVPVFIDDDDEMDS EEA

>comp15316\_c0\_seq2; 624 278 1675 LEN=2229; translated  
MQNPPTAERIPTPREIRKGLDEYVIGQSDVKVALSVGVYNHYKRISVVEAKAANEARRAA  
LDSQEDYTF SQMQQHHPNRDLSDLNLTQFGTSKNNTSAHATTQDVNNIADSDFATQVEE  
CEIDKSNLMVLGPTGSGKTHLIKTLARLMDVPLVIADATCLTQAGYVGEDVESVLFKLYL  
ESQDIERCQKGI IYIDETDKIRKSGGNVSI SRDVS GEGVQHALLKIVEGNVNVVPKEP  
RKNPRGDFLQIDTTNILFICGGAFAGLERIVNHRTNAASIGFGAEMKKKIEDPKVQGRCF  
DNVIPKDLVEFGMIPEFVGRFPVIVSTKGLDLNLDNLVDILTVPKNSI IKQYRRLFAIDDVK  
FHVTD CGLKEIANTAFERGTGARGLRSITDQVLMETQYVVPVSLSDVHTVYVDAPAVRGER  
KPIILLKDGMTVEKEYESLTEEAGSQQVSGAVPVFIDDDDEMDS EEA

>comp15317\_c1\_seq1; 1057 1 2084 LEN=2493; translated

XGNYHSPNPEEDRRFSLDVSTMHPEFSSVVDTMPAELLARHSLLPHEARNYDPRRSQYQ  
PYLEVRI VNTGGASLKAGVGSFMPYYK PQSQKLKEELRRRVQRQATMGAAASLRSSASEM  
KADDPFLLVDSAQSSTSSRR IKENMYTKQTEAAYVSGNGYSNRNSNFVNGNFNFNFN  
SNYPNQRSRYGENYVMENDSSSFLQGFGGNSNGFMGSGQSGGGGGVVRADVPGGASLFGGS  
NESRPATRRYSMFVSSRDLGYNGFNPNND SYLSGRSPMQQTPSRRRKANGYHRNGMGT  
SFNDRVPEHPVGPESGVIDTVATSGGRSSGSSNLALASF GGNGGSSVSGMQGRQQQRQQQP  
FGSQGSVIGDGVINGRSLGDGNEYDGYGNNGFGNGRPMNGGSGNRRFGGNSGSYSERNSM  
NDMGNSNRRFAGNRGGFGRENSMKVDSRSDPAGGSFAGNGRVI GDGI IKGRPTQPGFQGF  
SSSGMTDGRADGFGTNTNSFAGTSGGGSTNNINGPFGNMGRPPPTTANSKNPFATLNGE  
TGGDNNSFGASTNDFGSNESNNLFGGSTGSSNSFGGSRQTNGFGSNDDDSNSFGGGMGSP  
QRPLGGSSAMKNPFSGLNGNANANGASGGPFGNIGGNNQSQQGGSSSPFGNIGSPSTTAM  
RSNNNNYGEYDEQEGSSDGSIMGFAKNFVKGFGS

>comp15318\_c0\_seq1; 770 432 3118 LEN=3328; translated  
MKQSLCSSMLHLVAVSMLLEKARAVSFEDTYKQTCELPSYDWAAFGTRLTGRMYTRRAAF  
LDNSLYAAGYLKSTGAPDKEDFVETDQDFCLTGPYNNKDPTGFYFSRILCVDLVSYTTEF  
GSFAQYEVGVTKIDATTGEPQDIFVYYGEGQDETSGLAARELDNGDKLLAVSGHFVGSALT  
ADHGDGSKTTLTLYNSNAEGTATDYIAHPNAITNGYDDGFVISADAETGDAKWMVAYPLSN  
KDAQTVGVDIDGDGNVYGAGYSCNLLVGDNNEVQVNADEKPIASCDGFVAKFAAEDGSIL  
WEQKYLDLGAAMWIAAYDEEDDSLYVTGTTSYIGEATEIPSDTKDHKYCNHDVCAITMRLS  
AVDGTTEWIRTTEGSPRWNFQDQTDIGLANDLDGPYVYVALDDVGEEGIATLDEGTPYA  
ACRNDNDGTLTPEYEINPNGNVTGADCEPSTFVPRSDEENAFPAADALTGANCGAGHEG  
VDACVIKYHKYTG LPIWGADVHPVAGIVSAPDGKSIMVSGFYWNSESYGHGNFDTVELP  
DYNGIEGSYNAKLNSETGQGEYVMHSGGVGKTRVYDIVGDPDGDVYVMGYTQSAVINWGG  
SLQTKIVEEGIDQNDVGTAFQMGKVSNTNEYQFFAVKLTASETSAPSCVESCDLEGGN  
VANPVIKDGHC LIDTFVTKRAKRRNFLDARVWSVSPARARQNGVLEVRTKNCIPFESVTL  
DQIICSNYIMITHLTENTLDRELDTDMVG DYVCLIDNICIDKGFYSYRKSRRETFVSQC  
QICDPQSNSTGWSVLPDFVLPVGPVEPPDDCLNATDAPATPLAPTSPPVVAKTEFPTSTPI  
RITKNTDGGDDIDMKPFVIDGDMSSGVGSVVKLAFGNIVATIAVGGFVASTMLL

>comp15318\_c0\_seq2; 852 432 2999 LEN=3209; translated  
MKQSLCSSMLHLVAVSMLLEKARAVSFEDTYKQTCELPSYDWAAFGTRLTGRMYTRRAAF  
LDNSLYAAGYLKSTGAPDKEDFVETDQDFCLTGPYNNKDPTGFYFSRILCVDLVSYTTEF  
GSFAQYEVGVTKIDATTGEPQDIFVYYGEGQDETSGLAARELDNGDKLLAVSGHFVGSALT  
ADHGDGSKTTLTLYNSNAEGTATDYIAHPNAITNGYDDGFVISADAETGDAKWMVAYPLSN  
KDAQTVGVDIDGDGNVYGAGYSCNLLVGDNNEVQVNADEKPIASCDGFVAKFAAEDGSIL  
WEQKYLDLGAAMWIAAYDEEDDSLYVTGTTSYIGEATEIPSDTKDHKYCNHDVCAITMRLS  
AVDGTTEWIRTTEGSPRWNFQDQTDIGLANDLDGPYVYVALDDVGEEGIATLDEGTPYA  
ACRNDNDGTLTPEYEINPNGNVTGADCEPSTFVPRSDEENAFPAADALTGANCGAGHEG  
VDACVIKYHKYTG LPIWGADVHPVAGIVSAPDGKSIMVSGFYWNSESYGHGNFDTVELP  
DYNGIEGSYNAKLNSETGQGEYVMHSGGVGKTRVYDIVGDPDGDVYVMGYTQSAVINWGG  
SLQTKIVEEGIDQNDVGTAFQMGKVSNTNEYQFFAVKLTASETSAPSCVESCDLEGGN  
VANPVIKDGHC LIDNVCYEEGETSELFGRSCLVCKPSESKTEWSFGNMVG DYVCLIDNIC  
IDKGFYSYRKSRRETFVSQCQICDPQSNSTGWSVLPDFVLPVGPVEPPDDCLNATDAPAT  
PLAPTSPPVVAKTEFPTSTPIRITKNTDGGDDIDMKPFVIDGDMSSGVGSVVKLAFGNIV  
ATIAVGGFVASTMLL

>comp15319\_c1\_seq1; 943 422 2749 LEN=2911; translated  
MNNF SVILFAIILIAVSSETLRGSEVNIESDSQDKLPRSRHRRQLKPGITCLLYLEEIEF  
QTERESVEEWVCMLEPEEEASALGMQFVEIDKSTSIKGA KSGQSTITLNSAVIDTEEAKM  
YIPMDGHVEVRNLSHDDPRARRNLA AKTGTLTALVIRVADSKGVAPGASVAQLENDVFDD  
LSCLKSQMEACSYGKLKIEPFVGITETDVEVKHGVVDVQMPDYDVVANGKRGG LQQAAMA  
AATEQLGNLQSDRYDII LLVLP PPGSGDWTAYAYSNGKWSFYNDMSASSVSVQMHEVGHNL  
GLAHSGEDNLEYQDKTGMGMSIFSSDDLMMCFNPAKNYQLGWYS DKVETINPLSTSGSAV  
RRFTLNGVADYKNNDDGLIVLRLEQLGLEQDYIIGYNRQVGINEDTAEDKNMVTIVRKEF  
GTPMEYKSMKVAKLFSGQSFTEIENFNERSVEIKFVGLANTDGDPSDPIRDAIEVIDV  
DNRPVDEDDIFGPKVACANYTFEMTTDNYPGDNNFFIVADSAVGEIFAEGVPMTESFTTY  
STEVCLPYDKKYKFLYDQYEDGICCGQKGSYRGLDPKGNIIFSSSGVPEGFDVKIEYF  
EVGVNPFVVPQAQTQIPTFSPVAPNPSPTDVPTKVPTGSPTKAATSSPTVSPTKSVTG  
SPTGSPTKYPTPTGSP TLSATESPTVSPTLAPSFKVTQAPSTRSPTRPPSMNPTKTPT  
ATPTKSPTRDPTLSP TFPPTSSPTPDLVEVGLDCEDRKRGRFKVKNKGRRKRCKW

>comp15319\_c1\_seq2; 672 50 1672 LEN=1728; translated  
MKKFSTILFAIIFASASSETLRGSQVTIQDDLDLQQLP GGRQRQLKPGTTCLRLYLQEDI

EFKTEQESVEEWLCLMPFEEEEASALGIKSVKIDRSSTSF IKDAESGESTITLSSAVIDTEE  
AKMYIPVDAHVEVRNRRNDGAKIGNLTALVIRVTDANGIHPTATISELENYIFDNEVCLK  
SQMEACSYGKLNIIIPFKGTTETGVVVKHGVDVQMPDLPVGEADGISEFPARAAAKEQLG  
DLESDKYDIFLLVLPPTGDWNSYARGKWTIYNDRQVHSVSTQMHEVGHTFGLNHAGEYT  
ANHDINVYGDTTGLMGKSYGSFTKACYNPANSYQLGWYPEQVKTIDPFNNNQAVREFTL  
NGVANYKENQDALIVLRLEQLGQVQDYIIGYNRQIGINEDTYEDKNMVTIVRREANGRST  
KVGKLI PKESHIIKFNFNNETGRNVEIKFVGYS DGN GFFFEETP RDAVIEVIAPNQPGPTP  
APTDACRDSKGFVNKHKKKCKWVRKNNKRCDKTFEGKPLWEHCRKSKRCDEDMIIV  
>comp15319\_c1\_seq3; 395 1 1255 LEN=1311; translated  
XTKPPPKPPTKPPTKPPAPTIGNRTALVIRVTDANGIHPTATISELENYIFDNEVCLKSQ  
MEACSYGKLNIIIPFKGTTETGVVVKHGVDVQMPDLPVGEADGISEFPARAAAKEQLGDL  
ESDKYDIFLLVLPPTGDWNSYARGKWTIYNDRQVHSVSTQMHEVGHTFGLNHAGEYTAN  
HDINVYGDTTGLMGKSYGSFTKACYNPANSYQLGWYPEQVKTIDPFNNNQAVREFTLNG  
VANYKENQDALIVLRLEQLGQVQDYIIGYNRQIGINEDTYEDKNMVTIVRREANGRSTKV  
GKLI PKESHIIKFNFNNETGRNVEIKFVGYS DGN GFFFEETP RDAVIEVIAPNQPGPTPAP  
TDACRDSKGFVNKHKKKCKWVRKNNKRCDKTFEGKPLWEHCRKSKRCDEDMIIV  
>comp15320\_c0\_seq1; 629 197 1990 LEN=2576; translated  
MRVKMHDETRRLVRRDGEESNVGFRSYEGVDNYYNLGDKQQHEDAENEEDRSNRYKNLAL  
IALTTPGVKFFKSAQSSFOEYLMTDRELQMSATTYGVLLTLISMPIVPLLGGALLDYKRG  
GDGHHHRHHPHAGSTNHRNGSLVEDGSDSDDESQHDIVSSLRTITTTAPSGTALDTDQKA  
SQSNAYCGFLGLTLAGIVVYGFLEKMHSIPIGLLGAFVFGVGE GCVMAAARAFVGHFEF  
GGDGAFAQGVLIAMNNLAMMASKNIVPWLIETRQESILAGEDNADADHSSIRVGILACC  
VVQLVALGAGCLYAQRNGGFCAPRRERAHGHHRHHPGRWERPLPEGGKTDDECGGHYF  
RKNALASGRQTLHANKAPSR CERSSFSMAALVNLPLTFWIIVAIGRAIFLVTFKVSRY  
NSFLIEEFDVNAVKAGRISVNELFALFSPLVGFLAYRSPGGIVGFALLGAVLGTASIGS  
LAFVPASVVTNHLPGGPLTPLVGISIAHGIIIPISIAMIPHTVPATQLGMAFAVFEVLGS  
TLNMTDIVFGWLRDTS GNYDIPMQLLFGYALAGMLLLWISRKRIGSIGILGNEGGVR  
>comp15320\_c0\_seq2; 571 197 2149 LEN=2735; translated  
MRVKMHDETRRLVRRDGEESNVGFRSYEGVDNYYNLGDKQQHEDAENEEDRSNRYKNLAL  
IALTTPGVKFFKSAQSSFOEYLMTDRELQMSATTYGVLLTLISMPIVPLLGGALLDYKRG  
GDGHHHRHHPHAGSTNHRNGSLVEDGSDSDDESQHDIVSSLRTITTTAPSGTALDTDQKA  
SQSNAYCGFLGLTLAGIVVYGFLEKMHSIPIGLLGAFVFGVGE GCVMAAARAFVGHFEF  
GGDGAFAQGVLIAMNNLAMMASKNIVPWLIETRQESILAGEDNADADHSSIRVGILACC  
VVQLVALGAGCLYAQRNGGFCAPRRERAHGHHRHHPGRWERPLPEGGKTDDECGGHYF  
RKNALASGRQTLHANKAPSR CERSSFSMAALVNLPLTFWIIVAIGRAIFLVTFKVSRY  
NSFLIVSVAALCPFSVVELSLYRWFVAFRILLVVRWFVPLCVSHKSNTAAHEMGGVQEE  
FDVNAVKAGRISVNELFALFSPLVGFLAYRSPGGIVGFALLGAVLGTASIGSLAFVPAS  
VVTNHLPGGPLTPLVGISIAHGIIIPISIAMIPHTVPATQLGMAFAVFEVLGSTLNMTDI  
VFGWLRDTS GNYDIPMQLLFGYALAGMLLLWISRKRIGSIGILGNEGGVR  
>comp15321\_c0\_seq1; 561 261 1926 LEN=2272; translated  
MKIFRKGSGKSDDKGNDPLQPSEERLFEDCELEIQKALRAKAGRREGSSSADPKRLLCFN  
KPSREERDSDQPAQHYGVDTLPKFFGNSSSIVEYECHHPQLMEDDSRDIRDSVDDGDE  
LCDSYIEGHGRQGDHPIILTAESAELI AALS RDSDSKTSYAPVRKFSTSSSDSGR SERQ  
KLHHA AEQRKFDEHQWRQRQRSLVDDLSTCTDEHNPIEKEMFCHLSAHIHRHLSNNP  
KVASKKGGSKDAPSVPEAKKKKAKKTA AVVDAKEKGF TGDENS VVSRVSSLSSASGTIA  
TDSVFTISVASSWETQSVILSPRVQPTIDKQHSR SRSHSSKR NQNYIRRSESVIYSN  
LDTIDEGEDSYREIRKPLSSSSSIYSTSASDNDSYRSENEEELPIFYEASISKA EQQAP  
AKHRSPREAGTLIAALTTGPSTNISRR LGFTTRIVVLF EKSV AQITERGGK GFRPTHNYH  
IFDLTIWYNFITITITNIAVTILGSKHYQEKSVE SAAHGTPKTKITK SMLAKQIIVATCD  
VPRSNDRRKEVDL  
>comp15322\_c0\_seq1; 534 254 2113 LEN=3565; translated  
MIPRLQPRPSARRQKGIENIFVDANSNEDVNKNVGRNLNDAEDDPASTFP SCTDMSGIPH  
PRNEKNDSL PSTEA AQSSKETENLQCS PWQRSALS VTYDEVVQSPVPNYYSQHKYLLLN  
YSSSSSTPVEKEMDNNDLDRPSYCKDFSLTPPTAGSRPPLIVSAKRYGSEVRRQH SKKRRR  
RRRPTSTKSDFGKHS GALGISSEGGDATCPQEIKNDALCLWKCDHSIGTEKNNLPSFASS  
DEEDERSDSIEKIVRAEHSKLSLVGIGNGKKQPQFSSFS AKRAPPEKGCLSNRPSRPTG  
VANQYKTPSKSPENLAMFSESNYTHKPRRVQFGIPSAVEYEIDRPAGHLTPLSQEVTKKR  
YSMDPKKSTREEQAITQETKENNLILSEWEDQFSVNRSKTSRLSSKGKKKNRRSSSIFSP  
GSRLSLDYDNTDEKICDEERTSATKEPHNVLT SRLSDSPDLVATNLASLSMSPPKLG LD  
ERDSSATPQATPVASAGSENEHRTWDCVADLGTINSNGAMELSPHMSDSSMIELTRGSAS

FKTMSNAHSAKSKVSEEQASFSQTADLDSINAFGGALDQDSPNRGPNLPTDSSTSNSSSSRSI  
GVVSDVMLTNAPSLLSPCY

>comp15322\_c0\_seq2; 823 254 3187 LEN=3457; translated  
MIPRLQPRPSARRQKGIENIFVDANSNEDVNKNVGRNLNDAEDDPASTFSPCTDMSGIPH  
PRNEKNDLSPSTEEAAQSSKETENLQCSWPQRSALSVTYDEVVQSPVPNYYGSQHKYLLLN  
YSSSSSTPVEKEMDNNLDRPSYCKDFSLTPPTAGSRPPLIVSAKRYGSEVRRQHSHKRRR  
RRRPTSTKSDFGKHSGALGISSEGGDATCPQEIKNDALCLWKCDHSIGTEKNNLPSFASS  
DEEDERSDSIEKIVRAEHSKLSLVGIGNGKKQPQFSSFSAPRAPPEKGCLSNRPRSRPTG  
VANQYKTPSKSPENLAMFSESNYTHKPRRVQFGIPSAVEYEIDRPAGHLTPLSQEVTKKR  
YSMDPKKSTREEQAITQETKENNLILSEWEDQFSVNRSKTSRLSSKGGKKNNRRSSSIFSP  
GSRLSLDYDNTDEKICDEERTSATKEPHNVLTSLRLSDSPDLVATNLASLSMSPPKLGLD  
ERDSSATPQATPVASAGSENEHRTWDCVADLGTINSNGAMELSPHMSDSSMIELTRGSAS  
FKTMSNAHSAKSKVSEEQASFSQTADLDSINAFGGALDQDSPNRGPNLPTDSSTSNSSSSRSI  
GVSRDGSSNTTAKMLLETWPWKDQELDFATLIKSVSFFTRKKGINLQRYFALIDPCVHENV  
SFANNSIEERVERALVSKQKQKQSSIANNVSVVKKTIMTEWMDIEIAFLNDLTACMLEF  
GRCDTQKIKVLMDTIKRNTFVNSLISKTSAQTIIEIRDISEFQNKIRLERSLSDVIDACA  
APKACILCLATGQIGIHGFNFEEFQDNHVLKFTYVHSVFGVKTHLTFHLNSHAGIVIESN  
LTVSDRDNACILDFHRRHLAMLAGEISLELNSSSLQDSLLELGKFLGKLDQCTRAFKSI  
NDEQKALITFDHPNILLNIPTKGTTCITLNSRTFVSTTISVSSNGGSYCWVTMPEKDSA  
VDCCELRLSLQDVFNRYA

>comp15322\_c0\_seq3; 312 184 1095 LEN=2547; translated  
MFSESNYTHKPRRVQFGIPSAVEYEIDRPAGHLTPLSQEVTKKRYSMDDPKKSTREEQAIT  
QETKENNLILSEWEDQFSVNRSKTSRLSSKGGKKNNRRSSSIFSPGSRLSLDYDNTDEKIC  
DEERTSATKEPHNVLTSLRLSDSPDLVATNLASLSMSPPKLGLDERDSSATPQATPVASA  
GSENEHRTWDCVADLGTINSNGAMELSPHMSDSSMIELTRGSASFKTMSNAHSAKSKVSEEQ  
SFSQTADLDSINAFGGALDQDSPNRGPNLPTDSSTSNSSSSRSIGVVSDVMLTNAPSLLS  
PCY

>comp15322\_c0\_seq4; 601 184 2169 LEN=2439; translated  
MFSESNYTHKPRRVQFGIPSAVEYEIDRPAGHLTPLSQEVTKKRYSMDDPKKSTREEQAIT  
QETKENNLILSEWEDQFSVNRSKTSRLSSKGGKKNNRRSSSIFSPGSRLSLDYDNTDEKIC  
DEERTSATKEPHNVLTSLRLSDSPDLVATNLASLSMSPPKLGLDERDSSATPQATPVASA  
GSENEHRTWDCVADLGTINSNGAMELSPHMSDSSMIELTRGSASFKTMSNAHSAKSKVSEEQ  
SFSQTADLDSINAFGGALDQDSPNRGPNLPTDSSTSNSSSSRSIGVVSDVMLTNAPSLLS  
ETPWKDQELDFATLIKSVSFFTRKKGINLQRYFALIDPCVHENVSFANNSIEERVERALV  
SKQKQKQSSIANNVSVVKKTIMTEWMDIEIAFLNDLTACMLEFGRCDTQKIKVLMDTIK  
RNTFVNSLISKTSAQTIIEIRDISEFQNKIRLERSLSDVIDACAAPKACILCLATGQIGI  
HGFNFEEFQDNHVLKFTYVHSVFGVKTHLTFHLNSHAGIVIESNLTVSDRDNACILDFHR  
RHLAMLAGEISLELNSSSLQDSLLELGKFLGKLDQCTRAFKSINDEQKALITFDHPNILL  
NIPTKGTTCITLNSRTFVSTTISVSSNGGSYCWVTMPEKDSAVDCCELRLSLQDVFNRY  
A

>comp15323\_c0\_seq2; 180 354 1267 LEN=1559; translated  
MAAVIGRGRFERMMGERAASSPSDEVYDPNHRNNGTGMQSPFALYTVTFFFTNGIAIIGGV  
ISQFDLHRNNYYGFYCDAWLAFANAFVGLHIGAALYIVHKIREPYPWSDGSLDATTYAE  
DGKGGVYATGYRLHTGNPLDLRNPVAVASAAAATHAQSPGPPDSLHRVRYTLNENKVF  
AGYIFVFGTYLCHWFFLDMRACNLGMAFAXAVRGHFHMGGALLVRLLRGYSDVEPGPHLA  
WPGASRCDSDGRGRFYNAFVAFGWPHRLPLASRRADTGVRFGDVCASLSVTGHSACVTVG  
RMGG

>comp15324\_c0\_seq2; 201 1 1508 LEN=1692; translated  
XTTKSLYPHCTMIITLVSLSEEHGLAVLSASSMHSEFVTETKIKGPICKINDAVDRHNSTM  
QDKERIYESFEEEFSDINTITVGIPKQNRKEFLELALRTQPSEVQMNQWIALVSVLQID  
VVDLVNGDEQLDTIIDNETFFETDENGMTILRFHNDSPRAFIDVPMDIVHFKSLTTLVL  
QNPRTIPIQQLSELMELEDLVLWGVLSSETSVDSTEGFRPLCVKNLNLNGSNASESLEWV  
GEALPDVKTALGSLWLENDVDVDRWLHVLTSENLOKLETLEFEGRQHGLTNTALGVLFLE  
ALPRFRRLRTLCLGNSLDYGGFRCLNAKLGLHPPISIPLRTIKWTDVDFVVRTTYEYTW  
LETEAIRLGRDAPNGVVREVAGFLRHLDITITGLEAAGGHLVHPAIEAELSRNRAGRHWIE  
RASGVAPGDGAAPALLPLVLALSSGAPDPDGLFYAVRSLPLAPALGFPQEPFAGCNV  
SGKKRAIFAGCNASGKKRALSV

>comp15324\_c0\_seq3; 505 1 2047 LEN=2292; translated  
XDTGNDTGKKRNYQVDLYMITSYHVSQEDKDVLRQALPPSTGIQYWSNAMPLMYHCDEFF  
DEPASTMFAKCIDASEPDFKPI SYMKNNTDTEHRNLRVRLREGSAQLARQHRLVVKDKL

PHYDFFVVMEDDMLYAKSHVETHRAVSARVRLLRDAALERGGADQAGRDGESGNPYPGDS  
WKAPLPYRFLSRMTAGFVRVEVLGASYRDTCKAKGKHNPDWTPRSVSVPEPFSENAIDPK  
TCCRVDANANSNSNSTPGSNATLSSSPSPSSVAEPAWQAFTENTDPSNEDLVLWETKLP  
FFLRRWDPIGANASETGGGSWFASPIKGHTNFPYWGAGYQITNRYDEDLRKNGNYEAPWE  
LQFRQGLAAQTGGWMASSGELHYHRTLCPQQTSFLPPFELPRHKRDGLFRHNVEYWS  
GGLQIYSNKGCGLQRVYEMESAKDFSRHLVYHASNNKQCFFKYLQEPAPVPASIRPRIDR  
VREIRKRAKEDGDAGTTDGDSDSDSLLDEYLNIDAXDGPDPVEPPVGGPGRDPTGLQR  
GKPHGVALCAALAAIGKAGEPKRGNARGTIMPCRAVRIRSIIEEPACASARTFEPGGRNSN  
NLLVSKKRTRDPVLSQRKGIWGLDLRSGEIGFAQSPEVVYLEEKGFCSAFLSKSSWEGG  
IRGGLDRKTTTRTTRTSGIPSW

>comp15324\_c0\_seq4; 502 1 2038 LEN=2283; translated  
XDTGNDTGKKNRYQVDLYMITSYHVSQEDKDVLRQALPPSTGIQYWSNAMPLMYHCDEFF  
DEPASTMFAKCIDASEPDFKPI SYMKNNTDTEHRNLRVRLREGSAQLARQHRLVVKDKL  
PHYDFFVVMEDDMLYAKSHVETHRAVSARVRLLRDAALEREGAGRDGESGNPYPGDSWKA  
SLPYRFLNRMTAGFVRVEVLGASYRDTCKAKGKHNPDWTPRSVSVPEPFSENAIDPKTCC  
RVDANANSNSNSTPGSNATLSSSPSPSSVAEPAWQAFTENTDPSNEDLVLWETKLP  
GFFLRRWDPIGANASETGGGSWFASPIKGHTNFPYWGAGYQITNRYDEDLRKNGNYEAPWELQF  
RQGKLAQAQTGGWMASSGELHYHRTLCPQQTSFLPPFELPRHKRDGLFRHNVEYWSGGL  
QIYSNKGCGLQRVYEMESAKDFSRHLVYHASNNKQCFFKYLQEPAPVPASIRPRIDRVRE  
IRKRAKEDGDAGTTDGDSDSDSLLDEYLNIDAXDGPDPVEPPVGGPGRDPTGLQRGK  
HGVALCAALAAIGKAGEPKRGNARGTIMPCRAVRIRSIIEEPACASARTFEPGGRNSNLL  
VSKKRTRDPVLSQRKGIWGLDLRSGEIGFAQSPEVVYLEEKGFCSAFLSKSSWEGGIRG  
GLDRKTTTRTTRTSGIPSW

>comp15325\_c0\_seq1; 563 158 2514 LEN=2673; translated  
MDDTKKIPTAAASSMSEFLALDDPKKEAKTIGRIRREDETSRQRFHNKLSFALTATLLLLL  
GVLSALFGSAPSDHSSGDGLSFGSTARWLEDASDDGSSSSANDNGDYSAYSCQYIYD TVS  
DAEDLCSFAKTCNDGEGVWAPWVFCSSKLSINAAFAVLSPLIVVMMVTLFRLLGSTAE  
DFSCSLEMFLKGLPFRFAGVTLLALGNGAADVSATMSAII SDEENGYKLSLGA  
LTGAAMLVGGVVSIGIVVLVAGGVKCRGALIRDIMALVVTVVVVWNNLSAGVVTRGDTT  
FFFGLYGFVVASVLAADVHRAVVLPRMEASAAISDAEHGDGTPVIPGPPNFMRI  
VTSISNYDNA CVTMAAPNATENPVLETQQELVEPVNAATTTTTPSVTITNASDAGV  
NEEPIVLHGQNGILGNHHHTPHAAAPSRNLEVDTHDQGGVYTLVEDHIDRVCV  
GAGSPGIPSYNWNWAWCDGKEEISEELANLWFQISLGEDGELKWERFLLLCEFP  
FTILRKVTIPIPCEGYNRGFVSLV ALSPFWFAYLLVQHEIDLWSKDSL  
PYFMIFYGISALIGLLVLRFPAGGEGNMSLIAATPIAFYGFVMAATWIDF  
IADRLVALLNFIGIILHIPGAIMGLTILAWGNSVGDLSANITMAR KGLAN  
MAMTACFAGPVFNILLGLGLGFRSLEAQTGKEESVSVLS SSPILAGFVFI  
ILNCATILTVGVFIGKGRIEVSYGYVAVALYTIYVITSITL EFXKLVAGV  
LVDETDQDLKDEKGMPRNTSDW

>comp15325\_c0\_seq2; 68 1001 1188 LEN=1188; minus strand; translated  
MGTTCAHEDGGKTQEEKAKMRDSVSPQKSDCTPQNTQRWRFDP  
SAEHDAITPRKDTNRARHDT

>comp15325\_c0\_seq3; 26 424 1163 LEN=1163; translated  
MSLIAATPIAFYGFVMAATWIDF IADRLVALLNFIGIILHIPGAIMGLTILAWGNSV  
GDL SANITMARKGLANMAMTACFAGPVFNILLGLGLGFRSLEAQTGKEESVSVLS  
SSPILAGFVFIILNCATILTVGVFIGKGRIEVSYGYVAVALYTIYVITSITL E  
FRKLVAGVLVDETDQDLKDEKGMPRNTSDWSDACEAHATS IQYFVPPYYPYKYL  
LKNMFLFSRVKYVIDAIVFEL AFLVIE X

>comp15326\_c0\_seq1; 977 1 1995 LEN=1995; translated  
QDSSVTNSNRGRPLWYHGAKRDNFTANGYVSASFVLLHRGAMDERVWSIQADH  
EMPAFR DNAEVL SAADGSKDESITEDDDENDNNIDAPIANNPKSQMMDYVTMFL  
DKTAAEEDEATA DDDDESEYAAKIADATLEDISEATHLIAVPLDTSHELLIELES  
VQRAILHHCPILLDAC ISGLTRLPLLYIKAPDANINDNPRNSASVSTSLARTIK  
RLVKKHIYTTVAKEDGDDEDE DNDDEDV NADGYRPLTMTFQSL EIDGSNNIL  
NTVGTFC DVEDTDDATEDDDGDAKNDDEV EQTLN YNEKRFNNLMSDLQSAIAA  
QGWQMAFSPDPNKA EYVKEDRSQ LFRPRVPFMELPK SFDENINRFKNS EIE  
ITDENMKFLRAEEGGNGISPIFWSNWWEDVFARNVRLREIGIYPT NPALD  
DADDDASLKIRNEQFYLPLETITLPGDTKMIKSEKFLDYHEKRMKEKEKEFMK  
EFKQSESESPQPSENPLSPGSSTPSGEPDILMKKTRKRLENIYLNAGFEDG  
DALLEQL ENEAQMDQDDDEIDLGETKDTSRASDDYIEDWMRQKIMQAKNPL  
VEKEEENTFAETKSV ADPKEPVEDTKDPSATDPTNTEKESDYMDSWMKEKIK  
NAVNNLESVKSREFVKKEPKFSIEDNPV

>comp15326\_c0\_seq2; 307 1 746 LEN=931; translated  
XTNTEKESDYMDSWMKEKIKNAVNNLESVKSRFVKKPKFSIEDNPVFKAYREGSLAEK  
KPAPPAKKLGPYPGNDFVGIWKVMVNPIGGEDNTRSEDGSENILIRVDGTTAAGPTLN  
PDTKQKAAGGTWKMLPQENGDVVLRIRLVIPPEKKRILVMEGRAVRGSPIGMALASKTFG  
IPQLEEKAREAGQNDREDRLTCSGEAWIEDAVTKKNRIRAENFYIEKLTGGKDPENYITII  
PKTLRRLD

>comp15327\_c0\_seq1; 307 1 844 LEN=1306; translated  
XWFALLLRACSQSTYTESNHRKKQNLGNIGYTLIYHKPTGDETIDEDDEDDDDCWVGR  
VTLVFRPGVCTHRDDGRDASVLPALWKTVEGGKSRSEIETHTLDLWSIDAVATTHSASN  
HGNKNKNKNNTSNTSSTASVNNSSIGQQWTEFANNNETIAWYKNTLSAALGDSGFQASAET  
NSSIYGGDDHEFDNCFSSITTRDGTVHLFEALTPADTLVIVEGIRRNAASLSRLLIEGK  
DTDKLLADFLGGSASTAVMTPAEALDLLSHAFLDHGGGGLE

>comp15327\_c0\_seq2; 298 1 832 LEN=1294; translated  
XWFALLLRACSQSTYTESNHRKKQNLGNIGYTLIYHKPTGDETIDEDDEDDDDCWVGR  
VTLVFRPGVCTHRDDGRDASVLPALWKTVEGGKSRSEIETHTLDLWSIDAVATTHSASN  
PGNKNNTSNTSSTASVNNSSIGQQWTEFANNNETIAWYKNTLSAALGDSGFQASAETNSSI  
YGGDDHEFDNCFSSITTRDGTVHLFEALTPADTLVIVEGIRRNAASLSRLLIEGKDTDK  
LLADFLGGSASTAVMTPAEALDLLSHAFLDHGGGGLE

>comp15327\_c0\_seq3; 1258 1 2182 LEN=2644; translated  
XVVLPRASQTTHTQTNPNRTEPFKEPRIEMKLLRSSKKTDTDAAGVDPEGNGDDDAEGR  
NATI QMKKGLLLGKDSRLSRKEKKEKKEKKAACKAAKKAATGGATPGKARAEKSR  
AEGSAEASTPATVGNDDDDYDSQSSPPGSPAYKVNHERYSVRVHEQSATSTTEQLVSE  
QLTVSVVPRKASRLAEEGGDDSLVGKLLTQLDLATTGDGGEETELIILPGSGGSME  
CESELEISIDSFPTPAQPAEEFRQPEAAPAVAEPEPETPSPSSNDDQQAEDAEVDEGPE  
QDEKEPQEESNDGLEQVQDETQEQDETQEQDETQEQDETQEQDQSFPTTEGIPEEPEIT  
EPEPEPEAKPEPEPKSGPESEPEGKDHNEKSDSMVDRLLSKANTTATDLRQQLAKLPESM  
GVAALTENTLCHSVLLQHSSCYGGSEHHYKSYTGGNNTANAVAMDDQAASEFLHNLGNIG  
YTLIYHKPTGDETIDEDDEDDDDCWVGRVTLVFRPGVCTHRDDGRDASVLPALWKT  
VEGGKSRSEIETHTLDLWSIDAVATTHSASNPGNKNNTSNTSSTASVNNSSIGQQWTEFANN  
NETIAWYKNTLSAALGDSGFQASAETNSSIYGGDDHEFDNCFSSITTRDGTVHLFEAL  
PADTLVIVEGIRRNAASLSRLLIEGKDTDKLLADFLGGSASTAVMTPAEALDLLSHAF  
LDHGGGGLE

>comp15327\_c0\_seq4; 1268 1 2194 LEN=2656; translated  
XVVLPRASQTTHTQTNPNRTEPFKEPRIEMKLLRSSKKTDTDAAGVDPEGNGDDDAEGR  
NATI QMKKGLLLGKDSRLSRKEKKEKKEKKAACKAAKKAATGGATPGKARAEKSR  
AEGSAEASTPATVGNDDDDYDSQSSPPGSPAYKVNHERYSVRVHEQSATSTTEQLVSE  
QLTVSVVPRKASRLAEEGGDDSLVGKLLTQLDLATTGDGGEETELIILPGSGGSME  
CESELEISIDSFPTPAQPAEEFRQPEAAPAVAEPEPETPSPSSNDDQQAEDAEVDEGPE  
QDEKEPQEESNDGLEQVQDETQEQDETQEQDETQEQDETQEQDQSFPTTEGIPEEPEIT  
EPEPEPEAKPEPEPKSGPESEPEGKDHNEKSDSMVDRLLSKANTTATDLRQQLAKLPESM  
GVAALTENTLCHSVLLQHSSCYGGSEHHYKSYTGGNNTANAVAMDDQAASEFLHNLGNIG  
YTLIYHKPTGDETIDEDDEDDDDCWVGRVTLVFRPGVCTHRDDGRDASVLPALWKT  
VEGGKSRSEIETHTLDLWSIDAVATTHSASNHGNKNKNKNNTSNTSSTASVNNSSIGQQWTE  
FANNNETIAWYKNTLSAALGDSGFQASAETNSSIYGGDDHEFDNCFSSITTRDGTVHL  
FEALTPADTLVIVEGIRRNAASLSRLLIEGKDTDKLLADFLGGSASTAVMTPAEALDLL  
SHAFLDHGGGGLE

>comp15328\_c0\_seq1; 334 506 1450 LEN=1674; translated  
MLFCILFVVYARSVTGEPLWSIGAGAPNISIPFVKSLSYLGDIDILKTLTTFILTFV  
NQAFGFWKSQVYQLSRDVQMSLSDFDILLIATNIKRDEEDGVPTAESSEFQNDISHYARLFCIL  
MWASKANRFSCLETPNGLKRMASRGLMTKKEKLVKLSLEVTGDRLFLAPLEWMMIRSNRA  
MDDGILAGDTATKGRLLGEITNLRRKQASISNKIDGRMPLAYAHMVQILVDTFVFTAPIA  
LYSDLGDYSVFAVGVITLFFYNGLNCLAKIFLDPLNNERFQENSIVMDLGVVLRRETNVASE  
DARKSGRMLPFDTF

>comp15328\_c0\_seq2; 450 346 2013 LEN=2237; translated  
MPLRLIFVVFFLLHEATAFLATEKLSLPRKHGRIVTSFTGSRLVVSQNGEGLVLQSKTFQE  
EEFIYNAIFQNTLFAELPNDKTRLVRAFERCQTKKGEKIIISQGDSCGGSVYLMREGKC  
RVIVDEKEVPEPYGILRPGAIFGELGILYESTRGATVEAATSATYQLPGDLFKDVLQ  
STESQSWSEMKEIDYVINKVLGTNELYGGSVILPYKPERFWLWKQYTGTVLRLISLVTTLF  
NMLFCILFVVYARSVTGEPLWSIGAGAPNISIPFVKSLSYLGDIDILKTLTTFILTFV  
NQAFGFWKSQVYQLSRDVQMSLSDFDILLIATNIKRDEEDGVPTAESSEFQNDISHYARLFCI

LMWASKANRFSCLEPNGLKRMASRGLMTKKELKVLKSLEVTGDRLFLAPLEWMMIRSNR  
AMDDGILAGDTATKGRLLGEITNLRRKQASISNKIDGRMPLAYAHMVQILVDTFVFTAPI  
ALYSDLGDYSVFAVGVITLFFYNGLNCLAKIFLDPLNNERFQENSIVMDLGVVLRRETNVAS  
EDARKSGRMLPFDTF

>comp15329\_c0\_seq1; 650 253 2181 LEN=2409; translated  
MAPGATKKQSSLSTPATLNVYKKVAIIRGSEDVLTYESAGNFKSVTDLHLAAVATTPH  
KAKPKDEIPVPKIKSNETYELDIPPNYECKASYVRYTRLSHEELRESLEYVIDTEDEAWL  
RNNTRFGSASVVVEEDPCKAVSVLDEDEPEGQSMPSGVIDEKNQSCCTTQTQGGNPKKDSTK  
RKVATKMTPTSVLTVAMLEVMMLDVMEKATAFDAIITLDQAEKLILEKLPQFLHMYPVRA  
KAGVVTIRHVINDVYQYWVSKRSKLRPLLRFPVPTSTEDSNPHLVFRPREKEKYKLRK  
KRQNDMDAYRKLQQLKQDFSHIRLLLGLIKKREELARSRVLLQKEWFEQKLYDAIDTSG  
CRVSQALDRNSLDKLEIEKQFDINEGGIGRGRKKSRRSAGQQQDGLTSAAGSRSTTPVP  
NPTFSSGTNMDMVSRTNQDQGHSSGATVTDGDPGSGSETKQKRLPLI IAGQNNGEPA  
SFLQPLASRESYATTWEGSVPHVATIVDGHAMNTSYFRHRPRLGRGGRLCIDRVPLPTDP  
NIA PSTYFRAGSRSTISRKPKERLLDLLPPPDKSKLSRRIEEICFDALKEDYDANAGGS  
SKT QGNAIAEDVDNNDGVEVLVKMKDWLNTDDQPWGEERYAIGPI

>comp15329\_c0\_seq2; 541 631 2363 LEN=2591; translated  
MRFXVPKIKSNETYELDIPPNYECKASYVRYTRLSHEELRESLEYVIDTEDEAWLRN  
NTR FGSASVVVEEDPCKAVSVLDEDEPEGQSMPSGVIDEKNQSCCTTQTQGGNPKKD  
STKRKVAT KMTPTSVLTVAMLEVMMLDVMEKATAFDAIITLDQAEKLILEKLPQFLH  
MYPVRAKAGVVTIRHVINDVYQYWVSKRSKLRPLLRFPVPTSTEDSNPHLVFRPREKE  
KYKLRKKRQNDMDAYRKLQQLKQDFSHIRLLLGLIKKREELARSRVLLQKEWFEQKLY  
DAIDTSGLCRVSQALDRNSLDKLEIEKQFDINEGGIGRGRKKSRRSAGQQQDGLTSA  
AGSRSTTPVPNPTFSSGTNMDMVSRTNQDQGHSSGATVTDGDPGSGSETKQKRLPLI  
IAGQNNGEPA SFLQPLASRESYATTWEGSVPHVATIVDGHAMNTSYFRHRPRLGRGG  
RLCIDRVPLPTDPNIA PSTYFRAGSRSTISRKPKERLLDLLPPPDKSKLSRRIEEIC  
FDALKEDYDANAGGS SKT QGNAIAEDVDNNDGVEVLVKMKDWLNTDDQPWGEERY  
AIGPI

>comp15329\_c0\_seq3; 650 137 2065 LEN=2293; translated  
MAPGATKKQSSLSTPATLNVYKKVAIIRGSEDVLTYESAGNFKSVTDLHLAAVATTPH  
KAKPKDEIPVPKIKSNETYELDIPPNYECKASYVRYTRLSHEELRESLEYVIDTEDEAWL  
RNNTRFGSASVVVEEDPCKAVSVLDEDEPEGQSMPSGVIDEKNQSCCTTQTQGGNPKKD  
STKRKVAT KMTPTSVLTVAMLEVMMLDVMEKATAFDAIITLDQAEKLILEKLPQFLH  
MYPVRAKAGVVTIRHVINDVYQYWVSKRSKLRPLLRFPVPTSTEDSNPHLVFRPREKE  
KYKLRK KRQNDMDAYRKLQQLKQDFSHIRLLLGLIKKREELARSRVLLQKEWFEQKLY  
DAIDTSGLCRVSQALDRNSLDKLEIEKQFDINEGGIGRGRKKSRRSAGQQQDGLTSA  
AGSRSTTPVPNPTFSSGTNMDMVSRTNQDQGHSSGATVTDGDPGSGSETKQKRLPLI  
IAGQNNGEPA SFLQPLASRESYATTWEGSVPHVATIVDGHAMNTSYFRHRPRLGRGG  
RLCIDRVPLPTDPNIA PSTYFRAGSRSTISRKPKERLLDLLPPPDKSKLSRRIEEIC  
FDALKEDYDANAGGS SKT QGNAIAEDVDNNDGVEVLVKMKDWLNTDDQPWGEERY  
AIGPI

>comp15329\_c0\_seq4; 541 515 2247 LEN=2475; translated  
MRFXVPKIKSNETYELDIPPNYECKASYVRYTRLSHEELRESLEYVIDTEDEAWLRN  
NTR FGSASVVVEEDPCKAVSVLDEDEPEGQSMPSGVIDEKNQSCCTTQTQGGNPKKD  
STKRKVAT KMTPTSVLTVAMLEVMMLDVMEKATAFDAIITLDQAEKLILEKLPQFLH  
MYPVRAKAGVVTIRHVINDVYQYWVSKRSKLRPLLRFPVPTSTEDSNPHLVFRPREKE  
KYKLRKKRQNDMDAYRKLQQLKQDFSHIRLLLGLIKKREELARSRVLLQKEWFEQKLY  
DAIDTSGLCRVSQALDRNSLDKLEIEKQFDINEGGIGRGRKKSRRSAGQQQDGLTSA  
AGSRSTTPVPNPTFSSGTNMDMVSRTNQDQGHSSGATVTDGDPGSGSETKQKRLPLI  
IAGQNNGEPA SFLQPLASRESYATTWEGSVPHVATIVDGHAMNTSYFRHRPRLGRGG  
RLCIDRVPLPTDPNIA PSTYFRAGSRSTISRKPKERLLDLLPPPDKSKLSRRIEEIC  
FDALKEDYDANAGGS SKT QGNAIAEDVDNNDGVEVLVKMKDWLNTDDQPWGEERY  
AIGPI

>comp15330\_c0\_seq1; 976 1 2500 LEN=2684; translated  
XPRIALLWRIRPNRLTGSSLVSLEKITRKHISKLGFEGCGEVLKEMASQGGHAPTQAA  
YTSLLAACYKICSDSGRIPHAIKAGDFGWRYWQEMRIVGIEPDVMAYGAILRLCAARG  
LPERAIGLLEDMERFEVKTTLCTAALKAVARSHEIANRYQRGTSRKDMKRETMTHHG  
KMARQIVIQAEEAEVQDDGFLSALMLCTAAAGDSATAKAILLASEVRKLDHLRTIGSR  
TQELDGHNNDLQLESMTMKNKGKFSDLIVVEGSLQKSSQSSKDIATFGEREYGNDRVIS  
ALVHSCAQUALNKGIGTMWAGRENLYLGCENSLRLITTRWEPNYRDNSVPGVSSTKVGV  
G ALRHVDEREKDYEYTPGKRKKFRGLFLDDDDIATLDDVRGBDNNFHDHEDDLEDYD  
DFSDDEDEDVTFADSKYALRDQNYEGKQLSKEKELSQQHIETDVFVKVSELKDQPTIH  
GEEFDLDDEEAHKLYETIEEFNRVVDGDDVSSPDSFDQAFDQALAEELKEEVGEDNE  
ELDSEIE



IEELMDQMRSKLDLFSFEGRQESLEKNELELERTSNDIPAKALAGLNPQIAKIEDLQSVLP  
GMPPLRRLRKISDAYEQTGLGHPSSLTLVPIILRETMPDYLSGRLKRSNKKNADFALQKASE  
DGIVDASLLNSMLEVKANSGLNDAIEYHKVEFAKHNI TSPSPYSDRLLLQMLVGNKRLTR  
ALELKEQIEEDGRNLDIASYGSMVQFYSRHDQLGSAILILKECISKHGAAPSEAYVSDLR  
VLCKRNGVEDVVGLVDLIGKDPTEWLRHGKLNKREKSKKGRNVQQAQNRL  
>comp15330\_c0\_seq2; 903 1 3215 LEN=3399; translated  
XSAGGGVRRRFRFERPSGVFGEVHAQQLRFRRHDRASAFSKPRPPTKKRRRAYNRRMKKAAD  
ERARHSAPGSKAGPRRQWARNRWEQLLTHGRDEDSL PVAQQEDEYTFEDAILEDLVGNT  
SYLTSQPTPEPVYLGHRRHREFYNRVADQMDAYREAI DAKQRLDENEERAGDDL PVSVEAV  
ALPSDQDISKTLRAFRDRHGTRQKPIGIIRALQHLQLD LGVPVSAFGEYTYTTLMTCCQT  
PQEGRRIFKLMRDQNEI SAYSWSILVDIHSKLGDFEGCGEVLKEMASQGGHAPTQAAYT  
SLLAACYKICSDSGRIPHAI RAKAGDFGWRYWQEMRIVGIEPDVMAYGAILRLCAARGLP  
ERAIGLLEDMERFEVKPTTLCTAALKAVARSHEIANRYQRGTSRKDMKRETMTAHHGKM  
ARQIVIQAEAAEVQQDDGFLSALMLCTAAAGDSATAKAILLASEVRKLDHLRTIGGSRTQ  
ELDGHNNDLQLESGTMKNGGKFSDLIVVEGSLQKSSQSSKDIATFGEREYGNDRVISAL  
VHSCAQALNKNGIGTMWAGRENLYLCENSLRLITTRWEPNYRDNSVPGVSSTKVGVGAL  
RHVDEREKDYEYTPGKRKKFRGLFLDDDDIATLDDVDRGDNNSFDHEDDLEDYDDFSDDE  
DEDDVTFADSKYALRDQNYEGKQLSKEKELSQQHIETDVF DKVVSELKDQPTIHGEEFDL  
DDEEAHKLYETIEEFNRVVDGDDVSSPDSFDQAFDQALAEELKEEVGEDNEELDLSEIEIE  
ELMDQMRSKLDLFSFEGRQESLEKNELELERTSNDIPAKALAGLNPQIAKIEDLQSVLPGM  
PLRRLRKISDAYEQTGLGHPSSLTLVPIILRETMPDYLSGRLKRSNKKNADFALQKASEDG  
IVDASLLNSMLEVKANSGLNDAIEYHKVEFAKHNI TSPSPYSDRLLLQMLVGNKRLTRAL  
ELKEQIEEDGRNLDIASYGSMVQFYSRHDQLGSAILILKECISKHGAAPSEAYVSDLRVL  
CKRNGVEDVVGLVDLIGKDPTEWLRHGKLNKREKSKKGRNVQQAQNRL  
>comp15331\_c0\_seq1; 391 401 1846 LEN=2059; translated  
MTAAHTMVRPPPPPPKPNRIPPRKSRPPPPPKRTLKPPPPPPSSSSRTGRSPPPPPP  
RVTPGVSGDSPSTNGIKRDRDVISSALPKNPVQNVPLQKKPRLSSRSSVSIRAPAVMRD  
VDAFEKKFQVGEETYGSVVFVGRDKVSNEIVALKRINTEQEENGFPITALREVKLLKGLKH  
ENMVI LKEIVCSNEHGSNGSLPKNVFMVFEYLEYDLTG VLETPEIRLTQDHVKSWSRQLL  
QGVHYMHKNKVIHRDLKASNLLINRKGELKIADWGLARSWNPEMKRLTNKVITLWYRPE  
LLLGMIDYSTKIDMWSVGCIVAEMFRSAFLKGRNEAHQLELIYKVC GTPNTQDWPELKT  
KCRLWKNFAPKPNDTIYPSRLPQVLRNENLPNPKWMTDAAVDLIGKLM EENPAKRWSAEQS  
LDADYFFENPVFKRAEDLNMKFAVASVHEMDCRKKFEQNEAKRQAQIAKARNQAAFARGG  
N  
>comp15331\_c0\_seq2; 343 401 2245 LEN=2458; translated  
MTAAHTMVRPPPPPPKPNRIPPRKSRPPPPPKRTLKPPPPPPSSSSRTGRSPPPPPP  
RVTPGVSGDSPSTNGIKRDRDVISSALPKNPVQNVPLQKKPRLSSRSSVSIRAPAVMRD  
VDAFEKKFQVGEETYGSVVFVGRDKVSNEIVALKRINTEQEENGFPITALREVKLLKGLKH  
ENMVI LKEIVCSNGTVAGSTLQPHFRTKAHIVFGLNRWSGDIFFSRSPLFCPTSDSVVQ  
PAERKMLEKAVSWTILGFCALPSIPPICVTETALLDSFAVACD LLYVCIITMKTRVLD FS  
SNVAXFLLDVYNDSDRNYASSHNPT EEHGSNGSLPKNVFMVFEYLEYDLTG VLETPEIRL  
TQDHVKSWSRQLLQGVHYMHKNKVIHRDLKASNLLINRKGELKIADWGLARSWNPEMKRL  
TNKVITLWYRPE LLLGMIDYSTKIDMWSVGCIVAEMFRSAFLKGRNEAHQLELIYKVC  
GTPNTQDWPELKT KCRLWKNFAPKPNDTIYPSRLPQVLRNENLPNPKWMTDAAVDLIGKLM  
EENPAKRWSAEQSLDADYFFENPVFKRAEDLNMKFAVASVHEMDCRKKFEQNEAKRQAQI  
AKARNQAAFARGGN  
>comp15331\_c0\_seq3; 343 759 2603 LEN=2816; translated  
MTAAHTMVRPPPPPPKPNRIPPRKSRPPPPPKRTLKPPPPPPSSSSRTGRSPPPPPP  
RVTPGVSGDSPSTNGIKRDRDVISSALPKNPVQNVPLQKKPRLSSRSSVSIRAPAVMRD  
VDAFEKKFQVGEETYGSVVFVGRDKVSNEIVALKRINTEQEENGFPITALREVKLLKGLKH  
ENMVI LKEIVCSNGTVAGSTLQPHFRTKAHIVFGLNRWSGDIFFSRSPLFCPTSDSVVQ  
PAERKMLEKAVSWTILGFCALPSIPPICVTETALLDSFAVACD LLYVCIITMKTRVLD FS  
SNVAXFLLDVYNDSDRNYASSHNPT EEHGSNGSLPKNVFMVFEYLEYDLTG VLETPEIRL  
TQDHVKSWSRQLLQGVHYMHKNKVIHRDLKASNLLINRKGELKIADWGLARSWNPEMKRL  
TNKVITLWYRPE LLLGMIDYSTKIDMWSVGCIVAEMFRSAFLKGRNEAHQLELIYKVC  
GTPNTQDWPELKT KCRLWKNFAPKPNDTIYPSRLPQVLRNENLPNPKWMTDAAVDLIGKLM  
EENPAKRWSAEQSLDADYFFENPVFKRAEDLNMKFAVASVHEMDCRKKFEQNEAKRQAQI  
AKARNQAAFARGGN  
>comp15331\_c0\_seq4; 391 759 2204 LEN=2417; translated  
MTAAHTMVRPPPPPPKPNRIPPRKSRPPPPPKRTLKPPPPPPSSSSRTGRSPPPPPP

RVTPGVSGDSPSTNGIKRDRDVISSALPKNPVQNVPLQKKPRLSSRSSVSIRAPAVMRD  
VDAFEKKFQVGEGETYGSVVFVGRDKVSNEIVALKRINTEQEENGFPITALREVKLLKGLKH  
ENMVLKEIVCSNEHGSNGSLPKNVFMVFLEYDLTGVLLETPEIRLTQDHVKSWSRQLL  
QGVHYMHKNKVIHRDLKASNLLINRKGELKIADWGLARSWNPEMKRLTNKVITLWYRPE  
LLLGMIDYSTKIDMWSVGCIVAEMFRRSAFLKGRNEAHQLELIYKVCCTPNTQDWPPELKT  
KCRLWKNFAPKPNDTIYPSRLPQVLRENLPNPKWMTDAAVDLIGKLEENPAKRWSAEQS  
LDADYFFENPVFKRAEDLNMKFVAVASVHEMDCRKKFEQNEAKRQAQIAKARNQAAAFARGG  
N

>comp15332\_c0\_seq1; 364 96 1460 LEN=4135; translated  
MKLATVLSCAVAIATTNGFSPSNLSRAQPRDRTPGQIIKVSPASTRLHLLQSSTSTNDE  
LVAKTEISSSSALASSVVSSANETASTEALLSETQFLVDPSPSFPPEETTGGLPDWIE  
PVAWRGVIVVLCALWASNFAAAKLVMAEPGVDSLYALSFRGIAAASLAPFAIRSVVRGK  
ESDGEDSRTPVMDMETLKEIIVCGSWVAFGYLGQTLGLLSTTASCSVICSMHCVFVAL  
IAEIWRVQKAASDQLGSAKFVVKRLVPALVAVVGVAIVELKGAGGSPTIGDALSFAQPIG  
FGMGYLILENIMARKPETALPVSAIKLTVVTAASFLMFEFSPLLHGGSFSDLSLRLPDFD  
PILHSTTAMGGIMYTGLITTALALWVESIAFAEVPATDASLILTTPEPLFAAGCGAIALGE  
TFGTSDYVGASLIVGACALSIFMDTPEAEQHAA

>comp15333\_c1\_seq1; 591 236 2902 LEN=3206; translated  
MKQDVTIVFYTWILIIILFSIIIVQTSDSLQLIPLLQYDMTKNDCFRGTFNNGGILGKESLA  
LVRNSNTTQCAPGTGIQSDFHSAVDNNTKTETSTALYASRPIGSFIDKMNAFHNDKRFGE  
TISLWIRPHREQMDQYKDYDLVSPRTIFTIGSDSFETNALRSGLTLCENSKIDLQLSII  
DTDLMELVYRTSNHLLLEPCQRVEFNTSTLRDNDNGIFSPHTITISLANFHQQVFNKSM  
ARRREVFNDLKHWNATSLFHFFNYPKHDSWQSRWDGQLFQFSVYSGVLNKNQVRSIIS  
QGLPPSQPVAHSSVARIYEDSADENTLIEEIKMSYSFIDDEIDKLLNRLSLSHQPAAYVR  
LYITRFPARGNIFDVGNQSQSIEPNGSHPVLVGDMGRIVYVPPKDEHSEFPGHSYSSDFC  
VTTNKIITSSQCVSATISVIVDPINDPPVATLPPTYFVHEGVNEEAQALLLTGFDVDKND  
YIQAIQITSPPKMGDLFLSVSSFRREDNLLHGTLLSNINNTIPGKQAYVEYRFITYDDVL  
IQDLSTVDFFRFRVQDRAGSWSEEAQEVKQVILSSVSYSSTNDPDPSTITSTTQVEGVNYQM  
KGLDSSGINRTLGFFLKSLPSNGVLLDHEGAQLTENLILEPTRNLFDGNEKIGEIINITY  
NCVPSVCDKSNLLVNDTFEYQVVALGTDGDVISASSTKDEHISIVCPVEQISIDAIGWK  
ERARVSAFGSQVDDHCSGYKFDNEQSKSSCRNIALVFLGHVENLEPLQEPYMSITTRG  
GFLSLKEDDLQELRPIFHQPVMRSSIRIILPPENLNKVLSAIHFQSDTIGMDEIQFVLQY  
GRCDHKEKFLIEHDFSESTIECFKAKKTLVVDVQONFQNLNMLHYPPFW

>comp15334\_c2\_seq1; 1007 147 1482 LEN=1482; translated  
MFDEDSSSDEEKNPVETKTTDDNDNDNDGDGKAAEESKIEEDGKGDGETKTAEEGKND  
DDGSDDES SVGKGQGGKKTETTKDASTAGLFDSSDDDDDAVDDAGAVVGSAPPKKK  
EEDPELKRRAASKKGRTOATVPSAGKPQEGCSLHMTKLPNVVAIQPSAFDEVYDEKE  
EEETYKGYVHNMIWRWYKDDNGNPMRDERGLIRESNTKLVKWSGDSFTLHIGKEAFDIQ  
NVDSSTGSGFSGLNGYVYQSQKATFQTDENDSDNDEDDLQNGGTVLECIGPVGSRFVAK  
PSSLQSESHKSLTAVRQRTVKRAKIAQYMTEEDPEKLLKQERIKYNEDAELKQRKRATG  
GSRGGRRPGMNKGYLEADDDEGYDTVNLRAMKKASASNYDMDEMDDYGDSEDDDYDQS  
FANRGRKRQRKPVVEEDSDDDDDEEMVX

>comp15334\_c2\_seq2; 375 1227 1888 LEN=1888; translated  
MIPHDRDNGSDERIEDEDTSMLKLPSSLLASRNNSNNSGDRNETGSNDCAYSQAQEKRG  
VSSACQKPVICNIREEQEAERNNPVHLKDKQPPKTI VVATIQTQDCDGVIHGDRDPEE  
SVVSTNSAEMDKPTTSMESQDLCIGQSLPSTKSSKDFLASADSTRTQSEDSIYDNDND  
DNDNDNDGDGKAAEESKIEEDGKGDGETKTAEEGKNDDDG

>comp15334\_c2\_seq3; 375 1239 1900 LEN=1900; translated  
MIPHDRDNGSDERIEDEDTSMLKLPSSLLASRNNSNNSGDRNETGSNDCAYSQAQEKRG  
VSSACQKPVICNIREEQEAERNNPVHLKDKQPPKTI VVATIQTQDCDGVIHGDRDPEE  
SVVSTNSAEMDKPTTSMESQDLCIGQSLPSTKSSKDFLASADSTRTQSEDSIYDNDND  
DNDNDNDGDGKAAEESKIEEDGKGDGETKTAEEGKNDDDG

>comp15335\_c0\_seq4; 175 497 1458 LEN=1458; translated  
MIRIPLRIDLDNDVRFIPLKPSPPAPTASAPTRTPTRRPTHRTPTIEPTRRPTHTPTT  
RPTPRTRTPTRRPTHRTPIQPTRRPTRTPTLRPTRRPTRSPTRRPTRRPTLTPTRRPTR  
FPTRAPVNPISLSIVANAALTYEATISQVDAAYVQAVQNMARFPIDNGRTSQRTTVVPE  
TTRVACTTLGSPFSSTAEGCVKTLNFFFTNEGEDIFSLRNRVRDAIENQSFKFEINLT  
GIIRTIITVELLGYNPSPVPAPSPTTSYTLTMNTALATQVSTSEANAFLRASESILQFNF  
NSGSSGSRRTTFSSDSSRVDCX

>comp15336\_c0\_seq1; 1063 118 2919 LEN=2966; translated

MRMKNKKKSRTSKKDRHLVKDAITNLSQMRTNLSQAPSRDEEMDALIQREGVDSNHAATS  
TGGGALWKVLAFFVMFGLVLLATDVIEFKKYTNPFNGDSKLSNPSAEAEETAHEILNGSV  
EQKPSVSEALQKAKATQAPTKTWIEITPPPTASPTIKATPPPPTLPPTTEKPTMPPTENPT  
AKATPAATKAKIEEPKPKADSTPAPEPTAAESTNQRHTYKPRGQPMSEEDRAAMESKWGK  
WTLEADTKARPMDDYYAAYPNRDVPRSAFPANAWQTDTEWLSKFLPEGIKLVDRAINAIL  
EYQGQPTDGTSDLFHLEKYEAWNAKMEKEHCKKQVGCTTTKSFENLKRLLHAIMTEDMF  
VFAMGGHSSAAGHGNHFVQSYTLQVQWILEGVFSRLGVRHQSRNFGLGGLGTTQSGIATK  
QIFGHDIDMLMWDSGMTEREKAKDMFFRQGILGPGKVPMIVAAPEVSSLLVLNEHIDAD  
VLMIGDQSAMKKAETLEEVAAMPWASQYVRCGNEISDICRDNEYAGVCWIERDDFTPAQA  
QDKVMGGRAKWHPGNRKHQVIGRAIAFAILEALREALVTWNDANGYELPDDAWHLTPLFE  
NTRSKLENLDPSIGSCKEYSELSTVMCNKAVKARLEFTPRSYPDHTNIRTLPPSQAEHI  
NPPPPVLYSAPDVFNKDLHPPAGAVDVLNIEEAGTPFTSNLVPDYTKFYKPKPFKAPT  
LDDRHEDGRELKAKVPDYCFEFAFEFAIDGKVTWNYDQYMEHMHLIQRVVEVIKVAEDP  
SITGEEKEVELAFRITGCKNVKVMHITHIYWA

>comp15336\_c0\_seq2; 1073 118 2955 LEN=3002; translated  
MRMKNKKKSRTSKKDRHLVKDAITNLSQMRTNLSQAPSRDEEMDALIQREGVDSNHAATS  
TGGGALWKVLAFFVMFGLVLLATDVIEFKKYTNPFNGDSKLSNPSAEAEETAHEILNGSV  
EQKPSVSEALQKAKATQAPTKTWIEITPPPTASPTIKATPPPPTESPTIKATPLPTLPPT  
EKPTMPPTENPTAKATPAATKAKIEEPKPKADSTPAPEPTAAESTNQRHTYKPRGQPMSE  
EDRAAMESKWGKWTLEADTKARPMDDYYAAYPNRDVPRSAFPANAWQTDTEWLSKFLPEG  
IKLVDRAINAIL EYQGQPTDGTSDLFHLEKYEAWNAKMEKEHCKKQVGCTTTKSFENLKR  
RLLHAIMTEDMFVFAMGGHSSAAGHGNHFVQSYTLQVQWILEGVFSRLGVRHQSRNFGLG  
GLGTTQSGIATKQIFGHDIDMLMWDSGMTEREKAKDMFFRQGILGPGKVPMIVAAPEVS  
SLLVLNEHIDADVLMIGDQSAMKKAETLEEVAAMPWASQYVRCGNEISDICRDNEYAGVC  
WIERDDFTPAQAQDKVMGGRAKWHPGNRKHQVIGRAIAFAILEALREALVTWNDANGYEL  
PDDAWHLTPLFENTRSKLENLDPSIGSCKEYSELSTVMCNKAVKARLEFTPRSYPDHTNI  
RTLPPSQAEHINPPPPVLYSAPDVFNKDLHPPAGAVDVLNIEEAGTPFTSNLVPDYTKF  
YKPKPFKAPTLPVKGKGYHLNTYAGVCDGSVDSWCRRNEGEKCLLSGHNDGRNGIHMDSY  
CGWFVTNLDPVKHGFILLKIEFWHQPKSNPKTASWNSINNEGDGDRKLSAERDGRFLRS  
TPSATNQSTAATLDDRHEDGRELKAKVPDYCFEFAFEFAIDGKVTWNYDQYMEHMHLIQ  
RVVEVIKVAEDPSITGEEKEVELAFRITGCKNVKVMHITHIYWA

>comp15337\_c0\_seq1; 1305 247 4306 LEN=5381; translated  
MAVKNHSFIFEFTLDDDATIMCRGNISSNAVGGPNNAKNSSHHHQQLRSVKGYNAPFHP  
QALACSNVLTTSYEDHPESLDFGGAASLGAIAGPRGVALFRLSRPHIPLLI FSHATNY  
SSSLTRNNPKARNSISSLAFQPTNRSSNAIDSNLYLAAARGSGVLIWDASGHSPNPLLG  
RLNDTTNDTSITSSVGRRDSDTRITSMWSYCRGRSSNSPLLATTTASSLSMWDLR  
HHTTGLFQPSLRFSGSRNANISATSSSSLNAPVAPLVQVACSSCSEECATMDTSGIVRTY  
DLRKTGGGRSSTVGSPLSVFVAHEAGVIEHLARSHGNDRVDSAWVTWGLEAPMSPAVV  
KIWGTATALPQDSSDAAVVDQDLEDYWFMSDESHRTPSTKGGTNSTSSNNNSDVKI  
QSPNYQLIAQYSRPNMCCARVCAPPVNSLVI VGYLDGKFGSSSSSAKEESGGWWVELMS  
ISADSGVENDLRKKERNFGLNRIVSFGGAANTDALTSALGDDNVGRLQAAELAFSSPM  
VPKNNKSRTEDEGLNNEIKSDETGVELLLCCLSDTGVLTTTAIPEALPNNQNTDAQNRDS  
SPQRTLQRRNLIRTAFAFGNNLARVFPETKEGNSLIDVASVWGAGTTGADLSLGRNEEKA  
EQPRSSSPVKLISTTEDLLRS DGRRPEGGLMPFMDVPPVAYNSIGTGNLGGIQLGMTE  
MTPPLSSMIDTSDDGVDTKARNLTSIMENIDTERVPCPRLCGAVFGSGNGRLTIFRNGEVK  
KMWKWYQKMDTIRLSSI PVGQLDVSPTPSSDPQNFVSNKSTSEEAGKQNQIGSSSGPRTM  
KELVDMVTAAKEAQWGEANDGSPAEDAMSVMDNFFEDDSLDSNSDDTAHDDDEDEDDED  
EIMQDADEMYKKYFGGRSWKSFSEIRATMAHGQNDTTHSIRHRSIGPSSDMLQPVVTVN  
AISDESRSILLAKGWKLGRWGEEEMHNEILPDPVLKDSPPNQIQHEQNHKLVSKGTSHR  
SLAPKKGNSPFSRTL SVPNLSR ISEMKNKPMGGPPLRENMEESMTFLKFLSHQEEGGITF  
STTLSPDPSRILMNQRI STPGKTFASGPVDSSSSMNNLKSHGLRSPDPTDTPMLTCQKY  
DGRSSYLDELQEIHQLCVHNAEICNKCDEVEKQNVWKL LAETAMPQMNERGRDFNGWGGK  
GGGALGIDMINNFVYYEALGDFQMLATMFCVLSGRDRNDRRNNSPCLLPHSRKKVYFTY  
IIRYGELLYSWGLLNTRAELNKHLRLKHEQIDFQLPETEEKKEECFDLGVALS CPRCDTE  
VNSSTTIAATVETSHSDALS VTLQC VVFPSPV

>comp15338\_c0\_seq1; 733 198 2870 LEN=2987; translated  
MARNMIQRNSNPCLACKYARRQTD SAMLSTTARNARSIVRLALMIGWSLGHLLFALPLVV  
FAGQHIPPAPERPVDAKSDYVHRRCIGQVFSTYKSNVAVNHEDSINENKGGKRNVR SMLNW

LHDHTSCDILLEPPFASSTNLSRKRKKKTTDSNDAVSSVTKNSNSQDLPHYHVVIPLMES  
HPIHQEIVIIITSGLLVAGINVTIFYISRGNDTIERHQNRETTANKIRSEVLSGIPPNNGF  
IERARDSFSLVELTMPKNGGKVDNISKTNICPAAHPLQONCAIDEAPSILKLLSREIDAFV  
GSETNEGNTKIHSNIPNARDSDCYDFVMMMDASFLGGLLYSEIKMVPTIAIGSQQMLTLA  
MEHNRNWGLSPLRSTLDRMDRIFLQRLDSLGLTIAFLRANWMRRSLGFQELNRLKSPIDF  
FQPQSMVAMLVDIVSTDTTFLSSSNPFSFSEMEPNNDGTNDGTQDDDRTPSRIADHSVGV  
HGYTERLHNLQPLLSPCTLCLNQSTSWNNEKNATVIMVAPPAGVSAKWVRSRIRALTLTK  
QALEGYDECHFDRATCQNRVVGFEVNWLVFQEEGSNPYFPPIVPSFIHTEASISTLDSAI  
RHPSTIVALIHCNSESNILLALGVEVFCVSQNDRTPTFFDFVGDQVDEDVLRMTIDSLTQ  
DRIDPKQVATELLRVLRRKSI EPDISNTEDNAEWEQKRRIKVARMITSGLERTVAIVRAT  
ARAHQRQNKWENLEDMQRIALKAI SECLDRDTS GQQGVNSKQVYADLNNDQKMELHDSFSI  
FIAWII FLSSSFYVLFKDSAVVKRWR TCHSHHKSGFFDTIRTHASDLDDAWGMLLAWSA  
DFAVGKTF SIDHDVRI LVSGENVAGDNGSEQYLPQHSVRRRRRTRMTR

>comp15338\_c0\_seq2; 728 198 2858 LEN=2975; translated  
MARNMIQRSNPCLACKYARRQTD SAMLSTTARNARSIVRLALMIGWSLGHLLFALPLVV  
FAGQHIPPAPERPVDAKSDYVHRRCIGQVFSTYKSNVNHEDSINENKGGKRNVRSMNLW  
LHDHTSCDILLEPPFASSTNLSRKRKKKTTDSNDAVSSVTKNSNSQDLPHYHVVIPLMES  
HPIHQEIVIIITSGLLVAGINVTIFYISRGNDTIERHQNRETTANKIRSEVLSGIPPNNGF  
IERARDSFSLVELTMPKNGGKVDNISKTNICPAAHPLQONCAIDEAPSILKLLSREIDAFV  
GSETNEGNTKIHSNIPNARDSDCYDFVMMMDASFLGGLLYSEIKMVPTIAIGSQQMLTLA  
MEHNRNWGLSPLRSTLDRMDRIFLQRLDSLGLTIAFLRANWMRRSLGFQELNRLKSPIDF  
FQPQSMVAMLVDIVSTDTTFLSSSNPFSFSEMQPNNDGTQDDDRTPSRIADHSVGVHGYT  
ERLHNLQPLLSPCTLCLNQSTSWNNEKNATVIMVAPPAGVSAKWVRSRIRALTLTKQALE  
GYDECHFDRATCQNRVVGFEVNWLVFQEEGSNPYFPPIVPSFIHTEASISTLDSAIRHPS  
TIVALIHCNSESNILLALGVEVFCVSQNDRTPTFFDFVGDQVDEDVLRMTIDSLTQDRID  
PKQVATELLRVLRRKSI EPDISNTEDNAEWEQKRRIKVARMITSGLERTVAIVRATARAH  
RQNKWENLEDMQRIALKAI SECLDRDTS GQQGVNSKQVYADLNNDQKMELHDSFSIFIAW  
IIFLSSSFYVLFKDSAVVKRWR TCHSHHKSGFFDTIRTHASDLDDAWGMLLAWSA DFAV  
GKTF SIDHDVRI LVSGENVAGDNGSEQYLPQHSVRRRRRTRMTR

>comp15339\_c0\_seq1; 383 59 1343 LEN=3206; minus strand; translated  
MSMWRTPALALAAVAAVAVPSISLVNAF SFIDHHP IQHQSSNLSSGFQLRMVASTPPAKS  
GATTQYPNPKLTD PWYSTR IQKDMEYSTNVRSLYIRHV VVERKETAELALDWYMQLSSGE  
TITSTGDDDDDIVVLTTSRDPFGDVAKQLSACSMTRDEGGKIGWVDIPSGEEDSENSSAE  
LTFASLIPLDILEKLVELQPKAGDVHIVG PSCDSNQWVPDDVADSERLEGILQDELGLVP  
VSDRSSKEEINRADV IIFNTCSIRDHAEQKLYDALGPF RARKRQKSSSEDSNFALIVTGCV  
AQQEGKALLRKIPEIDVVLGPQYV P YLGSVLEQIEWGHQLVVTAPTIIADNYKAAGATTT  
TTTPTTVEIDRSSKATDTVLNNDSDQVGSSEPSLGGLAQKSASPVSIELPENDDFSAKPI  
RGHSVRAW

>comp15339\_c0\_seq3; 546 599 2820 LEN=6063; translated  
MSSKKKKTAMDSSSAAVSTTEAYMISPTKTFFAVWSI IFFTQHYSISCIEXRTTGPSFF  
LHTALNGNFKAPNLYQSKSLVASKSQQLHLQRQRRRR SAQR RRERPVCI SGLPNQGQTCF  
LNSVLQSLASLEPFLEYLEGIVQFQEEMEHVATSASLSSESNDGSCDTSRYRSLLF SYNT  
KAQAHSSASTPTFTKQLLDLLKGIN SVEESIEDDEEESNGTLLIDGGNELAPTGFQSF FG  
QRMWSRRRRRRRKKLEPKALLR IAKSNKQFSTDGMHEQQDAQELFASLMEVVIH DSEL  
DASP SDGRLEAVSDDGYETTILSLSDLLIQLGNERNR FVDESNGDSL SLIMANKSFDILT  
EQHYDYLEEKKKELNEFMGSEL TNTASSRRSKNEPQGEKKWCRTSNR LPSNFPQTNFRYG  
KKAMRSTMSPI TPSPLSGWLGSTLRCSKCKHVRPIQNAPFLDIPLVPTSVPNYLSKAYGS  
TAKPVSPNL SHIPSCSLED CFENFTRVERVKDVECRSCTIRQEIANLEEEALMLQGAVGT  
TERRRNKRMGGSNKRTSELEPF EQTKCLRDDL IKVEKRLFR LKTMDDPDDSDVDP SLAPFV  
SEVDNMILFDSSDH DENISIQRF EAKKCLLLTRSPSILCCHVQRRYYDPFTNRMEKCVQF  
VEFPLILDLSPYCAYGQKSI TPWAAGSCMKDVRTNERRPPWNKRNNSTARLPYRLRSVIE  
HRGNAYGGHYVAYRRDHTGAW

>comp15339\_c0\_seq4; 291 59 1068 LEN=1068; minus strand; translated  
MSMWRTPALALAAVAAVAVPSISLVNAF SFIDHHP IQHQSSNLSSGFQLRMVASTPPAKS  
GATTQYPNPKLTD PWYSTR IQKDMEYSTNVRSLYIRHV VVERKETAELALDWYMQLSSGE  
TITSTGDDDDDIVVLTTSRDPFGDVAKQLSACSMTRDEGGKIGWVDIPSGEEDSDNSSAE  
LTFASLIPLDILEKLVELQPKAGDVHIVG P SSMTNQVHVIRVEELYVPNVLPKMIHKVYD  
KKQNDKDIKLSFGVNALIPRNKLGKGVMPV PKFERRSGTKEKEEDQHQR TYAIQT  
NGCQMN VADSERLEGILQDELGLVPVSDRSSKEEINR

>comp15340\_c0\_seq1; 299 155 1333 LEN=1829; translated

MSINDTIASEALAAAVGGAISSGALYPMEVLKTRMQAEGDSTNDTNNSHCDLPRDGKSH  
QKEGGEDVDIGDNKPKPATHSLDYARNIYSSEGIQVFFDGMVVSALQSAIEKALYFFAYT  
ALKRSYTHLTVRRRTRQNGSPKQQQPSAMASVLLGCLAEWVHLPITLPIDALTTAIQTSG  
GSNKHAMHKGATRDRQKSETVLALWMTLWKQKSFYKGIQAYWILCFKPALQYTI FEQVKA  
WICKLRSIPRGGTPPQHVFVAGQEPTKLSASEAFLLGMFSTRVATLVVFPFVRAKVRMQSL  
AKRESLRSEGCSSLGSSSTETPSPVVAAPPQTIWQLLAETLRQGGWKALYQGLGPELTRG  
ILSAALMMMVKERISGGVKKILYGGVSRSSSA  
>comp15340\_c0\_seq2; 564 491 1951 LEN=2158; minus strand; translated  
MVAIEEIKEEETQEAPVVKPSVPPPIPVTLSSGFLGAGKTLLKHILQSDEHKLKIAVIVN  
DMAELNIDAAYIQQPHEGEEGNEGVENEQIQDKLKKISIVQTEREVVKLQNGCICCTL  
RGDLVREIAKFRNDEGGGKYDYVLIESTGIAEPQQVAEGFVFDPATLAESNDMLWKQ  
ARLDTCVTVM DAHSILQHFTSLKQFSDQYDDGFDSTTEEGRKEGTKSIANLMVDQVEFAN  
VILLNKTDLVTPEELAKSIEIIRSLNSKAKIIPTKNCKVALSEIINTGKFSMAEAIRSPG  
WLAALHGDTTGDGVHSEADEYGVASFVYRARI PFHTKKLAQFMDDIMHFANEWTELPPEKR  
QQESDEKYEYMVSHYGNILRAKGF CWLAGKDSYLFGIAMTGRIGSLQGIMPWYTLIPREQ  
WGVKEGSEDEYEIINSRFEHPGDRRQEIVFIGTDLKVDKIRERLDSCLLNKKQLKKYKFY  
KDDGFP  
>comp15340\_c0\_seq3; 564 491 1951 LEN=3831; minus strand; translated  
MVAIEEIKEEETQEAPVVKPSVPPPIPVTLSSGFLGAGKTLLKHILQSDEHKLKIAVIVN  
DMAELNIDAAYIQQPHEGEEGNEGVENEQIQDKLKKISIVQTEREVVKLQNGCICCTL  
RGDLVREIAKFRNDEGGGKYDYVLIESTGIAEPQQVAEGFVFDPATLAESNDMLWKQ  
ARLDTCVTVM DAHSILQHFTSLKQFSDQYDDGFDSTTEEGRKEGTKSIANLMVDQVEFAN  
VILLNKTDLVTPEELAKSIEIIRSLNSKAKIIPTKNCKVALSEIINTGKFSMAEAIRSPG  
WLAALHGDTTGDGVHSEADEYGVASFVYRARI PFHTKKLAQFMDDIMHFANEWTELPPEKR  
QQESDEKYEYMVSHYGNILRAKGF CWLAGKDSYLFGIAMTGRIGSLQGIMPWYTLIPREQ  
WGVKEGSEDEYEIINSRFEHPGDRRQEIVFIGTDLKVDKIRERLDSCLLNKKQLKKYKFY  
KDDGFP  
>comp15341\_c0\_seq1; 843 598 3012 LEN=3407; translated  
MKPTPSPVPLPSTVPMPSNTPLVSEETSNEVQGDADV FVDEKESSCLSAKSGQVIPTSIN  
FTIYYKYELLAERNANMTDVIWPEIDRAFQHFLLSSELVECEMDVEGGGGEPTFASRLKSI  
SPKPFDSVGSLYPTGWSSENTTVDGNATACTHIVLDEKLLTERELYCDVVTGSVTLYLSEV  
AYMDAASNYPYVLFIDYSNDVIQFLRNEINEGGEAITNFMDDSLGVRGFYFISESPISNLG  
PTLGAPDAASDQIEKSSGSSSEKFSIPGIAASLAAITVFATVAAAGLAIHRKRQHLDEP  
HDTFKSINTPRTYDDDVEFYGPEELLDIDISDDGSTGDDL RERDGRSSKKTLPFTEDNIT  
SLSRTSEYDVQEVLVSD FATVCDLYETCDQQSINF EYSQLGVPMLRSPDGTLSRCNPTK  
CKPSPRNLDYNTSNLRLDPSIDYSRMDPEPDDQFPDESSVESESHSDNQPISEDPSSS  
KTRIGLKERESNENLSTKSSTSTGSALDYILSLGSSIMSPPQKPFDESSVSSAKCGSTNA  
VIGLGQESEIPHVPSVTDATSLYLKRTTLTPNSTAVSESRSLNRNSTINQSLVKTLPPS  
SSDNRESKSSSTESTPGSSKKT TVKGRSSSSSKGNEKSPDR LKNRKSLESRFQNYRRSL  
SESINNLDGTPAGSWSASREFTRSVSLYKNSGQPFSSPVTNLANSILNAGTKKELNESTV  
DSQEKRRSQSSKAPRVHKHYTSLNDIEDILEKEESTRVAEESSRRSSSENEGLETSLSPN  
NPQQQQSYTSPEPLQFPNTVML  
>comp15342\_c0\_seq1; 466 1 2402 LEN=2461; translated  
XDPDSPIIDFYPNFVVDMMNGKRWPWEAVTLLPFIDSKRLIEATSGIDQTKLSEEEELERN  
TMGTTVVMVHDPSHAEAI PSVGKTKMFREIESCSAVTVAYEDTDLNYTLKKPPVFKPEIK  
AGTRIPLPGFSTLRDAPVETLYRRRLGINVHGKKSRYKTASLEVSSAMPPLPPVETLAPK  
LIGTTVF INYFFFVEALVTA VSDERVTVRGNKEPKKWTPEEANRWRLQRDGVIRRAEVGE  
GYCGTGGLIVPEDQPI TLSVRPFQGFITTKSGQKAKSFAVFELEIPLISTFWAPSQPDPR  
LTGVPSRLEKNAYEIAMSKNVNDPLLGGRSKATNKKGK PRAAGNRRRLFPEKPHRSK KDT  
SLNNGIGNRETSKIS AANYSSYHSGSIRGSKTNKRILSTMTFGFRNEFQSQSI SFSLHTT  
SSLGTLNESMKQPTSNMNSMPFSQFTARSTLRERTLGSLSNKPLKDCTRKIHAATYSKYG  
TKSTGYRGR LFAAGLTAASFFFNPNVNAAKESTSSYLSFYKRYQISAWDYQNKHIKTRFL  
EPWSLPRGGDYEPSSSVLPPQSPAPPLEFAHGTTTLSFAFQGGIIAAVDSRASMGOQFVGS  
KTTQKVLVSSHILGTMAGGAADCQHWIRKLKSEALLHELTESGRMSVAHASRILADYLY  
YSLRGYDLSVGTMMIMGYDDYGIESTGTGKT DGGASNPYIYVDNTGLRIQGDMAVSGSST  
FALGILDSEANRYNLSVDEAISLGIRAIRHATFRDAYS GGYINVYLITPKDGWKRVYTED  
IARTPEVWNALKKDRSDDEK  
>comp15343\_c0\_seq1; 236 296 925 LEN=1555; translated  
MPMGFPNGTYAMVGGYLFAYDFVEGLEDEDDMGSI FDALTGSVLEV KIRDDGSCAITLV  
EPGDEPNGGKVY TACNSCSTVSCSNTDVA FDCSNLENGRVS NPGECESPNAQPFYYPFNT

DVSGGETEAPTVKETSSVGDDESSLDDLKPGFADLYDPAKAAMPSPGKKNASMGDIAEGSS  
SSGGSTAETHSTTMQVLALSGMVAAMMSLW  
>comp15343\_c0\_seq2; 236 296 925 LEN=1570; translated  
MPMGFPNGTYAMVGGYLFAYDFVEGLEDEDMGSIFDALTGSVLEVKIRDDGSCAITLV  
EPGDEPNNGKVVYACNSCSTVSCSNTDVAFDSCNLENGRVSNGECEPNAQPFYFPNT  
DVSGGETEAPTVKETSSVGDDESSLDDLKPGFADLYDPAKAAMPSPGKKNASMGDIAEGSS  
SSGGSTAETHSTTMQVLALSGMVAAMMSLW  
>comp15344\_c0\_seq1; 544 1 3173 LEN=3335; translated  
XQHSRSSQTSCNSTFPPIHSSQHSRATKTTTNTNFYNAKQKKEEQNHQFQYPPKNQS  
KGNTRIGMDGSIDMLSLYNYDASSGNIPLKQPPTYSKSTKTTTNLNAKLKEEEKQRHQF  
QYPPKVQSRGNVRIDVDGPIDMSSLYDYDDYDSFNKKNDAYAMKKQSTTNKVDVDGEKK  
AGVPWSNNAATTRMRMRMNRRLRRGYDSDESDDDDDDDYDSDDDDDSDGGGDYYSR  
TRRRSTSSSTRSGNYNAVAVYSSGVLVSQSPAVLTQHTKSEQQRHEEESLQSSGPTIN  
ADSFADRRISGSESLSTFYTRESSRNITNSSSSMQFQQQHGSSLIDAAVEHTVSGSIA  
DLTHGSTLPEDEASSILVNDNSGENADGEHQKAKKLPWYXVPVYFYSIVGTTVLLTTLMLV  
LLFVFRDKKEKPVPIAEIPIILFSPATPSPSTTPTASPSTTPTAFPTIVPPNPIKAKAFEQ  
YIIAADITSPETWKNQSSPQHDAYLWLMRDDGVVQYSQTMNENIELMRIRYILAVFYA  
LNGDEWNVNTGWLSDKTHCGTGWKFVSLKVGADGETGNFVKPVVGLRIENNNLNGSLP  
SELAHSELQYLLLSDNRIQSVGIGTAIDSLKYLRLAENPELLHHAFLSLTNLQQLYL  
KNTGFEGTLPSQLQGLSKLTDLSDNRLTGTLDQFKTMSRLQYIVLDFNELEGNLDDI  
LNCGSCASTLETFRSDRNPLTGSLPDRLFDFSALEFLSVSRSGVSGSIPARIGELTALTH  
LDIFENLMDGSLPTEIGALVNLQELDVSEWSLTGTVADQFSRMPRMETLRIGETLLEGS  
IPAGVCEFNLRRIEHPASVNTCPGISAGRKDDPVWLIVRNDFIRFVDGVPPIQTPKPL  
EGALFPRARARKKRSSFASVSDGQRGDKQASTALRAPVRLPARFSGFRVLESRVLRN  
NGIAVPVHLFFRPARRCNCSAVCHCALVLEQGWRSEARKRAEASGWMVWPGPIASPPCAS  
LASVQPRGGLLEERNLLPLLSAAPATVPRSLVVVNCYD  
>comp15345\_c0\_seq1; 357 1429 2802 LEN=2931; translated  
MASNSTKIIVLDDDPGTSQTVHSCLLLTWKVDVETLVIALTDTSSSLFFVLTNTRGMSPV  
RAADVTRVQCQLKCALSTLENANTTINPILVSRSDSTLRGHYPVETNIIGEELGPFDAH  
FLIPAFFEGGRITRDGTHYLVSGESNDELIPCHETEFKDSVFGYTTAYLPDYVAEKTGK  
TIPSDRVEHFKLNEVRGDCSDRLFCLKENTCCVVDCEEQSDLDNFAKQLKDVARSARDS  
DHPRKFLFRSGASILTSLAMLPPQPIPAEDMGRYVNNGCPCGAIIVGSHVKKTSLQNLNELL  
KENSVEGLEIEVERIRNQEQKAMLSETVARIEQLHAAGTTPVIYTSRTELTDFTDQKRL  
QFGETVSAFLMDVVQTLPPSLGFLISKGGITSNDVLSKGLALKTSRVLGQILPGCSVVKC  
PPDHLRYPNMPVVIFFGNVGNFGLVTTFRRLSSPTQ  
>comp15346\_c0\_seq1; 920 111 3791 LEN=3868; translated  
MKASNHGAMMISSTDNESDAVTMANAFRYASDDTRNVMNVMNTNQTPSALEALKFFAVTK  
SWFVRAWPILTAKPPDYIDDDFGDNLREYIGKIQNSSELVVEADQIGVDDEKKLQEEVVP  
SSGLTNEAMHHRKVPQHVEPIKMLPGLVHTKDYFFLGPASAWMLVKEKFGYDGYEICRSCK  
SVATGVGQGTIAVALLPGEETIPSTFVADDNDENVKSMQSAIIPVSGRFQYEKIIISAKIE  
SDICMNSTRRDMVEKRNELPVEEDETPEPILLPPSMVDDDSISDSCDKHKMEIETHENG  
GYSASTQTQVSTRKRFAAGLSNMGNCTCFMNSTLQCLAHTPLRRYFLSGEYEKDLNRDNP  
LGTGGELATQFASLMAEITWETSKRRNVEGETQNYKYSNPYSQAIIPRNFKNSLGKHA  
QFMGYDQHSQELATYLLDALHEDTNRVTIKPYVEKPEQGENESDAHAADNAWRMHLRRE  
DSRVLENFVGQVKSRLCECKGCTRVSTTFDFPFMYLSVIPGESERSMTVTFVPIQQR  
MQKLTLTIEKTATIACLLKAMNEELVRVKCSELIPLLEDLCAVEIYDKEIFKWHKIEDEV  
HVIKDFDKTYVYQLTSLEEVKRISNETSVDEDVGGIDWSKTLKHRVNLDLSTFNELNKGD  
RWKQQLSNYAKQRFQIYKILNVSRSSEIEMIEYKLVFLDECYLELEKHNDSELKHTG  
NHDENTKGEAIEMQSTSTGSEKSGNGTRGMIDCPSTRFPNVRTRHDIGVLEFCADKLREL  
IYDRMCREKEKNSEGVVIQVGIKPSGSSSTTHTTNRHGLLSTCLVLRPCNLVYGLRKE  
LAHRLSRSLYEQKKPLHEAKLGERHVNLSSTNGESNLESPELNILRRARLSCDNSDRGS  
HYENSKSLGMLNKATDSEAVENEDQSLLAISSDEMEQAVVATKVKNRGHVYLDLQEQEDGW  
EVFDAKEFEVVPDHDNGTPSKEPEPDVKVRDCIENYCKEQLEDSEMWCNECKKHVR  
AWKQFHIYRAPPILIIHLKRFFFSASTHRRDKITRKVDVPLEGLDLTDLVASYDEDDKPI  
YDCYAVSNHFGGLGGHYTAYTLSDGIWCNYDDSRVTTDINPEEVVSEAAVLYYRRRD  
VSVGEDHDIIDTKTSPNCEHTDCPGEVSDVSIINNTHAMDLTLYDSDSNGSSKTALSP  
TDSIENS DENIVHQSDDYMNVTTFQ  
>comp15347\_c0\_seq1; 842 253 2136 LEN=2354; translated  
MVISGPPFPLSLSFVTEQVAMHTNGTIGALLNATFGNAPELLIASAALRKGFRVQVQLAM  
LGSMLTNLLFVFGISCLIGGLRWQVQELRITSGNVNVMGMLLSTAGSLLPATLVLGGQLK

HGSSNDDATDDDDTTEQQSSSFADPNAVQPSLEELQFCRINASVLI FMYGLYL VLFQLGTHKE  
EFDDDEGGHEHVNGTDHREYHTAVHGKPSKHHARRNVFCVWLLQKTKCMLSRNGNDNRVR  
MSPSRPSEEGWIPSSRVIATDPRSSTAAGDVEMMYRNHATNNKHLNHQLLGMIPNEREE  
RIQKNLDDGGTSSSDDECLLPQNHKIDDDDDSYFDEYRFDGGLAKTETSSGGATRLRR  
NSHGAIAGHPHSASTPNHHPYMDHDTV P NGINSNHSK K K K NGRSTGALLPLGLAEPSET  
MLPTAPSQPPLFDGDHSTTSTQRSEAQMSFRV GILWLLIITLGISAMSDILVDTIDGFAL  
RLHVSEVFTSMVIVPFFSNVAEQVSAILFAYRNEMDLCVGVTVGSAIQVASFVLP GCVLI  
GWMVDRSMTLYFHAYETVCLFLAVVVVA AVLQGGTTNWLVGATCISVYVMM AAGFWFHS  
EDLSVDAETIGQDPNGTRRATVFGLLP

>comp15347\_c0\_seq2; 989 683 2872 LEN=3090; translated  
MTDELSKIETSHRRLPNDSIENDDDEYGGIDAFDDEHGSTLR TAATTSRKGFCGVCADLL  
SDLWNSSGLVLNHNKLNLLFAGPLALLGDAMGMLGETACFALSGIALIPCAERLSFVTEQ  
VAMHTNGTIGALLNATFGNAPELLIASAALRKGFYRVVQLAMLGSMLTNLLFVFGISCLI  
GGLRWQVQELRITSGNVNVGMLLLSTAGSLLPATLVLGGQLKHGSSNDDATDDDDTTEQQS  
SFADPNAVQPSLEELQFCRINASVLI FMYGLYL VLFQLGTHKEEFDDDEGGHEHVNGTDHR  
EYHTAVHGKPSKHHARRNVFCVWLLQKTKCMLSRNGNDNRVRMSPSRPSEEGWIPSSRVI  
ATDPRSSTAAGDVEMMYRNHATNNKHLNHQLLGMIPNEREERIQKNLDDGGTSSSDDE  
CLLPQNHKIDDDDDSYFDEYRFDGGLAKTETSSGGATRLRRNSHGAIAGHPHSASTPNH  
HPYMDHDTV P NGINSNHSK K K K NGRSTGALLPLGLAEPSETMLPTAPSQPPLFDGDHST  
TSTQRSEAQMSFRV GILWLLIITLGISAMSDILVDTIDGFALRLHVSEVFTSMVIVPFFS  
NVAEQVSAILFAYRNEMDLCVGVTVGSAIQVASFVLP GCVLI GWMVDRSMTLYFHAYETV  
CLFLAVVVVA AVLQGGTTNWLVGATCISVYVMM AAGFWFHSLEEDLSVDAETIGQDPNGTR  
RATVFGLLP

>comp15348\_c0\_seq1; 530 94 1734 LEN=1827; translated  
MTRGGDSHPNLRQRKHS D P SPRKNGETGLEGDEM K PLLTKPKEKSSVDTSKTDGYVLMPL  
RERSILARLDVGPFLLCYGFVLSLDLTREQHEDETSNETSAFSLVAFPLVLFVHLGLFLV  
QQWSVSWRATVGYQRVDTRQTRAPSTPSNTLLGWTHCLVTAPHVDQHQS SHDAGIVPVH  
RIRRTSGSDKDNEVLAVVNFQDIVFR CNIVDDTDADTSLWSNDDTSDSVTTRTTADGLFH  
RLKYPINLPLSFYDKWRGHKTMELVRKAQQTYGTNTTPIDLPPFIDLLQEQQVAPFFLFQ  
ILCVLLWSLDEYWYAMFTFFALLMFESTVAYNRLKSLERLRSYTVHSHRQI WVHRPTYP  
PLGKTGWVQISVSEIVPGDIVSCKQSTLRSSPNRSGSALA QKQHQLNQLPADILLNGDA  
VVDESQITGESVPQLKVALENSGGTVKTSATDETLDLQEHKQFILFGGTTLLVSHSGAS  
PHSTISEPPDHGAIGMVLRTGFETAQGSLLRTMAHTQKSVDGIHTRDTYAFILTL L CMAV  
ASAYMVW

>comp15348\_c0\_seq2; 1227 94 4092 LEN=4377; translated  
MTRGGDSHPNLRQRKHS D P SPRKNGETGLEGDEM K PLLTKPKEKSSVDTSKTDGYVLMPL  
RERSILARLDVGPFLLCYGFVLSLDLTREQHEDETSNETSAFSLVAFPLVLFVHLGLFLV  
QQWSVSWRATVGYQRVDTRQTRAPSTPSNTLLGWTHCLVTAPHVDQHQS SHDAGIVPVH  
RIRRTSGSDKDNEVLAVVNFQDIVFR CNIVDDTDADTSLWSNDDTSDSVTTRTTADGLFH  
RLKYPINLPLSFYDKWRGHKTMELVRKAQQTYGTNTTPIDLPPFIDLLQEQQVAPFFLFQ  
ILCVLLWSLDEYWYAMFTFFALLMFESTVAYNRLKSLERLRSYTVHSHRQI WVHRPTYP  
PLGKTGWVQISVSEIVPGDIVSCKQSTLRSSPNRSGSALA QKQHQLNQLPADILLNGDA  
VVDESQITGESVPQLKVALENSGGTVKTSATDETLDLQEHKQFILFGGTTLLVSHSGAS  
PHSTISEPPDHGAIGMVLRTGFETAQGSLLRTMAHTQKSVDGIHTRDTYAFILTL L CMAV  
ASAYMVWEEGSNDPTRNKFRLLLVHVI IITSVVPPELPMELSLAVTNSVADLIRRRIFCT  
ENFRIPLAGQVNMCCFDKTGTLTSDDEMQLTGLRLISESGGERSRGGDSEGLFTDVLEPNA  
TLQWSALRIMTACHSLAPNAGYRSHSSEDDRMNSLIGDPLEKAI LENTGYKMIQSNV L K K  
SDTTPEDRPA DAILQRF G F SSKLKRMSVLARESSDDTWVLT KGAPETVKTF L R P D S I P  
ENYDDISMHHMGQRV LAMAYKLTGEEAKPIKEISRETVESDLVFAGFLLMHCP IKP  
DSSSISELWNSGNEVMTIGDAILTAAEVARQVGIIRKKS K THPPTLQLKYIPDDKT TA  
TKTSFRHEHFVPLSTKAHVSSNENLTLSTTDVTHLKKMVAANELALCISGDALQKLV L K  
IVQYSYANHEGNGRVTDEKQLLHPATQDVLKDIVPMCNV FARCNP RQKEAIVAAFN L G G  
FTTLMCGDGTNDV GALRR AHV G I S I I S A P G I E A K Q R S A T K A I S Q M K A D H E K E R K K K R A K K  
GSRARNVSSLEQSLRELQEAQHELDQIELGDASIASPFTSRMVS IKCKVV L Q Q G R C T L V  
TMLQIYKILGVNCLVNAMVLSKLF L H G V K Q G D R Q L T I L G L F V A G L F F F V T R G K P L P K L S E  
RHPPDSVLSTEALVSIASQFAIHYTAMI IATEVALSFVDPFDP S M I P D G P F N P N T L N T C T  
FLISVLATINTFAVN YRGE P F V E P L R D N K M L W R S L Q V C Y T I L A V C A L E I F P P L N D L M Q L A  
EFPD TVN P E S L E W

>comp15349\_c0\_seq1; 393 164 1954 LEN=2796; translated  
MQRKARTRKPVGRNNQLANAVPEIHLTHKLFPPRQTLRLYRCDLILASLTIPVDNRPTPE

PNNATQRNDRYFAPTYAAVVAGRFVVGVGVAVSGVADVITYLRECAPIEWRGSIVSVNEAC  
ISLGFLLAYCAGYVYADEGAEWRTVFGVAGILAVIQFLGMLKLPESPAWLTEKGHDEAA  
RQALELINGSTDNSYVSGDESGVETLPSFGRSSGNPDGTFWSSPTRNGSGMNRSSSFER  
RRMERVDSNCPLRVDDAELDGSIQPATATMKNMEDEKISNRKKEEYASTRLKNRSLSACS  
CVRKFGYNLQAAALTLRYRQQTYIALFLAVAQQFCGQTSILNYAPLIFAEATKQDVEND  
GDANDGSTDQDMSLVIIGLVKFFVVTILVIWRIEYIGRRSLLIFGNCLIALGLLALVVAFG  
GSNNTATSGDADGANDAASWSPMTNIKTFDLALPGVLLVVSIGYSMSFGPLTWLLTSEIFP  
TEIRGRALGYSSIIITSMCGAISTQTFLYGQSILGSPFVFGIYCVITVAGVMFAYLAIPDT  
GGKTIVEIEESLNQMYWWKYSSIALSQDDEGCMGRSTNRSEMVPSPSPDFSGHGLT  
>comp15349\_c0\_seq2; 98 138 504 LEN=504; translated  
MQYTPSDKKRSRSHAATRSSSRRLGRIAAPHRQPSSSQSSSPRMVWLCLAVASAAASLW  
LPFVSESARGLSPLYGAGAGDQVHELLATSPGASLLGSGTDDRDTSKKSESRDYNALRK  
ASX  
>comp15349\_c0\_seq3; 343 168 1517 LEN=2359; translated  
MLSSPCLWLLASGMLKLPESPAWLTEKGHDEAARQALELINGSTDNSYVSGDESGVETLP  
SFGRSSGNPDGTFWSSPTRNGSGMNRSSSFERRRMERVDSNCPLRVDDAELDGSIQPAT  
ATMKNMEDEKISNRKKEEYASTRLKNRSLSACSCVRKFGYNLQAAALTLRYRQQTYIAL  
FLAVAQQFCGQTSILNYAPLIFAEATKQDVENDGDANDGSTDQDMSLVIIGLVKFFVVTIL  
VIWRIEYIGRRSLLIFGNCLIALGLLALVVAFGGSNNTATSGDADGANDAASWSPMTNIK  
TFDLALPGVLLVVSIGYSMSFGPLTWLLTSEIFPTEIRGRALGYSSIIITSMCGAISTQTFL  
YGQSILGSPFVFGIYCVITVAGVMFAYLAIPDTGGKTIVEIEESLNQMYWWKYSSIALSQ  
DDEGCMGRSTNRSEMVPSPSPDFSGHGLT  
>comp15349\_c0\_seq4; 343 168 1517 LEN=2659; translated  
MLSSPCLWLLASGMLKLPESPAWLTEKGHDEAARQALELINGSTDNSYVSGDESGVETLP  
SFGRSSGNPDGTFWSSPTRNGSGMNRSSSFERRRMERVDSNCPLRVDDAELDGSIQPAT  
ATMKNMEDEKISNRKKEEYASTRLKNRSLSACSCVRKFGYNLQAAALTLRYRQQTYIAL  
FLAVAQQFCGQTSILNYAPLIFAEATKQDVENDGDANDGSTDQDMSLVIIGLVKFFVVTIL  
VIWRIEYIGRRSLLIFGNCLIALGLLALVVAFGGSNNTATSGDADGANDAASWSPMTNIK  
TFDLALPGVLLVVSIGYSMSFGPLTWLLTSEIFPTEIRGRALGYSSIIITSMCGAISTQTFL  
YGQSILGSPFVFGIYCVITVAGVMFAYLAIPDTGGKTIVEIEESLNQMYWWKYSSIALSQ  
DDEGCMGRSTNRSEMVPSPSPDFSGHGLT  
>comp15349\_c0\_seq5; 393 164 1954 LEN=3096; translated  
MQRKARTRKPVGRNNQLANAVPEIHLTHKLFPPRQTLRLYRCDLILASLTIPVDNRPTPE  
PNNATQRNDRYFAPTYAAVVAGRFVVGVGVAVSGVADVITYLRECAPIEWRGSIVSVNEAC  
ISLGFLLAYCAGYVYADEGAEWRTVFGVAGILAVIQFLGMLKLPESPAWLTEKGHDEAA  
RQALELINGSTDNSYVSGDESGVETLPSFGRSSGNPDGTFWSSPTRNGSGMNRSSSFER  
RRMERVDSNCPLRVDDAELDGSIQPATATMKNMEDEKISNRKKEEYASTRLKNRSLSACS  
CVRKFGYNLQAAALTLRYRQQTYIALFLAVAQQFCGQTSILNYAPLIFAEATKQDVEND  
GDANDGSTDQDMSLVIIGLVKFFVVTILVIWRIEYIGRRSLLIFGNCLIALGLLALVVAFG  
GSNNTATSGDADGANDAASWSPMTNIKTFDLALPGVLLVVSIGYSMSFGPLTWLLTSEIFP  
TEIRGRALGYSSIIITSMCGAISTQTFLYGQSILGSPFVFGIYCVITVAGVMFAYLAIPDT  
GGKTIVEIEESLNQMYWWKYSSIALSQDDEGCMGRSTNRSEMVPSPSPDFSGHGLT  
>comp15349\_c0\_seq6; 322 270 2174 LEN=3316; translated  
MEPHGDPSAAGAGRGVSLLPWSYVVKLTATASLGGCLFGYDMGAISGTLPLQLTATFGLDN  
NQKELVVSILYVGGALGACIGGSLCDRIGRKVTIILTDFLFTLGAVWLYFAPTYAAVVAG  
RFVVGVGVAVSGVADVITYLRECAPIEWRGSIVSVNEACISLGFLLAYCAGYVYADEGAE  
WRTVFGVAGILAVIQFLGMLKLPESPAWLTEKGHDEAARQALELINGSTDNSYVSGDESG  
VETLPSFGRSSGNPDGTFWSSPTRNGSGMNRSSSFERRRMERVDSNCPLRVDDAELDGS  
IQPATATMKNMEDEKISNRKKEEYASTRLKNRSLSACSCVRKFGYNLQAAALTLRYRQQ  
TYIALFLAVAQQFCGQTSILNYAPLIFAEATKQDVENDGDANDGSTDQDMSLVIIGLVK  
FVVTILVIWRIEYIGRRSLLIFGNCLIALGLLALVVAFGGSNNTATSGDADGANDAASW  
SPMTNIKTFDLALPGVLLVVSIGYSMSFGPLTWLLTSEIFPTEIRGRALGYSSIIITSMCGA  
ISTQTFLYGQSILGSPFVFGIYCVITVAGVMFAYLAIPDTGGKTIVEIEESLNQMYWWKYSS  
IALSQDDEGCMGRSTNRSEMVPSPSPDFSGHGLT  
>comp15349\_c0\_seq7; 136 270 512 LEN=824; translated  
MEPHGDPSAAGAGRGVSLLPWSYVVKLTATASLGGCLFGYDMGAISGTLPLQLTATFGLDN  
NQKELGTIGRRSACCVAVRG  
>comp15349\_c0\_seq8; 322 270 2174 LEN=3016; translated  
MEPHGDPSAAGAGRGVSLLPWSYVVKLTATASLGGCLFGYDMGAISGTLPLQLTATFGLDN  
NQKELVVSILYVGGALGACIGGSLCDRIGRKVTIILTDFLFTLGAVWLYFAPTYAAVVAG



RFVVGVGVAVSGVADVITYLRECAPIEWRGSIIVSVNEACISLGFLLAYCAGYVYADEGAE  
WRTVFGVAGILAVIQFLGMLKLPESPAWLTEKGHDEAARQALELINGSTDNSYVSGDESG  
VETLPSFGRSSGNPDGTFWSSPTRNGSGMNRSSSFERRRMERVDNSCPLRVDDAELDGS  
IQPATATMKNMEDEKISNRKKEEYASTRLKNRSLACSCVRKFGYNLQAAALTLRYSRQQ  
TYIALFLAVAQQFCGQTSILNYAPLIFAEATKQDVENDGDANDGSTDQDMSLVIIGLVKF  
VVTILVIWRIEYIGRRSLIFGNCLIALGLLALVVAFFGSSNNTATSGDADGANDAASWSP  
MTNIKTFDLALPGVLLVVSIGYSMSFGPLTWLLTSEIFPTEIRGRALGYSSIIITSMCGAIS  
TQTFLYGQSILGPSFVFGIYCVITVAGVMFAYLAIPDTGGKTIVEIEESLNQMYWWKYSS  
IALSQDDEGCMGRSTNRSEMVPSPSPDFSGHGLT

>comp15349\_c0\_seq9; 399 1 1604 LEN=1794; translated  
XAREAAERAASLYDAGDQALKLFMNSARASFLGSGTADRHTGNRPPGQRFESSRFPPTDE  
SQDHYNALRKASVAREAIERKSRDGS GDGKSTSLPPQVLYIACCGLGHRLMRQAASFHG  
ARGLGARHLWIKWGTVCASKGTPKASRIDLFELLFGSGPMVAIETAANVTEGVRAAATDL  
SLERSAEAERGAVATNHTNESIERKNNRDPEKNITKLSFLHTEFHRVEKGLRTRKETLR  
FNNGAPGYEYRCPKKTREMVMDKARSDFEYKQLRSLFRYNYKISRFBVQEQRFSEIRITFG  
VHVRTGNGEKGDFFKNKNGRIGEDLDEFANLAKTLYELGRNMKSAVGGKHLTDNSRTQAL  
PPLVFIATDDASVVARMAKVLAPYGIATKAFPLRLEANEGVTYVTDGSSRACIANWAS  
QFIDASLLGATDALIAARYSSFTQSLPLATVLSSEIVRGGAQHRKTGSDRFANRLFCEVN  
RFGDGMKCYDDFGDWAMDENQILFPADLPSWNATEIAQESTWVPHRKEFLVPCP

>comp15350\_c0\_seq3; 423 1 1618 LEN=1618; translated  
XYTTPTKRRRMGLNYDDENSKPSINNLFS DHGNSDSRSSLGGGIVDES WREAPIVGSLSY  
PSLDNDPTRMEFLDWSLPTKLR IEVNGGTLRQKQSRNIVHSWVRDVMRDNADVVTTCWIYS  
SPVLPNSDVTGSESGGF AIAQQGFGLLSRSISTSNLSAVQRSIATKKSTMSRQDSFSSSR  
FDPKPKTVKGKASNNGKSDCETDSVGSSNASNRLAKFLIRFVRGPRAKYSRKRVL EEHCW  
WDEQATDGSRPTLTHDDRVERLQRRWQQAIRSLYSNFRRRAMSYGNQMHSANAMVLDTYF  
YICIGQDHSVLFRAAANDSDGDNEIRAMVPVVLISSTSEAFRKQLEQNGLDMSFDNSGSG  
DETVRFLESIQEREARERRKVA AAVKVNKKLFDKAILSPGVKADLEALRRAQAFGEAAGA  
DVMVKVSKSDLQSENQEKANKAFPKALRISGWDNVSLFFEVYWNQCGDTMGIGGGGMTEN  
GLYACAKSTNQRLLPICPNTKGISQFEHASMKRLRVYPVETMQTADGTDNKGNI DSQSL

>comp15350\_c0\_seq4; 917 44 2680 LEN=2780; translated  
MTSTTINFSSQSQSTWLQNDHESTLLGGSQVPFLDENKSDLPQLEQQQEQQNGNSSLFGAV  
MRQFSTGISSAFPMPPSSPFGRKPSR SVGSYADSSPQKDVGVGGGFRSLIASPSGKTIM  
NIVNQFNSPFKQSPSSSDKRRRAQRRRLWKDDEEDEKSNKGSKDAEDDYTTPTKRRRMG  
LNYDDENSKPSINNLFS DHGNSDSRSSLGGGIVDES WREAPIVGSLSYPSLDNDPTRMEF  
LDWSLPTKLR IEVNGGTLRQKQSRNIVHSWVRDVMRDNADVVTTCWIYSSPVLPNSDVTGS  
ESGGFAIAQQGFGLLSRSISTSNLSAVQRSIATKKSTMSRQDSFSSSRFDPKPKTVKGKA  
SNNGKSDCETDSVGSSNASNRLAKFLIRFVRGPRAKYSRKRVL EEHCWDEQATDGSRPT  
LTHDDRVERLQRRWQQAIRSLYSNFRRRAMSYGNQMHSANAMVLDTYFYCIGQDHSVLF  
VAAANDSDGDNEIRAMVPVVLISSTSEAFRKQLEQNGLDMSFDNSGSGDETVRFLESIQE  
REARERRKVA AAVKVNKKLFDKAILSPGVKADLEALRRAQAFGEAAGADVMVKVSKSDLQ  
SENQEKANKAFPKALRISGWDNVSLFFEVYWNQCGDTMGIGGGMTENGLYACAKSTNQR  
LPLPICPNTKGISQFEHASMKRLRVYPVETMQTADGTDNKGNI DSQSLKNGDKAKAVADQ  
SSGVEIRGILLPCMARKLLLLLARKQILEDEKQSSA ISSATALGATNQNHPPDERQQKDEQD  
ASRYVVLHSIRPNPTSMDDTPVQKSLIGGLSGTLVFNQGVKVRNKARDLEKND CNQNP L F  
ECYSGKVSMVAVDASREEVAACKLDDAF PANWYNNKS

>comp15350\_c0\_seq5; 180 227 573 LEN=573; translated  
MQQGNRKLKNGGDQNGARDGTYTIPPKHPLPPEAFRQLNGVSHPPPEPETQDDNLDEN  
NERTANRGEAAAAEAESSITVPRRPSQLIRRQSSLFGKLPVRSNSSLFGDAVNGSX

>comp15351\_c0\_seq1; 743 455 2564 LEN=3234; translated  
MVMGMFKRSVAKKSSPSSQSTENS DHSINDTSIARA EHP SAAASATATATTKQQVAPYHK  
QDPQPPKASVNGKSAKTSKTI IHSQTHQNHKQPVP TTINGTSSTALWIARS DANAVSAN  
GEKHIQRTSQHTNNSSESYYEEETIHEEDDND EYDSDFFEYVEEEGVPSASGQTNAVEET  
RLLPLPERKITIRFDEYDEMOTCLHINDYTKSEINKSWYKREYDKMVDLARKTASKAVK  
REKELREELERMLGEGQNA GLSVEDNDHQENSVPSSDTKKPTKRKPIEYRGLEAWTP  
DGASKVRFLEKESAIELVWNEQSRQWENGTFDPKSIREVYLPVSKAAGASALERGIHDEDL  
VKKLI EQERLRAIKRNRRTVYRKSKAALKKTAKNTASGLVSGVAGTTKIALKTGKVG MKL  
GKRGVKAGVATATLDPRLMKEALKVKKKRECERKKIITPSRAANERAE EEEQLSHQSTGN  
PASGTLACGLCLIFVGM YNMSVSI FGEWFVPYTGKSLSSFVPAVVE SKQPFVLTIFWSG  
VFTSSFSLEHRFFSNITVGP SLRCDRDDQSNDSIDMRSHAELSAAATSVDYGYEDPDHTD  
EGKSI SHRTHSSVVSRI SLGTEFSEVKTEFSEVEDDSTNDGKKKKSMLNLLGGPELKL L G

VVPIPGTKKVYKEERREHRAEKRIQRMPPRRASWETGVSDGKY  
>comp15351\_c0\_seq2; 740 455 2341 LEN=3011; translated  
MVMGMFKRSVAKKSSPSSQSTENS DHSINDTSIARA EHP SAAASATATATTKQVAPYHK  
QDPQPPKASVNGKSAKTSKTI TIHSQTHQNHKQPVPTTINGTSSTALWIARSDANAVSAN  
GEKHIQRTSQHTNNSSESYYEEETIHEEDND EYDSDFF EYVEEEGVPSASGQTNAVEET  
RLLPLPERKITIRFDEYDEMOTCLHINDYTKSEINKSWYKREDYDKMVDLARKTASKAVK  
REKELREELERMLGEGQNAGLGSVEDNDHQKENSVPSSDTKKPTKRKKPIEYRGL EAWTP  
DGASKVRFLKESAIELVWNEQSRQWENGTFDPKSIREVYLPVSKAAGASALERGIHDEDL  
VKKLI EQERLRAIKKRNR TVYRKSKAALKKTAKNTASGLVSGVAGTTKIALKTGKVG MKL  
GKRGVKAGVATATLDPRLMKEALKVKKKRE CERKKIITPSRAANEREAE EEEQLSHQSTGN  
PASVGP SLRCDRDDQSNDSIDMRSHAELSAAATSV DYG YEDPDHTDEGKSI SHRTHSSVV  
SRISLGT E FSEVKTEFSEVEDDSTNDGKKK SMLNLLGGPEL KLLGVVPIPGTKKVYKEE  
RREHRAEKRIQRMPPRRASWETGVSDGKY

>comp15351\_c0\_seq3; 740 455 2341 LEN=2994; translated  
MVMGMFKRSVAKKSSPSSQSTENS DHSINDTSIARA EHP SAAASATATATTKQVAPYHK  
QDPQPPKASVNGKSAKTSKTI TIHSQTHQNHKQPVPTTINGTSSTALWIARSDANAVSAN  
GEKHIQRTSQHTNNSSESYYEEETIHEEDND EYDSDFF EYVEEEGVPSASGQTNAVEET  
RLLPLPERKITIRFDEYDEMOTCLHINDYTKSEINKSWYKREDYDKMVDLARKTASKAVK  
REKELREELERMLGEGQNAGLGSVEDNDHQKENSVPSSDTKKPTKRKKPIEYRGL EAWTP  
DGASKVRFLKESAIELVWNEQSRQWENGTFDPKSIREVYLPVSKAAGASALERGIHDEDL  
VKKLI EQERLRAIKKRNR TVYRKSKAALKKTAKNTASGLVSGVAGTTKIALKTGKVG MKL  
GKRGVKAGVATATLDPRLMKEALKVKKKRE CERKKIITPSRAANEREAE EEEQLSHQSTGN  
PASVGP SLRCDRDDQSNDSIDMRSHAELSAAATSV DYG YEDPDHTDEGKSI SHRTHSSVV  
SRISLGT E FSEVKTEFSEVEDDSTNDGKKK SMLNLLGGPEL KLLGVVPIPGTKKVYKEE  
RREHRAEKRIQRMPPRRASWETGVSDGKY

>comp15351\_c0\_seq4; 743 455 2564 LEN=3217; translated  
MVMGMFKRSVAKKSSPSSQSTENS DHSINDTSIARA EHP SAAASATATATTKQVAPYHK  
QDPQPPKASVNGKSAKTSKTI TIHSQTHQNHKQPVPTTINGTSSTALWIARSDANAVSAN  
GEKHIQRTSQHTNNSSESYYEEETIHEEDND EYDSDFF EYVEEEGVPSASGQTNAVEET  
RLLPLPERKITIRFDEYDEMOTCLHINDYTKSEINKSWYKREDYDKMVDLARKTASKAVK  
REKELREELERMLGEGQNAGLGSVEDNDHQKENSVPSSDTKKPTKRKKPIEYRGL EAWTP  
DGASKVRFLKESAIELVWNEQSRQWENGTFDPKSIREVYLPVSKAAGASALERGIHDEDL  
VKKLI EQERLRAIKKRNR TVYRKSKAALKKTAKNTASGLVSGVAGTTKIALKTGKVG MKL  
GKRGVKAGVATATLDPRLMKEALKVKKKRE CERKKIITPSRAANEREAE EEEQLSHQSTGN  
PASGTLACGLCLIFVGM YMNMSVSI FGEWFV P YTGKSLSSFVPAVVE SKQPFVLTIFWSG  
VFTSSF SLEHRFFSNITVGP SLRCDRDDQSNDSIDMRSHAELSAAATSV DYG YEDPDHTD  
EGKSI SHRTHSSVVSRISLGT E FSEVKTEFSEVEDDSTNDGKKK SMLNLLGGPEL KLLG  
VVPIPGTKKVYKEERREHRAEKRIQRMPPRRASWETGVSDGKY

>comp15352\_c0\_seq1; 463 130 1693 LEN=1719; translated  
MVHQATTAQRCVCLVFLVLASASSL PALVSSPFPVPGALSIRSSPGGSTVLGMQSDSGG  
GGSCIPGSLGDGTIDTPTNDGNDGNGNDNQPGRDPSERNGPTAAPHVVLVLGGSGYTG  
RRVCRELVRSMGDLRSGGGDPVSAVSVSRSGRPNNGSSS ISSKRWEE EVDWIAENLL  
GGGAGDDGPEQLLEQLRGLVLRVREKGGNPGGSPSSE LFDLTVVGCIGNANPSPEWTGLW  
GLGFDNERLLKENGGVYEAFC AKTLGPLLGAAGPAAPVVL LSLGYEAQKCLEGPL EGFV  
EGKRLAERCFL EALRDETKGRALASIPPEENMVVLGLPYLVYGGRRFPRLGALYRWLVES  
APARAYVGANRALRSLSKTTTEDWLES MVFSSPIDVDVAGE IAAMAARGLVTRP IVNDGQ  
PRKQDFD TSGQPIEYENVLFLDGTHAIEAAIDHLRVS RGPQRREIRERNGENPSLAKAL  
PRWEGALVGRPYLFPVPVVAFFASFFWAVVTEQFVQPPA

>comp15352\_c1\_seq1; 1183 186 4987 LEN=5644; translated  
MRARRTRNEKDDPLDFPEERVKELVIELFRILLQYLS E LWTATLVAIDHQKEAQKQLLK  
WYQEAQDSLADRALILYNKI PDSWHEHKRSVSNRCSEIFEASDEWLERTLELTRFR LALL  
PPLLEDARHSFENLPLEMQSIALAVVLVALGWVLLLRKLWRSYCRSLRKHNRKRKRLR  
VKEGQAEILHGRTTLVYGAHGDLRDEEYLDDESITSSMRRRGFGRFGFDFFGINKFAASP  
KKRSPSKKRRRAGSQDKYNRNRGRSRSSGDHNF GSPAPRKR TSSTESFGNPAMIRPRSNS  
SGSLGDTVGGFLQGFGSLATRFATQSSNSSNIAKTKKAQTPRFKKERLGSMDVFFAPGK  
NGQPTPSTPRTARSASYDSGSKIYPHTRRQVSTEEPLNDTVNTWEEGRQPPRRDGGFKSV  
QAERHYYS GDDKYGDQDSIDSNDEDETRYLYDEF GVVTL SHKVTYHGPFQPLLHCGSTLV  
PPLPLEVVARKIFSAENLDLPLKRVLKL DLLKNTLTVVEPSTSVSQNGKWDVYEDIDSIS  
LKFKTPLEGGAFWIYRKGT PQHNAEHWKEHTSESAHAAAQFLDFLAFQILGQSLKQIF E  
ALNLVHQGSLAYSGQELVLHDNHRGSDGSEENENGDKGNKKSTTKSVEATQCVAWDDAI

XAMSSIPTVRIALERLWLSHRRPNEISSSFQIKDKSKRAKETKEKEQEQKNITRERKSPK  
NAKEKSKIALDSEKVSADADLSLKEEYIKRLLLLGPVDFRFLFVPTLPETAVPEGDTNNR  
GRMEQLLRWRKRVARASVLRVSYARARRVANKGWDLEQNVSQNFISSALEVSGASLGDFG  
GEELTKRFAYDGNANNNLRDIAAKNEIYEASVSRDVMCHVRPFDYLLSDEEKNRGRVNEE  
SEAGKQDGVGNDSSSLGEEENSEKHLVMSPYQAYTYVTTHYFKASNDMLWKGGALHPSR  
DPVEMFPSLKHIIVNNPDLDFVDCSTNATNNVMMISLFRVSLPKGIDPQFDNVIERFSN  
SSEKSRKEKLYLMFQLGNGADLTFFGWLFKLVSLYFRLTDTGRDSPMNLASDDRYGFP  
VRAGGLFRTYHFGGSLQKGTDPKPNYIGVTKCVATSYQERVFVKMLFDKLLQEMTTSTID  
YTYVIEGTQNDLPERALSTLRFVHVDPVKAQDPRVHLSIVEETEEDPKSSRPILQRS  
KPFSPLLFRKAFESVLRFGESGFNVFSTNKKKKSGLQAISEEDERGFDEIPEHLLRGA  
ELDYREKATDLVIDILRSVRVPPFRHKPEHFDPTDSTRWHDTEETGLVVMRSRIPVLRFLD  
RSDIQRYIFHSDYDLKLASRRLVETAAWRGKTFPIDKRSCRIELQNGQLFQQGYDRKNNP  
VFYFRNLCRGPWRGDIDAAIKSILYRFDKRLRELCKSNPSTRVTLVILMGHAKRGARKKK  
DAETLILESNEADAEDMIIDERNISAGTMVLDIPSEEEIKVHSGNPRISTEEKWMCHT  
NMEMIQRIFPQLIRHYPGRSLGVLVVKGRGNHYRDAMSGRAMAKRLLIEAGIDDWKQA  
MGKIRFVNKTADLITHISLKDLPFVGGIAPIRDSAYEFE

>comp15353\_c0\_seq1; 380 1 1525 LEN=1525; translated  
XPNSHNFERRARRAVLVKYRLHQFIPVSVREKASQRSTPGAPTS DPPTAGEDXDKRTQNE  
TRHACHSDGRSLFAMQVLEMEEVESLVGKASRKKLNTSRKTNQESGLRKAACFHRGDW  
LPKLVVLACSVLLGVMYLASQSDGDVATGGEQELKAVPSVPVAPVATPLPTVSTPPPTVA  
TPPPTVATPPPTAAPPPPPADPAPEQVPLTVEDDANQDANGNGNDNDNDKYMYSKYATIS  
PLIDHPFP SDAERAPLVEKFGRWHFYDGDDEERPLEDYTAGYPNRDMPEGEKFADDAWQAD  
AVYVNHILNDADQLISRAMEAIFIEYGHGKPLPPEGLAERMRFHWSREDL SVPNAQAPE  
KYRKRGRDNGGWTTKRSFDGLVRRLLHAMMTQDTFTVVMGGHSAAMGAGNNFRQSYMMQ  
FHKVMYPIFARLGVKLITRNVGQGLGTLQAGMGSGSIYGDEVDILMWD SGKFLVRNLLK  
LEHTFLGRFQPFESSLGINRTVRCGFSHQ

>comp15353\_c0\_seq3; 811 1 3215 LEN=3340; translated  
XPNSHNFERRARRAVLVKYRLHQFIPVSVREKASQRSTPGAPTS DPPTAGEDXDKRTQNE  
TRHACHSDGRSLFAMQVLEMEEVESLVGKASRKKLNTSRKTNQESGLRKAACFHRGDW  
LPKLVVLACSVLLGVMYLASQSDGDVATGGEQELKAVPSVPVAPVATPLPTVSTPPPTVA  
TPPPTVATPPPTAAPPPPPADPAPEQVPLTVEDDANQDANGNGNDNDNDKYMYSKYATIS  
PLIDHPFP SDAERAPLVEKFGRWHFYDGDDEERPLEDYTAGYPNRDMPEGEKFADDAWQAD  
AVYVNHILNDADQLISRAMEAIFIEYGHGKPLPPEGTS PGDTVDFGTSCGLPFVWLPRVR  
AAHGV EIAMI VPFVFLIVFGCFALTEHGLFFALGSSGLAERMRFHWSREDL SVPNAQA  
PEKYRKRGRDNGGWTTKRSFDGLVRRLLHAMMTQDTFTVVMGGHSAAMGAGNNFRQSYM  
MQFHKVMYPIFARLGVKLITRNVGQGLGTLQAGMGSGSIYGDEVDILMWD SGMTEPDPK  
HVDLFFRQGILAGNRVPLLWGGPF EVLKMLHEEADADVG DWGYALDGITEIESLEQAKEI  
PWAARYLKCKPEAEDICKEEPRFCATCWIDRPDGI APEAKQLDKPRGQVKWHPGWRMHQL  
VGRNLAF AVLEGLQA AINLWTEGVMGAFLPWFILSSVFRTXNFS PF AFL LERNGQTIGGP  
PLDDDFWHVTDY YENIRNKVKS LDKSLGH CYEIEGDL PTRL CNTPMKAKTQYTPRANPNE  
TALTSIIK P APDGYVPKNRLTMMYDGPDPHNTCSDIPEGEIDVFN VVTGRRGLIEDFDSQ  
QPGSLGVP GADLSAPADADATTPVHRELEDAIVPGKGWEVFGEP PGFC DGT YNAECARST  
GNECVMYGHHDYRGAVIGNEYAGWL VMTLKD LKEGVIVLKLHTWHT EAENTMTNGWTSVD  
NARRRLGQNR SFS PRTHEAEAERGDRMLMRSYDTPELPDSFVFDYAIDGVVTSLSRDQFL  
EQKKQQQRVVETLTI LDDPAFA SEAKDVEIAIRLRGSGSSIVFGVSHVYWA

>comp15353\_c0\_seq4; 563 205 1979 LEN=2104; translated  
MQFHKVMYPIFARLGVKLITRNVGQGLGTLQAGMGSGSIYGDEVDILMWD SGMTEPDPK  
HVDLFFRQGILAGNRVPLLWGGPF EVLKMLHEEADADVG DWGYALDGITEIESLEQAKEI  
PWAARYLKCKPEAEDICKEEPRFCATCWIDRPDGI APEAKQLDKPRGQVKWHPGWRMHQL  
VGRNLAF AVLEGLQA AINLWTEGVMGAFLPWFILSSVFRTXNFS PF AFL LERNGQTIGGP  
PLDDDFWHVTDY YENIRNKVKS LDKSLGH CYEIEGDL PTRL CNTPMKAKTQYTPRANPNE  
TALTSIIK P APDGYVPKNRLTMMYDGPDPHNTCSDIPEGEIDVFN VVTGRRGLIEDFDSQ  
QPGSLGVP GADLSAPADADATTPVHRELEDAIVPGKGWEVFGEP PGFC DGT YNAECARST  
GNECVMYGHHDYRGAVIGNEYAGWL VMTLKD LKEGVIVLKLHTWHT EAENTMTNGWTSVD  
NARRRLGQNR SFS PRTHEAEAERGDRMLMRSYDTPELPDSFVFDYAIDGVVTSLSRDQFL  
EQKKQQQRVVETLTI LDDPAFA SEAKDVEIAIRLRGSGSSIVFGVSHVYWA

>comp15353\_c0\_seq5; 870 1 3027 LEN=3152; translated  
XPNSHNFERRARRAVLVKYRLHQFIPVSVREKASQRSTPGAPTS DPPTAGEDXDKRTQNE  
TRHACHSDGRSLFAMQVLEMEEVESLVGKASRKKLNTSRKTNQESGLRKAACFHRGDW  
LPKLVVLACSVLLGVMYLASQSDGDVATGGEQELKAVPSVPVAPVATPLPTVSTPPPTVA

TPPPTVATPPPPTAAPPPPPADPAPEQVPLTVEDDANQDANGNGNDNDNDKYMYSKYATIS  
PLIDHPFP SDAERAPLVEKFGRWHFYDGDEEERPLEDYTAGYPNRDMPGEKFADDAWQAD  
AVYVNHILNDADQLISRAMEAIFIEYGHGKPLPPEGLAERMRFHWSREDL SVPNAQAPE  
KYRKRGRDRNGGWTTKRSFDGLVRRLLHAMMTQDTFTVVMGGHSAAMGAGNNFRQSYM  
QFHKVMYPIFARLGVKLI TRNVGQGLGTLQAGMGSISYGD EVDILMWD SGMTEPDPKHV  
DLFFRQGILAGNRVPLLWGGPF EVLKMLHEEADADVG DWGYALDGITEIESLEQAKEIPW  
AARYLKCKPEAEDICKEEPRFCATC WIDR PDGIAPEAKQLDKPRGQVKWHPGWRMHQLVG  
RNLAFAVLEGLQAAINLWTEGVMGAFLPWFILSSVFRTXNFSPFAFL LERNGQTIGPPPL  
DDDFWHVTDYYENIRNKVKS LDKSLGHCYEIEGDLPTRLCNTPMKAKTQYTPRANPNETA  
LTSIIKPAPDGYVPKNRLTMMYDGPDPHNTCSDIPEGEIDVFNVTGRRGLIEDFDSQQP  
GSLGVPGADLSAPADADATTPVHRELEDAIVPGKGEVFG EPPGFC DGTYNACARSTGN  
ECVMYGHHDYRGAVIGNEYAGWLVM TLKDLKEGVI VLKLTWHTEAENTMTNGWTSVDNA  
RRRLGQNRFS SPRTHEAEAERGDRMLMRSYDTPELPDSFVFDYAIDGVVTSLSRDQFLEQ  
KKQQQRVVETLTI LDDPAFASEAKDVEIAIRLRGSGSSIVFGVSHVYWA

>comp15353\_c0\_seq6; 839 1 3120 LEN=3245; translated  
XPNSHNFERRARRAVLVKYRLHQFIPVSVREKASQRSTPGAPTS DPPTAGEDXDKRTQNE  
TRHACHSDGRLSLFAMQVLEMEEVESLVGKASRKKLNTSRKTNQESGLRKVAACFHRGDW  
LPKLVVLACSVLLGVMY LASQSDGDVATGGEQELKAVSPVPAPVATPLPTVSTPPPPTVA  
TPPPTVATPPPPTAAPPPPPADPAPEQVPLTVEDDANQDANGNGNDNDNDKYMYSKYATIS  
PLIDHPFP SDAERAPLVEKFGRWHFYDGDEEERPLEDYTAGYPNRDMPGEKFADDAWQAD  
AVYVNHILNDADQLISRAMEAIFIEYGHGKPLPPEGTSPGDTVDFGTSCGLPFVWLPRVR  
AAHGVEIAMIVPFFVFLIVFGCFALTEHGLFFALGSSGLAERMRFHWSREDL SVPNAQA  
PEKYRKRGRDRNGGWTTKRSFDGLVRRLLHAMMTQDTFTVVMGGHSAAMGAGNNFRQSYM  
MQFHKVMYPIFARLGVKLI TRNVGQGLGTLQAGMGSISYGD EVDILMWD SGMTEPDPK  
HVDLFFRQGILAGNRVPLLWGGPF EVLKMLHEEADADVG DWGYALDGITEIESLEQAKEIPW  
AARYLKCKPEAEDICKEEPRFCATC WIDR PDGIAPEAKQLDKPRGQVKWHPGWRMHQL  
VGRNLAFAVLEGLQAAINLWTEGVMGGPPLDDDFWHVTDYYENIRNKVKS LDKSLGHCYE  
IEGDLPTRLCNTPMKAKTQYTPRANPNETALTSIIKPAPDGYVPKNRLTMMYDGPDPHNT  
CSDIPEGEIDVFNVTGRRGLIEDFDSQQPGSLGVPGADLSAPADADATTPVHRELEDAI  
VPGKGEVFG EPPGFC DGTYNACARSTGNECVMYGHHDYRGAVIGNEYAGWLVM TLKDL  
KEGVI VLKLTWHTEAENTMTNGWTSVDNARRRLGQNRFS SPRTHEAEAERGDRMLMRSY  
DTPELPDSFVFDYAIDGVVTSLSRDQFLEQKKQQQRVVETLTI LDDPAFASEAKDVEIAI  
RLRGSGSSIVFGVSHVYWA

>comp15353\_c0\_seq7; 898 1 2932 LEN=3057; translated  
XPNSHNFERRARRAVLVKYRLHQFIPVSVREKASQRSTPGAPTS DPPTAGEDXDKRTQNE  
TRHACHSDGRLSLFAMQVLEMEEVESLVGKASRKKLNTSRKTNQESGLRKVAACFHRGDW  
LPKLVVLACSVLLGVMY LASQSDGDVATGGEQELKAVSPVPAPVATPLPTVSTPPPPTVA  
TPPPTVATPPPPTAAPPPPPADPAPEQVPLTVEDDANQDANGNGNDNDNDKYMYSKYATIS  
PLIDHPFP SDAERAPLVEKFGRWHFYDGDEEERPLEDYTAGYPNRDMPGEKFADDAWQAD  
AVYVNHILNDADQLISRAMEAIFIEYGHGKPLPPEGLAERMRFHWSREDL SVPNAQAPE  
KYRKRGRDRNGGWTTKRSFDGLVRRLLHAMMTQDTFTVVMGGHSAAMGAGNNFRQSYM  
QFHKVMYPIFARLGVKLI TRNVGQGLGTLQAGMGSISYGD EVDILMWD SGMTEPDPKHV  
DLFFRQGILAGNRVPLLWGGPF EVLKMLHEEADADVG DWGYALDGITEIESLEQAKEIPW  
AARYLKCKPEAEDICKEEPRFCATC WIDR PDGIAPEAKQLDKPRGQVKWHPGWRMHQLVG  
RNLAFAVLEGLQAAINLWTEGVMGGPPLDDDFWHVTDYYENIRNKVKS LDKSLGHCYEIE  
GDLPTRLCNTPMKAKTQYTPRANPNETALTSIIKPAPDGYVPKNRLTMMYDGPDPHNTCS  
DIPEGEIDVFNVTGRRGLIEDFDSQQPGSLGVPGADLSAPADADATTPVHRELEDAI  
VPGKGEVFG EPPGFC DGTYNACARSTGNECVMYGHHDYRGAVIGNEYAGWLVM TLKDLKE  
GVI VLKLTWHTEAENTMTNGWTSVDNARRRLGQNRFS SPRTHEAEAERGDRMLMRSYDT  
PELPDSFVFDYAIDGVVTSLSRDQFLEQKKQQQRVVETLTI LDDPAFASEAKDVEIAI  
RLRGSGSSIVFGVSHVYWA

>comp15353\_c0\_seq8; 591 205 1884 LEN=2009; translated  
MQFHKVMYPIFARLGVKLI TRNVGQGLGTLQAGMGSISYGD EVDILMWD SGMTEPDPK  
HVDLFFRQGILAGNRVPLLWGGPF EVLKMLHEEADADVG DWGYALDGITEIESLEQAKEIPW  
AARYLKCKPEAEDICKEEPRFCATC WIDR PDGIAPEAKQLDKPRGQVKWHPGWRMHQL  
VGRNLAFAVLEGLQAAINLWTEGVMGGPPLDDDFWHVTDYYENIRNKVKS LDKSLGHCYE  
IEGDLPTRLCNTPMKAKTQYTPRANPNETALTSIIKPAPDGYVPKNRLTMMYDGPDPHNT  
CSDIPEGEIDVFNVTGRRGLIEDFDSQQPGSLGVPGADLSAPADADATTPVHRELEDAI  
VPGKGEVFG EPPGFC DGTYNACARSTGNECVMYGHHDYRGAVIGNEYAGWLVM TLKDLKE  
GVI VLKLTWHTEAENTMTNGWTSVDNARRRLGQNRFS SPRTHEAEAERGDRMLMRSY

DTPPELPDSFVFDYAIDGVVTSLSRDQFLEQKKQQQRVVETLTILDDPAFASEAKDVEIAI  
RLRSGSSIVFGVSHVYWA

>comp15353\_c0\_seq9; 321 1 1713 LEN=1713; translated  
XPNSHNFERARRRAVLVKYRLHQFIPVSVREKASQRSTPGAPTS DPPTAGEDXDKRTQNE  
TRHACHSDGRSLSFAMQVLEMEEVESLVGKASRKKLNTSRKTNQESGLRKAACFHRGDW  
LPKLVVLACSVLLGVMYLASQSDGDVATGGEQELKAVPSVPVAPVATPLPTVSTPPPTVA  
TPPPTVATPPPTAAPPPPPADPAPEQVPLTVEDDANQDANGNGNDNDNDKMYSKYATIS  
PLIDHPFPDAERAPLVEKFGRWHFYDGDDEERPLEDYTAGYPNRDMPGEEKFADDAWQAD  
AVYVNHILNDADQLISRAMEAIFIEYGHGKPLPPEGTSPGDTVDFGTSCGLPFVWLPRVR  
AAHGVEIAMIVPFFVFLIVFGCFALTEHGLFFALGSSGLAERMRFHWSREDL SVPNAQA  
PEKYRKRGRDNGGWTTRKSF DGLVRRLLHAMMTQDTFTVVMGGHSAAMGAGNNFRQSYM  
MQFHKVMYPIFARLVKLI TRNVGQGGGLTLQAGMGSISYIGDEV DILMWD SGKFLVRNL  
LKLEHTFLGRFQPFESSLGINRTVRCGFSHQ

>comp15354\_c0\_seq1; 589 11 1545 LEN=1545; translated  
MKAARSTLLVFVVRWVLLTNNAFLVSVSGSSSEKEPPPPSPSEEPKNNASEATDTNTETN  
TETKTNAAQSQSTLPIRNGRTKSLKLMNLAESIKKSRNKEYSDPEKADPGAGASTTKDQW  
ERALQEIKNLAVPRTSSSSYENGEDGGGDSKPSTGANGNNGLYRRWRSLLENEPTKLELDP  
KTGAKLTTPRFEGIASWERTLQDWADDVQEYMDRIEAEENRGYPMSQFGNAQKLAP EASD  
AQADARADAPASEPNETPPETPATATLASEHGNDVAVGATGGGLPPPKQAETPRTPPSDAT  
NQETKTSISLVPMPRKDGEEVVAYTDIADKSKRILIVTTASLPWMTGTAVNPLLR AAYM  
TRGRAEEGGSVTLMLPWLERRMDQVQVYGENRIFETPQQQEA F IREWLRDSAKLPVPSEE  
LKIQWYTAWQNK AENSVYSMGDITALIPEDEV D ICILEEPEHLN WYRAPGDSWTDKFKHV  
VGI IHTNYFVYAQDQPAAFIRVSGSCCCRTGX

>comp15354\_c0\_seq2; 454 1 1472 LEN=1497; translated  
XAFCLRRALS SRKAPAMRLLCSWMCRAHCHRIVKLSGTLGQFAPEKELIENVHGIRGSFL  
EAGREASKRIRADPSHDPVFGAEADPSVYFIGKMLWSKGIGSLMDLLQYAEENAGIKVRL  
DMYGGGPDKDAAESRASDQGVDMVFHGPIDHAELASTHKIFINPSTSEVLCTTVAEALGM  
GKFVVPVSHPSNDFFAEFPNCLVYTNKEEFVGNLYYALTHAPEPLTEEYSHALSWEAATQ  
RLEAAGSIPLAEATLKAESLSKNDAGIEISLPLIEDVEDR KIIASGLRRSRARYRMFRS  
RLSQEVSQSNVLPNRVKQSLVNELDKRLELDIDVMLES PKLRLELSPAELDKKLELYNN  
VADGPSGDVLRVIGGGNDVALQNLVYKRRRTTSKNLFLGPANGENPEEEKTASQWVNSV  
LKQNFPRSNAGNTPKEDDTRTDNQDKSGGMNMLCTNRPFRSSII PPSRTAFANRSCVGR  
SRALKFSLLI

>comp15354\_c0\_seq3; 427 1 1612 LEN=1637; translated  
XAFCLRRALS SRKAPAMRLLCSWMCRAHCHRIVKLSGTLGQFAPEKELIENVHGIRGSFL  
EAGREASKRIRADPSHDPVFGAEADPSVYFIGKMLWSKGIGSLMDLLQYAEENAGIKVRL  
DMYGGGPDKDAAESRASDQGVDMVFHGPIDHAELASTHKIFINPSTSEVLCTTVAEALGM  
GKFVVPVSHPSNDFFAEFPNCLVYTNKEEFVGNLYYALTHAPEPLTEEYSHALSWEAATQ  
RLEAAGSIPLAEATLKAESLSKNDAGIEISLPLIEDVEDR KIIASGLRRSRARYRMFRS  
RLSQEVSQSNGRFVLVSHLVASRHVRSYLVM LCRFGKFALVIPHCLHGAFRDERXLSVLP  
NRVKQSLVNELDKRLELDIDVMLES PKLRLELSPAELDKKLELYNNVADGPSGDVLRVI  
GGGNDVALQNLVYKRRRTTSKNLFLGPANGENPEEEKTASQWVNSVLKQNFPRSNAGN  
PKEDDTRTDNQDKSGGMNMLCTNRPFRSSII PPSRTAFANRSCVGRSRALKFSLLI

>comp15354\_c0\_seq4; 1090 11 3087 LEN=3112; translated  
MKAARSTLLVFVVRWVLLTNNAFLVSVSGSSSEKEPPPPSPSEEPKNNASEATDTNTETN  
TETKTNAAQSQSTLPIRNGRTKSLKLMNLAESIKKSRNKEYSDPEKADPGAGASTTKDQW  
ERALQEIKNLAVPRTSSSSYENGEDGGGDSKPSTGANGNNGLYRRWRSLLENEPTKLELDP  
KTGAKLTTPRFEGIASWERTLQDWADDVQEYMDRIEAEENRGYPMSQFGNAQKLAP EASD  
AQADARADAPASEPNETPPETPATATLASEHGNDVAVGATGGGLPPPKQAETPRTPPSDAT  
NQETKTSISLVPMPRKDGEEVVAYTDIADKSKRILIVTTASLPWMTGTAVNPLLR AAYM  
TRGRAEEGGSVTLMLPWLERRMDQVQVYGENRIFETPQQQEA F IREWLRDSAKLPVPSEE  
LKIQWYTAWQNK AENSVYSMGDITALIPEDEV D ICILEEPEHLN WYRAPGDSWTDKFKHV  
VGI IHTNYFVYAQDQPAAFIRAPAMRLLCSWMCRAHCHRIVKLSGTLGQFAPEKELIENV  
HGIRGSFLEAGREASKRIRADPSHDPVFGAEADPSVYFIGKMLWSKGIGSLMDLLQYAE  
NAGIKVRLDMYGGGPDKDAAESRASDQGVDMVFHGPIDHAELASTHKIFINPSTSEVLCT  
TVAEALGMGKFVVPVSHPSNDFFAEFPNCLVYTNKEEFVGNLYYALTHAPEPLTEEYSHA  
LSWEAATQRLEAAGSIPLAEATLKAESLSKNDAGIEISLPLIEDVEDR KIIASGLRRSR  
ARYRMFRSRLSQEVSQSNGRFVLVSHLVASRHVRSYLVM LCRFGKFALVIPHCLHGAFR  
XTWLSVLPNRVKQSLVNELDKRLELDIDVMLES PKLRLELSPAELDKKLELYNNVADGP  
SGDVLRVIGGGNDVALQNLVYKRRRTTSKNLFLGPANGENPEEEKTASQWVNSVLKQNF

PRSNAGNTPKEDDTRTDNQDKSGGMNCLTNRPFRRSSIIPPSRTAFANRSCVGRSRALK  
FSLLI

>comp15354\_c0\_seq5; 582 11 1545 LEN=1545; translated  
MKAARSTLLV FVVRWVLLTNNAFLVSVGSSSEKEPPPPSPSEEPKNNASEATDTNTETE  
TNASQSQSTLPIRNGRTKSLKLMNLAESIKKSRNKEYSDPEKADPDGAGAGASTTKDQW  
ERALQEIKNLAVPRTSSSSYENGEDGGGDSKPSTGANGNNGLYRRWRSLLEPTKLELDP  
KTGAKLTTPRFEGIASWERTLQDWADDVQEYMDRIEAENRGYPMSQFGNAQKLAPEASD  
AQADARADAPASEPNETPPETPATATLASEHGNDVAVGATGGGLPPPKQAETPRTPPSDAT  
NQETKTSISLVPVMPRKDGEEVVAYTDIADKSKRILIVTTASLPWMTGTAVNPLLRAAYM  
TRGRAEEGGSVTLMLPWLERRMDQVQVYGENRIFETPQQQEAFIREWLRDSAKLPVPSEE  
LKIQTAWQNKAEVSMGDITALIPEDEVDICILEEPEHLNWRAPGDSWTDKFKHV  
VGIHTNYFVYAQDQPAAFIRVSGSCCCTGX

>comp15354\_c0\_seq6; 1083 11 3087 LEN=3112; translated  
MKAARSTLLV FVVRWVLLTNNAFLVSVGSSSEKEPPPPSPSEEPKNNASEATDTNTETE  
TNASQSQSTLPIRNGRTKSLKLMNLAESIKKSRNKEYSDPEKADPDGAGAGASTTKDQW  
ERALQEIKNLAVPRTSSSSYENGEDGGGDSKPSTGANGNNGLYRRWRSLLEPTKLELDP  
KTGAKLTTPRFEGIASWERTLQDWADDVQEYMDRIEAENRGYPMSQFGNAQKLAPEASD  
AQADARADAPASEPNETPPETPATATLASEHGNDVAVGATGGGLPPPKQAETPRTPPSDAT  
NQETKTSISLVPVMPRKDGEEVVAYTDIADKSKRILIVTTASLPWMTGTAVNPLLRAAYM  
TRGRAEEGGSVTLMLPWLERRMDQVQVYGENRIFETPQQQEAFIREWLRDSAKLPVPSEE  
LKIQTAWQNKAEVSMGDITALIPEDEVDICILEEPEHLNWRAPGDSWTDKFKHV  
VGIHTNYFVYAQDQPAAFIRAPAMRLLC S WMCRAHCHRIVKLSGTLGQFAPEKELIENV  
HGIRGSFLEAGREASKRIRADPSHDPVFGAEADPSVYFIGKMLWSKGIGSLMDLLQYAE  
NAGIKVRLDMYGGGPKDAAESRASDQGVDMVFHGPIDHAELASTHKIFINPSTSEVLCT  
TVAEALGMGKFVVVPSHPSNDFFAEFPNCLVYTNKEEFVGNLYYALTHAPEPLTEEYSHA  
LSWEAATQRLEAAGSIPLAEATLKAESLSKNDAGIEISLPLIEDVEDRKI IASGLRRSR  
ARYRMFRSRLSQEVSQSNRFLVSHLVASRHVRSYLVMLCRFGKFALVIPHCLHGAFRD  
XTWLSVLPNRVKQSLVNELDKRLELDIDVMLESPKLRLELSPAELDKKLELYNNVADGP  
SGDVLRVIGGNDVALQNLVYVKKRRRTTSKNLFLGPANGENPEEKTASQWVNSVLKQNF  
PRSNAGNTPKEDDTRTDNQDKSGGMNCLTNRPFRRSSIIPPSRTAFANRSCVGRSRALK  
FSLLI

>comp15354\_c0\_seq7; 1139 11 2947 LEN=2972; translated  
MKAARSTLLV FVVRWVLLTNNAFLVSVGSSSEKEPPPPSPSEEPKNNASEATDTNTETN  
TETKTNAAQSQSTLPIRNGRTKSLKLMNLAESIKKSRNKEYSDPEKADPDGAGASTTKDQW  
ERALQEIKNLAVPRTSSSSYENGEDGGGDSKPSTGANGNNGLYRRWRSLLEPTKLELDP  
KTGAKLTTPRFEGIASWERTLQDWADDVQEYMDRIEAENRGYPMSQFGNAQKLAPEASD  
AQADARADAPASEPNETPPETPATATLASEHGNDVAVGATGGGLPPPKQAETPRTPPSDAT  
NQETKTSISLVPVMPRKDGEEVVAYTDIADKSKRILIVTTASLPWMTGTAVNPLLRAAYM  
TRGRAEEGGSVTLMLPWLERRMDQVQVYGENRIFETPQQQEAFIREWLRDSAKLPVPSEE  
LKIQTAWQNKAEVSMGDITALIPEDEVDICILEEPEHLNWRAPGDSWTDKFKHV  
VGIHTNYFVYAQDQPAAFIRAPAMRLLC S WMCRAHCHRIVKLSGTLGQFAPEKELIENV  
HGIRGSFLEAGREASKRIRADPSHDPVFGAEADPSVYFIGKMLWSKGIGSLMDLLQYAE  
NAGIKVRLDMYGGGPKDAAESRASDQGVDMVFHGPIDHAELASTHKIFINPSTSEVLCT  
TVAEALGMGKFVVVPSHPSNDFFAEFPNCLVYTNKEEFVGNLYYALTHAPEPLTEEYSHA  
LSWEAATQRLEAAGSIPLAEATLKAESLSKNDAGIEISLPLIEDVEDRKI IASGLRRSR  
ARYRMFRSRLSQEVSQSNVLPNRVKQSLVNELDKRLELDIDVMLESPKLRLELSPAELDK  
KLELYNNVADGPGDVLRVIGGNDVALQNLVYVKKRRRTTSKNLFLGPANGENPEEKT  
ASQWVNSVLKQNFPRSNAGNTPKEDDTRTDNQDKSGGMNCLTNRPFRRSSIIPPSRTAF  
ANRSCVGRSRALKFSLLI

>comp15354\_c0\_seq8; 844 11 2134 LEN=2134; translated  
MKAARSTLLV FVVRWVLLTNNAFLVSVGSSSEKEPPPPSPSEEPKNNASEATDTNTETN  
TETKTNAAQSQSTLPIRNGRTKSLKLMNLAESIKKSRNKEYSDPEKADPDGAGASTTKDQW  
ERALQEIKNLAVPRTSSSSYENGEDGGGDSKPSTGANGNNGLYRRWRSLLEPTKLELDP  
KTGAKLTTPRFEGIASWERTLQDWADDVQEYMDRIEAENRGYPMSQFGNAQKLAPEASD  
AQADARADAPASEPNETPPETPATATLASEHGNDVAVGATGGGLPPPKQAETPRTPPSDAT  
NQETKTSISLVPVMPRKDGEEVVAYTDIADKSKRILIVTTASLPWMTGTAVNPLLRAAYM  
TRGRAEEGGSVTLMLPWLERRMDQVQVYGENRIFETPQQQEAFIREWLRDSAKLPVPSEE  
LKIQTAWQNKAEVSMGDITALIPEDEVDICILEEPEHLNWRAPGDSWTDKFKHV  
VGIHTNYFVYAQDQPAAFIRAPAMRLLC S WMCRAHCHRIVKLSGTLGQFAPEKELIENV  
HGIRGSFLEAGREASKRIRADPSHDPVFGAEADPSVYFIGKMLWSKGIGSLMDLLQYAE

NAGIKVRLDMYGGGPKDAAESRASDQGVDVMVFHGPIDHAELASTHKIFINPSTSEVLCT  
TVAEALGMGKFVVVPSHPSNDFFAEFPNCLVYTNKEEFVGRSNSVQKH  
>comp15354\_c0\_seq9; 837 11 2134 LEN=2134; translated  
MKAARSTLLVFWVRWVLLTNNAFLVSVGSSSEKEPPPPSPSEEPKNNASEATDTNTETE  
TNASQSQSTLPIRNGRTKSLKLMNLAESIKKSRNKEYSDPEKADPDGAGAGASTTKDQW  
ERALQEIKNLAVPRTSSSSYENGEDGGGDSKPSSTGANGNNGLYRRWRSLLEPTKLELDP  
KTGAKLTTPRFEGIASWERTLQDWADDVQEYMDRIEAENRGYPMSQFGNAQKLAPEASD  
AQADARADAPASEPNETPPETPATATLASEHGNDVAVGATGGGLPPPKQAETPRTPPSDAT  
NQETKTSISLVPVMPRKDGEEVVAYTDIADKSKRILIVTTASLPWMTGTAVNPLLRAAYM  
TRGRAEEGGSVTLMPLWLERMDQVQVYGENRIFETPQQQEAFFIREWLRDSAKLPVPSEE  
LKIQWYTAWQNKAEENVYSMGDITALIPEDEVDICILEEPEHLNWRAPGDSWTDKFKHV  
VGI IHTNYFVYAQDQPAAFIRAPAMRLLC S W M C R A H C H R I V K L S G T L G Q F A P E K E L I E N V  
H G I R G S F L E A G R E A S K R I R A D P S H D P V F G A E A D P S V Y F I G K M L W S K G I G S L M D L L Q Y A E E  
NAGIKVRLDMYGGGPKDAAESRASDQGVDVMVFHGPIDHAELASTHKIFINPSTSEVLCT  
TVAEALGMGKFVVVPSHPSNDFFAEFPNCLVYTNKEEFVGRSNSVQKH  
>comp15354\_c0\_seq10; 248 1 659 LEN=659; translated  
XAFCLRRALS RKAPAMRLLC S W M C R A H C H R I V K L S G T L G Q F A P E K E L I E N V H G I R G S F L  
EAGREASKRIRADPSHDPVFGAEADPSVYFIGKMLWSKGIGSLMDLLQYAEENAGIKVRL  
DMYGGGPKDAAESRASDQGVDVMVFHGPIDHAELASTHKIFINPSTSEVLCTTVAEALGM  
GKFVVVPSHPSNDFFAEFPNCLVYTNKEEFVGRSNSVQKH  
>comp15354\_c0\_seq11; 1132 11 2947 LEN=2972; translated  
MKAARSTLLVFWVRWVLLTNNAFLVSVGSSSEKEPPPPSPSEEPKNNASEATDTNTETE  
TNASQSQSTLPIRNGRTKSLKLMNLAESIKKSRNKEYSDPEKADPDGAGAGASTTKDQW  
ERALQEIKNLAVPRTSSSSYENGEDGGGDSKPSSTGANGNNGLYRRWRSLLEPTKLELDP  
KTGAKLTTPRFEGIASWERTLQDWADDVQEYMDRIEAENRGYPMSQFGNAQKLAPEASD  
AQADARADAPASEPNETPPETPATATLASEHGNDVAVGATGGGLPPPKQAETPRTPPSDAT  
NQETKTSISLVPVMPRKDGEEVVAYTDIADKSKRILIVTTASLPWMTGTAVNPLLRAAYM  
TRGRAEEGGSVTLMPLWLERMDQVQVYGENRIFETPQQQEAFFIREWLRDSAKLPVPSEE  
LKIQWYTAWQNKAEENVYSMGDITALIPEDEVDICILEEPEHLNWRAPGDSWTDKFKHV  
VGI IHTNYFVYAQDQPAAFIRAPAMRLLC S W M C R A H C H R I V K L S G T L G Q F A P E K E L I E N V  
H G I R G S F L E A G R E A S K R I R A D P S H D P V F G A E A D P S V Y F I G K M L W S K G I G S L M D L L Q Y A E E  
NAGIKVRLDMYGGGPKDAAESRASDQGVDVMVFHGPIDHAELASTHKIFINPSTSEVLCT  
TVAEALGMGKFVVVPSHPSNDFFAEFPNCLVYTNKEEFVGNLYYALTHAPEPLTEEYSHA  
LSWEAATQRLEAAGSIPLAEATLKAESLSKN D A G I E I S L P P L I E D V E D R K I I A S G L R R S R  
A R Y R M F R S R L S Q E V S Q S N V L P N R V K Q S L V N E L D K R L E L D I D V M L E S P K L R L E L S P A E L D K  
K L L E L Y N N V A D G P S G D V L R V I G G G N D V A L Q N L Y V K R K R R T T S K N L F L G P A N G E N P E E E K T  
A S Q W V N S V L K Q N F P R S N A G N T P K E D D T R T D N Q D K S G G M N M C L T N R P F R R S S I I P P S R T A F  
A N R S C V G R S R A L K F S L L I  
>comp15355\_c0\_seq1; 869 2383 6120 LEN=6240; translated  
MSTGTTSSPTQWHRLLSSSTLSERPNSQTPOSRGYAVRNHKSGRAGTKTAKGNQAAHA  
RAQSSFTPQDRGLQHALSLTQSAPPLHFSQREDRSAYRYNGRNERERFDRHHHRGYSIS  
ENEQQQLRYNSRNTNAATSQYEGNNVRR T N E Y L R T A R I N D K N K N K N I D I G N N R G Q G Y H Y  
D R A S S N F D R T S N D G E S N R N D G N E R H H Q E Y K G K I N C G G H R N F E G D F D K N K K Q N P R F D N H W R  
R P A S N T G S Y F D D G R Q R S T H G D G S R C Q G M E Y D S L G S R D R R D S T G V P R W G R D R G Y P P A V E E P  
Q E H R H N E Y G R E L Y R S H H P P Y S H P Q V S A V E R S G Y G D D M D I Y R A R R S E G G G D R R N N N G N D Y R  
R N N N G I D N D H H G Y P S N I E Y S D R D N A G H Q R H Q H K Y R N H K Q P S P H Q Q E P Y L R W S S S E R G D G  
R F P S Q M H Q R H N G E F D S D A N G S E Y H H R S A P K A S G P E R D R L G P T R G N R D G S F D L P D A A R I D R  
E R Y P G G T T H R A S R G Y V P G G D S E K A A S V T S A R N T P L S R S L R E G D L E R G T E V G A N A S A N R K  
R L C S E T V G A N R D L D E T V K A S T E G P P S M K R Q R G M D T K S P T G S F E A N Q S K Q E G Q R A T V E Y Q T  
K S T R I P S S S A P K Q K S S S T S L A K A S S L P S T K T A N S A S A N A S G A I T L P C S K G G G V K L Q G L E  
T E G K Q L E D R K P T S S L P I P S S T N T A L T K P S L P L L S A K R I Q Q Q K Q V P V Q A K V T N K L G I P M R W  
L K P K A K P K P A K K A L P P A P Q P H M S K S E K I P L K S S K K A A A A T N H H H Q K P S S P F N R L V T D S S V  
G S S S I V S N R N N S S K L S K S A S K H N N P V E G K G S N S V P S A I V T K K A R P K S H K K E T I Y D P A E F  
E D G P E E G D E V W D S D A E S E P E E S D S S E S D T D D D E V L H W A S K V L G V Q P A V S S P V T S E S K S D S  
L V P N N I N S S N N D N K N V P S K P K S P K I K L R L S A E M K I K L S E S I K S S A V N K K D L S E E D G K K I E  
A A L K K L E R K K R K D E K L K A L S E K I S E R P E F D H E K V R Q E I E E D R R K R E E A K P L T A K E I R R I L  
Q E D N S S N R G D Q S N W V R R S R R Q P N K N L L R S K G V R F L V D K L K N N D T D V R V L K M K K Y I N D P N V  
P G A V L D A I L G A M E E N T N C E A L Y I Q N F N E G M R D Q Q V L H L L R I L Q Q S S C K I W C L N I G E N Y N V  
S D D T W E K F T K G L I H T K I T H M Y A S E H T I T T D M K D E I R F T I R E N R K K H D L H I N P N N L D V I I Q  
C T H C W W N P I N A K V L R P Y L K N K G Y E H M L R D K E A Q G L Q G S S S M A P S K

>comp15355\_c0\_seq2; 835 2383 6232 LEN=6352; translated  
MSTGTTSSPTQWHRLSSLSSTLSERPNSRQTPQSRGYAVRNHKSGRAGTKTAKGNQAAHA  
RAQSSFTPQDRGLQHALSLTQSAPPLHFSQRERDRSAYRYNGRNERERFDRHHHRGYSIS  
ENEQQQLRYNSRNTNAATSQYEGNNVRRRTNEYLRRTARINDKNKNKNIDIGNNRGQGYHY  
DRASSNFDRSTNDGESNRNDGNERHHQYKGINCGGHRNFEEDFDKNKKQNPFRDNHWR  
RPASNTGSYFDDGRQRSTHGDGSRCSQMEYDSLGSRRDRDSTGVPRWGRDRGYPPAVEEP  
QEHRHNEYGRELYRSHHPYSHPVSAVERSGYGDDMDIYRARRSEGGGDRRNNNGNDYR  
RNNNGIDNDHHGYPSNIEYSDRDNAGHQHRQQHKYRNHKQPSPHQQEPYLRWSSSERGDG  
RFP SQMHRHNGEFDSDANGSEYHHRSAKASGPERDRLGPTRGNRDGSFDLPDAARIDR  
ERYPGGTTTHRARGYVPGGDSEKAAASVTSARNTPLSRSLREGDLERGTEVGANASANK  
RLCSETVGANRDLDETVKASTEGPPSMKRQRGMDTKSPTGSFEANQSKQEQQRATVEYQT  
KSTRIPSSAPKQKSSSTSLAKASSSLPSTKTANSASANASGAILPCSKGGGVKLQGLE  
TEGKQLEDKPTSSLPPIPSSTNTALTTPSLPLLSAKRIQQQKQVPVQAKVTNKLGI PMRW  
LKP KAKPKPAKKALPPAPQPHMSKSEKIPLKSSKAAAAATNHHHQKPSPPFNRLVTDSSV  
GSSSIVSNRNNSSSKLSKSKASKHNNPVEGKGSNSVPSAIVTKKARPKSHKKEIYDPAEF  
EDGPEEGDEVWSDAESEPEESDSSESDDDEVLHWASKVLGVQPAVSSPVTSESKSDS  
LVPNNINSSNNNDKNVPSKPKSPKIKLRLSAEMKIKLSESIKSSAVNKKDLSEEDGKKIE  
AALKKLERKKRDEKLKALSEKISERPEFDHEKVRQEI EEDRRKREEAKPLTAKEIRRIL  
QEDNSSNRGDQSNWVRRSRQPKNLLRSKGVRFVLDKLNNDTDVRLVKMKKYINDPNV  
PGAVLDAI LGAMEENTNCEALYIQVRNEHTVNLKSDSDDG YDRLLGIVPSLILELTPFMK  
QNFNEGMRDQVVLHLLRILQSSCKIWCLNIGENYNVSDDTWEKFTKGLIHTKITHMYAS  
EHTITTDMDKEIRFTIRENRKKHDLHINPNNDVIIQCTHCWWNPINAKVLRPYLKNKGY  
EHMLRDKEAQLGSSSMAPSK

>comp15355\_c0\_seq3; 229 123 362 LEN=1407; minus strand; translated  
MQEMEYKADTDDADTDDTDDADTCHK SADXGEVTDTEDMKLLLEGGGVAADM RMKEEE  
DDASCCCTGMEDASCSLIW

>comp15356\_c0\_seq1; 710 469 2403 LEN=2799; translated  
MEHSEGGHQERRPQIPQHYLQQQQRQEQGQSLGGRLHQLPPGGQQSRWSVQQQQRQQQQ  
QQQQQEMKQNFMQAIGQHYNPVSSSRNTSTTNNNFVFGQYNATMEEASPI SPALEFQ  
GDSEPLLLPPGGKDAQNVQQFGTGQNRSSSELSPHPGMVNSLSQEYNKIIASSAYGNSK  
GNPVPLPSSNIVTNSLQQQHHPGQQASPTTRQETLTSTTTLTAPDIPTQLSQAVAAATQK  
QFAQSIPSTSSLHIDKNKDANASNSSPSVAFNKGVVAPLHPVAAAALASGTNNQFFPHF  
TAAAYLLQKAESAEEETEEKRAKRLERNRESARKSRRRKKERLQYLEGKVNRLYCKVETERR  
VRVAMNTALTSFEKERLLELKEMLDASRHEQDQDYANRLRNLLLRSTFINSEQSTRKE  
VVEFQYNSLSQNF LAKYQKFFLWMILQTD SYFLAGKEGHSKRIRAKKISTGKISSKQIGE  
EISKEEGPSYSASVSAGSRFWPLLCFELSISVEQEDRILETRRRRLREGESFRNRNGS QILA  
ATRLASNLKEAVLKLQYLTSFRKRKMYLDILTTPRQAILYQDWLLSNRERAETMLKERKKS  
SIEKEPGAVLKSPISSGTGKDYLNLEKLSLCLEESLEPTNLILL

>comp15356\_c0\_seq2; 578 469 1907 LEN=2982; translated  
MEHSEGGHQERRPQIPQHYLQQQQRQEQGQSLGGRLHQLPPGGQQSRWSVQQQQRQQQQ  
QQQQQEMKQNFMQAIGQHYNPVSSSRNTSTTNNNFVFGQYNATMEEASPI SPALEFQ  
GDSEPLLLPPGGKDAQNVQQFGTGQNRSSSELSPHPGMVNSLSQEYNKIIASSAYGNSK  
GNPVPLPSSNIVTNSLQQQHHPGQQASPTTRQETLTSTTTLTAPDIPTQLSQAVAAATQK  
QFAQSIPSTSSLHIDKNKDANASNSSPSVAFNKGVVAPLHPVAAAALASGTNNQFFPHF  
TAAAYLLQKAESAEEETEEKRAKRLERNRESARKSRRRKKERLQYLEGKVNRLYCKVETERR  
VRVAMNTALTSFEKERLLELKEMLDASRHEQDQDYANRLRNLLLRSTFINSEQSTRKE  
VVEFQYNSLSQNF LAKYQKFFLWMILQTD SYFLAGKEXPQEDKGENFNREDQFKANR

>comp15357\_c0\_seq1; 923 302 3520 LEN=3692; translated  
MSQNTNGAKATPKRVAVIGGGVTGLSAAWHLHSSSSVSEVVVF EAEDRLGGHAYTVPVPL  
DGDGSDVDIGFMVYNAANYPNMTKWF EALGGVEEEDTMSLSVSLDKGDSLEWTSNGGL  
NGLFAKRGQLVDSNFYAMVRDMTRFHDEAPKLLMSEDDPRKHVTVRHYLRQNGYTPSFG  
VYYLLPMMMAALWSASMEDVLEFPARQLIGFLCNHRMLQLFGRPQWKTVKGRSQT YTKRVA  
EILGEKQVRLSTAIDSMEKSGNTYELFTRNQGSNVSVGVFDEVVFACHTNVAASILRASA  
SNIQTHDNDLSLEQLELVNLSLSEIKFEDNVIYVHSDPKLMPKRRRAWASWNCMGDSEQIE  
TAFGIKKGKQVTEENKHS GAFEGAESGFNTISDRDENRDSTGAEANASSKDTLDGPDG  
RMKAVYVTYWLNKLQNL DAGGKDFVSLNPHEAPAEEMIYKKTILAHQPFTAASTVARKK  
LSDSFQGRNGLWFCGAWQGYGFHEDGCRSGFEVATKLSGVPLPWANESNGSDDGEEESTAL  
MVLPPDLAASSLQKKSLLRWLYDKFWYDLPLALCKRFMLYFLKAAVQHGKLIKIFNDGT  
VFEFGDGAPCGLGDASPTMRI FDEWLVFKIAWEYDLGLARSYMAGHFVIEPLEDVNEYN  
PVL RPASERDETTRECGDPVGLTRLLLLLLMGNRDRALADEHTPNTSYKGYTGANPVNAGP



YIISKIGSFLNFLRYRLTMDNSERGGSLKNIHAHYDLSNDLFTSFLDKETLMYSSAIYDA  
VKAPSPQKGLIFRGTLEEAQWRKLDLTLDDRAQVQPGQEVLDIGFGWGGLSLHAAKKYGCK  
VTGITLSVEQRALAMERVAKGLEDLITFEVIDYRTFARKKENLGRFDRVLSCEMIEAVG  
HDHLGGEFYWAVEQVLAPDGVVLVMEAITTTEERYENYLIRSTDFINTIIFPGSCCPCLHALV  
DAAYKGSRLTLEHIDNIGLHYAQTALADWRRRFRNANEELVRSLSLGFDDVFIRAWNYYSYCE  
AGFYARNVNCLILVFSRNGCSALTPLYETRACTQLPALTDSEVANWMSDASN  
>comp15358\_c0\_seq1; 1054 1 2689 LEN=3053; translated  
XLKASHPACTSSIRSIRTGTYYDIGTGVVSVGVAFGTTAVGGKKDRKIDRKNETREYIM  
RTTTAIPRRLSLGPLLPLLLVASLIVSMTAETLAVSAAAPVSSTLQNIAAETVHRLDLSY  
LHRSKAGDLAEVIRGTLELQKEQEHPPKKEEDESAVVDIDLTAASLIGKNLSEIISLKR  
GEEESPSLGRNKEAPPTVVRLTTRRNQWSPKEATVVLDVFSNNGPTNDTIAESDEQLTE  
ENKTLDGNDKNATAAPGSLLASQKDTDSETTIALASDENITTEETAEQSMEHKIATVTR  
PAFVTIQTLDLGNLGSDRTDGGPRRRGAASGVRLMNKALRKLSSPKHCPRTIRLDVC  
GLGPSACRDMAGMVERYQANGEDGQAMDRPIPLSLDLARNEGIGDVGVAALAAAIRTIA  
TQQHGSTENASKGKKRRRKKRKRKSKERPANNLEEGDGKEEDEDQRVSTDHTANDLENQSE  
ETNAEGESPSTSAGATAAMTIFERLDSLGCIGDGGAEALAIKNNPLCIKHLDLNNQ  
ISDDGAAALARVLGAEGDSSDKSCDVSVGCIQTLDSLXNKDLGDRGAKELARAFQGDGIS  
NLILRSCNVRADGAASFAIALRTIGSQEHSTEGEQRRLIDLXGNPLGVLSKKKSGGKYS  
ASALKSKATDTTKAYMNIIGKSFQKGLSSINSLNNGEGYGMTLESDDDEEDERMNQEEDD  
SIKKCGALALALAFVENNDDSSSETSEKGSVVHVELALRHCSFDTKAAEALAAVLQESRQN  
YPRMKLTMDMTMNDVLEEDI IAAALHGEEGYDDQLVDMAEVYLDALVEMREARERALKAAQ  
MAAARAKAQAQRESAWDAPSPGSRYDDQSEEWSDETEDEHWDHPMSSEDNYSDDDW  
>comp15359\_c0\_seq2; 681 333 3098 LEN=3127; translated  
MSTVSPSLLYAGSPSPVIVFAEIVPVVLAAPTGTSEVINECNNGHRRQQQGSCLTLTNFG  
VKRFLHTTKEAQRMTINSFTGGNSKRNFIMRWKENECVNRDQFIVSGYVFRNNGNKN  
DGIAENIDDKSNHRSPFIVYIPSDNPTSIIKKQPCCIIAYTIFNRVMNAGNKTTPGSDQKE  
SICQFSQDTLVRILPLRSAMNSLSHNRQHTLSSSVSTIPASFMSHLRRESMLLDLLGDEG  
SSNIISDEMNEVLQNHQETVGEELNKLKLSAVMVSVQIGTTRDAFRIKDTQEQQIRKIKK  
SIQVFATESKQLVRSQDKNSSGCGSLRSWPSLIVHSPNHGDGKTLVQALAKSSGYSSI  
HVIRPGALLAKYGVRAAALESQIHAILISAACRNKKVCIIVDQLDAILPSRLSGRSTG  
DAAFVFNIAIASYFRKITDMSQRKQEFPPFLKNPLYNPTNGSSGQVLTAECLVGIIVTCP  
DGGWRSHLKTNGGSMDEGSTILDCMISDRYRIPMLRKTTKLSAFDTAFSREGIALEACAQ  
GRLAQIVGSARWIKGSVFRVAKQLRWILMDNLMYDNNSGEGKSKATLQDLVKALALVKA  
NVTDFADEDLSEADSTLDEKESGASHFGSIGGNVQAKVSLEDALAFDHGKREMLSKFGLS  
PPTGVLLYGPPGCGKTLAKAVARLMRNPTQDDDTSSSLSCGTFISLSISEIVSAEVGTS  
EKTIASSEYAGKHTPSVIFLDEFQALFTDRNRGGSGKLTTLTLLQCLDDIKKWEIDTVV  
NHDKYSPSLGGKRVIIVIGATNTPWMIDSAFLRPGRLLDRVVYVGLPNISERKSILQVHIKR  
MRVDAVNSMHLIHKLCEDLAILTEGFSGADIAALCRSAAIRALEEGEHTTVQEHFKESM  
ERDCYPSSDDVLVKLLKNWRP  
>comp15360\_c0\_seq1; 927 223 3066 LEN=3274; translated  
MAGRVIGSDDDERVRKRKGTTRDPPQONGMAGYAGRSNGTSGHKTKKKERVRRKSSPIS  
RWMALQTSRSPAFVGLAVVASGILLVVTLISATFGGNKCIESHNLNGISGNVYTWCYKHN  
SKGGISSRVRRSLGAQTNDIEVERVVLVDGHAAQNKKEFLKAIGTHEDLSHDIVSEEQSE  
ICYADLGIIGDRMDDTRVYHSPAIGPCHHDYGLSFVPLAGSYEEAIDFYFFRDSLRSRYT  
DRVKCFQQCIKSALTERRDDATEGKHHGHLHVPDQRKKLERDERALFEIEPHERIPVDNV  
MLIEAAKIGMTLAVEKLFQYGLDPLYRQVENNPGNSRNFNAIQEAIRGGYAEIVAILTR  
GDNSIVIDEYGRTEVDYVRMSGSPVRPIDAKNVLGIEVEEGTEKRPVQKAKAPRKEGWD  
ETAADPYNEERCDFDIVDGLDPMVIFYKEYFMTGRPVVLRGQAPQMELDMFASKERWYKSK  
RFNPDKAFQVGPTAYPSLTQQKYCEKEMSINDIEQKVCCEEMPEKPMVHAFHPDEEDLMY  
LYPVFEGDVLDERGGFRSIIKHFFPLVEQWEDANWQVFFGGDGSATFWHHEAAFNILYVG  
VKEWKIAPPLYRGLTGMPAQRVAETLDPKISLTCVQHAGDMFYIPNFWGHSTYNHGFTTIG  
AAAIVQDWYQNGGASYRGDAWENYEQAEQEEEEEEEEEEEEEEEEDEGSPFLFVHINKTG  
GTSLIHMFGRCEEEYWGEYWDSDGEFHRFSFHATAHAYIEKYGREAWDNAYSFTVVRHP  
LARQVSNFFFLASMGCDKPNKCAERLIPTLDLSDAMSDEEKIEAFHTWLAKIYEAFPPGS  
PDHYRFGAAGHGNEVYDTFGASQTSWNVDSEKGYVTKDFYKLEELSKDITKLAENIPCLK  
NGPLEMDKKNKTSKYPNYMLFAKDEKTKQIINEVFAEDFKNFGYDPL  
>comp15361\_c0\_seq2; 157 1 263 LEN=1529; minus strand; translated  
XDGGDGEQDGIILDDDETVEDEAVNTVRGGVAVGVVEVEVYGSFFANGKRRSRRLMFSSSA  
DEVLSYCDCASGRRRSARIRARAVG  
>comp15361\_c0\_seq4; 288 1 383 LEN=681; minus strand; translated

XDGGDGEDGDDFSIIIPDDETVEDQAVNTVEEGEDEGGDEVVIVPDDAEGIIILDDETVED  
EAVNTRVGGVVAVGVEVEVYGSFFANGKRRSRRLMFSSSADEVLSYCDCASGGRRRSAR  
IRARAVG  
>comp15361\_c0\_seq6; 288 1 383 LEN=1425; minus strand; translated  
XDGGDGEDGDDFSIIIPDDETVEDQAVNTVEEGEDEGGDEVVIVPDDAEGIIILDDETVED  
EAVNTRVGGVVAVGVEVEVYGSFFANGKRRSRRLMFSSSADEVLSYCDCASGGRRRSAR  
IRARAVG  
>comp15361\_c0\_seq7; 157 1 263 LEN=1305; minus strand; translated  
XDGGDGEDGIIILDDETVEDQAVNTRVGGVVAVGVEVEVYGSFFANGKRRSRRLMFSSSA  
DEVLSYCDCASGGRRRSARIRARAVG  
>comp15361\_c0\_seq8; 157 1 263 LEN=561; minus strand; translated  
XDGGDGEDGIIILDDETVEDQAVNTRVGGVVAVGVEVEVYGSFFANGKRRSRRLMFSSSA  
DEVLSYCDCASGGRRRSARIRARAVG  
>comp15361\_c0\_seq9; 288 1 383 LEN=1649; minus strand; translated  
XDGGDGEDGDDFSIIIPDDETVEDQAVNTVEEGEDEGGDEVVIVPDDAEGIIILDDETVED  
EAVNTRVGGVVAVGVEVEVYGSFFANGKRRSRRLMFSSSADEVLSYCDCASGGRRRSAR  
IRARAVG  
>comp15362\_c0\_seq1; 999 767 2677 LEN=3143; translated  
MVSTQFNHNRVGTGGSCGSKNGCANITINVPGSYNNTSNHQNSGGNGNSNHTVNNNGK  
NMHSEVGM AAPSEYRKYQEYDIAVDPEQDDKATEIKLCSLAKPHMMAFHCSWWGFFVAF  
IWF AISP LLS EIREDLGLSDQAIWNSNITSVAGTIFMRIVLGPSCDKWGARIPMAVVLV  
CSIPTALTGFVNSGIGLAF LRLF IGCAGGTFVMCQYWT SRMFATEVVG TANALVGGWGNL  
GGGVTQLVVGAGLFP LLLKLCFNGDATMAWRTVSVFPAILAVFTGYMIYKIGDDCPKGN  
YADLKRHGS MQERSAASFFRQGCCNFNTWILFVQYACCFGTELT MNNAALYFKDKFDL  
NTETAAAIASIFGWL NIFARGLGGYCS DRANGNCGMRGRLWVQTGCLVAEGALVLF  
FAQTQSLTSAIVVMIFFSLFVQAAEGSTYGI VPYVDPSTGAIAGIVGAGGNTGAVCF  
SIGFRQLDYKNAFTIMGFATLGAFFSVF ILVKGHAGMFCGKDEHHQQT VTEELFT  
PYNVQGRKRNGSLMLPSRCP SNLDSSSSSSDSSRSDGAEHDGYLQPHSATSTSSSS  
SDHSPLQDFGMIPI EEEDEETSSEVGDSAETEEKGDGTTPTTPAPSAGEP  
>comp15362\_c0\_seq2; 529 1926 3521 LEN=3987; translated  
MAFHCSWWGFFVAF IWF AISP LLS EIREDLGLSDQAIWNSNITSVAGTIFMRIVL  
GPSCDKWGARIPMAVVLVLC SIPTALTGFVNSGIGLAF LRLF IGCAGGTFVMCQY  
WT SRMFATEVVG TANALVGGWGNLGGGVTQLVVGAGLFP LLLKLCFNGDATMAW  
RTVSVFPAILAVFTGYMIYKIGDDCPKGN YADLKRHGS MQERSAASFFRQGCCNF  
NTWILFVQYACCFGTELT MNNAALYFKDKFDLNTETAAAIASIFGWL NIFARGL  
GGYCS DRANGNCGMRGRLWVQTGCLVAEGALVLF FAQTQSLTSAIVVMIFFSLFV  
QAAEGSTYGI VPYVDPSTGAIAGIVGAGGNTGAVCF SIGFRQLDYKNAFTIMGF  
ATLGAFFSVF ILVKGHAGMFCGKDEHHQQT VTEELFT PYNVQGRKRNGSLMLPS  
RCP SNLDSSSSSSDSSRSDGAEHDGYLQPHSATSTSSSSDHSPLQDFGMIPI  
EEDEETSSEVGDSAETEEKGDGTTPTTPAPSAGEP  
>comp15362\_c0\_seq3; 529 1882 3477 LEN=3943; translated  
MAFHCSWWGFFVAF IWF AISP LLS EIREDLGLSDQAIWNSNITSVAGTIFMRIVL  
GPSCDKWGARIPMAVVLVLC SIPTALTGFVNSGIGLAF LRLF IGCAGGTFVMCQY  
WT SRMFATEVVG TANALVGGWGNLGGGVTQLVVGAGLFP LLLKLCFNGDATMAW  
RTVSVFPAILAVFTGYMIYKIGDDCPKGN YADLKRHGS MQERSAASFFRQGCCNF  
NTWILFVQYACCFGTELT MNNAALYFKDKFDLNTETAAAIASIFGWL NIFARGL  
GGYCS DRANGNCGMRGRLWVQTGCLVAEGALVLF FAQTQSLTSAIVVMIFFSLFV  
QAAEGSTYGI VPYVDPSTGAIAGIVGAGGNTGAVCF SIGFRQLDYKNAFTIMGF  
ATLGAFFSVF ILVKGHAGMFCGKDEHHQQT VTEELFT PYNVQGRKRNGSLMLPS  
RCP SNLDSSSSSSDSSRSDGAEHDGYLQPHSATSTSSSSDHSPLQDFGMIPI  
EEDEETSSEVGDSAETEEKGDGTTPTTPAPSAGEP  
>comp15363\_c2\_seq1; 305 1 763 LEN=840; translated  
XKGSAMATRSESVSSIISSDTITPCLASMSFPEEDVNFVSSDDGSSDSDGSSDE  
DVSEASSTTISSPETSPIGNPNTPPPPTALSEHSEGALAPTIPRERSIDFNEKVRV  
KRVLCQS QLV EEEDELEDLWFQPEEYEAIKRKT MALIRAIQEENTGGVTYCTRGL  
ERYFCIEEVQDKRNDAWDTVLDEQDLQRYEGAPDPERLSRLYARCTRRSSQEAVVR  
GKLEDAISR YTRKTRQALGRSSHGRVA  
>comp15363\_c2\_seq2; 271 1 733 LEN=810; translated  
XKGSAMATRSESVSSIISSDTITPCLASMSFPEEDVNFVSSDDGSSDSDGSSDE  
DVSEASSTTISSPETSPIGNPNTLPPPIALSEHPEGAPAPTIPRERSIDFNEKVRV  
KRVLCQS QLV EEEDELEDLWFQPEEYEAIKRKT MALIRAIQEENTGGVTYCTRGL  
ERYFCIQEVQDKRNDAWDTVLDEQDLQRYEGAPDPERLSRLYARCTRRSSQEAVVR  
GKLEDAISR YTRKTRQALGRSSH

GRVA

>comp15363\_c2\_seq3; 628 1 1568 LEN=1645; translated  
XTGTSATTEITNQALEAGSNTKYSPEPSSGSSSNHSQSTTKIKNSNKNRDTSKKKKKKSS  
KKTADSSSGSAKKSRRPDTKATRRERRELSFASIHGRSLHKSNNKRRGGIGNSPAVLSRDDS  
ENNVMKKSALKQKREEQQRKLREQSEGSSAVESKVLGNQKEDSTQNDTDAADPSGNASSG  
SVTAVDSSYSCSNSSIDDDCSIVSDGYSADDLLLGDSQEPTSSSSINPGDLYGGSFCGSS  
SNTSYNECSFANADGNEASYGTNAGDDKRVGHGNERSESVSSI ISSDTITPCLASSMSS  
FPEEDVNFVSSDDSSGGNDSDDGSSDEDVSEASSTTISSPETSPIGNPNTPPPTALSE  
HSEGALAPTI PRERSIDFNEKVRVVRVLCQSQLVEEDELEDLWFQPEEYEAIKRKTMALI  
RAIQEENTGGVTYCTRGLERYFCIEEVQDKRNDAWDTVLDEQDLQRYEGAPDPERLSRLY  
ARCTRSSQEAVVRGKLDEDAISRYTRKTRQALGRSSHGRVA

>comp15363\_c2\_seq4; 594 1 1538 LEN=1615; translated  
XTGTSATTEITNQALEAGSNTKYSPEPSSGSSSNHSQSTTKIKNSNKNRDTSKKKKKKSS  
KKTADSSSGSAKKSRRPDTKATRRERRELSFASIHGRSLHKSNNKRRGGIGNSPAVLSRDDS  
ENNVMKKSALKQKREEQQRKLREQSEGSSAVESKVLGNQKEDSTQNDTDAADPSGNASSG  
SVTAVDSSYSCSNSSIDDDCSIVSDGYSADDLLLGDSQEPTSSSSINPGDLYGGSFCGSS  
SNTSYNECSFANADGNEASYGTNAGDDKRVGHGNERSESVSSI ISSDTITPCLASSMSS  
FPEEDVNFVSSDDGSSDEDVSEASSTTISSPETSPIGNPNTLPPPIALSEHPEGAPPTI  
PRERSIDFNEKVRVVRVLCQSQLVEEDELEDLWFQPEEYEAIKRKTMALIRAIQEENTGG  
VTYCTRGLERYFCIQEVQDKRNDAWDTVLDEQDLQRYEGAPDPERLSRLYARCTRSSQE  
AVVRGKLDEDAISRYTRKTRQALGRSSHGRVA

>comp15364\_c0\_seq1; 516 1 1292 LEN=1776; translated  
XLGRNREWI PNRCALSERPTSSESTAIGPARKALRSMLPPRALPLVLVAAAAIAFP SRAG  
AADATAAAVAAATTTSLVCPVSPVEVEFRLMVRLVYAALVGAALGKERSFAKHSAGVRTMS  
LVSMGAAIFTVCSYCYGFTNFPKVDASRMAANVASGVGVGAGVITTSIHKPNKGDASGNL  
YQSNVVHGLTTAATIWL SAAVGVSCGVGLLRVATTAATAATIFILRMGRKRRPNYRPKKKD  
AQQQQTQQRSSLP RDNVSEGKREADMTLHSIDDDHHENSAVDDRYDSAAE IHVTTHWDE  
HQVQTQPEERDDENLLRESQISISSQQQHEQEAGANKRTFDEESKPTNSNNLVGVPPET  
KNVDDIEIDDKILRDP SRLMEEIVRSACQSNNETATAFVDLLLDRYERRERVFARESRF  
NGSEDSGYLP

>comp15364\_c0\_seq2; 205 1 929 LEN=1087; translated  
XTSPDKAEDSRFRKTFDVRQRSRSAPVFCDSFXNRRNEKLHAPRRNAGVSDEKKLEMIX  
DGDENRRRRRTDRAETIDSAF SRPVL FAGCVVVVFLDDGFLRMASNAIGSATRVSSHRAP  
THRENTILEDKSNALLLPSTIVAFVPSGTEADASGKEPRMDPEPLCPLRETNQQRKHRGP  
EGPTRNPRHRSGTKSAPEHAVPAGAAAGSGRRGSDRVSVPGRSGGRHGGGGGGDDDEPR  
VPRLAGGGVPAHGPAGLRGAGGGRPGE GTVLCEAQCRGPNHEPGEHGSRIHGVQLLRFY  
ELSKGGRYVR

>comp15364\_c0\_seq3; 604 1 1776 LEN=2260; translated  
XTSPDKAEDSRFRKTFDVRQRSRSAPVFCDSFXNRRNEKLHAPRRNAGVSDEKKLEMIA  
MVTKTTEGGGRIVPKRSTPPFPGLSCLLVASLLSFSTTASYAWHPMPVSVLQRFPLTEHQ  
RTVIRISSKTNQMH CYCLPPSSLSFLPGQKQTPLGRNREWI PNRCALSERPTSSESTEGR  
KGRPGTRAIGPARKALRSMLSPRALPLVLVAAAAIAFP SRAGAADATAAAVAAATTTSLV  
CPVSPVEVEFRLMVRLVYAALVGAALGKERSFAKHSAGVRTMSLVSMGAAIFTVCSYCYGFT  
NFPKVDASRMAANVASGVGVGAGVITTSIHKPNKGDASGNLYQSNVVHGLTTAATIWL S  
AAVGVSCGVGLLRVATTAATAATIFILRMGRKRRPNYRPKKKDAQQQQTQQRSSLP RDNV  
SEGKREADMTLHSIDDDHHENSAVDDRYDSAAE IHVTTHWDEHQVQTQPEERDDENLLRE  
SQISISSQQQHEQEAGANKRTFDEESKPTNSNNLVGVPPETKNVDDIEIDDKILRDP SR  
LMEEIVRSACQSNNETATAFVDLLLDRYERRERVFARESRFNGSEDSGYLP

>comp15364\_c0\_seq4; 595 1 1797 LEN=2281; translated  
XTSPDKAEDSRFRKTFDVRQRSRSAPVFCDSFXNRRNEKKQKRQTPLHAPHRNAGVSDE  
KKLEMIAMVTKTTEGGGRIVPKRSTPPFPGLSCLLVASLLSFSTTASYAWHPMPVSVLQRF  
FPLTEHQRTVIRISSKTNQMH CYCLPPSSLSFLPGQKQTPLGRNREWI PNRCALSERPTS  
SESTEGRKGRPGTRAIGPARKALRSMLSPRALPLVLVAAAAIAFP SRAGAADATAAAVAA  
ATTTSLVCPVSPVEVEFRLMVRLVYAALVGAALGKERSFAKHSAGVRTMSLVSMGAAIFTV  
CSCYCYGFTNFPKVDASRMAANVASGVGVGAGVITTSIHKPNKGDASGNLYQSNVVHGLTT  
AATIWL SAAVGVSCGVGLLRVATTAATAATIFILRMGRKRRPNYRPKKKDAQQQQTQQRSS  
SLPRDNVSEGKREADMTLHSIDDDHHENSAVDDRYDSAAE IHVTTHWDEHQVQTQPEERD  
DENLLRESQISISSQQQHEQEAGANKRTFDEESKPTNSNNLVGVPPETKNVDDIEIDDK  
ILRDP SRLMEEIVRSACQSNNETATAFVDLLLDRYERRERVFARESRFNGSEDSGYLP

>comp15364\_c0\_seq5; 123 336 603 LEN=603; minus strand; translated

MSRNSTSGETGHTRLVVVAAATAAAVASAAPARDGNAIAAAATRTSGSARGGSMLRSAFR  
AGPMAVLSLLVGLSERAQRFGIHSRFLPRX  
>comp15364\_c0\_seq6; 351 360 854 LEN=1338; translated  
MTLHSIDDDHHENSAVDDRYDSAAEIHVTTTHWDEHQVQTQPEERDDENLLRESQISISSQ  
QQQHEQEAGANKRTFDEESKPTNSNNLVGVPPETKNVDDIEIDDKILRDP SRLMEEIVRS  
ACQSNNETATAFVDDLDRYERRERVFARESRRFNGSEDSGYLP  
>comp15364\_c0\_seq7; 196 1 950 LEN=1108; translated  
XTSPDKAEDSRFRKTFDVRQRSRSVAVPFICDSFXNRRNEKKQKRQTPHAPHRNAGVSDE  
KKLEMIXDGENNRRRRRTDRAETIDSAF SRPVLFAFCV VVVFLDDGFLRMASNAIGSATR  
VSSHRAPHTRENTILEDKSNALLLPSTIVAFVPSGTEADASGKEPRMDPEPLCPLRETNQ  
QRKHRGPEGPTRNPRHRSGTKSAPEHAVPAGAAAGSGRRGSDRVSVPGRSGRHGGGGGG  
GDDDEPRVPRLAGGGVPAHGPAGLRGAGGGRPGEPTVLC EAQCRGPNHEPGEHGSRIHG  
VQLLRFYELSKGGRYVR  
>comp15365\_c0\_seq1; 530 323 2527 LEN=2777; translated  
MATFMALVTEMSGTHSPSRKVNHLRRYEFDFETEKIRPRVPRITASERKQGSRRRLPP  
PISPVLDIAGTTTTPEREIPCSVKGAKESSALPLHTIFNQATILDSSSAPGLIDISPDP  
DYDFNGSYSLRDNYHQQQQRDQREGDDADESYASQQERFYRSRFWAKQKLAAAI FSHPG  
SLGSFCVEAFEAAAREQTLSLHND DANHYTDAEDTPESQYIHDNNNTLSERITRIADIPR  
HILYNNMILSLTYDTWNVSLDLTLDVSYATVRVAAMALHASVCVVVNVWDGVTRSNPVNF  
ACAVITRPFNMGMKTRERVVSGIQSVATGVGSASSIALHRLSAKNRSPLSSGLVYGSQGN  
LRRMRSPGKMMVSEKLRKLNLTLSAAPVVSYTELDDNDGGLSRHAKSRVQRMHMYDVS  
LPFVATVKLQETFKKHPTTNNDFLDADDASTTSSPLEGPFMCTPQSFPTPASRAHVL  
KRGSRFADDVVFLARDQLRVHDGLESSNERTREMAEAL THGQRLAVFDADDASAGIDLSC  
GQH VATKVGPLYCYLSRMVPI LRNCFVYFEMTVLGR TGGLLQTSLATLSFGLSTKEMPT  
DTLVGAWKGSVGLCTTGQILISGQWCSPGPDPTISSFGDQETVGLVCLDDSSAFETWDG  
VMI TATVTFNINGRIVSPHVPTLPISGFDQNPPTLNLPVGTAPPSFTLPLLLVPAEEELYP  
TLTLHSPGTSVMCR  
>comp15365\_c0\_seq3; 487 323 1960 LEN=2914; translated  
MATFMALVTEMSGTHSPSRKVNHLRRYEFDFETEKIRPRVPRITASERKQGSRRRLPP  
PISPVLDIAGTTTTPEREIPCSVKGAKESSALPLHTIFNQATILDSSSAPGLIDISPDP  
DYDFNGSYSLRDNYHQQQQRDQREGDDADESYASQQERFYRSRFWAKQKLAAAI FSHPG  
SLGSFCVEAFEAAAREQTLSLHND DANHYTDAEDTPESQYIHDNNNTLSERITRIADIPR  
HILYNNMILSLTYDTWNVSLDLTLDVSYATVRVAAMALHASVCVVVNVWDGVTRSNPVNF  
ACAVITRPFNMGMKTRERVVSGIQSVATGVGSASSIALHRLSAKNRSPLSSGLVYGSQGN  
LRRMRSPGKMMVSEKLRKLNLTLSAAPVVSYTELDDNDGGLSRHAKSRVQRMHMYDVS  
LPFVATVKLQETFKKHPTTNNDFLDADDASTTSSPLEGPFMCTPQSFPTPASRAHVL  
KRGSRFADDVVFLARDQLRVHDGLESSNERTREMAEAL THGQRLAVFDADDASAGIDLSC  
GQHGA  
>comp15366\_c1\_seq1; 473 120 1853 LEN=2739; translated  
MKSKSKQTGTNTRNQIRIATIPILVGAVLGISCFMSMRYSVLVTVMWDIHTNELQKVNEPM  
LVTAITEPAATAVDTSAASNKSIASPQKQISVSTMEGTISNA AERSENHSRKS RDYTDAS  
LVPP IHPGRRLYDESLDFLQKLLVELGIKQWKY LKKKKGKRFKKGSSGNKFTQKIYAI  
AAETITAPSNKKNAPLDDKNLVIPMKT PVNATNNSTINCADPKYFKAFTGNLDPDGDKII  
VDWTMVGWDDRDFTEIRLA EYGD LIDRLVLFDMDTTLKGIPKPIIMPHLLEE QFKHLYSN  
KIDYHLLRNFTADFFSNATKKT KKIYRLQIQLRNRGRDYTKDLYKDHTARDRVYVIQN  
DGDEMMTRDSLHVIKCELKNP NGVLFAPAVNFKRNLA WLDKGSRMEIMIHSEQAQYSAM  
IPYNWLKGP AVQRLYGNITKKNSNFRKPYFHSDENFKVPHLGLGS AVHFSSPGHPLSTVL  
KSI STNDDPNFLKEFDSEFLNKALTKNLTYELR KIGFKCKSIPNIREAFVNKSTVNFAL  
SNIPWIVKAMPERYPWL VYDNLMELEQKVKECICAEDW  
>comp15367\_c0\_seq1; 819 343 3579 LEN=3980; translated  
MQHQRPQKGFDSASTASMASNVRHA AFSGSDNVPQPDKLM TDS SHRPKTRGSFGIMVVG  
LGGAGT TMLAGILAHRLNVEWYGPKEPNKPNYNGCITQLNSRGVHGGVGYRNLSPALD  
KRLGDASMAAVGGWDIRPTPPGDALLEGQILDYDLVRQVRSEMNKVKIFRGLFDPRFIGD  
SQHEAATHVLTEQDATCDS DALKCLRADIRYFKWRNGVVGHTTVIWSASVEPNSELVSQL  
KTPNDLMRSIELSEEERGGPLP SLLYATAALLEGCSFVNGGSQNTLACPALWELAKQQL  
GVYCLGTDFKAGQTKFKTAAVEYLRTMGLTPMVIASSNHLGNNDMRNLDSAKAARS AKLR  
VKHDI FAPWEEPQIDHKVSVMF TPYINDDKRD FVEYTS LGFMGQPHTMVTYTRASDSVLC  
VPLMIDA AVWCYDFAGRSWPYEKVSQALAYL FKVPEGGAKGVDPGFFRQMETLKENVFAA  
LDGTI SSRSGVLAAATISNQSTVVAEEGNAKRVRIRAGEEEKVVEWAIPHEARVICAG  
LACVDMQLNQATGGDGGEGIESFEGEKTIGGGSVSMACKTLARLCHGEALDEAYMQVTPP

VVSSVAPLCMVGNDTGTKLLSLENCGSASRNIDTRVVRNCRANKNPSRTALAVLP IYQ  
DGRRGCFFDAASNNEFTTDQLLDMI SELSPNLKSKEGVDTTGMSMPSYGGLLFGYPHLLP  
RIQGQALSHFFQQSRRIMIDQGI IALDLNGVPKPDLPFVMTGSLRSLNDLQNDRVIGPAL  
EHVDILHMNEDELVLLTGCQILD TDDSQQEDEF AITKAVELFLQCGVAVVAVTRGSKGSY  
VACASSERFERSPSLPMSWINSSAHMPAALLPEGTRLNTNGAGDAYTSGLLIATMLRHTG  
KITSNTPKPSIAGEVPQKKEELASSARGTSRSGKKMTPYTLYMKENYVSLKQQCKDDKKA  
IFTRCHEM WENETDEVKGM YERMVKEEYDDTGS DVFSDTSLDALDISDISSSNKSSGAQF  
QIEQKENACL NLES AIQFAGLVAA YHVDTKTRDLNSLDLGSLL EGSIVSLSHMAQNEI  
>comp15367\_c0\_seq2; 649 27 1538 LEN=1939; translated  
MACKTLARLCHGEALDEAYMQVTPPVVSSVAPLCMVGNDTGTKLLSLENCGSASRNID  
TRVVRNCRANKNPSRTALAVLP IYQDGRRGCFFDAASNNEFTTDQLLDMI SELSPNLKSK  
EGVDTTGMSMPSYGGLLFGYPHLLP RIQGQALSHFFQQSRRIMIDQGI IALDLNGVPKP  
DLPFVMTGSLRSLNDLQNDRVIGPALEHVDILHMNEDELVLLTGCQILD TDDSQQEDEF AIT  
KAVELFLQCGVAVVAVTRGSKGSYVACASSERFERSPSLPMSWINSSAHMPAALLPEGT  
RLNTNGAGDAYTSGLLIATMLRHTGKITSNTPKPSIAGEVPQKKEELASSARGTSRSGKK  
MTPYTLYMKENYVSLKQQCKDDKKAIFTRCHEM WENETDEVKGM YERMVKEEYDDTGS D  
VFSDTSLDALDISDISSSNKSSGAQFQIEQKENACL NLES AIQFAGLVAA YHVDTKTRDLN  
SLDLGSLL EGSIVSLSHMAQNEI  
>comp15367\_c0\_seq3; 789 1 3351 LEN=3752; translated  
VSDLPFLRSHFLYWLSVSLTQQSHENTIANNHTRTTSTMQHQRPKGFDSASTASMASNV  
RHAAFSGSDNVPQPDKCLMTDSSHRPKTRGSFGIMVVG LGGANGTTMLAGILAHRLNVEW  
YGPKGEPNKP NYNGCITQLNSR GVHGGVGYRNLS PALDKRLGDASMAAVGGWDIRPTPPG  
DALLEGQILDYDLVRQVRSEMNKVKIFRGLFDPRFIGDSQHEAATHVLTEQDATCDS DAL  
KCLRADIRYFKWRNGVVGHTTVIWSASVEPNSELVSQLKTPNDLMRSIELSEEERGGPLP  
PSLLYATAALLEGCSFVNGGSQNTLACPALWELAKQQLGVYCLGTDFKAGQTKFKTAAVE  
YLRTMGLTPMVIASSNHLGNNDMRNLDSAKAARSAKLRVKHDI FAPWEEPQIDHKVSVMF  
TPYINDDKRDFVEYTS LGFMGQPHTMV TYTRASDSVLCVPLMIDA AAVWCDYFAGRSWPYE  
KVSQALAYLFKVPEGGAKGVDPGFFRQMETLKENVFAALDGTISSRSGVLAAATISNQ S  
TVVAEEGNAKRRVRIRAGEE EKVVEWAI PHEARVICAGLACVDMQLNQATGGDGGEGIES  
FEGEKTI GGGSVSMACKTLARLCHGEALDEAYMQVTPPVVSSVAPLCMVGNDTGTKLLS  
LLENCGSASRNIDTRVVRNCRANKNPSRTALAVLP IYQDGRRGCFFDAASNNEFTTDQLL  
DMI SELSPNLKSKEGVDTTGMSMPSYGGLLFGYPHLLP RIQGQALSHFFQQSRRIMIDQ  
GI IALDLNGVPKPDLPFVMTGSLRSLNDLQNDRVIGPALEHVDILHMNEDELVLLTGCQIL  
DTDDSQQEDEF AITKAVELFLQCGVAVVAVTRGSKGSYVACASSERFERSPSLPMSWIN  
SSAHMPAALLPEGTRLNTNGAGDAYTSGLLIATMLRHTGKITSNTPKPSIAGEVPQKKEEL  
ASSARGTSRSGKKMTPYTLYMKENYVSLKQQCKDDKKAIFTRCHEM WENETDEVKGM YER  
MVKEEYDDTGS DVFSDTSLDALDISDISSSNKSSGAQFQIEQKENACL NLES AIQFAGLV  
AA YHVDTKTRDLNSLDLGSLL EGSIVSLSHMAQNEI  
>comp15367\_c0\_seq4; 422 343 2100 LEN=2100; translated  
MQHQRPKGFDSASTASMASNVRHAAFSGSDNVPQPDKCLMTDSSHRPKTRGSFGIMVVG  
LGGANGTTMLAGILAHRLNVEWYGPKGEPNKP NYNGCITQLNSR GVHGGVGYRNLS PALD  
KRLGDASMAAVGGWDIRPTPPGDALLEGQILDYDLVRQVRSEMNKVKIFRGLFDPRFIGD  
SQHEAATHVLTEQDATCDS DALKCLRADIRYFKWRNGVVGHTTVIWSASVEPNSELVSQL  
KTPNDLMRSIELSEEERGGPLP PSLLYATAALLEGCSFVNGGSQNTLACPALWELAKQQL  
GVYCLGTDFKAGQTKFKTAAVEYLRTMGLTPMVIASSNHLGNNDMRNLDSAKAARSAKLR  
VKHDI FAPWEEPQIDHKVSVMF TPYINDDKRDFVEYTS LGFMGQPHTMV TYTRASDSVLC  
VPLMIDA AAVWCDYFAGRSWPYEKVSQALAYLFKVPEGGAKGVDPGFFRQMETLKENVFAA  
LDGTISSRSGVLAAATISNQSTVVAEEGNAKRRVRIRAGEE EKVVEWAI PHEARVICAG  
LACVDMQLNQATGGDGGEGIESFEGEKTI GGGRYVLLDFYVAYEEX  
>comp15367\_c0\_seq5; 604 115 1872 LEN=1872; translated  
MQHQRPKGFDSASTASMASNVRHAAFSGSDNVPQPDKCLMTDSSHRPKTRGSFGIMVVG  
LGGANGTTMLAGILAHRLNVEWYGPKGEPNKP NYNGCITQLNSR GVHGGVGYRNLS PALD  
KRLGDASMAAVGGWDIRPTPPGDALLEGQILDYDLVRQVRSEMNKVKIFRGLFDPRFIGD  
SQHEAATHVLTEQDATCDS DALKCLRADIRYFKWRNGVVGHTTVIWSASVEPNSELVSQL  
KTPNDLMRSIELSEEERGGPLP PSLLYATAALLEGCSFVNGGSQNTLACPALWELAKQQL  
GVYCLGTDFKAGQTKFKTAAVEYLRTMGLTPMVIASSNHLGNNDMRNLDSAKAARSAKLR  
VKHDI FAPWEEPQIDHKVSVMF TPYINDDKRDFVEYTS LGFMGQPHTMV TYTRASDSVLC  
VPLMIDA AAVWCDYFAGRSWPYEKVSQALAYLFKVPEGGAKGVDPGFFRQMETLKENVFAA  
LDGTISSRSGVLAAATISNQSTVVAEEGNAKRRVRIRAGEE EKVVEWAI PHEARVICAG  
LACVDMQLNQATGGDGGEGIESFEGEKTI GGGMYCCDFYVAYEEX

>comp15368\_c0\_seq1; 1865 312 4838 LEN=4944; translated  
MLRHAARSAIQRRSRVVGQHTRSLATQSGDDTKKPTALAKIHLEDGTTLIGKSFGSHESA  
EGEVVFATGMVGYPENMTDPSYQGQILSLTTPMVGNYGVPDRKTLDEYGLPKYFESDKIH  
VNGLIVQDYSHHYSHWNAASSLGDWMKEQGVPLSGIDTRMLTKKIRESGALMGRIEVDL  
DAPAPDFSTIQNANLRHLVDEVS IKEPVVYVGKGNATKVI AVDCGMKNNI IRHLVKRGVEL  
TVVPWDYPFASEMHLYDGLFSLNGPGDPTMCKETIAELEKVISVPDDQVKPIYGICLGNQ  
LMGLAAGGQAEKLPFGHRGQNQPVNLHQTGECYITPQNHGFVIDCTTLRPGWKTLFTNAN  
DGSNEGIAHTSRPYFTAQFHPEAASGPCDTEFMFDTFLEACSKPMDKITFPVRKPPPPRP  
DVKKVLLLGS GGTSIGQAGEFDYSGGQAIKALKEEGKEVLMNPNIASVQTNMDSKSEFK  
ADHTFFLPVTPFVVEVIKKEKPDGIVVSMGGQTALNCAVEMYEAGTLQKYGVEVLGTPID  
VIVINTEDRQLFSDRLNEINEKIAKSYTADTVEEAEEAAKEIGYPLMIRSAFALGGLGSG  
MCYDEDLHRHMARQALSTSPQILVERSMKGWKEVEYEVVRDAYDNCVTVCNMENFDPLGI  
HTGDSMVMAPSQTLSDEEYHMLRNTAIKTVRHLGIIGECNIQYALHPESLEYCIIIEVNAR  
LSRSSALASKATGYPLAFVAAKLCLGIPMTEVINAVTKKTQAAFEP SLDYIVTKIPRWD  
TKFQHVSR EIGSAMKSVGEVMSIGRTMEESFQKAMRMVDPSIAGFEPHDFR FETIEDLKQE  
LAVPTDRRIYAI AQAMHEKTL SVQEIH DITKIDHWFLRKL ENIVQTRS QLEATTLDSLH  
ELMLDAKKVGFSDS QIANIFKCS EDDVRNKRI GLGVEPVVKQIDTLAAEYPAATNYLYMT  
YHGTE NDVEAEDGGVAVL GSGAYRIGSSIEFDWCGVSSIRSLRKMGYKATMINYNPETVS  
TDYDECDRMYFEELNRERVLDIYQRDNL DGVVSVGGQIPNGLAIPLADAGVKLLGTS AK  
MIDNAEDRNKFSAMIDEIGVQQPRWLELTDSGSAIDFANDVGYPVLRPSYVLSGAAMNV  
AWNDEQLKAF LNEAATVSKDHPVVISDFIEGATEIEFDG V GK DGEIIAAA IHEHIENAGV  
HSGDATLVLPQTLSDYTKHRVRDAAKKIVKRLNITGPVNIQFVAKGTDVMCIETNVRAS  
RSFPFVSKTMGVDFIEAATRAMVDEDTS DMNLP TLETRDRPSGYVGVKAPMFSFTRLRGS  
DPVLGVEMASTGEVACFGKTREEAF LK SMLSTGFKMPKKNILVSVQESLQDEFTHSAWQL  
IEQGYTLYATENTAEVLKKNQVPCTV VAYPTDEGSDLPNASELIKKG DVMVINIPTYES  
KRLEDNYSMRRTAMDYGVPLLTNTQLVKVFANAVQEHDRDKGLEPATLFEHYQGEKGS DA  
WTDASEFH

>comp15369\_c0\_seq1; 731 2643 4454 LEN=4710; minus strand; translated  
MPKSKSKVQASTEADDS LAIFHDGEASQSLLPDPPSDDDGYVYPVTAFP PPSAFEVS NDF  
PALILPAKRTNQVRNQLKSILLSRPRLSVVVEVSESDLDSPGDQAGKDP PGP SLVLTKEN  
MRGYRKLVLHPQRAGLHPPSKQQQQQDPATPSENHQHEMNHLLRSLLDDEPE SFRLGRHT  
ITLSYDHWTAEEILKRLLVPTGIAEVPSSFEAVGH LAHVNL RGEVLPYKLLIGKVLLEKN  
SPRIQTVCNKVGSI GDSEYRTFGMEVIAGKDHEKDG DGSWS DVLVKEEGCEYQLDFRK  
VYWNSRLGGEHRRLVQLIKRDAAARAQPQHTSTRTSTLVVADLMAGIGPFAIPLTAKNLL  
RNGKNNGKRQNNKKKQKGNNGDGGGRLLPMP IEVYANDLNPSSYEF LVANAKRNK CDFE  
SDKNFDSGGGQKHN LHVSNM DGRAYCHRLQDKGIRPDHFLMNL PASALELLDCFRGYPSD  
SDGSRPRIHVHCFAPKDPQASRSEIWKRAETALGCPLHETDDAVVIHTVRDIAPNKNMYC  
LSFLIPTAACTLPRIIDLQKGQEKPLGSDPSEQQQEQKRERSESDTDTGAGTEANAKKQK  
QTD

>comp15369\_c0\_seq2; 731 2646 4457 LEN=4713; minus strand; translated  
MPKSKSKVQASTEADDS LAIFHDGEASQSLLPDPPSDDDGYVYPVTAFP PPSAFEVS NDF  
PALILPAKRTNQVRNQLKSILLSRPRLSVVVEVSESDLDSPGDQAGKDP PGP SLVLTKEN  
MRGYRKLVLHPQRAGLHPPSKQQQQQDPATPSENHQHEMNHLLRSLLDDEPE SFRLGRHT  
ITLSYDHWTAEEILKRLLVPTGIAEVPSSFEAVGH LAHVNL RGEVLPYKLLIGKVLLEKN  
SPRIQTVCNKVGSI GDSEYRTFGMEVIAGKDHEKDG DGSWS DVLVKEEGCEYQLDFRK  
VYWNSRLGGEHRRLVQLIKRDAAARAQPQHTSTRTSTLVVADLMAGIGPFAIPLTAKNLL  
RNGKNNGKRQNNKKKQKGNNGDGGGRLLPMP IEVYANDLNPSSYEF LVANAKRNK CDFE  
SDKNFDSGGGQKHN LHVSNM DGRAYCHRLQDKGIRPDHFLMNL PASALELLDCFRGYPSD  
SDGSRPRIHVHCFAPKDPQASRSEIWKRAETALGCPLHETDDAVVIHTVRDIAPNKNMYC  
LSFLIPTAACTLPRIIDLQKGQEKPLGSDPSEQQQEQKRERSESDTDTGAGTEANAKKQK  
QTD

>comp15369\_c0\_seq3; 731 2643 4454 LEN=5430; minus strand; translated  
MPKSKSKVQASTEADDS LAIFHDGEASQSLLPDPPSDDDGYVYPVTAFP PPSAFEVS NDF  
PALILPAKRTNQVRNQLKSILLSRPRLSVVVEVSESDLDSPGDQAGKDP PGP SLVLTKEN  
MRGYRKLVLHPQRAGLHPPSKQQQQQDPATPSENHQHEMNHLLRSLLDDEPE SFRLGRHT  
ITLSYDHWTAEEILKRLLVPTGIAEVPSSFEAVGH LAHVNL RGEVLPYKLLIGKVLLEKN  
SPRIQTVCNKVGSI GDSEYRTFGMEVIAGKDHEKDG DGSWS DVLVKEEGCEYQLDFRK  
VYWNSRLGGEHRRLVQLIKRDAAARAQPQHTSTRTSTLVVADLMAGIGPFAIPLTAKNLL  
RNGKNNGKRQNNKKKQKGNNGDGGGRLLPMP IEVYANDLNPSSYEF LVANAKRNK CDFE  
SDKNFDSGGGQKHN LHVSNM DGRAYCHRLQDKGIRPDHFLMNL PASALELLDCFRGYPSD

SDGSRPRIHVHCFAPKDPQASRSEIWKRAETALGCPLHETDDAVVIHTVRDIAPNKNMYC  
LSFLIPTAACTLPRIDLQKGQEKPLGSDPSEQQQEQKRERSESDTDTGAGTEANAKKQK  
QTD

>comp15369\_c0\_seq4; 731 2646 4457 LEN=5433; minus strand; translated  
MPKSKSKVQASTEADDSLAI FHDGEASQSLLPDPPSDDDGYVYPVTAFPPRS SAFEVS NDF  
PALILPAKRTNQVRNQLKSILLSRPRLSVVVEVSESDLDSPGDQAGKDPGPPSLVLTKEN  
MRGYRKLVLHPQRAGLHPPSKQQQQDPATPSENHQHEMNHLRSLLDDEPESFRLGRHT  
ITLSYDHWTAEEILKRLLVPTGIAEVPSSFEAVGH LAHVNL RGEVLPYKLLIGKVLLEKN  
SPRIQTVCNKVGSIGDSEYRTFGMEVIAGKDHEKDGSGSWSVDLVKKEEGCEYQLDFRK  
VYWSRLGGEHRRVLVQLIKRDAARAQPQHTSTRTSTLVVADLMAGIGPFAIPLTAKNLL  
RNGKNNGKRQNNKKKQKGNNGDGGRLPPMPIEVYANDLNPSSYEFLVANAKRNKCDFE  
SDKNFDSGGGQKHNHVSNM DGRAYCHRLQDKGIRPDHFLMNL PASALELLDCFRGYPSD  
SDGSRPRIHVHCFAPKDPQASRSEIWKRAETALGCPLHETDDAVVIHTVRDIAPNKNMYC  
LSFLIPTAACTLPRIDLQKGQEKPLGSDPSEQQQEQKRERSESDTDTGAGTEANAKKQK  
QTD

>comp15370\_c0\_seq1; 340 270 1730 LEN=2259; translated  
MEVNHTEGDEESPVTEQSGADSLPTSTRPTMCKWMPVSNRSLLLKPVDS DTESPERHQ  
EPGRGSSGTGQTAYANGGGEAEVDYNETRYPSONDAAQATTDLEAGALITPEPVRDPST  
SGSSHSSYWGPNPRTIAQGADQEQDSSPPKLEPVDPPPETTDFSDGSSQHANSTRSAM  
TAQSDWGPTRPGFEQGEQDAAISKANA AVQETMMHLTKSNNHAFASYNAKTATTVVSIK  
GGNSSKYVRNSPPPSAKRIDFSGETTVHFYNSDSSEGGGSTKENQSTNNLSHQIRRYET  
YASNDQEKMRMCMPTIAPAIETSGRNDVEPSHFVWPKRVDPPSDLHYEDSYSTSEGEE  
CSTVSGGKDPSSHPTTSSTEF SINVHEQEDRRNGQNPVNDKANKKRGRTRNPSAEHKGDK  
KNEIPRHIFTHPTKKEAVVARKKRQTATRQKKKTNYLLHFTVCLIMLLIPGLTLFLVWYF  
LGF DNK

>comp15371\_c1\_seq1; 188 251 604 LEN=1098; minus strand; translated  
MPIQVLFRAVSAIETLVTEAKAAGVPCVA AVTHSAYLRVLVGMVLNEPLLQSSVRKIRNG  
SVTVIDVPEDLPSEMIGAKPKLLGGWLSQKPRDFTLSIPTCKTIRINETRHLPLDVI

>comp15371\_c1\_seq2; 907 119 3589 LEN=4423; translated  
MSNPVTIPDDTGSSSVPQSETTWSIRKSNSNDGKEDEEDTVSKTTVALGGLRKRKSFALL  
DGFFQDLETGEHERVTIDITRLPAMLGRSNE SDKGNPHFFGLGKKAISRKHCIIYYRDR  
EGGRAEWDEMADR VVYKDAS MVAKESGRPVSKTQPIPNPGMGGTITKGGSDDL PSSGFFV  
VECLGKNRILVDQKRVDQGD SMVLRPGSALRISSYMLYFMLPKDAVPATHKIEIPLTQE Q  
KDKVAAAKASKKKATAKASKTAAASPSVKKRPVPTLAASAMKKT KGGGNSAAATLAELE  
ALPVEDLIAMNEAVTKGIWDRKNQFIGGTICYHAVRSAGAAAEIQKKVSEDGGVSRSDIM  
EWIEQSDQYGAWVQQLT NMEPRSYQASITKSLKSGFVRTSGAGRYIKWITPKDLSAKA  
KHESSESSEASKKKLKLKTINSVPSVDRSEEGGASSEKGEDEDEDEDEDEDEESRIE  
EYPLTNAFRERAXYADPAPSMRQKSHRRNNSSLRNPPSQRKGSLLLAPDEHVELLQELQ  
SERSVKRSRRRSLSEPPGDVDKDDDDAGSKAATNTRSRSRKRKRSKMP SVSASLSPTRLN  
SSLRFQEP R SILRSSSHSRTSLPKSSNHSVPSAISSSNNSVVFSDNVFVSSDRSDNDS  
SEDFNEPIRFDDGTEGDDGPQNIQHNGSDKKDSSGRSSSRSGLKKSGSQGTASFMGLTTH  
SFRSNRSMMSVDSKEGFDDDPKWAALRYIRILP PHKNETSSEKQIRIFTWIALSLDFIA  
AIVSLTDYEGSTACCGEPIWDIIMDIDWNILFRTITVLYLV LIVAEIIPVIRNGVPFNIV  
NPTIGFLITFGLFLEDGIPAAATMWVIEAAAIFFEFVLYKVNAMYYETCFK LKQVEEDL  
EKAKKSRNLRELSSHRSNHSSTNDIERGRSTQSRPKIPVYHDDVDDSSDEDSLSGHS  
FGEDEQFQDERPLSGESLGGKQSMKPQRPRPPAQRMISNMASQPPARMSKNVRKPPSSYRM  
GARSRSRSLSSDSIWSNSGSYTSMEEISRKYSGEVKQNRLLRKRRLRERKKKEAIDLN  
YHFVGSVMNVCIALFAMILIICIGSIGGLCFDNDKLR LFDSDQVAKCASACPTGNGKEC  
TDVCTEESTQCYFPFI

>comp15372\_c0\_seq1; 536 140 1915 LEN=2363; translated  
MRDKSPFPGSIFPSELGTGSSYTGSNVSVKLAKAFVQRDGS SGN SAGIVILPRTAPGSND  
PEHGSRSKPGSDESLFP SDGVCLRVAKRVGLPETSFVLCSTPDLGCRRDGEKQSQRDNGR  
AVSPNLSRDRQKGLSGFGKND EDDGADFQVKWYTP EQEVD MCGHATIALAGLYTMMAKE  
QRLVGARCDPRDGAYFWRMKCKAGLLGIEVFEGAHNESHS GSAVYSKRGTKIDVEDTIPL  
LRVMEQANPEYCGSIDLNEIAVSLGIKADTDLAVTAIDNGENHDNSRHKSGLVFPFSH  
CEIVSTGGRDLMI PVRSAVLNEMDILGNDEKNNSARSSTRSLLLS ENINAI SRCYNLVGY  
HMFVDDRLFP HNCVFNDET GASLGTKPFRDAKNYEGNNRDN GSP IHLNELIHFQTARQ  
EGTDGIERCLEAVLLEHPQQQVWHEDEGETYDSVRDDGIGK KASSHKSVLPFVRHSRMIEV  
TGVRFNFAHVGIPEEPATGSANGALACYLVKHLFLGALRCGGHEDHHQNMTLLDTCNP IW  
FRFLFEQ GKAMGEPCLVDAEIEVVGGAIGTVKVGGLARVAGDTLELDLNSL

>comp15372\_c0\_seq2; 536 84 1859 LEN=2307; translated  
MRDKSPFPGSIFPSELGTGSSSYTGSNVSVKLAKAFVQRDGSNGNSAGIVILPRTAPGSND  
PEHGSRKPGSDESLFSDGVCLRVAKRVGLPETSFVLCSTPDLGCRRDGEKQSQRDNGR  
AVSPNLSRDRQKGLSGFGKNDDEDDGADFQVKWYTPQEVDMCGHATIALAGYLYTMMAKE  
QRLVGARCDPRDGAYFWRMKCKAGLLGIEVFEGAHNESHSGSAVYSKRGTKIDVEDTIPL  
LRVMEQANPEYCGSIDLNEIAVSLGIKADTDLAVTAIDNGENHDNSRHKSGLVFPFVSH  
CEIVSTGGRDLMIIPVRSVAVLNEMDILGNDEKNNSARSSTRSLLSENINAIISRCYNLVGY  
HMFVDDRLFPHNCFVNDGTGASLGTKPFRDAKNYEGNNRDNGSPIHLNELIHFQATARQ  
EGTDGIERCLEAVLLEHPQQQVWHEDGETYDSVRDDGIGKKASSHKSVLPFVRHSRMI EV  
TGVRFNFAHVGIPEEPATGSANGALACYLVKHLFLGALRCGGHEDHHQNMTLTDCNP I W  
FRFLFEQKAMGEPCLVDAEIEVVGGAIGTVKVGGLARVAGDTLELDLNSL

>comp15373\_c0\_seq1; 640 179 3188 LEN=3331; translated  
MLPDVVVRMKPAALSQSKSVATTSDDETFIEELLARRAQFGSRKHSLDGNLVLSPDYDPF  
LCEHFNVIIDATEEGELKILKLPPYEMPGENNTVMLVPRGECSEFERKAYAACKFYGAKA  
IMIYDRLGARYQWDIANERVVFPQRSQFDYECGNIGNIFMENLPLDPPAYDSMLLDPIMGMT  
TSTTTEAMGIMTMVNQNSLSTIVAEAENDGGNDVEINIESIGVCNLTDALDPCESQLCL  
VTSHLENSTQYPVCCAOWLPMTPSADDAKMDTDDILAVWLTIRQSEQIFQSDLLSVET  
KVTIESLYSKSDFNITYIFMWLWGTLMVGAGAWYAAGEYRRFGANLAAYKASEVRNEPRN  
RDDDSDRNRNRHGRRRRSPDQLRGEADNDIEKGGKKKKKNKDTSNCRENNIQEAE TDEV  
VFQMNTKKKRNEQAKKKKTGKKKKDEWVSLHSIPPPPRKQKKKNSPRENTARTTMTRME  
SETTIPQTESETVIPPRESEGIKSMEMNIWHVLIFFVVMASGTLILLFFFRYKFFFVYGY  
LGCAGTVSKLIFKPLIGALIPKLGVEVVEELKPKVTCGLDGFITITCHLFAFGWAI IWIWY  
GMTHYQPQQNPFWLTNNAFGAAACIYGACLLKLNLSIKIATILLGAIIFYDILRFYYPFL  
TGGASVMLKVAGATDNPSGEAFICYKYPDERQCHGIGFLPMLFLLPKINDYNGNSVILGLG  
DIFLPGFLIAFTARYDEAARLVNAHIPEETRIKAPSKWYHGFFFFPMMIAYSLGLFCAYTA  
VLLMKQGPALLYICPICLAATFIIGRKDIKDLWNGARVFKLADRLVKKTEREWGKARMK  
RFAEQRLLENSAQEQAEGRLESDNEQSSSRILRAPVHKQIEDSRRSDTERTSNNTLKSS  
EQFPAEPATSSDLVQPESTRDVCFRGKGHSGTKYFRKIVANVAADSDEENFTPELYKIIKM  
RLKGRRFKMDDDIWRRELTKKETKKEIRMAVVSIRRRNKNKS

>comp15373\_c0\_seq2; 206 627 1538 LEN=1681; translated  
MLFLLPKINDYNGNSVILGLGDIFLPGFLIAFTARYDEAARLVNAHIPEETRIKAPSKWY  
HGFFFFPMMIAYSLGLFCAYTAVLLMKQGPALLYICPICLAATFIIGRKDIKDLWNGARV  
FKLADRLVKKTEREWGKARMKRFAEQRLLENSAQEQAEGRLESDNEQSSSRILRAPVHK  
QIEDSRRSDTERTSNNTLKSSSEQFPAEPATSSDLVQPESTRDVCFRGKGHSGTKYFRKIVA  
NVAADSDEENFTPELYKIIKMRLKGRRFKMDDDIWRRELTKKETKKEIRMAVVSIRRRN  
KNKS

>comp15374\_c0\_seq1; 340 1 1032 LEN=1233; translated  
XVIRADTYCSRLLFGCSGKTELCKTLAETYYGSEKDMIRIDCSEYMEKHSVSRLTGPPPG  
YIGYDEGGQLTEAVRRAPHSVLLDELEKAHGDVNLILLQILEDGMLTDGKGRVNFKN  
ILIMTSNVGSQNILALSROHSEQQQGDLSLYAQLSETVKESEATMKPELLNRMDEIVVFS  
PLSGTDLSSITGLILSKTIKRAEAEQDLKISATPSLCEKVMEEGSSNAAQFGARPXRAA  
QRFFEDAVSDALIRGFLKKGDEAIVDLVAEANGSSSHHTVEVRRSSDNGVLQVLVDKVSQ  
GIGSAQMQRREDTIEKLSMMDDAPRTKKKSRPSEDIDVEVDPVR

>comp15374\_c0\_seq2; 885 296 2886 LEN=3087; translated  
MTEDCIGAIVTSQKQAQKFSQKQVELPFLVAGVVLDLPETPAMERTLKQYGVTVRKTVSAL  
GELYPDQKSGQLGGFFTAPDPSDDLAFGRDVKVLKEAGNIATAMESQKIQTTHLLLSM  
LQYKEGDPRAVTDASTNGAYYLLTKIDPDIDAVDMCVSLLGHLESDENERDLVTGVGS  
TAGTKTLEDELGVDLTAQAKDGLLDVVQGRDKEMDSCIRTLVRRRKNNVCLVGEAGVGKTS  
IVEGLAQILVSDRCPQRLKGTSLVSELANLVAGTKYRGEFEERLQAVVQEISDPKAPPT  
ILFIDEIHNLVGAGAAEGGMDAANLLKPALARSQQLIGATTISEYRKYIEKDAALERRL  
QPVMCKEPTVPETVDILRAIAGSYEKHHKVKYSPDSLVAACKLSERYLTDRFLPKAIDL  
MDEAGAIHLSSFSVSDVDREEGYATNEEGENNVPLVDEQTVMEI ISEWAKIPLGKLES  
SEMNRVLQLEEDMTLRVKGQKAIQSVSRVRRARSGLRDPNRPIASFMF CGPTGTGKTE  
LCKTLAETYYGSEKDMIRIDCSEYMEKHSVSRLTGPPPGYIGYDEGGQLTEAVRRAPHSV  
VLLDELEKAHGDVNLILLQILEDGMLTDGKGRVNFKNILIMTSNVGSQNILALSROHS  
EQQQGDLSLYAQLSETVKESEATMKPELLNRMDEIVVFSPLSGTDLSSITGLILSKTIK  
AEAEQDLKISATPSLCEKVMEEGSSNAAQFGARPXRAAQRFFEDAVSDALIRGFLKKG  
EAIVDLVAEANGSSSHHTVEVRRSSDNGVLQVLVDKVSQGIGSAQMQRREDTIEKLSMM  
DAPRTKKKSRPSEDIDVEVDPVR

>comp15374\_c0\_seq3; 862 296 3008 LEN=3209; translated



MTEDCIGAIVTSQKQAQKFSQKQVELPFLVAGVVLDLPETPAMERTLKQYGVTVRKTVSAL  
GELYPDQGKSQGLGGFFTAPDP SDDLAFGRDVQKVLKEAGNIATAMESQKIQTTHLLLSM  
LQYKEGDPRAVTDASTNGAYYLLTKIDPDI DAVIDMVCVSLGLHAESENERDLVTGVGS  
TAGTKTLEDELGVDLTAQAKDGLLDVVQGRDKEMDSCIRTLVRRRKNVCLVGEAGVGKTS  
IVEGLAQILVSDRCPQRLKGTSLVLELANLVAGTKYRGEFEERLQAVVQEISDPKAPPT  
ILFIDEVKFSETKFESPTPLLDKVAWKENDCTTNDKFLRSLFIFHFKIHNLVGAGAAEGG  
MDAANLLKPALARSQQLIGATTISEYRKYIEKDAALERRLQPV MCKEPTVPETVDILRA  
IAGSYEKHHKVKYSPDSLVA AAKLSERYLTDRFLPKAIDL MDEAGAI AHLSSFSVSDDV  
DREEGYATNEEGENNVPLVDEQTVMEI ISEWAKIPLGKLESSEMNRLVQLEEDMTLRVKG  
QQKAIQSVSRARRRARSGLRDPNRP IASFMFCGPTGTGKTELCKTLAETYYGSEKDMIRI  
DCSEYMEKHSVSRLTGPPPGYIGYDEGGQLTEAVRRAPHSVLLDELEKAHGVDLNLILLQ  
ILEDGMLTDGKGRVTNFKNTILIMTSNVGSQNILALS RQHSEQQQGD SLYAQLSETVKES  
LEATMKPELLNRMDEIVVFSPLSGTDLSSITGLIILSKTIKRAEAEQDLKISATPSLCEKV  
MEEGSSNAAQFGARPXRAAQRF FEDAVSDALIRGFLKKGDEAIVDLVAEANGSSSHHTV  
EVRSSDNGVLQVLVDKVSQGIGSAQM QREDTIEKLSMMDDAPRTKKKSRPSEDIDVEV  
DPVR

>comp15375\_c1\_seq1; 413 1 1202 LEN=1276; translated  
XFSLPTMLQVVLVQKRVGREQGS L F A M K I L K K T H L V R R R Q I E R T R T E R K V L S A V N H P F I M  
K L H Y A F Q S P E K L Y L V L D Y C P G G E L F F H L S R F R R F P E R V A R F Y A A E L L L A L G H L H K R G I I Y  
R D L K P E N V L L D A D G H V K L G D F G L A K A G I R H A Y E G A T S M C G T P E Y M A P E V L A Q Q G H G F C V D  
Y W G L G M L T Y E M M T G L P P W Y T T D R T K L F R R L R S A P L D I P P Y F S A P S A S F S A A L L E R N P R R R  
L G V T G I R A A M E H E F F K S I S W R A L Y G R R V E A P I R P C E G W S P P G S G G D E S P T H G S Q S Q N Q T N  
A H D S S S S P Q T T T I P T D L D A A T A N F D N Q F T R M P V E T D E D G N V H D D D D E L E L H E D T F V G F T  
F D D T D R D E I E A A Q L M K Q Q Q Q Q Q Q A R L R T H N Y T R E G H Q I D

>comp15375\_c1\_seq2; 343 1 1209 LEN=1209; translated  
X A G E N P E G F D F D G R S P P S A V R P G G Q P Y G V G S N D P R S V N G N A G R L K G S V F T R R S N A H N Q N S  
S G I E R A P A A S Q Y T I S S A A S D T S V S S Y H T T S N G M H G D E L A Y V N H P Q A Q P Q Q L H S Y P G R A Q  
N P Y Q Q Q Q Q Q P P P S I Y A P Q E H H Q H P Q Y Q Q H Y S Q S L P N H P Q T H H T N Y A Q Q Q I H G S T N T T N N N  
T T K K P R P G Q R A G A A I M N S M R N L N L G S A M H R I G G V G G I G K S P A A S P T R G G T S R R Q S H Q R R Q  
Q Q Q Q H Q H Q H E Q H Q V N E W E A R W D D D S D D D D D G N D S S H S S P R P Q Q L Q Q Q P Q Q T Q A S I L P P  
K M D S G Y T S A S V S S P D A R A G A Q P Q Q P Q T P P P P M G Q H P A Y P A T A S A M A T T A G D R R L V T D D E  
D D G V E W D T G A S G G K P A A Q D A S A N A T D D D E K T P N V K Q F L P L L R V L

>comp15376\_c0\_seq1; 1284 1 3333 LEN=3638; translated  
L T E D D G D D G S N K Q E T D V G M A T S M A T E R K K D S H D G S S P E K D K E S P F D D D G D D D A N F V N D N D  
D E Q D K N N E E Q N E D E N E E D E D E I E F L D T A Q D V I I E Q Q E A T I G T T S T D S P E V D D E V V D M V E  
S G K M A I G T T S T D T S T D V D S T D D D S T D D D I R I D L S I L D D D M E T N T T S D E S A D H A K Q D T T T D  
A E A D S K S D E I I Q V D A D E S S A D G D S E E I K D S E K A E Y I Q S N T T E D K N T E G D G D V F E E S T D G  
K E K L G S E E S E V K E V E D E D E D E D L S E R V S L D Y A S K S A G A L I I E K T P E F K G T S N L I T G D R D R  
Y A I V P C S E E K K Y V V L S L S E D I L V K E I K L A N Y E R F S S T V K D F Q V K G S H D L V K W V D L G T Y Q A  
E S S K G E Q T F V V K D P T W A R Y L K F K L L T Y H G F E H Y L T L S Q I K V H G S N M V Q G F H E Q W E S I E E N  
N D E Q G D D R I A D Y G T E K S T E A T E D E V N D T N K E G V K E K A I V D D G K A S N S S A S S C N D S D S E G S  
A E T G D P D A F E K V N S N S H N D P S A S F T V T S Q M G L P L A K F R T P K T F S E I L Q S E M E E E K L F S D L  
Y D L I P H T M D T L P A H S K N D I G S N S E E G E L R T V H Q L S Q L A I D S I Y S I G S R I G D D I A L L V M E D  
E K S S A I S S P K M N G Y F D E S S Y L Q K K F G S G I S S V V N L N P S T H T D N A S A T T E S S R S D A S K V R N  
E D N D S P A E T A T E A Q Q Q V D V G E A T G N P R K G E D A T P P A E K E I V E D T N D P M N Q A I A K L L K D L P  
S A E C L A N L D F A E F K S K V S A A R K S T N A A G S S P G G R M M E P I F K K L T D E I F A L Q T S L S V Q D Q F  
A K M S V S C Y K R V V V D L A M E M E K Q R R D Q E D R L L R L E E Q I L E P A S M R M F N K L V I S L V S T L A T W  
G I L M A S Q V I V T M K D H F V P W I L R L A L T D D H Y Q T L A R A S G L V R D Q S S R V I G Y L S T S A E S Q A W  
A E K L V Q R A R G R F Q N L L S M L G Q R A A V Q R F L S A W S S F Y D G G I A L I G V V L V L V V C H K L L R C A S  
I V A S Y R Q P K E K P A P V P T K K K S D P P S Q N L T T G Y T P E N A E D P T G G C S L E T R Y D E D V S P E I L  
L A C G E T P S T S E C D A S A A S K R K K R K P K K R S S G Q N D P P P T V V D D L S T K S S E E G V P E L  
D D E K D H G V P G G T R P G N R H Y A N S P S V V S L D D

>comp15377\_c0\_seq1; 1167 178 3714 LEN=4284; translated  
M M N P E T T E T K I A D S T N Q T T E S N I T A A E G G M N S A Q Y G G S N H S L S P P L D L P L N Q S S S Y L S L  
S S G S S A M P S P S N N T T T N K K S V I D D V G A V G E S N K E V Q E G R T T I E S S A K I P A S V P R K D S D D I  
S L S K I K P V H N F F G Q H Q Y S P Y D S D G S D G S L V F S P G S V T D D H K T A S I L S D N K M S S T S S G A G A  
V A S T T L G N K G K H K R Q D S Q S Q S T D R N R F P S I D S V A S N G S I R Y V R P S Q N A P T N S E P K Q S A S Q  
S Q P I N P Q L L P Y N E R R K L L Q Q R Q Y E E Q H Q Q L Q Y H A A L M H Q Q S H M A H H H P T Q S Y P M D P R M V A  
S Y Y Q M Y G M P P P P G V Y A S I P P Q H A S G N I P P V G Y P P H P P G N A S I G Y Q F P T P Q P G V P Y S H V P  
T P S T T Q L H P S V Q Q F Q Q Q T S S T G Y Q Q Q P Y Q H P S I P N H Q I S Q S L P S Q Y H Q N H P S G Y P M T T P P

YPNAMHAQFSYSQPPPPPVQSNPPTQAKQKEQPSREHHEQQKPPQPRSGSYSTDRFRN  
GGKDSVEGNSTTGISGGANTSHSSLSTATNNTKSNPPRLPPTTGSRRSTTSVNSGFSTS  
TGSIPPPPPPLTHGINSSGGSSSYHSRADSYGSLSSVGSHGIGATGHNKVENNDALQYPS  
KPSKLSANADDKNSNLTA PMTPTQTHPTIDTGLTVTTPETPRDAIHARKNSFLDMLRMN  
WSPQSRDPSRKPQPNINEFHRKNQAF LNRPNLSLPPFMKAPT PVQHRRIGSLDRPPASRGT  
HRRLQSI SNDEWDDSDGADEGDHAKNREGNKKDFVAKRSLEKKKSTQKNQSPTKLN VART  
PDSDEMSDSGTLTDEDRITTTDEDGYDDYKKNVNETSALLPSSRKSGNDHERKNSKFERRNR  
RGRQHYDATSNTRKNDHKKVHTGDSNQISSGTSISDSSSNI SRFSDMSTLRWDNRATSAS  
RKSRRKKNRHKNKQSSTSDGSSASSQDSSDSAFDHRKWT KKRAIMLEKERARLIEQWKA  
EAREEAE LLRKEEEANMWHRRMWRTTSEKLRNFGVTTFRCLTLVENFIGNLPLTIGAVAL  
AIVTLGVVWFKFAEEYLDTC EPVHFHSSQCIFPEFP GCFYCDTSALGYKIALGFHYLCTI  
MSGMLAMLV VAKVLLATR VVVDEMSSPTTSSPAGLLCMTSVCVFAGRGMVGMIVSAAAC  
FHLVLT IWIWFIYMALAYNIMPEPSWFPNTVIGLSAVKTIW

>comp15377\_c0\_seq2; 261 417 1271 LEN=1376; translated  
MAQPSFEEEEQPDVTSFQRVHRMVYLP CMHVMCALSL LGMAASIHSLYDRWADFKRKEFSP  
AHA AFCFPTLSHANAIQAYRGA IMSFSQVPPRSWRMFVLD TYWFI VLI GG TIATIWI CGK  
FLYKLP EWTS PDLSNEEEPPAPYDTLLSQQHMV TAGDTLTQNFVSPAILQANETGALILS  
RSSRDGTLRYVRTRRRIRALGF EPTMNWSEIQ EEEAKLLEWVGKHPRRRRHRTL SVPGIDF  
NYGHSQPTFGTGN SGVYSSYSPITSSGPGRKR SMSQGEKTAFFK

>comp15377\_c0\_seq3; 1250 178 4833 LEN=4938; translated  
MMNPETTETKIADSTNQTTESNITAAEGGMNSAQYGGGSNHSLSPPLDLPLNQSSSYLSL  
SSGSSAMPSPSNNTTTNKKSVIDDVGAVGESNKEVQEGRTTIESSAKIPASVPRKDSDDI  
SLSKIKPVHNFQGHQYSPYDSGSDGSLVFS PGSVTDDHKTASILSDNKMSSTSSGAGA  
VASTTLGNKGKHKRQDSQSQSTDRNRFPSIDSVASNGSIRYVRPSQNAPT NSEPKQSASQ  
SQPINPQLLPYNERRKLLQQRQYEEQHQQQLQYHAALMHQQSHMAHHHTQSYPM DPMVA  
SYYQMYGMP PPPGVYASIPPQHASGNI PPVGYPPHPPGNASIGYQFPTPQPGV PYYSHVP  
TPSTTQLHPSVQQFQQQTSSTGYQQQPYQHPSIPNHQISQSLPSQYHQNHPSGYPM TTPP  
YPNAMHAQFSYSQPPPPPVQSNPPTQAKQKEQPSREHHEQQKPPQPRSGSYSTDRFRN  
GGKDSVEGNSTTGISGGANTSHSSLSTATNNTKSNPPRLPPTTGSRRSTTSVNSGFSTS  
TGSIPPPPPPLTHGINSSGGSSSYHSRADSYGSLSSVGSHGIGATGHNKVENNDALQYPS  
KPSKLSANADDKNSNLTA PMTPTQTHPTIDTGLTVTTPETPRDAIHARKNSFLDMLRMN  
WSPQSRDPSRKPQPNINEFHRKNQAF LNRPNLSLPPFMKAPT PVQHRRIGSLDRPPASRGT  
HRRLQSI SNDEWDDSDGADEGDHAKNREGNKKDFVAKRSLEKKKSTQKNQSPTKLN VART  
PDSDEMSDSGTLTDEDRITTTDEDGYDDYKKNVNETSALLPSSRKSGNDHERKNSKFERRNR  
RGRQHYDATSNTRKNDHKKVHTGDSNQISSGTSISDSSSNI SRFSDMSTLRWDNRATSAS  
RKSRRKKNRHKNKQSSTSDGSSASSQDSSDSAFDHRKWT KKRAIMLEKERARLIEQWKA  
EAREEAE LLRKEEEANMWHRRMWRTTSEKLRNFGVTTFRCLTLVENFIGNLPLTIGAVAL  
AIVTLGVVWFKFAEEYLDTC EPVHFHSSQCIFPEFP GCFYCDTSALGYKIALGFHYLCTI  
MSGMLAMLV VAKVLLATR VVVDEMSSPTTSSPAGLLCMTSVCVFAGRGMVGMIVSAAAC  
FHLVLT IWIWFIYMALAYNIMPEPSWFPNTVIGLSAVKTIWLYYPMEFTGLQLRRRTMKRSS  
ILPISQYFSR SKLRPGHLLMAISLSLNF FFFPISLIRVVVNKKISATVAWMQMSAPAVS  
LYALT IMAQPSFEEEEQPDVTSFQRVHRMVYLP CMHVMCALSL LGMAASIHSLYDRWADFK  
RKEFSPAHA AFCFPTLSHANAIQAYRGA IMSFSQVPPRSWRMFVLD TYWFI VLI GG TIAT  
IWI CGKFLYKLP EWTS PDLSNEEEPPAPYDTLLSQQHMV TAGDTLTQNFVSPAILQANET  
GALILSRSSRDGTLRYVRTRRRIRALGF EPTMNWSEIQ EEEAKLLEWVGKHPRRRRHRTL  
VPGIDFNYGHSQPTFGTGN SGVYSSYSPITSSGPGRKR SMSQGEKTAFFK

>comp15377\_c0\_seq5; 1379 178 4737 LEN=4842; translated  
MMNPETTETKIADSTNQTTESNITAAEGGMNSAQYGGGSNHSLSPPLDLPLNQSSSYLSL  
SSGSSAMPSPSNNTTTNKKSVIDDVGAVGESNKEVQEGRTTIESSAKIPASVPRKDSDDI  
SLSKIKPVHNFQGHQYSPYDSGSDGSLVFS PGSVTDDHKTASILSDNKMSSTSSGAGA  
VASTTLGNKGKHKRQDSQSQSTDRNRFPSIDSVASNGSIRYVRPSQNAPT NSEPKQSASQ  
SQPINPQLLPYNERRKLLQQRQYEEQHQQQLQYHAALMHQQSHMAHHHTQSYPM DPMVA  
SYYQMYGMP PPPGVYASIPPQHASGNI PPVGYPPHPPGNASIGYQFPTPQPGV PYYSHVP  
TPSTTQLHPSVQQFQQQTSSTGYQQQPYQHPSIPNHQISQSLPSQYHQNHPSGYPM TTPP  
YPNAMHAQFSYSQPPPPPVQSNPPTQAKQKEQPSREHHEQQKPPQPRSGSYSTDRFRN  
GGKDSVEGNSTTGISGGANTSHSSLSTATNNTKSNPPRLPPTTGSRRSTTSVNSGFSTS  
TGSIPPPPPPLTHGINSSGGSSSYHSRADSYGSLSSVGSHGIGATGHNKVENNDALQYPS  
KPSKLSANADDKNSNLTA PMTPTQTHPTIDTGLTVTTPETPRDAIHARKNSFLDMLRMN  
WSPQSRDPSRKPQPNINEFHRKNQAF LNRPNLSLPPFMKAPT PVQHRRIGSLDRPPASRGT  
HRRLQSI SNDEWDDSDGADEGDHAKNREGNKKDFVAKRSLEKKKSTQKNQSPTKLN VART

PDSDEMSDSGTLTDEDRIITDDEDGYDDYKKNVNETSALLPSSRKSGNDHERKNSKSFERRNR  
RGRQHYDATSNTRKNDHKKVHTGDSNQISSGTSISDSSSNI SRFSDMSTLRWDNRATSAS  
RKSRRKKNRHKNKQSSSTSDGSSASSQDSSDSAFDHRKWTKKRAIMLEKERARLIEQWKA  
EAREEAEELLRKEEEANMWHRRMWRTTSEKLRNFGVTTFRCLTLVENFIGNLPLTIGAVAL  
AIVTLGVVWFKFAEEYLDTCPEVHFHSSQCFPEFPFCFYCDTSALGYKIALGFHYLCTI  
MSGMLAMLVAVKLLATRVVVDDEMSPTTSSPAGLLCMTSVCVFAGRGMVGMIVSAAAC  
FHLVLTIIWFIYMALAYNIMPEPSWFPNTVIGIGLSAVKTLWLYPMPGHLLMAISLSLNF  
FFPISLIRVVVNKKISATVAWMQMSAPAVSLYALTIMAQPSFEEEEQPDVTSFQRVHRMVYL  
PCMHVMCALSLGMAASIHSLYDRWADFKRKEFSPAHA AFCFPTLSHANAIQAYRGAIMS  
FSQVPPRSWRMFVLDTYWFIIVLIGGTIATIWIICGKFLYKLEPWTSPDLSNEEEPPAPYDT  
LLSQQHMTAGDTLTQNFVSPAILQANETGALILSRSSRDGTLRYVRTRRIRALGFEP  
TWNWSEIQEEEA KLLLEWVGKHPRRRRHRTLSVPGIDFNYGHSQPTFGTGNSSGVYSSYS  
PITS  
SGPGRKRSMSQGEKTAFFK

>comp15377\_c0\_seq6; 1227 178 4188 LEN=4188; translated  
MMNPETTETKIADSTNQTTESNITAAEGGMNSAQYGGGSNHSLSPPLDLPLNQSSSYLSL  
SSGSSAMPSPSNNTTNTKKSVIDDVGAVGESNKEVQEGRTTIESSAKIPASVPRKSDDI  
SLSKIKPVHNFFGQHQYSPYDSGSDGSLVFSVPGSVTDDHKTASILSDNKMSSTSSGAGA  
VASTTLGNKGKHKRQDSQSQSTDRNRFPSIDSVASNGSIRYVRPSQNAPTNSPEKQASQ  
SQPINPQLLPYNERRKLLQQRQYEEQHQLQYHAALMHQQSHMAHHHTQSYPMDFRMVA  
SYYQMYGMPPPPVGVIASIPPQHASGNIPVGYPPHPPGNASIGYQFPTPQPGVPIYSHVP  
TPSTTQLHPSVQQFQQQTSSSTGYQQQPYQHPSIPNHQISQSLPSQYHQNHPSGYPMTPP  
YPNAMHAQFYSYQPPPPVQSNPTEQAKQKEQPSREHHEQQKPPQPRSGSYSTDRFRN  
GGKDSVEGNSTTGISGGANTSHSSLSTATNNTKSNPPRLPPTTGSRRSTTSVNSGFSTS  
TGSIPPPPPPLTHGINSSGGSSSYHSRADSYSGLSSVGSVSHGIGATGHNKVENNDALQYPS  
KPSKLSANADDKNSNLTA PMTPTQTHPTIDTGLTVTTPETPRDAIHARKNSFLDMLRMN  
WSPQRSRDSRSPKQPNINEFHRKNQAF LNRPNSLPPFMKAPTVPQHRRIGSLDRPPASRGT  
HRRLQSI SNDEWDDSDGADEGDHAKNREGNKKDFVAKRSLEKKKSTQKNQSPTKLN  
VART  
PDSDEMSDSGTLTDEDRIITDDEDGYDDYKKNVNETSALLPSSRKSGNDHERKNSKSFERRNR  
RGRQHYDATSNTRKNDHKKVHTGDSNQISSGTSISDSSSNI SRFSDMSTLRWDNRATSAS  
RKSRRKKNRHKNKQSSSTSDGSSASSQDSSDSAFDHRKWTKKRAIMLEKERARLIEQWKA  
EAREEAEELLRKEEEANMWHRRMWRTTSEKLRNFGVTTFRCLTLVENFIGNLPLTIGAVAL  
AIVTLGVVWFKFAEEYLDTCPEVHFHSSQCFPEFPFCFYCDTSALGYKIALGFHYLCTI  
MSGMLAMLVAVKLLATRVVVDDEMSPTTSSPAGLLCMTSVCVFAGRGMVGMIVSAAAC  
FHLVLTIIWFIYMALAYNIMPEPSWFPNTVIGIGLSAVKTLWLYPMPGHLLMAISLSLNF  
FFPISLIRVVVNKKISATVAWMQMSAPAVSLYALTIMAQPSFEEEEQPDVTSFQRVHRMVYL  
PCMHVMCALSLGMAASIHSLYDRWADFKRKEFSPAHA AFCFPTLSHANAIQVRFNDV  
LKLFLFCSSRYLRELF

>comp15377\_c0\_seq7; 1008 178 2829 LEN=2843; translated  
MMNPETTETKIADSTNQTTESNITAAEGGMNSAQYGGGSNHSLSPPLDLPLNQSSSYLSL  
SSGSSAMPSPSNNTTNTKKSVIDDVGAVGESNKEVQEGRTTIESSAKIPASVPRKSDDI  
SLSKIKPVHNFFGQHQYSPYDSGSDGSLVFSVPGSVTDDHKTASILSDNKMSSTSSGAGA  
VASTTLGNKGKHKRQDSQSQSTDRNRFPSIDSVASNGSIRYVRPSQNAPTNSPEKQASQ  
SQPINPQLLPYNERRKLLQQRQYEEQHQLQYHAALMHQQSHMAHHHTQSYPMDFRMVA  
SYYQMYGMPPPPVGVIASIPPQHASGNIPVGYPPHPPGNASIGYQFPTPQPGVPIYSHVP  
TPSTTQLHPSVQQFQQQTSSSTGYQQQPYQHPSIPNHQISQSLPSQYHQNHPSGYPMTPP  
YPNAMHAQFYSYQPPPPVQSNPTEQAKQKEQPSREHHEQQKPPQPRSGSYSTDRFRN  
GGKDSVEGNSTTGISGGANTSHSSLSTATNNTKSNPPRLPPTTGSRRSTTSVNSGFSTS  
TGSIPPPPPPLTHGINSSGGSSSYHSRADSYSGLSSVGSVSHGIGATGHNKVENNDALQYPS  
KPSKLSANADDKNSNLTA PMTPTQTHPTIDTGLTVTTPETPRDAIHARKNSFLDMLRMN  
WSPQRSRDSRSPKQPNINEFHRKNQAF LNRPNSLPPFMKAPTVPQHRRIGSLDRPPASRGT  
HRRLQSI SNDEWDDSDGADEGDHAKNREGNKKDFVAKRSLEKKKSTQKNQSPTKLN  
VART  
PDSDEMSDSGTLTDEDRIITDDEDGYDDYKKNVNETSALLPSSRKSGNDHERKNSKSFERRNR  
RGRQHYDATSNTRKNDHKKVHTGDSKSDSNHPCEPFCDFHFSVY

>comp15378\_c0\_seq1; 645 82 1083 LEN=3003; translated  
MGRGKKRAVPKIEENLDRFAGSSDEEEEPMA SPAPAAATSENVHDADEENDTDEDDDD  
LGLSLPRDEYPAERKTDKKTIVDDGDVDDSSIEGEDMDPATKMANAMSRILGTQQTS  
SSKKSAPASSVVLAKTVTPLQLQKQKEKEQQKAIKEKRRANRERNLTALHPLSIATNT  
IQPDGQLSVAKELEQERFHRRVATRGGVVALFNAITQHQTANSNDNTNVSSKNKEPSKLT  
KHGFLDKIKAAAKSKGSDEQQGSGTLKRENDASDSHRNNRSSWGALKDDYMLSKKNWDEE  
SSDDEHSGESES DVKADAKDMKSRKKRRI SGKQ

>comp15378\_c0\_seq2; 405 82 818 LEN=818; translated  
MGRGKKRAVPKIEENLDRFAGSSDEEEPMASAPAAAATSENVHDADEENDTDEDEDDDS  
LGLSLPRDEYPAERKTDKKTIVDDGDVDDSSSIEGEDMDPATKMANAMSRILGTQQTS  
SSKKSAPASSVVLAKTVTPLQKLQQKEKEQQKAIKEKRRANRERNLTAHLPLSIATNT  
IQPDGQLSVAKELEQERFHRRVATRQVVALFNAITQHOKTANSDVRIWSFRSHYTRTQCD  
DQNNRX

>comp15378\_c1\_seq1; 543 1 2116 LEN=2172; translated  
KSLFLSSTSTGTSIHKMTRSREEENYEFVEQIRMQYSSKASFFPGKNWWWAQVHDGDEV  
ANSMTSIRRQEELLEFDLHELQTLACDAYPQNDLYGTyneETSQFEYLSYGEFGTKVEE  
CRLVLKDLGVNQHDKVGIIISNNRYEWAMIAAATYSLNATLVPMYEAQLEKDWQYIINDSS  
ASVIFCSTNHVFHRLQKEVLHTTPHVHSIIICLDAVDGEEYGYKEATGRIIDQMLSPRHNS  
IVSAPDEEDLANLIYTSGTTGKPKGVELTHRNIIVSNIKGRSISENPFDLLDESSKTLAL  
LPWAHSYGQTVELWMGMSFGSSCAICRGVPFLEDLQLVKPTVLFVAVPTLYKKIYDGVQ  
KMKSGHYIQDKLLENAIEIGSTNAQFQRGERGVLSYSEQVKFEVLDRLVLSKIRDRFGGH  
LKYGCVAGAACPDPVLKFMDSIGIPVLEGYGLTETSPITLNSLSNRSIGSVGRPIEDVQ  
VYIIDKDGKTLPPGEEGEICCVGPNVMRGYNNKEATDEVICVAPDGKSRMFRTGDLGSM  
NEEGWINVTGRIKEQYKLENGKYVVPAPIENSIGISRFSQVVLVGANRPYNVALIVPDW  
AVIRQVLNLFYHDLSDVEVANNEEVKDLIDNEIRISCSGLKKFEIPQKWAFFVAPFTAANM  
LTPKMSIRKHNVEAYGDLISHLYGDDPVNSNDADCAFTYHEAA

>comp15378\_c1\_seq2; 504 1 2222 LEN=2278; translated  
KSLFLSSTSTGTSIHKMTRSREEENYEFVEQIRMQYSSKASFFPGKNWWWAQVHDGDEV  
ANSMTSIRRQEELLEFDLHELQTLACDAYPQNDLYGTyneETSQFEYLSYGEFGTKVEE  
CRLVLKDLGVNQHDKVGIIISNNRYEWAMIAAATYSLNATLVPMYEAQLEKDWQYIINDSS  
ASVIFCSTNHVFHRLQKEVLHTTPHVHSIIICLDAVDGEEYGYKEATGRIIDQMLSPRHNS  
IVSAPDEEDLANLIYTSGTTGKPKGVELTHRNIIVSNIKGRSISENPFDLLDESSKTLAL  
LPWLVSLSLHNCRSFGKSLNFSFSLHSWANERLRDRRAHSYGQTVELWMGMSFGSSCAI  
CRGVPFLEDLQLVKPTVLFVAVPTLYKKIYDGVQNKMKSGHYIQDKLLENAIEIGSTNAQ  
FQRGERGVLSYSEQVKFEVLDRLVLSKIRDRFGGHLKYGCVAGAACPDPVLKFMDSIGIP  
VLEGYGLTETSPITLNSLSNRSIGSVGRPIEDVQVYIIDKDGKTLPPGEEGEICCVGPN  
VMRGYNNKEATDEVICVAPDGKSRMFRTGDLGSMNEEGWINVTGRIKEQYKLENGKYV  
PAPIENSIGISRFSQVVLVGANRPYNVALIVPDWAVIRQVLNLFYHDLSDVEVANNEEVK  
DLIDNEIRISCSGLKKFEIPQKWAFFVAPFTAANMLTPKMSIRKHNVEAYGDLISHLYG  
DDPVNSNDADCAFTYHEAA

>comp15379\_c0\_seq1; 691 93 2432 LEN=2499; translated  
MSESPHRKRGLFATNRQYYRKSksPLKKRGLSSKSTTNGISPFSSVRRRTAQYEENISKN  
NFSKDSSAKSDTVSFPESTDDCKENFIIGSTNVEIKSYSPLTVDTNAPIHPLQFPMEENA  
GNDGYIPRTTSPGHNSLPISSTIGRLSHSPSQPPPNHMDIRFDHGSPSILGTPTSKY  
TSLSDTKVKKKHNDGVRKMKSPFKIGGVIISPNIKSPFKVGSLSLSPNTYSKTRNRKDFNG  
DGSSGSTYLLGTLGERLDIHEFNHENGPEITILFEESNGDDELGELGDKSVRTSKKDEN  
VIKKRTGIENGKKRDGFVQIMSRSRPPSELHGLCTSMTTDDDLIKAKSLFLGIPLHQATR  
RNYKGETILHGFNSNKALATIIGNPNNEHYETKDFLTLFRQPSVDKGSTDQLNELVETFL  
VDELLPSFFGAPIAQDDSGQIPFEAGLIDWVATCHKEMYGISAEIGTGYFSTYSHRVSDV  
VTQAWESTSTTILSAIPFGNRSATKMLKKQCQGDShLDLERGDSMSSSGSSTTSGSIGKS  
KFSPhARFCLRMLSLILDEFEKFTegFRSMGVNHQMEKYGRAIKGIQOLENVTGPLDLCG  
RVVEKIASIPNLLEVIFSIINNDIDLDFVLSTKIIKRVLLDKHSVGPWLTQMLQSPQRQLS  
KRAILYLQTVSSLCSGSQKGNdkNGKEESQPEVAYYDDLIDEVSRLDDFIPSLALGDNV  
IEEISTSLIVKVMRMIARPFVATVVFCDIAIFLFLMIAGFRAAVNGMIMGDDLDTVLAW

>comp15379\_c0\_seq2; 691 93 2432 LEN=4423; translated  
MSESPHRKRGLFATNRQYYRKSksPLKKRGLSSKSTTNGISPFSSVRRRTAQYEENISKN  
NFSKDSSAKSDTVSFPESTDDCKENFIIGSTNVEIKSYSPLTVDTNAPIHPLQFPMEENA  
GNDGYIPRTTSPGHNSLPISSTIGRLSHSPSQPPPNHMDIRFDHGSPSILGTPTSKY  
TSLSDTKVKKKHNDGVRKMKSPFKIGGVIISPNIKSPFKVGSLSLSPNTYSKTRNRKDFNG  
DGSSGSTYLLGTLGERLDIHEFNHENGPEITILFEESNGDDELGELGDKSVRTSKKDEN  
VIKKRTGIENGKKRDGFVQIMSRSRPPSELHGLCTSMTTDDDLIKAKSLFLGIPLHQATR  
RNYKGETILHGFNSNKALATIIGNPNNEHYETKDFLTLFRQPSVDKGSTDQLNELVETFL  
VDELLPSFFGAPIAQDDSGQIPFEAGLIDWVATCHKEMYGISAEIGTGYFSTYSHRVSDV  
VTQAWESTSTTILSAIPFGNRSATKMLKKQCQGDShLDLERGDSMSSSGSSTTSGSIGKS  
KFSPhARFCLRMLSLILDEFEKFTegFRSMGVNHQMEKYGRAIKGIQOLENVTGPLDLCG  
RVVEKIASIPNLLEVIFSIINNDIDLDFVLSTKIIKRVLLDKHSVGPWLTQMLQSPQRQLS  
KRAILYLQTVSSLCSGSQKGNdkNGKEESQPEVAYYDDLIDEVSRLDDFIPSLALGDNV

IEEISTSLIVKKVMDRMIARPFVATVVFCDIAIFLFLMIAGFRAAVNGMIMGDDLDTVLAW  
>comp15379\_c0\_seq3; 999 93 3875 LEN=4320; translated  
MSESPHRKRGLFATNRQYYRKSXSPLKKRGLSSKSTTNGISPFSSVRRRTAQYEENISK  
NFSKDSSAKSDTVSFPPESTDDCKENNF IGSTNVEIKSYSPLTVDTNAPIHPLQFPMEENA  
GNDGYIPRTTSPGHNSLP ISSPTIGRLSHSPSQQPQPPNHMDIRFDHGSPSILGTPTSKY  
TSLSDTKVKKKHNDGVRKMKSPFKIGGVI SPNIKSPFKVGSLS SPNTYSKTRNRKDFNG  
DGSSGSTYLLGTLGERLDIHEFNHENGPEITILFEESNGDDELGELGDKSVRTSKKDN  
VIKKRTGIENGKKRDGFVQIMSRSRPPSELHGLCTSMTTTDDLIIKAKSLLFGIPLHQATR  
RNYKGETILHGFSNNKALATIIGNPNNEHYETKDFLTLFRQPSVDKGSTDQLNELVETFL  
VDELLPSFFGAPIAQDSDSQIPFEAGLIDWVATCHKEMYGISAEIGTGYFSTYSHRVSDV  
VTQAWESTSTTILSAIPFGNRSATKMLKKQCQGD SHLDLERGDSMSSSGSSTTSGSIGKS  
KFSPHARFCLRMLSLILDEFEKFTGFRSMGVNHQMEKYGRAIKGIQQLENTGPLDLCG  
RVVEKIASIPNLLEVIF SINNDIDLDFVLSTKIIKRVLLDKHSGVPWLTQMLQSPQRQLS  
KRAILYLQTVSSLCSGSQKGNKNGKEESQPEVAYYDDLIDEVSRLDDFIPSLALGDNV  
IEEISTSLIVKKVMDRMIARPFVATVVFCDIAIFLFLMIAGFRAAVNGMIMGDDLDTVLAW  
IYVSNTGIFYFIIISEIGKFVSLFLLSKHSRNYILSFWNLVDFLAILLAAISSITMRWQFT  
ISDETGIENDALRGLLAVTTGLLYLRVLNFKAINMQLATFVLAIVQITKDIWFVCIIL  
LTLIISFSQMFFTILAPPSCATKDNSGLQCQQTEYLLGVYSILLGDFGIFSREDFATGFS  
VFLVVLVYTFVLTVLLNVLIAIASDSYEKCLIKSQKLFGRARVMLIAELASFQSLRRRD  
QDTATLESNAGEGIVYSKWWTSVGLTHNWSRGSVLFVWLSMLVIVCWTFAELVGIVYQGVK  
VGLSIFSSVLINITYIVIMFFLDRNPSAKSLDGNDGWAIGLQKTVHWVLGVSRRSQK  
VSSKHSRGQDEWHGRVEFLQREMDR NAKKNAELMKSQSKSLQINIMMSETRVRTEINQID  
DKFKLLEASVQDEVNGTRELNANLMSAVRELRLISLAEGSSNGSDSPPSIPIEVNLGSE  
>comp15379\_c0\_seq4; 691 93 2432 LEN=4415; translated  
MSESPHRKRGLFATNRQYYRKSXSPLKKRGLSSKSTTNGISPFSSVRRRTAQYEENISK  
NFSKDSSAKSDTVSFPPESTDDCKENNF IGSTNVEIKSYSPLTVDTNAPIHPLQFPMEENA  
GNDGYIPRTTSPGHNSLP ISSPTIGRLSHSPSQQPQPPNHMDIRFDHGSPSILGTPTSKY  
TSLSDTKVKKKHNDGVRKMKSPFKIGGVI SPNIKSPFKVGSLS SPNTYSKTRNRKDFNG  
DGSSGSTYLLGTLGERLDIHEFNHENGPEITILFEESNGDDELGELGDKSVRTSKKDN  
VIKKRTGIENGKKRDGFVQIMSRSRPPSELHGLCTSMTTTDDLIIKAKSLLFGIPLHQATR  
RNYKGETILHGFSNNKALATIIGNPNNEHYETKDFLTLFRQPSVDKGSTDQLNELVETFL  
VDELLPSFFGAPIAQDSDSQIPFEAGLIDWVATCHKEMYGISAEIGTGYFSTYSHRVSDV  
VTQAWESTSTTILSAIPFGNRSATKMLKKQCQGD SHLDLERGDSMSSSGSSTTSGSIGKS  
KFSPHARFCLRMLSLILDEFEKFTGFRSMGVNHQMEKYGRAIKGIQQLENTGPLDLCG  
RVVEKIASIPNLLEVIF SINNDIDLDFVLSTKIIKRVLLDKHSGVPWLTQMLQSPQRQLS  
KRAILYLQTVSSLCSGSQKGNKNGKEESQPEVAYYDDLIDEVSRLDDFIPSLALGDNV  
IEEISTSLIVKKVMDRMIARPFVATVVFCDIAIFLFLMIAGFRAAVNGMIMGDDLDTVLAW  
>comp15379\_c0\_seq5; 999 93 3875 LEN=4312; translated  
MSESPHRKRGLFATNRQYYRKSXSPLKKRGLSSKSTTNGISPFSSVRRRTAQYEENISK  
NFSKDSSAKSDTVSFPPESTDDCKENNF IGSTNVEIKSYSPLTVDTNAPIHPLQFPMEENA  
GNDGYIPRTTSPGHNSLP ISSPTIGRLSHSPSQQPQPPNHMDIRFDHGSPSILGTPTSKY  
TSLSDTKVKKKHNDGVRKMKSPFKIGGVI SPNIKSPFKVGSLS SPNTYSKTRNRKDFNG  
DGSSGSTYLLGTLGERLDIHEFNHENGPEITILFEESNGDDELGELGDKSVRTSKKDN  
VIKKRTGIENGKKRDGFVQIMSRSRPPSELHGLCTSMTTTDDLIIKAKSLLFGIPLHQATR  
RNYKGETILHGFSNNKALATIIGNPNNEHYETKDFLTLFRQPSVDKGSTDQLNELVETFL  
VDELLPSFFGAPIAQDSDSQIPFEAGLIDWVATCHKEMYGISAEIGTGYFSTYSHRVSDV  
VTQAWESTSTTILSAIPFGNRSATKMLKKQCQGD SHLDLERGDSMSSSGSSTTSGSIGKS  
KFSPHARFCLRMLSLILDEFEKFTGFRSMGVNHQMEKYGRAIKGIQQLENTGPLDLCG  
RVVEKIASIPNLLEVIF SINNDIDLDFVLSTKIIKRVLLDKHSGVPWLTQMLQSPQRQLS  
KRAILYLQTVSSLCSGSQKGNKNGKEESQPEVAYYDDLIDEVSRLDDFIPSLALGDNV  
IEEISTSLIVKKVMDRMIARPFVATVVFCDIAIFLFLMIAGFRAAVNGMIMGDDLDTVLAW  
IYVSNTGIFYFIIISEIGKFVSLFLLSKHSRNYILSFWNLVDFLAILLAAISSITMRWQFT  
ISDETGIENDALRGLLAVTTGLLYLRVLNFKAINMQLATFVLAIVQITKDIWFVCIIL  
LTLIISFSQMFFTILAPPSCATKDNSGLQCQQTEYLLGVYSILLGDFGIFSREDFATGFS  
VFLVVLVYTFVLTVLLNVLIAIASDSYEKCLIKSQKLFGRARVMLIAELASFQSLRRRD  
QDTATLESNAGEGIVYSKWWTSVGLTHNWSRGSVLFVWLSMLVIVCWTFAELVGIVYQGVK  
VGLSIFSSVLINITYIVIMFFLDRNPSAKSLDGNDGWAIGLQKTVHWVLGVSRRSQK  
VSSKHSRGQDEWHGRVEFLQREMDR NAKKNAELMKSQSKSLQINIMMSETRVRTEINQID  
DKFKLLEASVQDEVNGTRELNANLMSAVRELRLISLAEGSSNGSDSPPSIPIEVNLGSE  
>comp15380\_c0\_seq1; 623 307 1872 LEN=2071; translated

MSDARKSPATERNKDVEASGSLLAIEEPFTNKQHIAASNHSTSIPDAVAVGNKLGSTPPE  
SRSSSSVPEALVTLSSNSNVLVRESEPVAVAMAVKYGDNSMSSDDNERKYKYNVKALTCI  
LVVIMVAIAIFLVVFFTFEKKQTKDSLTDGSENITTTSEENNLSAFEYSERRSSLIDILE  
PIVSDPQVFDPESSQASPDRIDALQWLVTTNLARLSIPVLEQRTSNTNSDLSDLEDFPEKT  
TEAAVKLKRQHFVLALFFATNGSNWENQYLFLSDIDACFWNTFRSTATEMNYFFIPDGI  
DARGVICDTEGRVSRITMYWNNLSGTLPELSYFKESLVELNIGGGSISGSFPLFFDDFE  
KLDALSLNDHCLTGTVSEALSRIPTLSILSIYGNIGLKGSFNGFCNGTSYKNERIAFLTA  
DYCGKFSGLNSSGVECDCCMCCDPNNFECFHPGWGTSSPIYQVGNVYTIKTFEKNCLTS  
DQKEWIDEPCFTNTMLDGYEDFECLNCTADGARKSHPPF

>comp15381\_c0\_seq1; 298 1179 2646 LEN=2731; minus strand; translated  
MTHSETYEILEYTPGKEGWAHPEEKRLLDGTEIIXFAAIEKEDFGLFPLFLISTGREHIT  
YQIPYGRCTCKKQPAKNAMRFCSEKQMRNRAFCFIILKPLCVSPTHHDXNSNEDIGAGR  
VSFFDQQRATRIALAGILIRLECAKHVVRDQILIVVLDVWIFRAATKAIGNKGCICFLEYF  
GIGASTKLCIRGRSDPENQVVSLLAVVVAPVAVALPPKAVAAAAAVAGRPWHARVRVDG  
NVLLGRGPLQPKVEDVRETHPRVEERVDVQRTQHPLHLGGVAAAAATGGGTDRARRVLS  
DLGKTDLVLAVRGGHDDVRGHEGPRAPVRPVVDLLEGDKVGVAVRRRVPAAHDEPAGGGF  
RARSAEKGIAALVLLQRAGGDRPSPGLLSAEALLFVAASIVAPATDAVEECEXGFDPGCG  
KKNRKADRPAPHRPDETVAAAAATAVAAMGEVRVVPVATIAPSRHTLSTSFGLRPFGLAA  
SRKLENQEH

>comp15381\_c0\_seq2; 296 950 2287 LEN=2372; minus strand; translated  
MTHSETYEILEYTPGKEGWAHPEEKRLLDGTEIIXFAAIEKEDFGLFPLFLSQAENTSL  
TKSPRHNSNEDIGAGRVSFFDQQRATRIALAGILIRLECAKHVVRDQILIVVLDVWIFRAA  
TKAIGNKGCICFLEYFGIGASTKLCIRGRSDPENQVVSLLAVVVAPVAVALPPKAVAAA  
AAVAGRPWHARVRVDGNVLLGRGPLQPKVEDVRETHPRVEERVDVQRTQHPLHLGGVAA  
AAATGGGTDRARRVLSDLGKTDLVLAVRGGHDDVRGHEGPRAPVRPVVDLLEGDKVGVA  
RRRVPAAHDEPAGGGFRARSAEKGIAALVLLQRAGGDRPSPGLLSAEALLFVAASIVAP  
ATDAVEECEXGFDPGCGKKNRKADRPAPHRPDETVAAAAATAVAAMGEVRVVPVATIAP  
SRHTLSTSFGLRPFGLAASRKLENQEH

>comp15381\_c0\_seq3; 298 848 2315 LEN=2400; minus strand; translated  
MTHSETYEILEYTPGKEGWAHPEEKRLLDGTEIIXFAAIEKEDFGLFPLFLISTGREHIT  
YQIPYGRCTCKKQPAKNAMRFCSEKQMRNRAFCFIILKPLCVSPTHHDXNSNEDIGAGR  
VSFFDQQRATRIALAGILIRLECAKHVVRDQILIVVLDVWIFRAATKAIGNKGCICFLEYF  
GIGASTKLCIRGRSDPENQVVSLLAVVVAPVAVALPPKAVAAAAAVAGRPWHARVRVDG  
NVLLGRGPLQPKVEDVRETHPRVEERVDVQRTQHPLHLGGVAAAAATGGGTDRARRVLS  
DLGKTDLVLAVRGGHDDVRGHEGPRAPVRPVVDLLEGDKVGVAVRRRVPAAHDEPAGGGF  
RARSAEKGIAALVLLQRAGGDRPSPGLLSAEALLFVAASIVAPATDAVEECEXGFDPGCG  
KKNRKADRPAPHRPDETVAAAAATAVAAMGEVRVVPVATIAPSRHTLSTSFGLRPFGLAA  
SRKLENQEH

>comp15381\_c0\_seq4; 446 1 3782 LEN=3806; translated  
WSCRAAWGINALVSQHRILFYSHCLTVLVNVLDSSSFDAAPKGRNPNEVDKVCRLGAI  
ATGTTRTSPIAATAAVAAAAATVSESGRCAGRSALRFFFPHGSKPHTLTPXASVAGATID  
AATNNNASRGEKTGGGGSITSGPLEENERSDSSLRGAGTETARRLVVGGRDAPSDRYPY  
FVSLQEVYNGTHRCAGTLVAPDVVWTAHCKDEIGFAQVQKYSAGPVRSSPPGGGGGDTT  
EMQRVLGPLHVHPLFNAGVSFSDVLLFRLERTSAKQYVAINTDPGVPRATGNSGSGGHG  
FGGQDRNGSNNHGEENLTLILGIGTTTTYTKFGASTNPKVLQETNTSFVFNRFRRSKD  
PDVEDNYQNLISDDMLCAFETNQDACQDGGGGLIKKGNSTPDLVGVIVSWGFGCAHPS  
FPGVYSRISYVSEWVIATICQLSSAPPIEYDCANVMAPSHENSIPVTVI IQYDDHPGEIS  
WSISQAESGLVLVNVTENLDTPARYRSQETVFLPPGSDLVFTIQDRYGDGLCCNAPGNR  
VVLGRNAVGVIAVGGGDFGREKFHSLRLPTDYVDDAEKPLIEDDQIALTVVIQLDGFPE  
ETGWRIDRLGVQVEDVIRIPTGIYTTQEMTVFRTIILQKNELYFFNLYDIAGDGIDHGYV  
KLFGLTDTSDLNRIIFESDGNFLSGVDHTFFAAIPPTILLPPSDSYXVDFPRDDDGLVS  
NVMLGLFFGYPKVSTLTYFFSLLDXPGEISLQLRMEDTEFSTNIDDERKDSIAFFRPPGY  
YKDRVNEVVTERIAIPQTPEGTTRHFSFIIGDRSADGLCCAWNGGQETGYTLYEGDPSMD  
NVIHVHSIFKSAGREIKHFSISNDKVDEISLNNKEGEQQSVKIKVSIKLDLHPGETGFLIS  
DSSGSRKLYVPPGTFKEQNAIVERSFAFHPLTYFTI IDTFGDGMNRDEIISIDLLEDR  
NRPSILTGTGDFNGAKSHDFLEGEARYPLQIHMTTGHKPHEFGFSIYRLDLVESVAII  
ASRSKGEYDQAYDNITESIMVTKGALYRIVFENSYSGIHGRVVINIGCSDLISCDMSMEYT  
FDSENAQGYRWWQVLYADNPSSLIGNNSEVMTLQIEPDRFPEQIEWVLVSSNHNYTLQR  
PFMIDGEEKREVAYGPLPESSVSRDTLIIPRPNKQGHALIIMNNGNDIAWLGECSLLQ  
LYDSQVYGGSPVYIDRFEEENRAVLFFSLIDSDAKGSPALIHGWTLSMWTSLILGLMLF

>comp15381\_c0\_seq5; 298 950 2417 LEN=2502; minus strand; translated  
MTHSETYEILEYTPGKEGWAHPEEKRLLDGTEIIXFAAIEKEDFGLFPLFLISTGREHIT  
YQIPYGRCTCTKKQPAKNAMRFCSENKQMRNRAFCFIILKPLCVSPTHHDXNSNEDIGAGR  
VSFFDQRATRIALAGILIRLECAKHVVRDQILIVVLDVWIFRAATKAIGNKGCICFLEYF  
GIGASTKLCIRGRSDPENGQVVSLLAVVVAPVAVALPPKAVAAAAAVAGRPWHARVRVDG  
NVLLGRGPLQPKKEEDVVRETHPRVEERVDVQRTQHPLHLGGVAAAAATGGGTDRARRVLS  
DLGKTDLVLAVRGGHDDVRGHEGPRAPVRPVVDLLEGGDKVGVAVRRRVPAAHDEPAGGGF  
RARSAEKGIAALVLLQRAGGDRPSPGLLSAEALLFVAASIVAPATDAVEECEXGFDPCG  
KKNRKADRPAHRPDSSETVAAAAATAVAAMGEVVRVVPVATIAPSRHTLSTSFGLRPFGAA  
SRKLENQEH

>comp15381\_c0\_seq6; 397 1 3866 LEN=3890; translated  
WSCRAAWGINALVSQHRILFYSHCLTVLVNVLDSSSFLDAAPKGRNPNEVDKVCRLGAI  
VATGTRTSPIAATAAVAAAAATVSESGRCAGRSALRFFFFPHGSKPHTLTPXASVAGATID  
AATNNSARGEKTGGGGSITSGPLEENERSDSLRLRGAGTETTARRLVVGGRDAPSDRYPY  
FVSLQEVYNGTHRCAGTLVAPDVVVTAHCKDEIGFAQVGVKYSAGPVRSSPGGGGGDTT  
EMQRVLGPLHVHPLFNAGVSFSDVLLFRLERTSAKQYVAINTDPGVPRATGNSGSGGHG  
FGGQGDRNGSNNHGEEGNLTLILGIGTTTTYTKFGASTNPKVLQETNTSFVFNRFRRSKD  
PDVEDNYQNLISDDMLCAFETNQDACQGDSSGGLIKKGNPSTDLVGVIVSWGFGCAHPS  
FPGVYSRISYVSEWVIATICQLSSAPPIEYDCANVMAPSHENSIPVTVIIQYDDHPGEIS  
WSISQAESGLVLVNVTENLDTPARYRSQETVFLPPGSDLVFTIQDRYGDGLCCNAPGNYR  
VVLGRNAVGVIAAYGGDFGREKFHSLRLPTDYVDDAEKPLIEDDQIALTVVIQLDGFPE  
ETGWRIDRLGVQVEDVIRIPTGIYTTQEMTVFRTIILQKNELYFFNLYDIAGDGIDHGYG  
GSMFNKRVVCHKWAAFAWFSNDXKFFSVKFLFLTDTSDLNRIIFESDGNFLSGVDHTFF  
AAIPPTILLPPSDSYXVDFPRDDDGLVSNVMLGLFFGYPKVSTLTYFFSLLDXPGEISLQ  
LRMEDTEFSTNIDDERKDSIAFFRPPGYKDRVNEVVTERRIAIPQTPEGTTTRHFSFIIGD  
RSADGLCCAWNGGQETGYTLYEGDPSMDNVIVHSIFKSAGREIKHFSISNDKVDIEISLNN  
KEGEQQSVKIKVSIKLDLHPGETGFLISDSSGSRKLYVPPGTFKEQNAIVERSFAFHPGL  
YTFTIIDTFGDGMNRDEIISYIDLLEDNRNRSILTGTGDFNGAKSHDFLIEGDEARYPLQ  
IHMTTGHKPHEFGFSIYRLDLVESVAIIASRSKGEYDQAYDNITESIMVTKGALYRIVFE  
NSYSGIHGRVVINIGCSDLISCDMSMEYTFDSENAQGYRWVQVLYADNPSSLIGNNSEVM  
TLQIEPDRFPEQIEWVLVSSNHNYTLQRPFMIDGEEKREVVAYGPLPESSVSRDTLIIPR  
PNNKQGHALIIMNNGNDIAWLGECSLLQLYDSQVYGGSPVYIDRFEEENRAVLFFSLIDS  
DAKGSPALIHGWTLSMWTSLILGLMLF

>comp15381\_c0\_seq7; 303 1 2102 LEN=2583; translated  
WSCRAAWGINALVSQHRILFYSHCLTVLVNVLDSSSFLDAAPKGRNPNEVDKVCRLGAI  
VATGTRTSPIAATAAVAAAAATVSESGRCAGRSALXVLLSAWIEAHSHSSTASVAGATID  
AATNNSARGEKTGGGGSITSGPLEENERSDSLRLRGAGTETTARRLVVGGRDAPSDRYPY  
FVSLQEVYNGTHRCAGTLVAPDVVVTAHCKDEIGFAQVGVKYSAGPVRSSPGGGGGDTT  
EMQRVLGPLHVHPLFNAGVSFSDVLLFRLERTSAKQYVAINTDPGVPRATGNSGSGGHG  
FGGQGDRNGSNNHGEEGNLTLILGIGTTTTYTKFGASTNPKVLQETNTSFVFNRFRRSKD  
PDVEDNYQNLISDDMLCAFETNQDACQGDSSGGLIKKGNPSTDLVGVIVSWGFGXVMCS  
LPVXDQKKGKSKILLNCKSIIISVPSNKRFFSSGCAHPSFPGVYSRISYVSEWVIATIC  
QLSSAPPIEYDCANVMAPSHENSIPVTVIIQYDDHPGEISWSISQAESGLVLVNVTENL  
TPARYRSQETVFLPPGSDLVFTIQDRYGDGLCCNAPGNYRVVLGRNAVGVIAAYGGDFG  
REKFHSLRLPTDYVDDAEKPLIEDDQIALTVVIQLDGFPEETGWRIDRLGVQVEDVIRIP  
TGIYTTQEMTVFRTIILQKNELYFFNLYDIAGDGIDHGYGG

>comp15381\_c0\_seq8; 496 1 3149 LEN=3149; translated  
WSCRAAWGINALVSQHRILFYSHCLTVLVNVLDSSSFLDAAPKGRNPNEVDKVCRLGAI  
VATGTRTSPIAATAAVAAAAATVSESGRCAGRSALXVLLSAWIEAHSHSSTASVAGATID  
AATNNSARGEKTGGGGSITSGPLEENERSDSLRLRGAGTETTARRLVVGGRDAPSDRYPY  
FVSLQEVYNGTHRCAGTLVAPDVVVTAHCKDEIGFAQVGVKYSAGPVRSSPGGGGGDTT  
EMQRVLGPLHVHPLFNAGVSFSDVLLFRLERTSAKQYVAINTDPGVPRATGNSGSGGHG  
FGGQGDRNGSNNHGEEGNLTLILGIGTTTTYTKFGASTNPKVLQETNTSFVFNRFRRSKD  
PDVEDNYQNLISDDMLCAFETNQDACQGDSSGGLIKKGNPSTDLVGVIXVVVSWRHTEG  
FEDDEAKCSVAHLLVFTAKPSSRFLPVAFSYMVRRGFGCAHPSFPGVYSRISYVSEWVI  
ATICQLSSAPPIEYDCANVMAPSHENSIPVTVIIQYDDHPGEISWSISQAESGLVLVNVT  
ENLDTPARYRSQETVFLPPGSDLVFTIQDRYGDGLCCNAPGNYRVVLGRNAVGVIAAYG  
GDFGREKFHSLRLPTDYVDDAEKPLIEDDQIALTVVIQLDGFPEETGWRIDRLGVQVEDV  
IRIPTGIYTTQEMTVFRTIILQKNELYFFNLYDIAGDGIDHGYVKKLFLGTTDTSDLNRII  
FESDGNFLSGVDHTFFAAIPPTILLPPSDSYMYLTLVMTMDLFPGEISLQLRMEDTEFST

NIDDERKDSIAFFRPPGYKDRVNEVVTERIAIPQTPEGTRRHFSFIIGDRSADGLCCEW  
NGGQETGYTLYEGDPSMDNVIVHSIFKSAGREIKHFSISNDKVDEISLNNKEGEQQSVKI  
KVS IKLDLHPGETGFLISDSSGSR LKYVPPGTFKEQNAIVERSFAFHPGLYTFTIIDTFG  
DGMNRDEIIYSIDLLEDNRNRP SILTGTGDFNGAKSHDFLIEGDEARYPLQIHMTTGHKPH  
EFGFSIYRLDLVESVAIIASRSKGEYDQAYD

>comp15381\_c0\_seq9; 461 1 3808 LEN=3832; translated  
WSCRAAWGINALVSQHRILFYSHCLTVLVNVLDSSSFLDAAPKGRNPNEVDKVCRLGAI  
V ATGTTRTSP IAATAAVAAAAATVSESGRCAGRSALRFFFFPHGSKPHTLTPXASVAGATID  
AATNNNASRGEKTGGGGSITSGPLEENERSD SLLRGAGTETTARRLVVGGRDAPSDRYPY  
FVSLQEVYNGTHRCAGTLVAPDVVTA AHCKDEIGFAQVGKYSAGPVRSSPGGGGGD TT  
EMQRVLGPLHVHPLFNAGVSFSHDVLLFRLERTSAKQYVAINTDPGVPRATGNSGSGGHG  
FGGQGDNRGNSNHGEEGNLTI LIGITTTTYTKFGASTNPKVLQETNTSFVPNRFRRSKD  
PDVEDNYQNLISDDMLCAFETNQDACQGDSSGGLIKKGNSTPSTDLVGVIVSWGFGCAHPS  
FPGVYSRISYVSEWVIATICQLSSAPPIEYDCANVMAPSHENSIPVTVIIQYDDHPGEIS  
WSISQAESGLV LVNV TENLDT PARYRSQETVFLP PPGSDLVFTIQDRYGDGLCCNAPXEFE  
TEKTLKLVNF DRENTKMISHLHRQLPTLIQGN YRVVLGRNAVGVIA YGGGDFGREKFHS  
LRLPTDYVDDAEKPLIEDDQIALTVVIQLDGFPEETGWRIDRLGVQVEDVIRIPTGIYTT  
QEMTVFRTIILQKNELYFFNLYDIAGD GIDHGYVKLFLGTTDTS DLNRIIFESDGNFLSG  
VDHTFFAAIPPTILLPPSDSYMYLTLVMTMDLFPGEISLQLRMEDTEFSTNIDDERKDSI  
AFFRPPGYKDRVNEVVTERIAIPQTPEGTRRHFSFIIGDRSADGLCCAWNGGQETGYTL  
YEGDPSMDNVIVHSIFKSAGREIKHFSISNDKVDEISLNNKEGEQQSVKIKVSIKLDLHP  
GETGFLISDSSGSR LKYVPPGTFKEQNAIVERSFAFHPGLYTFTIIDTFGDGMNRDEIIY  
SIDLLEDNRNRP SILTGTGDFNGAKSHDFLIEGDEARYPLQIHMTTGHKPHEFGFSIYRLD  
LVESVAIIASRSKGEYDQAYDNITESIMVTKGALYRIVFENSYSGIHGRVVINIGCSDLI  
SCDSMEYTFDSENAQGYRWWQVKLYADNP SLLIGNNSEVMTLQIEPDRFPEQIEWLVSS  
NHNYTLQRPFMIDGEEKREVVAYG PLP ESSVSRDTLII PRPNKQGHALIIMNNGNDIAW  
LGECSLLQLYDSQVYGGSPVYIDRFEEENRAVLFFSLIDSDAKGSPALIIHHGWTLSMWT  
SLILGLMLF

>comp15381\_c0\_seq10; 579 1612 3954 LEN=3978; translated  
MAPSHENSIPVTVIIQYDDHPGEISWSISQAESGLV LVNV TENLDT PARYRSQETVFLP  
P GSDLVFTIQDRYGDGLCCNAPGN YRVVLGRNAVGVIA YGGGDFGREKFHSLRLPTDYV  
D DAEKPLIEDDQIALTVVIQLDGFPEETGWRIDRLGVQVEDVIRIPTGIYTTQEMTVFRTI  
IILQKNELYFFNLYDIAGD GIDHGYVKLFLGTTDTS DLNRIIFESDGNFLSGVDHTFFAAI  
PPTILLPPSDSYMYLTLVMTMDLFPGEISLQLRMEDTEFSTNIDDERKDSIAFFRPPGY  
Y KDRVNEVVTERIAIPQTPEGTRRHFSFIIGDRSADGLCCAWNGGQETGYTLYEGDPSMDN  
VIVHSIFKSAGREIKHFSISNDKVDEISLNNKEGEQQSVKIKVSIKLDLHPGETGFLIS  
D SSGSR LKYVPPGTFKEQNAIVERSFAFHPGLYTFTIIDTFGDGMNRDEIIYSIDLLEDNR  
N RPSILTGTGDFNGAKSHDFLIEGDEARYPLQIHMTTGHKPHEFGFSIYRLDLVESVAIIA  
I SRSKGEYDQAYDNITESIMVTKGALYRIVFENSYSGIHGRVVINIGCSDLISCD SMEYTF  
F DSENAQGYRWWQVKLYADNP SLLIGNNSEVMTLQIEPDRFPEQIEWLVSSNHNYTLQRP  
F FMIDGEEKREVVAYG PLP ESSVSRDTLII PRPNKQGHALIIMNNGNDIAWLGECSLLQL  
Y YDSQVYGGSPVYIDRFEEENRAVLFFSLIDSDAKGSPALIIHHGWTLSMWTSLILGLMLF

>comp15381\_c0\_seq11; 259 950 2299 LEN=2384; minus strand; translated  
MTHSETYEILEYTPGKEGWHPNPLRTHMYEKATGKKRDEFCS ENKQMRNRAFCFIILKP  
L CVSPTHDXNSNEDIGAGRVSF FDQRATRIALAGILIRLECAKHVVRDQILIVVLDVWI  
F FRAATKAIGNKGCICFLEYFGIGASTKLCIRGRSDPEN GQVVSLLAVVVAPVAVALPPKA  
V VAAAAAVAGR PW HARVVDGNVLLGRGPLQPK EEDVVRETHPRVEERVDVQRTQHPLHLG  
G VAAAAAATGGGTD RARRVLS DLGKTDLVLA VRGGHDDVRGHEGPRAPVRPVVDLLEGDKV  
G VAVRRRVPAAHDEPAGGGFRARS AEKGIAALVLLQRAGDRPSP PGLLSAEALLFVAAS  
I VAPATDAVEECEXGDFPCGKKNR KAD RPAHRPDSETVAAAAATAAVAAMGEV RVVPVAT  
I APSRHTLSTSFGLRPF GAASRKLENQEH

>comp15381\_c0\_seq12; 481 1 3824 LEN=3848; translated  
WSCRAAWGINALVSQHRILFYSHCLTVLVNVLDSSSFLDAAPKGRNPNEVDKVCRLGAI  
V ATGTTRTSP IAATAAVAAAAATVSESGRCAGRSALRFFFFPHGSKPHTLTPXASVAGATID  
AATNNNASRGEKTGGGGSITSGPLEENERSD SLLRGAGTETTARRLVVGGRDAPSDRYPY  
FVSLQEVYNGTHRCAGTLVAPDVVTA AHCKDEIGFAQVGKYSAGPVRSSPGGGGGD TT  
EMQRVLGPLHVHPLFNAGVSFSHDVLLFRLERTSAKQYVAINTDPGVPRATGNSGSGGHG  
FGGQGDNRGNSNHGEEGNLTI LIGITTTTYTKFGASTNPKVLQETNTSFVPNRFRRSKD  
PDVEDNYQNLISDDMLCAFETNQDACQGDSSGGLIKKGNSTPSTDLVGVIVSWGFGXVMCS  
LPVXDQKKGKSKILLNCGCKSII SVPSNKR FSSGCAHPSFPGVYSRISYVSEWVIATIC



QLSSAPPIEYDCANVMAPSHENSIPVTVIIQYDDHPGEISWSISQAESGLVLVNVVTENLD  
TPARYRSQETVFLPPGSDLVFTIQDRYGDGLCCNAPGNYRVVLGRNAVGVKVIAYGGDFG  
REKFHSLRRLPTDYVDDAEKPLIEDDQIALTVVIQLDGFPEETGWRIDRLGVQVEDVIRIP  
TGIYTTQEMTVFRTIILQKNELYFFNLYDIAGDGIDHGYVKLFLGTTDSDLNRIIFESD  
GNFLSGVDHTFFAAIPPTILLPPSDSYMYLTLVMTMDLFPGEISLQLRMEDTEFSTNIDD  
ERKDSIAFFRPPGGYKDRVNEVVTERIAIPQTPEGTTRHFSFIIGDRSADGLCCAWNGGQ  
ETGYTLYEGDPSMDNVIVHSIFKSAGREIKHFSISNDKVDEISLNNKEGEQQSVKIKVSI  
KLDLHPGETGFLISDSSGSRKLYVPPGTFKEQNAIVERSFAFHPGLYTFTIIDTFDGMN  
RDEI IYSIDLLEDNRNRSILTGTGDFNGAKSHDFLIEGDEARYPLQIHMTTGHKPHEFGF  
SIYRLDLVESVAIIASRSKGEYDQAYDNITESIMVTKGALYRIVFENSYSGIHGRVVINI  
GCSDLISCDSEYTFDSENAQYRWWQVKLYADNPSSLIGNNSEVMTLQIEPDRFPEQIE  
WVLVSSNHNYTLQRPFMIDGEEKREVVAYGPLPESSVSRDTLII PRPNKQGHALIMN  
GNDIAWLGECSLLQLYDSQVYGGSPVYIDRFEEENRAVLFFSLIDSDAKGSPALIIHGW  
LSMWTSLIILGLMLF

>comp15381\_c0\_seq13; 376 1 3912 LEN=3936; translated  
WSCRAAWGINALVSQHRILFYSHCLTVLVNVLDSSSFLDAAPKGRNPNEVDKVCRLGAI  
VATGTRTSPIAATAAVAAAAATVSESGRCAGRSALRFFFPHGSKPHTLTPXASVAGATID  
AATNNNASRGEKTGGGGSITSGPLEENERSDSSLRGAGTETARRLVVGGRDAPSDRYPY  
FVSLQEVYNGTHRCAGTLVAPDVVTAHCKDEIGFAQVGKYSAGPVRSSPGGGGGDTT  
EMQRVLGPLHVHPLFNAGVSFSDVLLFRLERTSAKQYVAINTDPGVPRATGNSGSGGHG  
FGGQDRNGSNNHGEEGNLTLILGIGTTTTYTKFGASTNPKVLQETNTSFVFNRFRRSKD  
PDVEDNYQNLISDDMLCAFETNQDACQGDSSGGLIKKGNPSTDLVVGIXVVVSWRHTEG  
FEDDEAKCSVAHLLVFTAKPHRVFCRLFRFCASVGDLDAPIPPFLGCIRESSYVSEWVI  
ATICQLSSAPPIEYDCANVMAPSHENSIPVTVIIQYDDHPGEISWSISQAESGLVLVNV  
TENLDTPARYRSQETVFLPPGSDLVFTIQDRYGDGLCCNAPGNYRVVLGRNAVGVKVIAYG  
GDFGREKFHSLRRLPTDYVDDAEKPLIEDDQIALTVVIQLDGFPEETGWRIDRLGVQVED  
VIRIPTGIYTTQEMTVFRTIILQKNELYFFNLYDIAGDGIDHGYVKLFLGTTDSDLNRII  
FESDGNFLSGVDHTFFAAIPPTILLPPSDSYXVFDPRDDGLVSNVMLGLFFGYPKVSTL  
TYFFSLLDXPGEISLQLRMEDTEFSTNIDDERKDSIAFFRPPGGYKDRVNEVVTERIAIP  
QTPEGTTRHFSFIIGDRSADGLCCAWNGGQETGYTLYEGDPSMDNVIVHSIFKSAGREIK  
HFSISNDKVDEISLNNKEGEQQSVKIKVSIKLDLHPGETGFLISDSSGSRKLYVPPGTFK  
EQNAIVERSFAFHPGLYTFTIIDTFDGMNRDEI IYSIDLLEDNRNRSILTGTGDFNGAK  
SHDFLIEGDEARYPLQIHMTTGHKPHEFGFSIYRLDLVESVAIIASRSKGEYDQAYDNIT  
ESIMVTKGALYRIVFENSYSGIHGRVVINIGCSIDLISCDSEYTFDSENAQYRWWQVKL  
YADNPSSLIGNNSEVMTLQIEPDRFPEQIEWVLVSSNHNYTLQRPFMIDGEEKREVVAYG  
PLPESSVSRDTLII PRPNKQGHALIMNNGNDIAWLGECSLLQLYDSQVYGGSPVYIDR  
FEEENRAVLFFSLIDSDAKGSPALIIHGWTLISMWTSLIILGLMLF

>comp15381\_c0\_seq14; 303 1 2102 LEN=2659; translated  
WSCRAAWGINALVSQHRILFYSHCLTVLVNVLDSSSFLDAAPKGRNPNEVDKVCRLGAI  
VATGTRTSPIAATAAVAAAAATVSESGRCAGRSALXVLLSAWIEAHSHSSTASVAGATID  
AATNNNASRGEKTGGGGSITSGPLEENERSDSSLRGAGTETARRLVVGGRDAPSDRYPY  
FVSLQEVYNGTHRCAGTLVAPDVVTAHCKDEIGFAQVGKYSAGPVRSSPGGGGGDTT  
EMQRVLGPLHVHPLFNAGVSFSDVLLFRLERTSAKQYVAINTDPGVPRATGNSGSGGHG  
FGGQDRNGSNNHGEEGNLTLILGIGTTTTYTKFGASTNPKVLQETNTSFVFNRFRRSKD  
PDVEDNYQNLISDDMLCAFETNQDACQGDSSGGLIKKGNPSTDLVVGIVSWGFGXVMCS  
LPVXDQKKGKSKILLNGCKSII SVPSNKRFSGCAHPSFPGVYSRISYVSEWVIATIC  
QLSSAPPIEYDCANVMAPSHENSIPVTVIIQYDDHPGEISWSISQAESGLVLVNVVTENLD  
TPARYRSQETVFLPPGSDLVFTIQDRYGDGLCCNAPGNYRVVLGRNAVGVKVIAYGGDFG  
REKFHSLRRLPTDYVDDAEKPLIEDDQIALTVVIQLDGFPEETGWRIDRLGVQVEDVIRIP  
TGIYTTQEMTVFRTIILQKNELYFFNLYDIAGDGIDHGYGG

>comp15381\_c0\_seq15; 478 1 3790 LEN=3814; translated  
WSCRAAWGINALVSQHRILFYSHCLTVLVNVLDSSSFLDAAPKGRNPNEVDKVCRLGAI  
VATGTRTSPIAATAAVAAAAATVSESGRCAGRSALRFFFPHGSKPHTLTPXASVAGATID  
AATNNNASRGEKTGGGGSITSGPLEENERSDSSLRGAGTETARRLVVGGRDAPSDRYPY  
FVSLQEVYNGTHRCAGTLVAPDVVTAHCKDEIGFAQVGKYSAGPVRSSPGGGGGDTT  
EMQRVLGPLHVHPLFNAGVSFSDVLLFRLERTSAKQYVAINTDPGVPRATGNSGSGGHG  
FGGQDRNGSNNHGEEGNLTLILGIGTTTTYTKFGASTNPKVLQETNTSFVFNRFRRSKD  
PDVEDNYQNLISDDMLCAFETNQDACQGDSSGGLIKKGNPSTDLVVGIVSWGFGCAHPS  
FPGVYSRISYVSEWVIATICQLSSAPPIEYDCANVMAPSHENSIPVTVIIQYDDHPGEIS  
WSISQAESGLVLVNVVTENLDTPARYRSQETVFLPPGSDLVFTIQDRYGDGLCCNAPGNYR

VVLGRNAVGVIAAYGGGDFGREKFHSLRLPTDYVDDAEKPLIEDDQIALTVVIQLDGFPE  
ETGWRIDRLGVQVEDVIRIPTGIYTTQEMTVFRTIILQKNELYFFNLYDIAGDGIDHGYG  
GSMFNKRVVCHKWAAFAWFSNDXKFFSVKLFGLGTTDTSDLNRIIFESDGNFLSGVDHTFF  
AAIPPTILLPPSDSYMYLTLVMTMDLFPGEISLQLRMEDTEFSTNIDDERKDSIAFFRPP  
GYYKDRVNEVVTERIAIPQTPEGTTRHFSFIIGDRSADGLCCAWNGGQETGYTLYEGDPS  
MDNVIVHSIFKSAGREIKHFSISNDKVDEISLNNKEGEQQSVKIKVSIKLDLHPGETGFL  
ISDSSGSRLKYVPPGTFKEQNAIVERSFAFHPGLYFTTIIDTFGDGMNRDEIISIDLLE  
DRNRPSILTGTGDFNGAKSHDFLIEGDEARYPLQIHMTTGHKPHEFGFSIYRLDLVESVA  
IIASRSKGEYDQAYDNITESIMVTKGALYRIVFENSYSGIHGRVVINIGCSDLISCSME  
YTFDSENAQGYRWWQVKLYADNPSSLIGNNSEVMTLQIEPDRFPEQIEWVLVSSNHNYTL  
QRPFMIDGEEKREVVAYGPLPESSVSRDTLIIPRPNNKQGHALIIMNNGNDIAWLGECSL  
LQLYDSQVYGGSPVYIDRFEEENRAVLFFSLIDSDAKGSPALIIHGWTLMSMWTSLILGLM  
LF

>comp15381\_c0\_seq16; 380 1 3884 LEN=3908; translated  
WSCRAAWGINALVSQHRILFYSHCLTVLVNVLDSSSFLDAAPKGRNPNEVDKVCRLGAI  
VATGTRTSPIAATAAVAAAAATVSESGRCAGRSALRFFFPHGSKPHTLTPXASVAGATID  
AATNNNASRGEKTGGGGSITSGPLEENERSDSSLRGAGTETTARRLVVGGRDAPSDRYPY  
FVSLQEVYNGTHRCAGTLVAPDVVVTAAHCKDEIGFAQVGKYSAGPVRSSPGGGGGGDTT  
EMQRVLGPLHVHPLFNAGVSFSDVLLFRLERTSAKQYVAINTDPGVPRATGNSGSGGHG  
FGGQDRNGSNNHGEEGNLTLILGIGTTTTYTKFGASTNPKVLQETNTSFVPNRFCRRSKD  
PDVEDNYQNLISDDMLCAFETNQDACQGDSSGGLIKKGNPSTDLVVGIVSWGFGCAHPS  
FPGVYSRISYVSEWVIATICQLSSAPPIEYDCANVMAPSHENSIPVTVIIQYDDHPGEIS  
WSISQAESGLVLVNVNTENLDTPARYRSQETVFLPPGSDLVFTIQDRYGDGLCCNAPXEFE  
TEKTLKLVNFDRENTKMISHLHRQLPTLIQGNRYVVLGRNAVGVIAAYGGGDFGREKFHS  
LRLPTDYVDDAEKPLIEDDQIALTVVIQLDGFPEETGWRIDRLGVQVEDVIRIPTGIYTT  
QEMTVFRTIILQKNELYFFNLYDIAGDGIDHGYVKLFLGTTDTSDLNRIIFESDGNFLSG  
VDHTFFAAIPPTILLPPSDSYXVFDPRDDGLVSNVMLGLFFGYPKVSTLTYFFSLDXP  
GEISLQLRMEDTEFSTNIDDERKDSIAFFRPPGYYKDRVNEVVTERIAIPQTPEGTTRH  
FSFIIGDRSADGLCCAWNGGQETGYTLYEGDPSMDNVIVHSIFKSAGREIKHFSISNDKVD  
EISLNNKEGEQQSVKIKVSIKLDLHPGETGFLISDSSGSRLKYVPPGTFKEQNAIVERSF  
AFHPGLYFTTIIDTFGDGMNRDEIISIDLLEDRNRPSILTGTGDFNGAKSHDFLIEGDE  
ARYPLQIHMTTGHKPHEFGFSIYRLDLVESVAIIASRSKGEYDQAYDNITESIMVTKGAL  
YRIVFENSYSGIHGRVVINIGCSDLISCSMEYTFDSENAQGYRWWQVKLYADNPSSLIG  
NNSEVMTLQIEPDRFPEQIEWVLVSSNHNYTLQRPFMIDGEEKREVVAYGPLPESSVSRD  
TLIIPRPNNKQGHALIIMNNGNDIAWLGECSLLQLYDSQVYGGSPVYIDRFEEENRAVL  
FSLIDSDAKGSPALIIHGWTLMSMWTSLILGLMLF

>comp15381\_c0\_seq17; 400 1 3900 LEN=3924; translated  
WSCRAAWGINALVSQHRILFYSHCLTVLVNVLDSSSFLDAAPKGRNPNEVDKVCRLGAI  
VATGTRTSPIAATAAVAAAAATVSESGRCAGRSALRFFFPHGSKPHTLTPXASVAGATID  
AATNNNASRGEKTGGGGSITSGPLEENERSDSSLRGAGTETTARRLVVGGRDAPSDRYPY  
FVSLQEVYNGTHRCAGTLVAPDVVVTAAHCKDEIGFAQVGKYSAGPVRSSPGGGGGGDTT  
EMQRVLGPLHVHPLFNAGVSFSDVLLFRLERTSAKQYVAINTDPGVPRATGNSGSGGHG  
FGGQDRNGSNNHGEEGNLTLILGIGTTTTYTKFGASTNPKVLQETNTSFVPNRFCRRSKD  
PDVEDNYQNLISDDMLCAFETNQDACQGDSSGGLIKKGNPSTDLVVGIVSWGFGXVMCS  
LPVXDQKKGKSKILLNCKSIIISVPSNKRFSGCAHPSFPGVYSRISYVSEWVIATIC  
QLSSAPPIEYDCANVMAPSHENSIPVTVIIQYDDHPGEISWSISQAESGLVLVNVNTENL  
DTPARYRSQETVFLPPGSDLVFTIQDRYGDGLCCNAPGNRYVVLGRNAVGVIAAYGGDFG  
REKFHSLRLPTDYVDDAEKPLIEDDQIALTVVIQLDGFPEETGWRIDRLGVQVEDVIRIP  
TGIYTTQEMTVFRTIILQKNELYFFNLYDIAGDGIDHGYVKLFLGTTDTSDLNRIIFESD  
GNFLSGVDHTFFAAIPPTILLPPSDSYXVFDPRDDGLVSNVMLGLFFGYPKVSTLTYFF  
SLDXPGEISLQLRMEDTEFSTNIDDERKDSIAFFRPPGYYKDRVNEVVTERIAIPQTPE  
GTTRHFSFIIGDRSADGLCCAWNGGQETGYTLYEGDPSMDNVIVHSIFKSAGREIKHFSI  
SNDKVDEISLNNKEGEQQSVKIKVSIKLDLHPGETGFLISDSSGSRLKYVPPGTFKEQNA  
IVERSFAFHPGLYFTTIIDTFGDGMNRDEIISIDLLEDRNRPSILTGTGDFNGAKSHDF  
LIEGDEARYPLQIHMTTGHKPHEFGFSIYRLDLVESVAIIASRSKGEYDQAYDNITESIM  
VTKGALYRIVFENSYSGIHGRVVINIGCSDLISCSMEYTFDSENAQGYRWWQVKLYADN  
PSLLIGNNSEVMTLQIEPDRFPEQIEWVLVSSNHNYTLQRPFMIDGEEKREVVAYGPLPE  
SSVSRDTLIIPRPNNKQGHALIIMNNGNDIAWLGECSLLQLYDSQVYGGSPVYIDRFEE  
ENRAVLFFSLIDSDAKGSPALIIHGWTLMSMWTSLILGLMLF

>comp15381\_c0\_seq18; 498 1612 4030 LEN=4054; translated

MAPSHENSIPVTVIIQYDDHPGEISWSISQAESGLVLVNVVTENLDTPARYRSQETVFLPP  
GSDLVFTIQDRYGDGLCCNAPGNYRVVLRNAVGVKVIAYGGGDFGREKFHSLRRLPTDYVD  
DAEKPLIEDDQIALTVVIQLDGFPEETGWRIDRLGVQVEDVIRIPTGIYTTQEMTVFRTI  
ILQKNELYFFNLYDIAGDGIDHGYVKLFLGTTDTSDLNR IIFESDGNFLSGVDHTFFAAI  
PPTILLPPSDSYXVFDPRDDGLVSNVMLGLFFGYPKVSTLTYFFSLLDXPGEISLQLRM  
EDTEFSTNIDDERKDSIAFFRPPGYKDRVNEVVTERIAIPQTPEGTRRHF SFIIGDRSA  
DGLCCAWNGGQETGYTLYEGDPSMDNVIVHSIFKSAGREIKHFSISNDKVDEISLNNKEG  
EQQSVKIKVSIKLDLHPGETGF LISDSSGSR LKYVPPGTFKEQNAIVERSFAFHPLGLYTF  
TIIDTFGDGMNRDEI IYSIDLLEDNRNRSILTGTGDFNGAKSHDFLIEGDEARYPLQIHM  
TTGHKPEHFGFSIYRLDLVESVAIIASRSKGEYDQAYDNITESIMVTKGALYRIVFENSY  
SGIHGRVVINIGCSDLISCD S MEYTFDSENAQGYRWWQVKLYADNP SLLIGNNSEVMTLQ  
IEPDRFPEQIEWVLVSSNHNYTLQRPFMIDGEEKREVVA YGPLPESSVSRDTLII PRPN  
KQGHALIIMNNGNDIAWLGECSLLQLYDSQVYGGSPVYIDRFEEENRAVLFFSLIDSDAK  
GSPALIHGWTLSMWTSLILGLMLF

>comp15381\_c0\_seq19; 298 1255 2722 LEN=2807; minus strand; translated  
MTHSETYEILEYTPGKEGWAHPEEKRLLDGTEIIXFAAIEKEDFGLFPLFLISTGREHIT  
YQIPYGRCTCTKKQPAKNAMRFCSENKQMRNRAFCFIILKPLCVSPTHHDXNSNEDIGAGR  
VSFFDQQRATRIALAGILIRLECAKHVVRDQILIVVLDVWIFRAATKAIGNKGCICFLEYF  
GIGASTKLCIRGRSDPENQVVSLLAVVVAPVAVALPPKAVAAAAVAGRPWHARVRVDG  
NVLLGRGPLQPKEDVVRETHPRVEERVDVQRTQHPLHLGGVAAAAATGGGTDRARRVLS  
DLGKTDLVLA VRGGHDDVRGHEGPRAPVRPVVDLLEGDKVGVA VRRRVPAAHDEPAGGGF  
RARS AEKGIAALVLLQRAGGDRPSPGLLSAEALLFVAASIVAPATDAVEECEXGF DPCG  
KKNRKADRP AHRPDSETVAAAAATAVAAMGEVRVVPVATIAPSRHTLSTSFGLRPF GAA  
SRKLENQEH

>comp15381\_c0\_seq20; 296 1255 2592 LEN=2677; minus strand; translated  
MTHSETYEILEYTPGKEGWAHPEEKRLLDGTEIIXFAAIEKEDFGLFPLFLSQAENTS  
TKSPRHNSNEDIGAGRVSFFDQQRATRIALAGILIRLECAKHVVRDQILIVVLDVWIFRAA  
TKAIGNKGCICFLEYF GIGASTKLCIRGRSDPENQVVSLLAVVVAPVAVALPPKAVAAA  
AAVAGRPWHARVRVDGNVLLGRGPLQPKEDVVRETHPRVEERVDVQRTQHPLHLGGVAA  
AAATGGGTDRARRVLS DLGKTDLVLA VRGGHDDVRGHEGPRAPVRPVVDLLEGDKVGVA  
RRRVPAAHDEPAGGGFRARS AEKGIAALVLLQRAGGDRPSPGLLSAEALLFVAASIVAP  
ATDAVEECEXGF DPCGKKNRKADRP AHRPDSETVAAAAATAVAAMGEVRVVPVATIAP  
SRHTLSTSFGLRPF GAA SRKLENQEH

>comp15381\_c0\_seq21; 437 1 2114 LEN=2282; translated  
WSCRAAWGINALVSQHRILFYSHCLTVLVNVLD SRSALMQXPKGRNPNEVDKVCRLGAI  
V ATGTTRTSP IAATAAVAAAAATVSESGRCAGRSALRFFF XAWIEAHSHSSTASVAGATID  
AATNNNASRGEKTGGGGSITSGPLEENERSD SLLRGAGTETTARRLVVGGRDAPSDRYPY  
FVSLQEVYNGTHRCAGTLVAPDVVTA AHCKDEIGFAQV GKYSAGPVRSSP GGGGGGDTT  
EMQRVLGPLHVHPLFNAGVSF SHDVLLFRLERTSAKQYVAINTDPGVPRATGNSGSGGHG  
FGGQGDRNGSNNHGE EGNLTILGIGTTTTYTKFGASTNPKVLQETNTSFV PNRFCRRSKD  
PDVEDNYQNLISDDMLCAFETNQDACQGD SGGPLIKKGNSPSTDV LVGIVVVSWRHTEG  
FEDDEAKCSVAHLLVFTAKPSSRFLPVAF SYMVRRGFGCAHPSFPGVYSRISYVSEWVI  
ATICQLSSAPPIEYDCANVMAPSHENSIPVTVIIQYDDHPGEISWSISQAESGLVLVNV  
VTENLDTPARYRSQETVFLPPGSDLVFTIQDRYGDGLCCNAPGNYRVVLRNAVGVKVIAYGG  
GDFGREKFHSLRRLPTDYVDDAEKPLIEDDQIALTVVIQLDGFPEETGWRIDRLGVQVEDV  
IRIPTGIYTTQEMTVFRTIILQKNELYFFNLYDIAGDGIDHGYGG

>comp15381\_c0\_seq22; 285 1 2387 LEN=2689; translated  
WSCRAAWGINALVSQHRILFYSHCLTVLVNVLDSSSFLDAAPKGRNPNEVDKVCRLGAI  
V ATGTTRTSP IAATAAVAAAAATVSESGRCAGRSALXVLLSAWIEAHSHSSTASVAGATID  
AATNNNASRGEKTGGGGSITSGPLEENERSD SLLRGAGTETTARRLVVGGRDAPSDRYPY  
FVSLQEVYNGTHRCAGTLVAPDVVTA AHCKDEIGFAQV GKYSAGPVRSSP GGGGGGDTT  
EMQRVLGPLHVHPLFNAGVSF SHDVLLFRLERTSAKQYVAINTDPGVPRATGNSGSGGHG  
FGGQGDRNGSNNHGE EGNLTILGIGTTTTYTKFGASTNPKVLQETNTSFV PNRFCRRSKD  
PDVEDNYQNLISDDMLCAFETNQDACQGD SGGPLIKKGNSPSTDV LVGIXVVVSWRHTEG  
FEDDEAKCSVAHLLVFTAKPSSRFLPVAF SYMVRRGFGCAHPSFPGVYSRISYVSEWVI  
ATICQLSSAPPIEYDCANVMAPSHENSIPVTVIIQYDDHPGEISWSISQAESGLVLVNV  
VTENLDTPARYRSQETVFLPPGSDLVFTIQDRYGGWALLQCTGEFETEKTLKLVNFDRENTK  
MISHLHRQLPTLIQGNRVVLRNAVGVKVIAYGGGDFGREKFHSLRRLPTDYVDDAEKPLI  
EDDQIALTVVIQLDGFPEETGWRIDRLGVQVEDVIRIPTGIYTTQEMTVFRTIILQKNEL  
YFFNLYDIAGDGIDHGYVKLFLGTTDTSDLNR IIFESDGNFLSGVDHTFFAAI PPTILLP

PSDSYMYLTLVMTMDL

>comp15381\_c0\_seq23; 294 1 2086 LEN=2643; translated

WSCRAAWGINALVSQHRILFYSHCLTVLVNVLDSSSFLDAAPKGRNPNEVDKVCRLGAIV  
ATGTTRTSPIAATAAVAAAAATVSESGRCAGRSALXVLLSAWIEAHSHSSTASVAGATID  
AATNNNASRGEKTGGGGSITSGPLEENERSDSSLRGAGTETTARRLVVGGRDAPSDRYPY  
FVSLQEVYNGTHRCAGTLVAPDVVVTAHCKDEIGFAQVGKYSAGPVRSSPGGGGGDTT  
EMQRVLGPLHVHPLFNAGVSFSDVLLFRLERTSAKQYVAINTDPGVPRATGNSGSGGHG  
FGGQDRNGSNNHGEEGNLTLILGIGTTTTYTKFGASTNPKVLQETNTSFVFNRFRRSKD  
PDVEDNYQNLI SDDMLCAFETNQDACQGDSSGGLIKKGNPSTDVVLVGI VSWGFGCAHPS  
FPGVYSRISYVSEWVIATICQLSSAPPIEYDCANVMAPSHENSIPVTVIIQYDDHPGEIS  
WSISQAESGLVLVNVNTENLDTPARYRSQETVFLPPGSDLVFTIQDRYGGWALLQCTGEFE  
TEKTLKLVNFDRENTKMISHLHRQLPTLIQGNRYVVLGRNAVGVIAAYGGGDFGREKFHS  
LRLPTDYVDDAEKPLIEDDQIALTVVIQLDGFPEETGWRIDRLGVQVEDVIRIPTGIYTT  
QEMTVFRTIILQKNELYFFNLYDIAGDGIDHGYGG

>comp15381\_c0\_seq24; 294 1 2086 LEN=2567; translated

WSCRAAWGINALVSQHRILFYSHCLTVLVNVLDSSSFLDAAPKGRNPNEVDKVCRLGAIV  
ATGTTRTSPIAATAAVAAAAATVSESGRCAGRSALXVLLSAWIEAHSHSSTASVAGATID  
AATNNNASRGEKTGGGGSITSGPLEENERSDSSLRGAGTETTARRLVVGGRDAPSDRYPY  
FVSLQEVYNGTHRCAGTLVAPDVVVTAHCKDEIGFAQVGKYSAGPVRSSPGGGGGDTT  
EMQRVLGPLHVHPLFNAGVSFSDVLLFRLERTSAKQYVAINTDPGVPRATGNSGSGGHG  
FGGQDRNGSNNHGEEGNLTLILGIGTTTTYTKFGASTNPKVLQETNTSFVFNRFRRSKD  
PDVEDNYQNLI SDDMLCAFETNQDACQGDSSGGLIKKGNPSTDVVLVGI VSWGFGCAHPS  
FPGVYSRISYVSEWVIATICQLSSAPPIEYDCANVMAPSHENSIPVTVIIQYDDHPGEIS  
WSISQAESGLVLVNVNTENLDTPARYRSQETVFLPPGSDLVFTIQDRYGGWALLQCTGEFE  
TEKTLKLVNFDRENTKMISHLHRQLPTLIQGNRYVVLGRNAVGVIAAYGGGDFGREKFHS  
LRLPTDYVDDAEKPLIEDDQIALTVVIQLDGFPEETGWRIDRLGVQVEDVIRIPTGIYTT  
QEMTVFRTIILQKNELYFFNLYDIAGDGIDHGYGG

>comp15381\_c0\_seq25; 274 1 2613 LEN=2613; translated

WSCRAAWGINALVSQHRILFYSHCLTVLVNVLDSSSFLDAAPKGRNPNEVDKVCRLGAIV  
ATGTTRTSPIAATAAVAAAAATVSESGRCAGRSALXVLLSAWIEAHSHSSTASVAGATID  
AATNNNASRGEKTGGGGSITSGPLEENERSDSSLRGAGTETTARRLVVGGRDAPSDRYPY  
FVSLQEVYNGTHRCAGTLVAPDVVVTAHCKDEIGFAQVGKYSAGPVRSSPGGGGGDTT  
EMQRVLGPLHVHPLFNAGVSFSDVLLFRLERTSAKQYVAINTDPGVPRATGNSGSGGHG  
FGGQDRNGSNNHGEEGNLTLILGIGTTTTYTKFGASTNPKVLQETNTSFVFNRFRRSKD  
PDVEDNYQNLI SDDMLCAFETNQDACQGDSSGGLIKKGNPSTDVVLVGI XVVVSWRHTEG  
FEDDEAKCSVAHLLVFTAKPSSRFLPVAFSYMVRRGFGCAHPSFPGVYSRISYVSEWVI  
ATICQLSSAPPIEYDCANVMAPSHENSIPVTVIIQYDDHPGEISWSISQAESGLVLVNVNT  
ENLDTPARYRSQETVFLPPGSDLVFTIQDRYGGWALLQCTGEFETEKTLKLVNFDRENTK  
MISHLHRQLPTLIQGNRYVVLGRNAVGVIAAYGGGDFGREKFHSLRLPTDYVDDAEKPLI  
EDDQIALTVVIQLDGFPEETGWRIDRLGVQVEDVIRIPTGIYTTQEMTVFRTIILQKNEL  
YFFNLYDIAGDGIDHGYVKLFLGTTDTSDLNRIIFESDGNFLSGVDHTFFAAIPPTILLP  
PSDSYMYLTLVMTMDLFPGEISLQLRMEDETFSTNIDDERKDSIAFFRPPGGYKDRVNEV  
VTERIAIPQTPEGTTTRHFSFIIGDRSADGLCCX

>comp15381\_c0\_seq26; 296 1 179 2516 LEN=2601; minus strand; translated

MTHSETYEILEYTPGKEGWAHPEEKRLLDGTEIIXFAAIEKEDFGLFPLFLSQQAENTSL  
TKSPRHNSNEDIGAGRVSFDDQRIALAGILIRLECAKHVVRDQILIVVLDVWIFRAA  
TKAIGNKGCICFLEYFGIGASTKLCIRGRSDPENQVVSLLAVVVAPVAVALPPKAVAAA  
AAVAGRPWHARVRVDGNVLLGRGPLQPKEEDVRETHPRVEERVDVQRTQHPLHLGGVAA  
AAATGGGTDTRARRVLSDLGKTDLVLA VRGGHDDVVRGHEGPRAPVRPVVDLLEGDKVGAV  
RRRVPAAHDEPAGGGFRARSAEKGIAALVLLQRAGGDRPSPGLLSAEALLFVAASIVAP  
ATDAVEECEXGDFPCGKKNRKADRP AHRPDSETVAAAAATAAVAAMGEVRVVPVAT IAPS  
RHTLSTSFGLRPFGAASRKLENQEH

>comp15381\_c0\_seq27; 527 1 3706 LEN=3730; translated

WSCRAAWGINALVSQHRILFYSHCLTVLVNVLDSSSFLDAAPKGRNPNEVDKVCRLGAIV  
ATGTTRTSPIAATAAVAAAAATVSESGRCAGRSALRFFFFPHGSKPHTLTPXASVAGATID  
AATNNNASRGEKTGGGGSITSGPLEENERSDSSLRGAGTETTARRLVVGGRDAPSDRYPY  
FVSLQEVYNGTHRCAGTLVAPDVVVTAHCKDEIGFAQVGKYSAGPVRSSPGGGGGDTT  
EMQRVLGPLHVHPLFNAGVSFSDVLLFRLERTSAKQYVAINTDPGVPRATGNSGSGGHG  
FGGQDRNGSNNHGEEGNLTLILGIGTTTTYTKFGASTNPKVLQETNTSFVFNRFRRSKD  
PDVEDNYQNLI SDDMLCAFETNQDACQGDSSGGLIKKGNPSTDVVLVGI VSWGFGCAHPS

FPGVYSRISYVSEWVIATICQLSSAPPIEYDCANVMAPSHENSIPVTVIIQYDDHPGEIS  
WSISQAESGLVLVNVNTENLDTPARYRSQETVFLPPGSDLVFTIQDRYGDGLCCNAPGNR  
VVLGRNAVGVIAAYGGDFGREKFHSLRLPTDYVDDAEKPLIEDDQIALTVVVIQLDGFPE  
ETGWRIDRLGVQVEDVIRIPTGIYTTQEMTVFRTIILQKNELYFFNLYDIAGDGDHGYV  
KLFLGTTDSDLNRIIFESDGNFLSGVDHTFFAAIPPTILLPPSDSYMYLTLVMTMDLFP  
GEISLQLRMEDTEFSTNIDDERKDSIAFFRPPGYKDRVNEVVTERIAIPQTPEGTTRHF  
SFIIGDRSADGLCCAWNGGQETGYTLYEGDPSMDNVIVHSIFKSAGREIKHFSISNDKVD  
EISLNNKEGEGQSVKIKVSIKLDLHPGETGFLISDSSGSRLKYVPPGTFKEQNAIVERSF  
AFHPGLYFTTIIIDTFDGMNRDEIISIDLLEDNRNPSILTGTGDFNGAKSHDFLIEGDE  
ARYPLQIHMTTGHKPHFEGFSIYRLDLVESVAIIASRSKGEYDQAYDNITESIMVTKGAL  
YRIVFENSYSGIHGRVVINIGCSDLISCDMSMEYTFDSENAQGYRWWQVKLYADNPSLLIG  
NNSEVMTLQIEPDRFPEQIEWLVVSSNHNNTLQRPFMIDGEEKREVVAYGPLPESSVSRD  
TLIIPRPNKQGHALIIMNNGNDIAWLGECSLLQLYDSQVYGGSPVYIDRFEEENRAVL  
FSLIDSDAKGSPALIHGWTLSMWTSLILGLMLF

>comp15382\_c0\_seq1; 1224 98 3910 LEN=3984; translated  
MTSSSDAGVDKKTADNCGGLKFGADGYGSDSEYVTALPTDEEERQLLAGENVRAKERIE  
ELDEGRVSNHPSTLAATNKASSASREAEDNPFKDAEGGSLVNTRINDRESYQKRNNR  
VLREDGLSFKESMMQANLEKERDQLTRELEKDMKEGGTTEGLGKSNNNQOSEEQKST  
GKRRRKRWDTNSAPQTTSEKVESAMISDTESVTSTVKSKWDEDVSGTTGSSRRRKRWDET  
PVVSSNVAATPVVASGMATPAATISSKWDATPVFSGMSVSGTPAAALNQTSRNRWAETP  
APLLPGTPQTPAHGVITGNLNKALSLEMEMSRNRPWTDALDAILPSEGYIVMRPPSSY  
VPLRTPGRKLLATPTPMAMTQQGFQMDIPVEQRQDASIQDIREAYGVPLAITSSETGEAS  
ALPYIKPEDMQYFGRLMEDTDDDKLSKEEANERRIMSLLLKIKNGTTPQRKTAMRQITDR  
ARSGAGPLFNQILPLLMSPTLEDQERHLLVKVIDRVLYKLDLVRPYVHRILAVIEPLL  
IDEDYARVEGREIISNLAKAAGLATMISTMRPDIDSPDEYVRN'TTSRAVAVVASALGVP  
NLIPFLKAVCQSRKSWQARHTGIKIVQQIALLMGVAIILPYLRELVEIVSHGLTDDMQVR  
IITALTCALAEAAHPYGI ESFDSVIRPLWKGALEHHGKALAAFLKAIGFVIPLMEENYA  
SHYTRLVMPILLREFHSPDEEMKRIVLKVQQCVATAGVEPDYIRKEILPEFFKNFWIRR  
MALDRRNYRQVIETTEELANKVGSSEIITRVVDDLKDDSEPYRRMVMETIRKVLNLGAG  
DIDDRLEERLIDGILYAFQEQAVDASNTLGKESQIMLDGFGAVVVALGERCKPYLKQIAG  
TIKWRLLNKAASVRMQAADLVARVAVVMKACDEDQLMGHLGVVLYEYLGEYPEVLGSIL  
GALRAIVNVIGMTKMTPIIRDLLPRLTPILRNRHEKVQENCIDLVGRVADRGAEFVSAKE  
WMRICFELLEMLKAHKKAIRRAAVSTFGFIARAIGPQDVLHTLLNNLKVQDRQMRVCTTV  
AIAIVAETCGPFTVLPALMNEYRVEPNIQNGVLKAI SFMFEYIGLMGKDYVYAVTPLLE  
DALMDRDPVHRQTGCAAVKHLALGVAGHGCEDALHLLNFVWPNI FEESPHVIQAVFDAI  
QGLMVALGPNIILQYTLQGLYHPARKVREVYWRVFNTLYIYNADALVAGFPMVEDEGENT  
YARTTLELFI

>comp15383\_c0\_seq1; 322 1501 2948 LEN=4545; minus strand; translated  
MTERTSEEQASNSAEPGSPDGEEKEEFKIYIGRVPGRFKEKTIKRILAENLGTGGDDVV  
EIVELIYAHDEDGSGDNHDNQQRTQGRPSNEELREERQRNEKDPEKEHRGFVFSFKTAE  
LRDSALKLGTVRGGRKSTSKKLHTMYLRPYVALSDDTGEAPPDGGDGASCVPVGRDVCYL  
WSLFRCPYGDGCKFRHAGEGGCKPQESDLGPDERKQLKRKQKQKCFVYKKGRCPKGDDC  
PFSHDFEPDATAGGGERCVPVVPQSQKDCINWKTGKCRKGDACPYKHDPELRKKALEKK  
QKRQRAAAGGNDGGDDGTQAKRPRKEKQPI SVRVFGLNYDTTEHDVRKFMEATAGHPVKS  
IVFPRFEDSGRSKGYCGVYFASPKASKDAVEKCDGAELHGXAEGADGEVHDGRAVGGPA  
PQIVTSNRDHNHRQHLLIITTTLQQLLFI AKMHRIGKGF TVANS DVSFPTIRRIEIPDNI  
LT

>comp15383\_c0\_seq3; 322 1501 2948 LEN=4186; minus strand; translated  
MTERTSEEQASNSAEPGSPDGEEKEEFKIYIGRVPGRFKEKTIKRILAENLGTGGDDVV  
EIVELIYAHDEDGSGDNHDNQQRTQGRPSNEELREERQRNEKDPEKEHRGFVFSFKTAE  
LRDSALKLGTVRGGRKSTSKKLHTMYLRPYVALSDDTGEAPPDGGDGASCVPVGRDVCYL  
WSLFRCPYGDGCKFRHAGEGGCKPQESDLGPDERKQLKRKQKQKCFVYKKGRCPKGDDC  
PFSHDFEPDATAGGGERCVPVVPQSQKDCINWKTGKCRKGDACPYKHDPELRKKALEKK  
QKRQRAAAGGNDGGDDGTQAKRPRKEKQPI SVRVFGLNYDTTEHDVRKFMEATAGHPVKS  
IVFPRFEDSGRSKGYCGVYFASPKASKDAVEKCDGAELHGXAEGADGEVHDGRAVGGPA  
PQIVTSNRDHNHRQHLLIITTTLQQLLFI AKMHRIGKGF TVANS DVSFPTIRRIEIPDNI  
LT

>comp15384\_c0\_seq1; 583 79 1899 LEN=2029; translated  
MSNATATRPAAALPIDSRNAEPIQRRVKIVVVDKSDATNTTMTSTDNHENS LDDEVLLIEL  
DPTEQHLMDTLKKTADALREGRLSLGKKNVQIRIAGGWVRDKILGLQTHDV DIALDACTG

VEFAQTVKEFHEKEHGASGGNNRKDGKDRIGKIGVVAANPAQSKHLETA CLRIFGNDVDF  
SNLRHETYAEDSRIPDVTVMGTPLEDAFRDCTMNALYYNLNTGSVEDWTRRGLQDLLETK  
VVHTPLEAFQTFRRDPLRVLRVIRFAVRYEMELSEEIKSACKLPQIHNELRRKVSRRERVG  
NELEGMLSGKHADPAKAMD LICSLNLGGSVLYLPDDVNIMGTIGQIRLEPTPYTREDADG  
EGLSRLRECAWLETQECLRALSTILDSFVSNTNAITSLDQRIVYLAVFVLPYMKLQYLEK  
QKTKNVVDYMI RDGIKFKNKDAVYMDLITQNL DQMVLLLEQNTTMDCTPALRLQAGLLVR  
SAKDMWVTALVVAAVVLSRKHGMSRDVGYWCARAKELYEAIAIGMNL DGCWKTKPLMNGK  
DLIRVLELDRGPVVGVMEEQVKWTLTNP KGTIEELHGHLKRFKTARELGNDMD DQPVL  
KKMHLE

>comp15384\_c0\_seq2; 121 202 387 LEN=387; translated  
MSTDNHENSLDDEVLLIELDPTEQHLM DTLKKTADALREGRLSLGKKNVQIRIAGGWGRD  
KI

>comp15384\_c1\_seq1; 526 303 2141 LEN=2417; translated  
MVGKNHNTKPYNYDAAGDWRKSNGENLSQQLSSSD ETVVDSMSSDIENEHTLLLP SGGH  
SIDFDDEENTDRQLEQIQKQLKCREQNRF LILALIALTPMGVKFFKAAQSSFE EYLMHDP  
KLLMSATTYSMLSLM SLPVATLVGGAMLDYNAEAHRDEHDNKTKRKNHTGKRNR L MELI  
SSSRHSCLGTSRTPSYSAICFLVISLLGIAIYGYGLEMGKSI PMGLVGATVFG LGEGCVV  
VASRTFVAHAFYGS DGAFAQGVLVAMNNVAMMASKILLPWL IENEKMR AIATNCIHDGI  
NLECFDDDDFAFQHNPN TTPYAEVSSVAAGSETNENNIWIGILACCCVQLVSVVAGILY  
AWWFGLVPPPPSLQIHKPDQSSNQRSQPKSLHGKTNNALGSSLSHRVSACFETLPLTFW  
IVAIGRGI FVVVFKV FTRNSNSFLMEKFGVSAVAAGRKSSFHEL FALASPLVGF IAYRSP  
GGIVPVLLFASALASVSIATLACIPADTIQH YLPGGAVAPMIGISISHGIFIPICMAIIP  
QTCSP EHLGMAFAVVEVLG SVFNLTNIFLFGWLRDATGNYEVPME LLLLTYTLVGMFLLWMS  
RNDIKLKPNEA

>comp15385\_c0\_seq1; 541 618 1979 LEN=2002; translated  
MKKEYLAPT TTKLEKAHIAARIVNDIRSMNPPGRFLKEEKSDGMWYDIGDKKAIKKTGQA  
LREDAPGIRPVIDADAESSGDEKKPCVTKVADSNVAKSRGLSPNMIQRGNAIQDNTVNLS  
LEDARSIWPQQHLNDNTSNIQQSMSDYHAQSSMPPFRPNRNNNNAFSTSY PVGYSMHQE  
QNFMQNNGLQNGQGFQTRNIQLPQGALPNQTSFSNQLYPGVQSTTNNGNMVSRRMMDAMS  
QPSPPVRQQQYNAFPRQGGWQNQDIAFDRTFHEPNRMMGD DNTLSTISGLSEVISSNMG  
SANNPTSSLMNMSLRSNFSLTGSLRRNSMRGGNSIRTYDSIGAGGPGINGSI RSGFAPSL  
ARSNSFS DISSIMKGS DNWKEEGNLNLLEESDGRDRDWGRNSSAMSIGTLIDMQSNASST  
QLLAAAVPGQDDRSFMSSAMMMSTELDALDLAF

>comp15385\_c0\_seq2; 541 637 1998 LEN=2021; translated  
MKKEYLAPT TTKLEKAHIAARIVNDIRSMNPPGRFLKEEKSDGMWYDIGDKKAIKKTGQA  
LREDAPGIRPVIDADAESSGDEKKPCVTKVADSNVAKSRGLSPNMIQRGNAIQDNTVNLS  
LEDARSIWPQQHLNDNTSNIQQSMSDYHAQSSMPPFRPNRNNNNAFSTSY PVGYSMHQE  
QNFMQNNGLQNGQGFQTRNIQLPQGALPNQTSFSNQLYPGVQSTTNNGNMVSRRMMDAMS  
QPSPPVRQQQYNAFPRQGGWQNQDIAFDRTFHEPNRMMGD DNTLSTISGLSEVISSNMG  
SANNPTSSLMNMSLRSNFSLTGSLRRNSMRGGNSIRTYDSIGAGGPGINGSI RSGFAPSL  
ARSNSFS DISSIMKGS DNWKEEGNLNLLEESDGRDRDWGRNSSAMSIGTLIDMQSNASST  
QLLAAAVPGQDDRSFMSSAMMMSTELDALDLAF

>comp15385\_c0\_seq3; 594 861 2588 LEN=2611; translated  
MRRPYPFDFQFNYPYDDIANQLDPFCDSQQFNRKRQRRQAAA VVVESLWSNGGKNTSNGG  
SNTKTSSTPTRKSTAQPRPAYNIPPKGIGPISEPNENDVLCGRGGRINSHAGNVQFRNVI  
HSMKKEYLAPT TTKLEKAHIAARIVNDIRSMNPPGRFLKEEKSDGMWYDIGDKKAIKKTG  
QALREDAPGIRPVIDADAESSGDEKKPCVTKVADSNVAKSRGLSPNMIQRGNAIQDNTVN  
LSLEDARSIWPQQHLNDNTSNIQQSMSDYHAQSSMPPFRPNRNNNNAFSTSY PVGYSMH  
QEQNFMQNNGLQNGQGFQTRNIQLPQGALPNQTSFSNQLYPGVQSTTNNGNMVSRRMMDA  
MSQPSPPVRQQQYNAFPRQGGWQNQDIAFDRTFHEPNRMMGD DNTLSTISGLSEVISSN  
MGSANNPTSSLMNMSLRSNFSLTGSLRRNSMRGGNSIRTYDSIGAGGPGINGSI RSGFAP  
SLARSNSFS DISSIMKGS DNWKEEGNLNLLEESDGRDRDWGRNSSAMSIGTLIDMQSNAS  
STQLLAAAVPGQDDRSFMSSAMMMSTELDALDLAF

>comp15386\_c0\_seq1; 998 83 2068 LEN=2320; translated  
MASLEQLQMLDDDETTTSSSDSSCDGTTDDVANS LTASNDDDTDDKSTVDEDGGDSRKR  
AASATDGKGHQQKRIKLSLGGSFKAMASSAGQERQDKAVSLEEK PANASAGKETGSQSIG  
DSNSETKAKPETDLSPRKKIVSSEAGAEGSSSRKESPQKADSGKKNPRILPASKPKTKLK  
PKETSTSVASDGKNNTNQTKGAQQQKQAPPVTPSLAISKASSSPSHNKKRSMRSIRIT  
PMSSPGLLLPPGTSARVQNSGSASDSTSMVSPNQVFAQTMAAAGYTAEARAEFPHRGSSV  
ERTVDDMFDSVKICLHFPKLVPGDLFLLPAVPGGVP SADGDATKPTPMDGDETKPPSAA

DPNPDSKATDEVVAKEMKCLKAMEKLSERLIKAFQKNNNGESSLSTTSSENNTGSTRNHRK  
TIPQYSDMAPLSLTLPPYKKEYTQKRLEYIAKVNERRERAIVLRQEEKESTDVTPEGTIQTS  
TDSVPPPIPSLPQMPEPSDLRAITHNEEMFGSKGQQEQNHFPYLPENNRLVDHLDRRCFHA  
MSGRYFGLSSNTIADPYFYGPSAPGIGGLNLSATTGLAIASSGGGGGSGVGPLLATPSQS  
SSSAPSSSASVVAANISKTLASQSSTTSKIASVKPKTIEKPTQKAKPSSTPPQASAAVST  
K

>comp15387\_c0\_seq1; 953 386 2001 LEN=3300; minus strand; translated

MALLALVEFISKARGFTSSISPHLKASFSTLRRHQTSRRKGCQEGSKIIFPGVSDHHSYN  
IGRLTFRSLSAKPPNKGSNDEIDQSKKADLLAAAFDDLAKKDGFDSSLSQMAKDATFEDD  
FLEVDFDDEDGDDGFGDDIDFSDFMEGDFDFDDEDGDDDFLDFGGGDDDDMEARIAQAKL  
DMVRGEVSVPKDLDSFAKGASETDLQKLGFKKESEFYGNDEGGRQKKVTLITDAMTCPAC  
GVDFQSRDEHKPGYLPPAKFDIQAQLSKVEELQKLKEKADSATEWSPEDIDFLLQTSKG  
GDLDSDNEPTDADNIDIESLVEELGLDLEELSKKKTICKRCHGLQNSGKVDESRLPGWTD  
EPTLSQKQFKDLLRPISEKPAVVIALIDLDFDGGSVLRELDGIAGENPVILAANKADLLP  
KTLGKNRIENWVRRELEYLGVQSIANVGGAVRLISCKTGDGVASMMEKAQDLANEMEGDI  
YVVGAAANXTSPLPGTTLKFIKIDLDGQHLVDTPGLLVPGTITQLLTPDELKIVCPKK

>comp15387\_c0\_seq2; 1040 386 2122 LEN=3421; minus strand; translated

MALLALVEFISKARGFTSSISPHLKASFSTLRRHQTSRRKGCQEGSKIIFPGVSDHHSYN  
IGRLTFRSLSAKPPNKGSNDEIDQSKKADLLAAAFDDLAKKDGFDSSLSQMAKDATFEDD  
FLEVDFDDEDGDDGFGDDIDFSDFMEGDFDFDDEDGDDDFLDFGGGDDDDMEARIAQAKL  
DMVRGEVSVPKDLDSFAKGASETDLQKLGFKKESEFYGNDEGGRQKKVTLITDAMTCPAC  
GVDFQSRDEHKPGYLPPAKFDIQAQLSKVEELQKLKEKADSATEWSPEDIDFLLQTSKG  
GDLDSDNEPTDADNIDIESLVEELGLDLEELSKKKTICKRCHGLQNSGKVDESRLPGWTD  
EPTLSQKQFKDLLRPISEKPAVVIALIDLDFDGGSVLRELDGIAGENPVILAANKADLLP  
KTLGKNRIENWVRRELEYLGVQSIANVGGAVRLISCKTGDGVASMMEKAQDLANEMEGDI  
YVVGAAANAGKSTLINNLSRNSKEGKPRNKNSKKRAGNRNQVKGALTTSPPLPGTTLKFI  
KIDLDGQHLVDTPGLLVPGTITQLLTPDELKIVCPKK

>comp15388\_c0\_seq3; 483 516 1845 LEN=2678; translated

MSSRMTSLRNNCLDGDQPLLVAATSETLESFQDDVRYLWCPDIPVYETPPSAMDFLRNHV  
AVSRPCIIRNAITTRPRTHEDATAHGDNCAHANEAIPLQLTLDDLTGLIRANEDGNGND  
CDGGISLPLLCVDVTPDGHGDCLRKVAIDNETTQEEKVFVKPMERKMTISSFSNRLRRGR  
CKQQQQDVDSQRTLDRIFLSSPGSEETFDEGGGDDSEEDFWDDCVLYYSRQNDCLREELS  
PLWNLKAPSNATADTDGDHTAAYLFPRSFPAWEEAFFGNKPRGPDVAVNLWMGDERAVSAM  
HKDHYENLFYVLSGKVFGLCPPSDAPFLYEQEVLAGRFRSSEASTVEGNEEREPEPKRW  
SVVLDKEAEAANSNSYSKVHWIATDLFGKVGNSNDPNRIHRDEEFPMSTRYAHPIVTRVQT  
GELLYLPSLGSSTELPKLAKPSE

>comp15388\_c0\_seq4; 483 516 1845 LEN=2402; translated

MSSRMTSLRNNCLDGDQPLLVAATSETLESFQDDVRYLWCPDIPVYETPPSAMDFLRNHV  
AVSRPCIIRNAITTRPRTHEDATAHGDNCAHANEAIPLQLTLDDLTGLIRANEDGNGND  
CDGGISLPLLCVDVTPDGHGDCLRKVAIDNETTQEEKVFVKPMERKMTISSFSNRLRRGR  
CKQQQQDVDSQRTLDRIFLSSPGSEETFDEGGGDDSEEDFWDDCVLYYSRQNDCLREELS  
PLWNLKAPSNATADTDGDHTAAYLFPRSFPAWEEAFFGNKPRGPDVAVNLWMGDERAVSAM  
HKDHYENLFYVLSGKVFGLCPPSDAPFLYEQEVLAGRFRSSEASTVEGNEEREPEPKRW  
SVVLDKEAEAANSNSYSKVHWIATDLFGKVGNSNDPNRIHRDEEFPMSTRYAHPIVTRVQT  
GELLYLPSLGSSTELPKLAKPSE

>comp15388\_c0\_seq6; 483 516 1845 LEN=2641; translated

MSSRMTSLRNNCLDGDQPLLVAATSETLESFQDDVRYLWCPDIPVYETPPSAMDFLRNHV  
AVSRPCIIRNAITTRPRTHEDATAHGDNCAHANEAIPLQLTLDDLTGLIRANEDGNGND  
CDGGISLPLLCVDVTPDGHGDCLRKVAIDNETTQEEKVFVKPMERKMTISSFSNRLRRGR  
CKQQQQDVDSQRTLDRIFLSSPGSEETFDEGGGDDSEEDFWDDCVLYYSRQNDCLREELS  
PLWNLKAPSNATADTDGDHTAAYLFPRSFPAWEEAFFGNKPRGPDVAVNLWMGDERAVSAM  
HKDHYENLFYVLSGKVFGLCPPSDAPFLYEQEVLAGRFRSSEASTVEGNEEREPEPKRW  
SVVLDKEAEAANSNSYSKVHWIATDLFGKVGNSNDPNRIHRDEEFPMSTRYAHPIVTRVQT  
GELLYLPSLGSSTELPKLAKPSE

>comp15388\_c0\_seq7; 483 516 1845 LEN=2365; translated

MSSRMTSLRNNCLDGDQPLLVAATSETLESFQDDVRYLWCPDIPVYETPPSAMDFLRNHV  
AVSRPCIIRNAITTRPRTHEDATAHGDNCAHANEAIPLQLTLDDLTGLIRANEDGNGND  
CDGGISLPLLCVDVTPDGHGDCLRKVAIDNETTQEEKVFVKPMERKMTISSFSNRLRRGR  
CKQQQQDVDSQRTLDRIFLSSPGSEETFDEGGGDDSEEDFWDDCVLYYSRQNDCLREELS  
PLWNLKAPSNATADTDGDHTAAYLFPRSFPAWEEAFFGNKPRGPDVAVNLWMGDERAVSAM

HKDHYENLFYVLSGEKVFGLCPPSDAPFLYEQEVLAGRFRSSEASTVEGNEEREPEPKRKW  
SVVLDKEAEAANSNSYSKVHWIATDLFGKVGSNSDPNRIHRDEEFPMSTRYAHPIITVRVQT  
GELLYLPSLGSSTELPKLAKPSE

>comp15389\_c0\_seq1; 995 652 3714 LEN=3816; translated  
MAADASSSFNNDETEGNIGDALSSVTNAAVDSIANVVKDEPDTDAQEIARKQEMVQKRQTE  
KSYKVSLPLADSSGSKLGIRLCQISNGLELDSLLELNMDTLNVQEREELSGITSGEQAEN  
SDSISNDLVMDTAILRRRIDGEFQGLVSVSVTENSAGWAAGVVRPGDVLKTTSATLGNQMW  
PKSTLEGVKSAITSRKAVAESMEFEFQRLVETEDNRFELTLTRPIGFNLKETEDGYVEII  
GFTPKASKLARKAVRVGDRILAVDSSLGDRMWPVSTTEGLISAVTARLPGQKITFRFERR  
STATEDNAIIENDTAESSRPTSTSTSTEDTFFSPVTTSKSVSPTEAVDSALSGFDEKLLLR  
CQEILKRYKNDEKYVNFSLPGIVADKVVNALASAGTKVDGGTLSMILTAYLTCRQPDMA  
IRVFEAVVGLRADGIEGIEIESVETLSMDMIESDPLLGRNGKQIAPNADALDAYTAGAIMK  
AHAMNGDLVSMQRVLSVLEHGGMKVGDFEASWPGTGAEGILKPDSDQCYNIAITAAANS  
DAEEGLELAMIMFNRLGNPKNQRLVKDVVSNAIINAMTKFGKFDEAIETFYQMKKTGI  
KPKDYTYTALAKSVMVDDNDVEELLYDMREAGVDADVMTFNTIIRYLCEQKKMSAARKVV  
NFMESSGVPPDSWTYSFLMKGLLDGGNPSAALTLFESACADRRTVGLTENVFLYTSAMTA  
AASIGDHTRALELLTRMNSLGIKPNIKTMTALLSACISANEPDLAIDIFHRIPNPDYAV  
TKGLLALS LGGRGDEALAMLSEKESVAGSIK GKPLNKIYESLLINSIKANDYELARRVVK  
SLIGKGNIPSKAIFQKIFESMSLTLKDGLVANISYSKSGLVTRQSNDEQDAEKYKFLFL  
VDSLSDRNLPCEASLYSTILQFGNHIGGLARKVSAHLVSAKAASGVYGNVNVKLIDEVRA  
CETNCMIGGWEDLYLNFEELRNQIDSPSLPKLNVVAVASRELSRVLRAEKNLSYRKRSLV

>comp15390\_c0\_seq1; 531 452 2638 LEN=2908; translated  
MSFLNLDGGSGSAHIVERLNLERTRRAAKSIGFDAVDVDEAVLHAAVILFRERQQESAQP  
PTSSKQHQPQHHQHFTIDSGRRTPVTSRVIQNNPNGNTKSGNVKLEKLCINNC PANPFL  
EYLI EASMGMDLFRFELQGNMEEEEQAAELQAAANVRRGCQEASGGANS GDDDDGMDP  
RGPLQSNIFALDALGFRMRFSRRLRKVELINLPITRDHAESLMYGIETNDETGTGCRDLD  
LVMEGVRFVDDDETEDEPDDNDESRSAPVSPSDGTVVVRELCEGFNNRNLTTIQLERCR  
LTDAQIALVFDLSLASHPTLKHLCLENSCRNLGLEALDRMLMSPPSWMPEGGVVGSINDD  
PSTNGGRSSSTNYCRLETLELSYQFTSEETYGTGEHIQLGILTRNCTTRDADVRIYPNLR  
KLVLQGNQIDSDMKDLAFLIRHRFPHLEELDLRFNEITTQGLEIFANHSDPNHELFLAS  
NSADSSNPSQKHNHRFPQPSSRLRTIRLTNNPLVMTNQT SVVLLKLLKIYPELQLIQSNL  
EWEDGTSISRYIQHLLDINRAGRFLLLAGSNTNTNTLRSHQNKSERDGLTPGNGGYTEGI  
VPLTTEEKQRRKQQSEQQRCPLALGAWPLVLRALTRQSRYPHFIPVKNSLNGMYYLIRHG  
PIIMEQMASGLSNSSSSNAKSEGF SNGTNEG TNNEKERIHKRKRGD PALGGYETLADFLRC  
ELGSKPQF

>comp15390\_c0\_seq2; 531 452 2638 LEN=2946; translated  
MSFLNLDGGSGSAHIVERLNLERTRRAAKSIGFDAVDVDEAVLHAAVILFRERQQESAQP  
PTSSKQHQPQHHQHFTIDSGRRTPVTSRVIQNNPNGNTKSGNVKLEKLCINNC PANPFL  
EYLI EASMGMDLFRFELQGNMEEEEQAAELQAAANVRRGCQEASGGANS GDDDDGMDP  
RGPLQSNIFALDALGFRMRFSRRLRKVELINLPITRDHAESLMYGIETNDETGTGCRDLD  
LVMEGVRFVDDDETEDEPDDNDESRSAPVSPSDGTVVVRELCEGFNNRNLTTIQLERCR  
LTDAQIALVFDLSLASHPTLKHLCLENSCRNLGLEALDRMLMSPPSWMPEGGVVGSINDD  
PSTNGGRSSSTNYCRLETLELSYQFTSEETYGTGEHIQLGILTRNCTTRDADVRIYPNLR  
KLVLQGNQIDSDMKDLAFLIRHRFPHLEELDLRFNEITTQGLEIFANHSDPNHELFLAS  
NSADSSNPSQKHNHRFPQPSSRLRTIRLTNNPLVMTNQT SVVLLKLLKIYPELQLIQSNL  
EWEDGTSISRYIQHLLDINRAGRFLLLAGSNTNTNTLRSHQNKSERDGLTPGNGGYTEGI  
VPLTTEEKQRRKQQSEQQRCPLALGAWPLVLRALTRQSRYPHFIPVKNSLNGMYYLIRHG  
PIIMEQMASGLSNSSSSNAKSEGF SNGTNEG TNNEKERIHKRKRGD PALGGYETLADFLRC  
ELGSKPQF

>comp15391\_c0\_seq1; 776 55 3249 LEN=3318; translated  
MRLQLLISFLLWAPVVSQSVCTVCENGEMNNP NGLVTTSEGQTATCGTLAHHISQLDEG  
PCQAFQSLA AAPCECPGFESTTNEQTQDGEIGTAPETSQSEQLGCSICNGGEMTNPTSFT  
LSTRGLPISCQELADTSHTIPASSCERVQSF AKIPCGCVGGDATVSTTGEIVASFLEGHA  
DVYECVCGSGFISNPDGVVNERGTSKTCSELEAYRANVPVMTCVSLQOEALNPGCDY  
NQLPLGADQSPFACSVCGDGLVIANPSATVSLVAGQDEVQCGALEVNSHKFSEDQCPEIQ  
NIARESCGCVAPEITPPAANSNGLEIEVVSQCSICGAGEMTLPGGVVTPKGT SARCYDL  
DQNTKEISQSACSSI QDMVREPCGCTSSYQPPATDLLNDITPFQCSICEGGEITNPDGIV  
VTPPEGQAAKCSALNDNSHTIPEDSCPNMQRLAYGPCGCTGSI TLDNETP SDVSTGSPSAT  
PFTCSVCANGMLVTNPDGII DASNNVTCAEYEQESAKGRVTEEQCDVLQQTSSVTCGCHP  
PPQIPTPPTTQFKCEICGPNRMVGHDPDAEFLLPNFLT VTCGELQQRAEANDIHEFQCRQY



TPLAQQHCACIHKAYEPPPRPAYTCNICGGGRQVTNPDGVVRI PAQP PERTCAELMDAATA  
MNTNQCYLIHPFVQGPCGCSSTEEDIAPSGFDVDHTVNTTEERGDGCFSDLRDIYEMEKGI  
QDTSMKRLYLCPGKTYDMGVWSEEGTITGGHPFLALRPNVIYQCGQDGSRMNDCVLRGG  
DFGLASYGVFPGIHEHETVESVEVRGLTFQSQNMFSVLLKSAAGDITFKGCAFKGNSKNTPV  
LLQWEEKTSEGDSTAQNRRLLQDAFVEEEEASKQAALKQVVTFFQDCVFRDNAIDDSSTSF  
PGI IENTFGSELVVKNCFLKDNNTYGRANNPASAGYAIRSFGSLTLESSCFFGNEFLGHGP  
VLVYGAQYQAEDNYVETEQAAGLPCELAALFSTGDDTAANAPKCEASDAGSCSFSQAPTSS  
PTVYVPEDPFGQANDREPSSPATRATIGGRFWALAAGVLSLALV

>comp15391\_c0\_seq2; 261 1 724 LEN=793; translated  
XSFSFLSKQGNKNTPVLLQWEEKTSEGDSTAQNRRLLQDAFVEEEEASKQAALKQVVTFF  
QDCVFRDNAIDDSSTSFPGI IENTFGSELVVKNCFLKDNNTYGRANNPASAGYAIRSFGSL  
TLESSCFFGNEFLGHGPVLVYGAQYQAEDNYVETEQAAGLPCELAALFSTGDDTAANAPK  
EASDAGSCSFSQAPTSSPTVYVPEDPFGQANDREPSSPATRATIGGRFWALAAGVLSLAL  
V

>comp15392\_c0\_seq2; 1179 412 4375 LEN=4578; translated  
MGGDRFSADDTKEEIIDSTRLEDIHPRNSGIDAILGFGRSSSSSSSSSTKLFMVKAKTTK  
KWEVGDVLNLSKTDVSAQKGEIIAIRGGGWYSVGLLQTAENCDVDQEI IKCRGTQLQQ  
LAFDINDGKAVESDKKTSTSKNNNDTSKNASNLQIEITPHSSAIPDANGDGELSHLPSPT  
IYDFDAEVLQFQEGSSRDLI GNNPV LDERILRQVAHHATYERWVVF TDLHCSPATLDTCL  
EVL DVVHDTAMQQKEKCGVLF LGDFWHHRGTLRVDCLNAILGALRSWKVPMVMIPGNHDQ  
VTLGGQNHGLTPLENAYRVGDVPGPLVLSHPTRFRNALFVPHVRDINAMKAILSSRECQD  
SSALFLHADVKGALMNDM VVSTQGISPMFPMHKHVYSGHFHNP HSVKSSLCSTIEYVGS  
PYQISLAEAHQEKQLVVLNEKWECKRIPISVGRRHFKISSLEELEQIHVELEKVVSTVTA  
EEVERDGS TDVRRGDRI VMSVPKKEHRRLENSEYHTT LASSVRTLRDKGLVVELREVGEK  
ISPWSRKLANDVSDSPEFDEMTPESSWRAYLKDETVRSAISDSDCDTLLRVGLGILQEID  
SDSTQSIAMQRNLKLT SVTITGFGPFEDTVEYPLDDRGLVLLRGSNKDYGPDSNGTGKSS  
LAMATLWGLTGSLDARPSADMKVADVINDNSKTAKVTVEGF INNSPFVI IRSKTASKGDL  
RFELNDVDLTTQSVKETQSTIEEKLGVDAHILSRVAFYQGQHGMDLLEATDSKLDKDELSL  
LVPLDLWQQATSTARAKARYARKRVDMEGMIKLRKSDINGLSSRVAGAERARDLKQTRV  
LEAEAFNQELTKIQELLDRSADSKLEKLQTELESISSEIKRLSDLYDSTLADKEAQLKP  
LEDELFGVIRGIVTTMIREKNRFEMDVR SNKILLDSATVHINQIQERWSLCLSDGIPLDLK  
PPEFCPTCNQPLQAEGSEGGSEGLESVQKAMENE INEARISFKKAEVALEESHKMAECS  
KDLELKEELDDLQLNHEELLSRWVTKLNNIQDGMKEKRNTQHEISSQISMVVKESQLIS  
QKEAAKVRDLSEKLNFAHANQTYETLSREL ANAIDFLEDLNSQKDEEENDQRILSSIGER  
FSQRGVQTFILQNAVNSLQNTAQFYLDYLS DGSQRLELSLEAGDKILRNAFVRGADGEFR  
QRPLSTLSGGQWRRCSLALSFAFAELVAAKGRRLRSSLLVLDEPLTHLDRSGRTKFGKLV  
EILGAKQKSEKGTSGFEI STAIVILQDLSAELEEA FGDIDTVVRNHGKSILKLDDESSN

>comp15392\_c0\_seq3; 1145 412 4464 LEN=4667; translated  
MGGDRFSADDTKEEIIDSTRLEDIHPRNSGIDAILGFGRSSSSSSSSSTKLFMVKAKTTK  
KWEVGDVLNLSKTDVSAQKGEIIAIRGGGWYSVGLLQTAENCDVDQEI IKCRGTQLQQ  
LAFDINDGKAVESDKKTSTSKNNNDTSKNASNLQIEITPHSSAIPDANGDGELSHLPSPT  
IYDFDAEVLQFQEGSSRDLI GNNPV LDERILRQVAHHATYERWVVF TDLHCSPATLDTCL  
EVL DVVHDTAMQQKEKCGVLF LGDFWHHRGTLRVDCLNAILGALRSWKVPMVMIPGNHDQ  
VTLGGQNHGLTPLENAYRVGDVPGPLVLSHPTRFRNALFVPHVRDINAMKAILSSRECQD  
SSALFLHADVKGALMNDM VVSTQGISPMFPMHKHVYSGHFHNP HSVKSSLCSTIEYVGS  
PYQISLAEAHQEKQLVVLNEKWECKRIPISVGRRHFKISSLEELEQIHVELEKVVSTVTA  
EEVERDGS TDVRRGDRI VMSVPKKEHRRLENSEYHTT LASSVRTLRDKGLVVELREVGEK  
ISPWSRKLANDVSDSPEFDEMTPESSWRAYLKDETVRSAISDSDCDTLLRVGLGILQEID  
SDSTQSIAMQRNLKLT SVTITGFGPFEDTVEYPLDDXRIGPTKRYAIVFYIVLKLKRWQ  
HFSYHTLPFDVKS GSNKDYGPDSNGTGKSSLAMATLWGLTGSLDARPSADMKVADVINDN  
SKTAKVTVEGF INNSPFVI IRSKTASKGDLRFELNDVDLTTQSVKETQSTIEEKLGVDAH  
ILSRVAFYQGQHGMDLLEATDSKLDKDELSLLVPLDLWQQATSTARAKARYARKRVDMEG  
MIKLRKSDINGLSSRVAGAERARDLKQTRVLEAEAFNQELTKIQELLDRSADSKLEKLQ  
TELESISSEIKRLSDLYDSTLADKEAQLKPLEDELFGVIRGIVTTMIREKNRFEMDVR SNK  
ILLDSATVHINQIQERWSLCLSDGIPLDLKPPEFCPTCNQPLQAEGSEGGSEGLESVQKA  
MENE INEARISFKKAEVALEESHKMAECSKDLELKEELDDLQLNHEELLSRWVTKLN  
IQDGMKEKRNTQHEISSQISMVVKESQLISQKEAAKVRDLSEKLNFAHANQTYETLSREL  
ANAIDFLEDLNSQKDEEENDQRILSSIGERFSQRGVQTFILQNAVNSLQNTAQFYLDYLS  
DGSQRLELSLEAGDKILRNAFVRGADGEFRQRPLSTLSGGQWRRCSLALSFAFAELVAAK  
GRRLRSSLLVLDEPLTHLDRSGRTKFGKLVREILGAKQKSEKGTSGFEI STAIVILQDLSA

EELEEAFDGIDTVVRNHGKSILKLEDEMSSN

>comp15393\_c0\_seq1; 583 143 2683 LEN=2840; translated  
MAKSLVRKKKQKNGRGTNQRNEEFIGVSSTVCFLRFRATAVAILISGVFVYTLVSLNVAVK  
VHRLHETDNIWLEKTQGRHAGNAFASDHRTEKKQKEEHKLDGKIEFNDSAKHEEGIDSD  
VIAREIQQVLEEQETVDTSDNDEPKPTMKRPSYRANPHGYMVSPEIILGANKSTTSNEQ  
NTLLRKIPDHQTLKAFVENVDRSTWNSKPLPRRNVKAEDLIKISFTRLNNSCKLPEQWPV  
DDYPDADPFLPWIHDFVPTDDGKFIQFVAQNKRRCRHTGTTTPDEKTILEYTAPQVALFQHV  
PLKKLKSSTKETPRYRLSSHEDADPESINTRFICRFKPSGDITFSEFNNDYEWAAATRKRO  
KVMFHEDGRDNNQIHSSQLLFCVDPDHLIEQVKTGGTVVDDWATIFVDLIPVRTPPRYG  
PPHRFLVPYYAKSNHATSKTKNRTDVLFDPKTEWGEDHILPKIEDSGRWENIPVCKPSLM  
TYEPRALEGPKSNEKIKHNLISCLWASTGYATRGNRYAINDGQRRMIEWITFNKMLGFDH  
FYVYDNSGAFSNQSSLEPVADIFPDDVTVIKWPSTRICNPNPNVDSVGERSSQYAAEASC  
RLRFGSHVNWIGQFDIDEYLIPMGNYTRITPLLKLLDDEGTKIISFASWRAWPRRTHIND  
PEVTTFKNDVKMCRNNECFELSVRKDTTIMEAYNCDRQRPGAKSSTMPAEKQLYRPDYV  
TQHFHYSTITESTNLLPKFEQEKFKGQRPFPDPLSRFGDEVNEGLMLHKS SVARQDTAG  
WKLNCREDRKGFDQCRIGFPWPEDGSNATADKNGWAYNCYVNPRIIDNYFAPKVKAKLKEM  
GLMESE

>comp15393\_c0\_seq2; 361 143 1729 LEN=1892; translated  
MAKSLVRKKKQKNGRGTNQRNEEFIGVSSTVCFLRFRATAVAILISGVFVYTLVSLNVAVK  
VHRLHETDNIWLEKTQGRHAGNAFASDHRTEKKQKEEHKLDGKIEFNDSAKHEEGIDSD  
VIAREIQQVLEEQETVDTSDNDEPKPTMKRPSYRANPHGYMVSPEIILGANKSTTSNEQ  
NTLLRKIPDHQTLKAFVENVDRSTWNSKPLPRRNVKAEDLIKISFTRLNNSCKLPEQWPV  
DDYPDADPFLPWIHDFVPTDDGKFIQFVAQNKRRCRHTGTTTPDEKTILEYTAPQVALFQHV  
PLKKLKSSTKETPRYRLSSHEDADPESINTRFICRFKPSGDITFSEFNNDYEWAAATRKRO  
KVMFHEDGRDNNQIHSSQLLFCVDPDHLIEQVKTGGTVVDDWATIFVDLIPVRTPPRYG  
PPHRFLVPYYAKSNHATSKTKNRTDVLFDPKTEWGEDHILPKIEDSGRWENIPVCKPSLM  
TYEPRALEGPKSNEKIKHNLISCLWASTGYATRGNRYAINDGQRRMIEW

>comp15393\_c0\_seq3; 493 143 2858 LEN=3015; translated  
MAKSLVRKKKQKNGRGTNQRNEEFIGVSSTVCFLRFRATAVAILISGVFVYTLVSLNVAVK  
VHRLHETDNIWLEKTQGRHAGNAFASDHRTEKKQKEEHKLDGKIEFNDSAKHEEGIDSD  
VIAREIQQVLEEQETVDTSDNDEPKPTMKRPSYRANPHGYMVSPEIILGANKSTTSNEQ  
NTLLRKIPDHQTLKAFVENVDRSTWNSKPLPRRNVKAEDLIKISFTRLNNSCKLPEQWPV  
DDYPDADPFLPWIHDFVPTDDGKFIQFVAQNKRRCRHTGTTTPDEKTILEYTAPQVALFQHV  
PLKKLKSSTKETPRYRLSSHEDADPESINTRFICRFKPSGDITFSEFNNDYEWAAATRKRO  
KVMFHEDGRDNNQIHSSQLLFCVDPDHLIEQVKTGGTVVDDWATIFVDLIPVRTPPRYG  
PPHRFLVPYYAKSNHATSKTKNRTDVLFDPKTEWGEDHILPKIEDSGRWENIPVCKPSLM  
TYEPRALEGPKSNEKIKHNLISCLWASTGYATRGNRYAINDGQRRMIEWITFNKMLGFDH  
FYVYDNSGAFSNQSSLEPVADIFPDDVTVIKWPSTRICNPNPNVDSVGERSSQYAAEASC  
RLRFGSHVNWIGQFDIDEYLIPMGNYTRITPLLKLLDDEGTKIXKFRIMESLAKANSYQV  
SARVMSTLVLSVNFPLPCFHRITQQQQKNCDFPNENVRTWIFGHSPRYRLSRQSSDPE  
VTTFKNDVKMCRNNECFELSVRKDTTIMEAYNCDRQRPGAKSSTMPAEKQLYRPDYVTQ  
HFHYSTITESTNLLPKFEQEKFKGQRPFPDPLSRFGDEVNEGLMLHKS SVARQDTAGWK  
LNCREDRKGFDQCRIGFPWPEDGSNATADKNGWAYNCYVNPRIIDNYFAPKVKAKLKEMGL  
MESE

>comp15394\_c0\_seq1; 656 76 2550 LEN=2940; translated  
MSADSNDNNTIENKSNNEKSRSQPQRGAGKRKRRLDPFTSRVVVVGAGLAGLSTALSLR  
KAGFRNVCVYEKDPSEYQKEGYGLTLYNPKGPLADLGVLETVAQRDCPSRSHYLFQD  
PPGRKSSSLLPTDEQPPTESGAPACVSSDSDSNQTTTTEIENEIENDTAFPMGYFNAF  
FGPFTGNYRRGYGQRGNLVRPRKVLRRILYDELLRIQQEQEREMEAVGDKDADGVNSSDT  
NSDDKKKKSSSSVPEAVYWNRALDFRWDGTTQQYHLQFETHHLSQPSNGCLQRQSOGKS  
EVI EATADLLVAADGIRSSVLQKLYIQKLMQEP RRQPKSESEDTLCNDNIAPNTSAIPTT  
TRPSQGNPLPTIREQPELYGLRPMGIRMILGIADGIDHPLLRRERGFYITIDTHGHRLFMT  
PYVSSRFDMDDVKNIDGIQNNNSNNNSSENSAEETGSIERRTKKKNRIMWQLSFSTPINP  
NTLDSAFRLRQYVLETFHSHWPPALDLVRSTPPASIWGTDLMDRDPRAVYRELIVGTGGKG  
SIERPRLVCGDALHSMSPFKGQGANQALADGPLLARWLSKSSIDAALTNWWRETLNRTV  
PVVEASRKA AIDWHNPDRILGTTEEDHKEYHGFAGVEASSVPELVEILRKRKVGPHLGGQ  
LDQTVREVIREHGWFEQETMEPEVDVMKQQPQERCSAICERVLELASAGDTAGLRKMSLP  
SSSTKNTNLKNCAAMVDARDKNGRSCLHLAAIGNHWFTCVWLLVELKILEQWKEQHVNK  
KSPPSHNTTEGRPKDEYKTAFDYAFETGNKNLANVFETVLQGR

>comp15395\_c0\_seq1; 174 1 418 LEN=418; translated

XATTTAATTAASRETAKPASLEEAARHAQTPLPGQRLPLSTHRAESTIPRGSSESSEPPAH  
QVRWDGPNEHKENKHEKGGSSSTANWVYPSEQQVFNAMKRKGWKGIEEESIPSFLQIHNS  
VNERSWKKVLEWEKHGSSNS

>comp15395\_c1\_seq1; 512 1 1033 LEN=1585; translated  
XQQQQQQQSWATSSSSSNLSAMTEAAAEIYEYSYNKDAPTSDAIGGPSPPAPATPAGETE  
GSIQLAPGLVDKVKAFHLDEKEEASQGGSRFRTLVERAEQQRTAPRATHNPLLSAYDPN  
AYAQQQQQQQGGGATPPSSIMTPEEIASLSIDEQARLYREFFYVQQQQAATKGRGKSI  
GSTANNYLEPGIGFDGRKIGRNKDAEAVSNAGDVYLARLKRSTTRNLARYRGDEATANE  
VFHDPSTAEIEAPVNPYLEQQRKRMMDVVETVPEEMLLFREFESEEEERAAAEAAASAGRD  
RSYSGISYKERMARVREERRKNSNNKADQPPPEGNNPGNPYSY

>comp15395\_c2\_seq1; 676 1 2526 LEN=3402; translated  
QQQQQQQKQLSPKHTTNPSMPRTVTPVSAALVCAILSLSSTSRCPNHGVFPAAEAFAG  
QRGLVRHQVLVPSGQRHPLRPIPPTHVHRAGSVRLRAAPQYPDQEQQQQQQEGTPTG  
GGGEPSEAEKLLRDAERLRLEAEKMDASLTLQKIAALEEKLSNNAWLEKQRGQTVRDLYE  
ELRRLETKVSDSAGPGAPGGLSVDEKMEKLRREESLKPAAAEP SAGEPGHSSSGSTSGGK  
PKNRNLPLLAGFDDVDLELYVPVARDVNKMAQGKPLNERIGLFRDAPELQEHFKQKIQKL  
ILGPLEEIQELESKQYEFESSSSKEKDALLKRIKQLEARVEENNVAMGAGSDPDGGIGY  
SDRILIPPDQLPPLTEADLEERYETIRALPDILVAVYLQRNGLYELPVDESLINIQVGGG  
GINVTKTKSASADLPNEAGEDASAGAEP SGTDDDAESESEASSFDLYKDLKLAIQMDYYG  
LQLQLLDQARIVPLTDEMCKDFVAAYSLPPPVREQYVADKLGIDGLEAGVVASDRNEDV  
ECVLKEILQPIDEPFVALSQAGGLFGGRGTQEP IAEPPPEYNDVEFVDRSRYLEEFFP SLA  
LLEGRPSPEDVDL F MKDCLTDSAKKIFMVT SKPERVIGGYYIRGTNQM GIDESSSKTPN  
ERMVEEVS NR LR DHPTLKD KIEFFYITDPSPPDDEMELEVNLTP LFMVTAKDPK TMYNL  
SAPLTKAAVTV SGLVSAFFFFSIGSCVLNPKINAGIEKALDSATSSAPGTVYLDIDWFFNL  
CLPLYFSFIGILVAHEL AHRIVASIYKVR LDSNAAQISRGLPSQLRRTKSNHWSLFLFVT  
M

>comp15395\_c2\_seq2; 1138 1 3084 LEN=3291; translated  
QQQQQQQKQLSPKHTTNPSMPRTVTPVSAALVCAILSLSSTSRCPNHGVFPAAEAFAG  
QRGLVRHQVLVPSGQRHPLRPIPPTHVHRAGSVRLRAAPQYPDQEQQQQQQEGTPTG  
GGGEPSEAEKLLRDAERLRLEAEKMDASLTLQKIAALEEKLSNNAWLEKQRGQTVRDLYE  
ELRRLETKVSDSAGPGAPGGLSVDEKMEKLRREESLKPAAAEP SAGEPGHSSSGSTSGGK  
PKNRNLPLLAGFDDVDLELYVPVARDVNKMAQGKPLNERIGLFRDAPELQEHFKQKIQKL  
ILGPLEEIQELESKQYEFESSSSKEKDALLKRIKQLEARVEENNVAMGAGSDPDGGIGY  
SDRILIPPDQLPPLTEADLEERYETIRALPDILVAVYLQRNGLYELPVDESLINIQVGGG  
GINVTKTKSASADLPNEAGEDASAGAEP SGTDDDAESESEASSFDLYKDLKLAIQMDYYG  
LQLQLLDQARIVPLTDEMCKDFVAAYSLPPPVREQYVADKLGIDGLEAGVVASDRNEDV  
ECVLKEILQPIDEPFVALSQAGGLFGGRGTQEP IAEPPPEYNDVEFVDRSRYLEEFFP SLA  
LLEGRPSPEDVDL F MKDCLTDSAKKIFMVT SKPERVIGGYYIRGTNQM GIDESSSKTPN  
ERMVEEVS NR LR DHPTLKD KIEFFYITDPSPPDDEMELEVNLTP LFMVTAKDPK TMYNL  
SAPLTKAAVTV SGLVSAFFFFSIGSCVLNPKINAGIEKALDSATSSAPGTVYLDIDWFFNL  
CLPLYFSFIGILVAHEL AHRIVASIYKFDI GLPNVVP SLSTGLAGTITPLKSPPPSKKAL  
FDFAIAGPIAGLTVSIGLLFVGL ELTRQMGLETSLPVL PVDLVRSSSLGGGMVEFFLGKY  
TLLPDQGP GAFVELHPFAISGF IGCLTNSLALLPLGHTDGGRI SLAMFGRRGAFIVKLF T  
TLILTASGLFGLDEM NILLAYVVF TLIWQRELETAIRNEVDEL SFSRGLVGIISAILVGL  
ILIPMTS

>comp15395\_c2\_seq3; 676 1 2526 LEN=3531; translated  
QQQQQQQKQLSPKHTTNPSMPRTVTPVSAALVCAILSLSSTSRCPNHGVFPAAEAFAG  
QRGLVRHQVLVPSGQRHPLRPIPPTHVHRAGSVRLRAAPQYPDQEQQQQQQEGTPTG  
GGGEPSEAEKLLRDAERLRLEAEKMDASLTLQKIAALEEKLSNNAWLEKQRGQTVRDLYE  
ELRRLETKVSDSAGPGAPGGLSVDEKMEKLRREESLKPAAAEP SAGEPGHSSSGSTSGGK  
PKNRNLPLLAGFDDVDLELYVPVARDVNKMAQGKPLNERIGLFRDAPELQEHFKQKIQKL  
ILGPLEEIQELESKQYEFESSSSKEKDALLKRIKQLEARVEENNVAMGAGSDPDGGIGY  
SDRILIPPDQLPPLTEADLEERYETIRALPDILVAVYLQRNGLYELPVDESLINIQVGGG  
GINVTKTKSASADLPNEAGEDASAGAEP SGTDDDAESESEASSFDLYKDLKLAIQMDYYG  
LQLQLLDQARIVPLTDEMCKDFVAAYSLPPPVREQYVADKLGIDGLEAGVVASDRNEDV  
ECVLKEILQPIDEPFVALSQAGGLFGGRGTQEP IAEPPPEYNDVEFVDRSRYLEEFFP SLA  
LLEGRPSPEDVDL F MKDCLTDSAKKIFMVT SKPERVIGGYYIRGTNQM GIDESSSKTPN  
ERMVEEVS NR LR DHPTLKD KIEFFYITDPSPPDDEMELEVNLTP LFMVTAKDPK TMYNL  
SAPLTKAAVTV SGLVSAFFFFSIGSCVLNPKINAGIEKALDSATSSAPGTVYLDIDWFFNL  
CLPLYFSFIGILVAHEL AHRIVASIYKVR LDSNAAQISRGLPSQLRRTKSNHWSLFLFVT

M

>comp15395\_c2\_seq4; 742 1 2868 LEN=3420; translated  
QQQQQQQQKQLSPKHTTNPSPRTPVTPVSAALVCAILSLSSSTRCGPNHGVFPAAEAFAG  
QRGLVRHQLVPSGQRHPLRPIPGTHPVHRAGSVRLRAAPQYPDQEQQQQQQEGTPTG  
GGGEPSEAEKLLRDAERLRLEAEKMDASLTLQKIAALEEKLSNNAWLEKQRGQTVRDLYE  
ELRRLETKVSDSAGPGAPGGLSVDEKMEKLRREESLKPAAAEPGEPGHSSSGSTSGGK  
PKNRNLPLAGFDDVDLELYVPVARDVNKMAQKPLNERIGLFRDAPELQEHFKQKIQKL  
ILGPLEEIQELESKQEYFESSSSKEKDALLKRIKQLEARVEENNVAMGAGSDPDGGIGY  
SDRILIPPDLPLTEADLEERYETIRALPDILVAVYLQRNGLYELPVDESLINIQVGGG  
GINVTKTKSASADLPNEAGEDASAGAEPGTDDDAESESEASSFDLYKDLKLAIQMDYYG  
LQLQLLDQARIVPLTDEMCKDFVAAVYSLPPPVRQYVADKLGIDGLEAGVVASDRNEDV  
ECVLKEILQPIDEPFVALSQAGGLFGGRGTQEPPIAEPPPEYNDVEFVDRSRYLEEFFPSLA  
LLEGRPSPEDVDLDMKDCLTDSAKKIFMVTSPKPERVIGGYYIRGTNQMGIDESSSKTPN  
ERMVEEVSNRLRDHPTLKDKIEFFYITDPSPPDDEMELEVNLTPLFMVTAKDPKTMYNL  
SAPLTKAAVTVSGLVSAFFFFSIGSCVLNPKINAGIEKALDSATSSAPGTVYLDIDWFFNL  
CLPLYFSFIGILVAHELHRIVASIYKFDIGLNVVPSLSTGLAGTITPLKSPPPSKKAL  
FDFAIAGPIAGLTVSIGLLFVGLLETRQMGLTSLPVLVLDLVRSSSLGGGMVEFFLGKY  
TLLPDQGPAGFVELHPFAISGFIGCLTNSLALLPLGRKLEQNPLPTIRMFCSVFPW  
>comp15395\_c3\_seq1; 50 451 984 LEN=984; minus strand; translated  
MFPLLTSXPLHNATDGGEIRMDKALGVDIDVAHRFYGKGPYGGSPLAGGECLQGNALVFD  
PGSRQSLRINPQQAQVGVDPKSRPSRYAFSTDSPPSSTGAGLPWSLVFARLGSSSTAMST  
IQSVRNPTPAASEWVAVAVAVAVGGLWLWLYLYLLGVHSSDIYAGSGPLLAIAIAIX  
>comp15395\_c3\_seq2; 504 1 1636 LEN=2054; translated  
XGSACGSASSANPPPTVDRREGHFDPGPSLFGGGNNRPLDAALVEQNYKTHPKLLQDDES  
VELAFVGRDVLVFTNKRILDIDTKGWTGKKVEYTSIPYSSVLAYAVQTAGKHDRDAEVS  
IYTDMRYECEGEEGEEPDPGMSCLEWDFNKNLVDVLHLKRYLNQRLFLLAGRPTRASLAW  
FASDNVNASANANARAPEERGMKLLSKWGGDQRTIDAGEVNRSLHDDLGLLLDDETV  
MAFRAGRDVSCFTNRRVLIIDTKGWSGRKIEYLSIPYGSVGAFAESASTSGWDRDGSVN  
LYTKNHWTLKVKLDFRKGKADIFAIQTFLSAMVLGGSGTVSGGDTASAPNACGGCNDDA  
SYYCSHGPNASNEPRPVQAAAAATATATATNHSDAAGVGF LTDWIVDMAVEEDPSLANTR  
LHGPNPAPVLLGGESVEKAYREGRDLWVYTNLRLLRIDAKGLSGTRVKYQSIPLQALAASE  
GASAIRAFAVETVGHIDIDAECFVHTNLPSIGRIVQRVVLVVRGNIMDLHEYLXVQAIGSV  
TPEKQ  
>comp15395\_c3\_seq4; 50 482 1015 LEN=1015; minus strand; translated  
MFPLLTSXPLHNATDGGEIRMDKALGVDIDVAHRFYGKGPYGGSPLAGGECLQGNALVFD  
PGSRQSLRINPQQAQVGVDPKSRPSRYAFSTDSPPSSTGAGLPWSLVFARLGSSSTAMST  
IQSVRNPTPAASEWVAVAVAVAVGGLWLWLYLYLLGVHSSDIYAGSGPLLAIAIAIX  
>comp15395\_c3\_seq5; 504 1 1636 LEN=2023; translated  
XGSACGSASSANPPPTVDRREGHFDPGPSLFGGGNNRPLDAALVEQNYKTHPKLLQDDES  
VELAFVGRDVLVFTNKRILDIDTKGWTGKKVEYTSIPYSSVLAYAVQTAGKHDRDAEVS  
IYTDMRYECEGEEGEEPDPGMSCLEWDFNKNLVDVLHLKRYLNQRLFLLAGRPTRASLAW  
FASDNVNASANANARAPEERGMKLLSKWGGDQRTIDAGEVNRSLHDDLGLLLDDETV  
MAFRAGRDVSCFTNRRVLIIDTKGWSGRKIEYLSIPYGSVGAFAESASTSGWDRDGSVN  
LYTKNHWTLKVKLDFRKGKADIFAIQTFLSAMVLGGSGTVSGGDTASAPNACGGCNDDA  
SYYCSHGPNASNEPRPVQAAAAATATATATNHSDAAGVGF LTDWIVDMAVEEDPSLANTR  
LHGPNPAPVLLGGESVEKAYREGRDLWVYTNLRLLRIDAKGLSGTRVKYQSIPLQALAASE  
GASAIRAFAVETVGHIDIDAECFVHTNLPSIGRIVQRVVLVVRGNIMDLHEYLXVQAIGSV  
TPEKQ  
>comp15395\_c4\_seq1; 374 155 1127 LEN=1127; translated  
MVLNARKIFSVLSNNHFEIEASRAEELRSESEQLLLPTEAIEVAFKSRGEGGRDKAFFT  
SVRVLVQDGKGLGRKRKHYSIPYSGIRAFSVQTAGASSLDTDELRIWHEGDGNEGPFQ  
LDFCRRGVDLFRIQQYFNAKVFVGAAGAEGGAAEGAVGAVEGAKAKAAKEESTPFSTSTS  
TLLSWIADDAVSIDPVEAGQRFVSKADRASGWPVVEGEAIEAAYRARRDMVLLTSLRLL  
VVDKGLSGSRVEFLSVKWSCVRAFVSVETSGSWDLNSDFVHTNSSLRRIKQDLRKT  
DVLAVQMSFCDKLLGGTACGSACGX  
>comp15396\_c0\_seq1; 617 539 3179 LEN=3303; translated  
MYRPQTRFRITTKPPPTTRNPGAVEGIEENS IKKNDHRDDVESILQDDFDYIENTYGNSIID  
DTGEGYDGRERKDRPAMNYTLEPSLAMGCSSLPFGKTRYDYDGTRQPRRSSLKRPARTN  
RNSYEIPAIHHSNEHHGSRSPDSTRNTLNGVHGSTHIVRVRSLYPVQRRRSIQFQQ  
EAMVQEVTPALKLVGENNRRELWLQDDEVRAIKERRRSLVGKYKEAQKQKQVEESRTTRQ

EHDGELNCNTDADNSKRVSTNKMKKIHLNPICMNLLNALASSLTQNKRSAASSSSSSASLP  
SSAAGTSRRKHPTSRRTVIKTPGFSLPPPSAQOQQQQPDAFDTNVSIPPGGLPGYTGWAR  
PEKTLARHFSVVAESSLVATAAGSNQKRSEYTIKVKCEGHRHCFPKNKFKYHYSKNGD  
AGPSLFFLRAYGPAVVSSTVSRCTSKGDNDSADDSAGAGCSYDIRFAFFDPGLYTI  
AVLTFSNPPPI SVFPLGKGAETNEQDTHYEGYLLPGFPLLATVALDGTTEPSAARKDCAL  
DDL TETSPASAREKARWVTKVNEKGYSSSTMNSPLVTQPGYRSNANSLGINFEYQHAN  
HCRIVSEASFRDERPEEKLF SKPGCGTGKKQKIRIVYIGDSVLRVQRDTLQGLLEGPSSD  
REGFQFEFDFLSLHEGYRKNQALGPASVQDFLRDIQKKSADTKVAVLFNTGLHDIHRLC  
GSEFKLQRLAYLDNNALTTGSFACVDEYRALQRDFLETMDEFPATLKVFTTTSAWPKYG  
NFGIEWSEDAQDMPLVSDFSAAFNEIAFGVLADHELTAKGGNGDRIAIMDGYWITHPRP  
DNREIGSIGKKLSHPGEEVLSAMARIWAMIIQQRVCHNA  
>comp15396\_c0\_seq2; 264 1 752 LEN=876; translated  
XLPICIVYIGDSVLRVQRDTLQGLLEGPSSDREGFQFEFDFLSLHEGYRKNQALGPASVQ  
DFLRDIQKKSADTKVAVLFNTGLHDIHRLCSEFKLQRLAYLDNNALTTGSFACVDEYR  
ALQRDFLETMDEFPATLKVFTTTSAWPKYGNFGIEWSEDAQDMPLVSDFSAAFNEIAFG  
VLADHELTAKGGNGDRIAIMDGYWITHPRPDNREIGSIGKKLSHPGEEVLSAMARIWAM  
IIQQRVCHNA  
>comp15397\_c1\_seq1; 225 319 972 LEN=1661; translated  
MNEHYLLNADYDERLYTMCHEVGHGFGLPHTDENFNKDLGNCLDYTNTPKNNLRPGAAN  
CNRLLEMYGNIDGTVDLDDLDRRRRVSQKRAQRGLRYSDAEIEYEDETRDSEVVNDDSQY  
YYMYGRSEYPMATAEYESAMKELYEIEQGIFSDRQQQEEALLYEEENGGISIDNRDKRG  
RGKWRRLREHSRGGDFVRRRLNDGFALEVHVLYANNRK  
>comp15397\_c1\_seq2; 225 319 972 LEN=1670; translated  
MNEHYLLNADYDERLYTMCHEVGHGFGLPHTDENFNKDLGNCLDYTNTPKNNLRPGAAN  
CNRLLEMYGNIDGTVDLDDLDRRRRVSQKRAQRGLRYSDAEIEYEDETRDSEVVNDDSQY  
YYMYGRSEYPMATAEYESAMKELYEIEQGIFSDRQQQEEALLYEEENGGISIDNRDKRG  
RGKWRRLREHSRGGDFVRRRLNDGFALEVHVLYANNRK  
>comp15397\_c1\_seq3; 146 319 778 LEN=778; translated  
MNEHYLLNADYDERLYTMCHEVGHGFGLPHTDENFNKDLGNCLDYTNTPKNNLRPGAAN  
CNRLLEMYGNIDGTVDLDDLDRRRRVSQKRAQRGLRYSDAEIEYEDETDSDSQQYYMYGRS  
EYPMATAEYESAMKELYEIEQGIFSDRQQQEEEX  
>comp15397\_c1\_seq4; 225 481 1495 LEN=1495; translated  
MPRKERGC SICRML SCLLTLGLIGAGGYAAWFFLGQPSKDEL LDYAKDFGDKIKNIDFGD  
FTDVLQNF TGF TPELWDED PFGDNTTNVWEGHTSGEGGLTLELWNALDDTWQAEYVEAM  
ADWNEYCDPKVLLLTSEDVEVDRECTQENGVMKVCNGNYGETGWLGINEVLKTVPQGI IQ  
SSVAKMNEHYLLNADYDERLYTMCHEVGHGFGLPHTDENFNKDLGNCLDYTNTPKNNLR  
PGAANCNRLLEMYGNIDGTVDLDDLDRRRRVSQKRAQRGLRYSDAEIEYEDETDSDSQQYY  
MYGRSEYPMATAEYESAMKELYEIEQGIFSDRQQQEEEX  
>comp15397\_c1\_seq5; 304 481 1689 LEN=2378; translated  
MPRKERGC SICRML SCLLTLGLIGAGGYAAWFFLGQPSKDEL LDYAKDFGDKIKNIDFGD  
FTDVLQNF TGF TPELWDED PFGDNTTNVWEGHTSGEGGLTLELWNALDDTWQAEYVEAM  
ADWNEYCDPKVLLLTSEDVEVDRECTQENGVMKVCNGNYGETGWLGINEVLKTVPQGI IQ  
SSVAKMNEHYLLNADYDERLYTMCHEVGHGFGLPHTDENFNKDLGNCLDYTNTPKNNLR  
PGAANCNRLLEMYGNIDGTVDLDDLDRRRRVSQKRAQRGLRYSDAEIEYEDETRDSEVVN  
DDSQQYYMYGRSEYPMATAEYESAMKELYEIEQGIFSDRQQQEEALLYEEENGGISIDN  
RDKRGRGKWRRLREHSRGGDFVRRRLNDGFALEVHVLYANNRK  
>comp15397\_c1\_seq6; 304 481 1689 LEN=2387; translated  
MPRKERGC SICRML SCLLTLGLIGAGGYAAWFFLGQPSKDEL LDYAKDFGDKIKNIDFGD  
FTDVLQNF TGF TPELWDED PFGDNTTNVWEGHTSGEGGLTLELWNALDDTWQAEYVEAM  
ADWNEYCDPKVLLLTSEDVEVDRECTQENGVMKVCNGNYGETGWLGINEVLKTVPQGI IQ  
SSVAKMNEHYLLNADYDERLYTMCHEVGHGFGLPHTDENFNKDLGNCLDYTNTPKNNLR  
PGAANCNRLLEMYGNIDGTVDLDDLDRRRRVSQKRAQRGLRYSDAEIEYEDETRDSEVVN  
DDSQQYYMYGRSEYPMATAEYESAMKELYEIEQGIFSDRQQQEEALLYEEENGGISIDN  
RDKRGRGKWRRLREHSRGGDFVRRRLNDGFALEVHVLYANNRK  
>comp15398\_c0\_seq2; 720 1 2719 LEN=3165; translated  
XKRIESNPIQSKRKR SRINRFGNRFGRKNKHWDPSRPLKRVVIVDQCSIDRSIHQHLY  
DPSNAKSEHGSNYCNSVKXINEKATTKGCGVMEQHSGGGRSNDGQPSLARPPGEVHP  
HDVMCGRGGQTNNHPGNEWFRRLVRSNRDLYNRCPKHTKLLVAKAIVQAVQDQVPRGRFM  
KIKAGTTLWEAIPYNEAVGKTSQALRERALSSTRAENARGKRKGVTKNTKERSNQEREK  
AFEIAKKVADRIKTNGLQPALNLAELT SVAIKSAT EDLEHHPKRKSQKTHRHLQSLEQK

NKVAENKQRHRCGIDNQLFIDPYNITSQNHTDDVSSPMQALRNTGSLGVNSESTNVLLMS  
SSSSPATTLASMVT PGFSTSHANANDSNKRMRLSAQTEGGVGM LSGGTDSSGGHRR IQHM  
GRRLVNRVTF SASSDSQVMQNN SIQHAKMTMAQWQSMRSTGTMHSSAAETVDPLAASVYD  
TVRAGATYCGMCIEPRHF PKAGSLRNPFRSNI FSEQQRQQRQQQKVS DSGRFSGMDGHE  
EHQLWQHDASSASQGTWQPSYQQMQLRQPEVQDKQQQPQQMAV PFFPYK PETHACSGI  
LEIQDQQQGEDTLEE IPTVGLANVCADDEM VYDDRAI IPSPPKDLKAHVSDLFTSFFSGD  
SAPSNNDRNTT TYS SHAENGGDFAAPPLKGLSAQISDLFTSFFGKDQRSANNMNGKRTAT  
SGNRAANGDDCVMPPSPPKGLTAQMSDLFASFFKEDGSTRGRKNSSGRNKNQNFNWI SHS  
AADIDDSPLPLPPGGTFEGGLMRSISSSLFSLVEHPSMVLNMYKSSVSSPAQTAFTYQKP  
QQQQQQKHRQPGFGDVSIGDGMAGNSLLGQRAEQRSSLLDDFEETPMEQQLRNAQAKRNP  
EKWSGF

>comp15398\_c0\_seq3; 833 903 3086 LEN=3532; translated  
MKIKAGTTLWEAIPYNEAVGKTSQALRERALS SKTRAENARGKRKGVT KNTKERSNQERE  
KA FEI AKKVADRIKTNGLQPALNLAELT SVAIKSATEDLEHHPKRKSQKTHRHLQSLEQ  
KNKVAENKQRHRCGIDNQLFIDPYNITSQNHTDDVSSPMQALRNTGSLGVNSESTNVLLM  
SSSSPATTLASMVT PGFSTSHANANDSNKRMRLSAQTEGGVGM LSGGTDSSGGHRR IQH  
MGRRLVNRVTF SASSDSQVMQNN SIQHAKMTMAQWQSMRSTGTMHSSAAETVDPLAASVY  
DTV RAGATYCGMCIEPRHF PKAGSLRNPFRSNI FSEQQRQQRQQQKVS DSGRFSGMDGH  
EEHQLWQHDASSASQGTWQPSYQQMQLRQPEVQDKQQQPQQMAV PFFPYK PETHACSG  
ILEIQDQQQGEDTLEE IPTVGLANVCADDEM VYDDRAI IPSPPKDLKAHVSDLFTSFFSG  
DSAPSNNDRNTT TYS SHAENGGDFAAPPLKGLSAQISDLFTSFFGKDQRSANNMNGKRTA  
TSGNRAANGDDCVMPPSPPKGLTAQMSDLFASFFKEDGSTRGRKNSSGRNKNQNFNWI SH  
SAADIDDSPLPLPPGGTFEGGLMRSISSSLFSLVEHPSMVLNMYKSSVSSPAQTAFTYQK  
PQQQQQQKHRQPGFGDVSIGDGMAGNSLLGQRAEQRSSLLDDFEETPMEQQLRNAQAKRN  
PEKWSGF

>comp15398\_c0\_seq4; 833 873 3056 LEN=3502; translated  
MKIKAGTTLWEAIPYNEAVGKTSQALRERALS SKTRAENARGKRKGVT KNTKERSNQERE  
KA FEI AKKVADRIKTNGLQPALNLAELT SVAIKSATEDLEHHPKRKSQKTHRHLQSLEQ  
KNKVAENKQRHRCGIDNQLFIDPYNITSQNHTDDVSSPMQALRNTGSLGVNSESTNVLLM  
SSSSPATTLASMVT PGFSTSHANANDSNKRMRLSAQTEGGVGM LSGGTDSSGGHRR IQH  
MGRRLVNRVTF SASSDSQVMQNN SIQHAKMTMAQWQSMRSTGTMHSSAAETVDPLAASVY  
DTV RAGATYCGMCIEPRHF PKAGSLRNPFRSNI FSEQQRQQRQQQKVS DSGRFSGMDGH  
EEHQLWQHDASSASQGTWQPSYQQMQLRQPEVQDKQQQPQQMAV PFFPYK PETHACSG  
ILEIQDQQQGEDTLEE IPTVGLANVCADDEM VYDDRAI IPSPPKDLKAHVSDLFTSFFSG  
DSAPSNNDRNTT TYS SHAENGGDFAAPPLKGLSAQISDLFTSFFGKDQRSANNMNGKRTA  
TSGNRAANGDDCVMPPSPPKGLTAQMSDLFASFFKEDGSTRGRKNSSGRNKNQNFNWI SH  
SAADIDDSPLPLPPGGTFEGGLMRSISSSLFSLVEHPSMVLNMYKSSVSSPAQTAFTYQK  
PQQQQQQKHRQPGFGDVSIGDGMAGNSLLGQRAEQRSSLLDDFEETPMEQQLRNAQAKRN  
PEKWSGF

>comp15399\_c0\_seq1; 396 195 1292 LEN=2104; translated  
MSDVFSPYQIDYSVKNTSKTFGF SKKRITFKFGVANPPAVANGANGANCRGSEHEVIFTW  
SLNSGKRQILLDGKDVHYSETGQNGWTADQIFQH HFFQVRVAGLSGPLRAHLITQPANKDV  
PHIKPFDLRLNGVSYFAMPKIFELGGPRMIVRPVKGKGTQGGYSGGQRNEEVYVSPAER  
EAI AAKLASMQDLQRSAPAQAPVADLLSFDAAAPAQAPVGAYGHQPPQPQYSNYSLGSS  
VASQPQQPPAAYGAQPGGSFSYGGQPPPPQQQAYYGQQPPPPPGQGSFYGQQPPPALAP  
GGGAPSFDPNPSTMASPSSQSMASYQSYGSAPSFAQPPSQQRPPPPQQQYPPQGYNYGQ  
QPQRY

>comp15400\_c0\_seq1; 627 644 3129 LEN=3312; translated  
MKAWTETVLIIFLNLIYVWVVAIATLVSSTSKLIPV GELVVQSSDEGNDYNIRSPNIYFFS  
FGSLAITIYLLSSWLKEYFFRDENALTTTQWTF LAASGFLVMLTGF SLENSCTRGRYY  
SCPLTIFSI LAGLLSGVTSCLLIPWRSAPLKCQAEFALILVITWAAAIATLTFGAGPAVS  
INTMYFGIYISFSIALNILVTTLYADSVLEAS PFSQVEFGMTE SERAKDEIGMAGFLNMA  
YDNMTK SQPVL DHHDDPRNTDASLAILFD TLDGSSSLGSDNGDAHSNLLVGRDTSFNK  
NVI V GKRN LGRIE IWFILMVESIVSLAVFYGLLDGHDPIRDQWIVFAPILSIAFCFIGWI  
ASTVQMKWANILEGILVGPIS SKQHKITNSGSKNSKCANAYLDFDFCRFICVRTFTKTHT  
VFFSIFHADTCGDLDNIMHYNMDPGLIAVTTYFRDDSDAGVD TNKVIAMETMTANQLFMS  
YGSFFTSLYLLTNWSNASVTTTDWIFSFATSGTVFGLVYLILDEEEFKCFRDFGKCGQLE  
VLIMAALGSTLLSLVMVVSFLPPCGRFMPFIHFIIGTIVLVCWCVTSYFIVFRKDGVGS  
QIGPAFFACWGVLFVSVDIVSTNMLLLCKIRSDQGG EEDANLSLSISDGDECFEDEQNTH  
RPASRRDGKNFVREEEIQTARIDDI DGPFAESVTAPRDTSRADIELKGQFEGADSI RS

EMIDVIDCSEHDGYQYWNGGLIETAPSSQVIRERSVDSQNTDQEQSSTNTTDCADCSQHN  
TINSTPSSILDNSSTGTAEFLDCAEIEFAPLQNFVQENMLDDSFRR  
>comp15400\_c0\_seq2; 711 644 2953 LEN=3136; translated  
MKAWTETVLIIFLNLIYVWVVAIATLVSSTSKLIPVGELVVQSSDEGNDYNIRSPNIYFFS  
FGSLAITIYLLSSWLKEYFFRDENALTTTQWTFLAASGFLVMLTGFSLLENSSCTRGRYY  
SCPLTIFSIAGLLSGVTSCLLIPWRSAPLKCQAEFALILVITWAAAIATLTFGAGPAVS  
INTMYFGIYISFSIALNILVTTLYADSVLEASPFVQVEFGMTESEERAKDEIGMAGFLNMA  
YDNMTKSKQPVLDDDDPRNTDASLAILFDLTDGSSSLGSDNGDAHSNLLVGRDTSFNK  
NVIVGKRNLGRIEIVFILMVESIVSLAVFYGLLDGHDPIRDQWIVFAPILSIAFCFIGWI  
ASTVQMKWANILEGILIIISCITWIRGLIAVTTYFRDDSDAGVDTNKVIAMETMTANQLF  
MSYGSFFTSLYLLTNWSNASVTTDWFISFATSGTVFVGLYILDEEEFKCFRDFGKCGQ  
LEVLIMAALGSTLLSLVMVVSFLPPCGRFMPFIHFIIGTIVLVCWCVTSYFIVFRKDG  
GSQIGPAFFACWGVLFVSDIVSTNMLLLCKIRSDQGGEDANLSLSISDGEDECFEDEQN  
THRPARRDGDKNFVREEEIQTARIDDDIDGPFVAESVTAPRDTSRADIELKGQFEGADSI  
RSEMIDVIDCSEHDGYQYWNGGLIETAPSSQVIRERSVDSQNTDQEQSSTNTTDCADCSQ  
HNTINSTPSSILDNSSTGTAEFLDCAEIEFAPLQNFVQENMLDDSFRR  
>comp15401\_c0\_seq1; 513 324 3092 LEN=3553; translated  
MTFGFGNFFPGPENINSNTVDNSSNNNSINNRQAARSTYPGQRGNQQRDSVSTSGNTAE  
NNGTASHSIGVGVANSDSRGVFNLSNSSSSSYSNPSSMPSSNGPYVTRGSSGAPNGPYVVR  
GSNPGQQSTSSRNSTSSLPHPVPPRSNVGPTGSGISSNNNSASQLSPGAYIVTRSVTSSS  
ASQIYRVTIIPGVASGSEFTVHAGNRRVRVVCASSRPGQSLQITLPPPEPTTSRKLVKPA  
PITLVGKKEALCKDPFMRQGESMTGGAVEMLKEVEAVNKAATDNGGTPRTYVVTIPMNV  
RPGEKFRATFEGQRFVETCPNAGPGMKVRIVAPPSGQSPSYESEGDKEPQAAAKMQVFE  
VVVPNGVRPNQPFTLMANGQRVLVTCPPKVYPGSKIRFQLPVPETNTTKTKTRLVYKDGNG  
STGWERTVRVQDMKFQWVRVTDSDNMGDNKKNLADSKSLSNLTFDSSQMAFVRQIQFLE  
GNDARMRTGKVSLLVAQKAVVDSKYVDKNYQGTGQTKTLFSYANIESVQSKSLNDKVEWF  
RNSVCKELFRPWEQGHVKIVIRREVILEDLKAIALGRDDMRKRWRIEFSGEPGIEAGG  
LTREWFQLVTERIFDPALGLWMSSENNQMEMNINFTSYLTCGDAYLKLFRFLGRVMGRAL  
FDGQLIKGHMSRYLYKHLGWPVTFADIEAHDEQFYKNLKNLAKMDDPSLLDLNFTVTE  
TIVDGKKGVP LIPDGARYDLTSENLDQYKANLHYRMLNRCKPQITELLGIFYDIPEAA  
LTVFDPNELELILCGIPTIDMEDWTKNTKYSGIFESTAENNPVVKWFWDVVKEDFDQEMK  
ARLLQFVTGTSGVPPGGFSVLQGNDDNIKLFVHGVSRDQYVYPRAHTCFNRIDLPNYAT  
REELANRVKQAVSMTYVGFDE  
>comp15401\_c0\_seq2; 513 201 2969 LEN=3430; translated  
MTFGFGNFFPGPENINSNTVDNSSNNNSINNRQAARSTYPGQRGNQQRDSVSTSGNTAE  
NNGTASHSIGVGVANSDSRGVFNLSNSSSSSYSNPSSMPSSNGPYVTRGSSGAPNGPYVVR  
GSNPGQQSTSSRNSTSSLPHPVPPRSNVGPTGSGISSNNNSASQLSPGAYIVTRSVTSSS  
ASQIYRVTIIPGVASGSEFTVHAGNRRVRVVCASSRPGQSLQITLPPPEPTTSRKLVKPA  
PITLVGKKEALCKDPFMRQGESMTGGAVEMLKEVEAVNKAATDNGGTPRTYVVTIPMNV  
RPGEKFRATFEGQRFVETCPNAGPGMKVRIVAPPSGQSPSYESEGDKEPQAAAKMQVFE  
VVVPNGVRPNQPFTLMANGQRVLVTCPPKVYPGSKIRFQLPVPETNTTKTKTRLVYKDGNG  
STGWERTVRVQDMKFQWVRVTDSDNMGDNKKNLADSKSLSNLTFDSSQMAFVRQIQFLE  
GNDARMRTGKVSLLVAQKAVVDSKYVDKNYQGTGQTKTLFSYANIESVQSKSLNDKVEWF  
RNSVCKELFRPWEQGHVKIVIRREVILEDLKAIALGRDDMRKRWRIEFSGEPGIEAGG  
LTREWFQLVTERIFDPALGLWMSSENNQMEMNINFTSYLTCGDAYLKLFRFLGRVMGRAL  
FDGQLIKGHMSRYLYKHLGWPVTFADIEAHDEQFYKNLKNLAKMDDPSLLDLNFTVTE  
TIVDGKKGVP LIPDGARYDLTSENLDQYKANLHYRMLNRCKPQITELLGIFYDIPEAA  
LTVFDPNELELILCGIPTIDMEDWTKNTKYSGIFESTAENNPVVKWFWDVVKEDFDQEMK  
ARLLQFVTGTSGVPPGGFSVLQGNDDNIKLFVHGVSRDQYVYPRAHTCFNRIDLPNYAT  
REELANRVKQAVSMTYVGFDE  
>comp15402\_c0\_seq1; 932 203 3040 LEN=3218; translated  
MKGHGRKERETIKRLVRRRTLVLVLSFCLGGRLIGSADTAFAYVPRNHRTSMRRGRTIRRDN  
AYTLTIVSSSKIAPDRITPTNSTYNNYNDTSLNDKYPYDDTINEHRPHTNGTVVFSSEED  
FFHGDGISGMMSARLSDDMYDLEQLDDITVDENSSSINGAVKSGSIPPEANEGNGASET  
GMSGVEDRLFAEGLETGEFQIIGEASAKESDGTACTPEEFCENEQSADEDEYVQTSKNR  
TSLFRVRVLFGRVKNASGQAPSQKNDEVAPLSIDDGGETSDVVGNVVNSRKPFLRRLWRK  
RNARTIEEGIRLEQTNKLSFLLNKALVTATPSQEKSYLERSLMGLVNGLAEEVEDLDIEL  
NTMSKTPFWRKEVEEIRINF SRLGFRPIQIGGTNTIVEIIDQNEASNSTQSKTSDGDVG  
QGFPSMDSDLPFVVDCADEGFDRIDEDGSGTLDADELAQALNSITGLKTDKSSIEELASD  
LVRLYDDNGDGVVDREEYKRMVDDMAKLRKAKEDGKNPFTAMKDSIQSVSEGISSKAGEV

VSAARDKYFSEKNTEEQEETEMGSIVLSNVNLDLRRLLVFGAFPVIKKITPGGPLILQPFT  
ATVTASFSREDVMGSFLLDAALRRLVARALRVRVRSYRDLVEGAVFLGRQWKMESKTAPV  
VEVLGLSNVEFDSGDKMIVTGRAKIRADPDAPIVTSTFKLRKIGTRKNGQVIKLEPEL  
AFVFECPKALERGLGAVCETFGLPKRPPEPYYSFFPIYSPFKVDDDSGGFDMGEDNCIR  
SIFIRNGKLRFEMSVVLPRGRFLGNHYLAFTVPQRTFIIITMDRVWNGIRAARENKQVVER  
AKKLLKAEDKSTKSNRAEDTNE SVGESSISDGLPATPSDTNPRKRFFKAIKDNTPKPKSF  
YTRFVEGYTMLEREEEEANNERISNDISDWFGRQGSNNATSSEEE

>comp15403\_c0\_seq1; 805 116 2431 LEN=2587; translated  
MKQDTSSDFQATASYRREQLRRIQSIVDLVQRDILETSFEKPGEEEGKNDVCWSLWPGWP  
QPPRSSSSILPVNDGNSFLRKLRSRGEREVLKNVCGCSCANNDWSKLYVLLPTATKRAGAT  
ACTNRNVDTSLDLKSLVSNTHFDGFFVLDLTTKIDDEDGSMGETNTATSEWSHLPGLHS  
NACVSESI VALRSCRVRNLFVSRTFVGVSETVLANNHVSASVGGEDGFGTIAITVGAES  
GGGRSLLLLTAESTMHDVARQLGSADHHQEPDRDPSSASSPFANVVS HGS MIRDTPTVRNV  
FLHPFSSIESACSVVDSTLFGHSGKIGNASVASNVLMQWNATIMDNSRISNVLMMEHSHCG  
PSSILESTIMGPDASHASAGEIHASVFGPNTNAHHQSLLVGVLPWPMGRGNVAYGANVGSNH  
TGRLPDQECTAGEGIFWGLSCVVKLPVDLSQAPYSIVAAGTTLPPQRITMPFSLVVESST  
FSSSSRSRNDIVPGVWLQHSPTYTLVRNDKKYATRKRATR HADYTGWKILRPDTVERCRHA  
RKLLRKTQLPTDHEHYIPLQSVSGVGACALTERARDGGIKAYDNCIQLYALEGLLAWCSN  
AFGGDSEPILSMVDRIRQEFRTPS SAGRPTEDFSATRVEWPPFPWDANDCEETRAWEYQR  
NLLADEFPIPCDGTDRDNDSDVDELLESWIGNLLNKLVELEKDFAEVAKSKRRDDKRGASI  
IPGYSEFHVSAESDPVIVGVREKAFVTEQLVQKLTDLERSTGRFHHSRIQ

>comp15404\_c0\_seq1; 571 197 2381 LEN=2427; translated  
MADRNERHFLEFYTPARLRQTRIVRTEGQPRDSCSDEKENPSSHPRGNEGGILGQSQRRL  
LFTRSASKPKFAHDGYGNSGTDRDNCENASRD LASFHFATASLKTTPPCTARVFQSSQEV  
HTWSSADDGIVIKTSPSYTSPSSDTSNTVLKEYRSKQSLSSSKTRVLSFASPIPGGLRL  
RSSPFWKIGKAHNRKESGEQSKPQHDLNSTLPTMYTEDTNALSLOTTPSENVSPAAPSTT  
PKRHILWSPPGTSRLLRKYRQRTHERELDQSESSVHSPAAGASLKS PKTTGKIGLRLLDS  
GAKRCRNHRLALRPRTNRND EAKVGTKEYPSNDNRSLSPSTVSR LQQDIESYRHAHEKS  
KQTT SVMARPDVEETVAFDDNRGSND SHDLGDCDDQKGSNAQATSDVLPSSSNV VADPF  
KLAIDAGTTDELPLEKNQRADPQEDSAVWEA HAAEDTAKKESCADTIVPPVESISISDEE  
SGVFQSTRSKTRARRKSLADAIKAVSAAEKAITSR TQSNPMLLASELPLPSLPAAASCQN  
DHETTASDTPSSKGSLSQSIWDALNCGGRAESGDYPISSPESRDANPHTASRCSDCVNPMA  
STLMKMWREERKEADAFTEDDATNEMYSKASRKEVESPSNSWTSPPRKAFSSDLALVYG  
LERVERNLTLARPMARPATPPVLLGPLRSTNR TSDDWVLDRLGLFMVLGKCPRVAPASGTLR  
VAISTGL

>comp15404\_c0\_seq2; 610 439 2520 LEN=2680; translated  
MADRNERHFLEFYTPARLRQTRIVRTEGQPRDSCSDEKENPSSHPRGNEGGILGQSQRRL  
LFTRSASKPKFAHDGYGNSGTDRDNCENASRD LASFHFATASLKTTPPCTARVFQSSQEV  
HTWSSADDGIVIKTSPSYTSPSSDTSNTVLKEYRSKQSLSSSKTRVLSFASPIPGGLRL  
RSSPFWKIGKAHNRKESGEQSKPQHDLNSTLPTMYTEDTNALSLOTTPSENVSPAAPSTT  
PKRHILWSPPGTSRLLRKYRQRTHERELDQSESSVHSPAAGASLKS PKTTGKIGLRLLDS  
GAKRCRNHRLALRPRTNRND EAKVGTKEYPSNDNRSLSPSTVSR LQQDIESYRHAHEKS  
KQTT SVMARPDVEETVAFDDNRGSND SHDLGDCDDQKGSNAQATSDVLPSSSNV VADPF  
KLAIDAGTTDELPLEKNQRADPQEDSAVWEA HAAEDTAKKESCADTIVPPVESISISDEE  
SGVFQSTRSKTRARRKSLADAIKAVSAAEKAITSR TQSNPMLLASELPLPSLPAAASCQN  
DHETTASDTPSSKGSLSQSIWDALNCGGRAESGDYPISSPESRDANPHTASRCSDCVNPMA  
STLMKMWREERKEADAFTEDDATNEMYSKASRKEVESPSNSWTSPPRKAFSSDLALVYG  
LERVERNLTLARPMARPATPSRPPRPFAHQHSNE

>comp15404\_c0\_seq3; 610 428 2509 LEN=2669; translated  
MADRNERHFLEFYTPARLRQTRIVRTEGQPRDSCSDEKENPSSHPRGNEGGILGQSQRRL  
LFTRSASKPKFAHDGYGNSGTDRDNCENASRD LASFHFATASLKTTPPCTARVFQSSQEV  
HTWSSADDGIVIKTSPSYTSPSSDTSNTVLKEYRSKQSLSSSKTRVLSFASPIPGGLRL  
RSSPFWKIGKAHNRKESGEQSKPQHDLNSTLPTMYTEDTNALSLOTTPSENVSPAAPSTT  
PKRHILWSPPGTSRLLRKYRQRTHERELDQSESSVHSPAAGASLKS PKTTGKIGLRLLDS  
GAKRCRNHRLALRPRTNRND EAKVGTKEYPSNDNRSLSPSTVSR LQQDIESYRHAHEKS  
KQTT SVMARPDVEETVAFDDNRGSND SHDLGDCDDQKGSNAQATSDVLPSSSNV VADPF  
KLAIDAGTTDELPLEKNQRADPQEDSAVWEA HAAEDTAKKESCADTIVPPVESISISDEE  
SGVFQSTRSKTRARRKSLADAIKAVSAAEKAITSR TQSNPMLLASELPLPSLPAAASCQN  
DHETTASDTPSSKGSLSQSIWDALNCGGRAESGDYPISSPESRDANPHTASRCSDCVNPMA  
STLMKMWREERKEADAFTEDDATNEMYSKASRKEVESPSNSWTSPPRKAFSSDLALVYG



LERVENLTLARPMARPATPSRPPRFQAQHSNE

>comp15404\_c0\_seq4; 571 428 2612 LEN=2658; translated  
MADRNERHFLEFYTPARLRQTRIVRTEGQPRDSCSDEKENPSSHPRGNEGGILGQSQRRL  
LFTRSASKPKFAHDGYGNSGTDRDNCENASRD LASFH FATA SLKTT PPCTARV FQSSQEV  
HTWSSADDGIVIKTSPSYTSPSSDTSNTVLKEYRSKQSLLSSSKTRVLSFASPIPGGLRL  
RSSPFWKIGKAHNRKESGEQSKPQHDLNSTLPTMYTEDTNALSLQTTPEENVSPAAPSTT  
PKRHILWSPPGTSRLLRKYRQRTHERELDQSESSVHSPAAGASLKSPKTTGKIGLRLLLDS  
GAKRCRNHRLALRPRTNRNDEAKVGTKEYPSNDNRSLLSPTVSRLLQODIESYRHAHEKS  
KQTTVMARPDVEETVAFDDNRGSNDSHDLGDCDDQKGSNAQATSDVLPSSSNVADPF  
KLAIDAGTTDELPLEKNQRADPQEDSAVWEAHAEDTAKKESCADTIVPPVESISISDEE  
SGVFQSTRSKTRARRKSLADAIKAVSAAEKAITSRQTQSNPMLLASELPLPSLPAAAASCQN  
DHETTASDTPSSKGSLSQSIWDALNCGGRAESGDYPISSPESRDANPHTASRCSDCVNMA  
STLMKMWREERKEADAFTEDDATNEMYSKASRKEVESPSNSWTSPPRKAFSSDLALVYG  
LERVENLTLARPMARPATPPVLLGPLRSTNRSTSDDWVLDRLGLFMVLGKCPRVAPASGTLR  
VAISTGL

>comp15404\_c0\_seq5; 571 439 2623 LEN=2669; translated  
MADRNERHFLEFYTPARLRQTRIVRTEGQPRDSCSDEKENPSSHPRGNEGGILGQSQRRL  
LFTRSASKPKFAHDGYGNSGTDRDNCENASRD LASFH FATA SLKTT PPCTARV FQSSQEV  
HTWSSADDGIVIKTSPSYTSPSSDTSNTVLKEYRSKQSLLSSSKTRVLSFASPIPGGLRL  
RSSPFWKIGKAHNRKESGEQSKPQHDLNSTLPTMYTEDTNALSLQTTPEENVSPAAPSTT  
PKRHILWSPPGTSRLLRKYRQRTHERELDQSESSVHSPAAGASLKSPKTTGKIGLRLLLDS  
GAKRCRNHRLALRPRTNRNDEAKVGTKEYPSNDNRSLLSPTVSRLLQODIESYRHAHEKS  
KQTTVMARPDVEETVAFDDNRGSNDSHDLGDCDDQKGSNAQATSDVLPSSSNVADPF  
KLAIDAGTTDELPLEKNQRADPQEDSAVWEAHAEDTAKKESCADTIVPPVESISISDEE  
SGVFQSTRSKTRARRKSLADAIKAVSAAEKAITSRQTQSNPMLLASELPLPSLPAAAASCQN  
DHETTASDTPSSKGSLSQSIWDALNCGGRAESGDYPISSPESRDANPHTASRCSDCVNMA  
STLMKMWREERKEADAFTEDDATNEMYSKASRKEVESPSNSWTSPPRKAFSSDLALVYG  
LERVENLTLARPMARPATPPVLLGPLRSTNRSTSDDWVLDRLGLFMVLGKCPRVAPASGTLR  
VAISTGL

>comp15404\_c0\_seq6; 610 197 2278 LEN=2438; translated  
MADRNERHFLEFYTPARLRQTRIVRTEGQPRDSCSDEKENPSSHPRGNEGGILGQSQRRL  
LFTRSASKPKFAHDGYGNSGTDRDNCENASRD LASFH FATA SLKTT PPCTARV FQSSQEV  
HTWSSADDGIVIKTSPSYTSPSSDTSNTVLKEYRSKQSLLSSSKTRVLSFASPIPGGLRL  
RSSPFWKIGKAHNRKESGEQSKPQHDLNSTLPTMYTEDTNALSLQTTPEENVSPAAPSTT  
PKRHILWSPPGTSRLLRKYRQRTHERELDQSESSVHSPAAGASLKSPKTTGKIGLRLLLDS  
GAKRCRNHRLALRPRTNRNDEAKVGTKEYPSNDNRSLLSPTVSRLLQODIESYRHAHEKS  
KQTTVMARPDVEETVAFDDNRGSNDSHDLGDCDDQKGSNAQATSDVLPSSSNVADPF  
KLAIDAGTTDELPLEKNQRADPQEDSAVWEAHAEDTAKKESCADTIVPPVESISISDEE  
SGVFQSTRSKTRARRKSLADAIKAVSAAEKAITSRQTQSNPMLLASELPLPSLPAAAASCQN  
DHETTASDTPSSKGSLSQSIWDALNCGGRAESGDYPISSPESRDANPHTASRCSDCVNMA  
STLMKMWREERKEADAFTEDDATNEMYSKASRKEVESPSNSWTSPPRKAFSSDLALVYG  
LERVENLTLARPMARPATPSRPPRFQAQHSNE

>comp15405\_c0\_seq1; 110 257 537 LEN=537; minus strand; translated  
MPRSPVCAPPPGPRRWTSLGDGPLRVAVALVQCXVSVGWSVGLRACLLAFLLLVPPFGSVF  
LGATPDDPSDQSSSPRIGSSPPARGVDRHGAAGL

>comp15405\_c0\_seq2; 627 1 1761 LEN=2198; translated  
XCTFSLGPPIHQTKQLGVDVDVDVDVDVGVVSLDRIAPIESLLLASDIAIETGSSELG  
SRGKERNGYEIPSRVLDVDRGGAALAVAAIGRERNQLGVLLALSTMDTPKLTVAVSSST  
NNSTNNNTVNNRTNSGLDAILDTPVPISNSSTDQNTRSGDTETETETETETVPPKTP  
QPKEEQPLFFPIRTKPVGNQSLGEGSEATANGTETIPVTFVLVLLSGEFANLFFKIVYGL  
GVAKMAAEKFGIASRLVFAMQVDRRNRVREKATRTRARQLLRCLPYFRGIDLGLGNKLLNE  
GYFDEIDAKATGVPFGFLDKYLSLETSRKHLRVLADYLRGLGRDAVRSESTDTNTTSSHK  
DHHRVPMVRLDDMFSGYLDLYDEVVRTLLAFDDEACCGSTLEAPPGPDESVLHYRNF  
GTEFARPDRRRKMFGFEELPGDRIANELFANLES GGKLALAGRNLAKDSLKNNTGAHGLVE  
ALRARNLTVRFSPGTDPSPTASGDPAMEDFCFLKARKELVGFASKSTYVAMASALGGPSI  
ATTRLYTYTASDGSTGAQPRHAYQHPELAARIQYEDYFDPKDRPA

>comp15405\_c0\_seq3; 667 1 1791 LEN=2228; translated  
XCTFSLGPPIHQTKQLGVDVDVDVDVDVGVVSLDRIAPIESLLLASDIAIETGSSELG  
SRGKERNGYEIPSRVLDVDRGGAALAVAAIGRERNQLGVLLALSTMDTPKLTVAVSSSTN  
NNSTNNNTVNSSTNNSSTNNTVNNRTNSGLDAILDTPVPISNSSTDQNTRSGDTETETETE

TETVPPKKTQPKEQQPLFFPIRTKPVGNQSLEGYGSEATANGTETIPVTFLVLLSGEFAN  
NNLFKIVYGLGVAKMAAEFFGIASRLVVFAMQVDRRNRVREKATRTARQLLRCLPYFRGID  
LGLGNKLLNEGYFDEIDAKATGVPGFGLDKYLSLETSRKHLRVLADYLRGLGRDAVRSES  
TDTNTTSSHKDHHRVPMVRLDDMFSGYLDLYYDEVVRTLAFDDEACCGSTLEAPPGP  
DESVLHYRNFTEFARPDRRRKMGEELPGDRIANELFANLESGGKLALAGRNLAKDSLK  
NNTGAHGLVEALRARNLTVRFSPGTDPSTASGDPAMEDFCFLKKARKELVGFASKSTYVA  
MASALGGPSIATTRLTYTASDGSTGAQPRHAYQHPELAARIQYEDYYFDPKDRPA  
>comp15405\_c0\_seq4; 1485 1 2620 LEN=2721; translated  
XMI AALDSGSAALRPPDLRDECLLWDSLQTAMANDRNEQLSKFKAVERDLERKMIKAKT  
HSIDLERKVAAMAMATETPEGGEDGKPAARNAPERERDSDTKQLQQIESLRQALEAKERL  
LREQQESHDAEVLAIQRVLADVTTTEKLRLEGGEDALAAEKESPTAPDPEAAHRGANADTD  
ACAGAEDSGRIASLTSELEDARAKLKEAAQENEKLATEVDALRTELETAKASADERDSAA  
EDRHRACLGELEAAISSQKLENEKLHVEKMEIQVARATAQAEAEGETENEALEREAEQA  
KQEREQAMLEVEELKQQRALAEQEI GNLKKEKEKALGEVEKLRKSTLNGAGKPAADAKVD  
AADNSSADTPGATDDGDESNESANASAAEESGNKTVRAEEFEKQLQTLTATTLSLETSKK  
IIASLENANGSLAIESRTKLKEKEEELSVAQKESSEERKRHLDSLATELRDLQRKQGDIEA  
ADRRAMGQVANQKKLKALLESSLDLQESVAVHECVSDASNIDEISEILGDTLNAIAVTI  
ESAEQTIDGSFAAAASDADYAEETTSEASSQVDVIHRKEPSRSMKHELDQKKIAVKRLEEA  
LKKQNEEIRKLRYQLDVRGRGSNHSNNHNSSTNNSSTNNNEQLRAEIQNLRQOCTTMM  
EVLAKKERELSVLRSSLKVDNDSGYISDDASDDEDDDDGTEVGSIMSAPKLNAYGPADA  
EAYATILSQANGRIGMPATAQVDEIESLKKDLMEALGEKESASKELKARRESLANAKMII  
SSLEKANKGMEDLRSRLQDSNTAISLLDKSKAHENEAEDLKQKLQKLEREKAEEREKY  
ESELTELRRKARSDDGEESSLEEEKRTLAADLD  
>comp15406\_c0\_seq1; 759 1 1645 LEN=1922; translated  
SGSRSGIGSGIDRSGIDQDEYNCVSSKRQWNNHKEHEHEQCQSCYKNYFTNQTAANGAS  
DPLHSIGGAVDNPGASEVSATGGKVSRRKQHEEEGEPSPREASRRASSKRSSAAMWKRV  
LHDDSNENNDNGAWNANDNNTGYSYRIVDAVFTNTNANTNAGRTGEAGEGFGGGEAANG  
PSSNKRRLTLLDCSTVVSEESPLLWSLGKNPAEQSRTRTRRKAPLKVLDPWTRIVDDQL  
RSVQQGTTTPEAHYRQLTTPDKFTFRDSVEKCRYLWRLLEDGTNLLHCCALWNDPSTASE  
VLRTCQGSWTNPASASNARSEWMEQVDGDRTPYELAKLIGHDRVCEVLEEVYGGDTSNY  
VYDVFYLENNDDSDNNVHEASNGNPAGSGDGGTISEPLGYVDAYGNNNILTAELSSGVGY  
WTPGDLVFETAADDPSGRFLGNNDGYDDDDADSNCEDHGANDYPEHDADEFDLQHGHG  
YDDYRGYHPSNNLDREDAESNGNYGGTDPGYGRYGDWHDGYNHNPGDHDEYDDGYGECEYEY  
DWEQDLH  
>comp15407\_c0\_seq2; 159 528 902 LEN=1803; translated  
MTDAPDFLREGSPTINVNIRTEPKRRESDDGDGDAVARMWKDQERMPQPDRDEPAGGG  
GTQNSASVPGVASGGTAIEPVKTNTTTTIEYDVVKCADFVLEDEGCWVRNMPDEIRRVPNP  
FVPT  
>comp15408\_c0\_seq1; 822 1 2675 LEN=2873; translated  
XECDDACCCDDETNASDDGAYDSDHDEALRLHRQQLYCLMRRLFVRPFVFFLGLLVF  
RGGSRSAQGFFRKRFGGTGAAVGTDLHANVDPVSDGDAGVLDGNAGIDAFGDADNRISK  
RTSSNGNSGLSDLRNYSRMVLRGHQSQQRQENRQDHLPEDEEGEHLFLSTDAAGMKPSP  
AADRIADRIADRTEPKGTRTGEPEPGNEPRGSSIPRGMPLMASYPIFNSQMSPISYSSM  
VRRNSGNDGQNDSDNDDGSDTAKNNKNNNDNPDYGVWPQAYPDPLIDPVRCGIAYLTAE  
ELQSREGAAATGVDAEEERRGGVVATTPASDNAGRAGAGLRLCDPDWVLGGVYLERIAKRM  
RDFPFRFTTGTGGFGASGGDGENESPSEHSENDGQTEPPWPREVGVSLAVATVRKM  
NTHAVLRQEQVFYPYGDNDMNDAAQIFARSLHNEWKNNRNNHRDETGDGSEEDTGDAS  
VFTGGWDNSKNSASVSDKRSNNRDFGVLI FLSIQDRVCFISTGNAISNVLPWWRLEHIVA  
SMKPDRLHRDYGNAILTAAIDDLSEMLEAGPPTVRDRMHDFMARFGVVI AFALFTFVFGAW  
GECRDRQKRFQYAE LRSQ LNEVEREKARLRQKQFQTTSCPICLEPFARGGEDDETTVGTD  
EDTLGDQTKDASRSERKMSRVDSYGIPLNGADRKKIKFLRCGHIFCESCWKSWIRSGHG  
NPCICPVCRQDVGRSSSKSKRRKEQRAARRARVDIATALAMEEEGTPLLASDRHDSLGE  
GGFGTRSQPPSYGALTTSSLDSPAPAVASPVAPGPPSSFGAARGRAGHDENSALLVRGAT  
LWASAFGPGPSIATMNRDRSGSSSSSTATYPDALHHERREDRRRRNLTFR  
>comp15408\_c0\_seq2; 723 1 2435 LEN=2633; translated  
XDLHANVDPVSDGDAGVLDGNAGIDAFGDADNRISKRTSSNGNSGLSDLGIILGWFS  
EDTNRNNAKNNRQDHLPEDEEGEHLFLSTDAAGMKPSPAADRIADRIADRITIGQTEPKGTRT  
GEGPEPGNEPRGSSIPRGMPLMASYPIFNSQMSPISYSSM VRRNSGNDGQNDSDNDDGSD  
DTAKNNKNNNDNPDYGVWPQAYPDPLIDPVRCGIAYLTAEELQSREGAAATGVDAEEERR  
GGVVATTPASDNAGRAGAGLRLCDPDWVLGGVYLERIAKRM RDFPFRFTTGTGGFGASGG

GDGENESPSEHHSSENDGQQTEPPWPREVGVSLAVATVRKMNTHAVLRQEQVFYYPYGD  
MVNDAAQIFARSLHNEWKNNRNNHRDETDGSEEATDGDASVFTGGWDNSKNSASVSDKRS  
NNRDFGVLIIFLSIQDRVCFISTGNAISNVLPWWRLEHIVASMKPDLRHRDYGNAILTAID  
DLSEMLEAGPPTVRDRMHDFMARFGVVI AFALFTFVFGAWGECRDRQKRFQYAE LRSQLN  
EVEREKARLRQKQFQTTSCPICLEPFARGGEDDETTVGTDEDTLGDQTKDASRSERK GMS  
RVDSYGIPLNGADRKKIKFLRCGHIFCESCWKSWIRSGHGNPCICPVCRQDVGRSSSKSK  
RRKEQRRARRARVDIATALAMEEEGTPLLASDRHDSLGE GGFGRSQQPPSYGALTTSSL  
DSPSAPAVASPVAPGPPSSFGAARGRAGHDENSALLVRGATLWASAFGPGPSIATMNRDRS  
GGSSSSSTATYPDALHHERREDRRRRNLTFR

>comp15408\_c0\_seq3; 491 1 1543 LEN=1741; translated  
XGNGDGENESPSEHHSSENDGQQTEPPWPREVGVSLAVATVRKMNTHAVLRQEQVFYYPYGD  
DDDMVNDAAQIFARSLHNEWKNNRNNHRDETDGSEEATDGDASVFTGGWDNSKNSASVSD  
KRSNNRDFGVLIIFLSIQDRVCFISTGNAISNVLPWWRLEHIVASMKPDLRHRDYGNAILT  
AIDDLSEMLEAGPPTVRDRMHDFMARFGVVI AFALFTFVFGAWGECRDRQKRFQYAE LRS  
QLNEVEREKARLRQKQFQTTSCPICLEPFARGGEDDETTVGTDEDTLGDQTKDASRSERK  
GMSRVDSYGIPLNGADRKKIKFLRCGHIFCESCWKSWIRSGHGNPCICPVCRQDVGRSSS  
KSKRRKEQRRARRARVDIATALAMEEEGTPLLASDRHDSLGE GGFGRSQQPPSYGALTT  
SSLDSPSAPAVASPVAPGPPSSFGAARGRAGHDENSALLVRGATLWASAFGPGPSIATMNR  
DRSGSSSSSTATYPDALHHERREDRRRRNLTFR

>comp15408\_c0\_seq4; 735 1 2423 LEN=2621; translated  
XDLHANVDPVSDGDAGVVDGNAGIDAFGDADNRISKRTSSNGNSGLSDLGIILGWFS  
EDTNRNNAKNRQRDHLPEDEEGEHLFLSTDAAGMKPSPAADRIADRIADRTEPKGTRTGE  
GEPGNEPRGSSIPRGMPLMASYPFNSQMSPISSMVRNRNSGNDGQNDSDNDDGSDTAK  
NNKNNNDNPDYDGVWPQAYPDPLIDPVRCGIAYLTAEE LQSREGAAATGVDAEEERRGGV  
VATTPASDN GRAGAGLRLCDPDWVLGGVYLERIAKRMRDFPFRFTTGTGGFGASGGGDGE  
NESPSEHHSSENDGQQTEPPWPREVGVSLAVATVRKMNTHAVLRQEQVFYYPYGD  
DDDMVNDAAQIFARSLHNEWKNNRNNHRDETDGSEEATDGDASVFTGGWDNSKNSASVSDKRS  
NNDRFGVLIIFLSIQDRVCFISTGNAISNVLPWWRLEHIVASMKPDLRHRDYGNAILTAID  
DLSEMLEAGPPTVRDRMHDFMARFGVVI AFALFTFVFGAWGECRDRQKRFQYAE LRS  
QLNEVEREKARLRQKQFQTTSCPICLEPFARGGEDDETTVGTDEDTLGDQTKDASRSERK  
GMSRVDSYGIPLNGADRKKIKFLRCGHIFCESCWKSWIRSGHGNPCICPVCRQDVGRSSS  
KSKRRKEQRRARRARVDIATALAMEEEGTPLLASDRHDSLGE GGFGRSQQPPSYGALTT  
SSLDSPSAPAVASPVAPGPPSSFGAARGRAGHDENSALLVRGATLWASAFGPGPSIATMNR  
DRSGSSSSSTATYPDALHHERREDRRRRNLTFR

>comp15408\_c0\_seq5; 810 1 2687 LEN=2885; translated  
XECDDACCCDDETNASDDGAYDSDHDEALRLHRQQLYCLMRRLFVRPFVFFLGLLVF  
RGGSRSAQGF FRKRFGGTGA AVGTDLHANVDPVSDGDAGVVDGNAGIDAFGDADNRISK  
RTSSNGNSGLSDLRNYSRMVLRGHQSQQRQENRQRDHLPEDEEGEHLFLSTDAAGMKPSP  
AADRIADRIADRITIGQTEPKGTRTGE GEPGNEPRGSSIPRGMPLMASYPFNSQMSPISS  
MVRNRNSGNDGQNDSDNDDGSDTAKNNKNNNDNPDYDGVWPQAYPDPLIDPVRCGIAY  
LTAEE LQSREGAAATGVDAEEERRGGV VVATTPASDN GRAGAGLRLCDPDWVLGGVYLERI  
AKRMRDFPFRFTTGTGGFGASGGGDGENESPSEHHSSENDGQQTEPPWPREVGVSLAVAT  
VRKMNTHAVLRQEQVFYYPYGD  
DDDMVNDAAQIFARSLHNEWKNNRNNHRDETDGSEEATDGDASVFTGGWDNSKNSASVSDKRS  
NNDRFGVLIIFLSIQDRVCFISTGNAISNVLPWWRLEHIVASMKPDLRHRDYGNAILTAID  
DLSEMLEAGPPTVRDRMHDFMARFGVVI AFALFTFVFGAWGECRDRQKRFQYAE LRS  
QLNEVEREKARLRQKQFQTTSCPICLEPFARGGEDDETTVGTDEDTLGDQTKDASRSERK  
GMSRVDSYGIPLNGADRKKIKFLRCGHIFCESCWKSWIRSGHGNPCICPVCRQDVGRSSS  
KSKRRKEQRRARRARVDIATALAMEEEGTPLLASDRHDSLGE GGFGRSQQPPSYGALTT  
SSLDSPSAPAVASPVAPGPPSSFGAARGRAGHDENSALLVRGATLWASAFGPGPSIATMNR  
DRSGSSSSSTATYPDALHHERREDRRRRNLTFR

>comp15409\_c0\_seq1; 438 421 2295 LEN=2917; translated  
MDEFQFIESLDALLASEAMDEATTAAGVELANQSSNASMSLPMNTHLSSTETAPLQGG  
IFGMNGQGTIGGSNASCNWLGVNEANTSDNANSTNTCNNSNP NPF SMPMQSPTRMTTISE  
APSIAPLHHFQNFASATGTAPTAINPYAEQIPSGATSLTSTNNTNSTIGTIDGNTLKTG  
LGTILPSSTLTNPIISQPTTTAATSTNALPNADPSGVASICSANSRNSANSRGS SHASS  
KRRGSNKGGGADKTSVSRKRSRTTTAVSESEDECSRQRDRNLREQRRSQKITHQIDQL  
REVLAASVRFKPKDYSTLVSVVEYVKQLQRRSTMLDQEHKLLDITRTNEMVNEPYLQ  
NSGVSAASAIAGGGNNPGMGNRAENAQPDSALSGGAGATNSNSNAVSGGPNDIFNEDE  
LVFVRNVDYKSI FDRCGMPLAVASIDGRLIDCNAEFVKMTGFERTDLLPAEQQHRKQPS  
SAI IADVDGSSSHLSGAVFPDAASSSSNGNDSSTGIKQDPKTQTSSAKASQNVNAVRNFSL

FNLLSRNHMEKVFVSLSEMLKNPPKEECGTGFVSSADYWAGNVRLSRNTHLEVRMNVSLV  
RSPQGRAKFFDCSLTPVEPVGSYD  
>comp15410\_c0\_seq1; 193 768 1235 LEN=1235; minus strand; translated  
MSVSDSGGNEIGNSEGDEGQLSEGCDGDTVGITLKGKELALGIELHMSVGNKLGIEL  
GIILGIELELGIELGIKLGLELGVKLGLELTLGRELGIKRLGAVLELGTGIELGIELAL  
GIELGITLGLWLRLLGIELGITLGIELRVGIELGIEL  
>comp15410\_c1\_seq1; 839 1 3257 LEN=3459; translated  
XTNTNTNTKYENESEHELNERRRQSSTVLCFANPDNMAPPSSSNTSRIAANDGTCGRRRT  
RRSRMGILVSFLVVSQGPASAFVCTSPLATPVQSSHPPSMRASLFVPGPPLEGPVPTSTS  
LHGGRGALATNATQQHNSGHEHEHEERSPSSVEELLRFHEYGERIVKLAFDKTDGSFLGE  
RFVSRNGGAEDAGSPSPSESESIYAEVQDGGIARICRILRIMPSPPAKKKAGGQKPNLSR  
APRLEVGFRRDDDKDGGDSETKTIDLQITTIWTGLEDELGERLRKKNQSTDTICGKVQ  
ECLPVNHVDESFECKYKHYVGRGRSAQGMTKKQTNMISAAASVAASSNSSTFEETEELRV  
AIDRILKQCVRCSKYSRLMDSESLERWMFYVDVEGSIVKNHTRDTSMIERRIFCARALA  
EDAERAGRFRKRTPCVWLPPPADGSESGDETTLTLLNGGWTVVVDQSVRAATEARNFVDKA  
MNGKSGPAIGKSSSPYDPNNERILCRLESLACGEKLRKQQRGGNAGGGSIKLEVDVRTVL  
ETMNLPLSSEGAREALIRMGRWTKTGSVSENGETTTQYERWSPEVLEAAKWYTLMDGIRR  
EEMKSEILERRSGTQAAKKNSPSALEGRDLDLGLPCICVDAQRVSFRRDAFGIRKRSSTG  
RKVKKEASEWELMFHIADVSDIYSPEPVVVSACASGATEGQPTAAKTPIKDQKHLREL  
EKAARSRIRSEYNLPLGLPLHLLPTNVLASLSLDAFKQDFSSDPSTWPTSWQTMDREHGSV  
NRAVTLWVYIDERNFILDGMGFERSIISRPLALSFKTATNLLEASNEQQRKFPMLSKAR  
VLLSKVEQNIKEYDEYRMKTQDSARAREKKLASREFVSNQVYRGRNQKNRRDDGSDGFQR  
SRGHKLVDISILECYESAFRMMIRKRALVPHHQGFNNDGRSASSPLRXYLHGLAQRQALS  
ILCGYGGKPIDDKQCKEVGQTIRNTYTARQHVGGAIKGPKAVSKQQRQAVRALDFHLQNH  
PRSRNRVPAISTGVNSEVVIQGVGAIALCKEVPGTIARGVKVMVKILDVDAKNGKVVA  
LDKIV  
>comp15411\_c0\_seq1; 415 253 1341 LEN=1650; translated  
MAMPLFGAASLFLQGVSAQELCACSPSRYTFTLDFSLSCPPVNVTRNGGISATFCQVSPF  
GDEFHNITDLVPAEVMYVDVLELQGAFEVLSQQNITGSFMDGDQFDYTSIVEEEDNLEIP  
KVIQLNIFAQNAAGEAIVNFFAISYSNVCDEYPSLVEGESAGWTHFTSLEPPSIENCPAA  
LVPTETPATDQPTAAPVAVATDPPTTAAPVAVATDDPTPGSTASEPTAAPVAVVTELPK  
APQDTNVPTLVMSMDMSVDLGGLLADDDVMSMNLKPKTKSKSGKKVDKLIKSDKSAKFGK  
KSKKTSKPKDKHPKSEKSAKTVKAPKSEKSEKETKSVKKAKEGKSEKTDKPHRRRRLRVHQ  
VQ  
>comp15411\_c0\_seq2; 399 211 1187 LEN=1187; translated  
MAISRQQRSKRPMAMAMPLFGAASLFLQGVSAQELCACSPSRYTFTLDFSLSCPPVNVTR  
NGGISATFCQVSPFGDEFHNITDLVPAEVMYVDVLELQGAFEVLSQQNITGSFMDGDQFD  
YTSIVEEEDNLEIPKVIQLNIFAQNAAGEAIVNFFAISYSNVCDEYPSLVEGESAGWTHF  
TSLEPPSIENCPAALVPTETPATDQPTAAPVAVATDPPTTAAPVAVATDDPTPGSTASEP  
TAAPVAVVTELPKAPQDTNVPTLVMSMDMSVDLGGLLADDDVMSMNLKPKTKSKSGKKV  
DKLIKSDKSAKFGKSKKTSKPKDKV  
>comp15412\_c0\_seq1; 1465 1 4623 LEN=4747; translated  
XKISTKDISITSSVNTSRPHSGSIRWSQLPHERRAAQLQRQGERNEQVESTTIFNLKKIIG  
KTHKRYPIHIHTKLRKDATVPLYAKLRLMFVFLFTSLQDHLIAESSFVGRGTSISSI  
IFGRIRRGIGKHSQTARNEQYLSIRGGSVHNDSDDDEEYISLLDNDGSETQEDSRRGDD  
KESQLFTENIKEMPVIEVEGGAKGGEETNLGLLTEETDSADKMLVERHRKPNRHTSDIIL  
ELDRRSSVSGNDESLALRQMVTDRTEYIYELQEETSRLLDADDASTVKIPHRKLLHSL  
AKKVPAIKQSPDVNLRHSSRSDIDPGVAACIIGRLAFACERYEQVQKSASKDGTSSDN  
GDGRDDNNKQESAAPQLTMDRRFEQLVECVISGVNIKKRKMESLQRQIDKSNDEISTDIE  
EVLDEEDVHFDEGLNIRDSCRAAWGIAILGAHYLDTMGGVKVKDLLLALLSLRIRELLAR  
LQLLRQGDILSSDCGLYYQDSVPSERRLVTPEDRLNELAEELAEDAASAMWAFGCVKAC  
TGMKSVPLFEACCSILCQDPVLDLRRRAQEGLYEPDKYPSIGSSDVVDRLAHSEAVEAEED  
SLENHKKIVVEESCNDKDAFLDWLSPVEVTDILWALALHGSNTTSPKDKDEVTLSETA  
LTLRETAYDRLMEWLKEDLLENENESPOKQETSTEMESNEEDVTLVEVVDAAALLASEN  
DESSAPTGPSENVEERESVPTESFAMKNSAIVTNSANSQEVVVDAAKLLASMECDEDA  
VTVETEVMVAPTSVIEGNSVTSNVVVPNIIREKRPRIFSPHDLASIAWSVTELDRPLRH  
IVNDIIELLWRLGPDSICGLSGTDLNLAIAIARYDGENNDASSLSITRWIADHALQRTA  
KYALLRIFQPPELGRIMWAIACTSSTHTSALHGATGNEMGSIFLTREALKTASENLTF  
TETLVRIAWAHLEINESRLSMLDSFDTMALGKILAAAHEHSLHRWERVDFATDVTMAESHA  
ESPLFSTFFGRPRVNLPILEQTVNDDDDDDLLALAPLGRSQRPKLRDLMDPSTLCKAAC

GFQRLSKKHPYIRGGWTFTRVAVRLLSSKNARLMRECSIHDLVRLSEAVVLSVDVEHGKE  
LITGLFARKVVKVLNEILEDIDIQDGTSIDIASASSELSSTLIWALGEMGIKYVSAENGL  
SSKKTRLISIGPLLQNIIRVGSNLNLVALARLIRGYVLLKMTDPDEQPFLLLEVLNRINKELPS  
ISTGNDLCSLAEAI GMLKEATKTSAKKKTQREDSPLQPPSVEEGNGMKETDDVEKISV  
QQKISRLVDHTLNSIAELTIRLSGNMSANEIRRLLEVYSLLPFQADAMIGCLSDEISTR  
AALQNLKSHSLGALLE DANKRSSIVRSSLFDDSNSTFFSSMKARLVSVFGSSNVDQDEV  
ERINDEGTIMTEEIASIVQESIRATVDATNRAKADQSALQLSLDKIVASLEEGASFELGR  
SQELIENYNRTEFSTGERRSRDYDKGNFISKRVLSRLLP

>comp15413\_c0\_seq1; 873 169 3419 LEN=3467; translated  
MFSSNPQSEKFGPRYNLYNGCTSDSDSSKFESGAYNLSLLSDHSSTLSGLSGSQLNVSEI  
VNPDGSVTVRNLVQEDGTLIKKEKLEDQKTKNLNQSGGTFRNSSYGIHDPQFVAGD  
TRRVKRAFERNNSFDRVNPKHFM AENTLGMKRVD SFDSGSACSSAECSSGNRTGFNES  
TEAAAHLRRQLAQSPSSALNYTVRACSPPEPSLFHGVSPPIRALKSGRQSRKIMNSM  
VYSPSNYVATSVSPTRQKHVAFSEPEILEQAQPIPYSMSSPASSNIGDFGCWPVEAKNC  
YDPMGHKTSRESSSSVQSHEESSIFDGVKKNFNAGKTL DQLVLDLHEQQNSKTWISYLDKE  
GISPSLYSVTVRKGHRNEKIGIFVHLKRFPGNRLVVSQISPAGKFADTGI EVGDVVVSI  
NAENMIKDPKTQRALDIVTSATDTVTIVVQKHLDSDDFQSATETSISISSIKDISSIAKK  
PHFQTIEKVKTM DGSEHKPIRKNSEDINKRNTARKREEMTSDGSMLISKDTELKGPVVIS  
MKEWKLTGAI VVSVEKSDSSENP GIRMGMKETSSGRAVCISEISPSSLFARTPLRMGDI  
ILSINNVS LHDNADVF DAYAAMGKSEKRITLVAKKGGESLNDFLLAARSQPVMKGLNRS  
GHDSFDSQLSSKTAGTVGTTASGESGRGGSNDSFESFDGKSE DGVI GFKSTEEWKS NFRH  
DAVNNTSKAVSSPSRRRNEFEFDEESYGASLFGYNASSNVRIKSYCDEDIGFKMLEITT  
EWGRLLVVSNVTPRSLASCTDLKVGDA ILSINGISFRKKASAARASSIIRDAHREVYIEY  
QKLSSFS PAVPVDLQIRHHEKGEVLKTRSFDSYDSVSKKQADVSHSEKLGKNEENS SLEK  
ALASGQEKQVGRYAPQRRQNSPVNTSERRQNSPVNTPERRQNSSVNTPVRRQNSSVNYQK  
LRVTVTKDEKKQTVGISLATVNNKLIVTEISAKGLLRHSPLVHGDTILAINGVSFRDDPN  
AKKATLLVKDAPKVSFEVLKTENLYQESMDGVSTKSCVPVHLICSRRRKANHNDNFERV  
GKN

>comp15414\_c0\_seq1; 218 111 461 LEN=507; translated  
MRFKRLQIHRPLRQNGRVVAGSFRRVWSLLKVFSLIVAAAYLFGLYSIYNYGERTGTTS  
DPGGSFAFAGGQRQQQQQKEQHQRPPHTDEDEDEDEGVDADADADLDEEAGGRRGP

>comp15414\_c0\_seq2; 288 1 1353 LEN=1399; translated  
XQHNTTPHSEPAHGPA SCECKRPPNTALRGDPPEADAAAQPNKPSGAERNATAGGLRA  
SASKTHAPPCHGARAI AVAVRDPEHLPQAHPVPVRCGGAVLVGGGGG PSLSAGPA I L FCA  
AEGEATGGSGVIP SAGATGAPT VAPTRRP I VLVFDGEKATI QGDDESDREPYSRGWINY  
AFYFFRYGALLCLVCPVRGLGVVHSAGGRILLRYSSYDDRGRGIGLPTGLRYPADIE  
RWLFLTGLVDP AEGGPGSHPHGPRPPRAVPDRLTHAEVLALPEISAPAPLRGEDEHGT  
GSGDCDRDCDCHQTAEVVRIGAGKEEGSPTEEHAEPGGGPCTDADAGEAAAATA TTTT  
TTTTKSTACSI CLDDFEAGEPLRLLPRCGHAFHTDCILPW LTERQGVCPYCKVPVKEPPRG  
SDEDEDEDEGVDADADADLDEEAGGRRGP

>comp15414\_c0\_seq3; 441 1 1300 LEN=1716; translated  
XNRYGERTGTTS DPGGSFAFAGGQRQQQQQKEQHQRPPHTDEDEDDVADDGKITIGVASTV  
TGCGSEPFVDGA AVLKYS LDVQSRGAGSRFRYKNYVMYHPDARECVLPLEGLGYTL LERP  
TPIKVEEIGGDGTLRERIVNNGCCGEKELIKLEAFRLVQHPLVIHLDDLVLV NKPMD DVL  
DLMLNP KKYKESPELLANVPVMWPSQEIPDEISLMFTKDYNNVAPRRADKPYQGGFFVIK  
PSIDTYNDFVGI VRSGDYHVKRGWGKKGVPFYGGMTIQGLLPY YYYQWLHPGRSVELNRCK  
YNNMSDDPYQHRDNGNQRCRTNEEECEDCFARSDDVVT FHYTICQKPWNCNLYK SMLKT  
FGLCREMNRK WYELRSELENPGDGAAGEREASRWITTTDTAARKGRGATNPSSLPTGCQS  
ERRFGLWMQSGAE

>comp15414\_c1\_seq1; 529 205 2319 LEN=2658; translated  
MFSNSCNDDNNENNSGRSRRSTKIVSPVLP SRVQMMGPNGIPKPKSLLASFLFSALS  
GP EEQRHEQVGHQNASPRSLPAPRSLQSNLLPPCLLGENVAGSSRRSRTVTDDATEEPAEA  
SSRPLPLPRRSWKISRDDSTALSRVPSFYPP LDPNCTALVTDAPPSIVVVR ISECLRKR  
SIAAEYDDES VVARCMTVDRCEFEIQLYRSSSPATSFLGGDDFDVTMADLGTLPSTTYN  
APRCDAVIVEVRR LSSGSSITSFHAACR KILMAAKGLDAGTDERKPCRNGMEFRYRPTR  
KRGRNRLAPACGPKRPRSLLAGNGSPSSESGGSAVPDETPGGVSSAESALEGALELLRCKD  
RLECRRLGMERLVDLTNP DSCGRETCRHVGMRLLSQE QSPHHPRGVLMEYLMHPGAAQLA  
SETVFGSSANAQGD CDASANENENSERMVRSFLESSALSASPLASHSPQKQQRQOQSAHNG  
QSPSSCFKKKMSLALHRRPASPSPGQEHNSDARLLLS PD DL RHEARLRAMALRVLCNILD  
HLSATKELRRVLYPKASSE PRAANRGVGASRWVQPAFLLSLVQELQAGRPPSVAENGY

KLASVHEAALAARCLRLLAGYEGEDEDEKDCDERHPPPRGTDDDDDEDDCHNRNCVVEVR  
DFLRSEPVLERLSYARLCGRVTHAILEFEADCTYHRLTEDARSC  
>comp15414\_c1\_seq2; 447 92 1744 LEN=2190; translated  
MTEVGIISYTKVRDLEEQERERQQQENEVRDEPLTTDAPALTDLSAVSADQTPNTSTLMN  
RSINVDEAIERLGMGSFQLIVLTAAGLCFAADAMQVLLLLTFLSEILRSEWNLSDDDETAMI  
TSILFIGAIFGTLTLGPMADKKGRKPVFLAASIISCFGLAVSMVNSYWALLGNLFMVGW  
GVGGLTVPFDILAEFLPSNARGKNLLVIEYFWTIGVLFVVITAYFTLGHGKNDGNWRLFV  
AICVAPCWLSVLIGYYFVPESPRWLCSQGRCEEAIKILRHAATINGKDKELLYPEGMQFD  
DEPEEENCNFRELFRPRWRWTTLKLWGAWGFFAFGYGTVMGITEIFDSENQTGLEGEERA  
KNFDYLAIFVSSSAEFLGTTIAILSVDSLGRIPLQVVAYTMAGVLVCSLYLSAAHDSHRN  
VLIAFGFGARIFEMTGSCVSWVSTAEILTTEVRTTGHSAANAVARIGSLFSPFVIEGHGS  
LVGKGLVMLGIHAGTVFFVSQLPETKGSRLGISQDDSI EDEDDGMNDVFRDEDMQDDVLV  
VDDARQRRG  
>comp15414\_c1\_seq3; 529 205 2319 LEN=2770; translated  
MFSNSCNDDDNENNSGRSRRSTKIVSPVLPSPRVQQMMGPNGIPKPKSLLASFLFSALS  
GPEEQRHEQVGHQASPRSLPAPRSLQSNLLPCLLGENVAGSSRRSRTVTDDATEEPAEA  
SSRPLLPLRRSWKISRDDSTALSRVPSFYPLDPNCTALVTDAPPSIVVVRISECLRKR  
SIAAEYDDESVARCMTVDRCEFEIQLYRSSSSPATSFLLGGDDFDVTMADLGTLPSTTYN  
APRCDAVIVEVRLSSGSSITSFHAACRKILMAAKGLDAGTDERKPCRNGMEFRYRPTR  
KRGRNRLAPACGPKRPRSLLAGNGSPSSSESGSAVPDETPGGVSSAESALEGALELLRKD  
RLECRRLGMERLVDLTNPDSGRETCRHVGMRLLSQEQSPHPRGVLMEYLMHPGAAQLA  
SETVFGSSANAQGDASANENENSERMVRSFLESSALSASPLASHSPQKQQRQQAHHG  
QSPSSCFKKMSSLALHRRPASPSPGQEHNSDARLLLSPPDDL RHEARLRAMALRVLCNILD  
HLSATKELRRVLYPKASSSEPRANRGV GASRWVQPAFLLSLVQELQAGRPPSVAENGY  
KLASVHEAALAARCLRLLAGYEGEDEDEKDCDERHPPPRGTDDDDDEDDCHNRNCVVEVR  
DFLRSEPVLERLSYARLCGRVTHAILEFEADCTYHRLTEDARSC  
>comp15414\_c1\_seq5; 367 92 1829 LEN=2275; translated  
MTEVGIISYTKVRDLEEQERERQQQENEVRDEPLTTDAPALTDLSAVSADQTPNTSTLMN  
RSINVDEAIERLGMGSFQLIVLTAAGLCFAADAMQVLLLLTFLSEILRSEWNLSDDDETAMI  
TSILFIGAIFGTLTLGPMADKKGRKPVFLAASIISCFGLAVSMVNSYWALLGNLFMVGW  
GVGGLTGELFRVXNFLHQFDMTKVKGNPCSLPSMQSPFDILAEFLPSNARGKNLLVIEYF  
WTIGVLFVVITAYFTLGHGKNDGNWRLFVAICVAPCWLSVLIGYYFVPESPRWLCSQGR  
EEAIKILRHAATINGKDKELLYPEGMQFDDEPEEENCNFRELFRPRWRWTTLKLWGAWGFF  
AFGYGTVMGITEIFDSENQTGLEGEERAKNFDYLAIFVSSSAEFLGTTIAILSVDSLGR  
IPLQVVAYTMAGVLVCSLYLSAAHDSHRNVLIAFGFGARIFEMTGSCVSWVSTAEILTTE  
VRTTGHSAANAVARIGSLFSPFVIEGHGSLVGKGLVMLGIHAGTVFFVSQLPETKGSRLG  
ISQDDSI EDEDDGMNDVFRDEDMQDDVLVDDARQRRG  
>comp15415\_c0\_seq1; 178 29 1253 LEN=1364; translated  
MTTRLKQKVPLHDQITGIGESSFRVFPDRVEISDADGWIWDTKTTKKNNDGEYVKCVDCW  
TEAAPPCTPHTASTPKAGGRNRTYSVGGFDGVVSKDVTVDILKGAPLARN SFPMVHEGFQ  
DAYSEIRQQLFELLPLVLRQLAKSTESSTRAAGKEPLALPKIYCTGHS LGGSLAQLFAL  
DLAANCELVLPHRQSQRSSPSPTQNKLRQAGFFPTLTAATGLPPKDLRLQPAVGVYTY  
GQPRVGNKAFSRLYKQRVPHSFRVNEGDAITTIIPNYLWCGGLYKHAGLEVILDAGMTGN  
VLVGP TVETLFRFHKVRTNVMAHQMQR YRECLECIFDPS ELL EYRDHNVA YEELRDVS  
GGNDEKRRQEERRQTKENRPM DGLDWNLD SHRKETGVVETDELNWYS  
>comp15415\_c0\_seq2; 621 281 3963 LEN=4074; translated  
MSRDFNPFDDDYQDDNFQDRPVGDSQDPPIDTTASFNRGDELGQNYTKTRQGRSAPLLFS  
NPFVDQVGS DSGLGLPTATEKYLEDSFDRAPILSPDAIASSPSYKSPKRN YNEAGTIAH  
SEMSPLLPDDL SRGYQSSSPSLRSGRSRRRKITVPSRIFTGHTSEPSPYAHRRLSLSSA  
ESRRSGNFKRHRGGHQKSDVVMNELAHSDDHEHPEQVQMEYKYILLEDLGTAASWVILVL  
PYATFFSILLLYLISVPVAAMGSTVTALRISCFLVTFSSIFVFWIRKMEMVQLCIGGICK  
RLRCLYSLVCRNLF RDDEK GDEIDGNTDETYW WENPWVLFPERYYVLP LLVSSLLVLEPI  
LVVIYFY PALGTP TLYSIAHASSEVGIQACAFIYLCLIQGFRYHTGERSKRR AELQRKAL  
QLRRRAVKFVDECKDEHKS FIDSPKV VQNYDEFDIDGSAFTGHLRLPN DPCADGWADFL  
LPKTFLLAIGVLSASMVSFSMAPPGGDKGFRTL FVFGSIIYAMTLSAWTLLTIAALYTTG  
QKLKREPFLGTRPAQLAYRILFAHSGLAIIGL CIASMQYINQIKMALKNETISTIEQEN  
RSVVYLEDISFGMFGRLICLTAQVVITAFIFLPPHTMDFEEDFDDDKNELTELQILSKK  
RRDKRLVVHLAKE SRPGAFFRAXIQNLDESNSLFQDDMFQLYKDFHTDRDTHQRGLV SIG  
PYTPVFCAELACWLNEASWQAYNSPVESTERKDFGNIFDKEDFVGWMRLDLIGLQLEGYV  
YDERTSTQAYIATNSAPQVDGEEDSIIVVAFRGTSDVANVKTD FRFRQVPLHDQITGIGE

SSFRVFPDRVEISDADGWIWDTKT'TKKNNNDGEYVKCVDCWTEAAPCTPTHTASTPKAGG  
RNRTYSVGGFDGVSVDKTDVLDILKGAPLARNSEFPMVHEGFQDAYSEIRQQLFELLLPVLQR  
QLAKSTESSTRAAGKEPLALPKIYCTGHSLGGSLAQLFALDLAANCELVLPHRQSQRSS  
PSPTQNKLRQAGFFPTLTAATGLPPKDLRLQPAVGVYTYGQPRVGNKAFSRLYKQRVPH  
SFRVNVNEGDAITTIIPNYLWCGGLYKHAGLEVILDAGMTGNVLVGPVTVETLFRFHKVRTN  
VMAHQMQRYRECLECIFDPSLELEYRDNVAYEELRDVSGGNDEKRRKQEERRQTKENRP  
MDGLDWNLDShRKETGVVETDELNWYS

>comp15416\_c0\_seq1; 1325 433 3231 LEN=3353; translated  
MDLNDDKGRSSGLPQTTT'KKPPPQRQSRNYRSDQEEEEKSSGNEDIEVAINDGRSILSSS  
TTATTKTAAAAALLDQOIEGQRQKGVNNFDDNAGGKSRPDADADRAFKQKAKAARMSAVS  
SGAYRKPPPPGSVAAPASSAAVATARDMSDAMAKSRGRRNAGAKNQKRPVPAHLRDSST  
GGHRNGGNTGSKNQTTNTTKLERLEEEVAAKARGKAPTSAGARASVTKRNPPGLSPNRSQS  
EASSPGSSFTAVKRMNRMEADIAAKEQSRASRGSGDRPAGKRLDRLEADVAAKERAKASR  
VTGKKASAIARKLAKNQQRGAPATVPGAVSSTEGGGRAALLAKKRNVAASVAATGTSE  
GAASSKLLKAPP SHGVNHLVGGEEKQPKHESPDASDGGAGGPTNVPPGTGGTEVGGRYESD  
SNNGLAVAVAVRENEVDVFIIPSAVEYDPDAIKYPVYKNQRVRYGLLFCILLIIVTACTIG  
VLTILQRQDDEQHHVPTESPTCARCTLDYIEQLELEVGSQKLNDEPESPEYLAKEWI IHED  
EMQLLPDLDNFIQRFIMAAFYFDTHQVAPWRSCNQSIDLADNETEKCDFLKLSGIKPLV  
FEAF PANRWLSSVHECEWAGVICDNLMQIRVIDLHGQGI EGTFPSSFQRLRYVQTVAMQW  
NNFTGPLPGGFQMKYLIHVEMHNNRFTGSFPNSWSSARNLQLLNVAENFLTGTQIPTSVG  
NFRNIKGLFLFRNQFSGTLPPEFSNTKSLAFMRFHKNELTGTIPPEFGDMHVNELWLHNN  
ELTGTLPTELGLTNYLTDIRMSETSLEGTIPEEIKMSQLWRLDLHKSFTGTISPNT  
KLEGLQTLRLSSNGFTGTLP SDFSSMTNLRVWLDGNNLSGTIPSSICDLKEEHILEFVQ  
ADCLPDPSSGQPLVTCECCDVCCSAETGACQF

>comp15416\_c0\_seq3; 971 433 1996 LEN=1996; translated  
MDLNDDKGRSSGLPQTTT'KKPPPQRQSRNYRSDQEEEEKSSGNEDIEVAINDGRSILSSS  
TTATTKTAAAAALLDQOIEGQRQKGVNNFDDNAGGKSRPDADADRAFKQKAKAARMSAVS  
SGAYRKPPPPGSVAAPASSAAVATARDMSDAMAKSRGRRNAGAKNQKRPVPAHLRDSST  
GGHRNGGNTGSKNQTTNTTKLERLEEEVAAKARGKAPTSAGARASVTKRNPPGLSPNRSQS  
EASSPGSSFTAVKRMNRMEADIAAKEQSRASRGSGDRPAGKRLDRLEADVAAKERAKASR  
VTGKKASAIARKLAKNQQRGAPATVPGAVSSTEGGGRAALLAKKRNVAASVAATGTSE  
GAASSKLLKAPP SHGVNHLVGGEEKQPKHESPDASDGGAGGPTNVPPGTGGTEVGGRYESD  
SNNGLAVAVAVRENEVDVFIIPSAVEYDPDAIKYPVYKNQRVRYGLLFCILLIIVTACTIG  
VLTILQRQDDEQHHVPTESPTCARCTLDYIEQLELVPVVRX

>comp15416\_c0\_seq4; 1029 433 3424 LEN=3494; translated  
MDLNDDKGRSSGLPQTTT'KKPPPQRQSRNYRSDQEEEEKSSGNEDIEVAINDGRSILSSS  
TTATTKTAAAAALLDQOIEGQRQKGVNNFDDNAGGKSRPDADADRAFKQKAKAARMSAVS  
SGAYRKPPPPGSVAAPASSAAVATARDMSDAMAKSRGRRNAGAKNQKRPVPAHLRDSST  
GGHRNGGNTGSKNQTTNTTKLERLEEEVAAKARGKAPTSAGARASVTKRNPPGLSPNRSQS  
EASSPGSSFTAVKRMNRMEADIAAKEQSRASRGSGDRPAGKRLDRLEADVAAKERAKASR  
VTGKKASAIARKLAKNQQRGAPATVPGAVSSTEGGGRAALLAKKRNVAASVAATGTSE  
GAASSKLLKAPP SHGVNHLVGGEEKQPKHESPDASDGGAGGPTNVPPGTGGTEVGGRYESD  
SNNGLAVAVAVRENEVDVFIIPSAVEYDPDAIKYPVYKNQRVRYGLLFCILLIIVTACTIG  
VLTILQRQDDEQHHVPTESPTCARCTLDYIEQLELEVGSQKLNDEPESPEYLAKEWI IHED  
EMQLLPDLDNFIQRFIMAAFYFDTHQVAPWRSCNQSIDLADNETEKCDFLKLSGIKPLV  
FEACEYFGDRAPEXCIRSKTQRRESWFRKSSPSVLSLTVNPFPSLSTFWAVPANRWLSSV  
HECEWAGVICDNLMQIRVIDLHGQGI EGTFPSSFQRLRYVQTVAMQWNNFTGPLPGGFQ  
MKYLIHVEMHNNRFTGSFPNSWSSARNLQLLNVAENFLTGTQIPTSVGNFRNIKGLFLFRN  
QFSGTLPPEFSNTKSLAFMRFHKNELTGTIPPEFGDMHVNELWLHNNELTGTLPTELGLK  
TNYLTDIRMSETSLEGTIPEEIKMSQLWRLDLHKSFTGTISPNTKLEGLQTLRLSSN  
GFTGTLP SDFSSMTNLRVWLDGNNLSGTIPSSICDLKEEHILEFVQADCLPDPSSGQPL  
ELANVAMCAAAPKRG PANSRNRNDLCGFLVVATTMV

>comp15416\_c0\_seq5; 1208 433 2688 LEN=2884; translated  
MDLNDDKGRSSGLPQTTT'KKPPPQRQSRNYRSDQEEEEKSSGNEDIEVAINDGRSILSSS  
TTATTKTAAAAALLDQOIEGQRQKGVNNFDDNAGGKSRPDADADRAFKQKAKAARMSAVS  
SGAYRKPPPPGSVAAPASSAAVATARDMSDAMAKSRGRRNAGAKNQKRPVPAHLRDSST  
GGHRNGGNTGSKNQTTNTTKLERLEEEVAAKARGKAPTSAGARASVTKRNPPGLSPNRSQS  
EASSPGSSFTAVKRMNRMEADIAAKEQSRASRGSGDRPAGKRLDRLEADVAAKERAKASR  
VTGKKASAIARKLAKNQQRGAPATVPGAVSSTEGGGRAALLAKKRNVAASVAATGTSE  
GAASSKLLKAPP SHGVNHLVGGEEKQPKHESPDASDGGAGGPTNVPPGTGGTEVGGRYESD

SNNGLAVAVAVRENEVDVFIPSAVEYDPDAIKYPVYKNQVRVRYGLLFCILLIIVTACTIG  
VLTILQRQDDEQHHVPTESPTCARCTLDYIEQLELEVGSQKLNDPESPEYLAKEWI IHED  
EMQLLPDNLFIQRFIMAAFYFDTHQVAPWRSCNQQSIDLADNETEKCDFLKLSGKPLV  
FEAFPANRWLSSVHECEWAGVICDNLMQIRVIDLHGQGI EGTFPSSFQRLRYVQTVAMQW  
NNFTGPLPGGFGQMKYLIHVEMHNNRFTGSFPNSWSSARNLQLLNVAENFLTGTQIPTSVG  
NFRNIKGLFLFRNQFSGTLPPPEFSNTKSLGM

>comp15416\_c0\_seq6; 1162 433 2829 LEN=3025; translated  
MDLNDDKGRSSGLPQTTTCKKPPPQRQSRNYRSDQEEKSSGNEDIEVAINDGRSILSSS  
TTATTKTAAAAALLDQQIEGQRQKGVNNFDDNAGGKSRPDADADRAFKQKAKAARMSAVS  
SGAYRKP PPPGSVAAPASSAAVATARDMSDAMAKSRGRRNAGAKNQKRPVPAHLRDSST  
GGHRNGNTGSKNQNTTKLERLEEEVAAKARGKAPTSAGARASVTKRNPPGLSPNRSQS  
EASSPGSSFTAVKRMNRMEADIAAKEQSRASRGSGDRPAGKRLDRLEADVAAKERAKASR  
VTGKKASAIARKLAKNQQRGAPATVPGAVSSTEGGGRAALLAKKRNVAASVAATGTSE  
GAASSKLLKAPP SHGVNHLVGGEEKQPKHESPDASDGGAGGPTNVPPGTGGTEVGGRYESD  
SNNGLAVAVAVRENEVDVFIPSAVEYDPDAIKYPVYKNQVRVRYGLLFCILLIIVTACTIG  
VLTILQRQDDEQHHVPTESPTCARCTLDYIEQLELEVGSQKLNDPESPEYLAKEWI IHED  
EMQLLPDNLFIQRFIMAAFYFDTHQVAPWRSCNQQSIDLADNETEKCDFLKLSGKPLV  
FEACEYFGDRAPECVSQONTATRIVVSEIFTVCLNLXTVNPFP SLSTFWAVPANRWLSSV  
HECEWAGVICDNLMQIRVIDLHGQGI EGTFPSSFQRLRYVQTVAMQWNNFTGPLPGGFGQ  
MKYLIHVEMHNNRFTGSFPNSWSSARNLQLLNVAENFLTGTQIPTSVGNFRNIKGLFLFRN  
QFSGTLPPPEFSNTKSLGM

>comp15417\_c0\_seq1; 836 185 3979 LEN=4177; translated  
MDSVNSDSIELASGLADESNANANATVEELFNASEIPSFSPSFSPPTVNETSHNASAAVT  
SLASVMGWPFFLAGCGVLILSLLFFGLSVHMGWIEDLAPRIANRPRNVIKSALLRTLPSHT  
NANGKGLFWYYPMAWITWAFNTTYKDCLTGIPGTGTRRDGLDGPLLKTNLDAVVMRF  
HTLMFKVALLVAICTVVILP INLTAGCDKAVFGEGETCAQYNKSVSTNYLKTTIASIPPK  
LYNNDPTVTQTTFQTSQ LVP IDLSRFVDDSDNDDSVNTSNVEGNSANQIQGLIPSQDFR  
IWA ILASCLIIYIYTFWLLVHEWRSIVVLRREYFLETTHYSQRMAELDKQIDQQQQQKQR  
HPGRTAATRIGIAETNDPNHTGNHATRNDHVGTDTQEQLPPPYLTHPEIRETPPSIGVY  
SVMYQLPESMVTYDTDEATEIERQLVATTNFFDEIIPPQDGFSSSVAAVTILPDARLVAK  
AWTSWMACELKIQDLRLVRRKITALEDKAGNLENDFPQQKEPFEPEPKHDEESSQGDQ  
DIFPDSATVASESKDGRFRYKDFNIQEYARSLGFGEVDSGLSLVDGMGIEEFNIFAYEC  
ALLAGRPNLKKQIWQHYDLDELREEKTLTEGLKEAQEELI EARDKVAKKASCKNLLTEN  
RDENVLPSTLEGDTEALDYSHAEHQKESFGIRQRRSNATTSVPFNKNSNNDDRNGTGR  
PLELVDHNSAVLNPQSHEERQKRFSKVRLWHRIFRGEYGHVERERKKHYGEHCEQGKA  
FVTILRKPVYAVVFTTNRQSAVIARQCLADGGGGRNVWKQVDDIPIYPLADAPPMFFPR  
GFMRPVTPNITYTSKKIRLWAI SVFIVSFTVANVYFVNQINRILLKPQYLEALGIPSDKA  
VSWSTTISGATQTLF SVSPVIFKLLANCDGQSASMEKAEQKSITYFWYFYVVARFMGQI  
IWEAVRRFLSATASIEDTITEAITELASTVPTALGPSALSVIIFQFSVTWPAFYFLPIQN  
FATNLFRLTWINRLLKGGGPGLEVPYRIYVDNGYIFACVTALAPLCPLIGPFGLLYYIVI  
APMLRWLVFGYRPRFDGGGDKWPKLYHIVVSSLLGQFITAIVFFTKLNNLAGCVIGFC  
VVPTLLYNNIVKEKYL RPFKDAALLQTGRLSNNDSGEHFTNCQQRQEYCHWLVDCHKASY  
VPTCLSGGTNEKLTTLTAAPAKAIPKVFLREADDRDKDSEKLQALLERKRAKKEEVQNLMR  
NLSV

>comp15417\_c0\_seq2; 563 185 2782 LEN=3515; translated  
MDSVNSDSIELASGLADESNANANATVEELFNASEIPSFSPSFSPPTVNETSHNASAAVT  
SLASVMGWPFFLAGCGVLILSLLFFGLSVHMGWIEDLAPRIANRPRNVIKSALLRTLPSHT  
NANGKGLFWYYPMAWITWAFNTTYKDCLTGIPGTGTRRDGLDGPLLKTNLDAVVMRF  
HTLMFKVALLVAICTVVILP INLTAGCDKAVFGEGETCAQYNKSVSTNYLKTTIASIPPK  
LYNNDPTVTQTTFQTSQ LVP IDLSRFVDDSDNDDSVNTSNVEGNSANQIQGLIPSQDFR  
IWA ILASCLIIYIYTFWLLVHEWRSIVVLRREYFLETTHYSQRMAELDKQIDQQQQQKQR  
KQRHPGRTAATRIGIAETNDPNHTGNHATRNDHVGTDTQEQLPPPYLTHPEIRETPPS  
IGVYSVMYQLPESMVTYDTDEATEIERQLVATTNFFDEIIPPQDGFSSSVAAVTILPDAR  
LVAKAWTSWMACELKIQDLRLVRRKITALEDKAGNLENDFPQQKEPFEPEPKHDEESS  
QGDQDIFPDSATVASESKDGRFRYKDFNIQEYARSLGFGEVDSGLSLVDGMGIEEFNIF  
AYECALLAGRPNLKKQIWQHYDLDELREEKTLTEGLKEAQEELI EARDKVAKKASCKNL  
LTENRDENVLPSTLEGDTEALDYSHAEHQKESFGIRQRRSNATTSVPFNKNSNNDDRN  
GTGRPLELVDHNSAVLNPQSHEERQKRFSKVRLWHRIFRGEYGHVERERKKHYGEHCE  
QGKA FVTILRKPVYAVVFTTNRQSAVIARQCLADGGGGRNVWKQVDDIPIYPLADAPPM  
FFPRGFMRPVTPNITYTSKKIRLWA



>comp15417\_c0\_seq4; 373 98 1007 LEN=1205; translated  
MYPFLPGKATASIEDTITEAITELASTVPTALGPSALSVIIFQFSVTWPAFYFLPIQNFA  
TNLFRLTWINRLLKGGGPGLEVPYRIYVDNGYIFACVTALAPLCPLIGPFGLLYYIVIA  
MLRWVLFVGYRPRFDGGGDKWPKLYHIVVSSLLLGQFITAIVFFTKLNNLAGCVIGFCVV  
PTLLYNNIVKEKYLRFPKDAALLQTGRLSNNDSEGHFTNCQQRQEYCHWLVDCHKASYVP  
TCLSGGTNEKLTTLTAAPAKAIPKVFLREADDRDKDSEKLQALLERKRAKKEEVQNLMRNL  
SV

>comp15417\_c0\_seq5; 563 185 3286 LEN=3380; translated  
MDSVNSDSIELASGLADESNANANATVEELFNASEIPSFSPFSPTVNETSHNASAAVT  
SLASMGWPFFLAGCGVLILSLLFFGLSVHMGWIEDLAPRIANRPRNVIKSALLRTLPSHT  
NANGKGLFWYYPMAWITWAFNTTYKDCLTGIPGTGTRRDGLDGPLLKTNLDAVVMRF  
HTLMFKVALLVAICTVVILPINLTAGCDKAVFGEGETCAQYNKSVSTNYLKTTIASIPPK  
LYNNDPTVTQTTFQTSQLVPIIDLSRFVDDSDNDDSVNTSNVEGNSANQIQGLIPSQDFR  
IWAIIASCLIIYIYTFWLLVHEWRSIVVLRREYFLETTHYSQRMAELDKQIDQQQQQQK  
QKQRHPGRTAATRIGIAETNDPNHTGNHATRNCNDHVGTDTTEQLPPPYLTHPEIRETPPS  
IGVYSVMYQLPESMVTYDTDEATEIERQLVATTNFFDEIIPPQDGFSSSVAAVTILPDAR  
LVAKAWTSWMACELKIQDLRLVRRKITALEDKAGNLENDFPQQKEPFEPEPKHDEESS  
QGDQDIFPDSATVASESKDGRFRYKDFNIQEYARSLGFGEEVDSGLSLVDGMGIEEFNIF  
AYECALLAGRPNLKKQIWQHYDLDELREEKTLTEGLKEAQEELI EARDKVAKKASCKNL  
LTENRDENVLPSTLEGDTEALDYSHAEHQKESFSGIRQRRSNATTSVPFNKNSNDDRN  
GTGRPLELVDHNSAVLNPQSHEERQKRFSKVRLWHRIFRGEYGHVERERKKHYGEHCE  
QGKAFVTILRKPVYAVVTFNTRQSAVIARQCLADGGGGRNVWKQVDDIPIYPLADAPMM  
FFPRGFMRPVTPNITYTSKKIRLWAI SVFIVSFTVANVYFVNQINRILLKPYLEALGIP  
SDKAVSWSTTISGATQTLF SVSPVIFKLLANCDGQSASMEKAEQKSITYFWYFYVVARF  
MGQIWEAVRRFLSATASIEDTITEAITELASTVPTALGPSALSVIIFQFSVTWPAFYFL  
PIQNFATNLFRLTW

>comp15417\_c0\_seq6; 544 185 3274 LEN=3368; translated  
MDSVNSDSIELASGLADESNANANATVEELFNASEIPSFSPFSPTVNETSHNASAAVT  
SLASMGWPFFLAGCGVLILSLLFFGLSVHMGWIEDLAPRIANRPRNVIKSALLRTLPSHT  
NANGKGLFWYYPMAWITWAFNTTYKDCLTGIPGTGTRRDGLDGPLLKTNLDAVVMRF  
HTLMFKVALLVAICTVVILPINLTAGCDKAVFGEGETCAQYNKSVSTNYLKTTIASIPPK  
LYNNDPTVTQTTFQTSQLVPIIDLSRFVDDSDNDDSVNTSNVEGNSANQIQGLIPSQDFR  
IWAIIASCLIIYIYTFWLLVHEWRSIVVLRREYFLETTHYSQRMAELDKQIDQQQQQQK  
HPGRTAATRIGIAETNDPNHTGNHATRNCNDHVGTDTTEQLPPPYLTHPEIRETPPSIGVY  
SVMYQLPESMVTYDTDEATEIERQLVATTNFFDEIIPPQDGFSSSVAAVTILPDARLVAK  
AWTSWMACELKIQDLRLVRRKITALEDKAGNLENDFPQQKEPFEPEPKHDEESSQGDQ  
DIFPDSATVASESKDGRFRYKDFNIQEYARSLGFGEEVDSGLSLVDGMGIEEFNIFAYEC  
ALLAGRPNLKKQIWQHYDLDELREEKTLTEGLKEAQEELI EARDKVAKKASCKNLLTEN  
RDENVLPSTLEGDTEALDYSHAEHQKESFSGIRQRRSNATTSVPFNKNSNDDRN  
GTGRPLELVDHNSAVLNPQSHEERQKRFSKVRLWHRIFRGEYGHVERERKKHYGEHCEQGKA  
FVTILRKPVYAVVTFNTRQSAVIARQCLADGGGGRNVWKQVDDIPIYPLADAPMMFFPR  
GFMRPVTPNITYTSKKIRLWAI SVFIVSFTVANVYFVNQINRILLKPYLEALGIPSDKA  
VSWSTTISGATQTLF SVSPVIFKLLANCDGQSASMEKAEQKSITYFWYFYVVARF  
MGQIWEAVRRFLSATASIEDTITEAITELASTVPTALGPSALSVIIFQFSVTWPAFYFLPIQN  
FATNLFRLTW

>comp15417\_c0\_seq7; 836 185 3979 LEN=4450; translated  
MDSVNSDSIELASGLADESNANANATVEELFNASEIPSFSPFSPTVNETSHNASAAVT  
SLASMGWPFFLAGCGVLILSLLFFGLSVHMGWIEDLAPRIANRPRNVIKSALLRTLPSHT  
NANGKGLFWYYPMAWITWAFNTTYKDCLTGIPGTGTRRDGLDGPLLKTNLDAVVMRF  
HTLMFKVALLVAICTVVILPINLTAGCDKAVFGEGETCAQYNKSVSTNYLKTTIASIPPK  
LYNNDPTVTQTTFQTSQLVPIIDLSRFVDDSDNDDSVNTSNVEGNSANQIQGLIPSQDFR  
IWAIIASCLIIYIYTFWLLVHEWRSIVVLRREYFLETTHYSQRMAELDKQIDQQQQQQK  
HPGRTAATRIGIAETNDPNHTGNHATRNCNDHVGTDTTEQLPPPYLTHPEIRETPPSIGVY  
SVMYQLPESMVTYDTDEATEIERQLVATTNFFDEIIPPQDGFSSSVAAVTILPDARLVAK  
AWTSWMACELKIQDLRLVRRKITALEDKAGNLENDFPQQKEPFEPEPKHDEESSQGDQ  
DIFPDSATVASESKDGRFRYKDFNIQEYARSLGFGEEVDSGLSLVDGMGIEEFNIFAYEC  
ALLAGRPNLKKQIWQHYDLDELREEKTLTEGLKEAQEELI EARDKVAKKASCKNLLTEN  
RDENVLPSTLEGDTEALDYSHAEHQKESFSGIRQRRSNATTSVPFNKNSNDDRN  
GTGRPLELVDHNSAVLNPQSHEERQKRFSKVRLWHRIFRGEYGHVERERKKHYGEHCEQGKA  
FVTILRKPVYAVVTFNTRQSAVIARQCLADGGGGRNVWKQVDDIPIYPLADAPMMFFPR

GFMRPVTTPNITYTSKKIRLWAI SVFIVSFTVANVYFVNQINRILLKPQYLEALGIPSDKA  
VSWSTTISGATQTL LFSVSPVIFKLLANCDGQSASMEKAEQKSITYFWYFYVVARFMGQI  
IWEAVRRFLSATASIEDTITEAITELASTVPTALGPSALSVIIFQFSVTWPAFYFLPIQN  
FATNLFRLTWINRLLKGGGPGLEVPYRIYVDNGYIFACVTALAPLCPLIGPFGLLYYIVI  
APMLRWVLFVGYRPRFDGGGDKWPKLYHIVVSSLLLGQFITAI VFFTKLNNLAGCVIGFC  
VVPTLLYNNIVKEKYL RPFKDAALLQTGRLSNND SGEHFTNCQQRQEYCHWLVDCHKASY  
VPTCLSGGTNEKLT LTAAPAKAIPKVFLREADDRDKDSEK LQALLERKRAKKEEVQNL MR  
NLSV

>comp15417\_c0\_seq8; 855 185 3991 LEN=4462; translated  
MDSVNSDSIELASGLADESNANANATVEELFNASEIPSFSPSFSP TVNETSHNASAAVT  
SLASMGWPFFLAGCGVLILSLLFFGLSVHMGWIEDLAPRIANRPRNVIKSALLRTPSHT  
NANGEKGLFWYYPMAWITWAFNTTYKDCLTGIPGTGTRRDGLDGPLLKTNLDAVVMRF  
HTLMFKVALLVAICTVVILP INLTAGCDKAVFGEGETCAQYNKSVSTNYLKT TIASIPPK  
LYNNDPVTVTQTVTFQTSQLVPIDLSRFVDDDSNDDSVNTSNVEGNSANQIQGLIP SQDFR  
IWAIIASCLIIYIYTFWLLVHEWRSIVVLRREYFLETTHYSQRMAELDKQIDQQQQQQK  
QKQRHPGR TAATRIGIAETNDPNHTGNHATR NCTDHVGTDTQEQLPPPYLTHPEIRETPPS  
IGVYSVMYQLPESMVTYDTDEATEIERQLVATTNFFDEIIPPQDGFSSSVAAVTILPDAR  
LVAKAWTSWMACELKI QDLRLVRRKITALED EDEKAGNLENDFPQQKEPFEPEPKHDEESS  
QGDQDIFPDSATVASESKDGRFRYKDFNIQEYARSLGFGEVDSGLSLVDGMGIEEFNIF  
AYECALLAGRPNLKKQIWQHYDLDELREEKLTLEGLKEAQEELIEARDKVAKKASCKNL  
LTENRDENVLPSTLEGDTEALDYSHAHQKES SFGIRQRRSNATT SVPFNKNSNDDRN  
GTGRPLELVDH SNAVLN PQSHEERQKRFSKVRLWHRIFRGEDYGHVERERKKHYGEHCE  
QGKAFVTILRKP VYAVVFTTNRQSAVIARQCLADGGGGRNVWKQVDDIPIYPLADAPMM  
FFPRGFMRPVTTPNITYTSKKIRLWAI SVFIVSFTVANVYFVNQINRILLKPQYLEALGIP  
SDKAVSWSTTISGATQTL LFSVSPVIFKLLANCDGQSASMEKAEQKSITYFWYFYVVARF  
MGQI IWEAVRRFLSATASIEDTITEAITELASTVPTALGPSALSVIIFQFSVTWPAFYFL  
PIQNFATNLFRLTWINRLLKGGGPGLEVPYRIYVDNGYIFACVTALAPLCPLIGPFGLLY  
YIVIA PMLRWVLFVGYRPRFDGGGDKWPKLYHIVVSSLLLGQFITAI VFFTKLNNLAGCV  
IGFCVVPTLLYNNIVKEKYL RPFKDAALLQTGRLSNND SGEHFTNCQQRQEYCHWLVDCH  
KASYVPTCLSGGTNEKLT LTAAPAKAIPKVFLREADDRDKDSEK LQALLERKRAKKEEVQ  
NLMRNLSV

>comp15417\_c0\_seq9; 855 185 3991 LEN=4189; translated  
MDSVNSDSIELASGLADESNANANATVEELFNASEIPSFSPSFSP TVNETSHNASAAVT  
SLASMGWPFFLAGCGVLILSLLFFGLSVHMGWIEDLAPRIANRPRNVIKSALLRTPSHT  
NANGEKGLFWYYPMAWITWAFNTTYKDCLTGIPGTGTRRDGLDGPLLKTNLDAVVMRF  
HTLMFKVALLVAICTVVILP INLTAGCDKAVFGEGETCAQYNKSVSTNYLKT TIASIPPK  
LYNNDPVTVTQTVTFQTSQLVPIDLSRFVDDDSNDDSVNTSNVEGNSANQIQGLIP SQDFR  
IWAIIASCLIIYIYTFWLLVHEWRSIVVLRREYFLETTHYSQRMAELDKQIDQQQQQQK  
QKQRHPGR TAATRIGIAETNDPNHTGNHATR NCTDHVGTDTQEQLPPPYLTHPEIRETPPS  
IGVYSVMYQLPESMVTYDTDEATEIERQLVATTNFFDEIIPPQDGFSSSVAAVTILPDAR  
LVAKAWTSWMACELKI QDLRLVRRKITALED EDEKAGNLENDFPQQKEPFEPEPKHDEESS  
QGDQDIFPDSATVASESKDGRFRYKDFNIQEYARSLGFGEVDSGLSLVDGMGIEEFNIF  
AYECALLAGRPNLKKQIWQHYDLDELREEKLTLEGLKEAQEELIEARDKVAKKASCKNL  
LTENRDENVLPSTLEGDTEALDYSHAHQKES SFGIRQRRSNATT SVPFNKNSNDDRN  
GTGRPLELVDH SNAVLN PQSHEERQKRFSKVRLWHRIFRGEDYGHVERERKKHYGEHCE  
QGKAFVTILRKP VYAVVFTTNRQSAVIARQCLADGGGGRNVWKQVDDIPIYPLADAPMM  
FFPRGFMRPVTTPNITYTSKKIRLWAI SVFIVSFTVANVYFVNQINRILLKPQYLEALGIP  
SDKAVSWSTTISGATQTL LFSVSPVIFKLLANCDGQSASMEKAEQKSITYFWYFYVVARF  
MGQI IWEAVRRFLSATASIEDTITEAITELASTVPTALGPSALSVIIFQFSVTWPAFYFL  
PIQNFATNLFRLTWINRLLKGGGPGLEVPYRIYVDNGYIFACVTALAPLCPLIGPFGLLY  
YIVIA PMLRWVLFVGYRPRFDGGGDKWPKLYHIVVSSLLLGQFITAI VFFTKLNNLAGCV  
IGFCVVPTLLYNNIVKEKYL RPFKDAALLQTGRLSNND SGEHFTNCQQRQEYCHWLVDCH  
KASYVPTCLSGGTNEKLT LTAAPAKAIPKVFLREADDRDKDSEK LQALLERKRAKKEEVQ  
NLMRNLSV

>comp15417\_c0\_seq10; 373 98 1007 LEN=1478; translated  
MYPFLPGKATASIEDTITEAITELASTVPTALGPSALSVIIFQFSVTWPAFYFLPIQNFA  
TNLFRLTWINRLLKGGGPGLEVPYRIYVDNGYIFACVTALAPLCPLIGPFGLLYYIVIA P  
MLRWVLFVGYRPRFDGGGDKWPKLYHIVVSSLLLGQFITAI VFFTKLNNLAGCVIGFCV  
PTLLYNNIVKEKYL RPFKDAALLQTGRLSNND SGEHFTNCQQRQEYCHWLVDCHKASYV  
TCLSGGTNEKLT LTAAPAKAIPKVFLREADDRDKDSEK LQALLERKRAKKEEVQNL MRNL

SV

>comp15417\_c0\_seq11; 544 185 2770 LEN=3503; translated  
MDSVNSDSIELASGLADESNANANATVEELFNASEIPSFSPFSPTVNETSHNASAATVT  
SLASMGWPFFLAGCGVLILSLLFFGLSVHMGWIEDLAPRIANRPRNVIKSALLRTLPSHT  
NANGKEGGLFWYYPMAWITWAFNTTYKDCLTGIPGTGTRRDGLDGPLLKTNLDAVVLNMF  
HTLMFKVALLVAIICTVVILPINLTAGCDKAVFGEGETCAQYNKSVSTNYLKTTIASIPPK  
LYNNDPTVTQTTFQTSQLVPIIDLSRFVDDDSNDDSVNTSNVEGNSANQIQGLIPSQDFR  
IWAIIASCLIIYIYTFWLLVHEWRSIVVLRREYFLETTTHYSQRMAELDKQIDQQQQKQR  
HPGRTAATRIGIAETNDPNHTGNHATRNCNDHVGTDTTEQLPPPYLTHPEIRETPPSIGVY  
SVMYQLPESMVTYDTDEATEIERQLVATTNFFDEIIPPQDGFSSSVAAVTILPDARLVAK  
AWTSWMACELKIQDLRLVRRKITALEDKAGNLENDFFPQQKEPFEPEPKHDEESSQGDQ  
DIFPDSATVASESKDGRFRYKDFNIQEYARSLGFGEEVDSGLSLVDGMGIEEFNIFAYEC  
ALLAGRPNLKKQIWQHYDLDELREEKTLTEGLKEAQEELI EARDKVAKKASCKNLLTEN  
RDENVLPSTLEGDTEALDYSHAEHQKESFSGIRQRRSNATTSVFPFNKNSNDDRNDRGTGR  
PLELVDHNSAVLNPQSHEERQKRFSKVKRLWHRIFRGEDYGHVERERKKHYGEHCEQGKA  
FVTILRKPVYAVVTFTNRQSAVIARQCLADGGGGGRNVWKQVDDIPIYPLADAPPMMFFPR  
GFMRPVTNITYTSKKIRLWA

>comp15417\_c0\_seq12; 758 185 4114 LEN=4312; translated  
MDSVNSDSIELASGLADESNANANATVEELFNASEIPSFSPFSPTVNETSHNASAATVT  
SLASMGWPFFLAGCGVLILSLLFFGLSVHMGWIEDLAPRIANRPRNVIKSALLRTLPSHT  
NANGKEGGLFWYYPMAWITWAFNTTYKDCLTGIPGTGTRRDGLDGPLLKTNLDAVVLNMF  
HTLMFKVALLVAIICTVVILPINLTAGCDKAVFGEGETCAQYNKSVSTNYLKTTIASIPPK  
LYNNDPTVTQTTFQTSQLVPIIDLSRFVDDDSNDDSVNTSNVEGNSANQIQGLIPSQDFR  
IWAIIASCLIIYIYTFWLLVHEWRSIVVLRREYFLETTTHYSQRMAELDKQIDQQQQKQR  
HPGRTAATRIGIAETNDPNHTGNHATRNCNDHVGTDTTEQLPPPYLTHPEIRETPPSIGVY  
SVMYQLPESMVTYDTDEATEIERQLVATTNFFDEIIPPQDGFSSSVAAVTILPDARLVAK  
AWTSWMACELKIQDLRLVRRKITALEDKAGNLENDFFPQQKEPFEPEPKHDEESSQGDQ  
DIFPDSATVASESKDGRFRYKDFNIQEYARSLGFGEEVDSGLSLVDGMGIEEFNIFAYEC  
ALLAGRPNLKKQIWQHYDLDELREEKTLTEGLKEAQEELI EARDKVAKKASCKNLLTEN  
RDENVLPSTLEGDTEALDYSHAEHQKESFSGIRQRRSNATTSVFPFNKNSNDDRNDRGTGR  
PLELVDHNSAVLNPQSHEERQKRFSKVKRLWHRIFRGEDYGHVERERKKHYGEHCEQGKA  
FVTILRKPVYAVVTFTNRQSAVIARQCLADGGGGGRNVWKQVDDIPIYPLADAPPMMFFPR  
GFMRPVTNITYTSKXNPTLGEKTNVYCVLFKSCCTLALISPFQFFDTFSLNYWCKISLI  
HRHCYRISVFIVSFTVANVYFVNQINRILLKPQYLEALGIPSDKAVSWSTTISGATQTL  
FSVSPVIFKLLANCDGQSASMEKAEQKSITYFWYFYVVARFMGQIIWEAVRRFLSATASI  
EDTITEAITELASTVPTALGPSALSVIIFQFSVTWPAFYFLPIQNFATNLFRLTWINRLL  
KGGGPGLEVPYRIYVDNGYIFACVTALAPLCPLIGPFGLLYYIIVIAPLRWVLFVGYRPR  
FDGGGDKWPKLYHIVVSSLLLGQFITAIVFFTKLNNLAGCVIGFCVVPTLLYNNIVKEKY  
LRPFKDAALLQTGRLSNNDSGEHFTNCQQRQYCHWLVDCHKASYVPTCLSGGTNEKLT  
TAAPAKAIKPVFLREADDRDKDSEKQLQALLERKRAKKEEVQNLMRNLSV

>comp15417\_c0\_seq13; 758 185 4114 LEN=4585; translated  
MDSVNSDSIELASGLADESNANANATVEELFNASEIPSFSPFSPTVNETSHNASAATVT  
SLASMGWPFFLAGCGVLILSLLFFGLSVHMGWIEDLAPRIANRPRNVIKSALLRTLPSHT  
NANGKEGGLFWYYPMAWITWAFNTTYKDCLTGIPGTGTRRDGLDGPLLKTNLDAVVLNMF  
HTLMFKVALLVAIICTVVILPINLTAGCDKAVFGEGETCAQYNKSVSTNYLKTTIASIPPK  
LYNNDPTVTQTTFQTSQLVPIIDLSRFVDDDSNDDSVNTSNVEGNSANQIQGLIPSQDFR  
IWAIIASCLIIYIYTFWLLVHEWRSIVVLRREYFLETTTHYSQRMAELDKQIDQQQQKQR  
HPGRTAATRIGIAETNDPNHTGNHATRNCNDHVGTDTTEQLPPPYLTHPEIRETPPSIGVY  
SVMYQLPESMVTYDTDEATEIERQLVATTNFFDEIIPPQDGFSSSVAAVTILPDARLVAK  
AWTSWMACELKIQDLRLVRRKITALEDKAGNLENDFFPQQKEPFEPEPKHDEESSQGDQ  
DIFPDSATVASESKDGRFRYKDFNIQEYARSLGFGEEVDSGLSLVDGMGIEEFNIFAYEC  
ALLAGRPNLKKQIWQHYDLDELREEKTLTEGLKEAQEELI EARDKVAKKASCKNLLTEN  
RDENVLPSTLEGDTEALDYSHAEHQKESFSGIRQRRSNATTSVFPFNKNSNDDRNDRGTGR  
PLELVDHNSAVLNPQSHEERQKRFSKVKRLWHRIFRGEDYGHVERERKKHYGEHCEQGKA  
FVTILRKPVYAVVTFTNRQSAVIARQCLADGGGGGRNVWKQVDDIPIYPLADAPPMMFFPR  
GFMRPVTNITYTSKXNPTLGEKTNVYCVLFKSCCTLALISPFQFFDTFSLNYWCKISLI  
HRHCYRISVFIVSFTVANVYFVNQINRILLKPQYLEALGIPSDKAVSWSTTISGATQTL  
FSVSPVIFKLLANCDGQSASMEKAEQKSITYFWYFYVVARFMGQIIWEAVRRFLSATASI  
EDTITEAITELASTVPTALGPSALSVIIFQFSVTWPAFYFLPIQNFATNLFRLTWINRLL  
KGGGPGLEVPYRIYVDNGYIFACVTALAPLCPLIGPFGLLYYIIVIAPLRWVLFVGYRPR

FDGGGDKWPKLYHIVVSSLLLGQFITAIVFFTKLNNLAGCVIGFCVVPTLLYNNIVKEKY  
LRPFKDAALLQTGRLSNNDSGEHFTNCQQRQEYCHWLVDCHKASYVPTCLSGGTNEKLT  
TAAPAKAIPKVFLREADDRDKDSEKQALLERKRAKKEEVQNLMRNLSV  
>comp15417\_c0\_seq14; 777 185 4126 LEN=4324; translated  
MDSVNSDSIELASGLADESNANANATVEELFNASEIPSFSPSFSPPTVNETSHNASAAVT  
SLASMGWPFPLAGCGVLILSLLFFGLSVHMGWIEDLAPRIANRPRNVIKSALLRTLPSHT  
NANGEKGLFWYYPMAWITWAFNTTYKDCLTGIPGTGTRRDGLDGPLLKTNLDAVVMRF  
HTLMFKVALLVAIICTVVILPINLTAGCDKAVFGEGETCAQYNKSVSTNYLKTTIASIPPK  
LYNNDPTVTQTVTTFQTSQLVPIIDLSRFVDDSDNDDSVNTSNVEGNSANQIQGLIPSQDFR  
IWAILASCLIIYIYTFWLLVHEWRSIVVLRREYFLETHYSQRMAELDKQIDQQQQQQK  
QKQRHPGRATAATRIGIAETNDPNHTGNHATRNDTHVGTDEQLPPPYLTHPEIRETPPS  
IGVYSVMYQLPESMVTYDTEATEIERQLVATTNFFDEIIPPQDGFSSSVAAVTILPDAR  
LVAKAWTSWMACELKIQDLRLVRRKITALEDKAGNLENDFPQKEPFEPEPKHDEESS  
QGDQDIFPDSATVASESKDGRFRYKDFNIQEYARSLGFGEEVDSGLSLVDGMGIEEFNIF  
AYECALLAGRPNLKKQIWQHYDLDELREEKTLTEGLKEAQEELIEARDKVAKKASCKNL  
LTENRDENVLPSTLEGDTEALDYSHAEHQKESFGRQRRSNATTSPFNKNSNDDRN  
GTGRPLELVDHNSAVLNPQSHEERQKRFSKVRLWHRIFRGEDYGHVERERKKHYGEHCE  
QGKAFVTILRKPVYAVVFTTNRQSAVIARQCLADGGGGRNVWKQVDDIPIYPLADAPMM  
FFPRGFMRPVTNITYTSKXNPTLGEKTNVYCVLFKSCITLALISPFQFFDTFSLNYWCK  
ISLIHRHCYRISVFIVSFTVANVYFVNQINRILLKQPYLEALGIPSDKAVSWSTTISGAT  
QTLLFSVSPVIFKLLANCDGQSASMEKAEQKSITYFWYFYVVARFMGQIWEAVRRFLSA  
TASIEDTITEAITELASTVPTALGPSALSVIIFQFSVTWPAFYFLPIQNFATNLFRLTWI  
NRLKGGGPGLEVPYRIYVDNGYIFACVTALAPLCPILGPFGLLYYIIVIAFMLRWLVFG  
YRPRFDGGGDKWPKLYHIVVSSLLLGQFITAIVFFTKLNNLAGCVIGFCVVPTLLYNNIV  
KEKYLRFKDAALLQTGRLSNNDSGEHFTNCQQRQEYCHWLVDCHKASYVPTCLSGGTNE  
KLTTLTAAPAKAIPKVFLREADDRDKDSEKQALLERKRAKKEEVQNLMRNLSV  
>comp15417\_c0\_seq15; 777 185 4126 LEN=4597; translated  
MDSVNSDSIELASGLADESNANANATVEELFNASEIPSFSPSFSPPTVNETSHNASAAVT  
SLASMGWPFPLAGCGVLILSLLFFGLSVHMGWIEDLAPRIANRPRNVIKSALLRTLPSHT  
NANGEKGLFWYYPMAWITWAFNTTYKDCLTGIPGTGTRRDGLDGPLLKTNLDAVVMRF  
HTLMFKVALLVAIICTVVILPINLTAGCDKAVFGEGETCAQYNKSVSTNYLKTTIASIPPK  
LYNNDPTVTQTVTTFQTSQLVPIIDLSRFVDDSDNDDSVNTSNVEGNSANQIQGLIPSQDFR  
IWAILASCLIIYIYTFWLLVHEWRSIVVLRREYFLETHYSQRMAELDKQIDQQQQQQK  
QKQRHPGRATAATRIGIAETNDPNHTGNHATRNDTHVGTDEQLPPPYLTHPEIRETPPS  
IGVYSVMYQLPESMVTYDTEATEIERQLVATTNFFDEIIPPQDGFSSSVAAVTILPDAR  
LVAKAWTSWMACELKIQDLRLVRRKITALEDKAGNLENDFPQKEPFEPEPKHDEESS  
QGDQDIFPDSATVASESKDGRFRYKDFNIQEYARSLGFGEEVDSGLSLVDGMGIEEFNIF  
AYECALLAGRPNLKKQIWQHYDLDELREEKTLTEGLKEAQEELIEARDKVAKKASCKNL  
LTENRDENVLPSTLEGDTEALDYSHAEHQKESFGRQRRSNATTSPFNKNSNDDRN  
GTGRPLELVDHNSAVLNPQSHEERQKRFSKVRLWHRIFRGEDYGHVERERKKHYGEHCE  
QGKAFVTILRKPVYAVVFTTNRQSAVIARQCLADGGGGRNVWKQVDDIPIYPLADAPMM  
FFPRGFMRPVTNITYTSKXNPTLGEKTNVYCVLFKSCITLALISPFQFFDTFSLNYWCK  
ISLIHRHCYRISVFIVSFTVANVYFVNQINRILLKQPYLEALGIPSDKAVSWSTTISGAT  
QTLLFSVSPVIFKLLANCDGQSASMEKAEQKSITYFWYFYVVARFMGQIWEAVRRFLSA  
TASIEDTITEAITELASTVPTALGPSALSVIIFQFSVTWPAFYFLPIQNFATNLFRLTWI  
NRLKGGGPGLEVPYRIYVDNGYIFACVTALAPLCPILGPFGLLYYIIVIAFMLRWLVFG  
YRPRFDGGGDKWPKLYHIVVSSLLLGQFITAIVFFTKLNNLAGCVIGFCVVPTLLYNNIV  
KEKYLRFKDAALLQTGRLSNNDSGEHFTNCQQRQEYCHWLVDCHKASYVPTCLSGGTNE  
KLTTLTAAPAKAIPKVFLREADDRDKDSEKQALLERKRAKKEEVQNLMRNLSV  
>comp15418\_c0\_seq3; 554 395 1468 LEN=1846; translated  
MNLSSLALISLLSSTTTTGAFAPRTPKTASGSLSMISPGSKNVVAFSTTIHREEVD  
LESLSLPQLKRMQRELENLNAACTEEGTQTNPECDVVLKDERDDAIVQIQNMI SERTGKN  
SNLKYVDMEAVREMVKQPWTHSLRTRKQISAMEILNCECTEDGNQTDAAACDVQLKDERD  
AAIETLGLYMKSVKMLQTEGVRAEEERNRGNLPGASEICLDARVGDGAAGAATTFDMG  
EIRGCVDPGSRSLVEMQSMLAQLEAVHNACTEEGCQTNPECDVEVKAERDALMESLVSQ  
IHDACLMAQIKAFAEQGDNDLVAMEELMNTVINTIPNLPKNGQFSGPTDEFLVQI  
>comp15418\_c0\_seq4; 995 395 3049 LEN=3286; translated  
MNLSSLALISLLSSTTTTGAFAPRTPKTASGSLSMISPGSKNVVAFSTTIHREEVD  
LESLSLPQLKRMQRELENLNAACTEEGTQTNPECDVVLKDERDDAIVQIQNMI SERTGKN  
SNLKYVDMEAVREMVKQPWTHSLRTRKQISAMEILNCECTEDGNQTDAAACDVQLKDERD

AAIETLGLYMKSV EKMLQTEGVRAEEERNRGNLPGASEICLDARVGADGAAGAATTFDMG  
EIRGCVDQPGSRSLVEMQSM LAQLEAVHNACTEEGCQTNPECDVEVKAERDALMESLVSQ  
IHD AKLCMAQIKAF AEQGDNDLVAMEELMNTVINTIPNL PKNGQFSGPTDEFLVQXLGV  
AGGSLVHTTTSYQHDTITDDTMFESSRIESNTETKMNSDY SVP IVQGTAVPAPDSRPYDGA  
HAKSHYGAPTDNFQNEGTTINFDSHFQQQQQPTQFRDVF WAFVAFVAHIGVMSVLI SMNIA  
ANGGGDNGDGFSGSYGGIFFLVAATGLAALGLSSLTIVLMMKFPTAMVKAGLVFSSLLA  
GVMAVAMILSGEMFAILMGVFFFVAVTACYVAVVWKRI PYAAANLNTALTAVKSNAGLSLV  
AYSVMFVAFAWSGFWLAGMANSLATSNGGTVFLLLV SFYWTFGVLTNTIHVTTAGTVGTW  
WVVPGEASGCCSKGLQDSFCRATSY SFGSICLGSLLVAVVQALRQMARNARQNE DAQLLA  
CLIECILSCIQDII EYFNKWAYIYVGLYGFYIEAGRNVVELFRSKGWTTVITDDLADR V  
LLMMSIGVGLTGLVGLLVG SVNPGLLEDFGVEDGGGVATVAFVVGFFVGLGFCSILMSV  
VGS AVNTVIVCFAESPAEFEANHPVLSRELRS AWVEAWPELSIQ  
>comp15418\_c0\_seq5; 335 347 1090 LEN=1385; minus strand; translated  
MTVFTAEP T TLMXDAAKAQADKESH HKGHGGHATAVLDPEILQQTGVDGSDEQA HQPGQD  
ADADAHQHPVGEVVGDDGGPALAPEQLDDVPAGLDVAKPVQTNVDVRPLVEVLDNVL D  
AGQDALDQARQELGVLVLPVPGHLP ERLDHRHQRTQADR SKAVARGPAEAVLEALRAA  
PAGLARNEP PRSYGAGGGHVDRVGQDAKGPVEGHQEKKDGPAVAGRYELAMPASQNPLQA  
KATNMTE  
>comp15418\_c0\_seq8; 554 395 1468 LEN=1826; translated  
MNLSSLALISLLSSTTTTGAFAPRTPKTASGSLSMISPGSKNVVAF TTTIHREEVD  
LESLSLPQLKRMQRELENLNAACTEEGTQTNPECDVVLKDERDDAIVQIQNMISERTGKN  
SNLKYVDMEAVREMVKQPWTHSLRTIRKQISAMEILNCECTEDGNQTDAA CDVQLKDERD  
AAIETLGLYMKSV EKMLQTEGVRAEEERNRGNLPGASEICLDARVGADGAAGAATTFDMG  
EIRGCVDQPGSRSLVEMQSM LAQLEAVHNACTEEGCQTNPECDVEVKAERDALMESLVSQ  
IHD AKLCMAQIKAF AEQGDNDLVAMEELMNTVINTIPNL PKNGQFSGPTDEFLVQI  
>comp15419\_c0\_seq1; 700 1 2862 LEN=3433; translated  
XVVIVNIFPSLRITNRGVLNFGAIGVGSKEAIDASRLFHNNQVVEDEPNARRDFIAIIAV  
MMALSTGVAAAMNVTWTD FSFSK LKKCV DSSHSMSNYGQD LLDPCVLYDIRDSSFDN FN  
LDSEFSLSEMPNISEIIDPEIDSDDSIDRITPEITLVQVTPSFCNNHRDGAVTAVRKLNA  
DNNGKGVAIGYRRDHFVKFRLISIVGGNSKHMTDVEYKEIHKILLDSVLEEVDTAQYILG  
SCSFASVADKPVALKRKKVVISQVGGPFYMDVATNPYVFGI HVNSD TYPLPALQALEFH  
LISTEIP TSKQPV RVIYRDKSEFFYSTCRSVIDEATSKGFDVTP IEYDPEGFEGGSTVKN  
SQNIPFLEGLADRLCPLTVGKPTDDSDIYDHHSIEAEHPAIFACVLDDEADAILTRMR SN  
GCRPSLAWFTTATWSWANKNPEVVPFFQAGQWHENFEYS DQYFQTGQAVLDFGLQEFGY  
SGSYDHVVS YTIPTIIAEVMVSFFRFDHCDVEDVFLNQYEALRRVLAKTNTDTIFGPVS  
FNEYQRNNGRGPASMQWITKSTSEKTTDFVLGCMSPSDQAEAPIVIPS PSGDECS PGHHV  
NQTMIKIDPALLQAKCSACPINSFMSKKNERMECIACMFGSSTMD ETGAVECVQQSANLN  
PQVLKSMGYV FVVLWSLAIGYIVWMVSKRNGSVVKIGQPEFLFLICIGAIISTSAI IPL  
TLAEADVGEDTTAASRNCQAIPFLYSLGWVLMYSSLTAKSYRLNKIAAASAMRRKAVQA  
KEMYVIIAGFILLDTIILIAWQVVDPLVYVRSFQGSKDDNTGVVTIETVGCSSNSLWK  
FLGPIIGIHFCLMIITNGLLWRVRNMSDRYQEQKYVALASIYICELLLLGVPI LFAVQDS  
AAARYIVIAGVIFLTD TGVL SFIFLPKIRFESEGLPEGVSVAQSLNIGGAEIP  
>comp15419\_c0\_seq2; 700 1 2862 LEN=3422; translated  
XVVIVNIFPSLRITNRGVLNFGAIGVGSKEAIDASRLFHNNQVVEDEPNARRDFIAIIAV  
MMALSTGVAAAMNVTWTD FSFSK LKKCV DSSHSMSNYGQD LLDPCVLYDIRDSSFDN FN  
LDSEFSLSEMPNISEIIDPEIDSDDSIDRITPEITLVQVTPSFCNNHRDGAVTAVRKLNA  
DNNGKGVAIGYRRDHFVKFRLISIVGGNSKHMTDVEYKEIHKILLDSVLEEVDTAQYILG  
SCSFASVADKPVALKRKKVVISQVGGPFYMDVATNPYVFGI HVNSD TYPLPALQALEFH  
LISTEIP TSKQPV RVIYRDKSEFFYSTCRSVIDEATSKGFDVTP IEYDPEGFEGGSTVKN  
SQNIPFLEGLADRLCPLTVGKPTDDSDIYDHHSIEAEHPAIFACVLDDEADAILTRMR SN  
GCRPSLAWFTTATWSWANKNPEVVPFFQAGQWHENFEYS DQYFQTGQAVLDFGLQEFGY  
SGSYDHVVS YTIPTIIAEVMVSFFRFDHCDVEDVFLNQYEALRRVLAKTNTDTIFGPVS  
FNEYQRNNGRGPASMQWITKSTSEKTTDFVLGCMSPSDQAEAPIVIPS PSGDECS PGHHV  
NQTMIKIDPALLQAKCSACPINSFMSKKNERMECIACMFGSSTMD ETGAVECVQQSANLN  
PQVLKSMGYV FVVLWSLAIGYIVWMVSKRNGSVVKIGQPEFLFLICIGAIISTSAI IPL  
TLAEADVGEDTTAASRNCQAIPFLYSLGWVLMYSSLTAKSYRLNKIAAASAMRRKAVQA  
KEMYVIIAGFILLDTIILIAWQVVDPLVYVRSFQGSKDDNTGVVTIETVGCSSNSLWK  
FLGPIIGIHFCLMIITNGLLWRVRNMSDRYQEQKYVALASIYICELLLLGVPI LFAVQDS  
AAARYIVIAGVIFLTD TGVL SFIFLPKIRFESEGLPEGVSVAQSLNIGGAEIP  
>comp15420\_c0\_seq3; 146 366 738 LEN=738; translated

MKLGLRYSLAATTILSLVAPPPITAWSTGSSGRTTTTTIPTRGRTTTTARVRRMPAAFPLE  
ASRTPETDALPRFSSLFNRTGESRMDSGIDQTNDDGGAAYSVQQRAFRFGNQNKDRNIDN  
FDQGX

>comp15420\_c0\_seq4; 407 1 924 LEN=1432; translated  
NDDGGAAYSVQQRAFRFGNQNKDRNIDNFDQGGTETADAAETDGTSPVAVALAGLAAATG  
LLVLVSQGADPTDPSSVLATGSALAATAGETLSDPSAALDRVVELTESMGPLGVAYFGVA  
YCIAEILAI PAIPLTASAGYLF GPVQGTAVVLLSASVAAGVSFWIGRTFLREYVEGLLEE  
NPRFGKLDKAIGREGFKLM LLLR LSP I FPFALS NYLYGATS INFSAFFGGTLLGFAPGTI  
AYVYTGYVGKALTGDAGGDAYPWVYVGGGLALFAAFLKVVVADEATRVVREIEAEDEALA  
ALEATKR

>comp15421\_c1\_seq1; 291 1 577 LEN=1575; minus strand; translated  
XSLVDYDKIDFKLPPKVKKAAKFLGYTAAIWDNDGKVP IESKYWRKLSAEQQKAASTLG  
YNEEKWDNESDSSSSSSDDSKPCTGTGKSI IAKNMNRHDCNFDKLPEDAKNAAKVLGYNSS  
TWDSGGQIPIAGKEWSDLTTKERDAAVVLGMTEAKWAKNPYFETSQTGCIPLEFCASVET  
FATIIYSSNQTEF

>comp15422\_c0\_seq1; 389 1986 2861 LEN=2861; minus strand; translated  
MKNQQQQQHRRPETGILLVLHGKQTGELLGRI RLAKKLEKEFGLTAVAPDGPFPADL  
SEDFGGDKNHLRTWWRDGDHYAGLDDSLRAFAQQGKKEGILGFSQGARLAHLLATL  
HRRLPGEWFPHLRFVVFASGYAAPTPPELLPYLPGGNAGGTEPPLPSLHTWGSDELVT  
PDESEALAAALYPECRVYVHPGRHHVPTKGSSELPVYVDFIREALLPSSSSSPQPGAGGSGE  
TAPPSSRSSPAEEMDENAI PDEETAAMQRDEIQALEAIYPGAIDLRSGRRTS

>comp15422\_c0\_seq2; 171 3269 4144 LEN=4144; minus strand; translated  
MKNQQQQQHRRPETGILLVLHGKQTGELLGRI RLAKKLEKEFGLTAVAPDGPFPADL  
SEDFGGDKNHLRTWWRDGDHYAGLDDSLRAFAQQGKKEGILGFSQGARLAHLLATL  
HRRLPGEWFPHLRFVVFASGYAAPTPPELLPYLPGGNAGGTEPPLPSLHTWGSDELVT  
PDESEALAAALYPECRVYVHPGRHHVPTKGSSELPVYVDFIREALLPSSSSSPQPGAGGSGE  
TAPPSSRSSPAEEMDENAI PDEETAAMQRDEIQALEAIYPGAIDLRSGRRTS

>comp15422\_c0\_seq3; 389 450 1325 LEN=1325; minus strand; translated  
MKNQQQQQHRRPETGILLVLHGKQTGELLGRI RLAKKLEKEFGLTAVAPDGPFPADL  
SEDFGGDKNHLRTWWRDGDHYAGLDDSLRAFAQQGKKEGILGFSQGARLAHLLATL  
HRRLPGEWFPHLRFVVFASGYAAPTPPELLPYLPGGNAGGTEPPLPSLHTWGSDELVT  
PDESEALAAALYPECRVYVHPGRHHVPTKGSSELPVYVDFIREALLPSSSSSPQPGAGGSGE  
TAPPSSRSSPAEEMDENAI PDEETAAMQRDEIQALEAIYPGAIDLRSGRRTS

>comp15422\_c0\_seq4; 171 3026 3901 LEN=3901; minus strand; translated  
MKNQQQQQHRRPETGILLVLHGKQTGELLGRI RLAKKLEKEFGLTAVAPDGPFPADL  
SEDFGGDKNHLRTWWRDGDHYAGLDDSLRAFAQQGKKEGILGFSQGARLAHLLATL  
HRRLPGEWFPHLRFVVFASGYAAPTPPELLPYLPGGNAGGTEPPLPSLHTWGSDELVT  
PDESEALAAALYPECRVYVHPGRHHVPTKGSSELPVYVDFIREALLPSSSSSPQPGAGGSGE  
TAPPSSRSSPAEEMDENAI PDEETAAMQRDEIQALEAIYPGAIDLRSGRRTS

>comp15422\_c0\_seq5; 389 1743 2618 LEN=2618; minus strand; translated  
MKNQQQQQHRRPETGILLVLHGKQTGELLGRI RLAKKLEKEFGLTAVAPDGPFPADL  
SEDFGGDKNHLRTWWRDGDHYAGLDDSLRAFAQQGKKEGILGFSQGARLAHLLATL  
HRRLPGEWFPHLRFVVFASGYAAPTPPELLPYLPGGNAGGTEPPLPSLHTWGSDELVT  
PDESEALAAALYPECRVYVHPGRHHVPTKGSSELPVYVDFIREALLPSSSSSPQPGAGGSGE  
TAPPSSRSSPAEEMDENAI PDEETAAMQRDEIQALEAIYPGAIDLRSGRRTS

>comp15423\_c0\_seq1; 231 123 581 LEN=2620; minus strand; translated  
MEKECAPACMLCHMLHIDNRCPIDPNAKPAWEPGDLNAMFEHLVSEPIASKYPVTILSRD  
PWITLDDVISEEESERLIQLGAVEGYERSEDVGAKRADGTYGSMVSTGR TSSNAWCVDE  
CYKDP IAMQVINR LSELTMIDEKNSEYLQLLQ

>comp15423\_c0\_seq2; 231 123 581 LEN=2797; minus strand; translated  
MEKECAPACMLCHMLHIDNRCPIDPNAKPAWEPGDLNAMFEHLVSEPIASKYPVTILSRD  
PWITLDDVISEEESERLIQLGAVEGYERSEDVGAKRADGTYGSMVSTGR TSSNAWCVDE  
CYKDP IAMQVINR LSELTMIDEKNSEYLQLLQ

>comp15423\_c0\_seq3; 231 123 581 LEN=2718; minus strand; translated  
MEKECAPACMLCHMLHIDNRCPIDPNAKPAWEPGDLNAMFEHLVSEPIASKYPVTILSRD  
PWITLDDVISEEESERLIQLGAVEGYERSEDVGAKRADGTYGSMVSTGR TSSNAWCVDE  
CYKDP IAMQVINR LSELTMIDEKNSEYLQLLQ

>comp15423\_c0\_seq4; 231 123 581 LEN=2541; minus strand; translated  
MEKECAPACMLCHMLHIDNRCPIDPNAKPAWEPGDLNAMFEHLVSEPIASKYPVTILSRD  
PWITLDDVISEEESERLIQLGAVEGYERSEDVGAKRADGTYGSMVSTGR TSSNAWCVDE

CYKDP IAMQVINRLSELTMIDEKNSEYLQLLQ

>comp15424\_c0\_seq1; 3719 1 7753 LEN=8048; translated

XGEDEMDGLTNTVPPPPPPKSSCAEKQDEGVGTVVVDDDFGLNQDGDGWDDELHISGD  
DGIETIDDIGGPTNIVRPPPPPPPPCEQSTLAKGDNDRVDNVVHDDDFDLDHNGDGWG  
DDDELHIDGDDGIDDLGQNNIVDQIPPPPRDAGRPHGTNNAFGGDFDDISQDDTLSIAN  
SRSQQNHTLLRLSSTSTIGDEDCEPVEIVVSDDGESDANPAARSGTRLASRKVVDTPRQ  
TRGINADVSLMVAGHTSVGESLDSIDEANEEDYENDADAEQASRLSVAHTGLGSSEIAIG  
SAATPTATNGIQNNNFGLSLTDQTLRVVVDHSDGSIFQPAAF SRKPSIANSVDVLSVSS  
AEGDLGESGTIGLDDIKEELYGPMVDQIPPTPRNDSLKR IISLSGQASAGGGDSTVVGQA  
ENLEVANDIRQDDAMDEEEDEFEDGVDDSSKGWASTLAGEFDNRSLLSGLPLPVVDETQY  
LVDHVPVDKLLRGGGPGGIGGGAASTMVAMDASNASIRAEDTDVDDGSNAINF GP IVDHT  
PALRPSAGTRATPSIATSVAATAASGLDGDMDRDDDMDNTTVEGCGGAASTGALGDDLHDG  
NVEDDHIVDHIPEGKGGQQLTQDASVRVLVDKDENLMQVDTIVEDVAVDFGP IVDQTPPLPL  
ASSAASIEGSLQLQRNAADDNNTGTLGVSSEEDDNSGWDHDEPDLDLDF SASHLNGREQLN  
NSTKEENNLVDHIPKRTFNKPIDGSTIVLVPVDAASEADDADDDTAGNARIDKFGPVVD  
QTPAPRSAPASNATSMNQAIDGSATWYGASTLGGMSSAAGGASLAADDDSGTGWDDDDQ  
ILEDLASP AVIRRSP TNNLENHLVDHVPPLASPCQADANASTAVAI DPSVVSQTQNDKI  
DGVIFGAVVDHTPSVEPIHNHSADNSTS VTGFATNTKPEEELDETTWQGGVSAQGGEGWDQ  
DDPELEDIANGDENATSHLVDHVPQRPESTRYGDPSLIVAANPSEMSSQVEDFNQDENHFG  
PVVDQTPLERAILPPAVGSTVAVPSVLNDVSDGEGDEQNVDTTRVPNEWEEQLPNPQS  
GNDTENTREQLVDAVPPPPPEQRAMARDASSEMATVDDKSTLVPADPEKKEEF GPVVDHTP  
AGQESGITEIRNEDSHDDEDGDKKPPAIIDSVAPIYSVESKEKEDCLDEDEYGPVVDQLP  
AVSSKSSLAPSKGGSTVDALATVSKGEDDVNTRDGWDDDLTDI IDQASPNMSHRGNHSV  
TWDDNVCNKVQADLKD TNVSNASGDVGESGFFSAQTNTSSHPSA DETKYDAGYADMNGW  
GDESLNIADDDTPPSTPRPNTEFQSASTNGFHNCLNAEGTDSPCIETIVETNGGKDSMVG  
WLKTPGGDSVKVDFHKLQNETVKRILVEKESEALRETVKALQLSKETLVTAGEKQ MERE  
DEMMSAINKWKEENDDLKSDKNALSSEILKFQTENEELTSENTNLSTEKSR LSEDLLEIE  
SKYQTLASTNDRLEKELSSAQEAVSLLKQKLIQSKEAALSVEVASLKS SLEKQVQKSI  
SDGNIKEETRLQLVELSSRVNECAELNAQLALVEQKLR ISEAQNSKTVNDLATTTQGHK  
TIEELEKLLDSQSNEAEASQQVDKRIADLEMKLSFELSSTEKLQHEVFSSAQENSQ LHS  
QMOKVTLNHHEEMSQKEARIESLTSEMKAQADNLRLCDQINSYTHQIQRLSSISEELDA  
SFRERDALKESLDHSKTYITGLQEQLDDLNSLQLNASEPESILKALKEDRANQLLEIEA  
LAQSVNDMESEKNAIELRFEFKEAHAKSQSDSASALNAMKEEARMKNMQSELKQLRIQ  
LQNTTAGMQNSENECAILSKKCSALEDEIVRLREVAAQVDR LQQDLGQFHEKNKSQESLI  
QSLESSRSENERNLSRKAEEIMILQEQQRSQSFSIAEIESEKTQLLTQLQTLNAYITELE  
SENVDIKDKTATLFLQREEMEELT SERDEMQNAMENLVVENEMLVQFGLLNEEMDEKEN  
EAAQLREELDSRAIEVEELQMAATKYEELVRRDEKYEELQRKIQTHKEELQRKISIEG  
ELENLQLAQOTTQEYEDRLKMSEKKLNALIRESEEMTKNVGNVDDNTKKLVEVNSALRD  
KIGEMKSEQSAAAEQIQAMESHKLGLNGKVEDLQNLVDVLI VSFETKEGKLQATIDDARL  
QKNEIVKNSIAQESEIAQLRQQIQVLEGHAEQSETLRRTLSE TENKVSEYERLLLQKDA  
AQDLYNQLQSKGDAPVESAELEMLRQRVQDMETSVAIEKEELREMSVKCDRSEQELARVT  
EQLQSSEENVQQLQDDLHLMKDTEATNEMLESRLAQLEDEL MCSR AEQTKLRE EASDLRA  
GLKNKEETSTKQENNVSVEIMALRCQVEALQCEKDMTSSEAFAREEALERELRALQDRVV  
QKDDQIASMEKQLQLVSDLFDSRVEACSQMERIDELTAE LERVQSILTTTSSSALDIA  
RQAEANINTMQSQIVWLAQTLNSETKRAEAIETIEKERQ RNADTLRRMTDTMKRFYATL  
KIGN

>comp15425\_c0\_seq2; 320 1214 2278 LEN=2607; translated

MFSKTFILLSWLASPVVIVAFRGTENPTGLKGLTPLVLKEPRVIASEVDEMKNLITMDT  
MSEVGKAITADDMARGASARKRIEIGIFNAPSDYVEEYWYNPTIHTFGNIGIFGGFHAAL  
APISTKIIDMVAYDGEDIRSTVAQKLSRIVEARTSRCGRPARVLD MCCGVGISTRALQDA  
FPDSDCVVGLDTSPEMVNMANFLTTHLSFVKPLMALVIPDKSKKNKKNLLARNWGFSSR  
RAQFFTANAERTNFPSKTFDLVTVMYAFHEAPEIGREKILQE AHRVLQPGGT LAVIDIST  
DYTPSKPMLAGEPYVLEYQKNIHRQMRSLKGFTKVQYQHLVQDHVGIWILKRTN

>comp15425\_c0\_seq3; 320 1472 2536 LEN=2883; translated

MFSKTFILLSWLASPVVIVAFRGTENPTGLKGLTPLVLKEPRVIASEVDEMKNLITMDT  
MSEVGKAITADDMARGASARKRIEIGIFNAPSDYVEEYWYNPTIHTFGNIGIFGGFHAAL  
APISTKIIDMVAYDGEDIRSTVAQKLSRIVEARTSRCGRPARVLD MCCGVGISTRALQDA  
FPDSDCVVGLDTSPEMVNMANFLTTHLSFVKPLMALVIPDKSKKNKKNLLARNWGFSSR  
RAQFFTANAERTNFPSKTFDLVTVMYAFHEAPEIGREKILQE AHRVLQPGGT LAVIDIST  
DYTPSKPMLAGEPYVLEYQKNIHRQMRSLKGFTKVQYQHLVQDHVGIWILKRTN

>comp15425\_c0\_seq4; 320 1214 2278 LEN=2625; translated  
MFSKTFILLSWLASPVVIVAFRGTENPTGLKGLETPPLVKEPRVIASEVDEMKNLITMDT  
MSEVGKAITADDMARGASARKRIEIGIFNAPSDYVEEYWYNPTIHTFGNIGIFGGFHAAL  
APISTKIIDMVAYDGEDIRSTVAQKLSRIVEARTSRCGRPARVLDGCCVGISTRALQDA  
FPDSDCVVGLDTSPEMVNMANFLTTHLSFVKPLMALVIPDKSKKNKKPNLLARNWGFSSR  
RAQFFTANAERTNFPSKTFDLVTVMYAFHEAPEIGREKILQEHRVLPQGGTLAVIDIST  
DYTPSKPMLAGEPYVLEYQKNIHRQMRSLKGFQYQHLVQDQHVGIWILKRTN  
>comp15425\_c0\_seq5; 320 1472 2536 LEN=2865; translated  
MFSKTFILLSWLASPVVIVAFRGTENPTGLKGLETPPLVKEPRVIASEVDEMKNLITMDT  
MSEVGKAITADDMARGASARKRIEIGIFNAPSDYVEEYWYNPTIHTFGNIGIFGGFHAAL  
APISTKIIDMVAYDGEDIRSTVAQKLSRIVEARTSRCGRPARVLDGCCVGISTRALQDA  
FPDSDCVVGLDTSPEMVNMANFLTTHLSFVKPLMALVIPDKSKKNKKPNLLARNWGFSSR  
RAQFFTANAERTNFPSKTFDLVTVMYAFHEAPEIGREKILQEHRVLPQGGTLAVIDIST  
DYTPSKPMLAGEPYVLEYQKNIHRQMRSLKGFQYQHLVQDQHVGIWILKRTN  
>comp15426\_c0\_seq1; 629 384 2047 LEN=2047; translated  
MLGWILDEAHDQAENACNPGSGDGDSCSSSVATQRGNRSIEDSRTLSSSSSASASASN  
DLATDADTDTDVIGIKQRKGNKNTSEKEQHLRRKKLARELQHRIRLQEQRMLQQNSLYDDD  
GNNDEHRDDNEWRTSEGSQAGSESNHGYSDSDQRTSAAAQDHPHSVSSSGASSFDHALG  
VNSNGSFYFTSLNDVDRSIGKDSQGYSSHSHSSSVGGSPAGSSSKPAKQTPSFQGTAG  
TEPPLLPHPSSPAGDDDIETGRRQGAALGGLLLCGSGGASGLSTLACGTTNARAKAKT  
TPGDETTGGGTTGPEQRYSLTVLDVDDDDVSLLEKGSDESASLVDDDDSVFRTEPTNEC  
ILPACTGKKSRRTRTPRQLRANRSENRNTPKNSNNTSKHRRAIRPRILLLVGVAI  
VFVVGAGTAGVQKNRRSKNDSAGSSSNDDNNEATPTTEGGNQAINGYRNNSTSDDIPV  
ATATATANETATATATASETATTDGPEIVGENTGVASANNATENATSGGAADGNDGGDKQN  
EIDDKNNSDNEIKDX  
>comp15426\_c2\_seq1; 357 1 691 LEN=887; translated  
XNNNDNNSNNNGGDGAGTEKMDVLTSSWYAVEWFGKAFGRGNPGSDRSGDGESEKG  
GERATDRSAPPVSLAETLDRIGADNDRSYFLSGDMDVEIYEKDCVFADPFVVFAGRDRFV  
ENLENLGSFVTKYETRVLPFRGPGKASETSAGASNEPETESEPETTTTTTTTTTRLMVKLELN  
LPWKPVLAWPWGVTYITDKDTFLVTKHVESWEIAPLEGVKMIFRKPTARF  
>comp15426\_c2\_seq2; 350 1 664 LEN=860; translated  
XNNNDNNSNNNGGDGAGTEKMDVLTSSWYAVEWFGKAFGRGNPGSKGGERATDRSA  
PPVSLAETLDRIGADNDRSYFLSGDMDVEIYEKDCVFADPFVVFAGRDRFVENLENLGSF  
VTKYETRVLPFRGPGKASETSAGASNEPETESEPETTTTTTTTTTRLMVKLELNLPWKPVLAW  
PWGVTYITDKDTFLVTKHVESWEIAPLEGVKMIFRKPTARF  
>comp15427\_c0\_seq1; 902 87 1763 LEN=1949; translated  
MSASHSGTNTTLDWIRIVISLFLVIFSIIVVLLALITGNTQLARDINPIAAGVILWALI  
IWM SMVEGGQCSLVGLPPIDRELYRESHPIITYKITGWGHKGDNDRYLMGRQFMVIFIN  
TIGLGCAPLQGAEVLGLPDWVTAIFLGSIAMVLQNVVVGQLTSQVNASHCMLDYINNHF  
MTFTYVVAAGIEVTGVMHTSYLIRMMAYWAAGKPVESNEPPKTGFTLLFFWARVLFSLGV  
LGFALAVTIEALYRGKTSAWDSIPETVSLFLFFILMCCVGLLEGMQIAFFTVAKLPKSER  
GSSQMALRTCHTLFKDGGKNLPGFMCGRQMTVTLCFFVIARVTTVNIVIGEDENIFGVSD  
PIQKMLNLGFMGAITTTILGSIWQLVASSFP IAFLSNP I V F V F L Q A A L F L E A T G I C Y A A  
WFLAWCQRKVMGFQYDEVYVGTPEERAAGHADDNHDNDLATFLPASGIGTDDLAAR  
FKPLSVMQETYSGRREHILSNIKELRTHIAEAVTEDEKEAFETALKLEIDCLARLNTSEM  
ESKRFDEADKMDAISEEP  
>comp15427\_c0\_seq2; 864 93 1793 LEN=1948; translated  
MAVHNESHGISTPLDKIRIVFSLVLLVFSIVVLLALIGTGNTQLARDVHPIAAGVIMWSL  
I I W M S M V E G G Q C S M V G L P P I D R E L Y R E S H P I T Y K I T G W G H K G D N L D R Y L M G R Q F M V I F I N  
FTIGLGCAPLSGAKVLGLPDWVSAIFLGSIAMVLQNVVVGQLTSQCNASHMMLDYINTH  
FMTFTYVVAAGIEVTGVMHTSYLIRMMAYWAAGKPVESNEPPKTGFTLIFWGRVLFSLA  
VLGFALAVTIEALYRGKTSAWNGIPETVSLLLFFILMCCVGLLEGMQIAFFTVAKLPKSE  
RGSSPMALRTCECLFQNGGRNLPGMCGRQMTVTLCFFVIARVTTVNIVIGEDENIFGVSD  
DPIQKMLNLGFMGAITTTILGSIWQLVASSFP IAFLSNP I V F V F L Q A A L F L E A T G I C Y A A  
AWFLAWCQRKVMGFQYDEVYVGTPEERAAGHADDNHDNDVANLDLGTNVPAAHVAVGAPRITR  
EYMDLVEQNFTNQREKVMENIAELREQIKVAVTDEEKAVFEEAMKLEISILKSINEKQSE  
SMRDL SKLMGDDDDIEAGDAPVVVEP  
>comp15427\_c0\_seq3; 834 93 1778 LEN=1938; translated  
MAVHNESHGISTPLDKIRIVFSLVLLVFSIVVLLALIGTGNTQLARDVHPIAAGVIMWSL  
I I W M S M V E G G Q C S M V G L P P I D R E L Y R E S H P I T Y K I T G W G H K G D N L D R Y L M G R Q F M V I F I N



FTIGLCGAPLSGAKVLGLPDWVSAIFLGSIGIAMVLQNVIVGQLTSQCNASHMMLDYINTH  
FMTFTYVWAAGIEVTGVMHTSYLIRMMAYWAAGKPVESNEPPKTGFTLIFFWGRVLFSLA  
VLGFALAVTIEALYRGKTSANGIPETVSLLLFFILMCCVGLLEGMQIAFFTVAKLPKSE  
RGSSPMALRTCECLFQNGGRNLPGFMCGRQMTVTLCFFVIARVTTVNIVIGEDENIFGVSD  
DPIQKMLNLGFMGAITTTILGSIWQLVASSFPPIAFLSNPIVVFVFLQAALFLEATGICYA  
AWFLAWCQRKVMGFQYDEVYVGTPEERAAKDHADDPDAQAHLDLGTNVLEANVNAGLDIS  
WAEGDFTMRRVRILQONITNLREQIKLSVTEDEKAAFEHSLKIEIANLTRINKEQAKSYGE  
STLSLTAEVPAEVEESAEQTV

>comp15427\_c0\_seq4; 893 87 1769 LEN=1929; translated  
MSASHSGTNTTLDWIRIVISLFLVIFSI VVVLAL IATGNTQLARDINPIAAGVILWALI  
IWMSMVEGGQCSLVGLPPIDRELYRESHPITYKITGWGHKGDNLDRYLMGRQFMVIFINF  
TIGLCGAPLQGAEVGLGLPDWVTAIFLGSIGIAMVLQNVVVGQLTSQVNASHCMLDYINNHF  
MTFTYVWAAGIEVTGVMHTSYLIRMMAYWAAGKPVESNEPPKTGFTLLFFWARVLFSLGV  
LGFALAVTIEALYRGKTSAWDSIPETVSLFLFFILMCCVGLLEGMQIAFFTVAKLPKSER  
GSSQMALRTCHTLFKDGGKNLPGFMCGRQMTVTLCFFVIARVTTVNIVIGEDENIFGVSD  
PIQKMLNLGFMGAITTTILGSIWQLVASSFPPIAFLSNPIVVFVFLQAALFLEATGICYAA  
WFLAWCQRKVMGFQYDEVYVGTPEERAAKDHADDPDAQAHLDLGTNVLEANVNAGLDISW  
AEGDFTMRRVRILQONITNLREQIKLSVTEDEKAAFEHSLKIEIANLTRINKEQAKSYGES  
TSLTAEVPAEVEESAEQTV

>comp15427\_c0\_seq5; 923 87 1784 LEN=1939; translated  
MSASHSGTNTTLDWIRIVISLFLVIFSI VVVLAL IATGNTQLARDINPIAAGVILWALI  
IWMSMVEGGQCSLVGLPPIDRELYRESHPITYKITGWGHKGDNLDRYLMGRQFMVIFINF  
TIGLCGAPLQGAEVGLGLPDWVTAIFLGSIGIAMVLQNVVVGQLTSQVNASHCMLDYINNHF  
MTFTYVWAAGIEVTGVMHTSYLIRMMAYWAAGKPVESNEPPKTGFTLLFFWARVLFSLGV  
LGFALAVTIEALYRGKTSAWDSIPETVSLFLFFILMCCVGLLEGMQIAFFTVAKLPKSER  
GSSQMALRTCHTLFKDGGKNLPGFMCGRQMTVTLCFFVIARVTTVNIVIGEDENIFGVSD  
PIQKMLNLGFMGAITTTILGSIWQLVASSFPPIAFLSNPIVVFVFLQAALFLEATGICYAA  
WFLAWCQRKVMGFQYDEVYVGTPEERAAKGHADDNDVVANL DLGTNP AVHAGAPRITRE  
YMDLVEQNFTNQREKVMENIAELREQIKVAVTDEEKAVFEEAMKLEISILKSINEKQSES  
MRDLSKLMGDDDDIEAGDAPVVVEP

>comp15427\_c0\_seq6; 843 93 1772 LEN=1958; translated  
MAVHNESHGISTPLDKIRIVFSLVLLVFSIVVVLALIGTGNTQLARDVHPIAAGVIMWSL  
IIWMSMVEGGQCSMVGLPPIDRELYRESHPITYKITGWGHKGDNLDRYLMGRQFMVIFIN  
FTIGLCGAPLSGAKVLGLPDWVSAIFLGSIGIAMVLQNVIVGQLTSQCNASHMMLDYINTH  
FMTFTYVWAAGIEVTGVMHTSYLIRMMAYWAAGKPVESNEPPKTGFTLIFFWGRVLFSLA  
VLGFALAVTIEALYRGKTSANGIPETVSLLLFFILMCCVGLLEGMQIAFFTVAKLPKSE  
RGSSPMALRTCECLFQNGGRNLPGFMCGRQMTVTLCFFVIARVTTVNIVIGEDENIFGVSD  
DPIQKMLNLGFMGAITTTILGSIWQLVASSFPPIAFLSNPIVVFVFLQAALFLEATGICYA  
AWFLAWCQRKVMGFQYDEVYVGTPEERAAKGHADDNDVNDL DLATFL PASGIGTDDLAA  
RFKPLSVMQETYSGRREHILSNIKELRTHIAEAVTEDEKEAFETALKLEIDCLARLNTSE  
MESKRFDDEADKMDAISEEP

>comp15428\_c0\_seq1; 455 1 1492 LEN=2678; translated  
XKTNNDEFGLGIQYDTEADYFDAAYMYDATALGMSACRAIGHNKAFNAADHFSNLTEGL  
RFRGATGEVTFNNKGRTRYESTFYELVNYVTEDVVDENTGKNFVGLKTHTTNIYRNGSWI  
DVDESFIYSNGETEKPNALRERRES DSSGLAKKMKITALILSVLSII SAIGFGIWTWCHR  
FTRVIQASQPFFLYLVVFGVIMVGGSIIPFCMDDTQFSFDAMNKACSAVLWLLFPGFSII  
FSALFTKTYRINLIMKHSRSFRVTVTIRETLTMAVMLLNFNIAILTMTIRNPPQYDRK  
VSRLDHLERVAETYGTGCVWNQIHYIAALLAINMVIATLSAYQAWEARKLSTQFAESQYI  
FASLLISLTLFMVGLPVFALAGQKPEILFFVYGGALFLFCMETLLLLL FAPKIHYYWKKKE  
FSKVNISGIDLNIRTNGDRSNDYKGMIVTKK SATELARRVNDLELLLQKKEELEEHEKA  
KQIEITNTSTEHNVIDP

>comp15428\_c0\_seq2; 96 335 784 LEN=1558; minus strand; translated  
MLQE QEDGRNRAQKTSATTASEPTTTGEGAPDPKRTPNPGNTRKVFYTTCREGMANEYIR  
RHNDIPPEVCAGLRTAGIAFLSIHKLPGASNVLVLT IETAGSNLNLGRATGPGSVYRQNP  
VCQKWEVDMETHYHNGWTEMEEIHSSDVEW

>comp15428\_c0\_seq3; 283 1 843 LEN=859; translated  
XKTNNDEFGLGIQYDTEADYFDAAYMYDATALGMSACRAIGHNKAFNAADHFSNLTEGL  
RFRGATGEVTFNNKGRTRYESTFYELVNYVTEDVVDENTGKNFVGLKTHTTNIYRNGSWI  
DVDESFIYSNGETEKPNALRERRES DSSGLAKKMKITALILSVLSII SAIGFGIWTWCHR  
FTRVIQASQPFFLYLVVFGVIMVGGSIIPFCMDDTQFSFDAMNKACSAXPLVVVSGVFDN

FLSTFHENLPYQFDHEALQKLSQGHSDYSRNSYNNGSYVAL  
>comp15428\_c0\_seq4; 635 30 2170 LEN=2186; translated  
MTSTWPSLWPI SNATYVSVEQLIDDLPKTSVLYTLPAFDSIFRDL PADLITRDVYHHQVN  
NVIKINEEDMLEYNSSDSGSEYMEIPHCHFVGM LPFVFDSPWSANISSVSI ELAQAMALG  
IQHLNTGDSSLVSSLGDLRESSCSDMI FTMEYADPGNDPGGAIDK VLEIIGRRDGHKKPC  
SFLASTRSELTMPAALLSGNKGFME LSSSSTSTLLDSV SQFPYFARTVPNDRDN IKPIMD  
YFGKEIELEYLAL IHMNEPYGNSVGEALLRERENI IQDREKSSNAPVIRRF SIDSTGTAM  
DATLRALENSQFTFIIAAMP TMHFYHKL METAYDMGLVGNIGGAGYYQWYFTDSFWAPAS  
SMKLSPKLAIAYNGTGMFTPSAGRLENETS YNGFVQELGKLDKSS EDRNYI SALIPQNRN  
HLEQSPENLYQGEKTNNDEFFGIQYDAEDADYFDAAYMYD ATIALGMSACRAIGHNKAFN  
AADHFSNLTEGLRFRGATGEVTFN NKGTRTYESTFYELVNYVTEDVVDENTGKNFVGLKT  
HTTNIYRNGSWIDVDESFIYSNGETEKPNALRERRES DSSGLAKKMKIT ALILSVLSIIS  
AIGFGIWTWCHRFRTRVIQASQPF FLYLVVFGVIMVGGSIIPFCMDDTQFSFDAMNKACSA  
XPLVVVSGVFDNFLSTFHENLPYQFDHEALQKLSQGHSDYSRNSYNNGSYVAL  
>comp15428\_c0\_seq5; 287 1 763 LEN=986; translated  
XKTNNDEFLGIQYDTEADYFDAAYMYD ATIALGMSACRAIGHNKAFNAADHFSNLTEGL  
RFRGATGEVTFN NKGTRTYESTFYELVNYVTEDVVDENTGKNFVGLKTHTTNIYRNGSWI  
DVDESFIYSNGETEKPNALRERRES DSSGLAKKMKIT ALILSVLSIIS AIGFGIWTWCHR  
FRTRVIQASQPF FLYLVVFGVIMVGGSIIPFCMDDTQFSFDAMNKACSAVLWLLFPGF SII  
FSALFTKTYRINLM  
>comp15428\_c0\_seq6; 807 30 2819 LEN=4005; translated  
MTSTWPSLWPI SNATYVSVEQLIDDLPKTSVLYTLPAFDSIFRDL PADLITRDVYHHQVN  
NVIKINEEDMLEYNSSDSGSEYMEIPHCHFVGM LPFVFDSPWSANISSVSI ELAQAMALG  
IQHLNTGDSSLVSSLGDLRESSCSDMI FTMEYADPGNDPGGAIDK VLEIIGRRDGHKKPC  
SFLASTRSELTMPAALLSGNKGFME LSSSSTSTLLDSV SQFPYFARTVPNDRDN IKPIMD  
YFGKEIELEYLAL IHMNEPYGNSVGEALLRERENI IQDREKSSNAPVIRRF SIDSTGTAM  
DATLRALENSQFTFIIAAMP TMHFYHKL METAYDMGLVGNIGGAGYYQWYFTDSFWAPAS  
SMKLSPKLAIAYNGTGMFTPSAGRLENETS YNGFVQELGKLDKSS EDRNYI SALIPQNRN  
HLEQSPENLYQGEKTNNDEFFGIQYDAEDADYFDAAYMYD ATIALGMSACRAIGHNKAFN  
AADHFSNLTEGLRFRGATGEVTFN NKGTRTYESTFYELVNYVTEDVVDENTGKNFVGLKT  
HTTNIYRNGSWIDVDESFIYSNGETEKPNALRERRES DSSGLAKKMKIT ALILSVLSIIS  
AIGFGIWTWCHRFRTRVIQASQPF FLYLVVFGVIMVGGSIIPFCMDDTQFSFDAMNKACSA  
VLWLLFPGF SII FSALFTKTYRINLIMKHSRSFRRVTVTIRETLTMAVM LLLFNIAILTT  
MTIRNPPQYDRKVSRLDHLERVAETYGTCGWVNQIHYIAALLAINMVIATLSAYQAWEAR  
KLSTQFAESQYIFASLLISLTLFMVGLPVFALAGQKPEILFFVYGGALFLFCMETLLLLL  
APKIHYYWKKKEFSKVNISGIDLNIR TNGDRSNDYKGMIVTKKSATELARRVNDLELLL  
QKKEEELEEHKAKQIEITNTSTEHNVIDP  
>comp15428\_c0\_seq7; 639 30 2090 LEN=2313; translated  
MTSTWPSLWPI SNATYVSVEQLIDDLPKTSVLYTLPAFDSIFRDL PADLITRDVYHHQVN  
NVIKINEEDMLEYNSSDSGSEYMEIPHCHFVGM LPFVFDSPWSANISSVSI ELAQAMALG  
IQHLNTGDSSLVSSLGDLRESSCSDMI FTMEYADPGNDPGGAIDK VLEIIGRRDGHKKPC  
SFLASTRSELTMPAALLSGNKGFME LSSSSTSTLLDSV SQFPYFARTVPNDRDN IKPIMD  
YFGKEIELEYLAL IHMNEPYGNSVGEALLRERENI IQDREKSSNAPVIRRF SIDSTGTAM  
DATLRALENSQFTFIIAAMP TMHFYHKL METAYDMGLVGNIGGAGYYQWYFTDSFWAPAS  
SMKLSPKLAIAYNGTGMFTPSAGRLENETS YNGFVQELGKLDKSS EDRNYI SALIPQNRN  
HLEQSPENLYQGEKTNNDEFFGIQYDAEDADYFDAAYMYD ATIALGMSACRAIGHNKAFN  
AADHFSNLTEGLRFRGATGEVTFN NKGTRTYESTFYELVNYVTEDVVDENTGKNFVGLKT  
HTTNIYRNGSWIDVDESFIYSNGETEKPNALRERRES DSSGLAKKMKIT ALILSVLSIIS  
AIGFGIWTWCHRFRTRVIQASQPF FLYLVVFGVIMVGGSIIPFCMDDTQFSFDAMNKACSA  
VLWLLFPGF SII FSALFTKTYRINLM  
>comp15429\_c0\_seq1; 357 1 1991 LEN=2513; translated  
SRRNDTPCTSAVWNVDKETQRRGYTKTQHSTITITITMIAANSFSLHELK GKISSARRHNW  
NAFFVGFLALAAVACGIAVYAAGVVV PKLHDARDMSHGKQHPSFDAPDLKRHNAQHKHEF  
ESAYHMPDRKVL DREVEESLEAEKKEHNQLRAQPAAEKQKAGFSTTDAGSKTEIRGDAAN  
QKYHMFVSTSCSGFQNWQALAFFYFAHKVRQPGTVTRLVSGCTDEEEKLKKIHKERVVP  
LQIPGLQTFEMHVTPGFDDSGGGSQKYWNKPNGLLHWMEESLGF DGKSDHEDDDAIVII  
DPDMMLLRPITADFS SKNYAGWATSKNTKEHVANNMSPVDYSHDVVTHGRPHAAQQYGF  
SNWLTSLKGRLEEVGPDSPALKLSLDDANDYYPAGPPYLATAKDMYQIAVHWVKFLPKV  
HEIFEPFMCEMHAYSVA AAHLELPHKLG VGMVSDVDSDEEFGFVDKLM PSEVCMAPXAL  
EATESGQAIDLTDSTTMVDPVYKEVGIATQQLPFVLHYCQRYALGRWFFSKYKLREDIFT

NCTAPLLREPPRNVAELYQWYIFPNGIEKLNFAVKDEKWKQEGLRVKHLRHGWLLCAVL  
YINGAIEAYKTETCQDNDAFQKTWHFHDEVLFDKMITDPSIPSDLFEPDAKTDAGTSG  
GTQ

>comp15430\_c0\_seq1; 620 147 2558 LEN=2839; translated  
MATVGEIPCFSPHADARPFCSRASCCSRQRDRPESSSFWKRRNPTLQLLTTPWEYFV  
TIDQSALWQKHIAWAKPRGSDLKAYISSQYSSRMVLLSLLLATEMSVFFNSSPELINLRQ  
RLSLFNDGHDSNYMGQQQLRSFLPFWIGFVLLLNICVTISGILATFTTWNVVS AISDSN  
AHCLLRSSLGQYVTTLSRPLFVASLYMFLWFLFVFTQLIVGGNVFFDSENASESIRQF  
FKRHLHLILLWCVLFGIVTLFFSIVVPLSAFGRLVLHTGAMGEKNVLSSESLQLDLLPHG  
LHAGLVIRAHHSQRNTAVTNQYNRSRKRQRRMQPSAHHQLSQNHNNDSCDREHQQRSN  
IASPIGLFHGGEGEPSKDDGWGNPKHRIENGNKVNNTFYEGVHESEHSNHDGTTSSVI  
FKGLEPEMELSLETPAVSDSNSGSKHDRVEDCDSFSRHYEELGANRSKARTRATDVGGNL  
FVFDREPEDDTRERPDFLPRDKPHGRSRRHQRTLTMETTSLFLPPATILNLSMTANEFNE  
LIDSAMDTSSLCYTNSPANKTRTTSGREKGENHGNEPDRLATAGNRSERKEKGRGAAG  
AFESQRFESNRGGASEGEPHATSAAESAGVRASPFVSTSGTSPRPHRERQQQAFVTRHH  
RRVSSSRFLLHEWKEEHSVRGTYGAAPPADLPEEIAWETEAAKGRSGPAGGGGSGHRIPS  
ASNRGRSLGDWLLSPFSSPLGNCHGSDRRTGPGSFSHQRRGGAEGGATQGPFSRGLPSEP  
LLPDLDTDGNNGSDCDEETGGLL

>comp15431\_c0\_seq1; 449 286 1377 LEN=2454; minus strand; translated  
MKGLNKFNGDDKANASTFVLIIVIALNLIGGVEGMLQPLKYAEPETLFPVLFESNRVLV  
RKPHGIGHDESSSFAALDNKDQRHEALSTPGVLRLLRSEQRQRDEEGERLYGVHRLDK  
VTSGILVFAKDTLTASTLSEYFTKGIQKVYFGMSAKKPQKKKQGLVQGGMTRSRNKS  
LLRKPKEGKPKQRNFAKTRFFTTGIQANQIIDQGGDVINAMSKVKTVMFRPYTGRTHQL  
RVAAMGPIPLGDPYKDGVDKNTGEDI ELAATRMLHASGIHIPKFLDQAEINWVC  
SPTFFHVDVQSMQDALDCSNISSKMASLADSLDVAVSKLMTKNCDVPGILEAMMTQQSKK  
KQH

>comp15431\_c0\_seq2; 449 159 1250 LEN=2327; minus strand; translated  
MKGLNKFNGDDKANASTFVLIIVIALNLIGGVEGMLQPLKYAEPETLFPVLFESNRVLV  
RKPHGIGHDESSSFAALDNKDQRHEALSTPGVLRLLRSEQRQRDEEGERLYGVHRLDK  
VTSGILVFAKDTLTASTLSEYFTKGIQKVYFGMSAKKPQKKKQGLVQGGMTRSRNKS  
LLRKPKEGKPKQRNFAKTRFFTTGIQANQIIDQGGDVINAMSKVKTVMFRPYTGRTHQL  
RVAAMGPIPLGDPYKDGVDKNTGEDI ELAATRMLHASGIHIPKFLDQAEINWVC  
SPTFFHVDVQSMQDALDCSNISSKMASLADSLDVAVSKLMTKNCDVPGILEAMMTQQSKK  
KQH

>comp15432\_c0\_seq1; 631 37 1674 LEN=3151; translated  
MKFRSTFAAALGIVNAVSMIAMTILKIATTNIVVTIGVPPVANAKKAPELFETALKVHKVY  
SEFPFHDTDLDYDIIGVSPNATLAEISKNYRTL SRKYHPDKKQHRGKETPRQYAEKLRQI  
QKAYEILSDDSKRLPYHRYGLVDPNLAFFLLGPRVSPANYYQLLQQQNSYSSSSSKHT  
HSNRKTTTLFDKLDRELLHLMGYDDYSMEALAMATEAANNGDIDDPFKALEEHRVRTVAA  
LLESIRPVVEGRLDARLYAQMLTQDCDRWKRLPLGAQIIRSVGRAYRHEGSEFLQRYKH  
TNNNDVYSWHTQRRSQNTKPYNKLTSGKEMVLQLKTDLKI GFRRRWRSTKDFLEAAAVS  
GRVAIAERSFNQQEKKLMLQQQEKQQRKQESLERLEYHGS PSSVGS SSSSFLPKMDDYIGG  
DDIVDDYDSLEEELEEEQKALGKLQAQQTLLQTLQIEALWKVCKIDLDRVRRACAMILSG  
EYFFYP SHQSSYDTTIAIDSRQIGWVTSSGETIDSESARVAAA EVMKMTGEIMVQQSKEG  
TSWKQ

>comp15432\_c0\_seq2; 631 37 1674 LEN=3242; translated  
MKFRSTFAAALGIVNAVSMIAMTILKIATTNIVVTIGVPPVANAKKAPELFETALKVHKVY  
SEFPFHDTDLDYDIIGVSPNATLAEISKNYRTL SRKYHPDKKQHRGKETPRQYAEKLRQI  
QKAYEILSDDSKRLPYHRYGLVDPNLAFFLLGPRVSPANYYQLLQQQNSYSSSSSKHT  
HSNRKTTTLFDKLDRELLHLMGYDDYSMEALAMATEAANNGDIDDPFKALEEHRVRTVAA  
LLESIRPVVEGRLDARLYAQMLTQDCDRWKRLPLGAQIIRSVGRAYRHEGSEFLQRYKH  
TNNNDVYSWHTQRRSQNTKPYNKLTSGKEMVLQLKTDLKI GFRRRWRSTKDFLEAAAVS  
GRVAIAERSFNQQEKKLMLQQQEKQQRKQESLERLEYHGS PSSVGS SSSSFLPKMDDYIGG  
DDIVDDYDSLEEELEEEQKALGKLQAQQTLLQTLQIEALWKVCKIDLDRVRRACAMILSG  
EYFFYP SHQSSYDTTIAIDSRQIGWVTSSGETIDSESARVAAA EVMKMTGEIMVQQSKEG  
TSWKQ

>comp15433\_c0\_seq1; 772 314 4153 LEN=4288; translated  
MGDVLNDVKKHVTKP IKKFVDSKQKLRKKA VKLLDANDSDSSEESGGRQKHRRALAQAA  
HAHQSATTAQGGYVLESIRHWDVSLPPVRKNYKMGGKKIPGVKFGKLFKHKRRVTIELYK  
KATAQEKAHYAEHKRRVVFQKLYAKASITNLSIQEENELPALGDEDFIIFRILKAAKRKGE

RDFFDVDDDDSTIHSLPNGDLDAHSLTTYNLTDYGDGQTDHGDNQIVFRWKERYRTRL  
ESMEIEVLKEHKMIQLECSGVLRDVCFDNPHEVETFLRVFEKMRQLQHERGARMMAEHN  
KEESGFRQLSQTSTFLTNIPENEESIAEENNTGGLVSSLVGKKKDETLPKYVNLLEIVS  
ATNLP IADVISSDPYVVVEDGRKEWHRTSVISKTLNPVWTLSTGSLFLIETTLVEFFESA  
RHVEFIVKDYDSVGENDLGSLVNVKKEMLRSTGERLEYPLGTFQSEGKESSIALRFRSA  
TSNDIRFMRKMEAKKNSGIFRYLGLSSSLPTGVYIEDCYLPPRSHRANLMKRQSREAEDG  
VTIQYRLKPFADPSRPVAATKWLTKREIDQESKLPKEWIEAGSGKVGKIFYIEVLGCDGL  
PNTDFSVTGRNKSDPFVCITFEDCIVNTDVINDCLSPRWMPWTQRAFVCNVMHPSSQFYL  
AVMDYDEHVPGRTRTFDKLGRCIINPTNARPNVTYVYTIIRMSLFSDDHDKMTGKITLRFY  
ESCNERQFLLAQFQFNHYDVSTDKKADFI SARYAVTNDVCFGITHIPAKYLRWKISSN  
XFFDHAFHISVQNFEPMQYDYNLSLDTIQKYVDELFEYTEILDDIVDAMKTIVILWRGHF  
SFKFSFCRKEHTIKFPFHSMIAFGWGVLLSNDFFRFFSFIGFLCTWVLFASLESRRDNP  
PWKRPRTYIEMLGILLFNKSYARHCIREYENIEPI MEYDERREELLKFRKDAIETMRIRN  
ESDAKHLEKEDRELDKQAHDP SATMTIGVNQLILSPFKDILMPTQSFLYKSVVFARI IKS  
IVLWYDSVSSFWIATAGLMFCAVTFYIPWSFLFHWAFTILVWTF LGPMMKLVDIFFVTNV  
NNMSYNERKALVEEDYKKRYDYIMGESKIRRMKERRMKLRDMEKYMFGQYISRVP IFKE  
ERFGSVPLAGGSAPYDPATSPVNI VRRINGQVLTGTMPRRDNQAKIFKSKKIFESLQ  
LDVPVVVGTTPPTTSPYGD ETLPLLFDETG DVTSGGSQDAPGNAAGAYGTMKGRDKVGD  
EGQENDLQLVKELAFESMV

>comp15433\_c0\_seq2; 772 263 4102 LEN=4237; translated  
MGDVLNDVKKHVTKPIKKFVDSKQKLRKKA VKLLDANDSDSSEESGGRQKHRRALAQAA  
HAHQSATTAQGGYVLESIRHWDVSLPPVRKNYKMGKKIPGVKFGKLFKHKRRVTIELYK  
KATAQEKAHYAEHKRRVFQKLYAKASITNLSIQEENELPALGDEDFIIFRILKAAKRKGE  
RDFFDVDDDDSTIHSLPNGDLDAHSLTTYNLTDYGDGQTDHGDNQIVFRWKERYRTRL  
ESMEIEVLKEHKMIQLECSGVLRDVCFDNPHEVETFLRVFEKMRQLQHERGARMMAEHN  
KEESGFRQLSQTSTFLTNIPENEESIAEENNTGGLVSSLVGKKKDETLPKYVNLLEIVS  
ATNLP IADVISSDPYVVVEDGRKEWHRTSVISKTLNPVWTLSTGSLFLIETTLVEFFESA  
RHVEFIVKDYDSVGENDLGSLVNVKKEMLRSTGERLEYPLGTFQSEGKESSIALRFRSA  
TSNDIRFMRKMEAKKNSGIFRYLGLSSSLPTGVYIEDCYLPPRSHRANLMKRQSREAEDG  
VTIQYRLKPFADPSRPVAATKWLTKREIDQESKLPKEWIEAGSGKVGKIFYIEVLGCDGL  
PNTDFSVTGRNKSDPFVCITFEDCIVNTDVINDCLSPRWMPWTQRAFVCNVMHPSSQFYL  
AVMDYDEHVPGRTRTFDKLGRCIINPTNARPNVTYVYTIIRMSLFSDDHDKMTGKITLRFY  
ESCNERQFLLAQFQFNHYDVSTDKKADFI SARYAVTNDVCFGITHIPAKYLRWKISSN  
XFFDHAFHISVQNFEPMQYDYNLSLDTIQKYVDELFEYTEILDDIVDAMKTIVILWRGHF  
SFKFSFCRKEHTIKFPFHSMIAFGWGVLLSNDFFRFFSFIGFLCTWVLFASLESRRDNP  
PWKRPRTYIEMLGILLFNKSYARHCIREYENIEPI MEYDERREELLKFRKDAIETMRIRN  
ESDAKHLEKEDRELDKQAHDP SATMTIGVNQLILSPFKDILMPTQSFLYKSVVFARI IKS  
IVLWYDSVSSFWIATAGLMFCAVTFYIPWSFLFHWAFTILVWTF LGPMMKLVDIFFVTNV  
NNMSYNERKALVEEDYKKRYDYIMGESKIRRMKERRMKLRDMEKYMFGQYISRVP IFKE  
ERFGSVPLAGGSAPYDPATSPVNI VRRINGQVLTGTMPRRDNQAKIFKSKKIFESLQ  
LDVPVVVGTTPPTTSPYGD ETLPLLFDETG DVTSGGSQDAPGNAAGAYGTMKGRDKVGD  
EGQENDLQLVKELAFESMV

>comp15433\_c0\_seq3; 823 263 3985 LEN=4120; translated  
MGDVLNDVKKHVTKPIKKFVDSKQKLRKKA VKLLDANDSDSSEESGGRQKHRRALAQAA  
HAHQSATTAQGGYVLESIRHWDVSLPPVRKNYKMGKKIPGVKFGKLFKHKRRVTIELYK  
KATAQEKAHYAEHKRRVFQKLYAKASITNLSIQEENELPALGDEDFIIFRILKAAKRKGE  
RDFFDVDDDDSTIHSLPNGDLDAHSLTTYNLTDYGDGQTDHGDNQIVFRWKERYRTRL  
ESMEIEVLKEHKMIQLECSGVLRDVCFDNPHEVETFLRVFEKMRQLQHERGARMMAEHN  
KEESGFRQLSQTSTFLTNIPENEESIAEENNTGGLVSSLVGKKKDETLPKYVNLLEIVS  
ATNLP IADVISSDPYVVVEDGRKEWHRTSVISKTLNPVWTLSTGSLFLIETTLVEFFESA  
RHVEFIVKDYDSVGENDLGSLVNVKKEMLRSTGERLEYPLGTFQSEGKESSIALRFRSA  
TSNDIRFMRKMEAKKNSGIFRYLGLSSSLPTGVYIEDCYLPPRSHRANLMKRQSREAEDG  
VTIQYRLKPFADPSRPVAATKWLTKREIDQESKLPKEWIEAGSGKVGKIFYIEVLGCDGL  
PNTDFSVTGRNKSDPFVCITFEDCIVNTDVINDCLSPRWMPWTQRAFVCNVMHPSSQFYL  
AVMDYDEHVPGRTRTFDKLGRCIINPTNARPNVTYVYTIIRMSLFSDDHDKMTGKITLRFY  
ESCNERQFLLAQFQFNHYDVSTDKKADFI SARYAVTNDYDYNLSLDTIQKYVDELFEY  
TEILDDIVDAMKTIVILWRGHFSFKFSFCRKEHTIKFPFHSMIAFGWGVLLSNDFFRFFS  
IGFLCTWVLFASLESRRDNPNPWKRPRTYIEMLGILLFNKSYARHCIREYENIEPI MEYD  
ERREELLKFRKDAIETMRIRNESDAKHLEKEDRELDKQAHDP SATMTIGVNQLILSPFKD  
ILMPTQSFLYKSVVFARI IKSIVLWYDSVSSFWIATAGLMFCAVTFYIPWSFLFHWAFTI

LVWTFGLPWWKLVLDIFFVTNVNMSYNERKALVEEDYKKRYDYIMGESKIRRMRKERRMK  
LRDMEKYMFGQYISRPVIFKEERFGSVPLAGGSAPVYDPATSPPVNIVRRINGQVLTGTM  
VPRRDNQAIFKSKKIFESLQLDVPVVVGTDDPPTTSPYGDETLPLLFDETDGVTSSGGSQ  
DAPGNAAGAYGTMKGRDKVGDEGQENDLQLVKELAFESMV

>comp15433\_c0\_seq4; 823 314 4036 LEN=4171; translated  
MGDVLNDVKKHVTKPIKFFVDSKQKLRKKAVKLLDANDSDSSEESGGRQKHRRALQAQA  
HAHQSATTAQGGYVLESIRHWDVSLPPVRKKNYKMGGKKIPGVKFGKLFKHKRRVTIELYK  
KATAQEKAHYAEHKRRVFQKLYAKASITNLSIQEENELPALGDEDFIIFRILKAAKRKGE  
RDFFDVDDDDSTIHSLPNGDLDAHSLTTYNLTDYGDGQGDHGDNDQIVFRWKERYRTRL  
ESMEIEVLKEHKMIQLECSGVLRDVCFDNPHEVETFLRVFEKMRRELQHERGARMMAEHN  
KEESGFRQLSQTSTFLTNIPENEEIAEENNTGGLVSSLVGKKKDETLPKYVNLIVEIVS  
ATNLP IADVISSDPYVVVEDGRKEWHRTSVISKTLNPNVWTLSTGSLFLIETTLVEFFESA  
RHVEFIVKDYDSVGENDVLSVLVNKKEMLRSTGERLEYPLGTFQSEGKESSIALRFRSA  
TSNDIRFMRKMEAKKNSGIFRYLGLSSSLPTGVYIEDCYLPPRSHRANLMKRQSREAEADG  
VTIQYRLKPFADPSRPVAATKWLTKREIDQESKLPKKEWIEAGSGKVGKIFYIEVLGCDGL  
PNTDFSVTGRNKSDPFVCITFEDCIVNTDVIDNCLSPRWMPWTQRAFVCNVMHPSSQFYL  
AVMDYDEHVPGRTRTFDKLGRCIINPTNARPNTVYTIRMSLFSSDDHDKMTGKITLRFYR  
ESCNERQFLLAAFQFKNHVDVSTDKKADFI SARYAVTNDYDYNLSLSDTIQKYVDELFEY  
TEILDDIVDAMKTVILWRGHFSFKFSFCRKEHTIKFPFHSMAIFGWGVLLSNDFDRFFSF  
IGFLCTWVLFASLESRRDNPNPWKRPTYIEMLGILLFNKSYARHCIREYENIEPI MEYD  
ERREELLKFRKDAIETMRIRNESDAKHLEKEDRELDKQAHDP SATMTIGVNQLILSPFKD  
ILMPTQSFLYKSVVFARI IKSIVLWYDSVSSFWIATAGLMFCAVTFYIPWSFLFWAFTI  
LVWTFGLPWWKLVLDIFFVTNVNMSYNERKALVEEDYKKRYDYIMGESKIRRMRKERRMK  
LRDMEKYMFGQYISRPVIFKEERFGSVPLAGGSAPVYDPATSPPVNIVRRINGQVLTGTM  
VPRRDNQAIFKSKKIFESLQLDVPVVVGTDDPPTTSPYGDETLPLLFDETDGVTSSGGSQ  
DAPGNAAGAYGTMKGRDKVGDEGQENDLQLVKELAFESMV

>comp15434\_c0\_seq1; 526 140 1765 LEN=1908; translated  
MTIKTLKRSSELALASIRDESMSMKPVLPA SILD AWTSLAPEVRAALIAAETSSQKSGS  
LPTNASVSSMTSSSSSSDASIEKSTSSGSDDGADDTFIEFDPEAGTKTTLRPLERAPNNV  
FEITKTTSKETITVEKTGSATVTTKKTMATTGWRNVFSLPISYDVMVPRGTLTLLDPSN  
MQLLEATGVHTEGYNTRFAVIDEAVNGFYGERIMQYFKAQNI ELHTI VIPGGEPDKRSGA  
IDKILDAMCVYKLRREPFLAIGGGVLDIAGTAA CLYRRGVFPFVRVPTLLAIVDASVG  
VKNGIDYCCSLTDETYKNRVGSFYAPSSCLLDTDFIATQDSRNI SNGFGEIVKLG LVRSE  
DLFELLETHGEALIESRFTDTPSVPDGVAQRIIDLSIQIMLEELGPNLWEYNLERCV DYG  
HTFSKLLMVPGV DIMHGEAVNIDGFFCCLLSYLRGYVTMDTVNRVFR CMQALKLPTTSS  
HLQSELAWQ SCKDAVEHRHGAMRIPLITDIGESV VSDITPEELNRAIELLQTFKHTMSG  
E

>comp15434\_c0\_seq2; 324 1 1118 LEN=1261; translated  
XCSSDLLDPSNMQLLEATGVHTEGYNTRFAVIDEAVNGFYGERIMQYFKAQNI ELHTI VIP  
PGGEPDKRSGAIDKILDAMCVYKLRREPFLAIGGGVLDIAGTAA CLYRRGVFPFVRVPT  
TLAIVDASVGVKNGIDYCCSLTDETYKNRVGSFYAPSSCLLDTDFIATQDSRNI SNGFG  
EIVKLG LVRSEDLFELLETHGEALIESRFTDTPSVPDGVAQRIIDLSIQIMLEELGPNLW  
EYNLERCV DYGHTFSKLLMVPGV DIMHGEAVNIDGFFCCLLSYLRGYVTMDTVNRVFR C  
MQALKLPTTSSHLQSELAWQ SCKDAVEHRHGAMRIPLITDIGESV VSDITPEELNRAIE  
LLQTFKHTMSG E

>comp15434\_c0\_seq3; 261 101 985 LEN=1128; translated  
MCVYKLRREPFLAIGGGVLDIAGTAA CLYRRGVFPFVRVPTLLAIVDASVGVKNGIDY  
CCSLTDETYKNRVGSFYAPSSCLLDTDFIATQDSRNI SNGFGEIVKLG LVRSEDLFELLE  
THGEALIESRFTDTPSVPDGVAQRIIDLSIQIMLEELGPNLWEYNLERCV DYGHTFSKLL  
EMVPGVDIMHGEAVNIDGFFCCLLSYLRGYVTMDTVNRVFR CMQALKLPTTSSHLQSELA  
WQ SCKDAVEHRHGAMRIPLITDIGESV VSDITPEELNRAIELLQTFKHTMSG E

>comp15435\_c0\_seq1; 459 1 1638 LEN=1638; translated  
XLPNGFVEMQEFWDYTRVIGGRFCTWYCKDFYEEASSPPEPEGSNSPVETS PVEVTS  
TRPPEPEEPVIGLPVPPVSVTFPATTTSQFLHGLCVKGYA EIDNEAAIEVSSFSNLSYR  
QMGNFAEGTVLWGNRDYDAGPLSDPDSMCEGGMFLQPSRVKEIPRNTQISLSVIPAGDSP  
VVICGWTEVSPENRNGWINSPLGQGFTESAPFEWYRAGYMTYLGRWYCKEFPDDGSGGE  
TSVESPYTHVQYDFPATTTNEFMHGFCVKGSSEDDGISFTSDFEHSAYDVTGEEFRAGTDL  
FLDRFYTAGSLSDPDSMCEGGLFVQANRVKAYPRGMVVSADIVPSSSGPVKICAFVQTV P  
DPNDRDGGWDTALPLDGFTE SDEFSDWGENLIAARNHIS IARWYCKDFYHDDTPPPVDYA  
SPLPQQVSITFPPTTTSQFVHGLCVIGSSRDKIEYDSTDADLSYGFVDGFVGTNMWGD R

RYQAGPATNGEAMCDGGIYLESSRHKSIDRGTVISLDVEGEGNSPITICAFVESGPSEFR  
HGGWNTX  
>comp15435\_c0\_seq2; 382 1 843 LEN=843; translated  
MESFVFLYGEWIHSSLMAYPVMPPFMEEVGSLMNGEEACENHGYNEDQCNMVGCCHYND  
VEFDPPQCMSSVGNDCINPQGADLLALPAPVVLSDQASLNMIIEGVQSSVLAAYYNEGNT  
TVEAMTSNGNWIGEIVLPSGVPDGSFFALVCESTWSVNVMAEGGGSGLVETVEYGEVTTF  
VVVDGEWIGGNLGSAMTTLSTQASLNLIIEGEQSSQLARYYNEDGIIIEVEVVTNSGNWVG  
DIVLPSDVPEGSFLALRCDSTWPVNVRSMSGGWSETVSTGE  
>comp15435\_c0\_seq3; 351 1 791 LEN=791; translated  
XLPNGFVEMQEFDWDYTRVIGGRFCTWYCKDFYEEASSPPEPEGSNSPVEVTS  
TPPPEPEEALPAPVVLSDQASLNMIIEGVQSSVLAAYYNEGNTTVEAMTSNGNWIGEIVL  
PSGVPDGSFFALVCESTWSVNVMAEGGGSGLVETVEYGEVTTFVVVDGEWIGGNLGSAMT  
TLSTQASLNLIIEGEQSSQLARYYNEDGIIIEVEVVTNSGNWVGDIVLPSDVPEGSFLALR  
CDSTWPVNVRSMSGGWSETVSTGE  
>comp15435\_c0\_seq5; 406 1 1362 LEN=1362; translated  
XLPNGFVEMQEFDWDYTRVIGGRFCTWYCKDFYEEASSPPEPEGSNSPVEVTS  
TRPPEPEEPVIGLPPVPSVTFPATTTSQFLHGLCVKGYAEIDNEAAIEVSSSFSNLSYR  
QMGNFAEGTVLWGNRDYDAGPLSDPDSMCEGGMFLQPSRVKEIPRNTQISLSVIPAGDSP  
VVICGWTEVSPENRNGGWINSPLPGQGFTESAPFEWYRAGYMTYLGRWYCKEFPDDGSGGE  
TSVESPYTHVQYDFPATTTNEFMHGFVCVKGSSSEDGISFTSDFEHSAYDVTGEEFRAGTDL  
FLDRFYTAGLSLSDPDSMCEGGLFVQANRVKAYPRGMVVSADIVPSSSGPVKICAFVQVTP  
DPNDRDGGWDTALPLDGFTESEDEFSDWGENLIAARNHIS IARWYCKDFYHEDTPPPTNSP  
TDSPTGAPTGAPTSTPTNSPTDSPTETPVPPVSFX  
>comp15435\_c0\_seq6; 606 136 1993 LEN=1993; translated  
MVSLWSFFVHNTTSLSDVGGQTYPHTTFTNFATGMFASEQCVVSEEEIISAHTASCMKSAR  
GSAIVRLYKKFHEGSIATSRSATIPKCHDENDTSEVVEEIFELFCQPSCQSPQDYNPR  
DPNDMNRDRGGNIGGPQDGYEGTTPPEPVVSVTFPATTTSQFLHGLCVKGYAEIDNEAA  
IEVSSSFSNLSYRQMGNFAEGTVLWGNRDYDAGPLSDPDSMCEGGMFLQPSRVKEIPRNT  
QISLSVIPAGDSPVVICGWTEVSPENRNGGWINSPLPGQGFTESAPFEWYRAGYMTYLGRW  
YCKEFPDDGSGGETSVESPYTHVQYDFPATTTNEFMHGFVCVKGSSSEDGISFTSDFEHSAY  
DVTGEEFRAGTDLFLDRFYTAGLSLSDPDSMCEGGLFVQANRVKAYPRGMVVSADIVPSSS  
GPVKICAFVQVTPDPNDRDGGWDTALPLDGFTESEDEFSDWGENLIAARNHIS IARWYCKD  
FYHDDTPPPVDYASPLPQQVSI TFPPTTTSQFVHGLCVIGSSRDKIEYDSTDADLSYGFV  
DGFVEVGTNMWGD RRYQAGPATNGEAMCDGGIYLESSRHKSIDRGTVISLDVEGEGNSPIT  
ICAFVESGPSEFRHGGWNTX  
>comp15435\_c0\_seq7; 121 1 591 LEN=591; translated  
XLPNGFVEMQEFDWDYTRVIGGRFCTWYCKDFYEEASSPPEPEGSNSPVEVTS  
TRPPEPEEPVIGLPPVPSVTFPATTTSQFVHGLCVIGSSRDKIEYHSSDGLSYSFVDG  
FGVGTNMWGD RRYQAGPATNGEAMCDGGIYLESSRHKSIDRGTVISLDVEGEGNSPITIC  
AFVESGPSEFRHGGWNTX  
>comp15435\_c0\_seq8; 513 1 2021 LEN=2021; translated  
XKALAQAETVCPFDYVLRSENLHGVSTVTEETVNLGRRSLOQQRNAQIEILRQNGESV  
EFFVHNTTSLSDVGGQTYPHTTFTNFATGMFASEQCVVSEEEIISAHTASCMKSARGSAI  
VRLYKKFHEGSIATSRSATIPKCHDENDTSEVVEEIFELFCQPSCQSPQDYNPRDPNDM  
NDRDRGGNIGGPQDGYEGTTPPEPVVSVTFPATTTSQFLHGLCVKGYAEIDNEAAIEVSS  
SFSNLSYRQMGNFAEGTVLWGNRDYDAGPLSDPDSMCEGGMFLQPSRVKEIPRNTQISLS  
VIPAGDSPVVICGWTEVSPENRNGGWINSPLPGQGFTESAPFEWYRAGYMTYLGRWYCKE  
FPDDGSGGETSVESPYTHVQYDFPATTTNEFMHGFVCVKGSSSEDGISFTSDFEHSAYDVTG  
EFRAGTDLFLDRFYTAGLSLSDPDSMCEGGLFVQANRVKAYPRGMVVSADIVPSSSGPVK  
ICAFVQVTPDPNDRDGGWDTALPLDGFTESEDEFSDWGENLIAARNHIS IARWYCKDFYHDD  
TPPPVDYASPLPQQVSI TFPPTTTSQFVHGLCVIGSSRDKIEYDSTDADLSYGFVDFE  
VGTNMWGD RRYQAGPATNGEAMCDGGIYLESSRHKSIDRGTVISLDVEGEGNSPITICAFV  
ESGPSEFRHGGWNTX  
>comp15435\_c0\_seq9; 78 1 498 LEN=498; translated  
XLPNGFVEMQEFDWDYTRVIGGRFCTWYCKQFTQVGTQQVPTQQVSI TFPPTTTSQFV  
HGLCVIGSSPEKIA YDSTDADLSYGFVDGFVEVGTNMWGD RRYQAGPATNGEAMCDGGIYL  
ESSRHKSIDRGTVISLDVEGEGNSPITICAFVESGPSEFRHGGWNTX  
>comp15436\_c0\_seq1; 503 1 2088 LEN=2286; translated  
SEICSKRCVAVYIEDIGIDL CVDA AAILGFWLRAIFYPEGALLSTNTLTSFQTL LFRAAX  
IAETPTFATRDLNLNGTELSLGDQLGEGEFGSVYEIESLERQAPRVSLTDDGF AII LEE

IGDDQECGKGNQDQVDCDPTQNRQLSSGSSHGHPATASLTVP IPTDLIVDKGNLDGYLLRR  
IELLQDQENDNVTPTILEKNIQPSNKPQVYDNNELNEYCNQHLINDNGSSEEDDGSSESLH  
CPARRRPAIKLKDKKQMIKRQNNNNATNNFEGYAVKVVRDDIATERKKRVAADMATEA  
KILSALSHPNIMRIRGIMGYIERPGNYGIIMDKLRSTLQDQVKTWARVTSEDKVPRAAPE  
KQPFLEHVPKWMLLRPESREKQTQLFRQMEFFTERMEAVSDVAQALKYLHEKKIVFRDLK  
TENVGLTAEDKYVLFDFGLARYLTDDDRVEGKEDQYHATGLTGSRLFMAPEVALCKPYGF  
SADVFSFAILFWEVMSLKEVFPKMTMNKHFHFLVMVKGRRPSTMEHILPSELNQMMVDSWD  
ANPLERPTFESICDILAHEIEKYHSGSRNDGSSFRQLQSLMFSRHEEANAEDDDEGILSA  
KEFSKFDGYDDYGEFNEDDSDGDEDSNISHHTRKPKFISRTLHLAQVEDAFEKVKETFDH  
KLLSNLGSPSDSCSSSRKNAVDQKSSANHRKTTLF

>comp15436\_c0\_seq2; 1142 1 2791 LEN=2989; translated  
XRSGEFMTGLTVAHTAQPPNAPDP THGDIQNQHRCVVGPIATHSAKRSEALGVVPPRN  
QTHPRQRLPHGRPSEHRVMQEFDEMHSRRDPGTPTKFKRMPVKMTVDRSRAMKAHQVGA  
VAGGRVSGSFVSSSSSSSLSSSLGRAALQTLTGSNCSQSSSDTRTSRFNRPYIGSPMVA  
RDCFERAGGSRVSVSGNGSEGTAETSVRDDLAKAEVAAMFGTGSQDPTGSVGTDRDDGP  
SDSNGNGNGNGDDKNDNGNGNHRKGSAMKRLQASATSRIESAKDILERRLKKIDSQFFRE  
NPTHKVPFRVFNELSLGDQLGEGEFGSVYIEIESLERQAPRVSLTDDGFAIILEEEIGDDQ  
ECGKGNQDQVDCDPTQNRQLSSGSSHGHPATASLTVP IPTDLIVDKGNLDGYLLRR  
DQENDNVTPTILEKNIQPSNKPQVYDNNELNEYCNQHLINDNGSSEEDDGSSESLHCPARR  
RPAIKLKDKKQMIKRQNNNNATNNFEGYAVKVVRDDIATERKKRVAADMATEAKILSA  
LSHPNIMRIRGIMGYIERPGNYGIIMDKLRSTLQDQVKTWARVTSEDKVPRAAPEKQPF  
EHVFKWMLLRPESREKQTQLFRQMEFFTERMEAVSDVAQALKYLHEKKIVFRDLKTEN  
VGLTAEDKYVLFDFGLARYLTDDDRVEGKEDQYHATGLTGSRLFMAPEVALCKPYGF  
SADVFSFAILFWEVMSLKEVFPKMTMNKHFHFLVMVKGRRPSTMEHILPSELNQMMVDS  
WDANPLERPTFESICDILAHEIEKYHSGSRNDGSSFRQLQSLMFSRHEEANAEDDDEG  
ILSAKEFSKFDGYDDYGEFNEDDSDGDEDSNISHHTRKPKFISRTLHLAQVEDAFEK  
VKETFDHKLKLLSNLGSPSDSCSSSRKNAVDQKSSANHRKTTLF

>comp15437\_c0\_seq1; 1352 206 4141 LEN=4221; translated  
MVSIEEDNTDSSSSSSSDEKMTDGDENDSPQQVSSSSSSSDNDDEESGDSSDDDESSSDA  
TNSVARAASRGYSRLFSYRRTLGI VADGPFHLIPNQNSSAMVCAAIGERFHLVQCDRLH  
PVMVSHALPGTKDGSKTSAGGPQKIYHLVSDNTLSVAVVAHG FVSPGGNLAGGPRRVTLF  
ERTRSVATLDHLCERSDENEADWSIVGLLHLGKIKITMTGEKADKKENAALIAVVL SKGK  
PYDEASDGVVVGEDDGGDSGSDSDSDESETSGPEDARGPEQCRGEIVLLVASRTTTLT  
VHKRIKLTKFPSFCPRVAMHPPTYVNKIVVGGSCAKTSRDAMILLNVRTGKI IHTFKCLD  
KHSPLVKSEITSLEASPAIDTIATGNSKGAVHLINIRFDKLLFSLNHEPKNAGRKPVRIT  
SMSFRTDGAALKYGIAPLAVGRSDGTITVWDLSPNDDDDDDFHPAGGRTILCEMEQAH  
YPGGVCKLQYLPQEPLLVSTGTRSNNLVMHIFDSDPHSGRILRQRRGHTAPPKCIRYLHP  
GIGGILANTGDGTARACQILSGGSSDRTLRKFSTVRSVLDREFSOGKGLEKKARELGML  
SKTQLLLPPVTAMVTSEMRSRDWGDLVSIHQDHAFAYVWSSKNGAQSGPVL RQDGNVSA  
MKKQPPKSAHATSVSMSTCGNYALVGTGGVIYKYNVQSGMTRGTYPIDSNKKNKRGK  
DAGDIRRTFKALEKKMKL SNRASNQEKEELDLVTNAKREAIRNAKLRSASHEGYAVTGIA  
VDSVNRTVISVGADAKLILWSFATHAPHKKS PSMPLPAPATKLVKSDSLAAIALDDFST  
VLFDCSTFTIVRRFGIGSQSNRHTGPI SDFGFS PDARTLYTSSLDGTIRVWDVPTNSCVD  
WMCFDTPPTSLTISPTGEFLATHTGKLGISLWSDRSFYQTVHVDGTLALAAPSRMDDPA  
PIAEIDKMDDDDVVDLLNSIPSGIGQDRKKS VNEEDNSTGPAKAREHGLITLSGLPPAH  
WKNLFHLELVKERNKPKPKPPSAPFFLQWRPGVSATGESTTNAESKDQNELQNNVD  
QWDAVWSDDDNEKKGAENDAF PAGLPPKDET KRPRTEEEGKDEVLTSKRKVS IYRSQ  
LASLLQECSENAKRNDYNEKNNDI FTPVTEYVGTLP SAIDVSLSTLCNGTHDLEDGLP  
LLTLASRWLVEACQSRERFDVAVNAYLHRFLYLHANILSGINEANGNDMKRSEESAATAE  
EVEQRRRESEQRRELASCI AQLKQAQRDGSVVKLQAEMQNALCLLRHFSRMV

>comp15438\_c0\_seq1; 702 580 3021 LEN=3307; translated  
MTTFAQRQWLCHSLTESLTYRFHSGRSKRFRNQCSLSMVL AQDPTSSSWG NRKSNNRQYSF  
SPAEDSERQKRKRKYKRKRIPETERERKRLSKQRQKYDEIVEQADGTAPSIW SFENL  
FPKPVRDIKMIDEDLYGVSRRDGEV NKNNRLSKSLKSTSTSRPTDNL TDEEARKQIFES  
TSASKSVSKRKS GVDNANQAVVTSATGETTKSKSASP AKVDFALTRMVEDRLYGYRR  
GTETYQTS LMGDGA VQFREGVRLGNPLPINADILNYHAKKELRSNRLEEAQELYEMAIQI  
DPRDGRAYLGLSRCAQRRRDFKLARECLRIGIAQSVSCAEDSTPDNGANPFLQALGCLE  
EKAGHLSEAESLYISAVRSRASHAASWVALAQLRTRKLRQAAAGRVCYQAAERELNRVG  
LPPSSYVYTAWASMEYKCGDIRRARKLFKAALTVDKKCSA AWLQLGCMEADLEK WNEAQ  
LCFETVLKFDQRNSRVIQAYAIMESKRPE SNSRKVIGL FERALKANPRDAGVLQPYGLYV

AKLGDIDSARDLLRRATEVVKRHPAWQAWGVLETREGNPEEARNVFQOGIWACAQLTGG  
QSGGYSCARLWQGWGVLEAAEGDYAAARRCFSRALDADSRNVATITAWTNMEEELGNLED  
ARSLFKRSLKQFTPGTDETNQLWRAYELMEQRRGNEANAQEVYRQSMTEFSAAADEPEQ  
GPDPEIMVNLKKQKNSRDADKSDADIDSTNKAKREFEVSFRWDTGGQSMKAEILMDGSIE  
GKVPPSAMKKKKKSPSTLSSTSTTTISPSEDN

>comp15439\_c0\_seq2; 971 102 2958 LEN=4153; translated  
MVAMTLEPTDEDYINSIEDSFFKSVAQQVNIQTATTITDGEKAASANTRLEDMEITVRR  
KLELELLVEGNNLEASDCNGNDLKRRTADAIGIFWKSTLDLCHHLVHHLRSRNLTKTT  
VYEHLASCRRLPYILLSDCVDGLPSIEDVQHFVSTYVEPSLVNRVLFVGDKFWCRLTKENN  
SNGIILPNSHLPFLKVANQFLKRLGHTSDTAMLVWVKGRILWALARGFSVADKSSLKLVG  
NFHTSNLTFENEFEFNQIPRAVVSNSANAVDYSLEYEAMWSLQDFANPNKINVREFIRK  
LKLVLAAAMESASTTTCTDSTVALKRDDDQIENIATTKNTTKYLTSSALLPSQIEDPVFRS  
NIVTQQLLIVGSHLGSESPPLKNALSSILGRARKLLKNDNPQLHDILWGSILANGRENDWR  
TWKKQKCSASAFAPKFQRKHELVLDSSTDGSNRQRKRKEPFGKNGQNIKTSEKTVCSSTS  
NKFLGNNDLQNLKDNIPITLEVHLEPYVEALDPESGIEDEYHPKNDSLFTWRAMRLYAKHK  
LPLMNQCRKPADLEKITRKYRLSHGKDI PGGSNAI EESDGNNDGKKNDSVSSEIRENI  
DHQKENSSEGKTSIEKIDPEKASEDVKDISDGPSDSNMADVSESFETKENTNGKNEDDT  
NDSNMAHVNNENNDTEENNINLKKDEPDDSKMADVDDSNGTDTNGDSKTVDANNGDGNKMN  
TFDKNEDDTNETKMIDANDSNDNRKKTDTDPDAHGTTKIEGSKPPSTKHSDQKKGSDDRHR  
NYKSNKNIQSNQVEENRVPRETHLPQNESAAEGEAILAVETIKNAAEGTTEETIKNME  
DATIVCNKEGGVKICSNQEGDLVAMLHIEEGQMAHLLLEEKEGDTMTTIVEITEGKDLMEK  
EVTDLVTETTIVVATEAEVEVEEEMTIVVEKEIGEITRADPTEAEISGAEDE

>comp15440\_c1\_seq1; 389 1 2450 LEN=2578; translated  
XRARRQRWLHCRVLYNTTERDRRILQQGLFVANIPGEELGVLFPVHVHNMKQHNAAKKDGR  
NCWGSARERERMKARFNIRQRVNHNSNAVVGPSVSKPLPAGDVLNTEYSHEVISKYLSYIL  
RGDKSKFSTTFMDRHFGLIYAQHSIRCHILENPDTLSKSLKVAKKLRGSPSYVQALSQHME  
SVSTFTFMEYAVWMGKYSIVSGMLHGGINPCVRGSAIVFGSVPRSGLKKQDQLLLRQRQH  
LTEIGSRVLKRFFDCFPRLRSTYIVKRVVDMRIVARVDSHWQRTNENCSLNAKDVEFIIC  
NKMEAEKSHKDAATFRCPICCDQISNEFKLQFGRCKHVFCEMCFWNLMVHIDSPEKCGG  
TDVISCLACGEIETREDALLQTDNTRFLHEDISDLSPIEKYKLSMERLHRLPVDQHELK  
KRTSKKKRLSEEDYVASNWLDAVFPPLSGSTQDIRKDKFMLHVERNAITYVKGCLLSGVDV  
NQVNEYGQSAVYLAARWGYEELVALLGFGADHCIPANGGSTVRGLCSAGSCRKNTRVLE  
LLDQYESAPAAGTIRIGCDARDSADTQRMHHLPTNNPMSLLADGGILPNHPRRSILIPSS  
SDHPGAGSCFIDEAISSETTDALLDLFRSLPVDTNQKQKNSAPCSDRSYYCDTEGSLRL  
LLGNAVVRGGLASTTESLECVTDTNHSAADNNGQESPSLVRVFPHMRFLHYSRPGTVLPP  
HIDLRCRVNPFRCRPSDKQNPKYRSTHTFILYLTDCLSGGETALLEEVTADGSSPSLAVVSP  
RRGRLLVFPHVTPHKGMEVGNVVKILLRGELQIHGT

>comp15441\_c0\_seq2; 767 555 3713 LEN=4014; translated  
MNQHPSLLRSFSAASAESRPPMVPSSLHRGSSAGAI PSSSFGASNTNTNGNGSHHHKTYK  
SRFKRALKRVDVPAVLRQGI PVTRVF FANGEKPKKQYLTLSGDKFTLYVTNKPMVNPKSSQ  
DDKKQRSGSWKSFSLFRSSSVSDSSVSSSLTNVAEGSRKRANKEVRTIDIGEIQRIQRGAH  
NANLKT'TTTSAETVQNLTRRSRSELKNKI ISPLSSPTSSLHNRHSDSASSINANLPLSPS  
NIYNPFVDTLDPNGNVLYDFKNPNFVPEKTKGRFTWSSGKSEQAPPSVTTASSLDPGMC  
FSIIFRGDWTLDLMMTDFDIMTTKSGETS KKGADDTTSLSSASRITRDAILDALDNLVRA  
YENAKRQVSNEVLLLRYVWKDADQDKSNTIAQNEVGLVDFDR INHHMKKTELKAVYDQFCK  
VIGLNNKERKGGTLFEQTCTLLHKIKRDSWVVRPSHQYWNLLFGFEMKNGKQRLTVSSKT  
FLEKFLHQKQGERNATLEDANEIFRRLNEIELPRVAGEGLDPTRIDRDRFEVYLLGEDND  
VFDPKREAYDPRSMHRP ISEYWINSSHNTYLTGDQFTSNSSIDMYSNALYRGCKCLELDI  
WDGGYSSNGEPPVHVHGHMTSKILYKDI IKAIKLYVNFHPDTFPLILSYENHCAIPYQ  
EVMAAQLTEILGDSLYIPKEDSLLGKLPSPSDLRGMVVIKGRRPANIEIDDIDDGKNSDD  
GAPSTICLSDVYTTVSPGSPQQQVPAQKQKVPALARLTLFHGTCLKLGWDDSLMNP  
HFMHSFSESKIKSLCRKTDQRKQWVIYNQSHMSRSYPGGTRVDSNYSPILPWAMGTQLVA  
LNFQTVDAPLLLNDGRFRENGCGYVLKSTKLI DLQEPANEFNKE SRVPTKLSIRVLSGS  
CLPKPVGARKGDCINPYVRVSVHDVNGDKEVSPSFC'TTVANGFYPIWNGEKFSFRIENY  
ETAMLQMCVYTGSEELIAFSSIPISCVRKGLRSVKLFDTSNTRSGAFDFASLLIDVKKEK  
ARDEDSLLEIQREIVKNDTESSAATSTMAEI

>comp15441\_c0\_seq4; 369 150 1448 LEN=1749; translated  
MTSKILYKDI IKAIKLYVNFHPDTFPLILSYENHCAIPYQEVMAAQLTEILGDSLYIPKE  
DSLKGKLPSPSDLRGMVVIKGRRPANIEIDDIDDGKNSDDGAPSTICLSDVYTTVSPGSP  
QQQVPAQKQKVPALARLTLFHGTCLKLGWDDSLMNP THFMHSFSESKIKSLCRKTDQR



QKWVIYNQSHMSRSYPGGTRVDSSNYSPILPWAMGTQLVALNFQTVDAPLLLNDGRFREN  
GGCGYVLKSTKLIDLQEPANEFNKESRVPTKLSIRVLSGSCLPKPNGARKGDCINPYVRV  
SVHDVNGDKEVSPSFCSTTVANGFYPIWNGEKFSFRIENYETAMLQMCVYTGSEELIAFS  
SIPISCVRKGLRSVKLFDTSNTRSGAFDFASLLIDVKKEKARDEDSLLREIQREIVKNDT  
ESSAATSTMAEI

>comp15441\_c0\_seq5; 880 555 2633 LEN=2676; translated  
MNQHPSLLRSFSAASAESRPPMVPSSLHRGSSAGAIPSSSFGASNTNTNGNGSHHHKTYK  
SRFKRALKRVDVPAVLRQGI PVTRVFANGKPKKQYLTLSGDKFTLYVTNKPMVNPSSQ  
DDKKQRSGSWKSFSLFRSSSVDSVSSSLTNVAEGSRKRANKEVRTIDIGEIQRIQRGAH  
NANLKT'TTTSAETVQNLTRRSRSELKNKIISPLSSPTSSLHNRHSDSASSINANLPLSPS  
NIYNPFVDVTLPNGNVLYDFKNPNFVPEKTKGRFTWSSGKSEQAPPSVTTASSLDPGMC  
FSIIFRGDWTLDLMMTDFDIMTTKSGETSKKGADDTTSLSSASRITRDAILDALDNLVRA  
YENAKRQVSNEVLLLRVWVKDADQDKSNTIAQNEVGLVDFRINHHMKKTELKAVYDQFCK  
VIGLNNKERKGGTLFEQTCTLLHKIKRDSWVRPSHQYWNLLFGEFMKNGKQRLTVSSKT  
FLEKFLHQKQGERNATLEDANEIFRRLNEIELPRVAGEGLDPTRIDRDRFEVYLLGEDND  
VFDPKREAYDPRSMHRPISEYWINSSHNTYLTGDQFTSNSSIDMYSNALYRGCKCLELDI  
WDGGYSSNGEPVPPVWHGHTMTSKILYKDIKAIKLYVNFHPDTFPLILSYENHCAIPYQ  
EVMAAQLTEILGDSLYIPKEDSLLGKLPSPSE

>comp15442\_c0\_seq1; 353 180 1303 LEN=1303; translated  
MAPSRRRGASGKTSATVARSAAILATEKRRREELEQQSACDRKGNKDNNTSNSKNKHDT  
TSTAKGVHVGDDYDAYIDTNNSYHDSTENNYDNNYDMNRDEITAEVEKQRKKFSLFQPPFA  
SRGQPYCKVVPEDQHQCTKTYPNNIHQRSSKSGCKRKDDYYYSEEDGNSDNDHDAGDEG  
CLHCHRKVKSMPRIRVIDDENGHDHSDDEGHGGVNIQVRCDDCRGYICNGCHWCHEFQAN  
HEIRVCDRCDAFYCRRCEMDQDDCGEVVCGSCSTLLSCKFCGGGLCEECATACGRCGI  
VLCSRDAKFAVDCDTCRLSYCLVCLASGSKDPCVRCGHRPSKRMEQLVHLRLKSIYKAFK  
SSSGGSNAVGGSGNT

>comp15442\_c0\_seq2; 1641 180 4763 LEN=5217; translated  
MAPSRRRGASGKTSATVARSAAILATEKRRREELEQQSACDRKGNKDNNTSNSKNKHDT  
TSTAKGVHVGDDYDAYIDTNNSYHDSTENNYDNNYDMNRDEITAEVEKQRKKFSLFQPPFA  
SRGQPYCKVVPEDQHQCTKTYPNNIHQRSSKSGCKRKDDYYYSEEDGNSDNDHDAGDEG  
CLHCHRKVKSMPRIRVIDDENGHDHSDDEGHGGVNIQVRCDDCRGYICNGCHWCHEFQAN  
HEIRVCDRCDAFYCRRCEMDQDDCGEVVCGSCSTLLSCKFCGGGLCEECATACGRCGI  
VLCSRDAKFAVDCDTCRLSYCLVCLASGSKDPCVRCGHRPSKRMEQLVHLRLKSIYKAFK  
SSSGGSNAVGGSGNSGDGNNINSCNIANGAEGGGNIKSNTGHGNSTASNDGSHGGRPRRN  
KPTTLQDMVGDHDEDDVDDVDPMSMMMGAAAGVLPKHFCHDLEQNYLAEQKKADAAA  
EALLAELEEEETAIAQKSKKKKKKERKNASKQNOQSSQKNTDADGSKKLDADNTSKMKP  
SQSQHEMASADAGNGEVEDLSEEDVDSTGRAINGNDEGKNQSENLEDTKMDPVEKELV  
ECVNNIDLEGIENILFRLKGVPGRAALRKNNAKALKRLKLELNPPPLTPAHPKMEVTRKT  
EKKPTGSTTRLSSAINKLSTIAADPKSLSKKGTAKSSGGHEKSSHNSKSSHSKSSLHKN  
NASTRCEAVVEIVSRLVGWMIKNGQRIRDLMEESGAKIWIWDEKFKGQETRVYISGDR  
KSVDRVSLVNNVITNAPPPQGSTNTAAAAVTSTASIALATERPEGAMKLSSTTVEVKS  
AWVKTSKGSAGNTILGTVPKPPALITSSAPVVGNVKEHAQAQKSENVTIKEPLGKR TN  
SENLVSDYANPAISAPLASKSSEVVTEIVTCEARFVPLLIGKRGWIKQIQDDSGARVDI  
DQSVTPRQVRISGSKADVDAKAVTMVRDVLSPHAQPQSSIMEDGSLVHPGISTGIQQSET  
GIPISTPTKQSLAASAVLEHNVTRNTIPRQDETSDRIHSPPPMVGDAKSAISASSSLSS  
TPEPSMASSKGFIASRLQNGSLLHPPMEQYGMGINPSQISQSPFLHPVGGISDALGGGG  
LWQSTSLGTRPTGVSPPPPLYTESPGQIGMQGDGQMIIPRGHIAHPLIHQQLQQNQHIP  
INTGMSQEQQNRGYPTHQLHPLSQTFGHAGQVSHGMNLSVNGNGSPMERVSQLTNQINIG  
NNDPTRGVHSTLGGAPYNMYRNEGVPSARVIATTPLRNLMHHNGGGGMPVSSPVRESG  
YRQGSGLWDLNPNYSSDLPLQTSALQPRSSSEFTGVSMGFSTGQQHTNKDIAVSNLSL  
GYATSDAMPSQHSLPNTNPIPVPNTTTPFSSVSHVRRRDDSLMFDNLFGR TNSSAQTS  
ANATNSLLTGFNGLSLSTGGDGAKSSGLWGSDFTESWNEKKGSDVYSDSSAPNVSSLG  
NIFSDKRPNLSRPEESRFNWDSTYPNR

>comp15443\_c0\_seq1; 344 530 1468 LEN=1523; translated  
MRRPTIIVAEEDSGSESEDITNHTTAMDSSRCSTDLGASAGDSPGRSAGLAFRQGLDMP  
ANEF AEGCKLLQAAALSRRVMEGILEQRPLVNFDRDYDRRTAIHVAASEGHLDIVKYL  
RKGARINRSDRWGGSPLDDASRHRHKEVLYLRTL GATTGSASKSANFIKAAACGLDE  
EVLLTSADVVDNEG DYDKRTALHLAAGEGHADIVRLLCRHKANVNTEDRWGNRPLDDAL  
SKSEESAKVLREYGALKGLKKENTVDDSTTRRRETANLEVKFDDLEMVDKIGKGSFGEIY  
RCRWRDIMVAGK

>comp15443\_c0\_seq2; 344 485 1423 LEN=1478; translated  
MRRPTIIVAEEDSGSESEDITNHTTAMDSSRCSTDLGASAGDSPGRSAGLAFRQGLDMP  
ANEF AEGCKLLQAAALSRRVMEGILEQRPLVNF RDYDRRTAIHVAASEGHLDIVKYL  
V RKGARINRSDRWGGSPLDDASRRHKEVVLVLR TLGATTGSASKSANFIKAAACGDLDE  
V EVLLTSADV D VNEGDYDKRTALHLAAGEGHADIVRLLCRHKANVNTEDRWGNRPLDDAL  
R SKSEESAKVLR EYGALKGLKKENTVDDSTTRRETANLEVKFDDLEMVDKIGKGSFGEI  
Y RCRWRDIMVAGK

>comp15443\_c0\_seq3; 561 530 2374 LEN=2610; translated  
MRRPTIIVAEEDSGSESEDITNHTTAMDSSRCSTDLGASAGDSPGRSAGLAFRQGLDMP  
ANEF AEGCKLLQAAALSRRVMEGILEQRPLVNF RDYDRRTAIHVAASEGHLDIVKYL  
V RKGARINRSDRWGGSPLDDASRRHKEVVLVLR TLGATTGSASKSANFIKAAACGDLDE  
V EVLLTSADV D VNEGDYDKRTALHLAAGEGHADIVRLLCRHKANVNTEDRWGNRPLDDAL  
R SKSEESAKVLR EYGALKGLKKENTVDDSTTRRETANLEVKFDDLEMVDKIGKGSFGEI  
Y RCRWRDIMVAAK CIRTAKVQKDWA IKQALQQLQDGVDAADVIDEIDAVQIPEADK  
L KALSDFRTEISILKSLRHPNIVLMLAYSTTQDLEVMISELMRCSLLDIFKAHI  
INGTKMKMKDKIAYATQLAQGMHYLHTCKPVI IHRDLKPANLLIDNSGVLKVAD  
FGLSKVRPDRKRNEKDTFMMTGETGSRFMAPEIFRHMSYNETVDVYSYG  
MILFYLLDGKPPWPTENGLVAAKKAEEQGDRPTIPRSWDIKLQGLLQNCW  
DENPSCRPSFHQILKVLQRHTRTVFPSESEFLQASSPTLPTEEGRCRCVMM

>comp15443\_c0\_seq4; 561 485 2329 LEN=2565; translated  
MRRPTIIVAEEDSGSESEDITNHTTAMDSSRCSTDLGASAGDSPGRSAGLAFRQGLDMP  
ANEF AEGCKLLQAAALSRRVMEGILEQRPLVNF RDYDRRTAIHVAASEGHLDIVKYL  
V RKGARINRSDRWGGSPLDDASRRHKEVVLVLR TLGATTGSASKSANFIKAAACGDLDE  
V EVLLTSADV D VNEGDYDKRTALHLAAGEGHADIVRLLCRHKANVNTEDRWGNRPLDDAL  
R SKSEESAKVLR EYGALKGLKKENTVDDSTTRRETANLEVKFDDLEMVDKIGKGSFGEI  
Y RCRWRDIMVAAK CIRTAKVQKDWA IKQALQQLQDGVDAADVIDEIDAVQIPEADK  
L KALSDFRTEISILKSLRHPNIVLMLAYSTTQDLEVMISELMRCSLLDIFKAHI  
INGTKMKMKDKIAYATQLAQGMHYLHTCKPVI IHRDLKPANLLIDNSGVLKVAD  
FGLSKVRPDRKRNEKDTFMMTGETGSRFMAPEIFRHMSYNETVDVYSYG  
MILFYLLDGKPPWPTENGLVAAKKAEEQGDRPTIPRSWDIKLQGLLQNCW  
DENPSCRPSFHQILKVLQRHTRTVFPSESEFLQASSPTLPTEEGRCRCVMM

>comp15443\_c0\_seq5; 251 65 1197 LEN=1224; translated  
MVAACKCIRTAKVQKDWA IKQALQQLQDGVDAADVIDEIDAVQIPEADK  
L KALSDFRTEISILKSLRHPNIVLMLAYSTTQDLEVMISELMRCSLLDIFKAHI  
INGTKMKMKDKIAYATQLAQGMHYLHTCKPVI IHRDLKPANLLIDNSGVLKVAD  
FGLSKVRPDRKRNEKDTFMMTGETGSRFMAPEIFRHMSYNETVDVYSYG  
MILFYLLDGKPPWPTENGLVAAKKAEEQGDRPXNTQKLGHQAPGIAPELLGRK  
SLVPLVPPDPQGPPTHPNRLPIRIGIPPGFKPYTANGGRSLPMRHDV  
ELLVIVIHPSIVSIDYGDNRCEESMECMTLFCQCCLCVLAVSTTVKHSF  
GFSKKT SITMI IHGAFIAHF

>comp15444\_c0\_seq1; 395 1 1646 LEN=1674; translated  
TRGNSSLQPAQFPKPIVTEQKNKPRTRTRIDRSSGFHHRREMPGLRDPQGGDTAEIATS  
TGGVIKLPSPSVAMVPGIGSNTGGSRSRQTSVPVTEGLGREDEGSPTETSSESADSNPP  
GRGATTTTTTPEDSPPDGVSQDAAAREALAAMLGRCLRHRTASSNNSNNDHHHHTYRE  
KFPVACLPLLDLPGNRHCLDCHARDP EWAACIYGALVCIKCSGRHRS LGVAVSRVRSVP  
MDHWTHSEVVAMLEGGNAQLKGFFERHALTEDSFGKRQQQQQQQQPRQQQQQQQPRKQ  
QPQRPPASAGRDDSSAVEELGNHLGDLNLLSVFHMDD EYDAASIYTKGTADTSLSSSS  
GSSVASTASTRRRHKGAFRRNRK GAGSGRGDEITAGTSSWLESMQNSSRNVFVAGGETWT  
PGRGWGTRSKASPGTAWDADPGDCWKEADSFFAESTNEHWTSGSRAAEQRNGRAQRMAS  
GRWAKAGQAGGAPVVPVLPAPASIRCAPALLPGPWVWNNGGVLPAAHHCCWYGLDPATG  
FGRNSTK

>comp15444\_c0\_seq2; 1103 445 3243 LEN=3439; translated  
MLGLKKFVKNRKALADASNPNRNNTLAIDTCTSGFNSRAHEFQQKF SIKKHIKPA  
SKTKKSRGSQKEARKKEQPEQPQLVEISEEYDIQSAISGLTRNSQFWDQGDQEDPPPC  
RITRKE D LLAGREDANDDKSDTEWPDDET SWNHKVQVT TYSNNNIHSNNI  
IHNSIRSSNILHKN SGKNKDKSNKDPMEPSGMRIETLSQIKSAGNTSKLSKNCQTQNT  
NHGIEVVLSPSAEPDGIKLDGARVKAPVEPSGTRAEAIRSSNGNPKPSGRSSGRAT  
TRSDDSNNPNRIVTDVILNVEVVYNKDPEDTASSISERFSETNAPRRRSKSTSVARQSR  
DRKSPRKHTNAAVGWDDTTTTDSGSCPEDEKRRSQSMPTLKRFTPHYLKSEKADCNEE  
PSSRLNNKLSGGSKSKSKAQEPPLYCPLYIENTGEEITSTLGSQLDGCESQKQNPSTQ  
NEDAKKALSKPRTSKQNADSLCPAMSEPRVCVEFSNRHSGEYFPKNAQAENLSRNEAC  
NYKSTNDENNRYGLAAKQFSD

TKRKPEANKASTIPLRNKTNITIGTELPKKGKSKSIGNVRIRRAITKEASRNLLLTTPQEV  
EDDDSEDLLPKSRPLQPSLDPLVAASTTRMRPQKRNSVPVTPSPKFQSHRDERTGPLEGH  
VVTPVESSESPSPQTSTTPAGRKDLIQAYLSFRGKNNAKVDETSPTTTTTASSLTPSTLD  
SLKMERARSAGSSYSTPSSRIRNKLSTSSASRRNSLSKVHNKGSNYARPYSFQKNEKRG  
QAAGYDDASRYYQHYVEAASTRALSSLVVEKQSRDLGLDIGPARSLTQIADNKRRNTLSK  
KLMSTPRKRIDMDGSTTSVDQCRDDLAQMDWRSVCADFGTDLRQSNPSYSYCTDDDSSTE  
SLPLITGRPLLLTYEDELPHNQFMKMLGIGN

>comp15444\_c0\_seq3; 401 231 1332 LEN=1360; translated  
MWSNSRRRKANGRSANVRDYLGMAGANESRRKEPPSSSSSSSSSSSLPSSLFTGPPQAMGTV  
LVEIPEELESEGFFPASGGKLGVPNGSRRRRGPRASGSSNSNNSLGNSSNSLGSNS  
HSGHRSAGRDDSSAVEELGNHLGDLNLLSVFHMDDYDAASIYTKGTADTSLSSSSG  
SSVASTASTRRRHKGAFNRNRKAGSGRGDEITAGTSSWLESMQNSRNRFVAGGETWTP  
GRGWGTRSKASPGTAWDADPGDCWKEADSFFAESTNEHWTSGSRAAEQRNGRAQRMASG  
RWAKAGQAGGAPVVPVLPAPASIRCAPALLPGPWVWNGGVLPAAHHCWCWYGLDPATGF  
GRNSTK

>comp15444\_c0\_seq4; 1103 363 3161 LEN=3357; translated  
MLGLKKFVKNRKALADASNPNNRNLTAIDTSCSTSGFNSRAHEFQQKFSIKKHIKPAKTK  
KSRGSQKEARKKEQPEQPQLVEISEEYDIQSAISGLTRNSQFWDQGDQEDPPPCTRITRK  
EDLLAGGREDANDDKSDTEWPDETSWNHVKVQVTTYSNNNIHNSNI IHNSIRSSNILHKN  
SGNKNDKSNKDPMEPSGMRIETLSDQIKSAGNTSKLSKNCQTQNTNHGIEVVLSPSAEP  
DGIKLDGARVKAPVEPSGTRAEAIRSSNGNPKPSGRSSGRATTRSDSNNPNRIVTDVL  
NVEVVYNKDPEDTASSISERFSETNNAPRRRSKSTSVARQSRDRKSPRKHTNAAVWDDD  
TTTDSGSCPEDEKRRSQSMPTLKRFTPHYLKSEKADCNEEPSRLNNKLSGGSKSKSKA  
QEPPYLCPLYIENTGEEITSTLGSQDGCESQKQNPSTQNEDEKALSKPRTSKQAD  
SLCPAMSEPRVCVEFSNRHSGEYFPKNAQAENLSRNEACNYKSTNDENRYGLAAKQFSD  
TKRKPEANKASTIPLRNKTNITIGTELPKKGKSKSIGNVRIRRAITKEASRNLLLTTPQEV  
EDDDSEDLLPKSRPLQPSLDPLVAASTTRMRPQKRNSVPVTPSPKFQSHRDERTGPLEGH  
VVTPVESSESPSPQTSTTPAGRKDLIQAYLSFRGKNNAKVDETSPTTTTTASSLTPSTLD  
SLKMERARSAGSSYSTPSSRIRNKLSTSSASRRNSLSKVHNKGSNYARPYSFQKNEKRG  
QAAGYDDASRYYQHYVEAASTRALSSLVVEKQSRDLGLDIGPARSLTQIADNKRRNTLSK  
KLMSTPRKRIDMDGSTTSVDQCRDDLAQMDWRSVCADFGTDLRQSNPSYSYCTDDDSSTE  
SLPLITGRPLLLTYEDELPHNQFMKMLGIGN

>comp15444\_c0\_seq5; 303 1 851 LEN=1247; minus strand; translated  
XSVTTSTRYYYLVFLPNPVAGSKPYQQWCAAGKTPPLFQTHGPGSSAGAHRIDAGAGS  
TGTGTGAPPACPALAHRPDAIRCARPFRCSAAREPLVLVLVGAFGKEGVGLLPAIARVRV  
PSGPRARLAASSSPSPARRPGLSPRHKDVPRGVHLGQLPAACPGGYFVAPAASGPLPAVP  
KGPLVPPPGGRGAGHAASRRGGEARVGRSLGVDRGRVVLVHVHVEDAEKVVVEVTEVPEL  
LYRGGVPPGRAPVAAVAVASEAVAAAVVAEAVVAVAAAAVAANW

>comp15444\_c0\_seq6; 303 1 851 LEN=1165; minus strand; translated  
XSVTTSTRYYYLVFLPNPVAGSKPYQQWCAAGKTPPLFQTHGPGSSAGAHRIDAGAGS  
TGTGTGAPPACPALAHRPDAIRCARPFRCSAAREPLVLVLVGAFGKEGVGLLPAIARVRV  
PSGPRARLAASSSPSPARRPGLSPRHKDVPRGVHLGQLPAACPGGYFVAPAASGPLPAVP  
KGPLVPPPGGRGAGHAASRRGGEARVGRSLGVDRGRVVLVHVHVEDAEKVVVEVTEVPEL  
LYRGGVPPGRAPVAAVAVASEAVAAAVVAEAVVAVAAAAVAANW

>comp15445\_c0\_seq1; 390 1 1645 LEN=3296; translated  
XNTSAATLAPTIPPTETTTTGDENHEAKNDGADTKPNRRPLNVLVLPDDMSHKSMQDVS  
GRDYVETPFLTALARDGIRFTRNAVTTVCWMSRATLFTGQYAGSKDMVGPERDEKNRRC  
SVAAFDDLPSRLGSSDLFFFCESNVNKMKSI PFNFNPASSHGSFRLKCPRTLPEYWKDT  
WPAILQRVGGYYVGHVGVKQYFDGKRVLP SLFNVTTIFEGRHWFGGVSASDKGYDSAKKF  
LEDPRDRPFALTVAFYPPKAI GNSYEPGEQWSPKQETMELYANRTYKRPYDVEQVHNNL  
PGFLKRGI VSSRFESRWKTTDQYNMGMRNHALVTEVDACQKI IDVLKSEGLYENTMI I  
FTSDNGLMMGSHGLGKWI PYEDSIRVPLI IHDPRLPKEQRGRLEDSMSLNVDLASTILG  
AANIESAPGMQGRDLADIYLPKELATSPVDREPWRTEFVYEHNTDIHRVFALIDQQYKY  
IDWQQQNYEQLFDLTSDPYELNDLLHNDTTKNKMTEVVKKLRERYNQIRVGRMSPHEHGS  
DWCNASLH

>comp15445\_c0\_seq2; 385 1 1480 LEN=3131; translated  
XNTSAATLAPTIPPTETTTTGDENHEAKNDGADTKPNRRPLNVLVLPDDMSHKSMQDVS  
GRDYVETPFLTALARDGIRFTRNAVTTVCWMSRATLFTGQYASSHGSFRLKCPRTLPE  
YWKDTWPAILQRVGGYYVGHVGVKQYFDGKRVLP SLFNVTTIFEGRHWFGGVSASDKGYD  
SAKKFLEDPRDRPFALTVAFYPPKAI GNSYEPGEQWSPKQETMELYANRTYKRPYDVEQ

VHNNLPGLFKRGIVSSRFESRWKTTDQYNMGMGRNYHALVTEVDAACQKI IDVLKSEGLYE  
NTMI IFTSDNGLMMGSHGLGGKWI PYEDSIRVPLI IHDPRLPKEQRGRLEDSMSLNVDLA  
STILGAANIESAPGMQGRDLADIYLPKELATSPVDREPWRTEFVYEHNTDIHRVFALID  
QQYKYIDWQQQNYEQLFDLTSDPYELNDLLHNDTTKNKMTEVVKKLRERYNQIRVGRMSP  
HEHGSWCNASLH

>comp15445\_c0\_seq3; 546 178 2007 LEN=3658; translated  
MPIQFSQTNSKSDGLLRKCAALALLAILVLSFVQLARFHNTFYFESDAKDTSDNRLF  
PLRKAGNGTAPLINRQAAGEKQNNNPSFDRAKDTTRTTSTMTRAAAEARNTSAATLAPT  
IPPPETTTTAAKTTTTGDENHEAKNDGADTKPNRRPLNVLVLF PDDMSHKSMQDVSGRDY  
VETPFLTALARDGIRFTRNAVTT SVCWMSRATLFTGQYASSHGSFRLKCPRFTLPEYWKD  
TWPAILQRVGGYVGHVGVKQYFDGKRVLP SLFNVTTIFEGRHWFGGVSASDKGYDSAKK  
FLEDRPRDRPFALTVAFYPPKAIGNSYEPGEQWSPKQETMELYANRTYKRPYDVEQVHNN  
LPGLFKRGIVSSRFESRWKTTDQYNMGMGRNYHALVTEVDAACQKI IDVLKSEGLYENTMI  
IFTSDNGLMMGSHGLGGKWI PYEDSIRVPLI IHDPRLPKEQRGRLEDSMSLNVDLASTIL  
GAANIESAPGMQGRDLADIYLPKELATSPVDREPWRTEFVYEHNTDIHRVFALIDQQYK  
YIDWQQQNYEQLFDLTSDPYELNDLLHNDTTKNKMTEVVKKLRERYNQIRVGRMSPHEHG  
SDWCNASLH

>comp15445\_c0\_seq4; 551 178 2172 LEN=3823; translated  
MPIQFSQTNSKSDGLLRKCAALALLAILVLSFVQLARFHNTFYFESDAKDTSDNRLF  
PLRKAGNGTAPLINRQAAGEKQNNNPSFDRAKDTTRTTSTMTRAAAEARNTSAATLAPT  
IPPPETTTTAAKTTTTGDENHEAKNDGADTKPNRRPLNVLVLF PDDMSHKSMQDVSGRDY  
VETPFLTALARDGIRFTRNAVTT SVCWMSRATLFTGQYGASKDMVGPERDEKNRRCVAA  
FDDLPSRLGSSDLFFFCESNVNMKSI PFNFNPASSHGSFRLKCPRFTLPEYWKDTPAI  
LQRVGGYVGHVGVKQYFDGKRVLP SLFNVTTIFEGRHWFGGVSASDKGYDSAKKFLEDR  
PRDRPFALTVAFYPPKAIGNSYEPGEQWSPKQETMELYANRTYKRPYDVEQVHNNLPGLF  
KRGIVSSRFESRWKTTDQYNMGMGRNYHALVTEVDAACQKI IDVLKSEGLYENTMI IFTSD  
NGLMMGSHGLGGKWI PYEDSIRVPLI IHDPRLPKEQRGRLEDSMSLNVDLASTILGAANI  
ESAPGMQGRDLADIYLPKELATSPVDREPWRTEFVYEHNTDIHRVFALIDQQYKYIDWQ  
QQNYEQLFDLTSDPYELNDLLHNDTTKNKMTEVVKKLRERYNQIRVGRMSPHEHGSWCN  
ASLH

>comp15446\_c0\_seq1; 231 253 811 LEN=811; minus strand; translated  
MKPGSEYTG EWKENQMHGDGTRKFANGDTYTGRYHKGMRNGGPNCKFRFANGDLYVGAW  
VDRFHGDGRYFFAHDG SVLEGT FVHGVKEGKFKLQRQIRSTEKLDILRFEDDKLVGLGVR  
WNSKRKTWLLTVVPVSRPAQMRKLRDGDGNGNRIETNEAMKAPSLCRKDNSKSSSS  
RSSSNX

>comp15446\_c1\_seq1; 808 326 2629 LEN=2892; translated  
MKDQRKGAHQERTMNTKSINGSSEADTNKTTQNHRAHNINTSLAAEYTSGSSPLLL  
SSNPSNVLSSSTRSLYENLRQEATSCCPVCGFQNFVNNSIDTNTVQSANAIVASHLPAG  
TCFLCSQAVVEANHSDAIKTI CDENNIACISDNWRAKEKQVEEDRQLAATLSAILLEER  
EQEENIRRRPSACLGVVWLEESGCGNTNDSLEVARDTVNYDNYFNDINDEHCFNGKSSVN  
TGLTTNNSYKQVNHADWNHRDCNDNHHNNDSSYPSQDTE TMGGFATTPSFPAAAAVA  
SSNSCSEKNQIMRRSNESEM LCNPHNFI PRAWLIEDQEAIFAAAAENKNTTFGNHQHNP  
RSFRDDPLGDGVVYIGEYNLLGQPHGLHGEVIWKYSSNSNIGHHTQRYVGSFQNGMRS  
GQGTFFFRDGEYTG EWKENQMHGDGTRKFANGDTYTGRYHKGMRNGGPNCKFRFANGDL  
YVGAWEVDRFHGDGRYFFAHDG SVLEGT FVHGVKEGKFKLQRQIRSTEKLDILRFEDDKL  
VGLGVRWNSKRKTWLLTVVPVSRPAVQMRKLRDGDGNGNRIETNEAMKAPSLCRKDNS  
KKSSSSRSSSNSSNTDTKKPKFHRRLIGCLAKPLRYDFRSRNNPSSSLETGKSPARGNR  
NINGDTMETIATASKPYSSSSSFSTPPPKPTLPLPLSSTSSSSFISLPVDNTVPVFPQEI  
KFTTCIKKSVRIPISQAVSIQYDCEMGTTTTITAKKTRTSTILSSSSV

>comp15446\_c1\_seq2; 791 100 2355 LEN=2618; translated  
MNTKSINGSSEADTNKTTQNHRAHNINTSLAAEYTSGSSPLLLSSNPSNVLSSSTRSL  
YENLRQEATSCCPVCGFQNFVNNSIDTNTVQSANAIVASHLPAGTCFLCSQAVVEANHSD  
AIKTI CDENNIACISDNWRAKEKQVEEDRQLAATLSAILLEEREQEENIRRRPSACLGV  
VWLEESGCGNTNDSLEVARDTVNYDNYFNDINDEHCFNGKSSVNTGLTTNNSYKQVNH  
ADWNHRDCNDNHHNNDSSYPSQDTE TMGGFATTPSFPAAAAVASSNSCSEKNQIMRRS  
NESEM LCNPHNFI PRAWLIEDQEAIFAAAAENKNTTFGNHQHNP RSFRDDPLGDGVVYI  
GEYNLLGQPHGLHGEVIWKYSSNSNIGHHTQRYVGSFQNGMRS GQGTFFFRDGEYTG  
EYTG EWKENQMHGDGTRKFANGDTYTGRYHKGMRNGGPNCKFRFANGDLYVGAWEVDRFHGDGRY  
FFAHDG SVLEGT FVHGVKEGKFKLQRQIRSTEKLDILRFEDDKLVGLGVRWNSKRKTWLL  
TVVPVSRPAVQMRKLRDGDGNGNRIETNEAMKAPSLCRKDNSKSSSSRSSSNSSNT

DTKKPKFHRRLLIGCLAKPLRYDFRSRNNPSSSLETKGSPARGNRNINGDTMETIATASKP  
YSSSSSFSTPPPKPTLPLPLSSTSSSSFISLPVDNTVPVFPQEIKKFTTCIKKSVRIPISQ  
AVSIQYDCMGTTTTITAKKTRTSTILSSSSV  
>comp15446\_c1\_seq3; 423 460 1485 LEN=1748; translated  
MKTGSEYTGWKENQMHGDGTRKFANGDITYTGRYHKGMRNGGNCKFRFANGDLYVGAW  
VDRFHGDGRYFFAHDGVSLEGTFFVHGVKEGKFKLQRQIRSTEKLDILRFEDDKLVGLGVR  
WNSKRTKTWLLTVVPVSRPAVQMRKLRDGDGNGNRIETNEAMKAPSLCRKDNSKSSSS  
RSSSNSSNTDTKKPKFHRRLLIGCLAKPLRYDFRSRNNPSSSLETKGSPARGNRNINGDT  
METIATASKPYSSSSSFSTPPPKPTLPLPLSSTSSSSFISLPVDNTVPVFPQEIKKFTTCI  
KKSVRIPISQAVSIQYDCMGTTTTITAKKTRTSTILSSSSV  
>comp15446\_c1\_seq4; 285 460 1253 LEN=1253; translated  
MKTGSEYTGWKENQMHGDGTRKFANGDITYTGRYHKGMRNGGNCKFRFANGDLYVGAW  
VDRFHGDGRYFFAHDGVSLEGTFFVHGVKEGKFKLQRQIRSTEKLDILRFEDDKLVGLGVR  
WNSKRTKTWLLTVVPVSRPAVQMRKLRDGDGNGNRIETNEAMKAPSLCRKDNSKSSSS  
RSSSNSSNTDTKKPKFHRRLLIGCLAKPLRYDFRSRNNPSSSLETKGSPARGNRNINGDT  
METIATASKPYSSSSSFSTPTIKHKP  
>comp15446\_c1\_seq5; 653 100 2123 LEN=2123; translated  
MNTKSINGSSEADTNKTTQNHRAHNINTSLAAEYTSGSSPLLLSSNPSNVLSSSSTRSL  
YENLRQEATSCCPVCGFQNFVNNSIDTNTVQSANAIVASHLPAGTCFLCSQAVVEANHS  
AIKTICDENNIACISDNWRAKEKQVEEDRQLAATLSAILLEEEREQEENIRRRPSACLGV  
VWLEESGCGNTNDSLEVARDTVNYDNYFNDINDEHCFNGKSSVNTGLTTNNSYKQVQNH  
ADWNHRCDCNDNHHNNDSSYPSQDTEETMGGFATTPSFPAAA AVASSNSCNSEKNQIMRRS  
NESEM LCNPHNFI PRAWLIEDQEAIFAAAAENKNTTFGNHQHNPRSFRRDDPLGDGDVVYI  
GEYNLLGQPHGLHGEVIWKYSSNSSNIGHHTQRYVGSFQNGMRSQGQTFFFRDGSEYTG  
WKENQMHGDGTRKFANGDITYTGRYHKGMRNGGNCKFRFANGDLYVGAWVDRFHGDGRY  
FFAHDGVSLEGTFFVHGVKEGKFKLQRQIRSTEKLDILRFEDDKLVGLGVRWNSKRTKTW  
LTVVPVSRPAVQMRKLRDGDGNGNRIETNEAMKAPSLCRKDNSKSSSSRSSSNSSNT  
DTKKPKFHRRLLIGCLAKPLRYDFRSRNNPSSSLETKGSPARGNRNINGDTMETIATASKP  
YSSSSSFSTPTIKHKP  
>comp15446\_c1\_seq6; 670 326 2397 LEN=2397; translated  
MKDQRKGAHQERTMNTKSINGSSEADTNKTTQNHRAHNINTSLAAEYTSGSSPLLL  
SSNPSNVLSSSSTRSLYENLRQEATSCCPVCGFQNFVNNSIDTNTVQSANAIVASHLPAG  
TCFLCSQAVVEANHSDAIKTICDENNIACISDNWRAKEKQVEEDRQLAATLSAILLEER  
EQEENIRRRPSACLGVVWLEESGCGNTNDSLEVARDTVNYDNYFNDINDEHCFNGKSSVN  
TGLTTNNSYKQVQNHADWNHRCDCNDNHHNNDSSYPSQDTEETMGGFATTPSFPAAA AVA  
SSNSCNSEKNQIMRRSNESEM LCNPHNFI PRAWLIEDQEAIFAAAAENKNTTFGNHQHN  
RSFRDDPLGDGDVVYI GEYNLLGQPHGLHGEVIWKYSSNSSNIGHHTQRYVGSFQNGMRS  
GQGTFFFRDGSEYTGWKENQMHGDGTRKFANGDITYTGRYHKGMRNGGNCKFRFANGDL  
YVGAWVDRFHGDGRYFFAHDGVSLEGTFFVHGVKEGKFKLQRQIRSTEKLDILRFEDDKL  
VGLGVRWNSKRTKTWLLTVVPVSRPAVQMRKLRDGDGNGNRIETNEAMKAPSLCRKDNS  
KSSSSRSSSNSSNTDTKKPKFHRRLLIGCLAKPLRYDFRSRNNPSSSLETKGSPARGNR  
NINGDTMETIATASKPYSSSSSFSTPTIKHKP  
>comp15447\_c0\_seq1; 363 140 1237 LEN=3134; translated  
MGGSVEAGERKQVRKRIVLKKIKVKRKRSGIQKHDIKVRPATFLSSYTSQTALSAGLPAF  
RYRTNSSDAPCTGNRNSVDRNGRPRDVEDSSSLAFQYDDGQEEEEIPSDTLMAIRSLVQSD  
QGLHLP IANNGSVQVLENQIYSVF DENHASNVNTELLDLIQYNKLRIYCHDMSSAAFI  
LTDHYARAVWDAHAHGSDDPNSTTTTRASGLSGEIVSWFLSGLPFWTKTTI SESQLDDR  
DKKHPSSILSKKDTNLKDAVHYLLTAQFLIRDSRQTLGSSGKEESYFLWLPQWGI VLKAW  
SEARRQLLTLAQRKEMSKANVMQKNRHSQISTSFLLSELLSKEKIRIVERPFGSFIQLV  
KHDEK  
>comp15448\_c0\_seq1; 1545 262 7966 LEN=8102; translated  
MSNSISNVEGNGEVDDSKPPAKMPKVQQAENSAERAESTTPTSSSAATQGNQNSKRQVW  
ADEAFRATTKLLEDLPSEGAFLAPMPSVPLHNITISPGRVRNSSGSTPPGTTSSSGDN  
DFPRERNDNGHGTSTSDSASAGDETTASSRSELHRLGIATSGLRVLESNELEGS  
NPLPNRSQQNLYRGLLENLEELDKLESQLMRSPLTSTLTIATGNDVCYSPRAAINTLE  
SLSRTVPRRVCQHPFKKNDIVWVCRTCQADETCVLCHACYKGS DHEGHDVAFYHAQAGGC  
CDCGDPDWDPAFGCSRHGPAASA AWEGADYNDDDDLRNLGPLSGSVIFRVQGVVPA  
VDWMVKHVASAAELGFARVEEEEGKSTQAAKQQQDIKNYPDIYNRRLPRLSESRDVM  
NDFSSRVPALLRDTALSPSKTTTAKTIAKPLSVGAGRRRIFSPSAAGRSRPHKEEKEEPLA  
KNEILGMLARQEGGLYLILKNDEIHNDRLFEAFRDLFGTSSLYTQSTLRKVVQGLKQFG

QLVVWGTTELLSELTPQVRLWLDGDRVASGVMGSAMLRRAEILSRTHGLFCCILTRREL  
QLEQRAVNVLQWLTGLARSCDPLCQKVAESISPDRHLAPLLRADFKLSSRVTKYWHSLLL  
TLLAVPTFKSHLAVAYCDTYQSVTAEYARGMGVLERSGYALSVQFLNRVTYVVDLVQRRD  
LLGKLGASLFQTLDVAAVPVDEGSDAKTSVSHNARRQRRDPNHFVMMNRRYSPCISDLK  
CVLNVKGMPLRFASKSSLFLNDWIAALGLGQMMDSQVWRCWSQGHVEVEHRGWVGAFNAS  
ISLGSFERLLSWDDSDPSPIQDQNSPMSKNLMTCVELTLHVLT'TGIHEWQSLAMSTYTP  
TAHDGSRKPYEQRSASLPFSTISVQRGSVLAFRALPVAQVTPFSFHLPLHRFVAACLREA  
CLRESGIRDRLKLLSKNLTRFLEDELFNGLMEFPLLVLVLSRAAQVRAGLWRRNNGNGLSDQV  
LNYAEPFPCRAMRDADLLLIQFAMLGRIQNQTKDPRHDSVGVCFVHLLLHRLGLFDFC  
GLAKAPD'TDANQYLDEVEKGLYPGEMNSEDMGNDSAMPSTYSPARDSASCLLLLLLEEFLHA  
MIICKELPPAPPSPDKTAHTAQAKWRLKREVIHRLASGPKTHSEMAEVHVL'SHWDNVYL  
SEEGKLVNPD'DATGAALGVVLGEVANRKISRRTNEPHKWELNREAWESYDPSFYHINLRN  
HQTAAESRPAFPADNKFRVKPKPFCPSL'FESH'RD'FVRLRRDVTSDATILAITYRTLHMHI  
RDSKKA'EKTSELRGAIAYEEDDKSETAVARAVHLLTLGAYAWQDASSGDKN'WRRN'GGGSV  
GSIFFDRSDNIAAPTAKEWIAAAIMTSPNIQQASEWYEGEENCLRLLRRLAVDGGYDGCFF  
FAQDRAVQAGAAWLCEFAARYDSEASKLVYFEESADCIDDSEKQETELEK'RKRV'AKEKAM  
ERMKAQAAKFAFAMQEELGDGDEKEE'PGTD'KLEEDTSMSSVPHQSSII'LGTS'MRSLTDSD  
KSPSIASSSGVQQRAD'ELQIPM'RL'LLKARPQCIICSDDSNAEKRTKEREELGNRHSRRRRN  
NGGNALAFVGYTQASTVMKGGGGPPPISGDTCSFVPVRRFVGAHVALCGHAIHSECWESY  
LHTVSRREERRVSKRDEFRCPLCQRLSNCLIPFIDVGADWVDPVCTRNN'SAPMELTKLKT  
EDMEDEM'SCESMEV'VGPSSSQFLD'ATPWVSRHTDSITWDGQCAFVSNTAKQEYKTDIS  
AIPRRRSV'RALR'KKDLYAAWNAMMKT'PRFVRRKLRSDSNSTNIVAQHTSLDDPNASHL  
SSTDTAAETV'VWRR'FMDQVSDITYKADGKRLGDENLHRDFGEFRHYIVEKYSYNLANKFA  
NKEPLDW'PSCV'FPTALYD'TQRQ'ELSREKLLSKLMMSIQSLTYSVCC'EANEARRLTKQAKM  
KAAKYAGSASSP'DTRSTNAIFSR'YGIADILCNGQLIILPQPNATEDDGFQPFNGRLGRLR  
YLG'LAVMATAGPVAADLVQLVIGFPLQTPNNVPTEPYRSPIVYPILLGNILTHVVAAMCA  
SGGRARAI'SDSLEVAWPIPFSSR'GSFIHGKSADSMIDDAEGFVKLGLLARVLQVLLGTIG  
ILNAEAEYAVLETIQKMRAGLTQ'GSSAESIWTVNCVTLLEMALSKHQSSSEVGEGLHSDA  
SIANRIEKGCFLAARAACSFFADIGIILQ'LLVPGIMARYMSSATLNEKVDGNMNMFATLT  
ELHAF'FGIEPISEILESEAINVVS'NWDYTARSHHNYAKSLTAAIKRTGAMITSR'LFET  
QGFRVYDWPME'SCHDVGE'PNQTERSLKEKDTTRSKEKVEGTPMEIDL'PVEPTNPTARPQA  
PPPLV'SFSSKKSVELIGGYSSK'LAPMTSKRRPRI'ISMVPTSYTDLYAELSQLLPDSEQTAV  
CLVCGEVMNAGGRGECTRHSNQCGAGAGMFFLLQECAGLIMHNGKAAAYIHS'PYVD'SHGET  
PQYRGRPLNLDLDRYDDLHEIWSGHSIRQQVLAERESSRQIIIDVGFY

>comp15448\_c0\_seq2; 1494 166 8047 LEN=8183; translated  
MESTGPVFT'PGGR'TRIAGPR'SFRFPTSSLLGGSSGGTGRGLV'VLLLCLFCGLGPVASLGY  
EQHGARDVAQHGHCDESKCRSSGVMVLHLEDADGGNGTGNGWEY'EYSYPYPSYSYPSDD  
EHHQQVAKAYSSLNATSQTLTSR'FGCYAPVGTPLL'CAPSYTGQPV'PSEPIDLLVKNALG  
DQVTTTLVYYTCCRTKTRGGETNTNTNDNDDEIDIDIDIGAENGAENEKEESKDESTKH  
EPLVAERHCTDPLFVRPVVGEKIDVDVDNGDNQ'TQTLVSDPSPDASGFGKHAASAMP'CP  
FPDRPHPRLLVKGSHLTFYPATYVCCDSR'LGP'IPRGEHRDRP'P'LOEGLATSVDG'SVLVS  
FGSGDTNSSNSNGDEYDGDYNGDYGYNDYND'DDDDLRNLG'PLSGSVIFRVQGVVPAV  
DWMVKHVASAAELGFARVEEEEGKSTQAAKQQQODIKNYPDIY'NRRGLPRLSESRD'VVMN  
DFSSRVPALLRDTALSPSKTTTAKTIAKPLSVGAGRRRIFSPSAAGRSR'PHEEKEEPLAK  
NEILGMLARQEGGLYLILKNDEIHNDRQLFEAFRDLFGTSSLYTQSTLRKVVQGLKQFGQ  
L'VVWGTTELLSELTPQVRLWLDGDRVASGVMGSAMLRRAEILSRTHGLFCCILTRRELQ  
LEQRAVNVLQWLTGLARSCDPLCQKVAESISPDRHLAPLLRADFKLSSRVTKYWHSLLL  
TLLAVPTFKSHLAVAYCDTYQSVTAEYARGMGVLERSGYALSVQFLNRVTYVVDLVQRRD  
LLGKLGASLFQTLDVAAVPVDEGSDAKTSVSHNARRQRRDPNHFVMMNRRYSPCISDLK  
CVLNVKGMPLRFASKSSLFLNDWIAALGLGQMMDSQVWRCWSQGHVEVEHRGWVGAFNAS  
ISLGSFERLLSWDDSDPSPIQDQNSPMSKNLMTCVELTLHVLT'TGIHEWQSLAMSTYTP  
AHDGSRKPYEQRSASLPFSTISVQRGSVLAFRALPVAQVTPFSFHLPLHRFVAACLREAC  
LRESGIRDRLKLLSKNLTRFLEDELFNGLMEFPLLVLVLSRAAQVRAGLWRRNNGNGLSDQVL  
NYAEPFPCRAMRDADLLLIQFAMLGRIQNQTKDPRHDSVGVCFVHLLLHRLGLFDFCG  
LAKAPD'TDANQYLDEVEKGLYPGEMNSEDMGNDSAMPSTYSPARDSASCLLLLLLEEFHAM  
IICKELPPAPPSPDKTAHTAQAKWRLKREVIHRLASGPKTHSEMAEVHVL'SHWDNVYLS  
EEGKLVNPD'DATGAALGVVLGEVANRKISRRTNEPHKWELNREAWESYDPSFYHINLRNH  
QTAAESRPAFPADNKFRVKPKPFCPSL'FESH'RD'FVRLRRDVTSDATILAITYRTLHMHIR  
DSKKA'EKTSELRGAIAYEEDDKSETAVARAVHLLTLGAYAWQDASSGDKN'WRRN'GGGSV  
SIFDRSDNIAAPTAKEWIAAAIMTSPNIQQASEWYEGEENCLRLLRRLAVDGGYDGCFF

AQDRAVQAGAAWLCEFAARYDSEASKLVYFEESADCIDDSEKQETELEKRKRVAKEKAME  
RMKAQAQAFAMQEELGDGDEKEEPPGTDKLLLEDTSMSVPHQSSIILGTSMRSLTDSK  
SPSIASSSGVQORADELQIPMRLKARPQCIICSDDSNAEKRTKEREELGNRHSRRRRNN  
GGNALAFVGYTQASTVMKGGGGPPPISGDTCSFVPPRRFVGAHVALCGHAIHSECWESYL  
HTVSRREERRVSKRDEFRCPLCQRLSNCLIPFIDVGADWVDPVCTRNSAPMELTKLKTE  
DMEDEMSCESMEVVGPPSSSQQLDTPWWVSRHTDSITWDGQCAFVSNTAKQEYKTDISA  
IPRRRSVRALRKKDLAAWNAMMKTPrFVRRKLRSRSDSNSTNIVAQHTSLDDPNASHLS  
STDTAETVWRRFMDQVSDITYKADGKRLGDENLHRDFGEFRHYIVEKYSYNLANKFAN  
KEPLDWPSCVFPALYDTQRQELSREKLLSKLMMSIQSLTYSVCCANEARRLTKQAKMK  
AAKYAGSASSPDTRSTNAIFSRYGADILCNGQLIILPQPNATEDDGFQPFNGRLGRLRY  
LGLAVMATAGPVAADLVQLVIGFPLQTPNNVPTPEYRSPIVYPILLGNILTHVVAAMCAS  
GGRARAI SDSLEVAWPIPFSSRGSFIHGKSADSMIDDAEGFVKLGLLARVLQVLLGTIGI  
LNAEAEYAVLETIQKMRAGLTQGSAAESIWTVNCVTLLEMALSKHQSSSEVGEGLHSDAS  
IANRIEKGCFLAARAACSFFADIGIILQLLVPGIMARYMSSATLNEKVDGNNMFATLTE  
LHAFFGIEPISEILESEAINVVSNNWYDARSHHNYAKSLTAAKIKRTGAMITSRLFETQ  
GFRVYDWPMECHDVGEPNQTERTSLKEKDTTRSKEKVEGTPMEIDLPEPTNPTARPQAP  
PPLVSFSSKKSVELIGGYSSKLAPMTSKRRPRI SMVPTS YTDLYAELS QLLP DSEQTAVC  
LVCGEVMNAGGRGECTRHSNQC GAGAGMFFLLQECAGLIMHNGKAAYI HSPYVDSHG ETP  
QYRGRPLNLDLDRYDDLHEIWSGHSIRQQVLAERESSRQIIVDGFY

>comp15448\_c1\_seq1; 730 1 2463 LEN=2953; translated  
CICTKLVEAQGRHDQLALCITSSPSGRFCIITRSFVDPKLPEDAADAQQFSRQSVTDLVP  
ATTIGGTGNGREAKQWSRQKREPRGRSGAAPDQTPSKPRPRLPRHGCLCRHADGERRAKE  
LLSQRLFLGAGSEASAKYNDDDDDYANYNDDYKSLFGACDESRCISKDHTRRRYDCF  
GSSEPLAIANMRCSDGFVGRTEGVGNLQTYPVFRDGSNPFLFHYTCCPPETLKELASNR  
NIDGETTNTTEMLVLPTRPKRHCSEPIVLSQRVNATGQTTNWELNGIDLYGLSPSSGKDDV  
GRAIQPLENEEAELYKSLLRCDLPIVEPVLKYPRYLNSYHMETDQKQLSYVCCDEALPE  
DSKNIRNEDTITSNSNSRNDDETVLDRAACVSVCTDHDVYQCAILNAYGYLTPMVCQHPD  
FSKYAAF SHPKLVFTIGAVHELDP SNNFYNSMDGVS VFDCCREPPEDSSLAGPFVKDDSF  
LWTVWPQIAVSGGLGLSLLSIA SLALPILR KIKMEHDGDDVSEYNGYNFYLI LLWIPDA  
LLNSFVLSLYGGYANQFYSERHAGQIVFFHHTVTIGNAFRQNIPLHRAIYYACSTANLYL  
NCFVAHEVYVLLKRSRAGIRVPPPSLRATLQALVAYSYGTAIFVLHYFLDGRIVIDDS  
IHTVSAVLYYLLSAGFPLLYLGWVTVTIWRKKLVPSGLLSSLASRHGRGLRELAMYFRI  
IVVFLLYWAPGVAFLVASRFRNIDLNDWIQLGDTQYATSPWLYTAGLLLLTLQPIASVG  
MALTKTDVRRSFLALVTCGACGCVCGRKRKRQSSGSAGTV

>comp15448\_c1\_seq2; 730 1 2463 LEN=2966; translated  
CICTKLVEAQGRHDQLALCITSSPSGRFCIITRSFVDPKLPEDAADAQQFSRQSVTDLVP  
ATTIGGTGNGREAKQWSRQKREPRGRSGAAPDQTPSKPRPRLPRHGCLCRHADGERRAKE  
LLSQRLFLGAGSEASAKYNDDDDDYANYNDDYKSLFGACDESRCISKDHTRRRYDCF  
GSSEPLAIANMRCSDGFVGRTEGVGNLQTYPVFRDGSNPFLFHYTCCPPETLKELASNR  
NIDGETTNTTEMLVLPTRPKRHCSEPIVLSQRVNATGQTTNWELNGIDLYGLSPSSGKDDV  
GRAIQPLENEEAELYKSLLRCDLPIVEPVLKYPRYLNSYHMETDQKQLSYVCCDEALPE  
DSKNIRNEDTITSNSNSRNDDETVLDRAACVSVCTDHDVYQCAILNAYGYLTPMVCQHPD  
FSKYAAF SHPKLVFTIGAVHELDP SNNFYNSMDGVS VFDCCREPPEDSSLAGPFVKDDSF  
LWTVWPQIAVSGGLGLSLLSIA SLALPILR KIKMEHDGDDVSEYNGYNFYLI LLWIPDA  
LLNSFVLSLYGGYANQFYSERHAGQIVFFHHTVTIGNAFRQNIPLHRAIYYACSTANLYL  
NCFVAHEVYVLLKRSRAGIRVPPPSLRATLQALVAYSYGTAIFVLHYFLDGRIVIDDS  
IHTVSAVLYYLLSAGFPLLYLGWVTVTIWRKKLVPSGLLSSLASRHGRGLRELAMYFRI  
IVVFLLYWAPGVAFLVASRFRNIDLNDWIQLGDTQYATSPWLYTAGLLLLTLQPIASVG  
MALTKTDVRRSFLALVTCGACGCVCGRKRKRQSSGSAGTV

>comp15449\_c0\_seq1; 858 219 3122 LEN=3330; translated  
MAGMRKPRRRGAYIGLSTWLP LLILALSLSSIVFVARYTAEIMVETIETLAI EGIDGSR  
GLSSRATISKVGKTIIEQKQSRGIGTIDARAFLNIRSGTKLEHIAATEKNLEHKQHRYRYK  
LGLIRILGNAI PPKGDEHQT LQNL EFLLANEPTFESTVDKHWILNRIASDDFLRRISWLL  
NRYNQTF SVLPFRIEEYESKPYRYVKASKTIALGINNKNNQHHLDLIRNRSFWETKENHE  
GTRGETDQERNKYVDELYVDKRYVTNQNARNFAIEWYSSKNATVVVDYVLPWDGDCFL  
SEKAHEALHNDLEKHND EQQR IRAARALVRSEVRADDDVSLMNI GDDFIDSEIRK FVN  
PDSIHSGKLNAPINYFYAPVSEQQEIGGNHQEGETESVSSIHFKPIQTKGQLPQIVLHRN  
AKKRFDPNGTSEVSVLQKLQIEGPWNGNIKDYIIPPYDYNYPHLS EERGASGFLPYPEL  
GHGSGAVATPAVGWATRSVSGKSNL GAKNDASLKYGMVAFYQELDALAVSKIHYASDDKQ  
QEAANASPYMFYNQTI LEMEARAWGKENNAKESQSISSLSRLVQKLI ESADLSLQHKH

ENLTI RDRRSLEGFLSNFTVLGLAYELTGKRTYAKRAAELIQKKFVDPETLWYPTLGEKK  
RFNLI GDGADSPQRVKFGIADFKDVRSFIDAVQMERKAGASPYDSFDLLDFKDIYFFLDA  
MRMVEKSGELSETQRSGVRDWFMYLDQLVSSGKVAYYDDGYRGLYYDIQLISIATFVGN  
HPLAVKSAHESVSRIGDINKLHGI VDGRLSLSCEDNLMFTLEGWIVMARMLSKMGI ELW  
KKLPVKREFNVYSQKSRKQMKKEYQPVL CRAPVFAFLLSQDPGSCAGRSPSEFGRHGGD  
EYDRWLP IHATVQQWDCPSPKRNDDEQYDTNSHYAMEPLYDFSPEYSGYHSIAPFWNLGL  
GIDISFD

>comp15450\_c0\_seq2; 337 1 1030 LEN=1493; translated  
XASEFLGTNFCQGLTVIVDDYEGHLPLTPTKESLAFGLEDYGKIHERNLYAWLGALANVY  
WQHFFSMFKTKTALGNAVKAQMHRVDALERERSRNLPTLRDGSFSSVEKICFSRERVKDS  
IRPFKSDDTKWTSGPDTLIKLRERAPKPKKKVSPKKSTPSQSNVPEEDDYDSGDNDLMV  
GAPSSFLFDSVVKPVVNGEPLRERLDGRPV RASMKPQRFDEILDKPKSKTRKKRLKSTAD  
DDNSDGIRLKKKLDVRSK LKATQLELIASKTV CDDLQMQLEEKGEAKINESGEILK LKG  
QLTKAEAKHQEELEGLKRDHANKLREMMARIRELEGQTHEFTM

>comp15450\_c0\_seq3; 478 333 1538 LEN=2001; translated  
MPESDDCYQVKVSLGFDP RRINSKGVSN SFIGGQACSL LIFSRI SGRLFLKHDDARGVLR  
LTNSGTNFCQGLTVIVDDYEGHLPLTPTKESLAFGLEDYGKIHERNLYAWLGALANVYWQ  
HFFSMFKTKTALGNAVKAQMHRVDALERERSRNLPTLRDGSFSSVEKICFSRERVKDSIR  
PFKSDDTKWTSGPDTLIKLRERAPKPKKKVSPKKSTPSQSNVPEEDDYDSGDNDLMVGA  
PPSSFLFDSVVKPVVNGEPLRERLDGRPV RASMKPQRFDEILDKPKSKTRKKRLKSTADDD  
NSDGIRLKKKLDVRSK LKATQLELIASKTV CDDLQMQLEEKGEAKINESGEILK LKGQ  
TKAEAKHQEELEGLKRDHANKLREMMARIRELEGQTHEFTM

>comp15450\_c0\_seq4; 630 109 1951 LEN=1951; translated  
MSTIPVSGEKTVSDDPAPGFPPQKRVQHDVTQNDAAQHSSKV NGLGMWSAWERNFSNKL  
KACLDLVDNAVDAALWDSDEDEDEEGDNSTGERPEKAL TQMEKWK RQSGRISISTESH  
LAMYN YHDS SNGDDDDENGN S NATENPNSREKPSAAKSPPLI LHDILGNGGVGRRETS  
ANKNANDNGNVKSENSNNSDNVDFVLID DENTMCLHND CVHPVKELRKILDVYNSAKSDS  
DIGENGVGVKQAAAAMSDLSMVVTSR IDEEPLMMDYGDND DDDNSTPRIRKCLISIGILW  
RK FQTENCVIPSWTLP IEFYIDEHNERKKMEQGDGGA EVKIGIGDFLGETCKPVLLRELA  
NVTANNKLLGAAMKEYGAAAPS NRKYGIQRLAKHIELMISTP SKKNGKKQAKPPHPHQY  
LMILHKFGKHRKKGTE DGSKDERKSLIMKSRDELDDLRLDLAEMP KTYLHIPPAPFFRV  
KVNQETLNFQYWERHLVELHQI PLLIDRKNDFRTAEDWLMPE SDDCYQVKVSLGFDP RR  
NSKGVSN SFIGGQACSL LIFSRI SGRLFLKHDDARGVLR LTN SGT KLYLFSAGLIYGIRI  
QFCVVSLLN IHL YRX

>comp15450\_c0\_seq5; 999 109 2871 LEN=3334; translated  
MSTIPVSGEKTVSDDPAPGFPPQKRVQHDVTQNDAAQHSSKV NGLGMWSAWERNFSNKL  
KACLDLVDNAVDAALWDSDEDEDEEGDNSTGERPEKAL TQMEKWK RQSGRISISTESH  
LAMYN YHDS SNGDDDDENGN S NATENPNSREKPSAAKSPPLI LHDILGNGGVGRRETS  
ANKNANDNGNVKSENSNNSDNVDFVLID DENTMCLHND CVHPVKELRKILDVYNSAKSDS  
DIGENGVGVKQAAAAMSDLSMVVTSR IDEEPLMMDYGDND DDDNSTPRIRKCLISIGILW  
RK FQTENCVIPSWTLP IEFYIDEHNERKKMEQGDGGA EVKIGIGDFLGETCKPVLLRELA  
NVTANNKLLGAAMKEYGAAAPS NRKYGIQRLAKHIELMISTP SKKNGKKQAKPPHPHQY  
LMILHKFGKHRKKGTE DGSKDERKSLIMKSRDELDDLRLDLAEMP KTYLHIPPAPFFRV  
KVNQETLNFQYWERHLVELHQI PLLIDRKNDFRTAEDWLMPE SDDCYQVKVSLGFDP RR  
NSKGVSN SFIGGQACSL LIFSRI SGRLFLKHDDARGVLR LTN SGT NFCQGLTVIVDDYEG  
HLPLTPTKESLAFGLEDYGKIHERNLYAWLGALANVYWQHFFSMFKTKTALGNAVKAQM  
HRVDALERERSRNLPTLRDGSFSSVEKICFSRERVKDSIRPFKSDDTKWTSGPDTLIKLR  
ERAPKPKKKVSPKKSTPSQSNVPEEDDYDSGDNDLMV GAPPSSFLFDSVVKPVVNGEPLR  
ERLDGRPV RASMKPQRFDEILDKPKSKTRKKRLKSTADDDNSDGIRLKKKLDVRSK LKAT  
QLELIASKTV CDDLQMQLEEKGEAKINESGEILK LKGQLTKAEAKHQEELEGLKRDHANK  
LREMMARIRELEGQTHEFTM

>comp15451\_c0\_seq1; 640 146 2413 LEN=3189; translated  
MRKEDNTTRPNLQYQE QREPTRKFEESKQQNQPLKQSKGEENS NNSIGGSKKNSNYPPIP  
SQVFI DQIPIADLATS GVDVPGVDCSHNTDDKNSISTPAGNTQKRLLPTYPTTTNKSKND  
HSSPNI VAPDSPISDTGRRVLNPSGTREGNPNSESNSTKEELGGNRSHGFRPFSSEG TEN  
MVD DSFSQALLNLSFNDRNAIHEE IHGVSCMAPDEDAPGFHQLRAQVLYAMNIELNSIQ  
QKPAFDRAQEMHRAAQGNSATSS IAYVNTDAFRLGFLRCELFDPKAAQRMVTYLELVN  
KIYGPDALMRPIRLSDFS RDDMAFLRGGDYQLLPYRDRSGRRILCIVTNNRDDI SDMVRT  
KVLMYLWVVAEDVESQRKGMIVISYSGPQITKSASEEDASSNVKQKQK FHASRVTTHAVV  
GQAVPMRVVAIHFLCPNKPIFAVFSRIYGM SLGAWSSRVSFHLGEGIEIRYK LKSYGIP I



ELIPSTDTGNVKHVNLKQWIKLREFFERYEASGGNGAQCSTFGQISSDSEDAMDI EY  
SVGGNTQAMKQYLQMQQNQLNQVQQQQQQRQOPSHQLTLPRFFIVECPGSNDVIFRRGKS  
MIYHPGNAMFQSLIESRLEAHTKANQSGKVAIVAELIHTIRGIKGRFLTWD SKHSWWQD  
MTIPTFTFTSAQAQSEIQSKVNYAFRDFKMKKTQQNLQISRSSTYAFERQDGIQRKR  
KSGSVDRDASGGCGECGCGGNNTSAHNLVSDGGEY

>comp15451\_c0\_seq2; 243 246 1449 LEN=2346; translated  
MKTIDKGFVSLGAAEDVESQRKGMIVISYSGPQITKSASEEDASSNVKQKQKFHASRVT  
THAVVGQAVPMRVVAIHFCPLNPKPIFAVFSRIYGMSLGAWSSRVSFHLGEGIEIRYKLS  
YGIPIELIPSTDTGNVKHVNLKQWIKLREFFERYEASGGNGAQCSTFGQISSDSEDAM  
MDI EYSVGGNTQAMKQYLQMQQNQLNQVQQQQQQRQOPSHQLTLPRFFIVECPGSNDVIF  
RRGKSMIYHPGNAMFQSLIESRLEAHTKANQSGKVAIVAELIHTIRGIKGRFLTWD SKH  
SWWQDMTIPTFTFTSAQAQSEIQSKVNYAFRDFKMKKTQQNLQISRSSTYAFERQDGI  
QRKRFKSGSVDRDASGGCGECGCGGNNTSAHNLVSDGGEY

>comp15451\_c0\_seq3; 640 146 2413 LEN=3310; translated  
MRKEDNTTRPNLQYQEQREPTRKFEESKQQNQPLKQSKGEENSNNSIGGSKKNSNYPPIP  
SQVFI DQIPIADLATSGVDVPGVDCSHNTDDKNSISTPAGNTQKRLLPYPTTTNKSKND  
HSSPNIVAPDSPISDTGRRVLNPSGTREGNPNSSENSTKEELGGNRSHGFRPFSSEGTE  
MVDVDFSQALLNLSFNDRNAIHEEIHGVSCMAPDEDAPGFHQLRAQVLYAMNIELNSIQ  
QKPAFDRAQEMHRAAQGNSATSSIAYVNTDAFRLGLRCELFDPKAAQRMVTYLELVN  
KIYGPDALMRPIRLSDFSRRDMAFLRGGDYQLLPYRDRSGRILCIVTNNRDDISDMVRT  
KVLMLWVVAEDVESQRKGMIVISYSGPQITKSASEEDASSNVKQKQKFHASRVTTHAVV  
GQAVPMRVVAIHFCPLNPKPIFAVFSRIYGMSLGAWSSRVSFHLGEGIEIRYKLSYGIPI  
ELIPSTDTGNVKHVNLKQWIKLREFFERYEASGGNGAQCSTFGQISSDSEDAMDI EY  
SVGGNTQAMKQYLQMQQNQLNQVQQQQQQRQOPSHQLTLPRFFIVECPGSNDVIFRRGKS  
MIYHPGNAMFQSLIESRLEAHTKANQSGKVAIVAELIHTIRGIKGRFLTWD SKHSWWQD  
MTIPTFTFTSAQAQSEIQSKVNYAFRDFKMKKTQQNLQISRSSTYAFERQDGIQRKR  
KSGSVDRDASGGCGECGCGGNNTSAHNLVSDGGEY

>comp15451\_c0\_seq4; 243 246 1449 LEN=2225; translated  
MKTIDKGFVSLGAAEDVESQRKGMIVISYSGPQITKSASEEDASSNVKQKQKFHASRVT  
THAVVGQAVPMRVVAIHFCPLNPKPIFAVFSRIYGMSLGAWSSRVSFHLGEGIEIRYKLS  
YGIPIELIPSTDTGNVKHVNLKQWIKLREFFERYEASGGNGAQCSTFGQISSDSEDAM  
MDI EYSVGGNTQAMKQYLQMQQNQLNQVQQQQQQRQOPSHQLTLPRFFIVECPGSNDVIF  
RRGKSMIYHPGNAMFQSLIESRLEAHTKANQSGKVAIVAELIHTIRGIKGRFLTWD SKH  
SWWQDMTIPTFTFTSAQAQSEIQSKVNYAFRDFKMKKTQQNLQISRSSTYAFERQDGI  
QRKRFKSGSVDRDASGGCGECGCGGNNTSAHNLVSDGGEY

>comp15452\_c0\_seq1; 817 101 2568 LEN=2997; translated  
MYSRKEVRFSDAQDGNPTASFSDIQRSAQQISNAMKHYRRPLSGVSSWSAPPYTSRSNSK  
IAKTSPPPPPPPIRKRSTPSPPLKRSPTPPPMKRKRSPTPTPIRKRSTPPPMKRKRSPT  
PPPMHTKRSTATPQIKRSAPTPPPPPPPPPRVGMKQPTARPPVISKAVSENSDHYFSPS  
SKKNENDDGIDNANGNRNLENNQVFVTAPAL TILSPMSGITNVTDFNSPSTSTLRKRSVI  
ALD T T L N S I D M L N F E Y I E N C T C S H T L K R I I R L L S E S K N K S P Q L V K T A I K R L T I A Q Q Q E T T  
S A M T K N V P I V S S S S S M I N K I V S D D E K R E T S Y S N K D G L A A N L S R I T T A N T T L D S I D P C K S S  
L N F S L S P S S T L H G M D F I E N S T P D L K M F D S G R E S I D R R L G P I V E S P M R L P L O P P C L T R H S D  
Q R D K D I Q I S A S P K F T P C T T Q Q I K N L R K S L D E T N S D K K M L L A E I R K V T K E N E D K T R T L D I T  
R A A L C K N D E T R A I E E R L E S K I T E L S Q V L A D T T A R S K L V I E G E R T Y R K Q C E E E L S K E N K K  
N A E L I Q K L E D T R V N L E I L Q K R H S S F R V E L L K V T G I S K T E R R G L S Q R E F L T S L A K K I E T M K  
N D N D R M A L T L K Q A N K A I E E R D M M E I E M N D A L Q E K Q K L A I E N Q K L T Q K I H E L R A E V K S S R A  
Y I D K L L R T S H E S K E E D W E R H E L Q Y K Q V I H N L R K Q L L K Q D T V V S I D L Y K A E K D K V R E K V N Q  
L Q T A E G R I N S L H I K L A E L Q K E K E L F S N S K R S P K G V H E F F V D D Q N A Q T P K N N R R G S L T P K G  
N T G M E K S K D D L T G I T I T F R S P E S N N A S S P E K H I A E N R R N V S A

>comp15453\_c0\_seq1; 707 245 2299 LEN=3324; translated  
MSYNDTECLTTGFEEFTDEAGVNSASEEAEPGQESNANA IADANTIANASSDASENANAN  
ETDPRAKIRRGITNGITNGNSCSSHSSRTINSSGGGSSNNPNNTNTSAKQNTTISEFDAI  
QHLIKGNLPGCLNIPAFALSGWVLGMGLFALVAVQGIYSMVLLVYCKQWIRRDRIRKR  
RARSLAAGGEESRDQVQDDNDNDNEP IRTFMDVARASHGRAGSVCIQVLLFVLQAGVCCVF  
LSLIATNLHASLPHLPQEWCVCGVTVCLMVVLLRDLRELRLWLSLGANCLMLVAVLTASG  
SALWVLWKGDGNNENDNDTGDGDPGRACKWTTDPAAIATFVSSMFYSFEGIGLVMPVEN  
SYVGYFLGSNDDNDNNENDDDDANHDHEALPAGAAGGEGHVPVASEEADGPPDPEEAR  
ASRTASFVHPVLLVSMGTVAVFLFLIGATCGPAFPDILDGSVTAYLTTRYPNKWKYQLVN  
ASVMLAVFLTFPLQLTPAMEVLEEFWFGPGCDPVCCGGGESVAPCCYPWLRKVRPGGRHAV

VPQNDGIGRTDASSAGHGDGLFREGAPSAVAPPLPGLGPGAVSCFGSGEWIFRRWLVVV  
GCALVVLTVDDLGLLMSLFGALGNTGLAAAPCIVHRRRLVGDGIAPHPCLAAMDACTVAV  
SLCVAVAGVVFSVREILAGKEPGR

>comp15453\_c0\_seq2; 707 245 2299 LEN=3232; translated  
MSYNDTECLTTGFEEFTDEAGVNSASEEAEPGQESNANAADANTIANASSDASENANAN  
ETDPRAKIRRGITNGITNGNSCSSHSSRTINSSSGGSSNNNPNTNTSAKQNTTISEFDAI  
QHLIKGNLGPGLNIPHAFALSGWVLGMGLFALVAVQGIYSMVLLVYCKQWIRDRIRKR  
RARSLAAGGEESRDQVQDDNDNDDEP IRTFMDVARASHGRAGSVCIQVLLFVLQAGVCCVF  
LSLIATNLHASLPHLPQEWCVCGVTVCLMVVLLRDLRELRWLSLGANCLMLVAVLTASG  
SALWVLWKGDGNNENDNDTGDGDDPSGRAKKWTTDPAAIATFVSSMFYSFEGIGLVMPVEN  
SYVGYFLGSNDDNDNNENDDDDANHDHEALPAGAAGGEGHVPVASEEADGPPDPEEAR  
ASRTASFVHPVLLVSMGTVAVLFLLIGATCGPAFPDILDGSVTAYLTTRYPNKQYQLVN  
ASVMLAVFLTFPLQLTPAMEVLEEFWFGPGCDPVCCGGGESVAPCCYPWLKVRPGRHAV  
VPQNDGIGRTDASSAGHGDGLFREGAPSAVAPPLPGLGPGAVSCFGSGEWIFRRWLVVV  
GCALVVLTVDDLGLLMSLFGALGNTGLAAAPCIVHRRRLVGDGIAPHPCLAAMDACTVAV  
SLCVAVAGVVFSVREILAGKEPGR

>comp15455\_c0\_seq2; 977 1 2991 LEN=2991; translated  
YRMKRALAERALAERALAERAKAKQNNRANPNNGAFSSSAPVRAAVATVSDSTSPAPPSAAQK  
AKTPELKIEKPSPAIPSSGSKASKKPKSPRSRSTSSASSSPRPKKRARESLVKLEEEDED  
DSNSAAFYLRHQNRALASELRSVKYQLARLEREREHRRKQCSEAVQNLNTLNISWGKIEA  
ELEQQRNPKKTEARSATKIKIPASDAPLSTGSGKSVEWIGALSNSLARIGTTPGSSKPKK  
RGKNDGGTVKQEESENRTNDDSDMDVDCGNNQDQKEDDEEDLKNVDDIANIAENMSERVSI  
LQAWIWSLLQNLERSNPALNGGSKDPEISLPSAAELQRQVSLVEAENVTLQEHVEELARS  
RDEMVESDRRVRRLYRLAAGRVLNKEVLKAVATADEDKESAVAWMESTIAVAGSNAPGS  
GCPAASSGSGTLDQAKPEEDGKQPVSSKEVEQLKKQISDLNTLASSRSEQIKKLLSEKEE  
QTKKINKLVLKEDKTASDIPSNDEVKRSPLYLELTAKLAATTRNLEELNDKSDMAKKEWS  
IALADAEFSKKALEDLQANFSKRWAELTEEKTEKGEAAEGEGELSGISKAKDIITLQHKL  
TQALENVRQAESTRKTTLTEAVAMNSLQSKVEEFKAKYNALQAEKAARASNNQHTNSNST  
PSKEGSSSSKTKSSSTPGEKSDRSIEKLQREYKRARKELAATTASKDAAKAKLERTEKDK  
EFLNQMNSRLLKQASEKDEINAKSLSTILHLKQLTEQITKEKVNLEQQVKSAGQLALAAAR  
LASNARERVAEEFAKRDVKVLKKQLEELQSKCSVLAKEKENAEGKLALAEKARMSGLISDAH  
KAKNRCEELAVESTKLQEEKQKIIESLAIKREASEATTL SKKLATSKGGGVVSGFTAEO  
LNTQFHISKVDSPAQYAMCETKNAYCYDADTCFVNSAWMKTTLRIGVENVQLAAEGLTPKT  
SQIFGFENEIASSFSSDLYYYKVAYLRLNLYKSGCIMX

>comp15455\_c0\_seq3; 490 1 1412 LEN=1412; translated  
XLNDKSDMAKKEWSIALADAEFSKKALEDLQANFSKRWAELTEEKKEKGEAAEGEGELSG  
ISKAKDIITLQHKLTQALENVRQAESTRKTTLTEAVAMNSLQSKVEEFKAKYNALQAEKA  
ARASNNQHTNSNSTPSKEGSSSSKTKSSSTPGEKSDRSIEKLQREYKRARKELAATTASK  
DAAKAKLERTEKDKLEFLNQMNSRLLKQASEKDEINAKSLSTILHLKQLTEQITKEKVNLE  
QQVKSAGQLALAAARLASNARERVAEEFAKRDVKVLKKQLEELQSKCSVLAKEKENAEGKLA  
LEKARMSGLISDAHKAKNRCEELAVESTKLQEEKQKIIESLAIKREASEATTL SKKLAT  
SKGGGVVSGFTAEO LNTQFHISKVDSPAQYAMCETKNAYCYDADTCFVNSAWMKTTLRIGV  
ENVQLAAEGLTPKTSQIFGFENEIASSFSSDLYYYKVAYLRLNLYKSGCIMX

>comp15455\_c0\_seq4; 957 1 3033 LEN=3033; translated  
YRMKRALAERALAERALAERAKAKQNNRANPNNGAFSSSAPVRAAVPGTTTTVSGPSVPHPTV  
SDSTSRAPSSAAQKAKTPELKIEKPSPAIPSSGSKASKKPKSPRSRSTSSASSSPRPKKR  
ARESLVKLEEEDEDDNSAAFYLRHQNRALASELRSVKYQLARLEREREHRRKQCSEAVQ  
NLNTLNISWGKIEAELEQQRNPKKTEARSATKIKIPASDAPLSTGSGKSVEWIGALSNSL  
ARIGTTPGSSKPKKRGKNDGGTVKQEESENRTNDDSDMDVDCGNNQDQKEDDEEDLKNVDD  
IANIAENMSERVSI LQAWIWSLLQNLERSNPALNGGSKDPEISLPSAAELQRQVSLVEAE  
NVTLQEHVEELARSDEMVESDRRVRRLYRLAAGRVLNKEVLKAVATADEDKESAVAWM  
ESTIAVAGSNAPGSGCPAASSGSGTLDQAKPEEDGKQPVSSKEVEQLKKQISDLNTLASS  
RSEQIKKLLSEKEEQTKKINKLVLKEDKTASDIPSNDEVKRSPLYLELTAKLAATTRNLE  
ELNDKSDMAKKEWSIALADAEFSKKALEDLQANFSKRWAELTEEKTEKGEAAEGEGELSG  
ISKAKDIITLQHKLTQALENVRQAESTRKTTLTEAVAMNSLQSKVEEFKAKYNALQAEKA  
ARASNNQHTNSNSTPSKEGSSSSKTKSSSTPGEKSDRSIEKLQREYKRARKELAATTASK  
DAAKAKLERTEKDKLEFLNQMNSRLLKQASEKDEINAKSLSTILHLKQLTEQITKEKVNLE  
QQVKSAGQLALAAARLASNARERVAEEFAKRDVKVLKKQLEELQSKCSVLAKEKENAEGKLA  
LEKARMSGLISDAHKAKNRCEELAVESTKLQEEKQKIIESLAIKREASEATTL SKKLAT  
SKGGGVVSGFTAEO LNTQFHISKVDSPAQYAMCETKNAYCYDADTCFVNSAWMKTTLRIGV

ENVQLAAEGLTPKTSQIFGFENEIASSFSSDLYYYKVAYLRLNYKSGCIMX  
>comp15456\_c0\_seq1; 757 207 2717 LEN=3594; translated  
MTGLHDKEDDECVRRRGYKRPLETDIGVSSGSNSISEQKSKSNGITHLKDNGGDNNGNNN  
DNNYNDDNISPKQDALYGDTHTASSLGKGDKDFVPATSSNTDLPTPDESSASYDRLLPKG  
MELKWNPEQTRAVLVHLEDAVVANTEGNNHIREFRVCLVGRARVSVLEGSAILGHAMTS  
QLKDRGESESESERETSEERTPTGIVATSPFWSSWTTIIAERRDLPCRIALECIRGPQSF  
RVMPSPRPVVIPSTWKACVDEICSSIGSGSGSGSYECERKHHNGNHGSSIEDCHIGDPYF  
HQNSISNINHNDTHRRVCMITGAKGVGKSTLLRYTTNRLSSLANDVHGHYHRAIAILD  
DVGQPELAPPGLLRLAIVRKPLLPYWNLVSGGSNDAAHDWQQGTSSCYGPQPQPPKQ  
VHCDDSDYDSEDNDDDENSGGFQVLSVFFGATSSKADPARFIKGVRLHIEKYETEILP  
LNIPLLVNTDGVKMGYQILTTLIDHLRPHLVQILGETKGHAFDLSHTVAHAVVDECD  
SSSLPPPPLYQLPACQSLPGASLCKIPAVTMRNFRWATYFLPRQLQTFDAWDFASARLLQ  
TGWVLAANSRDTTTPVSWSSSLPSELLAQNDSHGDDSIGYTND EAGNSNTSTEPSNDHGA  
LADECRLRALARERPYCVPMEVDAFIIIGSDYEDFLNTTSDSNTNYTEESFAEQHMQTN  
HRIFQALNGRIVALCTDKSSMESLGYGILRSIDWDKRLLYVLVPPSIPPFSLHQVKALVG  
GHLPLPLAMLYRGAYGESFPYLTNTLSQEGVLGSEPMKSRNNIARKGLTNAGKVAT  
>comp15456\_c1\_seq1; 453 1 1737 LEN=1793; translated  
XAGFVDELVFQNALGDLFLVPPFLANVPYDKVIDGVVSLLLCFYWIGHEFXDTTKAAVGDD  
FIIRDICEEWNEEEISQGILEDQLVDEARNPEDPKTSIFDSQIPEAIKSLVPAAIIGTA  
VLLVSSNASAGASVDLSVRVGLHAMDFSGLFRFGLGSTLSELYFAGVYPLLGLVLGFGSGI  
LPYARLFLMLNAWMTPSLDQHRREKNLLTMDSIGRFSLVHTYVLILLVFRFHSEFGDG  
LGVDVNVSMTYGFFSFLVATCLSLVLGHATLIFHGKTMRGNSIGFDCSKRSLVNHAFKL  
RQADGGSNSKRLSRFAQALLLAFSTIAMLSWGFLQHSFTFEIGGLAGIVLGEDMRRTS  
YSVLSLGFALPSSVENSRSFSIMFLQFAFLFTVVTPIILCLVLLICLMLLPLTLKWQQHF  
LLATRIARSWSAIEVFLLTMLAVLYQISILTSFIIIGNKCDQIDTEAQKLFPEPNAELVC  
FTVDALVESNAWYLVVGVLVNFVAVVSFGVTFAENAVNERDDWCVSRNRSHASETTRCNR  
SFAQTLVSVPLVGTLLFITVDPDIAIPLDDEVVPNESRHG  
>comp15456\_c1\_seq2; 240 1 1081 LEN=1081; translated  
XSCSWGGRGLCPMPRSSFRSVGTRGVLCGRSRARARSRSAGVAVGFRSGVPRQLANDHA  
AGGGASEAFVLGFPKLVLKNWDSLFLKQLLKPASAENRLESSLVFGRIPPGETDFSAGPID  
GPAEPAPKSLPEATLVFDAYAGDGNPLGKLNLTFLGSLTNAEINLDYDLDRLGNLTV  
SRVLEDIGCSLLPAVQARILPGTTNLGGYLGANLTVALADGRNLSLSTNDYPGFAEIGSE  
TSAWFLEFFRTAANHAIERWIGVSIHECAGGSPVDTGSRDDSGNRKTTWIGLGLVVSVAQ  
LGLLFFVARTQGEDGRSRGVLEADGSHDEAAASHHLLPLLSSYQELMTDPIEAKEERNNS  
I  
>comp15456\_c1\_seq3; 510 1 1695 LEN=1751; translated  
GVLREADGSHDEAAASHHLLPLLSSYQELMTDPIEAKEERNNSIDDFIIRDICEEWNEEEI  
SQGILEDQLVDEARNPEDPKTSIFDSQIPEAIKSLVPAAIIGTAVLLVSSNASAGASVD  
LSVRVGLHAMDFSGLFRFGLGSTLSELYFAGVYPLLGLVLGFGSGILPYARLFLMLNAWMT  
PSLDQHRREKNLLTMDSIGRFSLVHTYVLILLVFRFHSEFGDGLGVDVNVSMTYGFFS  
FLVATCLSLVLGHATLIFHGKTMRGNSIGFDCSKRSLVNHAFKLRQADGGSNSKRLSRF  
AQALLLAFSTIAMLSWGFLQHSFTFEIGGLAGIVLGEDMRRTSYSVLSLGFALPSSVE  
NSRSFSIMFLQFAFLFTVVTPIILCLVLLICLMLLPLTLKWQQHFLLATRIARSWSAIEV  
FLLTMLAVLYQISILTSFIIIGNKCDQIDTEAQKLFPEPNAELVCFTVDALVESNAWYLV  
VGVLVNFVAVVSFGVTFAENAVNERDDWCVSRNRSHASETTRCNRSFAQTLVSVPLVGTLL  
FITVDPDIAIPLDDEVVPNESRHG  
>comp15457\_c0\_seq1; 167 119 846 LEN=846; translated  
MAFKHFLFFAAFRILNVFLIQSQFDPDEFWQNLPSYCRVFGEDLAFDNNSRCPGLTWEW  
KRRRQERYDELGTGSWSDRLADAFTFGLEGPVRSFSSILPTLVFYAVIKRYKWDSSWMVS  
RGPLIVNAIFVAAVTDWCVVYSSRWKSMTTGNEHNSKARREDRKNRNIVFWCIYCSLTS  
WFNGYTLVRTYSNSLETSLLAVSFALISPVGLKILFRCECTCDTQSIDVLGLQVQYCYLRD  
VQG  
>comp15457\_c0\_seq2; 161 229 1170 LEN=1170; translated  
MVAYMEHIHSIGTSXAGIPALTGILFPVLVYDLWFGRQTRATRNLWTIIACYVVAHSVSA  
HKEFRFLLPVLPIICLVCGARLQTLAIGLAPSQTNRLLVSIAGLNLIAVLYLGLVHQRAP  
IDVNQAILKSIDDFRALQGGSAAGIEDVAVHYLMGCHSTPLLSHMHPPTFRDPWYLDCC  
PKCRADSATECESDVFSDPDGFLLRTYFERGRDRYCETESEDDVCTATTNFKPRPLPQY  
VVCSSENLGAMKKRLQTMGMLEIGRFMNGINGIQIGRHILTFGSDLFFDPDSTRVGFNLNDL  
FVLGLEEIIILFKNPX  
>comp15457\_c0\_seq3; 162 1 1054 LEN=1054; translated

ALAGLLGFASSTVVLDRVMYGVWAI PVLGNFHFNV IQNGSLYGTHPFHWYFTAGIPALTG  
ILFPVLVYDLWFGQRTRATRNLWTI IACYVVAHSVSAHKEFRLLPVLPI IICLVCGARLQ  
TLAIGLAPSQTNRLLSIAGLNLI AVLYLGLVHQ RAPIDVNQAILKSIDDFRALQGGSA  
GIEDVAVHYLMGCHSTPLLSHMHDPPTRFDPWYLD CGPKCRADSATECESDVF SKDPDGF  
LLR TYFERGRDRYCE TESEDDVCTATTNFKPRPLPQYVVCSS ENLGAMKKRLQTMGMLEI  
GRFMNGINGIQIGRH LTFGSDLF FDPDSTRVGF LNDLFV LGLEE IILFKNPX  
>comp15457\_c0\_seq4; 158 119 859 LEN=859; translated  
MAFKHFLFFAAFRILNVFLIQSQFDPDEFWQNL EPSYCRVFGEDLAFDNN SRCPGLTWEW  
KRRRQERY YDEL TGSWSDRLADAF TFGLEGPVRSFSSILPTLVFYAVIKRYKWDSSW MV  
RGPLIVNAIFVA AVTDWCVWYSSRWKSM TTTGNEHNSKARREDRKNRNIVFWCIYCSLTS  
WFNGYTLVRTYSNSLETSL LAVSFALISPVGLKILFR CETCDTQSIDVLGLQVQYWK SRC  
YLRDIQG  
>comp15457\_c0\_seq5; 109 1 1033 LEN=1033; translated  
XSSRYRLGNRLNEIVFRTNTQSYQLLKYHSNGSLYGTHPFHWYFTAGIPALTGILFPVLV  
YDLWFGQRTRATRNLWTI IACYVVAHSVSAHKEFRLLPVLPI IICLVCGARLQTLAIGLA  
PSQTNRLLSIAGLNLI AVLYLGLVHQ RAPIDVNQAILKSIDDFRALQGGSAAGIEDVAV  
HYLMGCHSTPLLSHMHDPPTRFDPWYLD CGPKCRADSATECESDVF SKDPDGFLLR TYFE  
RGRDRYCE TESEDDVCTATTNFKPRPLPQYVVCSS ENLGAMKKRLQTMGMLEI GRFMNGI  
NGIQIGRH LTFGSDLF FDPDSTRVGF LNDLFV LGLEE IILFKNPX  
>comp15457\_c0\_seq6; 212 119 1050 LEN=1050; translated  
MAFKHFLFFAAFRILNVFLIQSQFDPDEFWQNL EPSYCRVFGEDLAFDNN SRCPGLTWEW  
KRRRQERY YDEL TGSWSDRLADAF TFGLEGPVRSFSSILPTLVFYAVIKRYKWDSSW MV  
RGPLIVNAIFVA AVTDWCVWYSSRWKSM TTTGNEHNSKARREDRKNRNIVFWCIYCSLTS  
WFNGYTLVRTYSNSLETSL LAVSFALISPVFLSAVETASDSKASMARAWVAFFIGGICVS  
IRFTCLTAYIPMGIILARQTSKTT SVMVAYLFRVCALAGLLGFASSTVVLDRVMYGVWAI P  
VLGNFHFNVIX  
>comp15457\_c1\_seq1; 230 27 401 LEN=3026; translated  
MGVRTKTVKKSARTIVEKYYTRLTLD FHTNKR FVDEVA I LPSKRMRNKIAGYTT HLMRRI  
AKGPVRGISLKLQEERERRLDFVPEVSALEQDTIQIDPDRDMLES LGFGSLNGVAVNQ  
GHRD  
>comp15457\_c1\_seq2; 230 27 401 LEN=3038; translated  
MGVRTKTVKKSARTIVEKYYTRLTLD FHTNKR FVDEVA I LPSKRMRNKIAGYTT HLMRRI  
AKGPVRGISLKLQEERERRLDFVPEVSALEQDTIQIDPDRDMLES LGFGSLNGVAVNQ  
GHRD  
>comp15458\_c0\_seq1; 755 264 2339 LEN=2533; translated  
MKSILSTGKNKKVATRVFGDNVFN ETDVSLCYSPSPGPAENTITFVGGKTKGNSSLIKSS  
ILEDSELT SQSTP SPTVLFQPDPSVDHLS SANTPSEKRV SF SQDDKENVNL SLSRGASSE  
SKAASRNSFRNAELNRLRASKTKSPLRRNLVKMTEATINDVTTSIERSALKKKKQNLIPS  
SSMYKSIDAGRNARKKVNVNKKNEEAKSVTFQWDRENSEAKSLQKKVEESRRQIRAIQRKL  
TTAHFREKAQQDEAEKFDRLAKLEKEYMFKSEVFDHQKQLKEDRDRNRKMSMDARANIR  
RKNREGKEFLEAMKLEEDQAMYEVRA DLHRARME TKRANTEKRMSFQFRAGDARKIREM  
RSVWKGKELHEQHIGHELTRGA AKDVENYKKRMKKAECDDFKQRNLDAHKFRQRQKEQRY  
QAYLAEHKS YELKWQGERDAEAYRKKMHEERRKSLAGRNKESARHANVMEELRNIAKEKE  
AESYMLKFDADNDVKTYVAKLAEERRKSLQLRGE EARKRRQYEDEQHSKAIESAFIESAL  
QSDCQKDLEKYEAECAERRRKS FQFRVKQGR LQRLEKEERRLDQTQKEEEGHRLDALAQ  
R DVEEYKDCQRRRRKSLALRAKEMRQHA EWKRRRQEKQLQERAHTSHLNSIDIHMHALAR  
ERERAERAMGALRSAGCTWKG NPFGNLLNDI  
>comp15459\_c0\_seq1; 885 139 2820 LEN=2990; translated  
MFQSCILARLAGAFGGENLDDWDNHNHNHTGIDGDDFGEDGYGNHPFGCWAHL LLDGRQR  
TREGATATVTATSRHRIRSVLKIDPFTGALKVPVYQEISRADHCPLLKSAWGDWGEVLR  
LCHSQPSRTLHKT KHSRGTALHLSTFDRRC PPLVARALLRANRHMIAVRDSNHYP LHI V  
AFFASSDLLRGRAAAGVAGNNMVRPLASASASPSATASPSASATASATAVLPTE SATKRS  
TDSSEEQQRAASEEARTEAESVLSLFCDTAIMVEQELRTPELFQGQNNKIEQQTSPLYLA  
AKRGAPLSILKILLETRSRTHWIAPSTGGEPYFWDGGDGT PDSNAPAPLSSSSSTTSL  
SSPLEIMLREDRLRSSAGHYRDAYLLEEEEDGNHPPRND DGNGSHQRAVFRAPSASTRLR  
IRPRQKASPARERGLSDRSPLHPEE IAGVPHLVQKMRRVAIDRCHRHFHPRDDVGRQTN  
HKTRSDDEECDQELNTAKQQPQSGLDPRSEEGDRLLVPMDF TQSQKQCLDLWEKCI ELLV  
TAGGGVPLLEVVVDHPRRHQEQLQPFQKHGILHACVCKMPVPSLVEVALLVFPEQAYQ  
RDVRHGMIP LHHVLR AEHKYAYATSSLLAILLQGRTPNAPNKKTVVPKQFLSSSSSGT  
RTEQKSSVDAASNDRKQSRCCANPSVLSPNYLQPTVLLPLPSESGGDGNHDGAE PKERR

RKRTGPTPLAYAIKLRRLPMDTVVDQLLEADSYSLSLRTVDPETQLPPFALVATKVPRHSAV  
KGYLINCNOGSKPQTTTSPSSARAKRKEFLQSDVDIVTAAIESTLNALSSGDGDTLRS  
TRNPLPTTSSSTENRKAESRARDTASAASVANYKLDDVYRLLLHAHPQVLAQHIP  
>comp15459\_c0\_seq2; 859 139 2784 LEN=2954; translated  
MFQSCILARLAGAFGGENNLDDWDNHNHNHTGIDGDDFGEDGYGNHPFGCWAHLLDGRQR  
TREGATATVTATSRHRIRSVLKIDPFTGALKVPVYQEISRADHCPLLKSAWGQDWGEVLR  
LCHSQPSRTLHKTKHSGRTALHLSTFDRRCPLVARALLRANRHMIAVRDSNHYTPLHIV  
AFFASSDLLRGRAAAGVAGNNMVGPSASAFSPSPASAVLPTEATKRSTDSSEEQQRAAS  
EEARAEAESVLSLFCDTAIMVEQELRTPPELFGQNNKIEQQTSPLYLAAKRGAPLSILKI  
LLETSTRTHWIAPSTGGEPYFWDGGGDGTPDSNAPAPLSSSSSSTTSLSSPLEIMLREDR  
LRSSAGHYRDAYLLEEEEDGNHPPRNDGNGSHQRAVFRAPSASTRLRIRPRQKASPARE  
RGLSDRSPLHPEE IAGVPHLVQKMRRVAIDRCHRHFHPRDDVGRQRTNHNKTRSDDEECDQ  
ELNTAKQQPQSGLDPRSEEGDRLLVPMDFTSQKQCLDLWEKCIELLVTAGGGGVPLLEV  
VVDHPRRHQEQLQPFQKHGILHACVCKMPVPSLVEVALLVFPEQAYQRDVRHGMIPLHH  
VLRAEHKYAYATSSLLAILLQGRTPNAPNKKTVVPKQFLSSSSSSGTRTEQKSSVDA  
SNDRKQSRCCANPSVLSPNYLQPTVLLPLPSES GGDGNHDGAEPKERRRKRTPPLAYA  
IKLRLPMDTVVDQLLEADSYSLSLRTVDPETQLPPFALVATKVPRHSAVKGYLINCNOGSK  
PQTTTSPSSARAKRKEFLQSDVDIVTAAIESTLNALSSGDGDTLRSRTRNPLPTTSSST  
NRKAESRARDTASAASVANYKLDDVYRLLLHAHPQVLAQHIP  
>comp15459\_c0\_seq3; 396 139 1331 LEN=1331; translated  
MFQSCILARLAGAFGGENNLDDWDNHNHNHTGIDGDDFGEDGYGNHPFGCWAHLLDGRQR  
TREGATATVTATSRHRIRSVLKIDPFTGALKVPVYQEISRADHCPLLKSAWGQDWGEVLR  
LCHSQPSRTLHKTKHSGRTALHLSTFDRRCPLVARALLRANRHMIAVRDSNHYTPLHIV  
AFFASSDLLRGRAAAGVAGNNMVRPLASASASPSATASPSASATASATAVLPTEATKRS  
TDSSEEQQRAASEEARTEAESVLSLFCDTAIMVEQELRTPPELFGQNNKIEQQTSPLYLA  
AKRGAPLSILKILLETRSTRTHWIAPSTGGEPYFWDGGGDGTPDSNAPAPLSSSSSSSPSS  
TSLSSPLEIMLREDRLRSSAGHYRDAYLLEEEEDGNX  
>comp15459\_c0\_seq4; 370 139 1295 LEN=1295; translated  
MFQSCILARLAGAFGGENNLDDWDNHNHNHTGIDGDDFGEDGYGNHPFGCWAHLLDGRQR  
TREGATATVTATSRHRIRSVLKIDPFTGALKVPVYQEISRADHCPLLKSAWGQDWGEVLR  
LCHSQPSRTLHKTKHSGRTALHLSTFDRRCPLVARALLRANRHMIAVRDSNHYTPLHIV  
AFFASSDLLRGRAAAGVAGNNMVGPSASAFSPSPASAVLPTEATKRSTDSSEEQQRAAS  
EEARAEAESVLSLFCDTAIMVEQELRTPPELFGQNNKIEQQTSPLYLAAKRGAPLSILKI  
LLETSTRTHWIAPSTGGEPYFWDGGGDGTPDSNAPAPLSSSSSSSPSSSTTSLSSPLEIML  
REDRLRSSAGHYRDAYLLEEEEDGNX  
>comp15460\_c0\_seq1; 140 1 831 LEN=1138; translated  
XFCNLREKKYSYNLTFHFSPFDGRFSFIDLASERGADTTNASRATRLEGAEINTSLLAL  
KEVIRALATGGSMTHIPFRGSKLTQVLKDSFVGTNSRCCMVACISPDIGNCEQTLNTRLRY  
ADRVKERNPETGVLSTSCQEATKII SNQQLKLSKQYPSPSKRKIGGGQEHRSGGFADEK  
KNYLDDDSIGENEMNPPIPPLSKSFSRTGETTEKREAGQALVSNHRVMSRWLTMVKTEM  
KLVNQVDANREGLDDYIILELQNNKESLSSVSSSSGA  
>comp15460\_c0\_seq2; 927 116 3223 LEN=3343; translated  
MGLVSTWLNIGLGSVVPTFEAAGIVSPSHLADLDVAYFESLGVTPDDRKLFLVQRI  
KMAVHKKDKVEGSKTPI SAEERVNAVVSKNFVSEDEGNDNDYEGADNAEGSVDNTPGEEK  
KEDGQLLRSARIRTKLKKKDDSLKESKNEGIETSGAGESAPEKKPSKSSSSKSKLGLK  
LSSKLIKDKKERKEKKAASSKSSTSLSSSNTVNEEDSAGVINGCEAETLNVCTS  
VEEKVTLEVSQKSPKIERSKKFQDDVSNLQPKSKLPVSSRLTKKTQKTSHQAAVPEAS  
LSESESHRSNDVNETQIEKSEILKPKSKRRVTLAGSMSSSDGTCQSKIDQASKNMDEHD  
NTASTKGTGQLDYHDEIPSIQRGGIPKVGSGISRSSKSMVSE SALLQHYQRGQQSRSS  
IPPASRSLRIPSPATAVVGSSKVDRTTTPKSRSSITASTSPIIMQVSTGPEWATKIS  
NLREDNKDEYELFRDQVDDENQYHEYDMRIKIVRKRPLSKSESLTGGIDIHPLDYGS  
YGKTLVYQPKTRVDLTKEVETVPFAFDNVFDESSTNIKIYERSLRNLVEPFFNGQWATVF  
AYGQTGSGKTYTMMGSNITGVNAGTATNDQKNLGLYYLAALDIFEMIELPEYRHLDVHVS  
LFEIYGGKLFLLNDRNQIKCLEDSKGVCFPLGTEHSVTS PDHVMQLIEEGAKNRSTGT  
TSRNADSSRSHAVLQIKLMKTTGRKKNIEHGRFSFIDLASERGADTTNASRATRLEGAE  
INTSLLALKEVIRALATGGSMTHIPFRGSKLTQVLKDSFVGTNSRCCMVACISPDIGNCE  
QTLNTRLRYADRVKERNPETGVLSTSCQEATKII SNQQLKLSKQYPSPSKRKIGGGQEHR  
SGGFADEKKNYLDDDSIGENEMNPPIPPLSKSFSRTGETTEKREAGQALVSNHRVMSRW  
LTMVKTEMKLVNQVDANREGLDDYIILELQNIQREQLGFIGELRRSLQNYVSAVEAPHQIF  
DAAHEDDDSFEDLRD

>comp15460\_c0\_seq3; 883 116 3131 LEN=3438; translated  
MGLVSTWLNIGIGLSVVPTEAAGIVSPSHLADLDVAYFESLGVTPDDRKLFLVQRI  
KMAVHKKDKVEGSKTPI SAEERVNAVVSKNFVSEDEGNDNDYEGADNAEGSVDNTPGEEK  
KEDGQLLRRSARIRTKLKKKDDSLKESKNEGIETSGAGESAPEEKKPSKSSSSKSKLKG  
LSSKLIKDKKERKEKKAASSKSSSTLSSSNTVNEEDSAGVINGCEAETLNVCTS  
VEEKVTLEVSQKSPSKIERSKFKQDDVSNLQQPKSKLPVSSRLTKKTQKTSHQAAVPEAS  
LSESESHRSNDVVNETQIEKSEILKPKSKRRVTLAGSMSSSDGTCQSKIDQASKNMDEHD  
NTASTKKGTGQLDYHDEIPSIQRGGIPKVGSGISRSSKSMVSESALLQHYQRGQQRSS  
IPPASRSLRIPSPATAVVGHSKVDRTTTPKSRSSSITASTSPIIMQVSSTGPESWATKIS  
NLREDNKDEYELFRDQVDDENQYHEYYDMRIKVIIVRKRPLSKSESLTGGIDI IHPLDYGS  
YGKTLVYQPKTRVDLTKEVETVPPAFDNVFDDESSTNIKIYERSLRNLVEPFFNGQWATVF  
AYGQTGSGKTYTMMGSNITGVNAGTATNDQKNLGLYYLAALDIFEMIELPEYRHLVDHVS  
LFEIYGGKLFDLLNDRNQIKCLEDSKGVCFPGLTEHSVTSPDHVMQLIEEGAKNRSTGT  
TSRNADSSRSHAVLQIKLTKTTGRKKNIEHGRFSFIDLASERGADTTNASRATRLEGAE  
INTSLLALKEVIRALATGGSMTHIPFRGSKLTQVLKDSFVGTNSRCCMVACISPDIGNCE  
QTLNTRLRYADRVKERNPETGVLSTSCQEATKII SNQQLKLSKQYPSPSKRKIGGGQEHR  
SGGFADEKKNYLDLDDSIGENEMNPPIPPLSKSFSRTGETTEKREAGQALVSNHRVMSRW  
LTMVKTEMKLVNQVDANREGLDDYILELQNNKESLVS SVSSGA

>comp15460\_c0\_seq4; 211 1 1216 LEN=1216; translated  
XNDVVNETQIEKSEILKPKSKRRVTLAGSMSSSDGTCQSKIDQASKNMDEHDNTASTKKG  
TGQLDYHDEIPSIQRGGIPKVGSGISRSSKSMVSESALLQHYQRGQQRSSIPPASRSL  
RIPSPATAVVGHSKVDRTTTPKSRSSSITASTSPIIMQVSSTGPESWATKISNLREDNKD  
EYELFRDQVDDENQYHEYYDMRIKVIIVRKRPLSKSESLTGGIDI IHPLDYGSYGKTLVYQ  
PKTRVDLTKEVETVPPAFDNVFDDESSTNIKIYERSLRNLVEPFFNGQWATVFAYGQTGSG  
KTYTMMGSNITGVNAGTATNDQKNLGLYYLAALDIFEMIELPEYRHLVDHVS LFEIYGGK  
LFDLLNDRNQIKCLEDSKGVCFPGLTEHSVTSPDHVMQLIEEGAX

>comp15460\_c0\_seq5; 184 1 923 LEN=1043; translated  
XFCNLREKKYSYNLTFHFSPFDGRFSFIDLASERGADTTNASRATRLEGAEINTSLLAL  
KEVIRALATGGSMTHIPFRGSKLTQVLKDSFVGTNSRCCMVACISPDIGNCEQTLNTRLRY  
ADRVKERNPETGVLSTSCQEATKII SNQQLKLSKQYPSPSKRKIGGGQEHRSGGFADEK  
KNYLDLDDSIGENEMNPPIPPLSKSFSRTGETTEKREAGQALVSNHRVMSRWLTMVKTEM  
KLVNQVDANREGLDDYILELQNIQREQLGFIGELRRSLQNYVSAVEAPHQIFDAAHEDDD  
SFEDLRD

>comp15461\_c0\_seq1; 215 1 1244 LEN=2617; translated  
XFCKSNPWNHRVTFAFYTYTLFWFLTKSRPFREQNLVDTA FVGRTAQDSAALAGMGSAAAL  
LTF SFYLFNFLCTVTTPLVSQRRRAAGENEGAI ELGGQALSLALLLGAALCCVLIGGSGPL  
LGVMGATETGDAAFSYASSFLGVRVAAPAVFVISASTGILRGYLDTRTTFFVLLGNSLV  
NASLDAVLIGWFRMGPTGAAIATTS SGRSSSECVGGCVWSAELKTKIDIEHVLI FVFFPP  
FECFVEWICAASLLLILAGIIPSVDGKLGSNQQCQTATGANWQVSSRTQQIEIVEERSNG  
LALSQ LQQEQPKIVVTPALNVP SWEAVKPLVVASSSVFVRTFVLQLSIAGAAAMATRGGG  
GSEAASASIAAHQIALQLWLLCSFVCDALAAASQALVADRIGQNTGTQATTRP

>comp15461\_c0\_seq2; 271 1 1315 LEN=2688; translated  
GDDDGDEDEDGVNDDVSNSPSFEETSTGLPQSQISTGQEILSIAVPALAGLAIDPLMNLVD  
TAFVGRTAQDSAALAGMGSAAALLTF SFYLFNFLCTVTTPLVSQRRRAAGENEGAI ELGGQ  
ALSLALLLGAALCCVLIGGSGPLLGMGATETGDAAFSYASSFLGVRVAAPAVFVISAS  
TGILRGYLDTRTTFFVLLGNSLVNASLDAVLIGWFRMGPTGAAIATTS SGRSSSECVGGC  
VWSAELKTKIDIEHVLI FVFFPPFECFVEWICAASLLLILAGIIPSVDGKLGSNQQCQT  
TGANWQVSSRTQQIEIVEERSNGLALSQ LQQEQPKIVVTPALNVP SWEAVKPLVVASSSV  
FVRTFVLQLSIAGAAAMATRGGGGSEAASASIAAHQIALQLWLLCSFVCDALAAASQALV  
ADRIGQNTGTQATTRP

>comp15461\_c0\_seq3; 249 1 1126 LEN=2499; translated  
XFCKSNPWNHRVTFAFYTYTLFWFLTKSRPFREQNLVDTA FVGRTAQDSAALAGMGSAAAL  
LTF SFYLFNFLCTVTTPLVSQRRRAAGENEGAI ELGGQALSLALLLGAALCCVLIGGSGPL  
LGVMGATETGDAAFSYASSFLGVRVAAPAVFVISASTGILRGYLDTRTTFFVLLGNSLV  
NASLDAVLIGWFRMGPTGAAIATTSSEWICAASLLLILAGIIPSVDGKLGSNQQCQTATG  
ANWQVSSRTQQIEIVEERSNGLALSQ LQQEQPKIVVTPALNVP SWEAVKPLVVASSSVF  
RTFVLQLSIAGAAAMATRGGGGSEAASASIAAHQIALQLWLLCSFVCDALAAASQALVAD  
RIGQNTGTQATTRP

>comp15461\_c0\_seq4; 389 1 1620 LEN=2336; translated  
XFCKSNPWNHRVTFAFYTYTLFWFLTKSRPFREQNLVDTA FVGRTAQDSAALAGMGSAAAL

LTFSFYLFNFLCTVTTPLVSQRRRAAGENEGAIELGGQALSLALLLGAALCCVLIGGSGPL  
LGVMGATETGDAAFSYASSFLGVRVAAPAVFVISASTGILRGYLDTRTTFFVLLGNSLV  
NASLDAVLIGWFRMGPTGAAIATTSSEWICAASLLLI LAGI IPSVDGKLGSNQQCQTATG  
ANWQVSSRTQQIEIVEERSNGLALSQEQPKIVVTPALNVP SWEAVKPLVVASSSVFV  
RTFVLQLS IAGAAAMATRGGGGSEAAASASIAAHQIALQLWLLCSFVCDALAAASQALVAD  
RIGQNTGGVRDVSRTIFAYSFLLGLLALMAALEIGNYSGFLLKLVHQRQIDTGRFETIVF  
LLIAAQPLNSFVFAADGVLQGASVFAYQAKSMVLSVSVAVATFFYLRRFGGKESDSGSTL  
MKVWYSLVVLQLMRGITSLWKLVEKNGPIDILNKKNSIETETFEDGSDENASLERRDGN  
>comp15461\_c0\_seq5; 445 1 1691 LEN=2407; translated  
GDDDGDEDEDGVNDDVSNPSFEETSTGLPQSQISTGQEILSIAVPALAGLAIDPLMNLVD  
TAFVGRTAQDSAALAGMGSAAALLTFSFYLFNFLCTVTTPLVSQRRRAAGENEGAIELGGQ  
ALSLALLLGAALCCVLIGGSGPLLGMGATETGDAAFSYASSFLGVRVAAPAVFVISAS  
TGILRGYLDTRTTFFVLLGNSLVNASLDAVLIGWFRMGPTGAAIATTSSEWICAASLLLI  
LAGI IPSVDGKLGSNQQCQTATGANWQVSSRTQQIEIVEERSNGLALSQEQPKIVVTP  
PALNVP SWEAVKPLVVASSSVFVRTFVLQLS IAGAAAMATRGGGGSEAAASASIAAHQIAL  
QLWLLCSFVCDALAAASQALVADRIGQNTGGVRDVSRTIFAYSFLLGLLALMAALEIGNY  
SGFLLKLVHQRQIDTGRFETIVFLLIAAQPLNSFVFAADGVLQGASVFAYQAKSMVLSV  
VAVATFFYLRRFGGKESDSGSTLMKVWYSLVVLQLMRGITSLWKLVEKNGPIDILNKKNS  
IETETFEDGSDENASLERRDGN  
>comp15461\_c0\_seq6; 355 1 1738 LEN=2454; translated  
XFCKSNPWNHRVTFAYTYTLFWFLTKSRPFREQNLVDTAFVGRTAQDSAALAGMGSAAAL  
LTFSFYLFNFLCTVTTPLVSQRRRAAGENEGAIELGGQALSLALLLGAALCCVLIGGSGPL  
LGVMGATETGDAAFSYASSFLGVRVAAPAVFVISASTGILRGYLDTRTTFFVLLGNSLV  
NASLDAVLIGWFRMGPTGAAIATTSSEWICAASLLLI LAGI IPSVDGKLGSNQQCQTATGANWQVSSRTQQIEIVEERSNG  
LALSQEQPKIVVTPALNVP SWEAVKPLVVASSSVFVRTFVLQLS IAGAAAMATRGGG  
GSEAAASASIAAHQIALQLWLLCSFVCDALAAASQALVADRIGQNTGGVRDVSRTIFAYS  
FLLGLLALMAALEIGNYSGFLLKLVHQRQIDTGRFETIVFLLIAAQPLNSFVFAADGVLQ  
ASVFAYQAKSMVLSVSVAVATFFYLRRFGGKESDSGSTLMKVWYSLVVLQLMRGITSLW  
LVEKNGPIDILNKKNSIETETFEDGSDENASLERRDGN  
>comp15461\_c0\_seq7; 305 1 1197 LEN=2570; translated  
GDDDGDEDEDGVNDDVSNPSFEETSTGLPQSQISTGQEILSIAVPALAGLAIDPLMNLVD  
TAFVGRTAQDSAALAGMGSAAALLTFSFYLFNFLCTVTTPLVSQRRRAAGENEGAIELGGQ  
ALSLALLLGAALCCVLIGGSGPLLGMGATETGDAAFSYASSFLGVRVAAPAVFVISAS  
TGILRGYLDTRTTFFVLLGNSLVNASLDAVLIGWFRMGPTGAAIATTSSEWICAASLLLI  
LAGI IPSVDGKLGSNQQCQTATGANWQVSSRTQQIEIVEERSNGLALSQEQPKIVVTP  
PALNVP SWEAVKPLVVASSSVFVRTFVLQLS IAGAAAMATRGGGGSEAAASASIAAHQIAL  
QLWLLCSFVCDALAAASQALVADRIGQNTGTQATTRP  
>comp15461\_c0\_seq8; 411 1 1809 LEN=2525; translated  
GDDDGDEDEDGVNDDVSNPSFEETSTGLPQSQISTGQEILSIAVPALAGLAIDPLMNLVD  
TAFVGRTAQDSAALAGMGSAAALLTFSFYLFNFLCTVTTPLVSQRRRAAGENEGAIELGGQ  
ALSLALLLGAALCCVLIGGSGPLLGMGATETGDAAFSYASSFLGVRVAAPAVFVISAS  
TGILRGYLDTRTTFFVLLGNSLVNASLDAVLIGWFRMGPTGAAIATTSSEWICAASLLLI  
L VWSAELKTKIDIEHVLIFVFFPPFECFVEWICAASLLLI LAGI IPSVDGKLGSNQQCQT  
TGANWQVSSRTQQIEIVEERSNGLALSQEQPKIVVTPALNVP SWEAVKPLVVASSSV  
FVRTFVLQLS IAGAAAMATRGGGGSEAAASASIAAHQIALQLWLLCSFVCDALAAASQALV  
ADRIGQNTGGVRDVSRTIFAYSFLLGLLALMAALEIGNYSGFLLKLVHQRQIDTGRFETI  
VFLIAAQPLNSFVFAADGVLQGASVFAYQAKSMVLSVSVAVATFFYLRRFGGKESDSGS  
TLMKVWYSLVVLQLMRGITSLWKLVEKNGPIDILNKKNSIETETFEDGSDENASLERRD  
GN  
>comp15462\_c0\_seq1; 1005 96 3029 LEN=3219; translated  
MGEEMMKDDENRPEYGLPRLTTAPKNSFATEGDNLTEDEDEDEDVDEDKNYPQDCMSF  
FALGPKGGPDKNNIIPMLYAGLVIAFQFFFLYLMLSRMVKNWNTTEIDIDNPNKEFRWGV  
AHFLPADVPSIVRATQIASLLAFVLFPEESLDFGKNVVFPRKENENTPKERREENIHC  
ARIASILQGLQGLLACLTIILVMTSTDVIDIILNFSAVNFISSFDETA FELASSGKYGP  
KLKRAAKHIERKPLTDCRKPENARYFQKREKVGAPPEGKYS AKCLHWCGSVFLVGLILLV  
LGISVVQYQSNKKWRTHMFRVQFDEETGLERYSGCYRYERGN SFIESDGRLVYSNKDEA  
QETAMLGYCHADRTWVFNVYNE SDPNQDFCDSTKGEIAHSEKTNSYDFSSAFEIGWKS PF  
NKPLDVYFIDNPGNKNGDNGFFECDSIANDGKCDKALNDFYKYDGGDCATTCTHADCH  
PEEANQAFGEDTPGAKQFPSCIDPDMVDLTIYLTRYNSKGIPEWARNSNYNDLEEWKSNW

KPPSLLLECNGNVVFSVPVNPILSDITEPSEQSPSIIAKVEPDAICNLNINSNFLTVDIN  
VEVNDDRVTTNTLSSSIPSEIGRLTNLMALNMGNSLAGTIPVNITHLHLEELDLHMNSI  
HGTIPYNIDSLKNLTKLRDFNTLTGSI PNRLQSLKLFHLDLSSNKLSGIIPNEIGELT  
NLAYLSLGGNSLTGEIPTEIGSLKHLFLDLSGNNLCGSVSCNTNFKEMDATELELCRERN  
TFKPCLTSPSPSISASPTNSNAPSAPPTISPAPSVTQNRRTSPAPTGLSSDSSSDRSEICD  
SIVDVICGEDRNLTSLCGFLSDEIEQELSIGNWTVFAPLNDIPENVTIVEEEDITDLAWF  
HIFEEVLTKEDLPCDNEGDNTTLITMANGRYTRIKCDDDIPIGQKGRGNNGTISNFI EFD  
IEACNGMIHIIENVLLP

>comp15463\_c0\_seq1; 516 331 2566 LEN=3213; translated  
MLEDCTFDEDYCRIVSWQPHGLAFKIHSEIELEKILHKWFREKYESFRCLLEQWGFVKLS  
RGNDRGCFYQKNFRHHLALSRAREKYANIEKDDFLRGMPQYLPRLDEPDLEKESTFDSII  
STKKRKTSLFSLNNEESAKSGKIAKTLHFNKNLSELAIEKPKVSQKKGLRYKEVNKKQC  
RYCHGMFHPQAMWKHEKFCATRIREIEWNDRDDNKHSKRFRKDELTSRDNKSDSSSMKVS  
YNERCPIAKNDDTKIYKRSALSDESSLSSNDSGCRICGFDDDHANLLLCEGCDTEHHIYC  
LNPPLDKVPEGDWFCGSDFTMDTVNSCLLLRRPFLTIFFWGNSNEDKCKARMDKAQINVE  
KLMHKVPPQMQRFGIEICFAKSAENAHWWPALIFDPRSFNNLEVVVELVRKNLKGKRYLVF  
FFENQDAFAAIPKRWIIVTWEEGVKKEFDRGKSVRHASKTRKERFQRAMNLANQALADIAA  
AGYSESETGFDSQFDNDDDENAGKKTNKDIRKTELENSTIFDLDPDFDWKSLREQAYRET  
ISASPSQYPTVIKPAIRKRMKNKGRRIRAQPIYIGKCLCYIGSFSDHEKAAFAIECFLLKMM  
KLAFFDDLKNGDSSLGSHSDSNPTDGGKRRSDLKSRGGFQSPSSSEISSKNPVAKAADPS  
SFGTFTDRKPPMRPRLRRVAKIASKTSLSNIEIVHPSEMSEKVESIEKDAASRPQNLEHLE  
DDERDELLLNASLCHYYLLPLSQF

>comp15463\_c0\_seq2; 550 339 2483 LEN=3130; translated  
MLEDCTFDEDYCRIVSWQPHGLAFKIHSEIELEKILHKWFREKYESFRCLLEQWGFVKLS  
RGNDRGCFYQKNFRHHLALSRAREKYANIEKDDFLRGMPQYLPRLDEPDLEKESTFDSII  
STKKRKTSLFSLNNEESAKSGKIAKTLHFNKNLSELAIEKPKVSQKKGLRYKEVNKKQC  
RYCHGMFHPQAMWKHEKFCATRIREIEWNDRDDNKHSKRFRKDELTSRDNKSDSSSMKVS  
YNERCPIAKNDDTKIYKRSALSDESSLSSNDSGCRICGFDDDHANLLLCEGCDTEHHIYC  
LNPPLDKVPEGDWFCDKCKARMDKAQINVEKLMHKVPPQMQRFGIEICFAKSAENAHWWP  
ALIFDPRSFNNLEVVVELVRKNLKGKRYLVFFFENQDAFAAIPKRWIIVTWEEGVKKEFDRG  
KSVRHASKTRKERFQRAMNLANQALADIAAAGYSESETGFDSQFDNDDDENAGKKTNKDI  
RKTELENSTIFDLDPDFDWKSLREQAYRETISASPSQYPTVIKPAIRKRMKNKGRRIRAQ  
PIYIGKCLCYIGSFSDHEKAAFAIECFLLKMMKLAFFDDLKNGDSSLGSHSDSNPTDGGKRR  
SDLKSRGGFQSPSSSEISSKNPVAKAADPSSFGTFTDRKPPMRPRLRRVAKIASKTSLSN  
EIVHPSEMSEKVESIEKDAASRPQNLEHLEDDERDELLLNASLCHYYLLPLSQF

>comp15463\_c0\_seq3; 550 331 2475 LEN=3122; translated  
MLEDCTFDEDYCRIVSWQPHGLAFKIHSEIELEKILHKWFREKYESFRCLLEQWGFVKLS  
RGNDRGCFYQKNFRHHLALSRAREKYANIEKDDFLRGMPQYLPRLDEPDLEKESTFDSII  
STKKRKTSLFSLNNEESAKSGKIAKTLHFNKNLSELAIEKPKVSQKKGLRYKEVNKKQC  
RYCHGMFHPQAMWKHEKFCATRIREIEWNDRDDNKHSKRFRKDELTSRDNKSDSSSMKVS  
YNERCPIAKNDDTKIYKRSALSDESSLSSNDSGCRICGFDDDHANLLLCEGCDTEHHIYC  
LNPPLDKVPEGDWFCDKCKARMDKAQINVEKLMHKVPPQMQRFGIEICFAKSAENAHWWP  
ALIFDPRSFNNLEVVVELVRKNLKGKRYLVFFFENQDAFAAIPKRWIIVTWEEGVKKEFDRG  
KSVRHASKTRKERFQRAMNLANQALADIAAAGYSESETGFDSQFDNDDDENAGKKTNKDI  
RKTELENSTIFDLDPDFDWKSLREQAYRETISASPSQYPTVIKPAIRKRMKNKGRRIRAQ  
PIYIGKCLCYIGSFSDHEKAAFAIECFLLKMMKLAFFDDLKNGDSSLGSHSDSNPTDGGKRR  
SDLKSRGGFQSPSSSEISSKNPVAKAADPSSFGTFTDRKPPMRPRLRRVAKIASKTSLSN  
EIVHPSEMSEKVESIEKDAASRPQNLEHLEDDERDELLLNASLCHYYLLPLSQF

>comp15463\_c0\_seq4; 516 339 2574 LEN=3221; translated  
MLEDCTFDEDYCRIVSWQPHGLAFKIHSEIELEKILHKWFREKYESFRCLLEQWGFVKLS  
RGNDRGCFYQKNFRHHLALSRAREKYANIEKDDFLRGMPQYLPRLDEPDLEKESTFDSII  
STKKRKTSLFSLNNEESAKSGKIAKTLHFNKNLSELAIEKPKVSQKKGLRYKEVNKKQC  
RYCHGMFHPQAMWKHEKFCATRIREIEWNDRDDNKHSKRFRKDELTSRDNKSDSSSMKVS  
YNERCPIAKNDDTKIYKRSALSDESSLSSNDSGCRICGFDDDHANLLLCEGCDTEHHIYC  
LNPPLDKVPEGDWFCGSDFTMDTVNSCLLLRRPFLTIFFWGNSNEDKCKARMDKAQINVE  
KLMHKVPPQMQRFGIEICFAKSAENAHWWPALIFDPRSFNNLEVVVELVRKNLKGKRYLVF  
FFENQDAFAAIPKRWIIVTWEEGVKKEFDRGKSVRHASKTRKERFQRAMNLANQALADIAA  
AGYSESETGFDSQFDNDDDENAGKKTNKDIRKTELENSTIFDLDPDFDWKSLREQAYRET  
ISASPSQYPTVIKPAIRKRMKNKGRRIRAQPIYIGKCLCYIGSFSDHEKAAFAIECFLLKMM  
KLAFFDDLKNGDSSLGSHSDSNPTDGGKRRSDLKSRGGFQSPSSSEISSKNPVAKAADPS



SFGTFTDRKPPMRPRLRRVAKIASKTSLSNEIVHPSEMSKKVESIEKDAASRPQNLEHLE  
DDERDELLLNASLCHYYLLPLSQF

>comp15464\_c0\_seq1; 851 1 2328 LEN=2361; translated  
LEIDEIILFLTLGLGFEKSGKFDWWGIPDGVPQVGGTAYPTLSALGNALVVRPDLDRMTG  
MSYRRRSRITDDEKVLNDYQMMALRLAIAEGLPDEDIPRGGGEEKDEARTSNETS VGVSD  
EPLIDFSSDAVERLIEETINPPKIWRLLQTLGCSWSGTNFYIRGLKRVFYVQNE MIDFL  
KHGCVGLDWDGCTLDEAGVASVVRYLKAFYIRGCSLSVVEEALAMVTKTTVRRCLESLGI  
HEEDGAYRIDSEELTESDVVNAIRSNPDLRFVKRRSSSPIKRRRSGSVDPLTRLET LAVR  
YWAALSDAPLPGMPSPSAIGAHRRGGGATEAPRGSIEEQASDTKDTRSTETTQEIRWGTP  
RPSVAQPPPEPSANAAEVPEESPTPLGVPKPNPTQSPNAKESQDPVNDISAKPPTEPM  
DSAAAENESLEPPPIEASQKNASNRTEVSGSAPMEEDLEDCNPTTSLIEASQKDGSNRA  
VESGSTQMDKEDLDHNPANSP IEASERDGSKNAIGSGSVPMEEDLADSMPTNSTNDHEP  
VSGSPEATLAATEGDYSKSSSFATQETENVPLEKERTASVAKPFVEDFPVAPNPSL FQCAA  
KIAELHARQRKNQAKTGVKANRPRANPLGEPAAANVGFASPKPARADRCHDTGFFFSPMHE  
PRMQASEEFATPKQYNGSLSSPDKENGRPEFARDDNDNDNDNDNRHSYSGEDQHGWLTQP  
AFEGNDGGDTETGEDDCSIDTMERPARFDLNSTDLLTQGDENSDGENWFDRTIFS

>comp15464\_c0\_seq2; 892 82 1773 LEN=2150; translated  
MSPSSVTSPA FRRLVQTLKHKHKT VTVAEQCCGGLIQAGIMAQPGASSV FVGGSVAYNTQ  
KSKPLLLNDADLHKSIT SGLGAAA SGIQHDKSTEEGYIASKFDWTSKVATAFCH ELKTDY  
ALAEGGATGPTFNPRGMETGF AVLSVAGKTGAGGGDGGGEISVSVSLQKQELIRSPDNDR  
EGNMRRFADAAAELLTEVVEQTKGGADCNPEANTAGNSSASDHTDGHHDNDNDNDNDND  
QTVSLDRATSLRADEAALDALKPLAKYVLIRGTEMLFRSPTELAFLSHEDTPLGKSDSGA  
ITTTFMGR LSDADHTPVFSLDLLDDGPSSGAPDGC FYANARTSAPLLASTLENELVLHAM  
AYANXAAVQQALFELRIAAGAGARRDGTGLQQRFLPGNPLVAAAGPLDHRVGV EPLPDQA  
SAGPEPPPPTEDATVLAGFVEAGESFESAVAREVYEETGVRVDPDSIEYVASQPWPFPRS  
TMIAFSATADAEAFASLEIDETELVEAGWFDRADVREARVEGAVMDSNVAKKALEKHPT  
LPLLI PPQVVAR KLIDRWLSLQ

>comp15464\_c0\_seq3; 877 82 1761 LEN=2138; translated  
MSPSSVTSPA FRRLVQTLKHKHKT VTVAEQCCGGLIQAGIMAQPGASSV FVGGSVAYNTQ  
KSKPLLLNDADLHKSIT SGLGAAA SGIQHDKSTEEGYIASKFDWTSKVATAFCH ELKTDY  
ALAEGGATGPTFNPRGMETGF AVLSVAGKAGDGDGEISVSVSLQKQELIRSPDNDREGNM  
RRFADAAAELLTEVVEQTKGGADCNPEANTAGNSSASDHTDGHHDNDNDNDNDNDQTVS  
LDRATSLRADEAALDALKPLAKYVLIRGTEMLFRSPTELAFLSHEDTPLGKSDSGAITTT  
FMGR LSDADHTPVFSLDLLDDGPSSGAPDGC FYANARTSAPLLASTLENELVLHAMAYAN  
XAAVQQALFELRIAAGAGARRDGTGLQQRFLPGNPLVAAAGPLDHRVGV EPLPDQASAGP  
EPPPPTEDATVLAGFVEAGESFESAVAREVYEETGVRVDPDSIEYVASQPWPFPRSTMIA  
FSATADAEAFASLEIDETELVEAGWFDRADVREARVEGAVMDSNVAKKALEKHPTLPLL  
IPPKQVVAR KLIDRWLSLQ

>comp15465\_c0\_seq1; 383 70 2477 LEN=3591; translated  
MMFSARMLLSLGLVAGPAAVTAIYPDDHWNYSTKLTTGNYADSIQNEIDNGKTVFVRFI  
ASEEDKRARGVAGSPATDAVHDTDAKNFVLFGLLLTGLLLLFLGLPPPRMGACFARLVL  
GSTERAEADDXKQAPAWNAVTKLFAGSPDVA FM DVNLSDEPIREGPNGE PYS PGAGGWPT  
VRYFNRETGIAGGAYAKKTDGPMCQELGNEDYMVEYVEGYGKTFRCRAPS GEGCDE REAG  
YIAKMSERTGAELVSELERLESMEGSSMAPDLEKWLKRKQKILGQLTAA PAEGGSDXALG  
RAGSVRFLPAASNETAGSARLPAGGTDAVLC CASGMEQKKQNEGNEPERIGPGGYRPGGG  
VWNDASLFRRAAXASKGSAACSA AATPKPERGGPDATAWHGMASDLFPGNVIANHPRDAG  
HASIRD TASGPVPIRVVRTDPLGFARLRWQRKNKTTQNNTTQNTTGQHNSRRHKTTQVYT  
IQDNTLQQTQPF SFNMPLSVRSKPKPMPKPRGPALFALKHYSDSIAVGRRRRSQSEGES  
GRVWP GTD PALRERPHRVVSCR FEMEVP TNALRMNVTL SVVAARDRRRNGCGGGAPGSSE  
SVFCPSVSYKITVCTPRRESHHGGIGSCSSSNPQRSYEPQHQRPEPHGPVVRKNADGSI  
THTTTTSTLRWTSNFFVSDNDEQGDPCHEWTGSFVFD DTPVDVSACSFHQLEGTFRGRNC  
SVGVRCSNNTTTNITSNNTTINTDGF GKNDQGRQRATPKRTIEHGHTHAGEEAEAPSF  
AVSEPPFAGHSTIASTNR

>comp15465\_c0\_seq3; 379 70 2465 LEN=3579; translated  
MMFSARMLLSLGLVAGPAAVTAIYPDDHWNYSTKLTTGNYADSIQNEIDNGKTVFVRFI  
ASEEDKRARGVAGSPATDAVHDTDAKNFVLFGLLLTGLLLLFLGLPPPRMGACFARLVL  
GSTERAEADDXKQAPAWNAVTKLFAGSPDVA FM DVNLSDEPIREGPNGE PYS PGAGGWPT  
VRYFNRETGIAGGAYAKKTDGPMCQELGNEDYMVEYVEGYGKTFRCRAPS GEGCDE REAG  
YIAKMSERTGAELVSELERLESMEGSSMAPDLEKWLKRKQKILGQLTAA PAEGGSDXALG  
RAGSVRFLPAASNETAGSARLPAGGTDAVLC CASGMEQKKQNEGNEPERIGPGGYRPGGG

VWNDASLFRAAXASKGSAACSAAATPKPERGGPDATAAWHGMASDLFPGNVIANHPRDAG  
HASIRDASGPVPIRVVRTDPLGFARLRWQRKNKTTQNNTTQNNTGQHNSRRHKTTQVYTI  
IQDNTLQQTQPF S FNMPLSVRSKPKMPPKPRGPALFALKHYSDSIAVGRRRRSQSEGES  
GRVWPGTDPALRERPHRVVSCRFEMEVP TNALRMNVTL SVVAARDRRRNGCGGGAPGSSE  
SVFCPSVSYKITVCTPRRESHHGGIGSSNPQRSYEPQHQRPEPHGPPVVRKNADGSIHTTT  
TTSTLRWTSNFVVSNDDEQGDPCHEWTGSFVFD DTPVDVSACSFHQLEGTFRGRNCSVGV  
RCSNNTTTNITSNNTTINTDGF GKNDQGRQRATPDKRTIEHGHTHAGEEAEAPSFAVSE  
PPFAGHSTIASTIASTNR

>comp15465\_c0\_seq4; 375 70 2278 LEN=3517; translated  
MMFSARMLLSLGLVAGPAAVTAIYPDDHWNYSTKLTTGNYADSIQNEIDNGKTVFVRFI  
ASEAEADDXKQAPAWNAVTKLFAGSPDVA FMDVNLSD EPIREGPNGE PYS PGAGGWPTVR  
YFNRETGIAGGAYAKKTDGPMCQELGNEDYMVEYVEGYGKTFRCRAPSGEGCDEEAGYI  
AKMSERTGAELVSELERLESMEGSSMAPDLEKWLKRKQKILGQLTAAPAEGGSDXALGRA  
GSRVRF LPAASNETAGSARLPAGGTDAV LCCASGMEQKKQNEGNEPERIGPGGYRPGGGVW  
NDASLFRAAXASKGSAACSAAATPKPERGGPDATAAWHGMASDLFPGNVIANHPRDAGHA  
SIRDASGPVPIRVVRTDPLGFARLRWQRKNKTTQNNTTQNNTGQHNSRRHKTTQVYTIQ  
DNTLQQTQPF S FNMPLSVRSKPKMPPKPRGPALFALKHYSDSIAVGRRRRSQSEGESGR  
VWPGTDPALRERPHRVVSCRFEMEVP TNALRMNVTL SVVAARDRRRNGCGGGAPGSSES  
VFCPSVSYKITVCTPRRESHHGGIGSSNPQRSYEPQHQRPEPHGPPVVRKNADGSIHTTTT  
STLRWTSNFVVSNDDEQGDPCHEWTGSFVFD DTPVDVSACSFHQLEGTFRGRNCSVGVRC  
SNNTTTNITSNNTTINTDGF GKNDQGRQRATPDKRTIEHGHTHAGEEAEAPSFAVSEPP  
FAGHSTIASTIASTNR

>comp15465\_c0\_seq5; 375 70 2278 LEN=3392; translated  
MMFSARMLLSLGLVAGPAAVTAIYPDDHWNYSTKLTTGNYADSIQNEIDNGKTVFVRFI  
ASEAEADDXKQAPAWNAVTKLFAGSPDVA FMDVNLSD EPIREGPNGE PYS PGAGGWPTVR  
YFNRETGIAGGAYAKKTDGPMCQELGNEDYMVEYVEGYGKTFRCRAPSGEGCDEEAGYI  
AKMSERTGAELVSELERLESMEGSSMAPDLEKWLKRKQKILGQLTAAPAEGGSDXALGRA  
GSRVRF LPAASNETAGSARLPAGGTDAV LCCASGMEQKKQNEGNEPERIGPGGYRPGGGVW  
NDASLFRAAXASKGSAACSAAATPKPERGGPDATAAWHGMASDLFPGNVIANHPRDAGHA  
SIRDASGPVPIRVVRTDPLGFARLRWQRKNKTTQNNTTQNNTGQHNSRRHKTTQVYTIQ  
DNTLQQTQPF S FNMPLSVRSKPKMPPKPRGPALFALKHYSDSIAVGRRRRSQSEGESGR  
VWPGTDPALRERPHRVVSCRFEMEVP TNALRMNVTL SVVAARDRRRNGCGGGAPGSSES  
VFCPSVSYKITVCTPRRESHHGGIGSSNPQRSYEPQHQRPEPHGPPVVRKNADGSIHTTTT  
STLRWTSNFVVSNDDEQGDPCHEWTGSFVFD DTPVDVSACSFHQLEGTFRGRNCSVGVRC  
SNNTTTNITSNNTTINTDGF GKNDQGRQRATPDKRTIEHGHTHAGEEAEAPSFAVSEPP  
FAGHSTIASTIASTNR

>comp15465\_c0\_seq7; 383 70 2477 LEN=3716; translated  
MMFSARMLLSLGLVAGPAAVTAIYPDDHWNYSTKLTTGNYADSIQNEIDNGKTVFVRFI  
ASEEDKRARGVAGSPATDAVHDTDAKNFVLFGLLLTGLLLLFLGLPPPRMGACFARLVL  
GSTERAEADDXKQAPAWNAVTKLFAGSPDVA FMDVNLSD EPIREGPNGE PYS PGAGGWPT  
VRYFNRETGIAGGAYAKKTDGPMCQELGNEDYMVEYVEGYGKTFRCRAPSGEGCDEEAG  
YIAKMSERTGAELVSELERLESMEGSSMAPDLEKWLKRKQKILGQLTAAPAEGGSDXALG  
RAGSVRF LPAASNETAGSARLPAGGTDAV LCCASGMEQKKQNEGNEPERIGPGGYRPGGG  
VWNDASLFRAAXASKGSAACSAAATPKPERGGPDATAAWHGMASDLFPGNVIANHPRDAG  
HASIRDASGPVPIRVVRTDPLGFARLRWQRKNKTTQNNTTQNNTGQHNSRRHKTTQVYTI  
IQDNTLQQTQPF S FNMPLSVRSKPKMPPKPRGPALFALKHYSDSIAVGRRRRSQSEGES  
GRVWPGTDPALRERPHRVVSCRFEMEVP TNALRMNVTL SVVAARDRRRNGCGGGAPGSSE  
SVFCPSVSYKITVCTPRRESHHGGIGSSNPQRSYEPQHQRPEPHGPPVVRKNADGSI  
HTTTTSTLRWTSNFVVSNDDEQGDPCHEWTGSFVFD DTPVDVSACSFHQLEGTFRGRNCS  
VGVRC SNNTTTNITSNNTTINTDGF GKNDQGRQRATPDKRTIEHGHTHAGEEAEAPSFAV  
AVSEPPFAGHSTIASTIASTNR

>comp15465\_c0\_seq8; 379 70 2290 LEN=3404; translated  
MMFSARMLLSLGLVAGPAAVTAIYPDDHWNYSTKLTTGNYADSIQNEIDNGKTVFVRFI  
ASEAEADDXKQAPAWNAVTKLFAGSPDVA FMDVNLSD EPIREGPNGE PYS PGAGGWPTVR  
YFNRETGIAGGAYAKKTDGPMCQELGNEDYMVEYVEGYGKTFRCRAPSGEGCDEEAGYI  
AKMSERTGAELVSELERLESMEGSSMAPDLEKWLKRKQKILGQLTAAPAEGGSDXALGRA  
GSRVRF LPAASNETAGSARLPAGGTDAV LCCASGMEQKKQNEGNEPERIGPGGYRPGGGVW  
NDASLFRAAXASKGSAACSAAATPKPERGGPDATAAWHGMASDLFPGNVIANHPRDAGHA  
SIRDASGPVPIRVVRTDPLGFARLRWQRKNKTTQNNTTQNNTGQHNSRRHKTTQVYTIQ  
DNTLQQTQPF S FNMPLSVRSKPKMPPKPRGPALFALKHYSDSIAVGRRRRSQSEGESGR

VWPGTDPALRERPHRVVSCRFEMEVP TNALRMNVTL SVVAARDRRRNGCGGGAPGSSES  
FCPSVSYKITVCTPRRESHHGGIGSCSSSNPQRSYEPQHQRPEPHGPPVVRKNADGSIHT  
TTTTSTLRWTSNFVVDNDDEQGDPCHEWTGSFVFDTPVDVSACSFHQLEGTFRGRNCV  
GVRCSNNTTTNITSNNTTINTDGF GKNDQGRQRATPKRTIEHGHXTHAGEEAEAPSAV  
SEPPFAGHSTIASTIASTNR

>comp15465\_c0\_seq9; 379 70 2465 LEN=3704; translated  
MMFSARMLLSLGLVAGPAAVTAIYPDDHWNYS TKLTTGNYADSIQNEIDNGKTVFVRFI  
ASEEDKRARGVAGSPATDAVHDTDAKNFVLF GGLLLTGLLLLFLGLPPP RMGACFARLVL  
GSTERAEADDXKQAPAWNAVTKLFAGSPDVA FMVNLSD EPIREGPNGE PYS PGAGGWPT  
VRYFNRETGIAGGAYAKKTDGPMCQELGNEDYMVEYVEGYGKTFRCRAPSGEGCDE REAG  
YIAKMSERTGAELVSELERLESMEGSSMAPDLEKWL RKRQKILGQLTAAPAEGGSDXALG  
RAGSVRFLPAASNETAGSARLPAGGTDAV LCCASGMEQKQNEGNEPERIGPGGYRPGGG  
VWNDASLFRAAXASKGSAACSAAATPKPERGGP DATAAWHG MASDLFPGNVIANHPRDAG  
HASIRDTASGPVPIRVVRTDPLGFARLRWQRKNKTTQNN TTQNN TGQHNSRRHKTTQVYT  
IQDNTLQQTQPF SFN MPLSVRSKPKMPPKPRGPALFALKHYSDSIAVGRRRRS QSEGES  
GRVWPGTDPALRERPHRVVSCRFEMEVP TNALRMNVTL SVVAARDRRRNGCGGGAPGSSE  
SVFCPSVSYKITVCTPRRESHHGGIGSSNPQRSYEPQHQRPEPHGPPVVRKNADGSIHTTT  
TTSTLRWTSNFVVDNDDEQGDPCHEWTGSFVFDTPVDVSACSFHQLEGTFRGRNCVGV  
RCSNNTTTNITSNNTTINTDGF GKNDQGRQRATPKRTIEHGHXTHAGEEAEAPSAVSE  
PPFAGHSTIASTIASTNR

>comp15465\_c0\_seq10; 379 70 2290 LEN=3529; translated  
MMFSARMLLSLGLVAGPAAVTAIYPDDHWNYS TKLTTGNYADSIQNEIDNGKTVFVRFI  
ASEAEADDXKQAPAWNAVTKLFAGSPDVA FMVNLSD EPIREGPNGE PYS PGAGGWPTVR  
YFNRETGIAGGAYAKKTDGPMCQELGNEDYMVEYVEGYGKTFRCRAPSGEGCDE REAGYI  
AKMSERTGAELVSELERLESMEGSSMAPDLEKWL RKRQKILGQLTAAPAEGGSDXALGRA  
GSVRFLPAASNETAGSARLPAGGTDAV LCCASGMEQKQNEGNEPERIGPGGYRPGGGVW  
NDASLFRAAXASKGSAACSAAATPKPERGGP DATAAWHG MASDLFPGNVIANHPRDAGHA  
SIRDTASGPVPIRVVRTDPLGFARLRWQRKNKTTQNN TTQNN TGQHNSRRHKTTQVYTIQ  
DNTLQQTQPF SFN MPLSVRSKPKMPPKPRGPALFALKHYSDSIAVGRRRRS QSEGESGR  
VWPGTDPALRERPHRVVSCRFEMEVP TNALRMNVTL SVVAARDRRRNGCGGGAPGSSES  
FCPSVSYKITVCTPRRESHHGGIGSCSSSNPQRSYEPQHQRPEPHGPPVVRKNADGSIHT  
TTTTSTLRWTSNFVVDNDDEQGDPCHEWTGSFVFDTPVDVSACSFHQLEGTFRGRNCV  
GVRCSNNTTTNITSNNTTINTDGF GKNDQGRQRATPKRTIEHGHXTHAGEEAEAPSAV  
SEPPFAGHSTIASTIASTNR

>comp15466\_c0\_seq1; 564 323 2299 LEN=2978; translated  
MEDSTYSGRQDLAKITAVDDCTETYNKSSKRSDPSLYTDAGGAGHVDSTRPKKRVKGSS  
KPSLSLPIIGSYLIKTDYDDDIVNVTVTTDVNDSDDD VDTSTPASRNVPFHACEWWDGT  
AYIRDWMTTPHDDADTTKTSEFSAASQNEYSEFLGSADKDP SPVLKFLGNIAASRESHDH  
SSHEVQSR YMEPLPLKTRNGGALYNAPEAFRNKASRLPMSTRKPPSGTLM PQLNQFGETT  
FDPYMS SQGHYHNQQPYQLQAQKQSVQACHPPSFLPESI HAAQHKKMQOQTYHGQRQQ  
IDQPGFVRADIALNKPQAKVLTDDIFCLGRDFQESYHEDTSFDEDSVTGVIANPNTSINP  
EDKVDENENIRKEMISAFVNF DGEDSKSVIENTDDRNDIMDKEIAVLIARDNGLEPSSGI  
STSKGTADDELTGAESDAFFDGGNLLDSNPSSDPSRDISKNILDSSKTHLELGTDKSST  
EVRFRAYQAESWTEKFEELIEFRKKGHCLVPNCYPDNPALAQWTKRQRYQYK LKLGNR  
STLTDERVALEDIGFIWDSHKAVW SERLQELAQFKKRF GHCVNPSRYRDNHQLAIWVKR  
QRRQWKNKLDGKPHCMTE DRKQALEAIGFVWDMKMLKYATKGNKENVKKKMSCKSKGV

>comp15467\_c0\_seq1; 718 656 2071 LEN=3716; translated  
MTTAMVSPSPSKKRKFEANSSSGDDGGDENEHDLRFRSNKTKKEEITKEEAMTYCPVKVE  
GNVSACELNNENSGVPTDPIGLVSDLCRPTSYIKTTKKEETTEEDTAIETDENLDGVKSE  
DIQQHEVSNL DKIKKEESDVT DHEV KRKERPEEQ TSSSVEVKKEEAKVKLEVARAEAYEK  
YADRPLLHRFFGIGLLGGGHQNTYVRPSKCKTKVFDGHEIRKGY PPKINEKKNANGNDV  
GAEYDMDTFAYCAFNTLRQFNGPKFAGQPTAAMSKLSSFLREKNLSFPIFMKRSLTKKNE  
SEQVLGW EYVGN YRCSTDKDIMLWESAKNISEATKRQTKEDLLRYAACASGHGRAFLDK  
WKAYLDKEVEKDHNAREGKQLSQSTIGARAKKLT YRKNLTDNDLIGILLELDEFYQGEI  
IEFVEYDERIYDFCSKGLTTKNSNGEIKAKKGGDHATARDWYNFAVENMLM

>comp15467\_c0\_seq2; 718 656 2071 LEN=3869; translated  
MTTAMVSPSPSKKRKFEANSSSGDDGGDENEHDLRFRSNKTKKEEITKEEAMTYCPVKVE  
GNVSACELNNENSGVPTDPIGLVSDLCRPTSYIKTTKKEETTEEDTAIETDENLDGVKSE  
DIQQHEVSNL DKIKKEESDVT DHEV KRKERPEEQ TSSSVEVKKEEAKVKLEVARAEAYEK  
YADRPLLHRFFGIGLLGGGHQNTYVRPSKCKTKVFDGHEIRKGY PPKINEKKNANGNDV

GAEYDMDTFAYCAFNTLRQFNGPKFAGQPTAAMSKLSSFLREKNLSFPIFMKRSLTKKNE  
SEQKVLGWVEYVGNRYRCSTDKDIMLWESAKNISEATKRQTKEDLLRYAACASGHGRAFLDK  
WKAYLDKEVEKDHNAREGKQLSQSTIGARAKKLTyrKNLTDNDLIGILLELDEFYQGEI  
IEFVEYDERIYDFCSKGLTTKNSNGEIKAKKGGDHATARDWYNFAVENMLM  
>comp15467\_c0\_seq3; 722 1 1944 LEN=2058; translated  
XTVSTREQTKELNIQHNVKTQNEHLRISSSSVQRKANANNKKQKHDTTTSKKNNTAKAR  
LEKNTANNDTEPSVGNRISVKANAKKQEREXETEKEYDEDEKQQQLILNPAATIDTESSD  
YGFYDNDVNKGKEGKSKTTSSCSASKKEVINICRTGSDNELIDLSDSNHKGIEVTDHSS  
IVDNNGADELKINVVPVVGPKKLDKDDTVAATAVIVTPRSSKRRKLELKTSSDGKGDNE  
SDLQQSILNPDLSKSSNIKKEESKEEGATSDCLCKAEGKVNNFQSDDEQDIPLATNPQQV  
RSSPDQVKKEDEGAANVSTVNATESLGEHVTHSSSTQVKKEEAEKLNARNEAYEKYAD  
LPLLHRFNIGILLGGAFQNSYPVPTNKCKKVFDDGDKIREGYPIPKHCTTKNENGDEYDM  
NDFAYVAFDFTLWHTNGPKFAGQPTAAVNELAGLFKKNVVFPLFMKRSLTKPSHKREQRV  
LGWEYVGNRYRCISDQDLELWESAKNVHEANKHKIKECMLRSAARSAGYGRCRIDRWKEHL  
DNEIEKHRKNAREGKVVIPNSIGARAIKLNRYRHNMTDSALMDVVVELDEFYEEEEIEFVE  
YDERIYEFCSKGLTTKNSNGEVRKNKGGAHATARDWYDFATENMLMN  
>comp15468\_c1\_seq2; 281 1 1027 LEN=1990; translated  
XSDSESSSDSEQYSLSPSAPVNGAGRSNGEDDDEAKDDDEPRDDAYTSAVREWVDRVPIA  
LNLCPWARLSRNNGRTRCVTCPSASKGGVSVFLEEEIDRLLDPFRFHRPWTTTLVVCPLV  
GDWKEDFGAFDKYVGEFAEEVRKRKRKEEEEEQDGS SCPGVSLVAFHPLFLRWGLPAGV  
GVGSRVLCHAGRSFGFSKSKGVYPATVVDPPELFGQRRIKVRF CGACEGSGDNGKRSTDT  
RSTERADPNSKGEASPGSTEHPFEGKEQYVPVDWVVPGDREGEHEHAKNEGPPSLSDNAMH  
RAPFPVHLIRNEDLSSLCARDVSRLKRRNARAMMGLSLDEV  
>comp15468\_c1\_seq3; 290 1 1158 LEN=2121; translated  
ITITTTTTATTAAFRPVSTRMNGGASNGSDSDSSSDACEEESTSTITSSSISSDSSSSDS  
ESSSDSEQYSLSPSAPVNGAGRSNGEDDDEPSDDAYTSAVREWVDRVPIALNLCPWARLS  
RNRGRTRCVTCPSASKGGVSVFLEEEIDRLLDPFRFHRPWTTTLVVCPLVGDWKEDFGAF  
DKYVGEFAEEVRKRKRKEEEEEQDGS SCPGVSLVAFHPLFLRWGLPAGVGVGSRVLCHA  
GRSGFSKSKGVYPATVVDPPELFGQRRIKVRF CGACEGSGDNGKRSDTRITERAVPDR  
TPEHPFEGKEQYVPVDWVVPGDREGEHEHAKNEGPPSLSDNAMHRAPFPVHLIRNEDLSS  
LCARDVSRLKRRNARAMMGLSLDEV  
>comp15468\_c1\_seq4; 330 1 1179 LEN=2142; translated  
ITITTTTTATTAAFRPVSTRMNGGASNGSDSDSSSDACEEESTSTITSSSISSDSSSSDS  
ESSSDSEQYSLSPSAPVNGAGRSNGEDDDEPSDDAYTSAVREWVDRVPIALNLCPWARLS  
RNRGRTRCVTCPSASKGGVSVFLEEEIDRLLDPFRFHRPWTTTLVVCPLVGDWKEDFGAF  
DKYVGEFAEEVRKRKRKEEEEEQDGS SCPGVSLVAFHPLFLRWGLPAGVGVGSRVLCHA  
GRSGFSKSKGVYPATVVDPPELFGQRRIKVRF CGACEGSGDNGKRSTDRSTERADPNS  
KGEASPGSTEHPFEGKEQYVPVDWVVPGDREGEHEHAKNEGPPSLSDNAMHRAPFPVHLI  
RNEDLSSLCARDVSRLKRRNARAMMGLSLDEV  
>comp15468\_c1\_seq5; 241 1 1006 LEN=1969; translated  
XSDSESSSDSEQYSLSPSAPVNGAGRSNGEDDDEAKDDDEPRDDAYTSAVREWVDRVPIA  
LNLCPWARLSRNNGRTRCVTCPSASKGGVSVFLEEEIDRLLDPFRFHRPWTTTLVVCPLV  
GDWKEDFGAFDKYVGEFAEEVRKRKRKEEEEEQDGS SCPGVSLVAFHPLFLRWGLPAGV  
GVGSRVLCHAGRSFGFSKSKGVYPATVVDPPELFGQRRIKVRF CGACEGSGDNGKRSDT  
RITERAVPDRTPPEHPFEGKEQYVPVDWVVPGDREGEHEHAKNEGPPSLSDNAMHRAPFPV  
HLIRNEDLSSLCARDVSRLKRRNARAMMGLSLDEV  
>comp15469\_c0\_seq1; 1645 1 3981 LEN=4036; translated  
RVLFRSDKLDVTIDAETNEISVRNNGQIPVELHQEENCYVPTLIFGHLLTGSNFDNEQ  
KTTGGRNGYGAKLANIFSTKFIVECLDSSKGVKVFVQTF TENMGHAGEPVVKKCTAAEKKK  
GDYTKITFSPDLARFGMTVLTNDTVGLLSKRVDIAGSMANSEGKRLVSLNKGKLP IKS  
FQDYIKIYKNVNAPCAFEEKVDDMWEVGVSLSSQDGA FMQISFVNSICTYKGGSHVNFVAD  
KVAKSLVTSIEKKNKGAKITNAQIKNHL CVFVNCLVNNPTFSSQTKEFLTNRKADFNNK  
CKLSDKFLKQVAKSDIVENILAFKFKQRELKKNNGKKKIKLTGIDKLDANKAGSRDS  
RKCTLILTEGDSAKSLAMSGLSVIGRDFYGVYPLKGLPLNVRDATHAAVVKNEEIKNVVD  
ILGLKYGTVYTEENMKELRYGHLMIMADQDHDGSHIKGLIINF IHNFWP SLLNIDGFLQQ  
FITPIVKVTKGKKSETFFFTLPQYENWREATGNDGKGWKIKYYKGLGTSTAADAKEYFSNL  
DLHEIAFEKLSLDIKEEEKDDDDDIILDAEPVPDIATSYGASLIDMVFNKKRSDDRDKWL  
QKLKKNFTLDYAAAQGGQALKYSQFINQEYILFSKADCARSIPHIMDGFKPSQRKVLFSFCF  
KRKLKDEIKVAQLAGYIGENSAYHHGEASLHTTIINMAQSFVGSNNINLLTPSGQFGTRR  
MGGKDAASPRYIFTMLEKITRAIFHPDDDGLLNYLSDDGLSIEPDYYPVPIPMVLVNGSD

GIGTGWMSKIPNYDPRQIIKNI RNMINNEPLEEMHPFYSGFNGDFKHETGGRYSCRGIIK  
RTDDTTLDTITELPIGTWTQNCCKIFLEKMLAPDAKSAEPDIKDFVENHTDTTVSFTITASR  
EKIDAWEKLPKGGLYAKFKLIGSTTTNNMNLFDTDNRIVRHPKPEGILVAFFEKRMFYI  
KRKELLVKNLRKEQNMLSNKARFVEEVCNGDLIVSNRKKVELLEDLQSRGYDLFDKKTGD  
DDDADDENEAPSSTSELSKGYEYLLGMKLNWLTFEKVEELRKQLAERTAELEEELEATEPS  
DIWMRDLEAIEVALDERDRKMQEAEDEELNAQKKTAKRQAMKSRRKAAPKRPASKKKKEE  
PNVYDESEDEDMDFTPAVKSTTRKAPARARKPAACKAPPKATEEVIIEEPTKTVSVDESDDD  
GLEVSLFDRLKLSKSASSDSSLAGSKRPSPKNGSKKAVPAKKAKATRKTAPKKAPAKSRK  
QKLPVSSDEEDFICDNGSDSDMEVETIPAPPPRARRAARATKKPVVYAVDDDDSFMADS  
DDSDSF

>comp15469\_c0\_seq2; 1960 96 4490 LEN=4545; translated  
MASIEYEIDYEDDESVMDDDENIVMAPAKKTTSKSKAASKKKPVLSARNENAVNIEAEA  
PDNGSKTKTIEERYQKKTQLEHILLRPDITYIGSDKPTEDKAFIYDTVQDAIVEKVIITYT  
PGLYKIFDEIIVNAADNKQRDPNMDKLDVTIDAETNEISVRNNGQGIPELVHQEENCYVP  
TLIFGHLLTGSNFDDNEQKTTGGRNGYGAKLANIFSTKFIVECLDSSKGVKVFQTF TENM  
GHAGEPVVKKCTAAEKKKGDYTKITFSPDLARFGMTVLTNDTVGLLSKRVDIAGSMANS  
EGKRLVVS LNKKLPKSFQDYIKIYKNVNAPCAFEEKVDDMWEVGVSLSSQDGAFMQISF  
VNSICTYKGGSHVNFVADKVAKSLVTSIEKKNKGGAKITNAQIKNHL CVFVNCLVNNPTF  
SSQTKFELTNRKADFNKCKLSDKFLKQVAKSDIVENILAFKFKQRELKKNNGKKKIK  
LTGIDKLDDANKAGSRDSRCKTLLILTEGDSAKSLAMSGLSVIGRDFYGVYPLKGP LNVR  
DATHAAVVKNEEIKNVVDILGLKYGTVYTEENMKELRYGHLMIMADQDHDGSHIKGLIIN  
FIHNFWPSSLNIDGFLQQFITP IVKVTGKKSETFFTL PQYENWREATGN DGKWKIKYY  
KGLGTSTAADAKEYFSNLDLHEIAFEKLSLDIKEEEKDDDDDIILDAEPVPDIATSYGAS  
LIDMVFNKRSDDRKDWLQKLLKNTFLDYAAAQQQALKYSQFINQEYILFSKADCAR SIP  
HIMDGFKPSQRKVLFS CFKRKLKDEIKVAQLAGYIGENSAYHHGEASLHTTIINMAQS FV  
GSNNINLLTPSGQFGTRRMGGKDAASPRYIFTMLEKITRAIFHPDDDGLLNYSDDGLSI  
EPDYMPVPIPMVLVNGSDGIGTGWMSKIPNYDPRQIIKNI RNMINNEPLEEMHPFYSGFN  
GDFKHETGGRYSCRGIIKRTDDTTLDTITELPIGTWTQNCCKIFLEKMLAPDAKSAEPDIK  
FVENHTDTTVSFTITASREKIDAWEKLPKGGLYAKFKLIGSTTTNNMNLFDTDNRIVRHP  
KPEGILVAFFEKRMFYIKRKELLVKNLRKEQNMLSNKARFVEEVCNGDLIVSNRKKVEL  
LEDLQSRGYDLFDKKTGDDDDADDENEAPSSTSELSKGYEYLLGMKLNWLTFEKVEELRK  
QLAERTAELEEELEATEPSDIWMRDLEAIEVALDERDRKMQEAEDEELNAQKKTAKRQAMK  
SRRKAAPKRPASKKKKEE PNVYDESEDEDMDFTPAVKSTTRKAPARARKPAACKAPPKATE  
EVIIEEPTKTVSVDESDDDGLEVSLFDRLKLSKSASSDSSLAGSKRPSPKNGSKKAVPAKK  
AKATRKTAPKKAPAKSRKQKLPVSSDEEDFICDNGSDSDMEVETIPAPPPRARRAARAT  
KKPVVYAVDDDDSFMADSDDDSDSF

>comp15470\_c0\_seq1; 551 205 1881 LEN=2023; translated  
MGSNVIVMSEAGKPIFSRYGSQGDVARICGLVQAIRTAINGEKTSLGLGEIQSIHSEKTC  
TVFMTVGSITLMHFSETTAATSDVAQTEAFARLQLEYIYAHLI FMLTANIQR TFLYNPGF  
DLRSLISSNDNLRGILDES GPEGNTGPFVSSVQSCYPISFRMRQKASKALQTIAREID  
NNIAFALLIVGDKLLTVVQPSFRPHQLRVSDLHLILNFISRQPLTSSSELWLP MCLPRFH  
STGFLYAYTNCFDIQSKLTIILLSSHNTTEQFQILRVSSQKVRETLELPAVSDSILIVKD  
DHGSVSSSNNTIDVHWKR RNESFDNGSTTDES FVNI SADMLGSESSVPQEAELLRQVRRS  
NELSSIDCICKQYLADEDSQWL VHF LFRLDIPIKNVSPRKKRQQQGG LFSQCIGP ALKA  
PFNKTVSQSRLWSNYQKLSRLRLG SATVEASTDAFDMIRNDSSEGGSQMKEAGIFAGIG  
KQCPSIGLHESTPYNSDGLSYIVEGDEIYLAINGKHFELYMVT TNVIPVKRAATIGTKLI  
REIIRDENILFLSKPLTW

>comp15470\_c1\_seq1; 1002 170 3061 LEN=5492; translated  
MTSLFGYSAPSAHEEKMEESNGNGSHPASRSGSKDKATFTSSKCP SGAGLENSCEL PFG  
FMWSPMAAYNDPRNLKGGDEMAVVKCDGNLPPVLCVSCLA YMN PYAEMDKKSGI WSCPL  
CGHENVPTDELYPGSDIMTAMSSSCIEYRQAI SKTNADDDEPEKQIGSNGKNSTYNGLQ  
EKEEDYCTYILLVDENLSPKDGQAIAPAVEAIFKEQIANAE DGAHPKARI GLVVFGKSV  
SIYQLGFSGLASADVYMPNESDADNTV FDAAVEKRSYLA EIQTGG EFTSLRNSLSSIFGV  
SVDEEADESASDLIGISSRMAMLSQRKASRLRKKESGADGVS NVTARS PVMKRSEESLSE  
KPKRCTAEALQCALELADASISNPSRTSRVILFTNGCPNSGTANVVD PDVASEKLRK RKG  
KRATHITVDTRDLQKALEYFDDLGNIAISAGIGIDVFCSGVTE LALPAYQAMVEPSDGYC  
LPLVSLDTPQLKKNLKFVIESTYVARSEDSVSTDDVNF LDGPECILDIRTDSFLTP TQMC  
GSGEIIPSSASVMVENERA AFEKGLKLAEEKGFKIKNLPSEKAYEIS MTRVQMGRVDPLS  
TVFVLM EVDDTFNHEDEYAFFQFVARYVSPMGDAEITRVLSFKILVAEDINDFLRSLNDE  
TMSVALAKIAVYRSLHGREETDDTRDMTVAGDVLQEKLAYAAQLDIDATVQRISGAFRL

LDLEKNTRMRSVSKKPI SRSETSSLDIAFPQPKETLNRLYHLRRGPLISP GPMRAMDDR  
AEQRRLFLRFPVKDCLIMMRPELWSTGCMAISSGWDTMLEFP PETLALWDDSI VAADFHD  
SMFIWTGANCTA QRYDGI RDKFKAHLLKISENRFPMPELHELSDGDSMGRRTARLAPSH  
ADPIDNQIVNFPALSELKPDAL EQLRSKFKFYDSDSDASFRTWFW SVASASNN SKKAGMS  
LCE

>comp15470\_c1\_seq2; 989 170 3150 LEN=5466; translated  
MTSLFGYSAPSAHEEKMEEEESNGNGSHPASRSGSKDKATFTSSKCP SGAGLENSCEL PFG  
FMWSPMAAYNDPRNLKGGDEMAVVKCDGNLPPVLCV SCLAYMNPYAEMDKKSGI WSCPL  
CGHENVVPTDELYPGSDIMTAMSSSCIEYRQAI SKTNADDDEPEKQIGSNGKNSTYNGLQ  
EKEEDYCTYILLVDENLSPKDGQAIAPAVEAIFKEQIANAEDGDAHPKARI GLVVF GKSV  
SIYQLGFSGLASADVYMPNESDADNTVFDAAVEKRSYLA EIQTGG EFTSLRNSLSSIFGV  
SVDEEAD EASADLIGISSRMAMLSQRKASRLRKKESGADGVS NVTARSPW MKRSEESLSE  
KPKRCTAEALQCALELADASISNPSRTRSRVILFTNGCPNSGTANVVDPDVASEKLRKRNG  
KRATHTIVDTDR LQKALEYFDDLGNIAISAGIGIDVFC SGVTE LALPAYQAMVEPSDGYC  
LPLVSLDTPQLKKNLKFVIESTYVARSEDSVSTDDVNF LDGPECILDIRTDSFLTP TQMC  
GSGEIIPSSASVMVENERA AFEKGLKLA AEKGFKIKNLPSEKAYEISMTRVQMGRVDPLS  
TVFVLM EVD DTFNHEDEYAFFQFVARYVSPMGDAEITRVLSFKILVAEDINDFLRSLNDE  
TMSVALAKIAVYRSLHGREETDDTRDMTVAGDVLDQEKLAYAAQLDIDATVQRISGAFRL  
LDXGKEYPNAKVCLPTVQKLKNQYPLLSHCYMSFSC LLYQSVSKKPI SRSETSSLDIAFP  
PQLKETLNRLYHLRRGPLISP GPMRAMDDRAEQRRLFLRFPVKDCLIMMRPELWSTGCM  
AISSGWDTMLEFP PETLALWDDSI VAADFHD SMFIWTGANCTA QRYDGI RDKFKAHLLKIS  
ENRFPMPELHELSDGDSMGRRTARLAPSHADPIDNQIVNFPALSELKPDAL EQLRSKFK  
FYDSDSDASFRTWFW SVASASNN SKKAGMSLCE

>comp15470\_c1\_seq3; 597 170 1844 LEN=1844; translated  
MTSLFGYSAPSAHEEKMEEEESNGNGSHPASRSGSKDKATFTSSKCP SGAGLENSCEL PFG  
FMWSPMAAYNDPRNLKGGDEMAVVKCDGNLPPVLCV SCLAYMNPYAEMDKKSGI WSCPL  
CGHENVVPTDELYPGSDIMTAMSSSCIEYRQAI SKTNADDDEPEKQIGSNGKNSTYNGLQ  
EKEEDYCTYILLVDENLSPKDGQAIAPAVEAIFKEQIANAEDGDAHPKARI GLVVF GKSV  
SIYQLGFSGLASADVYMPNESDADNTVFDAAVEKRSYLA EIQTGG EFTSLRNSLSSIFGV  
SVDEEAD EASADLIGISSRMAMLSQRKASRLRKKESGADGVS NVTARSPW MKRSEESLSE  
KPKRCTAEALQCALELADASISNPSRTRSRVILFTNGCPNSGTANVVDPDVASEKLRKRNG  
KRATHTIVDTDR LQKALEYFDDLGNIAISAGIGIDVFC SGVTE LALPAYQAMVEPSDGYC  
LPLVSLDTPQLKKNLKFVIESTYVARSEDSVSTDDVNF LDGPECILDIRTDSFLTP TQMC  
GSGEIIPSN TSVMAENERX

>comp15470\_c1\_seq4; 955 71 3134 LEN=3514; translated  
MTSLFGYSAPSAHEEKMEEEESNGNGSHPASRSGSKDKATFTSSKCP SGAGLENSCEL PFG  
FMWSPMAAYNDPRNLKGGDEMAVVKCDGNLPPVLCV SCLAYMNPYAEMDKKSGI WSCPL  
CGHENVVPTDELYPGSDIMTAMSSSCIEYRQAI SKTNADDDEPEKQIGSNGKNSTYNGLQ  
EKEEDYCTYILLVDENLSPKDGQAIAPAVEAIFKEQIANAEDGDAHPKARI GLVVF GKSV  
SIYQLGFSGLASADVYMPNESDADNTVFDAAVEKRSYLA EIQTGG EFTSLRNSLSSIFGV  
SVDEEAD EASADLIGISSRMAMLSQRKASRLRKKESGADGVS NVTARSPW MKRSEESLSE  
KPKRCTAEALQCALELADASISNPSRTRSRVILFTNGCPNSGTANVVDPDVASEKLRKRNG  
KRATHTIVDTDR LQKALEYFDDLGNIAISAGIGIDVFC SGVTE LALPAYQAMVEPSDGYC  
LPLVSLDTPQLKKNLKFVIESTYVARSEDSVSTDDVNF LDGPECILDIRTDSFLTP TQMC  
GSGEIIPSSASVMVENERA AFEKGLKLA AEKGFKIKNLPSEKAYEISMTRVQMGRVDPLS  
TVFVLM EVD DTFNHEDEYAFFQFVARYVSPMGDAEITRVLSFKILVAEDINDFLRSLNDE  
TMSVALAKIAVYRSLHGREETDDTRDMTVAGDVLDQEKLAYAAQLDIDATVQRISGAFRL  
LDXGKEYPNAKVCLPTVQKLKNQYPLLSHCYMSFSC LLYQSVSKKPI SRSETSSLDIAFP  
PQLKETLNRLYHLRRGPLISP GPMRAMDDRAEQRRLFLRFPVKDCLIMMRPELWSTGCM  
AISSGWDTMLEFP PETLALWDDV SFCHSSIDTRLLIAISHDIP IISXVLQSI VAADFHDSM  
FIWTGANCTA QRYDGI RDKFKAHLLKISENRFPMPELHELSDGDSMGRRTARLAPSHAD  
PIDNQIVNFPALSELKPDAL EQLRSKFKFYDSDSDASFRTWFW SVASASNN SKKAGMSL  
CE

>comp15470\_c1\_seq5; 1002 71 2962 LEN=5278; translated  
MTSLFGYSAPSAHEEKMEEEESNGNGSHPASRSGSKDKATFTSSKCP SGAGLENSCEL PFG  
FMWSPMAAYNDPRNLKGGDEMAVVKCDGNLPPVLCV SCLAYMNPYAEMDKKSGI WSCPL  
CGHENVVPTDELYPGSDIMTAMSSSCIEYRQAI SKTNADDDEPEKQIGSNGKNSTYNGLQ  
EKEEDYCTYILLVDENLSPKDGQAIAPAVEAIFKEQIANAEDGDAHPKARI GLVVF GKSV  
SIYQLGFSGLASADVYMPNESDADNTVFDAAVEKRSYLA EIQTGG EFTSLRNSLSSIFGV  
SVDEEAD EASADLIGISSRMAMLSQRKASRLRKKESGADGVS NVTARSPW MKRSEESLSE

KPKRCTAEALQCALELADASISNPSRTSRVILFTNGCPNSGTANVVDPDVASEKLRKRNG  
KRATHTIVDTRDLQKALEYFDDLGNIAISAGIGIDVFCVTEALALPAYQAMVEPSDGYC  
LPLVSLDTPQLKKNLKFVIESTYVARSEDSVSTDDVNFVLDGPECILDIRTDSFLTPTQMC  
GSGEIIPSSASVMVENERAFAFEKGLKLAEEKGFKIKNLPSEKAYEISMTRVQMGRVDPLS  
TVFVLMVDDTFNHEDEYAFFQFVARYVSPMGDAEITRVLSFKILVAEDINDFLRSLNDE  
TMSVALAKIAVYRSLHGREETDDTRDMTVAGDVLDQEKLAYAAQLDIDATVQIRISGAFRL  
LDLEKNTRMRSVSKKPIISRSETSSLDIAFPQQLKETLNRLYHLRRGPLISPGPMRAMDDR  
AEQRRFLRFPVKDCLIMMRPELWSTGCMAISSGWDTMLEFPPELALWDDSIWAADFHD  
SMFIWTGANCTAQRDGIKDKFKAHLLKISENRFMPPELHELSDGDSMGRRTARLAPSH  
ADPIDNQIVNFPALSELKPDALQRLSKFKFYDSDSDASFRTWFWWSVASASNNSKKAGMS  
LCE

>comp15470\_c1\_seq6; 989 170 3150 LEN=5581; translated  
MTSLFGYSAPSAHEEKMEEEESNGNGSHPASRSGSKDKATFTSSKCPGAGLENSCELPGF  
FMWSPMAAYNDPRNLKGGDEMAVVKCDGNLPPVLCVSCLAYMNPYAEMDKKSGIWSCLP  
CGHENVVPTDELYPGSDIMTAMSSSCIEYRQAIKTNADDDEPEKQIGSNGKNSTYNGLQ  
EKEEDYCTYILLVDENLSPKDGQAIAPAVEAIFKEQIANAEDGAHPKARIGLVVFVKSV  
SIYQLGFSGLASADVMPNESDADNTVFDAAVEKRSYLAEIQTGGFTSLRNSLSSIFGV  
SVDEEAEDESASDLIGISSRMAMLSQRKASRLRKKESGADGVSNTARSPWMKRSEESLSE  
KPKRCTAEALQCALELADASISNPSRTSRVILFTNGCPNSGTANVVDPDVASEKLRKRNG  
KRATHTIVDTRDLQKALEYFDDLGNIAISAGIGIDVFCVTEALALPAYQAMVEPSDGYC  
LPLVSLDTPQLKKNLKFVIESTYVARSEDSVSTDDVNFVLDGPECILDIRTDSFLTPTQMC  
GSGEIIPSSASVMVENERAFAFEKGLKLAEEKGFKIKNLPSEKAYEISMTRVQMGRVDPLS  
TVFVLMVDDTFNHEDEYAFFQFVARYVSPMGDAEITRVLSFKILVAEDINDFLRSLNDE  
TMSVALAKIAVYRSLHGREETDDTRDMTVAGDVLDQEKLAYAAQLDIDATVQIRISGAFRL  
LDXGKEYPNAKVCLPTVQKLKNQYPLLSHCYMSFSCLLYQSVSKKPIISRSETSSLDIAFP  
PQLKETLNRLYHLRRGPLISPGPMRAMDDRAEQRRFLRFPVKDCLIMMRPELWSTGCMA  
ISSGWDTMLEFPPELALWDDSIWAADFHDMSMFIWTGANCTAQRDGIKDKFKAHLLKISE  
ENRFMPPELHELSDGDSMGRRTARLAPSHADPIDNQIVNFPALSELKPDALQRLSKFKF  
FYDSDSDASFRTWFWWSVASASNNSKKAGMSLCE

>comp15470\_c1\_seq7; 968 71 3045 LEN=5361; translated  
MTSLFGYSAPSAHEEKMEEEESNGNGSHPASRSGSKDKATFTSSKCPGAGLENSCELPGF  
FMWSPMAAYNDPRNLKGGDEMAVVKCDGNLPPVLCVSCLAYMNPYAEMDKKSGIWSCLP  
CGHENVVPTDELYPGSDIMTAMSSSCIEYRQAIKTNADDDEPEKQIGSNGKNSTYNGLQ  
EKEEDYCTYILLVDENLSPKDGQAIAPAVEAIFKEQIANAEDGAHPKARIGLVVFVKSV  
SIYQLGFSGLASADVMPNESDADNTVFDAAVEKRSYLAEIQTGGFTSLRNSLSSIFGV  
SVDEEAEDESASDLIGISSRMAMLSQRKASRLRKKESGADGVSNTARSPWMKRSEESLSE  
KPKRCTAEALQCALELADASISNPSRTSRVILFTNGCPNSGTANVVDPDVASEKLRKRNG  
KRATHTIVDTRDLQKALEYFDDLGNIAISAGIGIDVFCVTEALALPAYQAMVEPSDGYC  
LPLVSLDTPQLKKNLKFVIESTYVARSEDSVSTDDVNFVLDGPECILDIRTDSFLTPTQMC  
GSGEIIPSSASVMVENERAFAFEKGLKLAEEKGFKIKNLPSEKAYEISMTRVQMGRVDPLS  
TVFVLMVDDTFNHEDEYAFFQFVARYVSPMGDAEITRVLSFKILVAEDINDFLRSLNDE  
TMSVALAKIAVYRSLHGREETDDTRDMTVAGDVLDQEKLAYAAQLDIDATVQIRISGAFRL  
LDLEKNTRMRSVSKKPIISRSETSSLDIAFPQQLKETLNRLYHLRRGPLISPGPMRAMDDR  
AEQRRFLRFPVKDCLIMMRPELWSTGCMAISSGWDTMLEFPPELALWDDVDFCHSSID  
TRLLIAISHDIPISXVLQSIWAADFHDMSMFIWTGANCTAQRDGIKDKFKAHLLKISEN  
RFPPELHELSDGDSMGRRTARLAPSHADPIDNQIVNFPALSELKPDALQRLSKFKFY  
DSDSDASFRTWFWWSVASASNNSKKAGMSLCE

>comp15470\_c1\_seq8; 955 170 3233 LEN=3613; translated  
MTSLFGYSAPSAHEEKMEEEESNGNGSHPASRSGSKDKATFTSSKCPGAGLENSCELPGF  
FMWSPMAAYNDPRNLKGGDEMAVVKCDGNLPPVLCVSCLAYMNPYAEMDKKSGIWSCLP  
CGHENVVPTDELYPGSDIMTAMSSSCIEYRQAIKTNADDDEPEKQIGSNGKNSTYNGLQ  
EKEEDYCTYILLVDENLSPKDGQAIAPAVEAIFKEQIANAEDGAHPKARIGLVVFVKSV  
SIYQLGFSGLASADVMPNESDADNTVFDAAVEKRSYLAEIQTGGFTSLRNSLSSIFGV  
SVDEEAEDESASDLIGISSRMAMLSQRKASRLRKKESGADGVSNTARSPWMKRSEESLSE  
KPKRCTAEALQCALELADASISNPSRTSRVILFTNGCPNSGTANVVDPDVASEKLRKRNG  
KRATHTIVDTRDLQKALEYFDDLGNIAISAGIGIDVFCVTEALALPAYQAMVEPSDGYC  
LPLVSLDTPQLKKNLKFVIESTYVARSEDSVSTDDVNFVLDGPECILDIRTDSFLTPTQMC  
GSGEIIPSSASVMVENERAFAFEKGLKLAEEKGFKIKNLPSEKAYEISMTRVQMGRVDPLS  
TVFVLMVDDTFNHEDEYAFFQFVARYVSPMGDAEITRVLSFKILVAEDINDFLRSLNDE  
TMSVALAKIAVYRSLHGREETDDTRDMTVAGDVLDQEKLAYAAQLDIDATVQIRISGAFRL

LDXGKEYPNAKVCLPTVQKLKNQYPLLSHCYMSFSCLLYQSVSKKPI SRSETSSLDIAFP  
PQLKETLNRLYLHRRGPLISPGPMRAMDDRAEQRRFLRFPVKDCLIMMRPELWSTGCMA  
ISSGWDTMLEFPPELALWDDVSFCHSSIDTRLLIAISHDIPISXVLQSIVAADFHDMS  
FIWTGANCTAQRDGI RDKFKAHLLKISENRFMPPELHELSDGDSMGRRFTARLAPSHAD  
PIDNQIVNFPALSELKPDALQRLSKFKFYDSDSDASFRTWFWWSVASASNNSSKKAGMSL  
CE

>comp15470\_c1\_seq9; 989 71 3051 LEN=3546; translated  
MTSLFGYSAPSAHEEKMEEEESNGNGSHPASRSGSKDKATFTSSKCPGAGLENSCEL PFG  
FMWSPMAAYNDPRNLKGGDEMAVVKCDGNLPPVLCVSCLAYMNPYAEMDKKSGIWSCPL  
CGHENVVPTDELYPGSDIMTAMSSSCIEYRQAI SKTNADDDEPEKQIGSNGKNSTYNGLQ  
EKEEDYCTYILLVDENLSPKDGQAIAPAVEAIFKEQIANAEDGDAHPKARI GLVVF GKSV  
SIYQLGFSGLASADVMPNESDADNTVFDAAVEKRSYLA EIQTGGFETSLRNSLSSIFGV  
SVDEEADESASDLIGISSRMAMLSQRKASRLRKKESGADGVSNTARSPWMKRSEESLSE  
KPKRCTAEALQCALELADASISNPSRTRSRVILFTNGCPNSGTANVVDPDVASEKLRKRNG  
KRATHITVDTRDLQKALEYFDDLGNIAISAGIGIDVFCSGVTELALPAYQAMVEPSDGYC  
LPLVSLDTPQLKKNLKFVIESTYVARSEDSVSTDDVNFLDGPECILDIRTDSFLTPTQMC  
GSGEIIPSSASVMVENERA AFEKGLKLA AEKGFKIKNLPSEKAYEISMTRVQMGRVDP L S  
TVFVLM EVDDTFNHEDEYAFFQFVARYVSPMGDAEITRVLSFKILVAEDINDFLRSLNDE  
TMSVALAKIAVYRSLHGREETDDTRDMTVAGDVLDQEKLAYAAQLDIDATVQRISGAFRL  
LDXGKEYPNAKVCLPTVQKLKNQYPLLSHCYMSFSCLLYQSVSKKPI SRSETSSLDIAFP  
PQLKETLNRLYLHRRGPLISPGPMRAMDDRAEQRRFLRFPVKDCLIMMRPELWSTGCMA  
ISSGWDTMLEFPPELALWDDSI VAADFHDMSFIWTGANCTAQRDGI RDKFKAHLLKISE  
ENRFMPPELHELSDGDSMGRRFTARLAPSHADPIDNQIVNFPALSELKPDALQRLSKFK  
FYDSDSDASFRTWFWWSVASASNNSSKKAGMSLCE

>comp15470\_c1\_seq10; 1002 170 3061 LEN=5377; translated  
MTSLFGYSAPSAHEEKMEEEESNGNGSHPASRSGSKDKATFTSSKCPGAGLENSCEL PFG  
FMWSPMAAYNDPRNLKGGDEMAVVKCDGNLPPVLCVSCLAYMNPYAEMDKKSGIWSCPL  
CGHENVVPTDELYPGSDIMTAMSSSCIEYRQAI SKTNADDDEPEKQIGSNGKNSTYNGLQ  
EKEEDYCTYILLVDENLSPKDGQAIAPAVEAIFKEQIANAEDGDAHPKARI GLVVF GKSV  
SIYQLGFSGLASADVMPNESDADNTVFDAAVEKRSYLA EIQTGGFETSLRNSLSSIFGV  
SVDEEADESASDLIGISSRMAMLSQRKASRLRKKESGADGVSNTARSPWMKRSEESLSE  
KPKRCTAEALQCALELADASISNPSRTRSRVILFTNGCPNSGTANVVDPDVASEKLRKRNG  
KRATHITVDTRDLQKALEYFDDLGNIAISAGIGIDVFCSGVTELALPAYQAMVEPSDGYC  
LPLVSLDTPQLKKNLKFVIESTYVARSEDSVSTDDVNFLDGPECILDIRTDSFLTPTQMC  
GSGEIIPSSASVMVENERA AFEKGLKLA AEKGFKIKNLPSEKAYEISMTRVQMGRVDP L S  
TVFVLM EVDDTFNHEDEYAFFQFVARYVSPMGDAEITRVLSFKILVAEDINDFLRSLNDE  
TMSVALAKIAVYRSLHGREETDDTRDMTVAGDVLDQEKLAYAAQLDIDATVQRISGAFRL  
LDLEKNTRMRSVSKKPI SRSETSSLDIAFP PQLKETLNRLYLHRRGPLISPGPMRAMDDR  
AEQRRFLRFPVKDCLIMMRPELWSTGCMAISSGWDTMLEFPPELALWDDSI VAADFHD  
SMFIWTGANCTAQRDGI RDKFKAHLLKISENRFMPPELHELSDGDSMGRRFTARLAPSH  
ADPIDNQIVNFPALSELKPDALQRLSKFKFYDSDSDASFRTWFWWSVASASNNSSKKAGMS  
LCE

>comp15470\_c1\_seq11; 597 71 1745 LEN=1745; translated  
MTSLFGYSAPSAHEEKMEEEESNGNGSHPASRSGSKDKATFTSSKCPGAGLENSCEL PFG  
FMWSPMAAYNDPRNLKGGDEMAVVKCDGNLPPVLCVSCLAYMNPYAEMDKKSGIWSCPL  
CGHENVVPTDELYPGSDIMTAMSSSCIEYRQAI SKTNADDDEPEKQIGSNGKNSTYNGLQ  
EKEEDYCTYILLVDENLSPKDGQAIAPAVEAIFKEQIANAEDGDAHPKARI GLVVF GKSV  
SIYQLGFSGLASADVMPNESDADNTVFDAAVEKRSYLA EIQTGGFETSLRNSLSSIFGV  
SVDEEADESASDLIGISSRMAMLSQRKASRLRKKESGADGVSNTARSPWMKRSEESLSE  
KPKRCTAEALQCALELADASISNPSRTRSRVILFTNGCPNSGTANVVDPDVASEKLRKRNG  
KRATHITVDTRDLQKALEYFDDLGNIAISAGIGIDVFCSGVTELALPAYQAMVEPSDGYC  
LPLVSLDTPQLKKNLKFVIESTYVARSEDSVSTDDVNFLDGPECILDIRTDSFLTPTQMC  
GSGEIIPNTSVMAENERX

>comp15470\_c1\_seq12; 955 71 3134 LEN=3629; translated  
MTSLFGYSAPSAHEEKMEEEESNGNGSHPASRSGSKDKATFTSSKCPGAGLENSCEL PFG  
FMWSPMAAYNDPRNLKGGDEMAVVKCDGNLPPVLCVSCLAYMNPYAEMDKKSGIWSCPL  
CGHENVVPTDELYPGSDIMTAMSSSCIEYRQAI SKTNADDDEPEKQIGSNGKNSTYNGLQ  
EKEEDYCTYILLVDENLSPKDGQAIAPAVEAIFKEQIANAEDGDAHPKARI GLVVF GKSV  
SIYQLGFSGLASADVMPNESDADNTVFDAAVEKRSYLA EIQTGGFETSLRNSLSSIFGV  
SVDEEADESASDLIGISSRMAMLSQRKASRLRKKESGADGVSNTARSPWMKRSEESLSE



KPKRCTAEALQCALELADASISNPSRTSRVILFTNGCPNSGTANVVDPDVASEKLRKRNG  
KRATHTIVDTRDLQKALEYFDDLGNIAISAGIGIDVFCVTEALALPAYQAMVEPSDGYC  
LPLVSLDTPQLKKNLKFVIESTYVARSEDSVSTDDVNFLDGPECILDIRTDSFLTPTQMC  
GSGEIIPSSASVMVENERAFAFEKGLKLAEEKGFKIKNLPSEKAYEISMTRVQMGRVDPLS  
TVFVLMVDDTFNHEDEYAFFQFVARYVSPMGDAEITRVLSFKILVAEDINDFLRSLNDE  
TMSVALAKIAVYRSLHGREETDDTRDMTVAGDVLDQEKLAYAAQLDIDATVQRISGAFRL  
LDXGKEYPNAKVCLPTVQKLKNQYPLLSHCYMSFSCLLYQSVSKKPIISRSETSSLDIAFP  
PQLKETLNRLYHLRRGPLISPGPMRAMDDRAEQRRFLRFPVKDCLIMMRPELWSTGCM  
ISSGWDTMLFPPETLALWDDVSFCHSSIDTRLLIAISHDIPISXVLQSIVAADFHDMS  
FIWTGANCTAQRDGIKDFKAHLLKISENRFPMPELHELSDGDSMGRRTARLAPSHAD  
PIDNQIVNFPALSELKPDALQRLSKFKFYDSDSDASFRTWFWWSVASASNNSKKAGMSL  
CE

>comp15470\_c1\_seq13; 989 71 3051 LEN=5367; translated  
MTSLFGYSAPSAHEEKMEEEESNGNGSHPASRSGSKDKATFTSSKCPGAGLENSCELFPF  
FMWSPMAAYNDPRNLKGGDEMAVVKCDGNLPPVLCVSCLAYMNPYAEMDKKSGIWSCLP  
CGHENVVPTDELYPGSDIMTAMSSSCIEYRQAIKTNADDDEPEKQIGSNGKNSTYNGLQ  
EKEEDYCTYILLVDENLSPKDGQAIAPAVEAIFKEQIANAEDGAHPKARIGLVVF GKSV  
SIYQLGFSGLASADVMPNESDADNTVFDAAVEKRSYLAEIQTGGFETSLRNSLSSIFGV  
SVDEEADDESASDLIGISSRMAMLSQRKASRLRKKESGADGVSNTARSPWMKRSEESLSE  
KPKRCTAEALQCALELADASISNPSRTSRVILFTNGCPNSGTANVVDPDVASEKLRKRNG  
KRATHTIVDTRDLQKALEYFDDLGNIAISAGIGIDVFCVTEALALPAYQAMVEPSDGYC  
LPLVSLDTPQLKKNLKFVIESTYVARSEDSVSTDDVNFLDGPECILDIRTDSFLTPTQMC  
GSGEIIPSSASVMVENERAFAFEKGLKLAEEKGFKIKNLPSEKAYEISMTRVQMGRVDPLS  
TVFVLMVDDTFNHEDEYAFFQFVARYVSPMGDAEITRVLSFKILVAEDINDFLRSLNDE  
TMSVALAKIAVYRSLHGREETDDTRDMTVAGDVLDQEKLAYAAQLDIDATVQRISGAFRL  
LDXGKEYPNAKVCLPTVQKLKNQYPLLSHCYMSFSCLLYQSVSKKPIISRSETSSLDIAFP  
PQLKETLNRLYHLRRGPLISPGPMRAMDDRAEQRRFLRFPVKDCLIMMRPELWSTGCM  
ISSGWDTMLFPPETLALWDDSIVAADFHDMSFIWTGANCTAQRDGIKDFKAHLLKIS  
ENRFPMPELHELSDGDSMGRRTARLAPSHADPIDNQIVNFPALSELKPDALQRLSKFK  
FYDSDSDASFRTWFWWSVASASNNSKKAGMSLCE

>comp15470\_c1\_seq14; 1002 71 2962 LEN=5393; translated  
MTSLFGYSAPSAHEEKMEEEESNGNGSHPASRSGSKDKATFTSSKCPGAGLENSCELFPF  
FMWSPMAAYNDPRNLKGGDEMAVVKCDGNLPPVLCVSCLAYMNPYAEMDKKSGIWSCLP  
CGHENVVPTDELYPGSDIMTAMSSSCIEYRQAIKTNADDDEPEKQIGSNGKNSTYNGLQ  
EKEEDYCTYILLVDENLSPKDGQAIAPAVEAIFKEQIANAEDGAHPKARIGLVVF GKSV  
SIYQLGFSGLASADVMPNESDADNTVFDAAVEKRSYLAEIQTGGFETSLRNSLSSIFGV  
SVDEEADDESASDLIGISSRMAMLSQRKASRLRKKESGADGVSNTARSPWMKRSEESLSE  
KPKRCTAEALQCALELADASISNPSRTSRVILFTNGCPNSGTANVVDPDVASEKLRKRNG  
KRATHTIVDTRDLQKALEYFDDLGNIAISAGIGIDVFCVTEALALPAYQAMVEPSDGYC  
LPLVSLDTPQLKKNLKFVIESTYVARSEDSVSTDDVNFLDGPECILDIRTDSFLTPTQMC  
GSGEIIPSSASVMVENERAFAFEKGLKLAEEKGFKIKNLPSEKAYEISMTRVQMGRVDPLS  
TVFVLMVDDTFNHEDEYAFFQFVARYVSPMGDAEITRVLSFKILVAEDINDFLRSLNDE  
TMSVALAKIAVYRSLHGREETDDTRDMTVAGDVLDQEKLAYAAQLDIDATVQRISGAFRL  
LDLEKNTMRMSVSKKPIISRSETSSLDIAFPQPKETLNRLYHLRRGPLISPGPMRAMDDR  
AEQRRFLRFPVKDCLIMMRPELWSTGCMISSGWDTMLFPPETLALWDDSIVAADFHD  
SMFIWTGANCTAQRDGIKDFKAHLLKISENRFPMPELHELSDGDSMGRRTARLAPSH  
ADPIDNQIVNFPALSELKPDALQRLSKFKFYDSDSDASFRTWFWWSVASASNNSKKAGMS  
LCE

>comp15470\_c1\_seq15; 968 170 3144 LEN=5460; translated  
MTSLFGYSAPSAHEEKMEEEESNGNGSHPASRSGSKDKATFTSSKCPGAGLENSCELFPF  
FMWSPMAAYNDPRNLKGGDEMAVVKCDGNLPPVLCVSCLAYMNPYAEMDKKSGIWSCLP  
CGHENVVPTDELYPGSDIMTAMSSSCIEYRQAIKTNADDDEPEKQIGSNGKNSTYNGLQ  
EKEEDYCTYILLVDENLSPKDGQAIAPAVEAIFKEQIANAEDGAHPKARIGLVVF GKSV  
SIYQLGFSGLASADVMPNESDADNTVFDAAVEKRSYLAEIQTGGFETSLRNSLSSIFGV  
SVDEEADDESASDLIGISSRMAMLSQRKASRLRKKESGADGVSNTARSPWMKRSEESLSE  
KPKRCTAEALQCALELADASISNPSRTSRVILFTNGCPNSGTANVVDPDVASEKLRKRNG  
KRATHTIVDTRDLQKALEYFDDLGNIAISAGIGIDVFCVTEALALPAYQAMVEPSDGYC  
LPLVSLDTPQLKKNLKFVIESTYVARSEDSVSTDDVNFLDGPECILDIRTDSFLTPTQMC  
GSGEIIPSSASVMVENERAFAFEKGLKLAEEKGFKIKNLPSEKAYEISMTRVQMGRVDPLS  
TVFVLMVDDTFNHEDEYAFFQFVARYVSPMGDAEITRVLSFKILVAEDINDFLRSLNDE

TMSVALAKIAVYRSLHGREETDDTRDMTVAGDVLDLQEKLAYAAQLDIDATVQRISGAFRL  
LDLEKNTRMRSVSKKPI SRSETSSLDIAFPPQLKETLNRLYHLRRGPLISPGPMRAMDDR  
AEQRRFLRFPVKDCLIMMRPELWSTGCMAISSGWDTMLEFPPELALWDDVVSFCHSSID  
TRLLIAISHDIPIISXVLQSIVAADFHDMSFIWTGANCTAQRDYGIRDKFKAHLLKISEN  
RFPMPPELHELSDGDSMGRRTARLAPSHADPIDNQIVNFPALSELKPDALQRLSKFKFY  
DSDSDASFRTWFWSVASASNNSKKAGMSLCE

>comp15470\_c1\_seq16; 968 71 3045 LEN=5476; translated  
MTSLFGYSAPSAHEEKMEEEESNGNGSHPASRSGSKDKATFTSSKCPGAGLENSCELPGF  
FMWSPMAAYNDPRNLKGGDEMAVVKCDGNLPPVLCVSCLAYMNPYAEMDKKSGIWSCPL  
CGHENVVPTEDELYPGSDIMTAMSSSCIEYRQAI SKTNADDDEPEKQIGSNGKNSTYNGLQ  
EKEEDYCTYILLVDENLSPKDGQAIAPAVEAIFKEQIANAEDGDAHPKARI GLVVF GKSV  
SIYQLGFSGLASADVMPNESDADNTVFDAAVEKRSYLA EIQTGGFTSLRNSLSSIFGV  
SVDEEAEDESASDLIGISSRMAMLSQRKASRLRKKESGADGVSNTARSPWMKRSEESLSE  
KPKRCTAEALQCALELADASISNPSRTRSRVILFTNGCPNSGTANVVDPDVASEKLRKRNG  
KRATHTIVDTDRLOKALEYFDDLGNIAISAGIGIDVFCSGVTELALPAYQAMVEPSDGYC  
LPLVSLDTPQLKKNLKFVIESTYVARSEDSVSTDDVNFLDGPECILDIRTDSFLTPTQMC  
GSGEIIPSSASVMVENERA AFEKGLKLA AEKGFKIKNLPSEKAYEISMTRVQMGRVDPLS  
TVFVLMVDDTFNHEDEYAFFQFVARYVSPMGDAEITRVLSFKILVAEDINDFLRSLNDE  
TMSVALAKIAVYRSLHGREETDDTRDMTVAGDVLDLQEKLAYAAQLDIDATVQRISGAFRL  
LDLEKNTRMRSVSKKPI SRSETSSLDIAFPPQLKETLNRLYHLRRGPLISPGPMRAMDDR  
AEQRRFLRFPVKDCLIMMRPELWSTGCMAISSGWDTMLEFPPELALWDDVVSFCHSSID  
TRLLIAISHDIPIISXVLQSIVAADFHDMSFIWTGANCTAQRDYGIRDKFKAHLLKISEN  
RFPMPPELHELSDGDSMGRRTARLAPSHADPIDNQIVNFPALSELKPDALQRLSKFKFY  
DSDSDASFRTWFWSVASASNNSKKAGMSLCE

>comp15470\_c1\_seq17; 968 170 3144 LEN=5575; translated  
MTSLFGYSAPSAHEEKMEEEESNGNGSHPASRSGSKDKATFTSSKCPGAGLENSCELPGF  
FMWSPMAAYNDPRNLKGGDEMAVVKCDGNLPPVLCVSCLAYMNPYAEMDKKSGIWSCPL  
CGHENVVPTEDELYPGSDIMTAMSSSCIEYRQAI SKTNADDDEPEKQIGSNGKNSTYNGLQ  
EKEEDYCTYILLVDENLSPKDGQAIAPAVEAIFKEQIANAEDGDAHPKARI GLVVF GKSV  
SIYQLGFSGLASADVMPNESDADNTVFDAAVEKRSYLA EIQTGGFTSLRNSLSSIFGV  
SVDEEAEDESASDLIGISSRMAMLSQRKASRLRKKESGADGVSNTARSPWMKRSEESLSE  
KPKRCTAEALQCALELADASISNPSRTRSRVILFTNGCPNSGTANVVDPDVASEKLRKRNG  
KRATHTIVDTDRLOKALEYFDDLGNIAISAGIGIDVFCSGVTELALPAYQAMVEPSDGYC  
LPLVSLDTPQLKKNLKFVIESTYVARSEDSVSTDDVNFLDGPECILDIRTDSFLTPTQMC  
GSGEIIPSSASVMVENERA AFEKGLKLA AEKGFKIKNLPSEKAYEISMTRVQMGRVDPLS  
TVFVLMVDDTFNHEDEYAFFQFVARYVSPMGDAEITRVLSFKILVAEDINDFLRSLNDE  
TMSVALAKIAVYRSLHGREETDDTRDMTVAGDVLDLQEKLAYAAQLDIDATVQRISGAFRL  
LDLEKNTRMRSVSKKPI SRSETSSLDIAFPPQLKETLNRLYHLRRGPLISPGPMRAMDDR  
AEQRRFLRFPVKDCLIMMRPELWSTGCMAISSGWDTMLEFPPELALWDDVVSFCHSSID  
TRLLIAISHDIPIISXVLQSIVAADFHDMSFIWTGANCTAQRDYGIRDKFKAHLLKISEN  
RFPMPPELHELSDGDSMGRRTARLAPSHADPIDNQIVNFPALSELKPDALQRLSKFKFY  
DSDSDASFRTWFWSVASASNNSKKAGMSLCE

>comp15470\_c1\_seq18; 955 170 3233 LEN=3728; translated  
MTSLFGYSAPSAHEEKMEEEESNGNGSHPASRSGSKDKATFTSSKCPGAGLENSCELPGF  
FMWSPMAAYNDPRNLKGGDEMAVVKCDGNLPPVLCVSCLAYMNPYAEMDKKSGIWSCPL  
CGHENVVPTEDELYPGSDIMTAMSSSCIEYRQAI SKTNADDDEPEKQIGSNGKNSTYNGLQ  
EKEEDYCTYILLVDENLSPKDGQAIAPAVEAIFKEQIANAEDGDAHPKARI GLVVF GKSV  
SIYQLGFSGLASADVMPNESDADNTVFDAAVEKRSYLA EIQTGGFTSLRNSLSSIFGV  
SVDEEAEDESASDLIGISSRMAMLSQRKASRLRKKESGADGVSNTARSPWMKRSEESLSE  
KPKRCTAEALQCALELADASISNPSRTRSRVILFTNGCPNSGTANVVDPDVASEKLRKRNG  
KRATHTIVDTDRLOKALEYFDDLGNIAISAGIGIDVFCSGVTELALPAYQAMVEPSDGYC  
LPLVSLDTPQLKKNLKFVIESTYVARSEDSVSTDDVNFLDGPECILDIRTDSFLTPTQMC  
GSGEIIPSSASVMVENERA AFEKGLKLA AEKGFKIKNLPSEKAYEISMTRVQMGRVDPLS  
TVFVLMVDDTFNHEDEYAFFQFVARYVSPMGDAEITRVLSFKILVAEDINDFLRSLNDE  
TMSVALAKIAVYRSLHGREETDDTRDMTVAGDVLDLQEKLAYAAQLDIDATVQRISGAFRL  
LDXGKEYPNAKVCLPTVQKLNQYPLL SHCYMSFSCLLYQSVSKKPI SRSETSSLDIAFPP  
PQLKETLNRLYHLRRGPLISPGPMRAMDDRAEQRRFLRFPVKDCLIMMRPELWSTGCM  
ISSGWDTMLEFPPELALWDDVVSFCHSSIDTRLLIAISHDIPIISXVLQSIVAADFHDMS  
FIWTGANCTAQRDYGIRDKFKAHLLKISENRFPMPPELHELSDGDSMGRRTARLAPSHAD  
PIDNQIVNFPALSELKPDALQRLSKFKFYDSDSDASFRTWFWSVASASNNSKKAGMSLCE

E

>comp15471\_c0\_seq1; 327 772 1995 LEN=3021; translated  
MSNNLIDSKNNGIPALMVPTTLRQVSPDKTRTDHSHNGHLRFSRTPSREEMRAVFLMCR  
GNQWNSVLDSIRSNILIQTTNMTDNNISTTIIHQAITSKGDINKRAIVIREILQVTPHA  
ASIKNGYGSPLPHVICQRNVKMNSSMKEILIRDLINAYPGSLTVQGGVVKRTPLHIIFTD  
YVSAEVTEFMIQYGRGACFMRDKNGLPAHVACSRHCSPEKLMKLLDVNPGSLFEKTNDG  
RTPLCLAKSKATKSHPNYALITDIETRVKIASTSVATVTTQYQFQPGLLNYPESLGQSTI  
SFDSATESAICFNQSPRFRESTPNRNIKRENTSRDESQKKIKQEERNPAALNSPFPFQ  
TKPNHNIKRENNSSDNDNQERTNQEESDPAVNLLHLSRHTDNIASV

>comp15471\_c0\_seq2; 375 106 1074 LEN=2512; translated  
MTRLSPRCGVLVLFGCIAACSSFGVDRRPLPMIPAPETAGDSPPPRLPEAAVAVGALRAAA  
LSVSVVATLALPPSEEHAHAAPTLDIAIVELSEASYPILRSLDAANFQAFSTRIGDLLL  
EINPDRVGRAIDLGDVLDLSDAPAEKVAEFGASLTAVYGDLDGTDTCRLVPLPPSAVAGRFA  
ALAADKVDAGKLEAFKEKWKPPVAALKITADDRICLPPTRAALDKLALAQADLGRSFGRA  
EARAFVSHTGPMQTGIPQKALSLVEDAKTLAPTATPQAKKDFAAAGKKAETASKLEIA  
RNKVAEQKAKQAASRAALASGS

>comp15471\_c0\_seq3; 327 772 1995 LEN=2761; translated  
MSNNLIDSKNNGIPALMVPTTLRQVSPDKTRTDHSHNGHLRFSRTPSREEMRAVFLMCR  
GNQWNSVLDSIRSNILIQTTNMTDNNISTTIIHQAITSKGDINKRAIVIREILQVTPHA  
ASIKNGYGSPLPHVICQRNVKMNSSMKEILIRDLINAYPGSLTVQGGVVKRTPLHIIFTD  
YVSAEVTEFMIQYGRGACFMRDKNGLPAHVACSRHCSPEKLMKLLDVNPGSLFEKTNDG  
RTPLCLAKSKATKSHPNYALITDIETRVKIASTSVATVTTQYQFQPGLLNYPESLGQSTI  
SFDSATESAICFNQSPRFRESTPNRNIKRENTSRDESQKKIKQEERNPAALNSPFPFQ  
TKPNHNIKRENNSSDNDNQERTNQEESDPAVNLLHLSRHTDNIASV

>comp15471\_c0\_seq4; 463 61 1698 LEN=3442; translated  
MTGETENITAEGNSVESGLIWTDNPELEYFRSMMTTRVDEREASGLNGGDSLIGESTIRD  
MLEIGDGDPEPSPKRNESSFPMNSRQVGDTSGLSDMENDTVDNIIYIEDESUVKAERIPGVA  
RLKAGTPQIQDKEEIVVLDNIATFEQNPQHQQDEIDAANQLSRLQPDIDGNPPLQLSF  
REYEFHDGAGATNQLPKKVPKIPGIIFVTDGHSSIIETRTEDASKKFKKGDSSYSLGKM  
LHRIRRVLIFFLLALIVIVAAIMAVFLSRKLLSSSSSSSHIQSDSDFPPTLAPTNLRT  
ILPTVEIEI EATTSNSVDDVEITVPGKTSAPETRFPTLEPSLELTPHPTPDPTPGPSGPS  
PRPSPQPSRKPTRKPTRNPTKSPSLSPSKENGAFVQPPSVAEPPTDRPTLYSTSYGTEA  
TTIVNTQTGQDPFDCESTVSTHKTTCYENGETMDIEFNKCNPQRDDWIGIFPAWATASDLP  
QALTWLYVCGNQFCRTPVGSVAQLHRVQGSAGFRIFLLRDNFISSGFSAYATGNEFTV  
ADSCR

>comp15471\_c0\_seq8; 375 106 1074 LEN=2783; translated  
MTRLSPRCGVLVLFGCIAACSSFGVDRRPLPMIPAPETAGDSPPPRLPEAAVAVGALRAAA  
LSVSVVATLALPPSEEHAHAAPTLDIAIVELSEASYPILRSLDAANFQAFSTRIGDLLL  
EINPDRVGRAIDLGDVLDLSDAPAEKVAEFGASLTAVYGDLDGTDTCRLVPLPPSAVAGRFA  
ALAADKVDAGKLEAFKEKWKPPVAALKITADDRICLPPTRAALDKLALAQADLGRSFGRA  
EARAFVSHTGPMQTGIPQKALSLVEDAKTLAPTATPQAKKDFAAAGKKAETASKLEIA  
RNKVAEQKAKQAASRAALASGS

>comp15472\_c0\_seq2; 560 1 1156 LEN=1156; translated  
XSDIDDPVEEIDAVGSGEAPHETIFVAPEASDLTEAIEDLLESIDEPVEFGAPSEAAIPL  
QEKAGSDLSWFDVLGAAAEAAAGIAGVAVRAASQAMEGVVPREALDVSVPYASASFLAYT  
EWLLEHGKEDRDLERYDDFRRTYREVTISNVVTKKKIRDGLFDGENAPSPRLAVLNQYAD  
LPEEEYRARTKALEPKSLGSMGDFATFAQKAATDAAGSVVGKAGPDADGGKALLPEPGP  
KQALSFLATKMGELAASVEKKEAPETGEEQPTGPEPEAARDKPF SFLSVGLPGIPKEST  
EPVVADATSSSEATKPKAFSFLSGGLPKARAKSDENPPTVEKPTAQQAKPGLAMSSFLSAP  
SLKPKKAPPKEQKAKATKPKITSFLS

>comp15472\_c0\_seq4; 763 1 1794 LEN=3180; translated  
XSDIDDPVEEIDAVGSGEAPHETIFVAPEASDLTEAIEDLLESIDEPVEFGAPSEAAIPL  
QEKAGSDLSWFDVLGAAAEAAAGIAGVAVRAASQAMEGVVPREALDVSVPYASASFLAYT  
EWLLEHGKEDRDLERYDDFRRTYREVTISNVVTKKKIRDGLFDGENAPSPRLAVLNQYAD  
LPEEEYRARTKALEPKSLGSMGDFATFAQKAATDAAGSVVGKAGPDADGGKALLPEPGP  
KQALSFLATKMGELAASVEKKEAPETGEEQPTGPEPEAARDKPF SFLSVGLPGIPKEST  
EPVVADATSSSEATKPKAFSFLSGGLPKARAKSDENPPTVEKPTAQQAKPGLAMSSFLSAP  
SLKPKKAPPKEQKAKATKPKITSFLSVPTLRSKAPANKPKEEPKSKVPSFLSVPTLASN  
KKPKTEPKPKISSFLSGPTLRSKPAKSTREKNKATGLFGNVGSLGSSGVSSSSKNKKT  
PIPALAKWKQNRDGSITGYISNSEAYATGTKITTSVPEENAKAGIVQTESXQPVAEVGL

DGPLVPECGKNLLSIAQLPDEKKS KAKQANRGKRHTGFVVRLQADILEPGKGATAVAN  
>comp15472\_c0\_seq5; 763 1 1794 LEN=2437; translated  
XDSIDDPVEEIDAVGSGEAPHETIFVAPEASDLTEAIEDLLESIDEPVEFGAPSEAAIPL  
QEKAGSDLWFDVLGAAAEEAAGAIGGVAVRAASQAMEGVVPREALDVSVPYESASF LAYT  
EWLLEHGKEDRDLERYDDFRRTYREVTISNVVTKKKIRDGLFDGENAPSPRLAVLNQYAD  
LPEEEYRARTKALEPKSLGSM LGDFATFAQKAATDAAGSVVGKAGPDADGGKALLPEPGP  
KQALSFLATKMGELAASVEKKEAPETGEEQPTGPEPEAARDKPF SFLSVGLPGIPKESTD  
EPVVADATSSEATKPKAFSFLSGGLPKARAKSDENPPTVEKPTAQQAKPGLAMSSFLSAP  
SLKPKKAPPKEQKAKATKTKITSF LSVPTLRSKKAPANKPKEEPKSKVPSFLSVPTLASN  
KKPKTEPKPKISSFLSGPTLRSKKPAKSTREKNKATGLFGNVGSLGSSGVSSSSKNK KTA  
PIPALAKWKQNRDGSITGYISNSEAYATGTKITTSVPENAKAGIVQTESXQVPVAEVL  
DGPLVPECGKNLLSIAQLPDEKKS KAKQANRGKRHTGFVVRLQADILEPGKGATAVAN  
>comp15472\_c1\_seq1; 570 245 1859 LEN=2941; translated  
MDEYNDDSDVANLPHPPSVSMWSRTGFASSSAFHEKRIPSSYDAHNTNENSGEGTDCSEG  
HLFLRKRIRSTASDLELLAVRMSLYFGSMVDPETNRFFLLSYPDGQNRYPHQSQLQSGSS  
AATTFYSHQHCLPLRDLGSAWDAVSAVRILLSHRGNADPAHQKPPAEVA AVIARLNDAVLQ  
TIQHYSSSLASVSVAGALSDGQGASLSPEVLNEPPNIAHNGLLLLALVESERLGLLGGET  
REEPSSFLSAAAAAAMDGLANGILAMQRSDGAFRTHYPLSPDTNASEHNDDEVLLGIEFF  
SGEAMTALVEALIQANGKKDGLTVCSETRNRILSAMVLALAFYRAFYE EGKRNHTIDANY  
AIWQVQAFGRLSLVLRLNLAAGDGGGDTLSMPGSGEPT EPRTAAEIADEAADYCRDMCMDI  
VRSPAWRMLSRGKSFYPNLSTVEIACGLDALVQGG LVEARRCRCGEEGNGGGDDCLLLFS  
GCIDDAIDFLRWSQERVPDDSGVGHGGLGYGGLRVTEQRLDVTGHALS AVSRLVVSFG  
>comp15472\_c1\_seq2; 570 245 1859 LEN=2042; translated  
MDEYNDDSDVANLPHPPSVSMWSRTGFASSSAFHEKRIPSSYDAHNTNENSGEGTDCSEG  
HLFLRKRIRSTASDLELLAVRMSLYFGSMVDPETNRFFLLSYPDGQNRYPHQSQLQSGSS  
AATTFYSHQHCLPLRDLGSAWDAVSAVRILLSHRGNADPAHQKPPAEVA AVIARLNDAVLQ  
TIQHYSSSLASVSVAGALSDGQGASLSPEVLNEPPNIAHNGLLLLALVESERLGLLGGET  
REEPSSFLSAAAAAAMDGLANGILAMQRSDGAFRTHYPLSPDTNASEHNDDEVLLGIEFF  
SGEAMTALVEALIQANGKKDGLTVCSETRNRILSAMVLALAFYRAFYE EGKRNHTIDANY  
AIWQVQAFGRLSLVLRLNLAAGDGGGDTLSMPGSGEPT EPRTAAEIADEAADYCRDMCMDI  
VRSPAWRMLSRGKSFYPNLSTVEIACGLDALVQGG LVEARRCRCGEEGNGGGDDCLLLFS  
GCIDDAIDFLRWSQERVPDDSGVGHGGLGYGGLRVTEQRLDVTGHALS AVSRLVVSFG  
>comp15472\_c1\_seq4; 570 245 1859 LEN=2068; translated  
MDEYNDDSDVANLPHPPSVSMWSRTGFASSSAFHEKRIPSSYDAHNTNENSGEGTDCSEG  
HLFLRKRIRSTASDLELLAVRMSLYFGSMVDPETNRFFLLSYPDGQNRYPHQSQLQSGSS  
AATTFYSHQHCLPLRDLGSAWDAVSAVRILLSHRGNADPAHQKPPAEVA AVIARLNDAVLQ  
TIQHYSSSLASVSVAGALSDGQGASLSPEVLNEPPNIAHNGLLLLALVESERLGLLGGET  
REEPSSFLSAAAAAAMDGLANGILAMQRSDGAFRTHYPLSPDTNASEHNDDEVLLGIEFF  
SGEAMTALVEALIQANGKKDGLTVCSETRNRILSAMVLALAFYRAFYE EGKRNHTIDANY  
AIWQVQAFGRLSLVLRLNLAAGDGGGDTLSMPGSGEPT EPRTAAEIADEAADYCRDMCMDI  
VRSPAWRMLSRGKSFYPNLSTVEIACGLDALVQGG LVEARRCRCGEEGNGGGDDCLLLFS  
GCIDDAIDFLRWSQERVPDDSGVGHGGLGYGGLRVTEQRLDVTGHALS AVSRLVVSFG  
>comp15472\_c1\_seq6; 570 245 1859 LEN=2171; translated  
MDEYNDDSDVANLPHPPSVSMWSRTGFASSSAFHEKRIPSSYDAHNTNENSGEGTDCSEG  
HLFLRKRIRSTASDLELLAVRMSLYFGSMVDPETNRFFLLSYPDGQNRYPHQSQLQSGSS  
AATTFYSHQHCLPLRDLGSAWDAVSAVRILLSHRGNADPAHQKPPAEVA AVIARLNDAVLQ  
TIQHYSSSLASVSVAGALSDGQGASLSPEVLNEPPNIAHNGLLLLALVESERLGLLGGET  
REEPSSFLSAAAAAAMDGLANGILAMQRSDGAFRTHYPLSPDTNASEHNDDEVLLGIEFF  
SGEAMTALVEALIQANGKKDGLTVCSETRNRILSAMVLALAFYRAFYE EGKRNHTIDANY  
AIWQVQAFGRLSLVLRLNLAAGDGGGDTLSMPGSGEPT EPRTAAEIADEAADYCRDMCMDI  
VRSPAWRMLSRGKSFYPNLSTVEIACGLDALVQGG LVEARRCRCGEEGNGGGDDCLLLFS  
GCIDDAIDFLRWSQERVPDDSGVGHGGLGYGGLRVTEQRLDVTGHALS AVSRLVVSFG  
>comp15472\_c1\_seq8; 362 380 1029 LEN=3044; minus strand; translated  
MVTVKIDFNGNFNGQGPVETIQGTAATADS AEATKYFDLTATLCGDNNKGPFKVGQDFE  
LCVEPDNSVTDYHISGFKNVVSXLTEVNWEDPDTKDKAIGFTSVVTAGFFSNPESP NPST  
FTCSGSAVMKQTGSRMLTGSIKTQSFLFSGVRGLQTSEEDADGVFAAQIAVVPDSVDFDV  
FAAPGVAAATSTIATVTGILFLAAALQMPSGAGGKR  
>comp15472\_c2\_seq2; 152 1 599 LEN=841; translated  
XARGFFPNYHKQGFILDVRHNRGGNIDSWVLDVLRKAWMYWQSRDFDPETGGLGWDEHY  
AFRGHLVVLVDEKTS SDGEGVSRGISELGLGKLI GTRTWGGGIWLASDNRLVDGGIASAP

EIGVYNENWSWGMGIENLGLLEPDIIVDNDPHETYTGRDRQLETAIEVLKNWIEDEPIPIPKPKTKRKDVMTMGDRECGAR

>comp15473\_c0\_seq1; 638 84 1796 LEN=2187; translated  
MSEPVKEPHAHDVLSGRGNFVNYHDGNEYFRKLVKKHKVVEYVKCPKQKKGKFSKLIVDEI  
RARDPPGRFLKQDKDTKLWYDIGEKKALDKTRQALREGAPEIMNNEKQDNGEKAAASVNO  
TATTEQQQLDNSEYNMLQQSIMSIGTDSFSQGGMMSQNTFNGMGGNSNNLSGGMLSAPLY  
ESPLGNDRHSSSNNDNMLGNRTNGIDLSQMIPPPQIHEPNINMMQQQQMPLREQEQQLQRE  
QERKWQELKLLQQQLKAQLHQSQRQFTSQQQEEILRNATAVMAADINYPQNNNMNFQH  
QPTTMHMDNLRINRLTEKRKLLDEQLLQQQQLLEMFEMKKLQNQQKLNELKQQQYQHQQQLQ  
QQMQHQEQQLSSSEIRGALQSRNAVYAGTDAYEPMPIGAPSAQPAEGLTSGGNHSDGS  
SPRRRGPGLVRENLSKMESIFENDGSDGDYTRRGSSGNTSGGSSNKKYNASIMSGMSMS  
ATSLSMGFEEESQLSALFDTSMKLNHTAALNDTGAPSKVKGPGRHNETKSNQSLLGMSLG  
MSLGTIPGEKSSSSSMSTDSFAHLGDSQFR

>comp15474\_c1\_seq2; 669 1 1903 LEN=3407; translated  
XSVQGLTHLSLSSKTKATTIWKNTLKHRAWPLSPIRYSRGGDNGMSDNGYESEMIATTS  
TSSYQRVSTRDEANS GDASADFHEDSDSGSSRADDADAETPGQGFLAAALPSSSSARHPLA  
NFLVMSFLFSANHGCVVSCMALASARLGSVGAWSGLLMFYSYAASSLLGATYAVKTMGAR  
NSLALGMLCYCAYVGCFWIAAHVDETDVDRRAVVAYTGALIGGVGAGFLWTAQGTIFYGLA  
SQDYASRASRSSDGGNGDGESEAEWLSATTARFAGYFAFLYLTEELFLRLLSSALLQLEL  
ASWGAI FGIYTLITVASAVAVPCWVHDYPAEDATSHRPDENHSSNGDEGENEIEIDGGDR  
VVDHKNSIFYKVTVAFYLLRDDPKMKYMIGLNAVFGFVAAF LNSYVNGQVVPVALDDPDS  
KYIGVLNSMVS AVAAAASLVFGKLAASSSGGGEGGIGAKGAILVFGALCFGGVVLVFCIQ  
PDAAYAWP SLTVVYALHGLGRATFEGTLRSTFADYFREEKEGAFANIIFQNGVASGIGY  
ILTFSLVCDTPSRYCIEYSDGRLHDVLTFXLVALVSVVVAIGGYLRASHLHRAEQERRAG  
DGYGYSRLRREAAHGDGRGGAAGLLRASENGVPA

>comp15474\_c1\_seq4; 669 1 1903 LEN=3446; translated  
XSVQGLTHLSLSSKTKATTIWKNTLKHRAWPLSPIRYSRGGDNGMSDNGYESEMIATTS  
TSSYQRVSTRDEANS GDASADFHEDSDSGSSRADDADAETPGQGFLAAALPSSSSARHPLA  
NFLVMSFLFSANHGCVVSCMALASARLGSVGAWSGLLMFYSYAASSLLGATYAVKTMGAR  
NSLALGMLCYCAYVGCFWIAAHVDETDVDRRAVVAYTGALIGGVGAGFLWTAQGTIFYGLA  
SQDYASRASRSSDGGNGDGESEAEWLSATTARFAGYFAFLYLTEELFLRLLSSALLQLEL  
ASWGAI FGIYTLITVASAVAVPCWVHDYPAEDATSHRPDENHSSNGDEGENEIEIDGGDR  
VVDHKNSIFYKVTVAFYLLRDDPKMKYMIGLNAVFGFVAAF LNSYVNGQVVPVALDDPDS  
KYIGVLNSMVS AVAAAASLVFGKLAASSSGGGEGGIGAKGAILVFGALCFGGVVLVFCIQ  
PDAAYAWP SLTVVYALHGLGRATFEGTLRSTFADYFREEKEGAFANIIFQNGVASGIGY  
ILTFSLVCDTPSRYCIEYSDGRLHDVLTFXLVALVSVVVAIGGYLRASHLHRAEQERRAG  
DGYGYSRLRREAAHGDGRGGAAGLLRASENGVPA

>comp15474\_c1\_seq5; 237 418 1341 LEN=1849; minus strand; translated  
MTTSTVQTLRQGPAAARGLLEAARSFYRKHSDLIKESHGIIHWRVHHHACNAIESLATA  
EQSHQRVQLSEHQALEIEAAALLHDVDEKEYFPKAAAPGKGDKRAADNDGQKYAFMYP  
NALELLKQAKIPEQSYETILFMIDAVSCSKNGNSVPCVDSGRGGISNDRSTNYHLLIP  
RWSDR IEAVGARGVWRICYQYNQEKKRPLCLPGVTTPRPRSEDELWHSVPERFEAYMQAED  
GATQDPSMIGHYYDKLLHVACPPREIVRNEYLEEKLRDSAKELVEVCLRYGESGVVDEY  
IRGFRD

>comp15474\_c1\_seq6; 371 16 516 LEN=516; translated  
MKS AIFASLIATAAAAFAPVSQKASSTAVKAFEDELGAQPPLGFFDPLGLVEDGDQEKFDR  
LRYVEIKHGRICMLAFLGQITTRYGVHLPGDIDMSGDSFDSFPNGWAAIAGPDAIP SAGL  
AQIVAFVAALELGVMKDIEGTGNEFVGDFRNGSLDFGWDTFDEETQL

>comp15474\_c1\_seq7; 328 382 1719 LEN=1984; translated  
MFRLLSSPLCSALFSVVTAWILLSCSSCCQYAFAFAAFTKIPNSLVDDRFLKERRNPLT  
RLTASRSRPLGNKPDASNHIERSNSNARSSTGLASTTTDGGSDSDDAVQKGRILLALVA  
MLYGT LNVSLRFVYDLPEVPPSAAALSATRGWIAFLCFLPPLLRNKLSNSNTVVEVETV  
ASSLPKADAIGPLFRSGVELALWNFLAQGLLNVLVSTGSARASFLTQTSVLF TPLIST  
LIGKQKVGSRVWCGLVALVGLVLTLLGGGSAEAAAASFSLSFSGDLCVLLGGLSWSM  
YVFRISFLGPKHLDLALQGVKTGLVAVLYSVWMMASAALSGGGLSWSLPSWVCS  
MVWFALLFSAVGPGTIADVLQQKQKVVT PSEANILLSAEP IFATVFAVLLLGETSSLLE  
IVGGGLIIAAAAIASVPSDNAAGA

>comp15474\_c1\_seq11; 125 707 864 LEN=864; minus strand; translated  
MAAKEVNTKSERKTKKFLVRDTCPTADDGRGKKECAFSSRRLDPALNGTRS

>comp15474\_c1\_seq12; 336 16 519 LEN=519; translated

MKSAIFASLIATAAAAFAPVVSQKASSTAVKAFEDDELGAQPPLGFFDPLGLLNGDVDQERFD  
GLRYTEIKHGRICMLAFLGQITTRAGIHLPGNIDYSGDSFDSYPNGIAALIGPDSIPTAG  
LVQIIAFVGFLEIGFMKDVPGTGNFVGVDFRNGSLDFGWDTFDEETQL  
>comp15474\_c1\_seq14; 328 382 1719 LEN=2010; translated  
MFRLSSSPLCSALFSVVTAWILLSCSSCCQYAFAFAAFTKIPNSLVDDRFLEKERRNPLT  
RLTASRSRPLGNKPDASNHIERSNSNARSSTGLASTTTDGGSDSDDAVQKGRILLALVA  
MLYGTNLVSLRFVYDLPEVPPSAAALSATRGWIAFLCFLPPLLRNKLKSNSTVVEVETV  
ASSLPSKADAIGPLFRSGVELALWNFLAQGLLNVLVSTGSARASFLTQTSVLFTPLIST  
LIGKQKVGRSVWCGCLVALVGLVVLTLGGGSAEAAAASAFSLSFSKGDLCVLGGALSWSM  
YVFRISFLGPKHLDLALQGVKTGLVAVLYSVWWMASAALSGGGLEALSWSLPSWMCSP  
MVWFALLFSAVGPGTIADVLQKQKQKVVTPSEANILLSAEP IFATVFAVLLLGETSSLLE  
IVGGGLIIAAAAIASVPSDNAAGA  
>comp15474\_c1\_seq15; 237 530 1453 LEN=1961; minus strand; translated  
MTTSTVQTLRQGAARGLLEAARSFYRKHSDLIKESHGIIHHWERVHHHACNAIESLATA  
EQSHQRVQLSEHQALEIEAAAALLHDVDDEKYFPKAAAPGKGDKDRAADNDGQKYAFMYP  
NALELLKQAKIPEQSYETILFMIDAVSCSKNGNSVPCVDSGRGGISNDDRSTNYHLLIP  
RWSDRIEAVGARGVWRQYQYNQEKRPCLCPGVTPRPRSEDELWSHVPERFEAYMQAED  
GATQDPSMIGHYDKLLHVACPPREIVRNEYLEEKLRDSAKELVEVCLRYGESGVDEDEDY  
IRGFRD  
>comp15474\_c1\_seq16; 221 241 1152 LEN=1736; translated  
MFVTSRFLVCLLAVIAGVSNAPTPAGTATSSSSSTEINNIVRTVPTDVPTKWPTN  
APTRFPTQKPTNLPTKYPTLPPTKSPTQKPSFKPTKYPSAKPTKKPTGRPTHKPTKQPTR  
KPTKKPTRVPTRKPTKKPTGVPTRKPTKKPTGKPTLRPTLRPTGKPTLSPTKMPVPTDA  
PTKAPVVPTEAPVPTPFVFFPPSIPPMPISPPFTPQTLAPVVPVFIIVTFAPAATVPGA  
ANILDPTPPPTSATISDLVGLGPSVAAVEDAGGQLPTPATLTYVASNVQRPTPPTFTNGLP  
QSF  
>comp15474\_c1\_seq17; 221 241 1152 LEN=1718; translated  
MFVTSRFLVCLLAVIAGVSNAPTPAGTATSSSSSTEINNIVRTVPTDVPTKWPTN  
APTRFPTQKPTNLPTKYPTLPPTKSPTQKPSFKPTKYPSAKPTKKPTGRPTHKPTKQPTR  
KPTKKPTRVPTRKPTKKPTGVPTRKPTKKPTGKPTLRPTLRPTGKPTLSPTKMPVPTDA  
PTKAPVVPTEAPVPTPFVFFPPSIPPMPISPPFTPQTLAPVVPVFIIVTFAPAATVPGA  
ANILDPTPPPTSATISDLVGLGPSVAAVEDAGGQLPTPATLTYVASNVQRPTPPTFTNGLP  
QSF  
>comp15474\_c1\_seq18; 328 382 1719 LEN=2032; translated  
MFRLSSSPLCSALFSVVTAWILLSCSSCCQYAFAFAAFTKIPNSLVDDRFLEKERRNPLT  
RLTASRSRPLGNKPDASNHIERSNSNARSSTGLASTTTDGGSDSDDAVQKGRILLALVA  
MLYGTNLVSLRFVYDLPEVPPSAAALSATRGWIAFLCFLPPLLRNKLKSNSTVVEVETV  
ASSLPSKADAIGPLFRSGVELALWNFLAQGLLNVLVSTGSARASFLTQTSVLFTPLIST  
LIGKQKVGRSVWCGCLVALVGLVVLTLGGGSAEAAAASAFSLSFSKGDLCVLGGALSWSM  
YVFRISFLGPKHLDLALQGVKTGLVAVLYSVWWMASAALSGGGLEALSWSLPSWMCSP  
MVWFALLFSAVGPGTIADVLQKQKQKVVTPSEANILLSAEP IFATVFAVLLLGETSSLLE  
IVGGGLIIAAAAIASVPSDNAAGA  
>comp15474\_c1\_seq19; 125 725 882 LEN=882; minus strand; translated  
MAAKEVNTKSERKTKKFLVRDTCPTADDGRGGKECCAFGSSRRLDPALNGTRS  
>comp15475\_c0\_seq1; 481 368 1984 LEN=2482; minus strand; translated  
MSSSQPPGDSGSSCNELNGERRGRIAAVTGASGFIGSYLCAVLLDRGYTVRACVRPGRK  
AVHLPPEGQNNHDANSNGSLEIHPADMSVRGAYDSIFEGCTVVFHVAGNFGTDYHSLWKKS  
KTKRATPASAENPVQATPETRNYRLPPADQLLRNLHRNQTTTEIHDVKDNRKLDALATLGV  
SDQDDPQQPWLSDHAYVESYITPMEWILES VKKNSATVRRVVYTSSGAAGGTIEADEPA  
NEADILDNSYGAAKRECE RLLYAF CGDHNADPANPHDPILGLSVCPCIVMGPPTVVPLHD  
TVYQHRWADMLRGRYVLEQSWEIADVRDVAEAHARLAEAPNVCNGTRVWVGSEPGQSVES  
LLESIASRDPYERDPRDLRQNL TAPANADIDDESNSDSNSKRGSDDGSRSDSVSSSS  
RSGSDSPSTGSDSDFGVSEWDLGTTTTWSDPTVLFNRKAVDDNGESDASYKPRTPRETL  
QDTHSILEQDRWKALGRDYSLTESLDYYTVAEMDGCSEEMEWLEGYAASLLASQRAK  
>comp15475\_c0\_seq2; 481 368 1984 LEN=2247; minus strand; translated  
MSSSQPPGDSGSSCNELNGERRGRIAAVTGASGFIGSYLCAVLLDRGYTVRACVRPGRK  
AVHLPPEGQNNHDANSNGSLEIHPADMSVRGAYDSIFEGCTVVFHVAGNFGTDYHSLWKKS  
KTKRATPASAENPVQATPETRNYRLPPADQLLRNLHRNQTTTEIHDVKDNRKLDALATLGV  
SDQDDPQQPWLSDHAYVESYITPMEWILES VKKNSATVRRVVYTSSGAAGGTIEADEPA  
NEADILDNSYGAAKRECE RLLYAF CGDHNADPANPHDPILGLSVCPCIVMGPPTVVPLHD

TVYQHRWADMLRGRYVLEQSWEIADVRDVAEAHARLAEAPNVCNGTRVWVGSEPGQSVES  
LLESIASRDPYERDPRDLRQLRQNLTAPANADIDDSESNDSNSKRGSDDGSRSDSVSSSS  
RSGSDSPSTGSDSDFGVSEWDLGTTTTWSDPTVLFNRKAVDDNGESDASYKPRTPRETL  
QDTTHSILEQDRWKALGRDYSLTESLDYYTVAEMDGCSEEMEWLEGYAASLLASQRAK  
>comp15477\_c1\_seq1; 1445 263 6112 LEN=6304; translated  
MIDWKQSLYSFLLRRALGPLLDASSAQKLHDSIDFSLQEGKFVLTNIKLDAAYLTELLESG  
KFPGLFVRKGSVDRLEINLTLRENHEQSNPTKEQSSSLAWRAMKLGSTESFPAVSLVADS  
KIDGIYLDLDTIDLKRKRKPEKSTYENSYGSTPTASSDTTTTCDVEPTSKSIIIGSYIEAALA  
TLQLNLKLTNIHVKFFHQKSESKELWVGKVVSSFSYNDLDVNPSONMTVLNKSIEFSTI  
QVETGEMQKGTGDLQSSLDTIPTQSIIGLAEGSGRIFLRVIDSQPSHHQKTRRENKDS  
HLQRDIEIRLNHQLNFSLDINLSRIQEVSLGFKDITEANVESDEVSI FRQSSMMNNPHI  
ALGLNDISEVITELDEAQTVHHSSAVYSSHEEVTDDIDREDLKALTGIMRQYREAYHMVEQ  
NKMKGILVPSNAYFDEGKCMQEVDDDMTFDVFDDANDQSLYNTVSVLTKSTDIDRDESD  
PDYIHTKLRINLLGASLKINFLPQDKRQHFHSHGDEYIILATMNDLSISFSSTHQTHEILLD  
ATHIQIEDAHLVHSDNDFGYSTGENSLPGLGCTVEIGNILCWAECDAYGEGNALVSQAPC  
LSVQWKSTKNGKDDSI VCKVALLPLELSFRQRTMLNVSAFAAAARSGVTEKSPVAHRH  
SYSSEECVENDKDISLSCECPSINISFPLSEKLETSPLFERSGDVNLGRIAREHAIGIAF  
ENTGFELKSELVKGVMNNTCLSGKFSCLHMALFAVSPQNEVGYDTHMLRKDIFVASGRM  
EVNPSIPISFGFTRPSGRKEQEKQGRDSFPIIPAISSEFKARQEDDDDDDENGRYIETEVD  
TGYRKELRGTDQPITMLANSEKSTIIFTTNIPELMTDLTTTEVETFLILKGMERSLSTN  
SSTIPKIKSPPPQKLSEKISVAVNIDKVSISIRDDPDLSESNQEMIEAKSFVFLAMDH  
IKSHAFSLDSEMKHFRVFSQDLCLYSIDRKLNPVDRREKPAKDRFRLKKNAMQEI SDL  
SVTPILFRSQLFPTISQDTPSVLVDLINFSPGTVANRNLQRKRIYMTLYHLYRYDIDS  
EWVKRLSNVFAHKGKSEACEEMNFETKESLSENVETSMTRLFVSCADINIDYKPPSYFST  
VSRSIIRIGDLRLSCNMMKPTGLSQAYNLSIGDATYDITNDVNDQYKNNRRLCQYSMI  
SKEEKKCGKKNVSLYGTMPPEAILRELNFVNVLSFDAMDIAIVTQRNQIGPLKPDLSKDSPL  
ALSLTMGTLISIQGCKDSFTCFANVSGELQSKLTALTNEDILDLLKKAQCVSIPPEPETSRI  
DKPYDEFKQPKVLHSISESKIPTIADNDLRTMLLDGYEWTTVDKDDLRLVIPPGEQIS  
GWYSTSDSCSAGCLLSQIIHHHFPLHSIADPLSEGMGARALVGHDDVFLKSRLSIQKL  
NIKVRLEDGYDWPDKCSAKEREAVKRLDKAFVIEPLPSSALNDKEIEKTRLRKSSSLATK  
TKLMGDLLEDGEDIMFEKVPLPEDRVSIMNREKHLRLSKRRPNVFFQVSLNEIGLRMDSYK  
KSTSHRLQSMLEITVSNLFI AETVSHSRPIK MIGEWSNDYEHPRDTRFGTLMMSMATWAP  
SSKVTKDDELASDEANITVQLMPMRCLLDQRAISFMKAFNNEGMVDVGRDAGPEKWSSR  
LHLVPPPLFKTFKIKPWVKVDYTPIRVDVEALRDGSIVELVNLSPIQRMVIALDEVTV  
NSVGMGSVFGVSVKWIQEI CATQLHKFLTSARPFEPFTDVGQGLTDLVVLVPEAFKEGD  
SIHKAMKGMKSLAETVVFOQLATTSGLTRIAANLMADSLGGGRGQNDVTDPLPSRPLSI  
PKGIGDARLHAATSLTRGFSAAANYKVVVVPYREYLRNGLTGAVTSVIKIPVLLVAPLIG  
ATEAASYTLLGARNALRPDLRREEEASIL  
>comp15478\_c0\_seq1; 112 1 870 LEN=905; minus strand; translated  
XTEEPSSEPSSFPMPSTSDPSDHPCSNNSFRHLHGQKKKDCDWAAKKTRKCKKRDSKTK  
KKVSFFCPRVCNPACKTPSPSPTKAPSPSPTSKCPPDDPEFKFRGDYLDKDCGWAGENPEK  
RCKLIDQAKKEKVEKFCPYSCNRRCTCRDSTTPFRVGDGPFTTCEGLTDGTEKCDTVAS  
RSKQNTAADFCPKKCGLLSTRALGSQPQQQHSILRTPEMCEAALEVAPFVGFWSLGGIE  
PFCPTYVKMIGEVCLPSQSSRQRPRFAGARWPACCTKLTSGFISSGRTN  
>comp15478\_c0\_seq2; 110 259 346 LEN=346; translated  
MXLKSSTLEVSHDPIGWLNDAASNILDIX  
>comp15478\_c0\_seq3; 171 1436 1788 LEN=1788; minus strand; translated  
MKRMVSSVDKRNREL TANDCDACSESTRPIVTESGDDFQQMISNCLEGS CPYSLPLNC  
WNVSRVQDMSYAFANNSNDHFNDQLYCWDTSRVTSMEGMFEGASEFNQPIGSWDT  
>comp15479\_c0\_seq1; 1801 90 3230 LEN=3418; translated  
MKISSVALLAFVAVERANPAFSFVTPSNNAGATRSVRS LAVDMAAETDVSSSDVSI PYD  
AAAELAYKDWISKFDKPYDAERYNVFLSNYKAITVMNISAKKKAREDPESGSPSLLSLNE  
YADCTAEYEAAMSGDSKPSADESSDAEESPASTGNILGDAVKAVESQASASSALQEAA  
DALEAEEEEKLAAQLGLDSVEELEDAMD FLEGIDSEGVEMDDGDMAREARVR SAYMDWCKE  
FSKESDETRFKQFFKNFLEMEDFAKETGKEMILNEFADYTEAEYVAMQNGETPEVEAVEK  
VEEIVIEEEEEVEEIVVAEDEEVSEAAAKAAALAKAAEEAAKAAEAAMAAEEAAKAAAEQ  
KAAD EAAKVAEEKAVEDAEAKAEAKAAAIQAEKDAAAKAIADKEAAIQAEKDAAAKA  
IADKQAAIKAEREARIKAEEDRKAAMQAEKARLAAMTDEERRKEIEKGIAARQSAQAKEI  
EKAAAAREAEVIAANLAAKLEAEKAAAARAIQDEAGEIARAQAQEWEEKQAKLNKGRQT  
VAKLPTPPQKAPPQK PATPVAAKASKPRPTLNIGSFFATPEKAKPAAPKAKTVAPTAPKV

APPKKDPPAQKAIKTSKPRPTFSLAGLFDSSKAAPAPKKKEAPKPVAKKPVVQKAAPVAK  
KPVVTTPTPAPKSEPRPTLSLSSLFESKPAAPKKAPAPAPVKAPSKPAPAPAMFKFNKPA  
AKKAPTAPAPAIVKKTPAPAFSFFGSKPAPKKAPAPAPTQPVKKAPAPAFSFFGSKPA  
SKKAPAPAPAPEPMKKQPAPTF SFFGSKPAPKKAPVPPPATAPAKKPVNSFFNAPKPAK  
KPVAKKPVAKTPVAKKPVVKKAAKPSPTLSLFGSKAKAKPAPAPAPEPAAAPKSSSWFG  
SPKPAKKPVAEKPAAPVKSTPKPRSTLSLFGSKAKKPEPKPEPTPEPKKAASGFSFFGG  
ASQTKPAPKKAAPAKSKVAPKKAAPVKDSIPVLSKWWQNADGSITGLVSNSDSFRRTGTKI  
TTSPVRKGAQGGTIVKTGSGSQYRLN

>comp15480\_c0\_seq1; 1453 561 6564 LEN=7542; minus strand; translated

MISKESNQDVNNGLSRRKELVQRGLNLSVMDCATRQQKNGAHADHQMAFESPQIENLTE  
VTSKKVLENADTSNDMKPTPESHIRNGEFTAATTQFNDGSDHDKMTNHNENQGLYISADV  
TTKSELETRRMIRKMQSTVHEELESKEHTITLHTDGATNDFQEMKTSSMETSTNFTDSE  
TKSGADSTKLSELILSTTVSKSCKSPTLANKRERDPHIPSVLRSEERSLFCQQSKRIRLS  
FEDSLTLGSKCNYGPVPIDRGSTTSHNSVLKTVTSAGIFEDAEDQTFDFDVYKKIPKRR  
SSIRPDVNGAISDSIAKTVNKMNSTIDETNLF SKIEKRVVTRKTKKRSTGKEKMAAREIL  
NGKIDLLRILPRQDCNFLSTVCFIFTLEQLEWVLNEDQTVKDASSRQVRREKLMNLKEN  
PTMIHESKLEIETPNQDEKASGRVFSSESWSVAEHSSRAFLAGKKNVWRKSIETW  
RQGDFTSDNDQFPLLDGPLSLLFPIGTLQFLKSIRVKSADFCLRRTESGPVVVMFRA  
WRRQCGLRDMNLHLSKHLRSIGTCIEESLKGKLLGGNETSKRITGAMGVL SGVAKEFLI  
DHSKMFSAQFIEQKTTKIADEFKWRATKGLSELKSSSAVAMVSAWKTQMKEQLLIQSS  
EGRFISEERMIEATDSEIKMIGLDDNRGQSKQQSETSSSKACALSPEFFSNFFADEQK  
LDMFKSVGITCARNFIETSKGKNSRLLKALVQMNSPQKNGEKVIVESCITQLHDWSSQMK  
KRIDGIENTGHDNVYKVGIEGPNLNDNRTRSRSVSKESPRFRKSASTKDSRKSRSVSKQP  
PRMRKSASMNPFDALSSSNKEFLLASMNI STAADFLATRITTDIAKAFMKWREDRGM PALK  
GLGAVASISGWKTLVTRTKAASLGESELVELGNDAAATDLTMERNVNKKKGCVPITIDLSGK  
LERINGRNPFPDSTCGTIELSNSISSNLSHQNKPDNGSFDRKSRKFCSPQLLLTLKTFG  
FYEELGITLEEAIKHVFLQKKSFCGVENTNPTQMVMVHNEIDI IETKCSRQKFNMFV  
LRNGRKKLIVCLVDP I EKGQTVKLELLALET FHSSWLAETNAGKIRKWIQERLSKLPITV  
LIELLEFVTEDIAVHVFKHLESALKSITPPFCNEKNEPGISSLTSTELVLARRRIHWVAV  
KIFENLQSTKTDLTCRHVSAELYWTKEFVDKLEDNLELKSIVAEP IRKEI IHEINHEFVY  
RFGSFASTKNLWCPMANKLFHCTLDL FVGLSAECGEFSLGENLTKKLQSLVLD CILELR  
ESSVFDSTNYENELTKFALVYKKGCRLD SNILPSFDDIKETL FIRPYVNAMELCNEPVS  
TLDSVKEIQIVAVHEERSSQKQVTCFRDLKNTVALEGT CIDVHWYVKTQILAVVRTAVQ  
SSLYTLALDDVKSSFVTIESQILDAAQRALGGTKVKNPSLENFEIDKQSVHSIQGSEKE  
PLGTTNQLSPTPSSKPF FFLVWPHLKQEGWSLIAGDAPSEISFVPPVPVKSQNINYHRK  
DSSLKRSNYATESNSFGLGYVPKLT KRLLIQCLEQNNEVSQGDGTGQTL SIKRVVDL FV  
SSTIASIDETDTLTVANMQQKIDKVAIELISLFDKLVPRTFGKEDSLQLGEGKQWSDILD  
CRYLKFFLIIAPTILQEANLP IQEYQQTIIIVRDLIKFLSENHQDLFSPS I KLPVEEYHC  
EQSFPSKLLSQMKEDSGVNLGPKSGSKCHESGDGFVIRPKDRANLTDYVAIVMSQTVIG  
IATPDENRAGQPYIVCRHCLGVAGGRYFYGSYESLSTAASSVEKHVMKCAKVDDEIKQE  
VVKARTYHSHKQRNLTSGAQSAFYARLYNRMQSMRPPYHESELSPGYNTSISSTQEKIS  
ATSNSAVDEKEDTYREFD SHLDVMDYIQNAEPWKSQKPLADLISKYYNCLEYGGKNFDTE  
RSPFVFSSEWIYSKHVNAEF

>comp15480\_c0\_seq2; 1517 561 6825 LEN=7803; minus strand; translated

MISKESNQDVNNGLSRRKELVQRGLNLSVMDCATRQQKNGAHADHQMAFESPQIENLTE  
VTSKKVLENADTSNDMKPTPESHIRNGEFTAATTQFNDGSDHDKMTNHNENQGLYISADV  
TTKSELETRRMIRKMQSTVHEELESKEHTITLHTDGATNDFQEMKTSSMETSTNFTDSE  
TKSGADSTKLSELILSTTVSKSCKSPTLANKRERDPHIPSVLRSEERSLFCQQSKRIRLS  
FEDSLTLGSKCNYGPVPIDRGSTTSHNSVLKTVTSAGIFEDAEDQTFDFDVYKKIPKRR  
SSIRPDVNGAISDSIAKTVNKMNSTIDETNLF SKIEKRVVTRKTKKRSTGKEKMAAREIL  
NGKIDLLRILPRQDCNFLSTVCFIFTLEQLEWVLNEDQTVKDASSRQVRREKLMNLKEN  
PTMIHESKLEIETPNQDEKASGRVFSSESWSVAEHSSRAFLAGKKNVWRKSIETW  
RQGDFTSDNDQFPLLDGPLSLLFPIGTLQFLKSIRVKSADFCLRRTESGPVVVMFRA  
WRRQCGLRDMNLHLSKHLRSIGTCIEESLKGKLLGGNETSKRITGAMGVL SGVAKEFLI  
DHSKMFSAQFIEQKTTKIADEFKWRATKGLSELKSSSAVAMVSAWKTQMKEQLLIQSS  
EGRFISEERMIEATDSEIKMIGLDDNRGQSKQQSETSSSKACALSPEFFSNFFADEQK  
LDMFKSVGITCARNFIETSKGKNSRLLKALVQMNSPQKNGEKVIVESCITQLHDWSSQMK  
KRIDGIENTGHDNVYKVGIEGPNLNDNRTRSRSVSKESPRFRKSASTKDSRKSRSVSKQP  
PRMRKSASMNPFDALSSSNKEFLLASMNI STAADFLATRITTDIAKAFMKWREDRGM PALK  
GLGAVASISGWKTLVTRTKAASLGESELVELNRARNAKHIQVVVNSKPGQAKSGGHKMKNH



LENLGSSKKKAKPILQTASKFQAKLSVLSKTRNVFHFEMEDRIGPSGKCNTYITYLGND  
AATDLTMERNVNKKKGCVPITITIDLSGKLERINGRNPFDPTSTCGTIELSNSISSNLSSHQN  
KPDNGSFDRKSRKFCSQPLLLTLKTFGFYEELGITLEEAIKHFVLQKKSFCGVENTNPT  
QMVSMVHNEIDIIEITKCSRQKFNMFVLRNGRKKLIVCLVDP IEKGQTVKLELLALETFH  
SSWLAETNAGKIRKWIQERLSKLPITVLIELLEFFVTEDIAVHVFKHLESALKSITPPFCN  
EKNEPGISSLTSTELVLRARRIHWVAVKIFENLQSTKTDLTCRHVSAELYWTKEFVDKLE  
DNLELKSIVAEPİRKEI IHEINHEFVYRGFSGFASTKNLWCPMANKLFHCTLDLDFVGLSA  
ECGEFSLGENLTKKLQSLVLDLCILELRESSVFDSTNYENELTKFALVYKKGCRLDNSNIL  
PSFDDIKETL FIRPYVNAMELCNEPVSTLDSVKEIQIVAVHEERSSQGKQVTCFRDLKNT  
VALEGT CIDVHWYVKTQILAVVRTAVQSSLYTLALDDVKSSFVTIESQILDAAQRALGGT  
KVKNP SLENFEIDKQSVHSIQGSESKEPLGTTNQLSPTSPSKPFFFGLVWPHLKQEGWSL  
IAGDAPSEISFVPPVPVKSQNIN YHRKDSL LKKRSNYATESNSFGLGYVPKLT KRLLIQ  
LEQNN EVSQGDGTGQTL SIKRVVDL FVSSTIASIDETD TLTVANMQQKIDKVAIELISLF  
DKLVPRTFGKEDSLQLGEGKQWSDILDCRYL FKFLLI IAPTILQEANLPIQEYQQTIIIVR  
DLIKFLSENHQDLFSPSIKLPVEEYHCEQSFPSKLLSQMKEDSGVNLGPSKSGSKCHESGD  
GFEVIRPKDRANLTDYVAIVMSQTVIGIATPDDENRAGQPYIVCRHCLGVAGGRYFYGSY  
ESLSTAASSVEKHVMKCAKVDD EIKQEVVKARTYH SKQRKNLTSGAQSAFYARLYNRMQS  
MRRPYHESELSPGYNTSISSTQEKISATSNSAVDEKEDTYREFD SHLDVMDYIQNAEPW  
KSQKPLADLISKYINCLEYGGKNFDTERSPFVFSSEWIYSKHVNAEF

>comp15481\_c0\_seq1; 427 105 1145 LEN=1779; translated  
MSDNETKLTPI TVITIGFLGAGKTTLVNYILKEQNEWKICVLENEFGEVSIDDGLVAESLD  
APEDLITMDNGCVCCSVRGDLVRTLGQLTKRRHEFDAILLETTGLADPAPIVYTLQTNSK  
MSDNYVLD SIVCLADAKHLPLHLDEKKPKEGDINEAYQQVAFADKILLNKIDLVTAEKK  
ALIARLGRINNFASVIETEKSRCP LGEILGLNSFRMESILGIDPDDFFESQEGESHNNLEV  
VQSVGLQFKGNLHAQWFNMFMMDLLRERAADLYRTKGVLSFHGQGNVKFVFQGVHEQINF  
GPAKEGWKDGEERMNKFFVFIGKNLNRAELTKSLQDCLYKEENNSSE

>comp15481\_c0\_seq2; 337 960 1799 LEN=2433; translated  
MDNGCVCCSVRGDLVRTLGQLTKRRHEFDAILLETTGLADPAPIVYTLQTNSKMSDNYVL  
DSIVCLADAKHLPLHLDEKKPKEGDINEAYQQVAFADKILLNKIDLVTAEKKAL IARLG  
RINNFASVIETEKSRCP LGEILGLNSFRMESILGIDPDDFFESQEGESHNNLEV VQSVGLQ  
FKGNLHAQWFNMFMMDLLRERAADLYRTKGVLSFHGQGNVKFVFQGVHEQINFGPAKEGW  
KDGEERMNKFFVFIGKNLNRAELTKSLQDCLYKEENNSSE

>comp15482\_c0\_seq1; 562 194 2207 LEN=2310; translated  
MGNDANDVSIVYASDTVDFGTIPMAKPSRIDRHETTSENSEGEDGTATAVPDGESYGGSTQ  
SESDSEILGHAQSNPTPRPIATDHHYHHYRSHPPQHAGSLWYHCGNGSNPESNGSDPNK  
IDNRGLEYIPIRLACGPTAYCSPDVL RNCMPVLRVSVQADLAGILRILPASVHSLVRRTNL  
WLNWNGYAYGPPAHP TVLRHITTHHHPAWLVEVANDAPRKAGGIEIYSCLDYARMRLHWN  
GSGLLLHEFCHLVHQCCLEDGLDNR TVEDLYEAASDSGRYEAVLRRDWAGKVAAVEAAKT  
PGVGHAVPSQPPETTPRDFDLAYAMVDKKEFFAEMSVAFWAKGYRALDKGDPGAMEACSP  
PLLHPEVTD RVRVLAEEERSRKRERTGADERETA AVVLFYHSIEHEYKLL EADDDGEDLD  
TEEDPPKRHLRCCRVDHDCCTPFPFVHRLARTIGEAI ERGAAALAI GHRNHHDENDDS  
RLRRMIDPVFREDALRHNCSTISHCNKFYFPFTRGQLFHHDPLLA EAMGALWGEVRAWEDP  
WAAPAPGGGCSGSSPARCGARSSTAQRGATGIARNGTTLYCRAQHSTAGNTHESAARQNE  
KGRATEPRRCGAVLHCTALHGNAKTTSWLRRNAVHDNSNGKNSNILHGAYA AVPCRAAMP  
CQLCLPPWL V

>comp15483\_c1\_seq1; 426 806 2074 LEN=2387; translated  
MVMKIQTICFVAMAMVVSQSVLAASTRESNTERRSRYKLRRTPGERGETGSTHNVAASEK  
TNKSERFFQASTSFDRGERTAIGSSETEFFERFLGVAYEVGSMSMDLVVTPRKVPVTKGK  
DTKKRKVGKDFKKGKDDSETAKDAKKSKKEGKDSKKTGGEESPPASKKESKKS KSNL  
SDKKGGEVGDGNLKKSESKSKAKRQALRTGRTRGTDGAERVL AGCWFETSGGKAGS  
KAGSKDGSKAGNKDGSKDGSKDGGRAGSKAGSKDGRVGPGRRLERSERELYNCEFKGSY  
TCCQVRSDPGDDPLCCKGDMTVLGVIAATPITPPPVVVETKDDLPEVYLQKDD EHSYMGG  
PAPIVQKDPKDDGSGDVVDKDPVDDGPYGVSDRPVVPYMPVTSPVEDESDGSESNDFIKGN  
SF

>comp15483\_c1\_seq2; 416 961 2229 LEN=2542; translated  
MVMKIHTICFVAMAMVVSQSVLAASTRESNTERRSRYKLRRTPGERGETGSTHNVAASEK  
TNKSERFFQASTSFDRGERTAIGSSETEFFERFLGVAYEVGSMSMDLVVTPRKVPVTKGK  
DTKKRKVGKDFKKGKDDSETAKDAKKSKKEGKDSKKTGGEESPPASKKESKKS KSNL  
SDKKGGEVGDGNLKKSESKSKAKRQALRTGRTRGTDGAERVL AGCWFETSGGKAGS  
KAGSKDGSKAGNKDGSKDGSKDGGRAGSKAGSKDGRVGPGRRLERSERELYNCEFKGSY

TCCQVRSDPGDDPLCCKGDMTVLGVIAATPITPPPVVVETKDDLPEVYLQKDDEHSYMGG  
PAPIVQKDPKDDGSGDVVDKDPVDDGPYGVSDRPVPMPTSPVEDESDGSESNDFIKGN  
SF

>comp15484\_c0\_seq1; 1429 273 3860 LEN=3940; translated  
MLRVGNLVSQSSQVRRLAARPLAAASTQSAAPQRREMCGLVAAIDDIWTVRSAGTTRGPI  
PILDDREALRQTRILDRHGRPDGYEISTGTVGGDADSANHARWSMGHTRLAIVDPSNRFA  
DMPFNLKFRRTGAEGSEKIVHLAANGEIYNHEDIYKKMVENDGWDHERISGSDCEVIAHAF  
AKYGGPKAAAMLGDMFGFVAFEEVDVQTKITAFARPVGIKPLYYGRTLCSKSDSDEAA  
AYVFSSELKALVGHADPATVVAIPPGHYWTPPEGLVCYYPWLRNDDYAPWEDEAHKVT  
DDEIREAFKAVKKRMMADVYGFVFLSGGVDSCIVSHDLLPLRQERLKEFGDDRIPTY  
TVGMENSPDVMAARAMVDNLGGDKYITHNVRSTPDEVFDLIPKIIYHMETYEAELIRSA  
IPNWLLAERAADVVKMVLGTGEGADELFAGYLYFQDAETPRQVQNELRRIYGLMGNINLHR  
TDRMTMAHCLEARVPFLDTEFTKLVMSVDPARKMVDPEAVKKNTRGREKSMRLRELFEEP  
ANGDVIPTPVLWRKAMQCEGVGEDWVSIQRRVSGLVSDAEMDEAHITYPINTPQTKEE  
LYYRRIYDENFHGLEHVVKLWEGGGRAMGAEWKSDLYTREGKLVNLLSHSLQNKQARA  
FSTSAGPTMSRGLHTGGVAGTRSFSTLPVQKFEPEYESAKAKGFDDFEAMLTCCGGDDRS  
LILDSSTNKYHIKQPVPDPAHVFRGSCGTGNPPTQRGYDAAKKLYDQLSAMPDGSLDGAI  
DVFADQRKRIAKILELEEGTEVIVPSSGSDAEYLPALAIARALKGDVPI SNGVTQLQEIGA  
GTAPASVGEYFSTHAPLKGKLDGKTLGSGFETFDGIAIPAREKNGDVIDASKKMEEFVA  
STIAKGSYPIVHGVFVGKGTGVRDETMPGSQDAGETSLGVVDACQGRFSLDELHGWLKQDS  
IVLYTSSKFYQAPPFCGAVIIPPTIAAKLRAAPAPEPKMYTLDGLGGFLTDKELPDCLE  
NWKPLLAKDSDANLGLALRWEAGLAGMEALASIPDQQRTEAYKEWAGSVASMVNERTELD  
AWCVERSIVSIRVAKGDGWLMSSELRDLRWMSMDVSGLVDPATPEEKDALSKPAYIGQP  
VDVSETHAIVRIALGVESMLSIFYEDKEKTLTEDQVTVLKLAAIGKHFDLTKKSGQ

>comp15485\_c0\_seq1; 597 168 1748 LEN=3710; translated  
MKRFAPLRKPSYLYISAIVISVVTGDEAEIHASSAYTASDAMGEEWLPSSSPCSPSVYYK  
GINSFSSRSELQKLEETHKEVLPYTDNDADDVWKALKDLDRGIDLNLPTVRLIYSKKD  
VPAEPKGTPTWNRHVWPKSRGVGYSQDFDTHVHLLFPADWGVNSIRNNRFFDNCNVVE  
EDVCRPPTELERIDDPFMFGGEVFPPLLEVGRDIARAIIFYMELRYPHLELTDSLDPEKTN  
QMAYLSTLLAWHDLDPPTDYERKRNDRACSRWQGNRNPVDFPDLAKIIHGTPSETITDD  
GFYSDNSTGTVEELTEVKLPIPGDVMVGVHTDNPDMVALVTFVDLPAGLVIHVTDNAYD  
GHSLASNEGTLISLTPETIAAGTIFGYGEGLLYGSSWTSEMDRGFALATSGDNLIYHTS  
SLESDDYVFLSAILFAGGTLLESNMGESALYGTSSAIPDLIKRYTVVLENKDNVYVIGK  
RVDSKEYLQHLLDSANWEGSNSKTDVSTLPIVTENTVGFVTEQS

>comp15485\_c0\_seq2; 180 168 498 LEN=498; translated  
MKRFTPLRKPSYICITLLVIAAIVISVVTGDEAEIHASSAYTASDAMGEEWLPSSSPCSP  
SIYYKDINLFSSRNEFQKLEETHKEVLPYTDNDADDVWKALKDLDRGIDX

>comp15486\_c0\_seq1; 1264 174 4139 LEN=4189; translated  
MKPLFSRCALPMLLLPIAGAASATNHDALVEWLQATPKGFFSEKIEWKQLGSSYHAMFAA  
EDIPKDEPLIVVPQSILITKGTGFNCDAVMMLIEELGKGDSDHYPPYIDYLFGDGKQGD  
LPMASDLGQEILDYIIGDGLFPLQFDHHRVQFCPEVTNDVNNPSQLEVDAYLFMIARS  
WDDVMIPVYDMVNRHNGKWRNVEATSADHNDINVFALRDIKAGEQLYISYSECDEDCR  
GLKYKIITPQILADYGFVEQYPRRFLLEQDTELVEVDVDEATGDKFLTWPGLRRPFDQ  
LNYIAAQSKRLHMDESIARGVALLESHERGVIKDYFEAYKEALHLAVAYRGEDVSATT  
AKAKTNKQYDPLTEGKGPVEGENIEVCWENPSDRDWDTSLSQSQYQEI EFTYNEDRDN  
TCLHLSGWLQCTNFRPHYHEAFVHVPAQYVEDVKRVAFLGGDNMILHEILKYPNLELV  
VGMELDQQVIRSAFKNLGTLFPYFDDHRVHWWFGDATKSLFALPESYFGSFDLVLVLDLQTF  
VADALKVTDKLTIMDTAILLMNPDGGVIAKNEDFNVRANVGFAYKTVLDLEYHDVPPQICQQ  
SITMGSNSIDFLKATPRAHDIEITLFDLPGTEEAEPFDWYSYRQTVRDTCAANYDSSDN  
STEDATLKDQIGILVVLEAEDVSKPLDSLAVQTMITSAIKELGLTEVSISSAADETTFF  
LIMKEYITARVFAEEKYIAFDVLLWDRDLIDVLDGVLIEAVGGDLEESASSFRFVSGG  
ISGLKQQIDVLTAVAGETIALLCQDDDIGEPVTGEDSAYDHTMSIILRDFVTTFFVPQPK  
DEGSSPVIAMCSDKRSNCSLNTLKLITGSLNVVPIYSCDSFDDMQACERDVEETLKSA  
VKQYKLDALVIDEGLPFSMGQIMESIFSNPVSHSKIMERSHLILTPSVDGESWRNV MID  
RFRTDIVLFDGAYRADIRFSGKNKPYKWSIF SAYDVDFSSLTALSSIKEHTSLEPEV  
EEVANGIVNYVPELDWQEFVTDSDYDKTRSKEQWESQTPMGHQTIFQMNVPQPKMRLEE  
KVLAEHEPGPVDVQYGGAVVQKYLGDKEYSVLYDGEVPEEISRQIRKFSADMDTSTS  
FEVGLIFIKNRSIHQNGVSRVDDDGTYSIYLLNTAGQKLYGVQRNELMYQFETANFF  
QEIPLDLSAATLEGAFKALKTKVVGPKLSSINSFPIGSGVIMTTFWKDGHALLKWDGLK  
RVDVNFFTYKEDFLRIAFLDVFCEIDYMKSTTRDEHPRGYGSIANFGSEIAKPPHWIT

Q

>comp15487\_c0\_seq1; 1989 121 3309 LEN=3374; translated  
MVDHGKNSKRKKFHDKDKYYKLAKEQGLRSRAAFKLSQINRHYPLMHSKTNVVLDLCAAP  
GGWTQVAQRTCGPQTSIIAVIDLPIRSLGKRNIITIVGDIITDKCKADINRAIIESTSNG  
GNDRNNSKEGTVDVVLHDGAPNIGASYDKDAYMQTELAVALRCATQHLRHMGSFVTKI  
YRSKDSASFQVVKQLFREVESTFKPKASRQSAEIFYVCQGYKPKIDPRLLDPKHIFE  
FVEGDTQGGGKDTSTGADKKFNVFHKSWDQAKRHRGGYTDHLDGTMRHIEPVSNFVFGA  
SSQLDAIQTLSTCTGFTFRADDDDNISKEQCDFLLNHPFTTAEIKECVIDLKVLNKGDFK  
GLVMWREKMLAAWKAQESNKDGDSDSEESGSDSSDGE SDDGDSAGEDDEDAIQKEIQKAR  
ERKLRKKAKKKERKLMMAKRRQAAGFMDLNAIEVQEHQFFSLSTLQSSKDLNVAEV  
NLDKVTNEEAFGRSDSDDDSDDEMGGANYLKKKGIPERNADTGYSYRMESELDLAYDLFL  
KNTKNSANKIGTKAAKRSKKLLREKMAQQSHEDQEMVLTGKKGINADTKAYAKMLQGGKD  
SDDSDDDDDNDEEGNYSDDDGFDEPMPAEHEAKKKKSAVSSGNNSNPLIHEFPDEPT  
PMKTARWFSNPLFAEIGEAVNAAASSNQKSSSGAATSDPLGDDSDHESDGDDEEEKK  
RPSKKSRENAGQSKKESKKEKITADDVLAMMPKTDKQKRHEKRIKAKERDERRQARRA  
KKMGEEASDFDLVPRANDDEDFDDELMQMEGTEERKQKIKEARKLIKAGMGKGASSD  
KGEKVGFEVVEAERPLPSMDDRKYNSDNEDYSDDHAETLALGTMMLRHSKAKSMVDASY  
NRFANDPDLPEWVVDENRHYRQPLPIPPALLAKMKEKMLALSTKPIAKVAEARARKN  
RKAKQKLANAKKKAQAIANSADMSEAMKLTISKALRSDDRKSGRKEYVVSCKGQGGKGV  
KGGIMVDKRLKNDKRGMERAMKRRKSGKGGLTGSKRRRNHK

>comp15488\_c0\_seq1; 1254 85 3471 LEN=3555; translated  
MSYDYDALVADITESRRLAREAEAAIGTKSEGGEPESEHAHAQSQLAVVEHLTTSVDRF  
ETLSGHCMPMTPLLWMQYALDASELVRMVSEEAPGKGVSNALQTGLQLLELGLHEFPGSA  
VLRRLHYVEVMMAWAGGRLGEDVQNDQTQDAVEECKTALEKAEVLDGDSHRNESRLVVEF  
FKHRC DVERWPGNDSNRDLLQKTI SDFLKRRAIPMGDGVNAGLGEEYANFCTNSLKTAP  
DATTL SRIETNRRLSKHFGFLVTHEDDIDVALKMEAGVSNRDGIDRVLAANS DSDTEAD  
NRIDATAVLSKWKRI LNQESGNSSTGCWALGGPHTANAFVKYAQACIRYRSPRGTYNDE  
TIDEEKKNESLLAAKIKNMSLSIYERGVAECTVESIWLSYLQQLNYLIEQTEVELREA  
NRAESTAATEAQTTDIRQRSKLLADASAVVDRAIRNCPYSTE LVKVKLVVLRRVNAGM  
LVLDPENLMTLILKETLANGFVVAESGENGPAAALELFGALLDIVRKRILFLLAEFDQT  
KVTTTTNSQKKSKTTVTTTLQYDDPESIQGILSPNKANPGDASNGKRMSDYLLQLEL  
LCIDLREIFDEAESYLKRNQGKFSNKTSIEDGRAALAKEKALTETHLVAPLLRTIQFLQS  
QNDNELETTRAAQSKGRETLAGVLRHHDKAAKIVQPIHPSVYLSYIQALTASNSVSTIL  
SFPTDVLANLRLRLRYLQKALKSVGKPKDRNKNVQTSSAGISEADELDYETSLRCLCRDY  
LMFERHFGSARSYEDCAKSIQKKMAKTFALNRNNNVTVGATTIVNEDSTAI PMDLDNSPS  
STMEIPDEATQKRKREVDDEPRNQDEESPSGKDLLPPTKRKKEENDKVQTAPKSSLEAEK  
VSNPTTFKEIEEAKGNLKHKPKHKVGVNLEYPAHPFTVKVSFLSPNTEDMDLVDFRPKC  
GAVVHAKIMREKHHHGGKKGKSGWALVQFEERESVEKALALSDVIGIHMKSVR IERSHL  
PAVGLVPAGLHRVNPKEGKSTKRNLQKRKEQHDISKKGSNNAPTEKGETNGPPVEGKAK  
PSRSSTKSTGSSSGASIFAFRPRGVASNMSRKRKSKINISEQKEKPER

>comp15489\_c0\_seq1; 739 129 3020 LEN=3141; translated  
MSSSSWLYPDDESHIVSAGKPLHMLNPNQFYKICPKSVFDEEDGSGTSSDDPICGDS PF  
CFYFSKPSQKSANKDRLLIELMGGGACWSDTCKMQQEMLYLDEQFDSVLGRSCKEVQYG  
MQQDRTEANMLCSNQFDDRNVFAQYNTIIVPYCTQDVHLGSKTVVYTEDTDDDDGNNGES  
QTVHHKGANNLRFVTNWWFKNFPGLRYAAVTGCSAGGTAVPVVEAILHRHYNHFGNRATQ  
VSSIADSPVYLTPSYFLKNALSNWDPQPILSSIGVPYKGYRSEDYPTLVWDYILRKGSN  
RNRWGFVSHTEDPVSLTYYYQYMSGNGDGDNDKNYDDDAYHYDDDLNEKNSGNQWYDELS  
ESVAYIKKHRNVKSYWMDSEGHCSFGLYYALQDQDFPEFAASIVREDPLVLSARPAARS  
FFLAATTGSCLLAYLVFHRIRRLQSSLPSEDEDGETDGF SAMDKGIWIQT PPPAMSDDN  
ESIRTKKYRTVRRRLSALLVALEDYPTVSGYTLCTIVYLLAMLKEGFAHPINNP SLGPS  
AVGLSIFGINNPSLIVYYHQWFRFLT SNFLVSGLLTFGLAMFYLWFRIRKLEQRMI SDFK  
SPWLFVTVIIILATIINAAYCLVPPRRGASTAAIPLLIGLQTFHLLTFYWNSFVRPYLSIG  
AVLDFDIVVVTLFFPNSSWVMIVA AVVTGWILAKMARTFDIWLPGPMMNVLKQSGINMEMG  
STVKSAREAGNHQISFGTALNFP SAAASESEYSNFDGHVNNSSRYETVDEQRSTCPDHNR  
SRRWKFVRRVTVC SLLALFVLIILVPLFVTLVAKPNALYAEPFYTGCKSFYTSIDELAAS  
FSLSGSDDDNQNEEGRRSLVIATAKETSQFFVRWLAGEGDENKDG DGYGCAEFCVPHL  
VVP IFQTVLRKKKIP IAKGRCLDNGYSNHIIDKTF SALSYSLDVELYGASGGYDDSDND  
DMM

>comp15490\_c0\_seq1; 1391 500 3682 LEN=3754; translated  
MPAGMRPDTQIAFGTEEDDDDDIDDEESNYQKCRDEIVKKALEEQDKEFKEERRRKVWGE

FADAKTAEDI ERVKQDLKEKIEKENIYKATLAKEQGVDMEVLEATQGDGFFDASSDIS  
IAGFGGKNWYDNLDEDLKQEWAAAMGGNDYGNKDDDDDAEEQDKASSAIDDTVAIDGKI  
VSRDR LKGV RVGSAGGWSLEVFPGDFVVRHRYGIGRFEKTTTTPR LKLRDEVKARDARR  
KEIITEKLRSTKGGVPQEMIQEIQATFGTEEDKDPISNPQVTVLEITYADGIVHVPVDRA  
YRLSR YRAGDAAVKPR LSKVVRGDQWRNARRKVEASTMELAQDVLALYATRETLQRQFPDP  
DKETRVKDFEKTFFKFEPTKDQAKCFEEVENDMVWR SRPMDRLICGDVGF GKTEVALRALF  
RAVANGRQAAMLAPTGV LASQHYKNILKRCGEDSEFNLNIALVRGGMAPKSKAGKEMREK  
IQNGEYDIIVGTHALLSNSMKFKDLGLLVVDEEQRFVVKQKERLKLICDGIDVLTLSATP  
IPRTLQMSLSGIRDTSTIRSPPPMRKSTKTFVQSFNKDIVKHAI AQELERNQOIFYVVR  
IALLDEAEETIRECFPDIKVIQAHGRMGRNTAEENVSNFAEGGIDILLATTVIENGVDIP  
SVNTII IQDSQNF GMSTLYQLRGRVGRSDKQGFAYFLHNEDAITEQSVMLQAIGELNEL  
GSGFDVANRDLEIRGAGSLLGTEQSGAAARVGF DLYMRMLKKSIRQLRGLDIPHVPRTNI  
LLPKGQGSMEVRKKNKSGKIVSVHAFQIPEDIYIPDENERQIAVSAVRLADSSTTLVELTN  
KWKDEY GALPAVLQRKLKTMHLHASTRRLGIDVIGLVENEDGGIDCVMRSTGLRPRHWGK  
VLSLLPKGRSPKGLDVIFFARF TLSGEEEEELIGGKRVDLKQLLEDSSLEDETDKWDALDE  
EEVEAMKEIASAYTIKRMDEIDIKQHPRFVIRDFGTGKQAVDRLLKVL LPIARTVYTQQE  
AEKENAKNAVELRDKRLLLEQRKKESENRENQKFSMNGMI

>comp15490\_c0\_seq2; 228 500 754 LEN=754; translated  
MPAGMRPDTQIAFGTEEDDDDDIDDEESNYQKKRDEIVKKALEEQDKEFKEERRR KVWGE  
FADAKTAEDI ERVKQDLKENLLMRK

>comp15491\_c0\_seq1; 299 182 1492 LEN=1699; translated  
MARDETIQINGTNHVYINHGQNTFDKNRLQRILKSFHGFPIRGIARHVCHD GVEINAFLE  
GIVK FSTRWSAIRFKLHHTIVECVYNLLTYGIPREAI PINNSGEVDLRFHHSFLNAIEK  
EDA VDRVLRRLPVEDIHQLQVEHQHQQRNQAMASSNNNVFNQQMANSRGQPYQKEP  
PLP ILEDGLWDISGLPETNLDPLVSSMGCLPEGDRENNYILGTNTNPN SATSNGRMVPLH  
THSFSCETNLVTINGGGQFGQTDEPILTGIEQIQPSV TYSAADALRQGGNETNGYILVPG  
PFDVMMGRGRHNKKKPGNQR LNKLLAEHQADYEAGDKFQKTVLSQVLVKKMMEGGSRFII  
RDSEVGNGLWVQVSLEKARDKVAHDFRNLRISAKGKAKDANKTG NR SKNNANSS LKRPRS  
VPSAGEEETGSKRSVF

>comp15491\_c0\_seq2; 196 1 1258 LEN=1465; translated  
XHGQNTFDKNRLQRILKSFHGFPIRGIARHICH D GVEINPFLEGVVKFSTRWSAIRFKLH  
HGTIVECVYNLLTYGIPREAI PINNSGEVDLRFHHSFLNAIEKEDA VDRVLRRLPVEDI  
HQLQVEHQHQQRNQAMASSNNNVFNQQMANSRGQPYQKEPPLP ILEDGLWDISGLPE  
TNLDPLVSSMGCLPEGDRENNYILGTNTNPN SATSNGRMVPLH THSFSCETNLVTINGGG  
QFGQTDEPILTGIEQIQPSV TYSAADALRQGGNETNGYILVPGPFDVMMGRGRHNKKKPG  
NQR LNKLLAEHQADYEAGDKFQKTVLSQVLVKKMMEGGSRFII RDSEVGNGLWVQVSLEK  
ARDKVAHDFRNLRISAKGKAKDANKTG NR SKNNANSS LKRPRS VPSAGEEETGSKRSVF

>comp15491\_c0\_seq3; 574 1 2272 LEN=2479; translated  
XHSFQAMINDLMFRDSSRKDVAGNESFLNGRI SNTRSSNANININFDGNTHGSGNCSNLA  
TNLLPKNVACAGIAIQSDLLDEVVANQMQQKINKMSKNYYQSFFSFGQNSNSNDTGADHA  
QDSSDDMVSSLTQKLRNLSVTERENAQSDMYGFR LKPP EHDLNQVQEIQIKEVDNYIAKAS  
SGNEEQFSSRLVMHIDVPSERNRYGSNKYYGKNGSGALYIQSQRLKFLRASNDPESTV  
VRMAKYLDL KLEYFGADSLARELTLQDLGETDL DLWRR LGFLQLSEEQDAYGRAILIFMG  
KEQCKVTPKTF LRVLIYMTTIMARDETIQINGTNHVYINHGQNTFDKNRLQRILKSFHGF  
PIRGIARHVCHD GVEINAFLEGIVK FSTRWSAIRFKLHHTIVECVYNLLTYGIPREAI  
PINNSGEVDLRFHHSFLNAIEKEDA VDRVLRRLPVEDIHQLQVEHQHQQRNQAMASSN  
NNVFNQQMANSRGQPYQKEPPLP ILEDGLWDISGLPETNLDPLVSSMGCLPEGDRENNY  
ILGTNTNPN SATSNGRMVPLH THSFSCETNLVTINGGGQFGQTDEPILTGIEQIQPSV TY  
SAADALRQGGNETNGYILVPGPFDVMMGRGRHNKKKPGNQR LNKLLAEHQADYEAGDKFQ  
KTVLSQVLVKKMMEGGSRFII RDSEVGNGLWVQVSLEKARDKVAHDFRNLRISAKGKAKD  
ANKTG NR SKNNANSS LKRPRS VPSAGEEETGSKRSVF

>comp15491\_c0\_seq5; 473 1 2425 LEN=2632; translated  
XHSFQAMINDLMFRDSSRKDVAGNESFLNGRI SNTRSSNANININFDGNTHGSGNCSNLA  
TNLLPKNVACAGIAIQSDLLDEVVANQMQQKINKMSKNYYQSFFSFGQNSNSNDTGADHA  
QDSSDDMVSSLTQKLRNLSVTERENAQSDMYGFR LKPP EHDLNQVQEIQIKEVDNYIAKAS  
SGNEEQFSSRLVMHIDVPSERNRYGSNKYYGKNGSGALYIQSQRLKFLRASNDPESTV  
VRMAKYLDL KLEYFGADSLARELTLQDLGETDL DLWRR LGFLQLSEEQDAYGRAILIFMG  
KEQCKVTPKTFVSNFSLNSDDVQTHYELRASIYIFVSLRAMINRGLSSFSNSGFXSLVF  
SQLRVLIYMTTIMARDETIQINGTNHVYINHGQNTFDKNRLQRILKSFHGFPIRGIARHV  
CHD GVEINAFLEGIVK FSTRWSAIRFKLHHTIVECVYNLLTYGIPREAI PINNSGEVDL

RFHHSFLNAIEKEDAVDRVLRRLPVEDIHQLQVEHQHQQRNQAMASSSNNNVFNQQQM  
ANSRGQPYQKEPPLPILEDGLWDISGLPETNLDPLVSSMGCLPEGDRENNYILGTNTNPN  
SATSNGRMVPLHHTHSFSCETNLVTINGGGQFGQTDEPILTGIEQIQPSVTYSAADALRQG  
GNETNGYIILVPGPFVMMGRGRHNKKKPGNQRLNKLLEAEHQADYEAGDKFQKTVLSQVLV  
KKMMEGGSRFIIRDSEVGNLWVQVSLEKARDKVAHDFRNLRSIAK GKAKDANKTGNRSK  
NNANSSLKRPRSVPSAGEEETGSKRSVF  
>comp15492\_c0\_seq1; 364 1428 2771 LEN=3230; minus strand; translated  
MSLLLSATVGMISRKPLNALGATLVRSFSSPSSPVRRIALRQGPERRRLFSSLPNRGDPS  
VARNRTALVFDTEETRMVRFDPPTDEGQPDVQLGFLLVDTGSWKIFSKGSFLVRFHRK  
GVRIDEGAQRVHGIISSGDCASYGIEHETALSIFGDLRRAADVIVGHNIRFDAIVMEAAFH  
HKTPVGESFLELFSSKRQICTMMASVDLCKLPSRFKSSYKWP SLAEAYGFVTKGRKGELE  
NAHDALADSEACLEIFRYLVEHGYVSLEDESPTSSTKSGVVAKAEKEPQIIPGPDHGGTG  
DPLSSLFSSIIESTLSMDDGLSSPNSIHEIQHSDGEWNGGIDRSMEIEEMAATWSPEDSWN  
SSQKTDVISPNNNIRSNDDSISKIGDFHAPTGESFRVRGNTYAHKEMIKKLGGRWDGRSK  
EWFVRDANASKLKS YKDLEIVFKTDE  
>comp15492\_c0\_seq2; 364 1428 2771 LEN=3159; minus strand; translated  
MSLLLSATVGMISRKPLNALGATLVRSFSSPSSPVRRIALRQGPERRRLFSSLPNRGDPS  
VARNRTALVFDTEETRMVRFDPPTDEGQPDVQLGFLLVDTGSWKIFSKGSFLVRFHRK  
GVRIDEGAQRVHGIISSGDCASYGIEHETALSIFGDLRRAADVIVGHNIRFDAIVMEAAFH  
HKTPVGESFLELFSSKRQICTMMASVDLCKLPSRFKSSYKWP SLAEAYGFVTKGRKGELE  
NAHDALADSEACLEIFRYLVEHGYVSLEDESPTSSTKSGVVAKAEKEPQIIPGPDHGGTG  
DPLSSLFSSIIESTLSMDDGLSSPNSIHEIQHSDGEWNGGIDRSMEIEEMAATWSPEDSWN  
SSQKTDVISPNNNIRSNDDSISKIGDFHAPTGESFRVRGNTYAHKEMIKKLGGRWDGRSK  
EWFVRDANASKLKS YKDLEIVFKTDE  
>comp15493\_c0\_seq1; 542 1977 3092 LEN=3661; translated  
MICGSPLQEGLPNSVDQRVVGENKLNLYQMYPSSKSNLSKPGFGTEFEPVVDPEYKENG  
SDEDEEEQKMKVLLTEHPKGRDWSIKPFEPTRKKQKSRKDRPKRRDRLEIEIAKLILNQA  
QNFDMRDFNVDRDNVICALSTGEILLDLAESSVGTSPSSIDPRKDSGDENAVLMEDIGKD  
KSGPRSLGKTHSRASESDLFTFNTSSDDDEWAEFDDSSMMNIPLLPSELDDKDFPLTFE  
SEAGKESFSRGGLESIDDAVSSDLVLNSEGRKESENQQKEGSCKNSIARSESEPNLPCLI  
GNPHGTPIEFEMPQSPSSVTNFTASERDSPSRKALVLPKRGQTSGPSIATQRLAWNPKP  
PKHYTNVHGAH  
>comp15493\_c0\_seq2; 377 148 2839 LEN=3408; translated  
MRPGVARS IARRAAIPNRAAIRPRGPLRSLATTSKSENESENSEPFYGS PRSTTGPLGI  
ADRIGIALRSATTALSDPTRADAVAALGEVTGDFTLRRIRDRMEADPTGRRILRERPVVT  
KATIPYERLVAEAPDRFGGNGGEDDGLTFGQVYGSFLKEHGFDPDERDDVRFVEDDTLA  
YVMLRYRQNHDFHAITGLPPTVLGELGLKWLELFQTGLPVAAAVLHGGLPPAGPAGTGR  
PGQFLSPLGREPPGSRGDPRRRPARGAAAAALPDERLLRKRIRHAHRRAPAETRS GARPG  
PPRMKECKTKVSTEREKSQRIVPARIASDRRSGLDPGPDGRGRKIFCVLHCRCSDFKISA  
REFLSLENPTASLSTKVSGRHSESTKKAILXASAHKIGAFRALSSRERARTPLSSTYNFS  
PLVNSXEYVRTALVLMQFHGDEKLPVSRPPFSNTLFTNHVELYVPNETQNFRFLNNIQKD  
ETSRTGEESETTRTIVSPWSEHTVAAPLSIVRPTVGHNSWIQSPSIMICGSPLQEGLPNS  
VDQRVVGENKLNLYQMYPSSKSNLSKPGFGTEFEPVVDPEYKENG SDEDEEEQKMKVLL  
TEHPKGRDWSIKPFEPTRKKQKSRKDRPKRRDRLEIEIAKLILNQAQNFDMRDFNVDRDN  
VICALSTGEILLDLAESSVGTSPSSIDPRKDSGDENAVLMEDIGKDKSGPRSLGKTHSRA  
SESDLFTFNTSSDDDEWAEFDDSSMMNIPLLPSELDDKDFPLTFESEAGKESFSRGGLE  
SIDDAVSSDLVLNSEGRKESENQQKEGSCKNSIARSESEPNLPCLIGNPHGTPIEFEMPQ  
SPSSVTNFTASERDSPSRKALVLPKRGQTSGPSIATQRLAWNPKPPKHYTNVHGAH  
>comp15494\_c0\_seq1; 401 1 1409 LEN=1539; translated  
XNDKKEKAEKYDKHDGQEMI AKHAKKEKMEKKYKAHPEHDDDTPYQDDYFEMDDYYFEE  
YCIFDEFRPLADGTEVCVSEFLEKTYLDIDVDDAMDCTESIELTAWHKYTACFALEYEP  
SVCNDFFYRAEEMYLCLMEANGWPDDDWHYEDDMYYEDDMYFNDDFHYHDDGDWEQDDYY  
SRCVDFDFDYQQHIIGCVESFSDSLALDSVGYLNCTLDFYSDYYEICYYGEEIDPSTDTTC  
NAFEKCEAIKNAFEYCDYGASVDYVEILEEQLDTSYVLDTIHNGTIDLGDALVALDGYTN  
SSEMTEWEWSDNLQCVESYFAPYIDGYCYLGDEIELLGGCISTFAGAFDDLDAESLMNCT  
ENFWDAFYGRYYYYYENDPFTAPAVCEQFELCTTALQTI EYCFGDNLGYGFSNYIEAFE  
VDEPEFGPLLQSLYDGSFNALDALGTLYGYTGELTSEPGEWGFVLCIVGF  
>comp15494\_c0\_seq2; 98 1103 1348 LEN=1348; translated  
MMPHGAXNDGRITFMILWRLSLVQKRDGNHEVVRHRKLDQGEGLTPKYGKYGKHGKHEK  
LMKGKAEKAMKFGKREKDSKYGX

>comp15494\_c0\_seq3; 154 969 1176 LEN=1176; translated  
MAPSIVLAVSEKRDGNHEVVRHRKLDQGEGLTPKYGKYGKHGKHEKLMKGKAEKAMKFG  
KREKDSKYGX

>comp15495\_c0\_seq1; 523 1 3938 LEN=3988; translated  
IFPSAHAAFVVPATEDIYELREFATNAFHKTRPXLHQMDAGFDLEQKHTQNHSCLSLCD  
AFDTNVAAPGTADRFYELAVRKQENEKELVCPTDYVVTKIDNDGTHAVTEETENSKQRTL  
QFKEHLPLHVLRRQGGDFVEFLVRNTTWFGEIETDHDQILFPQHIFTNYASDSFMSEHCI  
LDENMAPHSSTDVIRASCIDTPEAGNIALVRI FARFPDESTASSPTSIPKCCHDPYPKSA  
ASNKLLLEYVFEINCDVSCDDPIYYEPEDTDSPIPAPTSPSALPTPDVIPRTTCLANDSTE  
KSISSLRDLVVASLKNPFFYGARHSWAWPSANNKGCGRYSAMGPGTNGMPCFVDTQLKN  
RVLAFDSEYMNFEFSFDEGMTATMSLSDKAEASADAIGKEGSEIEIKEAPSIKRTAVSFFP  
AGEGGGKACSPPEKDDYKGYPIRLVRSGRYLHHWYFNNVGCNGDSDTRIELKVTPAGXV  
VLVEYARCSRVQFIMLLAEQSYGMIWCRPWGKRRLWIQLVLNTKQLVVIKDFIVNISXMI  
VVVVSFLVPLLLCCNMVKCNLSLNXSVEVYSISNNGAEPLYWLDASTKEKLGYNSSASSNG  
FAGVSYCVRCESELGSSGGSGNNEQLSGCGVVLTPIPTDCCPLTATNGDGSTLCGSGWN  
YESCDASNSLMTTPVTQDVIIVTSKNEYPVLASGHSFEIRVDRQTGNQLSNVATEFEVTNN  
SETWKKVKLQFHIDNPRRHTGAAGILRDPQTEEPTGIHVQMSKNWHVGDALYDGYWWTGV  
AHIRVPPGTSISLELVVAYQYYKSLHGVSLSQLSLIGWVGNLWEEVGLGANGESITYEP  
HGHHRRQMILDTRPWLVCQMNQAGCRGSPDSTQWTENHGGGDFLNAVNNRGMYYLVGDT  
SYHTMNGPRLTNATFAGTTVDGNIIVSRTVSTWTTDDFVRHLHSFKYTFLEDTAGNNYPR  
FALYTLGGDNINYIRFPLFAYGMGEDSYVDNSLDGSGVLSIKSVLTGVNDFRYLNDYYRV  
DAPIGCSQNNGDNDSCWFAMVTDPAQVHHRGNRGIIVRNFHGRNLNGEPWPPSDLVSPFA  
FHLIKSRQNNAAKDTVSIELALPSEFLTAVDNNEAQFQAGDYLTADIELMVPPRQNGDYY  
GNSNVLRMWMNAADVTDYSNGWKIVAKEAVAGDALRTSVFEGLERKYPVRVHVCVTD  
GAIFNIAIPDEIPGILPITIAGVGASTAFSENLLDRPLGKLWRYIVSRGAWEEEMGTNGSY  
QLEKDVLDNSHTYVYSLRLEFENDPVGTCEQFAFGEAPPLVANPPCEGFIFD

>comp15495\_c0\_seq2; 761 1 2921 LEN=3774; translated  
XSASTVPSSEPSATFSSKPSKPSQNPSSASSVPSSAPSACSSYVPSLKPSWIPSSNPSAV  
PSLHPSVNPSSVPSDTPPSAPKASSLSRDLVHSTQLNGPQWGSRHGWAWPSASNNGCSRF  
DGTVGPFGFSALPCAOKTRFVDRVLRFDAYSIKFKLEIDKGMKATIDLSAQASEISGGGTS  
ISFYPSGLNAACIAPPDGSWNDYPVRLVKSGRYFHHWYAEKVNCGGSTDTRIEWKVTPD  
CVELHMVSNNGADTLNWMASETGNSLSTSTNGYNGISYCAKCNSEINDSSDSDNDLSDCQ  
IVQTAFPSDCCPLSSTTGSGDTLCGTGWSYSTCDVSSALTTALTQEVITITSPSIPVNGN  
GHSFEMRIPRSGDQMSNNFQKFDIVNNSDSWKKVKNLNFHIENPRITGVSGILRDPVSK  
EPTGIHVQMSKNWHVDRNPALYDNYWWTGVAHVVRVPPGTTSLQLVVAYQYYKALHGVS  
QLSLLGWGTNGLWEEVIGSNGESITYEPHGHHRRQMILDTRPWLVCAMGRAGCVGTPDS  
TQWTENHGGGDFLNAVDRKGRMYQYLIEDTTFHTMNGPRLTNATYAGITVDENIAVSRTVS  
TWTADDVVRHLHSFHYSLKEIDGDNYPRFALYTLGGDNINYIRFPFFAYGEGGTNAIR  
DGVPGVPIAEVIAGVNDFRYTSYYQVDAPTGCGQGDNNSCWFGMITDPSTNIHQGRNRG  
IVVRNFHGRNLNGEDWPPTDREVSPFAFHLIKSRQNNAAKDTVSIELSLPSEFKTAVAAE  
AKFLEGDFLAADIELFLPPRQTADYFGNSQRLKNWLTEADVSDFKLGWKVIMKEAVVGD  
SIKTTVFRGILERLYHPRIHVDANDEARFNINIPDDIPGILPITIAGVESAKAFSTDLA  
RPDGKLWRYVDDSWKQFGQGGDYQLEKDVIDNSYTFVFSLKLEFESDPVVSCEFAFAGAV  
APTDPNPSCDTTD

>comp15495\_c0\_seq3; 745 1 3678 LEN=3728; translated  
IFPSAHAAFVVPATEDIYELREFATNAFHKTRPXLHQMDAGFDLEQKHTQNHSCLSLCD  
AFDTNVAAPGTADRFYELAVRKQENEKELVCPTDYVVTKIDNDGTHAVTEETENSKQRTL  
QFKEHLPLHVLRRQGGDFVEFLVRNTTWFGEIETDHDQILFPQHIFTNYASDSFMSEHCI  
LDENMAPHSSTDVIRASCIDTPEAGNIALVRI FARFPDESTASSPTSIPKCCHDPYPKSA  
ASNKLLLEYVFEINCDVSCDDPIYYEPEDTDSPIPAPTSPSALPTPDVIPRTTCLANDSTE  
KSISSLRDLVVASLKNPFFYGARHSWAWPSANNKGCGRYSAMGPGTNGMPCFVDTQLKN  
RVLAFDSEYMNFEFSFDEGMTATMSLSDKAEASADAIGKEGSEIEIKEAPSIKRTAVSFFP  
AGEGGGKACSPPEKDDYKGYPIRLVRSGRYLHHWYFNNVGCNGDSDTRIELKVTPDCVE  
VYSISNNGAEPLYWLDASTKEKLGYNSSASSNGFAGVSYCVRCESELGSSGGSGNNEQL  
SGCGVVLTPIPTDCCPLTATNGDGSTLCGSGWNYESCDASNSLMTTPVTQDVIIVTSKNEY  
PVLASGHSFEIRVDRQTGNQLSNVATEFEVTNNSETWKKVKLQFHIDNPRRHTGAAGILR  
DPQTEEPTGIHVQMSKNWHVGDALYDGYWWTGVAHVVRVPPGTSISLELVVAYQYYKSLHG  
VSHSQLSLIGWVGNLWEEVGLGANGESITYEPHGHHRRQMILDTRPWLVCQMNQAGCRG  
SPDSTQWTENHGGGDFLNAVNNRGMYYLVGDTSYHTMNGPRLTNATFAGTTVDGNIIVS  
RTVSTWTTDDFVRHLHSFKYTFLEDTAGNNYPRFALYTLGGDNINYIRFPLFAYGMGEDS

YVDNSLDGSGVLSIKSVLTGVNDFRYLNDYYRVDAPIGCSQNNGDNDSCWFAMVTDPAQ  
VHHRGNRGIIVRNFHGRNLNGEPWPPSDLVSPFAFHLLIKSRQNNAAKDTVSI ELALPSEFL  
TAVDNNEAQFQAGDYLTADI ELMVPPRQNGDY YGNSNVLRMWMNAADVDTDYSNGWKIVA  
KEAVAGDALRTSVFEGSLERKYPPRVHVCVTDGAI FNIAIPDEIPGILPITIAGVGAST  
AFSENLLDRPLGKLWRYIVSRGAWEEEMGTNGSYQLEKDVLDNSHTYVYSLRLEFENDPVG  
TCEQFAFGEAPPLVANPPCEGFIFD

>comp15495\_c0\_seq4; 538 1 3953 LEN=4003; translated  
IFPSAHAAFVVPVATEDIYELREFATNAFHKTRPXLHQMDAGFDLEQKHTQNHSCLSLCD  
AFDTNVAAPGTADRFYELAVRKQENEKELVCPTDYVVTKIDNDGTHAVTEETENSKQRTL  
QFKEHLPLHVLRRQGGDFVEFLVRNTTWFGEIETDHDQILFPQHIFTNYASDSFMSEHCI  
LDENMAPHSSTDVIRASCIDTPEAGNIALVRI FARFPDESTASSPTSIPKCCHDPYPKSA  
ASNKLLLEYVFEINCDVSCDDPIYYEPEETVVEDTDSPI PASTSPSAIPTPDV IPRTTCLA  
NDSTEKSISSLSRDLVVASLKNPFGYARHSWA WPSANNKGCGRYSAMGPGTNGMPCFVD  
TQLKNRVLAFDSEYMNFEFSFDEGMTATMSLSDKAEASADAIGKEGSIEIKEAPSIKRTA  
VSFFPAGEGGGKACSPSEKDDYKGYPIRLVRSGRYLHHWYFNNVGCNGDS DTRIELKVT  
PAGXVVLVEYARCSRVQFIMLLAEQSYGMIWCRPWGKRRLWIQLVLN TKQLVVIKDFIVN  
ISXMI VVVVSLFVLP LCCNMVKCNLSNXSVEVYSISNNGAEPLYWLDASTKEKLG YGNS  
ASSNGFAGVSYCVRCESELDGSSGGSGNNEQLSGCGVVLTP IPTDCCPLTATNGDGSTLC  
GSGWNYESCDASNSLMTTPVTQDVI VTSKNEYVPLASGHSFEIRVDRQTGNQLSNVATEF  
EVTNNS ETWKKVKLQFHIDNPRRHTGAAGILRDPQTEEPTGIHVQMSKNWHVGDALYDGY  
WWTGVAHIRVPPGTSISLELVVAYQYYKSLHGVSHS QLSLIGWGVNGLWEEVGLGANGES  
ITYEPHGHRRQMILDTRPWLVCQMNQAGCRGSPDSTQW TENHGGGDFLNAVNNRGM YQY  
LVGDTSYHTMNGPRLTNATFAGTTVDGNI AVSRTVSTWTTDDFVRHLHSFKYTFLEDTAG  
NNYPRFALYTLGGDN YNYIRFPLFAYGMGEDSYVDNSLDGSGVLSIKSVLTGVNDFRYLND  
YYRVDAPIGCSQNNGDNDSCWFAMVTDPAQVHHRGNRGIIVRNFHGRNLNGEPWPPSDL  
VSPFAFHLLIKSRQNNAAKDTVSI ELALPSEFLTAVDNNEAQFQAGDYLTADI ELMVPPRQ  
NGDY YGNSNVLRMWMNAADVDTDYSNGWKIVAKEAVAGDALRTSVFEGSLERKYPPRVH  
VCVTDGAI FNIAIPDEIPGILPITIAGVGASTAFSENLLDRPLGKLWRYIVSRGAWEEEM  
GTNGSYQLEKDVLDNSHTYVYSLRLEFENDPVG TCEQFAFGEAPPLVANPPCEGFIFD

>comp15495\_c0\_seq5; 760 1 3693 LEN=3743; translated  
IFPSAHAAFVVPVATEDIYELREFATNAFHKTRPXLHQMDAGFDLEQKHTQNHSCLSLCD  
AFDTNVAAPGTADRFYELAVRKQENEKELVCPTDYVVTKIDNDGTHAVTEETENSKQRTL  
QFKEHLPLHVLRRQGGDFVEFLVRNTTWFGEIETDHDQILFPQHIFTNYASDSFMSEHCI  
LDENMAPHSSTDVIRASCIDTPEAGNIALVRI FARFPDESTASSPTSIPKCCHDPYPKSA  
ASNKLLLEYVFEINCDVSCDDPIYYEPEETVVEDTDSPI PASTSPSAIPTPDV IPRTTCLA  
NDSTEKSISSLSRDLVVASLKNPFGYARHSWA WPSANNKGCGRYSAMGPGTNGMPCFVD  
TQLKNRVLAFDSEYMNFEFSFDEGMTATMSLSDKAEASADAIGKEGSIEIKEAPSIKRTA  
VSFFPAGEGGGKACSPSEKDDYKGYPIRLVRSGRYLHHWYFNNVGCNGDS DTRIELKVT  
PDCVEVYSISNNGAEPLYWLDASTKEKLG YGNSASSNGFAGVSYCVRCESELDGSSGGSG  
NNEQLSGCGVVLTP IPTDCCPLTATNGDGSTLCGSGWNYESCDASNSLMTTPVTQDVI V  
TSKNEYVPLASGHSFEIRVDRQTGNQLSNVATEFEVTNNS ETWKKVKLQFHIDNPRRHTGA  
AGILRDPQTEEPTGIHVQMSKNWHVGDALYDGYWWTGVAHIRVPPGTSISLELVVAYQYY  
KSLHGVSHS QLSLIGWGVNGLWEEVGLGANGESITYEPHGHRRQMILDTRPWLVCQMNQ  
AGCRGSPDSTQW TENHGGGDFLNAVNNRGM YQYLVGDTSYHTMNGPRLTNATFAGTTVDG  
NI AVSRTVSTWTTDDFVRHLHSFKYTFLEDTAGNNYPRFALYTLGGDN YNYIRFPLFAYG  
MGEDSYVDNSLDGSGVLSIKSVLTGVNDFRYLNDYYRVDAPIGCSQNNGDNDSCWFAMVT  
DPDAQVHHRGNRGIIVRNFHGRNLNGEPWPPSDLVSPFAFHLLIKSRQNNAAKDTVSI ELAL  
PSEFLTAVDNNEAQFQAGDYLTADI ELMVPPRQNGDY YGNSNVLRMWMNAADVDTDYSNG  
WKIVAKEAVAGDALRTSVFEGSLERKYPPRVHVCVTDGAI FNIAIPDEIPGILPITIAG  
VGASTAFSENLLDRPLGKLWRYIVSRGAWEEEMGTNGSYQLEKDVLDNSHTYVYSLRLEFE  
NDPVG TCEQFAFGEAPPLVANPPCEGFIFD

>comp15496\_c0\_seq1; 795 127 2809 LEN=2809; translated  
MATTKKRNNESRVRVGVRRVRLALQEINQGGNCSLNIDSPMIRMGRRSFTYDAVFD SNFG  
QEDLYESVSAPLLSSFIDGYNATIMAYGQTGSGKFTTMGSEAHIEPEESSQAGLIPRFIT  
DFFGNMQRKKAESDKCIEGCPVLLDYTLKASFLEVYGEDVYDLLDSTRNSLPLREDSKGG  
IVVVGLTSRSISTTAEALEVLHEGTMNRTTAATLMNHTSSRSHAVFTIQMSQVTRRGNSG  
DSADM TTTTSQFTFVDLAGSERM KKTGAEGERAREGIK INEGLLALGNVINALADDDQVKK  
DKKVHVYPYRQSKLTRL LQDALGGNSQTLFLACVSPSHTNASETTLSTLNYANRARNIRNAP  
TKNVDGASAE LNRLQNINRVLQLELVKSRFTAGGASVASSDIGKIDESLLKREDVETYMQ  
QVYDVADAMMSPSKTLRSPPLLIFDVSSKSPTARDLSVMNRGGHNDP MANQKSKSHNGSS

EKF D H S I L E D I N P D E E I A I L D Y L L E L Q Q H D H E Y E K S K K Q D D M K L I E M D G E L E K Q E T L L L Q  
L R N S L K V Y H G M K G K Y E E L M E E V Q Q L E N E K S N L A K Q L D R A T T D P T K G C S T A I K K K L E K V E M  
S L S R A R R E K R Y A E D Q E R K C K V L E R K V H D L K C A K L A L Q K K Q E D A V R Y R K T T E A K T K E L L V  
L K R K A K N A D K R M S K L E S E I I L Q K R T L S R R T E Y C A K L S D K L K N T E S H L V K L L A L R Q R D T A D  
H K V S S M Q R S S K R A C G K E S K L K E S Y Q K F T E E E M K T K N Y I F D R M V L D K V K Q A R L K N K Y E G L V  
A T Y S A T M R K V V S E V K T L K E I R A E M V G N D C D S T E K A E T L R E L K E N I A D L E F K L E L I D F E I Q  
D L S V Q M P K N I S S S E K D I D H A V T K L V K G L S S K A L Q S I L F E T F S K F V E A E V S F L P S X

>comp15496\_c0\_seq2; 1575 127 5256 LEN=5265; translated  
M A T T K K R N N E S R V R V G V R V R P L A L Q E I N Q G G N C S L N I D S P M I R M G R R S F T Y D A V F D S N F G  
Q E D L Y E S V S A P L L S S F I D G Y N A T I M A Y G Q T G S G K T F T M G S E A H I E P E E S S Q A G L I P R F I T  
D F F G N M Q R K K A E S D K C I E G C P V L L D Y T L K A S F L E V Y G E D V Y D L L D S T R N S L P L R E D S K G G  
I V V V G L T S R S I S T T A E A L E V L H E G T M N R T T A A T L M N H T S S R S H A V F T I Q M S Q V T R R G N S G  
D S A D M T T T S Q F T F V D L A G S E R M K K T G A E G E R A R E G I K I N E G L L A L G N V I N A L A D D D Q V K K  
D K K V H V P Y R Q S K L T R L L Q D A L G G N S Q T L F L A C V S P S H T N A S E T L S T L N Y A N R A R N I R N A P  
T K N V D G A S A E L N R L Q N I N R V L Q L E L V K S R F T A G G A S V A S S D I G K I D E S L L K R E D V E T Y M Q  
Q V Y D V A D A M M S P S K T L R S P P L L I F D V S S K S P T A R D L S V M N R G G H N D P M A N Q K S K S H N G S S  
E K F D H S I L E D I N P D E E I A I L D Y L L E L Q Q H D H E Y E K S K K Q D D M K L I E M D G E L E K Q E T L L L Q  
L R N S L K V Y H G M K G K Y E E L M E E V Q Q L E N E K S N L A K Q L D R A T T D P T K G C S T A I K K K L E K V E M  
S L S R A R R E K R Y A E D Q E R K C K V L E R K V H D L K C A K L A L Q K K Q E D A V R Y R K T T E A K T K E L L V  
L K R K A K N A D K R M S K L E S E I I L Q K R T L S R R T E Y C A K L S D K L K N T E S H L V K L L A L R Q R D T A D  
H K V S S M Q R S S K R A C G K E S K L K E S Y Q K F T E E E M K T K N Y I F D R M V L D K V K Q A R L K N K Y E G L V  
A T Y S A T M R K V V S E V K T L K E I R A E M V G N D C D S T E K A E T L R E L K E N I A D L E F K L E L I D F E I Q  
D L S V Q M P K N I S S S E K D I D H A V T K L V K G L S S K A L Q S I L F E T F S K F V E A E T E R Q N I T E L L K R  
K D A A L I G A E S E V D S L N F K V K V L S K D L G D R K A L D E T E N G H S L T I E R L T D E R N K C M D D L S V A  
Q K N F E Q S K K R I C G L E D S L R S T Q V E L A V A K E D L A V V K V S L K K V G G N N E V S E T I H Q L R R I W E  
D L G V E T S L R E H E Q K R I E F C F E D T C A K I L D D A V I M K H S T E Q E I S D M S S R L Q M M R T A L G M S T  
S D E Q E T P I L V P L L Q K L T S L K S D I S L L E T P Y C F A A A R R R K I V E T V M D L A E V L G L S T A E L H T  
D L K T L L Q H E N E I S N K S C K K L Q E A Q D I E T S E D I L P A K S I E T D F L T R C E H H I S E L R V A K S E K  
L V R D R E L G Q Q I K E L I E G M H L N P V Q S L Q L V D S W M K E N E P R H L E W W D S E F A E N L L R D I Q Q T E  
L F P S S T G N H S Q Y L E L I S K A L S T L A D S R R S I S E A L K S V I E H A Q K T L L D I V G R E I D A S E A Y T  
G F H D A L F R M P P L S K D L I L S C I S E L E A L I E G T E A M T Q T E T E A L T V V W E A L K I S Q Q D R Q K F W  
G L V E E S K S N I G V E K N H I S L E K L S T S H E E W M V E A A S N A R N F N Q I L E K R L K K L E G I N N E V E R  
L R S K Q D M K S Q I L S L D S E I R I M N T K L L E F E E L K C T K E R L L T K K N G G A A L L K E E R F R K Q M R S  
K F L A K L K Q L V N L L R S W E S K E K T L F D E S L L S D D V R E L L K K D P D Q M D N W V E M R T K L M P L R T T  
K T Q V V R K R S H E D R G P V R R S K D E S S R P A S R L T P P K K R M T P S R R S R K D F G L A E R R R L E D N G S  
P R L A S R L A S R L T P P R N I N W S S S R S R N D I G L A D K K Q V E D K K S S V L R K R D S N N K L D E R M R S P  
K I K K R K Q D S F A L P F G S I L A D T P Q K N R D N M

>comp15497\_c0\_seq1; 1022 333 4323 LEN=4572; translated  
M D T S G E D N A R D E T D R R R G P S H V P T G A G A S D L V G L F A P P P G P I V A V P P S E T D S L L G G A G G V  
S R G V E G D G Y G D G Y G D G D G N A L A D T I R T I N H A T P S E D H G S S G V R P D E T L K N E S G G G R D F F  
L Q T K T K P P S A K R Q P W Q V P E S T Q E T S G K A R D F H D V Y L K H N A S C L T V L S D D S A I P I A A A R K P  
S G T K T G G R S G G R C Y P S F L R Q P L S L L A P L T S L S T W M G G F M F V L Y H V V F C M A N G G S I T R P H S  
G I S M L G D M V R Y T A V G I L A S C P F L V Y N M S D N A R Q N R V G I P A M Y P S A D L F L A P F L A Q A A A A V  
D K C I W E D W N S G A L H L A D F G G G A G N G I D G R P D D E A E L A L T R L W F G S F A V V V S F G M F A S G S  
L L V L A T K I K L A N L G T Y L P Y G V L C G F F S A V G C L M W K L A I T I D T P T S R G N E D G D P G W T L V L V  
H H L P S V F V G I A M N Q L G P K H P F F V T G L I L F T S F F F L A M H F T G V S L E D A Q R A G W F Y S H E D L Q  
S S S L S A A S D E G I V A S D S W I D M V L P P C P M G T W V A I F R L E V Y W K A V F L G A E N M V A L A V L Y L  
L R S S I H A A A L K K N V H Y L V R R V P V E N P E A N Q E E G N A L T A A K N T Y T E L P K G A P A A S P R H R R T  
A S S G L K M A F D G A S Q L A S P R N E V L I V N M S L C D R K S L K G K C Y P S S R R G R T M S L A S N A T A L A  
R N V A K K E N A L S D A A S H A S P I T Y D S I P R T P L K P S T V N E T D E D E N I D L V V A P L E R E V S G L S H  
R T I P S G L P P D I L S P D K M S I A G S S R I V S G S S Q L S N N S N K T E G N A H T T I A D A D Y V E I H A P A S  
D M K L E Y I F V Q Y G Y G L F V A A V C G G F G C C P T I A T S N T M Y A I G A G R P A P Q Y L S V A L L L V A F Y V  
E G F E I V R F I P K A A F S S L L V L G A V D S F V T W F I K P I S K M A S L T E W S V V P F M A L L S L L I G F L P  
A V F L G I G L S T F L F V A D F F R V G V V K H D A S G S E I R S R I E R S L D Q S I W L D T N G D Y L R V I V L Q N  
Y L F F G N A S S L L R Y I E T M F E A I S L T E T E R I G F P I P P T P L V L V L D L S L I T G M D T S T V D V F M E  
I W R M C K S N D C K L Y L C G L S L R L K K T F T R G G M K P E K K G P R K T R T L L Y F S D L D H G L G K A E D V L  
I D T K M D N S P D Q S L S W M K N V I S G F H V A L R H I D E L H A T N L A D S L L E L E P H T N I V N L E E G Q I L  
F E K D G G V I R E S D H G L F F I E S G M I R I E D D S Y S R T N T R T G G S R R H S S G L F G N E N S L S S K H A  
R L D T A A Q R A S L K A L A R G N D S S Q S K S M R I G T A G P G W I G T H E F A T G Q H P L N I F K A V T K I K M  
H H I R F S D L A R I E E E S P A L V L R L Y K M L T H V M A R K E E D T V S H L S T L H T I L S S C A H S K P P I T K



LSRDSSAIY

>comp15498\_c0\_seq1; 1519 140 5095 LEN=5260; translated  
MTGGEGEGRHIEAAALLSHVKMLESKLSEEEQSAMASSSTFGHRKGPQLRLCRIPESNKSK  
QQKPI LAMMAHTERCISAQVMRESVGFSGAGAPVEVLVVSEEDAITSAILTLERPDLTM  
DDSLVVADDHDQEQNRPPHTRRQQQPKSLLTGGVVPVSPNSRLAIVGTKSSRVISIEF  
SVQTKSMQLVRRSYSTGSGSDQITILPYFEPFPRDHLTLKQVDLPQTTADCSRLHRTRRLD  
ENFSNSGSSSAKSTERNKEQKVVPFDPGGVASLVPYSVSTVHAQKRSQLNEITGRNNE  
SIEKSKETGNSGDRDGVVEHDIATYVWIGYGDGTGMRLHHAGFFPSVVLKYSNTYYNENGE  
GHENKKDELPPSLEDVLGQSLIKWQAHLPISSSTLSNPLSADMIVIPIPRCHPTPLAAAT  
NSVTPPPTSWNDAYQAGMMGRGIDTDTNNYCDKKTARGGEEKPKEDDWSKDYEAIVYYKN  
NYDNAFPTLVFYTSEDQYTRFEGDLRELLYGSSCNEEKKVDSNAGSLGNPLAAIVGGIF  
GVFTGGGDHNEDETEGTAGDAVADLNGAECTSSNGDADWEPCLPYPAINRAPIDLYAGVE  
IHDSPRQISQCTIDPHGNLAALDTLGRVSLMDLRTKQIIRMWKGFRETS CNWIEVPQSE  
ANAATCKPMLFLVIHSRQRSVVEVWRMTHGIRVKSMQVGREAEVISCROKYPGGTGYINT  
CYIVHSNVPFSNMNQVERITVSLEGNNDKGRSLEHPAKTIESSMPSQEATARMNRLQ  
QLLGETNVECQSVDVYKTMEQIDSLEDLAQCLDTVATSHALEEKMVGVDGSSFORLALSCLC  
QQKLEDAISKGGSECLTNPHEVLLAFKIAYYMQVCAGYELHKEYEKGNTESGDLDVEVKQ  
PESWGLEAAGWTSTYLKIKEMMDKDIVPPPTDPMMFCEYASCLVAPKKWKTAAAFDEKNG  
GYAIFLSDSSRTRRDMIARIFQPLISDVFSFKVVNQVFDLGIKNNYEYKAKCFGEWFGV  
LPKIKKATKNAIFVQFSPSMRWLKEIASQCIDNSLDADEITPMDSLYHFRCRHSDELVRAFW  
LAALCRQTI FEVATDKEKETYGRVDRSQIISRWDTLRLQLRVCLLVSLRFLGSPGACPI  
SVKAVDRKDNFSVFEWLARDELAMSHNQGEISTLEMACQISNRAFDPKREGDGKIRWKT  
VQRSCLTAAALGESERAAYLVDFDDERL GALHLYLRPHNKPELLVAHRALLS SKWGRGP  
SRLDILEDALVAMRTIDQNEQKSLAYAVTLDVWQRQIRPIYRAMLFGFDDVHEISP DVIT  
PLLNDTAWVDTF SKYASQLELLAGINFGEGEHVNQWTSQVVEDDSTWPPVRDCFILQRL  
VARNKLVDKGALEAHQTLVYALRINNDLQKLTGCIPSYHLFLSEALFNEVLYTEEIEEK  
QHEFMQDSIVVFAKSYHGPNMDTLNMGDIDALADLWDFDRMNVTFLFLSMYEF GKDAAV  
DELLTKSSSSISVEHFVDEGLDIMCRLNLLNVNPSDEIRHIMGTLADADICEWVKEKAE  
ESEPLLNAKFVKGISTHLFGLRLLSLAATADVSKAERI QIHS LIVLSGTIVKVLESTSS  
SAEKRSSVAGDVSQPINSPKKPPNPNSFSSP

>comp15499\_c0\_seq1; 663 1 2097 LEN=2265; translated  
KPAFYDNL IYMLNQNQAVKPPGIRRNDRFRVRNQS F HARFPTLLFCMCLLCVPFALGL  
QSPPPQEDDGPIIGIDLGTYSVSVFKD GSTHIIPNEQGNRITPSIVAFTDNKERLVGD  
AAKNQATINPENT IYDVKRLIGREYTDASVQEDKKLVPYKIVPDSQ GKPRVVVAQNGEER  
IYSAEEISGLILAKMKSIAEGYLGREVTTRAVVTPAYFNQAQREATKDAGRIAGLTVERI  
INEPTAAAIA YGLGQDAAVEDKNILVFDLGGGTFDVTLLNLDEGVFDVLSSEGDTHLGE  
DFDHRVMEYFINLSKKKSGIDISGNKQSLQKLRKEVERVKRTLSSKTQARLEIEDIVPGH  
DLLETLTRARFEELNSDLFKKTLDPVDSVLKRAGLEKEDVDRVVLVGGSTRIPKIQELIS  
EYFGGKELSKSINPDEAVAFGAGVQGSILGNSSPDEYANII LLDKTSLSMGIETVGGVVFV  
PIVKRDTSIPTKKSQIFSTNQDNQSRVIDVYEGERAMTKDNHPLGKFELAGIPPASRGI  
PQIEVSFRVDSNGILEVTAEDKGTGKAEKITITSDKGR LSEQEI QRMIEEAEEYAEEDRL  
ARERTDERNGLESYLYSLKTTLDGDETL SRNLSAEDKRDLLDLVEEKVDWMEENPEASRD  
DLVSQREEVEQIANPLLQRLYRDDPNGEDEDEDIDMDL

>comp15500\_c0\_seq1; 504 523 2587 LEN=2627; translated  
MTRLRYFSKPRLLTFLRIIHLSTFRSRNKTS DTGKXAIDIVAANHNAVYQRQRRRGSIH  
HSPNNYNSNRLAIHELCKLASCPTS VRFSKEEFSEDEEEDDEHEDSATNPSDETAELDKI  
FDACELEEGTKIYDVTQFMIDVSHSLGPTKVAISPYADTDDGDHENDNNENMHNLEINPA  
IEGYGEAEGNGNEINAAESRVYDNRDDNRDAGNVDQEEDIENDENHSRRHRDSTAIHESI  
LTVKDSMGKTPHLVLCENS CD TNMMKVILESSRDATGNPRAPTVLSLVLAKDSRGSTPLH  
YLAYSRCQPFSTLKLMMDYCQPRPSIDPTLCTDEDGETPLHWALGGYMSPRRIKELTRHS  
LDAIMARDQKGRPFDFHTTTFVDSWTEHDVCGKEVWENVQYLRVHVSNSYRKKNKFS  
HVTTRSSAADEGCKNYFNNGSKPQORSINRLVAFNEARQGFSEWLPLHFIAGSPYDFPPI  
FTDLALKYRKEDLQKADRHGNIPLHLACGRRCASIRNNNNEPETETQTNTPAKSGNGNIA  
TDNLLGLKLLKAFPRASLIRSTTTNQLPLHAVRAQQPMPPLIAALIRTYPRSLNIQDPMT  
KLLPYALAGLEDGTSDEAKGNDLWLSFALLRADPSVLHLRNLTDADRRPWSEGYDRATF  
DKKPMGVDES YXGTF LAPHASDNPMTR

>comp15500\_c0\_seq2; 547 437 2463 LEN=2503; translated  
MSRSSNQSPPTDLECIEMRHWQGAIDIVAANHNAVYQRQRRRGSIH HSPNNYNSNRLAI  
HELCKLASCPTS VRFSKEEFSEDEEEDDEHEDSATNPSDETAELDKIFDACELEEGTKIY  
DVTQFMIDVSHSLGPTKVAISPYADTDDGDHENDNNENMHNLEINPAIEGYGEAEGNGNE

INAAESRVYDNRDDNRDAGNVDQEEDIENDENHSRRHDRSTAIHESILTVKDSMGKTPH  
VLCENSCDTNMMKVILESSRDATGNPRAPTIVLSVLAKDSRGSTPLHYLAYSRCQPFSTL  
KLMMDYCQPRPSIDPTLCTDEDGETPLHWALGGYMSPRRIKELTRHSLDAIMARDQKGR  
PFDHFTTNFVSDSWTEHDVCGKEVWENVQOYLVRVHNSYRKKKNSHVTTRSSAADEGC  
KNYFNGDSKPPQRSINRLVAFNEARQGFSEWLPLHFIAGSPYDFPPIFTDLALKYRKEDL  
QKADRHNIPHLHACGRRCASIRNNNEPETETQTNTPAKSGNGNIATDNLLGLKLLKAF  
PRASLIRSTTTNQLPLHVAVRAQQPMPLIAALIRTYPRSLNIQDPMTKLLPYALAGLEDG  
TSDEAKGNDSLWLSFALLRADPSVLHLRNLTDADRRPWSEGYDRATFDKPKMGVDESXG  
TFLAPHPASDNPMTR

>comp15501\_c0\_seq1; 720 362 2488 LEN=2948; translated  
MSSQDRRKFNHEDSKNYVSGSYQSLANSVTSGFGLRRRSNVSRRREQGGSADAEKQOQGD  
GPNGIPHGFPKGLTPFFHINDNEELTEQPIAGYYTPPRSPMPSSDLEEQNIDVKLDLQRE  
KSYNLVTEPMSDSFNHSGLSALSVDGEMEEKNDPEGPEGYKSVGQNEFFSNQSDLDGGS  
ETDADAMGREKSKAVTLLQKFQKSRRQVGKFINNEYIQLGIIFLIVVNALLMGLATMEWV  
KDNPTNAKIFESIDEWFLYIFTVEVSMQLYYYGPALFLDKWLVFDFSVVLMWIFQGKGO  
ALRAFRIFRFRLITRVKPLRDLVLALGDVMPRLAAIFLLLVIIFYVFAVLFTELFSDVY  
IPGADGTDYFGSLEMSLFTCFQMMTMEWGHICRAVMDVDGDYYQYSWILFLAFVMLAGFI  
VFNLIVAVVVEAVSATEDTIRALDGIEDNSPSAQLDEAQRIDLLQMHLDEMMDGQQQIQ  
FMLETMAGELLHMETERVKAQYRETQLKEEINRRILLQNQLEARNLGNRAKSEASMQGGG  
DEGSRGVSVKKKSIRNWTVKPELTKSAKDTSMRESYSSGELYNRGRQSNSSGSKRNNRFS  
NWTIDHTIGTGNSSKSLTDSSEPSQSGGRMRDGRTRRQYQSQRNARFDLKDKSAISLS  
DHVSQSDRGIRYGLTDAPSSAPTSRRKLDLQRAKSKNWKSMFAFPV

>comp15502\_c0\_seq1; 872 376 3792 LEN=4379; translated  
MGCGQSKEAGAVSSFAAPPQVSSSPHTTKAKAEAGPVTSPVSAPKSSSTKVNENPNANNA  
IKNNTISVGVNGDDITKSLKMKVCLNDVVPVQGGSSDGDNRGRFLSYASGASTPNTSSGN  
LSWSDGSGKDEGETKSSETTGTVSSGGTNQGCTAKPKNKLYKHKHTGSAIDLGNMLNDQN  
ITSLTSKVVHIEVPFGRPIEEVYDGVHNGPILGSGVSGIVRKVTHKKTGVEYAVKSLDLQ  
WVETKEGLEQLREEIFIMCQLDHPNIVRLEEVYESHSEIYLVQELCTGGELFDRLEQPD  
YHYTEAECARLIKQMLCAVRYLHSGKIHRDLKLENFLFSSTAHDSELKMFDFGLSKHFR  
YGEVHHEAVGTPYTVAPEVIRGRYDERCDIWAIGVIAFLFSGDPPFGGCGGPEPLLVR  
QNILDGEFEFEPAEIWDLVSDLGKAFVKDLLVTDPKKRPTARESQKHAWLKMQAGRDSG  
NRQENVLNPNVVKALVGFKEFSVMRKLSEVLSFTLLPEQIKDLRKEFEIMDTDGTGEIT  
LDNLKQVLVSNAEAGSLGALTEEEVVDIFNAMRVNKEETIHWHEFIAAGLTQCRVDDRN  
LRLAFDRLDSDHKGYLTLKDIVNLVGSSEDMATEQEMRKMWTESMANVGGNQDHIYDHF  
LIMKGQTEKAVRHHHIDMELRPKQLESVPETEDDLSIALSTGMTSSITTTTSATPSAPAN  
NQNLALVTNNTKPIDTEEPKIEKDNSHFLVLAETNHSPLNGLVQSMYDSTSSVSIKDG  
VAGLSSNRNAAWPSPKSLKAASPKPNTLLKEGLPAALAPPDLLPKTVLKPTRLTRKRSQS  
LESEPTHYGRHDSLLDSDDLESSSSYQPGKSEKAMLGVDTRRALNLPERDDAIQDELAK  
KSALTVNRELYRAHRQMRINVLEASRRFEKQAIRARDTLMKKQMKEMAGLVMRHGTK  
LQVTSDAIRKYLDKTAAEQRVQIEKANRKGGRGRTRKKTISDMSAMLSPSMGQDELGDI  
AKAAAWSKTPDSKRSVNHYDFDGVCEMPDLSPNAGLDTVSNLPI SLAPRRMSKGNKAMA  
EAAAKVGVDTTGAIEQTQDAAAAPSLPEIDHKALRKATVPGQFLKTEDPFSTSGMYAT

>comp15503\_c0\_seq1; 1394 434 4135 LEN=4679; translated  
MFKTTTPFKKAKDGSKTIVGRIVEVGEKGVVDNENQRPVDNIAHDYDAKSSTPFRKGAISA  
SVSKIFAGHNNTAASSSTTRTPGRKLLKLICTPGKARSFPDTSISDADDFGVHIPNNSFD  
LPSFSQEESIIGANRSGPEGTASSPQKLAQNFPKTQDANPHHGEVNPRTESPARASGG  
EMPGNTTGTKQIDDALVAASDHSDRNEDMLFLTSTSSDETDERNETRNESDPMSRLASS  
QYHSPPRSSPTKAMRSPGISIPTPSMVKLRRETSSGSHTEDYLTAGSGIQFPHTFRSSDV  
PMEEQNNTAPNPKNLSTQFEEDDDDAFLPDDFDGVAMVQPVKSFTLAEVEKKINDARR  
EERIQLRMQHDKILREKENEFQVLIDSGTQWKKSDEQEAIFQRRLKEEERKVSKKHHE  
LINKVQSLDDLTTTLKETEGERDSLKSRIDQLEASQTSSDSRDQELGFLRNKAAADTR  
IAELESELSSKESLEAATQRHQDSNNELTRKLSDETEIELAKLKTQVEQMSSELQOKEEVAD  
QKVAELSENQVGLTKSYDHSQSQLEDLTKIALLKQQLAELPSVDPEEIRSSKLEVENLR  
KLRTDEKEIEALQSQLGQIVREHQDMCTPQKKKSTSYSESPCVGEIDMLRVDYNKAQD  
QLKSMGKILKRYKSERDDVKAKVQELEQGRVQTVETIAVKQAKEDQKEKREALAKENEALR  
NQLKTKDIAEQIVEEMKEHIEELKKRHEEKVSQLMKSMDDLKDNTDEEHKLRDAHFETER  
RNLVEEHEKEIETMKQYIQKIQTNETDEIERLRAELCQIKADFANEKAEI IKTKTECDA  
LGDQMTSMHELHTEELLLASERQEEVDDLNSRIAQLENLLSAKPVVPEESIQDMRSNFE  
ESLKEVRGEAKTERDRLQAKIDVLQDEKNAQIKKIKDLEVEIGEIQAESEARREKEKNEY  
SRQIYELKKNHGTESEDELLAQDLFEAETDQRCKAAENAIEKDAVISALGTQLAESER

SISATNKYKNLKHELKTLRNDMETANAKNEMSQIEIADLIAEHGKEMEEQIVLREVACNE  
AREEMIALAEGQLAERQEIYQALKRELDQAQSKI SVLERDLRFATKEVDEISRRYEGQEA  
DLRDELAQTKAVLATKEANLVRVGGKHEAELDRVKKAEKAMKSKLEEAQTTSHSLQKALA  
STLTEKQRIETELAEVTAISEELATMLEGKTH

>comp15503\_c0\_seq2; 1394 434 4135 LEN=4558; translated  
MFKTTPFKKAKDGSKTIVGRIVEVGEKGVVDNENQRPVDNIAHDYDAKSSTPFRKGAI  
SA SVSKIFAGHNTAASSSTTRTPGRKLLKLICTPGKARSFPDTSISDADDFGVHIPNNSFD  
LPSFSQEESSIHGANRSGPEGTASSPQKLAQNFPKTQDANPHHGVEVNPRTESPARASGG  
EMPGNTTGTKQIDDALVAASDHSDRNEDMLFLTSTSSDETDERNETRNESEDPMSRLASS  
QYHSPRRSSPTKAMRSPGISIPTPSMVKLRETSSGSHTEDYLTAGSGIQFPHTFRSSSDV  
PMEEQNNTAPNPKNLSTQFEEDDDDAFLPDDFDGVMVQPVKSFVTLAEVEKKINDARR  
EERIQLRMQHDKILREKENEFEQVLIDSGTQWKKDSDEQEAIFQRRLKEEERKVSCKHHE  
LINKVQSLDDLTTTLKETEGERDSLKSRIDQLEASAQTSSDSRDQELGFLRNAKAAADTR  
IAELESELSSKESLEAATQRHQDSNNELTRKLSDETEIELAKLKTQVEQMSELQQEKEVAD  
QKVAELSENVGVLTKSVDHSSQSQLEDTLKEIALLKQQLAELPSVDPEEIRSSKLEVENLR  
KLRTEDKEIEALQSQLGQIVREHQDMCTPQKKKSTSYSESPCVGEIDMLRVDYNKAQD  
QLKSMGKILKRYKSERDDVKAKVQEQLEQGRVQTVETIAVKQAKEDQKEKREALAKENEALR  
NQLKTKDIAEQIVEEMKEHIEELKKRHEEKVSQLMKSMDDLKDNTDEEHKLRDAHFETER  
RNLVEEHEKEIETMKQYIQKIQTNETDEIERLRAELCQIKADFANEKAEI IKTKTKECDA  
LGDQMTSMHELHTEELLLASERQEEVDDLNSRIAQLENLLSAKPVVPEESI QDMRSNFE  
ESLKEVRGEAKTERDRLQAKIDVLQDEKNAQIKKIKDLEVEIGEIQAESEARREKEKNEY  
SRQIYELKKNHGTESEDELLAQLDLFEAETDQRCKAAENAIKEKDAVISALGTQLAESESR  
SISATNKYKNLKHELKTLRNDMETANAKNEMSQIEIADLIAEHGKEMEEQIVLREVACNE  
AREEMIALAEGQLAERQEIYQALKRELDQAQSKI SVLERDLRFATKEVDEISRRYEGQEA  
DLRDELAQTKAVLATKEANLVRVGGKHEAELDRVKKAEKAMKSKLEEAQTTSHSLQKALA  
STLTEKQRIETELAEVTAISEELATMLEGKTH

>comp15504\_c0\_seq1; 3020 208 7287 LEN=7448; translated  
MNLAKEHGSNDDGSQEGITVAIRMPLNNAEENKRIWKVLQKYSSITQTTTRDGKPLPER  
TTGRTFFTFDKTFGENTNNKQVYESVAQGI VNSVVDGLNGTIFAYGQTSSGKTYTMQGAG  
NIEQGMGGEGGVVHMAANDIFSQIAQKQERNFLVRVSFLEIYNEEVRDLLGDVNQTLKIR  
EDPRHGVFVQSQEEIVTNFDGLLRILGRGDKSRTFAATGMNERSRSRSHITLITIESREK  
EFETEEEEEDDDMDIGVGNSCGDGVSRI STLNLVDLAGSESVRHTGATGERQKEGGLIN  
QSLTLRSRIVALGAPNQMHVNFDRSKLTRILQPSLSGNARMAI ICCATPSELYLEETRS  
TLQFASRAKLVKTNAQVNEVLDERSMIRRLQKELAEAKRNQSGVEQGVQVRDLEAQVATAG  
TQAMEAKKLDRLKASILNTGYIIDQVPLSSENHIKKTKKRRKSDGHL LLSLLSPEKMN  
KADVKS PKTAPRRHKNNVLOQYQRLDIEQELKLVQEAALTRNSFVRDLNLKLSQYSEQIKG  
KNCLENLRAHNTTLIEESKISKDSIMDLEETVVSLKQTLDSLSKENEQALAEKDSEVIE  
FFEKLQALRQNEAFENNSKENVARLAEVEGEKVI LEERISSVEDKLERERESHESRQND  
LITSIQSLQTONDEMKGALERETQSKVYLQDKFSKTEQENKSLVKSLESRLVEMEQQLEI  
QETVKKQLEEKLSNTQQQTEFSEKTLQSQLSGMVQRLQEEESMRKDLEVKLSDMESLEKT  
LRSQLVEMEKRLQEEVTTKKQWEEALSDVRQENESAENLQSQLAEMEQRLOEEAGMKKQ  
VEDTSLKTQQETESLEKMFQSQLSSEMEQQVKEETAMKKQLEEKLETIIKDSKLSLTLVST  
EKKQLEDQVQNYQKNMEDLNKVESLEERQQIMLEEKDSAQALLRAREEANL DLKQQIAS  
TEEQVSI IKAENKELSVANDIATNELEAMKMENTKSEL SKLKEELEKSRKETQSIEKE  
NEAKGSVIGPLKEQIESATAEVHEL RDVLSVSKSELENQEAVCAQLSQEKKILESAMGGI  
EGEMIDKDVTTLEQLRKDKQAAEDHATEAAGYKKEISDLHETLSDTKSKLEHQESEILKV  
SKDWEALEAHMKEMEDINTAKIATLEELHADKELANGDLEERLQKSSSEENQKLQDDLIVT  
KSKLEQQESEFAQLLEEKAALETHLEEMEDITTAKIATLEELQAARESLSQKMEELKKA  
EDLQNILTVAESEVKMLSLEKESLEIRIQSMEDIHASKESVIEELRVSAQEKDECTSKLK  
EKIEM YRTKIE TLEKNFASAEGGEARKDSIIKQLRVEREELQMKLDTKI SEAEKLENKAT  
DFECLIGRLSADVEIHNEIETLLLNLMQITGEKEELESSHVELKYSCESLTTENEAMHD  
RFSALECKNAEVEEEELCLMIEYKLLTERN SALEESEQLKKAQTKIQKTVAEYEEVETD  
LSEQIGTVFNEVLSFEDRNELQTLTIDNLQRKLQEKNTAFLQIQKDIETMAGSRDEMLRN  
LQNCRAERDEAKNEVKNI INSRDSMIQSLRDREAERDEATSELERLYDEIRD LNSNKTAS  
KAKESSELFEEVSELKVQNL ELKRL LASVNETEEKLRNALKIAEKENMTKTQELED AQHRI  
SRIEQELSKSQIVDVELSRVEQSKADLLVSL EIIQREKENIEQSLQEETNARNELQQQMR  
EEQRALIQEGENMMAALRKQLEECETKLNQSESEAYAAARKQVEEITDERNRLEEKYLETS  
TQLSSSDSSKQRQEEEMATLRSKLNDSKSESYALKEAAIDMKEKMRRATRDSEKAIRENE  
IANSELSTTRRKLVSLENLNEANHTENLKLKRLKLDLEVNETLAKELQKELEKRESEVAI  
MSNEISCLKLEIRKETDSTLEAELGKTEKEMKMMKNELDEMNELMKQKEKRIKKLEAVRL

TKDQLAQIKKMKTDNLQYEKKCSKLEKDL SRLQKHISTTGSEGNMSSHRSHYEQKCLHLE  
KEIDRLQNQLSTAGSETNLSLEVNELRFDKEALERKLRKFATHCQRLEDDKAGMADALRS  
CNINIE THGNVTD AIVHLCDKLASIEEVHDKQLNNSFHEKEKSSLQKIEKLSHSEEKL  
TEKLNQYQRD NAKLQEKLEKIATKPASGDSDEHRENIRYLEHENLQLMHDMKSVKRQLQA  
AREEIE TLRMNGIGRSPNSKFGSLDTRASMKHPLSPTTTCSSSKENSDTMELANLAEACT  
KNILRLSARKTKKRNVLSDNTNGLKDEHREERLADKRRKVI GLADKEKVDRVATNNISTP  
GLGESSHSTENTGECKQS

>comp15504\_c0\_seq3; 388 88 1569 LEN=2838; translated  
MGIVIVTERLRLVQALAI VVAVFSPLTT LGMVAEDSSRQKQYERMQKLLLSDDGLKSISA  
TTSLQDHIRVQEM LKNRHARRKPR L DAKDPIFNTGFDDNFDDLDRREDELWLSLPRKPKK  
KSSMILRSMINRKEQKR SKTSTAGSSR SKTTPNGLFIPFEDTLQALQAFHDEHSHLVI  
PRRFVVP ESSSYPSVWHGIDL AGTVY TMRWWQRHVKNQPD RVSELNRIGFVWERLQPEWN  
LILESLIIYKAIFG STLVPSTFVVPNDN RWP KACWGISLGN SVYKIRNRGDYLGARNSN  
SLSRRAQLDAIGFVWDVQELRF SKFTTALELYGKVEQH HQESNHSGALKVPSKFV VPRSS  
RWPTDMWGYPLGERCTQVRQKELYIKGHPDRVRILADLGFY TSGGNNNLRWLEV VHAAAV  
YSQMNNQLDVPTKFVVPAPRRVVAATEDDESEEDSGASRLVGSDDAWPWP GKF DNATV  
HKKCDILFKSYIY

>comp15504\_c0\_seq4; 410 88 1674 LEN=2718; translated  
MGIVIVTERLRLVQALAI VVAVFSPLTT LGMVAEDSSRQKQYERMQKLLLSDDGLKSISA  
TTSLQDHIRVQEM LKNRHARRKPR L DAKDPIFNTGFDDNFDDLDRREDELWLSLPRKPKK  
KSSMILRSMINRKEQKR SKTSTAGSSR SKTTPNGLFIPFEDTLQALQAFHDEHSHLVI  
PRRFVVP ESSSYPSVWHGIDL AGTVY TMRWWQRHVKNQPD RVSELNRIGFVWERLQPEWN  
LILESLIIYKAIFG STLVPSTFVVPNDN RWP KACWGISLGN SVYKIRNRGDYLGARNSN  
SLSRRAQLDAIGFVWDVQELRF SKFTTALELYGKVEQH HQESNHSGALKVPSKFV VPRSS  
RWPTDMWGYPLGERCTQVRQKELYIKGHPDRVRILADLGFY TSGGNNNLRWLEV VHAAAV  
YSQMNNQLDVPTKFVVPAPRRVVAATEDDESEEDSGASRLVGSDDAWPWP EYLWNFPL  
GQRLRDIRVKGNYLKGENGDARRRQLDALGFNWE PKRGRRLYKDRNPG

>comp15504\_c0\_seq5; 3010 208 7287 LEN=7448; translated  
MNLAKEHGSND DGSQEGITVAIRMRPLNNAEENKRIWKVLQKYSSITQTTRDGKPLPER  
TTGRTFFTFDKTFGENTNNKQVYESVAQGI VNSVVDGLNGTIFAYGQTSSGKTYTMQGAG  
NIEQGMGEGGVVHMAANDIFSQIAQKQERNFLVRVSFLEIYNEEVRDLLGDVNQTLKIR  
EDPRHGVFVQSQEEIVTNFDGLLRILGRGDKSRTFAATGMNERSRSHTILRITIESREK  
EFETEEEEEDDDMDIGVGNSCGDGSVRI STLNLVDLAGSESVRHTGATGERQKEGGLIN  
QSLLTLSRVIVALGAPNQMHVNF RDSKLRILQPSLSGNARMAI ICCATPSELYLEETRS  
TLQFASRAKLVKTNAQVNEVLDERSMIRRLQKELAEAKRNQSGVEQGGV RDL E AQVATAG  
TQAMEAKKLDRLKASILNTGYIIDQVPLSSENHIKKT KRRKSDGHLLLSLLSPEKMN  
KADVKS PKTAPRRHKNNV LQYQRLDIEQELKLVQ EALATRN SFVRDLNLKLSQYSEQIKG  
KNCLENLRAHNTTLIEESKISKDSIMDLEETVVS LKQTL DSS LKENEQALAEKDSEVIE  
FFEKLQALRQNEAFENNSKENVARLAEVEGEKVILEERISSVEDKLERERESHESRQND  
LITSIQSLQTONDEMKGALERETQSKVYLQDKFSKTEQENKSLVKSLESRLVEMEQQLEI  
QETVKKQLEEKLSNTQQQTEFSEKTLQS QLSGMVQRLQEEESMRKDLEVKLSDMESLEKT  
LRSQLVEMEKRLQEEVTTKKQWEEALSDVRQENESA EKNLQSQLAEMEQR LQEEAGMKKQ  
VEDT LSKTQQETESLEKMFQS QLS EMEQQVKEETAMKKQLEEKLETIIKDSKLSLTLVST  
EKKQLEDQVQNYQKNMEDLN EKVESLEERQQIMLEEKDSAQALLRAREEANL DLKQQIAS  
TEEQVSI IKAENKELSVANDIATNELEAMK EMENTKSEL SKLKEELEKSRKETQSIEKE  
NEAKGSVIGPLKEQIESATAEVHEL R DVLS SVKSELENQEAVCAQLS QEKKILESAMGGI  
EGEMIDKDVTTLEQLRKDK EQAAEDHATEAAGYKKEISDLHETLSDTKSKLEHQESEILKV  
SKDWEALEAHMKEMEDINTAKIATLEELHAEKETSSQ QMDEK LKQSSEENQKLQDDLI VT  
KSKLEQQESEFAQLLEEKAALETHLEEMEDITTAKIATLEELQAARESLSQKMEELKKA  
EDLQNILTVAESEVKMLSLEKESLEIRIQSMEDIHASKESVIEELRVSAQEKDECTSKLK  
EKIEMYRTK IETLEKNFASAEGGEARKDSIIKQLRVEREELQMKLDTKI SEAEKLENKAT  
DFECLIGRLSADVEIHNEIETLLLNLMQITGEKEELES SHVELKYSCESLTTENEAMHD  
RFSALECKNAEVEEEELCLMIEYKKLTERN SALEESEQLKKAQTKIQKTVAEYEEVTD  
LSEQIGTVFNEVLSFEDRNNE LQLTIDNLQRKLQEKNTAFLQIQKDIETMAGSRDEMLRN  
LQNCRAERDEAKNEVKNI INSRDSMIQSLRDREAERDEATSELERLYDEIRD LNSNKTAS  
KAKESELFEEVSELKVQNL ELKRL LASVNETEEKLRNALKIAEKENMKTQELEDAQHRI  
SRIEQELSKSQIVDVELSRVEQSKADLLVSL EIIQREKENIEQSLQEETNARNELQQQMR  
EEQRALIQEGENMMAALRKQLEECETKLNQSESEAYAAARKQVEEITDERNRLEEKYLETS  
TQLSSSDSSKQRQEEEMATLRSKLNDSKSES YALKEAAIDMKEKMRRATR DSEKAIRENE  
IANSELSTTRRKLVSLENLNEANHTENLKL RKKLKDLEVNETLAKELQKELEKRESEVAI

MSNEISCLKLEIRKETDSTLEAELGKTEKEMMMKNELDEMNELMKQKEKRICKLEAVRL  
TKDQLAQIKKMKTDNLQYEKKCSKLEKDL SRLQKHI STTGSEGNMSSHRSHYEQKCLHLE  
KEIDRLQNQLSTAGSETNLSLEVNELRFDKEALERKLRKFATHCQRLEDDKAGMADALRS  
CNINIE THGNVTD AIVHLCDK LASIEEVHDKQLNNSFHEKEKSSLQKIEKLSHSEEKL  
TEKLNQYQRD NAKLQEKLEKIATKPASGDSDEHRENIRYLEHENLQLMHDMKSVKRQLQA  
AREEIE TLRMNGIGRSPNSKFGSLDTRASMKHPLSPTTTCSSSKENSDTMELANLAEACT  
KNILRLSARKTKRNVLS DNTNGLKDEHREERLADKRRKVI GLADKEKVDRVATNNISTP  
GLGESSHSTENTGECKQS

>comp15505\_c1\_seq1; 567 210 2132 LEN=2581; minus strand; translated  
MKIQFSFVTF LALCAAAPVAFGDS PDGSSSLFSSSDKDEVASSLRVGLDVSSASNASLGS  
DDPTDSLATRVDSSLHANNANGRN LAPKISKYDSHVKILHMGDSYSSGNGANGLSYLSVG  
PKWCFRHD TNWGRQATDILRSSFEHPDALLYINRACAGSKIKHLYEDYLLDKKLNLLFF  
SVLITTTGGND AFGDIVRDCILVYTGRNKEKCETSIAAVKNFINDDYINMMYNAMEQLFD  
KLKPEARV VIGAYPYLTVTPEQEGTTS GFEDTRWANTLIRDVVAEAMTTTLQQNPDGFLV  
EMDASALLCSGLSLE CQKVRKTF AFGFSF ITFQIFFTEVHLIPIF SHAFSXQQLYHPNER  
GHTSLGIGMSNFLKNQVLPKLLTERRRRDRSSAKYPDSSFD FALLIDTTLSEEALKGTK  
DAIKAVSSTLSAITESWRFGILSYGCEDGDTKFLQEF TNDPNELKKAIGSVKSKTCETGS  
LLLSGLDKVFSHLPWRDGVTSNVIVLAGTEPDDNSISDLEASVNLI EDLGVVIDVVAFWG  
VDPGXYYLQKFAEFVY EEDYDGHVNLEVKTADGRVSNKISVPI TVNEFGLPEGYCDEDPT  
AHERCGATE TVPTAAPT KVTKKGN TKQNKPTKKPKGSKK

>comp15505\_c1\_seq2; 647 210 2237 LEN=2686; minus strand; translated  
MKIQFSFVTF LALCAAAPVAFGDS PDGSSSLFSSSDKDEVASSLRVGLDVSSASNASLGS  
DDPTDSLATRVDSSLHANNANGRN LAPKISKYDSHVKILHMGDSYSSGNGANGLSYLSVG  
PKWCFRHD TNWGRQATDILRSSFEHPDALLYINRACAGSKIKHLYEDYLLDKKLNLLFF  
SVLITTTGGND AFGDIVRDCILVYTGRNKEKCETSIAAVKNFINDDYINMMYNAMEQLFD  
KLKPEARV VIGAYPYLTVTPEQEGTTS GFEDTRWANTLIRDVVALANEKQKEVVDKLN RK  
LQTD AFHFFAESTE I FDTHEAMTTTLQQNPDGFLVEMDASALLCSGLSLE CQKVRKTF A  
FGFSF ITFQIFFTEVHLIPIF SHAFSXQQLYHPNERGHTSLGIGMSNFLKNQVLPKLLT ER  
RKRDRSSAKYPDSSFD FALLIDTTLSEEALKGTKDAIKAVSSTLSAITESWRFGILSYG  
CEDGDTKFLQEF TNDPNELKKAIGSVKSKTCETGSLLLSGLDKVFSHLPWRDGVTSNVIV  
LAGTEPDDNSISDLEASVNLI EDLGVVIDVVAFWGVDPGXYYLQKFAEFVY EEDYDGHVN  
LEVKTADGRVSNKISVPI TVNEFGLPEGYCDEDPTAHERCGATE TVPTAAPT KVTKKGN  
TKQNKPTKKPKGSKK

>comp15505\_c1\_seq3; 715 210 2604 LEN=3053; minus strand; translated  
MKIQFSFVTF LALCAAAPVAFGDS PDGSSSLFSSSDKDEVASSLRVGLDVSSASNASLGS  
DDPTDSLATRVDSSLHANNANGRN LAPKISKYDSHVKILHMGDSYSSGNGANGLSYLSVG  
PKWCFRHD TNWGRQATDILRSSFEHPDALLYINRACAGSKIKHLYEDYLLLEGDGEHVNK  
GECKEYLPEMRLEKTEFPWPFADHCRNIMRPQLDEVSNDVDLGMIVVFELSSFSMNMS  
FTTNKKNL LLLFFSVLITTTGGND AFGDIVRDCILVYTGRNKEKCETSIAAVKNFINDDY  
INMMYNAMEQLFDKLKPEARV VIGAYPYLTVTPEQEGTTS GFEDTRWANTLIRDVVAEAM  
TTTLQQNPDGFLVEMDASALLCSGLSLE CQKVRKTF AFGFSF ITFQIFFTEVHLIPIF SH  
AFSXQQLYHPNERGHTSLGIGMSNFLKNQVLPKLLTERRRRDRSSAKYPDSSFD FALLI  
DTTLSEEALKGTKDAIKAVSSTLSAITESWRFGILSYGCEDGDTKFLQEF TNDPNELKKA  
IGSVKSKTCETGSLLLSGLDKVFSHLPWRDGVTSNVIVLAGTEPDDNSISDLEASVNLI E  
DLGVVIDVVAFWGVDPGHIIFKTVVEESGGVALVNENVDVVAELGIWVEEKATIPVAFMT  
ELGYEITGQPVS VNAQGSFDPKYQGIVSYVWNFLDGDARGQLVTIEPF AEFVY EEDYDGH  
VNLEVKTADGRVSNKISVPI TVNEFGLPEGYCDEDPTAHERCGATE TVPTAAPT KVTKKGN  
KNTKQNKPTKKPKGSKK

>comp15505\_c1\_seq4; 690 210 2456 LEN=2905; minus strand; translated  
MKIQFSFVTF LALCAAAPVAFGDS PDGSSSLFSSSDKDEVASSLRVGLDVSSASNASLGS  
DDPTDSLATRVDSSLHANNANGRN LAPKISKYDSHVKILHMGDSYSSGNGANGLSYLSVG  
PKWCFRHD TNWGRQATDILRSSFEHPDALLYINRACAGSKIKHLYEDYLLLEGDGEHVNK  
GECKEYLPEMRLEKTEFPWPFADHCRNIMRPQLDEVSNDVDLGMIVVFELSSFSMNMS  
FTTNKKNL LLLFFSVLITTTGGND AFGDIVRDCILVYTGRNKEKCETSIAAVKNFINDDY  
INMMYNAMEQLFDKLKPEARV VIGAYPYLTVTPEQEGTTS GFEDTRWANTLIRDVVALAN  
EKQKEVVDKLN RKLQTD AFHFFAESTE I FDTHEAMTTTLQQNPDGFLVEMDASALLCSGL  
SLE CQKVRKTF AFGFSF ITFQIFFTEVHLIPIF SHAFSXQQLYHPNERGHTSLGIGMSNF  
LKNQVLPKLLTERRRRDRSSAKYPDSSFD FALLIDTTLSEEALKGTKDAIKAVSSTLSA  
ITESWRFGILSYGCEDGDTKFLQEF TNDPNELKKAIGSVKSKTCETGSLLLSGLDKVFSH  
LPWRDGVTSNVIVLAGTEPDDNSISDLEASVNLI EDLGVVIDVVAFWGVDPGXYYLQKFA

EFVYEEDYDGHVNLEVKTADGRVSNKISVPITVNEFGLPEGYCDEDPTAHERCGATETVP  
TAAPTQVTKKGGKNTKQNKPTKKPKGSKK  
>comp15505\_c1\_seq5; 752 210 2490 LEN=2939; minus strand; translated  
MKIQFSFVTFALCAAAPVAFGDSPPDGSSSLFSSSDKDEVASSLRVGLDVSSASNASLGS  
DDPTDSLATRVDSSLHANNANGRNLAPKISKYDSHVKILHMGDSYSSGNGANGLSYLSVG  
PKWCFRHD TNWGRQATDILRSSFEHPDALLYINRACAGSKIKHLYEDYLLDKKLNLLFF  
SVLITTTGGNDAKFGDIVRDCILVYTGRNKEKCETSIAAVKNFINDDYINMMYNAMEQLFD  
KLKPEARVVIGAYPYLTVTPEQEGTTSGFEDTRWANTLIRDVVALANEKQKEVVDKLNK  
LQTD AFHF FAESTE I FDTHEAMTTTLQQNPDGFLVEMDASALLCSGLSLECQKVRKTF AF  
GFSF ITFQ IFFTEVHLIPIF SHAF SXQQLYHPNERGHTSLGIGMSNFLKNQVLPKLLTER  
RKRDRSSAKYPDSSFD FALLIDTTLSEEALKGTKDAIKAVSSTLSAITESWRFGILSYG  
CEDGDTKFLQEF TNDPNELKKAIGSVKSKTCETGSLLLSGLDKVFSHLPWRDGVTSNVI  
LAGTEPDDNSISDLEASVNLI EDLGVV IDVVAFWGVD PGHIIFKTVVEESGGVALV NENV  
DVVAELGIWVEEKATIPVAFMTELGYEITGQPVSVNAQGSFDPKYQGIVSYVWNFLDGD  
RGQLVTIEPFAEFVYEEDYDGHVNLEVKTADGRVSNKISVPITVNEFGLPEGYCDEDPTA  
HERCGATETVPTAAPTQVTKKGGKNTKQNKPTKKPKGSKK  
>comp15505\_c1\_seq6; 610 210 2351 LEN=2800; minus strand; translated  
MKIQFSFVTFALCAAAPVAFGDSPPDGSSSLFSSSDKDEVASSLRVGLDVSSASNASLGS  
DDPTDSLATRVDSSLHANNANGRNLAPKISKYDSHVKILHMGDSYSSGNGANGLSYLSVG  
PKWCFRHD TNWGRQATDILRSSFEHPDALLYINRACAGSKIKHLYEDYLLLEGDGEHVNK  
GECKEYLPEMRLEKTEFPWPFADHCRNIMRQQLDEVSNDVDLGMIVVVFELSSFSMMS  
FTTNKKNL LLLFFSVLITTTGGNDAKFGDIVRDCILVYTGRNKEKCETSIAAVKNFINDDY  
INMMYNAMEQLFDKLKPEARVVIGAYPYLTVTPEQEGTTSGFEDTRWANTLIRDVVAEAM  
TTTTLQQNPDGFLVEMDASALLCSGLSLECQKVRKTF AF GFSF ITFQ IFFTEVHLIPIF SH  
AF SXQQLYHPNERGHTSLGIGMSNFLKNQVLPKLLTERRKRDRSSAKYPDSSFD FALLI  
DTTLSEEALKGTKDAIKAVSSTLSAITESWRFGILSYGCEDGDTKFLQEF TNDPNELKKA  
IGSVKSKTCETGSLLLSGLDKVFSHLPWRDGVTSNVI VLAGTEPDDNSISDLEASVNLI E  
DLGVVIDVVAFWGVD PGXYLQKFAEFVYEEDYDGHVNLEVKTADGRVSNKISVPITVNE  
FGLPEGYCDEDPTAHERCGATETVPTAAPTQVTKKGGKNTKQNKPTKKPKGSKK  
>comp15505\_c1\_seq7; 795 210 2709 LEN=3158; minus strand; translated  
MKIQFSFVTFALCAAAPVAFGDSPPDGSSSLFSSSDKDEVASSLRVGLDVSSASNASLGS  
DDPTDSLATRVDSSLHANNANGRNLAPKISKYDSHVKILHMGDSYSSGNGANGLSYLSVG  
PKWCFRHD TNWGRQATDILRSSFEHPDALLYINRACAGSKIKHLYEDYLLLEGDGEHVNK  
GECKEYLPEMRLEKTEFPWPFADHCRNIMRQQLDEVSNDVDLGMIVVVFELSSFSMMS  
FTTNKKNL LLLFFSVLITTTGGNDAKFGDIVRDCILVYTGRNKEKCETSIAAVKNFINDDY  
INMMYNAMEQLFDKLKPEARVVIGAYPYLTVTPEQEGTTSGFEDTRWANTLIRDVVALAN  
EKQKEVVDKLNKRLQTD AFHF FAESTE I FDTHEAMTTTLQQNPDGFLVEMDASALLCSGL  
SLECQKVRKTF AF GFSF ITFQ IFFTEVHLIPIF SHAF SXQQLYHPNERGHTSLGIGMSNF  
LKNQVLPKLLTERRKRDRSSAKYPDSSFD FALLIDTTLSEEALKGTKDAIKAVSSTLSA  
ITESWRFGILSYGCEDGDTKFLQEF TNDPNELKKAIGSVKSKTCETGSLLLSGLDKVFSH  
LPWRDGVTSNVI VLAGTEPDDNSISDLEASVNLI EDLGVV IDVVAFWGVD PGHIIFKTVV  
EESGGVALV NENV DVVAELGIWVEEKATIPVAFMTELGYEITGQPVSVNAQGSFDPKYQG  
IVSYVWNFLDGDARGQLVTIEPFAEFVYEEDYDGHVNLEVKTADGRVSNKISVPITVNEF  
GLPEGYCDEDPTAHERCGATETVPTAAPTQVTKKGGKNTKQNKPTKKPKGSKK  
>comp15505\_c1\_seq8; 672 210 2385 LEN=2834; minus strand; translated  
MKIQFSFVTFALCAAAPVAFGDSPPDGSSSLFSSSDKDEVASSLRVGLDVSSASNASLGS  
DDPTDSLATRVDSSLHANNANGRNLAPKISKYDSHVKILHMGDSYSSGNGANGLSYLSVG  
PKWCFRHD TNWGRQATDILRSSFEHPDALLYINRACAGSKIKHLYEDYLLDKKLNLLFF  
SVLITTTGGNDAKFGDIVRDCILVYTGRNKEKCETSIAAVKNFINDDYINMMYNAMEQLFD  
KLKPEARVVIGAYPYLTVTPEQEGTTSGFEDTRWANTLIRDVVAEAMTTTLQQNPDGFLV  
EMDASALLCSGLSLECQKVRKTF AF GFSF ITFQ IFFTEVHLIPIF SHAF SXQQLYHPNER  
GHTSLGIGMSNFLKNQVLPKLLTERRKRDRSSAKYPDSSFD FALLIDTTLSEEALKGTK  
DAIKAVSSTLSAITESWRFGILSYGCEDGDTKFLQEF TNDPNELKKAIGSVKSKTCETG  
SLLSGLDKVFSHLPWRDGVTSNVI VLAGTEPDDNSISDLEASVNLI EDLGVV IDVVAFWG  
VD PGHIIFKTVVEESGGVALV NENV DVVAELGIWVEEKATIPVAFMTELGYEITGQPVSV  
NAQGSFDPKYQGIVSYVWNFLDGDARGQLVTIEPFAEFVYEEDYDGHVNLEVKTADGRV  
SNKISVPITVNEFGLPEGYCDEDPTAHERCGATETVPTAAPTQVTKKGGKNTKQNKPTKKPK  
GSKK  
>comp15506\_c0\_seq2; 431 226 1167 LEN=1261; translated  
MAKTIVAAGIASPAVASPDVGNKAGAIINGVQSEPRFPYYVRVARNCGGVLIAPDIVL

TAAHCKEIEGKRMHVGAYKRNSTEFGAQFRKCERRIGHPSWDPATTQNDYALCKLNEPVI  
IDDSFVKLSLNEERDDAIPAVGTKLIAMGLGHIGRENKTI PNLLRNVTFGRESSEACEAF  
WEKHPDANRTYNRSVMLCVEYDPTTDRSTCYGDSGGPLVERKPYRGGGNDGAVFVDTLFG  
ITSFGKENCINGVFSRVGVAMDWIRSAACDTLNSTGGSSLCEPTDL PAKGSKKTKKQP  
RKSPKTTKAPKHK

>comp15506\_c1\_seq1; 311 199 1917 LEN=2348; translated  
MPTKSEDPEDVSSSACNINYGNEFLSTNNDPETIDILFSEELLKLSIEARNEIQEEAHGV  
RCLAPEETPEMIRDALRKFSNELDKLPRHTMRAYHISQKPTQRSPQRTFVNTDDFRLRF  
LRAQLFDVPAARCMANYLKVILDHVGEYALFRPIRLNDFTKEEQVRFRKGLAQLLPYRD  
RHGRRVLVFMGEDWEEVSVTLKVISIQRRTKPIVLKNTYRKSYPHSTPHLSIIXMTPNQS  
ICGSLMYILLKIMLYNTFNLGTEDLELQRKGLVVVFWCQESLTFQLKTNNSNTIARIDEC  
SPIRVSIAHICTPDPFYRFARGVWAMVIGRAYFALMRHFVGEPIELRYALESGLISTGQ  
LPITWTGKIKEQHIRQYMRMRRLQLEHSSSGENDNSTPIIECPNLSDIVFRQGTSAMYHP  
GNVIFRSRIQHLFEEAKPFTMDQSTRTLVTKLMEEIRENNGRILIIWSQLKTGTSVSFGDC  
WWTELRDQSQIYTKIENLVREFKYSKQKYQSINRNGSSVRTVQNAESDKSLFLQPCHDG  
FTGWCSTRGKKRAHDNTFEDDQCCSRNLCNRR

>comp15506\_c1\_seq2; 755 480 4073 LEN=4460; translated  
MSSVDKNISNIAFTRTVLGLLLGVIVLAVDELNPVKLFLHVFNPITPRQLSLTAFLAMIY  
VWISSEFKELLYFGAKIFINSMLSIFFRDIEVLGKDRLPRHGPMILVINHANQFVDMVV  
LGTGCGNENFKVSYLMAEKSFNRPIIGDIASALDVVPVKRAQDAAIRGLGTIRFLECAAVDK  
PAPSSPSSDGDSDGVVVDENENDNDKNSDGETGEGDSDNDGSLKCLTIHGRDGFTTSAF  
RVGDKLRPMGTATGVKVLKILDDTSCIVDVTAVSEADMATIFSTSENENITYDILKHVD  
LHSMFEKVLDRDLARGGVFGIFPEGGSHDRDPLPKVGVVALIAYSALERDGISVPIVPVG  
LNYFRTHRWRGKCLVEYGDVPVFKPGSLADYQKGGAAKRAVCNDLLNRIKDSMRSVIVSM  
PDYESLQVVHTARRLYQRNSEAIDGQEKQDLLRRFAVGYKILYSGLEDKPKAWIDLQERI  
KAYRRELKELGLRDYQVPLDRENNDDEQ TENIRTDIRIVYRIAHLLVLTALSALPSLFL  
NLPVRIMADIYAERRRKKALAASKVKIHGYDVMLTEKLTFCIVVVPLLWL VYGLIMVFFT  
NFDGQTITLCFMCFPVFSYTAIISSEAGMVDGKELKPYLLRLLPSTRKRLRALPKQRRDL  
RRDLRAFVKKVGPAGFELYHRKSVDWTQVTSRLSSENSADIMEKIVGEEDIPGVGGGMKKA  
VSEDGFHHVDNEAVAAAAAATDKKDQXRERVKRYXERKNQMS SHPFECNNRAGFVLTTL  
SGFLPKGPLSSIVRCRYDCRSMNETFTLEILLFTTNI PQTFKAAAPT KPFQMAFPKLH  
DSLFSPLASYLCFGAFVVFGLLRGGCFLVFFDPLGAXEIGWFAKGRTAGAVQGVARGGSD  
PVHRHADPGEHPVGAVFLAKGRDAKQGVHEHGTVVASPAVGLPFHEGAARVTVAGRPIGG  
GVVLHAEHDAAVVGSVRIRMFFPKGLAGLAAFPAGKDVAEQVRDGFVFPADVSESHGDEF  
GPDGRDGVVFLVQRQLDKGVVDDHGFVELAESVVVLCGGWIPARVADPSLAF AELGAEF  
GAVPFVGTDVHPLAFYLLAVGRGEDNVGRYEHA AAVPSDPDVIRKPARFGLHPVDDGPCL  
LVPDVRGGNGGSDPRGNDRFGHSRGGRSCSMVLGCCRSMILARHESVLEARES GTST

>comp15506\_c1\_seq3; 343 354 2312 LEN=2715; translated  
MADIYAERRRKKALAASKVKIHGYDVMLTEKLTFCIVVVPLLWL VYGLIMVFFT NFDGQT  
ITLCFMCFPVFSYTAIISSEAGMVDGKELKPYLLRLLPSTRKRLRALPKQRRDLRRDLRA  
FVKKVGPAGFELYHRKSVDWTQVTSRLSSENSADIMEKIVGEEDIPGVGGGMKKA VSEDGF  
HHVDNEAVAAAAAATDKKDQXRERVKRYXERKNQMS SHPFECNNRAGFVLTTL SGFLPK  
GPLSSIVRCRYDCRSMNETFTLEILLFTTNI PQTFKAAAPT KPFQMAFPKLHDSLFS  
LASYLFCFGAFVVFGLLRGGCFLVFFDPLGAXEIGWFAKGRTAGAVQGVARGGSDPVHRHA  
DPGEHPVGAVFLAKGRDAKQGVHEHGTVVASPAVGLPFHEGAARVTVAGRPIGGVVLHA  
EHDAAVVGSVRIRMFFPKGLAGLAAFPAGKDVAEQVRDGFVFPADVSESHGDEF GPDGRD  
GVVPPFLVQRQLDKGVVDDHGFVELAESVVVLCGGWIPARVADPSLAF AELGAEF GAVPFV  
GTDVHPLAFYLLAVGRGEDNVGRYEHA AAVPSDPDVIRKPARFGLHPVDDGPCLLVPDVR  
GGNGGSDPRGNEHGEEGGNDRFGHSRGGRSCSIMILARHESVLEARES GTST

>comp15506\_c1\_seq4; 766 480 4076 LEN=4479; translated  
MSSVDKNISNIAFTRTVLGLLLGVIVLAVDELNPVKLFLHVFNPITPRQLSLTAFLAMIY  
VWISSEFKELLYFGAKIFINSMLSIFFRDIEVLGKDRLPRHGPMILVINHANQFVDMVV  
LGTGCGNENFKVSYLMAEKSFNRPIIGDIASALDVVPVKRAQDAAIRGLGTIRFLECAAVDK  
PAPSSPSSDGDSDGVVVDENENDNDKNSDGETGEGDSDNDGSLKCLTIHGRDGFTTSAF  
RVGDKLRPMGTATGVKVLKILDDTSCIVDVTAVSEADMATIFSTSENENITYDILKHVD  
LHSMFEKVLDRDLARGGVFGIFPEGGSHDRDPLPKVGVVALIAYSALERDGISVPIVPVG  
LNYFRTHRWRGKCLVEYGDVPVFKPGSLADYQKGGAAKRAVCNDLLNRIKDSMRSVIVSM  
PDYESLQVVHTARRLYQRNSEAIDGQEKQDLLRRFAVGYKILYSGLEDKPKAWIDLQERI  
KAYRRELKELGLRDYQVPLDRENNDDEQ TENIRTDIRIVYRIAHLLVLTALSALPSLFL  
NLPVRIMADIYAERRRKKALAASKVKIHGYDVMLTEKLTFCIVVVPLLWL VYGLIMVFFT

NFDGQTITLFCMCFPVFSYTAIISSEAGMVDGKELKPYLLRLLPSTRKRLRALPKQRRDL  
RRDLRAFVKKVGPAFGELYHRKSVDWTSRLSENSADIMEKIVGEEDI PGVGGGMKKA  
VSEDFHHVDNEAVAAAAAATDKKDQXRERVKRYXERKNQMS SHPFECNNRAGFVLTTL  
SGFLPKGPLSSIVRCRYDCRSMNETFTLEILLFTTNI PQTFKAAAPT K PFFWQMAFPKLH  
DSLFSPLASYLCFGAFVVFGLLRGGCFLVFFDPLGAXEIGWFAKGRTAGAVQGVARGGSD  
PVHRHADPGEHPVGAVFLAKGRDAKQGVHEHGTVVASPAVGLPFHEGAARVTVAGRPIGG  
GVVLHAEHDAAVVGSVRIRMFFPKGLAGLAAFPAGKDVAEQVRDGFVFPADVSESHGDEF  
GPDGRDGVVFPFLVQRQLDKGVVDDHGFVELAESVVVLCGGWIPARVADPSLAF AELGAEF  
GAVPFVGTDVHPLAFYLLAVGRGEDNVGRYEHA AAVPSDPDVIRKPARFGLHPVDDGPCL  
LVPDVRGGNGGSDPRGNEHGEEGGNDRFGHSRGGRSCSIMILARHESVLEARES GTST  
>comp15506\_c1\_seq5; 332 354 2309 LEN=2696; translated  
MADIYAERRRKKALAASKVKIHGYDVMLTEKLTFCIVVPLLLWL VYGLIMVFFTNFDGQT  
ITLFCMCFPVFSYTAIISSEAGMVDGKELKPYLLRLLPSTRKRLRALPKQRRDLRRDLRA  
FVKKVGPAFGELYHRKSVDWTSRLSENSADIMEKIVGEEDI PGVGGGMKKA VSEDF  
HHVDNEAVAAAAAATDKKDQXRERVKRYXERKNQMS SHPFECNNRAGFVLTTL SGFLPK  
GPLSSIVRCRYDCRSMNETFTLEILLFTTNI PQTFKAAAPT K PFFWQMAFPKLHDSLFS  
LASYLFCFGAFVVFGLLRGGCFLVFFDPLGAXEIGWFAKGRTAGAVQGVARGGSDPVHRHA  
DPGEHPVGAVFLAKGRDAKQGVHEHGTVVASPAVGLPFHEGAARVTVAGRPIGGGVVLHA  
EHDAAVVGSVRIRMFFPKGLAGLAAFPAGKDVAEQVRDGFVFPADVSESHGDEF GPDGRD  
GVVFPFLVQRQLDKGVVDDHGFVELAESVVVLCGGWIPARVADPSLAF AELGAEFGAVPFV  
GTDVHPLAFYLLAVGRGEDNVGRYEHA AAVPSDPDVIRKPARFGLHPVDDGPCLLVPDVR  
GGNGGSDPRGNDRFGHSRGGRSCSMVLGCCRSIMILARHESVLEARES GTST  
>comp15506\_c1\_seq6; 410 199 1779 LEN=2210; translated  
MPTKSEDPEDVSSSACNINYGNEFLSTNNDPETIDILFSEELLKLSIEARNEIQEEAHGV  
RCLAPEETPEMIRDALRKFSNELDKLPRHTMRAYHISQKPTQRSPQRTFVNTDDFRLRF  
LRAQLFDVPKAARCMANYLKVILDHVGEYALFRPIRLNDFTKEEQRVFRKGLAQLLPYRD  
RHGRRVLVFMGEDWEEVSVTLKLIKIMLYNTFNLTGTEDELQRKGLVVVFWCQESLTFQL  
KTNSNNTIARIDECSPIRVSAIHICTPDTPFYRFARGVWAMVIGRAYFALMRFHVGEPIE  
LRYALES LGISTGQLPITWTGKIKEQHIRQYMRMRQLEEHSSSGENDNSTPIIECPNLS  
DIVFRQGTSAMYHPGNVIFRSRIQHLFEEAKPFTMDQSTRTLVTKLMEEIRENNGRILIW  
SQLKTGTSVSGDCWWTLELRDQSQIYTKIENLVREFKYSKQKYQSINRGNSSVVRTVQNA  
ESDKSLFLQPCHDGFTGWCSTRGKKRAHDNTFEDDQCCSRNLCNRR  
>comp15507\_c0\_seq1; 622 200 2581 LEN=2932; translated  
MAAKNPSGRGTNWRAAWSMLKSEATIPHHTVLSSSSDADEEHITVLPTRVYNELLLCMEK  
EPRCWQDAIRLAQYMESSGNDEGEVTTASKTENAAVDKYNRPWYIPSPNYE IYHTVIE  
CCCHNGGGRKDAHDASVYWLTKMLKKLEVDVTELKQQVNDKADKASTTITNRDRKLVNS  
IQLVLSLQSKQRKWREALQLLDYTEILSKPDGANVPLTVVQYNTVLTCLARSRQAGQCQR  
LLQRLQSKFKDQPSGLQPDEISYNAAISVCASAGKWEALRVLDECYDEPGVEPNIIYIY  
TNAMRACAKGGNTQRALELLEIVKDKGLPVDSYCYTAVIDACAKGKQWVKALELFD E MEE  
KGI EPTQVTVSVTISALGNGLQWKRALWLLNLMREKGMKVN LITYNAAITALAKSSKNRH  
SAKLLPSASDKNANGDDTHEDEELWTKAMDLLKQMS EDGIEPDGFCYSSAINCCGAEGRW  
EEACQLIETMKNGGPKSRPNKVAYTAAISACGRAGQATKALELFQNM SDDGLAADRVAYN  
ALFSALRVSEDPDKVSRKIIVERRHQIELEVGXKLACNFNSRRVSKLDKLNLVVIRSFIS  
GFELWGEICGTRSTESSSIATARNVASPDIITLTDCIATLSRAGYTSKMDEVF REAVEQQ  
IVLGSNELDEQWEMDL SGLPFP IARAATRYLLQINRHSSNPQDMVFITGIGKAQQKRKEE  
TDKNAIETTSNNVLDRKDRTTSLRDFIQGILETDFNPPLESVVPHRAQGT VVIEKETLAR  
WLEDQKQGIATK  
>comp15507\_c0\_seq2; 622 698 3079 LEN=3430; translated  
MAAKNPSGRGTNWRAAWSMLKSEATIPHHTVLSSSSDADEEHITVLPTRVYNELLLCMEK  
EPRCWQDAIRLAQYMESSGNDEGEVTTASKTENAAVDKYNRPWYIPSPNYE IYHTVIE  
CCCHNGGGRKDAHDASVYWLTKMLKKLEVDVTELKQQVNDKADKASTTITNRDRKLVNS  
IQLVLSLQSKQRKWREALQLLDYTEILSKPDGANVPLTVVQYNTVLTCLARSRQAGQCQR  
LLQRLQSKFKDQPSGLQPDEISYNAAISVCASAGKWEALRVLDECYDEPGVEPNIIYIY  
TNAMRACAKGGNTQRALELLEIVKDKGLPVDSYCYTAVIDACAKGKQWVKALELFD E MEE  
KGI EPTQVTVSVTISALGNGLQWKRALWLLNLMREKGMKVN LITYNAAITALAKSSKNRH  
SAKLLPSASDKNANGDDTHEDEELWTKAMDLLKQMS EDGIEPDGFCYSSAINCCGAEGRW  
EEACQLIETMKNGGPKSRPNKVAYTAAISACGRAGQATKALELFQNM SDDGLAADRVAYN  
ALFSALRVSEDPDKVSRKIIVERRHQIELEVGXKLACNFNSRRVSKLDKLNLVVIRSFIS  
GFELWGEICGTRSTESSSIATARNVASPDIITLTDCIATLSRAGYTSKMDEVF REAVEQQ  
IVLGSNELDEQWEMDL SGLPFP IARAATRYLLQINRHSSNPQDMVFITGIGKAQQKRKEE



TDKNAIETTSNNVLDKDRRTTSLRDFIQGILETDFNPPLESVVPHRAQGTVVIEKETLAR  
WLEDQKGQIATK

>comp15507\_c0\_seq3; 694 200 2443 LEN=2794; translated  
MAAKNPSGRGTNWRAAWSMLKSEATIPHHTVLSSSSDADEEHITVLPTRVYNELLLCMEK  
EPRCWQDAIRLAQYMESSGNDEGEVTTASKTENAANDKYNRPWYIPSPNYEYIYHTVIE  
CCCHNGGGRKDAHDASVYWLTKMLKKLEVDVTELKQQVNDKADKASTTITNRDRKLVNRS  
IQLVLSLSSKQRKWREALQLLDYTEILSKPDGANVPLTVVQYNTVLTCLARSRQAGQCQR  
LLQRLQSKFKDQPSGLQPDEISYNAAISVCASAGKWKEALRVLDECYDEPGVEPNIIYY  
TNAMRACAKGGNTQRALELLEIVKDKGLPVDSCYCYTAVIDACAKGKQWVKALELFDDEMEE  
KGIPTQVTVSVTISALGNGLQWKRALWLLNLMREKGMKVNLIYNAAITALAKSSKNRH  
SAKLLPSASDKNANGDDTHEDEELWTKAMDLLKQMSDGEIPEDFCYSSAINCCGAEGRW  
EEACQLIETMKNNGPKSRPNKVAYTAAISACGRAGQATKALELFQNMSSDGLAADRVAYN  
ALFSALRVSEDPKAYELWGEICGTRSTESSIATARNVASPDIITLTDCIATLSRAGYT  
SKMDEVFREAVEQGIIVLGSNELDEQWEMDLSGLPFPPIARAATRYLLQINRHSSNPQDMVF  
ITGIGKAQQKRKEETDKNAIETTSNNVLDKDRRTTSLRDFIQGILETDFNPPLESVVPHR  
AQGTVVIEKETLARWLEDQKGQIATK

>comp15507\_c0\_seq4; 269 698 1744 LEN=1834; translated  
MAAKNPSGRGTNWRAAWSMLKSEATIPHHTVLSSSSDADEEHITVLPTRVYNELLLCMEK  
EPRCWQDAIRLAQYMESSGNDEGEVTTASKTENAANDKYNRPWYIPSPNYEYIYHTVIE  
CCCHNGGGRKDAHDASVYWLTKMLKKLEVDVTELKQQVNDKADKASTTITNRDRKLVNRS  
IQLVLSLSSKQRKWREALQLLDYTEILSKPDGANVPLTVVQYNTVLTCLARSRQAGQCQR  
LLQRLQSKFKDQPSGLQPDEISYNAAISVCASAGKWKEALRVLDECYDEPGVEPNIIYY  
TNAMRACAKGGNTQRALELLEIVKDKGLPVDSCYCYTAVIDGTYLFEFCF

>comp15507\_c0\_seq5; 694 698 2941 LEN=3292; translated  
MAAKNPSGRGTNWRAAWSMLKSEATIPHHTVLSSSSDADEEHITVLPTRVYNELLLCMEK  
EPRCWQDAIRLAQYMESSGNDEGEVTTASKTENAANDKYNRPWYIPSPNYEYIYHTVIE  
CCCHNGGGRKDAHDASVYWLTKMLKKLEVDVTELKQQVNDKADKASTTITNRDRKLVNRS  
IQLVLSLSSKQRKWREALQLLDYTEILSKPDGANVPLTVVQYNTVLTCLARSRQAGQCQR  
LLQRLQSKFKDQPSGLQPDEISYNAAISVCASAGKWKEALRVLDECYDEPGVEPNIIYY  
TNAMRACAKGGNTQRALELLEIVKDKGLPVDSCYCYTAVIDACAKGKQWVKALELFDDEMEE  
KGIPTQVTVSVTISALGNGLQWKRALWLLNLMREKGMKVNLIYNAAITALAKSSKNRH  
SAKLLPSASDKNANGDDTHEDEELWTKAMDLLKQMSDGEIPEDFCYSSAINCCGAEGRW  
EEACQLIETMKNNGPKSRPNKVAYTAAISACGRAGQATKALELFQNMSSDGLAADRVAYN  
ALFSALRVSEDPKAYELWGEICGTRSTESSIATARNVASPDIITLTDCIATLSRAGYT  
SKMDEVFREAVEQGIIVLGSNELDEQWEMDLSGLPFPPIARAATRYLLQINRHSSNPQDMVF  
ITGIGKAQQKRKEETDKNAIETTSNNVLDKDRRTTSLRDFIQGILETDFNPPLESVVPHR  
AQGTVVIEKETLARWLEDQKGQIATK

>comp15507\_c0\_seq6; 326 200 1265 LEN=1336; translated  
MAAKNPSGRGTNWRAAWSMLKSEATIPHHTVLSSSSDADEEHITVLPTRVYNELLLCMEK  
EPRCWQDAIRLAQYMESSGNDEGEVTTASKTENAANDKYNRPWYIPSPNYEYIYHTVIE  
CCCHNGGGRKDAHDASVYWLTKMLKKLEVDVTELKQQVNDKADKASTTITNRDRKLVNRS  
IQLVLSLSSKQRKWREALQLLDYTEILSKPDGANVPLTVVQYNTVLTCLARSRQAGQCQR  
LLQRLQSKFKDQPSGLQPDEISYNAAISVCASAGKWKEALRVLDECYDEPGVEPNIIYY  
TNAMRACAKGGNTQRALELLEIVKDKGLPVDSCYCYTAVIDGTFVLSVDFEGGVQ

>comp15508\_c0\_seq1; 1192 46 3815 LEN=4497; translated  
MNDRTGSKKRLALMGILTWVAFHHQQQFLMVDVAVGTRSNGPSIQHRVKRSNRRVGYGYG  
AGAKTNSNARRNVRSSISRGTRAEDSINDDWELRKEIHSQDVVWVVFHAPSNGDSSSNN  
NDDDNKGNPAHARKDETPGRSNNVLRYLVDQFVGERVPPSDSLGAETNELLGRSNGTTEL  
EFHNRFNSTSSGALFHNSDHPFINSNGNVTSSSTSTATSTTTTTTTTTTTTTITGNITE  
SVVYNTYTTVTEDEHTQSNDEHYENNKTNPSADKNVHHTNNHGNGGYSNDGNAGHYGDSS  
DDLSEDHGNQHAANDTSQDEHNDAWEPQFQPLRMRAILAEENSQDRIGLNATERDILFYD  
LLSPALLAWSSSLRVNPVVGNLTVDVHQLVDGVTGPGMDSGLPSIRVPTQHIAEGIPDT  
DMIVYLSLGLSDSVGSGSNGTESNQTDAKASGLDEGTEHDGKFRFENDRKSQKKESSMG  
DRLKGHVNQGEDGDRTRRSITTVRNSEENGSSSSSSQLMDDNSAEPDGTITINICTGS  
YLAASYSCTDQFDRPTAALLHICIDDDHFFDTKHRQRMIMTLVHELGHALGFNANSMAHF  
RRPDGTPYTPRNEDGDIPTDSIQCTGPEDELRAATLPLPSEEILFRSVRGGVRAEIVT  
PSVVQVVRNQFDCQDLTGAELESSEGSPLSLTDFGAGCIGDHWERRLFSDDVMNPVDDI  
EYSTRISTLTAYFADSGWYQVDSLNSADVASGWGRGAGCEVVKDTCINEYGDVPPHNAPF  
FCNEVPDDRIPGLSLAQNIHGCTPDLRSRKARCSIGQYDLDPKAYQYFNSTYGSKVGGS  
DLMDFCPVYDGYDNGLCSDSESGTVIRANEIERFGLRNSRCLVGNVLPFYRNTALCLPIA

CVLEDRSLRVKLDDEEWYICEHADQTI ESETVNINCPDPRRICPTFFFCPYDCLGTGGEDY  
NSGECLCRYDDEMNPGETVLEPCDLVEEIRETETIAMSTRATTTLRPILHETGKIDALMP  
PLDTKISDYYPDVHLHLDAEPRLIDAWMVILSITSLVLSLFLVALFLSKKSMRDGSLAA  
CSRFRFCRRRPDEGDDDGIGRGGSHDGNRDKDKMVASVLDVMDRIRQNDAAARSIRRWRRS  
GALRTDLNDSLAEETDGRMTSDIASSAPPAMSDSLSEISSRQMVLDDESMDLSSDFGSDGL  
GDKGKPTGEEEXAAISAGVPPDGAETVCGKPVFVAMGGCRSVRVGPLQGCRTPTKI  
>comp15509\_c0\_seq1; 1123 1 3816 LEN=3871; translated  
KKKKKKKKRRGGGSGTGTSTKPQIAEKVIETEANQKSVTEDQIVEQVLESLESLVEPVIVVDSA  
LEQETKKEVDIEKTDEHEVDPTLKNVFENEEAHAIEDAIESHSSLVKTTASQDEDNATVT  
LLNADEEETISASRDKSESEAGDEIDLKTTDDSVSIVPEQSKFPTNDFKAPQNEDEPKEAQ  
NTNIDDQEDQWETVEVRPRGRKKASDKANSTRIGSQSNTSTNTKKKAPRTKEARARIKTR  
KMVREIIGGILDSVEDDLRRRRNASREHAHLQRIKATSSGSNNAPALPIKKSSTSVTQOK  
ANSQKNTLRDILVRGKLSNQNHVKSTSTVKSGPLPYSERAKSLMQSDSNDKKNIQRKK  
SEKSSHITGSKTNKALRAARASPADQNTLPTIASTNSAFTPSVTNVTRRKPGTAQSSNSS  
DSESAESKPKKTPSDPSKYVSPPPPPLPTLLSPGNMNSTSSSVASSLDAPHAGHHGNKSH  
QSENDVGCHLLSVCDRLSREIDVFMKRRETALAVRRHERGLVLAALEKTLGLIWPGNPTV  
EMYGSCATNLDLPSDDLVDVVCGLDRPYVESIQSPTNSSSIASNSPGNASRTDDDDNNRED  
ESTKAESHKDVPAYPEQRFSQHQMSTSYQMOMMYGHMSLNAERVLRLAMELEHQPWAVHV  
KAIPASVPVIKILADPARLQGAIMNGNADWLQVQPIHGQSPQIPSPNSRVENSEVLHGN  
QKHMSHYSSQSSPLWRGADVNGLLKVDITFEGPEHGGIGSTEFSSKKVVDDFANETTLP  
AECTPQVQVLMVLKELLAQRRSNEPFSGGLSSYALLLVISMIGERKIIREELEKTERQR  
RVVASGGGNAAPQPTNLNPFDAASDGQKHYPEKSRSKNIDPSKQPQEVETNYSLAVSRRQ  
ESTARTKVNPKQLETRAWKEK PANIEQAKPLKKAGAAVAPNSAPKSSAPSSWATIARSK  
ASSSSLASPEKKQEDPGKTSESKPESSGTMPTNAKDQKVPKPKPSSFADAVAKGKSFAVATK  
KIPAVKKNEGKRFDGLLDPPTSKLTKPKVEKEDETTSTKPPQVNFQAKIRKSVSCATTK  
QQKDFLFAFDANPNSSPSSGFPQGFHDVIEVLCSETTPGKLLMHFLLFYQGQHFESQS  
TAIDYSKTHQRDPADNNGYSVRSNYMLRRNAGSYDPVTGMYTVDPVIVVYDPLEGAENNNV  
ARSCFAWSSIRWVFAQSYMTLSSAAEQNASDGSRRGRATPGVGGKGPAYGHDESGNVVDP  
SSPLLELLLSF  
>comp15509\_c1\_seq1; 336 155 410 LEN=410; translated  
MGKKNKNKGGGQQQAADDDWEALLDAEASKNSAAAEEAGAAKAEPEEPKKEEAPAAPAEP  
LDAAAFLAAQGLDGDGGGGGGGGGX  
>comp15510\_c0\_seq1; 1762 150 5003 LEN=5106; translated  
MIASSSRSSKQALRRTTKAADGAAASRRSAASKNIGSLQSRSSISSASRI PRGSLSA  
LKLQKDIRLHPARYTTEQVLKLRGSKIDTEKQKVLVYDAKDEKDCNGVGLIANMKSIPSR  
HVVEVADEMLVRMAHRGGCGCDPASGDGAGFLGMPDSFMRTKAKELFATELPPMGEYAV  
GNVFFPPGSDTKTVMDCKAIMERLVKERGLSTVGWRRVPVDNSMLGKDPLDSEPI TEQI  
FVSVAGSTAKDRKTFEQDLLLVKMAEEEAATDMLGPESGFYVNSLTNNHITYKGQLTPEQ  
VSQYYKDLADPTFETHLALVHSRSTNTFP SWERAQPIRMMCHNGEINTLRGNKNWMSR  
GGIMESPIYGNTPFLPAVSDHMSDSGNFDSVLELLTKASNRSLPESVMMMIPEAWQGN  
DSLSDAKKAFYEYNSCVMEPWDGPAMVAFTDERYI GATLDRNGLRPSRYVVTNDDHVILS  
SEIGVSSELDPDVKIKHRLLEPGKMFVDFETQRIVPDNEIKEQIAAAKPYSDWVDGNID  
LASWAKSSGCQADPMDFNLTNRKLNMFGYTSEKLDVLLLPMAINGKEALGSMGNDAALAV  
LSEQPRQVNDYFKQLFAQVTNPPIDPIREEIVMSLVCVPGPEGNLLADDGPEHSRRLVNV  
HPVLTLEEMATLKGNEFKRSDGSTQFKCTTIDTTFPVGSGADGMLAALERICDEAADA IQ  
GKGFGEKGAQGVILSDKFAGPDRMALP SLLAVGAVHHHLIGTKQRPKAAIFAEVGDKEV  
HDYATIFGYGCDGVCYPMAYESLSKMNVDGMVEARAKKEMSDELDFKNYRNAAAKGLLV  
MSKMGISTLQSYKGAQVFEAVGLADEVVDRCFTGTTTRIQTDFEALYRDLERFHDDAFP  
IHDNEDSVMIRSDGQFHYRAGGEAHLNTPDSMVNLQIAARTNSRDAYKEFSRITNEQNSK  
VTLRGQLKFKYDPSKAIPLLEEVEPVSEIVKRFATGAMSLGSIQEAHETLAVAMNTLGGR  
SNTGEGGEDPKRFTDNRSSIKQVASGRFGVTSNYLANSDQIQIKMAQGAKEGEGELPG  
FKVSEYIAENRHTTPGVGLISPPPHHDIYSIEDLAQLIHDLNKAAQPTGEVSTKLVSEVGV  
GVIAAGVAKALSDHITISGHDDGTGAAAWTGKGCGLPWELGLAETQOTLVNLNLRDRIK  
LQTDGQLKTGRDVAIACLLGAEFFGFATAPLITMGCIMMRKCHLNTCPVGVATQDEELRK  
KFTGQPEHVNYFFLLAAEVREIMAKLGYRKMEDMIGQTQHLELNKKGQHYKSRGLDTP  
LLTPASELNPSAGVRNLTQYHGIDVTLDNKFAIQAQDALNNKAPVVINERIENTDRTLG  
TMSYEISKRYGGEGPLPDDTITLNLGKGGQSFGLAKGITANVIGDANDYTGKLSGG  
KIAVFPKSAEAVATGFKPEDHVVGNVCLYGATSGKAFFNGKAGERFCVRNSGALAVVEGV  
GDHGCEYMTGGVMVCLGETGRNFAAGMSGGIIAYVYDPEKKFPARCNMGLVGLKIDTDAE  
KEEVFGYIQEHVAATASSVGAEMLENWDSRAKDFVKVFPHDYKRVLEERAAAASAEAA

>comp15511\_c0\_seq2; 1256 1 4423 LEN=4579; translated  
XEANRDGGNTSTLSALQPTFWDYSPKGRAVAVTCLLRSYQDDFNGGEQGLGSFMGALTKCL  
AWEATSGNDDVLDACSEALSVCMSPPAARAMIQSSSLSDLKGLRDMI ISSPSAKAKRFL  
ADAFSGFLMDTSLGTLQWIDVVTEALSLSSDYLAVEPFKPSKDVQGAALLGGTCVRVIRL  
HPPLTRPETYEMASI ILKRLGSALTNADDMIGNVFCDAISLSCSGGFTPELHENLKQGMA  
SVLKNNTLALNKFHGHGDRVNAPRVLKAI EPTGLSIAVSSSTTEQSECVAALFKLLGSDAF  
RKDEEIGLAIGEALALFAETDKSTAMASGDWPLDLDETYARSLSPSCRVVYTLRLTAKST  
SNNHKRRACASALLAVVARATRLEPHSSFRKCLQLSLHEIQDCFLFLLVDAKSNQISRES  
CCLGLAGCNKLVVASEDELKGRLLRSFGTTTNHGGSAMQETEEQAAQRRRTEGENNDNN  
ANNGESETVGVGIDVGGAGGVSEAALGAYREMAAAVACGRPDILYSMLILSVSHTIWF  
TEKRRDAYGPSSLQGDNFNDEVKIALRPLYAKLLPRILRASHDPNKRTREQMETLWVGL  
TGGGEEGRRAITENLRPTMDKLV EETSSKYWRARVGCAGALSQICIGRSWAELGGGPAVL  
DENYDLVISKTSSESTLAGIRLLRLWRAVIRALDDVRI TVRESGESLGRTVRGLTI FLCN  
PHIENPNDSTRNSKERERDAISASATILRWLLRNGLKQQCAEAAGICISALIGIIDIAKP  
AILEALLSDVIYALLMAMSNLEPAAFSYLAVRGERGSDDYENLARLRIQVAQKSPLATAL  
RKCIDLVPKARNLKYQEAVVPALES AIRKSSGMATRATAAAESVITLCSTCPHMFQSSASS  
SSLLRCFFDSVYREREGKAVQDKMNSAFGGLSALCPGTAVRQLAGTATDRYKLAHGNNDD  
PVTRHASAMILRSIAVKASRQFSDPGNSDVWCKKVLPI SFLGMRDPDKATASLWREVWED  
GGASVDIVSSTNDIGNTLEEGLLLGLTKECVKALEDRSWSRRVTGAVSLASLAEKE ILAP  
PPRRLNGIYSKSEQARAKKRANATRIALSLLQLVGTSR IWTGKHEVVRAAIQVSKVWIP  
FAVAEEAESFLGDVGLRPVVF GDSLSGQDLFVGDAFFMKEAKENDELAEESD VDDNGILS  
GEKFSVTDIPPLVPIPGICRLLLMQSFPSKSALRSVASEDVL PYRSNVFLCLEELLKSLPT  
QDDDCFRERIFSF LAPQLWEVFRDSPSSADQTS PKESPLIVARSINCFAGSLWLG MFE  
KIKTTSTAESSALSQTFVLNADF TKQSAWTVREAAARGASKLAECADFETLQRRQAVSTL  
VDIAGIALKDRRFWKVRLGGLETLHSIVLRVGDASPPGTRNDLATTTVDRQLLLETVLPY  
KESI QALAKRSLVDSEAKVTSLSTKILGILSTWP

>comp15511\_c0\_seq3; 1880 104 7060 LEN=7216; translated  
MTSREGESVGDNANSNANASALADANAQLQSLNRVSHRLAMVDSAQKLQAVL DKLPRLL  
LRIGDNHKARLKI GNDPRLDSVLSKTHLKLVEMLSHVMKRI RDDTDCRLTNARGILDLLV  
AVDDEGRKTARDCDSFSLNLSLAF LTLAVPRCTPSEL DGLLPGLLV LHACYERRIRKRAA  
DGD ISASVDSARKQWLQVSHLLR TLERI IAE EESSLGASRKLAAAVAVANRTNGNKR IK  
TGDDHGNKDRAAADGDGKRGDAT TNDGGTAISGLEEARLLLSRDESPGTTGPDGAPPHLS  
VADATYGLFLDALLYQTKAGSVPPAGLSSGGWERMKSGHSAERDWA AEMAPPHRLATFK  
NRLLEWIAPHRRFGLFLGAAGAADQAGGTTNTHRS GSDGDDKTTGASVSSGGDTGRSRTV  
ALLVAASGDPMKKVSETAVQYTKQYFDSQKETGGFGDSTALTKELLSLCVGGINAEAVLS  
ASSANNKGHKTLSVLTGDL SFRRRQVSDSHFSELIGTATKALDDVPDDNGDDIAAIGKLS  
VLASDKMLS KLGNALGVTL LRGKPYIAAAELLNGLILRLGKHRRRRPEHGNSTVSSAEFH  
TEARVLTAVTILAPIAASRASSSSQISEASVAVRDSIYGTVSI LCRSEFARERFLWLLA  
AGNTEATGLSTDLLQLMFRCLGNEIDKLRPRATAALDALLF SCRRVVDGRDQMKREQQAQ  
TLI STTANPWGNQGSTTSSPGSQI ESSLPVGASMSP IAIASQLGKSLLP I VWAASHTSQP  
RQSRVGAARWSSDLLIDL DVISGTHILSFLAGSDITASAI AKEGLGLKGSKSAAVADFE  
ELIHVLI PDDGGNTSTLSALQPTFWDYSPKGRAVAVTCLLRSYQDDFNGGEQGLGSFMGAL  
TKCLAW EATSGNDDVLDACSEALSVCMSPPAARAMIQSSSLSDLKGLRDMI ISSPSAKA  
KRFLADAFSGFLMDTSLGTLQWIDVVTEALSLSSDYLAVEPFKPSKDVQGAALLGGTCVR  
VIRLHPPLTRPETYEMASI ILKRLGSALTNADDMIGNVFCDAISLSCSGGFTPELHENLK  
QGMASVLKNNTLALNKFHGHGDRVNAPRVLKAI EPTGLSIAVSSSTTEQSECVAALFKLLG  
SDAFRKDEEIGLAIGEALALFAETDKSTAMASGDWPLDLDETYARSLSPSCRVVYTLRLT  
AKSTSNNHKRRACASALLAVVARATRLEPHSSFRKCLQLSLHEIQDCFLFLLVDAKSNQI  
SRESCCLGLAGCNKLVVASEDELKGRLLRSFGTTTNHGGSAMQETEEQAAQRRRTEGEN  
NDNNANNGESETVGVGIDVGGAGGVSEAALGAYREMAAAVACGRPDILYSMLILSVSHT  
IWFSTEKRRDAYGPSSLQGDNFNDEVKIALRPLYAKLLPRILRASHDPNKRTREQMETL  
WVGLTGGGEEGRRAITENLRPTMDKLV EETSSKYWRARVGCAGALSQICIGRSWAELGGG  
PAVL DENYDLVISKTSSESTLAGIRLLRLWRAVIRALDDVRI TVRESGESLGRTVRGLTI  
FLCNPHIENPNDSTRNSKERERDAISASATILRWLLRNGLKQQCAEAAGICISALIGIID  
IAKPAILEALLSDVIYALLMAMSNLEPAAFSYLAVRGERGSDDYENLARLRIQVAQKSPL  
ATALRKCIDLVPKARNLKYQEAVVPALES AIRKSSGMATRATAAAESVITLCSTCPHMFQ  
SASSSSLLRCFFDSVYREREGKAVQDKMNSAFGGLSALCPGTAVRQLAGTATDRYKLAHG  
NNDDPVTRHASAMILRSIAVKASRQFSDPGNSDVWCKKVLPI SFLGMRDPDKATASLWRE  
VWEDGGASVDIVSSTNDIGNTLEEGLLLGLTKECVKALEDRSWSRRVTGAVSLASLAEKE  
ILAPPPRRLNGIYSKSEQARAKKRANATRIALSLLQLVGTSR IWTGKHEVVRAAIQVSK



EKVCFELCIGFQQD TDGVVRISSREVI AKYTRLV LVAEENHGDESVPKKEGCENGLPSL  
SSGWMAPRI I ELVQTASARVQNRGDVSASDSSSSGRAI IDDTVGI ELQSEMNLISGYLRC  
LNDDDAYT NQNYRRRETTRNRDNDTEKKDSRTI PHEKT TALTTVITRNVESKNNSTLCVD  
SLAREGVR SALVSSKQLRKS LKLF DVVDVSLNENTHKKFVP IVTIDKNDIKKTPVKLRY  
LHRPDLINLSRETILKSLGKLLGPKNGAIFTDEVLSDFMQASARIPNIEGNNYFSSSSTM  
EDSYDCWLHEWVGLIVARDILSGSFSGVTGVGESRKEERRRILRSLASSILPLL VGS  
SLWNLSIESKGSSTALSPKIFQRNTIVMVLLELIREFCFVLCKDVQHFLPHILYPIIDK  
TIRGGSTM CANVVQAMGLSTLEILSVSCGLRSTEDLIFSEQNQLMAALVGRRLRPLPGGSNA  
PGTYSEAQEI ISVCKNFLWVIKMIKSRKENTDAKRTKSSIVDFVSLLDYRLDHLFLK KML  
HDTVETICSLHKAFYEFYFLYIFDVQADRIYSYKSNNGSPNHEARQSWLGILSNFRHNNPE  
ISD TDNECGAESDEGNILDIDKTDVALFAKLVARDCYLLSHQKLLSRVSSCDALTTAFKF  
LAFVGSEHKDPSDDTNFMQNSVLRQVAESWPSIRARLR TLSEEV LASSSIDNSSVVLVLS  
QSKVGAQERSLISKDVGVQRI FL SNL FALIAAMCECSGDF FADRFRH DVPAMACHLELL  
LKKLQRHRDSHSRSLVPLTIPNDAINNMSDSERQLIDSILTCLNRIIGQNECGRAVEKLL  
GSI GFTLIP LFDIEGELRIQELAMECIRNIIRIDSDILRRPLMELTGNRI PPCLSKFGNK  
KLKNHLVVVPVSI ESKEIMAFRC SKLLELADSLPEQPIS

>comp15516\_c0\_seq1; 445 407 2684 LEN=2786; translated  
MAESVAKNAERRQRAAGKSTT LSDSSAMNTVVVSM DTVNSPYQGNFSAEVGEHLFEATE  
SLMGPEKSSSIQLPSKEAIE LFGEKEAETITEMSKAISVSGMLY GCDWSKGFIRGK WYGV  
IPTNLLLVLRRDHRIARANI TLLKLI AKDLK VWPICCLALSSWSLSELYPVLAQCNQKFI  
LKLKQRQFFHCFMFLARAATCMKILDVDSFGVGKSKLHSKIHA CLAIMEKEIDAEIVRA  
NSRKRKAAPVRPPSPVRSSCSNDNNDNRKR SVVTI SNTAMP MRNSTIPNFSGNYSRTG  
MQNHL PQIPSGGEHSCQLPNMNTETHENPILSRVSSKEKIASDDTDCVADPIRYPEIPNF  
SGHNSTTGIQNRSPQNNSGGEHSCQPPKNNTKTHDNPILSGVSNKQIASDDTDRAADLS  
HRLRSYGARIKSIYIHRKGEKGPNSRANGTTADCLQKPSPRKDVSRSVSNDFQKPSPRK  
HVSRSVSNFRSPGRLREERAPPRFSDLLHNGKRGGSHP TGRYHSERPAGVDP SSESTP  
SCCSDTTATSGCASTDPDYWFPRDPEEVILNETE IETAWLVEESLYCNRTSVIDWDFVMI  
YASXGAEGGPPAIDLPRRPVFP GDGPAERVVGA EVRGGPE DHSAGPRAKRGP EADEDHPA  
PAPVQDPPSSAEAEAGGHGKEGGGTLGANGVALPKTQDVVHKVXGRDDNNAHAVR PCSS  
GVRDGIETRMAYYTLLL FDRNGGQSCASIASKIVLGTG

>comp15517\_c0\_seq1; 1076 192 3260 LEN=3423; translated  
MTTNSNTDAGSEDTGKMDSGTTASIEHEATTL PPTAMSP TKMASTPMASTPMASTPIAPT  
PMASITMKTPTAMARSELSALHEYNEITEVPGTYPPAHSSHTLPTPILSNSSRKSIPKD  
DSEGPKLVPYNDEDNEFGHFLNVSNSPDRHQLIQORFNAGRPPQKLQFIKDEKQSSNND  
WNNADTLPRNNVQKGPASTVPLANLFQTPPLGPTIGPVLSTPDLFNLQKEQEONGLSTLS  
IPKLGSTGTHSGHDIIDNMDDYIGKRRNQRPVSFRSSISSSGSDFDDDDDTLDDGTPPDM  
PRPRNLMSLDSNRRVSLTVDMETGRSPGRNSQFHRGQSVLKRSCSVDMMTAQSPRVRMR  
QLSQNMESFRIEAKKIKKLLALPPGKLTGEAQKKEAGAAVKGDS DSDDEFYDIEGEEAAR  
LKQHRKRKVKSPVASQAESVRETDRNRNRNYNVQKSVRYFDRKHLLPKRQVYRLAAI  
SQTELLRRRYRESIDSRFNIPSNLIDSIHDPNHQAHENS PKTRLGKAVARFRKWLRMARI  
FVGEFLITTI SRRNASKSTGLIVRLLHFTFRRNIFVFLAALS FYVATVFFAVFLYLIG  
VENPQCIHVNGVDFGETRTOFIDAFALSWTTF TT VGYGLVYPATSATLPSGFNVAKECTG  
MVILTTMEAF CGILFSALWGAI VFAKVTRVGSFAQVVSFSDAII IKYGTGVTGVVEDDDEY  
GSSSDDDDPDLFNRLALYKASKLPCPILEFRIANRLHNRRGGEI IDACINIVASMEESQA  
SIQNGSGMGANKRRRHRKGRGKQNAQRK KKKFVVKDDGTVEEEDAITDEVVERAREAAE  
EMVSSYIETSARDDKGS SVERGGDSNMPFPNQVFAKLMVETMEHPFFNRVWNVVRHVLD  
ESPI LKAEAKELIRVNKGHWPEELNSAIGVRSSIHFSQILVSFSGTSNVDANSVYSQKAYN  
FMDVGVGYAF CNMLFRES DSGSIGVDHKL LNDVKEQSGGGGEPLDLWDSGGNPQRALKDIF  
IL

>comp15518\_c0\_seq1; 441 424 3405 LEN=3712; translated  
MNDHEFSLYFNNAPSKLDPAFQGFNTL TEKGEDYCRKIGPGIAIVEFTLIDGKNSLNKL  
HFAEPANESSFPPELPLSDIRMR CFAERPSDSLDDSVYVRI RITDTALKREILNQWILLT  
FNQALIAWVTERMLERSFYGLLRPVKDCSINKLDMKRKVLVDKLCPLPTINTILESSYN  
LPHAAIQRYENSGVIRSSMVALTLDLLENCILKPLVEKKMITIVDGGDDWSKCSLSEKF  
NLNLCVIRLSRSEKPHIAHLKWNASGRKKA AVSIS SKNGISRVEDSPVDCPEYICFFTV  
AERDRNIKGIDSQLRLYREVVIHDGISEKSESIDLLESVRGKSPRAFLRSFSFIFSVKRN  
SRRLWTYNWNPKLVKSVKTLIHEVEASNLADTSRESSILQRLLGALSPGLVEATSKKNT  
QQKIQHISPVSEISSSQKEKKSS IETSTDGPTRRIRRP TMIRRPKLI GKSVEGAAMQAM  
AASRKRAS TNQFKNITNPSAGTKAP SRLQVNQNSRNARGNLAGKTQSNSIRSQRASRIQ  
EEERDETLSRVLNDYFRLCSR PQAQLRRLSLIQSQARSQLADIWWPQSQSQTIPKSVAEF

LISVAPNAWNDVCALPPLPGGVFDVFIPTLARWVVALTPGLELLPVSLSLNQVTKRVDLSL  
LLCSKIRNVRGSKCCAITRISVVGRKSTKQGLSLVRSEGWVNLNRRRSKSSKIANKRKRV  
RSSYLTEKDSAAMDKLLKDVHHSFLFQSLLFDFASAMVERAVRLLDERIHFNDLVPTVQE  
LTRRYSYGKQKRMPLNHRAFEATIVLKSYNDRIDMFDAKILFERLCIEAEDREMLRCG  
NSLCLKSISMKGSHSMCFITLHPEDAKMKLVILSRTQGLDLADFMFREGSNVAIHILDN  
IAIEGSRALALKEHFVAECLLKDSLWKSFSRRSPHTSFQSTIHKMPQQQNLDELRLVPS  
SHPFLQLPMSGFRIDRINPDISFLFDKESGINW

>comp15518\_c0\_seq2; 1192 1 8178 LEN=8485; translated  
AERICYHFDLTEALVASASVSTLYNAAGPSGKDDARRHDGQSESGPGAQGDKAEGGPPSPV  
VDAAPPSACGGGPDPRDGTTRGGADGLPRLQATPGAAETLSPEKAAGIQRTPGGLPQR  
GGRRRRGGDPLLPAAGPPAPVQPLDQGPRLRQDRLLRRRLRQHDVPLRSQWEPERGA  
PEGGKQARPLPAGPPAGNGADLFPVPGRAHRQHPGAGALEAAGPRHRPRRVSNGEDVRDQ  
PAGPGLPRPGRGIRGQAGRPHRAMDAHRGGVRNLRAPQPAPARKHLVVRPDLLEPPARPG  
GGGLRPRRPLVGGEGHRCGDRPVLDVEGIVDVVVDISRVVDPVHVLDVSLTETHMEE  
DDASPMSKQEIFLTYDPGGNMGFPLYLTDDSEALFVVCRAATGGCFLDLSLLSEAAKSTA  
GQQQLADELVQSYSFKRRFVKMNGLQWLTFLSMSPISTFNSSWGKLLPPSYLQKQLSK  
SMVEGTASATIQPSYASDALEVFRHQNSARQTIASDPSITTSRGRQHAQSRTTFTSTYV  
SPVRIKALILARIKEGYRAKQYGLSTNDPDKVFIQFTLPLESGTILHYELSYKSLSPENH  
MVGSAHVKVELSGDPGFVQAVKNDLHQLSQAQEQRSFTVRQKRSERLCQVIRGMRRGDL  
LQSYLKPPSNWDNILANPGSPFVKRLGTLKSIERKRHFQADQLDVVCTGTIPYGIDDKFL  
SGFTTNQDGRRELIDAITDWSSQMTKGSKFLKRAPNSGTMNTNYCVVEIIESTKASQLFT  
MDIEFFGGTDPIQRFETLSSLKTTINRLKNVEVLGKQIAPFLIGNNKNAFLKNDVQIQFH  
HASWDLVKDSELLSLLSKRRTTEIGGFRLLSRDDYALFAKLASKTLDSPGDLVQYEIAVH  
AEKVVIDLYMESESGVFNPPYAIIGGRDMSKFGKMNVIIRRDQECGRALKSRTTLLRAFE  
EPVENQGMEDHELCKVRLAYSSRVTRKLRFFRFLFGEVNSILVELTSELLSKMFGVKS  
ARLRVDPRLIRDEEPGVWFIEYDRQTMMSIHLSLVDNAETNESIQTIRELTFFTIGIS  
DLYSKRDDLADDDSAESHISEYLCVSDFAFRFEVEQVKNFALAAYLALRQASNAEDAKIH  
RADFDEVIKSLQFVEVSSFLVTGAKLDNTEEYSKLLRSITITLSPVPGDQYHFYYSGHSK  
IDILEVGENESGDSSGDDSVNSGEDINSIDFVAPKVGEFVLSKNDHSVEGNDAVCMNKQG  
SLNPPIFVRFHLDGKLATMEDLNRITESSMLTVTVTSIFGSEDEGSDSDPSIQLPVSHQTF  
ALEIGTLLRSYIAEQTLERIQNINYSDESLLQVLRKCMAKIRSVVSFVIEIYFFISQRNMM  
MPAAAPAGEAEVEEGLHILEIDLNNHGFI LRPLNDGVYFLSRIVEDDAPLQFWCLLKL  
QRSNGTISSQIYHPEGEEVAMSAMAHIHGVCSCINLVNQQLLLRSMHRTRTVSELLIPN  
STQQSAGLADTEIERIASDTFVPGIFQCPIVYRKLFLGLYHRAATNPGQVARTLEATVLHN  
FAVSNRPGIFVYKDETGAIFYMKLEPRGSGIDSDGHVELLVYGIKKPGPSVTEQLRVLLQ  
RLLHIGVMDLSSVLTKNPHFKWKQADFLFLRSFDSEWKKLEKEKVNENGNHYYKFPCK  
VYDPCMVLLFFRQNLGCTTFHRLNDISQDGSSPSPTIGLDGMLTSGGTTLNMDHEFSL  
YFNNAAPSKLDPAFQGFNTLTKEGEDYCRKIGPGIAIVEFTLIDGKGNLNLKHLFAEPANE  
SSSFPELPLSDIRMRCAERPSDSLDDSVYVRIRITDTALKREILNQWILLTFNQALIAW  
VTERMLERSFYGLLRPVKDCSINKLDMKRKVLVDKLCPLPTINTILESSYNLPHAAIQR  
YENSGVIRSSMVATLTDLLENCILKPLVEKKMITIVDGGDDWSKCSLSEKFNLNLCVIR  
LSRSEKPHIAHLKWNASGRKKAASVSSKNGISRPVEDSPVDCPEYICFFTVAERDRNIK  
GIDSQRLRYREVVIHDGISEKSESIDLLESVRGKSPRAFRLRSFIFSVKRNRRRLWTYN  
WNPKLKSVKTLIHEVEASNADTSRESSILQRRLLGALSPGLVEATSKKNTQKIQHIS  
PVSEISSSQGKEKSSIETSTDGPTRRIRRPTMIRRPKLIKGSVEGAAMQAMAASRKRAS  
TNQFKNITNP SAGTKAPSRQLQVNQNSRNARGNLAKTQSNIRSQRASRIQEEERDETL  
SRVLNDYFRLCSRPPQAQLRRLSLIQSQARSQALADWWPQSQSQTIPKSVAEFLISVAPNA  
WNDVCALPPLPGGVFDVFIPTLARWVVALTPGLELLPVSLSLNQVTKRVDLSLLCSKIRN  
VRGSKCCAITRISVVGRKSTKQGLSLVRSEGWVNLNRRRSKSSKIANKRKRVSSYLTEK  
DSAAMDKLLKDVHHSFLFQSLLFDFASAMVERAVRLLDERIHFNDLVPTVQELTRRYSYG  
KQKRMPLNHRAFEATIVLKSYNDRIDMFDAKILFERLCIEAEDREMLRCGNSLCLKSIS  
SMKGSHSMCFITLHPEDAKMKLVILSRTQGLDLADFMFREGSNVAIHILDNIAIEGSRAL  
ALKEHFVAECLLKDSLWKSFSRRSPHTSFQSTIHKMPQQQNLDELRLVPSHPPFLQLP  
MSGFRIDRINPDISFLFDKESGINW

>comp15519\_c0\_seq1; 1089 133 2982 LEN=3048; translated  
MEDPNCRQQGELVEESEEEGPTSMYLDGKPTSPFLGDIDERGNSKDDDDNMMLDGFCLD  
DHKKDQNDLDDALLGDCCSEADNDNCGDNVDINRDENNEEADNADKSDGDESKTNEHNG  
DKEILRITVQSDGHREISGSVNATATVDTDTDQSQKEEHNAIVELPKTKFETAAVSKEDA  
SDKYSRQPEQNQTKPSNAIIEGESITEDVIDANQSRERTQNNIVETPEATSDESSPSPV  
VEFEEDDDLDLALLDSDHEADDADKVAGSNCKDANIEEKNVIKSQSREEGRNNTLGTPT

RIESEETTMPVSVLKEEKDDLDDLDLALLDDDDHEKELDDKTMANDGNEIIDGEEKGASSLV  
VSDVNYDDSFNDKDKKDSGKIHSRRNEKELPNDIASVSTEDEIALELDMLLDGEDNHID  
SKEQEKAIEINTEKNSDQNLAIPTTTEDKVALELDALLDGEHDEVESFQVIEEDSTIQMS  
SNLTQKAATTTTEKIGNDIRRRLFQSPNKVSEAAATLKRQEKIVREPERRATKKQSMGEILN  
RNSSSITASLSQSKKIVSTRDKVRDYSRDLTKRASDRMKKDSSSMVTGIDQKFDLSSPR  
SFMLSTLSSARRFGGQVAEEVKQKPKSLWGDNENMKGFERNYMRSTITFSNKVSETQNL  
QQKAELKQVRAQKIVMNRVPWKNKERPTRITSSHDDANRMVSPLPTPSCQRTSPVFSGT  
ISSITKVAALKLLRKQKAEEREAEIKKCVVDLSPRGESIE TVSRFMNPNVDANRLHTPWR  
SQVRSRSPRSVASKTSSRMSAGVRYSSASPAISFSDKSIGSVSSQCTVESFVSPRREGIRGC  
QNKFD PFLHEARGPCELCVFRLPQKEREKLDARGRHLLVQFTTGGCRDCAAFPKSVDEPH  
VRLCNKCHSVSHRVVDTRHRKVGNGTHIGYSFAKVSEGYSSIMQHQFDQ

>comp15519\_c0\_seq2; 1081 133 2808 LEN=2874; translated  
MEDPNCRQQGELVEESEEETSMYLDGKPTSPFLGDIDERGNSKDDDDNMMLDGFCLD  
DHKKDQNDLDDALLGDCCSEADNDNCGDNDVINRDENNEEADNADKSDGDESKTNEHNG  
DKEILRITVQSDGHREISGSVNATATVDTDDTDSQKEEHNAIVELPKTKFETAAVSKEDA  
SDKYSRQPEQNQTKPSNAII EGESITEDVIDANQSRERTQNNIVETPEATSDESSPSPV  
VEFEEDDDLDLALLDSDHEADDADKVAGSNCKDANII EKNVIKQSREEGRNNTLGT  
RIESEETTMPVSVLKEEKDDLDDLDLALLDDDDHEKELDDKTMANDGNEIIDGEEKGASSLV  
VSDVNYDDSFNDKDKKDSGKIHSRRNEKELPNDIASVSTEDEIALELDMLLDGEDNHID  
SKEQEKAIEINTEKNSDQNLAIPTTTEDKVALELDALLDGEHDEVESFQVIEEDSTIQMS  
SNLTQKAATTTTEKIGNDIRRRLFQSPNKVSEAAATLKRQEKIVREPERRATKKQSMGEILN  
RNSSSITASLSQSKKIVSTRDKVRDYSRDLTKRASDRMKKDSSSMVTGIDQKFDLSSPR  
SFMLSTLSSARRFGGQVAEEVKQKPKSLWGDNENMKGFERNYMRSTITFSNKVSETQNL  
QQKAELKQVAAKLLRKQKAEEREAEIKKCVVDLSPRGESIE TVSRFMNPNVDANRLHTP  
WRSQVRSRSPRSVASKTSSRMSAGVRYSSASPAISFSDKSIGSVSSQCTVESFVSPRREGIR  
GCQNKFD PFLHEARGPCELCVFRLPQKEREKLDARGRHLLVQFTTGGCRDCAAFPKSVDE  
PHVRLCNKCHSVSHRVVDTRHRKVGNGTHIGYSFAKVSEGYSSIMQHQFDQ

>comp15520\_c0\_seq1; 1452 179 2611 LEN=2773; translated  
MSKDAEMKDAIILGAGGKRSNRLIVDDATNDDNSVISLSPAKMEQLELFRGDTVLVKGG  
KGRD TVCIVLADETCDDANVRMNVVRKNLRI RLSDVVTVTACGDVYPYGR I HVLPDDT  
IEGVS GNLF EYVLYKPYFLEAYRPVKKGDLFLVRSAMHPVEFKVETDPSPYCIVAPDTVI  
HCEGDPVKREDEEKMDVGYDDVGGCRKQMAQIREMIELPLRHPTL FKTGLVKPPRGVLL  
YGP PGSGKTLIARAVANETGAFFFLINGPEIMSKMAGESESNLRKAFEEAEKNAPAIIFI  
DEIDSIAPKREKTNGEVERRIVSQMLTLM DGLKQRASVVVIGCTNRPN AIDPALRRFGRF  
DREIDIGVPDENGRLVFR I HTRNMKLEDDVDPEAVARETHGFVGADIAALCTEAMQCI  
REKMDLIDIEDEQIDAEILDSMAVNQDHRHALSQSNPSSLRET VVEVPNVSWEDIGGLE  
GVKRD LKELVQYPVEHPEKFEKFGMSPSKGVLFYGP PGCGKTLMAKAVANECQANFISVK  
GPELLTMWFGESEANVRDVF EKARQSAPCVLFFDELDSIAQQRGGSSGDGGAADRVMNQ  
LLTEMDGVGAKKNVFIIGATNRPDIIDTALMRPGRLDQLIYI PMPDFESRLSILRATLRK  
SPI SKDVDLSYMASQTDKFTGADLTEICQTACKLAIREEIERDIERQRIKAEAGDEMEDD  
DDEDDDDTMPEILPKHFESA VRQARRSVSDRDLAQYASFAQTLQQSRAAVTGATGSSLAT  
FAFPEGAEGAAAGDAGAADNDDDEEDLYS

>comp15520\_c0\_seq2; 1045 123 2486 LEN=2568; translated  
MPSEEVIELSVEETNKLREELGLKPLRIDNHQAPAAETATDSL PNDGGKADEEEALELSV  
EETNKLREKLG LAPLRTGA EKKNKEVHKPAENTGEQEALQRIERAKLRRQVEDGASRT  
FGTSTLGLGDNDNDWAVRMRHQK KAPAETK KKKKKRKEK PTEQRSSYDENDLEGMQVRNS  
MAGLEAGENA VLT LADAPILETKTDVSSKVVGINDEEDALENIGLTEQE KQRDGLRKKRM  
LEMGMGRAGGYAGFDDEFEE LGGTLGPHSHRERGGSGEQNGHKTQGFRI GSQRTAASDDS  
KTD FDRVQKGEAISLVWKGDTVTSYMTIEEEQELKAKRKSKEKATFKKKKSKKKRRR  
ADIYDDDDDEDGKAALSPLANN SGNLLSKLEETAGLNGGSTSLQKRRRS DDEVDDNEMQ  
PFTNSTTENSTDDKSRDSQSKRSY EKAMEKGNERTRNAFNNAE VKRRRH DVEVMDEEPD  
DSFLNAALEKARRLNRLREMNKAVSSGATAVAEAVKSSTVDNNTKESSGVTF SIDDTRE  
FSRAIRARTQOKERQSEKAKEETKLNAGVIANKNAGNSMQEASDKLAGKGVKEEDVENDE  
EMEDVDMEELAKEMKEDNVPSEFE GSTARFVGVGRGLSSFVSHLKT TGEITGKHGKKEEL  
RGRAKDERNYDNYEPLDLSKEVKIGKNATEKDRELARREIKLEYRDKHGRLLTQKEAYRD  
LCYQFHGHGGGKKKEKRLKQIAREQAEARMASGQVSAARDGTTVGT LGALRATQKATGK  
AFVVHKT

>comp15521\_c0\_seq1; 421 1 967 LEN=1153; translated  
XKALGRSSSVGIPLLFQGIHRKTAGNIGTDGARRPPRS GSTTALAAGNYL GELLGLGR  
KGS LVIAAVVAFFLGLQCISTVDVGQIGIASTFGS IERYDPGVHIRNPLITKVEILSAKT

ELLEQSNYVPTKEGLTVELD TAVLVRLDPKQALS LYGSVGPQFVKKLVLPEASSAIRGLT  
SESEAKALYTSGRSEIQNNLRSELKERLGPRGIIVEDVLLKNVVL PKDLSASIQEKARAE  
QESARMEFVLKKEKQEAERKAIEAEGIAEFQRIVTKGITPSLLQWKGIEATEKLAQSPNA  
KVIVGNSKDSL PVILGGGKD

>comp15521\_c0\_seq2; 367 209 1345 LEN=1534; translated  
MKPSFDPKQSIRRGNNWKISSFAAVSAVALVVGQSGSSPVLVEAFSTQLKTGKALGRS  
SSVGIPLLFQGGISQPVNRKTAGNILGTDGARRPPRSGSTTALAAGNYLGELLGLGRKGS  
LVIAAVVAFFLGLQCI STVDVGQIGIASTFGSIERYDPGVHIRNPLITKVEILSAKTELL  
EQSNYVPTKEGLTVELD TAVLVRLDPKQALS LYGSVGPQFVKKLVLPEASSAIRGLTSES  
EAKALYTSGRSEIQNNLRSELKERLGPRGIIVEDVLLKNVVL PKDLSASIQEKARAEQES  
ARMEFVLKKEKQEAERKAIEAEGIAEFQRIVTKGITPSLLQWKGIEATEKLAQSPNAKV  
IVGNSKDSL PVILGGGKD

>comp15521\_c0\_seq3; 110 1 817 LEN=1537; minus strand; translated  
XYPAGPPYLATAKMYQIAVHWKFLPKVHEIFEPFMCEMHAYSVAAAHLLEPHKLG VGF  
MVSDVDSDEEFGFIDKLM PSEVCMAPPAL EATESGQAIDLTDSTTMVDPVYKAVGIATQQ  
LPFVFLHYCQRYALGRWFFSKYK LREDIFTNCTAPLLREPPRNVAELYQWYIFPNGIEKLN  
FASVKDEKWKQEGRLVKHLRHGWLLCAVLYGINGAIEAYKTETCQDN SDAFQKTWHFHDE  
VLFDKMIADPSIPSDLFEPDAKT DAGTSGGTQ

>comp15522\_c0\_seq1; 1455 408 4265 LEN=4395; translated  
MHIKQITISNFRSFRQQPEINPFAATTNCVLGRNGSGKSNLFD AVQFVLLAPRFATLRSE  
ERQALLHEGSGSAAVNAFVEVVDNSDNRFSL EHSDEVVLRRTVGSKKDEFFLQRKRATK  
QEVQSLLEGAGFSKSNPYFMVQQGKIQSLCLMTDAQRLELLQQVAGTTLYEDKKSESLVK  
MQENSQSIEKIDSILGDIDERLNE LQSEKEELTIYQSLDRDRKALEYTYDKELRKARLV  
LDNIEHKRVIHLRDLTELHEHCKKTHDDIQNADAVLKIKSEKLRNRNRRALLEQDRRTA  
YKLEKEDLVLC AELEGTVMIRD TAQRNQALETLEGEIESTKERLEGGKTKLLKDEEDSL  
RKLEQERDQAIRKIDGLYARQGRGKEYNSKEERDESIRVQIRELEGGQSQKHQTL SQQRD  
SLANLRRQAVDLEASIESTKADVGT KREALQALHKRLDDQQKQRLKLMDLRKNAWRKA EA  
LTETLAECREAKGSTYANLYRSM PRNTSQGLRSLQTI VEREGLIRGEQYFGMV MENMKLK  
DPKFQTAVEVAQAQNALFHVI VDTDATAALLMKRLEEGKLG RVTFMPLNQLRVQDNIQYPQ  
SDDVAPLLSTCIAYEPRVKRAMQQV FDRLLARSPEVASEWSAKLRMDCITLDGDLCSRK  
GALSGGYVDVQKSRLKAYSAKTIAEEAYRKAREEHRRVDAEAKQAEQDVTNVSEEISR LQ  
HKQAQLARMIQNQEGGLS QSQSQMGOYSKQADRL ESQIIPSLEQNLEGLQFDIARLGEEV  
GTELTSSLSEEERTSLNELKAVKEKLV EKIADQRDTVEELRTERTRLESVLENNLYKRRT  
ELTQVNDTLDTNDGGAAMGGGVTTNAMLQE QTERQLEERRLASREAIRDADELEAKLEEI  
RKTEEELKKELIAAKNELERLKTADNK NTRDLDDAQRRAETLMGKSLNIGRRDSYMRKI  
QELGSLPPDSELNRNYKNQNI SDLEKSLERVSRLK KYSHVNKKA FQYVNFSEKRESLME  
RKDELDRGAEKVKELVESLDRKKDEA INRTFRGVSKHF AEVFKELVPLGDGELIMRTAID  
EALERDDAEDDNGSDETFRKKQLDNP DVSLYRGVGIKVRFS AVGENFIMSQLSGGQKAL  
VAMALIFAIQRCDPAPFYIFDELDQALD STYRQAVANVIYNQANNPDNPTQFITSTFRPE  
LVRIAKNCYGISHQNKVSSIHSMTKNDAL KFIANLMNEEEAVGNVSTTRSSLSKKGSKKR  
KSNDIETADETSQMSYGLQTPVEE

>comp15523\_c0\_seq1; 268 232 2376 LEN=3580; translated  
MPRTRSGLLDWFDLAGAENS DGENAVQQGVNPVPLRRRPPAAVFATLDTLVPDEHLPQTI  
PHAANKTDHDRKILCRPV EPSFAARDRGDDDDILEILETRRGNNPLLD FPHRRREDCLKFA  
FAENPCRFCPKCFYICDVPASACPEWTRGKEPHCSARHGDHHSRLKRKSIQIRRNTLRP  
RRQPALFCLERSNLPSLAEGTGASGAP HSSVVRQGDGASRRKRKSTKVRKNTIRSRRQAR  
LRLGHSNPPSVAEGTETSGETAARS PLSQTLKLP SKKEIPRTSKNERSNCKQIPLMNV  
RTALRPKRRRQAPIRLVHSYPI SVAQAEALKASGETVPSLPVVSPTERPLRTDDKRTNK  
AIGAMRESVVS HQQLP LLVLRNKR S SEETPRPAPDHVLLSTRKCSSNRGPESSSS S NKA  
ESSIAHNAASKVDTFASRNLS EKEPN SLKQIKWTV EEHRTIEGFIRCGNRWAETS KML  
NGRSSVTIERIERYWNGYMKKKIQ KYLQEKYASSGKGLGIGMTGRFVIRKDDVEGCLHALQK  
PGPKTESVKTHTQTVIPRNLR EITPSTLNMKHSNR IILVRYPPQRGRPERWRACSN TLEKE  
VFRASRALIKPKRRRMLTFANTSRGGGTSTKFPQLNANDRAKTNEDEVDPNRRRLFSS  
YNRNRKSVSLPRSS TTERQKPNESG SNV FHHTRSSSISVYQTTDEDTFGTLGAYW

>comp15524\_c0\_seq1; 863 345 3107 LEN=6076; translated  
MPALAASKSSDQTPRRNKKLFSKNLPPKEYQRRKLN SDFRLRKKRSDIHLAQQRLEEAI  
VYMIAENENDVESNIPSRMQKRHDQ IGLHKKD VDSGDLVLDQFPDIVTFHAVMGAHAKNA  
YKDRFAPRRAIGLLEQMKELSYTF SHLSPTIFTYNTVIEAYSNQISKSRNIQGSRDRLTD  
DQETIFGLYQELK DAGLSPNTYTKNLILASMP TESDEWYRLESWAFDYLENRSESTGTVT  
DRKTYNTLFLKLYSIAGNAKKADELLTKILRWHQNHADGTQ SMLTPSKVWFHCVL KALAVS



QSTADDPDDRIRQLIREMEELVKTGHADLQPDTTTTYNHVLNIYASFGNFDPALELIVKRME  
KSSEEWDRPDCVSYTTVIKTLASVQKNIKSDFQGSVEIAEKATKIFERMQKRSVLPNIV  
TYNTLISIWVNVGTREALIKAEDLFSQIRHPDSVTYSTLIHGWSKTRFPEASSKAQKLFK  
DVLRLPPSQQRNFSITKLCNSVISAYSKSGKEDAPECVDSLLAQLEGKYLGGEKRAQPD  
KITFLGIFDITYAKAGVSDAEERCNILLDRMSHYRDMHLHLELEPDRIVYNNVVLNALAKSQ  
QPDVIGTVEDILVMMENSQDELLRPDIVTYATVVDCYTKCGDMSLERADELLLFVEGGFR  
SGDETLKPNAMFYSAILQAWAKTATAEGAFAKAFSLQORNIALYADGNDYAKPHTIVYNAV  
MDAIARSNMAGAGARAEDLLTEMEFLYQSGDEDMRPSRRSFNAAILAYRNEGNGSKKAE  
LLYRMEELADSGRNEVRPDEVSYNNAIAAVVEDTNSSENTADRAQALLDQMEVYGIKPDGR  
TYSPIEAWLRRNDEKGHALADVMLTQFLDKVKESKTGNTRARKESELYEDAVWNVINSYR  
ENSDNDFYEQASKGWLGGG

>comp15524\_c0\_seq2; 1003 345 5551 LEN=5801; translated  
MPALAASKSSDQTPRRNKKLFSKNLPPKEYQRRKLNSDIFRLRKKRSDIHLAQQRLEEAI  
VYMIAENENDVESNIPSRMQKRHDQIGLHKKDQVSDGLVLDQFPDIVTFHAVMGAAHAKNA  
YKDRFAPRAIGLLEQMKELSYTFSHLSPTIFTYNTVIEAYSNQISKSRNIQGSRDRLTD  
DQETIFGLYQELKDAGLSPNTYTKNLILASMPTESEDEWYRLESWAFDYLENRSESTGTVT  
DRKTYNTLFLKLYSIAGNAKKADELTKILRWHQNHADGTQSMMLTPSKVWFHCVLKLAVS  
QSTADDPDDRIRQLIREMEELVKTGHADLQPDTTTTYNHVLNIYASFGNFDPALELIVKRME  
KSSEEWDRPDCVSYTTVIKTLASVQKNIKSDFQGSVEIAEKATKIFERMQKRSVLPNIV  
TYNTLISIWVNVGTREALIKAEDLFSQIRHPDSVTYSTLIHGWSKTRFPEASSKAQKLFK  
DVLRLPPSQQRNFSITKLCNSVISAYSKSGKEDAPECVDSLLAQLEGKYLGGEKRAQPD  
KITFLGIFDITYAKAGVSDAEERCNILLDRMSHYRDMHLHLELEPDRIVYNNVVLNALAKSQ  
QPDVIGTVEDILVMMENSQDELLRPDIVTYATVVDCYTKCGDMSLERADELLLFVEGGFR  
SGDETLKPNAMFYSAILQAWAKTATAEGAFAKAFSLQORNIALYADGNDYAKPHTIVYNAV  
MDAIARSNMAGAGARAEDLLTEMEFLYQSGDEDMRPSRRSFNAAILAYRNEGNGSKKAE  
LLYRMEELADSGRNEVRPDEVSYNNAIAAVVEDTNSSENTADRAQALLDQMEVYGIKPDGR  
TYSPIEAWLRRNDEKGHALADVMLTQFLDKVKESKTGNTRARKESELYEDAVWNVINSYR  
ENSDNDFYEQASKGWLGGGXNDIIFSSTIFCPYQFSTARLIKPSRIPVLLKPRCVLV  
AMFSLNLMVKCSHFVSDRRKPYSIETVQNPALITETSAGRDSSSGRSRAKRLYSWSVGS  
RSDAIRVNPATAAGTALIEGKXAVAGGNGCDRREQDECTGKKGILRDGKASQKNKAKGIV  
VVASVAFPCVVVVVRKEHRDTSPLVSVADGDLSDXDFSSHKT VRFANYDLSFSFLRVLWY  
WAVTTS DGSSGRKT PRAVLM PKQATL KANDIECHSDQTFPFGFSISMKNLEQFLTATXGF  
LSHVVSTARIHVIGVVRTVPGTKSDSDCFFERLNFNGWRGCKSLKGANPPKALYETASHSF  
IFLVRNFSFLSLRNSLTKNGDHFHFPFLNEDNCKRIPYDQNEINIGSAFGYTKAIVK  
IIDXPVMSFFGGGYGGYGAGGFGGGYGANRRFEEQYHCYSVAYADKPHLEKGDKILLPP  
SAFDTLARLQVDYPMFLFKLSSSVDDKITHSGVLEFTAEEGTCYIPFWMQNLLIEEGSVI  
TVTNSVSLPKATFVKLQPVDFLEISNPRVLEHALRNFSCVTKGDIIQLPYNNKNYHFE  
LKEVEPQDAACIIETDCNVDFDAPVGYKEPDYSGAAAASTNVPSSDPTTMTSTSSATNAD  
SAETAADAEDTEPKGTRIVNGEIVRPEDDGQPEGPSTAMLAERTGRTGVQKNSAIPQVAP  
KVDYWAVNAGD GARLDGKSPSSLKDKDGNEMDIRKLRAEAAAARRAEALAASTAGAKMM  
ASSGKNLLGEEIAPDAGAVQSALATAAPASKRKT KVGSKYSRLKKN TAFKGSANTF

>comp15525\_c0\_seq1; 1459 260 5563 LEN=5650; translated  
MNFVNQLEDYLRDLGAEARKKHPGVKEASERAILKRLTLQNQYVSAVRKASNSGEKHPDT  
RLFRSSDLLHPFLLATNYPNASPKLLDTSFKAMKTLLEADAICPGDGLNMVRVWMIQAQV  
VVSYSTTKESSSGSGLTAGTAMAIKSSQDSKRKQSTVAKNGSSNTDSKSGGSASSWFG  
GYFSPSVNNGSNTTMTTNSVVTKTAVSSSHGNAGSGHLNAKDLDKIALDILSCLLQLEL  
KELPVSNDQWIQSVTLCLLYLPTRQNVRAAHSTLPQVLSLLFQONENASQLRINTWDDL  
LSCALGIGDAELRSSNSQMRKMISSFHGVFVNCRLGGDAPQPPSQSLAFELMTNLLP  
ENPDI FSKVGQKTFGVIVQVLHDQSKIQSNALPLEVLKALQFALVVIQTQHSEWSECRE  
LICRLAQPI SLATEALRKQADFEDGYIYKVSNEKKS VNKPLSSASSKQNIETIQGLPNTV  
LWKAALSLETLTKTFIQDKNSYRELWLHEDVASTLLEATSDFCTIGASCEDHMMNMI TASH  
GPKGSKSLANSAAEALERWQDGRFNNDIYILGNALWTFGNALLVMIDQLDESILEQTF  
APSLSVLQHYLKRFPASGTIVKMSLKGYNLAKVSLSTAILRGALLSSLCKLSLPQWGRK  
CSSSVLKDHNVAALVCLLNI VHR YREQIGTDWALIFQTFEELS VLAIASPNLSNNSYAGA  
LSISATYARFASFSTCLSDESLSQFVVGIKEVSLLDKSTSTIP SVMGGASRRNFDKSISS  
RSQDKRGP MGGKLMNIGARAIGWNSDGSVMEEDVLVADRTSNTYDDYQTEFDGRLSSSR  
YPIRSQRVPYSVALLADVAMANIFRHSRCGMHVFRQLCVVSSEVPSFRPFLMDDMVSLIV  
SHIMEDEEGI PAPFFGPKTIYSDPRQNQLLATEKNAPNEAIRDAVSQLDILGPLCEFIS  
KAELADAAEAGLEALYSVLESMGHKLSDESWIQIVKAIASVSPNNSYDWTAAACQVGF  
CLKLIIDDFLEDAARLARSALLECCSTFGSAKHMNTSLTAIGLLWTIADQDKGTE SVDR

ALAKLVLLSGDLRPEVRNCSVNTLFCIVGRGLKFTGEQWESCICTTIFGVYDTATADTG  
NDNEVTKPELTRRNSRYQVNVHHSRDSADKQWVATQALVLKGMCRLLRNFFDILLKTTDT  
GRGDKDSPWFDDAWNKILGWAYDASTQIGGRDLDLRNSGVELMALCNQLACSAGMQAAI  
TPARVGTNMEVINGALRSVGTGPKSSNESI IRETNSAVVDMWRENFLDAFDVLESFRDH  
LESELSDDDKAGASAVLEPTQVQVLTCLASELSKLYECKDNEFKEELTSLKLIITFDSLL  
APVLTAPGDDAMVVRVFRVVISIATITSSGPDARFLSQAQRACIDILKLMASNGSPEAF  
SNLTVLAGAAFYAGRETS GKCKKGISILSHESSNALLEEFSSRALSDQCRVLLVLRLLSL  
FLMDNHGVVQTNPRETSYKMLIPIMEGGLGSAKNLRDVPGGTPEAIAGLLDNLWERVCLT  
LSRMFSPGLVAGSKECGILYALDVASFVNF CADNAPAFYSSDLSAIFLSGATKCVESTKT  
TENPEDFIDLLAACFSGMCKIRPRDTSMHGLANQVLLSAARSLESSPTEVDRNVQSALKI  
CEVLQTVSGVEHVVVGVFSSLAQLVSVEERSVRRAAAAVLAKADITKILGAAETRARTAE  
DKVLALEQEVAFLRKQNEAATSVLIMD

>comp15526\_c0\_seq3; 569 1 2242 LEN=2242; translated  
XNNGQNGINNTGATSVAASAQTSAPTSKKTPLSNARPTAQKSAVPATAATPATEKNGGN  
VPEKSSRSQQAATTNHQNRISKAATRTRVAVSLSSASASTMATALSSTSSSVTNHATRNTT  
GARAPSTAPVGRAPPPYEKRSATTQHHKAQKQLEQQQRLHPEANTHASARERQGSQASKQ  
TRAAKT TVATMPGKNGATNPHANKTNE SASA AKAARMRTAAQSSTSAATAAAFDPPSQPA  
TAASAISRFSVSTSNSASLPSAPIQDTAANTSSPENDSLDTAVAEQPIPTSKTSEVSL  
PADDSTQKPTIYGCFMEDRPQVSLKFRQHTPTKNMAEHFLKRLKKWDPYWKIENSLHVGL  
TAPVMEKRWMRKTDKVPDKYFPNTAGFFT IKNLKTVGPRIRQVGASRAPRNGELRVLIR  
MLPLDLKQYAYAGKNRDLHIWPKGTFQLHAAPSTRTKPRPLQLRQRKQOSHCF TKWLG  
ICNHLDVTSLLHSAWSSTTTSLNASSD TTVQLGCYDPELYFFSVALCRYQEPKTI VHNLM  
NAPRIPHGTAAGEPAVRMVKIEEMHNRARRKMENNNVLLDDSDDEDGGNQSKANAPEEL  
RRILF SIRDPLAMGVLTTTPVRGRRLHVSFCFDLNSFLHMNKSASGQRWKCGYCENFISYE  
DLEHCPLTEKAVKLF GSEVTNLQHMVEFKEDKSMSFCKRVKTHQERAKAKKAAAALTNTH  
GGNPAIAGGERTTSSTFWIRIRSRSSGX

>comp15526\_c0\_seq4; 482 1 1981 LEN=2036; translated  
XNNGQNGINNTGATSVAASAQTSAPTSKKTPLSNARPTAQKSAVPATAATPATEKNGGN  
VPEKSSRSQQAATTNHQNRISKAATRTRVAVSLSSASASTMATALSSTSSSVTNHATRNTT  
GARAPSTAPVGRAPPPYEKRSATTQHHKAQKQLEQQQRLHPEANTHASARERQGSQASKQ  
TRAAKT TVATMPGKNGATNPHANKTNE SASA AKAARMRTAAQSSTSAATAAAFDPPSQPA  
TAASAISRFSVSTSNSASLPSAPIQDTAANTSSPENDSLDTAVAEQPIPTSKTSEVSL  
PADDSTQKPTIYGCFMEDRPQVSLKFRQHTPTKNMAEHFLKRLKKWDPYWKIENSLHVGL  
TAPVMEKRWMRKTDKVPDKYFPNTAGFFT IKNLKTVGPRIRQVGASRAPRNGELRVLIR  
MLPLDLKQYAYAGKNRDLHIWPKGTFQLHAAPSTRTKPRPLQLRQRKQOSHCF TKWLG  
ICNHLDVTSLLHSAWSSTTTSLNASSD TTVQLGCYDPELYFFSVALCRYQEPKTI VHNLM  
NAPRIPHGTAAGEPAVRMVKIEEMHNRARRKMENNNVLLDDSDDEDGGNQSKANAPEXA  
PADPFLDSRSACHGGANDSRERQKVFTRFGTLRVFVPGGVRAFAHGSVSMRLRPSLCDHPW

>comp15527\_c0\_seq1; 937 232 4085 LEN=4454; translated  
MIPTSLPLPQSPSVRGDQHGLAEQWHAMMFHVEDVGS SNYDQEGTTVSSLTNTTRGYQHP  
EEERQLQSEYNIHRYDNFSDTHRKP KSERSED RNAQRRELDPHFQSKVYKNQSNYSYSSRK  
PQQADWHPRQQNSLRRQNDVHPLRATRGGTRGGNNYSKIHNNGYSRNKT KSDFLDGIIEN  
LSNLSNNNDGKSKS IMENSKNGWSIHESQRRSQERESRKL AGTFGTNTNTNINNWKKRED  
NTYDQQRNLNSQIPNNNGMRIDMSGGYIRRESPHKVERRENPPSMSKFGAYYSDQNRTR  
RYDLNVDVATRETNLGRNQRSQSLSLDDQMSPE SYLSPERKTI SHKSATIDGIES  
SLAQPRPPLRTPETVRSMPNRS PKRISHETDKYAATGPRLLK KRSILKEQNSPPP YLSP  
KNFVFPKNCGPVNGESPLNAVVDLFDAPMRMHIRQSPQHPTDRDRSHQRSGLEKQNHNPNNV  
IPLARQNEI PRQRSEHSQGSKDTWSEFSLQGTENTPGSSLQPSALH SKSTNSKLPKTEA  
QKRYELQMLRGIYKDSLEEKNYRPGSMDSQRMSFDQSRNSNKDSTYSIDGQSVPGGSRQP  
TLKSENDHETA AEFTIHQAIWGSNSSDSKGTS AQSRPPNRDVRISVTSNPPTQAI VATNI  
STPNLGLSLAKSVMMSPSPLSTISKAKVDDFLKSQFPSCNGEGIDSPPKISKLFTQTPSKE  
MADGKEKDAVQSSSLNMFEAIQQQLLGRTPIDSSGFPTKNPDDNEVTEQEHR IQEKLDAV  
RDRSIRNAQIF EKMTSENKSONIQENHFSFACVQDDNTDVF DNITNVGDGTDGDVQTTSS  
XSTNLKLTSSGLVTEATIGTNETDVKGYMYVAYSQFGDDARKVVKLCGHDSL PVPNRKK  
GEVLIRIHASTVSDSDCAIRRG EWPKISIDPYIIPGTALVGRVMENGKKKTRTRSSFLSS  
SIEAGDIVLSLSTFGANARFTCLPKSSLIKVP SKLNPERVVCLAETYLA AFQSLHLGQKG  
GIRYRENSLQGSILIMGGYSPFGKAI IELCRAGGASLCYALISDDPKTQNSSSRNLRH  
QYNCL EEWGAVPLSNNPQDWLTLIGRQIDIFVTTYDPNQHAKGMNITTDHWKALKKDG E  
VHVVC SHPGMNEADQRNMVFGSSSTNKSNDMKGF RVPSCRPGGREKLADRAHYNNL FDSW  
EGDRGARAMGKKDLEHLIKLLE IDLLHPEIAGRFP LSKIAKAQHNLQLGKLAGHGLVCS

PWFIEKTNVEQENGRKKPDLHILV

>comp15528\_c1\_seq1; 717 130 2476 LEN=2476; translated  
MNKIAEPTIALIPPRGQDGVDRKIRCETSFTASCSDVSTLSIDENQLDALLYQEQMGLG  
KELEEEISAVLPATNADEDANTNADANTDANTNANSNENANANANEDTSVAIGTEQEDHL  
PDPNAVDELLTQEVMLSLQQRNFQEEVHGVRCLAPEETPELYNEALGALQRELDALPA  
SEKVAYLKSQSMRFPGGTRAGQPPGILHRTETYVNSREFRLRFLRCDLFDASKAALRVTK  
FLDLVYELFGEVALWRPIQLCDFSAADLRKMKKGRYQLLPYRDRGGAYGRRVIAILPDAE  
WEEMSGKVRSRIFVYLLWVAGNDVNAQKEGMYVWFDPTRVNLSPMTYHKKHVESLSIR  
ISAFHMCTPNTEEYRIRRSTITKRMQNGRFRLLKQHMGGTDELRGILRSYGIPIEHLPIIT  
ESGAIKLVYFRQWTRLRAWEEKQPCGDDGFGPRIESPYLNDVIFRKRFNSTSDYPGNATFY  
GLVREKALLELQSQKGRRYTKRATAKAFVLEVVRAQLKDEEGGRFLQWDEDGWWTLS  
ETEIRRVEYTVTSVRNAVTKFYRNNQENKNNKSSSSSSKAATENATDGGESKATNAA  
TNGTADPVATAGRKEIHRATAKDYSGVYYTAKKPRAGLGSSENDGLADGSLGSFLPCLLVC  
LFCLLARLLVLFVGAIAIESFRVEILCVCMPMDALRIPGVHRNVVRPRQQTIRATPDPS  
HGDNPLXDRAWARGVTISGEPRSKTNPGEHLSVVGGRKNKKKNGWLRIAVAFPEESKQY  
NTX

>comp15528\_c1\_seq3; 714 130 2458 LEN=2458; translated  
MNKIAEPTIALIPPRGQDGVDRKIRCETSFTASCSDVSTLSIDENQLDALLYQEQMGLG  
KELEEEISAVLPATNADADANTDANTNANSNENANANANEDTSVALETEQEDHLDPNAV  
DELLTQEVMLSLQQRNFQEEVHGVRCLAPEETPELYNEALGALQRELDALPASEKVAY  
LKSQSMRFPGGTRAGQPPGILHRTETYVNSREFRLRFLRCDLFDASKAALRVTKFLDLVY  
ELFGEVALWRPIQLCDFSAADLRKMKKGRYQLLPYRDRGGAYGRRVIAILPDAEWEEMSG  
KVRSRIFVYLLWVAGNDVNAQKEGMYVWFDPTRVNLSPMTYHKKHVESLSIRISAFHM  
CTPNTEEYRIRRSTITKRMQNGRFRLLKQHMGGTDELRGILRSYGIPIEHLPIITESGAIK  
LVYFRQWTRLRAWEEKQPCGDDGFGPRIESPYLNDVIFRKRFNSTSDYPGNATFYGLVREK  
ALLELQSQKGRRYTKRATAKAFVLEVVRAQLKDEEGGRFLQWDEDGWWTLSSETEIRR  
VEYTVTSVRNAVTKFYRNNQENKNNKSSSSSSKAATENATDGGESKATNAATNGTAD  
PVATAGRKEIHRATAKDYSGVYYTAKKPRAGLGSSENDGLADGSLGSFLPCLLVCFLCLA  
RLLVLFVGAIAIESFRVEILCVCMPMDALRIPGVHRNVVRPRQQTIRATPDPSHGDNPL  
XDRAWARGVTISGEPRSKTNPGEHLSVVGGRKNKKKNGWLRIAVAFPEESKQYNTX

>comp15529\_c0\_seq1; 761 197 3070 LEN=3135; translated  
MVQGNWQRAEMSETRRLEAKQRKQRNAERKNFKSQAQDLMSFLNRNGAHIFRTHYQSQT  
SLGEKTDVTIHIWTDTPCSEDGSPDELWEEDHTANNKRKTKQKGGNMNYGRRDRSISV  
ENEESGRSAKGYKNNVNGKKKSHPRSKDNSTSNIVEASKIYSTHKPKLYRSHFFDERCNG  
STNKKGGSGAKKNYDRFRTHYPKDRTLHEVLVFKLLRDGDHEDSVSSVKKILLACDESH  
PSSIMPGDKTPTPEAMDMVYYLSFTTDELFGGFSNDGELSCQSFSPAIVDVITKQSCNIG  
SIVYFAVGNQLLYDRYRKGIVVEERQMIGLERHRSPTGKNASDANVGSMLHSASILEYIL  
TFLDDKAVASMASVCRSWNREIGKQSENWLKFLLRQRPFPHRHQVQVQIAFPTRLGAF  
VSHYTAVREANAVKIGIDCLLTRKSMNEYDGSIRSFESLRNSPEGVNYCMGVKIWASNHL  
LAGYSEDCTVRLFDSDVDSSESSGERLCRELICWCVDYQKTKKKNCTLLAMALDEYIGC  
ILQVADDISSYDGFILTVLSRDSFLIDDGSNDETVQVIDIRQAVLNFLLSRDDVDHSLLE  
LRDYLNEGDLDDIEVIASRSLAECGSGRFMVEVSVIIASDGVYEDSLLFRKLFSTSV  
GAI TWMSDSSGYSAPFRHWDESMKLF SVKTEENGRNEYDVL SLLCFSDTI INHTIDSVGN  
VNRSMPIQGTDLVRQELLRDGWVIKQSSERPVAVIKNLVVADNLCREEIENQSVRSVVS  
FYTRRSDDSRVCDLNLIGNLVVCHLIALGNSHVIAICRSLESDDAIDGHWFNPATP  
TVLMSMYAILIDVESRSEIYRTCLLNNLNDLGNSSLGFFMMEGEFPIHLAIDGDTAAAL  
TTKGVVLTGADCRSRANNVRSNQELMSTSKSAKAKKKKIAKKGKKGKDYARGLKS

>comp15529\_c0\_seq2; 285 197 1169 LEN=1169; translated  
MVQGNWQRAEMSETRRLEAKQRKQRNAERKNFKSQAQDLMSFLNRNGAHIFRTHYQSQT  
SLGEKTDVTIHIWTDTPCSEDGSPDELWEEDHTANNKRKTKQKGGNMNYGRRDRSISV  
ENEESGRSAKGYKNNVNGKKKSHPRSKDNSTSNIVEASKIYSTHKPKLYRSHFFDERCNG  
STNKKGGSGAKKNYDRFRTHYPKDRTLHEVLVFKLLRDGDHEDSVSSVKKILLACDESH  
PSSIMPGDKTPTPEAMDMVYYLSFTTDELFGGFSNDGELSCQSFSPAIVDVITKQSCNIG  
SIVYFAVGNQLLYDRYRKGIVVEEX

>comp15530\_c0\_seq1; 407 1029 2207 LEN=2621; translated  
MSSSETAVPTPDNANAECVGPSSENAGRASACDGCNPKACGSGAFNSPEAIARSREEAT  
KLKTSLENVSHTVLVLVSGKGGVSKSTVSCQLAHTLASMGYAVGLLDVDLCPGAPRMLIG  
DAHLTAQIAQSASGGWIPVYNPDKPNLCCVSI SFLLPDENRDQAVVWRGPRKNGLIQQFL  
TQVDWTGETDGLDYLIVDTPPGTSDEHISTVQYLQKAGAVSGAVLVTTPEEVCMAVDRKE  
LNFQCQTKVPVMGVVENMGEYTTTLDRLAFACSATRATGDGGTTGDKEDCTQKVLDTLRT

HCPPELFEDGSTLSVSSTLYPASGGGPREMADRYGVVPYWGLLPMDPDLQACEHGKAFVEE  
RPDSLAAKALEGFCQKI IDRLPVEEI ADEEMS  
>comp15530\_c0\_seq2; 407 1176 2354 LEN=2768; translated  
MSSSETAVPTPDNANAECVGPSSSENAGRASACDGCNPQKACGSGAFNSPEAIARSREEAT  
KLKTSLENVSHTVLVLSGKGGVVKSTVSCQLAHTLASMGYAVGLLDVDLCGPSAPRMILG  
DAHLTAQIAQSASGGWIPVYNPDKPNLCCVSI SFLLPDENRDQAVVWRGPRKNGLIQQFL  
TQVDWTGETDGLDYLIVDTPPGTSDHEHISTVQYLQKAGAVSGAVLVTTPEEVCMAVDRKE  
LNFCQKTKVPVMGVVENMGEYTTTLDRLAFACSATRATGDGGTTGDKEDCTQKVLDTLRT  
HCPPELFEDGSTLSVSSTLYPASGGGPREMADRYGVVPYWGLLPMDPDLQACEHGKAFVEE  
RPDSLAAKALEGFCQKI IDRLPVEEI ADEEMS

>comp15531\_c0\_seq1; 1585 213 4424 LEN=4671; translated  
MFRSSGDVFKDNLSSLTGSQQDDELSDDDNAAPEMASELDEANEEMMEDPRKLLALEELES  
RVVDALDKVMQHSKMKEQGSSSVQDELATILRPVIEIAAHTAPSIARTYYQGALSVAEGV  
EASCDEVYQQIVSDLVLP SLFDIAQTDTIPAKRSASLEFFRTLFKEFQKPGSWLDVNYIN  
SANAGPYGSGNVSSSSKRSSHTQRQPPTQLKRRQARRMQREGEVLRVWVKASIACLTPGV  
FTAASEMTVASRGVIAASASIRP SLKHIAQRIRDADDRGANKIFTPVMQMV EGV LK KLF  
FSTSEARQGDALRSSCIKFL EIVCLCCSGKPDSSRRKEHTRDDFSLKDL PAGHP I ITR  
EALES IADYAFSTLRGLTVLGGQVKIDRNLLSDMLVGEVTGLPTAPVLSILKPAALAYLE  
IESNLPSSAEALNDIKIDRSSLEYDFFLSQKSYALT VNAIAALAVNRPLFFKSGAVCLA  
RRCADPPSYVQDEGTYHNNNLSKSAVLAVRSHVKSSCLTLLRNALSVQTKSSALLHKV  
LAEKCSMKIQADKALGMAETTVK LKTAGRAARNQAKIHYEWD TSAADERTSKRKRETTDA  
LAKMRTAKVARGLNGIQLPTSTVD AIELVIENIKNIPSKRPLDKAIGASRKKTPFTLDI  
LVDAIMTNGASLIQEEGRWYSRDGGTAWSTTTLENEAERKYE LNVK FVDGGKSTEIEKKK  
KTFDSQCQTAASEALRRIVVNSLSSRNAELSDFANGVAARLCWTLKGVRPAEGLNQAQDM  
ALDSIESAKMRIKDEKKLATMDKLAESFPLVTSCVLSSTPAISYGMSVPNSDAASSLST  
AIINEAYVQDAYRDEHDEVDQDSDWKYDTS LDV FVSSVHASERSNEKPSDAVRKNVATN  
SSNSMQHKLGTFRLLSSALALVSAMCDLDGITKAAEASRKNSSQQTIAASAALNAARQA  
AEKRANTALLVLRDASFQRSNPKSRKDAVRIAVGLAAGQANASSSCEEKALKLVINMLYP  
KSQTIADDVVEAATAELKTI CRFAQENYTKIQKANREAKEKESESSHKSPMAPDSEEEKE  
AMDNARKPI ILYMALCIRRPVLIKTLFELSSAEKADVSKTVRQNM SKLARATG TKHGAS  
DVALMVAEASTRKETSLLSFLDALAPIGEKNMVSDDFIEACYKIQEMKAEGSRKNPGFL  
IPVVFAIKRQDLIPKLP EFVVADGDVFMALRKMAERLGRQALLFRDEPN EEEPSLKGMT  
HCEQFVFLHKLDFEAAGVKQKEYLDAIKMCLDNEE IFNDQVMSALDHMSGVFLTGSESL  
PLAFMRTCILVCSKHESLHNWICHTLLPRLVDGKLYEESRLWEGWMRCAKML ENHADTGV  
SSKEAIDKLPPAQLAMYNARYGS

>comp15532\_c0\_seq1; 674 326 3074 LEN=3074; translated  
MNSKKEELELAFRQSVKQAEENLESRSSPPTIRSLLDALHIFLTKWDTLQDEGDIETEE  
DENRQTRDLPEDYIRRVFCRILSNLNPVDSVDLVRENILSTLRCVETVDCRQIVLDFLPA  
VTKIFPAYSNNGDAARNEGQSKVKKEI ISCLKEVFENDSNSLPQILRFFSSFLAEGEPQK  
KVLDKRDYLLFIGILPKVPETNLHGALKALIEYIDSAEDARRAVDSIRTELGLLEKTDIS  
DMGSAKTFDVAIRGSKKA EKLFVEEYLVVVGELIDERKEKKHKLQLCDAAEFEAQILTF  
DLVVIILSKDNPGRDKILGMI SGVSPAESGLMSDSQLSKLKELVSGNHNCTPQAIDPLY  
PLDSNLHERLFESLVDFCMI ILLTPLRRSVELDSREFFSKANVLLLRVISILPDDCQLKA  
ISAALGIVDELRAKKPEGKIAI SNKNRSKSYEENHNKICQTI FSLLLTLSSAKTDM LKPF  
QNRLEEYIISGGFDSTQELDMLKTL C I VVTKLACTDKPSGGLD LLMICRTLLFSTTV DGR  
RRTTSQFDEFISIQRIRIGMVFLKVVISCCCLDTTMLMGVQKMSRILVSPHSGVLNLDPR  
VGFHGMQIIRHLQHQHTTYS P SGKELFRLVSLVLTHSRIVHYPPDASKATVTE TNTV LAY  
THTPSFLSSEDKARKQRKFRNMVICFDSFFSKDTALTQQSKWQSSTSWIFELLDTYF ILG  
RTAKWNPRAWIFAGINFRSVASSSLITKT SERKLV DWNADFSKFRCLQNNVLLLSTSEK  
KI IDVIKARTLSEKEAIVDSISRFAFTLLFALSVSIAILRNTFDHFKDTLEDETFDFKK  
KEPLQMVHYQLMKVCDLKHRCRSMERLFRNLGSRNQISVQKRRKKT KRPRSNNASAEKTV  
RINCAICIKPLLLEMRX

>comp15532\_c0\_seq2; 1375 171 4997 LEN=5055; translated  
MNSKKEELELAFRQSVKQAEENLESRSSPPTIRSLLDALHIFLTKWDTLQDEGDIETEE  
DENRQTRDLPEDYIRRVFCRILSNLNPVDSVDLVRENILSTLRCVETVDCRQIVLDFLPA  
VTKIFPAYSNNGDAARNEGQSKVKKEI ISCLKEVFENDSNSLPQILRFFSSFLAEGEPQK  
KVLDKRDYLLFIGILPKVPETNLHGALKALIEYIDSAEDARRAVDSIRTELGLLEKTDIS  
DMGSAKTFDVAIRGSKKA EKLFVEEYLVVVGELIDERKEKKHKLQLCDAAEFEAQILTF  
DLVVIILSKDNPGRDKILGMI SGVSPAESGLMSDSQLSKLKELVSGNHNCTPQAIDPLY  
PLDSNLHERLFESLVDFCMI ILLTPLRRSVELDSREFFSKANVLLLRVISILPDDCQLKA

ISAALGIVDELRAKKPEGKIAISNKNRSKSYEENHNKICQTI FSLLLTLSSAKTDM LKPF  
QNRLEEYIISGGFDSTQELDMLKTLCIVVTKLACTDKPSGGLDLLMICRTLLFSTTV DGR  
RRTTSQFDEFISIQRRI RGMVFLKVVISCCCLDTTMLMGVQKMISRILVSPHSGVLNLDPR  
VGFHGMQIIRHLQOHTTTTSPSGKELFRLVSLVLTHSRIVHYPDDASKATVTETNTV LAY  
THTPSFLSSEDKARKQRKFRNMVICFDSFFSKDTALTQQSKWQSSTSWIFELLDTYFILG  
RTAKWNPRAWIFAGINFRSVASSSLITKT SERKLV DWNADF SKFRCLQNNVLL LSTSEK  
KIIDVIKARTLSEKEAIVDSISRFAFTLLFALSVSIAILRNTFDHFKDTLEDETFDFKK  
KEPLQMVHYQLMKVCDLKHRCRSMERLFRNLGSRNQISVQKKRKKTKRPRSNNASAEKTN  
IQIIAELTALQLRET VVRFFQPSRFIPSEVLWISLTDSSHDSLIVFAVNNIQQCWMMESI  
SEVVQTRLNLI EHLATGIGSFSTIGCIDSQDILVRKPPLVRQYAARCLRLASFLL LKLPF  
MKEIKESHALVELL VKLISEYLRVCAILISKTDVNHQKLNIGNDDFLHFFCLYLSLIGS  
KQPLKSTIDYKGANDSATINDFKTLICNFQQHIEDCHTSITCQLEALSIFAARSDPSIM  
KCVIDFHWKATFMRKYANAVNHMGASEPPYVLT KILKSLSHFSPDGYSNSTAQERSTRHT  
LLKLMASRFNKSGEKNMLLIHSMCRHWALLALSQWKISLFTV FLETLLGKLV EYLYKD VDD  
CFVGQKASSKESDESSDDGDGEYVPPSTSSSQFCSSIPSVGDLFCLTSSSYP IFFDMVL  
RSTVSSIALFSVPEAMSSFQHSATVSYKLHPVYKLDQMI AVYGSLIKLYTDKFHIFPKSL  
LPSIVNASKTMLD TSAAKLQ EYVEWRNYQPIISMPEIESGFTDPASTIFLKSILDAFGVH  
VVGTLRRLFCSVHLEPTNSLIRKTERTYDLLRETSNRYNTGEIKSQVTGTM RHTSQGDIER  
QNVLFQSQMSLEKGLGEGPTE TVGTMIDNASLNRKRKSNRSDRQLLVEGYNPNDLEDDDS  
FVYGDESSSFGSDAFGVSGNWGQDDHSTEEEDDPKIDGSVGEIKMTK

>comp15532\_c0\_seq3; 1375 326 5152 LEN=5210; translated  
MNSKKEELELAFRQSVKQAEENLESRSSPPTIRSLLDALHIFLTKWDTLQGD EGDIETEE  
DENRQTRDLPEDYIRR VFCRILSNLNPVDSVDLVRENILSTLRCVETVDCRQIVLDFLPA  
VTKIFPAYSNGDAARNEGQSKVKKEIISCLKEVFENDSNSLPQILRFFSSFLAEGEPQK  
KVLDKRDYLLFIGILPKVPETNLHGALKALIEYIDSAEDARRAVDSIRTELGLLEKTDIS  
DMGSVAKTFDVAIRGSKKA EKL FVEEYLVVVGELIDERKEKKHKLQLCDAAEFEAQILTF  
DLVVIILSKDNPGRDKILGMISGVSPAESGLMSDSQLSKLKELVSGNHNCTPQAIDPLY  
PLDSNLHERLFESLVDFCMIILLTPLRRSVELDSREFFSKANVLLLRVISILPDDCQLKA  
ISAALGIVDELRAKKPEGKIAISNKNRSKSYEENHNKICQTI FSLLLTLSSAKTDM LKPF  
QNRLEEYIISGGFDSTQELDMLKTLCIVVTKLACTDKPSGGLDLLMICRTLLFSTTV DGR  
RRTTSQFDEFISIQRRI RGMVFLKVVISCCCLDTTMLMGVQKMISRILVSPHSGVLNLDPR  
VGFHGMQIIRHLQOHTTTTSPSGKELFRLVSLVLTHSRIVHYPDDASKATVTETNTV LAY  
THTPSFLSSEDKARKQRKFRNMVICFDSFFSKDTALTQQSKWQSSTSWIFELLDTYFILG  
RTAKWNPRAWIFAGINFRSVASSSLITKT SERKLV DWNADF SKFRCLQNNVLL LSTSEK  
KIIDVIKARTLSEKEAIVDSISRFAFTLLFALSVSIAILRNTFDHFKDTLEDETFDFKK  
KEPLQMVHYQLMKVCDLKHRCRSMERLFRNLGSRNQISVQKKRKKTKRPRSNNASAEKTN  
IQIIAELTALQLRET VVRFFQPSRFIPSEVLWISLTDSSHDSLIVFAVNNIQQCWMMESI  
SEVVQTRLNLI EHLATGIGSFSTIGCIDSQDILVRKPPLVRQYAARCLRLASFLL LKLPF  
MKEIKESHALVELL VKLISEYLRVCAILISKTDVNHQKLNIGNDDFLHFFCLYLSLIGS  
KQPLKSTIDYKGANDSATINDFKTLICNFQQHIEDCHTSITCQLEALSIFAARSDPSIM  
KCVIDFHWKATFMRKYANAVNHMGASEPPYVLT KILKSLSHFSPDGYSNSTAQERSTRHT  
LLKLMASRFNKSGEKNMLLIHSMCRHWALLALSQWKISLFTV FLETLLGKLV EYLYKD VDD  
CFVGQKASSKESDESSDDGDGEYVPPSTSSSQFCSSIPSVGDLFCLTSSSYP IFFDMVL  
RSTVSSIALFSVPEAMSSFQHSATVSYKLHPVYKLDQMI AVYGSLIKLYTDKFHIFPKSL  
LPSIVNASKTMLD TSAAKLQ EYVEWRNYQPIISMPEIESGFTDPASTIFLKSILDAFGVH  
VVGTLRRLFCSVHLEPTNSLIRKTERTYDLLRETSNRYNTGEIKSQVTGTM RHTSQGDIER  
QNVLFQSQMSLEKGLGEGPTE TVGTMIDNASLNRKRKSNRSDRQLLVEGYNPNDLEDDDS  
FVYGDESSSFGSDAFGVSGNWGQDDHSTEEEDDPKIDGSVGEIKMTK

>comp15532\_c0\_seq4; 674 171 2919 LEN=2919; translated  
MNSKKEELELAFRQSVKQAEENLESRSSPPTIRSLLDALHIFLTKWDTLQGD EGDIETEE  
DENRQTRDLPEDYIRR VFCRILSNLNPVDSVDLVRENILSTLRCVETVDCRQIVLDFLPA  
VTKIFPAYSNGDAARNEGQSKVKKEIISCLKEVFENDSNSLPQILRFFSSFLAEGEPQK  
KVLDKRDYLLFIGILPKVPETNLHGALKALIEYIDSAEDARRAVDSIRTELGLLEKTDIS  
DMGSVAKTFDVAIRGSKKA EKL FVEEYLVVVGELIDERKEKKHKLQLCDAAEFEAQILTF  
DLVVIILSKDNPGRDKILGMISGVSPAESGLMSDSQLSKLKELVSGNHNCTPQAIDPLY  
PLDSNLHERLFESLVDFCMIILLTPLRRSVELDSREFFSKANVLLLRVISILPDDCQLKA  
ISAALGIVDELRAKKPEGKIAISNKNRSKSYEENHNKICQTI FSLLLTLSSAKTDM LKPF  
QNRLEEYIISGGFDSTQELDMLKTLCIVVTKLACTDKPSGGLDLLMICRTLLFSTTV DGR  
RRTTSQFDEFISIQRRI RGMVFLKVVISCCCLDTTMLMGVQKMISRILVSPHSGVLNLDPR  
VGFHGMQIIRHLQOHTTTTSPSGKELFRLVSLVLTHSRIVHYPDDASKATVTETNTV LAY



AADGNLEELRQNIIRGFGEESPATLREPALNLARSIRSAEIEDDRPNTTTTGQASEHETKR  
KQKEAWQKATSHLLEFVNKRKRKTEEITSGSRNEXIALQTSIA  
>comp15534\_c0\_seq4; 246 1 1884 LEN=1884; translated  
RMAMICTSGHLRSRSMIRCLWHKHRNRTQKLLFRRIATNWDTEQVYCFSTHPSSYQYI  
HGRVGQPKSSEFTSPYRKFSAQTSSTYRDGNRLPNATVIENGAPQPIVSSGESEGGDLVL  
ESYLDSFAETIEKDVDNAITEIDSQELSVKDAGTKTRLSTPSGDNIEPKIDDNIPVRAKS  
TLRMRWERVMGKEDAQYRNRGRKGPNQRKFRLSIEELWGEALRRNGYFIKPKPAVAEPVS  
IEKEIAGDEGSVIDQEKDSFQDVNRELSPVFRLPVNEQMCPAELEASLSTNRYETNDDL  
TYGEKFEVTPFGFNDPIDGDNGKHDRVENHRKSILRSISLLIAMKPKDWSQFSDIPIDF  
ETRMEKNEPSSMDKDVHAQHELLHDETSVDQONQNMNVRNFLHHLMEHKYGLTTPMAN  
VLLAHLVVSTDMKNKEIGDMCLQVLEEMKLMAESGQRECGPDSTTYRILILAFGRRLQAM  
GEAIKIVQDITENPPTDTPPELVNDALRVCQAKAELSVAKSLMNSVLRNRSASINARSCI  
LYTEMLKTQKLDQEAIHFFDRIHEVSTVSEVEYRPSQKQDIHYVLIGCLFPSYPTGWYTX  
PKMAKKYISSLFVDGPGEVVAETFLTCPX  
>comp15534\_c0\_seq5; 387 1 2442 LEN=2456; translated  
RMAMICTSGHLRSRSMIRCLWHKHRNRTQKLLFRRIATNWDTEQVYCFSTHPSSYQYI  
HGRVGQPKSSEFTSPYRKFSAQTSSTYRDGNRLPNATVIENGAPQPIVSSGESEGGDLVL  
ESYLDSFAETIEKDVDNAITEIDSQELSVKDAGTKTRLSTPSGDNIEPKIDDNIPVRAKS  
TLRMRWERVMGKEDAQYRNRGRKGPNQRKFRLSIEELWGEALRRNGYFIKPKPAVAEPVS  
IEKEIAGDEGSVIDQEKDSFQDVNRELSPVFRLPVNEQMCPAELEASLSTNRYETNDDL  
TYGEKFEVTPFGFNDPIDGDNGKHDRVENHRKSILRSISLLIAMKPKDWSQFSDIPIDF  
ETRMEKNEPSSMDKDVHAQHELLHDETSVDQONQNMNVRNFLHHLMEHKYGLTTPMAN  
VLLAHLVVSTDMKNKEIGDMCLQVLEEMKLMAESGQRECGPDSTTYRILILAFGRRLQAM  
GEAIKIVQDITENPPTDTPPELVNDALRVCQAKAELSVAKSLMNSVLRNRSASINARSCI  
LYTEMLKTQKLDQEAIHFFDRIHEAGILTKNGEEVYLESICRWPRRSRRGDVLDLSSFWA  
EILCILEHKTLSVDKPDIKVWITFLEGLYNSAKNDGSLWKMVGSAMRMVLDVDCYPGSFVGA  
KLMTIGLDASSSVEDTELASMLKRVAAPGTGSAAQGRGTIVPFRAVRRALEMCVQTS  
TASARSIRESLEQIGDPYPSGAKFELHSLVLLCHAKANETEHAKRDLAMIENGSSPRCV  
MACLMVESEPNMNPDGKDSNAPSRSSHFHLVCI  
>comp15534\_c0\_seq6; 149 1 1132 LEN=1146; translated  
XTSCTISWSTEMKLMAESGQRECGPDSTTYRILILAFGRRLQAMGEAIKIVQDITENPPT  
DTPPELVNDALRVCQAKAELSVAKSLMNSVLRNRSASINARSCIYTEMLKTQKLDQEA  
HFFDRIHEAGILTKNGEEVYLESICRWPRRSRRGDVLDLSSFWAEILCILEHKTLSVDK  
DIKVWITFLEGLYNSAKNDGSLWKMVGSAMRMVLDVDCYPGSFVGA  
KLMTIGLDASSSVEDTELASMLKRVAAPGTGSAAQGRGTIVPFRAVRRALEMCVQTS  
TASARSIRESLEQIGDPYPSGAKFELHSLVLLCHAKANETEHAKRDLAMIENGSSPRCV  
MACLMVESEPNMNPDGKDSNAPSRSSHFHLVCI  
>comp15535\_c0\_seq1; 802 268 2861 LEN=3006; translated  
MGASASREKFRESVSALIEVDVSADDADFDELWKIPNSGEEVFELIPPSAARKLRDERF  
ANLATLFTQATAQLCQIVETPYNIYFDQALNCVRVLTRILPFLLEKGDGDLGESDEQVEQLC  
WGTNGDDLNDDEKIGLMIGTGKSTDSAKTSGNIGGNGNGLARNNTGPEDEQEPLALLVVH  
AAMHMLFLPQFTCDFYENKIDTSSHNGFRRSETKEDKELRSTVQGLLNAKSIEAGVSLVP  
RPSSVVWASGSGIKAGQLNGGYDASATRKYDKNRIEVLRLLLSACCDPLFSPADEYNPIA  
SRWLAVATAADAPNAVCLFYSLNLTVLTDFPNSVGFSDAHVKLVLSAQVLAVLLDCGLP  
GNPEPVLDMKGEPIEFETASRGGFNI FRSLMARIDSAADMDFIDG FARLLKNVYEPQS  
TYLPNSTTKLECFQELLVLLWKFLLENPLFMNHVLTTRCDINELVVPICFLMYKSRDPAQ  
IGLVHICTFCLLKLKLSGERSFGVALNKPFTKKLPDLPFSGGHDLTITLHKLTVNGAY  
KLVPLYSCFLTIIICNVSPYWRMSLVAAVKLVNLFELFSSPKFLYSGEHAHRHLALLLEV  
FNNVIQYQHGNTHLVYALIRRKVKFQFDLILLHHARKISMEKECLDSIALNQLDIGLDR  
WKLKERHPQLHHHILCIPLLAYSSRNTQDSFGRLASLTLKKAQDQCHKAYGDQSRSEYDG  
DYARRIERMDPKGLPNAGAMMGDDMGRKFVPTEEWLTELKNSLPLETVTRLLQHLVPPV  
DEIVAKRQGAVDEQEILDALKDIVMVGLLPVPHAIIVIRKYQPNQYTALWFTAFMWGVIFL  
RNQSLPMFDGQCIELEFQVSVQEDE  
>comp15535\_c0\_seq2; 790 268 2667 LEN=2812; translated  
MGASASREKFRESVSALIEVDVSADDADFDELWKIPNSGEEVFELIPPSAARKLRDERF  
ANLATLFTQATAQLCQIVETPYNIYFDQALNCVRVLTRILPFLLEKGDGDLGESDEQVEQLC  
WGTNGDDLNDDEKIGLMIGTGKSTDSAKTSGNIGGNGNGLARNNTGPEDEQEPLALLVVH  
AAMHMLFLPQFTCDFYENKIDTSSHNGFRRSETKEDKELRSTVQGLLNAKSIEAGVSLVP  
RPSSVVWASGSGIKAGQLNGGYDASATRKYDKNRIEVLRLLLSACCDPLFSPADEYNPIA  
SRWLAVATAADAPNAVCLFYSLNLTVLTDFPNSVGFSDAHVKLVLSAQVLAVLLDCGLP

GNPEPVLDMKGEPIEFETASRGGFNI FRSLMARIDSAADMDFI FDGFARLLKNVYEPQS  
TYLPNSTTKLECFQELLVLLWKFLEENPLFMNHVLTTRCDINELVVPICFLMYKSRRDPAQ  
IGLVHICTFCLLKLSGERSFGVALNKPFTKKLPTDLPFSGGHHLLTITLHKLVVNGAY  
KLVPLYSCFLTIIICNVSPYWRSM SLVA AVKLVNLFELFSSPKFLYSGEHAHRHLALLLEV  
FNNVIQYQYHGHNTHLVYALIRRKDSFGR LASLTLKKAQDQCHKAYGDQSRSEYDGDYARR  
IERMDPKGLPNAGAMMGDDMGRKFVPTTEEWLTELKNSLPLETVTRLLQHLVPVVD EIVA  
KRQGA VDEQEILDALKDIVMVGLLPVPHAI VIRKYQPNQYTALWFTA FMWGVIFLRNQSL  
PMFDGQCIELFQVSVQEDE

>comp15536\_c0\_seq1; 1564 351 3993 LEN=4142; translated  
MAFGKTNKTI AAAATAFFLLSCLGSAEFFAAPT LKWSLQLEGSGRLSGRGLRKGNAIVA  
HGDGTKIVATADDGSLHVIQT TNQVKTLAVFVPEELSGRQTECRSGATVVEKNQQAGLYA  
SSETEGATPVRNGVDFV VYAVVDKTI LDPVGI FEAGIMNSGVVDRGDGVT SRVLAVGMDG  
VLLWSVEVPGWIEGKPLVGRDGI YVTHNDNGLGNVSVLR LQPGDGT PVVATVTPPAAER  
GRMVPLGPPALRKP MYWEEEEEGDGDTE DMVIVAQNWD SGFSDDRGGLYMLSSDVSAFTNA  
DGKDRNEELSRPTDASENYGLVR ISSWSFSASSPPMVYGD SIYLGAAAGTLGGFTGDRKS  
DLSGITSGRERDIEPRWNLQVAPNPRNASQRXV LIRFVLF CFVSLCTVWNNLATFAWSAL  
HRDPHTMNCCGTDQSPTFTTKPILRVQPSVAXPVL DREGELLV VAGVDS DVYGIQTENGR  
QAWRDNQGSQVLAQPRIFEAGD GWAKVVYVIETQNGRVRQH DLYNGRRYWDYSCADISSQ  
LCQDAVEADFAVTESGNNLYYGD IYGRINSLEVANFATGAPT ISPTLGPTVTPTGTPTTT  
AAPTESPVSKAESPVAVAPVAVASSP ASGADEASSEGQDEATNDDEGGTGLSDENND EPS  
SIVDQQA AKKEDSSNTP IYIGAAMAGLCVLMIP I VIFAILRKKRKKPSEGKEMIVEI IDD  
CSAGISDEGDTDRFSNEISDSFNGD GIEVEMRSSPSAPTRGT PPNKKRKKKNSLPDTP  
NTVNTLASIEELPEEASAMV VAGKVHDI EDPSIEAVNLRN AFDKEAQR RAPGSKSLEIAI  
GSEHENHYLSDDDDDDIPPPPPPMEDSNQWTWGS LLQMGTAPSSLETNNPTEKFELKKA  
SNYAHPPKTETTIEESEEEKESD I VETETEEITEVAAYENAESQSRSETPVPPEEQTPSGQ  
STGHSLISDAVQNLSPGSMFGSPHGSESD SVGSDDDES LYTSYTSMTGGTREKKEQKELSP  
LSNYVYDQDIRRRDRTEIVNEGRGILHQ PDL SKRRSSRDKNKYHFIDHEEHPDDESTLAP  
GIQYKPHVIDETEGKYGKSARSKRDSDLFKATNASRNEYSHTPLAQMYDQLAAIGQQRE  
EKKPAFKRRSKRMEQSNPDP PPPKQEDEQSVDTWGSFLNELAQAEQQFFSPSKGNAKSL  
LNDASENGDGTEAA

>comp15536\_c0\_seq2; 1602 351 3824 LEN=3973; translated  
MAFGKTNKTI AAAATAFFLLSCLGSAEFFAAPT LKWSLQLEGSGRLSGRGLRKGNAIVA  
HGDGTKIVATADDGSLHVIQT TNQVKTLAVFVPEELSGRQTECRSGATVVEKNQQAGLYA  
SSETEGATPVRNGVDFV VYAVVDKTI LDPVGI FEAGIMNSGVVDRGDGVT SRVLAVGMDG  
VLLWSVEVPGWIEGKPLVGRDGI YVTHNDNGLGNVSVLR LQPGDGT PVVATVTPPAAER  
GRMVPLGPPALRKP MYWEEEEEGDGDTE DMVIVAQNWD SGFSDDRGGLYMLSSDVSAFTNA  
DGKDRNEELSRPTDASENYGLVR ISSWSFSASSPPMVYGD SIYLGAAAGTLGGFTGDRKS  
DLSGITSGRERDIEPRWNLQVAPNPRNASQPIRSQPVL DREGELLV VAGVDS DVYGIQTE  
NGRQAWRDNQGSQVLAQPRIFEAGD GWAKVVYVIETQNGRVRQH DLYNGRRYWDYSCADI  
SSQLCQDAVEADFAVTESGNNLYYGD IYGRINSLEVANFATGAPT ISPTLGPTVTPTGTPT  
TTTAAPTESPVSKAESPVAVAPVAVASSP ASGADEASSEGQDEATNDDEGGTGLSDENND  
EPSSIVDQQA AKKEDSSNTP IYIGAAMAGLCVLMIP I VIFAILRKKRKKPSEGKEMIVEI  
IDDCSAGISDEGDTDRFSNEISDSFNGD GIEVEMRSSPSAPTRGT PPNKKRKKKNSLP  
DTPNTVNTLASIEELPEEASAMV VAGKVHDI EDPSIEAVNLRN AFDKEAQR RAPGSKSLE  
IAIGSEHENHYLSDDDDDDIPPPPPPMEDSNQWTWGS LLQMGTAPSSLETNNPTEKFEL  
KKASNYAHPPKTETTIEESEEEKESD I VETETEEITEVAAYENAESQSRSETPVPPEEQTP  
SGQSTGHSLISDAVQNLSPGSMFGSPHGSESD SVGSDDDES LYTSYTSMTGGTREKKEQKEL  
LSPLSNYVYDQDIRRRDRTEIVNEGRGILHQ PDL SKRRSSRDKNKYHFIDHEEHPDDEST  
LAPGIQYKPHVIDETEGKYGKSARSKRDSDLFKATNASRNEYSHTPLAQMYDQLAAIGQQ  
RREKKPAFKRRSKRMEQSNPDP PPPKQEDEQSVDTWGSFLNELAQAEQQFFSPSKGNAK  
SLLNDASENGDGTEAA

>comp15537\_c0\_seq2; 380 1 1688 LEN=1879; translated  
XPGDVQADPSHQKT VNMYSGLW TNAPKELFEFFDYTFK DHFGNVRLP THLPRKHVLDYFL  
ARVTRNCPHFFEKYFSFR TT VVRVEQQEDES GKKTFRVCTRDETTGKEEVSCFDKCVWAA  
GVNGV PNVPKQTVQLLES GGFGRMVHSTDTANFKQDVEGKRVL MVGGGLSAEDLALMAV  
KEGVSRYITCRSESEVLDTRWPYDKVEVLGYTSIDK VSGSTISLKYVYFDVKKQKYR  
NDTDYPERKVL TNIDTI FCTGYIESMGMLEELQEKPFV NKVTV PEDWTMNPNEVSLR  
ILGDESAREIRPAKNEVLSFACDDERFGFTKLYNGVFWVDNPSMMYHMDYGHIP LLEIDI  
SSWMIAKVLTNQVALPSSEEMENETIRINLEYMHDP SARKIMDWKYAEAISDATEEAMEE  
SSDANDEDPFEELWEKSEANITTPMMFRIMGRVMNRFGYPVSFLEKDGETF SKYYDV MYA



NYVNDTRDLDDQIQYDGEIRKPSNDSDDVVCDNDTGNTSVTRPGWRTFRDAPSVEKCVSYF  
TGIIKAIISLPPKPVEMSEDDPLW

>comp15537\_c0\_seq3; 407 1 2231 LEN=2422; translated  
XRYRYRSHGAAKVIQVFRFSSTADFFTVFIDHLFCDSINTNTNQPPHLRDTIRKLG  
ISLSSSFVALAKIPGTNHPQAMLTEAPPAPTVAVIGGGPGALFLCHALEMQREELAKEG  
RDVSSFPVRCFERSEGGVWRSDRNHDEEGGASDRDSEEEKKEDPNICVQDAKRVKTG  
LHPGDVQADPSHQKTVNMYSGLWTNAPKELFEFFDYTFKDFHGNVRLPHTLPRKHVLDYF  
LARVTRNCPHFPEKYFSFRRTTVRVEQQEDESCKKTFRVCTRDETTGKEEVSCFDCVWA  
AGVNGVNPVQKQTVQLLESGLFPGRMVHSTDTANFKQDVEGKRVLMVGGGLSAEDLALMA  
VKEGVSRYITCRSESEVELDTTRWPYDKVEVLGYTSDKVSSTISLKYVYFDVKKQKY  
RNDTDYPERKVLTNIDTIIIFCTGYIESMGMLEELQEKPFVNVKVTVPEDWTMNPNEVSL  
RILGDESAREIRPAKNEVLSFACDDERFGFTKLYNGVFWVDNPSMMYHMDYGHIPLEID  
ISSWMIKVLTNQVALPSSEEMENETIRINLEYMHDP SARKIMDWKYAEAI SDATEEAME  
ESSDANDEDPFEELWEKSEANITTPMMFRIMGRVMNRFYVPSFLEKDGGETFSKYDYVMY  
ANYVNDTRDLDDQIQYDGEIRKPSNDSDDVVCDNDTGNTSVTRPGWRTFRDAPSVEKCVSY  
FTGIKAIISLPPKPVEMSEDDPLW

>comp15537\_c0\_seq4; 339 1 1588 LEN=1779; translated  
DYTFKDFHGNVRLPHTLPRKHVLDYFLARVTRNCPHFPEKYFSFRRTTVRVEQQEDESCK  
KTFRVCTRDETTGKEEVSCFDCVWAAGVNGVNPVQKQTVQLLESGLFPGRMVHSTDTAN  
FKQDVEGKRVLMVGGGLSAEDLALMAVKEGVSRYITCRSESEVELDTTRWPYDKVEVLG  
YTSIDKVSSTISLNVYFDVKKQKYRNDTDYPERKVLTNIDTIIIFCTGYIESMGMLEEL  
QEKPFVNVKVTVPEDWTMNPNEVSLRILGDESAREIRPAKNEVLSFACDDERFGFTKLYN  
GVFVVDNPSMMYHMDYGHIPLEIDISSWMIKVLTNQVALPSSEEMENETIRINLEYMH  
DPSARKIMDWKYAEAI SDATEEAMEESSDANDEDPFEELWEKSEANITTPMMFRIMGRVM  
NRFYVPSFLEKDGGETFSKYDYVMYANYVNDTRDLDDQIQYDGEIRKPSNDSDDVVCDNDT  
GNTSVTRPGWRTFRDAPSVEKCVSYFTGIKAIISLPPKPVEMSEDDPLW

>comp15537\_c0\_seq5; 441 235 2220 LEN=2411; translated  
MLTEAPPAPTVAVIGGGPGALFLCHALEMQREELAKEGRDVSSFPVRCFERSEGGVWR  
RSDRNHDEEGGASDRDSEEEKKEDPNICVQDAKRVKTGLHPGDVQADPSHQKTVNMYSGL  
WTNAPKELFEFFDYTFKDFHGNVRLPHTLPRKHVLDYFLARVTRNCPHFPEKYFSFRRTTV  
VRVEQQEDESCKKTFRVCTRDETTGKEEVSCFDCVWAAGVNGVNPVQKQTVQLLESGLFP  
PGRMVHSTDTANFKQDVEGKRVLMVGGGLSAEDLALMAVKEGVSRYITCRSESEVELDT  
TRWPYDKVEVLGYTSDKVSSTISLKYVYFDVKKQKYRNDTDYPERKVLTNIDTIIIFCT  
GYIESMGMLEELQEKPFVNVKVTVPEDWTMNPNEVSLRILGDESAREIRPAKNEVLSFA  
CDDERFGFTKLYNGVFWVDNPSMMYHMDYGHIPLEIDISSWMIKVLTNQVALPSSEEM  
ENETIRINLEYMHDP SARKIMDWKYAEAI SDATEEAMEESSDANDEDPFEELWEKSEANIT  
TPMMFRIMGRVMNRFYVPSFLEKDGGETFSKYDYVMYANYVNDTRDLDDQIQYDGEIRKPS  
NDSDDVVCDNDTGNTSVTRPGWRTFRDAPSVEKCVSYFTGIKAIISLPPKPVEMSEDDPL  
W

>comp15538\_c0\_seq1; 922 463 3480 LEN=3719; translated  
MRNPSSSDDEAVGPLSSTGGATGGTASTAATRRGRRPAGGTLRRRRGEVEVDSSDEDSTG  
SQDLRENFDRRRNSDRSSLSSSLNLTLLNSNSQSSRQRAPASSDKNTSGNAGNADESLSG  
DYGSSPSGYNGREPSSAAPSQSQRDVILEDADSNTLRIMISTDNHVGYAENDNIRGND  
AALAEVLYLAKEYGCDMVLLAGDLFHENRPSRRTLKTMDFRRCMGPAGAIQVQVVPAS  
RKGSNGNSKSNENKSPFVRGYVNYEDANYSDVLPVFSIHGNHDDPSRDGGNSELYAALDL  
LDVANLVNYFGKQEDTQIRIRIDPVLLRKGNTKVALYGLGSMRDERLNRMWGENLTFTRP  
AESTSDENVPWFNI FALHQNRDRGRGAKNCIKEDMIPDWMDFVCWGHEHECDIELEESV  
VGTFRISQPGSSVATSLVEGESVRKKVAVFDVREGQFRLTAIPLTQVRSFVVSTVRLAE  
RRLDPDDPKVDTKVKSLIEDKVRILIHAREKRRELEDAKNGGGLARYCAAAGNPDD  
MPLKHTMKEDEVLRVLRKVDHTGFAAVNNQRFGARFVGDVANPVRTVLLVCFEFLVEII  
RTESPVLMCKKSKSLTLHVSCPEXLQTDILLFTRKKAEGGRSRSSKSMKGIAPIEPSEIE  
MNI EDLIVEQFESSNTKLELFDKKSIAALDSYVGKQEAQAINETLEKLLGKQQRRLIKN  
GALSVAEGIEMDGDEEVGRRNNGKRRNRGRDDEEDENDAMQDSPPTRSRSNKSSQSRIR  
SRSTRKRADSYDSLDDGSMQESPPTRSRSNKSSQSRSTKSRSTGYDDDSYEAAPSQVRSK  
SSRTTSSRSTGRKAAARYEESSEDEYDDVVRVDPVPPSRNAKPARQRATRKTIDYSVDDS  
EDDKVDDSLSIDDPTRKPTGRGRASAKPTRKTATSRDRRSTDTASSGFSQSQLSFO  
PIKRKTGTTRAKRPRHSYSDDDDDMGPAGRSYDDDDWGTAKSGR

>comp15538\_c0\_seq2; 822 189 2402 LEN=2641; translated  
MGPAGAIQVQVVPASRKGSNGNSKSNENKSPFVRGYVNYEDANYSDVLPVFSIHGNHDDPS  
RDGGNSELYAALDLLDVANLVNYFGKQEDTQIRIRIDPVLLRKGNTKVALYGLGSMRDERL

NRMWRGENLTFTRPAESTSDENVPWFNIFALHQNRDRGRGAKNCIKEDMIPDWMDFVCW  
GHEHECDIELEESVVGTFRISQPGSSVATSLVEGESVRKKVAVFDVREGQFRLTAIPLTQ  
VRSFVSTVRLAEERRLDPDDPKVDTKVKILEDKVRILIHDAEKRELEDAKNGGNG  
LARYCAAAGGNPDDMPLKHTMNKEDEVLRVRLKVDHTGFAAVNNQRFGARFVGDVANPTDI  
LLFTRKKAEGGRSRSSKSMKGIAPIEPSEIEEMNIEDLIVEQFESSNTKLELFDDKKISA  
ALDSYVGKQEAQAINETLEKLLGKQQNRLIKNGALSVAEGIEMDGDEEVGRRNNGKRRNK  
RGRDDEEDENDAMQDSPPTRSRSNKSSQRSIRSRSTRKRADSYDSLDDGDSMQESPSTRS  
RSNKSSQRSTKSRSTGYDDDSYEAAPSQVRSKSSRTTSSRSTGRKAAARYEESEDEYDDD  
VRVVDPPPRSRNAKPARQRATRKTIDYSVDDSEDDKVDDSLSIDDPTPPRKKPTGRGRAS  
AKPTRKTATSRRDRRSTDTASSGFSQSLSFQPIKRKTGTTRAKRPRHSYSDDDDDMGP  
AGRSYDDDDWGTAKSGR

>comp15538\_c0\_seq3; 999 463 3354 LEN=3593; translated  
MRNPSSDDEAVGPLSSTGGATGGTASTAATRRGRRPAGGTLRRRRGEVEVDSDEDSTG  
SQDLRENFDRRNSDSRSSLSSSLNTTLNSNSQSSRQRAPASSDKNTSGNAGNADESLSG  
DYGSSPSGYNGREPSSAAPSQSQRDVILEDADSNTLRIMISTDNHVGYAENDNIRGNSDF  
AALEEVLYLAKEYGCDMVLLAGDLFHENRPSRRTLIKTMDFRRCYCMGPGAIQVQVVPAS  
RKGSGNSKSNENKSPFVRGYVNYEDANYSVDLPVFSIHGNHDDPSRDGGNSELYAALDL  
LDVANLVNYFGKQEDTQRIRIDPVLLRKGNTKVALYGLGSMRDERLNRMWRGENLTFTRP  
AESTSDENVPWFNIFALHQNRDRGRGAKNCIKEDMIPDWMDFVCWGHEHECDIELEESV  
VGTFRISQPGSSVATSLVEGESVRKKVAVFDVREGQFRLTAIPLTQVRSFVSTVRLAE  
RRLDPDDPKVDTKVKILEDKVRILIHDAEKRELEDAKNGGNGLARYCAAAGGNPDD  
MPLKHTMNKEDEVLRVRLKVDHTGFAAVNNQRFGARFVGDVANPTDILLFTRKKAEGGRSR  
SSKSMKGIAPIEPSEIEEMNIEDLIVEQFESSNTKLELFDDKKISAALDSYVGKQEAQAI  
NETLEKLLGKQQNRLIKNGALSVAEGIEMDGDEEVGRRNNGKRRNKRGRDDEEDENDAMQ  
DSPPTRSRSNKSSQRSIRSRSTRKRADSYDSLDDGDSMQESPSTRSRSNKSSQRSTKSR  
TGYDDDSYEAAPSQVRSKSSRTTSSRSTGRKAAARYEESEDEYDDDVRVVDPPPRSRNAK  
PARQRATRKTIDYSVDDSEDDKVDDSLSIDDPTPPRKKPTGRGRASAKPTRKTATSRRDR  
RSTDTASSGFSQSLSFQPIKRKTGTTRAKRPRHSYSDDDDDMGPAGRSYDDDDWGTA  
KSGR

>comp15538\_c0\_seq4; 745 189 2528 LEN=2767; translated  
MGPGAIQVQVVPASRKGSGNSKSNENKSPFVRGYVNYEDANYSVDLPVFSIHGNHDDPS  
RDGGNSELYAALDLLDVANLVNYFGKQEDTQRIRIDPVLLRKGNTKVALYGLGSMRDERL  
NRMWRGENLTFTRPAESTSDENVPWFNIFALHQNRDRGRGAKNCIKEDMIPDWMDFVCW  
GHEHECDIELEESVVGTFRISQPGSSVATSLVEGESVRKKVAVFDVREGQFRLTAIPLTQ  
VRSFVSTVRLAEERRLDPDDPKVDTKVKILEDKVRILIHDAEKRELEDAKNGGNG  
LARYCAAAGGNPDDMPLKHTMNKEDEVLRVRLKVDHTGFAAVNNQRFGARFVGDVANPVRT  
VLLVCFEFLVEIIRTESPVLCCKSKSLTLHVSCPEXLQTDILLFTRKKAEGGRSRSSKS  
MKGIAPIEPSEIEEMNIEDLIVEQFESSNTKLELFDDKKISAALDSYVGKQEAQAINETL  
EKLLGKQQNRLIKNGALSVAEGIEMDGDEEVGRRNNGKRRNKRGRDDEEDENDAMQDSP  
TRSRSNKSSQRSIRSRSTRKRADSYDSLDDGDSMQESPSTRSRSNKSSQRSTKSRSTGYD  
DDSYEAAPSQVRSKSSRTTSSRSTGRKAAARYEESEDEYDDDVRVVDPPPRSRNAKPARQ  
RATRKTIDYSVDDSEDDKVDDSLSIDDPTPPRKKPTGRGRASAKPTRKTATSRRDRRST  
TASSGFSQSLSFQPIKRKTGTTRAKRPRHSYSDDDDDMGPAGRSYDDDDWGTA  
KSGR

>comp15539\_c0\_seq1; 387 192 1281 LEN=1955; translated  
MKNSYQANDEFIAVDNYQCWHSVWQPPISQORTEQTSLSFDDDEESWVEKTKQNI VFHR  
IGVCVGFDDTMLVPDLLLQDSSKYNLDGNQPIWTVCPGSGTSQEREHEHIKEKDICFITCI  
FGGNVVDVDQPANVEFFRNHWCHTRFLLATNLPDLAPGWTKI ISETATRERDGNKIDNI  
NSKATSTEQETSSNNKSQLDVTKNHIVQSRHAKFLAWDALSDITPKYCAAVIYMDGYLIP  
KRFMNWRSFFGSLFFSPPWSPSSPLFEWFPRIPGGKRSPTQIPPEKQAVVRQVQTHR  
WGLSQVKQRYFDGLPMTTLLKNLVRDRKDTKEHVAKTIEWFHSQVTNFEEIMPYYLNKYF  
GE

>comp15539\_c0\_seq3; 387 139 1228 LEN=1902; translated  
MKNSYQANDEFIAVDNYQCWHSVWQPPISQORTEQTSLSFDDDEESWVEKTKQNI VFHR  
IGVCVGFDDTMLVPDLLLQDSSKYNLDGNQPIWTVCPGSGTSQEREHEHIKEKDICFITCI  
FGGNVVDVDQPANVEFFRNHWCHTRFLLATNLPDLAPGWTKI ISETATRERDGNKIDNI  
NSKATSTEQETSSNNKSQLDVTKNHIVQSRHAKFLAWDALSDITPKYCAAVIYMDGYLIP  
KRFMNWRSFFGSLFFSPPWSPSSPLFEWFPRIPGGKRSPTQIPPEKQAVVRQVQTHR  
WGLSQVKQRYFDGLPMTTLLKNLVRDRKDTKEHVAKTIEWFHSQVTNFEEIMPYYLNKYF  
GE

>comp15539\_c0\_seq4; 248 55 696 LEN=917; translated

MSPPTKFSGLKDLLWKVGSMPDRKRVKGATTITVKVVPNDVLVGRSRLDTFEVTGTNRN  
KSNLEGGKVAIVFGREGHHLTRTFVFKLAMIYRNITEKRDDVEFLFVSLDETKEQYDRF  
TKSMPWPVLPWEDKYIGSQLIKALHTPLKKTGYGQQASVVI VSDHETFLNTDAEYIIS  
KTHETTGAFFFRVSAENCCAVATATMMCTIM

>comp15539\_c0\_seq5; 383 139 1602 LEN=1672; translated  
MKNSYQANANDEFAIVDNYQCWHSVWQPPISQQRTEQTSLSFDDDEESWVEKTKQNIVFHR  
IGVCVGFDDTMLVPDLLLLQDSSKYNLDGNQPIWTVCPSPGSTSQEREHHIKEKDICFITCI  
FGGNVVDVDQPANVEFFRNHWCHTRFLLATNLPDLAPAGWTKI ISETATRERDGNKIDNI  
NSKATSTEQETSSNNKSQLDVTKNHIVQSRHAKFLAWDALSDITPKYCAAVIYMDGYLIP  
KRFMNWRSFFGSLFFSPPWSPSSPLFEWFPRIIPGGKRSPTQIPPEKFQAVVRQVQTHR  
WGLSQVKQRYFDGLPMTTLLKLNLRDRKDTKEHVAKTIEWFHSQVTNFEEIMPYYLNKYF  
AYDPSNQKYRDLSSYFWETYTTYGGVWRDQPLWAYTLHRFNVT PAVMTTEGTITKGGDLF  
QTGGEIGLGKTRVRLAPTFRPKKEEKKDTGTLRIFLTLRLMAAGISGAVSRFGTSHISVA  
MHIDNSG

>comp15539\_c0\_seq6; 383 429 1892 LEN=1962; translated  
MKNSYQANANDEFAIVDNYQCWHSVWQPPISQQRTEQTSLSFDDDEESWVEKTKQNIVFHR  
IGVCVGFDDTMLVPDLLLLQDSSKYNLDGNQPIWTVCPSPGSTSQEREHHIKEKDICFITCI  
FGGNVVDVDQPANVEFFRNHWCHTRFLLATNLPDLAPAGWTKI ISETATRERDGNKIDNI  
NSKATSTEQETSSNNKSQLDVTKNHIVQSRHAKFLAWDALSDITPKYCAAVIYMDGYLIP  
KRFMNWRSFFGSLFFSPPWSPSSPLFEWFPRIIPGGKRSPTQIPPEKFQAVVRQVQTHR  
WGLSQVKQRYFDGLPMTTLLKLNLRDRKDTKEHVAKTIEWFHSQVTNFEEIMPYYLNKYF  
AYDPSNQKYRDLSSYFWETYTTYGGVWRDQPLWAYTLHRFNVT PAVMTTEGTITKGGDLF  
QTGGEIGLGKTRVRLAPTFRPKKEEKKDTGTLRIFLTLRLMAAGISGAVSRFGTSHISVA  
MHIDNSG

>comp15539\_c0\_seq7; 383 192 1655 LEN=1725; translated  
MKNSYQANANDEFAIVDNYQCWHSVWQPPISQQRTEQTSLSFDDDEESWVEKTKQNIVFHR  
IGVCVGFDDTMLVPDLLLLQDSSKYNLDGNQPIWTVCPSPGSTSQEREHHIKEKDICFITCI  
FGGNVVDVDQPANVEFFRNHWCHTRFLLATNLPDLAPAGWTKI ISETATRERDGNKIDNI  
NSKATSTEQETSSNNKSQLDVTKNHIVQSRHAKFLAWDALSDITPKYCAAVIYMDGYLIP  
KRFMNWRSFFGSLFFSPPWSPSSPLFEWFPRIIPGGKRSPTQIPPEKFQAVVRQVQTHR  
WGLSQVKQRYFDGLPMTTLLKLNLRDRKDTKEHVAKTIEWFHSQVTNFEEIMPYYLNKYF  
AYDPSNQKYRDLSSYFWETYTTYGGVWRDQPLWAYTLHRFNVT PAVMTTEGTITKGGDLF  
QTGGEIGLGKTRVRLAPTFRPKKEEKKDTGTLRIFLTLRLMAAGISGAVSRFGTSHISVA  
MHIDNSG

>comp15539\_c0\_seq8; 387 429 1518 LEN=2192; translated  
MKNSYQANANDEFAIVDNYQCWHSVWQPPISQQRTEQTSLSFDDDEESWVEKTKQNIVFHR  
IGVCVGFDDTMLVPDLLLLQDSSKYNLDGNQPIWTVCPSPGSTSQEREHHIKEKDICFITCI  
FGGNVVDVDQPANVEFFRNHWCHTRFLLATNLPDLAPAGWTKI ISETATRERDGNKIDNI  
NSKATSTEQETSSNNKSQLDVTKNHIVQSRHAKFLAWDALSDITPKYCAAVIYMDGYLIP  
KRFMNWRSFFGSLFFSPPWSPSSPLFEWFPRIIPGGKRSPTQIPPEKFQAVVRQVQTHR  
WGLSQVKQRYFDGLPMTTLLKLNLRDRKDTKEHVAKTIEWFHSQVTNFEEIMPYYLNKYF  
GE

>comp15540\_c0\_seq1; 1337 216 4809 LEN=4904; translated  
MAPNARINLLYENDDIDRVCTFEKQGYRTTPILYVNGTRVSDAVASKVRSNQTLLSFLRD  
GMKLGKSKLGCAGGCGACSVMISKRDAESGDLKHI AVNACLMPALAADGCHITTVEGIG  
SVKGDNLHPIQKAMVEMHGSQC GFCTPGIVVAIYALYANN CSTKGI EEHMDGNLCRCTGY  
RPIWDAARSLCDDAEDLVRGPCGTACRDCPEREICEQDCNVEDKEKEAADDTKI IVTSSK  
DKMAMQKSLTSASPGWADQPKQMFPSDLLDATSTDSMALTKPLMVVDTTTEYQAGTWFKP  
TTLNGLLRLLKEFGDPVGGGYKIVVGNTEVGIETRFKHSIYPRLIYPGESIESIFQVSAS  
SDKIILGGCTPLSFIQHEAERLSKNDSIYSRTLMP IHDMLRWFASTQIRNVAACLGGLNLT  
ASPIDMNPMLASLGSKLVL SKLGGDGSTIVRRIVPVTEFFLRYRTVDIQTSEFLERIEV  
PVVVVKFEYVVKPFKQARRREDDISIVTSGMRIKLAPKDGKFIIEHVALAFGGMAPKTVMA  
IETAKGMIGAEFCRETFAKASDCLMNEKLPENVPGGQAAFRMTLATSFLYKLYLSVVG  
LKKDVEIQQNPSAFPDISLPLPSGPIVDDAELSGAFS FVSADKPCS SVQTYPTPKVAS  
GLEDKLYPNTDAAKKGAIDVVGKPC THQSGPLHVTGEATYTD D INAPSGTLHAALILAK  
EAGVIFESFGIEEALKTPGVVGVYGSSESI SLLKGENRRGMLRDENVFLPVGEKIGYVGEV  
LGITVGETLESAELGARNVSIKCSAQSDKVPVSI ED AIAADSFYESTRFAISRGDKSAL  
ESLKEIDDSTGDAKVGDLVKISGSFRSGAQEHFYLETNSTLVVPSEGNGLTVYCSTQAA  
SHTQEDIASATGTPQSKVVVRMKRMGGGFGGKETRNCFAAAAAAVASKCAERPVLTLPR  
DVMVTTGHRHCFLSNYHASARIT EDGAKIESMQIDIFSNGGWGV DLSGPIIGRACFHID

SVYYF PNLQVKG VACKTAQAPHTAFRGFGGPQGLAAC EHV IDHLALASKTPKDI FRRMNM  
YDDTHATHYGMALNQPHRKWHVPSI WDRMTSELNLSQRRLDIEEFNAKNRWVKRGAALTP  
TKFGIAFTAHF MNQGGALVHLYTDGTVLVTHGGTEMGQGLHTKVCQVAAQAFGIPIDQVY  
VDDTSTD KVANQIPSAASLSTDLYGMCTLDACRQIIGRLKPYREKLGPDADLKDIAHAAF  
FDRVDLSAHGFYAPDKSMCFF EKDKPKPDDYPDDMPENSWKGPFNFTQGVAYSEVEID  
VLTGNHRTLRS DVVVDVGSSINPAIDIGQIEGAFFQGMGWSTIEEIVYSDDDHTWSGKRS  
NLFTQGP GTYKIPGSVFSFCVGSNEKIKFETHTSCCDRCVFLFLAFNDHPEIFNVSLLE  
DAENPVA VHSSKAVGEPFFFLGSSVFYAIKDAVGSFRKEASGKDEYFEFRMPGTSERIRM  
QVNDTIGMKAKTAITGDEKKAENYQTQGSY

>comp15540\_c0\_seq2; 1341 216 4712 LEN=4807; translated  
MAPNARINLLYENDDIDRVCTFEKQGYRTTPILYVNGTRVSDAVASKVRSNQTLLSFLRD  
GMKLGKSKLGC AEGGCGACSVMI SKRDAESGDLKHI AVNACLMPALAADGCHITTV EGIG  
SVKGDNLHPIQKAMVEMHGSQCGFCTPGIVVAIYALYANNCSTKGI EEHMDGNLCRCTGY  
RPIWDAARSLCDDAEDLVRGPGCTACRDCPEREICEQDCNVEDKEKEAADTKIIVTSSK  
DKMAMQKSLTSASPGWADQPKQMFPSDLLDATSTDSMALTKPLMVVDTTEYQGAGTWFKP  
TTLNGLLRLLKEFGDPVGGGYKIVVGNTEVGIETRFKHSIYPRLIYPGESIESIFQVSAS  
SDKIILGGCTPLSFIQHEAERLSKNDSIYSRTLMP IHDM LRWFASTQIRNVACLGGNLVT  
ASPI SDMNPLASLGSKLVL SKLGGDGSTIVRRIVPVTEFFLRYRTVDIQTSEFLERIEV  
PVVVKVFEYVKPFKQARRREDDISIVTSGMRIKLAPKDGKFIIEHVALAFGGMAPKTVMA  
IETAKGMIGAEFCRETFAKASDCLMNEMKLPENVPGGQAAFRMTLATSFLYKFYLSVVG  
LKKDVESIQQNPSAFPDISLPLPSGPIVDDAELSGAFS FVSADKPCS SVQTYPTPKVAS  
GLEDKLYPNTDAKKKGAIDVVGKPC THQSGPLHVTGEATYTD D INAPSGTLHAALILAK  
EAGVIFESFGIEEALKTPGVVGVYGSESISLLKGENRRGMLRDENVFLPVGEKIGYVGEV  
LGITVGETLES AELGARNVSIKCSAQ SDEKVPVSI ED AIAADS FYESTRFAISRGDKSAL  
ESLKEIDDSTGD AKVGLVKISGSFRSGAQEHFYLETNSTLVVPSEGNGLTVYCSTQAA  
SHTQEDIASATGTPQSKVVVRMKRMGGGFGGKETRNCFAAAAAAVASKCAERPVLTLPR  
DVMVTTGHRHCFLSNYHASARIT EDGAKIESMQIDIFSNGGWGV DLSGPIIGRACFHID  
SVYYF PNLQVKG VACKTAQAPHTAFRGFGGPQGLAAC EHV IDHLALASKTPKDI FRRMNM  
YDDTHATHYGMALNQPHRKWHVPSI WDRMTSELNLSQRRLDIEEFNAKNRWVKRGAALTP  
TKFGIAFTAHF MNQGGALVHLYTDGTVLVTHGGTEMGQGLHTKVCQVAAQAFGIPIDQVY  
VDDTSTD KVANQIPSAASLSTDLYGMCTLDACRQIIGRLKPYREKLGPDADLKDIAHAAF  
FDRVDLSAHGFYAPDKSMCFF EKDKPKPDDYPDDMPENSWKGPFNFTQGVAYSEVEID  
VLTGNHRTLRS DVVVDVGSSINPAIDIGQIEGAFFQGMGWSTIEEIVYSDDDHTWSGKRS  
NLFTQGP GTYKIPAFNDHPEIFNVSLLEDAENPVA VHSSKAVGEPFFFLGSSVFYAIKDA  
VGSFRKEASGKDEYFEFRMPGTSERIRMQVNDTIGMKAKTAITGDEKKAENYQTQGSY

>comp15540\_c0\_seq3; 1274 1 4558 LEN=4653; translated  
SLFIGHDSKPTSIGYRTTPILYVNGTRVSDAVASKVRSNQTLLSFLRDGMKLGKSKLGC  
EGGCGACSVMI SKRDAESGDLKHI AVNACLMPALAADGCHITTV EGIGSVKGDNLHPIQK  
AMVEMHGSQCGFCTPGIVVAIYALYANNCSTKGI EEHMDGNLCRCTGYRPIWDAARSLC  
DAEDLVRGPGCTACRDCPEREICEQDCNVEDKEKEAADTKIIVTSSKDKMAMQKSLTSA  
SPGWADQPKQMFPSDLLDATSTDSMALTKPLMVVDTTEYQGAGTWFKPTTLNGLLRLLKE  
FGDPVGGGYKIVVGNTEVGIETRFKHSIYPRLIYPGESIESIFQVSASSDKIILGGCTPL  
SFIQHEAERLSKNDSIYSRTLMP IHDM LRWFASTQIRNVACLGGNLVTASPI SDMNPLA  
SLGSKLVL SKLGGDGSTIVRRIVPVTEFFLRYRTVDIQTSEFLERIEVPVVVKVFEYVKP  
FKQARRREDDISIVTSGMRIKLAPKDGKFIIEHVALAFGGMAPKTVMAIETAKGMIGAEF  
CRETFAKASDCLMNEMKLPENVPGGQAAFRMTLATSFLYKFYLSVVGELKKDVESIQQN  
SAFPDISLPLPSGPIVDDAELSGAFS FVSADKPCS SVQTYPTPKVASGLEDKLYPNTDA  
AKKKGAI D VVGKPC THQSGPLHVTGEATYTD D INAPSGTLHAALILAKEAGVIFESFGIE  
EALKTPGVVGVYGSESISLLKGENRRGMLRDENVFLPVGEKIGYVGEVLGITVGETLESA  
ELGARNVSIKCSAQ SDEKVPVSI ED AIAADS FYESTRFAISRGDKSALESLEIDDSTGD  
AKVGLVKISGSFRSGAQEHFYLETNSTLVVPSEGNGLTVYCSTQAA SHTQEDIASATG  
TPQSKVVVRMKRMGGGFGGKETRNCFAAAAAAVASKCAERPVLTLPRDVMVTTGHRHCF  
LSNYHASARIT EDGAKIESMQIDIFSNGGWGV DLSGPIIGRACFHIDSVYYF PNLQVKG  
VACKTAQAPHTAFRGFGGPQGLAAC EHV IDHLALASKTPKDI FRRMNMYDDTHATHYGM  
ALNQPHRKWHVPSI WDRMTSELNLSQRRLDIEEFNAKNRWVKRGAALTPTKFGIAFTAHF  
MNQGGALVHLYTDGTVLVTHGGTEMGQGLHTKVCQVAAQAFGIPIDQVYVDDTSTD KVANQ  
IPSAASLSTDLYGMCTLDACRQIIGRLKPYREKLGPDADLKDIAHAAF FDRVDLSAHGFY  
APDKSMCFF EKDKPKPDDYPDDMPENSWKGPFNFTQGVAYSEVEIDVLTGNHRTLRS  
VVVDVGSSINPAIDIGQIEGAFFQGMGWSTIEEIVYSDDDHTWSGKRSNLFTQGP GTYKI  
PGSVFSFCVGSNEKIKFETHTSCCDRCVFLFLAFNDHPEIFNVSLLEDAENPVA VHSSK

AVGEPFFLGSSVFYAIKDAVGSFRKEASGKDEYFEFRMPGTSERIRMQVNDTIGMKAKT  
AITGDEKKAENYQTQGSY

>comp15540\_c0\_seq4; 1278 1 4461 LEN=4556; translated  
SLFIGHDSKPTSIGYRTTPILYVNGTRVSDAVASKVRSNQTLSSFLRDGMKLGKSKLGCA  
EGGCGACSVMISKRDAESGDLKHIAVNACLMPALAADGCHITTTVEGIGSVKGDNLHP IQK  
AMVEMHGSQC GFCTPGIVVAIYALYANNSTKGIIEHMDGNLCRCTGYRPIWDAARSLCD  
DAEDLVRGPCGTACRDCPEREICEQDCNVEDKEKEAADDTKIIVTSSKDKMAMQKSLTSA  
SPGWADQPKQMFPSDLLDATSTDSMALT KPLMVVDTT EYQAGTWFKPTTLNGLLRLLKE  
FGDPVGGGKYIVVGNTEVGIETRFKHSIYPRLIYPGESIESIFQVSASSDKIILGGCTPL  
SFIQHEAERLSKNDSIYSRTLMP IHDMLRWFASTQIRNVACLGGNLVTASPI SDMNPLA  
SLGSKLVLSKLG DGSTIVRRIVPVTEFFLR YRTVDIQTSEFLERIEVPVVVKVFEYVKP  
FKQARRREDDISIVTSGMRIKLAPKD GKF IIEHVALAFGGMAPKTVMAIETAKGMIGAEF  
CRETFKASDCLMNMKLPENVP GGQA AFRMTLATSFLYK FYLSVVGELKKDVESIQQNP  
SAFPDISLPLPSGPIVDDAELSGAFS FVSADK PSCSGVQTYPTPKVASGLEDKLYPNTDA  
AKKKG AIDVVGK PCTHQSGPLHVTGEATYTD D INAPSGLTHAALILAKEAGVIFESFGIE  
EALKTPGVVGVYGSESISLLKGENRRGMLRDENVFLPVGEKIGYVGEVLGITVGETLESA  
ELGARNVSIKCSAQSDKVPVSI ED AIAADS FYESTRFAISRGDKSALES LKEIDDSTGD  
AKVGD LVKISGSFRSGAQEHFYLETNSTLVVPSEGNGNLTVYCSTQAASHTQEDIASATG  
TPQSKVVVRMCRMGGGFGGKETRNCFAAAAAVASKCAERP VLLTLP RDVDMVTTGHRHC  
FLSNYHASARIT EDGAKIESMQIDIFSNGGWGV DLSGPIGRACFHIDSVYFFPNLQVKG  
VACKTAQAPHTAFRGGFPQGLACEHVIDHLALASKTPKDI FRMNMYYDDTHATHYGMA  
LNQPHRKWHVPSIWRMTSELNLSQRRLDIEEFNAKNRWVKGAAALTPTKFGIAFTAHF  
NQGGALVHLYTDGTVLVTHGGTEMGQLHTKVCQVAAQAFGIPIDQVYVDDTSTDKVANQ  
IPSAASLSTDLYGMCTLDACRQ IIGRLKPYREKLGPDADLKDIAHAAFFDRVDLSAHGFY  
APDKSMCFFEKDKPKPDDYPDDMPENSWKQP FNYFTQGVAYSEVEIDVLTGNHRTLRS  
VVVDVGSSINPAIDIGQIEGAFFQGMGWSTIEEIVYSDDHTWSGKRSNLFTQGGPTYKI  
PAFNDHPEIFNVSLLEDAENPVAVHSSKAVGEPFFLGSSVFYAIKDAVGSFRKEASGK  
EYFEFRMPGTSERIRMQVNDTIGMKAKT AITGDEKKAENYQTQGSY

>comp15541\_c0\_seq1; 1098 219 4316 LEN=4429; translated  
MASTRYRKPHLTPDLRLALASLYSLPGGKVSSAPEAHDFLLQFQSRNPYRKLHSQFVNQK  
ENQENSPKGYNSDDVGSTWMACIDLISSISKGLNNRDQNNQVHYAEALFAAQTLVHRLR  
RVKLT E AIDIDFEPNFFDSSSVVSFP RPPEEVLHG YQRWILEYYHGCTDSSSFAMLSQLV  
QSYQPAVDQQQPTRPIELVERIKGEMSMMLV LASVVDNLTKACYNQSSQH QDEHIMLAQIR  
PLLKTLALALSAI AARIRYTSTSLPLPASHTQPIVAMILGAIQMVQAPSQQQKDTIGNEE  
AFHSLCYTCLTAIPEAVLTGNSNDGGGGAYGRFSLDPRCYTAVTKELKTEGMLQVCQSIQ  
TLMNSNASNPTSSILLQMC EAWGKYVPLPIDFVNSSVSLVLR AWEQLRSSDQAQHQTG  
EAKAAMAYWIAVMEAGTWTIDQVLTSSLVQSKESSRQSNKKKQSSKSKKRHQKFLEKTT  
DDLKSAFDEVQHRGQVACTMAQQTL PVLQDLLMIELRQIVTEEQEVQGDGPVGAITACA  
NACLPLYLLRASIAHQDKGSIDL FVSIKLIQQVCASSRMVRGFASESLFALHEALVKNF  
ADNQNI PPSKDFFEVVI NHFYQSSMNLALQC GYPEGYFNDLGADNDEDLSE RNDVREVL  
RTVSTVPSTKRNGCEAESIILITSSILFRLMQSCAQPIQDAIGTNTPFLEPALHAFSALA  
KPINSIARMYAEGLSQSRENQNFATIIKLAL E IISNAGKCLLSRFP HVSVNEILPLSRLY  
NLAIASLSPMFSTMGQIPSM EAEVKTVISIGIETAAASLFRIP ELTGPSTLRQTRYDIRG  
AMRSPGGEDHVGVLTLMRLANESNAL SLLFLKTKESILVDLCNLYTELKRIEDERGIGVF  
YGTGVLPKSRRI LLGII CHLELVSGGAAQASPVLASIFENAISSIANSNQIGNFEAKTL  
SMICENTFDIAAFSQNVLHSFFSISNNATPQATCMHVLHQAGNVGFLSLQNAEIDHESIV  
QWNRVRAALFTLLKTS GTPDL PASILEILISLIGKECEAVLIQCSAGPTSPSKIFNENVV  
FEETIPALFIRVVVETTFDEAFSMQTP ISSMKNALHVLYATR HAILNTLISECSMPVQKG  
SFEDPRVIAETWFLCMIQIAKAVVKQGGIDAQGAIGVEVLPVIKQLLVETFFVAAILLLL  
YASLEKTQEKRAHD PGMNLDGPQGLVMMDFVAYFDLGYSVIQAASKELINAVPVDIGSD  
PDAAGMAIIGAALFRGSQGLPPWAVESVPTVYSSLFKALSSNVDTFGVMLQISMNVR LI  
ENQHFGSVRGGSLLSGQFF EKMKDNAKLSFINQAKEQANKNTVASW

>comp15542\_c0\_seq1; 1242 296 4204 LEN=4507; translated  
MDNIQDIAKGVTIKGFKAVTKKGFKGAGKMMKTNKKATPKKYAGKGLNTAERFTA FVGSR  
RNGKNTEDDDYLDGDEEEEDYNGEEEDMYNGYNDEVSMTKANHILTSKGTHRLNRILR  
KSNNEEEDFNPNNSGMDGQAQIKQKLEDPRNPEEVS R FVANVVLPSLRVDQRSIGGTLI  
TLANEYPESMVQESLLCDKCKSFELTGDDHISVSCLENPATYAKHKRSLGLFGKSGGRN  
KIHYVVVARSTNPLLP SNQMSHEDDTGGQGAAEAGYDKMFASGDEDEDLGVIEGEGEEN  
PVDGERQGPPEGPDEEAQNP DADPQRPAADGGATEQGVAEISSFP TLVCLTLNNDGANPD  
IRKLI GLDQLTTVQDVTATVVQLAFQNGD TIRFDFSEDDEAKVVEAGLMKERFIWSLLQI

HAMLCVSVVERSSLANANNRELLPPLNIRNLDRAELQYVATVNNFLKNDAALCALLDRQR  
VLATESHDGPVKEDREDGEEKSGDVRDGMTYDLMMGNFATRVAIFHSADERAEAEIEILNS  
TEWTLSSLSSDEGAAANAERLSMVLQRRMRDLEAETCRRLIAWEDEKHF SVTGQAGLFAQ  
SANRDTVDALSLAHLFTTLESLDRELLE MENWLEDRVLAIKPLTDDCRDIEEENRQLEQQ  
WKS YDLLGSEMRLLKGLVIDEDELILIGNPAGALVYDEAGNIQVEESEEGVDRVYDAGK  
ALQEATEHAEQAGGLHLIAVSERVEALAQASEFFCTSLAQIIVTIMEQFKTEVVASSDHG  
KVSKQDTHSIIAKKIRDTQRKFQSSLLGYIKLIEVLALLSPKLLPAIRDAYSEMVAEGIL  
MKKRMKGYFQALPGRNAAYLNNVSKDLKNYSPYESGSNEMTVNAPDIRYALSELLPVVAR  
EAYFTAALFGLSSKAKDGREKKRNFEAAKKSVDHSTQYFRYYIQRTCGIVEDSDKDPTLL  
ERTDPMLSLVSSIHLEAMENYIDREKKGGDHSLSLAYVRATILDLRKKVVKQVVAWVER  
QIEWIRGNPGVPANGKRAGIFPAFARFPCYIDHILICCREGRSDNFTPDLSSIKVVSYYL  
QKIATALLESLRICAQEFTTDQQYAASVMQMENS YFFTQS IKNRGGIEAALFQKQITKAN  
AVCKSSTDAYLGWMIKREFKSLHALFSNISKIRREVGDRDVAMHVPKATFIRTLTKESNR  
ETMKEKIAIIYSRMEKHLSEEGLLPVAWKALVKVLYEWFGRWEKLS SQIYKHVLDPSAV  
DVVRIAKAAGASNRQDDRMGGRMAAMEARN SGNARDT SMAQF

>comp15542\_c0\_seq2; 591 1 2476 LEN=2779; translated  
TYDLMMGKPRRAVKEDREDGEEKSGDVRDGMTYDLMMGNFATRVAIFHSADERAEAEIEIL  
NSTEWTLSSLSSDEGAAANAERLSMVLQRRMRDLEAETCRRLIAWEDEKHF SVTGQAGLF  
AQSANRDTVDALSLAHLFTTLESLDRELLE MENWLEDRVLAIKPLTDDCRDIEEENRQLE  
QQWKS YDLLGSEMRLLKGLVIDEDELILIGNPAGALVYDEAGNIQVEESEEGVDRVYDA  
GKALQEATEHAEQAGGLHLIAVSERVEALAQASEFFCTSLAQIIVTIMEQFKTEVVASSD  
HGKVSKQDTHSIIAKKIRDTQRKFQSSLLGYIKLIEVLALLSPKLLPAIRDAYSEMVAEG  
ILMKKRMKGYFQALPGRNAAYLNNVSKDLKNYSPYESGSNEMTVNAPDIRYALSELLPVV  
AREAYFTAALFGLSSKAKDGREKKRNFEAAKKSVDHSTQYFRYYIQRTCGIVEDSDKDPT  
LLEERTDPMLSLVSSIHLEAMENYIDREKKGGDHSLSLAYVRATILDLRKKVVKQVVAWV  
ERQIEWIRGNPGVPANGKRAGIFPAFARFPCYIDHILICCREGRSDNFTPDLSSIKVVS Y  
YLQKIATALLESLRICAQEFTTDQQYAASVMQMENS YFFTQS IKNRGGIEAALFQKQITK  
ANAVCKSSTDAYLGWMIKREFKSLHALFSNISKIRREVGDRDVAMHVPKATFIRTLTKES  
NRET MKEKIAIIYSRMEKHLSEEGLLPVAWKALVKVLYEWFGRWEKLS SQIYKHVLDPS  
AVDVVRIAKAAGASNRQDDRMGGRMAAMEARN SGNARDT SMAQF

>comp15543\_c0\_seq2; 478 889 2970 LEN=3437; minus strand; translated  
MSVFASELLLSNIMLTKSNPIGRNLAKTLLKKNKIQQTRCLSGAALYGKISISSRSDA  
FGTAIGTAREYSYRYRTKLETAPKERNLGSNGYIFGIGNSYAQAQVRAPPKRFSSDSVT  
EQSASTEADMTAKETHGKSTGNVTKTTS GTNDTDKDYDYDLFVIGAGSGGIASAMRASGT  
WNKRVAVAEARRLGGTVCNAGSVPKVMWNAASIAESVHEMHR YGFYYGDEDAITFDWSF  
LKDQRVAVYRRLNGIYERNLKN SGVKRFLGTASLAKEPNTVHIEVVEEVKNWTKEKALNI  
TKIKTTKVVTAKHIL IATGGSPVLPVSEGNINEHCITSEGFFELEE QPLTAVVVGAGYI  
AVELAGILQSLGTDTKLVL RKECALRTFDPI LRDTLDEEMTKQIEIYRNTGGLQSV EEV  
VNEHEDLTKTVTLK DGRVLENDVVI VATGRAPLVQSLNLGNRGVAQRPSGHILVDERTS  
ETSATGVFAVG DVVGP IELTPVAIATGRRLADRLFGPHE THGHKHNLPHTHTSVSSDNP  
TVVFSHPPIATIGL TEPEAIKIHGKGNIKVYQSKFANMHYGIWNAEETEKAQQAKPMPYS  
SLDEPSAKTVPSIDDKPKTAMK LICCGPTERVVGLHVIGMGADELLQGF AVAIKMGATKA  
DFDNCMAIHPTAAEELVTLHPWGLKEGDKGSET

>comp15543\_c0\_seq3; 478 781 2862 LEN=3707; minus strand; translated  
MSVFASELLLSNIMLTKSNPIGRNLAKTLLKKNKIQQTRCLSGAALYGKISISSRSDA  
FGTAIGTAREYSYRYRTKLETAPKERNLGSNGYIFGIGNSYAQAQVRAPPKRFSSDSVT  
EQSASTEADMTAKETHGKSTGNVTKTTS GTNDTDKDYDYDLFVIGAGSGGIASAMRASGT  
WNKRVAVAEARRLGGTVCNAGSVPKVMWNAASIAESVHEMHR YGFYYGDEDAITFDWSF  
LKDQRVAVYRRLNGIYERNLKN SGVKRFLGTASLAKEPNTVHIEVVEEVKNWTKEKALNI  
TKIKTTKVVTAKHIL IATGGSPVLPVSEGNINEHCITSEGFFELEE QPLTAVVVGAGYI  
AVELAGILQSLGTDTKLVL RKECALRTFDPI LRDTLDEEMTKQIEIYRNTGGLQSV EEV  
VNEHEDLTKTVTLK DGRVLENDVVI VATGRAPLVQSLNLGNRGVAQRPSGHILVDERTS  
ETSATGVFAVG DVVGP IELTPVAIATGRRLADRLFGPHE THGHKHNLPHTHTSVSSDNP  
TVVFSHPPIATIGL TEPEAIKIHGKGNIKVYQSKFANMHYGIWNAEETEKAQQAKPMPYS  
SLDEPSAKTVPSIDDKPKTAMK LICCGPTERVVGLHVIGMGADELLQGF AVAIKMGATKA  
DFDNCMAIHPTAAEELVTLHPWGLKEGDKGSET

>comp15543\_c0\_seq4; 478 781 2862 LEN=3728; minus strand; translated  
MSVFASELLLSNIMLTKSNPIGRNLAKTLLKKNKIQQTRCLSGAALYGKISISSRSDA  
FGTAIGTAREYSYRYRTKLETAPKERNLGSNGYIFGIGNSYAQAQVRAPPKRFSSDSVT  
EQSASTEADMTAKETHGKSTGNVTKTTS GTNDTDKDYDYDLFVIGAGSGGIASAMRASGT

WNKRVAVAEARRLGGTCVNAGSVPKKVMWNAASIAESVHEMHRYGFFYYGDEDAITFDWSF  
LKDQRVAYVRRLLNGIYERNLKNNGVVKRFLGTASLAKEPNTVHIEVVVEEVKNWTKEKALNI  
TKIKTTKVVTAKHILIAATGGSPVLPVSENGINEHCITSEGFFELEEQLTAVVVGAGYI  
AVELAGILQSLGTDTKLVLKREKALRTFDPILRDTLDEEMTKQIEIYRNTGGLQSVVEEV  
VNEHEDLTKTVTLKDRVLENDVVIVATGRAPLVQSLNLGNRGVAQRPSGHILVDERTS  
ETSATGVFAVGDVVGPIELTPVAIATGRRLADRLFPGPHEETHGHKHNLPHTHTSVSSDNVP  
TVVFSHPPIATIGLTEPEAIKIHGKGNIKVYQSKFANMHYGIWNAEETEKAQQAKPMPYS  
SLDEPSAKTVPSIDDKPKTAMKLI CCGPTE RVVGLHVIGMGADELLQGF AVAIKMGATKA  
DFDNCMAIHPTAAEELVTLHPWGLKEGDKGSET

>comp15543\_c0\_seq5; 194 781 1421 LEN=1421; minus strand; translated  
MSVFASELLLSNIMLTKSNPIGRNLAKTLLKKNKIQQTRCLSGAALYGKISISSRSDA  
FGTAIGTAREYSYRYRTKLETAPKERNLGSNGYIFGIGNSYAQAQVRAPPKRFFSSDSVT  
EQSASTEADMTAKETHGKSTGNVTKTTSGTNDTDKDYDYDLFVIGAGSGGIASAMRASGT  
WNKRVAVAEARRLGGTCVNAGSVPKKVMWNAASX

>comp15543\_c0\_seq6; 194 749 1389 LEN=1389; minus strand; translated  
MSVFASELLLSNIMLTKSNPIGRNLAKTLLKKNKIQQTRCLSGAALYGKISISSRSDA  
FGTAIGTAREYSYRYRTKLETAPKERNLGSNGYIFGIGNSYAQAQVRAPPKRFFSSDSVT  
EQSASTEADMTAKETHGKSTGNVTKTTSGTNDTDKDYDYDLFVIGAGSGGIASAMRASGT  
WNKRVAVAEARRLGGTCVNAGSVPKKVMWNAASX

>comp15543\_c0\_seq7; 478 641 2722 LEN=3189; minus strand; translated  
MSVFASELLLSNIMLTKSNPIGRNLAKTLLKKNKIQQTRCLSGAALYGKISISSRSDA  
FGTAIGTAREYSYRYRTKLETAPKERNLGSNGYIFGIGNSYAQAQVRAPPKRFFSSDSVT  
EQSASTEADMTAKETHGKSTGNVTKTTSGTNDTDKDYDYDLFVIGAGSGGIASAMRASGT  
WNKRVAVAEARRLGGTCVNAGSVPKKVMWNAASIAESVHEMHRYGFFYYGDEDAITFDWSF  
LKDQRVAYVRRLLNGIYERNLKNNGVVKRFLGTASLAKEPNTVHIEVVVEEVKNWTKEKALNI  
TKIKTTKVVTAKHILIAATGGSPVLPVSENGINEHCITSEGFFELEEQLTAVVVGAGYI  
AVELAGILQSLGTDTKLVLKREKALRTFDPILRDTLDEEMTKQIEIYRNTGGLQSVVEEV  
VNEHEDLTKTVTLKDRVLENDVVIVATGRAPLVQSLNLGNRGVAQRPSGHILVDERTS  
ETSATGVFAVGDVVGPIELTPVAIATGRRLADRLFPGPHEETHGHKHNLPHTHTSVSSDNVP  
TVVFSHPPIATIGLTEPEAIKIHGKGNIKVYQSKFANMHYGIWNAEETEKAQQAKPMPYS  
SLDEPSAKTVPSIDDKPKTAMKLI CCGPTE RVVGLHVIGMGADELLQGF AVAIKMGATKA  
DFDNCMAIHPTAAEELVTLHPWGLKEGDKGSET

>comp15543\_c0\_seq8; 478 889 2970 LEN=3815; minus strand; translated  
MSVFASELLLSNIMLTKSNPIGRNLAKTLLKKNKIQQTRCLSGAALYGKISISSRSDA  
FGTAIGTAREYSYRYRTKLETAPKERNLGSNGYIFGIGNSYAQAQVRAPPKRFFSSDSVT  
EQSASTEADMTAKETHGKSTGNVTKTTSGTNDTDKDYDYDLFVIGAGSGGIASAMRASGT  
WNKRVAVAEARRLGGTCVNAGSVPKKVMWNAASIAESVHEMHRYGFFYYGDEDAITFDWSF  
LKDQRVAYVRRLLNGIYERNLKNNGVVKRFLGTASLAKEPNTVHIEVVVEEVKNWTKEKALNI  
TKIKTTKVVTAKHILIAATGGSPVLPVSENGINEHCITSEGFFELEEQLTAVVVGAGYI  
AVELAGILQSLGTDTKLVLKREKALRTFDPILRDTLDEEMTKQIEIYRNTGGLQSVVEEV  
VNEHEDLTKTVTLKDRVLENDVVIVATGRAPLVQSLNLGNRGVAQRPSGHILVDERTS  
ETSATGVFAVGDVVGPIELTPVAIATGRRLADRLFPGPHEETHGHKHNLPHTHTSVSSDNVP  
TVVFSHPPIATIGLTEPEAIKIHGKGNIKVYQSKFANMHYGIWNAEETEKAQQAKPMPYS  
SLDEPSAKTVPSIDDKPKTAMKLI CCGPTE RVVGLHVIGMGADELLQGF AVAIKMGATKA  
DFDNCMAIHPTAAEELVTLHPWGLKEGDKGSET

>comp15543\_c0\_seq9; 194 641 1281 LEN=1281; minus strand; translated  
MSVFASELLLSNIMLTKSNPIGRNLAKTLLKKNKIQQTRCLSGAALYGKISISSRSDA  
FGTAIGTAREYSYRYRTKLETAPKERNLGSNGYIFGIGNSYAQAQVRAPPKRFFSSDSVT  
EQSASTEADMTAKETHGKSTGNVTKTTSGTNDTDKDYDYDLFVIGAGSGGIASAMRASGT  
WNKRVAVAEARRLGGTCVNAGSVPKKVMWNAASX

>comp15543\_c0\_seq10; 478 749 2830 LEN=3675; minus strand; translated  
MSVFASELLLSNIMLTKSNPIGRNLAKTLLKKNKIQQTRCLSGAALYGKISISSRSDA  
FGTAIGTAREYSYRYRTKLETAPKERNLGSNGYIFGIGNSYAQAQVRAPPKRFFSSDSVT  
EQSASTEADMTAKETHGKSTGNVTKTTSGTNDTDKDYDYDLFVIGAGSGGIASAMRASGT  
WNKRVAVAEARRLGGTCVNAGSVPKKVMWNAASIAESVHEMHRYGFFYYGDEDAITFDWSF  
LKDQRVAYVRRLLNGIYERNLKNNGVVKRFLGTASLAKEPNTVHIEVVVEEVKNWTKEKALNI  
TKIKTTKVVTAKHILIAATGGSPVLPVSENGINEHCITSEGFFELEEQLTAVVVGAGYI  
AVELAGILQSLGTDTKLVLKREKALRTFDPILRDTLDEEMTKQIEIYRNTGGLQSVVEEV  
VNEHEDLTKTVTLKDRVLENDVVIVATGRAPLVQSLNLGNRGVAQRPSGHILVDERTS  
ETSATGVFAVGDVVGPIELTPVAIATGRRLADRLFPGPHEETHGHKHNLPHTHTSVSSDNVP

TVVFSHPPIATIGLTEPEAIKIHGKGNIKVYQSKFANMHYGIWNAEETEKAQQAKPMPYS  
SLDEPSAKTVPSIDDKPKTAMKLI CCGPTE RVVGLHVIGMGADELLQGF AVAIKMGATKA  
DFDNCMAIHPTAAEELVTLHPWGLKEGDKGSET  
>comp15543\_c0\_seq11; 478 889 2970 LEN=3836; minus strand; translated  
MSVFASELLLSNIMLTKSNPIGRNLAKTLLKKNKIQQTRCLSGAALYGKISISSRSDSA  
FGTAIGTAREYSYRYRTKLETAPKERNLGSNGYIFGIGNSYAQAQVRAPPKRFFSSDSVT  
EQSASTEADMTAKETHGKSTGNVTKTTS GTNDTDKDYDYDLFVIGAGSGGIASAMRASGT  
WNKRVAVAEARRLGGTCVNAGSVPKKVMWNAASIAESVHEMHR YGFYYGDEDAITFDWSF  
LKDQRVAYVRRNLNGIYERNLKN SGVKRFLGTASLAKEPNTVHIEVV EEVKNWTKEKALNI  
TKIKTTKVVTAKHIL IATGGSPVLPVSENGINEHCITSEGF FELEEQLTAVVVGAGYI  
AVELAGILQSLGTDTKL VLRKECALRTFDPI LRDTLDEEMTKQGI E IYRNTGGLQSV EEV  
VNEHEDLTKTVTLK DGRVLENDVVIVATGRAPLVQSLNLGNRGVAQRPSGHILVDERTS  
ETSATGVFAVG DVVGP IELTPVAIATGRRLADRLFGPHE THGHKHNLPHTHTSVSSDNVP  
TVVFSHPPIATIGLTEPEAIKIHGKGNIKVYQSKFANMHYGIWNAEETEKAQQAKPMPYS  
SLDEPSAKTVPSIDDKPKTAMKLI CCGPTE RVVGLHVIGMGADELLQGF AVAIKMGATKA  
DFDNCMAIHPTAAEELVTLHPWGLKEGDKGSET  
>comp15543\_c0\_seq12; 478 641 2722 LEN=3567; minus strand; translated  
MSVFASELLLSNIMLTKSNPIGRNLAKTLLKKNKIQQTRCLSGAALYGKISISSRSDSA  
FGTAIGTAREYSYRYRTKLETAPKERNLGSNGYIFGIGNSYAQAQVRAPPKRFFSSDSVT  
EQSASTEADMTAKETHGKSTGNVTKTTS GTNDTDKDYDYDLFVIGAGSGGIASAMRASGT  
WNKRVAVAEARRLGGTCVNAGSVPKKVMWNAASIAESVHEMHR YGFYYGDEDAITFDWSF  
LKDQRVAYVRRNLNGIYERNLKN SGVKRFLGTASLAKEPNTVHIEVV EEVKNWTKEKALNI  
TKIKTTKVVTAKHIL IATGGSPVLPVSENGINEHCITSEGF FELEEQLTAVVVGAGYI  
AVELAGILQSLGTDTKL VLRKECALRTFDPI LRDTLDEEMTKQGI E IYRNTGGLQSV EEV  
VNEHEDLTKTVTLK DGRVLENDVVIVATGRAPLVQSLNLGNRGVAQRPSGHILVDERTS  
ETSATGVFAVG DVVGP IELTPVAIATGRRLADRLFGPHE THGHKHNLPHTHTSVSSDNVP  
TVVFSHPPIATIGLTEPEAIKIHGKGNIKVYQSKFANMHYGIWNAEETEKAQQAKPMPYS  
SLDEPSAKTVPSIDDKPKTAMKLI CCGPTE RVVGLHVIGMGADELLQGF AVAIKMGATKA  
DFDNCMAIHPTAAEELVTLHPWGLKEGDKGSET  
>comp15543\_c0\_seq13; 478 749 2830 LEN=3297; minus strand; translated  
MSVFASELLLSNIMLTKSNPIGRNLAKTLLKKNKIQQTRCLSGAALYGKISISSRSDSA  
FGTAIGTAREYSYRYRTKLETAPKERNLGSNGYIFGIGNSYAQAQVRAPPKRFFSSDSVT  
EQSASTEADMTAKETHGKSTGNVTKTTS GTNDTDKDYDYDLFVIGAGSGGIASAMRASGT  
WNKRVAVAEARRLGGTCVNAGSVPKKVMWNAASIAESVHEMHR YGFYYGDEDAITFDWSF  
LKDQRVAYVRRNLNGIYERNLKN SGVKRFLGTASLAKEPNTVHIEVV EEVKNWTKEKALNI  
TKIKTTKVVTAKHIL IATGGSPVLPVSENGINEHCITSEGF FELEEQLTAVVVGAGYI  
AVELAGILQSLGTDTKL VLRKECALRTFDPI LRDTLDEEMTKQGI E IYRNTGGLQSV EEV  
VNEHEDLTKTVTLK DGRVLENDVVIVATGRAPLVQSLNLGNRGVAQRPSGHILVDERTS  
ETSATGVFAVG DVVGP IELTPVAIATGRRLADRLFGPHE THGHKHNLPHTHTSVSSDNVP  
TVVFSHPPIATIGLTEPEAIKIHGKGNIKVYQSKFANMHYGIWNAEETEKAQQAKPMPYS  
SLDEPSAKTVPSIDDKPKTAMKLI CCGPTE RVVGLHVIGMGADELLQGF AVAIKMGATKA  
DFDNCMAIHPTAAEELVTLHPWGLKEGDKGSET  
>comp15543\_c0\_seq14; 478 781 2862 LEN=3329; minus strand; translated  
MSVFASELLLSNIMLTKSNPIGRNLAKTLLKKNKIQQTRCLSGAALYGKISISSRSDSA  
FGTAIGTAREYSYRYRTKLETAPKERNLGSNGYIFGIGNSYAQAQVRAPPKRFFSSDSVT  
EQSASTEADMTAKETHGKSTGNVTKTTS GTNDTDKDYDYDLFVIGAGSGGIASAMRASGT  
WNKRVAVAEARRLGGTCVNAGSVPKKVMWNAASIAESVHEMHR YGFYYGDEDAITFDWSF  
LKDQRVAYVRRNLNGIYERNLKN SGVKRFLGTASLAKEPNTVHIEVV EEVKNWTKEKALNI  
TKIKTTKVVTAKHIL IATGGSPVLPVSENGINEHCITSEGF FELEEQLTAVVVGAGYI  
AVELAGILQSLGTDTKL VLRKECALRTFDPI LRDTLDEEMTKQGI E IYRNTGGLQSV EEV  
VNEHEDLTKTVTLK DGRVLENDVVIVATGRAPLVQSLNLGNRGVAQRPSGHILVDERTS  
ETSATGVFAVG DVVGP IELTPVAIATGRRLADRLFGPHE THGHKHNLPHTHTSVSSDNVP  
TVVFSHPPIATIGLTEPEAIKIHGKGNIKVYQSKFANMHYGIWNAEETEKAQQAKPMPYS  
SLDEPSAKTVPSIDDKPKTAMKLI CCGPTE RVVGLHVIGMGADELLQGF AVAIKMGATKA  
DFDNCMAIHPTAAEELVTLHPWGLKEGDKGSET  
>comp15543\_c0\_seq16; 194 889 1529 LEN=1529; minus strand; translated  
MSVFASELLLSNIMLTKSNPIGRNLAKTLLKKNKIQQTRCLSGAALYGKISISSRSDSA  
FGTAIGTAREYSYRYRTKLETAPKERNLGSNGYIFGIGNSYAQAQVRAPPKRFFSSDSVT  
EQSASTEADMTAKETHGKSTGNVTKTTS GTNDTDKDYDYDLFVIGAGSGGIASAMRASGT  
WNKRVAVAEARRLGGTCVNAGSVPKKVMWNAASX



>comp15543\_c0\_seq17; 478 641 2722 LEN=3588; minus strand; translated  
MSVFASELLLSNIMLTKSNPIGRNLAKTLLKKNKIQQTRCLSGAALYGKISISSRSDSA  
FGTAIGTAREYSYRYRTKLETPAKERNLGSNGYIFGIGNSYAQAQVRAPPKRFFSSDSVT  
EQSASTEADMTAKETHGKSTGNVTKTTSMTNDTDKDYDYDLFVIGAGSGGIASAMRASGT  
WNKRVAVAEARRLGGTCVNAAGSVPKVMMWNAASIAESVHEMHRVGFYFGDEDAITFDWSF  
LKDQRVAVYVRRNLNGIYERNLKNVGRFLGTASLAKEPNTVHIEVVVEEVKNWTKEKALNI  
TKIKTTKVVTAKHILIAATGGSPVLPVSENGINEHCITSEGFFELEEQLTAVVVGAGYI  
AVELAGILQSLGTDTKLVLRKECALRTFDPILRDTLDEEMTKQIEIYRNTGGLQSVVEEV  
VNEHEDLTKTVTLKDRVLENDVVIVATGRAPLVQSLNLGNRGVAQRPSGHILVDERTS  
ETSATGVFAVGDVVGPIELTPVAIATGRRLADRLFGPHETHGHKHNLPHTHTSVSSDNVP  
TVVFSHPPIATIGLTEPEAIKIHGKGNIKVYQSKFANMHYGIWNAEETEKAQQAKPMPYS  
SLDEPSAKTVPSIDDKPKTAMKLICCGPTERVVGLHVIGMGADELLQGFVAVAIKMGATKA  
DFDNCMAIHPTAAEELVTLHPWGLKEGDKGSET

>comp15543\_c0\_seq18; 478 749 2830 LEN=3696; minus strand; translated  
MSVFASELLLSNIMLTKSNPIGRNLAKTLLKKNKIQQTRCLSGAALYGKISISSRSDSA  
FGTAIGTAREYSYRYRTKLETPAKERNLGSNGYIFGIGNSYAQAQVRAPPKRFFSSDSVT  
EQSASTEADMTAKETHGKSTGNVTKTTSMTNDTDKDYDYDLFVIGAGSGGIASAMRASGT  
WNKRVAVAEARRLGGTCVNAAGSVPKVMMWNAASIAESVHEMHRVGFYFGDEDAITFDWSF  
LKDQRVAVYVRRNLNGIYERNLKNVGRFLGTASLAKEPNTVHIEVVVEEVKNWTKEKALNI  
TKIKTTKVVTAKHILIAATGGSPVLPVSENGINEHCITSEGFFELEEQLTAVVVGAGYI  
AVELAGILQSLGTDTKLVLRKECALRTFDPILRDTLDEEMTKQIEIYRNTGGLQSVVEEV  
VNEHEDLTKTVTLKDRVLENDVVIVATGRAPLVQSLNLGNRGVAQRPSGHILVDERTS  
ETSATGVFAVGDVVGPIELTPVAIATGRRLADRLFGPHETHGHKHNLPHTHTSVSSDNVP  
TVVFSHPPIATIGLTEPEAIKIHGKGNIKVYQSKFANMHYGIWNAEETEKAQQAKPMPYS  
SLDEPSAKTVPSIDDKPKTAMKLICCGPTERVVGLHVIGMGADELLQGFVAVAIKMGATKA  
DFDNCMAIHPTAAEELVTLHPWGLKEGDKGSET

>comp15544\_c0\_seq1; 306 1 1019 LEN=1134; translated  
XFGKPMGRKMDPPFAGMIARGKRNDNDFSWKKKANKSSISFESAIEDAVAFLIDKEKEE  
MSSGTALLNMMNSLKRGNDIVELRNRSIAIEELAVQLRSCQSHRHGTLVKYYALRERIHT  
LEERVQSLSHLLSNEALQLFPDFLCRKEVLKTLGYLDENEAVAVKGRVACEVNTCEELIV  
TEMVFEGILNDLDPTEIVAALSALLYQQKSTDDDFDIEVPESELLNCKQMKKIALNLGQL  
QKQHGLDLDPIDYAEESTMKFGLVHVVEWAIGVPPFSEICQLTTAQEGSIVRCITRLDEL  
REVRNCARVGNPTLYRKMEAASTAIKRDIVFAASLYVS

>comp15544\_c0\_seq2; 934 1 3470 LEN=3470; translated  
LGLDEKEHDAQIPKDLSPPTSFMSEFTLDGLKAVLKEKERGEKEKVVPEADDTLVAKE  
DIHEFYRDHGILGGPVKGIWKRRIPDSVYNCPLSQPLTTLVQWDSLPMIQDRYEQQKDG  
DGSNGGGVVEVRRSDLFPEEFLQEEGIVGDSGGLQRRPLGGNLTKLTYTRGKTGQTKP  
FTPGGLNPDEAKSSGAAGAAAGEATNPFLTPEAIERSLRVLKQGSKASWMDGSLITCPPG  
VDFKVGLSYEDVYGEDNADESKDDGTDPAKTSISETNHDGDDYLAKPIADSIQTNTRA  
VQWDQSFLLDDSLFGSSVSDSDCESDSDSESGEDDDPSDADDRESSGNDEADNTKTDGNPA  
EFGSTEHTLGSDEDIDQLTELSHAESHKNEVMKKDKHKDDDDGTANNPLRLMERQAKL  
QRDTRKSWASTELLPIDDFQTYIPNPAMQYPIILDTFQQQAVARLERNESVFVAHTSA  
GKTVAEYAVALAKQRGTRCIYTSPIKALSNQKFRDFSLKYGSENVGLITGDLQVNADDS  
TCLIMTTEILRSMLYRGADLIRDIEFVVFDEVHYVNDSEKRVVVEEVIIMLPSYVNLIFL  
SATTPNTFEFSDWIGRTKRRPVYVIKTDYRPVPLSHFLWANLKLHKIKEGKSGFLDKGYR  
DASNALRPKDNKNAGKTGKQKQKPAKQKQTPGRGPQNMVAQAQGGKSQWMSLVRYLEREDL  
TPTVVFVFSKCKCEEIANMLRSLNMNTASESAAIQGFCLQTVARLSPIDQSLPQVLTVCE  
MVKRGIGVHHGGLLPILKEMVEILFSRNLIKVLFATETTFAMGVNMPARAVVFNIRKHDG  
TQFRCLEPGEYTMAGRAGRGLDKVGTIVMLCFGEPPPVGMLRTMLTGSSTMLRSQFR  
LTYNMILNLLRVEEMSVESEMIKRSFSEFATQORALTSKEYPKLLARGQKTLNLRKQFDEE  
SGRIGAEDIEEYFSSCNKLMELNAELLSYITSTTDGSGDGLVLPGRVVLVSAARKLGI  
RAPALLLETKFSTGGAAAEGSKFLQCVCMVLLPEHYTSEGSDGKTEAKAKAVGEIGFSK  
QRYYGIEHEIKLDQILFVTDSKIKIEPGLLYTEKKASNMR IAGGLSSNRGSGAFSXXPMGR  
KMDDPFAGMIARGKRNX

>comp15544\_c0\_seq3; 303 88 997 LEN=997; translated  
MAGRARRGLDKVGTIVMLCFGEPPPVGMLRTMLTGSSTMLRSQFR LTYNMILNLLRVE  
EMSVESEMIKRSFSEFATQORALTSKEYPKLLARGQKTLNLRKQFDEE SGRIGAEDIEEY  
FSSCNKLMELNAELLSYITSTTDGSGDGLVLPGRVVLVSAARKLGI RAPALLLETKFST  
GGAAAEGSKFLQCVCMVLLPEHYTSEGSDGKTEAKAKAVGEIGFSKQRYYGIEHEIKLDQ  
ILFVTDSKIKIEPGLLYTEKKASNMR IAGGLSSNRGSGAFSXXPMGRKMDDPFAGMIARG

KRNX

>comp15544\_c0\_seq4; 544 1 1666 LEN=1758; translated  
LGLDEKEHDAQIPKDLSPPTSFIMSEFTLDGLKAVLKEKERGEKEKVVPFADDTLVAKE  
DIHEFYRDHGILGGPVKGIWKRRIPDSVYNCPLSQPLTTLVQWDSLPKMIQDRYEQQKDG  
DGSNGGGVVEVRRSDLFPEEFLQEEGIVGDSGGLQRRPLGGNLTKLLEYTRGKTGQTKP  
FTPGGLNPDEAKSSGAAGAAAGEATNPFLTPEAIERSLRVLKQGSKASWMDGSLITCPPG  
VDFKVGLSYEDVYGEDNADESKDDGTDPAKTSISETNHDGDDYLAKPIADSIQNTNTRA  
VQWDQSFLLDDSLFGSSVSDSDCESDSDSESGEDDDPSDADDRESSGNDEADNTKTDGNPA  
EFGSTEHTLGSDEDIDQLLTELSHAESHTKNEVMKKDKHKDDDDGTANNPLRLMERQAKL  
QRDTTRKSWASTELLPIDDFQTYIPNPAMQYPFILDTFQQQAVARLERNESVFVAAHTSA  
GKTVVAEYAVALAKQRGTRCIYTSPIKALSNQKFRDFSLKYGSENVGLITGDLVSTKNGR  
VLVQCILFEESFLSW

>comp15545\_c1\_seq1; 1235 246 4871 LEN=4984; translated  
MKTSRKWIRIVCLLVNVSIMALLFFPISFGTSPPETETTTQDILNTFLSAGAKNRNRRN  
NPFESMWNITKDIVGGTTSVGVKSPSTDGLSHSHSQHTSIDDLTNRGFLMEKTLLEEHYAS  
QFSDYWPELKKYMNRAQQQETAVASSTPPKSTSTAVSAESESKTGNLRWRQPKHTGDT  
CCCFSESVDSHWSFQWCPALTIYQRRQSGVLRPNYNLGSVHVLSSSETPEENKIMAES  
VEDANRLATTARMMYPTAESIRPYVGGDICVEGGSKRRSSVVVIHNNTSEKCREREGREM  
ILENVEEIRLCQYILHVCKARPEKPEKMDNAISRGDENTPPPLDAEMNFLTESGMKEINE  
TLHYIQNHVTDFAFKSRADARGKTRENI VTSLRAALPPLPKTRIEANLKLKIDMFTHAY  
DSYMYHGYPAAEVKPITCSPADFKLVQIPGLTLDLIDSLDTLVILGNYTEFARAVERLKYLN  
DNVYDLTGLPTTGEGLFSLNHNVSVFETNIRVLGGLLSAHQLAIAFLGKVLQKDVRAED  
DTILVGGYLTKKENYGCDEIKDTKCQHADRHWAYDGFLLNLAKDIGDRLLPAFKTKTGI  
PYGTVNLLNGIPEGETPIASLAGGTTLSLEMELLSRLTGNNDYGRAAKLATRALWMRRSP  
IGLLGKHICTRDGYWAETLSGIGSNSDSFYEYLIKHHILFPEDSDFWLQLLAAAYGGLHNQ  
TRIGEWYGDVDMYKGRSQSGSPRRVLEALMAFYPMQVLLGEVTPAARTLNSFFLAREYL  
GFLPERFQFGSWRVYGGKHLRPELLESAYFLHRASKGFQTQFRSSPGNHSVSDGSGW  
LWSGDFALHLIEKLTRSKCGYGSPREVSPETSGKLEADRNVRLTNEMPSYFLSETLKYL  
YLLFDENNILHTDEERDWFVTEAHP IHHEQREQSVTDKLVKQKEELKLRIRRRLEKREK  
RVHDVNEGLIYEKWTATSKIGDFVSQLEPLMANDKATYRSRRTKEHYVSQFPNIFPSSVE  
RLFSHENSWSPPFDVFNERFQMTNPAYLTFQPLGSQLQLISSCPNLYNSNFLWLRALNGGI  
ADYSDAYKSRITDFTSAHENDMIQLGSIDALGLHGAGVHIEHLYDAFFRCPVRDEKKQSD  
AKKSNVVQNGVQKGTLSNGSTRFEMGNMGMSFDISSFPGGSGFYVKHVESGETYITTLIE  
GALASTSGPLILVYAKDAETDLADQTTTSGKNKKSPTSDFGTHDSRSVVLADIHGNSYS  
CSVKIIESTPIRDGDTCTNDETGANVCVSEPHEIVSKNEQRIVREFPCSPALFGPSNIAN  
LEKIKNLEVHAKLQAPDNTDLYGCGRFSISSSSLSGENELDPSGSVLSIVHRGDCTFQEK  
AFNKKFSDGAKGVI VINGKDGDDL FVMSSGGGSKELAKLDTTDYPVTVLLTNDGQELLHM  
MKSRENGADSELSARISIAHDRFQDDSQANNSAKKENQVWPRVRASSEWLEIYKSKSWGIG  
QAVQNVLDDESGDVEKAQLSWQLYLFHRNVAEDKTEEDNVP

>comp15546\_c0\_seq1; 945 297 3275 LEN=3453; translated  
MDNGLEHSVLMVLNGKENIKSKKGGRRSRKAKNQKNQTKAGVTALLEKRDLSSNLVRRG  
MLTSLEVTGRSRRCQSRSLASNPTLSKPRRRGNAKKTQKMNLTNSTDNNVDSLFLCLP  
NSLTTNKHFQSKTTLAQNDKSRSRTEILDKKQERKTSKPSKPSTQRILQIAKSGNYFQS  
SVGEP SRQIPMQEKKPLHRTKDKTKRSQETCGLGAFIAIAENKTNQCSRKEKSLRRFVS  
PLENSVKNSILSLNEQGSASSFPVNTTKMETIGMKTTLSDIPNFIIVPI SQQIEPSLE  
TADVVRNEFEKNDNTAEAEETNAAAA KVPKDWMISSKKVHRNKTRLKHKNRAAASPQSPRE  
IEHEANPPKYAPGTFVKHFP SHGLFFGKIVAFEPESSLYNVYEDGDSEDLSESELEDEC  
KILSTSSVFGEDGQQLKTI SILHKTEEKSSKNVCNDSKGNRTTDASNNEESNSDCDPS  
KSLDKKIQSKISEKNKLTNNQNARTSPRESRRQSRRETHRKLFSVESHKGDKKSFTRRS  
KRRSQPIRLIDSSCKDQRETRSNRKRKRVSHQKGANEIVKEHKIGEDTTSRGEDELLT  
RSQSQPLLP SDDVQKCMKKHVDDALRAVMEPNQGLTGDSQTEDDIFNSTPMRKLFT  
RSGSNDTKPNGKEEHEQEEGKRRRRSKRKSIEPERYKGFANSASKSSEKQIKLTQPLSKS  
AEKKMGVS SRKENNKPRVKS KAKKRVIRVNEQPEESDAESCSASNTKDPWTETDLKTLHK  
AHR TADPT SFTFWEDVAERVGEKSSRECREKWFSLAKTPEPKSTAQKQNKVNIISTGHP  
LNADD DIFNSTPMRSVFGIGENINASAI EFEELGDISNMNFGSSIKIHNLNHNDDNLLPP  
TYQVSSYPHGKYTYIQNIGRSMRQRDSKKKIKSCGNSSYLPPLKLGKVAECVHEGDVEV  
KGR LSPGGTTLHVDTLGNDDNEDYLDDEDEL

>comp15546\_c0\_seq2; 944 297 3254 LEN=3432; translated  
MDNGLEHSVLMVLNGKENIKSKKGGRRSRKAKNQKNQTKAGVTALLEKRDLSSNLVRRG  
MLTSLEVTGRSRRCQSRSLASNPTLSKPRRRGNAKKTQKMNLTNSTDNNVDSLFLCLP

NSLTTNKHFQSKTTLAQNDSKRSRTEILDKKQERKTSKPSKPSTQRILQIAKSGNYFQS  
SVGEPQRQIPMQEKKPLHRTKDKTKRSQETCGLGAFIAIAENKTNQCSRFBVSPLENSVK  
NNSILSLNEQGSASSFPVNTTKMETIGMKTTLSDIPNFIIVPISQQIEPSLETADVVRN  
EFEKNDNTAEAEETNAAAAKVYPKDWMISSKVVHRNKTRLKHKNRRAASQSPREIEHEANP  
PKYAPGTFVKHFPVSHGLFFGKIVAFEPESLYNVVYEDGDSEDLSEELDECKILSTSS  
VFGEDGDQEQKLTISILHKTEEKSSKNVCNDSKGNRTTDASNNEESNSDCDPKSLDKKI  
QSKI SEKNKLTNNQNARTSPRESRRQSRRETHRKLFSVESHKGDKKSFTRRSKRRRSQP  
IRLIDSSCSKDQRETRNSRKKRKKVSHQKGANEIVKEHKIGEDTTSRGDELLTSSQNQPL  
LPSDDVQKCMKKKHVDDALRAVMPEGNQOQLTGSDQTEDDIFNSTPMRKLFTSRGSNDT  
KPNKKEEHEQEKGKRRRSKRKRSIEPERYKGFANSASKSSEKQIKLTQPLSKSAEKKMGS  
VSRKENNKPRVSKAKKRVIVNEQPEESDAESCSASNTKDPWTETDLKTLHKAHRTADP  
TSFTFWEDVAERVGEKSSRECREKWFSLAKTPEPKKSTAQKQNKVNIISTGHPLNADDDI  
FNSTPMRSVFGIGENINASAI EFEELGDISNMNFGSSIKIHNLNHNDNILLPPTYQVSSY  
PHGYKTYIQNIGRSMRQRDSKKKIKSCGNSSYLPLPLKLRKVAECVHEGDVEVKGRLSPG  
GTLHVDTLGNDDNEDYLDLDDVEDEL

>comp15547\_c0\_seq2; 461 1 1820 LEN=1820; translated  
XHTVHSSVSAADTDTNRTGQLEKEFDSFVSTTPELLMTTCYYSEDAKNKMSIAASRLV  
RVSVVTFYHDMSESSSVEFYNSGDSHNRRLRQEIDLQDFEALVETYSKSLVTNHRKNLQRR  
KRRRLRRLRSGPESAPVHRSDDSKREPDDSSPMVVTEVHKKAIVTLVRVDATSKRVI GIRP  
EFXSEKHKGGPVLPGPAGLSQVPPAGQMHPSPGKGSIGPRTGPFPGADGTAPGCLGHESAPP  
DQFRGAREPDDPGSLWKLRLKVGAGNVGENSSMVLFPSSMAKLLKXLETHIQNLLHISP  
EVLDGWSASMERLVVTQDLVMPSTATSSDERSMADGSASSVSELYFLDSEDDNENEDE  
GNSFSLQHSNIFREALKQLEERTFRSIAFRNLRALKLLFDDSEYREEGFVSSKPPGA  
YHRTGRSCKLATDQCVAPPSTRTPYTVPLSWLAGPLSSSLKELDIGSCIASTSSASP  
QKSVIPIEISWIDILREFPLLERLRLQDCRCSFAKTSADANTKNTIEETDAPLLLNLHLK  
QLVLDRCPEFALADEGDGVTEMTSSSSSQEANSEYYLTDHNGSLEEIVFSPSGSSDEESA  
TEPENERX

>comp15548\_c0\_seq1; 863 151 2406 LEN=2943; translated  
MNHSRRKNGLRRAKANFLLLIAIAAAVTLLECVPLSSASTATTTSSVSARNRSVGDEDQ  
NTPNSGDEDDSDGKAASKADKTRKTSWQYFYQKDETTAEETDGDASNNNNNNKPRFPF  
GARRRRAQGDDETQKKLEEMFTASNEIDDDHDDDDHNESLEEKKSNEEGTEDKTETGSE  
NDAENEDVPPTKKESSDDEEADADSESSKNDEEEKDEEGQESEKNNAANNDPVQYIEQ  
LQNAQKMQQQMRPMGYPGAIVYRSAPMHPQMRPGMSPHDGPGMPALAPGQAMVVSAMV  
NLLMLGSRIFLLKWIIDKLAFESSEKAPVQHFMECLNDKYVKDEEINRVLGRAPQSMG  
ISQRKWKTVRAMGPKKERKPGSKTKRKSNNKSEKIDGKQKDSKEHQLOPINPANDK  
QEESSDQETSKTVVVMDFTMNVNPNDFLRFADVVTFVLVGSNGPSKQMFQONPEVVLML  
QSPGGEVTSFAFAAAQVARLRKAGWNVTVCVDRIAASGGYMIASQATQILASPFAMVGSV  
GVITETLNFYEILKEYGIQSLVLKAGDSKMPITQFGKVTDKDIQTTQNDLDETHKSFIDL  
CRSRRPTLDPVAVCNGRILSGDKALERMIDRILTSDEYILEKIAEGDLVMKLHLVSGNSE  
RHMIANALQILPHLSTRFKRFLSAGGELGGGNNSSSIRRTLAKVSSWVEENVRMDGNFA  
SKAVQLVGLASMIRRAIGRSGFSKNDANIC

>comp15548\_c0\_seq2; 1071 151 2406 LEN=2924; translated  
MNHSRRKNGLRRAKANFLLLIAIAAAVTLLECVPLSSASTATTTSSVSARNRSVGDEDQ  
NTPNSGDEDDSDGKAASKADKTRKTSWQYFYQKDETTAEETDGDASNNNNNNKPRFPF  
GARRRRAQGDDETQKKLEEMFTASNEIDDDHDDDDHNESLEEKKSNEEGTEDKTETGSE  
NDAENEDVPPTKKESSDDEEADADSESSKNDEEEKDEEGQESEKNNAANNDPVQYIEQ  
LQNAQKMQQQMRPMGYPGAIVYRSAPMHPQMRPGMSPHDGPGMPALAPGQAMVVSAMV  
NLLMLGSRIFLLKWIIDKLAFESSEKAPVQHFMECLNDKYVKDEEINRVLGRAPQSMG  
ISQRKWKTVRAMGPKKERKPGSKTKRKSNNKSEKIDGKQKDSKEHQLOPINPANDK  
QEESSDQETSKTVVVMDFTMNVNPNDFLRFADVVTFVLVGSNGPSKQMFQONPEVVLML  
QSPGGEVTSFAFAAAQVARLRKAGWNVTVCVDRIAASGGYMIASQATQILASPFAMVGSV  
GVITETLNFYEILKEYGIQSLVLKAGDSKMPITQFGKVTDKDIQTTQNDLDETHKSFIDL  
CRSRRPTLDPVAVCNGRILSGDKALERMIDRILTSDEYILEKIAEGDLVMKLHLVSGNSE  
RHMIANALQILPHLSTRFKRFLSAGGELGGGNNSSSIRRTLAKVSSWVEENVRMDGNFA  
SKAVQLVGLASMIRRAIGRSGFSKNDANIC

>comp15549\_c0\_seq1; 1223 244 4428 LEN=4573; translated  
MSSYGSINIKNEKKMQYDATDEKTSLLPNGETIIFENEQLAGIWSKLTFGWMEPLMRLGN  
AKKKLDPEDISKIPLPIDGQTKNLQDAFHNFWEKELAKAKASGGTVEPSLMMALARAYGF  
DCIIVGGFVLKFIHDSVVFVGPQVLNKMILFLESDEYPLSYGLWLTAAVTLSQLTMSFCLR  
HYFFKCYKFGKIRTAVMVAVYEKALVLDAGERYTRSLGEITNLMSVDAQRLQELTTYLH

AVWFSFYQIGLALFLLWKQLGPSALAGLAVICIMIPVTKAVAKIMGRLQKKLMGSKDERV  
DVNSEVLGAMKVVKLQAWEGPFIDRIINLREKELKDLLIYVYASCVSVMLWSAVPLAVSL  
STFAAYVWLGNDLDVATALTSVALFEILRFPLFMLPQIINRIVEAGVSLKRVRSFLLCDE  
YKRVGEGDLKEDGNVRMSTLTAVYESLKPQLREGSEGEDITPMKKVVAEKNWEISLLQSQ  
LEEAELKIKQLTEKRNNDGKQPNGQDTMEDPESVASLSANMLCLKRVNFECKPGELIAV  
IGGVGSGKSSLLNGILGELRFLSGKTEVKGNLAFFSQNPFIMNATVKANILFHANDPVN  
EEKYQRAIECCALKHDLEMLPAGDQTEIGEKGITLSGGQKARVALARAVYHSDISLIDD  
ALSAVDAHVAKHLFDECITKDLLSGEGKRFKKRSVILATNALQHLNHPRVDKIVVLRGR  
IVEQGSYKELSEDSSSEFSRFLSVIDKTGVKPSVVEKTEEEIEDDIVGLPDDIVASVRKS  
ERSESSKKDKSTLMTIEERSTGRVGDVYFYWARAAGGIWVPLAIVLAFAAVEECIGVLSK  
WWLTYWSTHGAEHDQMYFLGIYGVINLANIVGIFLRLMFVMMTGLRASRKIYLGLLQVIM  
HAPMSFFDTPVGRINRFSQDMYTIDSNLVTSMRSYISTLLSVVSALVVNTGVSPAFTI  
SIIPLIFYAAQQRFFMTYRELKRLDSVSRSPIYALLGETIDGVATIRAHDGEEESLMRR  
LQKMLDVQQNAYYLLCVAQCWLAIIRLELVGTLVITLACLFPVWHHAFYGDPNFAGLAGL  
AISYALSITQALNWSVRMASDLEASMVSVERVRSYCQVETEASLDVGGDKQLPESWPSGG  
SIVFDNASLRYRPLPRVLKGLDIEFPKRSGKIGVVGRGAGKSTLMVSLLRIVELDAGKI  
FIDGHDRNIGLTKLRSNIAVIPPQDPVLFSGTIRSNLDPFGDFPDDEIFTVLTRVGLFTD  
IRGSTSTQSLSSLGLSQVNSLNDVKEGGSNFSVQQRQLLVIAARALLSGASIVIMDEATA  
AVDADTDARIQKVMRSEFADATCITIAHRINTIMDSDFILVMDKQAAEFDTPKNLIAKG  
GMFRDLVQAASHKN

>comp15549\_c0\_seq2; 1145 244 4506 LEN=4651; translated  
MSSYGSINIKNEKKMQYDATDEKTSLLPNGETIIFENEQLAGIWSKLTFGWMEPLMRLGN  
AKKKLDPEDISKIPLPIDGQTKNLQDAFHNFWEKELAKAKASGGTVEPSLMMALARAYGF  
DCIVGGFVLKFIHDSVVFVGPQVLNKMILFLESDEYPLSYGLWLTAAVTLSQLTMSFCLR  
HYFFKCYKFGKIRTAVMVAVYEKALVLDAGERYTRSLGEITNLMSVDAQRLQELTTYLH  
AVWFSFYQIGLALFLLWKQLGPSALAGLAVICIMIPVTKAVAKIMGRLQKKLMGSKDERV  
DVNSEVLGAMKVVKLQAWEGPFIDRIINLREKELKDLLIYVYASCVSVMLWSAVPLAVSL  
STFAAYVWLGNDLDVATALTSVALFEILRFPLFMLPQIINRIVEAGVSLKRVRSFLLCDE  
YKRVGEGDLKEDGNVRMSTLTAVYESLKPQLREGSEGEDITPMKKVVAEKNWEISLLQSQ  
LEEAELKIKQLTEKRNNDGKQPNGQDTMEDPESVASLSANMLCLKRVNFECKPGELIAV  
IGGVGSGKSSLLNGILGELRFLSGKTEVKGNLAFFSQNPFIMNATVKANILFHANDPVN  
EEKYQRAIECCALKHDLEMLPAGDQTEIGEKGITLSGGQKARVALARAVYHSDISLIDD  
ALSAVDAHVAKHLFDECITKDLLSGEGKRFKKRSVILATNALQHLNHPRVDKIVVLRGR  
IVEQGSYKELSEDSSSEFSRFLSVIDKTGVKPSVVEKTEEEIEDDIVGLPDDIVASVRKS  
ERSESSKKDKSTLMTIEERSTGRVGDVYFYWARAAGGIWVPLAIVLAFAAVEECIGVLSK  
WWLTYWSTHGAEHDQMYFLGIYGVINLANIVGIFLRLMFVMMTGLRASRKIYLGLLQVIM  
HAPMSFFDTPVGRINRFSQDMYTIDSNLVTSMRSYISTLLSVVSALVVNTGVSPAFTI  
SIIPLIFYAAQQRFFTEALQLRNDLLFXVTVHLISTTCNFQQMTYRELKRLDSVSRSPI  
YALLGETIDGVATIRAHDGEEESLMRRLQKMLDVQQNAYYLLCVAQCWLAIIRLELVGTLV  
ITLACLFPVWHHAFYGDPNFAGLAGLAISYALSITQALNWSVRMASDLEASMVSVERVRS  
YCQVETEASLDVGGDKQLPESWPSGGSSIVFDNASLRYRPLPRVLKGLDIEFPKRSGKIGV  
VGRGAGKSTLMVSLLRIVELDAGKIFIDGHDRNIGLTKLRSNIAVIPPQDPVLFSGTIR  
SNLDPFGDFPDDEIFTVLTRVGLFTDIRGSTSTQSLSSLGLSQVNSLNDVKEGGSNFSV  
QQRQLLVIAARALLSGASIVIMDEATAAVDADTDARIQKVMRSEFADATCITIAHRINTIM  
DSDFILVMDKQAAEFDTPKNLIAKGGMFRDLVQAASHKN

>comp15550\_c0\_seq1; 995 103 4118 LEN=4167; translated  
MLATSNGQNGRHLHRDFLKEKLRVRERYWHTISSRGNTSGSESENQIDWIIPDGLA  
LRTYLKLIIFLIEQEARHKSQQIEESDKRQTRRRACRWLLESVADWMDYRNVSPITAE  
SVHLHPEMASPHERSQIQRLVQRHEDMVEVFCDLVREGIGSDNDEDEWDLMEYDDMPMC  
DRSQNALFRAGRLLRQYRSNKTDKSSSRFFILSGDRDFAQQFPQEDGIQTVLMEDFLEQI  
YESRHYEDATQDHWMDVVFVQVKKLAARCEQEDYDLRNDPTKRSRNLLSALDAGIEEHW  
EERIQEGLRNKTLIKGRLTVTKENIKEGVVLSGGAEKDPSSLFINQSRGYFNRAFHQDV  
VVVQTLPKTKWSSPLGKRRLMPTQSNNDLNFSDAENGVSQDASPSVPSGRVVAIFKQS  
RRQFVATMVDTPMGDESACLVPMDVRIPIKIRIKTNGWRRFLGQRLVWVHDHWEVGSYP  
SGHCVELLGPANLETEITCLLKENQIYLEPFSAAALACLPEGHDKIPSHESISRRKDL  
RFTRRIFSVDPIGCQDIDDTFFHVHMLPNGDIEVGVHIADVTHFLLRDSPLDKEARRRATT  
FYLVDRRFDMPLSVLSSDLCSLHGDVDRALAVSTIWMSSDFKTVKDFWYGRVIRNCQAM  
TYNQAHNIIHNNPPDDPTKPPPLTAGYPVNHSNLSGLREDLLILTEL SRKLRKDREDI  
GGAVDLSSGDNSSELKFTLDENHNPVQVI PKKQLEIHQTVAGRFRCTCRAQSHTGTQEYS  
ILSRFALLPPTKMFLXLELMIMANSWAKTIFERFPTSALLRIHQSVDES RFEDLKDILD

AGKISFDGSSNMKLADSLKKA EK SCKTNSAVNSL FQSLATRAMSEAQYVSTGQIGGEQGL  
SHYGLGLGKYTHFTSP IRRYADV VVHHQLLQTLTLKADDFPLRAPPGFGRKALKSLPESK  
TISI IQEGIEDAKDRKKASTSSVTKNIDSPSSTGKASDILVEYFSRLTTAGKELGDAYT  
NEKVKIKCQTLNRQNRMAKLS SFECQGLFSLYFKDHVEITQAVVTNLR SNGFWAYIPKF  
DFRAPIYLSDRDGVVQIDPALLGLKKTSGLDPTTGFATSKSTRRFPSGTCTLHDSLEHSH  
LEVSLRETTKYKITILDVVTVKIFCDEWDTKSRVPRPRIHLIADSSEPKEKIKKKSTLS  
ESHRPANTNLKKS FVKREDQIRSLYDEIQNLSILPNLSVEFRSSNSKLFEGNKAAVPEAN  
HLMAGRTIFGNFVNPDRSAQQNKSIREASASALERRNQALANRTKHNEYDTSRKIETDV  
TARMQRLAASKRNTKKGR

>comp15550\_c0\_seq2; 1062 103 4011 LEN=4060; translated  
MLATSNNQGNGRWLHRDFLKEKLRVRERYWHTISSRGNTSGSDESENQIDWIIPDGLA  
LRTYLKLIIFLIEQEARH SKQQIEESDKRQTRRRACRWLLESVADWMDYRNVSPITAE  
SVHLHPEMASPHERSQIQRLVQRHEDMVEVFCDL SVREGIGSDNDEDEWDLMEYDDMPMC  
DRSQNALFRAGRLLRQYRSNKTDKSSSRFFILSGDRDFAQQFPQEDGIQTVLMEDFLEQI  
YESRHYEDATQDHWMDVVFQVKKLAARCEQEDYDLRNDPTKRSRNLSSALDAGIEEHW  
EERIQEGLRNKTLIKGRITVTKENIKEGVVLS SGGAE G DPSSLFINQSRGYFNRAFHQDV  
VVVQTLPKTKWSSPLGKRRLMPTQSNNDLNFSDAENGVSQDASPSVPSGRVVAIFKQS  
RRQFVATMVDTPMGDESACL VVPM DVRI PKIRIKTNGWRRFLGQRLVWVHDHWEVGSYP  
SGHCVELLGP IANLETEITCLLKENQIYLEPFSAAALACL PVEGHDKWIP SHEISRKDL  
RFTRRIFSVDP IGCQDIDDTFHVHMLPNGDIEVGVHIADVTHFLLRDSPLDKEARRRATT  
FYLVDRRFDM LPSVLSDDLCSLHGVDRLAVSTIWMSSDFKTVKDFWYGRVIRNCQAM  
TYNQAHNILHNNPPDDPTKPPPPPLTAGYPVNHNSL SGLRELLILTELSRKLKRDREDI  
GGAVDLSSGDNSSELKFTLDENHNPVQVI PKKQLEIHQTVAE LMIMANSWVAKTIFERFP  
TSALLRIHQSVDES RFEDLKDILDAGKISFDGSSNMKLADSLKKA EK SCKTNSAVNSL FQ  
SLATRAMSEAQYVSTGQIGGEQGLSHYGLGLGKYTHFTSP IRRYADV VVHHQLLQTLTLK  
ADDFPLRAPPGFGRKALKSLPESKTISI IQEGIEDAKDRKKASTSSVTKNIDSPSSTGK  
ASDILVEYFSRLTTAGKELGDAYTNEKVKIKCQTLNRQNRMAKLS SFECQGLFSLYFKD  
HVEITQAVVTNLR SNGFWAYIPKFDFRAPIYLSDRDGVVQIDPALLGLKKTSGLDPTTGF  
ATSKSTRRFPSGTCTLHDSLEHSHLEVSLRETTKYKITILDVVTVKIFCDEWDTKSRV  
RPRIHLIADSSEPKEKIKKKSTLSESHRPANTNLKKS FVKREDQIRSLYDEIQNLSILPN  
LSVEFRSSNSKLFEGNKAAVPEANHLMAGRTIFGNFVNPDRSAQQNKSIREASASALER  
RNQALANRTKHNEYDTSRKIETDVTARMQRLAASKRNTKKGR

>comp15551\_c0\_seq3; 257 593 1207 LEN=1293; translated  
MNDARVRF CFS PVL YAS PFFRLWCRLVGC P GSAAKAAMVQYMKGKNKPPESAPDHLALPP  
GGFEEATISYLEKDRVYIKKR VGFVKLALQHGYNVV P VYTFGENESYFNAOGLWKFRMWL  
NGMGIPAI AIFGAWFLPLPKRQSRGLRVVVGDP IELPTIPNPTREEVKLWHDKYIAALT  
RLFDEHKEEYYSVM SKTVKLELW

>comp15552\_c0\_seq1; 1506 226 5038 LEN=5126; translated  
MRARKGLGAMPVQTQQGMDPPASNSVAELVRETEQLGMAGETDPRATSGEVVDGEDPLLD  
LDQLEELHDEAERMKALGNKHMAAQEYTRAYNAYSAAQLSPVGPSSHVFLSNRSAALLS  
LKRYSAATDARRAIALAPTFGKAHARLGQSLYFLKDYEGAVSAYEDAIHFEPDNPITKT  
YLEKARSKWHRQKEKALKNRSGGEEVSVLTAESSVQQT VTN SVATDPN ASA AVVKTGFRG  
QSKAIMRAVGGGMPANKAGTTPNNDRRKDPNASTPTLNENAPLDASGEYDDDDDDYADD  
PDFDEALRIQERANRYLAN KSYKYAIEEYTAALFLVPDDVNLSPELHLGRAHALNGSRRH  
ESAKIDSQ LALRIKPTPEAYSTLAKSLFYMKDYEGAITAFDECKLLLPEGETLSMFDRA  
YLMKAEAAINELSKDSSVAHSVASIKTISR LGSSAPV PKLPPK FVSREEALARTPNMPA  
MPKEWPQQSPRESKVVKYGKERDVEFLSEALGIKLN RGP DGI VRVIEVSPNVP GSP IAR  
NGNIYVGDVIREAAGVD IRRPITNIMWGD TVALIKMAPRPIVLVAKETTESIMDERKRA  
AHNALSPTSAAQYFPSNASTEESVRDQMERQQSENHEDQLNKPV SFLYSITFCSAIQKLM  
FVYXADDSISPLFKQGETVTEQENPDEELEPVSSCEIVQGYETVEDQNTKTGDVDSENEVS  
EECNANEQNERSLEDNENGEDELGDEESKDRIGSEEAEEEEIEEQIEQEATSEISVPVDNH  
DKEMEVLGAEIIFEDNENLVAA YNGWNNLKWMAYSGIRKICTVERVYKYCEGRTGFLWNK  
DEYVRRKLAIYEEPDLILVLRANSIAEFRDLMELPPDAKFNEERALASHLFVESVIDPK  
TAKLRLSPLTTATSVIPNTASDCPRLRSTFELINPAESIVLSAVRQRKDGETPSYDNSRA  
FFETTEVEFVLSKSI CNAQAPETLSSNF SWRHQIILGTLHSYVILGNQAHLDKGIQQLR  
TKNGQSHLDLAIQQASEKMNPRFLNPRIIDAIDEGRKTAIQYACESRFSSAVISLVRAGA  
DVNKRTEPRNSTLSHISAKALDFKSLDAILTVSGSPNELDDL YRSPMYLAI TEGRTVGAQ  
LNPKALEYCIATLAKFGGQVGE LDENRHPVSYL AYMCHAEEMKIVLKYSRYKFP LHTTKK  
EEMGISLGALYQYPIHSALISVKHRLQNLGLGGYPDSQQLWRDCAGVDVEVNKTLKTLFA  
FGFEPNERIEGLSSTFREMDELLEYVGFAPIQIAMASAMELSDQRKALGEELYAKINDML

ANIMECLTLHGARIFLDPPPFLRSEDRRKFVAESEAGAQDKSTKRSLKIQGNVELSLLV  
GRSKIVEARSYWKTIKPAVPSNIVLHTDKAMIENSLAPGGSEKXKFLDLLEEVWVAYKK  
APMPNFTEICCDCESSRRIVFNDEEQRISDGQFLAKAEELSEVNRQLNAELAKEKRRKQ  
KAKLKGVSNRLDQLEAKEKDNRDSLFGGIMASVTKTLGVVEEPKGDITISGLSNQLNKTRD  
ALNERGDKLSTLSDKSDRLVSASQDFAAMAKELNKQSSQGFSSGW

>comp15552\_c0\_seq2; 1522 226 4942 LEN=5030; translated  
MRARKGLGAMPVQTQQGMDPPASNSVAELVRETEQLGMAGETDPRATSGEVVDGEDPLLD  
LDQLEELHDEAERMKALGNKHMAAQEYTRAYNAYSALQLSPVGPSSHVFLSNRSAALLS  
LKRYSAATDARRAIALAPTFGKAHARLGQSLYFLKDYEGAVSAYEDAIHFEPDNPITKT  
YLEKARSKWHRQKEKALKNRSGGEEVSVLTAESSVQQTVTNSVATDPNAAAIVVKTGFRG  
QSKAIMRAVGGGMPANKAGTTPNNDRRKDPNASTPTLNENAPLDASGEYDDDDDDYADD  
PDFDEALRIQERANRYLANKSYKYAIEEYTAALFLVPDDVNLSPHELHLGRAHALNGSRRH  
ESAKIDSQALRIKPTPEAYSTLAKSLFYMKDYEGAITAFDECKLLLPEGETLSMFDRA  
YLMKAEAAINELSKDSSVAHSVASIKTISRLGSSAPVPKLPPKFSREELARTPNMMPA  
MPKEWPQQSPRESKVVKYGKERDVEFLSEALGIKLNRPDGIIVRVIEVSPNVPGPSIAR  
NGNIYVGDVIREAAGVDIRRPITNIMWGDTVALIKMAPRPIVLLVAKETTESIMDERKRA  
AHNALSPTSAAQYFPSNASTEESVRDQMERQQSENHEDQLNKPVTEVTQENPDEEELPVS  
SCEIVQGYETVEDQNTKTGDVDSENEVSEECNANEQNERSLEDNENGDELGDEESKDRIG  
SEEAEEEEIEEQIEQEATSEISVPVDNHDKEMEVLGAEIIFEDNENLVAAYNGWNNLKW  
AYSGIRKICTVERVYKYCEGRTGFLWNKDEYVRRKLAIEEEDLILVLREANSIAEFRDL  
MELPPDAKFNEERALASHLFVESVIDPKTAKLRLSPLTTATSVIPNTASDCPRLRSTFEL  
INPAESIVLSAVRQRKDGETPSYDNSRAFFETTEVEFVLSKSIKNAQAPETLSSNFSWRH  
QIILGTLHSYVILGNQAHLDKGIQQALRTKNGQSHLDLAIQQASEKMNPRFLNPRIDAI  
DEGRKTAIQYACESRFSSAVISLVRAGADVNRKTEPRNSTLSHISAKALDFKSLDAITV  
SGSPNELDDLYRSPMYLAITEGRTVGAQLNPKALEYCIATLAKFGGQVGELENRHPVSY  
LAYMCHAEEMKIVLKYSRYKFLHTTKKEEMGISLALYQYPIHSALISVKHRLQNLGLG  
GYPDSQQLWRDCAGVDVEVNKTLKTLFAFGFEPNERIEGLSSTFREMDELLEYVGFAPIQ  
IAMASAMELSDQRKALGEELYAKINDMLANIMECLTLHGARIFLDPPPFLRSEDRRKFVA  
ESEAGAQDKSTKRSLKIQGNVELSLLVGRSKIVEARSYWKTIKPAVPSNIVLHTDKAM  
IENSLAPGGSEKXKFLDLLEEVWVAYKKAPMPNFTEICCDCESSRRIVFNDEEQRISDGQ  
FLAKAEELSEVNRQLNAELAKEKRRKQKAKLKGVSNRLDQLEAKEKDNRDSLFGGIMAS  
VTKTLGVVEEPKGDITISGLSNQLNKTRDALNERGDKLSTLSDKSDRLVSASQDFAAMAK  
ELNKQSSQGFSSGW

>comp15553\_c0\_seq1; 470 18 1079 LEN=1481; translated  
MTKEKDELNKLNASINKETNFEIQDLQRRLOEANSKMVEEREFEFNKLNASIRKEKEDDMQ  
DLRRQVEEANSKMEDRRELVTLHSTVNGNKIENQNLRFEEVANSKMTTEERNKYVELTK  
SIEKEKNSIAQDLRCQVDEASSTIANLKDTLKTSHEKIRELRELKRDLENTNEKAAQE  
KKTRKLLKLLKSTLNVTRVSRMKMDVNLSDYRDSKTGEYRRLPAEAEYSGPVVNSKPHGA  
GLMKFKCGDMYLGMFENGEINGEGSYITSPKKRRENGSSEKQTTASLLFKGHFDRSE  
FSPSPQPKENHVPRDDVASTKVRLFADPEMMVDLQELQHRMQHEADTETDV

>comp15553\_c0\_seq2; 153 1 298 LEN=298; translated  
ERDELIKLNSSLVKEKENEIINLRSQFDEANSKMAEEREELKLNSSLKKEKEMKIDELR  
CQLQEANSKMAAERGEMNKLNAAVVDRKEMEVAQALRSQFX

>comp15553\_c0\_seq3; 3237 239 7909 LEN=7909; translated  
MSFHQLKQQRKDALHLSIAAPSADTLRDIREAVEAADENGGEISNPNSNSNNNPSTADHF  
RNSKNDGLPSEMVSDEIDDDDDASGSGSWATMSDIDSQYTRQSKSSRWSNNIMELSMITD  
SEYSLGIYDENDYDDESEHADGNVNSLLTGTIPPIVSATSLTEAIASTKRSRSGPPSLFFS  
TTPPTNNGAAMGMPVTTIGTANSRIVSPQLSPQPSRNNENENEDDNASEQTGGNVTSE  
SRERRRSSLKSSNSRSSSSKRRKSKASKASMPDGVVERPHSPPLPHIPLANAEEAAKAH  
RARLLEWRQKCLQEAEQVFEARQELAGVSHLELLQERHTAEIRELQEQQLDRQKEEHRK  
TQIASDATFQSLQKENRALLQQQQQQSQQQATTAGTENSNAKEAIVRDLELESKKT  
DKVISEDHNKILQALQSEKALAESNLKALGRLQSLSENEQLLQDKQGLSQLETTQKKV  
RFAEQSSVLEFKVDEYKSKWENSLKRSRIVESELVTVRCDLQAAKQKHDAELQKQRE  
QEDSEANKQLEVKLQSLTEDRESLQAQLQAANRQKDTLETDLFQAKDESVRLOQELSDLR  
TSMRRAETEHELDKSKQTESFQSELRELRNSMALLVATDEQRHTELDRLRASESELKSKL  
VAAVNEVTGLQSYKAMPEQNTTEEQRSSFEAERIEHQFPDFLLSELKASVTKAQERQESW  
TTELEGLRTSIAALTTENEHQAELESELRAKESKLKADANAAVQAEAEFERERQKANDN  
EQKLVSELAESRSKAKYLEGETEALQSKVLALAEQTNLETELRETKNRWEDAKADSEQA  
ERDLKVVREDLAKTRASLEGLESEHTKLIQKVLVDTHEKEVREQQSEILLSQTRERTL  
QNELNALREQRKTAEQEARDLESKLQSTREDHAALADTHRASKLASETEILALKSEKDAL

TKQALALKSTLADLEEQLGKAKKKCDFLQRAQDDANAELDRRSKEHEAISKTSSEEYEKLA  
ASERDNLRRKVVQSFAKKETELEGKLISIVNILETSNANLTANEQERLETEELLAERETT  
QAKILQLEEECEVLKGITIVKGEKNDLDTLSAVQKEHYQLKETQKISEEKLSKFLLLQ  
DELKASSQKQLSDLLNQRNGFSKDLDES NRKQTELEETLLETTELLDET KRILVQKDIKF  
EELECKFENAKESIRHLEKEQSRRRFEKDETDALHARVVEEHRISAKNLEDRLGIATQKV  
TDLNIEQEVVAKTIQNLKADQTALEGKLESVDSLAKKNSQLEQNQNVRRQLEKINELE  
ERCEFLKVEQSDAKGETETVVKVLYENALQDHNELIKKMEELEASAAESVAAIRTEIVAEQ  
NVR IENAETEMRNAQAQLDILKEEQNRHEIATANEKALMVAHHVVMTRRHEASIAALQEE  
LEAIRKQALDSEDEKEVLQKQLKSLEDKEMALGQKYTATLETTLHTTT SRLDQAELEKSVL  
KSKLTELEADFEAIKTVDVSRKTKAFIASYEAEMTKSEMLIEEAENEVKSFKKKVAVL  
ERESSEFKQTAIKESMLALHSKELKDYENLSQDLQLKLVASEQDALESKRKREELQHV  
ITSLDSELMALKDEFEFKFSHLLRKAESDLKETEENESCLRSELMILQDKVDSLELEQSNS  
KKELDAQLNMIIEEQKAIKNAETATLLAKEQEKLRSSEAESLRISFEKEKQESIALHSLA  
IDNHCNSSRALREKLGAAEMQAKEYKQEKEKLNQVVS LNMELINHKDEFDKALVTFKTT  
AGELQEANERESLLKKQLSNLQAKLDC TKAEKADVSI RMQTL LDCHSKEVRENQESIKNA  
KADVKS AKTELDHLHQHEELKIIAVERERDLQAHSKEMEEVVRSMRSLRNDLDF AQKE  
CQIFTK EKNE LHERLQAIAGERLDLQSAFTTASNRLSEVERQLRIEEEEKINIQAALLKM  
QRNYELMKNERNETRVKMNE MVS VHAAALEKQKLLVEKSQANAQETTEQMKV LQSEKVKL  
EESRDAL KDKNDLRSKHESALSSIDLLNACVQKTEKAR IEMEANLRDAERREESLVQSV  
KSVTEENSSLKTAEVSETD HKAQVYRLEYSKLEVSIVNEKMSKEISNLRDAHLGESEL  
EMSEKKNLDLQHKLDEAITRNT ELADEHNHAMLGAQNQIGILQCQKTLHQRMIEA EAAR  
MVAEKGAENAI VLEGIQSDLRNSKRENDSLISGLNEAKGTILALKKDV EALTEKEEYY  
RAFRDLEEEIGVTRKRMQVIETDRQRLENEMQSMKDDRDKLEESKLTRSR LNTRDAEVE  
SLEKALKGERENLGSLEHKNNFLSQEKKNDLEIEK LASNLRDSRVIAAREQENHNASKK  
QMLAIRKECEDELLS QLSASKQEVETKVNKESHLC EEISSLKNQIYELNKEKDELKELNAS  
VEKKKVQEAQDLRQQFEEANSKLM EERDKLIKLNASIMDENNMKIKELNHQLDEAKSQA  
ERDKLNTSLMEKKCDEIQDLHQQLEEANSKMAEEREE

>comp15554\_c0\_seq1; 1007 184 3084 LEN=3121; translated  
MIYDDDDDET PRKSNPSKNDGVGDFDRGERDRQSSEESSGAANSANSLDASNKSTPQATA  
RTETIDPRQRATSKRTAKTKSRRGENRGNDN PRAKRNDTKRKRNGRLVRLVSLGSSKDD  
RDETAATTSSTTRTTSVPPLPGNQYTATLRRRAVRKAEGNNAHPDNECGDISLGMKLI VA  
GGRVIVQSLISLSEGLASPAQLAGVIHRGDVLLAIGNLSLTNLPIDQLMEGLRPLSTPDS  
AGCYQRILD LRFEAGAGLNLK LHEEEHTRPKDSLAPDPIFSIFPMVDNLSGLPLYEPQY  
DLDAYQTPNGGENKVDVDVDVVEAKDKFPGDEEMALERRMTEEGLHKLTKDLNCLIS  
ATLAKERNSDREYSEYFDWREDFPELLRRTISIVAEAEENGEQLYRLTKKERLELGLKI  
MQTAKALELSMEEIDKGYTTRANKNWSSGGSLRSISSATV KRQYNMDGTITSYRLSCDNV  
DEDSIDSDGSLDEVDPDKLLLG LAARDEIWRKQVLSILDAAIDDMENRVEEKLEDSVLP  
GGMDLTQQLGHFLFREN SAKVPKQVKSFSFPPEITRVLFDLTTYIAAGANDDVTVFGAS  
SKLSSHLSSFRSGTTSRSALFRADTVLATQFILDEALPHWLKAFRPLKVEDRAFLWPTQS  
NRGDSLSAAYTRSSDGSLTLD SGGSTHISTAQSKKEMREHLDYHAANNESRPELET CF  
LVTYFYTQKIVGTDLAKKQSIMNQKSFVETYGAYLQIPTCLSFAASVKDEVAISAVLEAS  
RSDP SHRDAMREIEKSNASL FYN SGKLSALLQCLKGVRFELEEEERRKILRDMCVSAYPDI  
QSWQVRDA CLSLPKIDSNETREHSSDDTMEALYYSYLSHLLNPVDGHESARQDLNLVKEF  
CEWSVGVLP RKEKKITCMENFLNVAS PSSLHNSYRRDLMMLLNLSMTIENHDLALDLGK  
FLIVSY

>comp15554\_c0\_seq2; 350 88 765 LEN=802; translated  
MNQKSFVETYGAYLQIPTCLSFAASVKDEVAISAVLEASRSDP SHRDAMREIEKSNASL F  
YNSGKLSALLQCLKGVRFELEEEERRKILRDMCVSAYPDIQSWQVRDA CLSLPKIDSNETR  
EHSSDDTMEALYYSYLSHLLNPVDGHESARQDLNLVKEFCEWSVGVLP RKEKKITCMENF  
LNVAS PSSLHNSYRRDLMMLLNLSMTIENHDLALDLGKFLIVSY

>comp15554\_c0\_seq3; 380 88 1194 LEN=1531; translated  
MNQKSFVETYGAYLQIPTCLSFAASVKDEVAISAVLEASRSDP SHRDAMREIEKSNASL F  
YXFGMYPFVHVEHKNTLLSIGPNIEFFSVGLKLGKLSALLQCLKGVRFELEEEERRKIL  
RDMCVSAYPDIQSWQVRDA CLSLPKIDSNETREHSSDDTMEALYYSYLSHLLNPVDGHES  
ARQDLNLVKEFCEWSVGVLP RKEKKITCMENFLNVAS PSSLHNSYRRDLMMLLNLSMTI  
ENHDLALDLVDEILENKKLASNKEAVRRIACCLRTIGGTALASCSDTSKDTTLFEGLIRP  
LSLFEKMSTNQCSICQRSINLPEELFTLFNQWKVQTG SNGDDPKMYLLIDFVVESSKVP  
G  
NVIRALILW

>comp15554\_c0\_seq5; 1131 184 3417 LEN=3754; translated  
MIYDDDDDET PRKSNPSKNDGVGDFDRGERDRQSSEESSGAANSANSLDASNKSTPQATA

RTETIDPRQRATSKRTAKTKKSRRGENRGNDNPRAKRNDTKRKRNGRLVRLVSLGSSKDD  
RDETAATTSSTTRTTSVPPLPGNQYTATLRRRAVRKAEGNNAHPDNECGDISLGMKLI  
VAGGRVIVQSLISLSEGLASPAQLAGVIHRGDVLLAIGNLSLTNLPIDQLMEGLRPLSTPDS  
AGCYQRILDLRFEAGAGLNLLKLHEEEHTRPKDSLAPDPIFSIFPMVDNLSGLPLYEPQY  
DLDAYQTPNGGENKVDVDVDVDVVEEAKDKFPGDEEMALERRMTEEGLHKLTKDLNCLIS  
ATLAKERNSDRERYESEYFDWREDFPELLRRTISIVAEAENGEQLYRLTKKERLELGLKI  
MQTAKALELSMEEIDKGYTTRANKNWSGGSLRSISSATVKRQYNMDGTITSYRLSCDNV  
DEDSIDSDGSLDEVDPDKLLGLAARDEIWRKQVLSILDAAIDDMENRVEEKLEDSVLP  
AGGMDLTQQLGHFLFRENSAKVPKQVKSFSFPPEITRVLFDLTTYIAAGANDDVTVFGAS  
SKLSSHLSFRSGTTSRSALFRADTVLATQFILDEALPHWLKAFRPLKVEDRAFLWPTQS  
NRGDSLAAAYTRSSDGSLTLDGGSTHISTAQSKKEMREHLDYHAANNESRPELET  
CFLVTYFYTQKIVGTDLAKKQSIMNQKSFVETYGAYLQIPTCLSF AASVKDEVAISAVLEAS  
RSDPSHRDAMREIEKSNASLFYNSGKLSALLQCLKGVRFELEEERRKILRDMCVSAYPDI  
QSWQVRDACLSPLKIDSNETREHSSDDTMEALYYSYLSHLLNPVDGHESARQDLNLVKEF  
CEWSVGVLPRKEKKITCMENFLNVASPSSSLHNSYRRDLMMLNLSMTIENHDLALDLVD  
EILENKKLANKEAVRRIACCLRTIGGTALASCSDTSKDTTLFEGLIRPLSLFEKMSTNQ  
CSICQRSINLPEELFTLNFQWKVQTGSNGDDPKMYLLIDFVVESSKVPGNVIRALILW  
>comp15554\_c0\_seq6; 1037 184 3513 LEN=3850; translated  
MIYDDDDDETPRKSNPSKNDGVGDFDRGERDRQSSEESSGAANSANSLDASNKSTPQATA  
RTETIDPRQRATSKRTAKTKKSRRGENRGNDNPRAKRNDTKRKRNGRLVRLVSLGSSKDD  
RDETAATTSSTTRTTSVPPLPGNQYTATLRRRAVRKAEGNNAHPDNECGDISLGMKLI  
VAGGRVIVQSLISLSEGLASPAQLAGVIHRGDVLLAIGNLSLTNLPIDQLMEGLRPLSTPDS  
AGCYQRILDLRFEAGAGLNLLKLHEEEHTRPKDSLAPDPIFSIFPMVDNLSGLPLYEPQY  
DLDAYQTPNGGENKVDVDVDVDVVEEAKDKFPGDEEMALERRMTEEGLHKLTKDLNCLIS  
ATLAKERNSDRERYESEYFDWREDFPELLRRTISIVAEAENGEQLYRLTKKERLELGLKI  
MQTAKALELSMEEIDKGYTTRANKNWSGGSLRSISSATVKRQYNMDGTITSYRLSCDNV  
DEDSIDSDGSLDEVDPDKLLGLAARDEIWRKQVLSILDAAIDDMENRVEEKLEDSVLP  
AGGMDLTQQLGHFLFRENSAKVPKQVKSFSFPPEITRVLFDLTTYIAAGANDDVTVFGAS  
SKLSSHLSFRSGTTSRSALFRADTVLATQFILDEALPHWLKAFRPLKVEDRAFLWPTQS  
NRGDSLAAAYTRSSDGSLTLDGGSTHISTAQSKKEMREHLDYHAANNESRPELET  
CFLVTYFYTQKIVGTDLAKKQSIMNQKSFVETYGAYLQIPTCLSF AASVKDEVAISAVLEAS  
RSDPSHRDAMREIEKSNASLFYXFGMYPFVHVEHKNTLLSIGPNIYEFFSVGLKLGKLS  
ALLQCLKGVRFELEEERRKILRDMCVSAYPDIQSWQVRDACLSPLKIDSNETREHSSDDT  
MEALYYSYLSHLLNPVDGHESARQDLNLVKEFCEWSVGVLPRKEKKITCMENFLNVASPS  
SSLHNSYRRDLMMLNLSMTIENHDLALDLVDEILENKKLANKEAVRRIACCLRTIGGT  
ALASCSDTSKDTTLFEGLIRPLSLFEKMSTNQCSICQRSINLPEELFTLNFQWKVQTGSN  
GDDPKMYLLIDFVVESSKVPGNVIRALILW  
>comp15554\_c0\_seq7; 852 184 2640 LEN=3217; translated  
MIYDDDDDETPRKSNPSKNDGVGDFDRGERDRQSSEESSGAANSANSLDASNKSTPQATA  
RTETIDPRQRATSKRTAKTKKSRRGENRGNDNPRAKRNDTKRKRNGRLVRLVSLGSSKDD  
RDETAATTSSTTRTTSVPPLPGNQYTATLRRRAVRKAEGNNAHPDNECGDISLGMKLI  
VAGGRVIVQSLISLSEGLASPAQLAGVIHRGDVLLAIGNLSLTNLPIDQLMEGLRPLSTPDS  
AGCYQRILDLRFEAGAGLNLLKLHEEEHTRPKDSLAPDPIFSIFPMVDNLSGLPLYEPQY  
DLDAYQTPNGGENKVDVDVDVDVVEEAKDKFPGDEEMALERRMTEEGLHKLTKDLNCLIS  
ATLAKERNSDRERYESEYFDWREDFPELLRRTISIVAEAENGEQLYRLTKKERLELGLKI  
MQTAKALELSMEEIDKGYTTRANKNWSGGSLRSISSATVKRQYNMDGTITSYRLSCDNV  
DEDSIDSDGSLDEVDPDKLLGLAARDEIWRKQVLSILDAAIDDMENRVEEKLEDSVLP  
AGGMDLTQQLGHFLFRENSAKVPKQVKSFSFPPEITRVLFDLTTYIAAGANDDVTVFGAS  
SKLSSHLSFRSGTTSRSALFRADTVLATQFILDEALPHWLKAFRPLKVEDRAFLWPTQS  
NRGDSLAAAYTRSSDGSLTLDGGSTHISTAQSKKEMREHLDYHAANNESRPELET  
CFLVTYFYTQKIVGTDLAKKQSIMNQKSFVETYGAYLQIPTCLSF AASVKDEVAISAVLEAS  
RSDPSHRDAMREIEKSNASLFYNSVCTRLSMLNNTKILS  
>comp15554\_c0\_seq8; 136 1 379 LEN=716; translated  
XVPIFRSVDEILENKKLANKEAVRRIACCLRTIGGTALASCSDTSKDTTLFEGLIRPLS  
LFEKMSTNQCSICQRSINLPEELFTLNFQWKVQTGSNGDDPKMYLLIDFVVESSKVPGNV  
IRALILW  
>comp15554\_c0\_seq9; 474 88 1098 LEN=1435; translated  
MNQKSFVETYGAYLQIPTCLSF AASVKDEVAISAVLEASRSDPSHRDAMREIEKSNASLF  
YNSGKLSALLQCLKGVRFELEEERRKILRDMCVSAYPDIQSWQVRDACLSPLKIDSNETR  
EHSSDDTMEALYYSYLSHLLNPVDGHESARQDLNLVKEFCEWSVGVLPRKEKKITCMENF



LNVASPSSSLHNSYRRDLMMLLNLSMTIENHDLALDLVDEILENKKLASNKEAVRR IACC  
LRTIGGTALASCSDTTSKDTTLFEGLIRPLSLFEK MSTNQCSICQRSINLPEELFTL FNQW  
KVQ TSGNGDDPKMYLLIDFVVESKVPGNVIRALILW

>comp15555\_c0\_seq1; 880 218 2815 LEN=3241; translated  
MKR NMSAGDDNLDVLDDETSFNLDNVD MIDDEVADVHDHVGVDVDVGT EHELPEREAEI  
DEEKKKAF EK KREEILSVVPQSVKERFGKIYFSTFGRFIGPVLIMNPYKVNPGALREQWM  
GMFHNCKKSGREEQMTHLTYWYGNYNLDLHNAYSFQKTSSLMSYELGMKKTEKKLRS AKQR  
LSEGKKINRNDNFINGVDEMEADRLKDPTERCGYVGCN FLEEYHIEEGHDNTTQETPEH  
KKEQK KAKTKSSDGAIVKRRK LKKMGNKSKTKKIEKKQHREEGTQEAAKNGETPKPKKKL  
VKKSKKKADSSIDI SRPMKKKKTGSSSGATAKDPNTSSQSSNREENHATENGNRKRQEED  
VKGSEKGGEDVTKGATKAKDKRPSAYDEYVAMVDVSSHGETDDENLELDDLQSSDDSED  
EDYMNKTKPKKASKKKTLEKKSKSGKSSTKRKEVPKKAQKIKIKLEK PATATKDKKSA  
KPNLKHLYKKEQRKFHECEALYLP LLHRWEKAITNKDANQLSRIYDELLSKMEMFTAPFM  
EAYEMGNLMKRSRGFENEKRKRVLSKFKTVYKEKKAMVPKDFKPKVKESEKYVSPDTTNTV  
PPTKLEPPVEETSQPKDKTPLPKPDEDGQTPNQPPVTAKSGNEKPPVDTPMPAVPKKSLK  
RSQSGISFSDTDPVPAPVPLPKKNQSSAAKAEPKRRSFSLGKLMRPGGSSSPTPGSMGA  
KPISSSVQSSSQPSAKKSQKTSHLWTT EISSSDNSSKNEDRTFGLF LQQAALFIPEGKT  
VNRNAVARNLETAVYHWATR DGKKKEAPSTAPDDRRWLDKYWNKI HDLSACVSGKRRRG  
TLADMIAEGKFATPDELVGLGGEDLW

>comp15556\_c0\_seq1; 768 148 2517 LEN=2640; translated  
MVDLRQLYVND SNANGETFVSVKDLRKEYQSSLNVEGNKREVFDDDDRSYISASVSVKDR  
LRQYQSTTALDTRQDIDQEEVDAEDRNGEEIKNKNDAGRYKDYQEERDLMHSTKDTASV  
VSASICRSSALSPVAFPTTIPKNRVSLIKASCRLSSSSSPSSSNTRHSFPPLTVYFQKG  
EEDAVEKEGLYYGNVSLR KVAPPVEDGWKKNLNINSIDASADDDNESLSSAAPDGRKDND  
TNQLLIRRKSLPPVKSELSNLMDAYSPPSSSLQTRESLLKKNNSNVKHKRNSSVINRSTS  
SLPSWQVRSKKDLTSPSKPSDDPNNQIQDFVSENEKFQKDVAAALKKVGP AIEERWKVIK  
NSAEHLSETSRSSLLTNIKSKHVGSTTSIAPNEQSTHSRRIWNQNREPNDMEEKSLSHIK  
RQHEVEVATKYNATEVTHGKKPAVRSRVSDLAKTFSTKTLKGSPEDDNEVSPESNEIEKV  
RNSLRSTPKGLEGRRDSFTSASPVAALIAEKIKAIENKNTKEAEGRRDLSLSPPVAKLI  
AEKNKANSTKNSTVENLRKKFAPSGQSTMKGRRSFGSANTKSPKYMNRKSYLDRSTSDGC  
LATQNSYLQDKGGQPSDPQEKRDENTLERDIADYFSSNSDWESTDACDMFPLSFPPETED  
KDSLFFNTERVSPKLESVSNAASEDDVLLHSFSTISENTADSESPWPSLGESRYIQFALS  
SGGVTEKVEPNINIFMAPSVDCPSMASVTDVSSRKDRMKGLVDPLKGAKKFFFGKNNKKK  
MTEDDSFSF

>comp15556\_c0\_seq2; 752 148 2496 LEN=2619; translated  
MVDLRQLYVND SNANGETFVSVKDLRKEYQSSLNVEGNKREVFDDDDRSYISASVSVKDR  
LRQYQSTTALDTRQDIDQEEVDAEDRNGEEIKNKNDAGRYKDYQEERDLMHSTKDTASV  
VSASICRSSALSPVAFPTTIPKNRVSLIKASCRLSSSSSPSSSNTRHSFPPLTVYFQKG  
EEDAVEKEGLYYGNVSLR KVAPPVEDGWKKNLNINSIDASADDDNESLSSAAPDGRKDND  
TNQLLIRRKSLPPVKSELSNLMDAYSPPSSSLQTRESLLKKNNSNVKHKRNSSVINRSTS  
SLPSWQVRSKKPSDDPNNQIQDFVSENEKFQKDVAAALKKVGP AIEERWKVIKNSAEHLS  
ETSRSSLLTNIKSKHVGSTTSIAPNEQSTHSRRIWNQNREPNDMEEKSLSHIKRQHEVEV  
ATKYNATEVTHGKKPAVRSRVSDLAKTFSTKTLKGSPEDDNEVSPESNEIEKVRNSLRST  
PKGLEGRRDSFTSASPVAALIAEKIKAIENKNTKEAEGRRDLSLSPPVAKLIAEKKAN  
STKNSTVENLRKKFAPSGQSTMKGRRSFGSANTKSPKYMNRKSYLDRSTSDGCLATQNSY  
LQDKGGQPSDPQEKRDENTLERDIADYFSSNSDWESTDACDMFPLSFPPETEDKDSLFFN  
TERVSPKLESVSNAASEDDVLLHSFSTISENTADSESPWPSLGESRYIQFALSSGGVTEK  
VEPNINIFMAPSVDCPSMASVTDVSSRKDRMKGLVDPLKGAKKFFFGKNNKKKMTEDDSF  
SF

>comp15557\_c0\_seq1; 986 203 3265 LEN=3290; translated  
MSALQMAKDENGVCQGSIRKTVTISSSKKPGRRNSGAF TLFSSRNSSSASLDTSPNLLT  
YSLLVGVKLI CYESMATMFGNDHPLAQYSLVGASPVSDNSTAFRAVTRDGRTHLLCSVP TK  
GCREVWLSALNAGLEYRLLQESERKKRSNNGDSSDDYSRSKILSPVKPTYPRGVKYKSA  
PVRYCHSCGKVELNKSSSESPAYYQAPLPQYGI EERVDVCVNCHRAQGVLENC DWMEELYA  
AQQKEQLAMLNARQLVLDKLGQKANHDQQSTSLKKESDSGVESGHDSTHTDMDDSSFAGD  
GDVINDSDNGNNVKKPEESDRDSTGRLLPKAHTIQLKPLSHHV LGLVLESPEGVALQRLS  
PTLRR LCTQFQQGMIGLMEFMELLEAAIGIRDPAMAELKKQAFRVAGDMGTALKLLYEQC  
LPPAVESSAGNNSLDSL SRQNRNRSNLGSNDLVSTELLQCILEFFLDLVVEEDELDTLAF  
FWPQISNIHLQMLPPKDALSLQKIELVEDFLLTVASKYSIHLANELVWSHTADLE DALSG  
SYEGSTTTFCGHRQSAVLRFLCELESLLFDFDTCWGGGSVTTGQFMSPSDHQI ELLKSSV

ARIQTYRLMVERDRLTRSHRLEKLQKSLGLSSPESPETQALEAMRVANNADYLSHHLVFT  
KRLCDIAERLRFLPVTERRGVLSTELAKLNASGTMGGDPTNI IKEGRTRVVRIPVMEGHV  
FRSKARTPVLLLLVETLEEGIASDQSTNEIESIVEEIEKESKMIVEEKIDSDDTSSVNGLS  
TLQNEESAEIFIEDPRDSEGGEVNDTVENEMRVSVDTHDDNTVHSEKEARIKEEVSNQEEL  
TTLPNEIGSSADIPLKPDSDRGDEIKPVQNL IENVSEKFNVIKIESNKANADDLAVSSH  
LKPGEETKVSSKVDGLKTRDESELFQIEAAAAKEDT IETDEEAKACQFDHGLVEDDKKT  
SLTEDKKVVFEDVIMPELDTSTRSSRLGSVQSYHSADTISSLNTSLHDKDVPRREFSRVH  
>comp15557\_c0\_seq2; 1600 203 5122 LEN=5579; translated  
MSALQMAKDENGVCQGSIRKTVTISSSKKPGRRNSGAFTLSFSSRNSSSASLDTSPNLLT  
YSLLVGVLKICYESMATMFGNDHPLAQYSLVGASPVSDNSTAFRAVTDGRGTHLLCSVP TK  
GCREVWLSALNAGLEYRLLQESERKKRSNNGDSSDDYSRSKKILSPVKPTYPRGVKYKSA  
PVRYCHSCGKVELNKSSSESPAYYQAPLPQYGI EERVDCVNVCHRAQGVLENCWMEELYA  
AQQKEQLAMLNARQLVLDKLGQKANHDQQSTSLKKESDSGVESGHDSTHTDMDSSSFAGD  
GDVINDSDNGNKKPEESDRDSTGRLLPKAHTIQLKPLSHHVLGLVLESPEGVALQRLS  
PTLRRLCTQFQQGMIGLMEFMELLEAAIGIRDPAMAELKKQAFRVAGDMGTALKLLYEQC  
LPPAVESSAGNNSLDSLSRQNRNRSNLGSNDLVSTELLQCILEFFLDLVEEDELDTLAF  
FWPQISNIHLQMLPPKDALSLQKIELVEDFLLTVASKYSIHLANELVWSHTADLEDALSG  
SYEGSTTTFCGHRQSAVLRFLCELESLLDFDFTCWGGGSVTTGQFMSPSDHQI ELLKSSV  
ARIQTYRLMVERDRLTRSHRLEKLQKSLGLSSPESPETQALEAMRVANNADYLSHHLVFT  
KRLCDIAERLRFLPVTERRGVLSTELAKLNASGTMGGDPTNI IKEGRTRVVRIPVMEGHV  
FRSKARTPVLLLLVETLEEGIASDQSTNEIESIVEEIEKESKMIVEEKIDSDDTSSVNGLS  
TLQNEESAEIFIEDPRDSEGGEVNDTVENEMRVSVDTHDDNTVHSEKEARIKEEVSNQEEL  
TTLPNEIGSSADIPLKPDSDRGDEIKPVQNL IENVSEKFNVIKIESNKANADDLAVSSH  
LKPGEETKVSSKVDGLKTRDESELFQIEAAAAKEDT IETDEEAKACQFDHGLVEDDKKT  
SLTEDKKVVFEDVIMPELDTSTRSSRLGSVQSYHSADTISSLNTSLHDKDVPRHALRRFD  
SPKTKPKIITPTTDRKMVENIMTSVVAKQLHLPSLAPDSNTHVYGKDIKSENHGTLASSK  
LEEQQQGSSSSSVDRKQQQQKYVSPKHAKIKNLGTGSTGQELCNGLSKTGGTRREVLTA  
IMTKGMSGSHVIAEQAATGAKRHLQDLERRVAVEALLTGGMGAALTATDDKREELLSLGI  
RSASREDVDLDDNKSDDDETMEAIRLLLIQYRVANGSISANDAALLAPHPPTARSKKNE  
GTI IHNGREFPEIDAGDIDSRLVGCGLPPAVLQALTLWKGDASINGELLELVKKDFEFE  
KQSKLVEQNTDKLNEDSAFWGRFAFGERWAEKRSRIAASSPEAVLPGWDLTAIIVKSNDD  
LRQESFVMQLIELSHEAFQEALELWLNPYRIISTGRTTGIMSCIRNAMSF DGLKKRPGY  
GTGGIRGHLLRMTEHAANPGEAFQSAQRNFVRSLAAYSLLSYMFLFKDRHNGNIMLDTYG  
HVIHIDFGFVFGIAPGGSFSLEMSTPFKLTEEMIEVMGGLRSSLFSEFVTLFCGFLALQ  
AHYDTFATLVEVTSRGSTPFCFDGRDTADIISKIEDRFCDLNKEESVAHVLDVIKEAVG  
SYGTKQYDYFQYLSQGIAT  
>comp15558\_c0\_seq2; 1044 1 4482 LEN=4512; translated  
TAGSGVSI AVSEEKVKEMGKMLDRSSLSSNGPPNSSTLEESSFQPSKTALATFQTAGSGT  
SITVSKGKIEEMGKLLNKLSTNEAKRPLIVKKSTFQPPTVPLAMFQTADFGESINASQEK  
VEEMGMMPKPNIEAPESPA FKS NLGPSNTATVMFQRDSSRTSISLSEKVKDMGKMLNTV  
SSSKAHPSPSTAIASEKSQEKASAMQTS PSMDFRTSKEGETTLNEPSASDQENITSTSQ  
SENFSLTTPMPSHSHKQPGMPIATASNGVRDSIMGTNRSIPTAMFQTAGSGASISVSQKKIE  
EMGLMLSESSFSEDPGYSKTLYERPLFTVTQASNSFQTPRAVTKTNDDFPAITNEKAGS  
TNLP I PMFQKISSNTETDASKTEQIEETGRLSLCNTDPI CQKIHTDYELSTRTPITAFQI  
PRLVTAAKDSNAAGRPTSF SIFQTAGSGKAI EVSEETVEKMGFLEKPNSSDNASASKKV  
PSRATEPSESSEFCATKPAEVSTMTESNYPERSRIDGHDFVEAGSSSYSPLRINEAKSD  
SSPLLNHETVCTPQKDTLSTPHQKVARWDSIRRTTFGITPQSGSINNNLSSVRSNGNGA  
LMSQSSTDNNARDNTNVFDGQKAQDVHLS PQGSKPSSMSANVTMSCDDRTIARKTKLDRN  
CLMTPVPFDVNTLDGAETRVREQSPAELTLQNAIRLGNMSTCPSLCRRHGVREVTLMINY  
TNSLQLRFDSDGMPLALASNEEDSPSNLNGRCADIRQSLIDNGCDASRLKDAWIRNHTKL  
VVWKLACYERSFSQFLADKHLTYHNLIQNLVSRFQKEVISGLRPAIRKILNRDVAATKMM  
ILVVCRILPSSSEKSNDTSPQSTKIELSDGWYSVKGLDANLSEYVKNGWIKVGTKLLVS  
NARLVGAEDGIDPLDEVVGGNCQNC AATLQLTTNATRLARWDAKLGFLKASSTKRNPKGR  
LLVNRISDVVVGGNIPAIRL FVQRVYPMLYYEKRCSDSADFSCSKPSVFTEQEEDSR  
RREFEARKLRAIEKVTEKIQAEIEKVCIYRSFCVXVVKHEIPSNLKKSNLFLEEVDEGCP  
EVWKQMMGSSTPEETFESFSNHDK EVISRWRDQRTSLVNRRVREEVESELETQPSLIRE  
TSFLRVKVYSINPKSSCENASATLTIWQPTEDQLGFLTEGTSVEFHNLAVRESKSYDGT LQ  
LVANNRTVVEPFSFDACSLAEKIGFRQRQFLSMFQVHALAHETVGKRSRTKTSVDFDVG  
VQVHVVPRTNSSDEVIFYISDETNLVLR I HCRNPPSALKTLILA EKQSFPSYGMRDLSIR  
SFDYEQCAVAEFRETSSVVL TNKRL ENLGKWASSAHNELHQITAYLNAGLP IWEQECN

EKTYLGYAIGLRCESVENVFIADCCGQGTNEWKLPVHVLQQMISSISEENLRVTLCPDE  
EDLIAKLGRIGSILRARGVLWQFQISSQSESVVYSATKASKTNVGHIIYAALQQ  
>comp15558\_c0\_seq3; 1182 1 4398 LEN=4428; translated  
TAGSGVSIIVSEEKVKEMGKMLDRSSLSSNGPPNSSTLEESSFQPSKTALATFQTAGSGT  
SITVSKGKIEEMGKLLNKLSTNEAKRPLIVKSTFQPPTVPLAMFQTADFGESINASQEK  
VEEMGMPKPNIEAPESPAFAKSNLGPSTATVMFQRDSSRTSISLSEKVKDMGKMLNTV  
SSSKAHPSPSTAIASEKSQEKASAMQTSPSMDLFRSTSKEGETTLNEPSASDQENITSTSQ  
SENFSLTTPSHSKQPGMPIATASNGVRDSIMGTNRSIPTAMFQTAGSGASISVSQKKIE  
EMGLMLSESSFSEDPGYSKTLYERPLFTVTQASNSFQTPRAVTKTNDDFPAITNEKAGS  
TNLPIMPQKISSNTETDASKTEQIEETGRLSLCNTDPIQKIHDTYELSTRTPITAFQI  
PRLVTAAKDSNAAGRPTSFSIFQTAGSGKAEVSEETVEKMGFLEKPNSSDNASASKKV  
PSRATEPSESSEFCATKPAEVSTMTESNYPERSRIDGHDFVEAGSSSYSYSPLRINEAKSD  
SSPLLNHETVTVCTPQKDTLSTPHQKVARWDSIRRTTFGITPQSGSINNNLSSVRSNGGA  
LMSQSSTDNNARDNTNVFDGQKAQDVHLSQPQSKPSSMSANVTMSCDDRTIARKTKLDRN  
CLMTPVPFVNTLDGAETRVREQSPAELTLQNAIRLGNMSTCPSLCRRHGVREVTLMINY  
TNSLQLRFDSGMPALASNEEDSPSNLNGRCADIRQSLIDNGCDASRLKDAWIRNHTKL  
VVWKLACYERSFSQFLADKHLTYHNLIQNLVSRFQKEVISGLRPAIRKILNRDVAATKMM  
ILVVCRILPSSSEKSNDTSPQSTKIELSDGWYSVKGCLDANLSEYVKNGWIKVGTLLVS  
NARLVGAEDGIDPLDEVVGGNCQONCAATLQLTTNATRLARWDKLGFLKASSTKRNPGR  
LLVNRISDVVGGGNIPAIRLRFVQVYPMPLYEKRGCSDSADFSCSKPSVFTEQEEDSR  
RREFEARKLRAIEKVTEKIQAEIEKEVDEGCPEVWKQMMGSSTPEETFESFSNHDKAVIS  
RWRDQRTSLVNRVREEVESELETQPSLIRESTSFLRVKVYSINPKSSCNESATLTIWQP  
TEDQLGFLTEGTSVEFHNLAVERESKSYDGTQLLVANNRTVVEPFSFDACSLAEKIGFRQR  
QFLSMFQVHALAHETVGRSRTKTSVDFDVVGVQVHVVPRTNNSDEVIIFYISDETNLVLR  
IHCNPPSALKTLILAEKQSFPSYGMRLDSIRSFYDYEKQCAVAEFRETSSVVLTKRLEN  
LGKWASSAHNELHQITAYLNAGLPIWEQECNEKTYLGYAIGLRCESVENVFIADCCGQ  
GTNEWKLPVHVLQQMISSISEENLRVTLCPDEEDLIAKLGRIGSILRARGVLWQFQISSQ  
SESVVYSATKASKTNVGHIIYAALQQ

>comp15559\_c0\_seq1; 874 136 3375 LEN=6355; translated  
MASVSPDVSQHGQDTRVSNVGMVYRLRRGCTCVDIWLQNASYGIVNHALWKILIVLLTIL  
LLFGPPFQLWLIPPSGDKVMDVSYF IG FVIFAIDMILHSYLDPNYLPFVPCPNHRINKN  
VCVNRGSYLLGFVGSFGFWCDFASTMCFLVEISIFFQWRFAIAIQIIELNKFGFPNPGEF  
AKGTGTEHLVVRPDSMSLIILIFKTLRVARLVPPTKVVEISTKINVFVFLVRLTPSFYCG  
LFRERRAGAKRMKRNALARSSWGDLIGAVAMMRARKKVEKEMKQKGVAYAWYILKTR  
IENTLRFHILPGTNLELKRQIAATRIQRAWNRNAEYGEHPGEGSQAWRSTVDSNSH  
AGGSFWDGSTFRMSRNALASPKKEGFNRRKLRKRKKKVDPSQVGTAMAGLTGRSVAIF  
LVINLILTLELTYTERDTTVASTMVVLHGQTTTQATDFAWKAVDTARRSTVPNLYSYSAS  
SMKKNINFNWTFGEQPENRPVNTLNVTVKDELGGVSTGLIDREAFVDKNAMMELLLTFCV  
LLTWFFGVAAAFAGPIITLVINPIERAVKLLSMLVMDPLGYQNTLQYKQFLTESDFNAKTS  
RWSKEVLKGMETDFLMSTIVRIGSLMKVGFSGAGAQIIRNSLQKSDNNDTGTILNSEG  
MVSCIFLFCDIRSFTDATECLQEEVFAFTNQVAAVVHSICSSYGGSSANKNIGDAFLVSWK  
LDEVHSGNHGSRNGLATRHOADKALLSVVKISIALHHDDFYVGLLSDHAKAALLTKFKDR  
PGPIVQQLGFGLHAGKAIEGAIGSQRKIDATYVSMVERAEYLETSTKKYKVNMLMSGSFH  
RLLQKSRRAKCRMIDRLMFEDEYIDFCREDDNNQKLLLELFTYDIDVDALFEDSQSDEDE  
SSELSITDGDLSGMFGSIRDLSRGSFGILSRRSRSGTRKSNNNSGSLRADNQHIKAAI  
AAATAKALRTGHI STAESIEEATKKKRELVLPTGPALYSENWLQDKIKRIRRYTTPF  
FDTYNLGLRKFYSKDWDEAKILFEANLDRFEDGSPRYFLDEMCKYNGIPPENFKPYGKE

>comp15559\_c0\_seq2; 874 136 3375 LEN=6455; translated  
MASVSPDVSQHGQDTRVSNVGMVYRLRRGCTCVDIWLQNASYGIVNHALWKILIVLLTIL  
LLFGPPFQLWLIPPSGDKVMDVSYF IG FVIFAIDMILHSYLDPNYLPFVPCPNHRINKN  
VCVNRGSYLLGFVGSFGFWCDFASTMCFLVEISIFFQWRFAIAIQIIELNKFGFPNPGEF  
AKGTGTEHLVVRPDSMSLIILIFKTLRVARLVPPTKVVEISTKINVFVFLVRLTPSFYCG  
LFRERRAGAKRMKRNALARSSWGDLIGAVAMMRARKKVEKEMKQKGVAYAWYILKTR  
IENTLRFHILPGTNLELKRQIAATRIQRAWNRNAEYGEHPGEGSQAWRSTVDSNSH  
AGGSFWDGSTFRMSRNALASPKKEGFNRRKLRKRKKKVDPSQVGTAMAGLTGRSVAIF  
LVINLILTLELTYTERDTTVASTMVVLHGQTTTQATDFAWKAVDTARRSTVPNLYSYSAS  
SMKKNINFNWTFGEQPENRPVNTLNVTVKDELGGVSTGLIDREAFVDKNAMMELLLTFCV  
LLTWFFGVAAAFAGPIITLVINPIERAVKLLSMLVMDPLGYQNTLQYKQFLTESDFNAKTS  
RWSKEVLKGMETDFLMSTIVRIGSLMKVGFSGAGAQIIRNSLQKSDNNDTGTILNSEG  
MVSCIFLFCDIRSFTDATECLQEEVFAFTNQVAAVVHSICSSYGGSSANKNIGDAFLVSWK

LDEVHSGNHGSRNGLATRHOADKALLSVVKISIALHHDDFYVGLLSDHAKAALLTKFKDR  
PGPIVQLGFGLHAGKAIEGAIGSQRKIDATYVSMVERAEYLETSTKYYKVNMLMSGSFH  
RLLQKSRRAKCRMIDRLMFEDEYIDFCREDDNNQGLLELFITYDIDVDALFEDSQSDEDE  
SSELSITDGDLSGMFGSIRDLSRGSFGILSRRSRSGTRKSNNSNSGSLRADNQHIKAAI  
AAATAKALRTGHI STAESIEEATKKKVVRELVLPTG PALYSENLWLQKDIKRIRRRYTTPF  
FDTYNLGLRKFYSKDWDEAKILFEANLDRFEDGPSRYFLDEMDKYNGIPPENFKPYGKE  
>comp15560\_c0\_seq1; 714 577 4057 LEN=4057; translated  
MVSSYNRKNTGKGGTSQNRHSYIKKLSGEEKALS NARDAKQVFKILSRDYGIAGNSKRLV  
LNFDDDMVPVLRATELLHPDPSEPLKLEALGDEALTQGVYKDRSITCFKALYEAEFF  
PNLALRLIQGNLTGPNHSTIAWFLQLGITNETLLSDPDVLKVIDFLNTSQQVGFPKL  
SEQLA VV FYKSRKLSAEDGNL KREDGDCQPAPEDLLSSLGAARNVMRQPGVRDHDNDKTN  
FRAISIVPTTSELACSESPYLPSPIELISNDVTAKEENIGFNSSTKGNANKSLEALALDR  
QFRMLREDLIGTVKEELRDEWKMP SHKRRFLTGPSVIGFGSKPEPHVVVQVPLPLRLSQ  
RLRAENNSKAI EFFEKGPGKRVLQKGT LVVLTSSNEEGDKPLSTDQAQQREFKIKAVGT  
VVERLKLKIVYDENKRGRRLVQVGISFTPEMRFLTPLFEHFHAKKKEGLSMVAEDHSS  
GLFNASAGLFSLEPILKALQGM D KVPMSDQLIHLRKPQPELPHGGKNFDDLDLALRKAV  
SSDKAQKRALEE IFRSNVVLVQGP PGTGKTYIGVQMVKAMLNLEGKAPAVSPLRILCLCY  
TNHALDSFLLDLIDAGISETFFVRLGSSPKIDPKIQRRCLGEINSTVNNKFGRNESAAYG  
AIKRESETLEE QFKGLMKDISKNSTWGSSSLHWWNIISIWMEDSEHYEKLDEL RVPSTSQS  
DGFVKV GAN KAL KSNYLWKRWF GGKNGIFHDQKMPQEG LWKLD EGERKLLIQKWQEW  
IQPKLYDLEYTIEKMKRNTEALRALRRINDLKALKNAKIIGCTTVAAAKFQGMINPSVVI  
VEEAGEI LESHVLANLGDSCQQLIMIGDHKQLRPK IENYSLQKESGHGF DLNVSLFERLV  
TSTASCIPVFPLTVQHRMRPEISRIRGMALYESLEDHENTKGRKSVAGITNDVVFLDHR  
FPEKADEATAAVGMETKVNPF EVMVVSIAKYIIQQGQYSPEQITILTPYLGQLALIRKK  
LEETKIGSFVSDQDFGDLARQNLTDNVERQRDSPIRIATIDNFQGESEVVIISLVR SNP  
QGARIGFLCSEERINVLFSRAREGMYIVGNLKSLSSECSASGRRLWSNLKDVFEKNKNVY  
DYFPAKCQKHLMLLTFRWKIX  
>comp15560\_c0\_seq2; 1985 357 8620 LEN=8940; translated  
MVSSYNRKNTGKGGTSQNRHSYIKKLSGEEKALS NARDAKQVFKILSRDYGIAGNSKRLV  
LNFDDDMVPVLRATELLHPDPSEPLKLEALGDEALTQGVYKDRSITCFKALYEAEFF  
PNLALRLIQGNLTGPNHSTIAWFLQLGITNETLLSDPDVLKVIDFLNTSQQVGFPKL  
SEQLA VV FYKSRKLSAEDGNL KREDGDCQPAPEDLLSSLGAARNVMRQPGVRDHDNDKTN  
FRAISIVPTTSELACSESPYLPSPIELISNDVTAKEENIGFNSSTKGNANKSLEALALDR  
QFRMLREDLIGTVKEELRDEWKMP SHKRRFLTGPSVIGFGSKPEPHVVVQVPLPLRLSQ  
RLRAENNSKAI EFFEKGPGKRVLQKGT LVVLTSSNEEGDKPLSTDQAQQREFKIKAVGT  
VVERLKLKIVYDENKRGRRLVQVGISFTPEMRFLTPLFEHFHAKKKEGLSMVAEDHSS  
GLFNASAGLFSLEPILKALQGM D KVPMSDQLIHLRKPQPELPHGGKNFDDLDLALRKAV  
SSDKAQKRALEE IFRSNVVLVQGP PGTGKTYIGVQMVKAMLNLEGKAPAVSPLRILCLCY  
TNHALDSFLLDLIDAGISETFFVRLGSSPKIDPKIQRRCLGEINSTVNNKFGRNESAAYG  
AIKRESETLEE QFKGLMKDISKNSTWGSSSLHWWNIISIWMEDSEHYEKLDEL RVPSTSQS  
DGFVKV GAN KAL KSNYLWKRWF GGKNGIFHDQKMPQEG LWKLD EGERKLLIQKWQEW  
IQPKLYDLEYTIEKMKRNTEALRALRRINDLKALKNAKIIGCTTVAAAKFQGMINPSVVI  
VEEAGEI LESHVLANLGDSCQQLIMIGDHKQLRPK IENYSLQKESGHGF DLNVSLFERLV  
TSTASCIPVFPLTVQHRMRPEISRIRGMALYESLEDHENTKGRKSVAGITNDVVFLDHR  
FPEKADEATAAVGMETKVNPF EVMVVSIAKYIIQQGQYSPEQITILTPYLGQLALIRKK  
LEETKIGSFVSDQDFGDLARQNLTDNVERQRDSPIRIATIDNFQGESEVVIISLVR SNP  
QGARIGFLCSEERINVLFSRAREGMYIVGNLKSLSSECSASGRRLWSNLKDVFEKNKNVY  
DYFPAKCQKHQTLHNIQTPEDFVRLAPEGGCALRCTL LLD CGHQCPK KCHRHVQH VHS LI  
QCKEKVEDVCSNGHKQLRECYSTVKCTKIMWFCSRGH SINGRCWKGRPKVCKMCDKLDK  
LEEEIERKREDLNQEIRKQKQLMLVRAKLA AEDSKESEAKLSMIVYEQKLLDERLSNL  
LARQDHDKAAAGETTEIEEHN LHAGMNGVVGGRDSGEAKETIFHHQLPQASEVENIYDEI  
DKNENEGRHSADNIKKNAEDRDYYSQKKDELNLSDRDHAGHSDNFKMAE I FAGDCLFKT  
KDDSISSADRTQKVF SNPNAISYDLYKDGKKPEGKPNKAVPHNISPVSSPNPNSLNFNP  
FCDALVRFKKNKFLEADDLIDSCMKT SQSEQNRKTLNAFR CILYNSLDPFEKHHVDADIP  
DEAPKTFEAAIRCWARFVAFASSEDFPSITIKTANFFLSYRDT SNSGIAQDVIQIGRNQA  
KDVI EKA EKKIRSSLSQKPGQESEVERAWTKIRERDPSAPSVVNEVMMMI GLFHVKEALI  
GQYHQIKISQRQGDASVSSYNVRFEGNPGTGKTTVARYYSTFLQQLAVLPKTSITLEVTA  
ASLKNKGI SHLEDMLKVKKAGGGVIFVDEAYQLSADQTGEKLLDFILPISSELDGPF GK  
LVWIFAGYPKEMEKLFEHNYGLPSRFPQQFRFADYDAVQMEAI FRGFMEFKEKSSEKNLR  
TKMPKQKNMARNYRLTSLGRKIAFNSTNGETYVDRFGNSWTCNSSEGLWRDGYGNTTGY

HPSDIGDKDNPLACSEDNLTWTHDGEFVISSRGESQKHYPGSPNPSTKSI GKKERRESPF  
KCENDKFLRIAMRRLERQSNRPGFGNARAVRNLFDSVVRVQAKRLTKENQKGRCPDDFNF  
TRDDLGLVALTETQLKKSQAYQKLQKMEGLKPVKEQIDDLIRLGESNLKREESERPLLEI  
ILNRI FLGNPGTGKTTVAKLYGQLLVEMGLLSKGEVI IKNPSDFKGDVLSSEKNTDIL  
RAAEGNVLVIDEAYALCSSNGLNGTTDPYGNVIDTLVEQIQARPGDDRAVVMLGYRKEM  
ENMFKNVNPGLSRRFQLEQAFVFPDYND DALVKILFRKAKECSLKVTTI AVAKRAVRSLAR  
ARAKPNFGNAGAVDSLSSQAKERLQKRDGTSNELTLEDFAI PGNDELNEEELSVLFAGLV  
GMEDVREKIDELKNVIQFAKARGEDPKESICFNFLFLGNPGTGKTTVARCMGKMFKILGL  
LPDDTVYECTPKDFTTGFAGQSGSKTAEQLQKSRGGVLFIDEAYQLNPRRGGPYMTEVV  
ELVAKLTDEEFKGIKLVLLAGYDADMNDMLNVNPGLSRFAERIFFNDLTGVATRDXPGL  
DAGEQKIPLPKDDAESDALLELATRLAGSREFANGRDVATVCDKTYAGVARRSGKRKGTG  
RGITAVFDDVREAVNGLLLSREQKETGLSCSTLDFADQATSNNRSREALPSARVVSEHRHI  
KDEEQEIPDEEPNDTEEVETTANPFGALSTDHLKTLNDIVDEMRLNTQEGIQQLLSASP  
KLGEEIAVLQKLMERLDISEDAARGILKDWKKAHAEAKRQKLAI AKKSKGMEAIW  
>comp15560\_c0\_seq3; 1932 577 8926 LEN=9246; translated  
MVSSYNRKNTGKGGTSQNRHSYIKKLKSGEKALSNARDAKQVFKILSRDYGIAGNSKRLV  
LNFDDDMVPVLRATELLHPDPSEPLKLEALGDEALTQGVYKDRSITCFKALYEAEEFF  
PNLALRLIQGNLTGPNHSTIAWFLLQLGITGNETLLSDPDVLKVIDFLNTSQQVGFPKL  
SEQLA VV FYKSRKLSAEDGNL KREDGDCQPAPEDLLSSSLGAARNVMRQPGVRDHDNDKTN  
FRAISIVPTTSELACSESPYLPSPIELISNDVTAKEENIGFNSSTKGNANKSLEALALDR  
QFRMLREDLIGTVKEELRDEWKMP SHKRRFLTGPSVIGFGSKPEPHVVVQVPLPLRLSQ  
RLRAENNSKAIEFFEKGPGRVQLQGTLVVLTSSNEEGDKPLSTDQAQQREFKIKAVGT  
VVERLKLPLKIVYDENKRGRVQLQVIGSFTPESMRFLTPLFEHFHAKKKEGLSMVAEDHSS  
GLFNASAGLFSLEPILKALQGMKVPMSDQLIHLRKPQPELPHGGKNFDDLDLALRKAV  
SSDKAQKRALEEIFRSNVVLVQGGPGTGKTYIGVQMVKAMLNLEGKAPAVSPLRILCLCY  
TNHALDSFLLDLIDAGISETFFVRLGSSPKIDPKIQRRCLGEINSTVNNKFRNESAAYG  
AIKRESETLEEQFKGLMKDISKNSTWGSLSLHWWNIISIWMEDESEHYEKLDEL RVPSTSQS  
DGFVKV GANGLKSNYLWKRWF GGKNGIFHDQKMPQEGWLKLEDEGERKLLIQKWQQEW  
IQPKLYDLEYTIEKMKRNTEALRALRRINDLKALKNAKIIGCTTVA AAKFQGMINPSVVI  
VEEAGEILESHVLANLGDSCQQLIMIGDHKQLRPK IENYSLQKESGHGFDLNVSLFERLV  
TSTASCIPVFP LTVQHRMRPEISRIRGMALYESLEDHENTKGRKSVAGITNDVVFLDHR  
FPEKADEATAAVGMETKVNPFVNMVVSIAKYII IQGQYSPEQITILTYPYLGQALIRKK  
LEETKIGSFVSDQDFGLARQNLTDNVERQRDSPIRIATIDNFQGESEVVIISLVR SNP  
QGARIGFLCSEERINVLFSRAREGMYIVGNLKSLSSECSASGRRLWSNLKDVFEKNKNVY  
DYFPAKQCQKHQTLHNIQTPEDFVRLAPEGGCALRCTLLLDLDCGHQCPKKCHRHVQHVS LI  
QCKEKVEDVCSNGHKQLRECYSTVKCTKIMEFWFC SRGHSINGRCWKG RPKVCKMCDKLDK  
LEEEIERKREDLNQEI RQKQELMLVRAKLAAAEDSKESKESAKLSMIVYEQKLLDERLSNL  
LARQDHDAAAGETTEIEEHNHLHAGMNGVVGGRDSGEAKETIFHHQLPQASEVENIYDEI  
DKNENEGRHSADNIKNAEDRDYYSQKDELNLSDRDHAGHSDNFKMAEIFAGDCLFKT  
KDDSISSADRTQKVFSNPNAISYDLYKDGKKPEGKPNKAVPHNISPVS SPNPNLSLFNNDP  
FCDALVRFKKNKFLEADLDIDSCMKT SQSEQRNKT LNAFRCILYNSLDPFEKHHVDADIP  
DEAPKTFEAAIRCWARFVAFASSDEFPSITIKTANFFLSYRDTSNSGIAQDVIQIGRNQA  
KDVIEKA EKKIRSSLSQKPGQSESEVERAWTKIRERDPSAPS VVNEVMMMIGLFHVKEALI  
GQYHQIKISQRQGDASVSSYNVRFEGNPGTGKTTVARYYSTFLQQLAVLPKTSITLEVTA  
ASLKNKGI SHLEDMLKVKKAGGGVIFVDEAYQLSADQTGEKLLDFILPISSELDGPF GK  
LVWIFAGYPKEMEKLFEHNYGLPSRFPQQFRFADYDAVQMEAIRGFMEFKEKSSEKNLR  
TKMPKQKNMARNYNRLT LSGRKIAFNSTNGETIYVDRFGNSWTCNSSEGLWRDGYGNTTGY  
HPSDIGDKDNPLACSEDNLTWTHDGEFVISSRGESQKHYPGSPNPSTKSI GKKERRESPF  
KCENDKFLRIAMRRLERQSNRPGFGNARAVRNLFDSVVRVQAKRLTKENQKGRCPDDFNF  
TRDDLGLVALTETQLKKSQAYQKLQKMEGLKPVKEQIDDLIRLGESNLKREESERPLLEI  
ILNRI FLGNPGTGTIQYIFVASFLPEFHVILIALINNESSNRQNDGGEALWPITSGDGTVV  
ERGSDIKNPSDFKGDVLSSEKNTDILRAAEGNVLVIDEAYALCSSNGLNGTTDPYGNA  
VIDTLVEQIQARPGDDRAVVMLGYRKEMENMFKNVNPGLSRRFQLEQAFVFPDYND DALV  
KILFRKAKECSLKVTTI AVAKRAVRSLARARAKPNFGNAGAVDSLSSQAKERLQKRDGTSN  
ELTLEDFAI PGNDELNEEELSVLFAGLVGMEDVREKIDELKNVIQFAKARGEDPKESICF  
NYLFLGNPGTGKTTVARCMGKMFKILGLLPDDTVYECTPKDFTTGFAGQSGSKTAEQLQK  
SRGGVLFIDEAYQLNPRRGGPYMTEVVDELVAKLTDEEFKGIKLVLLAGYDADMNDMLNV  
NPGLSRFAERIFFNDLTGVATRDXPGLDAGEQKIPLPKDDAESDALLELATRLAGSREF  
ANGRDVATVCDKTYAGVARRSGKRKGTGRGITAVFDDVREAVNGLLLSREQKETGLSCST  
LDFADQATSNNRSREALPSARVVSEHRHIKDEEQEIPDEEPNDTEEVETTANPFGALSTD

HLKTLNDIVDEMRLNTQEGIQQLLSASPGLGEEIAVLQKLMERLDISEDAARGILKDWKK  
AHAEAKRQKLAIAKKSKGMEAIW

>comp15560\_c0\_seq4; 714 357 3837 LEN=3837; translated  
MVSSYNRKNTGKGGTSQNRHSYIKKLKSGEKALSNARDAKQVFKILSRDYGIAGNSKRLV  
LNFDDDMVPVLRATELLEHDPSEPLKLLLEALGDEALTQGVYKDRSITCFKALYEAEFFF  
PNLALRLIQGNLTGPNHSTIAWFLLQLGITGNETLLSDPDVLKVIDFLNTSQQVGFPKL  
SEQLAVVFYKSRKLSAEDGNLKRREDGDCQPAPEDLLSSLGAARNVMRQPGVRDHDNDKTN  
FRAISIVPTTSELACSESPYLPSPIELISNDVTAKEENIGFNSSTKGNANKSLEALALDR  
QFRMLREDLIGTVKEELRDEWKMPSHKRRFLFTGPSVIGFGSKPEPHVVVQVPLPLRLSQ  
RLRAENNSKAIEFFEKGPGRVQLQGTLLVLTSSNEEGDKPLSTDQAQQREFKIKAVGT  
VVERLKLKIVYDENKRGRRVLQVGISFTPEMRFLTPLFEHFHAKKKEGLSMVAEDHSS  
GLFNASAGLFSLEPILKALQGMKVPMSDQLIHLRKPQPELPHGGKNFDDLDLALRKAV  
SSDKAQKRALEEIFRSNVVLVQGGPPTGKTYIGVQMVKAMLNLEGKAPAVSPLRILCLCY  
TNHALDSFLLDLIDAGISETFFVRLGSSPKIDPKIQRRCLGEINSTVNNKFGRNESAAYG  
AIKRESETLEEQFKGLMKDISKNSTWGSSSLHWWNIISIWMEDSEHYEKLDELVRPSTSQS  
DGFVKVGGANGKALKSNYLWKRWFGGKNGIFHDQKMPQEGWLKLEDEGERKLLIQKWQQEW  
IQPKLYDLEYTIEKMKRNTEALRALRRINDLKALKNAKIIGCTTVAAAKFQGMINPSVVI  
VEEAGEIILESHVLANLGDSCQQLIMIGDHKQLRPKIEENYSLQKESGHGFDLNVSLFERLV  
TSTASCIPVFPPLTVQHRMRPEISRIRGMALYESLEDHENTKGRKSVAGITNDVVFLDHR  
FPEKADEATAAVGMETKVNPFVNMVVSIAKYIIQQGQYSPEQITILTPYLGQLALIRKK  
LEETKIGSFVSDQDFGLARQNLTDNVERQRDSPIRIATIDNFQGESEEVVIIISLVRNSP  
QGARIGFLCSEERINVLFSRAREGMYIVGNLKSLSSESSASGRRLWSNLKDVFEKNKNVY  
DYFPAKCQKHLMLLTFRWKIX

>comp15560\_c0\_seq5; 1989 357 8632 LEN=8952; translated  
MVSSYNRKNTGKGGTSQNRHSYIKKLKSGEKALSNARDAKQVFKILSRDYGIAGNSKRLV  
LNFDDDMVPVLRATELLEHDPSEPLKLLLEALGDEALTQGVYKDRSITCFKALYEAEFFF  
PNLALRLIQGNLTGPNHSTIAWFLLQLGITGNETLLSDPDVLKVIDFLNTSQQVGFPKL  
SEQLAVVFYKSRKLSAEDGNLKRREDGDCQPAPEDLLSSLGAARNVMRQPGVRDHDNDKTN  
FRAISIVPTTSELACSESPYLPSPIELISNDVTAKEENIGFNSSTKGNANKSLEALALDR  
QFRMLREDLIGTVKEELRDEWKMPSHKRRFLFTGPSVIGFGSKPEPHVVVQVPLPLRLSQ  
RLRAENNSKAIEFFEKGPGRVQLQGTLLVLTSSNEEGDKPLSTDQAQQREFKIKAVGT  
VVERLKLKIVYDENKRGRRVLQVGISFTPEMRFLTPLFEHFHAKKKEGLSMVAEDHSS  
GLFNASAGLFSLEPILKALQGMKVPMSDQLIHLRKPQPELPHGGKNFDDLDLALRKAV  
SSDKAQKRALEEIFRSNVVLVQGGPPTGKTYIGVQMVKAMLNLEGKAPAVSPLRILCLCY  
TNHALDSFLLDLIDAGISETFFVRLGSSPKIDPKIQRRCLGEINSTVNNKFGRNESAAYG  
AIKRESETLEEQFKGLMKDISKNSTWGSSSLHWWNIISIWMEDSEHYEKLDELVRPSTSQS  
DGFVKVGGANGKALKSNYLWKRWFGGKNGIFHDQKMPQEGWLKLEDEGERKLLIQKWQQEW  
IQPKLYDLEYTIEKMKRNTEALRALRRINDLKALKNAKIIGCTTVAAAKFQGMINPSVVI  
VEEAGEIILESHVLANLGDSCQQLIMIGDHKQLRPKIEENYSLQKESGHGFDLNVSLFERLV  
TSTASCIPVFPPLTVQHRMRPEISRIRGMALYESLEDHENTKGRKSVAGITNDVVFLDHR  
FPEKADEATAAVGMETKVNPFVNMVVSIAKYIIQQGQYSPEQITILTPYLGQLALIRKK  
LEETKIGSFVSDQDFGLARQNLTDNVERQRDSPIRIATIDNFQGESEEVVIIISLVRNSP  
QGARIGFLCSEERINVLFSRAREGMYIVGNLKSLSSESSASGRRLWSNLKDVFEKNKNVY  
DYFPAKCQKHQTLHNIQTPEDFVRLAPEGGCALRCTLLEDLDCGHQCPKKCHRHVQHVHSLI  
QCKEKVEDVCSNGHKQLRECYSTVKCTKIMWFCSRGHSINGRCWKGRPKVCKMCDKLDK  
LEEEIERKREDLNQEIIRKQKQLMLVRAKLAAAEDSKSEAKLSMIVYEQKLLDERLSNL  
LARQDHDAAKAAGETTEIEEHNHLHAGMNGVVGGRDSGEAKETIFHHQLPQASEVENIYDEI  
DKNENEGRHSADNIKKNAEDRDYYSQKDELNLSDRDHAGHSDNFKMAEIFAGDCLFKT  
KDDSISSADRTQKVFSNPNAISYDLYKDGKKPEGKPNKAVPHNISPVSSPNPNSLFDNPD  
FCDALVRFKKNKFLLEADDLIDSCMKTSQSEQNRKTLNAFRICILYNSLDPFEKHHVDADIP  
DEAPKTFEAAIRCWARFVAFASSEDFPSITIKTANFFLSYRDTNSNGIAQDVIQIGRNQA  
KDVIKAEKKIRSSLKSNLQKSGQSESEVERAWTKIRERDPSAPSVVNEVMMMIIGLFHVK  
EALIGQYHQIKISQRQGDASVSSYNVRFEGNPGTGKTTVARYYSTFLQQLAVLPKTSITL  
EVTAASLKNKGISHLEDMLKVKKAGGGVIFVDEAYQLSADQTGEKLLDFILPISSELDG  
PFGKLVWIFAGYPKEMEKLFEHNYGLPSRFPQQFRFADYDAVQMEAIFRGFMFKEKSSE  
KNLRTKMPKQKNMARNYRLTSLGRKIAFNSTNGETYVDRFGNSWTCNSSEGLWRDGYGN  
TTGYHPSDIGKDNPLACSEDNLTWTHDGEFWISESRGESQKHYPGSPNPSTKSIGKKERR  
ESFPKCENDKFLRIAMRRLERQSNRPGFGNARAVRNLFDSVVRVQAKRLTKENQKGRCPD  
DFNFTRDLDLGLVALTETQLKKSQAYQKQKMEGLKPVKEQIDDLIRLGESNLKREESERP  
LLEIILNRIFLGNPPTGKTTVAKLYGQLLVEMGLLSKGEVIKKNPSDFKGDVLGSSEKNT

RDILRAAEGNVLVIDEAYALCSSNGLNGTTDPYGNVIDTLVEQIQARPGDDRAVVMLGY  
RKEMENMFKNVNPGLSRRFQLEQAFVFPDYND DALVKILFRKAKECSLKVTI AVAKRAVR  
SLARARAKPNFGNAGAVDSLSSQAKERLQKRDGTSNELTLEDFAIPGNDELNEEELSVLF  
AGLVGMEDVREKIDELKNVIQFAKARGEDPKESICFNLYFLGNPGTGKTTVARCMGKMFK  
ILGLLPDDTVYECTPKDFTTGFAGQSGSKTAEQLQKSRGGVLFIDEAYQLNPRRGGPYMT  
EVDDELVAKLTDEEFKGGKILVLLAGYDADMNDMLNPNPGLKSRFAERIFFNDLTGVATR  
XPGLDAGEQKIPLPKDDAESDALLELATRLAGSREFANGRDVATVCDKTYAGVARRSGKR  
KGTGRGITAVFDDVREAVNGLLLSREQKETGLSCSTLDFADQATSNRSREALPSARVVSE  
HRHIKDEEQEIPDEEPNDTEEVETTANPF GALSTDHKTLNDIVDEMRLNTQEGIQQLL  
SASP KLGEEIAVLQKLMERLDISEDAARGILKDWKKAHAEAKRQKLAI AKKSKGMEAIW  
>comp15560\_c0\_seq6; 1936 577 8938 LEN=9258; translated  
MVSSYNRKNTGKGGTSQNRHSYIKKLSGEEKALS NARDAKQVFKILSRDYGIAGNSKRLV  
LNFDDMV PVLREATELLHPDPSEPLKLEALGDEALTQGVYKDRSITCFKALYEAEEFF  
PNLALRLIQGNLTGPNHSTIAWFLQLGITNETLLSDPDVLKVIDFLNTSQQVGF PKL  
SEQLA VVIFYKSRKLSAEDGNL KREDGDCQPAPEDLLSS LGAARNVMRQPGVRDHDNDKTN  
FRAISIVPTTSELACSESPYLPSPIELISNDVTAKEENIGFNSSTKGNANKSLEALALDR  
QFRMLREDLIGTVKEELRDEWKMP SHKRRFLTGPSVIGFGSKPEPHVVVQVPLPLRLSQ  
RLRAENNSKAIEFFEKGPGRV LQKGTLVVLTSSNEEGDKPLSTDQAQ QREFKIKAVGT  
VVERLKLPLKIVYDENKRGRRLVQVGISFTPESMRFLTPLFEHFHAKKKEGLSMVAEDHSS  
GLFNASAGLFSLEPILKALQGM DQVPMSDQLIHLRKPQPELPHGGKNFDDLDLALRKAV  
SSDKAQKRALEEIFRSNVVLVQGGPGTGKTYIGVQMVKAMLNLE GKAPAVSPLRILCLCY  
TNHALDSFLLDLIDAGISETFFVRLGSSPKIDPKIQRRCLGEINSTVNNKFGRNESAAYG  
AIKRESETLEE QFKGLMKDISKNSTWGS SLLHWWNIISIWMEDSEHYEKLDEL RVPSTSQS  
DGFVKVGANGKALKS NYLWKRWF GGKNGIFHDQKMPQEG LWKLEDEGERKLLIQKWQQEW  
IQPKLYDLEYTIEKMKRNTEALRALRRINDLKALNAKIIGCTTVAAAKFQGMINPSVVI  
VEEAGEI LESHVLANLGDSCQQLIMIGDHKQLRPKIENYSLQKESGHGF DLNVLSL FERLV  
TSTASCIPVFP LTVQHRMRPEISRIRGMALYESLEDHENTKGRKSVAGITNDVVFLDHR  
FPEKADEATAAVGMETKVNPF EVMVVSIAKYIIQQGQYSPEQITILT PYLGQLALIRKK  
LEETKIGSFVSDQDFGDLARQNLTDNVERQRDSPIRIATIDNFQGESEVVIISLVR SNP  
QGARIGFLCSEERINVLFSRAREGMYIVGNLKS LSECSSASGRRLWSNLKDVFEKNKNVY  
DYFPAKQCQKHQTLHNIQTPEDFVRLAPEGGCALRCTLLLD CGHQCPKKCHRHVQHVS LI  
QCKEKVEDVCSNGHKQLRECYSTVKCTKIM EWFC SRGHSINGRCWKGRPKVCKMCDKLDK  
LEEEIERKREDLNQEI RQKQEQMLVRAKLAAAEDSK ESEAKLSMIVYEQKLLDERLSNL  
LARQDHDAAAGETTEIEEHN LHAGMNGVVGGRDSGEAKETIFHHQLPQASEVENIYDEI  
DKNENEGRHSADNIKNAEDRDYYGSQKKDELNLSDRDHAGHSDFNKMAEIFAGDCLFKT  
KDDSISSADRTQKVFSNPNAISYDLYKDGKKPEGKPNKAVPHNISPVS SPNPNLSL FNNPD  
FCDALVRFKNKKFLEADDLIDSCMKT SQSEQNRKTLNAFR CILYNSLDPFEKHHVDADIP  
DEAPKTFEAAIRCWARFVAFASSDEFPSITIKTANFFLSYRDT SNSGIAQDVIQIGRNQA  
KDVIKAEKKIRSSLSKNLSQKSGQESEVERAWTKIRERDPSAPSVVNEVMMMI GLFHVK  
EALIGQYHQIKISQRQGDASVSSYNVRFEGNPGTGKTTVARYYSTFLQQLAVLPKTSITL  
EVTAA SLKNKGISHLEDMLKVKKAGGGVIFVDEAYQLSADQTGEKLLDFILP ISESLDG  
PFGKLVWIFAGYPKEMEKLFEHNYGLPSRFPQQFRFADYDAVQMEAI FRGFMEFKEKSSE  
KNLRTKMPKQKNMARNYRNL TSLGRKIAFNSTNGETYVDRFGNSWTCNSSEGLWRDGYGN  
TTGYHPSDIGDKDNPLACSEDNLTWTHDGEF WISSRGESQKHYPGSPNPSTKSI GK KERR  
ESPFKCENDKFLRIAMRRLERQSNRPGFGNARAVRNLFD SVRVRQAKRLTKENQKGRCPD  
DFNFTRDDLGLGVALTETQLKKSQAYQKLQKMEGLKPVKEQIDDLIRLGESNLKREESERP  
LLEIILNRIFLGNPGTG TIQYIFVASFLPEFHVILIALINESNRQNDGGEALWPITSGD  
GTVVERGSDIKNPSDFKGDV LGSSEKNTRDILRAAEGNVLVIDEAYALCSSNGLNGTTDP  
YGNVIDTLVEQIQARPGDDRAVVMLGYRKEMENMFKNVNPGLSRRFQLEQAFVFPDYND  
DALVKILFRKAKECSLKVTI AVAKRAVRSLARARAKPNFGNAGAVDSLSSQAKERLQKRD  
GTSNELTLEDFAIPGNDELNEEELSVLFAGLVGMEDVREKIDELKNVIQFAKARGEDPKE  
SICFNLYFLGNPGTGKTTVARCMGKMFKILGLLPDDTVYECTPKDFTTGFAGQSGSKTAE  
QLQKSRGGVLFIDEAYQLNPRRGGPYMTEVDDELVAKLTDEEFKGGKILVLLAGYDADMND  
MLNPNPGLKSRFAERIFFNDLTGVATRDXPGLDAGEQKIPLPKDDAESDALLELATRLAG  
SREFANGRDVATVCDKTYAGVARRSGKRKGTGRGITAVFDDVREAVNGLLLSREQKETGL  
SCSTLDFADQATSNRSREALPSARVVSEHRHIKDEEQEIPDEEPNDTEEVETTANPF GA  
LSTDHLKTLNDIVDEMRLNTQEGIQQLLSASP KLGEEIAVLQKLMERLDISEDAARGILK  
DWKKAHAEAKRQKLAI AKKSKGMEAIW  
>comp15560\_c0\_seq7; 1932 357 8706 LEN=9026; translated  
MVSSYNRKNTGKGGTSQNRHSYIKKLSGEEKALS NARDAKQVFKILSRDYGIAGNSKRLV

LNFDMMVPLREATELLHPDPSEPLKLEALGDEALTQGVYKDRSITCFKALYEAEEFF  
PNLALRLIQGNLTGPNHSTIAWFLLQLGITGNETLLSDPDVLKVIDFLNTSQQVGFPKL  
SEQLAUVFYKSRKLSAEDGNLKRREDGDCQPAPEDLLSSLGAARNVMRQPGVRDHDNDKTN  
FRAISIVPTTSELACSESPYLPSPIELISNDVTAKEENIGFNSSTKGNANKSLEALALDR  
QFRMLREDLIGTVKEELRDEWKMPSHKRRFLFTGPSVIGFGSKPEPHVVVQVPLPLRLSQ  
RLRAENNSKAIEFFEKGPGKRVLQKGTLVVLTSSNEEGDKPLSTDQAQQREFKIKAVGT  
VVERLKPLKIVYDENKRGRRLVQVGISFTPESMRFLTPLEHFFHAKKKEGLSMVAEDHSS  
GLFNASAGLFSLEPILKALQGMKVPMSDQLIHLRKPQPELPHGGKNFDDLDLALRKAV  
SSDKAQKRALEEIFRSNVVLVQGGPPTGKTYIGVQMVKAMLNLEGKAPAVSPLRILCLCY  
TNHALDSFLLDLIDAGISETFFVRLGSSPKIDPKIQRRCLGEINSTVNNKFGRNESAAYG  
AIKRESETLEEQFKGLMKDISKNSTWGSSLHWWNIISIWMEDSEHYEKLDELVRPSTSQS  
DGFVKVGANGKALKSNYLWKRWFGGKNGIFHDQKMPQEGWLKLEDEGERKLLIQKWQQEW  
IQPKLYDLEYTIEKMKRNTEALRALRRINDLKALKNAKIGCTTVAAAKFQGMINPSVVI  
VEEAGEIILESHVLANLGDSCQQLIMIGDHKQLRPKIEENYSLQKESGHGFDLNVSLFERLV  
TSTASCIPVFPLTVQHRMRPEISRIIRGMALYESLEDHENTKGRKSVAGITNDVVFLDHR  
FPEKADEATAAVGMETKVNPFVNMVVSIAKYIIQQGQYSPEQITILTPYLGQLALIRKK  
LEETKIGSFVSDQDFGLARQNLTDNVERQRDSPIRIATIDNFQGESEVVIISLVRSNP  
QGARIGFLCSEERINVLFSRAREGMYIVGNLKSLSSESSASGRRLWSNLKDVFEKNKNVY  
DYFPAKQKHQTLHNIQTPEDFVRLAPEGGCALRCTLLLLDCGHQCPKKCHRHVQHVSLLI  
QCKEKVEDVCSNGHKQLRECYSTVKCTKIMEWFCSRGHSINGRCWKGRPKVCKMCDKLDK  
LEEEIERKREDLNQEIQRKQEQMLVRAKLAEEAEDSKESAKLSMIVYEQKLLDERLSNL  
LARQDHDAAKAGETTEIEEHNHLAGMNGVVGGRDSGEAKETIFHHQLPQASEVENIYDEI  
DKNENEGRHSADNIKNAEDRDYGSQKDELNLSDRDHAGHSDFKMAEIFAGDCLFKT  
KDDSISSADRTQKVFVSNPNAISYDLYKDGKPEGKPNKAVPHNISPVSSPNPNSLNFNP  
FCDALVRFKKNKFLLEADDLIDSCMKTQSQEQNRKTLNAFRICILYNSLDPFEKHHVDADIP  
DEAPKTFEAAIRCWARFVAFASSDEFPSITIKTANFFLSYRDTSNNGIAQDVIQIGRNQA  
KDVIEKAEKIRSSLSQKPGQSESEVERAWTKIRERDPSAPSVVNEVMMMIGLFHVKEALI  
GQYHQIKISQRQGDASVSSYNVRFEGNPGTGKTTVARYYSTFLQQLAVLPKTSITILEVTA  
ASLKNKGIHSHLEDMLKVKKAGGGVIFVDEAYQLSADQTGEKLLDFILPISSELDGPFVK  
LVWIFAGYPKEMEKLFEHNYGLPSRFPQQFRFADYDAVQMEAIRGFMEFKEKSSEKNLR  
TKMPKQKNMARNYRNLTLGRKIAFNSTNGETYVDRFGNSWTCNSSEGLWRDGYGNTTGY  
HPSDIGDKDNPLACSEDNLTWTHDGEFVISSRGESQKHYPGSPNPSTKSIGKKERRESPE  
KCENDKFLRIAMRRLERQSNRPGFGNARAVRNLFDVSRVRQAKRLTKENQKGRCPDDFNF  
TRDDLGLVALTETQLKKSQAYQKLQKMEGLKPVKEQIDDLIRLGEENLKRRESEERPLLEI  
ILNRIFLGNPGTGTIYQYIFVASFLPEFHVILIALINESNRQNDGGEALWPITSGDGTVV  
ERGSIDKNPSPDFKGDVLGSSEKNTRDILRAAEGNVLVIDEAYALCSSNGLNGTTPYGN  
VIDTLVEQIQARPGDDRAVVMGLYRKEMENMFKVNPGLSRRFQLEQAFVFPDYNDALV  
KILFRKAKECSLKVTVIAVAKRAVRSALARAKPNFGNAGAVDSLLSQAKERLQKRDGTSN  
ELTLEDFAIIPGNDELNEEELSVLVAGLVGMEDVREKIDELKNVIOFAKARGEDPKESICF  
NYLFLGNPGTGKTTVARCMGKMFKILGLLPDDTVYECTPKDFTTGFAGQSGSKTAEQLQK  
SRGGVLFIDEAYQLNPRRGGPYMTEVVDELVAKLTDEEFFKGKILVLLAGYDADMNDMLN  
NPGLKSRFAERIFFNDLTGVATRDXPGLDAGEQKIPLPKDDAESDALLELATRLAGSREF  
ANGRDVATVCDKTYAGVARRSGKRKGTGRGITAVFDDVREAVNGLLLSREQKETGLSCST  
LDFADQATSNSREALPSARVVSEHRHIKDEEQEIPDEEPNDTEEVETTANPFGALSTD  
HLKTLNDIVDEMRLNTQEGIQQLLSASPKLGEIEAVLQKLMERLDISEDAARGILKDWKK  
AHAEAKRQKLAIKAKSKGMEAIW

>comp15560\_c0\_seq8; 1936 357 8718 LEN=9038; translated  
MVSSYNRNKNTGKGGTSQNRHSYIKKLSGEEKALSARDKQVFKILSRDYGIAGNSKRLV  
LNFDMMVPLREATELLHPDPSEPLKLEALGDEALTQGVYKDRSITCFKALYEAEEFF  
PNLALRLIQGNLTGPNHSTIAWFLLQLGITGNETLLSDPDVLKVIDFLNTSQQVGFPKL  
SEQLAUVFYKSRKLSAEDGNLKRREDGDCQPAPEDLLSSLGAARNVMRQPGVRDHDNDKTN  
FRAISIVPTTSELACSESPYLPSPIELISNDVTAKEENIGFNSSTKGNANKSLEALALDR  
QFRMLREDLIGTVKEELRDEWKMPSHKRRFLFTGPSVIGFGSKPEPHVVVQVPLPLRLSQ  
RLRAENNSKAIEFFEKGPGKRVLQKGTLVVLTSSNEEGDKPLSTDQAQQREFKIKAVGT  
VVERLKPLKIVYDENKRGRRLVQVGISFTPESMRFLTPLEHFFHAKKKEGLSMVAEDHSS  
GLFNASAGLFSLEPILKALQGMKVPMSDQLIHLRKPQPELPHGGKNFDDLDLALRKAV  
SSDKAQKRALEEIFRSNVVLVQGGPPTGKTYIGVQMVKAMLNLEGKAPAVSPLRILCLCY  
TNHALDSFLLDLIDAGISETFFVRLGSSPKIDPKIQRRCLGEINSTVNNKFGRNESAAYG  
AIKRESETLEEQFKGLMKDISKNSTWGSSLHWWNIISIWMEDSEHYEKLDELVRPSTSQS  
DGFVKVGANGKALKSNYLWKRWFGGKNGIFHDQKMPQEGWLKLEDEGERKLLIQKWQQEW



IQPKLYDLEYTIEKMKRNTEALRALRRINDLKALKNAKIIGCTTVAAAKFQGMINPSVVI  
VEEAGEIILESHVLANLGDSCQQLIMIGDHKQLRPKIEENYSLQKESGHGFDLNVSLFERLV  
TSTASCIPVFPLTVQHRMRPEISRIRGMALYESLEDHENTKGRKSVAGITNDVVFVLDHR  
FPEKADEATAAVGMETKVNPFVNMVVSIAKYIIQQGQYSPEQITILTPYLGQLALIRKK  
LEETKIGSFVSDQDFGLARQNLTDNVERQRDSPIRIATIDNFQGESEVVIISLVRSNP  
QGARIGFLCSEERINVLFSRAREGMYIVGNLKSLSSECSASGRRLWSNLKDVFEKNKNVY  
DYFPAKCQKHQTLHNIQTPEDFVRLAPEGGCALRCTLLLDCGHQCPKKCHRHVQHVS  
LIQCKEKVEDVCSNGHKQLRECYSTVKCTKIMEWFCSRGHSSINGRCWKGRPKVCKMCDKLDK  
LEEEIERKREDLNQEIRKQKEQLMLVRAKAAAEDSKESEAKLSMIVYEQKLLDERLSNL  
LARQDHDAAAGETTEIEEHNHLAGMNGVVGGRDSGEAKETIFHHQLPQASEVENIYDEI  
DKNENEGRHSADNIKKNAEDRDYYSQKKDELNLSDRDHAGHSDNFKMAEIFAGDCLFKT  
KDDSISSADRTQKVFSNPNAISYDLYKDGKKPEGKPNKAVPHNISPVSSPNPNSLNFNPD  
FCDALVRFKKNKFLLEADDLIDSCMKTSQSEQNRKTLNAFRICILYNSLDPFEKHHVDADIP  
DEAPKTFEAAIRCWARFVAFASSDEFPSITIKTANFFLSYRDTSNNGIAQDVIQIGRNQA  
KDVIKAEKKIRSSLSKNLSQKSGQESEVERAWTKIRERDPSAPSVVNEVMMMIIGLFHVK  
EALIGQYHQIKISQRQGDASVSSYNVRFEGNPGTGKTTVARYYSTFLQQLAVLPKTSITL  
EVTAAASLKNKGISHLEDMLKKVKKAGGGVIVFDEAYQLSADQTGEKLLDFILPISESLDG  
PFGKLVWIFAGYPKEMEKLFEHNYGLPSRFPQQFRFADYDAVQMEAFIRGFMEFKEKSSE  
KNLRTKMPKQKNMARNYRLTSLGRKIAFNSTNGETYVDRFGNSWTCNSSEGLWRDGYGN  
TTGYHPSDIGKDNPLACSEDNLTWTHDGEFVISSRGESQKHYPGSPNPSTKSIGKKERR  
ESPFCENDKFLRIAMRRLERQSNRPGFGNARAVRNLFDSVVRVQAKRLTKENQKGRCPD  
DFNFTRDLDLGLVALTETQLKKSQAYQKQKMEGLKPVKEQIDDLIRLGEENLKREESERP  
LLEIILNRIFLGNPGTGTIYQYIFVASFLPEFHVILIALINESSNRQNDGGEALWPIITSGD  
GTVVERGSDIKNPSDFKGDVLGSSEKNTRDILRAAEGNVLVIDEAYALCSSLNGLNGTDP  
YGNAVIDTLVEQIQARPGDDRAVVMLGYRKEMENMFKNVNPGLSRRFQLEQAFVFPDYND  
DALVKILFRKAKECSLKVTTIAVAKRAVRSLARARAKPNFGNAGAVDSLSSQAKERLQKRD  
GTSNELTLEDFAIPGNDELNEEELSFLFAGLVGMEDVREKIDELKNVIQFAKARGEDPKE  
SICFNFLFLGNPGTGKTTVARCMGKMFKILGLLPDDTVYECTPKDFTTGFAQSGSKTAE  
QLQKSRGGVLFIDEAYQLNPRRGGPYMTEVVDELVAKLTDEEFKGIILVLLAGYDADMND  
MLNVNPGKLSRFAERIFFNDLTGVATRDXPGLDAGEQKIPLPKDDAESDALLELATRLAG  
SREFANGRDVATVCDKTYAGVARRSGKRKGTGRGITAVFDDVREAVNGLLLSREQKETGL  
SCSTLDFADQATSNRSREALPSARVVSEHRHIKDEEQEIPDEEPNDTEEVETTANPFGA  
LSTDHLKTLNDIVDEMRLNTQEGIQQLLSASPKLGEETIAVLQKLMERLDISEDAARGILK  
DWKKAHAEAKRQKLAIAKKS KGMEAIW

>comp15560\_c0\_seq9; 1985 577 8840 LEN=9160; translated  
MVSSYNRKNNTGKGGTSQNRHSYIKKLSGEEKALS NARDAKQVFKILSRDYGIAGNSKRLV  
LNFDDDMVPVLRATELLHPDPSEPLKLEALGDEALTQGVYKDRSITCFKALYEAEEFF  
PNLALRLIQGNLTGPNHSTIAWFLQLGITGNETLLSDPDVLKVIDFLNTSQQVGFPKL  
SEQLAVVYFYSRKL SAEDGNLKR EDGDCQPAPEDLLSSSLGAARNVMRQPGVRDHDNDKTN  
FRAISIVPTTSELACSESPYLPSPIELISNDVTAKEENIGFNSSTKGNANKSLEALALDR  
QFRMLREDLIGTVKEELRDEWKMPSHKRRFLTGPSVIGFGSKPEPHVVVQVPLPLRLSQ  
RLRAENNSKAIEFFFEKGPGRVQLQGTLLVLTSSNEEGDKPLSTDQAQOREFKIKAVGT  
VVERLKLKIVYDENKRGRVQLQVGISFTPESMRFLTPLFEHFHAKKKEGLSMVAEDHSS  
GLFNASAGLFSLEPILKALQGMKVPMSDQLIHLRKPQPELPHGGKNFDDLALRKA  
SSDKAQKRALEEIFRSNVVLVQGPPTGKTYIGVQMVKAMLNLEGKAPAVSPLRILCLCY  
TNHALDSFLDLIDAGISETFFVRLGSSPKIDPKIQRRCLGEINSTVNNKFGRNESAAYG  
AIKRESETLEEQFKGLMKDISKNSTWGSSLHWWNIISIWMEDSEHYEKLDELVRPSTSQS  
DGFVKVANGKALKSNYLWKRWF GGKNGIFHDQKMPQEGWLKLEDEGERKLLIQKWQEW  
IQPKLYDLEYTIEKMKRNTEALRALRRINDLKALKNAKIIGCTTVAAAKFQGMINPSVVI  
VEEAGEIILESHVLANLGDSCQQLIMIGDHKQLRPKIEENYSLQKESGHGFDLNVSLFERLV  
TSTASCIPVFPLTVQHRMRPEISRIRGMALYESLEDHENTKGRKSVAGITNDVVFVLDHR  
FPEKADEATAAVGMETKVNPFVNMVVSIAKYIIQQGQYSPEQITILTPYLGQLALIRKK  
LEETKIGSFVSDQDFGLARQNLTDNVERQRDSPIRIATIDNFQGESEVVIISLVRSNP  
QGARIGFLCSEERINVLFSRAREGMYIVGNLKSLSSECSASGRRLWSNLKDVFEKNKNVY  
DYFPAKCQKHQTLHNIQTPEDFVRLAPEGGCALRCTLLLDCGHQCPKKCHRHVQHVS  
LIQCKEKVEDVCSNGHKQLRECYSTVKCTKIMEWFCSRGHSSINGRCWKGRPKVCKMCDKLDK  
LEEEIERKREDLNQEIRKQKEQLMLVRAKAAAEDSKESEAKLSMIVYEQKLLDERLSNL  
LARQDHDAAAGETTEIEEHNHLAGMNGVVGGRDSGEAKETIFHHQLPQASEVENIYDEI  
DKNENEGRHSADNIKKNAEDRDYYSQKKDELNLSDRDHAGHSDNFKMAEIFAGDCLFKT  
KDDSISSADRTQKVFSNPNAISYDLYKDGKKPEGKPNKAVPHNISPVSSPNPNSLNFNPD

FCDALVRFKKNKFFLEADDLIDSCMKTSQSEQNRKTLNAFRCILYNSLDPFEKHHVDADIP  
DEAPKTFEAAIRCWARFVAFASSEDFPSITIKTANFFLSYRDTSNSGIAQDVIQIGRNQA  
KDVIKAEKKIRSSLSQKPGQSESEVERAWTKIRERDPSAPSVVNEVMMMIGLFHVKEALI  
GQYHQIKISQRQGDASVSSYNVRFEGNPGTGKTTVARYYSTFLQQLAVLPKTSITLEVTA  
ASLKNKGI SHLEDMLKKVKKAGGGVIFVDEAYQLSADQTGEKLLDFILPISESLDGPFGK  
LVWIFAGYPKEMEKLFEHNYGLPSRFPQQFRFADYDAVQMEAIFRGFMFKEKSSEKNLR  
TKMPKQKNMARNYRNLTLGRKIAFNSTNGETYVDRFGNSWTCNSSEGLWRDGYGNTTGY  
HPSDIGDKDNPLACSEDNLTWTHDGEFWISSRGESQKHYPGSPNPSTKSIGKKERRESPE  
KCENDKFLRIAMRRLERQSNRPGFGNARAVRNLFDVSVRVRQAKRLTKENQKGRCPDDFNF  
TRDDLGLVALTETQLKKSQAYQKLQKMEGLKPVKEQIDDLIRLGEENLKREESERPLEI  
ILNRIFLGNPGTGKTTVAKLYGQLLVEMLLSSKGEVI IKNPSDFKGDVLGSSEKNTRDIL  
RAAEGNVLVIDEAYALCSSNGLNGTTDPYGNVIDTLVEQIQARPGDDRAVVMLGYRKEM  
ENMFKNVNPGLSRRFQLEQAFVFPDYNDALVKILFRKAKECSLKVTIAVAKRAVRSLAR  
ARAKPNFGNAGAVDSLSSQAKERLQKRDGTSNELTLEDFAI PGNDELNEEELSVLFAGLV  
GMEDVREKIDELKNVIQFAKARGEDPKESICFNLYLFLGNPGTGKTTVARCMGKMFILGL  
LPDDTVYECPKDFTTGFAQSGSKTAEQLQKSRGGVLFIDEAYQLNPRRGGPYMTEVVD  
ELVAKLTDEEFKGIKLVLLAGYDADMNMLNPNPGLKSRFAERIFFNDLTGVATRDXPGL  
DAGEQKIPLPKDDAESDALLELATRLAGSREFANGRDVATVCDKTYAGVARRSGKRKGTG  
RGI TAVFDDVREAVNGLLLSREQKETGLSCSTLDFADQATSNRSREALPSARVVSEHRHI  
KDEEQEIPDEEPNDTEEVETTANPFALSTDLKTLNDIVDEMRLNTQEGIQQLLSASP  
KLGEI AVLQKLMERLDISEDAARGILKDWKKAHAERQKLAIAKKSKEGMEAIW  
>comp15560\_c0\_seq10; 1989 577 8852 LEN=9172; translated  
MVSSYNRKNNTGKGGTSQNRHSYIKKLSGEEKALSNAKQVFKILSRDYGIAGNSKRLV  
LNFDDDMVPLVREATELLHPDPSEPLKLEALGDEALTQGVYKDRSITCFKALYEAEFF  
PNLALRLIQGNLTGPNHSTIAWFLLQLGITNETLLSDPDVLKVIDFLNTSQQVGFPKL  
SEQLAVVYFKSRKLSAEDGNLKRDEGDCQPAPEDLLSSSLGAARNVMRQPGVRDHDNDKTN  
FRAISIVPTTSELACSESPYLPSPIELISNDVTAKEENIGFNSSTKGNANKSLEALALDR  
QFRMLREDLIGTVKEELRDEWKMPSHKRRFLTGPSVIGFGSKPEPHVVVQVPLPLRLSQ  
RLRAENNSKAIEFFFEKGPGRVQLQKGLTVLVTSSNEEGDKPLSTDQAQQREFKIKAVGT  
VVERLKLKIVYDENKRRRVLQVGISFTPESMRFLTPLFEHFHAKKKEGLSMVAEDHSS  
GLFNASAGLFSLEPIKALQGMKVPMSDQLIHLRKPQPELPHGGKNFDDLDLALRKAV  
SSDKAQKRALEEIFRSNVVLVQGGPGTGKTYIGVQMVKAMLNLEGKAPAVSPLRILCLCY  
TNHALDSFLLDLIDAGISETFFVRLGSSPKIDPKIQRRCLGEINSTVNNKFRNESAAYG  
AIKRESETLEEQFKGLMKDISKNSTWGSLSLHWWNIISIWMEDSEHYEKLDELVRPSTSQS  
DGFVKVGGANGKALSNYLWKRWFGGKNGKIFHDQKMPQEGWLKLEDEGERKLLIQKWQEW  
IQPKLYDLEYTIEKMKRNTEALRALRRINDLKALKNAKIIGCTTVAAKFQGMINPSVVI  
VEEAGEIILESHVLANLGDSCQQLIMIGDHKQLRPKIEENYSLQKESGHGFDLNVSLFERLV  
TSTASCIPVPLTVQHRMRPEISRIRGMALYESLEDHENTKGRKSVAGITNDVVFLDHR  
FPEKADEATAAVGMETKVNPFVNMVVSIAKYIIQQGQYSPEQITILTPLYGLALIRKK  
LEETKIGSFVSDQDFGLARQNLTDNVERQRDSPIRIATIDNFQGESESEVVIISLVRSNP  
QGARIGFLCSEERINVLFSRAREGMYIVGNLKSLSSESSASGRRLWSNLKDVFEKNKNVY  
DYFPAKQCQKHQTLHNIQTPEDFVRLAPEGGCALRCTLLLDCGHQCPKKCHRHVQHVHSLI  
QCKEKVEDVCSNGHKQLRECYSTVKCTKIMEWFCSRGHSSINGRCWKGRPKVCKMCDKLDK  
LEEEIERKREDLNQEI RQKQELMLVRAKLAAAEADSKESSEAKLSMIVYEQKLLDERLSNL  
LARQDHDAAAGETTEIEEHNHLHAGMNGVVGGRDSGEAKETIFHHQLPQASEVENIYDEI  
DKNENEGRHSADNIKKNAEDRDYYGSQKDELNLSDRDHAGHSDNFKMAEIFAGDCLFKT  
KDDSISSADRTQKVFVSNPNAISYDLYKDGKKPEGKPNKAVPHNI SPVSSPNPNSLFFNPNP  
FCDALVRFKKNKFFLEADDLIDSCMKTSQSEQNRKTLNAFRCILYNSLDPFEKHHVDADIP  
DEAPKTFEAAIRCWARFVAFASSEDFPSITIKTANFFLSYRDTSNSGIAQDVIQIGRNQA  
KDVIKAEKKIRSSLSKNSQKSGQSESEVERAWTKIRERDPSAPSVVNEVMMMIGLFHVK  
EALIGQYHQIKISQRQGDASVSSYNVRFEGNPGTGKTTVARYYSTFLQQLAVLPKTSITL  
EVTAASLKNKGI SHLEDMLKKVKKAGGGVIFVDEAYQLSADQTGEKLLDFILPISESLDG  
PFGKLVWIFAGYPKEMEKLFEHNYGLPSRFPQQFRFADYDAVQMEAIFRGFMFKEKSSE  
KNLR TKMPKQKNMARNYRNLTLGRKIAFNSTNGETYVDRFGNSWTCNSSEGLWRDGYGN  
TTGYHPSDIGDKDNPLACSEDNLTWTHDGEFWISSRGESQKHYPGSPNPSTKSIGKKERR  
ESPFKCENDKFLRIAMRRLERQSNRPGFGNARAVRNLFDVSVRVRQAKRLTKENQKGRCPD  
DFNFTRDDLGLVALTETQLKKSQAYQKLQKMEGLKPVKEQIDDLIRLGEENLKREESER  
LLEIILNRIFLGNPGTGKTTVAKLYGQLLVEMLLSSKGEVI IKNPSDFKGDVLGSSEKNTR  
RDILRAAEGNVLVIDEAYALCSSNGLNGTTDPYGNVIDTLVEQIQARPGDDRAVVMLGY  
RKEMENMFKNVNPGLSRRFQLEQAFVFPDYNDALVKILFRKAKECSLKVTIAVAKRAVR

SLARARAKPNFGNAGAVDSLSSQAKERLQKRDGTSNELTLEDFAIPGNDELNEEELSVLV  
AGLVGMEDVREKIDELKNVIQFAKARGEDPKESICFNLYFLGNPGTGKTTVARCMGKMFK  
ILGLLPDDTVYECTPKDFTTGFAGQSGSKTAEQLQKSRGGVLFIDEAYQLNPRRGGPYMT  
EVDDELVAKLTDEEFKGIKLVLLAGYDADMDMLNPNPGLKSRFAERIFFNDLTGVATRD  
XPGLDAGEQKIPLPKDDAESDALLELATRLAGSREFANGRDVATVCDKTYAGVARRSGKR  
KGTGRGITAVFDDVREAVNGLLLSREQKETGLSCSTLDFADQATSNRSREALPSARVVSE  
HRHIKDEEQEIPDEEPNDTEEVETTANPFPGALSTDHLKTLNDIVDEMRLNTQEGIQQLL  
SASPGLGEEIAVLQKLMERLDISEDAARGILKDWKKAHAEAKRQKLAIAKKSKGMEAIW  
>comp15561\_c0\_seq1; 1423 227 4333 LEN=4524; translated  
MISSDVISDVNKAAGMVMNSAVAAVGPDPTEFLNSQLASALSTLGDSQYWEETISPTTIR  
NELSASDPSPNPSTPVLQRGMKWLLASISKGRDVSDFYPHVVKLAGANSLEVRKMVYMYL  
VQYADHDDTTRELSLLSINAFQRLSDQEQLIRALALRVLSSIRINDILQIQILGVQKCA  
SDSSPYVRKCAANALAKLVPRCDEMQRMLLQLMKEEFLLDKDSSTMVLTSAVAFRELCP  
DRLELLHSSYRKICHLLTDMDEWGQVVIIDLLARYCRRFFKEPKALKQGEAELIDQERRV  
HRKLSTGAQQTTHKSEKAALGAHSVPLFQETKLDTGGGGGFRDVIQSSSNTGGFKDKTHV  
IRQVTKGFYSDEEDDSAGEEVVTRTISTASAMRQPPVIGTVMASANTSPEPLNVLANTDI  
DSDLKNLDDLHQLLLISMPLLKSRNAGVVLVSVCSLHYCGVSSIKARSAIGKALVRIHR  
GRREIQYIVLTSIRVLRDPCSAFAPFLSDFVVKALDPPFTRLIKIDILVSLALEPAAIK  
AVLNELRSYIRDGDKAFATASIRAVGRVVEIAQIVYDRHGESNGMSVRERQAACEVALDA  
LYGLSVVTQVSESRIVVGEAVMMESILVSLNASATLGDGSTFVVQDPNQVRAYAMRRIL  
LLLAGSLSSRQKELILEVDEESDDEEKEVSDIEKLSVDLRSALSSALWIVGEWMANSPS  
FNTSWMHGAHDISKVRQELLRLVDSFCFPHFNVTEKEQSLHFASKVWISFGPSTGLKSETT  
LCEHILAMGRLDVNPDKDRARFESSLLHASIGLKHDTSGLDERSGAIKLDLGQSKAILL  
ANKPTPSYLP IEGETIIDTTSFRFGTSSLVGHRARGPSTSLPQWAAKNSPTALREPIQV  
AKEQLAHNFSESGPDNIREMPGFYDDDNDEDSSDDSSDSSSSSSSGSDSSESSSSGDSESD  
SDDSSSSSDESDKRNLRVAAPT SVATNGFQNNLFQPMGLTNMPSIPNSSISRACEPKCTT  
VESSDSDSSESDDESDESSVESPIIPLKNSMTSGHHGGIPNHVQKDGNNLGMTSTNNRFA  
STVDQRPSTSSSAMDDFKGLTMEPIKIEDQGVNFERDSGAWTQLVRPELCCGGLSVKSRYL  
RGLTKDNQLQSSNINPLNANAVCVQLEFNSKKSDATPIRRIKVLRPSASTGAYATKKTLC  
PPEIMELKANESISAALIFEFASMSNREGDLVGRIEVKQGFSGSVPIEFKPSVGELLLPP  
SRILSIQEFDLAMNRMQGFQRIESPYYTSLPITSVSTSVVKNSSLKTIIGNGTFSSDKKLR  
LMGLLPANKEPVLVKIEANQGGGKITVCCDHVVAIN SILSLVKRSVAS  
>comp15561\_c0\_seq2; 1321 227 4466 LEN=4657; translated  
MISSDVISDVNKAAGMVMNSAVAAVGPDPTEFLNSQLASALSTLGDSQYWEETISPTTIR  
NELSASDPSPNPSTPVLQRGMKWLLASISKGRDVSDFYPHVVKLAGANSLEVRKMVYMYL  
VQYADHDDTTRELSLLSINAFQRLSDQEQLIRALALRVLSSIRINDILQIQILGVQKCA  
SDSSPYVRKCAANALAKLVPRCDEMQRMLLQLMKEEFLLDKDSSTMVLTSAVAFRELCP  
DRLELLHSSYRKICHLLTDMDEWGQVVIIDLLARYCRRFFKEPKALKQGEAELIDQERRV  
HRKLSTGAQQTTHKSEKAALGAHSVPLFQETKLDTGGGGGFRDVIQSSSNTGGFKDKTHV  
IRQVTKGFYSDEEDDSAGEEVVTRTISTASAMRQPPVIGTVMASANTSPEPLNVLANTDI  
DSDLKNLDDLHQLLLISMPLLKSRNAGVVLVSVCSLHYCGVSSIKARSAIGKALVRIHR  
GRREIQYIVLTSIRVLRDPCSAFAPFLSDFVVKALDPPFTRLIKIDILVSLALEPAAIK  
AVLNELRSYIRDGDKAFATASIRAVGRVVEIAQIVYDRHGESNGMSVRERQAACEVALDA  
LYGLSVVTQVSESRIVVGEAVMMESILVSLNASATLGDGSTFVVQDPNQVRAYAMRRIL  
LLLAGSLSSRQKELILEVDEESDDEEKEVSDIEKLSVDLRSALSSALWIVGEWMANSPS  
FNTSWMHGAHDISKVRQELLRLVDSFCFPHFNVTEKEQSLHFASKVWISFGPSTGLKSETT  
LCEHILAMGRLDVNPDKDRARFESSLLHASIGLKHDTSGLDERSGAIKLDLGQSKAILL  
ANKPTPSYLP IEGETIIDTTSFRFGTSSLVGHRARGPSTSLPQWAAKNSPTALREPIQV  
AKEQLAHNFSESGPDNIREMPGFYDDDNDEDSSDDSSDSSSSSSSGSDSSESSSSGDSESD  
SDDSSSSSDESDKRNLRVAAPT SVATNGFQNNLFQPMGLTNMPSIPNSSISRACEPKCTT  
VESSDSDSSESDDESDESSVESPIIPLKNSMTSGHHGGIPNHVQKDGNNLGMTSTNNRFA  
STVDQRPSTSSSAMDDFKGLTMEPIKIEDQGVNFERDSGAWTQLVRPELCCGGLSVKSRYL  
RGLTKDNQLQSSNINPLNANAVCVQLEFNSKYVVFVSCYEERTIGVTMLDVSLSTTFLLSS  
NILLSL SATLNMMVXKSDATPIRRIKVLRPSASTGAYATKKTLC PPEIMELKANESISAAL  
LIFEFASMSNREGDLVGRIEVKQGFSGSVPIEFKPSVGELLLPPSRILSIQEFDLAMNRM  
QGFQRIESPYYTSLPITSVSTSVVKNSSLKTIIGNGTFSSDKKLR LMGLLPANKEPVLVKI  
EANQGGGKITVCCDHVVAIN SILSLVKRSVAS  
>comp15562\_c0\_seq1; 839 1 3712 LEN=4302; translated  
XSVVHPKEVLIAFMPYMRGDNQIAMS IHETYQSGRDQQAFLQAARQFLFQEQSRSKGRHA  
STLSTSPQPSLISGPN SAPLPMPPTTTPVVTNSQTAKSPIDKMNAPAFSNGQLRTNETLPP

QMNSPLPHGVHNTSQQLHYQVGNHLQQQQPQQHHVNQQHHLQQLQPGEGSPSMHILERK  
MAKLLSDDDDIVTMPSPPLNNNTASTIGPSVNAFHSSGSKSTLPPPHSOLFNFPLQHQNSV  
TSQQQNYRQQQLSPPFQQVSKPPSQRLPHGVPGAMPQIAPDILSSLFSNTVKTNSDNRT  
LYSTQQPINQFQNNNTAPVYSGNNTASWSSSIQPSASPITSSAIEIQSKATTNRSVIPQSP  
KQTPLETPTKRITSTKLGPOATPNKTHKPEFQPKRLWTHLEEQPGKLLVNDVVSASVGT  
NLRPRQELTARWILPLSYLRERNTGKKITSPRDLLKGLTVGLFRRGCTENGVQASIVSKE  
ILRPKGQSRDDYPFQVIDDVIVGTAPFYSPRTPGHVVFRLYWRGNHLHTLATGPTLN  
TENDFEPDIRFILSNFKGKKVNPTSLSSLNSLALVLEQFQISTNKSGFLVQHHEFESAGRA  
VWGCVCESRKVLDACSVDYQKTTIKLEKLEETVEELKEKVAEEEEQEEKEEKGDADDEATQ  
KSCDVTVDIPLNVALLEKTKSLMSGRASCERKWRDSQLAFASILKAIVTNPSVTMLLRD  
LITKLRLEFELWCPLCEEFAMLGDSGQQMWYEPLTRFSQPI TNDHFKVCTDARSKMQIRI  
LGFDPNTRRLDSILYTANRDGTRQMNAGAVNCFNCLSSSMGQLYQDVYFTADSILQOREA  
IRSKVERLVGMCDCFPPGTKVAIFGSSANGFGSPKSDLMDCLQVPSHLLVMKSGDAKGA  
AMATLAKIFEENMVDVDTSR LGARIPVIKFNCPRENCNENKGLVECDLSMHNPLAVLN  
TSLLSYAEINPVSVMASVIKRWAKARDINDPARHTLSSYGYILMLLHFLTYHKRSGDG  
LVSPVVKLSRDNQAIPLLPNLQWMNPKWPDSSREAPYTELNELPKQLMQHPREENVKVNS  
YFYRLGRANLENLQQRFPQDLSLAILLASFFRYAYDFDYKRHVVS LNSTSRHGIVERE  
VKAELDGWRNYSAAALTIEDPFETFYDVAHVLRGGYYHRIRREFAVAYSKIADVAMGKTSS  
SCNNRVVDLTMTGMDLIDWICEPVSTEREEGQLTEK

>comp15562\_c0\_seq2; 348 373 1401 LEN=1931; translated  
MAIDDPFEYLTFGGTFGRSFGLLDFRDLFMAVSVVAMIPFFVIYLTMAIFLASVFIQEE  
ENPDFHPTHIPLLVLTFGVQILVYDLASVIGQGAITQAVSEIYVQRPEWLQCLTKAWSR  
KWQLLGASLIVYGSSFVSLIPVLIAMNFATTYPNAFTITLSVLITVAFIAGVVYFYFGAI  
LASPAIMVEGFNSSMKGVKRSWELAVGSRCYLICTLFCLWFLNQLIARLLHNMFTGDIM  
DIMFSLVGVVVT FIPMFLAFPLHAIMETVLYLNLIRIGRESMNHQVLVGDLTNDASLASRF  
RREDQGGPTLSEEPMDYRHVPLVDADDELTEQRKEQTSFV

>comp15562\_c0\_seq3; 267 2380 2715 LEN=3681; minus strand; translated  
MAMSPFKEVSRQLALSWSGVYVDPDLKAGSYGYTVSEEGMFDYENPIVEEASDDLDIVLKSA  
CRAALKKGLVSDPDDL VVTAGLPFGTPGAANVIRIVPAAGPSCWEGVCRA

>comp15562\_c0\_seq4; 252 373 1170 LEN=2095; translated  
MAIDDPFEYLTFGGTFGRSFGLLDFRDLFMAVSVVAMIPFFVIYLTMAIFLASVFIQEE  
ENPDFHPTHIPLLVLTFGVQILVYDLASVIGQGAITQAVSEIYVQRPEWLQCLTKAWSR  
KWQLLGASLIVYGSSFVSLIPVLIAMNFATTYPNAFTITLSVLITVAFIAGVVYFYFGAI  
LASPAIMVEGFNSSMKGVKRSWELAVGSRCYLICTLFCLWFLNQLIARLLHNMFTGDIM  
DIMFSLVGVVVT FIPMFLAFPLHAM

>comp15562\_c0\_seq5; 873 290 4219 LEN=4809; translated  
MSSSAGSTGGRKPSRGGNSPGRGRGRGRRGRRGRSNNRNRRSNNSSNQSRSTGNSLNG  
PSRNSNKKESTRLEPEMREDEVLIAFMPYMRGDNQIAMS IHETYQSGRDQQAFLQAARQFL  
FQEQRSKGRHASTLSTSPQPSLISGPNASAPLPMPPTTTPVVTNSQTAKSPIDKMNAPAFS  
NGQLRTNETLPPQMNSPLPHGVHNTSQQLHYQVGNHLQQQQPQQHHVNQQHHLQQLQPG  
EGSPSMHILERKMAKLLSDDDDIVTMPSPPLNNNTASTIGPSVNAFHSSGSKSTLPPPHS  
QLFNFPLQHQNSVTSQQQNYRQQQLSPPFQQVSKPPSQRLPHGVPGAMPQIAPDILSSLFS  
NTVKTNSDNRTPLYSTQQPINQFQNNNTAPVYSGNNTASWSSSIQPSASPITSSAIEIQSK  
ATTNRSVIPQSPKQTPLETPTKRITSTKLGPOATPNKTHKPEFQPKRLWTHLEEQPGKLL  
VNDVVSASVGTVVNLRPRQELTARWILPLSYLRERNTGKKITSPRDLLKGLTVGLFRRGCT  
ENGVQASIVSKEILRPKGQSRDDYPFQVIDDVIVGTAPFYSPRTPGHVVFRLYWRGNHLH  
TLATGPTLNVRITENDFEPDIRFILSNFKGKKVNPTSLSSLNSLALVLEQFQISTNKSGF  
LVQHHEFESAGRAVWGCVCESRKVLDACSVDYQKTTIKLEKLEETVEELKEKVAEEEEQEE  
EEKGDADDEATQKSCDVTVDIPLNVALLEKTKSLMSGRASCERKWRDSQLAFASILKAI  
VTNPSVTMLLRDLITKLRLEFELWCPLCEEFAMLGDSGQQMWYEPLTRFSQPI TNDHFKV  
CTDARSKMQIRILGFDPNTRRLDSILYTANRDGTRQMNAGAVNCFNCLSSSMGQLYQDVY  
FTADSILQOREAIRSKVERLVGMCDCFPPGTKVAIFGSSANGFGSPKSDLMDCLQVPSH  
LLVMKSGDAKGAEMATLAKIFEENMVDVDTSR LGARIPVIKFNCPRENCNENKGLVE  
CDLSMHNPLAVLNTSLLRSYAEINPVSVMASVIKRWAKARDINDPARHTLSSYGYILMLL  
HFLTYHKRSGDGLVSPVVKLSRDNQAIPLLPNLQWMNPKWPDSSREAPYTELNELPKQLM  
QHPREENVKVNSYFYRLGRANLENLQQRFPQDLSLAILLASFFRYAYDFDYKRHVVS  
LNSTSRHGIVEREVKAELDGWRNYSAAALTIEDPFETFYDVAHVLRGGYYHRIRREFAVAYS  
KIADVAMGKTSSSCNNRVVDLTMTGMDLIDWICEPVSTEREEGQLTEK

>comp15563\_c0\_seq1; 1195 204 3722 LEN=3912; translated  
MSGRTPLMEKPSDDTTIEMIATSTTELSDEGSSDGS GTVHGNDAAASCHTTTSVHTLASL



>comp15565\_c0\_seq2; 1176 396 4205 LEN=4356; translated  
MSNEPQNETTAAGDGGKHFHFAIDRGGTFTDVVCRLPEGHEVVFKLLSEDPSHYLDAPT  
IRRLLEEHDSPVSGIGYPRGEPVNTSRIGSIRMGTTVATNALLEREGARMALVTTKGF  
LLEIGNQARPDIFDLCKTPSLLYEEVVEVKERILLQKFCSEELLEDPEESPLKDFPRK  
ITKEEVLVERVPDLDAVRAELERLRGIGITSLAIALMHAYTFPDHELMIGDLAQEMGCF  
QISMVSHKVMVMKMPVPRGHTTSAAYLTPKITAYLGNFQRFDEGLSSVPLQFMKSDGGL  
APVNDFFGGHQAILSGPAGGVVGYAKTTFNSTKTPVIGFDMGGTSTDVSRFDGHLEHVF  
TVTAVGVAIQAPQLDIHTVAAGGSRFLRRGMFVVGPESAGAHGPGVCYRKNHGLAVTDA  
NLVLRGVI PGQFPNIFGNEDQPLSDGAAHAFEELERLPEAKGRKAAELAWGFLQVANE  
AMCRPIRNLQMRGFDITTHVLACFGGAGPQHACAMAKALGMSEVVFVHRYGGVLSAYGLL  
LADAVHEEQEPAAETYNGGVSANGEERLAHLKRASIEALKKQGYSDSSIVVEEYLNMR  
YQGTDNAIMILRSPDSSFEEFVSLYRREFGFVLQNRDILIDDYRVRAVVPGETLSTPA  
APPPLGVPTASLGTTKAYFETGWHEVPVYKIDDLKPGHNVPGPSIIVQPISTVVLEV  
GCEAFVTLDGDLKIEIGKQDEKASMA DGSISEVVEDPVKLSIFSHRFMGIAEQMGR  
TLQRTAISVNMKERLDFSCALFTKDGGLVANAPHIPVHLGAMQEAVRYQVKHWSERE  
GIEQEGDVLSNHPQLAGGSHLPDITAITPVFFDGKIIFFVASRHHADIGGIAPGSM  
PPHSHKALEDEGACIVAFKLVKGGEFQEEGVTEILNAPGKIPGNSGTRNLRDNLSD  
LRAQVAANNSGIRLLKELVEENGLHVVDAYMKFIQTNAEQTVRLMLKEFAAKKGT  
KVCVDHMDGSPKLTIEINPETG DALFDFGTGTPQVLANHNAPPVAVYSAVIYSLR  
CLVAQTIPLNQGLAPITFVIPENSLLNPSADAGVVGGNVLTQRVVDVVLKAFSA  
CAASQGCMMNLTFGDDQFGYYETIAGGAGAPTWEGRSGIHTHTNTRITDPEIL  
ERRYPIVLRREFSIREGSGGTGKHKGGDGVIREMEPLRPLTVSILSERRVLQPY  
GMDGGGPGQCGRNLLLRKNVAVNIGRCSTSWKVGRLRLETPGAGGFGSEE

>comp15565\_c0\_seq3; 530 235 1347 LEN=1506; translated  
MSNEPQGETTAAGDGGKHFHFAIDRGGTFTDVVCRLPEGHEVVFKLLSEDPSHYLDA  
PTGIRRLLEEHDSPVSGIGYPRGEPVNTSRIGSIRMGTTVATNALLEREGARMALV  
TTKGFGLLEIGNQARPDIFDLCKTPSLLYEEVVEVKERILLQKFCSEELLEDPE  
SPLKDFPRKVTITKEEVLVERVPDLDAVRAELERLRGIGITSLAIALMHAYTFPD  
HELMIGDLAQEMGCFEQISMVSHKVMVMKMPVPRGHTTSAAYLTPKITAYLGNFQ  
RFDEGLSSVPLQFMKSDGGLAPVNDFFGGHQAILSGPAGGVVGYAKTTFNSTKTP  
VIGFDMGGTSTDVSRFDGHLEHVFETVTAGVAIQA

>comp15565\_c0\_seq4; 1325 235 3706 LEN=3848; translated  
MSNEPQGETTAAGDGGKHFHFAIDRGGTFTDVVCRLPEGHEVVFKLLSEDPSHYLDA  
PTGIRRLLEEHDSPVSGIGYPRGEPVNTSRIGSIRMGTTVATNALLEREGARMALV  
TTKGFGLLEIGNQARPDIFDLCKTPSLLYEEVVEVKERILLQKFCSEELLEDPE  
SPLKDFPRKVTITKEEVLVERVPDLDAVRAELERLRGIGITSLAIALMHAYTFPD  
HELMIGDLAQEMGCFEQISMVSHKVMVMKMPVPRGHTTSAAYLTPKITAYLGNFQ  
RFDEGLSSVPLQFMKSDGGLAPVNDFFGGHQAILSGPAGGVVGYAKTTFNSTKTP  
VIGFDMGGTSTDVSRFDGHLEHVFETVTAGVAIQA  
NLVLRGVI PGQFPNIFGNEDQPLSDGAAHAFEELERLPEAKGRKAAELAWGFLQV  
ANEMCRPIRNLQMRGFDITTHVLACFGGAGPQHACAMAKALGMSEVVFVHRYGG  
VLSAYGLL LADAVHEEQEPAAETYNGGVSANGEERLAHLKRASIEALKKQGYSD  
SSIVVEEYLNMR YQGTDNAIMILRSPDSSFEEFVSLYRREFGFVLQNRDILIDD  
YRVRAVVPGETLSTPAAPPPLGVPTASLGTTKAYFETGWHEVPVYKIDDLKPGH  
NVPGPSIIVQPISTVVLEV GCEAFVTLDGDLKIEIGKQDEKASMA DGSISEV  
VEDPVKLSIFSHRFMGIAEQMGR TLQRTAISVNMKERLDFSCALFTKDGGLVAN  
APHIPVHLGAMQEAVRYQVKHWSEREGIEQEGDVLSNHPQLAGGSHLPDITAIT  
PVFFDGKIIFFVASRHHADIGGIAPGSMPPHSHKALEDEGACIVAFKLVKGGEF  
QEEGVTEILNAPGKIPGNSGTRNLRDNLSDLRAQVAANNSGIRLLKELVEE  
NGLHVVDAYMKFIQTNAEQTVRLMLKEFAAKKGTKVCAVDHMDGSPKLTIEIN  
PETGDALFDFGTGTPQVLANHNAPPVAVYSAVIYSLRCLVAQTIPLNQGLAPIT  
FVIPENSLLNPSADAGVVGGNVLTQRVVDVVLKAFSACAASQGCMMNLTFGDDQ  
FGYYEKLLAELELALHGKADQGFILIAQILE

>comp15565\_c0\_seq5; 534 396 1508 LEN=1667; translated  
MSNEPQNETTAAGDGGKHFHFAIDRGGTFTDVVCRLPEGHEVVFKLLSEDPSHYLDA  
PTGIRRLLEEHDSPVSGIGYPRGEPVNTSRIGSIRMGTTVATNALLEREGARMALV  
TTKGFGLLEIGNQARPDIFDLCKTPSLLYEEVVEVKERILLQKFCSEELLEDPE  
SPLKDFPRKVTITKEEVLVERVPDLDAVRAELERLRGIGITSLAIALMHAYTFPD  
HELMIGDLAQEMGCFEQISMVSHKVMVMKMPVPRGHTTSAAYLTPKITAYLGNFQ  
RFDEGLSSVPLQFMKSDGGLAPVNDFFGGHQAILSGPAGGVVGYAKTTFNSTKTP  
VIGFDMGGTSTDVSRFDGHLEHVFETVTAGVAIQA

>comp15565\_c0\_seq6; 1044 396 3821 LEN=4009; translated  
MSNEPQNETTAAGDKGKFHFAIDRGGTFTDVVCRLEPEGHEVVFKLLSEDP SHYLDAPTEG  
IRRLLEEHDSPVSGIGYPRGEPVNTSRIGSIRMGTTVATNALLEREGARMALVTTKGF  
LLEIGNQARPDIFDL SCKTPSLLYEEVVEVKERILLQKFCSEELLEDPE S  
PLKDFPRKVGITKEEVLVERVPDLDAVRAELERLRGIGITSLAIALMHAYTF  
PDHELMIGDLAQEMGCFEQISM SHKVM SMVKM VPRGHTTSAAYLTPKITAYLGN  
FQRFDEGLSSVPLQFMKSDGGLAPVND FGGHQAILSGPAGGVVGYAKTTFN  
PSTKTPVIGFDMGGTSTDVSRFDGHLEHVFE TVTAGVAIQAPQLDIHTVA  
AAGGSRLFLRRGMFVVGPESAGAHGPVPCYRKNHGLAVTDA NLVLRV  
IPGQFPNIFGPNE DQPLDSDGAHA AFEELERLPEAKGRKAAELAWGFLQ  
VANEAMCRPIRNL TQMRGFDITTHVLACFGGAGPQHACAMAKALGMSEV  
FVHRYGGVLSAYGLL LADAVHEEQEPAAETYNGGVSANGEERLAHLKRAS  
IEALKKQGYSDSSIVVEEYLNMR YQGTDNAIMILRSPDSSFEESFVSLYR  
REFGFVLQNRDILIDDYRVRVAVVPGETLSTPAAPP PLGVPTASLGTTKAY  
FETGWHEVPVYKIDDLKPGHNVPGPSIIVQPISTVVLEVGC EAFV  
TLDGDLKIEIGKQDEKAS MADGSI SEVVEDPVKLSIFSHRFGIAEQMGR  
TLQRTAISVNMKERLDFSCALFTKDGGLVANAPHIPVHLGAMQEAVRYQV  
KHSEREGIQEGDV LISNHPQLAGGSHLPDITAITPVFFDGKIIFFVASR  
GHHADIGGIAPGSMPPH SKALEDEGACIVAFKLVKGGEFQEEGVTEILN  
APGKIPGNSGTRNLRDNLSDLRAQVAANNSGIRLLKELVEE NGLHV  
VDAYMKFIQTNAEQTVRLMLKEFAAKKGTKVCAVDHMDDGSP IKLTIE  
INPETGDALFDFGTGTGPVLANHNAPP AVAYS AVIYSLRCLVAQTIPLN  
QGCLAPITFVIPENSLLN PSADAGVVG NVLTSQRVVDVVLKAFSACAAS  
QGCMMNLTFGDDQFGYYETIAGGAGAGP TW

>comp15565\_c0\_seq7; 1081 235 3880 LEN=4010; translated  
MSNEPQGETTAAGDKGKFHFAIDRGGTFTDVVCRLEPEGHEVVFKLLSEDP  
SHYLDAPTEGIRRLLEEHDSPVSGIGYPRGEPVNTSRIGSIRMGTTVATN  
ALLEREGARMALVTTKGFGLLEIGNQARPDIFDL SCKTPSLLYEEVVE  
VKERILLQKFCSEELLEDPE S PLKDFPRKVGITKEEVLVERVPDLDA  
VRAELERLRGIGITSLAIALMHAYTFPDHELMIGDLAQEMGCFEQISM  
SHKVM SMVKM VPRGHTTSAAYLTPKITAYLGNFQRFDEGLSSVPLQFM  
KSDGGLAPVND FGGHQAILSGPAGGVVGYAKTTFN PSTKTPVIGFDMG  
GTSTDVSRFDGHLEHVFE TVTAGVAIQAPQLDIHTVAAGGSRLFLRR  
GMFVVGPESAGAHGPVPCYRKNHGLAVTDA NLVLRVIPGQFPNIFGP  
NE DQPLDSDGAHA AFEELERLPEAKGRKAAELAWGFLQVANEAMCR  
PIRNL TQMRGFDITTHVLACFGGAGPQHACAMAKALGMSEV FVHRYG  
GVLSAYGLL LADAVHEEQEPAAETYNGGVSANGEERLAHLKRASIEAL  
KKQGYSDSSIVVEEYLNMR YQGTDNAIMILRSPDSSFEESFVSLYR  
REFGFVLQNRDILIDDYRVRVAVVPGETLSTPAAPP PLGVPTASLGTT  
KAYFETGWHEVPVYKIDDLKPGHNVPGPSIIVQPISTVVLEVGC EAF  
V TLDGDLKIEIGKQDEKAS MADGSI SEVVEDPVKLSIFSHRFGIAEQ  
MGR TLQRTAISVNMKERLDFSCALFTKDGGLVANAPHIPVHLGAMQEAV  
RYQVKHSEREGIQEGDV LISNHPQLAGGSHLPDITAITPVFFDGKII  
FFVASRGHHADIGGIAPGSMPPH SKALEDEGACIVAFKLVKGGEFQEE  
GVTEILNAPGKIPGNSGTRNLRDNLSDLRAQVAANNSGIRLLKELVEE  
NGLHVVDAYMKFIQTNAEQTVRLMLKEFAAKKGTKVCAVDHMDDGSP  
IKLTIEINPETGDALFDFGTGTGPVLANHNAPP AVAYS AVIYSLRCL  
VAQTIPLNQGCLAPITFVIPENSLLN PSADAGVVG NVLTSQRVVDV  
VLKAFSACAASQGCMMNLTFGDDQFGYYETIAGGAGAGP TWEGRS  
GIHTHTCNTRITDPEILERRYPIVLR EFSIREGSGGTGKHKGGDGV  
IREMEPLR PLTVSILSGDVSYK

>comp15565\_c0\_seq8; 1085 396 4041 LEN=4171; translated  
MSNEPQNETTAAGDKGKFHFAIDRGGTFTDVVCRLEPEGHEVVFKLLSEDP  
SHYLDAPTEGIRRLLEEHDSPVSGIGYPRGEPVNTSRIGSIRMGTTVATN  
ALLEREGARMALVTTKGFGLLEIGNQARPDIFDL SCKTPSLLYEEVVE  
VKERILLQKFCSEELLEDPE S PLKDFPRKVGITKEEVLVERVPDLDA  
VRAELERLRGIGITSLAIALMHAYTFPDHELMIGDLAQEMGCFEQISM  
SHKVM SMVKM VPRGHTTSAAYLTPKITAYLGNFQRFDEGLSSVPLQFM  
KSDGGLAPVND FGGHQAILSGPAGGVVGYAKTTFN PSTKTPVIGFDMG  
GTSTDVSRFDGHLEHVFE TVTAGVAIQAPQLDIHTVAAGGSRLFLRR  
GMFVVGPESAGAHGPVPCYRKNHGLAVTDA NLVLRVIPGQFPNIFGP  
NE DQPLDSDGAHA AFEELERLPEAKGRKAAELAWGFLQVANEAMCR  
PIRNL TQMRGFDITTHVLACFGGAGPQHACAMAKALGMSEV FVHRYG  
GVLSAYGLL LADAVHEEQEPAAETYNGGVSANGEERLAHLKRASIEAL  
KKQGYSDSSIVVEEYLNMR YQGTDNAIMILRSPDSSFEESFVSLYR  
REFGFVLQNRDILIDDYRVRVAVVPGETLSTPAAPP PLGVPTASLGTT  
KAYFETGWHEVPVYKIDDLKPGHNVPGPSIIVQPISTVVLEVGC EAF  
V TLDGDLKIEIGKQDEKAS MADGSI SEVVEDPVKLSIFSHRFGIAEQ  
MGR TLQRTAISVNMKERLDFSCALFTKDGGLVANAPHIPVHLGAMQEAV  
RYQVKHSEREGIQEGDV LISNHPQLAGGSHLPDITAITPVFFDGKII  
FFVASRGHHADIGGIAPGSMPPH SKALEDEGACIVAFKLVKGGEFQEE  
GVTEILNAPGKIPGNSGTRNLRDNLSDLRAQVAANNSGIRLLKELVEE

NGLHVVDAYMKFIQTNAEQTVRLMLKEFAAKKGTKVCAVDHMDDGSPIKLTIEINPETGD  
ALFDF'TGTGPQVLNHNAPPVAVYSAVIYSLRCLVAQTIPLNQGLAPITFVIPENSLLN  
PSADAGVVGGNVLTSSQRVVDVVLKAFSACAASQGCMMNLTFGDDQFGYYETIAGGAGAGP  
TWEGRSGIHTHTCNTRITDPEILERRYPIVLRREFSIREGSGGTGKHKGDDGVIREMEPLR  
PLTVSILSGDVSYK

>comp15566\_c0\_seq1; 1517 19 6121 LEN=6572; translated  
MTQSQPEHMIVDDDCDGLQQQSLVRRFPRVGAQFQTRISKSTGPIVRPTPDRMSVNF PFL  
SEEEAKKRNLRCGNALAPLGSTEGETLRNLNLKFSIRKSNRGGSLIHSSVKDKAEFLNFV  
RPFIGSISNHVRPQITNEAWVQHMIHLHSTGSIKGRGRSSRGVVKRKRPENEELVWNLEK  
ILERLNKRARGHVDCDILGEEQAVALEHLRLCYDGNIEAAEFNTLIKLSGGQAWKMRKRE  
EKERTKRKSKTPSQQTSESWRDMYEFSTLPYVRTMLGQVQDDTGTFTYTKTKMSRMHENQ  
WSYHADVNLALEPDDLKGAWRSILACGKAIERQLNSESLGDKKPLLCTLLTFVNNAFALP  
TPESCFTGTHHVMIEEVSNTMISILNHVKEAQNIHAEIRDKIFEESKTGIDSDDLKFLDT  
KYSTLPIRLREIDNLYKFREIVVKWETRLVRMLSVDEEELETKQMKNYLRIAEEMEEEA  
RAHGYSKSLAQLNARLNKAYDLNRNIVGWEDAWRQGRSTIKTVAAFVKEAKRIKLYSP  
EVLKIFEFYRVAEEWIDRANIAIRSKISLDEMKNLIYRGEEMPIDLSHDHDKLTKLRIA  
QKWLEGLDEIVPCKKNEGKILETWENLQTSLQNGNHSRLSELSSEGNRIPVDIIDVKLL  
QLAIDARNWTVKAQKWTNNNTDSKRGLKCDLREHLEKINCLRGKPLQEIERNKWKPAGE  
YELTAIITDADSWLEKYKHFSLNDRKNDVRRCLSMAKLRSIVQEGNSIYANMGNSISKI  
SRILVNAENWYETNLPILKCCR IAPDSRDVHLRKPVVG IHEMAEAAEA AKLDVSLLELDE  
TVKLRELLERSNTWNRVALIAPKRKRHRGGRPKFTLKNLIDLIEESSLPIDTDENV  
NRLQNQLDSVETWRAEASKQLEEVFGFHDLKSHVDDVYGEAEDYSIDRISETGDADFES  
KNDHPEKLSRESVDMDKKNDKSNVIATESKSPAMASKHIDSDEEISKSVRGSNSTLR  
VLRLIKELNDEAKGISVITIEGELGELMDSVSKWCTKSFKYLNTPREVFDKRYFGAFDRF  
IVEGQDLYNMSSNNKISSDTLNTLDVRLNKAWGSVINDQLRRLMILKTEREKFEAWCQ  
RASQILADEKKLTAEKLAELAKDSRNF PANRDLVSKIRGLSVKFSKWTKTKGILESNEK  
INFHDAKSLIEAGEKFQVQSAELKKLKGEIRAARKWSSKAKECNLDQGSIHVNDVKQLID  
EHDCLLIEMPDELIDLKQATVGYCICRRPYDGFMI GCDHCEEYHGPCIGISESKADRFE  
KFTCIRCSTKMFHASANTAVGIVRKVSFLHDFKSLGEHISHSTYNVLDMPKALKKARQ  
VEFQKLQRKDRKERKEIAKLTNSIRQLEEQLSQAICTDQADMQCSNQTKLEKRVDEGVII  
ANNHDKNEKENLGEQVKGPSSEVLSKIGDSEYTLHDENPMTSNETSKRLSCRGGQTSHL  
LEKDKGNMTEATCLSEGGISKAKINETPIVPKDDDEIMLKIKKLRSLTQSRIRLQKVTS  
QSQERSRVEAKEDQHSNALRDWCLKIRSEVLAPSTESQSKRNQPQASGIMPPIMPQIIGE  
ARDLGVSDLPDVKRMIDCFKSLCWSFSAMTILRHKPSISDFQHLLIAEASKFKMPDEKALK  
TIKFMNKASQWQSKVHKAISPKMGEKKSFNVSILKGLKCKIQELPLVIPEERMLQLVIE  
DDGARHCVCGGGRDGKGMLECLACHQNIHLACAIAKQKSSLEGERWLCPCCGTLNISEIK  
LQVGHDATGLTSEVQNAKSKGEEASPHAPDPTQLWPPFGLKNSQSAIEAFGSHCLAIPD  
IHKSELYRDAKVRIPAATSSIALLQKADTSTKVFGKDQSTSDIQSSLFTTIENVPLETN  
SKEIAAKSCKESCTSDKTKDDLMLGLQIKPMKSPSNFIETNQSKIGINSNLILPPLQSNGL  
NSRVVTNVSNLCAVANPSSLSSTPDNPSSTPCASQSEKKWTDNAKNPNNTT

>comp15566\_c0\_seq2; 1543 19 6054 LEN=6505; translated  
MTQSQPEHMIVDDDCDGLQQQSLVRRFPRVGAQFQTRISKSTGPIVRPTPDRMSVNF PFL  
SEEEAKKRNLRCGNALAPLGSTEGETLRNLNLKFSIRKSNRGGSLIHSSVKDKAEFLNFV  
RPFIGSISNHVRPQITNEAWVQHMIHLHSTGSIKGRGRSSRGVVKRKRPENEELVWNLEK  
ILERLNKRARGHVDCDILGEEQAVALEHLRLCYDGNIEAAEFNTLIKLSGGQAWKMRKRE  
EKERTKRKSKTPSQQTSESWRDMYEFSTLPYVRTMLGQVQDDTGTFTYTKTKMSRMHENQ  
WSYHADVNLALEPDDLKGAWRSILACGKAIERQLNSESLGDKKPLLCTLLTFVNNAFALP  
TPESCFTGTHHVMIEEVSNTMISILNHVKEAQNIHAEIRDKIFEESKTGIDSDDLKFLDT  
KYSTLPIRLREIDNLYKFREIVVKWETRLVRMLSVDEEELETKQMKNYLRIAEEMEEEA  
RAHGYSKSLAQLNARLNKAYDLNRNIVGWEDAWRQGRSTIKTVAAFVKEAKRIKLYSP  
EVLKIFEFYRVAEEWIDRANIAIRSKISLDEMKNLIYRGEEMPIDLSHDHDKLTKLRIA  
QKWLEGLDEIVPCKKNEGKILETWENLQTSLQNGNHSRLSELSSEGNRIPVDIIDVKLL  
QLAIDARNWTVKAQKWTNNNTDSKRGLKCDLREHLEKINCLRGKPLQEIERNKWKPAGE  
YELTAIITDADSWLEKYKHFSLNDRKNDVRRCLSMAKLRSIVQEGNSIYANMGNSISKI  
SRILVNAENWYETNLPILKCCR IAPDSRDVHLRKPVVG IHEMAEAAEA AKLDVSLLELDE  
TVKLRELLERSNTWNRVALIAPKRKRHRGGRPKFTLKNLIDLIEESSLPIDTDENV  
NRLQNQLDSVETWRAEASKQLEEVFGFHDLKSHVDDVYGEAEDYSIDRISETGDADFES  
KNDHPEKLSRESVDMDKKNDKSNVIATESKSPAMASKHIDSDEEISKSVRGSNSTLR  
VLRLIKELNDEAKGISVITIEGELGELMDSVSKWCTKSFKYLNTPREVFDKRYFGAFDRF  
IVEGQDLYNMSSNNKISSDTLNTLDVRLNKAWGSVINDQLRRLMILKTEREKFEAWCQ



RASQILADEKKLTAEKLAELAKDSRNF PANRDLVSKIRGLSVKFSKWTKKTKGILESNEK  
INFHDAKSLIEAGEKFQVQSAELKKLKGEIRAARKWSSKAKECNLDQGS IHVNDVKQLID  
EHDCLLIEMPDELDILKQATVGYCICRRPYDGMIGCDHCEEWYHGPCIGISESKADRFE  
KFTCIRCSTKMMFHASANTAVGIVRKWTKALKKKARQVEFQKLQRKDRKERKEIAKLTN  
SIRQLEEQLSQAICTDQADMQCSNQTKLEKRVDEGVI IANNHDKNEKENLGEQVKGPSED  
VISLKIGDSEYTLHDENPMTSNETSRLSCRGGQTSHELLKDKGNMTEATCLSEGGISKA  
KINETPIPVKDDIIMLKIKKLRSLTQSRIRLQKVTSSQSQERSRVEAKEDQHSNALRDW  
CLKIRSEVLAPSTESQSKRNQPQASGIMPPIMPQIIGEARDLGVSDLPDVKRMIDCFKSL  
CWSFSAMTILRHKPSISDFQHLLIAEASKFKMPDEKALKTIKFMNKAQSQWQSKVHKAISP  
KMGEKKSFNVSILKGLKCKIQLEPLVIPEERMLQLVIEDDGARHCVCGGGRDGKGMLECL  
ACHQNIHLACAQKSSLEGKERWLCPCCGTLNISEIKLQVGH DATGLGTSEVQNAKSKG  
EEASPHAPDPTQLWPPFGLKNSQSAIEAFGSHCLAIPDIHKSELYRDAKVRIPAATSSIA  
LLQKADTSTKVFVKDQSTSDIQSSLFTTIENVPLETNSKEIAAKSCKESCTSDKTKDDL  
MGLQIKPMKSPSNFIETNQSKI GINSNLILPPLQSNGLNSRVVTNVSNL CNAVANPSSLS  
STPDNPSSTPCCASQSEKKWTDNAKNPNNTT

>comp15567\_c0\_seq1; 650 110 994 LEN=994; translated  
MGKDSDDGVDWGWKSIKSILEGSESDDAKKVKKLRKMVLLSLQMDSDKTAKKQFKKAIQ  
GMEEQGKIKLDADGTISLVLEKKS KKKKRRKASSNDDEREK KKKKKKKDKKRDEEEAAEA  
ERAEKAAAKSKFELQMEAMKKKEQAENGGDEPAGEAKPPARPTPKPQEIPEAPTQLA  
GEGENEDLVYGAPDDVVWSDKSNAMREAENA ADEDPSKVRTDSRNGRDDGLVPLHGGQLQ  
ATAERAVCPGGMVSGTQNRGNVETRGDRYATFYQYISQRLFLVARIVVFLDIWWL

>comp15567\_c0\_seq2; 141 1 643 LEN=667; translated  
XLFFVVAQTLLKLLTGEINATKGEVRRNPRLRMGIYNQHFVDRLPMGKTPVEHLRSRFD  
LDYQSCRNRLGRYGLEGHAHEVVMRDLSSGGQKARVVLVELSLQMPHILLLDEPTNNDIE  
TIDALCDAINEFNGGIVVVTHTDQRLIEECDCTLWVVEKQGVTEWTEGFDDYKESILRELE  
EQVEAQNKARQKKVEAAAAAKAEKIARLNKSKK

>comp15567\_c0\_seq3; 1638 110 2689 LEN=2713; translated  
MGKDSDDGVDWGWKSIKSILEGSESDDAKKVKKLRKMVLLSLQMDSDKTAKKQFKKAIQ  
GMEEQGKIKLDADGTISLVLEKKS KKKKRRKASSNDDEREK KKKKKKKDKKRDEEEAAEA  
ERAEKAAAKSKFELQMEAMKKKEQAENGGDEPAGEAKPPARPTPKPQEIPEAPTQLA  
GEGENEDLVYGAPDDVVWSDKSNAMREAENA ADEDPSKLLYKDGKLSNKERKRLIKER  
EAAAARAEYEVKAAKASREGAQFACSQTAVSEKDPQWQNSLDINIPNFSISAAGKILFKD  
AALTIAHGRRYGLVGPNGRGKSTLLKMIASKDLKLPPIRDFLYVEQEVVADNTPAVEAVL  
RADKVRWNLVEEEKILMAKVDAGDESDETIDRLGVVVEELANMGADSMEAKAHGILSGLG  
FTTEMQTKPTKMFSGGWRMRISLARALFVEPTLLMLDEPTNHLDLNAVIWLDYDYLQTWKK  
TLFVVS HDQDFLNSVCQEILHIEDLKLIA YKGNYSDFKKA EADRLKQQLRAW EKQEKIR  
ELKRKGQSKSKATEI IKTKSKREAGARSQKKKNQAI AAGTESAEIQELIKRPKEYTVKLE  
FSEVPQLTRPVMEVTNVHFRYSEKHPVIFNKIDFGIDMSR ICVVGPNAGKTTLLKLLT  
GEINATKGEVRRNPRLRMGIYNQHFVDRLPMGKTPVEHLRSRFDLDYQSCRNRLGRYGL  
EGHAHEVVMRDLSSGGQKARVVLVELSLQMPHILLLDEPTNNDIETIDALCDAINEFNGG  
IVVVTHTDQRLIEECDCTLWVVEKQGVTEWTEGFDDYKESILRELEEQVEAQNKARQKKVE  
AAAAAKAEKIARLNKSKK

>comp15567\_c0\_seq4; 842 1 1762 LEN=1885; translated  
XEFASASDGDGDAAKTPEDLQEEIMDALNAVYERLDALDADTAEVRARSILSGLGF THE  
MQAKKTKDFSGGWRMRVSLARALFLQPVCLLLDEPTNHLDM EAVIWLENYLSKWDRILL  
VSHSQDFLNNVCSHMIHFTNSKSLVYYDGN YDQFVKTKSEKEENQWKQYKWEQDSIKQMK  
EYIARFGHGTAKNAKQAQSKEKVLQKMIRAGLTPKPEEEKILNFKFTDPGHLPPPVLAFH  
DVSFGYPGCDPLYKNVNFVVDLDSRVALVGPNGAGKTTLVKLMAGELNPTLGDIRPHGL  
KLGRFTQH FVDVLDLEKTPLEFFETLYPNDRPRDEQRKYLGRFGVSGMQVRKMAELSDGQ  
KSRVVLAKLGRDVPHILLLDEPTNHLDMESIDALAKAVNEFDGGLVVLVSHDMRLISQVAE  
EIWICDNRTITKYRGDIMNFKMDMRHQMGIEGEQAVASKGGLQGDASVKAKAEKPKPKP  
PPKPPKLEVLSPAATKPAAGVTTIREPPAAPAPT VASAVPDSLATKAPPAKKADDAS  
TVATVASTGSGSTATGGGATAAAPAKKRYIPPHLRKKMAEAAAAAQK

>comp15568\_c0\_seq1; 1087 248 4042 LEN=4294; translated  
MCDTDDNTD GARPLRPPRPV IAGKKHMSLAGTDAI IDQMAIEDLRELVRHVLKIATDH  
EYK MIRSEMDYFFQVVAEDNRTSASEEGTNDTVLTSRTELAADVPIAAGTVIESITDE  
ATPTTAGTAVKPAAIPTADAATTVESDSEKETRAVTD TDAKPPTECTEASTTALESISE  
YATSV EATKAPESTPSAQQSAANPPATTDDAKESISDEATTADTSTKGPTELSAAVPIA  
SKASPIDSTPPDGSADLPLLD EETAALTTESVDPPLLRKSRSHDIDFIEEPTVVL RPFSE  
NENATRVATEKIEEEVEVSSEATPLQDNTTPSKRSYDTDAIDEPTAGLRRTQSQEGIEL

EDATEKTRKAEASKEMDSLADQIRNSQTKSNASRNVAGSNRSNQDKTQLIVLCNRKPAT  
TKECKDQDLAMKLCCKKIGVVPRVILSEIPAGKTNIIYNNPAATSQEERLVINSMIVALNQ  
CSESAVQSTAVSYSYPQFFVRFIFEDKNNNASNDMSRSSSNVAVGAIEYKGDYDTMEEELH  
RAGMLTKESLFDIIPPACNPMDASNETNDTNSAFSDRDRERLELLIRETTELTRKLNES  
GSGVDGGGENKVTVRDQKTKRPLRHTHIRLASVGSNQPLPSTSSSELPLSSTASTSTAR  
PGMRKSIHQGANTIALPSGVTVKRETVTTLKPRRQALQKEPSGANLTTSLTQARGSLQSP  
SSRQQPSTSVLQPVVEQPKRRIMNPYYALQEYGGSERGKETQGTSPSQADHQTEDFSVARL  
PEDPMEIKEDPPELSAPYDQVLDERDRSWEKRFVVGKAACYLVFNTSDDELNIHYSERPLA  
CAVGVWTSRNIIEAFKTSQGLSESELIGTCASNVTNDHKNYQGWCFAKAAKSMGATVTL  
LEGYGVSDVLYLDDSGRTIQISTKNAQAVFNTTSVDAVACVPRGCDPFMSGIVGKKWGK  
IAKKLGAVAVFKSLSSKSKINRGDNQALEQPVIKGEASTHISSESNQNEVVPVVLDEE  
IPSSSIDHEDESSPISEPNGEAEPEATELATELRGEPEAEPEPEKLELEPEPEPEPREVE  
ELDPAEPPSSSTELSDPERGACYLVYNPDSSGQIVEHYSRTPIDNAIGRWIPGPGKIAN  
FKFTRNVGRNVLIGNSAGVQGRKNYSSGWCQFVRSAKLMEADIMLWDPKEGQKGLKVDI  
YLYNGDPDASVQTIRLQKQGILYKTDDIDAVACVPKNTPFYEDIKVDLMLWQEGSKHGYS  
TRVG

>comp15569\_c0\_seq1; 825 2025 4459 LEN=4459; minus strand; translated  
MANEPLRTEENLDGGNHDKGHDQDLCEIESTEVEGNRDEQQDRFQFLLISIKDSDILTLDTA  
KSMPLPLDFPSIETLNLCEIKAESDMVDLLGSDLYDRQPHLVVLRLLGRGVPGFNHLLKF  
AREKNHDLIVVSGIPGSFELDLTAMCTVSTEIINQVTLYFNADGCSENMANMLRYLADHL  
LRCGFGYEAPSVQPDHGLYHPRFPGSGACDRASTTKSYLTSADAPCRKPTVAVIFYRCH  
FLSGNTSFVDAMIDEIEALGANAIGLFTETLRSHEFHNDVNGTAVERFPTALAFLLDEAT  
GRCQVDAIVSTMAFAMGEVNPDPGPTLGNWSTDAVRALDVPVLQAVSSFGTRTDWEDSARG  
LSPLDTAMNVAIPEFDGRLITVPI SFKAPQDET NKVHYEYEPVQDRVEMVAKQSVKLARLR  
HKPNREKKIAFLLTNSGKAQRIGDAVGLDTPGSIMKVFEAMRADGYDLGDDLPPDGDTL  
VQNLIDRCSYDEIFLTEDQLANAAARVPTSLYRPMFERLPAKQKEFMVKQWGPPEAYV  
HRDAISLAGLEFGNVFVALQPPRGYGMDDPKIYHTPDLPPPHNYFALYRWRNQGADAI  
VHMKGHTLEWLPKGKGVLSRDCYPTFLDDLPLVYYPFIINDPGEQTQSKRAHALIIDH  
LTPPMTTADGYGELAQLMQLVDEYYQIEMLDPTKMPYIQKQIWKLIQKINLDEDLSVLLR  
PRDHDRDGRNEENGRSHSHSHDESENNHESHSPSRSTDEDRDIGRHEHHHRNTRSF  
DEDHNHSHHHSHSHHEEMHQEPTFCHNEHEX

>comp15569\_c0\_seq2; 442 1227 3661 LEN=3661; minus strand; translated  
MANEPLRTEENLDGGNHDKGHDQDLCEIESTEVEGNRDEQQDRFQFLLISIKDSDILTLDTA  
KSMPLPLDFPSIETLNLCEIKAESDMVDLLGSDLYDRQPHLVVLRLLGRGVPGFNHLLKF  
AREKNHDLIVVSGIPGSFELDLTAMCTVSTEIINQVTLYFNADGCSENMANMLRYLADHL  
LRCGFGYEAPSVQPDHGLYHPRFPGSGACDRASTTKSYLTSADAPCRKPTVAVIFYRCH  
FLSGNTSFVDAMIDEIEALGANAIGLFTETLRSHEFHNDVNGTAVERFPTALAFLLDEAT  
GRCQVDAIVSTMAFAMGEVNPDPGPTLGNWSTDAVRALDVPVLQAVSSFGTRTDWEDSARG  
LSPLDTAMNVAIPEFDGRLITVPI SFKAPQDET NKVHYEYEPVQDRVEMVAKQSVKLARLR  
HKPNREKKIAFLLTNSGKAQRIGDAVGLDTPGSIMKVFEAMRADGYDLGDDLPPDGDTL  
VQNLIDRCSYDEIFLTEDQLANAAARVPTSLYRPMFERLPAKQKEFMVKQWGPPEAYV  
HRDAISLAGLEFGNVFVALQPPRGYGMDDPKIYHTPDLPPPHNYFALYRWRNQGADAI  
VHMKGHTLEWLPKGKGVLSRDCYPTFLDDLPLVYYPFIINDPGEQTQSKRAHALIIDH  
LTPPMTTADGYGELAQLMQLVDEYYQIEMLDPTKMPYIQKQIWKLIQKINLDEDLSVLLR  
PRDHDRDGRNEENGRSHSHSHDESENNHESHSPSRSTDEDRDIGRHEHHHRNTRSF  
DEDHNHSHHHSHSHHEEMHQEPTFCHNEHEX

>comp15569\_c0\_seq3; 495 87 1233 LEN=1233; translated  
MTRIQTYPLAMLSNVFEFLSGTAARGLAKLLPPIRVARDSLSGALDPYNRDPDTFSDAS  
EASAGEIPTPFVDLPIGATEDRVLGSDIFSATLKKGGEPVFPGLLASANRGILYIDEVN  
LLPAHLVDVLLDASASGVNTVQREGLAVSHPARFVLIGTMNPEEGDLRPQLVDRFGLMCD  
VLAPMDVTRSSVVRIRIAFEGNPVGFREKQWESERELSERILASRQLVQMEFPGLLD  
AISSICVEFRVASLRADITLYKTAALAAWHGRTGVEKDDIKQAAKWLHRKQRNPFDA  
PPPPPPPHANDKSNNSLEDDLMDRIILGSQPPRAEGDSNHETEENPQQPQEAETDDNEDPD  
GSEPNSEDNSNGDGDGDDX

>comp15570\_c0\_seq1; 710 162 1928 LEN=2339; translated  
MIRVKIRFKAKGVRKVLRFDKSIDFPPTLLRKIIHKLGVACQDKNDPSDPRQSFLEMGGW  
IIEDTSEIDHGDELDLVRIHDEEEGNATKELKVESSGDDIDHHGDSKPKTKSSQDKEASV  
PGLNESNSVKEESTDDIDVISISSDEDEDDYRSDDSWDGEYDGSDEEEDLDDRPSKRQK  
HVQSPPEPPLEVFVHKKDI PSAPGKCDEKSNHSSNDDGERFREVSLLDVAGAKKKA  
QEVKNRIMKLLNTGFHDQSNHEAKNAMKLAQRLMRKHNLSQLLLKEREANEKNLQGD

EVLKGGMVRVKIVNRKTRKPSLFFRWIARLTCVPCENFGVQCYFETRREGVRCDIVFYGIY  
SNAQLAGYAFKVATERISQMSAEYQPETSTYHHRTISTKSSRSLSYALGIVEGISKDVEKN  
VRMEKMQRERKLERARLAESKGEAYEESEDEDDCNDNGTGGLSLAKPENESKSDSPQITIS  
LNNVTSTKTNDNRKISGANLQSRVEELEQEAQAAIVLVCHKKKIAEEVLKEHDIKLTSA  
KRKAIDFDKQSYQGIEDSKEIDMNQRAIRAEVVIKTEKNDFFSFDKI  
>comp15571\_c0\_seq1; 903 142 2580 LEN=5730; translated  
MHLGPLLLILLLSIVTGEQDKKIQIDKTNVGEHKIADNDSVRLAANVFAKRSALTTVS  
DGVMGFEVVGAGPEGGRLLRVRASTEADNSDQDPSRPFKERLKKLPKATKSPKKAKSP  
KKNILKTDRCARLIAEDGNWETWVGDVATFAPIFRPATDSELMKIIKNSKKHGCKIRTMG  
ARHTQDGMVMQRTEEDVVVISLASHSTQVEGWSDSINAESSTFRIGAGKSWFDVSALIRP  
HGFVQLSRTTAQYFSVGGVIANMVHGGRTAGFIHDDVVKLVMTSDGTIKEVEGNLDY  
WRSSAGLLGFILSVEMNMHSEALPFIAGLDPETGEPDIVDPSKGGIMEREKSTFFSPINE  
ETFADLVTKVSTKVLETSAVSESVQFFYDFYNNALGEYRTNFGGKRFSGSNGNFADVGKA  
QAYSVATQNLAKLNSDSAFTGGQRVDLSTEALCESFCVPPTGPPAGGGDGSPCVRI  
PSQLVPGADLCNVPLEVNAALSTSIQTILDGAWDAGSSTSDNGYFILDTTSSFDVIAFL  
PARAFATAFATWYDITSKVTTGKLDNTSFAPNGNLEFRFLDPKTTAILNPIPPIDEIKAE  
FDQKYNTLFGGIDSAYDLLPLPPGIPDGYIAFELVNIRGIFDADASKYFFALQEAWS  
SMPTNPLLPYGGVPECDPSSGVLPCQGLPTAGAQCCNPPVPAKLVHYGKGWGYGIDPL  
TSPTTQNFVFPFTNTKAISDMYATGTTKNSVSAFNQKRSELEAEVFSGGSMRLRWLE  
PENPNSKFEV  
RKLDGQSCGSAEYATDPNSECIGQQCVGSICE  
>comp15571\_c0\_seq2; 161 142 519 LEN=519; translated  
MHLGPLLLILLLSIVTGEQDKKIQIDKTNVGEHKIADNDSVRLAANVFAKRSALTTVS  
DGVMGFEVVGAGPEGGRLLRVRASTEADNSDQDPSRPFKERLKVSHASYVIFYQRNL  
STDTNN  
>comp15571\_c0\_seq3; 641 1 2167 LEN=5317; translated  
XLTQIIPRLCCXSAAKLPKATKSPKKAKSPKKNILKTDRCARLIAEDGNWETWVGDVAT  
FAPIFRPATDSELMKIIKNSKKHGCKIRTMGARHTQDGMVMQRTEEDVVVISLASHST  
QVEGWSDSINAESSTFRIGAGKSWFDVSALIRPHGFVQLSRTTAQYFSVGGVIANMV  
HGGRTAGFIHDDVVKLVMTSDGTIKEVEGNLDYWRSSAGLLGFILSVEMNMHSEALP  
FIAGLDPETGEPDIVDPSKGGIMEREKSTFFSPINEETFADLVTKVSTKVLETSAVSE  
SVQFFYDFYNNALGEYRTNFGGKRFSGSNGNFADVGKAQAYSVATQNLAKLNSDSA  
FTGGQRVDLSTEALCESFCVPPTGPPAGGGDGSPCVRI  
PSQLVPGADLCNVPLEVNAALSTSIQTILDGAWDAGSSTSDNGYFILDTTSSFDVIA  
FLPARAFATAFATWYDITSKVTTGKLDNTSFAPNGNLEFRFLDPKTTAILNPIPPIDE  
IKAEFDQKYNTLFGGIDSAYDLLPLPPGIPDGYIAFELVNIRGIFDADASKYFFALQ  
EAWSSMPTNPLLPYGGVPECDPSSGVLPCQGLPTAGAQCCNPPVPAKLVHYGKGWGY  
GIDPLTSPTTQNFVFPFTNTKAISDMYATGTTKNSVSAFNQKRSELEAEVFSGGSM  
RLRWLEPENPNSKFEV  
RKLDGQSCGSAEYATDPNSECIGQQCVGSICE  
>comp15571\_c0\_seq4; 242 1284 1922 LEN=2397; translated  
MQSYDVCTTCKFALTFALATLSICEGLQVTIAGGTGKLGRLLLPKLVDHDVTVLTRNS  
FLASAPNRVTEVFGYLGKGLKHPHVSRLRDWDGGDLLDIVGSDFLGWQQDALKSADV  
VHMVGGYTEQREMATERLVRESFEFNKSAHVTVNPLEEITFISPGMVTLKKKRIQK  
CEDMVRDNCISSRCLRLEAFKDEEACEEIFKTIESLV  
>comp15572\_c0\_seq1; 139 1 396 LEN=396; translated  
HQTRNGEPADYRVSISTDDPLQCEQICRDGGYSFFGFECIRDSGTNVECNCNRART  
DEFPTDTRFVGLPIPGYQAENKDCNAFAFASCGGCSLCEGSSHAFVDGFSMGGPY  
VASVYLRDPSPVLQYGCT  
>comp15572\_c0\_seq2; 103 1 457 LEN=457; translated  
GSDHQTRNGEPADYREIISTDNPLQCEQICRDRGYAFFGFECIHDSGTRVECECN  
HARTDEFPTDTRFVGLPIPGYQAENKDCCTTFASDLYGSGSSSTGCVSSHFPV  
DGFMSMGGPYVASVYLRNPFTRYTFPATTTEQLIHAFVVKGSSVX  
>comp15572\_c0\_seq5; 139 1 445 LEN=445; translated  
HQTRNGEPADYRVSISTDDPLQCEQICRDGGYSFFGFECIRDSGTNVECNCNRART  
DEFPTDTRFVGLPIPGYQAENKDCNAFAFASCGGCSLCEGSSHAFVDGFSMGGPY  
VASVYLRNPFTRYTFPATTTEQLIHAFVVKGSSVX  
>comp15572\_c0\_seq6; 104 1 450 LEN=450; translated  
YGCTGSDWQKRNGRPDSYFELISTSDPFKCEQICRDRGYQFFGFECIRSNGSEVE  
CECNLSLRADGRGPTDKRYDPESFSLEGKTEDCNALSWTLYGGPVCNGAEHAFKSG  
FSMGGPHLASVYLVTVGVVLEEPHVVEEPEEPFPVQYGCT  
>comp15573\_c0\_seq1; 885 1 2896 LEN=3125; translated

LICFLLQPPHLFILFLMISLAPAVPKTRKTNIDEARANA EKAARARDEANNNSRQKEIPI  
EIGSLNKKIEDLKKKIEIDRAVQEDLRSTFKAQSAIEQMKA CKTDLEELKINVSEYSFL  
CQSQRITPPPRELPGNDTDGNGEELKRIMEKVNNEINSKKE DRELELGRQQDAIHRLEAI  
VSEKSALHNHNSVQSIRQKQKRLGALQPSIDRTKKVVEDLRF FEQHEQKIPTPVAITDGRP  
DELLSYVTKRLDEIEDRSTENIPPKMVKQVLQQIFYLVSLRLKILVMLLGKIVTFVLI FL  
RLHSSFRKSKPAKVGAGDDFVCPCCERSMPDEAEFKRFQDAMKKLWSDGSP LLQVDDWTK  
TAKVKYQEWQRIVKGAVGDITEHQRLQKDLVELQKNVSDLD RILIDRKGERDKIKSDIQN  
VELDLKELRELSDASKRWVGDSSRIAMDRIQVNEKESNFRLMNSDREGRDLKQVEGELSD  
SLQRKDEYADKITKLNTELASLNDRVQQASTNATRLEHLFKRMEEKYQE QIKDEETLAVF  
QTEYLK KRAEQEKLS DQIKPLKQRIEKKESDRTRARNLAAEEERRISSTLALFNNDIAGL  
QNI VDAINEYEKSNSKDDVDRMEAQRNELIRKAKEKDEEIEKMT PDLNRMERMVDDQERQ  
RKNLEENINLIRSTVKIKALEKEIGRIEKEKSSVGDRQRLQEDHESLQNRNEQLIESNAR  
LEGRRAEINDTIRGLKRKLSQNEYRDVEEDFRKASIRQDTTEMAVKDIEKYHSNLDKALQ  
RYHGIKITEINAIIRD LWNLT YKGEDITNIEIISGNSAGRTTRS YNYRVVMSKGGGSQM  
DMRGRC SAGQ RVLASIVIRLALAETF CVKFGCISLDEPTVNL DYNKKGLAVALAQIIAS  
RSQQSNFQLVLI THDEDFVLMMKNELSTQSNVSMPEKYFQIRREEGVDGKYYSKIDAIDW  
EELL

>comp15573\_c0\_seq3; 862 1 2927 LEN=3156; translated

LICFLLQPPHLFILFLMISLAPAVPKTRKTNIDEARANA EKAARARDEANNNSRQKEIPI  
EIGSLNKKIEDLKKKIEIDRAVQEDLRSTFKAQSAIEQMKA CKTDLEELKINVSEYSFL  
CQSQRITPPPRELPGNDTDGNGEELKRIMEKVNNEINSKKE DRELELGRQQDAIHRLEAI  
VSEKSALHNHNSVQSIRQKQKRLGALQPSIDRTKKVVEDLRF FEQHEQKIPTPVAITDGRP  
DELLSYVTKRLDEIEDRSTENIPPKMVKQVLQQIFYLSKPAKVGAGDDFVCPCCERSMPD  
EAEFKRFQDAMKKLWSDGSP LLQVDDWTKTAKVKYQEWQRIVKGAVGDITEHQRLQKDLV  
ELQKNVSDLD RILIDRKGERDKIKSDIQNVELDLKELRELSDASKRWVGDSSRIAMDRIQ  
VNEKESNFRLMNSDREGRDLKQVEGELSDSLQRKDEYAGTVFSPIFEMEIKWQLLSPEEV  
AHSHRSV FHRFSYLCTHIRVDKITKLNTELASLNDRVQQASTNATRLEHLFKRMEEKYQE  
QIKDEETLAVFQTEYLK KRAEQEKLS DQIKPLKQRIEKKESDRTRARNLAAEEERRISST  
LALFNNDIAGLQNI VDAINEYEKSNSKDDVDRMEAQRNELIRKAKEKDEEIEKMT PDLNRM  
ERMVDDQERQRKNLEENINLIRSTVKIKALEKEIGRIEKEKSSVGDRQRLQEDHESLQNR  
NEQLIESNARLEGRRAEINDTIRGLKRKLSQNEYRDVEEDFRKASIRQDTTEMAVKDIE  
KYHSNLDKALQRYHGIKITEINAIIRD LWNLT YKGEDITNIEIISGNSAGRTTRS YNYR  
VVMSKGGGSQMDMRGRC SAGQ RVLASIVIRLALAETF CVKFGCISLDEPTVNL DYNKKG  
LAVALAQIIASRSQQSNFQLVLI THDEDFVLMMKNELSTQSNVSMPEKYFQIRREEGVDG  
KYYSKIDAIDWEELL

>comp15573\_c0\_seq4; 819 1 3021 LEN=3250; translated

LICFLLQPPHLFILFLMISLAPAVPKTRKTNIDEARANA EKAARARDEANNNSRQKEIPI  
EIGSLNKKIEDLKKKIEIDRAVQEDLRSTFKAQSAIEQMKA CKTDLEELKINVSEYSFL  
CQSQRITPPPRELPGNDTDGNGEELKRIMEKVNNEINSKKE DRELELGRQQDAIHRLEAI  
VSEKSALHNHNSVQSIRQKQKRLGALQPSIDRTKKVVEDLRF FEQHEQKIPTPVAITDGRP  
DELLSYVTKRLDEIEDRSTENIPPKMVKQVLQQIFYLVSLRLKILVMLLGKIVTFVLI FL  
RLHSSFRKSKPAKVGAGDDFVCPCCERSMPDEAEFKRFQDAMKKLWSDGSP LLQVDDWTK  
TAKVKYQEWQRIVKGAVGDITEHQRLQKDLVELQKNVSDLD RILIDRKGERDKIKSDIQN  
VELDLKELRELSDASKRWVGDSSRIAMDRIQVNEKESNFRLMNSDREGRDLKQVEGELSD  
SLQRKDEYAGTVFSPIFEMEIKWQLLSPEEVAHSHRSV FHRFSYLCTHIRVDKITKLNTE  
LASLNDRVQQASTNATRLEHLFKRMEEKYQE QIKDEETLAVFQTEYLK KRAEQEKLS DQI  
KPLKQRIEKKESDRTRARNLAAEEERRISSTLALFNNDIAGLQNI VDAINEYEKSNSKDD  
VDRMEAQRNELIRKAKEKDEEIEKMT PDLNRMERMVDDQERQRKNLEENINLIRSTVKIK  
ALEKEIGRIEKEKSSVGDRQRLQEDHESLQNRNEQLIESNARLEGRRAEINDTIRGLKRK  
LSQNEYRDVEEDFRKASIRQDTTEMAVKDIEKYHSNLDKALQRYHGIKITEINAIIRD L  
WNLT YKGEDITNIEIISGNSAGRTTRS YNYRVVMSKGGGSQMDMRGRC SAGQ RVLASIVI  
RLALAETF CVKFGCISLDEPTVNL DYNKKGLAVALAQIIASRSQQSNFQLVLI THDEDF  
VLMMKNELSTQSNVSMPEKYFQIRREEGVDGKYYSKIDAIDWEELL

>comp15573\_c0\_seq5; 562 122 1378 LEN=1607; translated

MYLRF TQLSDQIKPLKQRIEKKESDRTRARNLAAEEERRISSTLALFNNDIAGLQNI VDA  
INEYEKSNSKDDVDRMEAQRNELIRKAKEKDEEIEKMT PDLNRMERMVDDQERQRKNLEE  
NINLIRSTVKIKALEKEIGRIEKEKSSVGDRQRLQEDHESLQNRNEQLIESNARLEGRRA  
EINDTIRGLKRKLSQNEYRDVEEDFRKASIRQDTTEMAVKDIEKYHSNLDKALQRYHGIK  
ITEINAIIRD LWNLT YKGEDITNIEIISGNSAGRTTRS YNYRVVMSKGGGSQMDMRGRC  
SAGQ RVLASIVIRLALAETF CVKFGCISLDEPTVNL DYNKKGLAVALAQIIASRSQQSN

FQLVLI THDEDFVLM MNKNE LSTQSNVSMPEKYFQIRREEGVDGKYYSKIDAIDWEELL  
>comp15573\_c0\_seq6; 1208 245 4519 LEN=4748; translated  
MASINKLSVRGVRFSFPEDAEQVLEFYMPLTVIVGANGCGKTTIIESLKFVAVCGALPPGK  
TAGQAFVHDPRSIGSSVVKSNIKLRFNNAAGHTMVIVRSMEVKQSKTKLNFKQLDGTIRA  
TDQHGQRVSM SHKCTELDRQVPLMLGVSKAILENVVVFCHQEDASWPLQEGAVLK KKFDDI  
FDSTRYTKALDV FVKAKKEYILKAKDHKAVVAELRSHRHAAQGFRAEIRKHNEQMEELED  
QLESGRHAI RENKEEQKMVDEL LDKINEIEDRFDIKEQEYVNAKETALTRRGLLEEDLTD  
RFSEDEL RDQLRTFDGKKEAHQDRKRELESRQRTLKRELEAIRHQQSELQSEVGRLQASK  
EADTENRKKRYDKMCAIGTTYGLE DVVSQITQNSQLAAGSTQDSSGSYHSRHHTQGDDDD  
SADGRDMAAPPAILDIPKKDLDEYFRVVRKKKDELEDQVAAEKSKAREQEDAFNNELSDL  
KGKLSSELRADELRTAQLKLNNDIAERTRKARQVPKTRKTNI DEARANA EKAARARDEA  
NNSRQKEIPIEIGSLNKKIEIDLK KKI EIDRAVQEDLRSTFKAQSAIEQMKAKCKTDLEE  
LKINVSEYSFLCQSQRITPPPRELPGNDTDGNGEELKRIMEKVNNEINSK KEDRELELGR  
QQDAIHRLEAIVSEKSALHNH SVQSIRQKQKRLGALQPSIDRTKKVVEDLRF FEQHEQKI  
PTPVAITDGRPDELLSYVTKRLDEIEDRSTENIPPKMVKQVLQQIFYLSKPAKVGAGDDF  
VCPCCERSMPDEAEFKRFQDAMKKLWSDGSP LLQVDDWTKTAKVKYQEWQRI VKGAVGDI  
TEHQRLQKDLVELQKNVSD LDRILIDRKG ERDKIKSDIQNVELDLKELRELS DASKRWVG  
DSSRIAMDRIQVNEKESNFRLMNSDREGRDLKQVEGELSDSLQRKDEYADKITKLNTELA  
SLNDRVQQASTNATRLEHLFKRMEEKYQE QIKDEETLAVFQTEYLK KRAEQEKLS DQIKP  
LKQRIEKKESDRTRARNLAAEEERRISSTLALFNNDIAGLQNI VDAINEYEKSN SKDDVD  
RMEAQRNELIRKAKEKDEEIEKMPDLNRMERMVDDQERQRKNLEENINLIRSTVKIKAL  
EKEIGRIEKEKSSVGDRQRLQEDHESLQNRNEQLIESNARLEGRRAEINDTIRGLKRKLS  
QNEYR DVEEDFRKASIRQDTTEMAVKDIEKYHSNLDKALQRYHG I KITEINAIIRD LWNL  
TYKGEDITNIEIISGNDSAGRTTRS YNRYRVVMSKGGGSQMDMRGRCSAGQRVLASIVIRL  
ALAE TFCVKFGCISLDEPTVNL DYNKKG LAVALAQI IASRSQQSNFQLVLI THDEDFVLM  
MNKNE LSTQSNVSMPEKYFQIRREEGVDGKYYSKIDAIDWEELL

>comp15573\_c0\_seq7; 1099 245 4738 LEN=4967; translated  
MASINKLSVRGVRFSFPEDAEQVLEFYMPLTVIVGANGCGKTTIIESLKFVAVCGALPPGK  
TAGQAFVHDPRSIGSSVVKSNIKLRFNNAAGHTMVIVRSMEVKQSKTKLNFKQLDGTIRA  
TDQHGQRVSM SHKCTELDRQVPLMLGVSKAILENVVVFCHQEDASWPLQEGAVLK KKFDDI  
FDSTRYTKALDV FVKAKKEYILKAKDHKAVVAELRSHRHAAQGFRAEIRKHNEQMEELED  
QLESGRHAI RENKEEQKMVDEL LDKINEIEDRFDIKEQEYVNAKETALTRRGLLEEDLTD  
RFSEDEL RDQLRTFDGKKEAHQDRKRELESRQRTLKRELEAIRHQQSELQSEVGRLQASK  
EADTENRKKRYDKMCAIGTTYGLE DVVSQITQNSQLAAGSTQDSSGSYHSRHHTQGDDDD  
SADGRDMAAPPAILDIPKKDLDEYFRVVRKKKDELEDQVAAEKSKAREQEDAFNNELSDL  
KGKLSSELRADELRTAQLKLNNDIAERTRKARQVPKTRKTNI DEARANA EKAARARDEA  
NNSRQKEIPIEIGSLNKKIEIDLK KKI EIDRAVQEDLRSTFKAQSAIEQMKAKCKTDLEE  
LKINVSEYSFLCQSQRITPPPRELPGNDTDGNGEELKRIMEKVNNEINSK KEDRELELGR  
QQDAIHRLEAIVSEKSALHNH SVQSIRQKQKRLGALQPSIDRTKKVVEDLRF FEQHEQKI  
PTPVAITDGRPDELLSYVTKRLDEIEDRSTENIPPKMVKQVLQQIFYLVSLRLKILVM LL  
GKIVTFVLI FLRLHSSFRKSKPAKVGAGDDFVCPCCERSMPDEAEFKRFQDAMKKLWSDG  
SP LLQVDDWTKTAKVKYQEWQRI VKGAVGDI TEHQRLQKDLVELQKNVSD LDRILIDRKG  
ERDKIKSDIQNVELDLKELRELS DASKRWVG DSSRIAMDRIQVNEKESNFRLMNSDREGR  
DLKQVEGELSDSLQRKDEYAGTVFSPIFEMEIKWQLLSPEEVAHSHRSV FHRFSYLCTHI  
RVDKITKLNTELASLNDRVQQASTNATRLEHLFKRMEEKYQE QIKDEETLAVFQTEYLK K  
RAEQEKLS DQIKPLKQRIEKKESDRTRARNLAAEEERRISSTLALFNNDIAGLQNI VDAI  
NEYEKSNSKDDVDRMEAQRNELIRKAKEKDEEIEKMPDLNRMERMVDDQERQRKNLEEN  
INLIRSTVKIKALEKEIGRIEKEKSSVGDRQRLQEDHESLQNRNEQLIESNARLEGRRAE  
INDTIRGLKRKLSQNEYR DVEEDFRKASIRQDTTEMAVKDIEKYHSNLDKALQRYHG I KI  
TEINAIIRD LWNLTYKGEDITNIEIISGNDSAGRTTRS YNRYRVVMSKGGGSQMDMRGRCS  
AGQRVLASIVIRLALAE TFCVKFGCISLDEPTVNL DYNKKG LAVALAQI IASRSQQSNF  
QLVLI THDEDFVLM MNKNE LSTQSNVSMPEKYFQIRREEGVDGKYYSKIDAIDWEELL

>comp15573\_c0\_seq8; 928 1 2802 LEN=3031; translated  
LICFLLQPPHFLIFLMLISLAPAVPKTRKTNI DEARANA EKAARARDEANNNSRQKEIPI  
EIGSLNKKIEIDLK KKI EIDRAVQEDLRSTFKAQSAIEQMKAKCKTDLEELKINVSEYSFL  
CQSQRITPPPRELPGNDTDGNGEELKRIMEKVNNEINSK KEDRELELGRQQDAIHRLEAI  
VSEKSALHNH SVQSIRQKQKRLGALQPSIDRTKKVVEDLRF FEQHEQKIPTPVAITDGRP  
DELLSYVTKRLDEIEDRSTENIPPKMVKQVLQQIFYLSKPAKVGAGDDFVCPCCERSMPD  
EAEFKRFQDAMKKLWSDGSP LLQVDDWTKTAKVKYQEWQRI VKGAVGDI TEHQRLQKDLV  
ELQKNVSD LDRILIDRKG ERDKIKSDIQNVELDLKELRELS DASKRWVG DSSRIAMDRIQ

VNEKESNFRLMNSDREGRDLKQVEGELSDSLQRKDEYADKITKLNTELASLNDRVQQAST  
NATRLEHLFKRMEEKYQEQIKDEETLAVFQTEYLLKKRAEQEKLSQIKPLKQRIEKKESD  
RTRARNLAAEEERRISSTLALFNNDIAGLQNIVDAINNEYEKSNKDDVDRMEAQRNELIR  
KAKEKDEEIEKMTPLNRMERMVDDQERQRKNLEENINLIRSTVKIKALEKEIGRIEKEK  
SSVGDQRQLQEDHESLQNRNEQLIESNARLEGRRAEINDTIRGLKRKLSQNEYRDVEEDF  
RKASIRQDTTEMAVKDIEKYHSNLDKALQRYHGKITEINAIIRDLWNLTYKGEDITNIE  
IISGNSAGRTRRSYNYRVVMSKGGGSQMDMRGRCSAGQRVLASIVIRLALAETFVCVKG  
CISLDEPTVNLNDYNNKKGLAVALAQIIASRSQQSNFQLVLI THDEDFVLMKKNELSTQSN  
VSMPEKYFQIRREEGVDGKYYSKIDAIDWEELL

>comp15573\_c0\_seq9; 1142 245 4644 LEN=4873; translated  
MASINKLSVRGVRFSFSPEDAEQVLEFYMPLTVIVGANGCGKTTIIESLKFAVCGALPPGK  
TAGQAFVHDPRSIGSSVVKSNIKLRFNNAAGHTMVIIVRSMEVKQSKTKLNFQLDGTIRA  
TDQHGQRVSMHCKTELDQVPLMLGVSKAILENVVVFCHQEDASWPLQEGAVLKKKFDI  
FDSTRYTKALDVVFKAKKEYILKAKDHKAVVAELRSHRHAAQGFRAEIRKHNEQMEELED  
QLESGRHAIARENKEEQKMVDELDDKINEIEDRFDIKEQEYVNAKETALTRRGLLEEDLTD  
RFSEDELQDLRTFDGKKEAHQDRKRELESRQRTLKRELEAIRHQQSELQSEVGRQLQASK  
EADTENRKKRYDKMCAIGTTYGLEDVVSQITQNSQLAAGSTQDSSGSYHSRHHTQGDDDD  
SADGRDMAAPPAILDIPKKDLDEYFRVVRKKKDELEDQVAAEKSKAREQEDAFNNELSDL  
KGLSSVELRADELRTAQLKLNNDIAERTRKARQVPKTRKTNI DEARANA EKAARARDEA  
NNNSRQKEIPIEIGSLNKKIEDLKKKIEIDRAVQEDLRSTFKAQSAIEQMKAACKTDLEE  
LKINVSEYSFLCQSQRITPPPRELPGNDTDGNGEELKRIMEKVNNEINSKKEDELELGR  
QQDAIHRLEAIVSEKSALHNHSVQSIRQKQKRLGALQPSIDRTKKVVEDLRFQHEQKI  
PTPVAITDGRPDELLSYVTKRLDEIEDRSTENIPPKMVKQVLQQIFYLKSKPAKVGAGDDF  
VCPCCERSMPDEAEFKRFQDAMKKLWSDGSPLLQVDDWTKTAKVKYQEWQRIVKGAVGDI  
TEHQRLQKDLVELQKNVSDLDRIIDRKGGERDKIKSDIQNVELDLKELRELSASKRWVG  
DSSRIAMDRIQVNEKESNFRLMNSDREGRDLKQVEGELSDSLQRKDEYAGTVFSPIFEME  
IKWQLLSPEEVAHSHRSVFRHSYLC THIRVDKITKLNTELASLNDRVQQASTNATRLEH  
LFKRMEEKYQEQIKDEETLAVFQTEYLLKKRAEQEKLSQIKPLKQRIEKKESDRTRARNL  
AAEEERRISSTLALFNNDIAGLQNIVDAINNEYEKSNKDDVDRMEAQRNELIRKAKEKDE  
EIEKMTPLNRMERMVDDQERQRKNLEENINLIRSTVKIKALEKEIGRIEKEKSSVGDQR  
RLQEDHESLQNRNEQLIESNARLEGRRAEINDTIRGLKRKLSQNEYRDVEEDFRKASIRQ  
DTTEMAVKDIEKYHSNLDKALQRYHGKITEINAIIRDLWNLTYKGEDITNIEIISGNS  
AGRTRRSYNYRVVMSKGGGSQMDMRGRCSAGQRVLASIVIRLALAETFVCVKGFCISLDEP  
TVNLNDYNNKKGLAVALAQIIASRSQQSNFQLVLI THDEDFVLMKKNELSTQSNVSMPEKY  
FQIRREEGVDGKYYSKIDAIDWEELL

>comp15573\_c0\_seq10; 1165 245 4613 LEN=4842; translated  
MASINKLSVRGVRFSFSPEDAEQVLEFYMPLTVIVGANGCGKTTIIESLKFAVCGALPPGK  
TAGQAFVHDPRSIGSSVVKSNIKLRFNNAAGHTMVIIVRSMEVKQSKTKLNFQLDGTIRA  
TDQHGQRVSMHCKTELDQVPLMLGVSKAILENVVVFCHQEDASWPLQEGAVLKKKFDI  
FDSTRYTKALDVVFKAKKEYILKAKDHKAVVAELRSHRHAAQGFRAEIRKHNEQMEELED  
QLESGRHAIARENKEEQKMVDELDDKINEIEDRFDIKEQEYVNAKETALTRRGLLEEDLTD  
RFSEDELQDLRTFDGKKEAHQDRKRELESRQRTLKRELEAIRHQQSELQSEVGRQLQASK  
EADTENRKKRYDKMCAIGTTYGLEDVVSQITQNSQLAAGSTQDSSGSYHSRHHTQGDDDD  
SADGRDMAAPPAILDIPKKDLDEYFRVVRKKKDELEDQVAAEKSKAREQEDAFNNELSDL  
KGLSSVELRADELRTAQLKLNNDIAERTRKARQVPKTRKTNI DEARANA EKAARARDEA  
NNNSRQKEIPIEIGSLNKKIEDLKKKIEIDRAVQEDLRSTFKAQSAIEQMKAACKTDLEE  
LKINVSEYSFLCQSQRITPPPRELPGNDTDGNGEELKRIMEKVNNEINSKKEDELELGR  
QQDAIHRLEAIVSEKSALHNHSVQSIRQKQKRLGALQPSIDRTKKVVEDLRFQHEQKI  
PTPVAITDGRPDELLSYVTKRLDEIEDRSTENIPPKMVKQVLQQIFYLVSLRLKILVMMLL  
GKIVTFVLI FLRLHSSVFRKSKPAKVGAGDDFVCPCCERSMPDEAEFKRFQDAMKKLWSDG  
SPLLQVDDWTKTAKVKYQEWQRIVKGAVGDI TEHQRLQKDLVELQKNVSDLDRIIDRKG  
ERDKIKSDIQNVELDLKELRELSASKRWVG DSSRIAMDRIQVNEKESNFRLMNSDREGR  
DLKQVEGELSDSLQRKDEYADKITKLNTELASLNDRVQQASTNATRLEHLFKRMEEKYQE  
QIKDEETLAVFQTEYLLKKRAEQEKLSQIKPLKQRIEKKESDRTRARNLAAEEERRISST  
LALFNNDIAGLQNIVDAINNEYEKSNKDDVDRMEAQRNELIRKAKEKDEEIEKMTPLNRM  
ERMVDDQERQRKNLEENINLIRSTVKIKALEKEIGRIEKEKSSVGDQRQLQEDHESLQ  
RNEQLIESNARLEGRRAEINDTIRGLKRKLSQNEYRDVEEDFRKASIRQDTTEMAVKDIE  
KYHSNLDKALQRYHGKITEINAIIRDLWNLTYKGEDITNIEIISGNSAGRTRRSYNYR  
VVMSKGGGSQMDMRGRCSAGQRVLASIVIRLALAETFVCVKGFCISLDEPTVNLNDYNNKK  
GLAVALAQIIASRSQQSNFQLVLI THDEDFVLMKKNELSTQSNVSMPEKYFQIRREEGVDG

KYYSKIDAIDWEELL

>comp15574\_c0\_seq2; 516 160 2670 LEN=3205; translated  
MYIERQNLRPNRKRRRTEGAKNNKSDDKLENNLRCKIGGGYERILFFAVDPKTAQLRLQF  
PAAHCDGEEDFRFPHYCYCNRNDSRYDAPDDTDLFSHSEQRHSQPLYSESPSHPLQKGG  
DSKSDSLCQFYTSRDRRRDRNEVLRGEEWRVQCCDLRQDENQFSLFWDESLRNRHRIERL  
SISTALEMTFSYHQRELYDSTKDAATTASYNVAAVSFEIVLAIVA AFLSLITILAVTLPL  
IKKKKRTRASTYNLYLGLFVAVPDLLYNAFLAYLFLTYDRWIELPSSNIEDTYASSNYSS  
STSSEVPQGGQTPLYGLPLVDHGDDTALFLGCATASLYTNVVICYEILKLLRNSKYRKR  
SKAPTLRKACIQASVTYSLGIMVVLVGVFAGDSMSHTLIVIPIVYVFTVAIPI SYMLWVT  
YRIWCEGLLSHTAGTGRRMRVLRVYFLRIVFIFICIWLPASILYILYWTSPMPQGLLHYL  
ACVFFAIQVFSFGFSLTKPDIRRNVVDLVVGFLLCCCLEFQKEMLPIGDAATGMTESGI  
TEQICDTPKPIKEEPEEEDQNPDSETPEDHHVQQDSKSDSDSYSVYLSGESDDDDDEIT  
WSSFRNRPSFKRSWFIDHSVFLMSSRNYAGSSFWRRRSTMSNLRQGRSDSPKSVNESGK  
KSSFFGFSFCLSPSSKSNVVFDEIHRVKGSGGFVHHYHGDSDDDINDIEAHPNDNESNGNA  
PRLGVHSLEEISGKNEPLQMPPTTETTGPLAPVLAHSNDNKINPEDETERKMLRPEEWPSV  
HHSSTNLSTRDCCSENDRSIDGDNESIEIVFSGDGTSDDLDSVSSDLDFDRSLMD

>comp15575\_c0\_seq1; 758 1 3550 LEN=3578; translated  
TGSTTRRIRNNSNRILPQRSQDGPVDAVASSLPCRSKRPTACGPISDAAEPEGAGSASF  
SGAFQAEELIPWYRFGAHNHVLVRQPATRVHSATALATPRSESTPASATSSVFSAQDLVQ  
GKVGDCWFLSALAVVAERSDLVERLFRTRPGEVGFEDDQRGVVRVNLFLDGIWTPVMDN  
FLPCILGGRGKEEEEELQRAIEASLLDASKNPIRNPYAKLKKAKHNADLYSSCTQRFPPTP  
SIQNNPHGLSISNIRIMNATSDFLREQYSKGDRSISGNSNSFQPRLLKEGHLAQTDLA  
YSKARRNQLWVPFLEKAYAKIHGSYKAISGGHVAEAFDLTGAPTLQIGWHASRLASEGS  
STLYRDPKRLWSDLKRWAQELPMGCGTNHSAGGLIGMHAYSILDVREVS NVGVDFFRDR  
LLTGTGNVSGFNEYDGKVRLLRVRNPHGQGEWKGEFSDKCDMWEKLMVNSGITLPRMA  
NDGTFWIGYDDFLGFSNIDVVLAKGNHAKSFVSNFPKSNHRCQRAFEVSLIDPQPG  
LETKERVEVYVMGIQKSRGARQGRADRKKSYKVSDFGILVGEYALGEEESGDNGYSTIRG  
EGCSPNQPFQAVHGMFGFQRNGHYKLVLDKRYCKRLVMPVVSFGHPAATDEFSLFVVR  
NADAPLMIRELETVPRMDRVLGDFLVSPKPAHFEEKTRQGKTTLWANRDFKVLQVDCRG  
NSGGTVFVYLCTSGSTGTGFAKMTESVLSLEASCRGMSCRVQGGLLDYETTAKGKQFA  
SWRKFSTVVTIGAKSGEAGSERSRLLMVLYQSGQDTEMGTITCKSMGRILGTRNINDCKS  
PTKPAASATLDRYWKKPSVGTNGTQIDRQDDYKELGIFHP IAMDAEAFRRCCGSNYELNS  
STSGFGPTHGEVLVDDADLEIALALSREQDATVPAGANVDNANGKLSIEEAMLQTVLM  
RSRLEHRTSAGGTVLPADDFSRDEAQMEDAPRRGHEERQSPKNEVLDLVGKRTAAGGAPA  
NGLDTAVTIDLTAEEATVATGGAAKGSTAAAGSSEVLDLTAPDARASPLPPRDPPANRSA  
KQDGAGDGGVGTNLLVVLDSSEEGDTGDRPSGSEAPPNGRVGGPSRADGNSGAGPSDAE  
RLAKKRKLAADAAMKRLQXVALAEHVPRHRATGRKEDVMIVPT

>comp15576\_c0\_seq2; 626 295 2247 LEN=2359; translated  
MSLFVPPHRHDEHHSRHHVPPRVHRRPAGNPMKGLSLVLLSLLLLSKGCLCSADAYASG  
SPPSHGR IAGDAVALMDAKALLSAGVSEGNLCRERAPAAGAGEDDAHWAELPLCDPSG  
SDADNSGADAGRRWVKQRGRSRKLEEEITLEGDPWSFFVMASCALACVTTAALAAGLSMG  
MLSLDPLMLLVKIRAPRSPEEKEQAESLLPIVKKHLLLVTLTLLLSMANEALPLFLDRL  
VPPYLAVLLSVTFVLIFGEIVPSAIFTGPKKIELASKMVPVMKVVMILVWPITYPIAKIL  
DHLHLHAEDGEDGESAFDRGEISALVRIQYEERVANKRRRTLGRMASTRASGRDFASAIVSS  
QEADIEAFAGSSSNRDLMERQSSGLSSISDSRTFRESIHMDEVMMVEGALQMKTKTAYDV  
LTP IHRMYAVPEDLILNEESIVDIYSSGYSRIPVYERNPSKPKCKDAIKGILSTKNLIV  
NSTENRPLRTMPLLTTPPCVSPVMNLVELVNLVQGTGREGHFALVCTRPRVGTAAALGESKPL  
PAAAGLLGVITLEDVLEELLQEEILDENDLVEKDAKRRIAQWVGTKWKNQKRKRD LRAQG  
KHASLASVAETMQATNESTSLGRNGNGREHPRKKNQSI LGSYQTMGLE

>comp15576\_c0\_seq4; 292 211 1323 LEN=1435; translated  
MVKVMILVWPITYPIAKILDHLHLHAEDGEDGESAFDRGEISALVRIQYEERVANKRRRTL  
GRMASTRASGRDFASAIVSSQEADIEAFAGSSSNRDLMERQSSGLSSISDSRTFRESIHM  
DEVMMVEGALQMKTKTAYDVLTPIHRMYAVPEDLILNEESIVDIYSSGYSRIPVYERNPS  
KPKCKDAIKGILSTKNLIVNSTENRPLRTMPLLTTPPCVSPVMNLVELVNLVQGTGREGHF  
ALVCTRPRVGTAAALGESKPLPAAAGLLGVITLEDVLEELLQEEILDENDLVEKDAKRRIA  
QWVGTKWKNQKRKRD LRAQGHASLASVAETMQATNESTSLGRNGNGREHPRKKNQSI L  
GSIYQTMGLE

>comp15577\_c0\_seq1; 686 1 2594 LEN=2726; translated  
XTRRHYTVETSWEVSVYTGTDVENRRVIGKRTNGRYGLYRDVPAGWSGPLREPVFGPVPP  
VELSLTWLLQHIDADEGKSHFAIDRSPENTSTKTPRRNPQIEQALSFFHSAFCWAEVHE

QFAVDYPMHVRSGDGDIDEAAQKLGSIESLSDAVFVPLLPLFEDTPDGEEGRIQNDND  
DVQAGSNAILSLPIGGDGDGNSDRERNHSPMGPSPLLSVPDTTRFLNEQIRTLREVRNK  
LRQDYDPDPTTTTLISSAEADVSVLCLHAQELASRYAASIDYIESMLKNQLVAAIGKKIY  
SSDIDKFMRYHNDKLMNPGPKPFCHTIRQPRRYPDGIILSLEREVSGPRGTLEMEPISTHV  
RQVECVPPTTIPLNSATTVELTGETYHLGWLNHGFGDASSNPPMRLIARARQFSSFLV  
GTMGSQNRMHKNAIILRNKDEVHILLNEIPTATEFNDAIGSLSPEQORFAKAFRSMQ  
LESSVLGVCIIQIKPQLEKLLGLPRDSLAKEMKLTEDLTELVEYQVPSDLLSYDGSSE  
STKDQVASVKENVKSILDVIAQQKKEQLEQOTLKTDMAVERRMASESPELRSKMDRRLAE  
YERRFASEPRILCKMAKSDTRNRGRMNSAIKCLKVSDNPPPPKQRELTYYDDCEPEN  
ITEIGCFGATLPSSSKNNTIDFTAIPKILDKAIELNDRDASIRSTTITTADHGWTKRRQP  
NLLSKPQKEFFSTAEIASEKNKAIDLLDALSRGSLEIPFSELHVVCATHRFEKNVMAT  
VIRDNINPIEKLEMSTLLMASTILGVPARHLVCSEKKCKQLSESFPELVKMVDADGSPSE  
SPSGAPINGMEESTLVDKSVADDY

>comp15577\_c0\_seq2; 147 140 701 LEN=701; translated  
MYFFSDFHEFDEEVFKDSVREALVSVQHVLDTDRCPNRLAESVDHEYVDKYKLADLLTN  
TAIISFLVLEGLGLTKEELLRLHNQHSKAPSRATTLRFASSTESCEFKQETVDVVRGL  
QKETKEVTTDTKDFGIDESTTTRFTIETIVNRFTRRHYTVETSWEVSVYTGTDVENRRVI  
GKRTNGRX

>comp15577\_c0\_seq3; 693 1 2679 LEN=2798; translated  
XTRRHYTVETSWEVSVYTGTDVENRRVIGKRTNGRFGLCRDVPANAPSERSGPLQEEVSP  
PVELSLTWLLQHIDADEGKSHFAIDRSPENTLTKTPIRNPQIEQAVSFFHSAFDWAEGVH  
ERFAVDYPMGVRSGDGDIDEAAQKLGSIESLSDAVFVPLLPLFEDTPDGEEGRIQNNEND  
DVQAGSNAILSLPIGGDGDGNGNESDRERNHSPMGPSPLLSVPDTTRFLNEQIRTLREVR  
NKLQRQDYDPDPTTTTLISSAEADVSVLCLHAQELASRYAASIDYIESMLKNQLVAAIGKK  
IYSSDIDKFMRYHNDKLMNPGPKPFCHTIRQPRRYPDGIILSLEREVSGPRGTLEMEPIST  
HVRQVECVPPTTIPLNSATTVELTGETYHLGWLNHGFGDASSNPPMRLIARARQFSSFLV  
VVGTMGSQNRMHKNAIILRNKDEVHILLNEIPTATEFNDAIGSLSPEQORFAKAFRS  
MQLESSVLGVCIIQIKPQLEKLLGLPRDSLAKEMKLTEDLTELVEYQVPSDLLSYDGSSE  
SESTKDQVASVKENVKSILDVIAQQKKEQLEQOTLKTDMAVERRFEQYASHPGGPPVL  
LKKKGKSDTRNRGRMKSGIKCCMRVSGNPPPPKQRELTYYDDANCFDGFSLGGERVEC  
VEEPNCEPENITENITEIGSFGATLPSSSKNNTIDFTAIPKILDKAIELNDRDASIRSTT  
ITTADHGWTKRRQPNLLSKPQKEFFSTAEIASEKNKAIDLLDALSRGSLEIPFSELHV  
VCATHRFEKNVMATVIRDNINPIEKLEMSTLLMASTILGVPARHLVCSEKKCKQLSESF  
ELVKMVDADGSPSESPSGAPINGMEESTLVDKSVADEIFEHDKPDLVTSSAD

>comp15577\_c0\_seq4; 681 1 2643 LEN=2762; translated  
XTRRHYTVETSWEVSVYTGTDVENRRVIGKRTNGRFGLCRDVPANAPSERSGPLQEEVSP  
PVELSLTWLLQHIDADEGKSHFAIDRSPENTLTKTPIRNPQIEQAVSFFHSAFDWAEGVH  
ERFAVDYPMGVRSGDGDIDEAAQKLGSIESLSDAVFVPLLPLFEDTPDGEEGRIQNNEND  
DVQAGSNAILSLPIGGDGDGNGNESDRERNHSPMGPSPLLSVPDTTRFLNEQIRTLREVR  
NKLQRQDYDPDPTTTTLISSAEADVSVLCLHAQELASRYAASIDYIESMLKNQLVAAIGKK  
IYSSDIDKFMRYHNDKLMNPGPKPFCHTIRQPRRYPDGIILSLEREVSGPRGTLEMEPIST  
HVRQVECVPPTTIPLNSATTVELTGETYHLGWLNHGFGDASSNPPMRLIARARQFSSFLV  
VVGTMGSQNRMHKNAIILRNKDEVHILLNEIPTATEFNDAIGSLSPEQORFAKAFRS  
MQLESSVLGVCIIQIKPQLEKLLGLPRDSLAKEMKLTEDLTELVEYQVPSDLLSYDGSSE  
SESTKDQVASVKENVKSILDVIAQQKKEQLEQOTLKTDMAVERRMASESPELRSKMDRRL  
AEYERRFASEPRILCKMAKSDTRNRGRMNSAIKCLKVSDNPPPPKQRELTYYDDCEP  
ENITEIGCFGATLPSSSKNNTIDFTAIPKILDKAIELNDRDASIRSTTITTADHGWTKRR  
QPNLLSKPQKEFFSTAEIASEKNKAIDLLDALSRGSLEIPFSELHVVCATHRFEKNVM  
ATVIRDNINPIEKLEMSTLLMASTILGVPARHLVCSEKKCKQLSESFPELVKMVDADGSP  
SESPSGAPINGMEESTLVDKSVADEIFEHDKPDLVTSSAD

>comp15577\_c0\_seq5; 1003 1 2630 LEN=2762; translated  
XTRRHYTVETSWEVSVYTGTDVENRRVIGKRTNGRYGLYRDVPAGWSGPLREPVFVGPVPP  
VELSLTWLLQHIDADEGKSHFAIDRSPENTSTKTPRRNPQIEQALSFFHSAFCWAEVH  
QFAVDYPMHVRSGDGDIDEAAQKLGSIESLSDAVFVPLLPLFEDTPDGEEGRIQNDND  
DVQAGSNAILSLPIGGDGDGNSDRERNHSPMGPSPLLSVPDTTRFLNEQIRTLREVRNK  
LRQDYDPDPTTTTLISSAEADVSVLCLHAQELASRYAASIDYIESMLKNQLVAAIGKKIY  
SSDIDKFMRYHNDKLMNPGPKPFCHTIRQPRRYPDGIILSLEREVSGPRGTLEMEPISTHV  
RQVECVPPTTIPLNSATTVELTGETYHLGWLNHGFGDASSNPPMRLIARARQFSSFLV  
GTMGSQNRMHKNAIILRNKDEVHILLNEIPTATEFNDAIGSLSPEQORFAKAFRSMQ  
LESSVLGVCIIQIKPQLEKLLGLPRDSLAKEMKLTEDLTELVEYQVPSDLLSYDGSSE



STKDQVASVKENVKSILDVIAQQKKEQLEQOTLKTDMAVERRFEQGYSASHPGGPPVLLK  
KKGKSDTRNRGRMKSGIKCCMRVSGNPPPPPKQRELTYDDANCFLDGFSLGGERVECV  
EPNCEPENITENITEIGSFGATLPSSSKNNTIDFTAIPKILDKAIELNDRDASIRSTTIT  
TADHGWTKRRQPNLLSKPQKEFFSTAEIASEKNKAIDLLDALSRSGSLEIPFSELHVVC  
ATHRFEKNVMATVIRDNINPIEKLEMSTLLMASTILGVPARHLVCSEKKCKQLSESFPEL  
VKMVDADGSPSESPGAPINGMEESTLVDKSVADDY

>comp15577\_c0\_seq6; 678 1 2637 LEN=2756; translated

XTRRHYTEVETSWEVSVYTGTDVENRRVIGKRTNGRYGLYRDVPAGWSGPLREPVFVGPVPP  
VELSLTWLLQHIDADEGKSHFAIDRSPENTSTKTPRRNPQIEQALSFFHSAFCWAEGVHE  
QFAVDYPMHVRSGDGDIDEAAQKLGSIESLSDAVFVPLLPFLFEDTPDGEEGRIQNDND  
DVQAGSNAILSLPIGGDGDGNDSDRERNHSPMGPSPLLSVPDTTRFLNEQIRTLREVRNK  
LRQDYDPDPTTTTTLISSAEADVSVLCLHAQELASRYAASIDYIESMLKNQLVAAIGKKIY  
SSDIDKFMRYHNDKLMNPGPKPFCHTIRQPRYPDGILSLEREVSGPRGTLEMEPISTHV  
RQVECVPTTIPLNSATTVELTGETYLHGWLNHGFGDASSNPPMRLIARARQFSSFLLVV  
GTMGSQNRMHKNAIILRNKDEVHIPLLLNEIPTATEFNDAIGSLSPQQRFKAFRSMQ  
LESSVLGVCIIQIKPQLEKLLGLPRDSLAKEMKLTEDLTELVEYQVPSDLSYDGGSS  
STKDQVASVKENVKSILDVIAQQKKEQLEQOTLKTDMAVERRMASEPELRSKMDRRLAE  
YERRFASEPRILCKMAKSDTRNRGRMNSAIKCLKVSDNPPPPPKQRELTYDDCEPEN  
ITEIGCFGATLPSSSKNNTIDFTAIPKILDKAIELNDRDASIRSTTITADHGWTKRRQ  
NLLSKPQKEFFSTAEIASEKNKAIDLLDALSRSGSLEIPFSELHVVCATHRFEKNVMAT  
VIRDNINPIEKLEMSTLLMASTILGVPARHLVCSEKKCKQLSESFPELVKMVDADGSPSE  
SPSGAPINGMEESTLVDKSVADEIFEHDKPDLVTSSAD

>comp15577\_c0\_seq7; 982 1 2636 LEN=2768; translated

XTRRHYTEVETSWEVSVYTGTDVENRRVIGKRTNGRFGLCRDVPANAPSERSGPLQEEVSP  
PVELSLTWLLQHIDADEGKSHFAIDRSPENTLTKTPIRNPQIEQAVSFFHSAFDWAEGVH  
ERFAVDYPMGVRSGDGDIDEAAQKLGSIESLSDAVFVPLLPFLFEDTPDGEEGRIQNNEND  
DVQAGSNAILSLPIGGDGDGNGNESDRERNHSPMGPSPLLSVPDTTRFLNEQIRTLREVR  
NKLQRQDYDPDPTTTTTLISSAEADVSVLCLHAQELASRYAASIDYIESMLKNQLVAAIGKK  
IYSSDIDKFMRYHNDKLMNPGPKPFCHTIRQPRYPDGILSLEREVSGPRGTLEMEPIST  
HVRQVECVPTTIPLNSATTVELTGETYLHGWLNHGFGDASSNPPMRLIARARQFSSFLV  
VVGTMGSQNRMHKNAIILRNKDEVHIPLLLNEIPTATEFNDAIGSLSPQQRFKAFRSMQ  
MLESSVLGVCIIQIKPQLEKLLGLPRDSLAKEMKLTEDLTELVEYQVPSDLSYDGGSS  
SESTKDQVASVKENVKSILDVIAQQKKEQLEQOTLKTDMAVERRFEQGYSASHPGGPPVLL  
LKKKKGKSDTRNRGRMKSGIKCCMRVSGNPPPPPKQRELTYDDANCFLDGFSLGGERVECV  
VEEPNCEPENITENITEIGSFGATLPSSSKNNTIDFTAIPKILDKAIELNDRDASIRSTT  
ITADHGWTKRRQPNLLSKPQKEFFSTAEIASEKNKAIDLLDALSRSGSLEIPFSELHV  
VCATHRFEKNVMATVIRDNINPIEKLEMSTLLMASTILGVPARHLVCSEKKCKQLSESF  
ELVKMVDADGSPSESPGAPINGMEESTLVDKSVADDY

>comp15577\_c0\_seq8; 689 1 2600 LEN=2732; translated

XTRRHYTEVETSWEVSVYTGTDVENRRVIGKRTNGRFGLCRDVPANAPSERSGPLQEEVSP  
PVELSLTWLLQHIDADEGKSHFAIDRSPENTLTKTPIRNPQIEQAVSFFHSAFDWAEGVH  
ERFAVDYPMGVRSGDGDIDEAAQKLGSIESLSDAVFVPLLPFLFEDTPDGEEGRIQNNEND  
DVQAGSNAILSLPIGGDGDGNGNESDRERNHSPMGPSPLLSVPDTTRFLNEQIRTLREVR  
NKLQRQDYDPDPTTTTTLISSAEADVSVLCLHAQELASRYAASIDYIESMLKNQLVAAIGKK  
IYSSDIDKFMRYHNDKLMNPGPKPFCHTIRQPRYPDGILSLEREVSGPRGTLEMEPIST  
HVRQVECVPTTIPLNSATTVELTGETYLHGWLNHGFGDASSNPPMRLIARARQFSSFLV  
VVGTMGSQNRMHKNAIILRNKDEVHIPLLLNEIPTATEFNDAIGSLSPQQRFKAFRSMQ  
MLESSVLGVCIIQIKPQLEKLLGLPRDSLAKEMKLTEDLTELVEYQVPSDLSYDGGSS  
SESTKDQVASVKENVKSILDVIAQQKKEQLEQOTLKTDMAVERRMASEPELRSKMDRRL  
AEYERRFASEPRILCKMAKSDTRNRGRMNSAIKCLKVSDNPPPPPKQRELTYDDCEPEN  
ENITEIGCFGATLPSSSKNNTIDFTAIPKILDKAIELNDRDASIRSTTITADHGWTKRR  
QPNLLSKPQKEFFSTAEIASEKNKAIDLLDALSRSGSLEIPFSELHVVCATHRFEKNVM  
ATVIRDNINPIEKLEMSTLLMASTILGVPARHLVCSEKKCKQLSESFPELVKMVDADGSP  
SESPGAPINGMEESTLVDKSVADDY

>comp15577\_c0\_seq9; 690 1 2673 LEN=2792; translated

XTRRHYTEVETSWEVSVYTGTDVENRRVIGKRTNGRYGLYRDVPAGWSGPLREPVFVGPVPP  
VELSLTWLLQHIDADEGKSHFAIDRSPENTSTKTPRRNPQIEQALSFFHSAFCWAEGVHE  
QFAVDYPMHVRSGDGDIDEAAQKLGSIESLSDAVFVPLLPFLFEDTPDGEEGRIQNDND  
DVQAGSNAILSLPIGGDGDGNDSDRERNHSPMGPSPLLSVPDTTRFLNEQIRTLREVRNK  
LRQDYDPDPTTTTTLISSAEADVSVLCLHAQELASRYAASIDYIESMLKNQLVAAIGKKIY

SSDIDKFMRYHNDKLMNPGPKPFCHTIRQPRRYPDGILSLEREVSGPRGTLEMEPISTHV  
RQVECVPTTIPLNSATTVELTGETYLHGWLNHGFGDASSNPPMRLIARARQFSSFLLVV  
GTMGSQNRMHKNAIILRNKDEVHILLNEIPTATEFNDAIGSLSPEQORFAKAFRSMQ  
LESSVLGVCIIQIKPQLEKLLGLPRDSLAKEMKLTEDLTELVEYQVPSDLLSYDGSSE  
STKDQVASVKENVKSILDVIAQQKKEQLEQQTLLKTDMAVERRFEQGYASHPGGPPVLLK  
KKGKSDTRNRGRMKSIGKCCMRVSGNPPPPKQRELTYYDDANCFLDGFSLEGGERVEVE  
EPNCEPENITENITEIGSFGATLPSSSKNNTIDFTAIPKILDKAIELNDRDASIRSTTIT  
TADHGWTKRRQPNLLSKPQKEFFSTAEIASEKNKAIDLDDALSRSRGSLEIPFSELHVVC  
ATHRFEKNVMATVIRDNINPIEKLEMSTLLMASTILGVPARHLVCSEKKCKQLSESFPEL  
VKMVDADGSPSESPGAPINGMEESTLVDKSVADEIFEHDKPDLVTSSAD

>comp15578\_c0\_seq1; 118 1 710 LEN=3219; translated  
XEAEERRCQEVEWPLLQRNRSIRNPNGDDTVPVVNNSNADNNTNFDDRNVLVCAGFAGSN  
SENNQCLCTNRGVHADSGNDDNNNREPILKGAAPFRSAGGFFLGDGDLGIDVGADPSA  
FTDQIDYLGDPVTRTLVLFVGGVILLAGLALSSKVDAAIENVLVDFETVMTSNREFED  
RWEAIESQLRVYDGEVEKARMRKQKLFEMEELQTEPELMKRVSAKMAALNSGNQ

>comp15579\_c0\_seq1; 1102 164 4596 LEN=4686; translated  
MTQRKSSGDERNCDGGKPCEEFKLPFPPTDSDENQSERGNLDNLVDDNDAPEDKQLF  
ERLQNEQEQRNGDVTKGTDEKIKIDHLSPLDFALVCCSLTVQDIASLATCSKALHIAC  
SNQDLWRQKFLARWNYDDPTVCDWFSAYQQAYFNPHDLWITHWNCVDPDGLGPGRCCIR  
GEKKRVHNYKIDRSKKTMTKNENEKQEGFSTERHQHKLCPICRYHPCLEIDTRIRNRET  
PIGISTVAQAIEAATNLRVEESSHVLPCKPYSPTVAKHAFTKASTLHRSLDYRQYEENSL  
YFLADLLFFHVYDDQNESSNGEPFEMREWKEYVXKMKTKNASVRPVNNQDDRRAQGRND  
HHPIRDCTSEPALHSWHLVNICNPDHNRPIVWRISVQRSDCFVFPSEGYLLPGESKTI  
TFGLTPFGSLIAYAAQQVNVHREGVDEFWANLYEEESHLPCKPFLFHYHFAPSIPCQRAD  
NIDLSLFQQYQQHQQQGLRSQQHATQSTPNLNFFLNQQTNIGSQWDQSTFNQIQPVRTF  
CVAGHVHTNYSLSSTFRKTLVFPILPRQVPTGTDIFLKRYLPRRHSTFPISQVVFCSPO  
LMEFYPAEWQRLQALRFEDQRNQSVLASKYRTEACWECGLTWGPRMEELGQAFVLAKLE  
SEISYQRCLQRFQCIYRTLKCLVIQYKHRHNYDFYHWNINQNHIVKCLQRKVTNCRGT  
PLLTKKEVHVLLQWEVILDLLSRYSQASDDAAFQKKKITDNLNHYGVYRYPTCTDSVFRD  
SAFDRDTSLLIHPDMISWKIEPRHLELFSHLGNSPGKFCFLREIYKRETKLDDLTLTSLT  
GKGDDNITDIFMNDKISGLKAALSVLADPRSLLVHGLFDKIPYPGRVFRCKLPVLPKLD  
EERCLNKIKHRHQILFSSLITSSSTQFAHYKVQDSDLQSLILVNSLCSSSCDAEALSHSF  
SLRNFINKNIPSPGNRFFALSTAKCDIDGHESLSDDFWFLKEYHSKVTELILEEEDMHG  
LTYSTKKHEESEAEQSMLSQEGAPRQGAADFLEAPGVNNAMLPGRGPRILNLIWISSQF  
GWTVDNNDCCVAVYVDRRILIAHWLSITLAFLLVTLARSYFQLIPAIPTSYQLEGLP  
YHAENKMRFLTVNECFHAGWMLLFYCVLGRYIERYTRRDFLRAMQEHFPVAKERNILH  
RLYIGMFHRGERVWDALCPSVLQRLIFLPQWNRKIDLMRHISFWRSQEWKERRSKFRA  
IGGRGGIFFEERDESLRLGNDCAMKKILAGIIMVLVGFSGSPHFLNSLSVFLCSVGF  
TSLSLQTIIGDRSGVTYRSTGSIVKFSLVTAVIFGLLVGQLVGSSGGAVFLAEFAITSI  
SLLLGGMGTISASGMETWGTFFCLSITAFWGYLFGRCSVIENMLKKKVGISSMLCISVY  
LVFSLFIYSVGYDWETVVDIVIKKTHVSEESPHMLP

>comp15580\_c0\_seq1; 601 742 2916 LEN=3007; translated  
MSSGEFCDNIDLFPPEEILVIHNWQWQLQRQRQLQDKMKNRNSVVFTGIVLSVLVVIAS  
ACVSTRLIKNTNIEYRNSESDRMDWHSIPGDDHDQDDNRNTYEIMILPDRERDDVLMDE  
YNSNFDISHDRGGFDQYKKGKIGVDLSLYVCPPAGEHLEINFSDIIPFRSADRYHRIMLE  
NSSPGILCTLVEVTVEGDLQKPIGRSYNNGRGWEPYRGQHSQTDDIPTSCSDSSSTDCL  
IDLPPLSVERKYALKSYRSLGSRDEAARFLERTTFGPTTSEINAFVADGNSNHTKWITDQ  
IQLPITSHRQFFRERANNFHGETTWMGTLDGFGPCQRGARYRRFVFAKDIGRYLTISTSS  
IDANYKVLVSGGHVRSVIPGRVRRVSTNNKLVVDPDGSYEICSLAGEPCIGSNVGIKFN  
TCYDAIFDGIYGNPVPKLDKQHLVLYEYMRIDVQHTMPAMADFFEGDTQIMQLASDIFD  
ERCPKKTTGAPEKVTIATIGEEFWIHTPSFRLQDNRLLEAPLDDGGRSAVEKSSTAPYDRM  
RVHCSNAPRTFLNEDHCLWSKNACSSSEEQKYSKAAIVCGSPYEVAIHSIDSGIQGRGG  
FDLLTKYNRTLPLKRLLEGQRETWFEISLQGEDQLRQRMALWALSQILAI SPDSL SATFQT  
ESFLAYYDIFVRNAFGNYFDVLKEVTFSPMMAEMLTYNNGVSTGLAWTKLNKRHHADVEVC  
PTLD

>comp15580\_c0\_seq2; 1285 729 6877 LEN=7329; translated  
MSSGEFCDNIDLFPPEEILVIHNWQWQLQRQRQLQDKMKNRNSVVFTGIVLSVLVVIAS  
ACVSTRLIKNTNIEYRNSESDRMDWHSIPGDDHDQDDNRNTYEIMILPDRERDDVLMDE  
YNSNFDISHDRGGFDQYKKGKIGVDLSLYVCPPAGEHLEINFSDIIPFRSADRYHRIMLE  
NSSPGILCTLVEVTVEGDLQKPIGRSYNNGRGWEPYRGQHSQTDDIPTSCSDSSSTDCL

IDLPPLSVERKYALKSYRYSLSGRDEAARFLERTTFGPTTSEINAFVADGSNHTKWITDQ  
IQLPITSHRQFFRERANNFHGETTWMGTLDGFCQORGARYRRFVFAKDIGRYLTIISTSS  
IDANYKVLVGGHVRSVIPGRVKRRVSTNNKLVVPDGSYEICSLAGEPCIGSNVGIKFNS  
TCYDAIFDGIYGNPVPKLDKQHLVLYEYMRIDVQHTMPAMADFFEGDTQIMQLASDIFD  
ERCPKKTGAPEKVTIATIGEEFWIHTPSFRLQDNRLLEAPLDDGGRSAVEKSSSTAPYDRM  
RVHCSNAPRTFLNEDHCLWSKNACSSSEEQKYSKAAIVCGSPYEVATIHSIDSGIQGRGG  
FDLLTKYNRTLPLKRLEGQRETVWFEISLQGEDQLRQRMWALSQILAI SPDSL SATFQT  
ESFLAYYDIFGESIFMPLFISWHSIDDPNSIXTILSFNSVRNAFGNYFDVLKEVTFSPMM  
AEMLTYNNGVSTGLAWTKLNKRHHADENYARELLQLFSIGLYKLNDGTTQKDP SGHEIR  
TYKNHDI SEYAKVFGFKKQRKRGNIEDGGRTHHEENEIDPLQII I ENKDYFPKLGMDNK  
YVGDGYPLCKDLPPRNFLRKGATFRFVGSNPMPELLSEPDEWYGSDPVRISLDPSSVLR  
KLCNKGEGKDCVPSMKLILDSDIDCSGVECVVEELRTFEVEAGSDLWFEYIRPPCVNHAF  
YENGFSIRRQRGEMGQAMCGDPKTLAASTVCCDSFDTSRGFSFAEELFTGERLSFASART  
RCSSSVNTEICENPFVTEDDCKNNGGCDGLGTFYWSSVGC SLTAKINQQGKIAI IHNPQI  
EGTTTHRMVRNDTEIFFRVNWLNHESNSLIQDLISNCANFGCVDEGDNQCICSI STRNTL  
AFVVSQEDIKSAEEVLSSATVGALIENERNFLPIREVDGVS IYDPGELTEETVFQLIDSNG  
QVHYRKNII SEVHIGRGLKFRNPVTFYSLSEPTIRDARYEIDAALHHSFFHENMATFLA  
IRLAQRFGESNPSPRYIKQISMAFRTGAYQHYSSGLQIGSGRYGCLTATIAAILLDNEVA  
DPILDADPTPVSNGDXEEKRRSNMTVTFETNGVLCNLSVXS IQEPYLKLVKVLRSLEFNA  
AKDHP LLRVESDLQGLIGQQSHKLP SVFSFFKSEYQPAGWVTIAGMSSPESQVLSGVT  
SVQMTNTIISYLKYGVTSCFGGFGGSKPKNCRVGATFPNNGESSYDPGSTGLASSMEIVAEL  
ELATLLTSGRLGDEKREI IKNAYEDT IASGKSTKEALINAQQLIITSPEFH TTNLCHTIGR  
RSLP LPEPNNNPKAVIFIMLPGGYDSFNVLVPKECSVTNSQGR TVLDQYMEQRGPVAF  
AFDEASGEFNLTINATGSHQPCSQFAIHDELTVVKDLYDSNDLAF LANAGI INNQGMTKSNY  
HDLTRSQLFAHNM MQHETAKVDPYDKIAGTGVMGRAKDILSKSGYLVSTMSIDNPSIA  
TE  
GVHGMSPSTVIGRRGYQKFATRPKTESDFDIEHYARILNGEMDAFSGIFGETWSQQFST  
GIEEAESYQSIFDQARLDNSIWKTSGYSGREGKLEREHREK WSTIAKVIQKKDVRKNNRDI  
FFVELGSDHNMKDGRLPQLRALNHGLEMFVEQAKSDGFWDITVVISSDFGRTLPN  
SNDGTDHGWWGHYIMGGDVQGGQILGEYPSDLTPSGRLVDDHGRFIPTTSWDSIWNIGIL  
EWTGVTYQADLDYCLPNRHNTASPVVEGGGYFPLLTASVMFKSSSLGQQDPSDPGSRRLR  
GREQNAKNRV

>comp15580\_c0\_seq3; 1451 742 6720 LEN=7172; translated  
MSSGEFCDNIDLFPPEEILVIHNWQWLQRQRQLQDKMKNRNSVFTGIVLSVLVVIAS I  
ACVSTRLIKNTNIEYRNSESDRMDWHSIPGDDHDQDDNRNTYEIMILPDRERDDVLMDE  
YNSNFDISHDRGGFDQYKKGKIGVDLSLYVCPPAGEHLEINFSDIIPFRSADRYHRIMLE  
NSSPGILCTLVEVTVEGDLQLKPIGRSYNGRGWEPYRQGHSGTTDI IPTSCSDSSSTDCL  
IDLPPLSVERKYALKSYRYSLSGRDEAARFLERTTFGPTTSEINAFVADGSNHTKWITDQ  
IQLPITSHRQFFRERANNFHGETTWMGTLDGFCQORGARYRRFVFAKDIGRYLTIISTSS  
IDANYKVLVGGHVRSVIPGRVKRRVSTNNKLVVPDGSYEICSLAGEPCIGSNVGIKFNS  
TCYDAIFDGIYGNPVPKLDKQHLVLYEYMRIDVQHTMPAMADFFEGDTQIMQLASDIFD  
ERCPKKTGAPEKVTIATIGEEFWIHTPSFRLQDNRLLEAPLDDGGRSAVEKSSSTAPYDRM  
RVHCSNAPRTFLNEDHCLWSKNACSSSEEQKYSKAAIVCGSPYEVATIHSIDSGIQGRGG  
FDLLTKYNRTLPLKRLEGQRETVWFEISLQGEDQLRQRMWALSQILAI SPDSL SATFQT  
ESFLAYYDIFVRNAFGNYFDVLKEVTFSPMMAEMLTYNNGVSTGLAWTKLNKRHHADENY  
ARELLQLFSIGLYKLNDGTTQKDP SGHEIRTYKNHDI SEYAKVFGFKKQRKRGNIEDG  
GRTHHEENEIDPLQII I ENKDYFPKLGMDNKYVGDGYPLCKDLPPRNFLRKGATFRFVGS  
NPMPELLSEPDEWYGSDPVRISLDPSSVLRSKLCNKGEGKDCVPSMKLILDSDIDCSGVE  
CVVEELRTFEVEAGSDLWFEYIRPPCVNHAFYENGFSIRRQRGEMGQAMCGDPKTLAAST  
VCCDSFDTSRGFSFAEELFTGERLSFASARTRCSSSVNTEICENPFVTEDDCKNNGGCDG  
LGTFYWSSVGC SLTAKINQQGKIAI IHNPQIEGTTTHRMVRNDTEIFFRVNWLNHESNSL  
IQDLISNCANFGCVDEGDNQCICSI STRNTLAFVVSQEDIKSAEEVLSSATVGALIENERN  
FLPIREVDGVS IYDPGELTEETVFQLIDSNGQVHYRKNII SEVHIGRGLKFRNPVTFY S  
LSEPTIRDARYEIDAALHHSFFHENMATFLAIRLAQRFGESNPSPRYIKQISMAFRTGAY  
QHYSSGLQIGSGRYGCLTATIAAILLDNEVADPILDADPTHGSIQEPYLKLVKVLRSLEF  
NAAKDHP LLRVESDLQGLIGQQSHKLP SVFSFFKSEYQPAGWVTIAGMSSPESQVLSGVT  
SVQMTNTIISYLKYGVTSCFGGFGGSKPKNCRVGATFPNNGESSYDPGSTGLASSMEIVA  
ELATLLTSGRLGDEKREI IKNAYEDT IASGKSTKEALINAQQLIITSPEFH TTNLCHTIG  
RKRSLP LPEPNNNPKAVIFIMLPGGYDSFNVLVPKECSVTNSQGR TVLDQYMEQRGPV  
AFDEASGEFNLTINATGSHQPCSQFAIHDELTVVKDLYDSNDLAF LANAGI INNQGMTKSNY  
HDLTRSQLFAHNM MQHETAKVDPYDKIAGTGVMGRAKDILSKSGYLVSTMSIDNPSIA

TEGVHGMSPSTVIGRRGYQKFATRPKTESDFDIEHYARILNGEMDAFSGIFGETWSQQF  
STGIEEAESYQSIFDQARLDNSIWKTSYSGSREGKLEREHREKWSTRIAKVIQKKDVRKNNR  
DIFFVELGSWDHNNEMKDGLRPLRALNHGLEMFVEQAKSDGFWDITVVISSDFGRTLT  
PNSNDGTDHGWWGHYMMIMGGDVQGGQILGEYPSDLTPSGRLVDDHGRFIPTTSWDSIWNG  
ILEWTGVTYQADLDYCLPNRHNTASPVEGGGYFPLLTASVMFKSSSLGQQDPSPDGSRRS  
LRGREQNAKNRV

>comp15580\_c0\_seq5; 565 372 2632 LEN=2723; translated  
MSSGEFCDNIDLFPPEEILVIHNWQWQLQRQRQLQDKMKNRNSVVFTGIVLSVLVVIASI  
ACVSTRLIKNTNIEYRNSESDRMDWHSIPGDDHDQDDNRNTYEIMILPDRERDDVLMDE  
YNSNFDISHDRGGFDQYKKGKIGVDLSLYVCPAGEHLEINFSDIIPFRSADRYHRIMLE  
NSSPGILCTLVEVTVEGDLQLKPIGRSYNGRWEPYRGQHSGTDDIIPITSCSDSSSTDCL  
IDLPPLSVERKYALKSYRYSLSRDEAARFLERTTFGPTTSEINAFVADGSNHTKWITDQ  
IQLPITSHRQFFRERANNFHGETTWMGTLDGFCQORGARYRRFVFAKDIGRYLTIISTSS  
IDANYKVLVSGGHVRSVIPGRVKRRVSTNNKLVVPDGSYEICSLAGEPCIGSNVGIKFN  
TCYDAIFDGIYGNPVPKLDKQHLVLYEYMRIDVQHTMPAMADFFEGDTQIMQLASDIFD  
ERCPKKTGAPEKVTIATIGEEFWIHTPSFRLQDNRLLEAPLDDGGRSAVEKSSSTAPYDRM  
RVHCSNAPRTFLNEDHCLWSKNACSSSEEQKYSKAAIVCGSPYEVATIHSIDSGIQGRGG  
FDLLTKYRNLPLKRLLEGQRETVMFEISLQGEDQLRQRMALWALSQILAI SPDSL SATFQT  
ESFLAYYDIFGESIFMPLFISWHSIDDPNSIXTILSFNSVRNAFGNYFDVLKEVTFSPMM  
AEMLTYNNGVSTGLAWTKLNKRHHADVEVCPTLD

>comp15580\_c0\_seq6; 1451 372 6350 LEN=6802; translated  
MSSGEFCDNIDLFPPEEILVIHNWQWQLQRQRQLQDKMKNRNSVVFTGIVLSVLVVIASI  
ACVSTRLIKNTNIEYRNSESDRMDWHSIPGDDHDQDDNRNTYEIMILPDRERDDVLMDE  
YNSNFDISHDRGGFDQYKKGKIGVDLSLYVCPAGEHLEINFSDIIPFRSADRYHRIMLE  
NSSPGILCTLVEVTVEGDLQLKPIGRSYNGRWEPYRGQHSGTDDIIPITSCSDSSSTDCL  
IDLPPLSVERKYALKSYRYSLSRDEAARFLERTTFGPTTSEINAFVADGSNHTKWITDQ  
IQLPITSHRQFFRERANNFHGETTWMGTLDGFCQORGARYRRFVFAKDIGRYLTIISTSS  
IDANYKVLVSGGHVRSVIPGRVKRRVSTNNKLVVPDGSYEICSLAGEPCIGSNVGIKFN  
TCYDAIFDGIYGNPVPKLDKQHLVLYEYMRIDVQHTMPAMADFFEGDTQIMQLASDIFD  
ERCPKKTGAPEKVTIATIGEEFWIHTPSFRLQDNRLLEAPLDDGGRSAVEKSSSTAPYDRM  
RVHCSNAPRTFLNEDHCLWSKNACSSSEEQKYSKAAIVCGSPYEVATIHSIDSGIQGRGG  
FDLLTKYRNLPLKRLLEGQRETVMFEISLQGEDQLRQRMALWALSQILAI SPDSL SATFQT  
ESFLAYYDIFVRNAFGNYFDVLKEVTFSPMMAEMLTYNNGVSTGLAWTKLNKRHHADENY  
ARELLQLFSIGLYKLNDDGTQKDPSCHEIRTYKNHDI SEYAKVFGFKKQRKRNIEDG  
GRTHHEENEIDPLQII IENKDYFPKLGMDNKYVGDGYPLCKDLPPRNFLRKGATFRFVGS  
NMPPELLSEPDWEYGSDPVRI SLDPSSVLRSKLCNKGEKDCVPSMKLILDSDIDCSGVE  
CVVEELRTFEVEAGSDLWFEYIRPPCVNHAFYENGFSIRRQRGEMGQAMCGDPKTLAAS  
VCCDSFDTSRGSFAREELFTGERLSFASARTRCSSSVNTEICENPFVTEDDCKNNGGCDG  
LGTFFYSSVGCSLTAKINQQKIAI IHNPIEGTTTHRMVRNDTEIFFRVNWLNHESNSL  
IQDLISNCANFGCVDEGDNQCICISISTRNTLAFVSQEDIKSAEEVLSSATVGALIENERN  
FLPIREVDGVSIPYDGELETETVFQLIDNSNGQVHYRKNII SEVHIGRGLKFRNPVTFYS  
LSEPTIRDARYEIDAALHHSFFHENMATFLAIRLAQRFGESNPSPRYIKQISMAFRTGAY  
QHYSSGLQIGSGRYGCLTATIAAILLDNEVADPILDADPTHGSIQEPYLKLVKVLRSLEF  
NAAKDHPLLRVESDLQGLIGQQSHKLPVSVFSEYQFAGWVTIAGMSSPESQVLSGVT  
SVQMTNTIISYLKYGVTSCFGGFGGSKPKNCRVGFATFPNNGESSYDPGSTGLASSMEIVA  
ELATLLTSGRLGDEKREIKNAYEDTASGKSTKEALINAQQLIITSPEFHNTNLCHTIG  
RKRSLPLPEPNNNPYKAVIFIMLPGGYDSFNVLVPKECSVTNSQGRTVLDQYMEQRPV  
AFDEASGEFNLINATGSHQPCSQFAIHDELTVVKDLYDSNDLAFLANAGI INNQGMTKS  
NYHDLTRSOLFANMMQHETAKVDPYDKIAGTGVMGRAKDILSKSGYLVSTMSIDNPSIA  
TEGVHGMSPSTVIGRRGYQKFATRPKTESDFDIEHYARILNGEMDAFSGIFGETWSQQF  
STGIEEAESYQSIFDQARLDNSIWKTSYSGSREGKLEREHREKWSTRIAKVIQKKDVRKNNR  
DIFFVELGSWDHNNEMKDGLRPLRALNHGLEMFVEQAKSDGFWDITVVISSDFGRTLT  
PNSNDGTDHGWWGHYMMIMGGDVQGGQILGEYPSDLTPSGRLVDDHGRFIPTTSWDSIWNG  
ILEWTGVTYQADLDYCLPNRHNTASPVEGGGYFPLLTASVMFKSSSLGQQDPSPDGSRRS  
LRGREQNAKNRV

>comp15580\_c0\_seq8; 601 729 2903 LEN=2994; translated  
MSSGEFCDNIDLFPPEEILVIHNWQWQLQRQRQLQDKMKNRNSVVFTGIVLSVLVVIASI  
ACVSTRLIKNTNIEYRNSESDRMDWHSIPGDDHDQDDNRNTYEIMILPDRERDDVLMDE  
YNSNFDISHDRGGFDQYKKGKIGVDLSLYVCPAGEHLEINFSDIIPFRSADRYHRIMLE  
NSSPGILCTLVEVTVEGDLQLKPIGRSYNGRWEPYRGQHSGTDDIIPITSCSDSSSTDCL

IDLPPLSVERKYALKSYRYSLSGRDEAARFLERTTFGPTTSEINAFVADGSNHTKWITDQ  
IQLPITSHRQFFRERANNFHGETTWMGTLDFGPCQRGARYRRFVFAKDIGRYLTIISTSS  
IDANYKVLVSGGHVRSVIPGRVKRRVSTNNKLVVPDGSYEICSLAGEPCIGSNVGIKFN  
TCYDAIFDGIYGNPVPKLDKQHLVLYEYMRIDVQHTMPAMADFFEGDTQIMQLASDIFD  
ERCPKKTGAPEKVTIATIGEEFWIHTPSFRLQDNRLLEAPLDDGGRSAVEKSSSTAPYDRM  
RVHCSNAPRTFLNEDHCLWSKNACSSSEEQKYSKAAIVCGSPYEVATIHSIDSGIQGRGG  
FDLLTKYNRTLPLKRLEGQRETVWFEISLQGEDQLRQRMWALSQILAI SPDSL SATFQT  
ESFLAYYDIFVRNAFGNYFDVLKEVTFSPMMAEMLTYNNGVSTGLAWTKLNKRHHADVC  
PTLD

>comp15580\_c0\_seq9; 565 729 2989 LEN=3080; translated  
MSSGEFCDNIDLFPPEEILVIHNNWQWLQRQRQLQDKMKNRNSVVFVTVLVLVVIAS  
ACVSTRLIKNTNIEYRNSSEDRMDWHSIPGDDHDQDDNRNTYEIMILPDRERDDVLMDE  
YNSNFDISHDRGGFDQYKKGKIGVDLSLYVCPAGEHLEINFSDIIPFRSADRYHRIMLE  
NSSPGILCTLVEVTVEGDLQKPIGRSYNGRWEPYRQHS GTTDI IPTSCSDDSSDCL  
IDLPPLSVERKYALKSYRYSLSGRDEAARFLERTTFGPTTSEINAFVADGSNHTKWITDQ  
IQLPITSHRQFFRERANNFHGETTWMGTLDFGPCQRGARYRRFVFAKDIGRYLTIISTSS  
IDANYKVLVSGGHVRSVIPGRVKRRVSTNNKLVVPDGSYEICSLAGEPCIGSNVGIKFN  
TCYDAIFDGIYGNPVPKLDKQHLVLYEYMRIDVQHTMPAMADFFEGDTQIMQLASDIFD  
ERCPKKTGAPEKVTIATIGEEFWIHTPSFRLQDNRLLEAPLDDGGRSAVEKSSSTAPYDRM  
RVHCSNAPRTFLNEDHCLWSKNACSSSEEQKYSKAAIVCGSPYEVATIHSIDSGIQGRGG  
FDLLTKYNRTLPLKRLEGQRETVWFEISLQGEDQLRQRMWALSQILAI SPDSL SATFQT  
ESFLAYYDIFGESIFMPLFISWHSIDDPNSIXTILSFNSVRNAFGNYFDVLKEVTFSPM  
MAEMLTYNNGVSTGLAWTKLNKRHHADVCPTLD

>comp15580\_c0\_seq10; 1321 729 6791 LEN=7243; translated  
MSSGEFCDNIDLFPPEEILVIHNNWQWLQRQRQLQDKMKNRNSVVFVTVLVLVVIAS  
ACVSTRLIKNTNIEYRNSSEDRMDWHSIPGDDHDQDDNRNTYEIMILPDRERDDVLMDE  
YNSNFDISHDRGGFDQYKKGKIGVDLSLYVCPAGEHLEINFSDIIPFRSADRYHRIMLE  
NSSPGILCTLVEVTVEGDLQKPIGRSYNGRWEPYRQHS GTTDI IPTSCSDDSSDCL  
IDLPPLSVERKYALKSYRYSLSGRDEAARFLERTTFGPTTSEINAFVADGSNHTKWITDQ  
IQLPITSHRQFFRERANNFHGETTWMGTLDFGPCQRGARYRRFVFAKDIGRYLTIISTSS  
IDANYKVLVSGGHVRSVIPGRVKRRVSTNNKLVVPDGSYEICSLAGEPCIGSNVGIKFN  
TCYDAIFDGIYGNPVPKLDKQHLVLYEYMRIDVQHTMPAMADFFEGDTQIMQLASDIFD  
ERCPKKTGAPEKVTIATIGEEFWIHTPSFRLQDNRLLEAPLDDGGRSAVEKSSSTAPYDRM  
RVHCSNAPRTFLNEDHCLWSKNACSSSEEQKYSKAAIVCGSPYEVATIHSIDSGIQGRGG  
FDLLTKYNRTLPLKRLEGQRETVWFEISLQGEDQLRQRMWALSQILAI SPDSL SATFQT  
ESFLAYYDIFVRNAFGNYFDVLKEVTFSPMMAEMLTYNNGVSTGLAWTKLNKRHHADENY  
ARELLQLFSIGLYKLNDDGTQKDP SGHEIRTYKNHDI SEYAKVFGFKKQRKRGNI EDG  
GRTHHEENEIDPLQII I ENKDYFPKLGMDNKYVGDGYPLCKDLP PRNFLRKGATFRFVGS  
NMPPELLSEPDWEYGS DPVRI SLDPSSVLRSKLCNKGEKDCVPSMKLILDSDIDCSGVE  
CVVEELRTFEVEAGSDLWFEYIRPPCVNHAFYENGFS IRRQRGEMGQAMCGDPKTLAAS  
T VCCDSFDTSRGSFAREELFTGERLSFASARTRCSSSVNTEICENPFVTEDDCKNNGGCDG  
LGTFFYSSVGC SLTAKINQQGKIAI IHN PQIEGTTTHRMVRNDTEIFFRVNWLNHESNSL  
IQDLISNCANFGCVDEGDNQCICISISTRNTLAFVSQEDIKSAEEVLSSATVGAL IENERN  
FLPIREVDGVS IYPDGELTEETVFQLIDSNQVHYRKN I SEVHIGRGLKFRNPVTFYS  
LSEPTIRDARYEIDAALHHSFFHENMATFLAIRLAQRFGESNPSPRYIKQISMAFR TGAY  
QHYSSGLQIGSGRYGCLTATIAAILLDNEVADPILDADPTPVSNGDXEEKRRSNMTVTFE  
TNGVLCNLSVXSIQEPYLKLVKVLRSLEFNAAKDHPLLRVESDLQGLIGQQSHKLP SVFS  
FFKSEYQPAGWVTIAGMSSPESQVLSGVT SVQMTNTI ISYLKYGVTSCFGGFGGSKPKNC  
RVGATFPNNGESSYDPGSTGLASSMEIVAELATLLTSGRLGDEKREI IKNAYEDT IASGK  
STKEALINAQQLIITSPEFHTTNLCHTIGRKRSLPLLEPNNNPYKAVIFIMLPGGYDSF  
NVLVPKECSVTNSQGRTVLDQYMEQRGPVAFDEASGEFNL TINATGSHQPCSQFAIHDEL  
TVVKDLYSNDLAFLANAGI INNQGMTKSNYHDLTRS QLF AHNMMQHETAKVDPYDKIAG  
TGVMGRAKDILSKSGYL VSTMSIDNPSIATEGVHGMSPPSTVIGRRGYQKFATRPKTESD  
FDIEHYARILNGEMDAFSGIFGETWSQQFSTGIEEAEASYQSIFDQARLDNSIWKTSGYSR  
EGKLEREHREKWTIAKVIQKDV RKNNRDIFFVELGSDWHHNEMKDGLRPQLRALNHGL  
EMFVEQAKSDGFWDITVVISSDFGRTLTPNSNDGTDHGWGGHYMIMGGDVQGGQILGEY  
PSDLTPSGRLVDDHGRFIPTTSWDSIWNGILEWTGVTYQADLDYCLPNRHNTAS PVEGGG  
YFPLLTASVMFKSSSLGQQDPSPDGSRRSLRGREQNAKNRV

>comp15580\_c0\_seq11; 1415 372 6436 LEN=6888; translated  
MSSGEFCDNIDLFPPEEILVIHNNWQWLQRQRQLQDKMKNRNSVVFVTVLVLVVIAS

ACVSTRLLIKNTNIEYRNSESDRMDWHSIPGDDHDQDDNRNTYEIMILPDRERDDVLMDE  
YNSNFDISHDRGGFDQYKKGKIGVDLSLYVCPAGEHLEINFSDIIPFRSADRYHRIMLE  
NSSPGILCTLVEVTVEGDLQLKPIGRSYNGRGWEPYRGQHS GTTDI IPTSCSDDSS TDCL  
IDLPPLSVERKYALKSYRYSLSRDEAARFLERTTFGPTTSEINAFVADGSNHTKWITDQ  
IQLPITSHRQFFRERANNFHGETTWMGTLDGFCQORGARYRRFVFAKDIGRYLTI STSS  
IDANYKVL SVGGHVRSVIPGRVKRRVSTNNKLVVPDGSYEICSLAGEPCIGSNVGIKFNS  
TCYDAIFDGIYGNPVPKLDKQHLVLYEYMRIDVQHTMPAMADFFEGDTQIMQLASDIFD  
ERCPKKTGAPEKVTIATIGEEFWIHTPSFRLQDNRL EAPLDDGGRSAVEKSS TAPYDRM  
RVHCSNAPRTFLNEDHCLWSKNACSSSEEQKYSKAAIVCGSPYEVATIHSIDSGIQGRGG  
FDLLTKYNRTLPLKRLEGQRET VWF EISLQGEDQLRQRM AWALSQILAI SPDSL SATFQT  
ESFLAYYDIFGESIFMPLFISWHSIDDPNSIXTILSFNSVRNAFGNYFDVLKEVTFSPMM  
AEMLTYNNGVSTGLAWTKLNKRHHADENYARELLQLFSIGLYKLNDDGTTQKDP SGHEIR  
TYKNHDI SEYAKVVFVGGFKQRKRGNIEDGGRTHHEENEIDPLQII IENKDYFPKLGMDNK  
YVGDGYPLCKDLPPRNFLRKGATFRFVGSNMPPELLSEPDEWYGS DPVRI SLDPSSV LRS  
KLCNKGEKDCVPSMKLILDSDIDCSGVECVVEELRTFEVEAGSDLWFEYIRPPCVNHAF  
YENGF SIRRQRGEMGQAMCGDPKTLAASTVCCDSFDTSRGSFAREELFTGERLSFASART  
RCSSSVNTEICENPFVTEDDCKNNGGCDGLGT FYWSSVGC SLTAKINQQGKIAI IHNPQI  
EGT TTHRMVRNDTEIFFRVNWLNHESNSLIQDLISNCANFGCVDEGDNQCICISISTRNTL  
AFVSQEDIKSAEEVLSSATV GALIENERNFLPIREVDGVS IYPDGELTEETV FQLIDSNG  
QVHYRKNII SEVHIGRGLKFRNPVTFYSLSEPTIRDAR YEIDAALHHSFFHENMATFLA  
IRLAQRFGESNPSPRYIKQISMAFRTGAYQHYSSGLQIGSGRYGCLTATIAA ILLDNEVA  
DPIILDADPTHGSIQEPYKLVKVLRSLEFNAAKDHP LLRVESDLQGLIGQQSHKLP SVFS  
FFKSEYQPAGWVTIAGMSSPESQVLSGVT SVQMTNTI ISYLKYGVTSCFGGFGGSKPKNC  
RVGATFPNNGESSYDPGSTGLASSMEIVAE LATLLTSGRLGDEKREI IKNAYEDT IASGK  
STKEALINAQQLIITSPEFH TTNLCHTIGRKRSLPLLPENNNPYKAVIFIMLPGGYDSF  
NVLVPKECSVTNSQGRTVLDQYMEQRGPVAFDEASGEFNL TINATGSHQPCSQFAIHDEL  
TVVKDLYDSNDLAF LANAGI INNQGMTKSNYHDLTRS QLF AHNMMQHETAKVDPYDKIAG  
TGVMGRAKDILSKSGYLVSTMSIDNPSIATEGVHGMSPPSTVIGRRGYQKFATR PKTESD  
FDIEHYARILNGEMDAFSGIFGETWSQQFSTGIEEAESYQSIFDQARLDNSIWKTSGYSR  
EGKLEREHREKWTIAKVIQKKDVRKNNRDIFFVELGSDWHHNEMKDGLRPLRALNHGL  
EMFVEQAKSDGFWDITVVISSDFGRTLTPNSNDGTDHGWWGGHYMIMGGDVQGGQILGEY  
PSDLTPSGRLVDDHGRFIPTTSWDSIWNGILEWTVTYQADLDYCLPNRHNTASPV EGGG  
YFPLLTASVMFKSSSLGQQDPSPDGSRRLRGREQNAKNRV

>comp15580\_c0\_seq12; 601 372 2546 LEN=2637; translated  
MSSGEFCDNIDLFPPEEILVIHNWQWQLQRQRQLQDKMKNRNSVVF TGIVLSVLVVIAS I  
ACVSTRLLIKNTNIEYRNSESDRMDWHSIPGDDHDQDDNRNTYEIMILPDRERDDVLMDE  
YNSNFDISHDRGGFDQYKKGKIGVDLSLYVCPAGEHLEINFSDIIPFRSADRYHRIMLE  
NSSPGILCTLVEVTVEGDLQLKPIGRSYNGRGWEPYRGQHS GTTDI IPTSCSDDSS TDCL  
IDLPPLSVERKYALKSYRYSLSRDEAARFLERTTFGPTTSEINAFVADGSNHTKWITDQ  
IQLPITSHRQFFRERANNFHGETTWMGTLDGFCQORGARYRRFVFAKDIGRYLTI STSS  
IDANYKVL SVGGHVRSVIPGRVKRRVSTNNKLVVPDGSYEICSLAGEPCIGSNVGIKFNS  
TCYDAIFDGIYGNPVPKLDKQHLVLYEYMRIDVQHTMPAMADFFEGDTQIMQLASDIFD  
ERCPKKTGAPEKVTIATIGEEFWIHTPSFRLQDNRL EAPLDDGGRSAVEKSS TAPYDRM  
RVHCSNAPRTFLNEDHCLWSKNACSSSEEQKYSKAAIVCGSPYEVATIHSIDSGIQGRGG  
FDLLTKYNRTLPLKRLEGQRET VWF EISLQGEDQLRQRM AWALSQILAI SPDSL SATFQT  
ESFLAYYDIFVRNAFGNYFDVLKEVTFSPMMAEMLTYNNGVSTGLAWTKLNKRHHAD EVC  
PTLD

>comp15580\_c0\_seq13; 1415 742 6806 LEN=7258; translated  
MSSGEFCDNIDLFPPEEILVIHNWQWQLQRQRQLQDKMKNRNSVVF TGIVLSVLVVIAS I  
ACVSTRLLIKNTNIEYRNSESDRMDWHSIPGDDHDQDDNRNTYEIMILPDRERDDVLMDE  
YNSNFDISHDRGGFDQYKKGKIGVDLSLYVCPAGEHLEINFSDIIPFRSADRYHRIMLE  
NSSPGILCTLVEVTVEGDLQLKPIGRSYNGRGWEPYRGQHS GTTDI IPTSCSDDSS TDCL  
IDLPPLSVERKYALKSYRYSLSRDEAARFLERTTFGPTTSEINAFVADGSNHTKWITDQ  
IQLPITSHRQFFRERANNFHGETTWMGTLDGFCQORGARYRRFVFAKDIGRYLTI STSS  
IDANYKVL SVGGHVRSVIPGRVKRRVSTNNKLVVPDGSYEICSLAGEPCIGSNVGIKFNS  
TCYDAIFDGIYGNPVPKLDKQHLVLYEYMRIDVQHTMPAMADFFEGDTQIMQLASDIFD  
ERCPKKTGAPEKVTIATIGEEFWIHTPSFRLQDNRL EAPLDDGGRSAVEKSS TAPYDRM  
RVHCSNAPRTFLNEDHCLWSKNACSSSEEQKYSKAAIVCGSPYEVATIHSIDSGIQGRGG  
FDLLTKYNRTLPLKRLEGQRET VWF EISLQGEDQLRQRM AWALSQILAI SPDSL SATFQT  
ESFLAYYDIFGESIFMPLFISWHSIDDPNSIXTILSFNSVRNAFGNYFDVLKEVTFSPMM

AEMLTYNNGVSTGLAWTKLNKRHHADENYARELLQLFSIGLYKLNDDGTTQKDPGSGHEIR  
TYKNHDISEYAKVVFVGGFKKQRKRGNIEDGGRTHHEENEIDPLQII I ENKDYFPKLGMDNK  
YVGDGYPLCKDLPPRNFLRKGATFRFVGSNMPPELLSEPDEWYGSDPVRISLDPSSVLR  
KLCNKGEGKDCVPSMKLILDSDIDCSGVECVVEELRTFEVEAGSDLWFEYIRPPCVNHAF  
YENGFSIRRQRGEMGQAMCGDPKTLAASTVCCDSFDTSRGSFAREELFTGERLSFASART  
RCSSSVNTEICENPFVTEDDCKNNGGCDGLGTFYWSSVGC SLTAKINQQGKIAI IHNPQI  
EGTTTHRMVRNDTEIFFRVNWLNHESNSLIQDLISNCANFGCVDEGDNQCICISISTRNTL  
AFVSQEDIKSAEEVLSSATVGALIEENERFLPIREVDGVSIIYDPGELTEETVTFQLIDSNG  
QVHYRKNIISEVHIGRGLKFRNPVTFYSLSEPTIRDARYEIDAALHHSFFHENMATFLA  
IRLAQRFGESNPSPRYIKQISMAFRTGAYQHYSSGLQIGSGRYGCLTATIAAILLDNEVA  
DPILDADPTHGSIQEPYLKLVKVLRSLEFNAAKDHPLLRVESDLQGLIGQQSHKLPVFS  
FFKSEYQPAGWVTIAGMSSPESQVLSGVT SVQMTNTIISYLKYGVTSCFGGFGGSKPKNC  
RVGATFPNNGESSYDPGSTGLASSMEIVAELATLLTSGRLGDEKREI IKNAYEDT IASGK  
STKEALINAQQLIITSPEFHNTNLCHTIGRKRSLPLLPENNNPYKAVIFIMLPGGYDSF  
NVLVPKECSVTNSQGRVLDQYMEQRGPVAFDEASGEFNL TINATGSHQPCSQFAIHDEL  
TVVKDLYDSNDLAFLANAGI INNQGMTKSNYHDLTRS QLFAHNMMQHETAKVDPYDKIAG  
TGVMGRAKDILSKSGYLVSTMSIDNPSIATEGVHGMSPSTVIGRRGYQKFATRPKTESD  
FDIEHYARILNGEMDAFSGIFGETWSQQFSTGIEEAEASYQSIFDQARLDNSIWKTSGYSR  
EGKLEREHREKWTIAKVIQKKDVRKNNRDIFFVELGSDWHHNMKDGLRPQLRALNHGL  
EMFVEQAKSDGFWDITVVISSDFGRTLTPNSNDGTDHGWGGHYMIMGGDVQGGQILGEY  
PSDLTPSGRLVDDHGRFIPTTSWDSIWNGILEWTVTYQADLDYCLPNRHNTASPVVEGGG  
YFPLLTASVMFKSSSLGQQDPSPDGSRRLRGREQNAKNRV

>comp15580\_c0\_seq14; 1321 372 6434 LEN=6886; translated

MSSGEFCDNIDLFPPEEILVIHNWQWQLQRQRQLQDKMKNRNSVVFTGIVLSVLVVIAS  
ACVSTRLIKNTNIEYRNSESDRMDWHSIPGDDHDQDDNRNTYEIMILPDRERDDVLMDE  
YNSNFDISHDRGGFDQYKKGKIGVDLSLYVCPPAGEHLEINFSDIIPFRSADRYHRIMLE  
NSSPGILCTLVEVTVEGDLQLKPIGRSYNNGRWEPYRGQHS GTTDI IPTSCSDDSS TDCL  
IDLPLSVERKYALKSYRYSLSRDEAARFLERTTFGPTTSEINAFVADGSNHTKWITDQ  
IQLPITSHRQFFRERANNFHGETTWMGTLDFGPCQRGARYRRFVFAKDIGRYLTI STSS  
IDANYKVLVSGGHVRSVIPGRVKRRVSTNNKLVVPDGSYEICSLAGEPCIGSNVGIKFNS  
TCYDAIFDGIYGNPVPKLDKQHLVLYEYMRIDVQHTMPAMADFFEGDTQIMQLASDIFD  
ERCPKKTGAPEKVTIATIGEEFWIHTPSFRLQDNRL EAPLDDGGRSAVEKSSTAPYDRM  
RVHCSNAPRTFLNEDHCLWSKNACSSSEEQKYSKAAIVCGSPYEVA TIHSIDSGIQGRGG  
FDLLTKYNRTLPLKRLEGQRET VWF EISLQGEDQLRQRM AWALSQILAI SPDSL SATFQT  
ESFLAYYDIFVRNAFGNYFDVLKEVTFSPMMAEMLTYNNGVSTGLAWTKLNKRHHADENY  
ARELLQLFSIGLYKLNDDGTTQKDPGSGHEIRTYKNHDISEYAKVVFVGGFKKQRKRGNIEDG  
GRTHHEENEIDPLQII I ENKDYFPKLGMDNKYVGDGYPLCKDLPPRNFLRKGATFRFVGS  
NMPPELLSEPDEWYGSDPVRISLDPSSVLRSKLCNKGEGKDCVPSMKLILDSDIDCSGVE  
CVVEELRTFEVEAGSDLWFEYIRPPCVNHAFYENGFSIRRQRGEMGQAMCGDPKTLAAST  
VCCDSFDTSRGSFAREELFTGERLSFASARTRCSSSVNTEICENPFVTEDDCKNNGGCDG  
LGT FYWSSVGC SLTAKINQQGKIAI IHNPQIEGTTTHRMVRNDTEIFFRVNWLNHESNSL  
IQDLISNCANFGCVDEGDNQCICISISTRNTLAFVSQEDIKSAEEVLSSATVGALIEENER  
FLPIREVDGVSIIYDPGELTEETVTFQLIDSNGQVHYRKNIISEVHIGRGLKFRNPVTFY  
LSEPTIRDARYEIDAALHHSFFHENMATFLAIRLAQRFGESNPSPRYIKQISMAFRTGAY  
QHYSSGLQIGSGRYGCLTATIAAILLDNEVADPILDADPTPVSNGDXEEKRRSNMTVTFE  
TNGVLCNLSVXSIQEPYLKLVKVLRSLEFNAAKDHPLLRVESDLQGLIGQQSHKLPVFS  
FFKSEYQPAGWVTIAGMSSPESQVLSGVT SVQMTNTIISYLKYGVTSCFGGFGGSKPKNC  
RVGATFPNNGESSYDPGSTGLASSMEIVAELATLLTSGRLGDEKREI IKNAYEDT IASGK  
STKEALINAQQLIITSPEFHNTNLCHTIGRKRSLPLLPENNNPYKAVIFIMLPGGYDSF  
NVLVPKECSVTNSQGRVLDQYMEQRGPVAFDEASGEFNL TINATGSHQPCSQFAIHDEL  
TVVKDLYDSNDLAFLANAGI INNQGMTKSNYHDLTRS QLFAHNMMQHETAKVDPYDKIAG  
TGVMGRAKDILSKSGYLVSTMSIDNPSIATEGVHGMSPSTVIGRRGYQKFATRPKTESD  
FDIEHYARILNGEMDAFSGIFGETWSQQFSTGIEEAEASYQSIFDQARLDNSIWKTSGYSR  
EGKLEREHREKWTIAKVIQKKDVRKNNRDIFFVELGSDWHHNMKDGLRPQLRALNHGL  
EMFVEQAKSDGFWDITVVISSDFGRTLTPNSNDGTDHGWGGHYMIMGGDVQGGQILGEY  
PSDLTPSGRLVDDHGRFIPTTSWDSIWNGILEWTVTYQADLDYCLPNRHNTASPVVEGGG  
YFPLLTASVMFKSSSLGQQDPSPDGSRRLRGREQNAKNRV

>comp15580\_c0\_seq15; 1415 729 6793 LEN=7245; translated

MSSGEFCDNIDLFPPEEILVIHNWQWQLQRQRQLQDKMKNRNSVVFTGIVLSVLVVIAS  
ACVSTRLIKNTNIEYRNSESDRMDWHSIPGDDHDQDDNRNTYEIMILPDRERDDVLMDE

YNSNFDISHDRGGFDQYKKGKIGVDLSLYVCPPAGEHLEINFSDIIPFRSADRYHRIMLE  
NSSPGILCTLVEVTVEGDLQLKPIGRSYNGRGWEPYRGQHSGETTDIIPITSCSDDSSSTDCL  
IDLPPLSVERKYALKSYRYSLSGRDEAARFLERTTFGPTTSEINAFVADGSNHTKWITDQ  
IQLPITSHRQFFRERANNFHGETTWMGTLDGFCQORGARYRRFVFAKDIGRYLTIISTSS  
IDANYKVLVGGHVRSVIPGRVKRRVSTNNKLVVPDGSYEICSLAGEPCIGSNVGIKFNS  
TCYDAIFDGIYGNPVPKLDKQHLVLYEYMRIDVQHTMPAMADFFEGDTQIMQLASDIFD  
ERCPKKTGAPEKVTIATIGEEFWIHTPSFRLQDNRLLEAPLDDGGRSAVEKSSSTAPYDRM  
RVHCSNAPRTFLNEDHCLWSKNACSSSEEQKYSKAAIVCGSPYEVATIHSIDSGIQGRGG  
FDLLTKYNRTLPLKRLEGQRETWWFEISLQGEDQLRQRMWALSQILAI SPDSL SATFQT  
ESFLAYYDIFGESIFMPLFISWHSIDDPNSIXTILSFNSVRNAFGNYFDVLKEVTFSPMM  
AEMLTYNNGVSTGLAWTKLNKRHHADENYARELLQLFSIGLYKLNDDGTTQKDP SGHEIR  
TYKNHDISEYAKVVFVGFKKQRKRGNI EDGGRTHHEENEIDPLQII IENKDYFPKLGMDNK  
YVGDGYPLCKDLPPRNFLRKGATFRFVGSNMPPELLSEPDEWYGSDPVRISLDPSSVLR  
KLCNKGEGKDCVPSMKLILDSIDCSGVECVVEELRTFEVEAGSDLWFEYIRPPCVNHAF  
YENGFSIRRQRGEMGQAMCGDPKTLAASTVCCDSFDTSRGSFAREELFTGERLSFASART  
RCSSSVNTEICENPFVTEDDCKNNGGCDGLGTFYWSSVGC SLTAKINQQGKIAI IHNPQI  
EGTTTHRMVRNDTEIFFRVNWLNHESNSLIQDLISNCANFGCVDEGDNQCICISISTRNTL  
AFVSQEDIKSAEEVLSSATVGALIENERNFLPIREVDGVSIPDGELTEETVTFQLIDSNG  
QVHYRKNIISEVHIGRGLKFRNPVTFYSLSEPTIRDARYEIDAALHHSFFHENMATFLA  
IRLAQRFGESNPSPRYIKQISMAFRTGAYQHYSSGLQIGSGRYGCLTATIAAAILLDNEVA  
DPILDADPTHGSIQEPYKLVKVLRSLEFNAAKDHP LLRVESDLQGLIGQQSHKLP SVFS  
FFKSEYQPAGWVTIAGMSSPESQVLSGVT SVQMTNTIISYLKYGVTSCFGGFGGSKPKNC  
RVGATFPNNGESSYDPGSTGLASSMEIVAELATLLTSGRLGDEKREI IKNAYEDT IASGK  
STKEALINAQQLIITSPEFHNTNLCHTIGRKRSLPLLEPNNNPYKAVIFIMLPGGYDSF  
NVLVPKECSVTNSQGRTVLDQYMEQRGPVAFDEASGEFNL TINATGSHQPCSQFAIHDEL  
TVVKDLYDSNDLAFLANAGIINNQGMTKSNYHDLTRSQ LFAHNMMQHETAKVDPYDKIAG  
TGVMGRAKDILSKSGYLVSTMSIDNPSIATEGVHGMSPSTVIGRRGYQKFATRPKTESD  
FDIEHYARILNGEMDAFSGIFGETWSQQFSTGIEEAESYQSIFDQARLDNSIWKTSGYSR  
EGKLEREHREKWTIAKVIQKKDVRKNNRDIFFVELGSDWHHNEMKDGLRPLRALNHGL  
EMFVEQAKSDGFWDITVVISSDFGRTLTPNSNDGTDHGWWGGHYMIMGGDVQGGQILGEY  
PSDLTPSGRLVDDHGRFIPTTSWDSIWNGILEWTVTYQADLDYCLPNRHNTASPV EGGG  
YFPLLTASVMFKSSSLGQQDPSPDGSRRLRGREQNAKNRV

>comp15580\_c0\_seq16; 1285 742 6890 LEN=7342; translated  
MSSGEFCDNIDLFPPEEILVIHNWQWQLQRQRQLQDKMKNRNSVVF TGIVLSVLVVIAS I  
ACVSTRLIKNTNIEYRNSESDRMDWHSIPGDDHDQDDNRNTYEIMILPDRERDDVLMDE  
YNSNFDISHDRGGFDQYKKGKIGVDLSLYVCPPAGEHLEINFSDIIPFRSADRYHRIMLE  
NSSPGILCTLVEVTVEGDLQLKPIGRSYNGRGWEPYRGQHSGETTDIIPITSCSDDSSSTDCL  
IDLPPLSVERKYALKSYRYSLSGRDEAARFLERTTFGPTTSEINAFVADGSNHTKWITDQ  
IQLPITSHRQFFRERANNFHGETTWMGTLDGFCQORGARYRRFVFAKDIGRYLTIISTSS  
IDANYKVLVGGHVRSVIPGRVKRRVSTNNKLVVPDGSYEICSLAGEPCIGSNVGIKFNS  
TCYDAIFDGIYGNPVPKLDKQHLVLYEYMRIDVQHTMPAMADFFEGDTQIMQLASDIFD  
ERCPKKTGAPEKVTIATIGEEFWIHTPSFRLQDNRLLEAPLDDGGRSAVEKSSSTAPYDRM  
RVHCSNAPRTFLNEDHCLWSKNACSSSEEQKYSKAAIVCGSPYEVATIHSIDSGIQGRGG  
FDLLTKYNRTLPLKRLEGQRETWWFEISLQGEDQLRQRMWALSQILAI SPDSL SATFQT  
ESFLAYYDIFGESIFMPLFISWHSIDDPNSIXTILSFNSVRNAFGNYFDVLKEVTFSPMM  
AEMLTYNNGVSTGLAWTKLNKRHHADENYARELLQLFSIGLYKLNDDGTTQKDP SGHEIR  
TYKNHDISEYAKVVFVGFKKQRKRGNI EDGGRTHHEENEIDPLQII IENKDYFPKLGMDNK  
YVGDGYPLCKDLPPRNFLRKGATFRFVGSNMPPELLSEPDEWYGSDPVRISLDPSSVLR  
KLCNKGEGKDCVPSMKLILDSIDCSGVECVVEELRTFEVEAGSDLWFEYIRPPCVNHAF  
YENGFSIRRQRGEMGQAMCGDPKTLAASTVCCDSFDTSRGSFAREELFTGERLSFASART  
RCSSSVNTEICENPFVTEDDCKNNGGCDGLGTFYWSSVGC SLTAKINQQGKIAI IHNPQI  
EGTTTHRMVRNDTEIFFRVNWLNHESNSLIQDLISNCANFGCVDEGDNQCICISISTRNTL  
AFVSQEDIKSAEEVLSSATVGALIENERNFLPIREVDGVSIPDGELTEETVTFQLIDSNG  
QVHYRKNIISEVHIGRGLKFRNPVTFYSLSEPTIRDARYEIDAALHHSFFHENMATFLA  
IRLAQRFGESNPSPRYIKQISMAFRTGAYQHYSSGLQIGSGRYGCLTATIAAAILLDNEVA  
DPILDADPTPVSNGDXEEKRRSNMVTTFETNGVLCNLSVXSIQEPYKLVKVLRSLEFN A  
AKDHP LLRVESDLQGLIGQQSHKLP SVFSFFKSEYQPAGWVTIAGMSSPESQVLSGVT SV  
QMTNTIISYLKYGVTSCFGGFGGSKPKNCRVGATFPNNGESSYDPGSTGLASSMEIVAEL  
ATLLTSGRLGDEKREI IKNAYEDT IASGKSTKEALINAQQLIITSPEFHNTNLCHTIGR  
RSLPLLEPNNNPYKAVIFIMLPGGYDSFNVLPKECSVTNSQGRTVLDQYMEQRGPVAF



DEASGEFNLTINATGSHQPCSQFAIHDELTVVKDLYDSNDLAFLANAGI INNQGMTKSNY  
HDLTRSOLFANMMQHETAKVDPYDKIAGTGVMGRAKDILSKSGYLVSTMSIDNPSIATE  
GVHGMSPSTVIGRRGYQKFATRPKTESDFDIEHYARILNGEMDAFSGIFGETWSQQFST  
GIEEAESYQSIFDQARLDNSIWKTSYSGYREGKLEREHREKWSTRIAKVIQKKDVRKNNRDI  
FFVELGSWDHNNEMKDGLRPLRQLRALNHGLEMFVEQAKSDGFWDITVVISSDFGRTLTPN  
SNDGTDHGWWGGHYMIMGGDVQGGQILGEYPSDLTPSGRLVDDHGRFIPPTSWDSIWNIGIL  
EWTGVTYQADLDYCLPNRHNTASPVVEGGGYFPLLTASVMFKSSSLGQQDPSPDGSRRLR  
GREQNAKNRV

>comp15580\_c0\_seq17; 565 742 3002 LEN=3093; translated  
MSSGEFCDNIDLFPPEEILVIHNWQWQLQRQRQLQDKMKNRNSVVFTGIVLSVLVVIASI  
ACVSTRLIKNTNIEYRNSESDRMDWHSIPGDDHDQDDNRNTYEIMILPDRERDDVLMDE  
YNSNFDISHDRGGFDQYKKGKIGVDLSLYVCPPAGEHLEINFSDIIPFRSADRYHRIMLE  
NSSPGILCTLVEVTVEGDLQKPIGRSYNGRWEPYRGQHSQTDDIIPITSCSDDSSSTDCL  
IDLPPLSVERKYALKSYRYSLSRDEAARFLERTTFGPTTSEINAFVADGSNHTKWITDQ  
IQLPITSHRQFFRERANNFHGETTWMGTLDFGPCQORGARYRRFVFAKDIGRYLTIISTSS  
IDANYKVLVGGHVRVSVIPGRVKRRVSTNNKLVVPDGSYEICSLAGEPCIGSNVGIKFN  
TCYDAIFDGIYGNPVPKLDKQHLVLYVEYMRIDVQHTMPAMADFFEGDTQIMQLASDIFD  
ERCPKKTGAPEKVTIATIGEEFWIHTPSFRLQDNRLLEAPLDDGGRSAVEKSSSTAPYDRM  
RVHCSNAPRTFLNEDHCLWSKNACSSSEEQKYSKAAIVCGSPYEVATIHSIDSGIQGRGG  
FDLLTKYRNLPLKRLLEGQRETVWFEISLQGEDQLRQRMALWALSQILAI SPDSL SATFQT  
ESFLAYYDIFGESIFMPLFISWHSIDDPNSIXTILSFNSVRNAFGNYFDVLKEVTFSPMM  
AEMLTYNNGVSTGLAWTKLNKRHHADVEVCPTLD

>comp15580\_c0\_seq18; 1451 729 6707 LEN=7159; translated  
MSSGEFCDNIDLFPPEEILVIHNWQWQLQRQRQLQDKMKNRNSVVFTGIVLSVLVVIASI  
ACVSTRLIKNTNIEYRNSESDRMDWHSIPGDDHDQDDNRNTYEIMILPDRERDDVLMDE  
YNSNFDISHDRGGFDQYKKGKIGVDLSLYVCPPAGEHLEINFSDIIPFRSADRYHRIMLE  
NSSPGILCTLVEVTVEGDLQKPIGRSYNGRWEPYRGQHSQTDDIIPITSCSDDSSSTDCL  
IDLPPLSVERKYALKSYRYSLSRDEAARFLERTTFGPTTSEINAFVADGSNHTKWITDQ  
IQLPITSHRQFFRERANNFHGETTWMGTLDFGPCQORGARYRRFVFAKDIGRYLTIISTSS  
IDANYKVLVGGHVRVSVIPGRVKRRVSTNNKLVVPDGSYEICSLAGEPCIGSNVGIKFN  
TCYDAIFDGIYGNPVPKLDKQHLVLYVEYMRIDVQHTMPAMADFFEGDTQIMQLASDIFD  
ERCPKKTGAPEKVTIATIGEEFWIHTPSFRLQDNRLLEAPLDDGGRSAVEKSSSTAPYDRM  
RVHCSNAPRTFLNEDHCLWSKNACSSSEEQKYSKAAIVCGSPYEVATIHSIDSGIQGRGG  
FDLLTKYRNLPLKRLLEGQRETVWFEISLQGEDQLRQRMALWALSQILAI SPDSL SATFQT  
ESFLAYYDIFVRNAFGNYFDVLKEVTFSPMMAEMLTYNNGVSTGLAWTKLNKRHHADENY  
ARELLQLFSIGLYKLNDDGTQKDPGSGHEIRTYKNHDI SEYAKVFGVFKKQRKRNIEDG  
GRTHHEENEIDPLQII IENKDYFPKLGMDNKYVGDGYPLCKDLP PRNFLRKGATFRFVGS  
NMPPELLSEPDWEYGS DPVRI SLDPSSVLRSKLCKNKGEGKDCVPSMKLILDSDIDCSGVE  
CVVEELRTFEVEAGSDLWFEYIRPPCVNHAFYENGFSIRRQRGEMGQAMCGDPKTLAAS  
VCCDSFDTSRGSFAREELFTGERLSFASARTRCSSSVNTEICENPFVTEDDCKNNGGCDG  
LGTIFYWSSVGC SLTAKINQQGKIAI IHN PQIEGTTTHRMVRNDTEIFFRVNWLNHESNSL  
IQDLISNCANFGCVDEGDNQICISISTRNTLAFVSOEDIKSAEEVLSSATVGALIENERN  
FLPIREVDGVSIIYDPGELTEETVFQLIDSNQOVHYRKNII SEVHIGRGLKFRNPVTFYS  
LSEPTIRDARYEIDAALHHSFFHENMATFLAIRLAQRFGESNPSPRYIKQISMAFRGTAY  
QHYSSGLQIGSGRYGCLTATIAAILLDNEVADPILDADPTHGSIQEPYLKLVKVLRSLEF  
NAAKDHP LLRVESDLQGLIGQQSHKLP SVFSFFKSEYQFAGWVTIAGMSSPESQVLSGVT  
SVQMTNTIISYLKYGVTSCFGGFGGSKPKNCRVGFATFPNNGESSYDPGSTGLASSMEIVA  
ELATLLTSGRLGDEKREIKNAYEDTIASGRSTKEALINAQQLIITSPEFHNTNLCHTIG  
RKRSLP LLPENNNPYKAVIFIMLPGGYDSFNVLVPKECSVTNSQGRVLDQYMEQRGPV  
AFDEASGEFNLTINATGSHQPCSQFAIHDELTVVKDLYDSNDLAFLANAGI INNQGMTKSNY  
NYHDLTRSOLFANMMQHETAKVDPYDKIAGTGVMGRAKDILSKSGYLVSTMSIDNPSIATE  
GVHGMSPSTVIGRRGYQKFATRPKTESDFDIEHYARILNGEMDAFSGIFGETWSQQFST  
GIEEAESYQSIFDQARLDNSIWKTSYSGYREGKLEREHREKWSTRIAKVIQKKDVRKNNRDI  
DIFFVELGSWDHNNEMKDGLRPLRQLRALNHGLEMFVEQAKSDGFWDITVVISSDFGRTLTPN  
PNSNDGTDHGWWGGHYMIMGGDVQGGQILGEYPSDLTPSGRLVDDHGRFIPPTSWDSIWNIGIL  
EWTGVTYQADLDYCLPNRHNTASPVVEGGGYFPLLTASVMFKSSSLGQQDPSPDGSRRLR  
LRGREQNAKNRV

>comp15580\_c0\_seq19; 1254 372 6228 LEN=6228; translated  
MSSGEFCDNIDLFPPEEILVIHNWQWQLQRQRQLQDKMKNRNSVVFTGIVLSVLVVIASI  
ACVSTRLIKNTNIEYRNSESDRMDWHSIPGDDHDQDDNRNTYEIMILPDRERDDVLMDE

YNSNFDISHDRGGFDQYKKGKIGVDLSLYVCPPAGEHLEINFSDIIPFRSADRYHRIMLE  
NSSPGILCTLVEVTVEGDLQLKPIGRSYNGRGWEPYRGQHSGETTDIIP TSCSDSSSTDCL  
IDLPPLSVERKYALKSYRYSLSGRDEAARFLERTTFGPTTSEINAFVADGSNHTKWITDQ  
IQLPITSHRQFFRERANNFHGETTWMGTLDGFCQORGARYRRFVFAKDIGRYLTIISTSS  
IDANYKVLVGGHVRSVIPGRVKRRVSTNNKLVVPDGSYEICSLAGEPCIGSNVGIKFNS  
TCYDAIFDGIYGNPVPKLDKQHLVLYEYMRIDVQHTMPAMADFFEGDTQIMQLASDIFD  
ERCPKKTGAPEKVTIATIGEEFWIHTPSFRLQDNRL EAPLDDGGRSAVEKSSSTAPYDRM  
RVHCSNAPRTFLNEDHCLWSKNACSSSEEQKYSKAAIVCGSPYEVATIHSIDSGIQGRGG  
FDLLTKYNRTLPLKRLEGQRET VWF EISLQGEDQLRQRM AWALSQILAI SPDSL SATFQT  
ESFLAYYDIFGESIFMPLFISWHSIDDPNSIXTILSFNSVRNAFGNYFDVLKEVTFSPMM  
AEMLTYNNGVSTGLAWTKLNKRHHADENYARELLQLFSIGLYKLNDDGTTQKDP SGHEIR  
TYKNHDI SEYAKV FVGFKKQRKRGNIEDGGRTHHEENEIDPLQII IENKDYFPKLGMDNK  
YVGDGYPLCKDLPPRNFLRKGATFRFVGSNMPPELLSEPDEWYGSDPVRISLDPSSVLR  
KLCNKGEGKDCVPSMKLILDSIDCSGVECVVEELRTFEVEAGSDLWFEYIRPPCVNHAF  
YENGF SIRRQRGEMGQAMCGDPKTLAASTVCCDSFDTSRGSFAREELFTGERLSFASART  
RCSSSVNTEICENPFVTEDDCKNNGGCDGLGTFYWSSVGC SLTAKINQQGKIAI IHN PQI  
EGTTTHRMVRNDTEIFFRVNWLNHESNSLIQDLISNCANFGCVDEGDNQCICSI STRNTL  
AFVSQEDIKSAEEVLSSATV GALIENERNFLPIREVDGVS IYPDGELTEETVFQLIDSNG  
QVHYRKNIISEVHIGRGLKFRNPVTFYSLSEPTIRDARYEIDAALHHSFFHENMATFLA  
IRLAQRFGESNPSPRYIKQISMAFRTGAYQHYSSGLQIGSGRYGCLTATIAAILLDNEVA  
DPILDADPTPVSNGDXEEKRRSNMTVTFETNGVLCNLSVXS IQE PYLKLKLVKVLRSLEFNA  
AKDHPLLRVESDLQGLIGQQSHKLP SVFSFFKSEYQPAGWVTIAGMSSPESQVLSGVT SV  
QMTNTIISYLKYGVTSCFGGFGGSKPKNCRVGATFPNNGESSYDPGSTGLASSMEIVAEL  
ATLLTSGRLGDEKREIKNAYEDT IASGKSTKEALINAQQLIITSPEFH TTNLCHTIGRK  
RSLP LPEPNNNPYKAVIFIMLPGGYDSFNVLVPKECSVTNSQGR TVLDQYMEQRGPVAF  
DEASGEFNLTINATGSHQPCSQFAIHDELTVVKDLYDSNDLAF LANAGI INNQGMTKSNY  
HDLTRS QLFAHMMQHETAKVDPYDKIAGTGVMGRAKDILSKSGYLVSTMSIDNPSIATE  
GVHGMSPSTVIGRRGYQKFATRPKTESDFDIEHYARILNGEMDAFSGIFGETWSQQFST  
GIEEAESYQSIFDQARLDNSIWKTSGYSREGKLEREHREK WSTIAKVIQKKDVRKNNRDI  
FFVELGSDHHEMMDGLRPLR LALNHGLEMFVEQAKSDGFWDDITVVISSDFGRTLTPN  
SNDGTDHGWWGHYIMGGDVQGGQILGEYPSDLT

>comp15580\_c0\_seq20; 1321 742 6804 LEN=7256; translated  
MSSGEFCDNIDLFPPEEILVIHNWQWQLQRQRQLQDKMKNRNSVVF TGIVLSVLVVIAS I  
ACVSTR LIKNTNIEYRNSESDRMDWHSIPGDDHDQDDNRNTYEIMILPDRERDDVLMDE  
YNSNFDISHDRGGFDQYKKGKIGVDLSLYVCPPAGEHLEINFSDIIPFRSADRYHRIMLE  
NSSPGILCTLVEVTVEGDLQLKPIGRSYNGRGWEPYRGQHSGETTDIIP TSCSDSSSTDCL  
IDLPPLSVERKYALKSYRYSLSGRDEAARFLERTTFGPTTSEINAFVADGSNHTKWITDQ  
IQLPITSHRQFFRERANNFHGETTWMGTLDGFCQORGARYRRFVFAKDIGRYLTIISTSS  
IDANYKVLVGGHVRSVIPGRVKRRVSTNNKLVVPDGSYEICSLAGEPCIGSNVGIKFNS  
TCYDAIFDGIYGNPVPKLDKQHLVLYEYMRIDVQHTMPAMADFFEGDTQIMQLASDIFD  
ERCPKKTGAPEKVTIATIGEEFWIHTPSFRLQDNRL EAPLDDGGRSAVEKSSSTAPYDRM  
RVHCSNAPRTFLNEDHCLWSKNACSSSEEQKYSKAAIVCGSPYEVATIHSIDSGIQGRGG  
FDLLTKYNRTLPLKRLEGQRET VWF EISLQGEDQLRQRM AWALSQILAI SPDSL SATFQT  
ESFLAYYDIFVRNAFGNYFDVLKEVTFSPMMAEMLTYNNGVSTGLAWTKLNKRHHADENY  
ARELLQLFSIGLYKLNDDGTTQKDP SGHEIRTYKNHDI SEYAKV FVGFKKQRKRGNIEDG  
GRTHHEENEIDPLQII IENKDYFPKLGMDNKYVGDGYPLCKDLPPRNFLRKGATFRFVGS  
NMPPELLSEPDEWYGSDPVRISLDPSSVLRSKLCNKGEGKDCVPSMKLILDSIDCSGVE  
CVVEELRTFEVEAGSDLWFEYIRPPCVNHAFYENGF SIRRQRGEMGQAMCGDPKTLAAST  
VCCDSFDTSRGSFAREELFTGERLSFASARTRCSSSVNTEICENPFVTEDDCKNNGGCDG  
LGTIFYWSSVGC SLTAKINQQGKIAI IHN PQIEGTTTHRMVRNDTEIFFRVNWLNHESNSL  
IQDLISNCANFGCVDEGDNQCICSI STRNTLAFVSQEDIKSAEEVLSSATV GALIENERN  
FLPIREVDGVS IYPDGELTEETVFQLIDSNGQVHYRKNIISEVHIGRGLKFRNPVTFY S  
LSEPTIRDARYEIDAALHHSFFHENMATFLAIRLAQRFGESNPSPRYIKQISMAFRTGAY  
QHYSSGLQIGSGRYGCLTATIAAILLDNEVADPILDADPTPVSNGDXEEKRRSNMTVTFE  
TNGVLCNLSVXS IQE PYLKLKLVKVLRSLEFNAAKDHPLLRVESDLQGLIGQQSHKLP SVFS  
FFKSEYQPAGWVTIAGMSSPESQVLSGVT SVQMTNTIISYLKYGVTSCFGGFGGSKPKNC  
RVGATFPNNGESSYDPGSTGLASSMEIVAELATLLTSGRLGDEKREIKNAYEDT IASGK  
STKEALINAQQLIITSPEFH TTNLCHTIGRK RSLP LPEPNNNPYKAVIFIMLPGGYDSF  
NVLVPKECSVTNSQGR TVLDQYMEQRGPVAFDEASGEFNLTINATGSHQPCSQFAIHDEL  
TVVKDLYDSNDLAF LANAGI INNQGMTKSNYHDLTRS QLFAHMMQHETAKVDPYDKIAG

TGVMGRAKDILSKSGYLVSTMSIDNPSIATEGVHGMSPSTVIGRRGYQKFATRPKTESD  
FDIEHYARILNGEMDAFSGIFGETWSQQFSTGIEEAEASYQSI FQARLDNSIWKTSGYSR  
EGKLEREHREKWTIAKVIQKKDVRKNNRDIFFVELGSDWHHNMKDGLRPQLRALNHGL  
EMFVEQAKSDGFWDITVVISSDFGRTLTPNSNDGTDHGWWGGHYMIMGGDVQGGQILGEY  
PSDLTPSGRLVDDHGRFIPTTSWDSIWNIGILEWTGVITYQADLDYCLPNRHNTASPVVEGG  
YFPLLTASVMFKSSSLGQQDPSPDGSRRLRGREQNAKNRV  
>comp15581\_c0\_seq1; 1260 172 3930 LEN=4115; translated  
MKQENRRFVSSRSTTRATRKNRKTPEFRTETRPPPPASTAGTKSCNGNRGASSPATVN  
LRLLIFFILISTSYCTPTTSLPLGLYKVGVGATNLIENILAGSTNSGRTPKPIVTESSS  
GIVHQSRGVTLGNSESI SKEKHSSSSTTTTNNNNNNNTKKTNKTKRRDKNKNSLKRNSNRH  
KKNKGKTKVPGTKGSLRHSEKEDENQAPSLGEDSEEDGTMLRIRGLSEDDKFLDR  
VQTSARTVRNWDADDELLKCRSHVPWKELELADDAHEKYANAVEDRFLRSGCGADSNALFL  
QRLCRWFPTFMTWVNAPPSCVCGCKDTEMKTVRGPESAEIDGEARRVEVYYCPDCKANT  
TTFPRYNKASKLLETRRGRGCEYANLFGFLCRSVGFETRMVLDWSDHLWTEVRLGDAWVM  
ADGCEGTIDKASMYEHGWGKDSFSYMIIGIGADHVVDVTPRYTRKFMTDDLQTRRREHTTS  
EEVGESMLQKLNEMRNTPTVLPKSRVEELVRRLELEHAELQQSKQATEWTDQEKYGSGR  
ISGSLAWKQSRREDGNKQDRSSAAETNSTTTDADREVAGFPAAEFVPARLENGRVSFRLR  
ATPTGRHDGIVVSETPCAUGVKDSVSLVVDDNHESFGCILQSKSFVDWSRIVEFLDRLP  
AGRIVLMNGKIEIGNETKAEDFYGEVKIPRLGGWNGEEVAREGVLFAGQVDAHDPDWTFC  
PLKETKGYEFEIEVQNSENGSEDEVANLRLRTERASFPQRIAGRLPEAFMPLTTQONGAT  
EREKREAYLRFKASHGGRYCGYTTRKNSPVYLLNSTAYPLQTVDAVATNILGEDVAWNTF  
LELPEPLVPTSDCGIEDAPSSGSSRPIYDVPLDSSFFRSSLGPHLLSGVDLRMDTADALS  
NARLIALYFSAHWCGPCRGFTPMLAELYDHLSETFETHGLEVVVFSGDRDQQSFNQYYRT  
MPWKAIPFDQLEFVKQSLNVTYGVRGIPSLVVLDAISGEVVVSASDSRQEVVTACRGGDL  
RIEAMFQSWLGRSPASTKELLSMIEMSAREMETGAGDEKSDPDENPYLKRTLGDGSEGGD  
HQEISIRFKAEFKLVLAGHDPNTAAATALTTVSKIPVEELVTTIPPGKLDGKAAAYAGEP  
RPERRDGVQALAHALERNAPSSVAEVLISGLKYLQNSRKTPEPKYRRFKLSNKVADKI  
TRVEGGLGLLQSLGFEVIPTYRDFEASIPVAADLAVVDEKMTKLLKELEGSS  
>comp15581\_c0\_seq2; 1260 172 3930 LEN=4126; translated  
MKQENRRFVSSRSTTRATRKNRKTPEFRTETRPPPPASTAGTKSCNGNRGASSPATVN  
LRLLIFFILISTSYCTPTTSLPLGLYKVGVGATNLIENILAGSTNSGRTPKPIVTESSS  
GIVHQSRGVTLGNSESI SKEKHSSSSTTTTNNNNNNNTKKTNKTKRRDKNKNSLKRNSNRH  
KKNKGKTKVPGTKGSLRHSEKEDENQAPSLGEDSEEDGTMLRIRGLSEDDKFLDR  
VQTSARTVRNWDADDELLKCRSHVPWKELELADDAHEKYANAVEDRFLRSGCGADSNALFL  
QRLCRWFPTFMTWVNAPPSCVCGCKDTEMKTVRGPESAEIDGEARRVEVYYCPDCKANT  
TTFPRYNKASKLLETRRGRGCEYANLFGFLCRSVGFETRMVLDWSDHLWTEVRLGDAWVM  
ADGCEGTIDKASMYEHGWGKDSFSYMIIGIGADHVVDVTPRYTRKFMTDDLQTRRREHTTS  
EEVGESMLQKLNEMRNTPTVLPKSRVEELVRRLELEHAELQQSKQATEWTDQEKYGSGR  
ISGSLAWKQSRREDGNKQDRSSAAETNSTTTDADREVAGFPAAEFVPARLENGRVSFRLR  
ATPTGRHDGIVVSETPCAUGVKDSVSLVVDDNHESFGCILQSKSFVDWSRIVEFLDRLP  
AGRIVLMNGKIEIGNETKAEDFYGEVKIPRLGGWNGEEVAREGVLFAGQVDAHDPDWTFC  
PLKETKGYEFEIEVQNSENGSEDEVANLRLRTERASFPQRIAGRLPEAFMPLTTQONGAT  
EREKREAYLRFKASHGGRYCGYTTRKNSPVYLLNSTAYPLQTVDAVATNILGEDVAWNTF  
LELPEPLVPTSDCGIEDAPSSGSSRPIYDVPLDSSFFRSSLGPHLLSGVDLRMDTADALS  
NARLIALYFSAHWCGPCRGFTPMLAELYDHLSETFETHGLEVVVFSGDRDQQSFNQYYRT  
MPWKAIPFDQLEFVKQSLNVTYGVRGIPSLVVLDAISGEVVVSASDSRQEVVTACRGGDL  
RIEAMFQSWLGRSPASTKELLSMIEMSAREMETGAGDEKSDPDENPYLKRTLGDGSEGGD  
HQEISIRFKAEFKLVLAGHDPNTAAATALTTVSKIPVEELVTTIPPGKLDGKAAAYAGEP  
RPERRDGVQALAHALERNAPSSVAEVLISGLKYLQNSRKTPEPKYRRFKLSNKVADKI  
TRVEGGLGLLQSLGFEVIPTYRDFEASIPVAADLAVVDEKMTKLLKELEGSS  
>comp15582\_c0\_seq1; 140 481 681 LEN=681; translated  
MGDQNEFDLSVLRGTSATFENKVMGRNEDDDLNALAELVLDLKNRKEPTTSMMLMDEQP  
SSGEGID  
>comp15582\_c0\_seq2; 341 296 1381 LEN=1867; translated  
MGDQNEFDLSVLRGTSATFENKVMGRNEDDDLNALAELVLDLKNRKEPTTSMMLMDEQP  
SSGEGIETPEMVKPPDLSPETENAVDPKKKDSFVREDDSSDDINDVLYAGDDVYMEENH  
SSGEDGNDKHLGRDPPPTSAANPSNANDALGLGDFNNISSGQSLSTATQTQEVMPMYLP  
TFKPATGCTNASDFIVRCFVARLRSGITVVKHGRSRWCKSRLRVLHIHPDGRSLSWKPAP  
GEPHSPKRPPKLDLTTCEEVRHAWSPDPQNPMTGTPILRQKCEAANAHSFALIFPKRT  
VDITSVTADQCKVLMEGFSALCFRLQVANLAGKGSKKGMPEAEQEDRISITASTTTPSNRR

G

>comp15582\_c0\_seq3; 140 296 496 LEN=496; translated  
MGDQNEFDL SVLRGTSATFENKVMGRNEDDDLNALAELVPDLKNRKKEPTTSMMLDEQP  
SSGEGID

>comp15582\_c0\_seq4; 207 481 1566 LEN=2052; translated  
MGDQNEFDL SVLRGTSATFENKVMGRNEDDDLNALAELVPDLKNRKKEPTTSMMLDEQP  
SSGEGIETPEMVKPPDLSPETENAVDPKKKDSFVREDDSSDDINDVLYAGDDVYMEENH  
SSGEDGNDKHLGRDPPPTSAANPSNANDALGLGDFNNISSGQSLSTATQTQEVRRMPMYLP  
TFKPATGCTNASDFIVRCFVARLRSGITVVKHGRSRWCKSRLRVLHIHPDGRSLSWKPPAP  
GEPHSPKRPPKLDLTTCEEVRHAWSPDPQNPMTGTPILRQKCEAANAHSFALIFPKRT  
VDITSVTADQCKVLMEGFSALCFRLQVANLAGKGSKKGMPEAEQEDRISITASTTPSNRR

G

>comp15582\_c0\_seq5; 140 1188 1388 LEN=1388; translated  
MGDQNEFDL SVLRGTSATFENKVMGRNEDDDLNALAELVPDLKNRKKEPTTSMMLDEQP  
SSGEGID

>comp15582\_c0\_seq6; 207 1188 2273 LEN=2759; translated  
MGDQNEFDL SVLRGTSATFENKVMGRNEDDDLNALAELVPDLKNRKKEPTTSMMLDEQP  
SSGEGIETPEMVKPPDLSPETENAVDPKKKDSFVREDDSSDDINDVLYAGDDVYMEENH  
SSGEDGNDKHLGRDPPPTSAANPSNANDALGLGDFNNISSGQSLSTATQTQEVRRMPMYLP  
TFKPATGCTNASDFIVRCFVARLRSGITVVKHGRSRWCKSRLRVLHIHPDGRSLSWKPPAP  
GEPHSPKRPPKLDLTTCEEVRHAWSPDPQNPMTGTPILRQKCEAANAHSFALIFPKRT  
VDITSVTADQCKVLMEGFSALCFRLQVANLAGKGSKKGMPEAEQEDRISITASTTPSNRR

G

>comp15583\_c0\_seq1; 1523 1 3159 LEN=3273; translated  
ELNDLKATKNSNNDNDEDVVOLEERTAELEMTIQSLETELQESGEEANKVISEWQDNC  
AAAEAKYSVIEQKLNLDLKAADSDQGLNGNDKVTLSNDMAELLAQKEEELQRLHQEVE  
SSSNSIEKLDQMLLAAEKRSQLEQGI EAAESAKEEFQQVYNEKSEQYEGQIMELNLRID  
SLCEELS NRKTEFAEALKRSEEKFEVMEKENS LNRENLADADAKSAELQELRICLSDENK  
IIQKWEDRTEALS ESIAALEEQLEQEQA VDAIEQWQKCCDLETKCTDMENNYQQSLE  
TITARNWSIEQLKSSNDNYWLQIKNLRMASEKIESSLTSDLIDAKTEASGLAELLAHQKK  
DFVDERTQLQAEKLLQEKSAKARDEIETLSSDLEERKIQLEQWSQRCSELEAAAEGAQE  
RLVGQEKAEIAEAISSWETKADELEKELDLAEDKILRLEEILLDADADRHVDFVAAENLV  
KENFNLRKMCCTNEGLLKNMKSEQNQLKKQLSLKLNKLEEERNRLIGVVAQLEDELREA  
NATLQACVTDGLTDRATEVAASAIRD DIKLNKQLIEYQQKFEDEKAAKEVANLEIDRLR  
EDITALLSLEIENRPADLKKLTTKSIEK LQKIEHTEIDELRKS LFRAL EELTRTAEK  
DSNDTISKMR LQISMYEQEIIAAKSEVNF LSEAMEEYRQTEDSKRASLEYRIGALENENA  
VVRKYQANELEDLRKELVQITMAKDMIAHQ LKEAEKTNASLLVSTEGEESGKTQQHADIY  
SECAKLR IENAQLLTVAAEDKCKAERRLRELLSAQAASSELDVILERELRLSAETALKEL  
KEDLGQSQKGEEDDKILVPINDWMTDEVNDLRASLET LKQDNDKLLALAE EASKSKEII  
DVLTDCCRRAQAKAFKFRDRTRTEHAVQSEISKMRFP TMVLEDRKMLSNGLLQSS LINGVA  
TDNPEVELPSSSELFD FIIQKQKQEIKEERMMYSETLQEH EELLALVAQQDIEKSCLREAL  
VEAAGDDVANEAMKKAEEFAVIRFGNAIQIVN

>comp15583\_c0\_seq2; 3488 1 8054 LEN=8168; translated  
XLFRGQSKDEFYAHTAIGKDTTGDNTTNNNNMEPMPPPPPEAVVAMDRFVSASSAQDAING  
LENLVDFAFKNSNQTKKTS ENGENGSDVVWQPAWIFEHEEIVEHLI WLLQHSTL KANDIPC  
QEGVHLVCKLYQYLAKSPEALQKPSPGV LIESLLDVL DHSEQKHPVFVRVLALKILEDVS  
NRHKSIALNQWLEAPNGLHRIADLLAIDVEQAPMEEP IRNQSLIVAQSLAREAPMAKVFL  
FAEVECKLLDLCWKEGGLTKGSPIVIDALQLIQEVLKHADASLQDLVWQRPNIAPRLVQL  
LDRGGEFFLHPKKTSSNADDTDDL SLLSSGDTSKTKQERKTNDPPIPRLLPPEEKVI  
KLVMGILRLLLETDSVRET VWKQHAGLCTIVWELALVSNPSNPPVCALPSPSLQDALS  
TADKINDPVIMDRLSGLDRLLYL VCTGGGLSKEFSDKLGASQSALAVLRHTISRDIHDI  
LMRTLAPPPTDDENAPPPGPTVVQKLWNTVQENLASESSDERTLFLCGALGGLGLMLCDE  
QSREIMSKLAPISLDQLLEFLSTESNGLVQCSSLRLLCEWVYECPFIAHLLSSTASTNL  
AGMAAAQTQYQSLTHLLLGLSMEYLTNEEECGGWTRDGILQIIKSGISKYTTSL ESKT  
SSNQDMAWVVS NMEYKSWKAFCTQAVLTIRKRVVQELAGGSEGP DGEDDDIAEGSSRG  
IKPLQKLVSQANEMEEMRSLSEAAEAKLMTQEDQLSIWKRRLECTPTELDDMMNQFTTK  
NVELEEKLR TMGLEYERQKTERDEEIKLSQEKLAKAHEEASALRTQEQEVRTDLERTEKE  
MEALSHAYNSLEKEFQEIQQQQDDEQKVQGEARSTEAMAFRAEISRLKEDALKADEWMSM  
AVGKMNELGTANMELKKE SVLNTQLQELQSVAESATRDNENRAQQQLQDIEKDLAQERTL  
RIA AEEYLP RVDDLQKELTRERKVS ELSQERITETEQSLSKYQSLQSKLENEQNRCVELE

RRIFQEQEATMSTTTTLLENEKKARKELEKQLEATKSSVQLSVGSETLDSREDIEQMRGEY  
EKVLASKNAEIDSLKLSLEEKQQEKKSDGAKNAFGTNTAIDQIRQSSQEEIYRLESIR  
EMKDRLGSGGLGTYKVEDIQERDKEIEELQTANEAQAQEWGKAAEHVQRNVVEIQRLSEEN  
AELKRKLEEEGQNSSSKVLI SAQSFKEKIEAEKNHEVVKLIKEELEKQEKQTNQGLLEDEL  
GIAMDDVAVMQQQLSEYKTTNSKLEMQLSGNVLRDENENLRSTNKDLQERLDGLEDWVET  
AQTKIAEIMEAKGAERELEEATEEVRSLRKESEDTVKAESEGGKGTLOKLEEDILELQSQ  
NDILSKESNDHQRFYEELQSEHNDLVSSSTRLEEMATLVVLKQDLEKFLVEEKQVSSSL  
SSELDEMKARNMTLLDSLEEHTNVDDCEVSNPTAMDAEKTNGISMVPTTDTPKIPEGST  
DEEQSEKIAELVDELERTKAALAEANEALSSDGDVLRWEDRVSELQAELESAREQIEEK  
EAEAEVIAKWQENAAACLEEKQSNLEDELKEALAGKEAMQSMIESSNLAQSSLRQKIEEL  
ETSLDDSSDERLVKLEELK IARATLDSDEEVVQQWEERTAELEMTIQSLETTELQESGEE  
ANKVISEWQDNCAAAEAKEYSVIEQKLNLDKAAKDSQDGLNGNDDKVQTLSDNMAELLAQK  
EEELQRLHQEVESSSNSIEKLDQMLLAEKRSQLEQGI EAAESAKEEFQQVYNEKSEQY  
EGQIMELNLRIDSLCEELSNRKTEFAEALKRSEKFEVMEKENSNLRENLADADAKSAEL  
QELRICLSDENKIIQKWEDRTEALSESIAALEEQLEQEQEAVDAIEQWQKTCCDLETKC  
TDMENNYQQSLETITARNWSIEQLKSSNDNYWLQIKNLRMASEKIESSLTSDLIDAKTEA  
SGLAELLAHQKKDFVDERTQLQAEKQLEKQEKSAKARDEIETLSSDLEERKIQLEQWSQRC  
SELEAAAEGAQERLVGQEKAEIAEAISSWETKADELEKELDLAEDKILRLEEILLDADADR  
HVDLFAAENLVKENFNLRKMCNEGLLKNMKSEQNQLKKQLSLKLNKLEEEERNRLIG  
VVAQLEDELREANATLQACVTDGLTDRATEVAASAIRDDIKNLKNQLIEYQQKFEDEKAA  
KEVANLEIDRLREDITALLSLSEIENRPADLKKLTTKSIEKQKIEHTEIDELRKSIFRA  
LEELELTRAEKDSNDTISKMRQISMYEQEIIAAKSEVNFLEAMEEYRQTEDSKRASL  
EYRIGALENENAVVRKYQANELEDLRKELVQITMAKDMIAHQKAEKTNASLLVSTEGE  
ESGKTQQHADIYSECAKLRIENAQLLTVAEDKCKAERRLRELLSAQAASSELVDILERE  
LRLSAETALKELKEDLQSQKGEEDKILVPINDWMTDEVNDLRASLETLKQDNDKLLKLA  
LAEEASKSKEIIDVLTDECRRQAQAFKFRDRTRTEHAVQSEISKMRFPMTVLEDRKMLS  
NGLLQSSSLNGVATDNPEVELPSSSELEDFDIQKQKQEIKEERMMYSETLQEHHEELLALVAQ  
QDIEKSCREALVEAAGDDVANEAMKKAEEFAVIRFGNAIQIVN  
>comp15584\_c0\_seq1; 380 74 2280 LEN=2499; minus strand; translated  
MIGDMHVILEAETRSFGDGNFKFWLDDVPPLMEKIPDASSFLTEFAAGIAPQRXDETQRT  
EKKQSGVWFGEPEEPAMQGPQAKGVDTPEGHTWDCIVVGAGCAGMAAAHRLALERGDQAG  
HRRKPPPGGFSLLVLEAGGRVGGTRRNHDLESGAGDAFRKGGSKSRCGGDPSGHVIELGG  
TWLSPEHTAAIRLCTEHLGLLELFRGWEGAPEEESGRNPGEGCGEPMPPWYWGVSDFKAAR  
DASKSMNAXEVAAFCAWYTFKLI EWFLSXLVLLVDYADEDMARLERTILHRDVAPSDG  
DTGSASGQHPSPITFVTPAEELLES LDPLTVRELRLDGNVDIDRDVEALTRGRAAGTSLW  
ELPEVPPSWGELDGGSTADHALPLLSTSNGRNLRNTILNKNAEPEGVSGLYNLISWSG  
SNSRGPDTYRNVGGTQAIPLRIAEKLSEVSSAPGTAASGFSRCKVLLNTPVKAVAREHG  
NDRRFLVTTENGKRFRCRNLVLTGSPSAIHETIDFGGGDESSCVLPLVQKELLSPLRMPM  
GRSSKFFAIYRRNGPWWRKFGVGLQGDVLAACGLPEELSIRIPSTESAGETLEEEAEDRAPL  
FPCCFDVSPRSRKYGVLCFLEGVSHRYFGTLSSEAQNEELLTRFLELSFKPFLDRAGDKG  
DDGSASKSQSAPLWVPDEFLLADWGPETRYVGGAYTYFRPGVLSQPEYWTAYRKVEKSP  
NLFWAGADYHAGFGT  
>comp15585\_c0\_seq1; 1051 1 4952 LEN=5596; translated  
ERDRIQWRAPSLQEIWREERARMKLLSPELTQEI VGDAILKKAFAADGNSKSPEPTAFT  
LDVKKASARSGTKLAVKGMWVSVGLQENFIRSLVDILERHKESIERADQGLKEGRT  
ERIAAHTSEQKLVNLSPLKDKTTEFLLQLATPSCNREQLPNAGRSTPPTMKEAISALK  
ALGASNHDNYKSPVSHQPLDSDTMTTLR SVPTPNTSRSKDTSLTQRSSVHKRSYYESPL  
QTRAGKEDTYQCEVTKTLNDPDLVVKRKSQDVSQSTKGVRLFVVEPSQPGRSMFEVDDEV  
NYTQDETQAFSEPLSYPTQDMHVETLPTSLNPVEYSQRMERGD SILHTQDQDVEELINP  
ETLAPYNHIVFGEDCCRAIFDVE TDSNMHRI CGFRGALCPREGHEFAEKRAKPGMYTTI  
TTGTVDGVLDNVKYGVSAGGIVDDGQEEEDYNVLEEFRRSQKSVDSQHEIKRQFTQVP  
IQSSCKYTIIDEAIEEESGTGESIFSDGVLNMQNKGLKNDGSPRRSQKRSLSKLLSQEAAA  
ESDNSCFLEDDNDRVPSWLVRASNPDESNDKDDQSSGNKTRKINRGKVYFEPKLLAPDCKD  
VKVWVTSQKTKFVMDNKNEVSRKKRYRQVEIRDYMVGRDQSDTCKILRKQPPFEMTPT  
QGAHPSDRELKRNENDTSGASSKESKSSQRARAQNEIQSESQESENALEGICNQGGRFLI  
QGGGGLKARTRDSNLAGFDQPSVTNATQGSKENTSFLASPI TMLAVEVHVQCRVGASRLD  
SKKISMAQDSSKDRITAIYVYARDKGGGESLEILSRGCLCLALEGENPGRDPNINKNIR  
LQLLRAMPRTSMGVRSPLSIDVVKDERHLLRRFKDIVRTKDPDLMMSWDTQGAGLGYIEE  
RGHALGKIPSSGIAVGESNKGEATSLDMAKLLGRTPMDKKAANFVTTVSQGRAKGVNLDQ  
INETNENAEQSWQSGSLGSDWDDRVGAGVAAASIIIGRLVFAGWKIIAEVVKHPNASYLP

VVFAVLNKRIPHHDDLLLTKWYANSADRWRTLNYRLTQATASLLLFDALDIVGRAGEAAR  
LSGVFEFSQSFPGIRGSQYKVEGVLLRALKSLRSDERGSKKGRKLESDFLTQQTNYSSISG  
RTKSQSQSPWKVRRSNAESDKLHSLIEDRQYFFFFSPSQDDVKEQEAELEVQALTLPEQSGHF  
TDPVVVCDFTALYPSLI IAYNLCYSTCAGKLDYHSTRREMOMEGRTREKVGPFAYCERRT  
ATVLNHHLKSLSNVSHDRSSREPDPFSRDRAVYVAPTGTVVVSESVLKGVLPQVLDLMLTT  
RAMLKKAKEYKKNVKDLSPAILRQLEARQLALKSLQMLRTAILLQHSAXEDXAMPLLADT  
IVECGRRTLQRAMHIANQWQGLDPWGKEDNNWLGAEVIYGD TDSL FIRM PGRSYKEAFD  
FGAKFCKAVTSLNPPPIQLKLEKVYLGSIMQTMKRYCGMKYDSKDQKKPTFEAKGWKPLD  
ATNAALTQKVLKDALITLFKAGIEAVKEYMCRQWSLIFAGDLPVSDFILTGRVVRTKYRGG  
KEGPVQAVLARLAEADPGRVVRHKERIPYVIVATPGVTFRLKDCVLTPLLELLERWDAYK  
IHSGYIEKHVNAALQRCLGLPPHFVKVADW

>comp15586\_c0\_seq1; 630 184 3450 LEN=3492; translated  
MDSRRGSRWGGGNDRRPVSSYASLAADPPPTYLEREREGEGEFRGGGVAEAGEEAAAAGDA  
VEEAGAAGGADRPSGILSGEGAGAVVPTSAAASXNDRGRASDRFAPSLSDRGAPDRPSP  
GRSSMGGASRTSGGIAAPAAAADAQESKREDDSGYESGELSPSPPKPVDMDPPRRMGSGI  
PNPGDNYGGGVNHHMGCDDFDRRGSGRIFNEERGMGPPDIGGNPYSGQRDGLSIHSRYTD  
DRDRPPSTPAVPLAEEASSEVETTTTAAAGGVEEATLMTAEEVGVAGVVILTALREAGEA  
RAERGDSAVRSSTTEAGVEDWEREVAVGSTTTEEEGISRAAVAEEEEVAAGWGGLVPPVL  
PVGSTAWTVAAEEAEGRAGTDGSTTKGEEDTVLVEEGIPSEEWASRHAMATEMGHDTVCP  
RPVPMVPETHLATGRFETDTWNYCEEEKTQREISLGISSGGTNPVTFQTEMNRIEMGQPE  
IFLEKMNPVTFRTEMDDQGSQGLSTKRWSKKGWFKRFSSERWSKQGSQRFSSKRWSKQ  
GWPKRFPTKEGPTRDGRDFSSRDGLGRDVPDFLKRDEPREMHRLDGRNFPFGGPRDF  
PRRDEPLRDGSRDFPRREEMRDGPRDLLRRDGRDFPRADEPVRDGMRLPGEGRGPRGP  
RDGRESMYMREEDRYQAPGRQSIGCGSYSNILNETDLRKDQNLGLASEIDRFNKRGRDDR  
DFRSIDRIEKRPDDYGLRNSVQRPLPNSDDRSFGPRDRAADESTLRPGPLMGSRNSG  
AGSPPQDDGKGHGQPAGLRDDTTSKPFNRPEFPHEPKRDYREGHPQINSPYDRGRDHP  
MDDVRRPERSPCPERGRGERGRGGRGAFRGRGRGNRSDFRGGRGAEFARNFPFGGRDFDGN  
RDPNLDPTYHRNDESRNRDVEGERSFDPGNRDRQRERESLPSFSSYGQLASNETPKPTK  
GNASAKGSAGTAPQVRPVQERKKSEPKTSQPVAETPKKAKQVSKKEEEKETESRPARPR  
APTPPPKGKPTGVMLALARLLELEASMEFAYAKHMLLVKQQKELEEYQVLETLPVGDIDA  
IKEDLEQ

>comp15587\_c0\_seq1; 1505 209 4296 LEN=4474; translated  
MEVPSTSSPSTEEESAEDANPLPHDGEVDDGNSSDKAKKEILSACENQSTQEKIETELAE  
MVETDLTLAANDDMSSNSLGEIQTIPSLGEEESPSTVVNEEKEEIPNNEIVSTRSFAFSSN  
WSEIFGSPVESQGFSPSQAGSHHGLGLKLAVEEHFSTALFLGGVSKFLSGMAGIYEPLGN  
NLLRVSRMISPQQLPFKTSIDDDFRSLNEAIFSMGSGFRDSAQCYSRSELVVSLQRILATV  
GNEREKTFKWKYKEAKQGSVDARTIALSNYSKGTNAVETAETEIKLWFSNLRQKQINRTNE  
ETEEGEVGIETQETDMPWEKSLKTIGTTENEVDSTCLLIKKLRLVQSCEQAYIASVKKEN  
ECVQSSQEKEGLALNKIQKGEEDQINFFVNDILAKIFPENSGDGSKSTSQASLKMSDKDK  
QFGIQEKGNLLSTLNLFKTQSTPYEEMGIMDAETLGLSODLGLVLRDKMKSRFTEENR  
IKATETI IKLFEEITNVTAKASFRMRSHITNQRKAASDAKASGSFIASQSGSIWETILK  
IFEDEAKLVSEVAFKITKLEKWFSSCKRALEIENDADNAAWKQVCDAARFETRLESRYKQ  
TKQQVEIARQRASSKEAGLSLSLMGSTDSDENPQSPRKR TDSSGSGSGASAIQSTPNKVG  
LAFLKGGNAMKLTENAMVQIAQISMAEKDQKEANDKLALAEARVKKKSAVLAYTTYTKE  
RIRKIESEDDIGWTEMKNTVEELTESANALNTVRSNAFENRVSKELDTSFQSLMATKEDW  
SKRFREKILNAEQSSLSSTDAVTEYTLAINPIKSGNVDRILGMTETVTTLAALDLEIEPL  
DQEIKEGDVASCNDIPSDQISPSDSTPAETSTDGTNSVRSEIGEKEVSTTEESSEMKA  
IKRFFWSKPKDEKIPDILETHLCAYRPKERVTLTSLNLYGRLYTTKDAIYFLASDKHFTL  
QWDTITGIEKEKGFMSNNDTDLVVSYSRSDNEILSFLLCRLKDRDEVVAHLKRLKKESE  
RRASETPKDNTAADAKSSLVPPDSTLTKMNIIVLSKTIKNMSIESLFESAWADRSEGESFY  
GWLKEEECFDVATEEWKIAEDTRFRNEWCNEEYDQYRLVTFKFNRTTHLYIGPPVAIVK  
QRHFIRVEGKDRCVLAISAEFDGIPYADTFAVEMRWVATRKGAQDVQEVGLFVNFKRT  
MLRSQIESGTIEETRNVHLRFLDAVKNAARKSLGGQPGEDEDEDAEDDAVPVGTAEPE  
LLALFGLVGLDRSTVLSSIAAVCLLLAGSYAGRSFLGSPFFPGHPAARAPDDGAPERS  
PRPPQVAGPGHGSPEGREPAVPPIGIDAPCGVRDAAPYGQLW

>comp15588\_c0\_seq1; 1596 132 3551 LEN=3727; translated  
MPSLCSIPGESGETAKAKESVENDVAFEETKTGESNNKDAIPTSANHPLSDHIASVDGE  
GPEDTGITPPESEPASNHKKRRVTPGSDCGSKQKQQRKINQMTLSSFFNKGSIPTPSKKK  
KKAATASTNQENNGVASGSSPKEREASANSSSPSTKLAKKTKMEIEIITVDSDDDKVQGK  
SPASNPI SPFKKAPLAVEGTSLSSDNEKTGTASQRAPVNDKKANKGDKSSQIMVGGSPR

SKTVICKPSSPTNSLSVLESASGTPAAISAIPIKRKSNRKVKT'KTKSPDPSTCPSLAVVK  
KKLSEKDLTKERLALLRKYTSMKDMYLKRANEIVSQHRDGLKGEKIESVNLEPITDGT  
QTKESKLCEDFPTQVVMALIEGSDPLSRLVSKVCSSELKDVHGVEWLEESVTAKVKL  
LSKRKAYLDPMKRCTKAVDLFEDDDQDRLWRWEVMTLDLLPSDFTSKVRKVR  
SARKKVSTHHSALLKLVKSLEETKKLILDPPELPKLESAKAKISRDEEKVLKFER  
DAEKVRLADEAKAR K L L E Q E A K K R A K E E A L E A K K R A K E Q A L E E K K R K K E E A A K A R E E D K R K K E E E K L L K E K E K K  
L E E T K K L Q T V T K Q K A S F R S F F A A P K K V T N D Q H K K A L N T C I D L T C D S F D A D S F R A K L D A S  
D D A L P F A L K E N K R S A T A M A S R K R R T K P V A V S V Y K T V E A D K T E W G A S D Y L E Q T T I E V P N R Y  
R F L S F H E D C R P P Y R G S W S K K S S I V T G K T P F R K D V A I F D Y E Y D S E A E W E E G D D E L G E N V D D  
D S K N G E D E A D L E G N A K V Y D F E D G F C V A D D R L L D N E E D A D E E T K A L Y K K K M Q D R A H E E Q Q Q  
L H S N R I R I I A P C F G G I P L H L K K E D C T S S D C L E G F Q I D K A T D T L S S Y K G I Q L S N V M L C V D A  
F P Q L Y T N Q E N R P E S N T N G D T N K D D Y S N E A M I A M V R F T H H S T L T S K D K V I E E L R A S S P T L F  
S N R A K A T R K L D A I A V K K K H P K Y S G V Y W E V K P Q I L T E L N L T D I L K K K V E D I V Y E D D V Q E K P  
V G S S G D Q K S K K V S K A K S Q S P D A S K A I K A K D G K A E A S G S A S K K R K T K E K T Q E Q T N S A K K K K  
E S T S E G R G S M K G D S M K N K D A C E G M K N L M A Q F V K R S P L K T K P S K T I A S S T K D A T P S S S S Q  
>comp15588\_c0\_seq2; 1555 132 3666 LEN=3842; translated  
M P S L C S I P G C E S G E T A K A K E S V E N D V A F E E T K T G E S N N K D A I P T S A N H P L S D H I A S V D G E  
G P E D T G I T T P E S E P A S N H K R R V T P G S D C G S K Q Q R K I N Q M T L S S F F N K G S I P T P S K K K  
K K A A T A S T N Q E N N G V A S G S S P K E R E A S A N S S S P S T K L A K K T K M E I E I I T V D S D D D K V Q G K  
S P A S N P I S P F K K A P L A V E G T S L S S D N E K T G T A S Q R A P V N D K K A N K G D K S S S Q I M V G G S P R  
S K T V I C K P S S P T N S L S V L E S A S G T P A A I S A I P I K R K S N R K V K T ' K T K S P D P S T C P S L A V V K  
K K L S E K D L T K E R L A L L R K Y T S M K D M Y L K R A N E I V S Q H R D G L K G E K I E S V N L E P I T D G T E L  
Q T K E S K L C E D F P T Q V V M A L I E G S D L P L S R L V S K V C S E L K D V H G V E W L E E S V T A K V K L  
L S K R K A Y L D P M K R C T K A V D L F E D D D Q D R L W R W E V M T L D L L P S D F T S K V R K V R S A R K K V S T  
H H S A L L K L V K S L E E T K K L I L D P E L P K L E S A K A K I S R D E E K V L K F E R D A E K V R L A D E A K A R  
K L L E Q E A K K R A K E E A L E A K K R A K E Q A L E E K K R K K E E A A K A R E E D K R K K E E E K L L K E K E K K  
L E E T K K L Q T V T K Q K A S F R S F F A A P K K V T N D Q H K K A L N T C I D L T C D S F D A D S F R A K L D A S  
D D A L P F A L K E N K R S A T A M A S R K R R T K P V A V S V Y K T V E A D K T E W G A S D Y L E Q T T I E V P N R Y  
R F L S F H E D C R P P Y R G S W S K K S S I V T G K T P F R K D V A I F D Y E Y D S E A E W E E G D D E L G E N V D D  
D S K N G E D E A D L E G N A K V Y D F E D G F C V A D D R L L D N E E D A D E E T K A L Y K K K M Q D R A H E E Q Q Q  
L H S N R I R I I A P C F G G I P L H L K K E D C T S S D C L E G F Q I D K A T D T L S S Y K G I Q L S N V M L C V D A  
F P Q L Y T N Q E N R P E S N T N G D T N K D D Y S N E A M I A M V R F T H H S T L T S K D K V I E E L R A S S P T L F  
S N R A K A T R K L D A I A V K K K H P K Y S G V Y W E V K P Q I L T E L N L T D I L V R C H L F C S G S V L V L S H F  
A M F E C L L S Y D C L R N L S N V N K K K K V E D I V Y E D D V Q E K P V G S S G D Q K S K K V S K A K S Q S P D A  
S K A I K A K D G K A E A S G S A S K K R K T K E K T Q E Q T N S A K K K K E S T S E G R G S M K G D S M K N K D A C E  
G M K N L M A Q F V K R S P L K T K P S K T I A S S T K D A T P S S S S Q  
>comp15589\_c0\_seq1; 700 131 2632 LEN=2663; translated  
M T P S K C D G N N S K N G I P S P L S W R E A R T R L K T S L Q E Y L R T S I N T V H P S E T N A N Y R L S T P F L I  
S L C Y K W D L D V V F C A V C I S V A L L V V S A L T F T S H I S S N D N D N N G G E I S F A R S Q L A G A T L I F S  
A Y I S N V L L V V R Y R Y S A S H G T E S L K R R M I S K F L E E L N E E E D R C V I N N V A T I E H E N N G I D L V  
G T S L T D V Y P V Y R L K N I C A E K N A C E G S W S R I P T L L L V K G D R I A L Q V G D S V P A E C R V L E G K K  
S M T F F Q V G Q E I T L E S S S G E S V S S L V E E L S R G R T T L P S H D S D G L L R L C N D V R L F E V L E T P L  
E S F L R E P Q R E S K K T Q I S R Q L D S V R G A L S L V A I F V F V W T T A I L L G R Y H Q F S S N L S Y L L P S P  
F L A A I A V L P V I G P G C L I F I E A L G T A R I L A A Y H P I A S R T R M E N S S D A A S G S V N V D L L I F R Y  
F L A T L S N R L S L K D L G E K L Y K I F Q P I F C R T K Q S K P R S W N S S M V W V P P A S L N L V E K L G V A T A  
F T L V D D E L V C E P Q A I P Q Q L L I P S G K G L K L L D L C P T Y E D E S E D E S E G E D S S S V D Y R R N R Q R  
S F D V E M N Y D S D S D D G M M K D H H R V P S N K K I R R R L L R K T F R V S A Q R A R E A E E D D S D S E L A  
D H E V Q F E D P G W W Q F L P S L K C I G L A C H L V D E K N K L P A R R S E A S L P E S L L S H D L Q S C K A G L A  
R L V C K E R N S M Q L R S L A R C I G F S T K K N N S G S R G D I S P F S E K H R L H I V D I A R L R E R F K I D S H  
E R G S E E S R W W G L L R A D S T S V I V Q D S R Y G A Y Q L L T V G D P K V V T R M C H E A W Q G E N S T I L P L S  
S H D R S T I L E T S D S W K L S D L D V E A F S Y A P I P H T F E S R C A E N M E S T V R T F A K Q S T  
>comp15589\_c0\_seq2; 1038 131 4009 LEN=4479; translated  
M T P S K C D G N N S K N G I P S P L S W R E A R T R L K T S L Q E Y L R T S I N T V H P S E T N A N Y R L S T P F L I  
S L C Y K W D L D V V F C A V C I S V A L L V V S A L T F T S H I S S N D N D N N G G E I S F A R S Q L A G A T L I F S  
A Y I S N V L L V V R Y R Y S A S H G T E S L K R R M I S K F L E E L N E E E D R C V I N N V A T I E H E N N G I D L V  
G T S L T D V Y P V Y R L K N I C A E K N A C E G S W S R I P T L L L V K G D R I A L Q V G D S V P A E C R V L E G K K  
S M T F F Q V G Q E I T L E S S S G E S V S S L V E E L S R G R T T L P S H D S D G L L R L C N D V R L F E V L E T P L  
E S F L R E P Q R E S K K T Q I S R Q L D S V R G A L S L V A I F V F V W T T A I L L G R Y H Q F S S N L S Y L L P S P  
F L A A I A V L P V I G P G C L I F I E A L G T A R I L A A Y H P I A S R T R M E N S S D A A S G S V N V D L L I F R Y  
F L A T L S N R L S L K D L G E K L Y K I F Q P I F C R T K Q S K P R S W N S S M V W V P P A S L N L V E K L G V A T A

FTLVDELVCEPQAI PQQLLIPSGKGLKLLDLCPITYEDESEDESEGEDSSSSVDYRRNRQR  
SFDVEMNYDSDSDSDDDGMMKDHHRVPSNKKIRRLLRKTFRVSAQRAREAEEDSDSELA  
DHEVQFEDPGWWQFLPSLKCIGLACHLVDEKNKLPARRSEASLPESLLSHDLQCKAGLA  
RLVCKERNMQLRSLARCIGFSTKKNNSGSRGDISPFSEKHRLHIVDIARLRERFKIDSH  
ERGSEESRWGLLRADSTSVIVQDSRYGAYQLLTVGDPKVVTRMCHEAWQGENSTILPLS  
SHDRSTILETSDSWKLSLDLVEAFSYAPIPHTFESRCAENMESTFYLMNDPRSEVLLPF  
QKDKKGASA EWMLQNQIFLGLIGSIVIPRSETQGLLSTLQDAGVRFVYFSPRNMRQKE  
LASQMGIDVAWNCALSLRTLQGEDDPHRMVSNYADWDVNAKLPHGVDVSVRRHLKDVDNV  
PLLVSFLT DATKDTTAEEMEEIELQSTIDDNAXSSFSDDLHTIGVGPQCIFLKDIFQEYN  
DTVIAVGVSHLPRNSKIFSTSDLAIGVDMLESECLGKAIPDNFEYNTLLPSEVIFASAI SA  
HSCAFRLEGIRSI EHIPTILAQGRASLRAATSAAVFFLHGYSFALYISFTVCSVATTIP  
YVPIIGSALYLMVILPLVGFPICMSDPDRQYMVKVPPKNDISVSFGKKEGKFFSLVCFK  
ALPPAIFPQLLYLIAFGELMIQHEQEIIQLKCTSNSSPENWLSVIRCSELNEYSVARDA  
AVHLSLAELALLTIINSTTFVFRILSIWEEPPW

>comp15589\_c0\_seq3; 1065 131 3907 LEN=4377; translated  
MTPSKCDGNNSKNGIPSPLSWREARTRKTSLQEYLRTSINTVHPSETNANYRLSTPFLI  
SLCYKWDLDVVFCAVCISVALLVVSALTFTSHISSNDNDNNGGEISFARSQLAGATLIFS  
AYISNVLLVVRYRYSASHGTESLKRMMISKFLEELNEEEDRCVINNVATIEHENNGIDL  
GTSLTDVYPVYRLKNICAEKNACEGWSRIPTLLLLVKGDRIALQVGDSPVPAECRVLEGKK  
SMTFFQVQGEITLESSESGESVSSLVEELSRGRTTLP SHSDGLLRLCNDVRLFEVLETP  
ESFLREPQRESKKTQISRQLDSVRGALSVAIFVFWTTAILLGRYHQFSSNLSYLLPSP  
FLAAIAVLPVIGPGCLIFIEALGTARILAAHYPIASRTRMENSDDAASGSVNVDDLIFRY  
FLATLSNRSLSKDLGEKLYKIFQPIFCRTKQSKPRSWNSSMVVPPASLNLVEKLGVATA  
FTLVDELVCEPQAI PQQLLIPSGKGLKLLDLCPITYEDESEDESEGEDSSSSVDYRRNRQR  
SFDVEMNYDSDSDSDDDGMMKDHHRVPSNKKIRRLLRKTFRVSAQRAREAEEDSDSELA  
DHEVQFEDPGWWQFLPSLKCIGLACHLVDEKNKLPARRSEASLPESLLSHDLQCKAGLA  
RLVCKERNMQLRSLARCIGFSTKKNNSGSRGDISPFSEKHRLHIVDIARLRERFKIDSH  
ERGSEESRWGLLRADSTSVIVQDSRYGAYQLLTVGDPKVVTRMCHEAWQGENSTILPLS  
SHDRSTILETSDSWKLSLDLVEAFSYAPIPHTFESRCAENMESTFYLMNDPRSEVLLPF  
QKDKKGASA EWMLQNQIFLGLIGSIVIPRSETQGLLSTLQDAGVRFVYFSPRNMRQKE  
LASQMGIDVAWNCALSLRTLQGEDDPHRMVSNYADWDVNAKLPHGVDVSVRRHLKDVDNV  
PLLVSFLT DATKDTTAEEMIDIFQEYNDTVIAVGVSHLPRNSKIFSTSDLAIGVDMLESECL  
GKAIPDNFEYNTLLPSEVIFASAI SAHSCAFRLEGIRSI EHIPTILAQGRASLRAATSA  
VFFLHGYSFALYISFTVCSVATTIPYVPIIGSALYLMVILPLVGFPICMSDPDRQYMVK  
VPPKNDISVSFGKKEGKFFSLVCFKALPPAIFPQLLYLIAFGELMIQHEQEIIQLKCT  
SNSSPENWLSVIRCSELNEYSVARDA AVHLSLAELALLTIINSTTFVFRILSIWEEPPW

>comp15590\_c0\_seq1; 949 367 3929 LEN=4185; translated  
MSERAGGDRVDRQKKSIAIDESNSVLAGLFPVPLYPSTPQRNTGSDDTGGDGAGSVSHMM  
KLFAPSIANAASIAPPTATTSTSEPSFWLSPNTNRMNSLLAAQNSPDNRQGE EAPLLGG  
YGLHTPQPSVDNTNYSQISSSSSAGDLEKTPKTSLSYGGVGNNGDRNGNGIAGHARHMS  
GAGHARVSSVAMP SISENRAQTILAQPDLNQNMMNANDKDCNCNKNTTDRVSNTCTHTGIF  
LRTTKEAIYSLFESTTYIGSFVYLLYHVVFCLALGSAIMRPNNPISILGLMTKTAALGTL  
VASPIYWIKLSNDIPALYPTADLFLAPFLARLATHVDDVLANDSAVTEEENDAVFLASFG  
VLTAIGMALSACLIMAASVFKLANLGSYLPFPVICGFFSAVGILTWTLAINVDTGGKTIG  
VILTSGDFDLIRYALIHIIPTIIVAGFMKYLGPKNPFFVCLVVVVTIGLFYGYMLVTGTP  
LQEMKEEGWFWSHEELVYDNDSSSTLGFDAWAPPAPFAVLAVIYQVHWGAVRNGISTAIAM  
SFLYLIRCSVHGAALKKKNISNLSRKVLSADLNKSETLTASAEFKNENDIRGTPGRISPKP  
SRKFSEAVDIEAVMSQPTPQGMTRSSRSINDSEEKYQIVHATSTSKSLKEISLAYGCSQV  
FNVVAGGFVAVTPSVASSSTMFMGLGADGLAPQIGSVLLLLLIFYLTDFQIVGYIPKPAFSSM  
LVLSSFDMINTWFFKSFLKTKDKMEVWVVPVIVICAFVLDLLSAVFLGIALSTFIFVGF  
FRSGVVKYVANGQSIINSTIERPSSRMSQWLNENGCRIQVICLQNYLFFGNASSIYNYVFE  
LFESNKEDESPLLESKSKYLILDLTTLVTGMDTSTVDVFSQIKNLCEGNHCKLFMAGMSSN  
IRSILALGGFKADKGVRSKRQLRFFASLDAALGKAEDMLESDYDDRIDQVRTRHLIRRR  
DSGFQAALRYIDNGHGDNICRELAGEKYTTMLELQPGEILYSDGKSKGIERGLFFIEAG  
ILKEERDTGNTATWGPKPAASSPSGTGGSQDXADEDAALPEGGSGRRLGKPNLSPRATR  
RGLGGGHDGILRDETPGEPGRTGPLPAPPALFETRGSGARGSDRSIETLQALVPSDGAT  
TGSNDWSAGNAPFHVFACALRSLGHELLLVENKSVSKNELRMAAPR

>comp15590\_c0\_seq2; 80 1 649 LEN=902; translated  
XSRFCSINVYESVRLIPWNAVHRQPGEILYSDGKSKGIERGLFFIEAGILKEERDTGNTA  
TWGPKPAASSPSGTGGSQDXADEDAALPEGGSGRRLGKPNLSPRATR RGLGGGHDGILR





PTFNPTKSP TKAPTEFPTE SMQPTDCFE PVVPQVVKSICMSSGGEPMDLIPMPQNAVEVT  
ELHRGGDGIDFAIFQEWGETVGM AIRLNLEDCMVRGNMRRGEAQDVVGE CIEGTTATV  
AFMDPEFDPDECEACNVEDLQEMGGNYEFCAYIVEI  
>comp15591\_c0\_seq9; 395 1 1041 LEN=1041; translated  
PCEPVS VACGEPSASPSG SFYPSSAPSESPSKSVSPSEEPSGSPTKDPTETPTHSP TKNP  
TSAPTNAPTEAPTHSPTKVPTSAPTSKPT EAPTHAPTSNPTS KPTS SDPTS KPTS SDPTNNP  
TSNPTEAPTHAPTSNPTS NPTS NPTGNPTS NPTS NPTS KPTS SDPTS NPTGNPTS NPTS NPT  
TSNP TSNP TNNPTFNPTKSP TKAPTEFPTE SMQPTDCFE PVVPQVVKSICMSSGGEPMDL  
IPMPQNAVEVT ELHRGGDGIDFAIFQEWGETVGM AIRLNLEDCMVRGNMRRGEAQDVVGE  
CIEGTTATV VAFMDPEFDPDECEACNVEDLQEMGGNYEFCAYIVEI  
>comp15591\_c0\_seq10; 6 1 627 LEN=627; translated  
PCEPVS VACGEPSASPSG SFYPSSAPSESPSKSISPSALPTATPSASPSSTPSSSP SHVP  
SGRPSESPSGSPSGSPSGVPSGRPSASPSGAPSSPPSSSPSQNPSSSPSVRPSDNP SGSP  
SSSPSGSPSSKPSRAPSGSPSSSPSGEPSVSPSGKPSVSPSSSPSGEPSASPSGEP SGSP  
SSSPSGKPSSSSPSGEPSSSPSAAPSGSFY  
>comp15591\_c0\_seq11; 88 1 300 LEN=300; translated  
SVVPSSSPSGEPSASPSG EPSSMPSSSPSGEPSSSPSGSPSGSPSSKPSDSPSVNPSSGP  
SSEPSSSPSGSPSGSPSSSPSGSPSDSPSGKPSVSPSSSP  
>comp15591\_c0\_seq12; 488 1 1041 LEN=1041; translated  
PCEPVS VACGEPSASPSG SFYPSSAPSESPSKSVSPSEEPSGSPTKDPTETPTHSP TKNP  
TSAPTNAPTEAPTHSPTKVPTSAPTSKPT EAPTHAPTSNPTS KPTS SDPTS KPTS SDPTNNP  
TSNPTEAPTHAPTSNPTS NPTS NPTGNPTS NPTS NPTS KPTS SDPTS NPTGNPTS NPTS NPT  
TSNP TSNP TNNPTFNPTKSP TKAPTEFPTE SMQPTDCFE PAIPQVVNSLCMKSGGELMDQ  
IPMPENAI VVSGYRSGGDEIGITTFQQWSNVAGLAVRSNLDDCIVTGDVELGQGVDFAGE  
CIEGIARVT VVAFMDPEFDPDECEACNVDDLQEMGGSYEFCAYVVEI  
>comp15591\_c0\_seq13; 268 1 562 LEN=562; translated  
XTKAPTEAPTSTPTS NPTKNPTSSPTS NPTS NPT EAPTKSP TKAPTEFPTE SMQPTDCFE  
PAIPQVVNSLCMKSGGELMDQIPMPENAI VVSGYRSGGDEIGITTFQQWSNVAGLAVRSN  
LDDCIVTGDVELGQGVDFAGE CIEGIARVT VVAFMDPEFDPDECEACNVDDLQEMGGSYE  
FCAYVVEI  
>comp15591\_c0\_seq14; 117 1 342 LEN=342; minus strand; translated  
XPDGLTDGLADGSPLGLLEGLTLGFPDGLSDGEPLGLLDGEPLGLPEGLLLGSELGPLDG  
FTLGLSEGFELGDPLGDPLGLDDGSPEGLDEGMDDGSPEGEAEGSPLGDELGTTL  
>comp15591\_c0\_seq15; 456 1 1041 LEN=1041; translated  
PCEPVS VACGEPSASPSG SFYPSSAPSESPSKSVSPSEEPSGSPTKDPTETPTHSP TKNP  
TSAPTNAPTEAPTHSPTKVPTSAPTSKPT EAPTHAPTRVPTSAPTNNPTEAPTHAPTSNP  
TNKPTS DPTRNPTEAPTHAPTNPTS DPPTS NPTS NPTS KPTS SDPTS NPTGNPTS NPTS NPT  
TSNP TSNP TNNPTFNPTKSP TKAPTEFPTE SMQPTDCFE PVVPQVVKSICMSSGGEPMDL  
IPMPQNAVEVT ELHRGGDGIDFAIFQEWGETVGM AIRLNLEDCMVRGNMRRGEAQDVVGE  
CIEGTTATV VAFMDPEFDPDECEACNVEDLQEMGGNYEFCAYIVEI  
>comp15591\_c0\_seq16; 346 101 946 LEN=1005; minus strand; translated  
MKATTVTRATPSKHSPAKSTPCPSSTSPFTIQSSRLARTAKPATLLHCWNVVIPISSPPE  
RYPETTIAFSGIAMRSMVSPTEFIQIESTTWGIAGSKQSVGCRDELGSPLGLLDGFPEGE  
DEGEPLGSPLGLADGSPLGLLEGLTLGFPDGLTDGSPLGLLDGEPLGARDGFEEGDPLGL  
LDGLPEGLSDGRTEGELEGFEMDXEDGGDEGAPDGLALGRPEGTPEGDPLGLPDGLSEGL  
PEGTCEGDELGVELGEADGVAVGNALGEMLLLGLSEGALLG  
>comp15591\_c0\_seq17; 287 1 632 LEN=632; translated  
PCEPVS VACGEPSASPSG SFYPSSAPSESPSKSVSPSEEPSGSPTKDPTETPTHSP TKNP  
TSAPTNAPTEAPTHSPTKVPTSAPTSKPT EAPTHAPTSNPTS KPTS SDPTS KPTS SDPTNNP  
TSNPTEAPTHAPTSNPTNKPTS DPTRNPTEAPTHAPTNPTS DPPTS NPTS NPTS KPTS SDP  
TSNP TSNP TSNP TSNP TSNP TNNPTFX  
>comp15591\_c0\_seq18; 339 1 646 LEN=646; translated  
XTSNPTS KPTESPTHTPTS NPTS NPTS KPTS SDPTS NPTGNPTS NPTS NPTS NPTS NPTNN  
PTFNPTKSP TKAPTEFPTE SMQPTDCFE PAIPQVVNSLCMKSGGELMDQIPMPENAI VV  
GYRSGGDEIGITTFQQWSNVAGLAVRSNLDDCIVTGDVELGQGVDFAGE CIEGIARVT V  
AFMDPEFDPDECEACNVDDLQEMGGSYEFCAYVVEI  
>comp15591\_c0\_seq19; 327 101 813 LEN=813; minus strand; translated  
MKATTVTRATPSKHSPAKSTPCPSSTSPFTIQSSRLARTAKPATLLHCWNVVIPISSPPE  
RYPETTIAFSGIAMRSMVSPTEFIQIESTTWGIAGSKQSVGCRDELGSPLGLLDGFPEGE  
DEGEPLGSPLGLADGSPLGLLEGLTLGFPDGLSDGEPLGLLDGEPLGLPEGLLLGSELGP



VTAGHILFDMRKGRFTFGARYKGLKNARAVVGVVSSKNDDKANAVFRYFAEIVADDICNID  
ACVLKITAKLGKDVNRHSLIGKQSGQFEIILKDVSEERLPVLKMTSTKFEREERGRIGF  
NQGGEGRRKKGEHISTTSDLLGGYICKLFKPSDDHSISSEDSSATEEGELRPREEIVVIC  
DANTIQHGSGGPFVNNNEGKVVGILSRSDPADPRRCYLVPPTSEIRTLIKKAKFQSSGLQYA  
P

>comp15593\_c0\_seq1; 153 684 833 LEN=850; minus strand; translated  
MARSTCACTERLCRLRERKKPESWLAGVALSVLKVFVLDLVVEEPSLLDF

>comp15593\_c0\_seq2; 462 318 1694 LEN=1694; translated  
MWQSFRESLFQTSDAQQRSNENEKSNKSKRVAKQATQTQRPSPSSDGSTLLHLQHFLPP  
STLEELEAQEQSLPDRWLDFFCIVGIDPDGPLVDEKPPVQGRTKGSDHRGSNRPVLLDRY  
PRDEYADTEFPEHLPTFCFPDGGCHPLRHKIRRHDHSATESRAVDNNTAESPPGLLLDCV  
GQGAASASDSTHTDTTAKHKHPIVRYHNVPEPSLCSMVLTTGAGNRLYCTSLTVYEVK  
DIPNQPKPQRPVPSNKKDNEPKATTPPEIDLKDNWWEPSIDSMKHIIEQRKRQGGSSSS  
SGSNIAIETEANHTDEYYVWVVKCLVMISHHPFFRAQSLILRELFYTVQSGSSPVPFERY  
VAHLVDDIPMPRSGVGRFPRSKNTVVEWRSWLYPANRVRPPGNTPLLRRLERPPPRLPP  
LGGGSVEPLFRTLSSLNVLVVWATLLSEGKVVLACESSS

>comp15594\_c0\_seq1; 160 232 1166 LEN=1166; translated  
MASQQSQPQPQSLQEDIGEIDVESLRRIFGSASFEDLNKRKAHELREQWMESVQQEKEQQ  
QQGGGGPSSGGSPGVPPSAAGLPRFLLDPRDDRHVAPHALALRLLLGRVRRREGDHDGGLY  
RRVAASCNDSESESERDNGAGTGTVAGTIAIDAPVGAGPRQRRGKQRRRRGNGSLRARA  
DADADADAYADAHPEPKLPALLLLPLAAIALVSLACQFVLEVLGGAGAVWGCAELAGLRG  
SGAPDSGRAASRTASLVVAVCLARFLVVRLLVPLRPPQRGGSAGAGFWELARAAAAGDPV  
LALHPSRGMLAG

>comp15594\_c0\_seq2; 235 232 1404 LEN=1811; translated  
MASQQSQPQPQSLQEDIGEIDVESLRRIFGSASFEDLNKRKAHELREQWMESVQQEKEQQ  
QQGGGGPSSGGSPGVPPSAAGLPRFLLDPRDDRHVAPHALALRLLLGRVRRREGDHDGGLY  
RRVAASCNDSESESERDNGAGTGTVAGTIAIDAPVGAGPRQRRGKQRRRRGNGSLRARA  
DADADADAYADAHPEPKLPALLLLPLAAIALVSLACQFVLEVLGGAGAVWGCAELAGLRG  
SGAPDSGRAASRTASLVVAVCLARFLVVRLLVPLRPTHQASTSTRTRAGFWELARAAA  
GDPVLAALHPSRGMLAGFLRGPRGRDTGGDSGNEIENKIDHEIDHEIESPVGCRKPPSSPP  
ALGGAGGPPSPRGSTWDASSSSDDDYECSSP

>comp15594\_c0\_seq3; 239 232 1446 LEN=1853; translated  
MASQQSQPQPQSLQEDIGEIDVESLRRIFGSASFEDLNKRKAHELREQWMESVQQEKEQQ  
QQGGGGPSSGGSPGVPPSAAGLPRFLLDPRDDRHVAPHALALRLLLGRVRRREGDHDGGLY  
RRVATSCGNENDSESERDGPKNSSGGRDSGGRAGTIAGTIAGTIASDAPVGAGPRQRRGK  
QRRRRGNGSLRARADADADADAYADAHPEPKLPALLLLPLAAIALVSLACQFVLEVLGGA  
GAVWGCAELAGLRGSGAPDSGRAASRTASLVVAVCLARFLVVRLLVPLRPTHQASTST  
RTRAGFWELARAAAAGDPVLAALHPSRGMLAGFLRGPRGRDTGGDSGNEIENKIDHEIDHEI  
ESPVGCRKPPSSPPALGGAGGPPSPRGSTWDASSSSDDDYECSSP

>comp15594\_c0\_seq4; 164 232 1208 LEN=1208; translated  
MASQQSQPQPQSLQEDIGEIDVESLRRIFGSASFEDLNKRKAHELREQWMESVQQEKEQQ  
QQGGGGPSSGGSPGVPPSAAGLPRFLLDPRDDRHVAPHALALRLLLGRVRRREGDHDGGLY  
RRVATSCGNENDSESERDGPKNSSGGRDSGGRAGTIAGTIAGTIASDAPVGAGPRQRRGK  
QRRRRGNGSLRARADADADADAYADAHPEPKLPALLLLPLAAIALVSLACQFVLEVLGGA  
GAVWGCAELAGLRGSGAPDSGRAASRTASLVVAVCLARFLVVRLLVPLRPPQRGGSAGA  
GFWELARAAAAGDPVLAALHPSRGMLAG

>comp15594\_c0\_seq5; 236 232 1449 LEN=1943; translated  
MASQQSQPQPQSLQEDIGEIDVESLRRIFGSASFEDLNKRKAHELREQWMESVQQEKEQQ  
QQGGGGPSSGGSPGVPPSAAGLPRFLLDPRDDRHVAPHALALRLLLGRVRRREGDHDGGLY  
RRVATSCGNENDSESERDGPKNSSGGRDSGGRAGTIAGTIAGTIASDAPVGAGPRQRRGK  
QRRRRGNGSLRARADADADADAYADAHPEPKLPALLLLPLAAIALVSLACQFVLEVLGGA  
GAVWGCAELAGLRGSGAPDSGRAASRTASLVVAVCLARFLVVRLLVPLRPTHQASTST  
RTRAGFWELARAAAAGDPVLAALHPSRGMLAGFLRGPRGRDTGGDSGNEIENKIDHEIDHEI  
ESPVGCRKPPSSPPALGGAGGPPSPRGSTWDASSSSDDDYDCCSP

>comp15594\_c0\_seq6; 232 232 1407 LEN=1901; translated  
MASQQSQPQPQSLQEDIGEIDVESLRRIFGSASFEDLNKRKAHELREQWMESVQQEKEQQ  
QQGGGGPSSGGSPGVPPSAAGLPRFLLDPRDDRHVAPHALALRLLLGRVRRREGDHDGGLY  
RRVAASCNDSESESERDNGAGTGTVAGTIAIDAPVGAGPRQRRGKQRRRRGNGSLRARA  
DADADADAYADAHPEPKLPALLLLPLAAIALVSLACQFVLEVLGGAGAVWGCAELAGLRG  
SGAPDSGRAASRTASLVVAVCLARFLVVRLLVPLRPTHQASTSTRTRAGFWELARAAA

GDPVLALHPSRGLAGFLRGPRGRDGTGGDSGNEIENKIDHEIDHEIESPVGCRKPPSSPP  
ALGGAGGPPRGSTWDASSSSDDDDYDCCSP  
>comp15594\_c1\_seq1; 151 391 1104 LEN=1510; minus strand; translated  
MSNTGHDEFDRLASSELSATIKEIEVALRERASGDSKNDKESRSGTNKLIVKASSILSKLS  
SVTKSVSEREPEGLKQELVDIYKAYKMQMKTFFKSLHQPELFFKNKIGTKASCTEKLELEK  
LTLFPSSGGKTVGSDELSSRWHDTSRTRNNFSRNGHSDRGIVSNTQGRVKGQNSRLQDA  
LKSLAESEQVAQEISGELQGQRETLQKAHGRMDQFSAMTEYSKTLNLSMNKPWWRWK  
>comp15594\_c1\_seq3; 151 359 1072 LEN=1478; minus strand; translated  
MSNTGHDEFDRLASSELSATIKEIEVALRERASGDSKNDKESRSGTNKLIVKASSILSKLS  
SVTKSVSEREPEGLKQELVDIYKAYKMQMKTFFKSLHQPELFFKNKIGTKASCTEKLELEK  
LTLFPSSGGKTVGSDELSSRWHDTSRTRNNFSRNGHSDRGIVSNTQGRVKGQNSRLQDA  
LKSLAESEQVAQEISGELQGQRETLQKAHGRMDQFSAMTEYSKTLNLSMNKPWWRWK  
>comp15594\_c1\_seq6; 151 469 1182 LEN=1588; minus strand; translated  
MSNTGHDEFDRLASSELSATIKEIEVALRERASGDSKNDKESRSGTNKLIVKASSILSKLS  
SVTKSVSEREPEGLKQELVDIYKAYKMQMKTFFKSLHQPELFFKNKIGTKASCTEKLELEK  
LTLFPSSGGKTVGSDELSSRWHDTSRTRNNFSRNGHSDRGIVSNTQGRVKGQNSRLQDA  
LKSLAESEQVAQEISGELQGQRETLQKAHGRMDQFSAMTEYSKTLNLSMNKPWWRWK  
>comp15594\_c1\_seq7; 151 492 1205 LEN=1611; minus strand; translated  
MSNTGHDEFDRLASSELSATIKEIEVALRERASGDSKNDKESRSGTNKLIVKASSILSKLS  
SVTKSVSEREPEGLKQELVDIYKAYKMQMKTFFKSLHQPELFFKNKIGTKASCTEKLELEK  
LTLFPSSGGKTVGSDELSSRWHDTSRTRNNFSRNGHSDRGIVSNTQGRVKGQNSRLQDA  
LKSLAESEQVAQEISGELQGQRETLQKAHGRMDQFSAMTEYSKTLNLSMNKPWWRWK  
>comp15595\_c0\_seq1; 897 1 3193 LEN=3540; translated  
GKLIKINKALKTSHNIIVGQNYDRSIDLSIRNLNEVGILLGMMSAVDSPKRKGSKASRR  
KTTSAARLQAACKALAEELTKDDDDQHETESDAKNCGWTLDMPSQQTSDATGRRPLLRTS  
SKQLIGASKETASKSTYRRSSLASMSAPSMKRVIPNRGPANSTSRSSFGLRRTRSQRSL  
SIGMMSNRNMMNRTLMSMDKNASMRNENDAFESEKLLSKTMIHVLSNELKGSRNDESSNNK  
LTTVGEAEDEGESAEMLTQRFMSEFPNDKVPTLGLVLRRLYSKANEPKKQETSSDESESD  
DSDYDNIDDKIHEAVATMMGVDSHSHKPNSTSFEDDVELSDSGLSFASESEKKSWRACATA  
GNSVDDDDSSDDDDGNDEDDDDGDDNGNGDGDGKAESLRKKGGEERKDNRPKKGISGGE  
SPRLEVLNIGKHKGGKSKSVSSKSHNSSSTKHSSGKSLGSSRNERCGSGSKSLSSSSYD  
PKKKSTRSRMDTSVHSSPSSSASTAKQSLTKGNLPSITGRERRDRSKKSSSSLSQKLEKI  
SSKSSKASRPREMGTSVHSFERSDHSTKEGDGSKLGRKINSRRRRDASRRKSCPSLSP  
VRSSAGSHSKEKDDKRTGRQINSRRLRDDLQPKCPSLPLRCATASSHSRKGDKGKAG  
RQMKSGRCPPDPQRKSCLSLSPVPLTGSVHSKTLKTKSKASIASLTMKSDHDHNYDTSS  
KGSVSMINSFHDSSVDFGSSLDMTTKPNLSRNSMASLNGNDSPPVKKIERRRIKRRGS  
HSEQDHRPRSRFDHNSRQSRASITDRRMQARRARSKSIDRSAAAKNGNEIRRRRSGIRS  
VKYSHDTQDELERINHSGQSGSKNFINPGRKKTIKASQQKDTIDSKSISGESTLES  
AGNTKIEESPLFKNPCAPKCIESIDVDDLDRLSAADLLWKEIDGQIAGEKTLEMGNQSK  
SSKSDETQKKEKQKTRTSAGDDTRTSSGVTRPTEKKTKNRDPKASRNTIHEETKGPDG  
GVSLWINPLEMDFVSPLAVRGKKKAGRPKKPRSRNTNIKKRGDV  
>comp15595\_c0\_seq2; 617 1 2705 LEN=2964; translated  
XSMYHFLFRFVFLLCFRITIDTILCQKAALDPKYVHSEFPQKFLNRIYEEHQKLCHAF  
TPQQERPLMVMSIGSVEVGNKPIRFLNQVDTSNFLVPTSLAKVSNVEAMTSSPILPLLR  
VLGVSSTLRLLSALLSEN RVLLISANPTRLAQCARSA SILAQGLLNWQHLYIPVLP  
FQYLGAPVPYILIGILSAFVPKLNADGLGEMVIINLDTNQMETRGMNPMDVARKVPDLFQK  
AVSEQMPASTMSASEMLAQDLIDLKVDKRAIYGESTLTNVSETAAKATKAVKSGFNKL  
ASKGKFFNTRKGSLSIDSIGSVEEVVETNTPEVDLNTMLPDAVYVQGSRNEFGEEQA  
KIAFASFYLSIFGNMRWYLSAMPGLPHLDRKRFLQKRAMGESTPIWPLLQNFCE  
LEEFKARVDEVRLRKPVTTDSPLFTQCANYHRLNNDIFS VVNVRVRSQVAESNPSRMI  
MQASFRRTAMLITSNKTYDGDYNKAVAHLEVEQCRESAAVLSDVMSVIWVRIRDSKGVH  
HGLQALQVLRNLLYHGPLAAIAEATDGLDKIRAMKIFYNDHMRSQICTQIRQAAHQV  
VDRAKLFHIRRICVKKRLLKQPEQSRYIKNTRISITHRFAMHQHFNPNAAARVAPAP  
GPLPSTGDDIFGLTSPSAGGIPAAPKSADVAQDIVGLFSNIDVSNQSSGGASPA  
NPFDPAPTNSQMSPPPQSVPRHPGAIPTQPSTPHSQNLFSVSAATAQPLCQGS  
VQQQATRAPIPGQPIITYGSPYPQTSTPTHQRPAAPQQQYYQPQPPGQHP  
AMSSPQQHQYNQAGGYKYAPGQQQHQHYQHPPSQQQYATQQAPPAQPPKPNLSQ  
FDPFQ  
>comp15595\_c0\_seq3; 702 231 3323 LEN=3582; translated  
MSNPQPLPLFDLFLDLPHPAGAASCPPPNYSYACPATNPEVEKEIAANMSRIAMFA  
FPEFD

DTLNQRI PRDKALNRFSQYAMQPKGFQNYTFSLQKSGVRVHGFVRRYLPMHQLV EHR YD  
VGRRGERALVMLTRFSGGDLMFASVLKTI DTILCQKAALDPKYVHSEPOKLF LNRI YEEH  
QKLCHAF LSTPQQRPLMVMSIGSVEVGNKPIRFLNQVDTSNFLVPTSL LAKVSNVEAMT  
SSPILPLLRLV LGVSSTLRLLSALLSEN RVLLI SANPTRLAQCAR SALSILAQGLLNWQH L  
YIPVLP PHLFQYLGAPVPYLI GILSAFV PKLNADGLGEMVI INLDTNQMETRGMNPM DVA  
RKVPDLFQKAVSEQGPASTMSASEMLAQDLIDLKVDKRAIYGESTLTNVSETAAKATK  
AVKSGFNKLASKGKFFNTRKGSLSIDSIGSVEEEVVE TNTPEVDLNTMLPDAVYVQGS  
RNEFGEEQAKIAFASFYLSIFGNMRWYLSAMP GKLP HLDRKRFLQOKRAMGGESTP IWPL  
LQNFCE SQMLEEFAKARVDEVRLRKPVT TDSPLFTQCANYHRLNNIDFSVVNVRRVSRQV  
AESNP SRMIMQASFRRTAMLITSNKTYDGDYNKAVAH LVEQCRESAAVLSDVMSVIWVRI  
RDSKGVHWHKGLQALQVLRNLLYHGPLAAIAEATDGLDKIRAMKFYNDHMRSQICTQIRQ  
AAHQVYNLLVDRAKLFHIRRICVKKRLLLKQPEQSR YIKNTRISITHRFGAMHQHFNPNA  
ARVAPAPRSGPLPSTGDDIFGLTSPSAGGIPAAPKSADVAQDIVGLFSNIDVSNQSSGGA  
SPAPASRARNPFDPAPTPNSQMSSPPPQSVPRHPGAI TPQPSTPHSQNLFSVPVSAATAQP  
LCQGS PAQQVQQQATRAPIPGQPI TYGSPYPQTSTPTHHQRPAA PQQQYYQPQPPGQHPP  
SGPPQKSGYAMSSPQQQHYNQAGGYKYAPGQQQH QHYQHPPSQQQYATQQAPPAQPPK  
PNLSQFDFPQ

>comp15595\_c0\_seq4; 124 1 786 LEN=786; translated  
QSLTKGNLPSITDDKASGRERRDRSKKSSLSL SQKLEKISSKSSKASRPREMGTS SVHS  
FERSDHSTKEGDGSKSGRTINSRRRRDASRRKSCPSLSPVRSSAGSHHSKEKDDKRAGRR  
ISSRRHQDDHQPKSCPSLSP LRCATASSHSRKGDKKAGRQMKSGRCPDDPQRKSCLSL S  
PVP SLTGSVH SKTLKTKSKASDHDHKYDTSSKGSVSMINSFHDSSVSFGSSLDMTTKPNS  
LRSNESMASLNGNDSPPVKKIE

>comp15595\_c0\_seq5; 334 1 1689 LEN=2036; translated  
QSLTKGNLPSITDDKASGRERRDRSKKSSLSL SQKLEKISSKSSKASRPREMGTS SVHS  
FERSDHSTKEGDGSKSGRTINSRRRRDASRRKSCPSLSPVRSSAGSHHSKEKDDKRAGRR  
ISSRRHQDDHQPKSCPSLSP LRCATASSHSRKGDKKAGRQMKSGRCPDDPQRKSCLSL S  
PVP SLTGSVH SKTLKTKSKASIASLTMKSDHDHNYDTSSKGSVSMINSFHDSSVSFGSSL  
DMTTPNSLRNESMASLNGNDSPPVKKIERRRIKRRGSHSEQDHRPRSRSFDHNSRQSR  
ASITDRRMQARRARSKSIDRSAAAKNGNEIRRRRSGIRSVKYSHDTQDELERINHSGQSG  
SKNF INPGRKKTIKASQQKDTIDSKSISGESTLES HSSAGNTKIEESPLFKNPCAPKCI  
ESIDVDDLRLSAADLLWKEIDGQIAGEKTLEMNDQSKSSKSD ETQKKEKQKKT RSAGD  
DTRTSSGVTRPTEKKTNRDPKKASRNTIHEETKGP DGGVSLWINPLEMDFVSP LAVRG  
KKKAGRPKKPRSR TNIKKRGDV

>comp15595\_c0\_seq6; 305 1 1206 LEN=1553; translated  
DRRIRRGSSHQPSTSSLLPMP SLTGSVH SKTLKTKSKASIASLTMKSDHDHNYDTSSKG  
SVSMINSFHDSSVSFGSSLDMTTKPNSLRNESMASLNGNDSPPVKKIERRRIKRRGSHS  
EQDHRPRSRSFDHNSRQSRASITDRRMQARRARSKSIDRSAAAKNGNEIRRRRSGIRSVK  
YSHDTQDELERINHSGQSGSKNF INPGRKKTIKASQQKDTIDSKSISGESTLES HSSAG  
NTKIEESPLFKNPCAPKCI ESIDVDDLRLSAADLLWKEIDGQIAGEKTLEMNDQSKSS  
KSD ETQKKEKQKKT RSAGD DTRTSSGVTRPTEKKTNRDPKKASRNTIHEETKGP DGGV  
SLWINPLEMDFVSP LAVRGKKKAGRPKKPRSR TNIKKRGDV

>comp15595\_c0\_seq7; 687 1 2290 LEN=2290; translated  
GKLKINKALKTSISHNI IVGQNYDRSIDLSIRNLNEVGILLGMMSAVDSPKRKGSKASRR  
KTTSAARLQA AKKALAE LTKDDDDQHETESDAKNCGWTLDMPSQQTSDATGRRPLL RSTS  
SKQLIGASKETASKSTYRRSSLASMSAPSMKRVIPNRGPANSTSRSSFLRRTRRSQSRSL  
SIGMMSNRNMNR TL SMDKNASMRNENDAFESEKLLSKTMIHVLSNELKGSRNDESSN NK  
LTTVGEAEDEGE SAEMLTQRFMSEFPNDKVPTLGVLRRLY SKANEPKQETSSDESE SDD  
DSDYDNIDDKIHEAVATMMGVDSH SKPNSTSFEDDVELSDSGLSFA SEKKS WRACATA  
GNSVDDDS SDDGND EDDDDGDDNGDGDGKAESLRKKGGEERKDNRP PPKGISGGE  
SPRLEVLNIGKHKGKSKSVSKSHNSSSTKHSSGKSLGSSRNERCGSGSKSLSSSSYD  
PKKSTRSRMDT SVHSSPSSASTAKQSLTKGNLPSITGRERRDRSKKSSSSLSQKLEKI  
SSKSSKASRPREMGTS SVHSFERSDHSTKEGDGSKLGRKINSRRRRDASRRKSCPSLSP  
VRSSAGSHHSKEKDDKRTGRQINSRRLRDDLQPKSCPSLSP LRCATASSHSRKGDKKAG  
RQMKSGRCPDDPQRKSCLSLSPVSLTGSVH SKTLKTKSKASDHDHKYDTSSKGSVSMIN  
SFHDSSVSFGSSLDMTTKPNSLRNESMASLNGNDSPPVKKIE

>comp15596\_c0\_seq1; 574 1 3123 LEN=3382; translated  
XKHLSEVTARDEEEGEEPLWKVSADKAITKREREENRAWKDEQRELFRKHTRHKFGFDS  
ESNVLSPE DWVEDLGSSEAEDEDSLSGESDSQSDFFDLGWRNAPFRASKLEIAKAKQLE  
DRRRELGRTTVRVIECSKRDDEREFRAWENGLKSSMTEIPYESSVDSRLDLEETSNNH

HATGTPQTEKYFTPSHATSGGDQSMSTAHVSI FAGRLKNRRGLRPSLLVLSKDPPISIDG  
RIERHLKEHQRDGIQFMFRNSFADLVRDDVSIPIGGCILAHSMLGKHLMLLKLVLISLP  
MLEVVFIPFFKSI FNGKFFLFLVYISVVRNIP LKRKIFVLHFSFANSHAAPVAHRFGDTK  
SKI FKVLLVVPVNTIMNWENEFWKWTGKI QERANL FNASTEAI SGRYKVV EAWSNQGGV L  
LVSDALFRSMAQNQIIEKFLIDSDAIVLDEGHKMLKNTDSLIFKALMKINTKRRICLTGT  
PFQNNLMEYYRMI SFIRPKLLGNSETSFQKEWIDPIQAGMGRDAPEDTKVMADSRLEFLF  
EKLKPHVHRKDATLLAKDLPPLQQVCLHLRPTKLQRCLYRAYNEYKSATDDTNFFRQFSS  
LRSVHNHPATLLSQPQHEKRIRSMTKKRDTLYHNIKLYQKGISNSGSKPETSLSSDEDD  
DDSRCDTKVSHKCWWTNTAMKFGIHNMKNPESGNKCIVLLHILSHASELGEKTVVFSQSL  
KTLDFLSTTLASKNWKELCPSLQESFPDMEIGGWVLGKDFLRLDGTTSPTERRDRLNDFS  
WEKRIKLF LISSEAGGIGINIVAANRVVLFDSHFNPSIDLQAI SRCYRYGQKRVSFAYRL  
LTQGSMEERVYSKAVNKIGLGNRVIDGKELHRFFSTDEIDSLARDNDWVECIRCKQWRMF  
PPDHTANVAKLPKEWVCEMMNEYDARMELTCSFKEKDSEWYYHHFKKPNKKVLSRTSHTA  
EAVIRETTNVI SAAQSEIKVDRDVI LKKLVTLFTRGKNAARIVTKHYFHEALFSDASTRT  
NASRTNREHPASDTEIFKDR

>comp15596\_c0\_seq2; 951 499 4909 LEN=5168; translated  
MVSSELKDSHTMDLGVTYESRGNDDDGTEVEKHHPATAPRAHI IAPTLSSFSDDKDEQ  
AEMAAAAAPGRKMTRVTTLSNANPQQDPEPDSLVPDAAHTDSQVTATEACIDQEETMLPL  
CNNSKFLEQHCWGCHTWIYHPGRWLAAKDESRLCFSALHLHPLMDVPVCVCCEDVEEVE  
RNFQQKQQQGIANPPIRSTMDMLSSNEKSKKADLYACACSACGKLSNELGMDQKREHD  
FLVCRIC SREICQQCFQALGGEGQADKNHQDNGIGKPIPGEWRCFYCPCGDEESYNRC  
NAGTSTSNLPAFLQQLQTRTRELFTSNRKKIAVQPI NEALGEMEQLFELKSCERKLEE  
EDELRLTIRNELSTEIGNDGEQVLFLEQRILDVHTEWYIYHQRLLDRIAAILGDKFRSDHG  
FDAHRWMSKXKLSSEGTARDEEEGEEPLWKVSADKAITKREREENRAWKDEQRELFKX  
TRHKFGFDS ESNVLSPEDWVEDLGSSEAEDEDSLSGESDSQSDFFDLGWRNAPFRASKL  
EIAKAKQLED RRRLEGR TTVRVIECSKRDDEREFRAWENGLKSSMTEIPYESSVDSRLD  
LEETSNNHHATGTPQTEKYFTPSHATSGGDQSMSTAHVSI FAGRLKNRRGLRPSLLVLS  
KDPPISIDGRIERHLKEHQRDGIQFMFRNSFADLVRDDVSIPIGGCILAHSMLGKHLML  
LKLVLISLPMLEVVFIPFFKSI FNGKFFLFLVYISVVRNIP LKRKIFVLHFSFANSHAAP  
VAHRFGDTKSKI FKVLLVVPVNTIMNWENEFWKWTGKI QERANL FNASTEAI SGRYKVV E  
AWSNQGGVLLVSDALFRSMAQNQIIEKFLIDSDAIVLDEGHKMLKNTDSLIFKALMKINT  
KRRICLTGTPFQNNLMEYYRMI SFIRPKLLGNSETSFQKEWIDPIQAGMGRDAPEDTKVM  
ADSRLEFLFEK LKPHVHRKDATLLAKDLPPLQQVCLHLRPTKLQRCLYRAYNEYKSATDD  
TNFFRQFSSLRSVHNHPATLLSQPQHEKRIRSMTKKRDTLYHNIKLYQKGISNSGSKPET  
SLSSDEDDDDSRCDTKVSHKCWWTNTAMKFGIHNMKNPESGNKCIVLLHILSHASELGE  
KTVVFSQSLKTLDFLSTTLASKNWKELCPSLQESFPDMEIGGWVLGKDFLRLDGTTSPTE  
RRDRLNDFSWEKRIKLF LISSEAGGIGINIVAANRVVLFDSHFNPSIDLQAI SRCYRYGQ  
KRSVSFAYRLLTQGSMEERVYSKAVNKIGLGNRVIDGKELHRFFSTDEIDSLARDNDWVEC  
IRCKQWRMFPPDHTANVAKLPKEWVCEMMNEYDARMELTCSFKEKDSEWYYHHFKKPNKK  
VLSRTSHTAEAVIRETTNVI SAAQSEIKVDRDVI LKKLVTLFTRGKNAARIVTKHYFHEA  
LFSDASTRTNASRTNREHPASDTEIFKDR

>comp15596\_c0\_seq4; 392 1 2060 LEN=3346; translated  
XKXLSSEVTARDEEEGEEPLWKVSADKAITKREREENRAWKDEQRELFKXTRHKFGFDS  
ESNVLSPEDWVEDLGSSEAEDEDSLSGESDSQSDFFDLGWRNAPFRASKLEIAKAKQLE  
DRRLEGR TTVRVIECSKRDDEREFRAWENGLKSSMTEIPYESSVDSRLDLEETSNNH  
HATGTPQTEKYFTPSHATSGGDQSMSTAHVSI FAGRLKNRRGLRPSLLVLSKDPPISIDG  
RIERHLKEHQRDGIQFMFRNSFADLVRDDVSIPIGGCILAHSMLGKSLSCISLLQTVML  
HPLLIDSVTQRARIFKVLLVVPVNTIMNWENEFWKWTGKI QERANL FNASTEAI SGRYKVV  
VEAWSNQGGVLLVSDALFRSMAQNQIIEKFLIDSDAIVLDEGHKMLKNTDSLIFKALMKI  
NTKRRICLTGTPFQNNLMEYYRMI SFIRPKLLGNSETSFQKEWIDPIQAGMGRDAPEDTK  
VMADSRLEFLFEK LKPHVHRKDATLLAKDLPPLQQVCLHLRPTKLQRCLYRAYNEYKSAT  
DDTNFFRQFSSLRSVHNHPATLLSQPQHEKRIRSMTKKRDTLYHNIKLYQKGISNSGSKP  
ETSLSSDEDDDDSRCDTKVSHKCWWTNTAMKFGIHNMKNPESGNKCIVLLHILSHASEL  
GEKTVVFSQSLKVRIHDARRAGTHEV

>comp15596\_c0\_seq5; 408 1 2208 LEN=3494; translated  
XKXLSSEVTARDEEEGEEPLWKVSADKAITKREREENRAWKDEQRELFKXTRHKFGFDS  
ESNVLSPEDWVEDLGSSEAEDEDSLSGESDSQSDFFDLGWRNAPFRASKLEIAKAKQLE  
DRRLEGR TTVRVIECSKRDDEREFRAWENGLKSSMTEIPYESSVDSRLDLEETSNNH  
HATGTPQTEKYFTPSHATSGGDQSMSTAHVSI FAGRLKNRRGLRPSLLVLSKDPPISIDG  
RIERHLKEHQRDGIQFMFRNSFADLVRDDVSIPIGGCILAHSMLGKHLMLLKLVLISLP

MLEVVFIPFFKSIFNGKFFLFLVYISVVRNIPLKRKIFVLHFSFANSHAAPVAHRFGDTK  
SKI FKVLLVVPVNTIMNWENEFWKWTGKI QERANLNFNASTE AISGRYKVV EAWSNQGGLV  
LVSDALFRSMAQNQIIEKFLIDSDAIVLDEGHKMLKNTDSLIFKALMKINTKRRICLTGT  
PFQNNLMEYYRMISFIRPKLLGNSETSFQKEWIDPIQAGMGRDAPEDTKVMADSRLEFLF  
EKLKPHVHRKDATLLAKDL PPLQQVCLHLRPTKLQRCLYRAYNEYKSATDDTNFFRQFSS  
LRSVHNHPATLLSQPQHEKRIRSMTKKRDTLYHNIKLYQKGISNSGSKPETSLSSDEDD  
DDSRCDTKVSHKCWWTNTAMKFGIHNMKNPESGNKCIVLLHILSHASELGEKTVVFSQSL  
KVR IHDARRAGTHEV

>comp15596\_c0\_seq6; 935 499 4761 LEN=5020; translated  
MVSSELKDSHTMDLGVTYESRGDNDGTEVEKHHPATAPRAHI IAPTLSSFSDDKDEQ  
AEMAAAAAPGRKMTRVTTLSNANPQQDPEPDSLVPDAAHTDSQVTATEACIDQEETMLPL  
CNNSKFLEQHCWGCHTWIYHPRWLAAKDESRLCF SALHLHPLMDVPVCVCCEDVVEVE  
RNFQQKQQQGIANPPIRSTMDLSSNEKSKKKADLYACACSACGKLSNELGMDQKREHD  
FLVCRIC SREICQQCFQQALGGEGQADKNHQDGNIGKPIPGEWRCFYCPCGDEESYNRC  
NAGTSTSNLPAFLQQLQTRTREL FSTNSRKKIAVQPINEALGEMEQLFELKSCERKLEE  
EDELRLTIRNELSTEIGNDGEQVLFLEQRILDVHTEWIYHQRRLLDRIAAILGDKFRSDHG  
FDAHRWMSKSKHLSSEGTARDEEEGEEPLWKVSADKAITKREREENRAWKDEQRELFRKH  
TRHKFGFDSSESNVLSPEWVEDLGSSEAEDEDSLSGESDSQSDFFDLGWRNAPFRASKL  
EIAKAKQLED RRRLEGR TTVRVIECSKRDDEREFRAWENGLKSSMTEIPYESSVDSRLD  
LEETSNNHHATGTPQTEKYFTPSHATSGGDQSMSTAHVSIFAGRLKNRRGLRPSLLVLS  
KDPPISIDGRIERHLKEHQRDGIQFMFRNSFADLVRDDVSIPIGGCILAHSMLGKSLSC  
ISLLQTVMLHPLLIDSVTQRARIFKVLLVVPVNTIMNWENEFWKWTGKI QERANLNFNAST  
E AISGRYKVV EAWSNQGGLVLLVSDALFRSMAQNQIIEKFLIDSDAIVLDEGHKMLKNTDS  
LIFKALMKINTKRRICLTGTPFQNNLMEYYRMISFIRPKLLGNSETSFQKEWIDPIQAGM  
GRDAPEDTKVMADSRLEFLFEK LKPHVHRKDATLLAKDL PPLQQVCLHLRPTKLQRCLYR  
AYNEYKSATDDTNFFRQFSSLRSVHNHPATLLSQPQHEKRIRSMTKKRDTLYHNIKLYQK  
GISNSGSKPETSLSSDEDDDDSRCDTKVSHKCWWTNTAMKFGIHNMKNPESGNKCIVLL  
HILSHASELGEKTVVFSQSLKTLDFLSTTLASKNWKELCPSLQESFPDMEIGGWVLGKDF  
LRLDGTTSPTERRDRNLNDFSWEKRIKFLISSEAGGIGINIVAANRVVLFDSHFNPSIDL  
QAISRCYRYGQKRSVFAYRLLTQGSMEERVYSKAVNKIGLGNRVIDGKELHRFFSTDEID  
SLARDNDWVECIRCKQWRMFPDHTANVAKLPKEWVCEMMNEYDARMELTCSFKEKDSEW  
YYHHFKKPKKVL SRTSHTAEAVIRETTNVI SAAQSEIKVDRDVILKLVTLFTRGKNA  
RIVTKHYFHEALFSDASTRTNASRTNREHPASDTEIFKDR

>comp15596\_c0\_seq7; 735 611 2845 LEN=3043; translated  
MKRRGRQGMFRLISKGRFMTARQSSILVRIREPLGTATFTSVGSGSRNFIVGRVRDLCSA  
FSHGCSIITPVTTTRDVLKVHYSSTCFSLDSYGLYRLLSQDERNLLEEQRQLTEASRELA  
SQVEATTAVPDSSLLSLQQYSSRNFL EELQLDATFSVVIAGEFNA GKSTLINALLGTKLL  
ETGALPTTDSITIVAGSTSRTSAVSDDNVGD EYNGD SLLTEIRASIAMDVPKSPSLLGVV  
VHSHVENLSLLEDLTLIDTPGTNSAWIDHTQRTKKMLPAADLILFVTSADRPFS DSERNLL  
KSIQTYRKNIVVI INKMDILETSGGSYGQTQKNAIVDFVTDKASELLGARPVVI PVSSRD  
ALS AKLME TKERKSQSQSI PDDQRSTVWQRSNFSTLEFYLKETLTTQAKLR SKLSNP IGV  
AEGIMAECLQVLNGQREELQVDVATLNI FQSQFEGWKKELEVDMLRSQTAMAEIVKQEGQ  
RCEILLNRMNLFNFYHWTFLFDTKLEEEWRVTKREVSVHRQHDEDLRADLLEHVLETADS  
VATRGRAQQGAAIEYLGKRPAVKSNQSLVGSVTTVSRFEETR KDLVEKLSNSIDEILKPG  
RVEEIDSTRLFASLKQIAFVSSSLHTCAIGSGILLALEAIDPVTGWIALSSSLIGGTSF  
ALGTAKIRQRINDQWIQRAQHLEKALDAITTKEVDRVNWKILDGVAPYTRFVKTERERIN  
YLKER CERMTSATRNLRNR IQRLR

>comp15596\_c0\_seq8; 558 1 2975 LEN=3234; translated  
XKHLSSSEVTARDEEEGEEPLWKVSADKAITKREREENRAWKDEQRELFRKHTRHKFGFDS  
ESNVLSPEWVEDLGSSEAEDEDSLSGESDSQSDFFDLGWRNAPFRASKLEIAKAKQLE  
DRRRLEGR TTVRVIECSKRDDEREFRAWENGLKSSMTEIPYESSVDSRLDLEETSNNH  
HATGTPQTEKYFTPSHATSGGDQSMSTAHVSIFAGRLKNRRGLRPSLLVLSKDPPISIDG  
RIERHLKEHQRDGIQFMFRNSFADLVRDDVSIPIGGCILAHSMLGKSLSCISLLQTVML  
HPLLIDSVTQRARIFKVLLVVPVNTIMNWENEFWKWTGKI QERANLNFNASTE AISGRYK  
VEAWSNQGGLVLLVSDALFRSMAQNQIIEKFLIDSDAIVLDEGHKMLKNTDSLIFKALMKI  
NTKRRICLTGTPFQNNLMEYYRMISFIRPKLLGNSETSFQKEWIDPIQAGMGRDAPEDTK  
VMADSRLEFLFEK LKPHVHRKDATLLAKDL PPLQQVCLHLRPTKLQRCLYRAYNEYKSAT  
DDTNFFRQFSSLRSVHNHPATLLSQPQHEKRIRSMTKKRDTLYHNIKLYQKGISNSGSKP  
ETSLSSDEDDDDSRCDTKVSHKCWWTNTAMKFGIHNMKNPESGNKCIVLLHILSHASEL  
GEKTVVFSQSLKTLDFLSTTLASKNWKELCPSLQESFPDMEIGGWVLGKDFLRLDGTTS



TERRDRLNDFSWEKRIKFLFLISSEAGGIGINIVAANRVVLFDSHFNP SIDLQAI SRCYRY  
GQKRSVFAYRLLTQGSMEERVYSKAVNKIGLGNRVIDGKELHRFFSTDEIDSLARDNDWV  
ECIRCKQWRMFPPDHTANVAKLPKEWVCEMMNEYDARMELTCSFKEKDSEWYYHHFKPN  
KKVLSRTSHTAEAVIRETTNVI SAAQSEIKVDRDVILKLVTLFTRGKNAARIVTKHYFH  
EALFSDASTRTNASRTNREHPASDTEIFKDR

>comp15596\_c0\_seq9; 769 499 3846 LEN=5132; translated  
MVSSELKDSHTMDLGVTYESRGNDDDGTEVEKHHPATAPRAHI IAPTLSSFSSDDKDEQ  
AEMAAAAAPGRKMTRVTTLSNANPQQDPEPDSLVPDAAHTDSQVTATEACIDQEETMLPL  
CNNSKFLEQHCWGCHTWIYHPGRWLAAKDESRLCFSALHLHPLMDVPVCVCCEDVEEVE  
RNFQQKQQQGIANPPIRSTMDMLSSNEKSKKKADLYACACSACGKLSNELGMDQKREHD  
FLVCRICREICQQCFQALGGEGQADKNHQDGNIGKPIPGEWRCFYCPCGDEESYNRC  
NAGTSTSNLPAFLQQLQTRTRELFS TNSRKKIAVQPI NEALGEMEQLFELKSCERKLEE  
EDELRLTIRNELSTEIGNDGEQVLFLEQRILDVHTEWIYHQRLLDRIAAILGDKFRSDHG  
FDAHRWMKSKKHLSSSEGTARDEEEGEEPLWKVSADKAITKREREENRAWKDEQRELFKHK  
TRHKFGFDES ENVLS PEDWVEDLGSSEAEDEDSLSGESDSQSDFFDL GWRNAPFRASKL  
EIAKAKQLED RRRLEGR TTVRVIECSKRDDEREFRAWENGLKSSMTEIPYESSSVD SRLD  
LEETSNNHHATGTPQTEKYFTP SHATSGGDQSMSTAHVSI FAGRLKNRRGLRPSLLVLS  
KDPPISIDGRIERHLKEHQ RDGIQFMFRNSFADLVRDDVSIPIGGCILAHS MGLGKSLSC  
ISLLQTVMLHPLLIDSVTQRARIFKVL LVVPVNTIMNWENEFWKWTGKI QERANLNFNAST  
EAI SGRYKVV EAWSNQQGVLLVSDALFRSMAQNQIIEKFLIDSDAIVLDEGHKMLKNTDS  
LIFKALMKINTKRRICLTGTPFQNNLMEYYRMISFIRPKLLGNSETSFQKEWIDPIQAGM  
GRDAPEDTKVMADSRLEFLFEKLPKPHVHRKDATLLAKDL PPLQQVCLHLRPTKLQRCLYR  
AYNEYKSATDDTNFFRQFSSLSRVHNHPATLLSQPQHEKRIRSM TTKRDTLYHNIKLYQK  
GISNSGSKPETSLLSDEDDDDSRCDTKVSHKCWWTNTAMKFGIHNMKNPESGNKCIVLL  
HILSHASELGEKTVVFSQSLKVR IHDARRAGTHEV

>comp15596\_c0\_seq10; 214 1 880 LEN=2166; translated  
XELFLFELSHKMLKNTDSLIFKALMKINTKRRICLTGTPFQNNLMEYYRMISFIRPKLLG  
NSETSFQKEWIDPIQAGMGRDAPEDTKVMADSRLEFLFEKLPKPHVHRKDATLLAKDL PPL  
QQVCLHLRPTKLQRCLYRAYNEYKSATDDTNFFRQFSSLSRVHNHPATLLSQPQHEKRIR  
SMTKKRDTLYHNIKLYQKGISNSGSKPETSLLSDEDDDDSRCDTKVSHKCWWTNTAMKFGI  
HNMKNPESGNKCIVLLHILSHASELGEKTVVFSQSLKVR IHDARRAGTHEV

>comp15596\_c0\_seq11; 785 499 3994 LEN=5280; translated  
MVSSELKDSHTMDLGVTYESRGNDDDGTEVEKHHPATAPRAHI IAPTLSSFSSDDKDEQ  
AEMAAAAAPGRKMTRVTTLSNANPQQDPEPDSLVPDAAHTDSQVTATEACIDQEETMLPL  
CNNSKFLEQHCWGCHTWIYHPGRWLAAKDESRLCFSALHLHPLMDVPVCVCCEDVEEVE  
RNFQQKQQQGIANPPIRSTMDMLSSNEKSKKKADLYACACSACGKLSNELGMDQKREHD  
FLVCRICREICQQCFQALGGEGQADKNHQDGNIGKPIPGEWRCFYCPCGDEESYNRC  
NAGTSTSNLPAFLQQLQTRTRELFS TNSRKKIAVQPI NEALGEMEQLFELKSCERKLEE  
EDELRLTIRNELSTEIGNDGEQVLFLEQRILDVHTEWIYHQRLLDRIAAILGDKFRSDHG  
FDAHRWMKSKKHLSSSEGTARDEEEGEEPLWKVSADKAITKREREENRAWKDEQRELFKHK  
TRHKFGFDES ENVLS PEDWVEDLGSSEAEDEDSLSGESDSQSDFFDL GWRNAPFRASKL  
EIAKAKQLED RRRLEGR TTVRVIECSKRDDEREFRAWENGLKSSMTEIPYESSSVD SRLD  
LEETSNNHHATGTPQTEKYFTP SHATSGGDQSMSTAHVSI FAGRLKNRRGLRPSLLVLS  
KDPPISIDGRIERHLKEHQ RDGIQFMFRNSFADLVRDDVSIPIGGCILAHS MGLGKHLML  
LKLVLISLPMLEVVFIPFFKSI FNGKFFLFLVYISVVRNIP LKRKIFVLHFSFANSHAAP  
VAHRFGDTKSKIFKVL LVVPVNTIMNWENEFWKWTGKI QERANLNFNASTEAI SGRYKVV E  
AWSNQQGVLLVSDALFRSMAQNQIIEKFLIDSDAIVLDEGHKMLKNTDSLIFKALMKINT  
KRRICLTGTPFQNNLMEYYRMISFIRPKLLGNSETSFQKEWIDPIQAGMGRDAPEDTKVM  
ADSRLEFLFEKLPKPHVHRKDATLLAKDL PPLQQVCLHLRPTKLQRCLYRAYNEYKSATDD  
TNFFRQFSSLSRVHNHPATLLSQPQHEKRIRSM TTKRDTLYHNIKLYQKGISNSGSKPET  
SLLSDEDDDDSRCDTKVSHKCWWTNTAMKFGIHNMKNPESGNKCIVLLHILSHASELGE  
KTVVFSQSLKVR IHDARRAGTHEV

>comp15596\_c0\_seq12; 380 1 1795 LEN=2054; translated  
XELFLFELSHKMLKNTDSLIFKALMKINTKRRICLTGTPFQNNLMEYYRMISFIRPKLLG  
NSETSFQKEWIDPIQAGMGRDAPEDTKVMADSRLEFLFEKLPKPHVHRKDATLLAKDL PPL  
QQVCLHLRPTKLQRCLYRAYNEYKSATDDTNFFRQFSSLSRVHNHPATLLSQPQHEKRIR  
SMTKKRDTLYHNIKLYQKGISNSGSKPETSLLSDEDDDDSRCDTKVSHKCWWTNTAMKFGI  
HNMKNPESGNKCIVLLHILSHASELGEKTVVFSQSLKTLDFLSTTLASKNWKELCPSL  
QESFPDMEIGGWVLGKDFLRLDGTTSPTE RRDLNDF SWEKRIKFLFLISSEAGGIGINIV  
AANRVVLFDSHFNP SIDLQAI SRCYRYGQKRSVFAYRLLTQGSMEERVYSKAVNKIGLGN

RVIDGKELHRFFSTDEIDSLARDNDWVECIRCKQWRMFPPDHTANVAKLPKEWVCEMMNE  
YDARMELTCSFKKEDSEWYYHFKKPNKKVLSRTSHTAEAVIRETTNVI SAAQSEIKVDR  
DVILKKLVTFLTRGKNAARIVTKHYFHEALFSDASTRTNASRTNREHPASDTEIFKDR  
>comp15596\_c1\_seq1; 1211 170 3787 LEN=4039; translated  
MKTSKSSASVRDIRKMFKDFKSPVGKSFKNDSNSPLDRVAETPSPGGTGIFSPESVQV  
KALSNTANNSRKAIKLKPSIDSSPAKCAEKPFDELTPDGKREAKIDFKSTTNSNGDYLV  
KKTQYERYLSQITNYGVSSPEHQSTLLESKPKVAAPIPFLYTGSPSEQGTFSPLATNISL  
SDEVALAEELGMAERRAFVQESKRLLRPTSPPSITTGVDPVQFVASPTSPVSRISLPSYH  
EKENKATATPTPVKPYSLFKSAEKKGSNRNYGNVDQISAREITDAAVAAATEAKYYKSSP  
VENPLPRKKALRDTPGAPEHAPLWNSMQMHQGEKAKEKPFDCAHGSPTENTQDSEKLQFL  
EEGKSDVKSKRISRKLFRCPNNTLEGIKAKQHKGPSALTPNQVLETMKILRDTVVEKS  
EIIYAFDEKSTGESFDDPEFAPLTFNTDDKNLDSPNHSGRSIRSGSPNKNKRLFSDEKEG  
RKCAEIAFYVCVLLALVVCGILAGLLVSGQFHFVWSEEKPSLGETWDEETITSMVTSYPT  
YINDSNVFEKSKIVACGNAVPIITEMDHTYYGSNWKAFWDPTIDTCGDQMSTGYAVWYSFT  
TASSKLI EASTCDNSDFDTQITIMSGSCNATKCISYNDQCGDQSLV TWYAEANTTYIM  
VHGYREAAGTFGLTLSEAYQSDDCDTAVQLEEE SVLAGTTAGV FSSI QPPQCGD VDLSDS  
GVWYTVGNVSGFYKAEVLLGYTNFSGQVSVYQSMNETDSGCSALMCEKGSSTGSMWLAE  
ATKTYVYINGKDGTS GDFDLFLGQNKASSCNFGTRIDANSIGYLSSTKGLNPQNVEGCG  
HAGYHTAPGVWFSVEGTGDVLEASTCGSSLDLDTQISVFGNGCDLKC IAGTGQNHPCGE  
NGSVTWKSELSEIYHVYVSGRSGRVGDFILNINDVPVADGLSCDGSFLLLEGDSGSIQSNT  
TYAPLALIEGCSGT YDVQGVWHKII GTGMTMTFSVCNNGTDFDARISMFTGSCNGLTCTA  
QTESRCGENDKIMITTHVGETYYL FVHGSTGSSFGNYLLTVDETEINDSCGKASTLDVLS  
SGKYFGSTLSAQKSSAIGCSMDVLS ESNALWYAFKGTGDVVTLSTCSYLTDFGTDVRIYS  
GSCAKAQCVSDVDNSFAVNGCGQQRISFQSNSEDELYYARIGAESANDAGSFVLEVNPRN  
TFFGP  
>comp15597\_c0\_seq1; 427 1 1089 LEN=1089; translated  
XSGSPSGAPSVSPSGSPSGSPSVSPSRFPSASPSWVPSRRPSLRPSSSPSGSPSGSPSDK  
PSGSPSGSPSGSPSSSPSSSPSGSLSGSPSAYPSAFPSPSGSPSASPSSGSPSQSPSGQPSLS  
PSLSPTDHPTESMMP TDCFMASPADVVASMCME SGNVIDIIPAPSNAIVVNGQDGKAVDF  
TVGFSWADATGMAILSEDKDHESSCVVLSDIATGHGERVEGGCIDGYTSATIVVYFDESF  
DPEECEACNVDDLEEMGGDYKFCAYRVEIACAPVSVCEGDP SASPSG SFYPSIAPSESPS  
KSVTPSRSPGTGTPSGSPSGRPSASPSVSPSGGSPSGSPSGSPSGTSPASPSMSPSGVPSSR  
PSGS  
>comp15597\_c0\_seq2; 427 1 1061 LEN=1061; translated  
SPSGSPSVSPSRFPSVSPSGTSPSSRPSLRPSESPSGSPSGLPSGSPSGSPSGSPSGSPSS  
SPSSSPSGSPSGSSNDPTS YEESSRGHTVSPTGQPI SR TALPSSVPSSSPSLSPTDHPT  
ESMMP TDCFMASPADVVASMCME SGNVIDIIPAPSNAIVVNGQDGKAVDFTVGF SWADAT  
GMAILSEDKDHESSCVVLSDIATGHGERVEGGCIDGYTSATIVVYFDESF DPEECEACNV  
DDLEEMGGDYKFCAYRVEIACAPVSVCEGDP SASPSG SFYPSIAPSESPSKSVTPSRSP  
GTPSGSPSGRPSASPSVSPSGGSPSGSPSGTSPASPSMSPSGVPSSRPSGS  
>comp15597\_c0\_seq3; 395 1 1046 LEN=1046; translated  
SPSGSPSVSPSRFPSVSPSGTSPSSRPSLRPSESPSGSPSGLPSGSPSGSPSGSPSGSPSS  
SPSSSPSGSLSGSPSAYPSAFPSPSGSPSASPSSGSPSQSPSGQPSLSPLSPSLPTDHPTESMMP  
TDCFMASPADVVASMCME SGNVIDIIPAPSNAIVVNGQDGKAVDFTVGF SWADATGMAIL  
SEDKDHESSCVVLSDIATGHGERVEGGCIDGYTSATIVVYFDESF DPEECEACNVDDLEE  
MGGDYKFCAYRVEIACAPVSVCEGDP SASPSG SFYPSIAPSESPSKSVTPSRSPGTGTPSG  
SPSGRPSASPSVSPSGGSPSGSPSGTSPASPSMSPSGVPSSRPSGS  
>comp15597\_c0\_seq4; 459 1 1104 LEN=1104; translated  
XSGSPSGAPSVSPSGSPSGSPSVSPSRFPSASPSWVPSRRPSLRPSSSPSGSPSGSPSDK  
PSGSPSGSPSGSPSSSPSSSPSGSPSGSSNDPTS YEESSRGHTVSPTGQPI SR TALPSS  
VPSSSPSLSPTDHPTESMMP TDCFMASPADVVASMCME SGNVIDIIPAPSNAIVVNGQDG  
KAVDFTVGF SWADATGMAILSEDKDHESSCVVLSDIATGHGERVEGGCIDGYTSATIVVY  
FDESF DPEECEACNVDDLEEMGGDYKFCAYRVEIACAPVSVCEGDP SASPSG SFYPSIAP  
SESPSKSVTPSRSPGTGTPSGSPSGRPSASPSVSPSGGSPSGSPSGTSPASPSMSPSG  
VPSSRPSGS  
>comp15597\_c0\_seq5; 144 1 266 LEN=266; translated  
PSGSPFYPSSAPSESPSKNASPIGVSPVSPSGSPSASPTESPSGSFYPSAPSESPPTPQE  
EEEEPEPTPQEEEEPEPIPQEEEEPEPTPR  
>comp15597\_c0\_seq6; 172 1 554 LEN=554; translated  
SPSGSPSVSPSRFPSVSPSGTSPSSRPSLRPSESPSGSPSGLPSGSPSGSPSGSPSVGPSA

APSASPSLPPSGGSPSGSPSSPSWSPSVSPSGSPSVSPSESPSGSFYFPSSAPSESP  
SKSVTPSRSPGTGTPSGSPSGRPSASPSVSPSGGSPSGSPSGSPSGTSPASPSMSPSGVPSS  
RPSGS

>comp15597\_c0\_seq7; 163 1 578 LEN=578; translated  
SPSGSPSVSPSRFPVSPSGTSSRPSLRPSESPSGSPSGLPSGSPSGSPSGSPSVGPSA  
APSASPSLPPSGGSPSGSPSSPSWSPSGVPSGSPSVSPSGSPSVSPSESPSGSFYF  
SSAPSESPSKSVTPSRSPGTGTPSGSPSGRPSASPSVSPSGGSPSGSPSGSPSGTSPASPSM  
SPSGVPSSRPSGS

>comp15597\_c0\_seq8; 34 1 208 LEN=208; translated  
XYPSSAPSEASKNASPSLVPPVLSSGSPSGGLSGLSAGSPSSVPTASPSMSLSGVPSTL  
LSGYPSEYPS

>comp15597\_c0\_seq9; 117 1 482 LEN=482; translated  
SPSGSPSGGSPSSPSGSPSGSPSSPSVGPASAPSLSPSGGSPSGSPSGSPSSPSWSPSG  
VPSGSPSVSPSGSPSVSPSESPSGSFYFPSSAPSESPSKSVTPSRSPGTGTPSGSPSGRPSA  
SPSVSPSGGSPSGSPSGTSPASPSMSPSGVPSSRPSGS

>comp15598\_c0\_seq1; 949 579 4553 LEN=4641; translated  
MADRKRADGYEDHGCCDTSDDPMVGPGEFGARSRAVAWIIPGAASGDVHEPPRHTKPPA  
PGRGRPALPATPLAPNRKGRIRTRKNWKTGPQETRCFVREGPETSPLAGEREDRKKRRA  
AFLSAALIAGFVSVLVCCSIGAVRTATSTRHPSYCGEGGTNHHCGNDTQPGITTEAATGN  
DRLSKLVATKRSKHPLVQTKINTTATNNSSTIDASPDEHGSKNTHYLPWSSYSPLLLPA  
WASSLSRILPDLGRGDRQQTEDDEEVVPLIDHLRRLYGSRESPSSSSSSSTSSSSSSSSSS  
SSFSPDTGKTNDPQLVIAGKMTVDDALCNIAQYNLRKTKKWSLTERIQLSLYNSYSGGEVY  
SLLANHTNTAAEASINPTNSIVPANSKTKNKIRTKSSDNEGSGELIVVGAFTTYRNS  
QVTYCSVGKWDGSELSKVGEGLCNSALSCKGMITTAAMAGPQDVYAAGSFQTVVWNGDRH  
EFVKIYNIAHYNAAGEGPPVWLPVNVGQITCSWCTVTVLALAWDAKRQQLHVAGKFNAID  
GRNVPAGLAIYDLKSGRLVAHPGGGLAMKNLTEDGVTALQLDEEKGVLYVMGSFERLTA  
TVEVCIGLAAYDINSNRWTCLANSAHTVQPTGGNMILTPYGLMVAGKTSKETTWEEDS  
RPYTIALLHTTLKTHQVDNHTDTSVASSHEKSHEKVTKSSGKTFMSPVSSILSTANKSS  
FEETHGIRNANNESDSARSQPKNVSYHEFEWSWLPGFHGNDEPLHALANGFGDHEGAVFI  
AGDNLVAKWSYQERPVTKSSSSSHDHSRMLLPDTSTDDMEWTAVTENLSTSHVRGAI  
MAISQMQLTPDEPEDTSRHEPEPISNINVTILITLAVGCLIGLLGAVMCNGQLRSKIFP  
CLGFDFSRREEGFPLDTLQIGHTNITDAYQRAMTRYVEQPHMLTIINPQEIFLQRIIGE  
GTFGRVWSARWSSSVAVKEFVFAQAAVIGRSSMQQIIVEEIIIGEAGMMSILRHPNVLQL  
FGCSLTAQAIWIVSELCSLGLSLRQVLDREIRILSDDLKVNLAALQVAEGMSYLHNQDPAII  
HRDLKSHNIFVHETFDITEQAGDSSINGPSGDGQINQFTKWIRPQKMQHTTLVAKIGDW  
GSARATWSGSRTMTHGVGTACWLAEVIKHARCSKYSDVYGYGIIWEMSTREEVYQGLE  
STQIIAKVANEGLRPPVPPNCSWGDVMAKSWAHEHPADRYSFNEIVTELNRISKDIDDDDN  
GSKENDAFVGEKRQLQEODLEENAEETLLIRIDESTKSGYINQKNGRKRNLSTILRQQ  
KGVG

>comp15599\_c0\_seq1; 1472 98 4891 LEN=5184; translated  
MSGESPEFVAKEQLQQHQEPEQLNDDNLHGMSPPENDTTNRPQQSSLPPAATHRGDT  
GENDGVLYPEVFMNRALYDPPRWGWTALGGIADVLSPHERSRRYSTCMAYRKAQKLRRI  
LKAAGPNITHSNSSCSSNGNVNNSKSAAVSTSOLKDPFPPFPSEPAQESSSTSFSSIVV  
NKLTSSTTPVAPKTSQSSTSAKAAALVEGIGEPSHEECEKEHNSIQSKPQSIATTVITAV  
AATSETTKIEEETANNTVAKREEPHAYAAGTKNENKKQQSLASSDHKKDLPRQQPRIDV  
GIQTVGVPNTILGIEIQRQQQNPQQQVSSSEGNEDATNDAAVTVNNTQRRCRGRPPK  
ASRRSGAGNVHKNKISKYKQVQSLGTI STRTDDDNVEGVHSGDNEISGTGIVLDMFAYH  
QREGMEARDADTGELLFSQPVTDTNHDLDAKSVLTIRIEFPLEDEEDSDDECSNNKN  
NSNSNNVATSHDNKETDGREDTMKSRRKFATEGKAGSLSSAQIKTSNIESEVTATIKKKK  
TIYQEDVTWDLSDANTPTPLAFASIGNNFGLSFGQTMDLASTIDRQIEKHVAENTQFRE  
PIAVKANKESTLKRKLGP I IQPYRYDQIVRSGKQGGTFKPKDNKLHAKSRSSLATGVW  
HRQNRNSGSLATGETALSSAKAGRRRDSGHTSSKNRRSHPPALKESGKENSILNEELNQE  
VLDEVKRRANLEAESAVRSNCTSGNIGLLATLSNVNCHICKSRKNCGFQFQCLIKNHVYC  
LSHLQKRLGVTSESGCFVYNSCPICSLTCECARCVRKLNVTATVFKARCIETGKKVQVD  
FPNLLSHSRNAIPQKELDNAID I ILNSRREDIRTQKGVTRSGQEHEAEETSQVQRSSHGKQ  
TRTIQLVDQVMVPRPPLSDFPAEVQTNNGFEIDESANAYFIVYSAKGRRPVTTIPDAWLDE  
ENGATLGPQVQPLKNKNTAEVQEDGNVDYCHICKNAGHLILCDFCPRAFHANCLESHNK  
SSPDKDHWECFVCKQEKTESDDDFVDGRLSMDLINGAFLNLDVTNERSLVGLEVLVSVIHQ  
MLQSLINYDFGNIFGQPVSSSEVLGYKEIVKRPMDIGTICSKLVNGDYARLLGESSFMSDDL  
VTRVLNDIELIWRNCIMFNIVIGSSVARMVAVLRRRVRMICKRSIFGKLTTEEKNNVENYR

KKFDS DWARASSEK WMDNAIKYHKPRSKLKVKT TASGKHKKVAVLDSVTGRVVNMYTSIK  
TASKAVEIMLKCGHRCEWNADAQKPSLNLKSIMQRSKDNPNMLLFGYRWLFLDDLDEGRI  
TFTNPVCDIIEMQLNQSTSVFQSVVEALSSSQLPTISDIYELRKKLTILDRSSVWTEISG  
VRWRRPVLQNADEKSIKSAEPQLIILGPVSGTFIEELQFSRNCTVLKQDLITDKNLVGFD  
SIQLAHQDWWQTAICSPSPFQSEDI TIENFKSHYLNDRNIDGI IWQSVDDRSRTKNAEQ  
KEVANLENTCDGMENQGRGDNQNTVPSSTNEQDNNLPRIQESVKDSYAAIATTVDDDQQ  
VPLEDTRICRKRKCMEDDKSVDFPPGKETRFVAVTVE

>comp15600\_c0\_seq1; 545 1 2119 LEN=2917; translated  
XDDDIILVSSTRQKWEQLHGINLHSLGSTRNKGSSDNDGVQSNRIHNNHQEDEDDEDD  
DEILVVAVPPTPPNHDKLNKKNDEHGSSGHKRTWIYQRI RNSFFGLALVDN NNKIFSEYA  
RNIGNPMMVLLFVATALSLGVKTRTRTKQNRPTSTIIAPSNLKKTENHGKGSAGAEN  
VAKGDPGNVKKEDTSRNKTKTADLAGEKSTDDL LSSKESKSPRRGKKKQKQNGKEPPE  
TQRILLPASPPSPPLSLSLALS KKT D ACENTTATTIVATKQRDEKVRMARRLAEDIR  
LVRDVLVEHSLDPSMAAQLAVSMQTSQSVIESQRELSYATTMIDSHERRLDRQISERQHR  
ESLEAARYDPNWREKLRSVRDECYWNLASGGFSRLWWEVLWIIQQMARGVLPVWQYYYSN  
AHRWNGVGT TTVHTDAALGATDPWSGLVASFLKDTIASILAQVCDRPHASIGPSEATAG  
ATTSLADHSTMTSWAMPFIASAAFSLHNTGTLQGLVEQWSCYGYCIASASMLMLTIVLH  
QGLRILSMPSSLHHA INLLSMTLFYGPHTLALGISSISRMLMVLPAFDSSTSFDHHIDD  
ILD LGPPAGGNQRAMLACSL LLSLWVGLPLTSWIRTPALCRRVESRVAGADPIDFER  
TLQAGTVQLRRWQWEQMAARYLLLSIYSALILWENIQNTTAIGSYA

>comp15601\_c0\_seq1; 401 519 2045 LEN=3259; minus strand; translated  
MTSNDPPSR TREARQNVILFHGLRRTGTMETRRRGNEYSSMPIAAFVQQPLQPATVTPK  
SVVVEGSGNRC SGLMATYVQCPPLQSRATNCFGRSTHSNEPRSAIPKKRTRFGNNLRTP  
TTTATLESELRIDGGDKVDAIFNEMQSNLHGSMGHNCTSIYLNKIQEFPRSRSDAPGDN  
GRCEDSPSQLFAAFKDVVEGQGPSWKKIRICNCSVLEVLLASLNFANIEELDFVDIHD  
NEAPNRQEDNRSISLPTSTQARPESQPRATPSTATIPSSIASLIVSVIRNTNRLKRLVVR  
GCNLKNSSELLRIMNVLCSHPNHADSLGYLDLRFNRLTPRAIGSILSVHLRSSLHSLKTIK  
LRQGIRCVVHRSIRDAILRGLQTNRVVLECIDVFNWDKSVQFFLDVNRARRAIFCNDL  
FPRSLWPLLEQALAI GDGDHTESDMIGGERKRSLLRSSVLENGQRDARPTHDCRHRQ  
ASVVYHMFRRNGGPMLLQQQSQAQAQEAQ

>comp15601\_c1\_seq1; 401 58 1584 LEN=1683; translated  
MTSNDPPSR TREARQNVILFHGLRRTGTMETRRRGNEYSSMPIAAFVQQPLQPATVTPK  
SVVVEGSGNRC SGLMATYVQRPPLQSRATNCFGRSTHSNEPRSAIPKKRTRFGNNLRTP  
TTTATLESELRIDGGDKVDAIFNEMQSNLHGSMGHNCTSIYLNKIQEFPRSRSDAPGDN  
GRCEDSPSQLFAAFKDVVEGQGPSWKKIRICNCSVLEVLLASLNFANIEELDFVDIHD  
NEAPNRQEDNRSISLPTSTQARPESQPRATPSTATIPSSIASLIVSVIRNTNRLKRLVVR  
GCNLKNSSELLRIMNVLCSHPNHADSLGYLDLRFNRLTPRAIGSILSVHLRSSLHSLKTIK  
LRQGIRCVVHRSIRDAILRGLQTNRVVLECIDVFNWDKSVQFFLDVNRARRAIFCNDL  
FPRSLWPLLEQALAI GDGDHTESDMIGGERKRSLLRSSVLENGQRDARPTHDCRHRQ  
ASVVYHMFRRNGGPMLLQQQSQAQAQEAQ

>comp15602\_c0\_seq1; 445 512 2457 LEN=2798; translated  
MFKKLLPASARASASASGIAPPSPPPSREEAGHTRNAVPREEDRSKPREETITNEGKSID  
CKNIDPELVLPASYSPTVVAPQLHRGSSEKDEEERSDSNQGHTREVSIDTTTSQSID  
LSGLLKNLEDSLQHDLGEQRGETAEASSFGAEPGNCKSHSPTSIEVAHIDCTGTRRDS  
CKTSSSDTVSSGITDNDKATSKTETTGVVRELSSSATPFASVNE SDPCSSTPLADSGH  
DLHTMVQVGGQLFLESLETHVKEEIQSFATTSESLVPGMEKKGKDIDRDKAPVDVRANTV  
SSNKAICANRAVVKKTI FVGIGVIVAVVFFAFDNGCII LRNPNSSTAQIADTEDLHSVEE  
HFSLPITNVHSSVEINNTADRNSDEPSITSGFKGQIKSKETMDHQNGEGPIVSRTVSSMQ  
IENRADDHNDAITILPSTTSNTQVEDSSDNEEKPPDESCDSNFGSCDAPEGGPGSTLI  
EPSITFAFCSWLTALFLLHG YFGSGFKPPWPLDXLMPKVEGKTKMEPMSPICSLPRHRQG  
HFLT PPLSKHRSMEPSEWMSPCYGEDALNVS VYESIKAELRKLRLDRKCDYRGTKQQM  
IKMLVQSYQNELACLTVQQLRPKLRKRLS QKGSKKDAVRRLVEAGPV

>comp15603\_c0\_seq1; 126 311 430 LEN=1439; minus strand; translated  
MAMYPKAILDMITSIIAPPVLEGVTSVRGVSPSEFEAT

>comp15603\_c0\_seq2; 157 510 654 LEN=654; translated  
MERMGLIGAGRKDGNNKQQQLQEQEVLSVETRAESGAVAVELWLAIAEYX

>comp15603\_c0\_seq4; 1468 431 6668 LEN=7224; translated  
MSWL RDMACSINVCDFWRTPTNKRSLKVQLFSSFLAAFCSLFVVVFSSCFVYYSGEKL  
IDRSQLLMYEQVENRLSSSVILLSLSGRAGFVEECIEILIESIRDRVAGYPSMDGWETGR  
YTPFESEVEESEGERKKKRFYPLNQPPVPLDFQVLRDLHADG IENDDQSIDMRLKEHPNV

LSSTKTASYKLPKGFWKGGITPPMSMNETMEMLRDDAIYQTTGDLSVFLKALFETFDELM  
VVEIFFFNEGKSTLQFPSLVVHNSFPDSPTYITEGCDWMTLERNPYTGKPYATKSPCE  
PPGTVLRSRERHPMDDIDIKKLMNYTSAKFAQADQQEPWQRQPQDAIEDDGNNDNNTSHR  
NGSTEGYTENGYTSVPPNNHQKVKRDKVTDKLI FWTGPQLTSKDNKTQILKAQKAI FDRV  
TNEFVGVLSLEISENKLSQLDQRRILDDASDGYSVHPSGLIIGTTPGAEQKVFERQSDFD  
KIEDHFKRITYIDQIPKWEWRDNQGSTPKPERIPTTYFTPTENGGFLVSCPVPPTPEYPW  
DDPLYSPIAFVVQKISPDVFEDFNI FENQVKQDVKKNIILCVSLGVLGLVLILSILAVMS  
KILTQPLTWIAYVARNI INNDSRSSKTYGENYESGDRNHMLEVDMRRESVKKNPNMSSTS  
RMDYEGAI VNCNNDPVHTTSKGNQLIILNLDLEADNSECNDDDEVGFVNFVDYNPKADKRLC  
CTLSTELQQLLEAFQSMHLHGFSGDGVSEVAEPGLCEIRNYLTWHSDFAKLYECNQEDISK  
TERKVSNSTRATTMGSTSNSSISISDASHYHIQDCEAITPCLSRNSQSESSSSSFPKSL  
HEHLAPPSDIIRDIGSQQYIPEDGEKNEDSIVSSSSLDIYLPGPPPGAAQVVVPAPSKVN  
VTSNLGTPRLDPRPILEYRDGSFGRIKTACSSKFFWWIVVLMALPVFFTSCIIGSIVSSS  
ILVTLPKRWKQSAKQGSNNIEIISAMKLI VDRKAATMENLIEGPARDIYLLARTTNWLI FG  
GVRKSSNI VDV DSTSERCKTYPKGECNPAKLCSCDWEYGNATGGQCESTEGFTDARYLQ  
RQWFEAQKLD SNPITGERISSPSVPTSSESTLWVKNVTELPGSEIGPSRTSGYDTLYNRV  
AVSSASAVMNFPLHNFPSGIHTERTLFGGYLAFAVDGLLLGWSGCDDWHSSNAHFVSTYE  
NGASLTDDKLCANGKHGYDPRCQDWYVQGRDRYL RDAVHAHVTS PYKLP LRNQVAQTITS  
PITNPRTG EYVGQVALDFRLDYEV LKRLDDESSFTFMI TPHDDVLGSNVVYFSESEEMF  
EPAKIEDLIFKNELNDVNRDYFKGEILPLIKAGERGNSEFFLAQEDGSEVEICLYYAPVK  
IQLPLGLEPDDFASGRKITEHLIYSVSGSKPCDEIKRPHYDGEDEVNQDLANQEYIFVAI  
IASSTVIFVIVSAISAIHIAFPMIKLSAIVRSTKKGEYDSXVSVSIPTEPYDLSELSSV  
FQNSCFIEIFIRHIFLIFFLDLLWKADAXEVQGVYNTFAKLNKIVKVSNTSFFSGKLDVA  
HHFVNDALGLYRK INDRKAI GVT CNLANTLFAIQFERIDGVNCCVASRPCYVKQTLALY  
NEATEYSQQDFDESGEDSKLDYAIQLADRRFNRLYFLFIDGYHCAPGDSRQRGYDDITF  
SRNLHYDIRDLLEKKELFANASSYF SRLIRRIDCLAAFYDDVGLREI WDAQVLLDEASH  
LMRAAIEVTSRGKNCPLFHEINCNGRQQQLESLEILLAMNSGDTLRAAKTGMRMLVEDDY  
LLESAFVRAAEALLVVMEEGDEDHNTYFSKRSIERTRLDLRAIVKSCCKESLDMGKNAVF  
VFELCPSQFMTKDNTDGRGTLLELNSQCLQLYDNFFQADDQIGILANNIGNSQTVEIGR  
KEDNEGRQRASLDVATSMKSSRVAHSDTTPDSGDYNHGTPAVDSSFPIALQMLIESSVSL  
QND SYI IWVTSGHTHQNEQGMISLHDKIVRLNQERTYQIHVLIIDLKLSCVEKGPYSGG  
MGDETPK GHELVEDIGNITKNSFYFDVSTDDELSAAFQW

>comp15603\_c0\_seq5; 291 685 1926 LEN=2792; translated  
MIKDILKGYHNSLPEFVQDIFDEDKVWILNSGDRSFDDL FADCRSLTFEDFY SIVTEGVV  
FVTPDTAISGSSDTPSHHQYTIDMTFIFSTTT CNDIKRILHISGVDAKSTSPSLNFLRL  
VLESHSKDEF TSKSSNVGVILKCFPMTPRQQLGSLDLSPPKGRTNLKRKVS SSGQSACYE  
TESRIDLEFRFLALNKAHCESIFCGNSSVVCVKFSQCEIDGWKIHNEKVKEKDPNGTIL  
STDRGAMPKLLLLSCTQSEFRKFAEGKLLMFNKT TIRELHLVLFHFMEDLDVHHLISTLE  
TNQSLEHLSIEYLEMDDEVWAGVCKVLHNHPKLSCLQLAYTEKFADNYRRLDSERRRTRT  
KDVLELLKKNRNLQKI QWPKFQQDET LIADVERLLIENKKRAAESTCYLEITR

>comp15603\_c0\_seq6; 291 777 2018 LEN=2884; translated  
MIKDILKGYHNSLPEFVQDIFDEDKVWILNSGDRSFDDL FADCRSLTFEDFY SIVTEGVV  
FVTPDTAISGSSDTPSHHQYTIDMTFIFSTTT CNDIKRILHISGVDAKSTSPSLNFLRL  
VLESHSKDEF TSKSSNVGVILKCFPMTPRQQLGSLDLSPPKGRTNLKRKVS SSGQSACYE  
TESRIDLEFRFLALNKAHCESIFCGNSSVVCVKFSQCEIDGWKIHNEKVKEKDPNGTIL  
STDRGAMPKLLLLSCTQSEFRKFAEGKLLMFNKT TIRELHLVLFHFMEDLDVHHLISTLE  
TNQSLEHLSIEYLEMDDEVWAGVCKVLHNHPKLSCLQLAYTEKFADNYRRLDSERRRTRT  
KDVLELLKKNRNLQKI QWPKFQQDET LIADVERLLIENKKRAAESTCYLEITR

>comp15603\_c0\_seq9; 267 448 1365 LEN=1449; translated  
MAKNETKSTNNTGQLIEHVDPTGSETPESDDEIEIILLDFKFGILVLLFFIFPLLP  
LGLATIFGALFVLC EPD TTFEQGFLYVVS NLLGMANPLTDYSPSGVAVGIVLDIYVAVTA  
LVCFGILLNIVNLFDPVKGINRMIRKCIKNAI LVPLIALGVIIPIVNAALCSAFGALLAL  
AEDWTIRDGILYVANSNLGLGTPLTDVTPSNTGGAIIDV IISSMALGYIAIFADYVTVLN  
PSAYIRRKMRSLGALRIIDLKSTPSQHPLAIPSYCDKVPDETARKIELERGNLPRSPSQ  
DDTIG

>comp15603\_c0\_seq10; 157 442 586 LEN=586; translated  
MERMGLIGAGRKDGNNKQQQLQEQEVLQSVETRAESGAVAVELWLAIAEYX

>comp15603\_c0\_seq11; 829 261 3310 LEN=3759; translated  
MTILRRIATAKWMDSRSMVSIASPLLFPPMLLILLLL SILFVADTVKAFSATSTHTNF  
HSVRNANANPHWCAQTKGTLVCMPLASTSSSLAASSSLEDPEEGDEPTLMVPKEAFTSEA

EIAERANEMLSGSNDNVDLRSELENSFLQYALSIILGRALPDARDGLKPVHRRILFAMQQ  
LKLNPKGSHRKCARVVGEVLGKYHPHGDM SVYDALVRMAQDFSTSYRLIDGHGNFGSVDA  
DPAAAMRYTECRLTSLATEGLLEELDLDTVDFANFDGNEEEPTVLP SKLPLLLLNGSSG  
IAVGMATNIPPHNLREIVAACKALIE TERMSTETQTKSKKVKKGILSDEL FELVPGPDF  
PTGATILGTS DAXKLYTTGNRVLVRAITHLEQIKGSGKKS RNAIIVTELPYQV NKAALL  
EQIANLVNDKKLEGISDLRDESDRDGIRIVLELQKORDANPKIVLANLYKKT KLQTSFSGN  
FLALMKPDSVSTSVESTTKGSSAKASSFALTPQRFTLRDALDYFLDFRFETIRRKTSYQL  
GKVQARTHIVDGLLLALDRIDDVIELIRTMPDQAACRAALMKIDESASSGKNKNS ELALG  
LSRIQADSVLKLQLGQMTRL SHDKLSEERDELESRRKGFQRILDEDNAVYELMIEEMADL  
DRKYGVERQSKIIYDEDEGEVQE LDMVKNSRSVIVVTRGGYIKRMELKTFESQRRGTRGKR  
GTFAGDSSSIDDEV MHCITCNDRTLLMISQDGVAYGLRAYQVPSGSR T AKGTPLPSVLP  
INIGELVTA VLPVTEFTEEEYLV LATAKQGMIKKTPLDAFEKISARGLRIATLADDDK LKW  
CHICTDKDDILIGSSRGMASRFEASKLRPTGRTSKGVKAMKLRDGTIADMN I LGGAGAG  
AKHKKEEFVLCITEQGYGKRVSTDAFRSTSRGAVGVIAIKFKKSSAENDSDKVSCFSIV  
NESDEILAITSKGVMVRQKVAQIPCQSR SATGVMVQKVNDSDRIT TISLVPTRTID  
>comp15603\_c0\_seq12; 126 311 430 LEN=1552; minus strand; translated  
MAMYPKAILDMITSIIAPPVLEGVTSVRGVSPSEFEAT  
>comp15603\_c0\_seq13; 267 335 1252 LEN=1336; translated  
MAKNETKSTNNTEGQLIEHHVDPTGSETPESDDDEIEILLDFKFGILVLLFFIFPLLP  
LGLATIFGALFVLC EPDTTFEQGFLYVVSNNLLGMANPLTDYSPSGVAVGIVLDIYVAVTA  
LVFCGILLNIVNLFVDPKGINRMIRKCIKNAILVPLIALGVIIPIVNAALCSAFGALLAL  
AEDWTIRDGILYVASNSLGLGTPLTDVTPSNTGGAIIDV I ISSMALGYIAIFADYVTVLN  
PSAYIRRMRSCLGALRIIDLKSTPSQHPLAIPSYCDKVPDETARKIELE RGNLPRSPSQ  
DDTIG  
>comp15603\_c0\_seq15; 829 261 3310 LEN=3966; translated  
MTILRRIATAKWMDSRSVMVSIASPLLFPMLLILLLLSILFVADTVKAFSATSTHTNF  
HSVRNANANPHWCAQTKGTLVCMPLASTSSSLAASSSLEDPEEGDEPTLMVPKEAFTSEA  
EIAERANEMLSGSNDNVDLRSELENSFLQYALSIILGRALPDARDGLKPVHRRILFAMQQ  
LKLNPKGSHRKCARVVGEVLGKYHPHGDM SVYDALVRMAQDFSTSYRLIDGHGNFGSVDA  
DPAAAMRYTECRLTSLATEGLLEELDLDTVDFANFDGNEEEPTVLP SKLPLLLLNGSSG  
IAVGMATNIPPHNLREIVAACKALIE TERMSTETQTKSKKVKKGILSDEL FELVPGPDF  
PTGATILGTS DAXKLYTTGNRVLVRAITHLEQIKGSGKKS RNAIIVTELPYQV NKAALL  
EQIANLVNDKKLEGISDLRDESDRDGIRIVLELQKORDANPKIVLANLYKKT KLQTSFSGN  
FLALMKPDSVSTSVESTTKGSSAKASSFALTPQRFTLRDALDYFLDFRFETIRRKTSYQL  
GKVQARTHIVDGLLLALDRIDDVIELIRTMPDQAACRAALMKIDESASSGKNKNS ELALG  
LSRIQADSVLKLQLGQMTRL SHDKLSEERDELESRRKGFQRILDEDNAVYELMIEEMADL  
DRKYGVERQSKIIYDEDEGEVQE LDMVKNSRSVIVVTRGGYIKRMELKTFESQRRGTRGKR  
GTFAGDSSSIDDEV MHCITCNDRTLLMISQDGVAYGLRAYQVPSGSR T AKGTPLPSVLP  
INIGELVTA VLPVTEFTEEEYLV LATAKQGMIKKTPLDAFEKISARGLRIATLADDDK LKW  
CHICTDKDDILIGSSRGMASRFEASKLRPTGRTSKGVKAMKLRDGTIADMN I LGGAGAG  
AKHKKEEFVLCITEQGYGKRVSTDAFRSTSRGAVGVIAIKFKKSSAENDSDKVSCFSIV  
NESDEILAITSKGVMVRQKVAQIPCQSR SATGVMVQKVNDSDRIT TISLVPTRTID  
>comp15603\_c0\_seq16; 641 468 2369 LEN=2668; translated  
MTEDI EGSEKSFSGFPWPF SNLMGDSSRNSNGNSNGYSTITTTKRPEARSAATASIRKGS  
RRLSLSGSRNHKAQVKE SPSTGSSSNNTTKPIIVPLVDDKFVVD RFRHDVEQAKLMRREM  
DRRRQQKEQQQEQRQQQQQRTRNEHLTEEHIRLAL EGLDEAVVLRQKGR TREALDISEL  
SIEMLIGYLKRCPAELDVQGVSRDAVGNRIQNALTLAEEMKSELRGNEQSSKPS TKGGNR  
NSTTTTQRQQLQSRRNKLSRAVEALSELLNETKPVSPTEKPTRKAKSKTITRMP SKSTDV  
NITRDMPGKTNTYGA KSRTANTKRQTAVGRPSLFANSQEPLVNTIKSELYIDPSKLHNT  
TWKDIAGLEHAKQALQEAAILPLMRPDLFSGLRKPRNILLYGP PGTGKTL LKVAHAHES  
TVL FVCTASAMTSKWHGEKLLRTL FQVARDAAPSIVFVDEVD SLLSSRKSDGEHEASR  
RFKTEFMTNIDGIVKTGGDENGKHL LVIAATNCPWDIDSAVLRFP RRIYIPLPDSTTRK  
ALLKLN LLEKAGDTELSDDIKRIVKRLEGFSGSDISSIASEASFGPI RSLGDISAIQSAK  
SVDIRPIQRKDFDQAIEQATKSVSKLLLKQYDQW  
>comp15603\_c0\_seq17; 1557 431 6550 LEN=7106; translated  
MSWL RDMACSINVCDFWRTPTNKRS LKVQLFSSFGLA AFCSLFVVVFSSCF AVYYSGEKL  
IDRSQ LLMYEQVENRLSSSVILL SLSGRAGFVEECIEILIESIRDRVAGYPSMDGWETGR  
YTPFESEVEESEGERKKKRFP LNQPVPPLDFQVLRDLHADGIENDDQS IDMRLKEHPNV  
LSSTKTASYKLPKGFWKGGITPPMSMNETMEMLRDDAIYQTTGDLSVFLKALFETFDEL M  
VVEIFFFN EGKGSTLQFP SLVHNSFPDSDTYITEGCDWMTELRNPYTGKPYATKSPCE

PPGTVLRSRERHPMDDIDIKKLMNYTSAKFAQADQQEPWQRQPQDAIEDDGNNDNNTSHR  
NGSTEGYTENGYTSVPPNNHQVKRDKVTDKLI FWTGPQLTSKDNKTQILKAQKAI FDRV  
TNEFVGVLSLEISENKLSQLQRRILDDASDGYSVHPSGLIIGTTPGAEQKVFERQSDFD  
KIEDHFKRXYIDQIPKWEWRDNQGSTPKPERIPTTYFTPTENGGFLVSCPVPPTPEYPW  
DDPLYSPIAFVVKISPDVFEFDFNIFENQVKQDVKKNIILCVSLGVLGLVLILSILAVMS  
KILTQPLTWIAYVARNIINNDSRSSKTYGENYESGDRNHMLEVDMRRESVKKNPMSSTS  
RMDYEGAI VNCNNDPVHTTSKGNQLILNLDLLEADNSECNDDEVEGVNFVDYNPKADKRLC  
CTLSTELQQLLEAFQSMHLGFGSGDGVSEVAEPGLCEIRNYLTWHSDFAKLYECNQEDISK  
TERKVSNSTRATTMGSTSNSSISISDASHYHIQDCEAITPCLSRNSQSESSSSSFPKSL  
HEHLAPPSDIIRDIGSQQYIPEDEKNEDESIVSSSSLDIYLPGPPPGAAQVVVPAPSKVN  
VTSNLGTPRLDPRPILEYRDGSFGRIKTACSSKFFWIVVLMALPVFFTSCIIGSIVSS  
ILVTLPKRWKQSAKQGSNNIEISAMKLI VDRKAATMENLIEGPARDIYLLARTTNWLI F  
GVRKSSNI VDVSTSERCKTYPKGECPNAKLCSCDWEYGNATGGQCESTEGFTDARYLQ  
RQWFEAQKLDNSPITGERISSPSVPTSSESTLWVKNVTELPGSEIGPSRTSGYDTLYNRV  
AVSSASAVMNFPLHNFPSGIHTERTLFGGYLAFAVDGLLLGWSGCDDWHSSNAHFVSTYE  
NGASLTDDKLCANGKHGYDPRCQDWYVQGRDRYL RDAVHAHVTS PYKLP LRNQVAQTITS  
PITNPRGTGEYVGQVALDFRLDYEYVLKRLDDESSFTFMI TPHDDVLGSNVVYFSESEMF  
EPAKIEDLIFKNELNDVNRDYFKGEILPLIKAGERGNSEFFLAQEDGSEVEICLYYAPVK  
IQLPLGLEPDDFASGRKITEHLIY SVGSGKPCDEIKRPHYDGEDEVNQDLANQEIYFVAI  
IASSTVIFVIVSAISAIHIAFPMIKLSAIVRSTKKGEYDSIPPLEGGCSEVQGVYNTFAK  
LNKIVKVSNTSFFSGKLDVAHFFVNDALGLYRKINDRKAIGVTCNNLANTLFAIQFERID  
GVNCCVASRPCYVKQTLALYNEATEYSQQDFDESGEDSKLDYAIQLADRRFN RGLYFLFI  
DGYHCAPGDSRQRGYDDITFSRNLHYDIRDLLEKKELFANASSYFSRLIRRIDCLAAFY  
DDVGLREI WDAQVLLDEASHLMRAAIEVTSRGNKCP LFHEINCNGRQQQLESLEILLAMN  
SGDTLRAAKTGMRMLVEDDYLLSAFVRAAEALLVVMEEGDEDHNTYFSKRSIERTRLDL  
RAIVKSCKESLDMGKNAVFV FELCPSQFMTKDNTDGRGTLLELNSQCLQLYDNFFQAD  
DQIGILANNIGNSQTVEIGRKEDNEGRQASLDVATSMKSSRVAHS DTT PDSGDYNHGTP  
AVDSSFPIALQMLIESSVSLQNDYSIIWVTSGHTHQNEQGMISLHDKIVRLNQERTYQIH  
VLIIDLKLSCEVEKGDYPYSGMGDETPKGHELVLLEDIGNITKNSFYFDVSTDELSAAFQW  
>comp15604\_c0\_seq1; 1309 296 3868 LEN=4086; translated  
MTPTPPPHKGV EASASARPNATGFRLPNRDERDRATREAE ECLEATKHESGFQLDGFNLL  
GVVANPRSGGAGATVQQSAATTTTPGEGPGSRQPPGAVAPPGQAQAPHPPPPPPSRAPLG  
SSSASSADQQHHGMFSDAVQTFEDTLAHVAEQIESLNLFL EQLSRQYLGDDEALYLEY  
YYQNEEEDETHPMHMMRADNIPPELVNLELQEMQYYLEECGVLAHTLVAQGLNTRTLHSE  
DVVDQDRLNQQLEDIPSVFYETDFDLTDARTFAELLLRQDGNETKTEHDGAPGDETTTKP  
MEANTKPTNSLYQPTQELIPVREQEF LAGHLDRVELALQE QVRQKSTAFFQETTRFQQLO  
SSIVDLLRQVQNL RACMQQALGVYRQTKDISDHQRQDYEILVDLLDGSMELV RCKASIGG  
LLSANDHLGAALQIQYGRLLNGSSGIEEGAEDAPGASSDDNPAESSGTGNAKNGNGNSH  
TENHHHDHNDDAATLELRLLTALSSTGAQFTQYESLVVQSL SDELVELFFHWRP SERERV  
LETAEALQICGAVHKTS ELYQRR LQQMIRMVTRTTIAEFMESSSSSVGSNKSSGGVTGMT  
YPAFYNCLQLLIEEIKSILVMAHRVDEF CASEAIFGEISSPGNLNGSERWTKEAVVQAAE  
LATNSIAELLRLRKEAHSVLSLSEMKQLWDTCTEFATKMEDYSNQTRAVSLRSTLVGQAK  
SFLDRTHESNMSTLVSALDSERWSQCEVSNERQAALTR LCTGLATVSTPLRNLQQNGDDD  
QKGAKNPVAVVEGVNYKVVWSCLLLIEMIMTNLSSAA YFQRTLATNAVTKVVELMRLFN  
ARATNLVLGAGAIHSAARLKSINAKHLSYVTQCLGMTISLLPHIRAALMAQLPAKQHGLL  
IDLDSIKSEYKDHNEKVLNKFVSIIGGIVEHGLAPRIASVDFDDR AKKQATANEEDVVEC  
FVFLDGISSSTRKLT VLNALLPPDHLQDVFSRIFAHLDEHIPKLFVAAVTTGVFTFPSS  
DAGKNRLLTEVGQTTKTLNGLSGVLPWDFTAINVLERKLDYKLPALIEPTETQTDEEITL  
AINENEEIAEAAAQGGRTTGSEKQVSAEGTGHDDGDTVEPSVAVEKGLPSETESAKNNLV  
DDSEGSPILNSGENTESIATDLTTNAAENGERGLPSEENGTQATKNTVQE  
>comp15604\_c0\_seq2; 1299 296 3847 LEN=4065; translated  
MTPTPPPHKGV EASASARPNATGFRLPNRDERDRATREAE ECLEATKHESGFQLDGFNLL  
GVVANPRSGGAGATVQQSAATTTTPGEGPGSRQPPGAVAPPGQAQAPHPPPPPPSRAPLG  
SSSASSADQQHHGMFSDAVQTFEDTLAHVAEQIESLNLFL EQLSRQYLGDDEALYLEY  
YYQNEEEDETHPMHMMRADNIPPELVNLELQEMQYYLEECGVLAHTLVAQGLNTRTLHSE  
DVVDQDRLNQQLEDIPSVFYETDFDLTDARTFAELLLRQDGNETKTEHDGAPGDETTTKP  
TNSLYQPTQELIPVREQEF LAGHLDRVELALQE QVRQKSTAFFQETTRFQQLOSSIVDLL  
RQVQNL RACMQQALGVYRQTKDISDHQRQDYEILVDLLDGSMELV RCKASIGGLSANDH  
LGAALQIQYGRLLNGSSGIEEGAEDAPGASSDDNPAESSGTGNAKNGNGNSHTENHHHD  
HNDDAATLELRLLTALSSTGAQFTQYESLVVQSL SDELVELFFHWRP SERERVLETAEAL

QICGAVHKTSELYQRRLLQQMIRMTVRTTIAEFMESSSSSSVGSNKSSGGVTGMTYPAFYNC  
LQLLIEEIKSILVMAHRVDFCSEAI FGEISSPGNLNGSERWTKEAVVQAAELATNSIA  
ELLRLRKEAHSV ILSSEMQLWDTCTEFATKMEDYSNQTRAVSLRSTLVGQAKSFLDRTH  
ESNMSTLVSALDSERWSQCEVSNERQAALTRLCTGLATVSTPLRNLQQNGDDDQK GKAKN  
PVAVVEGVNYKVVWSCLLLIEMIMTNLSSAAYFQRTLATNAVTKVVELMRLFNARATNLV  
LGAGAIHSAARLKSINAKHLSYVTQCLGMTISLLPHIRAALMAQLPAKQHGLLIDLDSIK  
SEYKDHNEKVLNKFVSI IGGIVEHGLAPRIASVDFDDRAKKQATANEEDVVECFVFLDGI  
SSSTRKLHTVLNALLPPDHLQDVFSRIFAHLDEHIPKLFVAAVTTGVFTFPSSDAGKNRL  
LTEVGQTTKTLNGLSGVLPWDFTAINVLERKLDYKLPALIEPTETQTDEEITLAINENEE  
IAEAAAQGGRTTGSEKQVSAEGTGHDDGDTVEPSVAVEKGLPSETESAKNNLVDDSEGSP  
ILNSGENTESIATDLTTNAAENGERGLPSEENGTQATKNTVQE

>comp15604\_c0\_seq3; 1228 296 2864 LEN=2864; translated  
MTPTPPPHKGV EASASARNATGFRLPNRDERDRATREAE ECLEATKHESGFQLDGFNLL  
GVVANPRSGGAGATVQQSAATTTTPGEGPGSRQPPGAVAPPGQAQAPHPPPQPPSRAPLG  
SSSASSADQQHHGMFSDAVQTFEDTLAHVAEQIESLNLFLQLSRQYLGDDEALYLEY  
YYQNEEEDETHPMHMMRADNIPPELVNLELQEMQYYLEECGVLAHTLVAQGLNTRTLHSE  
DVVDQDRLNQQLEDIPSVFYETDFDLTDARTFAELLLRQDGNETKTEHDGAPGDETTTKP  
MEANTKPTNSLYQPTQELIPVREQEFLAGHLDRVELALQEQVRQKSTAFFQETTRFQQLO  
SSIVDLLRQVQNL RACMQQALGVYRQTKDISDHQRQDYEILVDLLDGSMELV RCKASIGG  
LLSANDHLGAALQIQYGRLLNGSSGIEEGAEDAPGASSDDNPAESSGTGNAKNGNGNSH  
TENHHHDHNDDAATLELRLLTALSSTGAQFTQYESLVVQSLSDDELVELFFHWRPSESERV  
LETAEALQICGAVHKTSELYQRRLLQQMIRMTVRTTIAEFMESSSSSSVGSNKSSGGVTGMT  
YPAFYNC LQLLIEEIKSILVMAHRVDFCSEAI FGEISSPGNLNGSERWTKEAVVQAAE  
LATNSIAELLRLRKEAHSV ILSSEMQLWDTCTEFATKMEDYSNQTRAVSLRSTLVGQAK  
SFLDRTHESNMSTLVSALDSERWSQCEVSNERQAALTRLCTGLATVSTPLRNLQQNGDDD  
QK GKAKNPVAVVEGVNYKVVWSCLLLIEMIMTNLSSAAYFQRTLATNAVTKVVELMRLFN  
ARATNLAPAPRTRFVAX

>comp15604\_c0\_seq4; 1210 296 2843 LEN=2843; translated  
MTPTPPPHKGV EASASARNATGFRLPNRDERDRATREAE ECLEATKHESGFQLDGFNLL  
GVVANPRSGGAGATVQQSAATTTTPGEGPGSRQPPGAVAPPGQAQAPHPPPQPPSRAPLG  
SSSASSADQQHHGMFSDAVQTFEDTLAHVAEQIESLNLFLQLSRQYLGDDEALYLEY  
YYQNEEEDETHPMHMMRADNIPPELVNLELQEMQYYLEECGVLAHTLVAQGLNTRTLHSE  
DVVDQDRLNQQLEDIPSVFYETDFDLTDARTFAELLLRQDGNETKTEHDGAPGDETTTKP  
TNSLYQPTQELIPVREQEFLAGHLDRVELALQEQVRQKSTAFFQETTRFQQLOSSIVDLL  
RQVQNL RACMQQALGVYRQTKDISDHQRQDYEILVDLLDGSMELV RCKASIGGLSANDH  
LGAALQIQYGRLLNGSSGIEEGAEDAPGASSDDNPAESSGTGNAKNGNGNSHTENHHHD  
HNDDAATLELRLLTALSSTGAQFTQYESLVVQSLSDDELVELFFHWRPSESERVLETAEAL  
QICGAVHKTSELYQRRLLQQMIRMTVRTTIAEFMESSSSSSVGSNKSSGGVTGMTYPAFYNC  
LQLLIEEIKSILVMAHRVDFCSEAI FGEISSPGNLNGSERWTKEAVVQAAELATNSIA  
ELLRLRKEAHSV ILSSEMQLWDTCTEFATKMEDYSNQTRAVSLRSTLVGQAKSFLDRTH  
ESNMSTLVSALDSERWSQCEVSNERQAALTRLCTGLATVSTPLRNLQQNGDDDQK GKAKN  
PVAVVEGVNYKVVWSCLLLIEMIMTNLSSAAYFQRTLATNAVTKVVELMRLFNARATNLA  
PAPRTRFVAX

>comp15605\_c0\_seq1; 295 2315 3469 LEN=3625; translated  
MARRRTRKTTTPRPSLLWKEVRTGSFIAVYWDSL RGYYPCKVIRKPSGNTSPKSKFFVKYQ  
DNSKHWHDLAITKFRWLED R DVFFDEEAEEDHFTAAAASDSGSEGEDPDTKSDPEDESTA  
NESKRSEEKRAGSESSDSDGESYPDQNA TEPEEEEDSPGSSRKKMTGNEDV GASRKRSG  
PRNGAAPSWSMKSTTRDIKRAHEKKEINKQEALLSILMVYWMAGTESVALETLTRDLGC  
HPRTKTVASAWKEICSQDLVEEKCRGKQKAFGLTEKGIDAIAPDDYKHQLANPPKTTEEL  
QERIRSRAPIPHGATIFDALLNARKEGSSSLSTKELAAVCGVMERTKSFVCALKQLRNSGH  
VGDDPNHGGK KARFVLSPKCFLG

>comp15606\_c0\_seq1; 34 1 1150 LEN=2823; translated  
XTSHHITSHHTRSHGRHSLQAH RGLFRVPLHGALQGLLGPLVFEPLVLVCGDHGAGPAP  
GRCPLRDGAGRP GELPGEVPVAPGDAGGGPLPPGRGILPRGQDRERHRRGPPA QAPGHGAD  
RVPALPRSVDRRVP PGGNLLLFVALRGLEPSINGYFAEDYGSAGGCGSDARDRVSAVLGL  
GWFYLFAGPTVLSCTVCCASCCDKDYAADDEAFAAAAEAGRQSTKRPSKPSGEGTPGAGA  
PPDTGPPRTYSAEGIPIDRKDDDDDESEVVQAEAVVEGEVLP PVPMP PQSKDDAAAAPK  
TGT PPAKTKRWFGRGRGKKGDKGKDPGVDPXESNRVLGKRNGSPPPGWNGMLS GAAREWW  
PEGFACGGDAVPPHPAAGSFVDC

>comp15607\_c0\_seq1; 1117 1 3491 LEN=3619; translated



XAAGTESKGHIFLFFVSENKAKGSFERPTSTSSRTLYKLEENNRWKEGGNYASTGERS  
GTAGAMALLAISSDGFRTILPLQQPAMAVVSGDEYNENTNANMNTQESRGTGKISSDDVD  
DAEIEKMLDELGWKGQVGMVQMDISLLLLTTDDTQEIRFDQVLLDKWIGEYGVGSVLLNH  
YPWTAVEYRNEVIRLQQTAKGSRPPVIWGLDSVHGANYVRDALVTPQPINLAASFNTSL  
SFAAGALASRDTRRAGIPWLFSPLLGLSWNPFWSRVYETFGEDPLLVDMAESMTRGIQA  
LDASTNSSLLPSRAAACAKHFVGYSPHNGHDRAPSRIPMRHLYQYFLLPWRKALLELGD  
GSNARSNSKNNHGSRPMTVMESYTEIDGVPNVANRRTLDRILRKELGFGDGMMLVTDYNEI  
TNLERWHHVASDGDEALWRAMADGTIDMSMIGNLDDVRAFFEGMERLSAKGDEKLAHRVR  
ESARRVLKLLKDLGMFSESFRLQPLEEEDTGGEFRPSSESDVEAVLDMTRQSVILAKNENN  
ALPLLKQGMDTANQPLKILVTGPTSDSLSFQTGGWTGEWQGVNSNYEGEWFSYGGYKTVL  
GALRDEAGSFDTKHECGVDIMGNDCSNGSPVAPGETEDEDEDENPLSNLLDVVKGWIHFVGS  
SSASSASSDPLDAIVVCLGEEENYAEKPGDIEDLRLPQGQYDLVKALKEVIDSQHQEGGGA  
TRKTKIILVYFGGRPRLLADVPLVDAVVLGFLPGPFAGNAIADFFTGRANPDARLPLTY  
PKHQDLGGIPLYREVSDMCTEDTGGTLPWHNNVPCEVQWPFHGGLSYSRFEYDKTIQLST  
TTLQQHWHHDGGNENKKGAVDERLSVTVRVTNSGDLPGAETVLFFFTDESSTTPEYKRL  
RAYEKVWLEPGMSKDVTVTISLENDLRFVGPDDSHYILQDKMKFRVIGIPASDCRNNAD  
DQMCSETVTIRTEKNYVGACEAACNLWRGSGESCAKIVFPKSPSTTANSVAACRESCASI  
RFDKSEDGQLDNDGWGWNVEECLESILGNESFDSKDDCWKLTTLCRDVTQTFGMDEFSGD  
TSGSTVTIGSGGKATEDSPPLAVVLSLLSGIFASVMILYTVRGGYASEKTGNTKKRGEYG  
DVEFSAIDRGSNDITNSEVSLTL

>comp15607\_c0\_seq2; 1057 1 3598 LEN=3726; translated  
XAAGTESKGHIFLFFVSENKAKGSFERPTSTSSRTLYKLEENNRWKEGGNYASTGERS  
GTAGAMALLAISSDGFRTILPLQQPAMAVVSGDEYNENTNANMNTQESRGTGKISSDDVD  
DAEIEKMLDELGWKGQVGMVQMDISLLLLTTDDTQEIRFDQVLLDKWIGEYGVGSVLLNH  
YPWTAVEYRNEVIRLQQTAKGSRPPVIWGLDSVHGANYVRDALVTPQPINLAASFNTSL  
SFAAGALASRDTRRAGIPWLFSPLLGLSWNPFWSRVYETFGEDPLLVDMAESMTRGIQA  
LDASTNSSLLPSRAAACAKHFVGYSPHNGHDRAPSRIPMRHLYQYFLLPWRKALLELGD  
GSNARSNSKNNHGSRPMTVMESYTEIDGVPNVANRRTLDRILRKELGFGDGMMLVTDYNEI  
TNLERWHHVASDGDEALWRAMADGTIDMSMIGNLDDVRAFFEGMERLSAKGDEKLAHRVR  
ESARRVLKLLKDLGMFSESFRLQPLEEEDTGGEFRPSSESDVEAVLDMTRQSVILAKNENN  
ALPLLKQGMDTANQPLKILVTGPTSDSLSFQTGGWTGEWQGVNSNYEGEWFSYGGYKTVL  
GALRDEAGSFDTKHECGVDIMGNDCSNGSPVAPGETEDEDEDENPLSNLLDVVKGWIHFVGS  
SSASSASSDPLDAIVVCLGEEENYAEKPGDIEDLRLPQGQYDLVKALKEVIDSQHQEGGGA  
TRKTKIILVYFGGRPRLLADVVSALLAAVADMVFGLLSVPRFSRDANPVGLSSFVTVPLV  
DAVVLGFLPGPFAGNAIADFFTGRANPDARLPLTYPKHQDLGGIPLYREVSDMCTEDTGG  
TLPWHNNVPCEVQWPFHGGLSYSRFEYDKTIQLSTTTLQQHWHHDGGNENKKGAVDERLS  
VTVRVTNSGDLPGAETVLFFFTDESSTTPEYKRLRAYEKVWLEPGMSKDVTVTISLEND  
LRFVGPDDSHYILQDKMKFRVIGIPASDCRNNADDQMCSETVTIRTEKNYVGACEAACN  
LWRGSGESCAKIVFPKSPSTTANSVAACRESCASIRFDKSEDGQLDNDGWGWNVEECLES  
ILGNESFDSKDDCWKLTTLCRDVTQTFGMDEFSGDSTSGSTVTIGSGGKATEDSPPLAVV  
SLLSGIFASVMILYTVRGGYASEKTGNTKKRGEYGDVEFSAIDRGSNDITNSEVSLTL

>comp15608\_c0\_seq1; 770 52 2031 LEN=4045; translated  
MSPIDKQQDPHISSSMTSTTTTPSSRDDARKTNASPKDTNAGAGDEAAATKKNERSATES  
PSLAAPIQTKINEKIGCVLNEFECQHNNCTGILYVGPLGVVFLGSLFLEFFVVLKWEAV  
VKIERWKSTDSNSDKENENESESQRQTVIRIETTTSPQEKGVDYDFDGFSDHRSALAEALT  
RLHSDSLPGNPPGLITPGRASIRPRHMVRAHSDPARMSAIFRFGDPPLAATAPVREEAEA  
MPRAVEESPGRDAPERQVMRRQSSVSVPAAPNLGGLATGTKAAAMLEEDEGEASGRDNG  
QLLRAEWEAALVEVRALPQVAVQNRELPRNASQNGERQDLLDALVESFFRNDATHGMGRY  
MTDVYGDTDVEATDWTDDDKPASENERATSSARVQSRTIHYTHPVNAPMAPPTARAEKKQ  
TLRHVGSANGLMVETKIVKGVPKTDCFYVKDVLCEVVPDDKRGDRLVFSIRFDIVFVK  
STFFEGIIISNTTKGEFQTFMNGLADFLCEHWCSGGTSDTATVGGAPRPASPKEPADTTT  
NAAPLLSLPGPSAPKQPAGTKPTLGDAAWKSFCVVLLLLWIAFVQSRMWNEVRTVRKEWD  
EWKQNHGAAALGAKLDRIEALLANPPPREDTKDGTIPGEGESKRCSRSEEREGRDGL

>comp15608\_c0\_seq2; 770 52 2031 LEN=4027; translated  
MSPIDKQQDPHISSSMTSTTTTPSSRDDARKTNASPKDTNAGAGDEAAATKKNERSATES  
PSLAAPIQTKINEKIGCVLNEFECQHNNCTGILYVGPLGVVFLGSLFLEFFVVLKWEAV  
VKIERWKSTDSNSDKENENESESQRQTVIRIETTTSPQEKGVDYDFDGFSDHRSALAEALT  
RLHSDSLPGNPPGLITPGRASIRPRHMVRAHSDPARMSAIFRFGDPPLAATAPVREEAEA  
MPRAVEESPGRDAPERQVMRRQSSVSVPAAPNLGGLATGTKAAAMLEEDEGEASGRDNG  
QLLRAEWEAALVEVRALPQVAVQNRELPRNASQNGERQDLLDALVESFFRNDATHGMGRY

MTDVVGD TDVEATDWTDDDKPASENERATSSARVQSRTIHYTHPVNAPMAPPTARA EKKQ  
TLRH YGSANGLM VETKTIVKGVPKTDCFYVKDVLCEVVPDDKRGDR LVFSIRFDIVFVK  
STFFEGII SN TTKGEFQTFMNG LADFLCEHWCSGGTSDTATVGGAAPRPASPKEPADTTT  
NAAPLLSLPGPSAPKQPPAGTKPTLGDAAWKSFCV VLLLWIAFVQSRMWNEVRTVRKEWD  
EWKQNHGAAALGAKLDRIEALLANPPP ERDETKDGTIPGEGESKRCRSEEREGETAGRDL  
>comp15609\_c1\_seq2; 361 276 1112 LEN=1721; translated  
MVLFFCSAKRSKNLSLLLGAQLCWIVLLDPLRCWGAS PQQLPTNHEQDPMNLWEKNLYQS  
VVRGERATPNTVTSQKPNPSYPFQSLRRRNEPKEQAIVMGDDDDDDQFLNDDDAVVSNC S  
LCQGLPMEENFVPPFFSDGDNRTCSELEEFFYS DYWNTVPGESCINDGPVNKAFDLCCRQS  
IPKYE CETNIQERLFGSESNYNTAVPPVISMKEPLTVLVNMVYFFLQDIDTAESTAKISL  
QVSLTWVDPRLKWDIVDNDTCSNKIDVFSGHEIEQTMIW  
>comp15609\_c1\_seq4; 313 1358 2344 LEN=2753; translated  
MPPRKVQVTSSGRVQMEMFGGIEAFCPMSGLANIPFDTLGCQFVFWPREQYNALIKYELQ  
YPEQMWFAPYDGIYKEWQLVPDRTEQKIDPASGHVIVNFYFKRAKQYYIWNILVPTIILT  
YLSFFTFLDMRVGERLGFGMALALVVVAQQIVTSDKLPVSDQPLWLDK FVVRSFYWVLV  
GVVQSALVGFLYFLREDRQATKENKNLELMSMSARLSMMRRAASKRNEKAYTEDEATGEE  
QEALVDPTLQLTDAVSTMQKENFLYTF SFRKFDMICLALAAATSYSVFIVFMYTTVHGGI W  
VKNEPPKVGDN GTFDFVIVVHNTSDPTS  
>comp15609\_c1\_seq5; 361 276 1112 LEN=2862; translated  
MVLFFCSAKRSKNLSLLLGAQLCWIVLLDPLRCWGAS PQQLPTNHEQDPMNLWEKNLYQS  
VVRGERATPNTVTSQKPNPSYPFQSLRRRNEPKEQAIVMGDDDDDDQFLNDDDAVVSNC S  
LCQGLPMEENFVPPFFSDGDNRTCSELEEFFYS DYWNTVPGESCINDGPVNKAFDLCCRQS  
IPKYE CETNIQERLFGSESNYNTAVPPVISMKEPLTVLVNMVYFFLQDIDTAESTAKISL  
QVSLTWVDPRLKWDIVDNDTCSNKIDVFSGHEIEQTMIW  
>comp15609\_c1\_seq6; 597 276 2144 LEN=2553; translated  
MVLFFCSAKRSKNLSLLLGAQLCWIVLLDPLRCWGAS PQQLPTNHEQDPMNLWEKNLYQS  
VVRGERATPNTVTSQKPNPSYPFQSLRRRNEPKEQAIVMGDDDDDDQFLNDDDAVVSNC S  
LCQGLPMEENFVPPFFSDGDNRTCSELEEFFYS DYWNTVPGESCINDGPVNKAFDLCCRQS  
IPKYE CETNIQERLFGSESNYNTAVPPVISMKEPLTVLVNMVYFFLQDIDTAESTAKISL  
QVSLTWVDPRLKWDIVDNDTCSNKIDVFSGHEIEQTMIWIPDYE VVNGIEGIRSMPPRKV  
QVTSSGRVQMEMFGGIEAFCPMSGLANIPFDTLGCQFVFWPREQYNALIKYELQYPEQM W  
FAPYDGIYKEWQLVPDRTEQKIDPASGHVIVNFYFKRAKQYYIWNILVPTIILTYLSFFT  
FLDMRVGERLGFGMALALVVVAQQIVTSDKLPVSDQPLWLDK FVVRSFYWVLVGVVQSA  
LVGFLYFLREDRQATKENKNLELMSMSARLSMMRRAASKRNEKAYTEDEATGEEQEALVD  
PTLQLTDAVSTMQKENFLYTF SFRKFDMICLALAAATSYSVFIVFMYTTVHGGI WVKNEPP  
KVGDN GTFDFVIVVHNTSDPTS  
>comp15609\_c1\_seq8; 216 50 839 LEN=1248; translated  
MATTKGIYKEWQLVPARTEQKINPAAGQVFNFYFKRAKQYYIWNILVPTIILTYLSFFT  
FLDMRVGERLGFGMALALVVVAQQIVTSDKLPVSDQPLWLDK FVVRSFYWVLVGVVQSA  
LVGFLYFLREDRQATKENKNLELMSMSARLSMMRRAASKRNEKAYTEDEATGEEQEALVD  
PTLQLTDAVSTMQKENFLYTF SFRKFDMICLALAAATSYSVFIVFMYTTVHGGI WVKNEPP  
KVGDN GTFDFVIVVHNTSDPTS  
>comp15609\_c1\_seq9; 394 276 1521 LEN=1521; translated  
MVLFFCSAKRSKNLSLLLGAQLCWIVLLDPLRCWGAS PQQLPTNHEQDPMNLWEKNLYQS  
VVRGERATPNTVTSQKPNPSYPFQSLRRRNEPKEQAIVMGDDDDDDQFLNDDDAVVSNC S  
LCQGLPMEENFVPPFFSDGDNRTCSELEEFFYS DYWNTVPGESCINDGPVNKAFDLCCRQS  
IPKYE CETNIQERLFGSESNYNTAVPPVISMKEPLTVLVNMVYFFLQDIDTAESTAKISL  
QVSLTWVDPRLKWDIVDNDTCSNKIDVFSGHEIEQTMIWIPDYE VVNGIEGIRSMPPRKV  
QVTSSGRVQMEMFGGIEAFCPMSGLANIPFDTLGCQFVFWPREQYNALIKYELQYPEQM W  
FAPYDGIYKEWQLVPDRTEQKIDPASGHVIVNFYFKRAKQYYIWNILVRYTFNTVX  
>comp15609\_c1\_seq10; 497 276 1568 LEN=2662; translated  
MVLFFCSAKRSKNLSLLLGAQLCWIVLLDPLRCWGAS PQQLPTNHEQDPMNLWEKNLYQS  
VVRGERATPNTVTSQKPNPSYPFQSLRRRNEPKEQAIVMGDDDDDDQFLNDDDAVVSNC S  
LCQGLPMEENFVPPFFSDGDNRTCSELEEFFYS DYWNTVPGESCINDGPVNKAFDLCCRQS  
IPKYE CETNIQERLFGSESNYNTAVPPVISMKEPLTVLVNMVYFFLQDIDTAESTAKISL  
QVSLTWVDPRLKWDIVDNDTCSNKIDVFSGHEIEQTMIWIPDYE VVNGIEGIRSMPPRKV  
QVTSSGRVQMEMFGGIEAFCPMSGLANIPFDTLGCQFVFWPREQYNALIKYELQYPEQM W  
FAPYDGIYKEWQLVPDRTEQKIDPASGHVIVNFYFKRAKQYYIWNILVPTIILTYLSFFT  
FLDMRVGYV  
>comp15610\_c0\_seq1; 1082 451 3798 LEN=3872; translated

MTPSSQSTAGNDPLDKTATIMDKLSRLERAFFDEDEDEIGSNSDRDETCKNEGGNEHKKKL  
FKTKPVKKNRIHKNNQKLSMVVEQCGSNTDETESENSDFEELIHSKPDPQRTTLNIS  
QRNRSQESQAKEAAEKT TTTTEGTIRALT T TGSVDEKEKSN DLASLPSSTRTKEAAKTTTIF  
VGNIRVPEVGSVYEKEESNDNLLSLSSLAGSENRRRVLGSKKCQPGSEPQAEDHDGSN  
DFDFDGGCDIDDIPRNDYSEEP MYAPGNENGESASPSKPTTCRPQQALARRKAILLE  
REIDRLFLRTDTNTITMKIFCKTLGQRMDEPLDKATKKKVKARVLSLLKGEIMALEHDET  
TSKDHHDSTTAENTAEGKANEVDSNVDAANDDDRKSNAGQGVNDTLTIGESSMTDTHAAV  
EREAIVGRFCDERLNAIENNETLQKENEQDKATR TNLLPSMDAQLVAEAKGEVIVVNEES  
FSSDTLQNK AERGKGASEWKQVAACLDVPHVVATEVQSVVETRGEVTMETSSNGKRSEL  
LPEEPKETPGHTSKQHAARNHENAGVQIPNDNATIPTAPSPKKAKPASKKKKPSAATTKQ  
RRSKSKTKPNDNSNEISTNNDMPANGGTTGANAVKQIRPRKRTRKTQACALCKTCPCQRT  
NTSTNDHCNLATLEIKDFSRSDGAI EKTLARRLQKLEQSTERLEEQTEFVRRRLKKHRE  
AWKRTKPRRGADANNERGKGGKVMGIGTDDSYFLPDAEVFEQQQTESKGLSRNVVEKAQT  
RVFPSPVPTYQPTLFEVMGISRDKEKTKQNNVDVNI DDKENNSKENIEISTNETSFLCLEE  
NNSNEEVPT EYVPERDCSNRIHRL EWDNGASNDENEGMGATPGSIFDTILVMTQDQRCET  
NNKKRMEDNSRSIPLWDDLFESSHNRDLETVANDDAGLDDLGLFRDEETYAAKDILRN  
VSSAEGESRANPSLLSQGAQAVAEVLS TYSSQEKKRIEMLELSCP NWKENVYFALMQKS  
SEDILDALKNVRESRMRMQAQRKRILD AWESKNAALQLFETALKRSAARLKQDDKSSTVA  
SHDES RHTVANLSQSDCEAPMDNNSCPALSKGGDY

>comp15610\_c0\_seq2; 397 451 1325 LEN=1325; translated  
MTPSSQSTAGNDPLDKTATIMDKLSRLERAFFDEDEDEIGSNSDRDETCKNEGGNEHKKKL  
FKTKPVKKNRIHKNNQKLSMVVEQCGSNTDETESENSDFEELIHSKPDPQRTTLNIS  
QRNRSQESQAKEAAEKT TTTTEGTIRALT T TGSVDEKEKSN DLASLPSSTRTKEAAKTTTIF  
VGNIRVPEVGSVYEKEESNDNLLSLSSLAGSENRRRVLGSKKCQPGSEPQAEDHDGSN  
DFDFDGGCDIDDIPRNDYSEEP MYAPGNENGESASPSKPTTCRPQQALV

>comp15610\_c0\_seq3; 881 451 2939 LEN=2939; translated  
MTPSSQSTAGNDPLDKTATIMDKLSRLERAFFDEDEDEIGSNSDRDETCKNEGGNEHKKKL  
FKTKPVKKNRIHKNNQKLSMVVEQCGSNTDETESENSDFEELIHSKPDPQRTTLNIS  
QRNRSQESQAKEAAEKT TTTTEGTIRALT T TGSVDEKEKSN DLASLPSSTRTKEAAKTTTIF  
VGNIRVPEVGSVYEKEESNDNLLSLSSLAGSENRRRVLGSKKCQPGSEPQAEDHDGSN  
DFDFDGGCDIDDIPRNDYSEEP MYAPGNENGESASPSKPTTCRPQQALARRKAILLE  
REIDRLFLRTDTNTITMKIFCKTLGQRMDEPLDKATKKKVKARVLSLLKGEIMALEHDET  
TSKDHHDSTTAENTAEGKANEVDSNVDAANDDDRKSNAGQGVNDTLTIGESSMTDTHAAV  
EREAIVGRFCDERLNAIENNETLQKENEQDKATR TNLLPSMDAQLVAEAKGEVIVVNEES  
FSSDTLQNK AERGKGASEWKQVAACLDVPHVVATEVQSVVETRGEVTMETSSNGKRSEL  
LPEEPKETPGHTSKQHAARNHENAGVQIPNDNATIPTAPSPKKAKPASKKKKPSAATTKQ  
RRSKSKTKPNDNSNEISTNNDMPANGGTTGANAVKQIRPRKRTRKTQACALCKTCPCQRT  
NTSTNDHCNLATLEIKDFSRSDGAI EKTLARRLQKLEQSTERLEEQTEFVRRRLKKHRE  
AWKRTKPRRGADANNERGKGGKVMGIGTDDSYFLPDAEVFEQQQTESKGLSRNVVEKAQT  
RVFPSPVPTYQPTLFEVMGISRDKEKTKQNNVDVNI DDKENVFLGIILFVX

>comp15610\_c0\_seq4; 848 451 2816 LEN=3111; translated  
MTPSSQSTAGNDPLDKTATIMDKLSRLERAFFDEDEDEIGSNSDRDETCKNEGGNEHKKKL  
FKTKPVKKNRIHKNNQKLSMVVEQCGSNTDETESENSDFEELIHSKPDPQRTTLNIS  
QRNRSQESQAKEAAEKT TTTTEGTIRALT T TGSVDEKEKSN DLASLPSSTRTKEAAKTTTIF  
VGNIRVPEVGSVYEKEESNDNLLSLSSLAGSENRRRVLGSKKCQPGSEPQAEDHDGSN  
DFDFDGGCDIDDIPRNDYSEEP MYAPGNENGESASPSKPTTCRPQQALARRKAILLE  
REIDRLFLRTDTNTITMKIFCKTLGQRMDEPLDKATKKKVKARVLSLLKGEIMALEHDET  
TSKDHHDSTTAENTAEGKANEVDSNVDAANDDDRKSNAGQGVNDTLTIGESSMTDTHAAV  
EREAIVGRFCDERLNAIENNETLQKENEQDKATR TNLLPSMDAQLVAEAKGEVIVVNEES  
FSSDTLQNK AERGKGASEWKQVAACLDVPHVVATEVQSVVETRGEVTMETSSNGKRSEL  
LPEEPKETPGHTSKQHAARNHENAGVQIPNDNATIPTAPSPKKAKPASKKKKPSAATTKQ  
RRSKSKTKPNDNSNEISTNNDMPANGGTTGANAVKQIRPRKRTRKTQACALCKTCPCQRT  
NTSTNDHCNLATLEIKDFSRSDGAI EKTLARRLQKLEQSTERLEEQTEFVRRRLKKHRE  
AWKRTKPRRGADANNERGKGGKVMGIGTDDSYFLPDAEXLRTTANRKQGVIEKRRGKGP  
EGLSKRPE

>comp15610\_c0\_seq5; 1043 451 3970 LEN=4044; translated  
MTPSSQSTAGNDPLDKTATIMDKLSRLERAFFDEDEDEIGSNSDRDETCKNEGGNEHKKKL  
FKTKPVKKNRIHKNNQKLSMVVEQCGSNTDETESENSDFEELIHSKPDPQRTTLNIS  
QRNRSQESQAKEAAEKT TTTTEGTIRALT T TGSVDEKEKSN DLASLPSSTRTKEAAKTTTIF  
VGNIRVPEVGSVYEKEESNDNLLSLSSLAGSENRRRVLGSKKCQPGSEPQAEDHDGSN

DFDFDGGCDIDDIPRNDYSEPCMYAPGNENGESASPSKPTTCRPQQALARRKAILLE  
REIDRLFLRTDNTITMKIFCKTLGQRMDEPLDKATKKKVKARVLSLLKGEIMALEHDET  
TSKDHHDSTTAENTAEGKANEVDSNVDAANDDDRKSNAGQGVNDTLTIGESSMTDTHAAV  
EREAIVGRFCDERLNAIENNETLQKENEQDKATRNLNLPMDAQLVAEAKGEVIVVNEES  
FSSDTLQKAERGKGASEWKQVAACLDVPHVVATEVQSVVETRGEVMTETSSNGKRSEL  
LPEEPKETPGHTSKQHAARNHENAGVQIPNDNATIPTAPSPKKAKPASKKKKPSAATTKQ  
RRSKSKTKPNDNSNEISTNNDMPANGGTTGANAVKQIRPRKRTRKTQACALCKTCPCQRT  
NTSTNDHCNLATLEIKDFSRSDGAI EKTLARRLQKLEQSTERLEEQTEFVRRRLKKHRE  
AWKRTKPRRGADANNERGKGKVMGIGTDDSYFLPDAEVFEQQQTESKGLSRNVVEKAQT  
RVFPSVPSKRTQSLEKSSISSYTRLLYCNIKNEXKNLTPRVDXFLLFVHFVDASYSQALPF  
FFSFQAYQPTLFEVMGISRDKEKTKQNNVDVNIIDKENNSKENIEISTNETSFLCLEENN  
SNEEVPTTEYVPERDCSNRIHRLWDNGASNDENEGMGATPGSIFDTILVMTQDQRCETNN  
KKRMEDNSRSIPLWDDLFESSHNRDLETVANDDAGLDDLGLFRDEETYAAKDILRNVS  
SAEGESRANPSLLSQGAQAVAEVLSTYSSQEKKRIEMLELSCPWNKENVYFALMQKSSE  
DILDALKNVRESRMRMQQRKILDAWESKNAALQLFETALKRSAARLKQDDKSSTVASH  
DESRTVANLSQSDCEAPMDNNSCPALSKGGDY

>comp15611\_c0\_seq1; 1098 238 4477 LEN=4866; translated  
MRILPSMFRAIAILVSVFVIPTRVVPASGVVPEVSEIVEEEDATEEDEAFQDFVHATGA  
GGPDETGAVAKIEHQGSKTKTND AEDSIVRKHYLSRFPLFRFFQNEPPKKNQYTD FRHKL  
PFFVSMFGSHENDSKPAQDPGRPTNERVIDDKDGFHGDREKIEQVMQRFYEGVEEYPRFA  
RSIVSSLIATRARRQVHNRYDYRTTQNLNLLLRPTIPHNYEKDEHANGDRANKDDEDEDD  
NDELQPGTVLEVSSRRSPTMQNGNSDVSYELVKKIPHELGEAPPKHYSDFAYTSVI IK  
ESFSSTTSPFVPSVQPLVTSNSAKDAAAEVNNNGNEDHENS SNKKLYFDRSSPNVAFFP  
SDWKKWMPFSDSDWKTNGSTKDDFRTVESTAFAGGSNGEVWRGRRVCQKKHESESDAD  
NVNEYAKYRDNQAMFGKSNQNNIKNKKQSWKEENHEGSCFD FDDTKSCDGD DPDGEPIA  
GGDDKKCDDQTPVLVLRKLI ERGYLLEAGLREIYFGK LISRVLEESKRDSFTVYVDHFF  
REVPQRRRTYNNKR VFGGLPTKNQNNDEYDDDDSNNKDYQAANDLELWIVFEDAGPSLRS  
YIYTPLASDGGFVMHQHSLWMLRTFTNEKRATSKERTRPRDRDRNNWEGDDGDS SLEI  
RNNSTEPTRSPTKGGEQLNQQKIGQQFMQKILREILEAAAE LHRRGIVHRDIKPSNMCK  
SDKPLSDLFKASSSDSLLNIDCRLGDFSSGWDRYTSEKLF TKGPTPGEQTDEYAPPESY  
VGPYWKPFDKDKPHSYDSWSIGVLALELLLGTPQVFSVDQRTNALLTNQMKRAGASDDEL  
EYALFLAALS NF C I FVPSNVASRVEESWPLGRGDPLHKE LANVHERISAEILLCTFMIYD  
LKAAQPSNPFVLFYNRCILKTAMVTECTLQDFHRALRARDPLGIGFDSSTDLLLHLIWK  
LLAYEPNERITAEALNHPYFISPDGTLESLNRI PGFHNALESQMLDPRIDFDAEDEVKD  
FECPRCGRVFDWRSCHQHANLRKHAKFCSYNRSALPSCINTHSMLPEHATSGWCDLQGR  
RPTIEDFHSIHLHQDHQFYGIFDGHTGNLASKFATSELYRELLNHLPSVRELNRQSDSDS  
TGEWKERIKTNVTNAFEVVHERFLDRINTVTSHSIPKMDQSGTTATAMLVTD SVVIVAVL  
GDSRGMASAKDRDGEVSGSSKRSRKIHWKDFPSVSAIPFSIDHVASDPRERELVIQRG  
GFVSNVGGMPRVNGTLAITRSIGDANLAPVLSREPSVVAFDXVGDEDMCGDLGQSEERSN  
AVAI PCFVILASDGLWDVMSNQEA VDFVVDTFLQRSKAPNASDEIALFSQAKEEDSYEGN  
VGVFQESAERLAVEAYVRGSTDNIGVCVVAID

>comp15611\_c0\_seq2; 196 182 406 LEN=795; translated  
MSNQEAVDFVVDTFLQRSKAPNASDEIALFSQAKEEDSYEGNVGVFQESAERLAVEAYVR  
GSTDNIGVCVVAID

>comp15611\_c0\_seq3; 1098 219 4458 LEN=4847; translated  
MRILPSMFRAIAILVSVFVIPTRVVPASGVVPEVSEIVEEEDATEEDEAFQDFVHATGA  
GGPDETGAVAKIEHQGSKTKTND AEDSIVRKHYLSRFPLFRFFQNEPPKKNQYTD FRHKL  
PFFVSMFGSHENDSKPAQDPGRPTNERVIDDKDGFHGDREKIEQVMQRFYEGVEEYPRFA  
RSIVSSLIATRARRQVHNRYDYRTTQNLNLLLRPTIPHNYEKDEHANGDRANKDDEDEDD  
NDELQPGTVLEVSSRRSPTMQNGNSDVSYELVKKIPHELGEAPPKHYSDFAYTSVI IK  
ESFSSTTSPFVPSVQPLVTSNSAKDAAAEVNNNGNEDHENS SNKKLYFDRSSPNVAFFP  
SDWKKWMPFSDSDWKTNGSTKDDFRTVESTAFAGGSNGEVWRGRRVCQKKHESESDAD  
NVNEYAKYRDNQAMFGKSNQNNIKNKKQSWKEENHEGSCFD FDDTKSCDGD DPDGEPIA  
GGDDKKCDDQTPVLVLRKLI ERGYLLEAGLREIYFGK LISRVLEESKRDSFTVYVDHFF  
REVPQRRRTYNNKR VFGGLPTKNQNNDEYDDDDSNNKDYQAANDLELWIVFEDAGPSLRS  
YIYTPLASDGGFVMHQHSLWMLRTFTNEKRATSKERTRPRDRDRNNWEGDDGDS SLEI  
RNNSTEPTRSPTKGGEQLNQQKIGQQFMQKILREILEAAAE LHRRGIVHRDIKPSNMCK  
SDKPLSDLFKASSSDSLLNIDCRLGDFSSGWDRYTSEKLF TKGPTPGEQTDEYAPPESY  
VGPYWKPFDKDKPHSYDSWSIGVLALELLLGTPQVFSVDQRTNALLTNQMKRAGASDDEL  
EYALFLAALS NF C I FVPSNVASRVEESWPLGRGDPLHKE LANVHERISAEILLCTFMIYD

LKAAQPSNPFVLFYNRCILKTAMVTESCTLQDFHRALRARDPLGIGFDSSTDLLLHLIWK  
LLAYEPNERITAEALNHPYFISP DGTLESLNRI PGFHNALESQMLDPRIDFDAEDEVKD  
FECPRCGRVFDHWR SCHQHANLRKHAKFCSYNRSALPSCINTHSMLPEHATSGWCDLQGR  
RPTIEDFHSIHLHQDHQFYGIFDGHTGNLASKFATSELYRELLNHLPSVRELNRQSDSDS  
TGEWKERIKTNVTNAFEV VHERFLDRINTVTSHSIPKMDQSGTTATAMLVTDSVVIVAVL  
GDSRGVMASAKDRDGEVSGSSKRSRKIHWKDFPSVSAIPFSIDHVASDPRERELVIQRG  
GFVSNVGGMPRVNGTLAITRSIGDANLAPVLSREPSVVAFDXVGDEDMCGDLGQSEERSN  
AVAIPCFVILASDGLWDVMSNQEAVDFVVDTFQLQSKAPNASDEIALFSQAKEEDSYEGN  
VGVFQESAERLAVEAYVRGSTDNIGVCVVAID

>comp15611\_c0\_seq4; 1186 238 4349 LEN=4738; translated  
MRILPSMFRAIAILSVFVIPTRVVPASGVVPEVSEIVEEEDATEEDEAFQDFVHATGA  
GGPDETGAVAKIEHQGSKTKTND AEDSIVRKHYLSRFPLFRFFQNEPPKKNQYTD FRHKL  
PFFVSMFGSHENDSKPAQDPGRPTNERVIDDKDGFHGDREKIEQVMQRFYEGVEEYPRFA  
RSIVSSLIATR SRRQVHNRYDYRTTQNL LLLLRPTIPHNYEKDEHANGDRANKDDEDED  
NDELQPGTVLEVSSRRSPTHMONGNSDVS YELVKKIPHELGEAPPKHYSDFAYTSVI IK  
ESFSSTTSPFVPSVQPLVTSNSAKDAAAEVNNNGNEDHENS SNKKLYFDRSSPNVAFFP  
SDWKKWMPFSDSDWKTNGSTKDDFRTVESTAFAGGSNGEVWRGRRVCQKKHESESDAD  
NVNEYAKYRDNQAMFGKSNSQNNIKNKKQSWKEENHEGSCFDFDDTKSCDGD DPDGEPIA  
GGDDKKCDDQTPLVLKRLKIERGYLLEAGLREIYFGKLISRVLEESKRDSFTVYVDHFF  
REVPQRRRTYNNKRVFGGLPTKNQNNDEYDDDDSNKDYQAANDLELWIVFEDAGPSLRS  
YIYTPLASDGGFVMHQH SKLWTMLRFTTNEKRATSKERTRPRDRDRNNWEGDDGDS SLEI  
RNNSTEPTRSPTKGGEQLNQKIGQQFMQKILREILEAAAELHRRGIVHRDIKPSNMCK  
SDKPLSDLFKASSD SLLLNIDCRLGDFSSGWD RYTSEKLF TKGPTPGEQTDEYAPPESY  
VGPYWKPFDKDKPHSYDSWSIGVLALELL LGTPQVFSVDQRTNALLTNQMKRAGASDDEL  
EYALFLAALS NF C IFVPSNVASRVEESWPLGRGDPLHKTAMVTESCTLQDFHRALRARDP  
LGIGFDSSTDLLLHLIWKLLAYEPNERITAEALNHPYFISP DGTLESLNRI PGFHNALE  
SQMLDPRIDFDAEDEVKDFECPRCGRVFDHWR SCHQHANLRKHAKFCSYNRSALPSCINT  
HSMLPEHATSGWCDLQGR RPTIEDFHSIHLHQDHQFYGIFDGHTGNLASKFATSELYREL  
LNHLPSVRELNRQSDSDSTGEWKERIKTNVTNAFEV VHERFLDRINTVTSHSIPKMDQSG  
TTATAMLVTDSVVIVAVL GDSRGVMASAKDRDGEVSGSSKRSRKIHWKDFPSVSAIPFS  
IDHVASDPRERELVIQRGGFVSNVGGMPRVNGTLAITRSIGDANLAPVLSREPSVVAFDX  
VGDEDMCGDLGQSEERSNAVAIPCFVILASDGLWDVMSNQEAVDFVVDTFQLQSKAPNAS  
DEIALFSQAKEEDSYEGNVG VFQESAERLAVEAYVRGSTDNIGVCVVAID

>comp15611\_c0\_seq5; 1186 219 4330 LEN=4719; translated  
MRILPSMFRAIAILSVFVIPTRVVPASGVVPEVSEIVEEEDATEEDEAFQDFVHATGA  
GGPDETGAVAKIEHQGSKTKTND AEDSIVRKHYLSRFPLFRFFQNEPPKKNQYTD FRHKL  
PFFVSMFGSHENDSKPAQDPGRPTNERVIDDKDGFHGDREKIEQVMQRFYEGVEEYPRFA  
RSIVSSLIATR SRRQVHNRYDYRTTQNL LLLLRPTIPHNYEKDEHANGDRANKDDEDED  
NDELQPGTVLEVSSRRSPTHMONGNSDVS YELVKKIPHELGEAPPKHYSDFAYTSVI IK  
ESFSSTTSPFVPSVQPLVTSNSAKDAAAEVNNNGNEDHENS SNKKLYFDRSSPNVAFFP  
SDWKKWMPFSDSDWKTNGSTKDDFRTVESTAFAGGSNGEVWRGRRVCQKKHESESDAD  
NVNEYAKYRDNQAMFGKSNSQNNIKNKKQSWKEENHEGSCFDFDDTKSCDGD DPDGEPIA  
GGDDKKCDDQTPLVLKRLKIERGYLLEAGLREIYFGKLISRVLEESKRDSFTVYVDHFF  
REVPQRRRTYNNKRVFGGLPTKNQNNDEYDDDDSNKDYQAANDLELWIVFEDAGPSLRS  
YIYTPLASDGGFVMHQH SKLWTMLRFTTNEKRATSKERTRPRDRDRNNWEGDDGDS SLEI  
RNNSTEPTRSPTKGGEQLNQKIGQQFMQKILREILEAAAELHRRGIVHRDIKPSNMCK  
SDKPLSDLFKASSD SLLLNIDCRLGDFSSGWD RYTSEKLF TKGPTPGEQTDEYAPPESY  
VGPYWKPFDKDKPHSYDSWSIGVLALELL LGTPQVFSVDQRTNALLTNQMKRAGASDDEL  
EYALFLAALS NF C IFVPSNVASRVEESWPLGRGDPLHKTAMVTESCTLQDFHRALRARDP  
LGIGFDSSTDLLLHLIWKLLAYEPNERITAEALNHPYFISP DGTLESLNRI PGFHNALE  
SQMLDPRIDFDAEDEVKDFECPRCGRVFDHWR SCHQHANLRKHAKFCSYNRSALPSCINT  
HSMLPEHATSGWCDLQGR RPTIEDFHSIHLHQDHQFYGIFDGHTGNLASKFATSELYREL  
LNHLPSVRELNRQSDSDSTGEWKERIKTNVTNAFEV VHERFLDRINTVTSHSIPKMDQSG  
TTATAMLVTDSVVIVAVL GDSRGVMASAKDRDGEVSGSSKRSRKIHWKDFPSVSAIPFS  
IDHVASDPRERELVIQRGGFVSNVGGMPRVNGTLAITRSIGDANLAPVLSREPSVVAFDX  
VGDEDMCGDLGQSEERSNAVAIPCFVILASDGLWDVMSNQEAVDFVVDTFQLQSKAPNAS  
DEIALFSQAKEEDSYEGNVG VFQESAERLAVEAYVRGSTDNIGVCVVAID

>comp15611\_c0\_seq6; 209 398 1104 LEN=1493; translated  
MDQSGTTATAMLVTDSVVIVAVL GDSRGVMASAKDRDGEVSGSSKRSRKIHWKDFPSVS  
AIPFSIDHVASDPRERELVIQRGGFVSNVGGMPRVNGTLAITRSIGDANLAPVLSREPSV

VAFDXVGDEDMCGDLGQSEERSNAVAI PCFVILASDGLWDVMSNQEAVDFVVDTFLQRSK  
APNASDEIALFSQAKEEDSYEGNVGVFQESAERLAVEAYVRGSTDNIGVCVVAID  
>comp15612\_c0\_seq1; 371 1 1974 LEN=2528; translated  
HFGWNSCQRRGTQREVITSVWCRSQIRHIVSEGGCAGLCETMPTASLMNKHSSFATLNIK  
RNVSNQGARRRQKKDWDADAHRNPFDKDNKHDTSIATENRQFQFRRSGGSYGKKDIMKRLI  
GTVVLLISWMSFLFFFEYHVLSGNTDINGTNGSIPGGAVTNDGVNTTFGVSSGYDSIFCREN  
ANLREKLDHNDVSEQYSINNSKPVFLWGI PSTSSSYEIGRRKLLRETYLDFDKQLRSYVE  
KGVKVDALAKEAPDDSNRICSLHDFICNERVQAECQMVYIFFVAGHKNDTQSVPPILLN  
ESITDFRDMLLPYDGDKASALGSQNLNLREP GTVYLNIRENQFDGKMTTWFKFASLVAK  
EYNSRASIARPIEYVFKVSDLLLLTPRFFFEWFDSIHKEQQRQKQRTSNFESPSALKTI  
HTVYGGIEFPDSNCVVNYTFDHPCLPLSGPSYMSGELNFCVLDLATYIASDDCPRDKWT  
IPHEDVLSNYYISYQNN TAYHRKIGITSRGGTEDIQQLLIDVVSVNTSRILLLPNMKADW  
YPVNVKKNPEVLTSGELLWGHSIKRSNHSQYLYWKKDPKFKMFWKFFFKKYTSPDRGRNT  
TQTVTNSTGKAERLSSLNKMKNKGKQH FELFKRALERLHLRNPQTMKKNASEPKT  
>comp15612\_c1\_seq1; 355 197 751 LEN=1233; translated  
MSEGPSGKKESNSPADVAASDEGGPEEQSQQMKPLFEALKENENATLSFAEGFRDKVRI  
LFEHFDIDGDRLRYNELAALQLATNSSDDEQLSKEMYVMACQSLNCHPDQGLSLEALKF  
TYAAEGSDIDADYEKVF DKEGRPRKV VVLIPTKKDEETKTNDNTNDGDKVYEVGSDGAVD  
ISSS  
>comp15613\_c0\_seq1; 253 30 566 LEN=987; translated  
MENDPGSASASYGMPHPTARALAEVGVVTGLFLLAIGCMACALHRRPRNGGGDRCCRRI  
LRRGSSASGRFLFDGDDNDDEGESYIDDEETGRAPSPHVFDTLHEL VFFLGRAGDGGGGR  
PPPTGIVAGSGEAEGRVPAGLDRIFPDLL EAPGGAGGGDPQAPGGAEGGNLREPLL  
>comp15613\_c0\_seq2; 1461 240 4596 LEN=5735; translated  
MVGFGSSLRMGRRTGWESAYLDYETL KLLLSQIEAVYEERDLTGASADGFFVSMGGPGGG  
FAESERNANNNNGNSTNNE SGNNQNTDYRDEL FLEWSDIAFASEVDVGNDEDEDSSDGY  
EFEYGNRDVDPDRAALDESIEYNYIGVTVWEQQGLGQHMHVDPYQSKNMGSGSEPASQH  
RQNAPSPF SVSAYATTKDSGMYSSSSDEDKRFYPKPWSSTQRKKKDRSSKKPRALFTNII  
GSNKKKKKRQNFHQKSTATALPDAFIVEK GKSGGGYGDGANHSGDSSGGNNYYYYNFGG  
NDDSDRRPSWTS GGNRDDS MGKGDEQSPLMRCTPSTPTPKAGKGNFVSFPTPQKGD SGNF  
RSLDNYGTIVNPRSMTPSKSTAAPSSAAKAKAGVKDDGLSANYNKKNERKLR YDRERRRA  
RKQRRRRLLMRQRKEREKKVPPHIRIAHEKARAITERFLGLLRAEVEKVTLFAQARLGEL  
ADTAGSLRFLSSDETMDTSAINPANYEYPLSDGGIHP SASSSSDEGAGGYHNP NYKGGFP  
WSDSSDDGGSKASGSRVNI AKTFSSNDGYSVRTDARGNLTSAPPTPPTPPSPLAAATR  
KRGKRSPGRRAF TETREKFEATKRKIAQFQEI RRRERSIFQRNDYIVGEDLLLI SAVDEAD  
AFSAVGV ELLHILKYICVNLIAVRKICKKHDRLLMNRMLGGYYHRKRTRTSQEDTTLGGL  
IAHVAGDIYEAHPDLIGLVNNGKLIGVYDLKIQQLANSRTVKVISSCLAL TLSEYEVSRW  
RADALAKLNPALKKGRKTSPASQDQGNVSWPFNI RTDNCLKKSSQQHEETLQLLQDCDIY  
VGSDDHAGAGPPSTTSALSRLRYAVLSIAALREASRIKSNKFSYLSRSTLTFTGHAI  
IGGLDGC SRDTLDVLLSYNPNAALLDTS AIYEGLKCGQWRESSIASVMTSALAVALTL  
PYSRHTSGPIVMSPRAVHEKELIVSNALGILPPKSEGF IQKSPLEGAGLPPSIFLRISR  
TDVPASVLRANRLALLLYNANYFISHPTSVTLVLDSDENIAYSALVIGAP TLSAITSMM  
HCRILSGYSTMRIVNRKNVNLFRYLLIFSCFSAIAGNVVQVYGIQQQSI AFTILGRFLMG  
FSAAEIVNRQFVVCFLPA CLIVAESARLVQFQVTGQILGLLIGSSAGSLIPTTAE LNLSF  
MSFVYQNNDSRSDQSNQE QSSPGRKLLRDEKLNLTLSSESSIKQTS LPPVESKDPGTGILT  
LKATDTTKNRKLTPIPSASPTTASPMTKSSGDKFSSPTLTYGGSTS IPTNFGKNAFETLD  
PSYFGLSEKSV EFP R SSSSSSFSEKPMYASSAFDSL SYKPSMFP SGLNSEANESQVRRLTA  
ANWIMIALWVIYFLYVLFGWGVLDNAPDKGKEGTGEADNGNLADDGNHQDCNSSESSES  
QETVMEI IHRN  
>comp15613\_c0\_seq4; 1421 240 4696 LEN=5793; translated  
MVGFGSSLRMGRRTGWESAYLDYETL KLLLSQIEAVYEERDLTGASADGFFVSMGGPGGG  
FAESERNANNNNGNSTNNE SGNNQNTDYRDEL FLEWSDIAFASEVDVGNDEDEDSSDGY  
EFEYGNRDVDPDRAALDESIEYNYIGVTVWEQQGLGQHMHVDPYQSKNMGSGSEPASQH  
RQNAPSPF SVSAYATTKDSGMYSSSSDEDKRFYPKPWSSTQRKKKDRSSKKPRALFTNII  
GSNKKKKKRQNFHQKSTATALPDAFIVEK GKSGGGYGDGANHSGDSSGGNNYYYYNFGG  
NDDSDRRPSWTS GGNRDDS MGKGDEQSPLMRCTPSTPTPKAGKGNFVSFPTPQKGD SGNF  
RSLDNYGTIVNPRSMTPSKSTAAPSSAAKAKAGVKDDGLSANYNKKNERKLR YDRERRRA  
RKQRRRRLLMRQRKEREKKVPPHIRIAHEKARAITERFLGLLRAEVEKVTLFAQARLGEL  
ADTAGSLRFLSSDETMDTSAINPANYEYPLSDGGIHP SASSSSDEGAGGYHNP NYKGGFP  
WSDSSDDGGSKASGSRVNI AKTFSSNDGYSVRTDARGNLTSAPPTPPTPPSPLAAATR

KRGKRSPGRRRAFTETREKFEATKRKIAQFQEIRRERSIFQRNDYIVGEDLLLLISAVDEAD  
AFSAVGVELLHILKYICVNLIAVRKICKKHDRLLMNRMLGGYYHRKRTRTRSQEDTTLGGL  
IAHVAGDIYEAHPDLIGLVNNGKLIQQLANSRTVKVISSCLALTLSEYEVSRW  
RADALAKLNPALKKGRKTSPASQDQGNVSWPFNIRTDNCLKKSSQQHEETLQLLQDCDIY  
VGSDEHGAGPPSTTSALSRLRYAVLSIVSYIVVTMVPNGTVSSSCRFSELTQDIAID  
VKKAALREASRIKSNKFSYLSRSTLTFTGHAIIGEGLDGCSRDTLDVLLSYNPNAALLL  
DTSAIYEGLKCGQWRESSIASVMTSALAVALTLPSRHTSGPIVMSPRAVHEKELIVSNA  
LGILPPKSEGF IQKSPLEGAGLPPSIFLRISRFTDVPASVLRANRLALLLYNANYFISHP  
TSVTLVLDSDENIAYSALVIGAPTLSAIITSMHCRILSGYSTMRIVNRKNVNLFRYLLI  
FSCFSAIAGNVVQYGIQQQSI AFTILGRFLMGFSAAEIVNRQFVVCFLPACLIVAESAR  
LVQFQVTGQILGLLIGSSAGSLIPTTAELNLSFMSFVYQNNDSRSDQSNQEQSSPGRKLL  
RDEKNLNLTLSESSIKQTSLPVSSKDPTGILTLKATDTTKNRKLTPIPSASPTTASPMT  
KSSGDKFSPTLYGGSTSIPTNFGKNAFETLDPYFGLSEKSVEFPRSSSSSFSEKPMY  
ASSAFDSL SYKPSMFPSGLNSEANESQVRRRLTAANWIMIALWVIYFLYVLFGWGVLNAP  
DKGKEGTGEADNGNLADDGNHQDCNSSESSES SVQETVMEI IHRN

>comp15613\_c0\_seq5; 253 30 566 LEN=1029; translated  
MENDPGSASASYGGMPHTARALAEVGVVTGLFLLAIGCMACALHRRPRNGGGDRCCRRI  
LRRGSSASGRFLFDGDDNDGDESIDDEETGRAPSPHVFDLHELVEFLGRAGDGGGGR  
PPPTGIVAGSGEAEGRVPAGLDRIFPDLLLEAPGGAGGDPQAPGGAEGGNLREPLL

>comp15613\_c0\_seq6; 1373 240 4669 LEN=5808; translated  
MVGFGSSLRMGRRTGWESAYLDYETLKLKLLSQIEAVYEERDLTGASADGFFVSMGGPGGG  
FAESERNANNNNGNSTNNEGNNQNTDYRDELFLWSDIAFASEVDVGNDDEDSSDGY  
EFEYGNRDVDPDRAALDESIEYNYIGVTVWEQQGLGQHHMHVDPYQSKNMGSGSEPASQH  
RQNAPSPFVSAYATTKDSGMYSSSSDEDKRFYPKPWSSTQRKKKDRSSKKPRALFTNII  
GSNKKKKRQNFHQKSTATALPDAFIVEKKGSGGGYGDGANHSGDDSGGNNYYYYNFGG  
NDDSDRRPSWTSGGNRDSDMGKDEQSPLMRCTPSTPTPKAGKGNFVSFPTPQKGDGSGNF  
RSLDNYGTIVNPRSMTPSKSTAAPSSAAKAKAGVKDDGLSANYNKKNERKLRYDRERRRA  
RKQRRRRLMRQRKEREKKVPPHIRIAHEKARAITERFLGLLRAEVEKVTLFAQARLGEL  
ADTAGSLRFLSSDETMDTSAINPANYEYPLSDGGIHPASASSSDEGAGGYHNPYKGGFP  
WSDSSDDGGSKASGSRVNI AKTFSSNDGYSVRTDARGNLTSAPPTPPTPPSPLAAATR  
KRGKRSPGRRRAFTETREKFEATKRKIAQFQEIRRERSIFQRNDYIVGEDLLLLISAVDEAD  
AFSAVGVELLHILKYICVNLIAVRKICKKHDRLLMNRMLGGYYHRKRTRTRSQEDTTLGGL  
IAHVAGDIYEAHPDLIGLVNNGKLIQQLANSRTVKVISSCLALTLSEYEVSRW  
RADALAKLNPALKKGRKTSPASQDQGNVSWPFNIRTDNCLKKSSQQHEETLQLLQDCDIY  
VGSDEHGAGPPSTTSALSRLRYAVLSIAALREASRIKSNKFSYLSRSTLTFTGHAI  
IGEGLDGCSRDTLDVLLSYNPNAALLLDTSAIYEGLKCGQWRESSIASVMTSALAVALTL  
PYSRHTSGPIVMSPRAVHEKELIVSNALGILPPKSEGF IQKSPLEGAGLPPSIFLRISR  
TDVPASVLRANRLALLLYNVKYGVQTD SFSYEKKCLTISLSHFXYNYFISHPTS VTLVLD  
SDENIAYSALVIGAPTLSAIITSMHCRILSGYSTMRIVNRKNVNLFRYLLIFSCFSAIA  
GNVVQVYGIQQQSI AFTILGRFLMGFSAAEIVNRQFVVCFLPACLIVAESARLVQFQVTG  
QILGLLIGSSAGSLIPTTAELNLSFMSFVYQNNDSRSDQSNQEQSSPGRKLLRDEKNLNL  
TLSESSIKQTSLPVSSKDPTGILTLKATDTTKNRKLTPIPSASPTTASPMTKSSGDKFS  
SPTLYYGGSTSIPTNFGKNAFETLDPYFGLSEKSVEFPRSSSSSFSEKPMYASSAFDSL  
SYKPSMFPSGLNSEANESQVRRRLTAANWIMIALWVIYFLYVLFGWGVLNAPDKGKEGTG  
EADNGNLADDGNHQDCNSSESSES SVQETVMEI IHRN

>comp15613\_c0\_seq7; 1373 240 4669 LEN=5766; translated  
MVGFGSSLRMGRRTGWESAYLDYETLKLKLLSQIEAVYEERDLTGASADGFFVSMGGPGGG  
FAESERNANNNNGNSTNNEGNNQNTDYRDELFLWSDIAFASEVDVGNDDEDSSDGY  
EFEYGNRDVDPDRAALDESIEYNYIGVTVWEQQGLGQHHMHVDPYQSKNMGSGSEPASQH  
RQNAPSPFVSAYATTKDSGMYSSSSDEDKRFYPKPWSSTQRKKKDRSSKKPRALFTNII  
GSNKKKKRQNFHQKSTATALPDAFIVEKKGSGGGYGDGANHSGDDSGGNNYYYYNFGG  
NDDSDRRPSWTSGGNRDSDMGKDEQSPLMRCTPSTPTPKAGKGNFVSFPTPQKGDGSGNF  
RSLDNYGTIVNPRSMTPSKSTAAPSSAAKAKAGVKDDGLSANYNKKNERKLRYDRERRRA  
RKQRRRRLMRQRKEREKKVPPHIRIAHEKARAITERFLGLLRAEVEKVTLFAQARLGEL  
ADTAGSLRFLSSDETMDTSAINPANYEYPLSDGGIHPASASSSDEGAGGYHNPYKGGFP  
WSDSSDDGGSKASGSRVNI AKTFSSNDGYSVRTDARGNLTSAPPTPPTPPSPLAAATR  
KRGKRSPGRRRAFTETREKFEATKRKIAQFQEIRRERSIFQRNDYIVGEDLLLLISAVDEAD  
AFSAVGVELLHILKYICVNLIAVRKICKKHDRLLMNRMLGGYYHRKRTRTRSQEDTTLGGL  
IAHVAGDIYEAHPDLIGLVNNGKLIQQLANSRTVKVISSCLALTLSEYEVSRW  
RADALAKLNPALKKGRKTSPASQDQGNVSWPFNIRTDNCLKKSSQQHEETLQLLQDCDIY

VGSDDEHGAGPPSTTSALSLSRLRYAVLSIAALREASRIKSNKFSSYLSRSTLTFTGHAI  
IGEGLDGCSRDTLDVLLSYNPNAALLDTSIAIYEGLKCGQWRESSIASVMTSALAVALTL  
PYSRHTSGPIVMSPRAVHEKELIVSNALGILPPKSEGF IQKSPLEGAGLPPSIFLRISR  
FDVPAVSLRANRLALLLNVKYGVTDSFSYEKKCLTISLHSFXANYFISHPTSVTLVLD  
SDENIAYSALVIGAPTLSAIITSMHCRILSGYSTMRIVNRKNVNLFRYLLIFSCFSAIA  
GNVVQVYGIQQQSIAFTILGRFLMGFSAAEIVNRQFVVCFLPACLIVAESARLVQFQVTG  
QILGLLIGSSAGSLIPTTAE LNLSFMSFVYQNNDSRSDQSNQE QSSPGRKLLRDEKNLNL  
TLSESSIKQTSPLVSSKDPGTGILTLKATDTTKNRKLTPIPSASPTTASPMTKSSGDKFS  
SPTLTYGGSTSIPTNFGKNAFETLDPSYFGLSEKSVFPRSSSSSFSEKPMYASSAFDSL  
SYKPSMFP SGLNSEANESQVRRRLTAANWIMIALWVIYFLYVLFGWGVLDNAPDKGKEGTG  
EADNGNLADDGNHQDCNSSESSES SVQETVMEI IHRN

>comp15613\_c0\_seq8; 1333 240 4769 LEN=5866; translated  
MVGFGSSLRMGRRTGWESAYLDYETLKL LLSQIEAVYEERDLTGASADGFFVSMGGP  
GGGFAESERNANNNNGNSTNNE SGNNTDYRDEL FLEWSDIAFASEVDVGNDEDEDSS  
DGYEFEYGNRDVDPDRAALDESIEYNYIGVTVWEQQGLGQHMHVDPYQSKNMGSGSE  
PASQHRQNAPSPFVSAYATTKDSGMYSSSSDEDKRFYPKPWSSTQRKKKDRSSKKP  
RALFTNII GSNKKKKRQNFHQKSTATALPDAFIVEK GKSGGGYYGDGANHSGDSSG  
NYYNYNFGGNDSDRRPSWTS GGNRDDSMGKGDEQSPLMRCTPSTPTPKAGKGNFV  
SFPTPQKGD SGNFRSLDNYGTIVNPRSMTPSKSTAAPSSAAKAKAGVKDDGLSANY  
NKKNERKLR YDRERRARKQRRRLLMRQRKEREKKVPPHIRIAHEKARAITERFLG  
LLRAEVEKVT LFAQARLGELADTAGSLRFLSSDETMDTSAINPANYEYPLSDGGI  
HPSASSSSDEGAGGYHNP NYKGGFPWSDSSDDGGSKASGSRVNIAKTFSSNDGYS  
VRTDARGNLTSAPPTPPTPPSPLAAATRKRGRSPGRRAFETETREKFEATKRKIA  
QFQEIRRERSIFQRNDYIVGEDLLLI SAVDEADAFSAVGVELLHILKYICVNLIA  
VRKICKKHDRLLMNRMLGGYYHRKRTTRS QEDTTLGGLIAHVAGDIYEAHPDLI  
GLVNNKGLIGVYDLKIQQLANSR TVKVISSCLALTLSEYEVSRWRADALAKLNP  
ALKKGRKTS PASQDQGNVSWPFNIRTDNCLKKSSQQHEETLQLLQDCDIYVGSD  
DEHGAGPPSTTSALSLSRLRYAVLSIVSYIVVTMVPNGTVSSSCRFSELTQDIAID  
VKKAALREASRIKSNKFSSYLSRSTLTFTGHAIIGEGLDGCSRDTLDVLLSYNPNA  
ALLDTSIAIYEGLKCGQWRESSIASVMTSALAVALTL PYSRHTSGPIVMSPRAVHE  
KELIVSNALGILPPKSEGF IQKSPLEGAGLPPSIFLRISRFTDVPASVLRANRLA  
LLLNVKYGVTDSFSYEKKCLTISLHSFXANYFISHPTSVTLVLDSDENIAYSALV  
IGAPTLSAIITSMHCRILSGYSTMRIVNRKNVNLFRYLLIFSCFSAIAGNVVQVY  
GIQQQSIAFTILGRFLMGFSAAEIVNRQFVVCFLPACLIVAESARLVQFQVTGQIL  
GLLIGSSAGSLIPTTAE LNLSFMSFVYQNNDSRSDQSNQE QSSPGRKLLRDEKNL  
NLTLSESSIKQTSPLVSSKDPGTGILTLKATDTTKNRKLTPIPSASPTTASPMTK  
SSGDKFSYFGLSEKSVFPRSSSSSFSEKPMYASSAFDSL SYKPSMFP SGLNSEAN  
ESQVRRRLTAANWIMIALWVIYFLYVLFGWGVLDNAPDKGKEGTGEADNGNLADD  
GNHQDCNSSESSES SVQETVMEI IHRN

>comp15613\_c0\_seq9; 1333 240 4769 LEN=5908; translated  
MVGFGSSLRMGRRTGWESAYLDYETLKL LLSQIEAVYEERDLTGASADGFFVSMGGP  
GGGFAESERNANNNNGNSTNNE SGNNTDYRDEL FLEWSDIAFASEVDVGNDEDEDSS  
DGYEFEYGNRDVDPDRAALDESIEYNYIGVTVWEQQGLGQHMHVDPYQSKNMGSGSE  
PASQHRQNAPSPFVSAYATTKDSGMYSSSSDEDKRFYPKPWSSTQRKKKDRSSKKP  
RALFTNII GSNKKKKRQNFHQKSTATALPDAFIVEK GKSGGGYYGDGANHSGDSSG  
NYYNYNFGGNDSDRRPSWTS GGNRDDSMGKGDEQSPLMRCTPSTPTPKAGKGNFV  
SFPTPQKGD SGNFRSLDNYGTIVNPRSMTPSKSTAAPSSAAKAKAGVKDDGLSANY  
NKKNERKLR YDRERRARKQRRRLLMRQRKEREKKVPPHIRIAHEKARAITERFLG  
LLRAEVEKVT LFAQARLGELADTAGSLRFLSSDETMDTSAINPANYEYPLSDGGI  
HPSASSSSDEGAGGYHNP NYKGGFPWSDSSDDGGSKASGSRVNIAKTFSSNDGYS  
VRTDARGNLTSAPPTPPTPPSPLAAATRKRGRSPGRRAFETETREKFEATKRKIA  
QFQEIRRERSIFQRNDYIVGEDLLLI SAVDEADAFSAVGVELLHILKYICVNLIA  
VRKICKKHDRLLMNRMLGGYYHRKRTTRS QEDTTLGGLIAHVAGDIYEAHPDLI  
GLVNNKGLIGVYDLKIQQLANSR TVKVISSCLALTLSEYEVSRWRADALAKLNP  
ALKKGRKTS PASQDQGNVSWPFNIRTDNCLKKSSQQHEETLQLLQDCDIYVGSD  
DEHGAGPPSTTSALSLSRLRYAVLSIVSYIVVTMVPNGTVSSSCRFSELTQDIAID  
VKKAALREASRIKSNKFSSYLSRSTLTFTGHAIIGEGLDGCSRDTLDVLLSYNPNA  
ALLDTSIAIYEGLKCGQWRESSIASVMTSALAVALTL PYSRHTSGPIVMSPRAVHE  
KELIVSNALGILPPKSEGF IQKSPLEGAGLPPSIFLRISRFTDVPASVLRANRLA  
LLLNVKYGVTDSFSYEKKCLTISLHSFXANYFISHPTSVTLVLDSDENIAYSALV  
IGAPTLSAIITSMHCRILSGYSTMRIVNRKNVNLFRYLLIFSCFSAIAGNVVQVY  
GIQQQSIAFTILGRFLMGFSAAEIVNRQFVVCFLPACLIVAESARLVQFQVTGQIL  
GLLIGSSAGSLIPTTAE LNLSFMS



FVYQNNDSRSDQSNQEQSSPGRKLLRDEKLNLTLSSESSIKQTSPLVVESSKDPTGILTLK  
ATD'TTKNRKLTPIPSASPTTASPMTKSSGDKFSSPTLTYGGSTSIPTNFGKNAFETLDPS  
YFGLSEKSEVEFPRSSSSSSSFSEKPMYASSAFDLSYKPSMFP SGLNSEANESQVRRRLTAAN  
WIMIALWVIYFLYVLFGWGVLDNAPDKGKEGTGEADNGNLADDGNHQDCNSSESSESSESVQE  
TVMEIIHRN

>comp15613\_c0\_seq10; 1461 240 4596 LEN=5693; translated  
MVGFGSSLRMGRRTGWESAYLDYETLKLKLLSQIEAVYEERDLTGASADGFFVSMGGPGGG  
FAESERNANNNNGNSTNNEGNNQNTDYRDELFLWSDIAFASEVDVGNDEDEDSSDGY  
EFEYGNRDVDPDRAALDESI EYNYIGVTVWEQQGLGQHMHVDPYQSKNMGSGSEPASQH  
RQNAPSPFVSAYATTKDSGMYSSSSDEDKRFYPKPWSSTQRKKKDRSSKKPRALFTNII  
GSNKKKKKRQNFHQKSTATALPDAFIVEKGKSGGGYYGDGANHSGDSSGGNNYYYYNFGG  
NDDSDRRPSWTSGGNRDSSMGKGDEQSPLMRCTPSTPTPKAGKGNFVSFPTPQKGDGSGNF  
RSLDNYGTIVNPRSMTPSKSTAAPSSAAKAKAGVKDDGLSANYNKKNERKLRDYDRERRA  
RKQRRRRLMRQRKEREKKVPPHIRIAHEKARAITERFLGLLRAEVEKVTLFAQARLGEL  
ADTAGSLRFLSSDETMDTSAINPANYEYPLSDGGIHP SASSSSDEGAGGYHNPNYKGGFP  
WSDSSDGGGSKASGSGRVNIAKTFSSNDGYSVRTDARGNLTSAPPTPPTPPSPLAAATR  
KRGKRSPGRRRAFTETREKFEATKRKIAQFQEIRRERSIFQRNDYIVGEDLLLI SAVDEAD  
AFSAVGVELLHILKYICVNLIAVRKICKKHDRLLMNRMLGGYYHRKRTRTSQEDTTLGGL  
IAHVAGDIYEAHPDLIGLVNNGKLIGVYDLKIQQLANSRTVKVISSCLALTLSEYEVSRW  
RADALAKLNPALKKGRKTSPASQDQGNVSWPFNIRTDNCLKKSSQQHEETLQLLQDCDIY  
VGSDDDEHGAGPPSTTSALSRLRYAVLSIAALREASRIKSNKFSSYLSRSTLTFTGHAI  
IGEGLDGCSRDTLDVLLSYNPNAALLDTSAIYEGLKCGQWRESSIASVMTSALAVALTL  
PYSRHTSGPIVMSPRAVHEKELIVSNALGILPPKSEGF IQKSPLEGAGLPPSIFLRISRF  
TDVPASVLRANRLALLLYNANYFISHPTSVTLVLDSDENIAYSALVIGAPTLSAIITSM  
HCRILSGYSTMRIVNRKNVNLFRYLLIFSCFSAIAGNVVQVYGIQQQSIAFTILGRFLMG  
FSAAEIVNRQFVVCFLPACLIVAESARLVQFQVTGQILGLLIGSSAGSLIPTTAELNLSF  
MSFVYQNNDSRSDQSNQEQSSPGRKLLRDEKLNLTLSSESSIKQTSPLVVESSKDPTGILT  
LKATD'TTKNRKLTPIPSASPTTASPMTKSSGDKFSSPTLTYGGSTSIPTNFGKNAFETLD  
PSYFGLSEKSEVEFPRSSSSSSSFSEKPMYASSAFDLSYKPSMFP SGLNSEANESQVRRRLTA  
ANWIMIALWVIYFLYVLFGWGVLDNAPDKGKEGTGEADNGNLADDGNHQDCNSSESSESSESV  
QETVMEIIHRN

>comp15613\_c0\_seq11; 1421 240 4696 LEN=5835; translated  
MVGFGSSLRMGRRTGWESAYLDYETLKLKLLSQIEAVYEERDLTGASADGFFVSMGGPGGG  
FAESERNANNNNGNSTNNEGNNQNTDYRDELFLWSDIAFASEVDVGNDEDEDSSDGY  
EFEYGNRDVDPDRAALDESI EYNYIGVTVWEQQGLGQHMHVDPYQSKNMGSGSEPASQH  
RQNAPSPFVSAYATTKDSGMYSSSSDEDKRFYPKPWSSTQRKKKDRSSKKPRALFTNII  
GSNKKKKKRQNFHQKSTATALPDAFIVEKGKSGGGYYGDGANHSGDSSGGNNYYYYNFGG  
NDDSDRRPSWTSGGNRDSSMGKGDEQSPLMRCTPSTPTPKAGKGNFVSFPTPQKGDGSGNF  
RSLDNYGTIVNPRSMTPSKSTAAPSSAAKAKAGVKDDGLSANYNKKNERKLRDYDRERRA  
RKQRRRRLMRQRKEREKKVPPHIRIAHEKARAITERFLGLLRAEVEKVTLFAQARLGEL  
ADTAGSLRFLSSDETMDTSAINPANYEYPLSDGGIHP SASSSSDEGAGGYHNPNYKGGFP  
WSDSSDGGGSKASGSGRVNIAKTFSSNDGYSVRTDARGNLTSAPPTPPTPPSPLAAATR  
KRGKRSPGRRRAFTETREKFEATKRKIAQFQEIRRERSIFQRNDYIVGEDLLLI SAVDEAD  
AFSAVGVELLHILKYICVNLIAVRKICKKHDRLLMNRMLGGYYHRKRTRTSQEDTTLGGL  
IAHVAGDIYEAHPDLIGLVNNGKLIGVYDLKIQQLANSRTVKVISSCLALTLSEYEVSRW  
RADALAKLNPALKKGRKTSPASQDQGNVSWPFNIRTDNCLKKSSQQHEETLQLLQDCDIY  
VGSDDDEHGAGPPSTTSALSRLRYAVLSIVSYIVVTMVPNGTVSSSCRFSELTQDIAID  
VKKAALREASRIKSNKFSSYLSRSTLTFTGHAIIGEGLDGCSRDTLDVLLSYNPNAALL  
DTSAIYEGLKCGQWRESSIASVMTSALAVALTL PYSRHTSGPIVMSPRAVHEKELIVSNA  
LGILPPKSEGF IQKSPLEGAGLPPSIFLRISRF TDVPASVLRANRLALLLYNANYFISHP  
TSTVLVLDSDENIAYSALVIGAPTLSAIITSMHCRILSGYSTMRIVNRKNVNLFRYLLI  
FSCFSAIAGNVVQVYGIQQQSIAFTILGRFLMGFSAAEIVNRQFVVCFLPACLIVAESAR  
LVQFQVTGQILGLLIGSSAGSLIPTTAELNLSFMSFVYQNNDSRSDQSNQEQSSPGRKLL  
RDEKLNLTLSSESSIKQTSPLVVESSKDPTGILTLKATD'TTKNRKLTPIPSASPTTASPM  
KSSGDKFSSPTLTYGGSTSIPTNFGKNAFETLDPSYFGLSEKSEVEFPRSSSSSSSFSEKPMY  
ASSAFDLSYKPSMFP SGLNSEANESQVRRRLTAANWIMIALWVIYFLYVLFGWGVLDNAP  
DKGKEGTGEADNGNLADDGNHQDCNSSESSESSESVQETVMEIIHRN

>comp15614\_c0\_seq1; 828 425 2749 LEN=2901; translated  
MTEIQPEPKAKETVASVETKDCDATPSASSVNENTEISGASNVTYRSSLDTTPRKVVVH  
NVLKFLNKKDL DAMVQSWLDDAKKNDGFR LVIDRYRKP PRNGWVTVTVAEDCMVEPF IKL

INGTKRVNKRQIMVAKRAGEDSGNRKKRSRDGNDSTTDGKRARHDVPVCPTPSQIRSKL  
TALWAEPYQIQLETKKKDMIRNCAMKIEKEMKARFRTIEKEARNPNKKEKPKQFAWINA  
TPSIKVENVMNSPVI TKYRNKCELTFGYRCPDESESGTVDKETQSEKNGEEIQDRERVHE  
KNIHSADESVPKGIGISSRIPTLGLFLPYGWRHVSVARPHCLQNI PDEVCAISDLIDDFLLS  
SPFAPYESGVHRGLWRSVTIRSSERTGEVMLIVVHASPEGAAGDEKPESDSEKSRKEKRD  
LFEKERDRLVAILTKSRLSIPKRDLPMVDI IKESDNAKDEKVTGNEKSVEREDEVAKEE  
TPVFSVTSIFFQEYNGLSNPSVSHPVQHIYGTKFITEKLGKNTYQISPGAFFQVTTAGAE  
ILYDVVADRIREVSSDPLGLTLMFDVCCGTGTIGLHCLTEGVVGRVGVVDISKPAIDDALA  
NAIRNGFGDEKSKGKTRFVASRAELVMGDELRRANSTIGGANSRPSIVAVVDPARDGLHP  
NVIKAIRSTKEIQRLVYVSCNPTGSLVNDAAILCGHATNKYRGLPFPKPTRAQVDMFPLT  
PHCEMVMTFDRMTEEEVGESESAANRLTGTC SNKQLEDKNEEVQEAEDTDPNI

>comp15615\_c0\_seq1; 874 80 4084 LEN=4212; translated  
MPDARKPIASADDATCDNNNNRNGETPIDKKRSRFP SRHHDGIVGTGHDLIANELLCWL  
LPTHMATHRAKFAVVLIGLVCFVWRCWSDLAADATPTNFDPSILFLSSIGALVVFVWVW  
YYNSTLYASAKPMDPRVPATNRVEMHVPLRFFESTLQARRAACLPQMVSRRSTTGPMVA  
TEPELPLSGTANHTQNEEASHSDSSPELLSSSSPLTPNVLLDMDWEFQLLPTVEEALA  
RVGRDTRTSKTTDKRPGDWSP IRVPGNWMLQGFDDVPIYTNQKYPFPCRPPIVPRRNPTG  
CYRLSVPLPPDWQAELNEDDQFSIVLHGIESACFVYWNGKELGFFKDSRLPSEYLI PSHL  
LLPDDNESVHRNPVHLVVRWSDGSYLEDQDHWMAGIHRVELIRRRQGSIMDYSVQ  
SSASGDL SVTVKMRNVQSMRLTARLFSDEQLTAEGDWKAAPNEIWSQEKLTPKVSDGTVT  
ATATATNGSNEENPTTTTISFEGRVDNRRWTAETPNLYTLVLELERFPSLGSKIGQKSD  
RNSSRSQGITQVESCRVGFRTINIKGGILYCNGKQIMICGINRHEHDPDHGKVVSLDRMK  
QDITVLKQNNFNARTSHYPTHSSFYKLCDFYGMVVCDEANIETHGLKPMGRLAHDKGWE  
QAFVDRVRRMVQRDLNHPCIIMWSLGNESGRGRNLVSARQSLLDLDTSRPICYESGGSW  
EGIGRTELTDIVCPMPNVDEVVRLATDPDEDRPIILCEYSHSMNNSNGNLHLYWRAFRR  
FERLQGGFVWDMIDQGLRKTAKDGRSYFGYGGDFGVGQPSDRQFCINGMFS PDRDPHPSV  
SEIKYLQQPISIEVLGSKNTT NATL PFSHEIKIENNTDATPIRLKINNLYSFSDL SHLDW  
EWKLNHNSTEPLMVGRATDEHDIATIDISPAIKNIRSVMKEAEDFSTVLFLLDIKGF LN  
KDTT WALNGLILATEQIPITISFDTIHPSSIIPDEGCDNEREPLRLSSEKNMTKVSNGN  
IPFITIDHNTGGILSIDWNGTPILAGPVI PNFMR AATDNDRGGAELVLEFLLLRFTPIF  
RLLFGHEGFSYEMNWRRCGLSLDSPLIVCDSIRVVEELDDL VQIEALVSI LSKESGKTI  
IEQVWTYE IYRDGRISLASKVKPVARVPFLPRVGF SFRLNPSFHAVQYFGRGPLENYPDR  
KSGSNVGGWKT SVSNMGYDYIVPSENGSRSDCRQICFESGKGGITVLADSR TTF SF SAL  
LHSATEIHHASHTCDLDRRTDGKHP IFVSIHQLMGLGGDSWSPCVYPDFLVKGDREYS  
YKVVWFVSIPPGAKG

>comp15615\_c0\_seq2; 714 234 2996 LEN=3124; translated  
MDYSVQSSASGDL SVTVKMRNVQSMRLTARLFSDEQLTAEGDWKAAPNEIWSQEKLTPKV  
SDGTVTATATATNGSNEENPTTTTISFEGRVDNRRWTAETPNLYTLVLELERFPSLGSK  
IGQKSDRNSSRSQGITQVESCRVGFRTINIKGGILYCNGKQIMICGINRHEHDPDHGKVV  
SLDRMKQDITVLKQNNFNARTSHYPTHSSFYKLCDFYGMVVCDEANIETHGLKPMGR LA  
HDKGWEQAFVDRVRRMVQRDLNHPCIIMWSLGNESGRGRNLVSARQSLLDLDTSRPICYE  
SGGSWSEIGRTELTDIVCPMPNVDEVVRLATDPDEDRPIILCEYSHSMNNSNGNLHLY  
WRAFRRFERLQGGFVWDMIDQGLRKTAKDGRSYFGYGGDFGVGQPSDRQFCINGMFS PDR  
DPHPSVSEIKYLQQPISIEVLGSKNTT NATL PFSHEIKIENNTDATPIRLKINNLYSFS  
LSHLDWEWKLHNNSTEPLMVGRATDEHDIATIDISPAIKNIRSVMKEAEDFSTVLFLLDI  
KGF LNKDTT WALNGLILATEQIPITISFDTIHPSSIIPDEGCDNEREPLRLSSEKNMTK  
VSNNGNIPFITIDHNTGGILSIDWNGTPILAGPVI PNFMR AATDNDRGGAELVLEFLLLR  
RFTPIFRLLFGHEGFSYEMNWRRCGLSLDSPLIVCDSIRVVEELDDL VQIEALVSI LSK  
ESGKTIIEQVWTYE IYRDGRISLASKVKPVARVPFLPRVGF SFRLNPSFHAVQYFGRGPLE  
ENYPDRKSGSNVGGWKT SVSNMGYDYIVPSENGSRSDCRQICFESGKGGITVLADSR TTF  
FSFALLHSATEIHHASHTCDLDRRTDGKHP IFVSIHQLMGLGGDSWSPCVYPDFLVK  
GDREYSYKVVWFVSIPPGAKG

>comp15615\_c0\_seq3; 755 80 4194 LEN=4322; translated  
MPDARKPIASADDATCDNNNNRNGETPIDKKRSRFP SRHHDGIVGTGHDLIANELLCWL  
LPTHMATHRAKFAVVLIGLVCFVWRCWSDLAADATPTNFDPSILFLSSIGALVVFVWVW  
YYNSTLYASAKPMDPRVPATNRVEMHVPLRFFESTLQARRAACLPQMVSRRSTTGPMVA  
TEPELPLSGTANHTQNEEASHSDSSPELLSSSSPLTPNVLLDMDWEFQLLPTVEEALA  
RVGRDTRTSKTTDKRPGDWSP IRVPGNWMLQGFDDVPIYTNQKYPFPCRPPIVPRRNPTG  
CYRLSVPLPPDWQAELNEDDQFSIVLHGIESACFVYWNGKELGFFKDSRLPSEYLI PSHL  
LLPDDNESVHRNPVHLVVRWSDGSYLEDQDHWEYPPFHTIMDSNVLCNRIHRRKKTIT

LSMFLRFNYRWMAGIHRVELIRRRQGSDDIMDYSVQSSASGDLSVTVKMRNVQSMRLTAR  
LFSDEQLTAEGDWKAAPNEIWSQEKLTPKVSDDGTVTATATATNGSNEENPTTTTISFEGR  
VDNVRRTAETPNLYTLVLELERFPSLGSKIGKSDRNSRSQGITQVESCRVGFRTINI  
KGGILYCNGKQIMICGINRHEHDPDHGKVVSLDRMKQDITVLKQNNFNARTSHYPTHSS  
FYKLCDFYGMVYVCEANIETHGLKPMGRLAHDKGWEQAFVDRVRRMVQRDLNHPCLIMWS  
LGNESGRGRNLVSARQSLDLDTSRPICYESGGSWSEGIGRTELTDIVCPMPYVDEVVR  
LATDPDEDRIILCEYSHSMNNSGNLHLYWRAFRFRFERLQGGFVWDMIDQGLRKTAKDG  
RSYFGYGGDFGVGQPSDRQFCINGMFSPPDRDPHPSVSEIKYLQQPISIEVLGSKNTTAT  
LPFSHEIKIENNTDAPIRLKIINLYSFDLSHLDEWKLHCNNSTEPLMVGRATDEHDI  
ATIDISPAIKNIRSVMKEAEDFSTVLFLLDIKGFNLKDTWALNGLILATEQIPITISFD  
TIHPSIIPEDECDNEREPLRLSSEKNMTKVSNGNIPFITIDHNTGGILSIDWNGTPII  
AGPVI PNFMRAATDNDRGGAEVLVLEFLLLKRFTPIFRLLFGHEGFSYEMNWRRCCGLSLDS  
PPLIVCDSIRVVEELDDLQVIEALVLSILSKESGKTIIEQVWTYEIRYDGRISLASKVKPV  
ARVPFLPRVGFSLRNPSFHAVQYFGRGPLENYPDRKSGSNVGGWKTSSVSNMGYDYIVPS  
ENGSRSDCRQICFESGKDDGITVLADSRRTTFSFALLHSATEIHHASHTCDLDRRTDGKH  
PIFVSI DHQLMGLGGDDSWSPCVYPDFLVKGDREYSYKVVWFVSI PPGAKG

>comp15616\_c0\_seq2; 1240 129 5054 LEN=5522; translated  
MDQERKVGSRPSDKRRHGFESPEGMEMKDLPAAPKPRTAVSAGGMSGSQQQQHQHREQYPY  
VPI SMTASVSSQSPPTDILASTTISTVESTPPSVRAAATLLLAEELATDSPPQQIARRV  
EETPTKPGKRRLLFFTPSRRDAKKSPPQSAGRRQAAAQSPGSQPSSQQYSQAITGRGQHQ  
FQTPGSASSAMKTPGRRSSGRRQRRTPGSRSGLSGLSSTTPRSASHRTPSRRKFNPLGKI  
SDIFSPQSPFSSTSPNRADGHSPGDSFGLAGVGENRSLVSAESSDASSVSTSNVKEP  
FVEQVERLNEELLATPSQQLGDLAHTPLNEFNSSDDDLDEEMEDLEASRIMLAEEELSKVDYS  
LLGGGGDDSSGIDWKGGTAASPQGDNSDWRPLLTAEDHHPNFSPIGQLRKKKVTASAS  
TVDRPPRPKMMGKSALQTSSSSSNISPNISQDVTIYSGDEYYSPSMSSANATIHSGDEYF  
SPEKRSKDEELGETEATASTLAAQEI ELDRKPAAKKSLKVNTRTKIKKNVNYESLNTPP  
REREKQKNVPIEKEKREKKGSKREKTKYTPLNIRREDESATTTTSATLQGDGDHNEITFV  
PSQEEVKDLAPGRLMPNPSFAQVEQEEDPRKNRRDRKVKPTTAIPAARKGIQVVSKHVD  
GSSSGESEKYTGQATTALKPRPRPLNIQGGKGLKAPPTALSVKGKTEKEETETKKSCNS  
SVDQKSYAKRFGMKEVDPVHLTPITKHKEVELKEKQSEKSSPESNSSSTFDPFGFVARGE  
SQLSSVDMGSGDSSRGSPTSSSTASRNDNPSIFQSFLSFAERFDDGGTTPRGRKKSTYTPK  
RDVDHSRRVLEHLNTIFTPSGNENPNLSSITPERSTMPPLISATESPDAAKESSREKKS  
EEEEIFSTPPRDNDIGDSSIFGLSPISQNSEQIHLSTGDDLSREEAITALLSAKRPSNKS  
KVASKKTGSVAPAAAQARKSKDEKPPKINDPSTIVTILNDDGDDDI FYDPETPHANESDD  
VLTPLPGDKDFVFKDKSQMPGSDNEDEVTPTPAKGITPKSRCKRILLMAIIVFVIGF  
ALVLTGTLFYPREETVPTPSPSAIISPAQQRTSAPSALHSESSLHPTKTSMLNMDSPSLS  
PTNSGSEFPTALSINSFNIPYDVYITNGRVNRIPOSEYVPELIRSMDLLTDDILLNIKKR  
RSGGERRLTVLLPTTITNVSDVPCPTDVTEDSLCQEVNAKISLLDAENTWEQFKDTMEL  
AIEIGRLQYYLQMVDPNSPAEVIDAGWTPPVPTPAAPTAKHSSAPLSSPLLNLKEKSFDD  
GEALNDTESPQYRAYVWLHRNYELSKFSEKQKLQRFAMATLYATNGDQWLLNDLWLSDR  
TICKWFNKKKSPCNTKGDLLHLELDLNNLGGSLPGELGLLSSSLKTITLHGGPYSYIQGTL  
PMELGYLSQLKTLVLRNNDMDGAIPSEIGNCQNLGELDLRNNFEGKLPSEIGNFADLTS  
FDISANFFSGSLPTEMGMMNRNCRKMF FEYNHFASDIPTEIGYKLDLQAIRGGGNVNLFLP  
TELGELKSADII SFRDSSLMGAI PTELGWLRNLRKFFMTGMCILVAYFDTISFASDRQKL  
CQSKLSTNFYIQVVWSFIIIA

>comp15616\_c0\_seq3; 1251 129 5298 LEN=5406; translated  
MDQERKVGSRPSDKRRHGFESPEGMEMKDLPAAPKPRTAVSAGGMSGSQQQQHQHREQYPY  
VPI SMTASVSSQSPPTDILASTTISTVESTPPSVRAAATLLLAEELATDSPPQQIARRV  
EETPTKPGKRRLLFFTPSRRDAKKSPPQSAGRRQAAAQSPGSQPSSQQYSQAITGRGQHQ  
FQTPGSASSAMKTPGRRSSGRRQRRTPGSRSGLSGLSSTTPRSASHRTPSRRKFNPLGKI  
SDIFSPQSPFSSTSPNRADGHSPGDSFGLAGVGENRSLVSAESSDASSVSTSNVKEP  
FVEQVERLNEELLATPSQQLGDLAHTPLNEFNSSDDDLDEEMEDLEASRIMLAEEELSKVDYS  
LLGGGGDDSSGIDWKGGTAASPQGDNSDWRPLLTAEDHHPNFSPIGQLRKKKVTASAS  
TVDRPPRPKMMGKSALQTSSSSSNISPNISQDVTIYSGDEYYSPSMSSANATIHSGDEYF  
SPEKRSKDEELGETEATASTLAAQEI ELDRKPAAKKSLKVNTRTKIKKNVNYESLNTPP  
REREKQKNVPIEKEKREKKGSKREKTKYTPLNIRREDESATTTTSATLQGDGDHNEITFV  
PSQEEVKDLAPGRLMPNPSFAQVEQEEDPRKNRRDRKVKPTTAIPAARKGIQVVSKHVD  
GSSSGESEKYTGQATTALKPRPRPLNIQGGKGLKAPPTALSVKGKTEKEETETKKSCNS  
SVDQKSYAKRFGMKEVDPVHLTPITKHKEVELKEKQSEKSSPESNSSSTFDPFGFVARGE  
SQLSSVDMGSGDSSRGSPTSSSTASRNDNPSIFQSFLSFAERFDDGGTTPRGRKKSTYTPK

RDVDHSRRVLEHLNTIFTPSGNENPNLSSITPERSTMPLISATESPDAAKESREKKSSES  
EEEEIFSTPPRDNDIGDDSI FGLSPISQNSEQIHLSTGDDLSREEAITALLSAKRPSNKS  
KVASKKTGSVAPAAAQARKSKDEKPPKINDPSTIVTILNDDGDDDI FYDPETPHANESDD  
VLTPPLPGDKDHFVKFDK SQMPGSYDNEDEVTPTPAKGITPKSRCKRILLMLAIVFVIGF  
ALVLGTLFYPREETVPTSPSAIISPAQQRTSAPSALHSESSLHPTKTSMPLNMDSPSL  
PTNSGSEFP TALSINSFNIPYDVYITNGRVNRIPQSEYVPELIRSMDLLTDDILLNIKKR  
RSGGERL TEVLLPTTITNVS DVPCPTDVTEDSLCQEVNAKISLLDAENTWEQFKDTMEL  
AIEIGRLQYYLQMVDPNSPAEVIDAGWTPPVPTPAPTAKHSSAPLSSPLL NFLKEKSFDD  
GEALNDTESPQYRAYVWLHRNYELSKFSEKQKLQRFAMATLYYATNGDQWLLNDLWLSDR  
TICKWFNKKKSPCNTKGDLLHLELDLNNLGGSLPGELGLLSSLKTITLHGGPYSYIQGTL  
PMELGYLSQLKTLVLRNNDMDGAI PSEIGNCQNLGELDL SRNNEGKLPSEIGNFADLTS  
FDISANFFSGSLPTEMGMMRNCRKMFFEYNHFASDI PTEIGYLKDLQAIRGGNVLNFLP  
TELGELKSADII SFRDSSLMGAI PTELGWLRNLRLELHNNLSGSI PSELASIKSLHDQ  
LDLSRNELSGPVPTELGWLSDLRVLKHLHNSLSGTVPSELSQMGKLISIEINGNDLSGTI  
PSDVCKTFDVTYPQFQADCDDFEDNFLVVPFAASATRANADTW

>comp15617\_c0\_seq1; 879 329 4339 LEN=4533; translated  
MGSLEPQSGGGNGMRFLPHKHVHFRHTSSNDKHS DGGRN SHYSDIEERQTSARSTGRNGH  
FNPEEYKDPNGEMVPLHTKYQNGYHGVNKDATIPRSNRSGYNKYATNYTSNRNLNTCTND  
MDPRDKRKYIACNVPTKDISTIISAVAALALCIGALFAGLFHAVKKPNIRPHHEDHVG  
PYASLDLFDVSGRYIFEDYDIQTPYSDFLPLGLAGIYGKPLYAFFVNRGQGIASFVKS  
KDTPI MEFS PANTAYQTTSLVGFRTFIQGRREGKETFLEVPFSPLTTNFPAMMENGPEIT  
RPP TNKRTLYSGENEMQIQEIDYEQQLETNVTYFILPEEDFGAFVRRVTITNTHPEET  
TTISFLDGLAKMQPAGGNINGYLKNMGRTLEGFMGVYFPYEDTISMPFYRLSSRPID  
SEFVEAQERGHYCVSIREDRNTSLLPIVYDTSKVFGEDTLLRPLELYRKSINDIVSGP  
QYGGKAKTSSCFAAVEDVTLQPGESVTTTTFFGVADHILDLPVIVRRLRQDGFAYKLR  
TRTREVIRQITS SVETKSGSAIFDAHVSQMFLDNLGRGGIPIVLGDQEDNNAILTVD  
EDPRLKVYHVF SRIHGDLERDYND FELPPTFFSQGPGNFRDVAQNRRNDVVFNP  
KIGSFNIRLFLSLIQADGYEPNSVEGVVFTIEDKNLCNEIATNAVGPADGHRAQRE  
ALSEILNDGPFPRPGQLFQLMAEQNIFLIVSRQEFIDMVAVAANTHPFAVYKEGY  
WADHWTYLDMIQSYLSIYPDEEERVMFDTSLPYFFSPASVQPRSKKYVKNLSYD  
GGHNHIQQLDATIDDSAKRDMNKFFAQKIGWYRIA AHWQHDESGDEFESSPYAK  
LFLLATLKFATR DALGMGIEYEAGKPGWDDANNGLPGMLGSGMPESFELKALIN  
YLVRTGNKYARDFDIPEELYELYNAINDNLMALKGYKTNISLPVEEV PHELFSY  
WDNVSFARELYREKTRITFSGKTVMERGVAVKSLKNWAREIDKGIIRAKLLG  
TRGHDDDGSSGIIPTYFAYRVTNWNVGTGESNSNGHPYV IPLNMTVRHFPLFL  
LEGPTKMMKTVGPIAARDIFFSVRNSTLYDKPLHMYTVSASLTGQPVEMGRSTAF  
AQGW FENQSVWLHMSYK FYLELLRHKLYDDFFDSVLEGGLLPFVDARTYGRTPM  
QCSSFIASSVFEDPSVRGRGFMGRLSGSTAEFLSMWILMFIGPNPFFIDAASG  
DVRMQLAPTIPGWLFHTQSGPSKMGGLMVND DATPRISFKL FSSIAVHYFNEDK  
TDVLGT PPRQYRVGLRDGSIFEFNQTFVPTDMAEKIRRVVVFDFIEAHF

>comp15618\_c0\_seq1; 474 1 916 LEN=1193; translated  
XSKSNEYSPLPWQEQQEEASFQ TNGSPSSASNLVDPYRTNDQSDSSSHKQPD  
TVSDGSFYQTTPSSTDKEVRNGSSLSGIDDTPIEGFGNSSPFVDNSQGT  
VSDPNSSPQSSNSNSSNYEDSYFMNVPTNSDEEPQSFYIQKWAASNQEFSD  
QPDDARDEPSVDSSDGGAWYGSDESSTTASQSSPNPNPFARRNPLMNK  
GANYLNNLSRQDGSSLPNGANEAGSSHEESSQQSASSFFPDR IKAAYR  
DWCQYYGKEYNETRLGTFSSNFLAVERYHRETGVSLILNELADMTSEEF  
QQNRN

>comp15618\_c0\_seq2; 1566 1 3241 LEN=3518; translated  
XRIEAEAKAKATLEAKQKKAEBELKKRIEAEKVRREEEAKKNAEAERQRKE  
IEAKTKAEL EAKQKKA AEVKMRIEAE EKARAAEEARKNAEKEAKRMEEEE  
KKRTDVEIASKKSGGEAGINTEKEVVEKTAEKTSIDSEMRSGTETENNL  
DEGQIEVTEGETTVVSTAEVENNIDSQSD EVENQETR KVSMSKSSDS  
DEKKEELAELEATVKMKAEL EAKEEVEEKKRIEEEVKMKAEKEAAE  
AKKEEEELRIRGAYLDWCLEFSKPKDKIRMQQFKQNYLMLEGI  
AKDEGKEIKLNA YADYTAVEYEFEMKEKEEAKKQEERL  
KREQEETEAAFAAAGAENKMDTGTEGTD DIKIFDRFQKQNESE  
EVVVGAEETVSDADETKEQPQEEWVKQEEGLDESLLQKESGR  
WSGLNKEAESKSVRGNTDMGT SRAGQDV DADDPQVRKRVRTAY  
SNWCRMYNKEPDEGRFPKFKSNYLI MEKLAIKQGREVTLNE  
FADCTPDEYASASRSKSAGSASRPNSSGGTSTFNKREPQKAK  
VNER EINREINQSKASQNAEP ELVTRTKRTVYVSREDEDD  
VDQAALIAEVERFAMQKAE EAAKRV EQFRQQQGIAGFN  
RERATEERIKREREA AKSELEKRREAAALQREAESIAGA  
QISAKKAE EGSVKRQWEDTRAKSKNPFLEKQRLRRL  
REEAEREKETTEEDGFYQARQMDSRNPSFIQT  
DNSRSRDDGNATTPPKMDTEEMQPVVKPPRANPKNPFQRRPTFTSPTKETV  
GSKSNEYSP

LPWQEQQEQEEVASFQPNGSPSSASNLVDPYRTNDQSDDSLHKQPGTVSDGSFYQTP  
SSTDKVRNGSSLSGIDDTPIEGFGTSSPFVDNSQGTVDPNSSPQSSNSDSISNYEDSY  
FMNVPTNSDEEPQSFYDIQKWAASNQEFSDQPDARDEPSVDSSDGGAWYGSDESSTAS  
QSSPNPNPFARRNPLMNGKANYLNNLSRQDGSLLPNGANEAGSSHEESSQQSASSEFPDR  
IKAAYRDWCQYYGKEYNETRLGTFSSNFLAVERYHRETGVSLILNELADMTSEEFQQRN  
>comp15618\_c0\_seq3; 259 1 342 LEN=342; translated  
EAKRKAEEERKRKEVEAKAKAEAKRKAEEERKRVEAEAKAKKMAEEKRRLEAEAKRKA  
EKKRIEAKAKAEAKRKAEEERKRLAAEARAKAEERKQKEAQAKAKAEERKR  
>comp15619\_c0\_seq1; 1086 130 3333 LEN=3493; translated  
MADDNVDDAYDDIVDADYFSEEGFSDYVPTTIDPSPWVLLVCSCFCLLLVFLPLGVAVI  
QRKRRRASHKKVLEAGFVMKQARSKDQVEDQVQSSANIE TVLDSHLVIKSLDSKEEKLVR  
SSTTITLDRNDVALALCRPNMENESDPLTRFLEKEMESEQFENTPVENSSPFVQDDASWS  
TGVELAWKPAGTKIEDENQSGECFQSHGDIETKKSENGMYALIQTDSGNIKVQCIESKEM  
NSKLKELFDQVTSRSQMNCRIAEKPTLHVSSELGANSEKLELLL PANENPLIEIDDDL  
PVISQPPPLARPSSSEVRWPQIDATLCGESSFEDTPYYLCTDVP SMICGNDNTQDTIPPQC  
STMYGDDEEVVHDAKKVLPFQKAKKFSVY PDLVKRAVRYITSRSERRRNSRSERRRSE  
YRENTKRQKAMENLLYDIYGNRGPTVSVNVIPNSETTTQVSGVSGSILQKSESESIEDDG  
SESDSSSSTASEMTEITLSDLVSDIPLLEDIMSLQYDEHDTDPSAQMVAGWQKGYDYKTE  
TEYYYNLATGERSTDCPIDPVRSKHQIDYGLFGSSNRPWICYFCSSGFRRKVFKCLRFD  
HEMOKILKLAGPYTISISVLNCIFSAIEVAIVGRVLGTNALSAYFAVGYTIDLGTIFLCGV  
MEALHVTCSQAIGAENYKLAGQYLQLSVWIHQLYYIPFMVCFWNRFDVILWLGFNDETA  
ESALWYARYAMVYDFATIFHDTILSLLDVNDQENYSAILSSLQGAFCFGLLIFVNIYDS  
VQLWMI AVYHTLVMICFFLINIIIVLRMGWLEDYWRGLIGSNPLSMSWDNLKAFKSQALP  
LSIGYIEYGEWEVLFIFAATTGPAEMAVWGLLGEIWSLAEVGGAVTAASEVRVAKLLG  
AGKPKLAKYSAEKSMCIGLIVSCLMAALVLSLHSMIPTWL TNDKTLQSMLEELLPLVCLG  
VAVLAVGTTWSILCAQGRSHLSTSVSAIGSVFVSLPLAFVSTFGFNFNLEGLVASLIVG  
YSIAGFFNSLFLMSSNWEKISEKMSKGTKKRKKQPVDIEMVNTINA  
>comp15620\_c0\_seq1; 560 585 3071 LEN=3121; translated  
MYSNHSIFLKLDDVMDA IHPINSILMTSTQIRPDDNRAISTAMKNEMTDDAVSE DASN  
NVGAKDGVFFSNVSYDFRECTSPESHVPWPLEGDIQSKTSAITCGMSADTPFSRFFSSQL  
WTKKFEPLIKQC NKLVVFGVAFGGNFVKDLNAPHVQKLVNATDLERRHGRCFFILTTEND  
VVRNQHI VDKYNGKDRSFIDPIAVGHNTLVPIDDILPYKNPRRNVKLLKYVQGQYLFQNA  
ETVIWQDAKFFRDFVSKQPMNYLDLTDSSCVTAMALPVHKVTVGLANIRNGMQKHGRY  
RAQYEHHCMTIEEALS DRPNVTDSSDNLI RQCDAYLQHVYQDKGNIETMNQGLVDSAFIV  
WNHKTQVCRDFSSAFRCTIVDQIQCHSDRDQVGIPFAMYKMGVAGMYRQHTGGKLR TVDE  
KWDPRIHDFEIVTEEDKAKTNHSLAVTGN DGNDEEPP TMIRVTRSSCHWYFSRLGNCRT  
DLTDEKPTIALLVAGSAKRFVLDGLTEHF IKPLVEEQNTKVDYLLM LSVKQGLAYRSNDA  
YMKYQTFDPAFVEIRNEKNTDVVTAFLFDKIRKMI SLSGANVGGIHIQPPMRLDHPKLR  
RKQLEAKKARPKEDSHFRFPTDLRPEFRRTAVTNRNLFKLYLGIHKLWDKHLISSEY  
IGVSYDYVMILREDVMWLGD FNLKLIATNPQADAYVVS CDIRHQKDSQIIENEYSYGI  
VIKREKATLLGKYFTHILRTDLNACHESVKDMVPPDTGCNSGM LLYWIMKEHDVKVQ RVA  
QSVFPIERAFNLNFNHTTQR CIHRYCQSKEAPLQIPDDL PICSNLELQ  
>comp15621\_c1\_seq1; 1318 85 5679 LEN=5765; translated  
MRQKKT PVRRLKEDGDGEVQGEVLGRFQLRTSQSLDFMLAKEIAIDIRVGTKAASNSE  
IDMCDEQEMHATHQQLCDHEIEKQRPEVDRGHRMPPTLAAIERKIAQREHEMLSKGKKK  
TTRKRRRSKKHVHFASGNEGSPLSNNKHIVESDLIPPELIIKIDEGSFSKDECFKLLYF  
CPRMDSLADIDQCVILWSFHLERTKIVMTEERTVSTEKSN SIQHSVVTGIAIRDLWKS  
YNLPNQIVEPLIKCVQRNAIQLLCSSTQGEHSMSLDVILTPQAFESCRALPFIQQGRQQ  
KKLELANCLQQVIKDLYKLPMAAPFFSKDKSIDEISAKHIYNLV DNKKIQEYEGGENKKP  
LTLNIEGLIPTLRPYQAAAVQWMLERERMANHGEWVSWMVLD SKSRTITPLVKVKKSE  
ATDRGSLLYCPFNMIATSI EESKQLTLDGRTHS IKGILADQMGLGKTVEVLACIL AHR  
LPPTVLT EGNRRTCRKRLFWDGDFSPSNGENNGQGESEGD DPFVGD ESKDDIFAQTNIHP  
EAVSLMRLTHVNTNLVAPEKTEGHI EERWVDNIEVGSICGEIISFSRRQQKNMIVFCDN  
CEEPMHIGCTCLNPTDVEKLPRLHLRRTLGN EILKCVRCKGCPCCAMKEEP IRSRATIII  
CPPSILDQRQEIKRHS HQMKVLVYNGVEKESKRKGNANAIKLLYPAYLADADVILVSF  
VALMSDLTHSEENRFISQNN DGNWSSSNLRRRKKYRVVPSPLLSIHFWRICIDEAQRVEV  
TTTAAKMSLKLKGDHFAVSGTPIGHGKLQDLYGLFLFLRLAPFDQKEWFNACMNSVIY  
GLDDR IQCLLRHIFWRSTKALEIVKKQIGVPEMREQRIVLKFSSIERHFYNRQLQKTLQL  
ADDCKY SALGRKRKSKRVDFLSESLHRLRAACHPQVGSSGLSGGKRAKSRKLSRSRK  
DGGNSVASRVMTMEQILDRFID DARHKCEEAQRIAILHTNGMAGLTRLKVEARARGVKE

QNDRSLLIRSGRLYRESILLAQKNANPVRATSEARLSGSTGFCSTVQLFQNGKCFPMWKM  
QQCNGKIWTTIEYENSPPRIAKLLIRPMLHLPAHENSKNNSNDIEYKLIKPTSVTLQVATV  
ATGGDFVNCVEAALENNWVEVDNICRKNKSKVWRIVATIPDCCNNSTLSSSSKQREFFLG  
LEIQLFEPQINSDGLQLLHLSLHNSCLSYQAAIQITSEESNDDIYAQVKSMKQEITQIESV  
HKEQAVALHRACKLLEELTIKRQEKEQLLDFDFTTFSKANQCIDDCWDDGWYDDFLGMVS  
LYASDAQHNVI FDRIVQD VDSL YNVEEGMKFPDFN NISGLRTALNIRISKIRSDGLGKKQ  
LVL PATRADNEFVQVRSARFKCCKGEHRCMK SILNLSSSPGFREIDENSHCRLCKADWN  
QTGKICRHCDIASILQDLKPD SVTIAVLTAVYAAVRTSAGNSLLNSKEASHVTERAKRFF  
EVLEAEEREKIGAWRMWRIHLDLLNGLDELDSCKKGLRSL ENEDLTSYTEDQLNAIVQP  
IDLHHQYHDHAAKQAMSLGDLRQSTGTLRYLQNKQSMETKHVSTSETCVVCLQPLDGE  
SVLRFCGHRFHQKPCFDQILKNSCGVNVHCPMKRLVTAKNEVMI STDKARDDGSNTSRKV  
RGSYGTKITRIVSDILCIKEKGEKGVIFSQWHMDL DILE SALIENEVTVARPYGGKRFSE  
SLLAFQSPDCTVLLNLKQGAEGTLVHANHFVFMVEPIMNGLDQQA INRIHRIGQARRT  
FVWRYLIEDTIEMKLD RMRQKQQAENEVVENPMDSTKLN AVISAGGIDGGFASQEELLEI  
LDGN

>comp15622\_c0\_seq1; 989 337 3145 LEN=3340; translated  
MAKQSLTDAEVNVQSDGHHVCIVCFSSLESNMRAKLP CGHDDMCGICHRLRLRHLHEDKKC  
PICKQTNDTIIVDSDDTKTFDSYPRWGDEIGAGFVYKADVGMFFEEKYYEKAVVPLYEFS  
CQKCDFKVDENYNQRAQEDDGD DENNKGGKKKRKPLRILQDHLRKKHRLSMCQLCIDHK  
RDFVSQLPRFTASQLQNH LKNGDGP GSGFSGHPICEFCRPKRFYDVNFLYKHLHQEHYKC  
HICEKQGS DNQWFKNYKSLARHFDKQHF MCHHPQCQAARFVVFENELDLRAHGEYFGR LG  
LVEPLYC LLVNFWLWILKVKLVGALSLSMSALSSVHPLPEISVHGGTSTGSTKINLEFNIR  
RANGTSGSGERQRAPEADFN YDLGQAFVPPALANDNNSNDQGNNGSNNNASLHPQH V  
QRTEELRAHAAAVRQQALDNQGEAFPTLRDAAAPSPSSAPLVGWTSGTALQNINGSNRR  
VGQVTEESFPTLQSNSTSQRNKKKAMKGSIGAARRQFAAMTTAANQPASNWGGGDSAA YI  
GSVAVSPASGGYGNPFSSAMPARQMNRQADLAPDNF PSLG PSSSSARSASALASRNYQQ  
RTVASAPPPSINSAVD FPSMSSNGRSSTANVSRNMAAAAQNRKPPPSMNSVEHFPAPPS  
AKPVAKPKIRDQLLGNANRKMPAQDNVLRANMSSVSSTDAKATLEDMKTS LGQKNFKQLK  
KLTKSFAQEAI APEGYVDQCAALFEKSYDDPDFWSFLPSLLESCPNQESSKHALKYMNSL  
KRQKFGSSDSRPSPSFASSAAARATPSQWSAPSSKSSVMRQVI P P P P P P SFGAPRSLTQQ  
VAAGVGRPQTMA SKKKA AWGSGGKATIVRTKAPPGSVAAAAAATQGPQGGTATKFMAKQQK  
QQA KSNTNTNNTQQQKAKKKKQKNE LKDLAFGRS

>comp15622\_c0\_seq2; 770 1 2185 LEN=2681; translated  
XVLQCSVATLRYIVATESATVQDLPSLSIYYCRLSDTDRLEQERRNLD RGGKQQATSQ  
LESSRVESSQIEAKRNETKQIDPLIGAPPISPLQSDRARHHAVGTIRNAGLSRMP PPSGVL  
VALCPAEYSGNNGSNNNGSSATGASGALSPKPPAAAAAAVA AEPA TEKDATVCP PPR  
QPPAPLSSLS SFAPLSPSHRYSARVAMER IAPFLEMEEDSGSDDDEDEDDEDDALLQDVVL  
EDIALDDEEGEASNCQIVNRDTTNPAA SLLGNQTLPLPPGKGAKQ QDDNNGNVDHETN  
SPNYDKGSWMPF SHPLKTAPRDGLPWKAPRNACCSPGSCGRNHDDGFGDSSIKSCGKRQ  
RTHRRVTFPSGPIPFAR P SSSPTNEDNNTCDASGQPNKFPNHNPQGN SKDNNHYN YNY  
SNKTISSNPLVRV RDTIHRSEFTNEERLATWYTFDDLRSFKRDRKDTARMIDNGVLSLPF  
SPYEPMYPTNK PAKKEEKENKGETGDASSLAKPGETLGH CARGCENC TEAIGRTRYRRIA  
EGWRAVLNAQKKHRYEQQKMKAMTSAEQNQFRTLASLFGSGSKRPPRADHRTNEHGSETL  
CCPHALAEASLDIAWSRAIGDEREAAK LKKPGLPEHQHDP PPSREQPVEPKAGRDP AQQN  
RTDGTASIAAATGPAGGDSGCR TGNGNASGGDPCAPPTS PRAGEGVAGEEHEATPVAVPV  
AVPMATQ

>comp15622\_c0\_seq3; 1038 337 3006 LEN=3201; translated  
MAKQSLTDAEVNVQSDGHHVCIVCFSSLESNMRAKLP CGHDDMCGICHRLRLRHLHEDKKC  
PICKQTNDTIIVDSDDTKTFDSYPRWGDEIGAGFVYKADVGMFFEEKYYEKAVVPLYEFS  
CQKCDFKVDENYNQRAQEDDGD DENNKGGKKKRKPLRILQDHLRKKHRLSMCQLCIDHK  
RDFVSQLPRFTASQLQNH LKNGDGP GSGFSGHPICEFCRPKRFYDVNFLYKHLHQEHYKC  
HICEKQGS DNQWFKNYKSLARHFDKQHF MCHHPQCQAARFVVFENELDLRAHEISVHGGT  
STGSTKINLEFNIRRANGTSGSGERQRAPEADFN YDLGQAFVPPALANDNNSNDQGN  
GSNNNASLHPQH VQRTEELRAHAAAVRQQALDNQGEAFPTLRDAAAPSPSSAPLVGWT  
SGTALQNINGSNRRVGQVTEESFPTLQSNSTSQRNKKKAMKGSIGAARRQFAAMTTAANQ  
PASNWGGGDSAA YIGSVAVSPASGGYGNPFSSAMPARQMNRQADLAPDNF PSLG PSSSSA  
RSAASALASRNYQQR TVASAPPPSINSAVD FPSMSSNGRSSTANVSRNMAAAAQNRKPP  
PSMNSVEHFPAPPSAKPVAKPKIRDQLLGNANRKMPAQDNVLRANMSSVSSTDAKATLE  
DKTSLGQKNFKQLK LKTKSFAQEAI APEGYVDQCAALFEKSYDDPDFWSFLPSLLESCPN  
QESSKHALKYMNSLKRQKFGSSDSRPSPSFASSAAARATPSQWSAPSSKSSVMRQVI P P P

PPPSFGAPRSLTQQVAAGVGRPQTMASKKKAAWGSGGKATIVRTKAPPGSVAAAAATQGP  
QGGTATKFMKQKQAKSNTNTNNTQQQKAKKKKQKNELKDLAFGRS  
>comp15622\_c0\_seq4; 815 1 2205 LEN=2701; translated  
XVLQCSVATLRYIVATESATVQDLP SLSIYYCRLSDTRLEQERRNLD RGGKQQATSQG  
LESSRVESQIEAKRNETKQIDPLIGAPPISPLQSDRARHHAVGTIRNAGLSRMPPSGVL  
VALCPAEYSGNNGSNNGNGSSATGASGALSPKPPAAAAAAVAEAPATEKDATVCPPPR  
QPPAPLSSLSSFAPLSPSHRYSARVAMERIA PFLEMEEDSGSDDDEEDEDALLQDVVL  
EDIALDDEEGEASNCQIVNRD TTTNPAASLLGNQTLPLPPGKGAKQQDDNNGNVDHETN  
SPNYDKGSWMPF SHPLKTAPRDGLPWKAPRNNACCS PGSCGRNHDDGFGDSSIKSCGKRQ  
RTHRRVTFPSGPIPFARPSSSSPTNEDNNTCDASGQPNKFPNHNPQGNSKDNHYNYN  
SNKTISSNPLVRV RDTIHRSEFTNEERLATWYTFDDLRSFKRDRKDTARMIDNGVLSLPP  
SPYEPMYPTNKPKAGKEEKENKGETGDASSLAKPGETLGH CARGCENCTEAI GRTRYRRIA  
EGWRAVLNAQKKHRYEQQKMKAMTSAEQNQFRTLASLFGSGSKRPPRADHRTNEHGSETL  
CCPHALAEAYKPASMASLDIAWSRAIGDEREAAK LKKPGLPEHQHDPSPSREQPVEPKAG  
RDPAQQNRTDGTASIAAATGPAGGDSGCR TGNGNASGGDPCAPPTS PRAGEGVAGEEHEA  
TPVAVPVAVPMATQ  
>comp15623\_c0\_seq1; 419 226 1806 LEN=5728; translated  
MTSSRKISVTATPVL DDEY GIGDVSGTATSSFG EIETIQAKGASSSVDASFTSPTANDCT  
DDPDFLYKEKEACKWVARKKRK LKKRCKRVYLGATI AKRCRETCDYNNCAQKKLALVGAY  
YYPWWGDDFHRGVKPDV PNLYLRRQLINPQEF PALGEYDDTQPDVIAQHLKWSRQHNIKL  
WVTSWWGEGRREDDTIKNHILTNKQLKDHKIAIFYETTGRIRK KYGYKLDNVVDPDLEYLC  
KTYFTHSNYYRILDNNGISRPVFFVYLTRKLEELGLLEEVISLMREGAKAGGCDDIFIV  
GDQVFQGPPLQNNAADLIPFEILDAVTNYDVYGSIRGYDIGGYVGRQNVTDYYQGEQRA  
WKEIARSKGCAFI PCASPGFNDRGVRPEVKRIPLSRRLSPGAPEGSLFRAALQEGTLVD  
SEVDNLMVNSFN EWHEDTQIEPAVAFNGSKGNNSRTNLP TDVTYGLEYEAYGALYLKIL  
KKETVNWDVSM AVAPSSASQLRISPHESGCELEVITISDTIGLELD  
>comp15623\_c0\_seq2; 368 134 1067 LEN=1486; translated  
MRMPQVENKGN AFLESGEINPAINAYNEALSICEEYNLDDQKSDKSAIMLQQQEGSILLL  
RASAF LKQAQSHKEILQAEFV DDEETKSRSSQVLQALFSDTLAPPALSTLSDPRLQSNKE  
ETSSGLSVASNDVDDDQKKRTNSMVTEGEK DAAKTRTEKDDEPLPPSVDVHNSRDEYVDT  
DPQTASRLAMLRKLQ RDGIFEEAQLRKLQYRHGLYQISLLQAARDALRATEVLPDYSKAW  
LRAGELLSDLWKIKESRQYYEKALSIDGFLEESIEPILQELEARQELLDRAFASEEFPED  
TLQLALDIAG  
>comp15623\_c0\_seq3; 505 682 2073 LEN=2492; translated  
MPTLMPTLSSLRIEKHFLATQKSHFDFIASSLYVTFDTNVI TKDWQIYVDQSKASLDRGG  
VATFD AFFSLCDQYGGGGQNNNTDAIEVQVIPAILPKPVGGGKAPWIRCIWNTNKKDIVR  
PSPNLDVSNVDSVDKVYRVLTKHLGVENISQEACECLRWKYKGN AFLESGEINPAINAYN  
EALSICEEYNLDDQKSDKSAIMLQQQEGSILLLRASAF LKQAQSHKEILQAEFV DDEETK  
SRSSQVLQALFSDTLAPPALSTLSDPRLQSNKEETSSGLSVASNDVDDDQKKRTNSMVTE  
GEKDAAKTRTEKDDEPLPPSVDVHNSRDEYVDTDPQTASRLAMLRKLQ RDGIFEEAQLRK  
LQYRHGLYQISLLQAARDALRATEVLPDYSKAWLRAGELLSDLWKIKESRQYYEKALSID  
GFLEESIEPILQELEARQELLDRAFASEEFPEDTLQLALDIAG  
>comp15623\_c0\_seq4; 368 131 1064 LEN=1483; translated  
MRMPQVENKGN AFLESGEINPAINAYNEALSICEEYNLDDQKSDKSAIMLQQQEGSILLL  
RASAF LKQAQSHKEILQAEFV DDEETKSRSSQVLQALFSDTLAPPALSTLSDPRLQSNKE  
ETSSGLSVASNDVDDDQKKRTNSMVTEGEK DAAKTRTEKDDEPLPPSVDVHNSRDEYVDT  
DPQTASRLAMLRKLQ RDGIFEEAQLRKLQYRHGLYQISLLQAARDALRATEVLPDYSKAW  
LRAGELLSDLWKIKESRQYYEKALSIDGFLEESIEPILQELEARQELLDRAFASEEFPED  
TLQLALDIAG  
>comp15623\_c0\_seq5; 419 226 1806 LEN=5887; translated  
MTSSRKISVTATPVL DDEY GIGDVSGTATSSFG EIETIQAKGASSSVDASFTSPTANDCT  
DDPDFLYKEKEACKWVARKKRK LKKRCKRVYLGATI AKRCRETCDYNNCAQKKLALVGAY  
YYPWWGDDFHRGVKPDV PNLYLRRQLINPQEF PALGEYDDTQPDVIAQHLKWSRQHNIKL  
WVTSWWGEGRREDDTIKNHILTNKQLKDHKIAIFYETTGRIRK KYGYKLDNVVDPDLEYLC  
KTYFTHSNYYRILDNNGISRPVFFVYLTRKLEELGLLEEVISLMREGAKAGGCDDIFIV  
GDQVFQGPPLQNNAADLIPFEILDAVTNYDVYGSIRGYDIGGYVGRQNVTDYYQGEQRA  
WKEIARSKGCAFI PCASPGFNDRGVRPEVKRIPLSRRLSPGAPEGSLFRAALQEGTLVD  
SEVDNLMVNSFN EWHEDTQIEPAVAFNGSKGNNSRTNLP TDVTYGLEYEAYGALYLKIL  
KKETVNWDVSM AVAPSSASQLRISPHESGCELEVITISDTIGLELD  
>comp15623\_c0\_seq6; 548 382 1914 LEN=2333; translated

MIITLPSLLLVAHFVVFVSAFLNVPERMIPIQQHRRETINQQVSI SDKTIITGDKDLIR  
RSRTYELKAGLFGNHDPVKSPNSTHISPTSDWQIYVDQSKASLDRGGVATFDAFFSLCDQ  
YGGGGQNNNTDAIEVQVIPAILPKPVGGGKAPWIRCIWNTNKKDIVRPSNLDVSNVDSV  
DKVYRVLTKHLGVENISQEACECLRWKYKGNAFLESGEINPAINAYNEALSICEEYNLDD  
QKSDKSAIMLQQQEGSILLRASAFLKQAQSHKEILQAEFVDDDEETKSRSSQVLQALFSD  
TLAPPALSTLSDPRLQSNKEETSSGLSVASNDVDDDDQKKRTNSMVTEGEKDAKTRTEKD  
DEPLPPSVDVHNSRDEYVDTPQTASRLAMLRLKLRDGI FEEAQLRKLQYRHGLYQISLL  
QAARDALRATEVLPDYSKAWLRAGELLSDLWKIKESRQYYEKALSIDGFLEESIEPILQE  
LEARQELLDRAFASEEFPEDTLQLALDIAG

>comp15624\_c0\_seq1; 391 87 956 LEN=1815; translated  
MTDPYDEERLLSTIVALGELEEMPDTTPEGIQRFWQPFKLVENLKDIYAKKHENRNSNR  
HRSRSRRRKRKHIPTPVATTPPKIISIVIATPPDVSDSNKLFRRSLLANISALGELVSEM  
KQMSPI TKRLFWEAIKLEIKALRDLDDSNNGVNLRAIDQRTDDGLGPRPLQLEPRLDKEL  
TTSDSECTISTKSIHSQNSPSTTRSLRSLPRLQKSSRCNSNDEKEIAKSRSTSSMVDKM  
NWRRLRSVPTLSWLFPPASPDSEWLRPSVEAMGDAIDPNNNNFIETPV

>comp15624\_c0\_seq2; 391 87 956 LEN=1924; translated  
MTDPYDEERLLSTIVALGELEEMPDTTPEGIQRFWQPFKLVENLKDIYAKKHENRNSNR  
HRSRSRRRKRKHIPTPVATTPPKIISIVIATPPDVSDSNKLFRRSLLANISALGELVSEM  
KQMSPI TKRLFWEAIKLEIKALRDLDDSNNGVNLRAIDQRTDDGLGPRPLQLEPRLDKEL  
TTSDSECTISTKSIHSQNSPSTTRSLRSLPRLQKSSRCNSNDEKEIAKSRSTSSMVDKM  
NWRRLRSVPTLSWLFPPASPDSEWLRPSVEAMGDAIDPNNNNFIETPV

>comp15625\_c0\_seq1; 652 259 2358 LEN=2629; translated  
MTMPMMLAHRQRTTNASSLAQGRGPRKRPAGRSPAAPLASANPNSNPKATDLAASLAEG  
GTRLAGENHDEDSGHRANNYDVYIVLTPSGNSIGRAIVEEVAGRLSSPPFFQNHANANA  
RAADSGENESDQETEACFSFGETSPQSLARGGDRHNDKHDHTENSKSKSNNTNRAGALKSP  
AVATTTTMMNFVCLVRCPPAGDGNPGAIGRQKQSFSSANTNTHDLGDHDSPCCTVIDDDD  
GMCFDPLGSGPAIRTSAEACLRRIVRAVSSRVGDNRGERNESSAVERNRGRAGSASPTK  
PETSSRVRIRGIVFNYPGCCPQEQQAHSQAQDHNSRTGGGTDRYGSEQRATSSSLAEYK  
LLSIAIFLDAALSMRTTAIHSVVSRRDKNLEDEIDKHPKHKGKQNHGTSGGRASLRAI  
VVGTEAARGLPRMGI PVPDLNDDVDDFSIRNRMLRNRQRHNRSHSTGGAPSPWERDYAE  
MNAMAVLYKALAAQWNSSRSSETGGHGADLGDYVGTVSPGMTDESLDAAHVPASGRTL  
ALRCKLWCCRIPLVFHWLKAMEIAKDSAEGAALLVDALLNGPIERGNGGGGTAASVAAAT  
GGRGCLSWDDAYPSGSFVGARS GTGGPLCEQSLLVYNATSGRVGLSCGGDDGREERCPA  
AESPIAGRTNFLGNPRLQESVYRVVREFVSLAKNKTTC

>comp15625\_c0\_seq2; 548 606 1706 LEN=1875; translated  
MNHPLMVTVLLLLTAANSFVVVSSTAAATPGSQFDDLFHRRRMVRGAPHTADAAAPATRAS  
NGAQPRRKLPSGKDSKNGDNIFDRHKND CGCVENKRERQLQRKLGVGHNCDCSRKSKKTS  
KSARGSPPKYSSPQDDHDDVYTKESGGKVPKNAPKQKDDDDDDYFFQSVASGNVTNGSS  
SGKGRPGKGSNVASAKSAKAGGDSKVS KSSKESRTTSSKVGKSKDAKDQGRGQIVSNH  
LSAGGNIIGKNGNTPYKSSGFGTNAARNFII FVSVLVSF LICSCYRRESVLKQRSDGYW  
EEEHNQQQEKTEDREENLGETVHEESCSDDYEEDDEEDDENNCEEDYDVEDDDGGGERF  
QKPYTF

>comp15626\_c0\_seq1; 2576 185 6669 LEN=6669; translated  
MSSRITQRAKKQDKFRRRIANIDATASNDGVANANNSHNNSNNNKQISRSTSSSNRT  
NGKEKAPSSSAAPSETPFPRKVKSTFYALNSNPSQDSVGSVKSNSETYPVRREFKGLTG  
RMNGHRKRMGRSLTRASSVDKRDNSNSSSKVRPSSSESESESEEPGRIRTRNSDEPGR IK  
TRSRPGRSLTRALSVEKGSKSTSAASRAASRSASRSTSRPP IRAVNSNPPETSKASFALG  
SSSRFRARSLRNRYVAQPKRSHSQDSSASTKKDVSTKTSVVRPLSGRSPFSRLMAEKR  
QVASGTMKKSKKELYPTTKPAATPCESSEGDILEGNSASKTAAVETEELSTTITDDAPE  
AKNEDTDDTQCEPTTEERVSVVETDAVPAKIVDNERESLNESTTTEQKPIDVESEKPT  
EVVDIAEENLVTTVDEIENEAGFEDFEAMDSGNGLTLVADRGLSPVEETSHIGTPKTT  
LLDECEETPKDDANTPILSDKI ISNHVSRSGEVI VDEFGDPPELEEMESEVSIGPFDK  
INLQHCPLSPSESLDSFIPSPTKALVSPTESILDSFAPTPTSNANA EADVVENQKKEEG  
SEIEKKENAYS IKNEKKENDDEGKITPDTSQSSKAAQTASAWNLTNSQFNLVNSVTKSS  
DNDMDMLFDTWVTEKDTNFSNASLSNPYVKEDSSGEKKNESGDRSGTSDKTS SDLEKNTD  
GMFDMFDTSSWAAGTETGFSNTSISKLDVDIE SERNFVEMMKEEMKHRALTEESDMLFA  
AQKAINAEKAI AERSIVQKDDEPLIRQVADSNANDFTGEGSLPLEDRLKEYSNV KPD  
EDSESSTNNSSES DSKDGDNDVEYVDHQNEEEVDELDRKVEDVSSSLNGLSVSSTDVPT  
LAVAAATAEKTSSIPKQSLDNDTSTPTQESYVIPKTL EELKMATPPPPPPPPGIPKPKRKA  
KKKTKSSSRGKGVVPLISPPPKEKMKKWEDQQQKTPDYAKIMKEKLESSETKKSDVSSG



YFHFVKVDESQENAASETVCNSSVSPRQERECNESQDSCRDAQVIEENTIEKEIKQNMFDNEAEDEWKEMDNSKSSSTEEETQEAVTVMADLIDRDQSKNDDFVQTESPKKQTDSTEDTNSQLDKAHDHDSISAIQAQEVIRKNEEAALSNEKNNLWRKEVADAMGLVERLEEEYNQDFPLIDSYLTPLLSDDEISKKLSAQGLYQGVSYSKMSSMPKIPKIPSVGYSTSIPSSSQD SKDICEAEVEGQFSGESKQSTAQLIPDVQKDVVERSDTPESDCSDDVGLTKDRLLSVEIFDDPPMDREKTESMFYSPKASSRSTKANDFNEKKRSSDSILTDFKMADKVAMASSAAASTFEYQFSPRMDKKTDPKNATSAKGEILSWFSREVLKTEPPALELDTDVSEVARGLLENRQHFNMSCRYVAERINEVSIQMKPDLKFSESVLSSFDTENPFVSKTMSSTSSGDSGDESTTSVEQKRVLKPVILSDAMMTLNKNYLAANFVSFIYMASRLAKVASPFGDSNPFLAMIVSSSLNKTTEKEATEETTQDLLFEKLGKKAENLIEFVYKVKASCADMTVLTAAAIIVVKQSFESMDEEETKRDFGRRFIFPDNHPSPFEASVFEAPRIVA AVL SFLGDPVTVCRMKAVNHSCRQIVEENEHTLMQDAVRIGGLNASLRPAFWMWIALEKCDVSNRQNNFSGCDELNALEREAE EGKWHHVIQRDVARSFGNMPPHKTGARFRSDSIVAALVTWGQSRVMKRGVKGGEPPVPIPEIGE QNLRKQKVKRSTNTSSPPWK CENEDGSDGDTSVVKS DTSGAPTDTVSDWSAVSPKGSFVGSINDPELFVDESTEEIVLCGNSLSADV KEDLQNKLSYILHSLAATYEDIGYCQGM DYVAHLLRNLQD TIRLRAAKGTMPAIVSTASSVETDLLIDAENIEIMNKEIDSHRVVEETIVRIMDTFFVSYNLRHMYWPELRCLKTCCRVFERLIQIKLPVLADHFEHDLNVGLFALGWFTLFLYLPSMPSATVCHMWDIWLVERSFKIFFRAGTAILFLSQPILLNHELEGGMMTYLNTIPDATLLRPDILIPCALNIKV TNRMLQELEDEVMKNPXLGQVEITFMSLSEQKNAPNVKYRK

>comp15627\_c0\_seq1; 693 219 2456 LEN=2896; translated  
MAKDLKTYLKYTNEDHIEGYQLEKSSMIISIIHNPLLI SADELSRSMLEATEIKTSVEKD  
GNDGKVVNFSESI EEDDALDDPAEELENGIQPAVAICGVFWILSMLS YVGGSWRVFSYLG  
LLSVGIGIPPIAKKAYRTACRGMIDTNVLMFLAVFGAVCLGQFN EAAAVTFLFSLSEWLE  
HRATSRANAALTSIVK LKPERANI IQPKTKDLVVVPATSV PVGAMVAVKSGDKIPCDGII  
VEGNSTVDES S LTGESRPVKKGPRDEVSGGTVNSGNTQIVVQTTRTSDDSAVSRLIRLVE  
EAQANRSETEKIIDSF AKVYTPVVVLSALAMCTISWFWGPAVGRDWT SRGLSLVVIACPC  
ALVISTPISYVAGLAATAQNGVLVKGGAHLEALGQLKHVCFDKTGTTLTVGEFKLLKLSMI  
GSKLGRQEV LQNLALMEERATHPLAKSLVDGIKAEGVTVPPTLVVKDHTV LAGEGAEGTV  
NGKKVYVGNERLFRRLGIFDTIPLAQKDKIESWEATGGTVGFMSIGDEGIVCTYCVADGP  
RPETMQVIKELKDMGMSVTMLTGDKRR TALSIGKLIGMESENIKSELLPEEKLARI SELK  
EETGASNPLLALFFAKPRLVLMCGDGVNDAPSLVVANVGVAMGAGAALAMETADVTLMDS  
QLTKLTYSIKMGRLVIQKIRENVVFSILV KLVVLGLTVTNHVGLWAAIGSDVGSMI VVTL  
NGMSLLPKDEKMH TTTTKMETQIV

>comp15627\_c0\_seq2; 1310 9 3614 LEN=4054; translated  
MASTPQPSSNEEEKLLGPNSSPSSSDNNKNNNYGAAATAATLLGSSPNPTRNSCCDENGNCENAPSRKRAFPGTASSASSSSSTNNLVRFFGDLFQTQNSRTSVAACCASGTCVYTQKFLYSGPDNNPEQQKQLPRRPSERSLSEESVGSYNNPSTPIRSRTNSADSSSLSGQSPSSLTQQQLGSTTPPPQMDPTVAQTIVRSTLHCTGICCSSEVPELLEILQPTEGIAEVKVNVP LKQIILDHDCRVISATQIAKLL EELFPSKVERDGGASLPSFVRSTFH SKGLCCSSEVPLIVSILQPYEGVSDIKFNVPLKQIIVEHNSKVISAAQLASLLTKEDFPTSIVADGGTKTVGVEGRSKFHVGGICCASEIPA KTI LEPEKEGIKGLIVNVATKMVYVDHSANII SADS IADSLNDNGFD AVVKYDCYK DAGGFLSSFVMSKFSI ESSSPTMAKDLKTYLKYTNEDHIEGYQLEKSSMIISIIHNPLLI SADELSRSMLEATEIKTSVEKDGNDGKVVNFSESI EEDDALDDPAEELENGIQPAVAICGVFWILSMLS YVGGSWRVFSYLG LLSVGIGIPPIAKKAYRTACRGMIDTNVLMFLAVFGAVCLGQFN EAAAVTFLFSLSEWLEHRATSRANAALTSIVK LKPERANI IQPKTKDLVVVPATSV PVGAMVAVKSGDKIPCDGII VEGNSTVDES S LTGESRPVKKGPRDEVSGGTVNSGNTQIVVQTTRTSDDSAVSRLIRLVEEAQANRSETEKIIDSF AKVYTPVVVLSALAMCTISWFWGPAVGRDWT SRGLSLVVIACPCALVISTPISYVAGLAATAQNGVLV KGGAHLEALGQLKHVCFDKTGTTLTVGEFKLLKLSMIGSKLGRQEV LQNLALMEERATHPLAKSLVDGIKAEGVTVPPTLVVKDHTV LAGEGAEGTVNGKKVYVGNERLFRRLGIFDTIPLAQKDKIESWEATGGTVGFMSIGDEGIVCTYCVADGPRPETMQVIKELKDMGMSVTMLTGDKRR TALSIGKLIGMESENIKSELLPEEKLARI SELKEETGASNPLLALFFAKPRLVLMCGDGVNDAPSLVVANVGVAMGAGAALAMETADVTLMDSQLTKLTYSIKMGRLVIQKIRENVVFSILV KLVVLGLTVTNHVGLWAAIGSDVGSMI VVTLNGMSLLPKDEKMH TTTTKMETQIV

>comp15628\_c0\_seq1; 1531 177 6317 LEN=6365; translated  
MFESIVGFTRENVVFDNLHKHLLQSLPNSFLQTLHQYASLAVDNTDATSSLVVFAIFLVSFVFLKYRVLFSRPPVPLKCLPPRALCIQFKPDDDESALSNQKEKQTTTAHSGSSVAAPS SFDSAFDETTSYASVGSTHGSTMGGPGSHRRSRSYSEMPRPF RFDLPDSFAPLLSSSQT

EMLLHHLTADLIHGVAHAKAIAQINEGVHEIPLDKDPSRPQFNVDVAKSGCRVSIANAVGS  
DSFTQAQDLVSIPTTSRSPRMVKYAEVTFDPPVSLKNVAPTLIHIPTLFEDSYVVPYR  
RIAITRYFINLIIGISNYIEKVLWIVENFLHIHLGRVRI TPVYKGRSSIDDNSPEWRLGL  
AFSGHCNLFVGFPIPFINVILPTFIIPQPHALLEYLMKQPLATAKIRRENIAEQKLTIA  
ALDMIDTWNQCQLELVATPPAVGIDLTPGGVSLGLEFMHGRDSGAGKSRDNFSEVLTPGE  
RLTRSSASRTSWTSNDRSDSAFGNNYFSPSSSKTGALPFNANKLVPWKVELSAKGSMMKD  
KISLYIQRCSEFRHDDPSSPIPAESQILVRGSFVVKATPEAGSSNRNTGRSLYDRRTFAH  
RAALAASGNDCPSVAAMLLFPQDLESFHQATRLLQYDFAFDESDSRIDAVTFVVGASHPM  
LNGGSMVTTIFESIYASGSVTARENATLDPPIEIKRKRNVKHLPAVDFTFGVQNGFIPPE  
SNSYMDDGQTRTLPRMEGARLEVQILGGIDRLKDDMENELKEDFGKRGIGKENIVEGIQV  
IADCVVSSIIDSETNVKEFPPELEIFEGTKLRAYTSGKLGNNVKCHLKPQKLAHSVSTG  
PNLNFNLEAYEIDFSGCDFSVRLRESTTSLGHRRVIIPSETTVKIRVVEISIVDMSMEGKS  
ELEILWDFQGLSPILQVTEVGLPEPTVNHENKEQVSLLIAPLRQGRLSAKISQVGGVSI  
KAATSREDKEGLYDWFKNALVSPNPDPEASARLLDVIHDKRSMRKLQVVRLINNDIYK  
LLDFIFTRVWRLKEIMDQEAVSEAKDIIPGHKMARLFSLALCEDLREVPECLRIIRRVTA  
GDGLDVVAVKELLRKYAGIYDNWTPRIDRGVRMLEVMFNPTPAEPFYVEDHITPLALLSE  
YSSRFRRIPSAADLYDQIHDRPDLPLDRKFSNLVGRISPYLSFRQIEHLLKVRDKKDWQS  
SDLKRLRYVYSIKRKVMDIAESYGGLSFLPQSFLVSVFLGEATRSSLKYIQPAKKENPLS  
LNI SNRPSTLVSLRQRARLHDP SLNQINEEKEASFVTPAARVASSSNFSSINVPVELQN  
STIQKERSLNAMDDDEEYELGDCLLGPADVAILLQAGLTSVMKGSSVVQLNQRMLLDLVT  
SQPKGFAVSVLAEIGTPGGQGSQRQLASALMALLELDQSSFTPQHQLDMKLLLESWLPGM  
RVPRREDYMAGGRWARQSYGAI FSLAKNILEDAECYMALNSHLQRYRHHLES DPIP LPQ  
EELQSIQNETNGGDGDELQSKLKEAIRDAVCKINDADTKGEELLPRLLSHGNAAKSGLY  
TEVKNAYYDAFKACARVRDLDPQSFTSEWFRYFYQRNYNALMIKSVFDNVVDDVDDVRYW  
MHCLRRGATYGPQRNDELIREGSKEPPNVFEKFLNGITDGP IKNVLD SNICIFLNPSKR  
SEQEIVDAILDALIFDKHDREIMRRDPLVRLIIPNLDGNYDFTVVTAMGVITEGKAGTEL  
QNALRRLEEKRGVKFIRADTATARSFEYNAERIEAIEATKEYNVFPFLIGYSQGCANSL  
MAESILYSGTPEQQEYIKRNLAQRQLLFSANGSAHGSSTDKKASRLILMVVEEFAKYQQG  
YFSRALQTAFLLETVTSMLDSSQFHKSMGGAQGFLHDGCRAFWRQAHLPNVPTCTLRGIL  
EEHTTPEALEMLSQMLTKQSGSALHDSQVHASDAVGYPVYHRNRNGRILEKCEIGAGAIQ  
RTHHWSPLKEEVEFIRTSRDHDIASFDCAKDRHIFPWVDVNARFGFIKYSRNPASGHPCG  
NGDGEE

>comp15628\_c0\_seq3; 1490 177 6122 LEN=6458; translated  
MFESIVGFTRENVVFDNLHKKHLLQSLPNSFLQTLHQYASLAVDNTDATSSLVVFAIFLVS  
FVFLKYRVLFSRPPVPLKCLPPRALCIQFKPDDESALSNQEKQTTTAHSGSSVAAPS  
SFDSA FDETTSYASVGSTHGSTMGGPGSHRRRSYSEMPPRFDFLPDSFAPLLSSSQT  
EMLLHHLTADLIHGVAHAKAIAQINEGVHEIPLDKDPSRPQFNVDVAKSGCRVSIANAVGS  
DSFTQAQDLVSIPTTSRSPRMVKYAEVTFDPPVSLKNVAPTLIHIPTLFEDSYVVPYR  
RIAITRYFINLIIGISNYIEKVLWIVENFLHIHLGRVRI TPVYKGRSSIDDNSPEWRLGL  
AFSGHCNLFVGFPIPFINVILPTFIIPQPHALLEYLMKQPLATAKIRRENIAEQKLTIA  
ALDMIDTWNQCQLELVATPPAVGIDLTPGGVSLGLEFMHGRDSGAGKSRDNFSEVLTPGE  
RLTRSSASRTSWTSNDRSDSAFGNNYFSPSSSKTGALPFNANKLVPWKVELSAKGSMMKD  
KISLYIQRCSEFRHDDPSSPIPAESQILVRGSFVVKATPEAGSSNRNTGRSLYDRRTFAH  
RAALAASGNDCPSVAAMLLFPQDLESFHQATRLLQYDFAFDESDSRIDAVTFVVGASHPM  
LNGGSMVTTIFESIYASGSVTARENATLDPPIEIKRKRNVKHLPAVDFTFGVQNGFIPPE  
SNSYMDDGQTRTLPRMEGARLEVQILGGIDRLKDDMENELKEDFGKRGIGKENIVEGIQV  
IADCVVSSIIDSETNVKEFPPELEIFEGTKLRAYTSGKLGNNVKCHLKPQKLAHSVSTG  
PNLNFNLEAYEIDFSGCDFSVRLRESTTSLGHRRVIIPSETTVKIRVVEISIVDMSMEGKS  
ELEILWDFQGLSPILQVTEVGLPEPTVNHENKEQVSLLIAPLRQGRLSAKISQVGGVSI  
KAATSREDKEGLYDWFKNALVSPNPDPEASARLLDVIHDKRSMRKLQVVRLINNDIYK  
LLDFIFTRVWRLKEIMDQEAVSEAKDIIPGHKMARLFSLALCEDLREVPECLRIIRRVTA  
GDGLDVVAVKELLRKYAGIYDNWTPRIDRGVRMLEVMFNPTPAEPFYVEDHITPLALLSE  
YSSRFRRIPSAADLYDQIHDRPDLPLDRKFSNLVGRISPYLSFRQIEHLLKVRDKKDWQS  
SDLKRLRYVYSIKRKVMDIAESYGGLSFLPQSFLVSVFLGEATRSSLKYIQPAKKENPLS  
LNI SNRPSTLVSLRQRARLHDP SLNQINEEKEASFVTPAARVASSSNFSSINVPVELQN  
STIQKERSLNAMDDDEEYELGDCLLGPADVAILLQAGLTSVMKGSSVVQLNQRMLLDLVT  
SQPKGFAVSVLAEIGTPGGQGSQRQLASALMALLELDQSSFTPQHQLDMKLLLESWLPGM  
RVPRREDYMAGGRWARQSYGAI FSLAKNILEDAECYMALNSHLQRYRHHLES DPIP LPQ  
EELQSIQNETNGGDGDELQSKLKEAIRDAVCKINDADTKGEELLPRLLSHGNAAKSGLY  
TEVKNAYYDAFKACARVRDLDPQSFTSEWFRYFYQRNYNALMIKSVFDNVVDDVDDVRYW

MHCLRRGATYGPPQRNDELIREGSKEPPNVFEKFLNGITDGPIKNVLDNSNCIFLNPSKR  
SEQEIVDAILDALIFDKHDREIMRRDPLVRLLI PNLDGNYDFTVVTAMGVITEGKAGTEL  
QNALRRLEEKRGVKFIRADTATARSFEYNAERII EAIEATKEYNVFPGLIGYSQGCANSL  
MAESILYSGTPEQQEYIKRNLACRQLLFSANGSAHGSSTDKKASRLILMVVEEFAKYQQG  
YFSRALQTAFLLETVTSMLDSSQFHKSMGGAQGFLHDGCRAFWREAQHLPNVPTCTLRGIL  
EEHTTPEALEMLSQMLTKQSGSALHDSQVHASDAVGYPVYHRNRNGRILEKCEIGAGAIQ  
R

>comp15629\_c0\_seq1; 366 265 2386 LEN=2386; translated  
MLRVLAIALLLLGSIPASWKATADDLPDAAGSVIDEKPEPVDCQSLHYDCHGCLANGCYW  
CPTDALCFETPEYVAKQTNKNLLYPDRIHNCKTPESFTQTTCTAPGNFFSDPVYSAQKWI  
FDNIKVEPVWAKGYTGSQVVRVNDAGIQPDHPEFLGRIDLNASCPVYEPDASKNSHGMI  
VASLVGATANNRSLTLVLVIGLGLVFGSKIGQFVLLHRDAIDCHSNTTRNTTRKARRK  
SSSHFCGCLAGPFRFLXSLSSLSIDPKDNCVGIAPGVTL SACHVGSMPKEALLLYKVD  
EIDISQNSWATEGCGPASITVASCNHPGCDRKLAEAEAEETSFCPFAYKPFESYNQFPCD  
HCNFTVGVYPYSDQGEERCRTMMIKHCSFYYPQENKACMEIVDLILFDKQPLSMGECHFGAL  
SADAIAAFTYGIIEGRDGGKIVYVFAAGNEFAVGDDTNFQGYGSNTRFTIPVASVGKPGN  
FSAFSTPGASVFI AAPGGDSKQSI TRVVGATVDGGCNDNGDGT SYAAPVVSQVVALMLEA  
NPDLTWRDVQYILALTAQVVDSTDP TVAENGAGKIHSNRYGFGIVNAEKAVELSEEW TN  
IGPELMLVKEGKGNVHL PDDVNNATKISLDFSHEKSFITEHVYLYLNFNHSSRGHLRIDL  
SSPSGMLSVMSPGKRPE SQQWGMKFTSVRHWGEDPTGNWTIQIVDTX

>comp15629\_c0\_seq2; 180 1 659 LEN=1152; translated  
XSPSGMLSVMSPGKRPE SQQWGMKFTSVRHWGEDPTGNWTIQIVDTNAGDVRNCISYKD  
YRIEVDEFSSLS CDGKDRTRLEQYCKNGKFDPN EEWAKACNNTDKKTADANLVSSCDFVE  
RFKTEKNAGLTGPEACCICGGGFSPDLLPEELLEWKLV IYGHEKFPGEGFFSGVEGATEL  
GKWKDRGRVYVEDRLRIPDGIDPLPGYQKPN SNVRRRGV

>comp15629\_c0\_seq3; 90 265 927 LEN=1039; translated  
MLRVLAIALLLLGSIPASWKATADDLPDAAGSVIDEKPEPVDCQSLHYDCHGCLANGCYW  
CPTDALCFETPEYVAKQTNKNLLYPDRIHNCKTPESFTQTTCTAPGNFFSDPVYSAQKWI  
FDNIKVEPVWAKGYTGSQVVRVNDAGIQPDHPEFLGRIDLNASCPVYEPDASKNSHGMI  
VASLVGATANNRSLTLVLVIGLGLVFGSKIGQICLAVAS

>comp15629\_c0\_seq4; 523 265 2155 LEN=2155; translated  
MLRVLAIALLLLGSIPASWKATADDLPDAAGSVIDEKPEPVDCQSLHYDCHGCLANGCYW  
CPTDALCFETPEYVAKQTNKNLLYPDRIHNCKTPESFTQTTCTAPGNFFSDPVYSAQKWI  
FDNIKVEPVWAKGYTGSQVVRVNDAGIQPDHPEFLGRIDLNASCPVYEPDASKNSHGMI  
VASLVGATANNDCVGIAPGVTL SACHVGSMPKEALLLYKVD EIDISQNSWATEGCGPA  
SISAASCNHPGCDRKLAEAEAEETSFCPFAYKPFESYNQFPCDHCNFTVGVYPYSDQGE  
ECRTMMIKHCSFYYPQENKACMEIVDLILFDKQPLSMGECHFGALSADAIAAFTYGIIEGRD  
GKIVYVFAAGNEFAVGDDTNFQGYGSNTRFTIPVASVGKPGNFSAFSTPGASVFI AAPG  
GDSKQSI TRVVGATVDGGCNDNGDGT SYAAPVVSQVVALMLEANPDLTWRDVQYILALTA  
QVVDSTDP TVAENGAGKIHSNRYGFGIVNAEKAVELSEEW TNIGPELMLVKEGKGNVHL  
PDDVNNATKISLDFSHEKSFITEHVYLYLNFNHSSRGHLRIDLSSPSGMLSVMSPGKRPE  
SQQWGMKFTSVRHWGEDPTGNWTIQIVDTX

>comp15629\_c0\_seq5; 158 1 501 LEN=994; translated  
NCISYKDYRIEVDEFSSLS CDGKDRISLEQYCKNGKFDPN EEWAKACNNTDKKTADANLV  
SSCDFVERFKTEKNAGLTGPEACCICGGGFSPDLLPEELLEWKLV IYGHEKFPGEGFFSG  
VEGATELGKWKDRGRVYVEDRLRIPDGIDPLPGYQKPN SNVRRRGV

>comp15630\_c0\_seq1; 630 136 2292 LEN=2382; translated  
MKTTLKKSLSLDFCGMITGRNTMDATHHETRASRFSRETFASHMNDEEGSFEGYSKVDH  
ITPLIDKIYREEVNEKSYTRSNANARSVSLHLHNNNFVDERRKWSVGKFSVLILIVFSLA  
DVIFCMVDAQIGSLEAHDDYDAL SADVIRPAFRYRQDQSSH KARPSMGLGSAAISSVTTT  
LSPILPFAGGIDL RREDYWADGWIGSFYSVVEHARIAFKNSPTGANPAPKDSIGEVLATP  
RGGAAVSVKTRRNNKSKSKKKQGASTANVDFILSNSECFVPLKEIAESTLKDITMSFRYA  
VESTQRDFNSGKFLSGLLPRVKKMI ERVSTATNAARGRVSAPITTEQIGHSHIIAGDID  
AINFCAAMRIFAEWRVLRQVPPGYKGYAVGIGLQKDIVQNI AKIELAIHEYGVHQSKEN  
GNKERASVDSNEVGSETIFTSP TLRDLLQYEVETDVHDNTKLPRLKEKSAAMGLLWVRRQ  
LEYQTTFN NVLEVGRFDS SRAAVQAAYDEIYGD LHWAVQKIFSYSFQAAPEGIEIYK  
YMNPHRLEEVQGEARTKIMGRPGGRKGRNGV NPLERFGRHVVKEDKIANNVVNEWGKLS  
ENVENEDKVTGNIGQLFGQQRRHKD HSHKKRQLRSTTEMKDATSITTTATPDNSIQTTI  
TDEDVLALKELEMENFINREMRKDAYDHIKAYLEVVNPLLDLSTLIDEFNMDDPTKV

>comp15630\_c0\_seq2; 619 882 2996 LEN=3086; translated

MNQIIDTGSPSLTSVSSLPMSAYIATHYSFDMDRGSFEGYSGKVDHITPLIDKIYREEVN  
EKSYTRSANANARSVSLHLHHNNFVDERRKWSVGKFSVLILIVFSLADVIFCMVDAQIGSL  
EAHDDYDALSADVIRPAFRYRQDQSSHKARPSMGLGSAAISSVTTTTLSPILPFAGGIDLR  
REDYWADGWIGSFYVVEHARIAFKNSPTGANPAPKDSIGEVLATPRGGAAVSVKTRRNN  
KSKSKKKQGASTANVDFILSNSECFVPLKEIAESTLKDITMSFRYAVESTQRDFNSGKFL  
SGLLPRVKMIERVSTATNAARGRGVSAPITTEQIGHSHIAGDIDAINFCAAMRIFAEW  
RVLQRQVPPGYGYAVGIGLGQKDIVQNIAKIELAIHEYGVHQSKENGNKERASVDSNEVG  
SETIFTSPTLRDLLQYEVETDVHDNTKLPRLKEKSAAMGLLWVRRQLEYQTTIFNNVLEV  
GTRFDSSRAAVQAAYDEIYGDLHGWAQKIFSYSFQAAPGIEIYKYMNPHRLEEVQQEA  
RTKIMGRPGGRKGRNGVNPLERFGRHVVEWDKIANNVVNEWGKLESENVENEWKVTGNI  
GQLFGQQRHKDHSKKRQRLSTTEMKDATSITTTATPDNSIQTTITDEDVLALKELEME  
NFINREMRKDAYDHIAKAYLEVVNPLLDLSTLIDEFNMDDPTKV

>comp15631\_c0\_seq2; 275 203 1204 LEN=1770; translated  
MDGHKAGLSTGDIEFAMVNAVLYATNSFHAGQPLAKIQAEVFKLQELTILFRQKSCESVI  
SPILQQVYNLRSSNHSIVASEQPPWILTGTACNEEQLVSEALVSNNVMCLSQFNFRKLWM  
AYVFRNYDVAFEMAESRITIKSSPASFMVFSHYFFEGMTCMALAANLNGTKQKRKRKKF  
RKLAACKLKTMNKYTNHCKLNCQNKVLMLEAEFKIAQGDLAGGLELFKKSASISHQEGLM  
HEQAIAYERAGLAVLSHQAYNPSNANTDNKPPSSPSSVSIITLSNDQASKLQQQNHVD  
SSHYFFGKSIAQYKLWGATAKVEHMIAKGHGGS

>comp15631\_c0\_seq3; 931 108 3900 LEN=4466; translated  
MSDNCHAIETYDVGSSQIVTVRTRKGGESGYRERSNERSDDGFVFDHTNTVSTGAATASTE  
ETYVEDMDVSYAAASSCSAQHHKSGGNPTSHQOELSTDLDWSFLREGQLFDRKEQQKQLL  
EIFRRKHHTNKDFVLVSGLSGTGKTVLVQETLKDPAVNAGGYFLLGKLDQLNKKSPQRPY  
APFVAASFVLDLAKRENEAETIRALTSSHMIQGDIDLLETFPSLTSIIRPMEHNDGN  
KHTEKSDTSNHGQNTNHARLFSNNIHDRNKSQONENQNRQQIGKSKFTTADNQQLARI  
VRSFLECISNPDRPIVLLVDDLQWADSGTLVLLHSLQAEKLRDCKPTTNI SNDFNSGL  
LLVGTCTRHNEVGLDDDLAKFLRTLEDEGKVTIRQIEISNLSRQACGELVARILGFPDGY  
QSHQGESLAPLVDIAYGQTQGNALLQFLRSLHEEGYLVQSQPRQTTSSLPTKHEWL  
WNEEVIRGNSLHGAVRATSDATPDPVIMAYQMMRLPPHVQETLKVAAACLGAEFSEELLY  
RAMPCTVPI TVADSSSIEKGDVSESLDLMIFKELVRLNSGSGRFQFCHDKIQQAALTLI  
PEQQRDLYCTNIGRRILEHAQAQANSIPNEDSEYICIFLIVNLLSHGISADI I KEPEVKMM  
VATVLL EAGELAAAMSDFATAATYLNGLIECLQSNFICVKNKYWKHEYNFSLAIYNAAAE  
VEYCTANFERMDCFIKEILLNARCFQDKMRAYITMIYSLGSRERLLEAIAQGFSLLEVLG  
EHFPRRDNKIFLLFDLIKTKRMVKTSVDFYGDLDRLPLM QDERKLA AIQILNIIFPYCMM  
LKHPKTPLA AFRMVQLSVKHGFTETSATGFSGYGLMLSSIGDFMNGNRNGKFALRLLDRF  
QAKHLNPESILCIMVLLAIGTPLKLNKPTMDGHKAGLSTGDIEFAMVNAVLYATNSFHA  
GQPLAKIQAEVFKLQELTILFRQKSCESVISPILQQVYNLRSSNHSIVASEQPPWILTGT  
ACNEEQLVSEALVSNNVMCLSQFNFRKLWMAYVFRNYDVAFEMAESRITIKSSPASFMV  
FSHYFFEGMTCMALAANLNGTKQKRKRKKFRKLAACKLKTMNKYTNHCKLNCQNKVLMLE  
AEFKIAQGDLAGGLELFKKSASISHQEGLMHEQAIAYERAGLAVLSHQAYNPSNANTDNK  
PSSPSSPSSVSIITLSNDQASKLQQQNHVDSSHYFFGKSIAQYKLWGATAKVEHMIAKGH  
GGS

>comp15632\_c0\_seq1; 659 413 2431 LEN=3014; minus strand; translated  
MAQATIRAAAAASTHQKMRTTTTPTTTTTTTTTIAATPLRAGRRGKRSGKRTWSSGTLTLLQA  
CLAIATGTVFLGVVRIESVLYREFRDTTTRRAEEDSPNLSGKRHRSSGGSESEYQGNDEG  
GGTSDGLVRRSTESKPMIAREAGHDKPRPRLASGSRI VALNEHLERATMPAEIGRKMART  
IQMELEDTFAAADGYDHYGGHLEFEREYDQCDPVLDPKVVHPTCNSIHELSTELE  
ERSLLSMKGAWRSVWVKVDLNTVDNDIDKMKTNNTALAFAPDSNNSTIVSSNISTSTSS  
AVLKMLHLHR SFDHQSF EAHATDSIAMDRLTASPYVVDAYGFCGQSVVTEFAEVSGRDYV  
KRYDIGSRDRLR IARDLARGLADIQALRALPHAELLVNATKNATTIAAVVRDYDVRGTG  
IRTTTRSPIVFAHNDITIANVMVDGR I KWNDFNIGMFLRRPKRKNDDSGRKLHRSDDSG  
SRRHLRSPDRSSSNHRQVDDDESADAKVPPSKGSQSLSFRAFTEENSGTSDEALCPAPVK  
FRSDMWRSP EIRNTSYVQMTQTDVYGLGNI IYQTMTRHQPTWYKEPGGALTKEDVAVRK  
QNGTIPTIPEQYLNNTKRELQTLFAATNLCFHDPWKRPTARRLAFGLGSLYNRVSHKKG  
VTRLMILDYLPV

>comp15632\_c0\_seq2; 659 409 2427 LEN=3036; minus strand; translated  
MAQATIRAAAAASTHQKMRTTTTPTTTTTTTTTIAATPLRAGRRGKRSGKRTWSSGTLTLLQA  
CLAIATGTVFLGVVRIESVLYREFRDTTTRRAEEDSPNLSGKRHRSSGGSESEYQGNDEG  
GGTSDGLVRRSTESKPMIAREAGHDKPRPRLASGSRI VALNEHLERATMPAEIGRKMART  
IQMELEDTFAAADGYDHYGGHLEFEREYDQCDPVLDPKVVHPTCNSIHELSTELE

ERSSLLSMKGAWRSVWKVDLNTVDNDIDKMKTNNTTALAFAPDSNNSTIVSSNIISTSTSS  
AVLKMLHLHRSFDHQSFEAHATDSIAMDRLTASPYVVDAYGFCGQSVVTEFAEVSGRDYV  
KRYDIGSRDRLRIARDLARGLADIQALRALPHAELLVNATKNATTIAAVVRDYDVDRGTG  
IRTTTRSPIVFAHNDITIANVMVDGRIKWNDFNIGMFLRRPKRKNDDSGRKLHRSDDSG  
SRRHLRSPDTRSSSNHRQVDDDESADAKVPPSKGSQSLSFRAFTEENSGTSDEALCPAPVK  
FRSDMWRSPPEIRNTSYVQMTQTDVYGLGNI IYQTMTRHQPWYKEPGGALTKEDVAVRK  
QNGTIPTIPEQYLNTTKRELQTLFAATNLCFHDPWKRPTARRLAFGLGSLYNRVSHKKG  
VTRLMILDYLV

>comp15632\_c1\_seq1; 391 1 1701 LEN=2003; translated  
XPMIAREAGHDKPRPRLASGSRIVALNEHLERATMPAEIGRKMARTIQMELEDTFAAADG  
YDHYGGHLEFEREYDQCDSVLDPLPKVHPTCNSIHELFLSTELENERSLLSMKGAWRS  
VWKVDLNTVDNDIDKMKTNNTTALAFAPDSNNSTIVSSNKSTSTSSAVLKMLHLHRRFDH  
QSFEAHATDSIAMDRLTASPYVVDAYGFCGQSVVTEFAEVSGRDYVVKRYDIGSRDRLRIA  
RDLARGLADIQALRALPHAELLANATKNATTIAAVVRDYDVDRGTGIRTTTRSPIVFAHN  
DITIANVMVDGRIKWNDFNIGMFLRRPKRKNDDSGRKLHRSDDSGSRRHLRSPDTRSS  
NHRQVDDDESADAKVPPSKGSQSLSFRAFTEENSGTSDEALCPAPVKFRSDMWRSPPEIRN  
TSYVQMTQTDVYGLGNI IYQTMTRHQPWYKEPGGALTKEDVAVRKQNGTIPTIPEQYLN  
TTKRELQTLFAATNLCFHDPWKRPTARRLAFGLGSLYNXGVPQKGGDPADDSGLSRSVT  
RATSTTRMRTREQCDVGPALGREASTQ

>comp15632\_c1\_seq2; 618 60 2164 LEN=2466; translated  
MAQATIRAAAAASTHQKMRTTTTPTPTTTTTTTTIAATPLRAGRRGKRSGKRTWSSGTLQA  
CLAIAATGTVFLGVVRIESVLYREFRDTTTRRAEEDSPNLSGKRHRSSGGSESEYQGNDEG  
GGTSDGLVRRSTESRPMIAREAGHDKPRPRLVSGSRIVALNEHLERATMPAEIGRKMART  
IQMELEDTFAAADGYDHYGGHLEFEREYDQCDSVLDPLPKVHPTCNSIHELFLSTELN  
ERSSLLSMKGAWRSVWKVDLNTVDNDIDKMKTNNTTALAFAPDSNNSTIVSSNKSTSTSS  
AVLKMLHLHRRFDHQSFEAHATDSIAMDRLTASPYVVDAYGFCGQSVVTEFAEVSGRDYV  
KRYDIGSRDRLRIARDLARGLADIQALRALPHAELLANATKNATTIAAVVRDYDVDRGTG  
IRTTTRSPIVFAHNDITIANVMVDGRIKWNDFNIGMFLRRPKRKNDDSGRKLHRSDDSG  
SRRHLRSPDTRSSSNHRQVDDDESADAKVPPSKGSQSLSFRAFTEENSGTSDEALCPAPVK  
FRSDMWRSPPEIRNTSYVQMTQTDVYGLGNI IYQTMTRHQPWYKEPGGALTKEDVAVRK  
QNGTIPTIPEQYLNTTKRELQTLFAATNLCFHDPWKRPTARRLAFGLGSLYNXGVPQK  
GDPADDSGLSRSVTRATSTTRMRTREQCDVGPALGREASTQ

>comp15633\_c0\_seq1; 278 475 2012 LEN=2510; translated  
MAGPSLERALAAAALVLWALRFGEPEGLVPAAVSALVSGRAGRFGGSRSGWPEPYGGP  
TRAPSERVLHAENGGAFQGSNATDPSPGSRGGSGPVALAPSGTGATLASPPPPFGGAS  
GGGTLGDIMSPAVDDADELFRDGLVTSESYSLAQTYGITNPLDRMAVTANGNLQRLFSS  
YYDAPVVVEVYCRRRKAEQGDASPAVWDRRVELVMFGNTTVCTADSIVEVHNRDLEDLV  
ESGRVGIGQIFRRFSILPEFVLSAAGPLQGGGFWRNYTLESEPVTCSIREVFCGGVWDLA  
GGNPTGDPAXAEREARSVTTGPVALPPDAHEXVRECETPTSTVQNNSMGVAQNRFRMLSQ  
TNSTTAPRPGQLVLNERARSTSSSHATSNESSLWVQNSPFGPRDGAVARGGPGRSQEPRVA  
VLIRSVRRVPLRGQAPVVVLLVAVVSPFSGSSGLQAGFRFQSRGANVSVVRGKMPGLGL  
PKETPPIRVPPVAPSLHQGDRLRRKTARRFGQW

>comp15634\_c0\_seq1; -6 1 231 LEN=231; translated  
TRTPTTAAPTAKSPLRISGQQNLNLISGQTGSSVLAGYYISDGYTTVEVETWDGSWINQIV  
LPNGVPDGSKLLIICRS

>comp15634\_c0\_seq2; 1009 190 3006 LEN=3006; translated  
MMMNRKGRNDRKVFDDLDRSSSSSSSEFSDHREVRADYSSRSLFDLSAAIPDATEDSN  
RFSPTASQKLGHDASSLQILP IPEKEHEILALENDSRDHSTNDCCGYDSDSSMPHS  
VNYSLPHASDDTSVARGTRLNYSKQVPYTTYDTSSGRSHRKISSVPNQPNHDLYKNAKN  
DDDFDEHDGDSFKDTLMAKNRDEKESSTNNQPTYFDGDLCTQRSDGTDDSDYSFFPTFA  
STRRHAPLFSFCRDHSTSDSEIIPAIESSLTTGGNNSHGGISLSTITPQNMREGHHIHS  
DEMSLGRSTIHGICIGDRDSNDRIEQYTVTLPLFEDEKCNITISHKSKSIRFAPKISSVF  
GDEGQSRDELIDGGSAGNSQQQFFSCPSIHRQLDIYDEHSNRSLDHNMYEDDDVSVFVSCI  
SGDDDYDDDTQELKKNVLSVGVAVGLSMLVEFVVRTFRHNSADNDALNDTIASNNAVSTS  
NGTFAGSNGIHAPTEFIKQASFSGSTSRDVLAMAHPMTTTTTSSAATSAVAESMAIGA  
VQSVSGSALSASSAVAASSVGGAVLGATTSGGLVAAVGLTGGGTSVSTIAVSVGATAI  
AGSAAAYASNGNPTMFSQYLETCPHKITDNKSGNVRLTLDVAGIVSSSGTGNEFYISGLNN  
STYDDGVEINQDIWEEMFASTYNNLTNFGCNELYERRVNDVTLASAVYSTYEDGENIEG  
LVDVEWSVSVSCWEACPAEPVFGTDLRRNLVEKTQTHNRDPEEIIINNNADQHYGLISEI  
EFRAQLEQLVDETYSAARQQQDIISPNTSQSQLSTPLPVPNPSSSLPGASIPKSPPLPG

ATIPSKSPTSGPTESPTVQPSLTPTIANSKRQSESPSSYPSEIPSISISEWPSEIPTDVP  
SNTPSDVPSALPTEIPTDVP SGVPSNFSSAGPSIVPSTV  
>comp15634\_c0\_seq4; 182 1 648 LEN=648; translated  
PSTIPSAIPSAIPSTIPTGDPSRRPSAVPSRSPSSAPSDIPSGVPSLDPTGSPSSVPSNS  
PSVIPSDMPSRYPSSSSPSLRPTQTPSSIPSVSPSGFPSTSPSYVPSKHPSFSPSGSFFPS  
KAPTEGPSTSLSPSSRPSGRHTDFPSYNPSTAPSFYPSAKP SLSISEWPSEIPTDVPSTV  
PSDVPSALPTEIPTDVP SGVPSNFSSAGPSIVPSTV  
>comp15634\_c0\_seq5; 61 1 212 LEN=1790; translated  
XSDGYTTVEVETWDGSWINQIVLPNGVPDGSK LKIICRSTWSVDISYPDGGWTSNVRTNE  
NPLFKVNYGVW  
>comp15634\_c0\_seq6; 969 190 2913 LEN=2913; translated  
MMMNRKGRNDRKVFDDLD R SSSSSSSSSSEF SHDREVRADYSSRSLFDLSAAIPDATEDSN  
RFSPSTASQKLGH DASSLSLQILPIPF EKEHEILALENDSRDHSTNDCGGYDS DSSMPHS  
VNYSLPHASDDTSVARGTRLNYS LKQVPYTTYDTSSGRSHRKISSV PNQPNHDLYKNAKN  
DDD FDEHDGDSFKDTLMAKNRDEKESSTNNQPTYFDGDLCTQRSDGTDDSDYSFFPTFA  
STRRHAPLFSFCRDHSTSDSEIIPAIESSLTTGGNNSHGGSISLSTITPQNMRGGHHIHS  
DESM SLGRSTIHGICIGDRDSNDRIEQYTVTLPLFEDEK CNTISHKSKSIRFAPKISSVF  
GDEGQRSELDIDGGSAGNSQQQFFSCPSIHRQLDIYDEHSNRSLDHNMYEDDDVSVFVSCI  
SGDDD YDDDTQELKKNVLSV GAVGLSMLVEFVVRTFRHNSADNDALNDTIASNNAVSTS  
NGTFAGSNGIHAPTEFIKQASFSGSTSRDVLGLAMAHPMTTTTTTSSAATS AVAESMAIGA  
VQSVSGSALSASSAVAASSVGGAVLGATTSGGLVAAVGLTGGGTSVSTIAVSIVGATAI  
AGSAA YASNGNPTMFSQYLETCPHKITDNKSGNVRLTLDVAGIVSSSGTGNEFYISGLNN  
STYDDDGVEINQDIWEEMFASTYNNLTNFGCNEL YERRVNDVTLLSAVYSTYEDGENIEG  
LVDVEWSVSVSCWEACPAEPVFGTDLRRNLVEKTQTHNRDPEEIIINNNADQHYGLISEI  
EFRAQLEQLVDETYSAARQQQDIISPNT EQSQLSTPLPVPN PSSSLPGASIPTKSPTLPG  
ATIPSKSPTSGPTESPTVQPSLTPTIANSKRQSESPSSYPSEIPSISITGPSIVPSPIPS  
TIPSTIPS  
>comp15634\_c0\_seq7; 217 1 666 LEN=666; minus strand; translated  
XVGS MVGDL LGALVGVFVGG LVGCMVGLVGLLVGLLDGVPVGV LVGRMVGD LVGAAVGA  
PVGAVVGT LVGDLVGLD LGALVGI SEGLELGDKLV DGP SVGALLGKKLPLGEKLGCLLGT  
YLVKWRGTQKVTKQLRMVSELGEEKXDELGYLEGISD GITEGELLGTLGLP VGSNEGT  
PLGISEGADDGDL LGTADG LLLGSPVGI VDG IADGIADGI VDG  
>comp15634\_c0\_seq9; 61 1 212 LEN=1589; translated  
XSDGYTTVEVETWDGSWINQIVLPNGVPDGSK LKIICRSTWSVDISYPDGGWTSNVRTNE  
NPLFKVNYGVW  
>comp15634\_c0\_seq10; 106 1 221 LEN=402; minus strand; translated  
XLVGC MVGDLVGLD LGALVGLV GDFVGA AVGV LVGV LVYRTRYTDARCGPPIEMPSTMP  
SSPLKQPLCLPLE  
>comp15634\_c0\_seq11; 145 1 265 LEN=446; minus strand; translated  
XAGAAVGA AVGAI VGV LVGCMVGD LVGDLVGLV GDFVGA AVGV LVGV LVYRTRYT  
DARCGPPIEMPSTMPSSPLKQPLCLPLE  
>comp15634\_c0\_seq12; 111 1 263 LEN=263; minus strand; translated  
XGCTVGD LVGALV GALV GALVGV VWGSMVGD LVGALV GALV GALVGV LVGSMVGD LVGDL  
VGV LVGALV GALV GDFVGA AVGV LVGV LX  
>comp15634\_c0\_seq13; 202 1 409 LEN=590; minus strand; translated  
XVGS MVGDL LGALVGVFVGG LVGCMVGLVGLLVGLLDGVPVGV LVGRMVGD LVGAAVGA  
PVGAVVGT LVGDLVGLD LGALVGLV GDFVGA AVGV LVGV LVYRTRYTDARCGPPIEMPS  
TMPSSPLKQPLCLPLE  
>comp15634\_c0\_seq14; 188 391 1014 LEN=1369; translated  
MEPTLEPSMEPSIEPSMEPSIEPSIKPSIEPSMEISIKPSMEPSIGPSMEPSIRPSIKPS  
IEPSIKPSTKPSIEPSTEP SIEPSSEPSSISVRMAADPLGVSLRNSNAPGVQP SLSFSPT  
SLPRCSDLQANPCIDPSEECPLPPNDI WYLVICEGMPDWSTNRCDTTQAAPCIDPSVRM  
VPSAAKFTVNATMQERTGLALQTQDGT  
>comp15634\_c0\_seq15; 988 190 2976 LEN=2976; translated  
MMMNRKGRNDRKVFDDLD R SSSSSSSSSSEF SHDREVRADYSSRSLFDLSAAIPDATEDSN  
RFSPSTASQKLGH DASSLSLQILPIPF EKEHEILALENDSRDHSTNDCGGYDS DSSMPHS  
VNYSLPHASDDTSVARGTRLNYS LKQVPYTTYDTSSGRSHRKISSV PNQPNHDLYKNAKN  
DDD FDEHDGDSFKDTLMAKNRDEKESSTNNQPTYFDGDLCTQRSDGTDDSDYSFFPTFA  
STRRHAPLFSFCRDHSTSDSEIIPAIESSLTTGGNNSHGGSISLSTITPQNMRGGHHIHS  
DESM SLGRSTIHGICIGDRDSNDRIEQYTVTLPLFEDEK CNTISHKSKSIRFAPKISSVF

GDEGQRSELDIDGGSAGNSQQQFFSCPSIHRQLDIYDEHSNRSLDHNMYEDDDVSVFVSCI  
SGDDDDYDDDTQELKKNVLSVAVGLSMLVEFVVRTFRHNSADNDALNDTIASNNAVSTS  
NGTFAGSNGIHAPTEFIKQASFSGSTSRDVLAMAHPMTTTTTSSAATSAVAESMAIGA  
VQSVSGSALSASSAVAASSVGGAVLGATTSGGLVAAVGLTGGGTSVSTIAVSIVGATAI  
AGSAAAYASNGNPTMFSQYLETCPHKITDNKSGNVRLTLDVAGIVSSSGTGNEFYISGLNN  
STYDDDGVEINQDIWEEMFASTYNNLTNFGCNELYERRVNDVTLLSAVYSTYEDGENIEG  
LVDVEWSVSVSCWEACPAEPVFGTDLRRNLVEKTQTHNRDPEEIIINNNADQHYGLISEI  
EFRAQLEQLVDETYSAARQQQDIISPNTSQSQLSTPLPVNPSSSLPGASIPKSPPTLPG  
ATIPSKSPTSGPTESPTVQPSLTPTIANSKRQSESPSSYPSEIPSIISISEWPSEIPTDVQ  
SNVPSNFPASGPIVPSPIPSTIPSTIPS

>comp15635\_c0\_seq2; 1245 1 5975 LEN=6253; translated  
XCWSEFQEEVSEMTPTGTFPSPIMFEKSRPKNITGSDASRQDIETFGSSMEMDDNAAARV  
LLSTIQQLPPIPPPQASQAQAEKDREGYIQSHEDAKILAI SRQSQNSNRSRMEPKPSRVP  
FQPTGDYQSRRSQPTTIETGLDSQSERQDAALDMRCIEGNSRSGPYGRRTYHDDQIIDDD  
TLGNSRMEYLP SRHFQVSAADKSLVLQSSFYGSARAARDSIRRPSSIDGQQEQQHYNVSM  
RAELESPSNGSYHSQGSAYTFTSDHSARSYRAGPFRQNSTNSMMLYGEEIDLEADVAMAE  
AGYRQRQQVYQRADSGYFIGNTDSTSQHNLNLFQMIGGGSPFSTGVRYSGGHSMSSH  
GFIQLNQEQYHGNGNAAPFTFGVTSEHISNVREHANKLGKGAKKALTMMEQVTVAAKHI  
MNKYRPPSPRSKELNDLEFLQRRHKEKFEKYRSPNDDSNEEEDNFFDFVLVLKSEKA  
YEYWAELLDLFRGEYSEDIISPCGGSPATGSSSGGEDATSAVENKKANFDEIVRSPESDD  
NENLSTPRTGLLRRRAKTPSSNSKSPRFSLRSASQNFDSHHKSQSSRSNTTQFRGTPL  
MKQASRMSIFEQLIQSPTISGRSRTFSQHSYYSRNSNSNGRNEQGVITETPVRGVERRRW  
GNPTANLRSHSVKASANTPPVRSVARRCLSEGTQINLDNSFRSSGVKKQPKTKSTKSNLL  
DDTNKTEGDEENEAPKSNRGAIPQGFAKTNELTRFLEALRQGIVLRRHRPGEAAFCRM  
YSIDGGSTIRYKLINPKDAFAAAFEQQRAHYSSGATSEKGPPEWSREAETSDKSPQYREK  
YLRAVDIASVHPARNADSDYPPERGTASLRQSLSQYDEQLSFLSKVDSKVKVSKIWKKRKA  
DEISFKTLDFEAATSGEYWLIFRGLLLLHRDIKRGRLGGNRNAGIGGGVIRIGENESERSF  
DLENQLTRDMFIEPSPVGVWEKLIIVKFKLNDYIHGAVMPGAI PPVSDYFLGFKSPGTT  
IWSRLRSAGLETRRIYSVDTRRVMIKIRCPDYRLTDVAEVLRLRMEKKDGSFEPFRESCA  
GIFKQRQDHLDPDMYRGRMASLLRSKDRQLIIDFIIIGSRIRDGAQLARTGNIKIIQV  
EGTQPKRKLDFANAPLVSCYQFIVDFMTRHRNRDSEDESIVRTCNLGNAIEARIPLHMPH  
KLDLSCNSWVFFYWRKERWIKNSVSKLSSEGGDSSPTTDEGKGEDQSEDSRPVVPNFVSRF  
FVGAFKQPLDSIEDYFGEHVTFYFAWAQHCSVHLLFLAFFGLIVTFCEISAYNLDHPIRP  
WFSMAVMIWFTVLVNRKRSNALAYRWGSLDHKEQETNRPEFQGEFERDPKTNEYRVDP  
ITNEYIIKYPRWKRWLKYMISVPITLFFFTGLALFLILMVHANRDTQMANYIEKRINNSTS  
EVEFTFNVRNIGKKQYVGDVEVNRDLLDPTYWIIMVTLPSLLGLCIPILNIILMKISYM  
LNDFENYQTDQAQYRTHLIIKVF SFRFVSQFGTVYYYAFMSIDEENSAKAVENGMIRMATS  
LAIYTTVAHWNIILOVYIFMGIQHIRRYFYNQGLKKMLSQLERDEEDHIANERCNDAR  
SIKLENRRILAEQAHDHWEKIMKAPHDSFPEYITAVVQFTFVACFSVILPCIPFLVLVN  
YLLSMRFDAYKVCRRRRSIAKRTGGIGVWEHLLHIVAVIAVLTNCWLVAITNQEFRAIA  
EEIGSTATVFLVVAWEHAMLKLYLMGTTISKLPKEIRDEIRAKQHDFEKIEYEDMRLKT  
EQTRRLKRDKSFVQSCPTDMSHAGSGFFHHDYKSVNGSSPSSRSKAGTVVSSPHDRSSL  
LNHFEPDGYSLHLTTTPEKSARLQTI ESFDESVDKLSNADSRSEVYESPTTENKSCSQ  
SIELFDDTDSGSSVELFESRPIESKNFRQTI GSLDSSRGTSGDSGESPTTENESRHQPI  
DDSRPGELYEC

>comp15636\_c0\_seq1; 909 428 3585 LEN=3641; translated  
MEIEAFTNACLTRLLENGSYNDRQGPLSRREVGSYNSINRELVVDEVEGDDDTDVEGDS  
NHDIVEETALPSSEENSRRDSTMAGDANEETSSFKTTASVMEMLRNFDVNPPTSGDPEE  
LELWLECYSQRETVLRHQDMLQKARDRKA FDSMSLMQRHVQWFQGMRAIERRQKEFLS  
NQDKRRASNRYGPFLLCSLHPDKMAVILAQEAI IQALLNSGKDGKEGIPLVKIARAIGAAV  
ETEVSQRMRKERFHNFP PAVSPSTGDENQONENQNEHDAGDVAKEYSMDRWSFSASHLK  
LFFEDLQRMGMGKTKRSIQFAIKRAQAMNSCETWTNDDLIIHLGAALLSIIITENAKVNVN  
GREEPAFRVEKRWSNNGTKVTSYVTINNHLHKIFLEEEYLSWAANTTRHMPMIVPPSNWT  
GPNKGGYRWLEVEMMRTHRSNVQKEALEHADLSTVCDGLNII LGKTAWKINKEILKVGEYC  
WENNIPIGDI PSRTDLKVPPEPKYPVEYDPEMYTNKDDPAMKEKIEAIQSYRESTTKYQR  
VIQKNMDLRSRLCSAMLKLNQAKKFQDFEKIYFPYNLDFRGRACXVSSLFLASLAANGLF  
QIFHDSKFSFCYRLLEDVPPHLSNVGSDLCRGM LTFSEAKPLGKRGLYWLKVHLANFAG  
KDKMSFDDRADYVDDNMENVRECVRPDPFGSNWNWMELDLDPFQGLATCREIVHAIDSGNPE  
AYMCSLVPVHMDGSCNGLQHYAAIGRDTVGGKAVNLLLEGDPEDVYVGMHEVIRRVKEEA  
ELDVRFDVDDADLNSKQRKAIKNNAAKLVNGLIDRGVVKRTVMTSVYGVTYIGARQQIQ

EKIEEKLKEKGYDIDEIEREVFSAAGYVATVTMEVMGDLFQGAKKTKTWLADCARLISQQ  
GHPVAWISPIGVP AIQPYRQRRPRTVVTVMQKITVVDENDDLQVHKSQCTAFPPNYIHS  
LDSSHMLMTALEMDRRGLAFSAVHDSFWTHACDIDEMNEALRGCFVELYSQPLLQDLKES  
WELRYPEVEFPEIPELGNLDLNEVKSATYFFQ

>comp15636\_c0\_seq2; 686 428 3029 LEN=3029; translated  
MEIEAFTNACLTRLLPENGSYNDRQGPLSRREVGSYNSINRELVVDEVEGDDDDTDVEGDS  
NHDIVEETALPSSEENSRRDSTMAGDANEETSSFKTTASVMEMLRNFDVNPPTS GDPEE  
LELWLECYSQRET VLRHQDMLQKARDRKAFDSMSLMQRHV VQWFQGM RDAIERRQKEFLS  
NQDKRRASNRYGPF L CSLHPDKMAVILAQEAI IQALLNSGKDGKEGIPLVKIARAIGAAV  
ETEVSQRMKERFHNFP PAVSPSTGDENQENQNE DHAGDVAAKEYSMDRWSFSASHLK  
LFFEDLQRMGMGKTKRSIQFAIKRAKQAMNSCETWTNDDLIHLGAALLSIIITENAKVNVN  
GREEPAFRVEKRWSNNGTKVTSYVTINNHLHKIFLEEEYLSWAANTTRHMPMI VPPSNWT  
GPNKGGYRWLEVEMMRTHRSNVQKEALEHADLSTVCDGLN ILGKTAWKINKEILKVGEYC  
WENNIPIGDI PSRTDLKVPPEPKYPVEYDPEMYTNKDDPAMKEKIEAIQSYRESTTKYQR  
VIQKNMDLRSLRCSAMLKLNQAKKFQDFEKIYFPYNLDFRGRACXVSSLFLASLAANGLF  
QIFHDSKFSFCYRLLEDVPPPHLSNVGSDLCRGLM LTFSEAKPLGKRGLYWLKVHLANFAG  
KDKMSFDDRADYVDDNMENVRECV RDPFSGNNWWMELDDPFQGLATCREIVHAIDSGNPE  
AYMCSLPVHMDGSCNGLQHYAAIGRDTVGGKAVN LLEGDGPEDDVSCQILEHSNQQT KLL  
CSSSDKDFDQKIWFALDVGMHEVIRRVKEEAELDVRFDVDDADLNSKQRKAIKNNA AAK  
LVNGLIDRGVVKRTVMTSVYGVTYIGAX

>comp15636\_c0\_seq3; 902 428 3682 LEN=3738; translated  
MEIEAFTNACLTRLLPENGSYNDRQGPLSRREVGSYNSINRELVVDEVEGDDDDTDVEGDS  
NHDIVEETALPSSEENSRRDSTMAGDANEETSSFKTTASVMEMLRNFDVNPPTS GDPEE  
LELWLECYSQRET VLRHQDMLQKARDRKAFDSMSLMQRHV VQWFQGM RDAIERRQKEFLS  
NQDKRRASNRYGPF L CSLHPDKMAVILAQEAI IQALLNSGKDGKEGIPLVKIARAIGAAV  
ETEVSQRMKERFHNFP PAVSPSTGDENQENQNE DHAGDVAAKEYSMDRWSFSASHLK  
LFFEDLQRMGMGKTKRSIQFAIKRAKQAMNSCETWTNDDLIHLGAALLSIIITENAKVNVN  
GREEPAFRVEKRWSNNGTKVTSYVTINNHLHKIFLEEEYLSWAANTTRHMPMI VPPSNWT  
GPNKGGYRWLEVEMMRTHRSNVQKEALEHADLSTVCDGLN ILGKTAWKINKEILKVGEYC  
WENNIPIGDI PSRTDLKVPPEPKYPVEYDPEMYTNKDDPAMKEKIEAIQSYRESTTKYQR  
VIQKNMDLRSLRCSAMLKLNQAKKFQDFEKIYFPYNLDFRGRACXVSSLFLASLAANGLF  
QIFHDSKFSFCYRLLEDVPPPHLSNVGSDLCRGLM LTFSEAKPLGKRGLYWLKVHLANFAG  
KDKMSFDDRADYVDDNMENVRECV RDPFSGNNWWMELDDPFQGLATCREIVHAIDSGNPE  
AYMCSLPVHMDGSCNGLQHYAAIGRDTVGGKAVN LLEGDGPEDDVSCQILEHSNQQT KLL  
CSSSDKDFDQKIWFALDVGMHEVIRRVKEEAELDVRFDVDDADLNSKQRKAIKNNA AAK  
LVNGLIDRGVVKRTVMTSVYGVTYIGARQQIQEKIEEKLKEKGYDIDEIEREVFSAAGYV  
ATVTMEVMGDLFQGAKKTKTWLADCARLISQQGHPVAWISPIGVP AIQPYRQRRPRTVV  
VMQKITVVDENDDLQVHKSQCTAFPPNYIHS LDSSHMLMTALEMDRRGLAFSAVHDSFW  
THACDIDEMNEALRGCFVELYSQPLLQDLKESWELRYPEVEFPEIPELGNLDLNEVKSAT  
YFFQ

>comp15636\_c0\_seq4; 947 428 3584 LEN=3640; translated  
MEIEAFTNACLTRLLPENGSYNDRQGPLSRREVGSYNSINRELVVDEVEGDDDDTDVEGDS  
NHDIVEETALPSSEENSRRDSTMAGDANEETSSFKTTASVMEMLRNFDVNPPTS GDPEE  
LELWLECYSQRET VLRHQDMLQKARDRKAFDSMSLMQRHV VQWFQGM RDAIERRQKEFLS  
NQDKRRASNRYGPF L CSLHPDKMAVILAQEAI IQALLNSGKDGKEGIPLVKIARAIGAAV  
ETEVSQRMKERFHNFP PAVSPSTGDENQENQNE DHAGDVAAKEYSMDRWSFSASHLK  
LFFEDLQRMGMGKTKRSIQFAIKRAKQAMNSCETWTNDDLIHLGAALLSIIITENAKVNVN  
GREEPAFRVEKRWSNNGTKVTSYVTINNHLHKIFLEEEYLSWAANTTRHMPMI VPPSNWT  
GPNKGGYRWLEVEMMRTHRSNVQKEALEHADLSTVCDGLN ILGKTAWKINKEILKVGEYC  
WENNIPIGDI PSRTDLKVPPEPKYPVEYDPEMYTNKDDPAMKEKIEAIQSYRESTTKYQR  
VIQKNMDLRSLRCSAMLKLNQAKKFQDFEKIYFPYNLDFRGRAYVPPPHLSNVGSDLCRGL  
MLTFSEAKPLGKRGLYWLKVHLANFAGKDKMSFDDRADYVDDNMENVRECV RDPFSGNNW  
WMELDDPFQGLATCREIVHAIDSGNPEAYMCSLPVHMDGSCNGLQHYAAIGRDTVGGKAV  
N LLEGDGPEDDVSCQILEHSNQQT KLLCSSSDKDFDQKIWFALDVGMHEVIRRVKEEAEL  
LDVRFDVDDADLNSKQRKAIKNNA AAKLVNGLIDRGVVKRTVMTSVYGVTYIGARQQIQE  
KIEEKLKEKGYDIDEIEREVFSAAGYVATVTMEVMGDLFQGAKKTKTWLADCARLISQQG  
HPVAWISPIGVP AIQPYRQRRPRTVVTVMQKITVVDENDDLQVHKSQCTAFPPNYIHS L  
DSSHMLMTALEMDRRGLAFSAVHDSFWTHACDIDEMNEALRGCFVELYSQPLLQDLKESW  
ELRYPEVEFPEIPELGNLDLNEVKSATYFFQ

>comp15636\_c0\_seq5; 738 428 2834 LEN=2834; translated



MEIEAFTNACLTRLLPENGSYNDRQGPLSRREVGSYNSINRELVVDEVEGDDDDTVEGDS  
NHDIVEETALPSSEENSRRDSTMAGDANEETSSFKTTASVMEMLRNFDVNPPTS  
LELWLECYSQRETVLRHQDMLQKARDRKAFDSMSLMQRHVQWFQGMRAIERRQKEFLS  
NQDKRRASNRYGPFCLSLHPDKMAVILAQEAI IQALLNSGKDGKEGIPLVKIARAIGAAV  
ETEVSQRMMKERFHNFPSPSTGDENQENQNEHDHAGDVAKEYSMDRWSFSASHLK  
LFFEDLQRMGMGKTKRSIQFAIKRAKQAMNSCETWTNDDLHLGAALLSIIITENAKVNVN  
GREEPAFRVEKRWSNNGTKVTSYVTINNHLHKIFLEEEYLSWAANTTRHMPMIVPPSNWT  
GPNKGGYRWLEVEEMMRTHRSNVQKEALEHADLSTVCDGLNILGKTAWKINKEILKVGEYC  
WENNIPIGDIPSRDLKVPPEPKYPVEYDPEMYTNKDDPAMKEKIEAIQSYRESTTKYQR  
VIQKNMDLRSLRCSAMLKLNQAKKFQDFEKIYFPYNLDFRGRAYPVPPHLSNVGSDLCRG  
MLTFSEAKPLGKRGLYWLKVHLANFAGKDKMSFDDRADYVDDNMENVRECVDRPFSGNNW  
WMELDDPFQGLATCREIVHAIDSGNPEAYMCSLPVHMDGSCNGLQHYAAIGRDTVGGKAV  
NLLEGDGPEDVYVGMHEVIRRVKEEAELDVRFDVDDADLNSKQRKAIKNNAAKLVNGL  
IDRGVVKRTVMTSVYGVTYIGAX

>comp15636\_c0\_seq6; 954 428 3487 LEN=3543; translated  
MEIEAFTNACLTRLLPENGSYNDRQGPLSRREVGSYNSINRELVVDEVEGDDDDTVEGDS  
NHDIVEETALPSSEENSRRDSTMAGDANEETSSFKTTASVMEMLRNFDVNPPTS  
LELWLECYSQRETVLRHQDMLQKARDRKAFDSMSLMQRHVQWFQGMRAIERRQKEFLS  
NQDKRRASNRYGPFCLSLHPDKMAVILAQEAI IQALLNSGKDGKEGIPLVKIARAIGAAV  
ETEVSQRMMKERFHNFPSPSTGDENQENQNEHDHAGDVAKEYSMDRWSFSASHLK  
LFFEDLQRMGMGKTKRSIQFAIKRAKQAMNSCETWTNDDLHLGAALLSIIITENAKVNVN  
GREEPAFRVEKRWSNNGTKVTSYVTINNHLHKIFLEEEYLSWAANTTRHMPMIVPPSNWT  
GPNKGGYRWLEVEEMMRTHRSNVQKEALEHADLSTVCDGLNILGKTAWKINKEILKVGEYC  
WENNIPIGDIPSRDLKVPPEPKYPVEYDPEMYTNKDDPAMKEKIEAIQSYRESTTKYQR  
VIQKNMDLRSLRCSAMLKLNQAKKFQDFEKIYFPYNLDFRGRAYPVPPHLSNVGSDLCRG  
MLTFSEAKPLGKRGLYWLKVHLANFAGKDKMSFDDRADYVDDNMENVRECVDRPFSGNNW  
WMELDDPFQGLATCREIVHAIDSGNPEAYMCSLPVHMDGSCNGLQHYAAIGRDTVGGKAV  
NLLEGDGPEDVYVGMHEVIRRVKEEAELDVRFDVDDADLNSKQRKAIKNNAAKLVNGL  
IDRGVVKRTVMTSVYGVTYIGARQQIQEKIEEKLKEKGYDIDEIEREVFSAGYVATVMT  
EVMGDLFQGAKKTKWLADCARLISQQGHPVAWISPIGVPVPAIQPYRQRRPRTVVTVMQKI  
TVVDENDDLQVHKSRQCTAFPPNYIHSLSHMLMTALEMDRGLAFSAVHDSFWTHACD  
IDEMNEALRGCFVELYSQPLLDLQDLKESWELRYPEVEFEPEIPELGNLDDLNEVKSATYFFQ

>comp15636\_c0\_seq7; 693 428 2932 LEN=2932; translated  
MEIEAFTNACLTRLLPENGSYNDRQGPLSRREVGSYNSINRELVVDEVEGDDDDTVEGDS  
NHDIVEETALPSSEENSRRDSTMAGDANEETSSFKTTASVMEMLRNFDVNPPTS  
LELWLECYSQRETVLRHQDMLQKARDRKAFDSMSLMQRHVQWFQGMRAIERRQKEFLS  
NQDKRRASNRYGPFCLSLHPDKMAVILAQEAI IQALLNSGKDGKEGIPLVKIARAIGAAV  
ETEVSQRMMKERFHNFPSPSTGDENQENQNEHDHAGDVAKEYSMDRWSFSASHLK  
LFFEDLQRMGMGKTKRSIQFAIKRAKQAMNSCETWTNDDLHLGAALLSIIITENAKVNVN  
GREEPAFRVEKRWSNNGTKVTSYVTINNHLHKIFLEEEYLSWAANTTRHMPMIVPPSNWT  
GPNKGGYRWLEVEEMMRTHRSNVQKEALEHADLSTVCDGLNILGKTAWKINKEILKVGEYC  
WENNIPIGDIPSRDLKVPPEPKYPVEYDPEMYTNKDDPAMKEKIEAIQSYRESTTKYQR  
VIQKNMDLRSLRCSAMLKLNQAKKFQDFEKIYFPYNLDFRGRACXVSSLFLASLAANGLF  
QIFHDSKFSFCYRLLEDVPPPHLSNVGSDLCRGMLTFSEAKPLGKRGLYWLKVHLANFAG  
KDKMSFDDRADYVDDNMENVRECVDRPFSGNNWWMELDDPFQGLATCREIVHAIDSGNPE  
AYMCSLPVHMDGSCNGLQHYAAIGRDTVGGKAVNLLEGDGPEDVYVGMHEVIRRVKEEA  
ELDVRFDVDDADLNSKQRKAIKNNAAKLVNGLIDRGVVKRTVMTSVYGVTYIGAX

>comp15636\_c0\_seq8; 731 428 2931 LEN=2931; translated  
MEIEAFTNACLTRLLPENGSYNDRQGPLSRREVGSYNSINRELVVDEVEGDDDDTVEGDS  
NHDIVEETALPSSEENSRRDSTMAGDANEETSSFKTTASVMEMLRNFDVNPPTS  
LELWLECYSQRETVLRHQDMLQKARDRKAFDSMSLMQRHVQWFQGMRAIERRQKEFLS  
NQDKRRASNRYGPFCLSLHPDKMAVILAQEAI IQALLNSGKDGKEGIPLVKIARAIGAAV  
ETEVSQRMMKERFHNFPSPSTGDENQENQNEHDHAGDVAKEYSMDRWSFSASHLK  
LFFEDLQRMGMGKTKRSIQFAIKRAKQAMNSCETWTNDDLHLGAALLSIIITENAKVNVN  
GREEPAFRVEKRWSNNGTKVTSYVTINNHLHKIFLEEEYLSWAANTTRHMPMIVPPSNWT  
GPNKGGYRWLEVEEMMRTHRSNVQKEALEHADLSTVCDGLNILGKTAWKINKEILKVGEYC  
WENNIPIGDIPSRDLKVPPEPKYPVEYDPEMYTNKDDPAMKEKIEAIQSYRESTTKYQR  
VIQKNMDLRSLRCSAMLKLNQAKKFQDFEKIYFPYNLDFRGRAYPVPPHLSNVGSDLCRG  
MLTFSEAKPLGKRGLYWLKVHLANFAGKDKMSFDDRADYVDDNMENVRECVDRPFSGNNW  
WMELDDPFQGLATCREIVHAIDSGNPEAYMCSLPVHMDGSCNGLQHYAAIGRDTVGGKAV

NLLEGDGPEDDVSCQILEHSNQQTKLLCSSSSDKDFDQKIWFALDVGVMHEVIRRVKEEAE  
LDVRFDVEDDADLNSKQRKAIKNNAAKLVNGLIDRGVVKRTVMTSVYGVTYIGAX  
>comp15637\_c0\_seq1; 763 200 2695 LEN=2868; translated  
MAIQTTIGLLLLLISSIPFGSAEDSGPAFAEREARTLDCGMRAFALEFAKELLEPKDGGDY  
FRNEADAGRVLRDVSDALEMPRLCPEERVDGRPPQPSNLRRARVSDSASASDADNETDQT  
EGTDLEESLLRLSCHRSTATCIFVAPTPGHPYQNEARENKKEIENGSLDRPWTSLHRALHH  
SRSLSIGEKNIRNAENITIVLRGGIHSLEGEPLVLEPDSGLTIKRFPGEDSWISGGVSL  
SNAVFRPVQAIKEDEQRTVYVADLTELKLGWKIPKSPSLMSRTRRYIRARHPNGDPEVVD  
PNFFRSDTVLEWTKPEKAAPPEFELYDFAKDPPEGVYKNSAMDGINQYASGSGGACAE  
IWGESADSYWCNSASQGGWAEVDRECATSGEMQIPVGMTYNRSDPSLGPLHSNASVSTYS  
SSNQFSMEGGVVFAYHSQSWSVHMFESIASHSASNGTMAFAKGGKQGGRNWCRCDQCTYA  
GGWCGQHETPPNPDDTRLIGGNWRIENTRALLDQPGEYYFDRDSRKLVIIPNATNHQDLR  
DLSLGLLTDLIKVNRTAHVTIEGISFRDQAATFLEEGWSAPSGGDWALRRGGAILIENA  
SNVEIRRFFFRLDGNAIIFLSGKTHFVKIRRNRFEWLGE SAIATWGDTDGYDATGGNLPM  
HTLVEGNVMRELGIYQKQSSAVGQCKASLTTIRNNIMFNMGRAAINFNDMLGGGDVLENN  
LIFNTCRESGDHGPIINSWDRQAYLTDLKGNTKGFVPLLRITIRNNIFIFANYGASQGVNDND  
GSSWYHIHNVFYQADGFKMDYGGHDSIYEYNNMAMSLCECSIVVYWCVPNV  
>comp15637\_c0\_seq2; 847 200 3163 LEN=3335; translated  
MAIQTTIGLLLLLISSIPFGSAEDSGPAFAEREARTLDCGMRAFALEFAKELLEPKDGGDY  
FRNEADAGRVLRDVSDALEMPRLCPEERVDGRPPQPSNLRRARVSDSASASDADNETDQT  
EGTDLEESLLRLSCHRSTATCIFVAPTPGHPYQNEARENKKEIENGSLDRPWTSLHRALHH  
SRSLSIGEKNIRNAENITIVLRGGIHSLEGEPLVLEPDSGLTIKRFPGEDSWISGGVSL  
SNAVFRPVQAIKEDEQRTVYVADLTELKLGWKIPKSPSLMSRTRRYIRARHPNGDPEVVD  
PNFFRSDTVLEWTKPEKAAPPEFELYDFAKDPPEGVYKNSAMDGINQYASGSGGACAE  
IWGESADSYWCNSASQGGWAEVDRECATSGEMQIPVGMTYNRSDPSLGPLHSNASVSTYS  
SSNQFSMEGGVVFAYHSQSWSVHMFESIASHSASNGTMAFAKGGKQGGRNWCRCDQCTYA  
GGWCGQHETPPNPDDTRLIGGNWRIENTRALLDQPGEYYFDRDSRKLVIIPNATNHQDLR  
DLSLGLLTDLIKVNRTAHVTIEGISFRDQAATFLEEGWSAPSGGDWALRRGGAILIENA  
SNVEIRRFFFRLDGNAIIFLSGKTHFVKIRRNRFEWLGE SAIATWGDTDGYDATGGNLPM  
HTLVEGNVMRELGIYQKQSSAVGQCKASLTTIRNNIMFNMGRAAINFNDMLGGGDVLENN  
LIFNTCRESGDHGPIINSWDRQAYLTDLKGNTKGFVPLLRITIRNNIFIFANYGASQGVNDND  
GSSWYHIHNVFYQADGFKMDYGGHDSIYEYNNMAMSLSYSGGPCFGMGSFLEGHGDVLRG  
NRCLLGVGNTKHNAENKAVGIMYNKWRSEALQEHYGYPAKRKGSSTGEGEPNFVGRWGG  
CEDSHVTLESNEYTPNGVAVLGCNDFFYNLSEVEARFGLGNSTVSLLPETGVILEWAR  
STLGFAPNTNTAHHETISSHASPTNLS  
>comp15638\_c0\_seq1; 2066 157 4822 LEN=5247; translated  
MTEGSAGQQDGGGGGGGRNGGRGGGKGNKSRGGRGGGGRGGRNKKNNDDKKDANKGNNNN  
GSGSNKDDANKDNNKPNNNKGNNAKNGGDPNKNPKPKNDNNKKGGEATKSNNRSRRRM  
MQHKNSKKGEQKPNPAVPKMTKEEQERIEQEKKKKLEEEAERKRLEEEERAKQARLEI  
RKKAKEKELNESFQEAMDYLRAVAETSEARRANRNSMSAEDLALS RKEFEASKKSLKSDLK  
KCTAFVKKIKTGGAWSMTPAALVKDLSLNL SRYVEEVVAAVLEAKLKLADLPVVLTLCK  
SMNLRYP AFLSNLMTGLWSVVHEKPTDNDT SKLRRVYVRLLETELLNGLATETKPLMKLI  
AEASGGKDGSSYNVTDASMI VAFVKGAGFEILGTRPTS IQKYSKLI EDEILKREQDKGKA  
PEEDEL SLPVLI SEEKATEGKELVATMDELVMERAVSPEISNKFLGHCKGAYAFLSRSLI  
ETDTKLQKMEKRCEQDRLLAGSLTDAREKGLQDARKLRESLEKSVEAMSDIMDLPLPQLE  
KEAEEETEGGTGVEVWTKDGGDEDGTDGFPDDEETRAF YCDVPDFLTTVPALLGLSPE  
EIEK LKAVNEKKFGAGFGPDNESEGDAVTDVVAPSSEAELEAVEKGEDIEPGDDNEETKD  
ENKDAPHYKLMVLEQELPECSRREQIDEISEKFCTNHGSSKNARKRLSKTLFHVPRARL  
DLLPYYSRMAATLGRVWPDIGEALLVDLEQQFHGQAKFKKNQNI ESRMRTARYIGELTIF  
RMAPP IVSLRCLRRCLDDFTGGNV DVACCLLES CGRYLNRLPHTNKRLNNIMETMVRLSK  
AKXMYLNEQTF LFRQLDDFSTICNAF SAXEERYLALIKTAMYTVKPPASGTKKEVKEYPP  
LEGYLRYLLMVKLQATESSITYASKQLLRFPPWADPSMQCGALICKIMLKT CRNNGYKYSIE  
AIANVAALKRRQKPEVCIRLLDDVVEELQWAI EHPAFRDQQR TLTARLLGELYVASLAS  
QQLIFQQLYRFINFSHDIPDALREASEKAVALAETESLPVFNSSSGVSGVILEDEEMEQ  
DDLEAKEEEKEETEAEIQPVAVSVH SKYDPRVLSVLDPPNSVFRIKLVCVLLEVVSKKML  
VTKNNIPKIEAFLASFQRYLFTKTTLPTVEVEFALLDFTFDI IDSKWREVLKDKKKNASDS  
ESSQGFRRYRTWLEAHNATI ANEEAEA AVDRRAQIRLEALAGNRGVAEVAEGDLLDEDD  
ELDDDEEYDSDGMSVDSKDSDEDSISVEEDSNNE DPSRYNEDATDDDDSEDDSDSDDE  
DSEEEFDEDAYMRQLEEEAFEALRRLTMDALEK GKSTSRGGKVS DN MVSGSQFIRKKQS  
DTETSPMPSFALGGTEGISFNLLKKS NKGKMEAKQFVVPIDTNLAAVATKQDDEAARERD

MIKARVLQYEAESAISEGNVYLEQEKLQVIRNRPLSMEEIDKNFGTTGGNLIITGPSKAP  
PAPGNYSGGRRGRGYSTGRGGGSFGSGAPFGRGTGNSFGRFGGRGRGRSSGRGLV  
>comp15638\_c0\_seq2; 2133 157 4749 LEN=5174; translated  
MTEGSAGQQDGGGGGGGRNGRGGGKGNKSRGGGGGGGRGNKKNNDKKDANKGNNNN  
GSGSNKDDANKDNNKNPNNNKGNKNGGDPNKNPKPKNDNNKKGGEATKSNNRSRRRM  
MQHKNSKKGEQKPNPAVPKMTKEEQERIEQEKKKKLEEEAERKRLEEEERAKQARLEI  
RKKA EKELNESFQEAMDYLRAVAETSEARRANRNSMSAEDLALS RKEFEASKKSLKSDLK  
KCTAFVKKIKTGGAWSMTPAALVKDLSLNL SRYVEEVVAAVLEAKLKLADLPVVLTLCK  
SMNLRYP AFLSNLMTGLWSVVHEKPTDNDT SKLRRVYVRLLETELLNGLATETKPLMKLI  
AEASGGKDGSYNVTDASMI VAFVKGAGFEILGTRPTS IQKYSKLI EDEILKREQDKGKDA  
PEEDELSPVLI SEEKATEGKELVATMDELVMERAVSPEISNKFLGHCKGAYAFLSRLI  
ETDTKLQKMEKRCEQDRLLAGSLTDAREKGLQDARKLRESLEKSVEAMSDIMDLPLPQLE  
KEAEETEGETGVVEVTKDGGDEDGTFDFPFDEETRAFYCDVPDFLTTVPPALLGLSPE  
EIEKLVAVNEKKFGAGFGPDNESEGDAVTDVVPASSEAELEAVEKGEDIEPGDDNEETKD  
ENKDAPHYKLMVLEQELPECSRREQIDEISEKFC TNHGSSKNARKRLSKTLFHVPRARL  
DLLPYYSRMAATLGRVWPDI GEALLVDLEQQFHGQAKFKKNQNI ESRMRTARYIGELTIF  
RMAPP IVSLRCLRRCLDDFTGGNV DVACCLLESCGRYLNRLPHTNKRLNNIMETMVRLSK  
AKRLEERYLALIKTAMYT VTKPPASG TKKEVKEYPPLEGYLRYLLMVKLQATESSITYASK  
QLLRFPWADPSMQCGALICKIMLKT CRNGRYKSIEAIANVA AKLRRQKPEVCIRLLDDVV  
EELQWAI EHPAFRDQQR TLTARLLGELYVASLASGQLIFQQLYRFINFSHDIPDALREA  
SEKAVALAETEESLPVFNSSSGVSGVILEDEEME QDDLEAKEEEKEETEAEIQPVAVSVH  
SKYDPRVLSVLDPPNSVFR IKLVCVLEEVVSKKMLVTKNNIPKIEAFLASFQRYLFTKTT  
LPTEVEFALLDTFDI IDSKWREVLKDQKKNASDSESSQGFRRYRTWLEAHNATI ANEEA  
EAAVDRRAQIRLEALAGNRGVAAEVAEGDLLDEDELDDDEEYDSGMSVDSKSDSEDSI  
SVEEDSNNE DPSRYNEDATDDDDSEEDSDSDDEDESEEEFDEDAYMRQLEEEAEFAELR  
RLTMDALEK GKSTSRGGK VSDNMVSGSQFIRKKQSDTETSPMPSFALGGTEGISFNLLKK  
SNKGKMEAKQFVVPIDTNLAAVATKQDDEAARERDMIKARVLQYEAESAISEGNVYLEQE  
KLQVIRNRPLSMEEIDKNFGTTGGNLIITGPSKAPPAPGNYSGGRRGRGYSTGRGGGSFG  
SGAPFGRGTGNSFGRFGGRGRGRSSGRGLV  
>comp15639\_c0\_seq1; 1795 388 7521 LEN=7611; translated  
MPPPLPPSSLAARRSRMSGTQTSHTDERSASNGGDGN DATNRSANRWHREDESQTSST  
SSRYARRISSSSAPTGSSTASRTHRRSNSNEEIERIREMRARRKRAQQEGGDLQNEQTEG  
SAALVSRHRRASAPI SRKYGDDSGLGRKRRRHNFMTEDGTDESSVSTQTTTASTAAS  
SDDTSIRSEIEARLAARRSKRKS AIE NGQLLTDVPEGSSNRGHRHTRSSIDAADLRASR  
NVPPRSISSGALRRQMATTYEEAKGITREN RVSRTKSTDRGLLQTRISNSDAEKDSRVPT  
IIEPYESRGSRKFKPKLQPRSSNDISERLRERREARERERKEREKKYDLKDL SLSTGSE  
STQSNRVGNAVEHTRVDTTKRPTNHSEM NIAEDLKHDESDTGNSSSVRLCIIISIDLPAS  
VVSNIPLCPVLKMGVLVLPAGVYKGGTKSVTSTTTKYLFQGIQAMGSAKIRSTTPKIL  
GKRDSGTIEYHEEYRWDNLKQPQTMGLCIELCVQGVRTPLNYMESPPAVFQYDAYASPSG  
DTLDSAETS LGSSPKLHQAP IRRAPPSRTKSF DALRIGIWNRSRTQQDTEMEAAEAAA AV  
ARMLVDESEPE SNDMEQGQSSMKISETPNSDYDVTLDCSNGHLNVGLTSDSKLGVVVIPL  
AQLALDKMKKGNMRLEQWYELDTGEESNDVSSRRKKPRVFLEITLSSPTSLDDSEDED  
GVYDEDEEPLKSSLYQNASFLRRASIKARCQNGEHK GKKEERKIEDPILEPGVIDFVAVV  
GCKNIGNQKNDEGMKGWKATPECVIMEQFPNNEFYMNSGRKAVLPEMLQWFCFPEGAR  
LWRGTNPPTHSDLNLKRFS AASPQN LASSIAAFDA CLGCTTSFSWF AIASNSDQYGS SLV  
KTYGAVIRFYVPAPT GIDPTQDDFAQAIMGRKADIPPPGAVKRLWVPIAICFTSNLP IVG  
IMEALLRLCEEI STIHSGLQSGKLVQIQEAVANIVLKYQKPIAGAVNCSVPFLPGDRFL  
LSLPPREGLPSLPHGRALISVCRLLGADGLNYLLSAVLTECKILLHSE DIAEIAMVAEVI  
TALTYPFAWSLPIPIPLGMI EFVEAPLAYLLGMPTCNLKMIDPGALEDTVVVLDLNKAF  
SSEYYLEKSKPRTASNKHPALLPASVATKISDAFYKLLREEDEMEERYSGTEFLHSLP  
HLEEE SLAEREFRTVAIEICGLLRGYQDCMGAVFDRDKFLKSSPALYEEKSEYKFVGE G  
SGIRNEVLKTKVMSSRSKRFLSSLVSGQNFQQLLERLDSDDALFFHEILKVI GESASDRM  
PPKRTSSGDFGLSQTEKNVDSL IKS LQKVEDKIPTFLVKVGGGLDTGDDEDDIPSSLMWT  
ENESHQFDALDHDTHIMNIEDQDTSTFSSNLLSSIKIESASKISESSMQAVSMEYLAKLE  
TTPWEYNNFLNISTEDMNTQDKIKLRDAIGERRFRSWKLARSKTNSNDEDMGFFSQSTRE  
SAKQESAVDLTALVTSAKNDSTDS SLSSTSNQSRMPSQTPAQERIAAAKSRDI IRRCMD  
RANTDQISKSDQINPFIENGRDLMAEAEKALRNP SAQLFLISILAQRSLENKRSRTARH  
HSTAQNPARLDDVAFDCLVRLSCAML DSCMEYKEYEMAYRLLTNSAGFIMVQELDNYGE  
YVADEYNGQSLIVITMSTRIGLHP IFADIRVWETVMTLHLRDRET VKKSDEFSSYSAGS  
DYEEEEEVVYDSAVATLYEMVGYGIPGEELSRFAMRVSQEHGWFCD DRGRQLMLLARRIS

IRRDQADMSGAGNTGDIDMVRKGPDLNEAFATFPEGGDSTERPDFVWKEVGVWCHPAAPSR  
KNLMRLDRNRKQLPIDKFMKRNPTALASFGSTMVASGGLDGGVFLAHLSDHSLTSTAN  
TEDLSEVRGIHLDWGVTSRPGSSSDGEYGVGAVSCLAAIYGDTSHTHSVGF SKDVKDPTN  
GVDILDSMEGSKI VAGTTAGDLRVVSVKDVYSSIVTTKNDELTSGHGASRLKYSLRGRA  
LAGHRGGVTCIDVPSQVYRPFVFTGGADGSIKLNWLRAPTGNRRNNNSGNSGYDSNDGS  
GQHQRGRMGDALNTLSGH DGRVLSITTAWHGDHLLSGGADRSIRVWDLGSSGGKCLHKL  
GHFGWVTNVQYWGPNTIVSASTDRSVALWDARVRSSPLFILRNHSSPISDLLVGSRTDPY  
MVSAAADGTIATWDFRSLSETTNTTEERKCNKCKIIRMPSASMHQTTTRKKVAVGSIHL  
ARDVTDPMNSFMSVGSDAILRKWNIASGNMLEESPTGHCDRITCFSSFSQNHGFGTKPAN  
IINSTVEDGIDAQDKGFLTTSLDGTIRMRLKLGKSDC

>comp15640\_c0\_seq1; 2156 289 5124 LEN=5309; translated  
MASLSVSLTPALGEDEKDARANLVSKNGGDKKKSIRKRLGLSSKTKRDSKNKSSRSTSKQ  
ASGDNNNNNPSSTSSILVDLNESSSSSLASSRDGASASASGTKIDGAAAAS IATGGAGKS  
SKRGRDEKGRSRI GRVVRSLSRSSSRHKRDSRPGGDGSDTDASSDQSSSSEGRNRNAT  
VVTVTSCRSDGYNQKAPGSTSKLPRKAPTNLKLFHELAVGLKDAFTAVGQTPTKPQKEE  
EITDEATGETKTVTMTDEEFAGRTILWDFMGNIDFLALVDEVAVDATRGALKDDTTF  
KGLRDVIKKCNKVL EMLVRRRERYTFFRLPRPTEARDMDRIKNWNEKVERAVGAVTES  
NKATSGSNNNGSGKNQSSSDSDSVSSIAGSSVVSNTSSKGSVFSRGRQLLPVAGRVRSRRA  
TPTPKLRKRAVSKEQEMDSNGNAEDGF AAASPVTQGNL AALQRSFQTSGSTPIAIQDNA  
EQNSFGVQQTQQQLV SQAPVIQPKDELVDVIRGLRMEKIQHRESSTDSDLTALKPDWRPK  
AEIPSSVPKLPTEYIHRHRLMKQVVSCLLELNGAGPRDTDEECKTEQNP IVTSITSRHGD  
KAGNGKTI LAVA AIQTVEVRERFTDGI AWIHLGRGPLLDRDIRRLYEEL YRQLVVKTTDD  
SLLGTDYDFLE DENDNGNKIGGARSSSRGSSFDANEAKSNNNNAKDESKRQLATLAETR  
RRFQGGDL DGIKEDLGRLLAKKVLICLDDVWRVEDAKWFI FDNQMLNRSNKAKKRRSN  
SDPLVEDDEYHSRILMTTRTPNLLGPGLVQEVFVRI LSET EAVKLLLSTAGRRPYGGKNS  
TVFHQAKLIVKGC GNSPLAVRVSGSMLRHSNRSWNINSPSWSALIHQCRLNLEEASQLRS  
FVNAVNRVVDLSFFTVADVHTRIALRRCFVAFAMAFRDNWMLSGRGVPHSVVLR LFKTI  
ISSDEASKDVSPGAI VTM LQNLNLMEHARHGVASRALTAAQKLSLARKQNRASSNDNDSD  
SDWDEDEEAQIHK AQQSWMHESLKSVAEEMAKRSTPCLSPDTDDFTSFSGKIEDERKIC  
TESSTLWQTPLRFFVQQLSNGSTPLTGFQGN EAHKIVLTSLLEVG DGMTNSTSIVDTLRE  
SQIDVAVIPGGDKME EYIVTFFPGHLIRCEIYSTAAEVLSDPHF IGRANALGIVEATSR  
QVADLQELRRLAGNATLTISRKSTKEGARGKAVPTKVDVNSIVREGSRI IDEISR VANK  
NESKPDSLGMAMCFAAVGEGLMKSRQPRDAMLRL EEA VGLYKELLGAYNTRVANALQTAA  
RALVKLSEPRIALIKFAEAARIYESCNATLHYSNIANAQSLASLLVDLGDMEKAQSMFEE  
VISM RKIVYGEHSVPVAKTINAYAILLAKHGRMDAALQNYE SAKLTYMAVPTPLIRDPEF  
EIKWNYDVT LINLN IASIRSKKGD LREAI SCYE EGVAGLRQYETALAE LQRDPLRPPETG  
KNTAHKHLVAALGRIGSLKLIKIGDSNGALRAYTSLLEEVKADSPSASQTEKAKAHIKCAT  
IYRQKDAPNSHEL SVSHLQHALD MYKAI FGP DHKDTAAISSSLRQWLAEDQ

>comp15641\_c0\_seq1; 122 89 1714 LEN=3346; translated  
MAETRLDRPVADECKFGKMAPPYLNYSGRGGSHRGLVREGRGGRGGRGTAYARGGT PRK  
ACPGRGNPAHPRTIARKNQWVRPRRSTEQSVAGFGERAVSGREEGDPVATHEQIRVHRT  
APNTGAIARESSRGVPSDRGTAAIPAHSHAIMKKRGQHQLVLLSSTNARPSALGPISGDS  
ELGKHDRQFLSASSTQSQT LTRTGKHKLVSV AIAAAEK RQKASMDRPSRDHRCNGFRGPN  
PGKPPDGAYRPASKRVRLSTG PSE RNDIGEC SG TARHDGPAAGEKECEGMPARPERLPAR  
QAAPSARGADKTDSEPN EKLTD FAYKETS RVRQRTIVPSQH LRWSKNQKNEASPSQTPGA  
DERPAPTASN FARKKNMXAGP GPPR PENPDLSDLLEGRGV LGSVLPQAARHPQGM RHARV  
LVFPAPRPVPAGRGLRLSAREGQPQGRALSGLCAAGLLRGRALQDAARARAKGHERHRGL  
RHCGCNK KRSEGNATAAERDDTKQRILSKEAKLWKS RNFTKPSPGVKSTFPSQNREAPT  
E

>comp15641\_c0\_seq2; 295 144 1692 LEN=1692; translated  
MAPPYLNYSGRGGSHRGLVREGRGGRGGRGTAYARGGT PRKACPGRGNPAHPRTIARKN  
QWVRPRRSTEQSVAGFGERAVSGREEGDPVATHEQIRVHRTAPNTGAIARESSRGVPSD  
RGTA AIPAHSHAIMKKRGQHQLVLLSSTNARPSALGPISGDS ELGKHDRQFLSASSTQSQ  
TLTRTGKHKLVSV AIAAAEK RQKASMDRPSRDHRCNGFRGPNPGKPPDGAYRPASKRVRL  
STG PSE RNDIGEC SG TARHDGPAAGEKECEGMPARPERLPARQAAPSARGADKTDSEPN  
KLTD FAYKETS RVRQRTIVPSQH LRWSKNQKNEASPSQTPGAD ERPAPTASN FARKKNMG  
LVRVRPDQRTPICPTFWKGV ECDP YCRKRHDIPKECAMPVCSFFQRHGQCLRGEDCVFR  
HVRVNPRAVPCPAFALLGFCEDEHCKMRHVRAPKATNGTGVC AIADXNKKRSEGNATAAE  
RDDTKQRILSKEAKLWKS RNFTKPSPGVKS AFPSQNX

>comp15642\_c0\_seq1; 926 358 3525 LEN=6061; minus strand; translated

MARSANKTRKKSIEPKRKAVATSTTSKSTSSSLNRIVVGGQLLGSRSKPFLDNQSNVASW  
NTFEP IITPEVTC DQRKKTERFVLLPHSRYISVLSYKTGIKVGTLVPSLKDDSNEKNV I I  
ECVSMVKYQRNVSETTVQDVLDRMDLEDDDEIDGIEGTSSSVDETLIMVGCHDGSVREFS  
LRELGNHGNASKQVDLGPYSISGSCFHPRRVIRVLK KDP IAHMTVPHIRTPQIRK DGLV  
MYVAARRLERKEEEEKDHPSKSTRVKSQKKDMSFTFEVIRVLVPHFDGSTRDVR LSSPKE  
SMRSLDKFKCKVSANKNKKYADMLPFRMMSAAKALSGDNSNTNTDNISIFVILARADSI S  
VYYDQLHALEYAPMSIAMP SNNPLTVASISLNKADITCGHHHGNI CVMNNILNDIELYH  
IAMKKAKRLTGDSSI STSKTVILPPDPRKNMITSRVHWHALPVT SIVYDAMSYPM DPLLY  
SGGDESVLVTWQISQGRDRPVHVHPR LALGGIVHLSSSDRCDDNPASGILVYCEDNTLQL  
LESHNKGCVWKVQGLACAQNESTKGS LHADPRSDGQKNSQLVVTGLTQAPGYIHWFDPSR  
ERLASSLEVVPFNRI SKTEPDESPLPKPSITAHVFSNGEDLITIDESQTENTYIGALDE  
PIKSIEYGTVSTIRFWSW NDSSTKNDSAPPYNEIASMTYPHGPKNRISAIDMSKDG SFA  
CTASCNEKAFRVWKKI IGSNKSI SWACRYKVKIPAGFSNCSIRANGLTFSDDN SLLVIAF  
GQTGTIWDTDGARLLTTFDHFQGNNDIEFVQFISPGLHKD LLLIQSKSCVSLRSPYGPY G  
SSRSFKGWNWSSQKNCIITAVEFIERLGCIALAVYSAVEDQSRVVFVDINTGREGVNDRE  
FSLSSVENIDGRISLCAVGKQRLKSNWDNTTHKGAKSPLTYALTSIGELMLITENRSN  
HQNTATSNE SFMATGPRLEIPSNEHSRRKRQRTNSFSAATSGSGEFFRPKKLALDIFGFG  
ANNDSTLVPSTAELP SLSANFVKTFVGRNLRKSIE

>comp15642\_c0\_seq2; 926 822 3989 LEN=6525; minus strand; translated

MARSANKTRKKSIEPKRKAVATSTTSKSTSSSLNRIVVGGQLLGSRSKPFLDNQSNVASW  
NTFEP IITPEVTC DQRKKTERFVLLPHSRYISVLSYKTGIKVGTLVPSLKDDSNEKNV I I  
ECVSMVKYQRNVSETTVQDVLDRMDLEDDDEIDGIEGTSSSVDETLIMVGCHDGSVREFS  
LRELGNHGNASKQVDLGPYSISGSCFHPRRVIRVLK KDP IAHMTVPHIRTPQIRK DGLV  
MYVAARRLERKEEEEKDHPSKSTRVKSQKKDMSFTFEVIRVLVPHFDGSTRDVR LSSPKE  
SMRSLDKFKCKVSANKNKKYADMLPFRMMSAAKALSGDNSNTNTDNISIFVILARADSI S  
VYYDQLHALEYAPMSIAMP SNNPLTVASISLNKADITCGHHHGNI CVMNNILNDIELYH  
IAMKKAKRLTGDSSI STSKTVILPPDPRKNMITSRVHWHALPVT SIVYDAMSYPM DPLLY  
SGGDESVLVTWQISQGRDRPVHVHPR LALGGIVHLSSSDRCDDNPASGILVYCEDNTLQL  
LESHNKGCVWKVQGLACAQNESTKGS LHADPRSDGQKNSQLVVTGLTQAPGYIHWFDPSR  
ERLASSLEVVPFNRI SKTEPDESPLPKPSITAHVFSNGEDLITIDESQTENTYIGALDE  
PIKSIEYGTVSTIRFWSW NDSSTKNDSAPPYNEIASMTYPHGPKNRISAIDMSKDG SFA  
CTASCNEKAFRVWKKI IGSNKSI SWACRYKVKIPAGFSNCSIRANGLTFSDDN SLLVIAF  
GQTGTIWDTDGARLLTTFDHFQGNNDIEFVQFISPGLHKD LLLIQSKSCVSLRSPYGPY G  
SSRSFKGWNWSSQKNCIITAVEFIERLGCIALAVYSAVEDQSRVVFVDINTGREGVNDRE  
FSLSSVENIDGRISLCAVGKQRLKSNWDNTTHKGAKSPLTYALTSIGELMLITENRSN  
HQNTATSNE SFMATGPRLEIPSNEHSRRKRQRTNSFSAATSGSGEFFRPKKLALDIFGFG  
ANNDSTLVPSTAELP SLSANFVKTFVGRNLRKSIE

>comp15642\_c0\_seq3; 926 358 3525 LEN=6148; minus strand; translated

MARSANKTRKKSIEPKRKAVATSTTSKSTSSSLNRIVVGGQLLGSRSKPFLDNQSNVASW  
NTFEP IITPEVTC DQRKKTERFVLLPHSRYISVLSYKTGIKVGTLVPSLKDDSNEKNV I I  
ECVSMVKYQRNVSETTVQDVLDRMDLEDDDEIDGIEGTSSSVDETLIMVGCHDGSVREFS  
LRELGNHGNASKQVDLGPYSISGSCFHPRRVIRVLK KDP IAHMTVPHIRTPQIRK DGLV  
MYVAARRLERKEEEEKDHPSKSTRVKSQKKDMSFTFEVIRVLVPHFDGSTRDVR LSSPKE  
SMRSLDKFKCKVSANKNKKYADMLPFRMMSAAKALSGDNSNTNTDNISIFVILARADSI S  
VYYDQLHALEYAPMSIAMP SNNPLTVASISLNKADITCGHHHGNI CVMNNILNDIELYH  
IAMKKAKRLTGDSSI STSKTVILPPDPRKNMITSRVHWHALPVT SIVYDAMSYPM DPLLY  
SGGDESVLVTWQISQGRDRPVHVHPR LALGGIVHLSSSDRCDDNPASGILVYCEDNTLQL  
LESHNKGCVWKVQGLACAQNESTKGS LHADPRSDGQKNSQLVVTGLTQAPGYIHWFDPSR  
ERLASSLEVVPFNRI SKTEPDESPLPKPSITAHVFSNGEDLITIDESQTENTYIGALDE  
PIKSIEYGTVSTIRFWSW NDSSTKNDSAPPYNEIASMTYPHGPKNRISAIDMSKDG SFA  
CTASCNEKAFRVWKKI IGSNKSI SWACRYKVKIPAGFSNCSIRANGLTFSDDN SLLVIAF  
GQTGTIWDTDGARLLTTFDHFQGNNDIEFVQFISPGLHKD LLLIQSKSCVSLRSPYGPY G  
SSRSFKGWNWSSQKNCIITAVEFIERLGCIALAVYSAVEDQSRVVFVDINTGREGVNDRE  
FSLSSVENIDGRISLCAVGKQRLKSNWDNTTHKGAKSPLTYALTSIGELMLITENRSN  
HQNTATSNE SFMATGPRLEIPSNEHSRRKRQRTNSFSAATSGSGEFFRPKKLALDIFGFG  
ANNDSTLVPSTAELP SLSANFVKTFVGRNLRKSIE

>comp15642\_c0\_seq4; 926 822 3989 LEN=6709; minus strand; translated

MARSANKTRKKSIEPKRKAVATSTTSKSTSSSLNRIVVGGQLLGSRSKPFLDNQSNVASW  
NTFEP IITPEVTC DQRKKTERFVLLPHSRYISVLSYKTGIKVGTLVPSLKDDSNEKNV I I  
ECVSMVKYQRNVSETTVQDVLDRMDLEDDDEIDGIEGTSSSVDETLIMVGCHDGSVREFS

LRELGNHGNASKQVDLGPYSISGSCFHPRRVIRVLKKDPIAHMTVPHIRTPQIRKDGVL  
MYVAARRLERKEEEEKDHPSKSTRVKSQKKDMSFTFEVIRVLVPHFDGSTRDVRLLSSPKE  
SMRSLDKFKCKVSANKNKKYADMLPFRMMSAAKALSGDNSNTNTDNI SIFVILARADSI S  
VYYDQLHALEYAPMSIAMP SNNPLTVASISLNKADITCGHHHGNI CVMNNILNDIELYH  
IAMKKAKRLTGDSSI STSKTVILPPDRKNMITSRVHWHALPVT SIVYDAMSYPM DPLLY  
SGGDESVLVTWQISQGRDRPVHVHPR LALGGIVHLSSSDRCDDNPASGILVYCEDNTLQL  
LESHNKGCVWKVQGLACAQNESTKGS LHADPRSDGQKNSQLVVTGLTQAPGYIHWFDPSR  
ERLASSLEVVPFNRI SKTEPDESPLPKPSITAHVFSNGEDLITIDESQTENTYIGALDE  
PIKSIEYGTVSTIRFWSWNDSSSTKNDSAPPYNEIASMTYPHGPKNRISAIDMSKDGSFA  
CTASCNEKAFRVWKKIIGSNKSIWACRYKVKIPAGFSNCSIRANGLTFSDDNSLLVIAF  
GQTGTIWDTDGARLLTTFDHFQGNNDIEFVQFISPGLHKDLLLIQSKSCVSLRSPYGPYG  
SSRSFKGWNWSSQKNCIITAVEFIERLGCIALAVYSAVEDQSRVVFVDINTGREGVNDRE  
FSLSSVENIDGRISLCAVGKQRLKSNWDNTTHKGAKSPLTLYALTSIGELMLITENRSN  
HQNTATSNE SFMATGPRLEIPSNEHSRRKRQRTNSFSAATSGSGEFFRPKKLALDIFGFG  
ANN DSTLVPSTAELP SLSANFVKTFVGRNLRKSIE

>comp15642\_c0\_seq5; 926 358 3525 LEN=6158; minus strand; translated

MARSANKTRKKSIEPKRKAVATSTTSKSTSSSLNRI VVGGQLLGSRSKPFLDNQSNVASW  
NTFEP IITPEVTC DQRKKTERFVLLPHSR YISVLSYKTGIKVGTLVPSLKDDSNEKNV I I  
ECVSMVKYQRNVSETTVQDVLD RMDLEDDDEIDGIEGTSSSVDETLIMVGCHDGSVREFS  
LRELGNHGNASKQVDLGPYSISGSCFHPRRVIRVLKKDPIAHMTVPHIRTPQIRKDGVL  
MYVAARRLERKEEEEKDHPSKSTRVKSQKKDMSFTFEVIRVLVPHFDGSTRDVRLLSSPKE  
SMRSLDKFKCKVSANKNKKYADMLPFRMMSAAKALSGDNSNTNTDNI SIFVILARADSI S  
VYYDQLHALEYAPMSIAMP SNNPLTVASISLNKADITCGHHHGNI CVMNNILNDIELYH  
IAMKKAKRLTGDSSI STSKTVILPPDRKNMITSRVHWHALPVT SIVYDAMSYPM DPLLY  
SGGDESVLVTWQISQGRDRPVHVHPR LALGGIVHLSSSDRCDDNPASGILVYCEDNTLQL  
LESHNKGCVWKVQGLACAQNESTKGS LHADPRSDGQKNSQLVVTGLTQAPGYIHWFDPSR  
ERLASSLEVVPFNRI SKTEPDESPLPKPSITAHVFSNGEDLITIDESQTENTYIGALDE  
PIKSIEYGTVSTIRFWSWNDSSSTKNDSAPPYNEIASMTYPHGPKNRISAIDMSKDGSFA  
CTASCNEKAFRVWKKIIGSNKSIWACRYKVKIPAGFSNCSIRANGLTFSDDNSLLVIAF  
GQTGTIWDTDGARLLTTFDHFQGNNDIEFVQFISPGLHKDLLLIQSKSCVSLRSPYGPYG  
SSRSFKGWNWSSQKNCIITAVEFIERLGCIALAVYSAVEDQSRVVFVDINTGREGVNDRE  
FSLSSVENIDGRISLCAVGKQRLKSNWDNTTHKGAKSPLTLYALTSIGELMLITENRSN  
HQNTATSNE SFMATGPRLEIPSNEHSRRKRQRTNSFSAATSGSGEFFRPKKLALDIFGFG  
ANN DSTLVPSTAELP SLSANFVKTFVGRNLRKSIE

>comp15642\_c0\_seq6; 926 358 3525 LEN=6245; minus strand; translated

MARSANKTRKKSIEPKRKAVATSTTSKSTSSSLNRI VVGGQLLGSRSKPFLDNQSNVASW  
NTFEP IITPEVTC DQRKKTERFVLLPHSR YISVLSYKTGIKVGTLVPSLKDDSNEKNV I I  
ECVSMVKYQRNVSETTVQDVLD RMDLEDDDEIDGIEGTSSSVDETLIMVGCHDGSVREFS  
LRELGNHGNASKQVDLGPYSISGSCFHPRRVIRVLKKDPIAHMTVPHIRTPQIRKDGVL  
MYVAARRLERKEEEEKDHPSKSTRVKSQKKDMSFTFEVIRVLVPHFDGSTRDVRLLSSPKE  
SMRSLDKFKCKVSANKNKKYADMLPFRMMSAAKALSGDNSNTNTDNI SIFVILARADSI S  
VYYDQLHALEYAPMSIAMP SNNPLTVASISLNKADITCGHHHGNI CVMNNILNDIELYH  
IAMKKAKRLTGDSSI STSKTVILPPDRKNMITSRVHWHALPVT SIVYDAMSYPM DPLLY  
SGGDESVLVTWQISQGRDRPVHVHPR LALGGIVHLSSSDRCDDNPASGILVYCEDNTLQL  
LESHNKGCVWKVQGLACAQNESTKGS LHADPRSDGQKNSQLVVTGLTQAPGYIHWFDPSR  
ERLASSLEVVPFNRI SKTEPDESPLPKPSITAHVFSNGEDLITIDESQTENTYIGALDE  
PIKSIEYGTVSTIRFWSWNDSSSTKNDSAPPYNEIASMTYPHGPKNRISAIDMSKDGSFA  
CTASCNEKAFRVWKKIIGSNKSIWACRYKVKIPAGFSNCSIRANGLTFSDDNSLLVIAF  
GQTGTIWDTDGARLLTTFDHFQGNNDIEFVQFISPGLHKDLLLIQSKSCVSLRSPYGPYG  
SSRSFKGWNWSSQKNCIITAVEFIERLGCIALAVYSAVEDQSRVVFVDINTGREGVNDRE  
FSLSSVENIDGRISLCAVGKQRLKSNWDNTTHKGAKSPLTLYALTSIGELMLITENRSN  
HQNTATSNE SFMATGPRLEIPSNEHSRRKRQRTNSFSAATSGSGEFFRPKKLALDIFGFG  
ANN DSTLVPSTAELP SLSANFVKTFVGRNLRKSIE

>comp15642\_c0\_seq7; 926 822 3989 LEN=6612; minus strand; translated

MARSANKTRKKSIEPKRKAVATSTTSKSTSSSLNRI VVGGQLLGSRSKPFLDNQSNVASW  
NTFEP IITPEVTC DQRKKTERFVLLPHSR YISVLSYKTGIKVGTLVPSLKDDSNEKNV I I  
ECVSMVKYQRNVSETTVQDVLD RMDLEDDDEIDGIEGTSSSVDETLIMVGCHDGSVREFS  
LRELGNHGNASKQVDLGPYSISGSCFHPRRVIRVLKKDPIAHMTVPHIRTPQIRKDGVL  
MYVAARRLERKEEEEKDHPSKSTRVKSQKKDMSFTFEVIRVLVPHFDGSTRDVRLLSSPKE  
SMRSLDKFKCKVSANKNKKYADMLPFRMMSAAKALSGDNSNTNTDNI SIFVILARADSI S

VYYDQLHALEYAPMSIAMPSSNNPLTVASISLNKADITCGHHHGNICVMNNILNDIELYH  
IAMKKAKRLTGDSSISTSKTVILPPDRKNMITSRVHWHALPVTISIVYDAMSYPMDDL  
SGGDESVLVTWQISQGRDRPVHVHPRALALGGIVHLSSSDRCDNPNASGILVYCEDNTLQ  
LESHNKGCVWKVQGLACAQNESTKGS LHADPRSDGQKNSQLVVTGLTQAPGYIHWFDPSR  
ERLASSLEVVPFNRI SKTEPDESPLPKPSITAHVFSNGEDLITIDESQTENTYIGALDE  
PIKSIEYGTVSTIRFWSWNDSSSTKNDSAPPYNEIASMTYPHGPKNRISAIDMSKDGSFA  
CTASCNEKAFRVWKKIIGSNKSIWACRYKVKIPAGFSNCSIRANGLTFSDDNSLLVIAF  
GQTGTIWDTDGARLLTTFDHFQGNNDIEFVQFISPGLHKDLLLIQSKSCVSLRSPYGPYG  
SSRSFKGWNWSSQKNCIITAVEFIERLGCIALAVYSAVEDQSRVVFVDINTGREGVNDRE  
FSLSSVENIDGRISLCAVGKQRLKSNWDNTTHKGAKSPLTYALTSIGELMLITENRSN  
HQNTATSNEFSMATGPRLEIPSNEHSRRKRQRTNSFSAATSGSGEFFRPPKLLALDIFGFG  
ANNDSTLVPSTAELP SLSANFVKTFVGRNLRKSIE

>comp15642\_c0\_seq8; 926 822 3989 LEN=6622; minus strand; translated  
MARSANKTRKKSIEPKRKAVATSTTSKSTSSSLNRI VVGGQLLGSRSKPFLDNQSNVASW  
NTFEP IITPEVTC DQRKKTERRFVLLPHSRYSIVLSYKGTG IKGVTLPVSLKDDSNENKVI  
ECVSMVKYQRNVSETTVQDVLD RMDLEDDDEIDGIEGTS SSVDETLIMVGCHDGSVREFS  
LRELGNHGNASKQVDLGPYSISGSCFHPRR VIRVLK KDP IAHMTVPHIRTPQIRKDG  
MYVAARRLERKEEEEKDHPSKSTRVKSQKKDMSFTFEVIRVLVPHFDGSTRDVR LSSPKE  
SMRSLDKFKCKVSANKNKYADMLPFRMMSAAKALSGDNSNTNTDNISIFVILARADSI  
VYYDQLHALEYAPMSIAMPSSNNPLTVASISLNKADITCGHHHGNICVMNNILNDIELYH  
IAMKKAKRLTGDSSISTSKTVILPPDRKNMITSRVHWHALPVTISIVYDAMSYPMDDL  
SGGDESVLVTWQISQGRDRPVHVHPRALALGGIVHLSSSDRCDNPNASGILVYCEDNTLQ  
LESHNKGCVWKVQGLACAQNESTKGS LHADPRSDGQKNSQLVVTGLTQAPGYIHWFDPSR  
ERLASSLEVVPFNRI SKTEPDESPLPKPSITAHVFSNGEDLITIDESQTENTYIGALDE  
PIKSIEYGTVSTIRFWSWNDSSSTKNDSAPPYNEIASMTYPHGPKNRISAIDMSKDGSFA  
CTASCNEKAFRVWKKIIGSNKSIWACRYKVKIPAGFSNCSIRANGLTFSDDNSLLVIAF  
GQTGTIWDTDGARLLTTFDHFQGNNDIEFVQFISPGLHKDLLLIQSKSCVSLRSPYGPYG  
SSRSFKGWNWSSQKNCIITAVEFIERLGCIALAVYSAVEDQSRVVFVDINTGREGVNDRE  
FSLSSVENIDGRISLCAVGKQRLKSNWDNTTHKGAKSPLTYALTSIGELMLITENRSN  
HQNTATSNEFSMATGPRLEIPSNEHSRRKRQRTNSFSAATSGSGEFFRPPKLLALDIFGFG  
ANNDSTLVPSTAELP SLSANFVKTFVGRNLRKSIE

>comp15642\_c0\_seq9; 141 1 319 LEN=748; minus strand; translated  
XLMMITENRSNHQNTATSNEFSMATGPRLEIPSNEHSRRKRQRTNSFSAATSGSGEFFR  
KLLALDIFGFGANNDSTLVPSTAELP SLSANFVKTFVGRNLRKSIE

>comp15643\_c0\_seq1; 275 552 1325 LEN=1925; translated  
MMFKALRKYRRIMVLEGMVQDFYGGSKYYKRLDIDMDDAQAWDK EKENQLGDFSGWPDYE  
IIFRDLFFSIFQPAPPIAKLVQQHLD SANLVRGEFSAAQYRAFHHVADDKTKVTDALLQK  
STRNAINCASQIQPGVPIFFASDSQVAVNTARFINDKHPDRHIVTFDGDQEALHLDKMKT  
WKSGNVSDFYSAFVDLLVMAEAKCISTGRGGYCRFANILSIDPTCVIRHDSERIKMIKRC  
NWN SGKPTVQADEVDPW

>comp15643\_c0\_seq2; 271 506 1705 LEN=2305; translated  
MDYTEPGCVPSGKNSPFDFAPTTKYRDSDKLPQWMKDYFDWHREQTSSLNECNYKNYKFL  
ILRCSAERKCGGIADRLKSI PFFIAAGARHKRIFLIRWSRPTKLEEFLLPNEINWVSD  
WLPDKVDNFEEHPQAMWIPSTKMMFKALRKYRRIMVLEGMVQDFYGGSKYYKRLDIDMDD  
AQAWDK EKENQLGDFSGWPDYEIIFRDLFFSIFQPAPPIAKLVQQHLD SANLVRGEFSAA  
QYRAFHHVADDKTKVTDALLQKSTRNAINCASQIQPGVPIFFASDSQVAVNTARFINDKH  
PDRHIVTFDGDQEALHLDKMKTWKSGNVSDFYSAFVDLLVMAEAKCISTGRGGYCRFANI  
LSIDPTCVIRHDSERIKMIKRCNWN SGKPTVQADEVDPW

>comp15644\_c0\_seq1; 566 1 3967 LEN=4594; translated  
TRNVAHHTSLLPAPGWLSTAQRSGVSCAAASCLRDERTTKTHPAGRDIRDKTAAREGKTA  
RFAIGACLLYL VGFHILYANIRSFPEVLLYETIAGGDFFITKQQQRPLQPPDPDSDPD  
ILLEWDASRIPGYLPGSNRSSLFGYVMRDL SRRFLSPVSDQQRRLRQRAKRSRGSAPTDP  
PLSTILVSPGANRQLSGLLGEAGESSDAGADHKHAIHRRFGYRIGPSFLVESVFGNGPH  
GVIAVDPTGATFDYHPGSGATENHRGTDRSVLLAVFDPDQGREYAVPPAWEDSVRNGS  
IEYATFRISSATGGSGDATTMRGIETFR LFRGEGYKLVLSSSHAPTDGLNYPGPNLLK  
NQGDVEEFLVFGVALATKENHARRSNDGGNCVFHSILFATRGLDLAIPSRREFLN TTD  
NDHVVDIEKEGIPFTECPDRETMATLFRNDARFAGYGTSDVGTGGGHNDSEDDDDDELQ  
LSCFGRKVSQETNTTIVLSTEER GASL FVELWHSHTNLSLSEAACL RCTKLTTPDGDD  
STDAGTIRNTAVEGK CSTRILPDRIFSESKIHTPVTADDNEKRGPNLLAIELRGVHHNML  
NLSLSGFETELKNVGLERVSPLISNNGWNSTAWSSVSEGSNGSDIGGHQRYRGINRCR

QTLLEDGLTDELVPHHGSQISGMFCFDYDRPNCLFGRHAATHLLDHVEEFIRTKIDKRE  
KWAAYITLVDGEESEETLVGTLKLP IIAFLSSLASEMSSEEWSENTIVAIYSDNERQPVLFL  
LKTGQYNHGMTKLKEGGNSTFVWDLNYFMQSILTARDIEDIEKAVQRHLRLDAAVATTD  
PLRNVVEKRTLAMDELIAPPSILSFYADIPKEQKFRLVKSSDNTPMKRALVVKGCQC  
CATNMSPWSPCNEHPWDSKNPKRFKETFILVDCPGQSIHLEIGIVRNRVLTHRSK  
KRIGNSAHLDNINIIFLELDSVSLEYADRHFPKTRELLKKHRIARIDDSVFECPSGIC  
SAAEFPYTSLVANSIPNQVAALSGCVSAPFFETCGMAQPKLGEICHDTNMAHNG  
LKLKRSQMRFWCPDRNVNVTKTPWLFVSDSKGYINFFGEEFCYDHS  
PYVTQGNVFPKHFFDIQSHKVFCSLVERKVVKQNL  
TINSWEKWGVMSDPCVEGYSCSKKFEKSAISLQFIDQMWDVYSSRPKLAFLNV  
IAAHDYSPDWEMAI  
PAAENYDEHLVQFLKRRIDLADKERTVIFIRSDHGLQKGP  
MIVDYALQVEHKHPWTEIVIPENLVISKPALFDNQARMLTGF  
DLYHTMRLMSDRAKGRDAESGIPDW

>comp15644\_c0\_seq2; 567 1 3982 LEN=4609; translated  
TRNVAHHTSLLPAPGWLSTAQRSGVSCAAASCLRDERTTKTHPAGRDIRDKTAAAREGKTA  
RFAIGACLLYLGVGHILYNANIRSFPEVLLYETIAGGDFFITKQQQRPLQPPDDSPD  
ILLEWDASRIPGYLPGSNRSSLFGYVMRDLRRLSPVSDQQRRLRQRAKRSRGSAPTDP  
PLSTILVSPGANRQLSGLLGEAGESSDHPSGAAGADHKHAIHRRFGYRIGPSFLVESVF  
GNGPHGVIAVDPDTGATFDYHPGSGATENHRGTDERSVLLAVFDPDQGREYAVPPAWEDS  
VRNGSIEYATFRISSATGGSGDATTMRGIETFRFRGEGYKLVLSSSHAPTDLNPNYGP  
NTLLKNQGDVEEFLVFGVALATKENHARRSNDGGNCVFSILFATRGLDLAIPSRREFLN  
TTDRKNDHVVDIEKEGIPFTECPDRETMATLFRNDARFAGYGTSDVGTGGGHNDSEDDD  
DDELQLSCFGRKVSQETNTTIVLSTEEERGASLVELWHSHTNLSLSEAACLRACTKLT  
PDGDDSTDAGTIRNTAVEGKCESTRILPDRIFSEKIHPTVADDNEKRGPNLLAIELRGV  
HHNMLNLSLSGFETELKNVGLERVSPLISNNGWNSTAWSSVSEGSNGSDIGGHQRYRGI  
NRCDRQTLLEDGLTDELVPHHGSQISGMFCFDYDRPNCLFGRHAATHLLDHVEEFIRTK  
IDKREKWAAYITLVDGEESEETLVGTLKLP IIAFLSSLASEMSSEEWSENTIVAIYSDNER  
QPVLFLKTGQYNHGMTKLKEGGNSTFVWDLNYFMQSILTARDIEDIEKAVQRHLRLDAV  
ATTDAPLRNVVEKRTLAMDELIAPPSILSFYADIPKEQKFRLVKSSDNTPMKRALVVKGC  
QC  
CATNMSPWSPCNEHPWDSKNPKRFKETFILVDCPGQSIHLEIGIVRNRVLTHRSK  
KRIGNSAHLDNINIIFLELDSVSLEYADRHFPKTRELLKKHRIARIDDSVFECPSGIC  
SAAEFPYTSLVANSIPNQVAALSGCVSAPFFETCGMAQPKLGEICHDTNMAHNG  
LKLKRSQMRFWCPDRNVNVTKTPWLFVSDSKGYINFFGEEFCYDHS  
PYVTQGNVFPKHFFDIQSHKVFCSLVERKVVKQNL  
TINSWEKWGVMSDPCVEGYSCSKKFEKSAISLQFIDQMWDVYSSRPKLAFLNV  
IAAHDYSPDWEMAI  
PAAENYDEHLVQFLKRRIDLADKERTVIFIRSDHGLQKGP  
MIVDYALQVEHKHPWTEIVIPENLVISKPALFDNQARMLTGF  
DLYHTMRLMSDRAKGRDAESGIPDW

>comp15646\_c0\_seq1; 1822 1 7363 LEN=7415; translated  
XPGTIPPPPGMGPPGMIPPNQEONFPPPPGMFSAAPGMGPPPPPGMGAGFPFDANTMD  
DREKAKRWDEMQUEEYNEPKKMGPFSAPOKEIMPADFLRKILQDHGDMSSKRYQSEKRL  
YLGALKYMPHALYKLLNMPMPWESYKEVPIFLHITGAICFVDQVPKVI  
EPVYRAQWGTAWLMRREKRDRRHFKRMRFPFDEEPPLDYVDHLLNVEPEGAIQLDLDDPQYDLIRDF  
YDQQPLSDVRDNTEDIILKHAWVNGPSYKTRWLDTQIMSQMFELAEPLLNAPDKNIRYN  
FDLPHFLTAKALNAIIPGGPKFEPLFRDVEEDEDWDFNDISKIIRQPIRTEYKIAFPN  
VYNSRPRKVRLLAPYHFVQSSHVIGTDEADEEDGILAFESYPSQLNP  
IVRVEKDDYNRFSRKTNDFSEFDEDDFNPLVGETDDDAPNYWICDQDSDEDDTYHFPSTGEQTP  
TNNTNVTVDPFLAEKPISTQKTPGIALYSAPYPFNTRSGRTRRTIDVPLIGHWFRDRVSGDLKYPTKV  
RVSYQKLLKAWVLNQLHSRPEKPKSKRTLFKSLKSTKFFQCTELDWVEAGLQVCKQGHNI  
LNLLINRKQLKYLHLDYNFNKPKTKTLTKERKKSFRGNVAFHLVREILRLTKLVVDAHVQ  
FRLSNIDAYQLADGLQYAFNHVQTLTGMRYRYRMLRQIRTKDLKHLIYYRFNTGPVVK  
GPGVGFWAPSWRVWIFFLRGIVPLLERWLGNLLARQFEGRLSKSFAKNVTKQRVESHFDL  
ELRASVMHDI  
LDMPAGVKQNKSRVILSHLSEAFRCWKANI  
PWKVPGM  
PAPVENMILRYV  
KAKADWWTNIAHYNRERIKRGGSDKTVVKKNLGRLTRLWLKAEQERQHNYLKDGPYVSA  
EEAVAIYTTTTVHWLESRKFTPIPFPPLSYKHDTKLLILALERLKEGYGLQIRLNSAAREE  
LALIEQAYDNPEALSRIKRHLLTQRTFKETTIEFMDMYQYLSPVYTI  
EPLEKITDAYLDQYLWYEADKRHLFPNWVKPADSEPPPLLVYKWCQGVNLEN  
IWDVEENGESVVLMETKYE  
KFYEKIDLTLNRLRLRIVDHN  
IADYMTAKNNISISFKDMMHTNSYGLIRGLAFSSFIVQ  
YYGLILDLLLLGLTRASEIAGPPQRPN  
EYLTFADIETEVNHP  
IRMYTRYLDKTYILFKFD  
ANEGKDI  
IQRYLIEHPDPNNENAVGYR  
NKKCWP  
RDCMRLLRRDVNLGRAV  
FWMKNR  
LPRSVTTLDW  
DNSFVS  
VSADNP  
NLLFDMCGFEVR  
INPIKAI  
RRDIFTGGQVEANAT  
TYKDRG  
VWNLQNETTKEMTAQAHLRVEDSAVQA  
FDNRIRQILMSSGATTFTKIANKWNTALIGLMT



YYREAVLNTQELLDLLVKNENKIQTRIKIGLNSKMPSRFPVVFYCPKELGGLGMLSMGH  
VLI PQSDLRYSKQTDMGVTHFRSGLSHDAEQLIPNLFYRLQPWESEFVDSQRVWAEYALK  
RQEANSQNRRLTLEDLEDSDWRGIPRINTLFSKDRHTLAYDRGWRVRTEFKQYQVLRVNP  
FWWTHQRHDGKLNWLNAYRTDMIQALGGVEGILEHSLFKGTYPPTWEGLFWEKASGFEE  
MKFKKLTNAQRSGLTQIPNRRFTLWWSPTINRANVYVGFQVQLDLTGIFMHGKIPTLKIS  
LIQIFRAHLWQKIHESI VMDIAQVFDQELDSLEIESVQKETIHPKRSYKMNSSVADLVLF  
AAYKWPVSKPSSLHDTKDDYDGSSTSNKFWLDVQLRWGDFDSDHDIERYSRAYLDYTTDNM  
SIYPSPTGCLLAVDLAYSLSYSGFGNYIPGGKPLLQQAMAKIIKANPALYVLRERIRKGLQ  
LYSSEPTPEYLSSQNYGELFSNQVIWFVDDTNVYRVTIHKTFEGNLTTPINGAIFIFNP  
RTGQLFLKIIHTSVWAGQKRLSQLAKWKTAEEVAALIRSLPIEEQPKQIIVTRKGMLDPL  
EVHCLDFPNIVLKGSELQLPFQAALKVEKFGDLILRATEPQMVLFNIYDDWLKSISSYTA  
FSRLILILRGLHVNVDKVKQILRDPRTVVTEPHHVWPTLTDEQWIKIEVALKDLILADYG  
KKNNVNVSSTLQSEIRDIILGMEIAPPSVQRQOVAEIEAQAQQSQMTATTTKTTNVHGE  
QIVVTTTTQFEQDTFQSKTDWRVRAISATNLYLRTKHIYVSEDI SEDGLTYVLPKNILS  
KFITITADLRTQIAGYLYGVTPDDNDQVREIRCI VMVPQVGNHQSVTMPKKL PDDPLLNDL  
EPLGWIHTQPNELIQNGTQVLPAPDVVTHASII SDHPNAWTGKNEIVLTTSFTQGSCLT  
AYRVTDHGLEWGGKSRNVAGGVANAQDYSSNCFEKVQMLLSDRFKGFFMVPRDGLGWNYN  
FQGKHNVSMDYTLKMDTPEAFYAECRHPQHFLSFVQMEDGDANEGADIEDALS

>comp15647\_c0\_seq1; 1449 477 5824 LEN=6173; translated  
MKA AAAALSAVELTKVVSXNEMDSEASANVSNHNYANYSQNGSMPFQHQAPISSSRKRKRL  
TEKVKASVTKPARAVGRRVFRNRNSRGGVVGEGVEIILSRDVSNKLSEDI FR TNSLEEA  
AGTTMSGGSHYGSTISEGRNLRRSLSQMISSKRSISTASSTNGNKMSRPGDIASQTNTIN  
DADWSVRTLEAILRKLATLCGVYALGSFRPEWSSLVLRMLEFVATAWVTCTI IILGLGWVR  
RWNLRERQERQEQEYLPHEIIVDQEPKQEDVEEIGTSEIAPLLQDQKNSIAYGISSIPAT  
RNASKPEKDDKQNRKSTTKKISLSHKA EKSLSEVHSSSVRKSNISSAETQNEIEHPKLT  
FYAVDTSTGRRISCNASTPFHISNEWMEMDMLIMLRTPDVDDPSAIKGTAAANDKVSGLYR  
NKQRRFEFQYQVKKKAPVKGKRFYFSCLEDEPIKMGIVTRAFVSAAMAFVKSTNPSFHYN  
VTGSKKKTGDGKFETPHMSFTAEGSLDRFVATKPEKLPPELGSEIHEDPELMKKRKS  
GMVFNTEDTYTFLWSSYVDFLDWRCLNLPGIKPFGLSSVLGSQSINLTMYLIDENRGGDNH  
YRKDITEIVKFEFSNGEKAGIGKEAQKLIDVAMERQKQQLNATQITTTMPQEVGELTRT  
ESDDSCSDDTDCIRNTITIDEVEEIDRDAADAAELGEGIYLRSGDSVLFKEFLPEDEKTT  
ACAVINGGGFAVSKQNTPIVIEKTKRQRKNKLIKSGDTVMFKMIQNKPGTEDLETRYLT  
IHRGWLKWVTTMPLKNGSFTIFTHETELGERALPTDETQSSFLTLLGGSFTLRHKRWSKY  
CVGISSKPTDFGGRMLSLYNSKSSGKGLVTEEGRNQSMYQSDRNQPTDQSDDDGETDRE  
MPSIEDSGRVKPLVLCQDPKTAKDLSPNSSPIKVSRSNDFHEKIEPKTPNGFKLIFSN  
EHSRADVPAWIEMLDVRVQRVRLAYVVRVCRNPTANASGKNNEETFARLKSGLRLAHVM  
SIGQSIDIPNFAPSSLVAVDSCDSVDAISKSNRDINQSCFAEPLSETNQGDDEEEDENLGH  
LDSSNENLNEFGLQGKITSSGSLSVYDSYGDPPDNVESSTPTKIEEDDFINEDI I IAD  
SMSDSSLSDTEVGIKKNRRLGNVKKLARKTVVGTGRITKETTKKAAGKIGTGKATGKAV  
KTTGKRLIAPVAIKTGKQPRSGPKKRKIKESQTVGPKTMKKLGKIEAKSGGPIIFVAGELS  
ATEQSRRTASRILERMSDVSIOSSAWKSCNDALSSEIGFLTEQDTWFLNGDAMHLGVKPS  
KKHGKLLGDTIVARCLYESHWREEWCGIYESCLVFYAPLAKSKCHEIFFSDISFVRPLAE  
NRLCPLPGF SILVVETAWQCHYIAFRDETSRGTFGDKVESALERLKMRRREVESPEQIDLQ  
KARFWQGFQTLSETSLSSCAAKWAKVSSQKAKERAILNGRRMAFDRLARSFGNSISKAN  
EFVEDLLTMALTF SFQSLEQDPESFIEFLDLTSELRFLEPDEDLSSPYAFCLFINIYHC  
LLQQALLSVNGPLQKKSISHFMRTSCYEIGGDVFLAELHSCVICGKMSKPINLKPPIYI  
EAPRKSNA YRYALNYTDARVHFVLTADMACPLFIPVMTQRYIEQQLNTACVDF FANNQ  
LVVDVKRRIVTVPKVCEIHRNDFNGELLNILKFCIGEMDNELGNAIRAAVSKKGEKGLT  
IRFQHAQEYHTSLKLRTAATDQNLNEMNYFSIENIKSNSTDE

>comp15647\_c0\_seq2; 1056 477 4072 LEN=4072; translated  
MKA AAAALSAVELTKVVSXNEMDSEASANVSNHNYANYSQNGSMPFQHQAPISSSRKRKRL  
TEKVKASVTKPARAVGRRVFRNRNSRGGVVGEGVEIILSRDVSNKLSEDI FR TNSLEEA  
AGTTMSGGSHYGSTISEGRNLRRSLSQMISSKRSISTASSTNGNKMSRPGDIASQTNTIN  
DADWSVRTLEAILRKLATLCGVYALGSFRPEWSSLVLRMLEFVATAWVTCTI IILGLGWVR  
RWNLRERQERQEQEYLPHEIIVDQEPKQEDVEEIGTSEIAPLLQDQKNSIAYGISSIPAT  
RNASKPEKDDKQNRKSTTKKISLSHKA EKSLSEVHSSSVRKSNISSAETQNEIEHPKLT  
FYAVDTSTGRRISCNASTPFHISNEWMEMDMLIMLRTPDVDDPSAIKGTAAANDKVSGLYR  
NKQRRFEFQYQVKKKAPVKGKRFYFSCLEDEPIKMGIVTRAFVSAAMAFVKSTNPSFHYN  
VTGSKKKTGDGKFETPHMSFTAEGSLDRFVATKPEKLPPELGSEIHEDPELMKKRKS  
GMVFNTEDTYTFLWSSYVDFLDWRCLNLPGIKPFGLSSVLGSQSINLTMYLIDENRGGDNH

YRKDITEIVKFEFSNGEKAGIGKEAQKLIDVAMERQKQQELNATQITTTTPMQEVGELTRT  
ESDDSCSDDTDCIRNTITIDEVEEIDRDAADAAELGEGIYLRSVDFKFLPEDEKTT  
ACAVINGGGFAVSKQNTPIVIEKTKRQRKNKLIKSGDVMFKMIQNKPGTEDLETRYLT  
IHRGWLKWVTTMPLKNGSFTIFTHETELGERALPTDETQSSFLTLLGGSFTLRHKRWSKY  
CVGISSKPSTDFGGRMLSLYNSKSSGKGLVTEEGRNQSMYQSDRNQPTDQSDDDGETDRE  
MPSIEDSGRVKPLVLTQDPKTAKDLSPNSSPIKVSRSNDFHEKIEPKTPNGFKLIFSN  
EHSRADVPAWIEMLDRVQRVRLAYVVRVCRNPTANASGKNNEETFARLKS GKRLAHVM  
SIGQSIDIPNFAPSSLVAVDSCDSVDAISKSNRDINQSCFAEPLSETNQGDDEEEDENLGH  
LDSSNENLNEFGLQGKKITSSGSLSVYDSYGDPPDNVESSTPTKIEEDDFINEDIIAD  
SMSDSSLSDTEVGIKNRRLGNVKKLARKTVVGTGRITKGNVRLKFPFVCFIFSLSHL  
>comp15647\_c0\_seq3; 361 477 2160 LEN=2160; translated  
MKAALSAVELTKVVSXNEMDSEASANVSNHNYANSQNGSMPFQHQAPISSRRKRKL  
TEKVKASVTKPARAVGRRVFRNRNSRGGVVGEGVEIILSRDVSNKLSEDI FRTNLSLEEA  
AGTTMSGGSHYGSTISEGRNLRRSLSQMISSKRSISTASTNGNKMSRPGDIASQTNTIN  
DADWSVRTLEAILRKLATLCGVYALGSFRPEWSSLVLRMLEFVATAWVTCIIILGLGWVR  
RWNLREQERQEQEYLPHIIVDQEPKQEDVEEIGTSEIAPLLQDQKNSIAYGISSIPAT  
RNASKPEKDDKQNRKSTTKKISLSHKAEKSLSEVHSSSVRKSNISSAETQNEIEHPKLT  
FYAVDTSTGRRISCNASTPFHISNEWMEMDMLIMLRTPDVEDPSAIKGTAAANDKVSGYLR  
NKQRRFEFQYQVKKKAPVGRFYFSCLEDEPIKMGIVTRAFVSAAMAFVKSTNPSFHYN  
VTGSKKKTGDGKFETPHMSFTAEGSLDRFVATKPEKLPPELGSEIHEDPELMKKRKS GKM  
VFNTEDTYTFLWSSYVQCILX  
>comp15647\_c1\_seq1; 176 1 1005 LEN=1307; translated  
RQHVYCSVHFGVALQRHYGTQSELTKSIQSTMMLASSFLHFFAASGLCFLSTEAFAPAA  
TKIQECTRTRSLLLHPPSACSPNLVPSREVRNRFGTSKANTQKALRRRASDDNNEDEC  
DSTDSRRPKVDDLVLVSLRMRRAVFLSWWTQVILTVVSSVTLLFTRNVLNIEGTGPVGF  
ANPVNRALLPNYFLAGSSIVLSFGSIFWTWATRRLSRLLRKPTRISRIQAANMLRKSITV  
TSLNLMGMAVALMGAEQIVGGLAIKVLTTSTASAVYQAGQAVNLLQPLDILVVQANTNT  
LFSHFCSVAYLFLARSIGQLDPPSVEGDERPRA  
>comp15647\_c1\_seq2; 176 1 1005 LEN=1479; translated  
RQHVYCSVHFGVALQRHYGTQSELTKSIQSTMMLASSFLHFFAASGLCFLSTEAFAPAA  
TKIQECTRTRSLLLHPPSACSPNLVPSREVRNRFGTSKANTQKALRRRASDDNNEDEC  
DSTDSRRPKVDDLVLVSLRMRRAVFLSWWTQVILTVVSSVTLLFTRNVLNIEGTGPVGF  
ANPVNRALLPNYFLAGSSIVLSFGSIFWTWATRRLSRLLRKPTRISRIQAANMLRKSITV  
TSLNLMGMAVALMGAEQIVGGLAIKVLTTSTASAVYQAGQAVNLLQPLDILVVQANTNT  
LFSHFCSVAYLFLARSIGQLDPPSVEGDERPRA  
>comp15648\_c0\_seq1; 974 119 3085 LEN=3149; translated  
MNFNFNLSDEDDDDQDHFASETPKKQPVALTKEGEAVAFDGNDFDNDSDSDNEYDDYDFD  
DDDRKASSLDASSHAAMAFPSDFDLPTTEERGDGEDDDDEDEIDWEDAEGEKATGRAIATP  
KAVTLDMEGADAKKSPSTGKKRKAQRSVSVFRHHKELAGNPALQQLTDLHKASLLAW  
VSHSNCFSRYASDDTCLAVAHSLIPTAWLWNDKDQHQTSNSTTRTSSVVIPTADDVGHFV  
RWFVDYAGLLPSNEGASSRWRKHSRNRKSTRTTSTKAKKDSNINGIEAIIHTDGSV  
GATVRSIKTYRLFHECRYLAKRNDRLHSSNNRQPRIDFGAGDALLFLCMVRS LGWRA  
RYVVALEPISRDLNVHDHPLFRHNDETNDNVLARFFKRVIRNHGIPYGSNEDAPISVDSDE  
SDSVKDLKPAKQSDTPSAARKPSLQHQP KSLFTNEADPVAASKHIGWEILCRQQTNT  
HGKRNKSDSTRSSRNMQWIHVDP IAGITNQPCVVEKTLFENHRLKSPGISIRRYKNRRPV  
CYALAVEHVPCRRNTNNSVDKDKGDLVSRMTDVTRRYASSMVETMEARGIVPDRRSSKPK  
RRKMMAVNQKQVFHQASIEEDRPDVWF SKLLEKISGKRMGKKSVDIAASSKIEQQELKH  
KGKTEQDAITLSDSDSDKPAAPSKSETVESNLNGLQNEDDHDDGFDTDHEEESQLRE  
SAKKEPLPTS KA AFKKHPIYVIRSVLNSTEVLPDCKKGVCGMFKGELVYLR SYVETALP  
AKRWLYEGRKVKASELKVLPKARKKPASSSFKALKSYGVGEANDGSEEFRAHQIEKG  
SAPLGETDKQYLYGSWQTDAGPPYVGPSPDIPVNDYNNVELELLNPGLVHVELHHVAKV  
AKRLNLPYAPCLLGFEGHGRNRTPTIRGIAIHEHNEELLREAHAGMADHLLKEEHEKRRER  
AILLRWKRLLVGILTKDRLEREYGD  
>comp15649\_c1\_seq1; 1112 1 4495 LEN=4596; translated  
AVGGAAPGAGGIDYGLGLPRLAPAMVDGGEPPAGYEAYQPNRDSSASERFVLVRRCS  
TSGTARRTKTKNHGLLVLP LQQSSPVKSKTKPKQSSREQPKSKKKRKS KKKKQRHEKEA  
TGPVSSQACSGFLDANYGHPFETFFEVDHGRIYCDTDTGECVHGGPSLHASPLPDLSSLA  
EEGGIPDGKRS AATDRYLPYNAVKLATPTLRGALEERLSSPLVVVQLAGK FVSLLEDGIR  
AIFSLGLTLVQHAWNANASIKSAGELADEVQTNLEKGCPLIWNRAKQRWLASDAGDLLP  
GDVFKMAAEQGGSDGEDNAANIDGKETNTEKHKKHEWIVPVDALVLSGQALTNEA IITG

ESVPQIKTPIDFLEDDDEETERTKLWQEEPATMGTARRLDLHKDRSSILFAGTTVFHTLG  
GRRNRGGGAVESGPLGQACVDTTDANPGGITCLALRTGTYSKGNLLEALRGNATHSGA  
ISNEQSEKDAVRMIVYLSLCAALSCGSLFRNQARAVKVSPFRRVIQCTRIILVSI  
PLALASVARGCSGVLRRERADVVCSEPGSLLTAASVDTVVFDTGTTLTADTQSLSKV  
VSIPLPESDLNTESEFQRFVLAGCHSLVQFQEDGRSSVVDPLDQAALRYSHWRHNET  
LGCYVRHGAFNDTVSEDSVSSSSIGSQPTRLWQICSFPPDPSSRLSSAIVLLQRDSS  
LQLWKLTKGSPDTMITLMEETLDSNITKSQFRNQTQELEMQGYRSIAIGAENLANSTI  
ARLLFPNGLSIEAEFLAQAKANAALHRKEVDGVRGLQFCGFCFEASIRRSSKRVIKEL  
LGGGLNCVMLTGDSVDAALSVARKVEMYKNRKIAVLELLENSTTEKADGLVWRILTLK  
TKKDGSKILRHRTREKVTVSSVKKYTGSKAKGKFLAAHGRALEMILCGRPNKVGKMIT  
KQLDAFVSVARATPELKKQVIETLKHDCDKRVMCGDGVNDVAAIQSADVAASLLTG  
FGAENIESNIDVDDKRRMKRLSMLNIGSNRATNVAQARKKESNERIRKEVEKYREEIRK  
QSSSKDTSKKSEFDELKEMISATMRAGRNEQORRAEQLRKGGGDAARILAEERQGQLS  
AEGDEVHDESLEPPPIKPGEASLVSSFSCLHPSVDGIDAIIRQGIATSASALATQQAIG  
LHSLMSCFHLATLYRDGFRYGKYMWDVEMLFYQILETARNRASCAPRRLPVSVD  
RPPTSLFEFGSVFETISQAVVHISCMASVRYAKHIERIDIDKGNERIEELKNFHGAQ  
STKIAKLMDALAKRSLMDTTEGEKNPNPFFQRAPFRPNYETNMVFIILSILQSAISAV  
VSHKGSFPYHGILESRLDLCTIAGATLIFVVACITGKLSLASSLLELKLPLPSKCSK  
LVLGIVSMNIAACVFCRYISDRFLLSTIEEQPNRVKIVSDEENAEQSNNAIYEEKLL  
REETETNWKGLKLLAAIFFYLVVEVLVSSE

>comp15649\_c1\_seq2; 1109 1 4513 LEN=4614; translated  
AVGGAAPGAGGIDYGLGLPRLAPAMVDGEGEPAGYEAYQPNRDSSASERFVLVRRCS  
PNTSGTARRTKTKNHGLLVLPQQSSPVKSKTKVSKTKPKQSSREQPKSKKKRKS  
SKKKKQRHEKEATGPVSSQACSGFLDANYGHPFETFFEVHDGRIYCDTDTGECVH  
GGPSLHASPLDLSSLAEEGGIPDGKRSAAATDRYLPYNAVKLATPTLRGALEERLSS  
PLVVVQLAGKVFVSLLEDGIRAFISLGLTLVQHAWNANASIKSAGELADEVQTNLEK  
GCPVLIWNRKQRWLASDAGDLLPGDVFVKMAAEQGGSDGEDNAANIDGKETNTEKH  
KHHEWIVPVDALVLSGQALTNEAILTGESVPQIKTPIDFLEDDDEETERTKLWQEEP  
ATMGTARRLDLHKDRSSILFAGTTVFHTLGGRRNRGGGAVESGPLGQACVDTTDAN  
PGGITCLALRTGTYSKGNLLEALRGNATHSGAISNEQSEKDAVRMIVYLSLCAALSC  
GSLFRNQARAVKVSPFRRVIQCTRIILVSIPLALASVARGCSGVLRRERADVVCSE  
PGSLLTAASVDTVVFDTGTTLTADTQSLSKVSIPLPESDLNTESEFQRFVLAGCHSL  
VQFQEDGRSSVVDPLDQAALRYSHWRHNETLGCYVRHGAFNDTVSEDSVSSSSIG  
SQPTRLWQICSFPPDPSSRLSSAIVLLQRDSSLQLWKLTKGSPDTMITLMEETLDS  
NITKSQFRNQTQELEMQGYRSIAIGAENLANSTIARLLFPNGLSIEAEFLAQAKANA  
ALHRKEVDGVRGLQFCGFCFEASIRRSSKRVIKELGGGLNCVMLTGDSVDAALSV  
ARKVEMYKNRKIAVLELLENSTTEKADGLVWRILTLKTKKDGSKILRHRTREKVT  
VSSVKKYTGSKAKGKFLAAHGRALEMILCGRPNKVGKMITKQLDAFVSVARATPEL  
KKQVIETLKHDCDKRVMCGDGVNDVAAIQSADVAASLLTGFGAENIESNIDVDDK  
RRMKRLSMLNIGSNRATNVAQARKKESNERIRKEVEKYREEIRKQSSSKDTSKKSE  
FDELKEMISATMRAGRNEQORRAEQLRKGGGDAARILAEERQGQLSAEGDEVHDES  
LEPPPIKPGEASLVSSFSCLHPSVDGIDAIIRQGIATSASALATQQAIGLHSLMSC  
FHLATLYRDGFRYGKYMWDVEMLFYQILETARNRASCAPRRLPVSVD RPPTSLFE  
FGSVFETISQAVVHISCMASVRYAKHIERIDIDKGNERIEELKNFHGAQSTKIAKL  
MDALAKRSLMDTTEGEKNPNPFFQRAPFRPNYETNMVFIILSILQSAISAVVSHK  
GSFPYHGILESRLDLCTIAGATLIFVVACITGKLSLASSLLELKLPLPSKCSKL  
VLLGIVSMNIAACVFCRYISDRFLLSTIEEQPNRVKIVSDEENAEQSNNAIYEEK  
LLREETETNWKGLKLLAAIFFYLVVEVLVSSE

>comp15650\_c0\_seq1; 1177 295 4281 LEN=4544; translated  
MAEHKMNNENRTFFPTTVVVVTPNPDEASACSAQKLESTLKRYLNDKRRYGEDE  
TAINVKVISTCDPFGARCGSFGGTLAALDLLRDNSSGSNGDNDVRRSSEGGESCV  
ETVLC LHAGGDSRCPLSMILGKAWTNLPSSQYRNP I IWLISQMEDLFYRTQIPE  
GSLVLVATDCVLSFGDFSSCDDSIQKKNMPEPERESEVVDPYTVLGVAVPSPLNTA  
KNHGVIIMPEHTLPIPRKDDKEGSNFGWSLAQMETPAAVWQKPELDKLLTNPTTTT  
ISSTMIESGMLPPTCFNVPNRSQKQAWIDTGIVIFYPKAYNTLMNLSNGLLALC  
TRRGLEAAYHSSSNTDVSVAQSSLSQFAKSNALKIDLYTDILHNLPLSDKKKATAP  
VHTDGKDDIQAALRKVLSVMSLKVLAADPGGAFSHV GTTQELIEFITTRS  
YGDGDDDFVARTIPAVMDQYVTKVLAKKLQFHHRFGTWQAPSGDDKNPAEYSS  
HQNTILFSTFPSEKTSRVGAFSVEYSDLSQSYESVSI GDHCMVSGLSWERY  
VNSQSPSANDGFDKALQIPDALSIQLLPLVSREENITIDRCPLQDEWMMV  
LGITDPTKAPLRTGEVYGIPIFSDFVRHTGISLDQIGFQDDLKQNDCLWTAKL  
HPIVHKTYTCVDGSSSFSSSLFAWVEKLRSGDPTLRNDQSLANWLSTERVSLKQI  
HGIADASQEWAHRIQLEEDISILKRQGHIDNLVLLRGQCQNVPCDLQWLINIE  
DFKEAFDTLCSLIGTLEQLALEEFANR

NFHVSGRALMLASASISQFSDERASNDAIACEGSINNASVSLEALINKFKLSHFPSGKGA  
GDHMLIMRDILELRGCHTSPATRNSMSLCSTILEQLALCMI EFTIVAGFRRFLEPIDNAK  
ISMKRTRATVYDKFVLSVAPVRVDLAGGWSDTPPITYEHECGGSVTGMAVLLDDHFP LSC  
RCRVIITGGTGMLLKTRELDIRISTGSLSSKQEDVTVISQLSDFRNPSASCALVKASLIVLG  
MLSEEQIVQSVDIQDLINQFCSSLDNVRIEIIITTSLLGMGTGMGTSSILGACILQNLAE  
VGIGRLGDEFLINAILMLEQLLSSGGGWQDQAHGIVPGVNTVVSAPKIPLEIKISPVVLS  
NENTSSFEERLLFVFTGKTRLAKNILQQVLRWAKRTNEIVSTVGNLVNCSLAVRNALEN  
GSWDGVGEYMYQSYKLCVMAGENSGAEPESVKVFI SELMNRSQINGAMLCGAGGGFLL  
LVMSQYVVRNDIESIFQKSILPLSDDFQYFSFHNCQIARRGLTSSII EKELTDANTYHLS  
WQSSKRPD

>comp15651\_c0\_seq1; 623 692 2479 LEN=3333; translated  
MTQTKPLVTLRARPTGGGAPFGPEIEFSLYPGSCVELRGPSGRGKTTVATVLTGIHDP SH  
QASLLRKLQLEVESDWDPSIPFRERCGLVLFQQTLLDELTVAGNLAVALRLHEDVFADAA  
SRDARIKQLLDTVGLDYGKDAHKLPSSELSGGMGRRVCLALQLAQRKRVVVLDEPFTGLDS  
ASAEGVARELVRLRKTQKTALLLISHEPHLSKLVHGGAEDERSIVELRAPSSSSGNNASA  
SALSDETKPSLFGTTFFDRFLERLVDYVFYSLPLIVMAFMACGLAISMLSADILQRLDIS  
TKVLDLVDVEVRPLIKMLTGEEASTFQMMGIRFKVSSMLNQTVP PAKATLYAIGLAKL FV  
LEVGP LLTALLLCGRIGGSYAGKVGTMQATNQNKLLRVLGVDPRWWTLAPSVLAASIASP  
VLT TVGTSLALV LGGIVGPLYGLNPKGVGDRTYWSDLQESVLPVLRRLVGFEGCWSEGEDG  
VGKNPRQLVSSVASVIFAGVSDPASIDLRVSYGARNATWRDTAIELATYPPIYHC IKA  
EAYILIVIGVAEWAGRYYPNLTPRGVPSVITLSVVL SGLLVILADWGF SQLLMLRE

>comp15651\_c0\_seq4; 623 692 2479 LEN=2951; translated  
MTQTKPLVTLRARPTGGGAPFGPEIEFSLYPGSCVELRGPSGRGKTTVATVLTGIHDP SH  
QASLLRKLQLEVESDWDPSIPFRERCGLVLFQQTLLDELTVAGNLAVALRLHEDVFADAA  
SRDARIKQLLDTVGLDYGKDAHKLPSSELSGGMGRRVCLALQLAQRKRVVVLDEPFTGLDS  
ASAEGVARELVRLRKTQKTALLLISHEPHLSKLVHGGAEDERSIVELRAPSSSSGNNASA  
SALSDETKPSLFGTTFFDRFLERLVDYVFYSLPLIVMAFMACGLAISMLSADILQRLDIS  
TKVLDLVDVEVRPLIKMLTGEEASTFQMMGIRFKVSSMLNQTVP PAKATLYAIGLAKL FV  
LEVGP LLTALLLCGRIGGSYAGKVGTMQATNQNKLLRVLGVDPRWWTLAPSVLAASIASP  
VLT TVGTSLALV LGGIVGPLYGLNPKGVGDRTYWSDLQESVLPVLRRLVGFEGCWSEGEDG  
VGKNPRQLVSSVASVIFAGVSDPASIDLRVSYGARNATWRDTAIELATYPPIYHC IKA  
EAYILIVIGVAEWAGRYYPNLTPRGVPSVITLSVVL SGLLVILADWGF SQLLMLRE

>comp15651\_c0\_seq5; 623 692 2479 LEN=3161; translated  
MTQTKPLVTLRARPTGGGAPFGPEIEFSLYPGSCVELRGPSGRGKTTVATVLTGIHDP SH  
QASLLRKLQLEVESDWDPSIPFRERCGLVLFQQTLLDELTVAGNLAVALRLHEDVFADAA  
SRDARIKQLLDTVGLDYGKDAHKLPSSELSGGMGRRVCLALQLAQRKRVVVLDEPFTGLDS  
ASAEGVARELVRLRKTQKTALLLISHEPHLSKLVHGGAEDERSIVELRAPSSSSGNNASA  
SALSDETKPSLFGTTFFDRFLERLVDYVFYSLPLIVMAFMACGLAISMLSADILQRLDIS  
TKVLDLVDVEVRPLIKMLTGEEASTFQMMGIRFKVSSMLNQTVP PAKATLYAIGLAKL FV  
LEVGP LLTALLLCGRIGGSYAGKVGTMQATNQNKLLRVLGVDPRWWTLAPSVLAASIASP  
VLT TVGTSLALV LGGIVGPLYGLNPKGVGDRTYWSDLQESVLPVLRRLVGFEGCWSEGEDG  
VGKNPRQLVSSVASVIFAGVSDPASIDLRVSYGARNATWRDTAIELATYPPIYHC IKA  
EAYILIVIGVAEWAGRYYPNLTPRGVPSVITLSVVL SGLLVILADWGF SQLLMLRE

>comp15651\_c0\_seq6; 138 723 925 LEN=925; translated  
MKLAEF SMLKLF LFTFANSSTYAKAAQVCPYDYVVVSEGGSSVDSGLEEMETRYRLLRG  
RRALQEQL

>comp15651\_c0\_seq7; 584 692 2639 LEN=3111; translated  
MTQTKPLVTLRARPTGGGAPFGPEIEFSLYPGSCVELRGPSGRGKTTVATVLTGIHDP SH  
QASLLRKLQLEVESDWDPSIPFRERCGLVLFQQTLLDELTVAGNLAVALRLHEDVFADAA  
SRDARIKQLLDTVGLDYGKDAHKLPSSELSGGMGRRVCLALQLAQRKRVVVLDEPFTGLDS  
ASAEGVARELVRLRKTQKTALLLISHEPHLSKLVHGGAEDERSIVELRAPSSSSGNNASA  
SALSDETKPSLFGTTFFDRFLERLVDYVFYSLPLIVMAFMACYCWTERNGTAHHRTTYIE  
PRLHCEFDLPYRFIDGQRPDVFFRFRCS SIERPSCGLAISMLSADILQRLDISTKVLDL V  
DVEVRPLIKMLTGEEASTFQMMGIRFKVSSMLNQTVP PAKATLYAIGLAKL FVLEVGP LL  
TALLLCGRIGGSYAGKVGTMQATNQNKLLRVLGVDPRWWTLAPSVLAASIASPVLT TVGT  
SLALV LGGIVGPLYGLNPKGVGDRTYWSDLQESVLPVLRRLVGFEGCWSEGEDG VGKNPRQ  
LVSSVASVIFAGVSDPASIDLRVSYGARNATWRDTAIELATYPPIYHC IKA EAYILIVIG  
VAEWAGRYYPNLTPRGVPSVITLSVVL SGLLVILADWGF SQLLMLRE

>comp15651\_c0\_seq8; 623 692 2479 LEN=3337; translated  
MTQTKPLVTLRARPTGGGAPFGPEIEFSLYPGSCVELRGPSGRGKTTVATVLTGIHDP SH

QASLLRKLQLEVESDWDPSIPFRERCGVLFQQTLLDELTVAGNLAVALRLHEDVFADAA  
SRDARIKQLLDTVGLDYGKDAHKLPSSELSGGMGRRVCLALQLAQRKRVVVLDEPFTGLDS  
ASAEGVARELVRLRKTQKTALLLISHEPHLSKLVHGAEDERSIVELRAPSSSSGNNASA  
SALSDETKPSLFGTTFFDRFLERLVDYVFYSLPLIVMAFMACGLAISMLSADILQRLDIS  
TKVLDLVDVEVRPLIKMLTGEEASTFQMMGIRFKVSSMLNQTVPKATLYAIGLAKLFV  
LEVGPLLTALLLCGRIGGSYAGKVGTMQATNQNKLLRVLGVDPRWWTLAPSVLAASIASP  
VLTTVGTSLALVLGGIVGPLYGLNPKGVGDRTYWSDLQESVLPVLRVLVGFEGCWSEGEDG  
VGKNPRQLVSSVASVIFAGVSDPASIDLRVSYGARNATWRDTAIELATYPPIYHCIAKAEA  
YILIVIGVAEWAGRYYPNLTPRGVPSVITLSVVL SGLLVILADWGFSQLLMLRE  
>comp15651\_c0\_seq10; 584 692 2639 LEN=3497; translated  
MTQTKPLVTLRARPTGGGAPFGPEIEFSLYPGSCVELRGPSSGRGKTTVATVLTGIHDP SH  
QASLLRKLQLEVESDWDPSIPFRERCGVLFQQTLLDELTVAGNLAVALRLHEDVFADAA  
SRDARIKQLLDTVGLDYGKDAHKLPSSELSGGMGRRVCLALQLAQRKRVVVLDEPFTGLDS  
ASAEGVARELVRLRKTQKTALLLISHEPHLSKLVHGAEDERSIVELRAPSSSSGNNASA  
SALSDETKPSLFGTTFFDRFLERLVDYVFYSLPLIVMAFMAYCWTERNGTAHHRTTYIE  
PRLHCEFDLPYRFIDGQRPDVFFRFRCS SIERPSCGLAISMLSADILQRLDISTKVLDLV  
DVEVRPLIKMLTGEEASTFQMMGIRFKVSSMLNQTVPKATLYAIGLAKLFVLEVGP LL  
TALLLCGRIGGSYAGKVGTMQATNQNKLLRVLGVDPRWWTLAPSVLAASIASPVLT TVGT  
SLALVLGGIVGPLYGLNPKGVGDRTYWSDLQESVLPVLRVLVGFEGCWSEGEDGVGKNPRQ  
LVSSVASVIFAGVSDPASIDLRVSYGARNATWRDTAIELATYPPIYHCIAKAEAYILIVIG  
VAEWAGRYYPNLTPRGVPSVITLSVVL SGLLVILADWGFSQLLMLRE  
>comp15651\_c0\_seq12; 584 692 2639 LEN=3493; translated  
MTQTKPLVTLRARPTGGGAPFGPEIEFSLYPGSCVELRGPSSGRGKTTVATVLTGIHDP SH  
QASLLRKLQLEVESDWDPSIPFRERCGVLFQQTLLDELTVAGNLAVALRLHEDVFADAA  
SRDARIKQLLDTVGLDYGKDAHKLPSSELSGGMGRRVCLALQLAQRKRVVVLDEPFTGLDS  
ASAEGVARELVRLRKTQKTALLLISHEPHLSKLVHGAEDERSIVELRAPSSSSGNNASA  
SALSDETKPSLFGTTFFDRFLERLVDYVFYSLPLIVMAFMAYCWTERNGTAHHRTTYIE  
PRLHCEFDLPYRFIDGQRPDVFFRFRCS SIERPSCGLAISMLSADILQRLDISTKVLDLV  
DVEVRPLIKMLTGEEASTFQMMGIRFKVSSMLNQTVPKATLYAIGLAKLFVLEVGP LL  
TALLLCGRIGGSYAGKVGTMQATNQNKLLRVLGVDPRWWTLAPSVLAASIASPVLT TVGT  
SLALVLGGIVGPLYGLNPKGVGDRTYWSDLQESVLPVLRVLVGFEGCWSEGEDGVGKNPRQ  
LVSSVASVIFAGVSDPASIDLRVSYGARNATWRDTAIELATYPPIYHCIAKAEAYILIVIG  
VAEWAGRYYPNLTPRGVPSVITLSVVL SGLLVILADWGFSQLLMLRE  
>comp15651\_c0\_seq13; 138 948 1150 LEN=1150; translated  
MKLAEF SMLKLF LFTFANSSTYAKAAQVCPYDYVVVSEGGSSVDSGLEEMETRYLLRG  
RRALQEQ L  
>comp15651\_c0\_seq16; 350 723 1601 LEN=1601; translated  
MKLAEF SMLKLF LFTFANSSTYAKAAQVCPYDYVVVSEGGSSVDSGLEEMETRYLLRG  
RRALQEQ QDQIKIVGQYGHVEFLVNNVTSSFANNLEYPQGIFTNFASGIFHSEKCEL  
SEQISSDIYSASC MSTAKGMVALVRTYSVSDGSIDSGQSATIPKCCHDPYNSNAV VET  
VYELFCETSCDDPIEFVSENKTEPRNPGDPEDVKNDTSLPSDESPVEE EPLAYEQYGCT  
LYNRGAQYGRKYQFDVSYGSGPAYEAFSPEECNDACANAGFDYFGFECPMGD K  
>comp15651\_c0\_seq18; 584 692 2639 LEN=3321; translated  
MTQTKPLVTLRARPTGGGAPFGPEIEFSLYPGSCVELRGPSSGRGKTTVATVLTGIHDP SH  
QASLLRKLQLEVESDWDPSIPFRERCGVLFQQTLLDELTVAGNLAVALRLHEDVFADAA  
SRDARIKQLLDTVGLDYGKDAHKLPSSELSGGMGRRVCLALQLAQRKRVVVLDEPFTGLDS  
ASAEGVARELVRLRKTQKTALLLISHEPHLSKLVHGAEDERSIVELRAPSSSSGNNASA  
SALSDETKPSLFGTTFFDRFLERLVDYVFYSLPLIVMAFMAYCWTERNGTAHHRTTYIE  
PRLHCEFDLPYRFIDGQRPDVFFRFRCS SIERPSCGLAISMLSADILQRLDISTKVLDLV  
DVEVRPLIKMLTGEEASTFQMMGIRFKVSSMLNQTVPKATLYAIGLAKLFVLEVGP LL  
TALLLCGRIGGSYAGKVGTMQATNQNKLLRVLGVDPRWWTLAPSVLAASIASPVLT TVGT  
SLALVLGGIVGPLYGLNPKGVGDRTYWSDLQESVLPVLRVLVGFEGCWSEGEDGVGKNPRQ  
LVSSVASVIFAGVSDPASIDLRVSYGARNATWRDTAIELATYPPIYHCIAKAEAYILIVIG  
VAEWAGRYYPNLTPRGVPSVITLSVVL SGLLVILADWGFSQLLMLRE  
>comp15651\_c0\_seq19; 350 948 1826 LEN=1826; translated  
MKLAEF SMLKLF LFTFANSSTYAKAAQVCPYDYVVVSEGGSSVDSGLEEMETRYLLRG  
RRALQEQ QDQIKIVGQYGHVEFLVNNVTSSFANNLEYPQGIFTNFASGIFHSEKCEL  
SEQISSDIYSASC MSTAKGMVALVRTYSVSDGSIDSGQSATIPKCCHDPYNSNAV VET  
VYELFCETSCDDPIEFVSENKTEPRNPGDPEDVKNDTSLPSDESPVEE EPLAYEQYGCT  
LYNRGAQYGRKYQFDVSYGSGPAYEAFSPEECNDACANAGFDYFGFECPMGD K

>comp15652\_c0\_seq1; 1291 276 6087 LEN=6506; translated  
MGKYTGTLHKLVESASHSNSEKKWSQVLFYLEGHTISNAQEAEPDFESPLAPSMVPSPE  
LERELFDHQSKREDSPLRIAVKSGPANVVAALCHLGPKASRMADTRERLPIHLACRRSS  
EDPETEKVLGILAKCNPEMSMLHRDCCGRTPLHWLFRFHAKSRSPEIVAFFCQELPYDLFL  
DIRQPQTGNKEYPLPEIHRPSTKMEVPQSASIVHDSCHGALPIHYAVMQGASKESIRAL  
INDYPGSISVGDRKGRSPLAWYLGAGSLKETNNKNICGEINDANITPWWQTRLSMQLIHA  
LVSSKAARMVDRDMKRTPLHWACHFFARSYTTGSYPINHSQAGPSISNKIFQIIVNHNIE  
ALTFQDINGETPLHVMFVVAESQSAEQQRVMSIKATEINLTKGGPTAFNPPKQLLELLL  
KCPDIDGQDIGHNYNDLGQPLVSAASLENKWGILPLHSALHVATSSECEIELLIQSHPTGL  
VHSSEEMQTPLIHAFSSEFSAPLQPLSNLKLALLASYPTSRHGTYMDGQLAVKMEDALGM  
YPIHYACQNQTSFESIKFFVENFNRCATYQNSDGDLPISMLSRDNLFSASSSGSVRGAS  
LAKPLGLLTVKEKEWQEEVKEVQKLMRILLEPLNLPPEHLKVGSAFHGMTPLHVAVAFGV  
LPYERIFRMLDAYPEANRQNTTEDGHNYSCIQLHDCLEEEETEDQEEWQAVKELLYSYNPL  
VDSHRREDELLHSCSKLVRNEISGCGSFHLIKLKEFGFKSQDNVDLNLKTLSEINASAVET  
PSRLEQRRREKALRRTLQRRENEMNEVQRDTSSSFVSMIANKLSGKDVNEAKKSIYDDDL  
QGQYVISPQQSMDDEDGHHSADGFSNSDGDVEYDSDDETLSNGDLFSETLGSDAVSQTLS  
QTLSFVQSGTYASDKSLLRKAIADKVIDDYPIENRNSDHAAGNVNKECAAKLTPKSGTT  
FELSPVGIRLWCFVAYNNRKS PKDNYLPQVQSILEDLFDVVEKLIDLAVPECAVEFID  
PDISPLGLTMRDIASPTVKALFESYYYFLGRYEFSSDIDGVLLHRSSDNNTVCIRATEHC  
VKTTEYQPPKDSPGVAEESIWNTEGEMVRDEEGYMASEFNDKKRQVCFKFKTRSKSVYDNEI  
SSRSQLGMEEGVTPNHILPLFSHFASDHGRYKLDVKDERFRILNCYGGEYVRLADYSY  
ALVYPHSDEGLDFDYFFHQGAHKQNEVVDIALQVAKALKLMHDRNVVHRKLSMRSIRMLP  
FDPEVQNPQRTWVLTNLSSASCDCAEAFMGAVSPDGSVHFETGLLPPEMLTKVSLSEEKI  
YKEYWEKVETIFNIKVDQMIKEPCVDASTGCSYVVRCHYTVGEKDQKRAAELPELPMYLV  
EARESADLWCLGLLLYTLCS DGRPLFPVNVKSGHLLDYHTILNWNMDAARANIYENIDDP  
IAQDLLLLKLLSPFEERNLNTMEAVISHPFFSPSSKSPLRNKIVDQRTNESAAHRNRMKL  
ISAKYEYDWLASRTVHVNCWNFDMKTFHFSSSDIRKLIKSKDSLPSFIMLPYKLSAK  
NKKGKLSPTTKRDVERAERMGVVLVSLAKTLSFGSYVEEAIEKSSVGHKWDAVTLNLSVS  
FPSEAYEDLKEEFYKVAADHIEAFRADPRSVVTKLVERRYFEIKSIFNEAKKAFLYLVD  
YMGVPLVGNCTCTPYPFESGTTMDSNLTKILPFMHACSMVVRVTSGGISGIVRLIFEAF  
PHVPPSWTQAGSGLMYSLNEEMIKREILLHRTLSGLKSSRARRSLADDLADVRSMCIEV  
DVRGDFANLHRVQCSDSLWTS PDCVKLIQDACDGYDFKQALKIQADLESKLT SQEQLIK  
QLQEKIDIMNWHKELNLNVPDSSGRTKTLTTPHGSQKKGAVNLSPNSSSQAGKGADVASV  
ATTNSRSTLRDNLSDV

>comp15653\_c0\_seq1; 734 2465 4286 LEN=4937; minus strand; translated  
MNNEIMDSGVQFVDCDCFDVTDASSSSFGDVASCTLFDREFLTYDPLGTSASHFDVCLV  
STTDFGEGPVANFVSHPLPDVLGIEHLPYDDDTGSSLSIASIAVTFEFETSCEKVTDEKGR  
FSYPLFPGYGKFACTCPYDGMFAAIRKIFLGMRFSLIFDAYCYFVVC SLFILLSTHICPF  
ILTSTGFIDFENEKSRLPDDIVFVGQPPSTSI FYQFIDGTSVGFWPHGNSSSHNMNSGDYD  
GMFFFEPTFATCGCRECDDVPMNALPSSAPSSLSPSQSPSDTDSISSPPSENVPVGGPNPAP  
TPSPFAGTPQQPDFSPTNDPVTISSEGPSHRSSSNPSIESSTEPSTADPSHSPSLEAILR  
PSMSPSISYSQSEFPNGFAPSLFSPDFQTKSPSSVSPSVYPSNVP SDNPTFLVSDV  
PSVYLSTYPATPLSFFPTSFPV TYRCPSPSKEPTDPNETPPVTPFPPTKGPIDTSVAPSDYP  
TTELSTDSPTTESTKNPTNHPTSQVSTTSSIDSTQSPSTTTVATGSPTSATTSTVTSEPVE  
NIPEEDCPDESGCFIFGLVNCVDRVTGNTCFPTCDPPSRRSLEQQIEYHQAA LAELVGNL  
IYRGRK

>comp15653\_c0\_seq2; 695 1 1976 LEN=2627; minus strand; translated  
XNFCCYQGASSLKLRFFGCAGEMGVVDENLVEEKKCQPTGTS DPLVLDSSSMNNEIMDS  
GVQFVDCDCFDVTDASSSSFGDVASCTLFDREFLTYDPLGTSASHFDVCLVSTTDFGEG  
PVANFVSHPLPDVLGIEHLPYDDDTGSSLSIASIAVTFEFETSCEKVTDEKGRFSYPLFP  
YGKFACTCPYDGMFAAIRKIFLGMRFSLIFDAYCYFVVC SLFILLSTHICPFILTSTGFI  
DFENEKSRLPDDIVFVGQPPSTSI FYQFIDGTSVGFWPHGNSSSHNMNSGDYDGMFFFEPT  
ATCGCRECDDVPMNALPSSAPSSLSPSQSPSDTDSISSPPSENVPVGGPNPAPTSPFAGT  
PQQPDFSPTNDPVTISSEGPSHRSSSNPSIESSTEPSTADPSHSPSLEAILRPSMSPSIS  
SYDSQSEFPNGFAPSLFSPDFQTKSPSSVSPSVYPSNVP SDNPTFLVSDVPSVYLSTY  
PATPLSFFPTSFPV TYRCPSPSKEPTDPNETPPVTPFPPTKGPIDTSVAPSDYPTTELSTDS  
PTESTKNPTNHPTSQVSTTSSIDSTQSPSTTTVATGSPTSATTSTVTSEPVENIPEEDCP  
DESGCFIFGLVNCVDRVTGNTCFPTCDPPSRRSLEQQIEYHQAA LAELVGNLIYRGRK

>comp15654\_c1\_seq2; 858 300 2627 LEN=2781; translated  
MATLATVMLGNARAVWSFSFRCCCTATGRSVSPSPRSLTSSGSSSSFRGDTMRLKLRPRML

PPFHTRDGNPNRHRCSYSGASSLCMMPEGPEVRTLVLDQLQGGIGKRLVDIKFLSGRYLQQR  
PKGFSDFAGTMTPLARESDDGSKTNRRTTIDVIRDINCKGKFIYMLLDDGCVTNRKRDDD  
ARNEDDDDDFQRSIWITLGMTGRFVSEQKHLEDPSYGRWVLELVDDDRCNQKKETHRQNP  
EQHRIFYHDKRNFVGTFRFCLSKHELDEKLASLGPDLALARERARIDDDVDDASVTIDDEL  
EVRSSDAKATQEFSLSLERQNRPNLNVCRFLMDQKKISGIGNYILSEALYRASIDPFCGI  
DELSTSQRKLFQQAQAVCYESYLSQQQSQRQTATSEPYTSVRSLEPFDFQLRVYGGQKLC  
PRGSPVRETNGPHGRTIWTNDQLFVARNLREEREQQQQGKSLGASATAKNFGNEKEDR  
WTIRKDGIDVGTNAATVIPDEDNKGLAFWNLLDGLHEPGWKQALEPYAASSRSFEGGLKK  
FLEEEYATHGEHQIYPPRHQIFAALNLCPLDKVKVVIILGQDPYHGPNQSTGLAFSVSKSI  
SKIIPSLRNI FRELDDDVGSLGGRRPPVIQHGDLEGWARQGVLMMLNTVLTVRRGQANS  
HQRKGWEDFTDEIVCILRDRANEDSKNHNKECDDDDNNDGDKRGGIVFLLWGGPAAKKAK  
SIVDS DARHVVIATSHPSPLGATKTASPFLLT SRCFSRVNEALIEMDKTPIDWYNR  
>comp15654\_c1\_seq3; 1095 300 3485 LEN=3734; translated  
MATLATVMLGNARAVWSFSFRCTATGRSVSPSPRSLTSSGSSSSFRGDMRLKLRPRML  
PPFHTRDGNPNRHRCSYSGASSLCMMPEGPEVRTLVLDQLQGGIGKRLVDIKFLSGRYLQQR  
PKGFSDFAGTMTPLARESDDGSKTNRRTTIDVIRDINCKGKFIYMLLDDGCVTNRKRDDD  
ARNEDDDDDFQRSIWITLGMTGRFVSEQKHLEDPSYGRWVLELVDDDRCNQKKETHRQNP  
EQHRIFYHDKRNFVGTFRFCLSKHELDEKLASLGPDLALARERARIDDDVDDASVTIDDEL  
EVRSSDAKATQEFSLSLERQNRPNLNVCRFLMDQKKISGIGNYILSEALYRASIDPFCGI  
DELSTSQRKLFQQAQAVCYESYLSQQQSQRQTATSEPYTSVRSLEPFDFQLRVYGGQKLC  
PRGSPVRETNGPHGRTIWTNDQLFVARNLREEREQQQQGKSLGASATAKNFGNEKEDR  
WTIRKDGIDVGTNAATVIPDEDNKGLAFWNLLDGLHEPGWKQALEPYAASSRSFEGGLKK  
FLEEEYATHGEHQIYPPRHQIFAALNLCPLDKVKVVIILGQDPYHGPNQSTGLAFSVSKSI  
SKIIPSLRNI FRELDDDVGSLGGRRPPVIQHGDLEGWARQGVLMMLNTVLTVRRGQANS  
HQRKGWEDFTDEIVCILRDRANEDSKNHNKECDDDDNNDGDKRGGIVFLLWGGPAAKKAK  
AIAVSMVMAMVPSGAKAFVVAHQRTTSPVYDSTTSQAFSADACKIAPAGYAPVRRSLPP  
TTALSTAATAVLPGLAAAAPVPTCLGLWRTGFVSYGYVAMLASGAVQFAAFLEGSSG  
ATLPLKLHAALYVFYGARLCSFLFHRARTSSLVQMKRKDATLAERLKRIPLLLGCSGLYY  
CMAAAPMKILASTNPVASLANAAAALAVGGSGFLAAVGDWYKSRIKARDGPDTLVTTGPF  
RYLRHPNYTGEMIGWTSVCVLPALSLGKTSVSSVPLALSALLGWAGMVFAVLGDATLG  
LEKKHREKYGGTPEYEAWVKSSWSGPMVGLDDDDAPAGKEE  
>comp15655\_c0\_seq1; 1766 871 5526 LEN=5715; translated  
MAPQIKKAKSAFLFFQGDQLSKIRKEKGLAMGEAMTELAARWRAMNDSEKSSYFASERAD  
RERFEMESAKADQERLALQEKRRALVQGEGETAGSRGARQKLDRERREREADKERRRIR  
LEEEMDDDERERRRLAEAEKKRETEERRRQRAEQEKALAKQHDKLDRERRQKKAANRLEYL  
FKQSPIFAKLRQEGEGSMEEATDAEAEANASKKRQKRSKGNKPHHVHDADSADEEINDED  
DGGDGDQHVFLTKQPSICKFKGLKPYQMESLNWMIHLAEKGLNGILADEMGLGKTLQSI  
ILAYHWEYLRIQGPLHICVPKSTLSNWMNELKRWCPALRTIRFHGSREDREYMIIEYFHA  
KAASHDGKRPDKQIMNEHGEVLVDDNSDNPRQWDVCVTTYEMCNERKTLOKFAWKYLVID  
EAHRLKNDASMFSTTVRSFSTANRLLLTGTPLQNNLHELWALLNLFLLPDIFSSAEQFDEW  
FNLEIDDEDSKKNMITQLHKILRPFMLRRLKADVAKGLPPKTTETIVMVGMSKMQKQLYKK  
LLLRDLDAFTGNQAKNRTAVLNIVMQLRKCCHPYLFEFEGVEDRTLDPGLGEHLVQNCGLF  
MVDKLLKRLKERESRVLIFTQMTRVLDILEDFMVMRGYKYCRIDGNTTHEDRENSIDAFN  
APNSEKFCFILSTRAGGLGINLQTADICILYSDWNPPQDLQAQDRCHRLGQKPKVSVYR  
LVSENTIEEKIVERAQKLLKLDAMVVQQGRLKEKDKVSKEEILAAVRFVADKVFVRSSEST  
ITDEDIDVILERGMATKELQEKIQNAEKGDLMDFRLDGGVSAQTFEGVDYSDRELREQL  
RLLAANSMTGKRERRPPPTDYNPIMHQKSMVINNAKIKLPRTLRLPQMEDHQFYNRERLL  
ELGKLEFETYATLREARKLPSKEYIERVRSLLPDELNEEKCELLDEGFGNWSRSQFFHFV  
KCNKYGRDDIASIAAELDMSEEQVRPYSVAFWKYGPTELKSEWERFTNMIERGEKLEK  
QKLTQTLKKFVSTFENPRQNLVFNKGTTHFALEQDRALLCAVDAGGYGNWDRVREDLR  
KDRKLFQHTVQGMTTAMITKRADYRIRQVERELEAREKALEKFRPTSAIAAQKALDSIK  
VMEKYEIDARTNELQGEPPKIDMFAETKTIYLERQKEKEQCVRRLQEIIEGQVNRCLLM  
AEE TRGI IRGDQYVNF SNINLKGKGTFTTAGGENTFEVLPDLESGKLEARFNRHILSIP  
ECGQCENCVNKGTLLRRLCVKRLERQRLRNETKTVLKKMGKSTANIIPGMITTSVAVSK  
KENKSSSNGGSKRKTEPSESDDRTAKKSKPAPSSKSKKSPKMMMTANGMKPRVTSQGNK  
RMSIPDEAFPDFCRRIGPYGTGERMKLINKFAEDYPETSIRQVTLKLG EITCKEPPACVD  
MTGRKVR AFMFYLRPRFYKLYPEDRPDNEQFADLDDKLWEMEKEQIRLKKERAMKLA  
EAAESES SVSSDRIEGASNVSPSVTGDDDDGDDTEDEGGGESAVKRLKVEASP  
>comp15656\_c0\_seq1; 977 145 4617 LEN=4733; translated  
MSPALHGHIVHRFELSKPPSDVAVSKRTTLKEKNGGHETGSAISENNVDTDEHVEHYNRC

GFIFIPYNENSFANEEYFLSLPKHLLKLACDAVRSEREVMIRRYTEVSLDADFTGSTAVG  
GRNVLSSQSSPPTSSSTVNFMI EVHELDILPKSYQEESQSSSCTS I KPTKSCKPENKANF  
WTLAQFWRKELVDFMMSKNSRSKFSILATVDAISPIIAMDPSPNFALIEAYDKDNSDITC  
IIVMHGNQAMLNHPAIIHPLDITLLFRDVVYKWPVSNLLNCDGNPKGSSASTVFCCLKGRI  
PTHVFAVATRAARVSWNHVCLGSPQQDVSPIPHHSQDGI PAVITPMNLLTTLQGTVYNVAT  
RSVTSGLSATAIDYVDMILLDKPSGTFNDGCVSNELSI AFPEVRSINGLSQNYQPRCRL  
YLSHFPMSTALQYSLRIGAMIQVYNIHLVCLQPTSSVKFDANLEIRWVYGTCLRSTLVLL  
KHATNEVPGATTKEIENRLTRDQRRKGS DIVRMQSFSPQPYDQPSTQMTSLLASSLPPRD  
GAQRHVNNSFKSKFPSIGPCLPFLNYCFRRIEQNYLSVVLSELVEDWEHRSYQ RSLILPS  
GKCRLEKHEVPKTWIVNTLLNLSGQNGLCCKRRGVDKSRDANLVRYIASNTRKKRVRSPY  
AEFFDHPFTSYTSQQGDDGMDCRDFQCGCHLSLLGREY PPLGPFALLDLNEIRIASQRYF  
ELHISKIFSSSQSNENPLQKLHQGFHGSIHVTRHELFSKLSKINFGTEGNRDVKCFVGG  
VSELHTNSSSDVAAIADGNCQIPIALHKKSSDHPSINDFIVGEFDSIIISCLCLSNLPRG  
FTEDEADDPLSIGFRSSVSKSLSLPTLNSSNSHLGGNC SLVAIHGLLFVTAVQMCHKYQ  
ILQKLNSSSTKDDMEGLEDVTLTVEDCLATQNFSEAFKPARVMGTVTRCQFNCKMNANG  
SHRCCRLTISSSLKRAESKCLESDNSCLQALQMNLSVIPNTARMIKFNEVLEVVWPGVNL I  
EAQKILGSSFWLLGNSGQTCALTFGGGEDIIPGSSCSNSSVELNFPNCSLQLTKEGYTRS  
FCTQDRVDAVFLHHDLDIKGLQAKGTLREKNSSRFFDFVGGGLKVMNGMLHQR LHRRFIAR  
SADPSFRSVGELTTEPSSAIPLNTVSEL FELIYKSLREP NLSHTTMKPSLVRR IANGRFL  
ALSFCQAECYCTRCLCSLVQSSRTREGAPGKTKRKRQEISNEVSFWHLPHPNERLRGNHR  
TSRCNTSDSVNIRSKLAPHVRSADLRCPKNDCKPMTFVKWECSGILDDGTGQATLYADG  
DAAL TLLGMPVAKIQAIIEGLWSLPGGNIQFMKSIPPPKRIRENVINILAARKGTGT KDL  
KMTDPTKLLSVQDRAIYLLERHCR LSSRPRRSLDYVVRCKPLVTKNNTRIPHVQHTNINC  
FLQESGSPTIHRGQLASYSVPPRLRLELVDCGVNSFQGIRTRFDRPESNYV  
>comp15657\_c0\_seq1; 363 1 1194 LEN=1341; translated  
RLRLFERIVYTNRVTIQGENSTNPFHTNPLKPGIPVRI TRGRVLEDGLVTMNNLGRDMRR  
RIAIQYYNEAGAKESGIDAGGLFKEFWTDLCAIAFDPNYALFRVTE DNMYPNPSSGAH  
GLAHIDLFKFLGRILGKSLYESITVHPQFAHFFLSFLRGDYNYLHMFSDLSTIDPQLYSN  
LMFLKTYDGAEDLCLSFTVSTEDFGGKKEIPLIQNGANIDVTNSNKHRYIGLITKYVYV  
DRMREQSEAF TQGLWEVIDKSWLHIFNEPELQV LISGASDGKIDVDDL RANTHYAGGFTS  
IDRNVVRFWSAFSSLTGKQQAGLLRFVTS CERPPPLGFATLIPPFTIQRVGISRDGDKLP  
SASTCFNVLKLPTY SSEKVMKERLIYAIESGAGFELS  
>comp15657\_c0\_seq2; 430 1 2273 LEN=2273; translated  
XLTRHWFKSTRSIQCGGENSELTPVSYX LIMFAEELSGNASRRRQDANRERRRKLKQEQQ  
KKAQQHKNEERKKEHSKETSTIKTTATATTTAKSSSIAPKVGIDDPTNNVNFSSVDKKL  
SAVEIANAQRQORHEAQAKKASTRIQSFYRAHRSNCLLLSDQTALLTSRLQDLHTLRGI  
LKAKANTNYIPPPATCTAF CQQVFLFTQSI PYKVKASQRCEIFTKIRDSGRDSRLIQQIY  
DWVLIPGLSSPDENVNPFVAVWLQSPNGMKRMKSMIRLALLTCTDPLVDSAVQKSCDLFLK  
TITIPK SIGNATTRNSANDSTAAIEFCRAHLLPTDRPNDQTIATQGT TQNFISKKSAPL  
DLILLRHHLVYTTGGAPIPSTSSKLR ESCISPKERAQADALFQTVLAI IQNEDFIKSMH  
ASMISRFVSELLTIPLLTWKLSDASTKQIFALVKCKSSRKDVRQPFLIVLIDLFI SVHLQ  
IMNAGDIEAVLCEDIPLKKSATPIQCLLANMVQIGSSCALINGLQRDKMNF EASVVYFR  
FLATLV DAMPVSTFSSSRDSVVEWVTDGGHHSPPVVISPIILEH CRTLLTDNFVRRFLCA  
MDPIRFGTNEILKKT DKDLKMEKELSEVRSSSVASLAAKEARVDRNK SFWKS SAWARGL  
TKVSKMFNGSQKGAGNKIKNSSGEGGLIDASAVSRRLAMEGGDSRSANFESVAAISSL S  
TTSSDSRKPSYSPEL FKVLCGLYGIILARWGGSGREX  
>comp15657\_c0\_seq3; 308 1 885 LEN=1032; translated  
VTEDNYMYPNPSSGAHGLAHIDLFKFLGRILGKSLYESITVHPQFAHFFLSFLRGDYN Y  
LHMFSDLSTIDPQLYSNLMFLKTYDGAEDLCLSFTVSTEDFGGKKEIPLIQNGANIDVT  
NSNKHRYIGLITKYVYVDRMREQSEAF TQGLWEVIDKSWLHIFNEPELQV LISGASDGKI  
DVDDL RANTHYAGGFTSIDRNVVRFWSAFSSLTGKQQAGLLRFVTS CERPPPLGFATLIP  
PFTIQRVGISRDGDKLP SASTCFNVLKLPTY SSEKVMKERLIYAIESGAGFELS  
>comp15657\_c0\_seq5; 442 1 2291 LEN=2291; translated  
XLTRHWFKSTRSIQCGGENSELTPVSYX LIMFAEELSGNASRRRQDANRERRRKLKQEQQ  
KKAQQHKNEERKKEHSKETSTIKTTATATTTAKSTS IAPKVGIDDPTNNVNF S  
SVDKKLSAVEIANAQRQORHEAQAKKASTRIQSFYRAHRSNCLLLSDQTALLTSRLQDL  
HTLRGILKAKANTNYIPPPATCTAF CQQVFLFTQSI PYKVKASQRCEIFTKIRDSGRDSR  
LIQQIYDWVLIPGLSSPDENVNPFVAVWLQSPNGMKRMKSMIRLALLTCTDPLVDSAVQKS  
CLDFLKTITIPK SIGNATTRNSANDSTAAIEFCRAHLLPTDRPNDQTIATQGT TQNFIS  
KKSAPLDLILLRHHLVYTTGGAPIPSTSSKLR ESCISPKERAQADALFQTVLAI IQNED



FIKSMHASMISRFVSELLTIPLLTWKLSDASTKQIFALVKCKSSRKDVRQPFLIVLIDLFI  
ISVHLQIMNAGDIEAVLCEDIPLKKSSATPIQCLLANMVQIGSSCALINGLQRDKMNFEA  
SVVYFRFLATLVDAMPVSTFSSSRDSVVEWVTDGGHHSPPVVISPIILEHCRTLLTDFNR  
RLFLCAMPDIRFGTNEILKKKTDKDLKMEKELSEVRSSSVASLAAKEARVDRNKSFWKSS  
AWARGLTKVSKMFNGSQKGAGNKIKNSSGEGGKLIDASAVSRRLAMEGGDSRSANFESVA  
AISSLSTSSDRKPPSSYSPELFKVLCGLYGIILARWGGSGREDX  
>comp15657\_c0\_seq6; 249 260 727 LEN=874; translated  
MREQSEAFQTQGLWEVIDKSWLHIFNEPELQVLI SGASDGKIDVDDL RANTHYAGGFTSID  
RNVVRFWSAFSSLTGKQQAGLLRFVTS CERPPPLGFATLIPPFTIQRVGISRDGDKLPSA  
STCFNVLKLPTY SSEKVMKERLIYAIESGAGFELS  
>comp15657\_c0\_seq7; 122 1 902 LEN=902; translated  
XAAISSLSTSSDRKPPSSYSPELFKVLCGLYGIILARWGGSGREDIVRQTKITRKGSKK  
EIATSSQKPC TLNINLVLCFSTDFLRFSWSMMQSEKNSFTCDRQPIKSMSIRPAYEKRGQ  
DSLGVFYLFIESLTHQLILTDDTEIHDMDRPLPIHQLRRCIVTLKQLLYKACCIDEANSL  
NSESEHVALEANYFGLALIKTSSKCLWDLYDRSSRRLICVPLNWIIDDLMEKELRACKTE  
SDYVSLLSAPVLRVCPFLVSVFKRRLRLFERIVYTNRVTIQGENSTNPFHTNPLKPGIPVR  
I  
>comp15657\_c0\_seq8; 132 1 324 LEN=471; translated  
NTHYAGGFTSIDRNVVRFWSAFSSLTGKQQAGLLRFVTS CERPPPLGFATLIPPFTIQRV  
GISRDGDKLPSASTCFNVLKLPTY SSEKVMKERLIYAIESGAGFELS  
>comp15657\_c0\_seq9; 217 1 621 LEN=768; translated  
EDLCLSFVSTEDFGGKKEIPLIQNGANIDVTNSNKHRYIGLITKYYVVD RMREQSEAF  
TQGLWEVIDKSWLHIFNEPELQVLI SGASDGKIDVDDL RANTHYAGGFTSIDRNVVRFWSA  
FSSLTGKQQAGLLRFVTS CERPPPLGFATLIPPFTIQRVGISRDGDKLPSASTCFNVLKL  
PTY SSEKVMKERLIYAIESGAGFELS  
>comp15658\_c0\_seq1; 469 1 1440 LEN=1440; minus strand; translated  
XAMLFAIGLGLFSSYNIAFTCAFAFSSSGIREVQATSFM SPLTSVVAPT KGRITPNTAGA  
KTHRTALFSQAESGQVEKEKQQQQQQQLDWKKISKQSKLFWNMAYPYFEESNAGRWLFAG  
MIGLTLNLSGVS VGFYSYIGKDFWNALSSKNTVDFYNVLGKYL GALLVGAPIVTLYKFQRE  
RLAVHWREWMTNRTLQLYEDNRVYYVIERGGEVDNPDQRICEDVQSFTSFSLQLFLTIIS  
TVIDLVSFSLILYSIYPQLFIAIVAYASFGTITTTWLGKDLVRLNQEQLTKEANFRFSLV  
RWRENAESIAFYAGEDLE GKVVGERLQSVVGNTR ELIATQRNLEFFTN GYRFLIQLLPVT  
VVAPRYFAGAIELGVISQSVGAFNHILNDSLIIVNQFEQLSRFSAGIDRLSVFLEAMQEA  
DPERRMMPNDSKDKSSLMKLANTTEAANANTTATDTATNGAVDSNGVKGTTDLGSIELIR  
X  
>comp15658\_c0\_seq2; 381 1 1227 LEN=1227; minus strand; translated  
XAMLFAIGLGLFSSYNIAFTCAFAFSSSGIREVQATSFM SPLTSVVAPT KGRITPNTAGA  
KTHRTAIGKDFWNALSSKNTVDFYNVLGKYL GALLVGAPIVTLYKFQRERLAVHWREWMT  
NRTLQLYEDNRVYYVIERGGEVDNPDQRICEDVQSFTSFSLQLFLTIISTVIDLVSFSLI  
LYSIYPQLFIAIVAYASFGTITTTWLGKDLVRLNQEQLTKEANFRFSLVRWRENAESIAF  
YAGEDLE GKVVGERLQSVVGNTR ELIATQRNLEFFTN GYRFLIQLLPVTVVAPRYFAGAI  
ELGVISQSVGAFNHILNDSLIIVNQFEQLSRFSAGIDRLSVFLEAMQEADPERRMMPNDS  
KDKSSLMKLANTTEAANANTTATDTATNGAVDSNGVKGTTDLGSIELIRX  
>comp15658\_c1\_seq1; 825 1996 4365 LEN=4459; translated  
MSFTESRRRGVNRSSPRRSLASAMLFAIGLGLFSSYNIAFTCAFAFSSSGIREVQATSFM  
SPLTSVVVPTKGRITPNTAGAKTHRTALFSQAESGQVEKEKQQQQQQQLDWKKISKQSKLF  
WNMAYPYFEESNAGRWLFAGMIGLTLNLSGVS VGFYSYIGKDFWNALSSKNTVDFYNVLGK  
YL GALLVGAPIVTLYKFQRERLAVHWREWMTNRTLQLYEDNRVYYVIERGGEVDNPDQRI  
CEDVQSFTSFSLQLFLTIISTVIDLVSFSLILYSIYPQLFIAIVAYASFGTITTTWLGK  
DLVRLNQEQLTKEANFRFSLVRWRENAESIAFYAGEDLE GKVVGERLQSVVGNTR ELIATQ  
RNLEFFTN GYRFLIQLLPVTVVAPRYFAGAIELGVISQSVGAFNHILNDSLIIVNQFEQL  
SRFSAGIDRLSVFLEAMQEADPERRMMPNDSKDKSSLMKLANTTEAANANTTATDTATNG  
AVDSNGVKGTTDLGSIELIRSPPSLYDGESYRLPSTAPLVSMKDLDLFTPDRKRTLIRDL  
SMDVQEGENLLIVGNSGAGKSSLLRAVAGLWTAGSGSITRPGDEDVYFLPQRPYCTVGS  
L RDQLLYPSLEQQQEDEGTKDNSTDTDGNGTPRHVVNRSLSDQDLLDVLEKVDL GELAKRS  
GDGDPPFKGLETVLDWSNTLSLGEQQRLAFGRVLVNQPKLVVLDEATSALDMVAEARMYNL  
LQGMGRKHLKNGEMTAPGLSYISVGHRSLLAYHDKRLRLNGEDQHSLEAIEKSASLDA  
QAFNKVSNM  
>comp15659\_c0\_seq1; 152 1 356 LEN=356; translated  
XSPDGI EILAANCDLGWDPQCQNT HNSGGSSSRDKSDGRGGNKNHGS GASSIHRPMPQR

QHKQHHRFSPSGMSGGEEDEEEEGSEDAMGKNNVQAPQHNHEESQSRQQQKTEGLAPNX  
>comp15659\_c0\_seq2; 1992 1 5371 LEN=5560; translated  
XEKPPQQAIGLVPDNDPHQTESNQGTLELYRFLIPVCKNALETLRCLKKNSNVAGSHPFQS  
ERNNNLDDEAWFAFTKQPMPACRRRNDEQSTTSTSLVERGEQKHGQSHRAQEQQQLPCEA  
SSSSCSIASIASSSLSDASELFRDESVVSVVLGYDDGDDSSSSSSLLSQQQEMQQQHSQA  
FLTNTNSPDGIEILAANCDLGDWPPCQNTNNSGGSSSRDKSDGRGGNKNHSGSASSIHRP  
MPQRQHKQHHRFSPSGMSGGEEDEEEEGSEDAMGKNNVQAPQHNHEESQSRQQQEQQQQ  
KTEGLAPNNAVSRDQHSKQQPQWRQSESEAVDSDEYEAEERQKQPQRTGKRSSLGSDGSYK  
AGEGDDDDTIPEEEENGDETDIEDDDNGDDGSDHEVPIWKPQDTQSVCEFTHVIRDYSA  
KRDSGCKKAEYSSTTVDNMGNKWRLIVYVNGNGRASNNHLSLFLQVADADDLPFGWKKAV  
SYVLTLEHPHAGAGLSYAKRNPDKTFKLCPKAIDWGSQFITSDRIQQESFVHNDTLVVR  
ASVTVKSSSVDDIDDAELYLKCAVEEGRPDAVQLCLDQGASVNCQFKDDLYTPLHTACS  
TSPNEDGVNAALGSGGEHNKPNNSAQPKSNSNSNNNAMSTHEGSMKVLELLLEKGGADGNAC  
NKWRETPLLIAANNGHKAAVEALLKHKADPSLCSEAGWSALTFAAHKGYGDIVELLLEDG  
APVNCRVTESSSTPLHKACAGSKPGHLEAVKLLLESKADVHALNKWRETPLLTAANHGQA  
GAVELLLRAGADPCKCTDTGWSPLSIAAYKGHDEVVKLLLEEGAPTEEADPTLSALLQAA  
TKGLPDTVELLLQHGDHTVTTKKGDTALSILVEQNLIDAAVEMVTEYKASIPRCSRDRK  
KVQQRARLLINRLKQQQRDDGSDEEDNVDQAPASGDEPNKRKSNRKKKKKSAEELQAKA  
AEEALLLELEQEDAERHKLQDASKKSARKKRRERERQLKKEQEEKRAKEKEEEEEKRRK  
KIQDAKDAAQREERLRIAAAQRKEEENRRKQEKIIRQQQKEREQRKKLRMEEEERKRL  
LQEKAKAAKAVSNKNGTTNGSEKSGEARRQSPSPQLSQTNAPLPKNGVSTNANARDGGNK  
RGWEIPQERENTVAVPLKPNINDGNSFAEVGVVDPYENFMGGAHVGGTVKPAVAVSSHK  
HIGSLDVSTAGGLRYGGGEIPSNVISNAIHIAAVRIEPPAVSIFRRDKIFELLHRFSTAK  
STSSPLGSDVLIVVKKVLFWRWIMRAAHESGYSVDFIVPSWNVKLDLDFQRFQFISETRK  
FVHNANRSINMESLKEAGTATAHLCLRLANDVADFHRQLVAQLPTEWNDANIGVTASETP  
STNISDSTVVINSANGYSVNLPGSVFLKLERYRGPKSQLLSSIFVCKTCYDTKLLLVED  
TSMDSYSLTPNARSNVSSSELSVSAEVWSDPFLASRNNSFFGQFAEIDRMFGGLKPFGTNED  
LLCQQGGSVVLVAPPDNLASRYLNRIFTVLESCDQANRPVSAIFLRSECFRNQKSPIC  
IDDLMLPRLRDRGNYSRVEITLVEGAHYFFSEKLGTSKPSSTASLFLVLLQNSSGKNRF  
PIRNIGILQIMGSREKEFNITEPTLGNPLTYAPNMTAHKDPFSMSDSRFLQPPTNLSAS  
PTPLPTISSGFGFNSIGTSAPPLSNFAQDSSTGVRPRRGRFLFELVDNGEEDAMNDVDVV  
SGMLGSLNVDLQNSDTQANVDIEAISLGLIGDSSTAFFPPRSNRTQGRFG  
>comp15660\_c0\_seq1; 183 1 292 LEN=292; translated  
XGIHLPGSIDLAGDRFDSFPDGAALFGPDAIPAAGFGQIIALIGALELGMKDVTEGAE  
FAGDFRNGALDYGWDTFGPETKLRKRAIELNNGRAAMM  
>comp15660\_c0\_seq2; 242 469 1614 LEN=1614; minus strand; translated  
MQLFAAALALSSTLFGTSFVNADQGCGLGGVYGDKTTTKLDIMDSVVRENSLHKIGGQLRY  
ESKTIESMRKSSILFLNTNQTVLREAVTLTPTLSFSDATQSDIFYPNSIFMTSDIGTV  
RDRPVSLVTVVDGDYADIAQVWIDRKRGSYQMNKKEGGKFANINLQTVGKPKSSEG  
NFRMCFVDTEITNELTTVEKFSWTVYDLDERGDKINKPVIKEKLIIDTKQARAFQLWPNE  
AQSEVKLSCEDGSQLPNCNSGVRTVFSSTDGTGDDNPTDPNSLTDLQKRSRVTFTFIDTD  
CWEFTYDHYCPVEQPEYDGPSPRKTCKKYTGGNFLFAGASEEINDGECLTSPSPPTASP  
TPVPTAEPPTSPTPSPTANPTX  
>comp15660\_c0\_seq4; 320 485 1392 LEN=1392; translated  
MRGFVDDTDLKGDRLFQHLAQQLDRVVPLAPDVPRFVALLIKDAGSERVENTVDAFSLGA  
GRPGLVKLHGDRRFVLIHNLDCVLERYIGDPVFLDEGDVSGEDASSSVNVGASVGLLVVG  
DSVALAVGGSVGEAVGEAVGDSVAPTVMGSGVGLVGLVVGVEVVISRIVGNTVGATVSSD  
VGDAVSNVVDVAVGKSEFSNFVGNVSNVVDVSGDVRVVGKSTAAVGEELLGDVVGPVGP  
AVGDVVGLAVGGTVGLEDPVAVGDAVGDVGLPVGFVAVGLVGEVVGSAVGTGVGEAVGD  
GGX  
>comp15660\_c0\_seq5; 378 260 883 LEN=1029; translated  
MKSALIFASLIATAAAAFAPAQQAKTSSALQVSELELGVTEPLGVFDPLGWLDTEPEAFERR  
RAVERKHGRIAMAADVGTIVHNNHIVFDGYISPSNDLKFSDIPTGMAGIAAVPSAGLAQI  
FLFVALIELAWMPASQYDGDYGVWGFGRDIEDPEEKARKLNVELNNGRAAMMGIFGNMVA  
EQLTGQTMFEQYSAGHISPFGDGQGVF  
>comp15660\_c0\_seq6; 370 1 1085 LEN=1274; minus strand; translated  
XPPSPPTASPTPVPTAEPPTSPTPSPTANPTGSPTVSPPTASPTAGPSSRPTVPPTASPTTS  
PTAGPTSGPTTSPSSSPTAAVDLPTTSLPTESPTSFDTAFPTKFENSDFPTASTTSFDTA  
SPTSLDTVAPTVPFTILEMPTTSPPTSPKSPPLPTVGATESPTASPTASPTPEPTAKA  
TESPTTSSPTDAPTTEDEASC PGDVTLIKKNGITDIPLENAIVNQDKSTVTVELHQ

WTSGTKRESVDSIFYSFRTSIFDQKCYESRDVGSQRYDTIELTCEVLKPIAFVEICVUDE  
ASHGILVPGEGNDNATVPKCCHPEEISPEVPVVCYTVEIKCQTECVVEIERGRRGLRGSY  
P

>comp15660\_c0\_seq7; 229 121 1330 LEN=1330; minus strand; translated  
MQLFAAALALSSTLFGTSFVNADQGCLGGVYGDKTTTKLDIMDSVVRENSLHKIGGQLRY  
ESKTIESMRLKSSILFLNTNQTVLREAVTLTTPTLSFSDATQSDIFYPSNIFMTSDIGTV  
RDRPVSLVVTVDGDYADIAQVWIDRKRGSFYQMNGKKEGGKAFANINLQTVEGKPKSGEG  
NFRMCFVDTEETNELTTVEKFSWTVYDLDERGKDKINKPVIKEKLIIDTKQARAFQLWPNE  
AQSEVKLSCEDGSQLPCNSGVRTVHSSDGTGDDNPTDPNSLTDLQKRSVTFIDTD  
CWEFTYDHYCPVEQPEYDGPSPRKTCKKYTGGNFLFAGESEEEIINGGECLTPPPSPTASP  
TPVPTAEPPTSPTPSPTANPTASPTVSPTVSPTAGPSSRPTVP

>comp15660\_c0\_seq8; 410 260 880 LEN=980; translated  
MKSAIFASLIASAAAFAPAQQAKSSTALNVNELEIGVTAPLGVYDPLGWLESQPESFERR  
RAVERKHGRIAMAATVGVIVHNNHIVFDGYLSPSQNLKFSDIPTGVDGIRAI PNAGLLQI  
LAFFALVELAWMPASQYDGDYGVGFGENLNPEEKTRKLNAEINNGRAAMMGIMGNMVVE  
CMTGQTMYEQYSAGHISPFGDGAGAF

>comp15660\_c0\_seq9; 373 1 1103 LEN=1292; minus strand; translated  
XPPSPTASPTPVPTAEPPTSPTPSPTANPTGSPTVSPTASPTAGPSSRPTVPPTASPTTS  
PTAGPTSGPTTSPSSSPTAAVDLPTTSLPTESPTSFDTAFTKPFENSDFPTASTTSFDTA  
SPTSLDVTVAFTVFPTILESEGPALPTTSPPTSPKSPPLPTVGATESPTASPTASPTTE  
PPTAKATESPTTSSPTDAPTFTTEDEASCPGDVTLIKKNGITDIPLENAIAIKIVNQDKSTVT  
VELHQSWTSGTKRESVDSIFYSFRTSIFDQKCYESRDVGSQRYDTIELTCEVLKPIAFVE  
ICVUDEASHGILVPGEGNDNATVPKCCHPEEISPEVPVVCYTVEIKCQTECVVEIERGRR  
GLRGSYP

>comp15660\_c0\_seq10; 366 260 775 LEN=775; translated  
MKSAIFASLIASAAAFAPAQQAKSSTALNVNELEIGVTAPLGVYDPLGWLESQPESFERR  
RAVERKHGRIAMA AVVGTIVHNNHIVFDGYLSPSNDLKFADVPTGMGGIAAIPSAGLAQI  
FAFFALVELAWMPASKYDGDYGVGFDDIKDPEEKARKLNVELNNGRAAMM

>comp15660\_c0\_seq11; 373 1 1103 LEN=1237; minus strand; translated  
XPPSPTASPTPVPTAEPPTSPTPSPTANPTGSPTVSPTASPTAGPSSRPTVPPTASPTTS  
PTAGPTSGPTTSPSSSPTAAVDLPTTSLPTESPTSFDTAFTKPFENSDFPTASTTSFDTA  
SPTSLDVTVAFTVFPTILESEGPALPTTSPPTSPKSPPLPTVGATESPTASPTASPTTE  
PPTAKATESPTTSSPTDAPTFTTEDEASCPGDVTLIKKNGITDIPLENAIAIKIVNQDKSTVT  
VELHQSWTSGTKRESVDSIFYSFRTSIFDQKCYESRDVGSQRYDTIELTCEVLKPIAFVE  
ICVUDEASHGILVPGEGNDNATVPKCCHPEEISPEVPVVCYTVEIKCQTECVVEIERGRR  
GLRGSYP

>comp15660\_c0\_seq12; 81 1 93 LEN=400; translated  
LNNGRAAMMGILGLMVHEQLGGSVPIVGEL

>comp15660\_c0\_seq13; 322 485 1410 LEN=1410; translated  
MRGFVDDTDLKGDRLFQHLAQQLDRVPLAPDVPRFVALLIKDAGSERVENTVDAFSLGA  
GRPGLVKLHGDRRFVLIHNLDCVLERYIGDPVFLDEGDVSGEDASSSVNVGASVGLLVG  
DSVALAVGGSVGEAVGEAVGDSVAPT VSGVGLDLVGLVVGVEVVKAVGPSLSRIVGNTVG  
ATVSSDVGDAVSNVDVAVGKSEFSNFVGNVAVSNDVGDVSGDRVVGKSTAAV GELLGDV  
GPEVGPVAVGDVGLAVGGTVGLEDPVAVGDAVGDVGLPVGFVAVGLGVGEVVGSAVGTGV  
GEAVGDGGX

>comp15660\_c0\_seq13;a 322 1 1103 LEN=1410; minus strand; translated  
XPPSPTASPTPVPTAEPPTSPTPSPTANPTGSPTVSPTASPTAGPSSRPTVPPTASPTTS  
PTAGPTSGPTTSPSSSPTAAVDLPTTSLPTESPTSFDTAFTKPFENSDFPTASTTSFDTA  
SPTSLDVTVAFTVFPTILESEGPALPTTSPPTSPKSPPLPTVGATESPTASPTASPTTE  
PPTAKATESPTTSSPTDAPTFTTEDEASCPGDVTLIKKNGITDIPLENAIAIKIVNQDKSTVT  
VELHQSWTSGTKRESVDSIFYSFRTSIFDQKCYESRDVGSQRYDTIELTCEVLKPIAFVE  
ICVUDEASHGILVPGEGNDNATVPKCCHPEEISPEVPVVCYTVEIKCQTECVVEIERGRR  
GLRGSYP

>comp15660\_c0\_seq14; 327 260 865 LEN=865; translated  
MKSAIFASLIATAAAAFAPAQQAASTSLNAFEDALGAQPPLGFFDPLGLVESGDQE QFDR  
LRFVEIKHGRIAMLAFLGQITTRYGVHLP GDIDKSGDAFASF PNGWAAIQGPDAIPGGGL  
AQILAFIAVLELSIMKDITGGEFVGDFRNDYIDFGWDFSEEAKLSKRAIELNNGRAAMF  
GILGLMVHEQLGGSQSLENSX

>comp15660\_c0\_seq15; 229 469 1678 LEN=1678; minus strand; translated  
MQLFAAALALSSTLFGTSFVNADQGCLGGVYGDKTTTKLDIMDSVVRENSLHKIGGQLRY

ESKTIEMRLKSSILFLNTNQTVLREAVTLTTPTLSFS DATQSDIFYP SNIFMTSDIGTV  
RDRPVSLVVTVDGDYADIAQVWIDRKRGS PYQMNGKKEGGKFANINLQTVEGKPKSGEG  
NFRMCFVDTE TNELTTVEKFSWTVYDLDERGKDKINKPVIKEKLIIDTKQARAFQLWPNE  
AQSEVKLSCEDGSQLPCNSGVRTVFHSSTDGTGDDNPTDPNSLTDLQKSRSVTFTFIDTD  
CWEFTYDHYCPVEQPEYDGPSPRKTCKKYTGGNFLFAGESEEIINGGECLTPPPSPTASP  
TPVPTAEP TTSPTPSPTANPTASPTVSPTVSPTAGPSSRPTVP  
>comp15660\_c0\_seq16; 369 260 799 LEN=799; translated  
MKSALFASLIATAAAAFAPAQQKAAS TSLNAFEDALGAQPPLGFFDPLGLVESGDQE QFDR  
LRFVEIKHGRIAMLAFLGQITTRYGVHLP GDIDKSGDAFASF PNGWAAIQGPDAIPGGGL  
AQILAFIAVLELSIMK DITGGEFVGDFRNDYIDFGWDKFSEEAKLSKRAIELNNGRAAMM  
>comp15660\_c0\_seq17; 242 121 1266 LEN=1266; minus strand; translated  
MQLFAAALALSSTLFGTSFVNADQGCLGGVYGDKTTTKLDIMDSVVRENSLHKIGGQLRY  
ESKTIEMRLKSSILFLNTNQTVLREAVTLTTPTLSFS DATQSDIFYP SNIFMTSDIGTV  
RDRPVSLVVTVDGDYADIAQVWIDRKRGS PYQMNGKKEGGKFANINLQTVEGKPKSGEG  
NFRMCFVDTE TNELTTVEKFSWTVYDLDERGKDKINKPVIKEKLIIDTKQARAFQLWPNE  
AQSEVKLSCEDGSQLPCNSGVRTVFHSSTDGTGDDNPTDPNSLTDLQKSRSVTFTFIDTD  
CWEFTYDHYCPVEQPEYDGPSPRKTCKKYTGGNFLFAGESEEIINDGECLTSPPSPTASP  
TPVPTAEP TTSPTPSPTANPTX  
>comp15660\_c0\_seq18; 370 1 1085 LEN=1219; minus strand; translated  
XPPSPTASPTPVPTAEP TTSPTPSPTANPTGSPTVSPTASPTAGPSSRPTVPPTASPTTS  
PTAGPTSGPTTSPSSSPTAAVDLPTTLSPTESPTSFDTAFPTKFENSDFPTASTTSFDTA  
SPTSLDTVAPT VFP TIELEMP TTSPTTSP TKSPTPLPTVGATESPTASPTASPT EPPTAKA  
TESPTTSSPTDAPTFTED EASC PGDVTLIKKNGITDIPL ENAIKIVNQDKSTVTVELHQ S  
WTSGTKRESVDSIFYSFR TSI FDQKCYESRDVGSQRYDTIELTCEVLKPIAFVEICV VDE  
ASHGILVPGEGNDNATVPK CCHPEEISPEVPVVCYTV EIKCQTECV EIEERGRRLRGSY  
P  
>comp15660\_c0\_seq19; 447 15 530 LEN=530; translated  
MKSALFASLIATAAAAFAPAQQAKTSTSLSVSELELGVTEPLGVYDPLGWLETQPESFERR  
RAVERKHGRIAMA AVVGTIVHNNHIVFDGYLSPSNDLKFADVPTGMGGIAAIPSAGLAQI  
FAFFALVELAWMPASKYDGDYGVGYFGDDIKDPEEKARKLNVELNNGRAAMM  
>comp15661\_c0\_seq1; 134 1 276 LEN=802; translated  
DKLPEDAKNAAKVLGYTSSTWDSGGQIPIAGKEWSDLTTKERDAAVVLGMTEAKWAKNPY  
FETSQTGCIPLEFCASVETFATIYSSNQTEF  
>comp15661\_c0\_seq2; 284 1 600 LEN=1126; translated  
RMLPIPENKEVNYDSCDFRKLPIEVQRAAKFLGYTAAIWDNDGKVP IESKDWRKLSAEQQ  
KAAS TLGYNEEKWDNESDSSSSSSDSSK PCTGTKSIIAKNMNRHDCNFDKLPEDAKNAAK  
VLGYNSSTWDSGGQIPIAGKEWSDLTTKERDAAVVLGMTEAKWAKNPYFETSQTGCIPLE  
FCASVETFATIYSSNQTEF  
>comp15661\_c0\_seq4; 1058 309 3293 LEN=3819; translated  
MVDLDEWKTTLIAVA VSI AINLTLP IWLRLAKLCDDNLCTKTRSEIPDINESEDGDDYT G  
GGRHPCESSVVS DSKYSSLSSTVIAPLNAVLDARPRRTAGRPAHRQRRRRDRDRVYAAEL  
TKLSFEESGIEVEHNIFFGDS CAGKSVMSKVS IDDISLNECSVGGE PVTKNMYSTVDIAP  
KISCWEKLELSEWESSL TSLAGFYMIQGI IETATEIVEVALISHMIGITEGNAFMVNF  
LFETSGVFSVGYQEALSVLPQAEGAGNDLLVGRYLQIVFIFSF LQCIPGFVLWSFYMYD  
IMLWFNFDELTA EIAQQYTYSIFLYWIAESVNECLLEFLDVT DREKYVTIFAVVQAFISS  
GTIVAMSTLGVSNMVAIGLAQSFVRITIMFVNFLIVSKKGWFDHVSEGLVKTFGLKDFRA  
MWTTFITAIPLGVSWILSFG EWSMIVFAQWIGSDEVAAWNFLGYIWDFFESVTEAVASA  
AEVRVGFVRMGAGK PQLAKKMSEKSIYFGTLCAIYTAGTLFVLA EFLPSWLTPNLVYQKLV  
FDQLPLIGFGGILMVPGMVMESILNAQGRVRLMTMIEI ISSWFI VIPIAAILVYLFDFGL  
EGMVI GLVVGYSTLSTICFFF IIRSNWEQLSKRVIKQNC AEGTRYLD TNWDEL PSEIREA  
ASTLGYNKILWESGDEPASTE KAWNKLTKVEKKAAGVLYGNKKWNGEDDKGNGYEEYDF  
DDLPPPEVRKAAKFLGYTSSVWDNDGKIPIEKKD WASLTPEQQDAATTLGYTEIKWNDDDS  
DSSSSSPDSSIHGDSSMPP I PENKEVNYDSCDFRKLPIEVQRAAKFLGYTAAIWDNDGK V  
PIESKDWRKLSAEQQKAAS TLGYNEEKWDNESDSSSSSSDSSK PCTGTKSIIAKNMNRHD  
CNFDKLPEDAKNAAKVLGYNSSTWDSGGQIPIAGKEWSDLTTKERDAAVVLGMTEAKWAK  
NPYFETSQTGCIPLEFCASVETFATIYSSNQTEF  
>comp15661\_c1\_seq1; 294 3365 3775 LEN=3775; minus strand; translated  
MTPDGKNTKWN GEDDKGNGYEEYDFDDLPPPEVRKAAKFLGYTSSVWDNDGKIPIEKKDWA  
SLTPEQQDAATTLGYTEIKWNDDSDSSSSSPDSSIHGDSSMPP I PENKEVNYDSCDFR K  
LPIEVQRAAKFLGYTAA

>comp15661\_c1\_seq2; 294 3272 3682 LEN=3682; minus strand; translated  
MTPDGKNTKWNGEDDKNGYEEYDFDDLPEVRKAAKFLGYTSSVWDNDGKIPKEDWA  
SLTPEQQDAATTLGYTEIKWNDDSDSSSSSPDSSIHGDSMPPIPENKEVNYDSCDFRK  
LPIEVQRAAKFLGYTAA

>comp15662\_c0\_seq1; 185 855 2156 LEN=2156; translated  
MGNTPVHSSSAGVPNRKPAXTLAKKPTPGPPIAGTDFSRPERAREEEPLGWFDECPNA  
ADGVRSGQELAGGVGPEIVPRRPGALHRRGSYSDSCFGGGSDRNELPRSRRGPATVEE  
GSGVDPVLPLEAIAPPRSLCAPPAAPGGGCAALPCRGFYRRNDAKRFGCSPSQETKATGV  
AQIPAAPAQAVPPDISAAAAAAVPLFDENNTSLATVPVTLVGHGTGIHATPSIARALRQ  
KLSALGRKSNRKHLAFQLLPGRITQSDHWSEEEESASQVENSHYSRNGIGREAYRNSGKK  
HAPRATPEIESTQGTMDGTNSVQRKWITLLPRQIEDHSGSNKSKNSKPRSSSSCSPVLRDF  
DPPDLFAPLSTVSAPEKQPVFGELDQLFSIEHSTGDLSTSMTTATHSLIDNTSYFCDDGS  
SSLEYVMDDDDDD

>comp15662\_c0\_seq2; 168 1 1305 LEN=1305; translated  
TMGNTPVHSSSAGVPNRKPAGRSRKSRLVRPLRERISLGGRSHERKSHWGGSTNAQT  
QLMASVLARNWREVLVRARSFPDEVVPCTVEVPIPIILVSEADRTGTNYRGRDEGQLPSK  
KAPVSIKRLRLPLHAACALRPPPQVVGVLVSHVVASTEETMPNGLVVPVPHKKQRLPV  
LHRFRQRQHKQYHRISPPRRRQRAVPLFDENNTSLATVPVTLVGHGTGIHATPSIARALR  
QKLSALGRKSNRKHLAFQLLPGRITQSDHWSEEEESASQVENSHYSRNGIGREAYRNSGK  
KHAPRATPEIESTQGTMDGTNSVQRKWITLLPRQIEDHSGSNKSKNSKPRSSSSCSPVLRD  
FDPPDLFAPLSTVSAPEKQPVFGELDQLFSIEHSTGDLSTSMTTATHSLIDNTSYFCDDGS  
SSLEYVMDDDDDD

>comp15662\_c0\_seq3; 254 451 1752 LEN=1752; translated  
MGNTPVHSSSAGVPNRKPAGRSRKSRLVRPLRERISLGGRSHERKSHWGGSTNAQTQ  
LMASVLARNWREVLVRARSFPDEVVPCTVEVPIPIILVSEADRTGTNYRGRDEGQLPSK  
APVSIKRLRLPLHAACALRPPPQVVGVLVSHVVASTEETMPNGLVVPVPHKKQRLPV  
LHRFRQRQHKQYHRISPPRRRQRAVPLFDENNTSLATVPVTLVGHGTGIHATPSIARALR  
QKLSALGRKSNRKHLAFQLLPGRITQSDHWSEEEESASQVENSHYSRNGIGREAYRNSGK  
KHAPRATPEIESTQGTMDGTNSVQRKWITLLPRQIEDHSGSNKSKNSKPRSSSSCSPVLRD  
FDPPDLFAPLSTVSAPEKQPVFGELDQLFSIEHSTGDLSTSMTTATHSLIDNTSYFCDDGS  
SSLEYVMDDDDDD

>comp15662\_c0\_seq4; 52 1 408 LEN=408; translated  
KKHAPRATPGIESTQGTMDGTNSVQRKWITLLPRQIEDHSGSNESKSKPRSSSSCSPVLR  
DFDPPDLFAPLSTVSAPEKQPVFGELDQLFSIEHSTGDLSTSMTTATHSLIDNTSYFCDD  
GSSLEYVMDDDDDD

>comp15663\_c0\_seq1; 1636 101 4879 LEN=5013; translated  
MPLSPSQLQQTTASRDPIPKQPMLOPEFNSPDDVPVPPDDGTGQNKSGGEDSDKTGNEN  
ENEDDYEQEEHNSLDYNALRRNSTGASGRISGIFSTMDVIEKYARNTVGLGYLSDLG  
MEGNDYSGCGEEDRDTEITVITKIVQYGNVLMNSFDNDDQDRERSFTNSNASTFSS  
SMGAASWYFENS DPQTSQQNRPDLSVTKLPFEGGDDHDAKATGPTNEKEVTDNNTSD  
IKNDRLEKRKKVFPNIKGRGGIGRI IHRNKANGPSLTRTSSYKSVGSENSKSWNQSRHNQ  
NQHLKGGNEGCNTGRDQKICIDNDVNTQEKGFATFLAANDAALDANGEATSQPSNKHNSC  
DPTGAVCSQSSFHYSENKEVVYDPNSFAEEKAI ISESFLFREQKIERSGSNKLPQQYDNH  
EIVYDDSESKLRVFNHDHGVIEHGNAEFVRKPRSKAFERGSRTAVQPFTDFRAAKASVPQR  
EKHKTNRGLQHKNEPHTSNRAPSMVQIPTDIMFAKENDEKEVIYEDDASSETKEGSRRSR  
CSFGKKEGSGRSRSSFNRKKRQSKKEDTKDEDRSNQVESLYEGVSANEILNDIRIQEAR  
SSYSRACHDHGKEVVYDSNTEGVVARTLPNDRFISSESYLADTDADKYADTDDAIPVQ  
KRRSSTHTMARTARTARPIPNYANTGSLIPSSPTIDESCDSDQTDGKASDQTHCTLQIE  
QTYDDSGIKPAKSSEADTKNCLDYLQSKKIESVAKEQNRNNQTKNRKFLRKKLQKRTET  
QYIHVSCDEDDPGKTQRDI ELVVATKDVQNKLGFWRPDQQQLIKGDAQRRPGRSSNV  
AYRSTRSKRTWNPERRLLCSRKHKEQREKSDRSVSKNNRKLQPSSTKQEIFPFGPAEIHDF  
VFSDDRNDKDASENLYQKTENKLNFPMTETKEEPELKTKNVLTSMETATTMGTEDS  
LCQIEVEDISTMSRPLISTLLREVESPKSTESKTSRDPQNVLETYPSVVEYVEYQEVTA  
GDINTTTVEFQDEKTHANDSAYILEDIALGVPDTPVHPKCFDEAPNDIEGILCRVSTFVEE  
VLEKNNFNGIVNDKECDVSYNPSHMESNAFTTEANDVMERSIVKMLGAPCIFVSNFNDKEY  
EETESEKEDSFPF IGSSIAFGDSLPAISFDLDAPLLSWDLETVLDGDCSQSRGSKVCDYR  
ELTLEHSLPTDLPQLQSDSKLLPNVDKANGYESFSSILGNLPHYRAAKTTVSKPVVDEKV  
APASESKKQDVPVPSENNKSDDGDCEDIHSTGSLIRAEAAEDSKQTTQDEIYSPQLQ  
VPAEEAENENPSTSVSHSGEIRRTRFVDFEGKPLSKQTGRTRGTNSLRTDKRNPPTKV  
RRVPQVLPSTRTNATSGHTKTTNPAPRSLAAVTEARAKMRHSVQQKRSQPPKGEQVPKTP

KPASTKVPIARAVSDSGFP IVAEARPKAQEAGSDPKSLVSNRMGKSSTKVGAGSSNENS  
SSNNNNYVVDKNGFLVDTTTAVLEDEESFESNQHKWSQRLRTPSPSTEASGEKNDSTS  
HRFVPPQQAYWKLKLNADPVMLEEYRRRPSLSK

>comp15663\_c0\_seq2; 1188 101 3704 LEN=3704; translated  
MPLSPSQLQQQTASRDPIPKQPMQLQPEFNPPDDVPVPPDDGTGQNKSGGEDSDKTGNEN  
ENEDDYEQEEHNSLQDYNALRRNSTGASGRISSEGFSTMDVIEKYARNTVGLGYLSDLG  
MEGNDYSGCGEEDRDTETNVI TKIVQEYGNVLMNSFDNDDQDDRERSFTNSNASTFSS  
SMGAASWYFENS DPQTSQQNRPDLSVTKLPEFEGDDHDDAKGATGPQTNEKEVTDNNTSD  
IKNDRLEKRKKVPFNIKGRGGIGRI IHRNKANGPSLTRTSSYKSVGSENSKSWNQSRHNQ  
NQHLKGGNEGCNTGRDQKICIDNDVNTQEKGFATFLAANDAALDANGEATSQPSNKHNSC  
DPTGAVCSQSSFHYS ENKEVVYDPNSFAEEKAI ISESFLFREQK IERSGSKNKLPGQYDNH  
EIVYDDSESKLRVFNHDHGVI EHGNAEFVRKPRSKAFERGSRTAVQPFTDFRAAKASVPQR  
EKHKTNRGLQHKNEPHTSNRAPSMVQIPTDIMFAKENDEKEVIYEDDASSETKEGSRRSR  
CSFGKKEGSGRSRSSFNRKKRQSKKKEDTKDEDRSNQVESLYEGVSANEILNDIRIQEAR  
SSYSRACHDHGKEVVYDSNTEGVVRRARTLPNDRFISSESYLYADTDADKYADTDDAIPVQ  
KRRSSTHTMARTARTARPIPNIYANTGSLIPSSPTIDESCDSTGKASDQTHCTLQGIE  
QTYDDSGIKPAKSSEADTKNCLDYLQSKKIESVAKEQNRNNQTKNR IKFLRKKLQKRTET  
TQIHVSCDDEDDPGKTQRDI ELVVATKDVDQNKLGFWRPDQQQLIKGDAQRRPGRSSNV  
AYRSTRSKRTWNPERLLCSRKHKEQREKSDRSVSKNNRKLQSSSTKQEI PFNGPAEIHDF  
VFSDDRNDKEDASENLYQKTENKLNFPMTETKEEPLKTKNVLNNTSMETATTMGTEEDS  
LCQIEVEDISTMSRPLISTLLREVESSPKSTESKTSRDPQNVLETYPVVEYVEYQEVTA  
GDINTTTVEFQDEKTHANDSAYILEDIALGVPDTPVHPKCFDEAPNDIEGILCRVSTFVEE  
VLEKNNFNNGIVNDKECDVSYNPSHMESNAFTTEANDVMERSIVKMLGAPCIFVSNFNDKEY  
EETESEKEDSFPIGSSIAFGDSLPAISFDL DAPLLSWDLETVLDGDCSQSRGSEVCDYR  
EX

>comp15663\_c0\_seq3; 1190 101 3719 LEN=3719; translated  
MPLSPSQLQQQTASRDPIPKQPMQLQPEFNPPDDVPVPPDDGTGQNKSGGEDSDKTGNEN  
ENEDDYEQEEHNSLQDYNALRRNSTGASGRISSEGFSTMDVIEKYARNTVGLGYLSDLG  
MEGNDYSGCGEEDRDTETNVI TKIVQEYGNVLMNSFDNDDQDDRERSFTNSNASTFSS  
SMGAASWYFENS DPQTSQQNRPDLSVTKLPEFEGDDHDDAKGATGPQTNEKEVTDNNTSD  
IKNDRLEKRKKVPFNIKGRGGIGRI IHRNKANGPKANGPSLTRTSSYKSVGSENSKSWNQ  
SRHNQNLKGGNEGCNTGRDQKICIDNDVNTQEKGFATFLAANDAALDANGEATSQPSN  
KHNSCDPTGAVCSQSSFHYS ENKEVVYDPNSFAEEKAI ISESFLFREQK IERSGSKNKLPG  
QYDNHEIVYDDSESKLRVFNHDHGVI EHGNAEFVRKPRSKAFERGSRTAVQPFTDFRAAKA  
SVPQREKHKTNRGLQHKNEPHTSNRAPSMVQIPTDIMFAKENDEKEVIYEDDASSETKEG  
SRRSRCSFGKKEGSGRSRSSFNRKKRQSKKKEDTKDEDRSNQVESLYEGVSANEILNDIR  
IQEARSSYSRACHDHGKEVVYDSNTEGVVRRARTLPNDRFISSESYLYADTDADKYADTD  
AIPVQKRRSSTHTMARTARTARPIPNIYANTGSLIPSSPTIDESCDSTGKASDQTHCT  
LQGIEQTYDDSGIKPAKSSEADTKNCLDYLQSKKIESVAKEQNRNNQTKNR IKFLRKKLQ  
KRTETTQIHVSCDDEDDPGKTQRDI ELVVATKDVDQNKLGFWRPDQQQLIKGDAQRRPG  
RSSNVAYRSTRSKRTWNPERLLCSRKHKEQREKSDRSVSKNNRKLQSSSTKQEI PFNGPA  
EIHDFVFSDDRNDKEDASENLYQKTENKLNFPMTETKEEPLKTKNVLNNTSMETATTMG  
TEEDSLCQIEVEDISTMSRPLISTLLREVESSPKSTESKTSRDPQNVLETYPVVEYVEY  
QEVTAGDINTTTVEFQDEKTHANDSAYILEDIALGVPDTPVHPKCFDEAPNDIEGILCRVS  
TFVEEVLEKNNFNNGIVNDKECDVSYNPSHMESNAFTTEANDVMERSIVKMLGAPCIFVSNF  
NDKEYEETESEKEDSFPIGSSIAFGDSLPAISFDL DAPLLSWDLETVLDGDCSQSRGSE  
VCDYREX

>comp15663\_c0\_seq4; 1638 101 4894 LEN=5028; translated  
MPLSPSQLQQQTASRDPIPKQPMQLQPEFNPPDDVPVPPDDGTGQNKSGGEDSDKTGNEN  
ENEDDYEQEEHNSLQDYNALRRNSTGASGRISSEGFSTMDVIEKYARNTVGLGYLSDLG  
MEGNDYSGCGEEDRDTETNVI TKIVQEYGNVLMNSFDNDDQDDRERSFTNSNASTFSS  
SMGAASWYFENS DPQTSQQNRPDLSVTKLPEFEGDDHDDAKGATGPQTNEKEVTDNNTSD  
IKNDRLEKRKKVPFNIKGRGGIGRI IHRNKANGPKANGPSLTRTSSYKSVGSENSKSWNQ  
SRHNQNLKGGNEGCNTGRDQKICIDNDVNTQEKGFATFLAANDAALDANGEATSQPSN  
KHNSCDPTGAVCSQSSFHYS ENKEVVYDPNSFAEEKAI ISESFLFREQK IERSGSKNKLPG  
QYDNHEIVYDDSESKLRVFNHDHGVI EHGNAEFVRKPRSKAFERGSRTAVQPFTDFRAAKA  
SVPQREKHKTNRGLQHKNEPHTSNRAPSMVQIPTDIMFAKENDEKEVIYEDDASSETKEG  
SRRSRCSFGKKEGSGRSRSSFNRKKRQSKKKEDTKDEDRSNQVESLYEGVSANEILNDIR  
IQEARSSYSRACHDHGKEVVYDSNTEGVVRRARTLPNDRFISSESYLYADTDADKYADTD  
AIPVQKRRSSTHTMARTARTARPIPNIYANTGSLIPSSPTIDESCDSTGKASDQTHCT

LQGIEQTYDDSGIKPAKSSEADTKNCLDYLSKIEVSAKEQNRNNQTKNR IKFLRKKLQ  
KRTETTQIHVSCDEDDPGKTQRDI ELVVATKDVQNKLGFWRP SDQQQLIKGDAQRRPG  
RSSNVAYRSTRSKRTWNPERLLCSRKHKEQREKSDRSVSKNNRKL PQSSTKQEI PFNGPA  
EIHDFVFSDDRNDKEDASENLYQKTENKLNFPMTETKEEPLKTKNVLNTSMETATTMG  
TEEDSLCQIEVEDISTMSRPLISTLLREVESSPKSTESKTSRPDQNVLETYPVVEYVEY  
QEVTAGDINTTTTVEFQDEKTHANDSAYILEDI ALGVPD TVHPKCFDEAPNDIEGILCRVS  
TFVEEVLEKNNFNGI VNDKECDVSYNPSHMESNAFTTEANDVMERSIVKMLGAPCIVFSF  
NDKEYEETESEKEDSFPFIGSSIAFGDSLPAISFDL DAPLLSWDLETVLDGDCSQSRGSK  
VCDYRELTLEHSLPTDLPQLQSDSKLLPNVDKANGYESFSSILGNLPYRAAKTTVSKPV  
VDEKVAPASESKQDVPVPSENKSDDDGDCDEDIHSTGSL LIRAEAAEDSKQTTQDEIY  
SPQLQVPAEEAENENPSTSVSHSGEIRRTLRFVFDGKPLSKQTGRTRGTNSLRDCKRN  
PTPKVRRVPQVLPSTRTNATSGHTKTTNPAPRSLAAVTEARAKMRHSVQQRKSQPPKGEQ  
VPKTPKPASTKVP IARA VSDGFPVIAEARPKAQEAGSDPKSLVSNRMGKSSTKVGGAGS  
SNENSSNNNNYVVDKNGFLVDTTTAVLEDLEESFESNQ QHKWSQRLRTPSPSTEASGEK  
NDSTSHRFVPPQAYWKLKLNADPVMLEEYRRRPSLSK

>comp15664\_c0\_seq1; 2934 109 13997 LEN=14109; translated  
MAGKKRRKASSAIGKATAKRKTGTSIPAEAPMIHVCMPI LRHLLDIASSRIRSEHVQTF  
YDGKCWTDTKKVPADVTIPVKTAGSNFDCYWIILATNIMNRL LILEKEATENNPVIANVY  
TALADALATILLSKSKLTAHQ TANASRSTLCRAILTTSLAALYGMQSYDPQKEAQRTYG  
TYEAAVATLDRVLHLRAGCAGLGKNCAGKSEEKERKNNNSNDVFGTIGKWNTAALVDTCT  
QIEEYLGLSYANPERGCI EVLLKTIDKEKRAKEEEAEKTPPTKRSTRSRGGRGAESIATT  
SKRKGSAKSPASAEAKTELSKNQSFDPSPVVAAFEKLLASEDFGNRIDGRVAIKRWASI  
AIVWVSHRGEGRFILREIHLRAIDRQYDKFCTPHEKSRLMSTMMYIVIESGKNCGVRAPT  
GGIEQYLRISIPGVGTAIPRSPEAGKSKRTKKGGNKEPNSPDSPSRSRISTMRRADIRDW  
TTVVIYDYVQNRKKCLLENVELAQEDEDSENDVPDDSTVSRNTDFSELIMGLCRNAESSV  
YNSSYNEHSSLSKALQSIASAFCLELAADPSLPLDTKMISFALS RVVNSLRMIDPNSTTG  
AMPSSGLSEGDNSSSVSEKEKRFETRFLQLTRLP TPVPTSSSLTTDSMDLMATGNCTF  
AGIVSSGDSFTDEHAVALAIRAFQIQRHGPDTPAAGKLLTFLVLDLVRRAYDTRKPKTTS  
TAKSYVEKTINATPSGKRKRPGKESSTNRRTSRRRKTESGYAESATEQETFVWLKISP EM  
SSVAIILALTAIKTCLINTKGYGSC TIRKIIRCMVTFDHMLNLVELGEMLDKIMIKSRCKA  
IGLENDFDPGTTSSASLAHAYQSDDF TASEIRLWETHMNCQIFGRGQLRYEENSGLDPL  
IWDSEERRKKIYKALTAPLDAFRSRGIEEKKSF TLPAAHNTLLVANMSCVSDDEDKDAE IY  
IVNRYINFIKDVFNDLETNLNPEKFGWYGRILNDDIPLSYNDARTFMLALNGLSRQKRQSC  
FERLVKSIRD AIESTQRNKA EKEKLF RNADVSGFFARVLVVCYSLMNSIVMGRKLRQNF S  
ATMGGSQIRIPSFITQADWYQDRTFMGI FG TWESSSLPDGVVKEANEQTQIPRKSNEF  
RSLLEKAFQIGFDAAPYDHCHLLFTAWNGLDQMPQPSSSGELSPELIPLNENYSKNILQL  
RDDVCSIYRAINDGENVDLKG MVLRASELTD TLLKNHIPDDEEMKQDMPLPAMVLLASLP  
AYIAAAVSGHTKPGNDYFSTT LSKSSTKKQKSHRGYYS DSDHSPSDCEDEDIDDY ESEA  
RIAAMSRLRECCDAFGAAPVHPDWLDVSCSLRDGIRPVYATEVAGK AINTLSHLAKVAFT  
QYKRHQSSAVRALKKEKDKTKR NENLYSTIIMWSRTS QYPNCREWPSNVATITKLSSKVA  
DYLSEDTTDV DTDQTKACWCPYAGQRLRGILQEENKLMGRWELSDAVLRAGGEWELLLAE  
ALSIACLNTNEGEDDLRHRESKDCIEVASTSGQETSSEMAKAQLWRTV LMSAI SHLVPA A  
ALLRLGLGKVGKPHFPFAFHENDQDPYDASPLHFCERLNGIEPSTSIPTSLQESVFETLS  
LLARLSIEAEDPLSTMCHSVASHLVVDSNTFLDLEAMQSMRC AFMGLNLIRDIAESLPNK  
DAKASIPFVVERLITMIEDSGTVDDVMARS DTDALTKHRRHLHYFLGDPPKSSVDTVATKS  
IDIFEILSFGQLKEICDSQAEIYKWSCGLSKEKAVNDFVSI LCEDSLRVNSKTRSR IAFM  
LSRLGIMESHSIINSTGIRQPFVISAIVKAFTKVDKHLKSVVLKDL CGIRGNKSPSQTF  
RRDMASIF TLLLFPQSTPKFEKAKFVHDMLMGVFD SWK KIDESNRDLT LSVLLTYGTCFN  
SLFEIGSKLVKHKEKSESDDDES VGEACLFYKYFDFIKSLKSVASKKAEVLPKASKIVVKK  
GSSKDVGT EYTTIPSEFPRWCSF IKRSGFHEQHWHYCYTCNLVADKGCCTLCALVCHR DH  
DVSYSRHSSFFCDCAAEDDNSVEQGRV SCKCIKSTPNSQLDAIYKNEHIEGHGSNSNVND  
GSKLVETYSRFEGTISA EVANYSPDEALES AIRFLLDVKNSHWLS SFLRIKKEFKRWK  
TKYGDPICLLLKESAESSLNSESI FRSSHLSEQKQMRWRRAK LLELRKIEEEALVSV CVA  
TGFVAKFSSDSTHDALTLARLSRNDVRSILAI DSRGRMILAEPSSLLL CSPMAI VNAR  
NPKRSDDERITRSQMCILGTLPLSFNVGVRLCAVNERHLVVGWGTSEACVLILKADYSGS  
EDTINLTFEVDEQSDGDVLVNC EWLPGSQTHAVGVSRVYVRLFDVCRSEKDKGSKRAQP  
VIGYNLGF EASRLDLSIVPQKEVATSENDSTESS NYRAEHTSKMFLLENGRLHSLEIK  
ISNGKIESPSELHFEPSECVSISTEGIRPRSTSSVGLPGASTRTLGE GSKLVYLKQSRCL  
LYKCKAAAVVALMIGNDGNVEGS FELI PHTIPIGVLGADENDDMYSISGPYTLWTELGMV  
YRKGETFFRVVCLGRATRS GHSKLLC IDFNEKTKIREISCSSGMGLSLDSFEGLAAFTA

PVVHTDTLNKQRMGTGERTFLCALTSEGNLQIFGEDLIDMIPTSPGQNSVAESTNALKLTD  
ISLIQSSPMKKFPLTIFEQLINVSksenLIFSgeklGfDSkelKSRLSRENSSSVFCPRR  
QGCCFIVSLSQNTDTASRSRSGAKSPDLIIISAIRVLVGSTCDYIPSRISVQGRSIDVTPR  
LKRWYNIPLTEEEIARGMRS GFVSIWIGQSFDPNAPVIDSVEVFASERNSLDMVLSTSY  
FAPASTPSSKTYRTLFDGPFKTSMSNNENDIPLDHRRTTSTGLILGVRATTTLCEFISPA  
VDAL EEGKDLMRQLIQITAVHPDKQLRESVEVLSGSLVSDRSRWSFQDENMLVGCQSLS  
VECNAMLNNPAMRSEGKNNISED MKWKAIRIILQDCLNVASLIARERPNNYLQSMGNIQE  
NDLKSGSIAIEASKLILQGLRRSAGFEELIGGSRGIITLSLTEM AIVVYMDDSKSTKDFV  
QLSR IREFIDVENLSTCEAISTFFQDHESEQKKRSIPDLFVQMEARRVAYQCDSCGVCP  
MKEVRYTILKDDY GIDL CNECYDVGKFFASNKRNKSSAEVIINGKSMGRDLTCAHMKKME  
PVSLEKMEMDVEQLDIETRHLQDLKGTAEDEALRKGKLCNLGESASHCSQQDLSADHRG  
YDYFLGELYSFVMEQLSYAFKKERCDSMESLIKALDLVKHSRLDSLKRERA EWFVKDV  
SRGIEKIVDSSSQREQLTNFEMSCLVACLRLSSLVKPDSDFDYHFPVAKSDTGRRHQSL  
SIESMTPKLTCDVHGILAVRRRC DKPGANKDRRFYVCGKEKGQRCNFFKWADDGQKKKEH  
NNPKSQFNQIVQSAMLDHQSPSGKALYDRLCGLLEELFGEEGGFYEVSVLASNQKEKKT  
DSSLKSFYSAQNIQRDFNDGVFCSKEKLLDVVSSEALVKSKLSGTRQLDIPVGTGDRG  
ALLLEASL DLLTI IADDKTEGISRWF SILCEITMATNKHSALRSLATKVLKTLCCGNRKK  
YHYIRDHFTFCFQLKKLYHFSYAILEAALIVKEKTRQCSAQWKGP AVEWATLGVGGLIGT  
QDLISED SISELNLKGC GKALDDMWTVLKSRGGSWRQFCGFRSLPLSQRHRKTS GSKLKE  
RNKEQQLF EAAPIKVLFWIASCLTG INQVKILRMIDFALFDWKERKTQLKTSMGHSEMGS  
NEDSEDDQVRGIGSAISKPEELLLNSGNTKLVVGDIIAMSLNMVQSGKTTTELRRSAFQIV  
LKLSRDMSDGDQLVLFENLLAATR DVGLLGKASIEYLNLLQMLTHFLKPSDSIGRLADYV  
ADSF IQQMEAIKYDKSNHEWTMVE TNVVGSTRTRKRFDLSRCIFCLKLQHHSGGRESTSRS  
SERKFLSNSGKVS NRTGSTSGVGR TGATISRQKWHSEQVSEFSRCRLDSLKETCSSNEFN  
LFYKLNKRVSISDIHLTVSDPRGRYVKTISIFFVSRPTSEALKSDNYSSKWQKIATLNL  
RGGSRVSASLSQPIVATNIRVEFTEFYERPGNKERGT DGSMLHCP RCTRPTVNAHGVCV  
TCGEVAFQCRKCRHINYDRLDAFLC VECGYTCCGSFSIELNAAVASNAIAITDDNVFDKS  
IAMYGIASSIEDELREN LG EKMRSLNQKHKHNHTEFDSFIDASLERALFGLLP IGDADKI  
GDNAQIP SMLDRFDKPGSIVKYVAHTENNVR SNGRSNSSTDRSERARSLRLAQQIRSGS  
SSSSDGRRSTDIIRHLGRGMSLENVEDESGLREVLRRGSSGTIRANNQDSEDKDPK DGE  
KILKAEMADCQKMLILLREAWRESYELQRRIIAWKNLNSGALVPFSPLDFTKSECVSFTP  
SHCSVCGGSVALQILVLWLKFLVAPTKV FVAKEFFRIIFQEDIPSSHCKGLQDIKNKVI  
ISIATNSRKGA EIVLVELRKR LAASRD MNCADVLGKIMKIEGFDMANEYAKLAM DILSSR  
GDPTVDMYM

>comp15664\_c0\_seq2; 2907 109 14110 LEN=14222; translated  
MAGKRRKASSAIGKATAKRKTGTSIPAEAPMIHVCMPILRHLLDIASSRIRSEHVQTF  
YDGK CWTDTKKVPADVTIPVKTAGSNFDCYWIILATNIMNRLILILEKEATENNPVIANYV  
TALADALATILLSDKSKLTAHQ TANASRSTLCRAILTTSLAALYGMQSYDPQKEAQR TYG  
TYEAAVATLDRVLHLRAGCAGLGKNCAGKSEEKERKNNSNDVFGTIGKWNTAALVD TCT  
QIEEYLGLSYANPERGCI EVLLKTI DKEKRAKEEEAEKTPPTKRSTRSRGGGAES IATT  
SKRKGS AKKSPASAEAKTELSKNQSFDPSPVVA AF EKLLASEDFGNRIDGRVAIKRWASI  
AIVWSHRGEGQRFILREIHLRAIDRQYDKFCTPHEKSRLMSTMMYIVIESGKNCGVRAPT  
GGIEQYLR SISPVGTAIPRSPEAGKSKRTKKGGNKEPNSPDSPSRRI STMRRADIRDW  
TTVVIYDYVQNRKKCLLENVELAQEDEDSENDVPDDSTVSRNTDFSELIMGLCRNAESSV  
YNSSYNEHSSLSKALQSIASAFCLELAADPSLPLDTKMI SFALSRVVNSLRMIDPNSTTG  
AMPSSGLSEGDN SSSVSEKEK RDFETRFLQLTR LPTP IVPTSSSLTTDSMDLMATGNCTF  
AGIVSSGDSFTDEHAVALAIRAFQIQRHPGDTSPAAGKLLTFLVDLVRRA YDTRKPKTTS  
TAKSYVEKTINATPSGKRKRPGKESSTNRRTSRRRKTESGYAESATEQETFVWLKISPEM  
SSVAI LALTAIKTCLINTKGYG SCTIRKI IRCMVTFDHMLNLVELGEMLDKIMIKSRCKA  
IGLENDFP GTTSSASLAHAYQSDDF TASEIRLWETHMNM CQIFGRGQLRYEENSGLDPL  
IWDSERRKKIYKALTAPLDAFRSRGIEEKKSF TLPAA NHTLLVANMSCVSD EDKKDAE IY  
IVNRYINF IKDVFDNLET LNPEKFGWYGRILNDDIPLSYNDARTFMLALNGLSRQKRQSC  
FERLVKSIRDAIESTQRNKA EKEKLF RNADVSGFFARVLVVCYSLMNSIVMGRKLRQNF S  
ATMGGSQIRIPSFITQADWYQDRTFMGI FG TWESSSLPDGVVKEANEQTQIPRKSNEF  
RSLLEKAFQIGFDAAPYDHCHLLFTAWNGLDQMPQPS SSGELSPEL IPLNENYSKNILQL  
RDDVCSIYRAINDGENVDLKG MVLRASELTD TLLKNHIPDDEEMKQDMPLPAMVLLASLP  
AYIAAAVSGHTKPGNDYFSTT LSKSSTKKQKSHRGYYS DSDHSPDCESEDEDIDDY ESEA  
RIAAMSRLRECCDAFGAAPVHPDWLDVSCSLRDGIRPVYATEVAGK AINTLSHLAKVAFT  
QYKRHQSSAVRALKKEK KDKR NENLYSTIIMWSRTSQYPNCREWPSNVATITKLSKVA  
DYLSEDTTDDVIDQTKACWCPYAGQRLRGILQEENKLMGRWELSDAVLRAGGEWELLLAE



ALSIACLNTNEGEDDLRHRESKDCIEVASTSGQETSSEMAKAQLWRTVLMASAI SHLVPAAL  
ALLRRLGLGKVGKRKPHFPFAFHENDQDPYDASPLHFCERLNGIEPSTSIPTSLQESVVFETLS  
LLARLSIEAEDPLSTMCHSVASHLVVDSNTFLDLEAMQSMRCAFMGMLNLRDIAESLPNK  
DAKASIPFVVERLITMIEDSGTVDDVMARSDDTALTKHRRHLHYFLGDPKSSVDTVATKS  
IDIFEILSFGQLKEICDSQAEIYKWSCGLSKEKAVNDFVSI LCEDSLRVNSKTRSR IAFM  
LSRLGIMESHSIINSTGIRQPFVISAIVKAFTKVDKHLKSVVLKDLGIRGNKSPSQTF  
RRDMASIFTTTTLPQSTPKFEKAKFVHMLMGVFDVSWKKIDESNRDLTLSVLLTYGTCFN  
SLFEIGSKLVKHKEKSESDDESVEACLFYKYFDFIKSLKSVASKKAEVLPKASKIVVKK  
GSSKDVGTETTTIPSDFQDQAPLSKEVDSTSTGIIVSLHDFIDRFFFCFQVIFESMSSK  
EVNSLSNLFSTKSGYTCNLVADKGCCTLCALVCHRHDVSYSRHSSFFCDCAAEDDNSVE  
QGRVSCCKIKSTPNSQLDAIYKNEHIEGHGSNSNVNDGSKLVETYSRFEGTISAEVANYS  
FPDEALESAIRFLLDVKNSHWLSLFRLIKKEFKRWTKYGDPICLLLKESAESSLNSES  
IFRSSHLSSEQQMRWRRAKLELRKIEEALVSVCVATGFVAKFSSDSSTHDALTLARLS  
RNDVSR SILAIDSRGRMILAEPSLLLCSPMAIVNARNPKRSDDERITRSQMCILGTLPL  
SFNVVGVRLCAVNERHLVVWGTSEACVLILKADYSGSEDINLTFEVDEQDSDGDVLVNC  
EWLPGSQTHVAVGVSRYVRLFDVCRSEKKDGSKRAQPVI GYNLGFASLRDLSIVPQKEV  
ATSENDSTESSNYRAEHTSKMFLLLENGRLHSLEIKISNGKIESPSELHFEPSECVSIS  
TEGIRPRSTSSVGLPGASTRTLGEKGLVYLKQSRCLLYKCKAAAVVALMIGNDGNVEGS  
FELIPHTIPIGVLGADENDDMYSISGPYTLWTELGMYRKGGETFFRVVCLGRATRS GHSK  
LLCIDFNEKTKIREISCSSGMGLSLDSFEGLAAFTAPVVHTDTLNKQRMTGERTFLCAL  
TSEGNLQIFGEDLIDMIPTSPGQNSVAESTNALKLTDISLIQSSPMKKFPLTIFEQLINV  
SKSENLI FSGEKLGFDSKELKSRLSRENSSSVFCPRRQGCCFIVSLSQNTDTASRSRGA  
KSPDLIISAIRVLVGSTCDYIPSRISVQGRSIDVTPRLKRWYNIPLTEEEIARGMRSGFV  
SIWIGQSFDPNAPVIDSVEVFASERNSLDMVLSTSYFAPASTPSSKTYRTLFDGPFKTS  
MSNNENDI PLEDHRTTSTGLILGVRATTTLCEFI SPAVDALEEGKDLMRQLIQITAVHPD  
KQLRESVEVLGSLVSDSRSRWSFQDENMLVGCQSLVECNAMLNNPAMRSEKNNISED  
MKWKAIRIILQDCLNVASLIARERPNNYLQSMGNIQENDLKS GSIAIEASKLILQGLRRS  
AGFEELIGGSRGIITLSLTEMAIVVYMDSDSKSTKDFVQLSRIREFIDVENLSTCEAISTF  
FQDHESEQKRSIPDLFVQMEAAARRVAYQCDSCGVCPMKEVRYTILKDDY GIDLNECYD  
VGKKFASNKRKSSAEVIINGKSMGRDLTCAHMKKMEPVSLKMEMDVEQLDIETRHLQD  
LKGTADEDEALRKLKCNLGEASHCQQDLADHRGYDYFLGELYSFVMEQLSYAFKKE  
RCDSSMESLIKALDLVKHSRLDSLKRERAEFVKDVS RGI EKIVDSSSQREQLTNFEMS  
CLVACL RGLSSLVKPDSDFDYHFPVAKSDTGRRHQSLSIESMTPKLTCDVHGILAVRRRC  
DKPGANKDRRFYVCGKEKQRCNFFKWADDGQKKKEHNNPKSQFNQIVQSAMLHDHQPSPG  
KALYDRLCGLLEELFGEEGGFYEVSVLASNQEKKTTDDSLKSFYSAQNIQRDFNDGVF  
CSKEKLLDVVSSEALVKSLSGTRQLDIPVGTGDRGALLLEASLDLLTIIADDKTEGIS  
RWF S I LCEITMATNKHSLARSLATKVLKTLCCGNRKKYHYIRDHFTFCFQLKKLYHFSYA  
ILEAALIVKEKTRQCSAQWKGPVAVWATLGVGGLIGTQDLI SEDSISELNLKGCCKALDD  
MWTVLKSRGGSWRQFCGFRSLPLSQRHRKTS GSKLKERNKEQQLFEAAPIKVLFWIASCL  
TGINQVKILRMIDFALFDWKERKTQLKTSMGHSEMGSNEDSEDDQVRGIGSAISKPEELL  
LNSGNTKLVGDI IAMS LNMVQSGKTTELRRSAFQIVLKL SRDMSDGDQLVLFENLLAAT  
RDVGLLGKASIEYLNLLQMLTHFLKPSDSIGRLADYVADSF IQQMEAIKYDKSNHEWMTV  
ETNVGSTRTRKRFDL SRCIFCLKLQHSGGRESTRSSERKFLSNSGKVS NRGTSGVG  
RTGATISRQKWHSEQVSEFSRCLDSLKETCSSNEFNLFYKLNKRV S I SDIHLTVSDPRG  
RYVKTISI FVSRPTSEALKSDNYSSKWQKIATLNLARGGSRVSASLSQPIVATNIRVEF  
TEFYERPGNKERGT DGSMLVHCP RCTRPVTNAHGVCVTCGEVAFQCRKCRHINYDRLDAF  
LCVECGYTCCGSFSIELNAAVASNAIAITDDNVFDKSIAMYGIASSIEDELREN LGKMR  
SLNQKHKHNHTEFDSFIDASLERALFGLLP IGDADKIGDNAQIP SMLDRFDKPGSIVKYV  
AHTENNVR SNGRSNSSTDRSERARSLRLRAQQIRSGSSSSDGRRSTDIIRHLGRGMSL  
ENVEDESGLREVLRRGSSGTIRANNQDSEDKDPKDGKILKAEMADCQKMLILLREAWRE  
SYELQRRIIAWKNLNSGALVPFSPLDFTKSECVSFTP SHCSVCGGSVALQILVLWLKFL  
VAPTKVFAKEFFRIIFQEDIPSSHCKGLQDIKNKVIISIATNSRKGAEIVLVELRKRRLA  
ASRDMNCADVLGKIMKIEGFDMANEYAKLAMDILSSRGDPTVDMYM  
>comp15665\_c2\_seq1; 1020 1 3589 LEN=3635; translated  
XLEIHGIPLSETFMVQDNEDESEEKKEEDTATTSTSF EHS LAMKFDRGDKQNVAEIKTLV  
WEVVVGTGPTRREKVTRKKYIVAALQTKDKVHLPALKSLVLRMQEYENPDQRLIWSMQ  
SMRLAPLKIAEGLTGYKSGCMPPICHSSIDDVSSSDCTNMELYLDRSIVDIYFRASKRV  
QRTASFASIGSGIMGKSLMMDLGTFLQVAGAHVDIKENATDSDMKSTACTVESFVAGASY  
SDNTIEDSESHGDNNTGFGTTANTGNEQKMMSGYELRKLQQEERKQOREMRKDRLEKEYRS  
FRKDDIVSKAKLLRTTARKKGRIQEMEILLKEALACGEFSKLMEIPDEQSPRTNIDKNAL

HICAWRGDYETVVRLVEISREHCPELDVVNLI SKGPGNYGKTPIFYALTQCREDDVVRYLV  
LEAGADLLIVNNKGQTPCSIARSHMTEETCQLLYKTEAEQLAARSLVGGNGTELFANYR  
ASIHSDGKLYGDLDPFRPIDDDNRYQKKGSVEDAVVDNDNIDNGRWASKNGFGQKVTED  
YMDRNDLLTDQIKEYEESVRLAPEESIVQGIPTVFSRSLRATVRWWNRDDKSLAAANDN  
NYDSGGQITFTQSRPKESRKPV ECRDMDEK KKRK GKSTKDDNNVSRFSEIDIDSLELVS I  
SDCINSGIPSGDVGSDLDSTKILVDDVESLSRFEAEVDNCLSELNHDLESRKLAEEEGSL  
FGHDEEIIILKYAWGLDCEWKPGPECGLDSPVSTLQLGTRRNVFLIDMQTICRKQESLDED  
SSMERSLDSILLKIFRNPNLPLVGFVVQDLGKLAASF SHLKCSSEFSAVMDLQSISSVI  
YKNKRDRRMMSSLQKMTAVLLNKRLDKAQQVSDWSNRPLSNEQISYAMLDAAIIPLLLKT  
IVEDSDVVERYNGQFFNVHNNLLSTIRYTLVEPCEEGFVYEMSFSGSIKSTLGKAFARQNW  
PTKMKLEEPAPPKLVACQAIADGSSSMPTTSKKERAHLRKVGDKGRKRPKPIPLKSLTG  
NLENLPIPGIFLGYTKESCAFRVVGHELFKTIPEGTYIGFNRRAGVVETSNAWILFCNFG  
GEKSFSEFANNGRQLSFRVNSTAQSGRSSESSMYREMISNAQSPRTHPSTDKKKIILFAR  
ESTRTKYMYCGLCSCTKVLPDSDTASLILKLEDYEKLMKPLDRISSDFEHLVEGI  
>comp15666\_c0\_seq1; 1032 109 3845 LEN=3845; translated  
MKSFRTRASVSVKLSLIALLVFTTISFRLEGVGGSYIPNENPGKGILGFLRLLLESTVEK  
KTLWFYRHFSGSNVDPKINRVQNXDFSDEPIKIFCGPALDPRASRLKQNVATSAEAAADS  
TVSLKNRSSLMSIIPSKCLEDDPECKRLRTLGDNEISLPSIGSMVKLSEGDSNVFPGQV  
PTEAPNHFGTTPHSFLTSMPSAPT GALATSHPTRYMCYGNHDSFKQASYRDDEMTNVRGKW  
CESEMPSVSLEPSGAPIIFPEGNKTGNFTTVVPTLQPSPKPTAQPVIIQFETQPTLQPSLV  
EEPVEELVERPVEKPVQVEQVEQPIETPTVKPVGSPTSQPIVRLPSSKPMGQPVLPQ  
TLRLTSSPTSEPSDSTNPTDYPDVPDVGPTQSVNPSVSPTTSPSQLPSELPSDAPSVSP  
TISSSPSRPSSESEPSNFSPSKLPTEEPSTSPTYKPSSSPSESPSNFSPSRSPSRYPSE  
SPSQSPSVSPSISSSPTSSPSHQPSAFSSSSPSHQPSDSDIPSEFPNTTTAPPSSSED  
LICEDEFARFTEDGSGIPTDLVSCISEDREILLPRKVSLFDEVGLAIGVVNIESTCTSLG  
ASEITVTLSELDGESVTGDTIVSILTPSNRILVETSSVELFEDSTGWISELSLSQQGRVL  
IELVTEVNEQTLTLSAFDDINNNICFDCGGEAAFYADPNGFLELGFRVNAYSENDANTGI  
INAARFMHTQLHELYEEFDANFVSDEVDTCLIVQENGLTPYAKPDGGNITFNFTD'TDD  
FFQFQLFNVEIGGTIFVLANDTITKISMKS AVNEVQNVVIDVPHVKMVTIQFDGQGAVCG  
IKSCLDGVAPSPTPVGYNPPTKSDVPTASPYPTWSSPPSIESNQPTDCYDLLGITEEHI  
NQIGSEEP I P E D S I K V I H G E Y E N A T I E I S Q L W S E D L N L T F F I H Y H S N T H E S I C E G I S D L S  
FGDKVIKSLECYDGWTDVGIIFYDKEITIEECQECMPPEPDEEGVIAYYFELPCESICE  
SLGPTKSPSLTAPTSIPSADIESIQPTDCYDLYGITEKDIHQIGSHEPIPENAIETIHG  
EFTHVSIEISQLWSKDTNLTFFIHYHSNTHDSVCEGIPEFSYRDTLTREIECYDGWTDVG  
IFIYFDELTLLEECEECRPPDGDEEGI IAYYLEIPCAPICKDFEQLDLQVAPSPSMAPFT  
IAPTDCYDLYGITEQDVISIQIGSDAHIPKNSLRIVDGDSTNATIEI  
>comp15666\_c0\_seq3; 1078 109 4134 LEN=4509; translated  
MKSFRTRASVSVKLSLIALLVFTTISFRLEGVGGSYIPNENPGKGILGFLRLLLESTVEK  
KTLWFYRHFSGSNVDPKINRVQNXDFSDEPIKIFCGPALDPRASRLKQNVATSAEAAADS  
TVSLKNRSSLMSIIPSKCLEDDPECKRLRTLGDNEISLPSIGSMVKLSEGDSNVFPGQV  
PTEAPNHFGTTPHSFLTSMPSAPT GALATSHPTRYMCYGNHDSFKQASYRDDEMTNVRGKW  
CESEMPSVSLEPSGAPIIFPEGNKTGNFTTVVPTLQPSPKPTAQPVIIQFETQPTLQPSLV  
EEPVEELVERPVEKPVQVEQVEQPIETPTVKPVGSPTSQPIVRLPSSKPMGQPVLPQ  
TLRLTSSPTSEPSDSTNPTDYPDVPDVGPTQSVNPSVSPTTSPSQLPSELPSDAPSVSP  
TISSSPSRPSSESEPSNFSPSKLPTEEPSTSPTYKPSSSPSESPSNFSPSRSPSRYPSE  
SPSQSPSVSPSISSSPTSSPSHQPSAFSSSSPSHQPSDSDIPSEFPNTTTAPPSSSED  
LICEDEFARFTEDGSGIPTDLVSCISEDREILLPRKVSLFDEVGLAIGVVNIESTCTSLG  
ASEITVTLSELDGESVTGDTIVSILTPSNRILVETSSVELFEDSTGWISELSLSQQGRVL  
IELVTEVNEQTLTLSAFDDINNNICFDCGGEAAFYADPNGFLELGFRVNAYSENDANTGI  
INAARFMHTQLHELYEEFDANFVSDEVDTCLIVQENGLTPYAKPDGGNITFNFTD'TDD  
FFQFQLFNVEIGGTIFVLANDTITKISMKS AVNEVQNVVIDVPHVKMVTIQFDGQGAVCG  
IKSCLDGVAPSPTPVGYNPPTKSDVPTASPYPTWSSPPSIESNQPTDCYDLLGITEEHI  
NQIGSEEP I P E D S I K V I H G E Y E N A T I E I S Q L W S E D L N L T F F I H Y H S N T H E S I C E G I S D L S  
FGDKVIKSLECYDGWTDVGIIFYDKEITIEECQECMPPEPDEEGVIAYYFELPCESICE  
SLGPTKSPSLTAPTSIPSADIESIQPTDCYDLYGITEKDIHQIGSHEPIPENAIETIHG  
EFTHVSIEISQLWSKDTNLTFFIHYHSNTHDSVCEGIPEFSYRDTLTREIECYDGWTDVG  
IFIYFDELTLLEECEECRPPDGDEEGI IAYYFELPCVPCESIQPSIEASESLPEVYSAS  
DNLTRTPDCYDGAMTIERD'TGGDPMCELSSQPLTIEALDDSGSNEVRF'SFQNNWPTTIDN  
IDLYYDRGDGLGKQCLSLKMLSSGAIYPGTLAVACDAKLKPLKLSL SVIPELRSHHIEV  
IVEFSGPKLVPTFSEFPVRQM

>comp15667\_c0\_seq1; 1882 161 7243 LEN=7357; translated  
MSASEDAMPQSVEEAGALLGAAITRYGKGSFVTNPPKGIHSSFAVMSPVPSSELLGLLH  
TLRSLRSAPKESPLVAAPSLLAGVLMKLLGISSSLAAKIPSNDDPSKPRNDIPPMLSTA  
IRRVVWDCVVLCHSLGEGLSGAQRINLFGFVRDMIILAGLNPRTARALGGTRIAALEVIS  
GLLEDKLSVKLASWAFDVAQLCQRALKSSNGEPPSYRIAAIRVACSVAVASRSFAFMKTR  
EIWGSAQFVLKGALEDKATFEMVKVLKIASQDRYPEVRSSATQLACLLGPMMAINLHIKSS  
SSPDAEATSPTSCLLEEIMTLAFRNLDDDSANVSEGWAEALARCMSTSIELKNQSGSDSIS  
TPDASTGRGAKKGMLSAEACSTLPKAIKYLVSFVKVGGDLAAPRAGGNYSLGGRAVRVG  
FARTIIHLLRLQLIQSIGEGRSLSYRESIVIILAMVGKDMETQLNPIDRGVPPIPYLDA  
STVVTSRISSSSSGSAFPPTQKGRNLFQGGPKVSHADGCIARLLTNQVLRDGLAQQMTEI  
SQLKVLHELVDLCSNKQSALQGNQLQVILVEISHLFATLGEATASSLEQILPGLLKCLSH  
SNHGVREAAVTFGSIASVFPSEGRKIVRECINKIQFEHAEMMSTASTGEQSNATEEINS  
PRFRFRRETPTKKKSNVDETLKHQYTIHGISLVVATLIRDLPDLPGLPTEILDVTVMIC  
EFLISTSTNDVIKGVSPSSICTCIRAGFCLIAAVLTTGPDAMSNHIASIFGLWQKVCETA  
QSKDNFTADHEMCMVESLLTSIVTFLKFGSELLLSIPDALSRSTLILENLLPLFFSKGRL  
GSIPVNPTAACRLDSAKASIMEAFAWLPPGSFPMIADSVFGFAASHIQKSIQDDVSCSIL  
PSLISKEDRILDITISFDRAKEFGQVGGAHDLGRDIFLRTSEVAHHGDRESALLFLRDQNK  
REGQSDDAFLDSEVLGLLNCERKEKPPTVLHEVGTWRKPVDPSCATRIRLVDASVQAFAS  
TFALRSKGKEQQKAMDILHSLPLLHFQKGRNAGLTDQDRTGKIKDNLAPATNIVAVILSC  
VKALPIEESTHDIAIGLGPSWKNKASTILISILSSRANDVRRAAEGLAVLSTLGIKEDM  
RFLQSAVLHSLDEVISRNPSQGGRNALQDNYQNGRSGGLLTLACIQRSTHRITESRASR  
SRLRGSPAASKHENEDSLQTIQIMTRVLPYVGGRLSSGISLNARASALHSILMLLQYSGK  
MNCIHLNEEDLHLLKKAIVEIDNYMSAWTVASHVLDQGNETQKIAFEPFSLSVILRFMT  
FLTPLLHQLEDYDAGIARRFSTMAMIIVECYGDHAVVQLEALAFFEVLAINQDLLPARVS  
GIKYDEHPLLSCIPYLMANISPNRSPVLSRGLMDIPHGCNSSPICLRGSLRTRLRALSVE  
ILVAEWSMEIISLLFAALEATSASNRFFGEVFNRLAAPREAETICNGNKICGEVSDIL  
RFMIYLERVSPKCEYILLRYILLRSIVAGISVSEEVDDNAHTVASVSKAALEQASFD  
KHLFELSNPIRWQVKVAVQMMTIALMELATKCREDTGKLEDTRSFNPRVAQIECLDACN  
LCNSSDSNSPKSALALHIPELIAAGCVVATATVDQVELRILQENSMYCLAIIIGRFGAIP  
DPDESHTSVLNQYIPQLSSCIKSALTAPDDNIDESTCRLFWAGCNALCSLIRSQVTNEVA  
VLKRLIRPTILNQEVPFFFEAGSSMPKNALGINELGDQNVRSILLKIGKMFMLGNIPL  
ENPEISRMIEPKKSCIGVHAASLAADGAKVLISSNLTLCGEPKRIQTKDKSDGFFSF  
QDICEIDDYTKAALTRTWATNARLSIEFLLDAINSPQASETEAKACLEWLERVIPFMFSG  
LYDAISAIGESCRQGTISWAKQVDACEVACCCLAGLSTLSGSGNISHLSEKWKHEIETSA  
VQIYKSILLPALVNNGFQRRGGKGRYDNEEDMTKLIVRSCALLVTFSATISFEEDSDSCPF  
LVTLLSPLDLLKNEISVTSDIASEIVAACLNAVARIIGNNGPSTLAKAMLPFALSLLTR  
PEKSSALVSSAQELLVKCLNHSTSTAELSAITLGLAKSRNWSAWSSAVKINDGIAAEE  
SLLEIEKALLNPTNTEEQLGALGAIREMVQNNPPNALTGRILSALGAEVFSVFQAYGSL  
SNPSVELQSHRVAACAGCMKIALASYQQCSTDFPESEDTEFLVVLFEVLIAVLRFNGLP  
NHPPPQGPLSDSSIGRMCAQAI THVARTTPIPFKASMGMRMADHDRAVLEYAVRGEMSGYA  
VATTPAPVKKKLSLKGFSKR

>comp15668\_c0\_seq1; 620 1 2629 LEN=2629; translated  
XNDYSDHNKPLDFPYKFPDAMSSTDGTAEDLLSCGSSLEDLGVTERGSGEDHRLSPRENH  
ESVGWIGNNDNINNAPNVATTDASSSSSSSSSLPVSRRPPMPKSEELSKPQATDTTLVKEN  
GQTQTPPCRENSPFRSWSVSGDASKASDSTFTTRNISNHNASEARIEGQTIENPILKHD  
ERHRSYRGDCSISSSDSNDRKSSTLSVNDEDCPMETEEFPRKDTEPAEVDKEIENLKC  
QLGKLWVAESNQLRKYERDKYGRLLIPDEERLGHRCDDGGKKNASVHTVKSNANITAN  
VPDFSSNTSPDRSYDVNGVPRSVGISDFYRTVIFVNCVSKNWSEHLKNMTARLNSFGD  
RVP IAGENVASDESRLDMDPKLQYSMTLADSVDKAWAKELYESDAQEREDI INELHGIQS  
SRMVNETPELVADAVRALREHIE TNVDEPLDNGDSIVPPITKDAYKRAVFDLKSEYVQSE  
AFLVKFLRACFFDIDKAALRYFRYLDLHDLFGDVALTRSLAMTDLTKREMRYLRKGGQMQ  
LLPSRDRAGRRMYAFSGCDDWTFNIREKYRINVYLVLDVLDADDVTTQIKGAVSLNAPRIGT  
GSNPFGEFGMTLRVKGQELLGKYTEPEYFRKINEAIPFRFSALHYFAPNNIIYNIKSI  
ILTLGKEDRKVVRFHAGSQIECEYSLRSFGIPHEDLTI TDGANIKTKNVQKFIKARQSI  
ESFREKQRRQQEGGGDCPQSLKDKPGIECPEVDCIVFGDKALNNHQANA EFRNLIKIV  
ERSREEQLAIARRQSKCSTNDEPKTPIKDYIDDI IQIAKSPPHNLRFLFFDKKKHLYVEF  
DDHNELCRVSQSLRDQRKFRLEDAKVRGVRAVENX

>comp15668\_c0\_seq2; 239 1 690 LEN=690; translated  
XNDYSDHNKPLDFPYKFPDAMSSTDGTAEDLLSCGSSLEDLGVTERGSGEDHRLSPRENH  
ESVGWIGNNDNINNAPNVATTDASSSSSSSSSLPVSRRPPMPKSEELSKPQATDTTLVKEN

GQTQTTPCRENSPSFRSWVSSGDASKASDSTFTTRNISNHNASEARIEGQTIENPILKHD  
ERHRSYRGDCSISSSSDSNDRKSSSTLSVNDDDCPMETEETFPRKDTEPAEX  
>comp15668\_c0\_seq3; 816 123 2926 LEN=2926; translated  
MGENVNHDRDFGDTATPNAVDEHRNNASLVYDRASSGTIDSDVNNGNDNINDNINVNVNV  
NVNVNENDYS DHYKFPDAMSSTDGTAEDLLSCGSSLEDLGVTERGSGEDHRLSPRENHES  
VGWIGNNDNINNAPNVATTDASSSSSSSSSLPVSRRPPMPKSEELSKPQATDTTLVKENGQ  
TQTTPCRENSPSFRSWVSSGDASKASDSTFTTRNISNHNASEARIEGQTIENPILKHDER  
HRSYRGDCSISSSSDSNDRKSSSTLSVNDDDCPMETEETFPRKDTEPAEVDKEIENLKCQL  
GKLWWAESNQDLRSKYERDKYGRLLIPDEERLGHRCDDGKKVNASVHTVKSANITANVP  
DFSSSNTSPDRSYDVNGVPRSVGISDFYRTVIFNVNCVSKNWSEHLKNMTARLNSFGDRV  
PIAGENVASDESLRDMPKLQYSMTLADSVDKAWAKELYESDAQEREDIINELHGIQSSR  
MVNETPELVADAVRALREHIETNVDEPLDNGDSIVPPITKDAYKRAVFDLKSEYVQSEAF  
LVKFLRACFFDIDKAALRYFRYLDLLHDLFGDVALTRSLAMTDLTKREMRYLRKGQMQLL  
PSRDRAGRRMYAFSGCDDWTFNIREKYRINVYLVLDVLAADDVTTQIKGAVSLNAPRIGTGS  
NPFGEFEMTLRVGKQELLGGKYTEPEYFRKINEAIPFRFSALHYFAPNNIIYNIGKSIIL  
TLLGKEDRKVVRFHAGSQIECEYSLRSFGIPHEDLTIITDGANIKTKNVQKFIKARQSIES  
FREKQRRQQEGGGDCPQSLKDKPGIECPEVDCIVFGDKALNNHQANAEFNRILKIVER  
SREEQLAIARRQSKCSTNDEPKTPIKDYIDDI IQIAKSPPHNLRFLFFDKKKHLYVEFDD  
HNELCKRVSQSLRDQRKRFRLEDAKVRGVRAVENX  
>comp15668\_c0\_seq6; 162 123 305 LEN=305; translated  
MGENVNHDRDFGDTATPNAVDEHRNNASLVYDRASSGTIDSDVNNGNDNINVNVNVNV  
N  
>comp15668\_c0\_seq7; 435 123 987 LEN=987; translated  
MGENVNHDRDFGDTATPNAVDEHRNNASLVYDRASSGTIDSDVNNGNDNINDNINVNVNV  
NVNVNENDYS DHYKFPDAMSSTDGTAEDLLSCGSSLEDLGVTERGSGEDHRLSPRENHES  
VGWIGNNDNINNAPNVATTDASSSSSSSSSLPVSRRPPMPKSEELSKPQATDTTLVKENGQ  
TQTTPCRENSPSFRSWVSSGDASKASDSTFTTRNISNHNASEARIEGQTIENPILKHDER  
HRSYRGDCSISSSSDSNDRKSSSTLSVNDDDCPMETEETFPRKDTEPAEX  
>comp15669\_c0\_seq1; 1261 1 2869 LEN=3223; translated  
XFRISGVENLEKDIGNEGNDARSTVSELTTLEEDKGAEPMQTEESHQEDLSPTIESET  
QEKKIEALQDVLSAQSTEVALFDGALLDDEDTEDEGATSQKIVMDDDTVVSHSKSVVDES  
TKNVDKAEALAKEMERALAESLAGFSSPTPSPSMDEMDGDENSKLDPGGQDPSKNPTAVH  
ETDIEHEEKERLPQNSSAFYYSKQEIILKLATSPVDSVRMVSQVQNVGGSSSHSRSTNSST  
SLPGSTAVPLRKQRQGFYRRPIMNSTFLGDAVSTNSTTTPSSPPLSKQHQQFQIGILES  
VIPALFLFAAVAICRHFFNPWLKVGNGQSNFWALVWTTMCI IAVTAPVFALEYLLLSGLI  
AGTALQKAI EQYPEVKKFKCKDVRMRMLQAGWWYPSEVRSRDKLETRNAE IILQQKQLG  
DDEDKRNMERLISREQEHRERKQLEKLF DGERAGWAAVKEQLASSLLAEKEQAALLQEKL  
SKQQQRQHELKACKEQMETDMAEERETWNATRSRLEQALKTAVGELEDETKASDLFSQIE  
KERDEERRHWKNEQEKLKSKIQQAEKIDRIKQEHETNVLELNEIHTAKQARSEAECKSL  
KETLKDTEGQAKAVKEDLECQICKLKDTQDAERAEIEKERSIFRTSIVELQEERDAEHFQ  
VEELEHLVKILKEERTEWNSTRANLEKNLEVAESDRDDSRQRMEGIEKVLQEERAAWKIT  
KKNQEDEIEAAKDEAIRVKINLDQQLLSKRSKI VALEGSIAQLENI ILIQSTVEQKHAEA  
DREADRLRQDIPFVGDVVQSSIESIEVSASNVTSGVNTCNSNASSYYSMIQKVQETHS  
KEQRVLRGLLTQHLRCQIANRHVGQLLASSRAMLEATDLSSENSEAAATFGKCLMQYTA  
ASISAKRYMDELISKTGHEDILEIQEMPSFVPSDLGDETIEDSIRSNRSLALASNPW  
>comp15669\_c0\_seq2; 1462 259 3348 LEN=3702; translated  
MNDADGESVEIKVRATIAPKIVLSVYNTDDLQEGPDDEFRRERMEPTASPENHVDVREEAE  
PTKEQDDPLNENGTFRISGVENLEKDIGNEGNDARSTVSELTTLEEDKGAEPMLTEES  
HQEDLSPTIESETQEKKIEALQDVLSAQSTEVALFDGALLDDEDTEDEGATSQKIVMDDD  
TVVSHSKSVVDESTKKNVDKAEALAKEMERALAESLAGFSSPTPSPSMDEMDGDENSKLDP  
GGQDPSKNPTAVHETDIEHEEKERLPQNSSAFYYSKQEIILKLATSPVDSVRMVSQVQNVG  
GSSSHSRSTNSSTSLPGSTAVPLRKQRQGFYRRPIMNSTFLGDAVSTNSTTTPSSPPL  
SKQHQQFQIGILESIVIPALFLFAAVAICRHFFNPWLKVGNGQSNFWALVWTTMCI IAVTAP  
VFALEYLLLSGLIAGTALQKAI EQYPEVKKFKCKDVRMRMLQAGWWYPSEVRSRDKLETR  
NAE IILQQKQLGDDDEDKRNMERLISREQEHRERKQLEKLF DGERAGWAAVKEQLASSLL  
AEKEQAALLQEKLKSKQQQRQHELKACKEQMETDMAEERETWNATRSRLEQALKTAVGELE  
DETKASDLFSQIEKERDEERRHWKNEQEKLKSKIQQAEKIDRIKQEHETNVLELNEIHT  
AKQARSEAECKSLKETLKDTEGQAKAVKEDLECQICKLKDTQDAERAEIEKERSIFRTS  
IVELQEERDAEHFQVEELEHLVKILKEERTEWNSTRANLEKNLEVAESDRDDSRQRMEGIE  
KVLQEERAAWKITKKNQEDEIEAAKDEAIRVKINLDQQLLSKRSKI VALEGSIAQLENI I

LIQSTVEQKHAEADREADRLRQDIPFVGDVVQSSIESIEVSASNVTSGVNTCNSNASS  
YYSMIQKVQETHSKEQRVLVRGLLTQHLRCQIANRHVGQLLASSRAMLEATDLSSENSEA  
ADTFGKCLMQYTAASISAKRYMDELISKTGHEDEILEIQEMPSFVPSDLGDETIEDSIRSN  
RSLALASNPW

>comp15669\_c0\_seq3; 638 1 1390 LEN=1744; translated  
XEQMETDMAAEREIWNATRSRLEQALKTAVGELEDETKASDLFSQIEKERDEERRHWKNE  
QEKLSKIQQAEEKIDRIKQEHETNVLELNEIHTAKQARSEAECKSLKETLTKDTGEQAKA  
VKEDLECQICKLKDTQDAERAEIEKERSIFRTSIVELQEERDAEHFQVEELEHLVKILKE  
ERTEWNSTRANLEKNLEVAESDRDDSRQRMEGIEKVLQEERAANKITKKNQEDEIEAAKD  
EAIRVKINLDQQLLSKRKSKIVALEGSIQLENIILIQSTVEQKHAEADREADRLRQDIPF  
VGDVVQSSIESIEVSASNVTSGVNTCNSNASSYYSMIQKVQETHSKEQRVLVRGLLTQ  
HLRCQIANRHVGQLLASSRAMLEATDLSSENSEAADTFGKCLMQYTAASISAKRYMDELIS  
KTGHEDILEIQEMPSFVPSDLGDETIEDSIRSNRSLALASNPW

>comp15669\_c0\_seq4; 576 1 1423 LEN=1423; translated  
XFRISGVENLEKDIGNEGNDDARSTVSELTTLLEEDKGAEPMQTEESHQEDLSPTIESET  
QEKKIEALQDVLSAQSTEVALFDGALLDDEDTEDEGATSQKIVDMDDDTVVSHSKSVVDES  
TKNVDKAEALAKEMERALAESLAGFSSPTPSPMDMDGDENSKLDPPGQDPSKNPTAVH  
ETDIEHEEKERLPQNSSAFYYSKQEILKLATSPVDSVRMVSQVQNVGGSSSHSRSTNSST  
SLPGSTAVPLRKQRQGFYRRPIMNSTFLGDAVSTNSTTTPSSSPPLSKQHOFQGILES  
VIPALFLFAAVAICRHFFNPWLKVGNGQSNFWALVWTTMCI IAVTAPVFALEYLLLSGLI  
AGTALQKAIQYPEVKKFKCKDVRMRMLQAGWWYPSEVRSRDKDLETRNAEIILOQQKQLG  
DDEDKRNMERLISREQEHRERKQLEKLFDFGERAGWAAVKEQLASSLLAEKEQAAL

>comp15669\_c0\_seq5; 777 259 1902 LEN=1902; translated  
MNDADGESVEIKVRATIAPKIVLSVYNTDDLQEGPDDEFREMERMEPTASPENHVDVREEAE  
PTKEQDDPLNENGTFRISGVENLEKDIGNEGNDDARSTVSELTTLLEEDKGAEPMLTEES  
HQEDLSPTIESETQEKKIEALQDVLSAQSTEVALFDGALLDDEDTEDEGATSQKIVDMDD  
TVVSHSKSVVDESTKNVDKAEALAKEMERALAESLAGFSSPTPSPMDMDGDENSKLDP  
GGQDPSKNPTAVHETDIEHEEKERLPQNSSAFYYSKQEILKLATSPVDSVRMVSQVQNVG  
GSSSHSRSTNSSTSLPGSTAVPLRKQRQGFYRRPIMNSTFLGDAVSTNSTTTPSSSPPL  
SKQHOFQGILESIVIPALFLFAAVAICRHFFNPWLKVGNGQSNFWALVWTTMCI IAVTAP  
VFALEYLLLSGLIAGTALQKAIQYPEVKKFKCKDVRMRMLQAGWWYPSEVRSRDKDLETR  
NAEIILOQQKQLGDDEDKRNMERLISREQEHRERKQLEKLFDFGERAGWAAVKEQLASSLL  
AEKEQAAL

>comp15670\_c0\_seq1; 1986 230 8452 LEN=8706; translated  
MRRSSSQGGDEIGASSKGSRRWRSRSTRSRGRKQKLRQQQQQIAGDTYYQAPPD  
HIEANGSEFAYVTSPPVPKAGLTGNISSLFRKSFKRGSSEGERHTNEASHPQSHQQQY  
HQHRIYTPPVEAGGSAHSPSAYDPNNSNHSSGIQMLGSSASQQQEQQKQRSSRFGIGGKK  
KGRKSDRSNNNSGSENHYPGAGSGYSMSGGRSVASGTNSRFLYFYSNADDDSDSEDSFDE  
RSSRVRASASTKNTFTTGDGYNTSGVDESFLTLDGSGSLRSQSQSSRYSHSSKSKSRHST  
KRDEDEEIPSTTILRYRGFSTSIKNLFLDEALVCASMGCFGLILSNRTEFLQLRNDRR  
GVQWGRNANRQTLPSRIVAYALLTLLLI GFTFVIWGFSGNSDNKKPFAFNNGSYNKGGS  
SSSSANNNNYDNANDDANYNNYNNDDGGYNGDDANANGDYNNNNNDDDDDDDDDED  
SEVSNPDQSTDDKERFMTSIGDAGENRCNLVEKEGWEGSI IPLRFISGRSII DQKTLTV  
SGLPTGGFSSVSGKGVMLTSGKWYEAILETAGCLQIGWADGSFAGHCHSDRGDGCDDGP  
SSWAYDGWRRYRWHSMATEWGRWAEAGDVVGLVDMDEGTVSFTLNGKAEIIGMGVAFSG  
QGFRPCGGVYACVSFNRRKLRLLIFGGSGSAAFKYPPVGYRQVGEAVLERVQERREALVS  
KESVLGAEVEDACKRFLCDFSDGEHGHELMAWNHRYYGSEASVHLGSGRSKHSNNPKS  
SSSLKSTENIAAYCVARRLRTEWARCGSLICSAEGENENPINEIKLAEEMADGLRLAGVE  
MHKQMLTEGMLLSSLITRKLHLHVIVAGDNFDPETFLESESKENSILRFWKMESSAS  
LRSAGWIGEAGAMAITAEALGLGISSTESLQSRSTVERAGFVSVGDLDEGVMLPAGSII  
QVLSVIDWDTDKDIGASTGSSLVASAEALGSGGGGVLTFLKGLQSSVIKSKEFRQV  
VVACIRRSVRQLAVVEYENDDSTSPEDKDEDLGERKTKTEKDGGSYPDARLVSFLTGL  
LLSTPVANDIDDFIDIQTELFEAWSIGLLSASLPWRMICALTAAGILNQCPRALSEVVKS  
TSTLSCYYARLRSTVSRRLWAERAAPVCSRYSQAMVELLCSVTRAVAKEDVVLPI SFLT  
TWDKTEMDAATPLPLPSTHTGCDWEVQDGWVSSDRGWEIWTGTMKRFAVDWETPSRS  
AVR TLMEGGDGPMLREGCIVIRGMDWDESKYNGDGKDLYEREKEKRGEKKKSEKPPKPG  
E QPQVD SHVNI EEKNDPIGIGTEENSNPMTKEDESGTKEVSGKKKKHPSLKLPIGTVLSIE  
PWNIGIPGMARRVRWHTTGTETGIYRYGGDGCYDISHIEVNERETRIKRHPLPESAEQCA  
SRHGFVGEKSQSILLRLRPSTKTTIEDGTNLIKRDGILELPEFSSGIYVSCVFKPDGFSV  
LEEKHLLYGSKDSGWHARFGKPSYVAGTVTELSPPSSSEEEELSQA KIDNKFSNQSLFQEY

GTSVHNVEYLNRRENGSQIQVKSELRISRGRRDSIEDSPLGSGFTETSMPSPIRFDRDFHA  
SSLSLSRDNRTLSCGSSDGRGTAFGNIGFSKGVHYWEVKLEQAEIGSVFIGVAEKPENENG  
SGSSHAHDSPPRLNKWHGWGFVNFRATYTAGSERIYGAHCHSGDVI GVLLDCDSGRISFF  
YDGLKYGEHILNDLGC AFENISPF GFNV DGC GSGGAGQ NAPSGIEGGRSGRYVAQGSVRP  
RTLWVPVGLKNQGD RV SFSPKWSSSYGVDSASTVRN I L ATDEI INCVSKASEMPKNVHTG  
TKARFPRWFINEAFNEYARWRLNSWCRANTRENGPFSLTTFGLDIELDSSPLACASASAL  
LGLNHALLSGDRVRLKRSAGRI L E L S E EAVVLGAYQGRLYYKIVSQKSEGGSLTEGGGRA  
WFWDESEVVDGLELINGSKANDIVLPLMDRFRCTSSGGLKVYEDGAVIRSDLEIFEGSL  
NLGSI PVGTVIPKVDILERRVNACGVIRYHIRFEEFEGWISSKIRGEEEEPIVIPNFLPE  
EEEDETEKRFSTSRCALEWQKTYQDTIASQDRGTIDFAIESIASFESFATEGIIDGYSE  
VSSDAFLARTVSVICDFCEGGSPLDAPFHEVASAIRYAISSFHDRAFDGKIF SCLQANRA  
ASTAFELLGVQKLPSVQSIMARIAMLRANRRARIALPWSVRPCQEGSAILGGVYGYGA  
SIDRARRGSSKESLSQVWQLPSTAKGMRDVRGMLFTSVKQDLLRSITEATTTPTPI SHDE  
YELPREIRTVRINRLRARRVMS SDNVETKRKY SVFSQLQEETKAWGGS AFRRGRFVAKGHG  
GQKRAFMMKLIGEGVNDYSGPYREAFADAICEILQVDADNGSLGVLDPTPNVSDIGEN  
RALYMFSLNKNDPSKIATVKKTMTRTERSIRSAFSTLITAGDESSRQVEEALVFLGRLAG  
TAFRHGIPLDLPLPLESVWKAMVEEDCKVDELKEIDFLAYQQHGCEESL LLSWQRMLN  
SFIDGISSVLPVEIFSIFTGEE LRDMFCGNPDIDVDM LRKVVEYEGYTESDQVIQSFWEI  
LREL TNEERKRF LQFVWARNRLPLKESDFDAPFKIQKDN GNDGDQALPSASTCFFSLSLP  
AYRSKEQLREKLLFAINNVTTMETDFQTN SAEISEGYKEV

>comp15671\_c0\_seq1; 689 1 3564 LEN=3654; translated  
XSKLFSILSYSTQVQVKYVPLTLAFVNTGNVIMSDNLSKETGDFHKFSRPSAGSRTVEGN  
TSGARAMRLERQRAKEQEDFERIKRQKISDNHAKLEIGSKFQQARIGSVEEQTFRAKT  
GLVTAEEFVRAANEKDG NLTNGSERPMTTEERAAAVKMAAAKAKKEAKRSRKKKKEKKR  
AALLSFGGDEEEEEETGHS DENKATENKPKTTGGGGSSKKDPTIDTSFLPKERE EALA  
AERIRLEKEWKQRQEEIKQEKLQITYSYWDGSGHRRTCTIRKGD SVGDGFLEVVRKDLCR  
EFKELGKIGCDALLYVKEDLILPHDITFYDLIVTKARGKSGPLFHFDVRDDIQVGP TDVR  
IEKDESHPGKVVERS WYERNKHIFPASRWEVYDPAKNYGGYTIAGKIVTTKENGHNIFQK  
KPYGNXTIFDGLTWKQTRSRI I AIXTSLTNNTNEVIYKSWRGFNE SLIDXIRPVFHRIV  
XFLASGGDKMYTSTVFFCRKNNPNRILGDNDKLR T L S QMRERNGIRIKTWADN I L I D E T L  
MIPRSYTMKNTDFCFGF XKMILAQLNRIYDDSRFCVHDTQSVLTLHG NLKNETNSSA  
NVFNEQRIVKHFREEREQE QAREXNAVKNSSLYSKLTSYQIKSQVNNTMENFEVVDAP I  
IKGMARESKITTI SFCNENFRGHNSKHVTTEDLSVREVPEDSLASSKKRKIDASSTDDSA  
VDNKELETFGSSSKSEQVLGDDDELNIRNSLARIERRIELINEKAKGGKNRGIHTEELL  
MSLSLKVDAVETNINKQLLLHDFSKKNKGI SEVDELLVSLKKA VDDL GAREVDAEKFKT  
KEKDLLFLLNTKVDTINARNKE I L E S E K R N E N I L V A M E A K A N D I E T R K K E L L E L E T K N E N  
VLVALATKFEDLERKNEEMSLSLGNSHDLVTNL TATVDSLKFTNENLVNLLVALNHK I T D  
MTVKNDNACVRYERLQEMMVAANEKVAEAS I E T A V K T T E D T Q K V K E E E E R Q E V S G K N A P N  
SEERDTWNSMFQRLQOFRKENG SCKVPFHLREYQDLSNWVNNQKRLYNNLITGNGAE I I E  
QDKISQLEHLGLNWGKDYP SQECWDAMFEKLESYHKDLGNCDVPLKSHYKQLAKWVIRQR  
KEYTDRKRGHLSLTCYQIRKLNIGIFNWDGPNSSKLLKKSASARSKP

>comp15672\_c0\_seq1; 81 1 727 LEN=727; translated  
EFSSFEISRNLKSKQRNIEKATADKNAKTSSYDDIEDAALSVRCGIPSL SISVIDNAIA  
GRHGREILLAQFDRI FASFSQSREGYHEIEFRLQTMQVDNHVPSSIHVPLIFCPKYDHME  
PFLHLSAVRRLQEHSN TYVFRYAAFRVLEVRIFLDRRTAENVASFFEPVLKSKADMADEA  
PDFVADLTTRMMKYSQSDRYTPTDVESLIHSANSGRFYFEQLHLHPVRITLTF SQEWMEF  
NEX

>comp15672\_c0\_seq2; 2482 241 11107 LEN=11124; translated  
MVKQALVQAI EEEVIGEYVLNIDKDKIKIAALRGKVKLENVHLDGDV LGGHVFEKIGLSGF  
GILSCWAKSATISIPMKNLEKETTRIELHG VHLICLPLLPATAHLSFGVGNVLDPRCTLR  
TRSKR TKLVRF EK NYLHGRIPDEGPISRRILRAVRNVEREQKRKSRKQAKGSTNSIFAGG  
STNGTATS DSGSASSYPYNSLGDMSDSDFFSEDLVEKTFLDQMGEYSSEEEELTN NAT  
EGYQQEAGQDQEEKSSRHSRTHIHNISDIADGTARELPQLARDWKVKLREKIMRNLEVS  
RDIHFRCEVFEGGLDFCHPDHRKKKYKRRRKDEYDQRAFAFGVTLDSFSMRTANEQWEAG  
SHEKTRSTTDNDHLGPNPYDARQNKVH SWKNLCMYWDDDPFLI SECGLVTTPGHRLSSE  
KFHSKI STAMESLRTQQEPGTKIRQSLAVYDRRTQNHE SRNSSTKEQKSHQYVFEDVCGQ  
FRQRTSNRTEPGPI SGQFEFLPLNLEFKLRPHQYVQYTKLKSAMLSQRRFD TMLRQRPTQ  
SPLENPREWWKYAFGCITTRPNRSWNDVIQITCNDRYIELVAKKLATD TDGAGFHRGL  
TEPESFELLELEDLLPIEALLSFHLLALREHVENTMSVDDIKRTGRKGGKEKRFSDRSSS  
SRGRILSRGSLTRIFNRSR SKNH SISEMDFVPIKEPHQITDP THPKPPHPVNGNPDGSM T

LLEAMTLRLGKSGSFTSXIYHITFTVTLLSASGQEIIVKLKSEKAGTIKFFGRGKLDYFFD  
ITRFEAADCCQAKSDEDGTILAINPVHVHESPIISPRGDDDDFSTDLSIDLALTPSF'TVDN  
VKHPTGFMDLPPSGIVCRLLAAAREKGSTKLSFSAHPATLMWTRQCFDAVAEFFGAPSTKM  
QTELTSHLKAATPLARKAQLAFLSQSTLLIHLNIAAPKIWIPLSEGTGALFLDAGNLR  
YSYDKKNSQSDVSWGLQASDIQVNFARWRVSEIRDRMANPISFTFIESPMKGLSSIIRPF  
QIDAAGMQRKLAIEIASGESLKYDGSVRFLDVAISTIALNLVDAEVLARAIGKWYSQG  
LLTARGRVSTKGGKSHYKDQNAFSSSTYEIHKRAARNFKSRNSTPQCLSLIVEKIEMALEG  
HSKMNFSDEKSIESHDTTLFGQFASPTRTYVVEVFRLCWERTKNHDI IANKLIASDASIV  
QLKAPSEYTPMKNRHQALESQYSILERGIMNGDGCPIILSVNLVHDGTIHLDEVEIDVDPV  
ILRVTPPTLTKDCTKGIRKIAELVQLITRAMERKVHEEGRKARQLDRNKTDTRPPSPAMS  
LTSTVDIAEAESITQRSVGTETTKKSPSDSSLIVKVIKDGCILAGRPTFSSPAKKLNRK  
IRYNKQAYSFAVVQIISNALIMFQSIENADASGSKTLHVSLDNLCGSVDTEFEKKSSTQQ  
TPMIGPSEAEFRLANATENMGCPVSNDISVDCEKLRSSSLTPNDLSILISIVEIMRQRLKG  
IQGFATGPGHKQVLKQTKSPLSSVLKFKQKRGTTIATNIRIELQNFSEFIVLRTFQSRYGAP  
EFLSFNQLKCTLNCGVSALAGECITDISVDFYNSEVSEWEYAVEPFPLKLAVDQMPNE  
MTLDISTNSEIQLNLTGIFLRFSELDQSLKPKRSKETSIALTPSALSTVGLRRATESR  
SVKVRNLTGLEIEIDLERSPRSHIKKTGVRFDVSGPGLIKDKFHASFDSLFDVDPKQNL  
ETSKFCLKIPASSANIIGERDITGLPVALSSGESRTIHLRPSLLQSSSNNERDLKPK  
EIEEHDDQSLTFTSTSPYYAYHAEPVVEYCMQNQRLLRSSTVDIYSLDKGRDLLSSSF  
SPEEDYNAESIGLIKSTHGLAAAYVDDSAVDNQKDVQHFLPNSPTRRQNDCKPLKGNWL  
RPYLKNDSPWTDMTCILPLARERVMPLPDNNMMVNDWTVDVSGDFEESDADGYEYSAD  
FETFTRLRRFYMRGDCRRRRWTRTRIVKPPLLNDRRPLKIVWHTFLDEMGNFVNDVKS  
HVTIHNSTSTSLFFVYSPSWEEELIGSAEPNRELSVPVLFASGIYLRRLAKRRCNRSS  
CLQDFDASDRNLMLPTSYSNNLIRTSIKMNDVSETHLHFLNPKSKKGIVDIHIIEPVLK  
IINLLPCQLEQCQGEVLRPSEERRQVDNRPIVSRGKKFRIANVETMRVASGLEKCVALNP  
GSKPHVSLRVPGYRWSAWQRIVNRKANSLTWRPSEAEIEIHLIYADKGAEDYAEFFKTSV  
HFDRLGKSGESLVLIIISVEAGHSPILRVYSQYWVLDKTFGEFCRFCEFSFSDLMGTVADTEY  
SRRSYLPNDNVGNPSMKKDLQIQGHQWSVGMNGMSLYFSLKEKIAISIETGSDNNGYFQG  
KKGVKSKWTSMPDVSNNLPKTVFVSVDEVGPRRFELAMSVTVCPGMFARTKLITFFPRYQ  
IVNLLKRELVIAQDGLKSAIILIPSQSSVPPHWERQSLPPKVRLLGTPTMEEKDTGDYDEC  
WTNGCIQLDKIGITSIRIPTAGILPARPMIVQTEVRLATKEQNSAVVIVIWSANEKSDPL  
YLLRNRTPYTILCRQPLQEEQNDDNPSGLTSCGTESTTVSNKRKNRLECGGIEITPMLRS  
FLGLDRIEEFVWVLRSGDVACWGFDDPEKPRILEWACMDDES YTFNESSEKVLVEIDNMG  
SSSSLNLGKKQVVCQIKAEHSTKVAEFSSFEISRNLKKSQRNIEKATADKNAKTSSYDD  
IEDAALSVRCGIPSLISVIDNAIAGRHGREILLAQFDRIFASFQSREGYHEIEFRLQT  
MQVDNHVPSSIHVPLIFCPKYDHMEPFLHLSAVRRLQEHSENTYVFRYAFAFRVLEVRIFLD  
RRTAENVASFFEPVLKSKADMADEAPDFVADLTTRMMKYSQSDRYTPTDVESLIHSANS  
RFYFEQLHLHPVRITLTFSSQEWMEFNEGNEVALLFQFLRGMASIAADAPLTFTSFVVAHV  
ESPQALLRVIGVHYSSQLTKQIFSIILGSLAILGAPADFI SNVGTGVRDFFYEP IQGAVHG  
PRQFIEGLEAGTQSLARGVFGGLSLAANVAEIVNHNLALASADDNFIGERKAHQRM LTD  
AMSRGTTNRRFRDSMYLAAAASVSRGVKSGAVGIVEQPTRYAAKYGPVGLVKGVGKAVVGA  
I IKPVVGVGDAALLMNHVSDATS NKQVQPKI PKRLRRALP SRS AKKPNCVILRPYDDQD  
AKAQKIVTEGERCDDVYIGHVYIPSHLIIASEQCLWAIDRLSREAWCVNWEIEISHFGQVD  
DGVRVVVFSQTGLKPYIFQVVDHEVEKQLQALLTME SDKMGNAASNLAELKRSALP SNES  
FEVSTSNIPGIKTPQKSYIFGKCNSEKRLSNTIKDEIDLIESCFGRVKRMGSEMPNFLE  
TLDEEAWTLVSCWGQVFSGLSSRRCVAASII NGTGEDIQIKSAILLEGGSPCYTIPTKEF  
DSDHGVLHAGGIIIFFGWSQQPSLLQPGNVFMHIETNAFTAELAHKNSRDGHAEACAGYE  
LGFLEKSYDDHGWWAKYWLLICKSESRDTFXDGNFRREFLAWCCTRASGGNHLLLELWTLFL  
ADGLEDDEEGPSTRRISEEIE

>comp15673\_c0\_seq1; 1594 445 5133 LEN=5610; translated  
MAKTDQQSVIPSLPGDIQPPSPSTPKQPSPRKSKKKKHSPKVLKDSHQQLRLDDEHRPP  
PESICSLPLAIDTNRVLTDFVVRSLRRRLWKAFFSEEDSASTMKVYQATLSDFVQWLEE  
EDRERRNQEEKAAAAATENLTPGRSSRKLKRGERRSRKKGMPDLEGDSDHSRNFVNDI  
DRDNTDYRNTLLRHQEQRVETEAMIGGSNIPILQSKMNPDSFIADDFLCPFFDDSTYDY  
PAQTKLPDPIQHALEQEALIAERKRQKRARHPRTAFRRIFLGVQPASLETSSTLDDISS  
HDRSATLSGWGMDPLLQSLTSSSDLATENDNRHDEDDDEKEDTMVITPLHEAARLGAGDL  
VRVFLAHGGNANEKNRCLRTALHMCAGGITAEQKLARAAAEADAASGKSRPNSPGNKPK  
TKKHKDRKSSKAKASLPSSTSPSLPQDSASAVVATIGIRATAIPSTSLDLLRQIDLAS  
ESKTSSSRSGRGGNRRKSFSGTSGSSKRNLFAKLRGFSNRRDRDEKMKSKSTQEKAQDSQC  
DTRSDQMAREPKNRSGNTANPKRLNEIVMDRMDAMVALLSWVDRESGDQPSINAVDTSGR

TALHYAAEHGRSDICMAILSNFGVMLTIVDEVGTRTPCEVAAANGHDALAAQLEARALLF  
VDPYGMDEMOTTLMAGQANQTDTSYVNRNRCGPVPPFRWFITCSKEEIAMERRS  
RLEKARGKLEKIILEGEGQASDDTNMILEDLDDKPSATEILTSDDVSRVPENLAPYVTTA  
TQHSKATTSGESPOEELKPPPSLNDGTETVGDDETETNVAEPKCYLELLADHHLERYMAY  
HEWNLPAALEAFRDKQSEALSAAGIDISLDIITKGAKAENAAARAADDIDTAGRHQCICY  
DDEIAEDKWMILRNCKHGFCKDCLVDYAKDAGNNRPLVHSVCKPQHGCDAGFSINDIRAL  
LEKDHPEILLRIEEASTDNFVTHPNFRFCTYPNC SGIVHRLKQPKWASSGYDESFLNYT  
GATCVACHSGENFAGSTSACNQLTYEGVADPDYANCLSRKQPLKAQRFCFSCGEGVHWPL  
TCERLEEWKQVRVDEIGSVDAEKGEESDVNDLAHKLWLNKANTRPCPACNVPIEKNDGCNH  
MVCHSCLHEFCWICRKDWKLHSNDTGGFFRCNIWKEDDPDRVEDRQDDEMDFGNENFLSN  
LLNDEGYGTSIHASRSAWRKKQEMKRFIHHYTRWEAHKASAILEQKMADTACTRLAPVVE  
AAIEFQGYPTFNFDGKGLSFVHNAFFELAECRSTLRHSYAFSFRYPSKSSDSQRFGYL  
NKRKEKLRFERLQSELETITEQMSDIVARSHLRATQMQITYLTAGASEKRVALNYLLFQI  
YREEKKALAQKENGDKQASSSSSKTTNYYPNSNSNDNSNGIQQYVGRYSSEVFNRL  
LLHIEGENYEPTLTPYVTAGNNRSTTTPYVTAGGSASAAAPSARDLSLQMLAASQHVHAMG  
DAVQRMEQLLNRSRNRGMALEDSDGAIDDANGYPAASEMWACSRCTYMNTGGFYCAMCES  
PR

>comp15674\_c0\_seq2; 1117 1 4913 LEN=5337; translated  
XKTRENKEAVNELIAQANASAIQLVDGDLRKLKMGFLSDPNYDDDMSERLLLGRPDF  
ERCDNNVVTAKYALTFLPMATREQFRFANVYFLCIAVIMCLGQYTG YFATAMSPWTTL  
GPLSIVISVSLTVEGLADIKRHRSDADINNGQCIIVRRCEDIGRDDGAERDNTIIGGKDV  
IVNLSKNYLLEGSSKRLLSREVEQPVTSNPSLVHVAFAQIKRKNIRQGHIIILIRNREAVP  
ADTII LASSGENGCAYIETSSIDGETNLKLRNSPKIPSAI LKDPRSNDLNNESQKDACDE  
DDTFQSL ELATKKITQLSALAYPNGIPTISHSDTHTERRDSKSFRRFERKGRSLRSSIDD  
NETENEPNQYIATLTSEPPNSHINTFSGKLTLPPEGGGEFVEIPLDAENILLRGAILRN  
TEWVLGFSCFTGNDTKLIRNSFQTPSKFSRIDV LNKYVVLIVLFMFMCI LYL SIMAVFT  
MDKSFDELWYVGYSHNSNPWPYLPNLPPPEWVNTSNMNLQNF LMF T TLLSNFVPLSMYVT  
LEMVNF FCLWL VYVDGEMYPQTD TAAAARSTNITDLGQVQYIFSDKTGTLTQNVMRFR  
CSVDGMI F GAPVQKVRPQDINVESSPKPGFHPRRQLVVG EISSKADGSGVLASKGMSFNA  
EMFVRVMSLCHTVVVEKDLDNSGNI EESKSVSSYGSTWMKKKFFQGRGRTATDMTSSSAN  
ALGTVSEEPASGAEIPLGFAEKGRSGSSLGSMAGHGRGGCYSSNSIEKGKDGAPAGFAYQA  
ESPDENALVSEASKTFGFQVTSRNSSGITLRCEHPTVLSDEKLVRGLRSGGISSKNLVS  
YATGTVQLKEQRTEERLKYTKASRSETWEILAVNKFDSEKRMSILLRAPPELGGVAI L F  
CKGADSAML DLTEPKAWFSGNSACDQRLHQLKSMVNESDENSELDTAQMLALQSHLGEFA  
SEGLRTLVLGVRFQLDPECNQWLEKYKIAASSLKNRDRMLKNAALEIEKDLHIVGATAVE  
DKLQGTVPDTIATLEKAGIKLWVL TGDKKETAIEIGYSTKVLTPRMHLTQVADKGVFVR  
AQCAMEFMRLVKAGKLPYQRAAVDQSSKNCSQQAFFSVRKMWR SF LQ SCKSLT LSFII  
FLRRTLGFSSKSQDNAMGNLKIEQKEEKERLKNVRRRNVRNRAEKIIE SYKQNLNVPLS  
HSSDAHNF DLSNDELPTVFNRAQSARSAL EMRDSQEGLTITNTRSIGISQLTAQEF AENT  
GQENVLDEDILSLQSVCLNANGSN SHFDKRRRTPLERLFAVDRDVRKGR LVKHRKRV TG  
SEPFITP SGEPRALII EGSALKHILGDHELEELLFN IASQCEAVIACRVSPKQKALLVK  
LVRYHVVPQPVT LAIGD GANDVGM IQEAHVIGIGISGKEGQAVNASDF AISQFRFLETLL  
LVHGRWDFMRQAI VVCF SFYKNAVMAGCLIVYTGSTLYSGQTLFDQWAVSTFNFLVFFPI  
FFLGI FDRCLEKDYIRKNPEVYQSTRQNEVLTFRTLFRWIFMTVSHIAI LYYGSIF YLAN  
GGGTSSYSGLMGYQKRVGDGEGSDLQTVGLVIFSSMI ILLGYKVLYESRTIINGKWP  
ACWKGVTEGFWSRIPYSW

>comp15675\_c0\_seq1; 1453 152 4462 LEN=5092; translated  
MENQPIIIKPPSLRRQPGSTGHGSSVKSISDKRTMPRNGQNYLRNSNIRNPNTLADDIS  
QNRSHDDFPQSRSMNDEDFYTS LRKTGQNNTRGATASSNLEQNLEEYTS LKETAQGARET  
KRCLVEWKRKIQSLEENLRDQDYAMQDVIAENKTLEKEVQMLIRSQAVK KIDKHTIQRN  
KLRRKEVQLGKALLVARKENDKLEELDSRNDKSEPYGGDSRRIT ALNLRRNDIQSERDL  
SSAERDK EGLEEVVSCDAKFQQMEERNQKLEEEIKTLHSELEISRRIVHTKRSLLRKEM  
SEETRQQMHEITERLTIELTEKIFKDLEDRMGKERERELTRLRKIDDDQKVRDVQHQP  
VLEKEIDRLREKIHAGQYHERTIAELEAHYEKKTETMIKNFSETRDKEELNFIKRVDELS  
TQNERMIARFEEKEEYGSQMREEVKEMQKEIQFLADQVTDLT KDSILLIEKA ADEKEL  
SEKSIREQLAKERDEMLAEAVKEKEAYAETIRDETIKEKDEEINKMKEELENIVSERDSL  
LEQVEKNKVNEKLSGERQDELEKCNLRLEELEATKDSLLKAVDELEGKLGSADEKYTMSV  
KELSASKSALESSKNEVIK LKNRDLNAKIDEYKQVCEEMSNEVRKIKGHFKYAVLIEY  
EEKILDLEDEIRTLQGVVEESKISNSENEDIISNQSLLEQYKAQQHAHDAEIKKNKIEL  
NSAISEVESKDSRLAELKSVILKKEAEGSKMLQVVKDLRKS LNAQENEMIIMQNEKERLK



QLDMSIRLYREKLTSVNRELALHKSRL EHCRCSGSSENRSRSGSFKKFEHDHYESVESPEHL  
RER IARLSTMLKMAEKNQHKEKINFEASKEQYSKDILACKNETEELRSEVSR LKNLLDQA  
QNDLRAVLEKGGPQMLADEMHR IQNDSIASSEVLTRKLATAKDDYNRTVKQMEERIQAL  
SAERDTVLLKLETAEKTA YDTTNTHMQQKSEYVNR IQELEDELKTCNEDKTKVAMELKKS  
KSLFKEAIISWRVEARDLKGELDQLKESKDHDVSKFKDSMPNDVGADARSELKGENFILP  
RHTQSLRDESEQRDDNSNSSQIEKDGDSRSLSLDDEHSPNIYPLFSVSEEGDSEMEMSH  
RSSSEIHDNIEESNSDFRDESEYKGD EERTPSRSFTKMLEISEHTTTSIEMRFDNLDKR  
FKSDNESSAHKSLKLFKDEF SRYLEGINSPDTIDRSTVKSVIGVSRKFPECKISRAPQPH  
DDGDRDEDQNMRDPSMSLSMRNSASDADNRDDSVGTRTSKSVRDISNVQSSDSSFLQQGK  
IDIESRDSTSSDREISDIRRLQLHQMMELREMSIQERKVAQIKSREVVTPHQQT EQEYNA  
KEIPNKLI PNTYQQQTTTTFPRSSEVHPGVVGASSSPFDEVPERRDTLPFDEYSFKE

>comp15676\_c0\_seq1; 1553 187 6686 LEN=6686; translated  
MKKSHASAGPTSSAGRSLLRVSGAADS FHRVNSWSTTGSVSTASNRSRSPMVP SASARPS  
VPPDNPSQVVMNSSSIDTNHSTNSISPI PSSGNAPNLQNIDRAEGFLPQISGRGFHMPPE  
VLGQAEDNANKTSQINSSETRGSE RHPKKTTLADLNKASRRRSL LAVKAVMSSAGTKAA  
KAAVKGVSSSTASNQLGETIWCSESI FTTILYGGMEVVF SYIVSHQAVVGVC SRTNFMFQ  
KLNLSKTPVVSITSNSSSGMLVITHKDGVIQSYIPIQTDPINVEGSQSQR RPKSVFGRF  
RWIDCMSIDAAGVFYSRNGEETINFC DRRQGRPGDIVDVSVS YDFKILVAHRQQ LAVFDA  
FPPSVKID DAGRYDEIHDSEKTDKVATLLWTTILPSAVVTAKLSGDGQAVVAIVNQPDEN  
GHYGAKTFLHDKNDGSSNAAGCGPSASTGMVFKPGPYLKHAKPVTRISFRGLGHVTPSAN  
PEAQQGNLLLLTYCKEDSATRIFNQNSWRQLMLWTAPPNSRADWIRGSSAFSLGDLESQK  
KANNRRGLGAGRSHANTISSDL PNGTSSISSGLHGTGAFRSAGSGSPTSDAGAWIAE VTF  
RGAYPALRLSRLSYMKRGNDDSQPAHFESIAAML PAGSI IARSVLDADDMGLAIQGVWPA  
WNPWLSEPSSNDTDDNLSGSAMKFLGLSSIHPPGTNQGTFGEYYAGGTHSPPTELRLVCS  
HPENGLVLMDFPLWGEDDFGAMELGSP IRSVLALSEVSVLQTKQQKIPPI LASMDYESS  
RLCAVTKSEGRSISLFWRKEGCI STYSTQWKEENEVFI RQSKDVIAPLSADLLHDL SLPV  
VPLALPPLKLPKGTPSVNKDRIVALKWWPDGSGFGPPLLVAVTSR TILVYEIPPPMFAL  
EPI MPNFSSNPYSSISSGTSLYDTTIAEGESDDEETKTERQEYEVLVTPHPDFGLGLRL  
ESPMDGLPAIAGSFKNPLNDGILPAEKTGM IQLGDELLSVNDVSL EHKTFDDI IATVRH  
VGAELGPGKPLKMKFRPVPFDRSRKTS AVVHESFSTRSIDRSYGSINETNGNSEDSGSLA  
ALLFSSSAEAQQEFGRVIGVLRKGLSSIDGDDFADR FIVLPWNTRTVVSPSRKLRSTALM  
IHAYESKI QVMRVELPSRAGLDKI QKVDLGVIDLLOTKNTTANDGKPIVIRSI TCAESTD  
EKLSFIVSDSLGNLRLIYLKFR EKILKRREGHGLNYHTNI IASVIQVQIYVIFVCMHRAQ  
VYLLQFRKVKVLDVLLKFGTRGQTHPLEISKGKAAIKDEHFNKDYESTIIVDPSESDSE  
LIDFCFLNTGYLEAFPTIIAFLTTEAVAYQRRGCNREWTPILRLSYPAILTSSLQSD FRT  
SFGILFD AVPMDAYPHILRLIRATLLS FDEENFLLSDWHPENLLTHMCTEENGAKFALGG  
DIKRILLWISDKTNRSLDDNLSSSVPLL VAPFACWGSEIVIGADDAGENKINKVGMSSRY  
PNNVRDKQRLKDLYEIEIEIHL SASSNSFKGNRCTTAPSFINDQPEEGTKSIPDFLT MNE  
SELLVLQAILKIVMDPPNYGILD IQGQLALT VYSIHREIKKEEKNGKEDKGKNSTSGFLT  
TGIYVKRQLSSVPSAPKLQ PQSASAGCLAALLSDYQEAIVDTIRQPGQKLSWSEVRNLRV  
PFWFRCD EKLRLSEEIGQQMYRQSKDILKSAIFFIIAGKKRTLNLAAADPTLSGKKFH  
KFLTSYDFSSRRGRVAAEKNAFSLLRKNQYDSASAFFLLAEPPI LKSAVETIAAKMEDLD  
LAF LVARLSGNPSSSSTIGRFGGVFGGGGFAGSGPPKSEATKD KESFKEWKRTLGG  
VAKSLIVDRILPSVHDDTCLSAVQLLWLGHFDEASNWLTGLINSNDK KVPDFVEDIFVPQ  
LRGLTAAARKSRDSTVLT VNSFINLASGPFLKVMKANGRTRLASTFALSRLSVNAGIEI  
PALRSLMKDMKEVHFQEEQESPLTVATPKISNEKHASSAQAPEAMSSSIFDSFGASPLPK  
PAVSTPASGAMASSIFDSFDTHLPPKSAVSAPASGAMSSSIFDSFDARPPP KPAVSAPAS  
GTMTSSIFDSFDARPPP KPEVAAPVSGPMTSSIFDSFDAR PPLKPAVSAPAS ETMASSIF  
DSFDAR P

>comp15677\_c0\_seq1; 1243 373 5643 LEN=6054; translated  
MELSHPETCGQLDPGKSSERNVQLAQNETSVST EKHDSGAPPLEIVDVERNSTPNKNDTG  
NTSIQIPRRHSARKRLSIEYRKL AQESLLKPKYALSTQEINDASSVMIDDDKSRSSQLRA  
HSFNMEDDVLRFCLNPKFTLRKQMMNSFGSL SVCTIIVVVAICVAMAQWIDVHTKSLLK  
YDYIEKLADTIYDKQKYLADVFGEFFLFD TAKLVHDVVQDRFDGYPNLSDDGVPFLDMK  
SKTNIYPIAADPMPFLWNLQPNVNEDNHGEFLQRRWEYFKDKSVDTTKAGFYIPLSCNPY  
APIVNGSVTVTNCTESDFDVQRGGGTINNKTEMYLRKGS DLVPI LRGLFEIREEILEIYI  
HFPNDGTGAGVLYPQYFPVFGNYTSEGCDWLLQANPYNASKTIGTESMV ENCRKKGAI VP  
YHSYNALERGWCEQALNPGKMFIDYRSGRLRPDNDEVIQIGT SIYDRTSKEFLACMYIG  
IDVNQIQRLLELSETQYEDIA LLIEYGQKGNIVASSFENFTLGATKTSIYDEPGFEMTEE  
KYTELNIYVDFDSVWDPDEVSKAYK KFSMTEGTGKKYIMSIAPLPSIPSEYDKSYRPKFF

FVAYFYKEKFQDEVVNIREVIDQNI INGILCAIVMGACGIVIAV I I I FFMAYILTTPLTN  
MNDMASDIVDSVGDPKKEDIKNSKSNELVISRCTPKTELADVCEFNKMFESFSGASEA  
KSEKERDEDEMLNIFPARNDLFLYKSRSDKTFKYNITGERVRSRSDNFHISYMLGGNYN  
ESPPVEEKLDTNEETEVLRAESRKSSRLFLWILLLIVAPIILIPAIASVGVITTIRISYE  
GIDDAILDLTIDVAKKQTEAVTRLRSEYVSKLTERSTRDLSLLSRYSSWLLFGGLKQSNS  
FTQVDSVVEDCKEFGGNFSQCKSDGKIDFVCDCKWQERGYEKMCTNYTESIRGRQMNYWS  
AQLSKNENGDLFTSNFPDSSISPQTTNWWDNAMELPGYQNESSTSGYSTSYKRLKVL SAV  
PIFQVLKNYRSGKSPQATLHTSVSFEADGMMIGNSGCGSAIGNAAYSNWTSTTENNGADL  
RPKLCVPGKYGYDPRCREWYNAGRNOALLNQSNVLHITTPYYFGINNENQIYGQSATYAI  
LDPRNGEHVGTLDIFANDFVSTMLSNQTVTLGKGQPILITVNDYEGDTILGPGEPGLLA  
SKPIAESVMPFDVQCIDKQCEERLSVFNDIVNKMKS GEEGSRDFFRKTENGDNERMILH  
YAPVNI PFVYPVNSSDYATGVEKKNFQLYSLGFLVREDDL RHETDDVAKKLDKHINVGTA  
IITIVIIIAAATSIYMSHRLAISFSATMRHLLGLLCYINTHDDKESPLPPQGIRPTFETV  
VLSRTLVTLHRIIKLANTAFFAGDLGSAYRVLIDALRLFRRLDNTKAVGVASNNLGNLTL  
SIYREMKMLQVNELYNLTVNDVISQGIAYFHTAITLGEKTYDNFYDLQGWTPSCLNFMQH  
LANRYFNRMGFLLLTKDDHHDPEIERLGMRLDQIADDMDQEVVAYGEDIGWGASERIAS  
RFNVNITRIQGYNVLCQEGYHHEEHDWGI EELIQDTISILRVEYKKINSNLFSDMTRFGR  
LQMLEVQLIQYRLLQEDFETAAKIAVRMIEDEYVFNAMKQAVKAFMKYTESHLVDADF  
REKMPVVFKEYLEDVGRIGAENRRELILGYSETNPLISTHDLTMSSHRWNFPNSPTSVGQ  
SDVQDELDFVTMEDF

>comp15678\_c0\_seq1; 1136 129 3457 LEN=3457; translated  
MTFAEEDTEDEETWIALDVEDNGPNEKFRNEETPAPDVAHFVRSEGNEQNRGSGNAKANA  
KPNSLPKQVPVQERQTRRRSHAGDNGGGSTSSARLRNVQRKLEDRISIQTHLVNHPIDYF  
WQRCLINSLRQVWQLEFRIRLGILLLLAAGLLTRVFLWSTWYLMYPRFAILSFLLVASILY  
LDPFDLQDQIKDARDFLAALTAPSSSISQQQQQLMVNGIDTDQIRRLSLVFLFLPTFLEV  
RTL SFLSSINAELTMNAANASADGWTFWSWASSYLFDIGVTLCIFTVMMFLKVRMKCC  
DVSHRGLLILYGFLLITISSYDNGKNDLRRIPVLAAPFFTASATLLL MYQDDRM EWLSR  
IVRQTFRLSLRDVLSVSEVTEDEMLQLAILRWICDFWASTQASASKPDTIDDSNSSST  
IPTSTALLQLQSSSELSRVSCTSATPPSVESENTARPFEPNVIQWHEELQPMNLNIEIDHMET  
EIVALQPGNNHSCGNSDKPCDDGHHESERRGSDGLVQLDQMDGRLSPNPALQHHKQQT  
SESMDSLMALKSMLVSFDVDDRAQPAVLAYKRAVESFPKPKKTAVTVSVIRRCPALLTLI  
LHIF SANDFNLF FISTLILSPFIAIEYRIIGWMDACERYSPIIDTERDENEAEENDWRIP  
VFLRNLDTMTILFSDDVHNAFRPPSLLL VWHNIVGVSVALEMGLSTARCAETTAVAI EFA  
GSAMSLVKFGFEVSQNGIFHGAVVLLKEALS IHASGRDIRNPGFSDDGEAEYTSAAIRAV  
HSGQKVVRNIHALSEDRNVMAAQPVLHFFGALVGHKWLWGKDEEENENADAKSKVILGD  
PGIKDDNIRSDNEAELRDHKT KASETNEGNDKATDKFTNDEESMSGASNNSISVSELLS  
PEEELTEVMEMVALAYEYELIEEREKDEFFQKLVDFREDELYDRSILSAMKRTLHIVLEN  
GEKDPTRDSVAPSSDFESHLLQIHGTGETENRNDEIVNEPKSE PENSEFPLTNESDASQ  
KKETDQ NATQDSIAPLGGVDRSIVDNHDS ETFENESDGTVNEPRVIKTKYSGVPLHNKFD  
ASQTEDTDQNP THDSSAVDRPVLNDHDTGX

>comp15678\_c0\_seq3; 489 280 2097 LEN=2705; minus strand; translated  
MVFFNFVTELFLXIGTSLANSIDSYDGDNVDSFDSFQNNWSALS DWVMDSSDFEEIEEI  
DNANVGKGTKV TSEEDIWIQDAVDEIYNLFP TLD DSGYEHGTDDKIQASMESEMDEEIA  
MLVRCNEDPESLLIAGGRAYAPLTNDEKNEVSQLVFLKDGFEATKFLRDAVSTMFREHA  
VPSTLDGILSMDRASIASWMTKSLKSEGEKVSQHDHRVLKTLSDFGSYGSGR LV EEEFQ  
NLYLRCIVGDASNLS TVSVKRHLQLRTPFRDAVWRDIRGXVARMKNIVVELHFI SFPFIL  
RENVISCVAHGMSQAEQERLHLV EEQERTSKLTVHGNGDRKTTDEM FVDECEILDWD  
YNAPELKRKSKSSTK GSSSHELVE MASDQKTPLRMRDGEFGRFLCVANISRVVLI SLTPT  
IWQLTDSFN NICSRNMNLVFI DEESCIGCTHCALIAPTSFKMVE SGRARTYFQRNSGDVN  
QAIDSCP VSCMHVSYDELKTFETARDKGMRLDSKNFRQGF TPIPLHVAGMDSDRNRQT  
SWYHSLKFKCFMSPNCPQKGCYDCPLYNKPGGNPFFIAKHKEAEHIRAQHFIESGEADDF  
RKKVDL

>comp15679\_c0\_seq2; 1955 152 6949 LEN=7011; translated  
MADQANLKGYSYQEMSSKVERADRSL LFSRSHEPTGEVESLRGR TDVGRMGDR LAAGQK  
HARPELLQSKKKAKKKPTQQGDR TTRRTVESIAAGGQSILDMNL TGYQPTTQAARAA  
YETILTTVSSKALLGNQASSILRDAAEVILILKDGGLRDPERHDQISRLLTGKGAGASG  
AMSSEKYAEFVRLGKGLDDYDELTKQGGDGGDGSRGDNGKDRVDDMGVAVVFDSDSE  
ENDDMNRPEGASDIEEGVVVDASSDSESEDEDEDNDGSGNANESEDQRGRRTKRGDGSESD  
GDGDDEEKLIQGGDSGSKKRRGQERILSVHEIDAHF LQRQLSRHIDDAEASARLAKEVL  
DALNINNKTDVRECENKLLMLLQFDMFDTIKLLLRNRVKVWACVAMKSAKTEDERTSIEK

ALMEESTGEGKAVWNEMHHSKRAEDWSKERMRGLTDSFKGGEQPADTNDVSKALDSIKRE  
DTKSSDKMDIDSDSKVKKEEAVELDLQDLVFREGAHTMSNKQCDLPDSSWRAMKKGYEEV  
HVPVAVKAVIPKDEKLITISELPKWITHSAFPGMEKLNRIQSKMYDVALRSENILLCAPTG  
AGKTNVACLTMNLILGQFKKQKASDDDDDEKESFDLSSFKIVYVAPMKALVQEVVTFNSQ  
RLAGYGVVVKELSGDSSLTRQQIAETQVLVTTPEKWDIVTRQGEGRAYTQLIKLVIIDEI  
HLLHDDRGPVLESIVSRVVRQVETTAEPIRLVGLSATLPNYADVATFLRVKPEKGLFFFD  
HSYRPVPLQMQYIGITERNAFKRFQLQNEICYEKAMVQRENGNQILIFVHSRADTAKTAK  
ALRDIAMERDELSHFVRDNSGTSEILREEAEEAKNADLKDVLRYGFIAIHHAGMHKDDREA  
VEALFASRHIGVLCCTATLAWGVNLPAAHAVIIKGTQVYNPEKGRWAELSPLDVLQMLGRA  
GRPQYDTEGEGIIILTQHSELQYYLSLTNLQLPVESQLIKTSLDHLNAEVVLGTIQNLEEA  
AEWLSYTFLYIRMLRNPKLYGIVNGVAEIKDDPTLKQRRDLAHTAATILEKNQLVRYDR  
RSGAIQATPLGRVASQFYISHASMAVYSRHRMNPMTDIELLRLFSLSGEFSHVTVRSEEK  
MELVKLAGRPVPIPVKESPSEPSAKINILLQAYISRLKLDGFALVADMAFIQQSAARIMRC  
LFEIALRRKWASLAKLALAFSNMVSHRIWRSQTPLRQFRNVPEVVARKIERKSDIEWRY  
SDLTSSDLGELVGVPKMGRILHKLHVHQPVKVDISAAQIQPITRSLLRIDLTLTPGFNFV  
NIHGFVQLFHILVEDVNNENILHHEYFSLKSSASEDDHTLVFVSPILEPLSPAYFVRVLS  
DSWLHSESVLPISFDMILPAKFPAPTELLDLQPLLP SAIGEPALSKFFQYDEFNPIQTQ  
TFHELKFTDRNCFVCSGSGKTACAFAIMRLLTTTSDGKCVYVAPTDDIADPIYRNWK  
KRFGALIGSSMVRLTGEVIPDLKLLNSGRIVVSTVNVWDALTRRWRQRKAIAKAVSLVIF  
DELHFLGGNIGPTLEVVISRMRYISSQRKEDAEAMRIIGLAASLSNAQDVGEWIGVPRKS  
LFNFSPKVRPSPLEIYFQSFQNNFSARLMAMAKPVYNSIVKHRDGKSVIVYVSSRRQAQ  
LTAIDLMTYNESRNGTFFFDPAHQELKAIASTIKEPTLQQVLEAGIGFVHGMPNSDWA  
STVNLFNNGKIKVLVCPAELCWQVSSIAHLVVMGTETYDGRERRHIDYKIADMLHMMGR  
HATGSIGKCVIMCHQPKKDTLKKLLYEPLPIESHLDLSYLHDHIISECVTKTIETMQDAVD  
YLTWTFLYRRLPKNPTYGLQGISNVHISEFLSEMIETVMGDLEESKCIKINDDGEISPL  
NLGMIAAYYYIQYKTIDIASSVTPKTKIRGVLEILSAAWEFADLPLRFREEKTIKMLAR  
TQPHDLDPVYDAHTKTLVLLQCHF SRKVPADLRIDQKKILTEAPKLVQAIVDVISSNG  
WLKPALAAMELSQMIIOGLWSKDNVVKQIPYFTDDIIERCMKYQGEEPIESVFDILTLED  
DIRNDLLRPPDKMADVAVF CNNYPNIEVSFEVQDEDDVTTGDPVQIVVQLERDIEEEM  
TEEELAE LGKVSAPLYPHEKKEGWVVVVDI SSNTLHALKRINLVRKQKVVLEFLAPEEA  
GDYNLTLFCMSDSYLGCDQEYTVNISVAQGDDSDDDSDDDSSENE

>comp15680\_c1\_seq1; 2528 1 5655 LEN=5766; translated  
XSSTSLSLSVLLLSTFVAEILGSGLQSGPSSGPFYAGGMYLDKEDQKLYMTGIHYSDEIV  
ASTASKLFAGNDPATTMPSCFLASMRLEENPESSGYILTESATGPPGVTSKNRYDAESCT  
ALAVHQPSQIVVLGTEKEDPSLNTPLAGNIAVYDRNQVNGDQLTEATLISQDDKMNQLIY  
PVAIAPDSRFSDYMYVVVLASSDAFDNTASYTSATEPYPDWLKHQKYGSSFDMHVSQIQI  
SQGTGRNSGFDGIPTGSITASKAWTTEFPLDPSSQMSPPRVFVGGILHKTTADNKDLVIV  
VGSTRGTGTGYGEAEGSDEDGFVTVLDPETGEMLGSGAREGSPKDDIVTGVCDDPNDPGH  
FFIVGGTLGRMGRLQNDKVRLEPTEMLSPFLRQVQVDRSNFNDDSNLWTLQWAVTKGSA  
NRAAYGSAIACAVDGDYIYVAGTVDDGAAVVQGDSPRTSQGGDDVWIAKVYKGTQGVWEI  
TQLGSEGNDRLARYGGLTIDKAGNPILYGDNTNGSLYRQRGNDEESGMGDMFVMAIDGSTG  
EVI TNEDLVSQKPYFGSSSQVLSMDDDIVQDDIVQDDLVQDDIVQDDQFSENEMTDDG  
GVDDGVMDDDDDDADDDFFDDDTFDKDTPDDSTSTPTPTMEPTYTDWPTNDENRGINKE  
PTGVPTYFTDFPTNDENRGINLVGDDEWNYDGDENPHFYRPIGLQIAGPSYAGGIAYDS  
QRNAVLLSGSTYMDAEMEMNENSLCLTGVDLELETGNLDVVRTPRGDPDSEEACNAVAFDTN  
RNAVYALGLAESGNGGEFVGGSSWDMGLSGDKAYGNIFQMNHDVQLLGGNHVVGYPVLH  
PVSIVADPLDKKAVFVASMASEEANGNDYTNAYFPNFLSREKQKYGSNFFLV IHRFMVT  
EVPGQSENDVPTLSQTWEAVFAPDNNGLLVGGMTMVGNGHVLVVVGSTRGSGGPFERV  
GEGRTDMDGFI MKIDPTTGDLAERSSSGSKSSTRLDSINKKDDWILNVCNDRFNHDAFYVV  
GKSTGKIRDVTDGEQPPEGSSHAFVAKVEVKSLGALWLKHFVMKGDGVMEAGAYACTVTP  
DSNGENIVYVGGTIKNGATLQGLSESAAPFGKDDMFVAAMNGSTGETKWIQQVGTPEDDR  
LATTQALDVSDFGNVVYGETYGFYDAHEGPEGSADLVI FTMNKKDGSFLAPRSEKGV  
GGDTAEIEAENVNPIPEESSQPSGIVATQTNLDSIPSYAGGMYDKFSNAVYLTGGTYTS  
DGKNLSKTSHCIFAIATLPQFQWKQNI SPGTERAPEACSSLTLANYQGKSEAI VVGSSEP  
SGLMTELRNSRSGKQYGMVMDNFVNQDGNVGLVGGTTIDEENVQYPVKVLSDNDKVFVSM  
ASKIQEVRPEADRADGRKYPNFTTGGITKYGSHYEILLERHTINHDEDMPGSMQTTMDM  
NWRKPLETADQKSI FLSGMTI INSGQNLVVVGSTQSDDEGFDGIMAKVSTQTGDLVEEGE  
NGERGVAYFASMNGSDDWLLNICTDPDDDRYFYVTGATGGTMDGVSRRDDADLTVHAVVA  
KINGSTLNI EWTTQFAVTHADGGTNRQAASVATGCAVAAGWGHIVVGDVENGAVLEGAI  
ESSGGDDIFVAMLETGNGNKIWSEQAGSSGDDRVARGGGIAVDENGNVAVVYGDTTGSFHR

KRGRSSSHTSDLFLMTFNHDNGAHQASLSKQSTDKTNNYNNNSVKTGKAPAEWFGEQVQMN  
SKTLGIVIGFAVLATLLTFCGCFRRRSRKRAYNVKKNISIFTYLQRFNVEDVDLRKSPAG  
GWHGTYLNKLAGSVNTNAALIHAPFRDEELDDEDKSLFDSAKSIGRNAKKGSLFHSSSAA  
GFGGYRDKKDSLKSSEIKADKFSIV

>comp15680\_c1\_seq2; 2512 1 5640 LEN=5751; translated  
XSSTLSLSVLLLSTFVAEILGSGLQSGPSSGPFYAGGMYLDKEDQKLYMTGIHYSDEIV  
ASTASKLFAGNDPATMPSCFLASMRLEENPESSGYILTESATGPPGVTSKNRYDAESCT  
ALAVHQPSQIVVLGTKEDPSLNTPLAGNIAVYDRNQVNGDQLTEATLISQDDKMNQLIY  
PVAIAPDSRFSDYMYVVVLASSDAFDNTASYTSATEPYPDWLKHQKYGSSSFDMHVSKIQI  
SQGTGRNSGFDGIPTGSITASKAWTTEFPLDPSSQMSPPRVFVGGILHKTTADNKDLVIV  
VGSTRGTGTGYGEAEGSDEDGFVTVLDPETGEMLGSGAREGSPKDDIVTGVCDPNDPGH  
FFIVGGTLGRMGRLQNDDEDKVRLEPTEMLSPFLRQVQVDRSNFNDDSNLWTLQWAVTKGSA  
NRAAYGSAIACAVIDGYIYVAGTVDDGAAVVQGDSPRTSQGGDDVWIAKVYKGTQGVWEI  
TQLGSEGNDRARYGGLTIDKAGNPILYGDTNGSLYRQRGNDEESGMGDMFVMAIDGSTG  
EVITNEDLVSQKPYFGSSSQVLSMDDDIVQDDLQDDIVQDDQFSENETDDGGVDDG  
VMDDDDDDADDDDFDDDTFDKDTPDDSTDSTPTPTMEPTYTDWPTNDENRGINKEPTGVP  
TYFTDFPTNDENRGINLVGDDEWNYDGDENPHFYRPIGLQIAGPSYAGGIAYDSQRNAV  
LLSGSTYMDAEMEMNENSLCLTGVVDLETGNLVDVTRPRGDPDSEEACNAVAFDNTRNAVY  
ALGLAESGNGGEFVGGSSWDMGLSGDKAYGNIFQMNHDVQLLGGNHVVGYVPLHPVSI  
ADPLDKKAVFVASMASEEANGNDDYTNAFYFPNFLSREKQKYGSNFFLVIHRFMVTEVPGQ  
SENDDVPNTLSQTWEAVFAPDNNGLLVGGMTMVGNGHVLVVVGSTRGSGGPFERVGEGR  
DMDGFIMKIDPTTGDLAERSSGSKSSTRLDSINKKDDWILNVCNDRFNHDAFYVVGKSTG  
KIRDVTGDGEQPPEGSSHAFFVAKVEVKS LGALWLKHFVMKGDGVMEAGAYACTVTPDSNGE  
NIVYVGGTIKNGATLQGLSESAAPFGKDDMFVAAMNGSTGETKWIQQVGTPEDDRLATTQ  
ALDVDSFGNVVYGETYGFYDAHEGPEGSADLVIFTMNKKGDSFLAPRSEGKGVGGDTA  
EEIAENVDNIPEESSQPSGIVATQTNLDSIPSYAGGMYDKFSNAVYLTGGTYTSDGKNL  
SKTSHCIFAIATLPQFQWKQNI SPGTERAPEACSSLTLANYQKSEAIVVGSSEPSGLMT  
ELRSNRSGKQYGMVDFVNQDGNVGLVGGTTIDEENVQYPVKVLSNDKVFVVSMAKIQ  
EVRPEADRADGRKYPNFTTGGITKYGSHYEILLERHTINHDEDMAPGSMQTTMDMNWRK  
LETADQKSIFLSGMTI INSGQNLVVVGSTQSDDEGFDGIMAKVSTQTGDLVEEGENGERG  
VAYFASMNGSDDWLLNICTPDDDDRYFYVTGATGGTMDGSVSRDDADLTVHAVVAKINGS  
TLNIEWTTQFAVTHADGGTNRQAASVATGCAVAAGWGHYVVGDVENGAVLEGAIESSGG  
DDIFVAMLETGNGNKIWSEQAGSSGDDRVARGGGIAVDENGNNAVYGDTTGSFHRKRGRS  
SSHTSDLFLMTFNHDNGAHQASLSKQSTDKTNNYNNNSVKTGKAPAEWFGEQVQMN  
SKTLGIVIGFAVLATLLTFCGCFRRRSRKRAYNVKKNISIFTYLQRFNVEDVDLRKSPAGG  
WHGTYLNKLAGSVNTNAALIHAPFRDEELDDEDKSLFDSAKSIGRNAKKGSLFHSSSAA  
GFGGYRDKKDSLKSSEIKADKFSIV

>comp15680\_c1\_seq3; 1303 1 3639 LEN=3750; translated  
NDENRGINLLDDDEWNYDGDENPHFYRPIGLQIAGPSYAGGIAYDSQRNAVLLSGSTYM  
DAEMEMNENSLCLTGVVDLETGNLVDVTRPRGDPDSEEACNAVAFDNTRNAVYALGLAESG  
NGGEFVGGSSWDMGLSGDKAYGNIFQMNHDVQLLGGNHVVGYVPLHPVSI VADPLDKKA  
VAVASMASEEANGNDDYTNAFYFPNFLSREKQKYGSNFFLVIHRFMVTEVPGQSENDDVP  
NTLSQTWEAVFAPDNNGLLVGGMTMVGNGHVLVVVGSTRGSGGPFERVGEGRDMDGFIMK  
IDPTTGDLAERSSGSKSSTRLDSINKKDDWILNVCNDRFNHDAFYVVGKSTGKIRDVTG  
EQPPEGSSHAFFVAKVEVKS LGALWLKHFVMKGDGVMEAGAYACTVTPDSNGENIYVGGT  
IKNGATLQGLSESAAPFGKDDMFVAAMNGSTGETKWIQQVGTPEDDRLATTQALDVDSFG  
NVVYGETYGFYDAHEGPEGSADLVIFTMNKKGDSFLAPRSEGKGVGGDTAEEIAENVD  
NIPEESSQPSGIVATQTNLDSIPSYAGGMYDKFSNAVYLTGGTYTSDGKNLSKTSHCIF  
AIATLPQFQWKQNI SPGTERAPEACSSLTLANYQKSEAIVVGSSEPSGLMTELRSNRSG  
KQYGMVDFVNQDGNVGLVGGTTIDEENVQYPVKVLSNDKVFVVSMAKIQEVRPEADR  
ADGRKYPNFTTGGITKYGSHYEILLERHTINHDEDMAPGSMQTTMDMNWRKLETADQKS  
IFLSGMTI INSGQNLVVVGSTQSDDEGFDGIMAKVSTQTGDLVEEGENGERGVAYFASMN  
GSDDWLLNICTPDDDDRYFYVTGATGGTMDGSVSRDDADLTVHAVVAKINGSTLNIEWTT  
QFAVTHADGGTNRQAASVATGCAVAAGWGHYVVGDVENGAVLEGAIESSGGDDIFVAM  
LETGNGNKIWSEQAGSSGDDRVARGGGIAVDENGNNAVYGDTTGSFHRKRGRSSSHTSDL  
FLMTFNHDNGAHQASLSKQSTDKTNNYNNNSVKTGKAPAEWFGEQVQMN  
SKTLGIVIGFAVLATLLTFCGCFRRRSRKRAYNVKKNISIFTYLQRFNVEDVDLRKSPAGG  
WHGTYLNKLAGSVNTNAALIHAPFRDEELDDEDKSLFDSAKSIGRNAKKGSLFHSSSAA  
GFGGYRDKKDSLKSSEIKADKFSIV

>comp15680\_c1\_seq4; 941 1 2016 LEN=2016; translated

XSSTLSLSVLLLSTFVAEILGSGLQSGPSSGPFYAGGMYLDKEDQKLYMTGIHYSDEIV  
ASTASKLFAGNDPATTMPSCFLASMRLEENPESSGYILTESATGPPGVTSKNRYDAESCT  
ALAVHQPSQIVVLGTEKEDPSLNTPLAGNIAVYDRNQVNGDQLTEATLISQDDKMNQLIY  
PVAIAPDSRFSDYMYVVVVLASSDAFDNTASYTSATEPYPDWLKHQKYGSSFDMHVSKIQI  
SQGTGRNSGFDGIPTGSITASKAWTTEFPLDPSSQMSPPRVFVGGILHKTTADNKDLVIV  
VGSTRGTGTGYGEAEGSDEDGFVTVLDPETGEMLGSGAREGSPKDDIVTGVCDPNDPGH  
FFIVGGTLGRMGRLQNDKVRLEPTEMLSPFLRQVQVDRSNFNDDSNLWTLQWAVTKGSA  
NRAAYGSAIACAVDGDYIYVAGTVDDGAAVVQGDSPRTSQGGDDVWIAKVYKGTQGVWEI  
TQLGSEGNDRRLARYGGLTIDKAGNPILYGDNTNGSLYRQRGNDEESGMGDMFVMAIDGSTG  
EVI TNEDLVSQKPYFGSSSQVLSMDDDIVQDDIVQDDIVQDDQFSENEMTDDG  
GVDDGVMDDDDADDDFFDDDTFDKDTPDDSTDSTPTPTMEPTYTWDWPTNDENRGINKE  
PTGVPTYLTNWPT

>comp15680\_c1\_seq5; 925 1 2001 LEN=2001; translated  
XSSTLSLSVLLLSTFVAEILGSGLQSGPSSGPFYAGGMYLDKEDQKLYMTGIHYSDEIV  
ASTASKLFAGNDPATTMPSCFLASMRLEENPESSGYILTESATGPPGVTSKNRYDAESCT  
ALAVHQPSQIVVLGTEKEDPSLNTPLAGNIAVYDRNQVNGDQLTEATLISQDDKMNQLIY  
PVAIAPDSRFSDYMYVVVVLASSDAFDNTASYTSATEPYPDWLKHQKYGSSFDMHVSKIQI  
SQGTGRNSGFDGIPTGSITASKAWTTEFPLDPSSQMSPPRVFVGGILHKTTADNKDLVIV  
VGSTRGTGTGYGEAEGSDEDGFVTVLDPETGEMLGSGAREGSPKDDIVTGVCDPNDPGH  
FFIVGGTLGRMGRLQNDKVRLEPTEMLSPFLRQVQVDRSNFNDDSNLWTLQWAVTKGSA  
NRAAYGSAIACAVDGDYIYVAGTVDDGAAVVQGDSPRTSQGGDDVWIAKVYKGTQGVWEI  
TQLGSEGNDRRLARYGGLTIDKAGNPILYGDNTNGSLYRQRGNDEESGMGDMFVMAIDGSTG  
EVI TNEDLVSQKPYFGSSSQVLSMDDDIVQDDIVQDDIVQDDQFSENEMTDDGGVDDG  
VMDDDDADDDFFDDDTFDKDTPDDSTDSTPTPTMEPTYTWDWPTNDENRGINKEPTGVP  
TYLTNWPT

>comp15681\_c0\_seq1; 1060 89 3451 LEN=3754; translated  
MGMTGKASSAPSEASASAADDANKDANETDMDRYNPYAGIDPNDPNAVSIKKEEFRAMM  
QKKKTMGIPPLRILQEKSKQRNAAPNKDGVFQNESVVPADLKP I EKHEE I PEEPEGEET  
SENIPPPPHLRRFLRMQKAGVPNEAILQLARVQGVTSDEQNTRLLGQLLGVSVDDEND  
SGGSRVDRQEASNSPRGAVPPFRFRFLKMKKQGIPEEAILQKARIQGFDCTELKGLWSS  
SHSNSDDPISRDFTVRNAASDGEIDQNLQRQKKAEPFHLKKSQPKKTKYIKMRMKG I  
EIPYILEFASNDGVTETE IPELEAILAEVGPVKRTRTI IATHKACDTSTGSIKSSPASR  
CHFTPIKNTNDSGAETENAHEK IAFHYAGTSVLASLVRKVMHTVDKTSR SR SRRESNRKH  
RSETKVDIGDDDMVINSKTLYQALGSFQGVQYARDAYNETMVTTPGTHQESMKNIGWLR  
AKRQSFQEI AKSIGLNLRLSQASSIDGLDALIDYIEDLYKEDIQESISLLQNSKLYDFDS  
LSALYVPGSRVVAKS IASGGIDMICRVSWNR I KSGITITGKESKQFEVCFEFVAVGSNQ  
ATIAEVVEGIDQFEGRNIFSRGPDGLTFIPWMAYNQEEQKSLLERYRRRGR IYNEVALN  
CPRTSNHSSIPSSSRSTFSYKAYRKGCFVVKRNGFGGTS SPSVTARGMATGGRIVVDTQ  
GAYDYGNLSNIGYDPMITGIQYKMEYKHLQSRFASGAGGSKVDGNKFI VDAAGNSYST  
SSPVS IQATSGTGDGDSGGMVLFDVIPDDYLEMVWPCVLFSLTAKAWGDCLVDGLEDIQ  
FSDDIFDRLVLPDNRKRIKALVKNSSHVSSAGGGIRQSKYNFQDLVAGKGEVSVFLLYG  
PPGVGKTLTAEAVAEILKRPLYALSMGTLGTTADDLEQRIGEILKLAAKWDAI ILLDEAD  
SFLEKRSSASSLERNAMVCVMLQLVEYFSGILFLTSNRMDSLDPAFQTRITLSLPHYNLS  
RDGRQQIWKNNLLQKSGVQNVQDGEVEVFGDSINTKKLAKYPLNGREIKNALRLALALAAE  
EDCVLTNKLLETSAMVKSVTDDSGDTYPFLSRAIAFLFGW

>comp15681\_c0\_seq2; 452 165 1064 LEN=1675; translated  
MMKHLNLVLTTLFLADFGNSYLVSGEDVDFVMENEHIEHHAHVHNDEEKEVNNGREP ID  
DEEEPLEDDFSNTTIPDGFDTNEEEEEADIMQTDPPVKTDPPAETEPPTQRPKLGKWE  
VVAVGAEGSSSEDKLPFGITYDVDPLVGEVYFEAHEDRFNDVAEGRDQLLYVDLFAVPS  
GGSCGDGTLTGDASTTIITSIEPYDEYSEVHPPSEGNNMQSFPVSRNGRVKGAIYKIEP  
NAFDLSGPQKIFFGDEMKYCKSSIVSLCNIYLPPELLRSYEQHSRHQLYCSPPYFSPSIS

>comp15681\_c0\_seq3; 195 1 469 LEN=469; translated  
XFQEI AKSIGLNLRLSQASSIDGLDALIDYIEDLYKEDIQESISLLQNSKLYDFDSLAL  
YVPGSRVVAKS IASGGIDMICRVSWNR I KSGITITGKESKQFEVCFEFVAVGSNQATIA  
EVVEGIDQFEGRNIFSRGPDGLTFIPWMAFPLFLPX

>comp15681\_c0\_seq4; 486 165 1088 LEN=1528; translated  
MMKHLNLVLTTLFLADFGNSYLVSGEDVDFVMENEHIEHHAHVHNDEEKEVNNGREP ID  
DEEEPLEDDFSNTTIPDGFDTNEEEEEADIMQTDPPVKTDPPAETEPPTQRPKLGKWE  
VVAVGAEGSSSEDKLPFGITYDVDPLVGEVYFEAHEDRFNDVAEGRDQLLYVDLFAVPS  
GGSCGDGTLTGDASTTIITSIEPYDEYSEVHPPSEGNNMQSFPVSRNGRVKGAIYKIEP

NAFDLSGPQKIFFGDEMKYCVRVSSKLDGTNGEMEYIGLADTNMRVHVKFIGTFVATVAE  
SSTHVVS

>comp15681\_c0\_seq5; 1032 89 3554 LEN=3857; translated  
MGMTGKASSAPSEASASAADDSANKDANETDMDRYNPYAGIDPNDPNAVSI SKEEFRRAM  
QKKKTMGIPPLRILQEKSKQRNAAPNKDGVFQNESVVPDLKPIEKHEEIPPEPEGEET  
SENIPPPPHLRRFLRMQKAGVPNEAILQLARVQGVTSDEQNTRLLGQLLGVSVDDEND  
SGGSRVDRQEASNSPRGAVPPRFRKFLKMKKQGIPEEAILQKARIQGFDCTELKGWLSS  
SHSNSDDPISRDFTVRNAASDGEIDQNLQRQKKAEPFHLKKDSSGQPKTKYIKMRMGI  
EIPYILEFASNDGVTETEIPELEAILAEVGPVKRTRTIIATHKACDTSTGSIKSSPASR  
CHFTPIKNTNDSGAETENAHEKIAFHYAGTSLASLVRKVMHTVDKTSRSTRRESNRKH  
RSETKVDIGDDDMVINSKTLYQALGSFQGVQYARDAYNETMVTTPGTHQESMKKNIGWLR  
AKRQSFQEIAKSIGLNLRLSQASSIDGLDALIDYIEDLYKEDIQESISLLQNSKLYDFDS  
LSALYVPGSRVAKSIASGGIDMICRVSWNRKSGITITGKESKQFEVCFEFVAVGSNQ  
ATIAEVVEGIDQFEGRNIFSRGPDGLTFIPWMAYNQEEQKSLLERYRRRGRIYNEVALN  
CPRTSNHSSIPSSSSRSTFSYKAYRKGCFVVKRNGFGGSTSPSVTARGMATGGRIVVDTQ  
GAYDYGNLSNIGYDPMITGIQYKMKYKHLQSRFASGAGGSTKVDGNKFIVDAAAGNSYST  
SSPVS IQATSGTGDGDSGGMVLFVDVIPDDYLEMVWPCVLFSLTAKAWGDCLVDGLEDIQ  
FSDDIFDRLVLPDNRKRLIKALVKNSSHVSSAGGGIRQSKYNFQDLVAGKGEVSVFLLYG  
PPGVGKTLTAEAVAEILKRKIMDYMAEAMKEDIHVCAITLFSSSLIFLSDMVGPLYALSM  
GTLGTTADDLEQRLGEILKLAAKWDAILLDEADSFLEKRSSASSLERNAMVCVMLQLVE  
YFSGILFLTSNRMDSLDPAFQTRITLSLPYHNLSRDGRQQIWKNNLLQKSGVQNVQDGEGE  
VFGDSINTKKLAKYPLNGREIKNALRLALALAAEEDCVLTNKLLETSAMVKSVTDDSGD  
TYPFLSRAIAFLFGW

>comp15682\_c0\_seq1; 568 1 2264 LEN=2787; translated  
XSNQWHTTAKQRGKGNLYLFPHISQALIVKVRNQYRADK GKERNKSNRMYRAAFQTMIVDE  
AHFCKNVLAFWGLGLALLGFQSKRTVLLSGTPYNNGPADMSALMTYIDPSHEAAGIDWWN  
EAVTKTSSSVGSRVNRKGNKNTVSAVSHWRKDFMLRRSKDVLLQKLPPIRIETDVGHPSE  
LWIYAAEYQKFLEALRRLKMNMEEGSPEAQHRMKAFAELMAYMACMRMSLIHPVMPGGR  
EVTIHFSPSRRHLLKRQECPKRCVLCNSDPHTMAEKVAAKRNEGEKREHGSNGVDHKCKD  
ENGDDDDDDGILALVGAMRTEMDLDDDDLDEDFDFEAKSKRERELEEKRLGPIIPLDPD  
FCDASGSECRHFAHEKCI EKYHADFGDDARCPCYCLQRRVRQNLRHSVYCEEIKTHIHD  
MPGGFITSSKIEEAIKWFRTTVSGNEKAIILSFFKGSLLDIEGILTTFKFGIECVRYDGDV  
SKETRSDLERFKTKATCRVLLATVQSGGTGLNITEANHVCFDRWFNCPVHDQAESRCH  
RIGQKDVHISYLDINLTIDIVMKRINVLKEGNANVILADGTSLGDRWSLGYKNVSGVIG  
NTLTALLAMREETINKNGDAPLPPYDESLLVKKMEEIQARIGNLESNETKQEETRVESKQ  
TAILLDSDDDDEIFNRCPAFAQVNPEKKEIPTRRLTSLNQLGEKRSPILDKVTTTEMRGTR  
TKHSTSF SRVPSQPMSSDDDDDCSFLHKGPIFKHM

>comp15682\_c0\_seq2; 507 1 2372 LEN=2895; translated  
XSNQWHTTAKQRGKGNLYLFPHISQALIVKVRNQYRADK GKERNKSNRMYRAAFQTMIVDE  
AHFCKNVLAFWGLGLALLGFQSKRTVLLSGTPYNNGPADMSALMTYIDPSHEAAGIDWWN  
EAVTKTSSSVGSRVNRKGNKNTVSAVSHWRKDFMLRRSKDVLLQKLPPIRIETDVGHPSE  
LWIYAAEYQKFLEALRRLKMNMEEGSPEAQHRMKAFAELMAYMACMRMSLIHPVMPGGR  
EVTIHFSPSRRHLLKRQECPKRCVLCNSDPHTMAEKVAAKRNEGEKREHGSNGVDHKCKD  
ENGDDDDDDGILALVGAMRTEMDLDDDDLDEDFDFEAKSKRERELEEKRLGPIIPLDPD  
FCDAASAASAVTLHTKNGEFLMNSICVFDIQIQKRFSISTCNSLYTFFYLNPTASKSITLT  
LATQDVQDATAKYKDEFDRIFDTVFTVRKLRPISXDMPGGFITSSKIEEAIKWFRTTVSG  
NEKAIILSFFKGSLLDIEGILTTFKFGIECVRYDGDVSKETRSDLERFKTKATCRVLLAT  
VQSGGTGLNITEANHVCFDRWFNCPVHDQAESRCHRIGQKDVHISYLDINLTIDIVMK  
RINVLKEGNANVILADGTSLGDRWSLGYKNVSGVIGNTLTALLAMREETINKNGDAPLPP  
YDESLLVKKMEEIQARIGNLESNETKQEETRVESKQTAILLDSDDDDEIFNRCPAFAQVN  
PEKKEIPTRRLTSLNQLGEKRSPILDKVTTTEMRGTRTKHSTSF SRVPSQPMSSDDDDDCS  
FLHKGPIFKHM

>comp15682\_c0\_seq3; 569 1 2342 LEN=2865; translated  
XSNQWHTTAKQRGKGNLYLFPHISQALIVKVRNQYRADK GKERNKFIQKKEKRPDCVARLI  
REERTKSWNKSNRMYRAAFQTMIVDEAHFCKNVLAFWGLGLALLGFQSKRTVLLSGTPYN  
NGPADMSALMTYIDPSHEAAGIDWWNEAVTKTSSSVGSRVNRKGNKNTVSAVSHWRKDFMLR  
RSKDVLLQKLPPIRIETDVGHPSELWIYAAEYQKFLEALRRLKMNMEEGSPEAQHRMK  
KAFELMAYMACMRMSLIHPVMPGGREVTIHFSPSRRHLLKRQECPKRCVLCNSDPHTMA  
EKVAAKRNEGEKREHGSNGVDHKCKDENGGDDDDDDGILALVGAMRTEMDLDDDDLDEDF  
DFEAKSKRERELEEKRLGPIIPLDPDFCDASGSECRHFAHEKCI EKYHADFGDDARCPC

YCLQRRVRQNLRHSVYCEEIKTHIHDMPPGGFITSSKIEEAIKWFRTTVSGNEKAIILSFF  
KGSLLDLIEGILTTFKFGIECVRYDGDVSKETRTRSDLERFVKTKATCRVLLATVQSGGTGLNI  
TEANHVCFLDRWFNPNVHDQAESRCHRIGQKKDVHISYLDINLTIDIVMKRINVLKEGNA  
NVILADGTSLGDRWSLGYKNVSGVIGNTLTALLAMREETINKNGDAPLPPYDESLLVKKM  
EEIQARIGNLESNETKQEETRVESKQTAILLDSDDDDDEIFNRCPAFAQVNPEKKEIPTRR  
LTSLNQLGKEKRSPILDKVTTEMRGTRTKHSTSF SRVPSQPMSSDDDDDCSFLHKGP IFKHM  
>comp15682\_c0\_seq4; 508 1 2450 LEN=2973; translated  
XSNQWHTTAKQRGKGNLFPHISQALIVKVRNQYRADKGKERNKFIQKKEKRPDCVARLI  
REERTKSWNKSARMYRAAFQTMIVDEAHFCKNVLAFWGLGLALLGFQSKRTVLLSGTPYN  
NGPADMSALMTYIDPSHEAAGIDWWNEAVTKTSSSVGSRVNRKGNKTVSAVSHWRKDFMLR  
RSKDVLQLKLPRIETDVGHPSELWIYAAYEQKFLALRRLKMNMEEGSPEAQHRMK  
KAFELMMAYMACMRMSLIHPVMPGGREVTIHFSPRRHLLKRQECPKRCVLCNSDPHMA  
EKVAAKRNEGEKREHGSNGVDHKCKDENGDDDDDDGILALVGAMRTEMDLDDDDLDDED  
DFEAKSKRERELEEKRLGPIIPLDPDFCDAAAASAVTLHTKNGEFLMNSICVFDIQIQKR  
FSISTCNSLYTFFYLNPTASKSITLTLATTQDVQDATAKDEFDRIFDFTVFTVRKLRPIS  
XDMPPGGFITSSKIEEAIKWFRTTVSGNEKAIILSFFKGSLLDLIEGILTTFKFGIECVRYD  
DVSKEETRTRSDLERFVKTKATCRVLLATVQSGGTGLNITEANHVCFLDRWFNPNVHDQAESR  
CHRIGQKKDVHISYLDINLTIDIVMKRINVLKEGNANVILADGTSLGDRWSLGYKNVSGV  
IGNTLTALLAMREETINKNGDAPLPPYDESLLVKKMEEIQARIGNLESNETKQEETRVES  
KQTAILLDSDDDDDEIFNRCPAFAQVNPEKKEIPTRRLTSLNQLGKEKRSPILDKVTTEMRG  
TRTKHSTSF SRVPSQPMSSDDDDDCSFLHKGP IFKHM  
>comp15682\_c0\_seq5; 220 1 601 LEN=1124; translated  
XVCSSDLV MKRINVLKEGNANVILADGTSLGDRWSLGYKNVSGVIGNTLTALLAMREETI  
NKNGDAPLPPYDESLLVKKMEEIQARIGNLESNETKQEETRVESKQTAILLDSDDDDDEIF  
NRCPAFAQVNPEKKEIPTRRLTSLNQLGKEKRSPILDKVTTEMRGTRTKHSTSF SRVPSQ  
MSDDDDDCSFLHKGP IFKHM  
>comp15682\_c0\_seq6; 618 114 1901 LEN=1901; translated  
MKS NFLITPPKPRLERERSKSTMEQDAIVESVKRGKTNLLDEFSSSSSGVDEKNQAHSST  
ALAI DSIENKRQKQTS LALRVD MN SPAIPNIITPPAVSSFKPDPLAAGDAKES SASPPLP  
PPPPSSSPAIEIDAELHATTEDPLLLATGTALAVKHDVPATALNPLRLSSPEDEDENEQA  
RERKEQNIETKQEVSAAI FNTNECAGKKRPRDKTNVNIS SCVDDMIKNKDHEYQYCKLE  
SPI SP SVSGSFKNCKMTELLDINRWWEAKSPQERASLEEKQGHNGIATGDQHSADQALQ  
MLLWDIGFEYSVYAHQFEAIRFVAGLVPTFPPELTHQSETKKPSRFCALERNETGAVAR  
SKAVLSASKE SFRWHKEEANKSKTTDNDNDNDFDNTKYAKP YNYILPTRGMLLADEMLG  
KTIEALAGAALRNATLRYSNLLGLPSSSSKTLPTLIVSPQDGIQE QWYDTLVKSGVKPSN  
ITVLGDTQTQTLERHNRNTSSSPGKFGGLRRQGSFILCTRYKIQSELRLFFAHPDCQ  
INNKNKNKKARLSNSSNQWHTTAKQRGKGNLFPHISQALIVKVRNQYRADKGKER  
>comp15683\_c0\_seq1; 844 435 4004 LEN=4580; translated  
MTNITSTPASTTPADNLRDIPMAVDNDFSYSDDGSVPSMSSEHASVSTRHLGNDSLDKIK  
LKQMEIARNEERQVRIIRTVTLSFIVFAAITISLVVYFFAKNFDKYEFSEYEAFVESIQ  
NDVVWEVKYNFALLQQLGSTITSEILVSNQTAPFVTLPNFEVTGGFTDGLGGIMAVVFAP  
LLLTKSSTTQVREWETYSVQHQQWLEESVKLQAEHTGHQRPLQGTQHDHETDLVDVQTPT  
NAVALP SHITEGIAETIWHWKDGERVPLEPSIAIERDIPVAPLWQSSPFNGATINVDLLS  
DPRLVDLYRASTETNQTLMSSATEIGNVFDWVFLPGEKHRKEEPHTFILERVFANFDTKS  
VSEQPVGFVLGLTSYRHLFERILPEGADGIYCVLEGRGACDTTLTYLINGPDAIFIGYDD  
LHKGMDDYEATIQLELYNTISENVCIHDLHIYPTPEFQTSHTNRAAVYTGVALAFALT  
SFCFLVYERLVTREKTKTAALHVVASLFPSEVQDKVLKGVQDGVKGTGTPQDGSQIASF  
FPDTTVLFGGCTIFNSAVPKYXMLRIRHLFIDHSFVYI FLIHYHWYNLADIAGFTAWSS  
TREPEQVFHLLLETVYGAIDQIAMRRGIFK VETVGD CYVAVCGLPDPREDHAIAMVRFARD  
CQLRMASLSQQLEVALGPD TADLAFRIGMHS GPVTGGVLRGQ NARFQLFGDTMNQASRME  
STGVKNRIQISETTAKLLIDRGK GKWLEKRSEKVDVKGKGLQETYFFKQSYGKHETVSVT  
SGCDADTIMSALNSVQPLANLQPLNNCISIKTQRLVKWNTEVLFRRIKSILRYRESAVH  
VEMSQNVANELHRYVLEIACMYRDNPFHNYEHASHVTL S MEKMLSRVEGTNETTRSISIN  
RYADDITTDPLAQFAVVYSALIHVDVHPGVSNNQLVKEQNSLAIKYHGKSPAENHSINLA  
WTTLMKPEYGNLVECLPTASEKMLRWKLVNAVLATDIFDEDLKESRNLRWKHVFSDSN  
NPGVSSNNRLEIQDGVNDSALRVMIVLEHLIQASDVATMQHWHVYIKWNERLFHELNE  
AYRNGRMGKNPAEFWYQGELGFFDSYVILAKKLRCAVFGVSCEEFNLNYAETNRNEWEA  
KGE GIVEDYRRRFQNEKSETAIAQKQEASGMTAASVGVSLPQIRTPVAA  
>comp15683\_c0\_seq2; 512 723 2156 LEN=2732; translated  
MNQASRMESTGVKNRIQISETTAKLLIDRGK GKWLEKRSEKVDVKGKGLQETYFFKQSYG

KHETVSVTSGCDADTIMSALNSVQQPLANLQPLNNCISIKTQRLVKWNTEVLFRRIKSIL  
RYRESAVHVEMSQNVANELHRYVLEIACMYRDNPFHNYEHASHVTL SMEKMLSRVEGTNE  
TTRISISINRYADDITTDPLAQFAVVYSALIHVDVHPVGSNNQLVKEQNSLAIKYHGKSPA  
ENHSINLAWTTLMKPEYGNLVECLCPTASEKMRLWKLVVNAVLATDIFDEDLKESRNLRW  
KHVFSDSNPNPGVSSNNRLEIQDGVNDSALRVMIVLEHLIQASDVAHTMQHWHVYIKWNE  
RLFHELNEAYRNGRMGKNPAEFWYQGELGFFDSYVIPLAKKRECAVFGVSCFEFLNYAE  
TNRNEWEAKGEGIVEDYRRRFQNEKSETAIAQKQEASGMTAASVGVSLPQIRTPVAA

>comp15683\_c0\_seq3; 227 723 1927 LEN=1927; translated  
MNQASRMESTGVKNRIQISETTAKLLIDRGKWKLEKRSEKVDVKGKGLQETYFFKQSYG  
KHETVSVTSGCDADTIMSALNSVQQPLANLQPLNNCISIKTQRLVKWNTEVLFRRIKSIL  
RYRESAVHVEMSQNVANELHRYVLEIACMYRDNPFHNYEHASHVTL SMEKMLSRVEGTNE  
TTRISISINRYADDITTDPLAQFAVVYSALIHVDVHPVGFNVSPSYVFPFCVVAHIQSI  
YRFFSPIYLVPCLTFRILPGSIKYQLVKEQNSLAIKYHGKSPAENHSINLAWTTLMKPE  
YGNLVECLCPTASEKMRLWKLVVNAVLATDIFDEDLKESRNLRWKHVFSDSNPNPGVSSNN  
RLEIQDGVNDSALRVMIVLEHLIQASDVAHTMQHWHVYIKX

>comp15683\_c0\_seq4; 568 435 4062 LEN=4062; translated  
MTNITSTPASTTPADNLRDIPMAVDNDFSYSDDGSVPSMSSEHASVSTRHLGNDSLDKIK  
LKQMEIARNEERQVRIIRTVTSLFIVFAAITISLVVYFFAKNFDKYEFESEYEAFVESIQ  
NDVVWEVKYNFALLQQLGSTITSEILVSNQTAPFVTLPNFEVTTGGFTDGLGGIMAVVFAP  
LLLTKSSTTQVREWETYSVQHQQWLEESVKLQAEHTGHQRPLQGTQDHETDLVDVQTPT  
NAVALP SHITEGIAETIWHWKDGERVPLEPSIAIERDIPVAPLWQSSPFNGATINVDLLS  
DPRLVDLYRASTETNQTLMSSATEIGNVFDWVFLPGEKHKRKEEPHTFILERV FANFDTKS  
VSEQPVGFVLGLTSYRHLFERILPEGADGIYCVLEGRGACDTTLTYLINGPDAIFIGYDD  
LHKGMDDEYATIQLLELYNTISENVCIHDLHIYPTPEFQTSHTNRAAVYTGVALAFALT  
SFCFLVYERLVTKREKTKTAALHVVASLFPSEVQDKVLKGVQDGVKGTGTPQDGSQIASF  
FPDPTVLFGGCTIFNSAVPKYXMLRIRHLFIDHSFVTYIFLIHYHWYNLADIAGFTAWSS  
TREPEQVFHLLLETVYGAIDQIAMRRGIFKVVETVGDVCYVAVCGLPDPREDHAIAMVRFARD  
CQLRMASLSQQLEVALGPDADLAFRIGMHS GPVTGGVLRGQNFQVLFQDGTMNQASRME  
STGVKNRIQISETTAKLLIDRGKWKLEKRSEKVDVKGKGLQETYFFKQSYGKHETVSVT  
SGCDADTIMSALNSVQQPLANLQPLNNCISIKTQRLVKWNTEVLFRRIKSILRYRESAVH  
VEMSQNVANELHRYVLEIACMYRDNPFHNYEHASHVTL SMEKMLSRVEGTNETTTRISISIN  
RYADDITTDPLAQFAVVYSALIHVDVHPVGFNVSPSYVFPFCVVAHIQSIYRFFSPIY  
LVPCLTFRILPGSIKYQLVKEQNSLAIKYHGKSPAENHSINLAWTTLMKPEYGNLVECL  
CPTASEKMRLWKLVVNAVLATDIFDEDLKESRNLRWKHVFSDSNPNPGVSSNNRLEIQDGV  
NDSALRVMIVLEHLIQASDVAHTMQHWHVYIKWVSVALGVYSTCDSVVMNLIKLITLFF  
PLLSLIYPVLAVHVXLPLLPALILNAKNERLFHELNEAYRNGRMGKNPAEFWYQGELGFF  
DSYVIPLAKX

>comp15683\_c0\_seq5; 786 435 4109 LEN=4685; translated  
MTNITSTPASTTPADNLRDIPMAVDNDFSYSDDGSVPSMSSEHASVSTRHLGNDSLDKIK  
LKQMEIARNEERQVRIIRTVTSLFIVFAAITISLVVYFFAKNFDKYEFESEYEAFVESIQ  
NDVVWEVKYNFALLQQLGSTITSEILVSNQTAPFVTLPNFEVTTGGFTDGLGGIMAVVFAP  
LLLTKSSTTQVREWETYSVQHQQWLEESVKLQAEHTGHQRPLQGTQDHETDLVDVQTPT  
NAVALP SHITEGIAETIWHWKDGERVPLEPSIAIERDIPVAPLWQSSPFNGATINVDLLS  
DPRLVDLYRASTETNQTLMSSATEIGNVFDWVFLPGEKHKRKEEPHTFILERV FANFDTKS  
VSEQPVGFVLGLTSYRHLFERILPEGADGIYCVLEGRGACDTTLTYLINGPDAIFIGYDD  
LHKGMDDEYATIQLLELYNTISENVCIHDLHIYPTPEFQTSHTNRAAVYTGVALAFALT  
SFCFLVYERLVTKREKTKTAALHVVASLFPSEVQDKVLKGVQDGVKGTGTPQDGSQIASF  
FPDPTVLFADIAGFTAWSSTREPEQVFHLLLETVYGAIDQIAMRRGIFKVVETVGDVCYVAVC  
GLPDPREDHAIAMVRFARDCQLRMASLSQQLEVALGPDADLXVSVRFAERIVAYFSFVT  
ACIKSIIYQLRLAFIVRIGMHS GPVTGGVLRGQNFQVLFQDGTMNQASRMESTGVKNRIQ  
ISETTAKLLIDRGKWKLEKRSEKVDVKGKGLQETYFFKQSYGKHETVSVTSGCDADTIM  
SALNSVQQPLANLQPLNNCISIKTQRLVKWNTEVLFRRIKSILRYRESAVHVEMSQNVAN  
ELHRYVLEIACMYRDNPFHNYEHASHVTL SMEKMLSRVEGTNETTTRISISINRYADDITTD  
PLAQFAVVYSALIHVDVHPVGFNVSPSYVFPFCVVAHIQSIYRFFSPIYLVPCLTFRIL  
ILPGSIKYQLVKEQNSLAIKYHGKSPAENHSINLAWTTLMKPEYGNLVECLCPTASEKMR  
LWKLVVNAVLATDIFDEDLKESRNLRWKHVFSDSNPNPGVSSNNRLEIQDGVNDSALRVM  
IVLEHLIQASDVAHTMQHWHVYIKWNERLFHELNEAYRNGRMGKNPAEFWYQGELGFFDS  
YVIPLAKKRECAVFGVSCFEFLNYAETNRNEWEAKGEGIVEDYRRRFQNEKSETAIAQK  
QEASGMTAASVGVSLPQIRTPVAA

>comp15683\_c0\_seq6; 324 1 1986 LEN=1986; translated



XFLFRVYTGVALAFALTSFCFLVYERLVTKREKTKTAALHVVASLFPSEVQDKVLKGVQ  
DGVKGTGTPQDGSQIASFFPDTTVLFADIAGFTAWSSTREPEQVFHLLLETVYGAIDQIAM  
RRGIFKIVETVGDICYVAVCGLPDPREDHAIAMVRFARDCQLRMASLSQQLEVALGPDADL  
AFRIGMHSGPVTGGVLRGQNFQQLFGDTMNQASRMESTGVKNRIQISETTAKLLIDRGG  
GKWLKRESEKVDVKGKGLQETVYFFKQSYGKHETVSVTSGCDADTMSALNSVQQPLANLQ  
PLNNCISIKTQRLVKWNTTEVLFRRIKSILRYRESAVHVEMSQNVANELHRYVLEIACMYR  
DNPFFHNYEHASHVTLSEKMLSRVEGTNETTRRSISINRYADDITTDPLAQFAVVYSALIH  
DVDHPGVSNNQLVKEQNSLAIKYHGKSPAENHSINLAWTTLMKPEYGNLVECLCPTASEK  
MRLWKLNVNAVLAATDIFDEDLKESRNLRWKHVFSNPNPVGSSNNRLEIQDGVNDSALR  
VMIVLEHLIQASDVAHMQRHWHVYIKWVSVALGVYSTCDSVVMNLIKLITLFFPLLSLIY  
PVLAVHVXLPPLPALILNAKNERLFHELNEAYRNGRMGKNPAEFWYQGELGFFDSYVIPL  
AKX

>comp15683\_c0\_seq7; 522 1 2060 LEN=2636; translated  
XFLFRVYTGVALAFALTSFCFLVYERLVTKREKTKTAALHVVASLFPSEVQDKVLKGVQ  
DGVKGTGTPQDGSQIASFFPDTTVLFADIAGFTAWSSTREPEQVFHLLLETVYGAIDQIAM  
RRGIFKIVETVGDICYVAVCGLPDPREDHAIAMVRFARDCQLRMASLSQQLEVALGPDADL  
AFRIGMHSGPVTGGVLRGQNFQQLFGDTMNQASRMESTGVKNRIQISETTAKLLIDRGG  
GKWLKRESEKVDVKGKGLQETVYFFKQSYGKHETVSVTSGCDADTMSALNSVQQPLANLQ  
PLNNCISIKTQRLVKWNTTEVLFRRIKSILRYRESAVHVEMSQNVANELHRYVLEIACMYR  
DNPFFHNYEHASHVTLSEKMLSRVEGTNETTRRSISINRYADDITTDPLAQFAVVYSALIH  
DVDHPGVSNNQLVKEQNSLAIKYHGKSPAENHSINLAWTTLMKPEYGNLVECLCPTASEK  
MRLWKLNVNAVLAATDIFDEDLKESRNLRWKHVFSNPNPVGSSNNRLEIQDGVNDSALR  
VMIVLEHLIQASDVAHMQRHWHVYIKWNERLFHELNEAYRNGRMGKNPAEFWYQGELGFF  
DSYVIPLAKKLRCAVFGVSCEEFNLNYAETNRNEWEAKGEGIVEDYRRRFQNEKSETAIA  
KQKQEASGMTAASVGVSLPQIRTPVAA

>comp15683\_c0\_seq8; 766 435 4136 LEN=4712; translated  
MTNITSTPASTTPADNLRDIPMAVDNDFSYSDDGSVPSMSSEHASVSTRHLGNDSLDKIK  
LKQMEIARNEERQVRIIRTVTSLFIVFAAITISLVVYFFAKNFDKYEFESEYEAFVESIQ  
NDVVWEVKYNFALLQQLGSTITSEILVSNQTAPFVTLNPFVETGGFTDGLGGIMAVVFAP  
LLLTKSSTTQVREWETYSVQHGWLEESVKLQAEHTGHQRPLQGTQDHDHETDLVDVQTP  
NAVALPSHITEGIAETIWHWKDGERVPLEPSIAIERDIPVAPLWQSSPFNGATINVDLLS  
DPRLVLDYRASTETNQTLMSSATEIGNVFDWVFLPGEKHKRKEEPHTFILERVFANFDTKS  
VSEQPVGFVLGLTSYRHLFERILPEGADGIYCVLEGRGACDTTLTYLINGPDAIFIGYDD  
LHKGMDDYEATIQLLELYNTISENVCIHDLHIYPTPEFQTSHTNRAAVYTGVALAFALT  
SFCFLVYERLVTKREKTKTAALHVVASLFPSEVQDKVLKGVQDGVKGTGTPQDGSQIASF  
FPDPTVLFGGCTIFNSAVPKYXMLRIRHLFIDHSFVTYIFLIHYHWYNLADIAGFTAWSS  
TREPEQVFHLLLETVYGAIDQIAMRRGIFKIVETVGDICYVAVCGLPDPREDHAIAMVRFARD  
CQLRMASLSQQLEVALGPDADLAFRIGMHSGPVTGGVLRGQNFQQLFGDTMNQASRME  
STGVKNRIQISETTAKLLIDRGGKWLKRESEKVDVKGKGLQETVYFFKQSYGKHETVSVT  
SGCDADTMSALNSVQQPLANLQPLNNCISIKTQRLVKWNTTEVLFRRIKSILRYRESAVH  
VEMSQNVANELHRYVLEIACMYRDNPFFHNYEHASHVTLSEKMLSRVEGTNETTRRSISIN  
RYADDITTDPLAQFAVVYSALIHVDHPVKFNVSPSYVFPFCVVAHIQISISYRFFSPIY  
LVPCLTFRIILPGSIKYQLVKEQNSLAIKYHGKSPAENHSINLAWTTLMKPEYGNLVECL  
CPTASEKMRLWKLNVNAVLAATDIFDEDLKESRNLRWKHVFSNPNPVGSSNNRLEIQDGV  
NDSALRVMIVLEHLIQASDVAHMQRHWHVYIKWNERLFHELNEAYRNGRMGKNPAEFWY  
QGELGFFDSYVIPLAKKLRCAVFGVSCEEFNLNYAETNRNEWEAKGEGIVEDYRRRFQNE  
KSETAIAKQKQEASGMTAASVGVSLPQIRTPVAA

>comp15683\_c0\_seq9; 773 435 4100 LEN=4676; translated  
MTNITSTPASTTPADNLRDIPMAVDNDFSYSDDGSVPSMSSEHASVSTRHLGNDSLDKIK  
LKQMEIARNEERQVRIIRTVTSLFIVFAAITISLVVYFFAKNFDKYEFESEYEAFVESIQ  
NDVVWEVKYNFALLQQLGSTITSEILVSNQTAPFVTLNPFVETGGFTDGLGGIMAVVFAP  
LLLTKSSTTQVREWETYSVQHGWLEESVKLQAEHTGHQRPLQGTQDHDHETDLVDVQTP  
NAVALPSHITEGIAETIWHWKDGERVPLEPSIAIERDIPVAPLWQSSPFNGATINVDLLS  
DPRLVLDYRASTETNQTLMSSATEIGNVFDWVFLPGEKHKRKEEPHTFILERVFANFDTKS  
VSEQPVGFVLGLTSYRHLFERILPEGADGIYCVLEGRGACDTTLTYLINGPDAIFIGYDD  
LHKGMDDYEATIQLLELYNTISENVCIHDLHIYPTPEFQTSHTNRAAVYTGVALAFALT  
SFCFLVYERLVTKREKTKTAALHVVASLFPSEVQDKVLKGVQDGVKGTGTPQDGSQIASF  
FPDPTVLFGGCTIFNSAVPKYXMLRIRHLFIDHSFVTYIFLIHYHWYNLADIAGFTAWSS  
TREPEQVFHLLLETVYGAIDQIAMRRGIFKIVETVGDICYVAVCGLPDPREDHAIAMVRFARD  
CQLRMASLSQQLEVALGPDADLXVSVRFAERIVAYFSFVTACIKSIIYQLRLAFIVRIG

MHSGPVTGGVLRGQNFQFLFGDTMNAQSRMESTGVKNRIQISETTAKLLIDRGKWKLE  
KRSEKVDVKGKGLQETYFFKQSYGKHETVSVTSGCDADTIMSALNSVQQPLANLQPLNNC  
ISIKTQRLVKWNTTEVLFRRRIKSILRYRESAVHVEMSQNVANELHRYVLEIACMYRDNPFH  
NYEHASHVTLSEKMLSRVEGTNETTRISISINRYADDITTDPLAQFAVVYSALIHVDVHP  
GVSNNQLVKEQNSLAIKYHGKSPAENHSINLAWTTLMKPEYGNLVECLCPTASEKMRLWK  
LVVNAVLATDIFDEDLKESRNLRWKHVFSDSNNPGVSSNNRLEIQDGVNDSALRVMIVL  
EHLIQASDVAHTMQHWHVYIKWNERLFHELNEAYRNGRMGKNPAEFWYQGELGFFDSYVI  
PLAKKLRECAVFGVSCSEFLNYAETNRNEWEAKGEGIVEDYRRRFQNEKSETAIAQKQEA  
SGMTAASVGVSLPQIRTPVAA

>comp15683\_c0\_seq10; 737 435 3807 LEN=3807; translated  
MTNITSTPASTTPADNLRDIPMAVDNDFSYSDDGSVPSMSSEHASVSTRHLGNDSLDKIK  
LKQMEIARNEERQVRIIRTVTLSFIVFAAITISLVVYFFAKNFDKYEFESEYEAFVESIQ  
NDVVWEVKYNFALLQQLGSTITSEILVSNQTAPFVTLPNFEVTGGFTDGLGGIMAVVFAP  
LLLTKSSTTQVREWETYSVQHQQWLEESVKLQAEHTGHQRPLQGTHQDHETDLVDVQPT  
NAVALPWHITEGIAETIWHWKDGERVPLEPSIAIERDIPVAPLWQSSPFNGATINVDLLS  
DPRLVDLYRASTETNQTLMSSATEIGNVFDWVFLPGEKHRKEEPHTFILERVFANFDTKS  
VSEQPVGFVLGLTSYRHLFERILPEGADGIYCVLEGRGACDTTLTYLINGPDAIFIGYDD  
LHKGMDDEYATIQLLELYNTISENVCIHDLHIYPTPEFQTSHTNRAAVYTGVALAFALT  
SFCFLVYERLVTKREKTKTAALHVVASLFPSEVQDKVLKGVQDGVKGTGTPQDGSQIASF  
FPDPTVLFADIAGFTAWSSTREPEQVFHLLLETVYGAIQIAMRRGIFKVETVGDCYVAVC  
GLPDPREDHAIAMVRFARDCQLRMASLSQQLEVALGPDADLAFRIGMHSGPVTGGVLRG  
QNFQFLFGDTMNAQSRMESTGVKNRIQISETTAKLLIDRGKWKLEKRSEKVDVKGKGL  
QETYFFKQSYGKHETVSVTSGCDADTIMSALNSVQQPLANLQPLNNCISIKTQRLVKWNT  
EVLFRRIKSILRYRESAVHVEMSQNVANELHRYVLEIACMYRDNPFHNYEHASHVTLSE  
KMLSRVEGTNETTRISISINRYADDITTDPLAQFAVVYSALIHVDVHPGVSNNQLVKEQNS  
LAIKYHGKSPAENHSINLAWTTLMKPEYGNLVECLCPTASEKMRLWKLVVNAVLATDIFD  
EDLKESRNLRWKHVFSDSNNPGVSSNNRLEIQDGVNDSALRVMIVLEHLIQASDVAHTM  
QHWHVYIKWVSVALGVYSTCDSVVMNLIKLITLFFPLLSLIYPVLAVHVXLPLLPALILN  
AKNERLFHELNEAYRNGRMGKNPAEFWYQGELGFFDSYVIPLAKX

>comp15683\_c0\_seq11; 241 480 1954 LEN=1954; translated  
MRRGIFKVETVGDCYVAVCGLPDPREDHAIAMVRFARDCQLRMASLSQQLEVALGPDAD  
LAFRIGMHSGPVTGGVLRGQNFQFLFGDTMNAQSRMESTGVKNRIQISETTAKLLIDRG  
KWKLEKRSEKVDVKGKGLQETYFFKQSYGKHETVSVTSGCDADTIMSALNSVQQPLANL  
QPLNNCISIKTQRLVKWNTTEVLFRRRIKSILRYRESAVHVEMSQNVANELHRYVLEIACMY  
RDNPFHNYEHASHVTLSEKMLSRVEGTNETTRISISINRYADDITTDPLAQFAVVYSALI  
HDVDHPVKFNVSPSYVFPFVVAHIQISYRFFSPIYLPCLTFRIILPGSIKYQLVKE  
QNSLAIKYHGKSPAENHSINLAWTTLMKPEYGNLVECLCPTASEKMRLWKLVVNAVLATD  
IFDEDLKESRNLRWKHVFSDSNNPGVSSNNRLEIQDGVNDSALRVMIVLEHLIQASDVA  
HTMQHWHVYIKX

>comp15683\_c0\_seq12; 695 435 4232 LEN=4808; translated  
MTNITSTPASTTPADNLRDIPMAVDNDFSYSDDGSVPSMSSEHASVSTRHLGNDSLDKIK  
LKQMEIARNEERQVRIIRTVTLSFIVFAAITISLVVYFFAKNFDKYEFESEYEAFVESIQ  
NDVVWEVKYNFALLQQLGSTITSEILVSNQTAPFVTLPNFEVTGGFTDGLGGIMAVVFAP  
LLLTKSSTTQVREWETYSVQHQQWLEESVKLQAEHTGHQRPLQGTHQDHETDLVDVQPT  
NAVALPWHITEGIAETIWHWKDGERVPLEPSIAIERDIPVAPLWQSSPFNGATINVDLLS  
DPRLVDLYRASTETNQTLMSSATEIGNVFDWVFLPGEKHRKEEPHTFILERVFANFDTKS  
VSEQPVGFVLGLTSYRHLFERILPEGADGIYCVLEGRGACDTTLTYLINGPDAIFIGYDD  
LHKGMDDEYATIQLLELYNTISENVCIHDLHIYPTPEFQTSHTNRAAVYTGVALAFALT  
SFCFLVYERLVTKREKTKTAALHVVASLFPSEVQDKVLKGVQDGVKGTGTPQDGSQIASF  
FPDPTVLFGGCTIFNSAVPKYXMLRIRHLFIDHSFVYIFLIHYHWYNLADIAGFTAWS  
TREPEQVFHLLLETVYGAIQIAMRRGIFKVETVGDCYVAVCGLPDPREDHAIAMVRFAR  
CQLRMASLSQQLEVALGPDADLXSVRFAERIVAYFSFVTACIKSIIYQLRALFIVRIG  
MHSGPVTGGVLRGQNFQFLFGDTMNAQSRMESTGVKNRIQISETTAKLLIDRGKWKLE  
KRSEKVDVKGKGLQETYFFKQSYGKHETVSVTSGCDADTIMSALNSVQQPLANLQPLNNC  
ISIKTQRLVKWNTTEVLFRRRIKSILRYRESAVHVEMSQNVANELHRYVLEIACMYRDNPFH  
NYEHASHVTLSEKMLSRVEGTNETTRISISINRYADDITTDPLAQFAVVYSALIHVDVHP  
VKFNVSPSYVFPFVVAHIQISYRFFSPIYLPCLTFRIILPGSIKYQLVKEQNSLA  
IKYHGKSPAENHSINLAWTTLMKPEYGNLVECLCPTASEKMRLWKLVVNAVLATDIFDEDL  
KESRNLRWKHVFSDSNNPGVSSNNRLEIQDGVNDSALRVMIVLEHLIQASDVAHTMQH  
WHVYIKWNERLFHELNEAYRNGRMGKNPAEFWYQGELGFFDSYVIPLAKKLRECAVFGVSC

EEFLNYAETNRNEWEAKGEGIVEDYRRRFQNEKSETAIAQKQEASGMTAASVGVSLPQIR  
TPVAA

>comp15683\_c0\_seq13; 646 435 3930 LEN=3930; translated  
MTNITSTPASTTPADNLRDIPMAVDNDFSYSDDGSVPSMSSEHASVSTRHLGNDSLDKIK  
LKQMEIARNEERQVRIIRTVTLSEILVSNQTAPFVTLPNFEVTTGGFTDGLGGIMAVVFAP  
LLLTKSSTTQVREWETYSVQHOGWLEESVKLQAEHTGHQRPLQGTQDHETDLVDVQTPT  
NAVALPSHITEGIAETIWHWKDGERVPLEPSIAIERDIPVAPLWQSSPFNGATINVDLLS  
DPRLVDLYRASTETNQTLMSSATEIGNVFDWVFLPGEKHKRKEEPHTFILERVFANFDTKS  
VSEQPVGFVLGLTSYRHLFERILPEGADGIYCVLEGRGACDTTLTYLINGPDAIFIGYDD  
LHKGMDDYEATIQLLELYNTISENVCIHDLHIYPTPEFQTSHTNRAAVYTGVALAFALT  
SFCFLVYERLVTKREKTKTAALHVVASLFPSEVQDKVLKGVQDGVKGTGTPQDGSQIASF  
FPDPTVLFGGCTIFNSAVPKYXMLRIRHLFIDHSFVTYIFLIHYHWYNLADIAGFTAWSS  
TREPEQVFHLLLETVYGAIQIAMRRGIFKVVETVGDYVAVCGLPDPREDHAIAMVRFARD  
CQLRMASLSQQLEVALGPDTADLAFRIGMHS GPVTGGVLRGQNARFQLFGDTMNQASRME  
STGVKNRIQISETTAKLLIDRGKWKLEKRSEKVDVKGKGLQETYFFKQSYGKHETVSVT  
SGCDADTIMSALNSVQQPLANLQPLNNCISIKTQRLVKWNTEVLFRRIKSILRYRESAVH  
VEMSQNVANELHRYVLEIACMYRDNPFHNYEHASHVTLSEKMLSRVEGTNETTRISISIN  
RYADDITTDPLAQFAVVYSALIHVDVHPGVSNNQLVKEQNSLAIKYHGKSPAENHSINLA  
WTTLMKPEYGNLVECLCPTASEKMRLWKL VVNAVLA TDFDEDLKE SRNLRWKHVFSDSN  
NPGVSSNNRLEIQDGVNDSALRVMIVLEHLIQASDVAHTMQHWHVYIKWVSVALGVYST  
CDSVVMNLIKLITLFFPLLSLIYPVLAVHVXLPLLPALILNAKNERLFHELNEAYRNGRM  
GKNPAEFWYQGELGFFDSYVIPLAKX

>comp15683\_c0\_seq14; 227 846 2050 LEN=2050; translated  
MNQASRMESTGVKNRIQISETTAKLLIDRGKWKLEKRSEKVDVKGKGLQETYFFKQSYG  
KHETVSVTSGCDADTIMSALNSVQQPLANLQPLNNCISIKTQRLVKWNTEVLFRRIKSIL  
RYRESAVHVEMSQNVANELHRYVLEIACMYRDNPFHNYEHASHVTLSEKMLSRVEGTNE  
TTRISISINRYADDITTDPLAQFAVVYSALIHVDVHPVKFNVSPSYVFPFTFCVVAHIQSIS  
YRFFSPIYLVPCLTFRILPGSIKYQLVKEQNSLAIKYHGKSPAENHSINLAWTTLMKPE  
YGNLVECLCPTASEKMRLWKL VVNAVLA TDFDEDLKE SRNLRWKHVFSDSNPGVSSNN  
RLEIQDGVNDSALRVMIVLEHLIQASDVAHTMQHWHVYIKX

>comp15683\_c0\_seq15; 575 435 4026 LEN=4026; translated  
MTNITSTPASTTPADNLRDIPMAVDNDFSYSDDGSVPSMSSEHASVSTRHLGNDSLDKIK  
LKQMEIARNEERQVRIIRTVTLSEILVSNQTAPFVTLPNFEVTTGGFTDGLGGIMAVVFAP  
LLLTKSSTTQVREWETYSVQHOGWLEESVKLQAEHTGHQRPLQGTQDHETDLVDVQTPT  
NAVALPSHITEGIAETIWHWKDGERVPLEPSIAIERDIPVAPLWQSSPFNGATINVDLLS  
DPRLVDLYRASTETNQTLMSSATEIGNVFDWVFLPGEKHKRKEEPHTFILERVFANFDTKS  
VSEQPVGFVLGLTSYRHLFERILPEGADGIYCVLEGRGACDTTLTYLINGPDAIFIGYDD  
LHKGMDDYEATIQLLELYNTISENVCIHDLHIYPTPEFQTSHTNRAAVYTGVALAFALT  
SFCFLVYERLVTKREKTKTAALHVVASLFPSEVQDKVLKGVQDGVKGTGTPQDGSQIASF  
FPDPTVLFGGCTIFNSAVPKYXMLRIRHLFIDHSFVTYIFLIHYHWYNLADIAGFTAWSS  
TREPEQVFHLLLETVYGAIQIAMRRGIFKVVETVGDYVAVCGLPDPREDHAIAMVRFARD  
CQLRMASLSQQLEVALGPDTADLXSVRFAERIVAYFSFVTACIKSIIYQLRLAFIVRIG  
MHS GPVTGGVLRGQNARFQLFGDTMNQASRMESTGVKNRIQISETTAKLLIDRGKWKLE  
KRSEKVDVKGKGLQETYFFKQSYGKHETVSVTSGCDADTIMSALNSVQQPLANLQPLNNC  
ISIKTQRLVKWNTEVLFRRIKSILRYRESAVHVEMSQNVANELHRYVLEIACMYRDNPFH  
NYEHASHVTLSEKMLSRVEGTNETTRISISINRYADDITTDPLAQFAVVYSALIHVDVHP  
GVSSNNQLVKEQNSLAIKYHGKSPAENHSINLAWTTLMKPEYGNLVECLCPTASEKMRLWK  
LVVNAVLA TDFDEDLKE SRNLRWKHVFSDSNPGVSSNNRLEIQDGVNDSALRVMIVL  
EHLIQASDVAHTMQHWHVYIKWVSVALGVYSTCDSVVMNLIKLITLFFPLLSLIYPVLAV  
HVXLPLLPALILNAKNERLFHELNEAYRNGRMGKNPAEFWYQGELGFFDSYVIPLAKX

>comp15683\_c0\_seq16; 497 435 4158 LEN=4158; translated  
MTNITSTPASTTPADNLRDIPMAVDNDFSYSDDGSVPSMSSEHASVSTRHLGNDSLDKIK  
LKQMEIARNEERQVRIIRTVTLSEILVSNQTAPFVTLPNFEVTTGGFTDGLGGIMAVVFAP  
LLLTKSSTTQVREWETYSVQHOGWLEESVKLQAEHTGHQRPLQGTQDHETDLVDVQTPT  
NAVALPSHITEGIAETIWHWKDGERVPLEPSIAIERDIPVAPLWQSSPFNGATINVDLLS  
DPRLVDLYRASTETNQTLMSSATEIGNVFDWVFLPGEKHKRKEEPHTFILERVFANFDTKS  
VSEQPVGFVLGLTSYRHLFERILPEGADGIYCVLEGRGACDTTLTYLINGPDAIFIGYDD

LHKGMDYIATIQLELYNTISENVCIHDLHIYPTPEFQTSHTNRAAVYTGVALAFALT  
SFCFLVYERLVTKREKTKTAALHVVASLFPSEVQDKVLKGVQDGVKGTGTPQDGSQIASF  
FPD'TTVLFGGCTIFNSAVPKYXMLRIRHLFIDHSFVYIIFLIHYHWYNLADIAGFTAWSS  
TREPEQVFHLLLETVYGAIDQIAMRRGIFKVVETVGDYVAVCGLPDPREDHAIAMVRFARD  
CQLRMASLSQQLEVALGPD'TADLXVSVRFAERIVAYFSFVTACIKSIIYQLRLAFIVRIG  
MHSGPVTGGVLRGQ'NARFQLFGDTMNQASRMESTGVKNRIQISETTAKLLIDRGKWKLE  
KRSEKVDVKGKGLQETYFFKQSYGKHETVSVTSGCDADT'IMSALNSVQQPLANLQPLNNC  
ISIKTQRLVKWNT'EVLFRRIKSILRYRESAVHVEMSQNVANELHRYVLEIACMYRDNPFH  
NYEHASHV'TLSMEKMLSRVEGTNETTR'ISISINRYADDITTDPLAQF'AVVYSALIH'DVDHP  
VKFNVSPSYVFP'FCVVAHIQ'ISISYRFFSPIYLPCLTFRIILPGSIKYQLVKEQNSLAI  
KYHGKSPAENHSINLAW'TTLMKPEYGNLVECLCPTASEKMRLWKL'VVNAV'LATDIFDEDL  
KESRNLRWKHV'FSDSN'PGVSSNRL'EIQDGV'DNSDALRVMIVLEHLIQASDVAHTMQHW  
HVYIKWVSVALGVYSTCDSVVMNLIKLI'TLFFPLLSLIY'PVLAVHVXLP'LLPALIILNAKN  
ERLFHELNEAYRNGRMGKNPAEFWYQGELGFFDSYVIPLAKX

>comp15683\_c0\_seq17; 659 435 3939 LEN=3939; translated  
MTNITSTPASTTPADNLRDIPMAVDNDFSYSDDG'VSPMSSEHASVSTRHLGND'SLDKIK  
LKQMEIARNEERQVRIIRTVT'LSFIVFAAITISL'VVYFFAKNFDKYEF'ESEYEA'FVESIQ  
NDVVWEVKYNFALLQQLG'STITSEILVSNQTAPFV'TLPNFEV'TGGFTDGLGGIMAV'VFAP  
LLLTKSSTTQVREWETYSVQH'QGWLEESV'KLQAEHTGHQR'PLQGT'HDHETDLVDVQ'TPT  
NAVALP'SHITEGIAETI'WHWKDGERVPLEPSIAIERDIPVAPLWQSSPFNGATINVDL'LS  
DPRLVDLYR'ASTETNQTLMSSATEIGNVFDWVFLP'GEGK'HRKEEPHTFILERV'FANFDTKS  
VSEQPVGFV'LGLTSYRHLFERILPEGADGIYCVLEGRGACD'TTLTYLINGPDAIFIGYDD  
LHKGMDYIATIQLELYNTISENVCIHDLHIYPTPEFQTSHTNRAAVYTGVALAFALT  
SFCFLVYERLVTKREKTKTAALHVVASLFPSEVQDKVLKGVQDGVKGTGTPQDGSQIASF  
FPD'TTVL'FADIAGFTAWSS'TREPEQVFHLLLETVYGAIDQIAMRRGIFKVVETVGDYVAVC  
GLPDPREDHAIAMVRFARD'QCQLRMASLSQQLEVALGPD'TADLAFRIGMHSGPVTGGVLRG  
Q'NARFQLFGDTMNQASRMESTGVKNRIQISETTAKLLIDRGKWKLEKRSEKVDVKGKGL  
QETYFFKQSYGKHETVSVTSGCDADT'IMSALNSVQQPLANLQPLNNCISIKTQRLVKWNT  
EVLFRRIKSILRYRESAVHVEMSQNVANELHRYVLEIACMYRDNPFHNYEHASHV'TLSME  
KMLSRVEGTNETTR'ISISINRYADDITTDPLAQF'AVVYSALIH'DVDHPVKFNVSPSYVFP  
FCVVAHIQ'ISISYRFFSPIYLPCLTFRIILPGSIKYQLVKEQNSLAIKYHGKSPAENHSI  
NLAW'TTLMKPEYGNLVECLCPTASEKMRLWKL'VVNAV'LATDIFDEDLKESRNLRWKHV'FS  
DSN'PGVSSNRL'EIQDGV'DNSDALRVMIVLEHLIQASDVAHTMQHW'HWYIKWVSVALGV  
YSTCDSVVMNLIKLI'TLFFPLLSLIY'PVLAVHVXLP'LLPALIILNAKNERLFHELNEAYRN  
GRMGKNPAEFWYQGELGFFDSYVIPLAKX

>comp15683\_c0\_seq18; 666 435 3903 LEN=3903; translated  
MTNITSTPASTTPADNLRDIPMAVDNDFSYSDDG'VSPMSSEHASVSTRHLGND'SLDKIK  
LKQMEIARNEERQVRIIRTVT'LSFIVFAAITISL'VVYFFAKNFDKYEF'ESEYEA'FVESIQ  
NDVVWEVKYNFALLQQLG'STITSEILVSNQTAPFV'TLPNFEV'TGGFTDGLGGIMAV'VFAP  
LLLTKSSTTQVREWETYSVQH'QGWLEESV'KLQAEHTGHQR'PLQGT'HDHETDLVDVQ'TPT  
NAVALP'SHITEGIAETI'WHWKDGERVPLEPSIAIERDIPVAPLWQSSPFNGATINVDL'LS  
DPRLVDLYR'ASTETNQTLMSSATEIGNVFDWVFLP'GEGK'HRKEEPHTFILERV'FANFDTKS  
VSEQPVGFV'LGLTSYRHLFERILPEGADGIYCVLEGRGACD'TTLTYLINGPDAIFIGYDD  
LHKGMDYIATIQLELYNTISENVCIHDLHIYPTPEFQTSHTNRAAVYTGVALAFALT  
SFCFLVYERLVTKREKTKTAALHVVASLFPSEVQDKVLKGVQDGVKGTGTPQDGSQIASF  
FPD'TTVL'FADIAGFTAWSS'TREPEQVFHLLLETVYGAIDQIAMRRGIFKVVETVGDYVAVC  
GLPDPREDHAIAMVRFARD'QCQLRMASLSQQLEVALGPD'TADLXVSVRFAERIVAYFSFVT  
ACIKSIIYQLRLAFIVRIGMHSGPVTGGVLRGQ'NARFQLFGDTMNQASRMESTGVKNRIQ  
ISETTAKLLIDRGKWKLEKRSEKVDVKGKGLQETYFFKQSYGKHETVSVTSGCDADT'IM  
SALNSVQQPLANLQPLNNCISIKTQRLVKWNT'EVLFRRIKSILRYRESAVHVEMSQNVAN  
ELHRYVLEIACMYRDNPFHNYEHASHV'TLSMEKMLSRVEGTNETTR'ISISINRYADDITTD  
PLAQF'AVVYSALIH'DVDHPGVSNQ'LVKEQNSLAIKYHGKSPAENHSINLAW'TTLMKPEY  
GNLVECLCPTASEKMRLWKL'VVNAV'LATDIFDEDLKESRNLRWKHV'FSDSN'PGVSSNRL  
LEIQDGV'DNSDALRVMIVLEHLIQASDVAHTMQHW'HWYIKWVSVALGVYSTCDSVVMNLI  
KLI'TLFFPLLSLIY'PVLAVHVXLP'LLPALIILNAKNERLFHELNEAYRNGRMGKNPAEFWY  
QGELGFFDSYVIPLAKX

>comp15683\_c0\_seq19; 319 480 1822 LEN=1822; translated  
MRRGIFKVVETVGDYVAVCGLPDPREDHAIAMVRFARD'QCQLRMASLSQQLEVALGPD'TAD  
LAFRIGMHSGPVTGGVLRGQ'NARFQLFGDTMNQASRMESTGVKNRIQISETTAKLLIDRG  
KWKLEKRSEKVDVKGKGLQETYFFKQSYGKHETVSVTSGCDADT'IMSALNSVQQPLANL

QPLNNCISIKTQRLVKWNTTEVLFRRIKSILRYRESAVHVEMSQNVANELHRYVLEIACMY  
RDNPFHNYEHASHVTLSMEKMLSRVEGTNETTTRISISINRYADDITTDPLAQFAVVYSALI  
HDVDHPGVSNNQLVKEQNSLAIKYHGKSPAENHSINLAWTTLMKPEYGNLVECLCPTASE  
KMRLWKLVVNAVLATDIFDEDLKESRNLRWKHVFSDSNNPGVSSNNRLEIQDGVNDSAL  
RVMIVLEHLIQASDVAHTMQHWHVYIKX

>comp15683\_c0\_seq20; 444 1 2192 LEN=2768; translated  
XFLFRVYTGVALAFALTSFCFLVYERLVTKREKTKTAALHVVASLFPSEVQDKVLKGVQ  
DGVKGTGTPQDGSQIASFFPDTTVLFADIAGFTAWSSTREPEQVFHLLLETVYGAIQIAM  
RRGIFKVVETVGDYVAVCGLPDPREDHAIAMVRFARDCQLRMASLSQQLEVALGPDADL  
AFRIGMHS GPVTGGVLRGQNFQVLFQDGTMNQASRMESTGVKNRIQISETTAKLLIDRGG  
KWLKLEKRSEKVDVKGKGLQETYFFKQSYGKHETVSVTSGCDADTMSALNSVQQPLANLQ  
PLNNCISIKTQRLVKWNTTEVLFRRIKSILRYRESAVHVEMSQNVANELHRYVLEIACMYR  
DNPFHNYEHASHVTLSMEKMLSRVEGTNETTTRISISINRYADDITTDPLAQFAVVYSALI  
DHDHPVKFNVSPSYVFPFTFCVVAHIQSISYRFFSPIYLVPCLTFRILPGSIKYQLVKEQ  
NSLAIKYHGKSPAENHSINLAWTTLMKPEYGNLVECLCPTASEKMRLWKLVVNAVLATDI  
FDEDLKESRNLRWKHVFSDSNNPGVSSNNRLEIQDGVNDSALRVMIVLEHLIQASDVAH  
TMQHWHVYIKWNERLFHELNEAYRNGRMGKNPAEFWYQGELGFFDSYVIPLAKKRECAV  
FGVSCFEFLNYAETNRNEWEAKGEGIVEDYRRRFQNEKSETAIAQKQEASGMTAASVGV  
LPQIRTPVAA

>comp15683\_c0\_seq21; 314 723 2082 LEN=2082; translated  
MNQASRMESTGVKNRIQISETTAKLLIDRGGKWLKLEKRSEKVDVKGKGLQETYFFKQSYG  
KHETVSVTSGCDADTMSALNSVQQPLANLQPLNNCISIKTQRLVKWNTTEVLFRRIKSIL  
RYRESAVHVEMSQNVANELHRYVLEIACMYRDNPFHNYEHASHVTLSMEKMLSRVEGTNE  
TTRISISINRYADDITTDPLAQFAVVYSALIHDVDHPGVSNNQLVKEQNSLAIKYHGKSPA  
ENHSINLAWTTLMKPEYGNLVECLCPTASEKMRLWKLVVNAVLATDIFDEDLKESRNLRW  
KHVFSDSNNPGVSSNNRLEIQDGVNDSALRVMIVLEHLIQASDVAHTMQHWHVYIKWVS  
VALGVYSTCDSVVMNLIKLITLFFPLLSLIYPVLAVHVXLPPLPALILNAKNERLFHELNE  
EAYRNGRMGKNPAEFWYQGELGFFDSYVIPLAKX

>comp15683\_c0\_seq22; 305 846 1918 LEN=1918; translated  
MNQASRMESTGVKNRIQISETTAKLLIDRGGKWLKLEKRSEKVDVKGKGLQETYFFKQSYG  
KHETVSVTSGCDADTMSALNSVQQPLANLQPLNNCISIKTQRLVKWNTTEVLFRRIKSIL  
RYRESAVHVEMSQNVANELHRYVLEIACMYRDNPFHNYEHASHVTLSMEKMLSRVEGTNE  
TTRISISINRYADDITTDPLAQFAVVYSALIHDVDHPGVSNNQLVKEQNSLAIKYHGKSPA  
ENHSINLAWTTLMKPEYGNLVECLCPTASEKMRLWKLVVNAVLATDIFDEDLKESRNLRW  
KHVFSDSNNPGVSSNNRLEIQDGVNDSALRVMIVLEHLIQASDVAHTMQHWHVYIKX

>comp15683\_c0\_seq23; 588 435 4035 LEN=4035; translated  
MTNITSTPASTTPADNLRDIPMAVDNDFSYSDDGVSVPMSSEHASVSTRHLGNDSLDKIK  
LKQMEIARNEERQVRIIRTVTLSFIVFAAITISLVVYFFAKNFDKYEFESEYEAFFVESIQ  
NDVVWEVKYNFALLQQLGSTITSEILVSNQTAPFVTLPNFEVTTGGFTDGLGGIMAVVFAP  
LLLTKSSTTQVREWETYSVQHQQWLEESVKLQAEHTGHQRPLQGTQDHDHETDLVDVQTP  
NAVALP SHITEGIAETIWHWKDGERVPLEPSIAIERDIPVAPLWQSSPFNGATINVDLLS  
DPRLDVLYRASTETNQTLMSSATEIGNVFDWVFLPGEKHRKEEPHTFILERVFANFDTKS  
VSEQPVGFVLGLTSYRHLFERILPEGADGIYCVLEGRGACDTTLTYLINGPDAIFIGYDD  
LHKGMDDYEATIQLLELYNTISENVCIHDLHIYPTPEFQTSHTNTRAAYVTGVALAFALT  
SFCFLVYERLVTKREKTKTAALHVVASLFPSEVQDKVLKGVQDGVKGTGTPQDGSQIASF  
FPDTTVLFADIAGFTAWSSTREPEQVFHLLLETVYGAIQIAMRRGIFKVVETVGDYVAVC  
GLPDPREDHAIAMVRFARDCQLRMASLSQQLEVALGPDADLXVSVRFAERIVAYFSFVT  
ACIKSIIYQLRLAFIVRIGMHS GPVTGGVLRGQNFQVLFQDGTMNQASRMESTGVKNRIQ  
ISETTAKLLIDRGGKWLKLEKRSEKVDVKGKGLQETYFFKQSYGKHETVSVTSGCDADTMS  
SALNSVQQPLANLQPLNNCISIKTQRLVKWNTTEVLFRRIKSILRYRESAVHVEMSQNVAN  
ELHRYVLEIACMYRDNPFHNYEHASHVTLSMEKMLSRVEGTNETTTRISISINRYADDITTD  
PLAQFAVVYSALIHDVDHPVKFNVSPSYVFPFTFCVVAHIQSISYRFFSPIYLVPCLTFRIL  
ILPGSIKYQLVKEQNSLAIKYHGKSPAENHSINLAWTTLMKPEYGNLVECLCPTASEKMR  
LWKLVVNAVLATDIFDEDLKESRNLRWKHVFSDSNNPGVSSNNRLEIQDGVNDSALRVM  
IVLEHLIQASDVAHTMQHWHVYIKWVSVALGVYSTCDSVVMNLIKLITLFFPLLSLIYPV  
LAVHVXLPPLPALILNAKNERLFHELNEAYRNGRMGKNPAEFWYQGELGFFDSYVIPLAK  
X

>comp15683\_c0\_seq24; 246 1 2118 LEN=2118; translated  
XFLFRVYTGVALAFALTSFCFLVYERLVTKREKTKTAALHVVASLFPSEVQDKVLKGVQ  
DGVKGTGTPQDGSQIASFFPDTTVLFADIAGFTAWSSTREPEQVFHLLLETVYGAIQIAM

RRGIFK VETV GDCYVAVCGLPDPREDHAIAMVRFARDCQLRMASLSQQLEVALGPDTADL  
AFRIGMHSGPVTGGVLRGQNARFQLFGDTMNQASRMESTGVKNRIQISETTAKLLIDRGG  
GKWLKREKSEKVDVKGKGLQET YFFKQSYGKHETVSVTSGCDADT IMSALNSVQQPLANLQ  
PLNNCISIKTQRLVKWNT EVLFRRIKSILRYRESAVHVEMSQNVANELHRYVLEIACMYR  
DNPFFHNYEHASHVTL SMEKMLSRVEGTNETTRSSISINRYADDITTDPLAQFAVVYSALIH  
DVDHPVKFNVSPSYVFPFTFCVVAHIQSISYRFFSPIYLPCLTFRIILPGSIKYQLVKEQ  
NSLAIKYHGKSPAENHSINLAWTTLMKPEYGNLVECLCPTASEKMRLWKLVVNAVLA TDI  
FDEDLKESRNLRWKHVFSDSNNPGVSSNNRLEIQDGVNDSALRVMIVLEHLIQASDVAH  
TMQHWVYIKWVSVALGVYSTCDSVVMNLIKLITLFFPLLSLIYPVLAVHVXLP LLLPALI  
LNAKNERLFHELNEAYRNGRMGKNPAEFWYQGELGFFDSYVIPLAKX

>comp15683\_c0\_seq25; 864 435 3977 LEN=4553; translated  
MTNITSTPASTTPADNLRDIPMAVDNDFSYSDDGSVSPMSSEHASVSTRHLGNDSLDKIK  
LKQMEIARNEERQVRIIRTVTLSFIVFAAITISLVVYFFAKNFDKYEFESEYEAFVESIQ  
NDVVWEVKYNFALLQQLGSTITSEILVSNQTAPFVTLPNFEVTTGGFTDGLGGIMAVVFAP  
LLLTKSSTTQVREWETYSVQHQQGWLEESVKLQAEHTGHQRPLQGT HQDHETDLVDVQTPT  
NAVALP SHITEGIAETIWHWKDGERVPLEPSIAIERDIPVAPLWQSSPFNGATINVDLLS  
DPRLVDLYRASTETNQTLMSSATEIGNVFDWVFLPGEKHKRKEEPHTFILERV FANFDTKS  
VSEQPVGFVLGLTSYRHLFERILPEGADGIYCVLEGRGACDTTTLTYLINGPDAIFIGYDD  
LHKGMDDYEATI QLELYNTISENVCIHDLHIYPTPEFQTSHTNRAAVYTG VVALAFALT  
SFCFLVYERLVT KREKTKTAALHVVASLFPSEVQDKVLKGVQDGVKGTGTPQDGSQIASF  
FPD TT VLFADIAGFTAWSSTREPEQVFHLLLETVYGAIDQIAMRRGIFK VETV GDCYVAVC  
GLPDPREDHAIAMVRFARDCQLRMASLSQQLEVALGPDTADLXVSVRFAERIVAYFSFVT  
ACIKSIIYQLRLAFIVRIGMHSGPVTGGVLRGQNARFQLFGDTMNQASRMESTGVKNRIQ  
ISETTAKLLIDRGGKWLKREKSEKVDVKGKGLQET YFFKQSYGKHETVSVTSGCDADT IM  
SALNSVQQPLANLQPLNNCISIKTQRLVKWNT EVLFRRIKSILRYRESAVHVEMSQNVAN  
ELHRYVLEIACMYRDNPFFHNYEHASHVTL SMEKMLSRVEGTNETTRSSISINRYADDITTD  
PLAQFAVVYSALIH DVDHPGVSNNQLVKEQNSLAIKYHGKSPAENHSINLAWTTLMKPEY  
GNLVECLCPTASEKMRLWKLVVNAVLA TDI FDEDLKESRNLRWKHVFSDSNNPGVSSNNR  
LEIQDGVNDSALRVMIVLEHLIQASDVAHTMQHWVYIKWNERLFHELNEAYRNGRMGK  
NPAEFWYQGELGFFDSYVIPLAKKLECAVFGVSC EEF LNYAETNRNEWEAKGEGIVEDY  
RRRFQNEKSETAIAQKQEASGMTAASVGVSLPQIRTPVAA

>comp15683\_c0\_seq26; 935 435 3881 LEN=4399; translated  
MTNITSTPASTTPADNLRDIPMAVDNDFSYSDDGSVSPMSSEHASVSTRHLGNDSLDKIK  
LKQMEIARNEERQVRIIRTVTLSFIVFAAITISLVVYFFAKNFDKYEFESEYEAFVESIQ  
NDVVWEVKYNFALLQQLGSTITSEILVSNQTAPFVTLPNFEVTTGGFTDGLGGIMAVVFAP  
LLLTKSSTTQVREWETYSVQHQQGWLEESVKLQAEHTGHQRPLQGT HQDHETDLVDVQTPT  
NAVALP SHITEGIAETIWHWKDGERVPLEPSIAIERDIPVAPLWQSSPFNGATINVDLLS  
DPRLVDLYRASTETNQTLMSSATEIGNVFDWVFLPGEKHKRKEEPHTFILERV FANFDTKS  
VSEQPVGFVLGLTSYRHLFERILPEGADGIYCVLEGRGACDTTTLTYLINGPDAIFIGYDD  
LHKGMDDYEATI QLELYNTISENVCIHDLHIYPTPEFQTSHTNRAAVYTG VVALAFALT  
SFCFLVYERLVT KREKTKTAALHVVASLFPSEVQDKVLKGVQDGVKGTGTPQDGSQIASF  
FPD TT VLFADIAGFTAWSSTREPEQVFHLLLETVYGAIDQIAMRRGIFK VETV GDCYVAVC  
GLPDPREDHAIAMVRFARDCQLRMASLSQQLEVALGPDTADLAFRIGMHSGPVTGGVLRG  
QNARFQLFGDTMNQASRMESTGVKNRIQISETTAKLLIDRGGKWLKREKSEKVDVKGKGL  
QET YFFKQSYGKHETVSVTSGCDADT IMSALNSVQQPLANLQPLNNCISIKTQRLVKWNT  
EVLFRRIKSILRYRESAVHVEMSQNVANELHRYVLEIACMYRDNPFFHNYEHASHVTL SME  
KMLSRVEGTNETTRSSISINRYADDITTDPLAQFAVVYSALIH DVDHPGVSNNQLVKEQNS  
LAIKYHGKSPAENHSINLAWTTLMKPEYGNLVECLCPTASEKMRLWKLVVNAVLA TDI F  
EDLKESRNLRWKHVFSDSNNPGVSSNNRLEIQDGVNDSALRVMIVLEHLIQASDVAHTM  
QHWVYIKWNERLFHELNEAYRNGRMGKNPAEFWYQGELGFFDSYVIPLAKKLECAVFG  
VSC EEF LNYAETNRNEWEAKGEGIVEDYRRRFQNEKSETAIAQKQEASGMTAASVGVSLP  
QIRTPVAA

>comp15683\_c0\_seq27; 857 435 4013 LEN=4589; translated  
MTNITSTPASTTPADNLRDIPMAVDNDFSYSDDGSVSPMSSEHASVSTRHLGNDSLDKIK  
LKQMEIARNEERQVRIIRTVTLSFIVFAAITISLVVYFFAKNFDKYEFESEYEAFVESIQ  
NDVVWEVKYNFALLQQLGSTITSEILVSNQTAPFVTLPNFEVTTGGFTDGLGGIMAVVFAP  
LLLTKSSTTQVREWETYSVQHQQGWLEESVKLQAEHTGHQRPLQGT HQDHETDLVDVQTPT  
NAVALP SHITEGIAETIWHWKDGERVPLEPSIAIERDIPVAPLWQSSPFNGATINVDLLS  
DPRLVDLYRASTETNQTLMSSATEIGNVFDWVFLPGEKHKRKEEPHTFILERV FANFDTKS  
VSEQPVGFVLGLTSYRHLFERILPEGADGIYCVLEGRGACDTTTLTYLINGPDAIFIGYDD

LHKGMDY EATI QLELYNTI SENVCIHDLHIYPTPEFQTSHTNRAAVYTG VVALAFALT  
SFCFLVYERLVT KREKTKTAALHVVASLFPSEVQDKVLKGVQDGVKGTGTPQDGSQIASF  
FPD TTVL FADIAGFTAWSSTREPEQVFHLLLET VYGAIDQIAMRRGIFK VETVGD CYVAVC  
GLPDPREDHAIAMVRFARDCQLRMASLSQQLEVALGPDTADLAFRIGMHSGPVTGGVLRG  
QNARFQLFGDTMNAQSRMESTGVKNRIQISETTAKLLIDRGK GKWLEKRSEKVDVKGKGL  
QETYFFKQSYGKHETVSVTSGCDADTIMSALNSVQQPLANLQPLNNCISIKTQRLVKWNT  
EVLFRRIKSILRYRESAVHVEMSQNVANELHRYVLEIACMYRDNPFHNYEHASHVTL SME  
KMLSRVEGTNETTRISISINRYADDITTDPLAQFAVVYSALIHVDVHPVKFNVSPSYVFP  
FCVVAHIQSISYRFFSPIYLVPCLTFRILPGSIKYQLVKEQNSLAIKYHGKSPAENHSI  
NLAWTTLMKPEYGNLVECLCPTASEKMRLWKL VVNAVLATDIFDEDLKE SRNLRWKHVFS  
DSNNPGVSSNNRLEIQDGV DNSDALRVMIVLEHLIQASDVAHTMQHWHVYIKWNERLFHE  
LNEAYRNGRMGNPAEFWYQGELGFFDSYVIPLAKKLRCAVFGVSCEEFLNYAETNRNE  
WEAKGEGIVEDYRRRFQNEKSETAIAQKQEASGMTAASVGVSLPQIRTPVAA  
>comp15684\_c0\_seq1; 300 288 1937 LEN=3305; minus strand; translated  
MTTVVKATFXLEIIVDHVTPFLDRTTYNSFLLLSRRAHSIL TTPRWQSDPLLSQQEQQQQ  
FPPWPRKVVARDHSCRVRCLTFSDDH SLLACGCFD GKIRSWDVRTGELPLPYEGHWPDEA  
VVAVAYSSSNRNLTKWNRKANNRRMLASSSTDGTIASGVSNQTLKRGGQEPVGIHGARQ  
KHTQKQPNGYNLWQTGPRRSSQALICIAADHAYSLHFSPDNSYLVSGHLPVSRTEATLQL  
GETIQIWDVWTGIRLRRLEGGGVPVAF LPSQTLPRDPSQLNSQKSYDYCATNDDQENKNGT  
GTSSASRTEHRLISSCGPSKCFKLWSWSDGTRCDNTS NIAATEGDTVLENDRCVQRWFLD  
PFNTVVPVPTGAMATGGGNDRSTSC TENVRCELLVASIDGPDSFAI WNTSEPGKRRTFRN  
TSPYEIQFSPDGRKVASVDDFNKVKVWRVSDG TLLQSFSGETYCEASDGGYGGSSGCSRC  
CRRTCGRYSSSSNTVTKENDGFEESSPTSSSGD GSGGGLFPIHELAFSKNSSTVAVISRY  
YNEVHLFSA  
>comp15684\_c0\_seq2; 229 1 1808 LEN=3272; minus strand; translated  
XGHGTVCTVLKLRVSYHLTPERQNRNEKNRSLEQHKALTRCIEGTIQREHDCCCSPDH DN  
SCQGNIPLEIIVDHVTPFLDRTTYNSFLLLSRRAHSIL TTPRWQSDPLLSQQEQQQQFPP  
WPRKVVARDHSCRVRCLTFSDDH SLLACGCFD GKIRSWDVRTGELPLPYEGHWPDEAVVA  
VAYSSSNRNLTKWNRKANNRRMLASSSTDGTIASGVSNQTLKRGGQEPVGIHGARQKHT  
QKQPNGYNLWQTGPRRSSQALICIAADHAYSLHFSPDNSYLVSGHLPVSRTEATLQLGET  
IQIWDVWTGIRLRRLEGGGVPVAF LPSQTLPRDPSQLNSQKSYDYCATNDDQENKNGTS  
SASRTEHRLISSCGPSKCFKLWSWSDGTRCDNTS NIAATEGDTVLENDRCVQRWFLD PFN  
TVVPVPTGAMATGGGNDRSTKVRCELLVASIDGPDSFAI WNTSEPGKRRTFRN TSPYEIQ  
FSPDGRKVASVDDFNKVKVWRVSDG TLLQSFSGETYCEASDGGYGGSSGCSRC CRRTCGR  
YSSSSNTVTKENDGFEESSPTSSSGD GSGGGLFPIHELAFSKNSSTVAVISRY YNEVHLF  
SA  
>comp15684\_c0\_seq3; 346 149 1984 LEN=3448; minus strand; translated  
MARVILTRNEKNRSLEQHKALTRCIEGTIQREHDCCCSPDH NSCQGNIPLEIIVDHVTP  
FLDRTTYNSFLLLSRRAHSIL TTPRWQSDPLLSQQEQQQQFPPWPRKVVARDHSCRVRCL  
TFSDDH SLLACGCFD GKIRSWDVRTGELPLPYEGHWPDEAVVAVAYSSSNRNLTKWNRK  
ANNRRMLASSSTDGTIRIWRVQPNPETRRAGTCGDSWSKAETYSKTAERVQPLANGTASV  
FASTKRQRTATVGD EGNECEGVTKNSPTCLICIAADHAYSLHFSPDNSYLVSGHLPVSR  
TEATLQLGETIQIWDVWTGIRLRRLEGGGVPVAF LPSQTLPRDPSQLNSQKSYDYCATNDD  
QENKNGTSSASRTEHRLISSCGPSKCFKLWSWSDGTRCDNTS NIAATEGDTVLENDRCV  
QRWFLD PFNTVVPVPTGAMATGGGNDRSTKVRCELLVASIDGPDSFAI WNTSEPGKRRTF  
RNTSPYEIQFSPDGRKVASVDDFNKVKVWRVSDG TLLQSFSGETYCEASDGGYGGSSGCS  
RCCRRTCGRYSSSSNTVTKENDGFEESSPTSSSGD GSGGGLFPIHELAFSKNSSTVAVIS  
RYNEVHLFSA  
>comp15684\_c0\_seq4; 1050 3736 5364 LEN=5495; translated  
MVLRSAVSTVAKRVALVTAAQTARRAATRGMASQTLELSSFLEAKIGAAAGAEDTSVQYA  
ETGSVISVGDGIARVYGLSNVQAGEMVVFACGLRGMALNLEEDNVGVVIFGDDRDILEGD  
NVTRTGAIVDVPVGPPELLGRVVDGIGQPIDGGASLDKIKRSRAEAKAPGII PRESVSEPM  
LTGLKAVDALIPIGRGQRELVI GDRQTGKTAIAIDTIINQTKKEPLACIYVGVGQKRST  
IAQLVGQLDERDAMDNCIIVAATASDSAPLQFLAPYTGAA MGEYFRDSGKHAVIFYDDL S  
KQAVAYRQMSLLLRPPGREAYPGDV FYLHSRLLERA AKMNSALGGGSLTALPVIETQAG  
DVSAYIPTNVISITDQIFLESELFYQQRPAISVGLSVSRVGSAAQYKATKAVAGTMKL  
ELAQYREVAFAKFGSDLDAATQQQLNRGVRLYELLKQGYEPQEPEEVVASLYIGVKGY  
CDRVPVENVQDFESAWLTHMKTAHSGVMQKIVDAGYALPDDVEAELAKCAEEFTSAYEPP  
SE  
>comp15684\_c0\_seq5; 1050 3522 5150 LEN=5281; translated

MVLRSAVSTVAKRVALVTAAQTARRAATRGMASQTLELSSFLEAKIGAAAGAEDTSVQYA  
ETGSVISVGDGIARVYGLSNVQAGEMVVFACGLRGMALNLEEDNVGVVIFGDDRDILEGD  
NVTRTGAIVDVPVGPPELLGRVVDGIGQPIDGGASLDKIKRSRAEAKAPGIIIPRESVSEPM  
LTGLKAVDALIPIGRGQRELVIIGDRQTGKTAIAIDTIINQKTKKEPLACIYVGVGQKRST  
IAQLVGQLDERDAMDNCIIVAATASDSAPLQFLAPYTGAAAMGEYFRDSGKHAVIFYDDL  
KQAVAYRQMSLLLRPPGREAYPGDVFYLHSRLLERAAKMNSALGGGSLTALPVIETQAG  
DVSAYIPTNVISITDGQIFLESELFYQGQRPAISVGLSVSRVGSAAQYKATKAVAGTMKL  
ELAQYREVAFAKFGSDDAATQQQLNRGVRLYELLKQGQYEPQEPEEVVASLYIGVKGY  
CDRVPVENVQDFESAWLTHMKTAHSGVMQKIVDAGYALPDDVEAELAKCAEEFTSAYEPP  
SE

>comp15684\_c0\_seq6; 300 271 1920 LEN=3288; minus strand; translated  
MTTVVKATFXLEIIVDHVTFPLDRTTYNSFLLLSRRRAHSILTPRWQSDPLLSQQEQQQQ  
FPPWPRKVVARDHSCRVRCLTFSDHSLACGCFDGIKRSWDVRTGELPLPYEGHWPDEA  
VVAVAYSSSNRNLTKWNRKANRRMLASSSTDGTIASGVSNQTLKRGQEPVGIHGARQ  
KHTQKQPNGYNLWQTGPRRSSQALICIAADHAYSLHFSFDNSYLVSGHLPVSRTEATLQL  
GETIQIWDVWTGIRLRRLEGGGVPVAFVLPSTLPRDPSQLNSQKSYDYCATNDDQENKN  
GTSSASRTEHRLISSCGPSKCFKLWSWSDGTRCDNTSNIATEGDTVLENDRCVQRWFLD  
PFNTVVPVPTGAMATGGGNDRSTSC TENVRCELLVASIDGPDSFAIWNTPSEPGRRTFRN  
TSPYEIQFSPDGRKVASVDDFNKVKVWRVSDGTLQSFSGETYCEASDGGYGGSSGCSRC  
CRRTCGRYSSSNTVTKENDGFEESPTSSSGDGSGLFPIHELAFSKNSSTVAVISRY  
YNEVHLFSA

>comp15684\_c0\_seq7; 905 415 2029 LEN=2029; translated  
MKFHEDDTIMATLQFPSPVFNNSDYYYQHYHYMTTILFVNDVWVTNTPSAICIFELLCR  
DVGNLFLNPFXTARRAATRGMASQTLELSSFLEAKIGAAAGAEDTSVQYAETGSVISV  
DGIARVYGLSNVQAGEMVVFACGLRGMALNLEEDNVGVVIFGDDRDILEGDNVTRTGAI  
DVPVGPPELLGRVVDGIGQPIDGGASLDKIKRSRAEAKAPGIIIPRESVSEPM  
LTGLKAVDALIPIGRGQRELVIIGDRQTGKTAIAIDTIINQKTKKEPLACIYVGVGQKRST  
IAQLVGQLDERDAMDNCIIVAATASDSAPLQFLAPYTGAAAMGEYFRDSGKHAVIFYDDL  
SKQAVAYRQMSLLLRPPGREAYPGDVFYLHSRLLERAAKMNSALGGGSLTALPVIETQAG  
DVSAYIPTNVISITDGQIFLESELFYQGQRPAISVGLSVSRVGSAAQYKATKAVAGTMKL  
ELAQYREVAFAKFGSDDAATQQQLNRGVRLYELLKQGQYEPQEPEEVVASLYIGVKGY  
CDRVPVEX

>comp15684\_c0\_seq8; 1050 3785 5413 LEN=5544; translated  
MVLRSAVSTVAKRVALVTAAQTARRAATRGMASQTLELSSFLEAKIGAAAGAEDTSVQYA  
ETGSVISVGDGIARVYGLSNVQAGEMVVFACGLRGMALNLEEDNVGVVIFGDDRDILEGD  
NVTRTGAIVDVPVGPPELLGRVVDGIGQPIDGGASLDKIKRSRAEAKAPGIIIPRESVSEPM  
LTGLKAVDALIPIGRGQRELVIIGDRQTGKTAIAIDTIINQKTKKEPLACIYVGVGQKRST  
IAQLVGQLDERDAMDNCIIVAATASDSAPLQFLAPYTGAAAMGEYFRDSGKHAVIFYDDL  
KQAVAYRQMSLLLRPPGREAYPGDVFYLHSRLLERAAKMNSALGGGSLTALPVIETQAG  
DVSAYIPTNVISITDGQIFLESELFYQGQRPAISVGLSVSRVGSAAQYKATKAVAGTMKL  
ELAQYREVAFAKFGSDDAATQQQLNRGVRLYELLKQGQYEPQEPEEVVASLYIGVKGY  
CDRVPVENVQDFESAWLTHMKTAHSGVMQKIVDAGYALPDDVEAELAKCAEEFTSAYEPP  
SE

>comp15684\_c0\_seq9; 1050 3510 5138 LEN=5269; translated  
MVLRSAVSTVAKRVALVTAAQTARRAATRGMASQTLELSSFLEAKIGAAAGAEDTSVQYA  
ETGSVISVGDGIARVYGLSNVQAGEMVVFACGLRGMALNLEEDNVGVVIFGDDRDILEGD  
NVTRTGAIVDVPVGPPELLGRVVDGIGQPIDGGASLDKIKRSRAEAKAPGIIIPRESVSEPM  
LTGLKAVDALIPIGRGQRELVIIGDRQTGKTAIAIDTIINQKTKKEPLACIYVGVGQKRST  
IAQLVGQLDERDAMDNCIIVAATASDSAPLQFLAPYTGAAAMGEYFRDSGKHAVIFYDDL  
KQAVAYRQMSLLLRPPGREAYPGDVFYLHSRLLERAAKMNSALGGGSLTALPVIETQAG  
DVSAYIPTNVISITDGQIFLESELFYQGQRPAISVGLSVSRVGSAAQYKATKAVAGTMKL  
ELAQYREVAFAKFGSDDAATQQQLNRGVRLYELLKQGQYEPQEPEEVVASLYIGVKGY  
CDRVPVENVQDFESAWLTHMKTAHSGVMQKIVDAGYALPDDVEAELAKCAEEFTSAYEPP  
SE

>comp15684\_c0\_seq10; 1050 3748 5376 LEN=5507; translated  
MVLRSAVSTVAKRVALVTAAQTARRAATRGMASQTLELSSFLEAKIGAAAGAEDTSVQYA  
ETGSVISVGDGIARVYGLSNVQAGEMVVFACGLRGMALNLEEDNVGVVIFGDDRDILEGD  
NVTRTGAIVDVPVGPPELLGRVVDGIGQPIDGGASLDKIKRSRAEAKAPGIIIPRESVSEPM  
LTGLKAVDALIPIGRGQRELVIIGDRQTGKTAIAIDTIINQKTKKEPLACIYVGVGQKRST  
IAQLVGQLDERDAMDNCIIVAATASDSAPLQFLAPYTGAAAMGEYFRDSGKHAVIFYDDL  
KQAVAYRQMSLLLRPPGREAYPGDVFYLHSRLLERAAKMNSALGGGSLTALPVIETQAG



DVSAYIPTNVISITDQIFLESELYQQRPAISVGLSVSRVGSAAQYKATKAVAGTMKL  
ELAQYREVAFAKFGSDLAATQQQLNRGVRLYELLKQGQYEPQEPEEVVASLYIGVKGY  
CDRVPVENVQDFESAWLTHMKTASGVMQKIVDAGYALPDDVEAELAKCAEEFTSAYEPP  
SE

>comp15684\_c0\_seq11; 341 187 1913 LEN=3281; minus strand; translated  
MTTVVKATFXLEIIVDHVTPFLDRTTYNSFLLLSRRAHSILTPRWQSDPLLSQQEQQQQ  
FPPWPRKVVARHDHSCRVRCLTFSDHSLACGCFDGGKIRSWDVRTGELPLPYEGHWPDEA  
VVAVAYSSNRNLTKWNRKANNRMLASSSTDGTIRIWRVQPNPETRRAGTCGDSWSKA  
ETYSKTAERVQPLANGTASVFASTKRQRTATVGDEGNECEGVTKNSPTCLICIAADHAYS  
LHFSPDNSYLVSGHLPVSRTEATLQLGETIQIWDVWTGIRLRRLEGGGVPVAFLPSQTLR  
RDPSQLNSQKSYDYCATNDDQENKNGTSSASRTEHRLISSCGPSKCFKLWSWSDGTRCD  
NTSNIATEGDTVLENDRCVQRWFLDPFNTVVPVPTGAMATGGGNDRSTSTCTENVRCELL  
VASIDGPDSFAIWNTSEPGKRRTFRNTSPYEIQFSPDGRKVASVDDFNKVKVWRVSDGTL  
LQFSGETYCEASDGGYGGSSGCSRCCRRTCGRYSSSSNTVTKENDGFEESPTSSSGDG  
SGGGLFPIHELAFSKNSSTVAVISRYNEVHLFSA

>comp15684\_c0\_seq12; 275 1 1897 LEN=3361; minus strand; translated  
XGHGTVCTVLKLRVSYHLTPERQNRNEKNRSLEQHKALTRCIEGTIQREHDCCCSPDHDN  
SCQGNIPLEIIVDHVTPFLDRTTYNSFLLLSRRAHSILTPRWQSDPLLSQQEQQQQFPP  
WPRKVVARHDHSCRVRCLTFSDHSLACGCFDGGKIRSWDVRTGELPLPYEGHWPDEAVVA  
VAYSSNRNLTKWNRKANNRMLASSSTDGTIRIWRVQPNPETRRAGTCGDSWSKAETY  
SKTAERVQPLANGTASVFASTKRQRTATVGDEGNECEGVTKNSPTCLICIAADHAYSLHF  
SPDNSYLVSGHLPVSRTEATLQLGETIQIWDVWTGIRLRRLEGGGVPVAFLPSQTLRDP  
SQLNSQKSYDYCATNDDQENKNGTSSASRTEHRLISSCGPSKCFKLWSWSDGTRCDNTS  
NIAATEGDTVLENDRCVQRWFLDPFNTVVPVPTGAMATGGGNDRSTSTCTENVRCELLVAS  
IDGPDSFAIWNTSEPGKRRTFRNTSPYEIQFSPDGRKVASVDDFNKVKVWRVSDGTLQFS  
FSGETYCEASDGGYGGSSGCSRCCRRTCGRYSSSSNTVTKENDGFEESPTSSSGDGSGG  
GLFPIHELAFSKNSSTVAVISRYNEVHLFSA

>comp15684\_c0\_seq13; 1050 3599 5227 LEN=5358; translated  
MVLRSVSTVAKRVALVTAAQTARRAATRGMASQTLLELSSFLEAKIGAAAGAEDTSVQYA  
ETGSVISVGDGIARVYGLSNVQAGEMVVFACGLRGMALNLEEDNVGVVIFGDDRDILEGD  
NVTRTGAIVDVVPVGPPELLGRVVDGIGQPIDGGASLDDKIKRSRAEAKAPGIIIPRESVSEPM  
LTGLKAVDALIPIGRGQRELVIIGDRQTGKTAIAIDTIINQTKKEPLACIYVGVGQKRST  
IAQLVGQLDERDAMDNCIIVAATASDSAPLQFLAPYTGAAAMGEYFRDSGKHAVIFYDDL  
KQAVAYRQMSLLLRPPGREAYPGDVFYLHSRLLERAAKMNSALGGGSLTALPVIETQAG  
DVSAYIPTNVISITDQIFLESELYQQRPAISVGLSVSRVGSAAQYKATKAVAGTMKL  
ELAQYREVAFAKFGSDLAATQQQLNRGVRLYELLKQGQYEPQEPEEVVASLYIGVKGY  
CDRVPVENVQDFESAWLTHMKTASGVMQKIVDAGYALPDDVEAELAKCAEEFTSAYEPP  
SE

>comp15684\_c0\_seq14; 270 1 1885 LEN=3349; minus strand; translated  
XGHGTVCTVLKLRVSYHLTPERQNRNEKNRSLEQHKALTRCIEGTIQREHDCCCSPDHDN  
SCQGNIPLEIIVDHVTPFLDRTTYNSFLLLSRRAHSILTPRWQSDPLLSQQEQQQQFPP  
WPRKVVARHDHSCRVRCLTFSDHSLACGCFDGGKIRSWDVRTGELPLPYEGHWPDEAVVA  
VAYSSNRNLTKWNRKANNRMLASSSTDGTIRIWRVQPNPETRRAGTCGDSWSKAETY  
SKTAERVQPLANGTASVFASTKRQRTATVGDEGNECEGVTKNSPTCLICIAADHAYSLHF  
SPDNSYLVSGHLPVSRTEATLQLGETIQIWDVWTGIRLRRLEGGGVPVAFLPSQTLRDP  
SQLNSQKSYDYCATNDDQENKNGTSSASRTEHRLISSCGPSKCFKLWSWSDGTRCDNTS  
NIAATEGDTVLENDRCVQRWFLDPFNTVVPVPTGAMATGGGNDRSTKVRCELLVASIDGP  
DSFAIWNTSEPGKRRTFRNTSPYEIQFSPDGRKVASVDDFNKVKVWRVSDGTLQFSGE  
TYCEASDGGYGGSSGCSRCCRRTCGRYSSSSNTVTKENDGFEESPTSSSGDGSGGGLFPI  
IHELAFSKNSSTVAVISRYNEVHLFSA

>comp15684\_c0\_seq15; 1050 3813 5441 LEN=5572; translated  
MVLRSVSTVAKRVALVTAAQTARRAATRGMASQTLLELSSFLEAKIGAAAGAEDTSVQYA  
ETGSVISVGDGIARVYGLSNVQAGEMVVFACGLRGMALNLEEDNVGVVIFGDDRDILEGD  
NVTRTGAIVDVVPVGPPELLGRVVDGIGQPIDGGASLDDKIKRSRAEAKAPGIIIPRESVSEPM  
LTGLKAVDALIPIGRGQRELVIIGDRQTGKTAIAIDTIINQTKKEPLACIYVGVGQKRST  
IAQLVGQLDERDAMDNCIIVAATASDSAPLQFLAPYTGAAAMGEYFRDSGKHAVIFYDDL  
KQAVAYRQMSLLLRPPGREAYPGDVFYLHSRLLERAAKMNSALGGGSLTALPVIETQAG  
DVSAYIPTNVISITDQIFLESELYQQRPAISVGLSVSRVGSAAQYKATKAVAGTMKL  
ELAQYREVAFAKFGSDLAATQQQLNRGVRLYELLKQGQYEPQEPEEVVASLYIGVKGY  
CDRVPVENVQDFESAWLTHMKTASGVMQKIVDAGYALPDDVEAELAKCAEEFTSAYEPP

SE

>comp15684\_c0\_seq16; 272 336 2171 LEN=3539; minus strand; translated  
MARVILTRNEKNRSLEQHKALTRCIEGTIQREHDCCCSPDHDNSCQGNIPLEIIVDHVTP  
FLDRTTYNSFLLLSRRAHSILTPRWQSDPLLSQQEQQQQFPPWPRKVVARDHSCRVRCL  
TFSDDHSLACGCFDGGKIRSWDVRTGELPLPYEGHWPDEAVVAVAYSSSNRNLTKWNRK  
ANNRRMLASSSTDGTIRIWRVQPNPETRRAGTCGDSWSKAETYSKTAERVQPLANGTASV  
FASTKRQRTATVGDGNECEGVTKNSPTCLICIAADHAYSLHFSPDNSYLVSGHLPVSRT  
EATLQLGETIQIWDVWTGIRLRRLEGGGVPVAFPLPSQTLPRDPSQLNSQKSYDYCATNDD  
QENKNGTSSASRTEHRLISSCGPSKCFKLWSWSGDGTRCDNTSNIAATEGDTVLENDRCV  
QRWFLDPFNTVVPVPTGAMATGGGNDRSTKVRCELLVASIDGPDSFAIWNTSEPGKRRTF  
RNTSPYEIQFSPDGRKVASVDDFNKVKVWRVSDGTLQSFSGETYCEASDGGYGGSSGCS  
RCCRRTCGRYSSSSNTVTKENDGFEESPTSSSGDGS GGGLFPIHELAFSKNSSTVAVIS  
RYYNEVHLFSA

>comp15684\_c0\_seq17; 274 235 2082 LEN=3546; minus strand; translated  
MARVILTRNEKNRSLEQHKALTRCIEGTIQREHDCCCSPDHDNSCQGNIPLEIIVDHVTP  
FLDRTTYNSFLLLSRRAHSILTPRWQSDPLLSQQEQQQQFPPWPRKVVARDHSCRVRCL  
TFSDDHSLACGCFDGGKIRSWDVRTGELPLPYEGHWPDEAVVAVAYSSSNRNLTKWNRK  
ANNRRMLASSSTDGTIRIWRVQPNPETRRAGTCGDSWSKAETYSKTAERVQPLANGTASV  
FASTKRQRTATVGDGNECEGVTKNSPTCLICIAADHAYSLHFSPDNSYLVSGHLPVSRT  
EATLQLGETIQIWDVWTGIRLRRLEGGGVPVAFPLPSQTLPRDPSQLNSQKSYDYCATNDD  
QENKNGTSSASRTEHRLISSCGPSKCFKLWSWSGDGTRCDNTSNIAATEGDTVLENDRCV  
QRWFLDPFNTVVPVPTGAMATGGGNDRSTCTENVRCELLVASIDGPDSFAIWNTSEPGK  
RRTFRNTSPYEIQFSPDGRKVASVDDFNKVKVWRVSDGTLQSFSGETYCEASDGGYGGSS  
SGCSRCCRRTCGRYSSSSNTVTKENDGFEESPTSSSGDGS GGGLFPIHELAFSKNSSTV  
AVISRYYNEVHLFSA

>comp15684\_c0\_seq18; 295 271 1908 LEN=3276; minus strand; translated  
MTTVVKATFXLEIIVDHVTPFLDRTTYNSFLLLSRRAHSILTPRWQSDPLLSQQEQQQQ  
FPPWPRKVVARDHSCRVRCLTFSDDHSLACGCFDGGKIRSWDVRTGELPLPYEGHWPDEA  
VVAVAYSSSNRNLTKWNRKANNRRMLASSSTDGTIASGVSNQTLKRGGQEPVGIHGARQ  
KHTQKQPNGYNLWQTGPRRSSQALICIAADHAYSLHFSPDNSYLVSGHLPVSRTTEATLQL  
GETIQIWDVWTGIRLRRLEGGGVPVAFPLPSQTLPRDPSQLNSQKSYDYCATNDDQENK  
GTSSASRTEHRLISSCGPSKCFKLWSWSGDGTRCDNTSNIAATEGDTVLENDRCVQRWFLD  
PFNTVVPVPTGAMATGGGNDRSTKVRCELLVASIDGPDSFAIWNTSEPGKRRTFRNTSPY  
EIQFSPDGRKVASVDDFNKVKVWRVSDGTLQSFSGETYCEASDGGYGGSSGCSRCCRRT  
CGRYSSSSNTVTKENDGFEESPTSSSGDGS GGGLFPIHELAFSKNSSTVAVISRYYNEV  
HLFSA

>comp15684\_c0\_seq19; 226 280 2050 LEN=3514; minus strand; translated  
MARVILTRNEKNRSLEQHKALTRCIEGTIQREHDCCCSPDHDNSCQGNIPLEIIVDHVTP  
FLDRTTYNSFLLLSRRAHSILTPRWQSDPLLSQQEQQQQFPPWPRKVVARDHSCRVRCL  
TFSDDHSLACGCFDGGKIRSWDVRTGELPLPYEGHWPDEAVVAVAYSSSNRNLTKWNRK  
ANNRRMLASSSTDGTIASGVSNQTLKRGGQEPVGIHGARQKHTQKQPNGYNLWQTGPRRS  
SQALICIAADHAYSLHFSPDNSYLVSGHLPVSRTTEATLQLGETIQIWDVWTGIRLRRLE  
GGVPVAFPLPSQTLPRDPSQLNSQKSYDYCATNDDQENKNGTSSASRTEHRLISSCGPSK  
CFKLWSWSGDGTRCDNTSNIAATEGDTVLENDRCVQRWFLDPFNTVVPVPTGAMATGGGND  
RSTCTENVRCELLVASIDGPDSFAIWNTSEPGKRRTFRNTSPYEIQFSPDGRKVASVDD  
FNKVKVWRVSDGTLQSFSGETYCEASDGGYGGSSGCSRCCRRTCGRYSSSSNTVTKEND  
GFEESPTSSSGDGS GGGLFPIHELAFSKNSSTVAVISRYYNEVHLFSA

>comp15684\_c0\_seq20; 234 1 1820 LEN=3284; minus strand; translated  
XGHGTVCTVLKLRVSYHLTPERQNRNEKNRSLEQHKALTRCIEGTIQREHDCCCSPDHDN  
SCQGNIPLEIIVDHVTPFLDRTTYNSFLLLSRRAHSILTPRWQSDPLLSQQEQQQQFPP  
WPRKVVARDHSCRVRCLTFSDDHSLACGCFDGGKIRSWDVRTGELPLPYEGHWPDEAVVA  
VAYSSSNRNLTKWNRKANNRRMLASSSTDGTIASGVSNQTLKRGGQEPVGIHGARQKHT  
QKQPNGYNLWQTGPRRSSQALICIAADHAYSLHFSPDNSYLVSGHLPVSRTTEATLQLGET  
IQIWDVWTGIRLRRLEGGGVPVAFPLPSQTLPRDPSQLNSQKSYDYCATNDDQENKNGTS  
SASRTEHRLISSCGPSKCFKLWSWSGDGTRCDNTSNIAATEGDTVLENDRCVQRWFLDPFN  
TVVPVPTGAMATGGGNDRSTCTENVRCELLVASIDGPDSFAIWNTSEPGKRRTFRNTSP  
YEIQFSPDGRKVASVDDFNKVKVWRVSDGTLQSFSGETYCEASDGGYGGSSGCSRCCR  
TCGRYSSSSNTVTKENDGFEESPTSSSGDGS GGGLFPIHELAFSKNSSTVAVISRYYNE  
VHLFSA

>comp15684\_c0\_seq21; 341 215 1941 LEN=3309; minus strand; translated

MTTVVKATFXLEIIVDHVTPFLDRTTYNSFLLLSRRAHSILTPRWQSDPLLSQQEQQQQ  
FPPWPRKVVARDHSCRVRCLTFSDHSLACGCFDVKIRSWDVRTGELPLPYEGHWPDEA  
VVAVAYSSSNRNLTKWNRKANNRMLASSSTDGTIRIWRVQPNPETRRAGTCGDSWSKA  
ETYSKTAERVQPLANGTASVFASTKRQRTATVGDEGNECEGVTKNSPTCLICIAADHAYS  
LHFSPDNSYLVSGHLPVSRTEATLQLGETIQIWDVWTGIRLRRLEGGGVPVAFPLPSQTL  
RDPSQLNSQKSYDYCATNDDQENKNGTSSASRTEHRLISSCGPSKCFKLWSWSDGTRCD  
NTSNIAATEGDTVLENDRCVQRWFLDPFNTVVPVPTGAMATGGGNDRSTSTENVRCELL  
VASIDGPDSFAIWNTSEPGKRRTFRNTSPYEIQFSPDGRKVASVDDFNKVKVWRVSDGTL  
LQSFSGETYCEASDGGYGGSSGCSRCCRRTCGRYSSSSNTVTKENDGFEESSPTSSSGDG  
SGGGLFPIHELAFSKNSSTVAVISRYNEVHLFSA

>comp15684\_c0\_seq22; 1050 3773 5401 LEN=5532; translated  
MVLRSVSTVAKRVALVTAAQTARRAATRGMASQTLELSSFLEAKIGAAAGAEDTSVQYA  
ETGSVISVGDGIARVYGLSNVQAGEMVVFACGLRGMALNLEEDNVGVVIFGDDRILEGD  
NVTRTGAIVDVVPVGPPELLGRVVDGIGQPIDGGASLDKIKRSRAEAKAPGIIIPRESVSEPM  
LTGLKAVDALIPIGRGQRELVIIGDRQTGKTAIAIDTIINQTKKEPLACIYVGVGQKRST  
IAQLVGQLDERDAMDNCIIIVAAATASDAPLQFLAPYTGAAAMGEYFRDSGKHAVIFYDDL  
KQAVAYRQMSLLRRPPGREAYPGDVFYLHSRLLERAAKMNSALGGGSLTALPVIETQAG  
DVSAYIPTNVISITDGQIFLESELFYQQRPAISVGLSVSRVGSAAQYKATKAVAGTMKL  
ELAQYREVAFAKFGSDLDAATQQQLNRGVRLYELLKQGQYEPQEPPEEVVASLYIGVKGY  
CDRVPEENVQDFESAWLTHMKTAAHSGVMQKIVDAGYALPDDVEAELAKCAEEFTSAYEPP  
SE

>comp15684\_c0\_seq23; 224 235 1993 LEN=3457; minus strand; translated  
MARVILTRNEKNRSLEQHKALTRCIEGTIQREHDCCCSPDHNSCQGNIPLEIIVDHVTP  
FLDRTTYNSFLLLSRRAHSILTPRWQSDPLLSQQEQQQQFPPWPRKVVARDHSCRVRCL  
TFSDHSLACGCFDVKIRSWDVRTGELPLPYEGHWPDEAVVAVAYSSSNRNLTKWNRK  
ANNRMLASSSTDGTIASGVSNQTLKRGQEPVGIHGARKHTQKQPNNGYNLWQTGPRRS  
SQALICIAADHAYSLHFSPDNSYLVSGHLPVSRTEATLQLGETIQIWDVWTGIRLRRLE  
GGVVPVAFPLPSQTLPRDPSQLNSQKSYDYCATNDDQENKNGTSSASRTEHRLISSCGPSK  
CFKLWSWSDGTRCDNTSNIAATEGDTVLENDRCVQRWFLDPFNTVVPVPTGAMATGGGND  
RSTKVRCELLVASIDGPDSFAIWNTSEPGKRRTFRNTSPYEIQFSPDGRKVASVDDFNK  
KVWRVSDGTLQSFSGETYCEASDGGYGGSSGCSRCCRRTCGRYSSSSNTVTKENDGFEE  
SSPTSSSGDGSGGGLFPIHELAFSKNSSTVAVISRYNEVHLFSA

>comp15684\_c0\_seq24; 274 336 2183 LEN=3551; minus strand; translated  
MARVILTRNEKNRSLEQHKALTRCIEGTIQREHDCCCSPDHNSCQGNIPLEIIVDHVTP  
FLDRTTYNSFLLLSRRAHSILTPRWQSDPLLSQQEQQQQFPPWPRKVVARDHSCRVRCL  
TFSDHSLACGCFDVKIRSWDVRTGELPLPYEGHWPDEAVVAVAYSSSNRNLTKWNRK  
ANNRMLASSSTDGTIRIWRVQPNPETRRAGTCGDSWSKAETYSKTAERVQPLANGTASV  
FASTKRQRTATVGDEGNECEGVTKNSPTCLICIAADHAYSLHFSPDNSYLVSGHLPVSR  
EATLQLGETIQIWDVWTGIRLRRLEGGGVPVAFPLPSQTLPRDPSQLNSQKSYDYCATNDD  
QENKNGTSSASRTEHRLISSCGPSKCFKLWSWSDGTRCDNTSNIAATEGDTVLENDRCV  
QRWFLDPFNTVVPVPTGAMATGGGNDRSTSTENVRCELLVASIDGPDSFAIWNTSEPGK  
RRTFRNTSPYEIQFSPDGRKVASVDDFNKVKVWRVSDGTLQSFSGETYCEASDGGYGG  
SGCSRCCRRTCGRYSSSSNTVTKENDGFEESSPTSSSGDGSGGGLFPIHELAFSKNSSTV  
AVISRYNEVHLFSA

>comp15684\_c0\_seq25; 295 232 1869 LEN=3237; minus strand; translated  
MTTVVKATFXLEIIVDHVTPFLDRTTYNSFLLLSRRAHSILTPRWQSDPLLSQQEQQQQ  
FPPWPRKVVARDHSCRVRCLTFSDHSLACGCFDVKIRSWDVRTGELPLPYEGHWPDEA  
VVAVAYSSSNRNLTKWNRKANNRMLASSSTDGTIASGVSNQTLKRGQEPVGIHGARK  
KHTQKQPNNGYNLWQTGPRRSQALICIAADHAYSLHFSPDNSYLVSGHLPVSRTEATLQL  
GETIQIWDVWTGIRLRRLEGGGVPVAFPLPSQTLPRDPSQLNSQKSYDYCATNDDQENK  
GTSSASRTEHRLISSCGPSKCFKLWSWSDGTRCDNTSNIAATEGDTVLENDRCVQRWFL  
PFNTVVPVPTGAMATGGGNDRSTKVRCELLVASIDGPDSFAIWNTSEPGKRRTFRNTSPY  
EIQFSPDGRKVASVDDFNKVKVWRVSDGTLQSFSGETYCEASDGGYGGSSGCSRCCRRT  
CGRYSSSSNTVTKENDGFEESSPTSSSGDGSGGGLFPIHELAFSKNSSTVAVISRYNEV  
HLFSA

>comp15684\_c0\_seq26; 1050 3825 5453 LEN=5584; translated  
MVLRSVSTVAKRVALVTAAQTARRAATRGMASQTLELSSFLEAKIGAAAGAEDTSVQYA  
ETGSVISVGDGIARVYGLSNVQAGEMVVFACGLRGMALNLEEDNVGVVIFGDDRILEGD  
NVTRTGAIVDVVPVGPPELLGRVVDGIGQPIDGGASLDKIKRSRAEAKAPGIIIPRESVSEPM  
LTGLKAVDALIPIGRGQRELVIIGDRQTGKTAIAIDTIINQTKKEPLACIYVGVGQKRST

IAQLVGQLDERDAMDNCIIVAATASDSAPLQFLAPYTGAAAMGEYFRDSGKHAVIFYDDL  
KQAVAYRQMSLLLRPPGREAYPGDVFYLHSRLLERAAKMNSALGGGSLTALPVIETQAG  
DVSAYIPTNVISITDGQIFLESELFYQGQRPAISVGLSVSRVGSAAQYKATKAVAGTMKL  
ELAQYREVAFAKFGSDLDAATQQQLNRGVRLYELLKQGQYEPQEPEEVVASLYIGVKGY  
CDRVPVENVQDFESAWLTHMKTAHSGVMQKIVDAGYALPDDVEAELAKCAEEFTSAYEPP  
SE

>comp15684\_c0\_seq27; 336 187 1901 LEN=3269; minus strand; translated  
MTTVVKATFXLEIIVDHVTPFLDRTTYNSFLLLSRRAHSILTPRWQSDPLLSQQEQQQQ  
FPPWPRKVVARDHSCRVRCLTFSDHSLACGCFDVKIRSWDVRTGELPLPYEGHWPDEA  
VVAVAYSSSNRNLTKWNRKANRRMLASSSTDGTIRIWRVQPNPETRRAGTCGDSWSKA  
ETYSKTAERVQPLANGTASVFASTKRQRTATVGDEGNECEGVTKNSPTCLICIAADHAYS  
LHFSPDNSYLVSGHLPVSRTEATLQLGETIQIWDVWTGIRLRRLEGGGVPVAFPLPSQTL  
RDPSQLNSQKSYDYCATNDDQENKNGTSSASRTEHRLISSCGPSKCFKLWSWSDGTRCD  
NTSNIATEGDTVLENDRCVQRWFLDPFNTVVPVPTGAMATGGGNDRSTKVRCELLVASI  
DGPDSFAIWNTSEPGKRRTFRNTSPYEIQFSPDGRKVASVDDFNKVKVWRVSDGTLLQSF  
SGETYCEASDGGYGGSSGCSRCCRRTCGRYSSSSNTVTKENDGFEESSPTSSSGDGSGGG  
LFPIHELAFSKNSSTVAVISRYNEVHLFSA

>comp15684\_c0\_seq28; 336 215 1929 LEN=3297; minus strand; translated  
MTTVVKATFXLEIIVDHVTPFLDRTTYNSFLLLSRRAHSILTPRWQSDPLLSQQEQQQQ  
FPPWPRKVVARDHSCRVRCLTFSDHSLACGCFDVKIRSWDVRTGELPLPYEGHWPDEA  
VVAVAYSSSNRNLTKWNRKANRRMLASSSTDGTIRIWRVQPNPETRRAGTCGDSWSKA  
ETYSKTAERVQPLANGTASVFASTKRQRTATVGDEGNECEGVTKNSPTCLICIAADHAYS  
LHFSPDNSYLVSGHLPVSRTEATLQLGETIQIWDVWTGIRLRRLEGGGVPVAFPLPSQTL  
RDPSQLNSQKSYDYCATNDDQENKNGTSSASRTEHRLISSCGPSKCFKLWSWSDGTRCD  
NTSNIATEGDTVLENDRCVQRWFLDPFNTVVPVPTGAMATGGGNDRSTKVRCELLVASI  
DGPDSFAIWNTSEPGKRRTFRNTSPYEIQFSPDGRKVASVDDFNKVKVWRVSDGTLLQSF  
SGETYCEASDGGYGGSSGCSRCCRRTCGRYSSSSNTVTKENDGFEESSPTSSSGDGSGGG  
LFPIHELAFSKNSSTVAVISRYNEVHLFSA

>comp15684\_c0\_seq29; 224 336 2094 LEN=3462; minus strand; translated  
MARVILTRNEKNRSLEQHKALTRCIEGTIQREHDCCCSPDHDNSCQGNIPLEIIVDHVTP  
FLDRTTYNSFLLLSRRAHSILTPRWQSDPLLSQQEQQQQFPPWPRKVVARDHSCRVRCL  
TFSDHSLACGCFDVKIRSWDVRTGELPLPYEGHWPDEAVVAVAYSSSNRNLTKWNRK  
ANNRRMLASSSTDGTIASGVSNQTLKRGQEPVGIHGARKHTQKQPNGYNLWQTGPRRS  
SQALICIAADHAYSLHFSPDNSYLVSGHLPVSRTEATLQLGETIQIWDVWTGIRLRRLE  
GGVPVAFPLPSQTLPRDPSQLNSQKSYDYCATNDDQENKNGTSSASRTEHRLISSCGPSK  
CFKLWSWSDGTRCDNTSNIATEGDTVLENDRCVQRWFLDPFNTVVPVPTGAMATGGGND  
RSTKVRCELLVASIDGPDSFAIWNTSEPGKRRTFRNTSPYEIQFSPDGRKVASVDDFNK  
KVWRVSDGTLLQSFSGETYCEASDGGYGGSSGCSRCCRRTCGRYSSSSNTVTKENDGFEE  
SSPTSSSGDGSGGGLFPIHELAFSKNSSTVAVISRYNEVHLFSA

>comp15684\_c0\_seq30; 1050 3708 5336 LEN=5467; translated  
MVLRSVSTVAKRVALVTAAQTARRAATRGMASQTLLELSSFLEAKIGAAAGAEDTSVQYA  
ETGSVISVGDGIARVYGLSNVQAGEMVVFACGLRGMALNLEEDNVGVVIFGDDRDI  
LEGD  
NVTRTGAIVDVVPVGPPELLGRVVDGIGQPIDGGASLDKIKRSRAEAKAPGII  
PRESVSEPM  
LTGLKAVDALIPIGRGQRELVI  
GDRQTGKTAIAIDTI  
INQTKKEPLACIYVGVGQKRST  
IAQLVGQLDERDAMDNCIIVAATASDSAPLQFLAPYTGAAAMGEYFRDSGKHAVIFYDDL  
KQAVAYRQMSLLLRPPGREAYPGDVFYLHSRLLERAAKMNSALGGGSLTALPVIETQAG  
DVSAYIPTNVISITDGQIFLESELFYQGQRPAISVGLSVSRVGSAAQYKATKAVAGTMKL  
ELAQYREVAFAKFGSDLDAATQQQLNRGVRLYELLKQGQYEPQEPEEVVASLYIGVKGY  
CDRVPVENVQDFESAWLTHMKTAHSGVMQKIVDAGYALPDDVEAELAKCAEEFTSAYEPP  
SE

>comp15684\_c0\_seq31; 346 166 2001 LEN=3465; minus strand; translated  
MARVILTRNEKNRSLEQHKALTRCIEGTIQREHDCCCSPDHDNSCQGNIPLEIIVDHVTP  
FLDRTTYNSFLLLSRRAHSILTPRWQSDPLLSQQEQQQQFPPWPRKVVARDHSCRVRCL  
TFSDHSLACGCFDVKIRSWDVRTGELPLPYEGHWPDEAVVAVAYSSSNRNLTKWNRK  
ANNRRMLASSSTDGTIRIWRVQPNPETRRAGTCGDSWSKAETYSKTAERVQPLANGTASV  
FASTKRQRTATVGDEGNECEGVTKNSPTCLICIAADHAYSLHFSPDNSYLVSGHLPVSR  
EATLQLGETIQIWDVWTGIRLRRLEGGGVPVAFPLPSQTLPRDPSQLNSQKSYDYCATNDD  
QENKNGTSSASRTEHRLISSCGPSKCFKLWSWSDGTRCDNTSNIATEGDTVLENDRCV  
QRWFLDPFNTVVPVPTGAMATGGGNDRSTKVRCELLVASIDGPDSFAIWNTSEPGKRRT  
FRNTSPYEIQFSPDGRKVASVDDFNKVKVWRVSDGTLLQSFSGETYCEASDGGYGGSSGCS

RCCRRTCGRYSSSSNTVTKENDGFEESPTSSSSGDGSGGLFPIHELAFSKNSSTVAVIS  
RYYNEVHLFSA

>comp15684\_c0\_seq32; 1050 3696 5324 LEN=5455; translated  
MVLRSVSTVAKRVALVTAAQTARRAATRGMASQTLELSSFLEAKIGAAAGAEDTSVQYA  
ETGSVISVGDGIARVYGLSNVQAGEMVVFACGLRGMALNLEEDNVGVVIFGDDRDILEGD  
NVTRTGAIVDVPVGPPELLGRVVDGIGQPIDGGASLDKIKRSRAEAKAPGIIIPRESVSEPM  
LTGLKAVDALIPIGRGQRELVIGDRQTGKTAIAIDTIINQKTKKEPLACIYVGVGQKRST  
IAQLVGQLDERDAMDNCIIVAATASDSAPLQFLAPYTGAAAMGEYFRDSGKHAVIFYDDL  
KQAVAYRQMSLLLRPPGREAYPGDVFYLHSRLLERAAMNSALGGGSLTALPVIETQAG  
DVSAYIPTNVISITDGQIFLESELFYQQRPAISVGLSVSRVGSAAQYKATKAVAGTMKL  
ELAQYREVAFAKFGSDLDAATQQQLNRGVRLYELLKQGYEPQEPEEVVASLYIGVKGY  
CDRVPVENVQDFESAWLTHMKTASHGVMQKIVDAGYALPDDVEAELAKCAEEFTSAYEPP  
SE

>comp15684\_c0\_seq33; 226 336 2106 LEN=3474; minus strand; translated  
MARVILTRNEKNRSLEQHKALTRCIEGTIQREHDCSSPDHDNSCQGNIPLEIIVDHSVTP  
FLDRTTYNSFLLSRRRAHSILTPRWQSDPLLSQQEQQQQFPPWPRKVVARDHSCRVRCL  
TFSDHSLACGCFDGKIRSWDVRTGELPLPYEGHWPDEAVVAVAYSSSNRNLTKWNRK  
ANNRRMLASSSTDGTIASGVSNQTLKRGQEPVGIHGARQKHTQKQPNNGYNLWQTGPRRS  
SQALICIAADHAYSLHFSPDNSYLVSGHLPVSRTEATLQLGETIQIWDVWTGIRLRLEG  
GGVPVAFPLPSQTLPRDPSQLNSQKSYDYCATNDDQENKNGTSSASRTEHRLISSCGPSK  
CFKLWSWSDGTRCDNNTSNIATEGDTVLENDRCVQRWFLDPFNTVVPVPTGAMATGGGND  
RSTSTENVRCELLVASIDGPDFAIWNTSEPGKRRTFRNTSPYEQFSPDGRKVASVDD  
FNKVKVWRVSDGTLQSFSGETYCEASDGGYGGSSGCSRCCRRTCGRYSSSSNTVTKEND  
GFEESPTSSSSGDGSGGLFPIHELAFSKNSSTVAVISRYYNEVHLFSA

>comp15685\_c0\_seq2; 271 1 620 LEN=620; translated  
XPLAPPPGSGNHRSQGSRAPRPTRRAAELSKRQLMSTNGRANSKSEGRDGTGEPTESSN  
TSTTSGEYESFLESQAQKHPQNKPVGNAPDTTTTTNNNNFERKPPVRSDFSFTDSNYE  
DFLKSLQQEQQQELQQQQQQPPKIKPSPKTKQRPALQRDTPKRNLPRRKS LPAIYSNK  
SVSTDDREHAKSNVSNDFKHFQPTTAA

>comp15685\_c0\_seq4; 591 510 2102 LEN=2102; translated  
MSYNSRAKVNPFLLIQDSNYDDEEYAWDDEEDDACHDDSDDEDEDYGYGNDDEQQMLMSNRG  
NQRYNSEVRERGRRYEHEHSVEFSVLRGGRQSYHNGGHEERYSNGSYHPYHGHTHPV  
FWKYGLLTVGTIALAMAFGAPFSVSVFSPVETSDVEGNAGFASGGFASPSGNSRDDYRIV  
VLGERHSGTHWMDRLRECFPDVSVSRLQRQGYLFQDDEATARSKWKLLQKKRSPASS  
HGNEENDNSDNNDRGLHHGRSASAAPDTRTIVVHVTLNAYDWLERMRLSPEYAPAHIGS  
HPGGGHPVPLPWSDFLSKPWTMERPEIDLEFENSTGPPVCQMGFAYQEVVSCRGRREKVPE  
KSQRIAPPRIGDPVYELQPGGLAAASERNHTGGTFPPLIDLRAAKLKNHANVVDVSWPSV  
AKRIHVQYESTAEVFRTTVVGILETTGWQPPSSSEDSWPCLNGFLPPPGLGSPHQMTEE  
YARYVTDLLDWDTERAVANYAPWSEEILKGLVASSSTLGDEQDGRTSQQPG

>comp15685\_c0\_seq6; 372 271 972 LEN=1480; translated  
MDSSPSSASPHTEGTPADAPDRSSEPRTISARDTVLESSEDELRRASATAAAPPENDN  
SASASSPNCGNSSSSSHRRRRRREQENRGRLLQSQFRQQQQQQEQEQEQEQHDALQPP  
QQPDEPASPAPAPKSLFFLRPVHRYADLVCIASVFAYLLETTLNAALAIIFGIGVGVGL  
VLGDSFRAALPLLPSVQSVQGAGAAAPAAPQAGQGDSQVFRPRDVSDDLPAQ

>comp15686\_c0\_seq1; 469 255 2102 LEN=2369; translated  
MIENKLGKKTLLVLLLLLALWLLVDESTSISPNDVNKGNEIYRKYHHLAVWTAFRRHPP  
CFRIFRALLEFNLMLWGLAVSLWLWKNVTGKMTGYLLFQVVDHDESKIRGVYFTESALG  
RYRPLNQHQDDHDSSEDEERSFPSKNEGESDCELLPTAKNTVQEEESNQPNVAVHELYET  
KPGGTEIDNNNSIFEDQLRNESDPTRFELINPPCPMNVTYAALDSLTFILVTLFLFTLS  
SAEGGRYVDGMESVHTFRFVASVAAPVPLVFFVFLALIVPLHKRKRSHWKILGYTIGA  
PLYHVTVRDFGFIGDILTSSVRPLQDIAFTTFYLLSGLQGWQSYDLDAADLPLESNWVL  
HTMLPMMMSPLWYRFFCQNLRTYEQYKSRWPYLGNAKLYFIAAEVGFIFGVYMRSPGHST  
LWLAGFVAATLYQIWDVFMWLNLLYVSSWKTLLNLKVFNRPNVLSIPTSFRLRKRTRISV  
SWLYWGFGTNIVLRFWTLFPLPHYLNRAVLSSETFEGDLTAYLNPIIASGEIVRRTM  
WGWLRVWEAIAKVARTEPRLRGTWTDLGEDEPDSNDLNPSSIEFQIMNVNNAPEKPE  
PLETITSSPSFSNTIW

>comp15686\_c1\_seq1; 1448 334 5919 LEN=6036; translated  
MTDSNAAGDERSRYWRDDFRPLRDAGKNVLRMLRRDETSAGDLYRRIMSQNPRGSRIAG  
LGNRSGNGASDTGRSPTIREVGDAAEANPAHRYFAGDDGSNPIAGSDASSGPESVQIAGPF  
KHSQTIPLPPYLQEVRSKAKVSI LMGFLPDAELAWMTTDDTVYLVWYHONSANTNGIRSA

GGGENQFLEFRVPSRQP I V S V G L A P P K K G V F R E V V E W C L V V T T K E E A M I C A I A K A S A T I E  
D P R N G T S S S S P W T V V P T K F I V P S D W I S F L C V A S T K N G R I F L G G Q D G N V Y E L D Y D L L V K R  
H Q Q Q S Q A Q R S G D G T G S V Q E R L D R F Y D G S D E T G S S S T E C P G V L V D K S L P A N T S T V E R V Y R N  
G K R V L E I V T G S D T Q R Q Y Q R Q P P R K C R K L N H S Q N G I L R H L L P D F L N K V G T A L I S G A G F D S F  
S T T A G G A I T Q M V V D D E R Q V L Y T L S S P K G W I C A M D L S P S P A T T D G A T G S P S P P V P S L A A V L  
D A P A T A R L Y L E A V S R G R M N P P H T S G S N Q G I L H F L G S G E A A Q A G V G G M D G A R R V L K L V E Q A  
K L R S N N R G R G G G S S G R R A G R G S G N G I N M L T P V S I R V V P N R E S T R I T L V A V T S G G M R Y Y L T  
T L N P K T M G V G P T T A Y D R K P R H S N P W K P Y S R F T L C H V K A P P P V V A E D H Y Y Q N G G S R S S G G V  
S A S A N A S G P S S T P K F P P S G A A P T V S R L L R V D A S C Y L N G S F L V A F Q P M G S I D T N T G G G A G S  
A P T F D A R N D V L I A T T P D S A K R L T V K Y I R E E N N T I E S S R H A P G G I C E I V S R H L S K S K R V V G  
G R V W D I E P A S C A R G R V L Y L A L H S K T P T D A D L G V G M V P V Y I T K S S N T S R N S S S K T T N G T I V  
P A S S G S L S S A G F K V F T N M L L G R P A E Y G L E V Q K P L V K S L Q K S P S Y R I S K R S G S D G F S F T A A  
D M S P Q S K S N S I S R S A R L S P W L L R P D V V P L D P L A L Q H L E R H E S T F L A L N S G G I H S Y Q S T S L  
L G K L S E L I L A A G M N V R T D T K V T A F F E S Y G Y D E G C A M C L M L A I Q K G A S H D L R E W A I R A A M Q  
R A Y R A Q L T P S I N S S Q L N I Q Q S Q P S N D E S W V P S G Y S F E S S A L C R G L C L S L A R L L R P M W Y K P  
A V V V T E G R V V K R G S V S I T T P T K V E L L L D D D I L Q E I N Q P L K A L E E V V A T V F R K S I D S V P V K  
G V N T S A V L S I A E A E E L A Q H I E E R N I H S V Y R L L T R T T Q L L S L L S C L R R A H S M P D L P E V E W G  
L L H G I T V S Q L V E T S H G Q E R I E N L L N K L V T S G L E N M A M A S A D A N H L A N M L S Q Q C Y H Y F S P G  
N R Y S Y L G F Q M A K E A L A L P P G Q A R R A V R A N E A A L H L K E A A K N W F S P S L I T G R V L Q T R E S E G  
Y L E I A E R A I K Y N S P L A R A A S L L V D L E D V E G L V A V C L I T A T N F R V K G G N N G G Y E A S D A G G F  
Y S W E N G L Y H K K P E A P A G S G P N G S S G K A M V L G T N V T S P D A I D T C Y S L I F Y Y L S K F L Q S F N E  
R E K F L G D K M V S V C S F I D S D K A F L N A F F D H M L N N N H K D V L L R V T S P D L E K W L T L Q Q H D H P D  
L L M N Y Y Q I Q E K G F E A G Q V A M S R A K E G N Q T M T L Q N R T E Y L E I A F V A F S G A L Q R N P M N Y S E I  
E R R Q K E A E E L L S I A K L Q S R I L K S I D S T I Y E I D E Q D T K E L E Y S L L S A S D L Y N R F A N A Y D M H  
E I C L L L I H A C Q F P N P D V I K E S W K R L L C S E I F P C S T R N N D V F Q S L E I F R E G F V T E M Q G L A L  
L D T E S S G E H P V F E N G S W I S N V E E I V V R L G R Q I V G N G A D F V F P V E F L G G C L E E L R R I N E L A  
T V T N E S T P N Q E W T F S V L I S V G V P F R V A F D T L Y K I I E N E N R G S T G A L D S S T H L T N L E A L V S  
M L E S F I R D L R D G R L Q E Q N V N R L D L T S A V E R V K M Q L Q S V P E N I A A V E N R I S V V E H D I S R L A  
P

>comp15687\_c0\_seq1; 151 1 463 LEN=490; translated  
A I R S M K T Y L E A K E E W H R A R K G S F F G S P P K N S F R A Q P V E E D S S M D G S G I Y D T L P T C T T S V S  
T W K A P V A V H D H S Q G G F P A G A V R L P V D Q G E C E R G A P K Q T C A G A T L S V H R F G G S R R M Q R I Q E  
S G L E R A R A Q N G S D E E E L H G F K N E T T L K T I F H C F

>comp15687\_c0\_seq2; 317 1 1135 LEN=1162; translated  
S D D P P S D P S H G V L I R S K S C F E T I D Q S V A V S G S R D E L T T S R S T R S L Q T K V L H R C I E F D P L A  
I L E T L P R V E T Q P P E P G Q R P E Q E S S G P F G F S R V L P I H I A C L Y E A S S P V L R I L L E E Y S E G S  
S R D V L G M L P V H M V A A K W S M G I A P P N A P A R E E E E A T E A F S T A G D G G F Q R D R L E T L V E S A P G S  
L W K A S S A H G L R P L E Y A N T L A P G A A N R F D E N E N A K A I R S M K T Y L E A K E E W H R A R K G S F F G T  
L A G A A R A P Q N S F R A Q P V E A S D G G D S S M D G S G I C D T L P T C T T S V S T W K A P V A V H D P S Q G A F  
P A G A V R L P L D Q G E C E G G V P K P T S A G A T H S V H R F G G S R R M Q R I Q E S G L E R A R A Q N G S D E E E  
L H G F K N E T T L K T I F H F S

>comp15687\_c0\_seq3; 75 1 541 LEN=648; minus strand; translated  
L L A R R L R I A V G S R Q R G R P K D K G L P V F D R L D A V E R G N A H D Q R R G P A D A V L V L V Y M X R V R A C  
A L R P S A A S P G S G A C G L V G R E V P P Y R V R V L P G V L A G V P S L R R L W F E W I V S C R V V S G L V G V M  
D R D R A I V L C E T D C G G M P R R W D V E R R X K T S V E W L G L D V L A V V A R E K A K E P M M D G P A A Q S K E

>comp15687\_c0\_seq4; 999 11 1453 LEN=1558; translated  
M E E L E D D D D E N D D D L S M E E E L E E Y L V T K G L V S G N K F D R K R S D S R L T R H R S S I E E L Y G V Y D  
D D D D D E E T M M E E L G M A I Y G I E N I D D D G L S D G L T V V E S R N E F D F D G S N G N N Y N H N N Y D D E D  
D Y G F G V E D F D S L A E T S A S S Q L G D V M D S I R M L T E A D I V D E L G I E G G R D E L S K I L I D G A L A  
K Q Q M I K S N V R L V T S I A K K W M R T S A S S V H K N R N A D N E K N R K G S N N L G D W S T P S L D E V V Q Q G  
I V G L A I A A E R F E P E R K F K F S T Y A T Y I T N E I R Q I M Q S A T T Q C L Y V P P Y F Y T I K N K Y E K I V  
R D N Y R E T A G D P A R S L G M D E I A A L L K L K R T R L E F I L K S T Q T L A Q L D A S L D T S N Y N A G K A G S  
G P D G E K V E T L A D I L P A D D P S P E E I V E R S L L R Q C L E N A L A E L L P L E R D I V R L R H G L D D G K  
S R T H K E V M G S F G G L L T L N D I R T A E T R A Y R K L R F K S S V H N A R L R E F A A E F I G V A P E K L K T V

>comp15687\_c0\_seq5; 484 1 1579 LEN=1606; translated  
D D D D D E E E T G A S L T I S E S S C S S C D G S V V R C D L V S P S A S G Y F C S D Q D M A T A P V A Y R G T D D  
R A S A I S N E L E Q F F V S N S L A I T E G R S S L Q T T A N S G P T A K D P S D Y I G K D I S F E L E R F F E S F S  
G D D T D E S S G D S S S L L Q W T S N G R M A M V G A S D D P P S D P S Q G D P I R S K S S F E T I D H S V A V S G S  
R D E L T T S R S T R S L Q T K V L H R C I E F D P L A I L K T L P R V E T Q P P E P G Q C P E Q E S S G S F G V S R  
V L P I H I A C L Y E A S S P V L R I L L E E Y S E G S S R D V L G M L P V H M V A A K W S M G I A P P N A P A R E E E

ATEAFSTAGDGGFQRDRLETLVESAPGSLWKASSAHGLRPLEYANTLAPGAANRFDENEN  
AKAIRSMKTYLEAKEEWHRRARKGSFFGTLAGAARAPQNSFRAQPVEASDGGSSSMDGSGI  
CDTLPCTTTSVSTWKAPVAVHDPSQGAFFPAGAVRLPLDQGECEGGVPKPTSAGATHSVHR  
FGGSRMQRIQESGLERARAQNGSDEEELHGFKNETTLKTIHFHS

>comp15687\_c0\_seq6; 214 1 554 LEN=554; translated  
TLNSIQTI EYGESFVFRTTTTLAGTHRDPEPARKQGRCHGETPRSVPLAACGALGAARRGD  
DPWSLSSSTTKQRRETHRGKKGHQS VSGAKEETKPLAPTRSAQSVAS IADASYQLLDH  
ELLTKDEEYELGLKIRKFIDTKTQIEEMMKKKKEEYERRQEENQRREKAAEDRRRRRTE  
KITRX

>comp15688\_c0\_seq1; 692 180 2774 LEN=2787; translated  
MASCYSASEDNSNSSGSANDTFDRFMEDPNLLPANAKNGMVLDSRNVNLD RDYLSVPIAP  
DRYTPSETTPKSRNTNRPTYSDFTPTSDYTPQNFNVSKREEMFTKDTSP TSVMN LQVGN  
AGGVRWNKNLTQQEYILSPQQTKLNPDS DHSRPGSSGQPKSILRGRHSSSYNQNGNVEG  
GAIDPSNDFPFVDFNSPEMQSNM DI SARENSIESFQNPFPDDPFKMDFFDENERSISPIQ  
TDTGADNSGKFPESYVNFIEAVASVVIQTKIRQKLARNKVQKLRNDLRIKRATGSSGTNM  
TPMVRKSYDLARKLRNDKMKKERTRRGNAALDFYTLAAIQIQAAFRGWVVRDCLGVDNYC  
ATMIQKEFRGMLRRREYLYDLYNIVLVQSI CRRWLATD TTVTRIY CIVRIQAFARGFLVR  
KRVGFDLFEKDVYDAAATMIQTQWRAFACEMKFLRAYEDILVVQSIARGWITRRYLSSSK  
RSTKARTFRRVEAHSRFRKRSKAPSKLRNDFSPAYSNHVAFMTKTLSPVRKPKDSLHRPSS  
YRKAWKPPHTKEDNFSFRDHQETFNTN NFY GKAKKAPHTKEDNASFQDQOQETLHTNKQNS  
VERKVAKHGSTSRDQA AKKLDDKRVEPEQVKSHEIELNKSKARAVIERRRKERELEM  
RAN EVEEQRRNQSHAADMAEISLRRKSMALKA EARKKQEVATTQNSVTGTIEHAKPAKGI  
SDS SKESLFSKRKRDL ETPKSVVSSTKTDSALTGKRNVTISGDKLRPNRPASKTMDAK  
DEVTK TSGGQKTS DKKSSADPKPMQPKSESKAGNQAGKSKYQDLMQSLRSESEQKR  
IDEMHNI FRQAGLMSRAKRTTVAQVHIDNGTNL

>comp15688\_c0\_seq2; 965 256 3816 LEN=3829; translated  
MATSSAPLSSYYADERENTTSWDTHYQRRGRNREVHDYINSSSGGHRSNYDHN PQHRPR  
RSLSADSRPQYQTKTNQNTAHS PYGSLSQRN VGPSHIHSDRAQSDVGATTNSNSIGFYQL  
PGYGGVVDHDTVLYSSGRRRLEEQQQQRYSTSQRVLFAEGQHNRARKNARENAMSYQND  
NGRHQYSSSYEDARQYDFAKDNLITFGRCDEPTTESTGFSQEELLQRKRREDTWQRRGK  
RSSKANKQQRIISFPSSLLKRSKGQAQSAQSQRQYQSGYGNEDTAKNGRGDGLYSNSNS  
GRNKGARS AVRRHRDKIKRLQMASCYSASEDNSNSSGSANDTFDRFMEDPNLLPANAKN  
GMVLDSRNVNLD RDYLSVPIAPDRYTPSETTPKSRNTNRPTYSDFTPTSDYTPQNFNV  
SKREEMFTKDTSP TSVMN LQVGNAGGVRWNKNLTQQEYILSPQQTKLNPDS DHSRPGSSGQ  
KPKSILRGRHSSSYNQNGNVEGGAIDPSNDFPFVDFNSPEMQSNM DI SARENSIESFQNP  
FPDDPFKMDFFDENERSISPIQ TDTGADNSGKFPESYVNFIEAVASVVIQTKIRQKLARN  
KVQKLRNDLRIKRATGSSGTNMTPMVRKSYDLARKLRNDKMKKERTRRGNAALDFYTLAA  
IQIQAAFRGWVVRDCLGVDNYCATMIQKEFRGMLRRREYLYDLYNIVLVQSI CRRWLATD  
TTVTRIY CIVRIQAFARGFLVRKRVGFDLFEKDVYDAAATMIQTQWRAFACEMKFLRAYE  
DILVVQSIARGWITRRYLSSSKRSTKARTFRRVEAHSRFRKRSKAPSKLRNDFSPAYSNHV  
AFMTKTLSPVRKPKDSLHRPSSYRKAWKPPHTKEDNFSFRDHQETFNTN NFY GKAKKAP  
HTKEDNASFQDQOQETLHTNKQNSVERKVAKHGSTSRDQA AKKLDDKRVEPEQVKSHEIELN  
KSKARAVIERRRKERELEM RAN EVEEQRRNQSHAADMAEISLRRKSMALKA EARKKQEV  
ATTQNSVTGTIEHAKPAKGI SDS SKESLFSKRKRDL ETPKSVVSSTKTDSALTGKRNV  
TIS GDKLRPNRPASKTMDAKDEVTKTSGGQKTS DKKSSADPKPMQPKSESKAGNQAGK  
SKYQD LMQSLRSESEQKRIDEMHNI FRQAGLMSRAKRTTVAQVHIDNGTNL

>comp15688\_c0\_seq3; 617 180 2549 LEN=2699; translated  
MASCYSASEDNSNSSGSANDTFDRFMEDPNLLPANAKNGMVLDSRNVNLD RDYLSVPIAP  
DRYTPSETTPKSRNTNRPTYSDFTPTSDYTPQNFNVSKREEMFTKDTSP TSVMN LQVGN  
AGGVRWNKNLTQQEYILSPQQTKLNPDS DHSRPGSSGQPKSILRGRHSSSYNQNGNVEG  
GAIDPSNDFPFVDFNSPEMQSNM DI SARENSIESFQNPFPDDPFKMDFFDENERSISPIQ  
TDTGADNSGKFPESYVNFIEAVASVVIQTKIRQKLARNKVQKLRNDLRIKRATGSSGTNM  
TPMVRKSYDLARKLRNDKMKKERTRRGNAALDFYTLAAIQIQAAFRGWVVRDCLGVDNYC  
ATMIQKEFRGMLRRREYLYDLYNIVLVQSI CRRWLATD TTVTRIY CIVRIQAFARGFLVR  
KRVGFDLFEKDVYDAAATMIQTQWRAFACEMKFLRAYEDILVVQSIARGWITRRYLSSSK  
RSTKARTFRRVEAHSRFRKRSKAPSKLRNDFSPAYSNHVAFMTKTLSPVRKPKDSLHRPSS  
YRKAWKPPHTKEDNFSFRDHQETFNTN NFY GKAKKAPHTKEDNASFQDQOQETLHTNKQNS  
VERKVAKHGSTSRDQA AKKLDDKRVEPEQVKSHEIELNKSKARAVIERRRKERELEM  
RAN EVEEQRRNQSHAADMAEISLRRKSMALKA EARKKQEVATTQNSVTGTIEHAKPAKGI  
SDS SKESLFSKRKRDL ETPKSVVSSTKTDSALTGKRNVTISGDKLRPNRPASKTMDAK  
VKLET

KPANRNIKI

>comp15688\_c0\_seq4; 890 256 3591 LEN=3741; translated  
MATSSAPLSSYYADERENTTSWDTHYQRRGRNREVHDYINSSSGGGHRSNYDHNPOHRPR  
RSLSADSRPQYQTKTNQNTAHSYGLSQRNVGSPSHIHSRAQSDVGATTNSNSIGFYQL  
PGYGGVVHDDTVLYSSGGRRRLEEQQQQRYSTSQRVLFAEGQHNRARKNARENAMSYQND  
NGRHQYSSSYEDARQYYDFAKDNLITFGRCDEPTESTGFSQEELLQRKRREDTWQQRGK  
RSSKANKQQRIISFPSSLLKRSKGQAQSAQSQRQYQSGYGNEDTAKNGRGDGLYSNSNS  
GRNKGARSAVRRHRDKIKRLQMASCYSAEDNSNSSSGSANDTFDRFMEDPNLLPANAKN  
GMVLDSRVNLDRLDYLSPV IAPDRYTPSETTPKSRRNTNRPTYSDFTPTSDYTPQNFVNS  
KREEMFTKDTSPVSMNLQVGNAGGVRWNKNLTQQEYILSPQQTKLNPDSHSPGSSGQ  
KPKSILLGRHSSSYNQNGNVEGGAIDPSNDFPFVDFNSPEMQSNMDISARENSIESFQNP  
FPDDPFKMDFFDENERSISPIQTDTGADNSGKFPESYVNFIEAVASVVIQTKIRQKLARN  
KVQKLRNDLRIKRATGSSGTMTPMVRKSYDLARKLRNDKMKERTRRGNAALDFYTLAA  
IQIQAAFRRGWVWRDCLGVDNYCATMIQKEFRGMLRRREYLYDLYNIVLVQSICRRWLATD  
TTVTRIYICIVRIQAFARGFLVRKRVGFDLFEKDVYDAAAATMIQTQWRAFACEMKFLRAYE  
DILVVQSIARGWITRRYLSSSKRSTKARTFRRVEAHSRFRKSKAPSKLRNDFSPAYSNHV  
AFMTKTLSPVRKPKDSLHRPSSYRKAWKPPHTKEDNFSFRDHQETFTNTNFYGKAKKAPH  
TKEDNASFQDQOETLHTNKQNSVERKVAKHGSTSRDQAAKLLDDKRVEPEQVKSHEIELN  
KSKARAVIERRRKERELEMRANEVEEQRRNQSHAADMAEISLRRKSMALKAEARKKQEVA  
TTQNSVTGTIEHAKPAKGISDSSKESLFSKRKRDLTPKSVVSSSTKTDALTGKRNVTIS  
GDKLRPNRPASKTMDAKVKLETKPANRNIKI

>comp15689\_c0\_seq1; 468 919 2613 LEN=4659; minus strand; translated  
MDES DPLLIAGSIKSSAELSSECSMSHR SADGRVLSTSTGEDI ECARWMLFISHFFNQFS  
EQVWQFCLALFLAAYTNNQSLILVTSYGLVTYSFVCLFGSSVGRYIDGSNRLVVARQFIG  
FENVAVVATILCYKLLSRDHDLI TRYGNVTPVDPNMSRGE EPLYNLESVSLLVGIHLLG  
AVAMILDSGFLVAVERDWIVVMSI AVCNICKSERKLTKEEEENVQKTWLSDTNVRMRQID  
LSCKILAPAIGGIFIASFDDGKSKNHGYNLREATLLVGT VNVVALIVEYICTAKIYHKIT  
ELSQKSHNDTSVKLGHKGEESEN TDNGKKEVAKEGR TKHAGTINGKRSFKILDDVEVYFSQ  
SICWAGFSLSLLYLNVTLTFGNIMTVYLVWRGIGMEVIGIWRGIASVAGLSGTFVYHFLA  
NDKKTDLVDIGMMSVAFQFLC LSACYVSLFIEDDSTFTIMLVGGVCLSRVGLWVFDITVT  
QLMQLHIPPIRGLVGGVQQSMNAFFVTVMYLVGLFLSDPSDFFIYSFTSYIGVFLAAMF  
YGTMVFRKLTTFISSKDDKNEVSV

>comp15689\_c0\_seq2; 468 805 2499 LEN=4545; minus strand; translated  
MDES DPLLIAGSIKSSAELSSECSMSHR SADGRVLSTSTGEDI ECARWMLFISHFFNQFS  
EQVWQFCLALFLAAYTNNQSLILVTSYGLVTYSFVCLFGSSVGRYIDGSNRLVVARQFIG  
FENVAVVATILCYKLLSRDHDLI TRYGNVTPVDPNMSRGE EPLYNLESVSLLVGIHLLG  
AVAMILDSGFLVAVERDWIVVMSI AVCNICKSERKLTKEEEENVQKTWLSDTNVRMRQID  
LSCKILAPAIGGIFIASFDDGKSKNHGYNLREATLLVGT VNVVALIVEYICTAKIYHKIT  
ELSQKSHNDTSVKLGHKGEESEN TDNGKKEVAKEGR TKHAGTINGKRSFKILDDVEVYFSQ  
SICWAGFSLSLLYLNVTLTFGNIMTVYLVWRGIGMEVIGIWRGIASVAGLSGTFVYHFLA  
NDKKTDLVDIGMMSVAFQFLC LSACYVSLFIEDDSTFTIMLVGGVCLSRVGLWVFDITVT  
QLMQLHIPPIRGLVGGVQQSMNAFFVTVMYLVGLFLSDPSDFFIYSFTSYIGVFLAAMF  
YGTMVFRKLTTFISSKDDKNEVSV

>comp15689\_c0\_seq3; 468 620 2314 LEN=4465; minus strand; translated  
MDES DPLLIAGSIKSSAELSSECSMSHR SADGRVLSTSTGEDI ECARWMLFISHFFNQFS  
EQVWQFCLALFLAAYTNNQSLILVTSYGLVTYSFVCLFGSSVGRYIDGSNRLVVARQFIG  
FENVAVVATILCYKLLSRDHDLI TRYGNVTPVDPNMSRGE EPLYNLESVSLLVGIHLLG  
AVAMILDSGFLVAVERDWIVVMSI AVCNICKSERKLTKEEEENVQKTWLSDTNVRMRQID  
LSCKILAPAIGGIFIASFDDGKSKNHGYNLREATLLVGT VNVVALIVEYICTAKIYHKIT  
ELSQKSHNDTSVKLGHKGEESEN TDNGKKEVAKEGR TKHAGTINGKRSFKILDDVEVYFSQ  
SICWAGFSLSLLYLNVTLTFGNIMTVYLVWRGIGMEVIGIWRGIASVAGLSGTFVYHFLA  
NDKKTDLVDIGMMSVAFQFLC LSACYVSLFIEDDSTFTIMLVGGVCLSRVGLWVFDITVT  
QLMQLHIPPIRGLVGGVQQSMNAFFVTVMYLVGLFLSDPSDFFIYSFTSYIGVFLAAMF  
YGTMVFRKLTTFISSKDDKNEVSV

>comp15689\_c0\_seq4; 468 805 2499 LEN=4769; minus strand; translated  
MDES DPLLIAGSIKSSAELSSECSMSHR SADGRVLSTSTGEDI ECARWMLFISHFFNQFS  
EQVWQFCLALFLAAYTNNQSLILVTSYGLVTYSFVCLFGSSVGRYIDGSNRLVVARQFIG  
FENVAVVATILCYKLLSRDHDLI TRYGNVTPVDPNMSRGE EPLYNLESVSLLVGIHLLG  
AVAMILDSGFLVAVERDWIVVMSI AVCNICKSERKLTKEEEENVQKTWLSDTNVRMRQID  
LSCKILAPAIGGIFIASFDDGKSKNHGYNLREATLLVGT VNVVALIVEYICTAKIYHKIT



ELSQKSHNDTSVKLGHKGEESENTDNGKKEVAKEGRTKHAGTINGKRSFKILDDVEVYFSQ  
SICWAGFSLSLLYLNVTLTFGNIMTVYLVWRGIGMEVIGIWRGIASVAGLSGTFVYHFLA  
NDKKTDLVDIGMMSVAFQFLCLSACYVSLFIEDDSTFTIMLVGGVCLSRVGLWVFDITVT  
QLMQLHIPPIRGLVGGVQQSMNAFFTVMYLVGLFLSDPSDFFIYSFTSYIGVFLAAMF  
YGTMVFRKLTFISSKDDKNEVSV  
>comp15689\_c0\_seq5; 468 493 2187 LEN=4233; minus strand; translated  
MDES DPLLIAGSIKSSAELSSECSMSHR SADGRVLSTSTGEDIECARWMLFISHFFNQFS  
EQVWQFCLALFLAAYTNNQSLILVTSYGLVTYSFVCLFGSSVGRYIDGSNRLVVARQFIG  
FENVAVVATILCYKLLSRDHDLITRYGNVTPVDPNMSRGE EPLYNLESVSLLVGIHLLG  
AVAMILDSGFLVAVERDWIVVMSIAVCNICKSERKLTKEEEENVQKTWLSDTNVRMRQID  
LSCKILAPAIGGIFIASFDDGKSKNHGYNLREATLLVGT VNVVALIVEYICTAKIYHKIT  
ELSQKSHNDTSVKLGHKGEESENTDNGKKEVAKEGRTKHAGTINGKRSFKILDDVEVYFSQ  
SICWAGFSLSLLYLNVTLTFGNIMTVYLVWRGIGMEVIGIWRGIASVAGLSGTFVYHFLA  
NDKKTDLVDIGMMSVAFQFLCLSACYVSLFIEDDSTFTIMLVGGVCLSRVGLWVFDITVT  
QLMQLHIPPIRGLVGGVQQSMNAFFTVMYLVGLFLSDPSDFFIYSFTSYIGVFLAAMF  
YGTMVFRKLTFISSKDDKNEVSV  
>comp15689\_c0\_seq6; 468 805 2499 LEN=4664; minus strand; translated  
MDES DPLLIAGSIKSSAELSSECSMSHR SADGRVLSTSTGEDIECARWMLFISHFFNQFS  
EQVWQFCLALFLAAYTNNQSLILVTSYGLVTYSFVCLFGSSVGRYIDGSNRLVVARQFIG  
FENVAVVATILCYKLLSRDHDLITRYGNVTPVDPNMSRGE EPLYNLESVSLLVGIHLLG  
AVAMILDSGFLVAVERDWIVVMSIAVCNICKSERKLTKEEEENVQKTWLSDTNVRMRQID  
LSCKILAPAIGGIFIASFDDGKSKNHGYNLREATLLVGT VNVVALIVEYICTAKIYHKIT  
ELSQKSHNDTSVKLGHKGEESENTDNGKKEVAKEGRTKHAGTINGKRSFKILDDVEVYFSQ  
SICWAGFSLSLLYLNVTLTFGNIMTVYLVWRGIGMEVIGIWRGIASVAGLSGTFVYHFLA  
NDKKTDLVDIGMMSVAFQFLCLSACYVSLFIEDDSTFTIMLVGGVCLSRVGLWVFDITVT  
QLMQLHIPPIRGLVGGVQQSMNAFFTVMYLVGLFLSDPSDFFIYSFTSYIGVFLAAMF  
YGTMVFRKLTFISSKDDKNEVSV  
>comp15689\_c0\_seq7; 468 620 2314 LEN=4584; minus strand; translated  
MDES DPLLIAGSIKSSAELSSECSMSHR SADGRVLSTSTGEDIECARWMLFISHFFNQFS  
EQVWQFCLALFLAAYTNNQSLILVTSYGLVTYSFVCLFGSSVGRYIDGSNRLVVARQFIG  
FENVAVVATILCYKLLSRDHDLITRYGNVTPVDPNMSRGE EPLYNLESVSLLVGIHLLG  
AVAMILDSGFLVAVERDWIVVMSIAVCNICKSERKLTKEEEENVQKTWLSDTNVRMRQID  
LSCKILAPAIGGIFIASFDDGKSKNHGYNLREATLLVGT VNVVALIVEYICTAKIYHKIT  
ELSQKSHNDTSVKLGHKGEESENTDNGKKEVAKEGRTKHAGTINGKRSFKILDDVEVYFSQ  
SICWAGFSLSLLYLNVTLTFGNIMTVYLVWRGIGMEVIGIWRGIASVAGLSGTFVYHFLA  
NDKKTDLVDIGMMSVAFQFLCLSACYVSLFIEDDSTFTIMLVGGVCLSRVGLWVFDITVT  
QLMQLHIPPIRGLVGGVQQSMNAFFTVMYLVGLFLSDPSDFFIYSFTSYIGVFLAAMF  
YGTMVFRKLTFISSKDDKNEVSV  
>comp15689\_c0\_seq8; 468 919 2613 LEN=4778; minus strand; translated  
MDES DPLLIAGSIKSSAELSSECSMSHR SADGRVLSTSTGEDIECARWMLFISHFFNQFS  
EQVWQFCLALFLAAYTNNQSLILVTSYGLVTYSFVCLFGSSVGRYIDGSNRLVVARQFIG  
FENVAVVATILCYKLLSRDHDLITRYGNVTPVDPNMSRGE EPLYNLESVSLLVGIHLLG  
AVAMILDSGFLVAVERDWIVVMSIAVCNICKSERKLTKEEEENVQKTWLSDTNVRMRQID  
LSCKILAPAIGGIFIASFDDGKSKNHGYNLREATLLVGT VNVVALIVEYICTAKIYHKIT  
ELSQKSHNDTSVKLGHKGEESENTDNGKKEVAKEGRTKHAGTINGKRSFKILDDVEVYFSQ  
SICWAGFSLSLLYLNVTLTFGNIMTVYLVWRGIGMEVIGIWRGIASVAGLSGTFVYHFLA  
NDKKTDLVDIGMMSVAFQFLCLSACYVSLFIEDDSTFTIMLVGGVCLSRVGLWVFDITVT  
QLMQLHIPPIRGLVGGVQQSMNAFFTVMYLVGLFLSDPSDFFIYSFTSYIGVFLAAMF  
YGTMVFRKLTFISSKDDKNEVSV  
>comp15689\_c0\_seq9; 468 919 2613 LEN=4883; minus strand; translated  
MDES DPLLIAGSIKSSAELSSECSMSHR SADGRVLSTSTGEDIECARWMLFISHFFNQFS  
EQVWQFCLALFLAAYTNNQSLILVTSYGLVTYSFVCLFGSSVGRYIDGSNRLVVARQFIG  
FENVAVVATILCYKLLSRDHDLITRYGNVTPVDPNMSRGE EPLYNLESVSLLVGIHLLG  
AVAMILDSGFLVAVERDWIVVMSIAVCNICKSERKLTKEEEENVQKTWLSDTNVRMRQID  
LSCKILAPAIGGIFIASFDDGKSKNHGYNLREATLLVGT VNVVALIVEYICTAKIYHKIT  
ELSQKSHNDTSVKLGHKGEESENTDNGKKEVAKEGRTKHAGTINGKRSFKILDDVEVYFSQ  
SICWAGFSLSLLYLNVTLTFGNIMTVYLVWRGIGMEVIGIWRGIASVAGLSGTFVYHFLA  
NDKKTDLVDIGMMSVAFQFLCLSACYVSLFIEDDSTFTIMLVGGVCLSRVGLWVFDITVT  
QLMQLHIPPIRGLVGGVQQSMNAFFTVMYLVGLFLSDPSDFFIYSFTSYIGVFLAAMF  
YGTMVFRKLTFISSKDDKNEVSV

>comp15689\_c0\_seq10; 468 805 2499 LEN=4650; minus strand; translated  
MDES DPLLIAGSIKSSAELSSECSMSHR SADGRVLSTSTGEDIECARWMLFISHFFNQFS  
EQVWQFCLALFLAAYTNNQSLILVTSYGLVTYSFVCLFGSSVGRYIDGSNRLVVARQFIG  
FENVAVVATILCYKLLSRDHDLI TRYGNVTPVDPNMSRGE EPLYNLESVSLLVGIHLLG  
AVAMILDSGFLVAVERDWIVVMSIAVCNICKSERKLTKEEEENVQKTWLSDTNVRMRQID  
LSCKILAPAIGGIFIASFDDGKSKNHGYNLREATLLVGT VNVVALIVEYICTAKIYHKIT  
ELS QKSHNDTSVKLGHKGEESNTDNGKKEVAKEGR TKHAGTINGKRSFKILDDVEVYFSQ  
SICWAGFSL SLLYLNVTLTFGNIMTVYLVWRGIGMEVIGIWRGIASVAGLSGTFVYHFLA  
NDKKTDLVDIGMMSVAFQFLCLSACYSVSLFIEDDSTFTIMLVGGVCLSRVGLWVFDITVT  
QLMQLHIPPIRGLVGGVQQSMNAFFTVMYLVGLFLSDPSDFFIYSFTSYIGVFLAAMF  
YGTMVFRKLTFISSKDDKNEVSV

>comp15689\_c0\_seq11; 468 620 2314 LEN=4479; minus strand; translated  
MDES DPLLIAGSIKSSAELSSECSMSHR SADGRVLSTSTGEDIECARWMLFISHFFNQFS  
EQVWQFCLALFLAAYTNNQSLILVTSYGLVTYSFVCLFGSSVGRYIDGSNRLVVARQFIG  
FENVAVVATILCYKLLSRDHDLI TRYGNVTPVDPNMSRGE EPLYNLESVSLLVGIHLLG  
AVAMILDSGFLVAVERDWIVVMSIAVCNICKSERKLTKEEEENVQKTWLSDTNVRMRQID  
LSCKILAPAIGGIFIASFDDGKSKNHGYNLREATLLVGT VNVVALIVEYICTAKIYHKIT  
ELS QKSHNDTSVKLGHKGEESNTDNGKKEVAKEGR TKHAGTINGKRSFKILDDVEVYFSQ  
SICWAGFSL SLLYLNVTLTFGNIMTVYLVWRGIGMEVIGIWRGIASVAGLSGTFVYHFLA  
NDKKTDLVDIGMMSVAFQFLCLSACYSVSLFIEDDSTFTIMLVGGVCLSRVGLWVFDITVT  
QLMQLHIPPIRGLVGGVQQSMNAFFTVMYLVGLFLSDPSDFFIYSFTSYIGVFLAAMF  
YGTMVFRKLTFISSKDDKNEVSV

>comp15689\_c0\_seq12; 468 919 2613 LEN=4764; minus strand; translated  
MDES DPLLIAGSIKSSAELSSECSMSHR SADGRVLSTSTGEDIECARWMLFISHFFNQFS  
EQVWQFCLALFLAAYTNNQSLILVTSYGLVTYSFVCLFGSSVGRYIDGSNRLVVARQFIG  
FENVAVVATILCYKLLSRDHDLI TRYGNVTPVDPNMSRGE EPLYNLESVSLLVGIHLLG  
AVAMILDSGFLVAVERDWIVVMSIAVCNICKSERKLTKEEEENVQKTWLSDTNVRMRQID  
LSCKILAPAIGGIFIASFDDGKSKNHGYNLREATLLVGT VNVVALIVEYICTAKIYHKIT  
ELS QKSHNDTSVKLGHKGEESNTDNGKKEVAKEGR TKHAGTINGKRSFKILDDVEVYFSQ  
SICWAGFSL SLLYLNVTLTFGNIMTVYLVWRGIGMEVIGIWRGIASVAGLSGTFVYHFLA  
NDKKTDLVDIGMMSVAFQFLCLSACYSVSLFIEDDSTFTIMLVGGVCLSRVGLWVFDITVT  
QLMQLHIPPIRGLVGGVQQSMNAFFTVMYLVGLFLSDPSDFFIYSFTSYIGVFLAAMF  
YGTMVFRKLTFISSKDDKNEVSV

>comp15690\_c0\_seq1; 752 1 2300 LEN=2300; translated  
SQDTRSSLKSI STPPRQALADQFLFDGFMGT YEQEFSQTSNDMTSSFVDNSRVVND SG  
QTSP LDRHIRTP EVEKQPQGEISSKDDGCEEFPAELQVKQQQDLFEESLARAAYEQRLQ  
EVRKEQSKTERELKDLYVHTCERNENKIRELQV VNE DL RKALEESKTKQNAL THTRIEEL  
ERKVAETEKLRMQTQVQANEKIHTKTKYRRVAKAKEDSLRKRLTKLEEENNILREESESR  
LIELGMARTMVTEMEFRIVEAEREKVEITNRLEDASC SIQELEESILLSKESDQNNHGII  
EHTQKKLEEV MREKEALMEEIESYESFKEESSVLTEKLANSLQEKQKAVIESQSLASKIE  
AENYELSKQIADANS DVEQLLEEKLLLEDKLAKTWKDIEQTKNDASTIHETLMKLENGE  
YYTFADIEEKKIVIQSLTKDLQVLKETS KDELIKSSKKA INLHLQLRGAKRELLEIQQSE  
IEVTEERN DLQERKLEEEI IADMDSRVK KATKMYEDEQAVVNE LKIQIETVTKSKEIAE  
VKHRELIEALSLQIASKTSELSSCREKLD EMDLLTKDVVATSEN LKTQVESVTKSKEEAE  
LQYQESIESLSLQLESKSEL TMCQGRVKEIQYLKDEQSKMNANLQSQLDDMTKAEKESE  
LKFQDSIKLLSSKLESNRNELLCEGLMKEAESHKEQLMI ISNLQSQLDAVTKSKDESE  
SKYEESMVSLSTELSRKTELLLCQSRLEQTL SQKDEQAKMITDLQX

>comp15690\_c0\_seq2; 278 1 932 LEN=932; translated  
XKKA INLHLQLRGAKRELLEIQQSEIEVTEERN DLQERKLEEEI IADMDSRVK KATKMY  
EDEQAVVNE LKIQIETVTKSKEIAEVKHRELIEALSLQIASKTSELSSCREKLD EMDLLT  
KDVVATSEN LKTQVESVTKSKEEAE LQYQESIESLSLQLESKSEL TMCQGRVKEIQYLK  
DEQSKMNANLQSQLDDMTKAEKESELKFQDSIKLLSSKLESNRNELLCEGLMKEAESHK  
EKQLMI ISNLQSQLDAVTKSKDESESKYEESMVSLSTELSRKTELLLCQSRLEQTL SQK  
DEQAKMITDLQX

>comp15690\_c0\_seq6; 591 1 1680 LEN=1680; translated  
XYRRVAKAKEDSLRKRLTKLEEENYV LREESESRLIELGMARTMVTEMEFRIVEAEREKVE  
ITNRLEDASC SIQELEESILLSKESDQNNHGII EHTQKKLEEV MREKEALMEEIESYES  
FKEESSVLTEKLANSLQEKQKAVIESQSLASKIEAENYELSKQIADANS DVEQLLEEKLL  
LEDKLAKTWKDIEQTKNDASTIHETLMKLENGEYYTFADIEEKKIVIQSLTKDLQVLKE  
TSKDELIKSSKKA INLHLQLRGAKRELLEIQQSEIEVTEERN DLQERKLEEEI IADMDS

RVKKATKMYEDEQAVVNELKIQIETVTKSKEIAEVKHXRELI EALS LQIASKTSELSSCRE  
KLDEMDLLTKDVVATSENLTQVESVTKSKEEAELQYQESIESLSLQLESKKSELTMCQG  
RVKEIQYLKDEQSKMNANLQSQLDDMTKAEKESELKFQDSIKLLSSKLESNRNELLLCEG  
LMKEAESHKEKQLMIISNLQSQLDAVTKSKDESESKYEESMVSLSTELESRKTELLLCQS  
RLEQTLQKDEQAKMITDLQX

>comp15690\_c0\_seq7; 697 1 2146 LEN=2146; translated  
XSRVVNDSGQTSPLDSRHIRTPEEEKQPQGDISSKDDGCEEFPAELQVKQQQDLFEESLA  
RAAYEQRLQEVKQTKTERELKDLYVHTCERNENKIRELQVVNEDLRKALEESKTKQNA  
LTHTRIEELERKVAETEKLRMQTQVQANEKIHTTKYRRVAKAKEDSLRKRLTKLEEENN  
ILREESERLIELGMARTMVTEMEFRIVEAEREKVEITNRLEDASCSIQELEESILLSKE  
SDQNNHGIIEHTQKKLEEVREKEALMEEIESYESFKEESSVLTEKLANSLQEKQKAVIE  
SQSLASKIEAENYELSKQIADANS DVEQLLEEKLLLEDKLAKTWKDIEQTKNDASTI HET  
LMEKLENGEYTFADIEEKIIVIQSLTKDLQVLKETS KDELKSSKKA INLHLQLRGAKR  
ELLEIQQSEIEVTEERNDLQERKLEEEI IADMSRVKKATKMYEDEQAVVNELKIQIET  
VTKSKEIAEVKHXRELI EALS LQIASKTSELSSCREKLDEMDLLTKDVVATSENLTQVES  
VTKSKEEAELQYQESIESLSLQLESKKSELTMCQGRVKEIQYLKDEQSKMNANLQSQLDD  
MTKAEKESELKFQDSIKLLSSKLESNRNELLLCEGLMKEAESHKEKQLMIISNLQSQLDA  
VTKSKDESESKYEESMVSLSTELESRKTELLLCQSRLEQTLQKDEQAKMITDLQX

>comp15691\_c0\_seq1; 642 167 1789 LEN=2236; translated  
MELEQKLQKTSGDDDGCSAVAPSKRNMGRSSFLASLRDAISIGESIGETTNSDEDEFVFK  
DQIHQRKEFEMVNATLTELGFVTSTCDDSDDGDEDKEVNEKELYPLLSQSTKNDKENKD  
NRETQEKATSPHSNERSYPYRRQSKIDAFQHGQKESFIQVLD RVDQIQDAARKDKGLNEW  
NFTFGLVNCLFIAYVHGSHPEHFWILYAVETIFWMSYKLGMYAQPLCEVLYLDFCWV  
MNTLGAVLVISALIFDGYLSTDLISIELRKNIFLACFGIFCGPVFLAAMVLPFVAFVLFHD  
VNTMANLI IHLMPMSVMYNQRWHAADIYAA YPTIFPHLVEFTEQINRDKDGVGVS RMTLI  
IYFAWFVPYTVWMLRTGLKLPVAVSKDEKPPPVYD TVFHSTWKGALCEIVGSMLWKR SKK  
RSRDCSERNDYEIRDFLFYMMHAFGSCGFGIIVLGDIMCYRGGKVVHGTMLCLAI IICA  
KRGADRYTYVTKMYGQKLRKVFHEGIEKGLKLEPLHLGERGTIYGAIQEEDEGKTEN

>comp15691\_c0\_seq2; 323 184 897 LEN=1344; translated  
MANLI IHLMPMSVMYNQRWHAADIYAA YPTIFPHLVEFTEQINRDKDGVGVS RMTLI IYF  
AWFVFPYTVWMLRTGLKLPVAVSKDEKPPPVYD TVFHSTWKGALCEIVGSMLWKR SKKRSR  
DCSERNDYEIRDFLFYMMHAFGSCGFGIIVLGDIMCYRGGKVVHGTMLCLAI IICAKRG  
ADRYTYVTKMYGQKLRKVFHEGIEKGLKLEPLHLGERGTIYGAIQEEDEGKTEN

>comp15691\_c1\_seq1; 513 76 1002 LEN=1473; translated  
MNILTVIIALTAIVIVPPSIHDRAHGFPSCPSRVFSGATGTFGRRRRTDSPMLWYAESP  
ISLAEMKASEMKKELESYGI STKSMFDRKDFEKALEKARHDQPAKSGQATSDNKKQSSKA  
PFSTTDGTTSYAKSKKENGAKTQGEKWSKKWKNLDPNEKEAWSPHADSSSSNHSSNAPKD  
ELSEPSASPSTSASTSTSTSTSTGEDGGSTREEQYEAAL EEGKSMTLSNLKKEKELKERGIS  
TSSFFEKSDLIKAYANA IADGVGVKTSTNN DSEESYDPSYRDVTTVVFDPTNLLTGREMI  
IDITDSMN

>comp15691\_c1\_seq2; 513 76 1002 LEN=5390; translated  
MNILTVIIALTAIVIVPPSIHDRAHGFPSCPSRVFSGATGTFGRRRRTDSPMLWYAESP  
ISLAEMKASEMKKELESYGI STKSMFDRKDFEKALEKARHDQPAKSGQATSDNKKQSSKA  
PFSTTDGTTSYAKSKKENGAKTQGEKWSKKWKNLDPNEKEAWSPHADSSSSNHSSNAPKD  
ELSEPSASPSTSASTSTSTSTSTGEDGGSTREEQYEAAL EEGKSMTLSNLKKEKELKERGIS  
TSSFFEKSDLIKAYANA IADGVGVKTSTNN DSEESYDPSYRDVTTVVFDPTNLLTGREMI  
IDITDSMN

>comp15692\_c0\_seq1; 1466 200 5737 LEN=5814; translated  
MSRMVKTVANLDSYSSSDGGFEPGSELD RPEASPFLEAGSDLLRKL LVQLTLNDSPPS  
NDYNDTRDATKEMRQPPPTESWSETEIQNKS NVSLKQQGHISLAKLCTSALETLEQRTC  
QAHKHDIRRKENAHKDTKNISSEKKTQPFHWKTKNKN SHQSKGESWNSDSSSDFR  
EGRDASEARRDENEFTPRLQMFGEYARYLSTT PLAPKDASNQSSRRAFSRRTLKNSLQN  
IEDADAQVQSGPITDIIVIRGDEKPPKGYFRVSQSLSGKPFRIEDRKATFFLCVKKERNW  
DRAAQRPCVTAVSIIIFPDRKEFVPPGFS LVRSPKLDATSSAQPIFN EGGSEPVYFCFRR  
SREGNPLTGI IPLLPSRRELIPDGYTVLERS PRNFVATFRSSKAPVFLSYRQLANLELL  
RPPPLVMSMLNGNSKVIRLESYCTGGTVVSKVGGFHM DRSTHSLSPSSIKHRLTLI  
ELSRRKTWESISEHPNIVGAKYSYSDTSSVRSTPSSNILPNGSEISEHRTIMSDSDRQS  
SVADFESVTSSSDIDGSFSSFTTQETR TSVRMSESSKSKEPLTLDAHKDLHRCLEALSFI  
PKVSTGFRGTGSIEATTTFEARTSILLPILTSCYTKHGGS AFLSITGLTDLLRQDFYADD  
IEMSQDPSARTTLLDLSIQVACDVATMGAQEAQLHACVEFVEEAIKFGCGYLSTRSIGYV

IRFFLFVHFHFGISSPSGNWGIVSASDQYLLEDIRCSRDKWTLPGGAPQSAILALKDLIVF  
MIARLGSQVHFDQCSHQEITNSNSNNATCPHFNFIDTLLNKVVDDSVFRVDIANFTELAM  
HQIMRSGGSELFWYEMINLCGSGLFSDTMLREQTRHMYAICFTLLANCVKNASSKVRKN  
EKFEGYPRDVANKLMSLEMLKFFLEKWERGVDSQDIAGSHSNISFAFCIRRLVVPCLLTN  
TSDALSDPRIFRRLIQIVGVWLCSPFYRKHMKLEIGILFDHFVLKLLKLGPOILFKSNDS  
KDTPYIFAQOLELMKEIKNWFSGDTRLLELYLNFSDYGTHQVGRRAKAFPLDLEWKVS  
EQLFSLLCNISEDCTEFLGDKIEASHSFSPIKKLSKEDVNNNDGYEGLSVNTLARESARR  
LRQGALDAISLIVKGLALSAAESLGGFVVSITEAWYYGQKYTNNGKVRVRETNREMSGSN  
FRRDSALVVNYWNKLGGTKIKNDNHVKALDISHATIPERNNAMRIAIISKEKGLRKAIEY  
LIACDVLTAAPREISSFLRVHCSDFDASILGKYLGVGSEFEMEFNGQIRYNYIRATSFV  
GMTIEEGLRHLLTEGGFRLPGEAQQIDRLISTFARCYWEDNIGDQIHCPVDDKDTIFLIS  
FAIIILNTDLHKSSSHLSGGKRRNKLKKMTKDEFITNIQRANKGKEINKEYLSKIYDIE  
SNPIALHAQIDDDNDLRDLGSTALLKKSIGLMNKNVKNLDALLRGLAIEHYKYFPLKDFS  
AEVGVSTVDEAKLCLARSIMTKSWHQVHGLINSALKIAHLDPKALESCIDLLKFSCLTIL  
LDMPKIQSAFLDQLGRFRLFNTSHKESGSGRSFASSFNDHESYKKEKWMVMKRNHILNK  
EESFQPEIRKERSNKKIESLNNVDEMGMNKTAHVADAARRRIMRDVTRRIENAEF  
LLNDPTRSFLREGDIMKRANRSGKDVEYRFFLSDILYISKIKRSSAKFSASSPIKYRI  
HEELPLIMKVVDFPAMPKKEESTRAIQFYHPRKNFLVLCSSRDERNKWVKDIRQAIK  
ELKRKIGIENARKAANRFVSKGNTISGNLSSNPDPKSCLNPF

>comp15693\_c0\_seq2; 705 72 2798 LEN=5202; translated  
MAKKPSLSISVAKAVFASSWLVLRTLPTATALPSFGTKIPNGERVPCPPDETEASEGCTP  
SGFCFGLGHPSCGGFQOPENRSDTGVI SLNPF GDDWRATGFKWTAELCGLDSDGDGYTNG  
EELGDPCC2TWAGSSEGANPVP IEAFVPSHPGLASHVPEGPVLDLATFCESEGGSGEAI  
ADVEVDAAEDEDSSLSVVDARYNEGESRGSLELRMNPYPPIPIRTTTYVDFVFNLPDDFP  
DLVHVVF AEVINSQPDHLHFFVLTGCTNAFPEDQHGNPIDDVSP2DCNVQLGGWAPGMDP  
FGTPSSEYGVALGPGMGIAALHLNVHYTDGVYEDEDTEETHKMATDGMKIHYYTDFRPF2TT  
VAKPLIWV2TYGPKSLAIPANESRFYTSRTCQVQSSCTDAPDENLQRLVKLMGLAGDDEDG  
DGETSGLASMLSSLSCQSVAAFCFLPGELQSLMQMVCPE2TCGLCGSSGV2DGTSNPRNPES  
YRITGIHYHAHLLGSEMYATLLREETQSGTIDVQKKNMEQATEVVASTRVVAKDLKSRD  
IWHYDDQASIPLEYDLFVEKPVEEGFSNDSNNNATAATAATVTKVLKQGV2MVKAGDEISV  
TCVFDSTARQEP2TAFGPSTYQEMCIVTVYVTFDTPRVLLDIGE2SSSVLSSTANLLVLDLN  
LRSFACGV2DDEFHKT2DVHTGTLSEEDGRNIWRDHPIGD2TKRCTYPVRDYIFSDSVITRD  
EICPEDDGDEDVEE2EF2SKGAGICDSYNPLPSVEVLFMDATIAGATCTGGKYDQMDGNEQF  
DNVTEEMCLVEGKGS2SYEPYTCLDAQD2WLDNTAPFDPSINDEV2LDFVRDVWQGMCCRLGS  
IAMDV2EEESPLKTVDAID2EKSEEEQDAKAGDVTTAEAGISS2SSSVVSILSAVPATLLGTL  
AVFASVVF

>comp15693\_c0\_seq3; 903 72 2798 LEN=3389; translated  
MAKKPSLSISVAKAVFASSWLVLRTLPTATALPSFGTKIPNGERVPCPPDETEASEGCTP  
SGFCFGLGHPSCGGFQOPENRSDTGVI SLNPF GDDWRATGFKWTAELCGLDSDGDGYTNG  
EELGDPCC2TWAGSSEGANPVP IEAFVPSHPGLASHVPEGPVLDLATFCESEGGSGEAI  
ADVEVDAAEDEDSSLSVVDARYNEGESRGSLELRMNPYPPIPIRTTTYVDFVFNLPDDFP  
DLVHVVF AEVINSQPDHLHFFVLTGCTNAFPEDQHGNPIDDVSP2DCNVQLGGWAPGMDP  
FGTPSSEYGVALGPGMGIAALHLNVHYTDGVYEDEDTEETHKMATDGMKIHYYTDFRPF2TT  
VAKPLIWV2TYGPKSLAIPANESRFYTSRTCQVQSSCTDAPDENLQRLVKLMGLAGDDEDG  
DGETSGLASMLSSLSCQSVAAFCFLPGELQSLMQMVCPE2TCGLCGSSGV2DGTSNPRNPES  
YRITGIHYHAHLLGSEMYATLLREETQSGTIDVQKKNMEQATEVVASTRVVAKDLKSRD  
IWHYDDQASIPLEYDLFVEKPVEEGFSNDSNNNATAATAATVTKVLKQGV2MVKAGDEISV  
TCVFDSTARQEP2TAFGPSTYQEMCIVTVYVTFDTPRVLLDIGE2SSSVLSSTANLLVLDLN  
LRSFACGV2DDEFHKT2DVHTGTLSEEDGRNIWRDHPIGD2TKRCTYPVRDYIFSDSVITRD  
EICPEDDGDEDVEE2EF2SKGAGICDSYNPLPSVEVLFMDATIAGATCTGGKYDQMDGNEQF  
DNVTEEMCLVEGKGS2SYEPYTCLDAQD2WLDNTAPFDPSINDEV2LDFVRDVWQGMCCRLGS  
IAMDV2EEESPLKTVDAID2EKSEEEQDAKAGDVTTAEAGISS2SSSVVSILSAVPATLLGTL  
AVFASVVF

>comp15693\_c0\_seq5; 705 72 2798 LEN=4659; translated  
MAKKPSLSISVAKAVFASSWLVLRTLPTATALPSFGTKIPNGERVPCPPDETEASEGCTP  
SGFCFGLGHPSCGGFQOPENRSDTGVI SLNPF GDDWRATGFKWTAELCGLDSDGDGYTNG  
EELGDPCC2TWAGSSEGANPVP IEAFVPSHPGLASHVPEGPVLDLATFCESEGGSGEAI  
ADVEVDAAEDEDSSLSVVDARYNEGESRGSLELRMNPYPPIPIRTTTYVDFVFNLPDDFP  
DLVHVVF AEVINSQPDHLHFFVLTGCTNAFPEDQHGNPIDDVSP2DCNVQLGGWAPGMDP  
FGTPSSEYGVALGPGMGIAALHLNVHYTDGVYEDEDTEETHKMATDGMKIHYYTDFRPF2TT

VAKPLIWVITYGPKSLAIPANESRFYTSRTCQVQSSCTDAPDENLQRLVKLMGLAGDDEDG  
DGETSGLASMLSSLSCQSVA AFCFLPGELQSLMQMVCPE TCGLCGSSGVDGTSNPRNPES  
YRITGIHYHAHLLGSEMYATLLREEETQSGTIDVQKKNMEQATEVVA STRVVAKDLKSRD  
IWHYDDQASIPLEYDLFVEKPVVEEGFSNDSNNNATAATAATVTKVLKQGMVVKAGDEISV  
TCVFDSTARQEP TAFGPSTYQEMCIVTVYVTFDTPRVLLDIGE SSSVLSSTANLLVDLN  
LRSFACGVDDEFHKT DVHTGT LSEEDGRNIWRDHP IGDTKRCTYPVRDYIFSDSVITRD  
EICPEDDGDEDVEEEFSKGAGICDSYNPLPSVEVLFMDATIAGATCTGGKYDQMDGNEQF  
DNVTEEMCLVEGKGSSEYEPYTCLDAQDWLNTAPFDPSINDEVLDFVRDVWQGMCCRLGS  
IAMDVEEESPLKTVDAID EKSEEEQDAKAGDVTTAEAGISSSSVVSILSAVPATLLGTL  
AVFASVVF

>comp15693\_c0\_seq6; 705 72 2798 LEN=5567; translated  
MAKKPSLSISVAKAVFASSWLVLRTLPTATALPSFGTKIPNGERVPCPPDETEASEGCTP  
SGFCFGLGHPSCGGFQOPENRSDTGVISLNPFGDDWRATGFKWTAELCGLDSDGDGYTNG  
EELGDPCC2TWVAGSSEGANPVP IEAFVPSHPGLASHVPEGPVLDLATFCESEGGSGEAI V  
ADVEVDAAEDESSLSVVDARYNEGESRGSLELRMNPYP IPIRTTTYVDFVFNLPDDFP  
DLVHVVF AEVINSQPDHLHFFVLTGCTNAFPEDQHGNPIDDVSP TDCNVQLGGWAPGMDP  
FGTPSSEYGVALGPGMGIAALHLNVHYTDGVYEDEDTETHKMATDGMKIHYYTDFRPF TT  
VAKPLIWVITYGPKSLAIPANESRFYTSRTCQVQSSCTDAPDENLQRLVKLMGLAGDDEDG  
DGETSGLASMLSSLSCQSVA AFCFLPGELQSLMQMVCPE TCGLCGSSGVDGTSNPRNPES  
YRITGIHYHAHLLGSEMYATLLREEETQSGTIDVQKKNMEQATEVVA STRVVAKDLKSRD  
IWHYDDQASIPLEYDLFVEKPVVEEGFSNDSNNNATAATAATVTKVLKQGMVVKAGDEISV  
TCVFDSTARQEP TAFGPSTYQEMCIVTVYVTFDTPRVLLDIGE SSSVLSSTANLLVDLN  
LRSFACGVDDEFHKT DVHTGT LSEEDGRNIWRDHP IGDTKRCTYPVRDYIFSDSVITRD  
EICPEDDGDEDVEEEFSKGAGICDSYNPLPSVEVLFMDATIAGATCTGGKYDQMDGNEQF  
DNVTEEMCLVEGKGSSEYEPYTCLDAQDWLNTAPFDPSINDEVLDFVRDVWQGMCCRLGS  
IAMDVEEESPLKTVDAID EKSEEEQDAKAGDVTTAEAGISSSSVVSILSAVPATLLGTL  
AVFASVVF

>comp15694\_c0\_seq1; 829 1004 3907 LEN=4422; translated  
MLFMVLA MLCRFVLLSASSILPVSVLAASSAATAPPSYLYKTQDSRTAVEHGGNKDNKNY  
ARETNSRFESSDTTKKTSFHNIVVLDQTRVCLSTRGGQQLQPQTSDEDEVSTVTDNSND  
EYVSEEKEYSETDGN YDDDDLFDDDSCEYNDDDEVVDSE TNKRHRFRKKRKLRLNRIVK  
VTSLLLRKDVEATL DAYQGT LFRKKERQEKQKSYSTGLQYDDNEEDDERITQQSDLTRPG  
RYVHI VTTAALP WMTGTAVNPLLR AAYLHERLEYINNSINYNATDSNTTESATGNGKSSY  
VTLVIPWLELPEDQRKVYNGRVFDSKDEQELYVRNWL ENSANMPGAAANLNIVFY NARYH  
VGLGSVFAMGDILRELPTDEL DVCVLEPEHLNWFRA PSMESWTKRYNYVVGIVHTNYDQ  
YASQHYSGLMTAPAIRLMSAAMV RAYCHKVIKLSAVVQDFAPEKEVVS NVHGVREEFIVD  
SVVSVETEEVAIARAENISDDVT TNVTD SLARNESSCSTE EPSPPQAEVYF IGKLLWTK  
GLDILLEYQELYKGVVGEYFEIDIY GSGPDQREI SRAYLGRQSFKKSNNQRNQSQRFAKN  
TKGMKTVFEKTSKHAFVRAF KWVNRRRRSKR SKWKNRKNIDNTTKTQNYDNDTGHTYSGID  
DENKRTIAIERINNDVMDVMESLPVKARES IDGMSSQLKESLNKLS EDVTKAQQSVVGLP  
AKTRKVNQLIDDITSRANTFPLPRSLYEFRRQSIPATFPGRVDHAILKGNATDASQYKV  
FVNPSVSEVLC TTTAEALAMGKFVIIPVHPSNQFFLNFPNCLGYRTPYEFVANLRWAL TH  
DPVPHTEEVQRFTWEAATDRFLEASSITHKEARDRELLGRSKIDERIAWLHREMKGKAK  
GDILRKALGAGPVAGQVQYEMRQSGNATAADNEEEDGLEEGGLSRKFRNSV FVKALLEAT  
TFTSID

>comp15695\_c0\_seq1; 100 163 522 LEN=1042; translated  
MVWPFPCSCRSTLKV DSSGSI SCNVCPYASNLDELDPSEIPSSVTYSASRATPLWAKTDA  
EQESLRRNKEPTRATIEEPCVKCGHPEVGYTVQLRSVDEGQTVFY ECPACKHTWSINN

>comp15695\_c0\_seq2; 100 163 522 LEN=864; translated  
MVWPFPCSCRSTLKV DSSGSI SCNVCPYASNLDELDPSEIPSSVTYSASRATPLWAKTDA  
EQESLRRNKEPTRATIEEPCVKCGHPEVGYTVQLRSVDEGQTVFY ECPACKHTWSINN

>comp15695\_c1\_seq1; 330 692 1450 LEN=1450; translated  
MTSETDNNSVYDPLQNKIVSEPLQDAFRDDVRAEWIRAVFGTDFPYRKEIETNADVTTTS  
IDPDQTQKKNHNSWKGVGLAGLSSYVSYTA VL DLSQSSTKLNGRNDSDASKPASMDDRND  
DVSLLP AIPSESQPQPQPSLGM TLRSLGLYVRTIRPGSEAWCAGIEENSVLVGIND  
GELNLLAEP SKLALERI WQYEG IACKTNNSTGTIDEHVEQIGSKNDSEARSLTASAI SPN  
SKMKISTPISLTF

>comp15695\_c1\_seq2; 1312 692 5317 LEN=5681; translated  
MTSETDNNSVYDPLQNKIVSEPLQDAFRDDVRAEWIRAVFGTDFPYRKEIETNADVTTTS  
IDPDQTQKKNHNSWKGVGLAGLSSYVSYTA VL DLSQSSTKLNGRNDSDASKPASMDDRND

DVSLLPAPSESQPQQPPQPSLGMTLSRSLGLYVRTIRPGSEAWCAGIEENSVLVGIND  
GELNLLAEP SKLALERIWQYEG IACKTNNSTGTIDEHVEQIGSKNDSEARSLTASAI SPN  
SKMKISSPISLTFIRNGRLYKVILLSDPPY GIDWGPCGKFC LVQRVKPNGIADRAGVRPS  
SIVAGINLGRFRED SVKNEDRPEDEDICSNMSTIYHL DHSSVAAALKEATSDC ILQQRGE  
SKSTHRIRIQLCFTPSRARS GHWERQDDALEEKGSKRSNTTGP GGSTNGISINSSTLTRH  
PQQPTRPRVAEMNGVQVRIHP LLGGGGFVGVSSRRSIQAGDFDSLRRRSQSASIVSPSS  
LLSKLAERVAAGEPLSIWGNDR TDHYVINENNASSSLGEYGNFYR PCPLLKHSVKSNGN  
NTQPN SNQQPPLSFFPTCPSIFDCWNVQQA FIIYVFRYHIARYNEVELKMNASGDNNLLNI  
LRDLLLKAETNNSRSK DREASVILDALSTYLLFWFGWLTANENKPLELTQFLLKLVHQNQ  
MKNNGSISIPNSFGTTNIALSSFS LAHMEFLARSLDNGYIKNSLRKLRKERQQQHLV  
RNTIQKLDHTYGSNGLPSIRAVTGTTPSHEESQQA KDLTFDRASEQKVPSSSAKAKSTTV  
EKPKPRRRFPFFRKKKKGHAKNKQSSSTNVSNDSENADV ASREKQRPVKEKRNLTDGDRM  
TSSSVSPPLL CGDLINGSKGSNSCDTKSPFMILKELGNVLSSESADSLFANTVKFLDELE  
TVCTDVEKSLMKSFSQKFARWALQPWTANNQSALTQVTNAMRKRLDKYNT EYYSMPLLDP  
IDSSSQPLISIDTKGCYILPSAHFPLLLTFDC KRRIEDRSNTGGGRDPKLP SRMSIPNLI  
GEEKIYRTSVELVALRGSKALS GNEKLPYHGFTA HGS IAGSVIESQQSVRVDHKSNNHVVW  
NLANLMVFDTRSTWGP PKTFSLRLSETLINEKEKGAQNP TNSTPDRTSRQQECGYCW INL  
VPFWEETS GKQQV SCKTRVVPDFND FDEHGELRKDSYAE LMQCMEIEFRISTKVLETK  
SSVKRSLLYKHDD DVQRQEMFAIEFIKSCDRILQSCGLHLKMLTFRAIPVSKRRGFIEWVP  
GSVPLSEICQPFAGSILAKNRDRNKSVKLTRIGNNEIEDAMEDDDNDSIAMSSVARAGMT  
KYESLNR LRSDD ESEQRNARGNYVLP SRKNNPIQDFLRSLAYDPDES YKIRRDMVDTFVK  
SCAGYSVVTYILGVGDRHLDN LLLHESGHFFHCDFSFVLGNDPKKYLPMRITKDMINGMG  
GWKSDNFCQFLSLACGAFLTLRRPENVRHLLSLIRLLEGCGLPDLEKTQSMENAIQGV RD  
RLKLNLTDEEAILFMEKLIEDSCASKMWIAVD AIIHSLAQR F

>comp15696\_c0\_seq1; 1635 37 5901 LEN=6061; translated  
MDGDGYDDPEIRATVDNDESDACL YLNEMTQDVIEWDESNNKDL DQMFKSPMPSSGRKG  
ARSSTRKRSNSTSSTKCNKNANKRSTPSSKATTNSPLFLGVGRQLDPSFLSTVNTDGNRA  
EKCAEREIDGTINSLKMKTD SKPLVNADTKRTIHLSSMFSDPLGTTPIRQGSKRPAKTTL  
NRHHTY PKTKSSATSLAQRHRRRTDYSRAQKEHTNSADALLPSASMADSALSQPNNALT  
ICKHSGP T SRDGRNTQNVLPKEATAPDDFAELLEAIRTPHSPNESRPLGRLPLSSVDEN  
AIAIRTTTVHSIERKDT DSCSTEDQTKGSLIDSVDTSSEVVHRPQSALS KQEPSANIIPQ  
LRHYSQFEHKKTQPKIYSGI SNQHESPVVLQVEASHSRPVNRISCPERRGNDGVRDAGKM  
TGSVDICEHNKLEEFDNIDFSEDDLAKIDS LTQPALGQNNKQMLRVQSSERKNSVENMTK  
RFNTNENAPT LQGNLTDTSTKAKPFD SHTTKHDVDEF GDFPSDIDFAQIDAMVSSQACRS  
RTEKNTSLAKASPQAW EASSTEILASSATHMLTSRCEKTQLVTSSNMIQLPKQNSTPEEE  
DEFGDFPTDIDFSEMDALVATQCCNIKHDDSKSSVRSSI STKHSNEWKNDP SKSQNLST  
KTEDDDY GDFPEDIDFDSL DQAVTQKMLSKPEASVDPTGIVRNRRRSGIRPREMSFMKFS  
RYKVLAVENDQKNCIKILKVAGWVESMMKIH EEEKIHRDGKVKRSDDYVLDEDNCSFS  
LPQDIEYPEDGMIYLCGEWTF TPVSPGDFIHVCSLTGQFETDTAALPIVLNSYPPPGSDI  
DDLILVLHPDMLLSPSII SEASSCNRAALSKL GSTGLSSKSAVVG TMRHGLFEGCMKA  
AEFSPSFAQKVMKLI REKAEMLIGCNVSESEAEVEILN ILPMIQHFAGQYTTLRKDV MV  
LSSLGKPVGGAACHPDLRL LGTRVHSVEENIVSAAI GLKGSIDAVLETQSEI IGRKQQA  
SSPTVVAAPQHSLMCFELKTGH NQNIQNVHMAQLSLYTFMLQSRYGADIKLDNNKMIGSQ  
SETKFVVRGAAPGG ILLYLNESQQI SHVSPQLNEVKTLM TQRNVVASDSKRS SRLRGIA  
LSYDEGHREDDKYLKAKLLP APPADLP ELKASSHPCKRCFSNRECMVYAASDPATDTGR  
HHELLSQFTGHLKEEDLTYFRKWDRLIDIEADASNPKIVAPWLVD SRIREIENGESISRL  
VFDASASFVKGTSHALVCFRRKLETSSQSPLERLNIAPGSYVILSTDGNIFDDFSRTHG  
ARKHRNQMHVTKGYLDRIEDDKVFLSMTSDELNQVEMLVSR YQDEVQKKSNGNNLSSSVL  
FRLDMNTRSVGTGTLRWNLVNF LSGDY SQKNREECTELEQRRQRRLVWLRDIVIRLKTPE  
FADESDAFFEGIDLHISGCNLQELCREFHLLNDDQKLAVKKVLSGRDYTLIQGLPGTGK  
TSILGFLARLLVGRGRRVLI TGYTHSAVDNIMLKLMEKGMKPLNSNPGVSSLVRI GQNR  
CHTSVKPIMHSHLAL EQDRILNNRNSCEELAHDDVEHPSATALKKVITNARIVGVSALS  
PRSALEENQFFDVVI IDEAGQMNEPTALGALAAADSFVLVGDH KQLPPLVNSAIAESGGY  
GVSLKLAEKHPHAIAPLTMQYRMNEDI CKISSESMYGGRMKCGDEKVKSQQLHLP GPF  
SLLPKSVKQQPTDWR TIIDPDRPVVFD TDNLRTKFS EFDGSTESSNRKEKYETLEGI  
GGKGS GSIINRAEATLVRYIVGALQSCGHDLSEIGVISP FRAQIRVLGENPTLLSWKKEG  
LELSTIDRYQGRDKSTI ILSLVR SNEKNNTGRLLQDARRLNVAFTRAKYKLIVIGSYRTL  
TLGSAPLRPILNRMNMRDQRVEPPENALGCYDMN

>comp15697\_c0\_seq1; 844 1246 4305 LEN=4305; translated  
MHNGGMSFGPDGNLYLATGDTGYPRSIDPANNLDNLWGKILRIKDDGTVPSDNPYVGQN

KSQRCGGKIINPGDGKSRVCTEIFARGFRNPF SLEMNPNIKNGDVEFHI SDVGRENWEEI  
NIGGTGYEKANYGWREREGPCQMGTSSNSCDKVDPLEFVDP IHFYQHTNSRGSACVGG  
FIPNGIWPKEYDNEYLYADLRAQSI FHMKLDKDNCRGKQCDKQKSKYIGVPIVNNIEGN  
SVLRLRFGPHSKKRSQDISLYHLLYDSGKINRLTYIGKGGSDDDNDVSNNRKPEAVIETF  
YSSDEKGVTVRFDGSKSSDPDGDKLSMEWEFGEEDQDDTNDSPITSHYRKSGRFTASL  
KVSDGNGKTSKTTVTINVDKDYDRSSSDSHGIPTLQTFPWSEECDSYHDDDTNIDRCGIL  
EFCFDEDSGIYGYQIAEGGQCGILTMGSAPVIRLQPGFTYRLTLRNLTPDPTNIHHTHGLH  
IVGSGNGDDVTRVMDGGGNCMDYTWDIRSDHPGGTYWYHPHAHSFSEVQVNGGASGLLVV  
EDNTNNDNI PGWASNELLQLLRLLDDGYKMLSNGRSYEIFNLKAGKWYRMRI STVDPLG  
APQELRFTSGCEVHKVASDGVVHVSVPFDEGSMNKFEMTGS SRGDFAIRCNISPGINIRF  
SDTIVAILNIKQDGSSTLRQEIGRWQPKRPPSIQNMVSATVADENKLVIKIKRDSINDRE  
WNPVFLGLSLAYDEVHEWELPDTRHEPHFIHLYHMVQVATPNGCGNDFREGEFYDTISAGP  
CTVRFRTSDFGQRLVHVHMLHSDLGSMGWFVDRGAGMPVYELTSQHHCDSGNIVPSP  
TISPTRKFDEGIENCKIFDKLSFTANANQFCEYSDDTTIGNDAEEKQCGMGPVDMKLSINSS  
SCNNDCFVAFTIAGEFVTYKFLTTSTVGNVMIKAKVASKLSKKKRFRLIMLDQNSESGVL  
LAPGKGYEVFEEVTWELSGLPKGLHHLQVYFIDGNINLCSIEVQMNTVSEPGPTLAPMQP  
>comp15697\_c0\_seq2; 589 735 2633 LEN=2701; translated  
MAWTPDGRVLIAGKEGEIYIFDDGDVEGDKKLIHNVNPNCTEQERSLLSILVHPKFGTKSN  
GQFDFVYAYVWHKGDGNCMIPDNFKI INKDGOPYCQLSRFQLTKSNKLQDEEVLLRTGNA  
GKMHNCGGMSFGPDGNLYLATGDTGYPRSIDPANNLDNLWGKILRIKDDGTVP SDNPYVG  
QNKSQRCGGKIINPGDGKSRVCTEIFARGFRNPF SLEMNPNIKNGDVEFHI SDVGRENWE  
EINIGGTGYEKANYGWREREGPCQMGTSSNSCDKVDPLEFVDP IHFYQHTNSRGSACV  
GSFIPNGIWPKEYDNEYLYADLRAQSI FHMKLDKDNCRGKQCDKQKSKYIGVPIVNNIE  
GNSVLRLRFGPHSKKRSQDISLYHLLYDSGKINRLTYIGKGGSDDDNDVSNNRKPEAVIE  
TFYSSDEKGVTVRFDGSKSSDPDGDKLSMEWEFGEEDQDDTNDSPITSHYRKSGRFTA  
SLKVSDGNGKTSKTTVTINVDKDYDRSSSDSHGIPTLQTFPWSEECDSYHDDDTNIDRCG  
ILEFCFDEDSGIYGYQIAEGGQCGILTMGSAPVIRLQPGFTYRLTLRNLTPDPTNIHTH  
LHIVGSGNGDDVTRVMDGGGNCMDYSKFDST  
>comp15697\_c0\_seq3; 511 1246 2778 LEN=2846; translated  
MHNCGGMSFGPDGNLYLATGDTGYPRSIDPANNLDNLWGKILRIKDDGTVP SDNPYVGQ  
KSNQRCGGKIINPGDGKSRVCTEIFARGFRNPF SLEMNPNIKNGDVEFHI SDVGRENWEEI  
NIGGTGYEKANYGWREREGPCQMGTSSNSCDKVDPLEFVDP IHFYQHTNSRGSACVGG  
FIPNGIWPKEYDNEYLYADLRAQSI FHMKLDKDNCRGKQCDKQKSKYIGVPIVNNIEGN  
SVLRLRFGPHSKKRSQDISLYHLLYDSGKINRLTYIGKGGSDDDNDVSNNRKPEAVIETF  
YSSDEKGVTVRFDGSKSSDPDGDKLSMEWEFGEEDQDDTNDSPITSHYRKSGRFTASL  
KVSDGNGKTSKTTVTINVDKDYDRSSSDSHGIPTLQTFPWSEECDSYHDDDTNIDRCGIL  
EFCFDEDSGIYGYQIAEGGQCGILTMGSAPVIRLQPGFTYRLTLRNLTPDPTNIHHTHGLH  
IVGSGNGDDVTRVMDGGGNCMDYSKFDST  
>comp15697\_c0\_seq4; 587 735 2654 LEN=2868; translated  
MAWTPDGRVLIAGKEGEIYIFDDGDVEGDKKLIHNVNPNCTEQERSLLSILVHPKFGTKSN  
GQFDFVYAYVWHKGDGNCMIPDNFKI INKDGOPYCQLSRFQLTKSNKLQDEEVLLRTGNA  
GKMHNCGGMSFGPDGNLYLATGDTGYPRSIDPANNLDNLWGKILRIKDDGTVP SDNPYVG  
QNKSQRCGGKIINPGDGKSRVCTEIFARGFRNPF SLEMNPNIKNGDVEFHI SDVGRENWE  
EINIGGTGYEKANYGWREREGPCQMGTSSNSCDKVDPLEFVDP IHFYQHTNSRGSACV  
GSFIPNGIWPKEYDNEYLYADLRAQSI FHMKLDKDNCRGKQCDKQKSKYIGVPIVNNIE  
GNSVLRLRFGPHSKKRSQDISLYHLLYDSGKINRLTYIGKGGSDDDNDVSNNRKPEAVIE  
TFYSSDEKGVTVRFDGSKSSDPDGDKLSMEWEFGEEDQDDTNDSPITSHYRKSGRFTA  
SLKVSDGNGKTSKTTVTINVDKDYDRSSSDSHGIPTLQTFPWSEECDSYHDDDTNIDRCG  
ILEFCFDEDSGIYGYQIAEGGQCGILTMGSAPVIRLQPGFTYRLTLRNLTPDPTNIHTH  
LHIVGSGNGDDVTRVMDGGGNCMDYTWDIRSDHPGGTYW  
>comp15697\_c0\_seq5; 509 1246 2799 LEN=3013; translated  
MHNCGGMSFGPDGNLYLATGDTGYPRSIDPANNLDNLWGKILRIKDDGTVP SDNPYVGQ  
KSNQRCGGKIINPGDGKSRVCTEIFARGFRNPF SLEMNPNIKNGDVEFHI SDVGRENWEEI  
NIGGTGYEKANYGWREREGPCQMGTSSNSCDKVDPLEFVDP IHFYQHTNSRGSACVGG  
FIPNGIWPKEYDNEYLYADLRAQSI FHMKLDKDNCRGKQCDKQKSKYIGVPIVNNIEGN  
SVLRLRFGPHSKKRSQDISLYHLLYDSGKINRLTYIGKGGSDDDNDVSNNRKPEAVIETF  
YSSDEKGVTVRFDGSKSSDPDGDKLSMEWEFGEEDQDDTNDSPITSHYRKSGRFTASL  
KVSDGNGKTSKTTVTINVDKDYDRSSSDSHGIPTLQTFPWSEECDSYHDDDTNIDRCGIL  
EFCFDEDSGIYGYQIAEGGQCGILTMGSAPVIRLQPGFTYRLTLRNLTPDPTNIHHTHGLH  
IVGSGNGDDVTRVMDGGGNCMDYTWDIRSDHPGGTYW

>comp15697\_c0\_seq6; 922 735 4160 LEN=4160; translated  
MAWTPDGRVLIAGKEGEIYIFDDGDVEGDKKLIHNVNPNCTEQERSLLSILVHPKFGTKSN  
GQDFVYAYVWHKGDGNCMIPDNFKIINKDGPYQLSRFQLTKSNKLQDEEVLLRTGNA  
GKMHNGGMSFGPDGNLYLATGDTGYPRSIDPANLNDNLWGKILRIKDDGTVPNDNPYVG  
QNKSQRCGGKIINPGDGKSRVCTEIFARGFRNPFLEMNPNIKNGDVEFHI SDVGRENWE  
EINIGGTGYEKANYGWREREGPCQMGTSSNSCDKVDPLEFVDP IHFYQHTNSRGSACVG  
GSFIPNGIWPKEYDNEYLYADLRAQSI FHMKLDKDNECRGKQCDKQKSKYIGVPIVNNIE  
GNSVLRRLRFGPHSKKRSQI SLYHLLYDSGKINRLTYIGKGGSDDDNDVSNNRKPEAVIE  
TFYSSDEKGVTVRFDGSKSSDPDGDKLSMEWFEFGEEDQDDTNDSPITSHTYRKSGRFTA  
SLKVS DNGKTSKTTVTINVDKDYDRSSSDSHGIPTLQTFPWSEECDSYHDDDTNIDRCG  
ILEFCFDEDSGIYGYQIAEGGQCGLTMGSAPVIRLQPGFTYRLTLRNLTPDPTNIHTHG  
LHIVGSGNGDDVTRVMDGGGNCMDYTWDIRSDHPGGTYWYHPHAHSFSEVQVNGGASGLL  
VVEDNTNNDNIPGWASNELLLQILRLDDGYKMLSNGRSYEIFNLKAGKWYRMRISTVDP  
LGAPQELRFTSGCEVHKVASDGVWHSVVPFDEGSMNKFEMTGSSRGDFAIRCNI SPGINI  
RFSDTIVAILNIKQDGSSTLRQEIGRWQPKRPPSIQNMVSATVADENKLVIKIKRDSIND  
REWNPVPLGSLAYDEVHEWELPDTRHPFHILHYHMVQVATPNGCGNDFREGEFYDTISA  
GPCTVRFRTSDFGQRLVVHCHVMLHSDLGSMGWFDVRGAGMPVYELTSQHHCDSGNIVPS  
PTISPTRKFDEGIENCKIFDKLSFTANANQFCEYSDTTIGNDAEEKQCGMGPVDMKLSIN  
SSSCNNDCFVAFTIAGEFVTYKFLTTSTVGNVMIKAKVASKLSKKKRFRLIMLDQNSEG  
VLLAPGKGYEVFEEVTWELSGLPKGLHHLQVYFIDGNINLCSIEVQMNTVSEPGPTLAMP  
QP

>comp15698\_c0\_seq1; 492 1 2887 LEN=2960; minus strand; translated  
AIDHKWANEYLRQVYESECMPLPHMFEFHLQRPDYAPHPKELMKRLMTNHP SKLFWYLSSQ  
PGDIFEECLSLEHANCLRYSYSNQPPPQNSDVLIDGKTHVAIGFVLDLGF LMASDSLEFRT  
SPLRYIGIDSSAYVVAKTSLIWELIQYAGSTASTEERDLYKWIYIQVWFSTTWSEGEPA  
VKAALSSLLSLPARHFDSEVRSILQHWHRASPLPLKEARLKI QSFKTDAGASIGLLKKKQ  
DRIAMAKYQLTGDFGVTNPVCGSIVYLDPCPDGTPPPPSNETVFSALDFEKMELAKKDSR  
MTILDAAEKYACERVAKLVAWCSRKLITVELRCTKVQDAIDYIASQRPRSIGWSNVLDYI  
GRGEFHMAQECSVEGETIHYGYSMNWPTVVFGTCLFDYGGEESEWKKKEMKRSNRAQK  
NHFCELGWESYFRFPLPQNPLNTVARVLELIHVEKWVDYFLSTYPNGQFCRGGSEYCYGI  
TSPLSVTGEGETVYLSWTYDRIEPPGFVDISISLQKEGIVDETSFSSFSRHRLLVLLAQSL  
YLYLSNDSSTCKRIHLEIQRTSAIMXKLC LFRVMQLFIVDSRPFVLLTSVAAAAPDVVV  
VDADI VVASFLAAAPDDVVVDADI AVAPDAVVAVAPVEADETGPAAVFVVLAAAVVPADP  
ALSSPXVDGDAETLSTTMYKTLRRRPRTSDTVMYLLPSSSFLLSPRFPWAPCPLLSGN  
GSRCTILGRVARKEYSTDRLVSIACSPWFALGSEIFPRTQNSTTGDPDGDGDEDATEG  
GMAWGAVELEDLVPAPPGGVACSEGFSGFRKGF LAVLLKYLEVVLVVI VVAGPVGAERQ  
GDAVLQAQPGKPGGAAGFGSGARRWVRCFGAFRRSGR LAWTA AFFGEAPRHDGLVKAMAM  
AIATADRGPSAGGSHPSQRGPGTGRAPQATPDQKGRQSSRPDPGGSSWRESWCNHGCCP  
RKG

>comp15698\_c0\_seq2; 740 458 2701 LEN=3078; minus strand; translated  
MKTTQ GKVLAKGDRVTLVGLKSTGMNGKGTIVYLPGAHSSKEENRYGVVVDGCDKAMSI  
KSINIRPERLEASDPFNATREESHQTEASSSLATKNQAFQK GDRVALFGLKTSKLNRRG  
KIVSLSDPTNENRYGVKVDGRKKAMRIK PANMRQIAKTQELKQEHQELKGRGEFKNEEC  
PSADEMEMTRRMMSMILTEKNATALFGRKIEPLPNFRV ELIKEGGGFPKSIDHKWANEYL  
RQVYESECMPLPHMFEFHLQRPDYAPHPKELMKRLMTNHP SKLFWYLSSQPGDIFEECLSL  
EHANCLRYSYSNQPPPQNSDVLIDGKTHVAIGFVLDLGF LMASDSLEFRTSPLRYIGIDSS  
AYVVAKTSLIWELIQYAGSAASTEERDLYKWIYIQVWFSTTWSEGEPAVKAALSSLLSL  
PARHFDSEVRSILQHWHRASPLPLKEARLKI QSFKTDAGASIGLLKKKQDRIAMAKYQLT  
GDFGVTNPVCGSIVYLDPCPDGTPPPPSNETVFSALDFEKMELAKKDSRMTILDAAEKYA  
CERVAKLVAWCSRKLITVELRCTKVQDAIDYIASQRPRSIGWSNVLDYI GRGEFHMAQE  
CSVEGETIHYGYSMNWPTVVFGTCLFDYGGEESEWKKKEMKRSNRAQKNHFCELGWESY  
FRFPLPQNPLNTVARVLELIHVEKWVDYFLSTYPNGQFCRGGSEYCYGITSPLSVTGEGT  
VYLSWTYDRIEPRDLLTFLSHYKRREL

>comp15698\_c0\_seq3; 604 1 2970 LEN=3043; minus strand; translated  
YKELKGRGEFKNEECPSADEMEMTRRMMSMILTEKNATALFGRKIEPLPNFRV ELIKEGG  
GFPKSIDHKWANEYLRQVYESECMPLPHMFEFHLQRPDYAPHPKELMKRLMTNHP SKLFWY  
LSSQPGDIFEECLSLEHANCLRYSYSNQPPPQNSDVLIDGKTHVAIGFVLDLGF LMASDSL  
EFRTSPLRYIGIDSSAYVVAKTSLIWELIQYAGSAASTEERDLYKWIYIQVWFSTTWSEGE  
TEPAVKAALSSLLSLPARHFDSEVRSILQHWHRASPLPLKEARLKI QSFKTDAGASIGLL  
KKKQDRIAMAKYQLTGDFGVTNPVCGSIVYLDPCPDGTPPPPSNETVFSALDFEKMELAK



KDSRMTILDAAEKYACERVAKLVAWCSRKLITVELRCTKVQDAIDYIASQRPRSIGWSNV  
LDYHEMAQECSVEGETIHYGYSMNWPTVVFVGTCLFDYGGEQNSEWRKEVMKKS NRAQKDH  
FCELGWESYFRFPLPQNPLNTVARVLELIHVEKWVDYFLSTLPNGQFCRGGLEYCYGITSP  
LSVTGEGTVYLSWTYDRIEPPGFVDISISLQKEGIVDETSFSSFSRNRFS AIMXKLCLFR  
VMQLFIVDSRPFVLLTSVAAAPDVVVDADIVVASFLAAAPDDVVVDADIAVAPDAVVA  
VAPVEADETGPAAVFVVLAAAVVPADPALSSPXVDGTD AETLSTTMYKTLLRRRPRTSDT  
VMYLLPSSSFLSPRFPWAPCPLLSGNGSRCRTILGRVARKEYSTDRLVSIACSPWFAL  
GSEIFPRTQNSTTGDPDGDGDEDATEEGMAWGAVELEDSLVPAPPGGVACSEGFGSFRKG  
FLAVLLKYLEVVLVVI VVAGPVGAERQGD AVLQAQPGKPGGAAGFGSGARRWVRCFGAFR  
RSGRLAWTAAFFGEAPRHDGLVKAMAMAIATADRGPSAGGSHPSQRGPGTGRAPQATPDQ  
KGRQSSRPDPGGSSWRESWCNHGCCPRKG

>comp15698\_c0\_seq4; 509 1 1749 LEN=2126; minus strand; translated  
YKELKGRGEFKNEECPSADEMEMTRMMSMILTEKNATALFGRKIEPLPNFRV ELIKEGG  
GFPKSIDHKWANEYLRQVYESECM LPHMFEFHLQRPDYAPHPKELMKRLMTNHPSKLFWY  
LSSQPGDIFEECLSLEHANCLRYSYSNQPPQNSDVLIDGKTHVAIGFVDLGFLMASDSL  
EFRTSPLRYIGIDSSAYVVAKTSLIWELIQYAGSAASTEERDLYKWI IQVWFSTTWSEG  
TEPAVKAALSSLLSLPARHFDSEVRSILQHWHRASPLPLKEARLKI QSFKTDAGASIGLL  
KKKQDRIAMAKYQLTGDFGVTNPVCGSIVYLDPCPDGTPPPPSNETVFSALDFEKVMELAK  
KDSRMTILDAAEKYACERVAKLVAWCSRKLITVELRCTKVQDAIDYIASQRPRSIGWSNV  
LDYIGRGEFHMAQECSVEGETIHYGYSMNWPTVVFVGTCLFDYGGEESEWKKEVMKRSN  
RAQKNHFCELGWESYFRFPLPQNPLNTVARVLELIHVEKWVDYFLSTYPNGQFCRGGSEY  
CYGITSPSVTGEGTVYLSWTYDRIEPRDLLTFLSHYKRREL

>comp15698\_c0\_seq5; 337 1 2397 LEN=2470; minus strand; translated  
XIQVWFSTTWSEGTEPAVKAALSSLLSLPARHFDSEVRSILQHWHRASPLPLKEARLKI Q  
SFKTDAGASIGLLKKKQDRIAMAKYQLTGDFGVTNPVCGSIVYLDPCPDGTPPPPSNETV F  
SALDFEKVMELAKKDSRMTILDAAEKYACERVAKLVAWCSRKLITVELRCTKVQDAIDYI  
ASQRPRSIGWSNVLDYIGRGEFHMAQECSVEGETIHYGYSMNWPTVVFVGTCLFDYGGEE  
NSEWKKEVMKRSNRAQKNHFCELGWESYFRFPLPQNPLNTVARVLELIHVEKWVDYFLST  
YPNGQFCRGGSEYCYGITSPSVTGEGTVYLSWTYDRIEPPGFVDISISLQKEGIVDETS  
FSSFSRHRLVLLAQSLYLYLSNDSSXTCKRIHLEIQRTSAIMXKLCLFRVMQLFIVDSR  
PFRVLLTSVAAAPDVVVDADIVVASFLAAAPDDVVVDADIAVAPDAVVAVAPVEADETG  
PAAVFVVLAAAVVPADPALSSPXVDGTD AETLSTTMYKTLLRRRPRTSDTVMYLLPSSS F  
LLSPRFPWAPCPLLSGNGSRCRTILGRVARKEYSTDRLVSIACSPWFALGSEIFPRTQN  
STTGDPDGDGDEDATEEGMAWGAVELEDSLVPAPPGGVACSEGFGSFRKGF LAVLLKYLE  
VVLVVI VVAGPVGAERQGD AVLQAQPGKPGGAAGFGSGARRWVRCFGAFRRSGRLAWTAA  
FFGEAPRHDGLVKAMAMAIATADRGPSAGGSHPSQRGPGTGRAPQATPDQKGRQSSRPDP  
PGGSSWRESWCNHGCCPRKG

>comp15698\_c0\_seq6; 438 1 1557 LEN=2631; minus strand; translated  
AIDHKWANEYLRQVYESECM LPHMFEFHLQRPDYAPHPKELMKRLMTNHPSKLFWYLSSQ  
PGDIFEECLSLEHANCLRYSYSNQPPQNSDVLIDGKTHVAIGFVDLGFLMASDSL EFR T  
SPLRYIGIDSSAYVVAKTSLIWELIQYAGSAASTEERDLYKWI IQVWFSTTWSEGTEPA  
VKAALSSLLSLPARHFDSEVRSILQHWHRASPLPLKEARLKI QSFKTDAGASIGLLKKKQ  
DRIAMAKYQLTGDFGVTNPVCGSIVYLDPCPDGTPPPPSNETVFSALDFEKVMELAKKDSR  
MTILDAAEKYACERVAKLVAWCSRKLITVELRCTKVQDAIDYIASQRPRSIGWSNVLDYI  
GRGEFHMAQECSVEGETIHYGYSMNWPTVVFVGTCLFDYGGEESEWKKEVMKRSNRAQK  
NHFCELGWESYFRFPLPQNPLNTVARVLELIHVEKWVDYFLSTYPNGQFCRGGSEYCYGI  
TSPLSVTGEGTVYLSWTYDRIEPRDLLTFLSHYKRREL

>comp15698\_c0\_seq7; 512 1 2522 LEN=2522; minus strand; translated  
AIDHKWANEYLRQVYESECM LPHMFEFHLQRPDYAPHPKELMKRLMTNHPSKLFWYLSSQ  
PGDIFEECLSLEHANCLRYSYSNQPPQNSDVLIDGKTHVAIGFVDLGFLMASDSL EFR T  
SPLRYIGIDSSAYVVAKTSLIWELIQYAGSAASTEERDLYKWI IQVWFSTTWSEGTEPA  
VKAALSSLLSLPARHFDSEVRSILQHWHRASPLPLKEARLKI QSFKTDAGASIGLLKKKQ  
DRIAMAKYQLTGDFGVTNPVCGSIVYLDPCPDGTPPPPSNETVFSALDFEKVMELAKKDSR  
MTILDAAEKYACERVAKLVAWCSRKLITVELRCTKVQDAIDYIASQRPRSIGWSNVLDYH  
EMAQECSVEGETIHYGYSMNWPTVVFVGTCLFDYGGEQNSEWRKEVMKKS NRAQKDHFC EL  
GWESYFRFPLPQNPLNTVARVLELIHVEKWVDYFLSTLPNGQFCRGGLEYCYGITSPSVT  
GEGTVYLSWTYDRIEPPGFVDISISLQKEGIVDETSFSSFSRNRFS AIMXKLCLFRVMQL  
FIVDSRPFVLLTSVAAAPDVVVDADIVVASFLAAAPDDVVVDADIAVAPDAVVAVAPV  
EADETGPAAVFVVLAAAVVPADPALSSPXVDGTD AETLSTTMYKTLLRRRPRTSDTVMYL  
LPSSSFLSPRFPWAPCPLLSGNGSRCRTILGRVARKEYSTDRLVSIACSPWFALGSEI

FPRTQNSTTGDPDGDGDEDATEGGMAWGAVELEDSLVPAPPGGVACSEGFGSFRKGFLAV  
LLKYLEVVLVAGVVVVAGPVGAERQGDVLAQAPGKPGGAARRWVRCFGAFRRSGRLAWT  
AA

>comp15698\_c0\_seq8; 740 458 2701 LEN=3775; minus strand; translated  
MKTQGKVLAKGDRVTLVGLKSTGMNGKGTIVYLPGAHSSKEENRYGVWVDGCDKAMSI  
KSINIRPERLEASDPFNATREESHQTEASSSLATKNQAFQKGRVALFGLKTSKLNRRG  
KIVSLSDPTNENRYGVKVDGRKKAMRIK PANMRQIAKTTQELKQEHQELKGRGEFKNEEC  
PSADEMEMTRMMSMILTEKNATALFGRKIEPLPNFRVELIKEGGGFPKSIDHKWANEYL  
RQVYESECMLPHMFEFHLQRPDYAPHPKELMKRLMTNHP SKLFWYLSSQPGDIFEECLSL  
EHANCLRYSYSNQPQQNSDVLIDGKTHVAIGFVDLGFLMASDSLEFRTSPLRYIGIDSS  
AYVVAKTSLIWELIQYAGSAASTEERDLYKWI IQVWFSTTWSEGT E PAVKAALSSLLSL  
PARHFDSEVRSILQHWHRASPLPLKEARLKIQSFKTDAGASIGLLKKKQDRIAMAKYQLT  
GDFGVTNPVCGSIVYLDPCDGT PPPPSNETVFSALDFEKMELAKKDSRMTILDAAEKYA  
CERVAKLVAWCSRKLITVELRCTKVQDAIDYIASQRPRSIGWSNVLDYIGRGEFHMAQE  
CSVEGETIHYGYSMNWPTVVFGTCLFDYGGEEENSEWKKVMKRSNRAQKNHFCELGWESY  
FRFPLPQNPLNTVARVLELIHVEKWVDYFLSTYPNGQFCRGGSEYCYGITSPLSVTGEGT  
VYLSWTYDRIEPRDLLTFLSHYKRREL

>comp15698\_c0\_seq9; 569 1 2017 LEN=2017; minus strand; translated  
YKELKGRGEFKNEECPSADEMEMTRMMSMILTEKNATALFGRKIEPLPNFRVELIKEGG  
GFPKSIDHKWANEYL RQVYESECMLPHMFEFHLQRPDYAPHPKELMKRLMTNHP SKLFWY  
LSSQPGDIFEECLSL E HANCLRYSYSNQPQQNSDVLIDGKTHVAIGFVDLGFLMASDSL  
EFRTSPLRYIGIDSSAYVVAKTSLIWELIQYAGSAASTEERDLYKWI IQVWFSTTWSEGT  
E PAVKAALSSLLSLPARHFDSEVRSILQHWHRASPLPLKEARLKIQSFKTDAGASIGLL  
KKKQDRIAMAKYQLTGDFGVTNPVCGSIVYLDPCDGT PPPPSNETVFSALDFEKMELAK  
KDSRMTILDAAEKYACERVAKLVAWCSRKLITVELRCTKVQDAIDYIASQRPRSIGWSNV  
LDYHEMAQEC SVEGETIHYGYSMNWPTVVFGTCLFDYGGEQNSEWRKEVMKSNRAQKDH  
FCELGWESYFRFPLPQNPLNTVARVLELIHVEKWVDYFLSTLPNGQFCRGLEYCYGITSP  
LSVTGEGTVYLSWTYDRIEPPGFVDISISLQKEGIVDETSFSSFSRNRFS AIMXKLCLFR  
VMQLFIVDSRPFVLLTSVAAAAPDVVVVDADIVVASFLAAAPDDVVVDADFDALDVDVDA  
HIAVAPDAVVA

>comp15698\_c0\_seq10; 731 458 3666 LEN=3666; minus strand; translated  
MKTQGKVLAKGDRVTLVGLKSTGMNGKGTIVYLPGAHSSKEENRYGVWVDGCDKAMSI  
KSINIRPERLEASDPFNATREESHQTEASSSLATKNQAFQKGRVALFGLKTSKLNRRG  
KIVSLSDPTNENRYGVKVDGRKKAMRIK PANMRQIAKTTQELKQEHQELKGRGEFKNEEC  
PSADEMEMTRMMSMILTEKNATALFGRKIEPLPNFRVELIKEGGGFPKSIDHKWANEYL  
RQVYESECMLPHMFEFHLQRPDYAPHPKELMKRLMTNHP SKLFWYLSSQPGDIFEECLSL  
EHANCLRYSYSNQPQQNSDVLIDGKTHVAIGFVDLGFLMASDSLEFRTSPLRYIGIDSS  
AYVVAKTSLIWELIQYAGSAASTEERDLYKWI IQVWFSTTWSEGT E PAVKAALSSLLSL  
PARHFDSEVRSILQHWHRASPLPLKEARLKIQSFKTDAGASIGLLKKKQDRIAMAKYQLT  
GDFGVTNPVCGSIVYLDPCDGT PPPPSNETVFSALDFEKMELAKKDSRMTILDAAEKYA  
CERVAKLVAWCSRKLITVELRCTKVQDAIDYIASQRPRSIGWSNVLDYHEMAQEC SVEGE  
TIHYGYSMNWPTVVFGTCLFDYGGEQNSEWRKEVMKSNRAQKDHFCELGWESYFRFPLP  
QNPLNTVARVLELIHVEKWVDYFLSTLPNGQFCRGLEYCYGITSPLSVTGEGTVYLSWTY  
DRIEPPGFVDISISLQKEGIVDETSFSSFSRNRFS AIMXKLCLFRVMQLFIVDSRPFVLL  
TSVAAAAPDVVVVDADIVVASFLAAAPDDVVVDADIAVAPDAVVA VAVAPVEADETGPAAVF  
VVLAAAVPADPALSSPXVDGTD AETLSTTMYKTLRRRPRTSDTVMYLLPSSSFLLSPL  
FPWAPCPLLSGNGSRCRTILGRVARKEYSTDRLVSIACSPWFALGSEIFPRTQNSTTGD  
PDGDGDEDATEGGMAWGAVELEDSLVPAPPGGVACSEGFGSFRKGFLAVLLKYLEVVLVA  
GVVVVAGPVGAERQGDVLAQAPGKPGGAARRWVRCFGAFRRSGRLAWTAA

>comp15698\_c0\_seq11; 512 1 2778 LEN=2851; minus strand; translated  
AIDHKWANEYL RQVYESECMLPHMFEFHLQRPDYAPHPKELMKRLMTNHP SKLFWYLSSQ  
PGDIFEECLSL E HANCLRYSYSNQPQQNSDVLIDGKTHVAIGFVDLGFLMASDSLEFRT  
SPLRYIGIDSSAYVVAKTSLIWELIQYAGSAASTEERDLYKWI IQVWFSTTWSEGT E P  
VKAALSSLLSLPARHFDSEVRSILQHWHRASPLPLKEARLKIQSFKTDAGASIGLLKKKQ  
DRIAMAKYQLTGDFGVTNPVCGSIVYLDPCDGT PPPPSNETVFSALDFEKMELAKKDSR  
MTILDAAEKYACERVAKLVAWCSRKLITVELRCTKVQDAIDYIASQRPRSIGWSNVLDYH  
EMAQEC SVEGETIHYGYSMNWPTVVFGTCLFDYGGEQNSEWRKEVMKSNRAQKDHFCEL  
GWESYFRFPLPQNPLNTVARVLELIHVEKWVDYFLSTLPNGQFCRGLEYCYGITSPLSVT  
GEGTVYLSWTYDRIEPPGFVDISISLQKEGIVDETSFSSFSRNRFS AIMXKLCLFRVMQL  
FIVDSRPFVLLTSVAAAAPDVVVVDADIVVASFLAAAPDDVVVDADIAVAPDAVVA VAVP

EADETGPAAVFVVLAAAVVPADPALSSPXVDGTD AETLSTTMYKTL LRRRPRTSDTVMYL  
LPSSSFLLSPRFPWAPCPLLSGNGSRCRTILGRVARKEYSTDRLVSIACSPWFALGSEI  
FPRTQNSTTGD PDGDGDEDATEEGMAWGAVELEDSLVPAPPGGVACSEGFGSFRKGF LAV  
LLKYLEVVLVIVVAGPVGAERQGD AVLQAQPGKPGGAAGFGSGARRWVRCFGAFRRSGR  
LAWTAAFFGEAPRHDLVKAMAMA IATADRGPSAGGSHPSQRGPGTGRAPQATPDQKGRQ  
SSRPDPPGGSSWRESWCNHGCCPRKG  
>comp15698\_c0\_seq12; 735 458 2701 LEN=4104; minus strand; translated  
MKT TQGV LAKGDRVTLVGLKSTGMNGKGTIVYLPGAHSSKEENRYGVWVDGCDKAMSI  
KSINIRPERLEASDPFNATREESHQTEASSSLATKNQAFQKGD RVALFGLKTSKLNRRG  
KIVSLSDPTNENRYGVKVDGRKKAMRIK PANMRQIAKTTQELKQEYKELKGRGEFTNEEC  
PSADEMEMTRRMMSMILTEKNATALFGRKIEPLPNFRV ELIKEGGGFPKSIDHKWANEYL  
RQVYESECMPLPHMFEFHLQRDPYAPHPKELMKRLMTNHP SKLFWYLSSQPGDIFEECLSL  
EHANCLRYSYSNQQPPQNSDVLIDGKTHVAIGFVDLGFLMASDSLEFRTSPLRYIGIDSS  
AYVVAKTSLIWELIQYAGSTASTEERDLYKWTIQVWFSTTWSEGT EPAVKAALSSLLSL  
PARHFDSEVRSILQHWHRASPLPLKEARLKIQSFKTDAGASIGLLKKKQDRIAMAKYQLT  
GDFGVTNPVCGSIVYLDPCDGT PPPPSNETVFSALDFEKMELAKKDSRMTILDAAEKYA  
CERVAKLVAWCSRKLITVELRCTKVQDAIDYIASQRPRSIGWSNVLDYIGRGEFHMAQE  
CSVEGETIHYGYSMNWPTVVFGTCLFDYGG EENSEWKKEVMKRSNRAQKNHFCELGWESY  
FRFPLPQNPLNTVARVLELIHVEKWVDYFLSTYPNGQFCRGGSEYCYGITSPLSVTGEGT  
VYLSWTYDRIEPRDLLTFLSHYKRREL  
>comp15698\_c0\_seq13; 27 1 647 LEN=647; translated  
XHSYSPIKV FVLLAKHGPKQKPASSHPLRGQPWLHHSRHEEPPGGSGREDXPAFLIWC  
CLWCPSPGRSPLARVAATGTRTAVGGRDRHRRLDQP VVARCFTEESGGPSEPAATKST  
KAPNPPPGPGPESGCTSRFSRLRLEYSVPLALRS DRAGDDYDYEYDFQILQKDKCEPFAE  
GTEPFRTGNTARRGRDQRILELYAPHAIPPAVASSSX  
>comp15698\_c0\_seq14; 509 1 1749 LEN=2823; minus strand; translated  
YKELKGRGEFKNEECPSADEMEMTRRMMSMILTEKNATALFGRKIEPLPNFRV ELIKEGG  
GFPKSIDHKWANEYLRQVYESECMPLPHMFEFHLQRDPYAPHPKELMKRLMTNHP SKLFWY  
LSSQPGDIFEECLSL EHANCLRYSYSNQQPPQNSDVLIDGKTHVAIGFVDLGFLMASDSL  
EFRTSPLRYIGIDSSAYVVAKTSLIWELIQYAGSAASTEERDLYKWI IQVWFSTTWSEG  
TEPAVKAALSSLLSLPARHFDSEVRSILQHWHRASPLPLKEARLKIQSFKTDAGASIGLL  
KKKQDRIAMAKYQLTGDFGVTNPVCGSIVYLDPCDGT PPPPSNETVFSALDFEKMELAK  
KDSRMTILDAAEKYACERVAKLVAWCSRKLITVELRCTKVQDAIDYIASQRPRSIGWSNV  
LDYIGRGEFHMAQECSVEGETIHYGYSMNWPTVVFGTCLFDYGG EENSEWKKEVMKRSN  
RAQKNHFCELGWESYFRFPLPQNPLNTVARVLELIHVEKWVDYFLSTYPNGQFCRGGSEY  
CYGITSPLSVTGEGT VYLSWTYDRIEPRDLLTFLSHYKRREL  
>comp15698\_c0\_seq16; 707 458 3977 LEN=3995; minus strand; translated  
MKT TQGV LAKGDRVTLVGLKSTGMNGKGTIVYLPGAHSSKEENRYGVWVDGCDKAMSI  
KSINIRPERLEASDPFNATREESHQTEASSSLATKNQAFQKGD RVALFGLKTSKLNRRG  
KIVSLSDPTNENRYGVKVDGRKKAMRIK PANMRQIAKTTQELKQEHQELKGRGEFKNEEC  
PSADEMEMTRRMMSMILTEKNATALFGRKIEPLPNFRV ELIKEGGGFPKSIDHKWANEYL  
RQVYESECMPLPHMFEFHLQRDPYAPHPKELMKRLMTNHP SKLFWYLSSQPGDIFEECLSL  
EHANCLRYSYSNQQPPQNSDVLIDGKTHVAIGFVDLGFLMASDSLEFRTSPLRYIGIDSS  
AYVVAKTSLIWELIQYAGSAASTEERDLYKWI IQVWFSTTWSEGT EPAVKAALSSLLSL  
PARHFDSEVRSILQHWHRASPLPLKEARLKIQSFKTDAGASIGLLKKKQDRIAMAKYQLT  
GDFGVTNPVCGSIVYLDPCDGT PPPPSNETVFSALDFEKMELAKKDSRMTILDAAEKYA  
CERVAKLVAWCSRKLITVELRCTKVQDAIDYIASQRPRSIGWSNVLDYHEMAQECSVEGE  
TIHYGYSMNWPTVVFGTCLFDYGG EQNSEWRKVMKSNRAQKDHFCELGWESYFRFPLP  
QNPLNTVARVLELIHVEKWVDYFLSTL PNGQFCRGL EYCYGITSPLSVTGEGT VYLSWTY  
DRIEPPGFVDISISLQKEGIVDETSFSSFSRNRFS AIMXKLCLFRVMQLFIVDSRPFVRL  
LTSVAAAAPDVVVVDADIVVASFLAAAPDDVVVDADI AVAPDAVVAVAPVEADETGPAAVF  
VVLAAAVVPADPALSSPXVDGTD AETLSTTMYKTL LRRRPRTSDTVMYL LPSSSFLLSPR  
FPWAPCPLLSGNGSRCRTILGRVARKEYSTDRLVSIACSPWFALGSEIFPRTQNSTTGD  
PDGDGDEDATEEGMAWG XVELEDSLVPAPPGGVACSEGFGSFRKGF LAVLLKYLEVVLV  
IVVAGPVGAERQGD AVLQAQPGKPGGAAGFGSGARRWVRCFGAFRRSGRLAWTAAFFGEA  
PRHDGLVKAMAMA IATADRGPSAGGSHPSQRGPGTGRAPQATPDQKGRQSSRPDPPVVL  
GESRGATMAVVRAKDEKMLVFV LARVWQAKQRP  
>comp15698\_c0\_seq17; 438 1 1557 LEN=1934; minus strand; translated  
AIDHKWANEYLRQVYESECMPLPHMFEFHLQRDPYAPHPKELMKRLMTNHP SKLFWYLSSQ  
PGDIFEECLSL EHANCLRYSYSNQQPPQNSDVLIDGKTHVAIGFVDLGFLMASDSLEFRT

SPLRYIGIDSSAYVVAKTSLIWELIQYAGSAASTEERDLYKWI IQVWFSTTWSEGTEPA  
VKAALSSLLSLPARHFDSEVRSILQHWHRASPLPLKEARLKI QSFKTDAGASIGLLKKKQ  
DRIAMAKYQLTGDFGVTNPVCGSIVYLDPCPDGTPPPPSNETVFSALDFEKMELAKKDSR  
MTILDAAEKYACERVAKLVAWCSRKLITVELRCTKVQDAIDYIASQRPRSIGWSNVLDYI  
GRGEFHMAQECSVEGETIHYGYSMNWPTVVFGTCLFDYGGEEENSEWKKEVMKRSNRAQK  
NHFCELGWESYFRFPLPQNPLNTVARVLELIHVEKWDYFLSTYPNGQFCRGGSEYCYGI  
TSPLSVTGEGTVYLSWTYDRIEPRDLLTFLSHYKRREL  
>comp15698\_c0\_seq18; 800 458 2969 LEN=2969; minus strand; translated  
MKTQGVKVLAKGDRVTLVGLKSTGMNGKGTIVYLPGAHSSKEENRYGVWVDGCDKAMSI  
KSINIRPERLEASDPFNATREESHQTEASSSLATKNQAFQKGRVALFGLKTSKLNRRG  
KIVSLSDPTNENRYGVKVDGRKKAMRIK PANMRQIAKTTQELKQEHQELKGRGEFKNEEC  
PSADEMEMTRMMSMILTEKNATALFGRKIEPLPNFRVELIKEGGGFPKSIDHKWANEYL  
RQVYESECMLPHMFEFHLQRDPYAPHPKELMKRLMTNHP SKLFWYLSSQPGDIFEECLSL  
EHANCLRYSYSNQQPPQNSDVLIDGKTHVAIGFVLDLGF LMASDSLEFRTSPLRYIGIDSS  
AYVVAKTSLIWELIQYAGSAASTEERDLYKWI IQVWFSTTWSEGTEPAVKAALSSLLSL  
PARHFDSEVRSILQHWHRASPLPLKEARLKI QSFKTDAGASIGLLKKKQDRIAMAKYQLT  
GDFGVTNPVCGSIVYLDPCPDGTPPPPSNETVFSALDFEKMELAKKDSRMTILDAAEKYA  
CERVAKLVAWCSRKLITVELRCTKVQDAIDYIASQRPRSIGWSNVLDYHEMAQECSVEGE  
TIHYGYSMNWPTVVFGTCLFDYGGEQNSEWRKEVMKKS NRAQKDHFCELGWESYFRFPLP  
QNPLNTVARVLELIHVEKWDYFLSTL PNGQFCRGLEYCYGITSP LSVTGEGTVYLSWTY  
DRIEPPGFVDISISLQKEGIVDETSFSSFSRNRFS AIMXKLCLFRVMQLFIVDSRPFV L  
LTSVAAAPDVVVDADIVVASFLAAAPDDVVVDAD FALD VDVVDAHIAVAPDAVVAVA  
>comp15698\_c0\_seq19; 500 1 2714 LEN=2714; minus strand; translated  
YKELKGRGEFKNEECPSADEMEMTRMMSMILTEKNATALFGRKIEPLPNFRVELIKEGG  
GFPKSIDHKWANEYLRQVYESECMLPHMFEFHLQRDPYAPHPKELMKRLMTNHP SKLFWY  
LSSQPGDIFEECLSL EHANCLRYSYSNQQPPQNSDVLIDGKTHVAIGFVLDLGF LMASDSL  
EFRTSPLRYIGIDSSAYVVAKTSLIWELIQYAGSAASTEERDLYKWI IQVWFSTTWSEG  
TEPAVKAALSSLLSLPARHFDSEVRSILQHWHRASPLPLKEARLKI QSFKTDAGASIGLL  
KKKQDRIAMAKYQLTGDFGVTNPVCGSIVYLDPCPDGTPPPPSNETVFSALDFEKMELAK  
KDSRMTILDAAEKYACERVAKLVAWCSRKLITVELRCTKVQDAIDYIASQRPRSIGWSNV  
LDYHEMAQECSVEGETIHYGYSMNWPTVVFGTCLFDYGGEQNSEWRKEVMKKS NRAQKDH  
FCELGWESYFRFPLPQNPLNTVARVLELIHVEKWDYFLSTL PNGQFCRGLEYCYGITSP  
LSVTGEGTVYLSWTYDRIEPPGFVDISISLQKEGIVDETSFSSFSRNRFS AIMXKLCLFR  
VMQLFIVDSRPFVLLTSVAAAPDVVVDADIVVASFLAAAPDDVVVDADIAVAPDAVVA  
VAPVEADETGPAAVFVVLAAAVPADPALSSPXVDGTD AETLSTTMYKTLLRRRPRTSDT  
VMYLLPSSSFLLSPRFPWAPCPLLSGNGSRCRTILGRVARKEYSTDRLVSIACSPWFAL  
GSEIFPRTQNSTTGDPDGDGEDATEGGMAWGXVELED SLPAPPGGVACSEGFSGFRKG  
FLAVLLKYLEVVLVAGVVVAGPVGAERQGD AVLQAQPGKPGGAARRWVRCFGAFRRSGR  
LAWTAA  
>comp15698\_c0\_seq20; 498 1 1825 LEN=1825; minus strand; translated  
AIDHKWANEYLRQVYESECMLPHMFEFHLQRDPYAPHPKELMKRLMTNHP SKLFWYLSSQ  
PGDIFEECLSL EHANCLRYSYSNQQPPQNSDVLIDGKTHVAIGFVLDLGF LMASDSLEFRT  
SPLRYIGIDSSAYVVAKTSLIWELIQYAGSAASTEERDLYKWI IQVWFSTTWSEGTEPA  
VKAALSSLLSLPARHFDSEVRSILQHWHRASPLPLKEARLKI QSFKTDAGASIGLLKKKQ  
DRIAMAKYQLTGDFGVTNPVCGSIVYLDPCPDGTPPPPSNETVFSALDFEKMELAKKDSR  
MTILDAAEKYACERVAKLVAWCSRKLITVELRCTKVQDAIDYIASQRPRSIGWSNVLDYH  
EMAQECSVEGETIHYGYSMNWPTVVFGTCLFDYGGEQNSEWRKEVMKKS NRAQKDHFCEL  
GWESYFRFPLPQNPLNTVARVLELIHVEKWDYFLSTL PNGQFCRGLEYCYGITSP LSVT  
GEGTVYLSWTYDRIEPPGFVDISISLQKEGIVDETSFSSFSRNRFS AIMXKLCLFRVMQL  
FIVDSRPFVLLTSVAAAPDVVVDADIVVASFLAAAPDDVVVDAD FALD VDVVDAHIAV  
APDAVVAVA  
>comp15699\_c0\_seq1; 1424 1 5826 LEN=5826; translated  
XEYEGSTYKSNRSNSTGITRFGWLVLCLNAAGQREPDAVQII EIA PAPNTNLD SXGLGTRS  
NEHTVMGREKRKGRNLNKAAGDGAASTGAFIGFGAFAETSSTATMAPSAFAAHPHSTNGAP  
QTTASASTASASAYASAGSNAGSPQTRLSP IYTGSDPALALLFPKVGQKRDATTKSKAL  
LDLIGFFRDGSTPKKTKAEALSHFLYLFQTKLCYDHS SKVRAQSVRLCATAAGCEPRAWK  
NLVVGGHCEILGMLL CARADPASEVRAAASEAVFDNPDGGS DRAALAADAGIWGFAQKIL  
SYQKPLDMHADLFQKKGKGGGKPKPARANSAAAKLSEAQQEELEERYERIVGTAI EGLRLH  
LVANHAARKTRPESRVENPSTVKYLWR TLASHKASLRRTYSLLSTVCQLSRIDLVDSDK  
LSKLLAQSVSSEKESANLGVLLETLLAFVASCYITRAERSTVLEQRF SRPLSRLFKKGCH

GAAPTSSWTP TILPLVALLPKHASDDSGGGLPPRIDLLTNAWEGRTHVVGASDRCEIVRA  
VAETA AFLAREEETSENNPCDDGGAFDQILARCWIHALTSYLAGGSSPERGSGKASGSG  
GGGSLAHRALGTT LAKGWLQLDRASHRAGVDP SKSPP I VYHIGEFWFNEALEAAVLAGTT  
RKANLTHLLAEIRAQQKSGSGGGSTSETPLRSARVLGRKFRSLAPGNNASWVPPDRDVYQL  
WIAILRLVPSLGKEVFS SATMGGSIEGFVANNLLSWAVLHTSRLSDRSGSGLALLDVQLL  
HGLSVGFPDRFLEWWRPILREILLAQPDLGILTDCLGWLAREGKLFAGDLTTEGGTDAAD  
GPNVFSGFCIETARTAVAQTSSGEKANHRHSDLDGESESESGSHFDPNEDDDAEHRKTGRF  
LRACVGLDDQTPVTVLVGERVVD AWWACACPIRGEDDNGDSVNENPVLDTLVAMIRAKKL  
SGAGESSCRTERVLLQSWRQGGSLWEDECLPWLLQVENSVD RSSLIQNASTESKSCV GKA  
CAGTNDLAWD WTERAHRLLRLCSNKRGE S S TLP SLAIVGLGDVSMWEKGARFDFLSTC  
LLKLI RRVENVSSRQ L FIDSETDTMDL FVAVL FQLSTGAESP I EADLARRRKDP C AMLL  
ADLGFADFDSDTIMDSIGCCVSKLSRLL EQSTIDQAKICRGI AVLSQLIDTRFASLRPDP  
MADAAREALDASDVQSGDKI WYVTNTNDPTAQEP CVLVKIHNDLPEEVYFTIRLSRNGEQ  
QERQTVRERLRKVRWTKSDDNKSTKERRTISVDQIGDEEKREKREKIVGPILDKLIKSID S  
AQPNSY Y E I Y N I V I V Q C G L V S G R G I G S A H Y S V V Q K L M E L Q Q R L L E S L S S N D A S A K I A S A L  
WHLALALGYGMNAPASEWSIPLTGLNAADSLPLLLAYEEDEGNESTKDMDCAMA AWI SVC  
ASACDDIVLQTQAYSTLFELATRLLCYHNGDEYGLN PCHYIALRAIEV GQIESHKAKEGE  
SVIQESEAEALTELTKVFSMVWSSTEEDKCVSTSWNSIPLFDSIIRASLRKRPTLMAIAS  
RQCIDALAKSLYEP I K Q R Y S M L I L Q A Y A R E G R P L F D D V D D D L I N P K T L E R L D M W S E D M L  
ESEADELEDDVASVAQVWCKELMNDVESWHDDDDIDDEIACGRMLS WLSVLDITDTATGK  
DSMNRLAFTSYVSKANAVDAI LD LALI YCNVGSERKAEMDIVVPLEEIVECMLSRLAAR  
VIFRSIEVFPTLSKNWWDSSCPKYLTSTVREFVETQVSPDILNLAVQSIRNAAAFGEMKV  
KGSPITREVNATYVQDDFTLSVVIKLP L S F P F R R A E V D C S K T L G V P E C R W K R W S L Q I T Q M  
LNNQGGTLKDALLLWKENVDKEFEFEGVEPCPVCYSVLHVKSHKLPNLECNTCHNQFHSECL  
FEWFKNSGKSACVICQQPWSGTX

>comp15700\_c0\_seq1; 780 130 2955 LEN=4719; translated  
MKSPKYNPTYGTDNDGSPKFLERGRSSSVKVEESKEDGRDTMLDSVATRNNKLD SAST  
STKANNDSSNRQKPFYGD LVRVAFTAIVPVSA YDVEKTMACQDNESDPGHCGRALFTV  
FLCFMVCILN WMSYIKHSNKISFLAYLFALWVCAYLNLNQWPYAGECII TNMYQGT LFGN  
LCNGSLTFRNHIVRMVIMFAVGTYVSIMSPFSTFKEDIILGLGVPMVLAIVFLSATK LDR  
TALFEHVNWNALSVLGARWVLAAYMYHVTCEMLSMTFDG VGAQDMFRTL VKASFVACVG  
VASTGAFQNEIDLNEELEVKVKNRTRI IQEKSDKLHMVELALRASETAIAITDSDLRIIW  
LNAACEEITSPVVGRIAKNQEDKMERPSASLQDR TSLLGKPI TEVLALDTIMDEKKLANA  
FSKNRREDEICINDMIYGLEVSPYNYLSPTMESSNNHTNDSSRFLVVLKNVTAERARE  
IAEKTAQEEAMLAKAMADSMVTLTHELRTPMQGIMGV TGMLLHQKQNADAVTVESLKLIM  
ASSGLLLNLINLLDVKKVNSDMMDEFPLSSVVAASAIQDTIDFCQPLASISGVAVVTDY  
GETKSQGYHVSNPLRLQQVLINLVSNAIKYTSEESEILISIQPTVMSDVELK MENALAC  
SRENLNKIDIKEPLASNTPVLCFSISDSGPGIAPHQADRLFRRFARLDSKPTRVLGGSN  
KVGQPSGTGLGLNLCQLFVQRM DGEI WATNNSTGHGATFSFFLPLAASGSIETKVMAPIS  
VTKQFHQFERTSIRATQLRVL MVDDVLI NRKVI GRMVNQVGVADIVSVDSENGALREISE  
NGPFDL VITDLQMPGMSGTEL CETIMLGKTCPTGRVPVVVGLTADTSVRVTTDCKASGMS  
TVLYKPI SVIEVEEFFETTIIQLRPGVWYGGQGNSTILSPQ

>comp15700\_c0\_seq2; 875 130 4413 LEN=4703; translated  
MKSPKYNPTYGTDNDGSPKFLERGRSSSVKVEESKEDGRDTMLDSVATRNNKLD SAST  
STKANNDSSNRQKPFYGD LVRVAFTAIVPVSA YDVEKTMACQDNESDPGHCGRALFTV  
FLCFMVCILN WMSYIKHSNKISFLAYLFALWVCAYLNLNQWPYAGECII TNMYQGT LFGN  
LCNGSLTFRNHIVRMVIMFAVGTYVSIMSPFSTFKEDIILGLGVPMVLAIVFLSATK LDR  
TALFEHVNWNALSVLGARWVLAAYMYHVTCEMLSMTFDG VGAQDMFRTL VKASFVACVG  
VASTGAFQNEIDLNEELEVKVKNRTRI IQEKSDKLHMVELALRASETAIAITDSDLRIIW  
LNAACEEITSPVVGRIAKNQEDKMERPSASLQDR TSLLGKPI TEVLALDTIMDEKKLANA  
FSKNRREDEICINDMIYGLEVSPYNYLSPTMESSNNHTNDSSRFLVVLKNVTAERARE  
IAEKTAQEEAMLAKAMADSMVTLTHELRTPMQGIMGV TGMLLHQKQNADAVTVESLKLIM  
ASSGLLLNLINLLDVKKVNSDMMDEFPLSSVVAASAIQDTIDFCQPLASISGVAVVTDY  
GETKSQGYHVSNPLRLQQVLINLVSNAIKYTSEESEILISIQPTVMSDVELK MENALAC  
SRENLNKIDIKEPLASNTPVLCFSISDSGPGIAPHQADRLFRRFARLDSKPTRVLGGSN  
KVGQPSGTGLGLNLCQLFVQRM DGEI WATNNSTGHGATFSFFLPLAASGSIETKVMAPIS  
VTKQFHQFERTSIRATQLRVL MVDDVLI NRKVI GRMVNQVGVADIVSVDSENGALREISE  
NGPFDL VITDLQMPGMSGTEL CETIMLGKTCPTGRVPVVVGLTADTSVRVTTDCKASGMS  
TVLYKPI SVIEVEEFFETTIIQLRPGVWYGGQGNSTILSPXVRNEREYQIDFRTLQQQRT  
VEKWEKIECHFSCQYYGF XNVLEYAMHHTSSFC EKWRIGLPDXE IAYETPDFLEMRKCIN

SRYTVWPAFYHGEIEAMKQTIIVNFAVATTLAVHAKVYPSRNSKWLTLWILGIKISATPMK  
ALIPKTPPPARKVGETXNVTNTATVEYEKQHQHSGLDQDVNEKLFACADLKSNSLKLYPX  
KRPKRSSRAELTVSPKKAKKTVGDKAHSIADLLSTMVQMVKRNKSCSYTSIMKARKM  
NDRNTPWRKEWRSLIEEGFIQPASVSKSATSNSDGGGNGIFTGNYELTEKGEDRAGTPEM  
KAIKNMIETEPETSEEQHARIRKICMNNRTVQIFDLLLLKHGPLTRRELAATIGISDRGAP  
FSYGLRQLKELGYVVVDSKNSGRGSKALILSDKAFVDPKDRPREIHIDPQILAAANLEKVY  
GREKRAAAAANKSSSLSIKEEKVKEESNPAIKNEEGTPSPVQKEDDSND

>comp15700\_c0\_seq3; 780 130 2955 LEN=4833; translated  
MKSPKYNPTYGTDNDGSPKFLERGRSSSVKVEESKEDGRDTMLDSVATRNNKLDASAST  
STKANNDSSNRQOKPFYGDVRAVAFTAIVPVSAYDVEKTMACQDNESDPGHCGRALFTV  
FLCFMVCILNWMSYIKHSNKISFLAYLFALWVCAYLNLNQWPYAGECIIITNMYQGTFLGN  
LCNGSLTFRNHIVRMVIMFAVGTYVVSIMSPFSTFKEDIILGLGVPMLAIVFLSATKLDLDR  
TALFEHVNWNALSVLGARWVLAAYMYHVTCEMLSMTFFDVGVAQDMFRTLKASVAVCVG  
VASTGAFQNEIDLNEELEVKVKNRTRI IQEKS DKLHMVELALRASETAIITDSDLRIIW  
LNAACEEITSPVVGRIAKNQEDKMERPSASLQDRSLLGKPI TEVLALDTIMDEKLANA  
FSKNRREDEICINDMIYGLEVSPYNYLSPTMESSNHTNDSRFLVVLKVNVAERARE  
IAEKTAQEEAMLAAMADSMVTLTHELRTPMQGIMGVTGMLLHQKQNAVAVTVESLKLIM  
ASSGLLLLNLINLLDVKKVNSDMMDEFPLSSVVAASAIQDTIDFCQPLASISGVAVVTDY  
GETKSQGYHVVSINPLRLQQVLINLVSNAIKYTSEESEILISIQPTVMSDVELKMENALAC  
SRENLNKIDIKEPLASNTPLVLCFISISDSGPGIAPHQADRLFRRFARLDSKPTRVLGGSN  
KVGQPSGTGLGLNLCQLFVQRMDEGIWATNNSTGHGATFSFFLPLAASGSIETKVMAPIS  
VTKQFHQFERTSIRATQLRVLMVDDVLINRKVIGRMVNQVGVADIVSVDSEGENALREISE  
NGPFDLVIDLQMPGMSGTEL CETIMLGKTCPTGRVPVVVGLTADTSVRVTTDCKASGMS  
TVLYKPI SVIEVEEFFETTI IQLRPGVWYGGQGNSTILSPQ

>comp15701\_c0\_seq1; 1091 100 4258 LEN=4266; translated  
MNGVMTKLQKLLGEMLVGGDGKYSLDFSNALGIQHNEQQDPNEFARLLFDRMEESFQQC  
STRSCDTKNTSANSNGRGDLGGLLQRI FHGTTYETICMMWENIGADEGFMDLNLPIVQRQ  
PNEEDETEEFDHDEPKSKGESGDSVSAKRKRKKGPLETAFRKQRKDKVATDVQYCFDQ  
YTKAEMLNQYFCEVCDKQDAKRVMTLTELPPVLNIQLSRYVDRKKFVKKKLMDEV  
SLPTVLVINRRGSDSDLSFPVSSSKRSRSCKKRYLLCAVMRHQGTSAYSGHYVAEAMD  
WTTGQWYEFNDETVMTLTAPSCSFIPTAGNSEEERKSAGSQDAYNMYVDEEYLGKNAV  
ATMARNQRLNSVLGSNSNRNEYDNYDVLNLI REKVQRYSVLTQLCTDDYTI SDRLRRR  
DGIRKYMFGDPSSLLIKRGSIEDDEPYFWVDGKTLREFLSCDRRLDDKLGSKEPIMCSKS  
LLCPHGYLDPRSARRGKLLRKSQYDSYKSLLVGERKLLCKAIDGKCSVDTGCVITSTDIM  
TCRHCAQAYSKEELSEKLEFVKNVKHLYHDILDETKDATKTFVDDPNEDQTENEYSYIVSR  
STISKFKKHVIDAMKSVADFKKGGSLDNTSISIESDSHKILSGIDDLDISSFPGPSPTFVS  
FTKTPKAGNTGTYEWWQDKFNSKITCPHGNCNDFNLRIVRYVHHKTWAKIKKVFDAIEH  
KILIIYAVDGMRKPNIDDDGCKQCREERDAINNLTSNVERWAKETKRSVALKNVLDGKNI  
SESEI AVHNFDSAQSNCR LVHRDDIANLCKSVKLLSRLSKLKVPTMDIKNFVENIAFPS  
YHSVVLDFEKQPSARLLQSIRSLICCEHKRVIKSAIIDVFGKDGDNLEPRYQLSKGVAVLS  
VEEYDAYVNCLAQLLIILNENYHRHEDVNKSLQDITTSLLDDIKKFSASCHPVIKMTNA  
KEEVDEILLFVGGDSKEFSIVPGICEHETCKKDFVPLVQKSSREIVESVSDESLECLGN  
QKKGVGEKIDCRIGSVAISPIIVESDLEDFTHTAENTQKIRVFQYSESELKDAMQSLKT  
AVGLCNSDDNGVNVNLRSTRRRKVKFPVGCITHE TRIDIGLHNNVAALRLLLYQNCQI  
SLVCKLSIAVFLDDNSAPKYLDIDYDWSEKTLNLDLVDQLNPGDNSIHDLDDSSPSDHFFL  
LYQKNKDNESGDIETTMMDSLQVSNQFPDSRNNSSKGGKTRKKPSEGRFQGTLLQSSA  
SSGVTVEQNVLHLDEACYNSETNPTMVEKRPRSNTIISDDEEENSKLDATNCTVTTIPSP  
TRTPIGHDKQMELVRLKKTVDKDESECFEAILWAIKSNPKFNEGEVINAAAYEKMPGLT  
RLKK

>comp15701\_c0\_seq2; 445 1 1378 LEN=1378; translated  
XSDSDSDNGGARTMEEDGNDGTEAAPASATQRGERTSGRVVTPWDVCQWGILSAPKTIPS  
ARQDQEEFRQANKNHGVI GEDESRALVLDLPHNLVRNLTESCCPSILEWTKQRLEEENKK  
KQQARKSRKQRSTSGTKRNRSTSRNNNNNDNHEISPVFARLGMRP SDTNFLCPCDFNPFL  
ASLGGFMNELLEERCKGITVTIRDDVDGSSKNGPSKSKRTRKVI EVDNDEKNETNKNV  
EILDVDQETKGGASESVSAEGAGILAF LGVKVDMITHGNEKENTADVLTCTRLGPRWRK  
PTTGDPKAVFTSEVNI SDQYLN TDYSQITKEEIEKLRKYNDVDLSNIKKVVENILGLCR  
KSKADTEVMTMEYIETL TEWHKSLIFVNPTKEERDVASDNITIALPPGIQNLGATCYLN  
TQLQCLAQNPVFLDGILSWRPVSATHKMNGVMTKLQKLLG

>comp15701\_c0\_seq3; 961 1 3891 LEN=3899; translated  
TTYETICMKCGKTSVRSEGFMDLNLPIVQRQPNEEDETEEFDHDEPKSKGESGDSVSAKR

KRRKKGPLETAFRKQRKDTKVATDVQYCFDQYTKAEMLNQYFCEVCDSKQDAKRVMT  
LTELPPVLNIQLSRYVFRKKFVKKKLMDEVSLPTVLVINRRGGSDSDLSFPVSSSKRSR  
SCKKKRYLLCAVMRHQGTSAYSGHYVAEAMDWTTGQWYEFNDETVTMLTAPSCSFIPTA  
GNSEEEKSAGSQDAYNMYVDEEYLGKNAVATMARNQRLNSVLGSNSNRNEYDNYDVLN  
NLIREKVQRYSVLTQLCTDDYTI SDRLRRRKDGIRKYMFGDPSSLLIKRGSIEDDEPYFW  
VDGKTLREFLSCDRRLDDKLGSKEPIMCSKSLCPHGYLDPRSARRGKLLRKSQYDSYKS  
LLVGERKLLCKAIDGKCSDVTCVITSTDIMTCRHCAQAYSKELESEKLEFVKNVKHLYHD  
ILDETKDATKTFVDDPNEDQTENEYSYIVSRSTISKFKKHVIDAMKSVADFCKKGGSLDNT  
SISIESDSHKILSGIDDLDISSFPGPSPTFVSFTKTPKAGNTGTYEWWQDKFNSKITCPHG  
NCNDFNLRIVRYVHHKTWAKIKKVPDAIEHKILIIYAVDGKMRKPNIDDDGCKQCREERD  
AINNLTSNVERWAKETKRSVALKNVLDGKNI SESEI AVHNFDSAQSNCR LVHRDDIANLC  
KSVKLLSRLSKLKVPTMDIKNFVENIAFPSYHSVVLDFEKQPSARLLQSIRSLICCEHK  
RVIKSAIIDVFGKDGNEPRYQLSKGVAVLSVEEYDAYVNCLAQLLIILNENYHRHEDVN  
KSLQDITTSLLDDIKKFSASCHPVIKMKTNAKEEVDEILLFSVGGDSKEFSIVPGICEHE  
TCKKDFVPLVQKSSREIVESVSDESLECLGNQKKGVEKIDCRIGSVAISPIIVESDLED  
FTHTAENTQKIRVFQYSESELKDAMQSLKTAVGLCNSDDDNGVNVNLRSTRRRKVKFP  
VGCITHE TRIDIGLHHNVAALRLLLYQNCQISLVCKLSIAVFLDDNSAPKYLDIDYDWSE  
KTLNDLVDQLNPGDNSIHDLDDSSPSDHFLLYQKNKDNEGDIETTMMDSLLQVSNAQF  
PDSRNSSKGGKTRKKPSERFQGTLLQSSASSGVTVEQNVLHLDEACYNSETNPTMVEK  
RPRSNTIISDDEEENSKLDATNCTVTTIPSPTRTPIGHDKQMELVRLKVKVTD SKDESEC  
FEAILWAIKSNPKFNEGEVINAAYEKMPGLTRLKK

>comp15701\_c0\_seq4; 907 1 3866 LEN=3874; translated  
XCGKTSVRSEGFMDLNLPIVQRQPNEEDET EEFDHDEPKSKGESGDSVSAKRKRKGGPL  
ETAFRKQRKDTKVATDVQYCFDQYTKAEMLNQYFCEVCDSKQDAKRVMTLTELPPVL  
NNSYRDMYLI AKKFVKKKLMDEVSLPTVLVINRRGGSDSDLSFPVSSSKRSRSCKKKRYL  
LCAVMRHQGTSAYSGHYVAEAMDWTTGQWYEFNDETVTMLTAPSCSFIPTAGNSEEERK  
SAGSQDAYNMYVDEEYLGKNAVATMARNQRLNSVLGSNSNRNEYDNYDVLN NLIREKVQ  
RYSVLTQLCTDDYTI SDRLRRRKDGIRKYMFGDPSSLLIKRGSIEDDEPYFWVDGKTLRE  
FLSCDRRLDDKLGSKEPIMCSKSLCPHGYLDPRSARRGKLLRKSQYDSYKSLLVGERKL  
LCKAIDGKCSDVTCVITSTDIMTCRHCAQAYSKELESEKLEFVKNVKHLYHDI LDETKDA  
TKTFVDDPNEDQTENEYSYIVSRSTISKFKKHVIDAMKSVADFCKKGGSLDNTSISIESDS  
HKILSGIDDLDISSFPGPSPTFVSFTKTPKAGNTGTYEWWQDKFNSKITCPHGNCNDFNLR  
IVRYVHHKTWAKIKKVPDAIEHKILIIYAVDGKMRKPNIDDDGCKQCREERDAINNLT SN  
VERWAKETKRSVALKNVLDGKNI SESEI AVHNFDSAQSNCR LVHRDDIANLCKSVKLLSR  
LSKLKVPQTM DIKNFVENIAFPSYHSVVLDFEKQPSARLLQSIRSLICCEHKRVIKSAII  
DVFGKDGNEPRYQLSKGVAVLSVEEYDAYVNCLAQLLIILNENYHRHEDVNKSLQDITTS  
LLDDIKKFSASCHPVIKMKTNAKEEVDEILLFSVGGDSKEFSIVPGICEHE TCKKDFV  
LVQKSSREIVESVSDESLECLGNQKKGVEKIDCRIGSVAISPIIVESDLEDFTHTAENT  
QKIRVFQYSESELKDAMQSLKTAVGLCNSDDDNGVNVNLRSTRRRKVKFPVGCITHE  
TRIDIGLHHNVAALRLLLYQNCQISLVCKLSIAVFLDDNSAPKYLDIDYDWSEKTLNDLVD  
QLNPGDNSIHDLDDSSPSDHFLLYQKNKDNEGDIETTMMDSLLQVSNAQFPDSRNSS  
KGGKTRKKPSERFQGTLLQSSASSGVTVEQNVLHLDEACYNSETNPTMVEKRPRSNTIIS  
SDDEEENSKLDATNCTVTTIPSPTRTPIGHDKQMELVRLKVKVTD SKDESEC FEAILWAI  
KSNPKFNEGEVINAAYEKMPGLTRLKK

>comp15702\_c0\_seq1; 684 229 3885 LEN=4103; translated  
MTVASLWKALQRAGCGKRVGAKELQDHHHEKAKTNPWNVNEKLLSSPLENGPVLAVDLS  
IWICEALTSSAMQHNHVTD PALQLVYSRTLKLLNLGIGLVIVIEGKRRIRNLGRSRTSAT  
DKDNVKNDEGDKFRKRRSGARFWTACQRCEEMLKLLGTPVVRANAEGEALCALLNKKGIV  
DGVISNDGDCLLFGAKVLYTKFVENLDQSNIRYDANNIQAVVDDDDTDKYDSTRKKS  
DGKDVVKLSRSDLIAFAILTGSDLAGGGLSKIGCRKAIRFIRKQCIDNPLKEDTNSSPVL  
KLLLSWEQNAIGASEDDNKKEISGPHSCCGHPGTTKSHKRYGCKGCGTKPGELCFKISS  
GDRFRKSLRSRALEM RPDPFHPSS TIRAYHEPNENQIPLCLIGKTARTVKMKVPQLEKMLQ  
SSFIVRGRSHEENQEYIRKSLSTYLARQELFGOMMSK SASKEDRI IKLPTNSNRPVPIGI  
NKLLVRAGKPSCEVKWVVKATTS DVEGNPLDRYEFSTIEDKGAIQKCYPKLIRVFEEEQK  
ALQQQGAAEQEKRR AFLNMEEAMAHRCVGPLLET SKKDRARQDCFDKYQCVVNNACNTK  
SKGVSDDVKAILVQIKNNQLRKEENSGNRKYDLHIGKI IATNADGGFKELKPHQRGLRR  
GVRDAIAMNGTTDENEEMDCDSSTIMTINL TEYDIGKPKTFRDNDIPDHCCNALTPGH  
LHYLGVRSTKFRYMTGSEHHFKNETQKLSKSSTLP IFLDAVDQTSKHPVSKETRP GKNA  
VATHRNFAPTSVADIPRSYSKDAIRAEYHCSDRTNKRKEISHEKRSISTESEIEKSRLKV  
HQDSTVHEQKRSLSRSPQLKRAKGTLDQNEGIDDALYRPSQERQRSLSWSLPLKRPKTML

DQNECIGGEVSRDLHRAENGI LNSYRHSEEGDRLFRIEVLKTKIKLLELEHDELEERKKR  
TWPRSEALRVVGGDDNGTDHFEI PSILPVRHGKEECHRQRPGLRRI FVDERRRQGSSSIAP  
APLLDKSSEWFPQRPEALDLGDCQEF EWCGGLRKS HGWVYDSHEYTERQARDDQLHCLR  
AIDERDDFRFGHATNEDCNPNPEPIGRPAFHTNRKGS LFD SHCCVRDRTGSRGGDGP HRG  
TRRTGTEKASPHRVPCPRATNPRAREFEVELELELEERVASKLESRTRRAKLGLLCSEGL  
CLAGGEGDAATARVGVWYS

>comp15702\_c0\_seq2; 181 1 660 LEN=753; translated  
AIVAMAGITSMGPFEGV PFDQLRTLLETNVLGTMHVLHRLMPIVRAHQARIVVAGAPDVP  
LPQYAVKSACNGALLAFTRALRADLWGLGVSVSIVQPAATRGGMVVHGPKMVRTTREAMP  
PSLRVAVYPPGFRLMMRNEGAGDFGLDPGWATRAFEHAISSPRPKTRYSTTPPGTALYFAS  
FLVDPDRMLEMLFMGPLGPGGPEVVVGESEEEPTKTKTM

>comp15703\_c0\_seq1; 1041 564 3594 LEN=3594; translated  
MTKMMHQTYESECNKLN TSKLSEILSEDMSLDAEISRCL ETQATLFD PPFQILKTYMLKLE  
LTLKKS CMINEFWEGGHLKSRSEI WASRVRSARSIRGLSRL LLLKLVNAI HAKAFTSAWVH  
SHVSKSHDSEGSTSDRNYKVLP SDWSEEKEK LKHRWEMTPSNMILDLCISGDNDLMAFAT  
GIRSDIFIAKQISVIKSKRKRKFTSSSR AKGLETENLIATSKPSICV GVEQQPKKSKAE  
DLNKT TTDPERIAKNEANASPRIETTDQATPDSFDDREIDQINSNSMPRVE SNVANGTFD  
VLLSTEEKPEVPKPPIPVGI VHSNNEIMKNSSNATNLVKIFKEPEDPDQSKMKGESDEAP  
GCHTTTKAEQDSSSKQMETTEEKQAENDNDLNEEKVDTIISTPTSSAKKKRRQAKSRPR  
EPSSRRHTRRSGRLSSEFSVECSRNASILEAGDLSTSTMEPLGGMALQIENSKKEKIPGL  
EKLKVGQYAVQGIWPIAGRQIFPTIGNLPPGEMKRLAKNAGSALAANLSYHTNHEVAQVC  
YGHIWRKRVASCGRFEELLHLIRVLESSLDREMIHQENQTKRGKTKNLKV VQITMRNPS  
SGSLEHFVVKTKNGCWVPAEQLDVSSLIADLFLRRQRQREERLKR VSEEKKLIEYERN  
KRIAEAVKKA EEDKRKQEAARA AVKRKKKEEKEKKRLEQQ LKKKARLLAEAHAQKASDLV  
MKKFEAQSDVSNWKKQINYAFESH ELRTEYALSSWINRGSSTIPDNELIEIRKRTL VQLR  
KIMDKLRQLNESVMTDQQLITRMFDHEHKVALRCQSKKPTMNGMGNS ENLTFATSANAGN  
KESNSSSAIHDNRDDNVNSFSGQNVATRFTIAPGSNEQEGPNQLSMSNGNPNPNPKHVSP  
SDKFPFEDNTFSSQSI PNQIQSAQSSHGFDKRLGEYGM RNNAPGQMGLISQSFDIKSQQS  
AGVNPSRIGLQNPTSIVSSSTPSKQNFVLNGSFSRDNNAFSSSV PVPVPVX

>comp15703\_c0\_seq4; 1805 172 6397 LEN=6397; translated  
MGYSYKAGGGGVGVHKKRQHDNIRWPLL AGDNLTHLDIYSWPLFYDDYCHLTADRLWASY  
HGPLEPDSDDAQDHKNYIDFRNIGLFGSSPGHE YRTKQCADGVTLPAANQK KYFRAGYRE  
AKTAHGQKGEC AKQKESYQDSNDEIFLSKKSQVRHVERGDADRAATTNLLHSDHSKSEE  
EYTAGDDDDNDEDWTKPKPKKRRRVVKNV SAGSISIKPSISAHMPNASMPGSTDKE  
QQMASVPNHWSRITSSPKSAPTLASAIN DGSTPSWSRITSLEPSPQKELQPNILPQSAT  
TQNNFDQKEDVNKPTKSVQSLGDKS QLPASGLINANNMNIDCKQTILSSGLSMTTSLLVK  
VNGGMDPSEKDSTAKIGADCSRPIRPTDTPNSMPTSDSDVPRYIDNFKDPK KETELSN TI  
TQSTTDVQHDP AIAPKESSSSELLNSTSDSHNASNCNQNTENNSTDISLVVRATHDIHD  
PTAMMSLQAAVVT EPGAHVLA TPQGHSSTPNPTSVGQPGKCTESDLICQQSQQIQE EKE  
TDNNILRIRGGGGADDSKTKNSFN SGNVMQKMRPRGRSRRALPIHNR TGASRTTNLPMHR  
HQFTMPPLQQQSNQQQSLFQQQ EYRFYQAQIKARANENFGKPI TLAGINSITSGASKENP  
SQLKHLQFLNALS NQELHPLKKG RFEVEDHRELLDAPYLV PDDV RDAINAFVYDPSSYKR  
KATNVEVLGDDDHHSVHKRSDKEDLFEKELERDLWLHFKPLKAMRSGIPYHRLPTEDKIN  
MLEFLIDELLTVDAISA EFQKRRI RTEYHETPYGSLPDEE EYKNLDNND ECAVCGQEGDL  
LCDDGCVSSYHRGCLNMNAGQSLPEGK WLCPECSLVD PCTFGTMRGGRKSEL DWF'TVDDV  
VKCCNKVSPCTS QGFVSE SPLQLQSSFKNHNP PPSVIGVSDNKRSGDAIVKNTTESRNNKD  
QQNLKEKELLVHGFVFCRKLSSSNQFKPYTALS KKDLEDLLSQVGERVSKAWPLIQVPS  
ADQTSFPSLNTYFN DIATFNPCLYRNKYSAPI SLLTKVGAVHNMTKMMHQTYESECNK  
LNTSKLSEILSEDMSLDAEISRCL ETQATLFD PPFQILKTYMLKLELTLKKS CMINEFWEG  
GHLKSRSEI WASRVRSARSIRGLSRL LLLKLVNAI HAKAFTSAWVHSHVSKSHDSEGSTSD  
RNYKRVLP SDWSEEKEK LKHRWEMTPSNMILDLCISGDNDLMAFATGIRSDIFIAKQISVI  
KSKRKRKFTSSSR AKGLETENLIATSKPSICV GVEQQPKKSKAEDLNTKT TTDPERIAKN  
EANASPRIETTDQATPDSFDDREIDQINSNSMPRVE SNVANGTFD VLLSTEEKPEVPKPP  
IPVGI VHSNNEIMKNSSNATNLVKIFKEPEDPDQSKMKGESDEAPGCHTTTKAEQDSSSK  
QMETTEEKQAENDNDLNEEKVDTIISTPTSSAKKKRRQAKSRPREPSSRRHTRRSGRLS  
SEFSVECSRNASILEAGDLSTSTMEPLGGMALQIENSKKEKIPGLEKLVKGYAVQGIWPI  
IAGRQIFPTIGNLPPGEMKRLAKNAGSALAANLSYHTNHEVAQVCYGH IWRKRVASCGR  
EELLHLIRVLESSLDREMIHQENQTKRGKTKNLKV VQITMRNPS SGSLEHFVVKTKN  
GCWVPAEQLDVSSLIADLFLRRQRQREERLKR VSEEKKLIEYERNKR IAEAVKKA EEDKR  
KQEAARA AVKRKKKEEKEKKRLEQQ LKKKARLLAEAHAQKASDLVMKKFEAQSDVSNWKK



QINYAFESHELRTTEYALSSWINRGSSTIPDNELIEIRKRTLVLQRLKIMDKLRQLNESVMT  
DQQLITRMFDHEHKVALRCQSKKPTMNGMGNSENLTTFATSANAGNKESNSSSAIHDNRDD  
NVNSFSGQNVATRFTIAPGSNEQEGPNQLSMSNGNPNPNPKHVSPSDKFPFEDNTFSSQS  
IPNQIQSAQSSHGFDKRLGEYGMRRNAPGQMGILISQSFDIKSQQSAGVNPSTRIGLQNPTS  
IVSSSTPSKQNFVNLGFSRDNNAFSSSVPPVPPVX

>comp15704\_c0\_seq2; 1313 174 4211 LEN=4942; translated  
MSTYLKSAAMSLLSKTLQTFLLTKYLSVDVVEGVTLPSYDGSWGVRLKNVRLREGVQLME  
KMPGGVKKRIIKRRRRRRRRRIPMGETATQESLSSRQKLLNEDSDLSRRKNI SAHPNTN  
ARETIEPQNVTSSELSNARIEKDDARKFPTRQSRSLSTDDLELIDIVAKSETDYITDED  
LEYDENGIQRPSTPDQQSRRLFACFYNRNASTNNTTGGDTKLNHSLHQGTEQRNEQHLY  
QSAEGNSSTANLEHQPSTTSSSSSLPSDRIAIGAKSFDKHEHFANNFDVNEGGVDEYEYY  
YEEEDCEEEYELPLRLCLGEDGRIGMIDVRLIGKELHVMLEDAMITIEAIPPIPKDDTVD  
KDRTNEDANDVSSGERQSHGNATDSKMDSAKNDDANGNDNTSLQDNKNATKSQPEPKRDT  
VYDRVLADNGLARIISAIPHLEFIRDVCMRIVRNEPMPRTSEETENNSTKNFTSTSSYTT  
TNNYLDGYTKPKSSKDTMVEVGVDFLSVTSGEDILSHFQQEHTSSEEDLDILNNGGSNL  
DETLHSKRSTSSDTMSTKPPSLLKIPSTVVDSNGEQKNEYLVQRIRTGRGPSAGISVRI  
FTPHSMLPKFMMKSTASSQVLWARQHWVSATESHLLRCSGVDIQARIHMGTKRVDAGYSW  
FYGDYVDGQDENSEIDSLILFGSGMDTIAPGPQLPLPIEPMPPPEPRMSRGETPRKKKL  
GSAWNEDGKMHESSIHGVDVYSVDANGIQSCKVPSLFHRVSRGMELTSLKDNKCLPSES  
SDSCWEAPPKSDVQRASPLDSSIPMPGLVLHIGIRDPLEINVDNRNIESIGLIKSLFTKS  
TGAVTTNDGDEKKETKTVMITPSNAEDTTQATAASTGFFSGLLYGKAEETIQEEDTPVD  
SFESYMQPESISVMGIYFAKTTIRVHVMGEDQNDNRNLSFCYWQIDMNCLTIDRQSLAASE  
KCFSDLRFVDVGLKWEYRIGRKNIMSLGAHQLSMRRGDSQTSLSMMLDDHTQNKAP  
WPSTACALLDIPPLESLAYKSREHGLQFRFISTPSTKESNPDAVSKSLIHLRLGLTTV  
DSSWGIRNDIRLIISEIMKNLSNSEGKTSEKEHNEATEAGNTQSNTDVEIEESAAETERA  
RPRFLMAYTIQVDSGISLPLLIQTKMPLTRFSGERSLAGFSIESVLGKLDIFSYSKPEP  
PRLHKGCLSLPQIASIPEHARMHILLCLEDTSALEIALNVKEMNPFRRRIKAVDKAILKM  
AKKIAKRTSKMTSKKLNLRNPSLSLRENKDSATRRQNILTEIMKLDDGELS NLWSVHQ  
RYQKKLAKKLEERAQEKLEANAGG

>comp15705\_c0\_seq1; 498 319 1803 LEN=2005; translated  
MFCHGDPQALYRLSGVAAVSLPLVALFYAAIVWSSYAFYREIPWSHGPSLRAMGKRWL  
LVVASWLVAIGVGAACGACESNTNSGNTDNIDIDRGPDPGCLAWAALACAAGLAVVAFRW  
ILDTRRSVAVGVDAPPGFPLEGRFFVVTGANNGIGRETTRLLAAQGATVAMLCRNPVRA  
KNAAREILEEQSVASANDSGGRTPLVRKDQLVFVPIDLTDFSSVHRAVGAIHQHLDLRSS  
PQKRARVDALVCNAGLMMGTQSKTKDGLTMMQANHLGHFLLTKLMLESGMLETVEEGG  
TGEPSRVCLLTSSTYEFASAGGFDFEDPYCSK GKRAYTLFGQYSMTKLANLLTARELAR  
RYNDKNHNRALAVFAVHPGIVRTNVTSNMNYYRLGNTAFGWIVASLSKTPEEGAYSTVE  
VVGAPLSELGDYWSRGSFVVNCRESTNTHGYVRGPAGERDAGRLWEWSEEQLELFGAAGG  
TPAKAAEAGEKKEQ

>comp15705\_c0\_seq2; 471 1 1657 LEN=1859; translated  
XRNQRHILSSARVSSTRPNTTHPKRFDTNPIRSDPIEPHQSERPTSQPTNPPTARHPTMF  
CHGDPQALYRLSGVAAVSLPLVALFYAAIVWSSYAFYREIPWSHGPSLRAMGKRWLLV  
VASWLVAIGVGAACGACESNTNSGNTDNIDIDRGPDPGCLAWAALACAAGLAVVAFRWIL  
DTRRSVAVGVDAPPGFPLEGRFFVVTGANNGIGRETTRLLAAQGATVAMLCRNPVRAKN  
AAREILEEQSVASANDSGGRTPLVRKDQLVFVPIDLTDFSSVHRAVGAIHQHLDLRSSPQ  
KRARVDALVCNAGLMMGTQSKTKDGLTMMQANHLGHFLLTKLMLESGMLETVEEGGTG  
EPSRVCLLTSSTYEFASAGGFDFEDPYCSK GKRAYTLFGQYSMTKLANLLTARELARRY  
NDKNHNRALAVFAVHPGIVRTNVTSNMNYYRLGNTAFGWIVASLSKTPEEGAYSTVEV  
VVGAPLSELGDYWSRGSFVVNCRESTNTHGYVRGPAGERDAGRLWEWSEEQLELFGAAGGTP  
AKAAEAGEKKEQ

>comp15705\_c0\_seq3; 369 158 871 LEN=1073; translated  
MGTQSKTKDGLTMMQANHLGHFLLTKLMLESGMLETVEEGGTGEPSPRVCLLTSSTYEF  
AASAGGFDFEDPYCSK GKRAYTLFGQYSMTKLANLLTARELARRYNDKNHNRALAVFAV  
PGIVRTNVTSNMNYYRLGNTAFGWIVASLSKTPEEGAYSTVEVVGAPLSELGDYWSRGS  
FVVNCRESTNTHGYVRGPAGERDAGRLWEWSEEQLELFGAAGGTPAKAAEAGEKKEQ

>comp15705\_c1\_seq1; 2680 1 11319 LEN=11447; translated  
XSNPITPTPMDGTFFVNSFFDSIRTAGPNEHPPFLPYRTHPQHPTTRSRTEEMGKPGSVVL  
APPPFVSTGQRPGAALVRSAGVTDGRGLLAQPPRRPPRQPLVPFMLELAFDREATAERAS  
RGRPSDPGSGGRGPSNPNRGEESDAHGFLRYSSAIWNGLLCLSSGDDPDLFFDAQEKP  
MPRDRRRMDSNGRLLTLTLPRAPEKGEANDEQELRKTNTCATAASTRASDGLCSVVSF

ASNDSVSVESVEVEVVRLEKAGSGSSIATRTICGVRGGAFDPRGNPHHHNPQCQQSDQSL  
RAHPDPNPSDAGCRQQQDDPPPPPPAHPGTQGHNPFARVLP PPPPKELPLRFLRAGKGD  
VEGQRRYEATLQWRKEHSIDTILLEAHPKFEMIKENYPHYFHLRGRQNEPVFFEQPKTD  
LAALRRGGMDLHGLVRHYVMVTEFQWQFLEPNDLARSITVLDLEGMRMVDFVGECEVYVK  
MCSQFTGQHYPERAGHVIVVNVPRWFAMIWKVVKPMVDEVTLKKISIVRGKDAVLAALSE  
KIP IENIPPEYGGVQHAAGGIAGGTSSPGSHETQQCAGTGGLFVRWQDRNAALQVLCVGP  
SEELLIRSDPIQSIPIPTPPKQNKIIESNRVTKSAKMEDNASIIPGINASRTAVTPSLLPS  
YPMPVQLNFI PGVSYNTDNNNDRTNPDQNNKMGKNSAGVSNHTYLLSTFSYSDNIPER  
SSSSLSLSMSGT PRSGGRGKFFGSPMSEVPSLTILDN SAEHKAGIQGLLYTPDWLAHK  
ARLADDLLNYVVRTYHKDVSQPTLVFLPSLSVLANA AFGRLTGVPPLRAKTWADAMVLQY  
SHDKVEDDCNIDEDGDENRKPDPAAAMVNTGSGGTTVA YLKKLLEEDQLAENGKGC EI  
RRPRRPCGYVFKRGDIAWNCRCTCQTDSTCVICDTCFRHSDHEGHEVYFHRTTPGGCCDCG  
DAEAWKPEGCCPVHRPLTPVSSSTGGSPDGVDDEADPEEA VRMAQQGLKDGLETLRQAPTK  
LEPKLAAALAAVIGAAVRCVTEAVD GAGVGDPAQWQLRWAD EACRIWNGVAETHDYHNL  
KSVKQPLKKPGDFLPDTTISHCFPGNYKLQLRLHND DVHTFDEVIDALRGNMTHDGPV GK  
PLVTNKDEATQMTTHVDADGQVTVKMYTTIQAA MEGYKRLKSRGLHCAVVSSAQFDMEQR  
ARHLLSWLSEISA AHP SAAVLV V HALLQIKSTQDLGGISVWQEP RMIPTWVAPNETDEMA  
LHRRFKVFPPHLATS YLTGEEAEK LHAMAMKVD AKAFL EFTGADPTTYSNVPYRLPSAKY  
RKSPHSLWGTLPSLYDDSVPIVKKHPLLSLLKSGKWTMGEWDAELFAMRNDLTETVYVID  
TDLRKQQEADQTLSTVFSHRLPGLYMISGVGT IKPNMVGANPSSPPNPMEYRPLLAASSF  
RAPVSPA ILLLLLLDPYPTKQLRGAIHSLFLSLLTDARFKCRFAAALGIAYRPLSTLFCAG  
VGTEADTPLGFTVQIFTAGSLVRALGSAPAAKLLLSDDERESAYQKSSSIGVFTVP IAL  
TVVRCIHTNLLGATKEVHMI LNNTANSCLAATTYVAGEHP IMTLLPTAPDDGYLDSRSTR  
HKRLPHLLRDLEYVIETPGTAMRI LLLPKQFPYRGMSLSSRGEVLTFTTWARLLRLAQ  
GMDPQKRKTNGGHVEYEQSRWLEAFGLSLNFAGTRDALAESPTNSSS AALAPVSEDGSHL  
VSIREAMGNIMAALLKEIKLWLYKEGMLETGLPAVPRSALSASDQAQVEALQRSTLHIAA  
SQIGSSSPEGQTFPSSASTVALACATSVKMRESQLIL IENALKLEGANRRVKSDGVQSP  
MAASSPTSGAVMGDWLRVPHSPLSGDLSFHLPLHRALAKTIRSLCAVVVPESIRNSDAL  
GWWKLPVVDI IKDFTDLNANNLQHPLVPLIRPTLRPSNCRV VWSAGPDCNAQEAQRRRDR  
SRTVSANIAVAKI IHSLVDHP IRCLAAAQQIERHLWARNGTSVAGMALNYSNAPLCRSFR  
DLDLALVQLSASGMSVGLGARRVLTLLINRFSMDGYLCDPERRSTGNSTYATGLGAWIIP  
PRLQDPDYAPILSESLFSTLCILVTELP PPPPISSSDET WLRQSIRRELIHALAAEPRSH  
SAAMAAASC AVGRRDESDGSAGTSGGGGLFRDVF AKVLKDVGKQKTQGSRGRSGPSTFEL  
SPSCCEEYDPTFFHLRRQEHQHAMDV VSSLRKQKLT RDKGKESAGADASCFLVCVPPKA  
HPRFIACRLMLHLS PMDAAIRALLFALCGGAWFP PSEPVKKVEVEDDIIMPSSSDASAG  
QSSFARGRSIGDVPIMTRSRRSGNSP SNPFQKRAMFNEGDSSTPFSAEVVAASSVSFLEE  
LQLLTQVHTLEECASLHRLQPDLDDEAKSLSSGLSINSYLGRLVHVPE SLLDVWALRQF  
PNGPLKSKSGGECRGSILGLLIALYEYRGDHGAGSNGMQEEAGEGHGGARALTSSGLKWL  
LRFVNALVDGAPSVATAVKSATTGVPLKQSTPSSIPGTE SNGTTIWSIDETVRVTISGML  
SNLPDLWPKAADDKMQKEASANEK KERGKIAQQRMLEMMRKKQSAFEKKMGTSDKGSVK  
DQLEQAEDDLCIICRCDDADGGNNGPLGYLGHVQRSRVAQMRACCEGIGKANEGIESQSL  
YQKYRVVGHMGCQVRETEAMDSKPLCCLKRGTIVSVL KSTVSDKYDII SRRVLVNHTCKD  
TGKVTKGWASMQSSQGYVILSPLASLCYENTRWGSTRPIFR LCGHAAHLKCEAHTLSLH  
QRAAGDQPF DGRFAANIDDEGFLCPLCKQLSNILVPI DGCATEGDASEEKENTDAVPHDP  
NCIEETVQDLFTRGTFLGKEKADSYSVIGTKALANFGTHLMQAMVVPWERAGSKKRKSRK  
WDPSILRWDYEESPDPVATVGSLLRLLRQQHIAWAGVGHSA AAAAAAVRGVEEVLPFGIF  
SKTDEPWPGYKDKENDPMLLELTRTMTGTSGLFEVLMFEMIEQLGGKFDGAGPSIVAKC  
LADILCGHSWMQGMKDARNGLIDDKERDRALALSQATALMSAMPCHVARDGMLSQRHEAR  
ATAAEMWVSKGLGSKSDVSGNPP IPLSVKKTGKT VLPQPTMERNWGLDPTAKSEVDATV  
PFRPAAATAFLYTPLLAWDLNVLGAVFSSILANANNVQLTSEEI LQCGRLLITGRMIQA  
LITPGGFDSVDGMEIDEDEEGRWNPSEMQTEFEALVSLYSHCKARVSSHSLDNDAKLEE  
YTDVSSPSNLFGNVGAILPFARSIVLLMRACYAATKSRNRRKGTSTDGPDSASTRA FEE  
FLDGTETMASSDGLFILREMGAPMP SAIVNEANPYWKI INRWLTGVIGLERHHGSSGKSV  
LPTLYPPAGSSQDDTWMAIDSHEESPTTGTAENKVAIGDY EKMSLTKAPNPIDRHSPVN  
EDPRIGMAAVAQYFNDGLGEDSDEELI EEMEMEDDEALIGLVDQVANAVTGIEESSDDL S  
SSGSDEGENQNTSHL FAGLGE SP IISYQPSLLGQAVVGP GKRGSML ESGASSGMSDL SH  
LGLVHCKDTP TFSLIRLPKSFVELYGI VSKVKGREESASLEDSDDAGNAETAICLLTGTV  
MRSGLPRRPHYRSQRPPGACTIHARKNGSGIGIFFLVQKCTVLLMHNNKSAYSASLYVDE  
HG EEDPGLRRGRPLFLNDARLRALEQLWRQQGIPRKAQIRSTSDRVIRDN WY

>comp15705\_c1\_seq2; 481 1 1872 LEN=1906; translated

XVVLAPPPFVSTGHTDRGLLAQPPRRPPRQPLVPFMLELAFDREATAERASRGRPSDPG  
SGGRGPSNPNRGEESDAHGFGLRYSSAIWNGLLCLSSGDDPDLFFDAQEKPMRDRRRM  
DSNGRLLTTLTPRAPEKGEAANDEQELRKTNTCATAASTRASDSGLCSVVSFASNDSVSV  
ESVEVEVVRLEKAGSGSSIATR TICGVRGGAFDPRGNPHHHNPQCQQSDQSLRAHPDPNP  
SDAGCRQQQDDPPPPPPAHPGTQGHNPFARVLP PPPPKELPLRFLRAGKGD PVEGQRRYE  
ATLQWRKEHSIDTILLEAHPKFEMIKENYPHYFHLRGRQNEPVFFEQPPKTDLAALRRGG  
MDLHGLVRHYVMVTEFQWQFLEPNDLARSITVLDLEGMRMVDFVGECEYVKMCSQFTGQ  
HYPERAGHVIVVNVPRWFAMIWKVVKPMVDEVTLKKISIVRGKDAVLAALSEKIP IENIP  
PEYGGSSMPLGESPEERALRDLMDT TMRWHGGIVRAVAGPQRRPAGFVCGALRGVIDP IR  
SDP IRSAADETETKGNRNHRSGKRTDALLVVGDSGRGRGGWNGSNQDAEKRRKPRMPC  
GFLPPSNPAETTRYRIQYLYVLL

>comp15705\_c1\_seq3; 531 1 2281 LEN=2315; translated

XSNPITPTPMDGTFVNSFFDSIRTAGPNEHPPFLPYRTHPQHPTTRSRTTEEMGKPGSVVL  
APPPFVSTGQRPGAALVRSAGVTDGRGLLAQPPRRPPRQPLVPFMLELAFDREATAERAS  
RGRPSDPGSGGRGPSNPNRGEESDAHGFGLRYSSAIWNGLLCLSSGDDPDLFFDAQEK  
MPRDRRRMDSNGRLLTTLTPRAPEKGEAANDEQELRKTNTCATAASTRASDSGLCSVVSF  
ASNDSVSVESVEVEVVRLEKAGSGSSIATR TICGVRGGAFDPRGNPHHHNPQCQQSDQSL  
RAHPDPNP SDAGCRQQQDDPPPPPPAHPGTQGHNPFARVLP PPPPKELPLRFLRAGKGD  
VEGQRRYEATLQWRKEHSIDTILLEAHPKFEMIKENYPHYFHLRGRQNEPVFFEQPPKTD  
LAALRRGGMDLHGLVRHYVMVTEFQWQFLEPNDLARSITVLDLEGMRMVDFVGECEYVK  
MCSQFTGQHYPERAGHVIVVNVXVVSFAGFCACLAASFALPRRF DGRWGSFPRVLR  
KRYNHPVRFVVSFWR LTHPPTNVAIHESNQTHRFAMIWKVVKPMVDEVTLKKISIVRGK  
DAVLAALSEKIP IENIPPEYGGSSMPLGESPEERALRDLMDT TMRWHGGIVRAVAGPQRR  
PAGFVCGALRGVIDP IRSDP IRSAADETETKGNRNHRSGKRTDALLVVGDSGRGRGGWNG  
SNQDAEKRRKPRMPCCGFLPPSNPAETTRYRIQYLYVLL

>comp15705\_c1\_seq4; 514 1 2075 LEN=2109; translated

XSNPITPTPMDGTFVNSFFDSIRTAGPNEHPPFLPYRTHPQHPTTRSRTTEEMGKPGSVVL  
APPPFVSTGQRPGAALVRSAGVTDGRGLLAQPPRRPPRQPLVPFMLELAFDREATAERAS  
RGRPSDPGSGGRGPSNPNRGEESDAHGFGLRYSSAIWNGLLCLSSGDDPDLFFDAQEK  
MPRDRRRMDSNGRLLTTLTPRAPEKGEAANDEQELRKTNTCATAASTRASDSGLCSVVSF  
ASNDSVSVESVEVEVVRLEKAGSGSSIATR TICGVRGGAFDPRGNPHHHNPQCQQSDQSL  
RAHPDPNP SDAGCRQQQDDPPPPPPAHPGTQGHNPFARVLP PPPPKELPLRFLRAGKGD  
VEGQRRYEATLQWRKEHSIDTILLEAHPKFEMIKENYPHYFHLRGRQNEPVFFEQPPKTD  
LAALRRGGMDLHGLVRHYVMVTEFQWQFLEPNDLARSITVLDLEGMRMVDFVGECEYVK  
MCSQFTGQHYPERAGHVIVVNVPRWFAMIWKVVKPMVDEVTLKKISIVRGKDAVLAALSE  
KIP IENIPPEYGGSSMPLGESPEERALRDLMDT TMRWHGGIVRAVAGPQRRPAGFVCGAL  
RGVIDP IRSDP IRSAADETETKGNRNHRSGKRTDALLVVGDSGRGRGGWNGSNQDAEKRR  
RKPRMPCCGFLPPSNPAETTRYRIQYLYVLL

>comp15705\_c1\_seq5; 2676 1 11116 LEN=11244; translated

XVVLAPPPFVSTGHTDRGLLAQPPRRPPRQPLVPFMLELAFDREATAERASRGRPSDPG  
SGGRGPSNPNRGEESDAHGFGLRYSSAIWNGLLCLSSGDDPDLFFDAQEKPMRDRRRM  
DSNGRLLTTLTPRAPEKGEAANDEQELRKTNTCATAASTRASDSGLCSVVSFASNDSVSV  
ESVEVEVVRLEKAGSGSSIATR TICGVRGGAFDPRGNPHHHNPQCQQSDQSLRAHPDPNP  
SDAGCRQQQDDPPPPPPAHPGTQGHNPFARVLP PPPPKELPLRFLRAGKGD PVEGQRRYE  
ATLQWRKEHSIDTILLEAHPKFEMIKENYPHYFHLRGRQNEPVFFEQPPKTDLAALRRGG  
MDLHGLVRHYVMVTEFQWQFLEPNDLARSITVLDLEGMRMVDFVGECEYVKMCSQFTGQ  
HYPERAGHVIVVNVPRWFAMIWKVVKPMVDEVTLKKISIVRGKDAVLAALSEKIP IENIP  
PEYGGVQHAAGGIAGGTSSPGSHETQQCAGTGGLFVRWQDRNAALQVLCVGPSEELLIRS  
DPIQSIPITPPKQNKIIESNRVTKSAKMEDNASIIPGINASRTAVTPSLLP SYPMPVQLN  
FIPGGVSYNTDNNDRNTPDQNNKMGKNSAGVSNHDHTYLLSTFSYSDNIPERSSSSSLSL  
SMSGTPRS GGRGGKFFGSPMEVPSLTILDNSAEHKAGIQGLLYTPDWLAHKARLADDLL  
NYYVRTYHKDVSQPTLVFLPSLSVLANA AFGRLTGVPPLRAKTWADAMVLQYSHDKVEDD  
DCNIDEDGDENRKPDPAAAMVNV TSGGGTTVAYLKKLLEEDQLAENGGKGEIRRPRRPG  
YVFKRGDIAWNCRCTQTDSTCVICDTCFRHSDHEGHEVYFHRTTPGGCCDCGDAEAWKPE  
GCCPVHRPLTPVSSSTGGSPDGVDDDEADPEEAVRMAQQGLKDGLLET LRQAPT KLEPKLAAA  
LAAVIGAAVRCVTEAVD GAGVGADPAQWQLRWAEACR I WNGVAETHDYHNLKSVKQPLK  
KPGDFLPD TTI SHCFPGNYKLQLRLHNDVHTFDEVIDALRGNMTHDGPVGKPLVTNKDE  
ATQMTHHVDADGQVTVKMYTTIQAAMEGYKRLKSRGLHCAVVSSAQFDMEQRARHLLSWL  
SEISAAHPSAAVLVHALLQIKSTQDLGGISVWQEP RMIPTWVAPNETDEMALHRRFKVF  
PPHLATSYLTGEEAEK LHAMAMKVDAKAFLEFTGADPTTYSNVPYRLPSAKYRKSPHSLW

GTLP SLYDDSVPIVKKHPLLSLLKSGKWTMGEWDAELFAMRNDLTETVYVIDTDLRKQOE  
ADQTLSTVFSHRLPGLYMI SGVGTIKPNMVGANPSSPPNPM EYRPLLAASSFRAPVSPA I  
LLLLLLDPYPTKQLRGAIHSLF LSLTLDARFKCRFAAALGIAYRPLSTLFCAGVGT EADTP  
LGFTVQIFTAGSLVRALGSAPAAK LLLSDDERESAYQKSSSIGVFTVP IALTVVRCIHT  
NLLGATKEVHMILNNTANSCLAAT TYVAGEHPIMTLLPTAPDDGYLDSRSTRHKR LPHLL  
RDLEYVIEPTGTAMRILLPKQFPPYRGMSLSSRGEEVLTFC T'TWARLLRLAQGMDPQKRK  
TNGGHVEYEQSRWLEAFGLSLNFAGTRDALAESPTNSSAALAPVSE DGSHLVSIREAMG  
NIMAALLKEIKLWLYKEGML ETGLPAVPRALSASDQAQVEALQRSTLHIAASQIGSSSP  
EGQTFPSSASTVALACATSVKMRESQLIL IENALKLEGANRRVKSDGVQSPMAASSPTS  
GAVMGDWLRVPHSPLSGDLSL FHLPLHRALAKTIRSLCAVVVPE SIRNSDALGWWKLPV V  
DI IKDTFDL NANNLQHPLVPLIRPTLRPSNCRV VWSAGPDCNAQEAQRRRDRSRTVSANI  
AVAKI IHSLVDHIPRCLAAAQ QIERHLWARNGTSVAGMALNYSNAPLCRSFRDL DLALVQ  
LSASGMSVGLGARRVLTLLINRF SMDGYLCDPERRSTGNSTYATGLGAWI IPPRLQDPDY  
APILSESLFSTLCILVTELP P P P P I S S S D E T W L R Q S I R R E L I H A L A A E P R S H S A A M A A A S  
CAVGRREDES DGSAGTSGGGGLFRDVF AKVLKDVGKQKTQGSRGRSGPSTFELS PSCCEEY  
DPTFFHLLRRQEHQHAMDV VSSLRKQKLTRDKGKESAGADASC FPLVCVPPKAHPRF IACR  
LMLHLS P M D A A I R R A L L F A L C G G A W F P P S E P V K K V E V E D D I I M P S S S D A S A G Q S S F A R G R  
SIGDVPIMTRRRSGNSPSPNFQKRAMFN EGDSSTPFAEVVAASSVSFL EELQLLTLQV  
HTLEECASLHRLQPDLDDEAKSLSSGLSINSYLGR L V H V P E S L L D V W A L R Q F P N G P L K S K  
GSGECRGSILGLLIALYEYRGD HGAGSNGMQEEAGEGHGGARALTSSGLKWL LRFVNALV  
DGAPSVATAVKSATTGVPLKQSTPSSI PGTESNGTTIWS IDETVRVTI S G M L S N L P D L W P  
KAADDKMQKEASANEK KERGKIAQQRMLEMMRKKQSAFEKMGTS DKGSVKDQLEQAED  
DLCIICRCDADGGNNGPLGYLGHVQRSRVAQM RACCEGIGKANEGIESQSLYQKYRVVG  
HMGCVRETEAMDSKPLCCLKRGTIVSVL KSTVSDKYDIISRRVLVNHTCKD TGKVTKGW  
ASMQSSQGYVILSPLASLCYENTRWGSTRPIFR LCGHAAHLKCEAHTLSLHQRAAGDQP  
FDGRFAANIDDGEFLCPLCKQLSNILVPI DGCATEGDASEEKENTDAVPHDPNCIEETVQ  
DLFTRGTFLGEKEADSYSVIGTKALANFGTHLMQAMVVPWERAGS KKRKSRKWDP SILRW  
DYEESPDVPATVGSLLRLLRQQHIAWAGVGHSA A A A A E A A V R G V E E V L P F G I F S K T D E P W P  
GYKKDKENDPMLLELTRTMTGTSGLFEVLMFEMIEQLGGKFDGAGPSIVAKCLADILCGH  
SWMQGMKDARNGLIDDKERDR LALWSQATALMSAMPCHVAR DGMLSQRHEARATAAEMWV  
SKGLGSKSDVSGNPP I P L S V K K T G K T V L P Q P T M E R N W G S L D P T A K S E V D A T V P F R P A A A T  
AFLYTPLLAWDLNVLGAVFSSILANANNVQLTSEEILQCGRLLITGRMIQALITPGGFD  
SVDGMEIDEDEEGRWN PSEMQTEFEALVSLYSHCKARVSSHSLDNDAKLEEYTDVSSPS  
NLFGNVGRAILPFARSIVLLMRACYAATKSRNRKGTST DGPDSASTRAFEF LDGTETM  
ASSDGLFILREMGAPMPSAIVNEANPYWKI INRWLTGVI GLERHHGSSGKSVLPTLYPPA  
GSSQDDTWM AID SHEESPTTGT AENKVAIGDYEKMDSLTKAPNPIDRHSPVNEDPRIGMA  
AVAQYFNDGLGEDSDEELIEEMEMEDDEALIGLVDQVANAVT GIEESSDDLSSSGSDEGE  
NQNTSHLFAGLGESPIISYQPSLLGQAVVGP GKRGSMLESGASSGMSDL SHLGLVHCKD  
TPTFSLIRLPKSFVELYGI VSKVKGREESASLEDSDDAGNAETAICLLTGTVMRSGLPRR  
PYHRSQRPPGACTIHARKNGSGIGIFFLVQKCTVLLMHNNKSAYSASLYVDEHGEEDPGL  
RRGRPLFLNDARLRALEQLWRQQGIPRKVAQIRSTSDRVIRDN WY

>comp15705\_c1\_seq6; 2659 1 11322 LEN=11450; translated  
XVVLAPPPFVSTGHTDRGLLAQPPRRPPRQPLVPFMLS ELAFDREATAERASRGRPSDPG  
SGGRGPSNPNRGE GSDAHGFGLRYSSAIWNL LCLSSGDDPDLFFDAQEKPMPRDRRM  
DSNGRLLTTLTPRAPEKGEAANDEQELRKTNTCATAASTRASDSGLCSVVSFASNDSVSV  
ESVEVEVVRLEKAGSGSSIA TRTICGVRGGAFDPRGNPHHNPQCQSDQSLRAHPDPNP  
SDAGCRQQQDPPPPPPAHPGTQGHNP FARVLP P P P P K E L P L R F L R A G K G D P V E G Q R R Y E  
ATLQWRKEHSIDTILLEAHPKFEMIKENYPHYFHLRGRQNEPVFFEQPPKTDLAALRRGG  
MDLHGLVRHYVMVTEFQWQFLEPNDLARSITVLDLEGM RMVDFVGECEVEYVKMCSQFTGQ  
HYPERAGHVIVNVXAVVSFAGFCACLAASFRALPRRFDGRWGSFPRVLR AKRYNHPVV  
RFVVSFWRLTHPPTNVAI HESNQTHRFAMIWKVVKPMVDEVTLKKI SIVRGKDAVLAALS  
EKIPIENI PPEYGGVQHAAGG IAGGTSSPGSHETQQCAGTGGLFVRWQDRNAALQVLCVG  
PSEELLIRSDPIQSIPIPTPKQNKIIESNRVTKSAKMEDNASIIPGINASRTAVTPSLLP  
SYPMPVQLNFI PGGVSYNTDNNNDR TNPDQNNKMGKNSAGVSN DHTYLLSTFSYSDNIPE  
RSSSSLSLSMSGTPRS GGRGKFFGSPMSEVPSLTILDNSAEHKAGIQGLLYTPDWLAH  
KARLADDLLNYVRYHKDVSQPTLVFLPSLSVL ANAAFGRLTGVPPLRAKTWADAMVLQ  
YSHDKVEDDDCNIDEDG DENRKDPPAAMVNVTGSGGTTVAYLKKLLEEDQLAENGGKGC E  
IRRPRRPGCYVFKRGDI AWNCRTCQTDSTCVICDTCFRHSDHEGHEVYFHRTTPGGCCDC  
GDAEAWKPEGCCPVHRPLTPVSS TGGSPDGV DDEADPEEAVRMAQQGLKDGLETLRQAPT  
KLEPKLAAALAAVIGA AVRCVTEAVD GAGV GADPAQWQLRWAD EACRIWNGVAETHDYHN

LKSVKQPLKKPGDFLPDTTISHCFPGNYKLQLRLHNDVHTFDEVIDALRGNMTHDGPVG  
KPLVTNKDEATQMTHHVDADGQVTVKMYTTIQAAMEGYKRLKSRGLHCAVVSSAQFDMEQ  
RARHLLSWLSEISAAHPSAAVLVVHALLQIKSTQDLGGISVWQEPRMIPTWVAPNETDEM  
ALHRRFKVFPPLATSYLTEGEEAEKHAMAMKVDKAFLEFTGADPTTYSNVPYRLPSAK  
YRKSPhSLWGTLPSLYDSSVPIVKKHPLLSLLKSGKWTMGEWDAELFAMRNDLTETVYVI  
DIDLKQEQEADQTLSTVFSHRLPGLYMI SGVGTIKPNMVGANPSSPPNPMEYRPLLAASS  
FRAPVSPAILLLLLDPYPTKQLRGAIHSLFSLSLTDARFKCRFAAALGIAYRPLSTLFCA  
GVGTEADTPLGFTVQIFTAGSLVRLGSAAPAAKLLLSDDERESAYQKSSSIGVFTVPIA  
LTVVRCIHTNLLGATKEVHMILNNTANSCLAATTVVAGEHPIMTLLPTAPDDGYLDSRST  
RHKRLPHLLRDLEYVIETPGTAMRILLPKQFPYRGMSSSRGEEVLTFTTWARLLRLA  
QGMDFQKRKTNGGHVEYEQSRWLEAFGLSLNFAGTRDALAESPTNSSAALAPVSEDSH  
LVSIREAMGNIMAALLKEIKLWLYKEGMLTGLPAVPRSALSASDQAQVEALQRSTLHIA  
ASQIGSSSPEGQTFPSSASTVALACATSVKMRESQLILLENALKLEGANRRVKSDGVQS  
PMAASSPTSGAVMGDWRVPHSPLSGDLSFHLPLHRALAKTIRSLCAVVVPE SIRNSDA  
LGWVKLPVVDIIKDTFDLNNANLQHPLVPLIRPTLRPSNCRVWVSAGPDCNAQEAQRDR  
RSRTVSANIAVAKIHSVLVDHPIRCLAAAQOIERHLWARNGT SVAGMALNYSNAPLCRSF  
RDLDLALVQLSASGMSVGLGARRVLTLLINRFSMDGYLCDPERRSTGNSTYATGLGAWII  
PPRLQDPDYAPILSESLFSTLCILVTELP PPPPISSSDETWLRQSIRRELIHALAAEPRS  
HSAAMAAASCAVGRRESDGSAGTSGGGGLFRDVF AKVLKDVGKQKTQGSRRSGPSTFE  
LSPSCCEEYDPTFFHLRRQEHQHAMDVSSLRKQKLTTRDKGKESAGADASCFFPLVCVPPK  
AHPRFIACRLMLHLSMDAAIRRALLFALCGGAWFPPSEPVKKVEVEDDIIMPSSSDASA  
GQSSFARGRSIGDVPIMTRSRRSGNSPSPNFQKRAMFNEGDSSTPFAEVVAASSVSFLE  
ELQLLTLQVHTLEECASLHRLQPDLDDEAKSLSSGLSINSYLGRLVHVPESLLDVWALRQ  
FPNGPLKSKSGSEGRSILGLLLIALYEYRGDHGAGSNGMQEEAGEGHGGARALTSSGLKW  
LLRFVNALVDGAPSVATAVKSATTVGVLKQSTPSSIPGTESNGTTIWSIDETVRVTISGM  
LSNLPDLWPKAADDKMQKEASANEKKEKRGKIAQQRMLEMMRKKQSAFEKKMGTSKGSV  
KDQLEQAEDDLICIICRDDADGGNNGPLGYLGHVQRSRVAQMRACCEGIGKANEGIESQS  
LYQKYRVVGHMGCQVRETEAMDSKPLCCLKRGTI VSVLKSTVSDKYDII SRRVLVNHTCK  
DTGKVTKGWASMQSSQGYVILSPLASLCYENTRWGSTRPIFRLCGHAHLKCV EAHTLSL  
HQRAAGDQPFDFRFAANIDDEFLCPLCKQLSNILVPI DGCATEGDASEEKENTDAVPHD  
PNCIEETVQDLFTRGTFLGEKEADSYVIGTKALANFGTHLMQAMVVPWERAGSKKRKRSR  
KWDP SILRWDEYESPDVPATVGSLLRLLRQQHIAWAGVGHSAAAEA AVRGVEEVL PFGI  
FSKTDEPWPGYKDKENDPMLLELTRTMTGTSGLFEVLMFEMIEQLGGKFDGAGPSIVAK  
CLADILCGHSWMQGMKDARNGLIDDKERDRLALWSQATALMSAMPCHVARDGMLSQRHEA  
RATAAEMWVSKGLGSKSDVSGNPP IPLSVKKTGKT VLPQPTMERNWGLDPTAKSEVDAT  
VPFRPAAATAFLYTPLLAWDLNVLGAVFSSILANANNVQLTSEEILQCGRLLITGRMIQ  
ALITPGGFSDVSGMEIDEEDDEEGRWNPSEMQTEFEALVSLYSHCKARVSSHSLDNDAKLE  
EYTDVSSP SNLFGNVGRAILPFARSIVLLMRACYAATKSRNRKGTSTDGPDSASTRAFE  
EFLDGTETMASSDGLFILREMGAPMPSAIVNEANPYWKI INRWLTGVIGLERHHGSSGKS  
VLPTLYPPAGSSQDDTWMAIDSHEESPTTGTAENKVAIGDYEKMSLTKAPNPIDRHSV  
NEDPRIGMAAVAQYFNDGLGEDSDEELIEEMEMEDDEALIGLVDQVANAVTGI EESSDDL  
SSSGSDEGENQNTSHLFAGLGESPIISYQPSLLGQAVVGPGRGSMLES GASSGMSDLS  
HLGLVHCKDTPFSLIRLPKSFVELYGIVSKVKGREESASLEDSDDAGNAETAICLLTGT  
VMRSGLPRRPYHRSQRPPGACTIHARKNGSGIGIFFLVQKCTVLLMHNNKSAYSASLYVD  
EHGEEDPGLRRGRPLFLNDARLRALEQLWRQQGIPRKVAQIRSTSDRVIRDNRY  
>comp15705\_c1\_seq7; 2663 1 11525 LEN=11653; translated  
XSNPITPTPMDGTFVNSFFDSIRTAGPNEHPPFLPYRTHPQHPTTRSRTEEMGKPGSVVL  
APPPFVSTGQRPGAALVRSAGVTDRLGLLAQPPRRPPRQPLVPFMLELAFDREATAERAS  
RGRPSDPGSGGRGSPNPNRGEESDAHGFLRYSSAIWNGLLCLSSGDDPDLFFDAQEKP  
MPDRDRRMDSNRLLTLTLPRAPEKGEAANDEQELRKTNTCATAASTRASDSGLCSVVSF  
ASNDSVSVESVEVEVVRLEKAGSGSSIATRTICGVRGGAFFDRGNPHHHNPQCQQSDQSL  
RAHPDPNPSDAGCRQQQDPPPPPPAHPGTQGHNPFARVLP PPPPKELPLRFLRAGKGP  
VEGQRRYEATLQWRKEHSIDTILLEAHPKFEMIKENYPHYFHLRGRQNEPVFFEQPPKTD  
LAALRRGGMDLHGLVRHYVMVTEFQWQFLEPNDLARSITVLDLEGRMVDFVGECEYVK  
MCSQFTGQHYPERAGHVI VNVXAVVSFAGFCACLAASFALPRRFDGRWGSFPRVLR  
KRYNHPVVRVVSFWRLTHPPTNVAIHESNQTHR FAMIWKVVKPMVDEVTLKKISIVRGK  
DAVLAALSEKIPIENIPPEYGVQHAAGGIAGGTS SPGSHTQQCAGTGGLFVRWQDRNA  
ALQVLCVGPSEELLIRSDPIQSIPITPPKQNKIIESNRVTKSAKMEDNASIIPGINASRT  
AVTPSLLPSYPMPVQLNFI PGVSYNTDNNNDRTNPDQNNKMGKNSAGVSNHDHTYLLSTF  
SYSDNIPERSSSSSLSLSMSGTPRS GGRGGKFFGSPMSEVP SLTILDNSAEHKAGIQGLL

YTPDWLAHKARLADDLLNYYVVRTYHKDVSQPTLVFLP SLSVLANAAFGRLTGVPPLRAKT  
WADAMVLQYSHDKVEDDDCNIDEDGDENRKPDPAAAMVNVGTSGGTTVAYLKKLLEEDQLA  
ENGGKGC EIRRRPCGYVFKRGDIAWNCRTCQTDSTCVICDTCFRHSDHEGHEVYFHRT  
TPGGCCDCGDAEAWKPEGCCPVHRPLTPVSSSTGGSPDGVDDDEADPEEAVRMAQQGLKDGL  
ETLRQAPT KLEPKLAAALAAVIGAAVRCVTEAVDVGAGVGADPAQWQLRWAEACRIWNGV  
AETHDYHNLKSVKQPLKKPGDFLPD TTI SHCFPGNYKQLRLHNDVHTFDEVIDALRGN  
MTHDGPV GKPLVTNKDEATQMTHHVDADGQVTVKMYTTIQAAMEGYKRLKSRGLHCAVVS  
SAQFDMEQRARHLLSWLSEISAAHP SAAVLVVHALLQIKSTQDLGGISVWQEPRMIP TWV  
APNETDEMALHRRFKVFPPLHATS YLTGEEAEK LHAMAMKVDKAFLEFTGADPTTYSNV  
PYRLPSAKYRKSPHSLWGTLPSLYDDSVPIVKKHPLL SLLKSGKWTMGEWDAELFAMRND  
LTETVYVIDTDLRKQEQEADQTLSTVFSHRLPGLYMI SGVGTIKPNMVGANPSSPPNMEY  
RPLLAASSFRAPVSPAILLLLLDPYPTKQLRGAIHSLF LSLLLTDARFKCRFAAALGIAYR  
PLSTLFCAGVGT EADTPLGFTVQIF TAGSLVRALGSAPAAK LLLSDDERESAYQKSSSI  
GVFTVP IALTVVRCIHTNLLGATKEVHMILNNTANSCLAATTYVAGEHPIMTLLPTAPDD  
GYLDSRSTRHKRLPHLLRDLEYVIE TPGTAMRILLPKQFP PYRGMSSLSSRGEVLTFCCTT  
WARLLRLAQGM DPQKRKTNGGHVEYEQSRWLEAFGLSLNFAGTRDALAESPTNSSSAAALA  
PVSE DGSHLVSIREAMGNIMAA LLKEIKLWLYKEG MLETGLPAVPRSALSASDQAQVEAL  
QRSTLHIAASQIGSSSPEGQTFPSSSASTVALACATS VKMRESQLIL IENALKLEGANRR  
VKSDGVQSPMAASSPTSGAVMGDWLRVPHSPLSGDSL SFHLPLHRALAKTIRSLCAVVP  
ESIRNSDALGWWKLPVVDI IKD TFDL NANNLQHPLVPLIRPTLRPSNCRV VWSAGPDCNA  
QEAQRRDRSRTVSANI AVAKI IHSLVDHP IRLCAAQQ IERHLWARNGTSVAGMALNYS  
NAPLCRSFRDL DLALVQLSASGMSVGLGARRVLTLLINRF SMDGYLCDPERRSTGNSTYA  
TGLGAWI IPPRLQDPDYAPILSESLFSTLCILVTELP PPPPISSSDET WLRQSIRRELIH  
ALAAEPRSHSAA MAASCAVGRRDES DGSAGTSGGGGLFRDVF AKVLKDVGKQKTQGSRG  
RSGPSTFELSPSCCEEYDPTFFH LRRQEHQHAMDVVSSLRKQKLRDRK GKESAGADASC  
PLVCVPPKAHPRFIACRLMLHLS PMDAAIRRALLFALCGGAWFP PSEPVKKVEVEDDIIM  
PSSSDASAGQSSFARGRSIGDVPIMTRSRRSGNSP SNPFQKRAMFNEGDSSTPFSAEVVA  
ASSVSFLEELQLLTLQVHTLEECASLHRLQ PDL DDEAKSLSSGLSINSYLGR LVHVPESL  
LDVWALRQFPNGPLKSKGSGE CRGSI LGLLIALYEYRGD HGAGSNGMQEEAGEGHGGARA  
LTSSGLKWL LRFVNALVDGAPSVATAVKSATTGVPLKQSTPSSI PGTESNGTTIWSIDET  
VRVTISGMLS NLPDLWPKAADDKMQKEASANE EKKERGKIAQQRMLEMMRKKQSAFEKKM  
GTSDKGSVKDQLEQAEDDL CIICRCD DADGGNNGPLGYLGHVQR SRVAQMRA CCEGIGKA  
NEGIESQSLYQKYRVVGHMGCQVRETEAMDSKPLCCLKRG TIVSVLKSTVSDKYDIISRR  
VLVNH TCKDTGKVTKGWASMQSSQGYVILSPLASLCYENTRWGSTRPIFRLCGHAAHLKC  
VEAHTLSLHQRAAGDQPF DGRFAANID DGEFLCPLCKQLSNILVPI DGCATEGDASEEKE  
NTDAVPHDPNCIEETVQDLFTRGTFLGEKEADSYSVIGTKALANFGTHLMQAMVVP WERA  
GSKKRKSRKWDPSILRW DYEESPDVPATVGSLLRLLRQQHIAWAGVGHSA AAEAAVRGV  
EEVLPFGIFSKTDEPWPGYK KDKENDPMLLELTRTMTGT SGLFEVLMFEMIEQLGGKFDG  
AGPSIVAKCLADILCGHSWMQGMKDARNGLIDDKERDR LALWSQATALMSAMPCHVARDG  
MLSQRHEARATAAEMWVSKGLGSKSDVSGNPP IPLSVKKTGKTVLPQPTMERNWGS LDPT  
AKSEVDATVPFRPAAATAFLYTP LLAWDLNVLGAVFSSILANANNVQLTSEEILQCGRL  
LITGRMIQALITPGGFSDV DGM EIDEEDEEGRWNPSEMQTEFEALVSLYSHCKARVSSH  
LDNDAKLEEYTDVSSPSNLFGNVGRAILPFARSIVLLMRACYAATKSRNRKGTST DGPD  
SASTRAFE EFLDGTETMASSDGLF I LREMGAPMP SAI VNEANPYWKI INRWLTGVI GLER  
HHGSSGKSVLPTLYPPAGSSQDDTWMAIDSHEESPTTGTAENKVAIGDYEKMDSLTKAPN  
PIDRHSPVNE DPRIGMAAVAQYFNDGLGEDSDEELIEEMEMEDDEALIGLVDQVANAVTG  
IEESSDDLSSSGSDEGENQNTSHL FAGLGESPIISYQPSLLGQAVVGP GKRGSMLESGAS  
SSGMSDLSHLGLVHCKDTP TFSLIRLPKSFVELYGI VSKVKGREESASLEDSDDAGNAET  
AICLLTGTVMRSGLPRRPHYRSQRPPGACTIHARKNGSGIGIFFLVQKCTVLLMHNNKSA  
YSASLYVDEHGEEDPGLRRGRPLFLNDARLRALEQLWRQQGIPRKVAQIRSTSDRVIRDN  
WY

>comp15705\_c1\_seq8; 498 1 2078 LEN=2112; translated  
XVVLAPPPFVSTGHTDRGLLAQPPRRPPRQPLVPFMLSELAFDREATAERASRGRPSDPG  
SGGRGPNPNRGE GSDAHGFGLRYSSAIWNGLLCLSSGDDPDLFFDAQEKPMPRDRRRM  
DSNGRLLTTLTPRAPEKGEAANDEQELRKTNTCATAASTRASDSGLCSVVSFASNDSVSV  
ESVEVEVVRLEKAGSGSSIA TRTICGVRGGAFDPRGNPHHNPQCQQSDQSLRAHPDNP  
SDAGCRQQQDPPPPPPAHPGTQGHNP FARVLP PPPPKELPLRFLRAGKGD PVGEQRRYE  
ATLQWRKEHSIDTILLEAHPKFEMIKENYPHYFHLRGRQNEPVFFEQPPKTDLAALRRGG  
MDLHGLVRHYVMVTEFQWQFLEPNDLARSITVLDLEGMRMVDFVGECEVEYVKMCSQFTGQ  
HYPERAGHVI VVNVXPVVSFAGFCACLAASFRALPRRFDGRWGSFPRVLRKRYNHPPV

RFVVSFWRLTHPPTNVAIHESNQTHRFAMIWKVVKPMVDEVTLKKISIVRGKDAVLAALS  
EKIPIENIPPEYGGSSMPLGESPEERALRDLMDTTMRWHGGIVRAVAGPQRRPAGFVCGA  
LRGVIDPIRSDPIRSAADDETETKGNRNHRSGKRTDALLVVGDSGRGRGGWNGSNQDAEKR  
KRKPRMPCCGFLPPSNPAETTRYRIQYLYVLL  
>comp15705\_c1\_seq9; 48 1 433 LEN=433; translated  
XVVLAPPPFVSTGHTDRGLLAQPPRRPPRQPLVPFMLELAFDREATAERASRGRPSDPG  
SGGRGPSNPNRGEESDAHGFGLRYYSSAIWNGLLCLSSGDDPDLFFDAQEKPMPRDRRRM  
DSNGRLLTLTLPRAPEKGAAANDER  
>comp15705\_c1\_seq10; 81 1 636 LEN=636; translated  
XSNPIPTPMDGTFVNSFFDSIRTAGPNEHPPFLPYRTHPQHPTTRSRTTEEMGKPGSVVL  
APPPFVSTGQRPGAALVRSAGVTDGRGLLAQPPRRPPRQPLVPFMLELAFDREATAERAS  
RGRPSDPGSGGRGPSNPNRGEESDAHGFGLRYYSSAIWNGLLCLSSGDDPDLFFDAQEKP  
MPRDRRRMDSNGRLLTLTLPRAPEKGAAANDER  
>comp15706\_c0\_seq1; 588 36 2858 LEN=6120; translated  
MEENQSQAEAMATRESSKKKARLRSTGGKESSSSNPTPLSDSPCAMESRFAAIRRWIAKPI  
DSFRGEDGVFRDPYPASVIVETNEPKLMMSGTKSKNTIEDNENHKHLVAMEDTGVLI GNK  
YHASVDVHLEIGVTAVLNLCASGGISRLPVGELRERGIYAFTNVQDDLKYPILHGLLP  
TNAKGD TNSEN NF SILCASQHLKVAKSMYIEEVLWKKGKLLFFCVAGQNRSATLALATLL  
LRGKKHYTLDSMCRSLSETRPFVLENEG FQQLELELFLGHSGKKRCYRRTQNTMDES  
DPSMTMFAYGDYTPPEERIGPSLSYD TVDSLLEVSGVTGGNLEHSRTNSITSTSNRPPGDG  
SDGRQRVEIELLIPGLCTMEVFIPVPSSISEIKA CLVDHVNKYLLRSEHRRVSKSWVLA  
SFGKDDMYDLPLENEAIERSVQWDR LSEMFLKIEEDEKNNKLVHWTSSCRFALVIFSV  
FCDGEGNDGDVGNKDVDKKTPLGLTIDDPNQIQVPWTFVHRERPGAPSTLLSNTLSSTHL  
RAWDFCDGQAFRSKEPIVFSFSDDPRDRRQFMKISTSAQEAQQFYAPGEGGILGMGANAI  
VHRVELKSTSPKSFGEDETIDGASNPISDAGNEEWDAAVKRPFSLSKMLASLEAGSEAA LG  
KRLRQLSNRSLNDSGRVLYFYGLGVALSSNAYRPTEYKFEAAILARYEEEFSSYTMKRF  
MEDYTSKETPAPRNGEVGDDNWRKNFSLISVKVLLVSLNNAFRDLTLMGVHAFDFNHLGN  
VLISR DHQSVKLLDIDGRKGSIP LSEYINESV VSPGLEQPSSPRSPKMVRQASRILHKP  
CLDVDLNAVLP TVVQELLLGKGRGRSFVVNTKSEIWR LPPQKARALVEETISQNF GPLTE  
RHMAKVVEWFYVMLKKQPPWGNWTHDIYDAMRCIDHLPVR  
>comp15707\_c0\_seq1; 343 172 1042 LEN=1158; translated  
MVDRDEFGRVRNGNHNHNGRGGTSSYSRHGDSRRQSSSATLPSEARSRSDPYGPA SDEKED  
KHLCPGVVHGEVIRIESYGA FVSFRDRLRRHHKGLLHISQLASHRVEHVTDILKMNQEV  
HAVILEVEYDQRIGKRIRLSMKDVDQSTGKYSGGKIGGIIRGGPRVSPHQLQLRAKLRE  
TLLNLNSHWKDRKNGDSSGKSYKSNKGVSVDEPSSYLRLWSSSPLPPGRQDIEPPTKEN  
RRNDNDYTDSSSDDASDSSSASGDSSSSDSYESDAVDDVEKEVVEEEEEK  
>comp15707\_c0\_seq2; 226 1 971 LEN=971; minus strand; translated  
XVRVCFGVCFGGFPVDGQDDRPAAGAAGPPEEPLPETAVVEDVVAAGALQGGKRDGLPFQ  
KALEADAANGGRGIRWRLRSGLRPAPKAGGPRNGLCSWDPCLVLVVVIGFVFGVCST  
ADLHLGQDAFSGEKAAQEPFPERVFCPPVGT TANGKRRRAIAAAAAAALGGLRLEAGRLAQ  
GGMVWRMVRGPTAGGFYAVEGVVLSALPPGIVLYSLAGVVVGLDGLLDHPLVDGFVP  
LLHHGLVLGGKESQLAPAVPTERPVDQKDNVDPQRNDQNHQQAHDSDVARCRSGGGV LDR  
RFGAGRTDPSVGLPPEGARVRGGG  
>comp15707\_c0\_seq3; 558 1 1537 LEN=1537; translated  
VCSSDLDDLENEYTLKIESLEQKLKEFRNQRKHGTDLQNKNYEELLKKAREEITMQSIH  
QDRIEELAKDHVKALEEVQKTHEDLKYEYDTFLEIHLKLEEDALQAKMHYKESLVKIRAM  
ESES RDNREATEKMKLEHRETVEKANEIHEEELKKMEEVVEWKRKFHKIEEYALAIKT  
EEEAKDKFALDLET LKKDHHLALAKQEELRKS DAAAYQKLRQEFNAALIEHGKKEQSTIH  
SYEQVKRDYESKMRGYQHKIDEFEKLLAMAKDGNEQEVKRLVGEIQLESREKTEQLQAKL  
KETARLVELEADAKQIMEEQAESKEKLSRLEASNDLREQIEASKNELNKRAATHDLEL  
EKSEKEFQVKLEETIGRLNAETELNQSLQKQAITGEKLNRLVESNKELRDRAERQEC EL  
KESRDNQNRNTYHELNTSSYQASLLKIESLLQORENVNTPKVLHISTGKDGEESRTEKG  
GTVFERIQKFEKKAEP IAAKTKLSRKARSEERX  
>comp15707\_c0\_seq4; 655 290 2732 LEN=3247; translated  
MLGRGYDEKSRGSSSRNGRQTNNHLHGHDRRGNDRPNVRSNPFMSGATTGQNQSN DNIN  
RNKSSKNKIEALKQTKNNRIEALKKQTELYSELSEKLEEKLAKREAEVQALRSANQVLH  
KECNRHTRIANLETQCVARS AKVAQLSDMIATKRS DKVQERLMEKSLEVADLIEETERL  
KIQNKQMQR EKTNGRLMLEMSDIIRQLNKIEVKYDKAEGDKKYFEMNRVRYDDSLTPF  
AGSPQDAPLENVRRKIATIERVLEGEESLRREHGFQKGRIESLRRDNENLNVEIASLQVK  
LRDQADQHRQKMELOMLKQRANEEQTVHETVHQT VSSGSGSEYTFCTTSGEEEDHGQLSK

EVSYE EFVVENERSQSEDGSEDSGMDDSYRSH PQFSRVNKPLSPVVEANSSVEKVSAAAV  
AAAAAAPESHQRRLGSLRAMSIALIHRERCVTVDATNAPTAAIDQNQIDAKGDASKIKK  
LLEEELEAEKYQRRLEQQLOKAGVVAEDIPIYDVAKQKVFQIGQRMGELHSGGDGGDNGR  
EYFKLEQEMEKYIAALELTEEWIEEQAEDERKWEAAMEEENNLALKRVLRHMPVDVRNRG  
ELQLRASPTPNGRYISRSIAQKFKRTNCLQLLRTDPNEMTRWHPAMFENLRVTGLTLTER  
RALHHHLKTLGYHWKEQSGSGDKMTERKLVWFETLKTNFRDSSLAYERHINRYGPPENH  
NCPMIGRQCPLADKTIIDYSGDYGYPENSEYFEETNDDVSKSNSDGGTEPTEEKNRCFAL  
LQFPGKMLGARKKEAQELIQYYLMARTSDEKEN

>comp15707\_c0\_seq5; 595 1 1639 LEN=1639; translated  
SRTNHTDYEASYNEMVSMKENS DRALKEVSDMNHLRQQYDDLENEYTLKIESLEQKLKE  
FRNQKRGHTDLQNKNYEELLK KAREEITTMQSIHQDRIEELAKDHVKALEEVQKTHEDLK  
YEYDTFLEIHLKLEEDALQAKMHYKESLVKIRAMESESRDNREATEKMKLEHRETVEKAN  
EIHHEELKMEEVVEEWKRKFHKIEEYALAIKTEEEAKDKFALDLETLLKDHHLALAKQ  
EELRKS DAAAYQKLRQEFNAALIEHGKKEQSTIHSYEQVKRDYESKMRGYQHKIDFEKFL  
LAMA KDGNEQEVKRLVGEIQLESREKTEQLQAKLKETARLVELEADAKQKIMEEQAESKE  
KLSRLEASNDLREQIEASKNELNKRAATHDLELEKSEKEFQVKLEETIGRLNAETELNQ  
SLQKQAITGEKLNRLVESNKELRDRAERQECELKESRDNQNQVRNTYHELTSSYQASLL  
KIESLLQQRENVNTPKVLHISTGKDGEESRTEKGGTVFERIQKFEKKAEP IAAKTKLSRK  
ARSEERX

>comp15707\_c0\_seq6; 655 290 2732 LEN=3151; translated  
MLGRGYDEKSRGSSSRNGRQTNNHLHGHDRRGNDRPNVRSNPFMSGATTGQNQSNNDNIN  
RNKSSKNKI EALKQTKNNRIEALKKQTELYSELSEKLEEK LAKREAEVQALRSANQVLH  
KECNRHTRIANLETQCVARS AKVAQLSDMIATKRS DKVQERLMEKSLEVADLIEETERL  
KI QNKQM QREKTKNGRLMLEMSDIIRQLNKIEVKYDKAEGDKKYFEMNVRVRYDDSLTPF  
AGSPQDAPLENVRRKIATIERVLEGESELRREHGFQKGRIESLRDNENLNVEIASLQVK  
LRDQADQHRQKMELOMLKQRANEEQTVHETVHQTVSSGSGSEYTFCTTSGEEDHGQLSK  
EVSYE EFVVENERSQSEDGSEDSGMDDSYRSH PQFSRVNKPLSPVVEANSSVEKVSAAAV  
AAAAAAPESHQRRLGSLRAMSIALIHRERCVTVDATNAPTAAIDQNQIDAKGDASKIKK  
LLEEELEAEKYQRRLEQQLOKAGVVAEDIPIYDVAKQKVFQIGQRMGELHSGGDGGDNGR  
EYFKLEQEMEKYIAALELTEEWIEEQAEDERKWEAAMEEENNLALKRVLRHMPVDVRNRG  
ELQLRASPTPNGRYISRSIAQKFKRTNCLQLLRTDPNEMTRWHPAMFENLRVTGLTLTER  
RALHHHLKTLGYHWKEQSGSGDKMTERKLVWFETLKTNFRDSSLAYERHINRYGPPENH  
NCPMIGRQCPLADKTIIDYSGDYGYPENSEYFEETNDDVSKSNSDGGTEPTEEKNRCFAL  
LQFPGKMLGARKKEAQELIQYYLMARTSDEKEN

>comp15707\_c0\_seq7; 197 1 779 LEN=876; minus strand; translated  
XVRVCFGVCFGGFPVDGQDDRPAAGAAGPPEEPLPETAVVEDVVAAGALQGGKRDGLPFQ  
KALEADAANGGRGIRWRLRSGLRPAPKAGGPRNGLCSWDPCLVLVVVIGFVFGVCST  
ADLHLGQDAFSGEKA AQEPFPERVFCPPVGT TANGKRR IAAAAAAAAALGGLRLEAGRLAQ  
GGMVWRRMVRGPTAGGFYAVEGVVLSALPPGIVLYSLAGVVVGLDGLGVGVGFSRLGS  
ASRGRKTQQAGGCVAHAMEW

>comp15707\_c0\_seq8; 1402 1 4200 LEN=4252; translated  
SRTNHTDYEASYNEMVSMKENS DRALKEVSDMNHLRQQYDDLENEYTLKIESLEQKLKE  
FRNQKRGHTDLQNKNYEELLK KAREEITTMQSIHQDRIEELAKDHVKALEEVQKTHEDLK  
YEYDTFLEIHLKLEEDALQAKMHYKESLVKIRAMESESRDNREATEKMKLEHRETVEKAN  
EIHHEELKMEEVVEEWKRKFHKIEEYALAIKTEEEAKDKFALDLETLLKDHHLALAKQ  
EELRKS DAAAYQKLRQEFNAALIEHGKKEQSTIHSYEQVKRDYESKMRGYQHKIDFEKFL  
LAMA KDGNEQEVKRLVGEIQLESREKTEQLQAKLKETARLVELEADAKQKIMEEQAESKE  
KLSRLEASNDLREQIEASKNELNKRAATHDLELEKSEKEFQVKLEETIGRLNAETELNQ  
SLQKQAITGEKLNRLVESNKELRDRAERQECELKESRDNQNQVRNTYHELTSSYQASLL  
KIESLLQQRENVNTPKVLHISTGKDGEESRTEKGGTVFERIQKFEKKAEP IAAKTKLSRK  
ALSDSNVDSMFQRTFDMILNRI GFDS CIETNSEESVTSSSVDSAADRKTLFEAIVNRVDE  
HAEKMEDIQKLRDFFEDAVAIDQIFDVLVYHFVQLRKVNNI VLRLPQFGNNEITNELQSD  
DNKSNRIISDLLIHKRKFQVQSCLLRRTMVTHLDEMYP SRLGDVYSSTCSHSRFSITPS  
ELGYSVPCTKSPNQVHKNPVSDDKDFGIGTNKSNIAMHRARLEAARLQDENFANQVNI ST  
EEIKTKAREKEVRLLDLKYKTLKEEFRELTANEVQKPPSNI AVPNIDDNGDSESYQPSLA  
MSSVTQPTMLGISRVDSLHKQVLAELKVECSRRELKQKSWVNEARREQQKISNNLKS V  
VSHLDLEIILEETDYNESMAEDDSFLSSHLGENLSEDR EAIWDMISKSVQNRVSPASSE  
NTEDTSLNPASTISSERRDDKNMYRSSPTKIEGADQTHCPQIDHELDTNSKKIHGIQVEL  
RKAKEAAEAARRKQLEREEALRDVIFQYRELEKEHKAVTGKRQQEGLGQQSMTNTDCEDP  
TAMAAIVSELKQAQENVNIMKGELEKASERHCEEKDGRLRHIMGQYKALQDDFVKILSEKQ



ELEKFBVYQRPMSVGNNGFVENSSSLIEAPIGVSSPSGPMNEQQIRRDPRSIFVFNDS  
VVTNEKNSEVIGLKQLRFVVGASSASPKRVGPPINSNHQQHQKSTNTIVELNDSDRVP  
LVRLNRSRGSEIRSSDKTPNANANVLQGSIIATTSSETINQRPSSKKMGTPKSSSLKRQST  
VSGISIEKDSESSLQKRHNFPQQSKQTMQKRKLSQPQRQKEQLPQFSPTMPTSKKKLGI  
FRGFGFHGGKKQPREKAAS

>comp15707\_c0\_seq9; 444 290 2037 LEN=2037; translated  
MLGRGYDEKSRGSSSRNGRQTNNHLHGHDRRGNDRPNVRSNPFMRMSGATTGQNQSNNDNIN  
RNKSSKNNKIEALKQTKNNRIEALKKQTELYSELSEKLEEKLAKREAEVQALRSANQVLH  
KECNRHTRIANLETQCVARSAKVAQLSDMIATKRSDKVQERLMEKSLEVADLIEETERL  
KIQNKQMQRKTKNGRLMLEMSDIIRQLNKIEVKYDKAEGDKKYFEMNRVRYDDSLTPF  
AGSPQDAPLENVRRKIATIERVLEGESELRREHGFQKGRIESLRRDNENLNVEIASLQVK  
LRDQADQHRQKMELOMLKQRANEEQTVHETVHQTQVSSGSGSEYTFCTTSGEEEDHGQLSK  
EVSYEFEVVENERSQSEDGSEDSGMDDSYRSHQPFSRVNKPLSPVVEANSVVEKGLCSSS  
SSSDGASFVCGGAHRGAEDPLGEGLLGGLLTRESVLAKMEVGGRAPDTEKPKTTTTNT  
RHGSQEQRPLRGPFAFGAGRKEPDRKRQMRPFPFAASASSAFWKGRPSRFPFCRAPAAT  
TSSTTAVSGSGSSGPAAPAAGRSSCPSTGNPPKQTPKQTRTX

>comp15707\_c0\_seq10; 1365 1 4098 LEN=4150; translated  
VCSSDLDDLENEYTLKIESLEQKLKEFRNQRKHGTDLQNKNYEELLKKAREEITTMQSIH  
QDRIEELAKDHVKALEEVQKTHEDLKYEYDTFLEIHLKLEEDALQAKMHYKESLVKIRAM  
EESRDNREATEKMKLEHRETVEKANEIHEEELKMMEEVVEEWRKRFHKIEEYALAIKT  
EEEAKDKFALDLETLLKDHHLALAKQEELRKSADAAAYQKLRQEFNAALIEHGKKEQSTIH  
SYEQVKRDYESKMRGYQHKIDFEKLLAMAKDQNEQEVKRLVGEIQLESREKTEQLQAKL  
KETARLVELEADAKQKIMEEQAESKEKLSRLEASNDDELREQIEASKNELNKRAATHDLEL  
EKSEKEFQVKEETIGRLNAETELNQSLOQKQAITGKLNRLVESNKELRDRAERQECLE  
KESRDNQNRVNTYHELTSSYQASLLKIESLLQORENVNTPKVLHISTGKDGEESRTEKG  
GTVFERIQKFEKKAEPAAKTKLSRKALSDSNVDSMFQRDFDMILNRRIGFDSCIETNSEE  
SVTSSSVDSAADRKTLEFAIVNRVDEHAEKMEDIQKLRKTFEEDAVAIQIFDVLYHFVQ  
LRKVNIVLRLPQFGNNEITNELQSDDNKSNRIISDLLIHKRFRKGVQSCLLRRTMVTHL  
DEMYP SRLGDVYSSTCSHSRFSITPSELGYSVPCTKSPNQVHKNPVSDDKDFGIGTNSN  
IAMHRARLEAARLDENFANQVNI STEEIKTKAREKEVRLDLKYKTLKEEFRELTANEV  
QKPPSNIAPVNDNGDSESYQPSLAMSSVTQPTMLGISRVDSLHKQVLAELKVECSRR  
ELKGQKSWVNEARREQKISNNLKSVMVSHLHDLIELETDYNE SMAEDDSFLSSHLGENL  
SEDREAIWDMISKSVQNRVSPASSDENTEDTSLNPASTISSERRDDKNMYRSSPTKIEGA  
DQTHCPQIDHELDTNSKKIHGIQVELRKAKEAAEAARRKQLEREEALRDVIFQYRELEKE  
HKAVTGKRQOQGLGQOSMTNTDCEPTAMAAIVSELKQAQENVNIMKGELEKASERHCEE  
KDGLRHIMGQYKALQDDFVKILSEKQELEKFBVYQRPMSVGNNGFVENSSSLIEAPIGV  
SSPSGPMNEQQIRRDPRSIFVFNDSVVTNEKNSEVIGLKQLRFVVGASSASPKRVGPP  
INSNHQQHQKSTNTIVELNDSDRVPLVRLNRSRGSEIRSSDKTPNANANVLQGSIIATTS  
SETINQRPSSKKMGTPKSSSLKRQSTVSGISIEKDSESSLQKRHNFPQQSKQTMQKRKLS  
QPQRQKEQLPQFSPTMPTSKKKLGI FRGFGFHGGKKQPREKAAS

>comp15707\_c0\_seq11; 10 1 413 LEN=528; translated  
XEADAEADADATATPAASSTPAPKRKDGQGRGTKDLRKERARLVGQRSLRKKGAFFCAGC  
GLVRLGEGLSRDLCPLVPGGSLATTATATTTAKTTAAARTRAGAGVRERQCSGVPTAPA  
PENQPPATRRREAAPP

>comp15707\_c0\_seq12; 541 290 2046 LEN=2046; translated  
MLGRGYDEKSRGSSSRNGRQTNNHLHGHDRRGNDRPNVRSNPFMRMSGATTGQNQSNNDNIN  
RNKSSKNNKIEALKQTKNNRIEALKKQTELYSELSEKLEEKLAKREAEVQALRSANQVLH  
KECNRHTRIANLETQCVARSAKVAQLSDMIATKRSDKVQERLMEKSLEVADLIEETERL  
KIQNKQMQRKTKNGRLMLEMSDIIRQLNKIEVKYDKAEGDKKYFEMNRVRYDDSLTPF  
AGSPQDAPLENVRRKIATIERVLEGESELRREHGFQKGRIESLRRDNENLNVEIASLQVK  
LRDQADQHRQKMELOMLKQRANEEQTVHETVHQTQVSSGSGSEYTFCTTSGEEEDHGQLSK  
EVSYEFEVVENERSQSEDGSEDSGMDDSYRSHQPFSRVNKPLSPVVEANSVVEKGLCSSS  
SSSDESNSTSSCDSSSLTSDSPPSFVEENS PKETSSPSHTNSIDHEEHEKLNQNF DKAL  
DVIERLKS DLKERKTRNVEMLINSTRSYASNDDRVERELERTKAQYKVLQDEFKTLHDRH  
QTVLANSRTNHTDYEASYNEMVSMKENS DRALKEVSDMNHL LRQX

>comp15708\_c0\_seq1; 142 1 216 LEN=512; minus strand; translated  
SSECLAPKISCKLRERDDL SLLPETFDEDDTSSIEAPELSTSMFSPFVRAVSTLLFSSSP  
SSAGICESPKS

>comp15708\_c0\_seq2; 599 1 1642 LEN=1800; translated  
XASHSYGAEDVEEKESYENAKSAADVRSAAHVETRSTQLSSTGLIEENKSTDEKSNS

TMESSSHGDSPEGEDVEERESYENDEHAADIKAGPRRIGGSVELVEVGDTSMKKMSLSTV  
SSYPESDSVAEDLEKNTSSQETGFRERENVLYDSSGGSLQLFEEVEESEDAPSIPTMEFA  
KSENEEEHRPSSVICEEIEDLDKMIETDDFEELGLETNMAEQFKLNSTFLENISDLQSN  
GNGKADAGPKSNGFHELDISNISVSPSLSALDSGSKDSTIPSATQQGSPQRSDSDSGGTD  
PVSFESSNESDGVNTSPKLSPELKYKVKSENDPTRKHVRGPSSNRSCVEEQNSIVNKVD  
GIVANNVSNVDGDGANSVNSLIPVEYGGPPLTENESETTLSSSVSPSPIRVAQSGGL  
DPQLNAPRGGNSNNDLFP IEGWTATGTVGGLLADLSDSTATSVCSNAESMTGSISSMEV  
ARAPSYLDIPMANEIGKRIDLNYDAARLVPEELDEEQGIKKRISATRQKKRDLEAVRN  
SFGSSGS

>comp15708\_c0\_seq4; 846 409 3521 LEN=3521; translated  
MEATGCDPSCCVRELVVLYEGEEFREYLEYHVGNYQRIHRDISITLQDTSDIQSSPSGID  
DFRTYNDLLSEGESLLGYINNMTDAGQWDGVVFPGHMVGALKESHRLWSWNEYLLRERDA  
NEAIDNNPTDIQWADIQPFYRSQAQQYAATNNTLTPSPPSLKPLLSNPDDADRETFYVPL  
DGDVLALLYRKDLFEKYNVEVPRTWDDYRAAAFFHGKPFGNNTTMTGSCVSRKRRRC  
DDGRSINAYWASLVLTMTQTKGTSTGFLLNPDNDLPILGDAMQETLRILAEQSMYEDPN  
ELTDCDHDINDNSTSGADQLLEEGTCAMAYTANRWKTSAMGTYSFGNNIGIARTPGSGR  
VLDRETGSLETCTSKLCPHGTFYSDIKIVNQPVYAAFVGGVWAGVSNAPSESQRAMASFF  
SYLSNKAQSFQDALPNERSAFLSPYRYSHL SAYDWINAGIDATTAVQYTETVKKVNSQNT  
VSEIRIPPGSEIRDILDQEVYRYLTAGRGFDNATKDGFDTIEDATLRAETTNNMDVRIE  
AISNFDKSTVLNNYVSSLGYSRRFVEGKSMNYIEKAYRDTGWFIAALICSMSIGTIVWFL  
WNRNKSIMRAFQPFSLIQVAVGLFLMGGTLIPLGFDDSLFGKEVLDISCVVAPWIYILGF  
SIFFSAVYSRIRCCLKIFNPNPKYERMIVKPKDSIQVFCQVFALNGILLGLWTFDPLTW  
QRREKMTNGPAFPSSDGTVEYTGSCQSEDTMYHSFGMAIFFYNLILCLIAMLQALKCRLL  
VLEYHQMQWLQLSILPFFEAWIIGGPVLTLLYDRPTAQYILFSVIIASSSISAALVILAP  
TEWYLRKNRLEFIERQKNNKMLPGDTPKGGPQSCSTGVRVLKHPKVESQKHVRNLQSKL  
ERYKTSNTELAIEIRILHEKFRKLEKEKLVVVRGMFAKEITDWHRSRIVRTAKGLEEDD  
WLGLSSQDFGDSQMPAEDGEEEEKSKVDALT KGLNIDVDNSGASIDDVSSSSKVSRSRDK  
SSRSLSLQDIFGARHSEX

>comp15708\_c0\_seq5; 586 1 1606 LEN=1764; translated  
XAEDVEEKESYENNKSAHVETRSSTQLSGTGLIEMGSKSTDEKSNSTMESSSHGDSPEG  
EDVEERESYENDEHAADIKAGPRRIGGSVELVEVGDTSMKKMSLSTVSSYPESDSVAED  
LEKNTSSQETGFRERENVLYDSSGGSLQLFEEVEESEDAPSIPTMEFAKSENEEEHRPSS  
VICEEIEDLDKMIETDDFEELGLETNMAEQFKLNSTFLENISDLQSNNGKADAGPKSN  
GFHELDISNISVSPSLSALDSGSKDSTIPSATQQGSPQRSDSDSGGTDVPSVFESSNESD  
VNTSPKLSPELKYKVKSENDPTRKHVRGPSSNRSCVEEQNSIVNKVDGIVANNVSNVDG  
DGANSVNSLIPVEYGGPPLTENESETTLSSSVSPSPIRVAQSGGLDPQLNAPRGGNS  
NNDLFP IEGWTATGTVGGLLADLSDSTATSVCSNAESMTGSISSMEVARAPSYLDIPMA  
NEIGKRIDLNYDAARLVPEELDEEQGIKKRISATRQKKRDLEAVRNSFGSSGS

>comp15708\_c0\_seq6; 721 409 3111 LEN=3144; translated  
MEATGCDPSCCVRELVVLYEGEEFREYLEYHVGNYQRIHRDISITLQDTSDIQSSPSGID  
DFRTYNDLLSEGESLLGYINNMTDAGQWDGVVFPGHMVGALKESHRLWSWNEYLLRERDA  
NEAIDNNPTDIQWADIQPFYRSQAQQYAATNNTLTPSPPSLKPLLSNPDDADRETFYVPL  
DGDVLALLYRKDLFEKYNVEVPRTWDDYRAAAFFHGKPFGNNTTMTGSCVSRKRRRC  
DDGRSINAYWASLVLTMTQTKGTSTGFLLNPDNDLPILGDAMQETLRILAEQSMYEDPN  
ELTDCDHDINDNSTSGADQLLEEGTCAMAYTANRWKTSAMGTYSFGNNIGIARTPGSGR  
VLDRETGSLETCTSKLCPHGTFYSDIKIVNQPVYAAFVGGVWAGVSNAPSESQRAMASFF  
SYLSNKAQSFQDALPNERSAFLSPYRYSHL SAYDWINAGIDATTAVQYTETVKKVNSQNT  
VSEIRIPPGSEIRDILDQEVYRYLTAGRGFDNATKDGFDTIEDATLRAETTNNMDVRIE  
AISNFDKSTVLNNYVSSLGYSRRFVEGKSMNYIEKAYRDTGWFIAALICSMSIGTIVWFL  
WNRNKSIMRAFQPFSLIQVAVGLFLMGGTLIPLGFDDSLFGKEVLDISCVVAPWIYILGF  
SIFFSAVYSRIRCCLKIFNPNPKYERMIVKPKDSIQVFCQVFALNGILLGLWTFDPLTW  
QRREKMTNGPAFPSSDGTVEYTGSCQSEDTMYHSFGMAIFFYNLILCLIAMLQALKCRLL  
VLEYHQMQWLQLSILPFFEAWIIGGPVLTLLYDRPTAQYILFSVIIASSSISAALVILAP  
TEWYLRKNRLEFIERQKNNKMLPGDTPKGGPQSCSTGVRVLKHPKVRKLDLELPNARIH

>comp15709\_c0\_seq1; 334 397 2166 LEN=4037; minus strand; translated  
MEALGCANPDGDDSKGAVLGPADHRDREPSTDHANENTTQSASSSSSSASPGTSRDASI  
NSFDIDIDNDIDDRPPPGTMAALVAAPVIFTERIAEACTSSILLEQLLFFLAGLGSSIG  
YISSLSSLVYFKLLFGPDSFVYLNCAVFFPLLPISLAQAAWDSVFDIYQSRVTFVRAV  
VGFVGFVAGTLGMAAFGRQHPTDSIEVETEDEPPP HLHGLSWVIASALLQIGGAVLFGQ  
LNQLASIVGNLHTAADVYDTLPKKFKAASVAGVQASALVVLAVSVSSGFGTMNGERFAPF

CQSIVYAEVFCFGAGLWLLVARPRVRVSMQRRDASMTNLAAAEVSDPSPSSSSSLSSPSEL  
EDFNERLSLLPGNPNRDGLLLRQLLPQEQRVGDSTVAELSIAQLFYCSRSPCYGMALVL  
VPSFLVGSWFTHVQTDWMELAQILFYTRIGSDLAGRFATILVPPSSMRCVLWVAGLRWIL  
VVLFFLNSGKRIGAHREGGAAEAPRDDSLLLLRGSPGEVQASAAWEATATAPTQTQRDCLT  
IALVATIAFFSGYLVTSCYQLAPQLLPGTPEQRAANAARQASLLTVAFP  
>comp15709\_c0\_seq2; 334 251 2020 LEN=3891; minus strand; translated  
MEALGCANPNDGDDSKGAVLGPADHRDREPSTDHANENTTQSASSSSSSASPGETSRDASI  
NSFDIDIDNDIDDRPPFPPTMAALVAAPIVFTERIAEACTSSILLEQLLFFLAGLGSSIG  
YISLSSLVYFKLLFGPDSFVYLNCAVFFPLLPISLAQAAWDSVFDIYQSRVTFLVRAV  
VGFVAGTLMGMAAFGRQHPTDSIEVETEDEPPPPLHLHGLSWVIASALLQGIGGAVLFGQ  
LNQLASIVGNLHTAADVYDTLPKKFKAASVAGVQASALVVLAVSVSSGFGTMNGERFAPF  
CQSIVYAEVFCFGAGLWLLVARPRVRVSMQRRDASMTNLAAAEVSDPSPSSSSSLSSPSEL  
EDFNERLSLLPGNPNRDGLLLRQLLPQEQRVGDSTVAELSIAQLFYCSRSPCYGMALVL  
VPSFLVGSWFTHVQTDWMELAQILFYTRIGSDLAGRFATILVPPSSMRCVLWVAGLRWIL  
VVLFFLNSGKRIGAHREGGAAEAPRDDSLLLLRGSPGEVQASAAWEATATAPTQTQRDCLT  
IALVATIAFFSGYLVTSCYQLAPQLLPGTPEQRAANAARQASLLTVAFP  
>comp15709\_c0\_seq3; 334 642 2411 LEN=4282; minus strand; translated  
MEALGCANPNDGDDSKGAVLGPADHRDREPSTDHANENTTQSASSSSSSASPGETSRDASI  
NSFDIDIDNDIDDRPPFPPTMAALVAAPIVFTERIAEACTSSILLEQLLFFLAGLGSSIG  
YISLSSLVYFKLLFGPDSFVYLNCAVFFPLLPISLAQAAWDSVFDIYQSRVTFLVRAV  
VGFVAGTLMGMAAFGRQHPTDSIEVETEDEPPPPLHLHGLSWVIASALLQGIGGAVLFGQ  
LNQLASIVGNLHTAADVYDTLPKKFKAASVAGVQASALVVLAVSVSSGFGTMNGERFAPF  
CQSIVYAEVFCFGAGLWLLVARPRVRVSMQRRDASMTNLAAAEVSDPSPSSSSSLSSPSEL  
EDFNERLSLLPGNPNRDGLLLRQLLPQEQRVGDSTVAELSIAQLFYCSRSPCYGMALVL  
VPSFLVGSWFTHVQTDWMELAQILFYTRIGSDLAGRFATILVPPSSMRCVLWVAGLRWIL  
VVLFFLNSGKRIGAHREGGAAEAPRDDSLLLLRGSPGEVQASAAWEATATAPTQTQRDCLT  
IALVATIAFFSGYLVTSCYQLAPQLLPGTPEQRAANAARQASLLTVAFP  
>comp15709\_c0\_seq4; 501 397 1573 LEN=1573; minus strand; translated  
MEALGCANPNDGDDSKGAVLGPADHRDREPSTDHANENTTQSASSSSSSASPGETSRDASI  
NSFDIDIDNDIDDRPPFPPTMAALVAAPIVFTERIAEACTSSILLEQLLFFLAGLGSSIG  
YISLSSLVYFKLLFGPDSFVYLNCAVFFPLLPISLAQAAWDSVFDIYQSRVTFLVRAV  
VGFVAGTLMGMAAFGRQHPTDSIEVETEDEPPPPLHLHGLSWVIASALLQGIGGAVLFGQ  
LNQLASIVGNLHTAADVYDTLPKKFKAASVAGVQASALVVLAVSVSSGFGTMNGERFAPF  
CQSIVYAEVFCFGAGLWLLVARPRVRVSMQRRDASMTNLAAAEVSDPSPSSSSSLSSPSEL  
EDFNERLSLLPGNPNRDGLLLRQLLVVFFVPIPX  
>comp15709\_c0\_seq5; 501 642 1818 LEN=1818; minus strand; translated  
MEALGCANPNDGDDSKGAVLGPADHRDREPSTDHANENTTQSASSSSSSASPGETSRDASI  
NSFDIDIDNDIDDRPPFPPTMAALVAAPIVFTERIAEACTSSILLEQLLFFLAGLGSSIG  
YISLSSLVYFKLLFGPDSFVYLNCAVFFPLLPISLAQAAWDSVFDIYQSRVTFLVRAV  
VGFVAGTLMGMAAFGRQHPTDSIEVETEDEPPPPLHLHGLSWVIASALLQGIGGAVLFGQ  
LNQLASIVGNLHTAADVYDTLPKKFKAASVAGVQASALVVLAVSVSSGFGTMNGERFAPF  
CQSIVYAEVFCFGAGLWLLVARPRVRVSMQRRDASMTNLAAAEVSDPSPSSSSSLSSPSEL  
EDFNERLSLLPGNPNRDGLLLRQLLVVFFVPIPX  
>comp15709\_c0\_seq6; 501 251 1427 LEN=1427; minus strand; translated  
MEALGCANPNDGDDSKGAVLGPADHRDREPSTDHANENTTQSASSSSSSASPGETSRDASI  
NSFDIDIDNDIDDRPPFPPTMAALVAAPIVFTERIAEACTSSILLEQLLFFLAGLGSSIG  
YISLSSLVYFKLLFGPDSFVYLNCAVFFPLLPISLAQAAWDSVFDIYQSRVTFLVRAV  
VGFVAGTLMGMAAFGRQHPTDSIEVETEDEPPPPLHLHGLSWVIASALLQGIGGAVLFGQ  
LNQLASIVGNLHTAADVYDTLPKKFKAASVAGVQASALVVLAVSVSSGFGTMNGERFAPF  
CQSIVYAEVFCFGAGLWLLVARPRVRVSMQRRDASMTNLAAAEVSDPSPSSSSSLSSPSEL  
EDFNERLSLLPGNPNRDGLLLRQLLVVFFVPIPX  
>comp15710\_c0\_seq1; 452 758 4290 LEN=4501; translated  
MAFSHNWEKSYEILSVPENTEDFTNDSSDENKGTKHRFFEESSTRWYLQFLGTRFGFLED  
TTAYQFLQFFLTLHLGFGILCLVEMAVRAAEARRIVVEHQIAIALEDRIAIAVTKAYRRR  
KLLQGHAPAGLSFYISWKAEEAIPSTLTTRTIKRNPIPSLSIISDTASSDSTATENNTV  
HRCHQVIEDNNENETDKRETTNMEGKDDEVINERNILLFLRATFRLWIPVGVTCFFWFAL  
LSLPEYYRVVKALLFDIEDCDASRLNIDGNYCFDNENSTWVGYSLCYDVQSHLCYGLLS  
TSQSPLATAQLHYFEILGDDSSWATLWITTAIFRWTEALSSMQDYLMKVVWKKYLLAGGK  
GLKNRPKLVLTRARRVLFNFKLIRFAGPLTRMTLKLNDQLLTGYFLFRKDRSSKSYRAEK  
LRHPSILLRDLKRIESFHKIETAIASWPSQCSMLLESILTQEVKAPFCRVSSAAAKIYAQD

FLEQSRQRGRQITRKIHWLQGGIQKGLTDFSSLEVYDSIVQLSKDISLGHLDFHDES  
YGEHKSNGQEEDFSGNNGGSRAAKDSTNRRHHSSKISRWDYDLHLGSLSSRDCLISPR  
RFSVWVWVITVTNCLVSLFVLPKFWVDLVLSSLLPXVLIKSKSTLNFNFFSIMHVVSILLHR  
IALHRELWYPPVVGIDETLHFVVPDQNLPPSITQVISRFLVDCSNIPEETKNLFRFVTDR  
IDEWHAGLAHAIPVLPFKDKLVILCVPTSQSSRLFLLAGSAMEVVIDVVSFLDIFWFF  
TGDLDGETGLVVPKAFVGRGRCILPGTVVQILDHPTLPEVLPSSLGRAASTTMSIGWSR  
VIRWLCALVPALKILVGRPLSAYFFRHFEEENTDADSSSANGGVGGAVSGDLLMKYAESFG  
YLP  
RRKSSSLVVGSTASTAAQLRPQPAIDTHRGVWNHGSDESDDGSTEAVADNGANHHHDS  
AFTLTAYDQERESFSSSLATIQQGIRTPPASVRSVLRSPVTPVNGVRAGGQLPRLQSPK  
SPPLSPGAAVRFVSVAGEPCLHRRPSFGDGDGGGGSGSDHGGCDGGSDDGGSMDYDI  
GLSLSSHALGDMHDHPYDEXPLSCSNTELLSRLHQRHRRILVVFQNTTWIAVDRGCGVP  
PQCDARVRSKNNRDRISPLGLVILPLTADGMHLKADC

>comp15710\_c0\_seq2; 646 758 3892 LEN=4330; translated  
MAFSHNWEKSYEILSVPENTEDFTNDSSDENKGTKHRFFESSTRWYLQFLGTRFGFLED  
TTAYQFLQFFLTLHLGFGILCLVEMAVRAAEARRIVVEHQIAALEDRIAEAVTKAYRRR  
KLLQGHAPAGLSFYISWKAEEAIPSTLTTRTIKRNPIPSLSIISDTASSDSTATENNTV  
HRCHQVIEDNNENETDKRETTNMEGKDDEVINERNILLFLRATFRLWIPVGVTCFFWFAL  
LSLPEYYRVVKALLFDIEDCDASRLNIDGNYCFDNENSTWVGYSLCYDVQSHLCYGLLS  
TSQSPLATAQLHYFEILGDDSSWATLWITTAIFRWTEALSSMQDYLMKVWVKYLLAGGK  
GLKNRPKLVLTRARRVLFIKLIRFAGPLTRMTLKLNDQLLTGYFLFRKDRSSKSYRAEK  
LRHPSILLRDLKRIESFHKIETAIASWPSQCSMLLESLTQEVKAPFCRVSSAAAKIYAQD  
FLEQSRQRGRQITRKIHWLQGGIQKGLTDFSSLEVYDSIVQLSKDISLGHLDFHDES  
YGEHKSNGQEEDFSGNNGGSRAAKDSTNRRHHSSKISRWDYDLHLGSLSSRDCLISPR  
RFSVWVWVITVTNCLLLELTRLISWYLTKTFLHSITQVISRFLVDCSNIPEETKNLFRFV  
TDRIDEWHAGLAHAIPVLPFKDKLVILCVPTSQSSRLFLLAGSAMEVVIDVVSFLDIFW  
WFFTTGDLDGETGLVVPKAFVGRGRCILPGTVVQILDHPTLPEVLPSSLGRAASTTMSIG  
WSRVIRWLCALVPALKILVGRPLSAYFFRHFEEENTDADSSSANGGVGGAVSGDLLMKY  
AESFGYLP  
RRKSSSLVVGSTASTAAQLRPQPAIDTHRGVWNHGSDESDDGSTEAVADNGANHH  
HDSAF<sup>2</sup>TLTAYDQERESFSSSLATIQQGIRTPPASVRSVLRSPVTPVNGVRAGGQLPRLQ  
SPKSPPLSPGAAVRFVSVAGEPCLHRRPSFGDGDGGGGSGSDHGGCDGGSDDGGSMDY  
DIGLSLSSHALGDMHDHPYDEDEH

>comp15711\_c0\_seq1; 2102 1 7476 LEN=7549; translated  
STMVSVTNDGNQQINHQLDADTITVGRLEVEASRTWPGINKPGGVARVVEVHFVDFASDGD  
DDEDGIDNDPKDSLEGKRRNPTHVNVRYILGSSREKRVPLEYVQLAPQYETRSSKTSPE  
NGSENYVASSLRDRSMLLGRCCRRCGLRSDCGSCDWAMEEEAAVSTVASSNANTPKNSQK  
SSVKKRKKDGKRSNAVDELLENKSDDESSESSSGGNNDMARWGHLIRQTRRRRRHRQS  
SENKRRSSSSSRDDDPENSITENKKGKSNLKFQNYGISTSQKKWQRYPVLLDFCSSSSS  
DSSDSEVAESNNSKRAIGFARSKRPRESRRNFANGKSVLESPLTTSANTSDHPAKNAKSL  
SQTTSAPLVSTSKYSSLRVRRKPNIDPPIPSPELHHAETSFLADTAAVEENLRRSFS  
PSTQISISYEQQLELEARARFQIEQQQQQTRTSSTAINNGNEDVGFIOPEGQEAENLPE  
DVVDLSRSIPYKDLGTFVDEMVKVEDEILPDVKLTLASLHRRRLRIQKQNTKINNEVG  
CLPGSTDGTRASAERLLQRYHQWDEVRLSVIHNGTDQCRATLRRMLDDKLYRKHRLHT  
VRERKRCRGAGVMDSRNLRMDAMDDTVEAFIRKLKDAVILCESECANAQNDMMMSIGSNVD  
GNHDDDESSIGGAIYSSDDTSSSSQDDDLDLLPIAAMAHDNLSSLQQIVPFTPHEHASRA  
KQMGSNKRKVESKELKSSTSKSSKNHSDRTKKRRTKTRPNKIARIDPTTKRKPQSSFTSV  
SQERANGQSESNVSTNLENSINVLENSSEEDDHVTSVQNEIHAGKSSSSRRRRNRVRRG  
QLHSSSGNASLVPVPRDPKRSISERMQAFLDANIGDGPVDSEKLNKTQVQTRQTNQNGRM  
ERQFPIFEPGKGRKDERTNEAVMSVEERVNELEEIREEERRKIMPQTHEPQFTSCGTCAL  
FTRLLVAPCVSEESSQTSFVEDHSSLDESWEVVLADMEAAALSNNPESMNSFLRKAFSILI  
NEGSRTIQEMISSNDRSLSHIRTLCLCIRSLQYVRDDELPIIFTKEKQDDFLNFVVLQM  
VDALYSLNLPASAWALDIENMESIQKLIPLRNALGLRIPLEAVSRCIINTFGCQNRKS  
RYKNHTFVSSLDPKFWFEFLQSGRKFENPQVTRFKKLGRHWPRIETDALWRILAFISSAR  
SSSTDESLEFRFQIISKLFSSGVFAVENIEAEDRLPPSEEQILACQREVGYSILIRKGVL  
NCMPKSDSMLVKLVQYSLQLQSDSYRGNDLTRASCIPGPSDDVMTKKVSPMFWGITHPLY  
FDSSVGDHSIVSVSGFPFDQCHHKPGARYRKLKLYPSSDLLTGCLSLVNVNWITHVSPKKVR  
QNRILTNSLQALQNYLLKEANQLLQQAQKVADFEAFSVKPSVEIGIASERVAIFKES  
ASYLQVISLSSRKRTPELSRFSWNNMSDDQMKRQSNILARRENSDKYAGDAYRLFAT  
VKIMATLLLAQVNI<sup>2</sup>SPWHL<sup>2</sup>SLGKTVSR<sup>2</sup>LFTDNSKAEIGHTAF<sup>2</sup>AI<sup>2</sup>SCIFACLDCLCDVEVG  
PHLFSQVYEMIILVFANLTATIKRGEIFIHRDHVYASC<sup>2</sup>FYPVLIKVRMHLTSSKASQES  
FHLGLCLSLVRSIHSFSIAQRNAEALSATVRESASNQNMTPSNDNIDDMWGE<sup>2</sup>LNDSD<sup>2</sup>F

ADLDTLCI ISENEHQKRKQNLWYFLSDALDQSKPSKRYAILGKTSTTISDSDNHLSSIG  
KFLVAQKINEICGFATAIASSELEDENSSSEITNLVSKWIEPSYENDEYQYSSKIARKL  
TSELCLLAEKFPCKSFVFDRAADNMILNFKELVNSSRLEKLPSSNLERIGEISGKAGTK  
QALHMLDLFNDISFQETDLGLQGAILRKMQRNRKHALEIWNFCSKLGSVFLKKNLPPGPF  
STTQVGRILVNLSDLTQKFDSDRMI SLENEVFKIFRLLRNRFVSFTATNDASFVFERI  
SSCSLLLLANHVIGIVQSLKYNDQTSDDREYKARLSELLSSFVELFVSLSAWI IREGAK  
NRSTTWSFLQTYLRDRFLSPILRNQPIDSTIALQEVAVAAKFVLDPCRSEGVSLPTVNCV  
SLVGC SKYLDDHFLTSILRRSKQLLIATALNPQNLGLQNAILEAVMGSNDNIEEATYLIV  
GTSFPLGKSQFAPSRLVWPYKSSIEKQIDDYLVNVEENFALS LNRNDRWRSMAIMNK SFL  
KNHLLPRLNSSSMGIGKRRILLLFNYMLEYDKVGFDTYETSANILGDESQTTVDLDFVR  
DMVKAURLNIHECLMQYSVDNNLARIAFSCSTHLASKILFIEGREQNLI SWSREKVS GTK  
GKTMLDLSNSMILGSYVWVFFKWLEAIGDLIVNQSCNDSL VGIDGLTMLRQDWQRTQCCR  
HGMDEEILDLEESKSLQVWDRMLLDFEDLASPSSRKESSSVINVYAKPAISHPYLVESK  
GEPGLSWEEMPS TLVRRSLKELMAVILSTL

>comp15711\_c0\_seq2; 1098 1 4016 LEN=4089; translated  
XTVYIFLHTACFLTEMKVTRFKKLGRHWPRIETDALWRILAFISSARSSSTDES LFRFQI  
ISKLFSSGVFAVENIEAEDRLPPSEEQILACQREVGYLSILIRKGV LNCMPKSDSMLVKL  
VQYSLQLQSDSYRGNDLTRASCIPGPSDDVMTKKVSPMFWGITHPLYFDSSVGDHSIVSV  
SGFPFDQCHHKPGARYRKL LYPSSDLLTGCLSLVNVNWITHVSPKKVRQNR LTNL KALQN  
YLLKEANQLLQPAQKV VADFEDAFSVKPSVEIGIASERVAIFKKESASYLQVISLLSSR  
KRITPELSRSFWNNMSDDQMKRQSNILARRENSDKYAGDAYRLFATVKIMATLLLAQVN  
ISPWHLSLGTKVSR LFTDNSKAEIGHTAFAISCIFACLDCLCDVEVGP HLF S QVYEMIIL  
VFANLTATIKRGEIFIHRDHVYASC FYPVLIKVRMHLTSSKASQESFHLGLCLSLVRSI  
HSFSIAQRNAAEALSATVRESASNQNMTPSNDNIDDMWGE LNDSDFADLDTLCI ISENE  
NQKRKQNLWYFLSDALDQSKPSKRYAILGKTSTTISDSDNHLSSIGKFLVAQKINEICG  
CFATAIASSELEDENSSSEITNLVSKWIEPSYENDEYQYSSKIARKLTSELCLLAEKFP  
CKSFVFDRAADNMILNFKELVNSSRLEKLPSSNLERIGEISGKAGTKQALHMLDLFNDIS  
FQETDLGLQGAILRKMQRNRKHALEIWNFCSKLGSVFLKKNLPPGPFSTTQVGRILVNL  
SDLTQKFDSDRMI SLENEVFKIFRLLRNRFVSFTATNDASFVFERI SSCSLLLLANHVI  
GIVQSLKYNDQTSDDREYKARLSELLSSFVELFVSLSAWI IREGAKNRSTTWSFLQTYL  
RDRFLSPILRNQPIDSTIALQEVAVAAKFVLDPCRSEGVSLPTVNCVSLVGC SKYLDDH  
LTSILRRSKQLLIATALNPQNLGLQNAILEAVMGSNDNIEEATYLIVGTSFPLGKSQFAP  
SRLVWPYKSSIEKQIDDYLVNVEENFALS LNRNDRWRSMAIMNK SFLKNHLLPRLNSSSM  
GIGKRRILLLFNYMLEYDKVGFDTYETSANILGDESQTTVDLDFVRDMVKAURLNIHEC  
LMQYSVDNNLARIAFSCSTHLASKILFIEGREQNLI SWSREKVS GTKGKTMLDLSNSMIL  
GSYVWVFFKWLEAIGDLIVNQSCNDSL VGIDGLTMLRQDWQRTQCCRHGMDEEILDLEE  
SKSLQVWDRMLLDFEDLASPSSRKESSSVINVYAKPAISHPYLVESK GEPGLSWEEMPS  
TLVRRSLKELMAVILSTL

>comp15711\_c0\_seq3; 2087 1 7451 LEN=7524; translated  
STMVSVTNDGNQQINHQLDDADTITVGR LVEVASRTWPGINKPGGVARVVEVHF D ASDGD  
DDEDGIDNDPKDSLEGRNRNPTHVNVRYILGSSREKRVPLEYVQLAPQYETR SSKTSPSE  
NGSENYVASSLRDRSMLLGRCCRCSLRSDCGSCDWAMEEEAAVSTVASSNANTPKNSQK  
SSVKRKKDGKRSNAVDELLSNDKSDDESSESSSGGNDDMARWGHLIRQTRRRRRHRQS  
SENKRSSSSSRDDDPENSITENKKGKSNLKFQNYGISTSQKKWQRYPVLLDFCSSSSS  
DSSDSEVAESNNSKRAIGFARSKRPRESRNFANGKSVLES LPTTSANTSDHPAKNAKSL  
SQTTSAPLVSTSKYSSLRVRRKPNIDPPI P SSPEDLHHAETSFLADTA AVEENLRRSFS  
PSTQSI SYEQQLLELEARARFQIEQQQQQTRTSSTAINNGNEDVGF IQPEGQEA IENLPE  
DVVDLSRSIPYKDLGTF FDEMVNKVEDEILPDVKLTLASLHRR LRI IQKQNQTKINNEVG  
CLPGSTDGTRASAERLLQRYHQLWDEVRLSVIHNGTDQCRATLRRLMDDKLYRKHRLHT  
VREKRRCRGAGVMSRRLMDAMDDTVEAFIRKLDKAVILCESECANAQNMMMSIGSNVD  
GNHDDDESSIGGAIYYSDDTSSSSQDDDLDLLPIAAMAHDNLSLQQIVPFTPHEHASRA  
KQMGSNKRKVESKELKSSTSKSSKNHSDRTTKRRTKITRPNKIARIDPTTKRKPQSSFTSV  
SQERANGQSE SNGVSTNLENSINVLENSSEEDDHVTSVQNEIHAGKSSSSRRNRVRRG  
QLHSSSGNASLPVPRDPKRSISERMQAFLDANIGDGPVDSEKLNKTVQTGRQTNQNGRM  
ERQFP IFEPGKGRKDERTNEAVMSVEERVNELEEIREEERRKIMPQTHEPQFTSCGTCAL  
FTRLLVAPCVSEESSQTSFVEDHSSLDESWEVVLADMEAAALSNNPE SMNSFLRKAFSILI  
NEGSRTIQEMISSNDRSLSHIRTLCLCIRSLQYVRDDELPIIFTKEKQDDFLNFVVLQW  
VDALYSLNLP SAWALDIENMESIQKLIPLRNALGLRIP LLEAVSXVHYQYFWLSELEKK  
SVQKSYLCFISGSKILVRI STIGAKIREPPRHWPRIETDALWRILAFISSARSSSTDES L  
FRFQIISKLFSSGVFAVENIEAEDRLPPSEEQILACQREVGYLSILIRKGV LNCMPKSDS

MLVKLVQYSLQLQSDSYRGNLDRASCIPGPSDDVMTKKVSPMFWGITHPLYFDSSVGDH  
SIVSVSGFPFDQCHHKPGARYRKLKLYPSSDLLTGCLSLVNVNWITHVSPKKVRQNRLLTNSL  
KALQNYLLKEANQLLQPPAQKVADFEAFSVKPSVEIGIASERVAIFKKEASASYLQVIS  
LLSSRKRITPELSRSFWNMSDDQMKRKQSNILARRENSDKYAGDAYRLFATVKIMATLL  
LAQVNISPWHLSLGTKVSRFLFTDNSKAEIGHTAFAI SCIFACLDCLCDVEVGPLHFSQVY  
EMIILVFANLTATIKRGEIF IHRDHVYASCFYPVLIKVRMHLTSSKASQESFHLGLCLS  
LVRSIHSFSIAQRNAEALSATVRESASNQNMTPSNNDIDMWGELNDSDFADLDLTCI  
ISENENQKRKQNLWYFLSDALDQSKPSKRYAILGKTSTTISDSNDHLSSIGKFLVAQKI  
NEICGCFATAIASSELEDENSSEITNLVSKWIEPSYENDEYQYSSKIARKLTSELCLLA  
EKFPRCKSFVFDRADNMILNFKELVNSSRLEKLPSSNLERIGEISGKAGTKQALHMLDL  
FNDISFQETDLGLQGAILRKMQRNRKHALEIWNFC SKLGSVFLKNLPPGPFSTTQVGR I  
LVNLDSDLTQKFDSDRMISLENEVFKIFRLLRNRFVSFTATNDASVVFERISSCSLLLL  
ANHVIGIVQSLKYNDQTSSDREYKARLSELLSSFVELFVLSAWI IREGAKNRSTTWSF  
LQTYLRDRFLFSPILRNQPIDSTIALQEVAVAKFVLD CPRSEGVSLPTVNCVSLVGC SKY  
LDDHFLTSILRRSKQLLIATALNPQNLGLQNAILEAVMGSNDNIEEATYLIVGTSFPLGK  
SQFAPSRVWPYKSSIEKQIDYLVNVEENFALS LNRNDRWRSM AIMNKSFLKNHLLPRL  
NSSSMGIGKKRRI LLLFNMLEYDKVGFDTYETSANILGDESQTTVDLDFVRDMVKAVRL  
NIHECLMQYSVDNNLARIAFSCSTHLASKILFIEGREQNLI SWSREKVS GTKGKTMLDLS  
NSMILGSYVWVFFKWLEAIGDLIVNQCNSDLV GIDGLTMLRKDWQRTQCCRHGGMDEEI  
LDLEESKSLQVWDRMLLDFEDLASPSSRKES SVIN VYAKPAISHPYLVESKGEPLSWE  
EWM PSTLVRRSLKELMAVILSTL

>comp15712\_c0\_seq1; 252 1 2324 LEN=2324; translated  
SKSSVGGDSETNLSVSKSKNERHVEQLKKIMDTYNAMVCQPPLEDSNDFDSAIHTTEPEPV  
STTKTGVLMSIRQKVQDLESSGGLGAALSQYTVNEPGSVIPERHSTLLTRRGSGGLYPP  
GSNRTSIFNNERRRAASPLLTMRSSQQQERPGPSKVFP TLI SAQIDSSSILHPGQQRSLGI  
HRPFP SRIVSGRERSGSFSGTTTNTSHPGTSAGNRVLFDPARQTIVPVSRSPP TSGGRVT  
SSGLFNSAPRGP I KLYSQSPRLSTPQERFAPSKI IARSPPAQENYSGERVLSQTPPKTS  
DMPKERPGSPILRNVSKDKPGSPSASYRVRDRSSSSKMI GRGDSPHGVSVK TSLPSRRKKA  
FNPFRQSD EDEVLAKRSHNRNRWSHVYPEGEVEFKRHAGP IWN SLTSPAILPLSVDYFPT  
PQELKDENAFQFSFYQVTLGGIENNYEKHADLLKEMVRQRVTQDYQIVTDTAIGESKKR  
ANESLREGRNAGKLQGRPTSRVDTSPRFLSFNEQQKIDG TKHHYLSMGHKIQVMNYDSSS  
DTIEIVLYNRKSAQNDRENVNTYKFLLF SKVTQQYTPSIQTFFKYSEPYNWNRVNLCIG  
EADRTMDVGMFRFRVMFGLIPEVFRTEEAEEYV LNFQKLLSYLERLRDKDGSPSKLNVE  
IITTKSKKEKAKDTFSNTRKDMTDMIRFPVQLLRGKKDPFEWIEVAIGATFDTTTSYRI  
IFNWLVASSTKVETQIQLLQRRFKNFGLKFISFPQTTVSWDLFIHAVSAWKSFSST

>comp15712\_c0\_seq2; 452 379 3693 LEN=3693; translated  
MLTTGILSLNIHDSLTFEGTELCLNPDLFAVSEHGIGSALRGIGASSIGSGNSTGTSNHS  
SNGISVGDII EIRVWDPLPKEAGMKSPEVSSMRKRYQQAPTLLTPTGNLQGVSLGKDA  
GGMPADPGGAFPSLRARTTVYPNNPMLQQSGSMDPLVNSDGQRSMNSSPKSSSHQLSRRL  
SFDPTLNDGETSPSTPTPSSANN TSGAVNQTELLFPQRLPPVFPNRNLGTADLHP ISTS  
KPPKPQTTTHRRASSTAGALQTPQRSPKQQHQKQNNFLGAATTGGHRRDI SDMTADT  
TYQLDNI INDVMNVSR TSDPDTTVDEGAI AESYHNDMLSKITSGHRLRLSFVLKVMKTL  
TSFKGNSRTQISVLRRVADLYNLSNYDLVTVHKIEPQDEEEVLKAVSAD FVVVTIKDQFI  
SRGDMLLFQTKLIGSWIYEGQRLTEPTRGIKAHAREIRHG NFSAKSGIVTEKTNITFRSR  
SARIVWLVLQLSSEMWDYSSPYDRQYEQESVCEIYFDQWIRFLYKLFKKWKQLEVRSLYL V  
EWALGXMYKTKTKPHQSFNTPTLIQHDQNFXLTLFCFEKVSHSLTVIFFSRTFLSKDLKS  
NLDCQDVYGRRFEDHYKPV IENETCIDWTLIVRIKEEFTKYPLEVGVNLLNRRTPSCASQ  
GNLLEAINVVLNLMQYHYLDRDLHRTGQSIVIVSPGCGVFEVDKGLAGITYQRMLDNGIG  
SDMLSLGLPPLHIAPFFLYNVKFNQFLLIRADYXENYDSNAYTFVKNEYRTAETHGINA  
SETYYEVPHWMHLSFVIYDRPEEKRVYLSGLEEKKAPVQAGHWL DAYDIGAKGFLFPQNF  
DQANIESPVLKSKTAFTSSFAVGNMAATPGKAKLVQEQQARQLISGRKFRDILEACRP  
RVVGAVMPSPLKSLLELRGIATGNEAGSKKLSSEKKDSRLREWGTVDFNDHVLHSRLKA  
KMKGKSPIAKRTLRSSEILKSDRSYNSDDGSASSSLGSI SVSSAYGTSFDRVFW EYYETPE  
MPVKAFQMQRASIDYDELGKSFVIDGGPETNDDSTTVSDSVSKSSVGGDSETNLSVSKS  
NERHVEQLKKIMDTYNAMVCQPPLEDX

>comp15712\_c0\_seq3; 398 1 2730 LEN=2775; translated  
SKSSVGGDSETNLSVSKSKNERHVEQLKKIMDTYNAMVCQPPLEDSNDFDSAIHTTEPEPV  
STTKTGVLMSIRQKVQDLESSGGLGAALSQYTVNEPGSVIPERHSTLLTRRGSGGLYPP  
GSNRTSIFNNERRRAASPLLTMRSSQQQERPGPSKVFP TLI SAQIDSSSILHPGQQRSLGI  
HRPFP SRIVSGRERSGSFSGTTTNTSHPGTSAGNRVLFDPARQTIVPVSRSPP TSGGRVT

SSGLFNSAPRGPIKLYSQSPRLSTPQERFAPSKI IARSPPAQENYSGERVLSQTPPKTS  
DMPKERPGSPILRNVSCKDKPGSPSASYRVRDRSSSSKMIGRGDSPHGSVKTSLPSRRKKA  
FNPFRQSEDEVLAKRSHNRRRWSHVYPEGEVEFKRHAGPIWNSLTSPAILPLSVDYFPT  
PQELKDENAFQFSFYQVTLGGIENNYEKHADLLKEMVRQRTQDYQIVTDTAIGESKKR  
ANESLREGRNAGKLQGRPTS RVDTSPRFLSFNEQQKIDGTKHHYLSMGHKIQVMNYDSSS  
DTIEIVLYNRKSAQNDRNVNTYKFLLF SKVTQQYTPSIQTFFKKYSEPNWNRVDNLICG  
EADRTMDVGMRFRRVMFGLIPEVFRTEEAEEYVLNFQKLLSYLERLRDKDGSPSKLNVE  
IITTKSKKEKAKDTFSNTRKDMTDMIRFPVQLLRGKKDPFEWIEVAIGATFDTTTSYRI  
IFNWLVASSTKVETQIQLLQRRFKNFGLKFI SFPQTTVSWDLFIHALAAPTFFITVRDKKK  
TQAIEKSLKLDVFDGVTITSPQFLKCIDNSDDFRFPRFHRSGKLSIPSPQFVHRSGA  
IFIRKLTDRGKVLVGIENYRHASVENRFREIAKSVIEKVSDMIKSLPSGNDNQEANG  
IKESGGIKN

>comp15712\_c0\_seq4; 513 379 3557 LEN=3557; translated  
MLTTGILSLNIHDSLTFEGTELCLNPD LFAVSEHGIGSALRGIGASSIGSGNSTGTSNHS  
SNGISVGDII EIRVWDPLPEKAGMKSPEVSMSMRKRYQQAPTLLTPTGNLQGGVSLGKDA  
GGMPADPGGAFPSLRARTTVYPNNPMLQQSGSMDPLVNSDGQRSMNSSPKSSSHQLSRRL  
SFDPTLNDGETSPSTPTPSSANNTTSGAVNQTELLFPQRLPPVFPNRNLGTADLHP ISTS  
KPPKPQTTTHRRASSTAGALQTPQRSKQHQKQNNFLGAATTGGHRRDISDMTADT  
TYQLDNIINDVMNVSRTDSDPTTVDEGAI AESYHNDMLSKITSGHRLRLSFVLKVMKTL  
TSFKGNSRTQISVLRVADLYNLSNYDLVTVHKIEPQDEEEVLKAVSADVFVVVTIKDQFI  
SRGDMLLFQTKLIGSWIYEGQRLTEPTRGIKAHAREIRHGNFSAKSGIVTEKTNITFRSR  
SARIVWLVLQSSSEMWDYSSPYDRQYEQESVCEIYFDQWIRFLYKLFKKWKQLEVSHSLTV  
IFFARTFLSKGLKSNLDCQDVYGRRFEDHYKPIENETCIDWTS LIVRIKEEFTKYPLEV  
GWNLNNRTPSCASQGNLLEA INVVLNLMQYHYLDRDLHRTGQSIVIVSPGCGVFEVDKGL  
AGITYQRMLDNGIGSDMLSGLPLPLHIAPFFLYNVKFNQFLLIRADYXENYDSNAYTFV  
KNEYRTAETHGINASETYEVPWHMHSFVIYDRPEEKRVYLSGLEEKAPVQAGHWLDA  
YDIGAKGFLFPQNFQANIESPVLKSKTAFTSSFSAVGNMAATPGKAKLVQEQGARQLI  
SGRKFRDILEACRPRVVGAVMPSPLKSLLELRGIATGNEAGKSKKLSSEKKSRLREWGT  
VDFNDHVLHSRLKAKMGKSPIAKRTLRSSEILKSDRSYNSDDGSASSLSISVSSAYGT  
SFDRVFWEYETPEMPVKAQMQRSASIDYDELGKSFVIDGGPETNDDSTTVSDSVSKSS  
VGGDSETNLSVKSKNERHVEQLKKIMDTYNAMVCQPPLLEDX

>comp15712\_c0\_seq5; 311 1 2802 LEN=2847; translated  
SKSSVGGDSETNLSVKSKNERHVEQLKKIMDTYNAMVCQPPLEDSNDFDSAIHTTEPEPV  
STTKTGVLMOQSIRQKVQDLESSGGLGAALSQYTVNEPGSVIPERHSTLLTRRGSGGLYPP  
GSNRTSIFNNERRRAASPLLTMR SQQERPGPSKVFP TLISAQIDSSSILHPGQQRSLGI  
HRPFP SRIVSGRERSGSFSGTTTNTSHPGTSAGNRVLFDPARQTI VPVSRSPPTS GGRVT  
SSGLFNSAPRGPIKLYSQSPRLSTPQERFAPSKI IARSPPAQENYSGERVLSQTPPKTS  
DMPKERPGSPILRNVSCKDKPGSPSASYRVRDRSSSSKMIGRGDSPHGSVKTSLPSRRKKA  
FNPFRQSEDEVLAKRSHNRRRWSHVYPEGEVEFKRHAGPIWNSLTSPAILPLSVDYFPT  
PQELKDENAFQFSFYQVTLGGIENNYEKHADLLKEMVRQRTQDYQIVTDTAIGESKKR  
ANESSEKVS ENESAKKIE XILFLTLFLVSI IGRNAGKLQGRPTS RVDTSPRFLSFNEQQK  
IDGTKHHYLSMGHKIQVMNYDSSSDTIEIVLYNRKSAQNDRNVNTYKFLLF SKVTQQYT  
PSIQTFFKKYSEPNWNRVDNLICGEADRTMDVGMRFRRVMFGLIPEVFRTEEAEEYVLN  
FQKLLSYLERLRDKDGSPSKLNVEI IITTKSKKEKAKDTFSNTRKDMTDMIRFPVQLLRG  
KKDPFEWIEVAIGATFDTTTSYRIIFNWLVASSTKVETQIQLLQRRFKNFGLKFI SFPQ  
TVSWDLFIHALAAPTFFITVRDKKKTQAIEKSLKLDVFDGVTITSPQFLKCIDNSDDFR  
FPRFHRSGKLSIPSPQFVHRSGAIFIRKLTDRGKVLVGIENYRHASVENRFREIAKS  
VIEKVSDMIKSLPSGNDNQEANGIKESGGIKN

>comp15712\_c0\_seq6; 132 1 1470 LEN=2396; translated  
SKSSVGGDSETNLSVKSKNERHVEQLKKIMDTYNAMVCQPPLEDSNDFDSAIHTTEPEPV  
STTKTGVLMOQSIRQKVQDLESSGGLGAALSQYTVNEPGSVIPERHSTLLTRRGSGGLYPP  
GSNRTSIFNNERRRAASPLLTMR SQQERPGPSKVFP TLISAQIDSSSILHPGQQRSLGI  
HRPFP SRIVSGRERSGSFSGTTTNTSHPGTSAGNRVLFDPARQTI VPVSRSPPTS GGRVT  
SSGLFNSAPRGPIKLYSQSPRLSTPQERFAPSKI IARSPPAQENYSGERVLSQTPPKTS  
DMPKERPGSPILRNVSCKDKPGSPSASYRVRDRSSSSKMIGRGDSPHGSVKTSLPSRRKKA  
FNPFRQSEDEVLAKRSHNRRRWSHVYPEGEVEFKRHAGPIWNSLTSPAILPLSVDYFPT  
PQELKDENAFQFSFYQVTLGGIENNYEKHADLLKEMVRQRTQDYQIVTDTAIGESKKR  
ANESLREGQ

>comp15712\_c0\_seq7; 524 379 3614 LEN=3614; translated  
MLTTGILSLNIHDSLTFEGTELCLNPD LFAVSEHGIGSALRGIGASSIGSGNSTGTSNHS

SNGISVGDIIIEIRVWDPLPKEAGMKSPESVSSMRKRYQQAPTLLTPTGNLQGQVSLGKDA  
GGMPADPGGAFPSLRARTTVYPNNPMLQQSGSMDPLVNSDGQRSMNSSPKSSSHQLSRRL  
SFDPTLNDGETSPSTPTPSSANNTTSGAVNQTELLFPQRLPPVFPNRNLGTADLHP ISTS  
KPPKPQTTTHRRASSTAGALQTPQRSQKQHQKQNNFLGAATTGGHRRDISDMTADT  
TYQLDNIINDVMNVSRDSDPTTVDEGAI AESYHNDMLSKITSGHRLRLSFVLKVMKTL  
TSFKGNSRTQISVLRVADLYNLSNYDLVTVHKIEPQDEEEVLKAVSADFVVVTIKDQFI  
SRGDMLLFQTKLIGSWIYEGQRLTEPTRGIKAHAREIRHGNFSAKSGIVTEKTNITFRSR  
SARIVWLVLQSSSEMWDYSSPYDRQYEQESVCEIYFDQWIRFLYKLFKKWKQLEVRSLYL  
EWALGXMYKTKTKPHQSFNTPTLIQHDQNFXLTLFCFEKVSLSLTVIFFSRTFSLKDLKS  
NLDCQDVYGRRFEDHYKPIENETCIDWTSILIVRIKEEFTKYPLEVGNLNNRTPSCASQ  
GNLLEAINVVLNLMQYHYLDRDLHRTGQSIVIVSPGCGVFEVDKGLAGITYQRMLDNGIG  
SDMLSLGLPPLHIAPFFLYNNEYRTAETHGINASETYEVPHWMHLSFVIYDRPEEKRVY  
LSGLEEKKAPVQAGHWL DAYDIGAKGFLFPQNFQANIESPVLKSKTAFTSSFSAVGNMA  
ATPGKAKLVQEQQARQLISGRKFRDILEACRPRVVGAVMPSPLKSLELRLGIATGNEAG  
KSKKLSSEKKDSRLREWGTVDNFNDHVLHSRLKAKMGKSPIAKRTLRSSESILKSDRSYNSD  
DGSASSSLGSISSVSSAYGTSFDRVFWYETPEMPVKAFQMORSASIDYDELGKSFVIDG  
GPETNDDSTTVSDSVKSSVGGDSETNLSVKSKNERHVEQLKKIMDTYNAMVCQPPLDX  
>comp15712\_c0\_seq8; 585 379 3478 LEN=3478; translated  
MLTTGILSLNIHDSLTFEGTELCLNPDLFAVSEHGIGSALRGIGASSIGSGNSTGTSNHS  
SNGISVGDIIIEIRVWDPLPKEAGMKSPESVSSMRKRYQQAPTLLTPTGNLQGQVSLGKDA  
GGMPADPGGAFPSLRARTTVYPNNPMLQQSGSMDPLVNSDGQRSMNSSPKSSSHQLSRRL  
SFDPTLNDGETSPSTPTPSSANNTTSGAVNQTELLFPQRLPPVFPNRNLGTADLHP ISTS  
KPPKPQTTTHRRASSTAGALQTPQRSQKQHQKQNNFLGAATTGGHRRDISDMTADT  
TYQLDNIINDVMNVSRDSDPTTVDEGAI AESYHNDMLSKITSGHRLRLSFVLKVMKTL  
TSFKGNSRTQISVLRVADLYNLSNYDLVTVHKIEPQDEEEVLKAVSADFVVVTIKDQFI  
SRGDMLLFQTKLIGSWIYEGQRLTEPTRGIKAHAREIRHGNFSAKSGIVTEKTNITFRSR  
SARIVWLVLQSSSEMWDYSSPYDRQYEQESVCEIYFDQWIRFLYKLFKKWKQLEVSHSLTV  
IFFARTFSLKGLKSNLDCQDVYGRRFEDHYKPIENETCIDWTSILIVRIKEEFTKYPLEV  
GNLNNRTPSCASQGNLLEAINVVLNLMQYHYLDRDLHRTGQSIVIVSPGCGVFEVDKGL  
AGITYQRMLDNGIGSDMLSLGLPPLHIAPFFLYNNEYRTAETHGINASETYEVPHWMHLS  
SFVIYDRPEEKRVYLSGLEEKKAPVQAGHWL DAYDIGAKGFLFPQNFQANIESPVLKSK  
TAFTSSFSAVGNMAATPGKAKLVQEQQARQLISGRKFRDILEACRPRVVGAVMPSPLKS  
LLELRLGIATGNEAGKSKKLSSEKKDSRLREWGTVDNFNDHVLHSRLKAKMGKSPIAKRTL  
SESILKSDRSYNSDDGSASSSLGSISSVSSAYGTSFDRVFWYETPEMPVKAFQMORSAS  
IDYDELGKSFVIDGGPETNDDSTTVSDSVKSSVGGDSETNLSVKSKNERHVEQLKKIMD  
TYNAMVCQPPLDX  
>comp15713\_c0\_seq1; 2907 301 6222 LEN=6346; translated  
MSSSEQEQGNQNEAGTGAGAEAGGEDTAAAAATMDTTATHAAEEAEETEPSTWDLAREASS  
RMVLQSVLDDMENSAAKQKELQLLRRRAEEAESSLAGSNETIQRLEASLREGRKGKDDL  
SGQLREATLAAEVARETSVAEKERADRSAAESDRLREEISHLTKSNLTYQKQVAEAEAQA  
KLDGSSLFPLQLKTQSLNENNERLRTHATWLEGELSKKAEALSQKSSSTALESARSASV  
DTAQSERDALAI EANQLRQOLEKVETKAQGLARQLMEAKQEASDVKLDSEQELTASRLV  
DLQKEQLIRLEQKHDALARRLDSTKALAEAEATEDLARWKERESTLMDVARNNLKAQAE  
FENRILSMKEELEAANSRCKRAEDGLMLIEDAPEKSEARPRALPPSENGENGDEPLNL  
TDLYGRVAQAEDALHAETIRRKAEIRVSRIEEIEANAPLLIRQRKEYEHALQQLTEL  
TRFENSQGETAAIRNESDILESEVNRLKAENKDLTEEAKILAKQVRDMLIANSSSGSDP  
NVALTVSQMGAANTRLMKEYNALTTKVKELETSLSQNDGLYQQIQDLKAENASLEEQRKR  
EEGMVEKIVQQRDLYRAILNKQDTNLLGSEDESNALAVVRGQSERTKALEAKHNKLIIE  
HAAAQARLDLLARDQEAASERLARYEMLNDELTSIDKAKNEIDANAAAVARSQAEAVFF  
KDRAQLLEETQQRNREEIKNVTASKNLIMTTNTNLEQSLVKANMERSKMEDELNRNVQSKL  
MLAQAEAESAKAAERRVSESSQLRSELSRREAVLDGVQRIESSLLMKNADVEAYKLEI  
SALKENIESAKQKEEASTNALKETISNQELQVTQLESARAKATKEALEAKKESLLAVQKA  
DAATKKSILESQRLRAAKKLGVTGEGSLPDI ESELRTKLESITTDLEGSKTEVETWKKR  
AATYEKLAKNEDALSAMTEASNASKKLQEDDNTKLKEELERINTEMSKRKEIITELTND  
LATQREVREKAVNEVKQITGIKTEAENYQKKAEDAERYCQLQNDVNVVQSDLVAAQGN  
YERELTLHAEARTSLRLAREENEKANRLRNDIAIEELAALESKYKIQDSILEVEKTKREEA  
EKEFTTKMDATRAENTLLHSQLEKINEQVEKMQSRHTLKSEAADAEPEDATGDEEMFRLR  
MTVSELRELVKFVRAEKDSIQQLDSAKRSTERERTKAAVARRTVEETQAELDVLRESLQ  
NKSNGATDEGADKLKTAEEQSRLSLSNAHLQRQVQDLEANLASAKQEVEESKKALQPSA  
DKQKQLESDBKAVLLAEKDSLLREIDDWKGRVQSLVSKFNQVDPEEHLKVVKKSEELEKQV



KSLEEKKS YAE EESKRIRTLASRASSELSKNKQLVETHKKSITKLTAEKAALVKAQKESV  
SKKEIDDLKQKTAKLEERKAEEIQAKGSREMNEKLRNRLREFQKQIIDLRKEKTSLTKQ  
LEEARKIEQKGTKAVALLEKESAVATKAATTPVDAAKDPPVTTKSTVAVQKQSATTS  
TTPSTTESKTTAVVEKKVMPKVPVGGFKFAPSKPVEKGNPKRPA TELTIEAPVQKQKPA  
GESEPKTANEAARSPKLSPKSSPTRPAPPNRRTSGELKQMSLKEKLEKRRKLQELKRAK  
EDSQKEDAKPTEPVSTEPETKRNKTESDGATEKVAPKPESEASSLSPKAPSFVFNASL  
LKVAAAQMAAKTQAKDTTESSKEDGPELSAEEGEMEEGEEAPEPPKADTPAVASAGPSAS  
SIFGGGTPVQTTFGSGFGKATSVFGSGSTATSFGTSSAFSGGGTGFGSAATTTSVFGGGK  
KAETGSAAAPAPTGFSGAAFLNIKPPGSTAGSGPPQFSFGTSGSSITLPTPGAATTPKMT  
MFNAFSSPAPSQGFGGTGKATKPLFGDTTQETKEETE QADDGEMPDESEDASKK  
>comp15714\_c0\_seq1; 2280 213 8690 LEN=8690; translated  
MTSVREMSPGREEAIETLVMDPQGDYRATRVL EESV PQALSMPNLLTRAALVDQASA  
LSIYEVDDEKYDSLFRSHKNNRTSSNFSGQRLQTPLETKRNRIFRHHCKILA AAKKK  
MDATNKASSSSPRLVAALRRIYGKSGVATAGSGEQFPASFKSLNLYVMNHPAFYASE  
EKEATRAASSPAPAGCTSGKETEYTTLES LIAYLCKERSSMNTSQSSATFEHGLLITILSV  
LVEYEARDEEDPASSKNKNQEA STKPI TPEQQGHHHDSTNDPAILAPLQVGSIMNMLEID  
EEYEE SNARSWLVDTN LISYLGEEAATYEDRIEIQKARLWKRLSIAKDSDAKKKDSMFSE  
GEIQEADDDLPTSSPTTAPVSVSSPQVIDTPATPDGVSINAIEGSPEVLSAAA LEHMI  
SAVTGGAISAHRENGEDEDNAGSIRSGSDNHDMGFRVEDEPGAQELMIVNDIDDEAEDNL  
EEHASSCSSSSSSSSGSAAE PENEDNEDEIEDDGEEDGITLRQALALSML ESADSYSNQ  
INVSTNDAETGSVTENMGPLTPVTKTPLSKDKNEIYPESEESPLPAMPTPPTLSTNTDDV  
DDRMTDSKQLDPAALNAFGSIPAANVVVQLLTHMNCVMGRKFTTSDERS SKIENKTTN  
VNVTSGGTGSSLFAPKILPAQAEVSKERPSDDIATSLQLLVSIFLLTIDIRNDAIENLKR  
AVAQEKQSSYDDIEERSSEEGDDPAIALAYIEEESSDSKPSLETLEDKGMRRKAAAAAQD  
AAALLKSRHRNTWKKQAEFLS LCCFLSMESLRRFLQGVTRDWLRGHKGVSAADCHKLL  
PTSVISKLSIGLASLSSIGI INSLHALFDDNGLEVNDTESVFLHTKLYKSSILLWGESVP  
IVYPSLSAQIEVLRSLLEVCSSKNQSGSIQNRLLDNLTSLPLSDSEPSIHLRQLTSRRLR  
VSDLLDRFVSGPTRMPVDGAGSENDAGGLIEIREPSCARAVIDEIGSTSILSTGLKREL  
QAIYLALCHRYHVRVLLWDGLGTSTDREVIDSSTSLTSSAETFRVYQSESNRIQFDGTK  
CSDSMTIVANQDAVGSSLPFSSVNQRASKVWGTVLSSTAFTPKTGIYRWAIRLDQCDRGH  
VFIGVATAQASMRTYVGGDKYWGMIQTALWHDRKVRGDYGATFRTGSTIIVTLDTDA  
GTIAYSSWKDNSSTSSYSIDQM VQNISSPRRHGQGVGMVEDWGIAFEGLPLNAKLYPAVG  
LYQRDDKVTFLSVETIDGCRGGTGGLSDSTVGLCYYPFSSVQSDTKNEMVVPFEDKVR SFN  
DKVQLDGMQYVINSLDRIVRSVREGTDDFLWKSLPLSLASAICLFPR SIPVISKRFGFTL  
FHEL SKAILELNTLKN TDCISRGLFHKG VQEGKWIIRATGSSGNSNSDAEEYVVDVVASSE  
KDACMGFEGAGVGTIGKSKNGLVAIVGTVKGSSVHFVEEWRDANDDGFSSITTEDSCSSC  
VVNARVNIDGTFEGTYHNIQYGTGTIAGLLCHEESP KAPLFH SRETTARSTDFSYGGT  
AGRVLLRLAHGHLAVIIGEDLVDDNPQSVDRQLGSKAVQEEWKVQSRKLR ECI VSKTFAG  
ASLTSSKDHISEHIKDLKEIYYGSQACRSHNFSRALDLLIEDTCSSTVTKTNSPLLAKET  
ASYVETMDAEMCSKFCGTGSLAALCPREYRHARHRVICAI VAHLR KGLNKANDTDLKKIW  
KWSLRLMEDGVRRALSKNHDIPMREKARKCELF SNVSELLISLDASHSTEEFIDVDTIG  
TDFSRFLFKLISSMKDLDLLEEFRRSTRNTILRLIPIQHVF TLEMP SHCSDAVESSLV  
VPRLLDRGRSGSQTQSECNYLYDQLGCHYSSNTSGSSILRKL LQDRVHELLNVICGLMK  
GAIERRKQDGPASLVSIDSLTLACIPCLTVLRRADVGPVFLH SKLLGTIPLFLNTHRS  
CLAPYDTTTPLVDEQSSVIESLHNICHAEVSRAILRAIVALMHV ISFQAWNMLGSKSGSE  
EELSSSCLEVL FDEFHNLKPLVLD AVKKSTTDRRNSQSKI QWERFCEERTSADSVQKTLT  
KTTAYHHEVGRSGATFLRKN GALLMIQPSSPSNAGT RRRRTSSQNTSETFVKAQGLLI PQ  
YVSHWVHILVASVGSTIALDMIAQHPEWITILLDTIEIKNEARHDGKAFDPKID DQSTRM  
PARYRCRILRLLYRILEILPPSEHIIRNLLYLAGSSCGT VTTSSIDEDEAMVSQETVSLLR  
RLYSPAHASWRACINSALYRVLATEPDSLEFYARV GALCFLNGSIDS IKKGSRVLLKPPA  
AAPLSADRQSLSNSKSHSAFSLVNSSPHHLVGNTEGIVAGLCRYQSSAGIVSNIDAKN  
GVCEVILLSRKNTNLEHSIEQRSMNSRHGLTVRALRSPMTDVVQAQEVPICIDDSIEV GK  
IVSSLLAESLGILQRERFSPKRKDEPHL CDVRSRTVYLMYALMSLRSTITLLSDENIVS  
NFLKGTNSRNLAKALQLAF PDDKSSEYNDLMAGANDVFLSSFP ILEVRFHLVLSL FHR  
LCLEASVLEETPKMTWEKRLNDIKRIMEREFTKSDDEGIDDDSMTEHTRVGKI SEVQSAA  
SAGVRPSANTSGRTEASGNRRASQSTAASDQSEED EEEEAATAAAHLREAAIAQMAELG  
LPRSWSELALRRGTGNI EAAVHFCLERGGEMERLLAEERERERQSSGTRSSRQRASRME  
ASSHFLRQLTEMGFPSRWCAEALNATGNNVDEALTWILTNGERLSAEDEGMEEDDEEDE  
EDVDGD  
>comp15714\_c0\_seq2; 2109 1 8022 LEN=8022; translated

LFRSQQFPASFKSLNLYVMNHPAFYASEEKEATRAASSPAPAGCTSGKETEYTLLESLIAY  
LCKERSMNTSQSSATFEHGLLITILSVLVEYEARDEEDPASSKNKNQEASTKPIITPEQQ  
GHHHSTNDPAILAPLQVGSIMNMLEIDEEYEEESNARSWLVDTNLISYLGEAAATYEDRI  
EIQKARLWKRLSIAKSDAKKKDSMFSEGEIQEADDDLPSTSPPTTAPVSVSSPQFVIDT  
PATPDGVSINAIEGSPEVLSAAALEHMI SAVTGGAI SAHRENGEDEDNAGSIRSGSDNHD  
MGFRVEDEPGAQELMIVNDIDDEAEDNLEEHASSCSSSSSSSSSSGSAEPENEDNEDEIE  
DDGEEDGITLRQALALSMLLESADSYSNQINVSTNDAETGSVTENMGPLTPVTKTPLSKDK  
NEIYPESEESPLPAMPTPPTLSTNTDDVDDRMNTDSKQLDPAALNAFGSIPAANVVVQLL  
THMNCVMGRRKFTTSDERSKKIENKTTNVNVTSGGTGSSLFAPKILPAQAEVSKERPSSD  
IATSLQLLVSIFLLTIDIRNDAIENLKRAVAQEKQSSYDDIEERSSEEGDDPAIALAYIE  
EESSDSKPSLETLEDKGMRRKAAAAAQDAAALLKSRHRHTNTWKKQAEFLSLCCFLSMES  
LRRFLQGVTRDWRGRHGKVSAAADCHKLLPTSVISKLSIGLASLSSIGIINSLHALFDDNG  
LEVNDTESVFLHTKLYKSSILLWGESVPIVYPSLSAQIEVLRSLLEECSSKNQGSIQNR  
LLDNLTSPLSDSEPSIHRLQTLRRLRVSDLLDRFVSGPTRMPVDGAGSENDAGGDLIE  
IREPSCARAVIDEIGSTSILSTGLKRELQAIYLALCHRYHVRVLLWDGLGTSTDREVIDS  
STSLTSSSAETFRVYQSESNRIQFDGTKCSDSMTIVANQDAVGSSLPFSSVNQRASKVWG  
TVLSSSTAFTPKTGIYRWAIRLDQCDRGHVFIGVATAQASMRTYVGGDKYGWGMIGTQALW  
HDRRKVRGDYGATFRTGSTIIVTLTDAGTIAYSSWKDNSSTSSYSIDQMVQNISSPRRH  
GQGVGMVEDWGIAFEGLPLNAKLYPAVGLYQRDDKVTFLSVETIDGCRGGTGGLSDSTVG  
LCYYPFSSVQSDTKNEMVPFEDKVRSFNDKVQLDGMQYVINSLDRIVRVSVREGTDDFLWK  
SLLPSLASAICLFPR SIPVISKRFGFTLFHELKSKAILELNTLKNNTDCISRGLFHKGVQEG  
KWIIRATGSSGSNSDAEEYVVDVVASSEKDACMGFEGAGVGTIGKSKNGLVAIVGTVKGS  
SVHFVEEWRDANDDGFSSITTEDSCSSCVVNARVNIDGTFEGTYHNIQYGTGTIAGLL  
CHEESPKAPLFHSRETTARSTDFSYGGTAGRVLLRLAHGHLAVIIGEDLVDDNPQSVDRQ  
LGSKAVQEEWKVQSRKLRRECIVSKTFAGASLTSSKDHISEHIKDLKEIYYGSQACRSHNF  
SRALDLLIEDTCSSTVTKTNSPLLAKETASYVETMDAEMCSKFCGTGSLAALCPREYRHA  
RHRVICAIVAHLRKGLNKANDTDLKKIWKWSLRLMEDGVRRLSKNHDIPMREKARKCCE  
LFSNVSELLISLDASHSTEEFIDVDTIGTDFSRFLFKLISSMKDLDLLEEFRRSTRNTIL  
RLIPIQHVFLLLEMPSHCSDAVESSLVVVPRLLDRGRSGSQTQSECNYLYDQLGCHYSSN  
TSGGSSILRKLQDRVHELLNVICGLMKGAIERRKQDGPASLVSIDSLTLACIPCLTVV  
LRRADVGPVFLHSKLLGTIPLFLNTHRSCLAPYDTTTPLVDEQSSVIESLHNI CHAEVSR  
AILRAIVALMHVIFSQAWNMLGSKSGSEELSSSCLEVLDFEFHNLKPLVLDVAVKSTTD  
RRNSQSKIQWERFCEERTSADSQKTLTKTTAYHHEVGRSGATFLRKNALLMIQPSSPS  
NASGTRRRRTSSQNTSETFVKAQGLLIPQYVSHWHILVASVGSSTIALDMIAQHPEWITIL  
LDTIEIKNEARHDGKAFDPKIDDQSTRMPARYRCRILRLLYRILEILPPSEHIRNLLYL  
AGSSCGTVTSSIDEDEAMVSQETVSLRRLYSPAHASWRACINSALYRVLATEPDSLEFY  
ARVGALCFLNGSIDSIKKGSRVLLKPPAAAPLSADRQSLSNSKSHSSAFSLVNSSPHHLV  
GNGTEGIVAGLCRYQSSAGIVSNIDAKNGVCEVILLSRKNTNLEHSIEQRSMNSRHGLTV  
RALRSPMTDVVQAQEVPICIDDSIEVGKIVSSLLAESLGLQRFERFSPKRKDEPTHLCDV  
RSRTVYLMYALMSLRSTITLLSDENIVSNFLKGTNSRNVLAKALQLAFPPDDKSSEEYNDL  
MAGANDVFLSSFPILVRFVFLHVLSLFHRLCLEASVLEETPKMTWEKRLNDIKRIMEREFT  
KSDDEGIDDDSMTEHTRVGKISEVQSAASAGVRPSANTSGRTEASGNRRASQSTAASDQS  
EEDEESEEAATAAAHLREAAIAQMAELGLPRSWSELALRRTGGTNI EAAVHFCLERGGEM  
ERLLAEERERERQSSGTRSSRQRASRMEASSHFLRQLTEMGFPSRWCAEALNATGNVDE  
ALTWILTNGERLSAEDEGMEEDDDEEDEEDVDGD

>comp15715\_c0\_seq1; 1269 249 4925 LEN=5022; translated  
MDRCQQHTNDGNDGCPSEGGKANNNEGSVRTASQCHGHILRWVCLSGSGGKQWLDATEKQNE  
SSITTCFRGQSNRTIGLDTSVGEQWLHVRTSVRDSLSADTTDLESVNNNDNRNRDGSIGIPM  
SNHVPSPPRSPSQQFQSQTEKTQESSQLSLLAYLNQPEEQEESRSQMTEQEPPSLPIL  
DVLPNRERRNKTSHCHHHQGGNDLLSSHAFLCLEPVFIPVGVNQERVLWTVKDRSPLAE  
EPQSELEEYAVELWRSNQASPFWDETAGETQAQMATHVPLPRRRLIALSHGDAIRIV  
QTTTTHHTSKRTAGSSEEGHSPLQSMPTSLADRSPLAQDLATITVQYFESEAKAKETSPA  
TTRISGLAAIEAEASPNQRQGGSTSAPAGVLTGTAKNDQHQTAKASKAATRFEDQPNTFCG  
TTAGTPTTNTAANPMNNTVRSASPRQCQORTASTADCGTSVAVDSTVNPLQQSLRSTRIE  
LLTRPLATERSKNEENENDRAQTADVISDGSQPNGDPRTGVRSLIQVDKRSESQNEARKHQ  
GPPREDKTHKNGTNKIHSLSRNYQPAIRNKPAISTNDVAPAPLHPRSASLTGAPLPLPS  
LPFDVVVAAADPPCEQLTQDDAFLLQPRSQTSFLGGVIQLKKNRDEGTDIDKEKPIEGRV  
PDVAATCVVKNGIENCADAPCTTSVATVKREGADASLDGSMCTQPSKTGGAPKASDCNDA  
NKSPPSNGLAPRFFHDECEDRDATVSNAI STRMANRSVCSKCNKPNPHNSFSGEKISNA  
NAELREKDPNNDGLACEFENDDDDDDDATIPISVAPPLGYPDTEAKEVTVINNPHTRSR

HSSTFPLLTQPPEPKRTEECGQNKACNRDGTGMPKAYS YTVENRTKSSIEESTQPCFK  
AEQIPELKESCSIYPSDSLNP SVHDPRQGLDTNKKEDDEE ESEGENDAQRSQPLLSVSDS  
KDNFAGEGYKSESLVGCGLNLCNNVDVRNSPKDY SRGAKQNSVDRGPMRDTMNETDDE  
TDFGSTGANIAMSTGGSMSPSLVRDTGESILDHHLLEDYSCMGNTSENQNPTEDDLIDP  
IDPKPTEDDPKPTEDNIEISSCLSGSTMLEKEMKGLPKSHSSKVFKADREDNSMIRVDSK  
DQYKAIGEHSIDPKIAEVESSKSPSNSEIEAPKKELTSLEKHICNDGRHRSIGGKVDEAA  
SGDAKKTNEKINRGPTRKRKSLAVEKRTESEIETLPDTNTKGPKTRRTRNRVSPSDDISA  
VCRDADAVYEKRFMKAI ERGVVSLVMSGVEPKNMACVTSFCTMKSLNNEAVKVNVSSTID  
SDTTCVMPTASNKYEAARTLKALECSLLGVPIVPLKWIRDCVKAGGIPGIPDQYIRT  
LPSTLGT RSIKITTYGVARLAAMLDDPKSNRELLFQNTYVFLCGVYTNDKKKSIVKLL  
EQGCAIMVSTSREACLRLKSLMAESLTQQLPEQSNRKKFVLLFGDRGKAVPKSLYKATKE  
ALMGIVDNNKQSPLARAIYVVD SNWVLSIACAKMLAPT NFRPKDGVLDLWHICKDLPE  
>comp15715\_c1\_seq1; 404 195 1961 LEN=1961; translated  
MLFLCFQYRDSKKSNDKRRCCQLFESNSRITRFICLLFILLLWTSNAVQNTNTSALGNELA  
TLSDGGAFGNPMNSYRQDFCELYKRRVNESGIAGIQSALNGIELAVATFP GK YFIYDDEK  
GIDPVYPGIHAKMLDYIAERGNFTWRNSFAVFDKKGSNITEILDWGTQKYDLMVGT YTPS  
TERMKLGVSFVDGHFDGGLIMVRDVPPTETVINWFNWMTPFKTSVWF AIMGTVIFSAFVH  
QIIESIGAKGREEKSFRVWLM DNLYLSFINFTGNYSYEPTTLAGRFFGTSSAFWAMLITA  
AYTANLASLLVGREVAEPK VETILDVVEHDFPLCVQVGSFAEDHLRRKYPEVIPLLV PVP  
SDDLYDSLNRGDCEIL IAYKQDFMVS RKQAEANPKCTIERQGREIQPLKDAFATRHDPGI  
LCTDLVNEMFNYYIKEMDGE GILDELWEEHTRYFADEGHCPESDSELS DSELPGLGRRFL  
ERYVNAPGFSRRFLKGGTSVAGASAGGAVSTLVEEEEEEEIRALT IKDMAGTILFQVVASV  
IAILIALVSGFEAKTKQQR TVRKKTMRDTRRRTEDNGCVREDEDELCDYG  
>comp15715\_c1\_seq2; 111 1 171 LEN=842; minus strand; translated  
MGIVDNNKQSPLARAIYVVD SNWVLSIACAKMLAPT NFRPNDGVLDLWHICKDLPE  
>comp15715\_c1\_seq3; 221 195 2145 LEN=2145; translated  
MLFLCFQYRDSKKSNDKRRCCQLFESNSRITRFICLLFILLLWTSNAVQNTNTSALGNELA  
TLSDGGAFGNPMNSYRQDFCELYKRRVNESGIAGIQSALNGIELAVATFP GK YFIYDDEK  
GIDPVYPGIHAKMLDYIAERGNFTWRNSFAVFDKKGSNITEILDWGTQKYDLMVGT YTPS  
TERMKLGVSFVDGHFDGGLIMVRDVPPTETVINWFNWMTPFKTSVWF AIMGTVIFSAFVH  
QIIESIGAKGREEKSFRVWLM DNLYLSFINFTGNYSYEPTTLAGRFFGTSSAFWAMLITG  
TTGRTILQIMVIHCDTAPRCRAVLCSLPDXLLNETIGLIHCLIGRLLTIVCYILIDSISP  
AAYTANLASLLVGREVAEPK VETILDVVEHDFPLCVQVGSFAEDHLRRKYPEVIPLLV PVP  
PSDDLYDSLNRGDCEIL IAYKQDFMVS RKQAEANPKCTIERQGREIQPLKDAFATRHDPG  
ILCTDLVNEMFNYYIKEMDGE GILDELWEEHTRYFADEGHCPESDSELS DSELPGLGRRF  
LERYVNAPGFSRRFLKGGTSVAGASAGGAVSTLVEEEEEEEIRALT IKDMAGTILFQVVAS  
VIAILIALVSGFEAKTKQQR TVRKKTMRDTRRRTEDNGCVREDEDELCDYG  
>comp15716\_c1\_seq2; 344 1 729 LEN=3115; translated  
EQNVDP PLEKQREEQHQGN ERDQTRQETEEQEKQGIQQITEQTRKQKQQRQDQQQ GK  
QHQEQA KLERRKKQERQRSQEMEQQQK LKENQKQGREQNQDQQGLDNKEQQRKQKEQQH  
REQQRKEKDKKQTEAQAEAE AQERQQEEKMKNKQKHRKPIEDKRVTEVSNENRIPQNLWS  
ECHTSKPSSDTSEPSEFSLHRQYQYYTDL LNQEFDSSDDEVIICRMEWRRKRKTLIKTEQ  
SW  
>comp15716\_c1\_seq6; 562 1 1097 LEN=3483; translated  
KGRDGETGQE QKQGGEQTLDP RGGAQHEAEPQQQDEQQKDQRQPEIQKEQQPQQKEQE  
QRKEQQQQQQEQEQEQV VQQVQHKDQPQVENQNEQQPEQSKQRENQPQH QMEKEQQQQ  
QQSEQNVDQPKLEKQREEQHQGN ERDQTRQETEEQEKQGIQQITEQTRKQKQQRQDQQ  
QGKQHQEQA KLERRKKQERQRSQEMEQQQK LKENQKQGREQNQDQQGLDNKEQQRKQKE  
QQHREQQRKEKDKKQTEAQAEAE AQERQQEEKMKNKQKHRKPIEDKRVTEVSNENRIPQNL  
LWSECHTSKPSSDTSEPSEFSLHRQYQYYTDL LNQEFDSSDDEVIICRMEWRRKRKTLIK  
TEQSW  
>comp15716\_c1\_seq7; 565 1 1706 LEN=1706; translated  
XAIRVLCFEASLGLT SIQTTRKRVRHPNRKAKQPTLP IDEQQQPIPKRRPNTPKQNRHHR  
CSPPPPNPVAEALRRRSRRGTRRPPDGFQQEARRPGPEGDPGQHR SNAEAGLES AVRA  
ATGPADPHAEALEKSGDPSGAVALGHTGRYPPREDQQQKQKQKRTLQ QPSRPSAGDGIG  
AMEQSMAQRSFLRTAAIRDGMKKRQRQREWEATGRPGDSASVTTAKKRMRQHTKTKNIRP  
SHLQTRQHPGSLPLAKTMQRRLPQTQTKHHHQKPRRQLLLQQTKQKQKQKRKQKLLSPN  
EANAANERFFAANASPSVANLLISDSESEVESICSSSDDTFDHKDDHRASNKADNII SN  
NSMQSRESANAKNIKHGNANDNNRVQTVARRYQPLLA VGSAA SERREPFPRGTPASAPSM  
PVQAIEHIKIEEPSVIDLSNERD TDDNVKVERERSPARQKASGISGNATVRAIAEVLLNE

AIGRGADRHEMERYASELFRLLGLHSRKMILDALSDERYVPNLEQEVRKWHWMKGYHKIVF  
QSWVLKEKERKEQELREQQEQQQHQLQQ  
>comp15716\_c1\_seq8; 47 1 518 LEN=1431; translated  
XGVGNGLFQSFCLVHHLRGALVASLSVSGTRSTHDRVSIIFLEGAPFGMRGSGVLFDP  
QGDGRNFLHDGPCRGIDHADEQVRSEQNAGARNVPSGAENGAETSHKHLMDFLFDTPMT  
GIEPIELRVQTGSSSLPSIGRRNVSCSSDGTIWKNRKNSFTAHTALVCNFDV  
>comp15717\_c1\_seq1; 1213 139 5553 LEN=6600; translated  
MSLRRRQGGRSQQYPLGIPRHSYDYGDFGYAGSDGLRPSLRGGSCYSQLHHQHPLDTVY  
LDDSKIPTVPPYLEAVSTNKNSSGNSNNENNLHSTDGSSNATTIGKSEDGKDAATGKTSN  
SEEADAAGGETANAQKGNVSVLQRVTSLSIMSSSTLSALGRGKAPGDSNIKSTNGAISD  
TAMGKNGGTSGLKGSSSSSMLNQYYKGSYDKIYNPNHRNYRHHQYLRNMNMAGKYPHP  
ERPLSAAAETSSPPSPIETKPSWRLRDRMKTVGVLIMALNVGTDPPDVIKPHPCAQLQC  
WLDPSSVTRAKAKEKIGERLEKQYARWQQQRGGSSSSSSSSNNSRPFKYRKTLDPTVED  
VRALCLWLRKQARHERILLHYNGHGVPRPTPNGEIWFVFDKCHTEYIPLSVSDLRQWVGKP  
TIVILDCSSAGILIPFLTAPPAETPTNTPPRMPSPILNNSNAGGAASSSHFGRAVPEDDP  
IITNMDEAASHWVKDTIVLCPTSEGEWLPMPNPEYPADIFTSCLTTPIQMALRWFVRNRI  
SMEMLFNQKDSDFGPDFWVDSIPGQANDRKTPLGELNWIFTSVTDSIAWNVLPKPLFQRL  
FRQDLLVASMFRNFLADRILRNLNCTPQSYPLPPGVADHPLWQAWDLACETCLFGLIK  
DGILGDGPTTGLGDRDRHLHPRWQQQAEQIRKLQQPRIPRPI SAHTSSSLSPFFSEQLT  
GFEVWMEYAVIHKGNIEHLHPPEQLPIVLQVLLSQTHRVRALELLRQFLAFGPWAVNLAL  
SLGIFPYVGKLLQSAEYKTVLVHIWASILKFDPSCQVDLSKDKALKHF IKPLAQLSERTK  
ETAGASHQHTPEAAKQRTLNAFCLASLCKFYSTAQSECLRQNLHGSCAVLLSAQIKLREQ  
QEQQLKEQEQTSTRASEDATRFVLLPPVACEWICMCLGNLVQAFHVAQAQAYDIDMHDL  
ITLQQQDKPNVRAAATYALGNLFEHASLPSSNNLSSSTLSSSLRNRLQQNPPPPSTMN  
PPGIGSPTPISLGSQAFSNGSQGMLMPQGQLQSRPQQQMFPLPSPISSPGMPVASTLAA  
VNAFFGQLQQNPSISMNQGPASAALAAAMARGGLAPPTQQQLASNQNLVSHGMGQKGLTA  
GVQQQQIQNP I P Q K I Q G A P Q V M P G V S P M L S S Q V M L Q R G G V Q Q Q G V P Q V T P V L G A L A P Q H  
SPGVPMVGIGGHLAPGQPLMTRATSGPQLGAVQPGALFHPQRTNQPSIGGYLGPAAGNP I  
GIMTPSNVTRSAPVGMPIVGSPLGIGASAVGSPIMMKQMRVAPHLAEQQQRRRPTVYEDL  
RRILFDLKVMEBMIQVLADGSPIVRYEVVMALSNFVEKYLQAIMVIAEDATRLMDTMRLE  
KIAEGEDGITRHSKCRTRVVSLLPQGVNQKIMDRFGECKWALRKKVQHEDPHPNVSRAANK  
IVRVVHETLYDMRIELDAADRNRVKSELSGIEEGETGGDSLDRVKSANISLTS PDQR  
TKSLRVLQSDGSPNRLPTIKPKPYPLRRSSSEVPGGNFPSVQIGDPKSAPSLVMPGRNL  
MDRVKAENLLPKSQFYKWKKSIFRPDYDDEDVEDRDLNPEAARNYQHRRNAIVRENGR  
KISKHFEGKPRRDNIQQGSINMLLEDDSNGNEDTDIFLQSELRLKEKQLLRNTGGVKMT  
SMLKFHSYENALVVCNDQDYVSIWDYKGTQKSSFKNGNPTGSRMTSTFWMNESSSSLF  
VGDDGSARIWRGIVENNGEISNQAPVLESIFYAIPDMESGQRSKSGLICEWQQTGTGLI  
SGKK  
>comp15717\_c1\_seq2; 1251 139 6273 LEN=6423; translated  
MSLRRRQGGRSQQYPLGIPRHSYDYGDFGYAGSDGLRPSLRGGSCYSQLHHQHPLDTVY  
LDDSKIPTVPPYLEAVSTNKNSSGNSNNENNLHSTDGSSNATTIGKSEDGKDAATGKTSN  
SEEADAAGGETANAQKGNVSVLQRVTSLSIMSSSTLSALGRGKAPGDSNIKSTNGAISD  
TAMGKNGGTSGLKGSSSSSMLNQYYKGSYDKIYNPNHRNYRHHQYLRNMNMAGKYPHP  
ERPLSAAAETSSPPSPIETKPSWRLRDRMKTVGVLIMALNVGTDPPDVIKPHPCAQLQC  
WLDPSSVTRAKAKEKIGERLEKQYARWQQQRGGSSSSSSSSNNSRPFKYRKTLDPTVED  
VRALCLWLRKQARHERILLHYNGHGVPRPTPNGEIWFVFDKCHTEYIPLSVSDLRQWVGKP  
TIVILDCSSAGILIPFLTAPPAETPTNTPPRMPSPILNNSNAGGAASSSHFGRAVPEDDP  
IITNMDEAASHWVKDTIVLCPTSEGEWLPMPNPEYPADIFTSCLTTPIQMALRWFVRNRI  
SMEMLFNQKDSDFGPDFWVDSIPGQANDRKTPLGELNWIFTSVTDSIAWNVLPKPLFQRL  
FRQDLLVASMFRNFLADRILRNLNCTPQSYPLPPGVADHPLWQAWDLACETCLFGLIK  
DGILGDGPTTGLGDRDRHLHPRWQQQAEQIRKLQQPRIPRPI SAHTSSSLSPFFSEQLT  
GFEVWMEYAVIHKGNIEHLHPPEQLPIVLQVLLSQTHRVRALELLRQFLAFGPWAVNLAL  
SLGIFPYVGKLLQSAEYKTVLVHIWASILKFDPSCQVDLSKDKALKHF IKPLAQLSERTK  
ETAGASHQHTPEAAKQRTLNAFCLASLCKFYSTAQSECLRQNLHGSCAVLLSAQIKLREQ  
QEQQLKEQEQTSTRASEDATRFVLLPPVACEWICMCLGNLVQAFHVAQAQAYDIDMHDL  
ITLQQQDKPNVRAAATYALGNLFEHASLPSSNNLSSSTLSSSLRNRLQQNPPPPSTMN  
PPGIGSPTPISLGSQAFSNGSQGMLMPQGQLQSRPQQQMFPLPSPISSPGMPVASTLAA  
VNAFFGQLQQNPSISMNQGPASAALAAAMARGGLAPPTQQQLASNQNLVSHGMGQKGLTA  
GVQQQQIQNP I P Q K I Q G A P Q V M P G V S P M L S S Q V M L Q R G G V Q Q Q G V P Q V T P V L G A L A P Q H  
SPGVPMVGIGGHLAPGQPLMTRATSGPQLGAVQPGALFHPQRTNQPSIGGYLGPAAGNP I

GIMTPSNVTRSAPVGMPIVGSPLGIGASAVGSPIMMKQMRVAPHLAEQQQRRRPTVYEDL  
RRILFDLKMESMIQVLADGSPIVRYEVVMALSNFVEKYLQAIMVIAEDATRIMDMTRLE  
KIAEGEDGITRHSKCRTRVVSLPQGVNQKIMDRFGECWKALRKVQHEDPHPNVSRAANK  
IVRVVHETLYDMRIELDAADRNRVKSELSGIQEEGETGGDSLDRVKSANISLTSPOQR  
TKSLRVLPQSDGPNRSLPTIKPKPYPLRRSSSEVPGGNFPSVQIGDPKSAPSLVMPGRNL  
MDRVKAENLLPKSQFYKWKKSIFRPDYDDEDVEDRDLNPNSEAAARNYQHRRNAIVRENGR  
KISKHFEGKPRRDNIQQGSINMLLEDDSNNGEDTDIFLQSELRLKEKQLLRNTGGVKMT  
SMLKFHSYENALVVCNDQDYVSIWDYKGTQKSSFKNGNPTGSRMTSTFWMNESSSSLLF  
VGCDDGSARIWRGIVENNGEISNQAPVLESAFYAIPDMEGQSRKSGLICWQQTTGTLI  
SGGNSRNLRCWDMTAQKCSATINIESDSCITALTTAWDEDNNTGFRGTGPEIIAAGFSDG  
SLKLFVDRMPKSGAALSAAARANNKSPRGRATGATSRRRAGAAALNNRTFNEHGSWIVD  
VSFASYCGTQNEILSGSVAGDIRAWDIRSSRSLRAIEVQRSPMTALSVHKKIPVAATGS  
HAQFIKILTLEGETLQVARFHEESLPGHRIGPVSCLEFHKQKLVLAAGSTNALVSIYKPR  
RPLP

>comp15718\_c0\_seq1; 216 137 845 LEN=845; translated  
MASVKDRARMFGELASPPKGENERSFRRIGTKVTSSPFLSPSSKKTTPTASKFSASPFVS  
SSPKVSTSEVVGRSPSVQRNFSIPKEKKIILSSPSGARDTKESMGWPTEDGIPTPGAIRN  
DNTITEPEEKVGPVSKFANSPPFKVINNQGTTQGLHLVSELAKSKVGVGNSPLKTLQIK  
EKQFKAPVSVNNTLKPWQKKRDESSIVSKPNQGNESPEPETKEPTQIHIKEKQFKX

>comp15718\_c0\_seq2; 1836 137 5551 LEN=5821; translated  
MASVKDRARMFGELASPPKGENERSFRRIGTKVTSSPFLSPSSKKTTPTASKFSASPFVS  
SSPKVSTSEVVGRSPSVQRNFSIPKEKKIILSSPSGARDTKESMGWPTEDGIPTPGAIRN  
DNTITEPEEKVGPVSKFANSPPFKVINNQGTTQGLHLVSELAKSKVGVGNSPLKTLQIK  
EKQFKAPVSVNNTLKPWQKKRDESSIVSKPNQGNESPEPETKEPTQIHIKEKQFKPSIP  
APNNTSKPWHNKAKDSPTLSKEKQTSNTSAIPNEKTPDELENPAQNQASLNGNENSQSNA  
NTRNKSTRAIRLMRARRANGAPPTNVSTSLKQSLQAAKVVMQEEKSDAGASDTSRSSL  
NKELSDIAKRALKRSKDTIQNESKLALFTSMKGSESNLNDSEAREARRALLRLTTTKQRT  
VIGGRSVGESDSSVELGSKAKETAIKKSVITGKDGGSLSEIDIVGTLKSRNSNDVSRRL  
DHPAFAGRSGGKTNVSSAHILASFRHFNGRSTNGAGDSNASKNQDELKRSLSGDDSL  
SEASSTASLEQDQTMHSVSERPGLFPNSMRERVGESMRSMSEHAGESMHSTSSRKHADQF  
YRMHRVQVSKHNCNDTVISSLSGNTRSCQSIMSQSLPNKVVPSPINKRHSASSLLDP  
TPEYSSQTMKSPGPSNRSSHSFANSINSATPRVGHKSPSFRDRVDTSFMDTLEEIQSSSQ  
ESGANSADLDAALEAAVDDMDIITSPLNAGSYSKISEMKDDRSTGISILPSSSGRSHSP  
GFVFKDTEESDAGPPDPVADGIAPLDSIFGADDDTSTSTNGQGDKLRESVDDVKEGAK  
HGSTSTKQTVSSIRSGMSSIQNAPIVDDQNKETEGSTSI RTGLSGIQGSADMENSISIH  
NTTKKTNTEVGNKDETPLSVEEGVRKNDASDSKMTQKSSNMITPTYPDTIEEESKTS  
TEKSTLTKSTLKSDEKSTQKSTLSDNMCSVLKAKSTATTDGSSGNTSSSIQVSD  
SSNNTNNDLNMGRNILLPLOTANYSTNDEISNGLSLLSPTSRNSRPWKSIGNAIKNVLA  
KASPRASGHAALSNNGNLPERDECELSFSDDDDDIFGGLEVEDDERKKKIYKASKQPSV  
KSSGEKEGSI SYRTVEASNKRIP TTSRLRTQTKSTRTQSQSQNMKSSINSRRTQSQTMKSP  
SNSRRTQSQSMKSPSISRRTPVSTRQTPPTNSARKSLKSGTARSGVSNPTTNI SLHDKK  
DLLQSGAEIETSQNDRSGMVVDESEVHVNVNSDITSSLIIGPISGPPFQKAMNEATKIL  
EQNVLENVDRGNETEASETFLESQFLKEDEGESFTLLMEESETSFVEQKFSKPVSKGMAK  
TKEEVRIGISGEKQEEENEINCMFLNFGCTFTDPCGLASLCTPANKPENKDVVEEVI ED  
ADVDKEDYVSVSSQSDLTMLEKKVWNEWDRNLNETVLNKNQGDGKRDKFEKKRETARDKLL  
NIATAAITPHIGKSSEATLVDDDTKNFTNFTEVHTVSASGSTESYSTKGTESGASSGMESGD  
SMGSFSQESTRGYSTSYSTDEDESEDASEAPSHSNDGRKTSTTMMTPTAGPILLSFSQRS  
MEKFSKQLTAVGVQVLKLNTRRQWQTRFFTVSTEQIALSAHEAISKGTGIAQCPCALLWL  
KKFNPKSGGYGINNIDGNHGGMLLVLDVIEVCDRDKDDMVGNPIP KKLVDKFFENSVLVT  
LKYKMGVLRISIEFRCHRHNDEAQFLCTCMRVIRDLRRERSLRQKLSKQSSSTNKKTSSS  
SRRT

>comp15719\_c0\_seq1; 1111 70 4998 LEN=5169; translated  
MMEGSGLCCSHEPEVGNKQTQNGFAVLKNNAPGDDTRNVSGGDVVNEMTGHEKDIDIDVE  
KGIENTDRSRQORCLSESLTVNMFDSFGEQTQTTSTEDETAGNSDEHNAGFATVLRTC  
RSSLEEKGTNGNVDKHVDPGSFI EALDADVDIEPNSPSVATSASPPAPPVANAEEAATPSK  
KLRQWTRSSSFACLNALDSSRHLVVEEDDKNNDQOPTIKPVTEETERKSGGQVVTKQEGA  
NSSIDGALES LATESTPWNVNITESDVVDAYTTAAGRTRIKGSPSSFASPENTDCDVEDDY  
SNRQTIERP GTGGIDSNDNNGVFQDYDWRVDESCIEEIIFYDGSTSSGGEDKNKSHDSE  
CHQCQIEQADRNRDGRTRTSYMYASSNSQQSPNNTSNGNSQSKSNSQSSNELQDGIAREE  
DRAVRRWRI FLIVVLLVLTIVISLQVHSYFRNKELREFEEAFAMDSEKVFDSLSHTMDIN

LNAIDSLALLMASSAREKNETWPFMVLPDFATKASKIRILTRAIALQQFQYVDDKDRKEW  
ETYSKANEMWVQEVIDVERRDPTFHRSRNYRYAPDYNGTSWPTRS IWYGEITTNMISFPLK  
GTGPYAPSWQSYPLLPSSATNSPYNFDAMQHRALGPGIRKVV RDQNAVIGPVLNFADSDD  
LEGGNVFRAWASRHVDDGIDPIEPIVAVLYPILDTAHGAVTTRESNSKVVGVIAGIYLWK  
SFLENILPSSDRGLVVVFENSCRQSFTYMITGKRAEYLGQDLTAVTSGHVKHERHGDMM  
HFEVVQNMVQSRSEAMQDILGGHDRNLHDGGLGVLPLDNEFCAYTIKIFPCSAITENVH  
FTDNPRNFSIICVFIGFTALVFFAYDTLVRMRQKKVMQTAIQSTAIVSSLFPSNIRKRL  
MEEATGAQSRPPPNKNEILSESSRSKSLTQKSAHQPTKLVLRSYLNSGGGENEASEVGT  
KNKPIADLFADTTVLFADIAGFTA WSSVREPTQVFTLLEVYVYGFDEIAAKRKVFKVETI  
GDSYVAVTGLPDPKPDHAVAMAKFAFD CREQFNILCTVLERSLGPETGDLKLRIGLHSGP  
VTAGVLRGQKSRFQLFGDTVNTASRMESTGRVNKIQVSQKTADLLREARKGRWLQPREEI  
VEAKGKGLMTTYWIEPRKVAQSI ESSRSHSSSVHTSSRSHTSSSSSVPSFRAKRRDNCS  
QTERLVNWNVDVLERLLK KIALRRSALNEKADADV VWKIPSDAMVLKEVKEVIELPEYNC  
KYIDQAENPDSVILGKEVRSQ LHEFVVSISRIYHDNPFHNFPHASHVGM SVSKLLSRIVA  
PDKTFEKHEQLHDHTYGITSDPLTQFACIF SALIHDADHSGVPNAQLEKEETQMAKTYEG  
KSIAEQNSINRSWELLTRPSFV DLRKAI AQ TQQEEERFRQLV VNAV CATDIIDKDLKNAR  
NQRWEKAFSLPVSSAPSLSGNTSASIDVREQINRRATIVIEHIIQASDIAHTMQHWHIYI  
KWNERLYDEMYKAYVEGRAESDPTEGWYEGEIGFFDYI IPLAKKLSECGVFGVCSDEYLD  
DYARMNRNEW EKKGRAV VSGYAKKH NKEACCHHQISSPSHKKSSLGGETQQSSCSGTRDM  
SITLMHRSESEPQPTENGSLSN

>comp15719\_c0\_seq2; 1104 70 4968 LEN=5154; translated  
MMEGSGLCCSHEPEVGNQKAQNGFAVLENASGDLVNEMTGHEKDIDIDEKGIENIERSR  
QQRCLSESLLTVMNMFDS SVGEQTKTTRTEDETSNSDEHNAGFATVLR TCRSSLEEKGTN  
GNVDKHVEPGSFIEALDADVDIEPN SP SVATSASPPAPPVANA EAATPSK KLRQWTRSSS  
FACLNALDSSRHLVVEEDDKNND EQPTIKPVTEETERKSGGQVVT KQEGANSSIDGALES  
LATESTPWNVNITESDVV DAYTTAAGRTRIKGSPSSFASPENTDCDVDDYSNRQTIERPG  
TGGIDSNDNNGV FQDYDWPRVDESCIEE IIFYDGSTSSGGEDKNKSHDSECHQCQIEQAD  
RNRDGTRTSDYMYASSNSQQSPNNTSNGNSQSKSNSQSSNELQDGIAREEDRAVRRWRIF  
LIVVLLVLTIVISLQVHSYFRNKELREFEEAFAMDSEKVFDSLSHTMDINLNAIDSLALL  
MASSAREKNETWPFMVLPDFATKASKIRILTRAIALQQFQYVDDKDRKEWETYSKANEMW  
VQEVIDVERRDPTFHRSRNYRYAPDYNGTSWPTRS IWYGEITTNMISFPLKGTGPYAPSWQ  
SYPLLPSSATNSPYNFDAMQHRALGPGIRKVV RDQNAVIGPVLNFADSDDLEGGNVFRAW  
ASRHVDDGIDPIEPIVAVLYPILDTAHGAVTTRESNSKVVGVIAGIYLWKSFLENILPSS  
DRGLVVVFENSCRQSFTYMITGKRAEYLGQDLTAVTSGHVKHERHGDMMHFEVVQNMVQ  
SRSEAMQDILGGHDRNLHDGGLGVLPLDNEFCAYTIKIFPCSAITENVHFTDNPRNFSI  
ICVFIGFTALVFFAYDTLVRMRQKKVMQTAIQSTAIVSSLFPSNIRKRLMEEATGAQSR  
PPPNKNEILSESSRSKSLTQKSAHQPTKLVLRSYLNSGGGENEASEVGTKNKPIADLFA  
DTTVLFADIAGFTA WSSVREPTQVFTLLEVYVYGFDEIAAKRKVFKVETIGDSYVAVTGL  
PDPKPDHAVAMAKFAFD CREQFNILCTVLERSLGPETGDLKLRIGLHSGPVTAGVLRGQK  
SRFQLFGDTVNTASRMESTGRVNKIQVSQKTADLLREARKGRWLQPREEIVEAKGKGLMT  
TYWIEPRKVAQSI ESSRSHSSSVHTSSRSHTSSSSSVPSFRAKRRDNCSQTERLVNWNV  
DVLERLLK KIALRRSALNEKADADV VWKIPSDAMVLKEVKEVIELPEYNCKYIDQAENPD  
SVILGKEVRSQ LHEFVVSISRIYHDNPFHNFPHASHVGM SVSKLLSRIVAPDKTFEKHEQ  
LHDHTYGITSDPLTQFACIF SALIHDADHSGVPNAQLEKEETQMAKTYEGKSIAEQNSIN  
RSWELLTRPSFV DLRKAI AQ TQQEEERFRQLV VNAV CATDIIDKDLKNARNQRWEKAFSL  
PVSSAPSLSGNTSASIDVREQINRRATIVIEHIIQASDIAHTMQHWHIYIKWNERLYDEM  
YKAYVEGRAESDPTEGWYEGEIGFFDYI IPLAKKLSECGVFGVCSDEYLDYARMNRNEW  
EKKGRAV VSGYAKKH NKEACCHHQISSPSHKKSSLGGETQQSSCSGTRDMSITLMHRSES  
EPQPTENGSLSN

>comp15719\_c0\_seq3; 666 70 2058 LEN=2248; translated  
MMEGSGLCCSHEPEVGNQKTQNGFAVLKKNAPGDDTRNVSGGDVVNEMTGHEKDIDIDVE  
KGIENTDRSRQQRCLSESLLTVMNMFDS SFG EQTQTSTETE TAGNSDEHNAGFATVLR TC  
RSSLEEKGTNGNVDKHVDPGSFIEALDADVDIEPN SP SVATSASPPAPPVANA EAATPSK  
KLRQWTRSSS FACLNALDSSRHLVVEEDDKNND EQPTIKPVTEETERKSGGQVVT KQEGA  
NSSIDGALES LATESTPWNVNITESDVV DAYTTAAGRTRIKGSPSSFASPENTDCDVDDY  
SNRQTIERPGTGGIDSNDNNGV FQDYDWPRVDESCIEE IIFYDGSTSSGGEDKNKSHDSE  
CHQCQIEQADRNRDGTRTSDYMYASSNSQQSPNNTSNGNSQSKSNSQSSNELQDGIAREE  
DRAVRRWRIFLIVVLLVLTIVISLQVHSYFRNKELREFEEAFAMDSEKVFDSLSHTMDIN  
LNAIDSLALLMASSAREKNETWPFMVLPDFATKASKIRILTRAIALQQFQYVDDKDRKEW  
ETYSKANEMWVQEVIDVERRDPTFHRSRNYRYAPDYNGTSWPTRS IWYGEITTNMISFPLK

GTGPYAPSWQSYPLLPSSATNSPYNFDAMQHRALGPGIRKVVRDQNAVIGPVLNFADSDD  
LE

>comp15719\_c0\_seq4; 659 70 2028 LEN=2218; translated  
MMEGSLCCSHEPEVGNQKAQNGFAVLENASGDLVNMETGHEKDIDIDEKGIENIERSR  
QQRCLSESLLTVMNMFSSVGEQTKTTRTEDETSNSDEHNAGFATVLRTRCSSLEEKGTN  
GNVDKHFVEPGSFIEALDADVDIEPNSPSVATSASPPAPPVANAEATPSKCLRQWTRSSS  
FACLNALDSSRHLVVEEDDKNNDEQPTIKPVTEETERKSGGQVVTKQEGANSSIDGALES  
LATESTPWNVNITESDVVVDAYTTAAGRTRIKGSPSSFASPENTDCDVDDYSNRQTIERPG  
TGGIDSDNNGVFDYDWPVDESCIEEIIFYDGSTSSGGEDKNKSHDSECHQCQIEQAD  
RNRDGTRTSDYMYASSNSQQSPNNTSNGNSQSKSNSQSSNELQDGIAREEDRAVRRWRIF  
LIVVLLVLTIVISLQVHSYFRNKELREFEEAFAMDSEKVFDSLSTMDINLNAIDSLALL  
MASSAREKNETWPFMVLPDFATKASKIRILTRAIALQQFQYVDDKDRKEWETYSKANEMW  
VQEVIDVERRDPTFHRSRNYRYPDYNGTWPTRSIWYGEITTNMISFPLKGTGPYAPSWQ  
SYPLLPSSATNSPYNFDAMQHRALGPGIRKVVRDQNAVIGPVLNFADSDDLE

>comp15719\_c0\_seq5; 506 139 1947 LEN=2118; translated  
MAKFAFDCREQFNILCTVLERSLGPETGDLKLRIGLHSGPVTAGVLRGQKSRFQLFGDTV  
NTASRMESTGRVNIQVQSQTADLLREARKGRWLQPREEIVEAKGKGLMTTYWIEPRKVA  
QSISSRTSHSSSVHTSSRSHTSSSSSVPSFRAKRRDNSCQTERLVNWNVDVLERLLKKI  
ALRRSALNEKADADVWVKIPSDAMVLKEVKEVIELPEYNCKYIDQAENPDSVILGKEVRS  
QLHEFVVISRIYHDNPFHNFHASHVGMSSVSKLLSRIVAPDKTFEKHEQLHDHTYGITSD  
DPLTQFACIFSAIHDADHSGVPNAQLEKEETQMAKTYEGKSIAEQNSINRSWELLTRPS  
FVDLRKAIQATQEEERFRQLVNAVCAVDIIDKDLKNARNQRWEKAFSLPVSSAPSLSG  
NTSASIDVREQINRRATIVIEHIIQASDIAHTMQHWHIYIKWNERLYDEMYKAYVEGRAE  
SDPTEGWYEGEIGFFDYIIPLAKKLSECGVFGVCSDEYLDYARMNRNEWEKKGRAVVS  
YAKKHKEACCHQISSPSHKKSSLGGETQSSCSGTRDMSITLMHRSESEPQPTENGSL  
SN

>comp15720\_c0\_seq1; 1104 1 4485 LEN=4615; translated  
IITPRGTIRRNENCCDAHDTAGRFDXLLIEGGQKESEENKVPEQAIQSPGAPKQKRRSV  
RVSLQQQRRTERRSEREARQCDPFSFWGTPHFWKLELDSLNEIFLSVNMGINEQKRDEE  
SPLWSSPRSDPQKESPWLKQRRAPRSVRTPPSYNSNSSIHSRHRGKRRLPKPNFSGSN  
KSKSHNPFDSPLSPSVGNRSPPIAAPVSRNPSSEGDHRTAMNAGRTNPFDSPTPVRKSV  
GARNNPFDESPASSVGGPPKRHGHPRSAKQVLYNPFDPATGSGAGGVDSPPYYPQVKVTV  
HTQQDVRPTKQQGSVAVDSLQILDVTEETTTADESEDAGERLEENGREEWSEDPFPHHR  
QLSEAHRGYPSELQQEQMFYPQTPPPLTPTPSNFSALS RNGYSEDGTHTTATPSEKAL  
MAAETLKKSFQRRRQKKEGARGILPTTIDEQHEERVPRSNQKDSHDKTPVSEDGRPDGL  
VKGKALAGVAARRAEADAKQSTAPPFVGDADPTKRIPQTESQPTRNPTTGDQNVGASP  
VQAAGSQQQEQQPRSNQRAEQAGTTSANGNYTLHDLCD EAVGTDDLAWHNALYLLTIR  
PDLGGQIEPECKMTPLHVACLAQTAPP IWI TRGLLYASPGTCRQPD TGGRLPLHLLVATT  
ADLDTVRLLV EEPVPSVAHRDDRGF TPLQLLLKRNDFDGLL TLEHLRLLL GQDVEGIRK  
PKNRLLFRRGDHLKSDLRLQDLEWLA EERHORHESTFREYPDDVRRALTKLSQWKRRQAN  
KQVDKNNGESSGHFADEEFHFLQSRMADFNVPAS IPTPTGQLLPLHLLVRRSFHSDTGT  
RQNLHSIKRAGKVDLLRVLIAAFPQGLVAVDANGKTP IMTAMLQKNAPPSEEVV D L L L G L  
RTPGVDGRNDTRR PALIPTADTLQ TPLHVAAEFVSNYSLLSTVCEAYPDARTVQDAWGR  
TPLHLAFQNF RSVPIDEATLELLFVKPVAKIEDNEGKTP LDFLEN PACVIREPSKLRKD  
DRQNSGMVFQDFDASVERPRNRSEARDFLARFQKFP PWLRRQACAARFVQDILVEEIAS  
PFTTFRILGSGIVLALLLVALRRMLHMDPDYTL LIYYLASYHLLMQLIQGNSNTHGGMFS  
IVPFKYLEMFDLATVALSISCALYVSREI IDTDDGIGVFFPRLGASATIACWLSLVGYFM  
EWS CGLAVFIGSATQLLSVLFWPLFLAAIGFLATSQVLF TLEDCSDGGNCSLLEYTYLIY  
RTILGQPVLTDSDYDLSPGTSTLLVIF SILCIWWILSIIAMVVTEAGRLDRRQLALAWY  
EPKVALTVMTSAATTNKNKTRYPHSLVENYCDLSEKYWHIFESALRGERSDVHWDALCF  
RSTTMLFLTGFMAFLFLPIWFFLGLVSLGLLWPPQIRRWFVFCPRPASSTIFNRGSRAYAP  
NEEDPTRTKVSQLRTDVMHFKATTYDQNDRIQKDLAVIKDIIFRASMDGEERPE

>comp15721\_c0\_seq1; 267 98 1148 LEN=1148; translated  
MEDGIPSRSSPERCLRSVRCIGDTSTNNDVQAGSSERQKYLISAAPSYHVHNGKGTCC  
FPRGQYMFGRDDGDYNDVELLCTRYPSQQRIGTTTEYSEREQRKAVSPISSRATEFSPP  
FLSNDRKTNTAQHTDEDISRSVAKSEIPATPLAPSTCFPNSGLLSSASTIGLPISMFPH  
RTSAYLQSLAEI CHAILWDARWRVEGPRRSRLFSWEQADDMSAIHTLSRRYHAIDGNEQS  
YVGNHVGEESQEF SFSKSSDSGENDRKKANTENVKIETDTQISNNPIVAKNSKFQFHSEGG  
NSDPDDRCLLEVYARLYFRKGPWFRLDNIYASYLLPKKPRLQEEKETAKRNX

>comp15721\_c0\_seq2; 932 98 4643 LEN=5577; translated

MEDGGIPSRSSPERCLRSVRCIGDTSTNNVDVQAGSSERQKYLISAAPSYHVHNGKGTCC  
FPRGQYMFGRDDGDYNDVELLCTRYPSQQRIGTTTEYSEREQRKAVSPISSRATEFSPP  
FLSNDRKTNNTAQHTDEDISRSVAKSEIPATPLAPSTCFPNSGLLSSASTIGLPISMFPH  
RTSAYLQSLAEIICHAILWDARWRVEGPRRSRLFSWEQADDMSAIHTLSRRYHAIDGNEQS  
YVGNHVGEESQEFSEFKSSDSGENDRKKANTENVK IETDTQISNNPIVAKNSKFQFHSEGG  
NSDPDDRCLLEVYARLYFRKGPWFRLDNIYASYLPPKKPRLQEEKGAMSCNVSKQVDTSAI  
DVPATVEFPKPYRPSNFFAQRNNEHRNCEKKQTTVIDENDYIDKKCVDLQMEAVALLLED  
IKRFLFHMGLIRSFHSEEECGRTVKGREGKASLLREDERRAILTKLGGGRKQCAYNKSRTN  
YFPSSTKSTEEQQRQPLENLIWKQMCQQQTIFHSFNRRSGSTILPVIKHVHQILVEKWA  
SIIILKASKVEFVPSPIILRSATKTICNALLKMLQKFKSEMRLTSTVLCALREAPVRTLRRA  
CRLYLCAATSGPGDMRNNGSNAWRSLPDSHSHKDLQKLPRLRTNLVSPPGSSWNTVCYPGKDW  
RLRVISCSFVFRAYRPLVVKELDHTTGHDRDGTVMEGDENGNLTKKAKELGFADNISQLA  
DIQVFRDIQDFHQWELGVEVRENCDFLLELNDLLLYNERKRAREAKSESKSNSSSDGE  
DGDVEVSEDSSTETSSTETPRETTELDQELLTIVGRAKIIQGFQVQKEDSGSIFSEIERE  
VSILLGIPLCERPLCTLIQPPEDARMSQIVETSRLANECERILGVIGIVLTHVLEHRNI  
HKNTTEETRLCFERPLRHMNWEGCMSYVLWDIIPLLERRGYYGLAINALEVILFGKRLSR  
AKNEIIPDISSYSYKMSMDVTGYSHHSIIISRRARGKAFDRLIIDYTHLVRKVKVSGLMK  
SVSKDKGSTKPKRRASAASIVNEVVTLLETHIIRTSVPTGQIAFSSIRTLARRLKRPLSS  
TLKGLLSFETSELGLRLSNGTIAQQAVEKYNDWSPTFDTAVANAIGTDRASAGGRCSFIG  
FENDDHAVRTGSLNVEELAKEEYHQGRPLSDDSQRNGGWYGYHDEGGKIRILFRILSSA  
TLGMDWESTKSIDPASVPPTVHLTPYQGAPFDLHVGAERTDPAESRYGGIYAARKYSIND  
FLGRLSNLDGEDLSDFVYDCLNKRQYVNSLHRRDPSLES DLQQARTLAMVAAGLGKVL  
SSAFRCLFFDYRHYSGLPDLLVRAFRYNSTADDRSTRNDNFIGELVDLGEWIGEEFSS  
KYQEAMKAKQVARIFADTDGDFLGC SKVGDSSGRAIFKQFQRSSRSRNSRPNGFVQQED  
HSNENEAKPFYSMPEKLCFRHELQRIRVECMFVEVKSQNDRLDARQEDWLNILDLHG  
NARVCKFVKASKAKDDS

>comp15721\_c0\_seq3; 933 98 4655 LEN=5589; translated  
MEDGGIPSRSSPERCLRSVRCIGDTSTNNVDVQAGSSERQKYLISAAPSYHVHNGKGTCC  
FPRGQYMFGRDDGDYNDVELLCTRYPSQQRIGTTTEYSEREQRKAVSPISSRATEFSPP  
FLSNDRKTNNTAQHTDEDISRSVAKSEIPATPLAPSTCFPNSGLLSSASTIGLPISMFPH  
RTSAYLQSLAEIICHAILWDARWRVEGPRRSRLFSWEQADDMSAIHTLSRRYHAIDGNEQS  
YVGNHVGEESQEFSEFKSSDSGENDRKKANTENVK IETDTQISNNPIVAKNSKFQFHSEGG  
NSDPDDRCLLEVYARLYFRKGPWFRLDNIYASYLPPKKPRLQEEKGAMSCNVSKQVDTSAI  
DVPATVEFPKPYRPSNFFAQRNNEHRNCEKKQTTVIDENDYIDKKCVDLQMEAVALLLED  
IKRFLFHMGLIRSFHSEEECGRTVKGREGKASLLREDERRAILTKLGGGRKQCAYNKSRTN  
YFPSSTKSTEEQQRQPLENLIWKQMCQQQTIFHSFNRRSGSTILPVIKHVHQILVEKWA  
SIIILKASKVEFVPSPIILRSATKTICNALLKMLQKFKSEMRLTSTVLCALREAPVRTLRRA  
CRLYLCAATSGPGDMRNNGSNAWRSLPDSHSHKDLQKLPRLRTNLVSPPGSSWNTVCYPGKDW  
RLRVISCSFVFRAYRPLVVKELDHTTGHDRDGTVMEGDENGNLTKKAKELGFADNISQLA  
DIQVFRDIQDFHQWELGVEVRENCDFLLELNDLLLYNERKRAREAKSESKSNSSSDGE  
DGDVEVSEDSSTETSSTETPRETTELDQELLTIVGRAKIIQGFQVQKEDSGSIFSEIERE  
VSILLGIPLCERPLCTLIQPPEDARMSQIVETSRLANECERILGVIGIVLTHVLEHRNI  
HKNTTEETRLCFERPLRHMNWEGCMSYVLWDIIPLLERRGYYGLAINALEVILFGKRLSR  
AKNEIIPDISSYSYKMSMDVTGYSHHSIIISRRARGKAFDRLIIDYTHLVRKVKVSGLMK  
NSQQSVSKDKGSTKPKRRASAASIVNEVVTLLETHIIRTSVPTGQIAFSSIRTLARRLKR  
PLSSTLKGLLSFETSELGLRLSNGTIAQQAVEKYNDWSPTFDTAVANAIGTDRASAGGRCS  
FIGFENDDHAVRTGSLNVEELAKEEYHQGRPLSDDSQRNGGWYGYHDEGGKIRILFRIL  
LSSATLGMDWESTKSIDPASVPPTVHLTPYQGAPFDLHVGAERTDPAESRYGGIYAARKY  
SINDFLGRLSNLDGEDLSDFVYDCLNKRQYVNSLHRRDPSLES DLQQARTLAMVAAGLG  
KVLSSAFRCLFFDYRHYSGLPDLLVRAFRYNSTADDRSTRNDNFIGELVDLGEWIGEEFSS  
EFSSKYQEAMKAKQVARIFADTDGDFLGC SKVGDSSGRAIFKQFQRSSRSRNSRPNGFV  
QQEDHSNENEAKPFYSMPEKLCFRHELQRIRVECMFVEVKSQNDRLDARQEDWLNILDLH  
GNARVCKFVKASKAKDDS

>comp15722\_c0\_seq1; 300 1 383 LEN=383; translated  
XSNNNNNLQQLQQSVQMMQQQQQQQLQPSFPAPNYQQQFQPHSVQVQTGAPAVNPNVVA  
PSPIGTQDLITMLLQGNLQQQQQQQQTLDPNANFQNSLQQLSAILQQLNGCNALSTA  
AVNPSSSSNNX

>comp15722\_c0\_seq2; 1632 1 5061 LEN=5343; translated  
PPPPPLRTTAAATAAPIAPPPPTGALGSTGFALPPPPRVTTTTTRSTRARSTPSSSPSRPE  
AGRSPPSAPPPARPPPPPPPLVPANRQQQQPVRQEQPTQQQQQQQTAQAEPVPRAQEPVP



IPSPQAITTNAGPPSFLPVTAFSKSWTPKNKSEQQQQLRSILARRQTHVPVLVIAATEAA  
NRMAWKNGLQISDLFQGVVEDIHPSLQTMTPFRSVNRSFLKDVRRVFLSSSQLESFYSY  
EETQEMMEEQLKPREEDGNIDEDLTLEDRIDELLQHPQPNSSNHQSTNSVFGDDGTQQG  
ESLEDVTKEAFRLTSPLNSMPWLARYRKVLDRSTDSLPHDLINCPPLVLLVCTATKEVTD  
PEHVLQELYQSNHLLPEVYKRGLYDPSTIRQEVLVLDHNDHSDAAAFDEKRLRQLLRSRF  
GPNSYILRINSSSPETAALAQQESSDLWGGGGRLGTFLLSDNDRVLLRRYFQSMILTAL  
PSLERRMADLNAIVNERKKGMRNLVKSFWRKPKDETSGSGDSSNSYQSTSSAAGAGDG  
SSAGVEEVKYRYDSIESQTHLLADTLFLMEDYDNALAMYRLVRDDYKSDKAWVHYGNVLE  
MIALCMYQLDPYTRAREIFGIFEQALVNYTRAAEEERVRNDAVARQLGEQNIRHTTHKSY  
ITRLASRLSLVLATASDILARGRSLECADLLASVSSYESLGAAVLMEQSSIFYKAGMC  
RKFAFHMLMSGHMFQKAGQNHAFRCFSSALYIYRNEMWDKLYNHLKTALAAQLYTMGRM  
SVALVLYAKLIGVTGGGKVSQSQKQFLEHLLQICETHTKAALAGADRMLVPPCVPNRKR  
EIIYRNDRLQVHVHVQYTKGASRVLELPNVNLPKIPDSSVRLWTFMGSDHLVGETGATAE  
AEEISDSTFGTPARGDEKVVWEELEITTTVAEVSNAAGEKDNNGGKHNSQSEETITAALAKIEDP  
QHRRFIAEIDKEKQNRSLMERNQRKNPKSKPVVRARGEPIFCDFSMKNTLEVGVKITEIQ  
LVARMVDNSEDNKMCTNEFAIELGDGDCTDHPKSEWRFFACADHLEYTVPDFCRISEAGV  
KSLCPATSSPFFVVTQVEVELPADGEAVVSTSIAPLVEGDLEILGFRYKLLGKVWLYHSF  
DIPGPLLKDTRTNIMNKVRGKSVYLKSKIECDMPCLTAEVRRFQPGSPTVDIDDGPMLE  
GQISTWTIRLRNVGSAPASTVTLKTNLPWIDIVEQEGARSMRDNSNPTSHCVGPGSGLTMT  
LPIEGSIQPNGTLDIPIRVRTSGEKKQDFYMLYRYELEGGSEEGQSKRRRSRWLRKMYEIP  
VYPSLSFSAKPLACYWKGKDLLVSVQLSNRDLRPTDLYVTLDRLSLTSRRYRLEALPGQ  
FTRSEEFQDVLDQIGWQEQVTVFYRVVLPESDTEETIVSSDCPFSESGCTTTNECASFSA  
TNYLCLANAFASFQSTWKAHKKEIMRIENTPDGEKEHPRSIIHSIRRANTTDVIRGENDPAL  
AEIENHPTSAGSLCRRSTSEIHLTCSWRAILGQEVVHGEHHLRGIPIRPHFTFFHGCP  
AASADHASRMEHDFSENHPIPIKMTLKNLMLETVPVSWDPPTSVRSSLELIGTCQ  
QRLELDADAETIPILEVLVLPKAGVYNLQALRFVAVDPRGTDATDKDVVTHHLSEQWLVLHL  
LDSKAN

>comp15723\_c0\_seq1; 172 1 498 LEN=498; translated  
CIDPSEECDEGIDYVYGLWFCGMDPDWSTNRCNTTQAAPCIDPDYECNSDLNPDYESLK  
VCTDLSFLINRCDPLQWNPCLDMTNECNAVLPDYESLYLCELDLSSQLPRCDPLQLNPCI  
DPSEQCDESPDYISGLKICEVINPSMEPSIEPHIEPSIEPSIEPSI

>comp15723\_c0\_seq2; 140 1 559 LEN=559; translated  
XFQINRCDPLQWNPCIDVSLHPAENDKACNIFSEARSNLEICSGMEPVSGLNRCDVDQGY  
PCIDPGAECSDSMNPWAYTLNVCEDMATELNRCDALQWNPCLDMTNECNVGLNPDYESLY  
LCELDLSSQLPRCDPLQLNPCIDPSEQCDESPDYISGLKICEVINPSMEPSIEPHIEPSIE  
PSIEPSI

>comp15723\_c0\_seq3; 275 1 1198 LEN=1198; translated  
GFELLKVCEDLAPVLSRCDPLQMMPCFNPSEECIFAFEYLPLEFCYGMHPDPLSNRCAAT  
QIVPCIDPTSGQECVEMNPEMFSKICTDLSYLRSRCDPLQWNPCIDVRDESRYGCPHR  
TENRSSLPFCQMEPTAGLNRCDSQDHPCIDPGEECTSALNPLIEYLVKVCEDLATLLPR  
CHPLQKRNCIDPSEECPFDSDFYGHLLHICEDLLPDPDTNRCGSTQPAPCIDPSDECNSDL  
NPDYESLVKVCEDLSHMLPSCDPLQWNPCIDVSDFGWCPFGTENRDILPICSWTEPTSGLN  
RCDDQQEYPCIDPGAECSSDLNLGFEMLVKVCNDKATELNRCDALQLFPCLDVSVDLTSPS  
RLPCPDWTEHRSALDICSMEPNNGINRCHMDQQYPCIDX

>comp15723\_c0\_seq4; 256 1 1039 LEN=1039; translated  
GFELLKVCEDLAPVLSRCDPLQMMPCFNPSEECIFAFEYLPLEFCYGMHPDPLSNRCAAT  
QIVPCIDPTSGQECVEMNPEMFSKICTDLSYLRSRCDPLQWNPCIDVRDESRYGCPHR  
TENRSSLPFCQMEPTAGLNRCDSQDHPCIDPGEECTSALNPLIEYLVKVCEDLATLLPR  
CHPLQKRNCIDPSEECPFDSDFYGHLLHICEDLLPDPDTNRCGSTQPAPCIDPSDECNSDL  
NPDYESLVKVCEDLSHMLPSCDPLQWNPCIDVSDFGWCPFGTENRDILPICSWTEPTSGLN  
RCDDQQEYPCIDPGAECSSDLNLGFEMLVKVCNDKATELNRCVLDLQWX

>comp15723\_c0\_seq5; 173 1 696 LEN=696; translated  
CIDPSEECDEGIDYVYGLWFCGMDPDWSTNRCNTTQAAPCIDPDYECNSDLNPDYESLK  
VCTDLSFLINRCDPLQWNPCLDMTNECNAVLPDYESLYLCELDLSSQLPRCDPLQLNPCI  
DPSEQCDESPDYISGLKICEVINPSMEPSIEPSIEPSIEPSIHHNSNEQSIEPSIESSIEP  
SMEPSMYPMSYMSDPSMYQSTYPSIYPTNSDAPSVQPSLSFSPTSLPRCSD

>comp15723\_c0\_seq6; 327 1 1515 LEN=1515; translated  
GFELLKVCEDLAPVLSRCDPLQMMPCFNPSEECIFAFEYLPLEFCYGMHPDPLSNRCAAT  
QIVPCIDPTSGQECVEMNPEMFSKICTDLSYLRSRCDPLQWNPCIDVRDESRYGCPHR  
TENRSSLPFCQMEPTAGLNRCDSQDHPCIDPGEECTSALNPLIEYLVKVCEDLATLLPR

CHPLQKRNCIDPSEECPFDSDFYGHHLHICEDLLPDPDTNRCGSTQPAPCIDPSDECNSDL  
NPDYESLKVCTDLSHMLPSCDPLQWSPCIDISAIYGDSA WC PFGTENRNILP ICSGMEPV  
SGLNRCDEEQEYPCIDPGAECSSDLNLFEMLKVCNDKATELNRC DALQLLPCLDMTNEC  
NAVLNPDYESLYLCEDLSSQLPRCDPLQLNPCIDPSEQCDESPDYISGLKICEVINPSME  
PSIEPSIEPSIEPSIHHSNEQSI E P S I E S S I E P S M E P S M Y P S M D P S M Y Q S T Y P S I Y  
PTNSDAPSVQPSLSFSPTSLPRCSD  
>comp15723\_c0\_seq7; 269 1 1210 LEN=1210; translated  
GFELLKVCEDLAPVLSRCDPLQMMPCFNPSEECIFAFAFEYLPLEFCYGMHPDPLSNRCAAT  
QIVPCIDPTSGQECSVEMNPEMFLKICTDLSYLRSRCDPLQWNPCIDVRDESRYGCPHR  
TENRSSLPFCQGMEPTAGLNRC DSSQDHPCIDPGEECTSALNPLIEYLVKVCEDLATLLPR  
CHPLQKRNCIDPSEECPFDSDFYGHHLHICEDLLPDPDTNRCGSTQPAPCIDPSDECNSDL  
NPDYESLKVCTDLSHMLPSCDPLQWSPCIDISAIYGDSA WC PFGTENRNILP ICSGMEPV  
SGLNRCDEEQEYPCIDPGAECSSDLNLFEMLKVCNDKATELNRC DALQLFPCLDVSVDL  
TSPSRLPCPDWTEHRSA LD ICSGMEPN SGINRCHMDQQYPCID X  
>comp15723\_c0\_seq9; 48 1 280 LEN=280; translated  
XFQINRCDPLQWNPCIDVSLHPAENDKACNIFSEARSNLEICSGMEPV SGLNRC DVDQGY  
PCIDPGAECSDSMNPWAYTLNVCEDMATELNRC D  
>comp15723\_c0\_seq10; 311 1 1552 LEN=1552; translated  
GFELLKVCEDLAPVLSRCDPLQMMPCFNPSEECIFAFAFEYLPLEFCYGMHPDPLSNRCAAT  
QIVPCIDPTSGQECSVEMNPEMFLKICTDLSYLRSRCDPLQWNPCIDVRDESRYGCPHR  
TENRSSLPFCQGMEPTAGLNRC DSSQDHPCIDPGEECTSALNPLIEYLVKVCEDLATLLPR  
CHPLQKRNCIDPSEECPFDSDFYGHHLHICEDLLPDPDTNRCGSTQPAPCIDPSDECNSDL  
NPDYESLKVCTDLSHMLPSCDPLQWSPCIDISAIYGDSA WC PFGTENRNILP ICSGMEPV  
SGLNRCDEEQEYPCIDPGAECSSDLNLFEMLKVCNDKATELNRC DALQLFPCLDVSVDL  
TSPSRLPCPDWTEHRSA LD ICSGMEPN SGINRCHMDQQYPCIDAMFDCTFDLNPFFFEALK  
VCEDLGMELNHCDPLHWVPCIDLSGECPFGEYQAGLPICDLPVQYGCTSSDWGTRLTAP  
WDYKEVISTDNPLLCEDICRNRGYAFFGFECPHGTFSX  
>comp15723\_c0\_seq11; 304 1 1177 LEN=1177; translated  
GFELLKVCEDLAPVLSRCDPLQMMPCFNPSEECIFAFAFEYLPLEFCYGMHPDPLSNRCAAT  
QIVPCIDPTSGQECSVEMNPEMFLKICTDLSYLRSRCDPLQWNPCIDVRDESRYGCPHR  
TENRSSLPFCQGMEPTAGLNRC DSSQDHPCIDPGEECTSALNPLIEYLVKVCEDLATLLPR  
CHPLQKRNCIDPSEECPFDSDFYGHHLHICEDLLPDPDTNRCGSTQPAPCIDPSDECNSDL  
NPDYESLKVCTDLSHMLPSCDPLQWNPCIDVSDFGWCPFGTENRDILPICSWTEPTSGLN  
RCDDQOEYPCIDPGAECSSDLNLFEMLKVCNDKATELNRC DALQWYPCLDMTNECTAGL  
NPDYESLYLCEDLSSQLPRCDPLQLNPCIDPSX  
>comp15723\_c0\_seq12; 326 1 1317 LEN=1317; translated  
GFELLKVCEDLAPVLSRCDPLQMMPCFNPSEECIFAFAFEYLPLEFCYGMHPDPLSNRCAAT  
QIVPCIDPTSGQECSVEMNPEMFLKICTDLSYLRSRCDPLQWNPCIDVRDESRYGCPHR  
TENRSSLPFCQGMEPTAGLNRC DSSQDHPCIDPGEECTSALNPLIEYLVKVCEDLATLLPR  
CHPLQKRNCIDPSEECPFDSDFYGHHLHICEDLLPDPDTNRCGSTQPAPCIDPSDECNSDL  
NPDYESLKVCTDLSHMLPSCDPLQWSPCIDISAIYGDSA WC PFGTENRNILP ICSGMEPV  
SGLNRCDEEQEYPCIDPGAECSSDLNLFEMLKVCNDKATELNRC DALQLLPCLDMTNEC  
NAVLNPDYESLYLCEDLSSQLPRCDPLQLNPCIDPSEQCDESPDYISGLKICEVINPSME  
PSIEPHIEPSIEPSIEPSI  
>comp15723\_c0\_seq13; 154 1 453 LEN=453; translated  
XPLPPNDISYLGICEEMYDWNINRCNSTQEAPCIDPSDECNSDLNPDYESLKVCTDLSH  
MLPSCDPLQWNPCIDVSDFGWCPFGTENRDILPICSWTEPTSGLNRCDDQOEYPCIDPGA  
ECSSDLNLFEMLKVCNDKATELNRC DVLQWX  
>comp15723\_c0\_seq14; 173 1 612 LEN=612; translated  
XPLPPNDISYLGICEEMYDWNINRCNSTQEAPCIDPSDECNSDLNPDYESLKVCTDLSH  
MLPSCDPLQWNPCIDVSDFGWCPFGTENRDILPICSWTEPTSGLNRCDDQOEYPCIDPGA  
ECSSDLNLFEMLKVCNDKATELNRC DALQLFPCLDVSVDLTSPSRLPCPDWTEHRSA LD  
ICSGMEPN SGINRCHMDQQYPCID X  
>comp15723\_c0\_seq15; 107 1 360 LEN=360; translated  
CIDPSEECDEGIDYVYGLWFCEGMDPDWSTNRCNTTQAAPCIDPDYECNSDLNPDYESLK  
VCTDLSHMLPSCDPLQWSPCIDISAIYGDSA WC PFGTENRNILP ICSWMEPV SGLNRCDD  
>comp15723\_c0\_seq16; 141 1 757 LEN=757; translated  
XFQINRCDPLQWNPCIDVSLHPAENDKACNIFSEARSNLEICSGMEPV SGLNRC DVDQGY  
PCIDPGAECSDSMNPWAYTLNVCEDMATELNRC DALQWNPCLDMTNECNVGLNPDYESLY  
LCEDLSSQLPRCDPLQLNPCIDPSEQCDESPDYISGLKICEVINPSMEPSIEPSIEPSIE

PSIHHSNEQSIIEPSIIESSIEPSMEPSMYPSPMYPSPMDPSMYQSTYPSIYPTNSDAPSVQPS  
LSFSPTSLPRCSD  
>comp15723\_c0\_seq17; 202 1 591 LEN=591; translated  
XPLPPNDISYLGICEEMYYDWNINRCNSTQEAPCIDPSECNNDLNPDYESLKVCTDLSH  
MLPSCDPLQWNPICIDVSDFGWCPFGTENRDILPICSWTEPTSGLNRCDDQQEYPCIDPGA  
ECSSDLNLGFEMLKVCNDKATELNRCDALQWYPCLDMTNECTAGLNPDYESLYLCEDLSS  
QLPRCDPLQLNPCIDPSX  
>comp15723\_c0\_seq18; 317 1 1540 LEN=1540; translated  
GFELLKVCEDLAPVLSRCDPLQMMPCFNPSEECIFAFEYLPLEFCYGMHPDPLSNRCAAT  
QIVPCIDPTSGQECSVEMNPEMFLKICTDLSYLSRCDPLQWNPICIDVRDESRYGCPHR  
TENRSSLPFCQGMPTAGLNRCDSQDHPICIDPGEECTSALNPLIEYLVKVCEDLATLLPR  
CHPLQKRNCIDPSEECPFDSDFYGHHLICEDLLPDPDTNRCGSTQPAPCIDPSECNNDL  
NPDYESLKVCTDLSHMLPSCDPLQWNPICIDVSDFGWCPFGTENRDILPICSWTEPTSGLN  
RCDDQQEYPCIDPGAECSSDLNLGFEMLKVCNDKATELNRCDALQLFPCLDVSVDLTSPS  
RLPCPDWTEHRSAIDICSGMEPNNGINRCHMDQQYPCIDAMFDCTFDLNPFFEALKVCED  
LGMELNHCDPLHWVPCIDLSGECFPGSEYQAGLPICDLPVQYGCSTSSDWGTRLTAPWDYK  
EVISTDNPLLCEDICRNRGYAFFGFECPHGTFXS  
>comp15723\_c0\_seq19; 188 1 924 LEN=924; translated  
GFELLKVCEDLAPVLSRCDPLQMMPCFNPSEECIFAFEYLPLEFCYGMHPDPLSNRCAAT  
QIVPCIDPTSGQECSVEMNPEMFLKICTDLSYLSRCDPLQWNPICIDVRDESRYGCPHR  
TENRSSLPFCQGMPTAGLNRCDSQDHPICIDPGEECTSALNPLIEYLVKVCEDLATLLPR  
CHPLQKRNCIDPSEECPFDSDFYGHHLICEDLLPDPDTNRCGSTQPAPCIDPSECNNDL  
NPDYESLKVCTDLSHMLPSCDPLQWSPCIDISAIYGDSAWCPFGTENRNILPICSWMPEV  
SGLNRCDD  
>comp15723\_c0\_seq20; 170 1 570 LEN=570; translated  
CIDPSEECDEGIDYVYGLWFCGMDPDWSTNRCNTTQAAPCIDPDYECNSDLNPDYESLK  
VCTDLSHMLPSCDPLQWSPCIDISAIYGDSAWCPFGTENRNILPICSMEPVSGLNRCDE  
EQEYPCIDPGAECSSDLNLGFEMLKVCNDKATELNRCDALQLFPCLDVSVDLTSPSRLPC  
PDWTEHRSA  
>comp15723\_c0\_seq21; 71 1 348 LEN=348; translated  
PESGLNRCDDQEYPCIDPTLGQGCTVDLNPFFVLALKVCEDKAMELNRCRHLQWVPCLDV  
SVDLTSPSRLPCPDWTEHRSAIDICPGMEPNNGINRCHMDQQYPCIDPMFDCTFDL  
>comp15723\_c0\_seq22; 101 1 664 LEN=664; translated  
PESGLNRCDDQEYPCIDPTLGQGCTVDLNPFFVLALKVCEDKAMELNRCRHLQWVPCLDV  
SVDLTSPSRLPCPDWTEHRSAIDICPGMEPNNGINRCHMDQQYPCIDPMFDCTFDLNPFF  
EALKVCEDLAMELNRCDPLQWVPCIDPSECPFGPEYQAGLPICDLPVQYGCSTSSDWGTR  
LTAPWDYKEVISTDNPLLCEDICRNRGYAFFGFECPHGTFXS  
>comp15724\_c0\_seq1; 351 3938 5260 LEN=7836; translated  
MAFLRGLIVIIIGLFSFSAVYGTEDPHSGETVRVPVIDLAPWFDGSLKQKNQQQEPRRTE  
STGLDVYGLTEEQRNIVHQIRRACHEVGFQIVGGLGGRKKRAGDDAMIERTWKASREFF  
ELSVEEKLLHGTTDNTKYPYGYERSETLVKKGKSIDGEDEDLPGEKASSSVAADLKETF  
VGPPTGNGSGMPPRQWIDSENISSDFQISLEAYYKRMEELAMVLLRIFAFALGESPDFFE  
DKMDHMSALRLVHYYPLEPKAENEDAGKETQEOPIAHRLVRAGAHTDYGALTILAPQDE  
GLEVLLRDASNAQGTGEGSTQNKTKPTARWHPVPLVPGAFVVNLGDLMQRWTHHEWVS  
TMHRVMPSTEARERRYSMAYFVNINGDTPIETLRCCRGTAGDEGPVITAGEHLMKHLA  
SMGTTSDKTKFSGSGKNSL  
>comp15724\_c0\_seq2; 618 272 1705 LEN=1839; translated  
MTHLALCVWILISTTKITALSAFQSSEQSGHKTSSRCSTYTDVDQPSSSLATDGNLNRDI  
KALESWAQGGVSKGNFVLSENNIGDWSVSVTDAGSSGERVLQIPSSLVLSATIREEK  
EIFDNSSAAIEFLKSNKLDQVDQFLWLKVLQYEQYKGEESKFHPWLSLPRTFNAICM  
DEVELDCLAPFAWSLAKIEILHKDKFIEALQLTKGIVSQETKENYNLLRWFVNVVFSRCW  
GDGDEDEDRLDIVPMGDMFNHAPHANVFIDYDEDRNCNIIILKEDVKPGDALNLSYGF  
PNPYRFLVVFVGFVDESLETIYSQLLSAKPSKRHVDMGYDVSKMTFNVTGDSFTTEEVWDFV  
YSLLEQVPTIQDAYEAIHSGNQDGKDSIRRYKYLETCIMLKKHVDNTLLEMEDLIKID  
EHNMDHEHEILPMIRNNVVFARVFSKVYNVDNMIQEELMARKAEEKEQQRSGTFL  
>comp15724\_c0\_seq3; 351 3938 5260 LEN=7848; translated  
MAFLRGLIVIIIGLFSFSAVYGTEDPHSGETVRVPVIDLAPWFDGSLKQKNQQQEPRRTE  
STGLDVYGLTEEQRNIVHQIRRACHEVGFQIVGGLGGRKKRAGDDAMIERTWKASREFF  
ELSVEEKLLHGTTDNTKYPYGYERSETLVKKGKSIDGEDEDLPGEKASSSVAADLKETF  
VGPPTGNGSGMPPRQWIDSENISSDFQISLEAYYKRMEELAMVLLRIFAFALGESPDFFE

DKMDHHMSALRLVHYYPLEPKAENEDAGKETQEOPIAHRLVRAGAHTDYGALTILAPQDE  
GLEVLLRDASNAQGTGEGSTQNKTKPTARWHPVPLVPGAFVVNLGDLMQRWTNHEWVS  
TMHRVMPSTEARERRYSMAFVNINGDTPIETLRCCRGTAGDEGPVITAGEHLMKHLA  
SMGTTSDKTKFSGSGKNSL

>comp15724\_c0\_seq4; 351 4169 5491 LEN=8079; translated  
MAFLRGLIVIIIGLFSFSAVYGTEDPHSGETVRVPVIDLAPWFDGSLKQKNQQQEPRRTE  
STGLDVYGLTEEQRNIVHQIRRACHEVGGFFQIVGGLGGRKKRAGDDAMIERTWKASREFF  
ELSVEEKLLHGTTDNTKYPYGYERSETLVKKGKSIDGEDEDLPGEKASSSVAAADLKETF  
VGPPTGNGSGMPPRQWIDSENISDFQISLEAYYKRMEELAMVLLRIFAFALGESPDFFE  
DKMDHHMSALRLVHYYPLEPKAENEDAGKETQEOPIAHRLVRAGAHTDYGALTILAPQDE  
GLEVLLRDASNAQGTGEGSTQNKTKPTARWHPVPLVPGAFVVNLGDLMQRWTNHEWVS  
TMHRVMPSTEARERRYSMAFVNINGDTPIETLRCCRGTAGDEGPVITAGEHLMKHLA  
SMGTTSDKTKFSGSGKNSL

>comp15724\_c0\_seq5; 351 4169 5491 LEN=8067; translated  
MAFLRGLIVIIIGLFSFSAVYGTEDPHSGETVRVPVIDLAPWFDGSLKQKNQQQEPRRTE  
STGLDVYGLTEEQRNIVHQIRRACHEVGGFFQIVGGLGGRKKRAGDDAMIERTWKASREFF  
ELSVEEKLLHGTTDNTKYPYGYERSETLVKKGKSIDGEDEDLPGEKASSSVAAADLKETF  
VGPPTGNGSGMPPRQWIDSENISDFQISLEAYYKRMEELAMVLLRIFAFALGESPDFFE  
DKMDHHMSALRLVHYYPLEPKAENEDAGKETQEOPIAHRLVRAGAHTDYGALTILAPQDE  
GLEVLLRDASNAQGTGEGSTQNKTKPTARWHPVPLVPGAFVVNLGDLMQRWTNHEWVS  
TMHRVMPSTEARERRYSMAFVNINGDTPIETLRCCRGTAGDEGPVITAGEHLMKHLA  
SMGTTSDKTKFSGSGKNSL

>comp15724\_c0\_seq6; 618 272 1705 LEN=1827; translated  
MTHLALCVWILISTTKITALSAFQSSEQSGHKTSSRCSTYTDVDQPSSSLATDGNLNRDI  
KALESWAQGGQVSKNGFVLSENNIGDWSVSVTDAGSSGERVLQIPSSLVLSSATIREEK  
EIFDNSSAAIEFLKSNKLDQVDQFLLWLKVLQYEQYKGEESKFHPWLSLPRTFSSNAICM  
DEVELDCLAPFAWSLAKIEILHKDKFIEALQLTKGIVSQETKENYNLLRWFANVVFVSRWC  
GQDGEDEDRLDIVPMGDMFNHAPHANVFIDYDEDRCNII LKEDVKPGDALNLSYGFPF  
NPYRFLVVFVGFVDESLETIYSQLLSAKPSKRHVDMGYDVSKMTFNVTDGSFTEEVWDFVL  
YSLLEQVPTIQDAYEYEAHISGNQDGKDSIRRKYYLETICIMLKKHVDNTLLEMEDLIKKID  
EHNMDHEHILPMIRRNNVFVARVFSKVKYNVDNMIQEELMARKAEEKEQQRSKGTEL

>comp15725\_c0\_seq1; 312 482 1625 LEN=1625; minus strand; translated  
MKAALLFLLLGACTGESPVQVSNNGAEQSPRHRRLSPWSSRNDPYECFNEYGSSSSSKDY  
FFGFSGQDIGDFGGAIGTLPVCLIEVESNPVTNSMSTRPMPRLGNGIIGLSPSCSFSGD  
TPTRCANNETDVISSLVKSIGSISFQFTMCFEENGNLYLPGQYPESTKWFNPANPF  
GGEGPFWSLKGPSDGSVGI LARGSDGHETSIGEITSTEYNEGWCVDSDGTYGFI  
NSMILRKIANVWADDEEATQIFACYSVDCMLKVLEKQLQOQSLERKEEADHLNSLVPDLV  
RGFDGGDIVDGSLLLYETYPSSGIYLSWQPGNELCFGTGFLLYKTVVFDNSEPSTPRI  
GIVSEEGDCNEHDLDFVGYX

>comp15725\_c0\_seq2; 178 285 646 LEN=646; translated  
MGSSSTIKNSYDAASVAHTSTMASAMFGTIIIFATVALAVRAVLRGDHKPLFQAASHPKS  
SALKARSLFSVFLHFSIFGLILFYAYICEYHPPYQHADKNYDADLFFFLTFLLFVVS  
A

>comp15725\_c0\_seq3; 441 482 2247 LEN=2574; minus strand; translated  
MKAALLFLLLGACTGESPVQVSNNGAEQSPRHRRLSPWSSRNDPYECFNEYGSSSSSKDY  
FFGFSGQDIGDFGGAIGTLPVCLIEVESNPVTNSMSTRPMPRLGNGIIGLSPSCSFSGD  
TPTRCANNETDVISSLVKSIGSISFQFTMCFEENGNLYLPGQYPESTKWFNPANPF  
GGEGPFWSLKGPSDGSVGI LARGSDGHETSIGEITSTEYNEGWCVDSDGTYGFI  
NSMILRKIANVWADDEEATQIFACYSVDCMLKVLEKQLQOQSLERKEEADHLNSLVPDLV  
RGFDGGDIVDGSLLLYETYPSSGIYLSWQPGNELCFGTGFLLYKTVVFDNSEPSTPRI  
GIVSEEGDCNEHXLGEIEFGGQTQLVQLDTGSQMFMPLPNKPSMQMDAWPDSCLNIFWV  
GDGIVYAYVNKDDGKCSKYAPLIASSNYDSQLTLDFGVGYVYVGPVDFLRTLMEVQPF  
AQPLRAYCGKKKGYRKDLSPSFHYFPIGSNLTGELWKKPPDQLSPSVVSAFASDIGIEVT  
CSMTGAPSDDEDGGESDHEEEGKKSCKNKGKGTTSNKRKSKGSKKSPS

>comp15725\_c0\_seq4; 178 309 670 LEN=670; translated  
MGSSSTIKNSYDAASVAHTSTMASAMFGTIIIFATVALAVRAVLRGDHKPLFQAASHPKS  
SALKARSLFSVFLHFSIFGLILFYAYICEYHPPYQHADKNYDADLFFFLTFLLFVVS  
A

>comp15725\_c0\_seq5; 657 1 2801 LEN=3858; translated  
XILFYAYICEYHPPYQHADKNYDADLFFFLTFLLFVVSFAFTWQKHIPDDKSLATYDAPGD

KSHDEADQNGNRSNGAVAVANDKTEVLNRNQTEEWKQWQFMFLLYHYHAEVYNSIRI  
MITCYVWMTGFGNFSFFYLKADYGIIRVLQMLWRLNFLVLFCLCTQGTTFILYYICLLHT  
YYFFMVYVVMRIGHEHNYTKWVVRTKLAVLGVVIYLVWDTNLVLFKLIHFPPFFGETPMMG  
ATGGAMWEWYFRSSLDHWSTYMGMI FALNFPITSLFYRKLES LPPVQHLYLAKGMTGAALF  
AVFYFVWTGPFMQGKFDYNQTNAYYGI IPLITYIYFRNLTPFLRNHSLDLLHQIGKTTL  
TYLMQHIIWLTSDAKSLTLVPGWPKVNFLLSVIYVTF SRRLYQLTLYLRGMMLPDDRS  
ACFRNLGGMIAIIASFCLASFLS QSLGLGLTVGLVSVCGGFALYSFLLQFTNSDRASD  
VEQPSRGSNNPNKAMVTS CAVAAMAVMMVGAGWHTMAVRGAGKIQSLPPSCGAYANKG  
QWMSLNGCDEGPRGEEYRKFVSTVSTCSAQNPVSVWGWDQASASHCRFKQRDTKSLKK  
HLKDRTIYFVGDSITRYMYHSFCRQLGIADAGAYDTTIEKHANLSQEVGDVSVFEFKWAAL  
STELVESIGNLTLNADDHNLDLVVLGGGTWDKNYMYNTDEEKEAVKSSLENLKI KMEEL  
RKLKVPVVWITPTTMTAALSDQKRKNINEEEMKVIRELYENKGILSASSFVIDGESFTS  
TRVSE SFDGVHYPHHVYSAGTQILCNALDWLLPIPNKGLPVPPKQPGAMAHPTALIIIC  
FAIAGIFFFDGFLGMSYLA AIVAPSVSPKHLWYEAFASTLHQTKNLPSVEMQEIPSTIPVQ  
SNGAGIRSSNGEDRSSPTKEPNEEVVSLIGKER

>comp15725\_c0\_seq6; 491 1 2801 LEN=5830; translated

XILFYAYICEYHPPYQHADKNYDADLFFFLTFLLFVVSFAFTWQKHIPDDKSLATYDAPGD  
KSHDEADQNGNRSNGAVAVANDKTEVLNRNQTEEWKQWQFMFLLYHYHAEVYNSIRI  
MITCYVWMTGFGNFSFFYLKADYGIIRVLQMLWRLNFLVLFCLCTQGTTFILYYICLLHT  
YYFFMVYVVMRIGHEHNYTKWVVRTKLAVLGVVIYLVWDTNLVLFKLIHFPPFFGETPMMG  
ATGGAMWEWYFRSSLDHWSTYMGMI FALNFPITSLFYRKLES LPPVQHLYLAKGMTGAALF  
AVFYFVWTGPFMQGKFDYNQTNAYYGI IPLITYIYFRNLTPFLRNHSLDLLHQIGKTTL  
TYLMQHIIWLTSDAKSLTLVPGWPKVNFLLSVIYVTF SRRLYQLTLYLRGMMLPDDRS  
ACFRNLGGMIAIIASFCLASFLS QSLGLGLTVGLVSVCGGFALYSFLLQFTNSDRASD  
VEQPSRGSNNPNKAMVTS CAVAAMAVMMVGAGWHTMAVRGAGKIQSLPPSCGAYANKG  
QWMSLNGCDEGPRGEEYRKFVSTVSTCSAQNPVSVWGWDQASASHCRFKQRDTKSLKK  
HLKDRTIYFVGDSITRYMYHSFCRQLGIADAGAYDTTIEKHANLSQEVGDVSVFEFKWAAL  
STELVESIGNLTLNADDHNLDLVVLGGGTWDKNYMYNTDEEKEAVKSSLENLKI KMEEL  
RKLKVPVVWITPTTMTAALSDQKRKNINEEEMKVIRELYENKGILSASSFVIDGESFTS  
TRVSE SFDGVHYPHHVYSAGTQILCNALDWLLPIPNKGLPVPPKQPGAMAHPTALIIIC  
FAIAGIFFFDGFLGMSYLA AIVAPSVSPKHLWYEAFASTLHQTKNLPSVEMQEIPSTIPVQ  
SNGAGIRSSNGEDRSSPTKEPNEEVVSLIGKER

>comp15725\_c0\_seq7; 490 482 2323 LEN=2650; minus strand; translated

MKAALLFLLL GACTGESPVQVSN GAEQSPRHRRLSPWSSRNDPYECFNEYGSSSSSKDY  
FFGFSGQDIGDFGGAIGTLPVCLIEVESNPVTNSMSTRPMRPSLGNIGLSPSCSFSGD  
TPTRCANNETDVISSLVKSGS ISSFQFTMCFEENGNLYLPGQYPESTKWF PANPF IAS  
GGEGPFWSLKGPSDGS SVGILARGSDGHETSIGEITSTEYNEGWCVDSDGTYGFI FPQKF  
NSMILRKIANVWADDEEATQIFACYSVDCMLKVLEKQLQOSLELRKEEADHLNSLVPDLVF  
RGFDGGDIVVDGSLLLYETYPSSGIYLSWQPGNELCFGTGFLLYKTVVFDNSEPSTPRI  
GIVSEEGDCNEHDYSEKGNIVKMSAPGGLSNVLQRGVFLGEIEFGGQTQLVQLDTGSQM  
FMLPNKPSQM DAWPDSCLNIFWVG DGIYVAYVNKDDGKCSKYAPLIASSNYDSQLTLD  
GFVGYVGPVDFLRTLMEVQPF AECQPLRAYCGKKKGYRKDLSPSFHYPFIGSNLTLGE  
WKKPPDQLSPSVVSAFASD IGI E VTC SMT GAP SDE DGGESDHEEEGGKSKKNKGKGTTS  
NKRSGKSKKSPS

>comp15725\_c0\_seq8; 657 1 2801 LEN=4033; translated

XILFYAYICEYHPPYQHADKNYDADLFFFLTFLLFVVSFAFTWQKHIPDDKSLATYDAPGD  
KSHDEADQNGNRSNGAVAVANDKTEVLNRNQTEEWKQWQFMFLLYHYHAEVYNSIRI  
MITCYVWMTGFGNFSFFYLKADYGIIRVLQMLWRLNFLVLFCLCTQGTTFILYYICLLHT  
YYFFMVYVVMRIGHEHNYTKWVVRTKLAVLGVVIYLVWDTNLVLFKLIHFPPFFGETPMMG  
ATGGAMWEWYFRSSLDHWSTYMGMI FALNFPITSLFYRKLES LPPVQHLYLAKGMTGAALF  
AVFYFVWTGPFMQGKFDYNQTNAYYGI IPLITYIYFRNLTPFLRNHSLDLLHQIGKTTL  
TYLMQHIIWLTSDAKSLTLVPGWPKVNFLLSVIYVTF SRRLYQLTLYLRGMMLPDDRS  
ACFRNLGGMIAIIASFCLASFLS QSLGLGLTVGLVSVCGGFALYSFLLQFTNSDRASD  
VEQPSRGSNNPNKAMVTS CAVAAMAVMMVGAGWHTMAVRGAGKIQSLPPSCGAYANKG  
QWMSLNGCDEGPRGEEYRKFVSTVSTCSAQNPVSVWGWDQASASHCRFKQRDTKSLKK  
HLKDRTIYFVGDSITRYMYHSFCRQLGIADAGAYDTTIEKHANLSQEVGDVSVFEFKWAAL  
STELVESIGNLTLNADDHNLDLVVLGGGTWDKNYMYNTDEEKEAVKSSLENLKI KMEEL  
RKLKVPVVWITPTTMTAALSDQKRKNINEEEMKVIRELYENKGILSASSFVIDGESFTS  
TRVSE SFDGVHYPHHVYSAGTQILCNALDWLLPIPNKGLPVPPKQPGAMAHPTALIIIC  
FAIAGIFFFDGFLGMSYLA AIVAPSVSPKHLWYEAFASTLHQTKNLPSVEMQEIPSTIPVQ

SNGAGIRSSNGEDRSSPTKEPNEEVVSLIGKER

>comp15725\_c0\_seq9; 491 1 2801 LEN=5568; translated  
XILFYAYICEYHPPYQHADKNYDADLFFFLTFLLFVVSFAFTWQKHIPDDKSLATYDAPGD  
KSHDEADQNGNRSNGAVAVANDKTEVLNRNQTEEWKQWQFMFLLYHYHAEVYNSIRI  
MITCYVWMTGFGNFSFFYLKADYGIIRVLQMLWRLNFLVLFCLCTQGTTFILYYICLLHT  
YYFFMVVVMRIGHEHNYTKWVVRTKLAVLGVVIYLVWDTNLVLFKLIHFPPFFGETPMMG  
ATGGAMWEWYFRSSLDHWSTYMGMI FALNFPITSLFYRKLES LPPVQHLYLAKGMTGAALF  
AVFYFWVTGPFMQGKFDYNQTNAYYGI IPLITYIYFRNLTPFLRNHSLDLLHQIGKTLE  
TYLMQHIIWLTSDAKSLLTLVPGWPKVNFLLVSVIYVTF SRRLYQLTLYLRGMMLPDDRS  
ACFRNLGGMIAIIASFCLGLASFLESQSLGLGTVGLVSVCGGFALYSFLLQFTNSDRASD  
VEQPSRGSNNPNKAMVTS CAVAAMAVMMVGAGWHTMAVRGAGKI QSLPPSCGAYANKG  
QWMSLNGCDEGPRGEEYRKFGVSTVSTCSAQNPVSVWGWDQASASHCRFKQRDTKSLKK  
HLKDRTIYFVGDSITRYMYHSFCRQLGIADAGAYDTTIEKHANLSQEVGDVSVFEKWAAL  
STELVESIGNLTLNADDHNLDLVVLGGGTWCKNYMYNTDEEKEAVKSSLENLKI KMEEL  
RKLKVPVWITPTTMTAALS DQKRKNINEEEMKVIRELYENK GILSASSFVIDGESF TS  
TRVSE SFDGVHYPHHVYSAGTQILCNALDWLLPIPNKGLPVPPKQPGAMAHPTALIIIC  
FAIAGIFFFDGFLGMSYLA AIVAPSVSPKHLWYEAFASTLHQTKNLPSVEMQEIPSTIPVQ  
SNGAGIRSSNGEDRSSPTKEPNEEVVSLIGKER

>comp15725\_c0\_seq10; 491 1 2801 LEN=5644; translated  
XILFYAYICEYHPPYQHADKNYDADLFFFLTFLLFVVSFAFTWQKHIPDDKSLATYDAPGD  
KSHDEADQNGNRSNGAVAVANDKTEVLNRNQTEEWKQWQFMFLLYHYHAEVYNSIRI  
MITCYVWMTGFGNFSFFYLKADYGIIRVLQMLWRLNFLVLFCLCTQGTTFILYYICLLHT  
YYFFMVVVMRIGHEHNYTKWVVRTKLAVLGVVIYLVWDTNLVLFKLIHFPPFFGETPMMG  
ATGGAMWEWYFRSSLDHWSTYMGMI FALNFPITSLFYRKLES LPPVQHLYLAKGMTGAALF  
AVFYFWVTGPFMQGKFDYNQTNAYYGI IPLITYIYFRNLTPFLRNHSLDLLHQIGKTLE  
TYLMQHIIWLTSDAKSLLTLVPGWPKVNFLLVSVIYVTF SRRLYQLTLYLRGMMLPDDRS  
ACFRNLGGMIAIIASFCLGLASFLESQSLGLGTVGLVSVCGGFALYSFLLQFTNSDRASD  
VEQPSRGSNNPNKAMVTS CAVAAMAVMMVGAGWHTMAVRGAGKI QSLPPSCGAYANKG  
QWMSLNGCDEGPRGEEYRKFGVSTVSTCSAQNPVSVWGWDQASASHCRFKQRDTKSLKK  
HLKDRTIYFVGDSITRYMYHSFCRQLGIADAGAYDTTIEKHANLSQEVGDVSVFEKWAAL  
STELVESIGNLTLNADDHNLDLVVLGGGTWCKNYMYNTDEEKEAVKSSLENLKI KMEEL  
RKLKVPVWITPTTMTAALS DQKRKNINEEEMKVIRELYENK GILSASSFVIDGESF TS  
TRVSE SFDGVHYPHHVYSAGTQILCNALDWLLPIPNKGLPVPPKQPGAMAHPTALIIIC  
FAIAGIFFFDGFLGMSYLA AIVAPSVSPKHLWYEAFASTLHQTKNLPSVEMQEIPSTIPVQ  
SNGAGIRSSNGEDRSSPTKEPNEEVVSLIGKER

>comp15725\_c0\_seq12; 159 1 605 LEN=605; minus strand; translated  
XVGEITSAEFTNTSYIDSGTSGVVPQKYNFTILNEIANAWADDEDATEILGCSSVDSIL  
ELLADDYIYLSKEEADHLNLSLVPDIIYRGFDGGDLVSDGSFYLYETYPSSGAYTGSWLF  
PSSITLGTGFLLDKTVVFDNSDPSAPRIGIVSEE GDCDENDWERLSLEGKRN LXQLDTG  
SQMFMLPNKPCMQMDAWPDS CX

>comp15725\_c0\_seq13; 655 401 2305 LEN=2418; translated  
MTGTIAKEAGTSSIPSNLDGETTPPAHYFCDEQSF DNYELESNQSFHSHYSMSSGIANPP  
IVVGYAFGPKMSTMGVVLAEASRIQVIHEEIEEDGFDEDEEDLRERERDEYFGEQQEDP  
SAL TSAALKGLEAETTGR TLGDGHPGQAQETIITLGN SNDTNMQHIVRYFRSSCSAA  
SASIASMGETTASTSTPTTATTTNTSSTFCTYKQRRHSSLGERNRFPVQIAFVPLDPD  
QPLEDQHGGKFDLILHKLTEDILTC SLMESEDS SDRGDSNEIEAGEQASEDPSQKRVA  
IRDYCYLRNPNCCLVDDPKRVQLVMSRSQIARVLQNC LNVKTSSGIPVKS PRFVVVPGS  
APHRDRTR ELKQALQNNNEGDDTTLSTPLIVKPLIAAGTKQSHCMFIALKDSALTRLPK  
SIVQE FVNHDATLYKVYVLGDFVNVYRRHSLPNLPADLSEATVDLVEFDSQRPPYILKDF  
GLETEKSDDVNARGSCA QFPVTVEEVRPIVEALKRAFGLLELFGFDILMGSNSGQCFVVDV  
NYFPSYKEVPNFP SLLARYLTQRALEQRKGRMQMNASS SARHNRDADRNC GSSVARTTH  
GSESTPCSIDGCSVTDNNSSE RD LFLSRQEIKE

>comp15725\_c0\_seq14; 491 1 2801 LEN=5754; translated  
XILFYAYICEYHPPYQHADKNYDADLFFFLTFLLFVVSFAFTWQKHIPDDKSLATYDAPGD  
KSHDEADQNGNRSNGAVAVANDKTEVLNRNQTEEWKQWQFMFLLYHYHAEVYNSIRI  
MITCYVWMTGFGNFSFFYLKADYGIIRVLQMLWRLNFLVLFCLCTQGTTFILYYICLLHT  
YYFFMVVVMRIGHEHNYTKWVVRTKLAVLGVVIYLVWDTNLVLFKLIHFPPFFGETPMMG  
ATGGAMWEWYFRSSLDHWSTYMGMI FALNFPITSLFYRKLES LPPVQHLYLAKGMTGAALF  
AVFYFWVTGPFMQGKFDYNQTNAYYGI IPLITYIYFRNLTPFLRNHSLDLLHQIGKTLE  
TYLMQHIIWLTSDAKSLLTLVPGWPKVNFLLVSVIYVTF SRRLYQLTLYLRGMMLPDDRS

ACFRNLGGMIAIIASFCLASFLSQSLLGLGTVGLVSVCGGFALYSFLLQFTNSDRASD  
VEQPSRGSNNNNPKNAMVTSCAVAAMAVMMVGAGWHTMAVRGAGKIQSLPPSCGAYANKG  
QWMSLNGCDEGPRGEEYRKFVSTVSTCSAQNPVSVWGWDDQASASHCRFKQRDTKSLKK  
HLKDRTIYFVGDSITRYMYHSFCRQLGIADAGAYDTTIEKHANLSQEVGDVSVVEFKWAAL  
STELVESIGNLTLNADDHNLDLVVLGGGTWCKNYMYNTDEEKEAVKSSLENLKIEMEEL  
RKLKVPVWVITPTTMTAALSDQKRKNINEEEMKVIRELYENKGILSASSFVIDGESFTS  
TRVSEFDGVHYPHHVYSAGTQILCNALDWLLPIPNKGLPVPPKQPGAMAHPTALIIIC  
FAIAGIFFFDGFLGMSYLAIVAPSVSPKHLWYEAFTLHQTKNLPSVEMQEIPSTIPVQ  
SNGAGIRSSNGEDRSSPTKEPNEEVVSLIGKER

>comp15725\_c0\_seq15; 189 1 681 LEN=681; minus strand; translated  
XVGEITSAEFTNTSYIDSGTSGVFPQKYNFTILNEIANAWADDEDATEILGCSSVDSIL  
ELLADDYIYLSKEEADHLNLSLVPDIYRFGDGGDLVSDGSFYLYETYPSSGAYTGSWLF  
PSSITLGTGFLLDKTVVFDNSDPSAPRIGIVSEEGDCDENDYSEKGNIVKMSAPGGLSN  
VLGAGTYLGEIEFGGQTQLVQLDGTGSMFMLPNKPCMQMDAWPDSCX

>comp15725\_c0\_seq16; 657 1 2801 LEN=3847; translated  
XILFYAYICEYHPPYQHADKNYDADLFFFLTFLFLFVVSFAFTWQKHIPDDKSLATYDAPGD  
KSHDEADQNGNRSNGAVAVANDKTEVLNRNQTEEWKGMQFMFLLYHYHAEVYNSIRI  
MITCYVWMTGFGNFSFFYLKADYGIIRVLQMLWRLNFLVFLCLTQGTTFILYYICLLHT  
YYFFMVYVVMRIGHEHNYTKWVVRTKLAVLGVVIYLVWDTNLVLFKLIHFPPFGETPMMG  
ATGGAMWEWYFRSSLDHWSTYMGMI FALNFPITSLFYRKLES LPPVQHYLAKGMTGAALF  
AVFYFVWTGPFMQGKFDYNQTNAYYGI IPLITYIYFRNLTPFLRNHSLDLLHQIGKTTLE  
TYLMQHIIWLTSDAKSLLTLVPGWPKVNFLLVSVIYVTF SRRLYQLTLYLRGMMPLDDRS  
ACFRNLGGMIAIIASFCLASFLSQSLLGLGTVGLVSVCGGFALYSFLLQFTNSDRASD  
VEQPSRGSNNNNPKNAMVTSCAVAAMAVMMVGAGWHTMAVRGAGKIQSLPPSCGAYANKG  
QWMSLNGCDEGPRGEEYRKFVSTVSTCSAQNPVSVWGWDDQASASHCRFKQRDTKSLKK  
HLKDRTIYFVGDSITRYMYHSFCRQLGIADAGAYDTTIEKHANLSQEVGDVSVVEFKWAAL  
STELVESIGNLTLNADDHNLDLVVLGGGTWCKNYMYNTDEEKEAVKSSLENLKIEMEEL  
RKLKVPVWVITPTTMTAALSDQKRKNINEEEMKVIRELYENKGILSASSFVIDGESFTS  
TRVSEFDGVHYPHHVYSAGTQILCNALDWLLPIPNKGLPVPPKQPGAMAHPTALIIIC  
FAIAGIFFFDGFLGMSYLAIVAPSVSPKHLWYEAFTLHQTKNLPSVEMQEIPSTIPVQ  
SNGAGIRSSNGEDRSSPTKEPNEEVVSLIGKER

>comp15726\_c0\_seq1; 1929 529 4842 LEN=4952; translated  
MFAIKNLSNLLTSYSHDSHGLPHETDSDET VNNSETEDTHWPILAGKESKNNDVHMKTTK  
VLSFGSENEDDHSTAEESEYSSSNISQSTTNSGFAKDPSESPRKNQDQNLFSHSETKSP  
LNDGDEIPGEDEENDEAMVNEAKEFTKLEAESEFLAKAVGEMRSIVLDNARLIKTGAV  
EAANTDIDANAPKVEAEAEADRSKPAEATEEKNTGSYLP IRTKHEACLAEDTQEEKAIDDN  
EEEADLSMRTAIEDKMLSLGEDNATKKGVDIDVTSKNI ITRSDSIAKEEVVTKEGDKE  
DDSKPKPEAATTPPEAEPLDSHLEETIPSKTDTNIESRKLKSKTTKDEIYLAEEEAATNSRE  
EASKITEGTVSEATTKSGTDRKVE TDSRSQTGGEAVARTEIQPEAQAKASAGADTEKSD  
REIKTESDEEDRATVKITLAPNTKIDHSADKRFEVERKAVEEIDKKIELNLVDGLELELD  
QDVVVP SKTKGANMELQRAESRVQTEALSNTLLGSGDHKKGDKR VEMHGEIQPEGKTYAG  
EVKREDITAGPEEKDVI PWVDREEKASEMDTYPVKS NLVEEKIIDASSDEGDETRIVSLA  
ERMKDMFDSASPVEPSKAFGKKT SQEGRKHFGTKGSSTQSSLARMDKMKMFDSPSPDEPSM  
AFGLGNRVINQPHOPTIMDSKICRKSETKQSKRPDRDKVEPNSSKTDVDVNVVSASSQMV  
LLWASSLQKNEI SPSSRN TAADIEIEK GKEDKLVDCYTVVEKEDGEEIEEMTVHEYAESV  
ASCNEDDEDDFIEEVVIDDDNEDGTGITTAVDIEEMDVIDIVEVGRNQLHDETTVDDWEF  
EEATIDDETVEEISDKKIEDIDNIATIIITDSNKTNLNFNANGSVSQTRVDYTM SLNPSS  
HSQKDYKDN SPGRREFALPAPLMATE TDCSRNSLLREQQR PATDTEKENSETRRYMMR  
LGMSDAINVT PKKYPPSWQNSKNLSESTLGKRCNTKTS PVLQVTNTSAMAI IRPDWKKDE  
GLVEEII SIVKEPNAMQNKMLLAERITFLLVGDVEEETKSNTSFSSCCLSPSKTVEHSP  
TGNYQAEANAYSNRKKDGFKDPGLKMRDVL FQAKLDHVDDPDTISNRTLRRRRMR  
SKANESMHSSVLA AAF SFENETREDESSLPSAEDKAALAEKVISRIWPKTPDGANPKSKPWQ  
KGM LLEPPKTPSPK KLGDR LKMFES PSSSCSSPFTNDR CNRGRAERNTKGKADRAPISLF  
EKTTPKSGNVSGVAETNKVSERTLKNLCAFQRLWRRTRSKPGDVATTDIGASSKKKRVSF  
LTIPSDRTIRSSGANSEKPKPALREPRGSDALASTSSSGQERNADSAHAATGCSGIRYKL  
EDFELGRFDKDVVDMDKWEDFLEDEF SKHFVGSREEFSNQPKWKRDRERRRIRVAF

>comp15726\_c0\_seq2; 1240 1 2841 LEN=2951; translated  
VVP SKTKGDEQYDLGAGANMELQRAESRVQTEALSNTLLGSGDHKKGDKR VEMHGEVQPE  
EMTYAGDRVDREEKASEMDTYPVKS NLVEEKIIDASSDEGDETRIVSLAERMKDMFDSAS  
PVEPSKAFGKKT SQEGRKHFGTKGSSTQSSLARMDKMKMFDSPSPDEPSMAFGLGNRVINQ





IVRWILRNCIYDNSTTNNNPNTCSNNFCERNETEIKTKSTDHGHPRSDHGC DYPNGFYVN  
EKEEQSDSGFHCSDYCCQAECIATFLVMANPNGVNVQDYTGGETPLGIVQNH LRAIDTNTG  
TQYTTSDLKEPHDSLSSIGTRFRYIHDEGNDRGIKRPPSTC SHYLMPKFRSTVSAEDSYR  
LVERLETLLCFASQMTTTRKQTLVANRVTPASNDCKNGNENYHTAAVPTKEETK KSTPMS  
SRMTTAGSMRASTSMGQLRYKNREDEDDDSYSDRPQVTEEKSN DTKSLNYNDSQNMPPVI  
TLFSNHQQQLDPSSLNIEETTRRRMAKRKTRQSKEKQK IEMVM SHVQEKARVLGDAEDLLN  
KLLV

>comp15727\_c0\_seq3; 784 1 3153 LEN=3296; translated  
QAAEEVRSIMMKAQRLANNTKNICRRSNHHNALS KPVVERSTNATAINTTNEIGSATNTVP  
RRRGEEDENEHQDGVLPNDGEDLSNELTLPQLLQIVEVAHNNKQNHDCSPDRFLLEKES  
NMWYTNKTENTCLHLMP SNANKAGKSTAGAVPAGITPDQRTSEVEGEDDTKEDLSKRNVH  
HCCNLDDSNICSYEHSDHSP IRTSRHGIHRRTKLFETMQDLLITNSNERDCERDHSNS  
SDIEKNKSSKMSLVPNNNSNLLKNKNKNVYQSNNSCRQRYHCKHRRSLI SLSTSNLSDK  
GEGRRNDTNTCNEVNVKVHREKNKSIQNEPTHKNENH RREEHHRQREVKIFQTTEEGEI  
AKAVSIVEIPSPFLFKVCPNHNSNKNKNKTKTSVTGSSYATTMNSDETSSIGHNDTTP  
ILVGLIRRRKFKLALQVRVYFPTEATMEVKTHILPRCCCKDKNISHTTAIATNNGSSYHV  
SCSLALHEMIREIGRTRMPTTTMGQMSTNSNLVSGPTDLKYNQYRIIGEGQQWTSPLFS  
RQNLQQSTAVLSQEREHAFVEDEEISTQLELVKALIDANPDALKTCISSCGCTMDRTRKE  
NRNVTDHTEYGYLPLHMACASLCEIQNYRTQSVTGGAGDRIFQLQRQQQHRILELQLGV  
IRILLDRHLSGAFHHKNATKELPLHIIVRWILRNCIYDNSTTNNNPNTCSNNFCERNETE  
IKTKSTDHGHPRSDHGC DYPNGFYVNEKEEQSDSGFHCSDYCCQAECIATFLVMANPNGV  
NVQDYTGGETPLGIVQNH LRAIDTNTGTQYTTSDLKEPHDSLSSIGTRFRYIHDEGNDRGI  
KRPPSTC SHYLMPKFRSTVSAEDSYRLVERLETLLCFASQMTTTRKQTLVANRVTPASND  
CKNGNENYHTAAVPTKEETK KSTPMS SRMTTAGSMRASTSMGQLRYKNREDEDDDSYSDR  
PQVTEEKSN DTKSLNYNDSQNMPPVITLFSNHQQQLDPSSLNIEETTRRRMAKRKTRQSKE  
KQK IEMVM SHVQEKARVLGDAEDLLNKLLV

>comp15727\_c0\_seq4; 899 1 3394 LEN=3537; translated  
XSSSLSCSSLLAESAFPSSSPSFQIEENS DNSKNRDDSI IKPYIDERIRGKNDDRHKP  
SDYKHDLDVGNVRLVAQAAEEVRSIMMKAQRLANNTKNICRRSNRHNALPKPVETSTN  
ATAINTTNEIRSATNTFPRRRGEEDENEHQDGVLPNDDEDLSKELTLPQLLQIVEVAHN  
NKQNQDCSPDSFLLEKESNMWYTNKTENTCLHLMP SNANKAGNGIESTAGAVPAGITPDQ  
RTSEVEGEDDTKEDLSKRNVH HCCNLDDSNICSYEHSDHSP IRTSRHGIHRRTKLFET  
MQDLLITNSNERDCERDHSNSSDIEKNKSSKMSLVPNNNSNLLKNKNKNVYQSNNSCRQ  
YHCKHRRSLI SLSTSNLSDK GEGRRNDTNTCNEVNVKVHREKNKSIQNEPTHKNENH  
REEHHRQREVKIFQTTEEGEIAKAVSIVEIPSPFLFKVCPNHNSNKNKNKTKTSVTGSS  
YATTMNSDETSSIGHNDTTPILVGLIRRRKFKLALQVRVYFPTEATMEVKTHILPRCC  
KDKNISHTTAIATNNGSSYHVSCSLALHEMIREIGRTRMPTTTMGQMSTNSNLVSGPTDL  
KYNQYRIIGEGQQWTSPLFSRQNLQQSTAVLSQEREHAFVEDEEISTQLELVKALIDAN  
PDALKTCISSCGCTMDRTRKENRNVTDHTEYGYLPLHMACASLCEIQNYRTQSVTGGAGD  
RIFQLQRQQQHRILELQLGVIRILLDRHLSGAFHHKNATKELPLHIIVRWILRNCIYDN  
STTNNNPNTCSNNFCERNETEIKTKSTDHGHPRSDHGC DYPNGFYVNEKEEQSDSGFHC  
DYCCQAECIATFLVMANPNGVNVQDYTGGETPLGIVQNH LRAIDTNTGTQYTTSDLKEPHD  
SLSSIGTRFRYIHDEGNDRGIKRPPSTC SHYLMPKFRSTVSAEDSYRLVERLETLLCFAS  
QMTTTRKQTLVANRVTPASNDCKNGNENYHTAAVPTKEETK KSTPMS SRMTTAGSMRAST  
SMGQLRYKNREDEDDDSYSDRPQVTEEKSN DTKSLNYNDSQNMPPVITLFSNHQQQLDPSS  
LNIEETTRRRMAKRKTRQSKEKQK IEMVM SHVQEKARVLGDAEDLLNKLLV

>comp15727\_c0\_seq5; 1181 61 4146 LEN=4289; translated  
MGHITNYGNVHHQQYRNYDHSSGTDELHPSCARGCESENGNESSINNINNVGSSRNINK  
IGSGTIVEHKQIAGTSYDCPISIASNEVSTTNNASRSSCSKSTHQTFFLDSTKNLDVRF  
CTDTKSNIDNGTQSTYTGSCPGSGTNAIKAQKSDGATVGHYPYLPSSSLCWIVSLGTDDAA  
FSYKHNFHQRRQQQRSECSDDRDHEQFSTTRKITTTHPDCEPSVTLIRSSSLSCSSSL  
LAESASFQSSSPSFQIEENS DNSKNRDDSI IKPYIDERIRGKNDDRHKPSDYKHDLDV  
GNDVRLVAQAAEEVRSIMMKAQRLANNTKNICRRSNRHNALPKPVETSTNATAINTTNEI  
RSATNTFPRRRGEEDENEHQDGVLPNDDEDLSKELTLPQLLQIVEVAHNNKQND CSPD  
SFLLEKESNMWYTNKTENTCLHLMP SNANKAGNGIESTAGAVPAGITPDQRTSEVEGEDD  
TKEDLSKRNVH HCCNLDDSNICSYEHSDHSP IRTSRHGIHRRTKLFETMQDLLITNSN  
ERDCERDHSNSSDIEKNKSSKMSLVPNNNSNLLKNKNKNVYQSNNSCRQRYHCKHRRSLI  
SLSTSNLSDK GEGRRNDTNTCNEVNVKVHREKNKSIQNEPTHKNENH RREEHHRQREV  
KIFQTTEEGEIAKAVSIVEIPSPFLFKVCPNHNSNKNKNKTKTSVTGSSYATTMNSDE  
TSSIGHNDTTPILVGLIRRRKFKLALQVRVYFPTEATMEVKTHILPRCCCKDKNISHTTA

IATNNGSSYHVSCSLALHEMIREIGRTRMPTTTMGQMSTNSNLVSGPTDLKYNQYRIIGE  
GQQWTSPLFSRQNLQQSTAVLSQEREHAFVEDEEISTQLELVKALIDANPDALKTCISS  
CGCTMDRTRKENRNVDHTEYGYLPLHMACASLCEIQNYRTQSVTGGAGDRIFQLQRQQQ  
QHRILELQLGVIRILLDRHLSGAFHHKNATKELPLHIIVRWILRNCIYDNSTTNNPNPNTC  
SNNFCERNETEIKTKSTDHGHPRSDHGCDYPNGFYVNEKEEQSDSGFHCSDYCCQAECIA  
TFLVMANPNGVNVQDYTGGETPLGIVQNHRLAIDTNTGTQYTTSDLKEPHDSLSSIGTRFR  
YIHDEGNDRGIKRPPSTC SHYLMPKFRSTVSAEDSYRLVERLETLLCFASQMTTTRKQTL  
VANRVTPASNDCKNGNENYHTAAVPTKEETKKSTPMSRMTTAGSMRASTSMGQLRYKNR  
EDEDSDSYSDRPQVTEEKSNDTKSLNYNDSQNMPVITLFSNHQQQLDPSSLNIEETTRRR  
MAKRKTRQSKEKQKIEVMVSHVQEKARVLGDAEDLLNKLIV

>comp15727\_c0\_seq6; 200 1 465 LEN=608; translated  
ASNDCKNGNENYHTAAVPTKEETKKSTPMSRMTAGSMCASTSMGQLRYKNREDEDDDF  
YSDRPQVTEEKSNDTKSLNYNDSQNMPVITLFSNHQQQLDPSSLNIEETTRRRMAKRKTR  
QSKEKQKIEVMVSHVQEKARVLGDAEDLLNKLIV

>comp15727\_c0\_seq7; 1092 1 4038 LEN=4181; translated  
NYDHSSGTDELHPCARGCESENGNGSSSINNINNVGSSRNINKIGSGTIVEHKQIAGTS  
YDCPISITSSNEVSTTNGSRSSCSKSTHQFFWDSTKNPDVRFCTDTKSNIDNGTQSTF  
TGSCPGSGTNAIKAQKSDGATVGHYPSPSSSLCWIVSLGTDDAAFSYKHNCHFQRQQQR  
SECSCDDRDHEQFSTTRKITTTHPDCEPSVTLIRSSSLSCSLLAESASFQSSSPSFQ  
IEENS DNSKNRDDSIIKPYIDERIRGKNDDRHKPSDYKHDLDVGNVRLVAQAAEEVRS  
IMMKAQRLANNTKNICRRSNRHNALPKPVETSTNATAINTTNEIRSATNTFPRRRGEEDE  
NEHQDGVLPNDDEDLSELTLPLQLLQIVEVAHNNKQNDQCSFDFLEKESNMWYTKT  
ENTCLHLMPSNANKANGIESTAGAVPAGITPDQRTSEVEGEDDTKEDLSKRNVHHCCNL  
DDSNICSYEHSDHSPIRTRSRHGIHRRTKLFETMQDLLITNSNERDCERDHSNSSDIEK  
NKSSKMSLVPNNNSNKNKNVYQSNNSCRQRYHCKHRRSLISLSTSNLSDKGEGR  
RNDTNTCNEVNVKVHREKNKSIQNEPTHKNENHREEHHRQREVKIFQTTEEGEIAKAVS  
IVEIPSPFLFKVCPNHSSNKNKNKTKTSVTGSSYATTMNSDETSSIGHNDTTPILVGL  
IRRRKFKLALQVRVYFPTEATMEVKTHILPRCCCKDKNISHTTAIATNNGSSYHVSCSLA  
LHEMIREIGRTRMPTTTMGQMSTNSNLVSGPTDLKYNQYRIIGEGQQWTSPLFSRQNLQ  
QSTAVLSQEREHAFVEDEEISTQLELVKALIDANPDALKTCISSCGCTMDRTRKENRNVT  
DHTEYGYLPLHMACASLCEIQNYRTQSVTGGAGDRIFQLQRQQQQRHILELQLGVIRILL  
DRHLSGAFHHKNATKELPLHIIVRWILRNCIYDNSTTNNPNPNTCSNNFCERNETEIKTKS  
TDHGHPRSDHGCDYPNGFYVNEKEEQSDSGFHCSDYCCQAECIATFLVMANPNGVNVQDY  
TGGETPLGIVQNHRLAIDTNTGTQYTTSDLKEPHDSLSSIGTRFRYIHDEGNDRGIKRPPS  
TCSHYLMPKFRSTVSAEDSYRLVERLETLLCFASQMTTTRKQTLVANRVTPASNDCKNGN  
ENYHTAAVPTKEETKKSTPMSRMTTAGSMRASTSMGQLRYKNREDEDDSDSYSDRPQVTE  
EKSNDTKSLNYNDSQNMPVITLFSNHQQQLDPSSLNIEETTRRRMAKRKTRQSKEKQKIE  
MVMVSHVQEKARVLGDAEDLLNKLIV

>comp15728\_c0\_seq1; 341 259 1279 LEN=1279; translated  
MALHRRTKQAAXWIRELDHNGGAPVDLPANAAPAAAPAHRAAGGLDPPARSGTRFPHGG  
EAAPSEAAGEVLALSAAAGRNHDWTRNATAVVPVVEESPDSGDGDFDGHFRFCIEDIDDDDE  
DLDLRLRLRSMLEAMADLESFQATSSSSSLDPLGGALDAGKSPRPLPLDSDFTASTSTST  
SELSLLFPAAKASTEPKASTPGERDGPESAAAEEKEGVWRARWLLVGAALYGTNFSVVKL  
LGDEMPVGI STTLRFGLAALATFPWLVEGWFAAGRPGEAPTAANQRFMATMYGLEVGL  
WNSIGYVSQAVGLETTLASKSAFICSMVAVVIVPLLDWLAGX

>comp15728\_c3\_seq1; 240 1 1467 LEN=3279; minus strand; translated  
FEFKKTLFGAMDKKYRLDVARDKERKFI FEGDNPFLQELMEKKHQFVKDVAYYDLEDPD  
EFIFDYRRLMDRIDQPAAYKHFQKLLTTYIVDVYQTNYSYVQESLVELYKVCDEIRTLQV  
QEDFKTRKKGKMDAPVLFDRITKFGPRLEESLQPSLSRVFCNLLCFNKKRRVSPIQKEI  
RKIITEAAIVSRAYKGLFLKRQILDLECLHRAGSELGKIRMISASSWMLFIASLIFLISR  
IVTLAGFENFLFIAIGLWSQMLTLAGGLLSLFFSRNILTILWLGVTVDGKVKIAARTQD  
DNTHSAMRNIRSVISSRIYMRIVRLCAVLC SMAALPWVMVLYALPREEDASGYLPLYIGF  
VGLVLAVGEAITFFFVEYIVSYNLP SCLGEHICNAFREEIKLMHTSLTITKTKFHTEQAQ  
ERITWEYVACEFLHRYRFDLILGPDRFSSIFRFLQCGVENERATDSVGFGRPGRRHTQVF  
FGPEGDII

>comp15728\_c4\_seq2; 1535 1 6448 LEN=6448; translated  
GDDGDGDDGDDVDELSMESFEDDDVEGQNSRVDSLNGEDTTNFDTYQKVVSAIQGR  
RIVLSVLRMAVTKDGSDELVKFAQILQDSQTEGIARRVHPFEDTTTFGSPARVLELEKG  
QAILVIDPSGIDRMSETNMSVAVKETKLPENQDILELLKKKIATQGLDIRDAKESNQGR  
SMMGKLGRRARQKRLIRDIVEAMDDVNALNFRGQIQSSIPFLTGYESYLLAKVVEVLDKIA

LDSFYLGQVARVFDREVDPDLNVSKKTKRKMKKSRKRELYQILKYGFRNQNVARIVVQNLE  
FGFDFESHWFDFKVCNSRWYDARGQFPMSENITSSHDLVKKFWKRVNRFQAAQNLPAAGNE  
FISSKRHQFGTHIGRMITNEFRVENRPLVDESIVYSFVVSPIPTMINSQVHVLRQLAKH  
WNDVLAQPFQGNWTHHPMEQLDPFRTRMFYIPNVCIVLSSLRGRNKWDIDVLGPFIFKCQK  
LPTSSTAKECLNLAKEMRSKIIHELCAVVISIKNPLSSWLKAIQESCIQIEKDSKAIYEE  
VTGVEIGLRFQFDLITQVSWKVPDAELEHAISLHLQGKYPGEVVTQRNIRRALLSVTPR  
SSRTMLGLSKLDELGSKPMRVMIEVNRLLKRVIRRELLNDAILELSTGEHIFEDDLVIG  
DWYWLNQEGEKRSVYTFVGEQMRGETYVYLFISVDSGVERLVTDFDEEDINCQYIPVAE  
SIVRAQRCYMNLELNHCHKFKYDAFMEFSFLRIPLRRLALVSQIFCEELDSARLNLQEV  
KTSKQVKVEAGDLEPGKTYVYNSEFHVYAPFVCKKKYSPADSEWERLKMVEMVKVPPQS  
VCIIGSSITGLMTAIHCTENVLASGGQLKLYQSN DATVRADSI FERSEILRLGVRWIAML  
RYHLGSIFEDVFIPTSGEMNAHLGNHMATEGFVEIAIKYLECILHGEVTKLWSKEIEEVV  
SGSNVRYDTESENCLTKLGEHLEVGDNI LRHVDPNGNPCEGQHRWEVTNVHYTKTLGVKDL  
IIGEEYDIYRDQEI RTFSLSSVNLQTRIYTFSSKKKKIKDIVAPAHSLPPIYPLGTRQA  
ETVFLKCE TKGNSNENYLDRLSEGSVEGHEFVVDVGHSHVIDCTIKTPDVSSFSFQATPS  
EPYGVCCISRPND SIAGTSRIIGDFRKFVRQVSIANEMKILLQSKHWQRHF EKLVEDSDF  
STLNEKDP IVIKLMEAVEWHAKHAHDFRRRLQIQLEETGDNFCVAMELSREYEWKNDT  
VDRCLVWEKKRSEDVDHNSRYQMPDIDKLGIVSHNIDCLWFEATLEVLRQADVYNVEKT  
NEFPKLQLINSEIVEEVKNLSLGD SFREV GKPRTKFEILLTNKKGIFARTAEGVVR LFD  
TDRVFRREGTLARSYDFD TESKIAITTFPVSHYVNHRSIRHNNASKGYVFASF GDENSTSH  
LMRSCRLTGGCVNVLQFDNFVKAANDGIALKDRFQLYSRGANWSNGEAMHKGTMSNDGQD  
AFLRPGFSIDQCLKYLRSRIELLEAERDLDSILSQDWKAKFAASMVPCGMELNGKFIKT  
LKDDIFVFI FNMFLGVAKDKSLSDGILSILQARGDEMTEDRSKLSHDIYWKDFLFLGKT  
SLDDATQNR LKDYHCEIAKRMNQSILETISFAKKS YLYDQRFQELWKQPKSVDSLIDDF  
ALESWKYANSLSMIVAL SAGSVALCLFGSLQDSLVRILYESCGIIIAAFNMVICLGIIS  
NIGTYKTRNQEARV FYLKNHLFEFKTLFGAMDKKYRLDVARDK EERKFI FEGDNPF LQE  
LMEKKHQFVKDVAYYDLEDPDEFIFDYRRLMDRIDQPAAKYHFQKLLTTYIIVDVYQ TNS  
YVQESLVELYKVCDEIR TQLVQEDFKTRKKGKDMAPVLFDRITKFGPRLEESLQPSLSRF  
FCNLLCFFNKRRVSP IQKEIRKII TEAAIVSRAYKGLFLKRQILDLECLHRAGSELGKI  
RMISASSWMLFIASLIFLISRIVTLAGFENFLFIAIGLWSQMLTLAVGLLSLLFFSRNIL  
TILWLGVTVDGKVKIAARTQDDNTHSAMRNIRSVISSRIYMRIVRLCAVLC SMAALPWVM  
VLYALPREEDASGYLPLYIGFVGLVLA VGEAITFFFVEYIVSYNLP SCLX

>comp15729\_c0\_seq1; 2704 1 7209 LEN=7482; translated  
WTSWKYKSTLTMMFRRGYASAVLA AVAASLAYSSAFNTQAPAAFVRNNAIARQNI AFTPT  
ALKSTIEETSEATIDTVRTSVEDYVAARGGNLP IKKVL IANNGMAATKS IMSMRQWAYLE  
LGDERAIQFVAMASPEDINANA E F IRLADSYVEVPGGVNRNNYANVELITKTAIEQGVDA  
VWPGWGHASENPSLPTNLAKNGIKF IGPTAPVMSVLGDKIAANILAQTAKVPSIPWSGSF  
GGPDDGPLQAE LTEEGTIPDEVFAKGTTKTVEEAIEAARRIGYENGIMIKASEGGGKGI  
RFVDNEEDLKNAYIQVSNEVVGSPIFVMQLCKNARHLEVQIVGDEHGNAVALNGRDCSVQ  
RRHQKIIIEGPPVSAKPHVWKEMEDA AVALAKAVGYANAGTVEYLYSEDDAKFYFLNLP  
RLQVEHPVTEMITNVNLPAAQLQVAMGIPLDLIPEIR TLYGRSRFEDNPS SPPEARIDFAS  
AERQPANGHCIAVRITAENAEAGFKPTSGGIQELNFRSTPSVWGYFSMDSSGSIHEFADS  
QFGHLFANGVDREQARRNMV LALKELSIRGDI STTVDYISRLIELEDFIDNNIDTAWLDG  
I IKENV DGIANLVDENSGQ NATSGRSS LKRNTLSVTDLTSECSHLYVVLGATIVGYENCR  
EDESTFLELMSKGQLPSRSL LKMSHVELILNGTKYKMTCTRKGQNSFKIELAEDCRSNM  
GGSFVMTTVRSLSDGGYLIQIGGQSHVAYLT SRGDAATGMKLN VAGSSIAFSPDYDPTSL  
RTDVAGKLVKRLVDPDTRVKKGEAYAEIEVMKMF MPLKVEEAGVVEWKANEGAALSPGSL  
LATLELDN PENVATTTVFQGSLRVEGWGDSTRPANAKRPHLILRAAMDALNCAMSGYSLG  
QDEVD EAMEDLMKAVTDP SLPVLEVDEQLSVLSGRIPAKLYGNISSLIRDFDSTSRFPAS  
QVLSLLDEYASSLNDASAKSAFAALTQQLNDATTPYTRSKIDAVQGAEKALKSFIDILRQ  
WISVERWFCDEPSYADSVENIRKLHKDDATTILN ICRSHEQVQTTSYIITRIMDAIDDGS  
RAERISIVAGAESLLDALPSISEVGMGQRSEYSQVALRARKLLMQESMPNLELRKQVR  
VAAQKLSSSDTKEADDLLAEQTPLLDVFFP LLKEVTS SNEEIGLLELYARYLYRFYTNE  
TERSSDERLVKFSFFNKTSE RVLHKMTSVPSMTALSSAVSSNL TSLSDSTEGDKKVL  
SVSGLEKVP SNVARTGICKIIDSIDDIDPSVFEGILKNFPQFSSESENVGPINLVYLI  
VSKTDVENDEKSCDLMSGICQSKLSPYKDLLEKANIRRVTVSFDQEATDNIGASPATFTY  
RSPLFEEESLIRGIDPSHAINL DLGRVASNFSVRTTGARHTSTSHVHMYEATPRASALAN  
DKRANKSPRIFVRALSFLDFSSNSFERILVDALNALDLCSENRRADNHLFINLVSDFEK  
VVLDPVVVEQVVVDILKRHGDRVSNLGIVEVETKILCSL SRDSLPI SLRLVASNPTGYVH  
VLSTYVEAADETGD RVFKLIGGTKATLAGAGDSSWEGLHVDTPYPLTRPFDHQRRALR

SSDTLYAYDLPALFEAAVESEWINASKIEGAQGTDRPLMVMYTTTELVVKNSNPSAAPDDW  
TMDDYLNGLDELVQVNRGAGANDVGMVAWLMELKTVEYPNGRQVVLIANDI THKAGSFGT  
REDVVFKLASEFAREKRIPRLYVAANSGARIGVSESVRKTFKVAFKDVSKPENGFDFIYV  
TDDDY SALTAGDKPLIKAEPITYAGQSVHRVTDIIGSEPD LGVENLKG SGLIAGETSSAY  
NDIFTLTIVLGRTVGIGAYLVRLGQRTIQKTTASPIILTYQALNKL MGVDVYSTNDQLG  
GPGIMYSNGVSHLAESDHLRSVQAAINWLSYVPSQRRGLLPITDIRGLDEIERPISFSPV  
PGIPYDPRSLLTGAEDDNGVWQSGFFDKGSFKEALAGWAKSVVVGRRARLGGIPMGVVITE  
NRTAENIKPADPADVKASEAVIQEAGCVWFPNSAYKTAQAINDFRTE DLPLIVFANWRGF  
SGGQRDMFDEV LKYGSLIVDAFVAYEQPVFVIPPFAEIRGGAWVVL DASI NASVMEMYA  
SSETARGGVLEANGLASVKYR TKDLLKTMHRLDKTLVDL DKLQ TSEGLSDTEVDNIEKSI  
KSRECALLPVYEQISVQFCELHDT PVRMEAVGVIRKQVEWKSSRSFFYWRLLRKLAEFDL  
RKKLIDASEVGRGVASPTPLEATDMIKQWFLQSEGMDAAKWEDDKAMLTW MGNHHELLQS  
KVINF TQECV SQEVMKVMTAGNTAKIGTRGIVEGISRAMNTMTEEEKEAFKAMLGQTLQ  
L

>comp15729\_c0\_seq2; 2705 1 7047 LEN=7137; translated  
WTSWKYKSTLTMMFRRGYASAVLAAVAASLAYSSAFNTQAPAAFVRNNAIARQNI AFTPT  
ALKSTIEETSEATIDTVRTSVEDYVAARGGNLPIKKVLIANNGMAATKSIMSMRQWAYLE  
LGDERAIQFVAMASPEDINANA E F IRLADSYVEV PGGVNRNNYANVELITKTAIEQGVDA  
VWPGWGHASENPSLPTNLAKNGIKFIGPTAPVMSVLGDKIAANILAQTAKVPSIPWSGSF  
GGPDDGPLQAE LTEE GTIPDEVFAKGTTKTVEEAIEAARRIGYENGIMIKASEGGGGKGI  
RFVDNEEDLKNAYIQVSNEVVGSPIFVMQLCKNARHLEVQIVGDEHGNAVALNGRDCSVQ  
RRHQKIEEGPPVSAKPHVWKEMEDA AVALAKAVGYANAGTVEYLYSEDDAKFYFLELNP  
RLQVEHPVTEMITNVNLPAAQLQVAMGIPLDLIPEIRTLYGRSRFEDNPSSPEARIDFAS  
AERQPANGHCIAVRITAENAEAGFKPTSGGIQELNFRSTPSVWGYFSMDSSGSIHEFADS  
QFGHLFANGVDREQARRNMV LALKE LSIRGDI STTVDYISR LIELEDFIDNNIDTAWLDG  
IIKENVDGIANLVDENSGQ NATSGRSS LKRN T LSVTDLTSECSHLYVVLGATIVGYENCR  
EDESTFLELM SKQLPSRSL LKMSHVELILNGTKYKMTCTRKGQNSFKIELAEDCRSNM  
GGSFVMTTVRSLSDGGYLIQIGGQSHVAYLTSRGDAA TGMKLN VAGSSIAFSPDYDPTSL  
RTDVAGKLVKRLVPDGRVVKGEAYAEIEVMKMF MPLKVEEAGVVEWKANEGAALSPGSL  
LATLELDN PENVATTTVFQGS LRV EGWGDSTRPANAKRPHLILRAAMDALNCAMSGYSLG  
QDEVDEAMEDLMKAVTDP SLPVLEVDEQLSVLSGRIPAKLYGNIS SLIRDFDSTSRFPAS  
QVLSLLDEYASSLNDASAKSAFAAL TQQLNDATTPYTRSKIDAVQGAEKALKSFIDILRQ  
WISVERWFCDEPSYADSVENIRKLHKDDATTILNICSHEQVQTTSYIITRIMDAIDDGS  
RAERISIVAGAESLLDALPSISEVGMGQRSEYSQVALRARKLLMQESMPNLELRKQVR  
VAAQKLSSSDTKEADLLAEQTPLLDVFFP LLKEVTSSNEEIGLLELYARYLYRFYTTNE  
TERSSDERLVKFSFFNKTSERVLHKMTSVP SMTALSSAVSSSNL TSLSDSTEGDKEKKVL  
SVSGLEKVP SNVARTGICKIIDSIDDIDP SVFEGILKNFPQFSSESENVGP INVLYLI  
VSKTDVENDEKSCDLMSGICQSKLSPYKDLLEKANIRRVTVSFDQEATDNIGASPATFTY  
RSPLFEEESLIRGIDP SHAINLDLGRVASNF SVR TTGARHTSTSHVHMYEATPRASALAN  
DKRANKSPRIFVRALSFSLDFSSNSFERILVDALNALDLCSENRRADNHLFINLVSDFEK  
VVLDPVVEEQVVVDILKRHGDRVSNL GIVEVETKILCSLSRDSLPI SLRLVASNPTGYVH  
VLSTYVEAADETDGDRVFKLIGGTKATLAGAGDSSWEGLHVDTPYPLTRPFDHQRRALR  
SSDTLYAYDLPALFEAAVESEWINASKIEGAQGTDRPLMVMYTTTELVVKNSNPSAAPDDW  
TMDDYLNGLDELVQVNRGAGANDVGMVAWLMELKTVEYPNGRQVVLIANDI THKAGSFGT  
REDVVFKLASEFAREKRIPRLYVAANSGARIGVSESVRKTFKVAFKDVSKPENGFDFIYV  
TDDDY SALTAGDKPLIKAEPITYAGQSVHRVTDIIGSEPD LGVENLKG SGLIAGETSSAY  
NDIFTLTIVLGRTVGIGAYLVRLGQRTIQKTTASPIILTYQALNKL MGVDVYSTNDQLG  
GPGIMYSNGVSHLAESDHLRSVQAAINWLSYVPSQRRGLLPITDIRGLDEIERPISFSPV  
PGIPYDPRSLLTGAEDDNGVWQSGFFDKGSFKEALAGWAKSVVVGRRARLGGIPMGVVITE  
NRTAENIKPADPADVKASEAVIQEAGCVWFPNSAYKTAQAINDFRTE DLPLIVFANWRGF  
SGGSRDMAGEILKFGAMIVDALREYEHVYMYLPPHGE LRGGSWVVVDPTINEDKMEMYA  
DPDSRGGILEPAGISEIKFRTPDQVKMMHRLDEQLGLLD AELESDFEDSKKETEKQIVAR  
EEALKGVYLAATEFCDLHDKTGRMKAKGVIKDAVSWEDSRTFFFYRAKRRMYEDNFIDQ  
IKSVDASATRASGLEILQSLYSGDWEDNKAAAFYESETDVVNAKIAELKKASIQAKMDS  
LKAELDSM

>comp15729\_c0\_seq3; 3234 1 6270 LEN=6360; translated  
WTSWKYKSTLTMMFRRGYASAVLAAVAASLAYSSAFNTQAPAAFVRNNAIARQNI AFTPT  
ALKSTIEETSEATIDTVRTSVEDYVAARGGNLPIKKVLIANNGMAATKSIMSMRQWAYLE  
LGDERAIQFVAMASPEDINANA E F IRLADSYVEV PGGVNRNNYANVELITKTAIEQGVDA  
VWPGWGHASENPSLPTNLAKNGIKFIGPTAPVMSVLGDKIAANILAQTAKVPSIPWSGSF

GGPDDGPLQAEELTEEGTIPDEVFAKGTTKTVEEAIEAARRIGYENGIMIKASEGGGGKGI  
RFVDNEEDLNKAYIQVSNEVVGSPIFVMQLCKNARHLEVQIVGDEHGNAVALNGRDCSTQ  
RRFQKIFEEGPPSIAKPDFTFKEMQRAAQRLTQSIGYVAGTVEYLYNAETDDFFFLLELNP  
RLQVEHPVTEGISNVNMPATQLQVAMGIPLYNIPEVRRFFGRDMYETDKIDFMEEWYKDI  
DTHVIAARITAENPDEGFKPTSGSLERIKFQSTPSVWGYFSVGPNGGIHEYADSQFGHLF  
AKGANREQARKNLILALKEIEVRGEIRTTVEYLVQLLETDFAIDNTIDTAWLDGIIKEKS  
VGVEMPDHLTVASAAIFKAFQHVKESTAELTESLAKGQVSTSSIAEINSFSTEVAYKDIR  
YPFVVERLSNDIYRLTVAGNVI EARVTETKEGALVASFGGETHRIFGMEEPLGLRLVLDG  
VTILMPTVFDPSSELRTDVTGKVVRYLQESGGEVNEGEPYVEVEAMKMIMPLKASESGKVT  
HTVSPGTVISAGDLLASLELKDPSKVKKISVFDGELDIATGNVDEESKAAVSNILAGYTG  
EPEEAVQKAFSDISDAEEASSYATEILTEFARVENMFDNKLKDDVVRDMAKANAETLDVV  
IAENQAHMNSLRNRVVLSTLREIDLFEDRFGATEMSADLEAAMETITALQEKKYGELEL  
AADTMLRSSKISPFADRVGELKATLLDSNTDLAKLSKSSSTLSAGVDLLTSLFNDSDETVR  
NAAVEVYVRRVYRAHRMKEITVSEEDGKVVCDFTTFQFSDVEASDAVDRHGRFCVVP TLDS  
INDDLSKIIDSFSQSLGEKPTKVGDELINVLHIASSDNEEGDVEKMESAIIGESDKLTQL  
GVRNVHIVIPNERADPYYYTTFPECEGYKENALRRNMRPTFHLLLELSRLQENFNVDRI PA  
IAKNTLVYVGVEKTDKPVRRGGPPQVVF LRAISNSPGI VTANGARRMLQNGLDELERSQSN  
PSVNSQSSSRIFLHSLRELEGTPEQVGENFKELIGSLKSELAPRLLKLRVDEIEVKVRI  
QSTGSDGETVNVQSVRLVASSIGGEWLKPAIYLEEPDPVTGVSEKYCLVDPNSDEEMCIVD  
SYGGSNLVQTKRAIARRVGSTYAYDFLGLMEVGLISEWSNYVKETGNEMDIPASVFTAKE  
FVEDGEGGIGLGSRIIGSNKIGMLAWLITMKTPEYPEGRDIVLISNDVTVQSGSFGVAED  
EFFYAASKYAREHDI PRLYISCNAGARIGLVDELKSKINIKFVDESSPSKGFYLYLKDE  
DYKALPAGTVIAEEVSEGWAISDIIGTNHGIGVENLQGSK IAGETSAAYDEIFTLSYVT  
GRSVGIGAYLVRLGQRVIQMKQGPIILTGFSALNKLLGRSVYNSQDQLGGPQIMYPNGVS  
HEIVDDDQQGVASLLNWSLFSVPKKGALPAVRGSGDSPDRKVAWRPTPTPYDPRMMAGE  
GNDLGFDFKGSFKEYLAGWGKSVVGRGLGGIPFGAIAVETRQVEQVVPADPADPNSRE  
AILPQAGQVLYPDSSYKTAQAINDFKKEGLPVMIFANWRGFSGGSRDMAGEILKFGAMIV  
DALREYEHVPVYMLPPHGELRGGSWVVVDPTINEDKMEMYADPDSRGGILEPAGISEIKF  
RTPDQVKMMHRLDEQLGLLDAELESDFEDSKKETEKQIVAREEALKGVYLAATEFCDLH  
DKTGRMKAKGVIKDAVSWEDSR TFFYRAKRRMYEDNFIDQIKSV DASATRASGLEILQS  
LYSGDWEDNKAAAFYESETDVVNAKIAELKKASIQAKMDSLKAELDSM  
>comp15729\_c0\_seq4; 480 1 2088 LEN=2132; minus strand; translated  
XEHPHKHSFGSRNTIDHRHNHHEKFSHGDDADRDKGSHDHEHFHDLTQESLATMDGKDF  
AHLIEDMDGYLCELAGAQIRDGLHILGQVPPQGDSMVDMLQALTRLPNLNVPSLREAIAS  
MFGLDSKLLSNQGARIKDL SRILISLADRPLATAGDAVQAIDELAKHLLALLDQQNFDA  
EKISSVVGQTFPGMAVSAEIQKLNELVTFVCETLVP SLQGT TQEI KHLLDALNGRFVPAG  
PSGSPTRGMAHLLPTGRNFYACDPQALPSLAAWEVQGLAKEVLSRYLAETAAYPEHVAI  
SVWGTAAMRTHGDDIAQIFALLGVRPIWQQENHRVTGVELIPLAELLRPRIDVTVRISGF  
FRDAFPHLITLLDEAVNLAINAEPPDQNYVRKHFL EDM SKEEMDECSARYRIFGCPPGA  
YGKVDFAEFVSPYKNSLISFIFLLFENRNWDLDLIEAQNWEDESDFAKCYINWGGYAYS  
SKEIEGTEAKSEFTHRLTTVEVAIHNQDDREHDI FDSDDYFQFHGGMIATIRALSGKQPK  
GYFGDTQDPDTPKVRDIKEETLRVYRTRVINPKWLESIKRHGYKGASEMAATVDYLF GFD  
ATAEVVSDFMYEQIAQSYALDESTQEFYEQSNPWALRGV SERLLEAAQRGMWGTPNPETL  
EALRQTLLKSDDMLEGRADQAGESNPYFLQGN SGR  
>comp15729\_c0\_seq5; 2531 207 7079 LEN=7169; translated  
MSEFMSSTPSLKFYDKSEASHRWF DSPQHYVDELGGPKGFVIEKILIANNGVGAVKAIRS  
MRKWSYEVFGNERAIKFVVMATPEDMRANA EYIRMGDVIDVP GGSNNHNYANVTLIVEL  
ARLHG VQAVWAGWGHA SENPLLPNSLASSTPPIKF IGPA GPPMQALGDKIGSTIIAQTAG  
VPCIGWNGDEVRAEYDRNTGSLPDLAYEQGTIHSATEASEAATRIGFPVMIKASEGGGGK  
GIRMVHKAEDVANAYRQVCGEVPGSPIFIMKLS TNSRHLEVQLLADEYGN AVALNGRDCS  
VQRRHQKII EEGPPVSAKPHVWKEMEDA AVALAKAVGYANAGTVEYLYSEDDAKFYFLEL  
NPRLQVEHPVTEMITNVNLPAAQLQVAMGIPLDLIPEIRTLYGRSRFEDNPPSPEARIDF  
ASAERQPANGHCIAVRITAENAEAGFKPTSGGIQELNFRSTPSVWGYFSMDSSGSIHEFA  
DSQFGHLFANGVDREQARRNMVLALKE LSIRGDI STTVDYISRLIELEDFIDNNIDTAWL  
DGIKENVDGIANLVDENSGQNATSGRSSLKRNTLSVTDLTSECSHLYVVLGATIVGYEN  
CREDESTFLELMSKQLPSRSLKMSHVELILNGTKYKMTCTRKGQNSFKIELAEDCRS  
NMGGSFVMTTVRSLSDGGYLIQIGGQSHVAYLTSRGAATGMKLN VAGSSIAFSPDYDPT  
SLRTDVAGKLVKRLVPDGT RVKKG EAYAEIEVMKMF MPLKVEEAGVVEWKANEGAALSPG  
SLLATLELDN PENVATTTVFQGS LRV EGWGDSTRPANAKRPHLILRAAMDALNCAMSGYS  
LGQDEVDEAMEDLMKAVTDP SLPVLEVDEQLSVLSGRIPAKLYGNISSLIRDFDSTSRFP

ASQVLSLLDEYASSLNDASAKSAFAALTQQLNDATTPYTRSKIDAVQGAEKALKSFIDIL  
RQWISVERWFCDEPSYADSVENIRKLHKDDATTILNICRSHEQVQTTSYIITRIMDAIDD  
GSRAERISIVAGAESLLDALPSISEVGMGQRSEYSQVALRARKLLMQESMPNLELRKQR  
VRVAAQKLSSTTKEADDLLAEQTPLLDVFFPLLKEVTSNNEEIGLLELYARYLYRFYTT  
NETERSSDERLVKFSFFNKTSEVLHKMTSVPSMTALSSAVSSSNLTSLSDESTGKKEK  
VLSVSGLEKVPNSVARTGICKIIDSIDDIDDPVVFEGILKNFPQFSSSESENVGPINVLV  
LIVSKTDVENDEKSCDLMMSGICQSKLSPYKDLLEKANIRRVTVSFDQEATDNIGASPATF  
TYRSPLEFEESLIRGIDPSHAINLDLGRVASNFSVRTTGARHTSTSHVHMYEATPRASAL  
ANDKRANKSPRIFVRALSFSLDFSSNSFERILVDALNALDLCSENRRADNHLFINLVSDF  
EKVVLDPVVVEQVVVDILKRHGDRVSNLGIIVEVETKILCSLSRDSLPI SLRLVASNPTGY  
VHVLSITYVEAADETGDVRFKLIIGGTKATLAGAGDSSWEGLHVDTPYPLTRPFDHQRAA  
LRSSDTLYAYDLPALFEAAVESEWINASKIEGAQGTDRPLMVMTTELVVKNSNPAAAPD  
DWTMDDYLNGLDELVQVNRGAGANDVGMVAWLMELKTVEYPNGRQVVLIANDI THKAGSF  
GTREDVVFKLASEFAREKRI PRLYVAANS GARIGVSESVRKTFFKVAFKDVSKPENGFDFI  
YVTDDDY SALTAGDKPLIKAEPITYAGQSVHRVTDIIGSEPDLGVENLKGSGLIAGETSS  
AYNDIFTLTIVLGRTVGIGAYLVRLGQRTIQKTTASPIILTGYQALNKLGMVDVYSTNDQ  
LGGPGIMYSNGVSHLAESDHLRSVQAAINWLSYVPSQRRGLLPITDIRGLDEIERPISFS  
PVPGIPYDPRSLTGAEDDNGVWQSGFFDKGSFKEALAGWAKSVVVGRARLGGIPMGVVI  
TENRTAENIKPADPADVKASEAVIQEAGCVWFPNSAYKTAQAINDFRTEDELPLIVFANWR  
GFSGSRDMAGEILKFGAMIVDALREYEHPVYMYLPPHGELRGGSWVVVDPTINEDKMEM  
YADPDSRGGILEPAGISEIKFRTPDQVKMMHRLDEQLGLLDAELESDFEDSKKETEKQIV  
AREEALKGVYLAATEFCDLHDKTGRMKAKGVIKDAVSWEDSRTFFFYRAKRRMYEDNFI  
DQIKSV DASATRASGLEILQSLYSGDWEDNKAAAFYESETDVVNAKIAELKKASIQAKM  
DSLKAELDSM

>comp15729\_c0\_seq6; 224 1 1310 LEN=1310; minus strand; translated  
XEHPHKHSFGSRNTIDHRHNHHEKFSHGDDADRDKGHSHDHEHFHDLTQESLATMDGKDF  
AHLIEDMDGYLCELAGAQIRDGLHILGQVPPQGDSMVDMLQALTRLPNLNVPSLREAIAS  
MFGLDSKLLSNQGARIKDLRILISLADRPLATAGDAVQAIDELAKHLLALLDQQNFDA  
EKISSVVGQTFPGMAVSAEIQKLNELVTFVCETLVPSLQGTQEI KHLLDALNGRFVPAG  
PSGSPTRGMAHLLPTGRNFYACDPQALPSLAAWEVQGLAKEVLSRYLAETAAYPEHVAI  
SVWGTAAMRTHGDDIAQIFALLGVRPIWQQENHRVTGVELIPLAELLRPRIDVTVRISGF  
FRDAFPHLITLLDEAVNLAINAEPPDQNYVRKHFLIEDMSKEEMDECSARYRIFGCPPGA  
YGKVDVFAEFSVPPYKNR

>comp15729\_c0\_seq7; 243 1 1343 LEN=1343; minus strand; translated  
XEHPHKHSFGSRNTIDHRHNHHEKFSHGDDADRDKGHSHDHEHFHDLTQESLATMDGKDF  
AHLIEDMDGYLCELAGAQIRDGLHILGQVPPQGDSMVDMLQALTRLPNLNVPSLREAIAS  
MFGLDSKLLSNQGARIKDLRILISLADRPLATAGDAVQAIDELAKHLLALLDQQNFDA  
EKISSVVGQTFPGMAVSAEIQKLNELVTFVCETLVPSLQGTQEI KHLLDALNGRFVPAG  
PSGSPTRGMAHLLPTGRNFYACDPQALPSLAAWEVQGLAKEVLSRYLAETAAYPEHVAI  
SVWGTAAMRTHGDDIAQIFALLGVRPIWQQENHRVTGVELIPLAELLRPRIDVTVRISGF  
FRDAFPHLITLLDEAVNLAINAEPPDQNYVRKHFLIEDMSKEEMDECSARYRIFGCPPGA  
YGKVDVFAEFSVPPYKNSLISFIFLLFEK

>comp15729\_c0\_seq8; 2530 207 7241 LEN=7514; translated  
MSEFMSSTPSLKFYDKSEASHRWFDSPOHYVDELGGPKGFVIEKILIANNGVAVKAIRS  
MRKWSYEVFGNERAIKFVVMATPEDMRANA EYIRMGDVIIDVPGGSNNHNYANVTLIVEL  
ARLHGQAVWAGWGHASENPLLPNSLASSTPPIKFIPAGPPMQALGDKIGSTIIAQTAG  
VPCIGWNGDEVRAEYDRNTGSLPDLAYEQGTIHSATEASEAATRIGFPVMIKASEGGGK  
GIRMVHKAEDVANAYRQVCGEVPGSPIFIMKLSNRSRHLEVQLLADEYGNAVALNDRDCS  
VQRRHQKIIIEGPPVSAKPHVWKEMEDA AVALAKAVGYANAGTVEYLYSEDDAKFYFLEL  
NPRLQVEHPVTEMITNVNLPAAQLQVAMGIPLDLIPEIRTLYGRSRFEDNPPSPEARIDF  
ASAERQPANGHCIAVRI TAENAEAGFKPTSGGIQELNFRSTPSVWGYFSMDSSGSIHEFA  
DSQFGHLFANGVDREQARRNMVLALKELSIRGDI STTVDYISRLIELEDFIDNNIDTAWL  
DGIKENVDGIANLVDENSGQNATSGRSSLKRNTLSVTDLTSECSHLYVVLGATIVGYEN  
CREDESTFLELMSKQLPSRSLKMSHVELILNGTKYKMTCTRKGQNSFKIELAEDCRS  
NMGGSFVMTTVRSLSDGGYLIQIGGQSHVAYLTSRGAATGMKLVAGSSIAFSPDYDPT  
SLRTDVAGKLVKRLVPDGTTRVKKGEAYAEIEVMKMFMPKVEEAGVVEWKANEGAALSPG  
SLLATLELDNPNENVATTTVFQGLRVEGWGDSTRPANAKRPHLILRAAMDALNCAMSGYS  
LGQDEVDEAMEDLMKAVTDPSPVLEVDEQLSVLSGRIPAKLYGNISSLIRDFDSTSRFP  
ASQVLSLLDEYASSLNDASAKSAFAALTQQLNDATTPYTRSKIDAVQGAEKALKSFIDIL  
RQWISVERWFCDEPSYADSVENIRKLHKDDATTILNICRSHEQVQTTSYIITRIMDAIDD

GSRAERISIVAGAESLLDALPSISEVGMGQRSEYSQVALRARKLLMQESMPNLELRKQR  
VRVAAQKLSSTTKEADLLAEQTPLLDVFFPLLKEVTSNNEEIGLLELYARYLYRFYTT  
NETERSSDERLVKFSFFNKTSEVLHKMTSVPSMTALSSAVSSSNLTSLSDSTEGDKEKK  
VLSVSGLEKVPNSVARTGICKIIDSIDDIDDPVFEGLKKNFPQFSSSESENVGPINVLV  
LIVSKTDVENDEKSCDLMMSGICQSKLSPYKDLLEKANIRRVTVSFDQEATDNI GASPATF  
TYRSPLFEEESLIRGIDPSHAINLDLGRVASNFSVRTTGARHTSTSHVHMYEATPRASAL  
ANDKRANKSPRIFVRALSFSLDFSSNSFERILVDALNALDLCSENRRADNHLFINLVSDF  
EKVVLDPVVVEQVVVDILKRHGDRVSNLGIVEVETKILCSLSRDSLPI SLRLVASNPTGY  
VHVLSTYVEAADETGDGRVFKLIGGKATLAGAGDSSWEGLHVDTPYPLTRPFDHQRRAA  
LRSSDTLYAYDLPALFEAAVESEWINASKIEGAQGTDRPLMVMYTTTELVVKNSNP SAAPD  
DWTMDLYLNGDLELVQVNRGAGANDVGMVAWLMELKTVEYPNGRQVVLIANDITHKAGSF  
GTREDVVFKLASEFAREKRI PRLYVAANS GARIGVSESVRKT FKFVAFKDVSKPENGFDFI  
YVTD DDYSALTAGDKPLIKAEPITYAGQSVHRVTDIIGSEPDLGVENLKGSGLIAGETSS  
AYNDIFTLTIVLGRTVGIGAYLVRLGQRTIQKTTASPI ILTGYQALNKLGMVDVYSTNDQ  
LGGPGIMYSNGVSHLAESDHLRSVQAAINWLSYVPSQRRGLLPITDIRGLDEIERPISFS  
PVPGIPYDPRSLTGAEDDNGVWQSGFFDKGSFKEALAGWAKSVVVGRARLGGIPMGVVI  
TENRTAENIKPADPADVKASEAVIQEAGCVWFPNSAYKTAQAINDFRTE DLPLIVFANWR  
GFSGGQRDMFDEV LKYGSLIVDAFVAYEQPVFVIPPFAEIRGGAWVVL D ASINASV MEM  
YASSETARGGVLEANGLASVKYR TKDLLKTMHRLDKTLVDL D KQLTSEGLSDTEVDNIEK  
SIKSRECALLPVYEQISVQFCE LHDT PVRMEAVG VIRKQVEWKSSRSFFYWR LRRLKLAEF  
DLRKKLIDASEVGRGVASPTPLEATDMIKQWFLQSEGMDAAKWEDDKAMLTWGMGNHELL  
QSKVINFTQECV SQEVMKVM TAGGNTAKIGTRGIVEGISRAMNTMTEEEKEAFKAMLGQT  
LQL

>comp15729\_c1\_seq1; 835 1 4183 LEN=4323; translated  
XHLVVLVRLLRGVPGFNHLKFAREKNHDLIVVSGIPGSFELDTAMCTVSTEI INQVT  
LYFNADGCSENMANMLRYLADHLLRCGFGYEAPSVQPDHGLYHPRFPGSGACDRAS TTKS  
YLTS LADAPCRKPTVA VIFYRCHF LSGNTSFVDAMIDEIEALGANAI GLFTETLRSHEFH  
DNVNGTAVERFPTALAFLLDEATGRCQVDAIVSTMAFAMGEVNP DGPTLGNWSTDAVRAL  
DVPVLQAVSSFGTRTDWEDSARGLSPLDTAMNVAIPEFDGRLITVPI SFKAPQDET NKVH  
YYEPVQDRVEMVAKQSVKLARLRHKPNREKKIAFLLTNSSGKAQRIGDAVGLDTPGSIMK  
VFEAMRADGYDLGDDLPPDGDTLVQNLIDRCSYDEIFLTEDQLANAAARVPTSLYRPMFE  
RLPAKQKEFMVKQWGPPPGEAYVHRDAISLAGLEFGNVFVALQPPRGYGMDDPKIYHTPD  
LPPPHNYFALYRWLRNQWGADAI VHMKGHGTLEWLPKGKGVLSRDCYPDTFLDDLPLVYP  
FIINDPGEQTQSKRRHALI IDHLTPMTTADGYGELAQMLQLVDEYYQIEMLDPTKMPY  
IQKQI WELIQKINLDEDL SVLLRPRDHRDGRSNEENGSRS HSHSHSHESENHESHSPSR  
STDEDRDIGHSHEHHHRNTRSF EDEDHNHSHHSHSHHEEMHQEPTFCHNEHEHGHEYE  
HEHEHEREHPHKHSFGSRNTIDHRHNHHEKFSHGDDADQDKGSHDHEHFHDLTQESLAT  
MDGKDFAH LIEDMDGYLCELAGA QIRDGLHILGQVPPQGD SMVMDLQALTRLPNLNVP SL  
REAIASMFGLNSKLLSNQGTRIKDL SRILISLADRPLATAGDAVQAIDELAKHLLALLD  
QQNFDAEKISSVVGQTFPGMAVS AEIQKLNELVTFVCE TLVPSLQGT TQEIKHLLDALNG  
RFVVPAGPSGSPTRGMAHLPTGRNFYACDPQALPSLAAWEVVGQGLAKEVLSRYLAETAAY  
PEHVAISVWGTAAMRTHGDDIAQIFALLGVRPIWQQENHRVTGVELIPLAELLRPRIDVT  
VRISGF FRDAFPHLITLLDEAVNLAINAEPPDQNYVRKHFL EDMSKEEMDECSARYRIF  
GCPPGAYGIGILD LIEAQNWEDESDFAKCYINWGGYAYSSKEIEGTEAKSEFTHRLT TVE  
VAIHNQDDREHDIFDSDDYFQFHGGMIATIRALS GKQPKGYFGDTQDPDTPKVRDIKEET  
LRVYRTRVINPKWLESIKRHGYKGASEMAATVDYLF GFDATAE VVSDFMYEQIAQSYALD  
ESTQEFYEQSNPWALRGV SERLLEAAQRGMW GAPNPETLEALRQTLLKSDDMLEGRADQA  
VESNPYFLEGN SGR

>comp15730\_c0\_seq1; 357 1 795 LEN=795; translated  
XDNDDNDKLFQNKHREPPADGVTTAPSKPSHGADSVVAAPKGEAPPASKKKKQGI LK  
KLMVNPLKRIT EATSKTAKTVNEFAGAGKDHTDRPLMSNSDIAESNSSGRNNNNNNNGRT  
MVALDFGPF IQTAAAGEAAEGDERKTGPAEKGT AAPPALFASDDSL LSEECKSDYND DH  
VNDSGRKCNFSPSVSDEATDHNNVNVNANANTDAIDVAPNLNTSTTAGKKWTD TDVLHH  
GIESNQLPGYTRALS YQVCVQIIASX

>comp15730\_c0\_seq2; 609 102 1547 LEN=1547; translated  
MTSVHRRATATGSRKRLGPQSWLLLLTLLSVSI INSPVHALRGSSTHVDEDPSTGQEYSS  
TSSKVIDEVCENVECEDGEWEY YEEDECEHNECDVEVEVYQRQDDDQWEY YEECEEGEEC  
EGLEDENNYEQDNEQDDEQE EGEEDYDPNDYWTLEQLDEMEVIYQRYRNSLAEKYGADWE  
EHYELTEDAESIYERYLAFQE QKRAEREEAEKD AIQKVGKALRHHQQDQRVETGYF SLED  
ADHAAALWGYDSSADASED IVPQHDPFYLEREWADFNKVGGDAPFQEGPDSNNSTETA AF

WIDPSSQRTTLVLTTIATNENTEQQQKQQQQQQRQNYGGTGFGPFIQTAAAGEAAEGDER  
KTGPAEKGTAAPPAQLFASDDSLLECKSDYNDHVNNDSDGRKCNFSPVVSDEATDHNN  
VNVNANANTDAIDVAPNLNTSTTAGKKWTDTDVLHGGIESNQLPGYTRALSQVVCVQIIA  
SX

>comp15730\_c0\_seq3; 648 51 2213 LEN=4813; translated  
MRLLIYYKENSSDRDSDNDNPTSLKTLTDILSVNYQATGKAGLANCKGGIYAEVAINQNTR  
LSFLTAHLEAHEGEKHYRARNDSFKDILMETSQSKYYDASQSSHFTFFMGDLNRYRTNLPD  
IPLGSEHVRVLRCHSMVSKQAWRTLNKYDELRSLEKQTCVGFKTAYCNFPPTFKVSRED  
GYRNPKRSPSYTDRVLFKPKCHKTLDSAINLVLYEPIEGFVSSDHKPIRSGFSVRLNREL  
KWKSTAQLLLQEEHHHDEKGIKSTMATSDYNDGGFLDDIIPTTTTGSIDDDRESMHFF  
VTNVRCSIIPHKYDYIRRQEKALPSAKVVFLPDPQEAIVVFNDDEDGLEDKTNLMKLIIP  
PRFNFGKRKELSAKALNNVSSANNDSEFSHTQNGSTGGTNKKIKFPSTSVAKETMRPL  
WNDIDDHVHFALQTHTEHGRPIDFTGAQLHISLVDSKFGGTVIGSHCLNLADLIIVSREK  
RSKTSKATKKGRDQTTSKVPQEHKQRLSKSENKKKKKKNHRGNMVVPTHPVRNHSKPRR  
HSSPLPLASTPHRRAPPHAATAQLTRSSYGCHMVSQPSQALRSVAAGLSSPSVFTAFGSG  
KKESSGSAAGPSDEPSVRRVVKEAAEFVHFRGRSQGEGRSSSSSNIFESIVDDLSSGSAH  
EGPKGSSSFGPNGTRKRQQRQRRRKSCLLEFGIKSFRLNETLTEGGLVIGHIKCDIDVW  
W

>comp15730\_c0\_seq4; 648 51 2213 LEN=4902; translated  
MRLLIYYKENSSDRDSDNDNPTSLKTLTDILSVNYQATGKAGLANCKGGIYAEVAINQNTR  
LSFLTAHLEAHEGEKHYRARNDSFKDILMETSQSKYYDASQSSHFTFFMGDLNRYRTNLPD  
IPLGSEHVRVLRCHSMVSKQAWRTLNKYDELRSLEKQTCVGFKTAYCNFPPTFKVSRED  
GYRNPKRSPSYTDRVLFKPKCHKTLDSAINLVLYEPIEGFVSSDHKPIRSGFSVRLNREL  
KWKSTAQLLLQEEHHHDEKGIKSTMATSDYNDGGFLDDIIPTTTTGSIDDDRESMHFF  
VTNVRCSIIPHKYDYIRRQEKALPSAKVVFLPDPQEAIVVFNDDEDGLEDKTNLMKLIIP  
PRFNFGKRKELSAKALNNVSSANNDSEFSHTQNGSTGGTNKKIKFPSTSVAKETMRPL  
WNDIDDHVHFALQTHTEHGRPIDFTGAQLHISLVDSKFGGTVIGSHCLNLADLIIVSREK  
RSKTSKATKKGRDQTTSKVPQEHKQRLSKSENKKKKKKNHRGNMVVPTHPVRNHSKPRR  
HSSPLPLASTPHRRAPPHAATAQLTRSSYGCHMVSQPSQALRSVAAGLSSPSVFTAFGSG  
KKESSGSAAGPSDEPSVRRVVKEAAEFVHFRGRSQGEGRSSSSSNIFESIVDDLSSGSAH  
EGPKGSSSFGPNGTRKRQQRQRRRKSCLLEFGIKSFRLNETLTEGGLVIGHIKCDIDVW  
W

>comp15730\_c0\_seq5; 1214 102 3693 LEN=6382; translated  
MTSVHRRATGSRKRLGPQSWLLLLTLLSVSIINSPVVHALRGSSTHVDEDPSTGQEYSS  
TSSKVIDEVCENVECEDGEWEYEEDECEHNECDVEVEVYQRQDDQWEYEECEECEGEEC  
EGLEDENNYEQDNEQDDEQEEGEEDYDPNDYWTLEQLDEMEVIYQRYRNSLAEKYGADWE  
EHYELTEDAESIYERYLAFQEQKRAEREEAEKDAIQKVGKALRHHQQDQRVETGYFSLD  
ADHAAALWGYDSSADASEDIVPQHDPFYLEREWADFNKVGGDAPFQEGPDSNNSTETA  
WIDPSSQRTTLVLTTIATNENTEQQQKQQQQQQRQNYGGTGFGPFIQTAAAGEAAEGDER  
KTGPAEKGTAAPPAQLFASDDSLLECKSDYNDHVNNDSDGRKCNFSPVVSDEATDHNN  
VNVNANANTDAIDVAPNLNTSTTAGKKWTDTDVLHGGIESNQLPGYTRALSQVQGMRL  
IYYKENSSDRDSDNDNPTSLKTLTDILSVNYQATGKAGLANCKGGIYAEVAINQNTRLSFL  
TAHLEAHEGEKHYRARNDSFKDILMETSQSKYYDASQSSHFTFFMGDLNRYRTNLPDIP  
SERHVRVLRCHSMVSKQAWRTLNKYDELRSLEKQTCVGFKTAYCNFPPTFKVSREDGYR  
NPKRSPSYTDRVLFKPKCHKTLDSAINLVLYEPIEGFVSSDHKPIRSGFSVRLNRELK  
TAQLLLQEEHHHDEKGIKSTMATSDYNDGGFLDDIIPTTTTGSIDDDRESMHFFVTN  
RCSIIPHKYDYIRRQEKALPSAKVVFLPDPQEAIVVFNDDEDGLEDKTNLMKLIIPR  
FGKRKELSAKALNNVSSANNDSEFSHTQNGSTGGTNKKIKFPSTSVAKETMRPLW  
DDHVHFALQTHTEHGRPIDFTGAQLHISLVDSKFGGTVIGSHCLNLADLIIVSREK  
RSKTSKATKKGRDQTTSKVPQEHKQRLSKSENKKKKKKNHRGNMVVPTHPVRNHSK  
PRRHSSPLPLASTPHRRAPPHAATAQLTRSSYGCHMVSQPSQALRSVAAGLSSPSV  
FTAFGSGKKESSGSAAGPSDEPSVRRVVKEAAEFVHFRGRSQGEGRSSSSSNIFES  
IVDDLSSGSAHEGPKGSSSFGPNGTRKRQQRQRRRKSCLLEFGIKSFRLNETLTEG  
GLVIGHIKCDIDVWW

>comp15730\_c0\_seq6; 1214 102 3693 LEN=6293; translated  
MTSVHRRATGSRKRLGPQSWLLLLTLLSVSIINSPVVHALRGSSTHVDEDPSTGQEYSS  
TSSKVIDEVCENVECEDGEWEYEEDECEHNECDVEVEVYQRQDDQWEYEECEECEGEEC  
EGLEDENNYEQDNEQDDEQEEGEEDYDPNDYWTLEQLDEMEVIYQRYRNSLAEKYGADWE  
EHYELTEDAESIYERYLAFQEQKRAEREEAEKDAIQKVGKALRHHQQDQRVETGYFSLD  
ADHAAALWGYDSSADASEDIVPQHDPFYLEREWADFNKVGGDAPFQEGPDSNNSTETA  
WIDPSSQRTTLVLTTIATNENTEQQQKQQQQQQRQNYGGTGFGPFIQTAAAGEAAEGDER



KTGPAEKGTAAPPAQLFASDDSLLEECKSDYNDHVNNDNDSGRKCNFPSPVVSDEATDHNN  
VNVNANANTDAIDVAPNLNTSTTAGKKWTDTDVLHGGIESNQLPGYTRALSYQFGQMRLL  
IYYKENSDDRDDSNDNPTSLLKTLDILSVNYQATGKAGLANKGGIYAEVAINQNTRLSFL  
TAHLEAHEGEKHYRARNDSFKDILMETSQSKYYDASQSSHFTFFMGDLNRYRTNLPDIPLG  
SERHVRLCHSMVSKQAWRTLNKYDELRSLEKQTCLVGFKTAYCNFPPTFKVSREDGYRY  
NPKRSPSYTDRVLFKPKCHKTLDSAINLVLYEPIEGFVSSDHKPIRSGFSVRLNRELKWK  
TAQLLLQEEHHHDEKGIKSTMATSDYNDGGFLDDIIPTTTTGSIDDDRESMHFFVTNV  
RCSIIPHKYDYIRRQEKAEPLSAKVVFLLPDPQEAIVVFNDDEDGLEDKTNLMKLIIPPRFN  
FGKRKELSAKALNNVSSANNDSEFSHTQNGSTGGTNKKIKFPSTSVAKETMRPLWNDI  
DDHVHFALQTHTEHGRP IDFTGAQLHISLVDSKFGGTVIGSHCLNLADLIIVSREKRSKT  
SKATKKGRDQTTSKVPQEHKQRLSKSENKKKKKNHRGNMVPVTHPVRNHSKPRRHSSP  
LPLASTPHRRAPPHAATAQLTRSSYGCHMVSQPSQALRSVAAGLSSPSVFTAFGSGKES  
GSSAAGPSDEPSVRRVVEAAEFVHFRGRSQGEGRSSSSSNIFESIVDDLSSGSAHEGPK  
GSSSFGPNGTRKRQQRQRRRKSCLLEFGIKSFRLNETLTEGGLVIGHIKCDIDVWW

>comp15730\_c0\_seq7; 962 1 2941 LEN=5630; translated  
XDNDNDKLFQNKHRGEEPPADGVTTAPSKPSHGADSVVAAPKGEAPPASKKKKQGILK  
KLMVNPLKRITTEATSKTAKTVNEFAGAGKDHTDRPLMSNSDIAESNSSGRNNNNNNNGRT  
MVALDFGPFIQTAAGEAAEGDERKTGPAEKGTAAPPAQLFASDDSLLEECKSDYNDH  
VNNDNDSGRKCNFPSPVVSDEATDHNNVNVNANANTDAIDVAPNLNTSTTAGKKWTDTDVLH  
GGIESNQLPGYTRALSYQFGQMRLLIYYKENSDDRDDSNDNPTSLLKTLDILSVNYQATGK  
AGLANKGGIYAEVAINQNTRLSFLTAHLEAHEGEKHYRARNDSFKDILMETSQSKYYDAS  
QSSHFTFFMGDLNRYRTNLPDIPLGSERHVRLCHSMVSKQAWRTLNKYDELRSLEKQTCL  
VGFKTAYCNFPPTFKVSREDGYRYNPKRSPSYTDRVLFKPKCHKTLDSAINLVLYEPIEGF  
VSSDHKPIRSGFSVRLNRELKWKSTAQLLLQEEHHHDEKGIKSTMATSDYNDGGFLDD  
IIPTTTTGSIDDDRESMHFFVTNVRCSSIIPHKYDYIRRQEKAEPLSAKVVFLLPDPQEAIV  
VFNDDEDGLEDKTNLMKLIIPPRFNFGKRKELSAKALNNVSSANNDSEFSHTQNGSTGG  
TNKKIKFPSTSVAKETMRPLWNDIDHVHFALQTHTEHGRP IDFTGAQLHISLVDSKFGG  
TVIGSHCLNLADLIIVSREKRSKTSKATKKGRDQTTSKVPQEHKQRLSKSENKKKKKN  
HRGNMVPVTHPVRNHSKPRRHSSPLPLASTPHRRAPPHAATAQLTRSSYGCHMVSQPSQA  
LRSVAAGLSSPSVFTAFGSGKESGSSAAGPSDEPSVRRVVEAAEFVHFRGRSQGEGRS  
SSSSNIFESIVDDLSSGSAHEGPKGSSSFGPNGTRKRQQRQRRRKSCLLEFGIKSFRLN  
ETLTEGGLVIGHIKCDIDVWW

>comp15730\_c0\_seq8; 962 1 2941 LEN=5541; translated  
XDNDNDKLFQNKHRGEEPPADGVTTAPSKPSHGADSVVAAPKGEAPPASKKKKQGILK  
KLMVNPLKRITTEATSKTAKTVNEFAGAGKDHTDRPLMSNSDIAESNSSGRNNNNNNNGRT  
MVALDFGPFIQTAAGEAAEGDERKTGPAEKGTAAPPAQLFASDDSLLEECKSDYNDH  
VNNDNDSGRKCNFPSPVVSDEATDHNNVNVNANANTDAIDVAPNLNTSTTAGKKWTDTDVLH  
GGIESNQLPGYTRALSYQFGQMRLLIYYKENSDDRDDSNDNPTSLLKTLDILSVNYQATGK  
AGLANKGGIYAEVAINQNTRLSFLTAHLEAHEGEKHYRARNDSFKDILMETSQSKYYDAS  
QSSHFTFFMGDLNRYRTNLPDIPLGSERHVRLCHSMVSKQAWRTLNKYDELRSLEKQTCL  
VGFKTAYCNFPPTFKVSREDGYRYNPKRSPSYTDRVLFKPKCHKTLDSAINLVLYEPIEGF  
VSSDHKPIRSGFSVRLNRELKWKSTAQLLLQEEHHHDEKGIKSTMATSDYNDGGFLDD  
IIPTTTTGSIDDDRESMHFFVTNVRCSSIIPHKYDYIRRQEKAEPLSAKVVFLLPDPQEAIV  
VFNDDEDGLEDKTNLMKLIIPPRFNFGKRKELSAKALNNVSSANNDSEFSHTQNGSTGG  
TNKKIKFPSTSVAKETMRPLWNDIDHVHFALQTHTEHGRP IDFTGAQLHISLVDSKFGG  
TVIGSHCLNLADLIIVSREKRSKTSKATKKGRDQTTSKVPQEHKQRLSKSENKKKKKN  
HRGNMVPVTHPVRNHSKPRRHSSPLPLASTPHRRAPPHAATAQLTRSSYGCHMVSQPSQA  
LRSVAAGLSSPSVFTAFGSGKESGSSAAGPSDEPSVRRVVEAAEFVHFRGRSQGEGRS  
SSSSNIFESIVDDLSSGSAHEGPKGSSSFGPNGTRKRQQRQRRRKSCLLEFGIKSFRLN  
ETLTEGGLVIGHIKCDIDVWW

>comp15730\_c1\_seq2; 890 8 2287 LEN=2340; translated  
MYYKATITSLILFLTGVSQAQSSRMCTEKTSLLELDAATIDILNSMPNGNTIISSYDQYR  
SSGETIGSNTDMLAEAADASATGATIEDGKSGDTEFPFGDIKVIATIGERSVCPSSYGQK  
LVGVDPDVGAYLTDSTVRLIFQSESYGPLRYESFPIPMNDGSFLMGGSQVQYIDYDRSM  
MDGFMSYDGPASDMVVDVGNMIEYVYNLKGPEVGPVVDGGPTPVGAHFGNADADGNVVE  
EEPSESDWFLQSLCSAHMEERHQWGDGIGLEDDTFITNEEWINYAEGENFVGLSAHAIDV  
EKKISYAVGVFSNGGFKEIVEINSQHPDYVMFISISGYTGAFRGHSAELDARNAEYNRTDG  
KDYIWKNTIPARIYVGVKGLLEDGSDAPEDDFLARNGLKYGKIYGYAVDMGEPVRQSKG  
LWRDEFHRTPEFAVNGAKVRGFWIAQDQWDGVEVKYRHDAGWEYQDKPHTGNGSGRKK  
FEWTAAGPDSGCKTEHNTPDPREGYSAFIQSSTCGYFGHYIIEHAVEELNFANGGLPD

TFEGSYVYVYQGELDIRDQIDLGGKGQYVNGTDARMNYDKPETPHETFEDIDGFEVVEASD  
GALYAI IQEDSGNSYGERMFITKLEHDRNNKELKYYFVAMSGGSENSRIVNGVSVPKGSW  
SRATGHEFGVFDL SGFFAKNEDGSYVVASSNTGLAKRKADRTVDINDKLIILNVQAHSQ  
AGGVLSAFQLDRGGQLYLYQPSLPQSEDGVIAEMVRGIP

>comp15730\_c1\_seq3; 458 1 1331 LEN=1384; translated  
XVEKQHPYKSRVYLSNKLRCIPLTSGGHSaelDARNAEYNRTDGKDYIWTKNITPARIYV  
GVKGLLEDGSDAPEDDFLARNGLKYGKIYGYAVDMGEPVRQSKGLWRDEFHRTPEFAVNG  
AKVRGFWIAQDWQWDGEVKNYRHDAGWEYQDKPPHTGNGSGRKKFEWWTAAAGPDSGCKT  
EHNTDPREGYSAFIQSSTCGYFGHYIEHAVEELNFANGGLPDTFEGSYVYVYQGELDIR  
DQIDLGGKGQYVNGTDARMNYDKPETPHETFEDIDGFEVVEASD GALYAI IQEDSGNSY  
GERMFITKLEHDRNNKELKYYFVAMSGGSENSRIVNGVSVPKGSWSRATGHEFGVFDL SG  
FFAKNEDGSYVVASSNTGLAKRKADRTVDINDKLIILNVQAHSQAGGVLSAFQLDRGGQL  
YLYQPSLPQSEDGVIAEMVRGIP

>comp15731\_c0\_seq1; 1013 1 2734 LEN=2988; translated  
XDVTKAEEGTGGSSDNKISEGRSLDNGNGEEASLEEMPQIVEVESRVESEKEMVENAKALE  
EKKNRAMMKAIDEAKRLDESHRMAEAQLNEESLLRKAKYEDDKRAIDKALVNLESNFSSQ  
VKRLEKEVNECNQKHQTERKRIEKKRNKIEQQFLADERILMDQTKILLEKLTRVVSILES  
ERQNADADQEIDSKEVATETSRGWFGGITKKSEEQLRRQEKSKKWKLRREELEKEIDDIK  
AELNVVQKGAKVKKRRVNLKEKLENESECKNEE IADENEERLQOETDEIQKTFNREKEGL  
KIAMCHLENTRAEDEEWLASSRKKLYDNYNKCQETLKRVSSELKEIEHEKEEMYQRNAIA  
LKEKRVHEESELLSELEPSEHKEVENDIDASLQGTGETPDKISGSYRDLSEQE QSDSEKD  
VMETKLPVGLQOIEEKPVKMLMHGEKETDKAKNVMAGISNPdVRFDQVTCVTNTSNVSE  
NNVDVPETGDNIEGKEKSAENAI IDDTNPNATPNHLSHLCQPNFQEDEKSLKPNDLDFP  
PNSNEFATKLLTAALLAKQQEQEALQGKTKTPTVEDQTQLLAPSIQTKTVSTNITPPQS  
PERVAVQTTQGSVIADPALFRNTFLTDVSPSRSLAEKRRKVKETRQRAMAIRNASSRIVI  
DDNRLCKTNAKDSAVVNGIEAKNYSTKRSQTSLSMKQRQKVEEPPFSISRSISRSPKLP  
ASSPRSVHSMEMPIMIRETDRLSGFIRRYENKLETVCRSLLTVASATGEDSETLAARKLDLP  
EMFEF ITQQDWYKEHSQDLNSLDLPHLKF SKRRSRDGRHSNDNNEYKITATGKEFMQLDG  
PVQSDVSRFLAHIEYTKVGVTRHSMLEHWKEISRASEDVQNQRVCDKLDKLI SFCLDSCM  
IQKSKEAAATV

>comp15731\_c0\_seq2; 793 1 2277 LEN=2531; translated  
LADERILMDQTKILLEKLTRVVSILESERQNADADQEIDSKEAAIETSRGWFGGITKKSE  
EQLRRQEKSKKWKLRREELEKEIDDIK AELNVVQKGAKVKKRRVNLKEKLENESECKNEE  
IADENEERLQOETDEIQKTFNREKEGLKIAMCHLENTRAEDEEWLASSRKKLYDNYNKCQ  
ETLKRVSSELKEIEHEKEEMYQRNAIALKEKRVHEESELLSELEPSEHKEVENDIDASLQ  
GTGETPDKISGSYRDLSEQE QSDSEKDVMEKLPVGLQOIEEKPVKMLMHGEKETDKAK  
NVMAGISNPdVRFDQVTCVTNTSNVSENNVDVPETGDNIEGKEKSAENAI IDDTNPNATP  
NHLSHLCQPNFQEDEKSLKPNDLDFPNSNEFATKLLTAALLAKQQEQEALQGKTKTPT  
TVEDQTQLLAPSIQTKTVSTNITPPQSPERVAVQTTQGSVIADPALFRNTFLTDVSPSR  
LAEKRRKVKETRQRAMAIRNASSRIVIDDNRLCKTNAKDSAVVNGIEAKNYSTKRSQTS  
LSMKQRQKVEEPPFSISRSISRSPKLPASSPRSVHSMEMPIMIRETDRLSGFIRRYENKLET  
VCRSLLTVASATGEDSETLAARKLDLP EMFEF ITQQDWYKEHSQDLNSLDLPHLKF SKRR  
SRDGRHSNDNNEYKITATGKEFMQLDG PVQSDVSRFLAHIEYTKVGVTRHSMLEHWKEIS  
RASEDVQNQRVCDKLDKLI SFCLDSCMIQKSKEAAATV

>comp15731\_c0\_seq3; 1699 1 4399 LEN=4653; translated  
XSEKNPLFLERGVASRIPQQQIRSISDDSSSEEESESSTEKDSYSSESESETTSSCSDDS  
ESTMDFDNSMNGGNPPSIEKDADITTTMAPIVDSESEKLTHTDVPSSVDDDNQIPATHSS  
LNDNEKECCEEEIILIPDEDSAGSHS IKDEKNKNREYVLLSDDSSSCSSLSEAENDQPMTP  
SNQLPDETPNEHSDIEVPKIDPKELEWRKKKI QNALMEI IKETEKNELEDI IPQEI TEAL  
NAASLKTAFTRKYDYDSKKEKYVYPSVSVQAVFNFLIEEAEHFNGEIPFNISTALCTIV  
AARLKGNI DEVDSDSIVKGSVNVILPDEQNKTAPQTTEESIALNDVRNVREEQNTNGI  
SATKSQAENNERMKKIKHDLFSVIKHA EATDLRESITDEVFEALMRAANRNVFVKKYFDV  
TTDQFIYYP SITKRILDNSLFEARQFCSAGDLPLKYVSALHAAAEVKSSKSTEVNELDD  
YVINMSVDVAICDDQEVGFFRNTKSSLTASTASSLNEMISCVPEVIATNANDEYSCSD  
TSSPPKNDSSKEDSKSDVTKAEETGGSSDIKISEGRSLDNGNGEEASLEEMPQIVEVEI  
RVESEKEMVENAKALEEKKNRAMMKAIDEAKRLDESHRMAEAQLNEESLLRKAKYEDDKRA  
IDKALVNLESNFSSQVKRLEKEVNECNQKHQTERKRIEKKRNKIEQQFLADERILMDQTK  
ILLEKLTRVVSILESERQNADADQEIDSKEVATETSRGWFGGITKKSEEQLRRQEKSKK  
KLRREELEKEIDDIK AELNVVQKGAKVKKRRVNLKEKLENESECKNEE IADENEERLQO  
ETDEIQKTFNREKEGLKIAMCHLENTRAEDEEWLASSRKKLYDNYNKCQETLKRVSSELKE

IEHEKEEMYQRNAIALKEKRVHEESELLSELEPSEHKEVENDIDASLQGTGETPDKISGS  
YRDLSEQEQSDSEKDVMTKLPVGLQQIEEKPVKQMLMHGEKETDKAKNVMAGISNPDVR  
FDQVTCVTNTSNVSENNVDVPETGDNI EGKEKSAENAI IDDTNPATPNHLSHLCQPNEF  
QEDEKSLKPNDLFDPPNSNEFATKKLLTAALLAKQQEQEALQGKTKTPTVEDQTQLLAPS  
IQTKTVSTNITPPQSPERVAVQTTQGSVIADPALFRTNFLTDVSPSRSLAEKRRKVKETR  
QRAMAIRNASSRIVIDDNRLCKTNAKDSAVVNGIEAKNYSTKRSQTSELSMKQRQKVEEP  
FSISRSISRSPKCLPASSPRSVHSMPEMIRETDRLSGFIRRYENKLETVCRSLLTVASAT  
GEDSETLAARKLDLPEMFEF ITQQDWYKEHSQDLNSLDLPHLKFSKRRSRDGRHSNDNNE  
YKITATGKEFMQLDGPVQSDVSRFLAHIEYTKVGVTRHSMLEHWKEISRASEDVQNQRVC  
DKLDKLISFCLDSCMIQKSKEAAATV

>comp15731\_c0\_seq4; 1358 164 4129 LEN=4228; translated  
MQALRAGLKRIDGKRSKAERGKQYSSELTGDRSAWPLINYQDSNGTSPATSRPNKWESFE  
VGDNPLYDEEYDPTVTTQEKSRLLHEHDESMQPLTGGSMHSSSTIPSDHGDLTSLRIPNLA  
TWKPLTEYDENTPPI IKKQGSEI IDLSGWGSHISGTEIEQPLMLGHETKSSKMTHADNLT  
FPARNPSRWQPIEHDESTQPLMGRALKDSTKITASKENTNLELGDIQQRNNLRGRKGRLE  
DEKTFNRPVLQTPDETIRSKRNLNFRNRGRIDKTNDLWKQKDRLEGDAIFNQPVQRKPDQK  
IPVSFDPFFVGDAAELPQQSRYDIFDSCRLSNINIRDLQPNVETAGRKQDRQTYRVQD  
HLYQSEFHKVEPESEYSSSTEDNIFVHSADAENGADLHNTDGEVIHEEENNSFQPPISSST  
RNVVLEQRMNCFEGDFVSTGEAQCDGNTIDSRQEEELHISREAYTSSEPNTFHEDISVAE  
SAADF IKYYKLRQRERDLRNDNNIPTQAYWNGLLSESVEQESGAVGENDIKSNDVVRGSHG  
GAISNMSQQNSFCSDSGFPENMTPVKPGYATSPLSSMHIEEDNQSGTLTVALVSEFSGT  
LKQRSEQERAMSILRGSNIRNIEEVDGSLKSNRDRRNLFEVSGERGKYPQFFLQKKEEM  
VIYLGDFEWLTYMNDIGSLTNETIYGVLD SAHPLTERNEIQDESERI IENQYSEKNPLFL  
ERGVALLRIPQQQINQSNICIEQLCVEDEITNGIDSDSMHVIPS IHNVSIETRNCIPMYNA  
DVEVIDVEAIASSRRFAESVDAREQVIEEPKLSMDIVESRNMVYDQKQVQDLVHRVDEATD  
SNASLSSTGEKLSRQDYEMQRESLNEDIERNESGFRSCKGRRTKLVCVGSLLDDESRE  
DLSISSRSARSSIKSEFISADGMQNSP SRPTSTTVSYEQERNDDTQSTTSDDENRMNTLS  
INVGPHRKNIDRCSSFGKPELPRVGRDEGETSSREKEDAERKKLEKRRKRWRKRRILAE  
HRRRQSMGGCSVSLPGNEEQPLGASLNEIEMMNTFLAVAGPNFDGSLSAKEMEELHDRSR  
NAGLPVEFTNRMLDQAAGIFMCDGNND SKLP IKQGSRIAESLPMRDNEVPSIPPLSTNN  
NTYDEAGFTRKTPKEHSALDCFKSTFLAESSNIVGGMIENIQA AVSGDSSDTKSGWRSL  
DMIENIKASLSGDSSDQKGGWRSIDIIGSVKATLSGDSSDNKTGWRSSNVFESIKTALSG  
DSESKRKSVSSENGILKPHAAPRDKSPEIENSNTYSSWPSAPIVDIVHDGDELNESGLHE  
C

>comp15731\_c0\_seq5; 430 1 1336 LEN=1590; translated  
XAKDAMNASENNADAPYPGDNIEGKEKSVSVDTENAI IDDTNPATPNHLSHLCQPNEFQ  
EDEKSLKPNDLFDPPNSNEFATKKLLTAALLAKQQEQEALQGKTKTPTVEDQTQLLAPSI  
QTKTVSTNITPPQSPERVAVQTTQGSVIADPALFRTNFLTDVSPSRSLAEKRRKVKETRQ  
RAMAIRNASSRIVIDDNRLCKTNAKDSAVVNGIEAKNYSTKRSQTSELSMKQRQKVEEPF  
SISRSISRSPKCLPASSPRSVHSMPEMIRETDRLSGFIRRYENKLETVCRSLLTVASATG  
EDSETLAARKLDLPEMFEF ITQQDWYKEHSQDLNSLDLPHLKFSKRRSRDGRHSNDNNEY  
KITATGKEFMQLDGPVQSDVSRFLAHIEYTKVGVTRHSMLEHWKEISRASEDVQNQRVCD  
KLDKLISFCLDSCMIQKSKEAAATV

>comp15731\_c0\_seq6; 480 1 1556 LEN=1810; translated  
XTEETPDKISGSYRDLSEQEQSDSEKDVMTKLPVGLQQIEEKPVKQMLMHGEKETDKAK  
NVMAGISNPDVRFDQVTCVTNTSNVSENNVDVPETGDNI EGKEKSAENAI IDDTNPATP  
NHLSHLCQPNEFQEDEKSLKPNDLFDPPNSNEFATKKLLTAALLAKQQEQEALQGKTKTP  
TVEDQTQLLAPSIQTKTVSTNITPPQSPERVAVQTTQGSVIADPALFRTNFLTDVSPSR  
LAEKRRKVKETRQRAMAIRNASSRIVIDDNRLCKTNAKDSAVVNGIEAKNYSTKRSQTSE  
LSMKQRQKVEEPFSISRSISRSPKCLPASSPRSVHSMPEMIRETDRLSGFIRRYENKLET  
VCRSLLTVASATGEDSETLAARKLDLPEMFEF ITQQDWYKEHSQDLNSLDLPHLKFSKRR  
SRDGRHSNDNNEYKITATGKEFMQLDGPVQSDVSRFLAHIEYTKVGVTRHSMLEHWKEIS  
RASEDVQNQRVCDKLDKLISFCLDSCMIQKSKEAAATV

>comp15731\_c0\_seq1; 21 1 292 LEN=292; translated  
XDKVHCQCHSSSPNGPEVVDCKSRVSGGDKHCTGPAMIDGLSLGGADIGSMFKTKPPPA  
YEQHGCTRYNGGSQYGRTRKSDVYYGSGPDYEAFSPEX

>comp15732\_c0\_seq3; 127 1 370 LEN=657; translated  
XSVYLVGTGVELEKPGLELTYTFPATTTEQFIHALVVKGSSVNGISYFSTDPDLSYSLIED  
YEGKGGVKLWGNRNYKSESLSDGDEMYNGGIFLQPTLHREIPP GTVISLTIDPSGDEPVV  
VCAW

>comp15732\_c0\_seq4; 264 1 705 LEN=1340; translated  
YMEIIPKYDPLKCEQICKDRGYHFFGFECPDGDEVHCECNYARADGLGPADARWDPNPRS  
AGKDISYDCAELAYESVPRGFNRCNRNGEEDDYSGDGDYFSMGGPNVASVYLVSGAVLEE  
ELEKPGLELTYTFPATTTEQFIHALVVKGSSVNGISYFSTDPDLSYSLIEDYEGKGGVKL  
WGNRNYKSESLSDGDEMYNGGIFLQPTLHREIPPPTVISLTIIDPSGDEPVVVCWA  
>comp15732\_c0\_seq5; 264 1 705 LEN=914; translated  
YMEIIPKYDPLKCEQICKDRGYHFFGFECPDGDEVHCECNYARADGLGPADARWDPNPRS  
AGKDISYDCAELAYESVPRGFNRCNRNGEEDDYSGDGDYFSMGGPNVASVYLVSGAVLEE  
ELEKPGLELTYTFPATTTEQFIHALVVKGSSVNGISYFSTDPDLSYSLIEDYEGKGGVKL  
WGNRNYKSESLSDGDEMYNGGIFLQPTLHREIPPPTVISLTIIDPSGDEPVVVCWA  
>comp15732\_c0\_seq6; 93 1 419 LEN=419; translated  
XFGFECPHNDGVSVHCECNHARADGLGPADLRWDPSFAEMGTVEDCAALS YTFSPIGGNS  
CNSLREEDSFAGVDDYFSMGGPNLASAYLVSGVVLEKSSDAPSDTPSGVHSATPSRSLSE  
VPSRQPSHVPSEVPSEIHS  
>comp15732\_c0\_seq8; 264 1 705 LEN=1160; translated  
YMEIIPKYDPLKCEQICKDRGYHFFGFECPDGDEVHCECNYARADGLGPADARWDPNPRS  
AGKDISYDCAELAYESVPRGFNRCNRNGEEDDYSGDGDYFSMGGPNVASVYLVSGAVLEE  
ELEKPGLELTYTFPATTTEQFIHALVVKGSSVNGISYFSTDPDLSYSLIEDYEGKGGVKL  
WGNRNYKSESLSDGDEMYNGGIFLQPTLHREIPPPTVISLTIIDPSGDEPVVVCWA  
>comp15732\_c0\_seq9; 264 1 705 LEN=1338; translated  
YMEIIPKYDPLKCEQICKDRGYHFFGFECPDGDEVHCECNYARADGLGPADARWDPNPRS  
AGKDISYDCAELAYESVPRGFNRCNRNGEEDDYSGDGDYFSMGGPNVASVYLVSGAVLEE  
ELEKPGLELTYTFPATTTEQFIHALVVKGSSVNGISYFSTDPDLSYSLIEDYEGKGGVKL  
WGNRNYKSESLSDGDEMYNGGIFLQPTLHREIPPPTVISLTIIDPSGDEPVVVCWA  
>comp15732\_c0\_seq10; 141 1 511 LEN=511; translated  
YMEIIPKYDPLKCEQICKDRGYHFFGFECPDGDEVHCECNYARADGLGPADARWDPNPRS  
AGKDISYDCAELAYESVPRGFNRCNRNGEEDDYSGDGDYFSMGGPNVASVYLVSGAVLEE  
GPLEIYTQVPYGTASDQGKRVRDPWSHMELIPKNDPLKCEQICKERGYQX  
>comp15732\_c0\_seq13; 139 1 443 LEN=443; translated  
XSFSVTVEMDDYGFVWSNGMWEVHREPTYTFPATTTEQFVHGLVVKGSSVNGIISSTD  
PDLSYSLIEDYEGVGGVELWGNRDYKSESLSGGDKMYNGGIFLQPSKHRDIPPPTVISLY  
IDPAGDEPVVVCWAVIDIHTNVWDGGWLS  
>comp15732\_c0\_seq14; 127 1 370 LEN=987; translated  
XSVYLVGTGVELEKPGLELTYTFPATTTEQFIHALVVKGSSVNGISYFSTDPDLSYSLIED  
YEGKGGVKLWGNRNYKSESLSDGDEMYNGGIFLQPTLHREIPPPTVISLTIIDPSGDEPVV  
VCAW  
>comp15732\_c0\_seq17; 127 1 370 LEN=744; translated  
XSVYLVGTGVELEKPGLELTYTFPATTTEQFIHALVVKGSSVNGISYFSTDPDLSYSLIED  
YEGKGGVKLWGNRNYKSESLSDGDEMYNGGIFLQPTLHREIPPPTVISLTIIDPSGDEPVV  
VCAW  
>comp15732\_c0\_seq18; 128 1 494 LEN=494; translated  
YMEIIPKYDPLKCEQICKDRGYHFFGFECPDGDEVHCECNYARADGLGPADARWDPNPRS  
AGKDISYDCAELAYESVPRGFNRCNRNGEEDDYSGDGDYFSMGGPNLASVYLVSGVELEE  
APEEPLAYEQHGCTVYNGGSQYGRTRQSDVYVYSGPDYEAFSPEX  
>comp15732\_c0\_seq19; 55 1 310 LEN=310; translated  
XSAYLVSGVLDPVESYTVQVPYGTASDWGTRAGAPWYKEVIPKNDPLKCEQICKERGY  
QFFGFECPHDNGFRVHCECNARADGRGPEDKRWSDPRSAGKD  
>comp15733\_c0\_seq1; 1229 225 2756 LEN=8543; translated  
MSDDELEMLQVQARKLTALDLKQALAAKQSNHVGDALELLKQAKKIEQEGDDEQPFSSST  
LPIFWKKVAILCKQAGDIDRAKQALMHSKALESGLEAEIIIQAEENGTEMPEPQSEPTSE  
PEPTEHVASGKSDAPPPTYENVGSFTPPSPSYDNVLSKEDEEEEAMLAELVGGGEKSEK  
TMEVTEAPATQSSANSNDSDSHASGGNEMFTDNELMDEEMMTEFRLGGVKGIPQTQEE  
YAAKVLAYKLLALKSKQEGDIPKATQNLRAAKQLEKVATALKNMEDGLGLRIHEDSHGWM  
ETLNPEESDLLGELFASSPANNEAGNEEDGKPTDRLTLDDLEDMDDDNDVIELVEMMGP  
DALPTVEEVTEKINEHKQALQYKQEGNIELAKSLLQSKKAKLHAMRLAEIYRKRLEQRK  
SNGADHDGDDGNEQISMEALESLVDGNKKPDEPAPKQSPPEPSKDPWLLKPSSEIKAEV  
IRLKNEKQVKEATRLLQLFKQKLAEEQRQVELVKCSKLTDTIQKRIDVSETQRRLWQYYQ  
WFGTEPAVGCQRKEWTEFEFEGECQAIHFINTEGSDSVQLGPRGHETKRNEGCDGQSEDS  
KNKAVAKKLYMLEDLILSVETCTNTGKSAASSNSDDASTSNYLANNSLEVAIMGLFEM  
DKNEKLQKILSKQPKSKKADFDCPDLRISSKLQLPIHPEDPSKPVFMNFDPTGLSLKRRS

SARVSGKVSALQFKYDFDPSSKSCRQQIGLPRKDPKQERILLRRMETKTIQLSVYYLHNQ  
QKRQQAARKEAAERKKSSWFFSRGGSEPOAVEDEAGEGDAKDIFLGKVSNRNRFCHQS  
VGS

>comp15733\_c0\_seq2; 1263 225 2771 LEN=6423; translated  
MSDDELEMLQVQARKLTALDLKKQALAAKQSNHVGDALELLKQAKKIEQEGDDEEEDEQ  
PFSSTLPIFWKKVAILCKQAGDIDRAKQALMHSKALESGLEAEIIIQAEENGTEMPEPQS  
EPTSEPEPTEHVASGKSDAPPPTYENVGSFTPPSPSYDNVLSKEDEEEEAAMLAEVGGG  
EKSEKTMETVEAPATQSSANSNDDSDSHASGGNEMFTDNELMDEEMMTEFRLGGVKG  
PTQEEYAAKVLAYKKLALKSKQEGDIPKATQNLRAAKQLEKVATALKNMEDGLGLRIHED  
SHGWMETLNPEESDLLGELFASSPANNEAGGNEEDGKPTDRLTLDDLEDMDDDNDVIELV  
EMMGPDALPTVEEVTEKINEHKQQALQYKQEGNIELAKSSLLQSKKAKLHAMRLAEIYRK  
LEQRKSNADHDGDDGGNEQSI S MEAL E SLVDGNKKPDEPAPKQSPPEPSKDPWLLKPSSE  
IKAEVIRLKNKQVKEATRLQLFKQKLAEEQRQVELVKCSKLTDTIQKRIDVSETQRR  
WQYYQWFGTEPAVGCSQRKEWTEFEGECQKAIHFINTEGSDSVQLGPRGHETKRNEGCDG  
QSEDSKNKAVAKKLYMLEDDILSLVETCTNTGKSAASSNSSDDASTSNYLANNSLEVAIM  
GLFEMDKNEKLQKILSKQPKSKKADFDCPDLRISSKLQLPIHPEDPSKPVFMNFDPTGLS  
LKRRSSARVSGKVSALQFKYDFDPSSKSCRQQIGLPRKDPKQERILLRRMETKTIQLSVY  
YLHNQQKRQQAARKEAAERKKSSWFFSRGGSEPOAVEDEAGEGDAKDIFLGKVSNRNRF  
CHQSVGS

>comp15733\_c0\_seq3; 1388 225 3002 LEN=6336; translated  
MSDDELEMLQVQARKLTALDLKKQALAAKQSNHVGDALELLKQAKKIEQEGDDEEEDEQ  
PFSSTLPIFWKKVAILCKQAGDIDRAKQALMHSKALESGLEAEIIIQAEENGTEMPEPQS  
EPTSEPEPTEHVASGKSDAPPPTYENVGSFTPPSPSYDNVLSKEDEEEEAAMLAEVGGG  
EKSEKTMETVEAPATQSSANSNDDSDSHASGGNEMFTDNELMDEEMMTEFRLGGVKG  
PTQEEYAAKVLAYKKLALKSKQEGDIPKATQNLRAAKQLEKVATALKNMEDGLGLRIHED  
SHGWMETLNPEESDLLGELFASSPANNEAGGNEEDGKPTDRLTLDDLEDMDDDNDVIELV  
EMMGPDALPTVEEVTEKINEHKQQALQYKQEGNIELAKSSLLQSKKAKLHAMRLAEIYRK  
LEQRKSNADHDGDDGGNEQSI S MEAL E SLVDGNKKPDEPAPKQSPPEPSKDPWLLKPSSE  
IKAEVIRLKNKQVKEATRLQLFKQKLAEEQRQVELVKCSKLTDTIQKRIDVSETQRR  
WQYYQWFGTEPAVGCSQRKEWTEFEGECQKAIHFINTEGSDSVQLGPRGHETKRNEGCDG  
QSEDSKNKAVAKKLYMLEDDILSLVETCTNTGKSAASSNSSDDASTSNYLANNSLEVAIM  
GLFEMDKNEKLQKILSKQPKSKKADFDCPDLRISSKLQLPIHPEDPSKPVFMNFDPTGLS  
LKRRSSARVSGKVSALQFKYDFDPSSKSCRQQIGLPRKDPKQERILLRRMETKTIQLSVY  
YLHNQQKRQQAARKEAAERKKSSWFFSRGGSEPOAVEDEAGEGDAKDIFLGKVTIELKQ  
LLSRGCIAGDFPIMVNSKEIGGVLRVCLRTRPILDPDRYDGVVAVDGGISIPSIKTYK  
KGLAFVFNKDDENTSIEAIKQESS

>comp15733\_c0\_seq4; 1160 1 2400 LEN=5707; translated  
ASGKSDAPPPTYENVGSFTPPSPSYDNVQSKEDDEEEAVDEEEEAAMLAEVGGGKSEK  
METVEAPATQSSANSNDDSDSHASGGNEMFTDNELMDEEMMTEFRLGGVKGIPTEQEEY  
AAKVLAYKKLALKSKQEGDIPKATQNLRAAKQLEKVATALKNMEDGLGLRIHEDSHGWE  
TLNPEESDLLGELFASSPANNEAGGNEEDGKPTDRLTLDDLEDMDDDNDVIELVEMMGPD  
ALPTVEEVTEKINEHKQQALQYKQEGNIELAKSSLLQSKKAKLHAMRLAEIYRKLQKRS  
NGADHDGDDGGNEQSI S MEAL E SLVDGNKKPDEPAPKQSPPEPSKDPWLLKPSSEIKA  
EVI RLKNEKQVKEATRLQLFKQKLAEEQRQVELVKCSKLTDTIQKRIDVSETQRRWQYYQW  
FGTEPAVGCSQRKEWTEFEGECQKAIHFINTEGSDSVQLGPRGHETKRNEGCDGQSEDSK  
NKAVAKKLYMLEDDILSLVETCTNTGKSAASSNSSDDASTSNYLANNSLEVAIMGLFEMD  
KNEKLQKILSKQPKSKKADFDCPDLRISSKLQLPIHPEDPSKPVFMNFDPTGLSLKRRSS  
ARVSGKVSALQFKYDFDPSSKSCRQQIGLPRKDPKQERILLRRMETKTIQLSVYYLHNQ  
KRQQAARKEAAERKKSSWFFSRGGSEPOAVEDEAGEGDAKDIFLGKVTIELKQLLSRGC  
IAGDFPIMVNSKEIGGVLRVCLRTRPILDPDRYDGVVAVDGGISIPSIKTYKGLAFV  
FNKDDENTSIEAIKQESS

>comp15733\_c0\_seq5; 1354 225 2987 LEN=6321; translated  
MSDDELEMLQVQARKLTALDLKKQALAAKQSNHVGDALELLKQAKKIEQEGDDEEQPFSST  
LPIFWKKVAILCKQAGDIDRAKQALMHSKALESGLEAEIIIQAEENGTEMPEPQSEPTSE  
PEPTEHVASGKSDAPPPTYENVGSFTPPSPSYDNVLSKEDEEEEAAMLAEVGGGKSEK  
TMETVEAPATQSSANSNDDSDSHASGGNEMFTDNELMDEEMMTEFRLGGVKGIPTEQEE  
YAAKVLAYKKLALKSKQEGDIPKATQNLRAAKQLEKVATALKNMEDGLGLRIHEDSHGWM  
ETLNPEESDLLGELFASSPANNEAGGNEEDGKPTDRLTLDDLEDMDDDNDVIELVEMMGPD  
DALPTVEEVTEKINEHKQQALQYKQEGNIELAKSSLLQSKKAKLHAMRLAEIYRKLQKRS  
SNGADHDGDDGGNEQSI S MEAL E SLVDGNKKPDEPAPKQSPPEPSKDPWLLKPSSEIKA  
EV

IRLKNEKQVKEATRLLQLFKQKLAEEQRQVELVKCSKLTDTIQKRIDVSETQRRLLWQYYQ  
WFGTEPAVGCSQRKEWTEFEFEGECQKAIHFINTEGSDSVQLGPRGHETKRNEGCDGQSEDS  
KNKAVAKKLYMLEDDILSLVETCTNTGKSAASSNSDDASTSNYLANNSLEVAIMGLFEM  
DKNEKLQKILSKQPKSKKADFDCPDLRISSKLQLPIHPEDPSKPVFMNFDPTGLSLKRRS  
SARVSGKVSALQFKYDFDPSSKSCRQQIGLPRKDPKQERILLRRMETKTIQLSVYYLHNQ  
QKRQQAAARKEAAERKKSSWFFSRGGSEPQAVEDEAGEGDAKDIFLGKVTIELKQLLSRG  
CIAGDFPIMVNSKEIGGVLRVCLRTRPILDPDRYDGVVAVDGGSSISPSIKTYKKGLAF  
VFKNKDDENTSIEAIKQESS

>comp15733\_c0\_seq6; 1354 225 2987 LEN=8429; translated  
MSDDELEMLQVQARKLTALDLKKQALAAKQSNHVGDALELLKQAKKIEQEGDDEQPFSSST  
LPFIWKKVAILCKQAGDIDRAKQALMHSKALESGLEAEEIQAEEENGTEMPEPQSEPTSE  
PEPTEHVASGKSDAPPPTYENVGSFTPPSPPSYDNVLSKEDEEEEAMLAELVGGGEKSEK  
TMETVEAPATQSSANSNDDSDSHASGGNEMFTDNELMDEEMMTEFRLGGVKGIPTQEE  
YAAKVLAYKKLALKSKQEGDIPKATQNLRAAKQLEKVATALKNMEDGLGLRIHEDSHGWM  
ETLNPEESDLLGELFASSPANNEAGGNEEDGKPTDRLTLDDLEDMDDDNDVIELVEMMGP  
DALPTVEEVTEKINEHKQALQYKQEGNIELAKSSLLQSKKAKLHAMRLAEIYRKLEQRK  
SNGADHDGDGGNEQSI S MEALESLVDGNKKPDEPAPKQSPPEPSKDPWLLKPSSEIKAEV  
IRLKNEKQVKEATRLLQLFKQKLAEEQRQVELVKCSKLTDTIQKRIDVSETQRRLLWQYYQ  
WFGTEPAVGCSQRKEWTEFEFEGECQKAIHFINTEGSDSVQLGPRGHETKRNEGCDGQSEDS  
KNKAVAKKLYMLEDDILSLVETCTNTGKSAASSNSDDASTSNYLANNSLEVAIMGLFEM  
DKNEKLQKILSKQPKSKKADFDCPDLRISSKLQLPIHPEDPSKPVFMNFDPTGLSLKRRS  
SARVSGKVSALQFKYDFDPSSKSCRQQIGLPRKDPKQERILLRRMETKTIQLSVYYLHNQ  
QKRQQAAARKEAAERKKSSWFFSRGGSEPQAVEDEAGEGDAKDIFLGKVTIELKQLLSRG  
CIAGDFPIMVNSKEIGGVLRVCLRTRPILDPDRYDGVVAVDGGSSISPSIKTYKKGLAF  
VFKNKDDENTSIEAIKQESS

>comp15733\_c0\_seq7; 1388 225 3002 LEN=8444; translated  
MSDDELEMLQVQARKLTALDLKKQALAAKQSNHVGDALELLKQAKKIEQEGDDEEEDEQ  
PFSSTLPFIWKKVAILCKQAGDIDRAKQALMHSKALESGLEAEEIQAEEENGTEMPEPQS  
EPTSEPEPTEHVASGKSDAPPPTYENVGSFTPPSPPSYDNVLSKEDEEEEAMLAELVGGG  
EKSEKTMETVEAPATQSSANSNDDSDSHASGGNEMFTDNELMDEEMMTEFRLGGVKGI  
PTQEEYAAKVLAYKKLALKSKQEGDIPKATQNLRAAKQLEKVATALKNMEDGLGLRIHED  
SHGWMETLNPEESDLLGELFASSPANNEAGGNEEDGKPTDRLTLDDLEDMDDDNDVIELV  
EMMGPDALPTVEEVTEKINEHKQALQYKQEGNIELAKSSLLQSKKAKLHAMRLAEIYRK  
LEQRKSNGADHDGDGGNEQSI S MEALESLVDGNKKPDEPAPKQSPPEPSKDPWLLKPSSE  
IKAEVIRLKNEKQVKEATRLLQLFKQKLAEEQRQVELVKCSKLTDTIQKRIDVSETQRRLL  
WQYYQWFGTEPAVGCSQRKEWTEFEFEGECQKAIHFINTEGSDSVQLGPRGHETKRNEGCDG  
QSEDSKNKAVAKKLYMLEDDILSLVETCTNTGKSAASSNSDDASTSNYLANNSLEVAIM  
GLFEMDKNEKLQKILSKQPKSKKADFDCPDLRISSKLQLPIHPEDPSKPVFMNFDPTGLS  
LKRRSSARVSGKVSALQFKYDFDPSSKSCRQQIGLPRKDPKQERILLRRMETKTIQLSVY  
YLHNQQKRQQAAARKEAAERKKSSWFFSRGGSEPQAVEDEAGEGDAKDIFLGKVTIELKQ  
LLSRGCIAGDFPIMVNSKEIGGVLRVCLRTRPILDPDRYDGVVAVDGGSSISPSIKTYK  
KGLAFVFKNKDDENTSIEAIKQESS

>comp15733\_c0\_seq8; 1263 225 2771 LEN=8558; translated  
MSDDELEMLQVQARKLTALDLKKQALAAKQSNHVGDALELLKQAKKIEQEGDDEEEDEQ  
PFSSTLPFIWKKVAILCKQAGDIDRAKQALMHSKALESGLEAEEIQAEEENGTEMPEPQS  
EPTSEPEPTEHVASGKSDAPPPTYENVGSFTPPSPPSYDNVLSKEDEEEEAMLAELVGGG  
EKSEKTMETVEAPATQSSANSNDDSDSHASGGNEMFTDNELMDEEMMTEFRLGGVKGI  
PTQEEYAAKVLAYKKLALKSKQEGDIPKATQNLRAAKQLEKVATALKNMEDGLGLRIHED  
SHGWMETLNPEESDLLGELFASSPANNEAGGNEEDGKPTDRLTLDDLEDMDDDNDVIELV  
EMMGPDALPTVEEVTEKINEHKQALQYKQEGNIELAKSSLLQSKKAKLHAMRLAEIYRK  
LEQRKSNGADHDGDGGNEQSI S MEALESLVDGNKKPDEPAPKQSPPEPSKDPWLLKPSSE  
IKAEVIRLKNEKQVKEATRLLQLFKQKLAEEQRQVELVKCSKLTDTIQKRIDVSETQRRLL  
WQYYQWFGTEPAVGCSQRKEWTEFEFEGECQKAIHFINTEGSDSVQLGPRGHETKRNEGCDG  
QSEDSKNKAVAKKLYMLEDDILSLVETCTNTGKSAASSNSDDASTSNYLANNSLEVAIM  
GLFEMDKNEKLQKILSKQPKSKKADFDCPDLRISSKLQLPIHPEDPSKPVFMNFDPTGLS  
LKRRSSARVSGKVSALQFKYDFDPSSKSCRQQIGLPRKDPKQERILLRRMETKTIQLSVY  
YLHNQQKRQQAAARKEAAERKKSSWFFSRGGSEPQAVEDEAGEGDAKDIFLGKVSNR.SNR  
FCHQSVGS

>comp15733\_c0\_seq9; 1035 1 2169 LEN=5821; translated  
ASGKSDAPPPTYENVGSFTPPSPPSYDNVQSKEDDEEEAVDEEEAMLAELVGGGEKSEKT

METVEAPATQSSANSNDDSDSHASGGNEMTFTDNELMDEEMMTEFRLGGVKGIPQTQEEY  
AAKVLAYKKLALKSKQEGDIPKATQNLRAAKQLEKVATALKNMEDGLGLRIHEDSHGWME  
TLNPEESDLLGELFASSPANNEAGGNEEDGKPTDRLTLDDLEDMDDDNDVIELVEMMGPD  
ALPTVEEVTEKINEHKQALQYKQEGNIELAKSSLLQSKKAKLHAMRLAEIYRKLEQRKS  
NGADHDGDDGGNEQSI S MEALES LVDGNKKPDEPAPKQSPPEPSKDPWLLKPSSEIKA EVI  
RLKNEKQVKEATRLQLFKQKLAE EQRQVELVKCSKLTDTIQKRIDVSETQRRWLQYYQW  
FGTEPAVGCSQRKEWTEFEFEGECQKA IHFINTEGSDSVQLGPRGHETKRNEGCDGQSEDSK  
NKAVAKKLYMLEDDILSLVETCTNTGKSAASSNSDDASTSNYLANN SLEVAIMGLFEMD  
KNEKLQKILSKQPKSKKADFDCPDLRISSKLQLPIHPEDPSKPVFMNFDPTGLSLKRRSS  
ARVSGKVSALQFKYDFDPSSKSCRQQIGLPRKDPKQERILLRRMETKTIQLSVYYLHNQQ  
KRQQAARKEAAERKSSWFFSRGGSEPQAVEDEAGEGDAKDIFLGKVSNRNRFCHQSV  
GS

>comp15733\_c0\_seq10; 1160 1 2400 LEN=5734; translated  
ASGKSDAPPPTYENVGSFTPPSPPSYDNVQSKED EEEAVDEEEEA MLAE LVGGGEKSEKT  
METVEAPATQSSANSNDDSDSHASGGNEMTFTDNELMDEEMMTEFRLGGVKGIPQTQEEY  
AAKVLAYKKLALKSKQEGDIPKATQNLRAAKQLEKVATALKNMEDGLGLRIHEDSHGWME  
TLNPEESDLLGELFASSPANNEAGGNEEDGKPTDRLTLDDLEDMDDDNDVIELVEMMGPD  
ALPTVEEVTEKINEHKQALQYKQEGNIELAKSSLLQSKKAKLHAMRLAEIYRKLEQRKS  
NGADHDGDDGGNEQSI S MEALES LVDGNKKPDEPAPKQSPPEPSKDPWLLKPSSEIKA EVI  
RLKNEKQVKEATRLQLFKQKLAE EQRQVELVKCSKLTDTIQKRIDVSETQRRWLQYYQW  
FGTEPAVGCSQRKEWTEFEFEGECQKA IHFINTEGSDSVQLGPRGHETKRNEGCDGQSEDSK  
NKAVAKKLYMLEDDILSLVETCTNTGKSAASSNSDDASTSNYLANN SLEVAIMGLFEMD  
KNEKLQKILSKQPKSKKADFDCPDLRISSKLQLPIHPEDPSKPVFMNFDPTGLSLKRRSS  
ARVSGKVSALQFKYDFDPSSKSCRQQIGLPRKDPKQERILLRRMETKTIQLSVYYLHNQQ  
KRQQAARKEAAERKSSWFFSRGGSEPQAVEDEAGEGDAKDIFLGKVTIELKQLLSRGC  
IAGDFPIMVNSKEIGGVLRVCLRTRPILDPDRYDGVVAVDGG SISP SIKTYKKGLAFV  
FKNKDDENTSIEAIKQESS

>comp15733\_c0\_seq11; 1160 1 2400 LEN=7842; translated  
ASGKSDAPPPTYENVGSFTPPSPPSYDNVQSKED EEEAVDEEEEA MLAE LVGGGEKSEKT  
METVEAPATQSSANSNDDSDSHASGGNEMTFTDNELMDEEMMTEFRLGGVKGIPQTQEEY  
AAKVLAYKKLALKSKQEGDIPKATQNLRAAKQLEKVATALKNMEDGLGLRIHEDSHGWME  
TLNPEESDLLGELFASSPANNEAGGNEEDGKPTDRLTLDDLEDMDDDNDVIELVEMMGPD  
ALPTVEEVTEKINEHKQALQYKQEGNIELAKSSLLQSKKAKLHAMRLAEIYRKLEQRKS  
NGADHDGDDGGNEQSI S MEALES LVDGNKKPDEPAPKQSPPEPSKDPWLLKPSSEIKA EVI  
RLKNEKQVKEATRLQLFKQKLAE EQRQVELVKCSKLTDTIQKRIDVSETQRRWLQYYQW  
FGTEPAVGCSQRKEWTEFEFEGECQKA IHFINTEGSDSVQLGPRGHETKRNEGCDGQSEDSK  
NKAVAKKLYMLEDDILSLVETCTNTGKSAASSNSDDASTSNYLANN SLEVAIMGLFEMD  
KNEKLQKILSKQPKSKKADFDCPDLRISSKLQLPIHPEDPSKPVFMNFDPTGLSLKRRSS  
ARVSGKVSALQFKYDFDPSSKSCRQQIGLPRKDPKQERILLRRMETKTIQLSVYYLHNQQ  
KRQQAARKEAAERKSSWFFSRGGSEPQAVEDEAGEGDAKDIFLGKVTIELKQLLSRGC  
IAGDFPIMVNSKEIGGVLRVCLRTRPILDPDRYDGVVAVDGG SISP SIKTYKKGLAFV  
FKNKDDENTSIEAIKQESS

>comp15733\_c0\_seq12; 1160 1 2400 LEN=7815; translated  
ASGKSDAPPPTYENVGSFTPPSPPSYDNVQSKED EEEAVDEEEEA MLAE LVGGGEKSEKT  
METVEAPATQSSANSNDDSDSHASGGNEMTFTDNELMDEEMMTEFRLGGVKGIPQTQEEY  
AAKVLAYKKLALKSKQEGDIPKATQNLRAAKQLEKVATALKNMEDGLGLRIHEDSHGWME  
TLNPEESDLLGELFASSPANNEAGGNEEDGKPTDRLTLDDLEDMDDDNDVIELVEMMGPD  
ALPTVEEVTEKINEHKQALQYKQEGNIELAKSSLLQSKKAKLHAMRLAEIYRKLEQRKS  
NGADHDGDDGGNEQSI S MEALES LVDGNKKPDEPAPKQSPPEPSKDPWLLKPSSEIKA EVI  
RLKNEKQVKEATRLQLFKQKLAE EQRQVELVKCSKLTDTIQKRIDVSETQRRWLQYYQW  
FGTEPAVGCSQRKEWTEFEFEGECQKA IHFINTEGSDSVQLGPRGHETKRNEGCDGQSEDSK  
NKAVAKKLYMLEDDILSLVETCTNTGKSAASSNSDDASTSNYLANN SLEVAIMGLFEMD  
KNEKLQKILSKQPKSKKADFDCPDLRISSKLQLPIHPEDPSKPVFMNFDPTGLSLKRRSS  
ARVSGKVSALQFKYDFDPSSKSCRQQIGLPRKDPKQERILLRRMETKTIQLSVYYLHNQQ  
KRQQAARKEAAERKSSWFFSRGGSEPQAVEDEAGEGDAKDIFLGKVTIELKQLLSRGC  
IAGDFPIMVNSKEIGGVLRVCLRTRPILDPDRYDGVVAVDGG SISP SIKTYKKGLAFV  
FKNKDDENTSIEAIKQESS

>comp15733\_c0\_seq13; 1388 225 3002 LEN=6309; translated  
MSDDELEMLQVQARKLTALDLKQALAAKQSNHVGDALELLKQAKKIEQEGDDEEEDEQ  
PFSSTLPIFWKKVAILCKQAGDIDRAKQALMHSKALESGLAE EEEIQAENGTEMPEPQS

EPTSEPEPTEHVASGKSDAPPPTYENVGSFTPPSPPSYDNVLSKEDEEEEEAMLAEVLGGG  
EKSEKTMETVEAPATQSSANSNDDSDSHASGGNEMTFTDNELMDEEMMTEFRLGGVKG  
PTQEEYAAKVLAYKKLALKSKQEGDIPKATQNLRAAKQLEKVATALKNMEDGLGLRIHED  
SHGWMETLNPEESDLLGELFASSPANNEAGGNEEDGKPTDRLTLDDLEDMDDDNDVIELV  
EMMGPDALPTVEEVTEKINEHKQQALQYKQEGNIELAKSSLLQSKKAKLHAMRLAEIYRK  
LEQRKSNADHDGDDGGNEQSI S MEALES LVDGNKKPDEPAPKQSPPEPSKDPWLLKPSSE  
IKAEVIRLKNKQVKEATRLLQLFKQKLAEEQRQVELVKCSKLTDTIQKRIDVSETQRRL  
WQYYQWFGTEPAVGCSQRKEWTEFEFEGECQKAIHFINTEGSDSVQLGPRGHETKRNEGCDG  
QSEDSKNKAVAKKLYMLEDDILSLVETCTNTGKSAASSNSDDASTSNYLANNSLEVAIM  
GLFEMDKNEKLQKILSKQPKSKKADFDCPDLRISSKLQLPIHPEDPSKPVFMNFDPTGLS  
LKRRSSARVSGKVSALQFKYDFDPSSKSCRQQIGLPRKDPKQERILLRRMETKTIQLSVY  
YLHNQQKRQQAARKEAAERKSSWFFSRGGSEPQAVEDEAGEGDAKDIFLGKVTIELKQ  
LLSRGCIAGDFPIMVNSKEIGGVLRVCLRTRPILDPDRYDGVVAVDGGSSISPSIKTYK  
KGLAFVFKNKDDENTSIEAIKQESS

>comp15733\_c0\_seq14; 1035 1 2169 LEN=7929; translated  
ASGKSDAPPPTYENVGSFTPPSPPSYDNVQSKEDEEEEAVDEEEEEAMLAEVLGGGGEKSEK  
METVEAPATQSSANSNDDSDSHASGGNEMTFTDNELMDEEMMTEFRLGGVKGIPQTQEEY  
AAKVLAYKKLALKSKQEGDIPKATQNLRAAKQLEKVATALKNMEDGLGLRIHEDSHGWM  
TLNPEESDLLGELFASSPANNEAGGNEEDGKPTDRLTLDDLEDMDDDNDVIELVEMMGP  
ALPTVEEVTEKINEHKQQALQYKQEGNIELAKSSLLQSKKAKLHAMRLAEIYRKLEQRKS  
NGADHDGDDGGNEQSI S MEALES LVDGNKKPDEPAPKQSPPEPSKDPWLLKPSSEIKA  
EVI RLKNEKQVKEATRLLQLFKQKLAEEQRQVELVKCSKLTDTIQKRIDVSETQRRLWQYYQ  
WFGTEPAVGCSQRKEWTEFEFEGECQKAIHFINTEGSDSVQLGPRGHETKRNEGCDGQSE  
DSK NKAVAKKLYMLEDDILSLVETCTNTGKSAASSNSDDASTSNYLANNSLEVAIMGLFEM  
DKNEKLQKILSKQPKSKKADFDCPDLRISSKLQLPIHPEDPSKPVFMNFDPTGLSLKRRS  
SARVSGKVSALQFKYDFDPSSKSCRQQIGLPRKDPKQERILLRRMETKTIQLSVYYLHNQ  
KRQQAARKEAAERKSSWFFSRGGSEPQAVEDEAGEGDAKDIFLGKVSNRNRNFCHQSV  
GS

>comp15733\_c0\_seq15; 1229 225 2756 LEN=6408; translated  
MSDDELEMLQVQARKLTALDLKKQALAAKQSNHVGDALELLKQAKKIEQEGDDEQPFSS  
TLPFIWKKVAILCKQAGDIDRAKQALMHSKALESGLEAEIIIQAEENGTEMPEPQSEPTSE  
PEPTEHVASGKSDAPPPTYENVGSFTPPSPPSYDNVLSKEDEEEEEAMLAEVLGGGGEKSEK  
TMETVEAPATQSSANSNDDSDSHASGGNEMTFTDNELMDEEMMTEFRLGGVKGIPQTQEE  
YAAKVLAYKKLALKSKQEGDIPKATQNLRAAKQLEKVATALKNMEDGLGLRIHEDSHGWM  
ETLNPEESDLLGELFASSPANNEAGGNEEDGKPTDRLTLDDLEDMDDDNDVIELVEMMGP  
DALPTVEEVTEKINEHKQQALQYKQEGNIELAKSSLLQSKKAKLHAMRLAEIYRKLEQRK  
SNGADHDGDDGGNEQSI S MEALES LVDGNKKPDEPAPKQSPPEPSKDPWLLKPSSEIKA  
EV IRLKNEKQVKEATRLLQLFKQKLAEEQRQVELVKCSKLTDTIQKRIDVSETQRRLWQYYQ  
WFGTEPAVGCSQRKEWTEFEFEGECQKAIHFINTEGSDSVQLGPRGHETKRNEGCDGQSE  
DSK NKAVAKKLYMLEDDILSLVETCTNTGKSAASSNSDDASTSNYLANNSLEVAIMGLFEM  
DKNEKLQKILSKQPKSKKADFDCPDLRISSKLQLPIHPEDPSKPVFMNFDPTGLSLKRRS  
SARVSGKVSALQFKYDFDPSSKSCRQQIGLPRKDPKQERILLRRMETKTIQLSVYYLHNQ  
QKRQQAARKEAAERKSSWFFSRGGSEPQAVEDEAGEGDAKDIFLGKVSNRNRNFCHQSV  
VGS

>comp15733\_c0\_seq16; 1354 225 2987 LEN=8402; translated  
MSDDELEMLQVQARKLTALDLKKQALAAKQSNHVGDALELLKQAKKIEQEGDDEQPFSS  
TLPFIWKKVAILCKQAGDIDRAKQALMHSKALESGLEAEIIIQAEENGTEMPEPQSEPTSE  
PEPTEHVASGKSDAPPPTYENVGSFTPPSPPSYDNVLSKEDEEEEEAMLAEVLGGGGEKSEK  
TMETVEAPATQSSANSNDDSDSHASGGNEMTFTDNELMDEEMMTEFRLGGVKGIPQTQEE  
YAAKVLAYKKLALKSKQEGDIPKATQNLRAAKQLEKVATALKNMEDGLGLRIHEDSHGWM  
ETLNPEESDLLGELFASSPANNEAGGNEEDGKPTDRLTLDDLEDMDDDNDVIELVEMMGP  
DALPTVEEVTEKINEHKQQALQYKQEGNIELAKSSLLQSKKAKLHAMRLAEIYRKLEQRK  
SNGADHDGDDGGNEQSI S MEALES LVDGNKKPDEPAPKQSPPEPSKDPWLLKPSSEIKA  
EV IRLKNEKQVKEATRLLQLFKQKLAEEQRQVELVKCSKLTDTIQKRIDVSETQRRLWQYYQ  
WFGTEPAVGCSQRKEWTEFEFEGECQKAIHFINTEGSDSVQLGPRGHETKRNEGCDGQSE  
DSK NKAVAKKLYMLEDDILSLVETCTNTGKSAASSNSDDASTSNYLANNSLEVAIMGLFEM  
DKNEKLQKILSKQPKSKKADFDCPDLRISSKLQLPIHPEDPSKPVFMNFDPTGLSLKRRS  
SARVSGKVSALQFKYDFDPSSKSCRQQIGLPRKDPKQERILLRRMETKTIQLSVYYLHNQ  
QKRQQAARKEAAERKSSWFFSRGGSEPQAVEDEAGEGDAKDIFLGKVTIELKQLLSRG  
CIAAGDFPIMVNSKEIGGVLRVCLRTRPILDPDRYDGVVAVDGGSSISPSIKTYKKGLAF



VFKNKDDENTSIEAIKQESS

>comp15733\_c0\_seq17; 1229 225 2756 LEN=8516; translated  
MSDDELEMLQVQARKLTALDLKKQALAAKQSNHVGDALELLKQAKKIEQEGDDEQPFSSST  
LPFIWKKVAILCKQAGDIDRAKQALMHSKALESGLAEAEIIIQAEENGTEMPEPQSEPTSE  
PEPTEHVASGKSDAPPPTYENVGSFTPPSPPSYDNVLSKEDEEEEAMLAEVGGGEKSEK  
TMEVTEAPATQSSANSNDDSDSHASGGNEMFTDNELMDEEMMTEFRLGGVKGIPQTQEE  
YAAKVLAYKKLALKSKQEGDIPKATQNLRAAKQLEKVATALKNMEDGLGLRIHEDSHGWM  
ETLNPEESDLLGELFASSPANNEAGGNEEDGKPTDRLTLDDLEDMDDDNDVIELVEMMGP  
DALPTVEEVTEKINEHKQQALQYKQEGNIELAKSSLLQSKKAKLHAMRLAEIYRKLEQRK  
SNGADHDGDDGGNEQSI S MEALESLVDGNKKPDEPAPKQSPPEPSKDPWLLKPSSEIKAEV  
IRLKNEKQVKEATRLLQLFKQKLAEEQRQVELVKCSKLTDTIQKRIDVSETQRRLLWQYYQ  
WFGTEPAVGCSQRKEWTEFEFEGECQKAIHFINTEGSDSVQLGPRGHETKRNEGCDGQSEDS  
KNKAVAKKLYMLEDDILSLVETCTNTGKSAASSNSDDASTSNYLANNSLEVAIMGLFEM  
DKNEKLQKILSKQPKSKKADFDCPDLRISSKLQLPIHPEDPSKPVFMNFDPTGLSLKRRS  
SARVSGKVSALQFKYDFDPSSKSCRQQIGLPRKDPKQERILLRRMETKTIQLSVYYLHNQ  
QKRQQAARKEAAERKKSSWFFSRGGSEPQAVEDEAGEGDAKDI FLGKVSNRSNRFCHQS  
VGS

>comp15733\_c0\_seq18; 1388 225 3002 LEN=8417; translated  
MSDDELEMLQVQARKLTALDLKKQALAAKQSNHVGDALELLKQAKKIEQEGDDEEEDEQ  
PFSSTLPFIWKKVAILCKQAGDIDRAKQALMHSKALESGLAEAEIIIQAEENGTEMPEPQS  
EPTSEPEPTEHVASGKSDAPPPTYENVGSFTPPSPPSYDNVLSKEDEEEEAMLAEVGGG  
EKSEKTMEVTEAPATQSSANSNDDSDSHASGGNEMFTDNELMDEEMMTEFRLGGVKGIP  
QTQEEYAAKVLAYKKLALKSKQEGDIPKATQNLRAAKQLEKVATALKNMEDGLGLRIHED  
SHGWMETLNPEESDLLGELFASSPANNEAGGNEEDGKPTDRLTLDDLEDMDDDNDVIELV  
EMMGPDALPTVEEVTEKINEHKQQALQYKQEGNIELAKSSLLQSKKAKLHAMRLAEIYRK  
LEQRKSNGADHDGDDGGNEQSI S MEALESLVDGNKKPDEPAPKQSPPEPSKDPWLLKPSSE  
IKAEVIRLKNEKQVKEATRLLQLFKQKLAEEQRQVELVKCSKLTDTIQKRIDVSETQRRLL  
WQYYQWFGTEPAVGCSQRKEWTEFEFEGECQKAIHFINTEGSDSVQLGPRGHETKRNEGCDG  
QSEDSKNKAVAKKLYMLEDDILSLVETCTNTGKSAASSNSDDASTSNYLANNSLEVAIM  
GLFEMDKNEKLQKILSKQPKSKKADFDCPDLRISSKLQLPIHPEDPSKPVFMNFDPTGLS  
LKRRSSARVSGKVSALQFKYDFDPSSKSCRQQIGLPRKDPKQERILLRRMETKTIQLSVY  
YLHNQQKRQQAARKEAAERKKSSWFFSRGGSEPQAVEDEAGEGDAKDI FLGKVTIELKQ  
LLSRGCIAGDFPIMVNSKEIGGVLRVCLRTRPILDPDRYDGVVAVDGGISISPSIKTYK  
KGLAFVFKNKDDENTSIEAIKQESS

>comp15733\_c0\_seq19; 1263 225 2771 LEN=6450; translated  
MSDDELEMLQVQARKLTALDLKKQALAAKQSNHVGDALELLKQAKKIEQEGDDEEEDEQ  
PFSSTLPFIWKKVAILCKQAGDIDRAKQALMHSKALESGLAEAEIIIQAEENGTEMPEPQS  
EPTSEPEPTEHVASGKSDAPPPTYENVGSFTPPSPPSYDNVLSKEDEEEEAMLAEVGGG  
EKSEKTMEVTEAPATQSSANSNDDSDSHASGGNEMFTDNELMDEEMMTEFRLGGVKGIP  
QTQEEYAAKVLAYKKLALKSKQEGDIPKATQNLRAAKQLEKVATALKNMEDGLGLRIHED  
SHGWMETLNPEESDLLGELFASSPANNEAGGNEEDGKPTDRLTLDDLEDMDDDNDVIELV  
EMMGPDALPTVEEVTEKINEHKQQALQYKQEGNIELAKSSLLQSKKAKLHAMRLAEIYRK  
LEQRKSNGADHDGDDGGNEQSI S MEALESLVDGNKKPDEPAPKQSPPEPSKDPWLLKPSSE  
IKAEVIRLKNEKQVKEATRLLQLFKQKLAEEQRQVELVKCSKLTDTIQKRIDVSETQRRLL  
WQYYQWFGTEPAVGCSQRKEWTEFEFEGECQKAIHFINTEGSDSVQLGPRGHETKRNEGCDG  
QSEDSKNKAVAKKLYMLEDDILSLVETCTNTGKSAASSNSDDASTSNYLANNSLEVAIM  
GLFEMDKNEKLQKILSKQPKSKKADFDCPDLRISSKLQLPIHPEDPSKPVFMNFDPTGLS  
LKRRSSARVSGKVSALQFKYDFDPSSKSCRQQIGLPRKDPKQERILLRRMETKTIQLSVY  
YLHNQQKRQQAARKEAAERKKSSWFFSRGGSEPQAVEDEAGEGDAKDI FLGKVSNRSNR  
FCHQSVGS

>comp15733\_c0\_seq20; 1229 225 2756 LEN=6435; translated  
MSDDELEMLQVQARKLTALDLKKQALAAKQSNHVGDALELLKQAKKIEQEGDDEQPFSSST  
LPFIWKKVAILCKQAGDIDRAKQALMHSKALESGLAEAEIIIQAEENGTEMPEPQSEPTSE  
PEPTEHVASGKSDAPPPTYENVGSFTPPSPPSYDNVLSKEDEEEEAMLAEVGGGEKSEK  
TMEVTEAPATQSSANSNDDSDSHASGGNEMFTDNELMDEEMMTEFRLGGVKGIPQTQEE  
YAAKVLAYKKLALKSKQEGDIPKATQNLRAAKQLEKVATALKNMEDGLGLRIHEDSHGWM  
ETLNPEESDLLGELFASSPANNEAGGNEEDGKPTDRLTLDDLEDMDDDNDVIELVEMMGP  
DALPTVEEVTEKINEHKQQALQYKQEGNIELAKSSLLQSKKAKLHAMRLAEIYRKLEQRK  
SNGADHDGDDGGNEQSI S MEALESLVDGNKKPDEPAPKQSPPEPSKDPWLLKPSSEIKAEV  
IRLKNEKQVKEATRLLQLFKQKLAEEQRQVELVKCSKLTDTIQKRIDVSETQRRLLWQYYQ

WFGTEPAVGCSQRKEWTEFEFEGECQKAIHFINTEGSDSVQLGPRGHETKRNEGCDGQSEDS  
KNKAVAKKLYMLEDDILSLVETCTNTGKSAASSNSSDDASTSNYLANNSLEVAIMGLFEM  
DKNEKLQKILSKQPKSKKADFDPCDLRIS SKLQLPIHPEDPSKPVFMNFDPTGLSLKRRS  
SARVSGKVSALQFKYDFDPSSKSCRQQIGLPRKDPKQERILLRRMETKTIQLSVYYLHNQ  
QKRQQAARKEAAERKKSSWFFSRGGSEPQAVEDEAGEGDAKDIFLGKVSNRNRFCHQS  
VGS

>comp15733\_c0\_seq21; 1263 225 2771 LEN=8531; translated  
MSDDELEMLQVQARKLTALDLKKQALAAKQSNHVGDALLELLKQAKKIEQEGDDEEEDEQ  
PFSSTLPIFWKKVAILCKQAGDIDRAKQALMHSKALESGLEAEIIIQAEENGTEMPEPQS  
EPTSEPEPTEHVASGKSDAPPPPTYENVGSFTPPSPPSYDNVLSKEDEEEEEAMLAELVGGG  
EKSEKTMETVEAPATQSSANSNDDSDSHASGGNEMFTDNELMDEEMMTEFRLGGVKG  
IPTQEEYAAKVLAYKKLALKSKQEGDIPKATQNLRAAKQLEKVATALKNMEDGLGLRIHED  
SHGWMETLNPEESDLLGELFASSPANNEAGGNEEDGKPTDRLTLDDLEDMDDDNDVIELV  
EMMGPDALPTVEEVTEKINEHKQQALQYKQEGNIELAKSSLLQSKKAKLHAMRLAEIYRK  
LEQRKSNADHDGDDGGNEQSI S MEALES LVDGNKKPDEPAPKQSPPEPSKDPWLLKPSSE  
IKAEVIRLKNKQVKEATRLLQLFKQKLAEEQRQVELVKCSKLTDTIQKRIDVSETQRR  
LWQYYQWFGTEPAVGCSQRKEWTEFEFEGECQKAIHFINTEGSDSVQLGPRGHETKRNEGCDG  
QSEDSKNKAVAKKLYMLEDDILSLVETCTNTGKSAASSNSSDDASTSNYLANNSLEVAIM  
GLFEMDKNEKLQKILSKQPKSKKADFDPCDLRIS SKLQLPIHPEDPSKPVFMNFDPTGLS  
LKRRSSARVSGKVSALQFKYDFDPSSKSCRQQIGLPRKDPKQERILLRRMETKTIQLSVY  
YLHNQQKRQQAARKEAAERKKSSWFFSRGGSEPQAVEDEAGEGDAKDIFLGKVSNRNRF  
CHQSVGS

>comp15733\_c0\_seq22; 1354 225 2987 LEN=6294; translated  
MSDDELEMLQVQARKLTALDLKKQALAAKQSNHVGDALLELLKQAKKIEQEGDDEQPFSS  
TLPFIWKKVAILCKQAGDIDRAKQALMHSKALESGLEAEIIIQAEENGTEMPEPQSEPTSE  
PEPTEHVASGKSDAPPPPTYENVGSFTPPSPPSYDNVLSKEDEEEEEAMLAELVGGG  
EKSEKTMETVEAPATQSSANSNDDSDSHASGGNEMFTDNELMDEEMMTEFRLGGVKG  
IPTQEEYAAKVLAYKKLALKSKQEGDIPKATQNLRAAKQLEKVATALKNMEDGLGLRIHED  
SHGWMETLNPEESDLLGELFASSPANNEAGGNEEDGKPTDRLTLDDLEDMDDDNDVIELV  
EMMGPDALPTVEEVTEKINEHKQQALQYKQEGNIELAKSSLLQSKKAKLHAMRLAEIYRK  
LEQRKSNADHDGDDGGNEQSI S MEALES LVDGNKKPDEPAPKQSPPEPSKDPWLLKPSSE  
IKAEVIRLKNKQVKEATRLLQLFKQKLAEEQRQVELVKCSKLTDTIQKRIDVSETQRR  
LWQYYQWFGTEPAVGCSQRKEWTEFEFEGECQKAIHFINTEGSDSVQLGPRGHETKRNEGCDG  
QSEDSKNKAVAKKLYMLEDDILSLVETCTNTGKSAASSNSSDDASTSNYLANNSLEVAIM  
GLFEMDKNEKLQKILSKQPKSKKADFDPCDLRIS SKLQLPIHPEDPSKPVFMNFDPTGLS  
LKRRSSARVSGKVSALQFKYDFDPSSKSCRQQIGLPRKDPKQERILLRRMETKTIQLSVY  
YLHNQQKRQQAARKEAAERKKSSWFFSRGGSEPQAVEDEAGEGDAKDIFLGKVTIELKQL  
LSRGCIA GDFPIMVNSKEIGGVLRVCLRTRPILDPDRYDGVVAVDGGSSISPSIKTYK  
KGLAFVFNKDDENTSIEAIKQESS

>comp15733\_c0\_seq23; 1035 1 2169 LEN=3524; translated  
ASGKSDAPPPPTYENVGSFTPPSPPSYDNVQSKEDDEEEAVDEEEAMLAELVGGG  
EKSEKTMETVEAPATQSSANSNDDSDSHASGGNEMFTDNELMDEEMMTEFRLGGVKG  
IPTQEEYAAKVLAYKKLALKSKQEGDIPKATQNLRAAKQLEKVATALKNMEDGLGLRIHED  
SHGWMETLNPEESDLLGELFASSPANNEAGGNEEDGKPTDRLTLDDLEDMDDDNDVIELV  
EMMGPDALPTVEEVTEKINEHKQQALQYKQEGNIELAKSSLLQSKKAKLHAMRLAEIYRK  
LEQRKSNADHDGDDGGNEQSI S MEALES LVDGNKKPDEPAPKQSPPEPSKDPWLLKPSSE  
IKAEVIRLKNKQVKEATRLLQLFKQKLAEEQRQVELVKCSKLTDTIQKRIDVSETQRR  
LWQYYQWFGTEPAVGCSQRKEWTEFEFEGECQKAIHFINTEGSDSVQLGPRGHETKRNEGCDG  
QSEDSKNKAVAKKLYMLEDDILSLVETCTNTGKSAASSNSSDDASTSNYLANNSLEVAIM  
GLFEMDKNEKLQKILSKQPKSKKADFDPCDLRIS SKLQLPIHPEDPSKPVFMNFDPTGLS  
LKRRSSARVSGKVSALQFKYDFDPSSKSCRQQIGLPRKDPKQERILLRRMETKTIQLSVY  
YLHNQQKRQQAARKEAAERKKSSWFFSRGGSEPQAVEDEAGEGDAKDIFLGKVSNRNRF  
CHQSVGS

>comp15734\_c0\_seq1; 247 43 851 LEN=2084; translated  
MGVIVFVTVYVRKRIHKPLSSGNQDLGVALALYGVYPAILWLLIDKFHIGICGLETYISKQ  
EAILANKSLFLWFTALMRTYKLATITLYQAEAYDKQEDPEEECLVVQDGEADEETFC  
TRQKCRVWFILSQELTAILCVAFLLLLCLPTLAFWFMFISILVSIRNIYLLLQRLW  
KDAHSVTS LDDVPIVDETNDGSEIEFENFLDNFADEDNEFDEFVNNFANDDNEFEX  
KMNLLTPLFWKNEVDSFRASGVISIDHIIGMDLLDSKISV

>comp15734\_c0\_seq5; 1488 327 6056 LEN=7338; translated

MPSFGRNHPGNRLAAAAADSVQKLLLLLAATALAIVSLTNPAAVTANPEEIDYTCDFGLDY  
SPDNQCQTIQDGI CDDPRHGGSSGDACIGQDCIDCNVHCKQFQADCYGCLNAKGCYYCPE  
DGTCENSNFYTSTNKVPACSEPDVYLSNVLGDTPDACIDADS YTDPLWSGSEWYDEIN  
LVEVWEEYGLSGKGV SIRINDDGVYVNNKEFEGRFQDEENSCGF FMPNSMDQDVDGHGTA  
VAGIVLGNDDNLDLCATGIAHEATFSSCNFFADDVPYSAMAYKLDTFDISQNSVGMPCGGE  
EGQHSGRGGGPVLSKYNQVCPFEYTD SLYQPCVECDGEFIEDNTLSLSCQTAIARHCKSH  
YKLDRAACTDFPEIIIGGDCDFDKLP IAAIKAIELGIEEGRDGKGTIYTFASGNDFSKGD  
NVNFSGWTNSRYTISVGSVKG DGEHADYSTSGAGLMVSAPGGDPKDVGHLMTAGLGDEKC  
VDSGQGT SFACPVVTGVIALMLEANPDLTWRD VQGVLEVTSRSIEDDEDLTTTVNGAGLW  
HSNWFYGFVIDAKAAVDAAISWEPFSEELQAIGISDEVEDVLSVDPEDEYVSKIVLDPVE  
DGYPDDFVAESTVILLDLAHYNRGLQITLES PSGTTSVLT PGKRPEAGALDDGERWKLM  
TLKNWGEDPTGKWKLRDL SVEENEVVNPEPDI FSQWTLIVYGRSATGQKGF GGEDEA  
DANLTS DLCLNPTAPSTGCLTLGDGNSSCPAGATLNFNEGSITVDANIVCPEEILIGDNM  
HYSEASQRGLCSCEAALFDGNC DVLHEDLECECFSCPDGLRMSTAYS CNKPIFNDC LTFD  
CLGNCNGPYEPPLLGLQPLPTGGGGTQDQPLGQPVMT PVVAPVGEPTGEQPLIPPDPGQPPN  
GQPV SAPVLQPIGQQTPTDEGVGSEPVPPNDEPVGEPVISP DNTSAGSASDVPTLGEEVA  
SEPATTCKSALPVESAATNGGNITAVSILGLEGTCLSGLETLAGWYSVVGNGKVFTLQAC  
PRDP SKNIGISVFTGECGSLVCIENQSRQAATCENGYSTSWITENEKTY SILLTGLPVGV  
DLISSGRRL EAVDGPDFELEFTEEQIPENSLCGLSSS IASEGSAKGITVIGSDYVYNTC  
EGTEKTGAWYSVSEGT PSEDGIVYEASTCNSETTFYNALSIFRGDCTSLQCVDVDVLP  
ADNDY GQRVYWTTSKEEAFQIFVHAADTIEAALFDAGSYEIDIAFNDRQINDQCSQAIEL  
ELDAEIMGSTKGSKPDMSAISDSSCGTGSAGVWHSIVGNGGIFQASTCSNETDHKTSIYV  
YSGGCGSLNCIDEKGPNKSLCLDEVASDKAAVVNFKTQVDVLYHVLSVSGHEEDGKESGNF  
GLTVTEITPSAGNECKEALPISLDDPSTL GSTLQSTVDFSLGDVCGAPLDTPGVWYTI EG  
TGKGLEISTCKSNFNNTAISVFEGSCE SLECVTGTQAKDAACDNSGVTA AFQSKSATYY  
IFVHGTESSL SMGDFELTYKEFDVLETNEFCPQARSITADGSRIQGSTEDATHATI QETS  
CGVEISNPGLWYNFKGNGQPF TISACNEDADEFDV SISI FTGSCGNLKC IAGTTFFQNV  
STLETRRQLQSSTSGNNVRLMTVNLEDY YVHVHGQNGVGD FDLFVRDENLSGFGTAAPSE  
TPIQYGTDLRWYTIIDV GIEIVTDY LKLTIVSPPNNGTASV LGPIIEYNPN SGNFNGDDAM  
TLDGCVQSDCLRFDVIVSVMGNERTIPLSLNGSTSDDEWNKLWLLAILLVLP CCTCIPL  
IYFFYQKKRQKQEEENDVNNHSSDSEGFEDDFSD DDEKGERKLLSNDDDYSDDDWESSDDD  
ESSDDNSESFFDDEDADGWGSTLP SKPKKPAVTD PENSENDWESSDSD

>comp15734\_c0\_seq7; 3215 2531 10900 LEN=11227; translated  
MEGEDQSN DGSNDL SLIDLITDLASSRPDSISEDERESLVENATELLSGDADNRRSLAD  
HGGLK CAGK FANQRISKLYCVAI INEEDDEDVRK KLC LGLCTLLK KCSNGKIVEDCKRQL  
GD SGASIFADIAKANESSLGIPSLVFAATTDWDQFVTIALNTDPVATIGDSKLCRSVLEN  
MTPTSWEDIVG PPLLLK LKAKPESLLPMVEGFMR FANAAAIGPSKIVVEEYLT V LCKFLK  
SPKQKVRDLSSSILQHIAKAVIDQE QEESLSKLVD SVAETKGLALPHQRQIVYHTLYQIG  
NNITATG SIEVKKSTASAVLSGVGVPLAKEAKAAKQNR EQGLQALISWIVIARKNGVGS  
DKGYDDALTFVRKPVIAKNGPDTVENIGAMVQQINPDTMENVLDLWKDPKFVKGL EAFI  
EQANKKHASSSS IAPVDGLLAIYLSLVHVGVS SSKLSPLIEKALSAGSMSIGKTT FVYK  
AATNAVSSNSIVGLVLPQIISMFTKIASSTNIKQ GKMKASSSSVRALAYCTSY PVARGK  
SPSDSIESTRLVLDYESIAIPLIEALYVCVNEQSVESG SASTVSLDTVRQIAGMLSTRS  
LSAGSMAKALILMHLGTSQETVDAEDEEDGERSALVENTTALKALVVSCGNQNEFKST  
ISEIVAEQASAASYTDKEVAISESLHLASQSLIISLGNAASNFSPLSDDPEDDDMKPFAF  
AMDVLTNGISTR LADGLVPI TCEIDGLLTD DIALYTS PMGTLHVEDNLKEKTNVPTKDTG  
KSRTEDEEWELQIKKELAKKKSAS TEKSSTLSADDRKMVEKQDEKRREITTLIEGKCYR  
LLTSIESLVSSDIEIGNSCLPTLSPAVLQLSILDCPATDNLNEMKERLSKTLTSLAACVY  
EIEEYAPMMATALTISCKNPEKSEAKTEDKPSDTSTRFIVHALPTPCEPAANAVFEMDE  
FQEELSGPSFAFLFP IIRAALMGPRTPVPGCEGALRVLERHTVLLVGDADENVKLLRADM  
VTSVLELLKHDRAKAFVDPDPYETLVACYSTDEDNESGPALTTAELAPLLDERGALGEKN  
CRVAAMIALGSIASSHKKIVKNNPLIENRVWLNCFEDDESIRAEARKTWNIMNSKNETDE  
TLPPPSPMYAVPLLP LLHSSNPGIAAAA KAYAFGMKAHPKGVNRNLK KLCNSYIDSCPQ  
PEGAGKPASGAGAFPKANFPTPAPPKAKAPALPKLKKKT VKKSPGLAAIGQPKPKK VSK  
KTKKMTSAMLKPKQERTLDQAAL EDQFKIGPKTTPAEEDAPEKVSIRTGVLRVLA AFP SA  
ELEM DTDTLKLLTSFLMAYGIADGNEDVKNTSRNALKDIIVSYGASDEAIAFLLPHIDGI  
LKNGLADSQALDDL PKTKIAENTESSNRRKEGAVVALGSVALHLKGPENAMKIDNSVDML  
INSLKTPNEDVQASVADALTKLMKKGNTQARIEEILDQLVAVCLEGDSQATRHHGAYGIA  
AAVKGSGIASLKKFGIVTRLEEACAEGSSSNKEGSLFAIQLLC TRLGLLFEPYVIVLLPS  
LLKAFGDGSDEVRKAASKTVGVIMSKLSAHGVKLVLP AVLTA FNDSWR TKQASIDMLGA

MSHLAPKQLASALPKVVPKLT EAYADTHPKVKGSAQ GALDEISSVIRNPEIRDISPKLLK  
ALTD PANKTLSALEAL IETEF LHAIDAPSLALIVPILHRGLRDRAATTKRYGALITGNIC  
TMINDPRDFIPYIPTLMPDLKGSLLDPIPDVRSIAAKALGSLTRGLGEDALPDLRPWLE  
QLRLEELSSAERSGAAQGLTEVLIASGNVVEALMLDDILPLSSHPSHSTREGVLWVLCF  
LPPAMGHGFTTMLDES LPA LISGLSDENEQVREVAMKAGRVLIRSHGKVHFDKILPILQN  
GMTDEDYRIRLSSLMLLGDLLSMIGGTTVLR TDGDTQDDIRKAERAQAQITQVLGIKTRN  
QVLSDIYIARSDSASAVRHA AIQVWKTVVSVTARTLRQILQVLVSRVVDL ASGDAEKT D  
TAGKCLGDIVRKLGD SVLPNVV PVL RNSLYEGDHNTRRGVCVGLSEVILSSTKDQILRFL  
DIIVRVVQDAICDDNDGVRAMA AEFQONLYKLVGNVAMDEVVPSLMVALESAD EDEQRSE  
RAMNGLTGILSIRSKDLLPYIIPRLIQQPM TICHA KAIASIATVTSETLYFHFNHIIPAL  
LQDLSSGNDDKAQIEAVRDCAKSVFEHGDEAGVNKL VSEVTKNCTSDKAELRKE SCWMLG  
AIVTARKEAKDFYDLNSIIIRELIHRFN DENKDVVKAANKAFAALS KSVPAEVLVDDIEY  
MRNIIASMVSDARRRKG GVG DGEFLLPGFNIPKGLEPLLPIYQRGILYGT PAVREASAAG  
LGEVINLTANKFLAGPLIIKMTG PLLRIVGDRNPANVKIA IILQTLGLLILVKGGPALRAFV  
PQFQTT FVKALSDPSRQVRIEAINALGLLMPLSTRVDPLIKELVAGSLGRDSSGDDGVGV  
VAVQTATLEALAVVLAKGGKSKLPDSIPSALEASTSLIRHSDES VREAAAKVTGAACNI  
LGAEKTEETMKDFVLDIDDDSGDIREGKACAIRRVFSADVAKKLDGSITSEALAVATKY  
MNDEKLAVKESGIVAVGAVVGR TENPETSLSRVEKSLLSLMVGD LKQRLETHQAIARCLC  
LCLELSDVDSRIELFGLKLLKACMRLAMSGNQRVQFAYNDV LWLALRVSEGQDGLDEFSS  
LAMFEDAKQMKSIYSKVL LKIKTAKILED

>comp15734\_c0\_seq8; 511 250 1359 LEN=1686; translated  
MTG PLLRIVGDRNPANVKIA IILQTLGLLILVKGGPALRAFVPQFQTT FVKALSDPSRQVRI  
EAINALGLLMPLSTRVDPLIKELVAGSLGRDSSGDDGVGVVAVQTATLEALAVVLAKGGK  
KSKLPDSIPSALEASTSLIRHSDES VREAAAKVTGAACNILGAEKTEETMKDFVLDIDDD  
DSGDIREGKACAIRRVFSADVAKKLDGSITSEALAVATKYMNDEKLAVKESGIVAVGAVV  
GR TENPETSLSRVEKSLLSLMVGD LKQRLETHQAIARCLC LCLELSDVDSRIELFGLKLL  
KACMRLAMSGNQRVQFAYNDV LWLALRVSEGQDGLDEFSS LAMFEDAKQMKSIYSKVL LK  
IKTAKILED

>comp15734\_c0\_seq9; 511 250 1359 LEN=2108; translated  
MTG PLLRIVGDRNPANVKIA IILQTLGLLILVKGGPALRAFVPQFQTT FVKALSDPSRQVRI  
EAINALGLLMPLSTRVDPLIKELVAGSLGRDSSGDDGVGVVAVQTATLEALAVVLAKGGK  
KSKLPDSIPSALEASTSLIRHSDES VREAAAKVTGAACNILGAEKTEETMKDFVLDIDDD  
DSGDIREGKACAIRRVFSADVAKKLDGSITSEALAVATKYMNDEKLAVKESGIVAVGAVV  
GR TENPETSLSRVEKSLLSLMVGD LKQRLETHQAIARCLC LCLELSDVDSRIELFGLKLL  
KACMRLAMSGNQRVQFAYNDV LWLALRVSEGQDGLDEFSS LAMFEDAKQMKSIYSKVL LK  
IKTAKILED

>comp15734\_c0\_seq10; 3215 2531 10900 LEN=11649; translated  
MEGEDQSN DGSNDL SLIDLITDLASSRPDSISEDERESLVENATELLSGDADNRRSLAD  
HGGLKCAGKFANQRISKLYCVAI INEEDDEDVRKKLCLGLCTLLK KCSNGKIVEDCKRQL  
GDSGASIFADIAKANESSLGIPSLVFAATTDWDQFVTIALNTDPVATIGDSKLCRSVLEN  
MPTTSWEDIVGP LLLK LKAKPESLLPMVEGFMRFANAAAIGPSKIVVEEYLT V LCKFLK  
SPKQKVRDLSSSILQHIAKAVIDQE QEESLSKLVD SVAETKGLALPHQRQIVYHTLYQIG  
NNITATG SIEVKKSTASAVLSGVGVPLAKEAKAAKQNR EQGLQALISWIVIARKNGVGS  
DKGYDDALTFVRKPVI AKNGPDTVENIGAMVQQINPDTMENVLDLWKDPKFVKGLEAFI  
EQANKKHASSSS IAPVDGLLAIYLSLVHVGVS SSKLSPLIEKALSAGSMSIGKTT FVYGK  
AATNAVSSNSIVGLVLPQII SMFTKIASSTNIKQ GKMKASSSSVRALAYCTSY PVARGKK  
SPSDSIESTLRTVLDYESIAIPLIEALYVCVNEQSVESGSASTVSLDTVRQIAGMLSTRS  
LSAGSMAKALILMHLGTSQETVDAEDEEEDGERSALVENTT TALKALVVSCGNQNEFKST  
ISEIVAEQASAASYTDKEVAISESLHLASQSL LISLGNAA SNF SPLSDDPEDDDMKPFAF  
AMDVLTNGI STRLADGLVPI TCEIDGLLTD DIALYTS PMGTLHVEDNLKEKTNVPTKDTG  
KSRRT EDEEWELQIKKELAKKKSAST EKSS T LSADDRKMVEKQDEKRREITTLIEGKCYR  
LLTSIEESLVSSDIEIGNSCLPTLSPAVLQLSILDCPATDNLNEMKERLSKTLTSLAACVY  
EIEEEYAPMMATA LTISCKNPEKSEAKTEDKPSDTSTRFIVHALPTPCEPAANAVFEMDE  
FQEELSGPSFAFLFP IIRAALMGPRTPVPGCEGALRVLERHTVLLVGD DADENVKLLRADM  
VTSVLELLKHDRAKAFVDPDPYETLVACYSTDEDNESGPALTTAELAPLLDERGALGEKN  
CRVAAMIALGSIASSHKKIVKNNPLIENRVWLNCFEDDESIRAEARKTWNIMNSKNETDE  
TLPPPSPMYAVPLPLLLHSSNPGIAAAA KAYAFGMKAHPKGVNRNLK KLCNSYIDSCPQ  
PEGAGKPASGAGAFPKANFPTPAPPKAKAPALPKLKKKT V KKSPLGLAAIGQPKPKK VSK  
KTKKMTSAMLKPKQERTLDQA ALEDQFKIGPKTTPAEEDAPEKVSIRTGVLRVLA AFPSA  
ELEM DTDTL KLLTSFLMAYGIADGNEDVKNTSRNALKDIIVSYGASDEAIAFLLPHIDGI

LKNGLADSQLDDLPKTKIAENTESSNRRKEGAVVALGSVALHLKGPENAMKIDNSVDML  
INSLKTPNEDVQASVADALTKLMKKGNTQARIEEILDQLVAVCLEGDSQATRHHGAYGIA  
AAVKGSGIASLKKFGIVTRLEEACAEGSSSNKEGSLFAIQLLCTRLGLLFEFYPVIVLLPS  
LLKAFGDGSDEVRKAASKTVGVIMSKLSAHGVKLVLPVLTAFNDSSWRTKQASIDMLGA  
MSHLAPKQLASALPKVVPKLTAYADTHPKVKGSAQGALDEISSVIRNPEIRDISPKLLK  
ALTDPANKTLSALEALIEFELHAI DAPSLALIVPILHRGLRDRAATTKRYGALITGNIC  
TMINDPRDFIPYIPTLMPDLKGSLLDPIPDVRSIAAKALGSLTRGLGEDALPDLRPWLE  
QLRLEELSSAERSGAAQGLTEVLIASGNVVEALMLDDILPLSSHPSHSTREGVLWVLCF  
LPPAMGHGFTTMLDESPLALISGLSDENEQVREVAMKAGRVLIRSHGKVFHDKILPILQN  
GMTDEDYRIRLSSLMLLGDLLSMIGGTTVLRDGTQDDIRKAERAQAQITQVLGIKTRN  
QVLSDIYIARSDSASAVRHAAIQVWKTVVSVTARTLRQILQVLVSRVVDLASGDAEKTD  
TAGKCLGDIVRKLGDVLPNVVPLRNSLYEGDHNTRRGVCVGLSEVILSSTKDQILRFL  
DIIVRVVQDAICDDNDGVRAMAAESFQONLYKLVGNVAMDEVVPSLMVALESADEDEQRSE  
RAMNGLTGILSIRSKDLLPYIIPRLIQQPMTICHAKAIASIATVTSETLYFHFHNIIPAL  
LQDLSSGNDDKAQIEAVRDCAKSVFEHGDEAGVKNLVSEVTKNCTSDKAELRKESCWMLG  
AIVTARKEAKDFYDLNSIIIRELIHRFNENKDVVKAANKAFAALS KSVPAEVLVDDIEY  
MRNIIASMVSDARRRKGVGDFEFLPGFNIPKGLEPLLPIYQRGILYGTTPAVREASAAG  
LGEVINLTANKFLAGPLIIKMTGPLLRIVGDNPANVKIAILQTLGLILVKGGPALRAFV  
PQFQTTFKALS DPSRQVRIEAINALGLLMPLSTRVDPLIKELVAGSLGRDSSGDDGVGV  
VAVQTATLEALAVVLAKGGKSKLPDSIPSALEASTSLIRHSDES VREAAAKVTGAACNI  
LGAEKTEETMKDFVLDIDDDSGDIREGKACAIRRVFSADVAKKLDGSITSEALAVATKY  
MNDEKLAVKESGIVAVGAVVGR TENPETSLSRVEKSLLSLMVGD LKQRLETHQAIARCLC  
LCLELSDVDSRIELFGLKLLKACMRLAMSGNQRVQFAYNDVLWLALRVSEGDGLDEFSS  
LAMFEDAKQMKSIYSKVLKIKTAKILED

>comp15734\_c1\_seq1; 187 1 907 LEN=1895; translated  
XASQAISDDGTTRQQWSVKRATYNFFPVKQCDSRFFMKRILLVGSDIAYWPKELFPTPW  
EGGNDCTEWDQTLVSGHSGATLAEVPHLRTIIIEESRTL RHSNTASNAESRSQTSSSDA  
LVVVACAGENDIGEGLSLGS LDAMQKFLDLVFLAEDGIGNNSTVSSQTTPHDRYL VFLG  
PKFEPWLQHDPSYKKKYEAMARAFRHLQDYSEL DGN SAHGRIRFVDCLTMFCGETANVP  
GARLCGRAEADPRYFASDQLHLNSQGYSMWKDVVXEPDSKPPFAIEAVSNSNNGLIEEGY  
SV

>comp15735\_c0\_seq1; 1148 81 7436 LEN=7647; translated  
MNTQPLSSFLKKERTISLLGPDIDRVANIACEARKKAPLVATDGRHLQHQHREEDLSRVV  
VPPRFVSQRIIRDGSHWHMTIVTRHELRLQVLTQKADEDNGDDSDGDCNASCTNSQHEKK  
IVRFCQSFLEHQSERGKDFVFLGIGRQSKRREWDSGSRKQQCYFLVCCYPKADALRKRIG  
LPPKDFHVTLGF DGTDIHDVPGKITTLFQNPQLSLVLPSSPTRVLSTHLDLIEEARIVIL  
GGKPSEVIDNSEVPYTRKGRFQHANVLLDAAEDLIHLRSPRSGPSRTRFRKMRESMIPSH  
YLEHDLRRLIHLLSPGSEGEKSRISDYLEHDPWVSPDRHTRLIGQLFLMRCQILGRKRDF  
DGVIDYAEMHFELEATVKRNPQSNPTDIAQAASAACGYKGVALSMKESWDPAYAWLIASY  
RLYQESSVQCKDTSSAACSRRTRESKCMEDAAAAIERALAFCCSKIGFEPPIPPLVPFPR  
TAHLFDTGGTAVSSDDL VVSGNSCLVREFCNGTHEVVLEEKIDGANLGFSL SASGEILAQ  
NRSHYVSGGDH HQFGRLESWISEHRSSLVKVLT PSDQKPRAASQGLILFGEWCVARHSIP  
YGRLPGYFIAFDLYDRQKQKQFYSRKRFDILRHSGIPCVPVIEVKKFGPYPNQTVSKKAT  
NPSEFESHRLRLLDTRSRFRIDGGTIEGVVLRIDDGNAEWLEHRMKVVRPDFVHGITEHW  
TRRDMEKQTI DPGFAAQYCS EEDCSLAPPPPTPLDAPEIVPEEEHGHGSKQTTTEL PFR  
EPIDPRRRLKVSSGLSKDIVMPRNF SFLWEQEVAITS IPTSLEQVAAWNEHFHTTLVVTL  
MEEKRLPDSWFENTKCNLHVP IPNYRPPTLEQMDRIVESIERAVRGGGS AVVHCGGGKG  
RAGTVGACLLLKFGTLGVRASHGGSGGAETTAMSTR LSSAATTYIRKVRPGS IETS V  
QESFVSYANVLWRRSMPGFDLPTEGAVGSSSSTS SVTESSDANEQADAARTSSDLKPP  
PRAGKAGPSKTDSKTELERKQVTLRLQRKAPRCIVCMGLPGSGKSTFADRLAGSFP PENS  
WLVINQDR LGRKECERLAEKSRPGTRVILDRCNPTASDRAKWLELMHSPPRSDVSLVCF  
T ADASVCKQRVKGRNETHETIPRGRGGRIVSEMAKKLELPSDAERKRFGS IHFVSSFDDAEG  
LLSRLEHDNNASKCMAKIRIHFQSTFCTSSNSPSCRVPFAIFWINANNPTLHRTFETKLS  
CPGPF SMPRLESSAVVAKVLPCHFFQVPPEMAVPLFFLASVLSTQEVVPVQGE PALVGI  
LGHHRAIAFVVLVLESRSWFASPASPWQASXEILPDRCLVALLVFGFVQKAGQFRDGRG  
GSLYGKHI VDVVLLCPEHSGVVFVDIVPRGLDARRLGLPGRKGLAVGKEGPGEQKGG  
L HFARHASDAELGDERLDHPEGVPDLEQVLAVGGGAAGREGRRRLRRRQRRGGGVPQAAAPF  
SLQQGLALVPPAGVPGLPERAPPTVAKHKGVEAYVRVQVPAEAADGV PKEQLPLDGHAAG  
TPARS PRSLARRELD RQAPGKVD PPGQEADPVEPGDGPVADKAPQGLGVLVSDLQSQPE  
RGLAGQVVGQLRGPAGHSHHEHPAGVGLAHGRAQQCRGH PAARGGQRQPFGL EEDKEV

GVAEAVGQKDEGRDQEEDCELTGSVLRCGGRGRTGSIRIRLRIRVWISLRVLRCTIARCL  
LLGTAPVAFPSPLTHPVWLRRLGLWSGTVHARRRLVSLVVGGSLEIVVLIGVVWASSAAS  
LRSKGKAHKIQIFHGFSLRPLPVLPYVQCAPLFHFQSNRPRLFSRVSRFQCSMLFSSKT  
TPGSEIGAKCSILMCSDLCTFHQPSTTSTMQSXSTPASEDRDTQNQLKESENPDPSHR  
RVALILFSIVSNPRYQAIYLSIYLSFLYPKXAETMKFAVSARAVAGPTAYRFAKVGFLFF  
FVFAVNTASAAATEPTTPPSVASSTTTVLDKTIIPNVFDTTDEHQPADPTSGSGSGIDQ  
LIHESLDEILAAMKEFHSGGTPGRPFVTLTYAQSIDGKIALLLDRAARGASPRAAATSSN  
FAISGHESLRLTHALRSVHDAIVVGGNTLAVDNPRLGNRLWKTGASDSWSDRCGSGHQ  
RPVVDLTHLRSVRALGAAMRAKRPIVCCSKGAYDRAVREGFRCDAGLGERSTRGGGGGGP  
GDERVAGKTGSPVSSVTLPLCKTRAIGGRGEDPRIVLDLDPVLSALYHRYGIHSMVEG  
GASVITQFVTGTRDKCEGENHPSEEDRFGLVDLLCVTISPXAAGVERVGLDPVAPARHSS  
AARARPPAVHHPRRGLRPFQLPVMGIAAEKEKTMPCNATQHDTIQFDAQQYHAVRFPSQ  
QVAPLEEHGCRTLGDVFNNGVIRVAILAATFDVSPVVRQFSLTSCNPKME

>comp15735\_c0\_seq2; 429 717 2209 LEN=2420; translated  
MKFAVSARAVAGPTAYRFAKVGFLFFVFAVNTASAAATEPTTPPSVASSTTTVLDKTI  
IPNVFDTTDEHQPADPTSGSGSGIDQLIHESLDEILAAMKEFHSGGTPGRPFVTLTYAQS  
IDGKIALLLDRAARGASPRAAATSSNFAISGHESLRLTHALRSVHDAIVVGGNTLAVDNP  
RLGNRLWKTGASDSWSDRCGSGHQRPVVDLTHLRSVRALGAAMRAKRPIVCCSKGAYD  
RAVREGFRCDAGLGERSTRGGGGGGPGDERVAGKTGSPVSSVTLPLCKTRAIGGRGEDP  
RIVLDLDPVLSALYHRYGIHSMVEGGASVITQFVTGTRDKCEGENHPSEEDRFGLVDLL  
CVTISPXAAGVERVGLDPVAPARHSSAARARPPAVHHPRRGLRPFQLPVMGIAAEKEK  
MPCNATQHDTIQFDAQQYHAVRFPSQQVAPLEEHGCRTLGDVFNNGVIRVAILAATFDV  
SPVVRQFSLTSCNPKME

>comp15735\_c0\_seq3; 1148 81 7436 LEN=7693; translated  
MNTQPLSSFLKKERTISLLGPDIDRVANIACEARKKAPLVATDGRHLQHQREEDLSRVV  
VPPRFVSRIRIRDGSHWMTIVTRHELRLQVLTQKADEDNGDDSDGDCNASCTNSQHEKK  
IVRFCQSFLEHQSERGKDWFLVGLIGRQSKRREWDSGSRKQQCYFLVCCYPKADALRKRGL  
LPPKDFHVTGLGFDGTDIHDVPGKITTLFQNPQLSLVLPSSPTRVLSTHLDLIEEARIVIL  
GGKPEVIDNSEVPYTRKGRFQHANVLLDAAEDLIHLRSPRSGPSRTRFRKMRESMIPSH  
YLEHDLRRLIHLSPGSEGEKSRISDYLEHDPWVSPDRHTRLIGQLFLMRCQILGRKRDF  
DGVIDYAEMHFELEATVKRNPQSNPTDIAQAASAACGYKGVLSMKESWDPAYAWLIASY  
RLYQESSVQCKDTSSAACSRRTRESKCMEDAAAAIERALAFCCSKIGFEPPIPPLVPFPR  
TAHLFDTGTAVSSDDLVSNSCLVREFCNGTHEVVLEEKIDGANLGFSLASGEILAQ  
NRSHYVSGGDHGHQFGRLESWISSEHRSSLVKVLTSPDQKPRAASQGLILFGWCVARHSIP  
YGRLLPGYFIAFDLYDRQKQKQFYSRKRFHDLRHSGIPCVPVIEVKKFGYPNPQTVSKKAT  
NPSEFESHRLRLDTRSRFRIDGGTIEGVVLRIDDGNAEWLEHRMKVVRPDPVHGI TEHW  
TRDMEKQTIIDPGFAAQYCSSEEDCSLAPPPPTPLDAPEIVPEEEHGSKQTTTELPR  
EPIDPRRLKVVSSGLSKDIVMPRNFSLWEQEVAITS IPTSLEQVAWNEHFHTTLVVT  
MEEKRLPDSWFENTKCNLHVP IPNYRPPTLEQMDRIVESIERAVRGGGSAVVHCGGGK  
RAGTVGACLLLKFGTLGVRASHGGSGGAETTAMSTRSSAATTYIRKVRPGSIETSV  
QESFVRSYANVLRWRRSMPGFGDLPTGAVGGSSSTSVTESSDANEQADAARTSSDLKPP  
PRAGKAGPKTDSKTELERKVQTLRLQRKAPRCIVCMGLPGSGKSTFADRLAGSFPPENS  
WLVINQDRLLGRKECERLAEKSRPGTRVILDRCNPTASDRAKWLELMHSPRSDVSLVCF  
TADASVCKQRVKGRENHETIPRGRGGRIVSEMAKKLELPSDAERKRFGSIHFVSSFD  
DAEGLLSRLEHDNNASKCMAKIRIHFQSTFCTSSNSPSCRVPPIFWINANNPTLHRTFET  
KLSCPGPFMPRLESSAVVAKVLPCHFFQVPPEMAVPLFFLASVLSLSTQEVVPVQGE  
PALVVGILGGHHRAIAFVLVLESRSWFASPWPQASXELPDRCLVALLVFGFVQKAGQ  
FRDGTGRLGSLYGHKHI VDPVLLCPEHSGVVFVDIVPRGLDARRLGLPGRKGLAVG  
KEGPGEQKGGLEHFAHSDAELGDERLDHPEGVDPLEQVLAVGGGAAGREGRRRLRRR  
QRRGGGVPQAAAPFSLQQLALVPPAGVPGLPERAPTVAKHKGVEAYVRVQVPAEAADG  
VPKEQLPLDGHAAGTPARSPRSLARRELDRQAPGKVDPPGQEQEADPVEPGDGPVAD  
KAPQGLGVLVSDLQSQPERGLAGQVVGQLRGPAGHSHHEHPAGVGLAHGRAQQCRGHP  
AARGGQRQPFGLPEEDKEVGVAEAVGQKDEGRDQEEDCELTGSVLRCGGRGRTGSIRIRLRIRVWISLRVLRCTIARCL  
LLGTAPVAFPSPLTHPVWLRRLGLWSGTVHARRRLVSLVVGGSLEIVVLIGVVWASSAAS  
LRSKGKAHKIQIFHGFSLRPLPVLPYVQCAPLFHFQSNRPRLFSRVSRFQCSMLFSSKT  
TPGSEIGAKCSILMCSDLCTFHQPSTTSTMQSXSTPASEDRDTQNQLKESENPDPSHR  
RVALILFSIVSNPRYQAIYLSIYLSFLYPKXAETMKFAVSARAVAGPTAYRFAKVGFLFF  
FVFAVNTASAAATEPTTPPSVASSTTTVLDKTIIPNVFDTTDEHQPADPTSGSGSGIDQ  
LIHESLDEILAAMKEFHSGGTPGRPFVTLTYAQSIDGKIALLLDRAARGASPRAAATSSN  
FAISGHESLRLTHALRSVHDAIVVGGNTLAVDNPRLGNRLWKTGASDSWSDRCGSGHQ

RPVVLDTHLRSVRALGAAMRAKRPVCCSKGAYDRAVREGFRCDAGLGERSTRGGGGGGP  
GDERVAGKTGSPVSSVTLLPCKTRAIGGRGEDPRIVLDLDPVLSALYHRYGIH SVMVEG  
GASVITQFVTGTRDKECGENHPSEEDRFGLVDLLCVTISPXAAGVERVGLDPVAPARHSS  
AARARPPAVHHPRRGLRPFQQLPVMGIAAEKEKTMPCNATQHDTIQFDAQQYHAVRFPSQ  
QVAPLEEHGCRTLGD FNRNGVIRVAILAATFDVSPVVRQFSLTSCNPKME

>comp15735\_c0\_seq4; 429 717 2209 LEN=2466; translated  
MKFAVSARAVAGPTAYRFAKVGFLFFFVFAVNTNTASAATEPTTPTPSVASSTTTVLDKTI  
PNVFDTDDEHQPADPTSGSGSGIDQLIHESLDEILAAMKEFHSGGTPGRPFVTLTYAQS  
IDGKIALLLDRAARGASPRAAATSSNFAISGHESLRLTHALRSVHDAIVVGGNTLAVDNP  
RLGNRLWKTGASDSWSDRCGSGHQPRPVLDTHLRSVRALGAAMRAKRPVCCSKGAYD  
RAVREGFRCDAGLGERSTRGGGGGGPDERVAGKTGSPVSSVTLLPCKTRAIGGRGEDP  
RIVLDLDPVLSALYHRYGIH SVMVEGGASVITQFVTGTRDKECGENHPSEEDRFGLVDLL  
CVTISPXAAGVERVGLDPVAPARHSSAARARPPAVHHPRRGLRPFQQLPVMGIAAEKEK  
MPCNATQHDTIQFDAQQYHAVRFPSQQVAPLEEHGCRTLGD FNRNGVIRVAILAATFDV  
SPVVRQFSLTSCNPKME

>comp15736\_c0\_seq1; 767 168 2738 LEN=3815; translated  
MNDEESFVEPRETSDVSEANIRSNEPSSSDSSSLSKENITYPADCYSLMALHGPLDRTGY  
FYFGFLVWSFQVLFLLVLRVLSPTLSTNENTDNDPNDNGIFASFIPSNVNLTRATQFMA  
ILSYCIFADESLKDIVTAVETFPNIKEAKEGDRVDLMIVSSVLRFSQGFLATIVVLLL  
VNTPDVVDIVLNF TAVNFVSAFDDVAFELA QWGKYGPHLEAETKRIEELTAPDCMTRKSNY  
ARYQLTIIPVATLLIMLIMMAYRQDSPDHWLTHRLRVQFEDGTSMEQYSGCYDLDPSS  
SSRFWNRRVAYKSFQNPSTARMSYCMKERRWILYGTNTDACS VKIEDRLAYS DITYAF  
DVSSAFEVSWSSSGAPLEMYFFEDDTVLDDGRCGSFLGDGTCNYAFNTARYDYDHGCCS  
ATCKGRNCGLTTEGFFETFIDRNGGYPTCYDPAMKPM TILLNKIYTPNTDASGGFLST  
DYLDEEDRVPVPPIMILDCDGSNVLMTTIHP EMENQ TETVHVADGASCMLTMRNTSVGVA  
DTLFDVWRIYHGYNKSI L TDSII IAKGDSFENEVATFQRIKDCILTNLDGHIDNSTVYEG  
NHYSKAVKWLNSDSSGFSKCGDKHFIERIALVAMNFAAPV SFEE SRGDGRNIDARVNS  
TTDTDAGDQGLWISED RHC IWKVVGCRDGHVRS LN FADSNEQISGSIATEIGLLQDLGFM  
DASFQHL YGSIPSEIGQIGELESIKLDQNFLTGTIPTEIGLLTNLEMISLANNWHPENPG  
ISGSLPSEIMGLSSLNAMFLQANGITGSLPVDFGRLSSLKTFVAVRNRLTGRIPSSLALI  
PDLGTFIAGKYGVRFA

>comp15736\_c0\_seq2; 711 168 2874 LEN=3951; translated  
MNDEESFVEPRETSDVSEANIRSNEPSSSDSSSLSKENITYPADCYSLMALHGPLDRTGY  
FYFGFLVWSFQVLFLLVLRVLSPTLSTNENTDNDPNDNGIFASFIPSNVNLTRATQFMA  
ILSYCIFADESLKDIVTAVETFPNIKEAKEGDRVDLMIVSSVLRFSQGFLATIVVLLL  
VNTPDVVDIVLNF TAVNFVSAFDDVAFELA QWGKYGPHLEAETKRIEELTAPDCMTRKSNY  
ARYQLTIIPVATLLIMLIMMAYRQDSPDHWLTHRLRVQFEDGTSMEQYSGCYDLDPSS  
SSRFWNRRVAYKSFQNPSTARMSYCMKERRWILYGTNTDACS VKIEDRLAYS DITYAF  
DVSSAFEVSWSSSGAPLEMYFFEDDTVLDDGRCGSFLGDGTCNYAFNTARYDYDHGCCS  
ATCKGRNCGLTTEGFFETFIDRNGGYPTCYDPAMKPM TILLNKIYTPNTDASGGFLST  
DYLDEEDRVPVPPIMILDCDGSNVLMTTIHP EMENQ TETVHVADGASCMLTMRNTSVGVA  
DTLFDVWRIYHGYNKSI L TDSII IAKGDSFENEVATFQRIKDCILTNLDGHIDNSTVYEG  
NHYSKAVKWLNSDSSGFSKCGDKHFIERIALVAMNFAAPV SFEE SRGDGRNIDARVNS  
TTDTDAGDQGLWISED RHC IWKVVGCRDGHVRS LN FADSNEQISGSIATEIGLLQDLGFM  
DASFQHL YGSIPSEIGQIGELESIKLGKYGPOSAASTTADTDERHDLICANLSR SNVLRK  
QSYSRFSEI WIDQNFLTGTIPTEIGLLTNLEMISLANNWHPENPGISGSLPSEIMGLSSL  
NAMFLQANGITGSLPVDFGRLSSLKTFVAVRNRLTGRIPSSLALIPDLGTFIAGKYGVRFA

>comp15736\_c0\_seq3; 175 134 927 LEN=1138; minus strand; translated  
MPRGVARTSPFPKKNKNEPSNKRNRNGWMDPPTETTEDNRNGPFKTAGSGAERMRRTP  
RQPPTGEAASETKPTPTPEAALASPXGLGAIACAKLHRQIRGTL SFRVALAAPGEQFAP  
DGTAIRFVCILRKVPDIVRPDATVPIFFPQVEVWICNARTTKDARGTIPLLRGRPSASTA  
GRSLRFFASTQRRNP SLGNTILSAVAIVLSSPPTPRNDPRLFLSADYRSIDGNEIRELVP  
NDNKS RVPFVQFQWHCSGQSIEL

>comp15736\_c0\_seq4; 662 168 2447 LEN=2657; translated  
MNDEESFVEPRETSDVSEANIRSNEPSSSDSSSLSKENITYPADCYSLMALHGPLDRTGY  
FYFGFLVWSFQVLFLLVLRVLSPTLSTNENTDNDPNDNGIFASFIPSNVNLTRATQFMA  
ILSYCIFADESLKDIVTAVETFPNIKEAKEGDRVDLMIVSSVLRFSQGFLATIVVLLL  
VNTPDVVDIVLNF TAVNFVSAFDDVAFELA QWGKYGPHLEAETKRIEELTAPDCMTRKSNY  
ARYQLTIIPVATLLIMLIMMAYRQDSPDHWLTHRLRVQFEDGTSMEQYSGCYDLDPSS

SSRFWNRRVAYKSFQNPSTARMSYCMKERRWILYGTNTTDACSVKIEDRLAYS DITYAF  
DVSSAFEVSWSSSGAPLEMYFFEDDTVLDGRCGSFLGDGTCNYAFNTARYDYDHGDCCS  
ATCKGRNCGLTTEGFFETFIDRNGGYPTCYDPAMKPM TILLNKIYTPNTDASGGFLSTD  
DYLDEEDRVPVPPIMILD CDGSNVLM TTIHP EMENQTETVHVADGASCMLTMRNTSVGVA  
DTLFDVWRIYHGYKNSILTDSIIIAKGDSFENEVATFQR IKDCILTNLDGHIDNSTVYEG  
NHYSKAVKWLNSDSSGFSKCGDKHFIERIALVAMNFAAPVSFEESRGDGRNIDARVVNS  
TTDTDAGDQGLWISEDHRHC IWKVVGCRDGHVRS LNFA DSNEQISGSIATEIGLLQDLGFM  
DASFQHL YGSIPSEIGQIGELESIKLGKYG PQSAASNHC

>comp15736\_c0\_seq5; 711 168 2874 LEN=3726; translated  
MNDEESFVEPRETSDVSEANIRSNEPSSSDSSSLSKENITYPADCYSLMALHGPLDRTGY  
FYFGFLVWSFQVLFLLVLRVLSPTLSTNENTDNP DNGIFASFIPSNVNLTRATQFMA  
ILSYCIFADESLKDIVTAVETFPNIKEAKEGDRVDLMIVSSVLRFSQGFLATIVVLLL VV  
NTPDVVDIVLNF TAVNFVSAFDDVAFELA QWGKYGPHLEAETKRIEELTAPDCMTRKSNY  
ARYQLTIIPVAT TLLIMLIMMAYRQDSPDHWLTHRLRVQFEDGTSMEQYSGCYDLDPSSS  
SSRFWNRRVAYKSFQNPSTARMSYCMKERRWILYGTNTTDACSVKIEDRLAYS DITYAF  
DVSSAFEVSWSSSGAPLEMYFFEDDTVLDGRCGSFLGDGTCNYAFNTARYDYDHGDCCS  
ATCKGRNCGLTTEGFFETFIDRNGGYPTCYDPAMKPM TILLNKIYTPNTDASGGFLSTD  
DYLDEEDRVPVPPIMILD CDGSNVLM TTIHP EMENQTETVHVADGASCMLTMRNTSVGVA  
DTLFDVWRIYHGYKNSILTDSIIIAKGDSFENEVATFQR IKDCILTNLDGHIDNSTVYEG  
NHYSKAVKWLNSDSSGFSKCGDKHFIERIALVAMNFAAPVSFEESRGDGRNIDARVVNS  
TTDTDAGDQGLWISEDHRHC IWKVVGCRDGHVRS LNFA DSNEQISGSIATEIGLLQDLGFM  
DASFQHL YGSIPSEIGQIGELESIKLGKYG PQSAASTTADTDERHDLICANLSRSNVLRK  
QSYSRFSEIWIDQNFLTGTIPTEIGLLTNLEMISLANNWHPENPGISGSLPSEIMGLSSL  
NAMFLQANGITGSLPVDFGRLLSKTFVAVRNRLTGRIPSSLALIPDLGTFIAGKYGVRF  
A

>comp15736\_c0\_seq7; 731 168 3435 LEN=3498; translated  
MNDEESFVEPRETSDVSEANIRSNEPSSSDSSSLSKENITYPADCYSLMALHGPLDRTGY  
FYFGFLVWSFQVLFLLVLRVLSPTLSTNENTDNP DNGIFASFIPSNVNLTRATQFMA  
ILSYCIFADESLKDIVTAVETFPNIKEAKEGDRVDLMIVSSVLRFSQGFLATIVVLLL VV  
NTPDVVDIVLNF TAVNFVSAFDDVAFELA QWGKYGPHLEAETKRIEELTAPDCMTRKSNY  
ARYQLTIIPVAT TLLIMLIMMAYRQDSPDHWLTHRLRVQFEDGTSMEQYSGCYDLDPSSS  
SSRFWNRRVAYKSFQNPSTARMSYCMKERRWILYGTNTTDACSVKIEDRLAYS DITYAF  
DVSSAFEVSWSSSGAPLEMYFFEDDTVLDGRCGSFLGDGTCNYAFNTARYDYDHGDCCS  
ATCKGRNCGLTTEGFFETFIDRNGGYPTCYDPAMKPM TILLNKIYTPNTDASGGFLSTD  
DYLDEEDRVPVPPIMILD CDGSNVLM TTIHP EMENQTETVHVADGASCMLTMRNTSVGVA  
DTLFDVWRIYHGYKNSILTDSIIIAKGDSFENEVATFQR IKDCILTNLDGHIDNSTVYEG  
NHYSKAVKWLNSDSSGFSKCGDKHFIERIALVAMNFAAPVSFEESRGDGRNIDARVVNS  
TTDTDAGDQGLWISEDHRHC IWKVVGCRDGHVRS LNFA DSNEQISGSIATEIGLLQDLGFM  
DASFQHL YGSIPSEIGQIGELESIKLGKYG PQSAASTTADTDERHDLICANLSRSNVLRK  
QSYSRFSEIWIDQNFLTGTIPTEIGLLTNLEMISLANNWHPENPGISGSLPSEIMGLSSL  
NAMFLQANGITGSLPVDFGRLLSKTFVAVRNRLTGRIPSSLALIPDLGTFIAAYNFLTG  
TIPSELGLIKTGINRTLLINLQFNLTGTVPLELLDKRYTRLVVVGNELSDLIPVDG SVI  
CRQEQPGI VPGRGGGGEHYCNCRENCV PERRIPPLCACEEAQAPTCCGGRGSPSQQNGT  
PCILCRSGIANPDLYLGEEDRNCGVRAYDIRNLP EYANEANCSAVRSEL FARGCECNTEG  
KRPTNLPV

>comp15736\_c0\_seq8; 702 1 2268 LEN=2448; translated  
REEEFIHPSIRPSIRTPTICVTSKGAEREGKRPTTTTDTKTKTTRRIFRDGSSSSSEM SH  
NHKSNAAAAGSIDFASSALSTPSDEQQEGRESSVPQQKQQHQQPQEMAEGYHSLPASGN  
ALNVGRHRGGQEARNEHEPTLTKASGTSFITAMEQEOPFGDEEAAANQHTRGFYGYGY  
GYSYAEASEFSSRVLDAASTASGVVWKT VLVGGGEAFSSSLGKKALFVQACYLGIAAILGT  
LLRLVLAQLFGQACSNPETVGIADSVLCVTSSGTTTQNEGIVFADLPANLLGSFLMGL  
LQDGAALGLAINLPIAWVKP SHVQSMGVFHLALKTGFCGSLTTFSAWNSEM VVLLVGNH  
DAMPNRPMSMVWRALFGYVVG METAI GSYVFGRTVAWWLHKWVNPELAREQREMSVREK KH  
GIAINRDLPVVERRYHLGLFDRASRGVGGNTDGPSSLSGPALSPSSTLTREELAPLHRW  
RQSTRDARRVESGLSEELVELETALIVRKEVPTQETRDMAIYHGWDIDG LLEWLSKRRCH  
TELLEASASLESLSREESDLSQARPLTAAGVAAPMDIDGTVVYELPVAATMLGACLLLLV  
NLMGHWDAGTSYQNTYRTMAYSMLFAPP GALLRWKLS SFNGLGEYFSGRFHRWAWLP I G  
TLAANLLGAVVSI SMIGWEYNLEMAATLGGRSGFWGIATVRAVKIGFSGCLSTVSTFVSE  
VYTLTQQRQDRGYKIILVTLVASAVAGMVLVFAIV

>comp15736\_c0\_seq10; 787 168 3299 LEN=3719; translated



MNDEESFVEPRETSDVSEANIRSNEPSSSDSSSLSKENITYPADCYSLMALHGPLDRTGY  
FYFGFLVWSFQVLFLLVLRVLSPTLSTNENTDNPNGIFASFIPSNVNLTRATQFMA  
ILSYCIFADESLKDIVTAVETFPNIKEAKEGDRVDLMIVSSVLRFSQGFLATIVVLLL  
VNTPDVVDIVLNFVAVNFVSAFDDVAFELAQWGKYGPHLEAETKRIEELTAPDCMTRKSNY  
ARYQLTIIPVATLLIMLIMMAYRQDSPDHWTTHRLRVQFEDGTSMEQYSGCYDLDPSS  
SSRFWNRRVAYKSFQNPSTARMSYCMKERRWILYGTNTDACS VKIEDRLAYS DITYAF  
DVSSAFEVSWSSSGAPLEMYFFEDDTVLDDGRCGSFLGDGTCNYAFNTARYDYDHGDCCS  
ATCKGRNCGLTTEGFFETFIDRNGYPTCYDPAMKPM TILLNKIYTPNTDASGGFLSTD  
DYLDEEDRVPVPPIMILDCDGSNVLMTTIIHPEMENQTETVHVADGASCMLTMRNTSVGVA  
DTLFDVWRIYHGYKNSILTDSIIIAKGDSFENEVATFQRIKDCILTNLDGHIDNSTVYEG  
NHYSKAVKWLNSDSSGFSKCGDKHFIERIALVAMNFAAPVSFEESRGDGRNIDARVNS  
TTDTDAGDQGLWISEDHRCIWKVVGCRDGHVRS LNFAADSNEQISGSIATEIGLLQDLGFM  
DASFQHL YGSIPSEIGQIGELESIKLDQNFLTGTIPTEIGLLTNLEMISLANNWHPENPG  
ISGSLPSEIMGLSSLNAMFLQANGITGSLPVDFGRLSSLKTFVAVRNRLTGRIPSSLALI  
PDLGTFIAAYNFLTGTIPSELGLIKTGINRTLLINLQFNLTGTVPLELLDKRYTRLVVV  
GNELSDLIPVDGSVICRQEQPGIVPGRGGGGEHYCNCRENCV PERRIPPLCACEEAQAPT  
CCGGRGSPSQQNGTPCILCRSGIANPDLYLGEEDRNCV RAYDIRNLPEYANEANCSAV  
RSELFARGCECNTEGKRPTNLPV

>comp15736\_c0\_seq11; 767 168 2738 LEN=3458; translated

MNDEESFVEPRETSDVSEANIRSNEPSSSDSSSLSKENITYPADCYSLMALHGPLDRTGY  
FYFGFLVWSFQVLFLLVLRVLSPTLSTNENTDNPNGIFASFIPSNVNLTRATQFMA  
ILSYCIFADESLKDIVTAVETFPNIKEAKEGDRVDLMIVSSVLRFSQGFLATIVVLLL  
VNTPDVVDIVLNFVAVNFVSAFDDVAFELAQWGKYGPHLEAETKRIEELTAPDCMTRKSNY  
ARYQLTIIPVATLLIMLIMMAYRQDSPDHWTTHRLRVQFEDGTSMEQYSGCYDLDPSS  
SSRFWNRRVAYKSFQNPSTARMSYCMKERRWILYGTNTDACS VKIEDRLAYS DITYAF  
DVSSAFEVSWSSSGAPLEMYFFEDDTVLDDGRCGSFLGDGTCNYAFNTARYDYDHGDCCS  
ATCKGRNCGLTTEGFFETFIDRNGYPTCYDPAMKPM TILLNKIYTPNTDASGGFLSTD  
DYLDEEDRVPVPPIMILDCDGSNVLMTTIIHPEMENQTETVHVADGASCMLTMRNTSVGVA  
DTLFDVWRIYHGYKNSILTDSIIIAKGDSFENEVATFQRIKDCILTNLDGHIDNSTVYEG  
NHYSKAVKWLNSDSSGFSKCGDKHFIERIALVAMNFAAPVSFEESRGDGRNIDARVNS  
TTDTDAGDQGLWISEDHRCIWKVVGCRDGHVRS LNFAADSNEQISGSIATEIGLLQDLGFM  
DASFQHL YGSIPSEIGQIGELESIKLDQNFLTGTIPTEIGLLTNLEMISLANNWHPENPG  
ISGSLPSEIMGLSSLNAMFLQANGITGSLPVDFGRLSSLKTFVAVRNRLTGRIPSSLALI  
PDLGTFIAGKYGVRFA

>comp15736\_c0\_seq13; 767 168 2738 LEN=3590; translated

MNDEESFVEPRETSDVSEANIRSNEPSSSDSSSLSKENITYPADCYSLMALHGPLDRTGY  
FYFGFLVWSFQVLFLLVLRVLSPTLSTNENTDNPNGIFASFIPSNVNLTRATQFMA  
ILSYCIFADESLKDIVTAVETFPNIKEAKEGDRVDLMIVSSVLRFSQGFLATIVVLLL  
VNTPDVVDIVLNFVAVNFVSAFDDVAFELAQWGKYGPHLEAETKRIEELTAPDCMTRKSNY  
ARYQLTIIPVATLLIMLIMMAYRQDSPDHWTTHRLRVQFEDGTSMEQYSGCYDLDPSS  
SSRFWNRRVAYKSFQNPSTARMSYCMKERRWILYGTNTDACS VKIEDRLAYS DITYAF  
DVSSAFEVSWSSSGAPLEMYFFEDDTVLDDGRCGSFLGDGTCNYAFNTARYDYDHGDCCS  
ATCKGRNCGLTTEGFFETFIDRNGYPTCYDPAMKPM TILLNKIYTPNTDASGGFLSTD  
DYLDEEDRVPVPPIMILDCDGSNVLMTTIIHPEMENQTETVHVADGASCMLTMRNTSVGVA  
DTLFDVWRIYHGYKNSILTDSIIIAKGDSFENEVATFQRIKDCILTNLDGHIDNSTVYEG  
NHYSKAVKWLNSDSSGFSKCGDKHFIERIALVAMNFAAPVSFEESRGDGRNIDARVNS  
TTDTDAGDQGLWISEDHRCIWKVVGCRDGHVRS LNFAADSNEQISGSIATEIGLLQDLGFM  
DASFQHL YGSIPSEIGQIGELESIKLDQNFLTGTIPTEIGLLTNLEMISLANNWHPENPG  
ISGSLPSEIMGLSSLNAMFLQANGITGSLPVDFGRLSSLKTFVAVRNRLTGRIPSSLALI  
PDLGTFIAGKYGVRFA

>comp15736\_c0\_seq14; 92 1 570 LEN=781; minus strand; translated

SPHTRS YARFPRGLGAIACAKLHRQIRGTL SFRVALAAPGEQFAPDGT AIRFVCILRKVP  
DIVRPDATVPIFFPQVEVWICNARTTKDARGTIPLLRGRPSASTAGRSLRFFASTQRRNP  
SLGNTILSAVAIVLSSPPTPRNDPRLFLSADYRSIDGNEIRELVPNDNKS RVFPVQQFQW  
HCSGQSIEL

>comp15736\_c0\_seq15; 711 168 2874 LEN=3594; translated

MNDEESFVEPRETSDVSEANIRSNEPSSSDSSSLSKENITYPADCYSLMALHGPLDRTGY  
FYFGFLVWSFQVLFLLVLRVLSPTLSTNENTDNPNGIFASFIPSNVNLTRATQFMA  
ILSYCIFADESLKDIVTAVETFPNIKEAKEGDRVDLMIVSSVLRFSQGFLATIVVLLL  
VNTPDVVDIVLNFVAVNFVSAFDDVAFELAQWGKYGPHLEAETKRIEELTAPDCMTRKSNY

ARYQLTIIPVATLLIMLIMMAYRQDSPDHWLTHRLRVQFEDGTSMEQYSGCYDLDPSS  
SSRFWNRRVAYKSFQNPSTARMSYCMKERRWILYGTNTDACSVKIEDRLAYS DITYAF  
DVSSAFEVSWSSSGAPLEMYFFEDDTVLDGRCGSFLGDGTCNYAFNTARYDYDHGDCCS  
ATCKGRNCGLTTEGFFETFIDRNGYPTCYDPAMKPM TILLNKIYTPNTDASGGFLSTD  
DYLDEEDRVPVPPIMILDGDSNVLMTTIHPMEMENQTETVHVADGASCMLTMRNTSVGVA  
DTLFDVWRIYHGYKNSILTDSIIIAKGDSFENEVATFQRIKDCILTNLDGHIDNSTVYEG  
NHYSKAVKWLNSDSSGFSKCGDKHFIERIALVAMNFAAPVSFEESRGDGRNIDARVVNS  
TTDTDAGDQGLWISEDHRHCWKVVGCRDGHVRS LNFAADSNEQISGSIATEIGLLQDLGFM  
DASFQHLGYSIPSEIGQIGELESIKLGKYGPOSAASTTADTDERHDLICANLSRSNVLRK  
QYSRFSEIWIQDQNF LTGTIPTEIGLLTNLEMISLANNWHPENPGISGSLPSEIMGLSSL  
NAMFLQANGITGSLPVDGFRLLSSKTFVAVRNRLTGRIPSSLALIPDLGTFIAGKYGVRF  
A

>comp15736\_c0\_seq16; 787 168 3299 LEN=3362; translated  
MNDEESFVEPRETSDVSEANIRSNEPSSSDSSSLSKENITYPADCYSLMALHGPLDRTGY  
FYFGFLVWSFQVLFLLVLRVLSPTLSTNENTDNP DNGIFASFIPSNVNLTRATQFMA  
ILSYCIFADESLKDIVTAVETFPNIKEAKEGDRVDLMIVSSVLRFSQGFLATIVVLLL  
NTPDVVDIVLNFTAVNFVSAFDDVAFELA QWGKYGPHLEAETKRIEELTAPDCMTRKSNY  
ARYQLTIIPVATLLIMLIMMAYRQDSPDHWLTHRLRVQFEDGTSMEQYSGCYDLDPSS  
SSRFWNRRVAYKSFQNPSTARMSYCMKERRWILYGTNTDACSVKIEDRLAYS DITYAF  
DVSSAFEVSWSSSGAPLEMYFFEDDTVLDGRCGSFLGDGTCNYAFNTARYDYDHGDCCS  
ATCKGRNCGLTTEGFFETFIDRNGYPTCYDPAMKPM TILLNKIYTPNTDASGGFLSTD  
DYLDEEDRVPVPPIMILDGDSNVLMTTIHPMEMENQTETVHVADGASCMLTMRNTSVGVA  
DTLFDVWRIYHGYKNSILTDSIIIAKGDSFENEVATFQRIKDCILTNLDGHIDNSTVYEG  
NHYSKAVKWLNSDSSGFSKCGDKHFIERIALVAMNFAAPVSFEESRGDGRNIDARVVNS  
TTDTDAGDQGLWISEDHRHCWKVVGCRDGHVRS LNFAADSNEQISGSIATEIGLLQDLGFM  
DASFQHLGYSIPSEIGQIGELESIKLDQNF LTGTIPTEIGLLTNLEMISLANNWHPENPG  
ISGSLPSEIMGLSSLNAMFLQANGITGSLPVDGFRLLSSKTFVAVRNRLTGRIPSSLALIP  
DLGTFIAAYNFLTGTIPSELGLIKTGINRTLLINLQFNLTGTVPLELLDKRYTRLVVV  
GNELSDLIPVDGSVICRQE QPGI VPGRGGGGEHYCNCRENCV PERRIPPLCACEEAQAPT  
CCGGRGSPSQQNGT PCILCRSGIANPDLYLGEEDRNCV RAYDIRNLPEYANEANCSAV  
RSELFARGCECNTEGKRPTNLPV

>comp15736\_c0\_seq19; 175 134 927 LEN=1331; minus strand; translated  
MPRGVARTSPFPKKNKNEPSNKRNRNGWMDPPTETTEDNRNGPFKTAGSGAERMRRTP  
RQPPTGEAASETKPTPPTPEAALASPXGLGAIACAKLHRQIRGTL SFRVALAAPGEQFAP  
DGTAIRFVCILRKVPDIVRPDATVPIFFPQVEVWICNARTTKDARGTIPLLRGRPSASTA  
GRSLRFFASTQRRNPSLGN TILSAVAIVLSSPPTPRNDPRLFLSADYRSIDGNEIRELVP  
NDNKS RVPFVQQFQWHCSGQSIEL

>comp15736\_c0\_seq20; 731 168 3435 LEN=3855; translated  
MNDEESFVEPRETSDVSEANIRSNEPSSSDSSSLSKENITYPADCYSLMALHGPLDRTGY  
FYFGFLVWSFQVLFLLVLRVLSPTLSTNENTDNP DNGIFASFIPSNVNLTRATQFMA  
ILSYCIFADESLKDIVTAVETFPNIKEAKEGDRVDLMIVSSVLRFSQGFLATIVVLLL  
NTPDVVDIVLNFTAVNFVSAFDDVAFELA QWGKYGPHLEAETKRIEELTAPDCMTRKSNY  
ARYQLTIIPVATLLIMLIMMAYRQDSPDHWLTHRLRVQFEDGTSMEQYSGCYDLDPSS  
SSRFWNRRVAYKSFQNPSTARMSYCMKERRWILYGTNTDACSVKIEDRLAYS DITYAF  
DVSSAFEVSWSSSGAPLEMYFFEDDTVLDGRCGSFLGDGTCNYAFNTARYDYDHGDCCS  
ATCKGRNCGLTTEGFFETFIDRNGYPTCYDPAMKPM TILLNKIYTPNTDASGGFLSTD  
DYLDEEDRVPVPPIMILDGDSNVLMTTIHPMEMENQTETVHVADGASCMLTMRNTSVGVA  
DTLFDVWRIYHGYKNSILTDSIIIAKGDSFENEVATFQRIKDCILTNLDGHIDNSTVYEG  
NHYSKAVKWLNSDSSGFSKCGDKHFIERIALVAMNFAAPVSFEESRGDGRNIDARVVNS  
TTDTDAGDQGLWISEDHRHCWKVVGCRDGHVRS LNFAADSNEQISGSIATEIGLLQDLGFM  
DASFQHLGYSIPSEIGQIGELESIKLGKYGPOSAASTTADTDERHDLICANLSRSNVLRK  
QYSRFSEIWIQDQNF LTGTIPTEIGLLTNLEMISLANNWHPENPGISGSLPSEIMGLSSL  
NAMFLQANGITGSLPVDGFRLLSSKTFVAVRNRLTGRIPSSLALIPDLGTFIAAYNFLTGT  
TIPSELGLIKTGINRTLLINLQFNLTGTVPLELLDKRYTRLVVVGNELSDLIPVDGSVI  
CRQE QPGI VPGRGGGGEHYCNCRENCV PERRIPPLCACEEAQAPTCCGGRGSPSQQNGT  
PCILCRSGIANPDLYLGEEDRNCV RAYDIRNLPEYANEANCSAVRSELFARGCECNTEG  
KRPTNLPV

>comp15736\_c0\_seq21; 626 168 2210 LEN=2462; translated  
MNDEESFVEPRETSDVSEANIRSNEPSSSDSSSLSKENITYPADCYSLMALHGPLDRTGY  
FYFGFLVWSFQVLFLLVLRVLSPTLSTNENTDNP DNGIFASFIPSNVNLTRATQFMA

ILSYCIFADESLKDIVTAVETFPNIKEAKEGDRVDLMIVSSVLRFSQGFLATIVVLLLTV  
NTPDVVDIVLNFVAVNFVSAFDDVAFELAQWGKYGPHLEAETKRIEELTAPDCMTRKSNY  
ARYQLTIIPVATTLIMLIMMAYRQDSPDHWLTHRLRVQFEDGTSMEQYSGCYDLDPSS  
SSRFWNRRVAYKSFQNPSTARMSYCMKERRWILYGTNTDACSVKIEDRLAYSДИITYAF  
DVSSAFEVSWSSSGAPLEMYFFEDDTVLDGRCGSFLGDGTCNYAFNTARYDYDHGDCCS  
ATCKGRNCGLTTEGFFETFIDRNGGYPTCYDPAMKPMIILLNKIYTPNTDASGGFLSTD  
DYLDEEDRVPVPPIMILDCDGSNVLMTTIHPEMENQTETVHVADGASCMLTMRNTSVGVA  
DTLFDVWRIYHGKNSILTDSIIIAKGDSFENEVATFQRIKDCILTNLDGHIDNSTVYEG  
NHYSKAVKWLNSDSSGFSKCGDKHFIERIALVAMNFAAPVVSFEESRGDGRNIDARVVNS  
TTDTDAGDQGLWISEDHRHCIW

>comp15736\_c0\_seq24; 711 168 2874 LEN=4083; translated  
MNDEESFVEPRETSDVSEANIRSNPSSSDSSSLSKENITYPADCYSLMALHGPLDRTGY  
FYFGFLVWSFQVFLILLVLRVLSPTLSTNENTDNPNGIFASFI PSNVNHLTRATQFMA  
ILSYCIFADESLKDIVTAVETFPNIKEAKEGDRVDLMIVSSVLRFSQGFLATIVVLLLTV  
NTPDVVDIVLNFVAVNFVSAFDDVAFELAQWGKYGPHLEAETKRIEELTAPDCMTRKSNY  
ARYQLTIIPVATTLIMLIMMAYRQDSPDHWLTHRLRVQFEDGTSMEQYSGCYDLDPSS  
SSRFWNRRVAYKSFQNPSTARMSYCMKERRWILYGTNTDACSVKIEDRLAYSДИITYAF  
DVSSAFEVSWSSSGAPLEMYFFEDDTVLDGRCGSFLGDGTCNYAFNTARYDYDHGDCCS  
ATCKGRNCGLTTEGFFETFIDRNGGYPTCYDPAMKPMIILLNKIYTPNTDASGGFLSTD  
DYLDEEDRVPVPPIMILDCDGSNVLMTTIHPEMENQTETVHVADGASCMLTMRNTSVGVA  
DTLFDVWRIYHGKNSILTDSIIIAKGDSFENEVATFQRIKDCILTNLDGHIDNSTVYEG  
NHYSKAVKWLNSDSSGFSKCGDKHFIERIALVAMNFAAPVVSFEESRGDGRNIDARVVNS  
TTDTDAGDQGLWISEDHRCIWKVVGCRDGHVRS LN FADSNEQISGSIATEIGLLQDLGFM  
DASFQHLGYSIPSEIGQIGELESIKLGKYGQSAASTTADTDERHDLICANLSRSNVLRK  
QYSRFSIWIWIDQNF LTGTIPTEIGLLTNLEMISLANNWHPENPGISGSLPSEIMGLSSL  
NAMFLQANGITGSLPVDFGRLLSSLKTFVAVRNRLTGRIPSSLALIPDLGTFIAGKYGVRFA

>comp15736\_c0\_seq25; 767 168 2738 LEN=3947; translated  
MNDEESFVEPRETSDVSEANIRSNPSSSDSSSLSKENITYPADCYSLMALHGPLDRTGY  
FYFGFLVWSFQVFLILLVLRVLSPTLSTNENTDNPNGIFASFI PSNVNHLTRATQFMA  
ILSYCIFADESLKDIVTAVETFPNIKEAKEGDRVDLMIVSSVLRFSQGFLATIVVLLLTV  
NTPDVVDIVLNFVAVNFVSAFDDVAFELAQWGKYGPHLEAETKRIEELTAPDCMTRKSNY  
ARYQLTIIPVATTLIMLIMMAYRQDSPDHWLTHRLRVQFEDGTSMEQYSGCYDLDPSS  
SSRFWNRRVAYKSFQNPSTARMSYCMKERRWILYGTNTDACSVKIEDRLAYSДИITYAF  
DVSSAFEVSWSSSGAPLEMYFFEDDTVLDGRCGSFLGDGTCNYAFNTARYDYDHGDCCS  
ATCKGRNCGLTTEGFFETFIDRNGGYPTCYDPAMKPMIILLNKIYTPNTDASGGFLSTD  
DYLDEEDRVPVPPIMILDCDGSNVLMTTIHPEMENQTETVHVADGASCMLTMRNTSVGVA  
DTLFDVWRIYHGKNSILTDSIIIAKGDSFENEVATFQRIKDCILTNLDGHIDNSTVYEG  
NHYSKAVKWLNSDSSGFSKCGDKHFIERIALVAMNFAAPVVSFEESRGDGRNIDARVVNS  
TTDTDAGDQGLWISEDHRCIWKVVGCRDGHVRS LN FADSNEQISGSIATEIGLLQDLGFM  
DASFQHLGYSIPSEIGQIGELESIKLDQNF LTGTIPTEIGLLTNLEMISLANNWHPENPG  
ISGSLPSEIMGLSSLNAMFLQANGITGSLPVDFGRLLSSLKTFVAVRNRLTGRIPSSLALIPDLGTFIAGKYGVRFA

>comp15736\_c0\_seq26; 149 134 586 LEN=1366; minus strand; translated  
MPRGVARTSPFPKPKKNKNEPSNKRRNGWMDPPTETTEDNRNGPFKTAGSGAERMRRTP  
RQPPTGEAASETKPTPPTPEAALASPEVSESLARNYTGRFVGRFPSVLHSQPLANNSLR  
TALQFASFAYSGRFLISYALTPQFRSSSPR

>comp15736\_c1\_seq1; 453 267 1239 LEN=2554; minus strand; translated  
MEEGFFETFIDSGDGYPDCKDPAMKPMIILLNKVYTPNTDASGGFLSTDDYLDEEDRVP  
VPPIMILDCDGSNVLMTTIHPEMENQTETVEVADGASCMLTMRNTSVGEADTLFDVWRIY  
HGKNSILTDSIIIAKGDSFENEVATFQRIKDCILTNLDGHIDNSTVYEGNNYSSKAVKW  
LNSDSSGFSKCGNKQFIERYALVAMNFAAPVVSFEESRDDGRNIDARVVNSTTDTDAGDQGL  
WISEDHRCIWKVVGCRDGHVRS LN FADSNVHISGSIATEIGLLQDLGFM DASKFNKITN  
SAALDGGAAKLCSTVFAIGFISN

>comp15736\_c1\_seq2; 453 267 1239 LEN=2380; minus strand; translated  
MEEGFFETFIDSGDGYPDCKDPAMKPMIILLNKVYTPNTDASGGFLSTDDYLDEEDRVP  
VPPIMILDCDGSNVLMTTIHPEMENQTETVEVADGASCMLTMRNTSVGEADTLFDVWRIY  
HGKNSILTDSIIIAKGDSFENEVATFQRIKDCILTNLDGHIDNSTVYEGNNYSSKAVKW  
LNSDSSGFSKCGNKQFIERYALVAMNFAAPVVSFEESRDDGRNIDARVVNSTTDTDAGDQGL  
WISEDHRCIWKVVGCRDGHVRS LN FADSNVHISGSIATEIGLLQDLGFM DASKFNKITN

SAALDGGAAKLCSTVFAIGFISN

>comp15737\_c0\_seq1; 1149 234 3677 LEN=3928; translated  
MVTVAELVKAESRVEKHKATHTFERPSKIRSRSRNNSNSSSASVNMAGEVVEESPQSPN  
GNANANAETFPKXHARENGSSKEAKTSAKKNAKKKGRKKVNRKHIYRTSNGPKSANPGSG  
FSFCDHYSTGASTDLRFRGKAQGRKQLHVIDDVGRDQQLLLLVDKPGKKAGSKQLQVQAR  
VQFTGTFTGTLKTVCTLVSFVMTALCAFSIQCLLFLFMNVVATYTPSTWTADPPVWNI  
VGCILACPLLLVSLGSLMAMSWACTVDCWRGLGSHHASLLKATQFWPSHNRGQQAQFSP  
SRNGNGKKKATWRSPEADRRQWLVLVFLGIPLLVLGITALVDRSRDDFDGYDWWGMTLQ  
SWAGSAFVVFQILYIELCVWNELTVCYRMLQVYGADVSGASENRDSYPEFLGLIAQNI VLT  
QRQKYSAVRRKRYLLEGGYGPFRFYANSTSFSDATKAPAQIHCSLRTGLLLLCGGGWFY  
DLLRDDRILLEDTVIPSKRNFTIPEVFGSVQIYTKNNWSLARLWCLNPRKATSLFVVKG  
EGSVEKFQVNTAYICYALFMFLTLLVIGAVSTWLENPAGQTAVIVLLVLLICFVPMIRSA  
CKIRQYEMNQRMNDGNGDGHDEERKYHDENEDGDEGCSETFVSVWETVRVSELKVVACYA  
TAGMEIILFFLWPLISMVFVFNTPPLAVIFLVFGLHTIPRHYFNVSNNLLQELGSLDKL DLG  
GVDLALLSCGQHDSDDSDNDNESEEAENRVAGKFRKRDVKNKLLISNLVRRVTRSRA  
NRNWIGLFFFYFLVFFSGYYLSVSEEMFSYEMGRYKWKNVVYANDFSWDPQPNLPYPTCE  
VKKGFTFPGEETASLANAYAFSLTLTFSSAEAAQPLLDQWFGNGTVLDDTDYVEAYRQAT  
GTEDHPVTYKLFVFPSPDTAGIVGIRGSEMMWDMTMDQLWGGGIFAQAILSINPLGNIW  
EPIMDKLVYLINYPQSEKLKEVSYRFTSEFVEALYSGYGGRYESLRVTGASLGGGLAI  
LTGAITGASAIAFSGLNAMYSRRTFLPPIITEEQLNTRVFNTIPERDIIAHIDKPGMNYQR  
MQCNAPKNSLFGCHSMFRSLCEIQFQCGSQGRPINCWCVSNYGYPVPTQLGNKTWEEMCA  
RSSPPPS

>comp15737\_c0\_seq2; 471 131 1585 LEN=5901; translated  
MSIPAVLYDHPVPLDISNEDVEKTRKPEGVISYFVTSFTHNASAPREQDGFVNEEVGDGR  
NDRKNENQREDIPESTRGGSKCSCDTEKVDVVSQSINDSVGSDDSDNDRHDGDILILDENQ  
AVTENDETHCPLETIIEDIGSDYVLIPIPSPAENDDHRKLLSSALLARASKMPRAFLRA  
TRKKLDLSDHQITRLCQNAAQKFNALQATLLQPIHSYTKDNHSSSIYSSFDWVSETVVDASG  
NRLILPGSCISLDADEPISAQNGIGGDSEFSDNHIAGKLIVPARSASERSRGSNTLMVS  
AHDLLAAKRAQIKQRTCLVDATREGELDGPLCSWYCFGNEEIDFDHDKVMKATTRNLTQQ  
WKLALWKLAAQHKADVWYRDSHIFVRQSIQKSGHLLVKSQELLAQYWKRNHLHYHHRSMV  
PANNTSTGCDRCSEKSNRNAIHFRGMANDGNENSDTVDNQVDQLGIELIPCASRYRNLNTS  
YIQD

>comp15737\_c0\_seq3; 471 131 1585 LEN=5813; translated  
MSIPAVLYDHPVPLDISNEDVEKTRKPEGVISYFVTSFTHNASAPREQDGFVNEEVGDGR  
NDRKNENQREDIPESTRGGSKCSCDTEKVDVVSQSINDSVGSDDSDNDRHDGDILILDENQ  
AVTENDETHCPLETIIEDIGSDYVLIPIPSPAENDDHRKLLSSALLARASKMPRAFLRA  
TRKKLDLSDHQITRLCQNAAQKFNALQATLLQPIHSYTKDNHSSSIYSSFDWVSETVVDASG  
NRLILPGSCISLDADEPISAQNGIGGDSEFSDNHIAGKLIVPARSASERSRGSNTLMVS  
AHDLLAAKRAQIKQRTCLVDATREGELDGPLCSWYCFGNEEIDFDHDKVMKATTRNLTQQ  
WKLALWKLAAQHKADVWYRDSHIFVRQSIQKSGHLLVKSQELLAQYWKRNHLHYHHRSMV  
PANNTSTGCDRCSEKSNRNAIHFRGMANDGNENSDTVDNQVDQLGIELIPCASRYRNLNTS  
YIQD

>comp15737\_c0\_seq5; 1155 234 3860 LEN=4111; translated  
MVTVAELVKAESRVEKHKATHTFERPSKIRSRSRNNSNSSSASVNMAGEVVEESPQSPN  
GNANANAETFPKXHARENGSSKEAKTSAKKNAKKKGRKKVNRKHIYRTSNGPKSANPGSG  
FSFCDHYSTGASTDLRFRGKAQGRKQLHVIDDVGRDQQLLLLVDKPGKKAGSKQLQVQAR  
VQFTGTFTGTLKTVCTLVSFVMTALCAFSIQCLLFLFMNVVATYTPSTWTADPPVWNI  
VGCILACPLLLVSLGSLMAMSWACTVDCWRGLGSHHASLLKATQFWPSHNRGQQAQFSP  
SRNGNGKKKATWRSPEADRRQWLVLVFLGIPLLVLGITALVDRSRDDFDGYDWWGMTLQ  
SWAGSAFVVFQILYIELCVWNELTVCYRMLQVYGADVSGASENRDSYPEFLGLIAQNI VLT  
QRQKYSAVRRKRYLLEGGYGPFRFYANSTSFSDATKAPAQIHCSLRTGLLLLCGGGWFY  
DLLRDDRILLEDTVIPSKRNFTIPEVFGSVQIYTKNNWSLARLWCLNPRKATSLFVVKG  
EGSVEKFQVNTAYICYALFMFLTLLVIGAVSTWLENPAGQTAVIVLLVLLICFVPMIRSA  
CKIRQYEMNQRMNDGNGDGHDEERKYHDENEDGDEGCSETFVSVWETVRVSELKVVACYA  
TAGMEIILFFLWPLISMVFVFNTPPLAVIFLVFGLHTIPRHYFNVSNNLLQELGSLDKL DLG  
GVDLALLSCGQHDSDDSDNDNESEEAENRVAGKFRKRDVKNKLLISNLVRRVTRSRA  
NRNWIGLFFFYFLVFFSGYYLSVSEEMFSYEMGRYKWKNVVYANDFSWDPQPNLPYPTCE  
VKKGFTFPGEETASLANAYAFSLTLTFSSAEAAQPLLDQWFGNGTVLDDTDYVEAYRQAT  
GTEDHPVTYKLFVFPSPDTAGIVGIRGSEMMWDMTMDQLWGGGIFAQAILSINPLGNIW  
EPIMDKLVYLINYPQSEKLKEVSYRFTSEFVEALYSGYGGRYESLRVTGASLGGGLAI

LTGAI TGASAI AF SGLNAMYSRR TFLPPI TEEQLNTRVFNTI PERDII AHIDKVR RANRP  
AHQIEAPSRNRSHRFARQRTFDLLLSVFCFSNCHDSIANLFRVSRSVFFSPLPQPGMNYQ  
RMQC NAPKNSLFGCHSMFRSLCEIQFQCGSQGRP INCWCVSNYGYPVPTQLGNKTWEEMC  
ARSSPPPS

>comp15737\_c0\_seq6; 579 234 3596 LEN=7912; translated  
MVTVAELVKA EESRVKEHKATHTFERPSKIRSRSRSNNSNSSSASVNMAGEVVES PQSPN  
GNANANAETF PKKHARENGSSKEAKTS AKKNAKKKGRKKVNRKHIYRTSNGPKSANPGSG  
FSFCDHYSTGASTDLRFRGKAQGRKQLHV IDDXREGPAAAAPGGQAGEKGRKQAAAAGTGP  
GPVHRDLRNGPPENRLHAGIVFRHDGPLCLQHPVPAVLVHERRCYIHALDMDGRSAGLEH  
RRLHPGLPAPAGLARVAHGHELGLHGRLLEGAGLAPCLAPEGDPVLAEPQPRPAKSAVLA  
EPERQRQKKG DVEKPRGRSTAVAGPRGVFGNPAAGPRDHRVGGSQRDDFDGYDWWGMTLQ  
SWAGSAFVFQILYIELCVWNETV CYRMLQVYGADVSGASENRDSYPEFLGLIAQNI VLT  
QRQKYS AVRRKRYLLEGGYGP ERFYANSTSFSDATKAPAQIHCSLRTGLLLLLCGGWFY  
DLLRDDR TLLEDGTVIPSKRNF TIPEVFGSVQIYTKNNWSLARLWCLNPRKATSLFVVKG  
EGSVEKFQVNTAYICYALFMFL TLLVIGAVSTWLENPAGQTAVIVLLVLLICFVPMIRSA  
CKIRQYEMNQRMNDGNGDGHDEERKYHDENEDGDEGCSETFVSVWETVRVSELK VWACYA  
TAGMEIILFFLWPLISMVFV FENTPLAVIFLVFGLHTIPRHYFNVS NLLQELGSLDKLDLG  
GVDLALLSCGQHDS SDS DSDNDNRHDGDILILDENQAVTENDETHCPLETII EDIGSDY  
VLIPIPSPAENDDHRKLLSSALLARASKMPRAFLRATRKKLDSHQITRLCQNAAQKFAL  
QATLLQPIHSYTKDNHSSSIYSSFDWVSETVVDASGNRLILPGSCISLDADEPISAQKNG  
IGGDSEFS DNHIAGKLI VPARSASERSRGSNTLMVSAHDLLAAKRAQIKQRTCLVDATRE  
GELDGPLCSWYCFGNEEIDFDH SKVMKATTRNLTQQWKLALWKLAQHKADVWRD SHIFV  
RQSIQKSGHLLVKSQELLAQYWKRNHLHYHHR SVMVPANNTSTGC DRCSEKSNRNAIHF  
RGMANDGNENS DTVDNQVDQLGIELIPCAS YRNLNTSYIQD

>comp15737\_c0\_seq7; 579 234 3596 LEN=7824; translated  
MVTVAELVKA EESRVKEHKATHTFERPSKIRSRSRSNNSNSSSASVNMAGEVVES PQSPN  
GNANANAETF PKKHARENGSSKEAKTS AKKNAKKKGRKKVNRKHIYRTSNGPKSANPGSG  
FSFCDHYSTGASTDLRFRGKAQGRKQLHV IDDXREGPAAAAPGGQAGEKGRKQAAAAGTGP  
GPVHRDLRNGPPENRLHAGIVFRHDGPLCLQHPVPAVLVHERRCYIHALDMDGRSAGLEH  
RRLHPGLPAPAGLARVAHGHELGLHGRLLEGAGLAPCLAPEGDPVLAEPQPRPAKSAVLA  
EPERQRQKKG DVEKPRGRSTAVAGPRGVFGNPAAGPRDHRVGGSQRDDFDGYDWWGMTLQ  
SWAGSAFVFQILYIELCVWNETV CYRMLQVYGADVSGASENRDSYPEFLGLIAQNI VLT  
QRQKYS AVRRKRYLLEGGYGP ERFYANSTSFSDATKAPAQIHCSLRTGLLLLLCGGWFY  
DLLRDDR TLLEDGTVIPSKRNF TIPEVFGSVQIYTKNNWSLARLWCLNPRKATSLFVVKG  
EGSVEKFQVNTAYICYALFMFL TLLVIGAVSTWLENPAGQTAVIVLLVLLICFVPMIRSA  
CKIRQYEMNQRMNDGNGDGHDEERKYHDENEDGDEGCSETFVSVWETVRVSELK VWACYA  
TAGMEIILFFLWPLISMVFV FENTPLAVIFLVFGLHTIPRHYFNVS NLLQELGSLDKLDLG  
GVDLALLSCGQHDS SDS DSDNDNRHDGDILILDENQAVTENDETHCPLETII EDIGSDY  
VLIPIPSPAENDDHRKLLSSALLARASKMPRAFLRATRKKLDSHQITRLCQNAAQKFAL  
QATLLQPIHSYTKDNHSSSIYSSFDWVSETVVDASGNRLILPGSCISLDADEPISAQKNG  
IGGDSEFS DNHIAGKLI VPARSASERSRGSNTLMVSAHDLLAAKRAQIKQRTCLVDATRE  
GELDGPLCSWYCFGNEEIDFDH SKVMKATTRNLTQQWKLALWKLAQHKADVWRD SHIFV  
RQSIQKSGHLLVKSQELLAQYWKRNHLHYHHR SVMVPANNTSTGC DRCSEKSNRNAIHF  
RGMANDGNENS DTVDNQVDQLGIELIPCAS YRNLNTSYIQD

>comp15738\_c1\_seq1; 2863 82 12174 LEN=12279; translated  
MFENLAGNVLSKILSKYFTEESLAKNKATKTAHLGIWSGYISLEDLEVKTNI INEKLRRK  
GHPLDLVHC SLRQIEITIPWAKYGTNGLSRSNSSKEAVAVLVLDGVHALFRTSFSFFDDD  
LRAEEIKKRREALSRSEIFAKSSPDADEDFSEESKTYTEILKKRITSGILREILD KLHI  
HIRDFHVR IEDIESDPQN PCAFVGTME SMHVQDGNNDGIGIDQAPDES AVSKVAQINHFA  
VYWNALDYGD DLPVENSQNLHETCANDMAKTSRALDFCIVRRGSP IASPSRRPYIPTHTFL  
VLPFGGQLYFWLSNDPKDLS SRPAVEMDI ELDCISTNLRDFQCIQMLRLYKERKNFQFVK  
KYRKF RPKESVVD DPAWWFYAARI IKFELKDNFLRWSLSR FERKYAIRARYMSLYERRI  
RYSSKVTNSSSPVD TADDFNSTLDAIETA EIQELEDGIHGDL SVTDIILYRAIVNMRMGK  
DSNPIIYDVSKARRSSWWTETVQDATVDDVEAKEEFDRLLKYLDKVPENNDTSRPQVRN  
DSLIAISVTIHVEEVRFVLF SPLYITAEETQLKRLHEKFLFISQGTRMRGTLRGDYKNF  
GLEFSVVDFTASEVRMDKSQHLVASQLKREIISL DATVDQKMYEQD LLLFFFTKNPVNN  
PGVNKELRMVLRPLE INMNLDCQWIGHLKGFMREVT TAPNVEKFWGELSLAYLNSLTLGK  
LALMAKAESAASGHENLDVDVAMHCPVLRIGIGDADLLIDLGILSLRTDRLAGISR NKL  
KKRPLIQNGSAEDDFAPLGLRQMSIDDGSLNGGSRSSRVPSVFRKPIRNL MFSSAVSLE  
SIHASERTNRSFDGSLNLD DAFP AIDRGSERKNSQNESRIEELFYDKYQLRLQTGKISFS

GESEVFDVSSGFELRTTIQKSI IPTDHTLCKLKAHTVVESIKLVLNEDLVSRFAVGYTMW  
KSLMKADVASQTYRRAVTKSLVSKDEVGRFIPNDDQVKHEYDSSSSETASEIDECEFFDA  
KEGAESVGGENTSGVWFEDHWIADAESVIDAGSRGSSNDRRFHRRQPSLSDVSSVSDHSK  
NRRSQLENGYLSAENLARLEEVGEDDSVAESGKEMDDDSFHSVMSAGGQAQLLTDLEESA  
KELEAKIEHLSAIMEENADTLVDINDPELPERRNHKKTKRDIHRSKAELKALNAVCQDL  
QILLSKGNLAPELDKKEFAVVTIEQARTAKALIHAKQRNDSDESHRLVRHLNRELFKG  
SILLSSELQITLRTGDHSSDVKHDGKISDFEFFASQVALALFHYANDTKIYFSLDQVAMSV  
TNVVDVHAVKPSLIFSGGSSDTPLPVRPLPHLVAHSMEDRFIRGVMAIRKHRSSSESRRLA  
KCKIRLVVGDVEMSPSHKSI TMLQLSLVRVKAAMTSSESCIQTRDTPEPEEKQTEQLQR  
SHHYFDLALRLTSVRIVLTHEDKVTGAVVASESSLRLLLLASQIRNKFQGDFFRCANAQLL  
DILSFENIETCRGSEILGRRDPYNFLFQLRLRSQVLPSEDERSGWVGVHTPDSNKRGT  
DVRNTHLGIKISPLSILASPAFTKLSKSLCEIRQVFQKPRDLSKNQKKVSFIERIARQA  
RLRWRFDLVLRRINIRFPDENKSEWNI SDDIGTKMVVAFTTVLSVQESNIESGRISIRMG  
VTDISMIRSMDDWPILEPFTMIFELTLMNSNFVSRVSESRVDILPLLVMAGSPLNEIDVI  
MTRYGWSIPSRECNDKSTLVLFKFSPLKINISVCI IAFINGILQSFKTNPSRKQEKKLE  
PNPTMSLLPSAKNMMGRNKFGLQVSFEDAEIQLLRANESKPIAYASRLISFTMTDVTVDY  
SQGEEVSASILIRDSALFDLSSGKIRVIGEDPEARLGFYPYFVRIKLYMHLEGVQTI RHLH  
INWGKIQCLVLPSPFFRSILDLEKGLKSLNGTNRASGETRGRKVNPIRFLHHPNDINLIL  
SADAETFECILASRDII EYVKNKGDKDPFGVVTFRWKASLSLAMALDCLKDSSVPWLTLNF  
DGIFTDEEDVDLFDKDFSNNYLGNSGLPVENVGYKLANAFSTKVNYKLSAFQVLRNTITL  
MELFNPSQKGFVTMPRICFKISQPIAGEQRITNPIDLVLVYKATGASIANRADDEFSEYE  
VKLAQLLLLLEANFVDVLVYMGSKRLGGFSDSFSVSVKPI LDMAKRKDKTKRISQDNGISVP  
TDISSRFLKTPKLSDILKSSPSICRVQIEGLVTCVPGGASRLNESPI IKFELSNI LSGI  
AAVPVNLNLGMVPGKGTSEEDNSQRQYIAGSEMNNANVGGWIAFQITGHYHNRRLVAWEP  
FIEPWIADISFGIDLVEACRWEPTIKQEATITRTATESL TEVSGVETPGTGKDRLEIG  
RLIRSPFQSLQSSTSSRKGPSDISHSDLCYLMLSSSARSILSSALYNSSGSQSDVESKIF  
NTMPSTSPIEWLQGFQKPTKTSSTRDDHGPFISVILSDKMPLNVNLTGALIENVMGYLD  
NTKKTGSKAIVPHVIRNASGMTLRFREVLGTDRTKRKEKSAKII LADGSETPLTLKRSL  
QTCDPHRAFIYLELGSFEDTVGRISNGDFAIPKGERSANFSFKASAKIPVDAVGVHRYPL  
DRNVNSRGDTNDDGNSRALGWI IVRVALRGSVKVVSIESPFVLKNAADADLLCEVRDES  
GISLLWRCLVPKEECTDSNWKQDGVVSI PADIVPFI HDGSYRFSVTAISRSASFLHEADL  
TAIQYNAVEISTPPPFSPKSFGRGLVGEVEVILPALVSLGNNHSEGNEIFESDEKVHVTA  
CAVRIGSASFQVDSSIEVPEQRMIFFRSPLVIRNFLALPIAVQVRVKTISNALMNNNMN  
SSGRGHTLGTGWEDLGVLDGCVSVPWTGSPSSDQVELRVKFGVGTGDGNSRRYPGWSSPV  
HVPARDNGNGSIGQYNNPRSYAKMKVSDADDVVLNLSVAFEFGNDTSGIEQSECESIRHY  
CQKFPSATRSACIFVPYWI IDGTHQDLEFFAGSPVAGQLDRSDRIDDEEERRQKFGNTLG  
LAELMDNQNFLNASSSGFVDVLMIGDENAPRLTVRKRLSRNERLLMQGNASPWSDSIPLO  
VGRKATYDLTVLTPDEITSTFKSKGDDGQNLDRILRSSIVNANNRFGGKLGTKLIHIVN  
RYSISNETGRDIEIAANAGSTTTLVVRATTSPQPFHFDDREIRFRFKEFGWAWSGRFKI  
RLNRREVTRIRHKMKGTIIITVEVRSSKKSATNLI VFRESSHPPFRLENHTMYPLRFG  
QVLLGIGSEENDCDLLOQYQTEDFAWDEPEISRRALLLQASGSIDNPRDIVFGKFQLDK  
IAPGTVLQLDSDLFTGEVVADGPTRVLRVSDASMPRISSARQGEFDYFRSAPEVLKPLTT  
SFSINMSQIGISVVDFSPKELLYICLEDIELNRKKDKGKDDVRF SIGSIKLNQLWVTP  
YPVFLKMGHRHTGKANIRRNRRHNAISILWQSSLNTHGGYGNLTLDDWIEVSSEPIFAN  
VDGELAGLLVRMARQVASISSSGEDGSAFQSRDEELKSLLTSSGVGEYSEDSVVSRRTHH  
SLQDDASQEPLTTAAIAAKLRDSPAYVQSTPRSGHYLIENASRKRKKQPLMSKAQHKFY  
IERLKI STRADLSWSGVLPLGLSSSLFKALTLERLPMLRPFNSHAYGNVEDHLQILR  
SHYMSIWRVVDVFMGLSANPTFLFRGVFHTFREGYASILD SWALCLRYYSTQLTKLLQPD  
YKLVPSYDDGNPVQYTEHRSDFLK TICSPFVNGLAFVFNNTSMMISLISSQMKYSPKSSS  
ARHTRGLVRSRNPRLFAHLDGKDLLVEYVEGENAGKALLSRVRSGLHLGEGYFYHAEQVR  
QLKSYFRSRGDIDSAPLILMITLERILLTGKLDQHFCVSRWEAYSTNI IHIDLLPSDVL  
GEESAFPPYDEIIVWHLSDPEFSGGNKIDKAHKYAKNLVSGIDVLHKSIFVPRRLGEQVL  
EKLKLFESRS

>comp15738\_c1\_seq2; 115 1 678 LEN=678; translated  
XTLRFREVLGTDRTKRKEKSAKII LADGSETPLTLKRSLSQTCDPHRAFIYLELGSFEDT  
VGRISNGDFAIPKGERSANFSFKASAKIPVDAVGVHRYPLDRNVNSRGDTNDDGNSRAL  
GWIIVRVALRGSVKVVSIESPFVLKNAADADLLCEVRDESGISLLWRCLVPKEECTDSN  
KQDGVVSI PADIVPFI HDGSYRFSVTAISRSASFLHEADLTAIQYX

>comp15739\_c0\_seq1; 99 1 558 LEN=908; translated  
XFHYVHDYLN SIDNSXIFDKGLNLRPEVVPFRLLTPNMLDAFGPTGADGMFSSGMECSLE

VLRENDRILLSVLEPFVKDPVIDWKRHRTQQNVLPKALPND SHGEATRSIHVIKERLSG  
ICNMRNPNYRKLRLNIIPREHLRSRIEQDNMTIGILPLSVEGQVQKLCVEASKNENLVQLYV  
GWMPWV

>comp15739\_c0\_seq2; 2468 323 10940 LEN=11290; translated  
MVKRQVRPRYAIIVASEGETPAPNAGDSNGNSNTRRGNTSPRRRSSSGSPSPSTSGTTSR  
SNEPPKARNKIKGSNLQEQRSSSSSPRQKHRQKQKQQQQLAAEEILLQLLKACEKHHV  
NCHPDYHPRNEMDDSDENDLPSSCKSAITNLRVLI PKLECTIAPSDGDGKSTKSKTLTND  
ILQLCRFYDNVIRGNFCPHMPHLLGCGKDPQLILDKILYLLRNSLNVDLGNRDFTKKEG  
SSSTVPKDRVSAVADTFLDVVSQTI SGLMAFAVDDTTDHIRRNLFVDWIDFAEDLAVLSG  
LESQAAPAGPDNRQSNLWLPVELVLFEESSSVIKHRSRRTQE QAGRNDRGGGDADGNNHR  
EFYSLKLRWDQVRTLHTIVLNVLLNLLTSNGSALERLQASPGQEGEDAPSMLLGGMDL  
FFPSDIVTDIELVSLLLASMKPVLVSPDPIARSENSPLSFEATGVSAKAVDILIRLCLD  
WHRLGTATASIPLLPCMIDA AVLTRTILCELFNSRNIRADIPDMNAIYTNEKRLAFLLD  
RAVCCPPGLDNNHGNVTDDKNGVSRITIHSTVWTTLLDCIEGIVGRLHRRRQRNIEEYQOS  
SASKSDRDSAQSSASSVILDVAVLETIHYIAATPTLALAGSNYCTAQGIFSHLFFLVST  
TSLAVHNNDCSWNDDKLLLQAAQSLGVFLCASLRKDGHSAGLLDHACQGALKRHAQNTK  
QAVLQRAENVS NPGSMTGNGSNIDVQIGSEVSGVESNRREGSKRKREPLPQEASEISDNAN  
RSAPCPMQQRSTIVYPTLWYEALGSLFDQALAAAGESLKKSYATATTECQDFEIGEMIEEI  
RCLSGSLQLSLSLIQKVMTACDQSGSISGISHIVHELKQLLACSLLLGELTTQHN  
LMIPSNFTMVDVAVIGCGLSMHFSKLTQEVHESLLEFSEYFLDYVSSFSGRILELEPQQQ  
GGLD SWNKCI GIPTYFTGNKCRDHCKQRWCISSTVDSLKSDKHRNEWMFDRAIMTLHSLP  
LYVRAALVSSLHPVEQNFFSATEKNDFESIFGCYSLDLFSDLFNRYADDQKGSVDHDS  
RFIASLLHLLPLMVLSRHKKKERAI SRGNRGEQKNHFKKTAEASFNKPILLILKNGIGP  
LLASLKPND SFLFQSLVSTLYHIDVFNIDAVELPIFEPTGILEFIVTRYEHLQCTKSKK  
DEVSSTLRGMFDLADKGVNDEDPKSRYLLWICAARYCISASPSEIRQKITLKWSONAS  
SDRDDQTSKDNSILSWLVATPFSDPNNSLRK FATRKLSSILMSKEFSFLARFSSSEDFQ  
DYCTYSSKVRFRSEKNMCSLIRISDEIVDGLFHEIDRVLSEGC GFSETQLSLSLGCVK  
GKQHPKSYRRENQLAIRRTAAKAMASLCFHANLSHPIGKTLFEKSTLRLIRMWASASTEK  
KESSFPILYSTSTSRALAFGGLSCLSESRKLSLCLSGEVSWTYFPSAIFCDILILNNTKS  
REEQYKLEILVNSFLTHTGDSLQKKTSAFQARKIVDESIPSTIAQLVNDKDEETIHMVI  
AFRLFMTERCESFKAMNHYEVDEIGVPEPAMSKKSLSI SMGNSQLQSMTKDLCLKKIDK  
ILPLVLYYSDQEE SLPKYFMRLTAPVTL PDMMAGREQTILKGLAWELGRDPHRVDSAVR  
ALRTAAAARVRDKANRAPGATPDLTAAHLVWTKNFMYLVVNMVQLHWGSRKLGHQVQALR  
CLNILLDFLDPLEAAQYFPQVLATVNVVAIAVDKVRDLHQPDRA SLTLHAVQCLSKFIRLS  
AENSIEAVIDNLTITIVSLLPILEDGDIDL DGSILQEAKAEAVSMLEFLTRSKFVRKFSK  
AFSQIPFLPSSAALVNVHKSRLRDNGINFDNLLILSTSTSESQGMNTRRESLTS DNTSNA  
SFSSNGDNV LALQNRLSLISSLLDNENASVRKVSLOHLVDLLRTNRNLFHILVESDGGSS  
IRNYLTVIYDRNQNDIGNEQAKHTTNVTSVSI SFIIEKLMNRCV IETNSRVRLQLATCLG  
EIGAIGENRLDDMSLFRSKGSESESMYEWRLKQPPWQSRAAKYELQLVTKCLVAALKAAP  
SQEEQLKIAFTIQQLNLLDESARACDNKDSTNEKLD CQKREMSKWLMDRLVEANVYDSV  
EPYWLSEFSTKDERFTIRRQPPFFKVDKSYHLWIS EFCRWMIKKAKDCPLSRWKDFFFAC  
RIAIRSSTGLETAEFILPLIVLDRICFGSAEEFELICQEFIGILDIGSTSTAMSNNERK  
AISGFFAMIDTLSFWAETETERRYSKR TSHSKRSCKDGTROTSHDNSSSNWPADE TITQ  
IEELVSRIPLIDQARAAQEVGMHAKGLRLL EMVARKSVVXTFFESSSDNNDSEVPVSGNI  
LQHSLL ENADLGLMKVMSLNMDDCETMNVIGETS YLANPLLKVADSVQWKEANGNFEGAL  
RDYERALQVSSVANLGAEPGIERGALDCMLKLG RYESVLNRVLT EGRNADKMETQSFAIQ  
AACHLGQWDKLSLVQQNEASKINSLPDDMYRKATGKAILCLRDRDGISIADSFRSARSA  
VMEKLSVARESYSKAYTEIVRLQCVRLEDAARLLCTDGAKDMFTLSEAAESKLHEGWA  
WDGRLKLTTPRAASEIMNARVAIARIGNDRIMEGSLLLDIGKHAHKNGMATVAENFY SQA  
AVTLSLIREVQANANHQVGNLMDDVRVQYAKLKME SGENLLALKILGQEMLQDALSEMSQ  
NSKDIEFLKKVAVKYERLRAEKIFGGRLSVGDEKGLISRFSNRLRLRTQWTVEGGMQSGN  
EIIFRFETVITLSPDWEKGHFQFARYL NELVTRFFEKDSPHGIGDDVMRFNALYRNKVCH  
HYILLAI EHYAQNQLDLKHVYQTLPRLLSLWDFVSVQPPESDPNGTHGAFKPEYMKFL  
TENQNRANVLM AENTKAIPAAAAYTAIPQLISRVIHNNEDTAKVVKRILERVLA KFPHQ  
MWHLAWLRGSKNQERSKIGGDI FKGARVLIKNRQTQVANLLKASDSLKFLQDLAKFTP  
KTKSSSVSVKSWKGIADLSEFIPPVQAAMSITPFKLVKSSTREYFPRV IPRMRAFSSKVS  
VMQSKARPKKLFKAVPPTWKHANVNGSKDGAGRASASTPLDCDIGEIHFLVKQEA GDL  
RKDARVQDLNNVINRLMSSSKNSSSTLASRSRRLRVRTFAVTCLSEDTGILEWVPTD SL  
RNLVHRSYNSQTSSFCPRRRGSRMTSFADATMRSQFERAQNQFLKNGDIAQA AKLYLLC  
LKQHPPVLSWWFVQKFP SATDWYEARTKFTLTA AAWSAIGHVIGLDRHSENILVETATG

RVVHVFDCIFDKGLNLPPEVVPFRLTPNMLDAFGPTGADGMFSSGMECSLEVLRENRD  
TLLSVLEPFVKDPVIDWKRHRTQQNVLPTAKLPNDSHGEATRSIHVIKERLSGICNMRNP  
NYRKLRLNIIPREHLRSRIEQDNMTIGILPLSVEGQVQKLCVEASKNENLVQLYVVGWMPWV  
>comp15740\_c0\_seq1; 3349 1 10321 LEN=10443; translated  
XGDVTRNILNRATQTSIRDDDTNESVHCSLVANEECGLSTSTPALSEKSENLSGIARDIV  
NAAIDSPTLHASSSDSNKIHALLSSSVESVEEEESICTPVPSLKSESVGEIARNLVNAAIG  
SAAPKDVATEIKESEGDSFSTSDVSVNNESVGAVARDAVHSTTDNLDEKDTIRWQATEKS  
EPLPRNGSVDHASDTSRQRVNRSRGDPNDHDFMDEQISGSWSSRSKSPSENSSYIVHTSD  
TSSVDEEQSTTTTFEESLADLSRQI IETAVRSSGEQHKDRNHNQRELATSPIPSRNIG  
FPTRESAFDTEESFTPNTSAYIDDFGEKLHETRPLRGVEPMGEFEEVEEMEPSNNIEASE  
STSSVFSGETELSRRLVMDDSDCSSLSSGEVRELDLLDRQENGEIDEDRIYDLDF  
DRWQNGESLNDEEMSDLNDFMARRREQRHGKVEHEEPVHGKLETGTSKNTARLSQPEQN  
SSHWAPPDAEFFGDVNSESSFDETHSDYQEASNDEKQTTEYCAEVESDHRSKSAEGIQK  
TEELDLRKIDTEQERRGKTERLIDGEEKQAIIEPAKMAEKRFEGGTGEPGTEDAHPINEA  
LAWNPPEQSFFLDDEQKEVADKPKKTPSEWIPPEDNFFEENDSPGKSLPTPVKSEEQSEA  
DNTSLVSSNLEELSQUALGDDEGRRQIPLRSVDLSVSHKAPQKEPSLLEARECRESSPEK  
TSYIAKEKILEESLQDSYSVRSIDENSFSSLSTWELDELDDLDFDRQDNGDSYSLDRLRDL  
ELFERWQSGSGSSFDTDEQRDLAQFQRKRHRERAYRRELSNMLDAQKRGEVDRNRLEEL  
EIFARHHLGEDLEENEQEILRAFERREFGPEVAGSPRSSNLDSDDVEAGTTPYQENS  
RAPAEYDSSSSSGSQNDSL TNRN IAGVATQHNSNKL DYL SRDSVGRSSEIERDRSDTG  
VLAGYESFDTSEHSSEYSVGDSIQDDNIAEQQSENRLSEYDRQGTSNNPGRSSVEHPK  
VIEGEPSESGVLADYDSPKNSSYSQSDSFERRRFVEHELSEAGDLTEYDSSDSSYSQSD  
SARRAKIVELEPSATDLLPEYDSSDNSNSSQISRFEHSGVTEREPSETGVHTEYDGSEMS  
QTNSPWRGDVVNREPSETRIPLQYNSSDSDNSQTYSVSHERVVGRDPSESGACSRHSS  
NRSDGLKTNNIQPQRVVQREPSATDVLEEYDSSDTSSYFSQSDSVGRGKGTLLPESETGV  
SVEHNKSENARNSLWDDKVVKPEPSETDLLGEYDSSSSSSYSQSQSFIKSKLEHESSKT  
GIPEKNSLEDSQSNLWRGVVVDLDPSSGVDEQHDVSKRPDYSESDSLWDGEVAQLEPS  
KTDVIAEYESSDSSEYSQNSVSRSKALEREHSETVVDEQFDDSDRSDYFQSDSLRDRSV  
VKLENSESDVLADYDSSDNDYME SHNGGHSEIVEHKSSRTRVPEEYTS PNNQS DRLWA  
GKIAERELSKTGAPVEDESSNSNSSNYSHDDSVGRDDIVERGSEYENGVPVEYDTS DSSD  
YSQIESQYSRELSRIEEEDDNFTPTHQGEKDTELSGSDFEIEIQKSSDDERSHYASCHSD  
EIPINRREETNSNQRYANHQYDTDDDFYSQSDDFHENHSELSGNASHDRAMASSPRMFG  
GKHSRYDEVPSPSPIDESFSSRESILSAGEIEELNELLDREENGEAVDEDRIYELDLLSR  
WQIGESLDDDELADMFDFKARRKKQRERQRLTEEQLASRKP FATNL DKL SPAKKG DNSF  
ELETSNPDFHRRPPFGNISQLKPRKVATHQRKNASTAKLTAEKKLDHDKGFAEEIQMRD  
LEQKKMDKEREKLERINRLLAKEKELAE LARKKKLEEEALMAEEHKLKQLELKKSKEEQ  
DKREKEARLMEEQEKEAELELAKELRLAEEQSKMEIQRKKALNDARHAQEKILAQQER  
RKKLENDAMLAERRRLSKEAERKQLEMEEERLRNMNRLTEMKRVENEAQGVKAAEMKKQ  
IAAVVKSFEKVPSDEDYSNLSSIDAISISKESMLSISEVDELNGLLDREENGESVDESR  
IYELDLLSRFQIGEKLDAEEMIDLEKFKKKRRIHRATKKLKAKEDINEIEETRGSWKM  
SKYDSDI EESGSSVLEPLSMAEPGSFQTPESSRSIDEEDLGGDSLATPPKSKQKQKKKTR  
KKAREQVMVGGSPENSVHIDNIRRPKPVSNHREISSKVTEEFCSGPERVQSDSLLP TAI PK  
MSLP SAMKARNQQDFKRKRKNGNSLGGKASQIRRDPPPGSFSASFSSSTNSYDASSFRSS  
SHSSSYHDESSVKKEGSFSSATALTSTAVKQMKKKKTKFPGRREPSLTLHSSSKGDL  
VPKVP PHGSSADSKTNSITANNFNDVGGKNDKSI VHS TQSVLHSSTSTQTDDEIVGRTIHV  
DASSGADSNDRKKEIIESEQGKTSAVQQTTHDENKKHSHKVDETSVEGAINADVSYTADS  
NGAIKKEGQTDQVDF SVMGTNHLDEPSATQTEVPKPINNSDQKKEKPNTRF GKALE  
RAYLALKVWDVQSSQNSEKDKEDHSVVEDIEEGHTPWVPPNFNLNPFYIIPSEVDQDSP  
HNKPDPELHLRLPQNAAKPRSLEVSKIGKFTHENRAPEDSSVTSIFGKPRFINRTPEDS  
SITSNWGPSSLKKERGRKYSVHRKERFEMYTEPSHSTKDFDQKLIHGENSSENDSK  
EPVLLAQQHALPKISTDEPAQRVLSGANFKGFDPKLLSSWGIPELAI VPENKQMK  
TEIGLVQQNAPERIVDEESSWIYPRTEQSQSGHTENRN NVGASFSSASIDIEGSI SRTSK  
SRKDFDLESGYSTSSQSILMFGRNHREDGNRNDSSESNGSNGSNGSRGSSASIESRHDDI  
DIPMGHFSDEPDSHDSVIHSTKDESKSNGRKRKLIVASILSCILIVAVIGGGVAAALILL  
KKRDQDNPTPSAPLPPTSKPLTQPTLPPALSTMSPVSMPPNSSPPQSTGIPTSAPINKMI  
VDLIVANAADGGASLQDPTSPQSAALS WLQEP MNENYSEPRLLQRYALATLYYATNANST  
SWKTS SLWLSDADECKWYTTSDSQDICTADTTSTQRKNSSLGNVFAVL DLRQNGLTGRI  
PDEIGLLTNLRTIRLPKNSLTGTIPSYVTMMDLEYLDLSSNKLVHYMDEMNDNDDDAK  
EVLSDNIFSTAKTTRNGSKSSSFLSQRNME SLIHLDLNENSFRITTLPSHVWGDGSPSS  
NLKVLNLGNSQFYGNLPTEIGLLTKLTGLSVFDNDLSGQLPDSISRLSRELLLYVDSNNF



RTNRQKPGVPQTICDALRPVPLKEFWADCEKTSACCTTCCSEALGCIATSHQQE IETQV  
VVQDQANKVSYLVQDPNLVV

>comp15741\_c0\_seq1; 2119 57 9899 LEN=11032; translated  
MAHPSPEYDAIFSLTAQLTNSNTSIPKRREAALKLEQRLSNYDIRERLAKEVSPGRSSDG  
ISLSARRCHALSALWSNALSRCIILTKDILNQSRACKTIDDIRLPDKILRAASQRDDAFD  
SNGLSILKLSKKSIRNALKYCI GVLENEGNIPEGGEAKMIDMLAFICSKDEYIGCFKYAI  
DFQNALSEILHHMKKHMDQQKNDSFGRVISESACKAFCNFFGTCSRLGFEIHASLLSETL  
EIVADWCKMNTENRTLNSSTSHQHIFNALASMLLSHPADSIGPLKRCGRHILRSCQKAY  
RKANGLHKEALNRYLLSHLFVAQTAGKIQGLIDGDLGDLGSAALTERQLLFLIDLICIEDI  
IKVFDKDTNISTMSRIKRQKLSNRRIWYPVDDRQQLQLELMARLLACAQRLYIAREGWDA  
LRNPNDMLEAQLKAHSRDENKAWTDVGSFETLEIPLNSAKSPWMNTVLRNLVSPKFNMS  
SSDCRDIEITDFPTSLVPDTKTFASSLLELLLVKNHDTQQSPIPYLAIIGACTELFPAGEC  
WSSSATVKWHCFVPKEKAKDEVIWYHRSKISDLTFLLSILSKVLEDNGQPDSDPHAQYWI  
LLALTKLTETTAIMIQLSQNTPCHLYSLVMEWRMIWKTLRDLRYTSFVNSIEENSLGE  
IFVILLTEIISRKCTETVQKNTCSTGYRGSSFLYKYQRQIWEFMLKPAMFORVECEAHFE  
LISSISKFVGISNEQDVKGTGRSFRDLFRLSLDSTLEILTKITESTLQHFSVKDILRAA  
ASCIVSLVTGNDPSSLSQLSATDSRFYLTAPDSKNLHVQQKNKIMLSMEQQSDSETCLDIL  
WGNAEVVGGHPNLSSFAFYGASLDLPRVVARKLRLDQLKEQSMRSRNTFDFISESDSEDL  
RKIAFEDLNELVPCFEKKSTELKLSQTGAVKLILSLWITQTYLERDILAKIPRIISFFVN  
AILELSKCDSEPYEYLGIVTDLRQISRTLIEISARYPSEIDLTEQMVLVPVDECRSILSRY  
SEILMNDDFS LAYDESARNAREASLESDSGETHFEVSMINSPEGSHDGGNISENKKCDV  
HRPNEYNTNLRKRRKIYHFGVPPNGKCAGATRSVLLDKSKVIGSLLLSMAPSTSNCRVC  
EAILGTSLDADLEIKNGNMDLRSVTSISFLGTGEVLLNSCVRQLALNTNHSDELSPVMM  
MCQVIALMRKCVPEPSELFMYGHNTCAQLLSEMPKLLQLTDEETKMIIDLIRGEEGMRG  
RPNLRARRAIAATLAFENGNDDFHQLFDSFFANSIVKIGFDSANFLVRRLASIAAGEAFR  
KLDEQRILEYVDNHIAPIFRGSSAQDIEKFTNWWYVANGLSSTEEQDRSSLEARDSLEV  
ESDSIFAKAVLAGSTKNTETFMVLHEILEIPVARPGLEFMCYRALEKIAFMRGYSNGQE  
LIDLESEGLLAIWLPKLDKINSKESDIFPPSLTSPRSVWHIMMYGRYDFFYQSQFSCDP  
NDESIVFRKSSAMHFVSRHHSFIVPFTLMKRHDIIDDNEHPNAIVDQLSTEPGFNIMLKN  
LTSTKIQD TDVVANLLHHIADIQAFSILLEHSDNYLNKEIGQNMIRILVQSVSRDVMES  
ETRKSVSLLIRRIYIHGQAKSLRGIVPCSQSTYFRSITSLTKISSRLKRQSGDDFISVG  
TSVTELTIIYAYENLVKSEHFNHQDASLFWALLGDFLTNQLEEGGEEVQLGFFLHVNLG  
IVLQSSLSKIRSQUALIHKTLKVS LQVTESELGSEVALLINEIVSVCFHIHEESQRNIL  
QMVHHRKRSRQITLRKSCGFQHFQSDWNKQTHQOISECQLEVLNAEGSATGVDHSCLVN  
TYDIIHWIIDSREQLRLDFYVFLGLCGTSEVNHSDLNVLGKIDERYTAQKLAQGLRTRCS  
DRSLHEYVSALQRRTPRSHFLLKERTFNSSSLISEARANIDRLVGAELSQIAIFLGET  
DLEEVEIPDLNFLYNYLCYACTASSSRKVRFESSRCIALLEPRAVIDAPDFNDRNLLPSG  
LCSDSFLTLTRAKSIDCLARCLKSPVKGVAMTSLNTLEAILLDVTSRKASGMSVQSRSL  
IKPFLSNERCVREHHDNVLSDQVGLLMKRIGLVNVNTEMWCWEKKLWTLDTISEFDYE  
TWICHVTCAIIVCCFGSDGKNSSSGSRMEYSEGCFFRNSQRIALLDHAFASDIFPPLIIS  
LLLDEKKNPNRLNLLITQSFELLLSGISSQLKTVTTTKRKIKSKAISIVVDTLDVIRRF  
SQEEFLSLDHPNRKMRKNGKKGNHNDSEPFVVPWQGLPFGVILHLDGIVVAEACME  
IQRYASALFFLDMMFNSSQYKSGGLFEELNDSASCVDVVGKFGVSGVFCGEKFIKHKQNP  
DDKDLREMTTKAMSLTGECYKELGEFDLMRAAHMQLSSSLKFMDNSNNPILDLRLRCPSS  
LDNLQMLSFQSSQMSARDNRFFLSMAESMEDLGLDGFLSTYIEGILVDNKHLLLETADMES  
LREKWFESNLKTQNNVNTTCGIFSNKNL GSTLSAPSEILSNTRSLNQGFELLSGALNS  
FSNHDTVSSMRFLNQARSHAIHSLSNIAGEQLSTTRFIESIDKFRALKDIDNLVEVNFDF  
SRFDFDSVEFLDVSLRVRQITLTAFFSKHPEHPKILPLLKDHLWESCDAAVRRSRPHIAE  
SALSELRYLLRRSIENNIHVDSFEIILRIRLEAKIMECRGDFNSAIQKTKQLIRHLRD  
DERSSKFHKRLLTDAQILCGSWMTKYKTQAKVILDSYLNPAANRAKAI FDEDKTKANAS  
RAARVSIKLGHVANLYDDLLLRIQSSEWKETDARLLRQRKQYLD SAECRHELMATLKRY  
RNSTSSQSKLRYVEANRYLAEMEIKKEFQEMSKEREGIKDLIPYYLNRALESFLLALAM  
AGTSSNDLSSHVSRMISLWFSQNEIGDGEKTNGIMQDGLCRVPSFRFVVL TNQLFSRID  
YSEVESDQYFQDALQHLVFRMCRDHPYHCIAPLIALTNGEVDTKIYGAKSIKRLDKCGV  
RYVRSLVESYSVLT SAYHDLAIASTKKFEEGSQRKQKIRFSEIFRSSTTKSLDRCLKRL  
SCAPSIITSPPILRPGKYDGDGEDPIGGERIARFDSDFAITESGKNRPKIVMVCVSRGG  
AFRQLVKGEDDIRQDAIMSQVFSYVNNLMKKRTNTSEDSTGSKSVTRRTRHKLKMIYNI  
LPLSPSSGVLEWVEGTQPIITFLNDQFGRVGSRSRYFPDEW

>comp15741\_c0\_seq2; 2105 57 9756 LEN=11102; translated  
MAHPSPEYDAIFSLTAQLTNSNTSIPKRREAALKLEQRLSNYDIRERLAKEVSPGRSSDG

ISLSARRCHALSALWSNALSRCIILTKDILNQSRACKTIDDIRLPDKILRAASQRDDAFD  
SNGLSILKLSKKSIRNALKYCI GVLNENEGNIPEGGEAKMIDMLAFICSKDEYIGCFKYAI  
DFQNALSEILHHMKKHMDQQKNDSFGRVISESACKAFCNFFGTCSRLGFEIHASLLSETL  
EIVADWCKMNTENRTLNSSTSHQHIFNALASMLLSHPADSIGPLKRCGRHILRSCQKAY  
RKANGLHKEALNRYLLSHLFVAQTAGKIQGLIDGDLGDLGSAALTERQLLFLIDLICIEDI  
IKVFDKDTNISTMSRIKRQKLSNRRIWYPVDDRQQLQLELMARLLACAQRLYIAREGWDA  
LRNPNDMLEAQLKAHSRDENKAWTDVGSFETLEIPLSENSAKSPWMNTVLRNLVSPKFNMS  
SSDCRDIETIDFPTSLVPDTKTFASSLLELLLVKNHDTQQSPIPYLAIIGACTELFPAGEC  
WSSSATVKWHCFVPKEKAKDEVIWYHRSKISDLTFLLSILSKVLEDNGQPDSDPHAQYWI  
LLALTKLTETTAIMIQLSQNTPCHLYSLVMEWRMIWKTLLRPDLRYTSFVNSIEENSLGE  
IFVILLTEIISRKCTETVQKNTCSTGYRGSSFLYKYQRQIWEFMLKPAMFQRVECRARHE  
LISSISKFVGISNEQDVKGTGRSFRDLFRLSLDSTLEILTKITESTLQHFVSKDILRAA  
ASCIVSLVTGNDPSSLQSLSATDSFYLTAPDSKNLHVQQKNKIMLSMEQQSDSETCLDIL  
WGNAEVVGQHPNLSFAFYGASLDLPRVVARKLRLDQLKEQSMRSRNQTFDFI SESEDSEDL  
RKIAFEDLNELVPCFEKKSTELKLSQTGAVKLIILSLWITQTYLERDILAKIPRIISFFVN  
AILELSKCDSEPYEYLGIVTDLRQISRTLIEISARYPSEIDLTEQMVLVPVDECRSILSRY  
SEILMNDDFS LAYDESARNAREASLESDSGETHFEVSMINSPEGSHDGGNIS ENKKCDV  
HRPNEYNTNLRKRRKIYHFGVPPNGKCAGATRSVLLDKSKVIGSLLLSMAPSTSNCR LVC  
EAILGTSLDADLEIKNGNMDLRSVTSISFLGTGEVLLNSCVRQLALNTNHSDELSPVMM  
MCQVIALMRKCVPEPSELFFMYGHNTCAQLLSEMPKLLQLTDEETKMIIDLIRGEEGMRG  
RPNLRARRAIAATLAFENGNDDFHQLFDSFFANSIVKIGFDSANFLVRRLASIAAGEAFR  
KLDEQRILEYVDNHIAPIFRGSSAQDIEKFTNWWYVANGLSSTEEQDRSSLEARDSLEVM  
ESDSIFAKAVLAGSTKNTETFQMVLEHILEIPVARPGLEFMCYRALEKIAFMRGYSNGQE  
LIDLESEGLLAIWLPKLLKDISGKESDIFPPSLTSPRSVWHIMMYGRYDFFYQSQFSCDP  
NDESIVFRKSSAMHFVSRHHSFIVPFTLMKRHDIIDNEHPNAIVDQLSTEPGFNIMLKN  
LTSTKIQD TDVVANLLHHIADIQAFSILLEHSDNYLNKEIGQNMIRILVQSVSRDVMES  
ETRKSVSLLIRRI LYIHGQAKSLRGIVPCSQSTYFRSITSLTKISSRLKRQSGDDFISVG  
TSVTELTIIYAYENLVKSEHFNHQDASLFWALLGDFLTNQLEEGGEEVQLGFFLHV LNG  
IVLQSSLSIRSQUALALIHKTLKVSLQVTESELGSEVALLINEIVSVCFHIHEESQRN IL  
QMVHHRKRSRQITLRKSCGFQHFQSDWNKQTHQQISECQLEVLNAEGSATGVDHSCLVN  
TYDIIHWIIDSREQLRLDFYVFLGCGTSEVNHSDLNVLGKIDERYTAQKLAQGLRTRCS  
DRSLHEYVSALQRRTPRSHFLLKERTFNSSSLISEARANIDRRLVGAELSQIAIFLGET  
DLEEVEIPDLNFLYNYLCYACTASSSRKVRFESSRCIALLEPRAVIDAPDFNDRNLLPSG  
LCSDSFLLTLRAKSIDCLARCLKSPVKGVAMTSLNTLEAILLDVT SRKASGMSVQSRSL  
IKPFLSNERCVREHHDNVLSDQVGLLMKRIGLVNVDNTEMWCWEKKLWTLDTISEFDYE  
TWICHVTCAIIVCCFGSDGKNSSSGSRMEYSEGCFFRNSQRIALLDHAFASDIFPSLILS  
LLLDEKKNPNRLNLLITQSFELLLLSGISSQLKTVTTTKRKIKSKAISIVVDTLDVIRRF  
SQEEFLSLDHPNRKMRKNGKKGNGHNDESEPFVPWQGLPFGVILHLDGIVVAEACME  
IQRYASALFFLDMMFNSSQYKSGGLFEELNDSASCVDVVGKFGVSVFICGEKFI LKHQNP  
DDKDLREMTTKAMSLTGECYKELGEFDLMRAAHMQLSSLKFMDNSNNPILDLRLRCPSS  
LDNLQMLSFQSSQMSARDNRFFLSMAESMEDLGLDGF LSTYIEGILVDNKHLL ETADMES  
LREKWFESNLKTQNNVNTTCGIFSNKNL GSTLSAPSEILSNTRSLNQGF FELLSGALNS  
FSNHDTVSSMRFLNQARSHAIHSLSNIAGEQLSTTRFIESIDKFRALKDIDNLVEVNFDF  
SRFDFDSVEFLDVSLRVRQITLTAFFSKHPEHPKILPLLKDHLWESCDAAVRRSRPHIAE  
SALSELRYLLRRSIENNI SHVDSFEEILRIRLEEAKIMECRGDFNSAIQKTKQLIRHLRD  
DERSSKFHKRLLTDAQILCGSWMTKYKTQQA KVILDSYLNPAANRAKAI FDEDKTKANAS  
RAARVSIKLGHVANLYDDLRLRIQSSEWKETDARLLRQRKQYLD SAECRHELMATLKRY  
RNSTSQSSKLRVVEANRQLAEME KIKKEFQEMSKEREGIKDLIPYLYNRALESFLLALAM  
AGTSSNDLSSHVSRMISLWFS SQNEIGDGEKTNGIMQDGLCRVPSFRFVVL TNQLFSRID  
YSEVESDQYFQDALQHLVFRMCRDHPYHCIAPLIALTNGEVDTKIYGAKSI IKRLDKCGV  
RYVRSIYESYSVLT SAYHDLAIASTKKFEEGSQRKQKIRFSEIFRSSTTKSLDRCLKRL  
SCAPSIITSPPI LRPKDYGDGKEDPIGGERIARFDSDFAITESGKNRPKIVMVCVSGRGG  
AFRQLVKGEDDIRQDAIMSQVFSYVNNLMKKRTNTSEDSTGSKSVNDALVIN  
>comp15741\_c0\_seq3; 2287 57 10740 LEN=11033; translated  
MAHPSPEYDAIFSLTAQLTNSNTSIPKRREAALKLEQRLSNYDIRERLAKEVSPGRSSDG  
ISLSARRCHALSALWSNALSRCIILTKDILNQSRACKTIDDIRLPDKILRAASQRDDAFD  
SNGLSILKLSKKSIRNALKYCI GVLNENEGNIPEGGEAKMIDMLAFICSKDEYIGCFKYAI  
DFQNALSEILHHMKKHMDQQKNDSFGRVISESACKAFCNFFGTCSRLGFEIHASLLSETL  
EIVADWCKMNTENRTLNSSTSHQHIFNALASMLLSHPADSIGPLKRCGRHILRSCQKAY  
RKANGLHKEALNRYLLSHLFVAQTAGKIQGLIDGDLGDLGSAALTERQLLFLIDLICIEDI

IKVFDKDTNISTMSRIKRQKLSNRRIWYPVDDRQQLQLELMARLLACAQRLYIAREGWDA  
LRPNPDMLEAQLKAHSRDENKAWTDVGSFETLEIPLNSAKSPWMNTVLRNLVSPKFNMS  
SSDCRDIETIDFPTSLVPDTKTFASSLLELLVKNHDTQQSPIPYLAIIGACTELFPAGEC  
WSSSATVKWHCFVPKEKAKDEVIWYHRSKISDLTFLLSILSKVLEDNGQPDSDPHAQYWI  
LLALTKLTETTAIMIQLSQNTPCHLYSLVMEWRMIWKTLLRPDLRYTSFVNSIEENSLGE  
IFVILLTEIISRKCTETVQKNTCSTGYRGSSFLYKYQRQIWEFMLKPA MFQRVE CRAHFE  
LISSISKVFGISNEQDVKGTGRSFRDLFRLSLDSTLEILTKITESTLQHF SVKDI LRAA  
ASCIVSLVTGNDPSLSQLSATDSRFYLTAPDSKNLHVQQKNKIMLSMEQQSDSETCLDIL  
WGNAEVVGQHPNLSFAFYGASLDLPRVVARKLRLDQLKEQSMRSRNQTFDFISESDSEDL  
RKIAFEDLNELVPCFEKKSTELKLSQTGAVKLILSLWITQTYLERDILAKIPRIISFFVN  
AILELSKCDSEPYEYLGIVTDLRQISR TLIEISARYPSEIDLTEQMVLVPVDECRSILSR  
SEILMNDDFLAYDESARNAREASLESDSGETHFEVSMINSPEGSHDGGNISENKKCDV  
HRPNEYNTNLRKRRKIYHFGVPPNGKCAGATRSVLLDKSKVIGSLLL SMAPSTSNCR LVC  
EAILGTSLDADLEIKNGNMDLRS AVT SISFLGTGEVLLNSCVRQLALNTNHSDELSPVMM  
MCQVIALMRKCVPEPSEL FMYGHNTCAQLLSEMPKLLQLTDEETKMIIDLIRGEEGMRG  
RPNLRARRAIAATLAFENGNDDFHQLFDSFFANSIVKIGFDSANFLVRR LASIAAGEAFR  
KLDEQRILEYVDNHIAPIFRGS SAQDIIEKFTN WYV ANGLSSTEEQDRSSLEARDSLEV  
ESDSIFAKAVLAGSTKNTETFQMV LHEILEIPVARPGLEFMCYRALEKIAFMRGYSNGQE  
LIDLESEGLLAIWLPKLDINSKESDIFPPSLTSPRSVWHIMMYGRYDFFYQSQFSCDP  
NDESIVFRKSSAMHFVSRHHSFIVPFTLMKRHDIIDNEHPNAIVDQLSTEPGFNIMLKN  
LTSTKIQD TDVVANLLHHIADIQAFSILLEHSDNYLNKEIGQNMIRILVQSVSRDVMES  
ETRKSVSLLIRRI LYIHGQAKSLRGIVPCSQSTYFRSITSLTKISSRLKRQSGDDFISVG  
TSVTELT IYAYENLVKSEHFNHQ RDAWSL FAL LGDFLTNQLEEGGEEVQLGFFLHV LNG  
IVLQSS LKSIRS QALALIHKTLKVSLQVTESELGSEVALLINEIVSVCFHIHEESQRNIL  
QMVHHRKRSRQITLRKSCGFQHFQSDWNKQTHQQISECQLEVLNAEGSATGVDHSCLVN  
TYDIIHWIIDSREQLRLDFYVFLGLCGTSEVNHSDLNVLGKIDERYTAQKLAQGLRTRCS  
DRSLHEYVSALQRRTPRSHFLLKERTFNSNSSLISEARANIDDRLVGAELSQIAIFLGET  
DLEEVEIPDLNFLYNYLCYACTASSSRKVRFESSRCIALLEPRAVIDAPDFNDRNLLPSG  
LCSDSFLTLTRAKSIDCLARCLKSPVKGVAMTSLNTLEAILLDVT SRKASGMISVQSRSL  
IKPFLSNERCVREHHDNVLSD EQVGLLMKRIGLVNVDNTEMWCWEKKLWTLDTISEFDYE  
TWICHVTCAIIVCCFGSDGKNSSSGSRMEYSEGCFFRNSQR IALLDHAFASDIFPSLILS  
LLLDEKKNPNRLNNLITQSFELLLSGISSQLKTVTTTKRRIKSKAISIVVDTLDVIRRF  
SQEEFLSLDHKPNRKKMRRKNGKKGNGHNDESEPFVWPQGLPFGVILHLDGIVVAEACME  
IQRYASALFFLD MFNSQY GKS GGLFEELNDSASCVDVVGKFGVSGV FICGEKFILKHQNP  
DDKDLREMTTKAMSLTGE CYKELGEFDLMRAAHMQLSS LKFM DNSN NPILDLDRLRCPSS  
LDNLQMLSFQSSQMSARDNRFFLSMAESMEDLGLDGF LSTYIEGILVDNKHLL ETADMES  
LREKWFESNLKTQNWNVTTTCGIFSNKNL GSTLSAPSEILSNTRSLNQGF FELLSGALNS  
FSNHDTVSSMRFLNQARSHAIHSLSN IAGEQLSTTRFIESIDKFRALKDIDNLVEVNFDF  
SRFDFDSVEFLDVSLRVRQITLTAFFSKHPEHPKILPLLKDHLWESCDAAVRRSRPHIAE  
SALSELRYLLRRSIENNI SHVDSFEEILRIRLEEAKIMECRGDFNSAIQKTKQLIRHLRD  
DERSSKFHKRLLTDAQILCGSWMTKYKTQQA KVILDSYLNPAANRAKAI FDEDKTKANAS  
RAARVSIKLGHVANLYDDLLLR IQSSEWKETDARLLRQRKQYLD SAECRHELMATLKRY  
RNSTSQSSKLR YVEANRQLAEME KIKKEFQEMSKEREGIKDLIPYYLNRALESFLLALAM  
AGTSSNDLSSHVSRMISLWFS SQNEIGDGEKTNGIMQDGLCRVP SFRFVVL TNQLFSRID  
YSEVESDQYFQDALQHLVFRMCRDHPYHC IAPLIALTNGEVDTKIYGAKSIKRLDKCGV  
RYVRSLSVESYVLT SAYHDLAIASTKKFEEGSQRRKQKIRFSEIFRSSTTKSLDRCLKRL  
SCAPSIITSPILRPGKDYGDGKEDPIGGERIARFDSDFAITESGKNRPKIVMCVGSRG  
AFRQLVKGEDDIRQDAIMSQVFSYVNNLMKKRTNTSEDSTGSKSVTRRTRHKLKMITYNI  
LPLSPSSGEVKPAGDTFWVLRNSRQFYETSQVLEWVEGTQPIITFLNDQFGRVGSYSRYF  
PDEWSGDQCRFTLQKCSKNTDEKRKVFDEICARYSPSFRFFFLERFGNCMESWHTAKMNF  
TRSVAVNSIVGHTLGI GRHLGNILIDQATGEVVHIDFGFVFEQGKLLPIPECIPFRLTR  
NIVDGMGPCGVEGLFVNVAEQTMLVLRKHDQELLAILSAVVADPMYKWSVNSSTARRRQA  
IEEKAGIHSTDERGDNSLDIRDSQSSTTKTMNKIKEKLQGYEDSTSGEQQGVGQVQVFLI  
NSARDPNLNCNLFPGWAPWD

>comp15741\_c0\_seq4; 2321 57 10670 LEN=10963; translated  
MAHPSPEYDAIFSLTAQLTNSNTSIPKRREAALKLEQRLSNYDIRERLAKEVSPGRSSDG  
ISLSARRCHALSALWNSALSRCIILTKDILNQSRACKTIDDIRLPDKILRAASQRDDAFD  
SNGLSILKLSKKSIRNALKYICIGVLENEGNIPEGGEAKMIDMLAFICSKDEYIGCFKYAI  
DFQNALSEILHHMKKHMDQKND SFGRVISESACKAFCNFFGTCSRLGFEI HASLLSETL  
EIVADWCKMNTENRTLNSSTSHQHIFNALASMLLSHPADSIGPLKRCGRHILRSCQKAY

RKANGHLKEALNRYLLSHLFVAQTAGKIQGLIDGDLGDLGSAALTERQLLFLIDLICIEDI  
IKVFDKDTNISTMSRIKRQKLSNRRIWYPVDDRQQLQLELMARLLACAQRLYIAREGWDA  
LRPNPDMLEAQLKAHSRDENKAWTDVGSFETLEIPLENSASPMMNTVLRNLVSPKFNMS  
SSDCRDIETIDFPTSLVPDTKTFASSLLELLLVKNHDTQQSPIPYLAIIGACTELFPAGEC  
WSSSATVKWHCFVPEKAKDEVIWYHRSKISDLTFLLSILSKVLEDNGQPDSDPHAQYWI  
LLALTKLTETTAIMIQLSQNTPCHLYSLVMEWRMIWKTLRDLRYTSFVNSIEENSLGE  
IFVILLTEIISRKCTETVQKNTCSTGYRGSSFLYKYQRQIWEFMLKPAMFQRVECRHFE  
LISSISKFVGISNEQDVKGTGRSFRDLFRLSLDSTLEILTKITESTLQHFVSKDILRAA  
ASCIVSLVTGNDPSLSQLSATDSRFYLTAPDSKNLHVQQKNKIMLSMEQQSDSETCLDIL  
WGNAEVVGQHPNLSFAFYGASLDLPRVVARKLRLDQLKEQSMRSRNQTFDFI SESEDLDL  
RKIAFEDLNELVPCFEKKSTELKLSQTAGVAKLILSLWITQTYLERDILAKIPRIISFFVN  
AILELSKCDSEPYEYLGIVTDLRQISRTLIEISARYPSEIDLTEQMVLVDECRSILSRY  
SEILMNDDFSLEYDESARNAREASLESDSGETHFEVSMINSPEGSHDGGNISENKKCDV  
HRPNEYNTNLRKRRKIYHFGVPPNGKACAGATRSVLLDKSKVIGSLLLSMAPSTSNCRVC  
EAILGTSLDADLEIKNGNMDLRSVTSISFLGTGEVLLNSCVRQLALNTNHSDELSPVMM  
MCQVIALMRKCVPEPSELFMYGHNTCAQLLSEMPKLLQLTDEETKMIIDLIRGEEGMRG  
RPNLRARRAIAATLAFENGNDDFHQLFDSFFANSIVKIGFDSANFLVRRLASIAAGEAFR  
KLDEQRILEYVDNHIAPIFRGSSAQDIEKFTNWWYVANGLSSTEEQDRSSLEARDSLEV  
ESDSIFAKAVLAGSTKNTETFQMVLEHILEIPVARPGLEFMCYRALEKIAFMRGYSNGQE  
LIDLESEGLLAIWLPKLDKINSKESDIFPPSLTSPRSVWHIMMYGRYDFFYQSQFSCDP  
NDESIVFRKSSAMHFVSRHHSFIVPFTLMKRHDIIDNEHPNAIVDQLSTEPGFNIMLKN  
LTSTKIQD TDVVANLLHHIADIQAFSILLEHSDNYLNKEIGQNMIRILVQSVSRDVMES  
ETRKSVSLLIRRIYIHGQAKSLRGIVPCSQSTYFRSITSLTKISSRLKRQSGDDFISVG  
TSVTELTIIYAYENLVKSEHFNHQDASLFWALLGDFLTNQLEEGGEEVQLGFFLHVNLG  
IVLQSSLSKIRSQUALIHKTLKVSLQVTESELGSEVALLINEIVSVCFHIHEESQRNIL  
QMVHHRKRSRQITLRKSCGFQHFQSDWNKQTHQQISECQLEVLNAEGSATGVDHSCLVN  
TYDIIHWIIDSREQLRLDFYVFLGLCGTSEVNHSDLNVLGKIDERYTAQKLAQGLRTRCS  
DRSLHEYVSALQRRTPRSHFLLKERTFNSSSLISEARANIDRDLVGAELSQIAIFLGET  
DLEEVEIPDLNFLYNYLCYACTASSSRKVRFESSRCIALLEPRAVIDAPDFNDRNLLPSG  
LCSDSFLTLRAKSIDCLARCLKSPVKGVAMTSLNTLEAILLDVTSRKASGMISVQSRSL  
IKPFLSNERCVREHHDNVLSDQVGLLМКRIGLVNVDNTEMWCWEKKLWTLDTISEFDYE  
TWICHVTCAIIVCCFGSDGKNSSSGSRMEYSEGCFRNSQRIALLDHAFASDIFPSLILS  
LLLDEKKNPNRLNLIQSFELLLSGISSQLKTVTTTKRKIKSKAISIVVDTLDVIRRF  
SQEEFLSLDHKPNRKKMRKNGKKGNGHNDESEPFVWPQGLPFGVILHLDGIVVAEACME  
IQRYASALFFLDMMFNQYQYKSGGLFEELNDSASCVDVVGKFGVSGVFCGEKFIKHKQNP  
DDKDLREMTTKAMSLTGEYKELGEFDLMRAAHMQLSSSLKFMDNSNPIILDRLRCPSS  
LDNLQMLSFQSSQMSARDNRFFLSMAESMEDLGLDGLFSTYIEGILVDNKHLLLETADMES  
LREKWFESNLKTQNNVTTTCGIFSNKNLGSTLSAPSEILSNTRSLNQGFELLSGALNS  
FSNHDTVSSMRFLNQARSHAIHSLSNIAGEQLSTTRFIESIDKFRALKDIDNLVEVNFDF  
SRFDFDSVEFLDVSRLVRQITLTAFFSKHPEHPKILPLLKDHLWESCDAAVRRSRPHIAE  
SALSELRYLLRSIENNIHVDSFEEILRIRLEEAKIMECRGDFNSAIQKTKQLIRHLRD  
DERSSKFHKRLLTDAQILCGSWMTKYKTQQAKVILDSYLNPAANRAKAI FDEDKTKANAS  
RAARVSIKLGHVANLYDDLLLRIQSSEWKETDARLLRQRKQYLD SAECRHELMATLKRY  
RNSTSQSSKLRVVEANRQLAEMEKIKKEFQEMSKEREGIKDLIPYYLNRALESFLLALAM  
AGTSSNDLSSHVSRMISLWFSQNEIGDGEKTNGIMQDGLCRVP SFRFVVLTNQLFSRID  
YSEVESDQYFQDALQHLVFRMCRDHPYHCIAPLIALTNGEVDTKIYGAKSIIKRLDKCGV  
RYVRLVESYSVLT SAYHDLAIASTKKFEEGSQRRKQKIRFSEIFRSSTTKSLDRCLKRL  
SCAPSIITSPILRPGKDYGDGKEDPIGGERIARFDSDFAITESGKNRPKIVMVCVSRGG  
AFRQLVKGEDDIRQDAIMSQVFSYVNNLMKKRTNTSEDSTGSKSVTRRTRHKLKMITYNI  
LPLSPSSGVLEWVEGTQPIITFLNDQFGRVGSRSRYFPDEWSGDQCRFTLQKCSKNTDEK  
RKVFDEICARYSPSFRFFFLERFGNCMESWHTAKMNFTRSVAVNSIVGHTLGI GDRHLGN  
ILIDQATGEVVHIDFGFVFEQKLLPIPECIPFRLTRNIVDGMGPCGVEGLFVNVAEQTM  
LVLRKHQJELLAILSAVVADPMYKWSVNSSTARRRQAI EEKAGIHSTDERGDNLSLDIRDS  
QSSTTKTMNKIKEKLQGYEDSTSGEQQGVQVQFLINSARDPNNLCNLFPGWAPWD  
>comp15742\_c2\_seq1; 1282 1 2918 LEN=2918; translated  
XGCSDELQSGFTKLTTESOLEHKVDALQIEKEELVAEYEGKVGLLAARLENEEKLLI  
SAEKRERELLEKLKLLSIERENELKRSDLRIEDLTAGLQYEEYEFSSMEMRLDILQEEYD  
SVKSSLDTAMEEANSRMEKKEIVNIIHEEEMKRLNSELRSQHTLFEEAESNLKQSIKSV  
QYKKDIEQLTNELHTTRSELSVQEKLNFFEDNGIDSTTLAELKKSIDSLKSENEEASTQ  
YWESIQELTTDLQSRNQELSSKQSAIDHMEEEIQCNEIKIQELELEIFQKDIAIGNLRAE

LTVQAKRLDCSDTENSKKLDI ISSLKSKI IDIETSADDRQSSCDALKKNVRDLEKAKEKM  
SIDSCSEIFRLVKRLAILDHTHSDVKDQRLKAMEIAVMQRRWQKQAKLNVESLQKKLEAM  
SKRAIQFENELKVVNVSEQQEGKNRFTIELSEKTKQLERQSIMITEMQAEISAMQLVAKNF  
EDSKEKEISALITENENLQSMLSSEKIANAQIVGEAYDVRIELELLDEKFNSVSVSTKEKS  
MRTCTAFARSLFQANAIITSLSVQLKNNNRMLTEAFLNSQYKLEKEEKLEALEESRSL  
QELEKNTTEELKSHLAKTEECVKKTQQSLGDAQQSESDLRTQFNEWKNCLQNTVREIQANI  
RNAPAKAANEEIGDNGLNRNEHYEGSAVDLPSIIGEINRLIDSNLSLERDLEAMKNDKLI  
TSELLEKSMRTVRVLHEDASELREKVEAKNRDIDFLTEELKSAESSLRLKDKLEWNEKD  
YQSHVVELQQQVLSTRAIFIADHFQMQLNERCVSNLHQSENAKANEILELQATNGKLHDK  
MERMALIVAEREHQCEELLRAMKMKEMTPLTDEGKGEEETTKKSERTEKARLLKNIEDLS  
VKLISIEESHQRQSEIMHKSTEEESLKKNVSKLRAEFVAKHLETNDLKKQIVLLNHSSKKKAK  
ESITEFKRIISNLX

>comp15742\_c2\_seq2; 316 1 919 LEN=1142; translated  
XTAALEKELQHVNDHCVRSDPPVIEGAKSDHVSSVKDAFFKQAAVLEDVKISEKMLQDLI  
KEVMNLASKSESELLELSSTLGTVDLFLNPSNLLASLDLAGMDSSSENYFAEVRSRLEDL  
AALAYTTSVELNDRQNRLIQWKAKRSESPSLPKTPPPSKQLKKIFFDVNDVESTCDVTPV  
VTDAAKEVRDKVAGARLLCCVLENNNKMEVASAFRKTCAAGIMTASSNAKETAAELAHE  
LHV TREKIMVLKRHMKGTRAGKQKPKLRRILERIDTNARHDDHIKMHSSNTIDIHTDGN  
DCSFGI

>comp15742\_c2\_seq3; 709 1 1976 LEN=2199; translated  
XRAEFVAKHLETNDLKKQIVLLNHSSKKKAKESITEFKRIISNLQADLDESKVALSRSQTH  
ASEVDEQMIFIMNERKQCEEKLESLLKNKDEELNMLGNKVIQTNAAIESMEIENASLKSE  
NIKKQKKLEDSLSQKSFEVEQLQERTLFLENSLKNSEKKEKINEKESARKSEARKYSNLQRE  
MDCLSTKLETLEKEKNALSETISIQQKQLHVKEEFNLEIANELTRLREKVGILEVESST  
KSKSLADMGSALSMRIRFDNLDEKNELDEKFGSTIVELRQCRELLEDKEKHLIASNAM  
REAIGRDFENLIHQLGEEKNTRLKEVGV LKNKNANLEATNLTLCESVEDARKKTAALEKE  
LQHVNDHCVRSDPPVIEGAKSDHVSSVKDAFFKQAAVLEDVKISEKMLQDLIKEVMNLAS  
KSESELLELSSTLGTVDLFLNPSNLLASLDLAGMDSSSENYFAEVRSRLEDLAALAYTTS  
VELNDRQNRLIQWKAKRSESPSLPKTPPPSKQLKKIFFDVNDVESTCDVTPVVTDAAKEV  
RDKVAGARLLCCVLENNNKMEVASAFRKTCAAGIMTASSNAKETAAELAHELHV TREKI  
MVLKRHMKGTRAGKQKPKLRRILERIDTNARHDDHIKMHSSNTIDIHTDGNDCSFGI

>comp15742\_c2\_seq6; 291 1 874 LEN=1097; translated  
XTAALEKELQHVNDHCVRSDPPVIEGAKSDHVSSVKDAFFKQAAVLEDVKISEKMLQDLI  
KEVMNLASKSESELLELSSTLGTVDLFLNPSNLLASLDLAGMDSSSENYFAEVRSRLEDL  
AALAYTTSVELNDRQNRLIQWKAKRSESPSLPKTHVESTCDVTAVVTDAAKEVRDKVAGA  
RLLCCVLENNNKMEVASAFRKTCAAGIMTASSNAKETAAELAHELHV TREKIMVLKRHM  
KGTRAGKQKPKLRRILERIDTNARHDDHIKMHSSNTIDIHTDGNDCSFGI

>comp15742\_c2\_seq8; 576 1 1826 LEN=2049; translated  
XVALSRSQTHASEVDEQMIFIMNERKQCEEKLESLLKNKDEELNMLGDKVIQTNAAIESM  
E IENASLKRDNKTKQKKLEDSLSQKSFEVEQLQERTLFLENSLKNSEKKEKINEKESARKSE  
ARKYSNLQREMDCLSTKLETLEKEKNALSETISIQQKQLHVKEEFNLEIANELTRLREK  
VSILEVESSTKSKSLADIGSALES MRIRFGNLTDEKNELDEKFGSTNVELRQCRELLEDK  
EKHLIASNAMREAIGRDFENLIHQLGEEKNTRLKEVGV LKNKNANLEATNLTLCESVEDA  
RKKTAALEKELQHVNDHCVRSDPPVIEGAKSDHVSSVKDAFFKQAAVLEDVKISEKMLQD  
LIKEVMNLASKSESELLELSSTLGTVDLFLNPSNLLASLDLAGMDSSSENYFAEVRSRLE  
DLAALAYTTSVELNDRQNRLIQWKAKRSESPSLPKTPPPSKQLKKIFFDVNDVESTCDVT  
PVVTDAAKEVRDKVAGARLLCCVLENNNKMEVASAFRKTCAAGIMTASSNAKETAAELA  
HELHV TREKIMVLKRHMKGTRAGKQKPKLRRILERIDTNARHDDHIKMHSSNTIDIHTD  
GNDCSFGI

>comp15742\_c2\_seq10; 684 1 1931 LEN=2154; translated  
XRAEFVAKHLETNDLKKQIVLLNHSSKKKAKESITEFKRIISNLQADLDESKVALSRSQTH  
ASEVDEQMIFIMNERKQCEEKLESLLKNKDEELNMLGNKVIQTNAAIESMEIENASLKSE  
NIKKQKKLEDSLSQKSFEVEQLQERTLFLENSLKNSEKKEKINEKESARKSEARKYSNLQRE  
MDCLSTKLETLEKEKNALSETISIQQKQLHVKEEFNLEIANELTRLREKVGILEVESST  
KSKSLADMGSALSMRIRFDNLDEKNELDEKFGSTIVELRQCRELLEDKEKHLIASNAM  
REAIGRDFENLIHQLGEEKNTRLKEVGV LKNKNANLEATNLTLCESVEDARKKTAALEKE  
LQHVNDHCVRSDPPVIEGAKSDHVSSVKDAFFKQAAVLEDVKISEKMLQDLIKEVMNLAS  
KSESELLELSSTLGTVDLFLNPSNLLASLDLAGMDSSSENYFAEVRSRLEDLAALAYTTS  
VELNDRQNRLIQWKAKRSESPSLPKTHVESTCDVTAVVTDAAKEVRDKVAGARLLCCVLE  
NNNKMEVASAFRKTCAAGIMTASSNAKETAAELAHELHV TREKIMVLKRHMKGTRAGKQ

KPKLRRILERIDTNARHHDDHIKMHSSNTIDIHTDGNDCSFGI  
>comp15742\_c2\_seq11; 551 1 1781 LEN=2004; translated  
XVALSRSQTHASEVDEQMI FIMNERKQCQEKLESLLKNKDEELNMLGDKVIQTNAAI ESM  
EIENASLKRDNNTKNQKLEDSLSQKSFEVEQLQERTLFL ENSLKNSEKKINEKESARKSE  
ARKYSNLQREMDCLSTKLETLEKEKNALSETIISIQQQLHVKEEFNLEIANELTRLEK  
VSILEVESSTKSKSLADIGSALES MRIRFGNLTDEKNELDEKFGSTNVELRQCRELLEDK  
EKHLIASNAMREAI GRDFENLIHQLGEEKNTRLKEVGV LKNKNANLEATNLTLCESVEDA  
RKKTAALEKELQHVNDHCVRSDPPVIEGAKSDHVSSVKDAFFKQAAVLEDVKI SEKMLQD  
LIKEVMNLASKSESELLELSSTLGTVDLFLNPSNLLASLDLAGMDSS ENYFAEVRSRLE  
DLAALAYTTSVELNDRQNRLIQWKAKRSESPSLPKTHVESTCDVTAVVTDAAKEVRDKVA  
GARLLCCVLENNKMEVASAFRKTCAAGIMTASSNAKETAAELAH ELHV TREKIMVLKR  
HMKGTRAGKQKPKLRRILERIDTNARHHDDHIKMHSSNTIDIHTDGNDCSFGI  
>comp15742\_c2\_seq12; 1404 1 3129 LEN=3129; translated  
XEESIESLSSKLELVKGELLSCKDELESIRASKEDAI AAGVLLRHDMNALVT SKKQLEIQ  
HNESVEAIVSELESKNNELSQGLTKLKTTESQLEHKVDALQIEKEELVAEYEGKVGLLAA  
RLENEEKKLISAEKRERELLEKLKLLSIERENELKRSDLR IEDLTAGLQY EYEEFFSSMEM  
RLDILQEEYDSVKSSLDTAMEEANS LRMEKKEIVNIHEEEMKRLNSELRSQHTLFEAAES  
NLKQSIEKSVQYKKDIEQLTNE LH TTRSELSVVQEKLNFFEDNGIDSTTLAELKKSIDSL  
KSENEEASTQYWESI QELT TDLQSRNQELSSKQSAIDHMEE EIQCNEIKIQELELEIFQK  
DIAIGNLRAELTVQAKRLDCSDTENS KKLDISSLSKSKIIDIETSADDRQSSCDALKKNV  
RDLEKAKEKMSIDSCSEIFRLVKRLAILDHTSDVKDQRLKAMEIAVMQRRWQKQAKLNV  
ESLQKKLEAMSKRAIQFENELKVN VSEQQEGKNRFTIELSEKTKQLERQSIMITEMQAEI  
SAMQLVAKNFEDSKEKEISALITENENLQSM LSSEKIANAQIVGEAYDVRIELELLDEKF  
NSV VSTKEKSMRTCTAFARSLFQANAIITSLSVQLKNNRMLTEAFLNSQKYKLEKEEKL  
EAL EESRSLSQELEKNTEELKSHLAKTEECVKTQQSLGDAQQSES DLRTQFNEWKNCLQ  
NTVREIQANIRNAPAKAANE EIGDNGLNRNEHYEGSAVDLPSIIGEINRLIDSNLSLERD  
LEAMKNDKLITSELLEKSMRTVRVLHEDASELREKVEAKNRDIDFLTEELKSAESSLRL  
KKDLEWNEKDYQSHVVELQQQVLSTRAIF IADHFQMQLNERCVSNLHQSENAKANEILEL  
QATNGKLHDKMERMALIVAEREHQCEELLRAMKMKEMT PLTDEGKGEEETT KKSERTEKA  
RLLKNIEDLSVKLISIEESHQRQSEIMHKSTEESLKKNVSKLRAEFVAKHLETNDLKKQIV  
LLNHSK K KAKESITEFKRIISNLX  
>comp15743\_c0\_seq1; 2775 245 11987 LEN=12403; translated  
MSQDDASRRDEINAF AAMANCDFDPNPTDDAKDTTGN SGTFFDFSAAVRAGNASNDIQKSA  
DPIDPDNMKKS EDSFLSQLREADASLEQG REVRSSSFHALDETD SNTNHGGQIDKQGFDF  
SLLRRSFAQAGQKVDNSGTFSRLTPSAGIGDRSQSSGSARHRNQNLEAAALADDEGDA  
QGGNGTNSNVDSQAGTFSSDTFRQSLPSNGKNSYNASRSNINNSNLLQFPCGAAMNPN  
NMMNNSNNPLFSGVGLTATNSQAANGSGTAAAATNAQNRANLQFGQFSPNKS PMHVQQVH  
LPRPLFFGPNLPPRVLREAKKIMDEALDKQRRQFE EKQDHNEGIPYTPRLGQLPPGVRNL  
VSAIRCYGFGLDLFPSQGE EETDGKKDSFSGNSSFSTSVFCPRWSEDRKRAPGTVP IPCT  
DDDTSSFFENESYNDTDFGNQSQPDTKNAFRGRDQGE PKLSTSRFGTVKTEDSLTTNST  
LQSSVGSRQRQDIDGSGGENNSLTVS IDTSSMSERDAFSAFARHGSDYSGFATTDNENSK  
DASTDSESEDSTKIKEGSIDVIESPTQPVRIIRNPSLGQRQQS FVDPESKMVRSSSEGTV  
DDSATQELSEQUALFTQVWHGGESPATLNRSNSNNGAGTFNFNDSFHDTGGGNGRKNYFDK  
NASGTFMNTIVSTGNDDSDDDSVVGSSEM KKKVGVNEHLNAALASLQDEQSPAEPCESDAI  
GEPAAGELAQVPLTEDGGRPLSNQELMNAHAPLFAIDDPPLPSESDLGNHETREEQQRSK  
EQRRIQSFIEKFCPHNVFGPLACP NPATGPDDNHSWNSMSTPLQRNHGLSPSSATHDNIG  
SSTSPIGYSVSSEDLASLYSSNGHGLTAKRVSQ LASAPKVHDPRTRYGWWNKVINKDNKP  
TNHSSAKGECTVDDDFHESTGDNEALKDIP IQLPPVEHSANACLVTPLYPSPETLHKQNR  
PLSELHPATSLAQUALPFLSDRPPSYRYLQVDTQSVAFPALGGEVEPLFCSMCIYHVETAP  
RSGDRIMSPSPDVQRCGKITETLNFDFVNNPQVEKRCNSSLYPYTNSTDNMNTQSNLTR  
CGVFP LASNLSVYNLYAIITVSKVISEGSDFE PYLRSKSKIKDEDIDIESLR SKAQKACD  
DHGKFMVPFAFGVAPLLQVFGADIPHVPSSRAVQIPLFRFAAGKGEKQIIDHIMVMLYPR  
ADHITSGIKPAPVTNGGTAMLVMRNF GYLGLHEVVNGKSSLAKQRLVDFTGEMQLRRNHD  
DENDGGKLRAGKALHDSLAAWQLQYKA EPTIDGGRSEQLHCSNTGKPNSSLYAQELAPVS  
LLTSPLGRPTGAPLTVPKSRSGHSSGEDI EPYFHTTFCNELLCHPRTLKDCQKGNIVVK  
VEMREIEWNPEYSVHLAHVPACGPV VHN SRRGPFLVQDAYTSCSARCFDPEFLDEFKLL  
PLLLGNSESKSLAILFTAYRLSFSSRKKWGRLLRRKWL SNKVDEITGDVVGE SNVVAGK  
ECQLIQ LACGFLRLEKRQSLIENGIHDVKISHIAKYPLEEFCNEQG ISSNTLVLSDFTVG  
KGDIAAGDES AFEDVESQGS DRYLVDTMSATSASDRETI LTEQFDDNRTRQQKRQAGMLL  
EVRISVQSSVHPQ NATLNEFLSQEPDVSIP LQAGGKDIKSFLRS GKDAIIRQFSLPCPLK

LSPPSEDI EYETNKL LVSTVDLAKPDMCSVADISLHLIRLCKQLWKVIVVGTGNHDIKWA  
DPSATLPLRVNAFATLLQLLGSSTLFLSKRGVTQLDGNKSKWDFMSLSRVVGLLFDEKEMF  
GSIHDEELSKEFQSLGPGKEEELQRNPKRRPKRRHFRSNFEFGNGSDGLSAFINENIPT  
DENTNLTQRTQISLLKKPSNLDETL DVPQSSALEIYDRPIGSDTPKIDTVSDFRNAMQT  
GNRENEYEDDIHEGQFSGNAAAAAWIIAFGGSSGGSNRRWMTAPGLSTIQEDTDDVDEHK  
TSGKKEKTKQGPLDALDSEIILTKKEANRTPKRPVKQFRVPKTSTNSSSKNDDELFD  
NYKGLVPLVGMQNLALSTGSNQLPIESQGRTEERTRKQSQTLPATDADMLKAATPFL  
DAIEKSLGLGSSFSNYPPEEEVRYGRHRKTVSHSSIDWSIPNDDLGNLSTEPKHDKK  
HSIQAGKIEEIDESMSTLSQEIKLSLKLPSFADRLASLGDSSNGRWFPPFTYEIIMQWAA  
VLI EQQSAVDSNQDDESNAEISECNEAIQDAASRTTGVIACAPVLFVVIKQSLGSRVT  
SLIRRVKKGYIGTPPLVILDDGMLANLEQLIAITDACLDSRNFDSEYETRQSCVDVND  
IVFFLRDMYAFLDPRCVYRLTMLYWSRLVAKDTRQIDRDSKIGLRCSHEI IKLQMNVA  
FVRFPLIKVNSPQMNSWASLWTLSPDISTVNFDDGVLHRYEKLGLPSLIGDTNNRDRFE  
LPRMRPHWLVEIIVDICFSGIEHSERI IQQRSASLLELFWSHAQKSLSEGYSPIVASMY  
VTFIEKALSKTSYLSHGFTAKGPKSQVRHDIILCLIFVLQSAPPGLLRALWRKLFTRSSG  
KGSFRKFGGISSVSMNSLDELKESETPPSTTETDDIEGPNIDYDMFSLNNTSLATVEYEG  
CDEHAEVDRYEGDGPLLFWPKFELMTRERDTIDIARQRLLSIVTTTSEEKDESNDDEYA  
TTSSRKWLADASMVLIRTVQQIVRELRFVLEPMQGSQSLFNPARRKAKANKSHRSPAT  
NFDSEPSETGCTKFSYTDTVIFVRGATSVYLNLSLVLRES DIAIVKTLNASVEI IKIFGK  
IFNEAVGETLQHWLRMITFHCGSRAEVRVPASDFAEILRSTWDCFGSFFRIRIPLLA  
QTEVMERIVATAVARYYRDQRKTGIKIDLFSNSCAEASLTPLRWTTDRLLHQSASQNVAF  
RSSLVRLAEKIKKLHRAIIAAHALSFENNSGSRHQNSDSTHDPGISSDVETLKRANRIS  
VIRVVNASASYSKQFLGLQMAASENTSLAHEALEDAFLDAADVFSPTLDPHRIAWLRK  
LAQFHATR SKNAEEATCHYMIYYTLNRSCRLSSTLWSSSPFLPWIDNLS DGIHLEGPAGE  
SDGSNCDLPSLDYGRQIDKTNSFRRIFYRNENSVRLNPGEGLEGGARKAAAFAGVSLTSEY  
TATPWITHREMEANMLEEAEAGYLFQKSGIIASSRYMWGLAAQYYAEKFMYGKLTHTVYE  
RLARTLVAQVPNIDNTLEQVVDVGIPLGRFYRVWFHGGAPDELIGAEFVYRTRTKISLSK  
FGTELRLDVLRSIIPENTPIHLVLDGRPEESAQTNP SGFIRMGGAPLEPVKVKVTPLRPV  
RNESRIRGLPEWFKLYIDSAFSGHNANENRKDASKGFRDKYLNHSR SKPTMYYSTSFK GK  
DVGYSGNHRHYQFESSTEGELVGADKFWFIQSKDRSRGSRDWLKGASDDFAEKTIRVTQ  
LQVRQAFPACISRQRVIDRDVYSQSPLEAAVDNSCLWCAVLFRTSIASNGSAVLGESNDP  
GIGIDAAKVVSECIHSSRVKEIGTVLLRNTNTHVREEDDDVLHYDRLSVDEVH KIQRLA  
RALVVFME LLHLLIARNRDLLELIQKRIPPRDRRPNPHEVYSAVPPSTHARDMSIGSQ  
HSIGRNSIRGPNEYPSGVPSSVSHQSMKRVPSRGEISLPNTRTPSRDRSRHSNVHQRL  
SAPFENTSSSADSVKPNHANEDYDQGTNLTISSQRDRD TSAIGIQRELQ LAFINTAKVL  
LPKIQGVMGSDTPRWLQCCQDNFYF SAYTYRQVKIPIGEELTFDDVETEKNRGNSPM SKY  
PTGDKPGSISGGFHRSDKSCSSQAPDSPNGSTGNSVVSRSVSDARSVTSSRSMRSHKERP  
MPRQGGVDRPLS

>comp15744\_c0\_seq1; 1410 204 4273 LEN=4273; translated  
MNSRYGRRAPSAMDASLKKAE TDSLPGIQLNDRQMKLYAARKAGKTGGIKDQNHKLEPP  
PDRNPPK KYFSSNPQEKKTITATPSPMQP YL GREPTGTADTVPMTFSEDSASNVSYSIR  
SANSFSSRNEKANSFYQRLEPHERKRYDDLGN TW RDSQSEASAASAVSAALS RASKASA  
ASAKTSKSSSSLGSMA RLQLNLQRSGQGGSSKSSSTAGSTFSTSGSTYSASRSKASASN  
SVKMSDSRSVASAVSKAPSAASSSLK KLPVAMPVATAVKKSKTPRKKEQSAAAESSLS  
TESRPTLTPIDTKSQHLEDQSGRKASGLGTQKEKSKFLRK TMMQWAKPSTTSTSSSLKST  
TSSSSGKSSRRLSFAPKKSII TEYRSPKSTASGSI SPKEMAIMRKAERNKSKVKSNAM  
SPTKNSRRKAGLIKLLN SSSSLN SSSRFQEDDDQRKEKQSTVEAITTINTRKLY  
DDSGKSVNEDMSLVTANETPK EPAKLES LRSTSH TSSGSSTPKHGEVDRRTPIVMEEDM  
DEGEGDEETIARNQAMRKKAKGRSSI FKSRI NNIGMAVMDDLI EENAELSSDEDEQEYE  
NEEEVEEIE NASDYQDPADVSLHPARSIKSNKYEETPRNINTVLEENKDFLNMVREGPLK  
QATYIPLGDDSNPTKSESYDEETEEYKAFTKTLRAELSGTHAKLYDSFQAMFCYGENENM  
PARPLSVYPGSLDLKTK EAISSMSKYLNTEHDVECLLGSQIVKDNDVRNFTFRHPQKTPR  
NTSSATGVSACDSEDDYGSIRQVPSTDSINAGADGSEYEVTLGQHRRKSESVASSNDSRY  
LPSSVSKMTLKQSGGVKSSIFKLPAAAVGGSGGTPY NKVKLKSRSVPDKNKTNNVTVP  
SWTKVRLRPVVKTDPKVEDSASTTDSSEAPEFHRI VLRKTP TNAGGTTKTFDLGIATAPS  
SLTDTSGTSKKPIDIEHAGAPDQPIKLTENHTPEEKLTPMSGTEGKPIEIKDNRKGGEDN  
PIKLAPSVGYEENPIKLVPSKGEESANPIQLAPSIDLDLSEGSIMIALAKEAGVGSVDI  
NVI IAMNGITKVQSI PGQESTKANVIWRLDRSEVKSALLDMSTFHVKIIVSSENDKNHKD  
LQFP TSAQC MR FANALHEMRNNSDDTSTD IKDKKATVGNDDAS IYVEQLSNDEQKVLDE  
FRQRKMKPEPISELNEKDFAKEMLSK KLTSSIDCDGSKPMSVVGATPSSPVSEVSTAT

SALALDKSKTVMKYQLMLKTKVPKEAVKHKMEQDGVDAIIAQVLGEEAPKPSVVSAPSG  
NTNLSPEDEKTASTYRKMLKMGIPPEAVAHKMKKDGV  
>comp15744\_c0\_seq2; 6108 1 11959 LEN=12159; translated  
XNQKIVSSVIDDSNSNDKTKTPAVASGPTLTVPPEQAAAQKYQKMLKMCIPKEAVEHKMKK  
DGVDAKIVAFVLGLPQKAPGSASIPSKIKNSSSSLTSDDEESTASMYRKMLKMNIPKEAVR  
QKMTMNGISDKIVA AVLGNKNAKNQIKKGFNKNGFHWNPIDDDVSIAGSVWSKAGSSV  
AALEIISKHVEEFQKKVDSTKAPKNTGGKGGKEMAKLVKLERAQNVAITLKAFKDCEEN  
GSYKELSQIIEFLDPFCKIKGDRALFMKDLLPKSDEVKAIKAYTGGNEFLVRAELWFQQI  
VHIKRIEQKVQVMRTMETFKMDAIVLGKSFQLLTDVCNQVMSDRLPDLDDMVRQIGNRM  
NKGRGDDAAGFKLDFLRLAQTGKSDRKTALDLVVLIFCTRNQREALLLSDDFPNIQEA  
SRIDFQDLSTDVKKLELSVSKCKQEFDNLKEHESSLEGKAPEGKVNTLNETRSESALGG  
GASFLDEIKSRRGSANQCTTPKSDHVGGLSLMEEIRARNGSPRGTRSPTVSEVHSAIHKS  
NEKVRKSLSPRASLLASFSEKSSGKEYSIDASIRRLEKFGVEANYVILPKLESDRAAVE  
ACKDLASFFCEKGGERETSKLLEILAGFAANIDHSVRKYDEQQRILARKEATLKKKKKKK  
MRMKCKKKKKEWRACEKWLKENPETSAPGESSAPSLSQSPSASPSSSTNPTISTFPPSMVP  
TVLSFEKERKSPNIDSIGKPSSSPSMVGGRDGFLESQSPTLQKIIIPNASASLTTKAAF  
QNTAPLIVEASYKVAVLEILKGFDILEDIDIVDVAATRADCQVSTKHCFKVDLTVKAAP  
GSSVDPDAIHSIKEAIANRDFATKIEHASGLTGVIISPSASSTSTAAFDANDGVTVEDV  
ETAYNDAIKTVLLDFNIMEDDVLVGVNAVEAECEGAEVLSNKKCFRVVTDITVSPTSEIDP  
ETVMKKIEKSIKDDFEKEVETASDLTGSSSISIPTEKLTSTAAVVDENHATDPSTVASA  
YKVAIDDLKDSNIDEDDFLVDIQA VAVDCGESLPGKKCYEVVSVISTFPTSDADPSTVL  
DIIETAVGGQTLADKVDALGLDDVIIISNAPSSSFITSASFGPKTIAGKDLTVDDVESGYK  
TAIMSILEGAGISVDDVTLDVDVERTCDAKESDKRCFGVETTITTSPPSSVDPAAIKL  
IEKLI TKEDFADTTETTGLVDTAISSVPSSTSVTIASFDPSTSKGTETA AHDVEVAYEKA  
IKSILSESGVMANDVVVDVVAIPVDCDSSAEKCFSVKSKITPSVSSDLDPEDVIDLLETA  
ITQGTFTDKIETGSNLENGIISNAPSSTSI TNASFNEETISGKPATVMDVVGAYEKAIED  
FLEKANI VNGVDVLEVDAIETTCDPALSTKKCFAVETIVTAASDFAVDPDSVINKLQIA  
IDHGFDAKKVEVGSGLAQAIISSAPSSSVSTAEFGHDTTGEAPNANDVEAAYKEAIGE  
ILDVANFVAEDVIVEVGAIEVDCAVNTTDTKCFKVETIVTAMPDSEVDTDAVITAITAI  
VQEDFTKEIEKLSDLTDAIISSTPSSSSISNVVVDNDLATEETIEEGYQVAIEDILDES  
GITPDNIFVEVEALETECTDTSTETKCFVTETTLTASPTSDVLSNVIQTIENVIADDMF  
QEKVEDVTNASGTAVSIPLETATSISNVALEEGSATTAEIKSAYEEAIKSIVDEEDIME  
NKVLVGI EVVEAECTTDLAAKCFATSTISATPSSDVNPTDIEKIEQEI AKGTFEEKV  
EKAPSVTDSIIISNAPSSVIVSTGVFDQLTTEGAIITTPADAEAYKEAIKSALEESSIVD  
DILVEVEAVEAECDNALSDKKCFDIISTITASPSSGIDIDATSEKMESVIVDGTFFENKVA  
EVSDLTNPSIAIASPISISITSAVFDENTATGTTTTADNVATAYKEAIDEVLNDESLSKD  
VVVQVQAVEANCESGIIAKKCFDVETSIIIGMPSSGVNSDSVIEMIEIAVAKGDFEEQLDE  
TTGLTNAIISNAPSSTSIITAEFEENITGGVATTANDVEAAYKTAIEGILEEENIASDDV  
WVEIEALEKGC ELASASTKKCFQIETT V TASPSTSVDT EEI IDHIRTAVTRGDFADQVET  
GSDLGALISNAPSLESITHAEFNETTELGA PTTSDDDVESAYEKVIQSILEETDIKADDV  
LVEVDVVGVD CDADMTAKKCFKVESLVTALPGSDIDTEAVMDTIATAVGKGF AEKVESL  
SDLTDAAVTSIEALSSTSSAILDDASATQANLEAGYQVAIADILDESNIPTDDGFVEIE  
VVAVDCDAKFLSKKCF SVETFTASPTSNVEPATAIEAIEMAIAQGNFSDKVEATSELVN  
TNP I ISVPLVSATSISNAFIDQDALASNDDIQSGFLEAIQDTL NESDLKENILVEVEVLE  
AECSTELNEKKCFSIKSTVTVAPSSGTD PETVMDKIEVAIAEGKLDVKIEASPGITGAGI  
SNAPSSTSLSSASFSDSATAEDVEAAYEVAITSTLLEENIDSGDVLIDVEAVQIDCDKNS  
SNIKCYVVESVITATPSSTIDPASTVEKIEKSIDEGDLAGLIETSSGLVDAVINSAPTST  
TIATASFQDDILAGSQDYVESVLEVAINDVLT EANI STDDVLEVEGLIETTCDSSETEKK  
CFNVESTV TASPSTGIDPKDVI EEVKAIDKGDIVNAIETSSSLTDANI SNAPSSTAVTT  
AAFQDQND EASAEDVKKAYEDVVENILTEANI STNDVLEVEVEIETTCKTHMLSDKKCFDA  
EVSVTAPPSTGVDPGSTIEKVKEAIVGGDFVDKIEDTSNLEGSIIISLPIQSSGSDSTAAV  
DKVTTTGQPVGADDVEEAYKEVIDSILDDSGISKDDVVI EVEAVKANCDAE LSSEKKCFD  
VEFVATGSSPTS SVDPDDVLKQVKEEILGGGF AEKMDKSDLEGAIISFPPQTS SSNSDA  
VVDTVTSTGKPVVAEDLEEAYKEVIESVLANNIDKNEVTIDVKAVEDDCSVDVSLEKKC  
FNVESVVTADPNSEVDTDEVIKDLEKVIDTGDVIVMDRDKDFEFVPSLPPVSNTFFKSDVA  
VDQVTATGKYTGAKDVEGAYKEAFETILE DAGIAADNVSVKFRAKESECDNLPTGKKCYT  
VDSAVAVTPERGQHQEDIDQKIKQIVRAVFDAML DGFADNADKKS DLEGVIVTLPLQTS  
SSNSEVVVDKITEIGEVTGEEDVEGAFEDA IKSVLDDNKISMDDVVVEVKAVEKECKDLP  
SDKKCFDVESVITGSSPTS VVDTNVIDEMRDAI LGGEFSEKVDEKSDLEGAIISLPLES  
SSFNSDAIVDQNTETGAPIEAGDMEEAFNEVIESILEDDGISVTDVVVDLKALEVDCDDS



LSDKKCFNVETTITADPTTGVNTDDVVKVEIAIAEGDFGVQVDDKTGLDGTNISLPEVP  
NGIPSASTMTNAAFVYNTAEVVEASYEVAIVDILEESNIMSEGVVLEVEAVEGECGANL  
SVKRCFEVGITVGPSSGIDPDIAMQEIIEKAISEGAFSEKIESSGVSGGFFSLGPLKGP  
SAISTSKLNVADENATSEVDKTAISGAIEDIIEEINIDADDVATDIKVVVEADCEGSAEGK  
CFTVEAVVTTLPGSGVNPNNVVEKLESAILQGDVDDVLMNTGLETATSLLASLDSNVSF  
DNPAATTDEVETGYDETIKAILEENGIADGVKVIDAIPDCLSGSDGSCFEVESNFTAV  
PGTGVDPRDVIKVEEAIKEGDFSDVLAQKPDLTGADVSVSSSPSGAPVPGTDAPSGAPT  
DTWAPTTFLPKCKVSRKSDLDAVVDVLTALDEGWIAATFNRRLENVRCVDCTGVEFVDCR  
DVECVARNSCANTSFKSTVDTFDPSSIEEEEQMNVHCIGDHSRSGDFTGIDAITCRGEDS  
CAQAIVKRSYDLECATDNSCRGLEFQ

>comp15744\_c0\_seq3; 1107 204 3570 LEN=3570; translated  
MNSRYGRRAPSAMDASLKAETDLSLPGIQLNDRQMKLYAARKAGKTGGIKDQNHKLEPP  
PDRNPPKKYFSSNPQEKKTITATPSPMQPQYLGREPTGTADTVPMTFSEDSASNVSYR  
SANSFSSRNEKANSFYQRLEPHERKRYDDLGNTRWRSQSEASAASAVSAALSRSKASAS  
ASAKTSKSSSSSLGSMARLRQLNLQSRGQGGGSSKSSTAGSTFSTSGSTYSASRSKASAS  
SVKMSSDRSVASAVSKAPSAASSSLKKKLPVAMPVATAVKKSKTPRKKEQSAAAESSLS  
TESRPTLTPIDTKSQHLEDQSGRKASGLGTQKEKSKFLRKTMMQWAKPSTTSTSSSLKST  
TSSSSGKSSRRLSFAPKKSIIITEYRSPKSTASGSIKEMAIMRKAERNKSKVKSNAM  
SPTKNSRRKAGKLIKLLNSSSSSLNSSRSFQEDDDQRKEKQSTVEAITTINTRKLY  
DDSGKSVNEDSMSTANETPKPAKLESLSRSTSHSTSSGSSTPKHGEVDRRTPIVMEEDM  
DEGEGDEETIARNQAMRKKAKRGRSSIFKSRINNIGMAVMDDLIENAEELSSDEDEQEYE  
NEEEVEEIEENASYQDPADVSLHPARSIKSNKYEETPRNINTVLEENKDFLNMREGPLK  
QATYIPGLDDSNPTKSESYDEETEYKAFTKTLRAELSGTHAKLYDSFQAMFCYGENENM  
PARPLSVYPGSLDLKTKEAISSMSKYLNTEHDVECLLGSQIVKDNDVRNFTFRHPQKTPR  
NTSSATGVSACDSEDDYGSIRQVPSTDSINAGADGSEYEVTLGQHRRKSESVASSNDSRY  
LPSSVSKMTLKQSGGVKSSSIFKLPAAVGGSGGTPYKVKLKSRSVPDKNKTNNVTVPS  
SWTKVRLRPVVKTDPKVEDSASTDSSSEAPEFHRIVLRKTPNAGGTTKTFDLGIATAPS  
SLTDTSGTSKKPIDIEHAGAPDQPIKLTENHTPEEKLTMPMSGTEGKPIEIKDNRKGGEDN  
PIKLAPSVGYEENPIKLVPSKGEESANPIQLAPSIDLDLSEGSIMIALAKEAGVGSVDI  
NVIAMNGITKVQSIIPGQESTKANVIWRLDRSEVKSALLDMSX

>comp15745\_c0\_seq1; 180 1 306 LEN=500; minus strand; translated  
XPDAVPAVAVXSDKMGGMNDNDNDNVEELERDITLTKTSLVAWVPTVGPVEWVPADV  
DMVRFDLINGLNGWCDPMDGWNMVLVCCVGNILFWRRGK

>comp15747\_c0\_seq1; 74 1 678 LEN=678; minus strand; translated  
MRVVRMCRDRYRTRNQMVSIQDVFEEDTIDSGGSGIGQTANESSVRIDGRNAQRGRSTLG  
RRFFALLPAGRAGTRINGTRSVVCHGCRCGSDCGLFCSVAALLCSKVEGAVLLQCAVVVR  
GGGRGRGRGVAVSTGTQKQVIEIRTNGPEDNRKSSKQTRVLYGRWSMVDGRKTRVDPVRF  
LHLGGVSSSVLFDSTRLDICVLYSIYCLKRIFRMVNVNEMDCIDDX

>comp15752\_c0\_seq1; 188 74 400 LEN=400; translated  
MKLCFISTLALQAVLFGTLAQTAAHGGGEESEFWGTFVVEEIDSFPSAAPSAPSPGSPGP  
SPGSPGSPGSPGSPGSPGSPGSPGSPGSPGSPGSPGSPGSPGSPGSPGSPGSPGSPGSPG

>comp15754\_c0\_seq1; 279 1 1099 LEN=1220; translated  
XTKRPTKRPTKRPTKRPTKRPTKRPTKRPTKRPTKRPTKRPTKRPTKRPTKRPTKRPTKRPT  
YSTLCALLTEFDLCADDALGDLTSTFTLFPVDSAFAGIDRAVSDGEILEILFLHVLPN  
VAETFDLSVCNKIYKTLDDGQSTETLCMESIDPAVPIYKFQKGAGNQGVEFELPLVSMTV  
DEASNGNILGVDKLILPPLGPIGDELCREGTEYITLCFYLETGTLSSSLSDLSGITLFP  
TDEAFQNTREPENLDSNNIETLLLTHVMPEVHLPPTLACGGIYPTLADDQTTETTCVDGSD  
IKRQMGNGNHPNRNRRLIEPVYAYGNVITVKDLILPSATETRGPPLSPTKSPAPTTI  
FTFRPQ

>comp15755\_c0\_seq1; 136 1 304 LEN=631; translated  
XFCMNSDQADFAEQVGASCSEKRGADQTEGLSDPNDPSCLLATLQGDDEEACKQTM DATNK  
PCEWCSLAGYGFCANVDQAQIADQAGATCDGVAPGISAATA

>comp15756\_c0\_seq1; 63 1 387 LEN=486; translated  
GRDDGRDETRLLSMIVDAIPNYGMPHEQYGEAIAAEKIGESLSLVEEHIQRHVQASRDLE  
RRPFLVTIARSTLDGFCPPGVVEGLQTSVLELLHRQICGSKCESFSERSGGASDCDRCL  
RLLRDYGEW

>comp15758\_c0\_seq1; 28 1 212 LEN=325; translated  
XQQQQQQHYSAQQHRPQSAQYYPGAAVSSSHTGHPAAGRGYGRGNPHYQVQRHQEQHY  
ALSSSTATRK

>comp15760\_c0\_seq1; 919 1 2536 LEN=2988; translated

XPTPPSPGPTPPPTPSPTLPPTLSPTEGECMIDSSLNCTAIMDNEQIACEDIPQEDKPVCECEECVRELKFKYSGLCSEGF AASGKCIDEGPNPFVAA YRIVDCEDATQVFASGEAQQGGDDVTIGAADGTCLPSCLDVTISVDPDGSATQTFEIDSECGKNGLSLTS DYGALESIGYSCSETDTHNCEQGVSYGLQVCNTGTTNEAIYQWFLTINKEDIDLLENI PPE DAMLSPGECFYDTYDVEVDRCNLLENCVNITASATNPVTGLPPNCPGKDEIKFGWDQPVTPPPTPQPSPFPSPAPSPEPTSSCIIDIALTGCPKYNSSLDNNCDGRPQVITFRYNGGGCSQSDNLQPRQKFCNDFNGGPPPLASGTENYITAFPTGGDDMYFSGPVPVDGKFTLNEDKTFDKLSADMTILIFESEGGDLLQETLVHLSCSQPLFLFDKFGANQVTEWIE TDGRIISDKQLDVPTGTIEVKLDTASDIVKPVRLLEMTVLTNTQPEPIDYTDEVAGMVLEPGATIELPGFGVDIELSERTRYTFFTTLIGETIDGTNCTNGFSFLECTIGFNLNPTFPTMVPTPSPTITPYPTLDPETTACDISAGITCTVLSLQGISCDQVKAPVGDSCPGDAELLVAYLKYDGLGDSIFLEVVC DKSTTYIDRTITSGETFTFRTRSNSCEAVSFLVYSSDPEIGGDLLENI IETGCPGPWTLGATIAEVFTLDAFIDTEDDGSTFRIYIEEVELQLDYVAFNKGGSPLDITDGSISDLYIGSETSLGGSVALDELPIRLDPRTQKVLQTNVETIQMTGRTGDVVTFSLALFGASANQFALPCEDETSVTVTL

>comp15761\_c0\_seq2; 220 1 524 LEN=875; translated  
AAVHQDSNATVATVTPAARAAIKKRKGGIANKTTSSSTEEFLGDRTGAGITTTTTTTTASS  
ATSRRGXIIMKKTNIKKNKTTTCMIFLAIMMHSNNATXVILGVS RVVDTAVTQSKTSSST  
TSSSRQHNNRPNPEKQGGGGLLVGRGCKKKKKEKKTDPGEADEAKERRNLVQRDY

>comp15764\_c0\_seq1; 382 125 982 LEN=1147; translated  
MCKPIHQTNLDIVSPLLSEYATGSSSSSSPPRRAVCRTVTFSETSDEMFLIPLVSEMSSD  
EIKNTWYTTRTKAIRSMVKVIKRMMAAETRGIGDSSADENETDDSELEPTRGLEKKT  
RGS IARHKNWCAGLWAVLDEQGRQREEQQTNPANIAELYRQNTAHCQVEANEIAAIDARI  
VARDTNNYSSSSSSNNNTNNSIAAQEGAQPQEPAPSPTSTTEDAISTAVRSISIGDNN  
EDGNDDERIPKSLPAPSTSVVQNPANTLAYIMANHKPRSRRL

>comp15765\_c0\_seq1; 439 71 1222 LEN=1337; translated  
MTPRILRLVLSTAIMRAVEGSTRHLMRKRNQEMIAVVTRPEDTRASKRRLRYSSPIDV  
TNDAELELLFFMEESSISMSMGPPGGGNDGHGDGDGDDSGDDNGNDNGDDNGDNGSA  
YNNNGFSVCSDTSEVQDVQIYCDSPGTFYYGSGKYRNSQNCTSGDKGKFLIDFYINDAE  
NININGQPVLDIKAEGSIGWYERNQQVLDNADLCSLSSLKSLDGSVCPAAGKYRIKSSFY  
WDEDSNEVGGYYPVFYPKLSVGIKSSYQNTYDYGGANTPYCSGTTFFTSWTNNVKA IY  
ADSVSNFFKSFGLMFTIAVMGIFIFVMFKRRPRTFQYAGTTSANNNETVEEISYGEPSF  
SGSEEFDFNMKSPRANQSFLDF

>comp15766\_c0\_seq1; 116 1 357 LEN=696; translated  
SSPSVSPSSTPLPGGPSAAPSVCVDDPDFLLDANENRNCEWARENPDRVDIRCAKVDS  
VTNVAVADACPLSCNPECEEVPTPTPKTSEPTISPETQCGEDDPDFLFQ NREGRNCEW

>comp15767\_c0\_seq1; 357 15 647 LEN=685; translated  
MHGGATPMHDSMSDEVWRPGAIDEETAQPESSGNEWGADTSNTFGSPNNEDSGWGSSQGG  
STWQPTTEKQEPTDDSNVAPASASLSVKREQPSSTMETHVGDSD ETAVWFMDRVCVQLK  
SDDRPAVIKEINPDKTAVVLEDNKTQIVRFNEVSRIQPKKDMVLVIGGADVGEVELV  
CIDGSDAILKDSNEEFKIVDFVHLAKIAGD

>comp15768\_c0\_seq1; 259 1 428 LEN=428; translated  
DGSEDDGSEDKDSEDDGSEDDGSEDDGSEDDGSEDDGSEDDGSEDDGSEDDGSEDDG  
DSSKGSDDGKGGKASKSRSLLEASEGDEEKSSAKE SKKDKSKKDKSPKKSKEVPEDES  
KDESKDESKDTEESASTIKEKSX

>comp15769\_c0\_seq1; 120 183 486 LEN=486; minus strand; translated  
MIGREVAFATPFICFKTTXFNKANLAPASVTAPVDDASAVVSSAAASSAAPNRNAMSAR  
LSFADFIEPDFMEPPLPLDLDDFIDPLIDPPLPLDLDDFIDP

>comp15770\_c0\_seq1; 325 160 1047 LEN=1695; translated  
MAVEILSRTRVGCANGGFYHRVQHASKSTGTD MIFGLFLPSCYSKNAGSATT PVLFWLSG  
LTCDDTNFANKAGSRAFHRAEKENIAIVMPDTS PRGDGVPNVDSYDMGIGAGFYVDATEE  
PYKKNFKMYSYVTKELPELLENEFNGLGGKGLKSITGHSMGGHGAL TIALKQQNQWVSVS  
AFAPICNPTKVPWGEKAFTAYLGGTEAGKAHDATCLLQEKSAFDEILVEQGSSEDFLEKQ  
LTTDKLSESANRVGQRITVNMREGFDHSYHFIAAFIEDHVVFHGT KLRKLEKAC

>comp15771\_c0\_seq1; 553 211 2136 LEN=2208; translated  
MFLPPEEPASVLKALSAKSETPVANSANNTSKGIEQAQNSTAETNTIAKGHQVIGPVSR  
RSLFKKNLYKDYSEKSFRLNLRARTSTSGTEVEECENLRTRNIVNRALAVMTKSLEDRDCL  
PQSQGEVKVDTESDTSKEFESSDNLSPSISENDNESNSDEEGSIRDPKSIGDGGTLTAQ  
TSFRKIAKRRKARGQSSFHHTKSSKEYLRKAQEA YQKLKISEQSADASTNTEKESNDVD  
YGYGDAVESQPKAAVNYGYGDPKSESSEGAVDVFGYGDPTKSQVQEPVDYGYEDPEAAQQH

LPRRGRARRRRNSVTKFSVQAASVVAAKAAAERILQLKPSLTSLARGRSKTPTKLRRQLD  
HQVEPANAAQPPQKECRVRRALPQRSSRNALDVFVGSYATKYSSKHQEVKEPKESQHKESP  
TLRRSIQITENPHLKLTSDFSPDPKPRSLFCKNSGTSKNLSLRFKAPLRTDSWLSHDTN  
TDDDDADSLASDMESLCTFRNNSFRDLASHSFNRNADLPVPPPPPPQASPLTQASPSLTP  
APSNKSRSLTSLDHLANFSTGRSGNTESKRRNSLVVTVSDGSGKASKDNVHNTTREKLIG  
DGTKFPILPFAGTTTTSNNTSISKSCMPAPVIRTPSFKGSQ  
>comp15772\_c0\_seq1; 290 137 754 LEN=932; translated  
MSGSAFYDIQIKLLMIGDSGVGKTCLLLRVANDSFSPFTITIGIDFKIKNIDIDGTKIK  
LQIWDTAGQERFRTITTSYFRGAQGILLVYDVTDRRSFESIRNWISQIQHADVHVNKIL  
VGNKCDMLDEKVVSTEEGEKLAKEFNMPFWECSAKNNINVDESFIGIGRQVGDRLVAEQ  
GGPSQKASNVQLNQKSGPGRKGC  
>comp15773\_c0\_seq1; 259 915 2069 LEN=2312; translated  
MGSEQNNSSTCTNHHHVHQDSETSPLLLASPSTTDNELREAPSRGMISAAKQKGRLLLL  
LVAFLYGSLSVSLRAVYARPGPPAPSILSATRGWMSVLCWPIAALQSPVPTNGSPSTEI  
YSKASFYWFAFELAVFNFGTQGLLNIGLVTTASARSAFFTQLSVIITPILTYCIGRVRGK  
QILVEKKVWFSCFVALLGLYLSSDKSGGSNSGNSNESTHPSVGNNALHVFSFGDWCCLS  
AFCWSYIYRLSDWGGRYDETQTMLIKNIFMAILYTLWTVASYFYANECSSSGDSGGSFC  
LWEGWRDPISMVLFYTAASSGALCDVLQQAQASIVPAAESNVLLSLEPVFSALLAMILL  
TELP SAHELIGGAYIIGASLLSSN  
>comp15775\_c0\_seq1; 515 179 2038 LEN=2609; translated  
MILHRPIILPAALSLLLLALRPSSTFAALKVGDICTEGYIMDFFCIDRGTLLDNPTVRT  
LEEPFLHTIHCLVDVNSCVSSPFEVLLDPPENSQATGDVYNRGWRLDEPSKEQAIELARS  
VGTCTTCLTNDSENHVKGFRAMKATILDLNENDPTLPPIIQVDTGNMQDTTAYVGS  
GQSACEAFFGMPDILDVDAAGSDGETVDEAPCASALEAGDEICTEGYVMDLFCIDRGTLF  
DNPEIVTLEDPGAHSIHCLVDVESCIASPFIEILLDPSTLPDSDGLYSRGWRFDDESSKQA  
VELAQSVGTCTTCPVTNTEDNSHVRGFRVATRAVILDLNENDASVPPTIQVIGTIADTTA  
YNSTGLETQSACQSFFGMQDIVDRSCASAGANGGGSLLDGIAASANLGSNTLRKHFH  
ATLMILGWGFLLPAGAITAKFFKHRPDGIWFKLHRGIQMFGLLLALIGWIIALVNFVFR  
DYGFNNYRHGICGMTVMILGLLQPLNAFLRPHPPSEGEAKSTTRRVWFVHKCSGWAAVF  
LAIPTIILGTLSLPILEDQTKFQIGYVVGCGGMLGLVAYMFYDKKVFVKENVMNGNGN  
QGAKNPKREQAQDQEVEA  
>comp15776\_c0\_seq1; 168 1 1051 LEN=1173; translated  
NLKTEIVSEELHKSQSKKLTAPAICIAKNEISKLIPIEKNTSTHESFALAGRNICR  
GNFMYKCIKLNRENRAERAAPESVDDGGDFGSIYRIFTDGGWGCMQDGVLLFAVHSIFSK  
DNAELPLLRSIGEECTDNSENRSNNTRVAAFQKDLPRRYRGPFRIHVPDSSCASAMVC  
SGWRDTCQNLINHIRSIDRREQLEFGHHIGTAPEYGSFLASQASLLMAKFCVSESRRPLS  
CLGLLASGSCGLWVVDATGAYRVRAHALGQGSDRMNEILRKVDWTQRDSNGVKDELRL  
LYSDSVHSDDENSSSEIKIPEGSCIEMAVIEKPTRKAPNTMKRLFASL  
>comp15778\_c0\_seq1; 411 87 842 LEN=1076; translated  
MSHQSNNDTADLRNSAIDEDSSATDFQYGEGRPGGVSKNASVRLSALPPRLRPSATMYDR  
NGDGALSKSDIALAIQDLNNTNQNRNLTKIISACFLILVLIAAIFGASIAAARMSQEV  
SVNSANGFAYVKGSEETEVMKTEKAIWEEGNVAELGNESSLNRLTEVVLGGDVRVQIKG  
SARVAANDNVLLVEGGTLTWTLADGLVDASGYAKDMLAAAFGEDAFGSSDSDGRRRLD  
SCGASWNGYGY  
>comp15779\_c0\_seq1; 152 1 310 LEN=652; translated  
XCRNVADDLDEETDPVATPVAAPVAAPTDSMMPTADVPDNEVTPAPTTSDNTDSENCPP  
ANQIVNGNPCSDFIPAGSQEASCFVGDTEQCNCQETPDPVW  
>comp15780\_c0\_seq1; 367 332 1237 LEN=1770; translated  
MFQIDLSSLAAFLSSSTTPEPAPQTFQSITKNFDFEEGKRKKNNTNMIPCSTVQTHSSMM  
TDDLTRSTTTSSSLSSSSAGRVLHSPQLQRRSGPIDGSKHLHHPNSPSIIRRTEKKT  
NTGKHKNKSKKKGQSLFQSKPSSLSSSPTKNHRHPLLEEVANTRAYPSKPRERKSKHE  
TNPSPPPSSLSSSMESLLKRRIRRCSLRRKNCIEIVSLLGLSNDIPYGFNDNNDNNTRSS  
NSCYSEEKELKFWAACPPPSTTNTCPKMAVDNNGGFSDLMI FVNNEHCVLEYTQDEFESF  
D  
>comp15781\_c0\_seq1; 383 38 658 LEN=930; translated  
MKIAALLLALASSASAFAPSAQNAATTALSAKLDDEMAGFTAPFKGFDPLGLADLGSEET  
LAWFRAAELKHSRVAMLATTGYLVQAAGHFHFGMLSKDVSFESLSSMKPFDAWDAVPEAG  
KEQIIGLIFLAEIISSEQPTHYTKGGDLPTVIFPPINFSGVDPETLTKQNRELNNGLA  
MIAIMSFVAEANVHGSVPALAGNPMF  
>comp15782\_c0\_seq1; 884 287 1735 LEN=1937; translated

MSEAEVDTGAPQEWKKYSEYFVEVDPDQDDKAKEIKLCSIARPHMRAFHCSWWGFFIAFF  
IWFIAIAPLLSEIRDDLGLTKQEIWTSIVGVAGTIFMRFILGPACDKYGARIPMVAVLCF  
ASIPALTGTVTKTATGLAILRFLFIGSAGGTVMCQYWSSRMFCKEVVGTANALCGWGNL  
GGGVTQLVMGSALFPLFKYFFDGDASKAWKWSIVPAVVAFTGVMIIYVSDDAPKGNYS  
ELKKHGQMAVSAASFRQGAVNFWNTWILFIQYACCFVELTMNNAALYFKDKFGLSTE  
SAAAIASIFGFMNLFARGLGGFMSDKGNQYLGMRGRIASQTICLIIEGVLVLVFAQTNSL  
GAAIAMVFFSLFVQAAEGTSYGIVPYVDPSTGAISGIVGAGGNTGAVCFGLGFRNLAY  
KKAFMIMGFTILGSTILSLGIIKIGHSGLVCGKDAPKEEAPTETLAVPVKENEATDDVNA  
EE

>comp15783\_c0\_seq1; 271 318 1478 LEN=1596; translated  
MILADPGASVRDDPAERSLLVPPSLPLHPSLEGDSSPTRPGLLRRAEALAEAEALATLA  
EARAAAXSTAMRAAATFLDVTVAASETTLGREVKLTPTTGGGASGGGGASTGALLDAETD  
TRYFLKSARNGYDMLRAEYEGVKAMSETSTIRVPKPIAFGRHEANDQAFALFEYLEFCGS  
GPGGQYELGVALAKMHKAGVSPNGEAPFGFPVDNTIGATFQPNLPWRENWADFWDEHRLG  
HMLRLTGNAGGLPSDKIEALRSKTRELLSPEARGGDPVVASIVHGDLDWGGNKGFCCKDPEA  
PGGIAPTIFDPACYYGREVDVAMTYVFGGFTGDFYDGYESVWPLSEGHEKRRTVYNLYH  
ILNHDVLFGGGYIRQARGMIDEILRS

>comp15784\_c0\_seq1; 271 1 1032 LEN=1230; translated  
XKEKKRQQQNKPPFSVYFHDDSPAGLPDKPNLTQPNPKQIKPNQAAQRSTAQHSRPNKTQ  
RSKMCGNSSKIKISPDPKPEKPDTRTRVAVYGVQLLFLFAWGNALSRLIIHKFWDRQYN  
IDRMHKILASDEAPVVIKTGIRSTIMSYFTTRYGWFLPHVAGSLIWWNLYFLQLVPSIRR  
KHKKFHRVLGRVLMVCALAQTIVSGVGLAYNNKSPVTKIVSYLLAVAVAYCLYAWYAWI  
RDIPKHKYWSLRLVGYLQTIALQRVFFAVLMVCWFTGGLGLYPLFDGEDKETLLQVFDSD  
FVSCFIVGMMATEWYLAGYYGWTEGPKVPVAVSGSGGGEKPKAA

>comp15785\_c0\_seq1; 339 148 1167 LEN=1228; translated  
MTKNKYKTALALLLAGISSAMQDIRFASPLQSLTIPDPEVLEKIPGSSSSNDGDGEP  
IAQHTMVTPRNRFNRFNFTQGLKAEKTAREELALGIKIDDDAFDASGKDWVNQAKSADERRR  
RTEGAFIESAHDAAVAKCEASTGKDAEGRPKNPKNKYQFVGLVDRSNKDKPISWHARPKPE  
NSKWSVRLVHVNKEAIVKDLFDRGKIDIFAKYTNTRGRKVQIEEKGEDGSTIMKSTNVP  
IVTTKYEARERSLKNLNFNSPKHFFTDSSGAYWRERRLRPGMYTDGDSVYESSYRYRDRNG  
MHKIGTLQQFLSSSSVDTNDKEKILKLNAAADVVLEL

>comp15786\_c0\_seq1; 305 1 1176 LEN=1865; translated  
VDTSSSVPVNDEETILSQEQVDHRTLSTLGFYNGPVDLDDSIDSSSSAPVNDKEINLSEK  
QVGHRTLLIRNDKGYHGEIDTGSQKLDHVFGSSEKQFNPCEEIGFVSKQYRTLSIENSS  
QGSLNEDDLKYKLRQRAENGSFPNSAGPCYNDWKREQEKEKSLRHQVEKQEQLQFYLSSD  
DTTNSKAKVDAIVQNNLSTIQELQVPPKTKKISRMLSRILQVRRTRKKSAGKRKDTGL  
DKFVAPPGNDFEGNVDDISEPTLLPLNTFGYLIDSSGREAAARQQTLLVHLESERQKQMS  
AIEKEREELGEHIRNSVLKERKLERQRFLSHTIDSITYRVASPGVGFSTNKPSSLASHVM  
KANHESKLDNLLNSSKPSKRGCMYSTTPIKYW

>comp15787\_c0\_seq1; 508 31 753 LEN=1088; translated  
MKTPEVSLKKQATQEKLAASAAAAAEEKAAADAVKFFVANSKKYDEEYEAQQLAIDN  
RRKAKADGGFFVPAEPKLALVIRIRGIIGVSPKAKKVMQLFRLRQLHNATFVKLNEATIR  
MLRLIEPYVTYGYPTRATVQKLVYKRGFGKINKQRIPIANNDVISQGLADSTGIECAADL  
INEIYTVGNPFKANNFLWPFKLSNPKGGFSSKTKLLHFMEGGEAGARGEIEINKLVAKMI

>comp15788\_c0\_seq1; 273 322 1192 LEN=1192; translated  
MLTQRTGSFFRFLVAALSASGGWNHGLDSAILVDAHKDHP IEPSSSDNASLNGRVDWCP  
GYFSGDGGACASILPSGASWGQCTYYESD TDNGTTRLETKVCLCTVDDPFWRVCSSTVTD  
PPLGSSTEPTAAPTRFFRFPKTPSPTTEPTATHSSHPSPAPSAPTHPPTRGPTQPSAAP  
SGTPTSFFVYNTTPTVNPTRATRWRGVVAYGNPPPEEHKPLNLCEGDCD TD DDCVDGLI  
CFHRIGHNHVPYCHGMRDETPSDYCTYPDDGAMEASATPSTAPSAAPSX

>comp15789\_c0\_seq1; 319 136 1164 LEN=2000; translated  
MRVKRQGNPIDWKKSAFHCAFLLLCFATVLNLRGFASLDFTYQLMEYASTEVVSPSIRSS  
NSNTAYKQSFGLLNDIPNEEWEKIRKVTQSIIYQNPENPLLRVHETEWLQNNLNPFD  
CNKKEQIGGQNL EDGVKFCVNPDRLTTHKTDEGDEEKGLVYSIGCAGNYVFEDGLSERL  
KNKCEIHVFDPAKWARRDPEKNIHYHAWGFVRS LDRQAKSRVWPAGVGGEFKTFQET  
IEALGHKNRTIDLKIDCEGCEYSTYKDWIGHDIRQILVEIHGVPTPDGPPGFWYSENMD  
VSEYYGEYQKNGFALYHSHYPYQKGVELGYIRLDQDFWRPLDA

>comp15790\_c0\_seq1; 319 467 1234 LEN=1304; translated  
MTAAAMGQVSDVSGVVFGLDLSRILRISPVQLTAMQKSAIVGRLRLWGAVAGVILGCT  
MGATALYITPEREATAAITMEKSGSSTPLSPLSENROEQMKDQLCRLQQVMNDVMTRDEK

WRNRCASCKLYVDESMGACIPKSPRTSPDDLGNYSYITATVDYFSRENNNIDGKKDSAVI  
QAATEKRVVVFANTIIYVPIADTNKNNTSTNSKSDVVLGVLKVDLENGSFYAGSEIQDAK  
RFARNLGFMMHMVM

>comp15791\_c0\_seq1; 313 335 1456 LEN=1671; translated  
MEMKQGNAGNDFEESTLIKRDWQRDLTSMFLGGSLFLASAFGGALPPASYAVEDMAPPS  
AGFEFEFAAKGGVMKTDPPQCFDQCGDQSKACFTNPSCLKGITCLGNCRGEQLCATQCFAR  
FGSEKLNLDWLSCTLEEKECVTTGVKQDTSFFYKDPPTKAMEKFTPADLEGKWKYKQGYN  
PKYDTPCQINTFTPRADGGLDNDILFRVPKPEGGTGSWQNNFVESMANSKGPPEGKASM  
TVEGKMFGLTFHEQWYVVLGKGESPDWRVYVAYIGDTQQGPYDGAFFVYTKKDTLTGPDGPA  
IQSAVNAVLEAGLDPKQMVITDNTCPTDATTAGVSKEDASKEKLEWKDVFELTEWFRPG  
TLKKQADFDPNKM

>comp15792\_c0\_seq1; 1022 340 3096 LEN=3126; translated  
MKQSVATLLVLGTVLQSSDSFVTHPNAGGKPLAIAQKTMAGTGLPTATTVARWASTMDE  
KAVDEKASEDETSDDSDVRLGDINKNEDINNFSTIADDDKESVGFGERVANSVASAA  
AMATAAVNAAVSMKTLLEAPDVTKSYIALDKTQQELDEEGLPLVYDKDVEAYWSKEKAL  
NKRWGYFVGKAVPFLTKLTLTFLIRDGKIEEKEIPALSRQARLDLQDLGPTFIKAGQMMSV  
RPDVLQSTLDELTKLQDSVEPFDTKVAVEQIEKELGGPLGQFFTSISEKPVAAAASLAQV  
YLATLNDGNDTKVAVKVRPSVLGTVSKDLYVLRRAAEVFGQLVERFAPQQRNTNYVALLN  
EWSIGFYTELDNFNEARNQQKLRDLLMEKKVKGVKVPKYNELCTRRILVSEWVEGKLS  
DASNEEINRVTPFAQEAFLTQLFEVGFHADPHPGNLILLDEPTEAGEELALIDCGLMAA  
INEEDRDFMISAVIHLANKDYASLVDDFVVKLILPEDTNRAAVIPLMDKALSPYVKGGA  
KKYEEELKKLYNMEDGNMQSQVGGFQAMTQDALTVLNDVPFSIPPYFAILGRAIVTLEGV  
ALTGNPEYGIILEAYPFIARKLLTRESSTVQSALQEVLYGNNDGTSGLKLSRLALLLN  
AAGAVATQDGAFFVDIDAVPEDGIDFQQGLKFMSEDAESLRTLLEPEVDSIVDILTRQI  
FRQGIQEAIVALTPPRPPAIPFLGDILPPSPKLEELPLPLLLPGAEGVRSPSFTVTTLKQ  
LTDVAVPKLNQKDELFAAGLADAAQEFFGEGMGDFVRGESVLSIKSIEILLSGLRSGVVG  
KTDLLSPEAVETVIDTLSNALTLAQSSAPELSMEKELGEAVDNLDPSEKERLDEIVNEV  
TKRSITRFLERLSSLESA

>comp15793\_c0\_seq1; 738 1 1363 LEN=1503; translated  
XHEKVRNDNKKKEKMSKPFDYKWDKIELSDDEDDVHPNIDRESWFRMKHRSRVEREEHE  
AKDKKRINSEMDKANQRLKMLERDMKIVKKAEDSDSDDDDLDDVEAIKIEEELKSNQ  
AQRQATLDEYEKNNKWNVDNMFVKEERTMVNKNAAKSNYTSSTGHAQSTVTGEVAKKEFE  
KARQEAEEKKESDSVKKASELSKPAAGPSKPPSATTATMPEKSSTDPTVEVSDPEFLYT  
YHEFTEKYADLCEKFMFIKSFEDSKEFLLKYGTIMLQEHAAANYLLLATLEDEMNGKHDEM  
KQRAKQSQIVTNIAEALQSWQTHPGNAILPFFNRLEQREFLEGFLSGVKVFVEKIEKRAI  
IKRKEIDAARAEQHGTRVKKEGVDLSEIPKEERLPGGLDPLEVIESLPQSMQDAFES  
RDTDQLRQALMEMDPKDAEYHMQRQCVDSGLWNAQ

>comp15794\_c0\_seq1; 145 1 222 LEN=222; translated  
XGSVGYGSGKYGYGPSYRNLEGEVDIEADFEADFEADVVDIEADVADEDRELNGGYGYSY  
GYGYYGNKGGKGGK

>comp15795\_c0\_seq1; 340 153 767 LEN=1337; translated  
MLRIATILPVAVASLTTAEFALSTHAEGIISSNSFQATRGLSIINGSGVREGRELSPEE  
AEEPKGSKSKAPKKGKDPKGEKGDGKSKSKKEKGAAGAKVQKVSCKGKSFQSEDILDW  
LLDDAEGNVTITTTETVTTETDTVVDDETETTSTEDPPAADDSSSTEQEEVPPESKSSGAV  
RSPSFASSVLFTHAATCVAAAQFL

>comp15796\_c0\_seq1; 142 113 373 LEN=373; translated  
MSRIEEQCTSQAPLDYLGVEKQRLLKDVSSPTPTISKDSNSGSTAEKNPCKPDAAKSNV  
ASIPATTEWISNWRFERVPSKTET

>comp15797\_c0\_seq1; 589 98 2104 LEN=2104; translated  
MTGNTPFQEAALANLVLADVVDIDHYRIHGGMAVETDYIIGVAFKGGKNGNDANFDPFT  
LSKTFSHFRSFAKELKLSISDGLVSSRLSKKKKEDSTTIKIGWYCETVYHLVESQKQYVVG  
KVNYKFMKSLAKKRAAIIAEILESTLNNFPTNPKENKLTMDVSHAIETFFRTDICIEIED  
REHSDDVKNYYLSEEIKVDSKHKHPEDKATVMSSISSASTPVVPLSRKPRSSLVTRKAD  
LDDLKKTGKEARFLDDDDRAESEPPVFDSPVVSQGSKIGELFKNHPVVFVVTMGLLYY  
LKRFGTVAVTVDLVMLLFWAAFCVGLNSARPINSSVAKSAGPSRSKRSKAGSDADGRK  
LLRQISRMSIRSGHCNDTGDDSDYDESDDDEEPIESPLPVFPKGAAGSHMNCWSEPF  
NDFYVRGPNYLKDRVKSVEGDFLWVVRGIDLFLTDTPPENAGRLSGIMGGKLRDVPFTII  
NFRLPWGVLLAYFTIPDMYIPFIKAGHDPEFDKSSLASTDDMTPGQRCAARYCQSSAQEK  
DELLKIVPSVVDGPVWVKSVMGKPAILGTMKPVSYVEKEEDGKAMYLEMDLDIVASSA  
ARGILSMVRTYTNVLTIDLGFVIQGNHEDELPEQMLAGTRLHGLDPLNSPALPVPRDQFL

SNLEPAAHD

>comp15798\_c0\_seq1; 282 77 445 LEN=832; translated  
MKLFIITFCLALLAATATALPQCTPNETDGYENCKHVYQVNGSGSDDLCEYCESKEDCLMVFP  
PWTPSDESEDASNEEDDDDDDDDDDDTVEQNI SAIEEAIVSAAPSASVVASAVVASSFLAAV  
MC

>comp15799\_c0\_seq1; 555 99 836 LEN=965; translated  
MVRFFSTAFFAAAAALSASASALELDPDNWQEMTQGKTVFLKIFYAPWCGHCKAMAADWAKV  
EADFAGHEVALVGSVDCTDDKNDQICEAYNIEGFPTLKWGDVNSLKEYPGMRSYDDLKEF  
ATKYVTKPVCVSVHLEACTDEEKAVIEAVDVGKSDEELETAKDIAEQAFEAEQKFD AEVE  
KIEKQFDALQKEFENTVEKIKAKTNFNIVEMIMNKRGLRVPRPEDFDPRFDMEDDDDDDD  
LKGEL

>comp15800\_c0\_seq1; 263 299 979 LEN=1271; translated  
MKLSVRMLATSLLVAKVWSADDASGTDILGELISGVNETINELMDTPLVSCAMDDYELWT  
DNQALEAAVDDYWGSEYHESAAAVMGSSEEHYTISSYSEATEAYKQACISAGGLWDALP  
DQTVDCYDEAGHTHTVTITTVNYGGCTPDSACRTVKGQWEALVVSFTELMLDEGLKCT  
LKEPADDVVDADVDADASTTSAAPSVGAFASASIAAGLAVAMVL

>comp15801\_c0\_seq1; 927 185 2077 LEN=2272; translated  
MKSDKVGNINNSKLTCKKDKNRAKTKRRGKRSNSSNRSTRSQKSTETVPASNVSSESEL  
TSETRITNGPSTFSLKVPGRLLTTSNSILERSENQPVLDLQVDTMAANNKNGHANSRS  
NSNHNTQQIALSPAETFDTVPLAHSPPSSVSSSRFSINSKSNKNNNRDSNRDYLPLVSL  
NFDSPRNGVGGKPNKINGNKVVIHQSLSPSSKSSSSSSPRSSMPLCVWVVKPILGILL  
IIMLLSQAASVFGWFFKFPKSLNDQVEALEDEIEALQGEINRLETQVDRLETENDRYEFLN  
NQLGIAVFDLEEVKNDLNGTVLDLEQTAWSLNSTKDALANEVIDLSLKNDEYKALNDELK  
LSVKKITSEASFFRTALDGLKEEHSILTNTTEALRDLVYNFTTTANETNVSLQAMLQETL  
EGFVTENDRLEALNTNLENGLLYLNTTLNQQAQTIAQEQSLEAIVALLGDKVEQQQRST  
LVQLEISYRQLLMGWDCDFKNVFFGGSSSSSNSNGVLLPLPDEITAYVDERVLSKLCLE  
ESDFLQYLLYTSSPNSSSISSDQFVRALVLYTEEAMKYYFPSSGIFPGANNNASDRDGLL  
LSHWIDA AFHCESLQSPFVFPNGISTRRS

>comp15802\_c0\_seq1; 344 142 1350 LEN=1350; translated  
MMKLSKAAFFLAFLKADTATAEPIKTIERIVGGVESEPGSFPYFVEMGGCGGSLVSPDTV  
LFAAHCGNWQGGQIIIGSYNAGTLDEGAQARFCDVWIPDPLYGTGGSDINNDALCKLDQ  
PVTVSKAFVTTLELNENNSVPSDGADLIVMGHGATSQGGPQASTLRQVTVPTVSNAACGNS  
YPGQITDAMLCAGFPQGGKQDSCQGDSSGPIVRRTSNADGTFVDTQVGVVSWGEGCALPDF  
PGVYARVSSRVGWIKETMCNTFNSVAPFCNNSPPPACDNAQNLIIRLTTDQYAQETSFTL  
TDTSNGEVIMSRYSINNIENEHQICLQPDRCYDWTVRDSFPDGFDPGYSYALVGGNTIA  
SGNGDFRESKTERVCTGSGNPVPAPTTPPTSTNFPVPPPTSTN

>comp15803\_c0\_seq1; 610 247 1698 LEN=1847; translated  
MTIEPTIFTKLFINNEFVDSGKTFDVVNPATEEVITQVQRGDKTDVDNAVKCAKAAFT  
KWRDVSGPARRDLILKYANLIEENQQFLAEVECKDNGKPVSIARDVDIAMAVKCLRYFAG  
WADKIQKTIPTVENTDSMAFTIHEPIGVVAGIIPWNFPLLMFVWKVAPILACGNTCIKS  
SEKTPLTALLMGKLAKDAGFPFVGLNVLSGYGPDCAALASHPDVDKVAFTGSSKVGHEI  
VKYSGSSNLKKSLELGGKSPLIICDDADLEQAADAHAHIGLFLNHGQCCASSRIFIDAK  
IHDKFVELCVERAKKIAIGTDEGKFGQPQVDKIQFEKILGYIESGKQEGAKCVLGGKRIG  
TKGYYLEPTIFTEVEDEM KIAKEEIFGPVQM LMKFN TIEEAIERANNTSYGLAAGVCSVN  
MSKAMGIAKRLKAGTVWINQYDDFDAAVPFGGYKESGWGRDKGEYALENYMEVKTISFPV  
NNY

>comp15804\_c0\_seq1; 300 1 628 LEN=758; translated  
XNNTSNYSTMKTAAILALIAGTASAF TTSNVNSSPRSATLSAAVDDMVGAVDLRGKEFFF  
DPLGLAETYSPLFPWFREAE LRHGRTAMLAVIGFIATDFVRIPGEMYSFDAIPKTINAHD  
ILIEQGPMIQLGMWVGLFDLIVTAPACAATMNGEREAGDFGWTKWAPKDQEA FDAKRASE  
LLNGRLAMCAVGGIATQSVLTGNGFPYLF

>comp15805\_c0\_seq1; 262 90 815 LEN=1165; translated  
MASHDLHFTVSQNGVEDPSALHDPSTMPATPGPQSGILGETLSQSAHPVVCIFHLLFKGL  
ALFFYIFGGWFGSGDGKGGSSGANFITVTVICILLAAADFVWVKNITGRLLVGLRWVWKVE  
GDKTSWIFESAENRQVNFSSVFWTVLYATPVVWSALMIGILKFNGLWLIIVVTALSLS  
SAANVYGYKCS TDQKAKFQMMQAQGAQAGAMTMVRSNMLGWLTGTSNTQQPQTQQTNTY  
V

>comp15806\_c0\_seq1; 168 1 170 LEN=539; translated  
XYGGPGAYQGG SAYNAGGGHPYGGGGHPQGSYPGGGAPDYQQGGGAPQQQQQQW

>comp15807\_c0\_seq1; 442 63 887 LEN=1113; translated

MSNTARSVATKFLDLTGKVAIVTGGGTGIGAGLAQGMAEAGAKVALVGRRADRLEETATN  
INEVVGEERAFSLPADVLKYDEHPDLILKAQSITGGGPPPTILLNAGINVRQKAENLTP  
EHWTVSLDLMLTAPFFLARAMSDAMKQEKYGRIMNIASPQSYLAFPDSPYAAAKSGNLG  
LARAMAEYFAPYHGFENVTVNNISPGYVKTELTEVSFADTERAGRLAQRTLIGRNSVPDD  
MVGTVVYLSSEASNYVTGQTIPVDGGFTALGLR

>comp15808\_c0\_seq1; 216 142 909 LEN=1082; translated  
MYDGPPTTQTPPTTHHYGYNCCGDFSQPGMDTPATVDPSPLNLLSSAASALSAQSTPVP  
PSANHRWDDRSPSPPIHTTSPFNGSSSPSSTRCPRTNRNTAILAVFPKLPSSSVAPFS  
MQPGMEIRVSHLPNIHLQPRSKSYTEMKPAASSKKRDYKYMRYSSLSMTRAAAHRYIAD  
LERASNYGLRAVGNSSSGYMNCTIYPEAEYGAYNAHAYTIPSPVPIRATKGNISPTLYPY  
NSTFEPHYQTYVQYG

>comp15809\_c0\_seq1; 474 108 1847 LEN=2313; translated  
MILSTSLLSFLLLATPASSSTLRSGSDTHQDRRLSFELIASYEPYTQVTDMAIDLDQA  
SMEDQLAIRDPTSWKRAEDIYTYGGNSKSVAMITLSSPLTSSLKKFTAASGKNADGAVVY  
GTVYDDYPNGATTIGIQYKTTDIQASYVECQVGGVLVKKTLKGCLAPSGSISLDGNVLEYT  
YNPETENVNKRTLKKLSSDAEQMFRCEHCPSPTFRKFFDYGGFFDYADKWVSAAFKGS  
TSLAKNGAFGLYGYVGRDEAIKKGTAIYLSIWMWVIKQMEDAFFECDSECTTDNCNNRAQ  
RAWDEAVASYTGSLEGVDGTGSGKLLYALADKRCKDFKTCGSLANSAEGTSHVNI EIRS  
FALGSRLLAQGECAEVKPYTERIVQLMSVPLIQGTLRYAYITSNNPSSGDKAEVEGATFA  
ASILPLVDACDEDAADI IYENMKTGQAKTADFAKVKAALSVYGCMDGVDGRNVGGIWNAD  
TGKYL TGAKPARGSYSRAASSVNVPLIVGCVAGGLVLGVILYLFASKCCNRSKLPPVEKE  
DPLGLSEDEQVADTSQPVVHEEDPLPSTNSEMEPVEIS

>comp15810\_c0\_seq1; 357 15 626 LEN=807; translated  
MMKVSILAALLSSAAAFAPAPASKATTALNGEKSPAMPFLPYPQNLKGYIGDDIGFDPLR  
ISDYFPM DYLR EAELKHSR ICMAAVTGYITVDLGYTIHPYGEVSSAAAHNV MVENGVMG  
NALVFIGLFEIVSYLGAEMLQGS GREPGDFGIGTWYLEGKSEDEVKIKYQEI MNGRLA  
MMAFGGI VTSVLFDTGFPYIGV

>comp15811\_c0\_seq1; 224 204 824 LEN=1010; translated  
MTVPCEACGKGCNELGKLCGKGCSEFGNLMCTPFMPYIAVTFMLNTPSVVYAIKSAQSYG  
CSYSLFRWL VVNAFAVSHMVAALYIVKLIQEPTAAETAPETATINATTGLRAAE EGQSA  
QGTNNNFYV LNSDEGNVPGGANSFKRIKYVLCYDKMAVYIVIFLTWVWVMGIGVSRRLF  
SGDANDDYECDEMLHF MNLAIAVGYVW

>comp15812\_c0\_seq1; 2275 87 6848 LEN=7094; translated  
MSDIGQEIQDQLHNTVSTLIKETSEERNSDYAGDRLPNRRPRAPGALRLFQVYEFETG  
QRAKGGGIIAPQKVLLEWIKKLVNSINKDRKPKSNSKAALDLYEAIKIATENGPINCRW  
DEDLVSQVIGIFETHPTFKSGKIENIETIIGRLKDPKEDIDITMDSNMNSLGLSLASG  
SVSPSDGSDSSAGISNIIQDIPACTRDANTFRDITLAEITSNNATS AVNEAMARI IYFF  
CVKGRHSDGPTSGTGVSSLLGSLIPGRGNDVSADGWNLKS VSDVLDQDYSSLDWKLVAQ  
NWDFPGFAMKDAEQFRILIDLRYSGARQQPPLSAFTSQWRNTSGQFSVIESIMSVPEVY  
MTPLNDEESADAATAAQGITGIDAQSLASMEILQRLFLSDINPLYRRVRDLLIRGLMIC  
PEVLLCSLVRQLHVANTPPQAGREALANAGLQIKTELMRELIPLFFRPNTHHRVQNA  
ALRRLYAI SPNTVTAACFEAWRSTVGDNSQMRVATLVHI INIARFLPSPADAVASLLNGN  
KDPEFSVAIAFVMADNDFLQKLPWLNEKLAQRNMSSVFAAAIVSYIAKTHSAASVRGSEP  
TPLVSLENIAIAMQSLQGLDSATLSQPFSADGNLIHGTTLDGDNVKA VLEACVTTHPNLR  
GRLTASNNSGSSGGGTSSGSSSSTGASDDVEEMATAYFQKIY TSEQSIGEVVEMLKRFKT  
SGNSKENEIFACMVHNLFD EYRFFSKYPEKELRITGILFGLTIEEQLVISITLGI ALRYV  
LEALRKPPSPPGGPTTSSGKMFQFGMFALEQFKGRLHEWPQYCSHIVQI PHLKEGYAGLV  
KEIENAMLESQNRAAGSTSGSQISSNLS PAGESDSDDKNNGRSGFARNSDDAAPAQSMV  
FAPNP SDGVS NLDISGSSVPVETKPRVAEFGPLLGRAVTDLADEEQVHESPPGNLLDRIQ  
FLINN LAPSNVESK SQELKDLLEPKYF SWLAHFLVVKRISTQANYHSLYLSFLDNLGEY  
KGLLEAILDSAYRNI GKLLRSPKITTSSERSYLKNLGIWLGQITLARNRPI LQVMLDCK  
ELLLQGYETGKLI AVAPFLAKTLEGAKNSFVFRPPNPWLMGLLG VFRSVYNVEGLKMN  
IKFEVEVLCKNLGTRLEDIPLKDRELAKRVAPVKEKNPDFNIKASAKASASNQTPATPDAKN  
ALNISLDSARTSGSSDDEATLIPNLAAVTVNQLS NELLQKSAQAGTLASLNTAALKRAV  
PIAVDRAIREIIQPVVERSVTIACITTK EIVTKDFAMESDENKMRKAGQLMVANLAGSLA  
LVTCREPLRTSVSTHLRQLLTPNSSGSEAKLTEQEONIIEQCVQVCATDNLELGCMLIEK  
AATEKAVRDVDEALAQQLN SRRKHREQTGQPFYDMSIFGNKQRYPAGLPEQLRPKAGGLR  
AEHFQLYDSFQKMPRQTPTPGMAPNVASSGLGPGRSAPSRVPESDMQPSAQKPQLGIEA  
LSALAAKLD SGVTALLTSAGPRAPEVKLQMLPPEHQIRQLLSAVNQILPNLNANGEVVRP  
LIQSEQDAVLQFSQGIFKRLYELSLGEPLRLEALVALLEKINVSCPKLGKDMGTWATYAP

TNTEAQRRLHRTVLLLLLVRSRLLAVIELDQFLAARADNGRNPVWVEFALLFIRTAFMERI  
SLPNDPKVIDLMTRIADGRSLAGQNVIAQYKKPILRMLLEMRGLSSVASSQSDRATPPT  
TGSSSSLSVDSLRFSTASGKVAEATEAFAQKDPNARQQVTQLLENWIRVNNEAAGNDKI  
NGQFLQYLQGFVGVKVEEHTERFLRLASLIVVDAVQKSGVSGENGKSVLNYAVADIYCKL  
LVLMFKHLNSGSNPEQIKVQRLAMLNKILGCTVRTMMWDVEKTKGSKGQQWDQRPWYRIF  
MNLVIDINKPDEPEPIRQGVLSVFAATFHVSQPLVVPGFSSWFELVSHRHFLPNMMLI  
ENQQGWDTIHQLLIDYLLFLEPHIKIGEMTPPVKKLYEGTLRVFLVLLHDFPSFLAGYHL  
SFCNVIPHNCIQLRNMILSATPKGMNPPDPFTP NLKIDMLSEISQSPIILSNVLGPIDSF  
RGHLDAFLKEGQRRDILEAFPLLLKKDNSNGIDAPKVNSLVLYVGIHALARQSSQISLSR  
SPEMEVLQKLMDFDDKGRYVCLNAIANQLRYPSSHTHYFSCVMLYLFSESKNVAVKEQVT  
RVLLERLILHRPHPWGLLVTFIELIKNQEKYQFW

>comp15813\_c0\_seq1; 120 242 922 LEN=1517; translated  
MTSMDREDVAIRALPGNNRCIDCDRIKPQWASVKLGILVCLDCSGVHRSLGTHVSFVRS  
VKMDSWSPDQIALMNAGGGNDACKAFLEDKGINMEAKLMANPTEAAAAAIRKDYDSPAQQL  
YQKVLRARVDGEPTELAEPVVTLQASGSGDNTTSTKTSGGGAVGQPPVKIMEGFGSSP  
HPSEQKRRRPKISKKIIAGIGAAAIGAIATVGLFRKRSSRKLKSGK

>comp15814\_c0\_seq1; 401 209 1519 LEN=1585; translated  
MISAANRSSRCRKNNSQVGRKFRPFELCNKNPNKHRGNTVVQPEPTTSSSPVAFLPSSI  
ASSVGPASLVGGTAAIYTSLLQHPSSTLNQLSFVLMMLVLAIQYAVQPRLSRKYISP KIKK  
QTVALVEEVTKTGFAAAIFFSKPSAEIQNAFKGWSLSSSLACAGLPAVLALQGVLYVVS  
YQHLDVTFNGLTQTKTLSAAFCCWLIIGKQPSPQLQMVVALGILFGSALVFQGYIRVETFW  
KKNPQSSRTNDPATIVAEMKTLEGTSPPTASAKPKGTSVSKKNDDWWWRGVVPCLGAAF  
LSGLAGAFSQKGLQVTGFRGRDPFLYTMVEVSFFSAITLLINIFRSDAFVDLEWQKQKTYW  
NWETFIPIFMKATSGVITLVHXYAGSVSKGFALMFGVLVLSNMIQLRTNRESLQSHQVLG  
TMMIMLSTWLHFTNPG

>comp15815\_c0\_seq1; 742 1 1910 LEN=1910; translated  
XEDEELQLVLEDTLQSTLNGLLDEGCNDEFRAVENVQLVLTGEESENPDRNRPDNSFFDP  
NNAFYQRTWIPPIISRIARTSRNADFLDNTLTSSENVTYNDDIFHDEDEEEETDSPTFS  
PFDPTNEKRETDSPTFSPFDPTATTSDEAVASDATVLFVSGVCSGCCDDNFLTGLTNDVV  
RRLKATVGEKISSSSSKAHKKSIPSPERFLQERQGLPKSDCFPIDAKENSGQIEATVVA  
ESYQESLEEEVAVDVEILGEVEVVTCSMITEFRTTATFAIDGDVPDASIGELASSLQS  
TYNDLNALNCDPLSRQITFVDVNVKVNIVRGRKQPQTRQRQKSLHRRRLQQAEDDESS  
CDPTTVDTVETVIEFVVEGTCLGCDSTLFDGSRRRRRRARQLEPEHLRSIFSSYKLSAY  
HAPRNGIRKHRPRRRLQGEICVCEGDTVADRPTFDEFFAVFADDIVTVPVAVCGIFDVE  
VEISASKELEQPETFQDILELRSPATAPVLPPIILGSKEDITVVDEVDRDNELKDVVDEE  
VDINDGELDIILEEDIVIANETEAPTNPPTSLQINATAPPTNPPTNPPIIDAPPAPAPTNP  
PTTPTNATTSSSIAPSIAPSIALSTAPSLAPTGVPTX

>comp15816\_c0\_seq1; 368 78 600 LEN=600; translated  
MKSMIAATLVASAAAFAPAQTGRSSTAIDAKAFSDDIGAMAPLGMFDPLGLIEDGNQEK  
DLLREYELTHGRVSM LAVVGYLVTAAGIRFPGAQDVPAGLKAFDYLLASKDQONILLQML  
AFFAVATIVNRDAEWLDVEAEHVG DYRNGVLDGFWDKFDDATK LKKRTIELNNGX

>comp15817\_c0\_seq1; 1200 260 3166 LEN=3262; translated  
MRFQQFSSWLLLLAAAASTTAFAPRSVLSTSAAKVNSTTCSSNNTSNGINSNQSCTPVTAL  
NMSTDTAVAASKPVEIFRKYKPLDIVVEKINMDFDIRDGKTIVKSELFLAKNP KLEWD  
PDTTHDLVLDGDETSVTLLEVTLTGRTLRGEGEDYTLAPGSMTLINPPPGSVLKTTVSIVP  
EDNTQLSGLYQSGPMYCTQCEAMGFRRITYYPDRPDNMAVFERIRLEADKESYPVLLANG  
NLVEEGPAEEDDSRHFVAVWTDYPYKPSYLFCCVAGNLGKITDSYTTNPTGRTVELNIYSD  
PKDAHKLSYAMESLKNMKNWDEDKYGLYDLLYNIVAVDSFNMGAMENKGLNVFNTAYV  
LADPSTATD TDYERVEGVIGHEYFHNWGTGRVTCRDWFQTLTKEGLTVFRDQEFSGDMNS  
AAVKRIEAVSSLRASQFSQDAGPMQHP IRPDSYI SMDNFYTATVYNKGAEI IRMYHTLLG  
EDGFRKGM DLYFERHGDVAVTCDDFLSAMSANDGFDLEQFALWYSTPGTPVVSYEHSYD  
DATKTFSLTSLQSTQSKDGPMHIPI SVGLLDKATGEEVLETTVLNLK KDTQTFEFPNIEG  
EVFPSMLRRFSAPIKLI PANGASVDEELLAFLAANDTDGFNKWDSGQALSRLVVFQVMEK  
GADDALGEGSDT WASVKEAFARTISDTESSDLSILAYALTLPT EATLQEFIPDGEDVDPL  
AIHSARGAVKKALAREFEGALRERYDAITAETKDGAFAVDAEAI GRRKLRNVCLEYLCGI  
RSTPEEQASAADLAF AHYEAATCMTDKVSALNALASMDGAGAESRDTIVQRFYDEADGDA  
LVLDKWF AIQAMADLPDILERVQALKEHPDFTLKNPNRCRSLVGGFVANAAGFHASSGTG  
YKVFREILEELDPINPQISGR LSSALITWKKYDSERGGKMKSELKKLSELTPISDDLFEI  
VQRGLKEE

>comp15818\_c0\_seq1; 224 1 583 LEN=1142; translated



XNNNNNNNNNNNAAGAITGNGNYGTLANRNSPVKCPICPNQWFQNNRITTAGTAKTCGALQ  
ESVQDVPDQNAHTATWCGQTRIEALTGGCCVQPWQQYVSKINGPCDLCGSAGIKPSMIG  
GEAVDTKYIGAHECSSLSAALQSGVVSQDTCTLIKTGSDVVSKCCNAYAIQGRSASVPEK  
EPRAAGFLRGAAGN

>comp15819\_c0\_seq1; 730 1 1597 LEN=1656; translated  
XDHERETGDTLKLLEFESHHTQYFNSETIKMAHVEAPERKHLDP LAVVKDYAAVPRLEYR  
TIGGVNGPLVILDNVKLPKYNEIVNLTLRDGSKRSGQVLEVSGSRVAVVQVFEGTSDIDNR  
KTKCEFTGEILKMGVSEEMLRSGFNGSGKVIDHAPKVLPAQAYLDINGMPINPSSRDYPKA  
MIQTGISAIDVMNSVARGQKIPIFSAAGLPHNEVAAQIARQASLVKQKDTMDTHEENFAI  
VFGAMGVNMETARFFRSDFEESGAMQRTSLFLNLANPTIERIITPRLALTTAEYLLAYER  
DLHVLTLITDMSSYADALREVSAAAREEVPGRRGYPGYMYTDLSTIYERAGRIVGRNGSIT  
QLPILTMPNDITHPIPDLTGYITEGQIYLDRQLDTKGIFFPINVLP SLSRLMKS AIGEG  
MTRDDHGAVSNQLYASYAMGKDVMMKAVVGEEALSMEDHLYLSFLERFEGKFI SQGPYE  
ARTIFESLDLAW SILRAFPKELLKKIPKKTLDKYYARRREAME DMNKADGSN

>comp15820\_c0\_seq1; 450 72 1553 LEN=1742; translated  
MRYSTSSGTTIAMNILLAWLVMASNPVAKAEPTRIALHKRSNDELVSAHLAREREARR  
RGGNGRLRGLSGQAGASVAIKDYENAQYFGVVELGSPQSFVVIYDTGSSDLWVPGVGC  
HCGIPFGPAKSKYDASASATYEDGGGEAFAILYGSGSVRGAYARDKVSMEAGSVVVVE  
NQDFGRVSDAGGLGLLYGLGRFDGILGLGFSSLSVGLKTTVFENAIRQHAVDQPVFASF  
GREDEGEQELTLGGYDASKFEGDDLAFVDLEEATYQIVLDSVRAGENYDKTTAADGGPV  
TAIVDSGTSFLVAPKAEADALARAVGARPSLAPGEYTI GCDRVGEMPDLEFGIGGKTYTI  
PGPAAVIESGGTCLLALLGRYANPLGPQWILGDVFMREYYTVFDYLGRKVG FARAVQSPP  
GGGGEETAGGDADHDHEHDDNAVARTALGGMRDGHGCLVAAGYAWCVSPRGCYRPWETPC  
GDRASRTDGGKVD

>comp15821\_c0\_seq1; 292 159 1214 LEN=1214; translated  
MKSTLSLLLLLALLFVATISVSHAESVCPADVFVAKREATNLRRKLDISFMLPPQPDED  
HLNHRLPIEVIEQKGEYVVFHVHNSTWYAGEHESQRDTEGNVFPEDIFTSYSGSPFLSEH  
CIIVERLAPLAPNSVHNATCNDASGGGKIAIIRTYARFSGTPASSGSMVMPKCCHDPTPD  
NTDLVVEYIFEVFCPTCDSPEMMDTDTQKLPDVTAAAYLLVEDQEHLDTIHGDEGSDEL  
GDIYNSQGYTDVEVDTS DRGWIDEIVLPRSV PDRSMFTLRVNSPNSV VVHDY PNNWSAEV  
EPNTELSVVEHHGAWVLPPRHVNTINAPFPQTAGGPPFPQGGMPPGGPMAG

>comp15822\_c0\_seq1; 560 344 2034 LEN=2605; translated  
MAIAPREAIGATAASKQTI RSTINNGXGIAVRLRASFWLMGLLNNAGYTIMIAAAKNIS  
EGGVALVFLANILPALGIKATAPYWF EKVS YERRLFAS TASMVASFSLVASSSTLQWQLV  
GVAFSSQLQSGLGEASLLALAGRIDGAATDSACDGDGRVND CDGDFVDEQNDNSGREQD  
GAAEKGVCLNGFSSGTGFAGVFGFFWKWFNNRLGLSLSNTLWLAIILPVAYLSTYRYVE  
YLQKEQWAMKMATGTGLIKRRLQKQESLDSQQRIETE QGYRDRIDDKESMGGGKNTSP  
DSDRFDSKTDLVGDSDSSPYGTGDDSYGESDDGLGHSGFNALDS DGNESRQPTSKLH  
VSAMDARQRFCLVLGLWPMVPLFTVYVAEYTLQSGTWT TIGFPVTSVESRDTFFEYSNW  
MYQAGVVFVSRSSGSFFLAPMVLLWMPFLOVLNVGIYWFIAAHQQDHYSEDGDDSSFAFV  
YSPVFLYPTAFYTG LGGAVYIHGYLRICRDLPLERREFALSATSLAECLGIVVADGLGL  
LVQACLYRINGLDGAVTSCPVRV

>comp15824\_c0\_seq1; 400 73 1047 LEN=1450; translated  
MDYDMDIDSTMSSITDKVSESQVETFRSFTANASISDLIIGLAFSAIILVCGVHMSQAYS  
RTAAEAERHRIAQIAAAEKKIKDAESNRVKIAKTIESCAIRLTNMTTSSL SLSLSRHK  
IDWDNDNTKNRTLPTGSSDKDEEGQSGSFTTKTICLEDNEETDS DIEQPCEGCNYENEMI  
TYNDSIECESETFATVDENHQVQQASSLPSTNTIISSTLMDAVTNNPCAICLENFRPGDV  
VICCANSISGKKPHVFHQACSLDYIVSHNDGIKAPCPCKTSFLPTDSEQKKILKHCQPS  
VLMIPHLENQEDFDMEDNGVSNTE

>comp15825\_c0\_seq1; 585 43 2004 LEN=2475; translated  
MTRI IKRSRSTTALVVFLCAGLLAVGGFQLDQPRLQRHRIRGPKTAVADGQNPTRVVT  
PTTSSNTSLRAFPAAAALKGISHFFLSPAVSTPSKILRVAGLFLAGFLAASSRLRHRVFW  
PGLTYPSESSESELLPGPLGCPFIGSPFMIGNEASYGAGSFYRRI SKKLGASLGKVPKVK  
YYFMGKNFAVFGGKTYQKILSMEFDGSLTSSGVDLLDGLMMPKSLLFEREKKRHSYLR  
RLVGAAMTPAAVSQSASNLQLAAEEQVSKMNDAMANDGEVRIQQICTDYTL DVAWRQILG  
LELPEEEI PYFEQQVATWIEGIMSLRILFRVGVESSPGYKAKQYVSSKIEQRIDELLEQ  
PDNKSTLSGMVFATDDESENGSKEGIGKLSRQELIDNALILIFAGSETSASTLTNAMLF  
LGLHPSVWSKLVQEQEHIRAREGDDLTSSLDSTNAPFLDAVLKETLRMRTVVGGIPRIA  
LKDIDVDGDGKTVIPKGWLLDPSMMLTHEEDPATKLPDAMHLDAIQGFRPERWLDGSSAD  
GDDSNAAALEKPSSEWVYPYGFGRYCLGKNLAQLEMKVFLATMARKIDFPKLA MLPENY

DFSRDKKNPEDPNYFSVEWSTREAVIPNASDGLATITAKTPQTQKEKSTPMP  
>comp15826\_c0\_seq1; 325 66 1652 LEN=1983; translated  
MSAKKKTGVIGLGPAGLAMVKELKADGGFGEVIGFDRCSRVGGRWSLDRDTHNAGIWKE  
LCTNTRSRRHSEFSDFPWDAEDGYDGHEKAYAGIYPHCTEVLAYLEAYARKFDLYPSLRLE  
TEVKSIEKVESGKVVVTIGSKNDVVTTHDFDAIVVCNGAQAKPYHPLESKLTDFSGDVIH  
AQLFRSEQDFIDKRVLVIGSNVSGSEIASILAEGLNNGGCQKVHVSVRKMPYHIQKLAG  
NNWSYDDLFFYNRSVWVTRVLPDWVVAKGMKSVILSLWPDQCDANTPNCAIRVSPDIRQC  
GIAVSKNYVDQVKNGKLPVKPEVASVDGNNVTFVDGTTTEKLDIVCATGYDFDLFSFLPKS  
IQKEVGIIPNPATGKTVMALYKNTLVPNPELVGNLAFCLVNSVGPYFPQGEMQARYISAI  
WSGRTPCPDLSRLRSNAEASIAKKMDKSSILNQYDVSTSLNEDIGDELGVTPSFPTDFLN  
PKKYLLGPVLSCFYRSNPNAPGGDKAVAEEKSMKRFDRLVASSPQVGQI  
>comp15827\_c0\_seq1; 596 455 2054 LEN=2441; translated  
MIPRRRPNEQNGNGTTEKPNGTTPALPISQPPTAASSFGSALGTRKNRRLIMVLMVTA  
GYWMTREEKLLDEEHYEDARKEYLKKNSHHERYSTVHKYHRNPNAASGKFVLEPENEFT  
PGIAWLMSFPNSGTSFTMTMVARSTNKSFATNYGNEIIAPDEPNLSIYPRRPEGPFWPG  
LSGKMHTPRELPDHFVITKTHCGSRCSKCGPDEYIETPEEFLRRCTLGHALLTPAKVRRK  
YDVEYPSERVQRAIHLIRNPMHNIARYHLEHRHKGYKNDTNWQENHSNDAKGLHKWCDA  
FSKDYLEEDIAFFGSKSKIPKAPCHGEFYKWTQWHNLAHDVINIMRGKAEGFDFPFRDVP  
VHKVYEDYNTKFEETANGILDFLDLKQVAPFREFTSRKDYGGYFPPEELRNIRDLVKSV  
ASEETWSDVKHYFEDDVETDAAAAGSGSRSRKEEVAEEEEQSSDTSTKLLSGETQGNDFPV  
HKVCNDNYNTKFEKTSQGILDFLELSRVARFAQCFLYNGYAGFLSTGESMQI  
>comp15828\_c0\_seq1; 453 103 861 LEN=1173; translated  
MKTSAGLILSFLASATAWTSPPSSMARTROQSALKMAIDYNDPVVAEEFAKVQPMTWEEIE  
EELNESGIPAPPSMSDMDLKLMLVEMRLRLTGRLDGDKAKERPTTFKSAFEAAIWKPAF  
AEFYKIYEDRDDHNSMNVIKEMLNIPDIAQQRYSTSYASLLEELDFALNAPPPVNSPTLL  
FSGFPPSNMGEAALKMTLEALGIEGLECEEDESFPILRGTVTFADIESAKACVAQYNGMD  
MGMGTLLEITSV  
>comp15829\_c0\_seq1; 430 128 1192 LEN=1600; translated  
MTEETYVPKYLSRQNLRLVDDDEKLTSKRTRRRKLLSIDVSAVNTKSSANIDQKNSGDK  
DYQFGDTTYRHDGFSIGKDYLRCDGKTLTRGKLFNSNSTTIGEIIIGQGNFSQVYKGTFINA  
SNSMGIDCSKENPVPVAIKKSTVFDISEQRKMLLKLKALSQLOSKALVGFHGAFLD  
AVVLVMEYMDGGSLEQWRQKKKTDNISDLLSTKSSRLKRERFVVSIAAYQVLKGLEYLHSQ  
RIIHRDIKPGNILLNSRGEVKLCDFGISSLYGEDDASLQTTVVGTSRFSMPERLRKPYG  
KASDIWSFGLVILELWKEEIPFKECASIVSLVITVEETSLLDGLSIRSLSGNLW  
>comp15830\_c0\_seq1; 202 86 493 LEN=1524; translated  
MAISARATLFTLVVAALALSAGAFAPPSSAVTRSAPVFGDIASSTTQLSERQWNFN  
SPWGMKGNAETWNGRVAQVAFVWIFLQELVTGKGVFQGIIEGNWFFLLNAGVFGVGVVAL  
TGWLAIQGDDDYTKE  
>comp15831\_c0\_seq1; 238 177 1109 LEN=1571; translated  
MMPQGISTPARISSLLLLSFSVSSLLVVSPLDALSSPHHTQWRAGQSESWTVFGRRSHRDS  
ISRRRGNPWLRSLLLPTRMVLGETLDEGGSYEPIDDDVFFGGSDGESSEVATNKNKLI  
EIKSEIELPFAEVAYDAYSDLPRQSSWSSWLESVEVVENKYTDNNGYNGAKKVESLWTS  
KMFGIRYSWTAVAVKNERPHTIQWRSVTGLRNEGIVRFYKREGKTYGQGPTLMTLRMAFV  
APRAVSGILRRSKKLSRYVEEKMIAQSLQGFREDIVLKNLEKEIGSFSTEERRHEVSEAT  
TAASTGTLSE  
>comp15832\_c0\_seq1; 165 124 322 LEN=322; translated  
MNNIPPYHHQLLINSVSDMSIDNEDDVIIGSDSESEWMHAVRGDGLALESAPDEMKNNMQ  
VVTAAX  
>comp15833\_c0\_seq1; 453 301 1890 LEN=2206; translated  
MMFGKKKFSKWIYQADTQDSSDDSSSIPSEAAVLDDLHAKGNGDTQTTVAVVEGRVHENL  
YDAERQSGAKLKDSLVLMDRIGDRMGERLESARETIRENCQLFLVSAIIVLIVGMIV  
VGVNVGRSKEKLAVAVPDDDDGDFRGRFVNTTSAILPGAPTNAPOSKMQSIQDTKMP  
TSEPSISNALPVSLSNFPLAPIGSWSMSPSSIPGSTELPSFSPTHTIPTTPIDPVTRSPV  
RPFANDDSVLTFCVIADVPYTEDEVADLPKQIRTQMHGCEFLVHLGDI FVGDTCRAEN  
YETIRDIMLESHAPFLVPGDNEWDCIRSEIDTGWDHWTNHFIGFENNWNHTFSLIRQP  
GYPENFYFIRKRTL VFLNIVGGRVHNETEWQIRLRSEYEWVRDVMLLNLVAMDASDGI  
LMAHANPSEDHSEFFNAFRVFLRDVLKNQFPVLYLHGDGHDFMYTPNYHNQENFLRIQHE  
GGTNEPVLKIMAGPKRGHRVRSVQNAFQYNRQLSTFFPSREKEKNKKDE  
>comp15834\_c0\_seq1; 451 136 1146 LEN=1226; translated  
MPSRQRYSLCALAAAASLAATADALVPPHVSRRPGRGPLFHKAPKHDVKGQAGSIEDLPA

DQREERIEAFVEHQKGVPRIGFPADVRSLVQYNHGFVAVMSTHKSNSPGFPGGSVVGF'TVDE  
EGRPLFVFGSMSSHTQDILADPRCSLTVADKNFKGAADGRVNLMTAERLRDEETIAAAR  
ELYLQKHPGAFWVNFDFNFRMEVESIRFVGGFARAGSVSAGDYKAAKPDPVMAFGGHV  
AAHMNDHSEATMAMVRHYVPGLDAEGYVEGALINRVDSLGMVTVTRNQADETTLPGQP  
QQFKVRLPFPEPITERGAVKTAIVEMTRASAPAPAE  
>comp15835\_c0\_seq1; 197 334 825 LEN=902; translated  
MLRTRSSAAHVWKICSAFDGRAPPLHRMSFHSIAQPMRSDGCLGTAKGTTTTKLSSI  
RRRTFFTDHNSGAEQLETSSAQFTPLQEFLLDVSAWMLAITLWYAPRIEFDDDLILGENQD  
GNLEYREDYGPCLESSSQSSSTSTSKSDRRNPKNTNEKKSDDKDV  
>comp15837\_c0\_seq1; 449 909 2426 LEN=2543; translated  
MRKRVGSMDSMDLLRSVGSIGSSDRTINGSNNGSKSPANFSDTSGSNYSVGNVTGGQNRQP  
PGTFRGYMGSYNNGAPGSSAQCNNGEEWIEISRDFYVPGADDVGRKLEAAAAYSTE  
TGELLMHRVIKTDIVLAQAPHLKRSVLTAKNGAGAGSGARFRIVTYNVLAEIYATQQQY  
PYCDI WALNWEYRFHNIMREIVDAAPDVVCLQEVQADHYENHLYASMSEQGFEGVYKQKT  
RQSMGLAGKVDGCALFWRRSKFHLVESYSIEFNELAQRQATQVMGLNPRSEEGINFLNRL  
SKDNVAQLVLELANPQLASRANRDPINQVCIANHLYSNKEFPDVKLWQAWQLLQELN  
FIMSRGTSPLMICGDFNSSPDSAVYGLLMQQTVHPGHPDVNVVTGDDCPNVLDPAMNIS  
HSFQLGSAYQSVLGEEPQQTNYTLNFKGVLDYMCYSLQTLRPLSASPVPDESILTRHGDA  
LPSTEFSSDHIMLISDMQIVNNGGR  
>comp15838\_c0\_seq1; 835 1 2132 LEN=2248; translated  
XGKKKSLQQHSRRSVVPYVDEHRSSHQCQLLFIKPTQGQRNNEALFRLSNFSGRFVERLH  
DNTRHRAGSATLQPGALVAETHRSVKSFLSSSASDDSDASSAAEIGA EVADASASDSS  
NTGSAALDQWNEQKQAAEKENEESDAGDSSDKDSDVEPPLKIAIVGGGWGGWGAAKAI  
CESKENVELTLLDALPDPTGATPFVSKSGKPVEAGTRGFWDYDYNINKLCEELGLNESDI  
FTSFTNSSFYSPDGLEATAPVFSEGIKPKIDTPLPFLNQLSGQSFQPLPSPLGQILSTFP  
LFERIPLQDRASMVGLLVATVDCIGNDVAVQEKYDRMSAQDLFILFGLSERLVEDFIKPT  
LLVGLFKPPEELSALVVMELLYYALAHQDSFDVRWIKNGTVSDSLILPLATHLQEDYGL  
EVKGGSFVSKIMYDDSEATKKTSTIEYKTRDGEVSTMDVDGIVLALNGKGM SAVMTNSPDL  
AKYPTFSKAASMANGVDVIVSRWLDRYVPTRTPANVFSRFDALRGSGGTFMMLDQFQAE  
NEDALWGDETPQGSVLACDFYNAGALLSLSDDKITEILMKELLP EAVPDFAYANVDSWV  
GKFPGSVSFFSPGSFNRRPMPQGD PDVPTIKFAGDWVRMGDMEHGAKGLCQERAYVSGIQ  
AGNLLLEDETIGKSRLYKHPVLPVREDEAQFKAVALNKQVMKVLPRFWVR  
>comp15839\_c0\_seq1; 898 88 1671 LEN=1905; translated  
MKFATLTVATVLASSHYASAFSPVNRFSVARQQNYERHQPLFGILDEVMGDDYNLMGSE  
VVGDEENNEMVQAFEIFLGLDLVSTNDPRLDIIENYERATDPEFLKWMEQKAENSNEAD  
ERLALKDLLAMIKDVIKQELTKIREEREAREAAEAEQRIIDAEVVAEEGRQLSNADLL  
RKAQKIDQASQASAEADRAETKKSFFEEEITPEILMSYEDTLKDLLPPYKTGTTPASVVM  
NNYDRFDAQFVKVLNAKVAEGDQGCADLLNALAEEQSKRIANATEQLKTVLGMGDPMRME  
GAIKMCREDKIDESFLLLLEVNENQAREAGAMP AELMKRRLRLRAAEKDKQASSKEIA  
LIRKLLRAADSAREKMLEDAFTPRENLLVAGTPD NAAKAMDGEVPDQEKMPDPVPPDF  
INACKAVMLNFGNLQYDDERGLASRIKQIASEAEVVATRIYQGMSLRDQDRMWKEQT  
TSIFELEQMELEAEANG EKAPWASDKDDDDMLLPGFDAQGKMTIGGT  
>comp15840\_c0\_seq1; 256 170 1110 LEN=1386; translated  
MKTAALALAATALALFPAAVAYVSPPRQPSRHSRSFPPGLAYAPDPETGGRIAGTTPEGF  
ASPVLIQNHRALLAWKETYGHPNIPKNEGGSSACEVLRRLHNQKLN GAEVAWLEGIGFR  
FHSIEDVYRFADFGEMLARLMA YEEARPGNNFQVPKCPEDPELGAVVTGIRRLGREGVH  
PDHERRLCDLGFQAVSTRKCGSKFMLKYRELSERAASGEDVLADTKTTDWIRAQQALRQ  
GKLSQTRVQYMGQLFGDTWTTLGREAGGXEQQRAV TAPNQSIIHHPATPSIAASLHPCPGN  
FWKHRARLVSLGD  
>comp15841\_c0\_seq1; 379 95 967 LEN=1128; translated  
MPPYATHQEDHFESKVVLSFHPLDPLLNVPNAIGSNKMAPSGTSSNTNSMEHPVTAMSSL  
DSEDTSSSSVLERLLDFNPCIGMMGKRRNSSADAGEE EPKNKA AF SFSNPYSAIFKDRRC  
SECCKGCTKLGYSKIVIVANHMFEEGTSRELPIEESSTKKIYLHKWCSQLRDYRNEHKE  
GFNGVLCQLMDYFRALELEAQMKREAE LRRKQEEVARDTIDNSQIDRNLAEGQKKNATKG  
FLKRVKSGKRIQKSFSMNACMGINRSK SANNTTAITS AVDES AFSRREI  
>comp15842\_c0\_seq1; 821 227 2107 LEN=2345; translated  
MTDPRDESNDGTSSGTGDDDEEQQRQQRGRKPPSTPSFLSPVGTTSRNY SVALDEDEIMD  
LSSPLTPTMGIHPLHAASIPSPASRGNNGRSHRNANGVDPGPNSPERRSVNHRFWESD  
YEADYRNGNHNASDDEDDSSLPVPLLGYDYHDDSHYRRPSNSHQRRHRLNHDQHYHS  
HRQNRNAPPKLNGLNLYLVITYVLNVFTSYFIGVQGLFGVMPKRRDIFLEYETLVT PADY

AYYLWAPILVFEFFFFATAQLFPHYRARPIIQOQTGLYFFWACIIQTVWTVFFAMRWFILS  
FVAVVLALLCLVFLLLASQHYNCLCVPTVHRGGGGIMTVVGFLLSSATGVPRQRKSLLEYW  
LFRFPFYLHCGWLLVCTVVQLSMAFRYRFTDSTGGQLAADIVALGVLLPPGTFFLTQSS  
GPDFVIPLVIVWSYISIAVELHTPSETLIELYGHPAIVAVRNASYVFTGLIGVMLVPRIV  
VWIAQEFCTIDVVELVDDDEEDYISTTMNEVRNGGAEREKGGFFHGVSLRIDNVAGEES  
ASPPSTHHPAVGGFADGSDSDEREDLPPLCTRRRNEEYVLDDEESGEEDFQDCREIDHD  
GAGASAGGKHGEETPTETTEEDVVEE

>comp15843\_c0\_seq1; 564 1 2114 LEN=2114; translated  
XLLLLKRFLRMLRFLRGGKSNRKTDRFEREKKSHGHGHGLDHEKENAESMSMGTSIYTTP  
SKATLKGARACGNIEWFSSQSGSEGQPGTIFTAELALAKYRLGAWESPADIESTPASSNT  
TSSFSSPSLRLSQEENGIATDVPIDDISLASSNLSLQAVGPEGLVTGDAEESSIDEHS  
TASSDISWYYDSETHHEKLVSTMDTQNHSDKRTVPQYHGDICEKREDMFSDISNRKDFE  
EASACSTVSSLTMYKYFGQAGGEFVMPVPLSACTSSLSRHDGIRRSDEVSEVHFAHGPS  
NGDKMDSSTDDSCCLNGHSIATSSNSVKSVSFVLISTLEAESLAKRLKPCIPTSPRMI  
GKMINTNTPGMTSNPGLDGSRSKVVKTPVPQTKKQLYLIPKQEGEANFGTPKMSNV  
TDLSDYSHMIPDAWENNHGATSVATTCCTEKKECSGIRSKFEAQSLKDRTEPLVPRRTIG  
KTFRSVIQSEGGKMEYSCTKNECFNDQNSDANFERDIPSSSKEANSCQLSSSLSE  
EISKTKSDPQEEASAIENNAIYEIENNASHEISNAAQMIHSEESLEACSEFHDTKTEISDE  
DRRVEEKSIDSSRPKRTMNYPTVLSKSEEDQNELHLEGEERFTSDVSVSSLEHQFISE  
AEDSSEVVQSLLTATFENEVYLDEANMVNKQTTHLRFYNGPVDLD

>comp15844\_c0\_seq1; 536 1 1860 LEN=1953; translated  
RTTPNSMASPWLKDYFLDQLSSKIGKIHSQHSSPTADHSATNTASAEPRRIHHSRLVKIL  
ARGQGERLACGDWSNGWVNRQRGSTPNLANHTNAWLLISDGSHSARVYLTIGALKQIF  
DWDNKNNDGLFGRGCCVLLKQYYLESASLGNNDGDNLEERNLLEKVVSSLEPKP  
GFNHHANSNDSFNSSASISPMKEIDLGLYGLQFLARERQLDKTLTSSTCGETNGSPNGTT  
NPKSVVRDWDVAFGRLSKGIILSTSTLPGGAAVTDENSILNLAEKASSTEEAIREWENKKK  
EYGITGADDNFNIGRNSSDHQNDRAQTKTNADSQEETHTKDSEASDEDEDEEDDSRLFQ  
NVLATQEEEEETGEGGGESNMPLSTQTENDDNEENQSSTSEELLLPETQPTAAALEKRN  
ELNGQPNSEKELEGLDATTRINAKQKRNRSTDDQSVSVSSRRLAMYDSIGTTRHGPRSPR  
RRRGNRQNRQSRKRSKGIWDSVKTLFDPDRAIVYCVPSFQLTQGSHGSGDDHTYSTPM  
KRSARGPGDHLVSGSDRSKTNLTDTRSTPNPSSGAYRYKYGLSRWLSRNTIAVESDSNSH  
NKSNSAASSGDERDYAWK

>comp15845\_c0\_seq1; 318 172 1368 LEN=1516; translated  
MTATDPHLKINNNTLTKEEQDEVLRLQLLPACQPQEGSPANFTFTQSELDDLQRAVGRKIG  
PSRSSNSNKVDIRDVQQAFAKPPTEPLPQNQEPLIEAFPADGSCDVHASPODDHESDRAK  
NGCNSRNSLDWHGAPRLHEVLHLSRAFREEVRRGDFTTPTNGVCPGFMQCNLVVLPHP  
ISFDFLLFCQRNPKACPLIEVCDVGSPPHFGVAPGADLRDVPKYAIYRNGKLEKEVTDV  
TSYWPENSVAFILIGCSFSYDGMNAGIPLKSAEQGNVPMYNTTLKCRSAGSLSGNMVV  
SMKPIPALQISKHIEITSKYTHAHGGPVAVGSALAIIGIKDIDNPEWGESITVDEGEVVPV  
HACGVTPQSILMNAKVPFAITHSAGHMFVTDLPSDMGL

>comp15846\_c0\_seq1; 588 96 1487 LEN=1612; translated  
MPRTRDRLDINYGDDGTYSNSDSYSESQSDDTGSGSSCSGSDYDSYDVRHGEVRSSTTS  
LEEGEQMEIVFGGNSRAERKGDGDDGYDGYDARSKSSKSMRSMRTITWKQIRLRQKKLA  
IGIGAAVLLVLILIIALPVSLSKSKDSAKAAAPAPPKDI FADFAGEPIDDAGSSDNG  
KTNTSEFTVEVTMEPENGLFDTIGDDGIYNDTIAPTHKGTTFWWETGGGQDSFEDDYWG  
ATGTATWGPSSTFYPTFEFWWETGNSGSDREEGTGEPTVAVNTTNAPTTGSPTGSPTGSP  
TESPTESPTESPTTKSPTVSPTTKDLFADFKSEVTEPTAPTESPTKIPTERPVAVPIIP  
PRATQPPSTPAPTRITEAPSASPSWEPWPTAESTSWPTWAPTWWQPTGSHLPTILIDYPF  
YFPMAAQNEQNEATVAEGRSEVELDGEENVMVTRTHHFFGRK

>comp15847\_c0\_seq1; 931 200 2233 LEN=2530; translated  
MSAEETPAHPAPAPADAYVDENGNPCSKNAYKKRMAEAAKKAKEKEAACAALQP  
AKKKKEEITDPNQFLENRRNAIAQMEKEGMNYPHKFHVDFRIPDFNAEFETKTTAGEK  
IEDKVVSIAGRIVSVRHQGLFFYDLNGDGAKVQIMSDPKTYEDEEEFAKIHRLKRGDI  
VGVTVGYPGKSKNGQLSVFPKTMILLSPCLHMVFPKSGDSCLGGITNMETRYRQRYLDLIV  
NEEVDRDIFEIRAGIITEVRKYLDLDRHFLEVETPMNMIPGGATAKPFITYHNDLSMDLYL  
RVAPELYLKMVLVGGGLDRVYEIGRQFRNEGIDLTHNPEFTTLEFYQAYADYNDLMDMCEE  
LVSGLVKICGSYKIKYAPKPGMDEVEIDFTPPFKRISMIEGLEERMNTTLPKMDDPEIE  
TKLLALLKEHNLECTPPHTTARLLDTLVGEFLEDNIHPTFITEHPQIMSPLAKYHRSKN  
FLTERFELFAAGRELANAYTELNNPVVQRELFLQAKAGSAGDDEAMVLDDSFVTALEHG  
LPPTGGFGLGIDRLTMFLSNKANIKEVLLFPAMKPSDEQMALIAANAPKSDSDFSLMALM

SSLSLGV DVTSD DALDKLDETLNGKSFLKGTAPSKDDAE LLEKVLKADEAAIASRSNVAA  
WCKLLGMFTPEVRATWE  
>comp15848\_c0\_seq1; 248 72 398 LEN=815; translated  
MENPQ T L S I N N T T T F V E E M D Q I I P K H L Q L P V G I A I G L V A I I I A L G L T K V S S G K N Q K E A S K  
V Q F D A S A V S T P V K S A N V S E S G T P I N Q K T G T V F T P A G R R S A R L A R R K E D  
>comp15849\_c0\_seq1; 200 1 613 LEN=785; translated  
X P Q T A T A H K N T T T A S A K A S F C S S T T P M S S L L D P Q L L T G L G C A S A V F L S A A G A A S A S A H G A  
V Y A Q T S K M P L P L S L V P I V Q A G V L A I Y G P V I A Y L L V G R M E E S M T A G E G F R C L S A G L S V G L A  
C L A S G W G M A G F L E K L N G G L D A P L P P P A P P S R E E P V T E S T P M L P R S E G I D A S T R A C F R K T V  
L S L I F L E S I G L Y G L V V A L F L I G K K  
>comp15850\_c0\_seq1; 286 138 575 LEN=1509; translated  
M A G I A A A A G A A A M P G M A L A D G A V S A A T I Q R A K F Q Y G S R I A A L K D A V S K G D F G A V A A E K N A  
F I L Y N S G A F P G T K N K D K K A A A I Q G T N A I F A A I R S K D A G A L K T A Y A A Y T K T V E L S D Y A A I S  
A D Q G Q G Y S S D Y D Y R V K T S Q A A I W V R  
>comp15851\_c0\_seq1; 537 395 1885 LEN=2115; translated  
M I A A A A P V G G S A R A G M A F V A F L W L A L F V S T C Q S F L P Q M Q T N Q K Y P F R Y A N E E T T E V G E P S  
S S S I G S P L S S W F P E D R Q I L R F R E P T T N V T V L L I G S M H Y N P A S I N L V E T T V E K L G E Q G E L A  
S V I I E S C D I R W N K T Q E M L Q K K E E K Q R Q R L E A T N R W K Q S L G W P L E D D D S E G N D G A E T S R V T  
Q L Q P L S N D K D F L G N E M R A A W E V A S K Y Q R P T V L G D Q R I N A T V D A L K A S L K E T A S D L L L G P P  
G G W K R S F D E I G A N W N E T I P M A P L S L S S S Q E T D V A L R E G D D D Y L S A V A F F D P R L L I S L P V S  
L V K Y P L S F L V K D P I P V G T F F A L L A A L N L Y G S G S L D L D P G S A D G L S S T L L A A A S A V L S A G T  
A D A T W K D Y V L S V G I A V L E T V L F A R L L L K P L L A D R N E I L A R S V L D Q C A L Y A T N G K A A G N S N  
N W L S R L I S S P P T F G E Q A L G E R E P E V G I V Y V P G T D P E T L M N G D Y D S P E P G D K E K V V V A V L G  
M A H C N G V M K L L K E Q R V  
>comp15852\_c0\_seq1; 921 373 2621 LEN=2655; translated  
M N N F V L L Q F R L L T A F S M A I A A A A S T T A L R G S E Q T L P A S E T S S L R N G R S L R R R L E V H T P T T  
C R L F L D E I A Y K T K G P S P D E D P R V A T A R R E T E S K A D R P K A E D P L V L D D P L D G D R W I C E I S S  
P E E S A R I G W Q L V E I D G L E R A V G V D A S S L K S G T S V L T I G R A I I E D V D T N P R M Y I P A G S I L D  
L R T E G G I G T E G T S M R N S Q D L L A G T Q L A G T R V E T R E G K A G S G K K S L T V L A V R V I D A K G R A P  
D A G L K Q L E N D I F D D E V C L R S Q I E A C S H G K L S I E P F S G R T K T N V A I N R G V V N L V L D S H D I S  
A D N D Y N T L L G A A M K A S Q A K L G D L I N S K E F D L V M M C M P P G T L K G G A E W L A H A Y S N G K M S F Y  
N N S C S P V S M Q L H E I G H N L G L A H S G D E R T T Y G D K S G L M G S S N D L D D I R M C Y N P A K S Y Q L G W  
Y D E K V K T I N P I S N N K P D L P V R Q F T L R G V A D Y N A K A V D D A L V V L R L E Q T D L V P D Y Y V G Y N R  
R D G A N S D V M E D W D K V T I V R K D S G S P S E Y G R S T K V A S L Y V G Q S Y R I K S F N G Q S K R T V E V K F  
L G L R N G F G D A V V K V T D L R N S P P S T N G A K A P P C R M H Y V D V K A D L Y P D D N A W Y I A K E D Y V N G  
K L V E T A V A A G E P I L E A Y G T S R T K V C L P Y N A K Y R F V V Y D H F G D G L L Q G D K G Y Y R V A D A T G K  
V L F K S D D L T P F K H V V Q P I S V G S C E D M N G X T A Q V E E K Q D K D L C M G R Q E Q K V Q Q E I R Q V Q N A  
A E E N L F P V V W R L W E I K A S R E Q G T S G A L L T  
>comp15853\_c0\_seq1; 91 159 470 LEN=655; translated  
M P G G H T A S N K D V P P H L N D V A D A V R P Q L E E M R G E R P G F R F D A Y K V L E F R Q Q V V A G M V Y H F K  
I R V G E R D D D C L H A K V F E P L P H T G D G P V V V V Q E R A T L Q D P L K I L  
>comp15854\_c0\_seq1; 304 152 835 LEN=923; translated  
M I S A Q H L L R N T A Y R G L V R S S G A S A S V G N R T T N A T H V A F R S L A T T P R S A A T K N P D V D D D N I  
L P T P W E T V F D R A S Q I F F L T E I V R G F S L A L E V G L K P K V T I N Y P F E R G Y L S P R F R G E H A L R R  
Y P T G D E R C I S C K L C E A I C P A Q A I T I E A E T R E D G A R R T T R Y D I D M S K C I Y C G F C Q E A C P V D  
A I V E G P N Y E F A T E T H E E L L Y D K E K L L S N G D K W E K Q I A K N L M S E F L Y R  
>comp15855\_c0\_seq1; 256 93 926 LEN=984; translated  
M S A N D D D D R Q Y L F V I R H G D R W D Y S Y P N W K L P T S R L G D S P L S P L G H Q Q A R E V G Q F L D S W  
L S E R N F S A K D M T W M S S P F L R C I Q T S N E A L N A F R S I D V S S D L N I L P E Y A I F E W D G H N G E W H  
K D L P P L E E R V N Y F P R L D I S Y Q S L F V P S L P E P R S T F F D R C N R V V E T F N E R H P Y K P R Q V F F M  
V S H A A G C V A M S K A L S G L P L N E I T P A G P C S I Y M F S R T S G S E K W T L D P H D Q P K S M N G F T D H L  
N D M G T A T V P W N N F G D G K T K F Y T G P K N S R F A P K E C S E K  
>comp15856\_c0\_seq1; 502 1 1213 LEN=1330; translated  
X S D D E S S E S S V S V E N T H D E V T E T K K D I G G V D K P E D D E W V G V L P P P E E D Q G L S E P P V I E R  
R F V G E E K T E D D A P G D E A P K E D E G F Q Q P Y K E R Q I T R D E M G E E P D F A H Y K T N V A E R L W R A N K  
A A N N E G L T A S P D M V P M A R E Y Q E W R Q K M A L L N R Y I A D Y Q S A M Q E V S E K R N K L I E H Y A L L T K  
D T P L W S H V G Q P L T P E Q L A A V A E D E D A E P A E D V E T R T K A I A Q V A E D I G P G T L M A Y Q Q L T R M  
H D E L N Q K D Y Q T H I A A Y I D E W D E V V T S K L D K D V K A V H D L G K K R E Y Y I N K V D K L R E K V N I I E  
R K G K Q L A P K K L A D Q L D R N E K K L L D A D K A Y E R K A N D V S V S L F E A T R R S W V D L Y P V M K N V M K  
F E I N R I G R E S S T Y G N Y H A T L A A L K N D Y K V A T A N T V D A P N A G S A L



>comp15869\_c0\_seq1; 517 209 1144 LEN=1346; translated  
MKFCMAIVFLAASMASTATAFAPARVTRSASSTSLKIVVGDTAEEFAARVDATFENSPAK  
DPEFDIVRERFPGALTNQELVTGTVNVLASKGYNGENTLLATSLCCDELARELEDDFNG  
IYGNNFNLGGLAGFPFAGKTGFGAMAAHI PDDGYCLIVYGPHVGVAAADGTVGKVERSIA  
LVDTCCGSAVAASGYVESIMSGTKELTTGIQNFVDFQQQGVQELILPHGKRLADADDRMI  
ELPYALYDSQDMLMTEIVVGGSTGIKRGMLLGGVQINTGPDTPDYFVPLKFDYMNVRGE  
VVADLLPGLVG

>comp15870\_c0\_seq1; 236 129 710 LEN=926; translated  
METSTLISRRLKTYKHCRPKTFSTSPQSQENRIRSRLLNRLGILHHQKDSNEMPRVT  
RHELHSIQTKNQSVPPFFQPLRDSDEHCYLLPTTIYPTTFTTSKHGTIRANISMKRTKTSR  
VRFDNKVLVPIPSRHAYSNRIKAFWRDGNLEDIADRNYEYASEGSDWSKVLEDEDM  
YIDVDTGEKVHPC

>comp15871\_c0\_seq1; 318 167 733 LEN=1016; translated  
MASSMIRGILVFGFSALVLLAHGGEAFVTKQPVSTSSKVGTDLPKVTHLPIYDMLSKGKE  
QHSSSSLLMATEDNSKGGGLPFWLDPGTRGGAVFLSLVLFIIPLVGYSVATNMFVDEVD  
AGKYIGVGFATAVATLLWVSTYIFRVATKDMTYAKQLKDYENAVIQKRLEELDEDEIQALQ  
EEIERDEF

>comp15872\_c0\_seq1; 356 95 1543 LEN=1742; translated  
MSNNINGGGRSRNALSSVDFYRRVPKDLTEATSLGAAMSLVALSIMGILFFSETAAFART  
KIATSITLDENSQPRRLNLFNITMLDVHCDYVSVVDVWDALGTNRQNVTKNVEKWQISEDG  
NTRLFSGRNREQREVRHEEHDRTLEEMHEEDGVHAVELTNSFKGFLAENEMAFVDMYAP  
WCVWCQRLHPTWEKLAVEVKLNMPVIGIGKVDVCMVQADLCRDQKVMFAFPTLRWYEMGKPI  
SPEYKMDRTVQAMVGFARLKLKLEMNKFKDWEKGAVDREGESNEAIDKKRKLFAQNRDPHPS  
CQVSGHLMVNRVPGNFHIEAKSKNHNLSAMTNLTHIVNHLVSGDPIDQKSRRAKRILKQ  
VPEDHRQFNPMDDSLYVTKEFHQAYHHYIKVVSTHLMGTALANQMLTYQFLEQSQIVYY  
DETNPPEARFSYDLSPMSVVVEKEGRKWYDYLTSLCAIIGGTFTTLGLIDAVLYKVFKPK  
KL

>comp15873\_c0\_seq1; 268 255 783 LEN=996; translated  
MDMDEDTFILGLRRLVFAEFREDKTEDHRRMERGQPPKGVGEELRPNLQEQDDPVALAWM  
AERDDCEDDERSDFLVARNDMLSTVPTVIVFRPKKLRKREHNYPEPELNVSDYFVKCSDFG  
YEKGIKNQKKTMSRLKKTTFYLFEEVGAEAGVGAEAEATHDLYDKTRSSDYLSG

>comp15874\_c0\_seq1; 299 184 1009 LEN=1069; translated  
MDEYTLNKYDHHYNQQQKVDSDGLKIDGLGSTLSRRDVFVGSATAAIVAAALPLPADALP  
DGDPPLDGLHVRDRKSNKALIREDYWFMMGKTPPRVNLNGLITDDPEFNFAFGSCETSGG  
GGGSNSCTYVSLKQRI PVYSKYGFSITLGAKEYSMLGNSLRKGDWNGAVPYLVSQDSNLP  
PPPPVDALLKMLVLFASGMLTSPNYSGPSKRLLVARFYANEVGFAGFAIGEIKEAIDARDQKRA  
MEAWEFGRDSFNYSYFQIVNDSISPKVGDKFDLIQ

>comp15875\_c0\_seq1; 373 62 1324 LEN=2083; translated  
MSTPKTVVSSPSRRVIRFFDPHFHWWDTTRTVAASDTAHTRADEPEKKNDDGTTVSGHDG  
GQIFVPGSDRYGRSEYEREVASEPADAEEGTQSGCGSSSPFVVVHEGGICIEANSVCF  
VDRPGSELTHIYRKELEWTLDQMPDPHGDGNDGNDGNHQQDAHRGERDGTALPETPPP  
KTYAFVACASLESPDAESWLAELSRKRPLVCGVRQILNHEPSWPRNASLGELLTNEEWKR  
GFAFLVHRTGLVFDAQLNPSQFGPLLSVLEETERAFAAGPETAVRKRAAVVIDHAGTPTR  
SDLADPARSAAYWDGLEALAGCGLVAGIKLSMLSYAPGPQGSPPSGWDRDPVVEGAVHRI  
VRIFGARRVALASNAPVDGGISGWVPAVLSGFGFVGLGDRYTEERSWLFGGAAREMYGL

>comp15876\_c0\_seq1; 593 557 2218 LEN=2235; translated  
MTPVPRSTDNRNTHMHHHHHHMLNSQPIQHQQESVTRSRLSEDRTSCGLTNIHSDVGGSS  
SPHGTKEGRPFDSDNLEGVVKSNSVSASTGPPITIVTAPQTTLAAASEESLVRNPVAGS  
SVINSCGKLVVDVTPPHPTARPQNDETIVCNQFVVVGGSTSLSGVISTISPEEQPPPTTIL  
DSLKKSSPTVGTALKKISITSTDNKNYNGLLGAERPCLASHDRPAAIVTPSMPSTTDL  
GASAREFQAALVTNNTNLTIHCTGGDRLLSSTADSSFRPNTTNTNVGSKRKLSSSTAAPPA  
SEANLSVDTRKGAFFPDNVTNTPLSRRRDSLPMGLRNKKMKATDCLLFAASLLEQDERA  
EGLMAARSEVNSSTASALSVAAHCSPPPYTTSVATPIAKTKPKTKPMKKMVCEKIERSLR  
ETTEKLLKQQEQREEDGDAEYKPNEDVLCGRGGKVNKHPGNIYVRKVVEYNKSYQQSVH  
KKHRILVSQSIVKAIINYGGRFMGQNNKEWSEIGFKRAVQKTSQALRERSNTSDVLQGGI  
QQLVAVTTEVIK

>comp15877\_c0\_seq1; 269 62 673 LEN=894; translated  
MKQMKTKAKATITRIVKVPQKIGHSVLTVDKLLKQGEKKDEEYPDWYEAERDEATYKS  
KISHAKVCSDIIEDQHARSSVTESRDECIREITDHLKLFLEKSNNSNSERYEYEEWIMAL  
HPENVDFIGSRLIDHRFYMKDSHRELWNECMITMCKESIVPEESRSNKNKSRITLVD

VLVEEPEELFSAIDQTCCTREP  
>comp15878\_c0\_seq1; 253 156 833 LEN=1108; translated  
MIDANDSNKLGKELTNNYPLVVFMAKSTLQIDSGSKVSSVAVTAVYINGCDIRATLCRG  
DLCEKTSFYKFDPLRSKNELSERILSDVRNRVCAPNP IWLVTDPALFILVICGFLAY  
GTYVGVEDMTNAFVQHPRIERTLTAIFGSPRTFSYSICGAFWFSVVAHGIEATVGVHNAV  
KLLLELGMVPASLWGMIFLVGYPIFRRLQELISIERAHVKSCHND  
>comp15879\_c0\_seq1; 318 482 1144 LEN=1243; translated  
MHAMIIPSETMLLTSATSNEAKVTIMTADDETATCSSFTESDDSTTSHTLKEVKGSILGP  
STSDTGSESESVLSRASSSSSIDSLDESENVITKKRVSFDAVNIRSYQQTMGDNPVAVSYG  
PPIQLDWDYEEHDSIDIDSYEACRGLSRRTLQMATSYQKTFLEREYGFTEETRQAK  
KDANKIKFRREVTKSLLPYMHVEDAIESVGRKVKRMVSKR  
>comp15880\_c0\_seq1; 444 1 1680 LEN=1937; translated  
LQAHKTKRHATDDTPSKENKTKKTQRTMSKTQSSPTTKTRWPRILIAAVAMALAAVFW  
TLPCHTSLTSLFQNTTSAGDI ISSNDATKTSPLPEPTTATTQNSFTFPPSSSTPVPPTLS  
IGMGFQGRNIPECCSFCEIEQVNTETVRPLLSKIVATPFFSHFKIDLCTSCELWEDAPL  
CRMKDCSVCECEPPAWSFENVPEFPLTGPDCDGISDDNVVTTVDASIRNGWMSGGIGGS  
NSHDYNLFGIVDGEDSGNSAQVVDLLKNPEGYTGYTGP SAEKVWSAVHKQNCFPQSET  
PKSTPSVEESAHEINVDEYCFLPSEQRLYNRFISGLHSSISLHIAHSYCLEMDPHKVGE  
RMWGLNDRIAYDRVLSHPDRVENLYVAFSLLLRAVVKAEGAIAAVPASDPVLEDSLSHW  
KEDLLPELLALPQRAPTTFNESALLFDEDFKSSKAKRSELQRRFRELQSIMQCVGCDRC  
KLWGTQLTGLVGTALKVLFHQDDGGKISLSRQEAVALVNTLERLSSSLVFAKEFRQRD  
TANLFRDDPSSCSNANRP  
>comp15881\_c0\_seq1; 450 62 886 LEN=1036; translated  
MPRYSDEWLIDKTMFDYVQGGSCACCSGFLFMPGGTPELIRSMSEFETDAANDEVSA  
LDPWPQEMKDEVWKERVRLRQYCKKNMKIYKSFWEYDGRYQAWFHLSRLKIRRLFQ  
LARTEVVERLQHQKFMHAAFGTVLCAVTEQVAHFVETKYPVDGRGEAIEGFENILG  
YDRRGFFTLKDDEEESRTKWLIRHKALGGPKLLERNPKANNDSNEDGDGDEKED  
EDIDRKSSVPSFRSDRRIIRLLIARCFADTLQEAFLKEVEESGG  
>comp15882\_c0\_seq1; 1081 114 3227 LEN=3439; translated  
MSEPLQHSQGSCININRVVFDIEMGSDSNFASSENTTTGDEVMVEGMANSNEFSI  
VGPLDENERNQASSEYSHDNSSRNQNSTSFLKNRKKGALRRGSGATQSTSGNNSGL  
TGSVSLRSRSSHSTGGSSGSGSVYSPHFKATPRPIWYGRWLFLLCLVAVALGYLTY  
SSLSNNETNLADCVFVKVAENAEVIVISSNQKKKLGMDTMAVIGSTGYDRGQWPY  
VAQDDYEAIATNVIDTSRGCNIAYGPIILTPVQVPSFEFFAADWYQKSRVPGPF  
PNGTGIGKTNDQVGVWAMDNGTAFHDTTGETIAWDSERRIVVPMFQHPGASKKLM  
FMHSSPLLGSTIEKMMTCAEETKELILEHEITYANLPDQDGEATEVPPVPSLKDCT  
MVTDIAQNKTSTIQKEPMGPGANMLQPIFPATNTTEMVGLVTSIVWTEETMDV  
FSANVDGVVYVSTPSESVTFTVNGKVEFFGTGDLHDPNYDHMQEGNITIPGLF  
APQVSPYTIALYPSDTVYDMYSTKNPYATIGAI CVMFFTVMFTAYDCMVRREF  
SAKAELLKAKRHFMRVYSHEVRTPLNSVCMGLNLMQEEIQSKLSSAGADGSGTAS  
ITIDEATAWLDLSRDVHVSARSATNLNDFLNKYDIESRQLTLELSVIPIQSLISE  
ISKEFVLP AQDKAIQFTLTQEKVDATGVACTNSSNNNSNIKSIKKEVDHTDEI  
QSELLEDQVVVGDKARLSQVIRNVI SNAIKFTPSKGSITVKSKWIVATVGEST  
SINLQDQGTEDLHQGTGWIQLEVTDTGPGMTEEQLATVFESGVQFNVNKNQKGG  
GSLGLFIAKGIVDQLNGTLTVHSDGLGKSSFVCKLPLFCPKPEQNL CNVPIVHR  
DQSITERVSSWLDEQHEHDHSYRILVVDDAPMNRKLLTRLLMKRGHVVEAEDGLE  
ALEKVTAEMKVGKRYDTILMDYQMPVIDGPTSTQRIRMEGCDSFIVGITGNVLPQ  
DIEHFKACGADGVLGKPFQVEELES MWIEYGVTSDE  
>comp15883\_c0\_seq1; 465 74 1315 LEN=1443; translated  
MKFTRSAICTAFGLVVATTLSATPNVDAFSP IPTSSTSNRQKVGTTSAFTPRSIQ  
SMASSSSTSLNSYTIIGIVGATGAVGKEIRNCLEDRGVVVKDKLRF FGSE  
RSAGKKVSTKNSGEVEIELFSVDAARECDVFLAVDGFALAHAKAISEGDDGAVV  
IDNSSAFRYEPEIPLVPEINGECTKSKLIANPNCTTAIGLMALWPLIKQFGVKK  
VLMSTYQASSGAGQPGMDELTEG TKQYLEGDMKSHDEIENKIFAYPLPFNVI  
PQIDKFQENGYTKEEMKVTWETRKICDLGDDVPISCSAVRIPTIRAHSEVIVLE  
TEDKVDLEVARKVLEDAPGVVVKDDPETLTYPMPLTATGSYDVEVGRIRQSLA  
FGDYGIEFFVCGDQLLGAALNAVLVAEEMDKNGALA  
>comp15884\_c0\_seq1; 369 1 1214 LEN=1438; translated  
XPPPVRNYQMKKTTVVLLYGKGPILTTTKVPTLRTTRIFVTMKVLLVSALGCL  
LATATVVE SFARSSVPGRTSPVGSRAFALGNSATDEATTAKSGGDDTAPNGLL  
KRDRYVASNRFVVRPGREAKFEKRWATRKSRLAELDGFYFHLMRRVTLNDDDDG  
STSYDGGDDKESQGNYSFTVWDKKSDFSARWKGDAFVEAHGGTSIGAFVSTMV  
NSALVLKGP RPAPAFYDGLLVQSE



EPEFMPETVDGWRKIDFPNEGTLPAECFVACNQFFVPRDNAVAFAEQRWKNRESKLRDCEG  
FVAFSMMRRDQAKGHGTVMDESVEPTYLSTTIWKDRASFQKWRDGSNFSKSHGKKDEG  
EVKGPVEASKKSPPPQAQGPPMWSRPPKPIFYEGTLVISTADGA  
>comp15885\_c0\_seq1; 157 31 678 LEN=970; translated  
MSFLSSISRPLISKASCVRLNIALRSMAGTAESRTSALGKLDSDQLEQRFLDQVPVKD  
NVEYTI SRVDDL VNWARKGSLWPMTFGLACCAVEMMHAAASRYDMERFGMVFRASPRQSD  
VMIVAGTLTNKMAPALRKVYDQMPEPRWVSMGSCANGGGYYHYSYSVVRGCDRIVPVDI  
YVPGCPPTAEALLFGMLQLQKKIKGNKALLLKM RK  
>comp15886\_c0\_seq1; 335 168 1346 LEN=1477; translated  
MINLAIHYNNLGVDTLCGRCPNNTSGGNGDKYRQASNEYELQPRHCPGSNIDVRDEQSG  
EPVRKRRKCMIDVEFQAKRTINGEEKTIHQIDSALALFQKALAFIVQNTLAYLQNGLY  
HPNDDEGFLRYENENVRRQIISSTNPCDTGISLKGESSCKQYIYWKAIKIGNEDIIDLK  
YTNQQRCQKGGHSCGNHNHRGRQEP RPQGEYEALTKSIYHSMICIFNIGLCYQYKGMTAK  
AEQMKLMANYANPFAFGFNNNYDFLNASIDHYTQAYELMTRFRLEDTSQYTFMLMAMMN  
LAATYGS LGQTSKVNICNRCLVQSLILVICSSERDGH LGQEVLSRTETKSVLRKEEDRTT  
FESFLSNV MYLMLGDGPNGDQRYSGNTVAEAA  
>comp15887\_c0\_seq1; 166 1 202 LEN=292; translated  
XDDDDDDDDADDDDDADGEVFAFPEDPLDKLIHVEDHGFRCRTKSRFLLCPGVPEQADHT  
IFYVFGWLW  
>comp15888\_c0\_seq1; 247 268 900 LEN=1198; translated  
MEASRRILEEYVSDANASYSCPSWAPT VGFVGIASAVVFANIGGAYGTARAGQGIMSMG  
IRSPELLMKNIIPVVMAGVLGIYGMIVAVILNGKITPPGQGTRYATYSQFNAFCHLAAGL  
CCGLTSLISGIAIGIAADAGTRAVGAQS QMSESWKMGFSGDAGGQSN SGNLDFVATIL  
IQVFASNIGLYGLITSLILSQEYTCDYNN  
>comp15890\_c0\_seq1; 395 231 1484 LEN=1558; translated  
MSSSHVLSPTALRSRRRGRPCTKSHLPVDEIPQSPCELS PFRNRTNICDEENKEDTV  
IGSSSSTCSLTLKIRRTAVPSNDLPNIVSAFQMPSSI INKKNLHESFDTQETVSVSESED  
EISSHSSSFDDGESSSEDSAYSCHSKRSIRFADEVGLPIQNVRYHCECDRRRQEHSELLVL  
CLFPERKKFEFLHVGYHCEEKKGVTVQALLSELPGMCTDSIFSSSEFVTLYRSNPVDNA  
FVNICASPQSTSENETSTEEFSSQTLTDCAFRENELLVASVRGSSERAVLEGIGSLLSND  
TILKTLKRARRSRRSLKFVYSEDDRRYRTLRLSLKTRKRANKDAKSDVQLP IVEPKNEV  
HHREQTAATTQIDCTDLVDEYCHDYDFCDESDFYLLVAIITISLGTVVFSAMGI  
>comp15891\_c0\_seq1; 5 1 205 LEN=250; minus strand; translated  
XTGSLSVSKEYLAFEGGPPIFRQNF'TCSALLDTSLKASHTGLSPAMAALPNAFWSLIGL  
WSPFARRY  
>comp15892\_c0\_seq1; 315 139 1495 LEN=1574; translated  
MDTLSTEEQNPTDDQRPVSFAIVSTAEIAKNKVI PGLLSVPYAVLVGVSSRSREKAQAF  
VDEHCGGAPCMGMTHDEIFDGV DAPGTTATPRIDALYVPLPSGVRNSYLKRALELGKHVY  
SEKPHGGTVNELRAVLDLAASKNLQWMDGTMWYHAHRTKEMEERLLPSSSNASGNPKPLG  
KVRRVSASF TWGGGGLVDEAWREGNGRTDPLREPMGMLGDSGHYPVSAVLWAFGWELPT  
MAKAVYTKRNRGAIISVEAVLWFEDGGRAIVDASCELP HRSQFEIVCDNGILRVDDL VG  
GQGRSGDFGAYERPFVGA SEYTLGDYTRDRTKASAEACDQVQCLLRAF CGRVKAI EGGGA  
ADPEWSRRSLCTHTVLC AIFESSMRDGV DVGIVRGNTDTRATGYVIEGQTYGDRRRGTGA  
KPPEVPDEGEPIFPAAASTVLR AQMFVSPCC  
>comp15893\_c0\_seq1; 565 350 1843 LEN=1877; translated  
MVSKNITRRQRLSQTFFYYMTSCVLVMSSTLILSSVSPASQPWNCNSFQAVEAFTSPPHN  
HRHPFGQSSFATTTAGARTHLFSSPTTETDSETNPEELHVDHSP TDCPTVVRAPLKF IGP  
YPCALRFPNLATESQRSRNITGISLDFVMDTAANVNTVQSQAQELL LPKQEDSPALPG  
VSSSGPMDGGD TYVLGDSQLEQAAIMVLDNLREQTEEERKQQQEPPEFEMQNL TAAALPV  
VNPGSAGLLGLAFFYCFEGGVEFRWGSTQQQPQLVDGMI VPTDFRDDSSPSVTFYGEDDS  
SNSDSSLQRALSDLVRVPIETIPVTQLPSLKIKNVNGVEVMALLDTGSPVTVLNQGAQA  
GIQTTQDTAKAAAQ TNSAGGWKNP FSSVVDKFKEAQATAEAAAKGEILMIGGSDGKPV T  
LYRSASDHHSISVATGLGGDDL SFGSDLPVYVGDIPGLAALNGIGVDSPPAVVLGLDVL  
RKRPRMLFRPRENEVYF  
>comp15894\_c0\_seq1; 144 1 528 LEN=956; translated  
GRKVEEENRSNFERNKYNN ETDLRHYIDKMDDYPADEIPDP IGEESFDRRYTTLME  
FLSTSSEMRTASSFKQSLWAGSGAMAGMVAGPVGGLLGGITGSLIGFLKSSDYDGVV  
VHLCKLDPASKKELLIQVGHLLVAAGAATQGLNTE SALRDALVSYACQSGVRDQIW  
>comp15895\_c0\_seq1; 442 152 1522 LEN=1553; translated  
MSNVGSSGRASGGELEEKIDLTPETDVKLEQSAQLAKGGQLKDALAMLA AVEKRCRTGND

TANLIRVCKASLEYCKDAGDDELLLTTLQTLATRRSQQAAIKALVHTSIPYCVVEGQFTP  
LPVTSLEKKS SRDKLVEALREISDGKIFLEGERARLTRCMAMILEQEGDTSTAADVLEQEV  
HVETYGSLSKREKVEYIILEQMRLTLAKEDYVRS AIVAGKVS RKHLQEDNMEEYKVKFFTL  
MAKLRHEKDAFSLAKDYHSIYSTPLILKDDTKWKEALQTTVVYLALSPHSNEQQDMMNR  
VCEDSNLEKLP SFHTIIKLF LKKEI INYPMANQAEVEGIPALKEGGQDLAQFWHESFHRR  
IIQHNIRVVS LYRRIHGARLSQLLGLDPVRLEKEISSMVSDGSVYAKIDRPKDIVRFSE  
PKSPEVLS EWASDIDKLLHMVETTTTHLINKEKMTK

>comp15896\_c0\_seq1; 409 1 1212 LEN=1266; translated  
SEGKRINKFMKMLYRVALLALVSTATLSHGFMPRHSVSRGGALPMSTETEEKVKDKKVEG  
KKAGKDAPPVNI GWD SHTAVEKVPDSL VREGDGP EGNFPMRSKF EKMC RDAQIEITKAI E  
EIDGEAKFQEDAWTRANGGGMSRVMSGGKVF EKAGVNL SVVYGSMPQEALQAATERGVD  
RAKGMAPGERV PPFACGLSSVMHPKNPHCPTMHFNRYFETDGGVWVFGGGTDITPSYVN  
EDDMKH FHGTYKEICDKHDPGYKEFKDWADRYFVIQHRNETRGLGGIFFDDQNNKEPEQ  
HFEFSKECLNSVVKAYGPIIEKHKNDEFTQQEKEWQLMRRGRYVEFNLVYDRGTVFGLKT  
GGRIESILMSLPETARWEYNVIPEEGSKEADFIDACKNPREWV

>comp15897\_c0\_seq1; 676 16 936 LEN=975; translated  
MTFIQEGRTKAYFSRYQVKFRRRRREGKTDYRARKRLCAQDKNKYQSPKYRLVVRFTNTKV  
ICQIAYALVDGDRILCQAQSTELGRYGLTVGLKNYAAAYCTGLLCARRLLQKVGLDEIYE  
GNTEVDGEV VSTEYDKKTYFVEEVD DDKRPF RALLDVGCKPTTTGHRLFGALKGAADGGL  
DVPHSEKRFP GYDRDAKEYDS DMHRERIFGGHVSEYMEYLEEEDNQKYKEHFAKYIEADV  
EGDSLEELYESVHEAIREDPSPSEKKDFSPDKSFKRPAKLTYDERKA AVAAKKA AKVAEL  
EAEDSE

>comp15898\_c0\_seq1; 699 121 2316 LEN=2569; translated  
MNLHSSVIRNTIGTVCVLLSAAWSTDAQSHLKRKDLCPYSEVDPLIECVEVASYGGLVE  
VIENAPSGAEITFCPFFIRKTI SVDPI MVKKG I KVT CARKEEDQFCTIIIGYGNHLVIDTA  
EDTLWQGFNFKGSNDHAVLITGEADNTE LATHTFCQVSFSENVRAKSTRGGALMLERSAG  
TVNVVETFFAENFSSTYGAAIYSRTNQLNIIYSLFLQNKSNGYGPAVFVAQGGNLMVKTT  
TFIGNKGRDGHGVLFNPGEGAGTYEDGFDNSINNGDCRQVYDLTTKACIVFNVSPPTRY  
TPSPTFKPTKQPTKLPTAPPTIAPKPTRPPIVAITKSPVKVYTAAPT KVTVTKAPT KAP  
NSTQKPIVSPNTKPTIDITKGPVQVTAAPT NKPTLTKKPIASPSNNPMIAPISATAEPT  
DKQLASAPTITTKPTTEPTKKVTEANSFAKDIANLCIFRAIPKDRKCIDVET YEDFKVA  
IKSAMKSESKDVQFCGGFTLEKLEVEPEVDRSIDIRCIATCTFFGVGPF AKISGLSKIR  
LQNLKFVNAQETS AVVVSTISVASKTTFCETEF SKNLVSPENLDLGGALT VADKSGIVNV  
VNSTFSGNIAALGGAIHSDGFKLN VVGTSFVANNA YNTGNAIYVGDGNHLFVESSTFILN  
IEAASRELGRGGDGAESVAIAVQPD RSIRSGIHKGMIQDGGSNQMILSGKCKGYYILQK  
KFCYYFSKYLS

>comp15899\_c0\_seq1; 784 86 1453 LEN=1469; translated  
MKLLFTALTIVVPVATAFSPVSLSKVASTPSTTAVFAENGENG SF EKKKIIVLGGDGF CG  
WPTSLYLS DQGH DVVIDNLSRRKIDLDLGCDSLTPISSPETRVQAWKEVTGKDIPFHNL  
DVA KDYDLLVQLIKDEQ PDSIVHF AEQRAAPYSQKNSKTKRYTV DNNVGGSNLCCAVID  
ADVDAHIVHLGTMGVYGYGTSGGEIPEGYIDVTLPGGRESNILHPAYPGSVYHATKCLDA  
ILWQFYQKNDALRITDLHQGIVWGTNTPQTAKDDR LVNRFDYDGDYGTVLNRF LMQGAMG  
VPLTVYGTGGQTRAFIHVTD TARCIELAINNPPEKGERVEILNQIAETRVRDIAEMVAG  
MTGVEANFIPNPRQEAENELDVSNRKFRNLGLDPI TLDTGLFEEVTLIVDKYSRCDPK  
KILPASFWNKKRAEECASLDPNSIKIKDDAKETVA

>comp15900\_c0\_seq1; 257 68 688 LEN=768; translated  
MKKAESKTI STKMESSPLPKKSVRFLTNSLVYRTEHINDYTKGEIERSWYSQEEMSSIVS  
DCMDTLTAVKNNDP SNSSGRCLRGLEYHLPEGQKRRANKFGAIDLVLDEQTIQWECEEE  
DAHAIRTLTYLTVS VPCQAEANRIGLDDEREARFVYRES DKNNDNCLLELSATRPSLLALK  
QASQHKSFK CISNELASQCSPVGRAA

>comp15901\_c0\_seq1; 208 216 548 LEN=634; translated  
MHPPLDRPHRCQLEINGLRECHETKASKLRFWACNDAKASLDKCFREEKEEMLRKMNAD  
LDEKKREEQEQAALAFGRKETFFREFLAKDPTYEREVERERQRQKSWFSMF

>comp15902\_c0\_seq1; 292 208 864 LEN=962; translated  
MTVHSFHI FDRKGKTLFTKRYAKTPGGKKSEEDLLAEKEQLSEQRKLVFGMLFSLRELSS  
SLSPAEGPGDLHMVKTGASTLYNYETVSGLRFLVLYTTPDTKIAAKGGSGGAAGTPQSSVH  
GGSSGPILTAPTATGFANSATSSDPGGGGSGAGGGPSSSTNPAVTADVRSSLKHIYETIW  
VTSVIRSPMYRPNSSESIRSTSFEADLDAYFKRMAWFP

>comp15903\_c0\_seq1; 281 1 1268 LEN=1563; translated  
XNSVQFHPGSQQYPVRVAELHTDFGLQKSIRATIENPSIIHELIPLDTRS FVTKDHF KRV

KRNQSQDGKRKFAMHIKDNRITFASFLYNASRAQSSSSLSWVLPSCRHSRNQRCPAKQY  
QQEQQRRIVVKGKTLPLHVNDLKAQQATGVGLFSPQQQRQKHRFRKKHTRLPRNYTSD  
LVVVLDMDECLIHSQFLEGPYAKYAHQLQKQSSSLDGASSKGVETFNITLPGGERVLVH  
ERPHLHEFLREVSSKYETHIFTAAMEVYAKPVLKMLDPHGDIFSGIHYRESCQLDSTVGA  
YIKNLDLFCDSYDEHERQQRNLNRTVLVDNNPLSFLANPEHGILVSSFYDDSRDITLPAVL  
DLLNELDKHEDVRPVLDAKFRLREALDDISRGRPFSGRHQQIDEQQQQQRQDDHTSIALA  
TS

>comp15904\_c0\_seq1; 184 178 984 LEN=984; translated  
MKLAPTANIDGKRLDLSWEMFSNIPSLCWYHISNWNVHWPSVIYFIGVHYTALKGLFLIK  
ECSAETLFFAQILWPITGYGVTVGAHRLWAHRTYEAHFLFRLYLIITNSMAYQGSVYTWA  
TNHRIHHAYSETDADPHNSTRGFFYSHFGWLILKKHPDRVAALEKIDRTDLWEDPLVRIQ  
HMCDFYAFYFVWFLPAQIAHYGWGEDYWNALYVAGALRYCCVLHFTFLVNSAAHLYGDR  
PYDTKSVAGENPFVNAFTGGEGWHNWHHK

>comp15905\_c0\_seq1; 1163 56 2017 LEN=2060; translated  
MAAVTGESVIGIDLGTYSVGVWQNDRVEI IANDQGNRTTPSYVAFTETERLIGDAAKSQ  
AAMNADNTVFDKRLIGRKFDTAAVQADMKHWPFVVISGPGGTP I I KVEYKGESKTFKAE  
EISSMVLTKMKDIAEAYLGEVKNVAVTVPAYFNDSQRQATKDAGSISGLNLVRIINEPT  
AAAIAAYGLDKKDEKNVLIIFDLGGGTFDVSLLTIEEGIFEVKATAGDTHLGGEDFDNRMV  
DYFLTDFKRRHKKMSKNQRSLRRLRTACERAKRTLSSTQAHEIDSLFDGIDFNATIT  
RARFEDLNMDYFKKCEPCEKVLRLDAKISKAGVDEIVLVGGSTRIPKIQTMLTEFFNGKE  
LCKSINPDEAVAFGATVQAAILSGSKSEKLSLELLLDVTPLSLGLTAGGVMTTLIKRN  
TTVPAKKTQTFSTYADNQPGLIQVFEGERSMTKDNNILGKFNLDGIPPMRGPQIDVC  
FDIDANGILNVSALSKSTGKENKITITNDKGRLSQEEIERMVSEAEKYKAEDDANKNRIE  
AKNGLENYCYSLKGSLSGEVADKMDPADKTAVESKIEETISWLDSNPAAEKEEYEEKQKE  
LEGVAMPILQKMGAAGGMPGMPDMGGMPGGAPGAPAAEDPAGGPTIEEID

>comp15906\_c0\_seq1; 194 1229 1381 LEN=1674; minus strand; translated  
MAFATARSGITLFAAGRFEMKDDKRNKQLRELSEAMIGNEVLVELPRI

>comp15907\_c0\_seq1; 147 70 678 LEN=721; minus strand; translated  
MFCRPTSILXQTPRRAIGQTGKRIESNQLVPPDSFPRSVLEPAAGTPPAALFGVEKPALV  
GLLVGLALDPAECPGDRRLDTGCSCVVLEVTAVA EKVLVPQSESGSLSSSDHDDRDRD  
GANDGDKDIGVDEEDSSHRDRIISIDTSPARGWSEESKEPLWRRGPKLLQGRHVNRKEA  
DPSVARSSVGCIVAVLAWYGVV

>comp15908\_c0\_seq1; 436 208 1506 LEN=1806; translated  
MSECSRADSESSDEYFVPIVDQSRGYSYGIQNDHFDHSFIPISPGEGGSERLSPISPPHQ  
ATPANPQSPLSECESHQHQHQQYQQRYRTKQKRYQHHRHTSELATFPTDPNANTPFRSSL  
VFTAHRKRKSTFSFAVTAFCVLFGLYSSARSSLHTTVKEVDELVVSEKVRQLRRADYE  
IRLLERELTALDAMETEREDEEVEERVLSQSSAFANPELVDEMRIIEEKLKESQAQADKL  
KTQVSI VSKQDAVAKYGSVIRVKMDLIFPEKSDSDGTVPTGPHTIIMEMASLDIMPHA  
VFTFLEMVSAKLLDGCSEFILNALHVLKAAPLPYDGSSASSKAREFIDHGLESAFREYSH  
DYPHDKYTVGFAADGSPSYINTEDNSQIHIGEPCEFAKIIISGFDTVQRLEGMPTRNGIWL  
EHRIGVREVSIL

>comp15909\_c0\_seq1; 410 190 1032 LEN=1161; translated  
MPSEFENKVIVITGAGGNFGRAGCLYFAKRGAKIVAMDNNPSTLEETASLIRAEASLAE  
EILLATCDVTDASSVQAAVDSAVFRSRIDLWNNAGYQGQIKPTLDYDPKDFALVMNIN  
VTGMFIVLQAVAKQIARQRDAEEGTRSYSIVNTASVAGLRGTPAMVAYASSKAAVLAMTV  
STSKDLAPIGVRVNAVSPALIGPGFMWTRQNELHAGSGSPYFATDPDTVARNKVNGVPMK  
RLGTIEEVLQSVAFLLSDQSSYTTGTNLVVDGGMSSGLKC

>comp15910\_c0\_seq1; 392 445 1317 LEN=1497; translated  
MNTTRTIARHAGFRCALSSRGANAMANRVARGGANANAIAFRPISTVHRALVREGRPGPS  
GTHRHHGGGSGVLARPNRGRSVGSPRFPAGTPCFSTAGGGDLGSAQPPPHETETKTE  
TNTEPAGYDPFDITKSFSDTSYFPPPEETDPSALAARYEGMTNEELMDTSTIALEDENN  
NNNDTGTTVAWGDGLMHSPPVRDKNAGLPRGSLVGTVVSTKMQKTVNAVDRYRLHPKYR  
KRIRYTRKFMAHDEDEVASDGDTVLIVPSQRI SKKKHFVLRREIVRAKQQL

>comp15911\_c0\_seq1; 818 16 1629 LEN=1678; translated  
MKFTVAATALFLASASAFAPRTGVVNVKVAAPSSSAINGFTSDIFEVTEVDFADTKETIVK  
GGRDLFPLLPKAFEGIKQVGVIGWGSQAPAQAQNMMSLKEAGADTKVVIGLREGSSSFQ  
EAKDVGFSEEEGTLGEMYDVIKNSDLVMLLISDAAQAKLYKEIFAAMKPGATLGLSHGFL  
LGYLDSIGEFKPEDMDVIAVCPKGMGSPVRRLYEQKEVNGAGINSSFAVHQNVSQKATE  
LALGWGVAVGSPFMFETSLRSEYCSDIYGERGILLGAVHGIVESLYRRYQRQGMTAEDAF  
LNSSESITGNITKIIISTQGIIKAVYDGLSDEDKIFQTAYSASYPKAKEILQEIYDEVSSG

NEIRTVIMHGDRDLDRYPVVGKIDGTNTWTVGEEKVRADRDDENIPLNPFPTAGVYVATMMAQI  
DVLLEEGHPYSEVVNESVIEAVDSLCPYMHYRGVAFMVDNCSFTAKTGSRKWAPRFDYIL  
DQLAYTAVDNGVAVNEELISDFENHRVHQAVEECCCLRPPVDISLFAETSTKEIVIQ  
>comp15912\_c0\_seq1; 366 197 1135 LEN=1293; translated  
MMDTECTPSSFVIPEQDHNVEEIIANMLRQERTTYKREDYLTLLLPSKLNDDDETIDASWR  
QRIVEWMYGVVDHCNLRRESVSVATYFLDLASCHDLVRSRKDFQLVAMTSLMLSIKLND  
TMVKLDSMVRLLGRGLFNEADVIGMESKMLKAFTHVHPPPTPVCFMRQLLRLLPPESTPVA  
RYIIVEVTRFVSEVSACLYKFVKYPASSMAFAAIIISMERIDEATLPLWQRHQFLYNVAS  
TTGLESTSWDVLHAAEDLRISLDNNVNLQDLMQTIDAQCIRANQTIAAKESKDHAMEISG  
PNSPREVSAGVF  
>comp15913\_c0\_seq1; 89 1 177 LEN=750; translated  
DDDDDDQGDDEENRFTKQSLGVGFDRAAQGVDPARRRDPVAPGRSRATGERRRDR  
>comp15914\_c0\_seq1; 313 259 983 LEN=983; translated  
MSSETKMRSSDRSNPNRSRFQAAAGTVGAAAVRENDRVAGQALSRWKGEKKEDPDTS  
DKEKMNPDDEWSKLAYTSRMAAMAANKQRATANQKLF SRVVDTAHTWDVWTPPPSNSVSG  
KVVPHFVNRHKHRRRCSIEIHRVTPVGLEEEKNGNENENENDDAQEPDSYEECVVRLLP  
ATRELNRKVRNEALRHLMHKGPAPSSADTHVGSRRDLHASSVARGDGDVVDNYTNDDDDD  
DX  
>comp15915\_c0\_seq1; 268 131 523 LEN=667; translated  
MSDDSKDPQEQFKELIKSGVSAANGLRLAQTTFLLNFKEPISSTLQSIENGAVASKNAK  
TIYMKRKQYAPEIMGGTAVATGGYLWLRGRRIAGVFGAVIGAGAAYSIVYDEFPTFEVDL  
PNVIFGKKDE  
>comp15916\_c0\_seq1; 221 69 338 LEN=482; translated  
MAACVSGFAPVSTPRQTVAVSMSKAPEPVEFEKQDKAAAVAAFATAMAPFAAHAEAVDEAT  
VIGYGAGLVACVVSLAVGFAIGYGLVTKL  
>comp15917\_c0\_seq1; 260 29 1174 LEN=1628; translated  
MTNYSKYACLHASCLLLLLIASSTVTFAESFLQCKNSISSVDHPTPVRHRAGMHIGSAI  
STRVQSSSTDKAVSIPPGGGDKSVSSPEERTKANEIMTYCAKITALSAVVDLLVDGSSLI  
AGIASGDxdfSPDYALESELQLQRVEGFQIVQEKDQNGRLSLSIAGKIPGQDDWDLAAPR  
RNGVALVPGVGGNRVEGFHSEQRPALNALYAFVGVISIKLSANETENLAIKRPEQDDEA  
SPQRIVRLGRVAVRAMSLGVSFAVLD SIMTPAIALRKPRGEAIVLLDLTVSIPFAIVLW  
KLRRSYIGFIEDVANTPIGGSSPTMKARVVKPETQIQLAIAQQNFWGRIKSFQQHQMFY  
KTLALIAQYKVIKVPGVFAK  
>comp15919\_c0\_seq1; 583 196 1098 LEN=1156; translated  
MAEETTTEDIRTEIAAISIPEDDEDYTPPSKPVSSFSLTPSSTSKPQDEPLTLTEDDEGE  
HAELEKEVRSKDENITGLEKLRMEKQEELEGLQKELDKERLLQMKESILHRIEVERLKRQ  
TKAVEERLTVLEKDMQNKDAIREYAEIKSVAPKGGADSQYVMKLQSQLAKAVKRMDAT  
SHQMTQLEHSCEEVNSLKHEIGDIVEDRCRTELDMKQLELLEEQKKEIQSEYDDRILL  
NQQELERLKEKLTVEVTLDDLEQEMEETEELMKLNNTCEMQDRVIEELKNISSSAEEKD  
>comp15920\_c0\_seq1; 734 380 2131 LEN=2331; translated  
MPQKLYNESYHRSQGAETGGSSTMSVSSINMISPASMPSELNGAIGVDSNTVGGQTLQS  
DCIFLEDLRDILMCLKAQEASYERRRIRHQARARNISSDLPPFHDSWRPVMI SWMYHVADT  
FRLMP IVVATAVYILDTCAMD IWNDSRTKNPREIYPLMTMTALNMAVKCHETKMFPLDQL  
VLLGPNGRNSKGRGYTPVQICSMERKILQRCGWKLHKPTTHDYLLRFVEVLAKDQRDVV  
KGAAVMHLKRSLLWEHMAHQQQIVCRPFSDCTLAYGAFLLAMEDCGIPLVDKQSACLALL  
HVANLSAQTPMLSEAYNWLLQAQSLQMHLQKGTTPKGPATSHTPANRP IVAVPDHVSAP  
QPKPRAANLAVDLLSDNSDAMSCDTASSMSAMALAPQPTHGSSADLLEEFVVEEKEQP  
RSMVTQDDDPFASETLAAAVEQKEDEDSSDDRSTSLMSQSSNGTYDEVIFCSYSSDGDA  
FEVITTEYSVEDEDHDSVTRSDVIMSILPTVMEEDDYETEGISDNLVDEESDDDEDSDQE  
EGQRLVLTESLDEGDGEVAIRGKNSDDHLSGMVTSPREVSVTI  
>comp15921\_c0\_seq1; 78 344 805 LEN=1228; translated  
MEFIPTFKNGLPHRCNTNEIKTIEHFLGDLLARETGMVEHSVEYLDRMYDADEHGRSHR  
AVKHHHLSKVRGFDFTFDCPLQEDRIECPDNWCHVLCLETVRPGHKNLTDRAADLKEK  
LHFYAKTLEGPYNVRLGHTAALDFHLLVSVSP  
>comp15922\_c0\_seq1; 394 926 2095 LEN=2247; translated  
MIRSFGLKKGILWRKLGWMAISFVCIALGIVWADTTFYLSRHNGKPMHGSTDDCYEPAAS  
LSMFNSSFILTPFNALSYNKISNLKDHGLHPRWTHAVVNMVIMYGPLTLATYVLIITKT  
LHSASATSNLSLRKPFGEVNATLMASGAVLIFGLGFLSIAPHQEPRFLLPLLIPLVLLG  
EIPFRRYPTACVVVWVLFNTIILLTLFGILHQGGVTQSLLEIGSSQVWGHQKQPTSWIYM  
TYMPPTFLTRLSHDVVHNSRTCNGYQENGVCNPI SFHVFGAERDDACQKAEVRIMDLKGS

SIDKLSDTLQSELSNTRRQDDSKFNSFLYLVGPKGQCELPNDTYKCSEVKSFSGPHLSTEDFPPLNGSVTEFYTMLLALSVYKISCAAMT  
>comp15923\_c0\_seq1; 448 43 984 LEN=1265; translated  
MRFSSFRISVFLFLQKQSLAFITPPCQHQPASSLFFVSASTTDEIDLSSNYGADMNQDDMM  
ESDLLVIVDQNDNVVELSKDQSVSKAAHTFSNEQPRGILHRAFSLFCFNEEGKLLLTQR  
AADKITFPGVWNTACSHPLMGMPSSSEVDIWPKAFPEMPGIKRAAARKAKHELGLDIQAD  
IPDVQFVSRFHYWASDVETHGSETPWGEHEVDYILFLKSPVKEYTLNINPEEVADVKEYVT  
ISELKDMIYNQPDLTWSPWFIGIMERGGFDWEDLENTLQGKNTNEDITFFDPLPNHFAT  
YNTPEHTRESTGVW  
>comp15924\_c0\_seq1; 316 77 958 LEN=1091; translated  
MQNYTADPCSAVAPLVRAMECIPEGENEDGLHGSSASLFFSSIRNLNPAFGGTETDKQEAP  
LKDLKQRLESFLSCGWLTQKEYQQHADFLATYHSDSSIGANGKFALRELEKELDSIEEKK  
SAQPAPQSWSDMFMSTLGI STSKPGSSGPQARTSFSPLANATNRSANGATNPSPTIVSP  
GDLSNVLSGEDVAELFVETCF FARLGFVQPPCCMSCTYREALRGLPNEQC DRWVWVRRD  
AGKTFDP SNNADLGKNALVVQCRSARRLIAGKTVEGYRWDDKKRVLRRRTKGI  
>comp15926\_c0\_seq1; 696 188 2452 LEN=2593; translated  
MSIVNRERRKNAGKRMEILGKKMEEEDDAFWSHETWAEDDSGNE SFHESDEDSALRKDVF  
DSDFNDESE DNEDEEVAAGEAEERELR KSERARRRPKTNIHAA YGNLSADVSARGKGRKG  
GSGAFKRAIGEGFNAGIVLNLPP ESSDSLAYMESLSEKANGTLQVIQHKQPAPLEPETQT  
TSTKVIPSTTTSTDLANLTRFTALPPASEVTVTKT TTTAQATTTTSSSQRKSSRRATRDPV  
VRESHASSRERRSQRKLRSCGGSATEATRTMSTRKTAPPSGQKKPSSSGVTPRVLSAAK  
QKRISQEELLLLEAVHDTEPENQRWLHGRKRVDQHDREKDSNAGLRERHRGRKIVQKFHS  
RRGCLITLTFPEMDSVPEILTRRQQSLQQHQTQDVIQGAQPPSQPLQQQSKRCVITGRIG  
RYLDPLTKHPYYDVTAFKELRRRHKAGLSIANGCVVESNVSNKRKIPSN SAQNELSTTKM  
PATGQKSKPI PITVCSGGNTTNELAKRQQGAKGKSSSSSVNVNQLKLPFQSPKLPKSKT  
VTMYRQKKNLNLHLVLPLEGN SGSASAAAKNSDKFLVCP SGRRLSPRKRK PSEKVLETMA  
MLPRKGS GGNEAVTPNNF WIDPKKSQPAKLPKDRRQNSGNKKNETS NPKSSNSTALASA  
LPKLV LKLLPSVQSM PSTINGSNQMALEEKSVVYRDPNISTAICPEKDVLIPLLAIVDV  
DPSKAMTTKPTDDSLDGNIVVKSATDKTSSRDIG  
>comp15927\_c0\_seq1; 419 562 1737 LEN=1950; translated  
MRVVEDGGDEF AVLAVNVEGKFTDGN SNSETW DGRYLPTIEAFAGVERGEACDTGDLLTL  
LTD FGAAYVDAEGKKKWRNIGQTQDGDYGSALVEMPLHDSSVWTPINADNFKVGTFEACV  
RISRKHDTDYVFFD TFFSLKIDAKGLFQTFEQEILVEEFGNVQNYDKEETRKIGV DAYL  
CGPSTSANPGRSYAIGQSFHVCVGPQAELEKGF AVVGFHDVTCAGTDVVTDGDFADQLT  
SVARNPVDFIDGKENPEAVATDAGVAYFETVVTPEFYAGSEAGSFTCEGRVDLEQKSPEE  
GVGVEIPTRRLTASF SRHSDDLRRHLQESGEAETD TDTGSSFGITVGLLPDGESADALF  
GDLAGPAADTGGVPGTAMATAAGAAVLAALL  
>comp15928\_c0\_seq1; 480 168 1418 LEN=1840; translated  
MNICPPSERKDGIMVAGPQYSSKDRDRVDLLKSPPSNRMKVFGKSPPLTMPTKT V GKDAL  
VEVSETKKKKRKRKRKWKPEGKPKRPLSAYNIFFAQERVLMLGKDIPTAEQEEQKKRV  
HCKTHGKISFAAMARTIGAKWKALDSSEKAI FEDRARSEKARYHAEITLWKESQKSTASA  
SGETDASDSGKTGPAGTSPMPIASTSPAKKSSSEPI SGT SRAVSEPAAVSPA EQLAAYMN  
EESLLLRREVASANAIGTLLPSERTAPTLP PHRINDNGSNVMRMILEEENRIRCMSLLGL  
QSNPLADFTLSDISDASREYLNHHQFPELDQAF LSRHDMNLQQLLANPMDAYSGLRSPLS  
FNHEERSLRGNLQLPGTDGLSFREYHSRYLQVLEEYATILEIEERHKRMMGHLMNK  
>comp15929\_c0\_seq1; 202 50 505 LEN=647; translated  
MVFTLSVPSEYGFVVLGAGVGSVVCNFFLAGAVMKGRKDCDVPYPNLYATPGYHKKADEF  
NRIQRSHQNFMETLDSYIAMTLLGGLKYPIACAVGTVFYVGSYFYQGYIDTSLDVATA  
RYKKGGAIKWIGFLTSMISTISLAISMIKSK  
>comp15930\_c0\_seq1; 350 131 952 LEN=1044; translated  
MNYGMDFQGGDTGGGGF SNNGN NYGGGSQGSPTKQRRNYDEQTLIPITISMAFKARANQS  
GGDDTLTLEDGRPLHSAKIIAAVRSADVQSTNIMYTI EDGTGALDVKQWLDNDAAEIVE  
MKQQTAKEHTYVKVIGQIKDYDGKKQLVANSVLP LSSGNELTHHLLLEVIYSAEKFKQADS  
IVAAPMTTGMAFGNNKPIQPKVEGGDAGFSVKDRVLQFLRQHDNDSEMSSIDL CIEQMK  
DVSEADIRTAQDLSEEGQIYSTV NENYFKVAM  
>comp15931\_c0\_seq1; 602 182 1394 LEN=1394; translated  
MARHKSRAILATTAASMFWTIAMCLALLSVVDAGDACKAEARRALVPDPFAVKPAVW  
DDEDDGPWEAPKVKMSDLP AWYRLLHEVRIGLAGAAPWL VVGVA AALLTTVMKPLVPSS  
LLRSCLGSGSNSNSNAVLDSVRG SVFGLLVPFCSCGALPLALALSQEGVSPSSIAAFVTA  
AQAGVDSLFFTYGVFGARVALFRLASAGMLAFLVGMTLAVSSSEGNKAGDKQPTSDSK

NQSKASSNDGGTCCNSNKASGGCGEEPNTNSEASSPVTGAASLAMFAHTAVELFASVSVW  
VVLGVVVSASASVWAPASSFAPVPSDGGSPGLVQSVVVRTGLFLLTVPLTICEHGIVSLA  
DALRGVGFVGTAVALVVTGPSTNAGTLLLLLRLNQNKRQQQQX  
>comp15932\_c0\_seq1; 528 220 2269 LEN=2396; translated  
MELLNANQSSISPEKDLRRSRNHNSTGTSNHDSKDPNLYKPKRRQRPSIMDRILKACLT  
IESGKGSWRGGLGNAVYLRILKCNRIGTYGPSASRDNLQDALELLHPAIQLQKEAETP  
SPHFSLLSNNFVGSCHLLVSVLMRLGKMEEAATAARCVTDKLEDLYEQTTGNAKNNTDCS  
ILFGLAGGLQALWFLRRELGDSDFGSDLALTMSSYILLEGLQDNDNYGMPLLDWNLWPY  
LGAGTGAVGVLYALLGHTDDEWANLGDCLPNAREIVRESIDGLACHLYETTGNLKDSSVGG  
FEESDRSVGWTHGGAGYCLLLLKAFGVYGDKEYVHWAVEFADEVLPNRTTRCEGPGGLARG  
APGIAYVFLAMARVDFHRSGLWKQRARDVAATVLAETRSVLVHPQNNNYSLFDGIGGLAS  
LLIDLEDLETTKTTTPWCYFFPFESCQANLRCRKFYELTKREDHPRLFSFRIERKNSTCDD  
NREAKRAFLQSKPPARKTSPAATLSTTETATTALTTSTVSTNPSRNPFRSGNASNDAFQLS  
TPRSIHASDRAALDVSHLTMDDTSNIPVVEAAPRPFMAASPPGPSIPEEEDSLIRTR  
KVSVDTPPARRTANAKPPPCWINDCAYDEAFMTDSVDGSSARKNPGSSILEQGNKSSNTNT  
VAEARIMQHVAEAGADETSATWW  
>comp15933\_c0\_seq1; 183 1 568 LEN=710; translated  
XPTNEIRQLRRIPVGTAEQPCRVLRLPQATQHNRQHILHLDMSETFKQRSRRHSQETT  
DSDAPDARMPREESDKTKRGRGYLLHVAVGLSLCLAVLVLTKEAAVSASSLIEKASNL  
RGDGTGTDIQTLPYHTWPEGCNWKCYMENNPDLEKNMAAPDEHNIAHWWLLHGVTEKR  
DCQCKNKTR  
>comp15934\_c0\_seq1; 605 75 1658 LEN=2004; translated  
MNIALSLRSVTLVSTVALATAFAPLGNLKPSSSSSSSHSSSLFAVDGEYDFDVAIIGCGVG  
GHGAALHSRAQGLSTAVFAGGDVGGTVCVNRGCVPSKALLAASGRVREMQDAEHLKSLGIE  
VGDVNYREGIAAHAKNLANRVKGNLENSLVALGCDVIEGRGMLTTNAQEVKDEATGKVY  
KCKDILAPGSIPIFVPPGVTVDEKTVYTSDGALELGFVPEWVAIIGSGYIGLEFSDVYTA  
LGSEVTFIEAMDKLMPTFDREIAKQAERLLIRDRPIDYRTGVFASEVTPGIPGKEPVTIK  
MIDAKTKEHVETIEVDAAMVATGRVPNTANMGLEDRGIEITNRGFVNVNEKMQVLAGPDSE  
EVIPNLYCIGDANGKMLLAHAASAHGISAIEINICDRPHEVDHNAIPAACFTHPPEISMVGP  
TEEQAIELAEKEGWTLGKSQGSFRANSKALAEEGEGNGMAKVLFKKETGHVVAVHIIGLHA  
ADLIQECANAVAAGTTVQELSMMVHTHPTLSEVMDEAFKGAVGMSH  
>comp15935\_c0\_seq1; 343 68 619 LEN=955; translated  
MGLTFSKLFEGLFGKEMRILMVGLDAAGKTTILYKLLKLGVEVTTIPTIGFNVETVEYKN  
ISFTVWDVGGQDKIRPLWRHYQNTQGLIFVVDSDADRIDAARDELHRMLNEDELRAV  
LLVFANKQDLPNAMSAAEMTDKLGHLGLRPSYRQWYIQACCATTGDGLYEGLDWLSATLV  
KRK  
>comp15936\_c0\_seq1; 506 493 1910 LEN=2369; translated  
MTSNNHRGGEFLFGGAAXSDLPLAFLLVGFVTIGCCTAFHVNANPYCNKALSCLHVMSSSSP  
PSPSPSSSSSEPSMSGYDRQEFEMQVGRAMDTRLDDYPEILVKDPDYSIYSSDMELIDPS  
GFHVHGVKNYGNISIRLVHTLIGLFYCPDQSDVKFRMCFDKARQNIIRIHWANVVPKAI  
GKETTLLHVDGISIYEFDRMTGNITQHRLERLVMNDNQVTTEQGVFAALRKAQAVVSNADGI  
PSFSRHMESMTKIGGEKLQNSIESVKVPDNLQFRRSIIFNRRGSVLFQDNNDEGLQTR  
SFVTASSRSSLTSMSSSAAGEAEGPDASMADELEKKNATRKKFGLKSLTMEEFLEIEQQ  
IKEMDLQQQKAAAAAVEAMELERAKEQEKNRGGFVIGKLFGEVMKDTCESNYDCERPEVC  
CDFGFKMCSSGMRIVDGMNRRQQLAEVPPVIRNPNPWPGDPRNKRGSW  
>comp15937\_c0\_seq1; 446 104 889 LEN=1336; translated  
MKLLFAALLTSSAVAWTPKNSDASTRREVIKTLMAGATVASPAISNAYNLDDLPAFD  
LEPFIIDAPTMKIHHDKHHATYVANINKATEGKDEVPIIDLMLADALSAGPVRNSGGHYN  
HAFFWGMTSPDKAKDTKVSQDLQKLIDSSFGSMDEMKAFFETQAAPGAVFGSGWVWCV  
NQAGDKLEIVGTPNQDNLPMKGVTVSEVMFPILGLDVWEHAYLKYQNRNRPEYVSNWV  
NWDKVENCAVVENHAGVSV  
>comp15938\_c0\_seq1; 341 177 1061 LEN=1360; translated  
MATASAFAPTSKIQVPALTTTESTTSLNQAIDYNPNLGGPMSDDPVDRTLMSMFPDIPM  
RKMQGGGTVRTWDIPPEAERLSYIRTNRPLKALVELWVGPIIRRIHSVDIECEDGDQTP  
FRAMLKFKPGTKTKLISTGSHEFPFIEFGAEPNAQRMEETWAATQKVFDTSPKTTVQGG  
STEGGGSVRYFNIPDDVETTQMLVLSRDIGKRTVKAQIEVLQGPNSVRQLYTLHCGGST  
QPYHCVIPTPGPWITRIIATNYMEFPFSAVVTPYELTGEVDQFGHGPAPLYMN  
>comp15940\_c0\_seq1; 1344 54 2468 LEN=2543; translated  
MRFDRIAIAKALALLAVSHAPTFRSSSSVSMVGAETPAANIAVPDGAESFTFEAEVSK  
MLDIVVNSLYQNKDVFLRELISNASDALDKIRFLSLTNPDFLEGEKLVQVQIEYDGDANT

LTIRDGTGIGMTHDELVANLGTVARSGTTKFLQALKAEGSDGKESGAISQIGQFGVGFYSA  
FLVADRIQVASKHYNSPTQYVWTSANGSSEFNIIYEDPRGTTTLTRGTEITLFLKEDCLEYA  
DENKLSQLAKHYSEFVTHPI SLRVTVTMEVEVEDEDESAADDEKTDGDDLEVTEEEVEE  
KPKKTKEVTTFDWEVLNNGPAIWTRSKEDITDEEYQAFFKVLTKDENKKAELWTHFSAEG  
NINFKSILYLPMDSLQGMNGMIPHGDEFGISLYVKKVLI SDEYELLPRYLYFMKGVVDS  
DLPLNVSRETLEQESKIIKIRKKVVRKALELLKSFQKESDDEVAAAAEEEGDDDNKTPTT  
NKYNEWYKQFSVHLKVGAI EDEPNRSKILKLLRYESTTSDGGLVGLKYEVENMKEWQKDI  
FFVAGDDIEKVKKSQFLEQFAEKGVVLYFVEPMDEYMADNIRSFDRHFKNIASDGIKL  
EDDKEDKDLATRRQKQFYQEKFKPLTTWLKLYGRSVMKVTVSERSISAPAIVSSAEYGHS  
ANMERLMRAQAYGSGQNGFATQSMKIFEINPRHPMITKLLSAPPEDADKDYEVSRKAD  
VALFLQEMALLNGGFSIENPEGHSKRILKFLQSELGLESKLEADHADLPVEEDVPPPEVDG  
EDVTL DIDEIVGEMKAEAAASDEL

>comp15941\_c0\_seq1; 539 121 1110 LEN=1233; translated  
MISRISRQLLAKQNAETSSALIEQLGTSEAFSFLSLREQEAILKRDQEDSVKLDKGI EFA  
KAKGVLDKNYVAQPYVVIDVLGKTPSLVADGII GSVKTD SNGESGDGSVIVLCLGSGTGK  
GTTVKMLEEKLTSDGKQVVCWSNGNIFRSVTL LAVTWCEQQEGLGAFDKDRALTKENLE  
TFMGM LTFGKYNGKYDTHIHGLGLDLYISEVQNTLTKSPKVS DNIP TVAEVTQGEVVSFA  
AGAVDTMGKDGI VVLEGREQTVDFVRTPHRFTLVLSDES LIGKRRAAQRVMAAALEVTS  
DESTDDEVGKALEACTEKFAIEAGYQPAN

>comp15942\_c0\_seq1; 261 186 1270 LEN=1371; translated  
MRIGGNAVAFRTFRSAAGIRTGTADALASAAASRAPFCKTIDRAVAILSNPSPRRAWTQQ  
SSTTTPTCTTSRSTRFRVGGSGIQHQHQLRGVDSVWAKRAAAAAAIAASGVACVCLGT  
RERHGLPASNGHHRNRRTTPLVAIPAASDQESRTLDPPPEPGAPVRAYIATSTSPAAPRR  
RDLTRVQLGGSSVVLVDHSSGEGTTSRPVAHDASVPLVLPED EATISPFLYCLMSQAKL  
VRIREEDQERTHLPIGLPGFACAHCKXLQRR LAIPQPQALEPDL SHGPEDAAL EGAETT  
LPPHTEVRAVPARGQAGAEATEKNGRRIH HVEGEAQQDLEGGT PPFQEI M V P NGAQGGIV  
S

>comp15943\_c0\_seq1; 972 119 2182 LEN=2290; translated  
MELEKECINTIRALSIDQVQAANS GHPGAPMGMAPIAYVLWKEIMKYSSSSPEWINRDRF  
VLSNGHASALQYAMLHLTGYEDSKMEDLKGFRVLGSKTPGH PENFMTAGVEVSTGPLGQQ  
ISNAVGLAMAETHLAATYNTDDHKIFDNYTYVLCGDGCMQEGISGEACSLAGHLGLGLKLI  
VMYDDNNITIDGDTLSFSEDAKRYESYNWHVQKVG DVNNGVDDL RKAIAEAQKVTDKP  
SII CVKTVIGEGSPKKAGTAGAHGAPLGVEEAAATKKVYGLPNPEETFQVSDAVKAVFAD  
AAKKGEEALTAWQAVMDAYQAAHPEKAQEIQRRFAGELPEGVFDSL PKFVVGEDKELATR  
KYSQECINAIYPNLPEFVGG SADLTPSNCTFPKGASDYQMASPEGRYIRFGVREHGMAAL  
CNGLFAYGGLRPYCATFMVFGYCMG SVRLSALS KFGVIYIFTHDSINVGQDGP THQPIE  
QFEQIR SMPNIHLWRPADSDEMAAA YKSGIQRKSTPTVIGCSRSP T T ALFGSSIDNAMKG  
AYVAIEADGTPDLII VSTGGEVQFCVKA VADLVAQGI STSLVSMPCQDV FLEQSEDYQKS  
VLPGNIPTLSVEAGATHGWHRF SHGQIGMDNIFGASGDGN AVYAHFGFTPENVA AKGKAL  
VDYYKADGKTVPNL RDVP HFE PFAKPH

>comp15944\_c0\_seq1; 367 1 808 LEN=843; translated  
XADGSHPLRREKGT TAGTNQSVSKSISNTMWQTF TFGFLLSAVVTNAFTTAPSSGAGGA  
LSTKLRSSASFFD TTDASKREAQMI EQTKR LFD DDVKLGLADGGECLAENFQFCAAVVGP  
IGKDAFLDALGGFKLEDSFDINQNRFGYAVSPVQPNRVYFLTSNTATQTKEFMGVAPEDS  
PNSELILPPECHHADFD EATGKLT EYGFYTVDRQYGN TGG LGGAFGFFYGVGKALPFREA  
KPFKKS AKYAFFTWLGNFMSRKKKSSNDK

>comp15945\_c0\_seq1; 727 163 1419 LEN=1613; translated  
MPVPTTTLEQQFGALSTDDRP IAEKTAPAFVTPTKNPGSTRSNQDSVGSDDDDTCASESFP  
AAPTPESLAGGSKSDSGASLVAKTDHKLMEER GELAPEPLLVENPHRFVIFPIKDN DLWE  
MYKKA EASFWTAE EIDLGSDMADWVKLS DNERHFISHILAFFAASDGI V NENLAQNFMTE  
LQSP EGRCFYGFQIAVENIHSE TYSLLIDTYIKDSEEKLRLLHAIDTVPCVRKKARWALQ  
WCDSGMA SFAERCVAFCVVEGIFFSGSFCAIFWLK KRGLMPGLAFSNELISRDEGLH CDF  
ACMLYNKLVNKLAPERIVEIVTNAVDIEKEFVSDALPVELIGMNSKLMQYIEFCADRLL  
VALGAPKHYQTPNPF EWMEMISLQGKT NF FEKRVGEYAKSGVGGASEDNHCF SMDEDF

>comp15946\_c0\_seq1; 481 76 747 LEN=826; translated  
MADVEEVEDIVADEEVEVEVEVEVEVEVEVEVAVGASEVKLFGK WAFDDIEIRD ISLEDYIAC  
KGDHAVYLPHTAGRYQQKRFRKASCPIVERLVCCLM KKGRNSGKKLMAVRIVQHTLEI IH  
LLTDQNP IQVVVD AI INSGPREDSTRVGGAGV VRRQAVDMSPFRRVNYALYLLATGAREA  
SFRNLKTMSECLA EELINAARGSSNSYAIKKKDEIERVSKSNR

>comp15947\_c0\_seq1; 342 112 1266 LEN=1450; translated

MAASPIPAPRSKIQLPVPALDRNGDSTAAEKPSHDSGDCEIVEDSAIEIEPLNDAMRAGI  
SSLGESSLSSFLSVLFEDDETNQREISIVPDNPKPEQHSVRELHHSFTEFSRESIKPKCR  
WDYIARDNSDRYLMAHEREREKLRVSSSSFSGLKLPSTKRGLRTSNSFSLGRSNSTTSMFL  
QMPQRKQSPTRSTNGRKKSIKEKIDHRFNSSLSGLELPLPSRTRGRSSGREPGRSGRAG  
NDDPGTGNASWGNEDAMERRRRATNLFDKMMESEGDVSTGTTTTMSISMSSESDRELS  
ESFNLSLGFSHNGMREQEQQQQSSMSMPRRRPSRRSRSPPAKPSRKSNAAPPKPSRYYSKSP  
NIPTRRLESPPPDNLLANKASDLE

>comp15948\_c0\_seq1; 916 228 3083 LEN=3274; translated  
MVRDAVDESSEPDLESMLRAGVDIDDDGVFDPTCLLQQPLDQDIDDLDELGINVEEDEDG  
GGYLEQIHGGTEGVSSNDSPHVQQNTMRTTPISSYPSKDDRNNENFYDECLRNDNGHDCN  
RNNTSSNSRNSPGFFNSPAHSPPVDDMIDGNQHQYDHRQVSMNEHPSSGGSERDHGHSPP  
EYDHPSHYNNAGGNNEEHFNPPTERQSSNRHRPSGKRQKRHPQRIAEVQQRILQVQEKIR  
EVQHENMDHDQMPQHYEMRGDHYRHDRQEHGYQHODHHNHRRRHHRRHHHQHHDHDDH  
HDHSHHYNEHQRPQGYPENFTDNAYNSHGSTRDFPRDSDPYDSRDSYNRPPSNMRSGVD  
SFRGDHPRHHQQGPHQPPLYPDNSMRPHSLKGRHSPDDMRANGNDNDFCSDHRTQEMNSM  
RRGGPPHTMAHPENLPNYKNSDEDNFGGHGRSMRHQQQVVGMSQSLNGIPGHSNNNMV  
NNSRMHQHTHPQNMRLRMSRSLNGSLSGRMQNQSMNGSNNGGITSRMGIQSMSDSLNGIA  
GGKQGMNDHVKTNSQHDMMDRSNNGRLLPQQNMMDRSNDGNMTQHRSIHSMNSLNGIQNT  
NDGNI SNQNGARNGNNILSNRRGIQSLSRSLNGLSSEQMMSQSVNGIPRSGGNGGFEGHH  
QGHRQEHRSHTGGQMSRSLNGPQNI EQNYAGSFRQHQQGMNRMNQTSGPPSDMAHMN  
GNQASRNDYGPHNLRGGQTALQGMSQSLNGAHNVNLDNFGHRQSLPNKMNESREKRDIE  
NNNNNIMRGSTGMGMNPRDIGSPVLNNSVSPAPLLNQVSNLAKLPNRRGNSPMMQQLHG  
APSTANEKVEVATEQGGNGTSKRGNPMALAEATMRSASSRKMIREFGLSLVKLQSNRGRQ  
SKSFSSSNSKETVVKAKRKS GRESYTMLQSEAAFREHSRQTKMQDQTTLS

>comp15950\_c0\_seq1; 517 1 1777 LEN=2186; translated  
EIQDQQTVDKANFISTSTMKKVILHTFTLLLLPRARGTLADTGSKTHLSPVQQNIRER  
LQSI PPPNDGVSDPSAILTREAKHNIAEKLLFYSSRFVVSRTGQMTSTGCQNTGKDASVK  
GQSDSDCDVDGFPVQIAVAIVEELGIPRNLDDDEYDTLVEKYARESAMSLHDRWIGYIEI  
PDTNDGGENNGGGGGTGVLVFLSVRDRVVFVSTGGALRHILTNGRIDRI RNEMRPDLKR  
AEYEKGLMHGIDAIAEVLEKGEEPSVFECVFDWISKNAIVLTWAFVFGWGALNRWKTRR  
DQRDYAAAATRLSEIDRARA EALRGTYCPATSCPICLEDFRSEHIGSDGRPIQLLRCGHV  
FDKTCYEEWVASGRGDVTKPCVCRADVGCVSSGCPADKIRTPLLTRNETAESQNEQTNGD  
RNNSRSTTTTTSIGYDDDDSPVFDNANEANLVEDNVADEIHDAMDLYQRDRNFRLERL  
AQLYPRYISTEHVTRWSSPSFSGSLARDPFFRNNDPAIVREAHRTSSGSNYKSSFGGDS  
GGGGEYSFGGGTSGGGSGGASRNASTSNTERFDAQYLAMQEQQAGNIEFHV

>comp15951\_c0\_seq1; 715 101 1846 LEN=2969; translated  
MNKKVVVSASKPMGWSRGTSFGSDVSRSTSSNTSASSVVPSPPSSELCALISFAYKLGSSV  
HNNDNSNIIGNNSDVRREAKLLMSLSCSSPVQTDDEDGEGHNI VHQNCNSNYSKALTGRESI  
SVAIDASSSSSSSLSTGRITPHTSITSMSSGGSRDFTFCFTCPSLSLDDAQRGTNNTVGS  
STNPGSMLSRTLKVDDQDAMRLSSEAMARNVIESVQKAI EWRILSWVDSLKALVVKEME  
LKHNTIGDDLQQLQELYYSSNEALLIVALGEIKGINVLEANTAFKVLNKVSVQVDETG  
LAKRRRVGEEEDRTGLEEGEYVYDVVHILEMQCTLNISTPAGNVQVDLNVPGKINGTFLSG  
EDDACEKDLTDVAIHLNTEMASMI EKCSRIAVRVSAEALLKGEQQDLPEVEEKAKAMAF  
EESQSQNTTLIKKTVTTSIAIVSPPPATRS PKRKATEDRNVPLM VITPARNTNSSLTQGR  
GSNTNPVGLQIPSNFPRSRDGGRRQSQVSQDFTSDFDYASPSTTKIDFAARLPPKLLILKQ  
KKHSAAIITPLKTMapeyIQREKGNLPVLVEAACAIAIKKN

>comp15953\_c0\_seq1; 489 95 1153 LEN=1212; translated  
MKFTSSTLAAVVALAFAATSTTTEAFAPTASSARTTRQWATIAEEAATDFDLGEYVMSKQ  
PVLNAMLQETVKPNQPNTEL VSECM EYSLMAGGKRIRPVLCLAAEMFTSKEEAEAVLP  
TAVAVEMIHTMSLMHDDLPSMDNDDLRRGKPTSHVVYGEDFAILAGDAMLSTSFQWIAEK  
TPQDKVDASKILDVITRVGKCVGADGLVGGQVLDLLCEGRRGKRDVSVDDLAWIHTHKT  
ALLKVSVACGALLAGATEKEVEACEIFA EKIGLAFQVADDILDVTGSTEDLGKTAAKDLV  
ADKTTYVKKLLGLDGARAEAQRLTDEAKKELDIFGDRAIPLLLALADYIINRKN

>comp15954\_c0\_seq1; 216 100 978 LEN=990; translated  
MIVTSTNNIERKIKTKKTS SKSRIMLPEDFTPGSKDILCGRGNVFSNHAGNQYFGNTIR  
ASLREYMNASNRPEKIRVVDRILQNI RIYGARFAKIDNDTKRWYELNDVQAHQKIGHAIR  
DTIRLIQKQGKKNIRPFSVSGVVSNETRRKQREQTRTNTKRTTNKKAVFFPLPSASNKI  
DSHYRLRTASETRNDAMEDILRLSLD TVDFLDES LGTEIHRDLPASITPPQSPSITKIA  
SVTSTLAPTKSYLLHNEYPEESFNFSASTFFGENTFEHYPRSTRITQYSEFI

>comp15955\_c0\_seq1; 209 172 516 LEN=537; translated



MAPPGSAHLNFTLGGGLCAIGGVVGYAKKKSTPSLAAGLAFGGLLVGSGVLI SRNEAFEGH  
ALASGTTGAMVLATGRRFASTGRFVPAGMVAALGAVGFAYNVKKTLEWMPDKSG  
>comp15956\_c0\_seq1; 180 137 616 LEN=709; translated  
MPPFFPRPQNLNSAFQMASDQAKQRLPELTHNQVARLYRASLKLSSWCIDRDFNEEAT  
KIRFQFDEERGCRPEKATRLLREGEKLNWYTHPDHYRNPIMPGGSKFMRNPPLPMDVCF  
PDGNYPADAPTYEIDPDWSKSDPSTKGYSLIDYVKKNME  
>comp15957\_c0\_seq1; 610 161 1855 LEN=2448; translated  
MTRPRLSVGLRCWMFQFLAASAATAAPSDTTSGAETGTQWSLPPAPIINAKFLQDIQDAM  
DASVIVQFPEFGSTDAFFMQPLGGNNSDDDDKEYELSNHHPGFDSIRLYTSEPDSIGIL  
RKRREDGTCVCYTAFRGTTPSAKDWLQDFDVRIEPIIPEAATPDDDESIMCYARKGFTNF  
LNRANWNKAKEGLARCLEPDNANQPHCESILTGHSKGAQAALVAVALHTEDGGTADTTR  
NTVINFAQIPVLDRCGPYVDSVDFRFRVNTIYNYGHYNDNHAANALIDAFLPDYNGPFWN  
RRNTLLFDMVPFVPEVYGDHYGYGFLGAAARSEDDAGHGTTTTVWDGLDKGAEGNPPLK  
YYAWNEYTIFDSEEENDNETGNSIAVGNVTLPVDSRIVFGNNTDFRAHDVAPFMSNHSY  
WNRISLAVQNAGANTITTEPNASHSAVVVTNGFAGESPCDPYFFEACASLECKLSASYS  
SESANAKLFDWRFLDQTKPQPEPRELWECGEVPPPEPLGLPDGPAKSLASSSSPLPVP  
RRLAFLAGAVACGSIFQQQLISFLL  
>comp15958\_c0\_seq1; 701 126 2105 LEN=2278; translated  
MKISTSCAFVAFLAASGTAPSTAFAPAI SRQVHKNFSETASILVKGS DVARATTSSLYSA  
KEDVAEVRRSRPKYIPGEIPDPDYVRIFD TTRLR DGEQSPGATLTSQEKLEIARNLAKLGV  
DII EAGFP IASPD DFAAVKQIADV VGNVEVFEDGYVPVVCGLSRAFPKDIERAWDAVKGAK  
LPRIH TFIATSPIHMETKLNKTPDE VVEIAVNAVKFAKSLGCNDIEFSPEDAGRSDPEFL  
YRILSEVIKEGATTLNIPD TTGW NMPW EFGDLISNLRKNVDGADKVV FSTHCQNDLGLAT  
ANSLAGAKNGARQLECTINGIGERAGNASLEEIVMSLALKGETHFDG SQSGKLYTAINP  
IHI TATSKMVSEYTGMI CQPHKAI VGVNAFQHESGIHQDGM IKNKSTYEIMTPESIGLMR  
GDAQSGAGIVLGKHSGRNAVGT RLKELGYDLEMDKLN SVFDRFKQVAEKKKGGLEDEELE  
ALVWDQSDTPNSLWKVSGLQVTTGMSGVPTATVKMIGPDMVERFVATTGTGPVDAVYKAI  
DLIMGVSVDLETYALS AVNEGIDAMAVTRVTIAPKEGGPND SLSIHSQSGNLEARKFSGS  
GSDTDIMTSSARAYVSALNKL LTNWARRSLQASKTDQDSGQITSESVAAGPMAVTESSA  
>comp15959\_c0\_seq1; 310 154 1071 LEN=1462; translated  
MGTNGTADLERRLSVLESRVGISHRNSSSSALASNIDCVSDRLLKIRGDLERKISSSSTG  
AAPRSTNNTNTNSNTHISQNEQSWKQIQKMLRELDPGIALTHQQQPLLYKRQQV LASSDE  
LFKDFAE L DLILKLLLTGTKIDGTEAQSS LGTAESNANNISSNRNRGGAGGSADASNATK  
AGQASSALEKQKQQQDKKKEQELSSQQQRQTQRGEPSSIRLDQVTQAPILTOHMSTTAT  
RPEDQKRMEDLRFKLLHDFHNRRTTALAQILRRNLECYHTVAVAVSEKIVLADEQISMLTAA  
KAAA  
>comp15960\_c0\_seq1; 259 80 589 LEN=977; translated  
MINHRLMLIALILGFLT FESVHSFHTPRVPSNIRTKEISLQVTEEKNSVEETTEKYGLEV  
GLAQAAKEGDGESAKSLKKYGIAYLATS IPLAIVSFTLCYVLVDNGVDVGSLLAKVGIE  
DTGMADKAGTVAIAYAAHKAASPIRFPPTVLLTPVVAKIIGKEPEEAKE  
>comp15961\_c0\_seq1; 438 63 731 LEN=862; translated  
MAPLMKLFMLAITASAAVAFTPAVTSRTANVPSSTQLYEDFGLGLGESTYDNQPDLLKGE  
QEYKQYANRINEDNMLNRKYNVVKRVRELDLLQATIDNGVLSKLEKNGLDLATVEKLLPL  
AEEYGLLSLAANNQQLLVNLAAPLLVEGAPFLLPVVAGALEVGPAAFFGAAAVLAGLDAA  
LIVNVEIPFIFGLSAGVLLGLILVPLSAVLAGAGVALGSLKK  
>comp15962\_c0\_seq1; 406 226 876 LEN=1058; translated  
MAPTKSTRSYGSSTQTFLFDKMFEEEGMLGKITVGSVQVALRSNDRASDTSIFGLLEDH  
SNLDS DANEDLARMANDVCLDLMRKSDDWVAACSTSKWFSQNDAGKAESYYNELANNIAT  
KFDKEYVPDEDEDEEGGPTLVVVS LVL EIQGDSTKFDGAGYSIAQTKEVLSSIGSDCLID  
DGYCVNAVEALWTPSERNEVMSKNDMIIDFPELIDF  
>comp15965\_c0\_seq1; 499 233 1348 LEN=1399; translated  
MTKRTPVVTRDPRFLAGRKLVERGLADEAITVYGTLL EETTQQYGDASVETAPAYY EYGN  
SLLRAAVKQQQEQQQDETT SREEQRSA AAAAAAEHRQQSSSNENTGKGGEAEKKPAAVDN  
SDTNQFENDGSSEQNNQEDEGMSDGENDNLASEDL SLALEMMENSFSILEEYKEKAGKGA  
AGDNDQYSNWVSEQLPRILLGLGDTLSTLNRHADAADAYSRALELRKACLQEFEDRKAHS  
DHKQQSTIEHLKAHRMVCEANILIAEALLSCPPDKDVVTTETQSLIVKANERVS YARGYY  
DQARDALQEAVVFMGDLPRQVDL GREKEDVCFLATLVMGVGESLATIDEQADEAAVVSST  
EPVKKKAKRGL  
>comp15966\_c0\_seq1; 52 1 1236 LEN=1288; translated  
XFNAIALAQHTLQAGIKDRTSIYSAHNLLLETTRDPNXKRNEEPTGRYKFTALYWNFVPM



KGMQLFTHEMNHAGNKPFVIGMGVMSAIYMYAFLGQSAESRANSEYWSKYHLKK  
>comp15975\_c0\_seq1; 385 172 918 LEN=918; translated  
MPSVFMAESVEEASMDAIDKMEKSIESVLQNMNTIRTGRASPAILDRVKADYYGVESPIN  
QMATISVPSAQQLTVEPFDFKSMLEIERALMESDVGLTPMNDGNVIRLNIPSLTEERRKE  
MMKQCKAIGEEGKVAVRNIRRKAVDTIKKLEKDSEISEDESKSSQDEIQKMTDDKVKEID  
GIVEKKEKEVMTXLINQSGSISNSNENDFLLTLLWDDSKFDEAVLFDARHSFDHKHNL  
AKQIKNTMKX  
>comp15977\_c0\_seq1; 454 23 1276 LEN=1473; translated  
MSNAVPRNNVRNSNYDVVLIIFVAVVLVGKLEQLHTTIAQVPHTTSTIFVEGFAAGGFGE  
GGFGSSPKANHGKANKKKKKRQSLIEITDTTATAKSKGKGNPSLETETPKLTKWGLP  
VATLEDFPPLPASTKREPVDAKDYELYEIQECLKDHVDLGDLSRVFDNQGFAKIPNK  
DGSTMRLRLLHRSPPVLTLDNFLTADCCQGVKNVSEKESSTHRVDSATFKGALSTRTSTS  
WFCNYADVPLLAKAHYMLGIPLETIEEPQIVRYRGGEFFSWHYDEVPPSQILNGGQ RVA  
TLLVYLTTVPVSWKGGGTTFRDLYESTSSSSSLVMQPQRGSALLFFPSLADGNPDDR TLHK  
SEVLVSNQDIDDEDDHKWIVQMWSHQYDYQAALPIGNSNKAARDVMEKTGGELGYV  
>comp15978\_c0\_seq1; 690 101 1234 LEN=1446; translated  
MKIANQLFTLVAHQALSASAFAPANNNVLTSTTTALNYKINESEKFQQEELTKAADLRA  
LRHVLKKGPSNSGASAASSAPPKPEMGGKFKDLAAAKKARTPKNLGAVRGAFQSLTNSK  
SIKSIQGGKCLKTWNIMNNEIDRVSVMINNEGVPLSAQVEVWQGPESTPMRIQVASDDGC  
TYPFSAVLETPNTHNSVAVKNMSPMEFAMGACVVADVEDARAGGGKQAGQGAVVRALADL  
GEPFVHGSNGVESFQFEDTVESIQLHLQTDGRPLHARVELIQGPDDSKQVIDIMSDNGL  
EQPFFAVIDSPTLSMGGGATVRVINTAPSTVFPLTAIVEPYLVTDYVPPSTPEIGVDKS  
EDLFFLSTDDDDAGCTI  
>comp15979\_c0\_seq1; 228 200 1114 LEN=1203; translated  
MRSVNNERKLLCWSVLALSMLALFLAESMTHVNAHPMLIEVAEQGERCLRLNIPEDDDAH  
MVFLSLPSESFENDDQTGSPDWTKNYSGIENHFLNQMODLTNRRTKNGSLLRKFPEKPPQ  
DVQNSMNSFISSNESKSGCTVKLTNPKSTSSRSFNTHWFIPLVINHLRKA VRTEKKDRES  
SPLEGYEACFQENENDYPVHFILDSVMVGEQPEYDDDDNASEDPTFQGHHTPLANLLEES  
IKSAKVVITEMQYMERREARMRHTADNINSRVRFSSYISIAILFVVTFQLQVSYLKRYFKK  
KKLL  
>comp15980\_c0\_seq1; 120 1 158 LEN=399; translated  
XGDKVKARYSFVYTNEEGEWKIVHHHSSQMPEEIVPKASLPEFADANGATLE  
>comp15981\_c0\_seq1; 272 222 1544 LEN=1794; translated  
MTAEQKGQPREDEGQSSKYEGEAWKIVSASVGSAITALAVTPLDVVKVRQQAAGLSPGNA  
AAPVSAAPAPKTPAGTTSRSPSRSGASCARGCGTFVLNTGLGEYLTSRNRAGYFDPKTGA  
LKQEKVAEVLKTTGGPFRIIRSIFAHEGLAGIYAGLAPTVMGIPNTVLYFYTYEELALR  
FKERFPTNSPVSGAVPAISGASARFVASLSTAPLELLRTRQAARAGLDVSGTVSGREGRG  
MISEFRMTIQDGVLSLFRGVRPTLMRDVPFSAIYWCVENMRNFWRTRHRDLSTSAVST  
TEQTIEALINGSVSGVIAAAFTTPLDVLKTRSQIETPAAVSVGKAAAVENVCVAPRLFCH  
HGGALAVHPESARLVSPAGSMAGTGTTQRLSTMNIAKSIVQAEGMGGLWRGNVARCMKVA  
PACGIMIATYEAGKRILTVD  
>comp15982\_c0\_seq1; 193 171 1217 LEN=1326; translated  
MADDRKRTPVPPTATTTASSRVGRSSLTTLTSSKFEPVPIVLEISSTVLRVGFAGEKSR  
PQHIIVLEGPIFDCDYCSGDEARSIERKNRKTTESEWYLVLSPLIAQVYDRMLCKPSTRR  
VVCMSYNQRYTPLAFRKALCQHLWNRGVPALVEIDPLEVLPVIVQGWTRGLAVNITREEAY  
CICHADGYVLPYTYQMVPPGGYKNWLQSEKRNEINEESMASLVSAVLSCLQKCPRDLRMS  
VVSNNVFCGDGVLVLPDLPRKVMKKVRDILQCNDNDEERSLGKFPSEYGCVPPLDLANLR  
SLASSVALTSCAPYRADWICWVGASLWAAVWNKYNDEETPIPWMFNSE  
>comp15983\_c0\_seq1; 566 98 889 LEN=1223; translated  
MKFSIVSTFFSFSALAVSSVSGQAF'TNKKQRGSSQELNEQAKKGGAAAGGDMADIMKAM  
GLNPEMDGDLPELDEVKMMMAEMSPEDLAAQMQEAMEMFGDDMLANMMGHQDEILQSL  
QSGAVTPEELAKFKADPEYFEQKMKESMDQMQLFADPEMMAQAAEGMKAAQQMYNNPDA  
LNDMMGDLKELSDIEDIESVRQMFIGEAAADPMMQQLLGSFDTSELEDVLSDPKWRKTV  
KEGLGMLGGGAGAGGNKIVGEL  
>comp15984\_c0\_seq1; 444 1 1084 LEN=1796; translated  
XDFIRMVRKSSLPTSSEQSNRTQPTTSSSLPGKRHSQTKQKSFKMMDDNVYATNHMDHMD  
DHDHHDPEIDEDPLADPPEAELHEGGRRNSWRSRISEVQFPLVVVAAASVLLIAVWSW  
EPELMAQGYVFSVPSLSLAIALLSLLLTVYREDLYAIYGQHLAHVLFVWNFTGACFLTFV  
SPFTTTGNGYFAAWGCMATSAMAMGLTADAVRSRIKGLGSLMGLCASAIIVLIALDFDLG  
TDVPAYLKGETLYAVVVCFTIILCIGLMYFQKRHEGSQADSTEVLARFFFLSLFALLWF

ALAFLVTFRGPVTTGNGYFASWCGAVCACSAAFNAKKEAATARAQFLHAYDATGLSATI  
T

>comp15985\_c0\_seq1; 214 76 552 LEN=1065; translated  
MPISFLLMVKQGGQTRLSSYYEWISMVERSALESEIIRKCLSRSELQCSFVEYRGYKV  
VY RRYASLFFIVGSRLSKDGNPNPENELGLLEFIHNLVETMDKWAGSICELDIMYQLEQVHF  
LLEDMMVNGHIVETNKMNVLRLPLDLMERESQKAESMYR

>comp15986\_c0\_seq1; 237 416 842 LEN=842; minus strand; translated  
MYWKGGEYTGVSNIPLVPIPEEPSDDFGLDAVEPLYFYPLGDWEELGPFVFTALNFDVN  
YDQDIFYFCHIHAGMSARIKLLDANGEMLNPEPTPEIPYEYDVIDAFDYECGTFNLT  
DFA NPKDIDTCPDIFVCEGDGIEPQTX

>comp15987\_c0\_seq1; 474 185 1684 LEN=2463; translated  
MFERQQRDIPPAFASQSFIKTAFLLLVGILLPWNAYISAKQYFVSRLCGLSQNGITYNN  
VDQTIEMWFSIIYNGASVLSLAVVILIQYITDSNNLFFMTSKATKGISSVQSMIFKRTKNL  
SISMMSSSTSLEGRIDTRHSTDCASWYVMVPLAVYLAVFAISTLMVFYTSIQPQIFLLL  
TSLGLFICGVCTAIATTGVVGTAGLFPATLGINPFFNGQAMGLLVACANFTASILNGPL  
HFVLQYCSKNIPFKATVHNTNELVDEPYNETNQEKTVCIAEYEVSLATAGYFSMGTFVLA  
ACMLGYDYVDYRKRVRKNSFALVEDESAKSPDKVDKGDHNGERLELLVVDVSVPE  
SYTS AFDHSVNGNLSDTDMITNKIPMSYQNHKLITSEVRRQDSNDTDFTEATENTQGV  
LGSVWL PVRGVAVSLFFTYFCTLAVFPAWTSELISDFQCTSLSRLRNDLRFVPLSFVIF  
NVGDLVGR FMSSAIKIEEIKNLSGKLVW

>comp15988\_c0\_seq1; 315 75 986 LEN=1087; translated  
MVLDMRLNRFPPLLPYGLKCLAFHLVLYVTFRSLPLSRKGADATETLDDFPWKISPSMTA  
HKIVAFSVMIHWTFLGFQHLREHDYSASSNLESEVSALVFVPAGFDIAQYAMGALLLWDI  
PLGLCHESGRNDVVMHVHHLGMVVVTSVGLVGPSSVSSDGIVGTHVAPIFLGAIELSS  
IPLQIVDLFHPKSPHWNKFANDGSSSTSSFSKFCATINETSRIFFAILFLVRLVGLYF  
PYV VATIAAPDFYVEGSVPSMVLSSMSILFTLLQMYWANLVLGQVKKTFIGNETAGNKKY  
TSR KKE

>comp15989\_c0\_seq1; 255 252 992 LEN=992; translated  
MSNKEAVVLVDAGQSMGVGLFTDPGNDPPARAPRTRFDCAKEAGMAILSDLMVRSKTNE  
ATVVVLHTERTNNFFFREDEGDGEEHSSSAHCPFPNITEFSGNGEVMGIRQPLPGLLR  
RHGLKPGSIACGSGRGDFESGLVYAADALYRTEGKRYRRRIVLVTDAEHRIGSTEERPR  
QLLVALEGLRAMDCSIQVVGMDFVKGADFGVRLEGPSEIEREPADDAAIIGDGS  
GGEGTD DDEDEDD

>comp15990\_c0\_seq1; 251 67 537 LEN=601; translated  
MAEEARGICVRDVPAPAFIEAYAEHLKNSDKFELPVWADTVKTGVFKELAPYGEDWY  
YIR AASIARKVYL RPGVGVGM LQKWYGGTYRRGARTEHFRKANAGVIRSVLIQLQEMR  
VVEPV EKGGRRITTVGQQDLDR IAGTVYRAGEDSDSDSDSDE

>comp15991\_c0\_seq1; 895 166 4074 LEN=5749; minus strand; translated  
MEALVCEILVKGVDIDLHEISNGKERNRNLSTSSLLSLLSWLGFSASEVDVGHEGFFD  
DGEHDCVMMEDAGPFDAEFYRSIENFLIEVWKPHDIPQHKFFGLGSNDGDFGLDGGTETT  
PSLYRSILSVRVTFLRYWMDLNVGGGGTGRAMAVDADEEGNGDYERRSTLSFHLMKNC  
SFDIKATSALDSSKLRFRFYPLIHALYQQIEQLPYLQSQIYAYSQSLSRVEGGNGLNRPG  
VGVADPKSRLEQLQRGQVRKERLDQEFANHVLDLEFIVGEWYSLGSVDVRRQARAQLGSV  
WSGFELRATSGGGSSSLSGSGMRSENTSSSGVAMTLRVLHRILLGTAVTKKTGQQQEEKQ  
LRKSYEHLLFQHILPLHRPNMVLWRDQTCLELYHEPLVKCIAILLRKKPELTGKVI  
EG LLAPDIWNKGAGNTPKLVLLHEIDTYIGCLPGTKTHDGVTSSELGDSL  
PALLRTLGSMA SENSRLAQRALPFVKNKTFVRLIEKNMKTLEILLPFLFRKEPSWNP  
TVRKMITYTVLTT LQELDPEL FVSI  
GNRFFAKNDEHREQKRPLPGPPADSSSGPKANNNHAVRSAPRDVESSL  
LPADYTI RSAMAGWTPPARSGNAIGTNDMVMATFPRNRRRGISGSNSNPPVSVTVG  
VAPWA MKGPSGTSSNPPLGITGVAPWAMKGPREDAAKTTTMSGRKHPPMGKSVAPWA  
AKNKLPMP VPRALRSETTGKTAASNNDAFGNGSLPKGDGANTEPAPCRVKAYMDMIK  
PPEEEQGISSW SKTQMEESPTLLPTLRFYDLVFGHTLGEFSFGCVRYARRIDRTTTR  
SHWSEYAVKVVSTE KIKEIGYEAPLQRELA  
VLRVLSHPC IARMISSFRFREGVYFVLEYASGGDLHTLLKTN  
GSLDHESTRFVIGEVT  
SALASIEHIGLYFDLPGKAARSEIYGESRLGCVKAEVTD  
DXNAN AIVPFASSRAVAENDRLHSPPPPLSIHQENIVIT  
ESRHKLTDFGGCRPVTQA  
AKMIRD SARNAFQLRDGGWKKTETKAKSFDMD  
DENDDDETKTDFLQDYDPD  
TDLRIEGTTIYLP PEVALGSFPTLAADSWALG  
CVMYQCLTGRPIPEADDR IAKQRI  
VAFDLGGARGESGNSG ESILFAEPHASST  
EEPARDLIRQLLRRFPHERPRMTRVADH  
FFFGE  
SGVDVFALWRQPSPLPKAGDPRASSPP  
LDAGWARRQLSKIWAPQPRAYDLSSSL  
SVSSEDPFRPVVRLPMRTSGDAPIREGDE  
GPFSSRTSVLRGVRPKPGGIPMP  
TREKGS

>comp15992\_c0\_seq1; 292 356 1179 LEN=1495; translated  
MSDEAADDLDWNDEDFVLTRVKASGWDLRLAPSKMRDRRRIVLGAVRSEPFALMWASETL  
KNDTEVVTLAVGKYWDSLGFASSTERRDDPGILSIALKQTGAALQHASKRLRGSKPTVLEA  
VKKEGIALRFASDKLKLKDKDVLAAIRSNARALLYASEELRGDVDVVKAAVSQDSLICY  
ASEKMQSNPEVVRMVKRRQFDDXKTLPLVLAEKAQDCLVIDAMRCLAGGLGLRRTPGFGFE  
TETHTVRYVMLWQNSISMVRREARNGTTRKRVQRD  
>comp15993\_c0\_seq1; 65 73 420 LEN=855; translated  
MAEVRAAHLLIKHTGSRNPVSRRTGKEITLTPDQAMAELKEFERRIRAEGIVETFFPGYAG  
QRSDCSSFRNSGDLGFFGRGQMPEPFENAAFALRKDEMSGIVSTDSGYHLIYRIA  
>comp15994\_c0\_seq1; 576 69 1847 LEN=2212; translated  
MVLQLALEKKEIRTEILSHLTLSEIQECFRSVSREAQSI CDGYKSFVVEWLSANPKTDS  
REVLTIQLQSEIGKLLNGKIGRTAGTKRSYKAGRIPIELEVANWISGESDLSFKLCNLH  
AFFRRSVNRKEHSVPPALKNYTSTSMPLSHLRILDNMLLVARWFAFLVEGVVTRPDFED  
DILALQRLPVDDPAVKELDSRIFDYWREKPFRCRSRSPKFGTALDYIFKYIKMNGDIDQR  
SRDVATLDKLVKADGYRGTNMIRNCFYCMKTWKEEHVRGGFWVTDTYKTGSVMVYLSIE  
NPESFSTVYLVKGDTSIGEVLGCSGGVPRFCKTTILPLYDFWVFNQVYDVGRIYIGPNSK  
NDEFTKQLQAHVQQAISRSVSWRGP SAEKGLWDFQNNVPAMPTIIVDENPYVVVDWHDG  
INHAYHQENNARSSSTFSVKDMSLARQIAKMAVELGETRKNENEEVDHRYEFSLLAVRR  
LGYSYENPNGLGSMFDCRVGVLYPFRFDVDHWNKAKVPTYALNDVLKILISMKKAAP  
LPLVSSILADRAILEPLDQILVKTFAEEGIYAPIVAYEKKGIRVDTRWTRV  
>comp15995\_c0\_seq1; 111 1 400 LEN=586; translated  
XHPMGHPMGHSMNGPMSNSMGNNMNSAHNSGMNPMGGGMVPMGNGGSQMSPSTHQPP  
YEVEYHNMRRMHGPMGTGMNSHQMSPGRHSPTRNGGMHGPDPMPNDGYGHDNMNGAMMRR  
YHEHSRYHHSNM  
>comp15996\_c0\_seq1; 600 331 1914 LEN=1984; translated  
MKTVSFSTFLSLIAISVSGAEAFAPNGRAFVAHSTQQLLNDPFLVRGGAQQQLLRKEQP  
KKNFYKSVSASVSGASDSSSSSTNLLQGLASAPLTKAVLSSTLFFVFTDLVIKLNLFKTKGI  
SFPSSLAGCCFLAASLLASPFHEKLYRILNPGAKLMQKFMMIFLVPNLIVLPLCGGNYS  
LEMAKITTIILGGFLFSLSTCYSVTAVSKLFGTNTGDASTSATSTETAAVSSHAKTAKP  
KAFSDELTYGSRALMVLGAAAAISSNVGSLTTPMLALSMLAATVHNFAFGARQSKKFI  
KVFHPLVSCVTLVSWVWATILGWTTGGTLTSMQLQYRAGGPISLAASGAGDYLTFLVGPV  
VSLGVSIIYERRVLIKQNIKEVLTATFVSCVGGFLFGTAAVVRIMGLASAE LRSLMLPRNIT  
SALAVAIADIVGANKSLAVAIIVTGLIGANFGASLLDLFGIKDPITRGLGIGSAAHGLG  
TAAVDEKDAFPFAAISMALTAICGTLVSVPSVKALAIRIALGGLA  
>comp15997\_c0\_seq1; 224 85 336 LEN=599; translated  
MMLRSNIFLFFLVAFVAIVSGSQEAGFRENVDGVDNLVEDQMTRVLLNETNTTASGND  
ENNGENEIFGIDVGKSGAGTTTTW  
>comp15998\_c0\_seq1; 476 139 1143 LEN=1529; translated  
MMKTTSAFSLPPAARS AVGVSNPFLMMSDESSAVSEPEKHTVYVGNL PFSSTREQISD  
LFTEKGISVLNVAMPNMNERVDEFTGMPTSKGFCFVDVASEMITTAVDAFNQMDMGGRP  
MRVNLKLPKEEVQKQNNRGNFTPDGQKLYVGNL PFESEYDQIKEHFSQFGDVQDLYIP  
LRDNQSRGFCFVTMDTEAADKAMAELNGADFMGRPLVVNEPLKKGESLPPRAPRAKQFKL  
YVGNLSFYTTRETLEGVFEFGEVYDCYLPTDPNTDQPRGFGFITMDQDGEIAIAELDG  
LELDGRFIRVNEAQGKRRPPPTQDYDSDGDVNEW  
>comp15999\_c0\_seq1; 909 357 2882 LEN=3119; translated  
MVSGRRSYSGPAVNGAGLPPVSSKAKDYTERPEEVVDELDELVRGIAKVLNKHFTTTT  
KQLAIEKAEADAALADLERRRAQTKAFVPSKGGQLNPNYDQLYLQLQKRAECRRKERETM  
LLYQRVVMKYGKSAKADPLISATPSDSNGPQQLKAPNSPSKGDPPGKSGLSTLDENSEIT  
FSKFYDKQREKQELERIKRENSEKSAKHFMALNKFMADEDETDLDHQANGVPELVPSKD  
SCQPSPASSNGKLDPFMSALS RFKEGQEDRAEEEEESPAMVATNDDDEDDDEQVQVNIHR  
VAADA AEKPEDNDLLVIKRTSPSEDPPGKGGTECVPEDESIVSEQRDRSNEKSLPTLQKTA  
PNGYTTIAKTETAIPPATPDIVPAVGQATLSPVTNQSTPKSGKFDVNDIEGDFDQRSII  
SELTLANS AVTRQVLDVEVEMEMDDFIQSEMQAIRKMLDSEEDASTVDPSFNEDQSEASSL  
VLADQSVKAMKAEAMAREMQKILDDFAKEDAMSV AEGSTSGANESVQSPEKQSN SAEPA  
SVYPYKFEP AIPGEEWVYVHFDNYQKEFYVERRSNRTQWDYPQKVPSPQREERPVSADDF  
LSDMHSVASSRRSLRRSSRRS IYRQKRRRRARRLMISFLALLCVLVSVFCWRIKHPGE  
SITVALTTFAVGLRDM SIEDFVNLVIDQYEYSFTDRKAREEESRRLQEQKAKELAAARLA  
AERAAKLAREDSQREKEEAERIANQKA AAKAAREREEAARVARELA AKRAKEEREERERLV  
LLEAEAKAKAE EEA KVEVKARRNFGCNI PFAYVVPYCWRLAKSNPIFGLKNENDLVFL  
Q

>comp16001\_c0\_seq1; 146 479 916 LEN=916; translated  
MADRTRKLETAQKHVDAGKNLSWNKGFDTALTELKKSQIRESIWGMVHEETSLSYEEI  
GRVLFQKLYEESLASRKLIRVSLYKGFSTETKNADHCVRLVVQAKGLYSGREINEA  
IEAIYNSVNHEISGDTYRKAGRNAEA

>comp16002\_c0\_seq1; 446 141 1271 LEN=1399; translated  
MTYSNNNNRRRRSMDVVAVLVACGVFAQVQSFVPTSTSNHPLRIFDQVQSNEIPRCATAA  
AVNGVSKKEESVSESESEYLWNLRLNVNEKARTVASVCTSGTLCCTVSGHDGIQGFVGS  
FVDYVLDDEGNPVLMLNEMSMHTMNI EQNAISNQDGVSNLVTLFTQLASETAEQSQDVS  
CSFTCKVEKIARDAEDMDAIRMRYSLTHVYADQVMDSPKFAFYRLIPEKIYYVGGFGVMA  
KWVDVEDYKDATPDILSKEANQIVKKNLREFKDDLECMAIHLLEAEKLENVRVTNVDRLG  
MDVRVTRQHETRRNKLMTDEYRIGFRIPVISVEDAKSEILKVFQEAWEKQGLDWGDAEE  
PGSTVPIMKIAADSLE

>comp16003\_c0\_seq1; 543 310 1818 LEN=2248; translated  
MSADDNDYIDVSVAQDGGVQKILQAAPEGARGPPNGNEVEAHYTGTLASDGSKFDSSR  
DRGKPFKFTIGQGQVIKGWDEGFASMKVGEKAVLKIRYDYAYGETGSPPTIPAKADLFFD  
VELLGFKEKPKERWQLSPQERIAEAEKMKAAAGTEFFKEKRFEEGAAQYEEESALFAVEEGI  
SGNDIPEGERQLYVSCFGNAAMCYIKLKSWPDAIRTCQVLEIDSETTSNIKALYRRGLA  
RMHLGLYKEAKADLMDAYKIDNSNKDVRKAIKQLKEASQKAKNKEKAAFSGMFGRVEGGF  
YGDKKGPLIPNAKGDNPHVYFDIRHGEKNLQKVVMLYADITPKTAENFRSLCTGEGEGE  
TLGKPLHFKGCGRFHRVIKDFMIQGGDFTSQDGTGGESIYGEKFAENFVIKHTKAGQLSM  
ANAGPGTNGSQFFITSKDTPHLDGKHVVFGHVVEGMDIVRQVEDVSVGANDRPEVEVIE  
DCGQMPADYKEPAKCKKSCCGA

>comp16004\_c0\_seq1; 205 1 806 LEN=851; translated  
XTTTTTIKSTVQDKDNTRTSDQSKNHYIAMVFVYLSKPSASRQWPSMHTIVALGCLLVL  
LSSLSSTASAEFVTLTDETFEHQTQASTGMTTGSWLVLVFGIPNCSNCELSKPVLAELGSD  
EELYERGILTASVDCSEKGSVCFRFSATRLPVLVYLHKKRMYRYPLFRDQVDFNEFRTLPT  
ASDLKYFMETGFVEAGAEAIPEPPSALEALMKPIMAIYENNPLAGYAIIFGMAGMMGFITL  
VLVATLIKSAMGGGETAKPKRKSSKKNK

>comp16005\_c0\_seq1; 196 291 821 LEN=1030; translated  
MSWFGNNKEMANAGYAQPTEDLPVATLVTDDAVATEYQQLNQHLNQASAPVEPVATATSS  
GGGCCAAAASKPPATAPPSSNSCTNNYLDSDPTVSRFPMNMRECPNCHRASRTRVVTKPS  
CKTWVAFGIMTGVFWPLCWVPLVSDCKETEHEFCTSCGAKVAKVRAFQDCCVEHRG

>comp16006\_c0\_seq1; 311 1 951 LEN=1415; translated  
HQGKYISSNSIVLERNKTKIMSIAATNTHRRPAVLALLAAASLSVSDAFCFPSTNTRIOM  
KLAANSAPSLDAILWMDMGVLAETEKDAHRVAFNKVAFADRSLDTEWTVEGYGKLLLEVGGG  
KERMTAHWNAVGWPSAFDDTEDDEEQRQARVKELHLAKTDVFNELIREGGVPLRPGVERL  
IDEALDSGKQLAVCSTSNEKAVKNLVNTLLGPERAAKFSIFAGDCVSRKKPAPDIYNLAV  
DTLDDLSRCLIVEDSGIGWGAAKAAGICCVVTKSVYTAHEDFTGADAIVTDLDGTDGAS  
DPVTLETVEGLLQQRQ

>comp16007\_c0\_seq1; 385 239 1183 LEN=1299; translated  
MKLLSASAFILAFAGTTSGFQQPMPRPSLQQTATVQKSPVNEGVNSMVASSKRQQQTPPS  
LSAASATPESNEDRVLDTAEIAKYAGSIAIQMLLFKGFFTGVDFLASSASFEIPFAANF  
FLFYFFSLKSRVFNPMNSNRPRRDTEIDGGGEAGADSTPQRNMPPEWTPPGVVFPIMWIL  
IIGPLRAASSALLVTNGGAGYASDAILALMLHLSIGDTWNTINNVERRYGTSMVGVACVW  
MSAAFAAYSYGQVDPLAGKLLSLPLVWLTIASSLIVRTWQLNPSDNKEKESILPTKPAQ  
EGSITKWAWFEGTD

>comp16008\_c0\_seq1; 207 159 1669 LEN=1669; translated  
MAWCETCSSPIPRSPRRRTALRISAAAMVAAAALALAAMGCCQAFRLAAPASVGTGRPL  
VHPTDPAPRHAPDPSAPAFHRLSPVLSAGGDAEPPSGAESKDEADDRIDVSVDERLYRV  
RLSRAPGIEWGTDLSFSFVYVRDMEPTGQASLSGLVSKGDQLCELI PVVNDEDAPRPEAI  
SLLGASFDYVMTSFAGLEKTVSEIDL VFFRGTDELKALCNGEAAGTDGDDTITITVQON  
KGSPEEKLLRLRAPRGANVRQFLVDNGINVYQSVTRWTNCKGKQLCGTICVNIADGLPNT  
NWKSMDEASTLRSNPDSYRLSCVTFAGHDVTVETYPVNAASGPGEERRGXAQRTRNSVR  
CGLLASGVATR NATAPGSLRAHKTQRPGGMGSSHRSLYRAPPGTNGNPHGVHQGASAL  
ALVRRRCGIRPHTHETLLWPQSPWSLCEPLPFLAKNYIALRTRTTLGVFLCPRIPGEWD  
SLDTRICKALGSRIAASESKSLGS

>comp16010\_c0\_seq1; 451 1 1523 LEN=2030; translated  
XTNQKAIHDSIRRRRIKLPKQQPTDQNHLELCNMPSLVDASIALI SPDPLSLSETASAS  
DGAADAGAPSKPNEKSNAATDKENENKSKAKKEEKAPT VVTADERFYAVDSSKLLKREE  
KPWVGTSQQEQQARGAQOSTESGTASKRPLAKFFESVLSLSPSAVTKMMMHQCQSGVEKGI

AQGGNPIEVMGLMLGRPDPHKPTNLIVTDAFPLPIEGFETRIVVADDENVVNHMISLGECL  
ERTRREKFMGWYHSHFPFDLILGEDSRSHCFLSQTDLSTQLQWQRAEDPHGNPFCVVVIDP  
LRSMHLGTPQLKAFRAFPPPEYQSPTPNCEPDGSIVESEKLRRLERWGSWCWNRYEELGVEYY  
MSAASRSILGDLTQNYLWMMKSFRENAEDGVASGAEGGAGGSQSAMVGLREIAKSASSV  
TIANGSGNQAGFGLSAGLGGGSMASLRGESSVPLGSASSVEPLVRSRSLRSRATQAMTE  
QTARTVHARVFAKLNSSSPGMSGEGDE

>comp16011\_c0\_seq1; 565 126 1673 LEN=2327; translated  
MMPFFASLIALSFFSSPVYFVLSRHLPSLSLGSAAVIPTSEKKHSETSTLNYHQSFNEY  
SEYDNDINIVYDEGISGSPSSSSKSALYSLSVTELRKLLTDRGIDFRDCFEKQDLVDRL  
QTSPPSSGQSRGLSDHLNSSGSNHGLSDHERTLVHTFKRVSPAVANIKTSAVIPQRNSVF  
GLNLGADAEVPLGSGSGLWDDKGHVVTNYHVISPPGTNNNDRLMKGKTMVKLANMAEA  
LEAKIVGFPEKDIIVLRIVHKGNGKIKLPRPIDIGTNDLQVQSVLAIGNPFGLDDTL  
TTGIVSALGRDVKIGGRPIHGCIQTDAAINPGNSGGPLLDGRGRLIGVNTMIYSPSGGN  
IGIGFAIPVDTVRRVNVQIIQYGVVVRPTIGINVVDDRIVRYIENQLGRPLDGLVAQVI  
PNPSPASVVGLEATSQSRFGSLVGLDLIVAVNGEVPVRQSEDLIAAIEEKRRERDVIDLTMVK  
ECDPSKMRVSVTLTTRDELQQQSNNIRNSNAVWQ

>comp16012\_c0\_seq1; 333 449 1060 LEN=1467; translated  
MSEKNNGPSFVDQLGDWWSDEGRDDVKTYFVSLGIALLLRFTIVEPRYIPSLSMYPTFE  
VGDQLAVEKVKTRIKPLYRDEVVFNPPQSFRDIMVDKYQNAARAREALIKRIVAIEGD  
EVEVKMGKLYVNGDEQDEPFTAEDAIEYEFGPVVVPPGNVVLVLDNRNHSLDGHIWGF LPK  
ENVIGRAV FVYVPPWRVGNEMGF

>comp16013\_c0\_seq1; 78 493 1460 LEN=1781; translated  
MAGPIGKGTKADXPFAFSPNNSGGNSNGSGANLVLVLPQCNPSPDKSYNNSYENARDSSDC  
DQYLSYCDRKYSGMDFSSGWMLPRDFYESMREVVYDRCFRSCSERSGGPQRFCSMPEPSRG  
YTSSLSQESRSYCSPIAEGSPAWSTRAMEVHEAEVLLAMNIKRSETGGTVCNRKNGNDMIS  
TFYPRSSPVVNPQLSCAARIQAQNIIVMETLETGRFSPNLHNACPSSTFLSSSAPICEGF  
TTRMMRAGYPYQSQGFGSVNEVTAVNYRTAEAVVGGWLSSTSGHCSAIVKQESPFVPTVEV  
GIGYFESGGITGHVVIVGQLRS

>comp16014\_c0\_seq1; 1504 301 4338 LEN=4338; translated  
MPSAIFRRLEEPAEEFLSSKAKVVEATSTDSSLTGMNSVSDRTVHTSETEEKRLLSTEDV  
PELVPEESDAPIAIESKNKPHEKEKQAAMPPLKTEKTPVRAPSSGAVANGSSTPITPDP  
PVSMMDMKKEENKVNESNKLKPGTGGAKDREQGKPHSKEGKEPEATSAGSRSKTEKAPTK  
SSRRHGHHSRRERKRPEDESSDDSSYFATHLPSPKSGRSFSSISSNASHASAPAGS  
SLFQINKQGS DASLFSDESEDDHDPKAKDRILQPMEGGVHLSPVVHPNRSVVDMLNLYP  
QRITRMHSVSSLVSSASSDNREVDYDSGSGEGEESNRRRTYTGDSSINSSLPSVASTGP  
ETMHQGMVDSAREGGYVQGSPPQSRQPAYMNPSPGLVVPVYFYSQQPMTNQMMAWATTPP  
SDSEFEYSRSSSTNNASHAYWKSMASSHGSKSGIQSDKSLASLVYSEDDDISKKPVARKA  
WSSGSATGKQASNPAGSRRSSGNPKGNLGGGSGGNTRETPSGRPGGNPGSGCQGATGD  
AESKGISATDGGSTEKIIVPSTPTGRQFTTVYWQRWIMLFYMSVLNLLSDWTCYSVAPIS  
LLTEEFAGNIDPERLVVFLGANAIPTACEPMLLARLGLRRTVLLGSLLLMIGSIIKSGG  
LPPIMEPSLEKGAESSLYLGFIVGLSQPLYQCTPALLSASFPEEERTMATGVALNAN  
QLGIGFAFVFGCLLVSKADDIPGYFGLLSQISTLCFIGHTLIQFDDAPPTPPSASARVMKG  
NLNFKIPQFADRQLKRYFSSNLSNPKPKSHAPSPAASSFPPEEKEKYRRSSKSKSGRS  
SSGNGRGGARRRNSAQKFQTANAENGLSAPSNAHYGSTREAMDEVARTNAELESILIPVA  
QAPSPAPMSGNPTDSDADL GAPNREDANPESSPGLNAGANPPGQMPMPGPPYPGQMPMPYH  
YGYPPGAYQYPPYMDPRMMEQMHQQAYMQQMYHQBHPMQQPPMPGPPGGAPPMPGYYPPP  
PQMMMNPYSYQHHPPTLAEFDPQRNAYDIDAYGEYGAEPVTVVTNHHLDIDIRDDQVVR  
SLHACMIRQGFSHALAAFTVSGIVINTLSTYMDYLVRLNGAPRSYTGIVGGAFQFAIMVS  
SLIMGKQTDNTRAYYSVTTGMLVLGAFGLAECGVSLDSNRGGDLRWSLLLVAVLVGLPQP  
ISTELGVEVAYPLSENTVLVIQQLF SNLLSAIFIPFFKSLKDIGTSSIEDGEIVERPEYT  
FSFYLLIVLHTLVTVYFATFNGKYLRYEHELOKKEEEAEVARLNGGEHQQSVHPLYAN  
QAGVPSQQYSSYQGGEQQLMSQNVX

>comp16015\_c0\_seq1; 1165 89 3262 LEN=3354; translated  
MGGIDISAFADCSVAVNHNHFGIPLSVVVFVAVVAVYTTLVLTGTPRNLKELGLRPHGENL  
WGWWWYNINARNGPSGISGYDPI LGSFDPSSRTAFHVAAVLALWASVLRAGVFFGGDDQ  
GELSVCKTFYDDAVPSAFLALGVYFAAIGFAVHYFLPGVSKPGGPRPHKIPRSPKWKDGR  
TSIPEAQLKGWTFLLTAQKSHLATSEQFGSETLLTGEPAGRQTFWVNVQQTGTEESKSEKQGE  
KASGGVGGFISLLSPTKNSKTNEGTDNDVDEALVQELALGGRPHPGFEPVNPNTNDQI  
FRAQQIRNYLRDYEKTKLAKSGDSNEILSPPPDMSSSPTTIECCRKAVQFYNMLVCE  
DGHWAADYGGPHFLPLGLIVTWYVMNRPSKLIDEKQAQMMAHYIRVHQQLDGGWGSHIES

PSTMFSGVLMYVALRLLGADKDDEACVKARSFMDEHGGALYTSSWSKFYLCLLGVMDWKG  
HNSVPPPEMWWLPNWIPFHPGRMWCHARMVYLPNGYLYGSRFVYAKVDSPLIAELRTELY  
PGKSYDSIPWIKTRHLIAVTDNYSP I PLVMRLQLQNALARYENWSLFDGFRNFFRARGLEF  
SMEYMKAEDLQTNFIDIGPVNKLNLMSYHHSVTKPDGSGDAELLVEKHMARVRDYLWV  
AEDGMKMQGYNGSQCWDTSFQAMWEAGLLDEFPELTKRVWGYFERTQILSTEVSQSSP  
AYEFETCENRNKFYRHI SEGGWPFSTSAHGWPISDCTGEGLKATLCLLKSktiQDALNEK  
GDNQDGVASISDERLYKAAHILLTYQNEGGWATYENNRGWGWYEQLNPSVFGDIMIDY  
SYVECSMASLTALADFAEHFPDHRADDIRRSIDKGRSFLKSIQRDDGSWYGSWACFCYG  
IWFGLIEGLVRCGEPTDSSCIVRACRYLLKQONPNGGWGEDFTSCYDKDYAKEGMKAYGDS  
EGSGVVNTAWALMALSCAKCDDVEAIRRGVRYLMKRQLPSGDWPQEGISGVFNRSIGITY  
TAYRNVFPIWALGRCREAYGEEALSATTNGDETKETS

>comp16016\_c0\_seq1; 708 125 1519 LEN=1577; translated  
MVVPDLLLLAFFGETTSKLLGIDARAATASAREKMPVAPALFGLADCRRRCVLDQVVLVNLN  
KVTEEYQGGEAVATSQVQERLGGQHEPNLSGELKAAMEAMNEAARIAVCKLALYSEEDF  
ARSEPEARMERNLQGEGRDRTKMMEYFGLCQAALQLPCVMEFMVDTSRDSVFEFEKAAE  
PADGNSKNENGNADADAAMMFPQARLEYVQRLAKAIGWDPVVFVTAELRKIFVDQPSG  
ADRDSYGGEVSAVFQTLVEQMTVALRAATMHVRSRQDTALLNDLKGKGNTRVVSQYSEF  
DVDQHGNKIESSTNAAPGRTIDERGEESTDEEKKRRLRLASEAAILQQTILGELLAMDEA  
EREDKLEAGDASRKFTEEMALPPGKERIDFXEEHSGHVPAPGDAQAVARDAAGERGE  
TAEDGGAQGTMRGGGERAPHHTTPHNLLRDDTGVRRRVAAESQR

>comp16017\_c0\_seq1; 531 99 1322 LEN=1823; translated  
MSNPISAAALSSTPTTSSKRRSSKISKRRGENAPIFLRKYEMINTCDPEIATWSEDGT  
SFVVKDPEKFASEVIPSFFKHNNFSSFVRQLNFYGFYRRIKTDPIRIRDQENDAEAKYWR  
RHEKFLKGRPDLLSEIKKSNQIEPAEKQEVDAKLEVKDLKSQIATMSKNMEQLAALVGG  
MIQEEQKHHHANGRYVQDSPAASKRKRVSVALPPSPVKSMTLPI SIPKTSTSNNSKFYS  
EAHRMPIPTPAPIITNQRSYGSITDEDILETLRDLNDNDIYFDDELIAPDVPDPTMSLHP  
SKPMQEEKVDKLEKLRHSLNLTLPKTLQOVFVQRLVNVIASPQAFQSQVEAVSALAQA  
AEEAKSRLVNNDSCTGVDFNASNGNENKEVDLAAALESYLAKVGNQ

>comp16018\_c0\_seq1; 178 1 936 LEN=1086; translated  
XITVLNTNNYYLEPTAIPQAEPSNSTVIFYQAAHADNDIGSVLEGRSIFNQARSNRSES  
TQYTVHKTQQQLLGRSLSHITSQHERNATFPVVPGFGLLQSDEKQRTTRTQOTSLTETMAR  
MIRSCRIPSVLRRICTDNVIQTALLVTTDGEELLGSTATTFVLSPDGTTRESIDSLGTLIAD  
IAVDYGRLEGEYANLDPVPLAPVGPAPQAPGAPAGGSPAPPAGGVPSSVSSTPTPNHTGG  
SKKSHLQCLLLELELGLVAVSACAGVDCMVIATAAPSAPLGSVRARLQAIAAHVQAEALGP  
LATEAITTSYR

>comp16019\_c0\_seq1; 119 77 1234 LEN=1465; translated  
MVVILKEVLPVLFAGLLLLASPEPIDAASNGIRGVNRRNQQLDSLATSTIKQEDTERQLRK  
KGRNCRDGGKGGKGGKCKDNKRLIPSASSGTIAGRFNIPVNPAPTVPVPGPPKPTVNTW  
IGACAREDKAINTCSPDTHYICESCLFALSTTSTPTNAASGVNSCKRQYCERCSTEELL  
SFFNCGWKVNNPQGATVTEDNFPSSSEIRTPPIEAAKVAESEDEDDIYTDKVNCPAVYPR  
SGTECEMIGDFKFKESYELGPNVMCACSLQLVYSCTGTIVSNGFSAEKEDLTTVIEK  
ETELQAPPLPGADVIIISRIDDVEMCPNTPMIGDTCTTAGFYEIECCYNTPNPVPDTL  
GTVTCTCGSSGVWGCKGGSLSSTCTL

>comp16020\_c0\_seq1; 248 86 709 LEN=1150; translated  
MNSLNRILVLLATIAFASQPCCEAFQYAINQHKSTRLGATVIDAPTKEDLDRKVGRRSNR  
RGGEDNDLLGDAEENIEDALRKQGLEWLEDNPDERSDMKDPFHILILDQTFEKPKITV  
PYVASNLEYVLMPLDDAMDHSQWCYENGLSCVGVWPREECLALGRQLQLRDI VCRVVPY  
ADGGHRAWQADKNAQDVSYEVEGDSFS

>comp16021\_c0\_seq1; 497 92 1561 LEN=1561; translated  
MTFLHYLPLLAWAAALSSAPSADAVTTSQDPNDPKFLANVATDAPFFVSLYQRGDCAGTI  
VGRHHVLTAAHCIGDTRKPPKTI LSGTSLVLPISAYMNPDCPYNVQRDGNPKCDLAVMAY  
REDLFERLSPLAGGGQPLSLPVFSGSDEVGKTIITIIYGYGLSGDAGQLTGNNGCRKADEDG  
RFRRVQNVVTSTTGSTSASGGVVRVKMDRTNDGGLALEGMAQDGDSSGAATVTVGGVVYL  
AGANSQTMERNSCDYGSVDEYVRVSRHHSFVSKVLRCDASIGPWKNWGNNNNNNNQLCIP  
SPTPDVVPNPVPSVPPNPSPIPSPTPGPIPNPNPNPNPDPIDPCPLTEKKQKKFRIRW  
DNRKMRGTCKKLSKQSGEDIAEICKQRLGKHKHKNKTVANMCPVTCGKAGVGDSPDILT  
SPTESPTASPTASPTASPTASPTAASATTTSNDDDDDDSNNGSRSINNSNNDNNGGTD  
DDDDDDDDDD

>comp16022\_c0\_seq1; 301 1 930 LEN=1271; translated  
ESQKVYVGGDLPSVGEDHLRALFSRFGTLHGVLQTDPTTRASKGYAFLSFRDPKVSHLA



IRTMAGKLLAGRPLKTGWANQNQQSAASIAAGCTIATSDRFPEDAPALAKEALSVLAQMT  
GGGVVPAEAEQAVALPAADPSALSVAEQLDKAMGLSAGAGTTAGMVAQPAAGLSGMP  
VAEARASLAADVVARQLAAATAARSSFIRGRAAPTRHLMVHNMYDKDQETEAGWEKDIEE  
EFLGECSEKFGTIERVTVLHDQPGGKIRATFADVGSARNCAENLAGRWFDRQLTVDYLP  
DGEEPEAQA

>comp16023\_c0\_seq1; 500 145 1395 LEN=1645; translated  
MDQPSLKKEDVGTAPSAVAVTQTPAVVATPAPLPVATVAPAAQAAPVVVAAQPAATAVDA  
NKRPAVVGNGSLAAPAPVAKKPNTATSATPNSTQLQQQIQQQLQQQLQQQLQAAAARGQ  
QANITPEQIQQAQAMVQAAAQAQAVVAAAKTRGDGLVPMNQSQIHALSQIQAQAI VHAR  
KSQGTPQQIQTQIQQLQAQALVHAHTQAQIAAGIYKGETPKDSNAATTASARTTITEVKS  
TPTGVNPNVMSGQILTSVSVASLPAAMVNGTGDSRAVDHNNALSSVDDHLIPPAAPSS  
SSPQFLAQLNGSLDKFWKEQLASVQELKQTEQDFKTHNDLPLARIKRIMKSDDEDVVMIS  
AEAPVLFKACELFILDLSIRSWNYSQLHKRRTLQKEDIQKTDIFDFLVDVI

>comp16024\_c0\_seq1; 351 92 877 LEN=1061; translated  
MARRYDSSTTTFSPEGRHLHQVEYAEAINNAGTCVGIKADGIVMASERRITSGLLAPSK  
TSEKTYQLCSHVSCNVAGLTADANILIDQARLRAGRYAYQYQEPPIVPEQLVEHVCNYKQF  
YTQRGGLRPFVAVFLFAGYDENYGFQLYQSDPSGNYSWKATVIGANNQAGKSLKTEYK  
TGEEGKEEGSIPDVQEAQLKLVKLNKTMGTAAAAAAEKMELYTMAKGENGECVHHILS  
KEEASKVIEAVDAESASAGES

>comp16025\_c0\_seq1; 401 225 1082 LEN=1587; translated  
MSKATIPSFAPALFLTAIYYADAFGSSDPMALSTVAHSRLRDANHAPFAPHKHVSASRK  
NTVLRMGFLDSVFSRFMDKREGDFVRLLEDMNEQFFGPGPALLLYSIPDAIEDDEVMDMLS  
DGAPVATSKGISLARITATDLQANACDGEDSDGNSQLLDSLNEALDVTVVQRETVSSLA  
STATIGKVSTNVEEPSWTGLQEKEGETPSKVTGSPVVLFSGFNSKEMMASYNILGEEIYK  
ETASYGQPGVSLACATAVNAMEKPLRQVLTEISGDHAEAMKEEE

>comp16026\_c0\_seq1; 934 97 2049 LEN=2089; translated  
MPTVALDKDQFFAHLGRTYTDDDEFDELCEFEFGVELDEITSEREEAEKSSAGKMSKELAA  
FSDRVIYKIDVPANRYDLLCVEGLCRGLRIFLGDQEAPEYTIIVDPETPGATLTVKKSNTD  
TIRPFVVAAILKIDITFTQERYDSFIDLQDQLHRNLRCRQRTLVAIGTHDLDSVEGPFVYDA  
RPPADIDFVPLTPSDKGSFKGGDLNYYETEVS AKHLKPYVPIIKDSPLYPVIVDAQDRV  
LSLPP IINGDHSKITLDTKNVFIECTATDLTKANIVLDTVLTMFSEYCAAPFTVVPVQVE  
YHDDSGSVVDSYLT PKLSVRREQAKIDFCNSLIGVNL SAAEQTL CNKVQLGPANLLEND  
TLLEVTVPPTRS DILHAVDIAEDIAIAYGYNNIVKRVPKTNTVGGAEPLNQVGDLLREEI  
GRAGYTEVLTHGLCSIHDNFTALRCPVREDWAVSLSNPANIEYEVCRITLLPGLLTKTFQH  
NKSASFANGFKLFEISDAVLVDRENVVTDITVIGARNVRKLAAYAGPTSGFEI IHGLVDR  
VMTLIEVAPEASYVATSGKKSSATGGADEEMYRISREGWFYTIAPLDYDGDGDAHEAKMYFP  
GRAAQILLTKPNCSEKIRVGTFGILHPLVLKNFDIQYPCSVVEINLEELM

>comp16027\_c0\_seq1; 580 136 1563 LEN=1841; translated  
MALQDAVKDYLPDWP EWALDVLVMAALLT VITVITQYLYTSPEEKEETSTNDVTSHADL  
KKKFDGFRKYYIIVYLVI MLADWMQGTHMYTLYLSYNVNVSALFITGFLSGAIFAPFLGS  
FVDKFGKRSKICIVYCVLEVIINTLEHSHDFGILLFGRVLLGGISTNLLFSAFESWMTTEHR  
KSGFPEEWMSKTYADQSIGNGTMAILAGIVAQVLEDNLGQIGPFQGAIALTVLALILVLP  
WEENYGEESDNDHSLYHQFKLWGATLSDSRIWRIGLTQALSEGMYTFVFMWVPTLLS  
MNPPGGLPTGCVFAAMMAITIGGMVYPPLOSIMSNFSPK GKAPELCATFVYLVASASTA  
VPAFILSQGASDVAGALTIVISAFMVTEATVGLFMPVAGTLRSKYVPDALQGA IILNIFRL  
PLNAV VAGTHATDHLDPNICFQLVSALFLGAALLQGTFLFGGSSTSTTSSKKN

>comp16028\_c0\_seq1; 249 218 778 LEN=1235; translated  
MPPLLTQVARLSDGLPLVAIQTPAGPIVPTNSDQKEAKDLLRKITAGANKMSIESGDKTF  
YYMTRESL CFLAMTESRYPKRMAFLYLDEVCDLILQELVREFGNNWRIEVDQTDPRYRFI  
NYDPIIQRKQKEFQDERQQRSKLNDDLSEIQSIMKKNINDILDRGEKLDNVQNISAEMLN  
KSNPFKW

>comp16029\_c0\_seq1; 390 196 875 LEN=875; translated  
MTTHHRRHAQVNNPFANKSRRTVGYTDQRYANLHHRGRSGNLLKRPVFLSMVMVYYFL  
LGGSPASEYD SHALLNSQAKKETAMTTTLLPKLPPTAHKSSEVHDASGNQYLQHQETDKN  
SMATDAETSTDADSDLASFNQGGGDWDIDSNSSGAPQTTDGLDAGADMLAVLKGIGRG  
SDSND SKNDDEAQTDFPDLDSSGAGLAEKHKPGIGYDGDGDGDG

>comp16030\_c0\_seq1; 402 80 571 LEN=707; translated  
MGPPP SDDVKIVIMRTVGGEVAPASALAPKIGPLGLSPKKVGEDIMKGTGDWKG LNVTVK  
LTVVNRQATVSMIPSSSLVMKALNEPYRDRKVKVKNV KHDGNLTL DQVIDIAKEMRERSC  
ARKLAGTVKEILGTCNSIGCTVNGESPRDIQSGIDEGEIEIPE

>comp16031\_c0\_seq1; 480 323 2280 LEN=3315; translated  
MYATAAPVPNGVASPIGGSSGDDQKASSPSSPSDVTTTPSDLKNNSTTEYSDVNMNNNQS  
RRDLIGDCALVEI IHLHDCLRGALNALEKDLIDLKMLLCSTSAASDAQEAQR IQLQTH  
HQSISKLESKATARFQVIWSVFRAHSAAEDEFIWPALRDKTQGAVNGSPCGSPCGSPRYQ  
PNQEHHQHEI PPSYAVAASNARAVHDASDDDEVVEQEEYEEDHADEERMFTMMDHLLTRLH  
KALVQLHQNTARDLSSQSAPHSQKNGIKKNLDSITNTTKEILSLAKTLNQHLMVHLEKE  
EKNCLPLVVKHLSKSEIHDLVGQIMGKRSSDTIAQILTMAVQNLKEADRENMVSHMKQAM  
VGTFFERWLSMTGWEGGNDIKDGVSGTNTGAEGVLGGTRRKRSASVADLSVTAESSPGGT  
SDNDAGVIFSRNKRQAGNDSQKGPINSMAESLSQTINKCQPTGEITSQENLQKLIRA  
VVTNPSLTPREKNTTIQGLRASVWKRNOQLTGKIARTDNQTKSHTSNTNSCKHLHFPSAY  
YQRDATGRIVCVWKMDNTNFKNEIVNRIPEQFIPKFTAELAPTYHDGTTSGDVLGCHH  
YPRACKLRHPITGSLFTCRLCADQDREASAPNEKEKPPLDRYAVTXDHVYEM  
>comp16032\_c0\_seq1; 122 1 201 LEN=869; translated  
QQQQQQQQFQLQQRQEQAQPQSPPLPFRPTDQNQESVGSLSVSYGLAGVGVAMGVTLV  
RVLLGA  
>comp16033\_c0\_seq1; 315 1 789 LEN=880; translated  
TMSNSNRRTAAVTAQTFWDVASPLIAVTEKHPFLVSMVDGTLAEENFKYVYVQDALYLKDF  
ADCLRRVADKAPSPADSRVLNFAKGAEECEMELHNSFFKQWNISSPGGTGEGAEDAQQ  
MPNCLLYTSYMKRVVATESYAQGLAVLLPCFVWVMHVGHVMLKLRKDLANSVNRKPQYDA  
WIDMYAGEDFEKEVKDFIAMVNAECQRIQEKGLDADEDTAEGSSAADAFKRMQHHSFGC  
KLEHMFWDQASTMMQWPKISGM  
>comp16035\_c0\_seq1; 481 259 1722 LEN=2363; translated  
MSSDSKPYTPDPNFYDLVVIGGGSGGVRASRMAAGHGAKTLLIEGQMKHGPPNYS AIGG  
TCVNVGCVPKKLMVFASRYPGSIAEAKGYGWDGAKPGTFSWDTFMEAKDAEISRLNNIYN  
EFVLKRAQVEVECEGLGKLNKNDVIALPDGSSKTVSAKNVLIAVGGWPFKPDIPGIEHT  
ITSNEIFYLKEQPKRMVIVGGGF IACEFAQIMHGLGTVTLMYRKDLFLRGFDMDRKHI  
YEEMSRTTIDIKFNTNPTEIKKNDDGSFTVVTTEGGSVDCDQVMYATGRVVKSDNIGLET  
VPELVTKGSFIPVDEYSQTNVPGIYAVGDITDRMALTPVALMEGHSLADTLFGGMDRVPD  
HEFVASTVFTTPELGTVGYTEEQAVEKYKDIRVFKTRFRPMAHSFPKSEMYTMMKVIVDS  
ATDRVVGCHIATDGAGEMIQGVAVKMGATKKDFDKTIGIHPTSAEELVTMRSPSYSYK  
DGEKVEK  
>comp16037\_c0\_seq1; 691 271 2508 LEN=2595; translated  
MGAATIRDPIASCQALALVTLLETFRPRMALKPYLVQLKTVVADLEAEDQQLQLQQLKDI  
HRVFFVASQASLEPPCEGCAEESVPGVPGKPSFGSNTSGAPRAHTSIKSPLSMNSPISVS  
TKTELRNRHGLPEDRDASGGENATVAAAAAPAASPKSLPPLYSPARHPRNEVASPIKPC  
ATSREMRSPFRSSSSFPSPQQPSDPYQPEQQRQPSPLASPKLQLSSSFQDRYHDKNRF  
LDDATIVFPLQNSIKKFDAGFEPATDPAKEAFDTPEIVSRILEFDGSLAAFYKNDLLEG  
YKSPMPRRRSQSRFQRRTTGNRQLAFVNKHFAVSLVIGAEGLAWKREARCEIEDRKRISR  
QIVSGANPSPLAKVFVIRNDVIAEFYLLRKHVVAIEQGNLQGDHSNDIFGMALTEYV  
NGGDRFGDSDSKRAFGAQSNESSRRSMGLPRGHAFRLFCSWEAKECDYTTLLAELAYNA  
VVCALDVLGVISKRHNTLYSTAFGPSGSQSLGLLVAQTCAQPCCLEEVAQGI RTLM SH  
QRLHREDLNACQLGSHGTSLVHVAAGDRELVEALLDVGYHPGVRCQDQWDSVGRGTNGNS  
NVSGSHQAKDGSTDRWLWYPEDWARVRGHTDVARLLERRRRQLEPRQDLQSLSELDSVLSE  
TSTRFTVASSYQPYDSDSSCSSTEYDSDSSDVFDSEIDQGDYSAYTSESSRFYSPGNY  
PYTINDLYRSPRRKRLRIQTTAISR  
>comp16039\_c0\_seq1; 213 135 935 LEN=1036; translated  
MKTHLDHEPLKSLNSYDSNETHLPSLASVSSYSSPSSPSSSTSSSSPLSSSGTKNGL  
VISPDKSDYNHFLANKVVALDCEMVGVGPRGKISVLARVSVDYYGKSLYDRFVHVEERV  
TDYRTHVSGVTESDLKNGVDFGIVRKNVKQILKNKLI VGHGLENLDRALKIEQDHSWYNI  
RDSATQYQPYMRLDFHGQWRPYRLRDLTWYHLGIVIQEGGKPHDSLEDARAAMALYRNAQ  
QSWDYEIECRRRNALATFASSKRGRY  
>comp16040\_c0\_seq1; 492 168 1076 LEN=1706; translated  
MNIHAVNPNSVFTATERSFIMMREDNEMEDDESCYESTERDESDDCQCDYKREQYGGSTAN  
SSKSTLIEECRDCSCYGNDDDLMDTNAVAKQYSFTEAEQGLMNI AVGLVEKALDMEDW  
DDESDCDNDDDDDEDMVAPPKSGDNDRNFSRRSTHRRKQELSLNERKEALFKAAIRIQES  
IGRSNRNDDNDNFPSYGHPCVTDTYHSYGWFLYEQGRLEEMVYLSWALKICHQWFGVGH  
TATEILLNDVRFVLVDKQQKRLQQQQHAPKGNQDPTMPATIFLSEGHHC GGDMVDDTWE  
NEW  
>comp16041\_c0\_seq1; 342 134 505 LEN=780; translated  
MMFGKSTLVLAALVAGARS DWSATNWQANVDKAMD MASAYQSINWEDGNWQGNSQKAQEI

AMSWKANNETDDELLEVSDEILELLKNTTDEEEEDETVPSSAPAFGTVA AVSTALLATTL  
ASL  
>comp16043\_c0\_seq1; 378 95 1073 LEN=1217; translated  
MRTSFMLDAAA VFI AVQ TMSMGV HARVEMADVD SENYVAKEVSPD VASGGIRKLHDQGV  
LRFESENDSKNQND RSLQSYDDDTVISEEIVTVEYYQDNRFSSAEPIYANIMNPQRGASG  
NKWLYANVPLQPIFGINDLP IQGLAQGF CENTFQDQTFCHFTYEFFDLQDGAITVFASI  
TAEGSTVPQGVSELNVLGGTGEFNGAAGTVKLVPGVIDESIIPARIFKDGSLFLGNVVG  
EMRMDLSVRYLLNAPPEIPVPQTVAI PAVPATPAQAQAAPASGIDTRVTCPGQIESDIVT  
VIWTAKPRLHDANALKLKLAVKEDE  
>comp16044\_c0\_seq1; 175 1 579 LEN=1080; translated  
TAFDNRRKQTITRIKISQAKMTRLLSAIGKAASFTAKGAAVTFGSTVFSCAAACSIEKGA  
NRMIFKYCPEKFANVEAASGITQEELDFVHFHYRGGIVAAASRD TGEPSPMETETNEPTEL  
FLFRSDDSLDDSCAEKSTEDFSPNGQVKSEDQREESAIEKFWAEGEDTAAKYISMIPVIL  
PRQEILACSMTS  
>comp16045\_c0\_seq1; 183 1 903 LEN=962; translated  
SSSSSNNNPGDGARSFVMPSPFP GWLPPFAPMLTPSYIDRSAYFQLLCTDYVREALEERL  
AETGQTIELSFSDSCRASIQHTAF AIFAEQLHHAAS IARQTPVLSSLQRLYKQVGGFS  
LMYIELLTD DNVQQIFLWMQEKSVFGMGALLLNDSPGVDFTHVDLARNLILSSGMNEPLE  
AQVRFYNTFWIDTLEKRFGLTVRSILDRLVRPVL MGKATRHIGDMEQQLKYKEATPAH  
MRHSFADNKPMVYARFHS HVQQRAIEMEDGDPNAITLEVAKSII EEMVTIGNSMENIKS  
>comp16047\_c0\_seq1; 160 1 1018 LEN=1252; translated  
XQHFFLSVKETA VHNEATGKTASTMGTKSDSPKLT PAERLARKRAAARLRQQR CRARKRQ  
AMLEKKRGETDRQGSATNNINTQHSPRSPVVMQCVRRRPQPRFP TYKPV RSTESSVEAWT  
GVRAEIPHRPQIHRFPSEPIYHCVSFD SQKSLEEAQH NKSLATSTPPESP LEKTKIVVTP  
SRTPPPLNALVQVLS DQKREDKPLVSEEEA VAAMLSL KSGARSPTEKPADENKKRPISP  
PREVTISHESKKSTHAGINGN NSEEQSHGPRARLPLPRRLTTGHFEAYHYGPPMKIPPLP  
PHIIHGPPGYRVPVPPPHAHYRRGYPPAPRYVSYEYK  
>comp16048\_c0\_seq1; 504 23 1195 LEN=1366; translated  
MTASTSKQTKTTSAMSPTS NITLPTVLLIATLSVAAAFQHSGAIQS AKLNTL FVHDSQQ  
AARPYSRNERTRIYTSRVQSLSSPTSLSRVRRKQ QPSSTLTQLHFSDDSSSNAPLEPSWW  
RKLFTASQYSASRSSTVTGTSSSTVGEDDEQDNVDAYLEFLDRRYRRLH CDDKKEVKAI SN  
PKQDSSELKTAKPFSAMDWLMK GSGSNSSDDLTTTREQQEDALYVLGVAGLASQKLLQKH  
HLPTTMNQHTKGVSTSTIDKVV ELKEQIDDAIEVNEVSINTSLKSEVNTLV LNNILLPIV  
RSLYLIQRQKDLFFRMIQEGVKAIATKATNGILSTFSQGP KSILD TLLSIGGGKRNFLRT  
IAVGYATIIVFRPLMHAIFA EGLAFDPLIQ  
>comp16049\_c0\_seq1; 629 108 2498 LEN=2786; translated  
MAASVPRQDLATGWDGDPQSSMETNPTSATSGL ELGIGGLNLISSNINSGANIKSRSPV  
NSGDSVHSTHSTGTANSNQG ESFTSGGSNMSRPPGMSSLP LLVPPIGKSGH SKSSSNSST  
AHTATLPTSSIDGGASNDLYVGP GGARSQNSPSSSGDHLPGITNLGSFDTDDGAHDGLM  
GLQALRERAQSSPGPPREFSANARGFVPGRPRLPSKDSGRSISVGSTRPPLAGGSAIAP  
HTVEGMGFQSTGNRSRGASPPPNAGVISRPDSQFLGYGNGGNPSDNSFDSMTLRRALSND  
TFGADYNNYGGPRQGN DHLNNSFSQVSLNNQIRGGPSGHVPGLYQSQSQRSLTGGPEYYH  
EANYEAGFI PHRANANVDADYAMQQQH HQDMNYHSYGPGGHQFQQPRGPHRRSLSLQHNS  
YSDNDLAGQGSQGVYGMHRRRGS LPHDGMQRRGA EFDRDFDQRERLGNTSYHRHDNRMV  
SPAHSMPQSSYGSNHNRYPSDISSASSSSPSLGLGSSAPLYGRHRLAHSDEDI SHPLAGE  
NIEVPGEDQYYNDGMTYQRSASMGHAPS YNTDSRHLP TAGASMQAPKNVYNVKFKRTQRT  
FEIGPRLNRHLEVGT YVKVEADRGEDLGIVIGKAKNPLARSSSFGAGMGDIPTAGAGGGG  
DLKKI IRLATHDEVQLLGMKRKEEEELLEVC RHKVIQRGMPMVVDAEYQFDRHKLTFFF  
EANTRIDFRELVRDLFSIYKTR IWMQQLDKSTSATCPTAPAPAPLVMDYGTPIIAPVSEY  
EGYAQTPAVGSDDGKE  
>comp16050\_c0\_seq1; 398 157 1437 LEN=1657; translated  
MDLGYMMCSTLRCDTGLDIEDSLVSESRNGSSQH PAPVEQSCSEFTSFSEQQQHSSSGSL  
DASSNSNSVLQWSTRQKLQSGHTSPSS LALQRRPQEPPVFLKQQT LSTDVSSSSGDNSSG  
VCSSFS SHNRNKDNMGFASKKSSRSGVSELENEMLVETKKGHSEKRTSPSPHAKFQELCI  
NPPPLRSKGWSEPSARNYQVRSNNYLATR I KESSEEA FRLITVDLVNTKTPIYTCMCSH  
PGERVQMALERERQTGMRELPEFIFAVNLCIPAQTIYH AVFYYGIDKATLDEIKNETAF  
GRIMNKFI FGSDSYRNDTFKLIPSIIEGNYVVRKGVGTKPAILGKKIKQYYVRDDRYFE  
IIVDIASDAVAKRVTKLCLGYIKTIVVDMMFVLEGN EESTLPERIFGGVTIKNLDFKMMD  
GKRTVN  
>comp16052\_c0\_seq1; 1003 104 1948 LEN=2067; translated

MRIQTASLLLFLSSYEQNDGVADAFSMVPRPTGKANAPSFVSTPEPVTESSTVLFGKRRQ  
TKRKKKQTOGRSQQFYEAIEDAKGNSSAPEESSSTATATATPPRSPEQQKAMDEAQAARFE  
QRPEVTTMVVDEESGTEFIAQGGQKVM DVVTRKAVKLSNAGADARLAQMFPVPPQVREQH  
RIDWKTAE IPEVLDKLLAACSTDLGDGKTGIPHPSLTNEGIDFVLANRDR LGYKMSKTI  
PRWTFNAASQGRMAEAEKEVWNKLHVNFLT IENYVSGPFRQIMQDAEGRVGP NFGNLELAS  
FCSGDLYERVANYLV LKGMVAHW EKKVVDADFL ENSD EDEIKMYRGDPKRYLKKDSQDAP  
ILYTLKECTQVCAMAQQMCKLFVEDEKLF GDFPDEIVFLEDALTIRGGTALRKYMID EFC  
PSRGITPEGLREGVKRLGQQLDNMQIDPYADITMKIEQLYAAMAVGSDDATDPYAKYLG F  
QASEDPNNPAYFETYTFNHAKKSLVRFMDDTYP SVGGIAEMIGPPP AKGENENE EKKNP F  
EGLTNGLNNIMGQIKGERTLRV EPSYDDDATPYVVPKERSIGRKH DQGWFEE LNADDGNP  
KDRFGKMEPGRIID

>comp16053\_c0\_seq1; 255 300 1115 LEN=1558; translated  
MISGPTATASIPKSTSPSPSLKLFNPSMVSGSGASLVSTSNDET PGSYS CCSAVSSMKEI  
LKSVYRCD SAAVVDGDASCGSTANQALYQGV E VILRKTT CNYGN DLKTSVASRPF FEYRC  
FCDDDDFLPEDVYSSPQVQQEAESRANKVFGHVRS GSTGTLS SGE SRNEQN PTEASSEND  
QG ESDERNAAEETVRTEADAPSTPRPLRTHTRDFY SKIHSPTKR SITR LYDIVPAS PSSF  
SRSPKSV PVDGVPSSIETSASEPVG VVVSAP

>comp16054\_c0\_seq1; 87 179 763 LEN=848; translated  
MAGRLSPTAEPPRRRKRTRDAQPGGKPARAAPDSIEAALDHAE AALAESGRRLGELHRSWR  
NQLLRMGLVVLVLLARKLGLASLAPGAPLRVSAAGSATELLSVLCGLCLVRLSWAPAGKAG  
PALWGALS LAPAIAATYHRGGGGSAPRSFPVVLIFEAVVLGSLFWMGHQDRQQEDGLRRI  
EKLRENLRASKQKQ

>comp16055\_c0\_seq1; 146 564 1346 LEN=1604; minus strand; translated  
MATSISMDEPINTSLSSAEQDTRDACTDDEEQGDGNXDVVGMAL EAE LVRQARPQLRDLG  
RLLPLPGEARSHRREGIRIAQQKREAAALSLSSAAPRAHTDSHPARVGSQE EPGRSVWVQ  
DDEF RHK DAPVADVSGFPQVPSLAVHGSEVGRMVRAAAA IGGAGIVFFVDGNVSLWSSS  
ARKELEGVSWMKQNC LSSIPRDEGGRPAWCTNLVFRVPGQPQQQRWKKVASSWIQPPTLG  
SSKGF IAPA EKDEPDASGSS

>comp16056\_c0\_seq1; 239 75 730 LEN=730; translated  
MVRRGVVSFQDTADETDGDVRNDNQSSPSEGNNATNRSLSASLPRREPSTSATALSHLQE  
RWP GKTGNRHL EVRPMSFDAILSGGSRI VVPMFQRRYCWTRS QIERW WKDVSE RRSEEH  
RTGKTMFKKVQNTAENETMLLCIDGQQLRTTTTIFLMALRAEARKHGKASASASSSALVR  
AIDAALFVNAEAVQGVKRWAKYHAFHLVRNNSSSSSSNX

>comp16057\_c0\_seq1; 526 101 1984 LEN=2058; translated  
MNNLTITILRTIVALSVCTSV AQSKPRIVGGTQSELG SFYPYFVEMGGCGGALIGPDVVL F  
AAHCGSLENQEINIGAYERRTATKLNASQSRFCEEYKAHPNYGTGGSSINND FALCKLD  
RPVNIDTSFVQLELDEGDVSLQSGDSLIVMGLGALNEGVSGPQFLHDVTVPFVSNDDCNA  
ESSYKGGVTDQMLCAGFPEGQKDACQGD SGGPLVKRIVQSNGTFKDYHVG VVSWG HGCAQ  
ANKPGVYARTSSGIDFIKNTACNDFKSTANFCHNSKSLSPHCDVELKVR LQTDVYGFET  
SWTITNDRRQEVKARKYLLKFH AHQHSVCLEKGTCTYTFEISDDYGDGMCTTDNGCGAYEL  
SVNGQTIHEGDGKFEKKETKDFCIDRNGNAVETGDPTPAPVTPVTPVTPVLEPSPNGNCG  
GKR NKQFQVQLKIDDFGGETGWILSKINPNEFDPE T FHTGI FVAESDPAGFEAFD IVTFP  
RDDSFYCLEQNACYLFEVYDEF GDGLVGGASKGFYKGF LGGLV FQGADFEY YEWKTFCT  
GNAEISSITDDAPTSPPTNHGDDCVD RKGKIKVGGKKRKC SWATNGSKKKRVKCKE KIVE  
GGKKFHDLCPKTCGKKAGIGKCKHLQR

>comp16058\_c0\_seq1; 249 85 1122 LEN=1214; translated  
MPGNNDLDSMPEDNDLKATIPLVSFLKLG DATVPGTDERNMLFMVAHIGFFAFNF FNVL  
YILVVQGI IKKELQRNKILKITLGACFCQLMSCMCSIHR YNTNDEF SAVGPF AHIS IATG  
LVAYAFGNTACL LIGLKNARRSIKNFAGL GIALHYSVLGVSCCMSTAFYCF LQGYIHW D  
PDPTKLNQFQPF RKF IGVSTMFQLLAIARCLYQYQYSGVSADKRIDFPNDPVRGSRG  
SVVRMFQTCIFLDLVALGLSGTGIPVLQYPATGSTFSAL TLCSIFVGRMSFARDPEPTQG  
EPGMLLANGTGYGIHTRNVDRPGDIEAGEDSELLD GREAVPVR

>comp16059\_c0\_seq1; 416 247 1536 LEN=1801; translated  
MLITFGLLLLTA VYIGMVLALHYKSPVECLETNTNTGVDSYFDGISAVVESDSGAPCQTE  
GVDNTILN WASDFFLAFWTFVFALHLSFLDPSKREVRKSGILAQVFMGGAFLMAGLGNWL  
FPNSGTEDNRGLLGYVSWIFSRVFFAISGLATAHFALCASLNTDPNLKNRSLLSRSYVP  
LAVCETL FVLSLSGFLTGSIWCSIEPELRADGVIDAFGEAGVVVATGGEEFEKHVCFRIA  
SASEAAMNASYALLWL P AGFLLR AASRNKPAVVMGLPTPIAAVLAMVLQWTVGSMLVVA F  
AVVDALVANKAGYFEAWNTVYGTVLYHWGMLMTLACVHNLSYGLPLFDANEDEGPAPLSW  
EWWVAMVAGMVPEPTEPPAKKPPTGAKPSGDEREGSSDEESAYHHDACEASDSKRKT VSF

DVVSTEISM

>comp16060\_c0\_seq1; 1011 162 2156 LEN=2224; translated  
MLLSFPGLVEARPIVRSIRSAHEFDRLLLAKHSHKETGLPVVDFYSDGCGPCRMMAP IYKK  
VAKEFEDRAVFKVVDNTMQHLSARYQVRSPLTFYWFVGGKRVQDEKGGIGEAALRQYTN  
KAVRQAETENTKLLLDLKAIFYAEMDPKTDDEIEAVYNKCKGRKEFCQGS IANTLAYKL  
KKKYKKRPETQKLFVPKPKKTEGDEKGSPTDPTNNQKAQPRKSNTPNLHLATKEQLLA  
ELEKREDEARDEEVEGEDIEEEDSLEDNASRWIRGSFPEKVIVIGGGPAGMSSAIYAARA  
GLTPLIIAPAMGGQLQKGVVDENYPGLANFTGPAVIAAMRSQAIKFGAKIEDDFVTRID  
TSSRPLKVYGNSTGAIEAHSV I IATGADSKWLGIPGEHEL RGGGVSSCATCDGFLFSGRH  
VVVVGGD TAMEDALV LARTSKKVTLVHRRDTFRASKVLADRVINHPLIEIQWNTVVEKI  
VGKSVSTPGGSSQDDSEELD LDDPSTADDGDKIVSGAVLKDVETGETRTLSCDAVFVAIG  
HSPNTGFLEGVVEFDPEHAGYIKTTGQSTKTSVPGIYAAGDVTDVAVRQAITSAGSGAAA  
ALDAERFLSEEGLGNEEAEMEAE LRELANEMNDGAANPDLGYNAYEDAGGRVHGVKESI  
SAEL

>comp16061\_c0\_seq1; 493 239 1186 LEN=1400; translated  
MAQRLKDAFASAAKRVSQASGGSGGGGGRAAAAAAQSVTALAVAGGLAYGTYN SVYTV  
PGGHRVIFN RVLGMKDSIYGEGLNFNIPWFERPVIYDIRTRPVNLQTLTGSKDLQMVTI  
AVRVLHKPNPSKLVWIYRMLGTNYDERILPSIMNESAKAIVARYNANELLTKREIVSREV  
SMDLQRRAAKFNVLDDVAITHLSFSPEYARAVEAKQVAQQDAEKAKYVVLGAQQEKKTI  
ITRARGEAE SAELIGLAVKKNPGFMKLRRI DAARDIADIVAKSGNKVYLNADSL LLLNLLG  
DADDKFEKSVASKWR

>comp16062\_c0\_seq1; 404 133 1464 LEN=1698; translated  
MTDEPLAKRRQLPEPGTNDKISTETSSSASRSAQETE QSEAPGSADSPLPPARES DASI  
KLPCDDNIDGSHPTRNETKESAAEIGTNAGNSSNDDSHRSAREDPNHRGGDKGEPDR TSK  
DYFYSYAHHAIHEEMLKDEVTRTRYEMA I KQNGHLFRDKIVLDVGC GTGILSMFASQVG  
ARHVYAVDCSSIAHQARRIVERNGFGDKITVIQKIEEIE LVPVEVDVIVSEW MGYFLLY  
ESMLDTVIYARDKWLVKDGTGIVFPDKAVMYISALEDGQVKRDRIEFWDNVYGFDMTP IK  
DIALKEPVVDVDSKAVVSDAVPILHLDILTCKREDVEFAASFELTANRNDYVHALVAYF  
ECAFTQVHKPIGFSTSPFCRYTHWKQTI FYLPENLVVCDGERIAGDIACKPNKKNRRDL  
IAISISVDGKHNSAFSVDYRLR

>comp16063\_c0\_seq1; 773 85 1533 LEN=1568; translated  
MGKGGDAVALK GKDELKEMPKYTWKDVKEHSVPSDAWIVYHNKVYDVSNWHEHPGGAVV  
FTHAGDDATDIFAAFHAPGSQNMLKKFLIGELIVESVEHKDAHQHAF EKAYRDLRSQ LIV  
MGMFKSNFWFVYKQLSNASMAGAAFAAMVYSENTFVHVGAALLMGLFFQCCGWLAHDFL  
HHQVYKKRRYGDYSGLFWGGVAQGYSMQWKNKHNAHHA VPNLHNS SATSQDGD PDIDTM  
PVLAWSLKQAQSFREL RADGKDSFPVKF MIRNQKYFYFP ILLRLARLSWLNESFKYAFGLG  
AASENAKLEREAKGLQYPVLEKIALVIHYALTYAFCTGMGRFSAAYSFGLFMIMTCTCGF  
FLAIVFGLGHNGMAVYDAEKRPDFWKLQVTTTRNITGGHGIPQAFVNWFCGGLQYQVDHH  
LFPMPRHNLEKTHDLVTSFCKEWKVGYHEADLVDGTYEVLNCLDRVAGEFVTFD LLDGPTM

>comp16064\_c0\_seq1; 378 1 1195 LEN=1229; translated  
XKMMELF TSVGSI AKRRCSNREVVVSIAYLVFALC I FVLSKEFHLLNGTAEISGVFDDAI  
KDRSKNLTKSYELDYESCKASGVDSLVPENWCLDSNNVPRYVGKEDWPPRNIHRYTHGGY  
EKCLGNKTLVFIGDSRVRYQFMSLASYLQSKEFMKCEDYSMIAEAKNITFSPDKCFLVN  
ERFLNISWNQWYEDTTAEFPGLCDCYRSNKKGFKPDSTFENRFFKKPTPFGEITLVYIQ  
NFLDDVTMKNHFPPFTSFEPNPQRCKPGNCLDR TIGFQGNLSAILWNIVPKFNPTHVFAN  
SGWTFVDYSCEVRDFSRHYPGIKSYLISHPSMLEKVYNPSLEFDATKLQCDSDLIDRTAM  
TKNVPKNWYDRAHVLSILNEEWNHLLVGKICPIKTY

>comp16065\_c0\_seq1; 364 104 1231 LEN=1420; translated  
MNLFSTRIGNDRVNSG SILVLAGFPILLSGQVALGVL TILVALVLTASQGIT EADKIEIR  
FNASTPENVLRLEQLSEMENVNGFGKSNNSRKTLLVDEETRIKH YVKGLLALGRKYGKS  
SDDKPQLSLRYQQLAFETIRLYPENDQIVDGSISLLALIAKEPIVRKRYKDAQHEFG LNR  
PISVLKSVLARARNEEDEAKEEMLAEILRKGCLFLGAVCNESEDLGLSSVVL SKGGLELI  
LEAAKWFRLHEEVS NWALWAI FTLSYDQLSIKARLVRLQGIQTICGIMENNQTSLEVTRH  
GTAILFDLLRERERTVVGFKWNPWEVRKIALASGLHERILAGMREFPDSMDIMKMGQEML  
IGTGYRGDIPKFQEI

>comp16066\_c0\_seq1; 304 15 1637 LEN=1867; translated  
MPPFLCWLVRGWVLLVAIIPLSRARREKVRTTCD DPTRWTPVAIFSSRFTATAPSDDFQE  
RRNSTGCRGSIRAATRATILSKRTQWREFRGKIRRGVLEGRFASGMKRYLEIVLLKQRHG  
MERIARSARNVAGVVLGAWMAFAGGLSTPPPLSASTSLTAP ELSLVLQCGMLAWVVND

LTRHCAHRADVKNDTATFVEARGRNDKYTTTHAYYNI AIGGRDCKGNDPTSSTDHYETTGV  
ATREARSP I IGHNVLLNDGI AVVVALLVLLAIKRNPHHKPHRAVFQMAVFLICIFRVTVR  
SFRSIVDDVLYVEHTRRNSILYRYLLRRRRASLPDVSNLQKRFLEWMAGFLVLAALSCVS  
SSSNAPLLPMVAASLMGATLVADSVVDEVVNNWFNLLLRRLGRNQRNAVVAHVIVTETIQE  
SLSDRVFGRLEAFQEFEDMVKGSVIGIDGNSSSIWSEGEF PKDGKRSNLSFLHDHTK  
KAISKNTKLQMVWTLAASGVLTLQFLILWREPIGFVVREALLSIHSDALWNDMFPDLFPFK  
>comp16067\_c0\_seq1; 324 256 960 LEN=1110; translated  
MKTMRVLLVWGSETNNTYGF AEKIGKEWREKHGDVLEIVKGDADIADRWDEVGTDNYD  
FLLVATSSYGEGEPTGFGKFLYRLQEASKGGEQPLKGLQHAVLGIGSTCYETFQNCPRH  
VDKYLGEAGSRRMKERFEWDEMEHVSDVLEWGEVWKMIDNTNNGDKPEVCPWTKPES  
LLL SKIVDEDDGYEVGQPPGFV LQMLLLGAGAMAAGAAYYHKMQFSEAVGEL  
>comp16068\_c0\_seq1; 2128 67 4299 LEN=4489; translated  
MVHFKA AVTLFVLGATTTAWTPASRTVAPSASLFGQRDAVTSVSKTLLSVVTDPTESST  
DIDVSMGSGGGMFTATNAENRRIVPENPDGRPTMKVVVYVLESQYQSSMSAAVKRINAAN  
PNMAVECVGYLLEELRND DAYEQFKADVEDANIFIGSLIFVQELAEKVVDVVKPARENLD  
ACLIFPSMPEVMRLNKVGSFTMKNLQGSKSVVADFMK KKKQEDGSSFEEMGLKLLRTPK  
VLKFLPSDKAADARTFMMSFYWLGGSPENIESLLKMGVQDYVEDISKNMEGKEKMEAVE  
PKLLPDIAIWHVPADVVFE SYSDYMRWYDNEFCPDAGIDAKTAPT VGI LLQKSHINTKD  
DTHYVSLIAELESRGARVVPVYSGGLDYS GPVNDYFKDANGKVI VDTVVNLTGFALIGGP  
ASQDHKKA AKVLKDLNVPYLCAVPLVFQSFE EWQSSELGLHPVQVALQVSLPEIDGAI EP  
VIFAGREGATGRSVPLADR VNLLAERSLKWANLKNKEKKDKKIAITIFSPFPDKGNVGT A  
AYLDVFD SIQAVLKLKSEG YDVG DAPETKEEIMEAVLNDPEARISSPELNVEYRMSTEE  
YYDLTPYATDLEENWGPAPGNLNSDGNLVVYGGKFGNVF IG VQPSFGYEGDPMRLLFAK  
SASPHHGFAAYTYLEKIFGADAVLHF GTHGSLEFMPGKQVGM SGT CYPDRLINTLPSAY  
LYAANNPSEATIAKRRSYSATVSYLTPPAENAGLYKGLKELKELIESYRGLRENEGRGPA  
IVNSIISTSYTCNLDKD VDLPDLE TYDSASDTKERRDDIVGQIYAQIMQIESRLLPCGLH  
TVGVPPSADEAVATLVNIAQLDRPEDGIEGLPRVIAASVGRDINDVYRGNNEGVLDVLDL  
NTKITEAARAATRALVEQSTDGYGRVKEVKS VFADVGNMFNSFVGGKKPWTEAI IKAGFP  
DVSEERLEGV MQYLEFCLKQVANNELGGIMEL LNGNFLMPAPGGDP IRNPDVLP TGRNM  
HALDPSA IPTQA AVEVAESVTNKL LDKLKL ENDGQFPESIAFTLWGT DNIKTYGESLAQV  
LALVGVRPVSDSLGRVNKVELI PLEELGRPRIDV VVSCSGVFRDLFINQMNLMDRGIKMA  
AEADEPAEMNFVRKHAMESAEELNVSLRE AACRVFSNSAGSYSANVGLAIENGGWEGEEQ  
LQEQFLTRKGF AFNADKPGMMEQQADLFKSALKKVDVTFQNLDSSEISITDVSHYYSDP  
TKVVEGLRDDKKK PMSLMADTTTANAQVRTLSETVRLDARTKLLNPKFYEGMLSTGYEGV  
REIQKRLRNTMGWSATAGEVDNFV FEDANDTF INDAEMQQRLLDTNPNAFRDMVTTFL E A  
NGRGYWDTSEENIERLQELYAEVEDRIEGV  
>comp16069\_c0\_seq1; 209 8 526 LEN=632; translated  
MTELNKSKPKVLTPTERKERNAMLQKLQDSGDFDRLKKS VYARLV LHPDGEAWMEGIRE  
QTRSALQRSNGGTESIEELTLDELSAAIVAGSSGIPAAIEEDCLSR IKNLYRXEGPEEEL  
VRSCAASPASDTDGWCSFVGGG TNVSVATHATGCDAIVEEMQSVVFGAQWI  
>comp16070\_c0\_seq1; 377 396 1271 LEN=1335; translated  
MFATRMLNLYLTF LAVTVSSVSSFSIPDVHHIQSTTDTILPHVSSILNTPSIVLNHNAIDA  
TAFDPI SGYKELLKTNPLPTKMVTGATLAVCGDAIAQSQDVDVEYDKRRAASFALFDMAY  
RALQHFAFPVIVAYCHGQILGSVGPLNVFDSSQLAAMEQTLASQLGIVPFLYYPAFFTIS  
SAIQGLSASGAWSRAVENFVPLMKRNLLFWIPVQFIQFGYIQEDLQIPFLSCAGLAWTFI  
LSVYAGSAKSYSQEDEIEIQESTVISLSNATAAVYDEQESPRLAVVESVAR  
>comp16071\_c0\_seq1; 708 299 2113 LEN=2382; translated  
MFSQPFVYLSPGNQQHRLAGGKEEIALTSSLGDANALSSKPPSSTISSKVMVGGEVSNN  
TWGKSEWFLGRQIQTYHLQQQQHVSILNAISASASRAITDHGSFGSSLKLSAEPQNNYT  
YHGTDLNWNAFNCESGTDKSKPKHHTTSKHRVRS DSDTATATLTTT PSCSLFSECSFSE  
DEHDAGGETMEFLLGDI EESA FPRVNEIDEDGGDHSNDCANDI INVGNRDEHDTGDIDNS  
DEWSHTTPLRRNASSFVVQEASEALNKSTETTTTTTKTKTETTTTTTTTTLTHTTTASTHK  
NKNIFVYPRFVPGNNQATPPANATGIAPKHNDQRKESTQANS PCGAGGFLKQTGINKNAN  
DSMVPFSDSQENPSITAPPSSALAYPHQQDLQHSICCPCCASKQQQIERQDIELKQMNML  
VKQLSRLLADVRSQNQHSDLHNSKNRLTRQOETISNHPHSTETNLSSYLSPKRRNPNEQ  
DSVTTTTSPSSSSSSSSLSISSAPQRKISSLPITCVGSQCPRSKNHRIEVNGESGTYRG  
PSISRDENGRNHYQRAGIFQGCVVRFDNGDLYVGSLSRNDTGSLTFYPPGTLYDATRSPK  
RRLR  
>comp16072\_c0\_seq1; 221 1 599 LEN=599; translated  
XNSNSNSNPNSKNTNDGRCDANHRENSHWKSFSMEKECSAFMEESFLSAGVFAFANQEV D

FGAXHSPEATGFFLGRNGSGVECSGVDAAEAAAADARRGEATQTKPNQTNHAPAILLCLL  
ESLVFPKQNGRRRVSGGCDNARRLHLELCLRGVDAMDGNRLLLDVAQRRLVADSKHQAKP  
DLEQTESEKEEKDDDDDDDX

>comp16074\_c0\_seq1; 276 1 1151 LEN=1574; translated  
XYNSEWTHWTTTPVSQPSGGRSSVKSFGQGVRSDWILVCARWLPSQRKHRTRDESDGCSSP  
WPSLHLANCPRWTERQSNPSMSGSLVEGAARKVALIMGIANQRSIAMGCMETFLRKGDWD  
VILTVQNERNQSKLRKLLLEGRSHNGGGGGGRILGEFICDVTDPSTDLFFHECLPEALDR  
SDRTLRSVIHSIAFAPDLRKPLETNRRESFLNAHEISAYSLSIQVARESIPYLGRNGRQDV  
VVNESDSSSASGSITTLSYLGADRAIPGYHSMGPAKASLESTVRGLALELQHRRTSGPI  
VRVNAVRAGPIPTLSSKGGIQNFERMRCVQRTAPLGNVSVSQVAATVYHVAAEADGMTG  
QTIEVDGGYSVAVGPPVLPDNDNA

>comp16075\_c0\_seq1; 506 405 2061 LEN=2113; minus strand; translated  
MNELDQGPDTGDFVSPSRASPSEPFVAVRGGVAVVVVVVFVVFVVVLSASAGLHEVPPAT  
AMRRFAAPRLAGRTAGRTGSGEAPGGDNGARRIDALRAAGFRSGASSRSSSSSSSSSLR  
DSFADTTLMYIAQPLDMDTXGDRPPGGGDQAVAGEIVEGPDLDVVYHDLNENPVVAALGAA  
LRDGPQQQQRRAHRPRGPPKAQGAGFVELVGRAPRQKAAGVHGGVVADRAENPAGHQDLGE  
ELPEGGSPGKPLDAPVDEGDAEAGPHGPQDRRAPQPVVDGLFPEAAEFRCPGSEGVFL  
AEPGSVAVCVVSSAMGMGMATAFATSIGSAPASSASEASESENCSSSSGSGSERSVSAASL  
VAVLAAVGSLSLGFVGGVVRVVDDKGVDEQEGVPADKLRSPRSFLFLSRCLAFCDPVRSW  
AAMSPVTNMAAPEMTRFRMTAAAAARASDAGLMATAAPASVFCFVPGCRKQADGGSNSNTA  
GNASLVIVRIVLVIGGALSRLRFVSLFSSSSLWCGIFLGLPFVGVPSAGLFGSDGDDCDNG  
DRNGTTFSSAPS

>comp16076\_c0\_seq1; 471 187 1491 LEN=1570; translated  
MENIDKKISFGLILLLLWCQNSLTFSWAFSTRSTIATASGAVRKRHRDRICKNSATQLF  
DAASFFDEDEDEDEEASCLPPGRRPEVKRIFLISDATGVMRSILLKSLAQFDTCADKA  
PYDTEKNKEGDDDDDEGDCSAGACDVRTRTFTFVRSEQALTNIMKLAKKKGACVMYTI  
AKPELRLALAGEECKERLNLHVDLIGPSLNALSKFLDEDEPLGIPALFSPRNRKQGDGKTKS  
QSNLGDSSYYQRIDAVEFCLKADDGQAPWLLPEADIVLVGVSRSGKTPLSVVLSQTMSELKV  
ANIPLVMEVPPPVQLLEQVDPKRVFCLTISPSELKIRTNRLERRGVKDIIEKLELAGKG  
IVVPKSNYADRNYILKDLGSRKLCQKHNWTEVDVTGRAVEETATSIVEIFNQRVFGDND  
DTSSSNSFSNSHIG

>comp16077\_c0\_seq1; 398 208 1581 LEN=1644; translated  
MFFWTSTAAQVALRMETMRKAEAGLVALARRFGDRNAKDDVGGQSTYKMEFDTAIISSSIL  
PLWSNGADNSCCDDKEEPLSMHAIRVTHENNQSSSSNSSQRLQRQEEYPLVIVHGYMN  
GALYFYRNLAGLANYFNTVISVDLLGWGLSSRPSFRLKDDSVESAEAFFVESLEAWRSKN  
QIDKMTLAGHSMGGYLSVAYCEKYPERVDRLLLLSPVGVPEETSEEQNDFRERVMKSSLP  
RRLMYGMFVSLWESGYTPASLLRSFPESRGRRLVEQYIERRLPAIADPDERAVLSEYMYT  
GNILPGSGEYCLGAILKPGAMAKKPLLRIPNLGVKNVSFFYGMHDWMDVNGGLDVQRIC  
LENARGTLSNKNQDHESPNDVYQVKNAGHLLMLENARGFNTAVIMAAGGKPPPEGSTEAD  
LPVVLDVRRISQATKRKENTTTSSSSRGTDSIQAAAQ

>comp16078\_c0\_seq1; 580 227 1963 LEN=2137; translated  
MQVMFQKSVXIAFFLRRRKWGEKENVGDDEEKKRDFFSNTPRLRSNEIHDNKIEHGNSIP  
EKLSDDPHSRIKEPDETTTTDSSTTGKLRQKQPTLKRRTADGARRSKATDASVIVDKRTL  
RWVAFTTSLPFVGFGMDFNFIILIIAGDYIDASLGVTLGI STMCAAIGNIVSDVAGIGCA  
ASINFCATTLNLPVPELSHAQRQLRSVRFASQGGMAIGMTIGCVLGMVPLLFIDSTKAD  
RLKKKARLERLCLDVVNEAKSLVGAESTCLYLVRVDEETKNSKKSASDGILPGFKPSVEGD  
YLYAKYYVEPPKGESSASSSVGRTSPTKALIRMVSNNGIRATPHKGSPEAGDAPESNQQAS  
RESSFPVTPHPVSSSRIIPVKGIIISRAVLTGTTWNI SGNLMDEPDFYPLSIETGTIDAA  
DVRCNTAEGDHRFRDCAVVP IRDAKGNVIAVLQALNKQRCASSTEMNSSAGGGFTDQDVE  
ILKSLASHVSVTLQRILLEREGEDDDLGLKDTIRILKEGKGTQNSNTPRWETSATTTTNN  
SSPRSEEHEGSSRNQNTTAITIPDTGRTTNSKLFPEP

>comp16079\_c0\_seq1; 662 91 1533 LEN=1632; translated  
MTVPYRLTKVFCVVSFLYCPQMTAAAFVPAALPFPVVRTGNTKQSTQKLNMSVNNLDVLT  
SGLASIFCLPRGVTVSSPPAGTNGIRIAKLYDVENSKECRGVRERITELDLVVEQVVPVA  
AGSSNAALLPGGKAPVLVVASPPAAGDEKETLRTIQGRGAILEYFDEAFGGASQSNAGSS  
QEESEDDALAIAKEKRLLAGVYLAGWMRSRGEAVSPSVASPSEKANRPEKPLVLYSYEG  
NQFCRLVREVLTELDITYELRSAGKESPRRAELASITGGSSQCPYLIDPNTGVSMPEAD  
IVEYLYKTYALWTPPSEILGWASTNVMALAKPVFGLAPLQAGEKDAESNYRGNLESARR  
EIEAEVSRKAVVVYTYELSPFSSETKSLLERLGVEYKEISLGKEWLPGLIAENGAIKRAA  
LLDMTGQSSSLPHIFVDGKSIGGLYSGSPGLVPMLEERGEFSKGKCLARETFSGIDDDADAFQ

>comp16080\_c0\_seq1; 628 156 2159 LEN=2451; translated  
MARAI RRQRQQSERDEDIDSYSNYSSDGSVERS PRTRTTISTSDVETSVAERYSPLDEN  
MRNLPI MKTNIPRIACAILASIT TGTTYAFGLYGGALKKRLHLTQGGQLDTISAVFFSAG  
LFSFIPGAMADRFGRTRNGICIGGIMGAI SLMLFWSVAKGHFPYFVDENGDPFFAVMILSI  
LNIGIFLSCALVTGVSFVKVISCQC GPGSKGS AVGIAKGFVGLGSGAYACL FQSIRQPSMS  
DLDFLPLCAFFFITAAAI PSSIGLPSKANET FVPDVL TPLHFRVMYVSLVVLATLVIGNA  
LLGLYHDARNSNHEEPS SNFFMTALLL FVWIAPIASLLFLPQRSDWESEPRTEAASVSGG  
RGRSDAEYEQLALHEESNVDTETV IISNENSSTGDISLEPMNQESFPNDEEE IILDEESV  
DGSATRRSARVTQDRNLFQMLQSPSAWMLLWTTTILAGSGTVETNNLAQMVESLGFNNAV  
TPAAMALF SVAQSGGRVITGALSESALTFETQRCCIDKGVPRPFFVFAASMVSI VAHTIL  
AFATDQVFFVIGVTL SGIAFGMFWPLLVL CVGEFFGTAHVGAN YMFYDGFTSAAGTFLLS  
KVVAQRVYEEHIDPHDNGTGDNDGVTCY GIECFQETHLVVLLSMT CVVVSLIMQYKTRR  
VYSRSSI

>comp16081\_c0\_seq1; 478 332 1765 LEN=1994; translated  
MRVPSSDAPVRLSKEDVDKSYRQE HGVGATILLDQPTNHEDPLENLSTIANEMVDMTKT  
KDLLAPT TASHTKKTVRINDVVT FIPLLTSSSFFRQTPKPKTVTNQGYGMMRSFRIVTP  
AAISRGHKTTKEDDLVPKSSLWWTKEERREILISNQKASRDFKRYHRAKIREANLIYEKI  
VMDCSVFEDDKDKDDEIYHF FRNNRLRRRTDDNENMIKNSKRRKRMATTD SIDCDISTID  
VGCNINPPSTPTTGETTMYLPDQIRGLEWGVLPDAKRYRKTHARNVLDWQDR LREMKGDI  
ERKRRRNHDCDQEDRQDNQDCSMSSSDEHVDYNDHVDHVKITRRLSYHQEQE ILLGQK  
AIISHRSCVLARMLGKSDAIAATDSVSI STSNLCEKSR TNSPTPSLTSTTDESNSGSDE  
EDDSESDDDSDSDSDSEEDGGASRSHFLYSTVT TNASSMHRRTFRPRMMPPMSWR

>comp16082\_c0\_seq1; 286 70 717 LEN=843; translated  
MKFTAALLMLSAFAAGEEETQQTAGRMHVDLYEGTRDCSDEDKVMAGNFLKMHYTGKI  
HEDSATGEKGVFDSSRDRGSTFD FQIGVGVQVIQGWDMGIVGLCKGSKAHLTIPPEMGY  
EHGAGRDI PGGATLSFDVEVVDISTTPPEPNL FDEIDTDGDQKLTKEEVEAFFMEKQGV  
GTPDGLWENEDKDGDFISWEEFGGPKGSPGGEEL

>comp16083\_c0\_seq1; 219 29 439 LEN=1081; translated  
MAGPIPLNKKTI VKKRTKKFARHQSDQFIRIRDSSWRKPKGIDGRVRRRFKGAIPMPSIG  
YGSDKTTRNIAPNGFKTVVINNVSELEMLMMHNRTYAATVAKSVSSRVRKDIVQRAEQLA  
IRVTNANAKLRAEEDA

>comp16084\_c0\_seq1; 455 177 1325 LEN=1733; translated  
MSASSSPYRFCKIPSVNLTPFFTKKGVVIGDAPTEDQLRVAATIYMVCQEHGFVHVTFNG  
MSNEMGEKLF AASRELFDNPKKGN DYEPWSPATNTGFSAFRNE SLNRNRPPDLKEAFNIR  
LPPAWENPSIPMTPQSFQDI IDDYLRVMKTATIRYGMVCSLALDLPMDTFTKVLNTFDMC  
TARFLHYPPCHFVEAIDPSVEREEG EKTKIPTASAKVQLAIRVGEHTDFGT YTFLLLAS  
NQGPMGLQIKPGERGGEIGGSAGGEEGGWMDV VIEQNSDDDSNVFGAI INTGAMLARMTN  
DFWRATPHRVIVPTAEIAAKDRYSIAFFVDPDSHEMIKVEGKYKDYSSSEDGKAPLVYRE  
PISSKDFILMKNL NELAQAQRKE

>comp16085\_c0\_seq1; 211 794 1105 LEN=1514; translated  
MYSTSSSEDQQQHFCFSSASN FQCRIDTGAVLSLSSAVMYSL LAVISMFSIRRTGRKECCA  
SKIDTDDSDSEDKGDI IGENSGDESEKQHEGV LQSDSNVSCESC

>comp16087\_c0\_seq1; 257 54 827 LEN=1177; translated  
MGKYIQAQRKGKSTIFQAHTRTRKGAVKLRSLDYAEKQGYIRGVVKEIMHDPGRGAPVCR  
VQFLNAYRYQRDNELFLCTEGMYTGQFVYCGKKASLACGNVLP LTAVPEGTIVCNIEAKA  
GDRGAFARASGSYAI VVTHDEDKGTTKLR LPSGGKKTVPSTVRAQIGIVAGGGRTDKPLL  
KAGRAYHKYAVKRNCWPKIRGVAKNPVEHPHGGGNHQHIGMPSTTGRERPA GRKCGLIAA  
RRTGRLRGVKKTAQDKE

>comp16089\_c0\_seq1; 150 72 272 LEN=523; translated  
MATQRRAAARAGGGGGRPAGGNNILQFYTD DDPGLQIGPTTVLIASLSFVGSVVVLHI  
IGKFRS

>comp16090\_c0\_seq1; 211 211 789 LEN=1017; translated  
MVKRGRWFSRPGDPVFILAERASKKISIGSIKKPERLNLEKDLRRSHVSQDVLVGIIDGN  
RERRSDEAPAGRIPDEAPTLQ GSEPQIRDNSYIFESEGAGISNLDP CDDDGHNSDTKTPG  
PASSVSSLRRWLQGRSTSASVEGIYFKHGFEPAYHTLDGMRKTLFDWDWQQESNGYPPIE  
DSHVGATTSIRE

>comp16091\_c0\_seq1; 596 26 1198 LEN=1426; translated  
MKITALALLTIFATSSSAFGLNGGPKTLAKTATRSVSAFQKPAMVQPV DVQGNRLSNVAL  
KDVSDAIAVRGGASDAAPAKSGPDFGLIAYFALWYLGNYYNITNKLALNAAGGKTGFPM  
SISSLQLGVGALYGI FLWLAPDARTKPTVNMQDLIKMIPVSFCFMGAHSASV FAMGMGAV



SFAQIVKASEPAFSAVLSQYVYGKPI SKAKWLC LPIVIGGVILASVKELDFAWSALIAAC  
IANMFAAVKGNENKKLMETDGLKDR LGSVGNQFAITSILAFILSLPIVAIKEGSRFGDFI  
EAAKTPPAIWKNL VASGLWFGYNECATLTLKKTGAVTQSVANTAKRVIVIVGVALVLGE  
SLDPIKLLGCSIGIGGVLLYSIIDTLVAKK

>comp16092\_c0\_seq1; 349 79 1395 LEN=1508; translated  
MKLVNTDEPEVPIPTVHASKTKNRRRRKRSM TISAENYDGG LVEFLMTNNSNTCRHKKHP  
QETEDLRSSNDLDDCDDTSSLTSGLESTYSYNS SSSLASSTRSTVSSLGSTSSSLRSSRS  
SSKQSRRRERERTKPT EIVFDPTLVPSK SCLKNNLCSSRSKRQTHGTTIKIYLPGNPEP  
VAKHRTINFNEQVSVREVRSAKSLLRNKAQYLW FQPHEHAEIKHGIQKILNAVNAEGT SI  
TNGRKYCVRGLERFRNPDECFLQRAKASEAVVMEQYLQRAEGNFDPAEISAVYIAASKPS  
QLASRRGIKDAIIAESILGTRFRTL VGGGGFSMSSSLSPVNSQTSTSRKSF SARESRTS  
RDL SLPSPESPSSRKSLSMRMSRSKSNGRASQSPSSTRKEKPRQKRKTKRSTTGT VSGCRP  
PLKGETPSYLP SYLVISN

>comp16093\_c0\_seq1; 717 46 1617 LEN=1975; translated  
MTLINRYTSLFVVLMTSLSMVDRAASKRIG SMPYLRDADLQNYISSSSSSSENNGQWVS  
MSEDVQFMPNSNLRPLRKPTRKLRKLESAEAE EEEEGESTTGAW EAYDPYSVQPFVEGMSE  
YDEYQQAWRL LGFMIDCNMSDDDDNNGSGSGD TTEDGCARYVLWAA YVDLDYEGGGIGEY  
QYWRDTE SWDDTACYADAGSGDGNNDGNDDANSKSRCAKMDCHLED TNF SVLGGFFKHR  
NYDDWMEQLFKHEGMCVWSDEEYAFMKNAREAWP QGCIDSGLTSE DGEYNLYNIKPMRN  
GRIAPGFYTD TQCLDDYSVTTDEMEDMIGNIFFDGN GSGSQDENYDFSSESLSESLDRWN  
SAFDVWHTCHPCVAHDL ENIYGDTYTDGYN YNGNYNGYR RRRRKLGG EYSAQGDIFECY  
DDAGYTNVNQCMKFS AKTVMKTATFRDLSLARTQT TLVEYPLSGFLDASDRYHMNI LGNF  
ATYFCLCAVVLAFYYS LYNLYRVSKAAEAERQQGSNKDSL LTE

>comp16094\_c0\_seq1; 201 331 564 LEN=876; minus strand; translated  
MTTATFSVTTLDNPSFGVLAGQPVDILL LN VNAGITTLIVGR TAIETNTQSLLDMTLGVA  
FNEELLKRVKDF TNGAD

>comp16096\_c0\_seq1; 877 131 2374 LEN=2522; translated  
MTGLLR FVARPFGSLSTRTAHPNKLLPSATTASASWSQRW MSSDENTALRNIGISAHIDS  
GKTTLTERILYYTGKINSIHDVVRGKDG V GAKMDSMELEREKGITIQSAATFCQWDDAHIN  
IIDTPGHVDF TVEVERALRVLDGGV LVL CGVSGVQSQSLTVDRQMKRYNVPRLAFV NKLD  
RQGASPDN VIGQLRDQLKLNAAAVQIP IGLEGAHEGVVDLIEERSIQFDGEKGENIKYGD  
VPEDMVDEVEEKRMELLERLADVDDEIAE FFLMEEFDPNETL KAAIRRTISCEFPVFM  
GSAFKNKGVQPLLDGVIDYLP EPEKKNYALDVTKDEEPVEVTC DKNSLLALAFKLD ET  
RFGQLTYMRIYQGT LKKNHI INVNDGKKIKLARI VRMHSDDME EIDEAGAGEV VAMFGV  
DCKSMDTFSCGSTDLVMASMFVPEPVM SLSLKP KSTMQNQLGKALNKFTKEDPTLRVKV  
DEDTQETIISGMGELHLEVYIERLNREYDVECITGAPNVNYKETINKQKFDWIHKKQTG  
GSGQYARVMGYIEPLSEEEQKEIKSTTHFDNQCIGTNIPPEFYSSCEKGMMDAILEGALV  
GSEVEGMRVVLQDGAHA V DSSDMAFRTCMANAIRD TMKKANPSILEPVMRVEVEIPSEF  
QGTVVAALNRRMGMIQSSDVNDGSGITILAEVPLSNMFGY STELRSLTQ GKGEFSMEYF  
KHIQVPRNTQDEL MKKYREEKEQE EAA

>comp16097\_c0\_seq1; 395 1 1056 LEN=1511; translated  
TLLPDCPQTAKPNQTNQVPTT PGTTFHENTKQKTKHANKMVVAAGALVQKMVIAAFAGM  
GAATICHP LDVIRVQM QTEGSDYKGTIDCGSQIVARNGIKKGLYAGISAAYLRQWLYGSC  
RIGIYAF LLEQAQTKNLDAGLPKNQIAFGTKLLMGMTSGGIGSFVGT PSEL SLVRMSNDS  
KLPEKQRRNYNGVVD CVRRRIATEEGVT KLWTGGTVTVMRAMVLSACVLACSSEIKLKLIA  
TGIFGTEGNLMFGGFPLLFVATLVSSFI ANIFSNPFDVVKSRVQNQKADPKTGELPYKST  
LDGFLKIIIGNEGVPKLWAGFTPAFVKLAPYTIISLILTEKITM VITGKSAL

>comp16098\_c0\_seq1; 196 1 995 LEN=1097; translated  
XQIQTMVELQQQLGALLCQEMKYAVRDYVIDLSSPWHDSGVSMVSN DENTSPNVSYNEGY  
LRGCGKRRNSDSVELKKTSTSSSSTDQQR AIHWRGKICEWLYQVADHFNFRDIVYIT  
LNYIDRICTASHAE EWL RDKNCFQLLAMAALCLAIKVHGEVDSSSPETEASIMTVILRLG  
RGQFSSEELKMM EKSA LKRLQWLLHPPTPQVFISFFVELFCAGDNIELKDTAIYLV ELSV  
HDYYFVPLKPSVVALAALSTASSILGLSESWLTGVREDL LLLRNGYE EPASIDACSARLEI  
LYASCQTQANDDYVDHADEIIGNHSPRSVMN

>comp16099\_c0\_seq1; 419 136 1428 LEN=1763; translated  
MAIFKSSSFALVLTALLANAAMGQTNLNYDQCKRVVDQRAINDNNGGDRSFS SNREGSQ  
RRTYGNLCTGSTFYSP LGNTNQQTGTIPSRVGD PFRFCDLIDRFPNVFNLMATGNSPH  
TVFAPTDAAFKIDGLIGRLDEQRMLELHILPQARLTRDLRCGQTYRTINTQQDRNRQR  
SKTRCINASRAQQVGP GNMHNLNPTIGVPDNI FNAQQFEFQTEFVLNFDNAGDTDEKTE  
YTFSQDVIACNGVIHVVD EII LPGPRNGSWNTGRNYYGSKAYNYGSKGGNRGNRGNRGN

TYYTGGNRGYNYYYNKAAGKGGKGYKGSKNGFAGKNGNNGNNNYRRGNEYNYGTGWRTRN  
LEGAVDGDDLDFFEEPDELIMSDAEFFGVEGLIERPDELEESVVEEQEREAELNRKHRLEAM  
LEPDGKIIQV

>comp16100\_c0\_seq1; 437 1 1678 LEN=2257; translated  
XYSKLCYQGERPKTGIAPPFIDEIENLSKRKINKEAKMQRFQGLADGVHRGPRRVVVTGI  
GMVSP LGNTLEDAWKQLVGDDMDCEGTGSQC GAMSLEETLLRFQNLSPDRFEREWK IARS  
LPCQVVAPVRGLEEAFLEGAGKKEESSGDSLWNPRTTARFVQMALLAGSQAMRQANLLN  
WLNNVDKNREQMREPTYNYNHRNRNFVGVGSGMSAVREIGNAWDIVGGGRIRKLSPHF  
IPKVL TNSAAGRLSLEYGLRGNLAPSTACAASAHAI GDALRAIQSGAADLMLAGGAEAS  
IEPLGLAGFSRLRALSTSFNDTP EEARPFDPDRDGFVMGEGAAILVLEELEHAKERMRL  
DAGQKGIATTRILAEVTGYAATGDAFHVTAPDEAGRGAERSMMLALQEDSYVSNSEVPIG  
YINAHATSTPKGDEIEAAVVDRLGHSEKAMDPPLECYMSSTKGATGHLLGAAGALEAAF  
TVMSLVDQRI PPTLNL SVDSEVNRNGTNRSLFTHVTGTKGIRPTADIEMAMSNSFGFGGT  
NASLVFRYEDDRDSEKKK

>comp16101\_c0\_seq1; 274 288 900 LEN=900; translated  
MGNLLGAPVTEKETHRGVTKDERLKYGLSSMQGWRVHMEHAHIAEGDLYALEETVTEATT  
TSCEGKEDVVHKRKRKIPLHGHSLFAVYDGHGGTFAAIYSGNNFLRILSKQRHFVRYAKM  
CNEDAGTGANSPPPATPTGST EPTKPKTTTTAAATRAAKKMLLEQALKQAFVETDYEIG  
LAIRGKSHADANSPYHNRNDDDDX

>comp16102\_c0\_seq1; 707 119 1792 LEN=1922; translated  
MINNRQEATNTQTMIRNNAYLTTRKRMFLATVGAVVLLLGATTSAAAERVDRNLNRGQE  
PFRHPKTFVVEEAAGFITSVFGSGSRGAKIRRAFEEQGV D GARLV SLEASDLEGLGMPK  
LYARRFRKTLDELLRKAEEEESEKTSSSSIESQENTNGNESDSNLNADDDNNVNDNRDND  
NYDDTIDNDDDGIVVENDDDAREDDKTENENADIDADRNP TENS DGNSDENDEKTAHSSD  
CNKEPTKAQTPSEAKETDLSLVVLTIAALANADTNVPAIQINSNQGDETQRNHDCHKLCA  
EQRSEHSQRPSTRGALRSAILDWGANPESSPHGAILGCWDVSEVTFDFSGAFENTRSWFE  
PNNSLSCWDVSSATTMDRMFRNAVRFE GSGLETW DVS KVTSMRETFSGARLFTGHGIVGW  
DVSSVTDMGGMFFDAAAFNESLEDWNVSEVTTTAFMFAAATSFNKPLGAWDMGKVHDFRS  
MFEYALAFNQPLAGWNVDAAKHVDRMFNGAEAFDQNLCEWKNPKNHPSFQQPPMYKKKAI  
GHELFEGTSCPKRKRKSW

>comp16103\_c0\_seq1; 504 142 1626 LEN=1948; translated  
MRRKSQTSMGWLD SRWVRCLPLVLAIFQIVVMVD TILKNPNNNNLKG NKYNIAPSSSVSE  
RGITIVKKGISTGGEDAIDTQAEAE TASP TGTGTETEK NLYTYTYSDDVENDEIGDGNES  
TQRTVYWM DHTAIYDNYFSGTW IQPIERFQRLNVDIMSSLEDASHRVFFENKEDVRMTVD  
WLDFAVEHLSKWCKKLDITNSNHNSVAIDKITGNLLRYIQATPEKTKVLLSKSESKVDKP  
LLHPTIAVISHGAVRTDDDTPIGNERSKNLTVTTLGATITSLLRVIGRIVVTGLDDLDA  
STAMETFR LIGDQFAAYTDEVVIVDTE LAYVNITEEKWIKSEYEDVHRPRATLYGLQEAL  
NGNLDKVTAEKWLGTLHDQSYWKYIYSTEPDLILQTRFESLPAIHKALEKGRVVMPHRLQ  
PVAHKLDLVGSNGEKYNGSDQIIPAKGKFHAMELDGAVDMCCDDGRNPKWDPKDDPADT  
PCYTWWYDCGYTREW

>comp16105\_c0\_seq1; 638 202 2598 LEN=2818; translated  
MLNEGSEARGRAIKSERERELEELRSRGVAKSRREKLDYSIPLQTAEEAKDFLIACREH  
QHKRESFGSISDSGNPSNMSAIDYNSFLMEQTRRQRELKMRREAEQLLHGFRGFYAESF  
GSWLSPRKKDRRSFSFGYGD SLADPDDVSRSSISRLMNSWDEEGRDDNNSQHRDRPKPN  
PLDPHCKDFLLDTRHWDGTDYPRTDQMDVSSGVVLFSPDASSTRHSWGGSGSKDGRIFS  
PDGSKSRQEWENDQEGRDDGHQSRDSCSPSNQNP SNPNRIEYKTLDPKSRDFLIDNRRYD  
GTQYPRTEQDMNV SNGVDLFSHEGNRRREGEYSTPHFRERPSSIRHPSSGDQQRGIQSGD  
FDREAVLYGENGTAEHLVQPEGSKSVSPYKSNSINLQVDTDREKKIDICASEQRLRAGI  
DPQGERVDVSGVMRNL EEDVSKIELSQATSQDDSIYNQQQASPRPETIWRSFISDEPGAQ  
FPPEAGRYHLYASYACPGSHRALIVRALKGL EDVVSVTIVHPTWRHTNPNNPNDRHRGWI  
FGDPNGRPFHNTMGRGGFPFPAYPDNAPDPVLNAYSVRNLYEHADDTSGKYTIPLLWDTK  
LNTIVNNESSDISYMLNSCFNEFAQNP ELDLYTEDDDDG LDR LNEVSKWLYPMMIHGVYR  
CGFAKTQRAYDQAI EELTDAFDAADELLQSQRYL TGD TLDADIRFFVTL LRFDEVYAFY  
FRANTRLVLMTPSLNFCREIYQMPGVAKTCQMDQIKAHFFGSHAENKYSVVPRGLGFM  
RYLEQPHDRDQITGFGHI

>comp16106\_c0\_seq1; 537 1 1662 LEN=1978; translated  
XSDLDSHKGSEGRYPEDNHP LSATSL LAPSTIEELXLSSQLSSLRRPSFKTNLRKQYNL  
VMTSPPTYITN RAGKVRNPKHIA YMRQKNSKAQKDTENETAQIAEAPDTS EDGKEPHG  
NEKRDDGYDKFVDLSRPWETAGDLATNPGARWCEREF SRFREVQRVTVVEDGKLVADYR  
RKGVGADETHHFLSTTKAVMSMLIGAVMEYSELVELNVTDTLGDIFPDDWAWHKLSGEEL

EYKKSIRVEELLTMTSGLISMFGRRGILHMKEVSIADAPGSDLPRALAAPAWDPKLRGK  
FKYMPSSNILSYVIHRKTGLSPRAFGEYVFSKLGIDHDKMDWDANANGVETSFSQLQLT  
TPQMCKIGQLYLQDGHWCPPADGEKTSTILSEDWIRASHTKHVFGDTKAGFDHWYGYLWS  
LYDREYHGVRSAAGDCWSAPGLGGQLIAISKETNRVAVSRSLPPDPKTLIHHKKLCIKL  
LGNTMHYQPQNANTKSKHGYGGLPPYIRNKDGKMRNPEYIAAMTEVSDGLNSSDMGGG  
RLAMADEVDEHKEEEE

>comp16107\_c0\_seq1; 224 1 699 LEN=786; translated  
GLFDDNNHNLTEAKANQPTLYRTNQPHPPPSSSHDSMPRTNPSSTATRNVRTSRSRCRF  
VALLVAATVPGTALGLATNGRRGFLASVSSCASAATVAALCPLPSAASQEVELRQGNQVT  
AFNGLAFNYRGGEGYGLDASTLDEPSSISYSDFNEKLRSGGVVFEFKAPDGDVAYATLRG  
EGDGPQRLRIGEGYPIEQHDGYSSPMFCIRTVKNAGVPYKVVVKGLDKYSQ

>comp16108\_c0\_seq1; 866 77 2356 LEN=2682; translated  
MSTDQGRRTIQSDGPLMEAAEENKLIIGGDSFPGRTPNPSWLKVRNEHYEAIKTRRAEEM  
AQKVPVEISVTMPDGTVLTHDKEEKPFMAYQTTPLVAAKISQGLADASIVARVTYEKYA  
DDYDPAQDGVGAADGLLDAMEDLDLEDNDDEENVGSGMKPQLWDMTRPLVGPVKKLEFLK  
FDDDDQDAKTVFWHSSAHMMGEALEHLFGSKLTIGPPLKAGFYDYSYMGADSIKDDDYKPI  
EKEVNAI IKKKQKFERMVI TKDEALELFADNPFVKILSTKVPDGTTRTTVYRCGDLIDL  
RGPVSHSGTKVKAFAAAKHSSAYWLGAENDSLQRLYGISFPDKKKLKVWQEMMEKAKER  
DHRRLANKQDLIMFNLDSPGSAFWMPHGARIYNKLI EFIRKQYWERGYDEVITPNI FNLD  
LWHQSGHALHYKDDMFSFEVEGQEWAMKPMNCPGHCLMFGSQIRSYRDLPIRYADFGVLH  
RNELSGALTGLTRVRRFQDDGHIFCRRDQITEEVLGALNFMKFVYDIFGMTYKLELSTR  
PKKALGEKELWDEAAEALEEAMNTFAGKGNWRVNPGDGAFYGPKIDIKVMDAMDR IHQCA  
TVQLDFQLPIRFDLKYTTDSKEEGKQFARPIIVHRAMLGVSVERMFAVLTEHWAGKWPFWI  
SPRQVMIIPVHKDFGDYAESVRQKLHKEMFFCDVDQSKATFQKKVRNAQIAQYNFQLVVG  
ANEVENGTVNIRTRENKVEGEMKVDEMIQMFKRLKEEYK

>comp16109\_c0\_seq1; 268 224 940 LEN=1275; translated  
MASNAQYDQSGSQPRPLQMGAKGAYIVRLLMVGDSGCCGKTSLVLRFDQNVFSTKFVTTIG  
VDYRDKMVKIEGVPMRLQLWDTAGQERFRSLTSNFFGRADGFVLTIDISNRPSFDHVIW  
MRDIKTRAPPDCDIVLCGNKSDLDNDRVVTYDEGKQLAEYGVFEFFETSALTGQNVKMF  
YGLSTTIKRKRIDEFEGSGGSASGGGGADQNAAGGEGSQKIDLGSSQGGADAPKAGCC

>comp16110\_c0\_seq1; 342 176 1555 LEN=1824; translated  
MSASSPSTQRRRTGVVYNFWRGHPNTGLLPAREMQEILQTMASRENQERLTTSLQYLKSD  
RGDPFLLKELSLFLRRHTLDDELPLENHAAEQRDEDMDFLTHGVSHGLDMLCTAQTTEG  
DVVLVERPCYFLAAGIFRSHGLEVKSLPMKQRRGAPVVDVVALERGLREGSIGVPRMIYV  
VPTHQNP TGITMPLDDRWRCLRLAREFGILVAADEVYHLLDWREDRTRPRSRFSVLDRLA  
SSQPSLLPASDGAKKINRKTMGCSVSVSSFTKIFTPGVRCGWIEGPT E I I DSIADLGYIQ  
SQGGCAPFVGNVLRALTEGGLQDRILAGLNASYQERCETLCDVLDSEPDIRIACRPAGGY  
FVWVDFLDLPRTEDETGAGEPPSSAFASHCLRHGLRFMPGVRCDPVVDGFGQSGQPKDLC  
ESSARLCFADMDLHDVSDGAKLLVRLYREYVAKQDNAN

>comp16111\_c0\_seq1; 327 1 1441 LEN=2073; translated  
XSSSTTPPEGAIEVGAETPTGSGRRILVLLVAGGMLRRSPGTTVVTDSPYLQRPLLRLV  
LILGVATSLSDITVDALANRHHHPAAPSERAGNKNDKLLIIGLGRVGLQVADLLVQNE  
EIAVNQVVGTVRKLKSKCEVDKNQEIVRIPFDSTIVREHLFGSNDDEGKGNYSDFVVP  
ASHVLF AIPLSREPDPAMEAVMEALNEWWECS DSSSHASSGQKVLGILSTTG VYGNHNGG  
LVTEESSLLCEKNSNAALYRTFENSWI STTDRVREADNEEDNTGSPRNRRLC I FRCAGIY  
DSSRSALHTVYKNLGAEGTDP SQMFASSASVPINTVGNKTNRIHSVDLARAVLSGMFLIE  
ENELGNPARI FNLDADNLP EVRSVVL SYALKLLSSIGIGVSTAGTKEAAAQIAVDPVAIPS  
RSSKTRQRREKESKLVCKRMREELL PNGGLLP TYREGLDFIFKDP TTPWQHSSKSSME

>comp16112\_c0\_seq1; 184 1 472 LEN=676; translated  
XSSNNVSYSYFVEVFERYNQTTGASSSTGEATTQDLVWAVLFGVPRDAFYFEXPEVPP  
PPPSNLVSTRNDGPRGRLSGGLKQKEEIDETIGPGKRPSKESHLASAQPSSPGGFRFV  
WQRDATRHS LAQHNAATVRDSERGRSRSVLSRETLP

>comp16113\_c0\_seq1; 506 105 893 LEN=1009; translated  
MAIGKNKRLTKSKGSRKKAVD PFLKKEWYKLIAPSIFAQKDCGKTLITKTQGTKI ASDY  
LKGRVVEVSLADLQKNESLAYRKIKLCIEDVQGYNCLLNFGMDMTRDKLCSLIRKKQTI  
IEANVDCR TTDGYTVR LFCIAFTRPQDNQISATCYAKSAQCRAIRAKMVQTMTELGTGKD  
LKSLVKELIASPIGDEIAKNCSSIFPIKDCYIRKVKVLKPKFDVTELM EWHNADEVVTT  
GDAGTAVEAPKEEGLAGSGGRL

>comp16115\_c0\_seq1; 613 1 1889 LEN=2200; translated  
IELGNKYRRPPDRSCIPRLCETAQEVSEISXEQTLDFTEWDRELSNIWNKTSISHFIRKR

MESFLKFLLEDLGAKPSDVTIVDDKASPELSAALFLLNRPVLSSSDFNRSSVSDVSSAS  
RPCRWSNMTEMDQLRIAKRMLSDLRTRNVAMSMSSPSLSTRHALDIGGNRRIKTISST  
TNIGFPSRESPSNRYDRSTSSSLPSADRTLVPNRSNPGWDDKALWHDVTSRMMNKNIEARK  
SKMQKQKDKDFVSSKSFHFDSDVENSLSREEEEEEIRSNLGLSSGEDSIDILEDFMEDWA  
VRKDLDSNSSTERFSTSSSSMSNLKPHGQGSSADMTDSTFDMDASYQSFLDYSKLVSNHQ  
APRLPQRKISQEKLVTLTPFLNMNSNIGEIHTKNNASFDQVPTVPGQQQRREPKTSHADI  
LPFISSASQVLASGPRDIRKKRTGLDSFIGVDRVFGSKKLSSTEEDIRSKNIDLRLERAR  
RLREALGSMAPSSRKNDDDTAGPRKFRWKSYSRIKKNSEAVTVKEQRSSQSQSPPRTFN  
PRGGGDKAVSGSSGTAALVPRRTKAVCSNSSSSSSSSSSSSSSPNHSVDDSSYSTLSIHSE  
ETVKSSNLRQSVTMPNSVGSSTVMEDSLAK  
>comp16116\_c0\_seq1; 159 1 474 LEN=650; translated  
RLHCGDASDYNFLKEKWDTYMNRPDAPPLMAVVDDGAHLHDQMAATLFFWFPRIQPGGIL  
VVEDVQPHSEANRFRTHIVPQVMKDLHWCGGTGSHTVSNLPLCFPTIQPLLEGVHCEMHI  
CVFVRNNEPAYEPDEATSRTPEAFMGAQKCLFGPHD  
>comp16117\_c0\_seq1; 257 164 1159 LEN=1368; translated  
MAVSKSSVAAPSLDRKAMFYMFLLSLQFAFQPIILTRTYTPTNICRSTVILMQELLKFILA  
FTMLAVSGSGRSVAVSGWTVSTWTTVAFVPAALYSLQNIQAYQTLTDLTDFNVLNQTKT  
LSAALCCYLVMGRRQSFMQIISLIFILLISALIMEKLIPLDFATARPLELTALESHHWAHG  
VAPIMLASFISGLSGALSQKNLQAQGGGRNSYLFMELCAASAIILICSLFMSPDGKTIA  
REGFWNGWTSTTWIPILTNSIGGIIVGLVTKYAGSVRKGFFALIFGMFLSGVVQAFITAEG  
VSVEQMVGGILSAFSLWMHATNPHVPKEKEE  
>comp16118\_c0\_seq1; 197 105 794 LEN=924; translated  
MSQLYSHNFAGCNLIPIRVDALSDDKSIRIVDTLLFDPCSWPVTLYEPLYASVEENVSLI  
AHTILSDAEVQPMGRTRVHFTGRDLWLNKQKTIEDQLRPLWLRIVEMSNEDQTLGKN  
GETLIPISIRLLFDRINIHENILWDKHGPLSPFDFAEDMVKEMNLPDDAIIISIAMTIEQ  
LHGLHVDTAPEPTSENNDKKKLYRGAWTTHDSKEHASIVSQVVAQHRSI  
>comp16119\_c0\_seq1; 305 172 1143 LEN=1217; translated  
MRLFLNSGHVVNACVTKSTPSQPVGLALEKIKTPSPTGWGEMKILRVSKLSKKSIFRNSS  
VPVHVGDRLVLEVNGIPVNDRKKFPNGVKDINELIRQTESVLQITLWKEDDVSCGGEAKPM  
VKTQVEKCI SPTSNECKPSPSRPIRIQSNPREIPDNQKSQRSSVCNKNPFKSRWDTKEQV  
VEVQDDGELVSHSCEKKRQEHTTTPMQLKLSPALEPWPSSQEDKEQCSVSSSTRSSSHCL  
TNLIDPGDLMELDGFENRSENGMTVQVVHRDDEGTTKRNP SHHQRRKTMWIVRLVSNAD  
GSTTGIGPNQLVAVPAKHLRHFV  
>comp16120\_c0\_seq1; 366 93 1280 LEN=1756; translated  
MSPAAIKKNANDVIVSALRTPMCRSRK GALAKTTPSTLLTTVLEATLKRTGVKGEDIED  
LCLGNCLMPPSGYAAMRMAMVAGIDAETPLSWVNRQCSSGLQAVANIADAVATKKIQV  
GIGGGIESMSYYPMSIIKAPDWDVDMKKAHKQTRVMDCLIPMGLTSDNVVSQYGLERKD  
LDAFAAHSHEKAARARASGKFKNEIVPVGNVTEDDGIRPQTVEILGKLPVFSKNGKTT  
AGNSSQTTDGA AAVLVMTRAEAEKRGLTILGIWRGYAVKGVPPRVMGIGPAVAIPAVLKQ  
CNLIVNDIDVWEINEAFASQASWCIDILNIDPAKVNPNGGAIALGHPLGCTGARQIATLL  
NELHRRKERFGVVS MCIGTGMGAAAVLEVETESRL  
>comp16121\_c0\_seq1; 197 87 371 LEN=716; translated  
MMHIPSFFVGLASGSFAFLLVHQQLSHREHMSRKWAMADRAEHELRLKLNKAQIKDEK  
FVIDTKEASFDTKAVSKCYNQMLDEAHKFLSKKE  
>comp16122\_c0\_seq1; 261 181 1074 LEN=1143; translated  
MRLIIFNQLVLVIALCSLLYPGN SHMPVALAFDISPRLSTPRHRITATEASTKSSVPIRT  
ATAAEKTIGCKEAHTIRNTERS HCKYDLGLGKNAPVVSKTLSRDQQGLPNSITDVGVNG  
NPSSYEVTRFLVEHEATR SYAPRTTDDHGLSLVSQQKNHAVIGKTAPKLEISTTIPKE  
RNASQHHLLIDSEVTRKQLSTMMENRSRKSPETTLEKRNSCHKQQKRSIARMQPKPKRSLE  
DCLTILDHEVTASKSSVPATMNSTIVSLPNTPQLDMNSIWVEMLLHNQMALAHQSNN  
>comp16123\_c0\_seq1; 406 226 1197 LEN=1219; translated  
MHRFAFPRGSPAAAGLLAAAIVAALAAVSSADDYSVAEGHGSLLAAVGCFCWCGEQAFEQY  
APGVVEVVS GYAGGTNDHPT YRDHPGHYEVVLVEYDPEKTSYEVLANAYARNMDPLDGGG  
QFCDRGSSYYPALFYATEEERITAERVLTEILESSPDWGAEDIEAQILERPKFWTAEYH  
QDYLLKNPANYGFYKACKRSERLKEVWGEDTYECYHDEELSCFLEETDADLASNQTDAG  
GGGENSVPTVVNERGEVVA AETNAKNAPQETAGLMPRWAI VVVS VAGASLVVLGLALGLF  
AAKRGHPGKTNGAHAQT TAEHLG  
>comp16124\_c0\_seq1; 259 1 1003 LEN=1491; translated  
QHKIVRTSRHGLFCRLQNDQEETLHYIMSDAMSLDKQRTFNSRIQDQQLPTAPSLQLWFW  
LLGLSSSSK RMSDTNHYYRWHENKQQQQRVPSACYGWFENLFEPKSSSESSESARQLQYP

EQYPATYELNILYVEEDANIPEAKLVRPLLKNTQLQSRALQLVYDANRDGWNPTAFHSAV  
DGKGASVIITTDENGRVCGGYNPKGQSSSLGGARPSVAAFLFYERRSKKNEEEPTRFQKLR  
KVGGGGLACARDDPDFGISFGPDSLVIQLQAGREMVAQSKLGSYYERGPEDLPSLFWQTG  
GATELIDLKVLVGCYDDDEDIPYSGGVLDMTSG  
>comp16125\_c0\_seq1; 433 94 1056 LEN=1413; translated  
MSTKNKSSGMFSGEYFQVQKSGLSQFQAMSAYLGGSAFQTIMDNPVTSYRQLVQQYAKDL  
NGKVVDPKVASQEAQAVFRANPVAASLSGVGPRLVGVGFKRIPKFGVLLGISFLMGNGEN  
PGAVAATGASILSAPFINPIRMIEKQRAYFKQTGAAKPIGEILREAAAQNFKPLFRGTI  
PLMGHSLASALLGLVQPKLQKYIQQEIGSKTNMGRTLTGLIASAVVSPYVVVVTNPLSR  
LEVIMQTSKISGKSISVTSAIKEVIRDSREFGMRGLFRGQIGIGKAVISLSLFFHEGRHF  
LQDVFKNYNIQNGYEEPSK  
>comp16126\_c0\_seq1; 718 126 1472 LEN=1636; translated  
MVFRFTTESRLLAAGMLLATAATTTAFTAPVQQRHQGLVGSIAREPVADYTRTSLAAESSD  
DEEEKPVNYPYADPNYPELEFVNYDDPEYVVDQGTGDEFFDTEAEVEAMREDRVRNDEYQ  
FETYYKDVLEKEGKFKGEWIVFQTSTFLDGETDAGGRPRLSRAAGPFKVISRGERVNIAG  
EGDEPSENREYERIVHHEKIFNDPDDDEEISEEWVQQQEASMNKFWPDQLCAFDLFRGQ  
QGNMVGNAYSICTATPLVDSQEPNKGPIATYGTVEGITSDDDVRFRIKLEYSVTDDEKA  
TDMPPHLHKSFTICRETLEMWPRATNYRSAIEAITQDALFGPRGAQQGLYDPPPVGSEEQ  
ASQYLLLDLEGRATVLLPYLMNQDPDVHDGMGWVTSLDWTPSAQRYQVDRKVKAGKDILG  
LKTLELLETVQSADAETYRPTDGGANMRQ  
>comp16127\_c0\_seq1; 441 393 1964 LEN=2615; translated  
MKEVATSENSRQRRRRRSPSSCSKKTIVRKSRSRGSFHFQSPRDRVQFDVTLVCMVFFLLY  
STVNDAPVLVMSFVLNDCGRCPKCGMIPERQQRKTKKIENVNLLPHLSAKSKQEFQGN  
KDDDGKDSFFGSFFKENDKKKPSIEQDDETSKGVPIVGRFFKSDEEKEERKRLKKKEKE  
KIKMNQKEKRRKERQPKQEKRSKIMPAVKNYFEERQIRKDAEVLNRNQVKQREKAERAQA  
EKDAEELRLEVQKREAKRQKQREIQKLSLAKSSTRKPANTRAQNSVVRQQLVAQKELD  
IKQKERRDQSENENDNKVTSSKSQRFGNAMSAAQKQFVSGVFENDQKKREEWIVVAPKTRI  
SPGEIVAVTAGGIDLLLVASKDGSVAVHCVANSCPHLGTPLVGSLELPIETSSAAPSSN  
FVGDSSTDVQKPKKSSSFANENDIARMLKEDGCEDCIVCPLHKTAFALKSGEVRGEWCP  
YPPVIGKITGTIVQQSNLQVDFVTRTKGKNIEVRLNTPVEISDN  
>comp16128\_c0\_seq1; 228 1 425 LEN=753; translated  
XAAEAAAAAAKPKQTMASVSTRAKALVPLLRSATSSRASTRAMRGGMSPMPAIARIPAP  
TENLVENHDCLFDDACAPELALDFDSQNVSTGEGFLFSWLLAIGAYVSLFNVIKYVQPEV  
ENPAVSRAESDDICIPVEHHE  
>comp16129\_c0\_seq1; 478 55 1824 LEN=2035; translated  
MDSTEEMAPVTETEVTCDYLIIVGAGTACLSFVDTLLDLRNDITFVIVDRNSDPGGHWTKA  
YPFVRLHQPCSYGVRSLPLGKLDKNGKEVYDTERATAKEICEYYEKVVKNLVATGRVR  
TYFNSNYEGEATDTDGSIKIHSDPASKVTHIIRNQNGLIHKCTKLRSESNVIVPSM  
RTGVFPFVVKSVVNTIPLNELPKYIGKTQKYLVIAGKSGIDALIYLLEDAKVDPDQIT  
WIVSQSAWYFMRDGIALTTPKPGKSFWKNATKVFPEPLGAAKSADEAFLLMEKAGSLGRVH  
PDDGHFPRVFRGANMTYTDLANLRRIKNVLKNMGRVTSITSNEIIFQNGAHSVFPSPIDT  
LVVDCMTEDTYGYFSFEEDFQFFNPHKIRLGPVAIFNPSHTSTMIAFLEAEFSDSAAGD  
AVKNSFCCFPGRGRELKKNSTQQLMLFYFYESKTNLNFYKPYSRFVLGDRTDMFQPDH  
HGGLLGLLWAFFGPTKLHKKTEFVERMENGSLDFPIGTLTGANEVDPEKFKAVKRKIP  
KVASSKSTTANAKKSIDNGDLPKPKKGLGSLFCRTADGIQTNMHYLF  
>comp16130\_c0\_seq1; 673 1 1227 LEN=1542; translated  
MGAMNGMGLGAMNGMAMNGMGSMLDPFHQDAYGAMGASADYLNQVRVLDLGGSSRLLA  
LQRQQEAGMVGMAQAGVFPVGVHPNMVGSFMDRERLMDLNLGYHTREQLAQAQAHEKLLL  
REQLQHRQLQSQQLQNGVNLKRRAPARKKTPNTKPRRPLSAYNLFFSEERERILKEIDE  
KAALERGEDPKKEGEEDADNKDKTSDEGDEKSSEKKSDEASKEGDSKKRIPKAFRLRPL  
LPGQRKRRARHKTGKISFRLLAQMVGARWALPDDDRKYYQDLAKEDSIRQKEAMKEYY  
RMEQRQQDDPTGESTKVEQVKAVSSESAAAEATASTANKVEPEPMVETKGDENEGTKEE  
KSDDENADTEEKSDNDTMAVDEPEDQKKSDDDKSEKGDSEGEDA  
>comp16131\_c0\_seq1; 953 247 2115 LEN=2300; translated  
MPSQSAPTRLASFLTLLPLLSFGVAASGECQNEQPLEFRFFTDNNSWKDNGWTFLECTE  
HGEGSSPKLLWQTPIGSLEQQESTEVIRQSACVPNSSTCTLHIYDASGNGLTGGNSDND  
TGWF AFLHGATTVGTYKNLENPSFSELYCVGPKCDKAPQEKQINDEDCQDVVYLAMQLD  
NKPQDTTYQLVCGSDETVVWNGSGFTEAGAYVEEETCLPKDVCCRFFVVTDEDTQGLTSSI  
DTSDPSLSDGTAEGFIYLERNFVPLLEYDYGSTGTEFKILSKTFGSCSSEKTSILDQEES  
VEQNTTEEFIKQKPNIPVVPSEDEDADGKEQGGDSTTLGNPTKIAEEDINEHTGERESSDG

ESSIEQYLNQFYKEKEQHTQEEATQKVDNQDKDVTAAEEYLTEFFAERVKSDEETQPPQQ  
EPQQKEQVTAPEDASSDVSADAFVDYENFQYEPFTDDSLVSNQYGDFTDDLFDDQLFT  
DDVEIWNTEPPTKGRNPWDLYDDVLKDDDQSWAEVDDIEEDLAWTKEQLSELEKLVHKAD  
ESLPIQQEDEGLSLGAKIGVGVAIPLLILWSVALVLYFFRERLMERFGETTDDDEVLEKAS  
TGSEDTYSQDDIRSVSSLGEAV

>comp16132\_c0\_seq1; 361 741 1724 LEN=2055; translated  
MDGKNLEESSKTDVDLALEMDQSCSSSDNEFEAASLCDGVS IATNGSCCSYERAASCGVA  
RRIATGGASDRYRGGPIRDEDDNHETLGEPPMVLVPEKADPGGRGNTGTDGRGFSTRPP  
ARTKSGEGLVQRAERQHVWKNPNASSDADGFGCDDGCDEYVPLPRSDDDDDNEQSRPAS  
RRRERSGGRRRTTVHDEAYREAALKRNSARRQRSSDMLGAMREATRNLALSPPQTLGRE  
AEGRALGGLRRRQPRRSGLPRNSDDGDDPDGNSDEARQHPVVRGVVRKPPARTKSGDG  
LLPQKGRSSESQGASSPPGTSAEVEGL

>comp16133\_c0\_seq1; 1640 174 5045 LEN=5239; translated  
MREISSSFVLLSPSTTSRDPDGINLPEDYGTQLEPSGTISDEINDLKGTSP LGTNDGQ  
MMFDMKKI IGLPPPPPKSKPPKKEKVRRSINNKPNSPSLTVGSSTKQKESTAVQKTRDA  
NFTISKPAARFTSSSLRAQNIVEERHQFNDVIVPDESNDPGEKDLKMESLGEMTVTKPRIE  
SLEGGKSDAKQQKRAKRGFFKMFGGSKSPENTQSGKDKIIPSVESVAVDQPKPTTNDP  
LPTTLRKINEATSSVPSSRSSELVTKERNLLKNNFSFDADDVKS LKMEESVSAISEESRR  
KFQEFSLDPPDDNDGPPPEFSGRPLGSPMYMDTTINDEEEQMLRDTVRSRIAEVYGDHEQ  
QLTIESADADLAKSLEEECLRVETSESRMCPAGASPIEQYTRGKHVVGLDSGDPQGDTP  
KARQNSRILSNPDAGVSLCHGSTTPKYSLKPEILSPNVSISDSISESNFEGKAIDEEAQQ  
SIIASEDHLKNQEPNHPMTEIVEGPVSDTILFQKDTDFTGKAEIDSLVPGKEKQSMITP  
PDRSNPDGHRSSKMSLSSVVLKKNNDENKENLIAIEKSGFKSVTNIAADLTVSAAAFN  
AKAIAYIHQLQGEPSRPTYHANHSIAPPLENPAALAKIRAFCAKKGIRAEKQATSK  
CPSPNEYSANAKIQEELKGPQKRNYVTHDPKKKFAPYSRFQGRRPRRKNENDLEFSTD  
DSLQQLSPKPNDTQFHIDLSIVVPGNNIATMAVSRGLELRKKS PERSGEDKSSKMMVERS  
RFNFFPAHESEIKNPIQRAGRRLLSKSAVPIQAKFRMYLCREALARMWGIIRIQSYFRR  
WKCEGNLRAHKNVLLVQKIIRGHKHREQMKVKAACATSIQKIVRGYLAALQAYETIYFV  
TRAQAVARGYLTRTFVARRNKAVLTLQAFFLNALKKKNQVAIRIQRFYREYILRKNERRI  
QRARTIIVQSVARRWAACRNAGLIRKSVYTHAITKYQALWRGYADRDRRQKSLAAEKLO  
SLWKKHIAKNQIKKNMAATKIQASWRGFQSYSDVFVAIVDILVVQRTARQWLASRKTNKL  
REERAATVQLQSAWRRKKAQFNLLYSLVSVIIVQSVARRFLTKNELIERRKVRDKSALIQR  
NKEVAATTIQKSWRGFWGFSHFIIIVKYDVTRI QALVRGKLARDEFNFRVGCAILIQAVGR  
RFLAQKILAAARTTARSAADAVGSVILASRAFELRERNESAKQIQFWRIVMDYMKKKAAL  
VIERFFIFVKSEVEREQAMEQERIWREKARKKQKSLKGFVDKRSNAADTNRPEVVNK  
NGRSKSAQRSRQPKKLAPNHSSYESFQDIRDNGFVDTSRDMDPMPDFLQLAPSADYMI  
SNLTNPTILDQYVEELKTPRTPKYEEKYEVKARPKNMSTDDYIKKYSGLQTAANNKS  
KSQSQHFFCGAGNFNDRRGERQSYDRTLAINAKTRSKISASRNGRAQIGKPVSLSTVGLD  
SLDRRGVMVPSTPRSRSGSTTPRGVLRCTCKDGVPSQFRPPVTPTMKKSAAIIRAGTADTE  
CSTFDNEKMSIPSRPSPTRHYSTHSCGGKGMIMKTNPNFMEDNKIQEAHEVMLLGEY  
GEV

>comp16134\_c0\_seq1; 295 1 754 LEN=872; translated  
XDFSRRTSTTIAAHNYSSTDTQEI KMKFYLASILALVGSSNAFAPA AKQSVQTS LQSTS  
SRGEFMKQIATSFVIAGGLSTLAPEPANAGWATGPGSAVIDPKESIIDDEIFRTAPVQKA  
LKAVKNYASTVTEMKKALSANSQVDLKPVL RKEFEFSALRSDLNLTNTAFDEDTQRGTDR  
LIRVILQDLNELEVANAQKEGIPRSDIRLAKMNGKLEKLQTAFTLLQFSPA AVEIKAPE  
PPAPAPTTEAV

>comp16135\_c0\_seq1; 480 71 1507 LEN=2010; translated  
MTSSASASADPGIGLPPRVEDSDMSGSLDIPGNCLYGCQTQRSLMNFPIGGIESKMPLQIV  
YAMALVKKSCAEYHAEIGKMDKAVAGAIQAADDEV MAGLDNHFP LVI FQTGSGTQTNMN  
VNEVLSNRAIQILGGEVGTTPVHPNDHVNMGQSSNDSFPTAMHISIAKMVTEITLPLGLK  
ILHASLKKKSEYADIVKIGRTHCQDATPLTVGQEFSGYAQQVEYGIHRLESALPSICRL  
ALGGTAVGTGLNTKIGYDVTIAERLAKAAGLPFVTAPNKFEALAAHDSVVEVSGVLNTIA  
CSLNKIANDLRLLGSGPRCGLGELALPANEPGSSIMPCKVNPTQCEAITMCAQVMGNHV  
AVTVGGAQGHFELNVFKPVMCANVLHSARLIGDSAKSFTTQCVDGLTVNEGRVEELMNAS  
LMLVTALNPHIGYDKASEIAKNAHKNGLTLKEAAVASGYLTAEQFDEWIIPRDMTGPK

>comp16136\_c0\_seq1; 287 209 676 LEN=969; translated  
MKSPSTLLSLLAFVCLSFSTTSFVVRPSAISQSQVTSVAPTSSSTSLNVFGKKKSKAQ  
QEEEA KAAMYWEGEWVCKDCGYIYQRSE CAGLFFEEQGVGFRCPQCSGPRRRYAKKVG  
RVGTTLDGGDAPILIFSFGVAATIAFGVWAVNNL

>comp16137\_c0\_seq1; 83 1 271 LEN=1252; translated  
XYGRRGYGRGGYGYGRGGMGSFYGGRGYDDYDDYGYGGMSYNSGVNTRNGRSMQFNSE  
YGGRNLYNGGYGRGGGYGSSYNYGRGGYFY

>comp16138\_c0\_seq1; 173 50 391 LEN=441; translated  
MSSLAVAKSDDLNLKYKLLRGCQKYPKSKNRDKILQSVREEFRENMTLDPSSSEKAKEQIHV  
AFKGLSQLHQFDNRSSASFVSLEQNPFKPDGYVDKRTIAVDKVL EENS GKQ

>comp16139\_c0\_seq1; 299 1 1147 LEN=1170; translated  
XARRREGAGQNNRNRNCYQAYRPSHSHIPKLVVSKSSAARKMPPSIPPHGASADGATTR  
LPLLR ETNGTQQSKKFARRSSSRSSKVAHSLSSSTVPERRGSAGSSSTPQRSNRKKLL  
RSNESNPRRTAPSHASRRNTMTNEARAGAVSSQSESLLETVEAGDGTATTHMPSSVDSM  
GLAPYGGMGVSPYGLHGGASMMMPPSPYMGLGMGMGGTGLPYLSGLNQIVYVQNI VFS  
ISQAIYMGANQQALQQAWESLNQMIDHAIKTFHEMRALECIEREHETEEEEKQRKRKRLKA  
LRYAFVFGGWLVYKTI RNLLFRKRRLRLQRHPTQQQYSPAGSNHYANASMASPNTTALL  
SYLPQPSAGYPGNYSHGNGYY

>comp16140\_c0\_seq1; 238 106 516 LEN=743; translated  
MARTKQTARKSTGGKAPRQLATKAARKSAPTAGGVKKPHRYRPGTVALREIRKYQKSTD  
LLIRKAPFQRLVREVAQDFKSDLRFQSTAVLALQEAEEAYLVGLFEDTNLCAIHAKRVTI  
MPKDIQLARRIRGERA

>comp16141\_c0\_seq1; 1510 93 3014 LEN=3056; translated  
MSEEQKELEWPMKKVRSFTFIEFFEKKHGHTFWKSSPCVPVDDPTLLFTNAGMNQYKPLFL  
GTCDPSLPMAKLKRAVNSQK CIRAGGKHNDLDDVGDVYHHTFFEMLGNWSFGDYFKEEA  
IAMAWSCLVDEFKLDTSRLYATYFAGDEMTPPDHEARDIWLKYLPAERVL PFDAA DNFE  
MGATGPCGCTEIHYDRIGGRDAAKLVNADLPDVEI IWNVFIQFNREADGSLRPLPAQH  
VDTGMGFERLTSILQGVDSNYDTDIFMPLFEEIRQLTGAPRPYGGKVGPEEDDGFVDMAY  
RVIADHVRTL SFAIADGAVPSNEGRGYVLRRLRRAVRYGRQNLGAE LGFFSKLVPKLVE  
IMADTFPEIKEKQDFI I SIVKDEEESFSRSLDKGLQKFKDLAAAKAEQGEKAVFS GKDA  
HYLYT TMGFVLDTELMAEELAMTVDMEGFEQKMKEEQEISQAHLAKMAGGSGKDMRMV  
AEQTSHLVNTLKV PATDDSAKYVTD AVLEGS AVKALF IGRGETEDMIGFVDSVTSESSTV  
GVILDKTSFYAEQGGQIFDVGSI ISAGGATFKVANVQLYGSFVLHLGEIVEGTLSVGDV  
SCSVDYVRRRPIASNHTMTHVLN YALREVLVSRPTAAGKAPSGVNVDQKGLSLVDEFKSRF  
DFSWNAQLTPKELADVEAICRERIE TEVPVDA YVAPLADAEKIGALRAVFGEKYPDPVRV  
VAVTPSPITDILANPQDATWNQYSVEFCGGTHLTNTKEAEAFCLLNEEGIAKGIRRTFV  
TCNDAKAAIAADEFEKKLDAAASKLEGGDELEALVKSLTLECDSLVISTVKKTAFRETIA  
GFLKKVMTWKKKRMAGMKDEIATKAI EAGEATEGNKV VFRDFGCDAKLGKNVATAFTKK  
IKDKAIMI ISADSDANRFLVLAMAPKGLDVDC KAWCMGVTEGTNGKGGGK KDSAQFTVPD  
VSLVDSVMEKAKQ

>comp16142\_c0\_seq1; 221 1 695 LEN=1100; translated  
XSTTTPLKSTITKQTTSNTTTPSDTKLNLNEVKMGNSSSSSALPALKTIANCDTKRFM  
GTWFVVGKPTVLETTCSNAVEKYTLLEDGNGNHDIDIDFKYNGNEDPLDEKNKVKSLPQ  
KGWIQGDKSKSGEWKVPVWPIKMTYPI IELDEQEYSYAVIGYPSRAYCWILSRTPMTD  
DLYEELGKKLVENHQYSLEGLRKVPQKWTADERTKRGLTADEL PDSFLIN

>comp16144\_c0\_seq1; 507 76 1509 LEN=1776; translated  
MATHHDPITGIPAFHYLSETDDRTPLF TFTIPSSIARVMTVEGTERPDIAFGFLMMSLSY  
WIELLVLVFAMMSLGAFVGLLLHHAVIKPKQEGTTKAYLVGWGIVLPFWSVFSFLVVEIF  
DARNMIFKFMGCF TVVYFFRTIETICGFSPEYVKGSASDFCFYYATIPIMARIKAQKAR  
PPQKKTREDGTNATTNDDGSDLI THNGNIGDQIPCTSTKILKHFVTFTFLLLALGLLQS  
ILSPFLDFALFRMESSNEDVASFCAKESCFTWRLYANSAIQAFLLQMYLTTYLEALTF LF  
TAFTGYEAEPVMDNPLLASQSPSEFWGRRWNLLVHTVLKNGVYKPIRKTCS SKTAAVIST  
FLASGIFHEWLLL MVFPNRFVGGNQHHDGSEKNIYRLEFGGTTIFFLWQAMLIGFEMTLG  
KSQLFQRISRWVPRPKTAFVVG TGIPLAHFFLEPYVRSDFFRHGAPGLPMVILIPK

>comp16145\_c0\_seq1; 192 390 932 LEN=1289; translated  
MFYVKTL EHEIVLQPSYFGPKLKATIVRLLKEEVEGLALAEYGFVNVNIEVPEDQIKSGI  
IEYDTGNVVFHVKYTALLRPFVNEVLDAVVSQCNTLGFFAFVGPLRVFVSKHSMPE DML  
NGWNPDKDSWVSDDKEVVISGCGVRLRIKGR TVEQGNITAGTIKDSYLGLVSEEDDEE

>comp16146\_c0\_seq1; 212 76 1153 LEN=1320; translated  
MPLVLVLLVACLCSIPYRCQAFLPAPVSVRADAGAAAPLRNFLSDWLGSLQDSMNTGGSY  
NLGIDYEALEYPGPEVGKMALEIAAGERAETTSTSTSSSTPRDGGFVSSLPRLPSDPRLE  
LATLAGGCFWGLQLALQRTEGVEVTLVGYTRGPEARPNYDMVSAGNTSHREAVLVGFDP E  
VVSFGDLLR TAFLARVDLSQAGGQGRDVGDRYATGIYCHALEQEEEAARLLREEVATNPR  
YRGRSLATEVAPAAAFWPAEGHHQRYLEKGRFRGPQSAEKGC TEESGATARPKVQGGSE

HARAGTRRNEETKHKDKPNPNTNQNKHKPLVSGGRGVRAPREPTRAKGGRESNKEGSA  
>comp16147\_c0\_seq1; 278 140 838 LEN=991; translated  
MKRHLIPQCQRLGDNQYMNNKFAILGQCQPLVNERNGRENAKRQKLSKSHNEESLHPTVT  
PLPTKPDNEHRMVALLSAMLVFSNEQEEEGRPKEDAQDEEQSDGTTSSQSSYDSLTDQDQD  
KKTGARPAASTAPLAITSSTRKKRSVSNENDIYKSYQMKPISPSTNNCDIISYEDIATN  
GSLDRHHGHYLPAPRLPTPTEIFPLIAPLSNQSIKNCDCSSYMTTRIYGAK  
>comp16148\_c0\_seq1; 392 230 979 LEN=1220; translated  
MSEEPPLKKKKKKPKPALSQISVDGDDNGLSVSTSEGRNVNKTKKSAAPEMTTS DGN  
DKGDNNAVPKKKKKKLVQSPSDPVGKRNHYNKKYREHNDDQDRSYDDRRNREYDDDGDS  
FDDRYRHRNHVAKDYRKHDDDGMSSEMGGDEPMDEYGREYDLSDEDEDEEPRFKYSTADL  
ANSNWRNSTCCLITAGIFFVIAVVVSVMMAKKMNADKQRFLLARQHHLRWVHLPQANVD  
LPAQDATLP  
>comp16149\_c0\_seq1; 140 1 391 LEN=864; translated  
XHRQATTTNTDIPSPIFVASYKDQNRILEKNNTNLKTIAMSADEKAPDTGNEPITIRVRD  
QTGEETFFKIKKTKMSKVFGTYANRKGVLSSLRFLLDGERIEPDQTPKMLELDDQDQI  
DCMLEQSGGW  
>comp16150\_c0\_seq1; 280 1 561 LEN=1072; translated  
PHPNTILFSNNKNFVTMKVIAALIVTASTVAAFSPASFGTKSSTALREGEYDLDYGAKNG  
YETASVGDGGQGFGARSPSNWRVPGTSPIGQGSWPGAADGGDEPWFAEAVSTVSLDLEK  
AGETMLAF'TKEAAQFKISAFCEANGVEDQEKALDDLVLGALGYDKFLESSVKQLAKAYKKL  
YPSEKE  
>comp16151\_c0\_seq1; 276 1 873 LEN=970; translated  
TSTNFPVPSPTSTDFVPPTNGDCNGSPALKIQLKTDNHGLETFWYLDESIAAGTYVIEF  
EFGYGYESNTEYTLPSDDPNDAYCLKENTCYVFSIWDNYGDGMMDVGDHYAGFLNGVEIF  
SGDGNFQFNRDHDFFCTGAGNDGPTIEPTSDVINDDPFLPTIEPTTEDPTSFPFAFPTFSP  
TAFPTSNPTGAEGCSDDPAFRFKGREKKDCNWVRRGNAAKVKKKCNKKHNRIRIHEYCKE  
SCGKKAGVGVCGFLKKKKKPRNKNMRRMREMLELAKTEGRAMNRSHK  
>comp16152\_c0\_seq1; 103 318 677 LEN=730; translated  
MAGTAGLARAARSLGLPLSSPAARSVPRRAFVGTPLGSLPMKAGTELESLSIFKQPPAP  
VVAERAEYPSWVAELPTPQPSLAALRKIPNEEADLDQIKRYLKLTRRQAVRQRNEESAA  
>comp16154\_c0\_seq1; 389 189 1256 LEN=1495; translated  
MRPTARGILCTLTVSIAMTLPTTTALSAGAPGQPPPVVNKAPADAAMESTYQRLAERAV  
GLYRSKGKTGLDGRCWIGVAGGPGAGKSTLAAVADCINGCKWAAGEGAQNNSNSNSKNE  
ENASPKAVAVPMDGYHYTRAKLAEISQTYEPSYDDGSMGMSRRGAPWTFDAEALARDLAE  
AKRAGSASLPEYDRVLSDPVEDAVRVEPSHKIVIVEGNYLLLGLLEAELDGDGSGSRKP  
VEGSNLSGIWPGVRAPFPVQGEIGRWKKTAELEWDETWFVSPDRCSHDHDKTAVEIQDR  
I IERSLETWTD SKTKAWGGGTDREAAVRAEFNDVFNARLVNCCRTYADVIVDSI  
>comp16155\_c0\_seq1; 202 70 1098 LEN=1423; translated  
MESDSFITGTETHSVGRVEKSARHGVAEKTYCPAAWIGSAMTGARIVLLPVAILAVSLLA  
FHASFNSTAVFSAVANNTGNNEGAVLVTGATGRLGSRLYLSLKQRKEIQQRKMKVYDE  
VAIAEVRALVRDRAKARDILGCEACDESEGIYIGDVTQDGLSAARDGKVTVLAIAAGA  
GPGVSKEVQRAVEFEGVVNSVRAIATKRSGTASTNGGAPRVVLCSSMGTTTPPSTSRIGD  
ILFWKLNAE'FLSTSGVSSTTIVKPCGLKDDIETSAAALYTGHLDEPSEFHTVSRDNVASV  
MTEAVVMTTSDGGHHRFDLCSKPGDPTTDFKLIEDSRWEWE  
>comp16157\_c0\_seq1; 1406 464 3835 LEN=3963; translated  
MSLNHRMPAIF'TALFSSAAVLTAAAFAGASCFLIRKGSDDDDLFLSSTGSETFGILCEHD  
FYPREGDKMPELSRIFLILSLTLGSVTAALAWAVASFLTPSNVSWNGISVLAAITAVIQV  
PIFVLFEAEP'CVAGDADEGE'GDSFFFKTGDASCQLGSGSYILMASDLLYVTVTLITQCL  
DRPRWKL'EMDLWKVGRGQSRPVSPVARNDEYYYDRDENYADNVRLTGRRASNRSAAGGR  
DDYYGNSC'ILPAGKARRSHPDKPVGFFAKLFGGSSSPDDREVP'GVPTHMSAEEDWDYE  
NQKSPD'QS'LVLRIVTTNDGGRGSPVSSSPTSVEGQEVSIGAF'EKIKAEEDLRQYQVQEE  
VVQSI'GLNAIERHQLIDSPNASFCGKDSIPLQHTAVVSSVNDILEDLHSEELGARRSKSS  
GDVIERNASSDAVVEGVRKLSK'KLSADSKRRSMK'KLSIRKPNL'FASANTGYALIDDEES  
DYSYH'DGNDDKNDHFLGLGAHDYNYKTDQKTLQEL'SVMSESTYNPDEFLPQATPESDG  
YAGANNLQ'MDDVSSDQDDLDDEDDIALLASAMDWQVDF'VPGKTS'PDNTTNNPFDCISIGS  
THSDPG'PVSVVNESFEDV'FDFSTPIVLTGGGPEEGQSSAADEIFKFSSIDDGQWESEFAN  
ESLLASTDDDYEDGYENEDEDDTYLDSGSEEQRGRSSGRYDGRRRRRPI'SPVGSIKSNGS  
LLHTI'INEETEEDVERELGVDS'PYP'IKRTLSCPEQRSFTGPIKNRKEKSTKELLK'KLEKL  
KRTMGD'GNAIGSRNRS'LPPRSPREVTNTANR'PSEIGSTSPDTMDEPESVLEDDL'RDSDDD  
SDSSVLSEASAGNLI'EEPESPIDEKQCIAPRSLEQSNPSKIVVPTTKPLKESDPNLLPTK



LPTTTKPRKKLILPNKSTPVDRSLDISDETSDTGCTRSTISDSGSSSESGSEAGPRQIRS  
KSMGRGRRTKKIRNLRASSLSPTRSTISVDDTAMRPANISSLARESRIIRRLQRRKGYLP  
LDNDNSREMPSPRDPYSTNQSKDDDDLELTPKRKTVGLSSAHEEAGTDSIASVMPSDLF  
QPSLDDTDESCPEFDNILEQLDLQLIDLNRPVGAEYGDDEVSL  
>comp16158\_c0\_seq1; 217 110 622 LEN=725; translated  
MSSSSSSTSDDKYFIRVSEDLPTLDECSRFDVNDSSCGAIATFTGTTRDNFQDKMVTQLSY  
EGYVPMAIKELRGVCDDACKKFASIHKIAAVHILGDCPVGKASVILACSSPHRRDALHCI  
EFLIDELKARVPIWKRECYEGDEGSVWKENVEWKEGRRRERVMVKEEGTEK  
>comp16159\_c0\_seq1; 136 1 757 LEN=913; translated  
XLPVDRSIEETSISTTTSTSFDLLASNMFVKLSAIDTRILVLVNSILPYRTLLCSLMLL  
KMLSSALVDEAAIAFPFGNGVRADGKCAFDPDLCQGYAAQDVGSWYETIGRSGRIRYLEI  
VALDFAVLIPMYSLFLFLEISMLARTIPTLVPHWLSLLPFVAVAFDMIETSTHCYGVARL  
AKVDLLGGLPWPLVPSSGWLELASLATRTRKFKFLLLSMVLAILGTTASSFAYLSGSTPQS  
QTIRDRKQDKQN  
>comp16160\_c0\_seq1; 334 108 683 LEN=1283; translated  
MASVDNAKALVQEQLALLRVKLDQIPALQDVEDKVKVPKEVLVLAGSFLFVVLVFFGIGA  
NTLCSFIGFIYPAHQTVKAI EQKNKGDDVQWSVYVWVLF SFFSLIETFQDFILYWI PFYFA  
FKLAFLLWAMPLQTRGAKFLYDSFLKDFLKKSSANSMSRIDTAMAEAKKSADTTASELVD  
NVSDLGTTKDE  
>comp16161\_c0\_seq1; 860 365 2605 LEN=2681; translated  
MAGEDHRYAVDIRVFSVIVVAMAVSFGVGVGLGPAVQTKGMTQNQDLPSVTSVEVNQAE  
SLLAAQAAADDGELHEPAGQHLLVDIKGIEAAFLDSEERLAKAMVDTVNEAGLTMSLYHC  
HKLIPKGVSCVGLLESHISFHTWPDEGVITLDFTCGNNPLVPAVKTIQDLFGIPREND  
TISMQWSHELGRFNKDKVPDKGNDNYAILDHNSDLSQM VVSPIDCPVKEQIISKLTQFQ  
RVDIWDMVGLEETPSHEDALRHNLPQGDPRWNTAEVVSPTRMLFLDGILQSESSSQKEYH  
EALVHAGMF SHPDPKRVAVVGGAEGATLREVLKHKTVESVTMVEIDDELIEISKTYMPFM  
SDCSDYLRSSNCFDDEILNLVTEDAKEWFMERKAEKEEFDVVIVDAMEPEASAAISKDL  
YDTAHLEAILNSLTSEGIMVIQIGRAPTILDRPDIGFNAPREELFKNLEALNAVEAMFV  
YEDPHCGFSEPRAFMIVCKSESCRRLFYATSDQIDYEIYSRIVKTHSKVRALS YFDGITH  
LGYQVAPKAWETTYCRREPTPFECYRHLDFKKPIFEFNFEESEENPFKVTADWEGEGED  
MSISSTHVFANTDIPK GAYIMPEHLASSLSLQKAIENLKETTEYGGVSVIEDFVTFVEK  
FGHESKAKGTERTLVEIGASYLIREVEKKEDANIGRWIPSHPDGRRPKYSPVYERHRLSF  
DVFAVATQDIPKGSSELLKYKGMWEEP  
>comp16162\_c0\_seq1; 375 1 641 LEN=722; translated  
XERTLNSLPTNHDNRNQEQTKNNNNEKMKVSLCLALAAATAATQSNALTTPTDRRGAFGQ  
LLGAGAGAFLAGAMPQAASAAA IKTGGASPFTGDYNDPNHPECLRQVKVVGAPLKG DTR  
SPYPVIEVVG YDGKGGKVCTDRPTREDLWKVVTGTVKSSDSAFIDFSPKGGPENLAAKYQD  
GGIVFPDGNKWKVARGTPTRRPKDMSTLKSED  
>comp16163\_c0\_seq1; 410 1 630 LEN=748; translated  
NNSNSNSENTREQQIRAANKRRKIVHDSTSLSSIQAGSKATVMKNNKLAMATFGTTSDH  
QNLANNVANGSHSMHNHSLKXQSI CEFLANAERIAVSTAAVDIACQEYENKHGKQQQ  
DTNGVFESVDCGEARSNHQSGSTLNGSGDNNFHDAIANDEKLVQAI IANDDRLNKEVGE  
LFEMDSFLRDEVDDEFESDEIADCLMGCM L  
>comp16164\_c0\_seq1; 423 161 1642 LEN=2016; translated  
MTNFSYIFWGFLLTLCASVTFRSSDYKNCSEKGLTINEDNGISDTAKKAHTKLLKXYMF  
VYLLATLSDWLQGPYVYALYSDYGF EQHEIAQLFVAGFGSSMIFGSFVGLADQGGRRLF  
VILFAVVYLASCLTKHFKSYSVLMVGRLLGGVSTSLLFVFEAWLIKAHADL PKQCLP  
KFSWAAFNGNSAVAIMAGVVANHIASSPMVPVSGNIYMGGYLNPFDLAI VALVLCASGA  
YLLWEENYSSSSEGTQHGGES ETNEKKAGNAAWYAGLKNALTAALHNRDIFLCGI ISSL  
FEGSMYIFVFMWTPLLKALEEDSNLPFGLIFATFMVCCMTGSSLFSIVVEKYPVEKLGIV  
VFGVGAIAMSI VALELVSETVSFLGMNLFEMCVGMYFPIMGMTMKGIVPEDKRAAIYNLYR  
IPLNFI VLSLLTDLTPRTSFTLNATMLVTATV LQAILSKRRLESRGWSESVSKQDVEPL  
VTSDPVLVGD SAV  
>comp16165\_c0\_seq1; 583 107 1219 LEN=1514; translated  
MSASSGSKTTVTLSNGVEMPV LALGSAPLSTSNDDTSHFHALNSFNGFLPEQA FRSLHA  
ALEADPGGAESQATPVHIDTAMYRTHPHVRQVLGNALATGRKQRSDVFLTSKV FHPNFG  
DAFGSEDLGHCMPLDPKCEM TYDDVYK FVYRQFQQSLNECGVGYFDLVLLHWPGRNHPET  
DASRNAQHRLAAWNVL EHCYSKGWARSIGVSNFSEHHL EELQSMNEAAKAKDKETNNTKN  
GSVAVRPHVNQIEASVFLQHSKILDYCLAHGIVAAAYSPLGRGVTHVATNTVVQDIAGKH  
GKDAGQVAIKYLLQKGYGCVVFWSTNPERIRSNHQLYDFDLDETEIAVLDGLNRS DGTGT

WGLLSPYKIP

>comp16166\_c0\_seq1; 548 272 1567 LEN=1836; translated  
MIFNPHKLGVHKVLQHIPLNGLFDAPYKRALQKAVNIADLRTIAKARSHKMVFDYLDAGA  
DDEISLRRGKDAYSELEMHFKILSGLKPPDLSTKIFGMDVNLPPFGCPTAGNRMFHWEG  
EAAAkakasekfgtlyglsslattgieeigsihsgpkvfqlyvWKDRELVRDVISLAKEGG  
FGALALTVDFTWYGNRERDIRNDFSIPPKYSVPQMMEAIRKPAWTYDFLSHEPYTYACIN  
KEVPADSLAAFVNSQIAPEFDWDAEWLLGEWNGPAAPKGVCRPEDAKKAVEIGFSSIWV  
SNHGARQLETSPATIDVLPsIREAVGPDVEVIMDGGVQRGTDIKALALGADSVGVGKPY  
LWGLAAGGEAGVSKAYDILKVELDRAMGLLGTGTVDQLKKEGPSLIKRRGASIRDYPDRY  
ALDRGYGGGIV

>comp16167\_c0\_seq1; 395 48 1622 LEN=1714; translated  
MPSNEARWENSGAFPSREKGSsSNYSSRGDKIFVNDsFDGQFDTLDTVNEGSRETLSSSH  
DGLMALSHSSSETPAMNNTTTVAVRNAVVRNALKkkkKVPsNNGCKNRVEKIYPYSVFRSL  
PKRKQEGEGEGEEQKTKSAQKSNENSFGTRSPIQPANTVnkTEKDNLDHRKSERPPSLPS  
PLISAIDDEISSVITDDNQEHEHRQFLYDYMAEGASVKPpMSVMSARSRRHGGGSKHHII  
RHTLATTQKVAANPSNMKNLFSVIEEERHLHRLTAQHRLRAIHNLWLLFLPSILFALVAGL  
VVFIFEADINSNEEIHIIYSSIFVGVLSMLSVFGQALCKQLDLGVKSSIHdACSVALKRLS  
EDIQLTMSAAETIPAEYIALIGEKYQAAADSCAFMIPCKLEAAASHLSDRMNLMLRPPPT  
AKSSQQQKHHLKQFDLLRIYGTAYDELtTEIINYPAPFFIIPDPRNVSEAAALRNLSIIT  
EGKEVSRsRWCWRSTCPCVGateEERNLFDVLPsVDPFRSQQSF

>comp16168\_c0\_seq1; 165 128 514 LEN=1004; translated  
MVATSLAQPGSSGSLAPPRNGPCPTNMPAATDDCSPtGGYTSCFYLNIIICKCNISGPWW  
CDTVPiGLKENNETDVEDLDIVGGDESFDQDGFGEIDGLDASRAAATGSSLALLFALVS  
MGASVFGl

>comp16169\_c0\_seq1; 156 59 226 LEN=226; translated  
MKISIVSLLIGLTATFASEDA VAPVEVADEDRELNSYKYGYIWDGYYGSKGGKGGK

>comp16170\_c0\_seq1; 144 105 500 LEN=626; translated  
MVFYECVLSTKHTTHFKALTALMKEVSLKVVENGGIIRSIQNHGLRTFPHRFKAKYPDYL  
TQQRYYEQGRFISVYYDANPATLKKVENILNMNDQVLRVTHLKSRSKLDWINYRHKPNPY  
VQKILKQDKEL

>comp16171\_c0\_seq1; 290 138 752 LEN=1225; translated  
MNAVPTTSSTTSVSTSGSGLSTHTLFTPNVSSeSLSSNISTVPSHVGGsARVgQRQQ  
QKMESLSQVAMSLMATGDGGIPQQFVTPDRCAQGYTLpKNLALITQNLEYISEEMKKNE  
KTVTAASTQNSVASKHASNGMKNIgRRLAASLLNGDFDSVQRfLLADESKTISPRVEVDt  
TTTKRAASESIPsSEPPSSRSRII

>comp16172\_c0\_seq1; 80 1 326 LEN=326; minus strand; translated  
XRVQSSRVLSSRLVLLLFDGFVLLARTARQGTARKHRRPRFGsNRGFGGTVCCAALLRLA  
KQTSRRRSCLEGLDVGCIaHRMSSRVrTYDRtIGKKYGTVPRALARLI

>comp16173\_c0\_seq1; 418 78 1241 LEN=1538; translated  
MFLFDHNSPFASLFLALLLLQGTNGFSTTVQQORQQLSLGRSKGNAAGLILRAPLATSTT  
GIRSPVLRPYCDGSSTRDCSELrATEDGEAEEDGEAEEDPERSSMDKKVAGRKKRLTMGY  
QLASSAYAASALFSLGTWGGVTSSSLYYIFGGGpLTAaAILYILKGAaIHDRLGSDTYKR  
LNIAMIAFGVIQLVAPTGDfPWTNGLMFkVpGLLSLINGIKGYGYGCLGWDKAKETtAVV  
KDFKdGIQSTLQcMTMIKAKSAVYIVGTlIMGIMSLIKtKELVtMLLAPSETpVAYLTMF  
VKLAKMARLGLVATIMYTLKdASDRDRLSGtTFVQlNfLAAAFSSIALYLLPTWGTASS  
IGQVVLVTGIAATtFFKGLVNRKAKTA

>comp16174\_c0\_seq1; 146 180 671 LEN=870; translated  
MTRAMANLTLTFYCVaIVSVALSCLYSTLAFVPAPRSPWFpPLPFHLYGNVGDGTGTy  
SESSVLSRLEALEGRVESLERRIMQSGGGRDRRNHKAaAVARHTTRKSVATQGRRIEEIT  
PTFRDYIQEGTpgYTNpFLSMGSKSRNGDDREIKFVTIQGSF

>comp16175\_c0\_seq1; 289 379 872 LEN=872; translated  
MDNSSDCFQPRPQEHSLIASPQQHTKYQQQPVHSVYNTATPSQVGVVSPEQNSRFRSHVE  
FQSQFQSQSHWKIPPLVRQDNNKGDcQTSIEGTDEDEELLFDIDeFLMEEGIQGYKHNGD  
DtdTVNSQEDNINEDNATpVAMVIAQSPVPNEKETNANVNKNVNX

>comp16176\_c0\_seq1; 655 263 1888 LEN=2639; translated  
MECVAADPDEtGAESVSVSSYHRFVDNGIENANEDVNKNGGGCEHECFEDECdQNGSes  
EDEEKRGNDRGNKERCgWSKschCCFRCCPLHkTIPEPQSLCTQPCVEAGSVQAAAAAAT  
ATRLSDRLTFLAPASpERSpGVWMLINAFMLVWSLSLGLYMTLLYWWYDKQgKRgAGKDA  
GAYSGYNYVIDDDDDYYNYQYEDSSRASKETtTYLWVSLLTMLVWMAEISLRAAFPAV  
DTVLVVGNHNRSGGPAATNGLSFPAPKQTEYRAMEETRDdSEDRPPREGNRGHdNDNDs

DTDHDRGGRRMAVAASGGTPGIPSDRSSGSSVHQHQHPAGNTRVALLPSHSIVTVVDK  
VQRRSKKRTALIVTELFLAVFFLYRTVENCWNYWGWGDEGDGDDGRSSGSSSDGGLFFTML  
EQQLDVWVGVLAYAYVYETYHAYHSSTASRRELQRSLSVPTALSLATAAGPGVVPQW  
TGVPPPLYGGGSGSTSDSDRGLLPNASDVVAGVAATDSDSGESGTTVSTAVAAGERPPAS  
Q

>comp16177\_c0\_seq1; 600 94 1296 LEN=1560; translated  
MASSLTSPSCDDADAIDLFSAEASIDLLPLQSRNSLQPTIHTDFERERKSRTNDVRERF  
GPMFCRYKASVTMKQKIENSITIHSTVGGDDDDDDINNIETALGGQQSRRRKVNESIEI  
IKEKMMRLRNMEEEELAASEDRRENHLWLCLKQTSLQALGKIQRYSQIQTSDDLHRHRIA  
EVGKEKNALNGKSSMVDELLAQNVRLLEKANDAERLEKELANASKLHHRKEMNFQQQHK  
LDEKVAECNKLELQMKDLQDSCDRLKALHTQEERDLNFELELELVDLKGFQNGHLYSGK  
NSLKPTHDPGTSPSIAATEPLTSLWTESSITSDRIIVDNDNSTIIEPSLSVIPRVMNRE  
SIDSDPFVQNLMAKIEALTRENAELRHAKSPVIAESNPTT

>comp16178\_c0\_seq1; 417 1 1311 LEN=1826; translated  
EKNNVKIVPLRSVQNEATSMQLEFANKDLYKFKKLTMKSKVIPFFSLLLAYAAAGQSLEEP  
LKPANIAATKPCFVKGELIRTTFANLKGEGIWIGLYPKNEVKDFSNLPSFDSGTLKGWIL  
TCGQRDNCDEWKSEGTVRFATDELGYEYVVTASGDRATKTSQAHSESFIVDAHCSEHRE  
WRPATPDQQRSPCPFLNNTAANHGFLNRNGTFINVDEMANLEALYNVASDFLIQGP IEQM  
IDCNQTYFDENGVRFDLDILFDDKCEEHEASMRADSF FGFERSKKVDDGLLNNLMRMN  
HGKNFLTLENVFDFQADRIMDSRLVNPETEFRHFVDVGNMGAQAMFLFLSSDNSMRTVEK  
DRLYFFLLDEKLPPDFEPGSLREVFPNPKDPADFVFNRLLEASMNNVETMMHTSIASALRG  
EGR LHSDANADHDHGV

>comp16179\_c0\_seq1; 270 182 1408 LEN=1752; translated  
MKG FV VSKAGDTHGSLKDDLPIPKPLPDEALIRILRAGICNTDLEILQGYMGFTGVLGHE  
FVGIVAEVNSKSQELRKRWMGKRVCGDINIGCASCWVCTNAPHDRNFAGCCPKMSRNHCP  
YRTVLGILNKHGTMAEYLTPLPLRNLHEVPDHSVDEVAVF AEPLAAACRIVEQNLVRYKDE  
SGRVPPDKVAI LGDGKGLMIAEVLGREHTARLGSSNEETS GDS DN VNGSPYPQPVLF GK  
HSHKLDLVRETAGVDCRSVTECIDASRFSGVASEHEHRYDVVVDATGSPAGLKLAAGMCR  
PMGTLVLKSTCAAGTDGFNAAPLVIDELRVVGSRCGP IDRALELLAI PNHG RGASENGSA  
TLQPLRAEKYITKTFPLSEAEAAIRCAAERSTMKVQI ICGDSNTDAKL

>comp16180\_c0\_seq1; 388 85 1734 LEN=1918; translated  
MEKTLVLSIIVLIMINITDSITSSIVGPSLVFYVTEMGGTKEEYGMISSSSFLSGMLMMS  
FYGHWVDQNGNKYKAPYTASFILGILGSLIYFFAIVMPKGRWAVYTI LMGRLVTGMGASG  
RTLAYS YVATAI PHDQQR TTTVM SM TRSFGMLL GPLM NLLVSEVDT SVAVFDWLVVPID  
RNNSVGLIVAFGEIILLIAMFLFLTDPPP REKSASRVSSSNTTEEQSKAGFREIWEAIA  
CFDLFLPMATMFVFMFNFLYGVAI PPVGFHALGWDPVQISNVLAVQAI FLFVGMCVSMY  
LSLKKAPDIYMIGFGNLCFIVSGTFTYLFWTDDAIAWQFVLPVFTVAFAYPFLGPANRSK  
FTKAVHGRPELGNAGVMQSLFNQGFMLAGFISP NFVASYVLR RPEDVGLDGISDH ELP  
WAWYIPITSTLIIIGLLYEEFFLEKNELGFLAEKEEIPASETSTLLEAKGTESKYKSIAT  
RRRSSVVECTQAFSREFEVNRRASVEINGIPNPFETSDEIQLRDRLWKDKQEW EHLQKTD  
AALEETEGN

>comp16181\_c0\_seq1; 203 64 1275 LEN=1674; translated  
MNFNTAITNTPIPTPKLSMHDQFIPSKPAVSVVPPFQSYLQRAGEGDQEAMEHLIELHT  
SGRGGAKQDIVELCRWMHCYLQVDRLTGRRPRNP ISTRCYLYAYGKFLLGSTTNSFPDS  
QRRLLPPLSIDPRKGSLLLERAAHEFN CERSIKILGSELHMTGLYHPEVPQNF EKGLYWLA  
RGVRNGNGKAAFDLAMA FNMGV IAPT NREVEKKWFEI GARLGCTEARDGLAQLRKAPVRT  
QSEARKLLRHLGKEKNITNYLTDR TTRCSNPGCDMVEQEGERFSLCESCKQVKYCSREC  
QSAHWREGGHKKRCSVLKYGKEQMK EANRNIALPFANICFNPACAKPQPKGVVFSICGSC  
KVARYCSRSCQVIHYKNGHKGPCSTICTYIKEGDKILGELADT

>comp16182\_c0\_seq1; 127 40 213 LEN=377; translated  
MVKQKNTCAHNNTHKAHANGIKKAKRTRFVSTRGMDPKFLRNQKFAKKYNGSKRVVE

>comp16183\_c0\_seq1; 165 88 510 LEN=1005; translated  
MAEHPTNAETIADAKISP GDDYEEIREQDRYLP IAN IARIMKNTLPENAKIAKDSKETVQ  
ECVSEFISFITSEASDKCLQEKRKTINGD DLLWAMSTLGF D KYVEPLKLYLSKYREAVRG  
DKPDKAAARASSAGVDQSKP

>comp16184\_c0\_seq1; 382 265 1452 LEN=1696; translated  
MMNVIQHNNTCSNSTHLQHDSVRCSIFSPYDERDNSYGVIHENSRTSHGNHTESRETNC  
NYNRSSVDDKNKSAMNKIRRKNSYSLVKERASNFLIPLTVASGASTSSGEKDYPLKNNQN  
TSNLMRRKSSTDFGMRRRSSTDFGAFHP IEYNNKNNTNHPNGSANATMNPTQQTSCST  
GNIYHSIDILGIDKCLFR TGS GIANNKKDNNRSNSAKNPRINSVSDLLTPNAVPLMIDSA

RQNAPCSTSAIINSATSILDCHNTFHSNGSNESGTEVIQPGPYDIVCGRNSGAYNYIGNR  
RFRVTIEMNLQRYINSPTREDKTNVIKSIVWMLHNDVGARFLKKETIKTSKHARASSGKK  
ATSRVVMTDKQSREKVGHALRDLVIAARKERQEK  
>comp16185\_c0\_seq1; 446 1 1304 LEN=1658; translated  
PAMPISHRKTTRIHQDFPYRTIVIDGTVEHKGKARINTPEIEETEWSDRNVIIGSDLRV  
WGNNDNRDDDXSSSSNKKTKTTATSTGDTPETKSLGLCFQDIWDEYCSNQASVGHNGYES  
GDDADVSNVFFELANAPSVCYRLQKEPRAPAPNSGSITIQQDVSGAAETHHTGGIVWETSY  
LLLNLYLLASKEWLGSTPLAGSVSKKTKSRTILEIGAGCGMLGLSLHKAFELGIIGGDER  
IELSSSRVILTETNEVMENLQRNLEQNYPCLSPPNNGDDCESNKKAVHHVSVDELWTRYE  
HDCSKAGIDAHSIDCIVGTDVVFSTRFVLPMLETMQFLSHSQTVIIFLCLQERCKDSHQLL  
LKEAIRYGFLVDDISATVYTDKELAPTCSFGRALECKLLKFTVVAQKIDITLNEKAKTKKE  
KKKRTGDKTSKKKL  
>comp16186\_c0\_seq1; 327 365 1189 LEN=1341; translated  
MLSTPVLTLDLARLAKIRNASIQSVKGFSPNHLNISAVVSKKRPRSSSNGECDSSACSSS  
SATNTPTAALPTDVS DLS PSEYLKTI FRANGFS DLESIAKNCEPRFLPVTTAMMEAYHTE  
ILNAVR SNNLEQAQALYRAGGFQHGCNACNRFGESILHIACRRGNLGMVRFVVEEVGLDV  
TAIRDDYHRTPLHDAFWTSTASYEVVDFLLRQPHVPDLLLLCKDKRGFTPLDYSRGEDRGR  
WLDFLSERSAILRPYQAEKTSSSESPCKRMRVVA  
>comp16187\_c0\_seq1; 193 90 596 LEN=941; translated  
MEGVQIAVNVNKNASVSPQTTTDETPPGWNRGRRFMARWVLFVVFVTTLSGRTIWATIFS  
AMSIIMKEGTLFSGNIKWMLLSGISFLASLGWSMSRGSEVVDEDKAYGLKMSLWLMMA  
KSTQVWGMILAVFLFSAATSRSSPPKEVTKAMTGGHGKAVGDGTKEE  
>comp16188\_c0\_seq1; 736 267 1832 LEN=2320; translated  
MIPAKFFSTAYLLLALSALLTASAREQPTCSWSACGEEIDPALKEFTYDVGDPQTTMVY  
VEPDLATFYEKDGEKYKRVKPAFNGLAGKFINMSNKPYPDQYWESYKGGTAHIMRRYAPFS  
AGGTGTFPTHRFFLSEPGTTDKRVKEWVGNYPNNIYVYDPYKVEGDPEQTEKNLQANLN  
AEERVQYDLWTKTLLYNEQYFAFTGRSYLANYGVNGPRAPPMHYMWRADYFGQEHVWTR  
ETHFVTVPPEDKLGKIRQDLASERILKEEDPRILQEYRAVDEATQEPLQSMNMTLKVLSV  
APRVFEIKNFLSRAEVDHILQVAAGVTLAESTTGVDVSGDGDPSRRSNKETKVRTSRNSW  
VPRERSAVLDAIYRRAADLTRIDEALLRFRGPDEYPELETKQPLAETLQLVHYDPKQEYT  
AHHDFGYSNIRDQTQGARFATVLFYLNDDMTGGETAFPRYVNGKSFHELKVKPEAGKAVL  
FYDQLPDGNMDDFSQHAAKPVIQGEKWLINLWIWDPLYERG  
>comp16189\_c0\_seq1; 382 320 1142 LEN=1357; translated  
MKTLTPLL LLSIALLSASAFQQGPLPRPSSRLAPRSVVP TAQSPLFGSELSAQFASNS  
DESTTTSSTSATATASFLRTVRNRLRTATGFSFTVFRATLRGITGISLTTLYAGTLAATG  
LWIRKAMSTVLGLFPSGFRYFLQPFVLYYTPLILLR SAASPTTRKRAVKKHETVVEAYK  
EAVTLAEETEKSGYWPVVVSDDG YFELAKPPSVGESGGA AKMAEVAEAVQHAMEINSDE  
DKKNAQGAILQCDAVPQAGRS AVEICTKTSKKK  
>comp16190\_c0\_seq1; 223 570 1583 LEN=1988; translated  
MSNNKSPSWSGLETPGMMEAKCSLLIQEDGTFDPRIKILPKQRVLVYQDKGYNPETDSDN  
QNGDENFYVDFNGCTILQFEPSPGTIQRTPITLTVGGRCIFTPENFQDFNVMRTKEQS  
IEMNISPNGSFDWPDVQSLLMCP LCGKTAETPQEGDDYEHEYWLLFYPLLQITIMKGSQM  
TLGTRTICRLTCLCEMEDLLEDMTLNVCPAIEGRRPKLSFSLPAREVLNEAGSASFLED  
GPPRPETHPHVEDLLDAWTLYNLWEHSGAWALQNDYRIVLSRSMHSDNGGERNRNRSA  
AEPKPKDRNGKSCANPSCRKTHGELDPETGEKVKISVW  
>comp16191\_c0\_seq1; 210 1 995 LEN=995; translated  
XIDGAESSHFRIRRYQQGPSNNVPVTSEGTWVFLRIEVDLAPDEYCKSVGRGHGPPQK  
QIGALPLHTIPGLPQNDVCVATLERIHKEFLPIIKRRGFNVRSISELCCCGDLHCVVR  
GRKKGKCRMSNNVLGYNQTTFGRIKSHSIHLRLRRPIDHLLLPWEDVAGTMAHELHSHCV  
HQNHGPGFFKLMEEIIEHATI QIHGLSGPSFLR PANADAVRQRNERRPGETAGTNNISI  
AAGSMGFLPQTGGYRLGGRNLSGKSRLNEDTANGRKLGGVAGAGRSQHELRS LIANAA  
ESRKRQMLRMRMIERSQEPVIEILD DDDDD  
>comp16192\_c0\_seq1; 251 182 1069 LEN=1244; translated  
MTNNRNAYRTASQDAVHFLDRDAVVIHTSTLDGYGTITNTNTCLGGSLVSREEDIDLPIA  
TKSDLGLDLSGEIASCTTLAFGSRKRKGFTHIYKHFFFLTCLFGFGFAIVGFSRHQGLQT  
SSEAKLTGSLYIFNELFRGSFKRRPSTVSLERPPPRTSLLLVAEAQVTPCNPVNDIDR  
QLTAKGMQDAEGLGLYLKQHYIPEPDWIFTSPSERTAFTEL MRRHWASNKPVAFEDILY  
TLEFNDYFSFVTGLNDFHRIMIVGHNTAILNTAKKVMKTHGIEDFPDAGLLEIRW  
>comp16193\_c0\_seq1; 230 296 1039 LEN=1296; translated  
MTTLGVATLAYAALVAPMSTSAFMNPTCTAKKLSGPTATTLYMPLDQVSDFYQNFPLQS

AVLTCGVKASVADTIAQVKPQLEEQKNERQQQHEASLSTFSQREGGITQRAPRHASDDSL  
EEQSRHRFDFAKSVSSGNKQCIGWEATRNLAYVLYGGIFVGLMSHIEYNMIFPAIFGQEK  
TFEIVKEVCFDNLIVAPTMWLPAYFIKACVYSASSDEDSGPGGIFREGLEKYLADVRD  
NQLLQKYW

>comp16195\_c0\_seq1; 446 139 2259 LEN=2457; translated  
MGLGHRRALIGADRTSRLDEHQQRNPENSSRLTRRGAAGAGCAKMLLFTVTTILLCSVGN  
QMVVQQQPLYEYAYHNHNHNGDHQSNEQLGIGGGGSDGKDGAVVSRTATNDENKNKTEI  
EIEIKNEIKDEIENKANNKGGANNDKWKWFDGDLNAYYNSLETQIHDRDPSKIASYAVH  
RWMGPKGSTEEHYELIDRAVAQHATVTRKLVKVF DAGCGLGSALMFFEKRHPNWDMTGHTI  
SEEQHRFAETKLPKHNQVNLRSYDEIDAIDSNSGNGD SKTISYDVIYSIEALIHSPNVT  
HTMKEWVDHLEPGGIVVIDDFISDGVDKHHHDIQAFSKSWLANVLITPTELEELARNVL  
GLTVVENLDDLAEYEIVKRNHNKPKVVKPVADRNHQGWGSKWRQRLTVEGKLSYNMIV  
LKKDRERRSLRRLDDVVTMDGEMCASVPSIKMDGENEEQRQAFPITPQLMSGRGAGGDNK  
MACISGCYCYNKGLKWDHLDHAHRTDNXSVTESWTGTFXGHYIEVFAKHLNDHYGSYPAA  
SSSASSSTERGRFLDIGGTGSTASGMTKVTSKQHFAGPLEYWKLHSDPAAKDLERTLFC  
DSDDLTAETCGFDVTFHTVLEHAKQLWKSFGTIARITKRGGGLTMHLVPSYQYYATLD  
DNYRFCHKALVTVFEDRGFDVLEVGVDVCSKPDQTKNRIDEHYDVIW

>comp16196\_c0\_seq1; 336 1 1308 LEN=1409; translated  
XQQSTKMEQETCKQSSASTLDRREYRRRTRPGRTSTLLAATRSTTGKTPSSFRKQQIP  
SRPNHSDVSRPLVIPFVSPALPTDYLQMAPVVLARHLLYARGLWPMSVPLMLVQQQ  
EQQIENGLQIHAGNSVDTTTDGKRRRISKNNRVSPSLRRKQKQAMAHITRLCDNWYAF  
AHFKKNCSDEMYSRASPVRVKSRYLLISLGPSEYERSEELYLLDFDSIIDDRDSNCNDI  
EPKGLSHEKAERMEATLARKLISALMNQPGRGNEESVLQSLPKATSPSFRLYFTAGFKTP  
DSGVAPTADDVPATTERHAQSGCTSNALVQENDPPLGIHVNLXLFEIVDSAQEIPIIA  
TTLP I E V I F A G P I S R H D S V P E K S S A A T R E L Y R R E E N R G K A W Y Y A Y N F S T N A S R V E R I D L  
DVFLGVHQGVSIITNQ

>comp16197\_c0\_seq1; 343 1 1048 LEN=1267; translated  
HRAAQGGTTEVQYAVFYPPETDVRATIRTDIKVATNLPENQELFPALVPLAHFCLQYLRN  
NERRSNLQPSVPQRQTPEFPGATWQVPIHDGMGLRGAAREDRRFQDIERPAIGLPDKKLP  
MNLSTCACILAKASIKDKDGKEEDVVRPYTPISTNELVGCDFLLVKDYGESGVMNSHLCK  
TIAVGDSDVDFKHIEFNVLQAPFSQKKIIMMVGGTGITPMIQALHAILGGDNDNEVVMFY  
GSRTEDDLGRTLIDSWAKEYPDKLKVHVLSEVSSTDDWKGRIGYITKELVEDEAGSAF  
GPECGDDVIVFVCGPPMYSALCGPRGEDEIKGLLADMGYKKEQVYKF

>comp16198\_c0\_seq1; 468 58 1374 LEN=1885; translated  
MSNLSLLEAVPRLSLFVWVVISFALASIASADEWKPKIVMDESKSSLFEIAHEIEVNSPS  
FFPKPTYPLNDPDDVVVVVEPEIGKHRPDQDVVMAYAEGYTLDYMSFIETLRATGFDGDI  
VLATSEYGLLKNHVLEYLKSQENLVVYIHKLDCFEADAVTPSDRIMKRGTDFQMCLLN  
DVYGWKDKDGNVVKTAKDPRIGRVVATLRYEYWIWAQHYNPDSWIMLVDARDSLQFQTNP  
FEGLRHQNGLLYFFGENAEATRIGKSTKRNWIRRSYGEDTLAAMANKPTICSGSTMGE  
QIAIETYLKALVNEWDETDIKMTGADQGFHNYLYSGKLANSQNI TKLVVWEQKGIINN  
LGALRTPKFEWGFYNQETKQVYNWDGTLSPVVHQWDRDKDMHMYMRTVFPQWKKSF EK  
KMRKERINGRARTMSAIA

>comp16199\_c0\_seq1; 382 111 1103 LEN=1293; translated  
MPPFRAEKDDDFVDRLIFIPPIMSERDRDICDTDFSTATTLSASLKRKRIRKESPPSS  
SILDQFMSLVPCVARSDDNPFVVAIDDGIFNYLAIPKVPNPSSAISKVRNWNLCGQGCNK  
MDGYVVKEVFDGQEEGEEVAIVDFVDFVERSKLYNEDWCAKRNAYRAEHSKLYSTVMH  
DLLQYFRAIEEEAADIATVKANTERETVEEKKIEDRLKRQENSIVTGSKPLRIRKTIQYV  
LRAFNETMKNFSFKNCFNSNSTRCMPEQVLLLPKTTQPKKFSRQSTLGNFSTCVSFEQ  
LLPEVQNCDEINFSAENKLFNPKKTKRHFR

>comp16200\_c0\_seq1; 387 68 691 LEN=991; translated  
MKTAAVLTLLVGSAAAFAPQASRASTSLAAFESELGAQPPLGFWDPLNMLDGVQERFD  
RLRYVEIKHGRIAMLAVLGHHTAFGARVPGNIDYSGTSFASIKTGIAGLSDIPNAGLIQ  
LFGFIGFLELFIMKDKGAGEFFPGDLRNGMFTWKASPEEQMQRAIELNNGRAAMMGILGL  
MVHEELTGEPYIINALCGQPSNFNAGL

>comp16201\_c0\_seq1; 344 96 947 LEN=1507; translated  
MAQQALKGLGRLAGVASVGAFGINSYINVDGGQRAVMFDQLRGGILPDVSGEGTHFLIP  
VIQRPIIFDIRTKPREIPSVTGKDLQMVNIKLRVLRPTESELPQIYRELGTDFDERVL  
PSIGNEVLKSIVAQYNAVELLSKRAEVSERIRSEMSKRAKTFHLEFDDVAITHLTFGREF  
MTAIEAKQVASQEAERQQVWVKKAEQERQAMVTRAEGEAEEAATIIITQAMERTNGNIIIEVR  
RIDAAKEIAGKLANSRNVVYLPNTGGGGGGSGSNLLGLDAK

>comp16202\_c0\_seq1; 151 282 1420 LEN=1420; translated  
MKRCDKRQRTIQRTDGVTVGRNGQCKDPDEPACVATGENSESGMTSDEYADLKICEDKSN  
SAKRCDLAQRERCLHPTQDCTAHLHRRNDDNDADLTVCSDLVTTGVARCAASQAFFPCIDP  
TVTCTAAINPNFASLAI CNDKRDAGDTSRCDYRQVNP C IDPNSECPYADANLARRVTL SI  
CPEKVPRPNVNRCHTSNNPADGPDNRCIDPRQGFECTEASSGLSTEEFTNYMGTNPKFCE  
DLAHRDLRCKARQFRPCIDPSQDCWESNASTLSICTELTPTAGINRCSAQQAHPCIDPRS  
GQECTSALNPSFADLSICNDLKSQGGVTRCDLRQLVPCYDPLTECPYSVVAKDNPRRRTL  
PVCLDKAELRRNAIPCHNDX

>comp16203\_c0\_seq1; 212 1 1635 LEN=1686; translated  
KNTPVHQTHSDLETIYGANSLRLEHQNLFFSRNTNETVSKHRTTKPNPGATQHSKAKQST  
AQQANQPKASEMGKNSGRKKSHRKNHKKKKERPAARDPNFVSEAGPGCFIARRGGVGDQAQ  
EAPDWMIGWEDVDPADFVEDGEALEVPDIALDPEECTVSVCNLDAHTKVAVYVTFVETAVI  
GAHGRELTPGSTTDNDGKTLRCVTFVVLCPFFVFAHLGYLDLPEGRDLSVVI ESDVSEW  
RKHPDPSDEHPCLLGFPLGQAPGTTTASYLCTQGEDGELTHFFSGNLHAIDFRCPIGTEV  
LAVADGVVAEAGDENTLTGIAVTNLFWRNSILLEVGGDRSGGGPLLVEYVHLSRTLVRAG  
DRVAKGQVLGYSVGFSPPEHLHFSAFRSPDPGAPTVRVRFEGKSPGGAFLLPRAGEWYD  
AGGRAXPAPPSGVSKASPRQGRDTGGVRGRVWRWTAATTVRSVGGQGNARGERNGCVAFV  
PAGENRGRLAERNETTVDHRLPRARDNKTNGRMLQRCVCTTMSLWSSPPVPPWNTPGIDF  
LGLF

>comp16204\_c0\_seq1; 281 173 865 LEN=1105; translated  
MRKQRENKKGESGSKGARVVLPLHLGDGLDNWGN DAMESNSFN GSMIRSKKKKKMDAYT  
YFVLELQHAMKFGKSKSYSPESADALFRCQLDLEDGSTIDNGKECDETEKTANICQDEIS  
FVGTDDSDSSDDESCKVQTYHNIIGATKNGQDSASYFWRRRRYVLRRCVLTLLAILSVV  
LVTLLVFRFGGLNTSELASEQMNIINSVNITNVKLNTIWDVDNTDMGV

>comp16205\_c0\_seq1; 250 257 1420 LEN=2021; translated  
MATPKDYRKGFGERMFLYAVSEEEEDVNEEEPSSESCNYSPPSLFSSVPSFCRLGIFDFL  
ESEDLVSLTLVSKSFCADCQSSFLKSRIVPEYEISPRPYSKSAPPPLLSLLKHLLEHQSH  
ESGKFSRYPRVRVHKIDQFYGRGESRRNAKLHKKILAVVDKLTATDDRQHHWSTLDLSLK  
VPTELPSPVPLPLGLAAVFPGLREIDL TNIVFPTGTDFAKIFDRLPFLGKIVWNNRGLYL  
MGWHLPAARSKDGSTNPNYHLKELILDDSEFNARDIRWVRAVSDIGNSNND EASPSFFL  
FHSCCGEGLEGLSIRNARCYTGK SIGNDRNDSFLKNVRKRGFDPKIPQTALIKFVRNAPS  
TLKWFRSDLTTEHKVMLRAERPEIELL

>comp16206\_c0\_seq1; 299 84 1328 LEN=1397; translated  
MGTPPCDEDWFISNDETKNTSYSPFALESIGFAQTVDKAGKQLPLVLELIPPLLSENNE  
QMPVGARGWYASAVLSAMMMVACSRNSNGGREGESGEGVLPNDGSDSRDSSGSRGIDL MR  
EDLKRAFTHSNLKVAKTGRNDDNIFLELGS GTIGLSGMAMAWILAQLQKTSLLQEDISC  
SNNKVVLTDYDEMCLKQLERNAEGTRQALSRYFSESEFSNECGDGKENHNASANKNTSAN  
GNNRIAPDIDVAHLDWNEYDQDQSPVLWDKDNSSSGDGADESNQRGIVSFACGAALVYTE  
ATSSCANQVAKLLRLHPQC VVVVQWPRGGWFSVFQOELTSKRNERDGLQIRVEKFGPES  
SPELF SDEIQGLASTLMPESMQQEGRMDIKYLRAVRITNHKDTVLLSENTKIGG

>comp16207\_c0\_seq1; 301 41 715 LEN=822; translated  
MKVAGLILLAGVASTDAFSSFTGTRLA AVSTSSANTLSMKLHDWKRRTADESDINDVENY  
EFTLDSL RPAPGSRKKKTRKGRGISAGQGATCGFGMRGQKSRSGRPTRPGFEGGQQPLYR  
RLPKFTGRPMGPGHGHTKKEYNLIQLDALNGVAPGSTCNFESL FESKAVTKSKHSTHKVVVG  
REEFTAKDITVQAHAFTKSARAAIEGAGGKCELLKPSTGEVIAA

>comp16208\_c0\_seq1; 54 125 906 LEN=906; translated  
MFLRIHTLIGLIFFLGV SIVEANDDTVSDRRYLHQNDEDNYVADYYDENGFEETEGNREL  
RPYNYGYRPSLRQRNYNRYGMRQQYGYQAPKKMPNPKFGKTYKAGKSSKNTPKYKGQPV  
YKQVNRYPQRGSNSYLGQRWEPVPGEPMPFVKTGPIPI LIIDEQGTSGMSDQEIQDAIN  
NAEGAAFPLEPTDDPTRRPTHKPTKKPSPLPELPPAVPPVDRRADRHADPPVDRRKDQR  
ADPPVDRHETPPQGPQTSRLX

>comp16210\_c0\_seq1; 330 239 508 LEN=709; translated  
MFRLTMLLSVFLALLAALTMPQTAMARTV SMSSTRSALS VGTVMALSSFAVFAADSEDDD  
DDVYDDEDEDEDEDEDEDDDEIVEGEL

>comp16211\_c0\_seq1; 150 244 570 LEN=570; translated  
MDRGLSRTSNSVTNQEQTSDSDVNGQRKIHGFPSPSTSAIRSGVALNNFDEERNKLLTA  
SITFFDDPLAFAEARAFVKGQQTLD FANTNAALIRARQLIDE EKLQRTL

>comp16212\_c0\_seq1; 397 176 838 LEN=1041; translated  
MPSYSSSVIVLYSVIGFLQSPLVSRAFVTQTSPTSTRHAYMQVQPRVALSSSIS SAEGLS  
VASDDEDDDDDEY EYVEYDILREEEFLGSEWL VGTVM DNSGENIVETWCRLAVDKDGKNVA

IWGDNSEGNWNFDVANQFLSMSKNSILGKNIWAGVVDDYYFCRGSVIRGWNFFSPASVVGQ  
WQARRLGVEKDEAGVAPWFEQEEDEEDALPKSTEASEEL  
>comp16213\_c0\_seq1; 631 6 1865 LEN=2469; translated  
MTKDGEEVNRTRQSGGVKEQGGVPTRSIKDYGTMFSGSKREDLVHVAPDRSSIAGNPYQ  
QYQLARRNSAPRPGEQKDPKSGSVGTRKGRMFYKGGKSSSTINSKGVSKSPGQRPQEGKRYST  
SNGGSQRNIRTNNDNMPDVSUNETSNNGIEVSFPGIQSSGNALGALGNKINAMKVKPVISL  
KERIRERQRVYKNQFSTVVATSSNVTSTAANANNWRPKGHRIPLLGISAVNTAYADALQL  
LKDAPAVDERKAVQQEELSMLLETSSLQQDRMWLQGMNVSRSNAGSDSIGNKENVSGTW  
NTHKLLKDDATKKQPLSVSERSALQKQRGTSITIHFRNANTKEILVHNIIVGEQHSQAQITS  
LCKNDHSITTIMPANNRSESAAMNFQHANLLSATDSKSIDSGFYVSRDVGQSQIIGKLP  
NRLARRFQHDEGVTTDAAERPKVEDLMYLSLSTGSLGCYFAKFQSGECWWGSAAEDEDFQYV  
MQSWDVYRVAFGPIETIQVYQPEQHPSKNSGVRYKSLPSNSWIILSHDGRAVWKNLPSQ  
LSKILERRMANSAAPVEVSLGPGDSYFVRFLDGSIDYSLPSKIARACERIEERGTTITNV  
CLHPDISHDFIIRHTELTR  
>comp16215\_c0\_seq1; 139 119 406 LEN=729; translated  
MATRILPLELIDKAIGSKIWILMRGSKEVVGTLRGFDYVNLVLDLDATEYTPDPNDKSKF  
IKTVIDNEILLNGNQIAILVPGGNGPPADSLAAQS  
>comp16216\_c0\_seq1; 462 321 1250 LEN=1668; translated  
MSSSENNESTDFSKRAEQKWSRAANSYVRYFEPMTVTAGRFLLSLLKLRFREKPLRVLE  
AGCGAGGLARELLLDAGTSTSTLSVSELVLTDLSEGMLERAREALSGISYSKERAIRVSL  
RRADFMGFDPFAFPDGHFDYFNSLCLHYAEDPDAVITEAARVLESEGIAGFTVWGRKAD  
SPVMTIVPDIMERFQKTTAAKVEQLQQRPKRSSFHMGEDDHALRQRILAGGFSKCTIVHY  
PAVLES LDPADYAEAILDGAPSTKKELEEDYSPGDQQVIRRMVRERAEELLAGGEPLILD  
MAMVVAQK  
>comp16217\_c0\_seq1; 505 1 1177 LEN=1494; translated  
LLRTHDSEETGPDIRQNDSPHTEKLGVAASAI AATSGAAEPKSINNEEDGDGVCWDDQQ  
KCQEEATRKRKNSSLPDAEGGADYVDDEYDGEYDDDDGEEEEEDDENDEEAVDGEED  
DDDEEVVDGESEHEHDDFGDNDNDSDLPDEYRVYPEEGEEDVWVKHGGKGDLYQALDCP  
DYGYGESTFDDTSFENIHTVETWSTFNRIYNEVIAATKGDPELEQUESTIPPVFEKNGFQF  
PIEIKFDSVVGGRGVYALTDIPKGSLLYISTNNAFLNGQTYRNFLKALPSKLGCDVSIWA  
FVRWVSLESDETDEHMVCVDLDEGSFVNSADSDEAYNMALGNDEGTLYTEGTYEEQIMLW  
SGCKMKFWASRDIKKGEEIRADYGFVEMDGW  
>comp16218\_c0\_seq1; 41 1 514 LEN=813; translated  
XPTKRPTKRPTKNPTATPTKNPTATPTKNPTAPATAKPTTPVIINTLVNSANATVNVNDYN  
TVESVATFCVPGKNSKVQVIEKGGKVVTICIKNRAGSRINFLSGGTLVTSVVYFPTAICGT  
QRTIPAYNYCGFSGVQTDSDIPLPVPTTSPTVAPTASPTQTGFPSAPVTP  
>comp16219\_c0\_seq1; 240 1 1525 LEN=1559; translated  
XKSKPNGEQKGLTMFAQSQSQYMDLGPKNRIRHMDRNSEYRWPYRVAKHISDKVHGQVQ  
QMLGESRLRRRFENDIRLIQPDILTVDHILGSGAFSQQVSAVTTTRDGRRYACKHLQQKLM  
ERPQDFQLAAAELALEAHILSSFDHPNLIKIRGWTANGIASFESGKHNSFFLMLDLDET  
LDERIRRWREEEIHVLKSDSNSTAMIPNLILDDNVTPDQSFYHHHLFNHSDYPRRSALQD  
SCDTRSQTLYAEKIRIMTEIAEALDYIHAQGVIFRDLKQPONIGFSAETNAVQIFDFGLSR  
ELPSLDTSTPFSMSGKVGTLRYMAPEVAMNQPYNTSSDIYSWAI VSYELLTLEKPFDFGWT  
RDLHEDLVCKRGVRPDTSKTLHPISDDMKLILEKAWSPFPNSNRGTMSQIAVQLQCSLSRR  
MAYLAEQQEQQQCRFFEQQEQIPLSVETVAPMITPPSMTNGIYIDNMPLCILPNPSCG  
TRISRSMSFETIETINTSSLSVDSSYCY  
>comp16220\_c0\_seq1; 702 1 1747 LEN=2777; translated  
XPGVPDEDDIYDRPVDVNSIPRDRRTEPDEPEYGWQRSPAEQESPSYDWSKQKGVLP  
LPNRPQVTTPTDFFFQLTSLIAEPEPSVAHSAQPPSYDWSAEKKAAPFNRPVVTKPFETDEEF  
QLTPVSEKPLYDWSAERPSKLRSEKEEPEYNWSGARPEGPFDRPTVTTATENDDDLELA  
AIPDDDDVSEYEDEDEEKEPAITGVPMAAWTMLALGAVVGAGA AVGPTTSLPAASPNVPQF  
ALEPNPSTTTDAFFPDNNSLVPCTTDAICQIVSDGIGPYIPPGTAELFDIPGTCQTKSR  
DWLRTGEDVLEFTGERIRNRYAMTVFFCEQDGGEWLENDMWLSDLHECDWYNMIGLDP  
CNRVEQMEMVRIHGNGLQGLTLPSELSTIYEFTASDNLITGTFPGDFSSLNEIDLTVLSF  
NQFSGQVPDYFFDFEDMVYFDLGFNRFEGTLPQDIPDAMPDLQVIFAENNNFSGTIPSNL  
GTLNLRSLHLLDDNQLTGTIPSSLGNPPNLVSLLLHGNQLTGTIPDSLAVPDKLKAASFHY  
NSLEGKVSNAICEKMYQKQLQVISVDCQTVACECCVCGESGV  
>comp16221\_c0\_seq1; 562 49 1551 LEN=1889; translated  
MRFELAALALIAKGVSSDAKASVLDTS PNDQNRNHKNDGAELKSSEQTSSLPVFTHG  
NLKGLSSHTHISAKELRNLPNADRIVALSEDDSEEFKICSNEEIGILHAACSSPNE  
SCVP

LRRFVAGNPSTRLEHENERQEVGVCLPTSQNLNDSYYESISYDRNLQVLDLDCDSVCGSDRKKI  
YEDGEDFQSLIAQAQSEPDLINCWDTSEVTNMTRAFFDLKSFNSALECWDTSNVEAMNGM  
FGGATSFNMPIGNWDTSKVTNMEAMFYMANEFNQPLGDWDTGQVTSMYAMFALANKFNQP  
IKDWNVSNVYDMASMFVLLYGSYFNQKLDSDWVSSVYMQSMFSGANSFNQCLGTWGSK  
TPESVGT EYMLYGTACPLGDGPNPSVGPWCQGSQDECFDFEACVDDEEF SFSNKGQ EYK  
CTNMPGKFCCKKTVASNCP SKCSLACKCEDK KKYKIKGEGKFLCAEVEEDANPTCNDEIK  
PGLMVRDECPKACESCLLPQ

>comp16222\_c0\_seq1; 303 171 1315 LEN=1626; translated  
MNPYRLPLIVKALLGASFVANVRALASCTTCALGNLITDANPCNNLEDNVNGLFNTDL  
DCKNAQLEHYQKCCPLPLEDHCGYCADGFSTPNMELMVPTGQIVGGYACFDY YYPQS  
RIGMFTDGDSDTFLQRAGFYCGCPNQE QECWLCPDGPSPKPAKGDWVTKATCRGIEY  
LFSLFKEDECAAFPYEAGADLAIFCGCGGLNQTEIDAQAEIYQC NLCENGGVV TNPDPFY  
STEGDFVKTCQAEEFAREI IKTPSGCRNPRHFGEARQKCTCSEPLFDTSPGAPSDGLV  
DAVAAPIADWDGGDR TSLTNFVIIAGDDTIDGDIDGLVVRGEGKGI FRIHFNSRNAYTRRC  
SAITFCDDDQISQEAMPMDGY

>comp16223\_c0\_seq1; 249 373 660 LEN=811; translated  
MALKPMRPDNGADEEEKTK EENKPRSKARIDAELIAQQALDKANSTMELRNFL EERKTDY  
DRMEEMKRKLDSTMQELDEDMEARQKSIDARKDQ

>comp16224\_c0\_seq1; 247 1 558 LEN=783; translated  
KLIAIQATEKYPSAMSSFATKPAEELNRNMV KFLPELASDYATYPMHHRWYQPQEKGP  
GEPCKIKGGADATLKKDYAFCKRGNFGPGYSLMTKIAYVNLYNKLDLQPGTCGIACNA  
ADRKAMDEYDDVKRLMYGRHMAARPCDKTAEKRMMDESEGMANAAYAMDNP TPLVVGAA  
TKVVKL

>comp16225\_c0\_seq1; 747 86 1291 LEN=1425; translated  
MKFSALALTAATCIASASAEFFITENFNDDSWSSRWTVP TSWKPKGEMGAWKHTAGEYYG  
DADDKGIQTSEDARFYGLSAKLDKPFVSGDKPLVIQYSVKHEQNLDCCGAYIKLLPGGDN  
FDAKSFGGDTPYAVMFGPDI CGSNKRTHAILHDFEKDDNLLIKKDVGTETDDLTHLYTLI  
VSPDNTIEVHVDNKSVRK GALDDEFDFLLEKKIKDPDASKPTDWDVNAKMPDPDSKKPDD  
WDDQPEEIVDPDAKKPEDWDEDDGEWEP MIDNPDFQGEWKPKMIDNPDYK GKWEHPMI  
DNPDYKYND DMYKVC RDGCTHVGF EIWQVKTGTLFDDIIVTDSIEEAKEYAEKTF FFKKE  
GEKKMYDEQLEAKRAAAASEMPEDDDYMGDMGMGDLMGDEF

>comp16226\_c0\_seq1; 409 249 819 LEN=819; translated  
MNFSLAAATLLATASTASAFGTKQLAPT FVPDANAFAYGLPGAIEPVG NFDPLGFAEGKD  
FETMKQYREAE LQHGRVAMLGALGMLITEEPIEFHPLFEADNKDIGPAIRHLDEVRVSP  
GFFEILGIIIGALELNRALTGW TAPGDVFGSGRVFKEDYFTGDVGF DPLGLSPEDPDEWY  
ALHTKELQNGX

>comp16227\_c0\_seq1; 401 45 1361 LEN=1901; translated  
MSQAVELHLVPTPGAKPEFLCAIKPIPKDGNTNNHNPPRIWQSIVNSLNKVIVLEGYTRE  
SWATDMNGGTWSS FQVQSV DGRNKLPGFVKYLRERQKTCFGRFVMDDHKSNTDNTNTKQT  
TFVWVISYKQTS SSSLSCR VAPINSIPNCNL RQKTS SVTVPPGRNRPRNSEPTAKSKPKK  
KGFGLLGNLVGAQRRTNNQVVTAS IATAPKSKTKHSMTS VESHAESNDETPDHPTGGAN  
GNSANETQRDDSDLPLTTSAQVLSDFRREMEQKMLDFDISPEMSIKIFVRLADHTKKVRE  
VDKGISMEVLKYIYVEQAE EVNDDWIAQKEPGEFTDEITVAIYKDAESAPPEVIEEMNA  
AEIPEEMKAQQKMIEQKQRQQEINARRIQEALQRQALRKMAGGGEGKGP SLSVLNTEKRD  
LRTIEEIQQDSAKRRKME

>comp16228\_c0\_seq1; 362 23 640 LEN=845; translated  
MGAYKMEELWRHKQSDALRFLMRVRAWEYRQRPNIYTCNNP TRTDKAHRLGYKAKQGYV  
IVRAGVRRGGRKRQNRHGMVFGKPKHQGINHLKFERNLQSV AEEKAGRRYSNLRVLNSYW  
VNQDATMKY YEVILIDPSHQKIRNDPRINWIVNPNVHKHREMRGLTSAGRKGRGIRKSGHR  
ANGRKGGSWKAAWLRRNQKLLKFR

>comp16229\_c0\_seq1; 183 20 763 LEN=1557; translated  
MKRTIRAFDSRRTPFGFI CAWKHCDVGRSYSLIASQRIPINTSLEKSGCGNSNTYRGCFP  
DDSPHSRTKALLTRNFGSSDRPDPFARRPTSKCDPYGQDGKPLTLDEAKTLLPTVEPEWE  
ILLLAGGSNDEQMGNTVETHSGVAKDCDDNASVPFGIARNFWHDDYMSGAQFLNHVAAV  
AQINAQHYPYKVVFDRLKLSRTKSWKICTRVVCRTHVLQGLSHHDFYLATLIDIEIQRPE  
VKNLVIQ

>comp16231\_c0\_seq1; 325 470 1523 LEN=1748; translated  
MLSTS YTTICVFILA EKETANKIDAIFHYQKESPSFSDRTLARSKLLPSLTSENAFAKAT  
NAALFPWESWESDKECDFPHGCPSETGNSNDMVREQHFE GDRASTQKCF AHRRLMILAR  
NATIEGEGHRHIVHFQNNPKRHSTITNPKDGV DSETIFRQLNVLKKG YWKHLPREEGY



REGIQGAYEDESTINRQILSRKEDDKENFRRRNHPNAYIPHSVEDEFPRHSSDEDEDEFEE  
DLVNYASMTLIGFVFNQDGNVSGICVHEVTEEGWICSLKKNYNTYDNRYEDQNLASDR  
HRAHLLLRPLPSKVAALGRQGMCIQIGLTRNNNGVLEPYNRCITIVNIGF  
>comp16232\_c0\_seq1; 531 328 1275 LEN=1275; translated  
MDDMGAMAAIGGTDIRKVMKSQGP I VSAVILRCP P P SSVNGNEDEIEDSKPAAVGDSKEN  
EEGDNEAKTDASETSTQRMILRDLIEELRIDTTPSKSKVAEILGGSFTFLGQYEEEGIVL  
MVRNLPDDLESDLKAIYENSEEENDDTGCFSFSEQLSKNFNVQALKALCFQRDIDTEHMK  
EKNELVQALVNYQKLLPSFNTHQLQPPLHKARVRGDIVVMKVAETADELDSENGDDIEQK  
TEISIENTEAASKKDAIEVPSNDEFFLDYSKEAFIKFASRTDIPHEVELQELGGESEEA  
VNGVDDGDND D D D D D D D D  
>comp16234\_c0\_seq1; 457 68 1675 LEN=1805; translated  
MVVSTSALTSASTRCFWETSEVVDGSKKKRSNQRSKAAVFLHRKRVALSWATAMATMPA  
IFSPWHGPFSAEAFASPGQRTQQRSGTTRRAANKTEMERVGTVHGKDVSELYPENFSET  
MLRNVFGFGNHPQWKERVYTDANGIVRPPLDSMTGRVVITGASSGLGLETAKRLAMAG  
ATVVLTARTADRVRFAVNAVRYDCRGRGNNGNNERKNMDPVVRGIELDLDLSSVRSFPDR  
YKDCLLSLSKITDRAADAKAKMKRAKEGRKSIPPPSGTKPIDVLVNNAGAGGFPSRELT  
V DGFERTFQSCYLGHFLLTASLFGEGLLKENDGEGEGCCTVINVSSLAHRGARASHGEGSE  
DAAFGFDFENIQSEIAYTDDVYSQSKLANIMFTKELDRRASGRLRSVSLHPGIIASDMWR  
CLDSFGYDTRSNERLRNGERLGEQPAGMGWMERV I I S P F Y F S V M T P V E Q G A N C H V Y L A Y  
AAATDFDGESVQSGQHYGEFGTPEPTLDFASDEDSLRLWEVSEELAGIRFDPS  
>comp16235\_c0\_seq1; 477 1 1701 LEN=1881; translated  
NELVTTREETYDWGQWDVPSDLVGDQRGNEPKILWGIASAFGSDMERRRREVMRKSYSLSF  
YKNNVHLVDNPDRI CSLIDVMEKKVEFDKQMVYTFMGGNPDGEEEMMLGTDSQSSDYL  
ADTSTIPDAERDSTYLNIKENQFGGKMSWFAYASSI INEGLAFDYVVKADSDTLLYPTK  
FLKVVRKLPANPVRIYSGVSVSRLHCGFRKDEHCSK MIDKYMGGAEEILSADLVHVA  
SLSYERRRELEITDHEDISIGNFVLSHPDHVTPIELGYPGKLVNRKPLLLPWVWSHDKKT  
KQPGKWSRLWNYEKDERWRNSSSDNIMIVAASKKCSQLVDK VIRP S C T K V G K S K V E H C V  
MNGFGDKSELHISKLATNTSSFSSTETVGDVTSETWNQRMVVTVQNPINELLTDWLDGL  
SPSNNAEIVVNTSRNRKALLQVKSSESIEFVVRAEHIWDDILFLEEILGNPNARNIEATE  
WPSLSDPAVAIKMNAIEGKLVSLQMCALHGEIRAYNELLLLKGNLEAPESKLQESLSDST  
YRSCGVQSSHELEDKCRASKTSFAQE  
>comp16236\_c0\_seq1; 303 1 1471 LEN=1596; translated  
XPCFWLDTVLDRSFTENPPTYRTAASSVRTSSNRNRNQRTRTGDPGWGSSRDQPRRQTMRV  
SSRGLALWCALAPALLAAAAGDEAPRTEPSFRRLWASKLATAGLSPPGGGFLRALSGDPP  
ASSFAVEFGPGADWSCTTPTETGGGYQACAKAGCSWCPLGSSSGVCLRTAQADLVNANAGA  
NGHDELLHLRCYASDSDSETEAESEGEPPVFDASDAAFWDGAASCLPKGEEGCGGDDSC  
WCTVDEPSLGFCLSRSLWDLNVAQALEDLSEEDQIPLDGVVHCRFPQSTGTGDGD  
DSTSTPGAGAIHPGLFDRGCLWNAIESDRDEVDCADRGLCVVQANPFPGLLGTGAGNY  
CVSAAQHGGDEVVDRGPPGRGMGGRGEPLSVRARQSVARDGKGRSLENRSAAEAVVGGVG  
GVVVFVFGGAVCKPIFEPVVRSANCSADLQWCDEVNVDGWSRELLELVHVLVETGLVV  
ATEWNFEFLL  
>comp16237\_c0\_seq1; 183 109 797 LEN=1568; translated  
MPQGEIAIENLKELFRC SKLKNGLVSEAEIKPAFHAVYDEELKVEFNGEFMSFXMVGL  
PVQRDAQERQLDAVLCRAARFVRLRLADGAVGGWPGPSRPLALDRLGKPEDIEDNQDAF  
LSGAMARYLFNFKHNAIPVATSAEDDTSEPYCTDHKKSSSTRGVNRS SSIYQYEDDES  
VFLPFRSIRSSIRRVSTTSSITIGSYNNSPXAAEHFQQQQQREKGGKKE  
>comp16238\_c0\_seq1; 508 232 1269 LEN=1437; translated  
MSEDWSEGASDPNKWTSSSRSNSKNNDGIGDDGDWATPIDGTAWSTFESIDDEEGDCSAL  
SDSRNDDGNDFLVDDSEAWLDTLQAI SAEIEFNQRDNERA EKALQMKEWGFDDTTIANT  
FGVAVDDSREKVDEPSGLAEYRKG I YDELGAEYDEENDSIESHTRVEIDPDTGEP IRQQM  
VYVDEHACIGCTNCATIAQSTFFMESGFRARVYQQWGD TDET VATAIETCPVDCIHYVP  
YEELVTLEKDRRGQKINNQARLVNQGESAHMASTGSSSQFTAPQTI SGNASARCSNCPTR  
GCKTCPMFVGVGNPEYERREALRKANQORRRLERQRADESKSADL  
>comp16239\_c0\_seq1; 487 1 1035 LEN=1526; translated  
XSLGKALLHSESNLKLFDRAVPSTFDXI IVMVSLRLLAWVLLLPAASAFLPTHSTIANTA  
QLKLSIGTTSASSPSLDQFFLVSDVSLDPEAVAAAAATAGVPNPSSLFNSNVGELVQNI  
ALGITAI AFLLAGLTYIAAAVLVPAGAQQLEVECTAI IPDTWNEYLAKLEDGQEMKDRPD  
LMFELGLLLKCKADRLEQVCKGARLAPDLWDKYQDMLAPDQELQDRPELIAALNADVGA  
RAAQVLKENTGVC PAAKWEAYEQKASADGGNGLAERPDLLELAVELGFSDLLAAVAAC  
LLGSSGDANIVDVEVVGDAREDATTISGITEIRKDNQWDEDDE

>comp16241\_c0\_seq1; 437 36 686 LEN=880; translated  
MKLAI FTTLAASAAAFAPAKQSRVSTAIAGDARSPDGLGVDPGPLDLFDPLGLAEDTDSF  
ARRRAVEIKHGRIAMAAFIGMMVQELGVTFFPGSMDLNGDVPFSSILDNGMGFPALAAIIPP  
FGLAQIVLFGGIAETIAMPAGQYTGGPQDLPGGYDGSAGTIPGGYPGQIEDPEARDRALN  
VEIQNGRAAMLGVTGCMVHSCLDSCDHHFFYPITHN

>comp16242\_c0\_seq1; 331 149 1072 LEN=1166; translated  
MERYQKIAKIGEGTYGIVYKAKDRVTGEIIALKKIRLEAEDEGIPSTAIRESISLLKELQH  
PNIVRLYDVVHTERKLTLVFEFLDQDLKKYLDVCDSSGLGLPILKSFLYQLLTGVAYCHHH  
RVLHRDLKPPNLLINREGQLKLADFGLARAFGIPVRSYTHEVVTLWYRAPDVLGSRKYS  
TPVDIWSVGCIFAEMANGRPLVAGTSEEDQLDRIFRLLGTPKPKQRDFPGIVELPEYSPES  
FPYP PPRGGLASLVPTLDASGVLLNCLQYDPARRITAQAALQHPFFADMKPDGGSKS  
ARAVGGM

>comp16243\_c0\_seq1; 190 1 1335 LEN=1627; translated  
XLNEGNVLIYILLMIREIEINHTIPLLEEQVTPLLCQGDKITKDIAVALLKNKPKDKQQCD  
GLVYKGDQMPSGIENNGWNTVIRRP TPEAETDKAVWAYKIKTTKNEEGDILIQYLPEA  
NKDADTIRSQALEELKMGNDGTRPWRGKIDHMLTSTLIRGTICKATLGKHMKKHKQSN  
GLWSTSDPGSPRFLMARLSLLEDPTVPIRLEPATEWEKGDYRGAKTFAIFLSKDTNTPG  
LAYLLFP SHGLAIEISQTVVVSWDASLLPHCVTTVENGVLFDNPKIDNDRFRKWFINKVF  
SSKGRSKGIQPG EAVMRERTQRLIELGATESLVGRPTGKKHMTYWEAAVVS LRKASVPG  
RNNEVKIAYRGELGQVVGAYVWSDFDVVKMERMDLRVLLDRENARKSKSKASIQHRKKRA  
KIEEAVGKQQYKSNVSCDYENYTL

>comp16244\_c0\_seq1; 267 152 1084 LEN=2021; translated  
MAGAAESSGKPRDTEPEPSLPTPD TATGASLSLTLSGIRDRAAASFESI AKATLVVSAVL  
FVADPLPPYTRLAALVSCFSVLKLSAAHKQLLIRRQH EEEQAGLEFVADGTTETEAEQQX  
STGEAAQGPISSEKILFRSRTNQG FYLLRGIALQAQLVGAQKPV AEPGMAPRTRTRQR  
VGRRKWMRDQHQRLSDET V LALTKSGEEPEPP PAAAAGADRPRDGGAWHSRNT E VPRGG  
GGKGPAGDNRGTHPDPREPHLQHPPGCLCFL LKQSRGRNF FLPPSMVAPGDHDGDDTANY  
CVQASDQRAK

>comp16246\_c0\_seq1; 679 532 1908 LEN=2713; translated  
MSSVTNSSVLPTKEEAFWALEQAKERDMVGPEDTALIFHSWTTHRKY LTHLMEVFGDHPN  
ALHAI AVKTNPHPAILRQLVAWGFGL ECASMEEVY LAMNAGCPGEKIVFDS PVKTKHEIR  
ICHENPQLHGILLNVNSLEELERIPENPNFVVGLRINPLVD TGTPEIFQVSGNESKFGTP  
ICSKEDIMDAIAKY PVTQLHVHSGTAMEDLQVAVGAIQSVVEFGVEANAMLEAKGIDRRI  
VGVDIGGGLRPEILGDENSDY GADLSRMQYYVNLKKAAPALFDEMKL VTEFGQWSYFYS  
GYAYSQIEYTLQREQTRVAYIHLGADMFLRDIYTGKNRGMDFLPVGEAAHRPQELTDIAG  
PLCFAGDYLQQHVMMPRFEEGDEILMLNTGSNAFGLWSRHC SRTPVQVIGVDRQSETLTV  
MSPRRNPHLEESYNGLLLPWEAPEDELEDEEEDAVVAAL

>comp16247\_c0\_seq1; 385 76 924 LEN=1142; translated  
MAKDNWFRQIAAEFLATTLFVWCGTGA AVSSNRWSEAGTNDPAALITIAIAFGFAISVLA  
YGIGHISGGHINPAVTLAFVALGEQSIVSGLLYMIAQFAGAFMGSLILWGCTFSLTDICE  
TVDSMVSVC RNSVSPDGSGPPFGLGLNSVGP RVNTGAAFLLEIVGTYLLVITVMNSAV  
HKKSGAGNAAP IAIGWSVMLAHIVLIPYTGCGINPARSF GPMMVDSIGGLAGKVWVRGWW  
VYYTAPFVGSLLAAFTYKFI FEEPEEKAEEPE SKKDEENVDA

>comp16249\_c0\_seq1; 154 125 526 LEN=896; translated  
MGDLVGSRKSTNSRLPPEVNRILYVRNL PFTMTAEELYGIFGKYGAVYQIRMGEKHKDTR  
GTAFVIYEDIYAKAAVDHLSGFNVAGRYLVVLYYQPAKFQRRAEAE EKQKELEELRRRV  
QKKKAQMAARGEN

>comp16250\_c0\_seq1; 463 205 1643 LEN=2253; translated  
MVMVAPITIERXGYIAGLH SYKPHPGTGEEDPEFSSFETAWKAIQSVPEALLNDFEDELW  
ETQSRRFVYGTKT VSVIDAVESSSSMPFDR LQDNANGTNASTKCLDKQRVFRYLVINER  
PNLIQTAVEV PFGAPYRHYDPSATNEIAGIFDGTSA AATNAQNLVPRPPSPISQTHLG  
GLAMVLPFWRRANS GTAFEDTYWKEADRLGEEAVD GWNDSPNCVLI GAGGCSLAHTMAAD  
LRSRSPSPNAGQRPLLTAVEACEPIVRVSELYFGAGDEQGGGCEASSFKGSLAGPPSP  
FDLVCDTGQSYL KSLVGSTKEEDPRPLIDVLVIDAEDGSAPPESMRTPKFWSEAVLPALG  
VATLSPSHGGGPVGVNAIGTDAETTRLVDTMRAALACPGSGSHYCVIAVSPPEAGVSD  
RHKL V FALPCTNRAEAPTHGPHHDLFRLLPTEDELRCVDVPTAWAQVRIAFEECAGI

>comp16251\_c0\_seq1; 238 656 1318 LEN=1936; translated  
MDILLEWDTTGN AQWDRHVQPGITKRLTPGEIGCALSHASLWRELATGKPNRHPEEGNEL  
TGTATGSL LSTPLLPMLIFEDDAEFLASSPNAQQGKHYSK SADRFLFAFRLARRQLPTD  
SWDV FYLGFSDRGERRDVLRS GAPQRREAGAGWQGAGEEDIVVELFRPTYGFHHCYAIT

QAAAQRLQLQNLPIVGPVDVWLADNEWFGLDVYCAVVANEGW  
>comp16252\_c0\_seq1; 156 172 525 LEN=863; translated  
MELHSLYHAADETDVRSVQSNHSQKSAVVDSMVGASKNCSSWVVGCGMCTDYMDKQVQY  
EIMAQRQFQETANNLKPTGTFDIQKAMASCHSNFDDIKATAARMFDEDSVVESIDLRQ  
>comp16253\_c0\_seq1; 219 135 535 LEN=649; translated  
MPLVLDEYEDDDWDELPAEIQKLCGEGIGYTQKLWDKDKDPECFDKDWEELTPTEQEAAAK  
LGYTPETWDEEXVRRPFARKDSVGSSEWIPPHGHLEGSEAAGFSRKALDATRRNAETIEG  
ATKHPWRGSLEYR  
>comp16254\_c0\_seq1; 428 59 1273 LEN=1511; translated  
MDNRPSLETSYVGGGYLNDSGRHHGAYPPDPSAYSQLTATRRDEEEEEEDPDAPIIIRV  
VAPATLPEGYTIDVLYNNEPHTVDIPRGGVREGEFFETVIDPKRKYREQHSTRRMTQMDQ  
LAEEEEDTFSRRSNAYSRSDESQRDQRRDSQRSNSVQQRHTSKLHSAKLYNDDGVSFTND  
TMNKTKDIEQSSTFPASLSGDEETMMEKTHIQNKQLAIVENKGDAAEGENKDKVWYDKNG  
TPHGKWRTRLFSCCDVLTQSTFWMGLICAPVLMQQLITRMGLTWNREGPPEETSLSYNR  
IVLGLVLMVSVYWIPIVFGTICVSIYYLVVVVVYVGSQVRRFMQKYSIPSTLPTRCGNRID  
DACMMFWCGCCSSIQMARHTHDDKDYPGHACTTTGLEFNAPSVV  
>comp16256\_c0\_seq1; 851 103 1806 LEN=1830; translated  
MTDTVALSVKWKETIALDFIVAGGVKGLKTELEEKTRVPADRMKLMASKGLWKGVKLD  
DFDFSTIDFATALSKAKGGPLNLLLMSGASELTGPKTKTVFLEDLPPEEVAKVAEPSGLE  
NLGNTCYLNSVVQCLRAVPQLRRGLESSTTTPTSAPTMLFSSLRDITYQLDRTATAVAPS  
TLVRVTKMAFPEFNRTGANGAPMQQDAEEFFSGLLTIAAGILKDDNQIKAALPFSTPQEL  
NGADNLIDALFGLKMEETLTCEDEFDDKASGDKDDKMQDDQVKEI STSAMVEPPVKS  
LHRKLVLCNIQGGSDGNAQTNVSHLAEGIALSLNGSIEKRSVAVLGRDAVWTRKQRIARLPP  
ILTVQFGRFYWKATPDSQDHAGVKCKVMKPVAFNSIFDIYDFCTDEVKKELKKS  
SRDKSLK  
EEEDRINRKLKGEDVDADTKMDVDEAGEDDEEAAAALKAALAMSMQEDGKPAVGPGLPA  
EFHGHYELFAVVTHKGRDADGGHYMAWVKAASNSGKVEK IADTEENEDWVVFDDDEVSP  
CKTEDVLKLLKGGGDWHMSYLNIFYRAKK  
>comp16258\_c0\_seq1; 501 2153 3256 LEN=3338; translated  
MSDSSHAFASSSSSSIVGVGHGVERNPNWSRLYNSASVTDAASTNNSAVDGDENVKTSEV  
LSLDSIRASLIRQEETIIFALIERAQFRNKVVYEPGASGLDSIVNSNDESFLYMLTET  
EKLHSGLRRYKSPEEHAFYPEKLRSDCSQFLKQDLEYDSGLLSDIGDASKVNFNEILLKK  
YIDEVVP SICAKGDDEQHGSCVLNDIAVLQALSKRVHYGKFVAESKYLADPEGYQALVDA  
NDAEGVMKLLTNEAVELKVLRRARLKAATYGTPEPLADLPPPLYGEEKTTSSIVAAAAASA  
VVAALEAMS DVAEEEA TNKVCPTTVEAIYRDLIIPLTKDIEVAYLFRRCGREPPPEFAPH  
RMSTDSP  
>comp16259\_c0\_seq1; 472 1 1486 LEN=1800; translated  
XQQQH HHHQPAPQIELELELQHKKNQPCHEILASSSFSSSRSSLTNHELHPDADD SREVI  
LQNCCKGERLEHFLALLMETNSALTVRYDKQQTMPVHLARGLLRGAQDCS QSSHKG DGED  
DDDDDENNFCLRSIALKGTITPLAANYLQMTLPLLPHEELTLQGNF ILSDLDK KSS  
IVGNSYSKMVRVVESLHTALQSLPRLKHLDLQRCHLPDEF LADILEAVDPES IETLKLNG  
NMAHSESQHVLG LLLSDGRCLRLHLDLSWQRLPNAKRNRSVLDVGR LAAVLVDQNTSLAT  
LELSENILLDEDFDLATVLSHPGLSRVSLQDCHIGDRGMVALAHHLARCKENLKNVYL  
DGKQGV RDTKLVRKTFEFESLLRN VYLRRELALPGTVQNESTDWALELN RAGRALLQPDER  
DCSDPAIECKLHASPSFDSQGTGTHNIPDGLWPRVLERADRIARREYLSEDDSAEMKAASA  
VYLLREKGYHAALG  
>comp16260\_c0\_seq1; 278 1 409 LEN=634; translated  
XQQQQQQQPSDKEQEFKSDNDNGDGDVIGCRSLSYDDS QGSSLPEDGDEK HQRCDE  
SDDPKTLCGNACGKKDPAALVDGSGVVVGTGEEQPHDDASINDVFVDFLCRTGSI IEL  
NAFMDETIGAEADAGP  
>comp16261\_c0\_seq1; 480 116 1495 LEN=1736; translated  
MGGDND SVISSKARRKRRNKQQRHEQRFANYLVFGFTSTVCMGLFALCYMIVLLILWPL  
LQASTPTTEMPDET PRDYIHHMHMPPSLKEIASVPVKDKIGEVTSKLRKNLAKFRQGRGVT  
DANLLDQAVKKYESIVKERQSEKQRESARDTASKNKNAENS AVVAGTHRNGFVVLGMHRS  
GTSMLAGLLHRSAGYTVGGPLIGSADNEMGFFERIDVVLQND EFMNNQNIWWDANVAHY  
DWEKALEDKENGSI TFKEGARGLAFLNDPGNAPWLQKDRMCITLKTWLKLMNNEPAVMF  
TYRHPVEVAMSINKRDN SIAVDTGLRLWI IYNMRAIQNSRGLCIVRSSNDAILADPLTEV  
QRI SDELNTKCGVPAPARRITQEEVEKF INPKLQHNNKKKKASKNVLETYNDGKCVVNAW  
ESKHEVGSEVYERELRLYRQAMKVYCDFQSGVAYEEDYT W  
>comp16262\_c0\_seq1; 608 68 1483 LEN=1682; translated  
MKFSINILTQVLCVIGSLSHASEAQKLRDDVHFLMYETD GALGGQHNSPLHFFTERS KVA

NVKATVYGNLDLEYRFGDKYQTLRPILEIVDDDTLIIILADARDVALNVPEDEDLAVAAVD  
HFIIQSFKRLTERSPNAVVLVSAEAQCCVSAMSHASPRDYFDPVTGKRNRACSSGLEAKCR  
WSENRNIEHWVSMHQRRFKETGLQGHGDVYLNAGLMAGYPRDLINLMDIMDIAPYEDDQ  
AVLTGLMYRYPEAIVLDYQEMFGNSQWTRGVPDVCVFEQGGSHAPLTHIDTHTQPLLIH  
TPGKLYACLDMIIESLGGSSQQRVYHSTHRKLLTGRLSLAAQLGFGGAGGAASYSDKVDNE  
EINEEVDEIVEETETETIEELGNYGYGTANYEQYGFQSDSNYQYGVASEDNYQYGIASD  
ANYQYGVASEANYQYGIATEANYGVVSEANYGSDARRVRRRRTSLVRGA  
>comp16263\_c0\_seq1; 659 107 1420 LEN=1610; translated  
MFSPMAMKFLTRSNNTAAAFFRRKFHGSGLPCWQKLNVEGLAKKVDLEGKNVLRVVDLNV  
LAKDDVTVTDDTRLRAIVPTTKFLLDKGANVVLMSHFGRPKGEI IETGKNRNLNPNVVKPL  
EELLGTPVQKIDTVIGAEAEAAASNLGKGEVLLLENTRFDIGETKNDKTLAEGMGKMADY  
FVMDAFGTAHRAHSSTAGVTEFMEESAAGFLLDKELKYLQGAVDAPVKPMMMAIVGGAKVS  
TKIPVIESLLEKCDTILVGGMIFTFYRALGYETGGSLVEEDI IDLAASLLKKAEEKGVK  
IVLPTDVVVADKFDNDANSAIAKVNEMSGDWMGLDIGPESIALFKEEIEKCNITIVWNGPM  
GVFEMSNFAEGTNSVAQMLAEATERGAIITIVGGDSVAAINQAGLGDKVSHISTGGGASL  
ELLEKGTLPGVAALSDV  
>comp16264\_c0\_seq1; 412 123 1229 LEN=1354; translated  
MNSSLVVASSVARRLRRASSTSILTGWGTAASTAVASLSTFGNASLTRSSGNDTIGSNHH  
ANADVAAAPCAVQRRFMGSGGGTRGARGHGWWVNYRAGKGGRHLLQGTYSHLDLSEMEKWN  
DAVFQLGRQLAYLDVKVEALVDEDNDSGEDQNEQSQQQQQVHRLTLELASEALPLATDN  
VVKLLQSSNLGENDGSEESPGYLSSTLHRIEKGVGILGGLVTDNPNHNPNNMNAPLTKRR  
MGRCHPDHRMRTSHTAMDVSSEKLVNLHLPVITMLQPRIGEIDSRFLILSHNAPHLDGV  
SVAVGRLVDSLEIVQEWESSLITSHGVPTNMVLRVVGCGLLEDGDSKATASKNSSSSNGTE  
ARAQQESM  
>comp16265\_c0\_seq1; 250 139 450 LEN=450; minus strand; translated  
MIYLK GKDLFEVCLLPILTDLVEVFDWLSVSLLLLLQLLSEVFLSLLLSIPEVEDNLA  
DDDDKDNIDIWDLALFRFLTSETFLSSVDIDADVDAAEFDVDVDV  
>comp16266\_c0\_seq1; 231 273 791 LEN=1144; translated  
MSTVEGLKPFLLLGGYNAELWWTNFILPTWLLMAMAPRWKHMPTLTIVSPIFHAAIYS  
LSIISVMLDMDLNDENAPDATSLLGVVTLFKNPNVTFAGWVHYLVFDALVGRWIVLDSIE  
RGCSIWHILAIVPSLFLTLMCGPVGWLLYVGVIRTFLLPVKENAATRAKTA  
>comp16267\_c0\_seq1; 454 1 1310 LEN=1433; translated  
XDDDDDDKYADYYDEYNEYDEYDENYGVVALESRNAKDANVLKSEVKWLRNKFHNGVVF  
GKVPRADISSGKGGEAAIISRLRAREDPDRGIDMSNFAGLILRVVSDGNRYEAFVRTGL  
YESDGI EYVYEFGTDSKMPTTENKSKSRFKTVRLAFENFKPVQQRKSSSSEGDSDDEED  
DWTVQPFVGNVQYIGFRFRSSSNMHEEDET SNRMNLSLDRLGKNNNSQRFSMALAYIK  
VYRSQPEPEFIYLSDARIPPVSDGMVHHRKMLLTSHNEMSDERN SNEPLSSSSSEKDAT  
KASVNTL FDEKDLQRRSKLERSPEETYFKYRGEELVKSGLSYTIVRVAGFNELSTSEAS  
TIDLIGTSARSDSKENTEIVPVSRAEVAQVCVSALLDPSALNKIVYMTKKKVVGKNVLD  
EDISAKFEGIPSDIVL  
>comp16268\_c0\_seq1; 759 1 1618 LEN=1731; translated  
TTIDIAIDITSTIAIAI AIPVAIVASIPTNAPGTHTLNGTSAIDNKQSLKNSKAELRNKQ  
QQQQQHTMPEPTEMEIDSEVVHEAVMHDSSVLPEDDEEDIEDLLDLVDNAKVESNDTIALL  
KQVTE SPKTGPKATQTKERAVYDLTRAFCKQKNYSEVVAFLEASSFFRSV NKAKCAKVVR  
QVLDIVCGLAPEEYDMQREICEKVVLWCRREKRTFLRQRVEAKLAGILFHQNVFAEALLL  
IDELLGELKKIDDKQLLVETHLMECKIHFGLRNVPKAKSALTASRTAANA IYVAPNLQSE  
IDTMSGTIQTEEGDYNTAHSYFLEAFEQLDQMNEKPQATKSLKYMMLCRILD SLTKTLKL  
SAKGAIGVDKTGAASGLDISNLVTSKQAVKYAGRDL EAMQSI AKAASDRSLRGFEKVLAE  
YDAELQSDLLIKHHLKILQEQLLESNLIRIMEPYSCVELTHIASLMDLPLPQVERKLSQM  
ILDGK FQGI LDQKGQLI IYEEGEKDKAMEKGLEVLEHMDEVVTTL FERSKALRTLML  
>comp16269\_c0\_seq1; 736 211 1818 LEN=1845; translated  
MLALLSRQSLAWTLTKHCGGPGSRTLAASSVSSRMLTSL SADATATPAESPATADRISRQ  
DLSLDIRTIVSDTDMVL SHMKSRRASDEALEAVNTIASLQSKRVALIQERDNFLNQRKEA  
SAQVQQLMRKLN SKNDEDVDKEAAAAEVDKQKEL SATAAEGAQKADEELESIQKVMDDML  
AGIPNLLDDKVPDGD DENENEVSEWGDVEALPKKLEWTEDFEPKWHDDVAMGLNGYQSE  
AAVKMSGTRFVALSGPIARLERALAMFFLDLHTGKHGYTEVSVPIYVGRSALEGTSQLPK  
FQEDLFAITPESHTCNGEDAF LIPTAEVPVTNLHADTILEEKDLPLSYVAWTPCFRAEAG  
SSGRDTKGLIRTHQFQKVELVKIT TADKSDEEHLLTSHA EACLQALELPYRKVRLCSGD  
IGFSARHCYDLEVWLP GAAEYREISSCSNTGDFQARRMAMRYRPEPPPAPAGEEGK KKKK  
PKMKPELCHTINGSLAVGRTLVAILENYQQPDG SVLVPEVLRPYMGGAEILKA

>comp16270\_c0\_seq1; 173 355 861 LEN=942; minus strand; translated  
MVPRCSPSLALPPPIPKNPFPPFRKEALNRTAIVPAVGLPNPSTFSTLFSVPSSVLAEEES  
FLRAETTLMLAMLASASPTGSLAAPNIERDVLLALFGLGFDGSGSGVEKADTDPTDAVPKV  
NTRPVTSTAQTAPNHRASEATEEALFLLAAVCVFPPESGPNVFIIDIVP  
>comp16271\_c0\_seq1; 953 66 3131 LEN=3131; translated  
MSNHDDYVTLNMSKDKYDNGRFFCAETQDQLGAAYRAFVDKEELMVPDFNLLQPISDKEA  
SDLMEALRGDYKEGYHIADGDMFLLPKSRVFEERLEHSTFDNINLESNRLKFRFLTPFII  
KAELKPLGLAFAEVLLTIVYILTLSSVLMHGFTIMAI FVGGVSLFLLLTIVHFWYGISRYP  
SIWNSITPHGLKGPSIDRNFSEIRQICSHHCNGHNHTYSQLPQFLITLPTAIYHANAF  
VTLVHVFVKISRNGGIGSKLPPVMTSVFISNILITYFWMGTSGIIFSACTVFFNQKA  
YNSLLFNRLDKDFCISLVFGNLMIEEKIAIDEKAIALASNGHEHDIENGIQVKKAEQGE  
FKSMFEKPKSIFEKPVADASGSSSLPLGDSSIDRSPDEHTPPSNSSTEPLQSTLMSTIQN  
IASYVSGEETANNKESKPEIFHDDFSQQTEDMTLQYLVTVMPTTPTTTATMINVDTSE  
DIQAGQERSEVNTTEEPHSTKSREKFFGLSRRIFPSPRRRKSSKREFPFDERAEDELSIE  
FKNPSDVHIDLDDHIGTIEWRNAISESIQRFRMKS YTLRKH TWVMNQIHGKSFFIKEDGK  
RRRKLKRKEIKAYCKAFHDKQMHLLNLQISGILEDLKDLDKKNHNTKSSSDHTRRSLGNSKK  
SKCSSDHTKNSFINIPSEMNGTEDFMNPLTESGGNERKSTDQHIMDDRNDQAANAVVAS  
STRDDSI VQSSKDISTLTESTDDPLEHEQENNNEDGINARSTPWITGPTLYPKDKDTV  
ADSESSCFSEKISVLLCSPWSENMNLLRDSNSMKDDRDETENDKADDASNAPQRQNNGL  
KGIMKDTGHKMDGENSVGLLGGKEAYWRAFVEEGNASKPKSSDNTEETNLSQTSRDTDDD  
GSVIPGGDSKPETGRKRYPWRS DLQRKKIEKAREKRSHDKDLSIKKQKRIASIFKAKMKK  
GGRSAGEGGQVRPRSPRITRKRKHGVYQPCDEMRHDEKEETKRWEDGGDENRDEDDDD  
DD  
>comp16272\_c0\_seq1; 656 195 1235 LEN=1288; translated  
MRVVLFS SIVLSASAFLSPSPQRIAPTAVFSTAEADIDASVEMAKEELLQLSRDFKEQYG  
VILIDTKAKESFRKAVEKLESVAEASTDSSMLVGDWNLECSSASSGASSKIEIDTNKIPF  
FNEGPLKDIRSTLND SVGVVQRIKFGEMSNSIDAIDHII DYRPPNQLSSFLKNIPDALKN  
LDINPLKVS DTKVVLKHKAEVEGTIPVIKTKLSLEAVVNVVAGESKNLDPNGEDVLGINI  
PFGEFLNAGSFDTTYVDDSMRISRKVGVPVDQIRV FVKADNTESDADEEVVAATVVEDDD  
LDDDEIVDDDLDDDEIVESAVDAEIVEEKEDNEDADEDEVSPSDVEN  
>comp16273\_c0\_seq1; 447 85 1227 LEN=1416; translated  
MKNIIAALILSLQISGSPVAARDIDHVRADQDMQQRQVRVLRDNNAPLDEDEKAFLKRLLE  
EKT LRYAKDVSESTNERRNLAKDDSDPLAAAMRKSGLRKINDARKLAE EASEEPEDNRR  
LQYGGSYNGGYNGGFNGGYS DGYDYGNGGGYSGPYNGDYNGAYYNGGYENGAGGEG  
AVGAGSLVLGSGAAYRGRVGIPEKVS MVLEAFQDSRRIQDP IRLGPDSSYLNAGTQYLYN  
NEPLYNVVFDVPPGGSRGAYLINEQDKVAVVSGSCIRTDPKLQYIGRAYCQFDYRFLDGR  
GQVEASLSVEGPI SKGDVHTLAITGGSGPFKRTVGTVVLESGRRLRNGVPPVFI PDDQLDL  
PSSYMVKMFVFMDSVDLEMS  
>comp16274\_c0\_seq1; 274 1 769 LEN=957; translated  
QTINELLTTIQTITLSFATRPSFGKAFFLTNTGTLAPS AVASASTLASTSAMIENNVPRS  
FKSDEYIVDDFIEAASEAADQRAEARAAIERTEDISAVPKKTA AATTRQNP IDIFGIDHV  
VLKVD DLEGMTQWYEKVLGCKVARRNEKFQMVHLDAGSSLIDLVDKAGPLGGGDTKNKDC  
GGTMNRTQQKMDHLCGLNDFEDAIREHLLLHGVTIVMELGVRYGKGGFGESLYFEDPE  
GNRIEIKKSQYTSVA  
>comp16275\_c0\_seq1; 232 298 837 LEN=1655; translated  
MVFDFFSTSTTSPSHSYEESALLTGDEKSVIFSERVKVVEIPSAKHL SKKDKKALWYAEP  
GERFSKKPKLRQLLCVIPDNRDDSSDSEDEDDRGFSRPELRRRLPVSAVLVEQNAQRESG  
IIDDEFIAKIYKQCSAHSTMKAQIRAMQDEEEARREYMATESRARRKSKKIFQRM LER  
>comp16276\_c0\_seq1; 186 415 1428 LEN=1705; translated  
MHLFVFELGLIAAVASNFLGLVTAQTD CSCGIDSPSAGSFKCGNNIYICPGVERICSKQP  
SKNGSYVVTEDQCDKMKTLAIGQDCIALPQHADVPIRALSNRVCYDASP KGFNGVKADG  
GGCEACKDGIDLFGPEGLGVHTTEPSVQASGTVAPSEFPPEDESIQTTACPD DIRLLKQD  
GNTPF PENYRGIQIIGQEPSAVTVDLGQHWTVPITNAEWS DGGGVH SVFYAFKENLFSYK  
CYEEENAGSDGVVFD RITIAACGILSRVAHLEICVADESGTIIDSGDHAVIPKCCHPDIPG  
EVPTVCYHFEIQCTQCLNNDYDALDRLLRS GSSVS  
>comp16277\_c0\_seq1; 545 63 1430 LEN=1527; translated  
MKSII PSLT PSLIVLAVKTQTTTAVRGRSSVSDGVS VYSNNRKL SWDMDGWFGNVWEQIT  
GSIGFDTS GDYSGDEYVIQNPEDANGNGNGTNYELPTDWEFPD SHWDWNEWLSNLLMEST  
NGSSGFLNGRGDGFSQQNGEGLGDL LDGLDFGNLDFGNIGSDGLDVCALVELGIGMSASF  
GIEASCVCSSGLATSGTVNGNDQGLEIRCSFDECAPGDSEVCGTIDL TLEFGGQANDPIV

KAGVCTDFRNDEFEEETCF SYEMSMEATSTEGGDTSQQHSCEASYGGNPCECSLLDNSMNL  
PCLSIDCTPFLPGGKLVDTQCQVLSMVDANNLANWFPNF EAFVPGFDLGPGLPNNNGGDD  
NTNGDIPDPEEDLPVTINIP EADKNNENINVVNGTTDP IRPSIGDSEGESNGGITV LQAN  
EMLDSSDSYDISLSRTSSARIGLLCVTFLLLAVQ

>comp16278\_c0\_seq1; 600 198 1763 LEN=1991; translated  
MSDEESYEYDYDDDDMDEGGFYTDDEEEANDSEVALENAYNSKGLRETDLQEAAEAFE  
QVI IQEREELASNHGDGEPKKYGPWSYKSIKQLVKLQLRTGTTQSVLGAYSRLLECVAE  
GNI SPNAVEKGINGMLERVASLLQGNAMRDMGLSANSNSMDPPKLALAVYDSTLKV FHPT  
SGSCPNERLWFKTNLKYGQLLYETNETVKLQQVLRDLQTTQE QNNINSMTDGGNSSTCNT  
QSI E IYALQIQLYSRQKDNKKLRQVFNKAMAVRGGIPHPRTLASI QELGGKMHMQAKEYE  
AAGKTFQAFKSYDEAGDPSRLRCLKYLVLASMLHASSINPFDSQEARPYRDDPEIAAMT  
NLVQAFQNEIHKFERILKNKERIMGDEFIREHVEDLLRTIRTQVLR RVIKPYTRISLQ  
AIARELNNIPVRDVENLLVGLIILDGSLDGRDLQVSGVLLKKA EKGGSGNDDKKLAPTSS  
SLTELKFEAMSQIAKVLEVIAS TTANSRMGESTTNTMTGMVR

>comp16279\_c0\_seq1; 735 32 1216 LEN=1253; translated  
MKFISAF AALTAGSVA AFAPS AFTPRQMGVASTSSLN MALADGVKPIVIGVAADSGCGKS  
TFMRRLTSIFGGDVVGPLGGGFEAGSWETNTLVSDLT TVICLDDYHLNDRNGR KESGLTA  
LNPLENFDLMEFQVSALKNGETVSKPIYNHVNGTLDTPETIEATPIIIF EGLHPMHDER  
VRDLLDF TLYLDISDEVKLNWKIQRDMEERGH SLESIMASIEARKPDFDAYIDPQK DAD  
MIIEVLPTALDEEDKKT LRVRCIQKEGVSDFNPCYLFDSGSSIEWVPAADKLS SPAPGMK  
LKSGPEDYAGKASQV VEMDGNFDNLQELVYIESALSNTKTKFYGELTQAMLALS DAPGSN  
NGTGLMQTLAAFAIRDIYEKKT AQAAKATAEATA

>comp16280\_c0\_seq1; 370 1 1846 LEN=1983; translated  
XKTIVCGTECHSPRTEARPNVXAVKEKKFEVFSMLILSWNVAGLSTTVEKIDKQYGDRTK  
RRNDPSSVIAHFFQRHGADIICIQEAKIPKSVLEIRREPLRCAHIAGYESFWSCCV DSTK  
RGFNGVVTYCRKGTVISADSKPLSSPDLDDQGRCVMTDHGRFVIFNVYVPAGGGQPLSYK  
MKFLNGLRQAMRKQRESYKKEVILVGD LNI SHREKDVFWGSRKLAINDICKEVQDEL PDT  
SRQKASEKS AKKRPLPKWKLDLARTWPKIEEVLKSKKTQMVITTNPRTKEKFEKFRMSVE  
MDGKQILLGDHEEKPDYCEYNFDFGSRHYTCSETGKQVLAQEEKIIALATVAELLLKIGK  
IEWNHKLQRSIASTDGI CCRVSPRRWLNEVIDDDGMIDCFRFYYPNAEGRFTCWDQFRN  
RRYGNQGARIDYTLIDKSLVGLSRKGHVSSLRCGNCGGRCHPESEAAALCAATANGGYQP  
VSFHGGGIVEASQKVLNTQFGTPHTGHIYTPPTFSDHIAVSMLLDNSCCSCHLELQDQDK  
KTKASQPHKRVTINSYFGPST SCKHGETKKQNKVAFSNLKVSN AKRKGPMDAFFRSPN  
PKTSVSNKRHKESR

>comp16281\_c0\_seq1; 649 80 1969 LEN=2233; translated  
MAEQKRIENSGVGTMQGMEISPPRTDELPIKVARPNFLASSDPV VAMAKKVSAAVV ESSF  
DSVGTDSYQSASSPPPGRIVKNVISPSSSIGQITSTTNSSTVDVQKSNSSPVLTLASAR  
LSHSPLLVKRRVQSSEDEEFSNKTSKDLRSDSPFIAGTGRPSIIRRGSSVLV GKRA TKAD  
TGSQKTSQSTPKVKVIEESSGVSAESAKTSSPNNTEHSGAIDAVAAASAMTAMRNKIPVP  
SAPTSKVKG TATTSGKRQLASTNQHTYTPPHQGFHPSAVVPTTFH PHLHSFAGHAFGPNG  
TYPMVYPGYPPHVPSTAPPLMLPQFHGHPVHGFPYPPAFH PHLNQRGGQHIPGLVTP  
HAHIPAATFPPPTKSSNGTKNLDSKLEQCVNSATTSESGADRKPVSANRCVPLQEPVPS  
KHWGKAEITTKVVLPDFHRLVNYPAYLSKSRGIATGDSSASKAIAGKKHCVMCGKLRVCS  
ASSLMEKGRAAISDDGTAHIIPRQNKGLCTACDVTVWVMTDGLEIKWCKGCKNFRQWAA  
FGEKGSATKCVRCRERQREKYAMQKDAKRARKCTKQGG LKAKGRQEKMARLLPSSSSTNQ  
RVEFVEKKEEPHFAAARGLTSLMNAARL

>comp16282\_c0\_seq1; 342 140 1147 LEN=1248; translated  
MTAAIAKQIPIVCPGHTRPLAELQYVNVENDDSN TADSSSSVFLLSACHDKMPMIRDGVS  
GDWIGTWQGHKGAVWSCQMDPTGNLAATASGDYSARVWDAITGQSLVELPHKHIVKTCVF  
SPNSQRLATGGKEASLRIYELPKILVKQNNGNKKPDATEASPSLEIPQESPITKLAWVSN  
DQLLCSMNGKIYLNWNTNQSLIRTFDTKEGAEIRDI EVCAIAGSQKLVLSVAAGTKVYF  
FDLSDSQSCKLLKEYKMPIHFREEGVTLHPSGKRFVAGGSDLWVRVDFDFETGEELECHK  
GHHGPIRCVRYSPDGQSYASGSEDGTIRLWKTSPA

>comp16283\_c0\_seq1; 606 194 2473 LEN=3942; minus strand; translated  
MVATLVGHTRCSPIRS YIDRIRRKLVVTANVGRPCHREQQYTFYNYNRGRMVSSASSSS  
ARYYDSHG DYQADAESGYFMTSSSIYSSSEGLATAPPPLFQH QDSLPRFPV PDLADTIER  
LKPTCLPLAATDRRAEERENFLRACDRFPEQASHLQRQLEDRASHQENWLQSWWNRIGYL  
QYREPSPINVNYLFQLPKTRGKHYSQLQRAARVLHSAFAYS ELVQSGSLPQDVI GKKSTT  
PLCSSMYRYMFYSCRIPKPNQDVYRVYRSRDHCKNSSNNSDEETSDFQKHAVVSVKGHYF  
SVDLIDPSTGMPYAVGELELALALEDCVSQAILISRQTS DGGDEGATAAATAAVKNLGI LTA

SNRDEWTSNRARLIEAIPGMKAALEKLESGLLLLCIDGEDNGRNAQVDSLSONARSYLMG  
TQGRWYDKSIQFIVTPSGNLGLNGEHSMMDMGMPVGLCQYILGQEASPNKRETEPKQKHP  
TPLFSPKVAPIFANQITILKELTNASLDETCKSMVQKATADFDKIRSSLDLEVQSFQYGST  
WIKTNAKCSPPDAYVQMAIQLAIGKLTTSKAFNGNDGSRYPWPATYESTQVRSYRYGRTE  
TRSVSEESAKWVGSMGLGNSNAEELKGMFHEATQAHVSYIRNASQGGGVDRHLFGLQMLL  
AEQEKQNKQAVDLFEDPLFVESKTKVSTSTLPVNPFGFVVPDGFVAYHIESNRIF  
TCTSYKGLAPALSHYLEESLVDKEMVLKADNPNDRSKL

>comp16284\_c0\_seq1; 829 57 1214 LEN=1214; translated  
MKFLPIALTALVGLTEGRKLNADLNRRMKAGLVNKSVMRGAKEPYNKEAKRKLLEDAAF  
EITGKYSIQFNSCTSMVQSNLMEENLIAMAANGDLVADKDYIIFNVCETDYCEYYGE  
DEKMTFIAEVGTYFQAI SQYLPKVKVQYCEACEESYDYCYAMSTGATYYPEGYEPEEEEE  
EEEEAEQEGEGEGEGEGEGEGEGEGERRRLIKKARKLANRKLANNQVIKVFDCGMCAD  
YECLDFHEKTANAYDENGDYVEAELDDAMEWLDGFSECAETNAYMDDYQIYSNLMCNAD  
GTGLEIGLFLNDECTLYTPKLAYKDIMQDADTTYNMI SDVVVEFTFTNEGIECYNPEVW  
YNEVDYQYQLERAQNGEEEEEEEE

>comp16285\_c0\_seq1; 613 307 1244 LEN=1244; translated  
MDTNNNDGVPFHDSIHPPDLIHLNMDTKASDSSPVPSPDPSPLSTPPDSPRRPSSAFRNGNS  
LDTADSNEEEEEKKEEDDGNQTEKEYLVAEDVPLDEQENNVGMSSNKNTVSTNSETGNI  
ELPSDEPAKIAASTVMDEPEIKKEEKTKIADTPSQSEKSDGTPFDEASKNSKQONEMEDT  
NDKSDQKSEDEQDAESASVPDDEKKSNDMSPPKVEATKIESINDTTTFEDTNSESESEPPS  
LSSPALSLEKMKKRLSDQGLSGFSESEEDMKVSKEATSPPRIVVKGEDINTTVGDKKTP  
EAASDNDVDVVSX

>comp16286\_c0\_seq1; 691 314 2149 LEN=2291; translated  
MTPSSSESSEPNVSRVGVASDAFLREFFQSDIDDVNLPPSMSIIRRSIGQLASGSDIRG  
QFVPHPVTRMASLARSIGQTKLPALTPFAAHCLGFATMVKEEQQLKKEDEEVIVCI  
GRDPREHGSILADSFARGAGGLNGVKVCYAGIATTPALFEFCRSSLCHGGVMVTASHLPG  
DRNGFKFFDSYNGGFQKWQIKKMLDIAQDHAHVWFNMGVLPPTNVGHVYCDEQVNWMECY  
QEKLKSALLKHVKMQSNNEQPLQGLNIVLNAGNGSGGFFQKVLADLGANVDGSINIKPDP  
SFPRGVPNPENKSMIQDTIEACETAHADIGILLDTADRFGMVAPRVFSKIITSQEGKEV  
LFQPSGYEPVKNRLIALIGVIYARQSPGCSIVTDSVTSNGLSKFLEEDLNLNHIRYLRG  
YANVIQKAKSVNSEMSANA EVAIETSGHCALRENDFLDDGTFTAIVKVLGLLAQEMKEMES  
STPKKNSLLDLSNLEELDEVIEFRLPGKDGSLSVLRLFDLIALDIETHCEEQSEWSID  
HENLEGVVRVGTGKGGYFLLRKS LHDPVMCLQVEASSKKVAKQLITDPLLGLFRSEPVQA  
ETLDLSALEQY

>comp16287\_c0\_seq1; 418 85 957 LEN=1671; translated  
MVPTNNLRIAQLLLTLCLFCRVGAVIVITYKKEEQCMEKTGKFFETAGKELQEMRHEFAAS  
LTMGMTSKDTMSASYPAEMLKDYDSLCSKYGGKLSIKIDFFDCYLLSGTPEDDVELTLK  
YFANCMADVEECEGFNQEHIIQEAWKEMGLKCELEAEETKKDSKKNKKKPVNDPDTAKKE  
KEAAAKGANEAEREEKNEYVPKEERDKNGNRKKKGGFLGSFFKFLAMGVCWACYVVF  
RKRGRYPIEIPFFGGSAPSRFQRRPQTGFVSDYNLLSGESELQFSSNLA

>comp16288\_c0\_seq1; 232 76 468 LEN=678; translated  
MVRMSVLADCLKTISNAEKRRRQVMIRPSSKVVIKFLRCMQQHGYIGEFEIIDDHRSNK  
IVIELNGLRNLKCGVISPRFDVPVHEIEKWVNLPSRQFGHLILSTTYGIMTHEEARRKK  
TGGKILGFFY

>comp16289\_c0\_seq1; 427 97 1188 LEN=1650; translated  
MENNAQKKIAVTGANGFIGTHCVVALLEAGFSVIAIVRDPSPNPTKTKFLEEEASKLGKKE  
LLSFAAGDLFKEGSYDDALEGTWGVVHTAAIVNMDSNTDPLVVKPAVEGTKNVTASVKK  
HANTIQRVNISSVAAVFSGDKPAGHVFDVDEDWNEWGTPERGDYGYAKTMAEKAVWDDA  
DLISAVDTVSLNPGVVLGKAFKSHAVTSSTSF IYNVLAGNP IGNPMPFVDARDVSKA  
IVLALTQDKEVVGKRFILSSVTMDSLNLNAIVKKSHPKGAAGSVFMPLFKALTWLGE  
KLPFLRKPLGWKEIWKCYGNVYDFDGSKAETVLGIGKYRSIEDTCQVAADSLVQFLDEDE  
TSK

>comp16290\_c0\_seq1; 200 85 819 LEN=1188; translated  
MLSRCHITNILIFVVCFLQAKDAYGGLREGTKMGNDARKKIQGGESNAASGMTREMF  
KDKTWELQPVDFSGIRNLKLRHCEKFLNHPKMKLSNRQKFGFLRAQGLQSGKRLRGF  
WRQSTSKPSTEELSKLSYDEAVKRLTTIEFEVQLPPTGKKSRLPSVIYSVAVEPASMN  
PKAMIPRGAGTVRVLPEGHSDVDVVALNAGKAFVSQPMKSGIVDPGWAKGRLIFRGR  
TGSV

>comp16291\_c0\_seq1; 434 73 1077 LEN=1188; translated  
MTAKNKRRAASRMKRAEREEKMKDIPVYDGENKYSDEEPPTLESTYKPFPTTAQLGALV

FLMAGVSKIYELSVLQEDKLEAPSCMIYLNNDETTTCQHPHFQSLVQAKYYS AISLTGLV  
AIYVLQLWQSEYYFMKFMNCLCISPLFTTFLAMVALPFTVQSATEEGVLSNKKMWELCTV  
LTILYGTVAPKSTDHLPFFFTGKKETESVDLVSPQSFGLWCLLGASLWDIARVFFYTAYSSN  
VGVQNALLDTPVPFPEPAKVLVYFWMVDKIAMVLLYAFVHLPNFKQRAILLASLGIKL  
CEYYAQIPSMDDSWQNQDTLVPMTMGLAILSGVGW  
>comp16292\_c0\_seq1; 424 1 1254 LEN=1515; translated  
PKTMPDQWADLSQFLANRVRSYVTNKNRNMCGRAAQTIHAAQIAAKDFC SSSYQPD S STL  
STTSKSIPIVDNFNLSPGMDCAVMSVNESGHIKVDKWKWGLISKRGTSKKPLYANENDIM  
KLCFSSLCFNARSDTLYSKPTFSNLAHRGRTCIIALDGYFEWKSQIRSKQPFFVYRKHQG  
DYEEKMQYHERQPLLIAGLWTRVATGLAEAPVLDSFAMLTTEASKQIEWLHHRMPLCVWD  
IDLAKRWLEQPSETLKKELDDAARSYGDVFAWHKVAPEMSKLTFRSKNAIREMKDTRRSV  
KHFFGEKRTFSEEDREENITGNSSVKKDGEVQSSSFTKRNN AIDERLESKLAITTAGSMM  
EESSTGTGKGGKRKSTFSAKSSPSKRKLSDKTQRGTSTTSNYNRKQLSINVFFQKK  
>comp16293\_c0\_seq1; 435 249 1961 LEN=2122; translated  
MKAVFSFSLRYFYVTILSLFVLLIYAVLVDVHGFENNGSLLQORTGPSASFTGQTILRQP  
FSLGTFHSLTTTKSYSDNCSFRINPNRLRTGTTLAMALGVIPTLTKWKIIPSGSVIGTVS  
NHPAIADGDVITTSPIENPDLAARQTTVTTASGSKYRLLLEPRGEISAAAREREAFALAKA  
MAAADAQFAADNNSNGNNAINAMPDSSERNKKQSSPGFFGGWAGSFNGSGNKKNAAVE  
EUVNGEISEARKKELLRSSPEWQNAVRQYRLTGDTVGLEDEYLLADKPERSTSGKSNIWE  
AYKTDESTGLPVAKAVPVCLKISSNLEAISREYENYRKL SFLGIWETGRFVRCYEFFPVA  
GYDKKFRDQCALVIERGARDLKSFLNSRGKLEKKELRDACVSATECVQALHRAGLVWTD  
MTENFVVMPSGEVKIDLESAMPIGDY PVDYSPEACPPPEFAAFLAGDGPYFELGTSYDV  
WSLGLMLLELSTGKGYFDGKTPAQITKLLRDIDEGEMTRYLENVECDERLKD LIRRCLQK  
DARKRPNTAQILMHPYFLAGNPF SFLSPMN  
>comp16294\_c0\_seq1; 889 379 2484 LEN=3069; translated  
MNTTAFRLRLVLAACVASSRGLRGSTVPATAETPASDTNANANEDHENSVDNKNRDDA  
PEFAFDEQRHRHLEPGETCNLVLRAVEHGPDVEHSDPYNTQEWGCILKGTDSKVRFDIV  
NQSAGSPIFAEAVSGKSVLVASEAIVDTIEPKMYIPRHASVELQEEPRNGLNEERRVDED  
NEPVD RVMNALVVRVSAKDSSPQQNVKQLQNDVFLDDHCLSSQFEACSYGKLIKINPYEAP  
GVDGGVVEVALDYNLADNDLRGVLQSAAYEAATEKVG NLMDDKFDLVLFCMPPGTGSWMA  
YAFVGTGKFSFYNDKWCYSVAHLHEVGHNLGLAHSQGHEESEYSDQSGAMGFSYGLDDQQ  
ICFNPAKNYQLGWYKDKVVDYNPLTSNKTERIFTLNGVADYKTGSPDANISVRLEQDAKV  
VDWYIGYMRKTGITQDIVEDGDKVTVLTKDAGFPNEYGLSTKHAALGIGDSYVIQNFNGE  
KHRDVRITYSATKSDGRDAIVTIADLGRHEDSPTDPCAVYTVELRTDNFPEDNSWTVFEH  
GGQGRAYGSSPDYGDANTDYTHNLCLPYETEYKFVITDVYSDGICCNQGEYSYRIKDPNG  
GVVAQGGQYSGGNDHFVEEHVFTVGP NPNADLGNPQNP DNE S NCADTVGKFFQWHKKKKK  
KKWKNCNWIARRNKCKPLPGVPGKLLSTLCPRACNTCGDV  
>comp16295\_c0\_seq1; 288 105 1052 LEN=1362; translated  
MIITRLAFLFQVTSTVGAFAQALSPSVATTRS VSTRLQVTPEEAIATMSTSQENIIRKIKS  
TIPDLESKDDFTWKGTDLVLDTCPVTL DARDAAGPSNVAWLSSMCVDSKMSSLQIFNGPL  
NDVPHLVSRCAILPDAKMRLTIDFRPRAYGAYEMRRPDG SYPGPDELGRKSF EYSGARSD  
YDKKFGTEEVKEFLTSLPLEGAVPCDVPTEL D L LTRGPLYTSLDMPMTESNIDVVVAAR  
EKAAAYWLDWTQETEHEHRPGAPINSQYVYDTKYKQNAFGALMSEY TALFGAEGGKRLAI  
GDSGPLDEAYVGGAS  
>comp16296\_c0\_seq1; 126 590 900 LEN=900; translated  
MYFHPARAINLVS AKIADGRYDEAIESLALTLKTLQLAISGDAKIHICWKACSSPERCES  
ERDNASGPRHRHPCSAAGFRYEF LSSRAETDMDT NMDTGMDTG  
>comp16297\_c0\_seq1; 237 154 996 LEN=1082; translated  
MTNLSGRIALLFLSAIHFCVTIEVSATGDVSDAFHAYRASRYGKMPDDAESSAGVRGGT  
SIGIYRGEASSVNSERDEEKIGETKPVGSTRAGMNDIVDIGHKPESCAKATESILAMNE  
DIRLEVASVDKRYLENASIEDVCDQH GKDSNCSFDFRRFP SKLQDVCERHGDKFYETEHS  
IQCYNAKTKESLYYQFDHYPGCFSAACEELDVEQLMADR IESITQIMSGYLGMTCFADDE  
ILRHADEYSSMQESSMQESSGVLTTRWGRVQMLPIAVYLLL  
>comp16298\_c0\_seq1; 173 87 668 LEN=1381; translated  
MMQRFASLASRSVFSSTLSLAPASRCFASTPVPEVDVIPFVHHGRRPRYRDYK KFKSPR  
KRASKLFGDLNDEACEK GKKANPTIWHETICVGD SVELKMVSQGLKEVEKQELEKIRGV  
VLGIVNRGLGSSILRDVVYGLPIERRIPMFSPMIKEAKVLERNFIFK GKVKRAKLYYF  
RDRNPLLTKVSKY  
>comp16299\_c0\_seq1; 562 209 1648 LEN=1826; translated  
MADSTPNVDPKH FQPLGTWTSEELNQSRAENPFAMGWAPNAARHVVPNMTHGEGVLYYDD



EGKKYLDWTSQAVCSNLGHDLPENVIQAAEYQMRLLPYSYGDIGQSEVKTRLNQLMNEIL  
PGDLKAAIYPSSGSEANEAGIMMARRYTGRQKIIISWYRGYHGATSNSSAATGDSRRWFNQ  
EGPGFIKAFNPFPLFFKPGGPQATEAEQVEAALAMLEETILNEGPDNIASIMTESIQGAG  
GCVIFPDGYLQGVRALCDQYGILMHVDEVMMGFGRGTGKMFQNYQGVMPDIVTCAKGIS  
SSAVPMSMLACSEDILNHFENKSMGWGSTYNGHPVAMAVSYESTKYLLQNNIVGRTAAMA  
PLFEACMQQLVEDHPSIKQYRAVGLFGCLDVQDVNGKNPKLQHEAPHEAFHKYKKAFAKDE  
GLVGLHRYPHIHCAPPLSISEEELIDGFERLDRALNVLDEALGFPPQVTDEDNAQQQAV  
>comp16300\_c0\_seq1; 402 139 966 LEN=1353; translated  
MYKMKYYLFGMLVMALVMVVRTTKKIDAFSTGPALAQIPRRSSTTLHLKDNNDQERRGFFS  
SVKRLFGASVLVAGTGVKPLPVLADETDTSSSGGRIVEIQVSNLDGGESGVIKIQMKPDW  
APRGVARFEELVANGFYNDCRFFRVLPGFIAQFGINGDGPVMSKWRSSSIPDDPVKVTNS  
RGTVVFATAGPNTRTTQIFINTRKQGNFLDKQGFSPFGVVLGDGMEIVDMLYAGYGE GAP  
GGKGNQALIQKKGNSYLI EAYPSLSYISKATILN  
>comp16301\_c0\_seq1; 373 32 676 LEN=831; translated  
MAKFSALLASLVASASAFAPQQTASQSSALKATGFEEVGGVFPDPLNLAKLGTGESFDT  
FPNMFDPVQFLQEAIEKHGRQAMIAWTGIWATHQGGMGLGMHIPGFPEESDWTQALGVFA  
KEQPGWFAGILFFIAICEGESVGHSGDNFRGKSTKTPGDLNFDVLGLGKNMSEEDAARYK  
IVEMKNGRAAMIAMASLFAHESIPGSVPLMDIFS  
>comp16302\_c0\_seq1; 257 303 706 LEN=706; translated  
MAPTF SALDLWDPRTGHASTGNATLENSPRGLRNPTPSRFVGCENDTICDDWYATDDCDC  
DYGTLAIARDAPPGFGSAFLCSGIALVAVVLGSVLVASVRHGRRGGRSGDTVATRDDVCG  
GESIGGIDDDDDDDX  
>comp16303\_c0\_seq1; 207 111 813 LEN=813; translated  
MSFNGYNGGRTGMATKVLLNVYDLSPTNEYLFPIGMGLHHTGVEINGREYSYASEGGIY  
DGPPRQAPGARFRCQLNLGTFDGGTQELNRALDELHRNNGGFGSGGYNLIRKNCNHF CNAL  
VYQLLRKPIPAYINRLANLGDCSCLLPKELLGESPVGSGNNHPSSSGSSFHVPTRATMN  
RGGGGASTNAFAGKGHSLGGSSGVAQPDLTRRERARKAALARLEQQQYQNKEX  
>comp16304\_c0\_seq1; 366 113 853 LEN=993; translated  
MISAPSATHAILMATILATSTSAFQSPMTSTSSSSVISIDREVESLTSSAPSVPQTKDY  
AVANHDNERSFWLQALQNLDDDEQDDSHDSSSSSEPSHSMWTRIACAFAPSSIRENYLLDP  
TQTLAEEAHLVRVGDNTLDISMAVPASVWKEANLDEMHTNQKAQRKDSAKLVSAPQEAA  
PLHQRGDRRKRNNQHTVTIRIDFPEGSSFDKDAYTFEDEL SAVIRQVRLLEHDANDRLS  
GLEMAH  
>comp16305\_c0\_seq1; 224 94 426 LEN=912; translated  
MSFPRTSTLLLALLVVVATLTHSADAFSTVQKQTV PASTIRSTALNVFGKKKEEEDLSYI  
ESRDMTREEMLALNAKNEEIMNMELTAMTGFSLVLSLPILYLCWVAFFSD  
>comp16306\_c0\_seq1; 275 1 821 LEN=860; translated  
XSYKHVQTTLQNIQMCINQDKKSKSSRRRPRSSAGSPTTVFGNMDIVDKLHKGMQNEQPA  
SPKTTSEKRKTKKSSASRKGKSVSFFKEVTVRQVLHKNNFTEEEICDSWFQADEYTTIR  
KSVLKNL DLAKMDLFRGPESTYRGLKYTSTGGIKESIRRRRQDAIWSVLDEQDLQVDK  
AEEQQLTYLVYDDKAIREVYKHKCRPTIDAARCAGRLDAQAASYENEPFEQTRCPTDSKS  
TPPAAKKTPASIRRMGAPDTPGAAPLIPMAA  
>comp16307\_c0\_seq1; 328 80 958 LEN=1167; translated  
MKLSIFCLLLVSRDTAFTAPVSNASPKAISTASRDLRFFSAMDHQPEPSIEADAE EEEIAF  
NPLPAATAALCLLSSEANAAGPDWGFIFEGKTGSLHPAMMFGMLALSASTALLGF EWRR  
QRTIGDSISTLKKSLPDLAGAKSVSEAIKACQAAEEVDSVQLARLQ SALPIDSEIKELQE  
ERKALAAKGPRDKHYGQGAMLAFLGTVFAIEGPLNTYARAGKLP GPHLYAGAGLVCLWA  
LAVAAVPQMKGND AARTVHIGANVGGIALFLWQLQSGIPILLKVWEKTSWP  
>comp16308\_c0\_seq1; 133 1 352 LEN=352; translated  
XGMNINHTRDLVRMGNAIYDQGTGISDEQREADLERLSMCTWAFVRSMKRHL SPEKEDENA  
FKAELYERLPKTQAQAIKAAHRPNRALYDL SLAIENLPMHFLRKNEMHAALTIFEDN  
>comp16309\_c0\_seq1; 623 342 1583 LEN=1787; translated  
MAQQYDSSYFMRILLGLCTVAKIFAFQSQSFHRATLSQTRLNVAVDPSTVTKKELDDIV  
GADF EKDAMYKRLQTN EFLYPKHVEVIEDIGPIANAMVDEILLETGEASWQPQDFLPDLA  
KDGWEEEVKELREMAQELPDEV MVVLVGD MVTEEALPTYQTLLNTFEGCDDPTGDS DTPW  
AKWSRGWTSEENRHGDL LNKYLYLSGKCDMRAIEVTIQHLITSGFNPD AQKDPYRGFVYT  
SFQERATKVSHSNVGRLAGDSGDSNLRRICAKIAGDEARHEKAYQTFSEEILKRDPGLI  
MTFGDMMRGQIVMPAELMTDGVD SNLYENFSAVAQKLG VYTAIDYAQIIGHLVKRWDLN  
LEGLSAEAEKEREYLCNL PQR YQKLAERSMNRK KKVNEEDPEVAFSWIHGRTV  
>comp16310\_c0\_seq1; 226 110 901 LEN=1268; translated

MMKEEPPGGILDSFWAIFLQDYDHIDDDRNSVGSSEAETLSFDEYESFKEGRSDIDRENPL  
IDANSKDEKELKMSILLDSLRRSNDLLTKMPPRHRTPISHESDIDKSRLQHNTPEHEYL  
ESFNFKTEPQHRTQMKIKRMETGRHADLGREPEREPPKTI FIDAQSDVAKVDR TARAT  
PKYNIREQNGASDDRNAPTELTRRQTEESPRDDQGGNYDEYLQPIEEESNEMDLKAAQRK  
ELIRKIALLRIRAKQIRNSRGYN

>comp16313\_c0\_seq1; 121 1 943 LEN=1170; translated  
XTTFLKQPQILALYCEFLSSDNNHLQPPDQDISHHNQKDNDDSYDRKLTFRSDNMKTQAF  
ILLSIIVLPKTSACQVILNGEDKTSDFVVIDSADDDAYVDCGDHDKCRGAVISDCPVIK  
CLGSECTDAEISNFTDSVVCEGVHACHRTEMTAAASGATIHHEQTVTCIGSGACDVAHI  
VGNVDRVSCNGSKACRKRVIIEGPKLVKQCQNGRDGALACDGFATLETCKVYCGAKGCSDH  
INTCRYKIIDDIESDNTSYKKCVPEQVVGNCSDDELKTELQLELTGKEEIDTDRVGGGS  
KSRRLGASHGNRVY

>comp16314\_c0\_seq1; 452 1 1302 LEN=1554; translated  
TKESVSIYQQHPSALYQGXSSASSKGGNESGLLEGALFRSGETEPNEDPLPAVPPAPKSKS  
SSKSNAGHGI EATAASVASASSATATSLGASRYSSSSATSPDAFAELEHKNWQRGVEAYA  
EGFGPLTAQAVPTLLEKAGFLEGDATDAQATATAKASLLDVACGPGQVLSAAISKAKMLA  
GENGKGNLAGVSFTALDFSSNFLELARDNLGSEHPGTPVAFVEGDASDMAGVLGCGGRG  
LREGTEENEAATPPPPLPKEGLFTSVANFGLHLSDPDAFLRESYRVLKPGGRLAFSA  
WAAPPHTFAFGLVLGAVRDAGNPSVELPEGPPFFRSDPSECLRSLEAGFVGVETTVVE  
GMEWTNLSSAGELYDTMLEGTARTRELLRQTEEEAAAVRGLLEKRFDELVDGRRPLRM  
PAVVSSGQKPVVG

>comp16315\_c0\_seq1; 795 256 2595 LEN=3107; translated  
MVKFSNQSKKTLQRKGQQLKSKFTLRNKRKSGSITLFLSLNKTKNKLLVHVPTVVLPSF  
KLSSINIGSSGNRAANTIRTVHTSTGKSDGKSSSSTMPAPLGKILETKLSTSSDKTSGN  
KANGKILDEKKNKRMSIKKFFHKSHRYNTRSSLDRTSAPDGDASPI SPKVVPKNATDDT  
LSPRSIGDYSATYLAPVEQNEGI INESSPVGDGPDDEPDDNRSSGGDTADITILTATTT  
PMRDDLHSLPATSPSTSSSDSAGFHQPKSPYIFADDEDSEHPGTIEVQAGASREKQEIT  
MMEDNTDGGENNTVETQLDREMERLDERIRDREAGTRAVAKEQLCSPQINVENSHFVHYE  
EQREENHIETEEGITTKAAAVTSNRKSERQIRLICLFSLLIPVALALPQFLTRVFETTF  
YDQSAILEQANSFFLDAGAGNKESPMEGVTVVVSETESSLGKQIETRFEQLGASVESVEI  
DCTDLRSVSESIDSLVERLHAIDYVVHTGNTCLSLQKEQTINENMNAILSRTAQGHVLY  
AGNYLSSFLVTQKLLPLLEQSQFGTLVQFTSPFSTLVDESLLDLGEADSSAGFLLQQTHD  
SGASTLLGLPVRFAAYAKLSEILQHRVVARAYPNVRTMEITQGWLGEGGVNSFFQRFVQS  
GENGSTKSDPVLSSPAIDDEDLQESLYEWSQKAVWEWVKPSSPSSGTSVSELILGSPLGN  
GGSSLAMDRTGEDGPASPSRYLPSTHQAVTVVTSAGVAMMAMKAKNILWRSTSSWWSLE

>comp16316\_c0\_seq1; 470 162 1238 LEN=1414; translated  
MWGGNSMQPGMGGGQQQNQLKHDIFVGNLAFNTTEEQLHQTFSEIGRVIKVRVLVTDVET  
GKPRGF AFVEFEDPQAALSAIRNMNDYELNGRRLRVNFSNSSHLEALASKLGMDSLQHQ  
RQSSSSAANNATQQPHHSAGTNAVADSLKTMSKGEMYDIVAKMKEIADRPDEARRLLA  
GHPQLPEAMLFIMSKLDMVQTALS VKSSMPQAAPMGIQLPVPPTRVADPRARALDPRAAA  
AAASTSSSSGMGMSMASDPRSAVTPVAPPRAADPRGRVDPARAAAIPAPPMAPPPRPKYGV  
PPPPMQPPPPSAPGLANLDPALVRQVMSLTPEMISQLPPHKQSSILALRQQISGSGM

>comp16317\_c0\_seq1; 343 118 714 LEN=1014; translated  
MNTESSSFNNSYNFPVVEFPTEWGPSENDQMLFGTGEDPYGVTTFSSEADWQTDKMMNH  
PLQEDDQMQDDAGAAFHTQPLEELFDSALYFDSEVDYPNITHEQGGFLDPLLSIETNDY  
NYDDDDSIGLPLEERYKATLEKLQASMKRSQETRNLCTMKTATTEEYERVGSVKEILASI  
SASSGQVQKYVTAIQRPI

>comp16318\_c0\_seq1; 163 1 367 LEN=624; translated  
XEKLPTQTNFKTQRHTISKMMYRATILVAFFMAVATNAGI IDEPSNQAGVTRLLQKGGK  
SKAPTMAPTKSTKGTGGTVSEAPSASPSAAPSASPTGAPTGAPTVAPTASTTFLGTSS  
TA

>comp16319\_c0\_seq1; 190 174 541 LEN=541; translated  
MASAFNTGNHRNQLPSTSQIFRAVVEEDYEGLAKKFAENARESIA SYVLSQRWAMRGE  
SMAASEEKIDEFLQHSSQHSSSPMLEPKELNTSSDYLVNLRDL SAFISDNNHGAGFPRGL  
QTS

>comp16322\_c0\_seq1; 354 456 1468 LEN=1515; translated  
MATKSQPPQEPPLPQQDYQEEEQELLPQEQYHQQT PPPPPQPHEEKPFVPTISLK YAAKA  
LLHTSEWNRRLQLGVKHWGRHRQHILSYPSHHYIEHQNHHPHDAQQSKYVYGNIPVNVH  
PSRTWNPIQASSGRFLEEEELSLFHAKTSRSETASQSDSRPNEINDETEGASHWGPELL  
PYLEHISEMLDIEADGVEVCLAMIYLDRACSVETLRSNGVPPCFPCAPRTVHRLGLAALL

VAVQAVRGDPHEMQHPSEQQPNPRFRRLSQSLGIPDHQLEEMVHWMQAALGDEGMYVTFD  
EXEAMEPIVGVHFFVVSRRNGEPNRVELGDQYLADATN  
>comp16323\_c0\_seq1; 287 152 1555 LEN=1645; translated  
MKLSGNQATKQFLAAASISTLGGSLVSARIGAGLKAAPLKHGHDPPTTSIIISHQRLRNQQD  
NPQRDQQREFYFEAIRKAVLEKDEQETHHLLRNSSYTTHTYENDVDHFDDDEADTGVLDP  
YYSPAESPPLDSYQTTSTLLSSTCMMGTYGDDLYPAGDYLQRMETEGAFYWNMLFDQE  
TNTVTCIQDRNLDAKHQLGCSNMYFKGCSVVKCLGKESCFDTKIRGADRIECEGFESCAN  
ANLDAPSIDCAGDRACINAIVGDKDSLVTTLDCSHSGHSTCAYLSAYKVDEVFCTGPKSCY  
GAQFDEVESRVFCQGIPHPDGYTPTCGGHDAFIEAAYGKNIDVVCSGDFSCFGSGRGEG  
FEIDVGDHGSVTCESGPYGNHDGGTYVCRFLDIAQCGSYQCKEPALAFERSDFPTCNHI  
YSADSKEMCTTNFDTGVERNFFEGLGNDDDDNFQLETFPKLIHKINR  
>comp16324\_c0\_seq1; 293 96 887 LEN=887; translated  
MISLRVLASVLLATSSSAFQLSRAKGSASMTLAAAPSPFMMPEPEKEPAKKPPPPRRQ  
PPLPTVTGESGQLDVVSRLKDRILLGLTDVNDMANVLAQLLYLANEDPKDITVYIN  
SPGGSVSAGLAIYDTMQFIPCDVQTVCFGMAASMGAFLLGAGTKGKRKSLPNARIMIHQP  
LGGAQGQAADIEIQAKEILFTKASLNKFMADYCDQPVEKIAEDTDRDFMTPYEALDYGL  
IDEVIQTKTSHIPLPAMPSQEAKT  
>comp16325\_c0\_seq1; 622 172 1989 LEN=2227; translated  
MKMMFSLSSSLPSTKSHLLVFLMLCGLKSIQTSSASKLEIVTSIQDDLEFDENKLSKH  
YVVFANRPDCATNLWETGEEETSYGFAAHPIDEGDALAKVFPDAEEKNECMAACLERT  
DVSLAGHTMPQFHYSRGGTLKGAQAKHFRSFWFNQHLKVEICFINYYVEERPLKVYWIH  
PTTGERLHRFDLKYSERNTNCFSSFLGHRLEAIDEESGFREYVAEYATKAFGTSPSS  
SQKFDGIEEVEKTVKNALDHEWSRHNMVVERTFSSSLGFAKGRLLDDIFANMGAFYNNRNN  
AVNEEWTGKGVFNWVWETDVRVFSIPWHTKRVWQDRLNMTVSKWAGVEIEETSMYGLRQY  
EEGARLLSHVDRIPTHAVSLIVNIAQNNLASPPVEVFDHGDRLHEVTMEPGDIVYYESA  
KNLHSRNRPLTCKQGGCQYVNLFTHYRPVGDGRWHRNLSMPPNRPPPLSNGASEYDHGK  
SSCRLPEGQQAQHENNTLDNHLGVGTVECEDRRLGSYMSPTLYRLNSGRDLFRWWKATAD  
PNFSGFDDPDGTDADAYDAYELQGDEKEESFNDDVLDGDDGVYDEEEDGEYDEEYEEDEAED  
GNDEL  
>comp16326\_c0\_seq1; 476 81 1688 LEN=1730; translated  
MTRISTSIQYKKRGRQCQETTSEEKDEATEKMTKIWSLALPWIVIVIASIAAAAFVSNISIE  
TDSDINWSERSLTEGSSEHHRVHKPVYDENHAPLFLPMSDRVGFMTAICGLMLAAGGGI  
GGGGILVPIYILVMGFSPKHGIPLSNVTVFGGAIANMILNTQKRHPLADRPLIDWDLILV  
MEPLTIAGALIGAFNLKILPEQLLTFMLVLLSFTANNLSLKAIAKMYKKESTRILRQEGLK  
PDGTKESELTHISKQEEEDMNQAGNELLEDMDLQEGESPGSGDRNVMMGDQTDAAQLQK  
ILEEERKTPLFNVKVLVGLFIVVLAMNLLKGGGAFPSPLGIKCGSREFWIANGIIMGWII  
FITIYIRNYLVKRNVDKERVGYKTVQGDIKWDARSTIYPSICCLAGFFAGMFGIGGGIV  
KGPLMLAMEVHPGVASASSACMIFFTSFTATTSFFVFGLLDPRYGPVCFICIGFVATYFGQ  
VGLSILMKYKRNYSIAFSGAVVLLSAIMMTVQSVLSIAEGEHSSGGICGKES  
>comp16327\_c0\_seq1; 121 278 1028 LEN=1389; translated  
MAXYLSHDAAVLVVYADVIERGSGNHEQQSPPGSGFRGASRRSLPNSKDRHFQEDGARRT  
SASGCEQRQGGQRRAEHGSDDTRCAQAPFPPEPDHPEARLVVLPQNRPLLQGIRPPLRG  
TLPVPRVPPVHPRLDAPQPRPGRAGQAGIPDPQHRVRCVHRTAVPLGGPEAVRGAQGIY  
GAIQQVRRGIVDQHEGRRGPPGGVSEPAGLGRNKVKRNEIKQSNELRSETNQEPENPMN  
YDESIEYLSM  
>comp16328\_c0\_seq1; 296 101 697 LEN=919; translated  
MAEYGPDWVNSGNNSAPAVSDANVDPSVTAPSANAGAEGGSGGKGNCLLGLLSLLNMGL  
AAMMTALGVLTIIEVHKGTIGDLSEPFLLAFYMLFAALLFLYELMWWSPMKKLNKDMRKN  
FGFMYGLRGKGLYLIFVAFLCFGLGKDAKVMILNYCTGAAFLAGGILHMFIIFFRPDTAM  
EYQAPTAGIGTDLSENVV  
>comp16329\_c0\_seq1; 218 1 691 LEN=726; translated  
XTKPATVGNATSAPTQTPSTRKDSQRSSVTAQQPASQRATMVSMSLCRHPSIATEPshed  
ATAAEHCPPGAEDASFGGEHDSDEDDEEGETKGLKVSFVPSNVFVLQAMEGASAKARVDL  
ERATAAAIRRIHLAKRTPPPSPCSGKTSAGVVVPDQRKLRAPPRKQVLPWFLFLC  
LVFVALGQAPLVRSAVSSRGIVANGFPPEQQSSLSDTSDIDLMRMLIVI  
>comp16330\_c0\_seq1; 236 160 882 LEN=1287; translated  
MKKSKTFHDKLDAATDKKECGVYLYDGFLSSGEARKAFDIFDDDSKFPWDTKPVLFGETL  
TSHAYEHDRYQFRKKKVRRALTSNERDLFKLEELCSKIERDFDVKISYVFCNRFQDPKHR  
MSWHKDTYGEHICVLTGSERRIEFRNNKTRRVEALTPASGDLYLMLPLRVNKYYKHRVCS  
AMASWGKSNTCHDVPPEDITRLSFVFFFEPPEYARKEFRISTRDMLVGIVEDFREKTGFW

>comp16331\_c0\_seq1; 211 222 493 LEN=493; translated  
MFKNLINKHKDKLAKPEGEGAVAEPADGDGKKKTKKSFFKVVKEMQAAEKAKEKSQDAE  
DSKPKAKADKKEKDADSKPAKKTETTKATA  
>comp16335\_c0\_seq1; 188 103 546 LEN=898; translated  
MAVDQAPESKNEGPVSSRAETMKHDAPNQSLREEDRLGDDSPIGFGKYRGKTYRFVALND  
PVYCWARGQDDDPSEMAAFHAWIDSRMIDLLSTAHALHGTEQVIGLDESEDETEAHDC  
GGLDCDSSTDGGHNDEDRYVSDVEGDP  
>comp16337\_c0\_seq1; 395 113 784 LEN=885; translated  
MKAFIGILWALMSLAVAVASQQYYDDYGDNDAAAGGDYYQQDYGGDYGDYYAEDGGDGA  
GGDTLYSDYAKHQEEKAMGVKGLNPLMKNAAAYGAAGWVFGAKFHSRRAVKKATVLAGKQ  
QQKLYERYVKDVSALQLQNAQLQEYIQOTTIQQLTEEFLQADTNNDRKVSRLFERYKAD  
YLKKHPEADPSMFPREFDFDPDHNGMVTLQEHEDYRQQGMIA  
>comp16338\_c0\_seq1; 391 114 758 LEN=1424; translated  
MKLLSLLVSLLAGSSSLAFAPAKIASTRSAAVAPMQMAASEELYIDEERRFLMNLILVGS  
AAVTVGAIGIPYILFFVPPGAGGGSGGVPKDALGNDIFAQAYLSSKPAGDRSLAQGLKG  
DATYLIVKDDNTLENYGLNAVCTHLGCVVPWSAANNKFMCPCHGSQYAPDGHVVRGPAPL  
PLALAHCDTAEDGKITFAPWTEDDFRTGGKGWNN  
>comp16339\_c0\_seq1; 225 231 795 LEN=1005; translated  
MGPILLKAVSPAGTYLAADSKISEDVEGAETSTKNKNKTHSLHPDASDSFHPWDFDESE  
MDLSSEAGIVSHEDEEGTFMQLEERDGLLPLSMENLFECVPCLLDQEVPSRCSPPSSQTM  
IQSSFAPFISSLDGPKIKCPNKIQPTPYAIASIADQKNQLEAASHTQEKACKDLKHREEG  
YVPFYVV  
>comp16340\_c0\_seq1; 87 1 435 LEN=752; translated  
QKLNLRPRYDSIGANNNNKQCQDGVVAKLKSVDSSAEATESEDYRFTALSSGGATTLT  
TKGGEIVVILICMMTVIATFGEDNPKFDDGLDYLIGSEDFARDSSLLSTKMIXKFDDNRL  
ARLVGDEDFAKKFEKAFKDNITES  
>comp16341\_c0\_seq1; 183 71 268 LEN=377; translated  
MGKPKKQAKNEELELSKDKKKVTKLESQIPYHEGRGNKEEVQKIKDQIEKIWTKTREAY  
EASLQ  
>comp16342\_c0\_seq1; 192 91 726 LEN=1061; translated  
MDPESEPRSTPPEDKTSVATASTQKAVLPEGWSTAVSPIDGRKYYWNQSTGATSWTHPST  
GEAAAAPAPVSSPIITAPSLGEFSGIMAARSAIDKDVETGKTDYAAMDDKGFHEYPD  
QAVINSHRCYSIVAFLLFFPLGMIALCKSCSVVSKYHQGRYKTAHDHSQQTLLFSRISCI  
IGVCLWSYIGYCLWAGPGPGVIEIPAEWPEW  
>comp16343\_c0\_seq1; 423 382 1548 LEN=1793; translated  
MASSSDTGDDSKVNLDDLAAAISSAIVAADQIIALASNGDGLDDAGDENKKNARLKI  
DGSFVTDADMAAQIIVDALYKVVSSGIRIIGEENEEEMRKRITGHEKKLESFELARKE  
VSMRYQELPCDKLPLSQSQGEKDEPVTAKEDVTEKDSYVAVIDKMQEYEVGTNRVTIWI  
DPLDATNSYAKGDYGPVSILVAIIVDQIPCFGVICKPFGYSGQPLILDTGCMAAYGGTLL  
GAAYIAGGSRLQINQNNQIVITKDLPRAVISKRSRQGIQNFVTHMAEKGLVHPDPLLV  
GAGEKSLRIITRFENEGLWFFPSGGTSLWDVAASDALLRAIGGKLTDKYGNMTMDYSKTRK  
EAENEDGVVACYDENLHSECIRLFSEASW  
>comp16345\_c0\_seq1; 317 109 522 LEN=954; translated  
MSGKGGKGGKGGKAGLQSPVGRVHRFLKNSVHQGHRVGATAAV  
YTSAILLEYLTAEVLELAGNACKDLKVKRITPRHLQLAIRGDEELDALIKATIAGGGVIPH  
IHKSLINKSAKGGKPKF  
>comp16346\_c0\_seq1; 739 283 1389 LEN=1580; translated  
MNAEGVRLIDKLNQTKKRKNRTRKGRHKRSLARKIEAIDSCHKIKDDYQSLLEACESI  
ARNKNDDGVMTDGKDDDNYSNRDQYDEDNQYNDDEDDDDYDYDTDDDDDDIISDYEYDE  
GEYSHLEYDEYDFSDSDSDDEDEDEDEDEDCRFKASSTLVLDLDDSFSDSDEDEDEDYR  
SKPSLTLVLDLDDSFSDAEDKDEDCRSPSLTLVGLDDSFSDTSSVSPTGRSLTGLDGAES  
IHLESHTERRDDKSPMSSASKKSGDFNTDTREGTQDDSDALGAVSSPVGKLIDSSSDGKN  
ESIGDSPLVPFQVRNDRRNLAWSRCAARKQKSQNNNQEKNCASSEPHSAHCAPIMTRG  
CFLFLPFG  
>comp16347\_c0\_seq1; 361 100 1224 LEN=1375; translated  
MTYLLLSALLFHQFSSTHVGHFSTSTPATWNRHNVDAERSNQDERHRLYDAMPPLYQE  
QERLLVDRGKFEGLMENNASPISPSVSKGTGAAGKFAASSGMKASDLKAAAKVHAKELR  
KSGVVRIDDIFPSDTADELREYVGLRERSEEQVRNGEVKPIARFADVLLKENRCDLTIP  
LEDDVVVDALLHVFKTPVKGMMSSMLGKQAALYELSCLISDTGNSRQVVHPDTPCKPDQ  
DAVLYTCFIALQDIDLTMGPTTWLPTHTPSAHELQDDYVGSSGGESSKDKLLRTPSPV

LGLLPKGS CAIFDSRLLHCGGANTS DTSRALFYFSFKNSKIGYPGNPGSIRPELSSKYTI  
TSLEAELKQLKKR  
>comp16348\_c0\_seq1; 242 1 1046 LEN=1046; translated  
XNDLSPGEP PAVPTTGWKAVRRSVFLPRTLPVVL SALVGTGAQIGCALGGTLVLSLGA  
ASFAVPGQVLTLLFLYASCGLVGGAVSSLLCGVFGCCKKAGAFATAAGLPALFLAAFLV  
LNAFVEGARASTAASEATIGALFLLWTAGSFPMVALGAYGASWARPAPEPSKDTGGASDD  
DENDADAADV PNASLAARAAYLLVLVGATLPMNIAGPESQLVLSCLWLGCAYLSPQAFY  
LPATMLSVAALSALVAIGLCFFQLCREDHRWWWRSFWNPALAGFYFFLYGLYFMD SRLSL  
AGLSVAIYL VYTSMMAVCFGLFCGSVGLLSSSLGFVRFYGRGTGREERDX  
>comp16348\_c0\_seq2; 304 111 1510 LEN=1510; translated  
MHKVCRFILYLWVLL LAREANAGAGERSEGRTEESLFAPPGEQQWVETEGIPGKSPSLGG  
LAETIHLRTDWRQLDPAIASKLREGRPLDRRERKEVEWSEWSAYKAMRRDGFDEVNTRE  
AIAMRNYRLRSMKQEQLSEILFPGQTPRDYLLGEALPVRMDLVRSRKTLMPLRYENLPV  
CRYPQPRMRMAFQALGPRLLGYERASGRSPYRFVAGENKECTPLCFVRLVEEDLVRTR  
INNQYRMYLEMDGLPMLMRS AELNYAVRGVPLGFKFPAFGRDTLNGNFVGDPIHYQDDAD  
EKFFLYNHLKFLV TYRRVGGSGERNAIRITGFDVHPVTIDHKRDADSGDVSTCRGPYVAN  
DPSRYFSL SAGESGHLDVVYSYDVEWENNDLAWADRWDVYFVGAPGGDLYRYGLIHS  
LAKVLVAVGVAAAFVVRSLRGGSGGGKAGGGYDRLPASEDDDDENDAX  
>comp16349\_c0\_seq1; 435 1 1014 LEN=1196; translated  
KNSYNPILKKRKFNSHLSMKLAISVPASVFLVGLGASRVNGYVYSSQPLHRNPCTPGSR  
RSDCSSGNGQNFASSPRKVPKGRFRINDSIVDRAFRDLQEELNGTYGDGVDVQFNWETM  
GSTKFPFEKINEETAKKWLEKAFDLASELNKDFAAATPTERERTDEMIQKSRDWWVRH  
YESGKTKAANDGGGSDSDMNQDNF SVAPESKIQDPKDMIGGPEPSLEANDEEEVLSEI  
QSEEV PFSENRSNEEVFQVAVDLPGVDR TAVDVTLDGDFLVVTATRSTGSADQPVR  
KYKTKVAFV ETEVDMDQMKATLNGVLLISAPKHKPTKRRKISIT  
>comp16350\_c0\_seq1; 605 119 1450 LEN=1681; translated  
MPYTTRINTP INHVQLTNVAVVRM NKGGRFEIACYRNKVM DYRQGLEQDLSEVLQTERV  
FANVSKGEF SKAKDMQKVFGTKDEDEISKIILSKGQLQVSDKERAQQQEK TSAQIAE  
WISKNCVQPATDRPYTMSQIRHAMKEANVSIHPTKPLKRQYLECVKLLQKIMPIQRA  
KMELLLVVLPEDKLETEEILKENNVTFSEPTETSPYLKYQILVDP SLYRILSDAMQK  
MSEARIEIVNQIVTKQGDVNLEEEVGNKSDGIQSNPNAAYTNEDDDFHAAQLIGKVN  
ISSKQNYDDSDSEIEGVRVNRKAQKKNKKKKGKAKRRNFEDADQKNNSHNERSTDG  
FSSQAIGLHQSVDA SAEPSDNSKNAVSITGNGSDPSGRKSCNTCGGFFDTASEFRA  
HFKSDWHRFNQKLMKGC APVSEKEFLLCDSGSFFENGDM L  
>comp16351\_c0\_seq1; 283 1 1839 LEN=1967; translated  
XSVG VQYRSYQQFSFPYDTSFFRVLNATAKYHHQSFSVIRLTSYWIGRIDRATDXE  
VATV RGECRMNRNNQQRSGNNS EHPVLRHRPSFEDIRCRIDDSASDLDPSSARTR  
FHPDTFLG NGDEEGEEDSLLNWVDQFFGAAAFWISFGLWTVVLLYTFV RPFSTTV  
YRRLVNQIGTGSYLEAISLLL PNTRICLTGSDVPNPVGT SILVSNHVMNADWYSL  
LLALGRCVGLRGSIKF FLRNEIFRLNKHVPREASRTTPESSPRKASSVQYTGA  
PTDDNPSVGGGRNYAISNGNALTRKEPSPDLVLAAKFFNSFLEFPLIDEEGYV  
SDRESLFKLLRSFTDSEGATAPVHFLFPEG WSLYNGESRNTV LARSNGFAKRE  
GRPQLKHL LPRTTGFNASISSLRESSPVIYDVT VAYRGYKGCIPAEEDNLSL  
SLWHTLRRCYPKEVHIRIKRYSMEEVLRDASWLDKKWAEKDRMLQYFSRHNS  
FPTDSRGFCRHQLFETRFE SMETSVL SFLRLALIPWTLPIFLSIPLVWTT  
FFAWLLYKGYQYTYNYPENTTASRNQSSSLDETDDNAGNSSRGT PHIPATPF  
ASP S ISN WHDMMIDRIRNEK  
>comp16352\_c0\_seq1; 256 77 973 LEN=1618; translated  
MAHRRRGVGVGRTRAGASRPGSVPASGQRRTSSAAMPSSQM IQMPQTQDDRLQK  
KADEMHALSMQSALDTVEK LQVKLADFAKKHQSDIQDDPAFRQQFLQMCAPL  
GVDPLVSKGFW AKTLGVGIGDFY YELAVKVAEVCFSTRSKNGGIMALAEVCD  
TLNRNKARRSSSSSKRKS GKKDQLYSKGDI AVAVKRLATLGGGFRIVTVGT  
SDMIVSVPTELDQDHVEIMALAQDGE GC VAVENVTRQLRWNE DREALALL  
LQEGMVWKDDYHGISFYWFPSVWKEKMAIEAGAQ  
>comp16353\_c0\_seq1; 237 1 992 LEN=1092; translated  
XLTTIPYTN SPCTTETS KSNQLISCLKKRMISSMPKGMACDSDSVDESSK  
VRTWCENEGSMFNIVGSNPDWSSDRRDTIKWIMKEKKRDRYPLSKDIYA  
FFVAPVFSVEYFFSLYVVALKYTVFAILATDIRFDAIH DENKGATAAKFFL  
IPVAIAMQDDLINSYFFFGNAIYCNSALAFSKHATKKLAFSFLLR TVD  
GFFSLAVNFGVMVTTDTTLGVFLNFAALSFLQSIDDV F YELVMLGFFG  
DRMEHMASVCAEITFRRRSGNDNNKICGLLRISHLDTILFLV TLLICLVI  
YIYMTLR IYGYFDEDPDVTKSTNK TILLY  
>comp16354\_c0\_seq1; 260 55 453 LEN=539; translated

MGILKVRLVKATNLADKDFIGKTDPYVRLELEQDNYLRDHDYGYQISSKKSND CNP VVWNE  
DFSFNIP TLDNMVLT LKAFDEDIGSRDDKCGKCKIKLNKEGISSSPKRIEKTIDRNLLRP  
NGKITV DISYNP

>comp16356\_c0\_seq1; 535 73 1491 LEN=1687; translated  
MTSFKDSEFKGLVSLADHDPELYDLIEQEKNRQWRSLLELIASENFTSKAVMECLGSALTN  
KYSEG LPHARYYGGNEVV DQVEILCQQRALAAAYGLDPEK WGVNVQPYSGSPANFAVYTAL  
LRPHDRIMGLDLPSGGHLTHGFYTYSKKEGTRKAVSATS VYFESLPYRVHPETGYVDHEQ  
LARDAGL FKPAMIICGGSAYPRDWDYAKFREIADANGSLMMDMAHISGLVATGEQSSPF  
DYCDIVTTTTTHKSLRGP RAGMIFFRKDERGFENRINQAVFPALQGGPHEHQIAGVATQLK  
EVATPEFKVYSQOVKSNAALANRLTSKYGYKMASGGTENHLVLWDLKPNGITGSKFEKA  
CDHVCITLKNKNCVPGDRSAVTPGGVRIGAPALTTRKMCEEDFEQIAEFLHEVLVASLAIQ  
EKSGPKLKDFAAALLEGDATLKDIDRDNKFFATSFPMGFDPKEMKYTDPSPG

>comp16357\_c0\_seq1; 161 1 909 LEN=1081; translated  
PKQNEPLEKIPIPKTRNPLGRRNTQIRNHQQAITTEQEHSQTTPQNRKHQRQAESKPTTE  
MIQAAASISRNHNGNVLSEDFVQEGEGSGSSESIIDLFGAENYAKSNGGNINELYNKMNQS  
DYEQFLVHINFTEPYL RDAVIGAVEDGGIGITTRNGRKHVAEVEILDFGCGTGIVGHLI  
KDAGFTNIWGLDASSGFIDMIRSNGVYKGGQVFLGRGVDRFP EYK N RFDLVTGTGCFL  
PKHAPSPAFFDAHAALKVGGVFCFTLRANLWEDGHDLGYKDAIDKLVADGKMRFLDHAAK  
DFW

>comp16358\_c0\_seq1; 404 110 820 LEN=1097; translated  
MEGHKINKVMIGEGETS IHDIDGESGLTKEEEDRQSQYRSGNNRKYP SKKGYDDNDSAST  
GSQGFAMMTTAGSFRASAI SALGIFSLPNRGKKEATPDLIVEDLT KSEMELDQMESNMI  
GYEHQVRQQQKEEQQQQQRELQEVQQRQFQHQQHEKQQEQQKEQFDNESSAGTFKDEDD  
EHTHNSGDSILSSLSRKR REREIFYSVSVL FVIMCALFITGGVIMYRNNKLNGE

>comp16360\_c0\_seq1; 205 338 709 LEN=709; translated  
MWGALKKDFGEFVSTVATDANETLQAIDQKMDEPLV GQRTDDQGGDEGYMGQEASPIDLD  
TGMVL DHVVG DVEEEDGDEVFSWKS PDENPTAEEMRDQLVLCEDVFKDSLVSSEDESTSK  
EEEE

>comp16361\_c0\_seq1; 464 24 1772 LEN=1857; translated  
MKKH SKLFLLSGAAFI AVAVIFNIMTISTFEKHTHGGAAERQPSMLSIALAKQNFTVEKQ  
AGSSSVMKKHDRLSADFGPAANEKDKETA EKT TTTIDAIGE ANPAVKENKNETTEKIRLV  
LPPKEIEWIRNRVDLYHNVYNTKRELNARKKRIEKAATDPERFYNETTGFTKYQEDKEG  
PWLDFMIAGHPKTGTTTLVANLANVAPMKVKDFCVATMDGV LRFVYKRWLDKFP EIQDLP  
DKYIPDRNLQMRGAKCPRYLS DPLLLLGYGYAYPRTKLIIGIRHPVLWFTSFFNMGNVGD  
LYTRMKLCPHYSNIDPFTGIPKSPVST AIDKDGKQIPPELCIGECRCGIPVCFHRSRLHL  
PLARVGKTP LSTKEERDLLAPGDPDGGENLFNGKLRNPV FVYDQTQMKDGSYWDELAQFL  
GLSYIPNAHYHAAHGQGHNKTLCVDYLDEF RSKMMAHSYNMSVWLENYFLPVGLDPNRPD  
VVIANPESFRAVLQTYKEDPCRRLVRRES DGEYILDPSLGEGLAVYSTKREDCPASYPK  
SQA EKDMHQQRKKAARLRGMEENGLVPRQGRKRNKRGQLVT

>comp16362\_c0\_seq1; 69 1 383 LEN=611; translated  
XSSSSPPPPIDAMLEKDRYFLHFARVSIRSCYRSCVAKAQQADLEVLTVRPLGT V GKSG  
QIYEDLLRIGVQTLVEEAKFSSLLEVRLVGSNPRETAKLVGILQEMGYSSSEPKNGRADG  
LTQERLS

>comp16363\_c0\_seq1; 397 90 791 LEN=949; translated  
MAEDPEEADVAAMLDSL KKKKKKKKKKSEKEASSASGSGGAGGADMSAQEALLREQDEAQ  
DCVEDPYDRKGQYVYGELLDLVVDLLQTNNPALVEKKRNKIPPPQMTMLT SKKTMWVNFQ  
EICSMMQRSPEHVMAFFFAELGTDGNMDGNQRLIIRGKYVPKYIESLLRKYVVEYVTCEM  
CRSPNTVLKKSSTRLHFLECSDCGSTRSVAQIRSGYHATS RADRRRAARNAKG

>comp16364\_c0\_seq1; 605 1 1674 LEN=1801; translated  
IFYNHHSASDIVSIPIRKTATMSSTTKNLNESFTVRS DKCYTDEAII SDFKYESTLVE  
GNVVVPVETKMQFKTERTVPKVGVM LIGLGGNNGCTCIAGALANKHGITWNTKEGEKKAN  
YWGSLMMSSTVKLGNDAGKNSVFTPFKNMLPMVDPSEVVWGGWDINKMNLGDGMKRSKVL  
DYDLQQKLYPYMKDIVPLPSVYFPDFIAANQSERADNVLGTGKQE QMDHIRKDISDFKAK  
HELDK VILLWTANTERFACVEEGVNDTAENILHSIQRDEAEVSASTIFAVASILEGCTFI  
NGSPQNTFVPGVVDLAREKKVFIAGDDFKSGQTKMKSVLVDVFLVSAGIKPVSIVSYNHLG  
NNDGKNLSAPSQFRSKEISKSNVDDMVE SNRILFEEDHDPHV VVIKHPVYVGD SKRAM  
DEYTSEIFMGKNTIAMHNTCEDSLLATPLIYDLVILGELCERITVKKEGETDWEQFHPV  
LSLLSYMLKAPLVPNGAPVVNALFTQREAIKNVMRACLGLGPENHMTLEHRFESSLKS LQ  
QKAAASSEPEKKARIE

>comp16365\_c0\_seq1; 201 83 499 LEN=920; translated

MSRCFPARNLFALLALLAATASAAPKTCTPSYCCCTGACPDSFAPHYASSSTIKNDVNEI  
CYAATEAGAFGIGGDSITIHSTGAVLSPNDLDECPENPPEEMIPLTNVAAVEEQVSGAST  
SSPLVATLVAGALGWIMA

>comp16366\_c0\_seq1; 195 120 1355 LEN=1673; translated  
MPSAKRKKKILYCLDFDGLCDVNETFHSGLRACRLIWNNESSDPKPSQWIDDLDRDSQ  
RMKTLMEDFRYVRPILYVWGWESILLIRFLACGDEEETLLGPNASKDAGAAPKRLSKRDAV  
FQRFHSGLKDHAEAWGFSAQEYGAALSDARNAWISQGDDEDSGEGSWIDAHGFYGGACE  
AVRYYLREKGNEDIYVITTKAKEFALRLLLEKQDLFRSGTTAPAAVSTSLCFKDSHVFGGLG  
SGPKASVLQRILEERQSNYNGSEPIDFVAVMVEDNVATLTKISRSPVGNKILSVVASWGY  
NSNEQLAEVFOAKTNRSGDDKDESNKYIVLPPRKNPESPDTERALEWAQCSKDRDPSG  
SSLASVLLTPGDAGRLLAKSCP IGTPIGSEDEDQDPYDFSSAENIAEAHFR

>comp16368\_c0\_seq1; 805 91 1335 LEN=1598; translated  
MKYSAAAFTLFAASATAFSPASGPNTRTALNTATLEAPTEETKAVAQPTRFDRLKKNYKG  
FKRSVEEEDMDSLSFDYDAFEAAVAETSYSFERNISIVKGQCIQYEPKGVIVDIGAKASAF  
LPEAEAAALIQPVGSTVNDLVNLNEELDFQIISDEDEDENGQLLVSIRRIQYRSAWETILKMQ  
AEDAILEAEVSVNRGGAICLVEGLRAFLPGSHLAGKMATEDLIGQKLPLKFLEVNQENN  
KLVVSNRKAVVETQADLSRGLVEGVVQALKPYGAFIEVGGMSGLLHISQISYDRIEDL  
EQVLQPGMAVKCMIIDHKVNGRIALSTKTLEPNPGDMLKDSAKVFEMAEDSAKKYHTQM  
EEERKQRESAARDIVLGLGDSLGLGDDLNGGDAPAATS DPLADVSDSLDSLSS

>comp16369\_c0\_seq1; 299 1 882 LEN=1131; translated  
KTCSLFRNPTLTIAAPTIFISNEISPAMDSTVGKYGEAISSVFSTPDTPEKGGKKSIAQSK  
ALANIHGELNLFETPPRCGEEEMDEGRDSNSVDVGEVISRPRQVEGNGAVESAQERALRE  
EQESLELARALMAEEAMASYTQSLDYLTNNQDQFSDDELALQAVMNEEQHQHELEINAD  
AEAAIDGDDNGDSYEFMLRRLGERMGDVKSERWAQVAQKKIDGLPIVVFDPENCSNKKDAN  
DCDIKCLVCQEEYCKAERLRKLP CGHCFHVECIDQWLLSKDFCPYCRTTLEKE

>comp16370\_c0\_seq1; 286 146 1129 LEN=1323; translated  
MAEVLGKRTTPKSSWKKHAMASAFRGGAAAGLVAMVLQVLLMWRRTTVNYQYKHGVDVATA  
LCTLYKEGGILRFYRGASFALLTGPISRFGDTAANEGIRELFGSTNSRSNVPLWAVTFLA  
SLVAASWRILITPFDTVKTTLQVYGSSRGWERLSSKTNRYGITLWDGALGNSFATLAGH  
YPWFVNNLSLEQLLPKPAKGSNDEDDRLYKRKTLVRRAFIGFCSSVASDCVSNIRVVK  
YRQTSEVPLSYREALSELI IAEKMSFVTRGLGLKIFSNGLGGILFSIVWKMVLERMQLSA  
NADVHAGALVNGDTSAGGNSAEGKKGK

>comp16371\_c0\_seq1; 479 1 1492 LEN=1528; translated  
XRTDKHASKYQMTICVVIQVVPVEDPQRMERLRQSVKSFVHDESPGEEAGGTSHRNV  
IRWARDXNAALDRHHEDAGGVPTMLLSAFLGTEHEEARFSPEQFAAFLQDAFNEYRSK  
NATNVNVEYRCEVWASAPAPLPLTKVGGDSIAADKTSNHPKHRSLRLLRSEFRTKGLCVL  
PGVLSCESETTNDHSSVLERVQSLVHWHIQTAEAAIAKNHPQILLGEDSFLFREMAS  
RSKQRFDLLVPRDELYKLVREVFVGESEMAEAGGGIGSGNAFARELLQRLFLDRDEAG  
ASEGSAAADWMDLSVVYSKPGANHQGWHADGAHADGAPDAGWSSECEPGSSNGSTGNA  
FAPSLAAPYALCWFVPLVDLHTVGF TQFWPGSHRHRALVGF GPF AEVAGATWDGIVPAG  
DAVCYDYRLLHRGMPNKSADPAKANGGGESTPLPPPF IAGYFRPPYRPVLQLLCRRTWY  
KEKNNYGSESIYEPSSL

>comp16372\_c0\_seq1; 304 74 466 LEN=780; translated  
MARHSILFTVLAGLFALQTVSAFAPLQQPSNSAPKTDLVDMKSKFATTAAVVISTSPLIA  
LAEVDDYEGAVSAPISVAWLGG LFAVGTALLPLALQGGEEAFDEMRERDAGKFGTGDS  
SALDRKGRF

>comp16373\_c0\_seq1; 296 112 1295 LEN=1457; translated  
MARERVIPHSTHSVSQSSKGRRRRRRVKGFKALLFGGATTLQNTIAIAMGLLLFSARKE  
TVTKMTVTSSKSSFFFATAFVVP SATAPSIAGRKSSATRTLQPHTLKAPVASIGRHCNP  
LGGGPDTIEPKDRYEIATQLLDLVLERRARDIRSENNGPASIISGAQTTNDRRSGDIQAL  
IEELTVPAKGNQPEYDPTTECLFGGGFFCTLYFYYPNTGDDGANNAPT PEDPIWEKTSL  
LLSNIKQQYYVRNSNNDNPRALSVINYSEIWGPGFNIQADGLTHITEENKSSNGTTL  
PDIYRVDATKISVSLFGGLISKTFDIEGSANLVVLYADPRLRIFVSPPPVQNGGKLGAS  
RVGRRSGPKRFGSTQKRKHPKGNRFEAMKEQMRH

>comp16374\_c0\_seq1; 268 140 694 LEN=1223; translated  
MSESSTRQVGTAKWLNHRGIGFITPDGQDAEVGKDFLVHYSNIKQDPSDGFKSLAEGSQ  
VEFETTEDPKNPNKLIAINVTG VGGNCDNYRGRRRGPRSENKEEPPGSQVFIGGLTEDC  
TWREVKDFFQYGEVVRADVFKKGGFGTVRFKKASADGAIELANGVEFMGGTLEVRDLK  
KASP

>comp16375\_c0\_seq1; 377 1 2228 LEN=2272; translated

XRKEENQGHDKLNETIAPNKDNWKFESDASVSVSTKGTMNAVKSKKTMGENEQPESNGAT  
TIKECKDEKDPTISDTKRRKKFKCLARVLLFLPYIVGLFWTCLHPIVSVITGEMKCRGWY  
LDEHSIETRFIDNLEPHILPPHLENLEVSPVRQPKYNGIHSLCDFPMEGDPGFNPSNLI  
CHSHGDYFEVAMIMPLSNAIDATEEAVVMVIPSPREETNEPSDTEEAKTSIDWSSSIFHQG  
MIQTIKHLADPGNTPWLAKAVLVVTPPTLSSDGTAKSLDETVSSFI SAYLGEDSPRFDYQ  
SSRQPQNHEKVPPMPTKLSGSLRNLIIVLQAMHNAEVDRTGRHISKSELDLSISPOGRRG  
VLPNADLFFLVSRMLMERTMFFRQSPYQKYFTHPCTQESRNADFWMQWIKKLQHRYYRKA  
EAVKEWAMGMVDTFLFARTLAVGPFPPHAAALERGIDSLTVHATFGGIYRRDPVLEFVQY  
SEYIVRSLANLHERLHHSFTLYLLPTPKTFVSHIEYLLPNLLVLLPLAVRVFGILLPAMK  
GGLDLTAVLGVLLILSIVVVAMLLADVALNAIGNEGAMTGILAVLYTGVAYFWIHNILFR  
ERDQDQSDNHEMLNEQDEGLKDASPSSTRTVRTLQFVACAMAVYILVPIAFANASLAYLP  
SVLWSAILAFPDYASMKKSVIGRTSFQKHVVI PVLGLLVFATAPPVLLVPRLFPPTYTFV  
KFAYVPIHVLFSLLMTSVLVS  
>comp16376\_c0\_seq1; 467 180 1136 LEN=1235; translated  
MMGPGDDLTTLTNNGDHMGVLRIRAHREPTMVISHLGALLGDELDRVIGSDAAARVA  
ALEQLCLAAIDTNDHVLAKSCLNQLKLSSAAASDGSSEGNLVQSDRYRLLGRCLEAAD  
DYEGATKLYEQMLKQNPNSNLVALQRKYCVLRAQKDSPEAVLEALNEYLGQQLSDVGGWY  
EMSQIRLSMADFKAAYALEQVVLGSPLDADIHLELAEVYATVGGLENTACARKHMAQAL  
ELEPTNVRAQFGLVSVSQQFLDESASSTKQKKLDEHERLVATELLKFGAAELLKSYKGS  
KMFASVKRVMDDYTQNLK  
>comp16377\_c0\_seq1; 106 153 524 LEN=1026; translated  
MKSLLRSVLWVLLLLLLLASPAAADGSLRGEPPGALARVQERHREGWTGRHLHRSPGYT  
EARNADPRASATRGSRSRSLYQEWARDDNGDLLWVWLVIGLIGILLCVVCCCGSVCC  
LRD  
>comp16378\_c0\_seq1; 250 70 468 LEN=570; translated  
MATYAQQANSKGDAGSNGGGGSNSYSSSHNNNNKSSDGSKKEEFRNYLEKSGVLDLTKV  
LVGLYEEPERPSNAIEYIKRYLGAPKNVDVIALQRENEELRRQLAALSEKKGTTETKQTTA  
DNNIRSNRSIAY  
>comp16379\_c0\_seq1; 121 1 295 LEN=498; translated  
XIATTAATATTITENSTCIKQNSINMENKEGFNETIVEPLRQFAKDSVHLVKKCTKPDR  
KEFTRIAQATLVGFAIMGFIFGFVVKLVHIPINNILVGN  
>comp16380\_c0\_seq1; 337 320 1432 LEN=1662; translated  
MAAAGNGSTAEEDAGVRKAKKISGIGADGWFTETAPMWPQGKFSALDRASSPSSRDS  
SILFHEQSEFQEILVFQSAQYGVFAIDGILQLTERDAFTFHEMMSHLPLFSHRNPERVL  
IVGGDGLVLQEVLRHREVRKVTLVEIDPMVIRASKECLRLVPELYDDPRVEIIHADAA  
EYVQDPEHHEKFDVILADTLDPLGPAESLFEPEFYECMHDALRAGGIVCTQGENMFIHFE  
LIRDLVACCKDIFGHAEYAITSVPSYPCGQIGFIVARKGRDNRSCSSPIRRPTPVFQKQL  
KWYNPQMHQAFFVLPYVVKQELSGDATGTNANGNAITNAATGYANAGYYHDDNDGDEEGD  
RCILSQCVIS  
>comp16381\_c0\_seq1; 285 77 880 LEN=1103; translated  
MITAVTLFLSLLLPIAASVAGTETEDVFVLDQNRDSASTSGSPLMLLAIDKTKKEGTEKS  
SSMLRGGTSTKNPDGSLDFPPLPIHPHHTGSVHYSSTMNSDGTTSYRRDINAPCDYGML  
VFNIGPAKDNMPYKYDLYADAYLWSDNESLCLMFYPSYTGFIQISNHGYPYKLGYPMTVNF  
GDLKDFRHMHRISSRILSPVDGSAQKNANAIKDNMAGDYIIMAHNFYTIIEYKELKQY  
VNSWRTEETGKNQSTAFDTFTATSTL  
>comp16382\_c0\_seq1; 304 1 1009 LEN=1802; translated  
XKPSRLYPFTNTTSMRTPIDIASLARFILSPECKSIVVLTGAGVSVASGIPDFRSPGMY  
DTLRPELLTAKPWEQKLMERDPSNVVNDIFQONSLEPYLEVRRPFILGTRKQKWKATIAH  
RFFELLHLRTSNKLTTRIYTQNIQDGLQEQCKGLPAEKIVNVHGTISEAQCEACGGNMDFDD  
FCDQVESKIKDIYDLDENHKAPSRSTPINCLNCGKPQVKPKTVLFGSLPEEFFVTRTEED  
LPTCDLLLAVAGTSLAVSPANSLVYRVPDKTVRVVNNELVGEFFGMDYGPNASRDYFAIG  
QCDEIFLDLIRELDWFDDLTSMIRDLPKSAALICL  
>comp16383\_c0\_seq1; 533 89 904 LEN=986; translated  
MQGRGVTNFSGDKPSHGYTTSTTEFDELIRGIVTTEQAMMAKASLEEAFLAEKRS  
GRDSIVHKRNSNENNAESQQTNDGDTNSDVSDDDDDFDFDDDDGFMEYRRIEQQLKE  
HETKRSELMLRSNNPSSQILHIAREEWKEEVNEASMGNRWVIITMVEASGDRRDRVQE  
LHKVAREFFPERLPERNLDDGDGGFGNSPSARLLTIDASEAIPNWPEERVPAAMFAYRN  
GVKQHEWIASRRGEFPSRDILEELFRQWNLI  
>comp16384\_c0\_seq1; 815 1 1362 LEN=1461; translated  
VVEPKSGGRSCKSREPCKNVKSKLLMTAAAKAKAKAKAEKRAKELASFPMSLSPSG



MYKSELTLALEEKRVAAEERLRSSFDEKDLKDGFIQKELSAALVASGIIATENTVVLGLM  
ESIDTNKDGVVDFDEFKAFASAVKNSSLARTGGGDQQPLDSGNSTAQPNTPPSPPSTLI  
IIGRAKPGVNMKSVKLGKLENYGGGGHPKAASATVRLNDESEAAGIMSKLVDELIIETSL  
QEQSTVGFMTSPVLSVKSDMSENQVEDLFNRYDVRALPVVNEENEVIGLVTYKEVAAAK  
QRMWNKEQKRLRQERQRKEKEEKNKASGGSGGDESLSPEEKENQRKQKFMEEERRRRGPT  
VKAWMKQHIKTVEASLTMAEVEAILLENDVGCIPVVQDGTKRLVGMVTRTDLLRQHRYYP  
SLHYNKGMSDSIASRKPIIALRRKLRKQFDLDE

>comp16385\_c0\_seq1; 278 1 1146 LEN=1306; translated  
DSHVFGISAVFVLIGVTNSIFVSKLSFRTSLVEIEEVAHFASFAPQARASKDKRNMPIWS  
AEEYFAIQVEERIYPLPTDCATSNYRRLIHSEETWRHLQAVYYEEKQARHSYHHRTHNR  
LRNLNHLGYSGLTLGLLEVRDGERGRAIYATEDIPSGTVVWKGNDQTNNGFWPNPRSMRK  
FLRRLPHDLQCDVLLWAYAYSQTRTQVEECNLDEASFFNHGERPDMVNVVKNKGVRSITS  
RDVAKGEELMDYSAFIALGDESVAWWDDLRTAWSEGEGLSNRIDGNHNSNEEEDDTCM  
NDYVNYGKPKPDAPPVVVVESSATPKASSSVFVGASAPRTHRITRAAPQTFAPVAATKGLP  
AEFVLALAVAGGVWAMGKRQR

>comp16386\_c0\_seq1; 445 32 1201 LEN=1341; translated  
MKDYRSPFLSMLLTCWFCFALPMTTGATESGGHKDIPTTAIAAANFDTLVAALSQADLVG  
ALSDPNGPYTVFAPTDEAFMSLPDGLVDCLLLDRNKNVLTNVLLYHVTVGTTFSSDLLDG  
MEISTLLEEEVTINISDNAVMVNSNVISADVDTSNQVIHVIDGVLVPPSIDVTAFLRTC  
PLTQDPDPVKCSYLGIGRSAGQYLTGPTHTCLCAQSGHWTDCVPNEKKVKSVEDVVVSNP  
KLSTLETAIRAAGLLGVLDGSDAATLAFAPDNRAFSRVPPVLDYLLTNTDVLSTVLRHYI  
IPGGVSSDDIALGSSMVPSSLDQDFIDFEKSCWSTVETCHEIFSIALNGESDVIAADIR  
ARNGIIHVIDEVLIPPSLEAVVESLLGSF

>comp16388\_c0\_seq1; 121 303 608 LEN=948; translated  
MGLAVLTPFLWFLMPDSYSDGFIDKGFVLLAGSISGHSWIGMNYVATDYVPKVKSKALLGP  
SRVAIAGMTAVTFLGLSRCSIQSEGGIKGCKLGLWNPPPSK

>comp16389\_c0\_seq1; 301 107 562 LEN=651; translated  
MSEQQKAKCPALCKMCGFFASEATGGCCSKCWSSIKKEKPAAADVVETPTSKNTTEID  
TRSRKQREEQTELPAAESSAVTPLKKSSEKVDSDASSSTAQVVKKKKKKKKGGYKNMMAGM  
MAGSNKKDIAKEKAILAKGLGGGAFSKIEKI

>comp16390\_c0\_seq1; 251 108 959 LEN=1628; translated  
MAPFDCDALNATVLENLSRYIGNMTPDELRSRTINGGGYDNFIETSKNMPLTSSERNISFL  
VGHFGFFIFNVINVVVLAFAFEGYAFDYLRKNRAAQFMLAACTIQLLSCATSLHRYNLNDE  
FGVWAKAGMITGTIAITLMTWSYLHLICRDNVRNTVFWMCGTSVIAAAVIGMSYWHWEEK  
NFFYFRLYLFSVSVSYGFI MLFAGQFQLRKGNIEMTRDISNTTMKRVVWVLI GLDFLHPA  
ISLADMPAFTYPLTGMVYIMSMVNSVCVGRMSFVKENLSSGVT

>comp16391\_c0\_seq1; 994 1 2757 LEN=2985; translated  
PPHHNRSASNRKNHQLRPPVLSTTDVLPILVLRDFFVEHHRDRESHRGRRRSSPSLPS  
EVARKLRRYEGRNLVRMDTATHAIVLDAAGKYSSSAMDGSTRSGTKGSLADEEPSAGNR  
NLKHREEWHSRHNQGVLFADRYLRDWINDYKRTAGSRSSERDARVGGPAQPDVVALGTV  
VHAWVESGLPGAARAEAWLKTWDDFWQEQENQGLAGPESESKHLGVHHQOSKRNLTYTF  
VLLAWARSGNPAKARAWIDRMI REGEYPDVRSFNCLLMAYQNAAPEQKRDASGNRNRAS  
KHNAECAEDVLRHMQRLYHDKDGFLEPPNVASYNIVIDAWTKRAGSGSSSFRAKGRER  
PIDAARRAHDWMEQMKLAGIPPNTITYNTVITAFSRAGEPLQSEKLEEMITAHQNDRCR  
NLTPQTSNFDGKDSGDTDDARNDVFFDETASTTTTKPDVQSFTSVLAGWARVGTFFAAE  
RAEELLRTMQRPDVGIRPNVESFGACIHGWARVASGTHPRGSREHKRHIASGKQQQAEAV  
KRAEALFHEMREHNIQPDVYSYTGVLVNAVGRSGRAETAHKFLEACLGEYDRTKDPRMKP  
TVVTFTAILNAWSKASRDPLAAERAHQLLRMRKNDYGIQPNAFSYSAVLDAYARSDQPDA  
ADKALRLFRDMRKVSGLEPNAYTCTNVLKA IARGGRVEEAEELLESELIHDERTRARLGAH  
AFSSVLYGWSKSKRTDAPIRAEALLIRMQELHRNRLIDEPPNAICCNVLA CWARSGLPG  
AAQRAEDLLRSISSEEQECKKDPDGDSQDFPTIRPNRIMYNTVINAWANEGNAARANL  
YEEFLERSKSEAGLAPPDEWYRALWKATIKTSQVPSEEKHLHQLKSLMRSMADSGFRPSD  
KMETDLQDILRTQGGEH

>comp16392\_c0\_seq1; 122 1 261 LEN=1049; translated  
CSYINLARSSLVTSKMPKQITDIRDFLQKARRSDAKLVKIRKRDQTQKFKIRCSRFLY  
TLVVADA EKANKLTQSLPPGLQRKNI

>comp16393\_c0\_seq1; 303 37 708 LEN=927; translated  
MAPIKSLVTLFSLVGGASAFAPAKPATSLKSSSLNIANPEVYEEAQARWEEEFAPLAKYG  
WGFSVHA EKWNGRHAMFGWFFICATAYAKGHGLIPNMDVPLDLKEWGTLATITGKGTITQ  
GRAIILAANMHFFAISLMATICPLPFGDLLLLDPDDESIEKSMERNKSKPFYMPFETGL

TEEA EIINGRLAMLGLISLIFATAIEQKPM LDIVNEW TGSFYF  
>comp16394\_c0\_seq1; 603 45 1553 LEN=1857; translated  
MRNGICKLPFLVTDERKWIHGVYGLYLLNFFLFLVVATGVVGESKTAKVNSDNDVGRPGE  
SQSLSPWQQCSTFIAPTTRTNMNVGVIANRNF SVGEIVDISPLTVPIPDGNSVIERSVLN  
DYVYGYMRIIEQERRRPFLQKLYSVLLGPD MFYNHHPVQPNI EFTTTFGREPSNGLPDAVN  
PQGFVAKRNILKGEELFTSYNGKDDGGKEWFRRRGVMMETPPLLPPVSSEYNDDMFDRHS  
EAFCSKIYSGLGLPSWKGRLLP LLPKEYKLPFEIDLKWLAPFD SGWGD AKTKVDVKKGER  
LEISTALVLSREFTKNTALMPLVYAWKDLHSNHQETLKR LHAAKQGNLHLQYQGPDTSWI  
PINNFTNKGDHND FEDLVLP AAGNIGMVRRTGSFDANCR LVVHPSNSEDMEDDHALIE  
FLDQPVGV TIELIATTDIMKSTTLVVDLFESIATPLEYKLLFSELKLTGQPF SRQVFQDR  
RRIRKGREHTPANKATLLNEEL  
>comp16395\_c0\_seq1; 313 1 1446 LEN=1703; translated  
QQLFKRYQSETPGSKNGKCSRDAKSLEFQNTTKWKPPFVNARSAITEYIPTDFDTFLLL  
NMRDPSYFSIEECSIIVPSFHSW MYAISVHTGCCLFGA IPTGILLYVIMPGAKGPTDTT  
KAYSSISETTKSFLCCTVGTAVASLIYTGRPKIESYAPNEEIRWMG PLLASTFGFAAFFK  
SLNSAFGNYPKGADRDLCTWLFWFFMMPEPSFAK GKLIKADRNEILVKIRDFS IKIVALS  
IILTILLRSHPPYRVMTAIPFSSSSLNEDDEFNGFN LWLFSTNINGFFHLWLLYLFFA  
FCLDFSTIVNYGISGMRMEPGFYNPLLGSRSYKETW GTRWNRPNVALLKRTLYVPARRS  
GLFNQQASALLTFFGSGLLHEYNFAI INHRSLSSPSGYRPGEVTCFFFFMGLLMVGETWI  
WNRCYPRRLQAAIETLPSVATASMLTFMVAGIAERYFLRGWFESGFVESVAQMIPYILCE  
K  
>comp16396\_c0\_seq1; 217 1 691 LEN=1138; translated  
XHKPEDPRRLAPTKISSVFGTHSAILLARYNFNRKTQKSLKRIEIMGQYDMEQV GITYKV  
AWQKNDEIMMKDACKIWKEMGLIKEEGMMPRAKLLSVVAYEGDKMVGLSTLTVAMQQQV  
FAKACHFR CVVRPEYRRRH IATEMAIRSLALSEEWSEQNPSYKVLA FVIRVETQDLTMKC  
YEPVWNNKMNFIGYSAEGLPLYLRWFKHATFGNPNEDPDFTFYPNRPGR I  
>comp16397\_c0\_seq1; 573 175 1500 LEN=1586; translated  
MKFVTSVFFFLALTAGSCDAFQSTASTGFQTSTQSRTQLNQVNEDANNSEMDRRNFGLS  
SLGWLATGAVASFTGAAPAANA EVFFDPAMYGDQELRVGTVDTVRERTRRA ILQNPKLAP  
AFYQLALLDGLSFNAKEQKYGPNGGVIYAVLNSNEKGESEY MENLRGAANVLIQAEKDLK  
KKTAVSIADCVAIAGAESIESIGGPVLPVQLGRMEVEKSKVQISPLPLDILSGNRSQKEV  
LAAFRNAGLTEREMTALLSGLLTLQLVEKNRTTEDWKASTKPKFVERGKMGRMSDYKRLT  
DEDIQAALNDEYDEDPDDGWYIADSF GGRDDRFGQRLAKDTISEKTFNLYMKQLLSTTGK  
KPVASDTNYGWIGKQILDPTPVCQAWLKKYADSNIIYIKDLSSSFNSITQLGAVYTGK  
YENLLKNRPRKTLNSDDLNL F  
>comp16398\_c0\_seq1; 276 70 894 LEN=1205; translated  
MQCVSSVSLSIICLTFKSIWIRAFIFETLPLRLDTSRPGFSRDNILQLGSTSDANIYRL  
FLEQNSTRNSYSIHLSNSRETALGVKLYRFGGSTVEDHMEANPELTSRDDALRFLTPTFD  
DFGKGKVVYGDGTIGESLQFFALGDDKSSLVSLLEKNNEEHVH DLLLQNRV IASIEAVKE  
PIEKELEIRVSIELKNLSVHEDSRRRGIGKALTKAVQDYARSEVLVLKEQKNKKEVGLV  
HLLVEAKNAGAVRLYEESGFRRIGIGKDPLCKMTW  
>comp16399\_c0\_seq1; 238 97 633 LEN=1393; translated  
MSLIDSSPSPSCSFLSNPNRNDNAALPPFHSLAFSAYYRTECQDKYCTSR LAYHVVDN  
ICASSLLT PCFDDREQEGCSEQPQHDHERQSQHTNSLYKPSYRCQAFVHGHQYSRKVR  
CFDRWVDAAGFVNAALSDIGRQMEALKQE QPVNEHDQELRMGHESIPTGSIQHASKA  
>comp16400\_c0\_seq1; 389 60 1019 LEN=1069; translated  
MNTTTNNTIQPLNIDEDLKKKIESTEFVYLVAKSGIGKSFTGDYLVVVRNWNHVDGDFPL  
KQSTFKPEYVDMVERL F ISGKYAHIQELPEEERREWFAREGYQAYFTEVARKTLEAARES  
DKVVATHATYIADARNFFIDTLIASGAKEVRLVYLD CDFDVHMDALWKRALRQAEQFPGT  
IEEGLEAFYGGSDFESFVKHQKNI IET YFEEPSESEKPTVVDVTAKDITTLDAVDRAFV  
PDGEGRGDLSEEMI EKIKAADIRDEEFFNMEINLEEEAKMDEAEMKKRRSFRNSSL  
RNSCCLKVLEANIEEAISA  
>comp16401\_c0\_seq1; 188 1 459 LEN=459; translated  
DQLPYRNRWPTLDQSQQQATETTTARYSSETMLSRIAESALAIARARVGAATVGARTGR  
SAFSSQVRSYAAAPVSPLNAFAQTWYNLFGSSTARYATFLAVGVIVAEMGTNSLTDYLW  
EANNKGKTYKQVDWSKFDPEDEDEEDDDDDDD  
>comp16402\_c0\_seq1; 493 174 1943 LEN=2155; translated  
MQPNND CPPTVLEYLSFEADATATEEPRMMMPTRPPRNSSNGSNLRS GNDYGDSSNGSA  
LSMQGFLWKRRDIFKNRWRPRWFLHPDQRVLTYYLLANQEAGVGPQQIVSGSSGTTTP  
RRRGRSNIHGSPLDTPPATDILNSGNRRRRTLSSESSAMSTGTIDCDVVRGTIYLLGST

VEANEALTKPQDGLYTLTITD HETGTHSHLAARDPETREEWILRIRRVCSQSGTASNAPQP  
YSQATPPPVRPGRGIRSNPRSKRKDRRRIRNSVDSTSAATGTRNELHVEEDPVAATNGSK  
RDLEPLFRDGESSDDAADKNLSTAIRFVRENEVLVLAAPLVLYKALMLLSFDLPAALSFA  
VTSTLVARWVLIYNLSSVVRFLLTGSNTTGNMPIGHGVSCCRFAVHLDSTKPSAISHVLV  
QSLAKAIRRQPLASKKLPLLPRIYSTDLVLLDLATTSSNASQAVRVNNADQKSLSEIGE  
SFADTDQLDQMOTIPMKFLEKIVGPPCRIVVSSETDGGPGPEPQIQDLNLTECPITVLV  
SKPRTSTRGKYEVHVSVTIQSTDVGACQQFAVTFERLLAASERSISPNO  
>comp16403\_c0\_seq1; 227 152 613 LEN=699; translated  
MNSLLPSGLVVAHPVRLKPGEDLVSSMEKTALSAMQKSGTASAFILSAVGSLESLETLRMA  
NAINSNNGNFVNEIREWNERLEVVSLVGTFSSEGGKHLHMSVSDGQGNVYGGHVMSGKIFTT  
LELVIGVILDVDFSRADQDPTTGKELVVNTLQK  
>comp16404\_c0\_seq1; 254 1 991 LEN=1049; translated  
XVPTAEKRQSNYSNCAHRSVRSPSKPSTASALQENIPAMKYSEFEKRPAQSELLGRSHATT  
LAVATIVVAFLSSVDAFQIYSARRVNQSVIGNVVHHRITSRHLHSSAPPGTEPDQKTDFPI  
TKSDEEWKEILTPDQYIILRKEGTETPGASVLNNISVEKNGQVDAGTFVCAGCENPLFVA  
SSKYDSGTGWPSFFAPVTSSAIALNTDYKMI VPRTECVCSQCGGHLGHVFEDGPDPTGQR  
YCMNGAAMQFYRDSERPELAEQVTEMSAKDPFRLSPAQALPSALINIIIGGIFFNALSS  
GQSTPIDFLTLPLPATYYGFLAAKSIKIMG  
>comp16405\_c0\_seq1; 229 1 756 LEN=916; translated  
RPSAKKLRKTAMVYKPREIQIIPSVLPGDFGNLADVKRMEAGCHRIFQFVMDGNFV  
NVTFGPDTIKHCRKYTNLPFETQLMVSEKCTDAMLDDQFVEVSKGPNGEPPGVVIVHVEACT  
HLHRTLKIRAAGGSPSVAMNPHTPPEMVENVLDLVDHVLVMTVNPFGGGQKFIPTMIPK  
IEKLRKWIVDRNLDVDIEVDGGIKATKETIGICAAAGANCFIAGSGLFAFEDMSEGVQKL  
TALAKEAQESS  
>comp16406\_c0\_seq1; 610 316 1833 LEN=2360; translated  
MTLWTWPWKPSGARPVTRKRLARTKMNNKSVFSIEGCCRPLLAIAVALIVLDQILLDGSY  
YRSSGNEYHLRIEKIEAIEPTRSAPSEPDNTYQKRPGDLSLAVLVAGSTHRFLFDSFAE  
RVAGGRRETASGRKKVRIDYFAVLTQSGPAFRQDLGYMGHLAGRDALFDDVPGFAGETK  
SNTERDSQSKFYEYFVESTRHKMLEAMNGALDRAVDKRKDKSNNEEDNNTLLQADTPTRI  
RALRLLLENPIEYDPVLDPVKSSLKQKLGSGDPDFDFKFFPMKDYRPSALKRNRNGNKNI  
IRLFLALESLWKNEFLSYEKSLQEAQEPDPRADHGGGEAAPPVYDYVLIVRDDALWLDD  
FDLEAVIATDPDADAYVLSCDARQPQMLPPEINDHGILIKRKSASVVEYVSSMASLDLK  
DCHDSVEEYVGKQRCNSEMVLRHVLEKNNVRVVKLVQSVLPFERAVRIEDEGGSKYYCY  
HKFCQSIERPLELPGEIKNCKELDF  
>comp16407\_c0\_seq1; 445 306 1103 LEN=1141; translated  
MKLTIAGLVLATSSVAAFQPKATPASDVESRRSFVSNGAAALIAGVGLAQPSFAGLL  
DEFGTDPKISNAPKKEVREAVVAQSKVESNYEPNLRSNYYPTNKKRYLPRIKKNDAI  
PGAASMIGNEDWEAAAEFADKIAEDTILPMKLYTSSLLGGGTNVKVSFAKDMNESAKAFE  
KAQKALSKAISKDQKSSAALEDLSSALLTYRTAGRLLGPDGGDIPSVDEIRRAACRV  
QGRTFEQVKSRDARLKESESVASK  
>comp16408\_c0\_seq1; 220 108 755 LEN=802; translated  
MILISVSLFVLEPTESFVSVDKQSSKGPEFSASSPAKKFPPSPDTPPIRVLEAQLDAMKDG  
ELPSIYHLFSRARKLDIDNAARRDARESDPSAARKHRAMTEFLTQRHSQGLLNHNRSV  
GIVGDPNPAKGRLLTKFARVKVDSRYRITLTRQSDWDGKGDPRDCDGYEKCWF IWDITP  
DGTDNSDNDDDDDGLPGGDNAKELSKTPTRVLARM  
>comp16409\_c0\_seq1; 255 160 918 LEN=1477; translated  
MSLETATSLSELKAKFEAGDVVGGKETLTKLKIHMDFPPGSPSHTQIMVESLEIGILM  
MVEDGDLDSFARNVAQIKPLYASLGAPGTPRKSHIIGLNLNLLIDNRLSEFHAELEILT  
EEESRNPFPVTFPINLERQLMVGIYDEVLSVTPDSTYQFFVDNLLQTVRDSIADCMEVSY  
KNMKLSDAMTMMKFGAEQELLEIEECRDDWIVEADTLFCQPPPSGSKAGDIPSIKMINQ  
NLSYATEMERIV  
>comp16410\_c0\_seq1; 349 198 1088 LEN=1088; translated  
MKNAFTLQAVSLIAAILVLEKSDIKVEGFSIGSRTTVPLRPSSSSLLKTRQPSGNIAT  
RPPSLFRVKDAKSEDTKDVVNENGMNMFQGICKMAATKCATQFVRFWFKSRRSVLTICGA  
LMFWIGAAGVHTPASQASSVSSMTKNIFSSSLDQMVDSYVKGHMFDDDAYDPVESIYKE  
AMNDRLEGTHPRDLKETTSVVGQVKAERKSGSGVSGLLMKSGLLQKQGLSEMQAI  
GLLAGTIVFGFPAAVLGLGMQIGNRSRRSMNKVMKNRYGETYSVDATEKVEDDVIDP  
>comp16411\_c0\_seq1; 263 80 865 LEN=907; translated  
MARGPKHKLRLHAPKHNIGKMGVWAPRSTGPHKLRECLPIAII LRERLKYALTGKE  
CQQICMERCVQVDGKVRTDANYPAGFMDVIEPKSNDRFRLLYDVKGRYVLCRLDREEAQ

YKLCRINKVFGANKVPCAVTHDGRTLRYDPDIKVNDTVKVS IATGKASDIFAFGLGSM  
VMITKGHNCGRVGTLMHVEKHDGFSFIVTVKDNKGNTFATRLSNV FVIGNGQKPEITLPK  
GRGIKKTILQERAEAEAAGRI  
>comp16412\_c0\_seq1; 148 61 453 LEN=513; translated  
MPSTAAFLRGAGALLVVHAAAYSCMHFRSLLQDLDLLAGAGAAAPPDQKTEEASAVAGAAA  
AAMIPPPDVVFELALALCLLLAGELLGMGPLQPIEL SAGRRRPLVAPAHRTDFDVYSN  
RSKMLLRKAE  
>comp16413\_c0\_seq1; 448 50 910 LEN=1187; translated  
MRAS IETCKKYL SLIIFLYIKCFTVAQVEDTPIVGLYPMDTPVYKEKDAGLIHEWVEGNV  
SEFHPSSNTYSILWSDMTTETIGAE TLADYVNNELLFEESKLVQDVEQEVL MQEQYEEEE  
LISGVEDTYTSDMDGDEEDEGDNASDREP VYAI GTTVAVTDDG TKRYGTIESYSGYYT  
VQWESDGI SEIFAVADGEIDMVVETELPLVSM DGNTSKSGLIAGITGAVVLVTVA VAAV  
AIVHFRKNQRLENQSL LKRNDSDNILGRTRLSLEFDGNGKNLLVGL  
>comp16414\_c0\_seq1; 296 268 1779 LEN=1926; translated  
MKTTIYYKTLPLYKGDAILSATGIPVTPPIGSCNAKR NAGMDPICLGRPAKLRKLEDEAE  
KEELLWVCPSSVKS NR TGLKNSVQRI IQPIIDGIKLG SQRTDKKDPISL ASADSSFAHVP  
PCTKAI EAI VQAVVRKPHTTGYTHACGS PESRCAIASHHSSPEHQLSPEHVIVTNGCSGA  
LELSLESLLDPGTTLLVPQPGLPLYEEISASIGANVIRYRLDPHQGWEC DMNHLEEIMTS  
KNGNTCCRAIRAMVITNPSTHGSV FSETHLTQILGFALKYRIP IISDEVYGD LTFGSRNF  
HPMARLA AVHGRKVP IITTS GF SKQFLVPGWRIGWVAFQD NSYGS LREVKKGARRLANLQ  
HGVSHLQQSVIPALLSVSTTPGLARWKEDFRNLLKSQAALLCSKLMNECHCLDIRSPPQG  
SMYAI VHLDLDCLEDETIQDDMDFVRLLVREENV FVLP GSSFGVPGTFRVAYSS CERILEM  
ASQRIINFCHRHRREKRRAHCNQ  
>comp16415\_c0\_seq1; 286 188 1231 LEN=1657; translated  
MNKRVSPIWRVIAIISIGLVLAQFIILISILDSKHP IHTDSNLSINSLPHPRSKLQDVVN  
EIRISDAVGKEELHLESKSQNSPDGVAATVMLKAPKWFHRRY TLMIHNVLANIPSTWSVQ  
IFSNE DWIKKDVLP LHPGLQRFRSHPRI IWTPIPKELRKKKPK EIMKNRWLWESLVSENV  
LLFSGNGVLCANSKNTIEDFLDYDYGV PWN SFEGVGGD GSSHSFRKRSTMLRILEKYPP  
VSEMANQDFRYFSKYLIEEGASKLANVTTTILFGGITDDLD AAPFVVS GTQAKLEYIARE  
SLLRACPELSMIFPSLHEPSCFGAHPNAEKCKATICALR DPLPSSGC  
>comp16416\_c0\_seq1; 524 480 2096 LEN=2364; translated  
MLSNK TILFMAIATVAVASAAAAQEAQLDGDGMGFFLR RQIKGIEAAAPTDRRLGNL TRRQ  
KRKERRQQKRIAEQKRQEELLNQTP IQIQNNPCPNGSFCLPEFFPSASPTTSSSPSEAPT  
EYPSESPSVAPSDAPSSSPSDAPSSIPSSAPSTYPSMTPSMTPSAQPSDAPSAGPSSKPS  
GLPSMSPSDSPSIAPSSLPSETPSLGP TDVPSSLP SNLPSSAPS MYPTFAPSMSPTVSAS  
DVPTDVP SMVPS SAPSI PPSSEGPS DSPSVAPTQAPSGAPSSSPTGDPTVAPTEFKLSNLV  
PSLSPTTTTTPSIAPSISSAPTDFLPRCKVSRKSNPMTTVDAISAIEKGWIVASYSRNL R  
RLECIDCKDMMFEDCRDIECTDRESCAGTSFTATGKFKDFYQVRCLVEESCEGATFKGID  
RITCLGENSCSSSLQNTVFENIRTI DCKGEGSCVGAIFGANNNETESVNC SGRDSCQFVE  
SLSVSKMVCNGKESCRGGKFYRETDAL ECSGNLACIRSILTGKKLRCGTAKSCKSLEW  
>comp16417\_c0\_seq1; 130 44 829 LEN=927; translated  
MLSNQVICLIGASSGIGASIAEGLFRAGANVCIGARRLGKLEEVAQICKEKYPESGGDIL  
AVECDVTSRESVQNLCAKACEKYASASVDAMICCSGV MYFTQMKNVMMDQWDQ TIDVNCR  
GPTNCMGAVIPKMVEAKKGIITISSDAGVRDFKNLAVY CASKR FVETVTEITRREL VGT  
GVTLHTIQPGDVKGTELILKNTDSEA ADEMVAIGKPVGEGFTRENLLDPEDVANAVITI  
LTAPPHVAIN SILIEARDQS  
>comp16418\_c0\_seq1; 212 146 574 LEN=789; translated  
MIRVATKASTILVSGTRRAAATTPSATPTPTFVSTTATTTTVRGMATKKAGGSTNNGRDS  
IGRRLGVKILHNQ PANAGSILVRQRGLKFRAGDNVGVGKDHTLFAKQAGVVRMEKIRLGA  
IAGTSKKKRIRNVVHVDALL  
>comp16420\_c0\_seq1; 234 139 755 LEN=755; translated  
MTPKSF LRP SERPKYDRSEQTACTFPAKKT RPVKFKRSNR I KRLQRERQRHKPVVNNLQF  
QPRFGTKTRSPSKRRSVSNPSSPVR SAPPTSRI SFPPATKITGRTRGIIPDGRSPGKRDS  
QVVQTRHGNHVPKIRCTISPPSKNTKATPEQP KTTTISKFAKQ QHPQORLQLKQHEEQQ  
QQEIEQQRQIEQEHEKQEHEQQLEQQQ  
>comp16425\_c0\_seq1; 346 106 1176 LEN=2016; translated  
MTSSSPLEPKSLTKLEFEDDEQILNYHDALIYGS DLRLEFETRTEWLNDSCIHVFCLLQQ  
ERQEKRGNPPSPSFLFMDPSVVSFWMHQCVDPEIEDFVANTNFPGRVPGTQTNNDSSES  
GGLIFVAVNDTMSTSSCHSSANSWRTPNSGSHWSLLVAEVFVGDGLREHDCSNSKDSTDN  
RSDGVSASTAATSTIELSFWHFD SIRNSGNMQAAEDIARKMRMNVPGARVVTEQRTRTQ

NPTGSPADATGAQLVRAAETPQQQNGYDCGVHVLGSARIVAARYHGRCHSASPETKTPVG  
LSKKQRPSTTRCTLEEELEDFLREEIGKKNNSQEFCAKLRAETSFEIRKIAFTRKER  
>comp16426\_c0\_seq1; 575 104 1624 LEN=1692; translated  
MTQTLPRFPSSLILLLLPLLAAAQAIVEDEDPFVSTCTNRFERDVLCSINDRIDWTMKL  
QRKDLTYCPASCRTCKNYDYFDSNAADVFRGRGFYSHDMNGTMYNDGDGHRLLKIHYDNYG  
NLYDEDRNPIHDQDGNWIFDPSLMHPTTPYEMQTFYESVHCARDFGRIQNIWKTGDNDRM  
YERILRDFSQYSPTVLSRPEDSDYASSRTAKDNPDVGVGPWLIQLENFLTEEECDEMIAQ  
TKIAIEGDDTTWAGIANDTEATQMGVCQSTQAWCDPDHMCNQEILQESWSKIEDLVDIP  
FATHAEPVHFIQYVPGQKYGSHTDAIPDEYDSMYGPRLF'TILFYLNDDVDDGNGGQTCFPK  
IERAYPDASNSTVFQEPICVQPKGRAVIWPNILNEIPDDRVEIPDDRWTWHEAHGITEGY  
KFASTVWYHLRNFSAEDIGCTNIYTDGGDYIEYGYDYDDFDDDDGYAYEGEGGDSYDEED  
EDSNSFVTSNYVGHDFDELFPVAYT  
>comp16427\_c0\_seq1; 207 71 643 LEN=1285; translated  
MVPLNIEEPTLSHWSMSSMPSLNFNSDSQLSYHDEDEFD'TTNDYKKDQFPYVNVQSKNVR  
FSEFSTLKYIPSNESYSEQEREAMYLTTEDKERIREEISD'TLTKIQYGDLPDTELEYFRG  
LEWKGISYLYNQKKAIREITLSLILSEQEQMNEICPDWIENVYSTMTKDSVAKARKMARW  
DAQCVDMAQ  
>comp16428\_c0\_seq1; 298 513 839 LEN=839; translated  
MTMMMSASNDSNESGAPASTSTSNNSVAAAATATAPPLPAATTGTGTGTATGTANSLPVT  
LEREDVLRLLTQNSENNLVSVASMTDANNDSEFNSNRNNSNSNNSNNS  
>comp16429\_c0\_seq1; 168 1 723 LEN=839; translated  
DILVNNAGVMMCPGSKTEDGFETQLGVNHLGHFLMLRLLTPVLVATARSTGRPSRFVALS  
SVAAAECGMNGKHGAPSIGFEDPMFETRPYDEGVAYGQSKLANYLHALEASRRIPADQLV  
STSNHPGWVYTPLDKHVAAKVLGTNPVSEFLAEGLRFFLWTGHMIQPVDGAQTTLHCVL  
DESVESGRFYFQFGIYKDEAFKPGGWPMERMPNPNATEEEAAEKLWELSEKLVGLSGSDTQ  
>comp16431\_c0\_seq1; 412 507 1644 LEN=1644; translated  
MVDGGERLQVLLTQEATYYQTCDYLSRMQSRARAQEAVLEAAAAAEQRCSYSATDSSEPS  
SPKKRKSWEDELTSAGETSETQQTEQHRTVPTTASTCASSTGAGSVGSASSSTSQINKHWR  
EKICEWAYQVVDHFDLNRREVSTAMSHLDRLVGVYDGIQVKNLQQLLQAMTCLYLSIKLNE  
YKHLIPGSKSSMDTILQLSRGF'FTLKEMERMEYEVLRQLRWHVHPPTAQLFVKHFLFFL  
SVEEHELHDLAQFMIELSVMDYFFVSYKPSIAMAALLNSMERLGKNASGVKFPITM'FID  
IHSPAIVACRERLSLIYAQANEQGGLEAGVTPPTPEATAVAPEPSRLQRTISPVSVMAP  
PEPNESTLQSYSSSQOSTCX  
>comp16432\_c0\_seq1; 169 233 577 LEN=665; translated  
MPTPAGPKLEFLEASETTISIQFKPVSSVGKYELEWKLVEHEWTSPIGKTTVKGEGKLLK  
AEAVDLDPGMTYCLRAFCLGADGSKGHSAGPELIIDTEQV'GCTPKAEKSCCVIQ  
>comp16433\_c0\_seq1; 406 354 2138 LEN=2326; translated  
MIISKTRRSRIGGCFARITCGKTAHSNIQRDFALSSTTAVLSASSLLSMPINVNKSSGHY  
RLPFYSSSLLSRYMQRFRSALPAEGYDDEEDENSGSNTSTSSASSATDINTAPT'PFLAD  
IGEGIAEVELLRWFVTEGQMIGFDPVCEVQSDKATVEITSRFEGKVHKLAYQSPGSMIR  
VGEPILWIRERSGSNEHPQQQHKDGHKPMDDMSAAPNSMYPPLNSATGLSSMRDPTDASL  
MMSVKQQHSKRHEAIPGYQE'QVAGVTFSSNLTSSKKVLTSPAVRKLARDNALDLSTVMGTG  
PSEIRITKGDILAALKESSPSTTSTKPAASPASTTPPAIGTCTEF'DVPLCNDITVPLR'GYN  
RIMSETMTASLKI'PHMVYSDEINLNRFAQYKREQHAAEKLI'FLPLA'IKAAASKALEKYP  
WLNASFDGEKQEATLWKDHNIGIAMDTSRGLIVPVLKNCQDKTLP'EAELKRLKDLATC  
QEGGGLPATDLQATFTLSNVGAIGGGGT'YMSPIITPPQVAIGALGQIRRLPRFASAPCH  
DQDPTASQRVEE'AHICTVSWAADHRIVDGATVARFHKSWKEYMEDPIKMLLELR  
>comp16434\_c0\_seq1; 566 1 932 LEN=932; translated  
XQQQQQLHQ'QEDDDSSAFSNPQRQPFARPPVASPGGSVY'GQQRYSA'PRT'HS'GSKSAA  
SSSTN'NGLP'NGISL'KSSANPSPSGAAAMNPPSSPFSN'ASYDPQFLAAAAAFHQQLQMQ  
QA'AVSSVKSAPTLQQTQ'QEEH'NNGMLWKLIQDKDNELRQVRESLQETQ'RRYQE'QVVLATK  
LQTTLDQVRETFEKERLLIKLQAEKEATESMASRQEEIFRKQLEWMDTNI'AKTKNSAKAS  
DEAGSELVAETETNRD'GIDPAKGEATAAAASKAKSEKDHPWNAVAKGSSGRTE'NESGMAG  
SGNANNNSNS  
>comp16435\_c0\_seq1; 355 334 1272 LEN=1320; translated  
MKDLEIFLEILNTPPPSSRDGDDDRACERLWDEFDEAKKEELAGVSYAYWIVRSRAGD  
HIPAGARQNSAMKEIRRHYIGESRNYARTLAVIREALEHRRRYRFDIVRSCCFEDQSYDN  
DSDAELAKKYRSFIVSDLETQPMVVRGVDADRRTI'YKPPRNSPGDAEGFMVTQIYTAER  
AMATSEFESRAGEEKLTVVFSFRDYSSKNSPSTSTMITLATLMQRCYPERL'GVLI'VADPP  
FWMRVIFKVVWPVLS'TD'TV'NKIKMPSGQAAIEEEF'SRVAKGNKELEGMLSSGDISSIDVT

DYVRKPFYSQYK

>comp16436\_c0\_seq1; 681 79 2238 LEN=2518; translated  
MTESISLPLNGRTDGLLRSLSSALGSDNQHNENADLIVWLETATVDDLRLAYPVLNWCNRS  
FLKSAKSKDGKTGRAQSLTEATSAADAPEDNDNSSTVLLSTITTTTEEVAERI IKVLEEAI  
QHDAGDSVFLSSEHANEEKKKQEVAARYASISALRMSLAGYLHTNHAKMRGLPVVSSLEER  
IKGRLGFDRPAINTLNMVNAASVDHSLSMSQYIKPEDEKADKGWGI PRIHLDLGLGLQES  
SPADVCKQFISDNKPLLHPFTGEKVGVMQVKKVFP SKRKPVWIEYFAPPSSPSDGSEEGS  
VEEPLKPDVLAKQGDDL RNF SVT C VSR L C E D I W A A A S V D W K L G H P P T V C A Y D V L V T A P D  
AGYLEMVPKGNFLDLSQKVAGVEPTNPDDSSSTTKSSSFSELSKPFCDRKTGWDDVDVK  
KLAPSLVGSYIVNFVLGVRDRHEDNMMVVGDLSEDPRMMQIDFGYILMEFPGGVHFDMPR  
LTMPIALVDRFNTEPGSDEGHTLMEDLQHDMLTAYLMLRRNSSQFIPFCAHLMSSSYEYK  
HVEAVLRGKHVFRTNMDETKVIKWM T Q K L L T Q W A H F Y F R R E I K Q G M V S G Y Y K F V E T M T F E  
NKG T D S N E K H T I R K R L T S F F A Q R S S H E A T A R S G S D H E D V D D S I D V D D D D S Y H V L D D G N N  
GSRDVSNRSIQDFGVLDQDCVKEAMLQQKEVRSFMISQKEEHGTLIDLDDDEDANKSSST

>comp16437\_c0\_seq1; 369 115 1638 LEN=2022; translated  
MISKNYLSMWLRSSRRATLWGSKTGMIEKYGVGYVARMFSTQGS SGNLLTNEEGVHQTM  
RLSKSWRQKPLFRRQGDVRFKTGMEANLLIREAKRRDSHEQDYIESVTSIMQCLSPVFD  
RNPKHAFVAKTLIEPERFIQFRVAWIDDDGVNRLNRGFRMQYSSALGPYAGSLHLGSLNT  
HNVAHSLAFDITVFSNAVTGFPLGAAVGGSDFDPLDKSESELHRFCQSYATELAKYIGPDQ  
DIPFVGMGCGKEEMGYIYGQYKRIKPTGNFM TNSNMLQAPGFTIAHFANRMLQDRGDSLE  
GKRVMITGSGRTARSVAKKLLLEYGAIPITMSDASGHVYEPDGIPEGKLAMLNKIKEERGA  
LLGRYIISSTTAEFNYPENLFDIPCDICIPCGAMKEIDDAEVKALADNGCKFVIEGGHSC  
VTSSARKVLKKGILYGPHTMTMTGPAIIYGLGKDATDGD LKREVDRIYNEVKMTAAEFN  
SHRDLYAGSNIAGFLRVANNMMLHGAV

>comp16438\_c0\_seq1; 602 118 1083 LEN=1150; translated  
MISTAASNALRMAGRRAATSSRFGASRLSSTVHQPGSGSQANKALLATTAGLVAAVAAMQ  
QQESNKTQNF FGKSAAKAVKETEEKFGTYWPRNIMILFGPPGAGKGTGPKIEDLLGIPA  
LSTGDMLRAAVSAGTEVGGKAKAVMASGGLVSDIVVGIIRDRIKEEDCKHGFILDGFPR  
TLAQTKALDKMLAEEGACVTKVIELEV PDSVLEERITGRWIHKKSGRSYHVKYAPPKSMK  
TDASGKPIPESMTDDATGEALMQRPDDTAKALTKRLAGYHNETVPILKHYEPSGIVKAVN  
ANQGMNGVWDEILAALKRGS A

>comp16439\_c0\_seq1; 434 150 1191 LEN=1259; translated  
MTESKDNWRETLYIWDGIVTARMPSLAAEDSAKNSSESAPIPLHWEGSWLPITGAPDAATV  
EAPKRNAFKRDMDAECKFAVGGNATPLTRKGDEKDDNDNDKHEHFFLAKLVDGTGWEMRD  
GDGEAKATHKDNVHDVLLKTI RWSGNQKDETESLVVAKGENAFGPFCSVGWMRPGCRWTV  
ARRYLPEEDPRAKWSLEEFYDVVVEKAIGDVEVAGT SKGGEEKAIKRLNLPWPQAAVMHV  
DHTGGEKQE QEDGGGKRQKVDKNTSVAVCEWFASRHKRSRNNR KGRDNSCAEKEQTQGI  
IEQQLEQDQQTVP HGRSVKKKEVEVTTGTELSTILTDFVVMYYHIT

>comp16441\_c0\_seq1; 571 378 1715 LEN=2196; translated  
MMRTRKRDDDSQYNNSITSDGTSLAFDASSMSVAGSRSSLTFASSRRQHNRPRKRRRKT  
LSDALQSI SLDQDVPQQILNMRDHDQSGSKNFPLRKSAASTKNNCSSNSNM TDNASWMT  
DQHNNLNARQLDRQLD HQQENELDGDIIYDDDDNSQLTS SSEDAGDHRIVMDEDED  
DEDDDDDDSRKKERTMTELEKAQRKVMFELVFGRNHREARKATEKNLEASRVATPPPLP  
IRIHPSEDSVSVLSPPLATVSTTSRRVSRSLGNRAAATLPRSTSDGSDYGD SYKDPAD  
RKLEQLLRRSLKNIQKGT HPLALPTLDAEDGSNLESLPPLKTQDDMAIDHEIYSRR TAAA  
EIFAQATTAGASVPTAPVASPMGPLPVASNSTAPGVSAPPAPPNHADGMRWEQSLFPRK  
RSNSLPGDLDLGC SAIGTTDMETDH

>comp16442\_c0\_seq1; 139 381 512 LEN=563; minus strand; translated  
MVGIIYVNGTICFRVKHLKELLAPPSVTLRHVTIEGAQIVVDH

>comp16443\_c0\_seq1; 330 81 1022 LEN=1123; translated  
MSSSSSVKSSSLGDAGTSESP T TSESTRKRKSDDIGDNVDESPSCPDFKTVIPNEKPT  
VANCEEAFD KKHPRTRGSSPALENPFTNKERTIQQSKAFFHDEERGRHEVNNACSPST  
PLSFRQEFHKVSTPTPSHYCVGVGGHSPTPSHYCVGGSPLSVVDELFTGFYGCMPHWE  
AVPWRGSDSEDDDDDKDQDEEYSYDKNYILRRETSHDAEAI REHLSFPKRLGREYVSQST  
EESRQQRNSTTINRTIRTPSSRLTTLES DSREKLP GSKMFR RTEINKVTEIHWDEKVL D  
TATIEQMAKLSVY

>comp16444\_c0\_seq1; 167 106 522 LEN=698; translated  
MLGRTISREVKLVNRLASLSLRVMP LRS LATGPPPSVPPRTPYNIDPKTADKTSEEMRL  
HTRTNHESEYKLGKHRNALELVQQVPIIEVEGEMAICDGGGGALGHPLEYISLERPGVV  
ERCKYCGRLRYASKAWAKH

>comp16445\_c0\_seq1; 281 158 949 LEN=1165; translated  
MRSPLAILTVSLTLLSTQQLIVHGFVPTQGRLAASHPGRPVVDITTSQPRHQRESAGTFG  
NVVRRGGNRNRDRHELAAPASLWWILGHTTLPFTGVPFVINGTKEGGWYRKIDLPWTP  
PDRLFGPVWTTLYTCMGLAVSRISKASASAPFGSPLVQLWLGHMAVNVAVAPVFFGLQR  
FRLGLVISYLLVGLAAIIPLFHAVDPVA AFLLVVPYGLWLSFATFGLNTSICRRNPTKNG  
YNEGMFQAQLQKLQEDAAAYAGV  
>comp16446\_c0\_seq1; 449 1 1171 LEN=1258; translated  
XDVDVDVDVGPDPHPAIDEDRDSTFDGGEYSGNLRKSSEGGKVRHGDSNQVEPEDASAF  
DDISELSPIRHHNEDSETEYQHSSEASTSVLQGTTFLLQRLQACAAPVVKSGTKCVAESPM  
SAHLAFLRNNQRPVGGSPDIKNGGKSGILQASAGICGRPDVIDEEDESTMGESAPSRSTM  
QSASPNIKSRDSNSRSRNSRQNASKDDLSSVISDGFSAKSAYLEAIAMKAAVSGGS  
KKKKRRSQGSEASATTATSRSSPGSSVSASNNVCRSEKQQFLDRRAAKDEQSKQSTLQ  
PSRSAEKSEVSSRAEKYASEKMNEMMDSMDNRGRAQEEYEKSGAFPKLPGATNTGNDAVL  
SAAEELAAARVEAMMQRLSAQDLERNEAEI  
>comp16447\_c0\_seq1; 324 116 889 LEN=1264; translated  
MNTFFLFLVLFSPVLVVEAFFVNAPQPCRRSRSYFAAGETAETDSQEHILDQMEAAKQI  
LYRAAETKQEDPDTVVDAALLDLEKLSRKANKADPSQSENTLKALSEGGMVNRLLIFTTGT  
DTQRKLGGTKINYPFKATQSFDSSTTQEEWVIQNGIAVGDLELIKQGFDFWNLSEKSGL  
TKLTFDFTSIQLFNGFFDIPLKKGQAADLGAKSGLGSANNVELEKQKRAFFNWISADDQ  
IATARGGGGGLALWKRI  
>comp16448\_c0\_seq1; 317 189 872 LEN=1041; translated  
MAGSAAASSEASSYLFRPEERDAHYEGNTAQYLIDLHNSKSTLNFCGMMFQLVLSEKLKA  
HLERVAKAASGSEEQPFIFDSSHLRMHQVSEYSQSADADNIRVFHGREIRQVPNASGGMG  
FVLQLSLSDETESDPEGWTREEIKGYDGWSDSGRVWRKGDRLAEGFSDFRKRFRGPKAF  
ALHHRFYLHYDKYSSMWSAEDGCEGTPAPDSGGIANRIASLMGLGA  
>comp16449\_c0\_seq1; 267 204 698 LEN=832; translated  
MATDVARSRVVALEATTNSNCSRNADNGIDNRRSFSVSSILSSAAVATLSVVIAPQPSLAA  
KRYVLDDTEGEYIEQEDDGNWQAEWKSRYEQMSTMSKDEIFVAARGAGNTNLKDLENESP  
ASKKRRAFSGCRDKPTRAKLGNIDEKSKTKRVLGDIDFVLGAL  
>comp16450\_c0\_seq1; 484 215 1546 LEN=2010; translated  
MQQLLPRCHAFASNANKNQLNSRISAGTWSTLSTGNHSDRFWLIRGGVVSQSFSSNQSA  
LPVTKSKTNLCSTASPLDLPASSTDENDAFERRALQSLSIASGGTTDTPMKSFGGLAYRD  
SSSSKSSSLFRVVFILGGPGAGKGTQCDLLIENYPCHHLSAGQLLRDEAEKKDGSSEHAT  
LIEECLVAGKIVPVEISLALLENAMREVEGNDSLIFLIDGFPRNFDNLEGWTRCMTRNDK  
SDESNTDAAAVWGVLSYNCPPLLEERVQMSKDSGRSDDNLESLRRRFKTFQSETVPVV  
NVLKIIDEKTSMLKVVVEIEGQKSIEEVWEETQNNMNSFIANDVLSANMRLLEAVANGDI  
DSYRALCAEEMFSDSQDNVIEEDLFVMKEQEAEGDKQSRKIDVKCAEMIFITGRKVSVSY  
DRTLDSGISFRETRISHQGPKGW  
>comp16451\_c0\_seq1; 273 1 930 LEN=1158; translated  
RRDDGIDMHRITCKAALVFAASCGVWIDHAAALLRPLLKASPKGSSSPLPPDGCGRRAIL  
VDAPLAVAASAGLFQATTTTAAAAADSPAPDIADPLLSVESASRLGSLGRLRRYPDPAL  
RNVASPVARNALGSSELGDGVVDLLSNAMVGNATTAVQYQIDARIVVLRGDASPEPGGGLV  
LVNPSVLARSGEDKMLAWREHCGVVAASPPAAAADRTEGLLGVDLLRDAVVEVAADPTG  
RPVRRALSGEAARAFQHELDHLNGILVVDHASLDELPAWVTELEAPFHRARQKRAFARTV  
YGGNGPLYW  
>comp16452\_c0\_seq1; 642 1 1752 LEN=1944; translated  
GDASRAAAAFVGSLEAEFGLAGEKRNAFAQFGREVQVASVLLPNPCTGHDELRALLTGPF  
RAAIDAVATEEEASEFLERIGPFYVQAFFGALYVTSASAYSYKARAARKIRAAMKSRYE  
RLAGRGAGGGELRTGDEDSGDSSARASALLRSWTEEGSGAEVGVKACGGDPAKLASRG  
RCEWSESAKEDPSIVRCDLVPYELAVAPAPAPAASTDCGANHSRLLKAAFDKYAERQE  
KLLSEWSDAWKPERVDIRGECETLQKLGDELRRERARAKKVVVDGVFSRPLRHLTRSKRDT  
NWLSSLDRCLEGWDEHGTGDVVPVGISEIEAYAENYHHREPSHSGAVLIGLLDTAGNSSRR  
HRNESSGPFGRDTEKSNVEYQLVYEKQSVKQSIQRKVHGSNNKNRGGGLATEENGLDPF  
SFDVSKETKAKPATVAGKDATAEARDLDVFORRREPRCFSGLIGELRNWVKSIEEAQTED  
KDFERTESSGNDSDSNPIKHAKEDGKSEIGEGKETASLSEAVEEGTSDKKDTATAESKT  
AESDSRACDEAKSDDGNFDRGCREGGAKIIIEETIVNDRVPSDE  
>comp16453\_c0\_seq1; 654 219 1544 LEN=1959; translated  
MKNRGRDHRRRRTDFVVSXSISSSSRACVLLRSEILWTVATMLALCSCNFSSHPCDAKT  
YPPEISPGMVTNTNRPLLRGVAGDGSRAERKAKSTRNGLSTHMEIPELQOTRMLWRNE  
TPRDDDDSFVSTSHQEHKREHREDNSHHQNITIGATLVVVDKQTTGNETTTTTTKDDDDV

FYDVIPIFPTNNTEATDDLAFANETIGMLEDDDEQDDEAIP TQQEEDNSYEIMGDEENIDDN  
NDADGVDDDDDDHNDNDDDRNEDQNEDETQQPRPPKDC LWRVLTGTGCTGSSSQGDET  
GNGGSI IQGYQH DYLVADGTCRYNDFLGYRAGCQQQATSTFSATTRNTVEFETNTDAT  
IVLEAVFCYDPKCSSGCM DGSVVHPSKVYTSNTCYASSYYYKGLMMSKEEENDTHYYYF  
FGFEFVGGCFESENCHNYSIS

>comp16454\_c0\_seq1; 522 1 900 LEN=948; translated  
PAFKLSCASNI IHRGTMKMQIALLSLTTLLSSTA AAFSPVSRTPAAPSISEHASRVSP LFM  
GRAAAVRAATKSKTD AKKAKVNAVFGKKITMAVKQGGSPSLDSNRQLAEIVKQAKANNVP  
VDNINRAIKRASEANTAD FSESTFEAYGFGGASLVITVLSDNANRANADV KSTVNKRNGK  
IAESGSVLFMYDRKGIVEVDAEVDEEALLDAAIEADIE DFILQEGDEEGSSLV LVEPSDS  
GKMF DVIKEMGFENAKMSLTWVTKAPVEVSEEDFELNMDIIDALEELDDVDSVEHNMSN

>comp16456\_c0\_seq1; 199 189 977 LEN=1046; translated  
MRTHARRKSPRGLARILALALAVALS YRIPGCDGWSPGVP GTPDPPSAASKQKPKERKRV  
TLSSREYAEAMSAIDRSSSGS GTPVEGLYEAVRLIDKNARHVYPDEASKEDLWTRAYGSWK  
LVLATGGGRQTTFFKVPVFAFAMLDETTFGNGVGLNEHRVLLSLRGRHELLTRRRQM VIG  
IDDVFLGSKRVTGSLPGFAGRALGLKRRTDYEA EKRRPPAFVFLAASETSLVARGGSGG  
IAIWTRLEEDIRPAAYGDDAPP

>comp16457\_c0\_seq1; 464 62 1030 LEN=1268; translated  
MKFP SRPVLLGVVAAASSAAAF CPRTTSAHAVSSAATSTTKRGMIANILDLLAGGGFDPE  
MVSPSEALPGRTQKMPNIDGLRHVYVLGNKLEEVPEGHKVAVFANGCFWGSEKGIWRLPGD  
GIHSTAVGYCAGFTPNPTYEEACSGRTGHTEGVRVVYDPDKIAFVDILRWFWEAHDPCSG  
MGQGNDRGTQYRSGFYFFDDEQKALIEASKAAYEAKLGGERPITTEIASADDEYKYGGLW  
FFGEAYHQYLAKPGARPYCSAQPQGVSVPDFDEWNP FAGNADLTEKHRPKLPESFWAKH  
APKRGCSVVSEPNEPILESSYL

>comp16458\_c0\_seq1; 491 258 1340 LEN=1592; translated  
MSD TD TD TNKNVRDFMTKIRLIILK KYLINFIAERYYSRMHTYLIFIP IQILAVWATLSS  
PLFMLVTDYKDN DVPNGLVLYDDVALAEVFTNITTE DI IADDLQEEAIK KHLDLWRTLAD  
TLVGAVLLIITNLGKALQYERKSEQH KIVADEMKKVLDDIN YLLRILPDNDSSLSQDMKD  
KNTKIRDYIEAAFEKSKDARSALSPPQSLVMAFENIECDM NLLMTGVGTREEMGKKEDTD  
GDKNGRSLRYVRKIKDEVYHVDNETRSEMLYDGYTDLADIMTAGISGCCFWRMMSSSEKAT  
AKTRKGLVEELESFCENPSVEPKKKGADAI FGFYERIKAEENAEAKHTNTGGIDESEKV

>comp16459\_c0\_seq1; 500 120 911 LEN=1028; translated  
MKFQTKAVMMTVLSSLLSSRTARGFSTIASRGRS AMVASSSSPTARF MASDSDGPM PYDE  
DKMPFYALGTNLAMQVGGQGNFKT LLEDEL DIVLEAF CENLKG TNTADARIVLTKY GQQ  
LNKILGDRTEGIVERVKKDGEEYCENFLACND DAVKTD SGLIYCPMKEGDGKQPV LADTV  
EVHYHGTLDGT VFDSSVDRGQTISFPLGGVIKGWQ EGLAMMKEGGKATLVIPSD LAYGD  
AGSGDTIPP GATLKF EVELFKVN

>comp16460\_c0\_seq1; 332 319 1215 LEN=1356; translated  
MVNSASSSFLSATDIEAMYAQTPTPTETLSVVEKSMGGFHELLEKDKTKNSNWRLAEENC  
PEECSDDFKLIFLRCEVF EVELAVKRYIKYWDNR IETFGIDKGF LPIINSDGSPGGAMKD  
DLEAIDFGYFRMAPP GMCEDPDGRAICFLNASVLDEE FIIIGAQMVRASWYAIHLGLQSE  
SAQRKGIVIIAKAPKRLAKALS KSPGKLLAASI QGAVPVRMAALHILD PPPAVSILTKFV  
RMVLGKKVKKRIYVHECNSLEKRMEALS KYGICREQLPRAVGGDFDFDEKSWKILAAK

>comp16461\_c0\_seq1; 452 1 1021 LEN=1229; translated  
XASASASASPSNSVSPVDLFRKKPSTANVYQSESGSNSNRSSNRSEGISNKDESSRSSSG  
GRSFGHG YEYQHGVVEVGGST DDEEYFHP SKDQISEALMPDLDEPIEEERPEDLSSRDQR  
NQFGHNQQYPYSNVTFGNVGMEDTAPSSGDMTLISKSGGSLTAGDASRSPSRSTKYSSS  
GGTSQSGAAVNKQGVDDYEDDY EYEPVSYT NATTQYNSNRQTLADDSEYEEVEEY EIE  
YTSHSDKHL SVHDGERGLGVFEEQSTYDEGDEENIQR YNTKASSKSSKSSVGSNTPL  
PFLAHNAQMQQGHKNSFETLRRKWETS KSSSNSNNTS

>comp16463\_c0\_seq1; 171 613 1333 LEN=1504; minus strand; translated  
MLHRFRSDPIRSDRVLQLAPAGDVATRVFTVPLGTGTIKGVVLI PDVNAAVIARRQQT LG  
QPILVRARARVGVFRCAARRRGIDAMLEESAARRPAPVAVGLTPKHEIAHRQPRDNAAKKL  
ERIRHDHQHQRVRREDSSGPEADGLQSRQRSSEGRGSLLPAGGFGLVLQQAIP SANTPR  
KKVQTI AATNLGTVLSVHDSNKKLRQFL LALCPARVQWKPSMYMTMPPMESSQKRLPLG

>comp16464\_c0\_seq1; 313 50 1057 LEN=1157; translated  
MTLNTNSNTNQQQQLKEYDPRRLPCVATADFFGDALLSQLSFYRNTPLEVDFSRPPQNGW  
RWGRCHGRKGWLPDWAAPVQKQNHHPVPT EYIYIKPETTETVPVPSSTRRHS LRRSRKCI  
VPMKSITESDSEGAYDDIDSSNGFDLSKNTCLGGSEWISSEGT PPSVRATEQGSPTSRTDG  
SGKVPQSGIQNLRFKRASRVGSDPKDHRRENPHTKDPAGPEWDGSEAPRIVSGVDGRV



AVVEADGRTAHYRSERAYGMALAARGMAEKMAGTTKAAGHKLADTTAAGHLLSEAVRHH  
KRSRKEEGRDDDDPEGEPPRTVQRGRFLVGKVAAPA  
>comp16465\_c0\_seq1; 363 129 983 LEN=1411; translated  
MTINKLVLLHTMGSSSDALRSKKVLAERKQMLKNGLGNEELLRGRALSRLPNIDLQNSSS  
ISDDDDDDIEITNAPSFSSISTAESITSAPESRRFRGRSLSCVERIRRPRNTDFADTIFSV  
GSSASAPELSIEDGTYALPSATISNLFQKSAPTTNNGRGGALVKKLIEEQQAKVCHKEDD  
CEKEEAEQDLRAIYQRYLSGEKESVLRSGSQWTSYGYGDRRRQRAHLLRKKISRNAADGKN  
PAEVGEELTAVERRNRKTLIPVEEMATDHHSKILKQRRRRARYSL  
>comp16467\_c0\_seq1; 927 141 1997 LEN=2113; translated  
MKFASAAALISLLSRPLASANLSVNPGALEAAIGCNQELGDLEFVLEDDAVVRSIEDDVR  
SDLAEIGFNVVAKPLSKADLNTARQSGDFHLSISETWGLPYDPHSFAQGWIDGNGGEGIF  
PAMVNLDAESSREELLDMMVEDVLQTDNPNNTARSKWYDIHKYYHEQAVLLPLYGKRIP TLL  
NRRLSGYEPGYQQFDYPVQRLRVVSGSKNVTISPGARAGLFHTVGTMPHVPYGPNEFFSN  
NWVYEGLVAFGPNGEVVP SLAVSWTVTPNELGGDTYTFQLREGVTFHDGAAWNCDAVAKLN  
FDHILALQDTKHNWYGVGKTEDWSCNMEMEFLVLR TNEKHESYLNELSLIRPTRMSPNA  
FVGGNSSDPFTSNSCHTDWGTVDVNCVGIETVAGTGPFKYVSKQEADGTTNRVTFEGNT  
AWGGTVDIERLEIVRYTSDVEVLEALLSGDLDIVWGAGVLSDSILEISTDPVYSERIQ  
VGQSDPIQTAMLILNTGAPPFDDINVRKTVIHAINKGDI IQKELPLASVVDNVFPRGAPY  
CDVELTPRWSYDFEKAVLLSCGGTSLEFASNENLDLALGLGLGIPLALVAIVAVVLYSKN  
NSLKQELEVMMKEGAQSA  
>comp16468\_c0\_seq1; 355 605 1713 LEN=1737; translated  
MSRSDKDGTVRRDPVEDAFWEIALNHDATGRAGELFSLSDDDDDVVENANQDLLGGKVTKY  
SLPNSSVTLELAQLPPEDGIWSPVGDHAWYSSALLTSLILQGEISVAMGENNNHGSTQAE  
EPKSIRVLELGSAGVLSGISFAVALSQQPTRVPSWTVTLTDNDATLLKQLEANVQSNIR  
SGKIVLAGGENKTPGNMQSIRVEHLDDWDLGSSNGGDDNGIDKNDNKDVANPDANSQGGQL  
LAADVIGSELAYTHETATALVTVLDALLRKNPSVQIWIWQVTD RYWGSEIVVPALAKP  
NVVIESVPLSFDTARYGVDDDTD GWRTGPLRVWGVSNQKHAMTPEELISIDRELNREQEC  
NTLECCSII  
>comp16470\_c0\_seq1; 466 97 840 LEN=1011; translated  
MVNSKKKIYDDCIGDVTSEGDTSDEECNTVGDRRKGLEVP HGNADDTSKRSQKRIGRRII  
WIITAFAIVSAAIFFGGIYFSKMSKKSPLVSQSSSEDNNSVSEADFEHPLTTETADKQEQA  
TINEDETSTMNQEESE TAPESNFGGKSNIGMLEDFLDYAVENDNRPKKAKDKEEKEEG  
SQPMQWPDLVGMNGDDAKAELE RRYGKTKYKIVVMNYSPTTRDYRLDRIRIFTDDAGVV  
MKVPRIG  
>comp16472\_c0\_seq1; 346 82 1527 LEN=2016; translated  
MISNFFVLSPRGDTIIAKRYRTEGDR TGSHERSHTEAFFRKIKFWDDNAGAGGVNSDGGG  
GGDNGSAEEGLSSSISTGDAPPVFLMPDGLTYMHVKRNGLI FACSTARNVSAVTVIELL  
NTIARVFKDYCGTLSEEGIRKNFILLYELLD EMLDYGYQPQVTRTLNLKSCVYNEAILIDP  
VSSTSKMVNPKTASASAVHKPVISAVNANGRKTESASQQKNEIFVDILERLNVLF SANGY  
VLNSTIDGCIQMSYLAGSPQLRLALNEDLAIGKNNSHYGAPTVD DINFNEIVNLSEFES  
ARTLSFVPPDGEFVVLNRYRVTDGFTTPFR IIPSIIEVEVPKLEITVLRADMPANHFAN  
VTVEIPLPKCTAVASCVV IASPGTGHTNAEFVRADGKILWTLKKIPGGSEQTMRAKVTLS  
QPCTTQIRREIGPINMNF EIPMFNVSQLOVRYLR I AENMVGYPYRWVRYVTQSSSYVCR  
V  
>comp16473\_c0\_seq1; 308 1 1270 LEN=1542; translated  
XRQLYYGTGSVGSVYVRRRGDDSSAAAAGSSPAKKASKGKAAL EALFGIRKSVANGND  
DDFDDDDCETTETALWESVHLVSI EAPSADGKSC EYRIRSRVWC RYKPLDVGDVPPKDRP  
PPPRKKKPEAAQEKQAPPKPKTAKALDVARLEIFDRAADNWD SHHKGKKKNGGPPKPKP  
QASRVKPGVPLVPATV TSSAVYTKETTKVCTIVGAKKAGAGGLFKVPPEQHICNLGAMIE  
KIEADLRSKMERVDAPRCSEILTSMYRPTLSPGLRLPARGGMVSRLGGH AVGMGVGRAL  
VGEIALLARSKGLGGGTGETTGAPATNAAMEGLLARERNKLV SASALGSEPRGPLSGLSK  
TASLRGVGTQVLP SGLAPGLRSLRKKTKSAPRSSSSSSLSSETAQAVPSAD FARFRN NLK  
SIK  
>comp16474\_c0\_seq1; 169 1 775 LEN=1257; translated  
XDGSSKNHSELHSIQNVLLKSALSDKGPLLPKVYRKITKGFRFGIVDAMHAFTDIHPNPN  
SNAETNAKTIPKEALS VVTGEEAGSIHRSAIGIGGIAIEGLASPMHAGQFSQTLRAHWKE  
EASQALDHLVRSVPVARIADRTREIGATLRAS TGAVLRQGRKRSVRSRVAKNVEEAAE  
AGSTKLDHGGQVAMREL RGFVGERLGAAGRKVGA FCAERWEARGQPPGGLRRWLGSANHY  
KGFVGRGSGAEGTKENAA  
>comp16475\_c0\_seq1; 84 1 283 LEN=555; translated

XQDSFHQSFQAKEHQSVVLDGTVEERRNVSQHATNLRPVAHGSHAVWAVEKSSPLSMPIVF  
FGSRRACRRIRALVGEMQSRMNPEDPDGNEVDK  
>comp16476\_c0\_seq1; 594 110 1480 LEN=1710; translated  
MSSGELPLEVYHRTNAVSGSFGSVVVYDDDGEEYAMKLFDEEDEGDGSEDEYDYGISL  
GALREISILRFLREENSHPNIIAHDVQTAFGEEDEEFGTYAMAMPLFPDGLANALSK  
ITTKKQKVEIARGIINAIAYLHENSIIHRDIKSDNILLRINSPENKPGCDTFDPVLIDFS  
LAKFVNAGECSEFEPHTPTSMGTPTYKSPPEVVAEPEYGLPSDMWSVGVVLELLELQKCID  
ATRDKAAIAFVSGSLERLPEGQPFPSLLRGLLETDPKKRWTARQALDCDLFTKFMSEEA  
DAKTFRQICLSSALPIEGDQSHDFGLDKENKENLWEPKRSTPKKNSNPVILKRDKLR  
KICKWMEWENPMTAKAAMQYSSLMNEIVGNVDDLNESNILLDCLVLAHKFFEQHFSGTSD  
LDELYNKFQGGDFDAEDYAGNENSIFAMMDFCLYPR  
>comp16477\_c0\_seq1; 924 200 2881 LEN=2989; translated  
MDGSLYSRDETEKSFESNEDNIFMTDRNVVGNANKKNSKDNDQSDNDNKSSAARSRIA  
DARKNSENAEDDDNDNDKTDDENDKGNSTSDNTIYSKKENDKKRKLPLRKNLNDDTLIA  
IQNYLKSDFYNNNTLEYEEVAYFSSKIHRytiERTRGRQGLLFQDGTIQNGDDLQGDIEP  
IVITEEDAEEELVYNQVYQKEEFHAVAMEFSKAVMDGALQMAKPTFVWHNKTANWLKRAA  
GMQRQYDPYETGENQQSRHLGSTYSESDDGEGETANGNSNGGGDIATKRVTRRRVKLTR  
YKRRQERFQKENENFRIISEVALELSKQPRNTDDCSDVYMTNPIATEINGESLYRFPTE  
QTGLKRICMNDITLENESGNESESACESAVLPPVVARCGLEFRRRALNLEEVRRKHRK  
SRKGRGGGAGRGAQATNRLYAKKCKALMTVLSNKLARSWTIHEFFYNLDREWYQIDGFI  
ADLVRGLPINSNTKLTQEWSLIRRTIRPRRFLSKRFIAEQKKNHHRALVRRLQDD  
PEVTEFSPISTGTHVTAYHIRGSTIGTGRVLLHDPKTHNYLIQFADRKLGCVECPDSDVR  
VSLPTKATTAKAFSPQLYEP CRAFSADFSSEGDNTELVLPKDITGTQRDDEIDRELLNSV  
LAVTMEAFERKRAILQALERCATDEDNDTSKHATWLLANLDQINRTLKAASMHLQVLYGS  
LYGSPVSGTETPEIKREKMALRTELPKTNEFREFMASLASATDKIGEFAFSFLGDGNGDS  
SNKRLQSDFLDSAKLLLIANYLAETSSTLLASGIEKTIYSGMLNPALKSLLDNFVNNCLP  
STSETLLVGKRLKEESGIEFELKQLGLAVGMLRAEVAIAADESRAFELNNAMA  
>comp16478\_c0\_seq1; 656 106 1341 LEN=1450; translated  
MKFSAAVSFLCLASASAFAPNRVKTSSSTRLYETADANQNVFGTKSLDFQGNDDSFKTV  
RLRDLNEADIERRKEEDEAAAARERAAEIAAREERLAKIAYMENMADDTAGTVDEFMFKE  
GVQAQLDKLDQELVGLIPVKKRVEIAALLVLDKMRRKLGFEAVPSLHMCFTGAPGTGK  
TTVAVRMGQILAKMGYSRQGHVVLATRDDLQVYVGHAPKTKEMIKKAMGGVLLVDEAY  
YLYNAANDRDYQESIEILLNVMENQQDDLVALAGYKDRMDTFFSYIPGMMSRIGNHID  
FPNYSADDELVEIAAVMAHQLEYDIDDDAYPVFKDYISRRMELPFFSNARTVRNAMDRARM  
NSAIRTFERFAINGENGVCVSHDLKAIQATDFQILLDDIVNADTDKRIFA  
>comp16479\_c0\_seq1; 285 473 919 LEN=1353; translated  
MNDEYGRNSLSSNIPLVVVINDDEENIPSIIRGLIVKEDVQLQLKKYETLLLNKKEK  
SSENNGTLHQYLRQTQGYAENLLSERKELLDVIQEMEDEENRRIDQELLLKFLMCSSLF  
LYLFGGSEQFLVATVVQLIVTLLNMVF  
>comp16480\_c0\_seq1; 270 198 716 LEN=1218; translated  
MTFNQAHTLPNRWMNILLGFLFVTRFLSCQALVSPPAIRNAARVGINNPLFS DASSNGI  
QTVDLGSLGDDHEKQGLMADSIWRWLDVEWFPQQVHIDMADQAKQSYIKRENNQNDVM  
DIMMQISNDLHADWAKYNDDAFINAWDIGNYCSYLVKQSGNEGCECASEIF  
>comp16482\_c0\_seq1; 187 124 462 LEN=462; translated  
MIPRIAAAAVLFVARTLPSGAAPSSGNLRNGLRGNLRNTNSNGEVACEQKGF GATEC  
ARVGC VFDGECWSAVGTGPEGSSPEDQDSQDLEENNNEDNEDNEDNEDNE  
>comp16483\_c0\_seq1; 422 1 842 LEN=883; translated  
XEEKEEEAEAESKEEKEKDYTESPKAQNSKKVSGNSKKITSSVMVMNETNNAPEAV  
QREEPLPRINAATVVQGNMTMYLLGGILEVGDREVTLDDMWAMDLRKRDKWECLWQGTMYK  
QVWRGAVHDDDESYISTGIEDGSDDEVDMSDIDGEERKLRRAGLRQEVSELNEKYDLGD  
QNRTPTEGESLADFYSRTEYWNAQASELLSGIDSEPLTNKELKRQGFVLAKERFEDLGP  
VLERLAELNIMGDEVKRKSKDSKKKKEKKEKKEKSSK  
>comp16484\_c0\_seq1; 363 230 1012 LEN=1168; translated  
MSSSKNGEKRRITKTEKIAELQGLKLLKQENERLKSEASDGMSKSGHSTGSSSKANS DM  
GKLKEALYALKRVTVKQEVSLAAMRDKAKQRAEIHENSLIKELEENKAFRKAHASLK  
SSGDDVSALRSQALADLELKLAREENDRAEQTKKLESEAGISSLQALLAKTNGRGLRRT  
PSSDSHGFGSVMSDSTAGEDIAKLLKQLAKKEEKITNLQYELEQCKDEIHDLKERNQFSN  
AFPKTPAPGELDFEDDDDFW  
>comp16485\_c0\_seq1; 346 102 1595 LEN=2018; translated  
MAPSKRQVRGNAILPDGGIRISNDRNATLGDDREPRTEQCSPWPSSLLCFNSRNGLVLFV

AALLFLRLQQWILVGIADVASESSVFADHSQEAAHAFLLPLLSKKRVSHGDDGLDPAESRTR  
PIRNRKIEQIENYKKGNGLMLNIHATHHGGTTFCGIIGRSGGPVASQKEEIAPSFACWF  
DQNGTVPEAKSYYTTLNKETFLSRTPWAYDETDSFLHSLRPYFHMI SWEYMGVDDMQRN  
LSETNWEHPELLSVIITRDPISRLLAGNRNMKLNYPGYNTGNLSHAGWWDIAFNPNRRLA  
DNFFFRIVEGTRKDKSAGRSVAVNGTTPQNNTTAVADDSATTSESTSQRRLLKTAKKQRHRE  
QQKENNDHRPDQNGLFYMFDTDDNLP SALPPLYSNLDR TNYDRAVSVLNRFTVVLDIECLN  
EGILALANLVGLDPETVQA AVLQNDLHRKKRKHDTKHKPARDRIGYQDVY EYLLLEKNKW  
DIKLYEYSKTVSLVRCE

>comp16486\_c0\_seq1; 223 177 902 LEN=1282; translated  
MVEFTTLLQNTFRKFQLRGEIALLDRESTNRQRAFVVELYDLIETQRVAIQKQAE EEEAKE  
SNSDPEKLADDLSKVLRI FQNVENAIRQPLEACRDEIESMEASAPMPFPVLIQRRKEEF  
GVEIWP IVSQPQWLHDCLQQDLEGAMA EKSRSQNADGNTTESATDAKKELGDLVNI AVRG  
VVKGTKTTIAKAI GRLSPEEREVEACVDRAKKDMALLENEKAQKFT EIEDLVEGGSTLEC  
C

>comp16487\_c0\_seq1; 330 219 1243 LEN=1686; translated  
MAVRHRAVALGGKRMAASKAPVFRSPILRGSGGGFSTSASPPPPASFFGRMWASYTEAL  
IARPLL VKGGAASLI FLVSDSATQRLMNGPEAEWDGSRALSGAGFGV VATCWLHYWWGFL  
E VVVNKR LPTGAYGQNK FVNALGKV VADQLVGAPLYIYSYCVTHFGKEWMAIREGAAGT  
DDDDTGP DGGEEAEP S GDSLSSAVSLMKDTS DRALEMLPDTLLRHWTLP I VHTLNFYYN  
PIHHRVLVQNI VLI FWSGYLSHLNNGGLDLVTPEKEVDMVVEKHQAXEAGVDHDGLGRAI  
ARRQRGHNM DRGRVAEKPDAMSSDDASNISGLPVAGTSKL

>comp16488\_c0\_seq1; 592 81 1805 LEN=1849; translated  
MHQRWKASLPALLLPFH YLSTIIQPTV VIALESKLPRQKYFKPFRPLTSSLRSPSWLLTI  
KQNP GDSADSGSKVIDMILRVR SNLGTVKLTIEDELNATESTIRTAMIEEQQRKTGKMFK  
ITQNL SFDP SGLHRINTSKSLKEQGIRHGSMVYCRLEEDISKDRV LMDNSD GVAQDKYEE  
EKKPGQSAEKKPSSNDVIDLMDSSDEEDTAVNQKPRGDLHDDDDVVVVI SPPRSGNVHKK  
QSSDKKDSQVRKRKRL ETNSASNHTKPKATMDASNIDSNPSNFQIASYNVWF GPPDPEAK  
DVFPKQRMAGIVKSLRAASIMKDLKEGIVSPLL FVGLQELTPPLVKYLT PHFDSIGYRIC  
TQPIG SFGPSY GIGIALPKDLAILDRQFVPYSNSIQGRGFLFIRTQTMLFATTHLESWCG  
PQFTGSKEREVQLADA AKFCRDQLNSVAGLELAVILGDLNWDDERKTKRSE PANQELLSL  
LPKGWKDAGT PFDYTYDQKENPMLSGNLRRRFRDCIYTTKQGKEFRSTGLQKIGKETIPN  
LVWDKKNPYNGTIRKMPVSPSDHFGIVISFSNAP

>comp16489\_c0\_seq1; 548 135 1574 LEN=1692; translated  
MSRNGYHPGGRGDSVMVLYK I INSEDRAGGLYNCFQ MAYGSGPTLNSIKQHCVA AHSLS  
TLGPEGFHFRVM MEDKPNATGERSFSWWDIQDGS AKLPVKETSQHEL RKL LFP SKSSGSG  
GSTTDSATKA AKGAFKMMGKAMASAIGDEGGAESHGPPVSVIVKMLDLNKIHDDYNRKH  
GGAPPAGPPRRARRPAPKARTPVAASRAAAPQSRARPPQRATPAAGQPRGRPAPAPAAAN  
LMDFGDAPSAAPARRAVHHAPSAMPAAPPNETRAQLKREQEARMKQNNRVWDDVDQRW  
VEKPAAGAARS GAAAAAARPKKKEVGVKLDMSNAAGKSAKVQQAMQKRVNEMNATRQKAV  
AEVKQREAEKKRMEDEEDAIRAQLEPKIKAWSEEHGKKKQLQALLGSLHTILWPGTKWKP  
ISIGDILQPAKVKKFFYFKATLVVHPDKTRDLPAEQRF LAKRIFDAL TQAKTIWDESQAR

>comp16490\_c0\_seq1; 359 1 1355 LEN=1532; translated  
XEA EVLRTCHKLV TILYPTAMIHYQSRQYIAMNRRQCTSH TARTCAVMGVFGIVVTTMLS  
NTIVSAFCPINKLFP GKTYICNTDSRIFTEKEFVFFATDDSSDDTTLAVDELLEQVDVK  
DGKKENLDEDKIRELMT ELSNADQYIWDETSSSSLFEP LIGYYNVSCTITAKPNDNPVG  
GKWTRGLWTVKRTMQHVL PPLPADISSTRKDSGKDGLYEMDSGVAKEDAVAALAVAQVIN  
AIRLELLWGFVNIWVLLRGDAVPLKQVKNIPTKATEDDLK KRTIPKLLPNLSDRTVKAY  
FDRPKIGLSLQGRKSNPLLKRVLT LGPTSAVVLDTPYADTQVRLGKGGTSGSQFVFRRL  
PDTDKAEIEEWKVVLEKSTANSSQRLTKNKL LFRV GILGVAFSILSRV LQQHWMKTGA AV  
SAILSGISMIGILNSTGGIETKGD TYMVGKQ

>comp16491\_c0\_seq1; 399 1 1048 LEN=1063; translated  
XQQQQQQQPVRTTKGTPFLGRSVLGSTFFMAVVFVVSRTVPTALGFSSRAPQLCPRCAAT  
ALHATAGARYPPMSRDEVQAALDAVPVFAVTEPNQEGLVLLKEKGNPRDIAYFFFSPQAA  
NTVFSPLRKKENESSGAGEWSVSAYPLGLVWFELINEPEEGVEYRLLPEPEDLIGAQNLL  
QQQQKQSNKVDPR LKDLFQSPFNEVPVFDQLLRVTSQEGDDQRERVPLYLGLRDLMDAV  
NQATKATSGEYQAAITGVNLRDLIDEMMSETGNDYRRAIFVPPSAKPEAGEPEGKEAAPP  
AAASSSSPESGMDDDLDDFKIVEGGRPSFKATNDGPINTPTASDDLWA

>comp16493\_c0\_seq1; 172 1 285 LEN=610; translated  
QAHNP IVSPLFTHLEPIYKMMKQTLIVAALVASASAFAPVSRPIAANTALNAEWEKDWKE  
TNFEADLEKVKAEAEKRLEEKVNELANIENAGK

>comp16494\_c0\_seq1; 401 1 1734 LEN=1852; translated  
XLYKVKTVAKIRRIIIIVVTDV GELIVQAIVRITASPAYLAFIKNILLPEKEKTIISMCRP  
NNTETTGNRRKRVIISGAGPAGLLLASLLLNKNKDSSTVTVTYDVTLLDGREDFGIFITKE  
ELSENHRSMWMLGLADHGMDAIKTLPDLYENYVKGEGILVREFNIFLGSKKVTQTLDSYEN  
TMKRLGKSADSSPPEAFIVDRNFIVAAMARYIRETHKNDSNFKAMYKTTTCQYVDYDNRR  
VLVRNVNTKEEHYVDYDLLVGC DGVRSTVREAIVKRHSDFSMEYTDIFQEFKMTHLKAPK  
KVSKSAMSILPDI FPNQCQIGICLPETGDLVNI GIGVPRNLVDDLDELKSDDYRVVAEYAR  
KNFKAFELEDYDDFGKQWVGQRWNQTMVHCNFYHSLKTGVVIMGDAAHATSPSIGMGMN  
TALRDAQIFSEILEETQDDFEKALPAFSEARVKEGNALS DLAMHLYCMDKXHQFIETIHL  
VVRSFYLSKFPTLIAEHPQTMVGRRGIALSDVYTQAVKLGVMGKHRAINDRIRMDYFERK  
TGMVKASEIMGRGIVSTLIYGAGLVALGAVTYQKLIL

>comp16495\_c0\_seq1; 123 1 747 LEN=1022; translated  
CGTIPPAVSVARIEDCTKRVEDTRANMSWKAGLSRYLPAMRFFACPESSSIGVRN WYVK  
HHNELKQLNPNFLLMRTAENCMPAVTTELEWTTDHL LQFMIQTGRFRNANGTIAEDRVE  
AANAYLSTDWEAF AARLAHKGFDP LQPSNQKQWTD DRSLASDLTEYSALKQSMDEQME  
VIRSGPDKEYIRGVNALLMAQRVDLWCAGEKEVELAVQHLYKLGRL LNERECVFPKHID  
FYPGAEDI

>comp16496\_c0\_seq1; 200 82 450 LEN=878; translated  
MGTGPSAKKKGSRSKI KKYKRA TWLCNRAKDRDQIQDEIEKAEETGKPI SF EYDDELPGG  
GQFYCVETAKHFTDAKALADHKKSRY YKKRKKELQEEKYTQETAEWASGMTKEKLPPAHP  
KK

>comp16497\_c0\_seq1; 664 726 1991 LEN=2714; minus strand; translated  
MKYSFSLVALLASTTEAFTVPKQSPTFGRTNGSAKFTPTK FVDDVATSSFD TQLSAA SL  
TPLDLEKKGDIATWEKFSNWITSTDNRLYIGWFGT IMFPTLLAAASCFITAFIAAPPVDI  
DGIREPVAGSLLYGNNIITG SVIPSSNAIGMHFY PVWEAASMD EWLYNGGPYQLVVMHFL  
LGVASYMGREWELSYRLGMRPWIFVAFSAPVAAATAVFLTYPIGQGSFSDGMPLGISGTF  
NFM L VFQA EHNILMHPLHMAGVAGVFGGSLFSAMHGSLVTSSLI RETTENESTNNGYKFG  
QEEETY NIVAAHGYFGRLIFQYASFNNSRALHFFLALWPVLGIWCTAMGVSTMAFN LNGF  
NFNQAVIDSEGRVINTWADI INRADLGM EVMHERNAHNFPLDLASGEILPVAMEAPAIVE  
A

>comp16498\_c0\_seq1; 314 131 820 LEN=827; translated  
MSCRNKTTTIREDTIPLAQASLLNHASELGGEVRREDILF SENPDLDSNNEHFLEANN SV  
GNTIESIIQDVC SVVTSSDPTIQDPDRYRHLQLNYHQNNQEDAVSPNNIQASNIDASTTN  
GAWAAGIVLGLF LIGGPSVSVAFGVGA AFYSKQEEGVAADIAKTFGTVAIF SHEKFGQVIQ  
KHDIVNNISTSTVAMSKKCFD VVRNTIDQFLNRYPRQSSTNESDSINYS

>comp16499\_c0\_seq1; 250 72 707 LEN=881; translated  
MTIRNRIEIVFAPLPEEERDVDRSGAKEFAHRTANQFRNSVTTSIKDGACVGEICHLVDW  
DKERFMESVSLRSMNEIDEDMTGGKTSIIVFLISCGPDG SVHRNVRKTTKWFKEQQQTL  
QLKEKSSSKAEAVESDGIITVSI FALLGH SVCKTSAEQMADEVFSPGRR LAKAIQNCMTA  
SQSIPTG DTRLQNFVLETQIELEPPEEKFD AW

>comp16500\_c0\_seq1; 520 671 2475 LEN=2680; translated  
MSNLEXLQSV EFAIWKASGPAERRKMGRFLIPQLRNATEGLLN VTRDTELLSHSIEKVNE  
KKGHN TAAERSLRELHCAFLNLTQVLLDHLDDDETSTREEGENDNNRKLPTDPLQLIELVL  
SISYRAHKLRLTYH LPLYQRLA IAVA EHPKIGEDKISDSMTTTLGCLVGN SRGEWIQTIN  
SWSQTSFGSDSESESSNDNDHPVFR TDQNDLKWFRP SLKVLATGARWSDVWHILKGLLRP  
LPELTRMDNKSHYQDRNKECYSIDHSRCSRETLL ETGVENEYDDKNAFSDQIFDDDDVIL  
SSATTFPYLDEDLVIDILLPMEQQGLLADLWSDGGCYPPP KAVEDTCNIILMMEPSIWKI  
FGK IASHVKANLITNLKMDQKKTYSLQDAIQILLKNSERNALDDGNPEGLGEHF LDNHEK  
DSL VQALKELEDLLDEHLHPEDDQVPGNEE ANQASELTALATDLSDEVRS DGSVDKNYNS  
RVHSRTSEDNSSQNLSDMMKV RVKRS GDDNIVEVTNVEDKYHQSTEEYLEGITDEDHFLY  
LIYDDRARNYEDNIPDISHQIYEKNGGKQLRYTASLERHIYNGMQQRLDYDSEEDDDIHL  
L

>comp16501\_c0\_seq1; 525 54 800 LEN=855; translated  
MLFRSSALLAVLALSTTDAFGIRTAVRKPSAAVRVSVSSPLSAPVATRLGMAEEETTEE  
TSDGEDAPAADDILSSPAFLKRKVEVLES DIAKTEEDLVAATERKEIAKEEWGPQLEALE  
REYTNIQORMTEQNQEGSDAKVRVVKGILDLLDNFDRASGVIVAETEADQAI EAA YKQA  
YQDILDKFKEMGVTEVETVGTEFDYELHQAVMQMPGSEYEEGFVCQEFQKGFIMGESLIR  
PAMVAVAI

>comp16502\_c0\_seq1; 434 72 830 LEN=1081; translated  
MIVSRKATASSSVRGIAATVRRRANGSGGHQHHRQQQQQLRSTLAGTNLPVGFRRDGDER

SEVAPARFHRPLATTECARGFHTTAPSERGPALVGLATVVSALGFAGSSAIKSYNEWKDS  
QPTKEELEEMRKQEEKEQATMKAQQAKEEERKKKEQKASADDDADKPRTNIFREWFVGT  
KYYEGGFEDTMTREAAALVGVRESSSPARIKAAHRKLLILNHPDTGGSTYLAGKVNEAK  
ELLLKGRSAKNN

>comp16503\_c0\_seq1; 1074 337 2652 LEN=2988; translated  
MNGLSAAMNQHQLSAFLLLCFMFAVGNATTSIYSGAISTSSSASAASNLDLQPPPIQR  
ELQRPTLVEAGACIPPEVIRAIHLDPDRLPLASGGEIQTKCYNERNSCGYNDSTSPSA  
CCRVSYEAGWVVCDAYNADFHMPCVCNDNTDGSPTPKPTLAPTTLPTLEPTRAPIKDPMDP  
TIAPTTSKPTKEPTKEPTKDPKPKPTKPTKAPTEEPTKEPTDPPTDSLTTKKPTTKPTK  
PPVVSSTNPPTTKPTSAPTLPATTEKKSPTTKPTVSLYYSTEEKYDNDLQATIRQSQCNE  
APPVIEFVQAATFVYRYEVTLSTEDAASA AVAINTDDSKMQEVSDFWTRELHDELAEEFL  
VCGRGVDYPYQNDAVWILQSKTHEVEDGAECSSGTGSLSSQSGISVEKRGNGDADEGSN  
DDSSQNCIVMKAVSRIFAYESPVGKKTNKQLWSDANDYDNGPVAKNFAEDAIDFLEFVLR  
EGGPENS NVLDVSVFQGGELVVDGDGAGNGEEVTEDEKEQDDNESNEDSATNQETATNGSE  
VGNDEADSNSSGGFSIDENGENSAIDNTAVGIEGSMASNNNEKRGLTPPIIATIIVASGFVL  
LLILMGVSLNRRNKNRQREEDEEYLREMEANRKLPMQYAMGAIHHLDLSDSDGDEPGP  
IVRSELDLEENYKGYQTSAGPSVGDDVQSHFNFSGVVRSRQSRQSMGPLGMSDEFDLDG  
QSIATTQTDRGNHRAAGPKRSSLPSLPSLQHTSPRSYNLRDVTKL

>comp16504\_c0\_seq1; 560 47 628 LEN=1117; translated  
MARGKFNKRGGGKRVDAISAAEIEQRNQLAEFEENRAKRRAEAEQDGDAGEEKEE  
KKSGQKGDAGKDSNEPVHVTSEQEHNKNLAKLEEKKRRALAEERRKAQEEIELAAEMER  
KAKFKEHEAEAGDDGKKKKKSKEMDIPKLSKIEIKMKPAQMKEALKERGLAIQGNKN  
ELTKRLVEYEDSR

>comp16505\_c0\_seq1; 198 1 801 LEN=1288; translated  
KLALVQPLLDAPRASGGAVEKDPLFSASGAGPGAPTRIPGCAPKGLAKAIGKATEAASAP  
EVPSPGGDSSEPPPPGGGSDDTGGTDDGCVVYARLGPACAAGDRATVEDLLGRFAS  
QLEADGNLGMARNCLSRARELQARKASAVFSVATLPVLAARRWGVSPAAAREQLEEASETG  
AVPSRVDADGRVFSFACALANQGRSGSTGVGLHEWIKLLEHLQKLNVDLSTSPRYHSLK  
EKEGRPGQQHQPEALVADEFHVSASV

>comp16506\_c0\_seq1; 82 1 121 LEN=1010; translated

XKXSGKSSKHNNTKSGSKSGRDTDIPMVDLVSASMSM

>comp16507\_c0\_seq1; 465 70 912 LEN=1854; translated

MNSTSLPAILQPKEEDIQMMLSAGVHTGTRNSDSAMEDYIWRRRNDGVHILNIGKTWEKL  
MLAARVIVAIENPEDVIAISARPYGMRAVLKFAQYTGASLAGRFTPGTFTNQITKQFRE  
PRLLIITDPRDTSQAVREASYVNLVAFCDSDSPLQYIDVAIPANNKGKYSIGLMYWFL  
AREILRLRGSVSRSDWDVPVDFHRDVEELKKSEEEQAQKAEAAAAPPAAAYEEIAAA  
PVEVEPVAAEAPAPAAGFEAPANGLWEGGQAATTTAAGDW

>comp16508\_c0\_seq1; 239 208 1293 LEN=1308; translated

MEVEPDTASTSVSSSSGDGSSNDESSSPMSTDGPGSVRTGNGGSNVGESSASSSEKTYN  
DLEGWLSKLSVGTPLAETE VKSLCDMARETLNESNVQVPVPAPVTVCGDIHGQWHLMEL  
FRIGGSAPDTNYLFMGDYVDRGYYSVETVSMVLVCLKVRYPDRVFLRGNHESRQITQVYG  
FYDECVRKYGSANVWKLFTDLFDYFPLTALVEHSVFLHGGLSPSIDTLDHVRQLDRVQE  
VPHEGPMCDLLWSDPDDRLGWGISPRGAGFTFGMDISQQFNERNGLSLVARAHQLVMDGY  
NWSHERAVVTIF SAPNYCYRCGNQAAIMEVDEALNKTF LQFDPAPRRGEPH LGRKTPEYF  
L

>comp16509\_c0\_seq1; 724 328 1698 LEN=1734; translated

MDMAGGF TLQNMACLTLDGSGNEDATPSEAAATGEQQVSKEKSSSQEARDESTAPTTSHR  
RGSSSSNLGTAGDIGGGFLASGFSWFDKQREKRRRDHLKQEAQKQLQKIADAQRAARK  
SASGNSSTKNIHSSVNRNHSLSISSSSSSSPSQDGMVMPNNSLKSASGSSDGGDCEN  
GNDKSNAKQRQTQFYTQTSNSFGTSDVSKSGEGASGTLDLSDIDALGDGGVSNRKS  
TDDDES VYIIPVVRVTHVEGDEASPYILS QKQMD EIAKHVLPETITICYRWRRLYGLGRDG  
DSFEGCLRIIGA EKRTLMMVVRTSKGDVFGGYADAPWHSRQANATAHFYGTASSCLF SFSS  
TLTEYSSSSSPTDSPINVYRWTGKNRYIQVCDVFHKMLAFGGGDKGAFGLCLQDDFQRG  
TTGHCDTFDNDPLCSGDSRTFDVVDVEFWFQTVGF

>comp16510\_c0\_seq1; 460 1 1932 LEN=2125; translated

KKVKRYCARKRSLKMPNFEWLIKEDVSYWADNTQEVCGDIGAATAESCSRSMETVKNA  
ADKSDLCHFRSKNVPVEGTDPENPEVLNSPESDQEKENNGSNCGGEPHFLQSLRTNPSLI  
SSRTGSWFNQRSLAHLPAPEETTTKGDQGSVGER TLPNSDGGDNESQDNDADKEYRYSAG  
YIACVVFAVLLVFFSIGLGVTIMMRKRSQNQIGGTNITTAEDISNTT MEDLTMESDFSVN  
SDTEQSEEVGANIDDASNSTTQE QPSEEIVEFDY TANTNYLVGAYYPWYSEDFHSNER

YLRESLI PPQQPALGEYDDSNPLVIKQHMEWFRRANIGLLVTSWWGPGRVEDTTTKDVIL  
EHEDVGNLKI ALHYETIGRIKDKTNMSTPRSDIEYICENYFDHPNYYKIDGRPVLFVYVT  
RVLHEDGVLEEALLTMRSEASKCGHNLYLIGDQVFD SAPDPDQDFVPFWYFDAVTNYDVY  
GSSGRPDGYAGMEAVDKYYSDQQEWKNQALKANCYI PPVSPGYNDRSVRFQNNNPPLSR  
RLSADAEEGSLFWYQLSQAELVDPQVDNMILVNSFNWEHEDTQIEPAVGVPGPSKGVTA  
TLPNVYTQGLEYTAYGELYLDLGAATSKNVEDHSSYDHLIQL  
>comp16511\_c0\_seq1; 392 144 1292 LEN=1567; translated  
MAISKSTDESTRTG VYHVKESGLE YQHLRDTTVPKDGKEYVKRFQKGFQMNVIENKDNDL  
VFELIGCDASFANALRRILLSEVPTVAIENVYMWNTSIIHDEVLSHRLGLIPINVDARL  
FDPIEDGDDTTDQNTLVFQLQVKCPSRRQAAAKAKKATGDD SALTETEKSVLENTELDHA  
AFMAAKKEAIQTPGRPYTLHLYSRDLVWVPQGDQERRFPNGIRPVHDDILIAKLRPGQEI  
ELEAHAMYGIGQDHAKYSPVATASYRLYINVEIVEPIYDEDAEELAHLYEPGVFEIIPAG  
VPGKRITVKVANPYACTMSRNYMRNPKLAKAIKMTRIPNHFI FSVE SVGMHKPAVLVAEA  
LKVLQKKCKDLIEVTKQQQEA F  
>comp16512\_c0\_seq1; 463 256 1254 LEN=1435; translated  
MGNTGKMMRAKVYSPHPKPPMIEPPPPQDSREELEAAAATVGKKGSSSSSHNRTTESQTGA  
SILEQLTIMESSTSSLRKKKGGNHRSRKSLNGPTEPPPEELVVRHGMQECISMIPEPSQ  
DQASPSKGNINRDNGR DGSNNGANPLFNFDLVPTMTKDTTWNQREIPNNVDDNGTIGA  
TFNPGPGPFAGDDGSKRSSTSRSIHKA AKTTEQPGKKKDRSVHERSTHDFTKQHKSTIH  
HGRKERSTHGHDFTKQNSKHNTLKKNK SINSDTLAALSKLEITGTESTAFSSDCTS YDTN  
DSVSLANSSSHKLHQKASYCMVFESILSVFEK  
>comp16513\_c0\_seq1; 379 413 1503 LEN=2107; translated  
MMRNNQDRRVPVTAPDDSL LHF GDVPVREIAFRRSIHDISDDEPIPIDLSKGERNCPKS  
GPHSPSSIFDVDSPLQDDLFSVSDTVLSRHERTGTDNTSVYFSDENERMDEETIPSFYSI  
CTTLNLDDGSADPSVMCAQIGEGSIKSMSP EVDVFGWQERSVISDVSSIVGTPSPNTQESH  
QLSNPQSSPKRRRN LKKRRTNKRTK GKAKSSAREFEKLHKL MIRTASSRCLLLQQSELC  
ISSSPQHVESLKL SVFKSIISSTKLR TNPNDSSRSNNDV LNISTSTSSGLPNCVAGGSV  
EQSQEKPKTYTECTXKPDHYVIAIMWKS GQPTARKSTAYTSSTRPFFLFD SKTNGSNWDN  
LDA  
>comp16514\_c0\_seq1; 80 1 216 LEN=796; translated  
FLPNSPLNNVKKQYQLQCTSGRKSIALAVPKSGTEDY PRLIRTQKLPTGESLVQSQKSP  
ASKRNQCDTVE  
>comp16515\_c0\_seq1; 385 427 1305 LEN=1471; translated  
MKFSAAIASLLVASTSAFTPSAQVK TGSALNVGQGWSPSSPPALGSPGGPFELFSSDIPM  
KRIEGGTVRTWDIPTETERLQYVLETNGRPLKAKVELWEGPV RLLHSMVDNLEDGSQTP  
YKGLAFPKGPKALKI STTGSQEF PCTFGAEVPSMERTKQLIAFQNDVWDSNPKHTMQGT  
VQEGGLGAVKAFPI SDSIESVQIMWWSKDTGKRAAKSKIEVLQGPNSIRQVFDLHCEGTT  
QPYHAI IETPGPGWTIRMWSKAPMEYPHEIVVEPHTVADNGGAMGDDRLWWE  
>comp16516\_c0\_seq1; 153 348 1193 LEN=1404; translated  
MSSTPNGTGESDGLATTSSIPSAIAPNP IKNSHVPSLAGSVIEASDGGITGDGTNKLLI  
RIQNIASTANFGIRLDLKKIALKCRNTEFNPRRFS AVVMRLREPRATALIFSSGKICVTG  
VKSTHNATLAMKKFHYI IERIGFQPK EYVDFKVQNI VGTADCGFPIRLEGLVYAHSAFAS  
YEP ELPGLIYRLVSPRVVFLIFVSGKIVITGAKKEVDLANALTKLYPVLVEFKKVHTAT  
FPP IAPTTAQKSSSSSSGNHEQQQGLLKHSSIGSVSQAEV  
>comp16517\_c0\_seq1; 304 1 1878 LEN=2165; minus strand; translated  
XLEYLDEMTEMGIKKNV IIFGAAMSCMEKSCRADIGFQLMERMRLEDVAPNVHIYNSAIS  
ACARCNLWEKGYELFVEMDRIGVNKDVVTYNAVLDAVSSQVELGRRLFKEGTDLSGFVDX  
MICVFIKLFPHLEIVPATLIDIDCKGVERGFYARVSR LGTQWLELDLHFLSLGGGEIALG  
WWFEELVPYLINTSKLEAVQSI SIVTGYGKTRSRGARMNDDGMRLRVRAMLK YMEIHET  
PQPKNKGR IHIKNSALIEVVKKNGRIRFDLEGYTRFKEEETTANKFPDVVQV RPRFRPA  
RPGQGPPTFIRDGDPVPPYRSPDDKRRELDHPVDRRSFSFRKSRDDRFPDRGPD SARPS  
GDDRMPDRASSNYGRTGESPRNNQDQRYGDEWRGGQRDAPRRGAFGDQEGHGRGSRGDR  
PENGI DHRRSQRGYGYEGGRPGIGNDGRRGGERQHEYDERRGGVRNWDDSGRDNMRSTN  
RDYDPNLRGQAGMDRRGRDERDGRSSMSRPDQSYYSDDRRPSMDGRGGPRAPRGP PGQNM  
HFQDRHS DRGSRSSGPNGGGRNGPNDMPADFRGARN TDLNAQASYRNEEELASTRKR P  
YDDYQKQQPSSRGYDIEPSYAKRRSS  
>comp16518\_c0\_seq1; 105 1 347 LEN=347; translated  
XEAMALKKRAQDMENVCNVEQATGSLVKFAKRQLFAKQKQAC PASTAGGLNLLAVAA  
STGSKRPAVGRGLGLGLKRVAKRPAFSSKKPVVA AVSKKVS AVPSKKASSPGDLPS  
>comp16519\_c0\_seq1; 706 246 2330 LEN=2510; translated

MNIDFLASSEHADTDGALNRRAIQPRDDSRTSALTPIFLEFALNAEPSESVLNSLTHTT  
SKVLGELILKNETLERYSEEFVLEIGEIGTTSTEENDEKCPAAYENCALVSTIVWFHHSR  
ALDSGSLEMEVLNESKKDFDAILASDTGPLEAKYLGRSLSSIEYSITFTGVPSGARMNDV  
QRRYFEDVTKYFLRKSSTSKIYSVIVINEIPEAFPLSQNRNEQVSGRSLFDDSTMARSGF  
LRKRDMETTASNRRKIEIIAEIVGEGSVQESSNSILKGI GEHLDSYSNEFSTQPDHRSFF  
GDAIDIQVKPRIHRRTNRGFTLGEVRSRILQIDGGKTSFVLVVCVLLILFVWLWILYRIY  
KDCFYAPVEQVRVIDGSAKPEIEEKIELSGTIDHVKTLLGSIKNPLQLGKASDSHSMGQ  
TAIDEGEKSRSNHLKSQTTPRGRSKSRGKSQKRPVSSNDPTFYDNRDLEDYSSDEESAPK  
RPSHKSLPLSLDNQNDQSSHTKKHNSRSLPVDRHNEIGINKKKYERKGRRDTSATKGI  
AVEGESKTLRGNTNRQTPNIGSAAKEVEKKKYSATTVSDSDSSSDSSISDVSRKVKK  
RVVRRDNQYNTDPKSKNVEKMIASSDAQSNKPRVHPKHKPGDKNKFKPANEISFKVSKK  
KTKPRGGNWEKVEFQRPNMGQRTPSKLEDLLFDK

>comp16520\_c0\_seq1; 249 1 725 LEN=1653; translated  
XQLNPLMRHFDRVSNKEIDHRNKIKNTISMSSKTEARVTTVATVSAVRDMEEELEGTLPLV  
ATAVSERGPGNGAIPAITQAFDYDEAISNEQQQLLAEFEFNEAFPPIPDNANQRNFAGVSD  
DSKTAVGKADLIGKIRCEEELEIIRNNRRIHRSRYFEANAYKSANERAQQRDREGLQVK  
DDRIGLSFAKNTLPEKVETSTEKYANNSETASKSGYHVKEYECMTYDTNEYSVSEYKSMY  
D

>comp16521\_c0\_seq1; 606 1 1847 LEN=1989; translated  
XQSVHRQQRSSTAMATTNDGSSSEAPTVTDAENRERQEAFFEFIEAAYSPDEAWVVLAS  
PPPGNGGAKKNHGPRSNQIHRRLLEPLDDHDNVGDGNDGDYDGSQSRSGISVELILTLPL  
LTYPSDETAPLEINASLMSRNSRNIPSKTQSNHVDASMYRKLAMDSPNLLQACRGTALE  
TAGTESVFFVLSRAEQWIDEDWSELRRTVPTSGGSNRNSSAQHSSAAGTTNDRDKLPLFL  
GRKLIYSHHIIAKAKRKAISDLAKDYQLGGFFKIGWPGIIVIEGEEENCNSFCDEIRSMR  
WQYLVIRGEEREAVPAAATALSNTAIADKETTETRLSRLRKFPLQMKELGEDQMSHLSE  
ICRKVGLLEDLFLTSMKIYNRNSNTGKGSRDEDDGEDEDETNNTNTTKSHKNTCDYGTLV  
LVDHMNDPKGYTKWIRKTCQSSGCRCAVLASSVGSNEDPARSSGSNQHRPTIFVALYASE  
ASSVKQVLKRWRTSKVIDSRGTPCLERKMDILVEGELPIAETGPTMALASFASLAGCS  
LDSSSSKNNPGKPPSETTIYTVIDNENNRKMLTIDQTESLLHSIGGSPWKETFRTQNR  
PSGGSKSKAKGNTKR

>comp16522\_c0\_seq1; 323 135 581 LEN=685; translated  
MNNPDLAFADGPTNQNHNDLGTIGPSFHDGAQDGEEDDEAAAAAAEPTGNDTGRKKGQPP  
NAAPALANEAAMALRDVSEGLDRALGSLRSSAERLLGGTASFLETGLSVEKAYGKAKDL  
ECAESQRLDAVEPAVLYRSGLLLGGDAG

>comp16523\_c0\_seq1; 353 199 1551 LEN=1650; translated  
MSECTANTAENVLDSREAIYAAAADIEVFSDSKKRIILRGCHLSTTTAATIVKILRKNET  
SVEELVLDKCKGRVDIILTVVFTVAMPKVVAILLDYPPSIPFEPLAHS LGVGLLTSANLH  
ELELNIGSNGGFFTLTAEARSLEQGMGSRRLSRLCIEHCRFAESSALRILAEGLRMK  
GTLRDVRLAFCYEPNGQPLEDRNVACLIRSLKDNSELERVDFSCNKCLDDGMQALASLVD  
STQIKVIDVSSQRMDRNESMNTFLLVGALGRTSTLESNLQSNLSSDYDMACLAAALH  
NTSIKRIDLSHNNISNSALNILSSKIPFMKVLQSLRIEGTPAAALDDNVSRRLASAMREN  
TVLRYVVCDSNLADYKMIYYADLNWSGRGHLLQNPACTYENENKGGIKTIPSSLWPTVL  
SRIRRLSKCRERRADIIYFLLQOGSPVFPT

>comp16524\_c0\_seq1; 378 168 785 LEN=1232; translated  
MAPGSSSKQRDYDYLFKLVLI GDSGVGKSCLLLRFADDAFTESYISTIGVDFRFRVTKID  
NKTVKLQIWDTAGQERFRTITSAYYRGADGIIMVFDVSTESFDHVNDWLKEVNRYYAEG  
TVKLLVGNKSDRTADKVVTEAQAKEFADELGIPFIETSAKSSKNVEEAFLTMAGELIRQR  
DARGGSETTGIDLNGEKKAGSNCC

>comp16526\_c0\_seq1; 473 1 1363 LEN=1548; translated  
XYSQLPADLQAKIFEAPKGIKRVIVSTNVAETSLTVDGIRYVIDSGFCKLKVYNPRIGM  
DALLVTPVSRANAKFASGRAGRTGPGYCFRLYTERQFQDEL METAVPEIQRTNLSNVVLL  
LKSLGIKNLLDFRMDPPPQENIMNSLYQLWILGALDNTGDLTDMGRRMADFPLDPPLSK  
MLLFAHEKERCSKEVLVIVSMLSVPSVFFRPKDREESDAAREKFFVPESDHLTLLNVYQ  
RAKQYKFDAEWCTKHF IHSKGIKAREIHAQLLDLMKQQRLEPNSSGGSWDVIRKAICSA  
YFYNSSKIKGIGEYINMLNGIPCSLHPSSALFGLGYTPDYVCYHELISTSKEYMSCVTSV  
DGEWLAELGPMFFSIKESFETTLKRHEKKLEQAKMAKEMAEKEARNEEEKKKSELNKR  
MQSLSKRRSAVATPGRGTGGSTPRFAPKSRGRLGL

>comp16527\_c0\_seq1; 218 1 1030 LEN=1515; translated  
XTIAEGGLFSYGPTMGVARTNSPTTVTHIALEDVAKTLHDVHRHDVCLVTSLEKEDHRTQD  
QPPETPEEDSASFRRRELKTKLRALISDKNGCTEDKEVADAVKKLSELNPHPVNCARFE

LFPGEYFTRSSPNFPGRIPKPSIGQEDIVQYTLGRLSFNIFQPNELLCTVKSIRNPVHPQY  
YEHDETAATFSYHFVLELTIHAPEGDLATLINRATCREDEKRNRMIVTFQGSTLIPGN  
HSTVDHASTLVLEKTFANAYKKADEQRSYFGWVYQYFLKLIILGLSLPDSRTRFDSSFH  
FDMKRPPKGFDFVLYLDEDMRITRGNRGTISVVERASPIGFSF  
>comp16529\_c0\_seq1; 288 150 1448 LEN=1777; translated  
MTTASSSDNASDAANTNEPGDTRAVHTWIFEPATSERNSKAFTDAGIEAIANHKYKAGHY  
TFLDNLLNPIWTWLTNLLPMWLAPNAVTMLGGLHCALSYFTTWYYSNPFATPLPDWVFL  
SGYCTIAYYTLDCMDGKQARRTGQSSPLGQLFDHGFDCICNLAHSSTQAGYLLLESRWFF  
AFQGSLLFAFFMAQWEEYYTGMLPHAMGNFVTEVNYSIGLFAIWNSLIDRERFWTTPLG  
DFLPAFLLDGSTPVAIPPLLAEEIRYVGMGIWLLGAVFLCGCSFYRTVTSPFVRENHLR  
LSALSCLVTPFLIAVAPFWLPYHVLEQETRYISVGMGLLISFLTCKMICFSMARQTFASI  
QMEAFPYFGI IWLIRSDYFNQHILTDQITKVILAGFCVYQAYRLVTWAKLAIDQICTRL  
INCLTIKHKKKD  
>comp16530\_c0\_seq1; 303 1 351 LEN=351; translated  
XQQQQQQQASPAATTNSTVGGTTS AAPSSSTNPPVAASVSVSSNPVPAPAPVAPPVPC  
QQQQQLQTQQAMMMQAMMMQSMQPMQMMQMPQAQQTAAHTTGAMPPQQQQQQX  
>comp16531\_c0\_seq1; 258 136 807 LEN=1204; translated  
MATDICIRRLTKELKLLMKDPKIPKIPKITAADANILEVHYVIEGSEKTPYTGGFYHGKL  
VFPKDYPLKPPSVIMMTKNGRFQPNRRLCLSMSDFHPESWNPWMSVSTILTGLYSFMIES  
APTLGSI ESSRSQKEKFARLSLDYNVRNPTFCKLFPEYVELHKERLAARQKALGISEEDK  
VATISHESSDRFGANELAENGLFATAAVLISVLSIFFAMRFF  
>comp16532\_c0\_seq1; 253 204 809 LEN=838; translated  
MSAAYSHGDAEALLEENLQLNSKWTIWFNDNPRFSDPKKDWKDNLTNCGSFDTIEGFWRIF  
NNLKPSMLTVNSNYHVFREGVIPMWEDEPANKNGGKFLVLTIPKKDSKTGRCDEWVLYTVL  
AIIGETLMDMGNEVCGAVVSIRKNQDRVALWLKSTDKERCSKIGARWKKCLEMYRTPLRY  
QEHA AAAASGRSFRNESTFEV  
>comp16533\_c0\_seq1; 473 1 1129 LEN=1211; translated  
XYPSEYPSEYPSEYPSEYPSEYPT EYSSTGSPSARMESHVSSHPSSDTTGVSSDWHSG  
SPSVLSSESHSDWPSQPPNLF GPPSPSDDNIQSLTPTDNTTKPITHSPSPERTSSPSHS  
TPGCPPEDPVLIDIIGGTMYPKGAPPIKITFQNTTHVGFVINTWETA FNYYTEYHESD  
FGDTECLEENVEAHAEVDEYIATCMHTVSIIVNVVVDNNGAWFDDMDDAEVPECCHP  
PDLKAPT VQYTFKLQCADPCPDSERRLSTKIGGDEKNSQQVPPKTNHNVMESNVPSQP  
VQTMKLSAGDEEGHFCVSEDPYCGEDNNHVHVCHYSTRDGYKTF CVPEADSDVLA FYKKD  
YCGPCVGGYRSKSKTK  
>comp16534\_c0\_seq1; 264 674 1177 LEN=1344; translated  
MPFAKRKGSASIPINRKS MRKTSSEHRMAQDEAEADYKDFVFFSRVNGISQQNSLLQDG  
SYLKSANEILIDNIVRSRHEQNEGEKFIDDDLHHSSTIHYRTQNTFQDLKIVTPTRMDR  
HVLLDNFLNEVPSPMLDSSSSHAHYQLHPAESVDDYDEDEGIFDLEL  
>comp16535\_c0\_seq1; 1008 370 1983 LEN=2036; translated  
MASSPAATADESQQVGLFSKYCDDNLI DKKTLESMPFFAMMLADEDLLPAELNDIWEA  
ALKSSKDP SRVSDSFAQIYRDVDDL FEDDEEDED EDEDSGETDASSEPADSETQMADA  
TENELDEELSKAYKSLCDENGLISKKMLEWEEIESLLEEGLLGEDEFEEELWANSVSDNA  
ESSIDSNGFLT FNGLDEL FELDEDEDEDEEEGELPPTPATPRAMVIEGDMPPGVLF S  
QLADENYL VGSKELILWVELKDMLEEGDLLESELKVI FKKYATPEGKLT EETFVEFYDEI  
DGLFEEDDEDEGEVTA AAPTTPPQQAQPN TAMSERVKGDFLSFIDIVIEE DEEPCGFGAS  
EADQEQVLN ILKVLEQQPTNMIVQKDG NIEQSDLAGTWELIYTSSAMKFNKGLSGIGGS  
FPNGKFGSLRQDLIATKFLSDMFYKERIDVNPSSASFDVTVNGVWDLRKS SVSIFTGQPTV  
ILNVEPDRVTYGPTSTRADHWKSLGPVNRDL SYLDDDLRVMRGCTSSSETV FVFKKV  
>comp16536\_c0\_seq1; 68 1 456 LEN=738; translated  
SNNSNNKIELSRFEGRPRDLTPKAWFLSALGIRDKPFDRHDWYV VNASENG GTERR YVL  
DFYMGDAGPGRDFGHGQGEALPRVEIDVRPALDTPEAFGRRGIRLLREAFP GIAREWD  
DRRRAGGGPSAVSSAASNPGATDARLPGTKI  
>comp16537\_c0\_seq1; 107 1 142 LEN=243; minus strand; translated  
XVWGLDEEEDDEVEGLEEGLADPPDANADAPFFLALAPGR LAEDMVAL  
>comp16538\_c0\_seq1; -39 1 878 LEN=878; translated  
XDGSGVSPSVPSGRKTGGRPRGPISRRAPVHLRPRAEAVRGRHLPTRWVFPGGGASRK  
RRRVSPGAGGGPPRRIFPAARARTRSPA AFPARPPP GTERAWAAGAGAVLRRDRGRGSG  
GPPGGPEKALAAGDARRGFRRQASGHARREGTPRVVLEGRGTPPERIVRTGVT SRPASA  
PGTGPLELGAAPDDERNKEATGLAKQRRGWLQKNETGAESVXDFDFDFDSNPSAPNAKE  
DTGPFLSIRHAAIPRIPGPGCAVLGTTKLTMYGTVIFL FVETENHCTATVSNS



>comp16539\_c0\_seq1; 253 1 824 LEN=866; translated  
XRTRNELVTQEAKSKEGTMNQIATIKTATVGGESAPPVSMDSLPHYVETVHEDYEEYALAM  
IEEEMKAIAPRPMKKIFPMTFRITMRNEYNNLVVADDSGETGDVHGLVFRGRPKQLKK  
FQHKKIVKPTTTEEWTDAAANGGRGALSQIKARYEAERLRNLLLEVEKEEGIANWKDYNA  
RLNKLGTWFSELLKQMDAVEEINFRRQQAQTQHVGPEDRLNQEYEEALYRRNKLEYTI  
EGIRRETKTSTAAFNSDAGETTSRKRVRVYGSNAD

>comp16541\_c0\_seq1; 592 153 1175 LEN=1391; translated  
MKNFGNSRGSYILLVLFSSFLGTNAFLASPTITLNQKLSVSPLOMSSTESDDAGIHVMVN  
GMPGPMATAAAEAELRKGKMLTPVAMTGPDIEMPTIMVYDPVSQKSQEVRLIPSTQKEEL  
SASIEGLKSSYGEKNVLAIDYTHPLAVNSNADFYVDQKLPFVMGTTGGDREKLMDGVNGA  
KHFAVIAPNMAKQIVAMQAALDLSRKFPGSFASYKIACRESHQKTKADTSGTAKAVIDS  
LTELSDDEFTYDDIEMIRDDQGAIDFGVPEEAMNGHAFHRYTLTSADGTTQFALEHNVS  
RTIYAEGTADAVKFLAGRVKEENDGKVYSMIDVLEAGGLE

>comp16542\_c0\_seq1; 188 94 909 LEN=1395; translated  
MGMKVSKERWPKKGMKNAMNCVSEDAGSSTITLQVTNCSQSSRSIPDISPSIKEPSI  
ACSKPKDQLEPERRERQKQRRQRKERRKTREKHIAIKTMHKERLRLRDGSHPLDPIIHH  
RNRKRRVKEDVCIICLEGNADGKPVEMFSACCGQAYHVGCIYRQLSYDSLKESRECGV  
CRMAMPRLLEEDGMYIKSYTMRGVSTLRAHRGKRELQRQTFLLHSNDICYNISREDDEIEDD  
DYEYEDSHESDSTMDSSSSNHELSTLYLFTES

>comp16543\_c0\_seq1; 177 90 317 LEN=739; translated  
MILRQKLQVIIMILLTFLTFATYHQGTGGVMWLQWLSVLSIMAFLLIFDLGFTNEMNFIF  
DPDADNWRKVEACN

>comp16544\_c0\_seq1; 356 32 598 LEN=1043; translated  
MANSKIKKSSGEPDAFEQQVANELLNLEMTSTELKASLRNIYITAAKEVDCGSGRTAIL  
YVPFKLLKSVNKIHKQLVRELEKKFSGKIVMIIGQRTILGKGYTRDQKTSGRPRSRTLT  
AVQDAILDVVYPTIEITGKRTRVKTDGKRIMKVYLDPRDQANVEGRTDTYAAVYGLTKN  
QVVFEEFQQ

>comp16545\_c0\_seq1; 373 73 1491 LEN=1649; translated  
MRFAVAASVLSTTITNCAASLSSTKGSSTAHPPFEPFETGEGSSNDGYGHGHGNENSN  
NGVYGPSEESGSLGRHSSPPSHRSLTNTGVGDGNDPTDTQTTDAGIDIGILSFRKLQPA  
TDETSNAPDSPAFLDFRIVDDDKTNFGFLCNPAEDGNPESYDCSTCERIGDTSAPGTGT  
VGSFVCRTPVPSSSSAGNCYEIDSRCPNNVMTVCRYDTLQRILYGETGTDTDSVSVSATG  
ESSSSTSTSPYSSERCRIEATLTKTDRPVSDEEESWFEFSYCMRYNIGENGYSCMEAD  
GVVCSSCRLETLDAMDENGLPRREFCATFDCGNTVLGYSGRFCKVPSLSRTALDYFVYRS  
LPCDGGCNLCGSFGDAEASGGPTMAMMEFRGSSFATPGSALKNCFGAQWEALVGPTEDSY  
CETAGPLVRESCGCTPRTILRPGSAASSAEAGPWLGGWAAAVGGGLVVLGCS

>comp16546\_c0\_seq1; 253 27 299 LEN=1116; translated  
MYRTVLVLAALCIAVASAFAPIANQAIATPMVGDAPQFMENTITEFSNQVASSQVIASSV  
SDFGGYFFPVPFGIGALAGLILFLAPPLADE

>comp16547\_c0\_seq1; 303 346 1527 LEN=1668; translated  
MFRTRRLQAPIISILSPSFSASKKAASLLSAVGNMDYFSAVPDDGGFAENSPRNTFKSAI  
SGFPKSWASVGCARCPVSGTIVHFCSPGNLDAPKKTGEKPFALLGITDSGQLKGDVVDFF  
TEFLASRLSEETALNRTILNFKASIKGSLTAKDLLRSISHDGLPLLSIPRQPKNPQDSAS  
PKSESRAHDDVSSIFLKEIVVPHFDYAVYRDGSTLISELAHPTKMPAVGVYEWPNKST  
CIRPLPTAPEDERLPSPLIFHCESPEDSTRIRTFGFLEAKIGYGLSPSHGQVMLLHKD  
LLGLDVRYCPRTAVSSAFAEAQDSSLAGSLEELQSTNVLVSRRREEVKSDARVNGDCWIE  
VRANLKRPSKLFQRSKSSQRKQKIAKIPDLPYD

>comp16548\_c0\_seq1; 90 1 646 LEN=1122; translated  
XSIGGRIIRNPYGSLLTSGWLKPKSLVALEVNVDGVCDEERLSFKVSRPLQTPKAQKIRTV  
VIASPSSTSYAKYRLTINQFQITQMSFSAKKFLKQYGTAGVISYVGVLTALSVTSIYLGLR  
SGVDVVLPLEKALGADSEFVQGVKAKLGESEPPASGEGVDSADSADMKPHQPSINWVREGTY  
LGIAGALDSFVLPKLMICLPLARHLLKIRGRRRP

>comp16549\_c0\_seq1; 260 42 482 LEN=541; translated  
MKSSSHLLFCSTTVLILGVMLRFGCASAFGLASSGSTPAIPSFKTPSPWEAIADSGVVALR  
MSEQEDGPGENRRSLQDYGFSDAEIERSRKRPEKEQMKVRVDMIDNIDATTLTAVGFGLV  
AFNFFVLANMGDGGIGIVAMIINSF

>comp16550\_c0\_seq1; 326 141 944 LEN=1236; translated  
MNAPPTYIILLVLLVGSASSVDSFLATAPRTATTQKQALRASFEFLRSAPFKDANIVK  
AGGWHNLEQLSEDPKALVEYVNVGLKGTSSGSIQPSVAARDSEKIEALALLLYGMGKGF  
TADAIDGEWDLVFTKQGSKSPSFQKLVGKQETAGRSKNVFDVAKMVFSGDVRFWRWGKVA

TTVRYTPTSDAFSTSDGKIVVRRIVCQIINAFFKWWKLPGIPFPLPKKGFLEVLYLDE  
DIRVTKGNRGGFFVHFRPGFLNQVMPL  
>comp16551\_c0\_seq1; 438 99 1256 LEN=1529; translated  
MKFGYSLCLLLAASFHAEGFTTPGPSVGAFSATNSKRKSSTTTVVVAQDSSTQLSMVASPQ  
TIVPKIAIKVAVALSTALAGTGFKVFLDKPSRTYSGTVANEYDEWTEEGILEYYWGE  
HIHLGYYGPDVKYKYRPLNEAQYTFIDEMMKFGGIDPQKDKAAKVLVDVCGGFGGTSRYLA  
RALGPEAEVTAITLSPKQVERAQELAIEQDTHNVNFMVEDALEMPSFPDNSFDIVWACES  
GEHMPDKKKYIEQMMRVLKPGKFMATWCQRDDREVFPDKRDKRDLQYLYEEWTHPYFI  
SKEEYTLIDNTGVMNKVTAANWVRETIASWRHTIFKGAKDPRGFIFKPKKYIKTLRDAY  
CIERMHRAFKRGLMEYGMLTATKKA  
>comp16552\_c0\_seq1; 223 108 581 LEN=757; translated  
MKSFACTLALLLSASEASAFSTSSSFAGSSIATAPQNSYGMSMEYIPSGISKEQWKKMKE  
QEKNTKGNLNGASGITTFKSRFSFDWQKAGGNLFPVDPKSVKDPKDLPYMQRPGGSAD  
DSDLKGGKGGFSFSFGKPKPEPEPEPEPPKKNFWTF  
>comp16553\_c0\_seq1; 375 381 1187 LEN=1511; translated  
MTKKTQFAFAAQAQNVIGGRGRKNKGGNRNGHRRTYSEDTDNTDGAGSLTYSATSSVQS  
GSAAGESSTDSFADIMRVLDLQDEKQLKEFIKKEGYSSVDELQKKRGWATSGTSTVSSL  
AYSTDGESALEGTKLLQTIAGQPSDSFGFDGGSTIEDENLNLFFAPAAPAIKTKGNKV  
VLGKDKAAKRNTNTQSRSSNNSVGNRSYGTPEQKDRRNYSHSPTSSTKSTPVKSPSPDP  
GTPPLPTKKYFTKDGMMIMEEDDDVWYKEW  
>comp16554\_c0\_seq1; 139 341 898 LEN=1205; translated  
MLQSRSQPRAFCTPGAVNGIRHYRVAKVYEPGHRPSRALHSNRGDNFAENENDKRRNTNG  
SVVDYVGLACQPVVVWVSLYSVATTGGGLPAGPGGCIGAVEGLSYLIVLVLALLPTSTTTT  
ISGTKEKPGDIKASFLISVNTLSRITIGLGLVILAGLAADRGCVPNAKPILDYSAYLPV  
CSNEF  
>comp16555\_c0\_seq1; 293 89 916 LEN=1365; translated  
MAISLRRSRRSTKKGVSVDYNGDIVEIDRQHGVIAARGRLAQLLTEGSPNPRWLVKFDSQ  
PYKDEEMYERAFGKLLHSAEDSEDPIMAQETVSGGGGGTRSKATVISTANTAAEGKGGQ  
TSSEGDRSDDGKKGKSGNVSNNSDSNNDTDTATSEIAISRSRSAQLWRGSGTSLQSDGDD  
STPADEPSRSASAREARSRRRQAMIDDAAIMPGETEILAGKRKLPPPSGTNRSKQCKSGD  
GQYAEEGEVVVKLLTGTLYLYRGEQRRVEFVRRV  
>comp16556\_c0\_seq1; 340 55 750 LEN=750; translated  
MKILSIVVAVNAVLASAQSLLRVRDGDATDAKKRRTNTNGRKSFLMIPAHNEKVNEQIDS  
KVQSVRLPTTKLNKIEEEVFKEEVNDQKIRKLGISYDDYWEKELFFSIEEKGGKGGKSG  
KGGKGGSKASKSSKSYGKGGKGGYVASSSSDYRYKVTHEHNDGKGDGKGGKGGTKGY  
NYYGSSGKGGKGGYDDDWTVKGGKSSGKGTGGYHYGSGDSGKGGKGGTKGY  
>comp16557\_c0\_seq1; 247 149 454 LEN=893; translated  
MNKPTAFLLLALARGSLAFTTSGPRSALSARAAPLPVSEMPHQGATSTSLNLKVKVD  
PNAKTNSAGNAKAAAYGGSIAIAALLPVIFLVWSVVKGN  
>comp16558\_c0\_seq1; 199 147 1193 LEN=1617; translated  
MYSRDVGVGIDYRDEEEARRTVLKAQTTLNRWNRRAQGTAKAPLHSNTNNANGATNDTR  
EGLLSQESDETEIYVVYQKYGYCSIFFSVVQTIVLVAMMAQCGVAPMNINPMIGPYDAL  
SEWGAKNTVLILEDDDEWRLLTPILLHAGVIHLACNLMVQIDTGAFFEREWGSVNWLIY  
LVSAVGSSALSVAMPDAISVGSSGAVMGLFGGKGAEVICRCCEKESTDQDRIAHQVRKE  
QCAGVMCSVTIVMLFSFIPYVDWAAHLGGLVAGFCVGMILFSANLKKARCSKLFWLLIGV  
GITITYFAVVFERMYSGEIETAELRDVCKYYRENFEDECNCQRNGD  
>comp16559\_c0\_seq1; 282 69 467 LEN=527; translated  
MFIPKENRIAVSYLQEGVCVVKDKTKSEKHPHIEGPNNLEVLCLMKSLASKNYVRVTF  
SWQYNYCYLTDEGIDYLRSYLALPAEIVPATHKQTNKRPEGRDREEDKFADGGRPAFRDN  
ARGGGFGRGGGV  
>comp16560\_c0\_seq1; 697 1 1706 LEN=1728; translated  
XEGYEKEFSMKVKGGSTLEICLQLLWLANAASSVVVDVEFHSTQAPTLVASQPLVIS  
AGREFARFGAAANLRSEKLNPSASLDKVHRTIRPSTYNIIVSGSTDRDIMPPSDAELRANP  
ELTASDGTEIFNMFLKYDFEIDSDKAIKVTVPVASSLNFNQLYDSPLDSQIWELRDSNSQLL  
ECGSSMHHSNAVSLEKGYTSLSFHTRHPSRKVLEQMKDLQFQLIMSTDALDCKIYSELDK  
ASTPAVTS DGRSEVGLQVLRKGSFKDLVSRPTGDLPSWVKPGDVMSGKVS LDKGRGATT  
SMTLSYQVPPKSKVKLLNDNKLPEDKEDEKTLDEIVFDSKVSYLSKNRKDAAAYKELSDA  
LLQENSTS IPLLTELLSFAKETKLDGEDSKEAARVSEIQKVRDLLSVSNGGPIDEAALAQ  
YFGVALPTEEDLQDDKEASKLKKMQEQKLLQATLLALSDASASLAISDTSQSDLFDSS  
VKELKKWPSFSDAKDKHTYAMTISRHLRLCKGEKGSIAIKTLM DARKDATPENYKELTEEL

LGIYDSLEGTEHVIEDTKNTLYKRFPK  
>comp16561\_c0\_seq1; 238 1 1121 LEN=1121; translated  
XNTTRSMIRRNESSTSSYFTRNSYRMELVFNAAFGIAHVSFLASNRETETETQQTQTEPMG  
GIVCPGFKEERETDTETETETETETETETETETETETETETETETETETETETETETETET  
AVSNQCGERGRGHGHENSESNTRPGSNPNPKPNPKPNHPWKANASENTVAEPAPPDHPPL  
RMARRRVQSFARGGPVFRREHNRKHNHNLNLPATNASASPGGEATTATATATATATATATETST  
TKPNQHQRFAFCLLVHEEKGVLLHCTRKKKGGKPPHYQLPGGRIDEDDYRSEQARGNDHD  
HDNATAPIREPDNQRPHEDRRIDETLVFAVARTGCAREVYEETGIDFRTRPEAFVPMVLY  
SDDGGGDSNSNSNX  
>comp16564\_c0\_seq1; 374 166 801 LEN=1159; translated  
MGTSTKQASSARAPSGAKNGVSKRRSSASEELSILKGNFFVTKGSSDMKWQRAKMMVGA  
LAVKSYFPLQPKEDMEPLYKDDGGGETKSKFEDALQVWEDLTLRKSFTKACADLPASSSCC  
GFSQSNDAASSIKQYSDLLNDGWVKYANNKLSRGGFKIDTFLWNVSASKPEDNTLLIRFFE  
LSTYKFRASHAGSLDLDMLLEQEAKDDSS  
>comp16565\_c0\_seq1; 230 111 911 LEN=965; translated  
MSGWTHATNSRQRFEEALCNPSVSAIECDVLMISIGKSNASEPILAHPPSRESDLTVALML  
QLIFAPEENGKKNLRKHLKLDLDFKEISAVKPTLDLIYKSNFNSDFKNEVILNADILPGPG  
FDNNDPSIVSPSAFFEMCLDFIAQMKSKKSAFLFALSGLFKCNWQADELYSASRVSQMSA  
LVHKYRLTTTKDSRIRIILALNARQLFRSLPVFDEFVLRVHPESTILAWTGSSEPSIPEIQ  
VNGIRDYYKSKMESRIEFDCIISE  
>comp16566\_c0\_seq1; 279 98 838 LEN=1306; translated  
MGVLQDEDGILSTSESTGVYTLRMDRGNPNVFNPRFVDLLGKAIGKIEKAPHPKALVVTG  
TGKFFSNGLDLEYLQRSSSESQKALITSFWELLARLMVADCRTVASINGHGFAGLFLAL  
ACDYRVMRTDRGYLCWPEVNLGMRLAKGFSELSKAKIGPRVLRDGVLTAKRYGSKEALAS  
GLIDEESLEHLRRTSERLAAAGLPENLGLLNFNPRFTFRSIIKELYVDAYRALTSQGQFDA  
PPESRL  
>comp16567\_c0\_seq1; 265 129 812 LEN=1264; translated  
MADENNSEENNNITTEIQTEDNEIVRNIPDCLDGMKMLEYWNKFCDDCDEAMKPIGRV  
VFVKSLLAFACFIIFGILAAFGFKIGETELSAYYGVVAPVTIILYFVCQVEAYAHKKAAS  
KIHRACSEVGNIKGLTLTLEDEEVDWYIKITINNALQQQVEADVEAAVPAMAVAAAUSA  
TQSVSAVPVAIASVSSSNTAPEKYVKDEETGKMKLNPEYRKMWNANK  
>comp16568\_c0\_seq1; 332 391 1065 LEN=1297; translated  
MAFLPGVEDLIEECKRDETAVALAILDDHGGETENLPREADIVYSTETAPPNPRDLWNTIH  
SIEISPKGFGGSSGFGQKAPDPERSPAPAHCVILCDTEDKCRAARFAGTRVLCLTENDLA  
DGMNIGVYSDESTGLDCYWESIYMDDIAMPGSFWLNPPHPKDDEGNGVDVFSVIKSYDD  
VERKQQQQQKESTQQATNEGLADDINPEDNEGYLSAILMDMDPL  
>comp16569\_c0\_seq1; 188 1 424 LEN=554; translated  
XNNNNNLLVREDFEGLNLFGSCIESLKRNGLEWIGNKDLLIQASQFFVQCCEKNILAT  
KEDFECVPLIVDCIANFPVSSYKGGFGFIFKKAQVVVDRSIMHESGLVRAIAISLESKD  
MDNEIKIASRQLLKDIVWEDE  
>comp16570\_c0\_seq1; 187 1 415 LEN=415; translated  
XDNDNDNDGGDATHNDAASDDGPENDTERSAGARDQGDQSPPLVEEIQIDPLEGSRAVHS  
SFFIVQGRIVVEPTTWTTRKRGPISTNFTSSSLSLSHHPPSRPSVAWPVTHEGPNKI  
TRLATAGNEDEKQQQQQX  
>comp16571\_c0\_seq1; 239 90 1100 LEN=1477; translated  
MPAAKSETDAIEGLLDTDASMRPFLDTLKDGTTSKMNLSTVRSALKTFSHPQIFCGFDQ  
FKSCCLPLLLPQEEKNSDSAAGGPHSSLFNTLDLFSFGTLMYDYNARENKDYFLPLNDQ  
ALGKLGQLTVLSCIQDACFNGKTSVSYDSLAKPLGLTGNIRAVEDVLRCLYANVLKGLK  
CQKSRFSWQGESLPVVLRSRDPSSRISDLIAALQSLGQRLEESQNDLAGTQHEVAQDLK  
ETTDYWKFFVHSQRKALLEESSKGGGSKGPGVGGGEPPTVASRLFDAGRQRPGRGTGHGS  
IGSDASRSNVGRSSKRSRGLAGKFTDAAGYRM  
>comp16572\_c0\_seq1; 267 61 471 LEN=855; translated  
MSDAVIAIKTRKFRNPLLSRKQMIVDVHPRANVSKDELAELLAGMYKGDAKLTTFLGF  
RTKFGGKSTGFCLIIDNEESMIKFEPKRMVRKGVTTLKETSRKAIKEAKNKGKIRGT  
GASIAKHAKRAEASD  
>comp16573\_c0\_seq1; 227 206 1069 LEN=1279; translated  
MKSTGATAFVQRSNIGSTKIAIELSIYNNLQRMQPRAILSGTTRTKITSLRMASKPKGRK  
KKSKKKKSNGGGKFGGGGAASAAQQGSDAFVAKPIKADKNALETQWDTFASITDLEIKC  
KCDDPSDDCEFFEVVDVHVRYGSDGTGDATTGWFRIGKVCTSANTSITAALALQKGLILW  
TAVHMRRELLAKGGKAGARSLELWTS PAIIYMGTE TDGPLEQDEVETHLNVLAGKPSPS

LLSEVKPGSFGFRPDWNPEGFTYKRREKAALKDKKKKSGLEELLIDE  
>comp16577\_c0\_seq1; 234 23 469 LEN=545; translated  
MVIATELCALSEYRIYPGNGKLMIRRDGKPIWLGTSKAHSLTIQRKKAACLWVTQAWRRL  
HKKGLSETTTKKRTRRANKVQRAVVGASLEDIKKRASEKSSVRSAARESALKDLKARKTA  
TKKSGAKGGAKGATFQKVPKHMPNRNR  
>comp16578\_c0\_seq1; 133 44 334 LEN=334; translated  
MSGKGGKGGRGAKKGSVSSSQKAGLQFPVGRIGRYLRQGYATRMGAGAPVYLASVLEY  
LCAEILELAGNAARDNKKSRIPRHITLAVKNDEELN  
>comp16579\_c0\_seq1; 206 1 1174 LEN=1587; translated  
XNASATELNSNICHHWRGCGSLNATGVALHEVLNRKEMAFRILHLIAVVAASQLLGGTSL  
GFCFSTPSVSSRLHHADSSQRCVSSEKEYCEPEIPETPQRFQSEQRLLERKLQSLQRRRF  
VSSLAFASTIGINVLCPPESSCASEQTAAAATTPQKQEESSRRRIIRLSSGLQFSDARVGS  
GPQVTLAKQTPASKPSSPEATDSGLNNDGVAGNENDPGVVLMHIRALKRDGSTLLDTRD  
GRPLLFRGSLIRAEELYINEGSALSKGMIPLGVQDAILAQGSASWEGGYKADPMRLGG  
LRMVVVPPELAYGSKGVSRYEAYKLGRLAPVARNELLRYEIELFRCNDNELELGSGKADT  
ANESTQIAAAAAPRARVCCLEDFYPCQTPKS  
>comp16580\_c0\_seq1; 277 1 1802 LEN=2047; translated  
XPLSLAPFEAKNQNEPTKLTAEQTVPHPIPLGATTRFNALSCKMWRRTARTILVGLVLFV  
ETTAVAPGSTDSVMSPITSQPLLSHRIVSNHGEYVSFDPNATEYWFDAVIDHFNFRPTE  
QGTFFPLRYFVNDQYYANRSPVIFYAGNEAPITQFLENSGFLWEAAKQLQGMVVFVFAEHRY  
YGESFPFGIPEAAMTPQNISYLTVEQAMEDFNTLQIHIRKKWGMLRDTAFLATGGSYGGN  
LALWLRKLNPNLWAGALASSATPLKHLRESNSFSRIVADVGNVSTACPVKIREGWFDL  
FENVKTEAGREIVKNEKLVPSPEEIKPENVAREIYGWISGALETMVQYGYPPYPTFEY  
NPVPGYFVRVACENLLEQSSSLGSLRAAAQVYYNTTGQAGSCFDWLPSSLANKTLQTNRG  
LMRHGKQRRFGDEDLVGTAWGYQCCTEVYQPMPTDGVTDLELPYQPNKTAYFERCRERW  
DGVEPRPDWEEMTFMGDNIQAGSNIFLTSGQLDPWRAAGIQSLPRNADPETIVRVVIENG  
AHLDLRSSHPLDPPSVTMVRQEEIKNFERWIRQWRSTYPSYSDAKETGGKTSLRGAVET  
>comp16582\_c0\_seq1; 247 1 714 LEN=832; translated  
NNNLHGAASSAGYNQMYPPGLASSASLSASPEGGGSGGALSPLLASSWTTSPVPEDP  
FASPGKPPSEAQFSFANVASKGHERKRFAGTFCFPATTSASARPSIPTVRIPQDLWNPHE  
NRDPSVFYISDPLERYQKVAASVQRSDVIDLHFQSTKTFPKVLETMLPLKLGSESANRGK  
VWIVTGTGHHVGGKTHQKGGGALESVVRWLSKKNYRFAKGRDKNGLCGALLVTADR  
>comp16583\_c0\_seq1; 234 685 990 LEN=1040; minus strand; translated  
MLVLLTACCTPPPLSILISDMNGVPSYVLPPLDHDRLLSRHLPLSLVSDFFASLLAPSIS  
RGRKNGSFEPGVSPSDASFSLDVSSSKSETPILIGRNKSSI  
>comp16584\_c0\_seq1; 173 440 1027 LEN=1110; minus strand; translated  
MVGYSGNILAYLSNRRSRPFDSEKEQRESRPMFRARNAEFQARLSSLFRYGPVVSWSGIS  
RERSSDGIRLRSVARSPLRCVDTGAGDLYSAVRCNTTARRQERLDTLPNAGGSPIDCNPS  
YGNMEGHEEHDHASLMELEDDPHNHGGMGEEEMDIEPNRVVVGNEGNREEFWAHEPSKEE  
IWSVRFHFYLSREIT  
>comp16586\_c0\_seq1; 215 76 609 LEN=754; translated  
MGSSSSKTEAQNKNSKCQDDFGTKVRNAVNDEIARRAMMQREIQMAVNIARTRDILCVFG  
TAWGFLTAGVVTAKALGKKVPPVAGVPIVVGGLVLGNFYDLAYGNKLQRVVKEAEHILEH  
ERGRFVFPKQAPFSKPHYTDEERAALFESASAVGDLFPNSFYAPRQGLPPPPTPSGKE  
>comp16587\_c0\_seq1; 249 211 438 LEN=533; translated  
MKLSLALLVVGISSASAFAPPATFTTAKVSTTQVNAEPDEEDGLDLDLGEMFEMFDAADK  
QDFDDAIKKVKGDE  
>comp16588\_c0\_seq1; 350 66 1010 LEN=1171; translated  
MVGSNRGAKVFRHLDDVENLSYGKGAKKQRTGSRFTCHRLNREERQIFDRAKRDGYLA  
VRNGYRKERKGSVWNTHRQRCDALKEPCVVVEKRSDDSDRVVVDLSTLRVPDDAKLVEF  
LLEEVFKPNYPEFFEAAILLAGMSRLGGDRKGGQSSCEESDGHEGSVSLPKADNTTHRPID  
WETVATKPIWGVDERLIAVSCDRDTAKSIARDVLGRCGSVRFAMLLADAENTPVEITTEN  
IPAEGDPTPTVVSTQREEEWLEVPTEETMLCGVGCDDKKQRRRIPESLGKTSNHNADQINA  
TESVDTDCIDWNDI  
>comp16589\_c0\_seq1; 371 282 1169 LEN=1517; translated  
MSRAEGSIPSVSERKRNKRSSRKKIDLQPGSPPEEYWNVDGLSEVSREQIGFLAEGFLKEL  
WARCGKQVAIDQVSLMIAEVQFSRGFDLLYKIHNDNEAALVEFHKSLKIRENILGKDHRDT  
GKTYCFVGHTLREMRDYDNSLGQYRSALRILVALLGKNHNHTKDVI SCVDDVLKAKGYPD  
EQVGDYLTCLLTSMEHKRNGDELME SNGGDFDLAIQAYKKALIVEEIDAIGKYHPDTAEI  
YSKIGSCLARTGDLKRACVEYGNALS IYAVTLGSDHRDTKEALKHIQNLPSLMMR

>comp16590\_c0\_seq1; 175 94 315 LEN=570; translated  
MPAPRNIRNRNAKFNKNITKRGVDPGKVKEREDDGPRISPALIGFFLVIVVGSLLVQVF  
NLFGGPKPPELEDE

>comp16591\_c0\_seq1; 542 239 1546 LEN=1700; translated  
MEEFRSPVLIAPCKSPLMGGVVSNSIIQAKSLGMKRRRLSGPSTDTGGSLSIGKKVCRQVKC  
AHRLSKVKWDLPAQHREDHPLPLPKKRCVENETDTWHSKEEYKLLLLDQFLTVHIMRSL  
RALSQNEDEKSGDSNKDKKFCDDYLKLAIDPKDYCERGLENYESEEGRHQINLNRKRH  
KLLVIEEYKQRITGTNDPELVRIISMTQSVRSMLKAQLLAAIDQQEARANNNGAKDETN  
GNNGKKKYVVKQHLLCPCVSLMSHLDSNGTKPTNSASVINEENIVAQLLVHRNDGHYVPQ  
AVRDEFKQHKQLQYRDLLLQHRNFLLKQQQQQLQHHIHSESKLHQHLQHCDKTCYNDKI  
MNIQQNTSLSPIAISLILNSMQGQELLRCNQQQQQHHLHCYQKHIQHLLHRHHHQQLR  
VIGLASAGSVENSPR

>comp16592\_c0\_seq1; 217 142 468 LEN=1068; translated  
MKANPMGGSTMAKGIIVLEKIGIEAKQPNSAIRKCVRVQLIKNGKKIAAFVPRDGLNYVD  
ENDEVLIAGFGRSGHSVGDIAGVRFKVVKVSGLWALYKEKKEKPRS

>comp16593\_c0\_seq1; 352 128 1774 LEN=1816; translated  
MTELLLRKIIIPMVFFCFALGPLKRVAGLVGRNSWNSTPKQYVSKFTRRHQWNNRRNEFR  
DTRLFFLDTKFQIKNSVRQIRVNAALTTIQRCMATDLQDVSDQEKIIDEVSMEEADGDK  
PSEENFLPSIMDGFVVRMYKTCQDSGFLLDQVEALVGVDDVGRLELTPRNISVPIALMM  
LDPGEYPSRSAARKACRKARILIHGPLEIDTETGEEQFDAKNCVRRARVGDVFPDVMC  
VQVRIADGTVPVARHQKPPFELPVVFEDDHFAIVNKPAGIVVYAKKGGGEGFMTIRAAIP  
FAVSPPKAGTYSSLRRPKPVHRLDKPTSGLLIVAKTMPAMVNLSEQFRARKVKKTYTAIV  
NGIPPERAESVISTKEAYTMGFVDVDPDSCSNKQVIDHVLDEKSAVTGWRALKYSNSIL  
ANENVLTTVELKPKTGRYHQLRRHMSWVCECPIIGDKEYDGGGDAQGLRGEGLFLCSNKV  
TLEHPFYNSLEEEGEKLLQQLSEKEKESLWLSPEGKVMVTASIELPKDFQSFISSQNADF  
KKKLEQEN

>comp16594\_c0\_seq1; 151 522 720 LEN=720; translated  
MSAIHTRSTRTSAFTLPVKEQEQSPRICASSSTASTASTSSASTSTPSPQAASEHKDDS  
NNNSNSX

>comp16595\_c0\_seq1; 151 149 307 LEN=307; translated  
MMNSTTDEFGANPFRIDGGAQPDIFAPVPQQQQQQAQQPQFAQPPPLQQPQF

>comp16596\_c0\_seq1; 526 157 1599 LEN=1929; translated  
MEIAPAEITIGSATSTIDGSPDDHEGSGKMSNTILDNLELEEPAPYVVGKPGMAPTEVVV  
NAAIISIDGVPNVVNTTEEKDDSELEHDEVGLNPIDDEAEKIMLENENKQCCDTAMDK  
CLDTSMVSDDMIEKIMCRADRKLCTCEVTDWMEKTTGYALCGDKDDAIVAEEDVTSISVD  
GTKVDSLFDDESASLDSRSQPNQYSASMLETSTSPSVTEEGHQKLNKTKRIETILENEDEA  
KDEKDDSKCHIVPAVLPSTKPPDRKNSSEEKESADNSGASVKETVISSSTETVKEENEN  
EKSEIDGNMCDSAMTTLPSVINSMDSNPSVEDTSSAQEPAVIEDDREDRSSLKSPFKMR  
SIQSIMKKAESNREEECEDQSGFECVLQRKITFEKQKIWQPKTPKSTSSSITELFDEQST  
GNTTTLVSVTPSPEKKMKKSLSRGKFSKRMSFKKRASSPVKQSPVAHSDSKGSTVDCF

>comp16598\_c0\_seq1; 140 285 1613 LEN=1802; translated  
MSGSVLQGDVLADSSVSVGESPLALSESMKLTLLWYPRVTGAVAFASSMCMISLAWSKRS  
HLFHRIVLGMFSFHLLYGICYMIGALAIPEGEEYGYVGYSONVGTIETCTAQGFIIYVSIR  
TGVFYAACLFLSFLGLVNNFDDKKYAACEKWIHAIHAGIPFSFAFYFLAVEGFNPGYSF  
CRQTSHPGCSSTDENLACERGPDSHGPLEMFWFFLFPVLIIVGISTGLMVALYKIKKRE  
QRQLENPQTELVCVMQSGQVRKQSCIIYLLVLYWVITPFFVFRMIFIVFPFDDILPVRVFA  
EINYALFFFWTLLMYRYFTADAVSASQAGSNAGSQEPKPSAHIQSSEFIFNFDDAEKDA  
GTASPDRNENGPAPAEAGNSNTPETPPSLQRSQSQQEQFTFNI FDGTNATGTYSGF IYCG  
DSDEDEDADQRETDHWNVSQNLR

>comp16599\_c0\_seq1; 289 394 1329 LEN=1744; translated  
MNFRAVVALLLASTTDAFTSPFTTNSLGEIQLPRKNYDCQECMDRNNRQAKSASRSETK  
VFMRNFDTGNTNTIARQQLKNTTSPSSQLGNADVAYSVSASKTTTTLAI AEDEDDDNA  
YVRFAYEYPFVNNFIIASLKTTVADLLAQIVIAQTPLDQVDLQRSLLFCAFGGIYSGAFQ  
YLYQVQIFKFLFDVKFTSQSWSQKLRDIPGMQALAAQTLDLTLVTLVYLPAFYIFKAS  
VFTGTSDPSVWFSSGVSTYTTNFGKDEADLLKVWLPADLVCFVPLYL RMPVRQSVSFLW  
TAYLSFARGGH

>comp16600\_c0\_seq1; 209 90 518 LEN=1088; translated  
MVFRKIFKGRRSRKEKSFSDAISIDASISSRSCRKGPTRYDGAFFVETVTTTMEEQDAD  
CYDCNPQRNDSHAIYMFPTAWKERTGSRCDGAYDTIDTENRTKTTLQDDDDSDITEMKNYE  
MGWDLAVDVNEDRYKSKEDSLSW



MAPFQSTFLLLVFTAFTMSTSAVAATNRERQQMRGMTSKRLRGGKKTSTSTNHNQYVGEN  
SRTGQAAVGVSAALRGSAAETSLPTNFEANYGNRLLLHKIDKHFPKRLEETQDDLKGI SKNQ  
KNEKGDKKQTKNTKATIPAEQVVKQVELDLHDKGDNKGTENK DENEKEDNIEKGDKDGDK  
KNQPKGKKKKKKKKK

>comp16612\_c0\_seq1; 142 134 440 LEN=440; translated  
MPKPTVLRCDPELFEKDLTGRIAIIVTGANSIGLEIARQLSSQGAHVVVACRNRDRGTDA  
SKEIGDGSFLAPLDLQSVRAFCD SFLGAYDRDLILVNNAX

>comp16613\_c0\_seq1; 41 1 238 LEN=420; translated  
XWHHKYPFDYACSEFGILTQYNPSKLIIDTMAALGLVWGRKRATSAWAMTRERRDRERSA  
ASESDKDSKKNIP LTKKVL

>comp16615\_c0\_seq1; 444 311 1405 LEN=1788; translated  
MKINNRASSSIFCAAVLLSVVGTGFDGAATVSALSPSGVPTARTRSTRATTERIRNSRSI  
HRKTNRNYKYKHKQKRSSDFALFMHSESR TTS GSHQGNAGA QHDNRKHPPSNVPGVSPR  
TTTSTARSAAALVDMEGASPSGSRRESGGIRIRSRVQTF LKKRKRGNKFVQEVTDIDAVKG  
LIVESGR TAAVTAVIFHAPYCKACKASMP LFENLAKKYTSPNGPPPQRRRKQOHPANQC  
PSRQRP SDPVWAAASSSSGRGELFGEGSPALSGAPAPEG PLPPDVR FVSVPVTQENAAAL  
EDFGVTRFPLAHIYDPKEGLVDERPVLKRFRAGFEERLASVVGDRSGSHRPSPEGSFNA  
TSPA

>comp16616\_c0\_seq1; 272 323 1597 LEN=1768; translated  
MVGFCFGRKSLISSILLLLIAPVLVAADRDTLSANVLSKYWIDARDVLEELDNYQALWIK  
IHGCVWSECAVDNDDDDGEGRDGDEQWYLARTQDFCANVAFSLYGI PKNHISALSCSRGN  
FINSFFTYGGADTLLEALGKRPSVYNAEY TNGYNSNYANGYNISNANCVVSEENYMSS  
TMGCSEKGFALAEFEGEYCHGTFDYDIIDPLRKYNRQMGQIGCHR IWGRSFGSADVATQ  
IFKNSWSCDLNLYPNGCPDPYGGKASYDYALRAVAHGQSPTWAVANMKLVPLRVLSWFL  
IIAGVFFLVFGYHVQNRRERMAASGGGLRGFFRVLSEDIHNYRKKLAKKRRAARTAAQEAR  
AQRKAERKRKKKKSSSKRDRSGRRSSRNRSRSGGNRDI ELAPTGSTFTGMSSAYDSPV  
SSML

>comp16617\_c0\_seq1; 539 198 1508 LEN=1530; translated  
MPVPSATTNMSDPSSVREWLANKHPKQLDLLDSFETELRMAGRLSKHPSQSDRLSITIRT  
VEVLKTMIGSTRWKSPAELLVLLRGLGRMDAAGGFREPAIGNVVRILAAVREEVLSGG  
PTRVENRSSLESMLWALPQHVKTHTRGNSMSLHSSSQENQSQQERRHMRSESVGSGVDIL  
EQQSLDAQDPLSNLPIFFAQPRPDLKQSIMEVIQEITSDLEDLHKTINGQATNHIHSGE  
IILTYGKSDTVIEFLRAAADKLRFTVIVCECAPHYEGHAMARALAEPT EAGNSIDVCVI  
PDAAIFAMMARANKVLLPAHAVLANGGLVAPSGSNLVVSA AENAVPVVCLTGMFKLTPL  
FPHEGQDTLNDLLSPGSSVVDYTSQQDQEVDFVNPLYDYIRPERINLYVTN VGSFQPSYIY  
RLLESEYYHQDDWGSPN

>comp16618\_c0\_seq1; 588 295 1068 LEN=1396; translated  
MNSSSVAVEDGVDIEGNLRHVRSIEAACESAGRPVDSVRLVAVSKTKPFSYIQEAYYKC  
GQKVFGENYAQELEEKAKEMGADENYQRDISWHF IGGLQSNKAAKLVKNVVPYKGLVET  
VNSEKVANKLDNAMANNFPEDDTPPLDVFVQVNTS GEASKSGVSVDESIDL SKHIAENCK  
RLNLKGVMTIGAPGDVDCLEQLGICREKVAEALSLETGDLELSMGMSGDYETAIAKGSTN  
VRVGSTIFGQRDYSNKA

>comp16619\_c0\_seq1; 143 1 175 LEN=504; translated  
XDDDDDDDDKCLFLSARFIEGIEAWRFVPGSSKIDPKDYLYLDQDETLRVCQVECSRY

>comp16620\_c0\_seq1; 259 113 460 LEN=599; translated  
MSAETKSTADAMVDIAKGSAAASGGPEAFVGTYPVNHPPGGTRTIKLVAEKAGDYQLAE  
VHGGGGTGEPEESYVLPAAVIGDRLIVIDFSPKGGPKDLIAVLDNGDIVFVQDGNRW

>comp16621\_c0\_seq1; 194 36 686 LEN=1052; translated  
MSFLTRTIAFLAVAI SLSSSTTVSAFSAVSFGNGNGSNSASSQASTGPEMNTPARQSLPDH  
LRLEEIPGKGLG VITNVKIPAGQVVG DYKGEVMTEEEKDRRYLDSCAHLRQPVDLWRQS  
RIDRGQMTGTLYLVGVHPNKSSQIFVDAEDEYCSLWTRFLNHASPPASNVNPKSLHQGI  
DGNPRVWFVSIRDIEIGEEICFDYGDYWL PEDNVV

>comp16622\_c0\_seq1; 393 1 936 LEN=966; translated  
TGTVKAEIISMSKSR TALNKTFTRRSDTNTTAQRYIQAMSLTAMRNGFIAMLLV VSTSS  
RIQVANALSFSPSASRRDFFTAAAVATGTASTLFPINPLVPGNGAAIAAGIPSVYEGMS  
AFAANKVEESITIIDSIIRDDPRRKPYLWQRGLS LYYADRYAEGADQFATDVAVNPNDTE  
EQIWHLLCLSKTEGVGSLEEARARKLTVGKDRRPMVRLVQKLF LGETNGSLSPLDTEKEL  
IAMAGNGNANNAGNQFYAALYLSLYYESLKEEKL SQQWVMNAVGT EYAKTIGRRDPMVDV  
AKIAMKRRGWD

>comp16623\_c0\_seq1; 308 191 1206 LEN=1206; translated

MRQQRHPRRNALTYTSSSTLGSSTTEEEEDENTVVS IENPKTGQIVTLIGTAHMSEKSN  
NQVQRLIESLQPNAMVIEIDPSRLERLGFDSADEIQVRKVTNSEIDIDLPIAPQTTRGGFL  
GMAQKVFVGFASQIARLLLTNMYKSMENEMDQKAGGEFLRAVQSAENCTVCDTVILGDRN  
SVKTIQVAELAIESGDFMGVLDRLQGVNKEEMDKLEPQVRKELLRRKGQEGNDDYELDE  
VELTTAMMETLKEDKQFRTRLF SKLEQDVPEFTQAFLKERDYLMSESIRRELELNPKEVK  
NVVGVVGLAHVPGMEKHQAVFSNRPAPLVEDLTCSEEX  
>comp16624\_c0\_seq1; 446 288 1772 LEN=1804; translated  
MLQDGIPIKGSIDLKKSNAITTKLQKQYKYKYKMNFDSQLKQYSGNNLLFGTELAGRIQ  
RDDHFKLSPSSSRSLGSLDFSHSPLSQGKSSDFGGSVLDLSPKPSEARNRQRSVSDLTAT  
PPRHANTAKIPHTLFLSHSPTKTDNRNDSTMRIPLPYSFPNHPSPPTSPKLLKALNNAEQ  
EYRMLLQHSGARIGSNYGT SQFAGRQKQKAPLSSLPSSITTSKMENSSESSEGRPKRGRYD  
EPHDL SKLSPLKRRFSNPVQRRLVDLELKRIQAQEQEAKHHEPQNNLPRRISMTAPNLL  
MKLKHSSRTNISDSGSSIGLSTPRSPQLAATSKNHLEMKQKYLKSADANLKAASQWSKPK  
VNRTPAASSSNWAGTQKMVFVTS GFPLPLSNTGSAKEKSICTGLLRNRVKANIDTF  
KDFNRDNSSKRFVVDKAPSLTSFGRKWNQMANRNVHINEHKISKSEQDMLLRESFGRAIT  
RRPDEYMSRKYRR  
>comp16625\_c0\_seq1; 192 56 343 LEN=1244; translated  
MAQFIVNPKPFLADLTGKIVRVRLKWGMEYEGK LASSDAYMNLQLLNTEEYIDGELAGAL  
GEVLVRCNNVLYIKASENQVEDDDGGNAPDEAMRD  
>comp16628\_c0\_seq1; 240 66 737 LEN=1113; translated  
MMEGPM SYDNHGYGQYSHDNNSPVNSDGNYQSPMISPGQWNAS PSSSNYATISPQSHA  
SIHGSPNSKTSVEIRSSPSTPPSS LQTPALPSELGGQGLQKEAEKSDRRSQEKLRQFL  
DKSAFDQEREKNANRRVQSMMIQATRRNRDDETFGKHEARSFLVSSGGEAFATSSRKTQ  
QEPMV MEDLKGSVNDFKQCQDRGRERAAKFHAMRIITRLDNAA  
>comp16629\_c0\_seq1; 257 1 786 LEN=1137; translated  
KEAGSGPNLCTDRLAPERSCTVLPSTHTPTMFLRNNLL LALLVVQNSLSGSSAFVVSAPA  
ASKTRGAFSPTDAAPSSATAF SNTAAEASSSALGVGGLELVDPSYNLAIGAF AIGLAGGF  
LEDLRDENGELLLTAKPFGLAVIFTVFSLFLAFQTTTLRF AFDDDSFSLVQANGANLEQ  
ENIVVGGENKWRYSDFSNYDFLPSRDFPILVYFREDQTPVENREEVPITIDNLEQVHFF  
PAISNSKQLEEGFVKHGCPKV  
>comp16630\_c0\_seq1; 403 17 1411 LEN=1785; translated  
MATMENLEQVYNVPIVAEKGNEHSDSETLNEEQHSYILRGLNEEEV RPWSEFCASVFSYK  
ANPPPAEYFYRHYANDPSRGSSKLIRVALYNGNIVASCRIFLRTISSGKGRGARGLRAGG  
IGEVC TAVEHRRRGISTALLKSTIPIMRERGLEVSSLHAAPVFFPLYESMGYSPTTSGNQ  
WSSVVMTKTSTLANGNDNAPIMQESDRCVVRQARFPGDTEALQELHAQYSEERLAGCLTR  
SKDYWTRYLSQELEGLSFLVLTGTPAPRSENATKDTNGETILAWLSLQSSNSSSPNREEGF  
PCFQLKEFGRNLSAAPPGGCAIPTGLALGTLVAHA AVASKPFSDQPPFRGASNTATAAGGT  
TDELTVRLKMPRFVRNEIRSDDKTEDAGTTNGVFRFDWESERTENDNGWMYRSLVSQPKA  
DGEETKSCDVSDFLFVCGQGSNHKAIANQKLPAEHFVWPSDSF  
>comp16631\_c0\_seq1; 532 215 1289 LEN=1289; translated  
MIPAGTSAIYRWNALDDLDDGISDSVNDDLLLGSDADMNYNPDDISPPARSKSLNSHLG  
LQPLDSMASTVEDTSCSSNSNSHDEDDTIDEDALILALDDR TNKTTQQRSYANKLKQLQ  
HMDSLPLSSKPDSSPLAVRMKKS VKHGHGNTYYRSNDAAKKSNSVVF AHTNTKENENYQL  
RNTMELRSVVQSHGTQEKALASIQNHRPATAIGTIQSDGMIAIRKANDITEYECSNDDSG  
GNRNENSKSNGMGDIDS IYMDIERVPTQEYNEESLRPLSRVATVHSDGTYSVSTALGDSY  
ANAIVLHNGIRSGEDGAHAIVPAAKGDMV VAPERIATIGSDGTITYQEIDRNSNSNSX  
>comp16632\_c0\_seq1; 147 190 564 LEN=805; translated  
MSAYTKIPPVHVLRSILRRLKVDPT ELTAAQREARRGSQSATAAHVLD RYRAHATTQDGG  
SSSSNAELSKLAYEYMLVLRDIAERRRLQKLD TGAENQLSPKEMSRAAARAGLELPSLN  
PDLN  
>comp16633\_c0\_seq1; 156 438 1088 LEN=1180; minus strand; translated  
MANPPSPDLLR KIAKGFCPPCFLSFEMP NYVIRIAGLLV PFFDSSMPAGLLVGVAEGS  
VSVSVSSVPVDAGAALGGPVPGGP ARFFPGSGSARERPPPAVPPFRSEPLGVARRDRRWA  
HKGEGIDQETAIRAPTGTGGPEGSP IRGGQEEEREPTQAAGTASGADHSSLVAQPDRCP  
SVPFLRACVCVFRASQSSGGSATDGS DRPQCFVSF  
>comp16634\_c0\_seq1; 18 1 705 LEN=1362; translated  
SWETKLR IYCDIQPTSCTLHYLQVQKSAVDTDQFTPMAYRSMQHLTRRGFGLTAGS FRAV  
TKAPVGNVAAAAPHAVGFSENRTGHSSPLRSYSSTR TTSKREYKPNPLDAFRDPVDRS  
TRMEQTVGRQWSAKELRRKSYEDLHRLWYVLYKEKNMLL TEQQLSRRRQLIFPQPERFKK  
VQKSMGAIRQVLGERKRETVAAHLARHEEKELAKQMTDEL DGQDTYEAI DETSK



>comp16635\_c0\_seq1; 111 1 375 LEN=375; translated  
QKAVGRRREKSTALRYSTARVAIAAATEIEIEIETTPYEKSRQLHAVPRRRETAREHTQ  
PANRQDRHAEAPQEETNMSPSESSSSGIAGRCVPDHESTRSLWGLLGGGKKDHGKLP SGAA  
TTTAA

>comp16636\_c0\_seq1; 384 101 1668 LEN=1815; translated  
MNLTRQHRQNRPNKNEHKNDLNVWNGTALLVADCLGTGLLALPHDVKVLGTTFFGLSFLIA  
NLPIN YFAGVILSYSAEKVEQNCSDSTSSDDSIGDQQTAMKAT IETALTTASEHDNYRTL  
ETSIDEDREQQYNIKCETPGDVATFDFVGMASAI FNDPGTTRLVMLLYVNI FLVLGNYI  
LVM SHA VIALFDSSGGNGGGVLS CVPIAGLFASTLMFAVCQLSTMANLGRTASNVSLSALG  
VVL LQCLYFSRTNTNANDGSDNFEGNAVGLRLLLRQMSACGSIGFAVGSQKLF LNIRHEF  
ANRSDAPKSLGMALATFGSVYVFIVLAAGENPPGDALRRDSPRNHPPTGSGPVFVDP CRG  
QLRHQQPGHMRVDGPQFLRWLGTGPDLVGPAPMDGPDGLYGVFGIFRCQRRAFFQRFPGGL  
LRCPNVRPADLVAAGRLLSARLRERSGLASPTGLGSFGCLSEL CIVCIAGVFESLHGAGD  
TRFRVLHLVGLGASNGRIFFVPVIGSIDPSPTDDGGLEPCVV

>comp16639\_c0\_seq1; 350 1 897 LEN=1234; translated  
LVSFLVVPTRFSEYCCEDHLVYYRFLGRVMGKAMFDRQLVKGHMVKHL YKHILGWPIYFK  
DLESVDEEYNNLKLQ LQSMHERGEDISVLCLDFTVTTEM MGVRKEVELVKDGASIDVTND  
NFPEYVEACLKYKLMGSKVPQLNELLLGFFDVIPEPLLTIFDYQELELIMCGLPHIDLDD  
WKAHTEYSGEYEDLGIHHPVRWFVWETLEEFNDEM RARLLLLFVTGTSGVPSRGGFV LQSN  
DGNIRNFTIHGVS AEICFY PRAHTCFNRIDLPLYDTKEELQGR LKLAVTMSATGFDIE

>comp16640\_c0\_seq1; 369 144 1043 LEN=1474; translated  
MATVVTGGARSTRRTLVS AVRRRPLWRAVAGGGSSVPTAEAPPLAGPFAQVSVAVARQK  
ATAAAAAATTGGADPSTAGGRWPQLPSSGWGTRAKAFLAAAVLVGNTLLTGCEPRQQSCE  
REPGLRDSAGGCFPFYSCLLEQARVVRYSEERDSATITSSSGRNKPTGLAGLACVHCCG  
CPGAGGGTQNEDESFVGA AIFPQDRRTLAREVTTDFYHLLGCEKCP PETKDDLRRTF A  
EQQLLQSQRSLPHIEKSN ESTAGTTRTTKTNPFGEPISKQERLFFKDVWYSMGHKDMKQ

>comp16643\_c0\_seq1; 208 215 1231 LEN=1508; translated  
MMKFKRRAISIVAFVVLNACL LPSFYKTVALSWTPPTNDLDVSPKSRGRMGRDFASAGI  
FGSVGLVTPFVLP SNIPPANAAPLSLAQKLSLRDPSAL TNSIFNI PPSTQSYPPFMRGAW  
NVTLQYSGYIFPSQKIPRSRLT TNAQVPGFQKCSIAALS DVGKEVVFHFNIDESTGLED  
RSTSLTTSINDHLGYS AVKEVLYNPKTNANRLSVV FYEYKT TNAERIELFCNGRESELIP  
APPPPQEGGENARGQIFV CSEYVRQVTFSGGSQVGI PRQVGTNYAHFWTWKEVPGSNDRV  
MTGNLLTAAYLDPQDSMF FEEPSKPVAVF SHLIKA EKL

>comp16644\_c0\_seq1; 167 1 566 LEN=648; translated  
XHRFSIAPKGT E IYFDWINGNKRHSIVMSNSSYKASSPSYGNSSGDSGLGLLLGESLPDT  
IKIEHVFTLKFSDKWRPLR KWIEKVVDGWLKLSPHYAESFRFIATGIGSYFFLLGVSRV  
VAASKMPRGSGRSNE DATTAKKNKTKPKDKKNKAKESKT TATAKKESTPDSVLPKSDA  
SVTASTSD

>comp16645\_c0\_seq1; 183 1 543 LEN=963; translated  
XNNNNNKASDS DHGETRGIRWETLSRSGTTASYAWLLLLLFSVLGAVVSQSALGAAASAPR  
PHEEASFSPPSLRAGTRRMAEVARGLASEANATVVP AEAAEAAENDDDDNNDGLGAAPLIP  
KGNSEIDGATHPVEQFQ QEDEGSATQRRATKSHSSPLERKFANRRMCASSTETHSDEGT  
L

>comp16646\_c0\_seq1; 198 191 523 LEN=848; translated  
MVSGDQRAGIGGILVNDINGLCLISKGKMSSENTPDAVTS DNHDDIDSGVYTS LTRLASS  
LTPCQAASTNNENPPSPLITIEMDGPSSII IKEYDGHTVALRVPNQTAKN

>comp16648\_c0\_seq1; 508 92 898 LEN=1236; translated  
MSSNPFAALDDSDDEGPPKAKAPKKSNAQKVV PASKPDPKSKPKNNDRNTKHGRGRPPV  
RDGKRAYDRRSGTGRGKEIKKGGGGARNWGENEAKAEAKAEGRINENE EVAPATDGNESPD  
VPSE EVEPEKEDNTMTYADY MASKGKKEEVALREVKNDFAGMAACAKGEEESFLEMGGGK  
KKKERKKKEVDKKTVDVGFVAKANS DGGRGDRRDGRGRGAGRGDRRDGRGRGRGKGGR  
GAGRGAKAGGNKKPQGLNVQDEGAFFPSL

>comp16649\_c0\_seq1; 221 178 813 LEN=1053; translated  
MTASEISSIVVTVGVCQLI IELLSNYLVYQNDPYQRSLRTMDRFKTKL DKADADLKKSEK  
HRKKYDRAKADYSTACADVARRHFAPNMLSSIFFI ILLRILGTEHKGVMGVLPFVYDF  
VSRMTCRGLDWRELLATEALADATSMHPKQAFSFFFVYVLTGLAVKYYINLLFGTKPPSG  
ADGGITTVMDSPLGQNVMRSMGVNPD DLKMD

>comp16650\_c0\_seq1; 238 547 1500 LEN=1725; translated  
MCKTVREQSQTQAASLLQGNIFVVGDSVLHWHMNAVLLDAYSKSPNLFNPNTSSWSKFY  
SAPGTGYEVDKRGFCGFPFEYLDMSIWP SAPKFTTARYPNYLCPRSNARKMAKCCPDNK

PISRTGAI SAKLNETKPDIV IAGLGVHYDTPDFQEANSEMLMALSQYSALNPDSLVLVFS  
EALPQHFDNPSGDSYDRFIEAGMPSAFTCVPLNVSLVKKNLLLGDNMTSIGIYNFNEIS  
RQAVEQTPGVQWLPKNSHAYATRSDGHEGAHQCCA KHADCTHYCYAPNLYKPAIESFYIA  
IESWYRDGSGNGTSILR

>comp16651\_c0\_seq1; 358 1 1548 LEN=1757; translated  
DDDDDDDDTTYERGGFCFTAWRFLANACCGVLCGYHLQLCGTCATAQESRHLRDVLPFGMR  
PGLWQRDYLTMQPWNEYYP SILRLRFPDPPRGEQQQPHQPQTHCLAHFGALSTLSRRILL  
SVVAFLLFVTGMFLLPVRFPKWEVLILYATLLQPVVFLIFVHWWNRDLSLDAVVKYFA  
SGFFICTGCALVYEFVVSQVGQKVL LLLALVFSEGFELFGHIPANGTPSAHSSYFDRPLW  
YQVAMASLTALINSLFVAAMTEEICKYLCYWMVEHPDLELRNKVILSPTLVLSAEKESAS  
ETDGDVDIDTETTGLLSQYRVESDPEEQFAFAPRASLASIGEAITVAMITVALGFACAE  
NLLYVFVYTPMGFGAQISTFYVRCLFP IHPMAAALQSIGVCRRDLEKDASYGIGWIVFPA  
WLLHGSFDASLMTYSAIKKILDRHNLVVQDHGFPTAPPGIEPGGGETLDADEGVPPFLMYV  
MAIPFVAMVYFLNESFYQRERLEQMDHENRRRVAT

>comp16653\_c0\_seq1; 268 69 790 LEN=790; translated  
MACHAKRKHHPWKQAFFEDKDENKRPRQLEGKIVHSWSNWADAYGDEGANLSNITKAAPNP  
THENQYPAFSGMISDITGNLTSNSDINS DITINSNNDNDTTPVMIMALPVLFCLFCALC  
CSGRGAGARYHRGEQIREQAERI WAAERRRAKRQEC SHTERLAAIHRRLSTMTVVGKQKR  
KAQAQGGGERGGKVAYVVC ELGVLESSVGTDCSREGSRGSASIVTSNNESTPTSTPTPTPT  
X

>comp16654\_c0\_seq1; 302 1 1056 LEN=1375; translated  
XEINVNIGFDDNKHPFIMLYRLVIPSDLSDFLVIALAATSSLLAMMSIALSPWIIYATRS  
SDQESFLKPSCKQPAIPKNSLDTGNREDRVL CAGQVDDGNKIESNETISCVERKIHQIP  
MPRDAIYKEEELRLPTSLFR TTSSTSNKTD RSISPVP TTVSATEAPHVVTPKPYPLATNV  
IFREATLSIETSRLKRVSHDISYCPESDDGCINRKGSSSD LQPKRKKLESPTS NKS LK  
LKSLRSKSSKLSKSPRSNKKKVLSDRRFRMAKEKAQKKKMKKNPSTKNWMDMYKQLATF  
KEQNNGSIVVPWSNNDADLQQ LGYWIRDQKRKLRTNKL SKNHADLLQSIGMV

>comp16655\_c0\_seq1; 321 1 1353 LEN=2228; translated  
QQQQEEIYLFSLNWI KENDPEYFRKKDVRRLWEWKDTALGDGRDFVVPKPKTLMALQKYL  
LDNIPNLTECSII SNCARLEVLC CYTHPVRANNINEKKKRNI VGDEELRLLARGISNCFV  
TQLNSYQNI SKNANALTKVMMQLP INADRPESLLTKVPPTIDHLEPLSYD SWWDVTVGT  
ETILTRLCKV SAGMHRPRR PDRSVVFRPFSSRDAHVLLQLKRTRENISFCSDSITGRNS  
GSCMNKGGNNSTTIQQORRKRKVLPTILDCALRAGKAARNPAIVPEIEELREL TSAESSA  
CSPSDLQISQRVANA ALEKGI LPLVKDCALKLHKSTQSIDQQVTEFRRS AFELLLLEVEGE  
KSGNSIVGGNND SVNEENIDRELRSWLNRR LHEPTVNLRSRLQQHINNEAYDNAELSYMN  
ESLDQILTELHKEHRLQQGNKKEIRSVIP

>comp16656\_c0\_seq1; 356 65 754 LEN=1215; translated  
MTSTNALDPSSVAEEGEAGEATLLVSEFP PPFYYTEASTLTPPEIPKEALERGTRKAAS  
AAAAARAKAEQQLADQ TGDV LGGVLAGNAANELEQEEEGDVVAVFGEVVEDPLLFQPLD  
PCEDPLVIRDEVKRLNREVV RGF INLVNDLVNRP AENKKRRDELEHNVFLMLEETNKFRE  
HQSRELLIEILEKQNEEREKLIQE LEAKILQSDKLLAEDPSNTIIMDAL

>comp16657\_c0\_seq1; 255 321 1085 LEN=1217; translated  
MSLSAPLFAILINLLSP ILLGLCLTTLRLACTELMRPGNRVGGTVSSVELTSIKLIVSSL  
VALILACMMERGETRDSWWIAFINLEESTRLGVI GGSMLIAVFQVNCTFLTFLTS AVAV  
GLVGQVKIIPQWIVATVFAKKT VGFKVHEMNMI GAFLIMVSAGAFVYNYIRT PFPKVKL  
HYYDEESGNSKQEK TASEEKPL LLLLRDADDWGASFM RKNYDSVRGETVEEIIIGCGTTPV  
EQNVPILT SKRQQ

>comp16658\_c0\_seq1; 245 558 1472 LEN=2096; translated  
MVTKR TVYAGTCFRDNLVCGVVQE QDFCDDGTWAPPHV VADMGHPNRI CAYYPDRMVIG  
RCDGEGGGSGGCWCSNLASRCGD PESFVAR DPTCRVTHDERSGVPTTYGRCGETRCVWSPE  
DCSEGEDYTPNDTGCTADRVELGACL DGFYCTVSPKTCANVDGSNTTEPYT THEEFLDK  
FDTNCYLGDVPKAPPPVAPAAPPPGPAAPATPSSNSNSNTHVAALQPPLSRNAVVGIVG  
IALVIGVVLGYWAARHRLRACRDP PPDYGGREGETPKDPPPATIAVGGTEHGVD DCE  
LSVC

>comp16659\_c0\_seq1; 422 1 835 LEN=1132; translated  
NSNSNSNTDNNNSNETSPWNSSCVILADVLAHPSSAFTTTGIALPAGKTSPQALQALRGH  
AERDQHGGQEQEQQRPPATTLGQTARLFGTALLSASLVFGSALTTAPEAASAMESKVI G  
QLKGSGLVFKDTLSIERFEDEPKVKG VVLYISNFDRPVTEKLSKGNFFNDPSYASVACART  
GQKVAIASNINKTPQGEVFEESR SLLFKTLRVQRVYDEETKTAVYVSYNTRLDKSDDSN  
KSRFKSSLCAVNLEDTVAPPVAAAAAASAPAAVAP

>comp16660\_c0\_seq1; 320 88 513 LEN=553; translated  
MSDTEEAPAVEEVAEMSVLDALREVLEKAMIHGGLKKGLHECAKALDRRTARLCCCLAKDC  
ENDEYKLIKGLCSEGEVHVVMVESGKDLGAWCGLAKLDDDDGSIKKAVRTSCAVITDFGE  
ETRALSVLLDYLQKQADGAEI

>comp16662\_c0\_seq1; 499 108 1625 LEN=1746; translated  
MTDTGAQHS�RRRNHHSSKGGHEPPGQAFPFKKNETSASFRRRSVRCVGLVTASLLFVFW  
GLLKFRRQNTERKFVAIHIGPIKTATTTIQMDSGRNENFTRALEKDGALYVGKYSQVQFE  
FEQGILCSERVIMDGEIPPRFRKKTMSAGDLTFHDLTFEDQEEIIREGCWGDKKGIIEK  
SLVFSNEFYSLTTDDFVEDTVPLYQQLFIDYLGDEIIVAAAYRRYGEWLSSAYKQRAKQ  
SCLFHADDMPNVWEYAQTYIQSPGYGTAFQYNLDTLLPYLKSSARTAATTTTTTAVPAS  
FDTSLYTNTIFRNFDPKSKIKFDVLNYFQLPREKHYSITTELYCKSLGEGRTKNTCRY  
SRDERSEAEVNTVKNRGSSEIVKYHDIIVVEAMNRGWIGDVTFFLDGSVEETHNRRIREV  
VDLEHFHTKELGLSATDNPLLCPSQSELQTFLSKSLEFEELIMPGLFNTKLGREEHIRS  
FEKMRDCKKQFCWLDIDRLFQASSW

>comp16663\_c0\_seq1; 574 45 1793 LEN=2353; translated  
MSKLSSTSSSSSLRMECSDVHVSQAFNAIANGSIEGRNSPRKATATPTRHDEPNKTNDFM  
LMALIVITATYSLIVIFFLILQAQRHDRKNKDTFRSASTFESEQPELIDRASTNTNNAVE  
HENLQLNSSSSKSKEKYIRSTAVLRYKSDTNLELCTAHSFSTSNTTNAIPIDFDKTKVV  
VLEDRSMQGEDKADLKIISKILVERGCVHNTNHGQPPILCEETNNTNSSYITNFDTS  
DSNSEASKFQTIKDYSTQDSNKHNSDDAANDRMKSDLGTSDPKLHQPTLDAIKHYLHS  
TPGWEEFLEENPLTFYVRIHKKTIERLSKVRPRMMLSTEGDGTNSAEYNHLYNRIHS  
QEEFIGVASYFFQAMMHQGVVRSSSGPRSSIKKTFQWVKNAAGMHRAHIHADDLEDEWNE  
DDMKPYSGEIGVVLTKKGEIISPSRRSNRVRVMNTKKKLEKEELRSIGILTQAAKELEQE  
MNVIFDNKIKRDYSKILRANTLEKQTSKIFSSKNRTQCRVEGGDKMARTLGLCFVNN  
SDKQELASADCFPSRKRKRDCCAIHASVQVEVEGKTPVHKTP

>comp16665\_c0\_seq1; 403 122 1267 LEN=1352; translated  
MVSSTKKESSVIGNDSEVEYLDYCSLSIDEIRKMAAGNDEERKRHFVPLSKVKKGDVLKV  
EKMTFFAEALCVLFLAFVVPNGVFTLPPAIALIGKLVLDVKMAFKIFGMFLLPLAILPQ  
EFVPTSLQSYLAIQVSKYFSFRFVVEKRPPPEPTNKNYHSGIYVAPPHGVFPYGNILSM  
LGFPTMFGHHFRGLASSAALRPPIFKQVLRISGTDASRHVARSALEGGESIGISTGGVA  
EIFFTNEKDECILLKERIGLIKLAIRTGADLVPCYLFGNNTLLNCWAGEGIPGATTVLEK  
FSRKLGFALILIYGRFFLPPIFRKPI LAVMGKPVHHTHVKGEDPTPEQIEMIQTQLLVEV  
ERIFNTYKHLHYGWDEKKIIIK

>comp16666\_c0\_seq1; 260 79 999 LEN=999; translated  
MKLVSATLSLALLASLFTTPVLAQGEVTQAEVTEGEGLVTHEGEKPVFGESLANNLAANA  
TDQVEGAESKDADTVAPVAPPFETVPTVAPVPTSAPSFKEGDAPVAFAPDTPVKQPVFMA  
PVAPPPISGAGRGAKTAAALALVLAASAAAGLWGKPAVWRGAEPECNAVPCSAVQCNV  
RFGEPPGRRPRGIPLERKRRPSGPCDALPSVCAVCARADGSKRRGVAVLWHSRGRRLRSPA  
LLRWYQLLQHWAEKNDSSVPSLSVWVRIAGIDRAGTVTRTKSPGETEWKLAVFDTSIIC  
FSNLVVE

>comp16667\_c0\_seq1; 702 133 1926 LEN=1992; translated  
MKFSVAAVAATIFFSSASAFAPSSLKQSLSTKIFSTAEETITKGPIIVDKPTGTSFLPED  
TVARCEKGNPTEKVKLAKDPINAWVDIYEYARKIREGEMTWEDVEKADLDRVVKYVGMHLH  
RNKRTPGQFMRLKVPNGIVNSDLLRFYAKSVEKYGDGGVVDITTRANIQLRGVKIEDAP  
DIIDGLHARNQTSFQSALDSVRNMVGSPLAGIDDDQEMVDTRELCNALNDLVSLDPVTNTR  
GNPMWANLPRKFNIAISGSRDDFAHHTHINDLGLQPCPHAETGEMGFNVVLGGYMSIKRVA  
ESIDSNMWIKADRNSVVTFAEAILRIFRDESERKNRQQARLMWLVEKYGPEDFKKAIIE  
VESYDRGVEILDQQRPTDKFERRELLGVHPQKQDGKVRIGVLVPTGRLNPEECRQLADV  
AEKYSDGEVRLTVEQNVIFPNIDESDVEEFKKEACFNDSRFKVNPGFIEGNVVSCTGAE  
FCGLALIEKQHAEDISKKLESVTVDRPIRIHWTGCPNSCGVQAADIGIMGGPARKEV  
DGKKMAVPGCKIFVGGRIGEDAHLAMEPVKSGIPLDEADLLPALVEILKTEFGAVEK

>comp16668\_c0\_seq1; 56 1 399 LEN=721; translated  
IELKYYEHLIKKQMMASSTSSSYRRVPQRETNETAASEISSGGFESSAGTTTPNTRSQG  
ERLEEKGVAFVWLVALVLRWTFNFPPIVWSDPRLNRTLRLVAGGGFILVLALFSYLTLY  
LPKIKGLSDPSVW

>comp16672\_c0\_seq1; 195 545 1099 LEN=1298; translated  
MSPTTEAARTLSFSSVPPYHEDGDRLSFGELKEYGQDIARSDSSKEFVAKFWRRRSNQE  
ISMDLEDLLAELADESAKNRTNGTNNASCISSTLHPDELLIVAEGVRHTAERSSMISLDL  
DDLFGCEEDGADRSDQNHHLNPNYGIIVSTLNLDELPAATTSCTSDCECDGGSEETKTTWGSEP  
QPGS

>comp16673\_c0\_seq1; 424 79 876 LEN=911; translated  
MSNPTDCDDSSRNIAFYSEMLERLRTEQFNLDTNKALASHPYLIAAKEGKLTLAQRRFAFA  
GEQYSIQYSDACSFALLAGHENFRPKSLSVASVPPAKDDETGSDTDSLDPDIFQFLLGGEV  
YASRLLLDHSKSLGFENAEESLKEYTVTAGGQAYPSYWARIALAGNRGAGAAACAVNFP  
WGAMCAELHESLRCRPEYGYGKMSDEEASSALAFINFFGTPIEKLDDMAATVMMKENVSY  
EDIVNEVRLQLQGYELMFWDVAVYDAK  
>comp16676\_c0\_seq1; 567 133 1389 LEN=1389; translated  
MKIIGNIAVLPLALLGFHVSAGQATFSDGMQEI SRRKFITVEYDYKLEANTSDTDLAQQY  
NITQPHPLEDALTDIDSTIISSIQSALPDGDIPEGKTQPDIFQFDTVNTRFINMCFTESDA  
CKWVKSRIKLSYLGDTPKNAMERLTIGLVQDFLREFSDSNPILNAMYVYPMIHSSVVQLQ  
ISPVEGAMNDTEIAYFEQNFRDVFHAMVSALDGD TDVSEAYFVKQIEIEISGKEEDITTV  
PSSKLSVDLKYGYKCRYCTEDELVETVDGSIEQNLD AFLKILKNNNGNSYFLQTENITVSK  
QVPPSELPPMDTEKVSATSEPSRKLPWGLWLVGLTAAAIFVGI VLIIRDQRQLKKEEAS  
TGDESSVYEENHEEDDVVGVYRSDTNDIENQNENDNDDDDNDENEMKNKNADADAAAAA  
>comp16677\_c0\_seq1; 192 1 646 LEN=698; translated  
XFDAHKLDISDELKGMVQLFIPHLDKIRVVLNKADSI STQQLMRVYGALMWSLKGVMNTP  
EVCRVFMGSFWDAPLQNTQAEELLQRETDLLNDIMNLPQQAVMRRINELVKRARSVKVH  
AYIIHYLRKQLPYTWGKKEKQKRLIARLESEFSAAARRYGLPKGDFPDLEPFRRKLLLEIK  
DLSEFPKLDKLVREMDKVFSDIPLLLLEKARDHR  
>comp16678\_c0\_seq1; 331 108 1298 LEN=1334; translated  
MGKNLAFADVLVEECDDESSILLSPEQPPEKIEVMFQRGTPEAVWDSEIKPTNHEFPT  
KNSALPYGALVFLDVRVPAKGIAYRVEAWKIKVNPKEGAIMTAREGRSEGVSCSIYLQK  
RCEAFSKFNGEFHKLGPKKKDVRSNLEGESPLDNRNKMKASDVADF SHGTNKMKGMRAT  
IFATWLVDTYGKDNLARGGGVLDVAGGKGLSIQLALQGGKI QSTVIDPLVRKHGKGFDP  
GARRIKKAQAPHTLLSKEFNRTTFLEISEQEDLVKNSSMLVGLHPDEPTEDI LDMALQY  
EKNVAIVPCCVFPCFFPLRHLSDGK FVRTYEDFLEYLLAKDDR LRKHTLPPFQGRNIVIM  
NQNKAGSNSEISNLNSLSQCVKCTRNGQKDDDSCEQ  
>comp16681\_c0\_seq1; 152 176 736 LEN=736; translated  
MARTRTTPRGGGCGAPGARCRSSPVSFMLLLASGSALRSDPSAAAAAHRGLGTNQQHQ  
IKDYTLWESARIAKTLATWGETYPGLVEVTTAQEAYGLPAAGGREDCPFYEADGCPNYFF  
TIQDFVAPPPEPVLGPPPRGLLERMPKRKRAGRTDQRHGGLGAAAGGGPLRGPAAVAA  
EIEETEEX  
>comp16682\_c0\_seq1; 138 1 482 LEN=989; translated  
XNTALRSIQQTTPKLCQKPTYRYGNHYPTIQSTRTEATFRWNRNRKKQNTSNSHTGKMN  
FGGGEAKPAGPDPVFAAKTEMEMYTDLFNKIASTCF SKCASRKHKEPDL SLGEMTCADR  
CVSKYLEGQERIGVVLOKANEEQAQQMAAQQMQQQFGR  
>comp16683\_c0\_seq1; 278 116 565 LEN=715; translated  
MIASAYFAITMMLAITSSSQGFHLPATTASRNTVGFSELSSTVAQASSNTSLQMI FGRG  
NKSNEKEEYIPGKKMTVARRKKLGINDDEEYDLEMALDNSTDPLITKIIAGSFILAVI  
ALLVFGLVIPATTDYGEVGNPLLTGGRC  
>comp16684\_c0\_seq1; 255 576 1232 LEN=1777; minus strand; translated  
MRCSTTILRGACLLSSGGFAAAWLAPPKAGGVPVRFGT PGVRHGAQNHVLLGSNGNGNG  
GDPVLENEEPLSVIFQRGLVLQRSGLDLSGALKEYQFFV KAAEGCGVSPMF AEVHVNIGA  
VYFRDASTQDLAERHFRALALEQRP IGTAFVN LALIALRKGSTAGAADPVLGRECLEEARS  
CLLRAIELDSDQTTEAAKKLLEDVDAIARQMNRNSGR  
>comp16686\_c0\_seq1; 611 153 2144 LEN=2378; translated  
MRNSRSSTTTSSSSSRALSCLPRAKGLSPAFSSPFSRRRALNEADAPNQIEVIDEY  
PLSKYLAMAERLFACFQQSFEHLNLDEAFVYGMRF AQLGLVELPRHGEWRAGGEREERLG  
SLVEKALSRL EIIKRRMDEEELTKLRVGMVARAE EEARAREREQERERARERERPQSTPR  
VPTERKEERGIGHRPRPPHEHETKSAGSKLRKFFRLPKKSGGVSAPPPAPQTVLPSLGA  
IQRSRARHEWFTGPNNDNYHNHPVVVATDPSPSGLYTRYAIEEYPLVEQVTLRLHPT  
TPSLNLNLERGTGPKSHEQVASKGERGETTAGCGDPSVPLISLPSPLVSSPLPPPLLP  
TPPAPLPHTEDESILSETKDPCCRIADRDRADAAASNAIESCEATERQSCVPASSGEP  
HAGSSTLVPQASVSPVRKTKERMLEEITARLKLTHGEDVNNYARLVEETEERTVYSA  
GTGCHRVPVLPGRGCGPKATEAFARRAEETTLGARTRSSTSTSSFDADFALARRAAA  
EEDDGDDEEGSYMEVTVVEEADEEKSYFEYVIEEDCGGEGYPDRSFPRERAQSTTTKAG  
GTGSPSGGSPTCVASEVLVPPCTSVIPDLGSLCDTFDPPGGVSVVYLLPFGENDDATCLT  
MDE  
>comp16687\_c0\_seq1; 435 78 1049 LEN=1314; translated  
MTNIRVLSITLLACVLSSIVRELESFQIRSPEQDVSNGRLSVRYTETLAMAVATSEIEEA

RNMMP EIVNRMPEPLPDNLKNRYMLRHGQSTANIAEIISSSRSLAYSEKHGLTAFGYEQ  
GKESATQLLDVMDKEGAKSGEKIVFVSSPFARAKQTAEACLDGLMGNEENQERIRTMGIE  
IENEISIDNRLMERYFGRLLDDDSIYTYAYVWPMDAINVTHTAFDVESVAAVCTRLLEVVK  
RCEEQYDNMHIVVWVSHADV LQIGQLYAANAENVGRFSSYRFKNGEVRAVKNTPD SLPNP  
PLEAPKRGT AQYSELKELPKLSQ  
>comp16688\_c0\_seq1; 274 149 649 LEN=3479; translated  
MKLVSILIASLVAAASAANESKECEVCVKVMDDIRATMSKADSRKKPMIEGAMAKYCANE  
DEKLSARERKICYIIDPIRRDVAQPFSGLGMSLKVQRITKTNPEICTVKFPVKTDKMEK  
KDLSKLRVKQLKKILDERGVDYSGLLEKEEFIKKIQSTEHLAGDEF  
>comp16689\_c0\_seq1; 940 48 1925 LEN=2003; translated  
MSGYYGNEEKEADYGYIFKVSGLVVAEGMSGAAMYELMRVGHQKLVGEI IKLEGDTASI  
QVYEDTSGLT VGDVLRKKQPLSVELGPGIMESIFDGIQRPLESIWKESGDVYVVKGVDP  
PCLSRERKRWFTTPGSIKEGQPI SGGDLVGT VYENEI IDQHKILCPPNIYGT VSKI FT TGT  
DGKET FVVDVMEVYNESTNVTHKLTLSHFVPRRPRP IAEKLPGNAPLITGLRVIDAL  
FPSVLGGTCAVPGAFCGKTVISQSLSKFSNSDAIIYVCGGERGNEMAEVLADFPPELTMT  
VTDPDGSEREV GIMKRTALVANTS NMPVAAREASIYTGITLAEYFRDQGMNVSMMADSTS  
RWAEALREISGR LGEMPADSGYPAYLGARLAAFYERAGRVKCLGSPDREGTVSVVGAVSP  
PGGDFSDPVTAATLSIVQVFWGLDKKLAQRKHFP SLNWLISYSKYMQVLEPFFNGMDEQY  
STLRETAMNILQ QEDNLQEI VQLVGKESLSE DQKVMEVAKLIREDFLAQNAFTEFDYTC  
PLVKT VGM LKVIITFY NLSQKAIADSPADSKITYAHIRTALAPI IQKVVDTKYVMPREP  
ETINATYNKIIDEMTNEFQTLTDGI  
>comp16691\_c0\_seq1; 268 1 1223 LEN=1406; translated  
XALRALGMLVFCGIDDEVVTESVLDLCEAALAAEYRGQATPPALRACAWRVWTL LATTVH  
ELYVAGTDH ESTGRGLLLPVVAECLEQAGDHS LREAAGQAMAYIHDCRLRLGPGGDDGE  
TGKSASQTKYELGSWEGSEWEDQVDEIGQTIYELAHASGHHVSKKKGKKEQRKVFRDYLGM  
LHDNETPEVVVQFRGGSLELSTFGEICALEFVRRLQGGFQVQLLTNPTLQAVFGCDGTA  
LGSSGGGYSQLEKRLLLSKTSEASKIKDLDRHKGRKKRQNVKNHFLTADGDDXLNEPTAR  
DGTSGKMARKGAAERKPFRA PSPVIRSPLPGRAMCRTPGGATRCAALVPRNKTGFQQE  
RAIPATARHGSTARTKRVGGRSRLQLWKAHAIRCVALAAVASRLAW  
>comp16692\_c0\_seq1; 264 26 457 LEN=485; translated  
MAPVNSVQVFGKKKTATAVAFAKQGRGLIKVNGQPIENIQPQIIAMKAFEPVLIIGQDKF  
SNLDIRIRVKGGGITAQIYAIRAAIAKSIVAYHAKYVDESSKNELRKTILDYDRSLLVSD  
PRRCEPKKYGGRSARARFQKSYR  
>comp16693\_c0\_seq1; 233 313 795 LEN=864; translated  
MVGAGLVGYGVALAATPVDELSEVGDEDEKETHTPDDSGRMAQKTEVGGSGSNGNYPST  
ILVRKYVKIAVTIGFGLFLSLPSLMSQIVWETMIPGITATDIVYDVSTENVRGMIPKWE  
IIKKPTLPGLGLIGGKEGRGGQMKTITTTIDSSRNEGSL  
>comp16694\_c0\_seq1; 194 205 993 LEN=1113; translated  
MPPAPGQEEPVKRITKIVNSLLANEDCAPFREPV DWRGLELFDYPQVIETMMDLGTIKRR  
LERGHYSTAHQVAEDIRLVWRNCMTYNADGSDFWLLAKSYARRFEDRYRKIRQ EYDVGET  
LDGGDAGGASGGGHP SKASRSRSGSGHASSSPSAPGASAPPPALDARARFGSNLFLLG  
GTELGHVLAACELECEPEALETCGNDRYKIEINVD AIP TDVFATLNTYVGVQKVGSGGVGAA  
SPGSGEAGGSGSGGRNRKKQRK  
>comp16695\_c0\_seq1; 406 36 989 LEN=1153; translated  
MTVVPSTVSSTPPLANYGILTGQLFLYAGGRAAFESASASGVGSELPPRKKCILLGGLSD  
GLLPVPYTGILEKACHENDWSLVQPVLSSSYLGFHGSLDRDCSEIEELMKYLCEYRNAE  
EFALVGHSTGCQDAVHFLQHAGPEFRKKTSLVALQAPVSDREGTELEEGFPEKLQEAQKM  
VSEGRGDEMLPRSFHWAPVTAQRVYDLHSRGGRRDDFFSSDYTDAELEARLSYVGGDPSQH  
PGLRVLVAFSGADEYVPEHVDRPKLTERLVVAMNAKSNGRAVAESLYLETGNHNLSEGPV  
DAAAFVQRLSELFRGTE  
>comp16696\_c0\_seq1; 193 189 692 LEN=823; translated  
MADGRGSSGYKYGSVDNDEEAGVDEKDKSFDESNLYFYKEEDLTRQEKISKFVKLFVPI  
ILAVSMVGGLAYILFHDFGLYPGPGEKSHSAGRVSQPTT VTSDDYTPNIANMSSSSNSS  
HGSSIPVISQTKTSSGNSCEANPGCAALGLTGNCPTSEGIKLGCC  
>comp16697\_c0\_seq1; 435 222 1254 LEN=1270; translated  
MASTPHEIENDNPETALRKT LASLDAQRTAIQEEADAI IAE LTT PPREGVEPMGLDTPLV  
DQEGYPRGIDIVYRARSQRNRFRVLKTDHKELEGKVEALLVRLANLKN SNPTETKAGSDE  
IARRRAPKPKPKYDAVTGKVV MNWDG SVAGIKDGDKLNFHDLSEN RGTQQQTSQSSVPS  
NPSERSASSVAATS RPPPPREVRP FARVDGVAVDSPASSAGMKVGD LVTRFGPLHVDNH  
DRLRALAKLVPEVANERGTIRLLVLRRTGGNDNNGDNYS DERQWKSLELMLRPMPFRAG

GCLDATSFVLDLDRSTTGERNIRHSKVVSAPCAKISTKQWLR  
>comp16698\_c0\_seq1; 269 74 558 LEN=558; translated  
MVLPRLFRETALWAALLVAFSSRAPVSPSHPPHWCSSFVLPCCLSLSFEGRPPPSSQRKV  
EQRIRQVRLPGIWLKTTASLPYELDIRSKLDKRFSTESGTNDESGDAILLKLNDGTFKQ  
CNEGYREGRWVTGRWKAQVVEKEDGNTPPDDNSSSSSSKSKSNX  
>comp16699\_c0\_seq1; 195 1 319 LEN=319; translated  
XXXXXXXXXTPPSTDSEKQDNDVVFVNSPAPKEIIDAIKPQVIPPLSSPLLDEQKEDKDV  
NPNEIIGVDEVDLRTADVREGADNDLVNKGDKEDKDDKADKKDKDDKX  
>comp16700\_c0\_seq1; 54 1 499 LEN=499; translated  
XKKETKRQAVRVMGTGFRGTFVISWSQTELDGMSTAPVQSLSVGQTWSWRGDAVRVDGPN  
QLLRLEGANGETVNRKRAARMVRRLVGAAMNNTRELIPAEMEEPLMDLGFVVTDGTRS  
VTIIEVGSEAAPLLMFHDEIPPRGREMWIVHHSLEGMRGASTGPASG  
>comp16701\_c0\_seq1; 172 1 843 LEN=1052; translated  
XVGRITTGWEIQQLVEPFGEESLRESWESNVPECCGRCALHPPQPHLFYGSADDP  
GTAPHVFRSPVLMQPLCIRGGVLQDTGRVEKERISEVLGFLSDAAARFVDRFFNWF  
YNILALFYTERNWAYLAVGGCAILLFSLNLFVFGITIPVQVFFKFTKKLMEYDGL  
DTRKSAVHDLRAAAAELTNETRFDETFMAFLFEERNVERRHTMDFASLSR  
SAALVAATGSSSRNRLQRQSMIAWRHLPSKQQRAAVQAKAETGKMD  
>comp16705\_c0\_seq1; 460 192 1760 LEN=2029; translated  
MTNGSLFSAALKVVVLAIAIMEAEADESRTIQTSKLQVQFPLSLKKNGGYD  
HREAMFGMPPYGGSIEQNVYADADLCSNTDYSRGGFPTRESGEDGIMKQWKAP  
FILMVDRGDCTFVMKARNAQKLGAAAMLIADSTCLCSAQDKCVSEGDYCESKEP  
IMADDGSGSDVTIPSFMYKQDADPLKEVMKNEAVRMTMSWALPRPDSRVEF  
SMWTTPTDEVSLPFQKEFRHVARALGDAQFTPHMYIYDGIYAGCVSPTGEN  
QCYTMTNNGRYCATDPDDNLDEGISGADVVEESLRRKCIWNTYGGDVGMP  
WWDYVNEFLYRCNSPDYFSSIECVKDCMDRSSVDFDRIQACMDDSGGL  
ENDDQNELLDDELLARESSGVVIPSFFVNAPLRGAPKTAEIFEAICAGYAL  
GYEPQACKKCKSCDDISRCVSVGHCPGDVDSFDTVSFGTFIGTLVVTVIC  
FGILGVIQWQRSQRQMRSQVRGIMAEYMPIDGKNNVETVGI PMDDEDDL  
NVEIS  
>comp16707\_c0\_seq1; 414 325 1641 LEN=1801; translated  
MTVPYQEEITDYLASVGRNTDIPSQEEIIGHITTISSRAFHEAVPLFCAAYS  
SWISAKMASLSLAAPSWLSTLLDDFFSFTIGDRFDSNKEINTAIVLLLAWS  
YYKTFRTLFLGIRFIWRTMLWIYVVRLLVANIYGVFFSAAQFFSASIFGKK  
QGHEYNDGNDQRLRSAAVPPKNHGTNENPHSMQSLHQHRQLQKPD  
DVPQQRNAASANMALPLMAHLEQPITVTSPALSRQHPQTERAPSMVIPH  
MEQKQSTLIAPPPGVVRCNNSPVPASSFAPIAFPVAPIASF  
LNRQVYPHSSIVANSVTNLNPQPQAPIFVPTS  
SNAPVATNIKEEERDLRVQSDSEDDHDGDWNEQNC  
LRVMHSVNAATKSNEHKTLTNHTNMKAKPMIQK  
SCKRKREATELAAKRTNASTTQOSKKQRIARARANA  
KKWANETFAD  
>comp16708\_c0\_seq1; 346 1 708 LEN=1809; minus strand; translated  
EKSTPSFGEAKTKMPFPKPKASFGGNTKSPKFGKVDNGDAEKSTPSFGQSKAK  
MPFPKASFESSAKIPNVGKVDSSKERASTERSSTKSFSPKPSARPISGDDRESS  
RESTFLTEENQKSFFPKTLSTKSEESMYRVEPRTGTVEQKSESSQEEEEESAY  
FTDKTKEGSFFPQPQSSPLQSQLRKDDSKPRIQPIEETALGETDGLYGKTP  
DELMAEVMRIAREQEEREARE  
>comp16710\_c0\_seq1; 137 1 443 LEN=717; translated  
XKGSKGGYSSGCDVVCDDHKPSYSPSYGKIKGADYYTGYGGKGSKGGKGS  
KGGKGSKGGYSSPSYKPSYPSYPSKCDSSPYCYGNCCQPEICYEVCYSGGK  
GGKGFYGGKGGKSGYYSSGCDYVCEAPSYGYPYPPKPFY  
>comp16712\_c0\_seq1; 384 98 916 LEN=999; translated  
MYSFLFAAGVLLALLSDRGHGFSPFPVSSSLRKSLSVSSPTSLNLF  
TDMGDALHDMGDALTGGKLVPQTEPLVYGTPLGGDDLSEELRTLAVQERL  
VSFTGEDFDIQDLIDINEPYCKVRGAMLHLP  
GKDKMRISLGGEQVAILDRKLI  
AITPTYDILRADGEKIGWIEKATIALTDTFEF  
HAECAPHF  
GPIKPPAAYRLEGF  
LDRRFV  
MKNDKGEAVAKITMDRLIEFD  
AWDHYQIRIAPGMDP  
VLVVACACAIDEEFDEEHKKREAEGR  
>comp16714\_c0\_seq1; 578 75 1250 LEN=1361; translated  
MFSSSFLRSGARVASRAGRFFESTAAKAAEPAAAPKEAASGGGFAMPLALMSL  
GGAAVYLD  
SQSKMDAMA  
AKVDSLQVELSGKTNSAFVFIKPHACKGKPGSVESVVEGKFKDSGIRVT  
DKGEYTA  
EIEIDKNMFIDNHYGAIASKAVK  
LKPSELNVPEKGGKQFEGAFGESWDSVIAAGKVYNAK  
DAAEKLGLDAAGINSEWSK  
LTRGKDLIKFGGGFYCGKVKDIYVMNGFYMSMRAAYC  
NPGEKI  
QWYTVSWPSDALSWEDFRGSV  
LGATDPSEAPKGSIRRTILDEYRKLGLASKPNTGDN  
GVHASASPF  
EALAERN  
NWLGKSI  
EEDSYGKGLLAAGVPMEVIEKWSGDCQVSV  
EGETKEGKTMSVFD  
TLEDLDA  
DAVLAKVSKISK

>comp16715\_c0\_seq1; 185 305 460 LEN=793; translated  
MTLSLKERPPPPTAEELAAKKRNFNLWFWGGGFVAPFLATFYFYGFKFWER  
>comp16716\_c0\_seq1; 234 1 618 LEN=806; translated  
QERQSTMKTSILLASMLVVSASAFTAPSTKSSSSALSANADDFGAMAPLGYFDPLGLVKE  
GDQEYMDHLREVEIRHGRCAMLAVVWGLVTASGARLPGMEAMPNGFKALTEIQDLPAEVR  
GTIPLTLGTVWALTFFAMQDLTGSSEFPDGRNGFIDLGWDKYSDEWKTCKRTIELNNGRA  
AQMGLGIMVHEQLGNLNDIGLPQP  
>comp16717\_c0\_seq1; 305 1 1437 LEN=1509; translated  
KKIRKQIKQTDTAFRQNELLAATRPRTRKRNITSQSDPSTTAPEPPTGEAFSWFGSLRRT  
IRRAGKPTMLRPRQPPPGTDASASPTLVIFRLFVLALFCTPGSGFVTPDGREGFSNTETG  
ASLQSQRVLPLSLPSHTGSGRTLGNLTLACQLLGMNCATPTDFTFSLKGFCKRGGETDIH  
SDGWGVAFYEGKQIRQFHSSPACSSPMANFLESNPIRTYNMMSHLRYATVGEVELSNVH  
PFCREMWGINFAFAMNGDIPMFKKDPKSKLRALMDPGDLPSDQSYNAVGNLTDSEAAFC  
AILNALRVKQQLPSLPLVKDAINELCEEIITEDPKATIMNFLTTCGPDTLWVYVSWPGSR  
PGSKVWNGLHYTTTRAHPFTTSRLRDVDYEIDFASTNKAGDCVSVIATKPLTHDEHWIEIG  
RGELIVFDQGRPHVTPESLFEIIELLGHGLKSSVIERPVLEEDMREFDLDPESFQGSFI  
>comp16718\_c0\_seq1; 397 77 1294 LEN=1450; translated  
MASRVLVVGSGCIGLRTALELTRKRVSVVLRSPVHPLDKSNCSQGAGGLWMPYICEDPRV  
DQWGFETLDEIYPLAEDAENSLVDLRHVLALKKRHEGPSTEDMVADNYHKGTTGGRSLLPS  
WSSDARFKFQNVTLQVQWQNIHKLRLPSLAKAQEAGYNHAWFFQTPVVDPCPKMMEHFL  
DELTGSNISKSAGKADINVTGIYYQSKAELFEEAKNFGCDAIVNCTGMGASELCKDVEL  
VGARGILMNYDRESCKRLEHKDDDDGTISAGVNDQLHDACIFADEAPWGTPEYPSYMIVRG  
DDIVVGGTCVKGDTETKIRPQERTRLFETARLLGIDTNACQPKEEWVGFPRPYRQEIRCEI  
DDEKSMSTNDTENDDRIRLVHCYGTGGSGWTIYTGLAKEAARLAMQ  
>comp16720\_c0\_seq1; 183 129 761 LEN=761; translated  
MNREPCRKACHALARALGNQRPPKGGPLGGNKCPGVSARHQNRAGVSTVAENQIAQWLKE  
GGEDALGNKGGKLVVDRHRDASAGMAVNQHDVVHISKILADNNIRPESIERLEMDRDWEK  
LKARIRDAWEHRGKTTRHGDNDQARLSIHEFSESEETARELFSSEVVKRLDLQAKRVNE  
AAISDSLRFNGRSPVRHAKPFVLEDRIVMAL  
>comp16721\_c0\_seq1; 286 1 1056 LEN=1202; translated  
RKTERKESPLLGTQRTTKHRKTPVTRTTSMHGGPFVRTASVAAAAAGLLGFPGCAAWVAP  
KPKHPRMAAAPGMISEQQLGYFEALETEAPPCCERRVALLDYTAGEDDDPVGFETAWGYQK  
EILCDQIDRLAEGGETGSSFLPADPGNGTAPGRRGDTVLMQLHRPVYTLGTGSDEAFVKQ  
ASSSSSSTPDPVPVVRMDRGGEVTYHGPQITVYPIILDLSYRMDIHWYMRALLEEAVIL  
AISRCGSLTAEREQVTVWIEDHKVAAVGIKRRWITQHGLAVNVGEESSLNFGGIVP  
CGLEGRRVGCLNGFLTARGEETITVGAFAAGLLGEALEEVFRIELVDQPLMR  
>comp16722\_c0\_seq1; 445 104 1492 LEN=1741; translated  
MIVFPENTDYSSPNRWSNESPSTKLYNKNPQIGGDYIQELHHRTNLVQRTPFEGHAGGFF  
TMEKEAPLESVHGDSPVCVKDKRFEHEPLHYEDPCEDAGGVAIDLCLPEDDLDISRHS  
TDDLGLLIGLELESQDEQAQDPKLQEEPQHHSRLSKQPLAPILERRVTFAAKHVVLRLDD  
HDGVDDLTCGIDQRYVHVQVFDVAVQVWFIPHHTDYSPEEKRNIIHSAEEMSSMKEDAIRAK  
LTSQRSSRNNTDSKKMPTSEKCSLFSPPVVGKQSRSLPSIDYFGSKLQKQETPSEDNLSS  
RRCRYEEMMDAVLLEQYEQKLMCFRVYGRVEGSGILDPLDRLAMVYSITGDTQKAHERAVA  
KAERHLRDLDERCDESSVSTSTSSSSTMENDSLASKPLKTTGSGANLKRTPSFSDK  
MALETSYCLDKSVSSLFEFLLPFLEIRSGDLFLGIGEEMSI  
>comp16724\_c0\_seq1; 210 128 742 LEN=926; translated  
MSKQELQRRAFEASGVSYEESLAKATKLIPSLYERLGRESGMEELSTLFYDRVFDDETENDW  
FLSIFASSTKAEADIDNQRFFVQTFGGPDLYRQKGGKGYTRLAGRHANYPI SHEAADLWV  
KHMEDAINEHKYLETTSNPCKYQONQNSVSEQHYNNIDMIETKEAMRAYFRYTAHYI  
VVASEYMRDDQLSGGTKIDGRVW  
>comp16725\_c0\_seq1; 291 140 754 LEN=1222; minus strand; translated  
MQMDETAGECLVVESESEGSVIAVYVNDKDDNCSKYAPLIDKYNFKNTCDNDVDDDCQAGE  
SYFGTVVDFLQILMEIQPFAECEAQRFCGDLKEYRKDLSSSFQYLPIGSDTLGWEKPE  
PEQFSLSLVNGTCSMTGVPDGMGGSTSGESDHASEEMSTADHEADKATDKEMSDGISGA  
GLAAPSLFLSLLSFFVLFLSAVVV  
>comp16727\_c0\_seq1; 309 40 837 LEN=888; translated  
MTTPRKQTNQFRLTGNALFLFAAVMLLALPELLPLPTIVQGFAAKNRRKGGRSKGRREGA  
SFGGFGKPPPTLDEVLDKINTKNNRLPKDADAEPCCGSGSTHGECGPLLVGSNHGGC  
LTPLQVLQSRYAFQYRNVGHVIRTTHEECRDYCEDKVAWAKDLKKEGMFDSFEFVGLIEI  
VGDGIDESEKDEDEAFLEFKVRLKGRSLEEAPVRSRSVSSVEGEETVVAERSRFLRDPDS

GVWKYAGGDVRSTVKGLEDTTLNA

>comp16730\_c0\_seq1; 794 1 2360 LEN=2490; translated

XALGFAHGSSELVDYQIRSTVLNLGRPLVAACLRAACLEGDYRAGLAILADEGILVAPGSS  
HPEEEWQWGGARDRMDPLCRDLAIQVLGGAAEGGTDDQFGEQGGPPDEHPWHGSRLALELFL  
RQSREEGVTTISREALVGVQAACERDQNRWGFVSLRRTVLDEEEAHAHAAKSRSPDSNNQES  
HPAPWLVPGSWLKITERDQLADSSIEPSHLPSLGSFLASVMRNCNRSSNFGMALFALELFL  
RIQLLQSNVGASAEPSTGKKAASDTKGNDSLSP EEGIRHVLFELSRANPNGNDAEHEIMI  
AGMVALCGLRCHKHAMQLYETTTEEWLSGSEGDREENASAAAVYGYASMHQERSGTPTAE  
LVPWGAAQNHLDDLAAAGLVKTIIRDAGDSGGLVVGQRRQMEIILARAMNSCTAGHQ  
ELSLYLLEWMEECVSEPPQHQAFLYPMGAETDLFDRVGSYQDSVTAEAIIVARRYTREY  
DAAIELEFTEATLEKHTDDDLRWGKTVSAGLAAMVAGGRGDDALQVFGALDVGVRNECYN  
TVGRYLSRVKDWQQLIDLIGEATAEGCSSEELAMLAMLAVTSTRVENRLRALRAIVNDCA  
SIAGVDPKQWMTNYWSLKKSLGFYHARLLMWWNDEDRAPLDEVNLAIKEFYRQKSKGTK  
PENDVLRRAIVSGAGRHDSLGLDHTDGYEQVPRSEEAWRFLLSDVRRSTRDSPIRYDPTFI  
DALVEAYKSLGNSKDCVNYVSGLLNAGGTRLRQTTLLENAMAEARLEQADGLYNDVRMLLS  
EGTEHS

>comp16731\_c0\_seq1; 304 1 1638 LEN=1935; translated

XPPSQKDSIASSVSGIHCTRDSIMGSLRELWSENQQGRLRLKRAKSLATTTPLRLRSFI  
TIIIFALLFLRVEVDATRKSHFGFAPKTRLTWVNGIGYNSHMEKEAPIISQYFGGKKEVF  
YHNPTQMVDEQDTRGYFSDLTQAGQKYLGRITEEVNGLVKHLKEAVRSVEGKRGGTVVH  
IAHSQGALVTWLAQQLTPELMNHIEVICFGGATPVRSTPGTFFRRCVNYYSVNDPLLFV  
NPSAETALRSGFIRYQSNYNTNEMEDEFCEFLAPRVGDIADHMLLGPTYASALEWEGRRF  
ERRYQSYMERIVRHTLLTSMIAIVQTIQLQFIVVCQAFKNLVKWKTFRRSVVRVICALAIV  
AIGSWTVAFKALLARIAAAISGLIAQTAKSSPATTEGSM LGSPAETPLPIDSSNVSSD  
EKISGEKRAASLLRFIRLTPTKGSVLESPPENSAFVDSTTVVTPEEEALGMKXNDFVFAF  
LATGASYGFCTLDEFFARENRRQRSMNTSEVETSTGLEIDLSGILPSKNGMTHDFDTSVF  
MSMIRF

>comp16732\_c0\_seq1; 527 154 1230 LEN=1376; translated

MAPLYIPEENDFFCSDDDSSATSSSTDASSASLSSSSSCFEASQPPQHAHRVRSVSFAAG  
TTVHEGAVMNIEDYSEYEKCECWYQLEEMREIRQDVKDTVAMMNIQSQANLNSTGDRKLM  
TALVDDVTQTIRGLEGKTRAGKRHRREVRLASIAAVFDEQTLQEMDGMVMDPLLIAMAYTE  
HSYPMQVAALERASIYREEANEIYNEDSSLLLRTPPYSTLKDSNAAEHQKNNVVENS LAQ  
DETSVVCDDVVVGPTICVLEIEEADDVVEQDNETTSSGALDDKNLQGS PAIEDSLSLKDN  
QKDDILPEKVENFDNVNNEIRPFNKGPLFRDRFACFLPGATSNRRPALMGALRAVHI

>comp16733\_c0\_seq1; 101 1 163 LEN=640; translated

XQQQHRHPPQVQHPPLVAADNNTGDSAQSSSQQQQDAKSQQTTEADSYAYAA

>comp16735\_c0\_seq1; 662 447 2474 LEN=2890; minus strand; translated

MSRWHQEQEKRYSSPRDLATEANIMVNAKATKRSSSKKTLFFASSSSIHMLPSDGEHVAHA  
GLYKCTFESNVANSEITKNRSGLRGELAPDVAEQQEPHPCGEARKVANGFNDRGRPYAEL  
SLYNLQFHNGFHETTRGAI TATAAPSSYLYANSHIKNRREHPD SHVDSWEILRAKLPATP  
DENAVSQELMFQSVFRTFEVFDWNECNFRCCPYDGSVDDDFAYSTDEENGYAHTHAYV  
RTVPRSSAVDESTGDVFWVSWEGFYANCDPANSNRGEGKLEWTIGVSRLKTEDPYCTTDQ  
FQVMENNFARCTEPVAIAFQSSKGREVVLP HGGFAVLPASKNPKHSRRSFLSLSTLQSPIT  
EERRHTTDLTSHVWGFSEGGIPNGGGLEDHQHLTISGNGTVVDGIFLDANTKDGGLRTR  
HTNPTTGRPDHLCRTIFNIGIGCMPISVTTEQDGIVRVQPEGEEQIVLTKAQVASFCKLQ  
DAEKSKFINYERQTTLVTLGLDVIWSDDPTDGNPSPETIVFGCFGSEGGHGNFGSIVVGKK  
NQQGRPQVQVLNGAFPGAVHFVPELEEFVLPSPSPDESESTLLLSSSLFARVTSKLCCTG  
YSSLFVFI LSIAIFAKRKWKRYRHPPNSYSENGLSPKIFNDSAYFELPRMDSASLRD  
LLTNTDSSASIKTME

>comp16736\_c0\_seq1; 238 76 975 LEN=1103; translated

MAYANDEGIQNKPSESNFSTSSRVFPPLKQRRILTRRNAMKDLRQSLMTGCLVLSAARF  
DNAVALAPTNNPRGSSNSNGLVSRKSVLNTGLAGLAF LATGPGAASAFENKISTKYDD  
RPKRRGPKPKDLGVATRTDIVGEEYKGLKHCGAAPNCFVSTEIQEDDPDHYIPSWKWPEG  
YDSEKAFSELVSTINAYQPGQAGVDGGFKIITSEKNYVYAQFESLKNYIDDFEFALIE  
GFDTKGVQVRSSSRIGYLDG VNAKRLNYIAGDLRAKWDAPGV D YKSHQNYAIQNELV

>comp16738\_c0\_seq1; 451 64 744 LEN=888; translated

MCSTDNTPGTRTSATAKHNKIVERVKADVRNTGKMIKEKSERFARDHEQEIETTKKRLS  
ATKIKIEETKLGAKVKKGVDFALDHKEQIESCKQKLSEARSKVKSTIKKALEPAVPEDE  
NNDGSDRKNASDETHEDDDGKASTETASTETDKSETLQEPDVAMHKTDNDETREDETKDT  
EDTDRDNGDIVAANDDIVDKEETTPDTKAVTEKKKPGVHKQKSWTP



>comp16739\_c0\_seq1; 72 1 446 LEN=517; translated  
EVVLQAGDVLYLPTQWFHYIISLNLNYQCNTSRSGVTPNYFDPIXEVWLLAGRFWCRGKAG  
VRTTLPRVQHGSQGHGTGASVAFRSGSGPEWKRRTALGAAWFCHKEPGGTVQGTTTTTTC  
WDNPKRVVVVVRQRTVISGSGSVNGSGG

>comp16740\_c0\_seq1; 300 1 815 LEN=815; translated  
XTTTTTGMAGSPAPPDPESHQPPTESLLLQQLMQMGFQRQEILDGIRHQTSATGSNGG  
PVTVD SVMVHLVTQREGMEEARMLDEARLVSEDQKQEDRARREASRETALAEATTGEQLL  
KIFPDSWVLGLLVGEEVCSFLLGGQETRRELIEILELEEGKSRKWYGWKLPAGYFQKMGSV  
LLNSELPSARSGHHNNALSKARDTAETKGNSCAAAEESSVITTYLRKETRKLRSGLYELE  
EQCNGQPKIFLDERPKEDLGGGEVVVIDDDDDX

>comp16741\_c0\_seq1; 291 25 339 LEN=898; translated  
MKVKQIFTCLLAIELPILAVAKFQGIVIEDDEKKFSLNLDGDLTIALSDSFGRVVDGAS  
AKNDSTQKGIKRGTKKSKKEKKEKQEKKKQIEIKDGKNAKKK

>comp16742\_c0\_seq1; 492 56 1012 LEN=1178; translated  
MNSETSQGTKEAEKEEARNSGDAIKPASQSTSTIIEKRDDTKMESSSSIVDETEGETKKS  
KNQLKRERKWEKMLEYKRRKKEHQKLNKIAKAKAEGRDIEALKEDMERRRVDGSGWARRN  
ERWKQLFKRISSEKYQVYIDCSFEKSMTSSEINSLANQIRYCYAVNKKAKHPVKVTACSLG  
GETRDLLEKVSQFDQWEHRAFHEKTEKNIVETSEDKTKLVYLTSDSENTLTKLEDGKIYII  
GGIVDRNRLKRAVIDRAENFEIQTAKLPITDYLMSVSTKVLTCNHVFEILLKWRENQGDW  
KKALLDVLPPKKKDAKEKS

>comp16743\_c0\_seq1; 317 169 1062 LEN=1215; translated  
MSELTSSNDTSLGGPPVSGFSFENTLRNQHMMLTGGSENFPAAKKTGTTICGVVYNGGVV  
LGADTRATSGSEVAEKNEKIHLYLTPNMYCCGAGTAADTEMITQLISSQLELLRMNTHSQ  
SRVVTACTLLKRRLFQYQGHISAALVLGGCDINGPSIYQIAPHGSTAKLNYTTMGSGSLA  
AMAI FESSWREEMDEAEAVKLVQRAIGAGIFNDLGGSGSNCDVCVIRTDGTVDYRRNDVTP  
NEIKPLRDQVHHSALLTMQPGVTPTLGETVVTPHPTTSGIGMTVSASSSDTAMEVEA

>comp16744\_c0\_seq1; 411 202 1455 LEN=1533; translated  
MASADGWRKDVLRIFPFVLLQVFSFFLSPSSASSTTNRNTYNVYNYDQTPQFTPDGRL  
LQVEYASSAADLSPPLVVFECLESTTYGTSDNDDEHRDEDANDNSQSYPCVTLIAIPKESN  
SPQHRIVIEETDDGKQERLPPMLSRNLRSYCVAMSGILADSLALLQAGMKAAGQHTLQY  
QMFFGMESLAQVADEQCQSRVFAGGLRYPYGSTLVLCGYDCDDGYRAKSSSELIYQTDPSG  
GILQHYTRPNTYDDKEKQRHHHYESSAATTFGVPPKKKKSLRRKDAADKNGAIKSRVRC  
VVGGSPLQRQLHKRIDQALVKFENNLQNKQNRREPSLAERIAACVAKILIQETTKGDVG  
AKNNDASHAEQHGSSSESSNRTEIVLVSPTLGCHRLDDRQLRAIQELVRDEKSRR

>comp16747\_c0\_seq1; 373 1 679 LEN=829; translated  
XPRPTPRPTPAPVAQAATPPPTRSPTRRPTPRPSPAPVKGSKDGSKGFGGIFGSKGSKGS  
KGFKGFKGSKSKDGSKDGSKSGSKSGSKSGGKGGNYYGGNYYGTGKGSKAGSKSGSKS  
GSKSGSKSGSKSGSYGSKGSKAMWISGSRNTNGSYGPGKPGTGKVFSHNSYVEGSDQKW  
NDQAKETVAAMLTDEGALLGVSSASTVFGFRFLSVVTVIGVTLFASL

>comp16748\_c0\_seq1; 392 212 1102 LEN=1373; translated  
MLRCTVSFLSTAPVAGFRSLDRFRGVDASAFRSPPEPHGRRHSGAVRFFSMRRENSWILLV  
DDEDPIRRAVGQFLLDKGYKVTTCADGRAALQLALSKRKEGIGVPCIIISDIRMPGMDG  
LELLGSRVNAEHSVLSHVPVLLTARANVQDRIAGYDAGADAYLTKPFSPEELVAIVDN  
VIERSEDISIREEELHKTGVIEDLKKDLAEIKDLLLNKGGCGIGNGWVQQTNVFLSKDER  
NVLDLLSRGLITKEIAANTHLSPRRIEQLLTGMFRKTGVKNRKLVRWGVSTGNVE

>comp16749\_c0\_seq1; 403 1 1684 LEN=1762; translated  
XEAVIKLPAYEIIIMKRKTPSANEEDEHDGKMLEEEDLYVEEPVKPEYLELPDELKNIDFQ  
ADGAAAWDKYAPYNPTRQLPITPLGEKPIFSEESPALCFHIHGIDGRARAATIHFPNGGP  
PVPTPRFMPVGTGKTLKGVLPDEIAAMNCPIILANTYHLEIQPGTELIDSVFNGLHNFMG  
GMMPSDPDLGKQSDDMHTMGPNNRRLYNLLTDSGGFQMVSLASLSVVTEKGVVFKSPYTG  
KPMMLRPEDSIRCQNNIGADIIMQLDDVIVSSVSTDDGRFKIATLRTLRRWDRCMQAHRAP  
ERQNLFPIMQGHLDVSKGGLRELCLAGFKYRDLRNISSDDGETKLREAEQKEEQQDQHG  
QDATVHRKRI PGFAIGGLAGGESKEDFWRVVEHACRHLPPDRPRYLMGVGYPLDLVICTA  
LGVDMYDCVYPTRTARFGVALVDRGQMKLRHEFAPGNSIYNSNIPIDANPCQACSRGI  
SRGRLHALLKAGNPIAVQLITQHNVTYMMGLVTRMRKAILEKKFPIFVRKFIIMKHFSGEG  
QKVPEWVNDALTAAGISLEVH

>comp16752\_c0\_seq1; 238 68 772 LEN=972; translated  
MGKKGKLVFKGDKPKKSKSKITKGEHAKTIGAGAAETIIDTEATANYQRKNVAPSIRN  
NTSASAVPSIENGTGHITTSVSGHDTKFEKEIHVGDAILVTISLPDNTTAEEMRIVT  
MRLSNVSLNLSSAFSQNLSEFPQSFVRKPKNLEQERRKERQKQLEANEIEKSAFDIYG

KDNRRGGCKNTVFTFREKTETGSRVVKQHVSSSGSITRGDLLDLRSKKTSDKYC  
>comp16753\_c0\_seq1; 276 64 597 LEN=679; translated  
MNTMNLICIAAILFVTAVGSAQALISPAVTCCEDNNGGKYEIVNGSDGQSGICRKDGVSTEA  
FYFMDQNCPPPTPAPSSTPAAAKYSVYAVNNCDATVTADFVLRASRRLGGNRNRGRVEVE  
EGQCTYVGPNTLDDVVAYTSEGSYISSGNDSCNIGDSNNSDCNLLGIAENACVINLC  
>comp16755\_c0\_seq1; 215 1 441 LEN=742; translated  
LCLTEKSLYISTYFVANKYCLKAMKLTQSLAFFAVVWTGANAFQPATRAAGSLTELAATK  
NPMEKILRNLANNFEPLHGHGSLEDDLDEQWEAQQELKERRRKNIDKEHLKQKYKNPEA  
RKTFDLNVGLTDDNKKKPFWNKKISP  
>comp16756\_c0\_seq1; 85 130 366 LEN=366; translated  
MVSINIRLSVFLWVGLLASASNAENLRRRLGVGFVPPPEPTDPIIDIAPPADPVEPTKPP  
ADPVDPEPESEDPTDPPAP  
>comp16759\_c0\_seq1; 173 108 572 LEN=943; translated  
MHPLVRSLYKEALHVGGRDYPLGLDRVRREWKKAIRNPQNCPCYSIVRREGDGGWERDLG  
ENDAVVSSEPPTLAIPKPMHSKEHPNPD CERELRKAVGKGRYMIREMIGVIQLKKYRSLK  
RRYGNDDNGGIDGLDKAHAGDFEETGPKKPTQNH  
>comp16760\_c0\_seq1; 553 36 842 LEN=904; translated  
MTVSKFALVAALVGGASAFAPANKASVSTALFNGPVLGAGGMADTRDPDELVHEDARKSI  
AAAPSFEEYLKMRDGGDAAAAPAAAAPAAAAPAAAAPAAAAPAAAAPAAAGGTIFATLQTL  
EGPGQVWGADGIAVGKEESDLKGYDNFGLFCERLQSTGVADILNGPGPYTFVAPVDSAIT  
TYEKMFGPFDADACKTHIVNGK IASSAVSTADLSNIGGTPLTYRRAVRKDFVNDAI IGEK  
TFGQYSYDYPVDVETSNGVIHAVGLSMAE  
>comp16761\_c0\_seq1; 598 47 1066 LEN=1161; translated  
MKTAFCLATILASASAFAPASKPAFSTQIAAEDFLEAEPYDQSTVPVNVWKNKAPFTGK  
IVSTKRIVGPQATGETCHII IDHDGDFPYWEGQSWGVIPPGTREKDGKPHSVRLYSIASS  
RYGDDKTGKTGSLCVRATYWCPELKAEDPAKKGICSNFLC DTQPGDEVMTGTPAGKVML  
MPEEDPKTDLIMVATGTGIAPYRGFIRRLFAEDTPAAEAYKQAWLFLGVANS DALLYDD  
EFQAAKKAFFENFRLDYALSREQTNVKGKMYIQDKVEEYADEVFEKLENGAHIYFCGLK  
GMMPGIQDMLKGVAEKKDIDYDEWLKLLKAKQWHVEVY  
>comp16762\_c0\_seq1; 223 1 1457 LEN=1555; minus strand; translated  
SALLQYELHYFHCIVRSRVFLYRTVPYQVRTVPQGYEKASHEKDFEQKPEPCLLNTFRG  
TFGGICALRDGGRMSRVRQSFRASSCIACFPVDAFRCPAILPEAHKKGHKYTRPLWPS  
SRRLQLRRSPKPDPTPEHAGSLEQEPTPPGVLCHGARGDSXASLSAGGRFLPMVSFRAF  
TVARTVGS HREQHGTKRRECLD SPSQMP SRPSCGCLPPEADAXENPPEDPTLRKIVHLN  
HAGASPSQQRVLDVAVCSHLRREQEDGGYAAQNAAGDSGRLEDVYRSVAELVGAEPGCI  
VESATVWTRAFYAMVQRDELERRASPDGTKRVILVSEAEYAANLVAACQWARDHGRWV  
VLALPSSVGPCCGSTGRVLDLALDAML DGT FAYEAGGEDGKDPVRLDPSSIALVCVTHVP  
TNSGIVNPVEDIGAKIRAHNEGRRHTGGAGGYLGSIKYLVDACQSVGQMDVDVRAVRCA  
LVATG  
>comp16763\_c0\_seq1; 175 105 473 LEN=556; translated  
MSAVGKESAKTLYRSILRAHKRYLPREMKGLGDSYVKSEFNMFKKVTNEGQLKQFYTEWN  
RYLDQLLQTARTKQSVSAGSLELSSDHAFGKHL PADVSLTDEQAIQLQLKKEETKRAGLP  
DH  
>comp16764\_c0\_seq1; 265 1 395 LEN=421; translated  
XSSNPKDGSPPPNDAHRNRENEENENETKPRREEPTLPDSPPSPSSSENAAPTVAE  
DESE STTEEIAGAAPATHGNDRPEKRRSLSPRTPPRTDKGRKWRERVS AKKKLKLKL  
QLQQQEPGEGQ  
>comp16765\_c0\_seq1; 255 104 547 LEN=653; translated  
MKSFLSLFLVVAVTLFTTRPTLVVADEVTEKECENPDVAADAPPKVEEDPNCPSREL  
VIR CAGIHL DANKNGKLD RSELQGAIDQLP WYARGILQILGSVDKMMKCDMDGDDA  
ISMDYD MIHNADQCLASCFKRKAFKSSFFPDCE  
>comp16767\_c0\_seq1; 183 81 359 LEN=359; translated  
MKT SIAFLSFAAASVQGTSLRAAANNNGKVL DSEVILKGT VGEPTAEDMEFIGAFV  
AS YNVHWQVGHYMTGSHAVDFKGPDSFLCRHCPD  
>comp16768\_c0\_seq1; 137 1 550 LEN=716; translated  
XTAQPTAQPTPLPTLDPTPQPTLPPIEEAIIITCPDNPCMLFFAENPGESCDPLVAA  
IEV DSWCGKRWD PWCVITYSDCFELTQCDEF SIGEIAEEGKVQREN IKCPTIISDA  
VVVAPIP EIGTGQD TVATIS CPTSFPGSGTSCVGGTNLQCEYLLTDRATDIDI  
PWL CNCANDAFYCS IKN  
>comp16769\_c0\_seq1; 775 1 1950 LEN=2075; translated

SSPSFANNGSPPPGSTAEPVQAQPPGSKRRLLLVLLQGAIHLGCIALYLIPILAPNEHA  
SPTLDESHVMNGEVQRDIHDPNATLTEIFSN DYWGRPMNSPSSHKSWRPLTILSFRYLKG  
PYTDLSTSMQLQTLVHRTLNAIFHAAAGDVVGRLATQLFAADQNAETLDPLWLQLATKI  
LFCLHPTHVEVTANAANRNHILAVFLAVVLCFPGNDGAKGIPHRTTTTPMWLFVLVALVSGY  
LVSETFIFIVPAVMVTMTVAVFPGYQKNAAKGLRPFVLDYLRAMLSIAPRLVFLALSAVS  
YYGGRWYFDTLDIPTGLIRPAESPYYTFTGMKRVRYLYILTVHLGKQWGSFFPKTFGGD  
PIGFSHEYGYDCIPEIKTWGDERLVFGVGFHLVFA MGLSVLLVARNPRQFFGLVAIHWSW  
TLITLFPITGILKVGTFVSDRIVVPSTVAIALWSGRVVQKHLTQVWVKKDSLFGSFRPLQ  
FVFLVWVIAASYMTVHSRALQWMDSISLMNSALVTCPRFAKVHMEVSKIHSGLFPDLDL  
KTARDHLDTAREIDPDLCDLHQQYIFLALREYNNLEIEKELPGAMLCPTASWAEQLWLQ  
FWEQQLASAPQGTPOYAAIASRYQAAFQIIEGIEEQRAEQEAQENER  
>comp16770\_c0\_seq1; 77 1 124 LEN=491; translated  
XDENEDEDEDEDEDEDERKKDMVSRMRASRLTTCPFGLI  
>comp16772\_c0\_seq1; 237 238 830 LEN=830; translated  
MPIATVIAIAVHHSRGRRLHTEYTLKGEAIVEEIVGFSDMLGMTTSSSTAATTVQEDRRA  
AQQDFRDVADQGTGDKVMGYKTLPRCLGDNSECLHGGAERPSCR SWGHFYDTIYNRWLGE  
YSTPDAKPIQFLEIGYFQGGKGF EAFSNFLPTAEKHSMEISCIIEGPRAEKWPWGNFAEK  
HRWYKDLRSSNRLHCGDA  
>comp16774\_c0\_seq1; 324 355 951 LEN=1084; translated  
MAKASEKRTQKKISGTSKSVSSKHQSAAKGGVAVKPKQAIILETI AKLHAIGMEAPSRK  
NVQAFSGNTKTKAGFEKNLQKGGYLYTYPGSTLILSEKSSLSLSSSASSALTNES  
IHEDMKEMLSPKARLIFDALLDGERHDRKVVALELGYDMSKLSGYQKDISKMKT LGFLEY  
PTKTEIRLSDTCFPLGRP  
>comp16775\_c0\_seq1; 123 1 258 LEN=413; translated  
VQSPQFLFSILSIPKETQKMPRSGTNSQGN SYTTPGGSNSNSGSSYHYSNSNGSYYSND  
NGSTYYNNGSGSSTYTSPSGYVSKK  
>comp16776\_c0\_seq1; 243 57 684 LEN=684; minus strand; translated  
MTSQNHGDAERPQSPYVDGDP TKLSIPYLAQICIEVYGD RNDENGGNTPVV FQEMENGD  
CFLAAVFDTPRGE GTEHNSESKTLCVAIRGSNSIEQHILNLSPDFFSMLNTPGLAPSK  
EGGTRSTSRDIGKEGYNKCWIEPARAIYLELAELCLDASSGGGSNWNEAFDQIVLTGHSR  
GGLLAVHAGEFFAGLRDSSTDPSTDSSTDX  
>comp16778\_c0\_seq1; 165 307 733 LEN=733; translated  
MRIGNHHHHHHHLSSTAPGSMVA AVASSPALETVSYDFNRSRSSESTEAVHTHHKTEKA  
KAGASSSPAATPSPTPSAALVSPSVAPCAYADSRGVFVSPKKIPMTPPRDLSSPFRAFP  
APSGLPHQRGLAGAGAAAAAAX  
>comp16780\_c0\_seq1; 665 117 1637 LEN=1637; translated  
MTQDGKRRRSVDANKLDADKQAQNRNSAKKKAKKEKSKKNKKDEHHNDSSGGINNGND  
EVNCKQSSSLMDSIFGAGSNTGSGSVNAATKTKSSSLMDSIFNSDNSTFVANKTSSSTAA  
LFDSTATE TAPTKIYHQFPFQQLPERKTPKTDN NANNEDDDADLIRKTLHNRKIRSEH  
RPLMRKALDFPGVFHNEEADENGFFLLDDENERAKETADAVRDHGLCIRKAIDPTDSS  
TDGGSHPLRDVVLPAAKALQRKLNKALKARNIHSSETFRFREAASRCRGR TDVVDFE  
KDESMIDISRQILRNKKVYPVIKNLLGAASGNDGDSDEDVKLVYAGLIFSYPNSCDQPWH  
QDGTPLFPPELPRNQSSLLQASLPPYALNVFLPLEDEDG SIEKGPTEFLPN SHKWESPDER  
LRMANLSSGDAVEENVGNDDDDDEGSDRSDEDEDEGNSDDEAIAPVLKCGDALIYDYRV  
CHRG TANLFGKFRSMIGSEATSKKKKK  
>comp16782\_c0\_seq1; 296 207 1790 LEN=2095; translated  
MIEASSNLRELFGDSDELDEVEETDGDDNSYSSTSAVACVEISTSEDSRGTNKKLVTK  
DPSPTRRDGNRPNNDYDSVSSHSLCYNEWSKRIGICDDVLT PGECDELIAVHSEAHH  
GYIDHLTVTRISDLVDHAPNYNSSEQTQRHDQOQQQQKQQRQQQEPLHNAVYLALPLLR  
ARYEVWQAVEDCFPEHCLLELPEFTALTAWHKGSFLENHYDSNRSYLEDRFISAVLYLND  
PVGSECGNCNSNDDDDDLHPENYHCTGFEGGDLVFEVPEGTSRLGANIGCQTNVSTPS  
DQTLQKHQITHPEKSTRVVT PRAGRLVCFPSCGRYVHRVEKITRGT RYALTMWFTRRDEA  
MERLQSLFLSQAANLAPQQQPWETPQQAELRRRIFLRPKIPLPKNSLLSETEW RHLI  
AYCWWKGIPLWEILSKSFTTETAMTDADIVEGRVFDN SSSRNPGIAMNSSTRTKLQKSE  
SQLERVVREWRDHYVNP RRNGMASAMARWNADGMLATFVKDDEM KCI  
>comp16783\_c0\_seq1; 355 51 935 LEN=1206; translated  
MSEPDELYTLRAQFWLGHYQMALDEARSIMRRPMSPD LKAEREELVARCHIAMKDYDTV I  
SGDISSADLKALALQAQYTTLAASGDSAQM QSVIQQLQSMLGDGVS PRVQLTAAHVFLQA  
GMKKEALQCVHQGLTLEQSSLCVQIYILLDRLDLAGNALNELRRIDEDSMLTQLASVHIA  
LATGSSMAGDAVHTLNQISEQYGPSPMLLNLMACAQM QGGNYAEAEERKLAQAREEFGADD

ADTLVNLIVASQYQHQPVDYIETLKRQHPHFHLSMGIDTVSGAFAREAIKYRA  
>comp16784\_c0\_seq1; 67 1 565 LEN=1185; translated  
XVGI LTHASEEDPNLSRGAALHMKIQIVGEARCPRQIKSGLFAENGPERQHTDRSIHLDT  
QQQSQPLVERNQEGCFVTHSFKRRIRSRVMSPTYTPQQDDVIELNVGGTRMSASRSTLTS  
VPGSKLALMFGGSLCSLKRDRKGNVFIQDQGFLLFQHMLNRYFRNKNNGTDKYPIKPPDLGP  
DQNFENFI AW  
>comp16785\_c0\_seq1; 429 240 1220 LEN=1316; translated  
MVSFLSLFFLFFIIYHDVVFVTVDAFATMSRAPAPIASISGRTELLWSSPKTTKLEKETSTD  
KTTE LSESESTESGPEKIPVAMDAGIDAMMKEAEKSDESEEEENLMQQIKDSGVAGVISYA  
AWELAFWTISVPVCFIFGYREVTGHWPDFQDKDDL SKLGAEAFVNFARFAVPLRIGLAL  
GTFPWIQENIVDVFFVDEVDNDKAEVIAEAREMKNDETTEALAEESASMNGNGIKKAM  
VAEIEPANDIATEEATEEESKDTKHDT SVEVKVAESNEASSITDEQVILEDEKEEIDS KS  
IAGRFRIRSRIGNLVNRILRRKRPSE  
>comp16786\_c0\_seq1; 277 62 802 LEN=936; translated  
MVHFLPVGFGILLAGILAFVANPRLPTFSFKVLKLYPTLLHDSTPAFSISADIRLHNANF  
ITAEVYAFTFDVYYPDWEERLKNIGQVTDVDFQKQSDPTTSGSATKEATNGKKKDAIWTL  
APRSNFEKVVDDMMVPTNAGMKVFSNLSWDAFQKSGLLQVPLSGVFIKANGKIPLSMSM  
ICNNNVLDAWNMEFQGVSCHLDYVGPWTDLTIESARLRSKLEDTTWRAADFPLEAEES  
AVETIS  
>comp16788\_c0\_seq2; 234 1 393 LEN=393; translated  
EEPEPVVEEEEPESMTADPLADLAQPVEKEEEEEEAEPAAATVEEVARSEPEALLTTSLL  
NSMGPASSDSSDEDAVELSDHSRKSQKPELVVREVTSDSDSDSDSDSDSDSDSDSDS  
DSDSDSDSDSD  
>comp16789\_c0\_seq1; 516 344 1357 LEN=2000; translated  
MHVMMTASEDSSSCDKSSVDTTAKSSRNVRFSLRKKRSYADRNI EPSRVNLSSYNSDFL  
SGLFADVAKANVLKELSIELPSSSSSNPSSTPITEACTPSLSSHLPDSMGSPRPEKKS R  
LSYQASFCRSRASC MNLLAIKNQSNLSNLSPKGINEISKLEKDVTKTKKQDSLAYQLDCL  
EQDSTQE QPHSTGAFALPATVSVSPTNNKKIKKDVAALAFPNLPSTISDSSCESNNTST  
GLTRERCLVLHGPAPEMAAASSSGSKDSFGWFVLDLDDNEENDAEDHHTATT SQETACPSD  
LAFQAPTAPKRANNNVQEEME QAYAADTIDSVLGLDF  
>comp16790\_c0\_seq1; 376 156 557 LEN=1077; translated  
MMNMMMLAQLMKDLQDPEIMAEAQKMMADPKFQEHMKKVTESQGFKTHMTAQKEAMSDPK  
KMKEMEEQMKRLQQGNAQLEQAKALREKAAAQKGD DDKAEDDKKEEATADDDKKEEKTE  
KEDMPDIPNLSLN  
>comp16792\_c0\_seq1; 213 66 575 LEN=602; translated  
MSTIFMTSMKSTPLRRKVGACFRGLKENISNNNNINND SMMDTSSYRPDCRYLSTHGQ  
QSVNRFREVFEEYRKNNYAQTI PPRFKKEISNAMGQMPARQQPSETSTLP IGFQRTVAVE  
QIEKLLQNIGAHGDRVSSDDIETIVFGNGGRDRDPSTKYRYGNKMKIK  
>comp16793\_c0\_seq1; 324 263 1189 LEN=1387; translated  
MFTDRFLAALAVLATASQAAEF SQIAGDLGEVTEIDISPVCKGFSQIPNTYWTITPATDV  
AVFTYPANLVEVSSSGKLSFSFNMSVAETAIDGAGVRIAVPAGQLNNVHVGGG TSAQVL  
DGF EAVSGLHASGASTLTATIT TNGVPTSVQADGASTVTLVSNANVSGGTINGASTV VAK  
TPSYESFTVNGASSLSIDGGIGSGTLNGASTVTATGDVAAGSLTLNGASTANLATCNSV  
TSNGGSSCNSGQSVSVEISELPETATGTGT CVRDILGSIFGGSAGTTIGVNKVQMFAPM  
FCALLLSLW  
>comp16794\_c0\_seq1; 387 15 722 LEN=1149; translated  
MKTVSILALAAPVAFTSQNVATRQSTQMSETKADLETLAGELNPLVKFWDPLNLADAGL  
YGMDAEESIRFLREAEIKHGRVMAAAFVGHVQSNVVPWKLT TDGVSYPSTDLSPPAQW  
DALPLASKLQIIGFVGVLEWFWYVNKTDKIGEYPSFKGKLPHVPFDLFDPPFGT SKNKSE  
EAKARGLKAEINNGRLAMIGIFGFVTAETVEGSVPTLTSIVKH YDGNYPWFESL  
>comp16795\_c0\_seq1; 118 1 1044 LEN=1149; translated  
HEHEHEHDTGHRHGTDDLIVPLFVEFPNPRSRSNVGGPDPFYRCMPSNPTKWVLCVET YR  
RVFGALTGVLPDFCTGDILRTGNWWKGEAEIGRWDRRSEKPGARPASCQAEKPTGT PRNR  
VSASLGERSDRGDAVDGEESESENE SVDYVLPVNLVAGGRLGQFSCDGACSLGRGRELY  
RFRNWLRNIGATAGSSSSSSTGTRAGYVVFSLSKSSRPDKVYGFEEIEGLARLRYGE  
NTVKVLD MSTLSLPEQVALMEETA VLVTNHGA VTVSSIFLTRGASALVFWHRVKGYNRF D  
HTWFESAGYFRTAWIGERERVYTNRTMSVLDL YHKT LAQWSRSGRY  
>comp16796\_c0\_seq1; 713 112 2007 LEN=2227; translated  
MGTANDEETDADRKRLIYALFLSDLVYRFGELRKVIEEWGLDAADLREQYLQHVDDAGKK  
KRFFMWGKDGKESHSIEEVMSGQVGMKSVRVTPKIPKTI FDKMMKDLKSTTLDW

SDELTGQISDESYEKIWFQKFDKDHNRQLVHAILERELSDQNQKNEIYIVFRGSVTASD  
WIQNIQAPFVEIKIRCDKHVRKKAYLVEQSSFFKIEINSDLARKLKKALNQDDQMDKQS  
KAKGYLNKEIPILVHQGFLNYLFRKPNDKADDCKYESIKNDAKILLEDKEFNPRKTEKM  
VVAGHSLGGALATLASFFLACDKDIEDANANEKAVIQCITFAAPMVGNIGFQRAFNVLLS  
NEIEEQSDTIKDEKSNLVEKNDGLGNSFEHFRI TNHRDLFPLAPPLTRYRHAPGEHAHFF  
KPSPWLSSCNIKFSNEKPHKWLFEFCGFSKVKVDGYTPIVLIPNSLLSGLFATTLPLFLCC  
LLTTLPIILLIVPYLGLKILIRCFWTLIPFLDAHAFKELPIPECLVSAGEFFKISLLFLG  
WLAILFFAGKPNTDWNATLVFISTPILAACSLRHFGREWFDAIAEHGDAWFLAGIFFFQ  
FLMLLGNKSYEVCTAKTHALTDYLESFLQVK

>comp16797\_c0\_seq1; 480 41 1345 LEN=1516; translated  
MGKGGDATQARPAARVFKGQQTDAEGNWKSSYNPLDKNAPELPTKGQIKASIPAHCFERS  
YIWGMAYLIRDLIIASAFVYATSKCLSTDLDIRDPVAVLTWTFGWSFYAFWMTIMTGP  
WVVAHECGHGAFSPSQTWNDIVGFVVHQFLLVPYFAWQYTHAKHRRNTNHLTDGESHVPS  
TASENGLGPNNERESFYAVLHEAIGDGAAAFQVWTHLAIGWPLYLLGLASTGKMDHKGQ  
PLAGRIADHFRTDSPMFPKISFKIGMSTSFIIQLAALCYMMLPSQIGPMPVILWYWNP  
YFFVNAWLVLTYLWQHNDPSVPHYGTGEWTWVRGALSTIDRPYGFIDFFHHRIGSTHVAH  
HLFHEMPHYNALEATHALKAYLEPMGLYNYDPTPWYKAMWRVVGKTCHYVQDDTGIQYYKS  
MEDVPLTKDAKTK

>comp16799\_c0\_seq1; 599 87 1061 LEN=1327; translated  
MARSLLLLAAATSSSATAAGAYSCGWIQGNRRQRVAKGSTGRLASLFSSSADGPATGPDT  
VPDIFVPGACIDFATVHDVDWGEMDPFNEIPFDDFEEMYIQGKARGDASLSKPGCDASYD  
SVMTDWDESVPTLNHLSLVGRVGSPPPEARYFDNPLGDGNNKPNVVVTMSLALPRYSSW  
EREQEGVSGFQEEETEFNLEVWGYLAEWTLKNVQKGSRIGVVGAIIDTFYRNKNTDMLST  
NPKLLVQDLIDILESKMEADTRRNKNGNNGNYNNGGSGNYNNNYANEQQGYNERGPSFF  
TDDDDDDVYDPSGGGSAGGFFDPM

>comp16800\_c0\_seq1; 543 299 1600 LEN=1600; translated  
MMRRRLSSSHLSINNKSNTNTSDGYSSDDAQAEATAAPPSTPSGILLNTSYVWVRTDVV  
RTILDNSGDLPHGWKQKPPSRKRGRNEGPRSWGWARARVETPSVAAAATLPSRSTHSR  
FGGNNANSRSRYQTQTDGSGTTRSVRITLAIEDDEYAPFGMNGKTVSLSYDSNTTEIVCN  
ANSWWNHETVGGFGGNDDDDCDSSVVEPPRDLTSLTHLHEPAVVYCLQKRYEQDSIYTY  
TGKILLALNPFRLDNVYGEDIMELYWQRDELQQRGGSNPNDNAGPPPHAYAIAQDAYRS  
LLHEGDDQSILVSGESGSKTVTKIIMAYLASQSQRNALEQNGSDNGNSHYNDDDSDN  
SDSREGIESQILQSNPILESFGNARTVRNDNSSRFKFIELLPSTGQLVSASIQTYLL  
EKVRLISQAYGERN

>comp16801\_c0\_seq1; 212 456 1238 LEN=2462; minus strand; translated  
MVGFAAIASDASGAIISDQYPPFFCSSWTVPLLGFAYVVLGGVLPRIAETFAELLSNQNP  
NQRPPLETTAKASIPYSSSRELRTAILAVTSTALI IKLSEVLETHPGIFDNLNVAHGH  
PEAASLCVMIAAAVLQWVLLDGSITALLVATVTAVGGPISELPFVGHGVWTYLEGAADYL  
PLQNFVDSVATTASDDSSLLLQLLRVVFGTSSYRELALSSITGPCYFAVAMDAIALGRW  
FDTQSVAPASLPAPFENDTR

>comp16803\_c0\_seq1; 521 52 840 LEN=970; translated  
MKFSLTLAATVATSSAFAPAATTRSTTALNVWGDKDYLIAPSILSADFARLGEEDNVL  
EAGADVHFVDMNDNHYVPLNTIGPMVCKALRDHGVTAPIDVHLMVSPVDESINEFISAGA  
SYITFHPEATSHVDRSLQLIKNGGCKAGLVFNPATSLDAAKYVMDKLDIILLMSVNPFGF  
GQAFIPAVLDKAREARKLIDNNDLCRLEIDGGVKVDNIKEVAEAGVDMMVAGSAILKEP  
RTVEAYKETIDAMREQLAAAEK

>comp16805\_c0\_seq1; 210 1 855 LEN=1170; translated  
NNNNNGSFPVAPEATSTGAQWPVPGARNDGDDEIIDITSPIRNSNQWNRNEASFRPR  
NAAVTRSSFATGLARYPVAGDATSRHGMRTYEQRRSQDPVRHRSVVIINDNGNRVVRVTS  
GNSSIRVSRREHNANTAGTHIPLTSDTAQTRTRALHSLDDWQQTENSINSVSSIRGLDR  
HRHQEQNEVLYQLLSRNQRAAAGSNHIDLNASYEELLHRFGDGTENLGAQSEIRRLPV  
HVVGDVPLPEDARQCLICLEDFEKEMRTILPCLHGFHQNCCHKW

>comp16806\_c0\_seq1; 448 93 725 LEN=993; translated  
MNFTSFLGKIKDQAEFEIEQNPEQVESLKHQAVGFVKTVDNEAEKEKESGKPKQTKADE  
TKAQILGVLPKLDDEFESYNAPPQEEETKPPGKPSYLI GKPSNDQGE EAPAKPAPAKP  
SYLIGPKPKDDNKEEEVEEAAPP SKPAPGKPSYLI GKPKKDEEEEPAE AAPPKPSKPA  
HGKPSYLIKKKKDPAEEEEAAAYNEAVQGSE

>comp16807\_c0\_seq1; 670 58 1149 LEN=1245; translated  
MKFVIAASLLASASAFSLGPAANTQGFSSALFAEEGGEIKPLRIGTRGSPLAMAQAFET  
RRRLQENFPEMNEDGAIEICVMKTQGDMLDKSLMELGGKGLFTKELDVALLGDEVVICV

HSMKDVPTWLPEGTVLP CNFPREDTNDAFITKDNVYKSIADLPDGSVIGTASLRRQAQIL  
SQNP TLKCVNFRGNVQTRLRKLN DGVDATLLAIAGLKRMDMDKYATAVLDWDEMLPAVA  
QGAIGVQCREGDERALQYINKLN DMDTHVCVNCERAFLEALDGNCKTPIAGQARIIDG EI  
KFRGLIAMPDGSQKFSV ESSGAIEDAVKIGKEAGEK LKADAGDKFFEMMVEMSPQQVLGQ  
ITK

>comp16808\_c0\_seq1; 231 94 1215 LEN=1621; translated  
MPQHRRRSMGLRASQQHPGGSND AVSIGSPIPTRSRSAERSSSALQSGGSWDLADGITYS  
KSN ESEKSGK LSTGSASHLQRSNSDPFDDAGDEIEEASGRDDKAGEELSERVKALPTLYR  
FPCTETR NQNCWSETPNSMFSVRGPGYMN GDKTKVPSKKYILQARGCDLFLTNDH SKSSP  
TILKAGLGGNLRKKPTYVFRFLFPWGVLIQYYEVP AKFVPMKMDMTKQEKRELSIEGFT  
KAELALARW MASDDAEFKNERLKLIAIVPEGPFLVRNLVTGK PALIGKRLDVS YKYIPQQ  
NQSLHCLQICDLDISSGTAIAKKT VNVTRRYLSSLKAVDIGFVIEGKTPAELPEEMMGST  
RLHQVDPTQAPT V

>comp16809\_c0\_seq1; 276 61 750 LEN=785; translated  
MARFSFFAIMALAMASVTNGFAPVSAPSNAV TGSRFSTELGVAIDTSDIKNGMTI ELDGE  
PWKVLGFSIMKQARGAAKTTIKFKNL IKGNTIENTYRSGEKFETALIEKSDHQYTYADGD  
LFYFMNSETFEEVPVSAKTVD DQEDWLEEGMEVSLVFFKGNVIEVVVPSTGVYEIVETEP  
TIKNTAQGH TKPALLSCGATVTIPGYLEQGEMIKVDTGKRAF LERANK

>comp16810\_c0\_seq1; 130 1 384 LEN=828; translated  
KKKPRAMHRR LLETQAKELYDIVLSASDESKIKQGFDRGFTTWSFLT VHLDPVDAKSFLF  
VLAFVYTGK VPRRTDEVLARNILREADRF GCKTLEFYAESTLVEKFLAPPVAAG LLLLLLAD  
SHSCALL

>comp16811\_c0\_seq1; 222 88 369 LEN=580; translated  
MAHRVSGNRAVVA AVGGTVGAALIGAIYV PFAVADRDLRGMHEEATPPTSAMLAQEIKKL  
QREGILRGDD DHSNVNIVSNSTKAPGSMWKNMK

>comp16813\_c0\_seq1; 193 184 513 LEN=588; translated  
MAKFSFLLSALVA CLVALSATAFAPAHKTCARPITSLDVKVKIN VGDGEP IESALRRFKR  
AVSNSGHMMELRH KRYFENSQEKKKR KIKEGRLRKKFERMQRKRMAKRT

>comp16814\_c0\_seq1; 204 1 198 LEN=223; translated  
DDDDDDDDYDDEEESH RVARSLEDDHDASDDVEHSDPPP KRLK LSEEQNDGND SKPAAA  
STQNS

>comp16815\_c0\_seq1; 149 15 245 LEN=506; translated  
MDTEQLKPI PCKVKCLKELSPANQV VLRGYIATLRAELKDKDDEIRKFQ QNGDPEAKK  
AKCGEPASSCKKGCCD

>comp16816\_c0\_seq1; 235 109 508 LEN=508; translated  
MACFRKARVTIPKLSPTHTRAKIIRFCPTGLPPPDP SPTAKAPSVYLECTDALFVLE CSP  
DLVTEGFREETEDGR DANPLMIVESHDEGDFRFLHGESSGDSE GTPPITIRLDEWYDVGO  
TIGLIDDGDDDDDX

>comp16817\_c0\_seq1; 506 82 1221 LEN=1545; translated  
MISSIPPTNPGFETAKAGCNALVTGSSGFAGCRLVEMLLERGAKT VIAFDIAVPNAVQQE  
RFKAIQKKTGGKIIILSQTEGDLCSDDAVDAAFK KVPKLDIVFHIGALVGP FHKKELYWE  
VNHRGTLRIIEGCKKYNVSKLVYSSSPSTRFRGGDVEGLSEDDMPIPDQFVALYAETKAA  
GEKAVEKACSDSLTISVAPHQLYGEYDSLFLPKLLEAAGSGNLRVFGKGENKISLCHID  
NYSHGLLCGADALYKN SPALAKFYVITDDEPQYFWKILNQAVIAMGFADLFSKFHLPVWL  
LYSVAYICDFVSFLTGKQFKLKPFTVKMLIIHRYFNIKNAKRDLLYKPLISFEKGWPETI  
EWFKINWLPEYQKVGTKKL

>comp16820\_c0\_seq1; 317 1 663 LEN=734; translated  
ETFRNETFAKISFIESSEATRGLWVAHGILMGLAWGILAPLAIGAAYLKKNLSVLSQDA  
HWLKVHFYLGVLVALFTFIFILAI VATKDDDLPHFKEDIHHELGLAIFILVLFQGLAG  
YIRPSPVPAAPKSTDDAE ESSQVAGKALYTRRVWEYTHRMLGIVLLGISW WNCQSGIVL  
QAEKYDQDDEQFMLKVFWGLSGAIAGSIFVGVVLR LSTD

>comp16821\_c0\_seq1; 88 1 184 LEN=571; translated  
XGGMPPGMGGMPGMGGGMP SMQQMMQAMAQGGGGMGNGGQMPDMATMMKMAQSMGMGQAPN  
R

>comp16822\_c0\_seq1; 104 1 1041 LEN=1162; translated  
XEEMP DGARTAE PAGENEA IHGDNGLDGS SLARVEGTSVCNGLPSADTNFTA AAVRTVQG  
VLSHLSLGS PKSPAGAEGWKSEADNKEFLRNYFYCARAEDGNHAKDAH SKRADAFEAGFD  
SSDNLGERLACTVPCNGRES PCYMGMDTICGSLVDLLPNQH DGGVDAPRAAGG PSARQ  
APRGASSRAARADRSSSIAAGQAAPGPAPRTPGGTTTWLGVVRRVASERLHIRFPADAE  
GGSEAPQPTK PQASFTXALPQPQGG LGGADPEPVPVVRGRGSGRRMQRPQRPNQTTG

IRTLRGQVPSFGTAIARAVGPDETRRDDWFAACRGATRICRAGALWG  
>comp16823\_c0\_seq1; 79 1 416 LEN=613; translated  
PLSAVDPTKRSIGDITYQIRRNNKEFWNRTFGXMPPLKPGQKYPTPTPGFGDRVVFYESLLK  
QRQTSEMAQDWCLNYGILSYKKAACLHAIIVTERKRRKQRMGVTGTSASKKSRSSSSPPPPKK  
KRVKKEGVASPVSAHL  
>comp16824\_c0\_seq1; 227 582 1397 LEN=1507; translated  
MTRCCLDPRSLKTEKKQKYTEHTNDKELDIEPFSSQLCDEYRDGLPEETRRRIHMNHL  
RNITDRLLREQLALSTCEDHSYPNEIKFCNKGRSRSWTVQSRSQHDSKDGRESIQTLPEP  
VESSIAKSVDKQSDSITENATLCTAFELLSTISCGNMCDRKKSMKTTTPPKKNPPKKY  
DDDLKVVGPLIPREISFENRGAFRNGMPREELVIKAKRKKFLKLLDRSGSIDRSTKVVK  
VRVYVDPKRTGGNNSVGNSTVTWPTVRNEF  
>comp16825\_c0\_seq1; 185 149 482 LEN=482; translated  
MSLQGTVKFFSQKGFGITPDSGTDDVVFVHYTHINKEGYKTLNDGESVTFDKTFDDAKQK  
WSASNVTGAGDGVVRPRHNHQGGRGGAYAYGGGRGGAVYQGGSPYNAGGGHX  
>comp16826\_c0\_seq1; 103 340 526 LEN=526; translated  
MEGLPRDHTPADTGFDPSSAPGGASTDPLDPAPPRQDPAGAPPSSPAGEERDESSNSSN  
SSX  
>comp16827\_c0\_seq1; 331 43 675 LEN=1550; translated  
MTKSSMLLAAAVLAGTAGAFAPVSTSRASTKLNEEFCRGYVGGEGPEPIPFAGIQQTSAN  
WDPLDFCGRSPEWVPWYREAELKHGRAAMLATVGFVPIPEFVRIPGEQFSFDSIPNVIDAH  
DALANTSMIQIFGWISFVEACTFPALANMNEYDRAPGDYGFDPGLGLKQDPEKLLKEYQLA  
ELKNGRLAMISIGGMVTGAAITGHGFYLP  
>comp16828\_c0\_seq1; 223 192 1091 LEN=1281; translated  
MVFSTPFRTDCLAGKVALVTGGGSGICFELTKQLLAHGAKGAVICGRRQQFLERSSSILE  
RETGKICKWKVCDVRDPKACEDAVKYALNEFSRLDILVNGAAGNFLAEAKTLKPKGFATV  
MSIDALGTFNMCSAAFPALAKAAKDKRTNNDALVVNISATLQSPATHWQAHASAAKSAVD  
SLTRSLGLEWGEYNVRVVGIIAPGPIKDTPTGTTKLSPGMSGEEVNDLIGNGIPLGRMGSA  
EIGHAAVYLATAKYVTGETLIVDGGEWLYKPPMVPKDLVSTLSRKVEKRSRAQAPKSRL  
>comp16830\_c0\_seq1; 207 564 1157 LEN=1484; translated  
MEAFFETFYNSFTSSADENSKFDEPRQPLYREIELIKVTAPRDDLNVFSEELSRIKHSIG  
VEISIVIPSQNKQDTELDRKRTKEEWDFLDAIFSDTIPFLHDFLTYGSPEAEFFQIKGPK  
GSLAVFNDVCATMIYARELQCKLEITDRRKLYGPKYLRKTLKNDIFGCPNSEPDLLDAMF  
TDDFSKVSPALHGMLVA  
>comp16831\_c0\_seq1; 313 125 952 LEN=1295; translated  
MRRLRTGCLLWAAVVAARVAVPGAAPVCGVAFVAALAAPTVYRYFGYGSNVIPSTMKA  
LRQIEVREVTAAVLPGYELRFESAARVPLPDPAGDRGERSSDKASENDDPNRGATGPA  
VHGLLYTLTEDEFAMVGSTEGVPPFGYRWQSCFVYPYRNGKRAQDAVIDPGVEPIRAYT  
LVESRVPASGRQEPQRTQORRSISNDGRPPSASYLGLIREGARLWKFDRTYQDELATVSV  
AKSRNVLPDGEWEPALAEKATGTRKTYMIDGY  
>comp16832\_c0\_seq1; 517 235 1632 LEN=1745; translated  
MAPDADRRLRQRQTKVLSDKSDADSTEPVLRISTLKSIGETEIVIDGGIYDIKDFDHPGGE  
SIQLFGGNDVTVQYKMIHPYHTTKHLEKMKRVGTVPDYSSEYIWDTPFEREIKKEVFKIV  
RRGREGFTWGYFARAFFYIGLFFALQYYWVTTPTTYALAIVYGVSQALIGLNVQHDANHG  
AASKKAWVNDLLGLGADFIGGSKWLWMEQHWTHHSFTNHHEMDPDSYGAEPMLLWNDYPP  
GHEKRRFVHKFQAFYLLFVLAGYWASAVFNTQILDLLKQAGAKEVGINMENPYIRKSRKYA  
IGLRILYILTNCVAPFYTVGGFMAVFGHILVMGAASSLTLATLTFALSHNFVKVDRDPTY  
DTRHGGEGTCWFKSQVETSSTYGGFISGALTGGLNFQVEHHLFPRMSSAWYPIAPKVRE  
VCKKHGVQYAYYPWVWQNLVSTIKYIHQAGNASNWAHGNPYTGSQ  
>comp16834\_c0\_seq1; 144 36 236 LEN=414; translated  
MNTNAILTQILVSFCLILAVAGHLKGAERGETERTLRGSMGGMGGMGGMGGMGGMG  
GMGKRN  
>comp16836\_c0\_seq1; 214 176 1241 LEN=2006; translated  
MSDDSIVTSGNSVYSFALAMTLIAVVIEAVGFGFLRAIENRKKQEINIYPIKSCGPMSVK  
ASRVTDTFGSYDRFAQVSDSKGHYLTPRDKANARLFHVNPSIVYEGSSIHLDLTCRSSGL  
PSFRIEHLNDAIENSATREATPIVGPVVLQDLGNEVAMWLSKATQIRDCRLTAVGPEYN  
RIVEMNPNQGEVPPIKDIGEEHQNIPIVSLADEAPFLLTTSASLEDLNSRLKARGKPEVD  
MQRFRPNIVVEGTLPEEEDSWKLRIGCVFQVWQRCGRCTMTTIDRMTLERGPEPLATL  
STFRERKNGQRNFGMHMIPVSKTMPNSMVEVGQKIEVLEYDAKRLEEWRRFFSK  
>comp16837\_c0\_seq1; 193 167 937 LEN=1211; translated  
MMILPLAYLQVTALAMSSNVLPALGLVLSLTASPSTTIPVATTSEVTQTILSSESHTTT

IRPQTVENVPVLEILKVYGKLAGPNCYGKKAPPGSSCQIRLRDLEQAFSPLETDGSNANT  
AENPSSVISREEFASKLERMEFQWPLKPYGINEKSLTKTAIMNKGAETRVFMEELESREM  
YDPRNPAGPLPTSLRPALNRELEREGIRDARAIDLAYEALIGSGESKGMRLAEQTEYIDY  
YDFLKRIGPNSITWPK

>comp16839\_c0\_seq1; 216 1 1268 LEN=2098; translated  
XQTSTDHLNYPFGTEHYIELKQSSDKCEKQENKHNTTMQSIDSLSASSAGIYSLTTPRNP  
SIHYLTESSASIPAHAFERERIANVVPFTKLESVAQSKSSDRGEGESEKSPIYSLSTIVS  
PDNSDISKGGVAIPFPYKHLHIMLEAMEAEAERGLPEGKSIVSWMPHGRAFKVHKPARFVQ  
EILAHFFSQTKYASFQRQLNLYGFSRITNPGPKGAVHHECFVRHKRDLVQGMVRKKVKG  
TKFRRVVPEDQPDFYKITSAEELTDDTNDVTATTSDTKIERTEVASVDNGDKHRITPS  
AEPKIDLDTNDFERHHHLNYDHLRFLQDSSLSILQAMPQTVDKTQYAVLRNAVNAVEEAL  
EKCNEENAAGLSNDSQRVDTSSLQQAVAHWPLRLRLQQSNNVSVSPSTSFLYGSSSLSS  
LGW

>comp16840\_c0\_seq1; 243 68 901 LEN=999; translated  
MTRSRDIRPTIATTVALIVGSGALWYRSNRSKPEADPDSNDGSNDKDKDTDELDSLVLPC  
IRNRRSVFPSSYLKDPPLDDAIVRSLLEAARWGPFGHNNYKGC IHPARFVVLGRKAAVE  
MQEMTLAYYDRNWRETGWGCSSSASGEDLREEDYREWRETHAEITGRWAPCSHMIAIVC  
RRQSGPKRLPEWEEAAAATAQNMYLQSTRFPELACYWSSWHAAARDSAEMKDFLGMGP  
EDRCMGFFVVAQRDPLRCSKTDRRRRDASVLEVEWRP

>comp16841\_c0\_seq1; 315 36 923 LEN=1086; translated  
MTAISASTRGRDNCSEDVYGNLRLEVSKMTIIDGDNHFFQHPKQQRKSRRQDSLPPVPQ  
QRSIKKTSPARRSFLQTAWRPESEFRLLTPVPIIEDSEQQESSEPSLFYVPVQSETI  
QAEVSNTKMNYPRGRKRQRPFQSRLAPPPLLPSSFELDDTANSNPYKRHVAIHSPIPGIGN  
SLNLDFVAKIKSSKSHFNERSKMIPSCLEERRSASSSSSYFTPASSSVLPREMDTIKIF  
FPIPDNALDVIEETPGDREQDHNSISIGRMALKMRRRYQNNNDNPRNIFEPTDELTA

>comp16842\_c0\_seq1; 510 1 2438 LEN=2500; minus strand; translated  
XFVFRLIHIIPFCCFFIALRSILLYDLGCLSIGKSKDELVCSEKENSALCQLSGLIEADS  
EGAELENTLNNGAFTIFAPNNEAALDLQIDVSSTEAILNVLRRHHAVPDVVLSASDLVCD  
ERLAMANGGFTRCEGDAVFQAGEGNTGPLPQIVEADLAECTGVVHVVDKIIILPEQCXI  
RVVYTALICFDFCFXSLSAAPPFEVPSRRMVHIVLLEIHLFAYVPCFFGPLFLDTNPTAC  
FGPPDDIACSTPEFSQFCGWIEAAGLEAALDGSNNELFSSLTVFAPTNAVAIENYDLLGF  
SDSMFNNETDAGAIRDILLFHTIAGSVIESSAIDCSNSSLSTTANGGSAEISCALDGF  
VVTGDANANTTAAEAVVRIITPDVAACNGILHGIDGVVPSLPGTISPPGLDGPDPVLPD  
DEDCQSFGTNETIIFFMGXGFRLFHAVRSETLKSSLFLTNDAAADCLPVLIVSSXFFSYT  
GDAVCSRADLKDFCRLVGLSRNDPEGVELLNALDTTAAATVFAPANAATVFSPPNEGLFAY  
TSEGSFDLTNPGDVTKILRNHVVLGTLKLLLEDLVCDQTEMSNNSTTTTECGMNQAGTEV  
VKRFQVGDGNSPGNPEVIDYNLVTCTGVVHILNGASYHCESYIVAPIECNAGHALASKRM  
FLFIGSILLNPFSSFIIVPSVVTCTANPTRSFSEATATPTSSITVEMSVGATPGDTPDGGTD  
GASAGATPGVSGEVSSNSVDVTGGASADTSASANGTPGPSTDASASSNGTPGLPADGTP  
GASADASASSNDTPGVSAADTPDASSGVPPPWA

>comp16844\_c0\_seq1; 281 58 579 LEN=636; translated  
MATAISMIAEQVLNTCCGDKLPDVKPTKFNNTDPHFKKKFLRKDMKFELCEWKKLPPNA  
KTACKELGYDEEKWDNGEEVEVSWTHWDLTDKQKKAWEILGWDEKAWEEQYQWTEWDL  
PHLQKKAQVAGYTEESWQEWTPPEGLDKWDDLDKREAMCVMGWTKAKWDE

>comp16849\_c0\_seq1; 161 472 747 LEN=747; translated  
MSIMTLHISFCKQILLLAVVWMLASTDADRPKLRRLRRDQEQVFVVDGLSNGENGRPSS  
SSFLYEFGDSSAASRALKSAKKSGKSHKSGK

>comp16850\_c0\_seq1; 97 1 561 LEN=1017; translated  
XPTPVPTPAPTLPTVPPTAVPTPGPTPVPTPLPTSAPVSDTESPTFFPTTFETAFCEDD  
PSYRFKNQRKKMCSKKWQRFANPGRPSQRKRKLRKLCCKNGGESVSINIAALPALKPI  
WGHVPPRRRTSNVVRALAAMDPSRATDMQTLAKLRIHLIVLEGDDSVFPNDGDPSPTRL  
LIIFVIW

>comp16852\_c0\_seq1; 219 77 436 LEN=545; translated  
MSTFKKEAGAAPDDAVVHRIRITLTSRNVNLEKVCADLKKASLDKLLVSGPVRMPTKK  
LRITTRKAPSGEGTNTWDRFEMRIHKRLIDLHAPSDVVKQVTSIPIEPGVEVDVTINDR

>comp16854\_c0\_seq1; 215 249 950 LEN=1150; translated  
MAFIPFTKVHANDCARHSHTLLQAIIEASFGMGCWFEPAEELLKVDGIVDTVSGYTGNKK  
FDEDPKTIPTSYESVCYGRDWVEGVRVYDTDKISYAEILLDVFFEIQKPQPGSRQYSSVI  
FPHNDQLEIAQNWKETSRRERDSGFKNDWTSIDFPRTKFYAAEGYHQRYWQKQRPFAF  
ILAMLGVTTGFADRLYDPSLQETVKTTFANGAVVAAGLAI TAERFLDSKVLELD



>comp16855\_c0\_seq1; 241 88 492 LEN=840; translated  
MMLSRSLILFVSLISFADAFVVRSSSRPQMMTLNAKSDAESVRKKEFVAIMAEELGYTKT  
DAEAAALNCVIDTIAENLADGKKTVPFGFTFEPRRSARVGRNPKTGEKIEIKASVGAGF  
SAAKGLKDRNLGRD

>comp16856\_c0\_seq1; 186 1 882 LEN=1179; translated  
XFLNLGDRANTQEHKHKHKGKDKDKLGSEHVQAARSTEQHSTAQDSTERRIGATRADGRP  
DRQPSARTTDMTPGSRSGGPEWLRSKRCPCQPCDRSGGQSGGALLAVAALSAGYAGYALHR  
SVREHGWDGALRYLWEGDPYDPVLRRAAVDRLEDAELQLRATHAIGDKLSGLEESLDAATA  
SSASHDPSFTAGLWNTVWMDHPSNGGWGTGRDRYALGVERTLAGISDKLKDIAAAVDAVV  
VAPPECAGASVDSVLGRRVKQRKKALSRAIVSEMERCDALLASYQVLRERTTE

>comp16858\_c0\_seq1; 348 222 1589 LEN=2239; translated  
MSSLPLSSASLSLPAIMVCVVAVAVSNTILRRIAMVPMENYPLFLTICQTFVYVTVYGMF  
LACRIDNRERDRGSGSGPRHRPVTREMLRIRKLPFLWIGLCDSLGDLGNAAGKLPGY  
QPPLLAKLNIVFTALFSSALLGEKYRCCQILSMGVVICGSFVTLVPLLRDALLVRTEETE  
GASSNGGTDNHAPGNGDSLVLFFYVFVYVSSVAPTALGFVLKEKIFREYEASFDLDFV  
NTYTAIGLLCQAVFFVPLAALSGVPYSQISRYMADGYRCFTNDAFGDNHTAAGAGAAS  
TSGDFEGDPSQPTPSCYGSPLAPILYLAVNILYNICFLVSIKYGGTLLTFITNTVTFPLS  
TLLFTCGIHWPLLGPPARLNGWILAGLVVEFTGILWYSEKTKPASSPPGFKNGTPEAHS  
LVAHHHGTENPSLSGKTNRGENNGASSNYGSIERG

>comp16860\_c0\_seq1; 155 557 691 LEN=691; translated  
MSGDDEPEWDS DARSESSGGEESFDDEGLDEGTEGSDAGTE

>comp16862\_c0\_seq1; 221 190 1482 LEN=1695; translated  
MNQKSSESSPAPPASASWLQRALRPVCLFLLSLQPGPWPRGSGLASGYVAPPMHASRP  
LSASVPLRGSPGAGPLGGRHGRKSDVFRRFESVSRPNGSNPASERSSPSEKLRHRLSVLW  
RFTRPHTIIGSALAI PALHLLAAPT YGTALTARSLSSMLYAMVPSLLMNL YITGLNQVTD  
VEIDKINKPDLPIASGDL SVKDARLLVVGSLVLSLALGASVPALATEGLGVALGVS AVLG  
TVYSLPPFRFKRFP LLA AFCIVAVRGAVINAGFFAHAAHAAAYGSGRGSVLGCLAGDLRC  
GLSSLYFAVFGVLVIALMKDVPDVEGDALSNI RTASVRLGPSAVYQAMHRLLTGLFWGVGL  
AFFRGALAAPASAAVRSGRALVGAAALLAGASVRREASPVDPHNPREVYGFYMHLLWKL F Y  
LSYLF L P FAR

>comp16865\_c0\_seq1; 584 153 2051 LEN=2100; translated  
MATRGRSATPGRRYGDIIGSIFSNSGDEDDTKDSCGSEAKRRFRERRRKS SSGTCLNRNS  
TPERRQNPSVPRPPSGRPPTPDRNRSRTPDYRHARSQSPSHAQNGILSSQMDPFENKKGK  
ISIRALSKSPSRRRVSELDTIGTISYVTNPNYETREGTEDIENSFFESRQOKSDQISSKEN  
ETEKKNVSASTTEPLVVTK EEDTKTTVFS S NDS AQMKK I IQAQDEQLHFYESRLRDQTN  
HIEQIRFELQ QSKQNEKKLQLELEFHDLRYSMYDDYRRMMDRRRLDGRNDDEGDDLWDS  
ASSNSSKNGVAMSKLDRLERLYEKSQAEATSRYSSLEEEYNRLVSESSQATREKASDVSE  
FTRTESVEKSSLLEKRIKILESDNAKYLNEIKRKQRELDVRLHQDNAIPSSGKEKQNTI  
QTDRLETQTLKNKITALETEIGFTSGQIDNRTRTSRYRALEKNLNEYVVEIMGLEDKLR  
KEKIISKLKKRELSQKAESSEGTSLKKWYERVDKGGKTQIASTHSMRGRKSSSDRSYNP  
DCTSAQTI EPAKNDIAKTS DASKSLVGENIDVVSTYINTNIGGNRRMRNKN GASSSSARI  
AMLRKRLDALATDHSSVCTDETFYTVKTTYPF

>comp16867\_c0\_seq1; 142 50 331 LEN=351; translated  
MLASHKASRCPNCDQPVVDRAARENQRALRTKGIPERVATAKDRAKGHERKQGTNGRRG  
EAKRGETRRDATMRAHA AVSGRPSTHQARLGIQ

>comp16869\_c0\_seq1; 258 106 408 LEN=408; translated  
MTTIAI IKKALLDLNDR TGSSSLIALNKWIKTNEKKEIAKHVMRAALAKGVTDGVLVKVKA  
SYKLSPEAKKAMTAKPKAKKPVKKAAPAKKKATATKKKTPA

>comp16870\_c0\_seq1; 155 1 307 LEN=307; translated  
XHPISILSDSDSSGFLSDFYSTGKLADVKPVVVKSEFKLPPLAKRRKASVPATPAFARQ  
IRQEAVLQSHCGDNTPSTMKALD LLSMKLTAGDTSTEAMALKK

>comp16872\_c0\_seq1; 463 1 1311 LEN=1641; translated  
LELVAHLGSTPSPEKIIIFVPTAIMSLPMPPTGNSSYGRSGAMDPRQLQAMDAPLIALT  
QQCKGDLRQLMYAFFSFLNRRTD FYLVPHPDTRDGKATQMGFAEGDAEKMLLA AFRQFP  
LRRIPRGGVPAGRKAPTPSAKTKTQANKSPSPSSKPDAGDKQTEPKPITDKGSSGNKKS  
ELSGDGTKQSPKTKNDDDDGSNSNSNDEEQVPPNMNGVR YNEEGLQIPVGNNGSTPKY  
KWTQTIDETTVLIGVPKEFRGKYDVSITASELSVKAKRCLPGEEKSRTFVEGKLVDSIR  
VDESTWSIEGGVMIVTLEKKAKKFWTAVYEDDIEKYKIDTELVD SRRRIDEYDDATQAQF  
RKTIFDQNQYHLNGPTSDEILGKTKKGGPNKPGIPGLPQGMEIKDAANNNAGIEDLPPGV  
EYIDKKTLDAAEKDKK

>comp16873\_c0\_seq1; 258 45 674 LEN=784; translated  
MTLKEKSVLDDEWSQTTPLVEPESIDSSSHQEEKKIDITRLVKKEEQKHLVKPAGVGGAIV  
GFIFGGPLLSALLGFGSAYAVRKENGAGDAARALGEMTKTVQDKADEIEDKNKYLERSKE  
TVDKVTGILPHTTREFEFASRWLAASNYTRDNQLIEKGVVEGTGKGIIECIGSSI AKLFRKSD  
NEKFAFVSTDEVHTVSSTGFTELSSVTTH

>comp16874\_c0\_seq1; 228 171 651 LEN=800; translated  
MKHATPFLLAIAAVACL SLGTEAFAPTSVVS AFRARVSSTVVVRESNGSDSEEEESPPEP  
AEKMSLEEKMSWEATDEELRAASLGGV I PQPRERTEAFDVGLYIAFPIMVITGLAFAVF  
PFIMGNIDVSDIEVPGSSALSAMNPQHTPTDGHRTTIL

>comp16875\_c0\_seq1; 212 1 516 LEN=903; translated  
QQQQQQQNEPAESSVTDSDDEPCPDEEECDIDWSKMPGFADDDENEAPSEARTPDAD  
YRDPGEELGELEPREAYVRRSERSIEKSRLHMEMNWQIDDCAVDEDTCTDACAECAGTGR  
VVCPCFSGRGTVFFGDEIRACILCEDGLVGCKACAGTGR IASWAKTHDGPP

>comp16876\_c0\_seq1; 376 82 918 LEN=962; translated  
MAFCMSSAGLLAVAAAAILFLSLVGSTNGFEHATSVLQWQHRRTTAVRRPLRSLSMASER  
EYERESDQRMNVREDPISLSRRSATVRAVALLAATAAAPSVASAKTPNGLILTAPTSGL  
RWADAKVGSGEALAVGSTCSIDFSMASTAGRFP SIYSTKNGDAPYRWTLGDGSTIKGIEL  
AILGSEEEGIPAMKPGGIRRIVPNSLGFNALIQQKNASPASNNKRCLAGNEGSIGPIPI  
PKDAPDGAYQRWYQFYCNPRIPYQPD LVLDIKLYGKRT

>comp16877\_c0\_seq1; 35 1 288 LEN=288; translated  
XPHHTTPHRTVYQRHPTTNAQGQPSPRCKRMSDTGTGVPTAPSIPATDAPNTNAASTDGV  
GTDGPASGKGRSPGIHPSGNKNKRGRHRRNSNSNSX

>comp16879\_c0\_seq1; 219 70 507 LEN=905; translated  
MRDIDPALTESDYFDKALLYPEFAPQFSYSRKIWLHTSKPSFHRNNADETVFVHRMHHE  
KDQRDSPVGIGANGTITCSTTNE DLESHSHCGSLAYSVESWPLGNLYLDDECREQYDGNVE  
VEVDLFLAEVAHDSEVFDVCFRPLAW

>comp16881\_c0\_seq1; 121 68 267 LEN=267; translated  
MKYSTASLLIYIFATVYGKEDSAIEASISLVEVEASEDQERSTRGNYGYPFTEPVYGYQY  
GGKGGKG

>comp16882\_c0\_seq1; 233 140 592 LEN=1132; translated  
MAPKQGLFQEDNCERPACDEMKA VLP TSMAELEEMKKKYEKQRKKQVECPPKSTELGRNT  
WSFLHSMAAWYPDRPTTKQKDG MVNFFHTLAEFYPC TYCAEDFQQNIKKIPVEAESRTDL  
CLWLCKQHNDVN EKL GKPLFECSMKNLDERW

>comp16884\_c0\_seq1; 254 84 506 LEN=851; translated  
MSENGIPVMNKPVDAMEVGPNGSNLATAAMRKHPMEELQQRQAAQRISFMGTDEEEVEVR  
RLYGS GFAMKLATERAANQTTIGSIGGGIPSSNNVMGDILSGRDMQIGFEDTLGLPEFR  
PVVSKMHEDPHMVMERKLG M

>comp16886\_c0\_seq1; 253 151 1119 LEN=1417; translated  
MSDATISKIKAIKESMSKKVASVESLSIEDVESLRDMLLQLDSFDVTLEILTTTLIGTVV  
SKFKKHAEIGPTVKTLVKKWKSIAKAGAATSSAQSRDSKSLSAKKTAE LSQKITTDKDMK  
SKRRSRTDTATAETREAWYGLQPYRQTTCQKLDVHLHLAKPKLIKQGINADAVDHLTVER  
ATDVEASIQKFTGQKQEVYQKARS LCFNLKKN TSLASQVILGQLSSSELVGLTSEQLVS  
DEKRKEIEARKKNLMDSNLLDWEAQNE DKINEMCGIKGDLLKASLFTCGRCKSTKTSTQ  
KQTRSADEPMTVFVLC LNCNNRW

>comp16887\_c0\_seq1; 124 223 499 LEN=499; translated  
MINLKQAAVTKTSTSNTKKSSTLFYLLAICFVQAGIFTLYKGPLQHF IWTSDILSKASRE  
TNFTGGDNDSVSIKNEQEHI IASDHVIQWTPRX

>comp16888\_c0\_seq1; 231 143 451 LEN=451; translated  
MLRRALDEAEQNHEQQQPQEPQLQRNHRPRAEEVEGSEERSGLIPPIHKKYGSTSVSSNRG  
KGGLGGDADYHHDHNYHSHNH IHTRRVNYPDEEDDEDDDDDD

>comp16890\_c0\_seq1; 462 97 1527 LEN=1641; translated  
MIEIQPAVSFGETTAVSRSKKKLR TCRCANTIVPFLFLFEITSPTNGFFLSKQGSRHQ  
TNRQRHRRALWRTSVKLG NPSAEMNSNNEQDSSLLPLMKLASTHCASQALYTAVQLKLL  
DILDEKQAPCSIDELCEAVTAASATSSQDNGTNRSCNRDALLRTMRLLTIGIVCEENDP  
PTGDDTPEWLF SFLTTLGKSLRTNSASNAEPSMASCILHWMEKPLWDSWLGLPGYILEG  
ESSTL PFERANNGVSSDAWYNREEHPESLRHANNFVRLIHDQEIEAVAERFDWSFCRGKR  
LVDVGGHNGKLA AAI AQREPTIDCYCFDLPEVIEGVP I APEGVTMVPGNVFD SATIPPC E  
VILMKHFCDRCMWDEPQTV ELLRCCRSALQKNGSSQSDDAEKGRIVIADAVLPDCGGVNE  
KNELALYLDALYMLVGRERQRTREWEQLANKAGLDLVLIESTTVPSCSLIVLETR

>comp16892\_c0\_seq1; 163 1 916 LEN=1109; translated

XGGNPPLVATGSWSGTIKLWDASLHQAERTLAHEDRIMGIA TKPQRAGGPLVLATSSI  
DR TAKLWTVRPNDGADGSSETEQNGGNEPSYLIEEAAHLRGHANRLCKVAFHPMGDHLVT  
TSFDHTWRMWDAAATGTELLQLQDGHAREVYGVGFHPDGLCS'TTDYGGVVQLWDLRTGRSV  
HHFLGHARRVFCAEFAPNGFQLATAGDDGTLKIWDLRRRRLSSSVPAHSGLVTLQLLFQDR  
EQGGVGGGEFLVSASFDTARVWSARDWKILATLRGHEGKVTGAGILGDGRQGLVTCGFD  
KTLKLW  
>comp16896\_c0\_seq1; 473 234 1070 LEN=1108; translated  
MVSTAKGLISVFWVAAGLLSILAPLAYRSLKVRDFRAMQARYNWQEQAREYEEQQEQNNQ  
EAGENNNYYYQNQWEMRESGLYDVNDCKWYQLNCYSYYYSNGEDGEPEPRAGWYPNWYS  
GWSLTEEEREQRMEEGRTPGSLVFVYLWQMLVFLGILGYVVVLNQRPLSGLVVALGVF  
ANMSFLSMWWLADGSIATESDYVQKVGFGQFVSVLVMFNAWYVLFVGVVFLAVFACVARR  
DTLREEKKAAREQEEGAEESRYQAPAAVEEPPGWTIN  
>comp16897\_c0\_seq1; 158 171 521 LEN=772; translated  
MAIMKKSSLVPFLAIVLLGILSEPNGAMAASLPGSRVLKTKKGPAPHPKMPKKAKKSKH  
PKKGPVTKPPTRSPPTPNPPTNPPTNPPTNPPTTSPVSTTSTSTESTSSEPLP  
>comp16899\_c0\_seq1; 150 1 249 LEN=995; minus strand; translated  
AFVKSDAVLKITEELTPLSLLPLKPAAMAGRFLLPKLLRDIYDSVADNRYRLMGMRNEC  
RFDADGEFEDRFVDDDIALKKP  
>comp16901\_c0\_seq1; 120 1 369 LEN=369; translated  
XTTRHDTTPHSAAPVHPRDRDVLPLCSGIVAGRGRVLLRVLVERPDPQRGHPGPGT  
DDGFDRGGGGGHRPDLHPGVSERQRTRKKVASQVTPPGAPPGARSSPAPAAPRQQQ  
QQX  
>comp16902\_c0\_seq1; 718 111 1991 LEN=2202; translated  
MATTLVARPTVYETETTSFAAGLDSGNGDRSPLCRQFLVRFQSKTHVISLGNEDTGSD  
DVLGALTESRLLRVLADRTGWSVLHLRVSHFAFPFVRVTARSSILGGKGGFGTLLKGQSK  
QAGAKMTTDFGACRDLQGRRLRHVNDEIKLRKWRERKRREAAGEKVDADDEMWNTPSGLYN  
WHLMTPTWADISKKATNKIKRQFKKMDQKLEKEVAMRKEKDEAYQKTMTHYLDQTNVSE  
SVQKNLGDIAIKQGLARKARAVNGKSTTINAAAASSNKRRKTETSAMGGVSSHFPDGEQP  
NSLVSLTGDVVVEPTPGTDSVKIQSKSEFMTSVYVLERKVGGEQSSLPGSYYYEVTLVTG  
GLAQIGWACIVNDGSKGRSSSFTPSNDLGDGVGDDASSFAVDGSRGLKFHGGEEWKFPIE  
WKAGDRLGCRLLVQCGTGAVASANETGSLSFTLNGKDLGAAFTSIDSEGMVPAFSCNQGE  
ILELHLTKRDCYFPTDDPTVAVKDLAPSEPVAKETPKPSETENAPASNGSGADKNSKP  
APGPVPSAPPRARAPTRPEPLDLGPYGSAGELSELGLDRLKSALMALGAKCGGTLEQRA  
ERLFSLKGLDPKDFPPKVRKGFVEP  
>comp16903\_c0\_seq1; 419 86 739 LEN=872; translated  
MATPAVSGGTTTSEADAKISRDLAVLAEKMDLLEGMLLPSEPAAPRPSVRTNEAVRALV  
GYLDACGPRMIELVTVCTTSPVFAVLGEEVFGEVLASNDRLQKILSDVDTLAMTETAAS  
TTAASAGGASGKSLGEDGDGNGDLGITDQFDDLFLSSEDAFAEAHGNTTHRSGAAGAKTT  
GEEDEGGDTKPAAKPAATAERDPFDDFFAERTEASNF  
>comp16904\_c0\_seq1; 312 330 956 LEN=1082; translated  
MADFIRFNETSNLAPIRAAVKSPTPAAVSNSMIAKPTNLSYTVRATKKGNVPCVVESRK  
HHKVVVLSNIDGDVDALLSTLKKKLTGGVKKGNTEINGGGDKQVEAIKRFCVKSGCLK  
GVSKQTKGAIVEKTSKSAKGTGNKKSNDENTPKPPSSIDPSMRLTSKEIKAMKPNKMKEH  
LAAWQLSTQGNKKELIARLISASALSTA  
>comp16905\_c0\_seq1; 203 256 510 LEN=510; translated  
MSGQQIVSAEAGSKVDPSSAEWPTDPSLFELTTKIGQAFATVWRARTTVVSSVNAGVSI  
SNANGSSESDNDTSLPPSNQQQQQ  
>comp16906\_c0\_seq1; 88 1 470 LEN=470; translated  
XNQTETKMKNKALRSLLVVALFGAATVTAQFSEQVLLEREDCPADQDPCMVLDPISD  
PDCDPAIALLIERDSFCGQKWEWCVVYNDCFNERCGPLLQNQISLIGQDGGQNGVDRD  
NLQCPPTASPTQAPTTSPSESPTRNPTNPPTPRPTPR  
>comp16907\_c0\_seq1; 281 341 838 LEN=838; translated  
MRRLSLVPLAMAIGDVAFAFTASTLKARCFFRNVAAGAIDSPVLSVSNNDKEEAAKEG  
GEESEELQRRMAVVRSLQMSFYGSSASKRDRGTNEDEDENGAVGNDEDGPPRHVSTGT  
IQRLPLFRAAWYELPGRSNVLILKDPIYTNMFEKMFYTSNNNNNN  
>comp16908\_c0\_seq1; 170 25 492 LEN=1029; translated  
MASSKSNLPAVAGTMDPRSGGVKRSSGVNVLPSVVEGWAEVRDSDNTEVDWILIGYDG  
NSKTDMKLIEKNGGIDVLSDKIATAAAGGAIFGGTRLLASSKFVHFVYVDENCPAMKKG  
RTMMYKNGVFNTLMGCVGEIEIAPGLRETEVGPPIR  
>comp16909\_c0\_seq1; 418 1 1559 LEN=1765; translated



MGGYSTASSSGSSSSSSSSSSSSSSSSSSSSSTASSDVCYPYVHIDNDWCPGTRKLRVAREV  
AEENDCSKYSKKISKQILKEMDGMFFFRVASNNTDDDDSSSSGSDSSSDSDSDSDSDSDSDSD  
KEYGFGCFTEEDEDEIDLDDDEVEEIPPKELHKAIKPFYEGERFLIENEACRDRVYFNH  
PNHPGTQAFVRASQAQAVIKLGVKRGFDKRVFNRMKRLLYDSYFIGTAPKCKEAEEDYY  
EIFRARYEFDRIMRRVMADRRKPRSIPGSSCIKRGCCENKDPDKKHCMVKIIGCVPKVV  
AAPVVGALAFVGFGLYFTIWFILKTIITAIYVAIGLSLSFMFGGTEIRPTEAPTMEPTE  
APTTLAPSVSAIPTTLEPTELVEIFEDRYKESGFRSSSSNSSSSS  
>comp16926\_c0\_seq1; 225 104 775 LEN=980; translated  
MEVASPPPHFPGHGTNKRHPGSPGFGDTTNRNPFAMIPGDSSEYMQQRSFKRRRFTLT  
DETMGGDTENNQNTFVQCQQQPIVAKGNSISSQGPYSKRCRTESQSTQQINQLQNVVNT  
QGAEIESLKSEKAGLQESIDTLKTEHNRVVENKTLKRAVVIQQRQONQALSEINAGRQF  
KVEAEDRIKKLEQLVISLRYHLQAQQHNTPGNDFMGYRPPDVY  
>comp16927\_c0\_seq1; 518 1 1369 LEN=1378; translated  
XIGLEIEIVMDSQHRVQRVQKIAMTRTVSSISLMFVSLGWLLCLLLTEIPRGAAFFVTSS  
CSSSNGCVNGAELHRFSKSFVRSAAAGSDTDVSATSSGKDDGSDNGGFFWDFRGHSCYA  
EIDRPAVSIDPNNKEGPKKPTIILVHGFCSTVYWRETRACLIREGYTVHSVDLLGQGKS  
AKPGRADNILYSIDLWAQLVDEYARKHVALSDDHDKSGIVLVGNSLGLSLVALSAATGDCF  
VHDRANPGTGYLASRVKIGCMFNCGVGLNTKNVLKVASNPWLKSIILGVVFGLLDILVFG  
NKLLLSYVIDNQVSKDTRNALTALYSFADDPQSRVDELVDSDIDPVLNDSTSDVVEVL  
SQIYTNDAGRTPIELHNKYLSDDGGKNVPIHLIWDKDVVTPIEGDVGVFYTELASNPGSG  
VSMQVINNAGHVLFDERPECNAGLIEWLDEKLLKQN  
>comp16929\_c0\_seq1; 462 1 1468 LEN=1651; translated  
XDFFHKKYKGNVCVRLSMDDSAKTELRLSKEGGKYRLRSLHQGTMLSHHSNNALRWA  
FAGGASRSSTQLYSILHFSTNSDSKGGSVGDYFNALRWKAADALTSNLPEEERNLLLGKL  
SANNRKVSSEKLRDDASPQATGFDTEENNTSYQPSIAEAVAATKLREAERYEEKWKNE  
KEALKAEAEAAARARIESDLTIQKRQIAFKAWKSQLEQEKMEHETSDTQILSKNKKSN  
LGEHPVLGPLIADLGYKRIHLASSKDLATIPVWKKQRIYRHGRSKSMATDKIKTLHLGMP  
GIIGIFENS DGSLVIIDGQHRIGMLKVLKDKVSDDDFNFERVLVEVFP SQIEHDEELQTK  
EIFLEVNKAEPVKLDLPGVAKAKDRKIINEVAERLRNFPDMFSESQRVPHLNVDNL  
RDALFASKIIEKHSKTKALEEWIMERNDLLATEFQEEETSRNSVSLNALKKAKEKFQFYL  
GLDSGWLYK  
>comp16932\_c0\_seq1; 244 1 943 LEN=943; translated  
XLDEEEDKTHAAGAFVRDYLPGDLLDRVRDTVENESSESISDDGMDRINNANAERYAFQK  
YLSAYEDFEHWKEVLRPTALEDHHRIPNYANLSEMEKNIADSNYLRTWVREKKKHLEQ  
TLGAAERARSSWHGVLTHEGGWLVFDGDDGVLGGGAVDAEEQRRADLGTIRSRHLVLA  
NLYHQVCEETASWLSRSLGEAEALRLSREALQRLGGGSASGGSAAHTPGHWYKHALDLA  
TLVADSSEIHKAFPRADLREFVAKIGETAVSGLMNPYRGGKAVRSPTGGGADALDSTLQ  
MLCIRSNNEDLPTAA  
>comp16933\_c0\_seq1; 54 1 676 LEN=676; minus strand; translated  
SNTDSSTDSSTATAIQSFTGHLRVVGFMPVVRNDDDESKRFCDWSASHVLSVWNYKDP  
VANGTLQKWSPSWKPLSLAVGGPRPQPRELQLVPEPPQPLRGWSEMPKALRSAGSIVAVEV  
GSTASEMTTIIQKHHPASVYAKLVSSDCLKQDQLPLPVCVVVVPVSRELVLVVVPSSENE  
RSPEHQHGWWSKVLRWVLRASGLFELLQNLLESGLPEVLQHKGWX  
>comp16935\_c0\_seq1; 106 1 96 LEN=282; translated  
KKKTPAKKATATKAKKKAAPKKKSTKKTKKQ  
>comp16936\_c0\_seq1; 359 69 857 LEN=969; translated  
MLSTRSTRLAKSAVSRLLQKQSVRSMGTTKSFHLESKDNNETTFDFTDENYERANRILQ  
KYPDNYRQAAMIPLDLAQRQNGWLPLAAMDKVAQICNIAPVRVYEVASFYTMFNRTPV  
KGYFMQVCGTTPCMICGSEEIMKTIQDHLGIKNGQTSDCGYFTLLEVECLGACANAPMVQ  
INDDYIECLSKETMIELLEAMKDELPAVGKWSGLPMNGQVSCGEGPLGKNSLFTIPKPPA  
IDPDRFKDGNVDPADVKKHMAV  
>comp16937\_c0\_seq1; 157 1 794 LEN=907; translated  
XKDKDKPRMTSPASKITINDVFCSCVSAAIARQLDFHRSTKPSLLSSPERTFGLPSMNL  
IPVHLQGGVLLPGQSMGNKIGAMVSRI PGETLSNPSGHLHHTDPTLAAERLARVHAVLH  
ERKQTPVAVLSYLLAGAMGYLSASSSSSWTPWIFRRAHAGASVVVTNVRGPETRVHMEG  
RPVEVFFGFLPLPAGVPIGLTVTSYDGRIHILTVSAEEYAVPDADRFLGWVRDEYDLLRTG  
AEAAAAAAKAKADTNTNTTPNASR  
>comp16938\_c0\_seq1; 235 81 686 LEN=860; minus strand; translated  
MVWFSIMYNWVTTSVLQKRPASQSQRIARHGSDSSLRRKAVALAVVVPLRSAARWLGVG  
FASITRRATGNSVRRGTGGPRGPAAPGEXEESSSQSEASSGVLSLSSLSVSPVEAVFES

WLVAVGVVAVIFVCEDDADRRRNEAMPAAVFCTFRRRPAQREERFFGAAPSTAPRVSGG  
ASSSWVATGNGNRKSVSSSV  
>comp16939\_c0\_seq1; 736 1 1866 LEN=1969; translated  
LGGVTVVISPLLALMKDQVEALLQKGIPAACINSSQTEKENKAILERLVPALYPRSLGRG  
TAATKKTEGGGGSSKNNRIENENVAVALAQPAVLLYVTPESIQTERMRAVLKTYLKEQR  
LTLFAVDEAHCLSSWGHDFRSSYRKLNYLRRTTFPETICMALTATATPKVIEDIRSELSLP  
KSNLHIGSFDRPNIFYKVKYKDALDNPLKELVKIVTKRHNSASECSGIVYVHKREDTAMI  
ARAI SRAGITASAYHAGLKKADRIAVQDQWSSGDIKVAVATVAFGMGIDRHCVRVYIHWN  
LPKTVEGFYQEAGRAGRDGLPSHSYLFYAPEDVIKYKYLIRMQGGKKNASAAEELRAEKN  
TERKLGQLEEMQDYCTKAKCRRNVLIKHFGGKPVDCCKTCDFCANPKKVERSMHASAAIK  
DVRROQKGFAGRGKKAGGKKEPWNQWDRPHGDFGNEDNIANDWGDNCLMAGDLRITGP  
LGGDSEDFNPSFASNKLPKGGFASKASDILSKYEAIEGRYGGDSRDDPPKNKSTSINIPEH  
LRASLKAASDFTTANNIASKKKVTKPLKSSDHANNAKQIEERLAKLKAAREERLKSFOAK  
TRAKPAPPPAPLSFGSRKRK  
>comp16940\_c0\_seq1; 259 1 1001 LEN=1711; translated  
XPVPPAAKSSPEDKTAALLFSREGSLRQIENGQAVPSDELVEVQVQVRESAPRTEAGRHH  
PKQVVAHLGEKTAETTSKVTSAIATLGVKLSMGRSLYSEEPEDASGSSGSGCTFSDDT  
PSSGGGSGGLVGKFRFDPPRSRYELRLNPVPARFLGVRDHAVLRDVSQHRVFLNPSVTEV  
LCTTTAEALAMGKVVVPRHPSNTFFLQFPNCLAYDTKKECVDHLRYALRSDPVPLSRAD  
RHKL TWEGANARLFESAMMTEEEAGERNNKKTGDAARLHIDTMRGTGAFFSGLWARGKTIQK  
HIALKERPEEKPEPTGESGSEPPKGPATGFCRV  
>comp16941\_c0\_seq1; 205 105 341 LEN=717; translated  
MDSLPPNDPNRNNNGNDRQAQKEQPFQDGTTRNGSNGGNGQENGEPMDIMGNMSDSPA  
VIMFLVGVAAWFLREQCVC  
>comp16942\_c0\_seq1; 264 1 635 LEN=635; translated  
PADVEMPQTESSRPLSAEETKGVDPDTSADASTLDPNSNRGVPPPSSDKRDSSESGDKDGD  
AAASASAPRADKDGTSAEQDPKTNNGSRDAKTSGESPAAPAKAIAAGDGGGASGAESDGE  
LPPRQEEDADRATKKKKKNKNKDSAAAKTSESGSIVPAPTREVVFVWGKQMPQKRARKAI  
EVGMRVKVRFATNATRIRKDGRRVSKKIFYGG  
>comp16943\_c0\_seq1; 126 121 243 LEN=243; translated  
MAELMFLGQTKKKKASEAKVRNTKANLRDVTNITETVETNL  
>comp16946\_c0\_seq1; 349 1 548 LEN=650; translated  
XEKKKKKKAKMEDVESDAIPRPQSFVKVAKKREKLSRDGSSVRLVGVTEEHTKPAKPLK  
KKKSKRITEEAVKTKLGKVDASTKKKKSKGKSTNDGEISPFKNAKKGKKMSDQSLQTD  
DAIHGDVESMHGSDQCIFDENDDVSSDNISSDNISSDGDVNVLSDIDDTKINERPTVIES  
FQ  
>comp16947\_c0\_seq1; 317 1 863 LEN=985; translated  
XEGIGSKVELPRTSSKNALKMMVVAHQISLLYITSLGLLLLAQRCD SFVAGPPAPFLGC  
TSTALQNDKFRRDIDEKSRQKASASGGSVAAAILGGLVGGPFGALFGASIGSNLGAQQA  
FDQARKEEMRKKGITQEMLDAAEEVGYALEQSFEGMEATRESLRSQOTLARRIDEDANSS  
YEKAKEAMAAGKEEEEAKSFLKRHEHQEYLKTLVRCAEKSRIEVMERNVDALQKRALE  
VEAMLQRAVGAKARQDSSDLVGSISD TDFLSREDPLLQKFKDLGID  
>comp16949\_c0\_seq1; 146 1 912 LEN=912; translated  
KKQNAMSPERDII XAVVEEDMSNKSHESDVAFIKALAE LLNDNDLTEL SVKREYGEDDTL  
QVRVSRGETVTTHYAPPPAPAYAPPPAAAPAAAAPAAEDPASHPGAVTSPMVGTVYMQA  
EPGAPAFVSVGTQVSEGDTLLIIEAMKTMNHIPAPRGGTVKRILIEDGAAVEYGXASDDH  
RIRPRAMFEKILIANRGEIALRVIRAAREMGIKTVAVHSTADADAMHVRMADESVCIGPP  
SSSESYSIPSIIAACEVTGAQAIHPGYGFLSENANFVQIVEDHGLTFIGPSAEHIRIMG  
DKITA  
>comp16951\_c0\_seq1; 137 1 518 LEN=518; translated  
QVSLVNPQIGNGFEAITTVTAF LTKPLIPKQVARHDPIDELPNTNKDKTQPDDHTERTT  
KHQDKKQNKND ETVSARTFQDRKPPRPNRDRPGRNRTRTILLGGLLDVVDARAVVAVFL  
LLAVVVPQLPLLPHESPAVELGHGRNGPGGCGRLGDL SQDTPPERAAAAPPPP  
>comp16952\_c0\_seq1; 186 1 904 LEN=991; translated  
XASESPRVHARSAPPLSTATAASVATAAAAAGGSPSGGASDPLGLALERLRSNPPSV  
YATAVGTGKVLGNIVSHPMEEKYRRVKKQNP AFRKRLGGLAGGHDCMLACGFRVEVDEG  
ENAEVYKLHATADSWNALVEAKTRVEEAVAKAAAGDRQQPVQAPGPAGLLPGGGFP  
PPGG LPNDPALRDSVSRMMSDPRALQAALQNPMLQQMIRS DPSVSPMLRQHLEQLSNNP  
AMLQQ MARQMRDPATMAMFQRAMGEGGPPGPAAPPGGPAPQPPRND SGQTEEMIAEA  
IRRSLED  
N

>comp16955\_c0\_seq1; 374 321 1298 LEN=2019; translated  
MGQKVSTTSFHKVGEDEPHFSRRKAILAKHPEIKELYGPDIRLAYSIVALVVAQLGLAVL  
SQRIESHASWLLLCWSIGGTLTHWLSLGNHELSHNLGFKTTLYNELLGMVANCAQGIPSA  
ITFKKYHLEHHYSQGVESIDVDIPTTWEGEVFDTRLKKVWLWVILQPAFYALRPLVVAPKP  
VCFKTVANTASTLAFDAAFAYCFGVRALLFNVLGTLGGMGIHPVAGHFISEHYTFVEGQE  
TYSYYGWLNLVTFNVGYHNEHHDFPRI PGFRLPEVRRIAPEFYEDLHSYDSWSGVIYDYV  
FRIDIGPYSRVKRPNRKSAGGKAA

>comp16957\_c0\_seq1; 193 1 658 LEN=774; translated  
XSKPIFSTMFMMKKIAVIYTSVLVLAAVPSAYGNEKCKGLYEIACGTNGLDKFCEWIQTTE  
LESLEFTGQESLTVFAPINEAINTVGSINQIEFLREIVLFSIHGAMYLDDMHCGYGTGKN  
LLRMASGKDSRTICEDHYPVFQKGGNTDELPRIVSSDIEACNGVIHMDVTVLLPGGFE  
EDIAEDQNFESESSFLSEGARLQTSCWYAI AALMLFMYQ

>comp16958\_c0\_seq1; 382 139 1262 LEN=1329; translated  
MFSRSLSLARRFSSSHGAPWHLSDP S RLLVAAAAASLASNGFSREDVTTTARCESPGEA  
SSGATDSEGLNSLFHGQCLKRQMRTPAVPYPLWDYNWDGRMTSDTTLEAFRNGEAKANAS  
SRAEQNNGNDGTRNKR SRHLILVRHGQYDERSDEDKHKRLTPLGRRQAIQTGKRLVEMAR  
GSASFEDHRFNGKCAVKAIHVSDMTRAKETAALIAEQFHGETALLREPDPMLNEALPAMP  
VPIRPDIKGAEEEIDENHDRIEAAFRKYFYRDDGEGERERDDPSPEEAGESDAFEVIVCH  
GNVIRYFFCRALQLPPEAWLRLCTFNCSITYLVVRPNGMVSARMMGDIGHLDYDESTFSG  
YHXFQVVAREEDAG

>comp16960\_c0\_seq1; 124 1 652 LEN=1558; minus strand; translated  
XAQVINAIRLELLWGFVNIWVLLRGDAVPLKQVKNIPKATEDDLKKKRTIPKLLPNLSD  
RTVKAYFDRPKIGLSLQGRKKS NPLLRVLT LGPTS AVVLDTPYADTQVRLGKGGTSGSQ  
FVFRRLPDTDKAEIEEWKVVLEKSTANSSQRLTKNKLFRV GILGVAFSILSRVLQQHWM  
KTGAAVSAILS GISMIGILNSTGGIETKGD TYMVGKQ

>comp16961\_c0\_seq1; 226 121 675 LEN=1641; translated  
MGILFSKVFETLFGSKEVRILILGLDNAGKTTILYRLQNESDEAVQTIPTIGFNVETLQY  
KNIKQVWDLGGQTSIRPYWRCYYPNTDAIIFVVD SADAERMPVAKGELAAMLEEDELKE  
SILLV FANKQDQKGAMNAQQISDALGLPEIRNRQWSIQETSALKGKGLFEGFDWLVTICIK  
GTDE

>comp16962\_c0\_seq1; 411 1 1089 LEN=1089; translated  
NNNNSLDGSTRSNQGGNKLKNENAAGGADYLGGSFAGGWQSNADLPDRRRVIYSILEVIR  
MMRPDSNQISQKLPMAKSLEENLYRTAQTKEEYMDQNTLRDRLQNI AKELETHSSNPGN  
GIQNKLPNESQQQLQLLLGGNNNNNSNGSMNAFDNGNMMNANATGNSNMERRR SAQ  
QQIDMIAQRNLLNQNNAAAGNNNLGSSLNSSMGGGSGSGSSNGDAQKVI RQQQRLLLLR  
HASKCQLGPECTTKFCAQMKPLWQHMQLCRDRDCQTRHCQSSRCVLT HYRHCKAQGRTAS  
CEICGPVMEHIRRQEA AEGLDSSDPLAEKEGDGNV PKQQQD GDMRNMFGQDDVLRQQQQ  
QQQ

>comp16963\_c0\_seq1; 452 63 1022 LEN=1384; translated  
MDDRYEDSKSHQVGNAPVDDVDSTANNNLATASSSSTQGDNANGIDIRQALEILSSRTPH  
DHHEDGHENAKHCCADVTKNPPPDVLRNMQTIDMFAPSTGSSIDAPKPPSTSTSSNN  
QVDPSERRKKIRDSLRLGLSIVASLKMLLTAQEDRVRTYRLYDEALGKVLLSNRLTDYPPA  
CAAATAAFSVLSDTVA AVRDELSNRI ELLLNNDGKTSPTS LALSSII ESINSLQSLERE  
KLQITAA YHLEQIRANNLKESKNLDDNDT KDSHEL SLLNKGISDMRSRNETCRS NINGI  
IEDLRCTLVELMEEGEDE

>comp16964\_c0\_seq1; 364 124 942 LEN=1024; translated  
MFALLWL VSGALT VLVPLVYRTMKMNNYQNMYYMYNWEEAQQQYQEQQQYYENMYENQY  
MNQYGE GNYRQWEQMRGNYDVNQCKWYQFNCFPYYINENGEPEPMAGWYPAWFSGWTVS  
EEAREQMI EDGETSSALKFTYVWQIFMFAVILAYGYIVIKQNRVVTGVTFALVVFANMCF  
LGMWMLADGSIITDGEFIQQTGFYGFVLMFITNAWYVLFGIIFGALFAIRGHNMHQEA  
PQEKQVEASAENYKALGGDSPPTPARKPILV

>comp16966\_c0\_seq1; 430 42 1187 LEN=1709; translated  
MDCPATSIDSGNNFGDTLATWDTARAVLLSLAFVLLATTVLLLESFLLPSRRKTRSGAGRS  
LEQELLTHVITGGSSGIGLSIARECIERGARVVTL LARNPEKLAAAKKELEALSSAVSG  
ASEGKKQRCAIEVVAVDVSDQPGIVRAARDVCTSQSHPVPTSLLNVAGTSSSAAFVTDY  
SEFRRLMDINYMGTAYATRAFLPYMLEDSGGIRPRAIVFTSSQAGQLGIYGYTAYSASKF  
ALRGLAEALHME LAPRNVSVQVFPDTPGFEIENLDKPAVTRV ISETSGLF SPEAVA  
KALLDSMAAKRPAFGITIGLDGFMLGALTAGMSPCVDGLGALYQIFLAGLFRFVSLFYLW  
DFRRTVARMLVEEEQKKEKNE

>comp16968\_c0\_seq1; 370 229 1173 LEN=1401; translated

MILRQRTLSVAALFQALLLFSTFDHTTNAFLVPATKAGSELHPASNACFTTMVACPLPHQ  
RQDSTIHAIPHIDISVLLTDLVATSSFHLSAVEVFDGSTIVDPVVVSSSFWSSLQRQILS  
VILGQFIASVVFILVTLAPQLVILRDTILEKFNDESSTTNGNGNRNIDATSPKTFIK  
ADSIVRDPDFGKLLVCLLIDVIGSASEALPIVVELTDVVSAPVLGLLILQKLYPGSSKFV  
FFFEEFAEELPLTDFIPFATICWAVDTYYPESTIAELFQLGDYNGSVVTAEEKANSLNAS  
SERVGQDVDSNINR  
>comp16969\_c0\_seq1; 88 1 117 LEN=379; translated  
GNWCNEIVSWEDGTNGITTKNSYQGRTKVYAADQTDYN  
>comp16970\_c0\_seq1; 299 60 524 LEN=558; translated  
MNSFRFLICATAAAVAAAAFVVEGFQAHRIQOTTRAGVAATSLSFFGSGKGDDEEPAGIEA  
EEEEPKKPAFFQDVVGMNTNFDAVVDDFVMKRMGAGEQFYGKRKYNPSSGNVEGDYNGMGQ  
SDLIRIEVARVQREEMELRRQRMEAEAAKRGGP  
>comp16971\_c0\_seq1; 677 1 1790 LEN=1875; translated  
XDDDDENSEKKGSKCPAGRYEHANQGAPFTLAIATTRKASLAVFCILQFALWIGVV  
RGVLVADGFGSLFVANHHHHKTVNSNTLFGGSATDSPQTSRHHFFSRFRNDHVARHHDE  
RICASRTPRLVLMWQKGGSKGDKQNRKKKATSSGATGASSPQPSSIPVQVSNQINVP  
RRQIRYKINKQLREAAATGQSFRQTRKGNFVPAGPGTAGNNVKRTSYRKQLDEETIQOK  
ALERQRKGQNPDWSVVLNQTADPLVLVDGYNVIYKWARLKKHMARGDVQHARELLEDL  
EGLASLRRWRIECVFDGAGRGGIAGPLGSGPGNKNDGLGLGKQPTTAPFGKAGTVRVTFT  
GSGIEADTYIEGRCAAANKVTLGKTTSSLVATDDAQIRLVANSAGALCMGSDRFVLELR  
AVKKSQYRVEKAMAENVGPIRPEKLWGTTVSSVAGGTGSSSFQASTTGTAASSDASNRT  
NKTAAKTDNNTATPQGTQRQSLRPI SAENRIGTAKKEVLEEHADGSKTIKARYGANHII  
ITDNRNKKPKQRKQHMATGRGEGEPKRKKKKKKKKKGGSSSSSSSSSSSSSDSDY  
>comp16974\_c0\_seq1; 300 173 931 LEN=1166; translated  
MSGSSSTRSRWSSAWEDILSGGNPRWRITSEESHEKAYANFYRFLPEGTPSDDKIKNISVL  
CPLAGDDPFVHLLYRKGYSVTAIDLVSEAVEAMKAQFDGDDSSWAKEEDENNDGSVTNI  
VWKHSSGRATLIVGDAMKKRTNLNQSFDAVYDKDSFGALPKELRKPFCQRRISEYTKENGI  
LYLECKLKKGGDDSGPPFSLQRGDLMEDDNFGGGKFEYIKGLGRVYDLPGNMNAVMQQTG  
HVLRRCSRAAAP  
>comp16975\_c0\_seq1; 221 24 1098 LEN=1098; translated  
MSTAKTQTGTQIETPTEIARDVIRIEAEALSALHADLPIDFDAVVTRLLEVKGRVIVSGM  
GKSGHIAAKIAATMASTGTPAQYVHPGEASHGDLGMITREDALILISNSGETRELADIIA  
HSRRFAIPLIAITKKPDSTLGGQADFRLTLNPAPEACAIGMAPTTSTTCTLALGDALAVA  
MMRLRGRFERENFLAFHPGGTLGAQLLRVSSVMHSGAALPVVSAETPMGETLIEMTAKGFG  
VAAVVEEGRMLMAVITDGLRRNLSDLMARTAGEVATRNPRSILPEALLSEALGVMNTHKI  
SALFAVDESGQLRGLVQSMTSCAPGSPDPGSAQKARIGDIAHRITRLNGHRTVRQFH  
>comp16978\_c0\_seq1; 152 92 409 LEN=599; translated  
MDEKIAKLETATAEALQLGVARQALETAEADLARAKEKYRALSQAQLEKSGDSMLVTDTE  
LPELLETRIRAKNVLETIEAKHKTNRQYLDMMIRKRDSANSGEET  
>comp16979\_c0\_seq1; 102 194 388 LEN=388; translated  
MIRRTRALMSGPLPPGAAGTAARTKTPKPRTVVRDPRRTARKAKGGHPVVPVASETERQWQ  
QQQQQ  
>comp16981\_c0\_seq1; 254 1 682 LEN=953; translated  
XQQRQHQHDEEDAFRSQRQRMQEEREAAEREAADRMAAERERQFEAEVQRMNEEQRKLAR  
KQKKIDGRVVKSVLRASGNKNLYAVLGIHRFPGLKIPAREVDLFGALRFTIPGISLFSG  
ELSEKQIRKQFRKRAMEVHPDKNRDGRAQEAFAVAVEEAAAVALSDPRQREAYDAERARQQK  
EQLERYKGAVKTAMAYAWALTRRTVQVIQTLLGPPFFVPVAIILALII  
>comp16982\_c0\_seq1; 100 1 262 LEN=875; minus strand; translated  
XLGCEKFVLKKYNYTDTIRGTAMKKYFDLGFLLKSVLPCGFRLRFLFLSSAIVKLCGGLE  
SQLLPYALDKAGPTSEMQFFLQRTDH  
>comp16983\_c0\_seq1; 129 35 223 LEN=262; translated  
MAESRKPKNLYATHPKGYGKGSRACRVTGREGGMGLIRKYGINMKRQAFRERAIMMGFQK  
YN  
>comp16984\_c0\_seq1; 186 356 847 LEN=1452; translated  
MERRTNTTAIQVASGIKNRIPKSTWSVLNLELTSSHHPIPTRELERLARLTLIDVSGSMD  
NNQTSLTQDLGNMLHMIKHVTFDFEQNPKTEATTNTIDNRETARIYDVVRGVEVMPPLRRV  
AENDLLQPEDTVQSHEIWKDFLEPKTTRRGGGHMYFAIETR GK  
>comp16985\_c0\_seq1; 131 1 423 LEN=711; translated  
SNNNSNNFAEWIKGQPDNYNVRMICGTRCSAVPKYGITLLELFRHALDRLWEDVSHVLFVE  
DMEEESFGRFAEAYGWEPYDPPDPGSPRTAGANGSAWDPYMFVLDDALYEFKQKQADTR



NATGQNGRRNATGVPGARGSW

>comp16987\_c0\_seq1; 628 65 1572 LEN=1593; translated  
MVYTDADKARDPSLRDAEFPMDDAFSATWWQSTERFLELGVPTIDASPESASWKVFEAH  
GYDHIRVTRDWMDLGVEHMSKWWKMWLDEMIVREGTGDKTVNKFADRILEIFKAYVSSKD  
RSEVWKAFRFGSGSNNDNDNHNHNEWLEVSGSTIAVIAFMNSKNYREDEILKWSLASTIL  
SLAQVGVGRIVVASAELDTDEALVKEALSIAERAMSAWDQPAELAVCDTGDATTGNDIS  
PINVPAASLLRLQQIFRNQAEASVEECWGMGNTNTKTATTGSSSSNTNRRWKYVFLGEPDT  
LLTTKPASTAALARELKKGNVLAPHRFQMPHEADFAERNSNSKRSGDTANHASSGLYMI  
PKSLEGTHPITADPLRNENWSCDDGNHKAYTDHPDCGNFWMCGFLAMRWPGEAPYKG  
LDQSPETAFESILEGYPLVRLEAGTGVVFAGAESXPEVPPEGRPLSGPGPKRTRKRTRKR  
ALTPKPTKPTNQDNASMECTM

>comp16988\_c0\_seq1; 466 212 2391 LEN=2391; translated  
MGVSDGKGRRSKTVGDGDDYEGFDGNDGDEEEKYTSEAWGNVFRFRHSPCMMRPATMLM  
ILALAVFFTVTLAFQIPGMVLGLFMAPILNRSSWYVEFLYPLPISRWHMLLMSFTSKMR  
HKAKDKNRGFHSRTVEQRVEVVPGRVYIHFLPQWLDNVGYLVVCLPEPIPCGGSFTTVEK  
GSNACPPVALVVDCEVDAVLRSDLIQDFHYKGMPIQLQAILSTHKHHDHTGGNASLL  
KHPAGKDITHVYGGAVERVPCCTDLLVDGEKLELPRCKLNDMNALVEIEAIAVPAHTRGS  
LVYCLRTKSGRQAEYMFDTGDMFSGGGVPPFEADTGVETDKQLRRSNGHHTVRGNLGAFA  
MERCSEIISRKPSNFSTGVGERILVFPGHEYTQELLIRQFQSMVSEHNKWKNFSPKDY  
FETVSHLYVALHRRSLPHNSGRLLLIPTIQRELHINPHMRSLLRSADLVVRALSFWNTH  
FSKAGAGDDRSSPSAYRSSRRLSIREQQPLPRKTPSRFKQWNLDAENVNSNAFTTVY  
TADLDSVIEDLACGKIKKNKAFERIQSLKQKMSKPVVVKRAIPGFPLPSDKNIYRGICGLA  
VLGSKPSAMTVSDSRKLMIPPPMDYNSDRIRVSMKRLILVLRGLTETSEGDDVSAIIK  
KLWKEANDYCNPQCEGKTYNAIDLESRKHCDEIELGLVKWLMYGVSANQPSWFSKLFKMP  
CGSSKTX

>comp16990\_c0\_seq1; 206 395 1069 LEN=2026; minus strand; translated  
MATSHPTRKPRNRWVYAIAGFAGIAVVDVAVSSGQRGVMGKPGDGGFSKAAETGAHS  
TRITVSRHGGRTNQKHPAALQSTAQAKETPFFAEFKEPSVARPSATASATPKASSPPASA  
MFTRGPDPAKPDYANIHGPLGKAVDDVFLWIFRTRLAEFVGVDSLPLKTDYDGLIELTA  
ALNARYSDREEIQTIQKTLRELPNLSCNGCILGSGITEYGLVW

>comp16991\_c0\_seq1; 452 1 1221 LEN=1387; translated  
HTSIPRMISTTWLKYSIKMIQTRILTIALFALCVTDSVFAADDNNLNTAFGKEATVSGGIK  
NDAGGAYSLVAGGKLNKSAKGYTSTVSGGSKNQAVGDKSYVGGGMSNIADGKESTVAGGTD  
NYALGVRASIAGGSKNDITLESKGGTIAGGSTNVLSGEYGVIGGGFQNFVAEHYGIIVAGG  
ESNAALTMHATVSGGNDNVAMGQGTISGGSGNFALPHASVSGGFKNVVAGEFSSISGG  
ETNFVEKRGSSIGGGKDNGISAEYATIAGGKDNIVVGSYGTVIGGEANEAAAGDYSIAGGA  
KAIAKANRSVFNLSPDQVESSEGGQLVAANSFTLKFVGDGDEFTLDAANIDKLRKLLGN  
GRRSLRGVPSNIDSDEYYQKKIEHLQRQVEELRLIVNSIVPPMF

>comp16992\_c0\_seq1; 239 128 715 LEN=954; translated  
MTAIAATAKSLRSLLIASLFFVQTSAYTKTTKSLYDIGCATQCQDQTDGPDIDVSGIDFADL  
VAAALISGNSTSTGNSTDNVLLIYGDIECWDVSEVTDMSGAFQENFNFDLGCWDVS  
SVTDMSEMFLAETSYNQDMNVWADKVPDRNIDTTSMFNSTGCEVESDPDTIGRPWCQYER  
PMWSPEFECFFFRNC

>comp16995\_c0\_seq1; 286 92 493 LEN=703; translated  
MADGYDPKSKVSDDTMETWRTTPTVADLNSVPGIGPATIKKLEAEIVEDRITNTYQLF  
GKFLMLKGPGESEDEIEIDSIEHMEKFWHLKNRGISSHRSAIVKAVAEKSATFFQGIYD  
PNIYDDDDDDDDL

>comp16996\_c0\_seq1; 304 100 1038 LEN=1754; translated  
MGRSKRDKKPDLAERPFAAETVPLTAEEVQLFDPLKTNFIWYKPLATEDSHETGGHQW  
CVAGHDMQVLTMTVPAGETIITEVGSFMYMHPGMETQVECTLCKMNTCGEAWKRVCGGES  
CVKVLLINESEDEQGYVGLTPNFPKVIPIKFGTHIESGRNMITKGGAYMAELGDVDVGC  
LDCSIATCCCAGLGCCRQKLSGSDGSIAFLNAGGTIVYKHLKEGETVTVDTGSLVGFEDS  
VHMGIIRFNGSFCTCCFGGEGCFSTTLTGPRVYMQSMSFQRFQAAVMQTIITEEERGGDSN  
TGMEDIATEILGP

>comp16997\_c0\_seq1; 343 1 772 LEN=772; translated  
XIRFDSIQMDQDAIGRGECPDRDNDYESSSSSMFYGADEAPIFGSDLCGMFEDPRASQ  
TDACAFFCCGVFLWQRNKDMLVLEEEEQQRELEQDENTSAKANAEESRSLSLWRFFETACL  
VLLVVAIAAWSLEDSADGHLFSDVTLISSGMLVLGTVMGIWFQSRRSFRKRLAIVEYY  
RRHGRSAIHKRGDENDHDPPELAAFLQAHHREIYGDGAHAFCGCAGSDNGCFGTRLRQPT  
GIAANRSGGTDDDDDDDD

>comp16998\_c0\_seq1; 231 118 744 LEN=1248; translated  
MGFIPHPSPMPIGVVRPHDIIVLLLLIGAAFELCTRLSLVKYKRKPDSIRQREYALKDLEIR  
VRKSRALGPHAFVETSKLERQMLSEEKNSDLGAKRQKALEKSEKLVGRIGTALNFIVFV  
CWYGI PMMEFSGHRVLSPTLLSREESAEMAASAFNSYMFPLSYLGMGVRISKWGLANPK  
ASTGALLVVWSAQTTVGKIMDGLLETLDD

>comp16999\_c0\_seq1; 249 346 798 LEN=987; translated  
MTKEEEEIEKARVSHLSPEEKEEELRKLNRREIAKLETLRGINTGELYTWSGRYKALVKNY  
GFPLFVYYWTLWATMGGFVYLGIDFGGLDAMALLERIDSNTGWAVSEKVDPLGKMGVAL  
ILNECLEPVRLPFVVVTLKPVMDIISPCKY

>comp17002\_c0\_seq1; 207 1 242 LEN=557; translated  
XKDKKDKKAKKDKKKDKKDKKGGKKEKKAKKDKKKDKKDKKGGKDKKPKKDKKAKKVKETKT  
KTKNKVKGAKEKKKNKGSKK

>comp17003\_c0\_seq1; 264 310 1380 LEN=1749; translated  
MKNAFLLALFLVAICNPIGIEAVCDANGTPTNGDLTTMSITEIACDPSLADTFSTLCNLL  
IRTDLDETLRRTSDFVFVAFPTNAFVNARMTAGVSI PQITKTLQYHVSNDSSDLTCGA  
RRDSSLTLLNSKTRSSSTRCAADGTTLLGQTGNVRTPRQSSPLPNFVAPTAGNEASVTACN  
GKIRAIQVLGFGPMVYRFGSNAPCSFYKSKCKAGKGGKAAKAGKKGKSYNYPVIEVEEE  
TVDGVTFDHFVLYGKSSKSKKDKGNGNGNVNRSWNGSRQQAQAQAQAQRNRDFM  
HHPGLEYMYNRYFGSSRYGRQRQLRGVISPDEYNEEYQLQSPYVSVDAVEYEDHYQ

>comp17008\_c0\_seq1; 179 147 959 LEN=1287; translated  
MPSTRKPVITSVLLGIVVAF CAMPRASLGFTSTGHLQNTFEKNQGSKEQAGPRGAETNGG  
SRRGFLEAASASTASAWLLPLAVGGTAAAPPARAFDNRLDDRYASAIPQTGTQPPDLGHS  
QRSNYFGLKSCGNPNCWNSAPKANIPARWLPWEAPKGS SIADVKKVVDTYEVGQNNV  
DGGGFRVMEYTNSSSEQYLYVQFQSYKAGYIDDFECWFNPESQKFDVRSRVSRYGSDLG  
NAIRLEYIANRLETEYGTWFERRKNGKLV

>comp17014\_c0\_seq1; 115 1 398 LEN=398; translated  
LAQHOREGYCNRDFLFQKEIKQESHGIVATATTACQQRDSGYTALPPACNLIPSMVLP  
IPAHEPYRRRIAYEFGVVVGGT DYALQTFESQAEENIVGPDVPSSSKCFLDDDGVMEQEE  
SRHGDKNLQQQQX

>comp17015\_c0\_seq1; 241 63 314 LEN=915; translated  
MFGSGTKLNEASYKTMFSSFDKDNSGYIDKSDLKKITKGILPANGVDMIIGFVDKSGDGK  
IDFNEFKSVMKKIETAKKFNLGK

>comp17016\_c0\_seq1; 210 1 596 LEN=705; translated  
XNSNSNSKSGAVRFAHEFFRRGQPELLHRITRVTKSQEPTSSEMKSLEKEDILELRKDIVA  
LSNRFDHRLQAMEASMEADYQQRSTDLAASYQALYAFYADRGAACLVGASEQAGATQDAPL  
SAAAGPDREEVAAPASSTPSDGARTAKTPVATISESSGSIASITSSNETGMESSSPERHK  
LSPLMTLSGVATALMKHS

>comp17019\_c0\_seq1; 179 1 124 LEN=403; translated  
XDDDDDDDEMEDGEMDDDYDDDDMLDHEEEDLREVKRIKVR

>comp17020\_c0\_seq1; 407 198 980 LEN=1028; translated  
MKLVLLSSVVATASAFAPMSAISINTALRSSTEEQLEVS AVEEVEAVQEVVAPTPI NGWV  
PDEGLPCYGLPGAIAPTGYFDP IGFARDGITLNEVKRNREAEVMHGRVAMLACVGYLAGE  
ATGGPFGLVGPANDQLQOVPLPAFALMTVGI AAAELNRARIGWVEPNFGSWSSTLWKLRE  
NYYPGDIGFDPLGLKPTDAKAFRNMQTR ELQNGRLAMLGAAGMCAQELVNHR TIFETIEF  
YSKVYSGENPYAACGEGII C

>comp17021\_c0\_seq1; 131 1 531 LEN=718; translated  
XPVSIHRDYRSTKSGKTI DKSDLLGXPIFRGPLARDDIDMVDFDFTRKHRDLNKESPEFR  
ENDLRHASISKSSPQTPNGLI IEMRKKPLESGSTKKEFFVKEVVNGGLFHKIHGDRIRTG  
DRLVKINDKPVVEEFASLWDINNYLKKELKIKIYVKRDGLHLEEKVWGKA EYISNKK

>comp17022\_c0\_seq1; 217 50 721 LEN=879; translated  
MASKIASKAPLLLAAGGAYVAACYIGYSSISKNKADYDQTLQAVEGGKFSFVENPKRNEQ  
YQNVAHKYDDEIGKEESVMGIELLRALLYFHAEGTVLELAAGTGRNIKYYPSSCDRVL M  
IDSSENMIAKARQKI SEVSNEKTSFACMVG DSSNLGDFPNRCFDTVVDTFGLCSYDDPVT  
VLKEMGRVCKPDGKILLLEHGRSKTWNFITNYL DKNAERHAKNW

>comp17025\_c0\_seq1; 199 1 1011 LEN=1208; translated  
PPRRIVSILPTQDTASTVLYPVLARNQKYKTTMMHTELRSTSQRKRTTRTTNSSIADDST  
NCHDLSACDVISMRVRRRHSFSRISLSPSNSCTVAPPKPLMLLFVAIASFFLANKVTPV  
YLSAAKNEWIGNSLQYYNRITRGAEHVQQSPTYLKSAMENYFALEKLRNNKPRHAETIY  
RRLMDEFNPRQGFVTKPAVDSMHADAEECEFSQLAVPTLLLGLLLQREGRFDDARTVFE  
GFSHVLEDANGGKAHACCCSARVLQAHALFEMKQDNPVKAAELIMKAVRMDKNLRSVLRW

KLRFREAMA EYRKYQRECRRHHTRSELNRQVLAVAAA  
>comp17028\_c0\_seq1; 174 210 518 LEN=994; translated  
MSSSASRIEYSEKYADDINEYRHVILPKELAKTLPKSRLLESEWRGIGVQQSRGWQHYA  
IHRPEPHILLFRRPLGTDPQSGRVDPEMERKAREEYRAQYKR  
>comp17031\_c0\_seq1; 979 1 2488 LEN=2614; translated  
XRFLRYSSTPTVDVTRGGILVSAEGSGCDVSVVDSILSSSAPSRSTPRRLLAASAVAAGF  
LSSHKLGLIAVLCSSPSLVPGSFAFAEAASSTCTPSMEIVLEAPPYYLGSVEECLRSV  
SNPDHCPEPFPEFPICGADDRELAAPACKLAVVGAGTGGLYTAYRLVEEGVFEGSDICIF  
EATDRVGGRIYSLRGGFPEGDISVDAGAYRTWPDYTPPTHALITEVLGFDVECYDEDDPC  
TKFNI VGETGEKIGFASFVEELMSRLIEKGACFFPRHNLVSVAHNNDDAETDGYASNTLT  
FSNGVKTRATHGTILNVPQRALLEILRESKDLFSSSSSSPSSIASGTNLDRSAREEEKRT  
YDSLHSVQTEIVTKLYLYEDAWWYKLGTLQGFSLPGDARSMLLEGRYHDGHVKEATD  
DGDEKCYGFLAVYAHDFSGTKAQYFRRFQRDRPEPVTILSDTNPEEEDFLRHAHERLVD  
YHVYGEDNARLLNASAYS PFQFRKIIESSPPTFAVLANWNTAAFAGGGGWHHTDTANA  
EKAMKPLNPLGIHVVNEAFSKIQGWAEGLLLADEILEEHYGVARPWSFEVPPQSIFYLAQ  
TSSEECVAGDDAGSGQSGSSSSGGAGPVAGELDLCAAGSLVEMANGNLVPIEDVEEGD  
SVATGVGGKIGLVTEKLVHPVRMKEAKKTAWGAPYRTRRWSDVVVVPTHEGDLVGTDPHP  
VLLGNSSEWMEGLDALERNLLAVGARRVSRDVIDIFYNLEIDGHKVYKDDGRQAQQSPHSY  
VVNGVVASGLGDNPLLNRLFPRQRFLEEQSKHHHDIDLISATSIVDKT  
>comp17032\_c0\_seq1; 166 159 398 LEN=398; translated  
MKIGVIGLFAVQTICIASIGVRATDDEGFWAAYVDAVASFPPTPSPTPSPTPPPTPGPT  
PPPSPGPTPPPSPGPTPPPS  
>comp17033\_c0\_seq1; 185 140 604 LEN=694; translated  
MASKIHTNNEAWTRDDWLRSTRALCDAFANHGTVEQIINCFSSSRPDDILLFEHGLPELA  
PFLGRTRFGKQGIRDYFGIVSKHLSYKDMTFSDYILDKELRVASVRGEAKFTWKSTGKSW  
KEVFIYRIQLDEDANVMVYEVWADSGAANLASLK  
>comp17035\_c0\_seq1; 352 1 1497 LEN=1786; translated  
XLNIARLVIRQKEISNPLTPVFLTVMGRIGTINVTRKRSRCEFLPTVREMSRNDETNDN  
EVSHPWRSVAVSGKDMAVDLIFGKFFLQSYGTKLGEALIEEVQEGQLVQIEAKTNPQQRES  
IEKWIDTNCLELVP MNCQLLSCGSRSYGDSFDKGGLOTGRKPKKTGSSSSLPTLTLSDIY  
QGNSSIKFVDDARSISEFSSDIAKLLSEVGDRPSLSPYVVIDCEWQPREFMEDKKQPQPV  
LLLQVSLHALERVYILDQLALLRPLEESDTPFNQLEGELESECLSKLMKSNRFIKVGYQLS  
SDLRRIFASYPHLPCFQEVHSILEISSFIKRVLRISKQKKSRYITMSLAAMTSHYLGMA  
L DKEHQMTDWA VRDLTPRQLEYAALDAAVPRLLEEALLESIGASFSDGPRGTEVSSCPVP  
RRHEGDAALEGXGRLGAVPPALGGHRRGDRRRAGGEADRRAVDPFLGLEGRGPAAAAAR  
GPLVLPALGGAARHATVQC  
>comp17039\_c0\_seq1; 98 1 567 LEN=739; translated  
XLLYLKLHHC PNQDASVISPQQDDCANTVIHQRTTPHTFSKKDEQLATTPVVNKTTLK  
SKPASWTFEKMLAGFSNNFRMWPMPMLVSAKNATARQPARATFRVLP RMTKHEIKEY  
LTKIYGLPVQKVNTANYLGKRKLV RGSRQVIRYKYADFKKAVVSFDRSFTDVGVGLRIPE  
IDDEPEP  
>comp17040\_c0\_seq1; 448 1 715 LEN=715; translated  
XDDDENDDDDTVSEYATKARAFYETFAAAAAPRLWSRMSHPFLKSSDENMTDFIAREDDDG  
AGGFVGEGETDERPSALLHRQLMHSMGEDSDENDLVHKLQRKYAESEEDDDSDGTEEEL  
ELVDHKDEKEEDKDDSSDSGDADADADTDNHYRGYYSPIEEEKDEWMLERQSQRKRRPSP  
PAAGGLGSTDGRTKTPSRKRLVRRKPATPSVAAAGPPSSGRKRALRIQESSSEDDDDDD  
>comp17043\_c0\_seq1; 220 1 403 LEN=403; translated  
XGGDDDDDDP THALYVVG SVIGSSPAFGEPESENPEG TNRKAGFVTKLDPDTGDLSSRR  
IRFESNDGSGKASGDSLVDTYVEAVCEGAGDGDQDDAIFVVGSYARVPVQGNRTRSLQAET  
QTDDGIGEDDDDDDD  
>comp17048\_c0\_seq1; 388 133 1409 LEN=1409; translated  
MVDPDAAGSGKKILAILSGSKVTVDLPPSPILGRENSSDADPGVRSFDPYPQSEDAMPI  
SSLAWNHNQMVIATSSGIPTDEFAHDNVVLLSSQSGQKLD SFQHDWGWKQKRKFALQQEQ  
QWQESSTQGSIVNSISFGGKSRYLICIGDESGAVCLWDLKKKVRVRQFFHNPIGGAGDNGG  
KCNFAGFSSLQVSLDPTD TYVM SLSPRAMYQYNLRDQQLLGSLEVPKDDDDSKDKQGTCLF  
TVFAISNLEPNICAIGTSGGNIYLYDISAPHGLDQTSTPHAKI IRRHNGRVTGLVFS PEN  
PNTFFLSSGTDGIVYVHNKSNGTRHKVCSAPDTNNPIQTL SLHADGVTCAIGCRSGDVVY  
DLQYI I KGGDMPAPLLATHQSSDPINSLVFAPPPKAKDPQPKSGIPSEQHNEEKVTQQK  
EQQQQX  
>comp17051\_c0\_seq1; 78 167 374 LEN=374; minus strand; translated

MLQIFALRDETQFHDRNIDLLIGWDSQEKVPAVFYRDCWRKTQQCSIVRSNSLVTLHGLC  
TALHGLATA  
>comp17052\_c0\_seq1; 109 1 341 LEN=341; translated  
XRTNSNESHNKSTMKFGSFLLLTCLAASGNAQLRDGSTAKRRRVEASSESNVIDLVDEIP  
ASEINKIKQRYLRRQEGPLPVSKFTRVYPRISKVFSRMEESDDADDMSMSMSMS  
>comp17054\_c0\_seq1; 148 1 425 LEN=559; translated  
XPVHKTVSRKSLKMGVEKQIISEGDGATFPKAGDQLTMHYTGTLTSNGKQFDSSVSRGKP  
FKFVIGIGQVIKGWDEGVMKMSLGEKANLQISSDYGYGARGAPGAIPPNSDLTFEVELLA  
IGNQKSSSFASSSGSSCTVM  
>comp17056\_c0\_seq1; 132 99 341 LEN=1009; translated  
MMKSLTALFVLRVIDHSIYADTSSHLLPDYSIDGDDPHALSERMSGAWVNGRIMVNETE  
SNAGSEAQSNLPEVEWSSTSW  
>comp17059\_c0\_seq1; 254 104 754 LEN=865; translated  
MTGNSLQLFLFLVVAASEFYSRVEVANAFSISQPYSSPFRTAKSCGEHLRRNTGQMFSIP  
PPLSPISNDDYDYDDFTTEEVNMYNVIESLSQESNDDARRARLKQIMEVALAGPNGGP  
KRFTVLFDRVLTQMGEKVQDARQEYAERSAAAAQNTTEERSNDAPPDDPPSKPKPNEADG  
SVEATPREKTPQELRLWALVDMMIQSKTIKHKHF  
>comp17060\_c0\_seq1; 147 121 432 LEN=679; translated  
MMNKATAKHNPITPNEVSKKLVNAFPDAASTGKRVSQEAATAISEALRLFVVDAYQRAS  
IEAECDFECAFEDNNDKPADDIRTSIGAHHVTRITADLLMDYS  
>comp17063\_c0\_seq1; 181 196 1149 LEN=1451; translated  
MSQDLIDAGIDQYGSRGGLPCGNCSLEGQCARPDHQPASTDEILDVPEKVHFTSGGTNP  
QKRAIKSILVWIMFQFLFIGAIVAAAFCLLFPALHEKQNGTITNLGGIHIPEPFSKSST  
PEPLAPPLEIQEKQNVGEIPEAPITPDTPGVERQYITKSGLILEGYALQGGSEFEDPES  
YNSRALEILLNYGILVLGKNDLSLNFELKLAQRYALLCLFFSTSGNQTSDATDSAQESSWKT  
PWGSPWDSDECDWPGVICSENKLVQRLDLGGNLLVGELEPMELIILNQVNITAMDFSNPR  
LGKGGFPAMLSEFDSLKW  
>comp17064\_c0\_seq1; 207 24 215 LEN=215; translated  
MKSALFATLVAAVSAFAPAKQASTSTAIKAFESLGAQEPLGFYDPLGFVEDGDQAKFDR  
LRYV  
>comp17066\_c0\_seq1; 132 482 763 LEN=763; translated  
MDFLRKKVSGWKL SAGEEQTDDETSPLVGPPTIGISAGQVREDVHYMESRGDIDLSFLRFH  
AFDPNGHIYGNLNNYNNQHGDNYNDSSNSNSN  
>comp17067\_c0\_seq1; 162 347 807 LEN=807; translated  
MMNCTDEESETXPNAGVKVAVVGLADTATEEAPAVAEVEFFQLQREVRVFHFLGSPLYVA  
AHDLSHDHDDQNDVERHDHHDIDDDAPRRGDDLPGGAGGFWKLRIDKPAHHTRRFRAAH  
GDPTPDAGNGNENHTGKQQHDANRGVAAAATATA  
>comp17069\_c0\_seq1; 150 74 294 LEN=294; translated  
MNLITITLLSFVAAFALANETGSSSVAVELTDTDPDERDLGGYPAYPAYPAYDYCYEICNG  
RGGKGSKGGKGSKG  
>comp17072\_c0\_seq1; 185 306 426 LEN=426; translated  
MPVGAKSAFQFGNSRETRTLSSAAPDETEGFYDDDDDDDX  
>comp17073\_c0\_seq1; 292 1 1178 LEN=1293; translated  
XQQQHQQQEEERKAEFDFIHSSQSLLEEVRLRLRGYSFVRVAVHGDTPTMVATRKKVLRYE  
EVLVSGNRSALCILVECHGIDHSECIGNGHFHSSGSGSPSRWCWVVGTHLDAFDGIQRAE  
EIQTLLSARLGERDCERTRHLPVLVMGDFNQQRSGDYTGPEWNR IAGSAGLRKVPLDDGV  
AGLLEGGKGFRCVLDAVRAGSGEAGEAVRCNWDPHQPPPSTHWSGTTIDYTYRCPAGNSGG  
NSDDSDAEGSEPEGRITVHPHGVYVGPAGFSDRHMTVTDWTLATTKPTGRGKMQQHPHQ  
PQQRPPRYMDKDFFRHLPAGRHDSWRCAAAAPDRTPEGEPLRGRPPPAFPACEKGS SSR  
SIGSTASSSSSSCPSIGSESLHELFRPLCSE  
>comp17074\_c0\_seq1; 40 1 210 LEN=210; translated  
XTRHDTTRPHHIPMISSARHSLRTTAGSLSHRFAARIAGTGPSSASKRPATAAAHGLWK  
DVDVNVNVNVX  
>comp17076\_c0\_seq1; 139 91 372 LEN=826; translated  
MRATLLSRTRGVVAQTQRRGMAGGPIPARYKVTKNKFVEEWNGRREITEKIWECDQKMAA  
NLFLYVVAIPFGFY SITRGEFQSKGDRRYKDCV  
>comp17078\_c0\_seq1; 366 456 1406 LEN=1776; minus strand; translated  
MNDFANATFP TISSSSLMRYPN SFFHQESLIHNEVIPVPLSQLSMQMESSNI IPTSSTV  
VIGKGRVPPKAPGNRKLRLSLVQDKVQDYVNAKSKMVKSSIVTDIYFAIEELCRQEGSAPP  
FVRYNGTGYSKTTESIAREKITS CFRDCLH DRYKSSSKNKVAKRRLANKEKA EKKRMKRI

EDQQLEFLRREMLPMPMPPILESSMAIHGIQKRLVADDSQHQHRETQHDGRAKPOIQTS  
DNLIHNTPSYTFNLQLOPKISRIGTFSTPLFEFVTTTPVDRSFFEKVPVVPDMDCASTCS  
SSSSYSSKCTGGIDGY  
>comp17079\_c0\_seq1; 194 209 598 LEN=598; translated  
MSGFDELSQEGNGVDVVDVTIATKALMTPDGKCAQHPWVELRKKDPSTGQTYQLDTCPEC  
NEQYEANREALRRRRLLELEKQLQALENESIDLATSRSRSGSGERETGGTGAASSESSQAY  
RPPLPQQQQQ  
>comp17080\_c0\_seq1; 73 1 238 LEN=489; translated  
XPPLWRAEEDRSAERDLVIGIDPIDTASLLPPGCCWEARSPMLRRRCWGMVTLCDPFVVE  
PSVAREKDRHLDCRRSRYA  
>comp17084\_c0\_seq1; 194 141 257 LEN=1034; minus strand; translated  
MNKDHCCNNDGSNIIGPLTEATTTMNNDDNYKEEEIAII  
>comp17086\_c0\_seq1; 191 507 1085 LEN=1240; minus strand; translated  
MNLVHPSNPVNYPSATKSVRLRNNVQRDVRSDIPFAFARFLHVLKLLNSPVEYQTYPSL  
TWHPCGYERSTVEHLLKTQFGAYLERVKTTCQAE LRRLLRDGPVWLTDPHALKLPAG  
EDKETTTITEATTTTPATDTHVCSLWYAGDNTVVS AKLNGAVEGGDRENLWNLKEFLVE  
EGKEPGDDDDNN  
>comp17087\_c0\_seq1; 324 198 1109 LEN=1470; translated  
MANRMLPLLSTKLCSRSAATKICRQSIRSFSGPLPHTPANRRNDKDERRQIHTTRPCNADV  
ADASPTVSSSTESSGIIDRFVVTAEVTVSKIFPAGFGWQTSSIIAENQFGFAPDTLNFALT  
TGAGDAIGVLGGHCLYYTAKKALVDSSINMKSEFQTGVLLGSAAFCSGTAWQPLVDALQG  
ANLSFGGVFAGT WVCGMAFYAGLRAGRTILSGYMSHIEEPTYENSKADASLSCVIGGAT  
GFFVGTDAAYLPNQNFLINIVGIPDGTPLDVGCGIAGSS TALGFLTSQSVFNVIYPTGKC  
WND  
>comp17088\_c0\_seq1; 407 112 1635 LEN=1696; translated  
MNPTSARSANLLVLCCLAQQFLSLLDLVGGFQHINPDFSIRNTRHHLHGSGLHAFKVSVD  
ELEKDLTPSERSITGVVRRRCGPSVTYVKSVLPSSPTNGARNFQRTRNGPRRRRSNQNES  
PSNGLPRGTDLGS GSGFIVAPGYICTNFHVEIQAYSIRKNLELAEHTFDEVVGNLTGGF  
LSHDLNITKSVVFQGALDKDSLDPVYVRISSSSQYKKCRVVDVNTDIDLAVLRIIDDIS  
EPSKDEEEKSPPSDTTAGVDFIPFGSSMDLLVGQTVVAIGNPFGLQSTVTSGVVS AVNRE  
FRAGTARTPANTPIRNVIQTDAAINPGNSGGPLLNKGEVVGINTAIITTS GSSAGIGFA  
VPADQIKPVVKEIIQKDRIQKGQRPNQGWLGLSVVRQD VSIAGNQ NATSSNTMPLALLKN  
WVAKVEMDSPASDAGIRSLAISSEGIVQYGD AIVAVGGNEVTNFEE LHRELESRVVGEQV  
ALTVQDAEGKRRVVVYVTL SRKPEKLGL  
>comp17089\_c0\_seq1; 334 21 1088 LEN=1256; translated  
MSSSETTTDKTEPQRTKKTAVVIGATGYIGSAVTMALGDHGMSVRCTSRDASGARWLKDL  
ASDVSVELALS DTAGEDTAKSLRSLLRGADMAFFCAGFEEQSPSTIDFMVSNALALVDA  
SRAEGVPVVLTSSGGSTNPPGGLPSSVPKSEVLHFS DPPEEQLRGRYSPA AKTRMEARA  
FAAVGRNHANEVDPVLAGDPATPRLVINPNLVLG PQLDPSPTVKGNL PVMARILRKE  
AMADAVPNDSMSIIDVRDLAELHVAALDEAASGRYFGVNR SYAWREILGAFQRVLAERG  
GRGYSPPPLKEGEDYDSA IPTQFDHTRKNSLGVTLRPLEETLGD LVDVFLRAKGAI  
>comp17090\_c0\_seq1; 251 191 568 LEN=930; translated  
MSRTSALFLLAAFLSSSINAF TMQTARSVQGAQLLQSKNMLASVLKMSEEEEEAAASKIS  
ADGTFYDDEIDSAPIKTGISDSMRQRLMAEASTGLDSEKKQTNVILYICVGVAAALVVLGG  
GGILY  
>comp17091\_c0\_seq1; 128 1 314 LEN=314; translated  
XFVWWRWNRFDISF DAVIKYFASGYVIGVFQAFMVETIMSI PYGVFATIELSSEVVSEVG  
QNATDPTTYLED RKNVAKMMKDYWG VNALYLFVGFIMAA FVEEVX  
>comp17095\_c0\_seq1; 348 1 1130 LEN=1217; translated  
XRNHKIFDRSEEQDTQIDQNEGEKKQRRAVFRNSCMLRRVGNRNGTARAPPPTSPDAGF  
NSGIGISED LGIVSTASLSSLLIGNPSTAYKASADPLNALI PAGSGAVLQQRATIERSNE  
WREGSPRLSTQLGLSRIGTTREDESSRAIAPLQQLSPFSDREL FYPSSLAGEWTVRSTL  
QQKVFPFGPDFVPSHSLVQGS PRNRGEQVGD TTSYTVRYISENEKTIADRAFNLVMSRS  
YQQLSPVIADSI VWSARDPTRLTYQTEPIAADMRPVGPRKAEVYLTARKTEESSSGFAA  
AERSRTITVGTGSVSANDQEVITEFLPVDGDTVRAVSRIAIYLT PNPNSREGVLWQQVNG  
KAVAFYDYEMVMERKK  
>comp17098\_c0\_seq1; 280 1 1344 LEN=1732; translated  
ERHEKPILLYLPGFDGTYVCPFLQFPELGTEFEVWCMTIGMEDRSTYDELKSVVLDVLR  
DLAAGHRAAEAVPAGASSESRSEGESETEEA VPPERAPAAGGSGRFSGLFGGNGRKAGAK  
TTGRPVYLAGESFGGILASDVARTLLEE QNAPGGAGGASTVDLKGVLVINPATCYDRSQL

ATAGPSVASAPSPFYLLGLFSLVPLFTDEFVSVEQLLLILLSAKGLPSVIDTPRREAYMGR  
VAFSLPTKLGYSASTLSWRLDEWLKTGCASTRRSSFGAFPDFRSLIVVGEKDKTLPSIA  
EAERLANKVMNPGKTRIHVVVDGAGHASTCGSRLDLAAVIRNCFPELQTPKGRRKPSRKSR  
GEDPEEELLEEDANPKRTSMKPEAAGGSGPRFGMEERYDKADVGLNPLFYWSKSHYRAVRQ  
DSQQRKVRVPGEAPSPYQKAVYTVQE

>comp17101\_c0\_seq1; 651 163 1449 LEN=1560; translated  
MPSQQSTRSSSHKTMSSGLASVALVALSSCSVEGFSPVSNAALAPPKTQSTVVVTSASY  
GRDRSTHLKMSSDAQDEVAKLKEMAAKAREEAAALAKELGYEDEDLGTKGASGSSTAAPP  
KPSKTTEEVAASIRAIDFNSGSASDQVSALDALRSEGSLSLYKSATAEAGSGDLRSYPCS  
LGMLENRAGLTSEKLGIGEEVSLDDFKYGTLLWITGGCTVAGIASLALLPENIGATLCYF  
LALIPILWLAVGSTVPAAIANLILLVKGNDDGGVDRTDRVCRHEAAHFLCGYLCGLPVAS  
YATADDSVPRVEFHYSDGAATANRELTMDENVNALTVVVALSGAVSEAMAFGKAQGGAGN  
ADLTELQNI FRKSEQFLGAEKQQDMTRWGALTAYRLLNSNSKQLNALVEAFRQKKSVAADC  
VAIIIEKA

>comp17105\_c0\_seq1; 874 151 2308 LEN=2308; translated  
MTSSNSTNCHTGPLPFHKLIVAGVCLFVLLHSSGLVNSFGIHHYPPPTSSQLLDGNSLK  
LSQQKRILQRRITQRRRQICYISNDDTDETEDEYDSMMDYDSDDDDFDVAALNKLTIPO  
LKQQRLRLRGMKISGNKQELIDRLAEKQTESANERVASMLDEEEGGKSSPGTKRKIPETKA  
QKFAKEQKGFIDVEAFLDEEDKGDVKTSLPTEEQKRSKEDEENAPLSNPEVWGSDAKI  
VDDYEGRSPVVDGLSRTIVEYTGSNQTDIQAIVVASRDAMKPFLEGGKNRTITNSDPLKR  
LREIQSKRERAERRPTRMDDQGLDEGDPEGIYKDAINRDFSDWGEFTATGAQLSAEEVQ  
GVLILSDVYGPFTTEATKNLAEKIAFECQPVVCMVPDLFRGRPWREDLTPGFNQEGQDYE  
TWRATHDDLRSVDIRASAAILREQYGVSSLVVWGTCFGGGRALEIAAGYLPRGQIHDVD  
GTIGPVPVRPEVVVAWYPTRYNANLLFGKDRTEQLRICEEPGRNFVAVMGVFAGKDTLEGA  
TPGDAEKLKSLLEDRIKDHMIKVFDPQEHGFANIYGRNQDETELDRLFVDEEFGGAGR  
VTVNDGDADVACLSTAFMETYSRKFLPTTGSPVAEDEAEFQWNSLELNMKDLSENVRDV  
RTEIDDSLNRHEDLPLGGKYIDPGDEEAQDELFKALQAMQDPNSESEFKINDDDNLETAX

>comp17107\_c0\_seq1; 88 1 783 LEN=1231; translated  
HQTYTYHRHTGGYFVAFPSKRRPTPPQANMKTTPRPAALALAVASGGLRAVFLGGLF  
RSGTTALADVPTFHPPVEDGERAGGSGNTQRGPRPPIPAEYLEGCRRSFGDPPQLACA  
TCNVLPEAHRSGCLDCCRPYRTLDKRSKRYGAAVLVNTGQPDSVRELLEEDRATILSRKG  
PDRFAVYGDGGGMDPLWSVFGHVREPSAILWFDRPPPAGASLEELSAGADEVTVLSGR  
RGLGRDDLRLMLLALLPDTE

>comp17109\_c0\_seq1; 146 1 362 LEN=362; translated  
QQQQQQQHQPSPSRKATYRNRQQEETDPDFRRGAGLQLQQPTPYTQAAAAAGYASSG  
GGRGSGTMYYPGSTGSHHRVGYGYGQPQHQLQQHHQHHSYHPSQQPQQHYQQQQQQQ  
X

>comp17113\_c0\_seq1; 469 99 1202 LEN=1220; translated  
MAAPASAEWNLDWGGYYNSHVGYVTVDSNTAAQAGADFDGVDVFTNAEIHFTPSVTLDN  
GLTFGINVQYEALNAGGGADGIDESFLSISGDTLGRIDLGAENSAGYKMSIGAPQVSGGI  
GINSPSVSGFVPIAAGGNLPAFRDSSGSISSYAEVLGNNDVQRITYYTPSFNGLTLGVS  
YAANAAGNAVNNFVGNRNAGVTDVFDIGLAYSQSFNGVDVFAARWGTAESNVVGTSDPE  
VWNIGLNVGFNGFVIGGGYGENDNGGLRAWDSEGWSLGVTYDIAGPWSVGFDTYQGEYS  
IGAASGDKAIEYAYQLVGSRSLSGAVTWAVYAAVEGVSNAADVATFGNANTTVEGTVIG  
TSVNLSF

>comp17114\_c0\_seq1; 326 688 1402 LEN=1402; translated  
MSNPWKASTTTGSKPQRQRQEQQLFREEETALLSFFRQSDFDLLKEKPPPTNPDAC  
AHGPGPGGPLVAPVGRAENDGSRNGGPCSTNPFDDAFVPVRAARRDESTAGARVGSRRTH  
HSFGHSRDRGRNSSYHNSNTRNPFSSPDGPTDELFPPLVPVSPASTDSVATAATAV  
PTGERPILPVATAVPNDSTTTNTVPFAAAVPIESVQTVTDAEACGDADGSVVPDSRSRX

>comp17116\_c0\_seq1; 146 1 696 LEN=806; translated  
YRLSPRSQKPNTAMETTKTSAGDADSSGSGTSVEIGFIDYRDESQLEHVDRLVAVDLSE  
YSIFTYRYFLNRYPDLCILAVDKSSEVCGCVVGKIDVETNTSVATGDHSNVVLDLDAESS  
DLDTSDRKNSAQQLCEDPTAGSAANYMVQTYIGMLAVSKSYRRKIGKDLVRQVLKR  
MKARRCTSVTLETEVSNVTAQKLYQDHFGFIREELLVRYLNCGDAYRLRLW

>comp17118\_c0\_seq1; 612 62 1804 LEN=1886; translated  
MASANNANESSGPGFNTWTFGDACESMSPLNSLHRADLVIDEGENEGDNEKAGADLLFVC  
HFSRGAETASSMGLDAETHASISSLLEEHAETYKNGSKEGSLTPTLRTMDGRTKTQRRLL  
VLVGMGEKGDQDPSRSAKIGRSLGKAIATRCSEEASPKLARAALLPFSIGAGEAQVSC  
ARELAAAFYSGLYADHRFRGSLESIQKPTVPARHLESVALRGYS DAGAGSSESETGSFET

AAMEDAVATGKAIARGVHLARDIVNAPHNVLNLSLADLARTIASESTDGCLSCTILDKD  
DCEKRGMGAYLGVARASETPPRFIHLTYTPPTTGASGPNKKVGVVKGKLLFDTGGYNIKT  
AMMELMKFDCGGAAAVLGAALTAAALRPGKVECHFVVAACENMVNDRGIVPSDVLVASNG  
VTIEIQNTDAEGRLLTADALVYCDREVGCEKIVELSTLTGSCMVALGKEVCGVFTENDDL  
AGEIDAVSKATGEPSSWRMPLVKSYEDQLRSKIADINNYGTRFSGSITAGLFLQHFVDTKR  
VPFAHIDIAGPVWNDSSGATGFGSRLVSEWIRROGVAGGA  
>comp17119\_c0\_seq1; 253 73 573 LEN=972; translated  
MNLNTLLAAIALVVGADAFSFSPENGTNAKPPTGSGVRRAAFAEVTATAAAIAGGSLLI  
SNPGTAVAATGPEVFGVGTYPDPINHPGGTRTIKLLDQKIGDYQLAEVRGGGGGRGEPENY  
VLPAAIIGDRTIVIDFSPKGGPRDFVIGILQNGDIKFLKDGNRWPRQ  
>comp17121\_c0\_seq1; 460 1 1417 LEN=1581; translated  
XNNRKMVRRRGAFAVLLATNLGAARVSAFHNRHHHRPHTPPDAGNPTAARRRSGFGAS  
ATTLPSRLSYAIDVQEHCPDRDPTMEAWVYECGVQGSGLRLVGEADETNHEDYSLSTEE  
DIPANSPVLYVPSEMVLSAQRAMEEFGQLEESEKLITSLNAESELRHYYLMVKILVEWER  
GMDSPWYPWLNLSLPRYFSNAASMTPFCKYKCLPSLMSILAMKERANMNHLMIKKVPFLSVE  
TRGNADLWAWAYNVVYTRSFEANNGSGDLCIAPMADYFNHGTETEVEVMGYDAEGNCHVQT  
TRDVPAGSPLRMSYGDPTNPSFLLARYGFLDESSPATFCKYIPPHVNDLREMGYAHRM  
LFFKDTGDASEEVDVLLHQILSSSNIAKKRALYKAHLDDGDYDTKRMLHEQYYSQTSKLL  
MEHIDTFNLQDDLSAKSVGKDVNEHPRLPLILKHNEFVRNTFLAVRSRYFE  
>comp17122\_c0\_seq1; 277 1 1315 LEN=1315; translated  
XASEEILALALAIATHGGEAVCLLCKDASHAEGVSDRLRGLPKGSCAPIGVGVCPSDDT  
WARDTAPTFVFCRGRNDQRNRLIGMDWTFNAYGGPEEGAYWPCKRDQRIARAICSETTVA  
VDPALRGAHGGLGSGSLAGSLSIGSLSVPLVLEGGSFHTDGEGLTLLTAECLLNPNRNP  
HLSREDIEAVLKRALGVSVVWLWLPYGLRNDHDTNGHVDNFCAFVRPGHVVLAWTDNEDEG  
GDEEDGDATNYERCRAAQKYLESHTDAMGRTIEITRLCLPDPPLAYTEEEAATIGQPSTG  
DSDAAALARLPNEPMAASYVNYVANQAVLVQFAAPGESTDHRSLRETDQRALDTLXA  
SVPEPDRGGGAEPNRPAGGREHPLPDAAGSGVCRTRGFSVAQACDTNHWKGRHRIKKVF  
KNHEKHAVTFQSVGPYSME  
>comp17123\_c0\_seq1; 211 1 673 LEN=1189; minus strand; translated  
XSIDEMQREREIQLGISRACATMNDLEVAANHTKELERLLTKSVDQGFPPNTPETEQLRM  
CVQSLGPVAGTFTLASDQSVESLLSVLKPRIRAIIVTDAVGS DHGASHGGGASGFSSVIVG  
GGITKTSTDRHSVRMNYELDEDAYQLLEVSQSYVSRLCTLLDEMLVPLCRYLAPRLADSL  
VLGVLGTVSKRLEVSLKKVRPRSLFLKLNHGLNASEPLRIIVT  
>comp17125\_c0\_seq1; 268 1 1231 LEN=1259; translated  
XRLKKIGGITTVAGSGDGIEREHLTPGQFLARLPLDPATGKMLVMGVVMKCLGPLLTA  
SCLSGRSPFYDPPGERKESKKIRQWFSDSDIMASVRAYDSFWQKVS EDGWKNAREWAYC  
HYVSVPAMIAIREVRLQLNELRKAGLVPKGDIITGSSSSRGSSRNQRVSSRGDLSPKAT  
VNEHSSCEMLTSAVWCTAFPENLASRRRLGHFGVIRTKHEDNASLHPSSVLYHRDQPE  
MSLPSDWYLYSEKILTSQVYVRGCTVLAPEQILLFGGYDLAQHGNSDNFDDNRRNNDYQH  
RIRGVLDGWIAVDGGKSDETVNLLLQTTRENIEMIFERRIMYPKKRKYRGKDGLESSRAVE  
DWDRDERNHDDR I IAGVRDMFESLTRNENSRIYEKEVDPPDDFDHYFLDK  
>comp17129\_c0\_seq1; 308 1 994 LEN=1687; minus strand; translated  
XRKRRQKNEKKQRKEARASALTNETDTEEPQYTTINTLLYDFLVFNLLLVLSFPQYLV  
SFLWSRFTSKQWSARRKTVVVTGARSPLAETARQYAAQGANLILISHSSTSVEDDLDWL  
VEECHQLGSSNVRYSADLSKADSAEQTLQQAEDFNETFVILNGENKSHGCLFEEII  
DVHEIEDMVKGNTIGCLTTLHYALKHIPKTSRIVILSSTSGLIASPYKSVYGATQHAL  
KGFCD SIRMELNSNYTERRAPKICYASFPELIGKNIHHQNCNIHISRMGAENPPMKTHSW  
AAIPLQKAVHDLLEAVALGERDYGSPRHVKAW  
>comp17132\_c0\_seq1; 243 345 1340 LEN=1454; minus strand; translated  
MNHRTIFRQOC SRFLPANLSFSPRRKVRVRLDVP SRFSRQFSSLVSWDVEESSDKKTI  
GIITLRS PETYNSLSEEMADEFRDLMFQLEDDLSDTEGNSINKNVGAIVLRGEGDKAFSA  
GGNLKFLQSKKENS V HANVDGMLRFYKSF LCVREKIPVPVIGALHGPVAVGAGACLALACE  
MRVVASGDRPILGF PFSKLG IPTGMGALHLLQNSSKLSNTQAGEILFLGKTLTGEEALDC  
GLANRLVPKERVKEEAKQLALEIARTGHPVAIRSMARSMRLATDHGSGSLADCMYRDAHA  
QAMCYNREDWGEGLRAAKTKRDPSFADYHSK  
>comp17134\_c0\_seq1; 441 47 579 LEN=579; translated  
MADPSNDDNDNVDAAKIKNDDDDFAPTTAVIMLGS MNFEPVATSDILSLKIQSPEEMSG  
VLEEASSSIRPNLSLVHLLKSSSVSSLFDESILTSFYEG LIPGKEVNVHVLPE SAVLA  
EDMPVQANDVDSIRTAMVMAGLMLHSEQAHEGSWILVAIKPGGETDDDDDEDDDDDDX  
>comp17138\_c0\_seq1; 490 223 1668 LEN=2383; translated

MGDSAVLGLTRHAASRPAHKTFRVLRMAAIAAAVLATLCSVETS VFVAVGTGAALGSEGT  
AVAPLPGTVPVATRNHHSATRD LASHSLVIGVPGSDELASPSLALSSLPHTNQATAERIA  
XEGKASVVELHVAAGHRAPPAPWNPAGGQGRHVDDRGLAPPAPRPLRDASGDRRIGIPL  
RPAAGELPKRAAPGGIGSAKDRKRGKDHGPNHPEAGHGDPQRRLLDGQVPSRRVLGG  
RSQGADEDVAAKNGTDDKAPYNVISLSVLTASPLESEYHQSVRGFGNRVSFPDPRVGS  
TGDAFHIMDVSFRFTSRHHKRYKEERFVLWEEGMRWGTGHSKTVPKHMPNGGQRTFLS  
DEYFYVHFKMHDGSAALGAAVNESTGRFVRSGLNTGLKAASHKGWRGTFLDETEPD  
RVSFRPPEPLSSAIDERCDSLRKAATSDPVSPTQGRGFGIPLCTLPWNV DASFGRGR  
QVRSATERLGG

>comp17139\_c0\_seq1; 252 1 899 LEN=921; translated  
XYNSTGTRERTMSILAGMINPSLLVCWLGVLGAGHNVAHAFVGGRTTHTARAKTTAATI  
RKVQHSLNAAPKIKQSPEQKARRKELLKRDPYFKVDKLSGNI EFGAATKLVTDLSQNKD  
ANKE SIEEWLSDNDGKGLALS I WDESLMEVLPDSVYRLQTMPLKFVTLELQPSVDLQMW  
TQRAGKNRAGRQLPPIFKLNSVGFETNLRLLPGMVISSESLGIFIEVAGDLRPTEDGTG  
V KGTISFQTKGSLPPLRLLPDSALKLAADTINDTIVQFAVASFEKG AIDKYNEFMQQR  
S  
>comp17144\_c0\_seq1; 66 1 863 LEN=863; minus strand; translated  
XLLLLLLLLAAPAAHRNVAVRPRPRAGSGLGRRNEPTPHLSLAPAKGGRLSDGPLEGFV  
D VKGADPPVDLEFLARRRRGDRRRRTGPQERRGQPGGRRPAVLAGRPNRDRVPA AQG  
KLLARLHHLVDEV LGGQVVARSRHRWERE VVGPARGTAAARRELPPRGGQPAAAAAS  
IRGASLLPKDVAASAQTQARASVGPRALAVRVTGVPARGPWAELAKGAGPQAGLPDAV  
VPPVAPPQDGPARGLCHHAPRGRGRVPGGQGGEPGPGG VGGAPRRSDWARGSL  
>comp17148\_c0\_seq1; 200 1 663 LEN=1459; minus strand; translated  
AILCLMVCRMAATGLLFEILKSVTPAFLSKGLMAMFPIEEIQASYDIMNEFVVEDGLLQ  
D QVARLFFITFHIQVIGIGYLGIDFLKQE QHRRNELVKMDIDIEGAVDKDGDGAKKAP  
LHDAKGGGTAKNKLQRGIEEKKMKRSQKFQRTAAPFIFFTAVPYMVRVIGYGNINAF  
AFACMRD DIHRAVRLYDLFDHDNHLVALADHSAPAGK KKKHLQFQ  
>comp17149\_c0\_seq1; 545 89 1104 LEN=1104; translated  
MNEPPIYQLIDEEEFWNIYGLRMAEEAGVGS ENENDRETQRR IASEQAYQE QIHAKIF  
GAEDLEEENGHEDDDDCHQVGGGERSFIRGGGAGSKRRRREKQLEKWEHEEIDIRL  
DASLLDSFPSSASESNEAKEQSPKNVSSSFRNTDKTVIIRVNLKALASRSDTVFAMAS  
YRHLFQNTAKPCNGTDKSENIGESKSNPEGKLSLSLCDYPVESVKIFLRVLLSSPLTK  
NADAPSDTE TSPPEHVIDCCRLAHYLQCQD LLD SIVDDYLMAEGSIDNENCRFLSK  
LADEL SLPRLWEASVNHMLSSLD RFDGGGAGITKKRIDNDNDINDNDNDNX  
>comp17151\_c0\_seq1; 210 570 1218 LEN=1218; minus strand; translated  
MITYNRSFAFWRLIFRAHGSAVYRSVLP SMISVLAYFLYHKYNT EYAGFAADDVLHP  
YAI GVLVSSSTFLIIFKLSQSYNRYWEACSSTYQFMSKWL DATSHTCCYHMQCDHY  
NDIKPPS FYDYPELNLHLMTRDRERSHTSHIHDV DDEETKDDNNVGLRNRKQSQTQ  
TSAPTENYPPM PSRKMF SARSLSGSIRSDASSGEYGRNAPKDLKGRSX  
>comp17156\_c0\_seq1; 73 1 308 LEN=466; translated  
XSNSNSNRNRNTT VAPTRGARGAAGAGAAAGAVGTTTEAAAGGTGTGGAAAGATAT  
AGTT ARGRGTTATAGDPENASDGIGTERTGATEQC RAGRPA MQRRAW  
>comp17157\_c0\_seq1; 79 1 788 LEN=788; minus strand; translated  
XAAAAAAMLHAVRSPRRWLPWPGLGPKPRRCACGRPLGSAAPAAAPCTGVGAFGPKPP  
F PRVPPSAFPVGYGGGAAPAAFRLPFAAFAVA AVPPERPRLPSCGAQGSRPAPGIS  
ATT SLGPGSTTTRLLLRGVGERFRFP GGASPPPGGLGVDPVPLPREPAAFLLLPRV  
PAGGQD RPDLDPFAKGHALLASPEEGLAGTGEGLAAVVS SKETTAGTRTDGDGNTL  
GGTANPSGL AGGACAAPLARGTRGPEPPFRP  
>comp17158\_c0\_seq1; 6 1 1128 LEN=1128; translated  
XVRALLGAARKLPGAPSPACMPN RAGRLPLHEACRHRATAEVLEELVRACPEAVLLR  
DGD GSQPLHIFCDRGGAVSSMEV LLEALLGTARGATMIAGKDCVLGKTPLEILDHR  
KNRAAFASTVESLRSMSRERRRCDKNNNGGNRNNHRSSNHSETNHRMNNRHRNR  
AADWEDPERIVG EARGTDFWRKARLLLLAEHASAGPFP PGKWKDGSVLRACLAAG  
CCPPSLVEYALLAHGEE LSEPNARGDLP LHEVCAGRGD LLSAVLEAHPGAAGAR  
NGDGVFPLGAYLGRDCLKPPT QKGV LWSLVETHPLAVGSLGLGPCLYPRLLSKLA  
ARPNQGLDAVFDVLRDTAPVLVAQQ LACDRGNHSNLEFIPNR  
>comp17160\_c0\_seq1; 130 309 704 LEN=718; minus strand; translated  
MPVLVRYRLQIVFDIGCSPKSTGNAGCCLRIATEHSTSDGHRRAE GSRKRTRR  
DGS LPPR AQVLGTKAPRPGTERSGVPGWAPIVVLGNAVLDGLPPGIPSDRNHR  
HEPAGSSATRPVAT NPTEYECSFFS  
>comp17163\_c0\_seq1; 465 270 1211 LEN=1228; translated



MTMDPERTPTPSTAEVAAPSEGNFEKSRSSKDFAKNTTITKPTQLSFDPMPTSSISKRRYS  
ERSPSTTSVTGENEDSTAGGEDSSAESHLEMQQPDPSDIRLEMNPIGATENFADLPDP  
EDDKLSPDEFHLKLVFATCGMELEPKKAKSLKDFFEKVTDAQVAAYTMVVVSACRNNDLD  
ALKKLHSEEGQTLNCFNRFGESLLTMACRRGFEDVVEYLLQQAGVDVRI SDDSGRTVLHD  
ACWNPSPQLRICGWITDRDPALWVADNRGCTPFQYARPEHWGIWRQFLLDHKGALQLLR  
TDDIKSKLSKQTQ  
>comp17172\_c0\_seq1; 401 11 943 LEN=1397; translated  
MALAAVLWIFFSLRLLVESFRHEHSCYSRQRRRHYYLAQPCVVEGFGVSVANRNVKRDAG  
IDCLENRLSLPDSVALFSSKGGGLGENQGSSEYRSVADVVGGLHGGKYQFGSDATGGAFF  
QNGDAFSGTGDSSGAQQELFATDTGDDGGELPNWAKRMAPRIEPPGSNHPNDCKVLKLP  
SNADPMDGMFHFTSIEIRNQERTWEKFYAKIMVKEGAADGGGFVELPSPEASNLLCVAPS  
SGFLAPRGASNACDANKPYSDRATIRIAQNLWQNDANDGLEERLWLVVGTEEEQWSYK  
LEFLALGDGD  
>comp17173\_c0\_seq1; 455 1 1466 LEN=1466; translated  
PHFAKTSDEIPTNEVDVIVIGSGLAGLSAALLSHCDKETVVFEAHDTPGGAHGWERR  
GFHFESGPSLYSGFSMDESPNPLKNVFIIGEDAEWITYDRWGTVMPPDGRKFAAKIGPEE  
FGDVLKEHGGPNAEKEFAALMERMEPLSNAQAALTSMALREDAGAIFTLLRYPKELFATL  
RQGQALNDPFSNIMEEMELKDKFVKNWLDMLCFLLOGLPASGTMNAVMAVMLADWYRPGV  
VLDFPKGGSGSIVDALVRGVRKNANGKVCLNAPVEEIIVEDDKVVGKLENGKVVKARQA  
VVSNAADPYVTNKMLSKARSEGLHTKAAEYMDSFINTDENTGGIPDLKSFIIHAGIDAT  
GLPTEASADFPQTQAVVRDWDAPEGVESPRNIVLCSMPSLIDPSLAPEGKHLHAYVPAT  
EPYEWWEGMDRDSEYKKKKDEAADFLWSAIEEYVPDARNRAVPGTVQIGTPLTHERFLR  
RSRGAYGPX  
>comp17181\_c0\_seq1; 305 1 1296 LEN=1678; translated  
YSYPIFNFKLFRFRNHFPQKRNPAPELPIVILLGDTATQLPSIVLIDGVRKPRIQGNP  
RRSNTIHYHPQSPFHSSTRSQAAATNSNTNTSPIAMTFQRNCDFHRSGRACRRTRQKRLM  
LNGPLLLLLGMVTALAPVDQLSRNSFPFVGMVESLSQVPLETQRQSSIRLTLATSTTKLQ  
LQMPTKDNSSNSIHCEETTRGKTEKGSDEKEDADPSLPIHRRTALFNMAAAVVAASAGSA  
TIPPLPSHAYTPDPDKLQESLYFVSRVQEATVQQERYIRKNLGGTGNGKEVRAKLKLTLR  
LVDKNYKLLDQINYASAYVTPDQLVEASAAGYEAVDALQGAIDFVANDSNWAGGNDADR  
AEVLTGFLRDCREQLLVFTESMPAEKLRNARYRVEDENVKNRDEFDGDDEDAGVYNPNL  
WKPVLAPTMPR  
>comp17186\_c0\_seq1; 432 1 1054 LEN=1317; translated  
XQSLSGTRGAKPVGDDGRNSPAAETHSTRQOASRSFAERSPQRHEPPAPTPATPQQLQR  
VTPGASAEGSDEEPSGKEQEDREEQRQOEEKQELANLEKKEQQDREEKLQEEQKQLADL  
EKKEQQDREEKLQEQTKQFVALEEEVRALREEKDRLQOQRAEGRDLKLOSEHSDLLRE  
HRGLLEKVERSMADLRVTEERDAIRSVYDRSRAAWESRFELLMEARRKQAAAGAGNPGG  
CAPVCPECETFEFYSGLAAALAGDDREGGEAPQAVHPSESHKQDPGETTEPGNPEMEN  
EIENIASMINGMTLSPCEPAESANPVKTESEPOADNQIENEPRQSMGTNC  
>comp17187\_c0\_seq1; 282 545 1381 LEN=1542; translated  
MAMTKRLASSALVEAMGDDASVNCNCYNGDDILSRLFGSVEARDSFFANDFGKNVHIRR  
STSGNDIRDLNLPIDVNEEDSNYEKTSKINMKILFDTSEFIALRIRGSMTYLNKAETSVD  
DFCEYIGNRGSVAIPVAEENALMPFRNQIEASMRDQLHMRQRNSQEVHLHQEQNEVQAGIN  
VYHSGPAVALNRHFDQYDVFLHLDGHKDWEIGVFDPDHVIDDDAFMDTTSIDKVRRT  
NMTLVPGDVLYIPKGVYHAATTADGYESTTHATIGLEY  
>comp17188\_c0\_seq1; 210 169 720 LEN=720; translated  
MDTKTVNKTQDDGFRPTTVVIRHGERLDYVQRAQGNWCQANPEQPWNPLTDEGVEMA  
RALGTALKEKILPEMRMAPIAAVYTSFPLRCRQTAAGIIGMSSVVITDENNSGSDGNGT  
AKSSLKVRVELGLSESMNENWFRSWSLPGADGTWGYKKEVPLNQFEVDPRALQPAETLLN  
WKDS  
>comp17194\_c0\_seq1; 29 1 229 LEN=229; translated  
XYQFEIRDSFGNGLIDPDGGNGSYTGTLDGAEIFSGSSFGNSEVSDFCVQAAPVPEPAP  
EPAPEPTPVPTPVPTPV  
>comp17195\_c0\_seq1; 340 72 884 LEN=1140; translated  
MTEAYSKSPSPDVATASEALKKPTRALFCLSLFFSLSLSFAGTLVQRNRVESCAESGA  
SASSACLVGPPPPSSHTELLVGYKILHHTLSKESQLKYLHWLRGATLRGPEGLKAIMS  
VIYETSGDRLSELEDLFRDEHPAISIGEAPVSAIGDSIQNEVEASSTAELVPLPFLSPTA  
SREEWGVRFLLVQAQATRMVVALATSLRKLEKSEARKQWLAGLAAEYEAIREDLVECVGS  
RRAGGRGSGGGTGMKESRVGPEGTTLRANPT  
>comp17203\_c0\_seq1; 164 83 467 LEN=467; translated

MRITFRGVNAVVFSSILCLWFLLFVKTLSDLPTIVGDNFPSLQQSHTEDSGTIGYKHKARQ  
YDKREEEHLHAIYGNEDRIRNSNRMKPENENETQTNDFDAVGPFYISVGNDDKPYLGRPH  
YDYNEDDX  
>comp17204\_c0\_seq1; 138 292 624 LEN=918; translated  
MNGEQSDSALDLKSGPFGVLWRAVKGNTQVLVNVRRNNHKLGRVKAYDRHMNLLMEDVK  
EMWTETSKGGKGTTRGTAVNKDRYVSKMFLRGDSVIIIVSNPAALAEAGGK  
>comp17205\_c0\_seq1; 132 201 309 LEN=309; translated  
MKSLIDALPPLATTESDSSDTDDSETDHYDNDNDNDX  
>comp17207\_c0\_seq1; 325 110 1282 LEN=1459; minus strand; translated  
MVGGVLENILGSFNPLDVVQSCEDVLAEASDGRDALQWATYIIQQGPHEGKKILAFMGTD  
FSNAEQLLADIWSTPTANYLIRNMAEEAVQVALEQEADFITGHSLGGILTEMVCSETGIE  
GASFAALGAYDPFTRLDALGINVASNVVDTALSQYSTTLESFGFDNTEIEEMIANWDEED  
IRQLLIRTEYNGLIENTLHNGIKFDVVINTYDLAARPIGSIDGSACSHIAKSCDVRWTFYF  
GVQYTFGHSSAHYTYNVNSYYTIGWENWILNARIDYNKIFLPNVQKNIACDFCNRDEYCE  
SDSCFEVPGLLSTGGQCNAADGKMPTLCPDESSQSGERGMCESGRDCQSGRCEVHVEFSL  
SPLSTRCYDKLPDGSVSLTDMYFSLKNNRV  
>comp17211\_c0\_seq1; 212 1 1372 LEN=1510; translated  
XSKYCTIQYPTRQGRNTERTLTDRENVLGTKALKMIATMIISTPCTSKRKSCDENDFPLC  
RLPEDVLCVKMSFLDAKSLCEMRKINRKFRESASKNSAGWVLCRNLWKNKIHVCEVAQE  
ELRRSSSSSCGCSHGNNITNASAMSAYRKSLLDGNRRDHLTREELIFNPATGKGTVWSFR  
FKEAAGSDWTAFDWPYNHQPCRKMVFLDDGRVKIYAPRTNKREDKEQNMIEEGHADISGG  
YADDILEVGGQSENMEIDDASTRSPSRIDPRRNPLGPEGDVNDTDLQDPAVPMTRFVTQ  
PLDFPDRPIGSYIRFSVRGREVPTYVCCRSPNTNNWGFVMESCWGVYASFKLPPRPRNDTN  
GRVLRRRRRRRQRLRRSLNLVPGREVFHFHVEIEDSSDDEEGSEEEPTGDDALVWDDNFN  
VTTELQWREAFLYNNFSFPLLEPGSDALAEFRNYGI  
>comp17214\_c0\_seq1; 159 80 297 LEN=297; translated  
MAVFDQQLCECDKAGAGKGGILVSVFLRIPLLLLATFLRSGEHQGLRNPVSEDGVLGLAS  
AGIFGSNSNNNNX  
>comp17219\_c0\_seq1; 488 57 1615 LEN=1775; translated  
MKYQVGRGALVFSNTRQRQSKLRLFRHIAAQLTNQIDDRHNRRLQDSSRVPIHSGFSFV  
GNKREHAPLHTGRNGPTTLHFPRPNHSIQARSIASWAPEFVQDFSVWGGTGVVLKSLHTA  
GLPYWTSFSAMNFMLRASLLPLVVYGAHTAARYAKVAPEIQFIVTLFQNDLKKMKAEGKS  
LFEQRNLFQNLLETVRSIYKLNINPLTVFLSPFLQIPFFYYVATDLRKIVNGSDPELAQ  
ELTESSFLWVPDLTDPDPWFGPLIAAGAMLYFNVEVAIGKRSLSGPSASKSDFAGLLKDL  
FQTLAVFMPCFSAQSPAGLQIYLVSSFTWTLFQGAALRNDTMRGWVNLPAAGNPPTEPKF  
AKEFMEFKKLEQKAREIRGDGPVLRNVLAVGFETSFPGTNRPSTIRGSDLPVPLDDEA  
PAEVSKVPKLSMQQASAAWGGQYMHGISAPMSELEDRMMDELREERVKEVASHKLTTEKE  
KFMAQGEADMKAANLGVKMTSPSPPETPSITDFPRSGKL  
>comp17223\_c0\_seq1; 384 1 1385 LEN=1646; minus strand; translated  
XLLLLLYRCGCCGPWLATGGEVAGAAGTVPGRVLPGICLGLVKELRVVVGRVLPVVRVAPP  
APRLVPEEVSQKQGGDPEVVQVVAPEGLVPPGVLLLRKVLPGKVGPPKEGRVDGVPPE  
GVLVQLAVGVKVLGPEPVVRGLEVRFDVLALSAAAHAHFGDPAAVLVLVVRVGLLGEHV  
AVQDPPGLGLEPPGRSDGQDGSVHVVDHVAAGSYDLFVLEALELGPRLSDEALERVRGKF  
FHQYRPAVFRFCLCLFCVCVRCVWICLRARARRWLRPRQLVDPVFLVGVKKEAVVVA  
VSVGEKPRGFLPQIDEVVELVPGARVLGGDEADVDRGSRNNGEELHDAVSGPGPPNRADR  
NDRPQSDERPVKIPVAPVAQTARTDPLQAAEQHVRLLAGDRGFVPELFPVAVFAV  
LDVAVAVDAGGALRLGFDGAVAVADGLVVVAAAFDLAHRGL  
>comp17230\_c0\_seq1; 442 95 1057 LEN=1132; translated  
MSNETTETTVQDEKGAIEQKGAVEETSQSVAVVDGAGGKKRKSNSNSRIAPITSEGDMPOK  
KYRQRAHCNPLSHNDNFQYPLRPDKMDWTEEHYPGWEEKYKPSGTTADAVVPTVLDIGCG  
FGGLTVALATILPNETILGMEIRAKVTEFVRLRLALRKEVPGSYENASVMRTNSMKFLP  
NYFRKGCNKLFFCFDPDPHFKRKNHPRRIVSERLLSEYAYFLAPGGKLYCITDVKELHEW  
HVAKCDAHPLFERIEDEKVLAAADPCVNAMVTETEEGKKVARNKGDYAVYKYRDDLVQN  
GEREWQMESFFDTFPEESKE  
>comp17240\_c0\_seq1; 582 249 863 LEN=946; translated  
MFARNAIVLAAVLASTEAFAPVSRVNTASTTALEAATIWIYSTSTGNTETVAQYIADAAGG  
LDINDIGDASDDEITGSDGLIIGAPTWHTGADEQRSSTSWDDWLYDTLPSLDLDGKVAI  
FGVGDQQSYGDNVYCDAAAGELYDLFTAKGAKVFGFTSQDGYDHVESKAVYDGFKFCGLMCDE  
DNQYDLSEDRSKAWVAQLKDEGFF  
>comp17243\_c0\_seq1; 325 1 1145 LEN=1299; minus strand; translated

XKSKKNKKNKKGSSNDYERPKIPPHLAHLKMKTPLSNGTKWSLSGPQFPRPTAIQQRICY  
PQGDSEYASKGAALWTMYNCNGKEDKEYRLLHVYFVSVKRANNTGRNALSVSVCSSKASSM  
SSKASTKRVRNRKRAILDARKGGKRQKRPYSKTGHDSKLSGVLPPSSPVRANGPIFRPPFV  
NVSPNTASASSRVIERNLSRDGSFGDNFGNHRIYTIIPSYLLNGDDESYDTSPALNAVDDI  
FRGSELPDAARDYDNMMGVELADPSSMMRVACIDWPTLNDSASAKHARHHYQQSSETFPQ  
VLVGLKLTLEKIIHEWVGSRRPRSEQGLLINLVANWARSISRSPLELNRIDRDVKEESDD  
ISGAVGLIDSLVDEDEDVAIAV  
>comp17244\_c0\_seq1; 76 1 499 LEN=855; minus strand; translated  
XLSYDSTSWVVENFDAALVKFNEDKNKNDLKIEIDYTSERLSSKTAHYACGEKTSIAMELC  
RSKSNRPDTSITFFDFRFGFKXGYDVVCLFVNNTANADTIKILRKCEVKMICNRCAGFDRI  
DTKAALAYGVSLARVPAYSPYAVAEFAVSLMLMGINRKIAKASTRVK  
>comp17246\_c0\_seq1; 422 1 1757 LEN=1898; minus strand; translated  
XIEPQTQYSECVQAMNCHMMASMTTNAVQGSALFCHQMIPHHQNAVNMASLLHTHDVIC  
VEEESWECELSPILYDIINVQNSQIMDMRAALDLLGAGEYENCVDVFTMDRDVLPSSRLV  
EPDFMQEQTHRVTAEEQSQSACAFVHGVDRCRCEGTTGACVIRMGVNLLAGEWGYFTVEG  
CDGVNPTLHLEVERTYLFQSDKSNWYHLIGFSYEADGAHVGVDELEPGIAPGNSDCAET  
NSCPAPMYWKDDEYTGVSNTPSLVPPIPEGGSDDFGLDAVEPLFFYPGGWEEMVFPVTS  
LTFDDENYDKDIFYFCHVRKHYFAAISVFGIASSTVNI FEKTTTTFPVFGAQIHSGMSARI  
KLIRPDGSMSETNTPEIPYDYSCVSLYDAECGTYGLEKYQTSKNPQCPENFVCSDAVGG  
IGVMANCINSMDCAMLSEMTVFYGDGKDDRMNDVILFLREMIPHHENAVNMAKTLFISG  
EVDCCDDPDEEDPACLEPIVRSIINVQNSQIQTMKGLLEGFGVPENQQCNVLDSDTQDS  
DTKDSVNEDYETKESDTQDSASIIQSSFGVLIALMVGSQGLIGFN  
>comp17251\_c0\_seq1; 766 444 2283 LEN=2283; minus strand; translated  
MATKGDSFPSYVTYGLLHKSNDYIDWIRVERDCVVPNETDSSPNVDAESTEPIDVTSCES  
EGERTEATALDVRAFEIFRSLQOKEGTDDGEQNKIEDPILKNNDENESDDDLIGIGDENH  
ISPGLFGKGTKLQMELEGERGMNKFSSNIAAKIMSAAETSSFGVFDANWNPLRFSRHSNSDV  
AILLYAAAKEQTRPDEESVTEASAWKRRTSIEKPGALSVDAASDTVSAATAKDGFSCL  
QDIETEIERTGLPVVPRSSQQQFLVKQSVNMFFRKESVQFFACFPLRNSPRTIYRFDM  
DGSDGTNGDQSRASAKWKGLARISSVSLASLKKQSIATGESNELSVGGDNPPAPKLSL  
NERLSKMKVSSATKTDDIRRSLSLSSNTKEKFENSSFRSTVSNTKKKFSEKFRKMPSLS  
SPNAEATEEDIVDYLEEEDIVIFDSSDIVDAEDQKMGDDSTNNDSIVAAANGANNDAAT  
VGTEHETVSEESQNAQGPAGYVALSIDDVPGRFNFADKSLSLPKVLDLDFDKYDAKAT  
FMVISSFLSPFHEPDMIRLLQEGHELANHGIRDEPMDKTLATSVDALFLEALDECNDKIKD  
LQOKANASNHDEFX  
>comp17254\_c0\_seq1; 348 90 848 LEN=1198; translated  
MNFVRSKIVPFVIGIALSLEPVAAFSTRSHLLPSFRSTSSSTTCKNWLGLWEEVIEFSTY  
GPSEKVLKARRKQAAAEKEKNDVSNDDISLTSFRQAKQKYGSSNSNDNRQDPSTSSSE  
DDESLSLQAFQSAVASKDEEDKEEIDFDGYKLRDLLVEKKGWVPLDIDFQRGSGGNSVYCT  
IMPVAFGSSKCRHESELDYLMHLQAVVEVLQKYNLDPFVFFIKKTSRAPKRGIESVPYL  
MDLDSDSLKKIL  
>comp17257\_c0\_seq1; 294 1 1175 LEN=1175; translated  
XQVSAFIPPLVTRTAHLRSSEKISSSSGLPPQSLLSLSSLRIGNLFMVSGTATANATLM  
MKSNSSSSSSHQNTTEHQNNDENKPSKPSGGPVRSSGIVVRKKFISPEELDQLLDRVDIVA  
LIESYGLPRFQRTSSSNACKLCPFHDDRNPQLQISGERGIYKCFSCGAGGSALKFVREYS  
ERYPEDNGSPLSFIEAVQALQEFADATSITRGSRRRDWQFTGSTS IKRANSKKSLLIG  
TTSRERILHANLFAAAYFEENLFKLVSAGQARMHLRSRGVLP TTVKAF AIGFAPESYFSR  
GERRQQQRKESWGEGLVNRLRDEGFTPQEILDAGLAILTKKGKEQQNKSSSQNFVDTKK  
NCDEDGNEVIQQQHQQHDFSTIMDRFRRLV  
>comp17260\_c0\_seq1; 654 80 1701 LEN=1701; translated  
MTVSCSINAVANKCFGFFLAVILATSALNQASAI AAPTEDQAKRFFANAKNAIFPPKPI  
YQAAKEEFDAAGKI QALEYESAKDWFRKKGYGDEFETYFEAKEFFEKKGYLKPVKTYD  
SGQFSFAREGEVFNKEAFHDIIVALHLSDFVYRIGELRKASRALSFEKEELEQEVLVGD  
FDTNAYSKCDPDFVKNCEQAGRKWNPKPMLQLVQGTLDINPDPTLALPNVNMAQLEDVM  
KYKGLKLNKDCANELVVSIAIHLKVNKVFLYKFDAYNDKNLVYAI AARERQNGLNINE  
YDIDLFI TFRGSVTARDWQNIQAPLVDIVFREDKKS GKCFMIEQLSYHRIEIEEDLYEK  
LNAAI EEDTPIRVHKGFLGYLFADYGGNKGKYDKSMFESI QSDVKLLLSRPGMKTNTLYV  
TGHSLGGALATLASFFLACDCTINGSNTQWSMRSQWKGVKCISFASPLVGNVSFQRAFDV  
LQEHQEGKQRRQRLKHIRFTNNRDLVPLLPFFTRYRHTAGTHVHLGGEGPFGRVGP  
SIR  
X  
>comp17262\_c0\_seq1; 366 255 1205 LEN=1368; translated

MNDFANATFPTISSSSSLMRYPNSSFHQESLIHNEVIPVPLSQLSMQMESSNI IPTSSTV  
VIGKGRVPKKAPGNRKLRLSLVQDKVQDYVNAKSKMVKSSIVTDIYFAIEELCRQEGSAPP  
FVRYNGTGYSKTTESIAREKITSCFRDCLHDIRYKSSSKNKVAKRRLANKEKAEEKRMKRI  
EDQQLEFLRREMLPMPMPILESSMAIHGIQKRLVADDSQHQHRETQHDGRAKPOIQTS  
DNLIHNTPSYTFNLQLPKISRIGTFSTPLFEFVTTTPVDRSFFEKVPVPVPMDCASTCS  
SSSSYSKCTGGIDGY  
>comp17263\_c0\_seq1; 92 1 618 LEN=618; minus strand; translated  
PYGRINAHRDLHLHRPAVSSGDDDDNALRCGAVRLFVCRVVLAVAMLLCVSQFADFPRVLF  
CFVVVWQASTGSKGGRKRIARAFEIAFLPMDRIGSYDPIRLFCFDDAXTPSSLRRIRTGS  
DPWFFFGRNAHPSSAQRNETQRNETRHELRVAPRRKNLILTDVLEERSIDPSDYKHRVGS  
SEPSTEPPTARCFRRVERKISQAMVP  
>comp17268\_c0\_seq1; 589 1 1661 LEN=1661; translated  
XQQPDMNKQHHVAKMAGAFASVSSSFLRPLGAATSAVMGALNKTKKRSRSKRFDKYFAI  
RFNADGRGKFSVQNFDEGSVTIEGETARNTLLYNTDCDCDQQNWLGQADAWSLEARGLIV  
DTIQETVEASIPASSGMGSPFLGSSSTRSESSGAELTKLETEWQVRHQGTPVGEVGGGGAN  
QRQWMIYELSRDINRLRRVGEKSLKFKWKEVHWIHWLRQWNLMGVPSAALNIAAAIWI  
RDKLRPYIPRVWAVAREVQGALEIFTTFRFWTPLRDLVDEIMNRRKGLVTGVSLAEES  
LDTMLHDLGLGDGTPATRHGATIEATRMYESYMRSGLVWHALGGQLVRLMLIQMQQLKVS  
MLDAAETIDVLFQSNRINMQLLAVVPAIGIVVVGTKILVRFVLFVRAKEFRPMVSVHAD  
TDYLNKLETNIILRTSDDNYQLRSYPGRGLSQRKTNNTSAAPAAPAASSNRVPESTEETQ  
LGEFALTLYKYLDDYSSPQLLPSRQCDAIHESLTAFLGRKGSFRDNLSTNGQIRLID  
LVKGGKHQDLSKFL  
>comp17269\_c0\_seq1; 198 1 652 LEN=652; translated  
XVYGFCINDCGSFNLDGQSAEVMKWLAGEYPCNGGAFFVANDDFNGNWSTEVNNQIAS  
DADLCLDQSPVDPVPAPVNPNTLSPATFSTQNPVSPSPKPTSLPTQSSTPYPTSAPVVN  
PTNQPIPSPPVSIQSAGCCSNDYKTCASWCNESRQKCGSPMCASMVWLENGSLSSDTCVS  
RWGACTNDVSSCCGGLVCKGESRWYKQCLAPNDPAPN  
>comp17270\_c0\_seq1; 216 81 565 LEN=565; translated  
MNQFATLVLLVASLSSTARAFVSPSPGAPVAREQITVSAPLFAAADETSDLLEIELS  
MPPSNSNVVARLKFPSVFSGPELVEVRYKLPFGLNVEPKNNLAMCTADGAGGERVGDV  
RYTSQWTMGIPOGDGVVTTVASFSGGISWQCSMFDVMKAKDX  
>comp17273\_c0\_seq1; 519 192 1526 LEN=1526; translated  
MHYFFLACILACAPYHANNGVYGSRTLLVGLICIVVILILTPETEISALRIQDSGKNE  
AAPPLAPDEIALLESLDYLENDDVEKAYAVLQASFESSARNPNPERRVNRLSQRKISLGG  
GTTFTTEYKIRQDIEQAQYLAETLDDSQKAEFFASIVLPVYKMLQSIPLLEALRETMGL  
YQFQRSDVEYGIMDVYNRALHVPDVPASRTDGTPIPIFSEALDPSQIEKDWIESDGI  
VVDNLSKEALELIQQKVLWESTVWYQTKLPQRFGGYTGAYIDDGLHQRILLQLSVDL  
RKLPLNIFDGHPLKYMWAYKYDSEYGGINLHADEAAVNVNLWLPNDANLDPESSGLV  
VYTVKPPQDWFELYNRDTDFVYEHLIQPSGFANVTVPFRENRAVIFDSALFHTTDEF  
HFRQGYKNRRINLTLLYGDMQKGGKQPPQSFEL  
>comp17275\_c0\_seq1; 1085 34 2220 LEN=2220; translated  
MTDEPIVAKRKLDDNDDNNMEELVHTVWEHYRNFLDSLGDGEDGEIDELQELIEIATDQ  
ISKPKLPEGKEGTNNSIDSEVVCPAWQSRGTMVHVLLSVACYHLADVAISEYLAMVQQQ  
QHDSPASGTDRAQSEEVVAARDRAKSLLVKSLEWYYPYNAATWSMGANFGRMSQSLSLGAA  
RNWYEMAVRTSTVLREQALAAVEDESIPNEEKIEWIELLVLNQIVGVQYETEEDDEVDG  
CGGDENPGDGLKTNDEMESNEAENDNHGSEKEAQNIDEGEDAPETDGDHDDAGWYSSSI  
EATSRFMCAMLCQSMNGDHRVLAHLESFRLTHRLHLPNVWKISPSIPEKTPVPAALAEPP  
VVFQAGGVLPPRLYNAMTKVFAPTAAFVKETDYASRGYFSFFHEYDAANKKQRPCNLI  
EEVVVDHLMPPRAQQCLDNTAAAADGATSPKICGFEEWAHTRPIKANLGHNLHFDTDES  
MLDQEGKVTHTPVLSSVLYLTGAQDGNPETSASSPAGATIVLDETPDSTSIGDCCWRCIP  
KDNAFLVFPGNKHLHGVLPVCPGKTKQDERESDNETRSMIDGLIHDWQDLEAKTSVGA  
SPTGSDEAAAPNRLTFMVGFWTRNVPATMKHRSLYGPCGPLPSTEESVWVGDIA  
RDYDNQAAEERP VADKMTATAI PRVSPAWE LIENEEDEGE PNAENGP SLTIPHGI  
DHRFFVRNAPVCFRESL FEDRETKH  
>comp17277\_c0\_seq1; 106 1 194 LEN=194; minus strand; translated  
XADYQETLPEEQRTKLPIDLTSTVTAFDKAQMRRVRRGVMGSCPVLIVAANENTWDGTP  
YQAT  
>comp17279\_c0\_seq1; 432 1 1576 LEN=1576; translated  
XTVSCQAKKGGGGSTTIIIVIVVLLILAAAGVGGGGFCYVRKRRRAAMNMKGGHDLK  
KKNKR GNGKNNNKKKGGRF SFGRKKGDEGTENS RDKGED IYDDEYDGDYQNRSP  
RNGKRSRTP

NSKKRNDNRNRKMGSFNGSDIENGGHPTDLSLSESEAGDLRSEAPSRSSRRGKSFEDED  
SISNDYGHGSRDKFSDRDTRDSSSRKRYLKEKKRSIENNRPVKSYQSVASDDDDVSRLD  
NSRNFDRADRSSSSPDLPSKIRSSKISSRELKKIMKENHESSRRLTAIEDEVADYERE  
LAKRDEEAERLHQEREEQSRRIKELEAKNDRLKQKAGGKSKSGRNLDRNVSESRERTGG  
NSHDDYGDNISEYSNRGKGKRNSSRRVGMDDYEEENDDDDDEDDDESYNNYNSRRGVS  
RSSRSKASMRDPGNSVSYRESRGSRRTRPERSRSKSGRTLERAGSRRPQSRSPSTRSL  
GKQASSLRQEASRRDSIRRSMSDRGDTARKARSKSPRSYLRDDDY  
>comp17281\_c0\_seq1; 266 95 625 LEN=834; translated  
MTKKRDDGLVLLSHPSTGTTAKASSVLQNNTKLHGAALKDCDDLSSWNSEGPSNGKKE  
SFLVVDFSGGGKHPNRTVRALELGLQFQAGFAAEEITVYAKAQQQEGETGGARWRKAEIE  
EAEDDHELQSFALPAEPTTALKIVFGETTDFYGRVLIYQIQVWGKNLGNDCDKSS  
>comp17284\_c0\_seq1; 226 1 854 LEN=1392; translated  
XARRDEARKFAKKLEEKEQILEDLTKLSDPSRKLITKSWEDIKFKVRDAINEAENVPS  
VLKQKQAATALNKAIEELVPLAEIRNRPLLKEGDKLVCKTGNLFGREAVVIKDNQKQV  
QVKVSGIGMTFKNTQLSMVMGEGSNNGGKQQQGTSRSPAGKSTRSSKAVQRALKNEGI  
DTRNKKQVVGEEKASSSLTIRTEGNTVDVRFNLEDAKSKVTDKISQCKLSRQKSVYILH  
GHGSGVLKSKLREWLKREKKLIKWAPADSLDGGDAFTRLELK  
>comp17292\_c0\_seq1; 494 85 1137 LEN=1528; translated  
MTMQQRVVPKPLPKIKEYGPNNAIEVKDLTFGYSSTGALDAQDERNVLHNLNLTLKTGSR  
CLLIGANGSGKSTLLRILAGRHLTQQEVKVLGLNSFRETCLNFHFRAYLNCDWGMTSIAFV  
GASVPLCADIPVYKMMEKLQNSYPERDELVRMLGIDLNWHMHQLSDGQRRRVQIMLGLV  
RPFKILLLDEITSLDVCVRQDLLKWLKESDERGATILYATHIFDGLDDWASHLFYLN  
EGRCGWQGMSELEKYQELKRENHPSKMLAIADHWLRRELEEARAKNQYKATYAAMELD  
PTDRQGGYASGRNIPMNETASTQPQRQSTLADAMGNAGKLDTHRQTSAAP  
>comp17294\_c0\_seq1; 97 1 111 LEN=384; translated  
DDDDDDTPTKSSEEIAMELWDEEFRSEKDRRDRGSR  
>comp17296\_c0\_seq1; 286 381 1106 LEN=1106; translated  
MLADGKTHACAETTKSGSRNQIAVAVNEAREKTLSCPENQKQHIIQHLQYDQQVQKLL  
LHEHQERAKINGNGNIIYLEKMRKAQDHLKERFVALANARMMLQHEVRQRNAEQQLALT  
AANMQQKAFLQIMSGERGLGHPTPQPSVRNGIRNNANVLLNAEYLQQLQIEVMVNHRRQ  
SKLTQNGLRFQVLNSNATTPNAITKLAANGAVASLKSPVVPNSKQIVADKFIQKAILM  
AR  
>comp17299\_c0\_seq1; 264 766 1836 LEN=2178; minus strand; translated  
MKNAFLLALFLVAICNPIGIEAVCDANGTPTNGDLTTMSITEIACDPSLADTFSTLCNLL  
IRTDLDELTSRRSTSDFFVFAPTNAAFVNARMTAGVSIQITKTLQYHVSNDSSDLTCGA  
RRDSLTLNSKTRSSSTRCAADGTTLLGQTGNVTRTPRQSSPLPNFVAPTAGNEASVTACN  
GKIRAIQVLGFGPMVYRFGSNAPCSFYKSKCAGKGGKAAKAGKKGKSYNYPVIEVEEE  
TVDGVTFDHVHLYYGKSSKKKSKDKGNGNGNVNRSWNGSRQQPAQAQAQAQRNRDFM  
HHPGLEMYNRYFGSSRYGRQRQLRGVISPEYNEEYQLQSPYVSVDAVEYEDHYQ  
>comp17302\_c0\_seq1; 185 77 730 LEN=1133; translated  
MAGMTSFRQILPLATTIVGTHAAFLASIRAGIGGIDPSRPGKSEQAECFDAQHYDLVT  
DWVGRLYRGRGTEAASGGGVELAPTATFEDPAAVCVGAEEVGEAFRALGALNPVSVSPR  
CIDVRPLGDSIELVLLHQEYTLGGRSLRPLSRLHVTVQLRQMTRLGLPESEFLVTEMKE  
LWHGNPLLWPYVLFYGPRLNGILSYHATSRFLSRVP  
>comp17303\_c0\_seq1; 729 341 2268 LEN=2268; minus strand; translated  
MAPFRPIPASALLVLALAIRHTGTRRISADAFAPKHLHGRADGCISSNRHSHPVPSLSAH  
RCGTEPSTKSANPDGNNATPSSIRRQMLRAMLAASAGSTLGAPPATAAAPALEAAPSPPA  
GFPDWSGIKVVVPPSDDRDYRVKVLNGLRVVLCSDPSSNEAGAAMDVHVGACSDPLEIP  
GLAHFNEHMLFLGTKEYPNESFEEFLSANGGSSNAYTASENTCYFTLQAEVDQTLTEG  
LKRFGSFFTSPFLTAAATGRELNAI ESENKNLQTD SFRVYQINKERQNRDHPHSKFFTG  
NKKTLDDTCKKIDLRQSLIEFYETHYSADQMTLAVVGPQSLDALGRMAEEAFSGIPNR  
NAGAPEKEWGMGVPPYDPSNSVIPSGNVVIVPVQDLRQLSISWPITYRDEQERQDALL  
TKQGQYVGHILGHEGPGSLLSYLKGWVNSLSAGGGEELSDFETFDVTATLTKSGLEKV  
DQVIESIYSTIGMVRNRAVPSYIFNEVLQLEELGWRFSKGPVGNVYVQSLSTSLQDYPPS  
LCVAGPRRLALRTQDASSTKLLASNAARVSFGSEAELDVTKKLASDFVDNLAVDNAMYTI  
ISKSYKGQTNQEKWYGTDYRVDPVALSTTLQWKNPTSVDGLG  
>comp17306\_c0\_seq1; 226 1 515 LEN=1025; minus strand; translated  
XPRLRTCDGNPNCSTTGDALLEDRQQYGVDFLVAPWVPPAGETDPIGGIAAVVASYPEG  
QGGIDGGGFALVKQTDNYLYYQFEALKKGFIDDFEFAVVGNDTTAVQVRSASRVGVTDFG  
VNAVRLNYISRKL RAGGW TIAEITPETHRDYWITANEAREATFDADRRSMD

>comp17307\_c0\_seq1; 299 1 1147 LEN=1259; translated  
XENENENDEDEDEDEPARLDPPITPEEISRVEALRLPEHPGTMANPGNPNEPLPYDVRRC  
PPQIPENYPYAWSILDVGLGHWNPDNTTTPERVHQGLCIIDWRDPEQRKTAVRYRRAEVPF  
VVKHHPVIWKAADRWTSEGYLHSLKLGDKAYRNEHSVNNHMMYWKLRGKRRGPPGWEPTQ  
DVKLSYPDWREKALEMEQLAAHQPESIPKTEHFYLRNLNGAYERAHEWLFDELFFDPSVQ  
NNIFMVDPTDARGINCRGLSRGTIAEAHYDMSRNFILILNGRKRYILAHPEQCSNMELYP  
MGHPSARHSRVNWSDDLSEYETTGKFPMSMVNEVVLEAGDGLYLPTYWLHFIVSLSLNYQC  
NARSGITRGYQEHINACGFGKL

>comp17308\_c0\_seq1; 411 452 1789 LEN=1917; translated  
MEGTDATATTTTELVEAYSGLNDEEFVSVLVKAVEEAYSETVGLDSVSCDTTMVSSSGCDI  
ETGGLLVGCLGRVLSVRTNLDDESADDLRALIAFQMDRLIYESGDLRQPVVSVQTSSE  
ETVTSGNDGTSVIEIENEIEQYGLRIPVYGNKDYKSRKETTTLFTPSLRIAIDGAETQVED  
SGEMFWDTSSVVVFDLVDLNNDLRRRLLEVVKGGKFFSSDDWVDVNGPDPHRWIRGGLQDV  
PDDVNDGDSEEGEVSSCWGLPEEAEIEICFKEHGAIQEFESILTDLFPQFVVSRLPEAVY  
GECVSPLTANAPVAGEDGLYDYHIDGDPLQTPSPWTDVYGRYPNRSPGKPRFVSVCLVYL  
SEEWGDSKWGAPTKFYDPPTGDAYEVTSPSPGRVCVIMDQDLGHTTVVPPHDAAGKRPRYSLV  
WKLILHPKTENQDMDLSPPLSGRNQW

>comp17311\_c0\_seq1; 118 657 773 LEN=773; minus strand; translated  
MERLAKEQKRIAAKQKDGEDSADSFASKQEASASDMLN

>comp17313\_c0\_seq1; 108 1 129 LEN=310; minus strand; translated  
LDLGLDVDRVRWLDIESDGLSGEGLDEDLHGEMLFLEFKLSM

>comp17315\_c0\_seq1; 213 1 940 LEN=1401; translated  
XNTASAVSLAHRAAAIALAQRRAAPSMHRGAIAGVSGANPAANPGTAADHAKAPPPKAAPA  
ATQAVPKQTEPSTSVSTPSGSALVWVGPPPEDLGLPLSNMFAPWNKDDWTKTTRKRLGGK  
TAGTFDSYWQYKDGGRFRSLNEIRRFVLRANNGNAVLARKPEQMRRARELLEQTALA  
DANANPNANVNANPNANANANHLNSTGCGTNATPKENIHQNAVGRARRLPSRFLHLQASL  
VLAAAADKEKVGELAATTTATTTATTTAGGGAALATTLAPTAKAVPRISISVTPPKDDCHF  
DSSGRLSDYIVVL

>comp17320\_c0\_seq1; 122 1 328 LEN=601; minus strand; translated  
XAAISACEKGLVPHKALEIFEQMKREGVRPTVVITYSALISAAEKQQWKLALALEVLEEMKA  
AGHGANVIAYSAAISALSQKGMWHKALELFREIESSGGKPSIVTYNATM

>comp17323\_c0\_seq1; 109 525 1286 LEN=1286; minus strand; translated  
MTTKRARSEPVSAVSTSFVRNISISSTILLMLHLTSSMVSVEPFSISSLKRHHFHRGPTNIS  
HLLQTTTRLDTKQNTNRYPNLSVQTIIVSAKPTGVWSSPPPSWNCKASGRTPTALGSGSLVA  
AGDQWGNLSALAAVSVASQRLGRSTRVGRLLGAPVTAMALTFFLASVGVLAQGGTPTSRS  
LQTMAIRFATPWILLGAIEFGTSGGDELVEASSSSSSSTSVAPLVVGFGLASLATLAGGCIG  
WNLGGALVSCALG

>comp17325\_c0\_seq1; 442 1 1309 LEN=1454; translated  
XTASCLPTPTAAATMSHSSSSPTDLLASAFGPGTTLYGALGSSRDASAADLKKSYRALA  
LLYHPDKQQTRRQTQNSQTKRQQATQGEPECEGGVSLAQATLRFQAVSAAEVLMDPERR  
AEYDATGTVAGETFSSDSGNGAGAPRHRSSDRDQRRWDGFFRSVVFSELATAGDKHGDG  
ESYRGSEEEARDVLSFYVLCKGDLARVLECVVHGEKGDLPWKKEIVGPAVARGEVDPYD  
AAAGGRNQTKNKRANRTGPGSGGAASGPAKPARRRFSKPKRKTIASRCLEDSSEDDDDGG  
GRRFRSRKTPAVSTGLCDTEDEEDEDGTETAGAAPPTRTPPPMNRDKMEYRVAKKRK  
LKALREMEVSRALRSKSWGGVAAAAAAGRGRRSAPVVAEAVLARMEGRYAPGGASSG  
KRSHSKSKKPLRRNKK

>comp17328\_c0\_seq1; 20 1 819 LEN=819; translated  
RMMKLAAVKSGHERTSISLTQLEQLPLEIKLQVVNHHDDQRVGVLSKPAPRAAKAGNDQR  
PRTSIPGTTDAGERPRPKPKRRSGDFATTTKPSHATRSTKTKQDSEKRIRFMARVDS  
WREDVLPPLREFLDGCCPVDRQGSFDRVVDFLSVVVREGRSCAAATMVRSLRHRTDEWGSK  
STTAR IARALDRVHAERYGSLDAEWLTGNEEGDATTRRNTPNPPPKRHPVYRTSPPPS  
DGASRWGRSGQGISAVAERLVAEKYVRLESKA

>comp17329\_c0\_seq1; 580 1 1421 LEN=1421; translated  
TGMSQEDKMLARLVKERTRQSNRSSKFRLLDDDDGGGDAILTHKGKLDPNKSEVMYSDD  
GDESGNLEAVDTELHFGGSGMGSSNPYGNMASGTDLSQLYGQTRKTELDDLIARRKAMK  
AEKMQAQETQVDTFEKMDDFGELSALLRYRKNERKPLIPPKPTQEDNEMKEWNSEIRQM  
MAKPKRRATDRKTPPEEIAKEESERLHELETRRMARMNGDFDEDDFSDIEIDQGRKKQK  
PKQRPDELSDSEDEEEEGNEVKFTADGTFIEQDDADESDSGSDDSEDEPDDDEDYHPLSE  
GARVRANYRAAEQFEGRENWYEGKIKTVHESPSGAVTYDVEYDDGDTEEDMIPKNVRPVE  
SVQKIKKEDKQKRNEAKLEQMKRMAKEKARSEIPYVFEAVTTLEGLHDLIGRYASTGKD

ASTIIKRIHASNSVRLDHRNGEKMQNFYDVLLRRRFVAVGD AIFDSGNGGQELGR  
>comp17330\_c0\_seq1; 147 42 289 LEN=289; translated  
MMKSAILSLLIASASAFAPASQTQRAGSVALNAEEFSSKIPFLVKPEKLDGSM PGDFGFD  
PMRLSDIQTDLRYARWAEIKHGR  
>comp17343\_c0\_seq1; 125 1 401 LEN=679; minus strand; translated  
XGNTKTKAGFEKNLGLKKGGLTYGPGSTLILSEKGSLSLSSSASSALTNESIHEDM  
KEMLSPKARLIFDALLDGERHDKVVALELG YDMSKLSGYQKDISKMKT LGFLEYPTKTE  
IRLSDTCFPLGRP  
>comp17346\_c0\_seq1; 64 1 136 LEN=412; translated  
XQNGRLAMLGWAGMVAQELVNGKEIFVNAGLAEDRFDP SKLPIQF  
>comp17348\_c0\_seq1; 202 1 934 LEN=1072; translated  
XKAFGEVGNACGEVMEGSVGLELSPIRGIFGIGNSNTYTYTDSIREKTWDPGNTPVCPKS  
EPIAAASFVQTVGHSNEDLMSISWDGTLGKDSGKLVLGK DASNGIPSTAEPLYLSPKKLA  
SSGSDGFYETNVTDIELNGRAMSTEMIPYVFD TGSPYISLPSNVFESVWSSNTT SKVIFS  
ILTLDDGGDEQIEVTITPELMRSGNVFQSVSNTSVHLFGLHVLRYVETILLGYDTTSPKRP  
YMKMVPDRTPITPTANLTRSGAPAGSITNATLPTEAVDAPAGVPSSGAVGGGFGSGQAA  
ALAAVASATVLW  
>comp17349\_c0\_seq1; 291 21 647 LEN=647; translated  
MSLRVYMQDLILAHTSCNTDDDYEENS IKITIVNDNSSSSLSYNYEDES SHKDRGQCDP  
SPSSAESMQIVEICNSFTDPVDECDKSSSGYGLQSSEHRVAQHQNKSLSDAA INNKVM  
LDDFRRRQCFLRAKFHPNRTAQANSQALQISPEPLVMESQTTMFVTPSASPTKNSDNVA  
EDEDMGIGVSEDNTFRCRMASLKSSI QED  
>comp17354\_c0\_seq1; 266 1 888 LEN=1170; translated  
AETTKADPGGTPIRDSAHEALGDIVMTLLFGGYDTT SICLSYALYLLAKNPAKKRKLLE  
EVDVAVLGAYYERDQPNGTLPPGPDEL PYTKAVVLESLR LFPSPVSTARTIEKPTTIGGGS  
VTLQEGQMVMLPIWSIQRSEMNYPRPNDMIPERWVRR TAGHRNNGDGDGKHPKSRWEVRPE  
DDRRPTGETRAPQPKTGDGDSGSVPPANREAFCAFAAGARN CVGKNLAVEETV VLLACLA  
RRLVFDLVEDYEVVPSIMAVVQQPEDGLPMRVTPRATQTAASKRGASAAATAAV  
>comp17357\_c0\_seq1; 54 229 548 LEN=548; minus strand; translated  
MGQCMGTGRKQRQLATDPTAAISCPEESQE QHSLHRPRSVEPSARMEKKT PPSPTDPT  
PQKKQKHSTSAEGVKEDADASSVSCRNGASNCATVCIHRYSF SCPX  
>comp17369\_c0\_seq1; 175 1 1151 LEN=1201; translated  
XQQQQQHPQHQPQPSGPKALSIERMSIKQLEEWSADVWMSPPCQPHTRQHNGGSESC  
NDAKDLDDPRSRSFLKICEWLEGGPPSGTGRRRRLRDESLPSLILLENVVGFE SSGSFRR  
WRSALGARGYRSAHFHLTPTQVRLPNDRPRYYCVAIRSTAGGSPLASRSLGSYFGE EPGP  
DEETPEPLPRPRICKSIPELGVVPETTEDSAKAQEEMPP IASFLDDKASDNGSLRVPASV  
LESKSAWCFDIVSPDRRSSCFTHSYGRFVRGTGSVLYEDNGD NESDSAGGRAAFRL LPP  
DQREYSDDWREGLDPTRLRYFSGKELARLFGFSDTFSFPD TTHKQQWKL MGNSLSVGVA  
SRLVELGLLLAYGGPDPPGDGPP  
>comp17373\_c0\_seq1; 160 1 330 LEN=330; translated  
DDDDDEEIDENDKSAMFNLMNEVLRQYREENGRGPNTKELLE LRSNIARELGVEIPHDI  
DGDWDKMAKENQVPSAKKIVFTKEADRVREYVPDANEYPSDR DDDDDDDDD  
>comp17377\_c0\_seq1; 457 1003 2172 LEN=2215; minus strand; translated  
MRAIRKDDTAKTPSTHRRTSKRPSATLLRRTILPNLSNGLFFAAVLVLSVWFGFDN PCAH  
NNQHKNKSSSSSNHNDNDNNHNNMTPAAASTVARAVSPMAKQPYKLLQKTRLSHDSFL  
LRYGLPEGRAILGTDPALPTCVKVDVFDEQ TASKTVSKSYSPVSHPSAKGFFDLVVKAYP  
YRSGGGV GAYLCDMTVGDSIAASLKKERSMHGSPAVLGRGWKHVGLVAGGTGIAPLLQIA  
RILLEDKDLPEEDRPRVHLLFVNHTPSDVLGREEIEALQKDHPYHFFVTHSFTREGPGAD  
PRSAPPGSPARVVSGRGDVAMVAASLPDPSGKADTMVLVCGR DGFVAHWAGPVGRGPPKP  
DGSKGPKVQGPLLGLVSEAGFEADQVFKY  
>comp17380\_c0\_seq1; 376 1 1010 LEN=1010; minus strand; translated  
HNNKELTTAIEEQMKRVHHSNLYFIPEQAALAEWLCANSGADKAFFCNSGAESNEAAIK  
LARRHASNRGIDKPVIVSAHQSFHGRTLAALSATQQPKYHKGFGYD GEMVQGF EACTYND  
IASLEEAVAKATSDGRGLAAIMLEPLQEGEGGIIPGDPAFFARARELCDEAGALLVIDEVQ  
AGMGRGTTLWGHENLGVVPDVFTSAKALGGGVPIGGVAPLLDLFHC LLLSWTGFVGFVAR  
RLGGFIRGGSSHLIVRCCSALLCFCQTFCVIPGAMMARGDAADTFGPGDHASTYGGNPLA  
CAAGLAVAKYICDHDVLTNVQERGEQLSKGLEAMAE  
>comp17382\_c0\_seq1; 490 1 1643 LEN=1751; translated  
XLVLMLLL ANRSTCLIPGPCYVGLTSSAPHGCGFRCD DALPNPKPHVAKNERDRFAPKT  
ITANKIGI ISSSDFCDDVDTTAAATTTIIRGGDDAFTTCRRHWR LRTTAISMVSVCS SGLV





ASKAALCEPDDAVAI FMPSSCEFVAALFGLIRSGVRAALVNTEL RGTSLVHALTSALDRG  
SDAGAAGARGVRAVLVSPGLKHVFDLSREAGQLPSSI AVIECGAGCELDPWTETRRFAFH  
GRQAQPKSKASGWDGTCLYIYTS GTTGFPKASKMNHMRIWMMGCAGKLAGCGPATGSIA  
PSRCTTPAALGS AWGPASRAAARRWCAQSFRCGSFLGTLRRTDARVGT LFGCRFLVTVSF  
HAVPRHTLACAKCLMLGSLDGVSPQLLSPYDVCLSCAMKLG VQYIGEMARYLVSAPPSF  
DSDVRLRFALGNMPQEIWLPFQKRYNIDL VNEFYASTE GNVNVFNGTGVAPGACGIVPL  
GFGWIYPIGIFRYD TDTGELLRDATTGLCVPASPNEP GELLGLIKSSDPTRRF DGYTNHS  
ATRSKIVSNVCRKGD RYFRSGDLLRQDRRGFLYFCDRVGETFRWKGENVSTSEVARALLE  
CRGNGVGSNTQAAGATEAKGDTAWFAEAVVYGV EVEGY PGRAGMATVVMNEGASSNKWQD  
SLWRS LQAELPRYAQPLFLRIATEIEKTSTQKYKKKKLQDESFFDCGGDAVYFRDDAANR  
FVPMDETIHHGILSGNRRV

>comp17440\_c0\_seq1; 365 53 1792 LEN=2302; translated  
MTPSPINKNTAPIRGVRTIASIKRELERLAERHSRLLPIDDNHHGSDCNNSANMTGTKAK  
KKNRKGF LQHRHIKSEFHGNYADNDADTNSGD DYYLSLFEFFAITVCHTGVIPRKE LFE  
AWAMALYVNH YFPTS GEGREGQRCYQ RVADLCSGHGLVSWAILFLDEHRSRTAVCIDISI  
PKACDIVESVMLRRHP EVATFEKAPSREGETN QEEQAAQPAATPAETSTRKRWHWIEGDI  
CRNVSADSS TLIVGVHCCGTLSDSILDLAIQSGSALALVPCCHTRRSLPYEYKPKHAFDA  
LIEQNI EKNAALPQTDP TTMPLSSEGEQEGDGEQPAP ELLPTTLTDVIDGFRIERLVNA  
GFDVQVESIPSVITPKNRIIVASPPDSSCQSGSAGGDQQA AFRDANECTEKKTAPNNI  
RNKRAFSIPLGDTPEARAVVASQSGRLAANLRDRRPAPNLSLSIYLPSPDECPTEENLQA  
LADRVAGGEAHRYYAKLEAS EDA TIIRTQVRYGADGVYSTPDGRFRSRYRIQYGVHDETG  
RLPQLTKQQAKELHALVCRAIEEGALPGIKLRQGMKRLS

>comp17452\_c0\_seq1; 116 1 302 LEN=302; translated  
QQQQQQQLHATS DILASSGSLFHLPLKRV SQSLDPAVFGTEKRQQTLTNAMNDGGISSA  
SFHGIRRTHKSIFMLDQCSCNSNNSIFPHGSSSDRE EEEEX

>comp17467\_c0\_seq1; 323 69 1376 LEN=1839; translated  
MSATPLPIGW PVAQLDRLSRIGLGDACPD DRAGGGGTTTNRHGKPD LTRGRPKTNPRQRS  
LIGEGRVASV LVLVSSDAKVLF TLRAKTLRSHPGQVS FPGGKR DGGDDVATALRETL  
EEVGLDYTGFRAGTETDTPAGHKDDGFRV VCRMPTTEV VGRLCVVP IVAFHEGKPWRAIH  
EELAINRAEVEEAFVWPLSVFRAGETGADPKDDPNPCLTECYEVPDWPVEGETFVYRRYD  
YEFPLTGRSF AITGLTAQIAHEVARVAFGGSPCASGTGGNR RERERAPADAALRGFLRRR  
APPGGSGTGHPHRSNAGWKRHF FVLGGRPGSGGILH QYDSSEQAVRKEQSATKKHRLRL  
VANTATDASYTSVSAWSESESEEQRP ARPQELWPF AVSTLGGVRWDLAASSPEERTLWM  
ERIESMVASGGPPPI

>comp17472\_c0\_seq1; 603 1 2417 LEN=2417; minus strand; translated  
XLWVCKSMGMSQYHDILLEFYGSKRLRYIYLVRDPRDVAMSFVKTPVGDCHWHAI VTKWT  
KLQACALRIVKECEPELIYKLYHEDILEDRE REMKNLYDFIGERRFGGVKRTASVMYME SV  
ENVVALAKEGRESLKAHRLSSQFMNLSRGISFFASQFEKWRHPDTGLQEDAIQILETVAH  
ETMKT LGYEPHLVGVTTKPSVWNDADLAVFERLNQEGISKMNEDLGRENPD DLARRIYQA  
AALAMVPVYKPEVWVETDASFDEIVSTGIQKILNEDELLKRRDITAEKTCTTKSGLRFRW  
ACGTQRGYYPDNHDKPNQDDWIAQTASTE EGDVHWF SVYDGHGTQGHKCE FARKEIPNE  
FQKRIATGQSFP LALEKAHVTVHNRLIANPQIETELSGTTAGT LMLMDDQCI VSNVGDSS  
FILGWEE SCGEHPPKITAKTLCTPHTPNR ADERSRIERAGGVVMTADQRDGLAPMLRTDR  
SRDDDHEPLRIWSDESA KVPGCAFTRTIGDGM AHKLGVARPELFEHSFNQNDRVVVLAS  
DGVTEFMDQDTCVRIACAEACP SRAAEALIREASKRWKSNSDYMDDITAI VVFLDP SKVA  
FREIDPLATAGETAGNNHLHHHGDGNLHLIVPTGSDSGDGSLEEGPRAIGPWASFWTLL  
AGGFSGFLGIGCIRGPPVILYFLHPPYPVTFDKKSQRATGAVITATNVAMRVAYYV VET  
LVLETKESYFRESDLVLYLCVVVSSILGVLVGT KLFDLMKDSRNNIRLILSFFLLMCGIS  
LLTLPSTSSDPKKKERRQKLSVVSAX

>comp17476\_c0\_seq1; 169 305 670 LEN=670; minus strand; translated  
MDENVPAMFSTPVLGSKFLLHGSEGF IKGGSFETDIDGSNSGELVLIPPAVGMSTVLLNR  
DHYE EYYKGMPPSPDGEVLR RHGDEIEYVRSSDHL SKKNEDLRTPYRALGRSDDTMNIG  
GE

>comp17484\_c0\_seq1; 762 1 2114 LEN=2848; translated  
XLSKKHFYSIYHQQASMEVQCMHGTNEAAIRSGTKQPSDVKLWVTSV SILVLSILSSPS  
HFAQSFAISKSLVPPSRCLSGHERVSSSFQTKAFHEIVQTHSLALFSTSNAPYIRELDGV  
DDLQEGSLVLSRVES SLGCHDLRQPYFHKAVILIDHDPNDFTQGVLLNRASDLTLDDR  
IVCMDGDCSDDDVDGNDALKEDPVSAFSSTWRIHFGGDIGGWYEEVPQLLCVHMISSEA  
ALAVSDPIHFHEDGIFITSFPGARSLVESGEATSDDFYTFSGFCGWERDQLQREVD RGSW  
CLASF TTKETILVESESSRRNESDDSRHKLAALIEKYSWKNSEYK PQSGGLEFWHELM

HNLGKDNVKPLLPYAAREDDGSDHPQPFSDLMVKEWSTQRLIVTTKMKSNNGYDDGGIYSGL  
NDNNCEEPVSQIDDADIFRVLKAAATPTPVMQGSILRGSSSPSSPYVTSSQLFYKSTILL  
LQDTPPEASVGVMLNLPKDAYVLRLEDKDYHFTVRYGGPSGKGGEEDPYFWFHDCDVLKE  
EGIGLPVSFSNAHPERSDPHGIHVCDIEDVREAMQRKLVQADEFLLVQGFCLWEKEAESA  
GGVTGQLLNGNLEDTQLQTTEQRESLWRSLLDQKQTI SEDRLQKNFELSQQAWKNSGGES  
VNNLSEDIRYVFDNSNEVSKLADDALFTWMKIFLLGNAFYLAED  
>comp17491\_c0\_seq1; 352 1 1406 LEN=1506; translated  
RNATMVLVSFQSIGRYRRLLVGLLATASSSSTKQKRSRSPKLFYQRRLPPLERLPAVSAS  
VSPVSDQTGKTKQVLP PPPNASYANSIGVVYTNVDVAFRWAQKHLWSDTEAPKILGWDM  
ESSPRLPWRESSYGSDFHFGPATIQSTPTDSMVFQIAQDGFQPIHETTGLPGFLHDILD  
DPNLIKTGVIDEDMVELYRWCGRIGVEEERLSWATRGGVDTGVADRPVEPPLRRFDLGG  
IGSSKPGGTIGLARLVAGILGVGIPKSSKLARSHWSAAPLRAREVDYAARDAWAAAAVLH  
RLCELDPSRFSPI SILQRLAELEGSKGTNRIRPIGEVSDRAVQRKAVKLEWKALKPPRR  
RNEDGIEVPQTTTEADTERLGILAEQMKALAPMQPIPYEIEESLGGENTLSFAGPVVNPQ  
RTNERRMRAFRVEEMGEKRSTAGIMDQLFRIEQAEEWEEESTNESCSRLV  
>comp17496\_c0\_seq1; 281 118 1344 LEN=1455; translated  
MKKFLLSQAVAIATINVHGAMVEHNLKRKSFEP I IQKKDHDDEGSRKLNPSSSLDLGTLT  
VEIGSSFSIDGNTRIVGGDATDSEEPYFVLMPPGGGCGGTLIAPT VVLTAAHCKPHNYLD  
QKVS VGPTRGRYYNSGQKIKVIAIATHPNYASSSFNDFAVLLLLEEPYNMNSNIQLGMNEH  
KSIPADNVVLNVIGMGRTSYNGNIAYVLTETNVP AISNDECKKANIRYKLNIMDSMICAG  
RGVGDACQDQSGGGLVKKDGDTHTLIGIVSWGIGCATHPGVYSRVSAGLEWMSIVCDE  
WNTGSSEFCGGLTPTSPSLPPTPAPVQRPSAPISQDTLKPCEDDPDDFFKNRKRKNCK  
WVAKKPYGKGGRCRKKHDKGKIGEFCTTCSKNRCQVVSEKIEGSNSP  
>comp17502\_c0\_seq1; 365 990 3000 LEN=3000; minus strand; translated  
MMLLISKKGRVRLNENPENLDTDDDEYINKEDEIDNDDNTESNLILDLSGEGTLCIDGER  
GLTSIVAHPNFLENGWVYLYYTRWSQWCLEDVLPQNILVRYTMNSTTLLLENEQLLVE  
FGVLGERVHNGGMMFGTDGYLYLATGDGGVRQHAQNRQNLHGSLRLNDDGSPDDNPY  
ARNSTLGVPCGKSDGVVPEIFASKEGGENVFCSEIYAWGFRNP I RMA LNHKGSNSEKVL F  
SISDVGAQLFEELS WGGTDYKDYKDYGWP NLEGPCITDSIDDCPLPSPDSNRIDPFHYVH  
KSYENGGCVAGSTFVPDGIWPEYKYL FIDFI FLKIY NLI EDPESDVAKVVHPQLLDIAT  
KPVGTL CVCLNQAVKYFSGMSSLFDSQHAIFFFKKVFESIHEEGENINEARIIDMFFGP  
YKDTEALYVIKYGNNSILRIRYTGVLGVPVAKIKIENEQENIRKDTTSSLPTSSASNI  
GTGQVLP LQKTTVVGKGQVINFDGSGSFDPEGNLSFTWDFGDGNNSTANATNLSYAYEV  
AGEYNVSLVVTDSKNKEHQAFFMVLVRKTP TVDMLSPKEGDLFSMGDILHLDGEAYDNQG  
NRIPDDQLIWEVRVHQDDQLDLSLLNKRSGNDFHLDPALGPEDLNGFLSIMLQAMDDDGLT  
TTIVRKINLX  
>comp17504\_c0\_seq1; 584 1 1622 LEN=1660; translated  
XEETKRNHDPDIQARPNQVRSRKAQAHARGIEMTVLRSVPSGSLQVLLRLWVLLAATVSS  
RTEEATSPEALFRTA AETWQRKHSRGSRTAWEVWKSFAKTLVEKYELLGTESSPASARAA  
AEIVGAMEEGILAIERTIFRETQQQPSGDDIARDSALAA MYTEYGRLLLLNSSEPPPPGDD  
EGSTHRCFELARDPHTLLIGAPERLNEYKSKQLQGSAA SQEAIHALFGPLCRDNAENAL  
RNALS DATLSEA EVLLETITGMDSKESVHARKPKEFVAELFDSFAETFDKLVGTLGYR  
VPQIIGETVGEILGSEKSEGNARFGFGAIRNVL D ACGGTGLAGRELKAI DGSQDQ QPTR  
ITLVGDASQKMLDI AKKCTTSKGCGLPATPSGQGGDDTKLYDALLDL DLEEMTLANTLS  
SGADSASSFELIVAADV FVYFSGSLEQMMVVLSEL SHSDGGLLVFT CERATEEEEAPLGFRL  
LPTGRFAHTKGHVLGAASEAGYSLLRYNQIVPRTEKGVVDVGH L FV FAMDGVSDEKAAEL  
>comp17507\_c0\_seq1; 211 1 909 LEN=1365; minus strand; translated  
DRFIWSTNQSGYTPIDLEWIRHNE LGNDVYTARPFY PVEATGVRNHCFKED EYRGLLKE  
SVAQMMENHDAACSRCSQSELSSREAEAKATFGSLLDRISLLIRAAATSGPILDSKGMIRS  
RLIESCTLGTPYSPSLPLPILQLFLWLRPQEVLEKDRLNMLPIHHALRFSVTL SRNLSTQ  
NAVDDWRSFV FQLL GK SADQCKAKCRDGR LPLHYVLDHSGEDDTNGGNAFPRAKLQ SARH  
AIVEKLI ELYPASVDQRDPI SGLYPFMLASVDQNL SIDTVFYLLRHSPSRCPDLRTFTTK  
KN  
>comp17512\_c0\_seq1; 312 1 728 LEN=728; minus strand; translated  
XEDIFVRVSEAYSVLSDEKERRKIYDRYKGNGLDAYEKQDPASAGFGGFGGSGGGGGFN  
GFGGGFQQGGGRQSSGGGFGGFGGFGGSGGFRGNGHGGGFD PFSMFEEMFSGQAGGGG  
GFGGGFGGRRGKGNRDRPPALFPKGQSHVARLGSPKFPDQDSKHMVMVLFYANSNQAS  
RAVSEKYEHLASQTNLPYKVGAVDCKLSPKEEFCAEKGIEPGHDLPSFGMVVDGELLRY  
EDFX  
>comp17523\_c0\_seq1; 151 1 1124 LEN=1751; translated

XDSVASVDELRRPTAMPTRDELLEPEIAATIPDAADQILSRSYALYRVDGATAANLRAAHR  
AAVGGFFQEAMRAGCGCESDRRSSGGNSGGLIERFRRIVNGNLYGYNIPMQTKELFRTHHH  
PRSGFGSEPNGDKGEEGAEKLFSSQQQPWPSSEFCVRSFRVAKDLDQLLSECLSQIKIAL  
GHRLQVHACNSGSAKLLSSKRRQPVSLSDSVPKRRRTSLAGIGKPIDIESGRDTHVDFLR  
SAGCPLDYFFYHNRVPHATNCSEHIDRGALVAVCLTDVPGLEV CASAPATSSERLFLCPE  
VLVHNESLYRERSENSSSCDLVCIMAGDQLSRVLLPRENNHGYRQITPCVHRVRNPLKR  
ARVSI SYELRLDDP

>comp17526\_c0\_seq1; 468 109 1826 LEN=2295; translated  
MIKKTKPGSFFNLAVASVLSFIVLQSVDSVMAFAPRSNFMGFAKTQNRRLTRDATGQEEK  
IQLCVAKD IRRNTSDNSQSDSGRNSTNDIIIVIDNSGNHNHTTTTTTKVDLLRNHAHISPL  
DGDHGLHYLDPLHRFPKQRQDVYKLYNGTEDENHWNVTSASDAFPGTGQKPNKRKHNP  
SYWVTSNFFTHRTDLGWYAMSPDRDNGDSRGCPPLQLISQAALGEEDRAESATKAEPNADA  
GDPQSVSRLLAKSEFRRTTATNKMKGKGGNQPTALRNITHV PALDTVAVSLSCGFYRCSR  
GGWKS PPLGGGGD TTKVHVWQTGFACLTDRDGERHFFGPGDTVIVPGWLGRWDIAEDL  
KTVWF EHKSGGIEIERKDTEEVSDSSTEDTDDLQTD DDTAAVVRARVIRYHELTPDPTKG  
YVQRSEHLLYASTATCKNVTLAGGGGKTPGPSPTPLAVSCVVKPTPGFVPAXTPAEL  
RAGVSSGRLDGIDHESRQPKLPARI IAGSLRQARGSF GPARGMVRSLQTFGNCQGT TDLG  
VTKMGWVAMGFDEMOWDAIQGMVWDENASATL

>comp17531\_c0\_seq1; 193 1 569 LEN=721; translated  
XAASASKQGGTPSEVDNVGLRNVAEACIANKVPHLVIVSSGGVSKPDSVPYKFLNIFGGI  
MEEKIKGEDTVRAMYKDIQGLTYTIIRPGGLTEDPIRGVSEIELNQGLKSGRISRVDVA  
KLCVEATFYPELTGSTTFECYDADTGKGLSGVGSNILKKKVEPSEFVTGKERRGESYKT  
MFSGLERDA

>comp17532\_c0\_seq1; 327 1 1092 LEN=1092; minus strand; translated  
XGYVDHVPWLGVSSTNGQGIDEAARYEELPPSVFSP TGR LHPVEAAVRAGKVATPLSNL  
LVAIKCRDGLLVSTYVPSPNVDARIASLAGSNQNTNTISSASIQQGNDDNSGHSDDGIES  
NQTTTNETLDVSGSNNSNPHTGEESHYTPSLFLFEETCASTSTGPIFDIHPVMGATAGN  
AVDNRI LGEKLLDLGLATTNFEEDDPLAGAADRVAKDLANQLQVVTQDITATQKQRLGRM  
QRYVAIVMFGVDMYDVMYIFRESGVRIPYXKKA FNVPINLFLVDLSSTCSCISFSPTTDC  
STVGFASPF AKSSAVVLGNKKLWRIDPTGQFWD CQATV LGHADRAEEAFCCRLF EQCER  
RHGD X

>comp17551\_c0\_seq1; 181 1 884 LEN=884; minus strand; translated  
XVFLVRYDDTNSTKLREVQIDNQSTVPYSTLPVKAERTNEXLTDRENV LGTKALKMIATM  
IISTPCTSKRKS CDENDFPLCRLPEDVLCKVMSFLDAKSLCEMRKINRKFRESASKNSAG  
WVDLCRN LWKNKIHV CVEAQEELRRSSSSCGCSHGNNITNASAMSAYRKSLLDGNNRDH  
LTREELIFNPATGKGTVWSFRFKEAAGSDWTA FDPWYNHQPCKRMVFLDDGRVKIYAPRT  
NKREDKEQNMIEEGHADISGGYADDILEVQSENMEIDDASTTRSPSRIDPRRNPX

>comp17561\_c0\_seq1; 324 1 1787 LEN=1787; minus strand; translated  
XQHENKINKTGKKPQQLQKKQSIIDGGEQDKLFSMEKKT KMSKMRKGQLSWSGGHGTPES  
CSDTKMRKI QYQLEQNARFRKKNMAKYVMDFRKRQSTYIAQSTTSAAGWEETMGVHARG  
MQLFVDLSDQKSFVANSSDNESASENDGPWFVLHIGPPKTATTTVQCGLKHSRLAKT  
DGYHFLGGGCGMQTKEYFMPNGEQVTLRLQILVALHSAESRSDYEAKRCHEPVSRYVEAI  
EAEKHRQRFIDRASFLRSKNRSVILSSEQFGS QLSVQREIMEQTRSMILSTEDGHGAGFP  
PDKVRIVLAYRHFVDWLP SFYYQKFFRLNSVMDREWHDNFRVRPLLEYIDEYLTKWEAHQ  
RKVDKYVARKNATLIHEGHSPLSLLPTNRQSIHPSWWLYTVWSAYFPLPNQVQVYDMHSP  
MNMNRPEDDMVTD FICHMLP SANDTCQNMDEADGKYDKSDYDNLDLHFSHSLHLPNRTT  
DFLNNIGRGNKPGAKRNLKADSNNGD NSDEKNNGKQTMVVRPSSDHHAKRIVEELLGRG  
DIKPF PYEYGT KYFEKLN EGGIMQDPSDAVTVNGYTMPNLLERANEILENHGVYS

>comp17583\_c0\_seq1; 105 137 1093 LEN=1440; translated  
MPELKYSEGGALPSNAPEWAVAASQRIQERMAEKGRAGLYDNPPPEGISKILLHSCCAPC  
SGAMVEEMLS YTEKYGLEVVIFFYNPNIHPRREY MIRKEENKRFAECLGIEFVDCDYDSD  
NWKRMKGMEFDPERGNRCTECFDMRMERTALYAHENGFDAIATTNATSRWKDAKQVDGS  
GIRAAARYEGLTYWYRDWQTDVMTLRKYQISAENKFYKQ EYCGCSYSLRDSNDWRRANGI  
PKIEIGGDRAGLGNRYFSDPIEDAQEESQDVVDEFFAQAQDIAAAGSDRTERKNALEMYK  
DRRKNEKEAGIDFGLNNW

>comp17586\_c0\_seq1; 486 1 1245 LEN=1245; translated  
XRSRANQSYSSLALSPKGRYALVAGKDTIQLVSVGPDGLKRVRS LKISHHFYNP GASAPS  
PDAAGGTGKAQQQQQQYGDLSGIFHLAAETRAAVTAGVANMNLNQFGNITVTKVAWS  
NNYSAAGILPALKHSTRNLSQRGSNAGATGSAADAGTDESAALS STRAADANDRGNTQK  
GRRRRSSRQQRKSASVEDADGDGLEGEDEETMKEDESLVAVAGSNGVVAVWRKRLLFSD



>comp17664\_c0\_seq1; 386 1 983 LEN=1397; translated  
XCVQYRHF DGLCELSVAHEKKRDASSYALDPLFETMKGPD SRSRGSFQPQHV LQWHADKGL  
YGVVNYGRHSIADLNRIMDKHTELRRYRWIPTVRQGYFGQATL LLENCKENNDLGNNO  
WALSMKLTNMLVPAQSQQAKGQGGQIEQSLELVEAHQELLDSDKEKQCPMLPPEELVE  
LAISKLEYCFDLDRVRLAFTGLSVCNFMQDKQAALDQMSR IWAEC LLADLSRWSEWAME  
GIGSGSELAWLREEALSSTAFGLLEECRMDAAMKDV TYGRHIEKDVIDRVQGDHRES  
FTRVLRVADTAATDTIRVDSL MVSTY

>comp17689\_c0\_seq1; 104 1 1638 LEN=1638; minus strand; translated  
ALTDIWDNVSQYNVEDKFSKVRMLVQNRSDADLLVLP SMEHKKTSTKMPFLLQLAEISG  
LCRAYKLQDLASLRMIELTLKYGSC E INLTGLAFALCGLCVARRHLHGEAYRYGRLAEMM  
SEGENPYGRQAI AHHHYSMRHWRSSMKNSRATLDDLCRASIKANEVDNLSFQVGTYISSI  
FYSGSAFDCEDTLLKLYDEKRAQHDLPECWNVTAPYRTL MKLSGEIPEVNAKV VVKPGGC  
WGPYRVFMQGLVATHFVQMTTGRKKISHQKQAANLVGILTAWTKKGMN NKXASDRGTTPK  
QSRILLDTAITFAYQDGFTHHAALASERAGLYFIHQDDKMASLYLSRAFSLYKEWGAN  
KTEQLERRYKNYLGITSEPIRGIQKGN SCNLMTDSNRRPRDRSRGEIVRTASRRHGVRR  
SFSHDEMINQRNQSSRNMMFARGSP SAPNIGRTYSFSEN RNSTWDKTSN SSRRLDRLSAT  
KGLSSTRSKSQFLSTNDKNARTPDSTKSI PRNKTKRPALLRNLSSSLTMSVASMLTKP SL  
ASRKEAX

>comp17695\_c0\_seq1; 563 106 1401 LEN=1516; minus strand; translated  
MTPNDKDASPYDMILG SWPFQSSKAEGKEAKMRVQTQQATTSPAPKLALVDHSLDQESLA  
SVASTIFSTSQRAQKSLFRPISPTPPEATELANSD FVTTEPLSDENFELESRISEIESID  
LAELENPFREKKDPSSSDKSGIQKVASTDSSDSSGCKGFKNKKINLFRLSRMNRIRGSN  
SIEKEAKSSREKTKTKSRKNASTRASIFSKSSAEEDVFE GVEDISSVEQEQQQFSMHEKWD  
SLRVENISIKGSASHVSDLSSESVYSSSQKGTED EEEEEVQLKTKNIIKPFPIPTNESPA  
TVTLSPSITSSVMSESTKKS LVNSTTARSEGSTAGFSSYESTTTTRDGTNSVNSLELEN  
SGVETTGFFDYFAAYATAVMTECANLAAASGAAEYQQEFMTIFSGGASVNNAELRHQTSR  
DVPSEHTRSTL

>comp17719\_c0\_seq1; 335 292 1080 LEN=1163; translated  
MVSIRSPRIFTGVVVAFLASNASAFSTQTPASAAAKSASGEISKSPMFEY LKFDKNPKFD  
VLEKTKTYVAKQTEDAGLNEEWYAEDYVLRGPVIGP INRKDLVEGQKGLDLRSAFPDIRI  
DSFGFSIDPENPYRCFYMQRWRTNTGDMNFGTIYPATGNEMEAPVATFCV VWNPEGKI  
VYEQVGAVVDRLEGNTQGKAAVFGLLHTAGLKLNASPGNKVFS LIQRVGHLAGNLGRSWS  
KEEDIPTWWVSPSRGADGTEEV

>comp17721\_c0\_seq1; 217 138 879 LEN=879; translated  
MGSKKRKNDGKAVDVSSSTKLIPSSSTPKLDTSNWPL LLLKNYHQLHVRTSHYTPLPCG  
SSPLARPLDQHLSYGVINLDK PANPSSHEVVSWIKKILRVEKTGHSGTLDPKVTGCLIVC  
IDRATRLVKSQQSAGKEYVAVARLHSACDVAKVQRSVETLTGALFQR PPLISAVKRQLRI  
RTIYESKLIQYDEDRNLGVLWVSC EAGTYIRTL CVHLGLLTGAGGHMQELRRVRS GALSE  
NDNLV TMX

>comp17732\_c0\_seq1; 45 1 265 LEN=265; minus strand; translated  
XGNAQGD DLESRAEPSSLPSNAVDALAGVAPAXVLLVVMGEEENAQDILHRILQEPGRS  
RSRGRKATVVCSTETRIVTACG GNAFPSV

>comp17780\_c0\_seq1; 321 1 1086 LEN=1086; minus strand; translated  
PPFVTRTPPQVNQMNHRLDYGT P P P P P HAPYHHRL P P P GTNGSMPPGSFRHGPPVLHHRQQ  
FGYPGAPP GHRFSPHQYFP P P RYLMQP L L HRTNSYGVGMVPSAPT P P NQQGAPATTKCN  
QWVCDYCNVASFSSYEEACAHEEICKKAGPKAAAQLLSVSRSYSSASMEDESVSSNMSM  
MVGHHLPANNPHLHPAFGNAMEAARRHHASLALKMGHQHRMQIDGNNSMISGSNNGS  
SSSNNRPGKATPVSAGKGN SREEQQPMTEEERRRQEMHLHSLGGYIVYPNDVEMIPPYV  
HFLMRQVEPCLFTEADR FVARSKGPVGYPGFQCRHCHGHAGLGKYFPVSSKSLSTNSTSQ  
NI

>comp17813\_c0\_seq1; 194 55 491 LEN=491; translated  
MKGLVSIPGILLWLSVGPQTALSLTTGNSKNTRRDFVNTAIIGTAGLIESSFP RVSWAVA  
ADDSNTQLPFCVIGSNGKTGT KCVQDILNRGI AVKATSRNGIYYEAE GSETKKPLLLPTI  
CDVTVPATIDA AVKGTAVIFAASAS

>comp17833\_c0\_seq1; 232 72 1578 LEN=1578; translated  
MESHAYHEFD PQGIEKLLQKELYELSVEDRNDILEEIHGVRCVAVPETPQLLSESLMMLE  
NELRNTYASSPTKTEHAHYSRNEQQELKLVFQKSLQY P NSYIHQNNFRLSFLRYEFFDIR  
KAARRMVKFMFCVTKYFGDYALQRKIVLSDFTKPEIKVMKLGHTQLLPFRDRSGRRIVCV  
FPDADYFAIDYRIRIKIALYMNFMGSGGSTLEDDIQDDADTQRKGAVFLVWMDSKSKPN  
IEPPTPAVDGTAQSAAKKSLNNNIDLIRTMGIEFQQASTVRVSAMHMCTPDTPLFRLQRS

LISLSFGPFRSRLCMHLGAEVEVHYVLKGYGIPTEQIPISYSGNIKTNELKRWCATRSIM  
EDPSLQTSFDRRNLVEFPRLIDVVFKNGTSAYSNPGNVHFRSLMEWKYEELQHKTKQIKLV  
RGQKEVLVKHLINGLLEIEERNLRLNWNNAKDAFWCRLCETKLIRKLSYIVQEFLEKS  
LRDAAATKSKQVSQSATSIFLQX  
>comp17848\_c0\_seq1; 275 1 1010 LEN=1166; translated  
XVAVPLRPGGPHRYNSDDTTDRPTDRPNQPAKQLRLPVVSEHDRDETEQNVPTPEPNPPVV  
PPAAGVLADRRGPGLCFSFRPPAPASSSRPSTRLLGGGF GKDSPNYKAPSKSYGKKELEP  
IKDLIDEESGMREFFESNEPWQPLFRSVAPDDSVPAMAF LGGAAGEGLETTETSSPWRKL  
PAVPTDEADIAVLGRFLDAMQTS LI EDIPVDESTKDDENDLHFLEEGRRMLVCSRYHVVO  
GIEKGSVETFDRLFSICWSELTELREAGEEDSGSLIVAPGFDYDELRRFVDMNLQRPLQW  
LGVEGFVAVASLEKGGGLGVIRI IYKLSDIPTLPRG  
>comp17852\_c0\_seq1; 80 457 634 LEN=634; minus strand; translated  
MDQPSXTDGAEGTADGKHA A IENEGGGREEKDAVDSTTDRSLTTETRLQDGLAVDGDXX  
>comp17928\_c0\_seq1; 284 1 672 LEN=1593; minus strand; translated  
XVGNQRNNDYKQQAMHPGEKSGATLLDDASVGSINPKD V D A M V A K G I G M L S I R D R N A I Y E  
EIHGVSSMAIKETPELIRDSL RNF E KELENA DHAKKFA Y D A I M N Q E E N A V S K D V I T D D A F  
RLRFLRFVFFDAKAAVARMISFLDILHTLYGMEALKKFDDSMDF FINTKELKIGLRAGYI  
QLLPFRDRSGRRI I V F V T D C L K L E S K V R V K D E I E M L S D D Y P S F Y  
>comp17936\_c0\_seq1; 283 70 624 LEN=843; translated  
MVLVLLLLLLPLRPFLLPPGDS CG I A S D R C D V E V A S S P E L L A D V V G V D G T L D S S A D F V F G A N  
DTLRLAFPAGEFTTVEEALWSSCSLRDNC SGDKGCSEAFGERVSDSKDAAFRTSSSSSFES  
VFRMTLASLDSLGGVLIPEALPTLLPPGLRLAREAKANA EANSV GSTFFLSDGLSMVTPS  
IVSF  
>comp17958\_c0\_seq1; 178 1 540 LEN=540; minus strand; translated  
GLANTDGDPSDPIRDAIIEVIDV D N R P V D E D D I F G P K V A C A N Y T F E M T T D N Y P G D N N F F I  
VADSAVGEIFAEGVPMTESFTTYSTE V C L P Y D K K Y K F V L Y D Q Y E D G I C C G Q G K G S Y R G L D  
PKGNIIFSSSGVPEGFDVKIEYFEVGVNPFVVP T A Q Q T Q I P T F S P T V A P N P S P T D V P T K V  
>comp17991\_c0\_seq1; 132 370 582 LEN=666; minus strand; translated  
MHTVFGQVLDGWDTLDKWERLPVWGERAQSRSQKTTPLEPPEITGITIHANPLADEGIVY  
PTPSGPPEKK  
>comp18028\_c0\_seq1; 90 1 540 LEN=540; minus strand; translated  
GHSVVAAGLRDVLALS AVPRTRQNDSGAFQVQSAPRQYLGSWGS GDSCQLWYRTGKDRIP  
DSLEYSIGLKSEEFYPKQYALEV V S S K G G T L T V Y N H F D E D R I V Y L T Y L T T S A R A A A N K V Y  
PKTKVSMVKEPMQTGHTTIVLDP AHDDNSDVMHRTRTS AVGLVKARSKGILEFTPLEEYT  
>comp18065\_c0\_seq1; 79 1 575 LEN=575; minus strand; translated  
XSKSTGSNPLVRKRRLDV S C T I S D L H Q R Q R R I H P D K K D R G N I D S T F T E T P N I I D G I N D D  
RRNQIESALLTFLRKYCVGTQLDEPLLD R M L P N E S V S Q E T N F I G N L L V S Y P I A I E A L L G Y  
LYKPGQRVGSISLRQKCGRLTAIAVLVAEKQSFEEAKKIDPNVLEPESDEEAL T Q M L F E G  
SKLCEQLENMVS  
>comp18100\_c0\_seq1; 172 1 830 LEN=830; minus strand; translated  
ALFQLENTHMNMIGQLLFARQWY Y L S I C D E K N M G F A H K R W R S L N A E D I T V A L D E T E S P I N  
LERGNVTNENDHGKNAMLPDSLSSRELLARKVGRFFAEAEI FVQEREK D A S R I Y D F D R M P  
VKDSEIPLSMAHSSATDIDSSLATSCSSSSQENFWNEWYD Y R M N S V N D R Y V F V R L S L R D G  
TGRFWHGFRRLTTEHNRTFFRMHFGMKELIQDMQWTELESYVQAQDTGYTSAENRLKTAK  
SLMRTTQLT V S L E G K L L M A T G G Y S K C F T S S G T N N R S X  
>comp18101\_c0\_seq1; 269 1 715 LEN=1712; minus strand; translated  
XPPVSRKKRNRTPPSSSDEESGKQSQPHIKEFYSDDTFNPRRTNDLVVKEMMLLSVGARN  
E I I E E I H G V R C M A R K E T P E L V E N A L W K M E L E L A R I P P S K K Q A L V S A Q R S D D N N T K S S R P S  
SCPSYVNTKEFRLKFLRCELFD A Q K A A L R M V G Y L E L M V D W L F P T S S H P E I L R R P V R L S D  
FDEEEKLLIRKGM I Q L L P F R D R S G R R V L A G V A T M G I R N N P L M V V S I V C F V L R Y V V C G M W  
>comp18108\_c0\_seq1; 174 1 550 LEN=550; minus strand; translated  
XGGALPARDQRILAFGGAAAMVHPSTGYHL CRALMGATDAAEAIEEELASETPNLDRAVA  
SAYNALWSRENIRQRNFANFGGEFLMKQDVVGLRGFFDGF FKLPLELWGGFLAGWPGLAN  
NEYHESWAKRIWFGLN FIVKLPVPVALDMASSIATYSIFNEGWSLIQSVPFLDPPPSYE  
YKQN  
>comp18136\_c0\_seq1; 58 1 214 LEN=214; minus strand; translated  
XRGDVAANFTQFGVGCFSFSDTEERILRQEITDQACRGWFSSGLVSSGLTTETSGDENQ  
HAENTKEISFTK  
>comp18191\_c0\_seq1; 69 1 329 LEN=329; translated  
VDLTEETYTDDSDSGESTKKVGS S G S K R S R A L S T T S N G G I V S Q G D E R R S S V K K N V D A T T R

GFLPFSSDGGSRSKKSKTPAARIVYLPPQQRSNCSIGRTRKQLNKIKG  
>comp18193\_c0\_seq1; 118 1 466 LEN=789; translated  
XQRFISIQLHGKAFFLEDFHKKLSVLRGLYDRVDKASRILVCHPQPLQCKVQISSSQDLH  
GLVRYQRKASGSGSWFGPGYLVRICALRRKLPPLAFSGRGNFFGLGRWKNLWLVGVAVIF  
AEAIDPGKMPEFDGNRYSESMVGESYKSSISDSLS  
>comp18275\_c0\_seq1; 382 1 1180 LEN=1626; translated  
XNHVQAFSTTSQAFATKPDQSVTFSRHFVWASIGESFVDETSNDDTSSSATASSLDWSF  
LDSVCLIHCPNGDVGDNRIQSTRNINLNTINLLDSTTIKEFETDDEDVRVRCYTSHSVSVFR  
DVLGANSRGSVSPGGFDFNFVQKVNARSIDSKNDGKDLNVLIFEDNLSLGNRILTQDT  
IDAVSDFIENKNSKWDVIHLAYIPYVPLKVSKTNEERIVKLSTSNQSALGTTAYIINK  
RAMERIEEDDQNGYTLSDPKMAVLFGDSRYALNPTAFVRAPATKSLVNPQLDDLRSIL  
FRPTVVSIVQQILVVTGLSTTVLLPLVILLVLTSSISSATSSVRAAIEFANYGTVDGPLL  
FPIMNSIISLFLGLIIQGVLLAPKPEEENDDE  
>comp18284\_c0\_seq1; 71 53 355 LEN=355; translated  
MDAKGPVVLIGWRDLLRNKKAQPKSETAFAAHNPGLHVHRHLALLPVGSLPKGRPPKALL  
LVPPLRPLFSLPGHLPRGYAAPERADEHPDRPQGHADDHA  
>comp18291\_c0\_seq1; 0 1 204 LEN=204; minus strand; translated  
GAEGVLGGTRRKRASVADLSVTAESSPGGTSNDAGVIFSRNKRQAGNDSQKGKGGPIN  
SMAESLSQ  
>comp18341\_c0\_seq1; 326 1 589 LEN=589; minus strand; translated  
XEDPKKEGEDADNKDKTSDEGDEKSGEKKDSDEASKEGDSKRRKIPKAFLRPLLPQQRK  
RRAHRKTHGKISFRLLAQMVGARWKAALPDDDRKYYQDLAKEDSIRQKEAMKEYRMEQRQ  
QDDPTGESTKEVQVKAVSSESAAAEEATASTANKVEPEPEMVEETKDGDENEGKKEEKSDEN  
ADTEEEKKDSNDTDMAVX  
>comp18388\_c0\_seq1; 548 1 1356 LEN=1356; minus strand; translated  
XGEESAKPTDGTSSKKGIFMWFKEIYSTCLLIFCSIIVLTVIFEKNTKISEATAWGAFF  
LFWIALYWLMSVEGGQASLVGLPVDMELYKESHPTTHKIMAIINKGETLDRYLMGRQFM  
VLALVFVENLCVHPIDASLSILGMPIAINKIFLDTGLAVFFMTAMIGKISAQVNASRCML  
DYVNNFFAYFTMQTARLIEVSGLLHCCYPVQIFFAWAAGQPLESKEPPRSLVQNIFFWAR  
VLVSTAILCFFAVTLYAILNGQTTMWEQVPSWLTILLFFLFMSVVGMLQIAFFAVA  
RMTEAERARSTWAKRTCDVLFEGDGRNLPGFMIQRQMCVTLCFIIARVTTVQLQAGDEN  
IFGVSDATQAFFATGLLALITIVASIAWQLVASAFPMAFLSTPITYVLLRFCLALEWT  
GICQGSWVARIHRKIVKFKRDEVYIGTAEERA  
>comp18400\_c0\_seq1; 36 1 222 LEN=222; translated  
XLGIRSHRDELVVVATDVAADLIGVAGSDHLRDLRCVCRPVDHEALAAASCSSTDHEPVL  
RFGGIAGFALSLSX  
>comp18451\_c0\_seq1; 126 1 780 LEN=780; minus strand; translated  
XDGAKCMVQSAVRAAPIALSILVLTWAAGSVYQALGIDRVVISWIVSDTISVEILPITIFL  
STFFLSITLSSMTTISILLPTIMTPLVDSLGGDSKMSLVLASILSGAAAGDHIGPFSE  
TTIISALVSGITVRRHFITQAPYALFVLVMSLLVGTLPVSYGSYPAYVGYIIGVVVLLLF  
VILVCRQVKRYKSSIGGSPMPVSEVLHPMIAPQDKRREDRSATPMHPGTDNQQQPRT  
NEPLDGTDVVEGRESFKSKLX  
>comp18468\_c0\_seq1; 283 239 1211 LEN=1211; minus strand; translated  
MTKKLGLAPGGPEDEDGIPAFLSKAITPPHVKSINNALELLVNLGAVLPETNDLTTLGEC  
LSVLSLEPRVGMVIWSYLLGCTKAASQMAVAMAYKSPFVLPVPPHMRREAESQLTSLDN  
SESDQVTVLNAIIKRDQLMRKSKGAYRAWCQONFLGASSLQMIQDLRKNLTRELSLGF  
DPMGGGYQNRHNKQHALWQAAIAAGLYPNVATRKQGDVNFSTMTNRKAKIHVSSVNALKG  
QPLNSKCQVPKGEIEFVFCYEMVKGSHFFTLSTHLPVSLPILLCGTSLSIQPIDDAE  
QKHSILNLDWIIFKCTTDVASRLX  
>comp18470\_c0\_seq1; 112 1 497 LEN=497; minus strand; translated  
XQHFTIDSGRRTPVTSRVIQNNPNNGNTKSGNVKLEKLCINNCANPFLEYLIEASMGMDL  
FREFELQGNMEEEEEQAAELQAAANVRRGCQEASGGANSRDDDDGMDPRGPLQSNIFALD  
ALGFRMRFSRRLRKVELINLPIITRDHAESLMYGIETNDETGTGCRXL  
>comp18484\_c0\_seq1; 59 13 211 LEN=211; translated  
MKRVGPVIVILGLNGFRIQSIQIEVAGNLNVSPSCRKMYSNLSLFRGKDGSGRIYPQQAAGNG  
NVSLPRX  
>comp18514\_c0\_seq1; 268 1 477 LEN=477; translated  
DGDDEKENLIDDFDDYQSTISALTEATNYNSKSNINQNYTSSKTFVIVPPPSSPANHSCQ  
TSSTSKSSSRHLEDFLKTETESLRKLLATVESGDDESTVVEESVRGANEAEERMAKEMERE  
TQLLLLIGDHHGDNESMVEEEACCEGHSSSLKNDDEMVOVV

>comp18515\_c0\_seq1; 209 1 995 LEN=995; translated  
XKISMGFALAMGTLVFLSLRLAGGHMLTGMVAVPNSDVFRSACSZYLYTRSWAAPAVLFLVL  
VAEGAFRNGDCKTPLVAASVAAVNLILDPLLMFPLRMGMAGAAAATAISQIAAAALYA  
WRLWKRQLLPQPQDSCGSIKAGKVVKDIIGANAAMLKSNFMSLVFYTAATTTATRIGAAH  
VATHQVCLSLFWLLTMWLDSSGVSAQLLLKSIKIGEGDSIQIKSLTKYMKVVFALVQGLAF  
STFVCGIGRYVPAGFTQDPVVSRYIMQCIPQLCLQMVVLSLCLVLEGLAIGGKQFRFMAS  
GTAVATAVGLWQMRFATSVVVDIWSGAVNTFFGX  
>comp18569\_c0\_seq1; 233 1 727 LEN=727; minus strand; translated  
XPAGTEANETKRKRKTKQKRKRNTPEDETGTNKPTGLPMRLARYALLASTASRPSSAFSP  
SGSAAPGSLRLEMSSSSSPPPLCLADAPSIPLRNGMSPHSIGFGTYKVGFPASASSA  
VATAGAASASSPGRTAEECVGDALALGYRFLCAEFYGNEDVGRAIAASGVPREDLFLC  
SKVWTTTTIEEGPEAVEAQLAQLEQLSDLGTDYLDLQVGVAVVVAVVVAVVVVVVVAVVL  
WRL  
>comp18577\_c0\_seq1; 98 35 229 LEN=388; minus strand; translated  
MTATDSVNMGEDVLKGSLLTILGSAMHGLTYVICEAVMTVGEERLTAAQNNFVQGSVAGG  
VFLGW  
>comp18635\_c0\_seq1; 66 1 219 LEN=219; minus strand; translated  
AGESCEFPSTKICSSPTDGKLEGRAFCNTNHGTCMDDARLGCDPCPPGFYGFSCYEYSRDT  
VSNEENDNTVWEG  
>comp18641\_c0\_seq1; 54 1 244 LEN=244; minus strand; translated  
GGFGSVTACKKGTSGKLYAMKVMNKKRIKVKKSELLALNERKVLAAVESPFVVNLKYSFQ  
STDDIYLILDLMTGGDLSYHLX  
>comp18659\_c0\_seq1; 170 1 789 LEN=789; translated  
XLAPTISPVEITTPSETLTLGYTASPVTKSTKERITMDEEKGKREERRAFVDSSESREM  
ESLAPAVDEVGGDQTSERSFGDSDNDGDSVAEGTGFLMMPMKGSSRQYLPVPSSTNA  
SPSFSSDESGWSLFLHKTLLTDEGIAFRGFPLLESSGFSTKLLKFCWTFLSICLVHLVV  
AQFFDDRDMFLRLSYVWKYEGDLIVRDCVFFVVGRLWEKPGIDHLAWMGALVANIYFE  
SQNYIWFLOHSVTLFQMCMWPWX  
>comp18665\_c0\_seq1; 201 342 1687 LEN=1687; minus strand; translated  
MHSYNCRRVLQVTRLYTWILDETPLSGIIILRFLGASIGSNVSVEQPFLFEPDLCKIGDN  
TVIEFETQFCTSEIKSGYLELRGVTIEDNVKIGVRSILLGGAHIHRNSQVVAKTTVDYCT  
STTREGQTLVGSAPVLDSSAEHVPPRKTSECSTPKKWRPQRGNGYLFQMVAAALTIIEVM  
TAIAYVGSLLIGGYVNERFGSISGLVFLGSAFQIICCFMWLCVVALLRLLIIPDLECGKLY  
SSSWFALRKWFLDRIFLSPFLIYASQVRLQTSSTFPWYLKLLGAKVGGKAWINHPIVRVG  
VEHITIGDDFHIGVRVENVESSDDISISFTCFQSNHFPFRMHAYFSTERQESDGVWFDRM  
QVGNYSFSGQRSVALGGTTVGSYVTIGAETVLPFDFTAEEGSTAFGSPPMKFTSTALFKD  
IVTQSQCYAKEFLLDHTHEGKCDTELVA  
>comp18699\_c0\_seq1; 194 1 684 LEN=684; minus strand; translated  
XGDSSFQQRQYGNLIRDVAVFHSLSRNDQYPPPTPSSLLCERDTVYVNNHFAIPIDAA  
GLNGNSYSYSPFSPMSPSVYSQHKYGAQAESAEGGPVVLPHYTLLFPHASPSEMLQTFHS  
SGSAPPQQLKHLLSVCPQKSLTQISIDANLPMHTTMAIASFLVAHGACITSPVNSRSR  
LTCLGSNSIQRIRELTLDFSQAFFGVNLFVVSFLTSSRHLGDTMAVL  
>comp18703\_c0\_seq1; 121 1 636 LEN=636; translated  
SPESENEFLADIRSVMHVPVCGESNKGKNSNTPLSNEQRLENSTDGRTSSPTGTVTPQSL  
CSRDLFRKRSNLYQVKSSEKCYNSSSANRVAKQNRRRRQRRVLRKRIRTVGSTIVLILLC  
TWTTLGHWQWNYPQEHFGTVLQNTASRIHQGVVVLNDVKHTREKAVALLATTTKVTRS  
YIRDVLPPLADDTKVLVAQTIGNGVSFADQA  
>comp18720\_c0\_seq1; 174 1 951 LEN=951; minus strand; translated  
XATESMPAMIKAQEEYLKNSAPIGKKRGRSNKNFNNTTSGVFPKGNVQRPKTKSTKLS  
ASAGDRRLVDGATVANPRRAGRQADMRRRRGELGKGEHSTDMSTALMGALHDKGQMGVI  
LRKGMKNVVLSSYETTRSFRLAAIQARSYQMTNFSGERNLSSGGGDLKVIYRGSVNK  
TKEEEIVDRIPRDVLQAVLEGIHASNKEALRPENLSRSLSPRVLWSCVKLFPVLSNVPDMY  
RQLLPDLNWSFLRRRAEQLESEKALENKRQAMDEDEGIDFERASNVVAAVEHAMEHLQDHH  
AEERKARQAQAAEARLX  
>comp18742\_c0\_seq1; 366 1 929 LEN=929; minus strand; translated  
XVYEATAIEQVYSLYLANQVFGTIIPLNNTNINISGRNAVFPFLTQSGVDRGILRAIWT  
ADPQSFGLTNIQSQFHVILRLVAMAQAGMLNNDTTIMGSAISQHASRQLPLPVFSNIAI  
PHVNQLMTMYGHLVMNVQSSSEEKIADATNTTSASGGFFSLQPSVLQSKGYQFGGVIQTP  
QKEQSPNVSTAPSIPTPGMTTTEASITHDNDDDDDGFGDFGSAPSIPVPPRNTVVSSFGG  
DSFMNQQRQQQPFVTDVDFGRTLSEPISGNNATPVIVPTSMSTLSVSDAFEDLGAVDAP



LPSLNALGSS

>comp18748\_c0\_seq1; 144 1 350 LEN=350; minus strand; translated  
AGSNTGSGSVNAATKTKSSSLMDSIFNSDNSTFVANKTSSSTAALFDSTATETAPTKEYH  
QFPFQQQLPERKTTPKTDNANNECDDDADLRKTLHNRKIRSEHRPLMRKALDFPGV

>comp18756\_c0\_seq1; 348 1 775 LEN=775; minus strand; translated  
IKAELLNASPNNAPRESEIVAQAGRTGAVTVATNIAGRGTDILLGGCPKTMARIKLRVSL  
VENGVLSTEEADALPPSPPEYYPCELNDVQYMMKDAAASLRNQFGSEMTSLGLNEILT  
IAIDTTEAEDDPEHILKLRNSAAVIREIFSEITDADRDLVQEAGGLYVMGTNRHESCRID  
NQLRGRAGRQGDPTSRFFLSFEDDMFVIFGGDGLQNILKTFRVSDMPVEAPQVSEALD  
KVQQAVEIKYQEIRGEIFX

>comp18786\_c0\_seq1; 110 1 361 LEN=446; minus strand; translated  
XSDLAGKRQKALEKSEKLVGRIGTALNFIVFVCWYGIPMMEFSGHRVLSPTLLSREESA  
EMAASAFNSYMFPLSYLGMGVRISKWGLANPKASTGALLVWWSAQTTVGKIMDGLLETLDD

>comp18867\_c0\_seq1; 201 1 971 LEN=971; minus strand; translated  
XGGAAGTVFFQFVIGQILWAEKYKFKPWVHFNNVSYIVFDPVVHGNSSGVDVTMOKGMKI  
SYVSRPMGHRRAVPGAPVGDPKNLTPFHFDGDGVWNNYFEPISDFAPGDKSCEKPL  
VTMDLYLVTPGVHGFSGAPRCWRYEYLPDYITKPHIPLNDWLAPQRQSAHDVFNRYIRFL  
PHIEELAEDANPYCSLHNSCLGLHIRHSDKAAGRRLVLETDEFPLPVQSFLAAGGKWVYLA  
TDSENVVDHIKNRWPRNVLKVIRSLGDNVVRNSNDLQAVFDIGSHHRTNTEILVEILALS  
CQFMIHGLSAVTESSIWINIDLHYX

>comp18892\_c0\_seq1; -2 1 320 LEN=320; translated  
XPGAQPDELSVNSFHHPCLCVLVLVLPVGNLDPSPRHKNICPQLGVVLILTVPKPRVQVVP  
ALADPALDADADKESPQAPGQARVRGQSSTLKGTRDVGSPRPDLLX

>comp18937\_c0\_seq1; 55 1 336 LEN=336; minus strand; translated  
XAEGTVPHPIPLGATTRFNALSCKMWRRTARTILVLGFLVVFVETTAVAPGSTDSVMSPTS  
QPLLSHRIVSNSHGEYVSFDPNATEYWFDAVIDHFNFRTPEQGTFFPLRYFVNX

>comp18971\_c0\_seq1; 105 1 215 LEN=215; minus strand; translated  
KSGKGSAAISPIAAEAATIQAPEAEGLLRASDRRKAEEEDNRTVYMEHIPKPRDLQEIRA  
QTMVKTDLPLPX

>comp18973\_c0\_seq1; 143 1 281 LEN=477; minus strand; translated  
THKPSPYPTPRPTPLPHTKPSYAFVTSISSPDSSSYAQTDDDAHEIPYTTASSRTNQVA  
NAKSYTRTNAQTNTSPYASSYEDAYNGANVTTN

>comp19087\_c0\_seq1; 146 1 346 LEN=346; minus strand; translated  
XRDEEVEGEDIEEEDSLEDNASRWIRGSFPEKVIVIGGGPAGMSSAIYAARAGLTPLIIA  
PAMGGQLQKGVVDENYPGLANFTGPAVIAAMRSQAIFGAKIEDDFVTRIDTSSR

>comp19158\_c0\_seq1; 149 1 333 LEN=333; minus strand; translated  
RVHWPVVQASDGNVQMVNDFKNALCIGSDGFSSDGDGDIDGTYRVKDGALSPLGVGLEW  
GAGSDTNSSNIMSTNIVRGMPYATMVYSDSSNMVPTIYSYNGLASDVQIDR

>comp19208\_c0\_seq1; 188 1 194 LEN=318; minus strand; translated  
XGGGRYDDRGGGYGDRGGHRRGGYDDRGGGGGYRGGGGYGGGGGGYDDGYGGGRGGGGG  
YDRY

>comp19209\_c0\_seq1; 78 1 246 LEN=246; minus strand; translated  
RRMLRTPQFLVELIGEGGLVPGEYHRLPPQQRERREFAFGDRDGATPAHIAAKLGNYS  
LQELVEALTTNAGGHRRRLLLG

>comp19251\_c0\_seq1; 22 1 251 LEN=251; minus strand; translated  
AGESSNSKKDIIISKPKLNI SDPRKLPRTCGVLYARDKKGGFVCSGCEGDLGYGVHVSVP  
GGRVKNAEAYSNYVNTQKQMKQGT

>comp19261\_c0\_seq1; 61 1 227 LEN=227; minus strand; translated  
XAMHSMASFRDSRAFANSKVAGQNLAREAERENELSETIMNKTLQEDAAKDRLKKAQAT  
LELANAAQHHTTEIDTG

>comp19262\_c0\_seq1; 129 78 295 LEN=295; minus strand; translated  
MQLIRWTDGGFGMAAHNYDGDMLTDQIAQVHRSPGFITSNLVGVNDDGSLIKEFEASHGT  
VSDLWHDHLAGKX

>comp19333\_c0\_seq1; 154 1 246 LEN=246; minus strand; translated  
PIYKKVAKEFEDRAVFKVDTNMQHELRSARYQVRSPLTFYWFVGGKRVQDEKGGIGEAAL  
RQYTNKAVRQAETENTKLLLLDD

>comp19392\_c0\_seq1; 91 1 525 LEN=525; minus strand; translated  
XGEELSERSVKALPTLYRFPCTETRNQNCWSETPNSMFSVRGPGYMNKDGTKVPSKKYILQ  
ARGCDLFLTNDHSSPTILKAGLGGNLRKKPTYVFRFLFPWGVLIQYYEVPKVFVPMK  
MDMTKQEKRELSIEGFTKAEIALARWMASDDAEFKNERLKLIAIVPEGPFLVRNLX

>comp19430\_c0\_seq1; 32 1 254 LEN=254; minus strand; translated  
EHYVYVSHQNVYLCAVTTKNSNVFLIFTFLYRLAQVFKDYFGSLEEEESIRDNFVVIYELL  
DETMDHGMPQSLDSNILRSFITQDA  
>comp19478\_c0\_seq1; 76 1 214 LEN=214; minus strand; translated  
GVSSASLTFAESNIHVQQEKISSSGATDTVDETI PSADGLAHGHNQGDQLIVSAEENS  
GNEDTIMNPAGX  
>comp19506\_c0\_seq1; 16 1 453 LEN=453; minus strand; translated  
XWGMLRDTAFLATGGSYGGNLALWLRKPNLWAGALASSATPLKHLRESNSFSRIVAD  
VYGNVSTACPVKIREGWFDLFENVKTEAGREIVKNELKLVPSPEEIKPENVAREIYGW  
ISGALETMVQYGYPTPEFYNPVPGYPFRVAX  
>comp19530\_c0\_seq1; 40 1 261 LEN=261; minus strand; translated  
XDKVVATHATYIADARNFFIDTLIASGAKEVRLVYLD CDFDVHMDALWKRALRQAEQFPG  
TIEEGLEAFYGGSDFFSFKHQKNIET  
>comp19540\_c0\_seq1; 131 1 300 LEN=300; minus strand; translated  
XFKSLFRRSTTNNSNKGESSFPDVSSCKALSITVRSR DADTYEGYYVSFGTDRVPGGHHHA  
MGYKTHFTVDSNNEFVELTLPFSDFS AHWDDATGKTTVTCX  
>comp19573\_c0\_seq1; 17 1 291 LEN=291; minus strand; translated  
PGLVYLG IHGDDFINRLANRILALNTNKASSNASEVDLPLEGDATAQMSPGGRAVDPRQ  
VFSTEYLSGYRKPWFVYVLGMPLFVKIALKGSNGLSE  
>comp19618\_c0\_seq1; 103 1 242 LEN=242; minus strand; translated  
XPGRAPKDYNNLLNYIGSRDVGLADLSEEEIIAEV DKGCRQVLLKSDAPPAKVIGMKVW  
PTAIPQYELGHLPI MKELEEAX  
>comp19704\_c0\_seq1; -10 1 285 LEN=285; minus strand; translated  
XGDDPLTVQERRMIRRISSITVSHPSTRRPSMSAGMGDYEADSQMTVTMTSRTEIFERR  
SSITSRTTADLEEVPDNIQDSEKAEMGF SKITIPQG  
>comp19716\_c0\_seq1; 42 1 204 LEN=204; minus strand; translated  
XRAQNSVVQRQLVAQKELDIKQKERRDQSE NENDNKVTS SKSQRFGNAMSAAQKFVSGVF  
ENDQKKREX  
>comp19817\_c0\_seq1; 147 1 277 LEN=277; minus strand; translated  
XTQKALPLAIRHV NATDTNTPQKS NYPPSPAKTTTTIHNMTTADTSPVESSQTCPRQVLL  
HENAQQLNHAA NFMEVGKLD E AIDALALLLES  
>comp19878\_c0\_seq1; 62 1 318 LEN=318; minus strand; translated  
XRARVTSLTTEELSGPWDEVRRKILWAGGLRDL PNARPGQYTGHSFN DYNHVDLTCMRD  
DVSDNENDG SVKMIAIGNQLGPGIRQASLP ELGSGGSWSTCAIGCNX  
>comp19951\_c0\_seq1; 88 1 333 LEN=333; minus strand; translated  
XEEHKPLNLCEGD CDTDDDCVDGLICFHRIGHNHVPYCHGGMRDETPSDYCTYPPDDGAM  
EASATPSTAPSAAPSATPSAAPSATPSATPSAVPSMRPSLNPTESPSVSPTX  
>comp19958\_c0\_seq1; 125 133 299 LEN=299; minus strand; translated  
MSGMPMAPQQT MFVDQTTTATEIYHQTVPAASNNGSQAPGVAGIAQHRQQSIYQX  
>comp20094\_c0\_seq1; 55 1 240 LEN=240; minus strand; translated  
THSATDVSMCWKEIFGQDVDFSWDYGMTDGN DVSKLHFHSYRGGISESRPAAML IHYGG  
RAGKNRLGAYA ALEEMGMAA  
>comp20109\_c0\_seq1; 42 1 254 LEN=254; minus strand; translated  
XTGSRVGALEDKEAGVRVCSNLATGEWDHVELK LFDASCNPYLGLAAVLSSGLDGIARG  
MELRPPLSKDQRG PLLPETLLDALD  
>comp20120\_c0\_seq1; 110 1 473 LEN=473; minus strand; translated  
XKMKRAKEGRKSIPPPSGTKPIDVLVNNAGAGGFPSRELTV DGFERTFQSCYLGHFLLTA  
SLFGEGLLKENDGEGECCTVINVSSLAHRGARASHGEGSEDA AFGFDFENIQSEIAYTD  
DVYSQSKLANIMFTKELDRRASGR LRSVSLHPGIIASD  
>comp20127\_c0\_seq1; 72 1 210 LEN=210; minus strand; translated  
XSGTTSAGNSNNSNSTFDLNDFP SLGGTVVMQGSNNDG SNNNNNSNSGLAAALRDQQR L  
LAHQQLLQQQG  
>comp20265\_c0\_seq1; 36 1 271 LEN=271; minus strand; translated  
XECFEQHSGDASLYPEYLELGHGSPHYCTKEGKEADVYNDWCPYIYFGPNRGKYRHPHVA  
FAAVETYLANLVMPDKCGTTWDDSNYPPEVD  
>comp20274\_c0\_seq1; 17 1 208 LEN=208; minus strand; translated  
XGGGGQLLQFPWKLHEMLHLAEKNGKTDIISWLP GGNFGFKVHNKELFCEEIMP GYFASQK  
YKTFQRSLNL  
>comp20385\_c0\_seq1; 50 1 206 LEN=206; minus strand; translated  
GLVAAGLCIGFFVMFLYSAAFSDVSGEIGVIAESVRKTKSHPVLMETPEDGEADTDAVDP

NHPPIQHPP

>comp20422\_c0\_seq1; 181 1 772 LEN=772; minus strand; translated  
XGYELYDLVMLSGGGSANEVGIIVRVGREDFTVVNNHGISRDVRPEELRGKRNSTSNRAV  
ALDVQGNQMRCDQVNI AEGPHKGTATVKRMSRSQLFLYSQTRSEHAGIFVVRSRKCLL  
AGRSRQQRGAQVGDASPFATPQSQSSRGGPGGGRGKQDSLIGKTVRIQAGQWKGYLGAV  
CDATATHVQVELHSRLKKVMVVRERVAVVGDKYGAVEDVNQNDMQNGIPTSFTTATPMHG  
GATPMHGGATPMHGGATP

>comp20480\_c0\_seq1; 35 1 244 LEN=244; minus strand; translated  
VDDEFHKTDVHTGTLSEEEEDGRNIWRDHPIGDTRCTYPVRDYIFSDSVITRDEICPEDD  
GDEDVEEEFSGGAGICDSYNPX

>comp20491\_c0\_seq1; 102 1 228 LEN=228; minus strand; translated  
XTVSAKNNNDKTIVLERFEGEHLDFDTEPSTSSLSQAVATNEMKEELWCDVLDGDQC  
PVEPSVSFGEALRDRA

>comp20581\_c0\_seq1; 48 1 254 LEN=254; minus strand; translated  
XQAQKSGIDVFRVFDLSNYLENLKLGVDAAGKAGGFVEGTMSYTGVDVADPTKGYNLEY  
MKLGRELVDMGSHSLAIKDMAGLLTX

>comp20695\_c0\_seq1; 84 1 321 LEN=321; minus strand; translated  
XLEKEDVDRVVLVGGSTRIPKIQELISEYFGGKELSKSINPDEAVAFGAGVQGSILGNSS  
PDEYANIILLDKTSLSMGIETVGGVFPVIVKRDTSIPTKKSQIFSTNX

>comp20726\_c0\_seq1; 111 1 218 LEN=308; minus strand; translated  
XLILFFKMRASSYRYGASKPRSPGNNDGGKYRPIDSSGRIEGTSTGETSAEYGEAGSDED  
EDGTSAEYGDVI

>comp20728\_c0\_seq1; 120 1 241 LEN=241; minus strand; translated  
GDLKLEAIYSSSLDDLKRTLSQSGYKIAENEVDQLKTQIVKEIKKDFDKYKKDIKEDIAT  
SILARYIPESMIMERNLKTDX

>comp20777\_c0\_seq1; 95 1 235 LEN=235; minus strand; translated  
XKGMRRAMPNSRFLLRMLDQKPVVQATDIVLEVKNIKMWDRCEKELAKLTGQPVERI  
QEDLKRDFYLSSEAVQYG

>comp20796\_c0\_seq1; 59 1 205 LEN=205; minus strand; translated  
XNFGSEAGA AVKAANGDCGFGYSNNYIDPSTNECTGQYAYWDVTCNEGCTVDEGVHWASI  
TYIGGLYTL

>comp20901\_c0\_seq1; 83 1 316 LEN=316; minus strand; translated  
XGMGDIPTAGAGGGDLKKIIRLATHDEVQLLGMKRKEEEELLEVCRRHKVIQRGMPMVV  
DAEYQFDRHKLTFEAFNTRIDFRELVRDLFSIYKTRIWMQQLDKX

>comp20958\_c0\_seq1; 132 1 245 LEN=245; minus strand; translated  
XGGGLDGMGGAGGGGQVLRRLTEEEMA AVNRLADMGFDRTEAAQAYLACDKNEALAN  
LLMDSMDSGGFGGGFDGGANDGX

>comp21031\_c0\_seq1; -4 1 216 LEN=216; minus strand; translated  
AGDDANAEIGLIWQGRGRAGQFFNILRSVILDWEWDTVDRKMMIDDFARPTTKEITSAL  
VGSALSYQLALH

>comp21035\_c0\_seq1; 62 1 273 LEN=273; minus strand; translated  
XDLLALTKLAPPSSWGADIAVGSARFGVPMGFGGPHAGFLSTSDKYSRKMPGRIIGVTV  
DSSGKPCLRMAMQTRQHIRRDKATSNICTAX

>comp21036\_c0\_seq1; 128 1 209 LEN=209; minus strand; translated  
GGATSWNISKLEETEKKDGDVDDWGAAREKAVAATAREEDKKKREEKLA EAEQQKER  
NLAKAVAHGX

>comp21040\_c0\_seq1; 89 1 718 LEN=718; minus strand; translated  
PALEYRDKYKNQNMQSSNTTNAMFGQPKIPYKPVLPFRFPESPNEI VPAPLGLPVQMLSD  
TLAMNNHAIMIQSKLNLIKQHNMVVELLILTNDLATSVAQLQYVKPLHQREIPVGPTAMK  
VVSA AEMKCQFLIEEQVERHLTEPEYSGGKYTSLHARMMICQLAPILGPNLGRMDHPLV  
SITKLRLLGLLEQEACDIFPFIQGLEEDILLKSISXKKKIGNGPSSLVPSNLGKDNWLES

>comp21360\_c0\_seq1; 122 26 207 LEN=207; minus strand; translated  
MTFPLRIWVDNSGSMNTGDGHRLVDSANQSHVRFVSCSRWTEIQETVQYHAQLAALLEA  
P

>comp21406\_c0\_seq1; 170 1 700 LEN=700; minus strand; translated  
VVAISASKQQAALPSSFWETGSGEDLVDLERYIRQGMQKTS DNSVKKKPPKSRAEKT  
QTDSNDDNDKRWKLKRREQTAGRVSSFTLAIRRVHISLARFCRALEREENRCAYVTLQS  
CALFKIRNGRQKQWEAMQINRSSASVSNCATITSSSGSRGDRSPYPDRHNPRHSRTN  
SFMSSYSLPSDAALKA FDNNDVSGEVLDTIEKDQEQEILELMLACNPQDNX

>comp21432\_c0\_seq1; 61 1 248 LEN=248; minus strand; translated

XASGLRFLWGQELIHRDIKPQNLLLTGRIPPEELVDNPPLENAATSCSESIHDDPNQGFSLKIADFGFARHLQTASLAETLCG  
>comp21623\_c0\_seq1; 59 1 178 LEN=254; minus strand; translated  
XYAGQRSDCSSFRNSGDLGFFGRGQMPEPFENAAFALRKDEMSGIVSTDSGYHLIYRIA  
>comp21625\_c0\_seq1; 129 1 212 LEN=212; minus strand; translated  
RSVSLRCTGWARETASTQGFRDYVAVHDALASLFDEQGNRHRNYDELIFGEKTSDVIRS  
TETITGDNNXX  
>comp21676\_c0\_seq1; 125 1 313 LEN=313; minus strand; translated  
XRRDASNYGNRSNNGYDNYGGRGGDMVPYANGAGGGDVRSMNSNNIASIEAPHNPEEED  
AYLRQAIENSLKEGSPNRRPAPAPAPAADNLLLDLDFMTPAAPAPV  
>comp21821\_c0\_seq1; 183 1 413 LEN=413; minus strand; translated  
SSSSSSSSGCSLCPGEIVCTDRELKSSRSTELALLLGAIVGLYLFQFAELMQSMPEIS  
SRISHYRLGGNLNLAKMEIDSGMAGGEAWEDEDEDQDGTKKHKYKRKKKKKNDKKNKNDN  
NDNNASIPTGVWPVSVRX  
>comp21946\_c0\_seq1; 34 1 518 LEN=518; minus strand; translated  
XAEFAGDETSRVYCLDECIKQPLETGHTTPIASILRLNRHRNDPPDRKRPRGFNFIDRAL  
PCIDIHYRPIRVITGGQSMGGNFHAIVTYNTALAFHLRASFMTTTIAKYEVSTQRQLQRL  
QQLELRRALALYELAYEIQRDQNTTRGPASMVQTNADESKGSVYFQSILLNNGVX  
>comp21969\_c0\_seq1; 47 1 280 LEN=481; minus strand; translated  
XERAARAKANPSKFEEDKGEKYDVVPGHMYPGVPTLPPDFKGVHRSLEEIEDLERDLSR  
QQEIEGRLAELKAQKAILIGNGVESTRSVEVEC  
>comp21996\_c0\_seq1; 62 1 240 LEN=240; minus strand; translated  
XEAMPNGFKALTEIQDLPAEVRGTIPLTLGTVWALTFAMQDLTGSSEFPGDYRNGFIDLG  
WDKYSDEWKTKKRTIELNNGR  
>comp22087\_c0\_seq1; 85 1 246 LEN=246; minus strand; translated  
GDDWVRDSGGGTRLDRDDWPWRTDSNDETCNDHSNGTGNERGVKNDDYDDTLRVLQQA  
FIIDKYNKPRSEEPSRALPSPA  
>comp22156\_c0\_seq1; 173 1 282 LEN=302; minus strand; translated  
LEAAALLSDNIVVTMSSNEDVNVDDARWTSRQDLLVERLIKGGASAERITVERLATDAIVP  
VGMSNNSNMHSHGYSYRTQYCTWRPKQESVGT  
>comp22222\_c0\_seq1; 115 1 244 LEN=244; minus strand; translated  
DWFKKQSYEVLGPRVKAATAFLNEKSPGQPLGVLGFCFGQWLQCKASATGDVDFACAVGC  
HPTTVLES AVFGDEEAMNAX  
>comp22282\_c0\_seq1; 160 1 301 LEN=301; minus strand; translated  
XAIASDARLAEIVAFSLDADISAPGDLYMSSSPQFRAAQWMAEEDFEKLPVPKPDALVSF  
EKGWTSTIPSSPSSGLRAEEATAPFNFVQRYVLAVFYFAVG  
>comp22292\_c0\_seq1; 45 1 237 LEN=237; minus strand; translated  
XGTGSRMKASMPKQYLPLRGVPLHHSLLDFLEKLVHDCKSSGDSSPPENVVLVMDPKYQ  
PEYQAIVD RYPRLEFANPG  
>comp22348\_c0\_seq1; 40 1 224 LEN=224; minus strand; translated  
XKLRRGLRNPDQFDGIMTEIELCISLIFKPLRHHMKSIFDTEASLLEALWVPTLDVIRDI  
SKDDSSEDNPISQTPX  
>comp22396\_c0\_seq1; 8 1 256 LEN=256; translated  
CAVHVVEVRSLGESCGRPFVSSSRMVPYVLVXSNILPVVFDISGATNQEDLSASKDSLGC  
HAAHATATARQAELCRVDHPLQQGNX  
>comp22410\_c0\_seq1; 63 1 201 LEN=201; minus strand; translated  
XWKISSFAAVSAVALVVGQQGSGSSPVLVEAFSTQLKTGKALGRSSSVGIPLLFQGISQ  
PVNRKTAG  
>comp22420\_c0\_seq1; 158 1 346 LEN=346; minus strand; translated  
XGEQFGVTTMLGSDHLATDIELSKIEPPPVEDLSKLSKSELKRRAKKAEKEKAKIDPTKP  
VEEHVVGAVDYKDFGKRVNLTVSGQLNVETHACALSDVYTFGPTFRAENSHTGR  
>comp22535\_c0\_seq1; 140 1 110 LEN=240; minus strand; translated  
XAVAAEEEEEEEEEEAEAPAGGGGLFGDDGDGDY  
>comp22580\_c0\_seq1; 120 1 340 LEN=340; minus strand; translated  
XTSLASGLKEFQPKIFVVPEDPSAPLEHVGLGELIKKAVLKRPMGFLKRSSTLDEDNVY  
LLDTGWKMFVWIGKNANPGEKVAALGAADRYAAIEPRARELPVTVLKSQERDG  
>comp22610\_c0\_seq1; 13 1 203 LEN=203; minus strand; translated  
AAEARPCVQQMSSPMGTLQRPNFRDALRRVAMILQRHIVKIESRFDEHQRSFGSSSPARR  
KATTRDGL  
>comp22644\_c0\_seq1; 21 1 209 LEN=209; minus strand; translated

ACYASVTGAVFKLAVVVKDTSKFMQFYDELVGGRLIVYDISLAGKAQDPPIIAEVAYEGWE  
SLYGDPTING  
>comp22704\_c0\_seq1; 84 1 179 LEN=254; minus strand; translated  
XFVIGRITELMQEHALEGTVENLRLAVSMETKDRGKRSGETPGEIEMKPMQSKKKE  
>comp22748\_c0\_seq1; 177 1 244 LEN=244; translated  
XTDYRKGAGMQEESFVAELQEIEMLLVDRIEPRQELLNVARWAGWDVWALRNWAEALD  
EEEAKLAMRNTGLEGNNDGDDG  
>comp22780\_c0\_seq1; 148 1 352 LEN=352; minus strand; translated  
XGNGKKSVPSSDRTLREDDTMKNIRLLSFGGEQIKEANGEATIIDEVKHVMIAACKSTEN  
EYSCRNRIWDALPEEAQDRFRFTNYLQLPNVHAAEIRGDTSIILDNLEGVVDDAPRETM  
>comp22944\_c0\_seq1; 179 1 369 LEN=369; minus strand; translated  
VESIQKQAEEQSSLPGGGIGGASPMDTTQAKETMKKLEDLPTILELAWAVNVRDIAKTL  
KDVCHKLFNDTSVEVEVRMKRAEAVKILGREFYAIGNACESIKHVTDNGDSAAEIKLRAE  
IAA  
>comp23081\_c0\_seq1; 38 1 215 LEN=215; minus strand; translated  
XGGHHSWVTKLKYVIGGGFLLASLAFIMFTGILFTNRRRRRAMMMRKYRQAKKAKRDKGNRK  
SRSGSKRRRSKSK  
>comp23096\_c0\_seq1; 9 1 237 LEN=237; minus strand; translated  
XPDTYMGQNLERLFEVIEESSDWSDERIKSELHPGHTNASLKSLLKDNLRVFPQGNVHH  
MFGNQVTETVRTTYENEPDX  
>comp23190\_c0\_seq1; 161 1 370 LEN=370; minus strand; translated  
XGFAGGFDGIGTESPKEGSGGFAGGFDGIGTEDPKEGEETPVMPDDFSPILPPMISEGN  
DTQSPNKEESTRSPSENEGTSQSPKSGSKGDEKGFGGIEKEEETSAPKANDQDEPAEASG  
MGFG  
>comp23330\_c0\_seq1; 97 1 184 LEN=204; translated  
XALDDNLVGGQVSEVLQFLVRGGVGDQAPDVSCSGAPYIPSPTRSDVDRDVLNQLGFQ  
G  
>comp23381\_c0\_seq1; 132 1 209 LEN=209; minus strand; translated  
XNNADDYDDDVENALEKLTLEMSDSTIHTIDDYAASNKYGMTVNERLFWEGMVVRQNI  
RKPGSENDTGX  
>comp23446\_c0\_seq1; 49 1 212 LEN=212; minus strand; translated  
XADVTDYNSGWKIIAKEAVAGDALRTSVFEGSLERKYPPRVHVDCVTDGAI FNIAIPDE  
IPGILPITIAG  
>comp23461\_c0\_seq1; 75 1 188 LEN=203; minus strand; translated  
XGGRAYWIRHLREMGYIEDGKVLRARPEGWKKPKNLLHNEMTKPNTGQPPPAPSGGLAT  
TG  
>comp23676\_c0\_seq1; 69 1 224 LEN=224; minus strand; translated  
XEIQRMIEEAEYAEEDRLARERTDERNGLESYLYSLKTTLDGDETL SRNLSAEDKRDLL  
DLVDEKVDWMEENPE  
>comp23783\_c0\_seq1; 24 1 207 LEN=207; minus strand; translated  
XRVRDYLWVAEDGMKMQGYNGSQCWDT SFAIQAMWEAGLLDEFPELTKVWGYFERTQIL  
STEVSQSSPA  
>comp23791\_c0\_seq1; 105 1 221 LEN=241; minus strand; translated  
XVDVMGNTPHLALTSVAPYESI ELLVASCPEVWTKTTNGELPLEIAQRKRAPQDVLQL  
LEKMMERLLVERD  
>comp23866\_c0\_seq1; 116 1 212 LEN=212; minus strand; translated  
ANLSRLHAWTLDFVEATPVGSKYRKLASVVEESLRFMNAIGVDLESPAMQVDFFTAHEC  
LLLPYEEAMTR  
>comp23872\_c0\_seq1; 82 1 235 LEN=235; minus strand; translated  
EICFGFDLSEETVDSIVVYSRSDNVCEISVVD SNGNEVVKETEVRRENATNSNTAEDIS  
RNNYAMEIATSEDFAQTPX  
>comp23885\_c0\_seq1; 129 1 228 LEN=228; minus strand; translated  
XAPDMVLTAAHCI GSFNKIEIGKYMKN DILDESETFVSFSSETMHPDYDEETTRFDVMVLK  
LNETSKMGKPVEINRX  
>comp23906\_c0\_seq1; 73 1 228 LEN=228; minus strand; translated  
XXXCLQPGSCYQFEIRDSFGDMLAPANYKGTLDGVEAFSGGQFASVEVKDFCVP GASAP  
TLAPVPAPTPAPVPAPT  
>comp23962\_c0\_seq1; -21 1 220 LEN=220; minus strand; translated  
XNTRLSNRYPTRRSYGRGLARGISYESETSLASTSGDSCATSYSTDLSTSNFTLGEFRAR  
VLGRSRRNRFTSSG

>comp24081\_c0\_seq1; 82 1 242 LEN=242; minus strand; translated  
XKKASDELQAQTEALFEELQSYKVGDKIYDSNDGKAIGQIVALPEEGTNVLLAQMRDRV  
GLLEKPAKPKGDDKATGDADX

>comp24104\_c0\_seq1; 137 1 306 LEN=457; minus strand; translated  
RDKKYTNFIEYNNYKVIYRRYAGLFFTTIAVDVQDNELSYLETIHLFVELLDAYFRNVCEL  
DIVFNFNKVYSILDEFMLAGEMQETSKQEILDRVKFMKME

>comp24359\_c0\_seq1; 223 1 463 LEN=508; translated  
XGGGVFGFEIDFSFRNAADFGGDDERIDRSLLSKLDVLSFRSEVHSGGDGIDLSFRSDSQ  
ADEEAFINEASDLVLPVLFTEDEGGDEDLLPSIEIFTEFRLGCGDDRIAVRCIVLVS  
DFDLRTILFGDLERGAETGTSRALCVSVLVVPRW

>comp24378\_c0\_seq1; 109 1 453 LEN=453; minus strand; translated  
XVPITAPSPIAPSGRPWNDNLPPAPTNSFIETRSWGTLVTYLDPVDPNFFPLEQCTGDCC  
NDDDCDGLICFQRGANPVPFCYGGENDYTATDYCTFFPDYDSNAYVVEPPSEREELIEC  
TTTISAVQDCYFAEANVLVDFENCNPEEEDX

>comp24608\_c0\_seq1; 46 1 225 LEN=225; minus strand; translated  
GQYRFTISDRRGTDYRAFKFYQLSYLDRKTQRSGLTGGETIVYTS DGT FEGESISHDFV  
IPVAAVDDSSSYSSS

>comp24852\_c0\_seq1; 129 1 190 LEN=259; minus strand; translated  
XGEYGDGDGIAVDAVGRLEVYKTYDGGYNSNNTGGGYEADDYGNPAGYAGYQEDFSETP  
PFN

>comp25164\_c0\_seq1; 106 1 238 LEN=238; minus strand; translated  
XEVLQGFQVTHSMGGGTGSGMGTLLVSKIKEEYPDRIISTYSVIPSPKVS DTVVEPYNAT  
LSIHLVENADQSFALDNEA
